# Supplementary material for: Efficient inter-species conjugative transfer of a CRISPR nuclease for targeted bacterial killing
Source: PubMed Central journal article supplement (PMC6778077; doi:10.1038/s41467-019-12448-3), 2019-10-04
Supplement: 41467_2019_12448_MOESM8_ESM.pdf [file 41467_2019_12448_MOESM8_ESM.pdf]

LOCUS pNuc\_cis\_no\_guide 61203 bp ds-DNA circular 02-AUG-2019

DEFINITION .

FEATURES            Location/Qualifiers

CDS            28445..29221  
              /label="trbJ"

CDS            31674..32378  
              /label="trbN"

CDS            complement(18304..19452)  
              /label="trfA1"

CDS            34625..35287  
              /label="upf32.8"

misc\_RNA      15571..15586  
              /label="crRNA"

CDS            complement(54188..55534)  
              /label="kfrC"

CDS            33460..33879  
              /label="upf31.7"

CDS            complement(4533..4790)  
              /label="korC"

CDS            complement(2416..2730)  
              /label="kleF1 "

CDS            27037..28428  
              /label="trbI"

CDS            complement(55563..55910)  
              /label="kfrB"

CDS            53698..54135  
              /label="traM"

CDS            52572..52976  
              /label="traK"

CDS            complement(58291..59367)  
              /label="korB"

CDS            complement(45068..47281)  
              /label="traE"

CDS            complement(60140..60445)  
              /label="korA"

terminator    15648..15709  
              /label="T7 terminator"

CDS            complement(3193..3411)  
              /label="kleD"

misc\_RNA      15587..15646  
              /label="tracrRNA"

CDS            complement(4813..5439)  
              /label="klcB"

CDS            complement(3427..3657)  
              /label="kleC"

CDS            29233..29442  
              /label="trbK"

CDS            complement(51963..52334)  
              /label="traJ"

promoter      15447..15500  
              /label="pTet promoter"

CDS            39265..40062  
              /label="istB"

CDS complement(49730..51928)  
 /label="traI"  
 promoter 10370..10672  
 /label="pBAD promoter"  
 CDS 33894..34589  
 /label="fiwA"  
 CDS 38093..39265  
 /label="istA1"  
 CDS complement(40853..41143)  
 /label="traA"  
 CDS complement(join(60619..61203,1..369))  
 /label="klaC"  
 CDS complement(36461..36754)  
 /label="parC"  
 CDS 20671..21567  
 /label="trbB"  
 CDS complement(366..1502)  
 /label="klaB"  
 CDS complement(2758..3081)  
 /label="kleE"  
 CDS complement(50029..50388)  
 /label="traH"  
 CDS 37503..38006  
 /label="putative ORF"  
 CDS 32709..33443  
 /label="trbP"  
 CDS complement(44799..45062)  
 /label="traD"  
 CDS complement(41607..43847)  
 /label="traC2"  
 CDS complement(59364..60143)  
 /label="incC2"  
 CDS complement(41607..44792)  
 /label="traC1"  
 CDS complement(35931..36776)  
 /label="parB"  
 CDS 21580..22017  
 /label="trbC"  
 CDS complement(57180..57707)  
 /label="korG"  
 misc\_feature 15715..17093  
 /label="Cen6-ArsH4-His3"  
 CDS 16407..17069  
 /label="his3"  
 CDS complement(56068..56994)  
 /label="kfrA"  
 CDS 52976..53701  
 /label="traL"  
 CDS complement(9463..10341)  
 /label="araC"  
 CDS complement(4074..4307)  
 /label="kleA"  
 CDS 20026..20337

/label="trbA"  
 CDS 22020..22331  
 /label="trbD"  
 CDS complement(19501..19851)  
 /label="ssb"  
 CDS 26550..27032  
 /label="trbH"  
 CDS 7501..8163  
 /label="pBBR1\_rep\_protein"  
 CDS complement(57717..58220)  
 /label="korF"  
 CDS complement(5962..6495)  
 /label="Gentamicin-3-N-acetyltransferase"  
 CDS 10714..15381  
 /label="TevSpCas9"  
 CDS 22328..24886  
 /label="trbE"  
 CDS complement(1520..2293)  
 /label="klaA"  
 CDS 31059..31658  
 /label="trbM"  
 misc\_feature 15503..15570  
 /label="246 bp stuffer"  
 CDS 32409..32672  
 /label="trbO"  
 oriT 8597..9367  
 /label="oriT"  
 CDS complement(3810..4025)  
 /label="kleB"  
 CDS 37312..37464  
 /label="parE partial"  
 CDS 29449..31035  
 /label="trbL"  
 CDS 37153..37464  
 /label="parE"  
 CDS complement(41151..41591)  
 /label="traB"  
 CDS complement(59364..60458)  
 /label="incC"  
 CDS 24883..25641  
 /label="trbF"  
 CDS 36905..37156  
 /label="parD"  
 rep\_origin 6730..7500  
 /label="pBBR1 oriV"  
 CDS complement(47296..47829)  
 /label="traF"  
 CDS 40193..40486  
 /label="putative\_ORF"  
 CDS 25653..26546  
 /label="trbG"  
 CDS complement(35311..35970)  
 /label="parA1"

CDS complement(18304..19161)  
/label="trfA2"  
CDS complement(47826..49733)  
/label="traG"

ORIGIN

1 ttcacccccg aacacgagca cggcaccgc gaccactatg ccaagaatgc ccAAGGTAA  
61 AATTGCCGGC CCCGCCATGA AGTCCGTGAA TGCCCCGACG GCCGAAGTGA AGGGCAGGCC  
121 GCCACCCAGG CCGCCGCCCT CACTGCCCGG CACCTGGTCG CTGAATGTCG ATGCCAGCAC  
181 CTGCGGCACG TCAATGCTTC CGGGCGTCGC GCTCGGGCTG ATCGCCATC CCGTTACTGC  
241 CCCGATCCCG GCAATGGCAA GACTGCCAG CGCCGCGATG AGGAAGCGGG TGCCCCGTT  
301 CTTTCATCTTC GCGCCTCGGG CCTCGAGGCC GCCTACCTGG GCGAAAACAT CGGTGTTTGT  
361 GGCATTATA CGGACTCTG TTGGGCCAGC TCGCGCACGG GCTGGCGGGT CAGCTTGGCT  
421 TGAAGATCGC CACGCATTGC GGCGATCTGC TTCTCGGCAT CTTGCGCTT CTGCACGCCT  
481 TCCTGCTGGA TGCGAATAAC GTCCTCGACG GTCTTGATGA GCGTCGTCTG AACCTGCTG  
541 AGCGTGTCCA CGTCGATCAC CAGGCGTTGG TTCTCCTTCG CCGTCTCGAC GGACGTGCGA  
601 TGCAGCAGGG CCGCATTGCG CTTTCATCAGG TCGTTGGTGG TGTCGTCGAT GGCCGTGGCC  
661 AGTTGACCGG GTTCTTCTG CTCGTTGAGG CTCAAGGCCA GCATGAATTG CCGCTCCAC  
721 GCCGGCACGG TGATTTGCGG GATGGTGTGG AATTTATCGA CCAGCATCTG GTTGTGGCC  
781 TGGATCATGC GGATGGTCGG CAGGCTCTGC ATGGCCGAAT GTTGCAAGGC GATCAGGTG  
841 CCGATGCGCT TGTCAGGTT GGCAACATC GCATCGAGGT CGGCCAGCTC CTGCACGCG  
901 CCCGGTCTG TCCCGACATT GCCGCGCAGA CCCTCGGCCT GCTCGCGCAG CTCGGCAAGG  
961 CGGACCTTGC CGGCCGCGAT GTGGACGCCA AGAAGGCGGT GTTCTCGCG CACGGCTGCG  
1021 AACATTTCTG CGAGCGAGGC ATTGCGCTGC GCGATGCCTT GCTGGGTGGT CTGCACTTCG  
1081 CTGACCAGGT GTTCGATCTG CTCGCGGGTC GTGTCGAAGC GCGCCATGAA GCCCGTCGAA  
1141 CGGACGCGGA AGCGTTCGAT CAGCGGGCCA ATCAGGGGCA GCGGGAACG GTTGTGGAC  
1201 AAAGGGCCGA CGTTCAGGGA ACGGGCCTTG GCGACAACCT GGGTCAGTTT CTCGCTGCT  
1261 TCGTCCAGGT CGCTGTTGCG CACTGGTCC AGCAGGCTAT CGGCGTAGCG GGACGTGTGC  
1321 TCGGCCACGT CGCGGCCGAA CTCGGCAACG GTCTGCGGAC TGCCGACCTC GATCCGCTGC  
1381 GCGACCGCAT GGACTTCCGG CACGTCGCTT TCCTGCAAGC CCAGCTCGCG CAGGGTTGCC  
1441 GGGGTTCATG TGAAGGCGAC GATAGGGGCC TTGGCGTCGT GCGTCGTTTT CAGTGCCTT  
1501 ATAGGGTTCT CCCGCCGTGT TATTGGTTGA TGCCTCCAG GCTCTGCGAA AGGCTCCGCA  
1561 TGAGCGCCTG GTGAGCTTTG GCCGCCTCGG CGACCATTGC CGGATTCATG TTCTTGGTGG  
1621 TGATGAGCGC GAGGGTGTGC TGACGCCAGA CGGGCACCAG GACGGATGCC GTTTCAGAGA  
1681 AGCGTCCAG CATGTCCAGC GCCTGCGCCC GCGTGAGCTT CATCTGAGTG ACGCTATTT  
1741 CATGGGACGC CATGAGGGTT GCCAGGTTGG CGAGCTTGCG CGCGAAGCGT TCGCGCGGT  
1801 TGTCGAACTC GATCACGCCG GCCTTGCCG CGCCGGCCTC GGGGTTCTCG TCCAGGAACT  
1861 CGCGCCCGG TTGAATGTAG GCTCTGAGCC GGTCTACCTC GGCCTCATGC GTATTGAGCA  
1921 TGTCATCAA GGCGCGCAAC GTGTCCGCA CGCGCTGCGC TACGCCCTCG GCTTCGTCCA  
1981 GCAACTGGTC GAGCGTCTG CGGGCGACCT GATACCTCAC CTGGCGTTCA ACCTCACGGC  
2041 CAAGCATCTT CTCGAACCAG GTAGGCTTTT CCGCGATCTT GCGGGGGTCC GCGTCGGCCA  
2101 GCTTCGCCAC GATCTGGCTG ATTTTGTGCG CCAGCGCGG AACTGCGCCG TGCTCCATCA  
2161 GATTGACAGC CTCGTTGAGG GAATCCGCC CGTCGATGCC GGCCCCGTAC TCGCCAATCG  
2221 TCGCCGCGCA CGCGAAGAGG GCGGGCAAAA CCTCCCCTT CAATCGCGCC ATGTTACGCG  
2281 TTTGTTCTTC CATTGATAC ACCCTCGCGG TGGGTTAATT GCTTTTCGAT GGAAGAAGTT  
2341 TAGCTAAACT TTCTATCCCT CGTCAACACC TTAGCCGCT AAAATTTGGG GACAGGTCAT  
2401 TTACAGAAAG CCAGCTCACT CTTGGCGTTG CCCCTTGAGC GCCGCTAGGC GCGCAGCATC  
2461 CTTGCGGCTG AGAAAGAACG TCATCAGCGG CCCGACCGTC TTGCTTGAAC CGTCGGCAA  
2521 GCAAACATCC ATCGAACAGC CTTGCGTGTG GGGGTCCAGC CTTTCGACCA GTTTCGAAG  
2581 GTCATGCCC CAGCCCTCGG CCTCCGGATT GAACAGTAC GCCGATGCGT CGCCGTTTGA  
2641 GTCGCTGTCG GCGTAGTCTT TGACCAGCAC GGCCACCCGC CCGGTCGTCG GGCACACGTA  
2701 GCCCGGCTGC TTAGGTTCTT GTCTTGGCAT TGCTCAAAGC TCCTTGAAGG GGCCGCTCTA  
2761 CAGCCCTTG GGCTTGTAGA GCGACACGAA ATAGGTGAGT GCGGTCAGTA CCGCGAAATG  
2821 CACCAGGAAC GTCCAGCCGG CATGAACGCC AAGGGTGTT CAGTGGTACA GCATCCGACG

2881 GAACTGAAAG AAAACGTCGA TAGAGATGAT CCACTTCGCC ACCGGCCACA CCAGGACAGT  
2941 AACGACCCAT ACAAAGCGGA CCAGGGCCTG GACACCCTTG GCAAAAGTGA ACCGGGGCGG  
3001 GGCCTTGCTC GGGGCCTCAA CGCGCGGGGC AGGGGCCTCG GCCTCCACTT CCACGCCTGG  
3061 GAACTTGATA ATCTTCGACA TTGCTTGACC CTCCACGGCG ATGCGTGTTT AATTCTGCCA  
3121 GCGCTCGCGC GCCTAGACCG TGATGTGACA GCATCGAGGT CAAGCGCCCC GGAGAAATCC  
3181 GGGGCGTCAT CCCTATGCCG CGTCCAACCT GGAACCGGC TTTTCCCTGG TGCTAACCT  
3241 GGCCGGCTCG ACCCACTTGG TGACTTGCTG CCACTCGTTA CCACTGCGAA CGGCTACCCG  
3301 AATCTGCACA CGTTTAGCCG CGATCTTCGT CACTATGCCA GCAACACAAA CGGAATACCC  
3361 GTACCCGCCG CGCGGGGTGT GCTGCCAGTT CACCCTATCT CCTACTTGCA TCATCATCCC  
3421 CTGGCGTCAG TGACCCGCCG GGAATTCGCG CAAGTCGATT TCGTTGAAGG TCCAGCGCTG  
3481 TTTTCGCCGT TCCTCAACC TCGACGACTC CCGCATGACC TCGATGCGCA GGCGCTCGAC  
3541 CTGGTGCATC AGCTCATCAG CGCGCCGCTG CTTCTCGGCA ATAGCATTCC GCTGCGCGAC  
3601 CAGCTCCTGG TCTACGTTTC GCAGCTCGTC GATCCACGGC ATGAACTTAT CGGTCATCGG  
3661 ATTGGCCTCC GGTAATTGAC CTGGGAATCT ACCCGGCCTC AAAACAAGAA TAGGGCATAA  
3721 TGCCCTAACT TGTCAGCAA TTTTAGCTAA ACAATTGAGG GGATTACAGC AGGCGTCATG  
3781 CTTGAAAACA CTTTTCCCTT GCGGTGCAAT CAGCTTGTCG CGGCGGCAGC GCACTGCCGC  
3841 AGCGCGCCA GCAAGGTGCC TTGCTCGATC CGCTGTCGTT CCTCCGGCGT AATGCAATCG  
3901 CCGCAGATAC CGCCAGCTC TTCGCGCAGG GCGTCCGCCG CGATCAGGCT GCGGCTAAGG  
3961 GTCGAAATGG ACTTACCACA GCGGCGGCAA TTGGTGGTGA CAATCTCGAT CTTGCGGTTG  
4021 GGCATGGCCC TATCTCCTTG AGAGAGGCCG GACCGTAGCC GGGCCTCGTT CCGTTACCA  
4081 CCTGCGCGAG CTTTCGCGCG TTCGACTTCC TGGGTGGACC AGTGCCCTT TGCTTACCC  
4141 TCCAGGGTGC AACCTTGACG GTACGCCTTG TGCCGAGCT CTTGCGCCTG GCGGTAAGC  
4201 TCTGCCGCTT GCTCCATCAG CGCCGCGATC TGGTACGAC GGGCCAGAAA ATCCGTGGCG  
4261 GCCGCGCCGG GCAGTCATC GAGCCAAGAC ATGATCTTGC TTTTCATCGG GGTGATCCT  
4321 CCGGTTGCTG ACCTGGGCGA AGTGCCCGGC CTTGGATTGC TATATTAGG CATTATGCC  
4381 TAGATAGTCA AGGAAATTTA GCTAAACAAT TTGCGGCGGG CGCACGAAAA AACCCGGCTT  
4441 GCGGGCCGGG CTGCTGGCAG CATATCGCAA CGATCAGGGT TGCGGTTTT AGCCGCTAAA  
4501 GTCCTCTCCC TTGGCGTAAA GTCCTGCGGG CGTCAGCCCT GGCCTTTCCA GATCGCCCA  
4561 ATCCCCGCTA GATCGCAAAG GATCGCCAG GCGGCATAGG GGATCGGCGA ATCCTCGCA  
4621 ACCCAACGCC GCACCGTGCG GTCGCCCTTG GCACCAAGC CCAAGATGCG CGCAGCCTGT  
4681 CCGCCGGTGA GGCCGGCCAA GTGCAAGACT TCCCGGATTT CTGCGCCGGT CGGCTGCACC  
4741 CAGCGTTCCG CCGGGCGCAG GCACTCAAGC CGGATATTCA CGTCGCTCAT GCTGCTTTT  
4801 TCCTAATCGT TATCAAATGG CGGCCGCAA TTGGTCTGAG CCGTAGCACG ACTCGATGCA  
4861 ACGCGGGTCA TATTCACAAA CTTTCTACC GTTGCATTG ATGCGATAGC GCGGCGGCTT  
4921 GTCGTCGTGC GCCACACCT GTCGCGTTTC GGGACTGATC TTCGTAATGA TGACGTGCTT  
4981 CCCGATTTCC TTGGCAAAAA CCGGTTGATG CACGCTACA ATCTCGCACC GCAGGCCAGG  
5041 AAAGAACGTC GCCGGCCACG CCGGCGCGTC CTCGTCCTTG GCCGGTCCG GCTCCGGCTT  
5101 GGCCGGTGTG ACCGGCTCCC TGCGCTGCCG GGCCGGCTCC TGAGCTTTCG CACGCGCGGC  
5161 CGCGAGCTTC GCCTTGCGCG TGGCCGCCA TTTGCGGGCG ATGAATGCCT GGTGCGCCGG  
5221 CAGCACGGCA TCAACCCAGG CGAAGCCCGG CGGCAGTTTC TCCGGCTTC GCCAGTCTC  
5281 GACCACGGCC CGCACGCGGC GCGGCGGTGG CGTGATACCC GCGAGCCACG CCGGCAGTGG  
5341 CTCGTCGGCA AGGCGGTCTT GTTCGCGGGC GTCCAGATAC CGGCGATGCG AGCGCAACAG  
5401 GGCAGCGAAA ACCCGTCCG CTACCTGGTC CACCGTCATG CCGCCGCGCG CATGGTCGTA  
5461 ATGGGACCGA TAGCCCGTTT CGGAAATAAA AGGGGTCTGA CGCTCAGTGG AACGAAAAT  
5521 CACGTTAAGG GATTTTGGTC ATGAGATTAT CAAAAAGGAT CTTACCTAG ATCCTTTTAA  
5581 ATTAATAAATG AAGTTTTAAA TCAATCTAAA GTATATATGA GTAACTTGG TCTGACAGTT  
5641 ACCAATGCTT AATCAGTGAG GCACCTATCT CAGCGATCTG TCTATTTCTG TCATCCATAG  
5701 TTGCTGACT CCCCCTGCTG TAGATAACTA CGATACGGGA GGGCTTACCA TCTGGCCCCA  
5761 GTGCTGCAAT GATACCGCGA GATCCACGCT CACCGCTCC AGATTTATCA GCAATAAACC  
5821 AGCCAGCCGG AAGGGCCGAG CGCAGAAGTG GTCCTGCAAC TTTATCCGCC TCCATCCAGT  
5881 CTATTAATCC ACCTGGCGGC GTTGTGACAA TTTACCGAAC AACTCCGCGG CCGGGAAGCC  
5941 GATCTCGGCT TGAACGAATT GTTAGGTGGC GGTACTTGGG TCGATATCAA AGTGCATCAC  
6001 TTCTTCCCGT ATGCCCAACT TTGTATAGAG AGCCACTGCG GGATCGTCAC CGTAATCTGC

6061 TTGCACGTAG ATCACATAAG CACCAAGCGC GTTGGCCTCA TGCTTGAGGA GATTGATGAG  
6121 CGCGGTGGCA ATGCCCTGCC TCCGGTGCTC TCCGGAGACT GCGAGATCAT AGATATAGAT  
6181 CTCCTACGC GGCTGCTCAA ACTTGGGCAG AACGTAAGCC GCGAGAGCGC CAACAACCGC  
6241 TTCTTGGTGC AAGGCAGCAA GCGCGATGAA TGTCTTACTA CGGAGCAAGT TCCCGAGGTA  
6301 ATCGGAGTCC GGCTGATGTT GGGAGTAGGT GGCTACGTCT CCGAACTCAC GACCGAAAAG  
6361 ATCAAGAGCA GCCCGCATGG ATTTGACTTG GTCAGGGCCG AGCCTACATG TGCGAATGAT  
6421 GCCCATACTT GAGCCACCTA ACTTTGTTTT AGGGCGACTG CCCTGCTGCG TAACATCGTT  
6481 GCTGCTGCGT AACATCGTTG CTGCTCCATA ACATCAAACA TCGACCCACG GCGTAACCGG  
6541 CTTGCTGCTT GGATGCCCGA GGCATAGACT GTACAAAAAA ACAGTCATAA CAAGCCATGA  
6601 AAACCGCCAC TGCGCCGTTA CCACCGCTGC GTTCGGTCAA GGTTCTGGAC CAGTTGCGTG  
6661 AGCGCATACG CTACTTGCAT TACAGTTTAC GAACCGAACA GGCTTATGTC AACTGGGTTT  
6721 GTGCCTTTCCAT CCGTTTCCAC GGTGTGCGTC CATGGGCAAA TATTATACGC AAGGCGACAA  
6781 GGTGCTGATG CCGCTGGCGA TTCAGTTTCA TCATGCCGTT TGTGATGGCT TCCATGTCGG  
6841 CAGGAATTCG AATTCATACC CACCGGCTCC AACTGCGCGG CCTGCGGCCT TGCCCATCA  
6901 ATTTTTTTAA TTTTCTCTGG GAAAAGCCT CCGGCCTGCG GCCTGCGCGC TTCGTTGCC  
6961 GGTTGGACAC CAAGTGAAG GCGGGTCAAG GCTCGCGCAG CGACCGCGCA GCGGCTTGGC  
7021 CTTGACGCGC CTGGAACGAC CCAAGCCTAT GCGAGTGGGG GCAGTGAAG GGCGAAGCCC  
7081 GCCCGCTGC CCCCCGAGCC TCACGCGCGC GAGTGCAGGG GTTCCAAGGG GGCAGCGCCA  
7141 CCTTGGGCAA GGCCGAAGGC GCGCAGTCG ATCAACAAGC CCCGAGGGG CCACTTTTTG  
7201 CCGAGGGGG AGCCGCGCCG AAGGCGTGGG GAAACCCCGC AGGGGTGCCC TTCTTTGGG  
7261 ACCAAAGAAC TAGATATAGG GCGAAATGCG AAAGACTTAA AAATCAACAA CTTAAAAAAG  
7321 GGGGTACGC AACAGCTCAT TGCGGCACCC CCCGCAATAG CTCATTGCGT AGGTTAAAGA  
7381 AAATCTGTAA TTGACTGCCA CTTTTACGCA ACGCATAATT GTTGTGCGC TGCCGAAAAG  
7441 TTGAGCTGA TTGCGCATGG TGCCGAACC GTGCGGCACC CCTACCGCAT GGAGATAAGC  
7501 ATGGCCACGC AGTCCAGAGA AATCGGCATT CAAGCCAAGA ACAAGCCCGG TCACTGGGTG  
7561 CAAACGGAAC GCAAAGCGCA TGAGGCGTGG GCCGGGCTTA TTGCGAGGAA ACCCACGGCG  
7621 GCAATGCTGC TGCATCACCT CGTGGCGCAG ATGGGCCACC AGAACGCCGT GGTGGTCAGC  
7681 CAGAAGACAC TTTCCAAGCT CATCGGACGT TCTTTGCGGA CGGTCCAATA CGCAGTCAAG  
7741 GACTTGGTGG CCGAGCGCTG GATCTCCGTC GTGAAGTCA ACGGCCCGG CACCGTGTG  
7801 GCCTACGTGG TCAATGACCG CGTGGCGTGG GGCCAGCCCC GCGACCAGTT GCGCCTGTG  
7861 GTGTTTCAAGT CCGCCGTGGT GGTTGATCAC GACGACCAGG ACGAATCGCT GTTGGGGCAT  
7921 GCGGACCTGC GCCGCATCCC GACCCTGTAT CCGGGCGAGC AGCAACTACC GACCGGCCCC  
7981 GCGGAGGAGC CGCCAGCCA GCCCGGCATT CCGGGCATGG AACCAGACCT GCCAGCCTTG  
8041 ACCGAAACGG AGGAATGGGA ACGGCGCGGG CAGCAGCGCC TGCCGATGCC CGATGAGCCG  
8101 TGTTTTCTGG ATGATGGCGA GCCGTTGGAG CCGCCGACAC GGGTACAGCT GCCGCGCCGG  
8161 TAGCACTTGG GTTGCAGCAG AACCCTAAG TGCGCTGTTT CAGACTATCG GCTGTAGCCG  
8221 CCTCGCCGCC CTATACCTTG TCTGCCTCC CGCGTTGCGT CGCGGTGCAT GGAGCCGGGC  
8281 CACCTCGACC TGAATGGAAG CCGGCGGCAC CTCGCTAACG GATTCACCGT TTTTATCAGG  
8341 CTCTGGGAGG CAGAATAAAT GATCATATCG TCAATTATTA CCTCCACGGG GAGAGCCTGA  
8401 GCAAACCTGGC CTCAGGCATT TGAGAAGCAC ACGGTCACAC TGCTCCGGT AGTCAATAAA  
8461 CCGGTAACAC AGCAATAGAC ATAAGCGGCT ATTTAACGAC CCTGCCCTGA ACCGACGACC  
8521 GGGTGAATT TGCTTTGCAA TTTCTGCCAT TCATCCGCTT ATTATCACTT ATTCAGGCGT  
8581 AGCACAGGC GTTTAACGAT CGTCTTCTT GCTCGTCGGT GATGTACTTA CAGCTCGAAG  
8641 TGCTTCTTCT TGATGGAGCG CATGGGGACG TGCTTGCAA TCACGCGCAC CCCCCGGCCG  
8701 TTTTAGCGGC TAAAAAAGTC ATGGCTCTGC CCTCGGGCGG ACCACGCCA TCATGACCTT  
8761 GCCAAGCTCG TCCTGCTTCT CTTGATCTT CGCCAGCAGG GCGAGGATCG TGGCATCACC  
8821 GAACCGCGCC GTGCGCGGGT CGTCGGTGAG CCAGAGTTTC AGCAGGCCCG CCAGGCGGCC  
8881 CAGGTCGCCA TTGATGCGGG CCAGCTCGCG GACGTGCTCA TAGTCCACGA CGCCGTGAT  
8941 TTTGTAGCCC TGGCCGACGG CCAGCAGGTA GGCCGACAGG CTCATGCCG CCGCCCGCG  
9001 CTTTTCTCA ATCGCTCTT GTTCGTCTGG AAGGCAGTAC ACCTTGATAG GTGGGCTGCC  
9061 CTTCTGGTT GGCTTGGTTT CATCAGCCAT CCGCTTGCCC TCATCTGTTA CGCCGGCGGT  
9121 AGCCGGCCAG CCTCGCAGAG CAGGATTCCC GTTGAGCACC GCCAGGTGCG AATAAGGGAC  
9181 AGTGAAGAAG GAACACCGC TCGCGGGTGG GCCTACTTCA CCTATCCTGC CCGGCTGACG

9241 CCGTTGGATA CACCAAGGAA AGTCTACACG AACCCTTTGG CAAAATCCTG TATATCGTGC  
9301 GAAAAAGGAT GGATATACCG AAAAAATCGC TATAATGACC CCGAAGCAGG GTTATGCAGC  
9361 GGAAGATATC GATGCATAAT GTGCCTGTCA AATGGACGAA GCAGGGATTG TGCAAAACCT  
9421 ATGCTACTCC GTCAAGCCGT CAATTGTCTG ATTCGTTACC AATTATGACA ACTTGACGGC  
9481 TACATCATTG ACTTTTTCTT CACAACCGGC ACGGAACTCG CTCGGGCTGG CCCCAGTGCA  
9541 TTTTTTAAAT ACCCGCGAGA AATAGAGTTG ATCGTCAAAA CCAACATTGC GACCGACGGT  
9601 GCGGATAGGC ATCCGGGTGG TGCTCAAAAG CAGCTTCGCC TGGCTGATAC GTTGGTCTC  
9661 GCGCCAGCTT AAGACGCTAA TCCCTAACTG CTGGCGGAAA AGATGTGACA GACGCGACGG  
9721 CGACAAGCAA ACATGCTGTG CGACGCTGGC GATATCAAAA TTGCTGTCTG CCAGGTGATC  
9781 GCTGATGTAC TGACAAGCCT CGCGTACCG ATTATCCATC GGTGGATGGA GCGACTCGTT  
9841 AATCGCTTCC ATGCGCCGCA GTAACAATTG CTCAAGCAGA TTTATCGCCA GCAGCTCCGA  
9901 ATAGCGCCCT TCCCCTTGGC CGGCGTTAAT GATTTGCCA AACAGGTCG TGAAATGCGG  
9961 CTGGTGCCT TCATCCGGGC GAAAGAACCC CGTATTGGCA AATATTGACG GCCAGTTAAG  
10021 CCATTCATGC CAGTAGGCGC GCGGACGAAA GTAACCCAC TGGTGATACC ATTCGCGAGC  
10081 CTCCGGATGA CGACGTAGT GATGAATCTC TCCTGGCGGG AACAGCAAAA TATCACCCGG  
10141 TCGGCAACA AATTCTCGT CCTGATTTTT CACCACCCC TGACCGCGAA TGGTGAGATT  
10201 GAGAATATAA CCTTTCATTG CCAGCGGTG GTCGATAAAA AAATCGAGAT AACCGTTGGC  
10261 CTCAATCGGC GTTAAACCCG CCACCAGATG GGCATTAAC GAGTATCCCG GCAGCAGGGG  
10321 ATCATTTTGC GCTTCAGCCA TACTTTTCAT ACTCCCGCCA TTCAGAGAAG AAACCAATTG  
10381 TCCATATTGC ATCAGACATT GCCGCTACTG CGTCTTTTAC TGGCTCTTCT CGCTAACCAA  
10441 ACCGGTAACC CCGCTTATTA AAAGCATTCT GTAACAAAGC GGGACCAAAG CCATGACAAA  
10501 AACGCGTAAC AAAAGTGTCT ATAATCACGG CAGAAAAGTC CACATTGATT ATTTGCACGG  
10561 CGTCACACTT TGCTATGCCA TAGCATTFFF ATCCATAAGA TTAGCGGATC CTACCTGACG  
10621 CTTTTTATCG CAACTCTCTA CTGTTTTCTC ATACCCGTTT TTTTGGGCTA GCCCTGTAGA  
10681 AATAATTGTT TAACTTAAT AAGGAGATAT ACCATGGGTA AAAGCGGAAT TTATCAGATT  
10741 AAAAAACTT TAAACAATAA AGTATATGTA GGAAGTGCTA AAGATTTTGA AAAGAGATGG  
10801 AAGAGGCATT TAAAGATTT AGAAAAGGGA TGCCATTCTT CTATAAACT TCAGAGGTCT  
10861 TTTAACAAAC ATGGTAATGT GTTTGAATGT TCTATTTTGG AAGAAATCC ATATGAGAAA  
10921 GATTTGATTA TTGAACGAGA AAATTTTGG ATTAAGAGC TTAATTCTAA AATTAATGGA  
10981 TACAATATTG CTGATGCAAC GTTTGGTGAT ACGTGTCTA CGCATCCATT AAAAGAAGAA  
11041 ATTATTAAGA AACGTTCTGA AACTTTTAAA GCTAAGATGC TTAAACTTGG ACCTGATGGT  
11101 CGGAAAGCTC TTTACAGTAA ACCCGGAAGT AAAACGGGC GTTGAATCC AGAAACCCAT  
11161 AAGTTTTGTA AGTGCGGTGT TCGCATACAA ACTTCTGCTT AACTTGTAG TAAATGCAGA  
11221 AATGGTGGTT CTGGTGGTAC CGGAGGTAGC ATGGATAAAA AGTATTCTAT TGGTTTAGAC  
11281 ATCGGCACTA ATTCGGTTGG ATGGGCTGTC ATAACCGATG AATACAAAGT ACCTTCAAAG  
11341 AAATTTAAGG TGTTGGGGAA CACAGACCGT CATTGATTA AAAAGAATCT TATCGGTGCC  
11401 CTCCTATTCC ATAGTGGCGA AACGGCAGAG GCGACTCGCC TGAAACGAAC CGCTCGGAGA  
11461 AGGTATACAC GTCGCAAGAA CCGAATATGT TACTTACAAG AAATTTTTAG CAATGAGATG  
11521 GCCAAAGTTG ACGATTCTTT CTTTACCCGT TTGGAAGAGT CCTTCCTTGT CGAAGAGGAC  
11581 AAGAAACATG AACGGCACCC CATCTTTGGA AACATAGTAG ATGAGGTGGC ATATCATGAA  
11641 AAGTACCCAA CGATTATCA CCTCAGAAAA AAGCTAGTTG ACTCAACTGA TAAAGCGGAC  
11701 CTGAGGTTAA TCTACTTGGC TCTTGCCCAT ATGATAAAGT TCCGTGGGCA CTTTCTCATT  
11761 GAGGGTGATC TAAATCCGGA CAACTCGGAT GTCGACAAAC TGTTATCCA GTTAGTACAA  
11821 ACCTATAATC AGTTGTTTGA AGAGAACCCT ATAATGCAA GTGGCGTGGG TGCGAAGGCT  
11881 ATTCTTAGCG CCCGCCTCTC TAAATCCCGA CGGCTAGAAA ACCTGATCGC ACAATTACCC  
11941 GGAGAGAAGA AAAATGGGTT GTTCGGTAAC CTTATAGCGC TCTCACTAGG CCTGACACCA  
12001 AATTTAAGT CGAACTTCGA CTTAGCTGAA GATGCCAAAT TGCAGCTTAG TAAGGACACG  
12061 TACGATGACG ATCTCGACAA TCTACTGGCA CAAATTGGAG ATCAGTATGC GGAATTATTT  
12121 TTGGCTGCCA AAAACCTTAG CGATGCAATC CTCCTATCTG ACATACTGAG AGTTAATACT  
12181 GAGATTACCA AGGCGCCGTT ATCCGCTTCA ATGATCAAAA GGTACGATGA ACATCACCAA  
12241 GACTTGACAC TTCTCAAGGC CTAAGTCCGT CAGCAACTGC CTGAGAAATA TAAGGAAATA  
12301 TTCTTTGATC AGTCGAAAAA CGGGTACGCA GGTTATATTG ACGGCGGAGC GAGTCAAGAG  
12361 GAATTCTACA AGTTTATCAA ACCCATATTA GAGAAGATGG ATGGGACGGA AGAGTTGCTT

12421 GTAAACTCA ATCGGAAGA TCTACTGCGA AAGCAGCGGA CTTTCGACAA CGGTAGCATT  
12481 CCACATCAA TCCACTTAGG CGAATTGCAT GCTATACTTA GAAGGCAGGA GGATTTTTAT  
12541 CCGTTCCTCA AAGACAATCG TGAAAAGATT GAGAAAATCC TAACCTTTTCG CATACTTAC  
12601 TATGTGGGAC CCCTGGCCCG AGGGAACCTCT CGGTTTCGCAT GGATGACAAG AAAGTCCGAA  
12661 GAAACGATTA CTCCTGGAA TTTTGAGGAA GTTGTGCGATA AAGGTGCGTC AGCTCAATCG  
12721 TTCATCGAGA GGATGACCAA CTTTGACAAG AATTTACCGA ACGAAAAAGT ATTGCCTAAG  
12781 CACAGTTTAC TTTACGAGTA TTTCACAGTG TACAATGAAC TCACGAAAGT TAAGTATGTC  
12841 ACTGAGGGCA TGCGTAAACC CGCCTTTCTA AGCGGAGAAC AGAAGAAAGC AATAGTAGAT  
12901 CTGTTATTCA AGACCAACCG CAAAGTGACA GTTAAGCAAT TGAAAGAGGA CTACTTTAAG  
12961 AAAATTGAAT GCTTCGATTC TGTCGAGATC TCCGGGGTAG AAGATCGATT TAATGCGTCA  
13021 CTTGGTACGT ATCATGACCT CCTAAAGATA ATTAAGATA AGGACTTCTT GGATAACGAA  
13081 GAGAATGAAG ATATCTTAGA AGATATAGTG TTGACTCTTA CCCTTTTGA AGATCGGGAA  
13141 ATGATTGAGG AAAGACTAAA AACATACGCT CACCTGTTTCG ACGATAAGGT TATGAAACAG  
13201 TTAAAGAGGC GTCGCTATAC GGGCTGGGGA CGATTGTCGC GGAAACTTAT CAACGGGATA  
13261 AGAGACAAGC AAAGTGGTAA AACTATTCTC GATTTTCTAA AGAGCGACGG CTTCCCAAT  
13321 AGGAACTTTA TGCAGCTGAT CCATGATGAC TCTTTAACCT TCAAAGAGGA TATACAAAAG  
13381 GCACAGGTTT CCGGACAAGG GGAATCATTG CACGAACATA TTGCGAATCT TGCTGGTTTCG  
13441 CCAGCCATCA AAAAGGGCAT ACTCCAGACA GTCAAAGTAG TGGATGAGCT AGTTAAGGTC  
13501 ATGGGACGTC ACAAACCGGA AAACATTGTA ATCGAGATGG CACGCGAAAA TCAAACGACT  
13561 CAGAAGGGGC AAAAAACAG TCGAGAGCGG ATGAAGAGAA TAGAAGAGGG TATTAAGAA  
13621 CTGGGCAGCC AGATCTTAAA GGAGCATCCT GTGGAAAATA CCAATTGCA GAACGAGAAA  
13681 CTTTACCTCT ATTACCTACA AAATGGAAGG GACATGTATG TTGATCAGGA ACTGGACATA  
13741 AACCGTTTAT CTGATTACGA CGTCGATCAC ATTGTACCC AATCCTTTTT GAAGGACGAT  
13801 TCAATCGACA ATAAAGTGCT TACACGCTCG GATAAGAACC GAGGGAAAAG TGACAATGTT  
13861 CCAAGCGAGG AAGTCGTAAG GAAAATGAAG AACTATTGGC GGCAGCTCCT AAATGCGAAA  
13921 CTGATAACGC AAAGAAAGTT CGATAACTTA ACTAAAGCTG AGAGGGGTGG CTTGTCTGAA  
13981 CTTGACAAGG CCGGATTAT TAAACGTCAG CTCGTGGAAA CCGCCAAAT CACAAAGCAT  
14041 GTTGACAGAG TACTAGATTC CCGAATGAAT ACGAAATACG ACGAGAACGA TAAGCTGATT  
14101 CGGGAAGTCA AAGTAATCAC TTTAAAGTCA AAATTGGTGT CGGACTTCAG AAAGGATTTT  
14161 CAATTCTATA AAGTTAGGGA GATAAATAAC TACCACCATG CGCACGACGC TTATCTTAAT  
14221 GCCGTCTGAG GGACCGCACT CATTAAAGAAA TACCCGAAGC TAGAAAAGTGA GTTTGTGTAT  
14281 GGTGATTACA AAGTTTATGA CGTCCGTAAG ATGATCGCGA AAAGCGAACA GGAGATAGGC  
14341 AAGGCTACAG CCAAATACTT CTTTTATTCT AACATTATGA ATTTCTTTAA GACGGAAATC  
14401 ACTCTGGCAA ACGGAGAGAT ACGCAAACGA CTTTAATTG AAACCAATGG GGAGACAGGT  
14461 GAAATCGTAT GGGATAAGGG CCGGGACTTC GCGACGGTGA GAAAAGTTTT GTCCATGCC  
14521 CAAGTCAACA TAGTAAAGAA AACTGAGGTG CAGACCGGAG GGTTTTCAA GGAATCGATT  
14581 CTTCCAAAAA GGAATAGTGA TAAGCTCATC GTCGTAAAA AGGACTGGGA CCCGAAAAAG  
14641 TACGGTGGCT TCGATAGCCC TACAGTTGCC TATTCTGTCC TAGTAGTGGC AAAAGTTGAG  
14701 AAGGGAAAAT CCAAGAAACT GAAGTCAGTC AAAGAATTAT TGGGGATAAC GATTATGGAG  
14761 CGCTCGTCTT TTGAAAAGAA CCCCATCGAC TTCCTTGAGG CGAAAGGTTA CAAGGAAGTA  
14821 AAAAAGGATC TCATAATTA ACTACCAAAG TATAGTCTGT TTGAGTTAGA AAATGGCCGA  
14881 AAACGGATGT TGGTAGCGC CGGAGAGCTT CAAAAGGGGA ACGAACTCGC ACTACCGTCT  
14941 AAATACGTGA ATTTCTGTA TTTAGCGTCC CATTACGAGA AGTTGAAAGG TTCACCTGAA  
15001 GATAACGAAC AGAAGCAACT TTTGTTGAG CAGCACAAC ATTTCTCGA CGAAATCATA  
15061 GAGCAAATTT CGGAATTCAG TAAGAGAGTC ATCCTAGCTG ATGCCAATCT GGACAAAGTA  
15121 TTAAGCGCAT ACAACAAGCA CAGGGATAAA CCCATACGTG AGCAGGCGGA AAATATTATC  
15181 CATTTGTTTA CTCTACCAA CCTCGGCGCT CCAGCCGAT TCAAGTATTT TGACACAACG  
15241 ATAGATCGCA AACGATACAC TTCTACCAAG GAGGTGCTAG ACGCGACACT GATTCACCAA  
15301 TCCATCACGG GATTATATGA AACTCGGATA GATTTGTCAC AGCTTGGGGG TGACGGATCC  
15361 CATCATACC ACCACCATTG AGCGGCCGCA TAATGCTTAA GTCGAACAGA AAGTAATCGT  
15421 ATTGTACACG GCCGCATAAT CGAAATTCCT TATCAGTGAT AGAGATTGAC ATCCCTATCA  
15481 GTGATAGAGA TACTGAGCAC GGGAGACCCA TGCCATAGCG TTGTTGCGAA TATGAATTTT  
15541 TGAACAGATT CACCAACACC TAGTGGTCTC GTTTTAGAGC TAGAAATAGC AAGTTAAAA



15601 AAGGCTAGTC CGTTATCAAC TTGAAAAAGT GGCACCGAGT CGGTGCTCCG CTGAGCAATA  
15661 ACTAGCATAA CCCCTGGGG CCTCTAAACG GGTCTTGAGG GGTTTTTTGG CGAGCATCAC  
15721 GTGCTATAAA AATAATTATA ATTTAAATTT TTTAATATAA ATATATAAAT TAAAAATAGA  
15781 AAGTAAAAAA AGAAATTTAA GAAAAAATAG TTTTTGTTTT CCGAAGATGT AAAAGACTCT  
15841 AGGGGGATCG CCAACAAATA CTACTTTTA CCTTGCTCTT CCTGCTCTCA GGTATTAATG  
15901 CCGAATTGTT TCATCTTGTC TGTGTAGAAG ACCACACACG AAAATCCTGT GATTTTACAT  
15961 TTTACTTATC GTTAATCGAA TGTATATCTA TTTAATCTGC TTTTCTTGTC TAATAAATAT  
16021 ATATGTAAAG TACGCTTTTT GTTGAAATTT TTTAAACCTT TGTTTATTTT TTTTCTTCA  
16081 TTCCGTAACCT CTTCTACCTT CTTTATTAC TTTCTAAAAT CCAAATACAA AACATAAAAA  
16141 TAAATAAACA CAGAGTAAAT TCCCAAATTA TTCCATCATT AAAAGATACG AGGCGCGTGT  
16201 AAGTTACAGG CAAGCGATCC TAGTACACTC TATATTTTTT TATGCCTCGG TAATGATTTT  
16261 CATTTTTTTT TTCCACCTAG CGGATGACTC TTTTTTTTTT TTAGCGATTG GCATTATCAC  
16321 ATAATGAATT ATACATTATA TAAAGTAAATG TGATTTCTTC GAAGAATATA CTAAAAAATG  
16381 AGCAGGCAAG ATAAACGAAG GCAAAGATGA CAGAGCAGAA AGCCCTAGTA AAGCGTATTA  
16441 CAAATGAAAC CAAGATTCAG ATTGCGATCT CTTTAAAGGG TGGTCCCTA GCGATAGAGC  
16501 ACTCGATCTT CCCAGAAAAA GAGGCAGAAG CAGTAGCAGA ACAGGCCACA CAATCGCAAG  
16561 TGATTAACGT CCACACAGGT ATAGGGTTTT TGGACCATAT GATACATGCT CTGGCCAAGC  
16621 ATTCCGGCTG GTCGCTAATC GTTGAGTGCA TTGGTGACTT ACACATAGAC GACCATCACA  
16681 CCACTGAAGA CTGCGGGATT GCTCTCGGTC AAGCTTTTAA AGAGGCCCTA GGGGCCGTGC  
16741 GTGGAGTAAA AAGGTTTGA TCAGGATTTG CGCCTTTGGA TGAGGCACTT TCCAGAGCGG  
16801 TGGTAGATCT TTCGAACAGG CCGTACGCAG TTGTGCAACT TGGTTTGCAA AGGGAGAAAG  
16861 TAGGAGATCT CTCTTGCAG ATGATCCCGC ATTTTCTTGA AAGCTTTGCA GAGGCTAGCA  
16921 GAATTACCT CCACGTTGAT TGTCTGCGAG GCAAGAATGA TCATCACCGT AGTGAGAGTG  
16981 CGTTCAAGGC TCTTGCAGT GCCATAAGAG AAGCCACCTC GCCCAATGGT ACCAACGATG  
17041 TTCCCTCCAC CAAAGGTGTT CTTATGTAGT TTTACACAGG AGTCTGGACT TGACTIONGAG  
17101 TGCGGTTGGA ACGTTGGCCC AGCCAGATAC TCCCGATCAC GAGCAGGACG CCGATGATTT  
17161 GAAGCGCACT CAGCGTCTGA TCCAAGAACA ACCATCCTAG CAACACGGCG GTCCCCGGGC  
17221 TGAGAAAAGCC CAGTAAGGAA ACAACTGTAG GTTCGAGTCG CGAGATCCCC CGGAACCAAA  
17281 GGAAGTAGGT TAAACCCGCT CCGATCAGGC CGAGCCACGC CAGGCCGAGA ACATTGGTTC  
17341 CTGTAGGCAT CGGGATTGGC GGATCAAACA CTAAGCTAC TGGAACGAGC AGAAGTCCTC  
17401 CGGCCGCCAG TTGCCAGGCG GTAAAGGTGA GCAGAGGCAC GGGAGGTTGC CACTTGCAGG  
17461 TCAGCACGGT TCCGAACGCC ATGGAAACCG CCCCCGCCAG GCCCGCTGCG ACGCCGACAG  
17521 GATCTAGCGC TGCGTTTGGT GTCAACACCA ACAGCGCCAC GCCCGCAGTT CCGCAAATAG  
17581 CCCCCAGGAC CGCCATCAAT CGTATCGGGC TACCTAGCAG AGCGGCAGAG ATGAACACGA  
17641 CCATCAGCGG CTGCACAGCG CCTACCGTGC CCGCGACCCC GCCCGGCAGG CGGTAGACCG  
17701 AAATAAACAA CAAGTCCAG AATAGCGAAA TATTAAGTGC GCCGAGGATG AAGATGCGCA  
17761 TCCACCAGAT TCCCGTTGGA ATCTGTGCGA CGATCATCAC GAGCAATAAA CCCGCCGGCA  
17821 ACGCCCGCAG CAGCATACCG GCGACCCCTC GGCCTCGCTG TTCGGGCTCC ACGAAAACGC  
17881 CGGACAGATG CGCCTTGTGA GCGTCTTGG GGCCGTCTC CTGTTTGAAG ACCGACAGCC  
17941 CAATGATCTC GCCGTCGATG TAGGCGCCGA ATGCCACGGC ATCTCGCAAC CGTTCAGCGA  
18001 ACGCCTCCAT GGGCTTTTTT TCCTCGTGCT CGTAAACGGA CCCGAACATC TCTGGAGCTT  
18061 TCTCAGGGC CGACAATCGG ATCTCGCGGA AATCCTGCAC GTCGGCCGCT CCAAGCCGTC  
18121 GAATCTGAGC CTTAATCACA ATGTCAATT TTAATCCTCT GTTTATCGGC AGTTCGTAGA  
18181 GCGCGCCGTG CGTCCGAGC GATACTGAGC GAAGCAAGTG CGTCGAGCAG TGCCCGCTTG  
18241 TTCCTGAAAT GCCAGTAAAG CGCTGGCTGC TGAACCCCA GCCGGAATG ACCCCACAAG  
18301 GCCCTAGCGT TTGCAATGCA CCAGGTCATC ATTGACCCAG GCGTGTTC AAGGCGGCT  
18361 GCCTCGCAAC TCTTCGAGG CTTCCGCCAC CTGCTCGCGC CACTTCTTCA CGCGGGTGA  
18421 ATCCGATCCG CACATGAGGC GGAAGGTTTC CAGCTTGAAG GGGTACGGCT CCCGGTGCGA  
18481 GCTGAAATAG TCGAACATCC GTCGGGCCGT CGGCGACAGC TTGCGGTAAT TCTCCATAT  
18541 GAATTCGTG TAGTGGTTCG CAGCAAACAG CACGACGATT TCCTCGTCGA TCAGGACCTG  
18601 GCAACGGGAC GTTTTCTTGC CACGGTCCAG GACGCGGAAG CGGTGCAGCA GCGACACCGA  
18661 TTCCAGGTGC CCAACGCGGT CGGACGTGAA GCCCATCGCC GTCGCCTGTA GGCAGCAGC  
18721 GCATTCCTCG GCCTTCGTGT AATACCGCC ATTGATCGAC CAGCCAGGT CTGGCAAAG

18781 CTCGTAGAAC GTGAAGGTGA TCGGCTCGCC GATAGGGGTG CGCTTCGCGT ACTCCAACAC  
18841 CTGCTGCCAC ACCAGTTCGT CATCGTCGGC CCGCAGCTCG ACGCCGGTGT AGGTGATCTT  
18901 CACGTCCTTG TTGACGTGGA AAATGACCTT GTTTTGCAGC GCCTCGCGCG GGATTTTCTT  
18961 GTTGCGCGTG GTGAACAGGG CAGAGCGGGC CGTGTCTGTTT GGCATCGCTC GCATCGTGTC  
19021 CGGCCACGGC GCAATATCGA ACAAGGAAAG CTGCATTTCC TTGATCTGCT GCTTCGTGTG  
19081 TTTACGCAAC GCGGCCTGCT TGGCCTCGCT GACCTGTTTT GCCAGGTCCT CGCCGGCGGT  
19141 TTTTCGCTTC TTGGTCGTCA TAGTTCCTCG CGTGTCTGATG GTCATCGACT TCGCCAAACC  
19201 TGCCGCCTCC TGTTTCGAGAC GACGCGAACG CTCCACGGCG GCCGATGGCG CGGGCAGGGC  
19261 AGGGGGAGCC AGTTGCACGC TGTCGCGCTC GATCTTGCC GTAGCTTGCT GGACCATCGA  
19321 GCCGACGGAC TGGAAGGTTT CGCGGGGCGC ACGCATGACG GTGCGGCTTG CGATGGTTTC  
19381 GGCATCCTCG GCGGAAAACC CCGCGTCGAT CAGTTCCTGC CTGTATGCCT TCCGGTCAA  
19441 CGTCCGATTC ATTCACCCTC CTGCGGGAT TGCCCCGACT CACGCCGGGG CAATGTGCC  
19501 TTATTCCTGA TTTGACCCGC CTGGTGCCTT GGTGTCCAGA TAATCCACT TATCGGCAAT  
19561 GAAGTCGGTC CCGTAGACCG TCTGGCCGTC CTTCTCGTAC TTGGTATTCC GAATCTTGCC  
19621 CTGCACGAAT ACCAGCGACC CTTGCCCAA ATACTTGCCG TGGCCCTCGG CCTGAGAGCC  
19681 AAAACACTTG ATGCGGAAGA AGTCGGTGCG CTCCTGCTTG TCGCCGGCAT CGTTGCGCCA  
19741 CTCTTCATTA ACCGCTATAT CGAAAATTGC TTGCGGCTTG TTAGAATTGC CATGACGTAC  
19801 CTCGGTGTCA CGGGTAAGAT TACCGATAAA CTGGAAGTGA TTATGGCTCA TATCGAAAGT  
19861 CTCCTTGAGA AAGGAGACTC TAGTTTAGCT AAACATTGGT TCCGCTGTCA AGAAGTTTGT  
19921 CGGCTAAAAT TTTGCGGGCC GCGACCAAAG GTGCGAGGGG CGGCTCCGC TGTGTACAAC  
19981 CAGATATTTT TCACCAACAT CCTTCGTCTG CTCGATGAGC GGGGCATGAC GAAACATGAG  
20041 CTGTCGAGGA GGGCAGGGGT TTCAATTTTCG TTTTATCAG ACTTAACCAA CGGTAAGGCC  
20101 AACCCCTCGT TGAAGGTGAT GGAGGCCATT GCCGACGCC TGGAAACTCC CCTACCTCTT  
20161 CTCCTGGAGT CCACCGACCT TGACCGCGAG GCACTCGCGG AGATTGCGGG TCATCCTTTT  
20221 AAGAGCAGCG TGCCGCCCGG ATACGAACGC ATCAGTGTGG TTTTGCCGTC ACATAAGGCG  
20281 TTTATCGTAA AGAAATGGGG CGACGACACC CGAAAAAAGC TCGGTGGAAG GCTCTGACGC  
20341 CAAGGGTTAG GGCTTGCACT TCCTTCTTTA GCCGCTAAAA CGGCCCTTC TCTGCGGGCC  
20401 GTCGGCTCGC GCATCATATC GACATCCTCA ACGGAAGCCG TGCCGCGAAT GGCATCGGGC  
20461 GGGTGCCTT TGACAGTTGT TTTCTATCAG AACCCCTACG TCGTGCCTT CGATTAGCTG  
20521 TTTGTCTTGC AGGCTAAACA CTTTCGGTAT ATCGTTTGC TGTGCGATAA TGTTGCTAAT  
20581 GATTTGTTGC GTAGGGGTTA CTGAAAAGTG AGCGGGAAAAG AAGAGTTTCA GACCATCAAG  
20641 GAGCGGGCCA AGCGCAAGCT GGAACGCGAC ATGGGTGCGG ACCTGTTGGC CGCGCTCAAC  
20701 GACCCGAAAA CCGTTGAAGT CATGCTCAAC GCGGACGGCA AGGTGTGGCA CGAACGCCTT  
20761 GCGGAGCCGA TGCGGTACAT CTGCGACATG CGGCCAGCC AGTCGAGGC GATTATAGAA  
20821 ACGGTGGCCG GATTCCACGG CAAAGAGGTC ACGCGGCATT CGCCATCCT GGAAGGCGAG  
20881 TTCCCTTG ATGGCAGCCG CTTTGCCGGC CAATTGCCGC CGGTCGTGGC CGCGCAACC  
20941 TTTGCGATCC GCAAGCGCGC GGTCCGATC TTCACGCTGG AACAGTACGT CGAGGCGGGC  
21001 ATCATGACCC GCGAGCAATA CGAGGTCATT AAAAGCGCCG TCGCGGCGCA TCGAAACATC  
21061 CTCGTCATTG GCGGTAATG CTGCGGCAAG ACCACGCTCG TCAACGCGAT CATCAATGAA  
21121 ATGGTGCCT TCAACCCGTC TGAGCGCGTC GTCATCATCG AGGACACCGG CGAAATCCAG  
21181 TGCGCCGAG AGAACGCCGT CCAATACCAC ACCAGCATCG ACGTCTCGAT GACGCTGCTG  
21241 CTAAGACAA CGTCTGCTAT GCGCCCCGAC CGCATCCTGG TCGGTGAGGT ACGTGGCCCC  
21301 GAAGCCCTTG ATCTGTTGAT GGCCTGGAAC ACCGGGCATG AAGGAGGTGC GCACCCTG  
21361 CACGCAACA ACCCAAAGC GGGCCTGAGC CGGCTCGCCA TGCTTATCAG CATGACCCG  
21421 GATTACCGA AACCCATTGA GCCGCTGATT GGCGAGGCGG TTCATGTGGT CGTCCATATC  
21481 GCCAGGACCC CTAGCGGCCG TCGAGTGCAA GAAATTCTCG AAGTTCTTGG TTACGAGAAC  
21541 GGCCAGTACA TCACCAAAC CCGTAAGGA GTATTTCAA TGACAACGGC TGTTCCGTTT  
21601 CGTCTGACCA TGAATCGCGG CATTGTTTC TACCTTGCCG TGTTCTTCTG TCTCGCTCTC  
21661 GCGTTATCCG CGCATCCGGC GATGGCCTCG GAAGGCACCG GCGGCAGCTT GCCATATGAG  
21721 AGCTGGCTGA CGAACCTGCG CAACTCCGTA ACCGGCCCGG TGGCCTTCGC GCTGTCCATC  
21781 ATCGGCATCG TCGTCGCGG CGGCGTCTG ATCTTCGGCG GCGAACTCAA CGCCTTCTT  
21841 CGAACCTGA TCTTCTGGT TCTGGTATG GCGCTGCTGG TCGGCGCGCA GAACGTGATG  
21901 AGCACCTTCT TCGGTCGTGG TGCCGAAATC GCGGCCCTCG GCAACGGGGC GCTGCACCAG

21961 GTGCAAGTCG CGGCGGCGGA TGCCGTGCGT GCGGTAGCGG CTGGACGGCT CGCCTAATCA  
22021 TGGCTCTGCG CACGATCCCC ATCCGTGCGG CAGGCAACCG AGAAAACCTG TTCATGGGTG  
22081 GTGATCGTGA ACTGGTGATG TTCTCGGGCC TGATGGCGTT TGCGCTGATT TTCAGCGCCC  
22141 AAGAGCTGCG GGCCACCGTG GTCGGTCTGA TCCTGTGGTT CGGGGCGCTC TATGCGTTCC  
22201 GAATCATGGC GAAGGCCGAT CCGAAGATGC GGTTCGTGTA CCTGCGTCAC CGCCGGTACA  
22261 AGCCGTATTA CCCGGCCCGC TCGACCCCGT TCCGCGAGAA CACCAATAGC CAAGGGAAGC  
22321 AATACCGATG ATCCAAGCAA TTGCGATTGC AATCGCGGGC CTCGGCGCGC TTCTGTTGTT  
22381 CATCTCTTT GCCCGCATCC GCGCGTCTGA TGCCGAACTG AACTGAAAA AGCATCGTTC  
22441 CAAGGACGCC GGCCTGGCCG ATCTGCTCAA CTACGCCGCT GTCGTCGATG ACGGCCTAAT  
22501 CGTGGGCAAG AACGGCAGCT TTATGGCTGC CTGGCTGTAC AAGGGCGATG ACAACGCAAG  
22561 CAGCACCGAC CAGCAGCGCG AAGTAGTGTC CGCCCGCATC AACCAGGCC TCGCGGGCCT  
22621 GGAAGTGGG TGGATGATCC ATGTGGACGC CGTGGCGCGT CCTGTCCGA ACTACGCGGA  
22681 GCGGGGCTG TCGCGTTC CTGACCGTCT GACGGCAGCG ATTGAAGAAG AGCGCCGGCG  
22741 GCATTCGAG AGCCTGGGAA CGATGTACGA GGGCTATTC GTCCTACCT TGACCTGGTT  
22801 CCCGCCGCTG CTCGCCAGC GCAAGTTCGT CGAGCTGATG TTTGACGACG ACGCGACCGC  
22861 ACCGGATCGC AAGGCGCGCA CGCGGGCCT CATCGACCAA TTCAAGCGTG ACGTGGCGAG  
22921 CATCGAGTCG CGCCTGTCGT CGGCCGTGTC GCTCACTCGC TTGAAGGGC ACAAGATCGT  
22981 CAACGAGGAC GGCACGACCG TCACGCATGA CGACTTCCTG CGCTGGCTGC AATTCTGCGT  
23041 GACGGGCTG CACCATCCGG TGACGCTCC CAGCAACCCG ATGTACCTGG ACGCCCTGGT  
23101 CGGCGGACAG GAAATGTGGG GCGGGTAGT GCCCAAGGTC GGCCGAAGT TCGTCCAGGT  
23161 GGTGCTCTC GAAGGCTTCC CTTGGAGTC CTATCCCGC ATCCTGACGG CGCTCGGCGA  
23221 GCTGCCCTGC GAGTATCGGT GGTGAGCCG TTCATCTC ATGGACCAGC ACGAAGCCGT  
23281 GAAGCACCTC GACAAGTTC GCAAGAAGTG GCGGCAGAAG ATTCGCGGCT TCTTCGACCA  
23341 GGTGTTCAAC ACGAACACCG GCCCGTCTGA TCAGGACGCG CTTTCGATGG TGGCCGATGC  
23401 TGAGGCGGCC ATTGCCGAAG TCAACAGCGG CATCGTGCC GTGGGCTACT ACACCAGCGT  
23461 CGTCGTGCTG ATGGATGAGG ACCGCACGCG CTGGAAGCT GCGGCCCGCG ATGTTGAAAA  
23521 GGCCGTCAAC CGGTTGGGCT TTGCCGCGCG CATCGAGTCC ATCAACACCC TGGACGCCTT  
23581 CCTGGTAGT TTGCCGGGCC ACGGCGTGA AAACGTCCG CGGCCGCTCA TCAACAGAT  
23641 GAACCTGGCC GACCTGCTGC CGACCAGCAC CATCTGGACC GGCAACGCGA ACGCGCCATG  
23701 CCCGATGTAC CCGCCGCTGT CGCCGGCGCT CATGCACTGC GTCACGCAAG GATCAACGCC  
23761 GTTCCGGCTG AACCTGCACG TGCAGCAGCT CGGCCACACC TTTATGTTG GGCCGACCGG  
23821 CGCAGGTAAG TCGACGCACC TGGCGATCCT CGCCGCGCAG CTCCGTCGCT ATGCCGGCAT  
23881 GTCGATCTT GCCTTTGACA AGGGCATGTC GATGTACCCG CTGGCCCGCG GCATCCGTGC  
23941 GGCCACGAAG GGCACCAGCG GCCTGCACTT CACCGTGGCG GCCGACGACG AACGCTGGC  
24001 GTTCTGCCC TTGCAATTCC TGAGACCAA GGGCGACCGT GCTTGGGCGA TGGAGTGGAT  
24061 CGACACCATC CTGGCGTTGA ACGGCGTGA AACGACCCG GCCAGCGCA ACGAAATCGG  
24121 CAACGCGATC ATGAGCATGC ACGCCAGCGG CGCGCGCACG CTCTCCGAGT TCAGCGTGAC  
24181 GATTCAGGAT GAGGCGATCC GCGAGGCGAT CCGCCAGTAC ACCGTCGATG GCGCAATGGG  
24241 CCATCTGCTC GACGCCGAAG AGGACGGCTT GGCCTGTCC GACTTTACAG TGTTGAGAT  
24301 CGAAGAGCTG ATGAACCTCG GCGAGAAATT CGCCCTGCCT GTGTTGCTCT ACCTGTTCCG  
24361 CCGTATCGAG CGCGCCCTGA CGGGCCAGCC GGCCGTCATC ATCCTGGACG AAGCCTGGTT  
24421 GATGCTCGGC CACCCGGCAT TCCGCGCGAA GATCAGGAA TGGCTCAAGG TGCTGCGTAA  
24481 GGCCAACTGC CTTGTGCTGA TGGCAACGCA GAGCTGTCC GACGCCGCCA ACAGCGGCAT  
24541 CCTGGACGTG ATCGTGGAAT CGACCCGCGAC CAAGATTTTC CTGCCGAATA TTTACGCCAG  
24601 GGATGAGGAC ACGGCGGCC TGTACCGCCG CATGGGCCTG AACGCTCGCC AGATCGAGAT  
24661 TCTGGCCAG GCCGTTCCCA AGCGTCAGTA CTAACGCTG TCGGAAAACG GCCGCCGTCT  
24721 CTACGACCTG GCACTTGCCG CGCTCGCGCT CGCGTTCGTC GGCGCATCCG ACAAGGAATC  
24781 CGTCGCCATC ATCAAGAACC TGGAAGCCAA GTTCGGCGAC CAGTGGGTGG ATGAATGGCT  
24841 GCGTGGCCCG GGCCTCGCCC TTGATGAATA CCTGGAGGCA GCATGAGTTT TGCAGACAGC  
24901 ATCAAGGGCT TGATCTTCAA GAAGAAGCCC GCAACGGCCG CAGCAGCGGC GACGCCGGCC  
24961 GCGACCGGCC CGCAAACCGA CAACCCGTAC CTGACGGCGC GGCGCACCTG GAACGACCAC  
25021 GTTGGTTCCG TTGTGTCGA AAAGCAGACC TGGCAGGTTG TCGGCATCCT TTCGCTGATG  
25081 ATCGTCTCG CGGCGTCTG CGGCATCATC CACATCGGCA GCCAGTCGAA GTTCGTGCC

25141 TATGTCTACG AGGTAGACAA GCTCGGGCAG ACGGCCGCCG TGGGGCCGAT GACCAGGGCG  
25201 TCGAAAGCCG ATCCGCGTGT CATTACGCC TCGGTGGCTG AGTTCGTCGG CGATGCTCGC  
25261 CTGGTGACGC CGGACGTAGC TTTGCAGCGC AAGGCCGTCT ACCGCCTCTA TGCCAAGCTC  
25321 GGGCCGAATG ACCCGGCCAC CGCCAAGATG AACGAATGGC TCAACGGCAC CGCCGACGCC  
25381 AGCCCGTTCG CTCGCGCGGC CGTCGAAACG GTCAGACCG AAATCACTTC CGTAATCCCG  
25441 CAGACGCCCG ACACCTGGCA GGTGATTGG GTCGAGACGA CGCGCGACAG GCAAGGCGTG  
25501 GTGAAAGGCC AGCCCGTGC CATGCGGGCC TTGGTGACGG TCTACGTCGT CGAGCCGACG  
25561 GCGGACACCA AGGAAGAACA ACTGCGAAAC AACCCGGCCG GGATCTACGT CCGGGACTTC  
25621 TCCTGGTCGA GACTTCTGTG AGGCACTGAA TTATGAAAAA GAACTGTTT GCTTTGGTCC  
25681 TGGCCGCGTC CGTTAGCGTG CCTGCATTTG CCGCCGATCC CGGCGCGGAC CTGACTGACC  
25741 TCTATTTTTT CGGCAAGAAC CCGGAGCTGA CCGCGCAAGA GCGGGCGGCC ATCGCCATCG  
25801 CCAAGAAGTG GGAGGCGGGT ACCGCCGGCA TCGGCGCGGT GGCCGGCCCC GGTGGTTCCG  
25861 TGCGTTCCT GTTCGGCGCG CAGCAGCCGA GCATCGTATG CGCCGTGCTG CAAGTGTGCG  
25921 ACGTGGCCCT GCAACCCGGC GAGCAAGTCA ACTCGATCAA CCTGGGCGAC ACCGCCGTT  
25981 GGACGGTCGA GCCGGCCATT ACCGGCAGCG GCGCGAACGA AACCCAGCAC CTCATCATCA  
26041 AGCCGATGGA TGTGGGCTG GAAACCAGCC TGGTCGTGAC CACGGACCGC CGCAGCTACC  
26101 ACATGCGCCT GCGCTCGCAT CGCACGCAGT ACATGCCGCA GGTGTCGTTT ACCTACCCGG  
26161 AAGATGCCCT TGCGAAGTGG GACGCCATCA AGAACCGCGA ACAGCGGGAT CGCGTCGAGA  
26221 AAACCATTCC GCAGACCGGC GAGTACCTGG GCAACCTGAG CTTCAACTAC TCCGTCAGCG  
26281 GGTCCACGTC GTGGAAGCCG GTGCGCGTCT ACAACGACGG CAAGAAAACC ATCATCCAGA  
26341 TGCCGCACTC GATGGAACAG ACCGAAGCGC CGACGCTCCT GGTCGTTCCG AGGGAGGGCG  
26401 GCCTGTTCTC CGACGATGAA ACGGTGATGG TCAACTACCG GGTCCAGGGC GACCGCTACA  
26461 TCGTCGATAC GATTTTCGAC AAGGCCATCC TCATCGCGGG CGTGGGCAGC AGCCAGGACC  
26521 GCGTGACCAT TTCAAGGGGG AACTAAACCA TGCCTAAGAT TCTGACCGTC ATCGCACTCG  
26581 CGGCCACGTT GGCCGGCTGC GCGACCTCCA AGTACGGCAG CTTCTGTCAG GACGCGCCGG  
26641 CCGCTACAA CCAGACCATT GCGACCGACG CCGTGAAGCA GTCGTCAAG CTCTACCCGC  
26701 CGGCGCAAAC CAAGCTGGAA TTGCAGCAGG CTACGCCCGA TCCGTTCCGC ATTGCCCTGG  
26761 TCACTGACCT TCGCGCCCAG GGCTATGCTG TCATGGAGTA CAAGCCCGAC GGCAACGCGG  
26821 CCGCAGCTCC GGCTGCTGCG TCCTCGGCCG CTGCGAAGCC GGCAACGCCG CAAGCCCAGG  
26881 GCGGCTATCC GCTGCGCTAC GTGCTGGACC AATTACGCGA CAGCAACCTG TATCGCCTGA  
26941 CCGTCATGGT CGGCTCTCAA TCGCTCACGC GCGCCTACCT CGCCAAAAC AACACGATGG  
27001 TCCGGCCCGG CGCATGGGTT CGGAAGGAGT AAGCCAATGA GCGAAGATCA AATGGCACCG  
27061 GACGCATCGC CAGATGCGGT CAAGCCGAAA AGCGGGGTTT GCCGCGTCAA CAACATGCCG  
27121 ATGTACCTCA TCGGCGGTGT GCTCGGCATC TTCTGCTGG TGATGGCCCT GGTGCTGCG  
27181 GATCGCGCTG CGCAGCAGAA CCAGCCGGGA GCTGCGAAGG CTGAGAAGGC CGGCAGCACC  
27241 AGCATGTTTG CCGACGAAAT TGCCGGCAA CAGCAGGACG GCATCATCAA GGCCAAGCCG  
27301 CTGGAGATTG CGCCGGAACA AACCGCCAG CAACCGACGA CGGAGCTGAC GCCAGCCCCG  
27361 GCGCAGGGAA CACTATCAC GGTGCGACGG CCCGAGAACC TGGACCAGCC CCCGACGCCG  
27421 CCGCAGGGTG CGCGAACGA GGACCTGGAC CGCATCCGCA TGGCGAAGTT GCAGATGCTG  
27481 GAAGAGGCGA TCAAGGCCAA GACGACGGTG CGCATCGACG CGCCGCGCAG CCAGGGCAGC  
27541 GCCGGCGGCG GTGCTCCGCA GGGCCGCGAG GAAACCCTTG CGCGCATCCA GGAGTGCCT  
27601 CGGCAGGCTG AGAACGCCCG CGCCACCGAT CCGACCGCCG CCTATCAGGC CGCGCTTGGC  
27661 CAGGCTCGCA CGATGGGCGG CGCGGCAGGG GGTGGCGGTA TGGGCGGCTC GGTGCGCCG  
27721 ACCCTGTCG AGACCTCGAA CCGCAGTGGT GGCGGCGCTG GCTATGGGTC GTTCGACAAC  
27781 CGCAGCGAGG GCGACCGTTG GCGGCTCGAC TCCAGCCGG AAGCACCTGC AACGCCAT  
27841 GTGCTGCGCG CTGGTTCGT GTTCCGGCT ACGCTTATCT CGGGCATCAA CTCCGATCTG  
27901 CCAGGCCAAA TCATGGCCA GGTATCGCAG TCGGTGTACG ACACGGCGAC CGGCAAGCAC  
27961 ATGCTCATCC CCCAAGGCTC GCGCCTGGTG GGCAGCTACT CGAACGATGT GGCCTACGGG  
28021 CAGAAGCGCG TTCTGGTGGC ATGGCAGCGC ATCATCTTCC CCGACGGCAA GGCAATGGAC  
28081 ATTGGGGCCA TGCCGGGCGG CGATAGCGCT GGGTATGCAG GCTTCAACGA CAAGTCAAC  
28141 AACCACTACT TCCGACCTT CGCATCGGCA TTCCTCATGT CGGGCGTCTG TCGGGCATC  
28201 AGCTTGAGTC AGGACCGTGG CAACAGCAAC AGCGTTACG GACGACAAGA CGCGGGTTCC  
28261 GCGATGAGTG AAGCGTTGGG TCAACAGCTC GGCCAAGTAA CGGCGCAGAT GATCGCCAAA

28321 AACTTGAATA TCGCGCCGAC GCTGGAAATC CGTCCGGGCT ATCGCTTCAA CGTCATTGTC  
28381 ACGAAAGACA TGACGTTTTT TAAGCCCTAC CAGGCGTTTG ACTATTA ACT CCAAGGAGTA  
28441 ACTTATGAAG AAGCTCGCTA AGAATGTTTT AGCCGCTAAA GTAGCTCTGG TGCTGGCCCT  
28501 CTCGGTCGGC ACCTTGCGG TCACGCCTGC GCAAGCGGGC ATTCCGGTCA TCGACGGCAC  
28561 CAACCTGTCA CAAACCACTG TCACCGCGAT TCAGCAGGTT GCGCAGGTCC AGAAGCAAAT  
28621 CGAGGAATAC CGGACGCAGT TGCAGCAGTA CGAAAACATG CTGCAAAAACA CGGTGGCCCC  
28681 GGCCGCCTAC GTGTGGGACC AGGCGCAGTC CACCATCAAC GGCCTGATGA GCGCCGTTGA  
28741 TACCTGAAC TACTACAAGA ACCAGGCGGG CAGCATCGAC GCTTACCTGG GCAAGTTCOA  
28801 GGACGTGTCC TACTACAAGG GGTGCGCGTG CTTCTCCCTG TCGGGCTGCT CGGAAAAGCGA  
28861 GCGCAAGGCG ATGGAAGAGA ACCGCCGCTT GCGTCCGAA TCGCAGAAAA AGGCCAACGA  
28921 TCGCTGTTC CGTGGCCTCG ATCAGCAGCA GAGCAACCTC AAGTCCGACG CCGCCACGCT  
28981 GGAGCAATTG AAGGGCAAGG CGACGACGGC GCAGGGCCAG TTGGAAGCCC TCGGCTACGC  
29041 CAACCAGTTC GCCAGCCAGC AGGCCAACCA GCTCATGCAA ATCCGTGGCC TTCTGCTTG  
29101 GCAGCAGAAC GCCATCGCCA CGCAGATGCA GGCCAGCAG GACCGGCAGG CCCAGCAGGA  
29161 CGCTGCGGGC GCGAAGCTGC GCGAGGGTTC GTACCGCGCA AGCCCGTCTA AGACCTGGT  
29221 AGGGGAGGCG CGATGAAGAA ATCCAACCTC ATCGCAGTTG CCGCGCTGGC GCCTGTCATG  
29281 GCGGCCAGCC TGGCAGGCTG CGACAACAAG CCCGACACCG ACAAGCTGAC CTGCGCCGAT  
29341 CTGCCGAAGG TCACGGATGC CGCTCAACGC GCGGAGCTGT TGAAGAAGTG CCCGCGCGGA  
29401 GAACCGGGAG GCTTCAAGCC CAGCGAAAAG AAAGAGTGGT GATGACGTAT GAAAATCCAG  
29461 ACTAGAGCTG CCGCGCTCGC GGTCTGATG CTGGCCTTGA TGCCGAGTAC GGCATACGCC  
29521 CAAATCGACA ATTCGGGCAT CCTCGACAAC GTATTGCAGC GCTACCAGAA CGCCGCGAGC  
29581 GGCTGGGCCA CTGTCGTCCA GAACGCCGCA ACCTGGCTGT TCTGGACCTT GACCGTGATT  
29641 AGCATGGTCT GGACCTTCGG CATGATGGCA CTGCGCAAGG CCGACATTGG CGAGTTCTTC  
29701 GCCGAGTTCG TGCGGTTCAC CATCTTACC GGCTTCTTCT GGTGGCTGCT GACCAACGGC  
29761 CCGAATTCG CGTCGTCCAT CTATGCGTCC CTGCGGCAGA TTGCAGGCCA GGCAACGGGG  
29821 TTGGGGCAGG GGCTTTCGCC GTCCGGCATC GTCGATGTTG GCTTCGAGAT TTTCTTCAAG  
29881 GTGATGGACG AAACCTCGTA CTGGTCGCCG GTCGATAGCT TCGTCGGTGC CTCGTTGGCG  
29941 GCCGCCATCC TCTGCATCCT GGCCCTGGTC GCGTGAATA TGCTTCTGCT CCTGGCGTCC  
30001 GGATGGATTG TTGCTACGG CGGTGTGTTT TCTTGGGCT TCGGCGGCTC GCGCTGGACC  
30061 TCGGACATGG CGATCAACTA CTACAAGACC GTCCTCGGGG TCGCCGCGCA GCTCTTCGCA  
30121 ATGGTGCTGC TGTAGGCAT CGGCAAGACC TTCCTCGATG ACTACTACAG CCGCATGAGC  
30181 GAAGGCATCA ACTTCAAGGA ACTTGAGTG ATGCTGATCG TCGGCCTGAT CCTGCTCGTT  
30241 CTGGTCAACA AGGTGCCGCA GTCATCGCC GGCATCATCA CCGGCGCGAG CGTCGGCGGT  
30301 GCTGGTATCG GCCAGTTCGG CGTGGCACG CTCGTCGGTG CGGCCGCGAC GGCCGGCGCG  
30361 GCAATCGCAA CTGGCGGCGC ATCTATCGCG GCCGGCGCTG CGGCGGCGGC CGGTGGCGCG  
30421 CAGGCCATCA TGGCGGCCGC GTCGAAGGCC AGCGATAACG TCTCTGCCG CACTGACATT  
30481 CTGTCGAGCA TGATGGGCGG CGGCGGTGGC GCGGCGGGTG GTAGCGCCGG CACCAGCGGC  
30541 GGCGACGGCG GCGGCTCGGG TGGCGGCGGT GGCTCGGGCG GCGGTGAAAC CCCGATGGCC  
30601 TCGGCCGCG GCGACAACAG CAGCGGCGCA CGCGGCGGCA GTTCGGGCGG CGGCTCGGGT  
30661 GGTGGCCGTT CGTCTGGCGG TATCGGTGCC ACGGCGGCCA AGGGCGGCCG GATCGCGGCC  
30721 GATACCGTCG CCAACCTGGC GAAAGGTGCC GGCTCGATTG CCAAGGCCAA GGCCGGCGAA  
30781 ATGCGCGCAT CGGCCAGGA ACGCATCGGC GATACCGTAG GCGGCAAGAT CGCGCAGGCA  
30841 ATTCGCGCG CGGGTGCGGC GGCGCAGACC GCTGCAACCG TCGCCGATAG CAACAGCCAG  
30901 GCGCAGGAAC AACCTGCACC GGCACCCGCA CCGTCGTTG ACGACAACAG CCTTCCGCA  
30961 AGCAACAACA GGAAGCGGC CGCCGACGCG GATTCCGAAG TGGCGAGCTT CGTCAACAAG  
31021 CCCGCCAAT CTGAAACGA CTCTAGGAG CTACGACCAT GCAACTGAAA AAAGCGTTCT  
31081 CGTCGGCCGC CCTGGTGGTG GCCTTGGGCC TCGGCGCAAC TGGCTCGGCC AGCGCGCAAG  
31141 ACGTGCTGAC GGGCGATACC CGCCTGGCCT GCGAGCCAT TCTGTGCCTG TCCACGGGCA  
31201 GCCGGCCCAG CGAGTGCAGC CCGTCGCTCT CGCGGTACTT CGGCATCCAC AAGCGCAAGC  
31261 TGTCGGACAC GCTCAAGGCG CGGCTGAACT TCCTAACCT CTGCCGGTA TCGAACCAGA  
31321 CGCCGGAAAT GCAGACGCTC GTTTCCTCGA TTTGCGCGG GGCCGGGCGC TGCGATGCGT  
31381 CCTCGTGAA CTCGTGCTG CGTGAGTGGC GGAGCTGGGA CGACCAGTTC TACATCGGCA  
31441 ACCGCTGCC GGACTIONG GCGGCCTACA CCGCCATGC CTATACCGAC TCAACACGA

31501 CCGCGCCGCG CTACGTCGGC ACGCCGGAAG AGGGCGGCTA TTGGATCGAG GCGGCCGACT  
31561 ACGACCGCGC GCTCAAGGAG TACGAGGCGA AGCTGAAAGA GCGGCAGCAG CAGTACGGTC  
31621 GCTATGGCAG CGACGCCTAC CGTCGGTTCG AGCGGTAAGG GGAGGGGATA GCGATGCCGT  
31681 TTGCCAAGCT GCTGGCACGG AACGCTCTGC CGGTGGTCGC CCTGGTGGCG GCCACTGGCT  
31741 TCGGTGCGGC GGATGCGACC GCCGCACGGC TCTTCCCCGA TCTGTCGGAA CAGATGGAAG  
31801 AGCGCGTTGT GTGCTCGGTG TCTGCGGCCG CGAAGTACGA GATTCCGGCC AACATTCTTC  
31861 TCGCCATTCG GAAAAAGGAG GCGCGCAAGC CGGGCCAGTG GGTCAAGAAC ACCAATGGCA  
31921 CCTATGACGT GGGCGAGCTG CAATTCAACA CCGCTACCT GGGCGACCTG GCGAAGTATG  
31981 GGATCACGGC CCAGGACGTT GCTGCGGCAG GCTGCTATCC CTATGACCTG GCGGCCTGGC  
32041 GGTTGCGCGG GCACATTCGC AACGACAGGG GCGATCTGTG GACACGCGCC GCTAACTATC  
32101 ACTCGCGCAC GCCGTGAAG AACCGATCT ATCGCGCCGA TCTGATGGTG AAGGCCGACA  
32161 AGTGGGCGAA GTGGCTGGAT GCGCGTTTTG TCACCGTCAA CTATGGCCCC AGCTCGCCGG  
32221 CGCAGCCGGC AGGGAAGGGG ACCACACTTG CGGCCGCTGA TACGTCGGCA GCAGCGCCGG  
32281 CCGAAGCGCA GCCGATGAAG CAAGGCCGGA TCACCCGCAC CAGCCTCCGC AGCTCGGGTT  
32341 ACGTACCCCG GCAGCTCATC ATCAACAACA CGCCATAAGG AGGAACGGCC GTTTAGCGGC  
32401 TAAAGCCTAT GGGCATTTCG AACCTGACGC AGCGATACAT GAACGGGGCC AGGGCCTACG  
32461 CGGCCTGGGC GGCATCGCAG GCGAAAGCGC CGTTTGATCT TCTGGTACTG GGCATCGGGC  
32521 CTGTCATCGT CTTTGGCCTG GTCGCGCATA CGCTGCTCGC GTTCCTGCC ACATGGGCCA  
32581 TGTACGCCGC CGGCGCTCTG CTGGTCTCG CGGCCCTGCC TTTGGCGCTG CACGTCCTCC  
32641 GGGAATACGC GCTGCGCTAT GGGCGCAAAT AGCGCCCTGC AGGGCGTTCT TACTCCAAGG  
32701 GGGAGGGCAT GAATACACGC GCCATGAACG ACGCCAGCGG CCGGGCCTCG CTGCCTGCCA  
32761 TGGTGATCGC CGACGGCACC ATTGAAGCCT TGAAGTGGCT CGCCTTGCTT GCCATGACCG  
32821 GGGATCACGT CAACAAGTAC CTGTTCAACG GTACGCTGCC ATATCTGTT CAGGCGGGGC  
32881 GCTTGGCCCT GCCTCTTTTC GTTTTCGTCC TGGCGTACAA CCTCGCCCGC CCGGGCGCGC  
32941 TCGAGCGCGG TTTGTACGGG CGAGCGATGA AACGCCTGTT GGCCTTCGGC CTGGTCGCTT  
33001 CGGTCCCCTT CATTGCGTTG GGTGGAGTGG TGGGCGGATG GTGGCCGCTG AACGTCATGT  
33061 TCACGCTGTT GGCCGCAACC GCGATGCTCT ACCTGGTCGA GCGCGGCCGC TCGGTGCTC  
33121 CTATAGCGCT GTTCGTCGTG GCCGGCGGCC TGGTCGAGTT CTGTTGGCCG GCGCTGCTGC  
33181 TGGCCGCGTC TGCTGGTTG TACCTCAAGC GCCCGACGTG GGCGGCCGCG TTGATGGCGC  
33241 TGCTGTCTTG CGCGTCCCTG TGGTACATCA ATGGCAACCT TTGGGCGCTT GCTGTTGTGC  
33301 CCCTGGTGAT CGTCGCCGCC GCGTCGATC TTCGTGTCCT GCGCCTGCGC TGGGCCTTTT  
33361 ACACGTAATA CCCGCTGCAT CTTGCCGCTC TTTGGCTGAT CCGCATTCCG ATGCGCGAGG  
33421 CGGGCTACTT GTTTTTACCC TGACCTTTGA GATTCCAATA TGCAATTGCT CAAGAAATGC  
33481 ACCATCGCGG CCCTGCCGCT GCTCGCCCTG TCCGGCTGCG CACTGCTGAA CATCCCCATG  
33541 CCGACGCCGC CCGTTTCGAC CCCGCCGAA ATGCTGACCG TGCCAGTGGC GCAAATCTGC  
33601 CGCGACGCTG ACAAGAACC TGTTCCGGCA ACGGAGCTGT ACGGCAAGAA AGGGTTGTGC  
33661 GCCACGGGCA AGGTGCAGGT GATTTCCGAA GGTTCAAGC CTCGCTATCG GGTGCTGCTG  
33721 CGCGCTGGCA GCGCCTCGGT CCATGCTGGG ACCGATAACC AGCTCGCCAT CAAGTCGGTT  
33781 TCCACCGGCC AGACCACGCG CGTCACTGGC ACCGTGAAGG ACGTGTCTTA CGACCATAAC  
33841 GGCTGCTCGA TCTCGCTTGA CGATGCGAAG TTCTACTGAG GGGAGGGCGG CGGATGCTGA  
33901 CACGGTTGAA GGGCTTCCTT GCTCGTCGCC GCGAGTTGAA GGAAGTGGAT GTGTCCGTGG  
33961 TGAGCCGGCC CCGGCCGGCT CCGGCCGAAAT TGGTCCAGGT TGATGCACGC GAGGCCGTTT  
34021 GCGCGTGCC GGTGCCCGGC CAGGCCGACC GCTTCATGTC GGCCAAGCCT GGCGCGATCA  
34081 ACGATGAAAT GTTCGTGGTT CGGGTGGACA CCGAAGCGTT CTATCGGGCT TGGCTGCGCA  
34141 GCAGCTCGAC GGGCCGCGAA ACGCGGTCCG ACAACTGCC GCTGCGCTCG GAAATGCCGC  
34201 AGGACTACAA GTTCAAGCAC GCCGTCCAGG GCTTCGCGCA CGGCAGGGAA AATCCTGTGC  
34261 CGCTGGCCTT CGCCGCGCG CACCAGGAGC GCCACCGGGT GGACATTGGT TTCAGCAACG  
34321 GGGTCACGCG CTCGTTCTGG CTGATTGCCA ACAAGGCTCC GTCGTTCCCG ATCCAGGTCC  
34381 ACGGCCGGGA GTCGGCCGAG CTGCTGAACA AGGTTTGCAG CCTCGATCCT GCGCCGCTGT  
34441 CGTTCACGGA ACTGTTGCG CAGGCCAAC GCCAGGCTCC GCAGGTCGCC ACACCGGCC  
34501 GGCCTGCGCC GGCAGCGGCC ACCCGGCCAG CTCCAAGGT GCAGCCACGC CCCGGCCGAA  
34561 GCGGCCCGCG CAAAGGCCGC GGACTCTGAC TACAACCGTG CGCAAGGCGC ATTAGGGAGG  
34621 ATGTATGTAT GTAATCGCT GCGGCATCGT TGCCGGCTTG GCGGCTGCGG TGGCCCTGTT

34681 GGGCTTCACG CCGATGATGG AGGCGCTTGC CGCCGGCGAA CGCCGCAAGG CACTCGCGCA  
34741 ATGGACGCGG ACGATGTTCC TGGTGTCTGCT GCCTGTCTGTG CTGATGTGCG CGCCCATCGG  
34801 GTCCAGCATT TACGACGCCG TGCAAGCGGA CGCTGGCAAG CCCATCGCTT TCCACAACGG  
34861 CCGGATCACG GTCGTCATGG CCCTGGTCGG CAGCTTGCC GTTGTCTGG TCGCGGCTGC  
34921 GCGTGCGGTG GTCAACCGCA AGCATGCCAG CTTCTGGTTC GTCGGCTGGG TGATGGCGTC  
34981 GGTTTTGGCC GGCGGCGTCG GCGCGATCGC CAGCGCGAAG CAACTGGCGT TCCTCGGCGA  
35041 ACATAGCGGC ATGGTGGCCT TCGGCTTCTT CCGCGACCAG GTGAAGGACA TGCACTGCGA  
35101 TGCGGACGTG ATCCTGGCCC GGTGGGATGA AAAGGCGAAC TCGCCGGTGG TCTACCGCTG  
35161 CCCGAAGGCG TACCTGTCA ACAGGTTTCG ATCCGCGCCC TTCGTGCCCT GGCCGGACTA  
35221 CACCGAGGGG GAAAGCGAGG ATCTAGGTAG GCGGCTCGCA GCGGCCCTGC GGGACGCGAA  
35281 AAGGTGAGAA AAGCCGGGCA CTGCCGGCT TTATTTTTGC TGCTGCGCGT TCCAGGCCGC  
35341 CCACACTCGT TTGACCTGGC TCGGGCTGCA TCCGACCAGC TTGGCCGTCT TGGCAATGCT  
35401 CGATCCGCCG GAGCGAAGCG TGATGATGCG GTCGTGCATG CCGGCCTCAC GTTTGCGGCC  
35461 GGTGTAGCGG CCGCGGCCT TCGCCAATG GACACCCTGA CGTTGACGCT CGCGCCGATC  
35521 CTCGTAGTCG TCGCGGGCCA TCTGCAAGGC GAGCTTCAA AGCATGTCCT GGACGGATTC  
35581 CAGAACGATT TTCGCCACT CGTTGCTCCT GCGGCCAGC TCCGACAGGT CCACCACGCC  
35641 AGGCACGCC AGCTTGGCCC CTTTGGCCCG GATCGACGCA ACCAGGCGCT CGGCCTCGGC  
35701 CAACGGCAAG CGGCTGATGC GGTGATCTT CTCGCAACG ACGACTTAC CAGGTTGACG  
35761 GTCCGCGATC ATGCGCAGCA GCTCGGGCCG GTCGCGCGT GCGCCGACG CTTTCTCGG  
35821 GTAGATGCCG GCGACGTAGT ACCCGCGGC CCGCGTGGCC GCTACAAGC TCTCTGGCG  
35881 TTCAAGATTC TGCTCGTCCG TACTGGCGC CAGGTAGATG CGGGCGACCT TCAACCTTCG  
35941 TCCCTCCGGT TGTTGCTCT GCGTCGCAT TTCCACGGCT CGACGGCGT GCGATCGGAC  
36001 CAGAGGCCGA CGCGCTTGC TCGCGCTCC TGTTGAGCC GCAGCATTTC AGGGTTCGGC  
36061 GCGCGGCCGT GGAAGCGATA GGCCACGCC ATGCCCTGGT GAACCATCGC GCGGTTGACG  
36121 TTGCGCGGCT GCGCGGCCG GCTGGCCAGC TCCATGTTGA CCCACACGGT GCCCAGCGTG  
36181 CGGCCGTAAC GGTGCGTGT CTTCTGTCG ACCAGGACGT GCCGGCGGAA CACCATGCCG  
36241 GCCAGCGCCT GCGCGCACG TTCGCCAAG GCTTGCCGT TTTCCGGCGC GTCAATGTCC  
36301 ACCAGGCGCA CGCGCACCG CTGCTGTCT ACCAGCACGT CGATGGTGT GCGGTCGATG  
36361 ATGCGCACGA CCTCGCCCG CAGCTCGCC CATGCCGCG AGGCAACGAC CAGGACGGCC  
36421 AGCGCGCAG CGGCGCGCAG CATGGCGTAG CTTGCGCGCT TCATGCGTGG CCCATTGCT  
36481 GATGATCGGG GTACGCCAGG TGCAGCACTG CATCGAAATT GGCCTTGCAG TAGCCGTCCA  
36541 GCGCCACCCG CGAGCCGAAC GCCGGCGAAA GGTACTCGAC CAGGCCGGG CCGTCGCGGA  
36601 CCTCGGCCCC CAGGACGTGG ATGCGCCGGC CGCGTGTGCC GTCGGGTCCA GGCACGAAGG  
36661 CCAGCGCCTC GATGTTGAAG TCGATGGATA GAAGTTGTG GTAGTGCTTG GCCGCCCTCA  
36721 TCGCGTCCC CTTGGTCAA TTGGGTATAC CCATTTGGG CTAGTCTAGC CGGCATGGCG  
36781 CATTACAGCA ATACGCAATT TAAATGCGCC TAGCGCATTT TCCGACCTT AATGCGCCTC  
36841 GCGCTGTAGC CTCACGCCA CATATGTGCT AATGTGGTTA CGTGTATTTT ATGGAGGTTA  
36901 TCCAATGAGC CGCCTGACAA TCGACATGAC GGACCAGCAG CACCAGAGCC TGAAAGCCCT  
36961 GGCCGCCTTG CAGGGCAAGA CCATTAAGCA ATACGCCCTC GAACGTCTGT TCCCCGGTGA  
37021 CGCTGATGCC GATCAGGCAT GGCAGGAACT GAAAACCATG CTGGGGAACC GCATCAACGA  
37081 TGGGCTTGCC GGCAAGGTGT CCACCAAGAG CGTCGGCGAA ATTCTTGATG AAGAACTCAG  
37141 CGGGGATCGC GCTTGACGGC CTACATCCTC ACGGCTGAGG CCGAAGCCGA TCTACGCGGC  
37201 ATCATCCGCT ACACGCGCCG GGAGTGGGGC GCGGCGCAGG TGCGCCGTA TATCGTAAG  
37261 CTGGAACAGG GCATAGCCAG GCTTGCCGCC GCGAAGGCC CGTTAAGGA CATGAGCGAA  
37321 CTCTTTCCC CGCTGCGGAT GGCCCGCTGC GAACACCACT ACGTTTTTTG CCTGCCGCGT  
37381 GCGGGCGAAC CCGCGTTGGT CGTGGCGATC CTGCATGAGC GCATGGACCT CATGACGCGA  
37441 CTTGCCGACA GGCTCAAGG CTGATTTTCCG CCGCTAAAAA TCGCGCCACT CACAACGTCC  
37501 TGATGGCGTA CTTACCCAAA GAACAGCTAG GAGAATCATT TATGCTCAGC AACTTCCAC  
37561 AAGCTCATGC AACTTTCTTG AACCAGCATCC GCGATGCGGT CGCTCCGAT GTTCGCTTC  
37621 GCGCTTCTT GATCGGCGGC TCTTACGTT ACAGGAGACT CGATGAGCAC TCCGATTTGG  
37681 ATTTGACAT CGTTGTTGAG GACAAGTCT ACGCAGATGT CTTGTCTACA CGCAAGGATT  
37741 TTGCCGAGG ACTGCCCGC TTCCTCAACG CGTTACCCG CGAACATGTA GGAGAACCAGC  
37801 GCCTTCTGAT CTGCTATAT GGTCCGCCAC TGCTACACAT CGATTTGAAG TTTTCTCTG

37861 CTTCCGATCT CGACCAGCAA ATCGAGCGGC GGGCGGTTCT GTTTGCTCGT GATCCGGCAG  
37921 AGATCGAGAA GCGCATTGAG GCGGCAGCGG TGGCATGGCC AAACCGTCCC TCCGAGTGGT  
37981 TCGAAGCACG TTGTCAGCGC CAGTGATATA AGACGGTAAT TCACCATTG GATTGTCCGC  
38041 TCCACCCAAC ATGTTGTTTC CTTAAGGTTT TCACACCAGA AAGGACATCA ACATGCTGAG  
38101 CAGAGAGGAC TTTTACATGA TAAAGCAAAT GCGCCAGCAG GGCAGGTACA TTGTGATAT  
38161 TGCGACTCAG ATTGGTTGCT CTGAACGGAC GGTCAGACGC TACCTCAAAT ACCCTGAACC  
38221 GCCAGCCAGA AAGACCCGCC ACAAATGGT TAAGCTGAAA CCGTTTATGG ATTACATCGA  
38281 CATGCGCCTG GCAGAGAATG TCTGGAATAG TGAGGTTATC TTTGCGGAGA TTAAGGCAAT  
38341 GGGTTATACG GGCAGACGTT CCATGCTGCG TTAATACATC CAGCCCAAAC GTAAAATGCG  
38401 TCCGTCAAAA AGAACAGTTC GCTTCGAAAC TCAGCCTGGA TACCAGCTCC AGCACGACTG  
38461 GGGCGAAGTT GAGGTGGAGG TTGCCGGGCA ACGGTGCAAA GTTAACTTTG CGGTTAATAC  
38521 GCTGGGGTTC TCCGCCGCT TCCATGTCTT CGCCGCACCA AAACAGGATG CTGAGCATA  
38581 CTACGAATCA CTGTTTCGCG CTTCCGCTA CTTCGGTGGT TGTGTGAAAA CGGTGCTGGT  
38641 TGATAACCAG AAGGCTGCGG TGCTGAAGAA TAACAACGGG AAAGTCGTGT TCAACTCCGG  
38701 ATTCCTGTTG CTGGCCGACC ACTATAACTT CTGCCACGG GCATGCCGTC CACGAGGGC  
38761 CAGAACAAAA GGTAAGGTTG AGCGGATGGT GAAATACCTC AAGGAGAACT TCTTCGTTG  
38821 GTACCGCAGG TTCGACAGCT TCACTCATGT TAATCAACAA CTGGAGCAAT GGATAGCCGA  
38881 TGTGGCTGAC AAACGGGAAC TTCGCCAGT CAAAGAAACG CCGGAACAGC GCTTCGCGCT  
38941 GGAGCAGGAA CATCTGCAGC CGTTACCGGA TACGACTTC GATACCAGTT ACTTCGACAT  
39001 CCGCCATGTG TCCTGGGACA GCTATATCGA GGTTGGTGGT AATCGTTACA GCGTCCCAG  
39061 AGCGCTGTGT GGTCAGCCGG TATCGATACG AATATCGCTG GATGACGAGT TCGGATCTA  
39121 CAGTAATGAG AAAGTGGTGG CCTCACATCG CCTCTGTTG GCATCGTCTG GCTGGCAGAC  
39181 AGTGCCGGAG CATCACGCC CGCTCTGGCA GCAGGTCAGT CAGGTGGAAC ATCGACCAT  
39241 GAGTGCCTAT GAGGAGCTGT TGTGATGCAT GAGCTGGAAG TCCTGCTGAG TCGCCTGAAA  
39301 ATGGAGCATC TGAGTTATCA CGTTGAAAGC CTGCTGGAAC AGGCAGCTAA AAAAGAGCTG  
39361 AACTACCGGG AGTTCCTGTG CATGGCGCTA CAGCAGGAAT GGAACGGCAG GCATCAGCGC  
39421 GGTATGGAGT CCAGGCTGAA GCAGGCTCGT CTGCCGTGGG TCAAAACGCT GGAGCAGTTC  
39481 GACTTTACCT TCCAGCCGGG CATCGACCGT AAGGTTGTCC GGGAAGTGGC TGGTCTGGCG  
39541 TTCGTGGAGC GCAGCGAAAA CGTGATCCTG CTGGGACCTC CTGGTGTCCG AAAAATCAT  
39601 CTGGCCATAG CTCTTGGCGT GAAAGCGGTG GATGCGGGAC ATCGGGTACT GTTTATGCCA  
39661 CTGGACAGAC TGATCGCGAC ACTGATGAAA GCGAAACAGG AAAACCGGCT GGAGCGTCAG  
39721 CTGCAGCAAC TGAGTTATGC CCGGGTGTG ATCCTGGATG AAATAGGCTA TCTGCCGATG  
39781 AACAGAGAGG AAGCCAGCCT GTTCTCCGG TACTGAACC GTCGATATGA AAAAGCGAGC  
39841 ATCATACTGA CGTCAAACAA AGGGTTGCGA GACTGGGGAG AAATGTTGCG AGATCACGTG  
39901 CTGGCAACAG CGATACTGGA TCGGTTGCTA CATCACTCAA CCACGCTGAA TATCAAAGGA  
39961 GAGAGTTACC GGTTAAAAGA GAAACGTAAG GCTGGAGTGC TGACCAAAAA CACAACGCCA  
40021 ATCAGTGATG ATGAAATGGT GAAAAGCGGA CAGCATCAGT AACGAAAGTA TCTTAGCGGG  
40081 CATGAAAATG GCAAATAACG GTCAAACATC GTGGCGTTGA CAACGTGCCT GGATCTGGCT  
40141 AACTATGCG GCCACCAAGC TCGCCCGTGG CGAGCTTTAC GAAGCGATCG GCATGCTCGG  
40201 TTTCTCCGT GAGCAAGTGT TAGGACCTTT GCTCTACCGT CGCGCTGGAA AGGACCAGCG  
40261 CGGAGTGAGG CGATTGAAAA CCCTTCGACT GGATGAAGAG CGCAGACTAG CCACCACCAT  
40321 TGCGCTGCAC GATGCGTTGT CTGTCAGGGA TGCCATCAAA GCATCTGCCT CCATCTATCT  
40381 CGACCTCCGA GCCGCCGATC CGTCGTTGGA ACCGACAACG CATATGCCAG GTCTTCTGTA  
40441 CGACTTAATA GAACGTGCGG TACCAGGCAC GCCTAACCGT CAGTGAGATT GGATGAGTGA  
40501 ACGATATTGA TCGAGAAGAG CCCTGCGCAG CCGCTGCCGT GCCCGAGAGC ATGGCGGGCTC  
40561 ACGTGATGGG ATACAAATGG GCGCGTGATA AGGTTGGTCA GTCCGGCTGC GCGGTCTATC  
40621 GGCTGCATAG CAAGAATTCT GCCGTGTTAT GGAAGTGTCT TGAGGAGTTC GAACCTTCGC  
40681 TTCAGGAGAG GCTTGTGCG CAATATGGCA TTGCCGATCC GGATAGGCGC AAGCTGCAAT  
40741 TTCATCTCCT GCTGGACGAA CTTTTCTAAG GCGATGCCCC CTCGACCTCG ATCAGGGAGG  
40801 CGTTCAGGAC GACTACAAA GAAAGCCGGG CAATGCCGGG CTTTTTCTGC TGCTACCTCC  
40861 GTAGTCGTAA GGTGCTTGA GGTGCTCGGG TGCGGTACAA CTCGCCGGTC GCCAGCTCAA  
40921 GCGCGATCAC GTCGTTGCCG TCGTAGTTGA CGATGATGCT GTTGGGCCGA CTGTCCTCAC  
40981 GCTTCGAGG GAGAGGCCAG CCTTCAATCG AAGCCGGCGC AAGCTCGTAG TGCTTCCCGG



41041 TTTCGACGCT GCGCAGCGTC CAGGTCCTGC AACCGGCCAC GCCGGTCGCA GAAACCACGG  
41101 CGAGCGAGCC GCGAAAATCG TGCGGGTACG CCTCGATGTT CATACGCCTC CTAGATCGAG  
41161 CGCGAGCGTT TCTGCTCGGC CTTGGCCGCC TGTTCTGGG ACACCTCGCC GATGACCTTG  
41221 CCCTGGCCCC GGCTGTAGGC GATTTCTAG TTCTTGCCGA CAACCGGCGG CTTCTCAAAG  
41281 ATGCCCCGGC TGTGTTTAC GATCCCGCT TCGCTGAACT GGTAGACGTT GCGCCCATCG  
41341 TCGTGCAGCA CCTGGCCGAC GTGCTTGTGC GGGTGGACGT TTTTGCTTGC GTCCTTCGCA  
41401 TCGCTCAACT GGTGAATGCC TTTCGGTAGC CCCGCCTCG GCAACACCTT CATGGTCAGC  
41461 CATTGCGCGT TCACTACCTG GTCCACCTGG CGGCTGCCGT TCATGACGGC GATCTTGACG  
41521 CTGCCCTCGG GTTTCATGAT GACGCCAGGG CTTGCCGATG TGC GTGGTGC CCCGATCTGT  
41581 ACTTTGTTCA TACGCTCTAG TTCTCTTAG TAGGTTCTCG CGCGGCGTTG CCGCTGTTCT  
41641 TGCTGCTCGA TGTCTTGCTG CTTGAGCTGC TGACCTTCT GCCGCTGGCC CTCGTCGAGA  
41701 AGCACCTTGC CGACAGCACT TCTCACCTGG CGTTCAACCC CGTCCTTGCC CAGGCTGCTG  
41761 CGCTCGGACA GGTCGTTGAA ATCGGTGTGC TTCTTCATGT TCGACAGGGC GGCGAGCTGG  
41821 CCATCGTTCA ACAGCGATTG CTTGAGCTTG GCCGTGTCGG CCTCGCTCAA CTGGACCTTG  
41881 CCGGCCGCGG CGTCCGCGAG GCGCTTTTCA GCGTGAAAT GGTTGCGGTA GTTCTCCGGG  
41941 GTGATCGGCG GCAGCTCCTT CGGGTAGGCG TTCTCGCCC GCGCGAAGAT TGGGAAGATG  
42001 GCCTTGCCGC CGACCGCCTT GCGGCCTCC TGTGCCTTCG TCCTGCCGGG ATTCACGCC  
42061 TGGGTGATCT GCACCTGGCG GTCGTGTCG CCGGCATCA CAACGGGCTT GTCCGGGAAT  
42121 TTCGCGTCA GGGCCTCGGC AACAGCCTGT AGGTTGCCGG AATCGAACGC GGCGACAGTC  
42181 GCGTGCCCCA GCGCTTCGGC CACTGTGGCG GCGGTGGCAT AGCCTTCGCC GATCACCAGC  
42241 GCCGGCGCGG CCGCGAGCGC ATCCATGCCA CCGACGACAT GGAAGCATCC TTCCTGCGG  
42301 CTGTCCTTGG CGAAGCGCTT GGTGCCGTCC TCCTGGATGT ACTGCATGGT CCATTGCTTG  
42361 CCGTCGGCGT CGTAGCCGG GATGTAGTT TTCTGGCCCT CCTGGTCGGT AAGGACGCCG  
42421 GCGTGCACCT GTAGACCCTT GTCGCGCAGG TACGGCGTCG GTTCCGTGAT GGAACCAAG  
42481 CTTTGCGCCT GCGGCCGAT GCGCTGCGCC GTGGCTTCGT GCTGGCGTTC TTGTTCTCG  
42541 GCACGCGCGG CCAGCTTGGC CGCCGCCTCG GCCTGCATCT TGGCCTTCTC GCGGGGTCC  
42601 AGGGCGTAGC CCTTGGCCTT CCACTTATT TCGACGCCGG TCGGTTGTT TTTGATGTAA  
42661 CCGGCCGGGT GGCCGTCGAG GTGGCCGACG TAGAAGCCCG ACTTCTCGCC CTTCTTGTG  
42721 CCCTCGTCT CGATGCGGTG CTTCTTGGCG TCCATGATGG GGTGCTCGCC GCCTGGGGTG  
42781 ACGACGCAGC CCATGCTTTT CAGGGCCTCC GCGAATCAT CTTGGGGGT GACGGCCGGG  
42841 GATTGCTGGG TGGGCACGTT GTCCGGCAGC CAGCGTTGCA GCTTGCCAT GTCGGCGTTC  
42901 GGTCCGGCGT ACCAGGACTT GGCCACCTTG TCCACTGCG CGCCGGCCGC CTTGGCAACC  
42961 TGGCGCTCGC CGTAGGGCAC GGCCAGGTAG ACGCGCTCCT GGGCCGCGTT GGGGCGCTCG  
43021 GCCGTGGGTT GGGTAGGCTG GGCCTCGGCG CGGGCCTCTA CGGCCGCTGT AGCGCCCTCG  
43081 CGCGCCATT TGGCGAACGG GGCAGGGTCA ACCCTGCCG GAACGTACCA GGCGCGTTCC  
43141 TGCGGTTCCC AGCGCGCTCC AAGGGCCTT ACCTCGTCTT TCTCCTTGA CGGCACGTTT  
43201 AAGTAGGCGC GCTCGGGCTT GCGGGGGGCT TGAGCGGCCG CCGGCTGCTC GCGGGGCTT  
43261 ATGGCCTGGG CCATTTCTG CTGCTCGCG TCCTAGTCGG CGATCCGGCG CTGTAGGTCC  
43321 TCGTCTGCA GCATGGCCGT GCCCTCGGCG GCCTTGC GCGCCTTGGG GGCAACCGCG  
43381 TCCTCGTCGG TGCTGTTGGG ATCGCGGCGA ACTCGCTCTT CATGGATGCG GGCGAACTT  
43441 GCGGCCTGCT CGTACTCGTT GGCCGTGCG TAAGCGTCGA TCACGGCCAG GCGGTCGGCG  
43501 AGCGCTTCGG CATTGGTCTG CGCGTCGGGG CCGGCGAAGT CGGCAAGCCA TTGGTGGCCG  
43561 CCCCACGCAT GGTTTCGATA GACGCCCAA AACTCCGGCT CTCGGTCGCC GGCCGGCACC  
43621 ACGGACCGTT CGCCGTCGTG CTCGACCTCG ACGTTGGCCT GGACCTGGAC GCGGCCGGTC  
43681 CAATCGGCG GCAGCTCAA GCCAGCGTG GTTTCGGTCA GCGCGGCCAG CGATTGGTTG  
43741 CCTTCGCCG GCTCCGCGCC GGCGCGGTAC ATGCGCAGGG TCTGCGCGAT CAGCTCGTCG  
43801 GCCGGCGCAA TGGCCGGTCTG TGCCACCTGG TCTTGCTGTT GCTCCATAGT TGCCCCCTGC  
43861 GCAGGCTCGA TGGCCTGCTG GGTGCTTGT TCTTGAATTT GCTTCTGCTC GAACGCCAGG  
43921 ACGAAATCCT GGATCTTCT CGCGTCGGCG GCCGCGCGGA AAATCTCTAG CGGGTCTCT  
43981 TGTAGCGCCT TGATCCACGA TCCGACATAG GCCGCGTCTT GGCCGGGGTC GTGGCCGATG  
44041 CCCAGCTCGT CGCCAGGAT CATGCTGGCA ATCTCGGCC GCAGCTCTT CTTGGCGTAC  
44101 CCCTCGTCC CGAAGGGATG CGCAGGTCG CGGTCCAGCC GCGACGGGTG GCCGTCCAG  
44161 TGCCCCAGCT CATGGAGCGC GGTTCGCTAG TAGTTGTCGG CGCTCGGGAA CTGGCCTTGG

44221 TCGGGCAGAT GGATGCTGTC CGTGGACGGC CGATAAAACG CGCGGTCGTG CTCGCCGTGG  
44281 CGGATGGTGG CACCTGACGC CGCAAGGATG TGCTCGGCC GCTCGACGGC GCTCCAAGTC  
44341 TGTTCTTGC GTTCCAACGG CGGCAGGCCG TCGATCTGCT CCGCATTGAA CACGGTGGCG  
44401 AAGAACACGC GCGGGCGTTC GAGCTGCACC GTCACCTTGA CCGGATCGCC GTTGGCATCG  
44461 AGGACCGGCT TGCCGGTCTG CTCGTCGGTC TTGGTCTGCT CTTCGCTGAA CTTCCAATAC  
44521 TGGATCGGCG TGCCTTTCTC GCCGCGACGC ACCTGTGCGC CGGCGGCAGC GGCCTGCTTG  
44581 TAGGTCATCC AGCGCGGGTC CGCATGGCCC TGGGCCATGA GCTGAATCGC GTTGATGCCC  
44641 TTGTAACGCT TCCCGGTAGT CGGGTTGAGC GGGATGAAGG AGCCGGGCAT GCCCGGTTCC  
44701 CACGGTTTTT GCCACGGCGC AGTGCCGGCT TTCAGTTGCT CAATGAGGCG TTCGGCAACC  
44761 TGCTCGTGA ACGGCTTTTT GACCTCTGCC ATAGCCAATT ACCTCCCGTC ATTGGCGGCC  
44821 GCGGTCGTCG TGTCCTCGGG CACGGTCGCG TCCACCAGGT CAATGTCGCT CTCGGCGGCG  
44881 TCCTGCTCGC TCAAGGCGTC CTCGGGGAAG GCCCCGGCCT TCTCCGCTTC TTCCGGGTGCG  
44941 AACTCGACCT GGAAGCCGGG CGTCATCGCA TCGGCGAGCT TTTCACGCAG GGCGGCGGGC  
45001 GCGTTCGCGG TATCGTCGAA CGGCGCAAAG TCGTCCTGCT GCACGGTCTT GGGATCATTC  
45061 ATCGCTTCA CTCCTGGTTG GTGCCGTTAC GGCCTTTGCT GTAGTCCGGC CTGCCTTTCA  
45121 GGTGCGGGTA TGTCTGCTTG CACGTCGGGA AGTTGCTGCA CCCCCACCAG AACATGCCGC  
45181 GCTTCTTGCC AGGCCGACGG GAAAGGCCGT GGCCGACGC CATGCACTTG TGCAGCTCGG  
45241 AGACTTTCGG GGCCTCGCGC GGGACGGGCT TGCCGCCCTT GTCGTCGCAC GCGAATTGCG  
45301 AGCCGTCGGC AAAGCCGGTG CAGCCCCAAA AGTATTCGTT CTTGTCCTTC TTCTGAGGC  
45361 GTCGACGCGG CTTGCCGACG GACGGGCAAG GGTGCGTGC GATCTTCATG TTGAGGCCGT  
45421 TGTCTTTGAT GTTGGCGACC TCGGCGCCGA TGTATTCCAT CAGCTCGTTG ACGAACGACA  
45481 GCGTGTGCGC CTCGCCGCC TGGATGGCCT TCTGCTGCTC ATGCCAGAGC GCGGTCATGT  
45541 CGGGGAATCT GGCCGTGTCG GGCAGTGCCT CGTACAGCTC TTCGCCGTC GGCCTGGACA  
45601 CGATGTGCTT GCCCTTCTCC ACCAGGTAGC CGCGCTCGAA AAGCGTGGCG ATGATGGAGT  
45661 CTCGCTTGC CGGCGTGCCG ATCCCGCCGT GTCGCTTTCG CTTGCCCTTG TCCTTTTCA  
45721 TCAAGATTTT CCGCAGGCGG TCATCGCGGA TGTATTCGC AACCGGGTA AGTCCGACA  
45781 GCAGAGATTC CATCGTGAC AGCGGCTGCG GTTTCGTCTC CTGCTGCTCG GCCTTCGCAT  
45841 CGGTGCAGGT GCCGGCCTGG CCGTCACGCA GCTTGCAGC GTCCTGTTCA ATGTCGTCGG  
45901 CATTGCCTTC CAGGTCTCG TTGCCGGCGT CGTTCCTGTA GAGAATCTTC CAGCCCGGCG  
45961 ACGTGGTGAC GTTCGAGCGC ACGCCGAAAC GATGATCGCC GACCTGGGCA AGCACGTCGG  
46021 TCTGGTCATA CAGATGCTTC GGCCAGAACT GCGCGACGTA GGCGCGCGCG ATCAGCAGGT  
46081 AAATCTTCTG CTCGGCATCG GTGAGCTTCG ACAGGTCGGC CGTGCTTTCG GTCGGGATGA  
46141 TCGCGTGGTG CGCGGAAACC TTGGACGAGT TGAAGGCGCG GCTCTTGATC GTCGGATTGG  
46201 CGCGCTGCGC AGCAGCGGCC AGCATGGGGG CCGTCTGTGC GATGGCCGCC AGCACGCCCC  
46261 GCGCATCGCC GTGCTGTTCC TCGCTCAAGT ATTCGACGTC GGAACGGTTG TAGGTGATGA  
46321 GCTTGTGCTT CTCGCGCAGG GCCTGCGTAA TGTCCTTAC CTGGTCCGGC TTGAAGCCGA  
46381 ACTTGCSCGA GGCCTCATT TGCAGTTTCA GCAGGTTGTA GGGCAGCGGC GCAGCCGCTT  
46441 CCTTCGCTT GGTGGTACG GACACGATGC GGGCGGGTTG GCCGCTACG GCGGCCGCGA  
46501 TGCCCTCGGC GTGCTCCTTG TTGCTGAGGC GGCCTTCTC GTCCACCGGA TCGCCGTCGG  
46561 CGACCTGGTA ACGGGCCGGG AACTGAATGC CCTCGACCTC GAACTGGCCG TTCACCAGGT  
46621 AGTAGTAGGT TTTCTGGTGG GCCGCTTCT CGCGGCAACG GCGCACGACA AGGCCAGGA  
46681 TCGGAGTCTG CACGCGCCCC ACGCTCAACA GCCCTGATA GCCCTTCGCG CGTGCCGAA  
46741 GCGTGTACAG GCGCGTGATG TTGAAGCCGT ATAGCTGGTC GCCGACGCTG CGGGCCTCGG  
46801 CCGCAGCGGA CAGGCCGGCG AACTCGCGGT TGTCGCGCAT CGCGGCGAGC TGCCGGCGCA  
46861 CGATCTTAC GTTGTTGTCG TTGATAAGCA GCCGCTGCAC CGGCAGACGG CAGTTGGCGT  
46921 ATTCCAGGAT TTCATCGACC AGAAGCTGGC CTTCGTCGTC CGGGTCGCCG GCGTGAACCA  
46981 CGCTTTTCG CTGCTTCAAC AGGCTGAGGA TGGTCTTGA CTGAGCTTTC GCACCGCAT  
47041 CGCCGGACGG TTTCTTGC CAGGGAATAT GGACGATGGG CAGGTCGGCC ATGTTCCAGT  
47101 TGGCGTAGCG CTCGTCGTAG TCCTCCGGGT CTAGCAAGGC CAGCATGTGA CCGTAGCACC  
47161 AGGTCACGCG GTCGGAGCCG CATTCTAAT AGCCGTCCTT GCGGCTGCCG CCGCCAGGC  
47221 CCTCGACGAT GGCTTTTGC AGCTCCGTT TTTAGCGAT TACAAGGCGT TCAAATTGCA  
47281 TATATCCCC TACCCTACC AGGTCAGAAC CGGCCTGATG ACGGTGATGA TTTGCGAACG  
47341 ATTGACAGGC CCGAAGTAGC GGCCGTCGAA AGACGTGTCG CTTACGTCGG ACATAAGCAG

47401 AACCTCGGCG GTCCCCAGGG TG TAGCTGTC G GACTGATAA CGAGGCAGCG GCCGTCTGA  
47461 TGGATCGGCC TTGATGAGCG CGCTGTGAGG CAGCAGCCCG CCATTCACGC GCACGCCGGC  
47521 GTCGGTGATG GCAACCTCGT CGCCTTTAGC GGCTAAAAC TCGCTTCATCA TG TAGCCGTA  
47581 GTCGCCGGGG CAGAAACCGC CGGCGATGTA GCCCCGCTCC TTGGCGTCCG AAAACACGCC  
47641 GACTTGC GGC GGGCAGAACA TGACGTAAGC CCCCTTCTCC ACCGGCGCAT TCGATTCCA  
47701 GTACAGGCCG ACCGGAATGC TTTTGGTGGT GTTGACCTTC GCGCCGGCGA GATAGGCCG  
47761 GCCGGCGAGC AACAAGGCCG CGCCGCCTCC GATGGCGACG TACTTGGTGA GGCCTGGAA  
47821 GCGGCTCATA TCGTGATCCC CTCCCCTTCC TCGACGGTGG CCGTCTGGAT CAGCTTGTGC  
47881 CTGACCTTCG GAGCCGGTAC GGCCGCGCGG GCCTGGAATA TCGGGTCTTT GAAGTAGAGC  
47941 GGCTGCTTGC CGTAGATCGC GGGATAGCCG GCGACGTACA CAACCATGTC GCCCGCTCT  
48001 TCAATGCTGC CGTCGGCGCT CTTCTTCGGC CCCGGCATGC GCAGGCATTC ATCGGGGGTC  
48061 AGCAATGGCC GCTGCACTTC CTGGAAGGTC CGCGAGACGT TGCCCAACAG CGCCGACGTG  
48121 CGGCGGCCCG TCGTCGTGAT CTGCTCCTTC ACGATGGTCG TGGTGCCTGT CAGTTTTGAC  
48181 AGGTGCTCGG CCGTCTCCAC GCGTTTCGGC GGGTAGGCGT TCTGCACGTG GCAGTTCGAC  
48241 GTGATGCTTT CGTCGTGGCC GTAGCCGGTT TCGCGGCTCT TGAGCTGGTT AATGTCCTGG  
48301 CAGATGAGGT AGCACTTGAT GCCGTAGCCG GCGACGAAGG CAAGGGACTC TTGCAGGATT  
48361 TCGAGCTTGC CCAGGCTGGG GAACTCGTCG AGCATCATCA GCAGACGATG CTTGTAGTGC  
48421 GCGACAGGAC GGCCGTTCTC GAAGTCCATC TTGTCCGGCA GCAGCCGGAC GATCATGTTG  
48481 ACCATGACGC GCACCAGAGG CCGCAGACGG GCCTTGTCTG TGGCTGCGT CACGATGAAC  
48541 AGGCTTACCG GGTCTGCTG GTGCATCAGT TGCTTGTGTC GGAAGTCGGA CTTGCTGACG  
48601 TTGCGGGCCA CAACCGGTC GCGGTACAGG GCCAGGTAGG ACTTGGCGGT GGACAGCACG  
48661 GAACCGGATT CTTCTCCGG GCGGTCCATC ATGTCGCGGG CCGCAGAGCC GACCGCAGGG  
48721 TGTTCTGCC CGTCAACGTG GCCGTAGGTG GTCATTTCCA TCCAAAGCTC GCCCACGTGC  
48781 CGTTTCGGGT CGGCAAGCAT GCCGTCCACC GACGGCAGGG TGGCCGGCGT ACCCTCGTTC  
48841 TTAGCCTTGT AGAGCGCGTG CAGGATGACG CCGACAAGCA GCGCCTGGCT GGTTCCTGC  
48901 CAGTGC GATT CCAGGCCCTT GCCGTCCGGA TCGACGATCA GGGTGGCAAG GTTCTGCACG  
48961 TCGCCAACCT CGTACTCGGT CCCCAAGCGG ATTCATCGA GCGGGTTCCA GCACGCGCTA  
49021 CCCTGCGCGG ATGCCGGCTC AAAGCGCAGC ACCTTGTGTC GGGCATGCTT CTTCCGCCAG  
49081 CCGGCGGTCA GCGCCACAAA CTCGCCTTTC AGGTCCGGTGA TGACGGCGCT GTGCGCCAG  
49141 GAAAGCAGCG TCGGAACGAC CAGGCCGACG CCCTGCCGG AGCGCGTCGG CGCGTAGGTC  
49201 AAGACGTGCT CGGGGCCGTT GTGCCGAGG TAGTGAACT TGCCGTCTT GTCTGCCAG  
49261 CCGCCACAT AGACGCCGCT GGAAGTGGGC GGGTGTTCG CTGACACCAG CTCGACGACG  
49321 GTGCGCGGCC GGGGCGAGC GCCGGCGGCC TGTATGTCCT TCTTGTGCGC CCAGCGGGCC  
49381 GAACCGTGCA GATAGTCGTT CGCCTTGCCG GTGTTGCGCT TGACCATCTG CGTGACGGCC  
49441 GTGCCAGCA GGCCACGGT CGAAACGACC ATACCCATGC TGGCCGCGCG CATGAAATCG  
49501 TCGGGATATT GGCCGTACCA CTTGCCGGCC CATTGAAGGA TCGACCAGGG CGTGTAGACG  
49561 TGTTGATAT TCCAGCCAAG TCCGGCCTGA TACTGGAAGG AATGGGCGAA ATATTGCGTC  
49621 GCGGTCTGCA AGCCTGCCCC AAGGGACAGG CCGGCGAGGA TGGGAACGGT CTTGCTGGCC  
49681 TTCGGTTTTT TCGCCGTAT CTGTGGCCCC ACGGCGTTGT TTCGGTCTT CATCTACTCC  
49741 TACCTCGGGT AGTTTTAAGG GAGCTCGCG GGGTCACGGT GACGGGATCA CCGATGGCGA  
49801 GCGCTTCAT GCGTTGACCC GTGGCCTTAT CGACGGGCGA CACCAGAATC TCGTCGTTTT  
49861 CTTTCTCAA CAGGGCCAGC GCCTGGTCTT CGACGTTCGG GGTGCCTGCA TAGGACAGCG  
49921 CACCAACATA ATCAGTATAT CGTGCATGCT TCGGTATATC GAAGCCGTTT AGCCGCTTTT  
49981 GCTCGCGCTC GGCAACATAT TTCTCGGCCG CCGCATCTG TTCGGGCTTT AGCCCTTTC  
50041 CTGGCCAGA AACTCCCCGT CGCAGTGCCT GAGCTGGTTC GGCTCCTTGC TGCTCCACGT  
50101 GACCAGGAAC ATACGCGGC AATAGCATT CAGCTCCGCC GGCGATGCGA ACCACACCGA  
50161 GTTGGGACAG CGCTCGAAA CGGTTTTGGC TTTGGGGCGG CGGCTTTCGT CCAATGCGTC  
50221 CAACGTTGGG CTTGCGGAGT GCGACGGTTC CGCCGGCGCT GACGGCGCGA GCGTCCCGTC  
50281 GGTGCGCGTC GCCGCTGTG GCGTTGAGGG TGGTCTGGC TGCGGCAGGT CGAATGCCTC  
50341 CATCGCCGCC GCGATCTCTT CGTCCGTAT TTCGTTCCGG TTGCTCATGT GCTTGCTCCT  
50401 TCGTCAGTAG TTCTTGACGG CGGCGCTCAA GGGCGGCGTC GTCAAAGGTG ATTGCCAGAC  
50461 GGCCAGCGGC GGCCGCTGC GCGATCCGCT CTTGAACTC TGCTGTGCCG TTGACGGTGA  
50521 TCCGGTCGCC GAAGCGCTCC ATTGCCAGGC GCAGGGCGGC GTCCAGGCCG TCCGTGGTGG

50581 CCTCGCGCGA GACTTGCAGG CGGTCGCCGT CGTCGCGGAC GGCCTGCTG CCGACGCGAT  
50641 AGATGATGGT TCCCTTCTTC GTGATGTTGT CCGTCACGGC CGCATGGCCC GGCTTGGCCT  
50701 CGCCGCTGCC CTGGATGGTG TTGCCCTTGA GGTGCTGCGC GCCCTCGCGT GCGCGCAGCG  
50761 CGGCCAGGGC CTTGTCGTCG CCCTTCATCG CCTCGGCCCT GAGCCAGTCG GCCACGCGC  
50821 GGCCTGCGT GCGCTCCTGG ACCGCCTGAC GGCCTGCCG GTACTCGCGG TTGATCTTGT  
50881 CCAGGTCGGC GCGCAGAGCC TTGTGCGCCT GCGCGTACAT CAGTCGCTTT GCAATGCGCC  
50941 CCTCGCCCAG CAGCTTGATA GCGGCGCGGC GCAGCCGGTT GCTGCGCATC GCGGCTTCAA  
51001 TCAGGCGGTC ACGACGCCGG CGCAGCGTGT CCAGCTCGCC CTTGCGCACG GCCCCATT  
51061 CCTGGCGTTC AGACTGATAC CGGGCGTATA GCTCGGTGGT GTCGATGCGG GTCTTGAGCG  
51121 GCTTCGCTCG AACTCCCGC CGCCGGGGGG CTTGCGCCGC CTCGGCTGGC GTGAATGCC  
51181 CGAATCGGGC TTCGAGCTTC GGCTTGACA GGTCGCGCGA AACGGTGCTG GCCTTGACCG  
51241 TCGTGCCGTC GCCGGCCTCG AAGATGAAGC CGTTTCCGCG CTCGCGCAGC TTAAGCCCGT  
51301 TTTCCCGCAG GACGCGGTGC AGGTCCTCC AGGATTGCGC CGCTTGACAG TCCGGCAGGC  
51361 ATTCGCGCTT GATCCAGCC ACCAGGCTTT CCACGCCCGC GTGCCGCTCC ATGTCGTTCC  
51421 CGCGTTTTC GAAACGCGC TGCCGCGTTT CGTGATTGTC ACGCTCAAGC CCGTAGTCCC  
51481 GTTCGAGCGT CGCGCAGAGG TCAGCGAGGG CGCGGTAGGC CCGATACGGC TCATGGATGG  
51541 TGTTTCGGGT CGGGTGAATC TTGTTGATGG CGATATGGAT GTGCAGGTTG TCGGTGTCGT  
51601 GATGCACGGC ACTGACGCGC TGATGCTCGG CGAAGCCAAG CCCAGCGCAG ATGCGGTCT  
51661 CAATCGCGCG CAACGTCTCC GCGTCGGGT TCTCTCCCGC GCGAAGCTA ACCAGCAGGT  
51721 GATAGGTCTT GTCGCTCG GAACGGGTGT TGCCGTGCTG GGTCGCCATC ACCTCGCCA  
51781 TGACAGCGGG CAGGGTGTTC GCCTCGCAGT TCGTGACGCG CACGTGACCC AGGCGCTCG  
51841 TCTTGCCTG CTCGTGCGT ATGTACTTCA CCAGCTCCGC GAAGTCGCTC TTCTTGATGG  
51901 AGCGCATGGG GACGTGCTTG GCAATCACGC GCACCCCCG GCCGTTTTAG CGGCTAAAAA  
51961 AGTCATGGCT CTGCCCTCG GCGGACCACG CCCATCATGA CTTGCCAAG CTCGCTCTGC  
52021 TTCTTTCGA TCTTCGCCAG CAGGGCGAGG ATCGTGGCAT CACCGAACCG CGCCGTGCGC  
52081 GGGTCGTCGG TGAGCCAGAG TTTACGAGG CCGCCAGGC GGCCAGGTC GCCATTGATG  
52141 CGGGCCAGCT CGCGGACGTG CTCATAGTCC ACGACGCCG TGATTTTGTG GCCCTGGCCG  
52201 ACGGCCAGCA GGTAGGCCGA CAGGCTCATG CCGGCCGCCG CGCCTTTTC CTCAATCTCT  
52261 CTTGTTGCTG CTGGAAGGCA GTACACCTG ATAGGTGGG TGCCCTTCTT GGTTGGCTG  
52321 GTTTCATCAG CCATCCGCTT GCCGAATTCT GACGCCGTTG GATACACCAA GGAAAGTCTA  
52381 CACGAACCCT TTGGCAAAT CCGTATATC GTGCGAAAAA GGATGGATAT ACCGAAAAA  
52441 TCGCTATAAT GACCCGAAG CAGGGTTATG CAGCGAAAAA GCGCTGCTC CTGCTGTTT  
52501 TGTGGAATAT CTACCGACTG GAAACAGGCA AATGCAGGAA ATTACTGAAC TGAGGGGACA  
52561 GCGGAGAGAC GATGCCAAG AGCTACACCG ACGAGCTGGC CGAGTGGGTT GAATCCCGCG  
52621 CGGCCAAGAA GCGCCGGCGT GATGAGGCTG CGGTTGCGTT CCTGGCGGTG AGGGCGGATG  
52681 TCGAGGCGGC GTTAGCGTCC GGCTATGCGC TCGTACCAT TTGGGAGCAC ATGCGGGAAA  
52741 CGGGGAAGGT CAAGTTCTCC TACGAGACGT TCCGCTCGCA CGCCAGGCGG CACATCAAGG  
52801 CCAAGCCCGC CGATGTGCC GCACCGCAGG CCAAGGCTGC GGAACCCCGC CCGGCACCCA  
52861 AGACGCCGGA GCCACGGCGG CCGAAGCAGG GGGGCAAGGC TGAAAAGCCG GCCCCGCTG  
52921 CGGCCCCGAC CGGCTTACC TTCAACCAA CACCGACAA AAAGGATCTA CTGTAATGGC  
52981 GAAAATTAC ATGGTTTTG AGGGCAAGGG CGGGTTCGGC AAGTCGGCCA TCGCCGCGAT  
53041 CATTGCGCAG TACAAGATGG ACAAGGGGCA GACACCCTT TGCATCGACA CCGACCCGGT  
53101 GAACGCGACG TTCGAGGGCT ACAAGGCCCT GAACGTCGC CGGCTGAACA TCATGGCCGG  
53161 CGACGAAATT AACTCGCGCA ACTTCGACAC CCTGGTCGAG CTGATTGCGC CGACCAAGGA  
53221 TGACGTGGTG ATCGACAACG GTGCCAGCTC GTTCGTGCTT CTGTGCGATT ACCTCATCAG  
53281 CAACCAGGTG CCGGCTCTGC TGCAAGAAAT GGGGCATGAG CTGGTCATCC ATACCGTCGT  
53341 CACCGGCGGC CAGGCTCTCC TGGACACGGT GAGCGGCTT GCCAGCTCG CCAGCCAGTT  
53401 CCCGGCCGAA GCGCTTTTCG TGGTCTGGCT GAACCCGTAT TGGGGGCCTA TCGAGCATGA  
53461 GGGCAAGAGC TTTGAGCAGA TGAAGGCGTA CACGGCCAAC AAGGCCCGCG TGTCGTCCAT  
53521 CATCCAGATT CCGGCCCTCA AGGAAGAAAC CTACGGCCG GATTCAGCG ACATGCTGCA  
53581 AGAGCGGCTG ACGTTCGACC AGGCGCTGGC CGATGAATCG CTCACGATCA TGACGCGGCA  
53641 ACGCCTCAAG ATCGTGCAGC GCGGCTGTT TGAACAGCTC GACGCGGCG CCGTGCTATG  
53701 AGCGACCAGA TTGAAGAGCT GATCCGGGAG ATTGCGGCA AGCACGGCAT CGCCGTCGGC

53761 CGCGACGACC CGGTGCTGAT CCTGCATACC ATCAACGCCC GGCTCATGGC CGACAGTGCG  
53821 GCCAAGCAAG AGGAAATCCT TGCCGCGTTC AAGGAAGAGC TGGAAGGGAT CGCCCATCGT  
53881 TGGGGCGAGG ACGCCAAGGC CAAAGCGGAG CGGATGCTGA ACGCGGCCCT GCGGCCAGC  
53941 AAGGACGCAA TGGCGAAGGT AATGAAGGAC AGCGCCGCGC AGGCGGCCGA AGCGATCCGC  
54001 AGGGAAATCG ACGACGGCCT TGGCCGCCAG CTCGCGGCCA AGGTCGCGGA CGCGCGCGC  
54061 GTGGCGATGA TGAACATGAT CGCCGGCGGC ATGGTGTGTG TCGCGGCCG CCTGGTGGT  
54121 TGGGCCTCGT TATGAATCGC AGAGGCGCAG ATGAAAAAGC CCGGCGTTGC CGGGCTTTGT  
54181 TTTTGCCTTA GCTGGGCTTG TTTGACAGGC CCAAGCTCTG ACTGCGCCCG CGCTCGCGT  
54241 CCTGGGCCTG TTTCTTCTCC TGCTCTGCT TGCGCATCAG GGCCTGGTGC CGTCGGGCTG  
54301 CTTACGCAT CGAATCCAG TCGCCGGCCA GCTCGGGATG CTCCGCGCGC ATCTTGCAGC  
54361 TCGCCAGTTC CTCGATCTTG GCGCGTGAA TGCCCATGCC TTCCTTGATT TCGCGACCA  
54421 TGTCAGCCG CGTGTGCAGG GTCTGCAAGC GGGCTTGCTG TTGGGCTGC TGCTGTGCC  
54481 AGGCGGCCTT TGTACGCGGC AGGGACAGCA AGCCGGGGGC ATTGGACTGT AGCTGTGCA  
54541 AACGCGCCTG CTGACGGTCT ACGAGCTGTT CTAGGCGGTC CTCGATGCGC TCCACTGGT  
54601 CATGCTTTCG CTGACGTAG AGCGCAAGGG TCTGCTGGTA GGTCTGCTCG ATGGGCGCG  
54661 ATTCTAAGAG GGCCTGCTGT TCCGTCTCG CCTCTGGGC CGCTGTAGC AAATCCTCGC  
54721 CGCTGTTGCC GCTGGACTGC TTTACTGCC GGGACTGCTG TTGCCCTGCT CGCGCCGTCG  
54781 TCGCAGTTCG GCTTGCCCC ACTCGATTGA CTGCTTATT TCGAGCCGA GCGATGCGAT  
54841 CTCGATTGC GTCACGGAC GGGGACGCG GGAGGTGTC GGCTTCTCT TGGGTGAGTC  
54901 GGTGATGCC ATAGCAAAG GTTTCCTTCC AAAATGCGTC CATTGCTGGA CCGTGTTCCT  
54961 CATTGATGCC CGCAAGCATC TTCGGCTGA CCGCAGGTC AAGCGCGCT TCATGGGCGG  
55021 TCATGACGGA CGCCGCATG ACCTTGCCGC CGTTGTTCTC GATGTAGCCG CGTAATGAGG  
55081 CAATGGTGCC GCCATCGTC AGCGTGTAT CGACAACGAT GACTTCTGG CCGGGATCA  
55141 CCTCCCCTC GAAAGTCGGG TTGAACGCCA GCGATGATC TGAACCGGCT CCGTTCGGG  
55201 CGACCTTCTC CCGTGCACA ATGTCCGTTT CGACCTCAAG GCCAAGGCGG TCGGCCAGAA  
55261 CGACCGCCAT CATGGCCGGA ATCTTGTGT TCCCGCCGC CTCGACGGCG AGGACTGGAA  
55321 CGATGCGGGG CTTGTGTCG CCGATCAGCG TCTTGAGCTG GGCAACAGTG TCGTCCGAAA  
55381 TCAGGCGCTC GACCAAATTA AGCGCCGCTT CCGCGTCGCC CTGCTTCGCA GCCTGGTATT  
55441 CAGGCTCGTT GGTCAAAGAA CCAAGGTCGC CGTTGCGAAC CACCTTCGGG AAGTCTCCCC  
55501 ACGGTGCGCG CTCGGCTCTG CTGTAGCTGC TCAAGACGCC TCCCTTTTGA GCCGTAATA  
55561 CTCTAACGAG TGCGCCCGCG ACTCAACTTG ACGCTTTCGG CACTTACCTG TGCCTTGCCA  
55621 CTTGCGTAT AGGTGATGCT TTTGCACTC CCGATTTAG GACTTTATC GAAATCTGAC  
55681 CGGGCGTGCA TTACAAAGTT CTTCCCACC TGTTGGTAAA TGCTGCCGCT ATCTGCGTGG  
55741 ACGATGCTGC CGTCGTGGCG CTGCGACTTA TCGGCCTTTT GGGCCATATA GATGTTGTA  
55801 ATGCCAGGTT TCAGGGCCCC GGCTTTATCT ACCTTCTGGT TCGTCCATGC GCCTTGGTTC  
55861 TCGGTCTGGA CAATCTTTG CCCATTCATG ACCAGGAGGC GGTGTTTCAT TGGGTGACTC  
55921 CTGACGGTTG CCTCTGGTGT TAAACGTGTC CTGGTCGCTT GCCGGCTAAA AAAAAGCCGA  
55981 CCTCGGCAGT TCGAGGCCGG CTTTCCCTAG AGCCGGGCGC GTCAAGGTTG TTCCATCTAT  
56041 TTTAGTGAAC TGCGTTGAT TATCAGTTA CTTTCTCC GCTTTGTGT TCCTCCACT  
56101 CGTTTCCGCG TCTAGCCGAC CCCTCAACAT AGCGGCCTCT TCTTGGGCTG CTTTGCCTC  
56161 TTGCCGCGCT TCGTACGCT CGGCTTGAC CGTCGTAAG CGCTCGGCCT GCCTGGCCG  
56221 CTCTTGCGCC GCCAACTTC TTTGCTCTG GTGGGCTCG GCGTCGGCCT GCGCCTTCG  
56281 TTTACCGCT GCCAACTCG TCGCAAACCT CTCCGCTTCG CGCCTGGTGG CGTCGCGCTC  
56341 GCCGGAAGC GCCTGCATTT CTGGTTGGC CGCGTCCAGG GTCTTGCAGC TCTTCTTT  
56401 GAATGCGCGG GCGTCTGGT GAGCGTAGTC CAGCTCGGC GCGAGTCTCT GCGCTCGACG  
56461 CTCCACTCG TCGGCCGCT GCGTCGCCAG CGCGGCCCG TGCTCGGCTC CTGCCAGGGC  
56521 GGTGCGTGT TCGGCCAGG CTTGCCGCTG GCGTGCAGC AGCTCGGCCG CCTCGGCGG  
56581 CTGCTGCTCT AGCAATGTA CGCGCGCCTG GGCTTCTTCC AGCTCGCGG CCTGCGCCTC  
56641 GAAGGCGTC GCCAGTCCC CGCGCACGGC TTCCAACCTG TTGCGCTCAC GATCCAGCC  
56701 GGCTTGCCT GCCTGCAACG ATTCATTGGC AAGGGCTGG GCGGCTTGC AGAGGGCGG  
56761 CACGGCCTG TTGCCGCT GCTGCACCG GTCCGGCAC TGGACTGCA GCGGGGCGG  
56821 CTGCGCCGTG CGCTGGCGT GCCATTGCG CATGCCGCG CTGGCGTCTG TCATGTTGAC  
56881 GCGGGCGGCC TTACGCACTG CATCCAGGT CGGGAAGTTC TCCCGTTCG CTGCTCGAA

56941 CAGCTCGTCC GCAGCCGCAA AAATGCGGTC GCGCGTCTCT TTGTTAGTT CCATGTTGGC  
57001 TCCGGTAATT GGTAAGAATA ATAATACTCT TACCTACCTT ATCAGCGCAA GAGTTTAGCT  
57061 GAACAGTTCT CGACTTAACG GCAGGTTTTT TAGCGGCTGA AGGGCAGGCA AAAAAAGCCC  
57121 CGCACGGTCG GCGGGGGCAA AGGGTCAGCG GGAAGGGGAT TAGCGGGCGT CGGGCTTCTT  
57181 CATGCGTCGG GGCCGCGCTT CTTGGGATGG AGCACGACGA AGCGCGCACG CGCATCGTCC  
57241 TCGGCCCTAT CGGCCCGCGT CGCGGTCAGG AACTTGTCGC GCGCTAGGTC CTCCTGGTG  
57301 GGCACCAGGG GCATGAACTC GGCCTGCTCG ATGTAGGTCC ACTCCATGAC CGCATCGCAG  
57361 TCGAGGCCGC GTTCTTTCAC CGTCTCTTGC AGGTCGCGGT ACGCCCCTC GTTGAGCGGC  
57421 TGTAACGGG CCAATTGGTC GTAATGGCT GTCGGCCATG AGCGGCCTTT CTGTTGAGC  
57481 CAGCAGCCGA CGACGAAGCC GGCAATGCAG GCCCCTGGCA CAACCAGGCC GACGCCGGG  
57541 GCAGGGGATG GCAGCAGCTC GCCAACCAGG AACCCCGCCG CGATGATGCC GATGCCGGTC  
57601 AACCAGCCCT TGAACATC CGGCCCGCAA ACACCCCTGC GCATTGCCTG GATGCTGCGC  
57661 CGGATAGCTT GCAACATCAG GAGCCGTTTT TTTTGTTCGT CAGTCATGGT CCGCCCTCAC  
57721 CAGTTGTTTCG TATCGGTGTC GGACGAACTG AAATCGCAAG AGCTGCCGGT ATCGGTCCAG  
57781 CCGCTGTCCG TGTCGCTGCT GCCGAAGCAC GGCGAGGGGT CCGCGAACGC CGCAGACGGC  
57841 GTATCCGGCC GCAGCGCATC GCCAGCATG GCCCCGGTCA GCGAGCCGCC GGCCAGGTAG  
57901 CCCAGCATGG TGCTGTTGGT CGCCCCGGCC ACCAGGGCCG ACGTGACGAA ATCGCCGTCA  
57961 TTCCTCTGG ATTGTTGCT GTCGCGGGG GCAGTGCGCC GCGCCGGCGG CGTCGTGGAT  
58021 GGCTCGGGTT GGCTGGCCTG CGACGGCCGG CGAAAGGTGC GCAGCAGCTC GTTATCGACC  
58081 GGCTGCGGGC TCGGGGCCGC CGCCTTGC GCAGTGCGCC GCGCCGGCGG CGTCGTGGAT  
58141 AGCTTGAACA GCATGATCGC GAAACACAGC AGCAACGCCG CGCTACGCC TCCGCGATG  
58201 TAGAACAGCA TCGGATTCAT TCTTCGTCC TCCTGTAGC GAAACCGTTG TCTGTGCGC  
58261 GCGGGTGGCC CGCGCCGCTG TCTTTGGGA TCAGCCCTCG ATGAGCGCGA CCAGTTTCAC  
58321 GTCGGCAAGG TTCGCTCGA ACTCCTGGCC GTCGTCCTCG TACTTCAACC AGGCATAGCC  
58381 TTCGCCGGC GGCCGACGGT TGAGGATAAG GCGGGCAGGG CGTCGTCGT GCTCGACCTG  
58441 GACGATGGCC TTTTCAGCT TGTCGGGTC CGGTCCTTC GCGCCCTTT CTTGGCGTC  
58501 CTTACCGTCC TGGTCGCCG CCTCGCCGTC CTGGCCGTC CCGCCCTCCG CGTCACGCTC  
58561 GGCATCAGTC TGGCCGTTGA AGGCATCGAC GGTGTTGGGA TCGCGGCCCT TCTCGTCCAG  
58621 GAACTCGCGC AGCAGCTTGA CCGTGCCGCG CGTGATTTCC TGGGTGTCGT CGTCAAGCCA  
58681 CGCCTCGACT TCCTCCGGG GCTTCTTGA GGCCGTCACC AGCTCGTTCA CCACGGTCA  
58741 GTCGCGCACG CGGCCGGTGT TGAACGCATC GCGGATCTTC TCCGGCAGGT CCAGCAGCGT  
58801 GACGTGCTGG GTGATGAACG CCGGCGACTT GCCGATTTCC TTGGCGATAT CGCCTTCTT  
58861 CTTGCCCTTC GCCAGCTCG GGCCAATGAA GTCGGCAATT TCGCGCGGGG TCAGCTCGTT  
58921 GCGTTGCAGG TTCTCGATAA CTTGGTGGC TTCGTTGTAG TCGTTGTCGA TGAACGCCGG  
58981 GATGGACTTC TTGCCGGCC ACTTCGAGCC ACGGTAGCGG CGGGCGCCGT GATTGATGAT  
59041 ATAGCGGCC GGCTGCTCCT GTTCTCGCG CACCGAAATG GGTGACTTCA CCCCAGCTC  
59101 TTTGATCGTG GCACCGATTT CCGCGATGCT CTCCGGGAA AAGCCGGGGT TGTCGGCCGT  
59161 CCGCGGCTGA TCGGATCTT CGTCGATCAG GTCCAGGTCC AGCTCGATAG GGCCGGAACC  
59221 GCCCTGAGAC GCCGAGGAG CGTCCAGGAG GCTCGACAGG TCGCCGATGC TATCCAACCC  
59281 CAGGCCGGAC GGCTGCGCCG CGCCTGCGGC TTCTGAGCG GCCGACGGG TGTTTTTCTT  
59341 GGTGGTCTTG GCTTGAAGCG CAGTCATTGG GAAATCTCCA TCTTCGTGAA CACGTAATCA  
59401 GCCAGGGCGC GAACCTCTT CGATGCCTG CGCGCGGCCG TTTTCTTGAT CTTCCAGACC  
59461 GGCACACCG ATGCGAGGGC ATCGGCGATG CTGCTGCGCA GGCCAACGGT GGCCGGAATC  
59521 ATCATCTTGG GGTACGCGC CAGCAGCTCG GCTTGGTGGC GCGCGTGGCG CGGATCCCG  
59581 GCATCGACCT TGCTGGGCAC CATGCCAAGG AATTGCAGCT TGGCGTCTT CTGGCGCACG  
59641 TTCGCAATGG TCGTGACCAT CTTCTTGATG CCCTGGATGC TGTACGCCTC AAGCTCGATG  
59701 GGGGACAGCA CATAGTCGGC CGCGAAGAGG GCGGCCGCA GGCCGACGCC AAGGTCGGG  
59761 GCCGTGTCGA TCAGGCACAC GTCGAAGCCT TGGTTCGCCA GGGCCTTGAT GTTCGCCCCG  
59821 AACAGCTCG GGGCGTCGTC CAGCGACAGC CGTTCGGCGT TCGCCAGTAC CGGGTTGGAC  
59881 TCGATGAGGG CGAGGCGCGC GCCTGGCCG TCGCCGGCTG CGGGTGGCGT TTCGGTCCAG  
59941 CCGCCGGCAG GGACAGCGCC GAACAGCTT CTTGCATGCA GGCCGATAG AAAGTCTTG  
60001 AGCGTGTAGG ACGCATTGCC CTGGGGTCC AGGTCGATCA CGGCAACCCG CAAGCCGCGC  
60061 TCGAAAAAGT CGAAGGCAAG ATGCACAAGG GTCGAAGTCT TGCCGACGCC GCCTTCTGG

60121 TTGGCCGTGA CCAAAGTTTT CATCGTTTGG TTTCTGTTT TTTCTTGGCG TCCGCTTCCC  
60181 ACTTCCGGAC GATGTACGCC TGATGTTCCG GCAGAACCGC CGTTACCCGC GCGTACCCCT  
60241 CGGGCAAGTT CTTGTCCTCG AACGCGGCC ACACGCGATG CACCGCTTGC GACTACTGCGC  
60301 CCCTGGTCAG TCCCAGCGAC GTTGCGAACG TCGCTGTGG CTCCCATCG ACTAAGACGC  
60361 CCCGCGCTAT CTCGATGGTC TGCTGCCCA CTTCCAGCCC CTGGATCGCC TCCTGGAAT  
60421 GGCTTTCGGT AAGCCGTTTC TTCATGGATA ACACCCATAA TTTGCTCCGC GCCTTGTTG  
60481 AACATAGCGG TGACAGCCGC CAGCACATGA GAGAAGTTTA GCTAAACATT TCTCGCACGT  
60541 CAACACCTTT AGCCGCTAAA ACTCGTCTT GCGTAACAA AACAAAAGCC CGGAAACCGG  
60601 GCTTTCGTCT CTTGCCGCTT ATGGCTCTGC ACCCGGCTCC ATCACCAACA GGTCGCGCAC  
60661 GCGCTTCACT CGGTTGCGGA TCGACTGC CAGCCAACA AAGCCGGTTG CCGCCGCCGC  
60721 CAGGATCGCG CCGATGATGC CGGCCACACC GGCCATCGCC CACCAGGTCG CCGCTTCCG  
60781 GTTCCATTCC TGCTGGTACT GTTTCGCAAT GCTGGACCTC GGCTACCAT AGGCTGACCG  
60841 CTCGATGGCG TATGCCGCTT CTCCCCTTGG CGTAAAACCC AGCGCCGAG GCGGCATTGC  
60901 CATGCTGCC GCCGCTTCC CGACCAGAC GCGCGACCA GGCTTGGGT CCAGACCTC  
60961 GGCCACGGCG AGCTGCGCAA GGACATAATC AGCCGCCGAC TTGGTCCAC GCGCTCGAT  
61021 CAGCTTTGC ACTCGCGCA AATCCTTGG CTCCACGGCC GCCATGAATC GCGCACGGG  
61081 CGAAGGCTCC GCAGGGCCGG CGTCGTGATC GCCGCCGAGA ATGCCCTCA CCAAGTCGA  
61141 CGACACGAAA ATCATGCTGA CGGCTATCAC CATCATGCAG ACGGATCGCA CGAACCCGCT  
61201 GAA

//
