# Supplementary material for: Efficient inter-species conjugative transfer of a CRISPR nuclease for targeted bacterial killing
Source: PubMed Central journal article supplement (PMC6778077; doi:10.1038/s41467-019-12448-3), 2019-10-04
Supplement: 41467_2019_12448_MOESM9_ESM.pdf [file 41467_2019_12448_MOESM9_ESM.pdf]

LOCUS pNuc-trans\_TevSpCas9 10827 bp ds-DNA circular 02-JUL-2019

DEFINITION .

FEATURES Location/Qualifiers  
terminator 9219..9280  
/label="T7 terminator"  
misc\_RNA 9142..9157  
/label="crRNA"  
promoter 9018..9071  
/label="pTet promoter"  
misc\_RNA 9158..9217  
/label="tracrRNA"  
CDS 4285..8952  
/label="TevSpCas9"  
CDS complement(3034..3963)  
/label="araC"  
CDS complement(110..769)  
/label="chloramphenicol acetyl-transferase"  
rep\_origin 1131..2044  
/label="p15A Origin"  
promoter 4113..4243  
/label="pBAD promoter"  
misc\_feature 9286..10664  
/label="Cen6-ArsH4-His3"  
oriT 2168..2938  
/label="oriT"  
misc\_feature 9074..9141  
/label="246 bp stuffer"  
misc\_feature 4272..4278  
/label="RBS"

ORIGIN

1 acgaccgggt cgaatttgc ttcgaattc tgccattcat ccgcttatta tcACTTATTC  
61 AGGCGTAGCA ACCAGGCGTT TAAGGGCACC AATAACTGCC TTAATAAAAT TACGCCCCGC  
121 CTGCCACTC ATCGCAGTAC TGTTGTAATT CATTAAAGCAT TCTGCCGACA TGAAGCCAT  
181 CACAAACGGC ATGATGAACC TGAATCGCCA GCGGCATCAG CACCTTGTCG CTTGCGTAT  
241 AATATTTGCC CATAGTGAAC ACGGGGGCGA AGAAGTTGTC CATATTGGCC ACGTTTAAAT  
301 CAAAACGGT GAAACTCACC CAGGGATTGG CTGAGACGAA AAACATATTC TCAATAAACC  
361 CTTTAGGGAA ATAGGCCAGG TTTTCACCGT AACACGCCAC ATCTTGCGAA TATATGTGTA  
421 GAAACTGCCG GAAATCGTCG TGGTATTAC TCCAGAGCGA TGAAAACGTT TCAGTTTGCT  
481 CATGGAAAAC GGTGTAACAA GGTGTAACAC TATCCCATAT CACCAGCTCA CCGTCTTTCA  
541 TTGCCATACG GAACTCCGGA TGAGCATTCA TCAGGCGGGC AAGAATGTGA ATAAAGGCCG  
601 GATAAAACTT GTGCTTATTT TTCTTTACGG TCTTTAAAAA GGCCGTAATA TCCAGCTGAA  
661 CGGTCTGGTT ATAGGTACAT TGAGCAACTG ACTGAAATGC CTCAAATGT TCTTTACGAT  
721 GCCATTGGGA TATATCAACG GTGGTATATC CAGTGATTTT TTTCTCCATT TTAGCTTCT  
781 TAGCTCTGA AAATCTCGAT AACTCAAAAA ATACGCCCGG TAGTGATCTT ATTTCAATT  
841 GGTGAAAGTT GGAACCTCTT ACGTGCCGAT CAACGTCTCA TTTTCGCCAA AAGTTGGCCC  
901 AGGGCTTCCC GGTATCAACA GGGACACCAG GATTTATTTA TTCTGCGAAG TGATCTTCCG  
961 TCACAGGTAT TTATTGGCG CAAAGTGCCT CGGGTGATGC TGCCAACCTA CTGATTTAGT  
1021 GTATGATGGT GTTTTTGAGG TGCTCCAGTG GCTTCTGTTT CTATCAGCTG TCCCTCTGT  
1081 TCAGCTACTG ACGGGGTGGT GCGTAACGGC AAAAGCACCG CCGGACATCA GCGCTAGCGG  
1141 AGTGATACT GGCTTACTAT GTTGGCACTG ATGAGGGTGT CAGTGAAGTG CTTTATGTGG  
1201 CAGGAGAAAA AAGGCTGCAC CGGTGCGTCA GCAGAATATG TGATACAGGA TATATCCGC  
1261 TTCTCGCTC ACTGACTCGC TACGCTCGGT CGTTCGACTG CGGCGAGCGG AAATGGCTTA  
1321 CGAACGGGGC GGAGATTCC TGGAAGATGC CAGGAAGATA CTTAACAGGG AAGTGAGAGG

1381 GCCGCGGCAA AGCCGTTTTT CCATAGGCTC CGCCCCCTG ACAAGCATCA CGAAATCTGA  
1441 CGCTCAAATC AGTGGTGGCG AAACCCGACA GGACTATAAA GATACCAGGC GTTCCCCCCT  
1501 GGCGGCTCCC TCGTGCCTC TCCTGTTCTT GCCTTTCGGT TTACCGGTGT CATTCCGCTG  
1561 TTATGGCCCG GTTTGTCTCA TTCCACGCCT GACTCTCAGT TCCGGGTAGG CAGTTCGCTC  
1621 CAAGCTGGAC TGTATGCACG AACCCCCCGT TCAGTCCGAC CGCTGCGCCT TATCCGGTAA  
1681 CTATCGTCTT GAGTCCAACC CGGAAAAGACA TGCAAAAAGCA CCACTGGCAG CAGCCACTGG  
1741 TAATTGATTT AGAGGAGTTA GTCTTGAAGT CATGCGCCGG TTAAGGCTAA ACTGAAAGGA  
1801 CAAGTTTTGG TGACTGCGCT CCTCCAAGCC AGTTACCTCG GTTCAAAGAG TTGGTAGCTC  
1861 AGAGAACCTT CGAAAAACCG CCCTGCAAGG CGGTTTTTTC GTTTTCAGAG CAAGAGATTA  
1921 CGCGCAGACC AAAACGATCT CAAGAAGATC ATCTTATTAA TCAGATAAAA TATTTCTAGA  
1981 TTTTCAGTGA ATTTATCTCT TCAAATGTAG CACCTGAAGT CAGCCCCATA CGATATAAGT  
2041 TGTAATTCTC ATGTTAGTCA TGCCCCGCGC CCACCGGAAG GAGCTGACTG GGTTGAAGGG  
2101 TCTCAAGGGC ATCGGTGCGAG ATCCCGGTGC CTAATGAGTG AGCTAACTTA CATTAAATTGC  
2161 GTTGCAGCAT CGTCTGCTT TGCTCGTCGG TGATGACTT ACAGCTCGAA GTGCCCTTTC  
2221 TTGATGGAGC GCATGGGGAC GTGCTTGGA ATCACGCGCA CCCCCGGCC GTTTTAGCGG  
2281 CTA AAAAAGT CATGGCTCTG CCCTCGGGCG GACCACGCC ATCATGACCT TGCCAAGCTC  
2341 GTCTGCTTC TTTTCGATCT TCGCCAGCAG GGCGAGGATC GTGGCATCAC CGAACCGCGC  
2401 CGTGCAGCGG TCGTCGGTGA GCCAGAGTTT CAGCAGGCCG CCCAGGCGGC CCAGGTGCGC  
2461 ATTGATGCGG GCCAGCTCGC GGACGTGCTC ATAGTCCACG ACGCCCGTGA TTTTGTAGCC  
2521 CTGGCCGACG GCCAGCAGGT AGGCCGACAG GCTCATGCCG GCCGCCGCC CTTTTCTC  
2581 AATCGCTCTT CGTTCGCTG GAAGGCAGTA CACCTTGATA GGTGGGCTGC CCTCCTGGT  
2641 TGGCTTGGTT TCATCAGCCA TCCGTTGCC CTCATCTGTT ACGCCGGCGG TAGCCGGCCA  
2701 GCCTCGCAGA GCAGGATTCC CGTTGAGCAC CGCCAGGTGC GAATAAGGGA CAGTGAAGAA  
2761 GGAACACCCG CTCGCGGGTG GGCCTACTT ACCTATCCTG CCCGGCTGAC GCCGTTGGAT  
2821 ACACCAAGGA AAGTCTACAC GAACCCTTG GCAAAATCCT GTATATCGTG CGAAAAAGGA  
2881 TGGATATACC GAAAAATCG CTATAATGAC CCCGAAGCAG GGTATGCAG CGGAAGATAT  
2941 CGATGCATAA TGTGCCTGTC AAATGGACGA AGCAGGGATT CTGCAAACCC TATGCTACTC  
3001 CGTCAAGCCG TCAATTGTCT GATTCGTTAC CAATTATGAC AACTTGACGG CTACATCATT  
3061 CACTTTTTCT TCACAACCGG CACGGAATC GCTCGGGCTG GCCCCGGTGC ATTTTTTAAA  
3121 TACCCGCGAG AAATAGAGTT GATCGTCAA ACCAACATTG CGACCGACGG TGGCGATAGG  
3181 CATCCGGGTG GTGCTCAAAA GCAGCTTCGC CTGGCTGATA CGTTGGTCCT CGCGCCAGCT  
3241 TAAGACGCTA ATCCCTAACT GCTGGCGGAA AAGATGTGAC AGACGCGACG GCGACAAGCA  
3301 AACATGCTGT GCGACGCTGG CGATATCAA ATTGCTGTCT GCCAGGTGAT CGCTGATGTA  
3361 CTGACAAGCC TCGCGTACCC GATTATCCAT CGGTGGATGG AGCGACTCGT TAATCGTTC  
3421 CATGCGCCCG AGTAAACAATT GCTCAAGCAG ATTTATCGCC AGCAGCTCCG AATAGCGCCC  
3481 TTTCCCTTGC CCGGCGTTAA TGATTTGCC AACAGGTCTG CTGAAATGCG GCTGGTGCGC  
3541 TTCATCCGGG CGAAAGAACC CCGTATTGGC AAATATTGAC GGCCAGTTAA GCCATTCATG  
3601 CCAGTAGGCG CGCGGACGAA AGTAAACCCA CTGGTGATAC CATTGCGGAG CCTCCGGATG  
3661 ACGACCGTAG TGATGAATCT CTCCTGGCGG GAACAGCAA ATATCACCCG GTCGGCAAAC  
3721 AAATTCTCGT CCCTGATTTT TCACCACCC CTGACCGCGA ATGGTGAGAT TGAGAATATA  
3781 ACCTTTCATT CCCAGCGGTC GGTCGATAAA AAAATCGAGA TAACCGTTGG CCTCAATCGG  
3841 CGTTAAACCC GCCACCAGAT GGGCATTAAA CGAGTATCCC GGCAGCAGGG GATCATTTTG  
3901 CGTTCAGCC ATACTTTTCA TACTCCGCC ATTCAGAGAA GAAACCAATT GTCCATATTG  
3961 CATCAGACAT TGCCGTCCT GCGTCTTTA CTGGCTTTC TCGTAACCA AACCGGTAAC  
4021 CCCGCTTATT AAAAGCATTG TGTAACAAAG CGGGACCAA GCCATGACAA AAACGCGTAA  
4081 CAAAAGTGTC TATAATCACG GCAGAAAAGT CCACATTGAT TATTTGCACG GCGTCACACT  
4141 TTGCTATGCC ATAGCATTTC TATCCATAAG ATTAGCGGAT CCTACCTGAC GCTTTTTATC  
4201 GCAACTCTCT ACTGTTTCTC CATAACCGTT TTTTGGGCT AGCCCTGTAG AAATAATTGT  
4261 TTAACCTTAA TAAGGAGATA TACCATGGGT AAAAGCGGAA TTTATCAGAT TAAAAACT  
4321 TTAACAATA AAGTATATGT AGGAAGTGCT AAAGATTTG AAAAGAGATG GAAGAGGCAT  
4381 TTTAAAGATT TAGAAAAAGG ATGCCATTCT TCTATAAAC TTCAGAGGTC TTTTAAACAA  
4441 CATGGTAATG TGTTTGAATG TTCTATTTG GAAGAAATC CATATGAGAA AGATTTGATT  
4501 ATTGAACGAG AAAATTTTTG GATTAAGAG CTTAATTCTA AAATTAATGG ATACAATATT

4561 GCTGATGCAA CGTTTGGTGA TACGTGTTCT ACGCATCCAT TAAAAGAAGA AATTATTAAG  
4621 AAACGTTCTG AAACTTTTAA AGCTAAGATG CTTAAACTTG GACCTGATGG TCGGAAAAGCT  
4681 CTTTACAGTA AACCCGGAAG TAAAAACGGG CGTTGGAATC CAGAAACCCA TAAGTTTTGT  
4741 AAGTGCGGTG TTCGCATACA AACTTCTGCT TATACTTGTA GTAAATGCAG AAATGGTGGT  
4801 TCTGGTGGTA CCGGAGGTAG CATGGATAAA AAGTATTCTA TTGGTTTAGA CATCGGCACT  
4861 AATTCCGTTG GATGGGCTGT CATAACCGAT GAATACAAAG TACCTTCAA GAAATTTAAG  
4921 GTGTTGGGGA ACACAGACCG TCATTCGATT AAAAAGAATC TTATCGGTGC CCTCCTATTC  
4981 GATAGTGGCG AAACGGCAGA GGCGACTCGC CTGAAACGAA CCGCTCGGAG AAGGTATACA  
5041 CGTCGCAAGA ACCGAATATG TTACTIONA GAAATTTTTA GCAATGAGAT GGCCAAAGTT  
5101 GACGATTCTT TCTTTCACCG TTTGGAAGAG TCCTTCCTTG TCGAAGAGGA CAAGAAACAT  
5161 GAACGGCACC CCATCTTGG AAACATAGTA GATGAGGTGG CATATCATGA AAAGTACCCA  
5221 ACGATTTATC ACCTCAGAAA AAAGCTAGTT GACTCAACTG ATAAAGCGGA CCTGAGGTTA  
5281 ATCTACTTGG CTCTTGCCCA TATGATAAAG TTCCGTGGGC ACTTTCTCAT TGAGGGTGT  
5341 CTAATCCGG ACAACTCGGA TGTCGACAAA CTGTTTATCC AGTTAGTACA AACCTATAAT  
5401 CAGTTGTTT GAGAGAACC TATAAATGCA AGTGGCGTGG ATGCGAAGGC TATTCTTAGC  
5461 GCCCGCTCT CTAATCCCG ACGGCTAGAA AACCTGATCG CACAATTACC CGGAGAGAAG  
5521 AAAAAATGGT TGTTTCGTAA CTTATAGCG CTCTACTAG GCCTGACACC AAATTTAAG  
5581 TCGAACTTCG ACTTAGCTGA AGATGCCAAA TTGCAGCTTA GTAAGGACAC GTACGATGAC  
5641 GATCTCGACA ATCTACTGCG ACAAATTGGA GATCAGTATG CGGACTTATT TTTGGCTGCC  
5701 AAAAACTTA GCGATGCAAT CCTCTATCT GACATACTGA GAGTTAATAC TGAGATTACC  
5761 AAGGCGCCGT TATCCGCTT AATGATCAA AGGTACGATG AACATCACC AACTTGACA  
5821 CTTCTCAAG CCCTAGTCCG TCAGCAACTG CCTGAGAAAT ATAAGGAAAT ATTCTTTGAT  
5881 CAGTCGAAAA ACGGTACGC AGGTTATATT GACGGCGGAG CGAGTCAAGA GGAATTCTAC  
5941 AAGTTTATCA AACCCATATT AGAGAAGATG GATGGGACGG AAGAGTTGCT TGTAAGACTC  
6001 AATCGCGAAG ATCTACTGCG AAAGCAGCGG ACTTTCGACA ACGGTAGCAT TCCACATCAA  
6061 ATCCACTTAG GCGAATTGCA TGCTATACTT AGAAGGCAGG AGGATTTTTA TCCGTTCTC  
6121 AAAGACAATC GTGAAAAGAT TGAGAAAATC TAACTTTT GCATACCTA CTATGTGGGA  
6181 CCCCTGGCCC GAGGGAATC TCGGTTGCGA TGGATGACAA GAAAGTCCGA AGAAACGATT  
6241 ACTCCCTGGA ATTTTGGAGG AGTTGTGAT AAAGGTGCGT CAGCTCAATC GTTCATCGAG  
6301 AGGATGACCA ACTTTGACAA GAATTTACCG AACGAAAAAG TATTGCCTAA GCACAGTTA  
6361 CTTTACGAGT ATTTACAGT GTACAATGAA CTCACGAAAG TTAAGTATGT CACTGAGGGC  
6421 ATGCGTAAAC CCGCCTTCT AAGCGGAGAA CAGAAGAAAG CAATAGTAGA TCTGTTATTC  
6481 AAGACCAACC GCAAAGTGAC AGTTAAGCAA TTGAAAGAGG ACTACTTTAA GAAAATTGAA  
6541 TGCTTCGATT CTGTCGAGAT CTCCGGGGTA GAAGATCGAT TTAATGCGTC ACTTGGTACG  
6601 TATCATGACC TCCTAAAGAT AATTAAGAT AAGGACTTCC TGGATAACGA AGAGAATGAA  
6661 GATATCTTAG AAGATATAGT GTTGACTCTT ACCCTTTT AAGATCGGGA AATGATTGAG  
6721 GAAAGACTAA AAACATACGC TCACCTGTTC GACGATAAGG TTATGAAACA GTTAAAGAGG  
6781 CGTCGCTATA CGGGCTGGGG ACGATTGTCG CGGAACTTA TCAACGGGAT AAGAGACAAG  
6841 CAAAGTGGTA AAACATTTCT CGATTTTCTA AAGAGCGACG GCTTCGCCAA TAGGAACTTT  
6901 ATGCACTGA TCCATGATGA CTCTTAACC TTCAAAGAGG ATATACAAAA GGCACAGTT  
6961 TCCGGACAAG GGGACTCATT GCACGAACAT ATTGCGAATC TTGCTGGTTC GCCAGCCATC  
7021 AAAAAAGGCA TACTCCAGAC AGTCAAAGTA GTGGATGAGC TAGTTAAGGT CATGGGACGT  
7081 CACAAACCGG AAAACATTGT AATCGAGATG GCACGCGAAA ATCAAACGAC TCAGAAAGGG  
7141 CAAAAAACA GTCGAGAGCG GATGAAGAGA ATAGAAGAGG GTATTAAGA ACTGGGCAGC  
7201 CAGATCTTAA AGGAGCATCC TGTGGAAAAT ACCCAATTGC AGAACGAGAA ACTTTACCTC  
7261 TATTACCTAC AAAATGGAAG GGACATGTAT GTTGATCAGG AACTGGACAT AAACCGTTA  
7321 TCTGATTACG ACGTCGATCA CATTGTACCC CAATCCTTT TGAAGGACGA TTCAATCGAC  
7381 AATAAAGTGC TTACACGCTC GGATAAGAAC CGAGGGAAAA GTGACAATGT TCCAAGCGAG  
7441 GAAGTCGTAA AGAAAATGAA GAACTATTGG CGGCAGCTCC TAAATGCGAA ACTGATAACG  
7501 CAAAGAAAGT TCGATAACTT AACTAAAGCT GAGAGGGGTG GCTTGTCTGA ACTTGACAAG  
7561 GCCGATTTA TTAACGTCA GCTCGTGAA ACCCGCCAAA TCACAAAGCA TGTTGCACAG  
7621 ATACTAGATT CCCGAATGAA TACGAAATAC GACGAGAACG ATAAGCTGAT TCGGGAAGTC  
7681 AAAGTAATCA CTTTAAAGTC AAAATTGGTG TCGGACTTCA GAAAGGATTT TCAATTCTAT

7741 AAAGTTAGGG AGATAAATAA CTACCACCAT GCGCACGACG CTTATCTTAA TGCCGTCGTA  
7801 GGGACCGCAC TCATTAAGAA ATACCCGAAG CTAGAAAGTG AGTTTGTGTA TGGTGATTAC  
7861 AAAGTTTATG ACGTCCGTAA GATGATCGCG AAAAGCGAAC AGGAGATAGG CAAGGCTACA  
7921 GCCAAATACT TCTTTTATTC TAACATTATG AATTTCTTTA AGACGGAAAT CACTCTGGCA  
7981 AACGGAGAGA TACGCAAACG ACCTTTAATT GAAACCAATG GGGAGACAGG TGAAATCGTA  
8041 TGGGATAAGG GCCGGGACTT CGCGACGGTG AGAAAAGTTT TGTCCATGCC CCAAGTCAAC  
8101 ATAGTAAAGA AAAGTGAAGT GCAGACCGGA GGGTTTTCAA AGGAATCGAT TCTTCCAAAA  
8161 AGGAATAGTG ATAAGCTCAT CGCTCGTAAA AAGGACTGGG ACCCGAAAAA GTACGGTGGC  
8221 TTCGATAGCC CTACAGTTGC CTATTCTGTC CTAGTAGTGG CAAAAGTTGA GAAGGGAAAA  
8281 TCCAAGAAAC TGAAGTCAGT CAAAGAATTA TTGGGGATAA CGATTATGGA GCGCTCGTCT  
8341 TTTGAAAAGA ACCCCATCGA CTTCTTGGAG GCGAAAAGTT ACAAGGAAGT AAAAAAGGAT  
8401 CTCATAATTA AACTACCAAA GTATAGTCTG TTTGAGTTAG AAAATGGCCG AAAACGGATG  
8461 TTGGCTAGCG CCGGAGAGCT TCAAAAGGGG AACGAACTCG CACTACCGTC TAAATACGTG  
8521 AATTTCTGT ATTTAGCGTC CCATTACGAG AAGTTGAAAG GTTACCTGA AGATAACGAA  
8581 CAGAAGCAAC TTTTTGTTGA GCAGCACAAA CATTATCTCG ACGAAATCAT AGAGCAAATT  
8641 TCGGAATTC GTAAGAGAGT CATCCTAGCT GATGCCAATC TGGACAAAGT ATTAAGCGCA  
8701 TACAACAAGC ACAGGGATAA ACCCATACGT GAGCAGGCGG AAAATATTAT CCATTTGTTT  
8761 ACTCTTACCA ACCTCGGCGC TCCAGCCGCA TTCAAGTATT TTGACACAAC GATAGATCGC  
8821 AAACGATACA CTTCTACCAA GGAGGTGCTA GACGCGACAC TGATTCACCA ATCCATCACG  
8881 GGATTATATG AAAGTGGAT AGATTTGTCA CAGCTTGGGG GTGACGGATC CCATCATCAC  
8941 CACCACCATT GAGCGGCCGC ATAATGCTTA AGTCGAACAG AAAGTAATCG TATTGTACAC  
9001 GGCCGCATAA TCGAAATTCC CTATCAGTGA TAGAGATTGA CATCCCTATC AGTGATAGAG  
9061 ATACTGAGCA CGGGAGACCC ATGCCATAGC GTTGTTCGGA ATATGAATTT TTGAACAGAT  
9121 TCACCAACAC CTAGTGGTCT CGTTTTAGAG CTAGAAATAG CAAGTAAAAA TAAGGCTAGT  
9181 CCGTTATCAA CTTGAAAAAG TGGCACCGAG TCGGTGCTCC GCTGAGCAAT AACTAGCATA  
9241 ACCCCTGGG GCCTCTAAC GGGTCTTGG GGGTTTTTTG GCGAGCATCA CGTGCTATAA  
9301 AAATAATTAT AATTTAAATT TTTTAATATA AATATATAA TAAAAATAG AAAGTAAAAA  
9361 AAGAAATTA AGAAAAATA GTTTTTGTTT TCCGAAGATG TAAAAGACTC TAGGGGGATC  
9421 GCCAACAAAT ACTACCTTTT ACCTTGCTCT TCCTGCTCTC AGGTATTAAT GCCGAATTGT  
9481 TTCATCTTGT CTGTGTAGAA GACCACACAC GAAAATCCTG TGATTTTACA TTTACTTAT  
9541 CGTTAATCGA ATGTATATCT ATTTAATCTG CTTTTCTTGT CTAATAAATA TATATGTA  
9601 GTACGCTTTT TGTTGAAATT TTTTAAACCT TTGTTTATTT TTTTTCTTC ATTCCGTAAC  
9661 TCTTCTACCT TCTTTATTTA CTTTCTAAAA TCCAATACA AACATAAAA ATAAATAAAC  
9721 ACAGAGTAAA TTCCCAAATT ATTCCATCAT TAAAAGATAC GAGGCGCGTG TAAGTTACAG  
9781 GCAAGCGATC CTAGTACACT CTATATTTTT TTATGCCTCG GTAATGATTT TCATTTTTTT  
9841 TTTCCACCTA GCGGATGACT CTTTTTTTTT CTTAGCGATT GGCATTATCA CATAATGAAT  
9901 TATACATTAT ATAAAGTAAT GTGATTTCTT CGAAGAATAT ACTAAAAAT GAGCAGGCAA  
9961 GATAAACGAA GGCAAAGATG ACAGAGCAGA AAGCCCTAGT AAAGCGTATT ACAAATGAAA  
10021 CCAAGATTC GATTGCGATC TCTTTAAAGG GTGGTCCCCT AGCGATAGAG CACTCGATCT  
10081 TCCCAGAAAA AGAGGCAGAA GCAGTAGCAG AACAGGCCAC ACAATCGCAA GTGATTAACG  
10141 TCCACACAGG TATAGGGTTT CTGGACCATA TGATACATGC TCTGGCCAAG CATTCCGGCT  
10201 GGTGCTAAT CGTTGAGTGC ATTGGTACT TACACATAGA CGACCATCAC ACCACTGAAG  
10261 ACTGCGGGAT TGCTCTCGGT CAAGCTTTTA AAGAGGCCCT AGGGGCCGTG CGTGGAGTAA  
10321 AAAGGTTTGG ATCAGGATTT GCGCCTTTGG ATGAGGCACT TTCCAGAGCG GTGGTAGATC  
10381 TTTGAAACAG GCCGTACGCA GTTGTGCAAC TTGGTTTGA AAGGGAGAAA GTAGGAGATC  
10441 TCTTTGCGA GATGATCCCG CATTCTTGG AAAGCTTGC AGAGGCTAGC AGAATTACCC  
10501 TCCACGTTGA TTGTCTGCGA GGCAAGAATG ATCATACCG TAGTGAGAGT GCGTTCAAGG  
10561 CTCTTGGGT TGCATAAGA GAAGCCACCT CGCCCAATGG TACCAACGAT GTTCCCTCCA  
10621 CCAAAGGTGT TCTTATGTAG TTTTACACAG GAGTCTGGAC TTGACTGAAA CCTCAGGCAT  
10681 TTGAGAAGCA CACGGTCACA CTGCTCCGG TAGTCAATAA ACCGGTAAAC CAGCAATAGA  
10741 CATAAGCGGC TATTTAACGA CCCTGCCCTG AACCGacgac cgggtgcaat ttgctttcga  
10801 atttctgcca ttcacccgt tattatc

//
