# Supplementary material for: Efficient inter-species conjugative transfer of a CRISPR nuclease for targeted bacterial killing
Source: PubMed Central journal article supplement (PMC6778077; doi:10.1038/s41467-019-12448-3), 2019-10-04
Supplement: 41467_2019_12448_MOESM10_ESM.pdf [file 41467_2019_12448_MOESM10_ESM.pdf]

LOCUS pTA-Mob\_-\_sequence\_ver 52707 bp ds-DNA circular 02-AUG-2019

DEFINITION .

FEATURES            Location/Qualifiers

|     |                          |
|-----|--------------------------|
| CDS | complement(38443..38652) |
|     | /label="trbK"            |
| CDS | complement(30729..30980) |
|     | /label="parD"            |
| CDS | 26294..26734             |
|     | /label="traB"            |
| CDS | complement(29879..30382) |
|     | /label="putative ORF"    |
| CDS | 3271..3489               |
|     | /label="kleD"            |
| CDS | 3952..4266               |
|     | /label="kleF1 "          |
| CDS | 2657..2872               |
|     | /label="kleB"            |
| CDS | 4389..5162               |
|     | /label="klaA"            |
| CDS | 7427..8521               |
|     | /label="incC"            |
| CDS | complement(42999..45557) |
|     | /label="trbE"            |
| CDS | complement(40853..41335) |
|     | /label="trbH"            |
| CDS | 5180..6316               |
|     | /label="klaB"            |
| CDS | complement(38664..39440) |
|     | /label="trbJ"            |
| CDS | 9665..10168              |
|     | /label="korF"            |
| CDS | complement(33296..33991) |
|     | /label="fiwA"            |
| CDS | 20604..22817             |
|     | /label="traE"            |
| CDS | 22823..23086             |
|     | /label="traD"            |
| CDS | complement(34006..34425) |
|     | /label="upf31.7"         |
| CDS | 7440..7745               |
|     | /label="korA"            |
| CDS | complement(34442..35176) |
|     | /label="trbP"            |
| CDS | 10891..11817             |
|     | /label="kfrA"            |
| CDS | 11975..12322             |
|     | /label="kfrB"            |
| CDS | complement(14909..15313) |
|     | /label="traK"            |
| CDS | complement(42244..43002) |
|     | /label="trbF"            |
| CDS | complement(28620..29792) |
|     | /label="istA1"           |

CDS 8518..9594  
/label="korB"  
CDS complement(45868..46305)  
/label="trbC"  
CDS 6313..7266  
/label="klaC"  
CDS complement(35507..36211)  
/label="trbN"  
CDS complement(36850..38436)  
/label="trbL"  
CDS complement(13750..14187)  
/label="traM"  
CDS 48724..49581  
/label="trfA2"  
CDS 20056..20589  
/label="traF"  
CDS 2375..2608  
/label="kleA"  
CDS 7742..8521  
/label="incC2"  
CDS complement(30421..30732)  
/label="parE"  
CDS 3601..3924  
/label="kleE"  
CDS 31131..31424  
/label="parC"  
CDS 48433..49581  
/label="trfA1"  
CDS complement(14184..14909)  
/label="traL"  
CDS complement(46318..47214)  
/label="trbB"  
CDS complement(41339..42232)  
/label="trbG"  
CDS 18152..20059  
/label="traG"  
CDS complement(47548..47859)  
/label="trbA"  
CDS 31915..32574  
/label="parA1"  
CDS complement(27399..27692)  
/label="putative\_ORF"  
CDS 26742..27032  
/label="traA"  
CDS 48034..48384  
/label="ssb"  
CDS 3025..3255  
/label="kleC"  
CDS 10178..10705  
/label="korG"  
CDS complement(27823..28620)  
/label="istB"  
CDS 17497..17856

/label="traH"  
 CDS complement(45554..45865)  
 /label="trbD"  
 CDS 187..720  
 /label="Gentamicin-3-N-acetyltransferase"  
 rep\_origin 51889..52659  
 /label="pBBR1 oriV"  
 CDS complement(36227..36826)  
 /label="trbM"  
 CDS complement(39457..40848)  
 /label="trbI"  
 CDS 12351..13697  
 /label="kfrC"  
 CDS 1243..1869  
 /label="klcB"  
 CDS 15551..15922  
 /label="traJ"  
 CDS 24038..26278  
 /label="traC2"  
 CDS complement(32598..33260)  
 /label="upf32.8"  
 CDS 23093..26278  
 /label="traC1"  
 CDS 1892..2149  
 /label="korC"  
 CDS complement(35213..35476)  
 /label="trbO"  
 CDS 31109..31954  
 /label="parB"  
 CDS 15957..18155  
 /label="tral"

ORIGIN

1 aatgcaagta gcgatatgcdc tcacgcaact ggtccagaac cttgaccgaa cgCAGCGGTG  
 61 GTAACGGCGC AGTGCCGGTT TTCATGGCTT GTTATGACTG TTTTTTGTGA CAGTCTATGC  
 121 CTCGGGCATC CAAGCAGCAA GCGCGTTACG CCGTGGGTCG ATGTTTGATG TTATGGAGCA  
 181 GCAACGATGT TACGCAGCAG CAACGATGTT ACGCAGCAGG GCAGTCGCCC TAAAACAAAG  
 241 TTAGGTGGCT CAAGTATGGG CATCATTCGC ACATGTAGGC TCGGCCCTGA CCAAGTCAAA  
 301 TCCATGCGGG CTGCTCTTGA TCTTTTCGGT CGTGAGTTCG GAGACGTAGC CACCTACTCC  
 361 CAACATCAGC CGGACTCCGA TTACCTCGGG AACTTGCTCC GTAGTAAGAC ATTCATCGCG  
 421 CTTGCTGCCT TCGACCAAGA AGCGGTTGTT GCGGCTCTCG CGGCTTACGT TCTGCCAAG  
 481 TTTGAGCAGC CGCGTAGTGA GATCTATATC TATGATCTCG CAGTCTCCGG AGAGCACCGG  
 541 AGGCAGGGCA TTGCCACCGC GCTCATCAAT CTCCTCAAGC ATGAGGCCAA CGCGCTTGGT  
 601 GCTTATGTGA TCTACGTGCA AGCAGATTAC GGTGACGATC CCGCAGTGGC TCTCTATACA  
 661 AAGTTGGGCA TACGGGAAGA AGTGATGCAC TTTGATATCG ACCCAAGTAC CGCCACCTAA  
 721 CAATTCGTTT AAGCCGAGAT CGGCTTCCCG GCCGCGGAGT TGTTCCGTAA ATTGTCACAA  
 781 CGCCGCCAGG TGGATTAATA GACTGGATGG AGGCGGATAA AGTTGCAGGA CCACTTCTGC  
 841 GCTCGGCCCT TCCGCTGGC TGGTTTATTG CTGATAAATC TGGAGCCGGT GAGCGTGGAT  
 901 CTCGCGGTAT CATTGCAGCA CTGGGGCCAG ATGGTAAGCC CTCCCGTATC GTAGTTATCT  
 961 ACACGACGGG GAGTCAGGCA ACTATGGATG AACGAAATAG ACAGATCGCT GAGATAGGTG  
 1021 CCTCACTGAT TAAGCATTGG TAACTGTCAG ACCAAGTTTA CTCATATATA CTTTAGATTG  
 1081 ATTTAAAAC TCAATTTTAA TTTAAAAGGA TCTAGGTGAA GATCCTTTTT GATAATCTCA  
 1141 TGACCAAAT CCCTAACGT GAGTTTTCGT TCCAAGTAC GTCAGACCCC TTTTATTTCC  
 1201 GAAACGGGCT ATCGGTCCCA TTACGACCAT GCGCGCGGCG GCATGACGGT GGACCAGGTA

1261 GCGGACGGGG TTTTGC GCGC CCTGTTGCGC TCGCATCGCC GGTATCTGGA CGCCCGCGAC  
1321 CAGGACCGCC TTGCCGACGA GCCACTGCCG GCGTGGCTCG CGGGTATCAC GCCACCGCCG  
1381 CGCCGCGTGC GGGCCGTGGT CGAGGACTGG CGGAAGCCGG ACGAACTGCC GCCGGGCTTC  
1441 GCCTGGGTTG ATGCCGTGCT GCCGGCGCAC CAGGCATTCA TCGCCCGCAA ATGGGCGGCC  
1501 AGCGCCAAGG CGAAGCTCGC GGCCGCGCGT GCGAAAGCTC AGGAGCCGGC CGGGCAGCGC  
1561 AGGGAGCCGG TTACACCGGC CAAGCCGGAG CCGGAGCCGG CCAAGGACGA GGACGCGCCG  
1621 GCGTGCCCGG CGACGTTCTT TCCTGGCCTG CGGTGCGAGA TTGTGAGCGT GCATCACCCG  
1681 GTTTTTGCCA AGGAAATCGG GAAGCACGTC ATCATTACGA AGATCAGTCC CGAAACGCGA  
1741 CAGGTGTGGG CGCACGACGA CAAGCCGCCG CGCTATCGCA TCAATCGCAA CGGTAGAAAAG  
1801 GTTTGTGAAT ATGACCCGCG TTGCATCGAG TCGTGCTACG GCTACGACCA ATTGCGGGCC  
1861 GCCATTTGAT AACGATTAGG AGAAAAGCAG CATGAGCGAC GTGAATATCC GGCTTGAGTG  
1921 CCTGCGCCCG GCGGAACGCT GGGTGACGCC GACCGGCGCA GAAATCCGGG AAGTCTTGCA  
1981 CTTGGCCCGC CTCACCGGCG GACAGGCTGC GCGCATCTTG GGCTTGGGTG CCAAGGGCGA  
2041 CCGCACGGTG CGGCGTTGGG TTGGCGAGGA TTCGCCGATC CCCTATGCCG CCTGGGCGAT  
2101 CCTTTGCGAT CTAGCGGGGA TTGGGGCGAT CTGGAAAGGC CAGGGCTGAC GCCCGCAGGA  
2161 CTTTACGCCA AGGGAGAGGA CTTTAGCGGC TAAAACCGCC AACCTGATC GTTGCGATAT  
2221 GCTGCCAGCA GCCCGGCCCG CAAGCCGGGT TTTTTCGTGC GCCCGCCGA AATTGTTTAG  
2281 CTAATTTCC TTGACTATCT AGGGCATAAT GCCCTAATAT AGCAATCCAA GGCCGGGCAC  
2341 TTCGCCCAGG TCAGCAACCG GAGGATCAAC CCCGATGAAA AGCAAGATCA TGTCTTGGCT  
2401 CGATGAGCTG CCCGGCGCGG CCGCCACGGA TTTTCTGGCC CGTCGTGACC AGATCGCGGC  
2461 GCTGATGGAG CAGGCGGCAG AGCTTACCCG CCAGGCCGAA GAGCTGCGGC ACAAGGCGTA  
2521 CCTGCAAGGT TGCACCCTGG AGGGTGAAGC AAAGGGCCAC TGGTCCACCC AGGAAGTCGA  
2581 ACGCGCGAAG GCTCGCGCAG GCTGGTAACG GAACGAGGCC CGGCTACGGT CGGGCCTCTC  
2641 TCAAGGAGAT AGGGCCATGC CCAACCGCAA GATCGAGATT GTCACCACCA ATTGCCGCCG  
2701 CTGCGGTAAG TCCATTTGCA CCCTTAGCCG CAGCCTGATC GGGGCGGACG CCCTGCGCGA  
2761 AGAGCTGGGC GGTATCTGCG GCGATTGCAT TACGCCGAG GAACGACAGC GGATCGAGCA  
2821 AGGCACCTTG CTGGCCGCGC TCGGCCAGTG CGCTGCCGCC GGGACAAGCT GATTGCACGC  
2881 CAGGGGAAAAG GTTTTTCAA GCATGACGCC TCGCTGAATC CCCTCAATTG TTAGCTAAA  
2941 ATTGCTTGAC AAGTTAGGGC ATTATGCCCT ATTCTTGTTT TGAGGCCGGG TAGATTCCCA  
3001 GGTCAATTAC CGGAGGCCAA TCCGATGACC GATAAGTTCA TGCCGTGGAT CGACGAGCTG  
3061 CCGAACGTAG ACCAGGAGCT GGTCGCGCAG CGGAATGCTA TTGCCGAGAA GCAGCGGCGC  
3121 GCTGATGAGC TGATGCACCA GGTCGAGCGC CTGCGCATCG AGGTATGCG GGAGTCGTCG  
3181 AGTTTGGAGG AACGGGCGAA ACAGCGCTGG ACCTCAACG AAATCGACTT GGCGAAATTC  
3241 CGGGCCGGTC ACTGACGCCA GGGGATGATG ATGCAAGTAG GAGATAGGGT GAACTGGCAG  
3301 CACACCCCGC GCGGCGGGTA CGGGTATTCC GTTTGTGTTG CTGGCATAGT GACGAAGATC  
3361 GCGGCTAAAC GTGTGCAGAT TCGGGTAGCC GTTCGAGTG GTAACGAGTG GCAGCAAGTC  
3421 ACCAAGTGGG TCGAGCCGGC CAGTTGAGC ACCAGGGAAA AGCCGGTTCC CGAGTTGGAC  
3481 GGGGCATAGG GATGACGCC CGGATTTCTC CGGGGCGCTT GACCTCGATG CTGTACATC  
3541 ACGGTCTAGG CGCGCGAGCG CTGGACGAAT TGAACACGCA TCGCCGTGGA GGGTCAAGCA  
3601 ATGTCAAGA TTATCAAGTT CCCAGGCGTG GAAGTGGAGG CCGAGGCCCC TGCCCCGCGC  
3661 GTTGAGGCC CGAGCAAGGC CCCGCCCGG TTACTIONTTG CCAAGGGTGT CCAGGCCCTG  
3721 GTCCGCTTTG TATGGGTCGT TACTGTCCTG GTGTGGCCGG TGGCGAAGTG GATCATCTCT  
3781 ATCGACGTTT TCTTTCAGTT CCTGCGGATG CTGTACCACT GGAACACCCT TGGCGTTCAT  
3841 GCCGGCTGGA CGTTCCTGGT GCATTCGCG GTACTGACCG CACTCACCTA TTTCTGTGCG  
3901 CTCTACAAGC CCAAGGGGCT GTAGAGCGGC CCCTCAAGG AGCTTTGAGC AATGCCAAGA  
3961 CAGGAACCTA AGCAGCCGGG CTACGTGTGC CCGACGACCG GGCGGGTGGC CGTGCTGGTC  
4021 AAGGACTACG CCGACAGCGA CTAACCGGC GACGCATCGG CGTACTGGTT CAATCCGGAG  
4081 GCCGAGGGCT GGGGCATGGA CCCTTGAAA CTGGTCAAG GCGTGGACCC CCACACGCAA  
4141 GGCTGTTGTA TGGATGTTTG CTTTGCCGAC GGTTCAGCA AGACGGTCGG GCCGCTGATG  
4201 ACGTTCCTTC TCAGCGCGAA GGATGCTGCG CGCTAGCGG CGCTCAAGGG GCAACGCCAG  
4261 GAGTGAGCTG GCTTCTGTA AATGACCTGT CCCCAAATTT TAGCGGCTAA AGGTGTTGAC  
4321 GAGGGATAGA AAGTTAGCT AAATCTTTC CATCGAAAAG CAATTAACCC ACCCGAGGGG  
4381 TGATCGAAT GGAAGAACA AGCGTGAACA TGGCGGATT GAAGGGGGAG GTTTTGCCCG

4441 CCCTCTTCGC GTCGCCGGCG ACGATTGGCG AGTACGGGGC CGGCATCGAC GGGGCGGATT  
4501 CCCTCAACGA GCTGTCGAAT CTGATGGAGC ACGGCGCAGT TGCCGCGCTG GCCGACAAAA  
4561 TCAGCCAGAT CGTGGCGAAG CTGGCCGACG CGGACCCCG CAAGATCGCG GAAAAGCCTA  
4621 CCTGGTTCGA GAAGATGCTT GGCCGTGAGG TTGAACGCCA GGTGAGGTAT CAGGTCGCCC  
4681 GCAAGACGCT CGACCAGTTG CTGACGAAG CCGAGGGCGT AGCGCAGCGC GTGCGGGACA  
4741 CGTTGCGCGC CTTGGATGAC ATGCTCAATA CGCATGAGGC CGAGGTAGAC CGGCTCAGAG  
4801 CCTACATTCA AGCCGGGCGC GAGTTCCTGG ACGAGAACCC CGAGGCCGGC GCGCCAAGG  
4861 CCGGCGTGAT CGAGTTCGAC AAGCCGCGCG AACGCTTCGC GCGCAAGCTC GCCAACCTGG  
4921 CAACCCTCAT GGCGTCCCAT GAAATGAGCG TCACTCAGAT GAAGCTCACG CGGGCGCAGG  
4981 CCGTGGACAT GCTGGACCG TTCTCTGAAA CGGCATCCGT CCTGGTGCCC GTCTGGCGTC  
5041 AGCACACCCT CGCGCTCATC ACCACCAAGA ACATGAATCC GGCAATGGTC GCCGAGGCGG  
5101 CCAAAGCTCA CCAGGCGCTC ATGCGGAGCC TTTCGACAGAG CCTGGAAGGC ATCAACCAAT  
5161 AACACGGCGG GAGAACCCTA TGAACGCACT GAAAACGACG CACGACGCCA AGGCCCTAT  
5221 CGTCGCCTTC GACATGACCC CGGCAACCCT GCGCGAGCTG GGCTTGACAG AAAGCGACGT  
5281 GCCGGAAGTC CATGCGGTCG CGCAGCGGAT CGAGGTGCGC AGTCCGACAG CCGTTGCCGA  
5341 GTTCGGCCGC GACGTGGCCG AGCACACGTC CCGCTACGCC GATAGCCTGC TGGACCAGGT  
5401 GCGCAACAGC GACCTGGACG AAGCAGGCGA GAAACTGACC CAGGTTGTCG CCAAGGCCCG  
5461 TTCCCTGAAC GTCGGCCCTT TGTCGACAA CCGTTCCCGC CTGCCCTGA TTGGCCCGCT  
5521 GATCGACCGC TTCCGCGTCC GTTCGACGGG CTTTCATGGCG CGCTTCGACA CGACCCGCGA  
5581 GCAGATCGAA CACCTGGTCA GCGAAGTGCA GACCACCCAG CAAGGCATCG CGCAGCGCAA  
5641 TGCCTCGCTC GACGAAATGT TCGCAGCCGT GCGCGAGGAA CACCGCCTTC TTGGCGTCCA  
5701 CATCGCGGCC GGCAAGGTCC GCCTTGCCGA GCTGCGCGAG CAGGCCGAGG GTCTGCGCGG  
5761 CAATGTCGGG AACGACCCGG GCCGCGTGCA GGAGCTGGCC GACCTCGATG CGATGTTTGC  
5821 CAACCTGGAC AAGCGCATCG GCGACCTGAT CGCCTTGCAA CATTGCGCCA TGCAGAGCCT  
5881 GCCGACCATC CGCATGATCC AGGCCAACAA CCAGATGCTG GTCGATAAAT TCCACACCAT  
5941 CCGCGAAATC ACCGTGCCGG CGTGGAAGCG GCAATTCATG CTGGCCTTGA GCCTCAACGA  
6001 GCAGAAGAAC GCCGTGCAAC TGGCCACGGC CATCGACGAC ACCACCAACG ACCTGATGAA  
6061 GCGCAATGCG GCCCTGCTGC ATCGCACGTC CGTCGAGACG GCGAAGGAGA ACCAACGCCT  
6121 GGTGATCGAC GTGGACACGC TCAAGCAGGT TCAGACGACG CTCATCAAGA CCGTCGAGGA  
6181 CGTTATTCGC ATCCAGCAGG AAGGCGTGCA GAAGCGCAAG GATGCCGAGA AGCAGATCGC  
6241 CGCAATGCGT GGCGATCTTC AAGCCAAGCT GACCCGCCAG CCCGTGCGCG AGCTGGCCCA  
6301 ACAGGAGTCC GTATGAATGC CACAAACACC GATGTTTTTCG CCCAGGTAGG CGGCCTCGAG  
6361 GCCCGAGGCG CGAAGATGAA GAAGCGGGGC ACCCGCTTCC TCATCGCGGC GCTGGCAGTC  
6421 CTTGCCATTG CCGGGATCGG GGCAGTAACG GGATGGGCGA TCAGCCCAG CGCGACGCC  
6481 GGAAGCATTG ACGTGCCGCA GGTGCTGGCA TCGACATTCA GCGACCAGGT GCCGGGCACT  
6541 GAGGGCGGCG GCCTGGGTGG CGGCCTGCC TCACTTCGG CCGTCGGGGC ATTCACGGAC  
6601 TTCATGGCGG GGCCGGCAAT TTTTACCTTG GGCATTCTTG GCATAGTGGT CGCGGGTGCC  
6661 GTGCTCGTGT TCGGGGGTGA ATTCAGCGGG TTCGTGCGAT CCGTCTGCAT GATGGTGATA  
6721 GCCGTCAGCA TGATTTTCGT GTCGTGCAAC TTGGTGAAGG GCATTCTCGG CGGCGATCAC  
6781 GACGCCGGCC CTGCGGAGCC TTCGCCGCGT GCGCGATTCA TGGCGGCCGT GGAGGCCAAG  
6841 GATTTTCGCG GAGTGCAAGA GCTGATCGAG GCGCGTGGAG CCAAGTCGGC GGCTGATTAT  
6901 GTCCTTGCAG AGCTCGCCGT GGCCGAAGGT CTGGACCGCA AGCCTGGTGC GCGCGTCTG  
6961 GTCGGGAAAG CGGCGGGCAG CATGGCAATG CCGCCTGCGG CGCTGGGTTT TACCCAAGG  
7021 GGAGAAGCGG CATACGCCAT CGAGCGGTCA GCCTATGGTG AGCCGAGGTC CAGCATTGCG  
7081 AAGCAGTACC AGCAGGAATG GAACCGGAAG GCGGCGACCT GGTGGGCGAT GGCCGGTGTG  
7141 GCCGCGATCA TCGGCGCGAT CCTGGCGGGC GCGGCAACCC GCTTTGTTGG GCTGGCAGTG  
7201 TCGATCCGCA ACCGAGTGAA GCGCGTGCAG GACCTGTTGG TGATGGAGCC GGGTGCAGAG  
7261 CCATAAGCGG CAAGAGACGA AAGCCGGTT TCCGGGCTTT TGTTTTGTTA CGCCAAGGAC  
7321 GAGTTTTAGC GGCTAAAGGT GTTGACGTGC GAGAAATGTT TAGCTAACT TCTCTCATGT  
7381 GCTGGCGGCT GTCACCGCTA TGTTCAACCA AGGCGCGGAG CAAATTATGG GTGTTATCCA  
7441 TGAAGAAACG GCTTACCGAA AGCCAGTTC AGGAGGCGAT CCAGGGGCTG GAAGTGGGGC  
7501 AGCAGACCAT CGAGATAGCG CGGGGCGTCT TAGTCGATGG GAAGCCACAG GCGACGTTCC  
7561 CAACGTCGCT GGGACTGACC AGGGGCGCAG TGTCGCAAGC GGTGCATCGC GTGTGGGCCG

7621 CGTTCGAGGA CAAGAACTTG CCCGAGGGGT ACGCGGGGT AACGGCGGTT CTGCCGAAC  
7681 ATCAGGCGTA CATCGTCCGG AAGTGGGAAG CGGACGCCAA GAAAAACAG GAAACCAAC  
7741 GATGAAAAC TTGGTCACGG CCAACCAGAA AGGCGGCGTC GGCAAGACTT CGACCCTTGT  
7801 GCATCTTGCC TTCGACTTTT TCGAGCGCGG CTTGCGGGTT GCCGTGATCG ACCTGGACCC  
7861 CCAGGGCAAT GCGTCCTACA CGCTCAAGGA CTTTGTACC GGCCTGCATG CAAGCAAGCT  
7921 GTTCGGCGCT GTCCCTGCCG GCGGCTGGAC CGAAACCGCA CCCGACGCCG GCGACGGCCA  
7981 GGCCGCGCGC CTCGCCCTCA TCGAGTCAA CCCGGTACTG GCGAACGCCG AACGGCTGTC  
8041 GCTGGACGAC GCCCGCGAGC TGTTGGGGG GAACATCAAG GCCCTGGCGA ACCAAGGCTT  
8101 CGACGTGTGC CTGATCGACA CGGCCCGAC CTTGGCGTC GGCCTGGCGG CCGCCCTCTT  
8161 CGCGGCCGAC TATGTGCTGT CCCCATCGA GCTTGAGGCG TACAGCATCC AGGGCATCAA  
8221 GAAGATGGTC ACGACCATTG CGAACGTGCG CCAGAAGAAC GCCAAGCTGC AATTCTTGG  
8281 CATGGTGCC AGCAAGGTGC ATGCGCGGAA TCCGCGCCAC GCGCGCCACC AAGCCGAGCT  
8341 GCTGGCCCGG TACCCAAGA TGATGATTCC GGCCACCGTT GGCCTGCGCA GCAGCATCGC  
8401 CGATGCCCTC GCATCCGGTG TGCCGGTCTG GAAGATCAAG AAAACGGCCG CGCGAAGGC  
8461 ATCGAAAGAG GTTCGCGCC TGGCTGATTA CGTGTTCACG AAGATGGAGA TTTCCAATG  
8521 ACTGCGGCTC AAGCCAAGAC CACCAAGAAA AACACCGCTG CGGCCGCTCA GGAAGCCGCA  
8581 GCGCGGCGC AGCCGTCCGG CCTGGGGTTG GATAGCATCG GCGACCTGTC GAGCCTCCTG  
8641 GACGCTCTG CGGCGTCTCA GGGCGTTCC GGCCATATCG AGCTGGACCT GGACCTGATC  
8701 GACGAAGATC CGCATCAGCC GCGGACGGCC GACAACCCCG GCTTTTCCC GGAGAGCATC  
8761 GCGGAAATCG GTGCCACGAT CAAAGAGCGC GGGGTGAAAGT CACCCATTTT GGTGCGCGAG  
8821 AACCAGGAGC AGCCGGGCCG CTATATCATC AATCACGGCG CCCGCCGCTA CCGTGGCTCG  
8881 AAGTGGGCCG GCAAGAAGTC CATCCCGGCG TTCATCGACA ACGACTACAA CGAAGCCGAC  
8941 CAGGTTATCG AGAACCTGCA ACGCAACGAG CTGACCCCGC GCGAAATTGC CGACTTCATT  
9001 GGCCGCGAGC TGCGGAAGGG CAAGAAGAAA GCGGATATCG CCAAGGAAAT CGGCAAGTCG  
9061 CCGCGTTC A TACCCAGCA CGTACGCTG CTGGACCTGC CGGAGAAGAT CGCCGATGCG  
9121 TTCAACACCG GCCGCGTGC CGACGTGACC GTGGTGAACG AGCTGGTGAC GGCCTCAAG  
9181 AAGCGCCCGG AGGAAGTCGA GGCCTGGCTT GACGACGACA CCCAGGAAAT CACGCGCGGC  
9241 ACGGTCAAGC TGCTGCGCGA GTTCTGGAC GAGAAGGGCC GCGATCCAA CACCGTCGAT  
9301 GCCTTCAACG GCCAGACTGA TGCCGAGCGT GACGCGGAGG CCGGCGACGG CCAGGACGGC  
9361 GAGGACGGCG ACCAGGACGG TAAGGACGCC AAGGAAAAGG GCGCGAAGGA GCCGGACCCG  
9421 GACAACTGA AAAAGGCCAT CGTCCAGGTC GAGCACGACG AGCGCCCTGC CCGCCTTATC  
9481 CTAAACGTC GGCCGCGGC GGAAGGCTAT GCCTGGTTGA AGTACGAGGA CGACGGCCAG  
9541 GAGTTCGAGG CGAACCTTGC CGACGTGAAA CTGGTCGCGC TCATCGAGGG CTGATCCCA  
9601 AAGACAGCGG CGCGGGCCAC CCGCGCCGCA CAGACAACGG TTCCGCTACA AGGAGGACCG  
9661 AAGAATGAAT CCGATGCTGT TCTACATCGC GGGAGGCGTA GGCGCGGCGT TGCTGCTGGT  
9721 TTCCGCGATC ATGCTGTTCA AGCTGCGCGA GCCGAAGAAG GAACACCGAC CGCAGCGCAA  
9781 GGCGGCGGCC CCGACGCCG AGCCGGTCTGA TAACGAGCTG CTGCGCACCT TTCGCCGGCC  
9841 GTCGACGGCC AGCCAACCCG AGCCATCCAC GACGCCCGC GCGCGGCGCA CTGCCCGCC  
9901 GAGCAGCGAA CAATCCAGAG GGAATGACGG CGATTTGTC ACGTCGGCC TGGTGGCCGG  
9961 GGCGACCAAC AGCACCATGC TGGGCTACCT GGCCGGCGGC TCGTGACCG GGGCCATGCT  
10021 GGGCGATGCG CTGCGGCCGG ATACGCCGTC TGCGGCGTTC GCGGACCCCT GCCTGTGCTT  
10081 CGGCAGCAGC GACACGGACA GCGGCTGGAC CGATACCGGC AGCTCTTGCG ATTTAGTTC  
10141 GTCCGACACC GATACGAACA ACTGGTGAGG GCGGACCATG ACTGACGAAC AAAAGAAACG  
10201 GCTCCTGATG TTGCAAGCTA TCCGGCGCAG CATCCAGGCA ATGCGCAGGG GTGTTTCGGG  
10261 GCCGATAGT TCAAGGGCT GGTGACCGG CATCGGCATC ATCGCGGCGG GTTCTCTGGT  
10321 TGCGGAGCTG CTGCCATCCC CTGCCCGCGG CGTCGGCCTG GTTGTGCCAG GGGCCTGCAT  
10381 TGCCGGCTTC GTCGTCGGCT GCTGGCTCAA CAGGAAAGGC CGCTCATGGC CGACAGCCAT  
10441 TTACGACCAA TTGCCCGTT ACCAGCCGCT CAACGAGCGG GCGTACCGCG ACCTGCAAGA  
10501 GACGGTGAAG GAACGCGGCC TCGACTGCGA TGCGGTCATG GAGTGGACCT ACATCGAGCA  
10561 GGCCGAGTTC ATGCCCTGG TGCCACCGAG GGAGGACCTA GCGCGGACA AGTTCCTGAC  
10621 CGCGACGCGG GCCGATAGGG CCGAGGACGA TGCGGTCGCG CGCTTCGTCG TGCTCCATCC  
10681 CAAGAAGCGC GGCCCCGACG CATGAAGAAG CCCGACGCC GCTAATCCCC TTCCGCTGA  
10741 CCCTTGGCC CCGCCGACCG TGCGGGGCTT TTTTGCCTG CCCTCAGCC GCTAAAAAC

10801 CTGCCGTTAA GTCGAGA AACT GTTCAGCTAA ACTCTTGCGC TGATAAGGTA GGTAAGAGTA  
10861 TTATTATTCT TACCAATTAC CGGAGCCAAC ATGGA AACTGA ACAAAGAGAC GCGCGACCGC  
10921 ATTTTGGCGG CTGCGGACGA GCTGTTTCGAG CAAGGCGACC GGGAGAACTT CCCGACCGTG  
10981 GATGCAGTGC GTAAGGCCGC CCGCGTCAAC ATGAACGACG CCAGCGCCGG CATGCGCGAA  
11041 TGGCGACGCC AGCGCACGGC GCAGGCCGCC CCGCTGGCAG TCCAGGTGCC GGACGCGGTG  
11101 CAGCAGGCCG GCAACCAGGC CGTGGCCGCC CTCTGGCAAG CCGCCAGGC CTTTGCCAAT  
11161 GAATCGTTGC AGGCAGCGCA AGCCGGCTGG GATCGTGAGC GCAACGAGTT GGAAGCCGTG  
11221 CGCGGGGAGC TGGCCGACGC CTTCGAGGCG CAGGCCCGCG AGCTGGAAGA AGCCAGGGC  
11281 CGCGTTACAT TGCTAGAGCA GCAGGCCGCC GAGGCGGCCG AGCTGGCCGC ACGCCAGCGG  
11341 CAAGCCCTGG CCGAAGCACG CACCGCCTG GCAGGAGCCG AGCAGCGGGC CGCGCTGGCG  
11401 ACGCAGCGGG CCGACGAGGT GGAGCGTCGA GCGCAGGAGC TGCGCGCCGA GCTGGACTAC  
11461 GCTCACCAGG ACGCCGCGC ATTC AAAGAA GAGAGCCGA AGACCCTGGA CGCGGCCAAC  
11521 CAGGAAATGC AGGCGCTTCG CGGCGAGCGC GACGCCACCA GCGCGAAGC GGAGAGTTTG  
11581 CGCACGGAGT TGGCAGCGGT GAAAGCGAAG GCGCAGGCCG ACGCCGAGGC CCACCAGGAG  
11641 CAAAGGAAGT TGGCGGCGCA AGAGGCGGCC AGGCAGGCCG AGCGCTTTAC GACGGTGCAA  
11701 GCCGAGCGTG ACGAAGCGCG GCAAGAGGCA AAGG CAGCCC AAGAAGAGGC CGCTATGTTG  
11761 AGGGGTCGGC TAGACGCGGA AACGAGTGGG AGGAAACACA AAGCGGGAGG AAAGTA AACTG  
11821 ATAAATCGAA CGCAGTTCAC TAAATAGAT GGAACAACCT TGACGCGCCC GGCTTAGGG  
11881 AAAGCCGGCC TCGAACTGCC GAGGTCGGCT TTTTTTTCGAG CGGCAAGCGA CCAGGACAGC  
11941 TTTAACACCA GAGGCAACCG TCAGGAGTCA CCCAATGAAA CACCGCCTCC TGGT CATGAA  
12001 TGGGCAAAGA ATTGTCCAGA CCGAGAACCA AGGCGCATGG ACGAACCAGA AGGTAGATAA  
12061 AGCCGGGGCC CTGAAACCTG GCATTTACAA CATCTATATG GCCAAAAGG CCGATAAGTC  
12121 GCAGCGCCAC GACGGCAGCA TCGTCCACGC AGATAGCGGC AGCATTTACC AACAGGTGGG  
12181 GAAGA AACTTT GTAATGCACG CCCGGTCAGA TTTTCGATAAA GTACCTGAAA TCGGGAGTGC  
12241 GAAAAGCATC ACCTATGACG CAAGTGGCAA GGCACAGGTA AGTGCCGAAA GCGTCAAGTT  
12301 GAGTCGCGGG CGCACTCGTT AGAGTTTTAG CGGCTAAAAA GGGAGGCGTC TTGAGCAGCT  
12361 ACAGCAGAGC CGAGCGCGCA CCGTGGGGAG ACTTCCCGAA GGTGGTTCGC AACGGCGACC  
12421 TTGGTTCTTT GACCAACGAG CTGAATACC AGGTGCGAA GCAGGGCGAC GCGGAAGCGG  
12481 CGCTTAATTT GGTGAGCGC CTGATTTCCG ACGA CACTGT TGCCAGCTC AAGACGCTGA  
12541 TCGGCGACGA CAAGCCCCGC ATCGTTCCAG TCCTCGCCGT CGAGGCGGCG GGGAAACA  
12601 AGATTCCGGC CATGATGGCG GTCGTTCTGG CCGACCGCCT TGGCCTTGAG GTCGAAACGG  
12661 ACATTGTGCA GCGGGAGAAG GTCGCCCCGAA CCGGAGCCGG TTCAGATCAT CGCCTGGCGT  
12721 TCAACCCGAC TTTTCGAGGGG GAGGTGATCC CCGGCCAGAA GTACATCGTT GTCGATGACA  
12781 CGCTGACGAT GGGCGGCACC ATTGCCTCAT TACGCGGCTA CATCGAGAAC AACGGCGGCA  
12841 AGGTCATGGC GGCCTCCGTC ATGACCGCCC ATGAAGGCGC GCTTGACCTG GCGGTCAAGC  
12901 CGAAGATGCT TGCGGGCATC AATGAGAAAC ACGGTCCAGC AATGGACGCA TTTTGAAGG  
12961 AAACCTTTGG CTATGGCATC GACCGACTCA CCAAGGAGA AGCCGGACAC CTCCGCGCTG  
13021 CCCCCTCCGT TGACGCAATC CGAGATCGCA TCGCTGCGGC TCGAAATGAA GCAGTCAATC  
13081 GAGTGGGGGC AAGCCGAACT GCGACGACGG CGCGAGCAGG GCAACAGCAG TCCCCGGCAG  
13141 TAAAGCAGTC CAGCGGCAAC AGCGGCGAGG ATTTGCTACA GCGGCCCCAG GAGGCCGAGA  
13201 CGGAACAGCA GGCCCTCTTA GAATCCGCGC CCATCGAGCA GACCTACCAG CAGACCCTTG  
13261 CGCTCTACGT GCAGGCAAAG CATGACCAGG TGGAGCGCAT CGAGGACCGC CTAGAACAGC  
13321 TCGTAGACCG TCAGCAGGCG CGTTTG CAGC AGCTACAGTC CAATGCCCCC GGCTTGCTGT  
13381 CCCTGCCGCG TACAAAGGCC GCCTGGCAGC AGCAGCAGGC CCAACAGCAA GCCCGCTTGC  
13441 AGACCCTGCA CACGCGGCTG GACATGGTGC GCGAAATCAA GGAAGGCATG GGCATTACAG  
13501 CGCCAAGAT CGAGGAACTG GCGACGCGCA AGATGCGCGC GGAGCATCCC GAGCTGGCCG  
13561 GCGACTGGGA TTCGATGCGT GAAGCAGCCC GACGGCACCA GGCCCTGATG CGCAAGCAGG  
13621 AGCAGGAGAA GAAACAGGCC CAGGAGCGCG AGCGCGGGCG CAGTCAGAGC TTGGCCTGT  
13681 CAAACAAGCC CAGCTAACGC AAAAACAAAG CCCGCAACG CCGGGCTTTT TCATCTGCGC  
13741 CTCTGCGATT CATAACGAGG CCCACACCAC CAGGGCGGCC GCGAACAACA CCATGCCGCC  
13801 GCGGATCATG TTCATCATCG CCACGCGCCG CGCGTCCGCG ACCTTGCCG CGAGCTGGCG  
13861 GCCAAGGCCG TCGTCGATTT CCCTGCGGAT CGCTTCGGCC GCCTGCGCGG CGCTGCCTT  
13921 CATTACCTC GCCATTGCGT CCTTGCTGGC CGCCAGGGCC GCGTTCAGCA TCCGCTCCG

13981 TTTGGCCTTG GCGTCCTCGC CCCAACGATG GGCGATCCCT TCCAGCTCTT CCTTGAACGC  
14041 GGCAAGGATT TCCTCTTGCT TGGCCGCACT GTCGGCCATG AGCCGGGCGT TGATGGTATG  
14101 CAGGATCAGC ACCGGGTCGT CGCGGCCGAC GGCGATGCCG TGCTTGGCCG CAATCTCCCG  
14161 GATCAGCTCT TCAATCTGGT CGCTCATAGC ACGGCCGCGG CGTCGAGCTG TTCAAACAGG  
14221 CCGCGCCGCA CGATCTTGAG GCGTTGCCG GTCATGATCG TGAGCGATTC ATCGGCCAGC  
14281 GCCTGGTCGA ACGTCAGCCG CTCTTGACAG ATGTGCTGA AATCGCGGCC GTAGTTTTCT  
14341 TCCTTGAGGG CCGGAATCTG GATGATGGAC GACACGCGGG CCTTGTTGGC CGTGTACGCC  
14401 TTCATCTGCT CAAAGCTCTT GCCCTCATGC TCGATAGGCC CCCAATACGG GTTCAGCCAG  
14461 ACCACGAAAA GCGCTTCGGC CGGGAACCTG CTGGCGAGCT GGGCGAAGCC GCTCACCGTG  
14521 TCCAGGAGAG CCTGGCCGCC GGTGACGACG GTATGGATGA CCAGCTCATG CCCATTCT  
14581 TGCAGCAGAG CCGGCACCTG GTTGCTGATG AGGTAATGCG ACAGAGGCAC GAACGAGCTG  
14641 GCACCGTTGT CGATCACCAC GTCATCCTTG GTCGGCGCAA TCAGCTCGAC CAGGGTGTG  
14701 AAGTTGCGCG AGTTAATTTT GTCGCCGGCC ATGATGTTCA GCCGGCGGAC GTTCAGGGCC  
14761 TTGTAGCCCT CGAACGTCGC GTTCACCGGG TCGGTGTCGA TGCACAAGGG TGTCTGCC  
14821 TTGTCCATCT TGTACTGCGC AATGATCGCG GCGATGGCCG ACTTGCCGAC CCCGCCCTG  
14881 CCCTGCAAAA CCATGTGAAT TTTGCCATT ACAGTAGATC CTTTTGTCC GGTGTTGGGT  
14941 TGAAGGTGAA GCCGGTCGGG GCCGCGCGG GGGCCGCTT TTCAGCCTTG CCCCTGCT  
15001 TCGGCCCGCG TGGCTCCGGC GTCTTGGGTG CCGGCGCGGG TTCCGAGCC TTGGCCTGCG  
15061 GTGCGGGCAC ATCGGCCGGC TTGGCCTTGA TGTGCCGCT GCGTGCAGAG CGAACGCTCT  
15121 CGTAGGAGAA CTTGACCTTC CCCGTTTCCC GCATGTGCTC CCAAATGGTG ACGAGCGCAT  
15181 AGCCGGACGC TAACGCCGCC TCGACATCCG CCCTACCGC CAGGAACGCA ACCGAGCCT  
15241 CATCACCGCG GCGCTTCTG GCCGCGCGGG ATTCAACCCA CTCGCCAGC TCGTCGGTGT  
15301 AGCTCTTTGG CATCGTCTCT CGCTGTCCC CTCAGTTCAG TAATTTCTG CATTTGCTG  
15361 TTTCCAGTCG GTAGATATTC CAAAAACAG CAGGGAAGCA GCGCTTTTCC GCTGCATAAC  
15421 CCTGCTTCGG GGTCAATATA GCGATTTTT CGGTATATCC ATCCTTTTC GCACGATATA  
15481 CAGGATTTTG CAAAAGGGTT CGTGTAGACT TTCCTTGGTG TATCCAACGG CGTCAGAATT  
15541 CGGCAAGCGG ATGGCTGATG AAACCAAGCC AACAGGAAG GGCAGCCCAC CTATCAAGGT  
15601 GTACTGCCTT CCAGACGAAC GAAGAGAGAT TGAGGAAAAG GCGGCGGCGG CCGGCATGAG  
15661 CCTGTCGGCC TACCTGCTGG CCGTCGGCCA GGGCTACAAA ATCACGGGCG TCGTGGACTA  
15721 TGAGCACGTC CGCGAGCTGG CCCGCATCAA TGGCGACCTG GGCCGCTGG GCGGCCTGCT  
15781 GAAACTCTGG CTCACCGACG ACCCGCGCAC GGCGCGGTTT GGTGATGCCA CGATCCTCG  
15841 CCTGCTGGCG AAGATCGAAG AGAAGCAGGA CGAGCTTGGC AAGGTCATGA TGGGCGTGGT  
15901 CCGCCGAGG GCAGAGCCAT GACTTTTTTA GCCGCTAAAA CGGCCGGGGG GTGCGCGTGA  
15961 TTGCCAAGCA CGTCCCCTG CGCTCCATCA AGAAGAGCGA CTTGCGGAG CTGGTGAAGT  
16021 ACATCACCGA CGAGCAAGGC AAGACCGAGC GCCTGGGTCA CGTGCAGGTC ACGAACTGCG  
16081 AGGCAAACAC CCTGCCCGCT GTCATGGCCG AGGTGATGGC GACCCAGCAC GGCAACACCC  
16141 GTTCCGAGGC CGACAAGACC TATCACCTGC TGGTTAGCTT CCGCGCGGGA GAGAAGCCCG  
16201 ACGCGGAGAC GTTGCAGCGC ATTGAGGACC GCATCTGCGC TGGGCTTGGC TTCGCCGAGC  
16261 ATCAGCGCGT CAGTGCCGTG CATCACGACA CCGACAACCT GCACATCCAT ATCGCCATCA  
16321 ACAAGATTCA CCCGACCGA AACACCATCC ATGAGCCGTA TCGGGCCTAC CGCGCCCTCG  
16381 CTGACCTCTG CGCGACGCTC GAACGGGACT ACGGGCTTGA GCGTGACAAT CACGAAACGC  
16441 GGCAGCGCGT TTCCGAGAAC CGCGCAACG ACATGGAGCG GCACGCGGGC GTGGAAAGCC  
16501 TGGTCGGCTG GATCAAGCGC GAATGCCTGC CGGAGCTGCA AGCGGCGCAA TCCTGGGAGG  
16561 ACCTGCACCG CGTCTGCGG GAAAACGGGC TTAAGCTGCG CGAGCGCGGA AACGGCTTCA  
16621 TCTTCGAGGC CGGCGACGCG ACGACGGTCA AGGCCAGCAC CGTTTCGCGC GACCTGTCCA  
16681 AGCCGAAGCT CGAAGCCCGA TTCGGGGCAT TCACGCCAGC CGAGGGCGGC GAAGCCCCC  
16741 GGCGGCGGGA GTATCGAGCG AAGCCGCTCA AGACCCGCAT CGACACCACC GAGCTATACG  
16801 CCCGGTATCA GTCTGAACGC CAGGAAATGG GGGCCGTGCG CAAGGGCGAG CTGGACACGC  
16861 TGCGCCGCGC TCGTGACCGC CTGATTGAAG CCGCGATGCG CAGCAACCGG CTGCGCCGCG  
16921 CCGCTATCAA GCTGCTGGG GAGGGGCGCA TTGCAAAGCG ACTGATGTAC GCGCAGGCGC  
16981 ACAAGGCTCT GCGCGCCGAC CTGGACAAGA TCAACCGCGA GTACCGGCAG GGCCGTCAGG  
17041 CGGTCCAGGA GCGCACGCGC CGCCGCGCGT GGGCCGACTG GCTCAAGGCC GAGGCGATGA  
17101 AGGGCGACGA CAAGGCCCTG GCCGCGCTGC GCGCACGCGA GGGCCGAGC GACCTCAAGG



17161 GCAACACCAT CCAGGGCAGC GGCGAGGCCA AGCCGGGCCA TCGGCGCGTG ACGGACAACA  
17221 TCACGAAGAA GGGAACCATC ATCTATCGCG TCGGCAGCAG CGCCGTCCGC GACGACGGCG  
17281 ACCGCCTGCA AGTCTCGCGC GAGGCCACCA CGGACGGCCT GGACGCCGCC CTGCGCCTGG  
17341 CAATGGAGCG CTTCCGGCGAC CGGATCACCG TCAACGGCAC AGCAGAGTTC AAGGAGCGGA  
17401 TCGCGCAGGC GGCCGCCGCT GGCCGTCTGG CAATCACCTT TGACGACGCC GCCCTTGAGC  
17461 GCCGCCGTCA AGAACTACTG ACGAAGGAGC AAGCACATGA GCAACCCGAA CGAAATGACG  
17521 GACGAAGAGA TCGCGGCGGC GATGGAGGCA TTCGACCTGC CGCAGCCAGA ACCACCCTCA  
17581 ACGCCACAGG CGGCGACGGC GACCGACGGG ACGCTCGCGC CGTCAGCGCC GGCGGAACCG  
17641 TCGCACTCCG CAAGCCCAAC GTTGGACGCA TTGGACGAAA GCCGCCGCC CAAAGCCAAA  
17701 ACCGTTTGCG AGCGTGTCC CAACTCGGTG TGGTTCGCAT CGCCGGCGGA GCTGAAATGC  
17761 TATTGCCGCG TGATGTTCTT GGTCACGTGG AGCAGCAAGG AGCCGAACCA GCTCACGCAC  
17821 TCGCAGGGGG AGTTTCTGGG CCAGGAAGAG GGCTAAAGCC CGAACAGATC GCGGCGGGCC  
17881 AGAAATATGT TGCCGAGCGC GAGCAAAAGC GGCTAAACGG CTTGATATA CCGAAGCATG  
17941 CACGATATAC TGATTATGTT GGTGCGCTGT CCTATGCAGG CACCCGGAAC GTCGAGGACC  
18001 AGGCGCTGGC CCTGTTGAGG AAAGAAAACG ACGAGATTCT GGTGCTGCC GTCGATAAGG  
18061 CCACGGTGCA ACGCATGAAG CGCCTCGCCA TCGGTGATCC CGTCACCGTG ACCCCGCGAG  
18121 GCTCCCTTAA AACTACCCGA GGTAGGAGTA GATGAAGAAC CGAAACAACG CCGTGGGGCC  
18181 ACAGATACGG GCGAAAAAAC CGAAGGCCAG CAAGACCGTT CCCATCCTCG CCGGCCTGTC  
18241 CTTGGGGGCA GGCTTGCAGA CCGCGACGCA ATATTTGCC CATTCTTCC AGTATCAGGC  
18301 CGGACTTGGC TGAATATCA ACCACGTCTA CACGCCCTGG TCGATCCTC AATGGGCGCG  
18361 CAAGTGGTAC GGCCAATATC CCGACGATTT CATGCGCGCG GCCAGCATGG GTATGGTCGT  
18421 TTCGACCGTG GGCCTGCTGG GCACGGCCGT CACGCAGATG GTCAAGGCGA ACACCGGCAA  
18481 GGCGAACGAC TATCTGCACG GTTCGGCCCG CTGGGCCGAC AAGAAGGACA TACAGGCCCG  
18541 CGGCCTGCTG CCCC GGCCG GCACCGTCGT CGAGCTGGTG TCAGGCAAAC ACCCGCCAC  
18601 TTCAGCGGC GTCTATGTGG GCGGCTGGCA GGACAAGGAC GGCAAGTTC ACTACCTGCG  
18661 GCACAACGGC CCCGAGCACG TCTTGACCTA CGCGCCGACG CGTCCGGCA AGGGCGTCGG  
18721 CCTGGTCGTT CCGACGCTGC TTTCTGGGC GCACAGCGCC GTCATCACCG ACCTGAAAGG  
18781 CGAGTTGTGG GCGCTGACCG CCGGTGGCG GAAGAAGCAT GCCCGCAACA AGGTCGTGCG  
18841 CTTGAGCCG GCATCCGCGC AGGGTAGCGC GTGCTGGAAC CCGCTCGATG AAATCCGCTT  
18901 GGGGACCGAG TACGAGGTTG GCGACGTGCA GAACCTTGCC ACCCTGATCG TCGATCCGGA  
18961 CGGCAAGGGC CTGGAATCGC ACTGGCAGAA AACCAGCCAG GCGCTGCTTG TCGGCGTCAT  
19021 CCTGCACGCG CTCTACAAGG CTAAGAACGA GGGTACGCC GCCACCCTGC CGTCGGTGGGA  
19081 CGGCATGCTT GCCGACCCGA ACCGCGACGT GGGCGAGCTT TGGATGGAAA TGACCACCTA  
19141 CGGCCACGTT GACGGGCAGA ACCACCCTGC GTTCGGCTCT GCGGCCGCG ACATGATGGA  
19201 CCGCCCGGAG GAAGAATCCG GTTCCGTGCT GTCCACC GCCAAGTCTACC TGCCCTGTA  
19261 CCGGACCCG GTTGTGGGCC GCAACGTGCA CAAGTCCGAC TTCCGCATCA AGCAACTGAT  
19321 GCACCACGAC GACCCGGTAA GCCTGTTTAT CGTGACGCGA CCCAACGACA AGGCCCTCT  
19381 GCGGCCTCTG GTGCGGTCA TGGTCAACAT GATCGTCCGG CTGCTGGCCG ACAAGATGGA  
19441 CTTGAGAAC GGCCGTCTG TCGCGCACTA CAAGCATCGT CTGCTGATGA TGCTCGACGA  
19501 GTTCCCAGC CTGGGCAAGC TCGAAATCCT GCAAGAGTCC CTTGCCTTCG TCGCCGGCTA  
19561 CGGCATCAAG TGCTACCTCA TCTGCCAGGA CATTAAACAG CTCAAGAGCC GCGAAACCGG  
19621 CTACGGCCAC GACGAAAGCA TCACGTGCAA CTGCCACGTG CAGAACGCCT ACCCGCCGAA  
19681 CCGCGTGGAG ACGGCCGAGC ACCTGTCAA ACTGACAGGC ACCACGACCA TCGTGAAGGA  
19741 GCAGATACG ACGAGCGGCC GCCGACGTC GGCGCTGTTG GGCAACGTCT CGCGGACCTT  
19801 CCAGGAAGTG CAGCGGCCAT TGCTGACCCC CGATGAATGC CTGCGCATGC CGGGGCCGAA  
19861 GAAGAGCGCC GACGGCAGCA TTGAAGAGGC GGGCGACATG GTTGTGTACG TCGCCGGCTA  
19921 TCCGCGATC TACGGCAAGC AGCCGCTCTA CTTCAAAGAC CCGATATTCC AGGCCCGCGC  
19981 GGCCGTACCG GCTCCGAAGG TCAGCGACAA GCTGATCCAG ACGGCCACCG TCGAGGAAGG  
20041 GGAGGGGATC ACGATATGAG CCGCTTCCAG CGCCTACCA AGTACGTCGC CATCGGAGGC  
20101 GCGCGGCCT TGTGCTCGC CGGCGCGCC TATCTCGCC GCGCGAAGGT CAACACCACC  
20161 AAAAGCATT CGGTCGCTT GACTGGAAA TCGAATGCGC CGGTGGAGAA GGGGGCTTAC  
20221 GTCATGTTCT GCCCGCCGA AGTCGGCGTG TTTTCGGACG CCAAGGAGCG GGGCTACATC  
20281 GCCGGCGGTT TCTGCCCGG CACTACGGC TACATGATGA AGCGAGTTTT AGCCGCTAAA

20341 GGCACGAGG TTGCCATCAC CGACGCCGGC GTGCGCGTGA ATGGCGGGCT GCTGCCTCAC  
20401 AGCGCGCTCA TCAAGGCCGA TCCATCAGGA CGGCCGCTGC CTCGTTATCA GTCCGACAGC  
20461 TACACCCTGG GGACCGCCGA GGTTCGTCTT ATGTCCGACG TAAGCGACAC GTCTTTTCGAC  
20521 GGCCGCTACT TCGGGCCTGT CAATCGTTTCG CAAATCATCA CCGTCATCAG GCCGGTTCTG  
20581 ACCTGGTGAG GGTAGGGGGA TATATGCAAT TTGAACGCTT TGTAATCGCT GAAAAACCGG  
20641 AGCTGGCAAA AGCCATCGTC GAGGGCCTGG GCGGCGGCAG CCGCAAGGAC GGCTATTACG  
20701 AATGCGGCTC CGACCGCGTG ACCTGGTGCT ACGGTCACAT GCTGGCCTTG CTAGACCCGG  
20761 AGGACTACGA CGAGCGCTAC GCCAACTGGA ACATGGCCGA CCTGCCATC GTCCATATTC  
20821 CCTGGCGCAA GAAACCGTCC GCGGATGCCG GTGCGAAAGC TCAGTTCAAG ACCATCCTCA  
20881 GCCTGTTGAA GCAGGCGAAA AGCGTGTTTC ACGCCGGCGA CCCGGACGAC GAAGGCCAGC  
20941 TTCTGGTCGA TGAATCCTG GAATACGCCA ACTGCCGTCT GCCGGTGACG CGGCTGCTTA  
21001 TCAACGACAA CAACGTGAAG ATCGTGCGCC GGCAGCTCGC GCGGATGCGC GACAACCGCG  
21061 AGTTCGCCGG CCTGTCCGCT GCGGCCGAGG CCCGCAGCGT CGGCGACCAG CTATACGGCT  
21121 TCAACATCAC GCGCCTGTAC ACGCTTTCGG CACGCGCGAA GGGCTATCAG GGGCTGTTGA  
21181 GCGTGGGGCG CGTGCAACT CCGATCCTGG GCCTTGTCTG GCGCCGTTGC CGCGAGAACG  
21241 CGGCCACCA GAAAACCTAC TACTACCTGG TGAACGGCCA GTTCGAGGTC GAGGGCATTG  
21301 AGTTCGCCGG CCTGTCCGCT GCGGCCGAGG CCCGCAGCGT CGGCGACCAG CTATACGGCT  
21361 GCAACAAGGA GCACGCCGAG GGCATCGCGG CCGCCGTGAG CGGCCAACCC GCCCGCATCG  
21421 TGTCCGTGAC CACCAAGGCG AAGGAAGCGG CTGCGCCGCT GCCCTACAAC CTGCTGAAAC  
21481 TGCAAATGGA CGCCTCGCGC AAGTTCGGCT TCAAGCCGGA CCAGGTGAAG GACATTACGC  
21541 AGGCCCTGCG CGAGAAGCAC AAGCTCATCA CCTACAACCG TTCCGACTGC GAATACTTGA  
21601 GCGAGGAACA GCACGGCGAT GCGCCGGGCG TGCTGGCGGC CATCGCACAG ACGGCCCCCA  
21661 TGCTGGCCGC TGCTGCGCAG GCGCCAATC CGACGATCAA GAGCCGCGCC TTCAACTCGT  
21721 CCAAGTTTC GCGCACCCAC GCGATCATCC CGACCGAAAG CACGGCCGAC CTGTCGAAGC  
21781 TCACCGATGC CGAGCAGAAG ATTTACCTGC TGATCGCGCG CGCCTACGTC GCGCAGTTCT  
21841 GGCCGAAGCA TCTGTATGAC CAGACCGACG TGCTTGCCCA GGTGCGCGAT CATCGTTTCG  
21901 GCGTGCCTC GAACGTCACC ACGTCGCCGG GCTGGAAGAT TCTCTACAAG AACGACGCCG  
21961 GCAACGAGGA CCTGGAAGGC AATGCCGACG ACATTGAACA GGACCTGCGC AAGCTGCGTG  
22021 ACGGCCAGGC CGGCACCTGC ACCGATGCGA AGGCCGAGCA GCAGGAGACG AAACCGCAGC  
22081 CGCTGTACAC GATGGAATCT CTGCTGTCGG ACCTTACCCG CGTTGCGAAA TACATCCGCG  
22141 ATGACCGCCT GCGGAAAATC TTGATCGAAA AGGACAAGGG CAAGCAAGGC GAGCACGGCG  
22201 GGATCGGCAC GCCGGCAACG CGAGACTCCA TCATCGCCAC GCTTTTCGAG CGCGGCTACC  
22261 TGGTGGAGAA GGGCAAGCAC ATCGTGTTCA CGCCGACCGG CGAAGAGCTG TACGACGAC  
22321 TGCCCGACAC GGCCAGATTC CCCGACATGA CCGCGCTCTG GCATGAGCAG CAGAAGGCCA  
22381 TCCAGGCCGG CGAGCGCGAC ACGCTGTCTG TCGTCAACGA GCTGATGGAA TACATCGGCG  
22441 CCGAGGTCGC CAACATCAA GACAACGGCC TCAACATGAA GATCGACACG CACCCTTGCC  
22501 CGTCTGCGG CAAGCCGCTG CGACGCTCA AGAAGAAGGA CAAGAACGAA TACTTTTGGG  
22561 GCTGCACCGG CTTTGCCGAC GGCTGCAAGT TCGCGTGCGA CGACAAGGGC GGCAAGCCCG  
22621 TCCGCGCGA GGCCCGAAA GTCTCCGAGC TGCACAAGTG CATGGCCTGC GGCCACGGCC  
22681 TTTCCGTCG GCCTGGCAAG AAGCGCGGA TGTTCTGGTG GGGGTGCAGC AACTTCCCGA  
22741 CGTGCAAGCA GACATACCC GACCTGAAAG GCAGGCCGGA CTACAGCAA GGCCGTAACG  
22801 GCACCAACCA GGAGTAAAAG CGATGAATGA TCCAAGACC GTGACGACAG ACGACTTTGC  
22861 GCCGTTGAC GATACCGCGA ACGCCGCCG CGCCCTGCGT GAAAAGCTCG CCGATGCGAT  
22921 GACGCCCGG TTCCAGGTCG AGTTGACCC GGAAGAAGCG GAGAAGGCCG GGGCCTTCCC  
22981 CGAGGACGCC TTGAGCGAGC AGGACGCCG CGAGAGCGAC ATTGACCTGG TGGACGCGAC  
23041 CGTGCCCGAG GACACGACGA CCGCGGCCG CAATGACGGG AGGTAATTGG CTATGCGAGA  
23101 GGTCAAAAAG CCGTTCCACG AGCAGTTGCG CGAACGCCTC ATTGAGCAAC TGAAAGCCGG  
23161 CACTGCGCCG TGGCAAAAAC CGTGGAACC GGGCATGCC GGCTCCTTCA TCCCGTCAA  
23221 CCCGACTACC GGAAGCGTT ACAAGGGCAT CAACGCGATT CAGCTCATGG CCCAGGGCCA  
23281 TGCGGACCCG CGCTGGATGA CCTACAAGCA GGCCGCTGCC GCCGGCGCAC AGGTGCGTGC  
23341 CGGCGAGAAA GGCACGCCGA TCCAGTATTG GAAGTTCAGC GAAGAGCAGA CCAAGACCGA  
23401 CGAGCAGACC GGCAAGCCGG TCCTCGATGC CAACGCGGAT CCGGTCAAGG TGACGGTGCA  
23461 GCTCGAACGC CCGCGCGTGT TCTTCGCCAC CGTGTTCAT GCGGAGCAGA TCGACGGCCT

23521 GCCGCCGTTG GAACGCAAGG AACAGACTTG GAGCGCCGTC GAGCGGGCCG AGCACATCCT  
23581 TGCGGCGTCA GGTGCCACCA TCCGCCACGG CGAGCAGCAG CGCGCGTTTT ATCGGCCGTC  
23641 CACGGACAGC ATCCATCTGC CCGACAAAGG CCAGTTCCCG AGCGCCGACA ACTACTACGC  
23701 AACCGCGCTC CATGAGCTGG GGCACCTGGAC CGGCCACCCG TCGCGGCTGG ACCGCGACCT  
23761 GGCGCATCCC TTCGGGAGCG AGGGGTACGC CAAGGAAGAG CTGCGGGCCG AGATTGCCAG  
23821 CATGATCCTG GCGCAGCAGC TGGGCATCGG CCACGACCCC GGCCAGCACG CGGCCTATGT  
23881 CGGATCGTGG ATCAAGGCGC TACAAGAGGA CCCGCTAGAG ATTTTCCGCG CGGCCGCCGA  
23941 CGCGGAGAAG ATCCAGGATT TCGTCTGGC GTTCGAGCAG AAGCAAATC AAGAACAAC  
24001 GACCCAGCAG GCCATCGAGC CTGCGCAGGG GGCAACTATG GAGCAACAGC AAGACCAGGT  
24061 GGCACGACCG GCCATTGCGC CGGCCGACGA GCTGATCGCG CAGACCCTGC GCATGTACCG  
24121 CGCCGGCGCG GAGCCGGCGG AAGGCAACCA ATCGCTGGCC GCGCTGACCG AAACCACGCT  
24181 GGGCTTTGAG CTGCCTGCCG ATTGGACCGG CCGCGTCCAG GTCCAGGCCA ACGTCGAGGT  
24241 CGAGCACGAC GGCGAACGGT CCGTGGTGCC GGCCGGCGAC CGAGAGCCGG AGTTTTGGGG  
24301 CGTCTATGCG AACCATGCGT GGGGCGGCCA CCAATGGCTT GCCGACTTCG CCGGCCCGA  
24361 CGCGCAGACC AATGCCGAAG CGCTCGCCGA CCGCTGGCC GTGATCGACG CTTACGCGAC  
24421 GGCCAACGAG TACGAGCAGG CCGCGAAGTT CGCCGCATC CATGAAGAGC GAGTTCGCCG  
24481 CGATCCCAAC AGCACCGACG AGGACCGCGT TGCCGCCAAG GAGGCGCGCA AGGCCGCCGA  
24541 GGGCACGGCC ATGCTGCACG ACGAGGACCT ACAGCGCCGG ATCGCCGACT ACGAGCGCGA  
24601 GCAGCAGGAA ATGGCCAGG CCATGAACGC CGCCGAGCAG CCGGCGGCCG CTAAGCCCC  
24661 CGCCAAGCCC GAGCGCGCCT ACTTGAACGT GCCGTTCAAG GAGAAAGACG AGGTGAAGGC  
24721 CCTTGGAGCG CGCTGGGACC GCCAGGAACG CGCCTGGTAC GTTCCGGCAG GGGTTGACCC  
24781 TGCCCCGTTT GCCAAATGGG CGCGCGAGGG CGCTACAGCG GCCGTAGAGG CCCGCGCCGA  
24841 GGCCAGCCT ACCCAACCCA CGGCCGAGCG CCCCACGCG GCCCAGGAGC GCGTCTACCT  
24901 GGCCGTGCC TACGGCAGC GCCAGTTGC CAAGGCGGCC GGCAGCAGT GGGACAAGGT  
24961 GGCCAAGTCC TGGTACGCC GACCGAACGC CGACATGGGC AAGCTGCAAC GCTGGCTGCC  
25021 GGACAACGTG CCCACCCAGC AATCCCCGGC CGTCACCCCC GAAGATGAGT TCGCGGAGGC  
25081 CCTGAAAAGC ATGGGCTGCG TCGTACCCC AGGCGGCGAG CACCCATCA TGGACGGCAA  
25141 GAAGCACCGC ATCGAGACCG AGGGCGACAA GAAGGGCGAG AAGTCGGGCT TCTACGTCGG  
25201 CCACCTCGAC GGCCACCCGG CCGGTTACAT CAAAAACAAC CGCACCGGCG TCGAAATGAA  
25261 GTGGAAGGCC AAGGGCTACG CCCTGGACCC CGCCGAGAAG GCCAAGATGC AGGCCGAGGC  
25321 GCGCGCCAAG CTGGCCGCGC GTGCCGAGGA ACAAGAACGC CAGCACGAAG CCACGGCGCA  
25381 GCGCATCGGC CGCCAGGCGC AAAGCCTGGT TCCATCACG GAACCGACGC CGTACCTGCG  
25441 CGACAAGGGT CTACAGGTGC ACGCCGGCGT CTTACCGAC CAGGAGGGCC AGAAAACTA  
25501 CATCCCGGCC TACGACGCCG ACGGCAAGCA ATGGACCATG CAGTACATCC AGGAGGACGG  
25561 CACCAAGCGC TTCGCCAAGG ACAGCCGCAA GGAAGGATGC TTCCATGTGC TCGGTGGCAT  
25621 GGATGCGCTC GCGGCCGCGC CGGCGTGGT GATCGGCGAA GGCTATGCCA CCGCCGCCAC  
25681 AGTGGCCGAA GCGCTGGGGC ACGGACTGT CGCCGCGTTC GATTCCGGCA ACCTACAGGC  
25741 TGTTGCCGAG GCCCTGCACG CGAAATTCG GGACAAGCCG GTTGTGATCG CCGGCGACGA  
25801 CGACCGCCAG GTGCAGATCA CCCAGGGCGT GAATCCCGGC AGGACGAAGG CACAGGAGGC  
25861 CGCCAAGGCG GTCGGCGGCA AGGCCATCTT CCAATCTTC GCGCCGGGCG AGAACGCCTA  
25921 CCCGAAGGAG CTGCCGCCGA TCACCCCGGA GAACTACCGC AACCATTTGC ACGTGAAAA  
25981 GCGCCTCGCG GACGCGGCGG CCGGCAAGGT CCAGTTGAGC GAGGCCGACA CGGCCAAGT  
26041 CAAGGAATCG CTGTTGAACG ATGGCCAGCT CGCCGCCCTG TCGAACATGA AGAAGCACAC  
26101 CGATTTCAAC GACCTGTCCG AGCGCAGCAG CCTGGGCAAG GACGGGGTTG AACGCCAGGT  
26161 GAGAAGTGCT GTCGGCAAGG TGCTTCTCGA CGAGGGCCAG CGGCAGAAGG TGCAGCAGCT  
26221 CAAGCAGCAA GACATCGAGC AGCAAGAACA GCGGCAACGC CGCGCGAGAA CTTACTAAGG  
26281 AGAACTAGAG CGTATGAACA AAGTACAGAT CGGGGCACCA CGCACATCGG CAAGCCCTGG  
26341 CGTCATCATG AAACCCGAGG GCAGCGTCAA GATCGCCGTC ATGAACGGCA GCCGCCAGGT  
26401 GGACCAGGTA GTGAACGGCG AATGGCTGAC CATGAAGGTG TTGCCCGAGG CGGGGCTACC  
26461 GAAAGGCATT CACCAGTTGA GCGATGCGAA GGACGCAAGC AAAAACGTCC ACCCGCACAA  
26521 GCACGTCGGC CAGGTGCTGC ACGACGATGG GCGCAACGTC TACCAGTTCA GCGAAGGCGG  
26581 GATCGTAAA CACAGCCGGG GCATCTTTGA GAAGCCGCGG GTTGTGCGCA AGAACTACGA  
26641 AATCGCCTAC AGCCGGGGCC AGGGCAAGGT CATCGGCGAG GTGTCCAGG AACAGGCGG

26701 CAAGGCCGAG CAGAAACGCT CGCGCTCGAT CTAGGAGGCG TATGAACATC GAGGCGTACC  
26761 CGCACGATTT TCGCGGCTCG CTCGCCGTGG TTTCTGCGAC CGGCGTGGCC GGTTGCAGGA  
26821 CCTGGACGCT GCGCAGCGTC GAAACCGGGA AGCACTACGA GCTTGCGCCG GCTTCGATTG  
26881 AAGGCTGGCC TCTCCCTGCG AAGCGTGAGG ACAGTCGGCC CAACAGCATC ATCGTCAACT  
26941 ACGACGGCAA CGACGTGATC GCGCTTGAGC TGGCGACCGG CGAGTTGTAC CGCACCCGAG  
27001 CACCTGCAAC GACCTTACGA CTACGGAGGT AGCAGCAGAA AAAGCCGGGC ATTGCCCGGC  
27061 TTTCTTTGTG AGTCGTCCTG AACGCCTCCC TGATCGAGGT CGAGGGGGCA TCGCCTTAGA  
27121 AAAGTTCGTC CAGCAGGAGA TGAAATTGCA GCTTGCCT ATCCGGATCG GCAATGCCAT  
27181 ATTGCGCAAC AAGCCTCTCC TGAAGCGAAG GTTCGAACTC CTCAAGACAG TTCCATAACA  
27241 CGGCAGAATT CTTGCTATGC AGCCGATAGA CCGCGCAGCC GGAAGTACCA ACCTTATCAC  
27301 GCGCCCATTT GTATCCCATC ACGTGAGCCG CCATGCTCTC GGGCACGGCA GCGGCTGCGC  
27361 AGGGCTCTTC TCGATCAATA TCGTTCACTC ATCCAATCTC ACTGACGGTT AGGCGTGCCT  
27421 GGTACCGCAC GTTCTATTAA GTCGTACAGA AGACCTGGCA TATGCGTTGT CGGTTCCAAC  
27481 GACGGATCGG CGGCTCGGAG GTCGAGATAG ATGGAGGAGC ATGCTTTGAT GGCATCCCTG  
27541 ACAGACAACG CATCGTGAGG CGCAATGGTG GTGGCTAGTC TGCCTCTTC ATCCAGTCGA  
27601 AGGGTTTCCA ATCGCTCAC TCCGCGCTGG TCCTTTCCAG CGCGACGGTA GAGCAAAGGT  
27661 CCTAACACTT GCTCACGGAA GAAACCGAGC ATGCCGATCG TTTCGTAAG CTCGCCACGG  
27721 GCGAGCTTGG TGGCCGCATA GTGTAGCCAG ATCCAGGCAC GTTGTCAACG CCACGATGTT  
27781 TGACCGTTAT TTGCCATTTT CATGCCCGCT AAGATACTTT CGTTACTGAT GCTGTCCGCT  
27841 TTTACCATT TCATCATCAC TGATTGGCGT TGTGTTTTTG GTCAGCACTC CAGCTTTACG  
27901 TTTCTTTTT AACCGTAAC TCTCTCTTT GATATTCAGC GTGGTTGAGT GATGTAGCAA  
27961 CCGATCCAGT ATCGCTGTTG CCAGCACGTG ATCTCCGAAC ATTTCTCCC AGTCTGCGAA  
28021 CCCTTTGTTT GACGTCAGTA TGATGCTCGC TTTTTCATAT CGACGGTTCA GTAGCCGGAA  
28081 GAACAGGCTG GCTTCCTCTC TGTTATCGG CAGATAGCCT ATTTATCCA GGATCAACAC  
28141 CCGGGCATAA CTCAGTTGCT GCAGCTGACG CTCCAGCCGG TTTTCTGTT TCGCTTTCAT  
28201 CAGTGTGCGG ATCAGTCTGT CAGTGGCAT AAACAGTACC CGATGTCCC CATCCACCGC  
28261 TTTACGCCA AGAGCTATGG CCAGATGAGT TTTCCGACA CCAGGAGGTC CCAGCAGGAT  
28321 CACGTTTTCG CTGCGCTCCA CGAACGCCAG ACCAGCCAGT TCCCGACAA CCTTACGGTC  
28381 GATGCCCGGC TGAAGGTAA AGTCGAAGT CTCCAGCGTT TTGACCCAG GCAGACGAGC  
28441 CTGCTCAGC CTGGACTCCA TACCAGCTG ATGCCTGCC TTCCATTCT GCTGTAGCGC  
28501 CATGCACAGG AACTCCCGGT AGTTCAGCTC TTTTITAGCT GCCTGTTCCA GCAGGCTTTC  
28561 AACGTGATAA CTCAGATGCT CCATTTTTCAG GCGACTCAGC AGGACTTCCA GCTCATGCAT  
28621 CACAACAGCT CCTCATAGGC ACTCAGTGGT CGATGTTCCA CCTGACTGAC CTGCTGCCAG  
28681 AGCGGGGCGT GATGCTCCGG CACTGTCTGC CAGCCAGACG ATGCCGAACA GAGGCGATGT  
28741 GAGGCCACCA GTTTCTCATT ACTGTAGATC CGCAACTCGT CATCCAGCGA TATTCGTATC  
28801 GATACCGGCT GACCACACAG CGTTCGGGA ACGCTGTAAC GATTACCACC AACCTCGATA  
28861 TAGCTGTCCC AGGACACATG GCGGATGTCG AAGTAACTGG TATCGAAGTC CGTATCCGGT  
28921 AACGGCTGCA GATGTTCTG CTCCAGCGCG AAGCGCTGTT CCGGCGTTTC TTTGAACTGG  
28981 CGAAGTTCCC GTTTGTCAGC CACATCGGCT ATCCATTGCT CCAGTTGTTG ATTAACATGA  
29041 GTGAAGCTGT CGAACCTGCG GTACCGAACG AAGAAGTTCT CCTTGAGGTA TTTACCATC  
29101 CGCTCAACT TACTTTTGT TCTGGCCCTG CGTGGACGGC ATGCCCGTGG CAGGAAGTTA  
29161 TAGTGGTCCG CCAGCAACAG GAATCCGGAG TTGAACACGA CTTTCCGTT GTTATTCTC  
29221 AGCACCGCAG CCTTCTGTT ATCAACCAGC ACCGTTTTCA CACAACCACC GAAGTAGCGG  
29281 AAGGCGCGAA CCAGTGATC GTAGGTATGC TCAGCATCCT GTTTTGGTGC GCGAAGACA  
29341 TGAAGCGGC GGGAGAACCC CAGCGTATTA ACCGAAAGT TAACTTTGCA CCGTTGCCCG  
29401 GCAACCTCCA CCTCAACTC GCCCAGTCG TGCTGGAGCT GGTATCCAGG CTGAGTTTCG  
29461 AAGCGAAGT TCTTTTTGA CGGACGCATT TTACGTTTGG GCTGGATGTA GTAACGCAGC  
29521 ATGGAACGTC CGCCGTATA ACCCATTGCC TTAATCTCCG CAAAGATAAC CTCATTATC  
29581 CAGACATTCT CTGCCAGGCG CATGTCGATG TAATCCATAA ACGGTTTCAG CTAAACCATT  
29641 TTGTGGCGGG TCTTCTGGC TGGCGGTTCA GGGTATTTGA GGTAGCGTCT GACCGTCCGT  
29701 TCAGAGCAAC CAATCTGAGT CGCAATATCG ACAATGTACG CGCCCTGCTG GCGCATTTGC  
29761 TTTATCATGT AAAAGTCTC TCTGCTCAGC ATGTTGATGT CTTTCTGGT GTGAGAACCT  
29821 TAAGGAAACA ACATGTTGG TGGAGCGGAC AATCCAAATG GTGAATTACC GTCTTATATC

29881 ACTGGCGCTG ACAACGTGCT TCGAACCCT CGGAGGGACG GTTTGCCAT GCCACCGCTG  
29941 CCGCCTCAAT GCGCTTCTCG ATCTCTGCCG GATCACGAGC AACAGAACC GCCCGCCGCT  
30001 CGATTTGCTG GTCGAGATCG GAAGCAAGAG AAAACTTCAA ATCGATGTGT AGCAGTGGCG  
30061 GACCATATAG GCAGATCAGA AGGCGCGGTT CTCCTACATG TTCGCCGGTG AACGCGTTGA  
30121 GGAAGCCGGG CAGTGCCTCG GCAAATCCT TCGGTGTAGA CAAGACATCT GCGTAGCAGT  
30181 TGTCCTAAC AACGATGTGC AAATCCAAAT CGGAGTGCTC ATCGAGTCTC CCGTGAACGT  
30241 AAGAGCCGCC GATCAGAAGA GCGCGGAAGC GAACATCGGA AGCGACCGCA TCGCGGATGC  
30301 GGTTC AAGAA AGTTGCATGA GCTTGTGGAA GTGTGCTGAG CATAAATGAT TCTCCTAGCT  
30361 GTTCTTTGGG TAAGTACGCC ATCAGGACGT TGTGAGTGGC GCGATTTTGA GCGGCTGAAA  
30421 TCAGCCCTTG AGCCTGTCGG CAAGTCGCGT CATGAGGTCC ATGCGCTCAT GCAGGATCGC  
30481 CACGACCAAC GCGGGTTCGC CCGCACGCGG CAGGCAAAAA ACGTAGTGGT GTTCGACGCG  
30541 GGCCATCCGC AGCGCGGGAA AGAGTTCGCT CATGTCCTTA AACGGGCCTT CGCCGGCGGC  
30601 AAGCCTGGCT ATGCCCTGTT CCAGCTTAGC GATATAGCGG CGCACCTGCG CCGCGCCCA  
30661 CTCCGGCGC GTGTAGCGGA TGATGCCGCG TAGATCGGCT TCGGCCTCAG CCGTGAGGAT  
30721 GTAGGCCGTC AAGCGCGATC CCCGCTGAGT TCTTCATCAA GAATTTCCGCC GACGCTCTG  
30781 GTGGACACCT TGCCGGCAAG CCCATCGTTG ATGCGGTTCC CCAGCATGGT TTTCACTTCC  
30841 TGCCATGCCT GATCGGCATC AGCGTCACCG GGAACAGAC GTTCGAGGGC GTATTGCTTA  
30901 ATGGTCTTGC CCTGCAAGGC GGCCAGGCTT TTAGGCTCT GGTGCTGCTG GTCCGTCATG  
30961 TCGATTGTCA GCGGCTCAT TGGATAACCT CCATAAAATA CACGTAACCA CATTAGCACA  
31021 TATGTGGGCG TGAGGCTACA GCGCGAGGCG CATTAAAGTTC GGGAAAATGC GCTAGGCGCA  
31081 TTTAAATTGC GTATTGCTGT AATGCGCCAT GCCGCTAGA CTAGGCCCAA ATGGGTATAC  
31141 CCAATTTGAC CAAGGGGGAC GCGATGAGGG CGGCCAAGCA CTACCGACAA CTTCTATCCA  
31201 TCGACTTCAA CATCGAGGCG CTGGCCTTCG TGCCTGGACC CGACGGCACA CGCGCCGGC  
31261 GCATCCACGT CCTGGGGCGC GAGGTCCGCG ACCGGCCCGG CCTGGTCGAG TACCTTTCGC  
31321 CGGCGTTCCG CTCGCGGGTG GCGCTGGACG GCTACTGCAA GGCCAATTC GATGCAGTGC  
31381 TGCACCTGGC GTACCCCGAT CATCAGCAAT GGGGCCACGC ATGAAGCGCC GAAGCTACGC  
31441 CATGCTGCGC GCCGTGCCG CGCTGGCCGT CCTGGTCGTT GCCTCGCCGG CATGGGCCGA  
31501 GCTGCGCGC GAGGTGCTGC GCATCATCGA CGGCGACACC ATCGACGTGC TGGTAGACAA  
31561 GCAGCCGGTG CGCGTGCGCC TGGTGGACAT TGACGCGCCG GAAAAGCGGC AAGCCTTCGG  
31621 CGAACGTGCG CGCCAGGCGC TGGCCGGCAT GGTGTCCCG CGGCACGTCC TGGTCGACGA  
31681 GAAGGACACC GACCGTTACG GCCGCACGCT GGGCACCGTG TGGTCAACA TGGAGCTGGC  
31741 CAGCCGGCCG CCGCAGCCGC GCAACGTCAA CGCCGCGATG GTTCACCAGG GCATGGCGTG  
31801 GGCCTATCGC TTCCACGGCC GCGCGGCCGA CCCTGAAATG CTGCGGCTCG AACAGGAGGC  
31861 GCGAGGCAAG CGCGTCCGCC TCTGGTCCGA TCCGCACGCC GTCGAGCCGT GGAAATGGCG  
31921 ACGCGAGAGC AACAACCGGA GGGACGAAGG TTGAAGGTCG CCCGCATCTA CCTGCGCGCC  
31981 AGTACGGACG AGCAGAATCT TGAACGCCAG GAGAGCCTTG TAGCGGCCAC GCGGGCCGCC  
32041 GGGTACTACG TCGCCGGCAT CTACCCGCGAG AAGGCGTCCG GCGCACGCGC CGACCCGCC  
32101 GAGCTGCTGC GCATGATCGC GGACTGCAA CCTGGTGAAG TCGTCGTTGC GGAGAAGATC  
32161 GACCGCATCA GCCGCTTGCC GTTGGCCGAG GCCGAGCGCC TGGTTGCGTC GATCCGGGCC  
32221 AAAGGGGCCA AGCTGGCCGT GCCTGGCGTG GTGGACCTGT CGGAGCTGGC CGCCGAGGCC  
32281 AACGGAGTGG CGAAAATCGT TCTGGAATCC GTCCAGGACA TGCTTTTGA GCTCGCCTT  
32341 CAGATGGCCC GCGACGACTA CGAGGATCGG CGCGAGCGTC AACGTCAAGG TGTCAGTTG  
32401 GCGAAGGCCG CCGGCCGTA CACCGGCCGC AAACGTGACG CCGGCATGCA CGACCGCATC  
32461 ATCACGCTT GCTCCGGCGG ATCGAGCATT GCCAAGACCG CCAAGCTGGT CGGATGCAGC  
32521 CCGAGCCAGG TCAAACGAGT GTGGGCGGCC TGAACGCGC AGCAGCAAAA ATAAAGCCGG  
32581 GCAGTGCCG GCTTTTCTCA CTTTTTCGCG TCCCGCAGGG CCGCTGCGAG CGCCCTACT  
32641 AGATCCTCG TTTCCCTCCT GGTGTAGTCC GGCCAGGGCA CGAAGGGCGC GGATGCGAAC  
32701 CTGTTGAGCA GGTACGCTT CGGGCAGCGG TAGACCACCG GCGAGTTCGC CTTTTATCC  
32761 CACCGGGCCA GGATCACGTC CGCATCGAG TGCATGTCCT TCACCTGGTC GCGGAAGAAG  
32821 CCGAAGGCCA CCATGCCGCT ATGTTCCGCC AGGAACGCCA GTTGCTTCGC GCTGGCGATC  
32881 GCGCCGACGC CGCCGGCCAA AACCGACGCC ATACCCAGC CGACGAACCA GAAGCTGGCA  
32941 TGCTTGCAGT TGACCACCGC ACGCGAGCC GCGACCAGGA CAACGGCCAA GCTGCCGACC  
33001 AGGGCCATGA CGACCGTAT CCGGCCGTTG TGAAAGCGA TGGGCTTGCC AGCGTCCGCT

33061 TGCACGGCGT CGTAAATGCT GGACCCGATG GGC GCGCACA TCAGCACGAC AGGCAGCAGC  
33121 ACCAGGAACA TCGTCCGCGT CCATTGCGCG AGTGCCTTGC GGC GTTCGCC GGC GGC AAGC  
33181 GCCTCCATCA TCGGCGTGAA GCCCAACAGG GCCACCGCAG CCGCCAAGCC GGCAACGATG  
33241 CCGCAGGCGA TTACATACAT ACATCCTCCC TAATGCGCCT TGCGCACGGT TG TAGTCAGA  
33301 GTCCGCGGCC TTTGCGCGGG CCGCTTCGGC CGGGGCGTGG CTGCACCTTG GGAGCTGGCC  
33361 GGGTGGCCGC TGCCGGCGCA GGCCGGGCCG GTGTGGCGAC CTGCGGAGCC TG GCGTGGG  
33421 CCTGCGCGAA CAGTTCCGTG AACGACAGCG GCGCAGGATC GAGGCCGCAA ACCTTGTTCA  
33481 GCAGCTCGGC CGACTCCCGG CCGTGGACCT GGATCGGGAA CGACGGAGCC TTGTTGGCAA  
33541 TCAGCCAGAA CGAGCGCGTG ACCCCGTTTG TGAACCAAT GTCCACCCGG TGGCGCTCCT  
33601 GGTGCGCGCC GCGAAGGCC AGCGGCACAG GATTTTCCCT GCCGTGCGCG AAGCCCTGGA  
33661 CGGCGTGCTT GA ACTTGTAG TCCTGCGGCA TTTCCGAGCG CAGCGGGCAG TTGTCGACC  
33721 GCGTTTCGCG GCCGTGCGAG CTGCTGCGCA GCCAAGCCC ATAGAACGCT TCGGTGCCA  
33781 CCCGAACCAC GAACATTTCA TCGTTGATCG CGCCAGGCTT GGCCGACATG AAGCGGTGCG  
33841 CCTGGCCGGG CACCGGCACG CGCCAAACGG CCTCGGTGC ATCAACTGG ACCAATCCG  
33901 CCGGAGCCGG CCGGGGCCGG CTCACCACGG ACACATCCAG TTCCTTCAAC TCGCGGCAC  
33961 GAGCAAGGAA GCCCTTCAAC CGTGTACAGCA TCCGCCGCC TCCCCTCAGT AGAACTTCGC  
34021 ATCGTCAAGC GAGATCGAGC AGCCGTTATG GTCGTAGGAC ACGTCCTCA CGGTGCCAGT  
34081 GACGCGCGTG GTCTGGCCGG TGGAAACCGA CTTGATGGCG AGCTGTTAT CGGTCCCAGC  
34141 ATGGACCGAG GCGCTGCCAG CGCGCAGCAG CACCCGATAG CGAGGCTTGA AGCCTTCGGA  
34201 AATCACCTGC ACCTTGCCGG TGGCCGACAA CCCTTCTTG CCGTACAGCT CCGTTGCCC  
34261 AACAGGGTTC TTGTACGCGT CGCGGCAGAT TTGCGCCACT GGCACGGTCA GCATTTCCGG  
34321 CGGGGTCGAA CCGGGCGGCG TCGGCATGGG GATGTTGAGC AGTGCGCAGC CGGACAGGGC  
34381 GAGCAGCGGC AGGGCCGCGA TGGTGCATTT CTTGAGCAAT TGCATATTGG AATCTCAAAG  
34441 GTCAGGTGAA AAACAAGTAG CCCGCCTCGC GCATCGGAAT GCGGATCAGC CAAAGAGCGG  
34501 CAAGATGCAG CGGGTAGTAC GTG TAAAAGG CCCAGCGCAG GCGCGGGACA CGAAGATCGA  
34561 CGCCGGCCGC GACGATCACC AGGGGCACAA CAGCAAGCGC CCAAAGTTG CCATTGATGT  
34621 ACCACAGGGA CGCGCAAGAC AGCAGCGCCA TCAACGCGGC CGCCACGTC GGGCGCTTGA  
34681 GGTACAACCA GACAGACGCG GCCAGCAGCA GCGCCGGCCA ACAGAACTCG ACCAGCCGC  
34741 CGGCCACGAC GAACAGCGCT ATAGGAGCGA CCGAGCGGCC GCGCTCGACC AGGTAGAGCA  
34801 TCGCGGTTGC GGCCAACAGC GTGAACATGA CGTTCAGCGG CCACCATCCG CCCACCACTC  
34861 CACCCAACGC AATGAACGGG ACCGAGGCGA CCAGGCCGAA GGCCAACAGG CGTTTCATCG  
34921 CTCGCCCGTA CAAACCGCGC TCGAGCGCGC CCGGGCGGGG GAGGTTGTAC GCCAGGACGA  
34981 AAACGAAAAG AGGCAGGGCC AAGCGCCCCG CCTCGAACAG ATATGGCAGC GTACCGTTGA  
35041 ACAGGTACTT GTTGACGTGA TCCCCGTCA TGGCAAGCAA GGCGAGCCAC TTCAAGGCTT  
35101 CAATGGTGCC GTCGGCGATC ACCATGGCAG GCAGCGAGGC CCGGCCGCTG GCGTCGTTCA  
35161 TGGCGCGTGT ATTCATGCC TCCCCCTTGG AGTAAAGACG CCCTGCAGGG CGCTATTTGC  
35221 GCCATAGCG CAGCGCGTAT TCCCGGAGGA CGTGCAGCGC CAAAGGCAGG GCCGCGAGGA  
35281 CCAGCAGAGC GCCGGCGGCG TACATGGCCC ATGTGGGCGAG GAACGCGAGC AGCGTATGCC  
35341 CGACCAGGCC AAAGACGATG ACAGGCCCGA TGCCAGTAC CAGAAGATCA AACGGCGCTT  
35401 TCGCCTGCGA TGCCGCCAG GCCGCGTAGG CCCTGGCCCC GTTCATGTAT CGCTGCGTCA  
35461 GGTGCGAAT GCCATAGGC TTTAGCCGCT AAACGGCCGT TCCTCCTTAT GGC GTTGT  
35521 TGATGATGAG CTGCCGGGGT ACGTAAACCCG AGCTGCGGAG GCTGGTGCGG GTGATCCGGC  
35581 CTTGCTTCAT CGGCTGCGCT TCGGCCGGCG CTGCTGCCGA CGTATCAGCG GCCGCAAGTG  
35641 TGGTCCCCTT CCCTGCCGCG TGCGCCGGCG AGCTGGGGCC ATAGTTGACG GTGACGAAAC  
35701 GCGCATCCAG CCACTTCGCC CACTTGTGCG CTTTACCAT CAGATCGGCG CGATAGATCG  
35761 CGTTCTTCGA CGGCGTGCGC GAGTGATAGT TAGCGGCGCG GTGCCACAGA TCGCCCCTGT  
35821 CGTTGCGAAT GTGCCGCGC AACCGCCAGG CCGCCAGGTC ATAGGGATAG CAGCCTGCCG  
35881 CAGCAACGTC CTGGGCCGTG ATCCATACT TCGCCAGGTC GCCCAGGTAG GCGGTGTTGA  
35941 ATTGCAGCTC GCCACGTCA TAGGTGCCAT TGGTGTCTT GACCCACTGG CCCGGCTTGC  
36001 CGCCCTCCTT TTCCGAATG GCGAGAAGAA TGTTGGCCGG AATCTCGTAC TTCGCGGCCG  
36061 CAGACACCGA GCACACAACG CGCTCTTCCA TCTGTTCCGA CAGATCGGGG AAGAGCCGTG  
36121 CGGCGGTGCG ATCCGCCGCA CCGAAGCCAG TGCCGCCAC CAGGGCGACC ACCGGCAGAG  
36181 CGTTCCGTGC CAGCAGCTTG GCAAACGGCA TCGCTATCCC CTCCCCTTAC CGCTCGAACC

36241 GACGGTAGGC GTCGCTGCCA TAGCGACCGT ACTGCTGCTG CCGCTCTTTC AGCTTCGCCT  
36301 CGTACTCCTT GAGCGCGCGG TCGTAGTCGG CCGCCTCGAT CCAATAGCCG CCCTCTTCCG  
36361 GCGTGCCGAC GTAGCGCGGC GCGGTCGTGT TGAAGTCGGT ATAGGCATGG CCGGTGTAGG  
36421 CCGCGCAGTA GTCCGGCAGG CGGTTGCCGA TGTAAGACTG GTCGTCCAG CTCCGCCACT  
36481 CACGCAGCAC GGAGTTCAGC GAGGACGCAT CGCAGCGCCC GGCCCCGCGC GAAATCGAGG  
36541 AAACGAGCGT CTGCATTTC GGCCTCTGGT TCGATACCGG GCAGAGGTTG AGGAAGTTCA  
36601 GCCGCGCCTT GAGCGTGTCC GACAGCTTGC GCTTGTGGAT GCCGAAGTAC CGCGAGAGCG  
36661 ACGGGGTGCA CTCGCTGGGC CGGCTGCCCG TGGACAGGCA CAGAATGGCC TCGCAGGCCA  
36721 GCGGGTATC GCCCGTCAGC ACGTCTTGC CGCTGGCCGA GCCAGTTGCG CCGAGGCCCA  
36781 AGGCCACCAC CAGGGCGGCC GACGAGAACG CTTTTTTCAG TTGCATGGTC GTAGCTCTA  
36841 AGAGTCGTTT CAGGATTGGG CGGGCTTGT GACGAAGCTC GCCACTTCGG AATCCGCGTC  
36901 GCGGCGCGCT TCCCTGTTGT TGCTTGC GGAAGCTGTTG TCCTGCAACG ACGGTGCGGG  
36961 TGCCGGTGCA GGTTGTTCTT GCGCCTGGCT GTTGCTATCG GCGACGGTTG CAGCGGTCTG  
37021 CGCCGCCGCA CCCGCGCCGC GAATTGCCTG CGCGATCTTG CCGCCTACGG TATCGCCGAT  
37081 GCGTTCCTGG GCCGATGCGC GCATTTCCGC GGCCTGGCC TTGGCAATCG AGCCGGCACC  
37141 TTTCCGAGG TTGGCGACGG TATCGGCCGC GATCCGGCCG CCCTTGCCG CCGTGGCACC  
37201 GATACGCCA GACGAACGGC CACCACCGA GCCGCCGCC GAACTGCCG CGCGTGGCC  
37261 GCTGCTGTTG TCGCCGGCGG CCGAGGCCAT CGGGTTTCA CCGCCGCCG AGCCACCGC  
37321 GCCACCCGAG CCGCCGCCGT CGCCGCCGT GGTGCCGGCG CTACCACCG CGCCGCCACC  
37381 GCCGCCGCC ATCATGCTCG ACAGAATGTC AGTGCCGGCA GAGACGTTAT CGCTGGCCTT  
37441 CGACGCGGCC GCCATGATGG CTTGCGGCC ACCGCCGCC GCCGACGCG CGGCCGCGAT  
37501 AGATGCGCCG CCAGTTGCGA TTGCCGCGC GGCCGTCGCG GCCGCACCGA CGAGCGTGC  
37561 AGCGCCGAAC TGGCCGATAC CAGCACCGC GACGCTCGCG CCGGTGATGA TGCCGGCGAT  
37621 GAGCTGCGGC ACCTTGTGA CCAGAACGAG CAGGATCAGG CCGACGATCA GCATCACTCC  
37681 AAGTTCCTTG AAGTTGATGC CTTGCTCAT GCGGCTGTAG TAGTCATCGA GGAAGTCTT  
37741 GCCGATGCCT ACGAGCAGCA CCATTGCGAA GAGCTGCGCG GCGACCCCGA GGACGGTCTT  
37801 GTAGTAGTTG ATCGCCATGT CCGAGGTCCA GCGCGAGCCG CCGAAGCCCA GGAAGAACAC  
37861 ACCGCCGTAG GCAAGAATCC ATCCGACGC CAGGAGCAGA AGCATATTCA CGCCGACCAG  
37921 GGCCAGGATG CAGAGGATGG CGGCCGCAA CGAGGCACCG ACGAAGCTAT CGACCGCGCA  
37981 CCAGTACGAG GTTTCGTCCA TCACCTTAA GAAATCTCG AAGCCAACAT CGACGATGCC  
38041 GGACGGCGAA AGCCCCTGCC CCAACCCGT TGCCTGGCCT GCAATCTGCC GCAGGGACGC  
38101 ATAGATGGAC GACGCGAAAT TCGGGCCGTT GGTGAGCAGC CACCAGAAGA AGCCGGTGAA  
38161 GATGGTGAAC CGCACGAACT CGGCGAAGAA CTCGCCAATG TCGGCCTTGC GCAGTGCCAT  
38221 CATGCCGAAG GTCCAGACCA TGTAATCAC GGTCAAGGTC CAGAACAGCC AGGTTGCGGC  
38281 GTTCTGGACG ACAGTGGCCC AGCCGCTCG GCGTCTTGG TAGCGCTGCA ATACGTTGTC  
38341 GAGGATGCC GAATTGTGCA TTTGGGCGTA TGCCGCTACC GGCATCAAG CCAGCATCAG  
38401 GACCGCAGC GCGGCAGCTC TAGTCTGGAT TTTCATACGT CATCACTACT CTTTCTTTC  
38461 GCTGGGCTTG AAGCCTCCG GTTCTCCGCG CGGGCACTT TCAACAGCT CCGCGCGTTG  
38521 AGCGGCATCC GTGACCTTCG GCAGATCGGC GCAGGTCAGC TTGTGCGGTG CGGGCTTGT  
38581 GTCGAGCCT GCCAGGCTGG CCGCATGAC GCGGCCAGC GCGGCACTG CGATGAAGTT  
38641 GGATTTCTT ATCGCGCCTC CCCTACCAG GTCTTAGACG GGCTTGC GGTACGAACC  
38701 TCGCGCAGCT TCGCGCCCG AGCGTCTGC TGGGCTGCC GGTCCTGCTG GGCCTGCATC  
38761 TGCGTGGCGA TGGCGTTCTG CTGCGAAGC AGAAGGCCAC GGATTTGCAT GAGCTGGTTG  
38821 GCCTGCTGG TGGCGAAGT GTTGGCGTAG CCGAGGGCTT CCAACTGGCC CTGCGCCGTC  
38881 GTCGCTTGC CTTCAATTG CTCCAGCGT GCGGCTCGG ACTTGAGGTT GCTCTGCTG  
38941 TGATCGAGG CACGGAACAG CGCATCGTTG GCCTTTTCT GCGATTCGGA CGCCAGGCGG  
39001 CGGTTCTCTT CCATCGCCTT GCGCTCGCT TCCGAGCAGC CCGACAGGGA GAAGCACGGC  
39061 GACCCCTTGT AGTAGGACAC GTCCTTGAAC TTGCCAGGT AAGCGTCGAT GCTGCCCGCC  
39121 TGTTCTTGT AGTAGTTCAG GGTATCAAC GCGCTCATCA GGCGTTGAT GGTGGACTGC  
39181 GCCTGGTCCC ACACGTAGG GCGCGGGGCC ACCGTGTTT GCAGCATGTT TTCGTACTGC  
39241 TGCAACTGCG TCCGATTC CTCGATTTG TTCTGGACCT GCGCAACCTG CTGAATCGCG  
39301 GTGACAGTGG TTTGTGACAG GTTGGTGCCG TCGATGACCG GAATGCCCGC TTGCGCAGGC  
39361 GTGACGCCA AGGTGCCGAC CGAGAGGGCC AGCACCAGAG CTACTTAGC GGCTAAAACA

39421 TTCTTAGCGA GCTTCTTCAT AAGTTACTCC TTGGAGTTAA TAGTCAAACG CCTGGTAGGG  
39481 CTTAGAAAAC GTCATGTCTT TCGTGACAAT GACGTTGAAG CGATAGCCCG GACGGATTTT  
39541 CAGCGTCGGC GCGATATTCA AGTTTTTGGC GATCATCTGC GCCGTTACTT GGCCGAGCTG  
39601 TTGACCCAAC GCTTCACTCA TCGCGGAACC CGCGTCTTGT CGTCCGTAAC CGCTGTTGCT  
39661 GTTGCCACGG TCCTGACTCA AGCTGATGCC CGCAACGACG CCCGACATGA GGAATGCCGA  
39721 TGCGAAGGTG CGGAAGTAGT GGTTGTTGAC CTTGTCGTTG AAGCCTGCAT ACCCAGCGCT  
39781 ATCGCCGCC GGCATGGCCC CAATGTCCAT TGCCTTGCCG TCGGGGAAGA TGATGCGCTG  
39841 CCATGCCACC AGAACCGCT TCTGCCCGTA GGCCACATCG TTCGAGTAGC TGCCACCAG  
39901 GCGCGAGCCT TGGGGGATGA GCATGTGCTT GCCGGTCGCC GTGTCGTACA CCGACTGCGA  
39961 TACCTGGGCC ATGATTTGGC CTGGCAGATC GGAGTTGATG CCCGAGATAA GCGTAGCCGG  
40021 AACGACGAAG CCAGCGCGCA GCACATAGGG CGTTGCAGGT GCTTCCGGCT GGGAGTCGAG  
40081 CCGCCAACGG TCGCCCTCG TCGGTTGTC GAACGACCA TAGCCAGCGC CGCCACCACT  
40141 GCGGTTGAG GTCTGCACGA GGGTCGGCGC ACCCGAGCCG CCCATACCGC CACCCCTGC  
40201 CGCGCCGCC ATCGTGCAG CTTGCGCAAG CGCGGCTGA TAGGCGGCGG TCGGATCGGT  
40261 GCGCGGGCG TTCTCAGCCT GCCGACGAG CTCCTGGATG CGCGCAAGGG TTTCTCGCG  
40321 GCCCTGCGGA GCACCGCCG CGGCGCTGCC CTGGCTGCGC GCGCGTCTGA TGCGCACCGT  
40381 CGTCTTGCC TTGATCGCT CTTCCAGCAT CTGCACTTC GCCATGCGGA TCGGTCCAG  
40441 GTCCTGTTG CGCGACCCT GCGGCGCGT CGGGGCTGG TCCAGTTCT CGGGCCGTGC  
40501 GACCGTGATA GTCGTTCCCT GCGCCGGGGC TGCGTCAGC TCCGTCGTCG GTTGCTGGC  
40561 GGTGTTTCC GCGGAATCT CCAGCGGCTT GGCCTGATG ATGCCGCTCT GCTGTTGCC  
40621 GGCAATTCG TCGGCAAACA TGCTGGTGT GCCGGCTTC TCAGCCTTCG CAGCTCCCG  
40681 CTGGTTCTG TCGCAGCGC GATCCGAGC AACCAGGGCC ATCACCAGCA GGAAGATGCC  
40741 GAGCACACCG CCGATGAGGT ACATCGGCAT GTTGTGACG CGGCGAACCC CGCTTTTCG  
40801 CTTGACCGCA TCTGGCGATG CGTCCGGTGC CATTGATCT TCGTCTATTG GCTTACTCT  
40861 TCCGAACCA TGCGCCGGCC GGGACCATCG TGTTGTTTTG GCGAGGTAG GCGCGCGTGA  
40921 GCGATTGAGA GCCGACCATG ACGGTCAGG GATACAGGTT GCTGTCGCTG AATTGGTCCA  
40981 GCACGTAGCG CAGCGGATAG CCGCCCTGGG CTTGCGGCGT TGCCGGCTTC GCAGCGGCC  
41041 AGGACGCAGC AGCCGGAGCT GCGGCCGCGT TGCCGTCGGG CTTGACTCC ATGACAGCAT  
41101 AGCCCTGGC GCGAAGGTCA GTGACCAGG CAATGCCGAA CGGATCGGGC GTAGCCTGCT  
41161 GCAATCCAG CTTGGTTGTC GCCGGCGGGT AGAGCTTGAC GAGCTGCTC ACCGCGTCGG  
41221 TCGCAATGGT CTGGTTGTAG GCGGCCGGCG CGTCTGGAC GAAGCTGCC TACTTGGAGG  
41281 TCGCGCAGCC GGCCAACGTG GCCGCGAGTG CGATGACGGT CAGAATCTTA CGCATGGTTT  
41341 AGTTCCCTT TGAAATGGTC ACGCGTCTT GGCTGCTGCC CACGCCGCG ATGAGGATGG  
41401 CCTTGTGAA AATCGTATCG ACGATGTAG GGTCGCCCTG GACCCGGTAG TTGACCATCA  
41461 CCGTTTCATC GTCGGAGAAC AGGCCGCCCT CCCTGCGAAC GACCAGGAGC GTCGGCGCTT  
41521 CGGTCTGTT CATCGAGTGC GGCATCTGGA TGATGGTTTT CTTGCCGTCG TTGTAGACGC  
41581 GCACCGGCTT CCACGACGTG GACCCGCTGA CGGAGTAGTT GAAGCTCAGG TTGCCAGGT  
41641 ACTCGCCGGT CTGCGGAATG GTTTTCTCGA CGCGATCCCG CTGTTGCGG TTCTTGATGG  
41701 CGTCCCACTT CGCAAGGGCA TCTCCGGGT AGGTGAACGA CACCTGCGGC ATGTAAGCG  
41761 TGCGATGCGA GCGCAGGCG ATGTGGTAGC TGCGGCGGTC CGTGGTCACG ACCAGGCTGG  
41821 TTTCCAGGCC CACATCCATC GGCTTGATGA TGAGGTGCTG GGTTTCGTT GCGCCGCTGC  
41881 CGGTAATGGC CGGCTCGACC GTCCAACGGG CGGTGTCGCC CAGGTTGATC GAGTTGACTT  
41941 GCTCGCCGGG TTGCAGGGCC ACGTCGCACA CTTGACGAC GGCGCATAAC ATGCTCGGCT  
42001 GTCGCGGCC GAACAGGAAG CGCACCGAAC CACCGGGGCC GGCCACCGGC CGCATGCCGG  
42061 CGGTACCCGC CTCCCACTTC TTGGCGATGG CGATGGCCGC CCGCTTTGC GCGGTCAGT  
42121 CCGGGTTCTT GCCGAAAAA TAGAGTTCAG TCAGGTCCG GCCGGGATCG GCGCAAATG  
42181 CAGGCACGCT AACGGACGCG GCCAGGACCA AAGCAAACAG TTCCTTTTC ATAATTCAGT  
42241 GCCTCACAGA AGTCTCGACC AGGAGAAAGT CCGGACGTAG ATCCCGGCCG GGTTGTTTCG  
42301 CAGTTGTTCT TCCTTGGTGT CCGCGTCCG CTCGACGACG TAGACCGTCA CCAAGGCCCG  
42361 CATGCGCACG GGCTGGCCTT TACCACGCC TTGCCTGTCG CGCGTCGTCT CGACCCAATC  
42421 GACCTGCCAG GTGTCGGGCG TCTGCGGGAT TACGGAAGTG ATTTGCGTGC TGACCGTTTC  
42481 GACGGCCGCG CGAGCGAACG GGCTGGCGTC GCGGTGCCG TTGAGCCATT CGTTCATCTT  
42541 GCGGTTGCC GGGTCATTCG GCCCGAGCTT GGCATAGAGG CGGTAGACGG CCTTGCCTG



42601 CAAAGCTACG TCCGGCGTCA CCAGGCGAGC ATCGCCGACG AACTCAGCCA CCGAGGCGTG  
42661 AATGACACGC GGATCGGCTT TCGACGCCCT GGTTCATCGGC CCCACGGCGG CCGTCTGCCC  
42721 GAGCTTGTCT ACCTCGTAGA CATAGGGCAC GAACTTCGAC TGGTGCCGA TGTGGATGAT  
42781 GCCGCCGACC GCCGCGAGGA CGATCATCAG CGAAAGGATG CCGACAACCT GCCAGGTCTG  
42841 CTTTTGCGAC ACAACGGAAC CAACGTGGTC GTTCCAGGTG CGCCGCGCCG TCAGGTACGG  
42901 GTTGTGGT TGC GGCCGG TCGCGGCCG CGTCGCCCT GCTGCGGCCG TTGCGGGCTT  
42961 CTTCTTGAAG ATCAAGCCCT TGATCGTGTC TGCAAACTC ATGCTGCCTC CAGGTATTCA  
43021 TCAAGGGCGA GGCCCCGCC ACGCAGCCAT TCATCCACCC ACTGGTCGCC GAACTTGGCT  
43081 TCCAGGTTCT TGATGATGGC GACGGATTCC TTGTGGATG CGCCGACGAA CGCGAGCGCG  
43141 AGCGGGCCAA GTGCCAGGTC GTAGAGACGG CGGCCGTTTT CCGACACGTA GTAGTACTGA  
43201 CGCTTGGGAA CGGCCTGGGC CAGAATCTCG ATCTGGCGAG CGTTCAGGCC CATGCGGCGG  
43261 TACAGGGCCG CCGTGTCTC ATCCCTGGCG TAAATATTCG GCAGGAAAAT CTTGGTCGCG  
43321 GTCGATTCCA CGATCACGTC CAGGATGCCG CTGTTGGCGG CGTCGGACAG GCTCTGCGTT  
43381 GCCATCAGCA CAAGGCAGTT GGCCTTACGC AGCACCTGA GCCATTCCCT GATCTTCGCG  
43441 CGGAATGCCG GGTGGCCGAG CATCAACCAG GCTTCGTCCA GGATGATGAC GGCCGGCTGG  
43501 CCCGTCAGGG CGCGCTCGAT ACGGCGGAAC AGGTAGAGCA ACACAGGCAG GGCGAATTTT  
43561 TCGCCGAGGT TCATCAGCTC TTCGATCTCG AACACTGTAA AGTCGGACAG CGCCAAGCCG  
43621 TCCTCTTCGG CGTCGAGCAG ATGGCCATT GCGCCATCGA CGGTGTACTG GCGATCGCC  
43681 TCGCGGATCG CCTCATCTG AATCGTCACG CTGAACTCGG AGAGCGTGC CGCGCCGCTG  
43741 GCGTGCATGC TCATGATCGC GTTCCGATT TCGTTGCGCT GGGCCGGGT CGTTTCGACG  
43801 CCGTTCAACG CCAGGATGGT GTCGATCCAC TCCATCGCCC AAGCACGGTC GCCCTTGGTG  
43861 CTCAGGAACT GCAACGGGCA GAACGCCAGG CGTTCGTCTG CGGCCGCCAC GGTGAAGTGC  
43921 AGGCCGCTGG TGCCCTTCGT GGCCGCACGG ATGCCGGCGG CCAGCGGGTA CATCGACATG  
43981 CCCTTGTC AAAGCGAAGAT CGACATGCCG GCATAGCGAC GGAGCTGCGC GCGGAGGATC  
44041 GCCAGGTGCG TCGATTACC TGCGCCGTC GGCCCGAACA TAAAGGTGTG GCCGAGGTGC  
44101 CGCACGTGCA GGTTAGCCG GAACGGCGTT GATCCTTGC TGACGCAGTG CATGAGCGCC  
44161 GCGGACAGCG GCGGGTACAT CGGGCATGGC GCGTTCGCGT TGCCGGTCCA GATGGTGCTG  
44221 GTCGGCAGCA GGTGGCCAG GTTCATCGTG TTGATGAGCG GCCGGCGGAC GTTTCCACG  
44281 CCGTGGCCCG GCAAACCTACC AAGGAAGCG TCCAGGGTGT TGATGGACTC GATGCGCGCG  
44341 GCAAAGCCCA ACCGGTTGAC GGCCTTTTCA ACATCGCGGG CCGCAGCTTC CAGGCGCGTG  
44401 CGGTCCTCAT CCATCAGCAC GACGACGCTG GTGTAGTAGC CCACGGCCAC GATGCCGCTG  
44461 TTGACTTCGG CAATGGCCG CTCAGCATCG GCCACCATCG AAAGCGCGTC CTGATCGACC  
44521 GGGCCGGTGT TCGTGTGAA CACCTGGTGC AAGAAGCCG GAATCTTCTG CCGCCACTTC  
44581 TTGCGGAACT TGTCGAGGTG TTACAGGCT TCGTGCTGGT CCATGAAGAT GAACCGGCTC  
44641 GACCACCGAT ACTCGCAGGG CAGCTCGCCG AGCGCCGTCA GGATGCCGGG ATAGGACTCC  
44701 AAGGGGAAGC CTTGAGAGC GACCACCTGG ACGAACTTGC GGCCGACCTT GGGCACTACC  
44761 CCGCCCCA TTTCTGTCC GCGACCAGG GCGTCCAGGT ACATCGGGT GCTGGGGAGC  
44821 TGCACGGAT GGTGCAGGCC CGTACGCAG AATTGCAGCC AGCGCAGGAA GTCGTCATGC  
44881 GTGACGGTCG TGCCGTCTC GTTACGATC TTGTGCCCT TCAAGCGAGT GAGCGACACG  
44941 GCCGACGACA GGCGGACTC GATGCTGCGC ACGTCACGCT TGAATTGGTC GATGAGGCC  
45001 CGCGTGC GCGCCTTGCAT CGGTGCGGTC GCGTCTGCTG CAAACATCAG CTCGACGAAC  
45061 TTGCGCTGGG CGAGCAGCGG CGGGAACCAG GTCAAGGTGA GGACGAAATA GCCCTCGTAC  
45121 ATCGTTCCA GGCTCTCGAA ATGCCGCCG CGCTCTTCTT CAATCGCTGC CGTCAGACGG  
45181 TCAGGGAACG CCGACAGGCC CCGCTCCGCG TAGTTCGGAG CAGGACGCC CACGGCGTCC  
45241 ACATGGATCA TCCACCCACT TCCAGGCC GCGAGGGCCT GGTTGATGCG GGCGGACT  
45301 ACTTCGCGCT GCTGGTGGT GCTGCTTGC TTGTATCGC CTTGTACAG CCAGGCAGCC  
45361 ATAAAGCTGC CGTTCCTGCC CACGATTACG CCGTCATCGA CGACAGCGGC GTAGTTGAGC  
45421 AGATCGGCCA GGCCGGCGTC CTTGGAACGA TGCTTTTCA GTTTCAGTTC GGCATCGACC  
45481 GCGCGGATGC GGGCAAAGAG GATGAACAAC AGAAGCGCGC CGAGGCCCGC GATTGCAATC  
45541 GCAATTGCTT GGATCATCGG TATTGCTCC CTTGGCTATT GGTGTTCTCG CGGAACGGGG  
45601 TCGAGCGGGC CGGGTAATAC GGCTGTACC GCGGTGACG CAGGTACACG AACCGCATCT  
45661 TCGGATCGGC CTTGCCATG ATTCGGAACG CATAGAGCGC CCCGAACCAC AGGATCAGAC  
45721 CGACCACGGT GGCCCGCAGC TCTGGGCGC TGAAAATCAG CGCAAACGCC ATCAGGCCG

45781 AGAACATCAC CAGTTCACGA TCACCACCCA TGAACAGGTT TTCTCGGTTG CCTGCGCGAC  
45841 GGATGGGGAT CGTGCAGCAGA GCCATGATTA GGCGAGCCGT CCAGCCGCTA CCGCACGCAC  
45901 GGCATCCGCC GCCGCGACTT GCACCTGGTG CAGCGCCCCG TTGCCGAGGG CCGCGATTC  
45961 GGCACCACGA CCGAAGAAGG TGCTCATCAC GTTCTGCGCG CCGACCAGCA GCGCCATCAC  
46021 CAGAACCAGG AAGATCAGGG TTCGGAAGAA GGC GTT GAGT TCGCCGCCGA AGATCAGCAC  
46081 GCCGCCGGCG ACGACGATGC CGATGATGGA CAGCGCGAAG GCCACCGGGC CGGTTACGGA  
46141 GTTGCAGCAGG TTCGTCAGCC AGCTCTCATA TGGCAAGCTG CCGCCGGTGC CTTCCGAGGC  
46201 CATCGCCGGA TGCAGCGGATA ACGCGAGAGC GAGAACGAAG AACACGGCAA GGTAGAACAA  
46261 AATGCCGCGA TTCATGGTCA GACGGAACGG AACAGCCGTT GTCATTGGAA ATACTCCTTA  
46321 CAGGGTTTTG GTGATGTA CT GACCGTTCTC GTAACCAAGA ACTTCGAGAA TTTCTTGAC  
46381 TCGACGGCCG CTAGGGGTCC TGGCGATATG GACGACCACA TGAACCGCT CGCCAATCAG  
46441 CGGCTCAATG GGTTCGGTG AATCCGGTG CATGCTGATA AGCATGGCGA GCCGGCTCAG  
46501 GCCCGCTTTG GGGTTGTTG CGTGCAGGGT GGC GG CACCT CTT CATGCC CGGTGTTCCA  
46561 GGCCATCAAC AGATCAAGGG CTTCCGGGGC ACGTACCTCA CCGACCAGGA TGCGGTGGG  
46621 GCGCATA CGC AGCGTTGTCT TGAGCAGCAG CGTCATCGAG ACGTCGATGC TGGTGTGGTA  
46681 TTGGACGGCG TTCTCTGCGG CGCACTGGAT TTCGCCGGTG TCCTCGATGA TGACGACGCG  
46741 CTCAGACGGG TTGAAGGCGA CCATTCATT GATGATCGCG TTGACGAGCG TGGTCTTGCC  
46801 CGAGCCAGTA CCGCCAATGA CGAGGATGTT TCGATGCGCC GCGACGGCGC TTTAATGAC  
46861 CTCGATTGC TCGCGGGTCA TGATGCCCGC CTCGACGTAC TGTTCCAGCG TGAAGATGGC  
46921 GACCGCGCGC TTGCGGATCG CAAAGGTTGG CGCGGCCACG ACCGGCGGCA ATTGGCCGGC  
46981 AAAGCGGCTG CCATCCAAGG GGAACCTGCC TTCCAGGATG GCGAATGCC GCGTGACCTC  
47041 TTTGCCGTGG AATCCGGCCA CCGTTTCTAT AATCGCCTGC GACTGGCTGG GCCGCATGC  
47101 GCAGATGTAC CGCATCGGCT CGCCAAGGCG TTCGTGCCAC ACCTTGCCGT CCGCGTTGAG  
47161 CATGACTTCA ACGGTTTTCG GGTGTTGAG CGCGGCCAAC AGGTCCGCAC CCATGTCGCG  
47221 TTCCAGCTTG CGCTTGCCCC GTCCTTGAT GGTCTGAAAC TCTTCTTCC CGCTCACTT  
47281 TCAGTAACCC CTACGCAACA AATCATTAGC AACATTATCG CACAGGCAA CGATATACCG  
47341 AAAGTGTTA GCCTGCAAGA CAAACAGCTA ATCGAACC GC ACGACGTAGG GGTCTGATA  
47401 GAAAACA ACT GTCAAAGCGC ACCCGCCGA TGCCATTCGC GGCACGGCTT CCGTTGAGGA  
47461 TGTCGATATG ATGCGCGAGC CGACGGCCCG CAGAGAAGGG GCCGTTTTAG CGGCTAAAGA  
47521 AGGAAGTGCA AGCCCTAACC CTTGGCGTCA GAGCCTTCCA CGCAGCTTTT TTCGGGTGTC  
47581 GTCGCCCCAT TTCTTTACGA TAAACGCTT ATGTGACGGC AAAACCACAC TGATGCGTTC  
47641 GTATCCGGGC GGCACGCTGC TCTTGAAAGG ATGACCCGCA ATCTCCGCGA GTGCCTCGCG  
47701 GTCAAGGTCG GTGGACTCCA GGAGAAGAGG TAGGGGAGTT TCCAGGGCGT CGGCAATGGC  
47761 CTCCATCACC TTCAACGAGG GGTTGGCCTT ACCGTTGGTT AAGTCTGATA AAAACGAAAT  
47821 TGAACCCCT GCCCTCTCCG ACAGCTCATG TTTGTCATG CCCCCTCAT CGAGCAGACG  
47881 AAGGATGTTG GTGAAAATA TCTGGTTGTA CACAGCGGAA GCCGCCCTC GCACCTTTGG  
47941 TCGCGGCCCG CAAAATTTTA GCCGCTAAG TTCTTGACAG CGGAACCAAT GTTTAGCTAA  
48001 ACTAGAGTCT CTTTCTCAA GGAGACTTTC GATATGAGCC ATAATCAGTT CAGTTTATC  
48061 GGTAATCTTA CCCGTGACAC CGAGGTACGT CATGGCAATT CTAACAAGCC GCAAGCAATT  
48121 TTCGATATAG CGGTTAATGA AGAGTGGCGC AACGATGCCG GCGACAAGCA GGAGCGCACC  
48181 GACTTCTTCC GCATCAAGTG TTTTGGCTCT CAGGCCGAGG CCCACGGCAA GTATTTGGGC  
48241 AAGGGGTGCG TGGTATTCTG GCAGGGCAAG ATTCGGAATA CCAAGTACGA GAAGGACGGC  
48301 CAGACGGTCT ACGGGACCGA CTTATTGCC GATAAGGTGG ATTATCTGGA CACCAAGGCA  
48361 CCAGGCGGGT CAAATCAGGA ATAAGGGCAC ATTGCCCGG CGTGAGTCGG GGCAATCCCG  
48421 CAAGGAGGGT GAATGAATCG GACGTTTAC CGGAAGGCAT ACAGGCAAGA ACTGATCGAC  
48481 GCGGGGTTTT CCGCCGAGGA TGCCGAAACC ATCGAAGCC GCACCGTCAT GCGTGCGCC  
48541 CGCGAAACCT TCCAGTCCGT CGGCTCGATG GTCCAGCAAG CTACGGCAA GATCGAGCGC  
48601 GACAGCGTGC AACTGGCTCC CCCTGCCCTG CCCGCGCCAT CGGCCCGCT GGAGCGTTCG  
48661 CGTCGTCTCG AACAGGAGG GGCAGGTTG GCGAAGTCGA TGACCATCGA CACGCGAGGA  
48721 ACTATGACGA CCAAGAAGCG AAAAACC GCCGAGGACC TGGCAAAACA GGTCAGCGAG  
48781 GCCAAGCAGG CCGCGTTGCT GAAACACACG AAGCAGCAGA TCAAGGAAAT GCAGCTTTC  
48841 TTGTTGATA TTGCGCCGTG GCCGGACACG ATGCGAGCGA TGCCAAACGA CACGGCCCGC  
48901 TCTGCCCTGT TCACCACGCG CAACAAGAAA ATCCCGCGCG AGGCGCTGCA AAACAAGGTC

48961 ATTTTCCACG TCAACAAGGA CGTGAAGATC ACCTACACCG GCGTCGAGCT GCGGGCCGAC  
49021 GATGACGAAC TGGTGTGGCA GCAGGTGTTG GAGTACGCGA AGCGCACCCC TATCGGCGAG  
49081 CCGATCACCT TCACGTTCTA CGAGCTTTGC CAGGACCTGG GCTGGTCGAT CAATGGCCGG  
49141 TATTACACGA AGGCCGAGGA ATGCCTGTCG CGCCTACAGG CGACGCGGAT GGGCTTCACG  
49201 TCCGACCGCG TTGGGCACCT GGAATCGGTG TCGCTGCTGC ACCGCTTCCG CGTCCTGGAC  
49261 CGTGGCAAGA AAACGTCCCG TTGCCAGGTC CTGATCGACG AGGAAATCGT CGTGCTGTTT  
49321 GCTGGCGACC ACTACACGAA ATTCATATGG GAGAAGTACC GCAAGCTGTC GCCGACGGCC  
49381 CGACGGATGT TCGACTATTT CAGCTCGCAC CGGGAGCCGT ACCCGCTCAA GCTGGAAACC  
49441 TTCCGCCTCA TGTGCGGATC GGATTCCACC CGCGTGAAGA AGTGGCGCGA GCAGGTGGC  
49501 GAAGCCTGCG AAGAGTTGCG AGGCAGCGGC CTGGTGAAC ACGCCTGGGT CAATGATGAC  
49561 CTGGTGCATT GCAAACGCTA GGGCCTTGTG GGGTCAGTTC CGGCTGGGGG TTCAGCAGCC  
49621 AGCGCTTTAC TGGCATTTC A GAAACAAGCG GGCCTGCTC GACGCACTTG CTTCGCTCAG  
49681 TATCGCTCGG GACGCACGGC GCGCTCTACG AACTGCCGAT AAACAGAGGA TTAATAATGA  
49741 CAATTGTGAT TAAGGCTCAG ATTCGACGGC TTGGAGCGGC CGACGTGCAG GATTTCCGCG  
49801 AGATCCGATT GTCGGCCCTG AAGAAAGCTC CAGAGATGTT CGGGTCCGTT TACGAGCACG  
49861 AGGAGAAAAA GCCCATGGAG GCGTTCGCTG AACGTTGCG AGATGCCGTG GCATTCGGCG  
49921 CCTACATCGA CGGCGAGATC ATTGGGCTGT CGGTCTTCAA ACAGGAGGAC GGCCCAAGG  
49981 ACGCTACAAA GCGCATCTG TCCGGCGTTT TCGTGGAGCC CGAACAGCGA GGCCGAGGGG  
50041 TCGCCGGTAT GCTGCTGCGG GCGTTGCCGG CGGTTTATT GCTCGTATG ATCGTCCGAC  
50101 AGATTCCAAC GGAATCTGG TGGATGCGCA TCTTCATCCT CGGCGCACTT AATATTTGCG  
50161 TATTCTGGAG CTTGTTGTTT ATTTGGTCT ACCGCCTGCC GGGCGGGGTC GCGGCGACGG  
50221 TAGGCGCTGT GCAGCCGCTG ATGGTCGTGT TCATCTCTGC CGCTCTGCTA GGTAGCCCGA  
50281 TACGATTGAT GCGGTCCTG GGGCTATTT GCGGAACTGC GGGCGTGGCG CTGTTGGTGT  
50341 TGACACCAA CGCAGCGCTA GATCCTGTCG GCGTCGCAGC GGGCCTGGCG GGGCGGTTT  
50401 CCATGGCGTT CGGAACCGTG CTGACCCGCA AGTGGCAACC TCCCGTGCCT CTGCTCACCT  
50461 TTACCGCCTG GCAACTGGCG GCCGGAGGAC TTCTGCTCGT TCCAGTAGCT TTAGTGTGTTG  
50521 ATCCGCCAAT CCCGATGCCT ACAGGAACCA ATGTTCTCGG CCTGGCGTGG CTCGGCCTGA  
50581 TCGGAGCGGG TTTAACCTAC TTCCTTGGT TCCGGGGGAT CTCGCGACTC GAACCTACAG  
50641 TTGTTTCCTT ACTGGGCTTT CTCAGCCCGG GGACCGCCGT GTTGCTAGGA TGGTTGTTCT  
50701 TGGATCAGAC GCTGAGTGC GCTCAAATCA TCGGCGTCTT GCTCGTGATC GGGAGTATCT  
50761 GGCTGGGCCA ACGTTCCAAC CGCACTCCTA GGTTAAACGC CTGGTGCTAC GCCTGAATAA  
50821 GTGATAATAA GCGGATGAAT GGCAGAAATT CGAAAGCAA TTCGACCCGG TCGTCGGTTC  
50881 AGGGCAGGGT CGTTAAATAG CCGCTATGT CTATTGCTGG TTTACCGGTT TATTGACTAC  
50941 CGGAAGCAGT GTGACCGTGT GCTTCTCAA TGCCTGAGGC CAGTTTGCTC AGGCTCTCCC  
51001 CGTGGAGGTA ATAATTGACG ATATGATCAT TTATTCTGCC TCCAGAGCC TGATAAAAAA  
51061 GGTGAATCCG TTAGCGAGGT GCCGCCGGCT TCCATTAGG TCGAGGTGGC CCGGCTCCAT  
51121 GCACCGCGAC GCAACGCGGG GAGGCAGACA AGGTATAGGG CGGCGAGGCG GCTACAGCCG  
51181 ATAGTCTGGA ACAGCGCACT TACGGGTTGC TGCGCAACCC AAGTGCTACC GGCGCGGCG  
51241 CGTGACCCGT GTCGGCGGCT CCAACGGCTC GCCATCGTCC AGAAAACACG GCTCATCGGG  
51301 CATCGGCAGG CGCTGCTGCC CGCGCCGTTT CCATTCCTCC GTTTCGGTCA AGGCTGGCAG  
51361 GTCTGGTTCC ATGCCCGGAA TGCCGGGCTG GCTGGGCGGC TCCTCGCCGG GGCCGGTCCG  
51421 TAGTTGCTGC TCGCCCGGAT ACAGGGTCGG GATGCGGCGC AGGTGCCAT GCCCAACAG  
51481 CGATTCTGCC TGGTCTGCTG GATCAACCAC CACGGCGGCA CTGAACACCG ACAGGCGCAA  
51541 CTGGTCCGCG GGCTGGCCCC ACGCCACGCG GTCATTGACC ACGTAGGCCG ACACGGTGCC  
51601 GGGGCCGTTG AGCTTACGA CGGAGATCCA GCGCTCGGCC ACCAAGTCTT TACTGCGTA  
51661 TTGGACCGTC CGCAAAGAAC GTCGATGAG CTTGGAAAGT GTCTTCTGGC TGACCACCAC  
51721 GGCGTTCTGG TGGCCATCT GCGCCACGAG GTGATGCAGC AGCATTGCCG CCGTGGGTTT  
51781 CCTCGCAATA AGCCCGGCC ACGCCTCATG CGCTTTGCGT TCCGTTTGCA CCCAGTGACC  
51841 GGGCTTGTTT TTGGCTTGA TGCAGTTTC TCTGGACTGC GTGGCCATGC TTATCTCAT  
51901 GCGGTAGGGG TGCCGCACGG TTGCGGCACC ATGCGCAATC AGCTGCAACT TTTCCGCGC  
51961 GCGACAACAA TTATGCGTTG CGTAAAAGTG GCAGTCAATT ACAGATTTTC TTTAACCTAC  
52021 GCAATGAGCT ATTGCGGGG GTGCCGCAAT GAGCTGTTGC GTACCCCTT TTTTAAGTT  
52081 GTTGATTTTT AAGTCTTCG CATTTCGCC TATATCTAGT TCTTGGTGC CCAAAGAAGG

52141 GCACCCCTGC GGGGTTCCCC CAGCCTTCG GCGCGGCTCC CCCTCCGGCA AAAAGTGGCC  
52201 CCTCCGGGGC TTGTTGATCG ACTGCGCGGC CTCGGCCTT GCCCAAGGTG GCGCTGCCCC  
52261 CTTGGAACCC CCGCACTCGC CGCCGTGAGG CTCGGGGGGC AGGCGGGCGG GCTTCGCCCT  
52321 TCGACTGCCC CCACTCGCAT AGGCTTGGGT CGTTCCAGGC GCGTCAAGGC CAAGCCGCTG  
52381 CGCGGTCGCT GCGCGAGCCT TGACCCGCCT TCCACTTGGT GTCCAACCGG CAAGCGAAGC  
52441 GCGCAGGCCG CAGGCCGAG GCTTTTCCCC AGAGAAAATT AAAAAAATTG ATGGGGCAAG  
52501 GCCGCAGGCC GCGCAGTTGG AGCCGGTGGG TATGAATTCG AATTCCTGCC GACATGGAAG  
52561 CCATCACAAA CGGCATGATG AACCTGAATC GCCAGCGGCA TCAGCACCTT GTCGCCTTGC  
52621 GTATAATATT TGCCCATGGA CGCACACCGT GGAAACGGAT GAAGGCACGA ACCCAGTTGA  
52681 CATAAGCCTG TTCGGTTCGT AAAGTGT

//
