# Supplementary material for: Efficient inter-species conjugative transfer of a CRISPR nuclease for targeted bacterial killing
Source: PubMed Central journal article supplement (PMC6778077; doi:10.1038/s41467-019-12448-3), 2019-10-04
Supplement: 41467_2019_12448_MOESM11_ESM.pdf [file 41467_2019_12448_MOESM11_ESM.pdf]

>rplC  
GTTAAAAAAGTTGACGTAACCGG  
>ytfM  
CTGAATATCGAGTCATTTGCGGG  
>yghJ  
GTTGATCGGTTTCATAAAACGCGG  
>stfA  
ACGCCAGTATGATCTTTGCTGG  
>aegA  
ACGCGGCTTGGCGAACCGGATGG  
>glTJ  
CCATAGCCAGCCGAGATAGGTGG  
>ompS  
ATTAAGGTAAACACCACCGAAGG  
>mviM  
TGCCGGCGTCCATGTCTGCGTGG
