# Supplementary material for: Efficient inter-species conjugative transfer of a CRISPR nuclease for targeted bacterial killing
Source: PubMed Central journal article supplement (PMC6778077; doi:10.1038/s41467-019-12448-3), 2019-10-04
Supplement: 41467_2019_12448_MOESM12_ESM.pdf [file 41467_2019_12448_MOESM12_ESM.pdf]

>MG16552

AGCTTTTCATTCTGACTGCAACGGGCAATATGTCTCTGTGTGGATTAAAAAAGAGTGTCTGATAGCAGCTTCTGAACTG  
GTTACCTGCCGTGAGTAAATTTAAATTTTATTGACTTAGGTCACATAAATACTTTAACCAATATAGGCATAGCGCACAGAC  
AGATAAAAATTACAGAGTACACAACATCCATGAAACGCATTAGCACCACCATTACCACCACCATCACCATTACCACAGGT  
AACGGTGCGGGCTGACGCGTACAGGAAACACAGAAAAAGCCCGACCTGACAGTGCGGGCTTTTTTTTTCGACCAAAGG  
TAACGAGGTAACAACCATGCGAGTGTGAAGTTCGGCGGTACATCAGTGGCAAATGCAGAACGTTTTCTGCGTGTGGCCG  
ATATTCTGAAAGCAATGCCAGGCAGGGCAGGTGGCCACCGTCTCTGCCCCGCCAAAATCACCAACCACCTGGTG  
GCGATGATTAAAAAACCATTAGCGGCCAGGATGCTTTACCAATATCAGCGATGCCGAACGTATTTTTGCCGAACCTTT  
GACGGGACTCGCCGCCGCCAGCCGGGTTCCCGCTGGCGCAATTGAAAACCTTCGTGATCAGGAATTTGCCAAATAA  
AACATGTCCTGCATGGCATTAGTTTGTGGGGCAGTGCCCGGATAGCATCAACGCTGCGCTGATTTGCCGTGGCGAGAAA  
ATGTCGATCGCCATTATGGCCGGCGTATTAGAAGCGCGCGTCACAACGTTACTGTTATCGATCCGGTCGAAAACTGCT  
GGCAGTGGGGCATTACCTCGAATCTACCGTCGATATTGCTGAGTCCACCCCGGATTGCGGCAAGCCGATTCCGGCTG  
ATCATATGGTCTGATGGCAGGTTTACCGCCGGTAATGAAAAAGGCGAACTGGTGGTCTTGACGCAACGTTCCGAC  
TACTCTGCTCGGTGCTGGCTGCCTGTTACGCGCCGATTGTTGCGAGATTTGACGGACGTTGACGGGCTCTATACCTG  
CGACCCGCTCAGGTGCCCCGATGCGAGTGTGAAGTCGATGCTTACCAGGAAGCGATGGAGCTTTCTACTTCGGCG  
CTAAAGTTCTTACCCCCCAGCCATTACCCCATGCCAGTTCCAGATCCCTTGCTGATTAATAAATACCGAAATCCT  
CAAGCACCAGTACGCTCATTGGTGCCAGCCGTGATGAAGACGAATTACCGGTCAAGGGCATTTCGAATCTGAATAACAT  
GGCAATGTTACGCTTTCTGGTCCGGGGATGAAAGGGATGGTCCGCATGGCGGCGCGCTTTTGACGCGATGTCACGCG  
CCCGTATTTCCGTGGTGTGATTACGCAATCATCTCCGAATACAGCATCAGTTTCTGCGTCCACAAAGCGACTGTGTG  
CGAGCTGAACGGGCAATGCAGGAAGAGTTCTACCTGGAAGTAAAGAAAGGCTTACTGGAGCCGCTGGCAGTGACGGAACG  
GCTGGCCATTATCTCGGTGGTAGGTGATGGTATGCGCACCTTGCCTGGGATCTCGGCGAAATTTCTTGCCGCACTGGCCC  
GCGCAATATCAACATTGTCGCCATTGCTCAGGGATCTTGAACGCTCAATCTCTGCTGGTAAATAACGATGATGCG  
ACCACTGGCGTGCCTTACTCATCAGATGCTGTTCAATACCGATCAGGTTATCGAAGTGTGTTGATTGGCGTGGTGG  
CGTTGGCGGTGCGCTGCTGGAGCAACTGAAGCGTCAGCAAAGCTGGCTGAAGAATAAACATATCGACTTACGTGTCTGCG  
GTGTTGCCAECTGAAGGCTCTGCTACCAATGTACATGGCCTTAATCTGAAAACTGGCAGGAAGAAGTGGCGCAAGCC  
AAAGAGCCGTTAATCTCGGGCGCTTAATTCGCCTCGTAAAGAATATCATCTGCTGAACCCGGTCATTGTTGACTGCAC  
TTCCAGCCAGGCAAGTGGCGATCAATATGCCGACTTCTGCGCGAAGGTTTCCACGTTGTCACGCCGAACAAAAAGGCCA  
ACACCTCGTCGATGGATTACTACCATCAGTTGCGTTATGCGGGCGAAAAATCGCGGCGTAAATTCCTCTATGACACCAAC  
GTTGGGGCTGGATTACCGGTTATTGAGAACCTGCAAAATCTGCTCAATGCAGGTGATGAATTGATGAAGTCTCCGGCAT  
TCTTTCTGGTTGCTTTCTATATCTTCGGCAAGTTAGACGAAGGCATGAGTTTCTCCGAGGCGACCACGCTGGCGCGGG  
AAATGGGTTATACCGAACCCGGACCCGCGAGATGATCTTTCTGGTATGGATGTGGCGCGTAAACTATTGATTCTCGCTCGT  
GAAACGGGACGTGAACTGGAGCTGGCGGATATTGAAATTGAACCTGTGCTGCCCGCAGAGTTAACCGCCAGGGTGATGT  
TGCCGCTTTTATGGCGAATCTGTCACAACCTCGACGATCTTTGCCGCGCGCTGGCGAAGGCCCGTATGAAGGAAAAAG  
TTTTGCGCTATGTTGGCAATATTGATGAAGATGGCGTCTGCCGCTGAAGATTGCCGAAGTGGATGGTAATGATCCGCTG  
TTCAAAGTAAAAATGGCGAAAAACGCCCTGGCCTTCTATAGCCACTATTATCAGCCGCTGCCGTTGGTACTGCGCGGATA  
TGGTGGCGGCAATGACGTTACAGCTGCCGGTGTCTTTGCTGATCTGCTACGTACCCTCTCATGGAAGTTAGGAGTCTGAC  
ATGGTTAAAGTTTATGCCCCGGCTTCCAGTGCCAATATGAGCGTCGGGTTTATGATGCTCGGGGCGCGGTGACACCTGT  
TGATGGTGCATTGCTCGGAGATGTAGTCACGGTTGAGGCGGACAGACATTCAGTCTCAACAACCTCGGACGCTTTGCCG  
ATAAGCTCCGTCAGAACCACGGGAAAAATATCGTTTATCAGTGTGGGAGCTTTTTGCGAGAACTGGGTAAGCAAAT  
CCAGTGGCGATGACCCTGGAAAAAGAATATGCCGATCGGTTCCGGCTTAGGCTCCAGTGCCTGTTCCGTTGGTGGTGGCGGCT  
GATGGCGATGAATGAACACTGCGGGAAGCCGTTAATGACACTCGTTTTGCTGGCTTTGATGGGCGAGCTGGAAGGCCGTA  
TCTCCGGCAGCATTACATTACGACAACGTGGCACCCTGTTTTCTCGGTGGTATGCAGTTGATGATCGAAGAAAAACGACATC  
ATCAGCCAGCAAGTGCCAGGGTTTATGAGTGGCTGTGGGTGCTGGCGTATCCGGGGATTAAGTCTCGACGGCAGAAGC  
CAGGGCTATTTTACCGGCGCAGTATCGCCGCCAGGATTGCATTGCGCACGGGCGACATCTGGCAGGCTTCATTACGCCT  
GCTATTTCCCGTCAGCCTGAGCTTCCCGGAAGCTGATGAAAGATGTTATCGCTGAACCCTACCGTGAACGGTTACTGCCA  
GGCTTCCGGCAGGCGCGGACGGCGGTGCGGAAATCGGCGCGGTAGCGAGCGGTATCTCCGGCTCCGGCCGACCTTGTT  
CGCTCTGTGTGACAAGCCGGAACCGCCAGCGCTTCCGACTGGTTGGGTAAGAACTACCTGCAAAATCAGGAAGGTT  
TTGTTCATATTTGCCGGCTGGATACGGCGGGCGCACGAGTACTGGAAAACTAAATGAACTCTACAATCTGAAAGATCAC  
AACGAGCAGGTGAGCTTTGCGCAAGCCGTAACCCAGGGGTTGGGCAAAAATCAGGGGCTGTTTTTTCCGCACGACCTGCC  
GGAATTCAGCCTGACTGAAATTTGATGAGATGCTGAAGCTGGATTTTGTACCCCGAGTGCGAAGATCCTCTCGGCGTTA  
TTGGTGATGAAATCCACAGGAAATCCTGGAAGAGCGCTGCGCGCGGCTTTGCCCTCCCGGCTCCGGTCCGCAATGTT  
GAAAGCGATGTCGGTTGCTGGAATTTCCACGGGCAACGCTGGCATTAAAGATTTCCGGCGTCCGTTTATGGCACA  
AATGCTGACCCATATTGCGGGTGATAAGCCAGTGACCAATTCTGACCGCGACCTCCGGTGATACCGGAGCGCAGTGGCTC  
ATGCTTTCTACGGTTTACCGAATGTGAAAGTGGTTATCCTCTATCCACGAGGCAAAAATCAGTCCACTGCAAGAAAACTG  
TTCTGTACATTTGGGCGGCAATATCGAAACTGTTGCCATCGACGGCGATTTCGATGCCTGTGACGGCGTGGTGAAGCAGGC  
GTTTGATGATGAAGAACTGAAAGTGGCGCTAGGGTTAAACTCGGCTAACTCGATTAACATCAGCCGTTTCTGGCGCAGA

TTTGCTACTACTTTGAAGCTGTTGCGCAGCTGCCGACGAGACGCGCAACCAGCTGGTTGTCTCGGTGCCAAGCGGAAAC  
TTCGGCGATTTGACGGCGGGTCTGCTGGCGAAGTCACTCGGTCTGCCGGTAAAACGTTTTATTGCTGCGACCAACGTGAA  
CGATACCGTGCCACGTTTCTGACGACGGTCAAGTGGTCAACCAAAGCGACTCAGGCGACGTTATCCAACGCGATGGACG  
TGAGTCAGCCGAACAACCTGGCCGCGTGTGGAAGAGTTGTTCCGCCGAAAATCTGGCAACTGAAAGAGCTGGGTTATGCA  
GCCGTGGATGATGAAACCACGCAACAGACAATGCGTGAGTTAAAAGAAGCTGGGCTACACTTCGGAGCCGACGCTGCCGT  
AGCTTATCGTGCGCTGCGTGATCAGTTGAATCCAGGCGAATATGGCTTGTCCCTCGGCACCCGCGCATCCGGCGAAATTTA  
AAGAGAGCGTGGAAAGCGATTCTCGGTGAAACGTTGGATCTGCCAAAAGAGCTGGCAGAACGTGCTGATTTACCCCTTGCTT  
TCACATAATCTGCCCGCCGATTTTGTGCGTTGCGTAAATTGATGATGAATCATCAGTAAAATCTATTCAATTATCTCAAT  
CAGGCCGGGTTTGCTTTTATGCAGCCCGGCTTTTTTATGAAGAAATATGGAGAAAAATGACAGGGAAAAAGGAGAAATT  
CTCAATAAATGCGGTAACCTAGAGATTAGGATTGCGGAGAATAACAACCGCCGTTCTCATCGAGTAATCTCCGGATATCG  
ACCCATAACGGGCAATGATAAAGGAGTAACCTGTGAAAAAGATGCAATCTATCGTACTCGCACTTTCCCTGGTTCTGGT  
CGTCCCATGGCAGCACAGGCTGCGGAAATTACGTTAGTCCCGTCAGTAAAATTACAGATAGGCGATCGTGATAATCGTG  
GCTATTACTGGGATGGAGTCACTGGCGGACCCAGGCTGGTGGAAAAACATTATGAATGGCGAGGCAATCGCTGGCAC  
CTACACGGACCCGCGCCACCGCCGCGCCACCATAAGAAAGTCTCATGATCATCACGGCGGTATGGTCCAGGCAACA  
TCACCGTAAATGACAAATGCCGGTAACAATCCGGCATTGAGGCTGATGCGACGCTGGCGGCTTTATCAGGCTAC  
GTTAATTCTGCAATATGAAATCTGCATGCTTTTTGTAGGCAGGATAAGGCGTTCACGCCGATCCGGCATTGACTGCAA  
ACTTAACGCTGCTCGTAGCGTTTTAAACACCAGTTGCCATTGCTGGAGGAATCTTCATCAAAGAAGTAACCTTCGCTATT  
AAAACAGTCAGTTGCTCTGGTTTGGTCAAGCATTTCATAAATGAAACGACTCATCAGACCCGCGTCTTTCTTAGCGT  
AGAAGCTGATGATCTAAATTTGCCGTTCTTCTCATCGAGGAACCCGGCTTGATAATCTCGGCATTCAATTTCTTCGGC  
TTCACCGATTTAAAATACTCATCTGACGCCAGATTAATCACCACATTATCGCCTTGTGCTGCGAGCGCCTCGTTCAGCTT  
GTTGGTGATGATATCTCCCCAGAATTGATACAGATCTTCCCTCGGGCATTCTCAAGACGGATCCCCATTTCCAGACGAT  
AAGGCTGCATTAATCGAGCGGGCGGAGTACGCCATAAAGCCGAAAGCATTGCAAATGCTGTTGGGCAAAATCGAAA  
TCGTCTTCGCTGAAGTTTTCGCCTGCAAGCCGGTGTAGACATCACCTTTAAACGCCAGAATCGCTGGCGGCATTTCGC  
CGCGTGAAATCTGGCTGCCAGTCATGAAAGCGAGCGGCTTGATAACCCGCGAGTTTGTGCTGATGCGCATCAGCGTGC  
TAATCTGCGGAGGCGTCAGTTTCCGCGCCTCATGGTCAACTGCTGGGAATTGTCTAACAGCTCCGGCAGCGTATAGCGC  
GTGGTGGTCAACGGGCTTTGGTAATCAAGCGTTTTGCGAGGTGAAATAAGAATCAGCATATCCAGTCTTGCAGGAAATT  
TATGCCGACTTTAGCAAAAAATGAGAATGAGTTGATCGATAGTTGTGATTACTCTGCGAAACATCATCCACGCGTCCG  
GAGAAAGCTGGCGACCGATATCCGGATAACGCAATGGATCAAACCCGGGCGCACGCCGAGTTTACGCTGGCGTAGATAA  
TCACTGGCAATGGTATGAACCACAGGCGAGAGCAGTAAAATGGCGGTCAAATGGTAATAGCCATGCAGGCCATTATGAT  
ATCTGCCAGTTGCCACATCAGCGGAAGGCTTAGCAAGGTGCCGCCGATGACCCTTGCGAAGGTGCAGATCCGCAACACC  
AGATCGCTTTAGGGTTGTTCAAGCGTAAAAAGAAGAGATTGTTTTCGGCATAAATGTAGTTGGCAACGATGGAGCTGAAG  
GCAAAACAGAATAACCACAAGGGTAACAACTCAGCACCCAGGAACCCATTAGCACCCGCATCGCCTTCTGGATAAGCTG  
AATACCTTCCAGCGGCATGTAGGTTGTGCCGTTACCCGCCAGTAATATCAGCATGGCGCTTCCCGTACAGATGACCAGGG  
TGTCGATAAAAATGCCAATCATCTGGACAATCCCTTGCCTGCGGGATGCGGAGGCCAGGACGCCGCTGCCGCTGCCGCG  
TTTGGCGTCGAACCCATTTCCCGCTCATTGAAAACATACTGCGCTGAAAACCGTTAGTAATCGCCTGGCTTAAGGTATA  
TCCC GCCGCGCCGCTGCCGCTTCTGCCAGCCAAAAGCACTCTAAAAATAGACCAAATGACGTGGGGAAGTTGCCCGA  
TATTCATTACGCAAAATACCAGGCTGGTCACTACCCAGATTATCGCCATCAACGGGACAAAGCCCTGCATGAGCCGGGCG  
ACGCCATGAAGACCGGAGTGATTGCCAGCAGAGTAAAGACAGCGAGAATAATGCCTGTACCAGCGGGGAAAAATCAA  
AGAAAAACTCAGGGCGCGGGCAACGGGTTGCTTGAATCCGCTGAAAATTTATGCCATAGGCGATGAGCAAAAAGACGG  
CGAACAGAACGCCCATCCAGCGCATCCCAAGCCGCGCCATATACCATGCCGTTCCGCCACGAAACTGCCATTGACG  
TCACGTTCTTTATAAAGTTGTGCCAGAGAACATTCCGCAAAACGAGGTCGCCATGCCGATAAACCGCGCAACCCACATCCA  
AAAGACGGCTCCAGTCCACCGCGGTAATAGCCAGCGCAACCGCGCCAGGTTGCCGCTACCCACGCGCGCCGCAAGAC  
TGGTACACAATGACTGAAATGAGGTTAAACCGCCTGGCTGTGGATGAATGCTATTTTTAAGACTTTTGCCAAACTGGCGG  
ATGTAGCGAAACTGCACAAATCCGGTGCGAAAAGTGAACCAACAACCTGCGCCGAAGAGCAGGTAAATCATTACCGATCC  
CCAAAGGACGCTGTTAATGAAGGAGAAAAAATCTGGCATGCATATCCCTCTTATTGCCGGTTCGCGATGACTTTCTGTGT  
AAACGTTACCAATTGTTTAAAGAAGTATATACGCTACGAGGTACTTGATAACTTCTGCGTAGCATACATGAGGTTTTGTAT  
AAAAATGGCGGGCGATATCAACGCAGTGTGAGAAATCCGAAACAGTCTCGCCTGGCGATAACCGTCTTGTGCGCGGTTGC  
GCTGACGTTGCGTGTGATATCATCAGGGCAGACCGGTTACATCCCCCTAACAAAGCTGTTTAAAGAGAAATACTATCATG  
ACGGACAAATTGACCTCCCTTGTGATACACCACCGTGTGGCCGACACTGGGGACATCGCGGCAATGAAGCTGTATCA  
ACCGCAGGATGCCACAACCAACCTTCTCTATTCTTAAACGCAGCGCAGATTCCGGAATACCGTAAGTTGATTGATGATG  
CTGTGCGCTGGCGGAAACAGCAGAGCAACGATCGCGCGCAGCAGATCGTGGACGCGACCGACAAACTGGCAGTAAATATT  
GGTCTGAAAATCCTGAAACTGGTCCGGGCGGATCTCAACTGAAGTTGATGCGCGTCTTCTCTATGACACCGAAGCGTC  
AATTGCGAAAGCAAACGCTGATCAAACCTCAACAAGATGCTGGTATTAGCAACGATCGTATTCTGATCAAACCTGGCTT  
CTACCTGGCAGGGTATCCGTGCTGAGAACAGCTGGAAAAAGAAGGCATCAACTGTAACCTGACCCTGCTGTTCTCCTTC  
GCTCAGGCTCGTGTGTGCGGAAGCGGGCGTGTTCCTGATCTCGCCGTTTGTGGCCGATTCTTACTGGTACAAAGC  
GAATACCGATAAGAAAGAGTACGCTCCGGCAGAAGATCCGGGCGTGGTTCTGTATCTGAAATCTACCAGTACTACAAAG

AGCACGGTTATGAAACCGTGGTTATGGGCGCAAGCTTCCGTAACATCGGCGAAATCTGGAAGTGGCAGGCTGCGACCGT  
CTGACCATCGCACCGGCACTGCTGAAAGAGCTGGCGGAGAGCGAAGGGGCTATCGAACGTAAGTGTCTTACACCGGCGA  
AGTGAAAGCGCGTCCGGCGGTATCACTGAGTCCGAGTTCCTGTGGCAGCACAAACCAGGATCCAATGGCAGTAGATAAAC  
TGCGGGAAGGTATCCGTAAGTTTGTATTGACCAGGAAAACTGGAAAAATGATCGGCGATCTGCTGTAATCATTCTTA  
GCCTGACCGGGAAGTCCGGTACGCTACCTCTTCTGAAGCTGTCTGTCACTCCCTTCGAGTGTATCATTCTGTTTAAACG  
AGACTGTTTAAACGGAATACTTTGATGAATACTTTACGTATTGGCTTAGTTTTCCATCTCTGATCGCGCATCCAGCGGCG  
TTTATCAGGATAAAGGCATCCCTGCGCTGGAAGAATGGCTGACATCGGCGTAACCACGCCGTTTGAAGTGGAAACCCGC  
TTAATCCCCGATGAGCAGGCGATCATCGAGCAAACGTTGTGTGAGCTGGTGGATGAAATGAGTTGCCATCTGGTGCTCAC  
CACGGGCGAACTGGCCCGCGCTGTGACGTAACGCCGATGCGACGCTGGCAGTAGCGGACCGCGAGATGCCTGGCT  
TTGGTGAACAGATGCGCCAGATCAGCCTGCATTTTGTACCAACTGCGATCCTTTCGCGTCAAGTGGGCGTATTGCGAAA  
CAGGCGCTGATCCTTAACCTACCCGGTACGCCAAGTCTATTAAGAGACGCTGGAAGGTGTGAAGGACGCTGAGGGTAA  
CGTTGTGGTACACGGTATTTTTGCCAGCTACCGTACTGCATTGAGTTGCTGGAAGGGCCATACGTTGAAACGGCACCGG  
AAGTGGTTGCAGCATTGACCCGAAGAGTGAAGACGCGACGTTAGCGAATAAAAAAATCCCCCGAGCGGGGGATCTC  
AAAAAATTAGTGGGATTACCAATCGGCAAGCGTGCAGCAAACTGCTCGTTCAGTACTTCACCCATCGCCAGATG  
ATTGCGCTGGCACCGAGATCAGCCCAATCCAGCCGCAAGTGGATGATTGCGGCGTTACCGGCAATGTTACCGATCGC  
CAGCAGGGCAACAGCAGCGTCAAGGTAAGAAAAACGAATTGCAGAACGCGTGCCTTTTACGCGTGCCGAAGAATAA  
ACAGCGTAAATACGCCCCACAGACCCAGGTAGACACCAAGGAAGTGTGATTTGGCGCATCGGTACAGCCAGTTTCGCG  
ATCAGCAGAATCGCAACCAGCTCAGCCAGAAAGAACCCTAAGAGGTGAATGCGGTTAAACCGAAAGTGTGCTTTTTT  
GACTCCAGCAGACCAGCAAAAATTTGCGCGATGCCGCCGTAGAAAATGCCATGGCAAGAATAATACCGTCCAGAGCGA  
AATAACCCACGTTGTGCAGGTTAAGCAGAATGGTGGTATGCCGAAGCCATCAGGCCAGCGGTGCCGATTAGCCAAC  
TTAGTGTGGCCATAATCTCAAAAATCATCATCGAATGAATGGTGAATAATTTCCCTGAATAACTGTAGTGTTTTCA  
GGGCGGGCATAATAATCAGCCAGTGGGCGAGTGTACGATCTTTGAGGGGAAAATGAAAATTTTCCCGGTTTCCGG  
TATCAGACCTGAGTGGCGTAACCATCCGGCGCAGGCGAGTTCAGTACGGCTGGAATCGTACGCGATAGGCGCT  
GCCGCTGACCGCTTAAACCCATTTAGTCCGCGACCTACAGGGCCTCCAGCCCCGCGCCGCGCAGCAAAACATGCCAA  
GTACGCTCATTGCTGCGTGGTGCCTAAAATGCGGGTCAAGTGGTGGAAAGCAAATGCGACACACCTTTTCCAAATAAT  
TTGCTTTTATCAGCAGCGGCGAGCAGCTTTCCAGTCACTCACCTGGCATCGACCGGTGCAGAACTCCTGCTTATG  
TTCCTCGTCCATTTTCTCCAGGTATTACGAGAAAATGTTCCAGTAACTGTTGCTCAATTTCAAACGTAGACATCTCTT  
TGTCGGCTTTACGCTTCAATCGCTTTGAAACATCGAGCAAAATGGCCGATACAATTTACCGTGTCCGCGCAGTTTGTG  
GCGATACTATGCCACCAAAATGCTGTAATTTCTCCGCAATCAGTGCAGTTGCGGCGATGTTGCTCGGGATGCCCTTC  
CATCGATTTAAACAGTTCGTTGCGCATCAGTACGCTGGAGAGGCGAGTTTTGCCTTTTTTATTATGGGTGAGCAATCGGG  
CGAAATTTGCCAACTGTTCTCACTACAATGCTGAAGAAAATCCAGATCTGAATCATTGAGTAATTAACATTCATTTTT  
TGTGGCTTCTATATTCTGGCGTTAGTCTGCGCGATAATTTTACGCTGGCCATATCCGATGAGTTCACCGTATGACCCG  
AAAAGGTGATTTTTGAGACGCAGCGTTTATTGTCGTTATCGCTGTTAATGTTGATCCAGTCAAGTGGTTTGCCTTCTTT  
ATTTCTGAAGGAATATTCAGGCTCTGACTGGCGCTACGGGCGCTTTGAAATAAACCGATGCACCGCTTAACTGTAATC  
GCCATGGTCCGCGAGAGTGTATGCGTTTACAATGCGACAAACAGGAAGTTTTCAGCGCCAGATCGTTGGTTTCTGTTAC  
GCGGATTGCAATGGCGCCGAGGATTTATGGTGGTTTGCCTGCGCGTGCAGCACAGCATCAGGCTAATCGCCAGGCTG  
GCGGAAATCGTAAAAACGGATTTTATAAGGATTTCTTATGTTGGAAGAGGTAGGGGGATGAATACCCACTAGTTTACTGC  
TGATAAAGAGAAGATTGAGCAGCTAATCTTTTCTTTTATTACAATTTTTTATGTAATGCCTGGCTGCGATTCACTCT  
TTATATGAATAAAATTTGCTGCAATTTTACGCTTTGCTGCTGCCATATCGCGAAATTTCTGCGCAAAAGCACAAAAATTT  
TTGCATCTCCCTTTGATGACGTGGTTTACGACCCCTTATGATGTAACCCGAGTGAAGTGAAGTCTGCAAAAAAATGAAA  
TTGGGCGATTGAAACCGAGCGTTTCCGCCCTATTACAGACTCACAAACCATGATGACCGAATATATAGTGGAGACGTTT  
AGATGGGTAATAAATTGATCGACCTGGGTAACCAACTCTTGTGTAGCGATTATGGATGGCACCCTCCTCGCGTG  
CTGGAGAACGCCGAAGGCGATCGACCCACGCTTCTATCATTGCCTATACCCAGGATGGTGAAGTCTAGTTGGTACGCC  
GGCTAAACGTCAGGCAAGTGCAGAACCCGCAAAACACTCTGTTTGCGATTAACGCTGATTGGTGCAGGCTTCCAGGACG  
AAGAAGTACAGCGTATGTTTCCATCATGCCGTTCAAAATTTGCTGCTGATAACGGCGACGATGGGTGGAAGTTAAA  
GGCCAGAAAATGGCACCGCCGAGATTTCTGCTGAAGTGTGAAAAAATGAAGAAAACCGCTGAAGATTACCTGGGTGA  
ACCGGTAACGAACTGTTATACCGTACCGGCATACTTTAACGATGCTCAGCGTCAAGCAACCAAGACGAGGCGGTA  
TCGCTGGTCTGGAAGTAAACGATCATCAACGAACCGACCGAGCTGCGCTGGCTTACGGTCTGGACAAAGGCACTGGC  
AACCGTACTATCGCGTTTATGACCTGGGTGGTGGTACTTTGATATTTCTATTATCGAAATCGACGAAGTTGACGGCGA  
AAAAACCTTGAAGTTCTGGCAACCAACGGTATACCCACTGGGGGTGAAGACTTCGACAGCGCTGATCAACTATC  
TGGTTGAAGAATTCAGAAAGATCAGGCGATTGACCTGCGCAACGATCCGCTGGCAATGCAGCGCTGAAAGAAGCGGCA  
GAAAAAGCGAAAATCGAACTGTCTTCCGCTCAGCAGACCGACGTTAACCTGCCATACATCACTGCAGACGCGACCGGTCC  
GAAACACATGAACATCAAAGTACTCGTGCAGAACTGGAAAGCCTGGTTGAAGATCTGGTAAACCGTTCCATTGAGCCGC  
TGAAAGTTGCACTGCAGGAGCTGGCCTGTCCGATCTGATATCGACGACGTTATCCTCGTTGGTGGTACAGACTCGTATG  
CCAATGTTTCAAGAAAGTTGCTGAGTTCTTTGGTAAAGAGCCGCTAAAGACGTTAACCAGGACGAAGCTGTAGCAAT  
CGGTGCTGCTGTTCAAGGTGGTGGTCTGACTGGTGCAGTAAAGACGTAAGTCTGCTGACGTTACCCCGCTGCTCTGG

GTATCGAAACCATGGGCGGTGTGATGACGACGCTGATCGCGAAAAACACCACTATCCCGACCAAGCACAGCCAGGTGTTCT  
TCTACCGCTGAAGACAACCACTGCTGCGGTAACCATCATGTGCTGCAGGGTGAACGTAAACGTGCGGCTGATAACAAATC  
TCTGGGTCAAGTCAACCTAGATGGTATCAACCCGGCACCGCGCGCATGCCGAGATCGAAGTTACCTTCGATATCGATG  
CTGACGGTATCCTGCACGTTTCCGCGAAAGATAAAAAACAGCGGTAAGAGCAGAAGATCACCATCAAGGCTTCTTCTGGT  
CTGAACGAAGATGAAATCCAGAAAATGGTACGCGACGACGAGAAGCTAACGCCGAAGCTGACCCTAAGTTTTGAAGAGCTGGT  
ACAGACTCGCAACCAGGGCGACCATCTGCTGCACAGCACCCGTAAGCAGGTTGAAGAAGCAGGCGACAAAACCTGCCGGCTG  
ACGACAAAACCTGCTATCGAGTCTGCGCTGACTGCACTGGAAACTGCTCTGAAAGGTGAAGACAAAAGCCGCTATCGAAGCG  
AAAATGCAGGAACTGGCAGAGTTTCCAGAAAACCTGATGGAATCGCCAGCAGCAACATGCCAGCAGCAGACTGCCGG  
TGCTGATGCTTCTGCAACAACGCGAAAGATGACGATGTTGTCGACGCTGAATTTGAAGAAGTCAAAGACAAAAATAAT  
CGCCCTATAAACGGGTAATTATACTGACACGGGCGAAGGGGAATTTCTCTCCGCCCGTGCATTATCTAGGGGCAATTT  
AAAAAGATGGCTAAGCAAGATTATTACGAGATTTTAGCGTTTCCAAAACAGCGGAAGAGCGTGAATCAGAAAGCCCT  
ACAAACGCCTGGCCATGAAATACCACCCGGACCGTAACCAGGGTGACAAAGAGCCGAGGCCGAAATTTAAAGAGATCAAG  
GAAGCTTATGAAGTTCTGACCGACTCGCAAAAACGTGCGGCATACGATCAGTATGGTCATGCTGCGTTTGAAGCAAGTGG  
CATGGGCGGCGCGGTTTTGGCGGCGCGCAGACTTACGCGATATTTTTGGTGACGTTTTCGCGGATATTTTTGGCGCG  
GACGTGGTCTCAACGTCCGCGCGCGGTGCTGATTACGCTATAACATGGAGCTCACCCCTCGAAGAAGCTGATCGTGGC  
GTGACCAAAGAGATCCGCATTCGACTCTGGAAGAGTGTGACGTTTGCACGTTAGCGGTGCAAAAACAGGTACACAGCC  
GCAGACTTGTCCGACCTGTATGGTTCTGGTCAGGTGCAGATGCCCGAGGATTCTTCGCTGTACAGCAGACCTGTCCAC  
ACTGTCAGGGCCGCGGTACGCTGATCAAAGATCCGTGCAACAAATGTCATGGTCATGGTCGTGTTGAGCGCAGCAAAAACG  
CTGTCCGTTAAAATCCCGCGAGGGTGGACACTGGAGACCGCATCCGCTTTCGCGGCGAAGGTGAAGCGGGCGAGCATGG  
CGCACCGCGCAGCGATCTGTACGTTACAGTTTACGTTAAACAGCACCCGATTTTCGAGCGTGAAGGCAACAACCTGTATT  
GCGAAGTCCCGATCAACTTCGCTATGGCGGCGTGGGTGGCGAAATCGAAGTACCGACCCTTGATGGTCGCGTCAAACCTG  
AAAGTGCCTGGCGAAACCCAGACCGGTAAGCTATTCGATGCGCGGTAAGGCGTCAAGTCTGTCCGCGGTGGCGCACA  
GGGTGATTTGCTGTGCCGTTGTCGTCGAAACACCGGTAGGCCGTAACGAAAGGCAGAAACAGCTGCTGCAAGAGCTGC  
AAGAAAGCTTCGGTGGCCCAACCGGCGAGCACAACAGCCGCGCTCAAAGAGCTTCTTTGATGGTGTGAAGAAGTTTTTT  
GACGACCTGACCCGCTAACCTCCCAAAAGCCTGCCGTTGGCAGGCTGGGTA AAAATAGGGTGC GTTGAAGATATGCG  
AGCACCTGTAAGTGGCGGGATCACTCCATAAGCGCTAACTTAAAGGTTGTGGTATTACGCTGATATGATTTAACGT  
GCCGATGAATTACTCTCACGATAACTGGTCAGCAATTCTGGCCATATTGGTAAGCCCGAAGAAGTGGATACTTCGGCAC  
GTAATGCCGGGCTCTAACCCGCCCGCGAAATTCGTGATGCTGCAACTCTGCTACGCTGCGGGCTGGCTTACGGCCCC  
GGGGGATGTCAATTACGTGAAGTCACTGCATGGGCTCAGCTCCATGACGTTGCAACATTATCTGACGTGGCTCTCTGAA  
GCGGCTGCGGAATGCCGCGACTGGTTTTGGCATACTTGCCGCACAAAACCTTGTGTACGCGCCGAGTTACGGGTTGTA  
CAAGCGAAAGAGATTGCGTCTTGTGATGGAACAGCAATCAGTGCGCCCGGGGGCGGAGCGCTGAATGGCGACTACAT  
ATGGGATATGATCCTCATACCTGTCAGTTCAGTATTTGAGCTAACCGACAGCAGAGACGCTGAACGGCTGGACCGATT  
TGCGCAAACGGCAGACGAGATACGATTGCTGACCGGGGATTCGGTTTCGCGTCCCGAATGTATCCGCTCACTTGGTTTTG  
GAGAAGCTGATTATATCGTCCGGTTCAGTGGCGAGGATTGCGCTGGTAACTGCAGAAGGAATGCGCTTTGACATGATG  
GGTTTTCTGCGCGGGCTGGATTGCGGTAAGAACGGTGAACCCTGTAATGATAGGCAATTCAGGTAATAAAAAAGCCGG  
AGCTCCCTTCCGGCACGCTCATTGCCGATCACTTCTCCGAAAAAGCATTAAATCAGTAAAACCCGACTGCTCAGCG  
AGAATCGTCGAAAAGGACGAGTAGTTCAGGCGGAAACGCTGGAAGCAGCGGGCCATGTGCTATTGCTAACATCATTACCG  
GAAGATGAATATTCAGCAGAGCAAGTGGCTGATTGTTACCGTCTGCGATGGCAAATTAAGTGGCTTTTAAAGCGGCTCAA  
AAGTTTGTGCTACCTGGATGCTTTCGCTGCAAAAGAACCTGAACCTCGGAAAGCGTGGATATTTGCTAATCTACTCGCCG  
CATTTTTAATTGACGACATAATCCAGCCATCGCTGGATTTCCCGCCAGAAAGTCCGAAAGGAAAGAACTAACTC  
GTTGTGGAGAATAACAAAAATGGTCATCTGGAGCTTACAGGTGGCCATTCTGGGACAGTATCCCTGACAGCCCTACAAAA  
CGCAATTGAAGAACGCGAGGCATCGTCTTAAAGAGGACCGAGGGCTCGCATTCTTACAGATGGTTCAACCCTAAGTTAG  
CGTTATGGGATCACTCCCCGCGTGTCTTACTCGGATTCTGAAGCCGTGAAAAACAGCAACCTCCGCTGCGCCAGTTC  
GGATGTGAACCTCACAGAGGCTTTTTCTGTTACCAGCGCCGCACTACGGCGGTGATACAGATGACGATCAGGGCGACA  
ATCATCGCCTTATGCTGCTTATTGCTCTTCTCCTTACGCTTACGGTCAAGAGGCACTCTACATGTGTTAGCAT  
ATAGGAGGCCCTCGGGTGTGGTAAAATATCACTCGGGGCTTTTTCTCTATCTGCCGTTACGCTAATGCCTGAGACAGACA  
GCCTCAAGCACCCGCGCTATTATATCGCTCTCTTAAACCATTTTGTATTCGATTCTAATCCTGAAGACGCTCGCA  
TTTTTGTGGCGTAATTTTTTAATGATTTAATTTAACTTTAATTTATCTTTCATCGCAATTTAGACGACAAGCTGG  
ATTATTTTGAATATTGGCCTAACAAGCATCGCCGACTGACAACAAATTAATTATTACTTTTCTAATTAATCCCTCAG  
GAATCCTCACCTAAGCTATGATTATCTAGGCTTAGGGTCACTCGTGAAGCGTTACAGCCGTA AAAACGCATCTACCG  
CTGATGGCGCAAATTTCAATAGCTCGTAAAAACGAATTATCTTACACTATAATCTGATTTTAAACGATGATTCTGTC  
GGGTAAAATAGTAAAAACGATCTATTCACTGAAAGAGAAATAAAAAGTGAACATCTGCATCGATTCTTATAGCAGTGA  
TGCTCTGGGAGGCATTATCTTATCATTGCCGCTATCTGGCGATGATTATGGCCAACAGCGGCGCAACCAGTGGATGGT  
ATCACGACTTTCTGGAGACCGCGTTCAGCTCCGGTGTGGTCACTCGAAATCAACAAAAACATGCTGTTATGGATAAAT  
GACGCGCTGATGGCGGATTTTTCTGTTAGTCGGTCTGGAAGTTAAACGTGAACCTGATGCAAGGATCGCTAGCCAGCTT  
ACGCCAGGCCGATTTCCAGTTATCGCCGCTATTGGTGGGATGATTGTGCCGCGATTACTCTATCTGGCTTTTAACTATG

CCGATCCGATTACCCGCGAAGGGTGGGCGATCCCGCGGCTACTGACATTGCTTTTGCCTTGGTGTACTGGCGCTGTTG  
GGAAGTCGTGTTCCGTTAGCGCTGAAGATCTTTTTGATGGCTCTGGCTATTATCGACGATCTTGGGGCCATCATTATCAT  
CGCATTGTTCTACACTAATGACTTATCGATGGCCTCTCTTGGCGTCGCGGCTGTAGCAATTGCGGTACTCGCGGTATTGA  
ATCTGTGTGGTGCACGCCGACGGGCGTCTATATCTTGTGGCGTGGTGTGTGGACTGCGGTGTTGAAATCGGGGGTT  
CACGCAACTCTGGCGGGGTAAATTGTCGGCTTCTTTATTCTTTGAAAGAGAAGCATGGGCGTTCTCCAGCGAAGCGACT  
GGAGCATGTGTTGCACCCGTGGGTGGCGTATCTGATTTTCCCGCTGTTTGCATTTGCTAATGCTGGCGTTTCACTGCAAG  
GCGTCACGCTGGATGGCTTGACCTCCATTCTGCCATTGGGGATCATCGCTGGCTTGGCTGATTGGCAAACCGCTGGGGATT  
AGTCTGTTCTGCTGGTTGGCGCTGCGTTTAAAAGTGGCGCATCTGCTGAGGGAACGACTTATCAGCAAATTATGGTGGT  
GGGGATCCTGTGCGGTATCGGTTTTACTATGTCTATCTTTATTGCCAGCCTGGCCTTGGTAGCGTAGATCCAGAATGA  
TTAACTGGGCGAAACTCGGTATCCTGGTCGGTCTATCTCTCGGCGGTAATTGGATACAGCTGGTTACGCGTTCGTTTG  
CGTCCATCAGTTTGACAGGACGTTTTACCGGGGAGCCATAAACGGCTCCCTTTTATTGTTATCAGGGAGAGAAATGAGC  
ATGTCTCATATCAATTACAACCACTTGTATTACTTCTGGCATGTCTATAAAGAAGGTTCCGTGGTTGGCGCAGCGGAGGC  
GCTTTATTTAACTCCACAAACCACTTACCGGACAGATTGAGCGCTGGAAGAGCGCTGCAAGGCAAATTTTAAACGCA  
AGGGACGTGGTCTCGAACCCAGCGAGCTGGGAGAACTGGTCTATCGCTATGCCGATAAAAATGTTACCTTAAGCCAGGAA  
ATGCTGGATATTGTGAATATCGCAAAGAATCCAATTTATTGTTTGGACGTTGGCGTGGCTGATGCATTTCCAAACCGCT  
GGTCAGTAGCTACTTAAACGCCAGTGGTAGAAGGCGAGCCCATTCATCTTCGCTGCTTGAATCCACCCAGGAAATGC  
TGCTGGAGCAATTAAGTCAGCATAAACTGGATATGATCATTTCTGACTGTCCGATAGACTCTACGCGAGGAAAGGCGCTG  
TTCTCCGTGAGAATTGGCGAATGTGGCGTGAGTTTTCTGGTGTACAAATCCACCACCAGAAAAACCGTTCCCGGCTTGTCT  
GGAAGAACGGCGACTTTTATTCTGGGCGACGTTCAATGTTAGGGCGCAAATTGCTTAACTGGTTTAACTCCAGGGAT  
TAAACGTAGAAATCCTCGGCGAGTTTGTATGATGCGGCTTTGATGAAAGCTTTTGGTGGCGATGCACAATGCAATCTTCGTT  
GCCCCAACGCTTTATGCATATGACTTTTATGCCGATAAAAATGTCGTAGAAATTGGTGGCGTCCGAGAATGTGATGGAAGA  
GTACCATGCTATTTTTGCTGAGCGGATGATTGAGCACCAGCGGTACAGCGAATCTGCAATACGGATTATTCTGCGCTTT  
TTAGTCCAGCGGTGCGTTAATCGGCGACTCCCCAAAGTTAAGTTGGGGGAGATAGATTAGTTGTACATTACCACGATTT  
TGACTCGGCTCATTATTTGCCGCTTGGACATTGTTCCATATGACGCGGGCAATAAATAGAGGAATCTGATTACTT  
CCTTCATGGGGATGCTGAAAAGAGTAGTAATTGCTGTAATGACTCCAATTTATTGATAGTGTTTTATGTTGAGATAATG  
CCCGATGACTTTGTCATGCAGCTCCACCGATTTTGGAGAACGACAGCGACTTCCGTCCAGCCGTGCCAGGTGCTGCCTCA  
GATTCAGGTTATGCCGCTCAATTCGCTGCGTATATCGCTTGTGATTACGTGCAGCTTTCCCTTCAGGCGGGATTACATAC  
AGCGGCCAGCCATCCGTCATCCATATCACCACGTCAAAGGGTACAGCAGGCTCATAAGACGCCCCAGCGTCCGATAGT  
GCGTTCACCGAATACGTGCGCAACAACCGTCTTCCGGAGACTGTATACGCGTAAAACAGCCAGCGCTGGCGCGATTTAG  
CCCCGACATAGCCCCACTGTTCCGTCATTTCCGCGCAGACGATGACGTCCTGCCCCGGCTGTATGCGCGAGGTTACCGAC  
TGCGGCTGAGTTTTTAAAGTGACGTAATAATCGTGTGAGGCCAACGCCATAATGCGGGCTGTTGCCGGCATCCAACG  
CCATTCATGGCCATATCAATGATTTTCTGGTGGCTACCGGTTGAGAAGCGGTGTAAGTGAAGTGCAGTTGCCATGTTTT  
ACGGCAGTGAGAGCAGAGATAGCGCTGATGTCCGGCGGTGCTTTTCCGTTACGCCACCACCCCGTCAAGTGCAGTGAACAGG  
AGGGACAGCTGATAGAAACAGAAGCCACTGGAGCACCTCAAAAACACCATCATACTAAATCAGTAAGTTGGCAGCATC  
ACCTACCTCAATGTGTATCAAAATCCATATCTTTGTTGGGGGAGTCTGGAGATTGAGTAGATATTCTTGTTCAGAATG  
TATCAGCCGATGGTCTACGATTCTTAAGCCACGAAGATTGAGATAGTACAACGGCATGTCTTTTTGACTATCTGGCA  
ACCGGACAGTGTGTTCTCTCACGCATCACAAAAGCAGCAGGCATAAAAAAACCGCTTGGCGGGCTTTTTCAAAAGCTT  
CAGCAAATTTGGCGATTAAGCCAGTTTTGTTGATCTGTGCAGTCAAGTTAGCCTTATGACGTGCAGCTTTGTTTTTGTGGAT  
CAGACCTTTAGCAGCCTGAGGTCACGATCGGTTGCATTTGTTAAATGCTTTCTGTGCAGCAGCTTTGTCGCGCAGCTT  
CGATAGTCCGTATACTTTCTGATGAAAGTACGCATATAGAGCAGCGCTTGGCTTGTGCTTACGAGCCTTTTTCAGAC  
TGAATGGCGCGCTTCTTAGCTGATTTGATATTAGCCAAGGTCCAACCTCCAAATGTGTTCTATATGGACAATTCAAAGGC  
CGAGGAATATGCCTTTTAGCTTTCTTTGTCAATGGATTTGTGCAAATAAGCGCCGTTAATGTGCCGGCACTCGTTACG  
TAGTGATGGCGCAGGATTCTACCAGCTTGGCGGGTGTGAATACAGCTTTTCCGCGATAAAAATTCAGCAGGCGGTGAGT  
TTCTTCCGCTGATTTGCGCCATGGCAATGAAAAGCCACTTCTTTCTGATTTCCGTAATCAATCGCCGTTAACCTTGACC  
GCTGTACAAGTATACTCGGACGATTTTCACTGTTTTGAGCCAGACATGAAGCTGATACGCGGCATACATAATCTCAGCC  
AGGCCCCGCAAGAAGGGTGTGTGCTGACTATTGGTAATTTGACGGCGTGCATCGCGGTATCGCGCGTGTACAGGGC  
TTGCAGGAAGAAGGGCGCAAGCGCAACTTACCGGTGATGGTGTGCTTTTTGAACTCAACCACTGGAATGTTTGTCTAC  
CGATAAAGCCCCGCAAGACTGACCCGGCTGCGGGAAAAACTGCGTTACCTTGAGAGTGTGGCGTTGATTACGTGCTGT  
GCGTGCCTTTCGACAGGCGTTTCCGCGGTTAACCGCGCAAAATTTATCAGCGATCTTCTGGTGAAGCATTTCGCGTA  
AAATTTCTGCGTAGGTGATGATTTCCGCTTTGGCGTGGTGTGAAGGCGATTTCTGTTATTACAGAAAGCTGGCAT  
GGAATACGGCTTCGATATCACCAGTACGCAAACTTTTTGCGAAGTGGCGTGCATCAGCAGCACCGCCGTGCGTCAGG  
CCCTTGGGATGACAATCTGGCTCTGGCAGAGATTTACTGGGGACCCGTTTCCATCTCCGGGCGTGTAGTCCACGGT  
GATGAATTAGGGCGCACTATAGGTTTTCCGACGGCGAATGTACCCTGCGCCGTGAGGTTTCCCGGTGAAAGGGGTTTA  
TGCGGTAGAAGTGTGGGCTCGGTGAAAAGCCGTTACCCGGCGTGGCAAACATCGGAACAGCCCAACGGTTGCCGGTA  
TTCGCCAGCAGCTGGAAGTGCATTTGTTAGATGTTGCAATGGACCTTTACGGTCCGATATACAAGTAGTGTGCGTAA  
AAAATACGCAATGAGCAGCGATTTGCGTCTGCTGGACGAACTGAAAGCGCAGATTGCGCGTGTGAATTAACCGCCCGCA

ATTTTTGGGCTAACAAAACCGGCTTAAAGCTGTATGTAATCAAACCGAAATACGGAACCGAGAATCTGATGAGTGACT  
ATAAATCAACCCTGAATTTGCCGAAACAGGGTTCCCGATGCGTGGCGATCTCGCAAGCGCGAACCCGGAATGCTGGCG  
CGTTGGACTGATGATGATCTGTACGGCATTATCGTGGCTAAAAAAGGCAAAAAAACCTTCATTCTGCATGATGGCCC  
TCCTTATGCGAATGGCAGCATTATATTGGTCACTCGGTTAACAGATTCTGAAAGACATTATCGTGAAGTCCAAAGGGC  
TTCCGGTTATGACTCGCCGTATGTGCCGTGGCTGGGACTGCCACGGTCTGCCGATCGAGCTGAAAGTTCGAGCAAGAATAC  
GGTAAGCCGGGTGAGAAATTCACCGCCGCGGAGTTCGCGCAGGTGCCGCAATACGCGCGGACCCAGGTTGACGGTCA  
ACGCAAAGACTTTATCCGTCTGGGCGTGTGGGCGACTGGTGCACCCGTACCTGACCATGGACTTAAAACCTGAAGCCA  
ACATCATCCGCGCGTGGGCAAAATCATCGGCAACGGTCACTGCACAAAGCGCGAAGCCAGTTCCTGTTGCGTTGAC  
TGCCGTTCTGCGTGGCGGAAAGCGAAGTGGAGTATTACGACAAAACCTTCCTGTCATCGACGTTGCTTTCCAGGCAGT  
CGATCAGGATGCACTGAAAGCAAAATTTGCCGTAAGCAACGTTAACGGCCAACTCTCGTGGTAATCTGGACCACCAGC  
CGTGGACTCTGCTGCCAACCGCGCAATCTCTATTGACCAGATTTCGACTATGCGCTGGTGCAGATCGACGGTCAGGCC  
GTGATTCTGGCGAAAGATCTGGTTGAAAGCGTAATGCAGCGTATCGGCGTGACCGATTACACCATTCTCGGCACGGTAAA  
AGGTGCGGAGCTTGAGCTGTGCGTTTACCATCCGTTTATGGGCTTCGACGTTCCGGCAATCCTCGGCATCACGTTA  
CCCTGGATCCCGGTACCGGTGCCGTTACACCGCGCTGGCCACGGCCCGGACGACTATGTGATCGGTCAGAAATACGCG  
CTGAAACCGCTAACCCGTTGGCCCGGACGGCACTTATCTGCCGGCACTTATCCGACGCTGGATGGCTGAACGCTCTT  
CAAAGCGAACGACATCGTCTGTTGCGTCTGCAGGAAAAAGGGCGGCTGCTGCACGTTGAGAAAATGCAGCAGCTATC  
CGTCTGCTGGCGTCAAAAAACCGGATCATCTTCCGCGCAGCGCGAGTGGTTTCTGTCAGCATGGATCAGAAAGGTTCTG  
CGTGCAGTCACTGAAAGAGATCAAAGCGTGCAGTGGATCCCGGACTGGGGCCAGGCGGCTATCGAGTGCATGGTTGC  
TAACCGTCTGACTGGTGTATCTCCGTCAGCGCACCTGGGGTGTACCGATGTCACTGTTCTGTCACAAAGACACGGAAG  
AGCTGCATCCGCGTACCCTTGAAGTGTGGAAGAAGTGGCAAAACCGGTTGAAGTGCATGGCATCCAGGCGTGGTGGGAT  
CTCGATGCGAAAGAGATCTCGGCGACGAAAGTGCAGTACGTGAAAGTCCGCGACACATTGGATGTATGGTTGACTC  
CGGATCTACCCACTCTTCTGTTGTTGACGTGCGTCCGGAATTTGCCGGTACGCAGCGGACATGTATCTGGAAGTCTG  
ACCAACACCGCGGCTGGTTCATGTCTTCCCTAATGATCTCCACCGCGATGAAGGGTAAAGCGCGTATCGTCAGGACTG  
ACCCACGGCTTACCCTGGATGGTCAGGGCCGAAAGATGTCTAAATCCATCGGCAATACCGTTTCCGCGCAGGATGTGAT  
GAACAACTGGGCGGGATATCTGCGTCTGTGGTGGCATCAACCGACTACCCGGTAAATGGCCGTTTCTGACGAGA  
TCCTGAAACGTGCTGCCGATAGCTATCGTGTATCCGTAACACCGCGGCTTCTGCTGGCAAACCTGAACGTTTTGAT  
CCAGCAAAGATATGGTGAACCGGAAGAGATGGTGGTACTGGATCGCTGGGCCGTAGGTTGTGCGAAAGCGGCACAGGA  
AGACATCTCAAGGCGTACGAAGCATAACGATTTCCACGAAGTGGTACAGCGTCTGATGCGCTTCTGCTCCGTTGAGATGG  
GTTCTTCTACCTCGACATCATCAAGACCGTCACTACCCGCAAAAGCGGACAGTGTGGCGCGTCTGATGCTCCGACT  
GGCTATATACATCGCAGAAAGCGTGGTGGCTGGATGGCACCACCTCTCTCCTTACCGCTGATGAAGTGTGGGGCTA  
CCTGCCGGGCAACGTGAAAAATACGTTTACCCGTTGAGTGGTACGAAGGCCCTGTTTGGCCCTGGCAGACAGTGAAGCGA  
TGAACGATGCGTTCTGGGACGAGCTGTTGAAAGTGGTGGCGAAGTGAACAAAGTCATTGAGCAAGCGCGTGGCGACAAG  
AAAGTGGTGGCTCGCTGGAAGCGGCAGTAACTTGTATGAGAACCAGGAACTGTCGGCGAAACTGACCCGCTGGGCGA  
TGAATTACGATTTGTCTGTTGACCTCCGGCGCTACCGTTGCAGACTATAACGACGCACCTGCTGATGCTCAGCAGAGCG  
AAGTACTCAAAGGCTGAAAGTCCGTTGAGTAAAGCCGAAAGTGAAGAGTCCACGCTGCTGGCACTACCCAGGAT  
GTCGGCAAGTGGCGGAACCGCAGAAATCTGCGCCGCTGTGTACGCAACGTCGCGGTGACGGTGAACAAACGTAAGTT  
TGCTGATGAGTCAATCGATCTGTTCAACAGGGCTACGCTGGCTGGCTGGTGGTGGTGGTGGTGGTGGTGGTGGTGGT  
GTAACATAGCGCGGGCTTAAAGTTTCTTCCGATAGCGCGGCTGGCAGCGTGGTTCTTCCGCTGCTTAACTGCATTATGCC  
ATTAGCGTGCCTGGCAGTGTATGATGATGATCGCTGAAAGGCAACGCAAGAGTAAACAATATCGCTTACCGCTGATTAT  
TGGCGGCGGCTGGGCAACCTGTTCCAGCGCTGTGGCACGGCTTCTGTTGTCGATATGATCGACTTCTACGTCGGCGACT  
GGCACTTCCACCTTCAACCTTCCGATACTGCCATCTGTGTGGTGGCGACTGATTGTGCTGGAAGTTTTTTGCCT  
TCTAGAGCGAAAAACAATAATAAACCTGCCGGATGCGATGCTGACGCATCTTATCCGGCTACAGATTGCTGCGAAAT  
CGTAGGCCGATAAAGCGTTTACGCCGCATCCGGCAAAAAATCCTTAAATATAAGAGCAAACCTGCATGTCTGAATCTGTA  
CAGAGCAATAGCGCCGCTCTGGTGCATTCACGCTAAAACCTGACGATGGCACCACCAGGCTACCCGCAACAACGG  
TAAACCGCGCTGTTCCGCCTGGGTGATGCTTCTTCTGAAGGCTGGAGCAACACCTGTTGGGGCTGAAAGTGGGCG  
ATAAAACACCTTCTCGTTGGAGCCAGATGCGGCGTTTGGCGTCCGTCACCGGACCTGATTCAGTACTTCTCCGCGCT  
GAATTTATGGATGAGCGGAGCCAGAAATGGCGCAATCATGCTTTTTACCGCAATGGATGGCAGTGAATGCCTGGCGT  
GATCCGCGAAATTAACGGGACTCCATTACCGTTGATTTCAACCATCCGCTGGCCGGGAGACCGTTCAATTTGATATTG  
AAGTGTGAAATCGATCCGGCACTGGAGGCGTAAACATGCAGATCCTGTTGGCAACCCCGCTGGTTTTTTGTGCGGGGT  
AGACCGGCTATCAGATTGTTGAAAACGCGCTGGCATTACCGCGCACCGATATATGTCGTCACGAAGTGGTACATA  
ACCGCTATGTGGTGCATAGCTTGGTGGAGCGTGGGCTATCTTATTGAGCAGATTAGCGAAGTACCGGACGGCGGATC  
CTGATTTTCTCCGACACGGTGTCTTCCAGGCGGTACGTAACGAAGCAAAAAGTCCGCTTGGGCGGCAAGTCTTATCTCATCGGTCACG  
CTGTCCGCTGGTACCAAAGTGCATATGGAAGTCCGCCGCGCAGTCCGCGTGGCGAAGAATCTATTCTCATCGGTCACG  
CCGGCACCCGGAAGTGAAGGGAACAATGGGCCAGTACAGTAAACCGGAAGGGGAATGTATCTGGTCAATCCCGGAC  
GATGTGTGAAACTGACGGTCAAAAACGAAGAGAAGCTCTCTTTATGACCCAGACCAGCTGTGCGTGGATGACACGTC

TGATGTGATCGACGCGCTGCGTAAACGCTTCCCGAAAATTGTCGGTCCGCGCAAAGATGACATCTGCTACGCCACGACTA  
ACCGTCAGGAAGCGGTACGCGCCCTGGCAGAACAGCGGGAAGTTGTGTTGGTGGTCCGTTGAAAACTCCTCCAACCTC  
AACCGTCTGGCGGAGCTGGCCAGCGTATGGGCAAACGCGGTTTTTATTGACGATGCGAAAACATCCAGGAAGAGTG  
GGTAAAAGAGTTAAATGCGTCCGGCTGACTGCGGGCGCATCGGCTCCGGATATTCTGGTGCAGAATGTGGTGGCACGTT  
TGCAGCAGCTGGGCGGTGGTGAAGCCATTCCGCTGGAAGGCCGTGAAGAAAACATTGTTTTCGAAGTGCCGAAAGAGCTG  
CGTGTGCATATTCGTGAAGTCGATTAAGTCATTAGCAGCCTAAGTTATGCGAAAATGCCGGTCTTGTTACCCGGCATT  
TATGGAGAAAACATGCGTTTACCTATCTTCTCGATACTGACCCCGCATTGACGATGCCGTCCGCAATTGCCGCCGCGAT  
TTTTGCACCCGAACTCGACCTGCAACTGATGACCACCGTCGCGGTAATGTCTCGGTTGAGAAAACATCCCGCAATGCC  
TGCAACTGCTGCATTTCTGGAATGCGGAGATTCCGCTCGCCAAAGGGGCCGCTGTGCCACTGGTACGCGCACCGCGT  
GCGGCATCTGTGCACGGCGAATCGGAATGGCTGGCTACGACTTGTGAGCACAACCGAAAGCCGCTCGGGATACCGG  
GTTTCTGGCGATTCCGGATGCCCTGATGCGTGCACCAGAGCCTGTACCCTGGTGGCCATCGGCCCGTTAACCAATATTG  
CGCTGTACTTTCACAATGCCCGGAATGCAAGCCGTATATTCCCGCTCTGGTGCATGATGGTGGTTCTGCCGGACGCGG  
AACTGTACGCCAAACGCCGAGTTTAAATATTGCTGCCGATCCAGAAGCTGCTGCCTGTGTCTCCGAGTGGTATTGAAAT  
CGTCATGTGCGGTTTGGATGTCACCAATCAGGCAATTAACCTCTGACTATCTCTACTGCGCAGTTAAACCGTA  
CCGGGAAAATGCTTACGCGCTGTTAGCCACTACCGTACGCGCAGTATGCAAAGCGGCTTCCGAATGCGCAGTCTCTGC  
GCCATCGCCTGGTGGTGCAGCCCGGACCTGTTCACTCTCAAACCTGTTTTGTGGCAGTGGAAAACAGGCGGAATTTAC  
CTCAGGCACGACGGTGGTTGATATCGACGGTTGCCTGGGCAAGCCAGCCAATGTACAGGTGGCATTGGATCTGGATGTGA  
AAGGCTTCCAGCAGTGGGTGGCTGAGGTGCTGGCTCTGGCTCGTAACCTGTACATGTTATTGGCATGCAGTCATTCAT  
CGACTCATGCCTTCACTGATATCCCTCCCTGTTTATCATTAATTTCTAATTATCAGCGTTTTTGGCTGGCGCGTAGCG  
ATGCGCTGGTACTCTGAAAACGGTCTATGCAAATTAACAAAAGAGAATAGCTATGCATGATGCAAACATCCGCGTTGCC  
ATCGCGGAGCCGGGGGGCGTATGGGCCGCCAGTTGATTACGGCGCGCTGGCATTAGAGGGCGTGCAGTTGGGCGCTGC  
GCTGGAGCGTGAAGGATCTTCTTACTGGCAGCGACGCCGGTGAAGTGGCCGGAGCCGGGAAAACAGGCGTTACCGTGC  
AAAGCAGCCTCGATGCGGTAAGGATGATTTTGTGTTTATCGATTTTACCGTCCGGAAGGTACGCTGAACCATCTC  
GCTTTTTGTCGCCAGCATGGCAAAGGGATGGTGCAGTACGGGTTTACGGAAGCCGGTAAACAAGCAATTCGTGA  
CGCCGCTGCCGATATTGCGATTGCTTTGCTGCCAATTTAGCGTTGGCGTTAACGTGCATGCTTAAGCTGCTGGAGAAAG  
CAGCCAAAGTATGGGTGACTACCCGATATCGAAATTAAGCAGCATCATAGACATAAAGTTGATGCCCGTCAGGC  
ACCGACTGGCAATGGGAGAGGCGATCGCCACGCCCTTGATAAAGATCTGAAAGATTGCGCGGTCTACAGTCTGAAGG  
CCACACCGGTGAACGTGTGCTGGCACCATTGGTTTTGCCACCGTGCCTGCAGGTGACATCGTTGGTGAACATACCGCGA  
TGTTTCCGATATTGGCGAGCGTCTGGAGATCACCCATAAGGCGTCCAGCCGTATGACATTTGCTAACGCGCGGTAAGA  
TCGGCTTTGTGGTTGAGTGGTAAGGAAAGCGGTCTTTTTGATATGCGAGATGTAATTGATCTCAATAATTTGTAACCACA  
AAATATTTGTTATGGTGCAAAAATAACACATTTAATTTATTGATTATAAAGGGCTTAAATTTTTGGCCCTTTTATTTTTG  
GTGTTATGTTTTAAATTGTCTATAAGTGCCAAAATTACATGTTTTGTCTTCTGTTTTGTTGTTTTAATGTAATTTT  
GACCATTTGGTCCACTTTTTTCTGCTCGTTTTTATTTTCATGCAATCTTCTGCTGCGCAAGCGTTTTCCAGAACAGGTTA  
GATGATCTTTTTGTGCTTAATGCCTGTAACATGATGAGCCACAAAATAATATAAAAAATCCCGCCATTAAGTTGAC  
TTTTAGCGCCCATATCTCCAGAATGCCGCCGTTTCCAGAAATTCGTCGGTAAGCAGATTTGCATTGATTTACGTCATCA  
TTGTGAATTAATGCAATAAAGTGAAGTGAATTTCTCTGGAGGGTGTGTTGATTAAGTCAGCGCTATTGGTTCTGGAA  
GACGGAACCCAGTTTACGGTCCGGCCATAGGGGCAACAGGTTCCGGCGTTGGGGAAGTCGTTTTCAATACTTCAATGAC  
CGTTATCAAGAAATCCTCACTGATCCTTCTATTTCTGTCGCAATCGTTACTTACTTATCCCATATTGGCAATGTCG  
GCACCAATGACGCCGATGAAGAATCTTCTCAGTACATGCACAAGTCTGGTATTGCGACCTGCGCGTATTGCCGAT  
AACTTCCGTAATACCGAAGACCTCTCTTCTTACCTGAAACGCCATAACATCGTGGCGATTGCCGATTCGATACCCGTA  
GCTGACGCGTTTTACTGCGGAGAAAGGCGACAGAATGGCTGCATTATCGCGGCGATAACCCGGATGCGCGCTGGCGT  
TAGAAAAAGCCCGCGCTTCCAGGTCTGAATGGCATGGATCTGGCAAAGAAGTGACCACCGCAGAAGCCTATAGCTGG  
ACACAAGGGAGCTGGACGTTGACCGGTGGCTGCCAGAAGCGAAAAAGAAGACGAGCTGCCGTTCCACGTCGTGGCTTA  
TGATTTTGGTGCAAGCGCAACATCCTGCGGATGCTGGTGGATAGAGGCTGTCGCTGACCATCGTTCCGGCGCAAACCT  
CTGCGGAAGATGTGCTGAAAATGAATCCAGACGGCATCTTCTCTCCAACGGTCTGGCGACCCGGCCCCGTCGATTAC  
GCCATTACCGCATCCAGAAATCCTCGAAACCGATATTCCGGTATTCCGGCATCTGCTCGGTGATCAGTCTGCGGCT  
GGCGAGCGGTGCGAAGACTGTCAAATGAAATTTGGTACCACGGCGCAACCATCCGGTTAAAGATGTGGAGAAAAACG  
TGGAATGATCACCGCCAGAACACGGTTTTGCGGTGGACGAAGCAACATTACCTGCAAACCTGCGTGTACGCATAAA  
TCCCTGTTCCAGCGTACGTTACAGGGCATTATCGCACCGATAAACCGGCATTAGCTTCCAGGGGACCCTGAAGCCAG  
CCCTGGTCCACACGACGCCGCGCTTGTTCGACCACTTTATCGAGTTAATTGAGCAGTACCGTAAAACCGTAAGTAAT  
CAGGAGTAAAAGACCATGCCAAAACGTACAGATATAAAAAGTATCCTGATTCTGGGTGCGGGCCCGATTGTTATCGGT  
AGGCGTGTGAGTTTACTACTCTGGCGCGCAAGCGTGAAGCCCTGCGTGAAGAGGGTTACCGCGTCATTCTGGTGAAC  
TCCAACCCGGGACCATCATGACCGACCCGAAATGGCTGATGCAACCTACATCGAGCCGATTCACTGGGAAGTTGTACG  
CAAGATTATTGAAAAGAGCGCCCGGACGCGGTGCTGCCAACGATGGGCGGTGAGACGGCGTGAACGCGCTGGAGC  
TGGAACGTCAGGGCGTGTGGAAGAGTTCCGGTGTACCATGATTGGTGCCACTGCCGATGCGATTGATAAAGCAGAAGAC  
CGCCGCTGTTTTGACGTAGCGATGAAGAAAATTGGTCTGGAACCCGCGGTTCCGGTATCGCACACAGTGAAGAAGC

GCTGGCGGTTGCCGCTGACGTGGGCTTCCCGTGCATTATTCGCCATCCTTTACCATGGGCGGTAGCGGCGGCGGTATCG  
CTTATAACCGTGAAGAGTTTGAAGAAATTTGCGCCCGGGTCTGGATCTCTCCGACCAAAGAGTTGCTGATTGATGAG  
TCGCTGATCGGCTGGAAGAGTACGAGATGGAAGTGGTGCCTGATAAAAAACGACAACTGCATCATCGTCTGCTCTATCGA  
AACTTCGATGCGATGGGCATCCACACCGGTGACTCCATCACTGTCGCGCCAGCCAAACGCTGACCGACAAAGAATATC  
AAATCATGCGTAACGCCTCGATGGCGGTGCTGCGTAAATCGGCGTTGAAACCGGTGGTTCCAACGTTAGTTTTGCGGTG  
AACCCGAAAAACGGTCTGATTGTTATCGAAATGAACCCACGCGTGTCCCGTTCTTCGGCGCTGGCGTGGAAAGCGAC  
CGTTTTCCCGATTGCTAAAGTGGCGGGGAAACTGGCGGTGGGTTACACCCTCGACGAACTGATGAACGACATCACTGGCG  
GACGTAACCGGCTCCTTCGAGCCGTCATCGACTATGTGGTACTAAAATTCCTCGCTTCAACTTCGAAAAATTCGCC  
GGTGCTAACGACCGTCTGACCACTCAGATGAAATCGGTTGGCGAAGTGTGGCGATTGGTCGCACGCAGCAGGAATCCCT  
GCAAAAAGCGTGCAGCGCTGGAAGTGGTGGACTGGATTGACCCGAAAGTGAAGCTGGATGACCCGGAAGCGTTAA  
CCAAAATCCGTCGCGAAGTGAAGACGCGAGGCGAGATCGTATCTGGTACATCGCCGATGCGTTCCGTCGCGGCTGTCT  
GTGGACGGCGTCTTCAACCTGACCAACATTGACCGTGGTTCCTGGTACAGATTGAAGAGCTGGTGCCTGGAAGAGAA  
AGTGGCGGAAGTGGGCATCACTGGCCTGAACGCTGACTTCTGCGCCAGCTGAAACGCAAAGGCTTTGCCGATGCGCGT  
TGGCAAAACTGGCGGGCTACGCGAAGCGGAAATCCGTAAGCTGCGTGACCAAGTATGACCTGCACCCGGTTTATAAGCGC  
GTGGATACTGTGCGCAGAGTTCGCCACCGACCCGTTACATGTACTCCACTTATGAAGAAGAGTGCAGGCAACTCC  
GTCTACCGACTGAAAAATCATGGTGTCTGGCGCGGCCGAAACCGTATCGGTGAGGATCGAATTCGACTACTGTT  
GCGTACACGCTCGCTGGCGCTGCGCGAAGACGGTTACGAAACATTATGGTTAACTGTAACCCGGAACCGTCTCCACC  
GACTACGACTTCCGACCGCTCTACTTCGAGCCGTTAACTCTGGAAGATGTGCTGGAATCGTGCCTATCGAGAAGCC  
GAAAGCGTTATCGTCCAGTACGGCGGTGAGCCCCGCTGAAACTGGCGCGCGCTGGAAGCTGCTGGCGTACCGGTTA  
TCGGCACCAGCCCGATGCTATCGACCGTGCAGAAGACCGTGAACGCTTCCAGCATGCGGTTGAGCGTCTGAAACTGAAA  
CAACCGCGAAGCCACCGTTACCGCTATTGAAATGGCGGTAGAGAAGGCGAAAGAGATTGGTACCCGCTGGTGGTACG  
TCCGCTTACGTTCTCGCGGTGCGGCGATGGAATCGTCTATGACGAAGCTGACCTGCGTCTACTTCCAGACGGCGG  
TCAGCGTGTAAACGATGCGCCAGTGTGCTGGACACTTCTCGATGACGCGGTAGAAGTTGACGTGGATGCCATCTGC  
GACGGCGAAATGGTGTGATTGGCGGCATCATGGAGCATATTGAGCAGGCGGGCTGCACTCCGGTACTCCGCATGTT  
TCTGCCAGCTACACCTAAGTCAAGAAATTCAGGATGTGATGCGCCAGCAGGTGCAGAACTGGCCTTCGAATTGCAGG  
TGCGCGGCTGATGAACGTGAGTTTGGCGTGA AAAACAACGAAGTCTACCTGATTGAAGTAAACCCGCGTGGCGCGCT  
ACGTTCCGTTCTGCTCCAAAGCCACCGCGTACCGCTGGCAAAAGTGGCGGCGCGCTGATGGCTGGCAATCGTGGC  
TGAGCAGGGCGTAACCAAAGAGTTATCCCGCGTACTACTCGGTGAAAGAAGTGGTGTGCGGTTCAATAAATCCCGG  
GCGTTGACCCGCTGTTAGGGCCAGAAATGCGCTCTACCGGGAAAGTCAATGGGCGTGGGCGCACCTTCGCTGAAGCGTTT  
GCCAAAGCGCAGCTGGGCAGCAACTCCACCATGAAGAAACACGGTCTGCGCTGCTTCCGTCGCGAAGGCGATAAAGA  
ACGCGTGGTGGACCTGGCGGCAAAACTGCTGAAACAGGGCTTCGAGCTGGATGCGACCCACGGCACGGCGATTGTGCTGG  
GCGAAGCAGGTATCAACCCGCTGCTGGTAAACAAGTGCATGAAGGCCGTCCGCACATTAGGACCGTATCAAGAATGGC  
GAATATACTACATCATCAACACCACCTCAGGCCGTCGTGCGATTGAAGACTCCCGCGTATTGTCGCGAGTGGCGTGA  
ATATAAAGTGCATTACGACACCACCTGAACGGCGGCTTTGCCACC GCGATGGCGCTGAATGCCGATGCGACTGAAAAAG  
TAATTTGCGTGCAGGAAATGCACGCACAGATCAATAATAGCGTGTGATGGCAGATATTTTTCATCCGCTAATTTGATCG  
AATAACTAATACGTTCTCTGATGAGGACCGTTTTTTTTTGGCCATTAAGTAAATCTTTTGGGGAATCGATATTTTGTGAT  
GACATAAGCAGGATTTAGCTCACACTTATCGACGGTGAAGTTCATACTATCGATATATCCACAATTTTAAATATGGCCTT  
GTTTAAATGCTTCAAACAGTGCATAGCCAGACTTTTAAATTTGTGAAACTGGAGTTCGATGTGTGAAGGATATGTTGAA  
AAACCACTCACTTGTAAATCGCGAATGGATGATGGCTGAAACTCGGTGGGTGATAGCAAAGAGAGATCTCTATTCACTT  
CGATATTGAACACAGCAAGCGGTTAATACCCTGACTTATATTCTGCGAAGTACAGAAAATAAGCTGCGAAGTAAAGA  
TGATCCCTAATAAGCTGGAAGGGCGGGGATGCCAGTGTGAGCAGTGGTTAAAGTGGTGCATATCGATGAGCAAATTTAC  
GCGCGCTGCGCAATAACAGTGGGAAAAATAGTGGTGAAGAAAGACGCGCGTATTCTGCGGTTCCGCTCACGGA  
ACTTAACCGGAGCAGAAGTGGCAGATGATGTTGTCAAAGAGTATGCGTCTGTTAATTTTATCTGTTGATACCGGGCTC  
CTGCTTGCAGATGCGATGTTGTAGCATCTTATCCAGCAACCAGTGCATCCGGCAAGATCACCGTTTAGGCGTCACAT  
CCGTCGTCCTCGCAAACGGGGCGATTTTCTCCATTTGCTCAGTGGCTGCGTTTATGTAACGATACATGACAGCGC  
CCGACAAGATCCTGATACTTTGGTATTCAACCGTTTCCAGTGAACCTGTCGCTACTAACATTGCGTACAGCGCGGGC  
TGGCGTACCCATCAACAAGTGGCGTTTCTGCGCGGAAAGCCCGCTTTGACAAAGCTCATGGCGGCAACAATGCTCTCTT  
CGCAATGACCGGCCATCCATAATCACGCTGTTTATCCCGACCAATGCATCGCAGCAATCAAACAACCATGCAGGATC  
GCTCCGTGCCGATATGGCGTTTTTCCCAACGATAGTGTGAGTGTGCGAGTAGCCATGCATAATGCAGCCATCTGAAT  
ATTGGCTCCCGCTTGCAGATCAACCGCCGTAGTACCACGCAGTGGGCGAGTGGGCGGATGTAGACACCGGCTCCCA  
CAATCACATCGCAATCAAGACGGCACTGGGATGGACAAACGCCGTGGGTGAACACCGGAATTAACCCCTCAAAGGCG  
TAATAGCTCACGTTGTTAACGTCCTTCCACACCGGATCGCGTCTCTGGCAAACGCCAGCGGCCCTTCAATGGCATCT  
TCCGAATGCAGAACCGATGGATAGTGTTC AACACGCGCTGCGAATATAGCGATACGCTTCTTACCGGCATTTGCT  
GGTGGTGGCGTAGATCTTTTACGCGCCGAATCGCCAGCGGGGCGCTGTTAACAGCTGCTGAGCCAGTTTCGCGGGCGT  
TATCCATCAGTTCCGCTGGCTAACACGCGGTTGACTATCCCCAACGCGCGCTCTTCTGCGCCATTGCTGCGCC  
GTCATCACCATTTTATTGACGATGGCAGGCGGAGGATCTTCGGCAGACGCAGCACACCGCCGCTGTCAGGAACGATGCC



CAGTTTGGCTCCGGCAGGGCGAAGCTGGCGTTATCGGCACAAACAATAAAATCTGCCGCCAGCGCCAGTTCAAAGCCGC  
CGCAAAGGCATAGCCGTTACAGCTGCGATAACCGGTTTGTGCGAGATTGAAAATTTTCGGTTAATCCCGCAAACCACCC  
GGACCAAAGTCAGCATCCGGTGCTTCGCCTTCTGCTGCCGTTTTAAATCCCAGCCCGGGAAAAGAACTTCTCTCCGGC  
ACCGGTAATAATGGCGACACGTAATTGCGGATCGTCACGGAAATTTAGAAATACTTCGCCATTTCAAAGCTGGTTTTTG  
CATCAATAGCATTTCGCTTTTGGACGATCAAGGGTAATTTCCAGAATTGATCCATTGCGGGTCAGATGTAATGATTCACTC  
ATTCCTTTTCTCCATTTTTGCTTTTTAGGGACGACAACATCCCTGCAAAAAATGCATATTGTTTTAGAGTGTGATTATT  
AGCTGGCAGGGTAGTTCCCTGCTGTTTCATTTATTTAGATTCTTTCTAATTTTTCCCGAGCAATTACGTGGCAGAT  
CTTTTCTGATCTCCAGATAAGAGGGCACTTTAAATTTGCCCATTTTTGTTGCGAGAAGCGGAAAAATTCCTCTTCGCTC  
AATGTTTACCTTCATTCAGCACCACAAATGCTTTGATGGCTTCATCGGAATCGAATCTTTAATACCCACAACCACGAT  
GTCCTGAATTTTCGGGTGCGCGGCGATAATATTTCCAGCTCCACGCAGGAGACATTCTCGCCGCCACGTTAATCATAT  
TGACGCGGCGATCGACGAAATAAAAAAGTCTCTTCGTCGCGGTATCCGGTATCGCCGGTATGCAGCCAGCCATCGGCT  
TCCAGCACTTTCGAGTGGCTTGTGGTTGAGAAAGTACTCTTGAAGATGGTTTTCCAGGTATGCCTTAAATGCAGAT  
TTCACCGATCTCACCAGCCGGAGCGGGCGATTGTGATCGTCGCGGATCTCCGCTTCGTAGCAAAACCCACCCGACCAA  
TCGACGGCCAGCGTCGTTTATCGCCAGGACGATCGCCGATAATGCCACAATGGTTTCCGTCATCCATAAGACGTCAGC  
AAGCGAAGCCGAAGCGTTCACAAAACGATCTTTTTCTGCTCCGACAAGTTGAGATAAAACATCACTCCCGCAGGCG  
GTGTTGCTGATCGTTTCGTTGAAGCGGCTGTACCATCAACGTACGGATCATCATCGGAATACATTTCGGTAACCGGTGGCGC  
GGTACTTCTGTACCTGTCCCGAGAAGGCGGGCGTGTATTTCTCGACCAGCACAAAGGTGGCCCGGAGAAAACGCC  
GCCATCGCCGAGTACACTGGCAATCGATATGAAACGCAGGCATTACCGTCAGGTAGACGTCATCGTCACGCAAGTGCACA  
CTGCCAGGCGGAGTAATATCCAGCGAAGCGCAGGTTGTAATGGGTAATCACCACACCTTTCCGTCGGGAGGTGGTGCCGG  
AGGTGAAGAGAATTTCCGCCGTATCGTCAGTCGATAGCGGCGTGCATAGCACAAAGGTGGCAGGTTGTTGATTTTTAGT  
TGAGTAAACGAACTCAGCCATCATCAGCGGAAGTCCACATCTGTAGGCAATGTGCCCAATTGAGTGGCATCTTC  
CTGCTGAATCTGTTGATACATAGGATAGAATTGCGCACTGGTCACCAGCAGGCACGCTGGCTATTTGCAAGATCCACG  
CGTTTTCTCGCACAAACAGGCGGGCGTAAATCGGCACCATAATCGCGCAATTTTTGCCAGCCGAACAGCAAAAGATA  
AATTCGGGCGAGTTGTCGAGATGTAGTCAACCTTGTGCCTTTCGCAATCCCAGCGTATAAAACAGGTTTGGCGTGC  
GTTAATCTCCTGATTTAACTCAAGATAACTATACCGGTTAACGACTCCGCCGCTGGATTACAAAATCAGCGCCGTTTTAT  
GACCGTAAACGTCGCAAGATCGTCCACATTTGACGTAGATGTTGTCGCCAATGATATCCATTGCACCTCTATCCATT  
TTTGTTCGTTGTTATTGGGCGGGCGTAGTCAGGCAAGCCGACTGACGCCACGCGTTTAGTCTCAACTTTGGCCAGAC  
CTTTGCTGACCAACTCCTGAATGTCGTTTTGCTGTAGCCGATATTTTTCAAAATGGCAGCCGTGTCCATGCCATGTGAG  
GGCATTCCGCGCCAGATTTGTCGGGGTTATTTTTGAATTTCCGGATGATGTTCCGGCCTTTGCAAGTGCACCATCCAT  
CGTTTCCACTGAGTGATTGATTCCGCGAGCCACATACTGTGGATTGCTTCCAGTTCGGTACGGTCAGCACTTTGGCC  
AGGCGATATTCAGTTCAGCAAAGCGTTCTTTACTTCCGCGATGGTATGTGTGCCAGCCAGGCATCGAGTTTCTCTTCA  
ACCAGTGGGCGTAAGGGCATTTCGATACGGTGGATAAGCTGAGTGCTTCCGGGATTTCTGGCGTGCCAAGCAGATGTGC  
GAGGCCAATATCTTAAAGCACTCTTCAATTTGGGTAATGCCACCAGTTCATCAGATGTAGCCGTGGCACATTTAT  
ACAGACCGCAACCGGCGTAGTAGGGATCTTTACCTTTGCTCATGCGCGGGCACATTTCCGCCCGGTTGAAGTAATCCATC  
ATGAAGTACTGGCCATACGCAGCATCACTTCATACATGGCGATGTGCATACTTTGCCTTTACCGGTTTACGCACCTT  
ATGCACTGTCGACGCGCCGCGTGGTGGCGGTGAGCCAGAAAAGTAATCGGCGGTATACGGGAAGGCAGGCATTGGCT  
GGTCAACATCACCGTTCTGAATCAGGTAACCACTAAAGGCTGGGCGATAGTGTATAGCCGGAAGATTGGTGTACTCC  
TCGGTGCCTACTGACAAAACCGACAGGTGAGCGATAACCAGTTTCGGGTTGTGCTGCCACAGTACTTCATCGGTAAT  
GCCACGACGGGCAAAGGCGGACCTTTACTGGCTTCGATGAAGATACGGTGGTTTTCCATTAATTTAGAAAACGCTTCGC  
GGCTTTCATCTTTGAAAATATTTAACGACAGCGCTGCAAAATGCGGCGGAGAGTTGCGGGTAGTTCCGTTGAACCGGA  
ATGGTGTCCGGCCAGGCGAGTTCTCGATCCAGATAAATTCGCGCCCACTTCGCGAACATTTGCCCGCAAACGGTCC  
GGCGATTTGATACCGGAGAAGACAACGCGCAATCCGGCAACGGCCGAATTTCCGCGATGGGTAGATGATCCATTATTT  
GCTCCTGAAAAATTTATGTAGCGCATGACTGCCGGATGCGGCGTAAACGCTTTATCCGGCCTACATTCGTGCTCCCGTAG  
GCCTGATAAGACGCATCAGCGTCGATCAGGCGAGCGCACGACTTAGCGGATTGCTTCAGCACCCGACGACCCAGCGTC  
AGGATCTGCATTTCTGTCAGATCCCGGAGACGCGGTCTACACGCAGATCACGCCAGAAGCGGCTGATGCGGTGGTTGCC  
CGCAATCCCGACACCGCCAGCACCTGCATTGCGCTATCCACAATTTCAAATGCCGATTGGCGCAGAAGTATTTGCACA  
TCGCTGCATCGCCAGAGGTGATGGTGCCGTTGTCTGCTTTCCACGCTGCTTCATACAGCATGTTTTTTCATGGAGTTAAT  
TTGATCGCCATGTGGCGAATTTTTCTGAATCAACTGAAACGACCAATAGCCTCGCAAACGACGCGCTGATTGGC  
GTAGCGCGCCGATCTTCAAAGGCGCACATCGCCGTACCGTAGTTGGTGAGGGTACCAGGAAACGTTTCATGGTCAACT  
CTTCTTTGACGCGTTAAAGCGTTACCTTCCGACCGAATGTCTTTCTGTCAGTTCACGTCGTAAGGTTGATT  
TCACAGCAGTATCCATACGCAGACCGAGCTTTTCAAGTTTGGTCACTTTGATGCCCGTTTGTCTCATATCAACAAACCA  
TTCGGTGTAGACAGGTTTGTCCGGAGAAGCCCGTCCGCGCCATCACCACGATGTACGGGGTGTAGGGCTGCTGGTAA  
TAAAACACTTACTACCATTAAGATAAATCTTACCATTTCTACGGTATAAGTCGTTTTAGGCTACCCACGTCGGAGCCC  
GCGCCCGGTTCCGTAATCGCTGAGTTCACATCTGCTTACCGGTCCGCGGAAAGCCATAATTTTTGTCGATCTGCTCTTG  
TGTGCTTTCGCGCAGGAAGTGTGAAACCCCGCCGCAACTGGTACAGCACATAGGTTGGTGGCCCGACGTCACGCT  
CCATCCACACGGCGGAGAGTAACAAACCCCGCTCCAGACCACCGTCTTTCAGGGATCAGCAGACTGTCGATACCC

ATATCCGCCAGTGCTTTGACAAAACGTTCCGGGTAGACGCTGTCACGGTCGCACTCGGCAAAATAGGCCCTCCAGTTTTG  
GCTGGCCATCAGTTCGCGGATACCGGGACAAAACAGTTCCTGCTCATCTTTAAATTAATCCATCTTTCAACCTCTTG  
ATATTTGGGGTTAATTAATCTTTCCAGTTCCTGTTTCGCGTCTTAATAAAGGAGAGCGTACCATAATGTTGACGAAG  
AACAGCGGGCATCCTCCGGCGATAATGGCGGTTTGAATCGGTTTCAGGCCGCCGAGCGCCAGCAGAACAATACCGATAAT  
GCCAACCAGAAATGACCAACCGATACGCACCAGCAGAGGTGGTCTTACCATCGCGTACTTCCGGCAAGTGGACATCG  
CCAGGGTATAAGAGCAGGCGTTAACAGCGTAACGGTGGCAATAAAGCAGAGGATGAAGAAGCCCCACATGGTGGCGGTG  
CTGAGTGGCAGAGCGGCCAGGTTTCAATGATGGCGCGGCCACACCGTACTGTTGATCAGATTTGGAATGTTGATGAT  
GTTTTATCTATCAACAGCAGAGTGTACTACCGAGTACAGTCCACAGGATCCAGGTTGACGCTGTCAGCCCCAGCACCA  
TGCCGAAGCACAGTTCACGCACAGTACGACCACGGGAGATGCGGGCGAGGAAGATACTCATCTGGATAGCATAAATCACC  
CACCATGCCAGTAGAACACGGTCCAGCCCTGCGGGAAGCCGCTTTAGCGATGGGATCGGTATAGAACAACATGCGCGG  
CAGATACATCAGCAACATCCCCACCGAATCGGTGAAGTAGTTCATGATGAAGCTGGCACCGCTGACATGAACCCCAAC  
CCAGCATCAGGAAGCTCAGTAACACGCACGTACTGGCGATACGTACCCCTTTTTGCAGACCGCAAGCGACGCAATG  
GCGTTGAGGATAATCCAGCAGGTAATGATGATAGCGTCCAGTTGCAGGGTATGCGGAATGCCAAACAACCATGATACA  
CTCGGTACCAGCGCGTGGCAAGGCCAGACTGGTACCCATCGCAAGATCAAGGCGACGAGATAGAAGTTGTCGACGA  
TAGTGCCGAACAACCTTTGGCGTGTTTTTCACCTACCAGCGGCACAGTGTGAGCTGGGCGAATCATTCCATTTG  
CGGAAAAGAAGTAAGCAAGGCGACTGAAAGGAAGCTGAAGTGGCCACGGCAGAGTCCCCAGTGGAAACAAGCT  
GTAAAGCAGCCCCAACTCTTTGCCCCCTGTCGAGTTCGTTCTAAGCCAAACGCGGGGTGGAGATGTAGTAGTATCT  
CAATCGATCCCCAGAACAGTACGGCAGCAGCGTACAGGAGGCGAACATCATAAAGATCCAACCTGGCGGTGCTAAATCT  
GGCGTTGCTTACCTAACGCTTTTTGGCATAACGGCCAAACACCAGCCAGAACCAACCGAAAAGCATCACCCATATA  
CCATTCAAATGCCATCCCCATACATTGGTGACGTAACGAATACAGCATTAAATAACGACATTCGCTGCATCCAGATCTC  
TGACTGTAAGCCAACAAGTATGCCGACGATTATTAACGGCGGAAAGAAAACCTTCGGTCTATTCCCGTTTTTCTCTTT  
TCATTCTTCATGAGTTAATCCACTGTGAAAACGAATATTTATTTGCGTTCGCTTTGTTTTATTTTTGTTAACATTTA  
ATATAATTATTAACTCGTGGACGCTTAATGGCTAACTCATAATGGGTATTCAATAAGCTGTATTCTGTGATTGGT  
ATCACATTTTTGTTTCGGTGAATAGAGGGCGTTTTTCGTTAATTTTGATTAATAATCAGTTTGTATGCTCTGTTGTG  
AGTAAAAATAACATCTGACTTTCAATATTGGTATCCATAAAACAATATTGAAAATTTCTTTTTGCTACGCCGTGTTTT  
CAATATTGGTGAAGAACTTAACAATATTGAAAGTTGATTTATCTGCGTGTGACATTTCAATATTGGTATTAAAGTTT  
TATTTCAAATTAAGGGCGTGATATCTGTAATTAACACCACCGATATGAACGACGTTTCTTTCATGATTTCTGGAGATG  
CAATGAAGATTATTACTTGTATAAGTGCCTGATGAACAGGATATTGCGGTCAATAATGCTGATGGTTCATTAGAC  
TTCAGCAAAGCCGATGCCAAATAAGCCAATACGATCTCAACGCTATTGAAGCGGCTTGCCAGCTAAAGCAACAGGCAGC  
AGAGGCGCAGGTGACAGCCTAAGTGTGGCGGTAAAGCCCTGACCAACGCCAAAGGGCGTAAAGATGTGCTATCGCGCG  
GCCCCGATGAACTGATTGTGGTATTGATGACCAGTTCGAGCAGGCACTGCCGCAACAACGGCGAGCGCACTGGCTGCA  
GCCGCCAGAAAGCAGGCTTTGATCTGATCCTCTGTGGCGATGGTCTTCCGACCTTTATGCCAGCAGGTTGGTCTGCT  
GGTGGGCGAAATCCTCAATATTCCGGCAGTTAACGGCGTCAGCAAAATATCTCCCTGACGGCAGATACCCTCACCGTTG  
AGCGCGAACTGGAAGATGAAACCGAAACCTTAAGCATTCCGCTGCCTGCGGTTGTTGCTGTTTCCACTGATATCAACTCC  
CCACAAATCTTCGATGAAAGCCATTCTCGGCGCGGCGAAAAGCCGTCAGGATGGTCCGGCGGCGGATATTGTTTT  
TAACGCAGAGGCGCCTGGTCAACAACAGGTTGCCGCGCGGAAACAGCGCAACGTGACGCGATCGTATTGAAGGCG  
ACGGCGAAGAACAGATCGCCGATTTGCTGAAAATCTCGCAAAGTCATTTAATTACAGGGGATGCTATGAACACGTTTT  
CTCAAGTCTGGTATTACGCGATACCCCTTCTGCTGCCGGAAGTATGACGGTGCAGGCTTTAGCTAATCAAATC  
AACACCTTTGCTCAATGATGCCGACGGCGCACAGGCAATCCAGCTCGGCGTAATCATGTCTGAAAATTAACGGCAA  
ACCGGACGATCGGATGCAAGATTACGCCGTTGTCATGGCTGACACTATTCGCCAGCACGGCGCAGACGGCCTGGTGC  
TGCTGCCAAACACCCGTCGCGGCAAAATTAAGCGGCAAAACTGGGTTATCGCTTAAAGCGCGGTTGCTAACGATGCC  
AGCACCGTCAGCGTACAGGACGGTAAAGCGACAGTAAAACACATGGTTTACGGTGGTCTGGCGATTGGCGAAGAACGAT  
TGCCACGCCGATGCGGTAAGTACCATCAGCAGCGGCACGTTGATGCGGCTCAGCCAGACGCGTACGCACTGGCGAAA  
CGCACACCGTGGAGTGGCAGGCTCCGGCTGTGGCGATTACCCGCACGGCAACCCAGGCGCGCCAGAGCAACAGCGTCGAT  
CTCGACAAAGCCGCTGTTGGTGGTACGCGTGGTCCGGTATTGGCAGCAAAGAGAACATTGCGCTGGCAGAACAGCTTTG  
CAAGGCGATAGGTGCGGAGTTGGCCTGTTCTGTCGCGTGGCGGAAAACGAAAATGGATGGAGCACGAACGCTATGTCG  
GTATCTCAACCTGATGCTGAAACCTGAACTGTACCTGGCGGTGGGGATCTCCGGGCGAGATCCAGCACATGGTTGGCGCT  
AACCGCTCGCAAACCATTTTCGCCATCAATAAAGATAAAAATGCGCCGATCTCCAGTACGCGGATTACGGCATTGTTGG  
CGACGCCGTGAAGATCCTTCCGGCGTACCGCAGCTTTAGCGGTTGATCCACTCTGGCAGGCTGCATTTTGGCCCTG  
CCGCTGACAGGAGCTCTTATGTCGAAGATATCTTTGACGCCATCATGTCGGTGCAGGGCTTGGCGTTGGTTGCCG  
CACTGGTGTCTGCCCCGAAGGTGCGCAAGTGTAGTTATCGAGCGTGGCAATCCGCGAGTGCCAAGAAGTCCACCGC  
GGCGTCTCTATGCCACAGTCTGGAACACATTATCTGGTTTCCGCGACTCCGCCCCGTAAGAAGCCTGATCACCCA  
TGAAAACCTCGGTTTATGACGGAAAAGTCAAGGATGACTATGGACTACTGCAATGGTACGAAAACCTCGCCATCCCAGC  
GTTCTTACTCGTTTTGCGCAGTAAATTTGATGCCTGGCTGATGGAGCAGGCCGAAGAAGCGGGCGCGCAGTTAATTACC  
GGGATCCGCGTCGATAACCTCGTACAGCGGATGGCAAAGTCTGCGGTGTAAGAAGCGGATGGCGATGTATTGAAGCGAA  
AACGGTGTCTTGTGATGGGGTGAACCTCATCTTCCGAAAATTTGGGATGGCAAACGCGTCAAACCGACGGATG

TGGCGTTGGCGTGAAGAACTGATCGAGTTACCGAAGTCGGTTATTGAAGACCGTTTTTCAGTTGCAGGGTAATCAGGGG  
GCGGCTTGCCTGTTTTCGGGGATCACCCACCGATGGCCTGATGGCGGGCGGCTTCTTTATACCAATGAAAACACCCTGTC  
GCTGGGGCTGTTTGTGGTTTGCATCATCTGCATGACGCGAAAAAATCGGTGCCGAAATGCTGGAAGATTTCAAACAGC  
ATCCGGCCGTTGCACCGCTGATCGCGGGCGGCAAGCTGGTGGAAATATTCCGCTCACGTAGTCCGGAAGCAGGCATCAAC  
ATGCTGCCGGAGTTGGTTGGTGACGGCGTATTGATTGCCGGTGTGCCGCCGGAATGTGTATGAACCTCGTTTTACCAT  
TCGCGGTATGGATCTGGCGATTGCCGCCGGGAAGCCGAGCAAAAAACCGTGCTTTTCAGCGATGAAAAGCGACGATTTCA  
GTAAGCAAAAACTGGCGAATATCGTCAGCATCTTGAGAGTGGTCCGCTGCGCGATATGCGTATGTACCAGAAAACCTCCG  
GCGTTCTTGATAACCCACGCATGTTTAGCGGCTACCCGGAGCTGGCGGTGGGTGTGGCGCGTGACCTGTTACCATTGA  
TGGCAGCGCGCCGAACTGATGCGCAAGAAAATCTCCGCCACGGCAAGAAAGTGGGCTTCATCAATCTAATCAAGGATG  
GCATGAAAGGAGTGACCGTTTTATGACTTCTCCCGTCAATGTGGACGTCAAACCTGGGCGTCAATAAATCAATGTGCATG  
AAGAGCATCCGCACATTGTTGTGAAGCCGATGTGATAAACAGGCGCTGGAGCTGCTGGTGAAGCGTGCCCCGAGGT  
CTGTACAAGAAGCAGGATGACGGCAGTGTGCGCTTCGATTACGCCGATGTCTGGAGTGGCCACCTGTCGCATTCTGGG  
GCTGGGGTCCGGCCTGGAACAGTGGAAATACCCGCGCGCACCTTTGGTGTGGAGTTCGTTACGGCTGATGTTGGTTTG  
ATACGTAACGCCGCACTGACTCTCATTGCAAAAAACAGGAATAACCATGCAACCGTCCAGAAACTTTGACGATCTCAAAT  
TCTCCTCTATTACCAGCCGATTTTGTGTGGGAAGCGGTGGTCCGTTTTCTGGATGGTTATGTAAGTAAATGATGGC  
GTGGCGCTGGGCAACTGACGCCGGCGTGAACCTGGACGTGACTGGATTGGCTTGTGGCGCGGGAACGCTCGCCGG  
GCTGTTTCGTTGGCACATCGCTGTTTGGTTATATTTCCGATAAAGTCGGACGGCGCAAAATGTTCTCATTGATATCATCG  
CCATCGGCGTGATATCGGTGGCGACGATGTTTGTTCATCCCCGTCGAACTGTTGGTGTGCGGGTACTTATCGGCATT  
GTCATCGGTGCAGATTATCCCATCGCCACCTCAATGATCACCGAGTTCCTCCAGTACCCGTCAGCGGGCGTTTTCCATCAG  
CTTTATTGCCGCGATGTGGTATGTGCGCGCGACCTGTGCCGATCTGGTGGGCTACTGGCTTTATGATGTGGAAGGGCGCT  
GGCGCTGGATGCTGGGTAGCGCGCGATCCCCTGTTTGTGATTTTATTGGTTCGATTGAACTGCCTGAATCTCCCCGC  
TGTTTATTACGCAAAGGGCGAGTAAAAGAGTGCAGAGAGATGATGATCAAACGTTTGGCGAACCGGTGGCTTTTCGATGA  
AGAGCAGCCGAGCAAACCCGTTTTCGCGATCTGTTAATCGCCGCAATTTCTTTTGTCTGTTTGTGCGCCATCT  
GGACCTGCCAGGTGATCCCAATGTTGCCATTTACACCTTTGGCCGCAAACTGTTGGTTTGTGGGATTGGGGTTGGC  
AAAAACGCGGCACTAGGGAATGTGGTATTAGCCTGTTCTTTATGCTCGGCTGATTCCGCCGATGCTGTGGTTAAACAC  
TGCCGGACGGCGTCCATTGTTGATTGGCAGCTTTGCCATGATGACGCTGGCGTGGCGTTTTGGGGCTAATCCCGGATA  
TGGGGATCTGGCTGGTAGTGATGGCCTTTGCGGTGTATGCCTTTTTCTCTGGCGGGCGGGTAATTTGCAGTGGCTCTAT  
CCTAATGAACTCTTCCGACAGATATCCGCGCTCTGCCGTGGCGTGATTATGTCCTAAGTCGATTGGCACCATTGT  
TTGACCTGGGCACTACCGATCTTTATCAATAATTACGGTATCAGTAACACGATGCTAATGGGGGCGGGTATCTCGCTGT  
TTGGCTTGTGATTTCCGTAGCGTTTTGCCCGGAGACTCGAGGGATGCTACTGGCGCAGACCAGCAATATGACGATCCGC  
GGCAGAGAATGGGGTAAATTGTTGAGATTTCTCTTTTTCTGAATCAATATTATTGACTATAAGCCGCTGAATATATG  
ACTACACTTTGTGGGAAAACAAAGGCGTAATCACGGGGTACCTATGATTCTTATAATTTATGCGCATCCGATCCGCA  
TCATTTCCATGCGAATAAACGGATGCTTGAACAGGCAAGGACGCTGGAAGGCGTCGAAATTCGCTCTCTTTATCAACTCT  
ATCCTGACTTCAATATCGATATTGCCGCCGAGCAGGAGGCGCTGTCTCGCGCGATCTGATCGTCTGGCAGCATCCGATG  
CAGTGGTACAGCATTCTCCGCTCCTCAAACCTTTGGATCGATAAAGTTTTCTCCACGGCTGGGCTTACGGTCATGGCGG  
CACGGCGCTGCATGGCAAACATTTGCTGTGGGCGGTGACGACCGCGCGGGGAAAGCCATTTGAAATTTGGTGGCGATC  
CGGGCTTTGATGTGCTGTGCGAGCCGTACAGGCGACGGCAATCTACTGCGGGCTGAACTGGCTGCCACCCTTTGCCATG  
CACTGCACCTTTATTTGTGACGACGAAACCCTCGAAGGCGAGGCGCTCACTATAAGCAACGTCTGCTGGAATGGCAGGA  
GGCCCATATGGATAGCCATACGCTGATTGAGGCGTGATTTATCTCGTTGCGCAGCGCTGATTGTACCATTGCGGTA  
CGTCTTGGTCTGGGATCGTACTTGGTACCTGATCGCCGGTGCATTATTGGCCGCTGGGGCTGCGACTGGTGGCGA  
TGCCGAATCTATTCTGCACTTTGCCGAGATTGGGGTGGTGTGATGCTGTTTATTATCGGCCCTCGAACTGATCCACAAA  
GGCTGTGGAAGCTGCGTGGCGCAGTGTTCGGCTGTGGCGCATTGAGATGGTATTGCGGGCGCTGCTGGGGCTGTTT  
TGATGTTACTTGGGCTGCGCTGGCAGGTGCGGAAATTGATCGGCATGACGCTGGCGCTCTCTCTACGGCGATTGCCAT  
GCAGGCGATGAATGAACGCAATCTGATGGTGACGCAATGGGTGCGAGTGCCTTTGCGGTGCTGCTGTTCCAGGATATCG  
CGGCGATCCCGCTGGTGGCGATGATTCCGCTACTGGCAACGAGCAGTGCCTCGACGACGATGGGCGCATTGCTCTCTCG  
GCGTTAAAAGTGGCGGGTGCCTGGTGTGGTATTGCTGGGGCGCTATGTCACGCGTCCGGCGCTGCGTTTTGTAGC  
CCGCTCTGGCTTGGGGAAGTGTAGTGCCTGGCGTTATTCCTCGTGTGGCTTTGGTTTGTGCTGCTGGAAGAGGTGCG  
GCTTGTGATGGCGATGGGCGGTTTTCTGGCGGGCTACTGCTGGCAAGCTCGGAATACCGTCATGCGCTGGAGAGCGAT  
ATCGAACCATTTAAAGGTTTGTGTTGGGGCTGTTTTTCATCGGTGTTGGCATGTCGATAGACTTTGGCACGCTGCTTGA  
AAACCCATTGGCATTGTCATTTTGTGCTCGGTTTCTCATCATCAAATCGCATGCTGTGGCTGATTGCCCGACCCT  
TGCAAGTGCCAAATAACAGCGTCTGTTGGTTTGGGTGTTGTTAGGGCAGGGCAGTGAGTTTGCCTTTGTTGTTTGGC  
GCGGCGCAGATGGCGAATGTGCTGGAGCCGAGTGGGCGAAATCGCTGACCCTGGCGGTGGCGCTGTCGATGGCAGCAAC  
GCCGATTCTGCTGGTGTCTCAATCGCCTTGGCAATCTTACTGAGGAAGCGCGTGAAGCCGATGAGATCGACGAAG  
AACAGCCGCGCGTATTATCGCCGGATTCGGTCTTTTTGGGCGAGATTACCGGACGTTTACTGCTCTCCAGCGGGGTGAAA  
ATGGTGGTACTCGATCACGATCCGGACCATATCGAAACCTTGGTAAATTTGGTATGAAAGTGTTTTATGGCGATGCCAC  
GCGGATGGATTTACTGGAATCTGCCGAGCGGCGAAAGCGGAAGTGTGATTAACGCCATCGACGATCCGCAACCAACC

TGCAACTGACAGAGATGGTGAAGAACATTTCCCGCATTTGCAGATTATTGCCCGCGCCCGCATGTGCGACACTACATT  
CGTTTGCCTCAGGCAGGCGTTGAAAAGCCGGAGCGTGAACCTTCGAAGGTGCGCTGAAAACCGGGCGTCTGGCACTGGA  
AAGTTTAGGTCTGGGGCCGTATGAAGCGCGAGAACGTGCCGATGTGTTCCGCCGCTTTAATATTCAGATGGTGAAGAGA  
TGGAATGGTTGAGAACGACACCAAAGCCCGCGCGGGTCTATAAACGCACACGCGCATGTTAAGTGAGATCATTACC  
GAGGACCGCAACATCTGTCAATTAATCAACGACATGGCTGGCAGGGAACCGAAGAAGGTAACATACCGGCAACATGGC  
GGATGAACCGAAACGAAACCTCATCTAATAAAGAGTGACGTAATCACACTTTACAGCTAACTGTTTGTGTTTTGTTT  
CATTGTAATGCGGCGAGTCCAGGGAGAGAGCGTGGACTCGCCAGCAGAATATAAAAATTTCCCTCAACATCATCTCGCAC  
CAGTCGACGACGGTTTACGCTTTACGTATAGTGGCGACAATTTTTTTATCGGGAAATCTCAATGATCAGTCTGATTGCG  
GCGTTAGCGGTAGATCGGTTATCGGCATGGAACGCCATGCCGTGGAACCTGCCTGCCGATCTCGCCTGGTTAAACG  
CAACACCTAAATAAACCCGTGATTATGGGCCGCCATACCTGGGAATCAATCGGTGTCGCTTGGCAGGACGCAAAAATA  
TTATCTCAGCAGTCAACCGGTACGGACGATCGGTAACGTGGTGAAAGTGGTGGATGAAGCCATCGCGCGTGTGGT  
GACGTACCAGAAATCATGGTATTGGCGCGGTGCGTTTTATGAACAGTTCTTGCCAAAAGCGCAAAAATGTATCTGAC  
GCATATCGACGAGAAGTGAAGGCGACACCCATTTCCGGATTACGAGCCGGATGACTGGGAATCGGTATTCAGCGAAT  
TCCACGATGCTGATGCGCAGAACTCTCACAGTATTGCTTTGAGATTCTGGAGCGGCGTAATTTGTATAGAATTTACG  
GCTAGCGCGGATGCGACGCCGTCGCTTTATCCGCGCTTCCCTATATCAGGCTGTGTTAAAGACGCCCGCTTCGCC  
CAAATCCTTATGCCGGTTCGACGGCTGGACAAAATACTGTTTATCTTCCAGCGCAGGCAAGTTAATGTACCACCCGACG  
AGCAGCCGGTATCCAGCGCTATATACCTTCCGGCGTACCTTTGCCCTCCAGCGATGCCAGTGACCAAAGCGGATGCTG  
TATCTTCCAGCGACAGGGCCAGGAATCGCAAACCACGGTTTCACTGGGGCAGGGGCTCTTCCGGCGATTCTTGTGTA  
CATATCCAGTTGACCGTTCCGGGAAGCAAAAACGCATACGGGTAAGCGTTGGTGATAAAACGCAGTCTTCCAGCCCC  
GCAATTCGGTGACAGTTATTTGGCATATCGCCGTACATGGCATCAAGAAAGAAGGGATAGGAGTCACTCGATAGCACC  
GCTTCTACATCGCGTGCACACTCTTGGCGGTGTCAGATCCACTGCGCGTATCCCTGCGTGGGCCATCACCAGCTT  
TTTCTTTCGTCGATTTGCAGCAGAGGCTGGCGCCGACCCAGTTAAGCAGCTCGTCGGCATCCGGCGTTCAGCAGCG  
GTGTCAGGCGATCTTTCGGTTTATTGGCGTATCCCGCAAATACCGCCAGCAGATGCAGATCGTATTGCCAGCACC  
AGACGTACGCTGTCGCTAAGGATTTACATAGCGCAGAACATCCAGCGAACCCGGCCCGCGCGACAGATCGCCCGT  
CAGCCAGAGGGTATCTTCCAGGGGTAATTTACTTTATGCAGCAATGCGATCAGTTCATCGTAACAACCATGAACGT  
CGCAATAAGGTATGTCGCATATTTCTTTAATGAATGAGTGTGGAAACGGCGAGTCGGAATACGGGAATGTCGATGCTG  
AAAGGGACGCCATTTTCATCGATCATTTCTGATGACCTGCATGGTCCCAGCGGGTTCATGATTGACCGCTGGT  
GTAATGGTACTCTTCCAGCGCGGATAAGTGGCTGGACGCCAACCTCCTTCCGCTGGACTTCGGTTTCACGGCCAT  
TGCCATTGGTATCAGCCAGTAACGCCCAACAACCTGCACTGGCGCTCGCCCAAGATTGCGTATGGTTACGGTATAAGCA  
AAAACGTAACGTTCAATATCAGGTGAAGATTGAGCCTCAATGTAGACGCTTTGAACCTGAATACACACTCGGGGCGAATT  
GATCATCGTTAACTCTCCTGCAAAGGCGGTTCTCCGCCAGATAGTTCGCCATCTGGCAATATTGCGCGACAGAGATATT  
TTCCGCTCGCATCGCCGGTTCGATCCCATTTCCGTTAACACCTCGACGCTAACAGGTTGCCGAGGCTGTTACGAATGG  
TTTTACGACGCTGGTTAAAGGCTTCGGTGGTATGCGGCTCAACACACGAACATCTTAAACCGGTGAGGCATCGTTGCA  
TGAGGAACAGGCGCACGACGGCGAATCCACTTTGGGTGGTGGTGTAAAGGCTGACGCGGTACTTCCAGTACCGGGAT  
CACATTGCAATAGTATTGCCCATGACGCTTAATCGACCATACGCTTTGCTGTTCCGTCCTGCAACCAGACGATTACCA  
CCTCTTTTTGCAACATAAAGTGCATGTCGGCAATGGCATCAGTATAGCTAAACAGATGGAACATCAACGGCGTGGAGATG  
TTATAAGGCAGGTTGCCGAAAACACGCAGCGGCTGACCCATTTCTCGCCAGTTCACCAAAGTTAAAGTTCATCGCATC  
CTGCTGATAAATCGTCAGTTTCGGGCTAAGAATGGATGCGTTTGCAGACGTGCCCGCAGATCGCGGTCAAGTTCGATGA  
CCGTGAGTGGTCCAGACGTTCCGCGACCGGTTCCGTCATGCCGACGAGTTCGATGAGAAAGTTTCCCGAAGCGTTTACGGC  
TTTTGCGGTTAATGGCAGACACAATACTGTCATCAGCAACTGATCGTTGAGAAAGTTTCCCGAAGCGTTTACGGC  
TAAGTGGCCCTGGTGGACTCGATTATTCATTGGGTGTTAAACAATCATTTTATGTCGAGATTAAAGCGCCGTAATAAAACT  
GCCGACATCGGCTTTGCCAGTCCCGCAGTTCAAGCGCGGTGCCGTGGTCCACTGATGTGCGAATAAAGGGCAGGCCCA  
GCCTAATGTTACACCGCGCCGAAGCCCTGGTATTTAGCACGGGAAGACCCTGATCGTGGTACATCGCCAGCAGCGCG  
TCGGCGTTATCAAGATATTTCCGCTGAAACAGGGTATCGGCAGGACGCGCCCGTTGAGTTTCATCCCCTGCGCCCGCAG  
CTCATTGAGCACCGGAATAATGGTGTCTATCTTCCGTACCCATATGACCGCCTTCCGCGCGTGGGATTAGCCCGC  
AGACCAGAATGCGCGGTTCCGCAATACCAAATTTGGTCCGCAATCGTGATGCAAAAATAGCAATCACTTCGTGCAAAAGT  
GCAGGGGTGATAGCGTCTGCATATCGCGCAGCGGTAATGCGTCGTTGCCAGCGCCACGCGAAGTTCCTCGGTGCGCCAG  
CATCATCACCACCTTTTTCCGCTGCGAACGCTCTTCCGAAAATCGGTATGACCGGTAAGGAATGCCAGCGTCGTTAA  
TAACGCCTTTATGACCGGACCTGTGATCAGCGCGGCAAAATCCGCGTTAGACAACCATCGCAGCTCGCGCCAGCGTT  
TCCACCACATAATGCCATTTTCAACCCTAACTGCCCGCAGTGACAGGTGCACGTAGCGCGACAGGAAGTAGCGTTAA  
TGTGCCCGCAGTTTCCGGTGTGTCAGGGGAGTTGGGGAATAAGGGCGGAGGTTGAGCGGCAACCGAGCATCGCTGCC  
GGTTGGTAAGGAGAGTGGCATCGGCACAAACAACAGTTTCGACCGGCCACTCACGCTGTGCAAGCTGGACAATAAGTCC  
GGCCAATCCCGCGGGGCTCGCCGGGAGTGATCACAACACGTTGGTTTTAACCATAGTTGCTCAGGATTTAACGTAG  
GCGCTGGCAGGTTGTTCCGTCATCCAGCTTGTGCTTCTCCGAGAACTTACGTTTCATCAGCATGCGGTATGCACGATC  
TTTCTGCGCAGCGTGGTTTTATCGACATTACGGGTATCCAGCAGTTCGATTAATGCCAGCCGAATGAAGAGTGAACCG  
GTGCACTCATTTGACCTTTGTTAGGGCAGTCAAGGGCGTACGGAAGGCCGGATCGAAAATATCTGGTGTAGCCAGCCG

AGATCGCCGCCCTGGTTAGCAGAGCCTGGATCCTGAGAGAAGCTTTTCGCTGCGGCAGCAAAAGTCGTTTTACCACTCTT  
GATATCAGCAGCAATCTGTTCCAGTTTACACGGGCTGTTTCGTCAGTCATGATCGGCACGGTTTCAGCAGAATATGGC  
GAGCATGAAC TTCGGTACCAGATATTTTTGCTTTCCGCGCAGGTCGTTAACTTTCAGAATATGGAAGCCAACGCCG  
GAACGAATCGGGCCAACAATGTCGCCCTTTCTTCGCGGTGCTTAATGCCTGGGCGAAGATCCCGGGCAACTCCTGAATACG  
GCCCCAGCCATCTGGCCGCGTTTCAGCGCTGCTGGTTCGGCAGAAATGAGCAATCGCCAGCTTACCGAAATCAGCGCCGT  
TACGCGCCTGATCGACAATGGCGCGCCCTGGCTTTCCGCTTCGTTACCTGATCAGAGGTCGGGTTTTCCGGCAGCGGG  
ATCAGGATGTGGCTCAGGTTCACTCAGTGTGGGCTGTTTTGGTTACCCACTGCTGCGCCAGGGATTGACTTCTCTG  
CGCAGGATGGTATGCGACGACGCACCTCGTTGTTACGCACTTCAGAGATAATCATCTCTTTGCGGATCTGTTACGAT  
AGGTGTTGTAGTTCAGTCCATCGTAAGCCAGACGGCTGCGCATCTGATCCAGCGTCATGTTGTTCTGTTTCGCGATGTTA  
GCAATCGCCTGATCCAGTGTCTCATCGGAGATTTTCACTCCCATTTTCTGCCCCATCTGCAGGATGATTTGATCCATGAT  
CAAACGTTCCATGATTTGGTGGCGCAGCGTGCCTCATCAGGAAGTTGCTGCCCTTGCTGAGCAGCGTTCAGTTTTACCG  
ACTGCATTAATCCATCAACGTGCTTTCCAGCACGACGCCGTTATTGACGACGGCTGCGACTTTATCGACTACCTGGGGG  
GCAGCGAACTGGTATTCGCGATCATGGCGATACCAGAGAAGCAGCGTTTTCCAGTTCCTCATACTTTTTCCATTTCAATT  
AACCGCACTGGGATTACGTGGTAAATCAACAAATCACAAGTGTTCGATGTTAAAGCCGATTGCGTTGCATATACCGCATGTTG  
TGGTACCCAGACCTAGTGGAGCTCAGGCCGCGAAGTTCGATGTTAAAGCCGATTGCGTTGCATATACCGCATGTTG  
TTTTATCGTTATCCCAACGTTTCAGCTTCGCTCGTAACCGACCGCAATTGCATAGCAGCAGGAGCTGATTTGCACACCTA  
ACATAGAGTCGGCTTGCTTGTAGCATTGGTGTCTAGTAGTAGGCCCAACAATGGACCAACGATCGGCAATTGGCCAG  
CTGGCGACAGCACCTACCTGCGAAATACCATTCTTATATTGCTCAGCAGTGAATAGTACTTAGGCAGCGTAGCCTGAAT  
ATATTCCGGGCTGGCGTAACGGTAATTCAGTGTACCCAGACGGTCTTCATCCCGACGGTATTCAATGCTGGAGTTACTGG  
TCGCTACGTTATCCAGACGTGTATCGTACTGAATCCCGCCACGCAATCCCAACGCTCGGAGATACGCCAGTAAGTATCG  
CCTGCCACACCAGTGAACCGTTTTGTCGTCATTTCCCATGTTATGTTGTCATCGCCAGTGCAGACTCCGTGAAATA  
GTAGATTTGACCAACGAAATATTAACGTTCAACGGCAGCATCATATATGCGAGATGTGACACGGTTCGTCACCT  
GGTTAGCGGAGCAATACGGTCAAGACCGCGTAAGTCCGGTCCCGAACAGGCCAGAGTAGTCAGATTGCAGCAGAGAC  
GAGTCGTAGTTATAGATGTCGCTCTGATCGCGATACGGCAGTACAAATACTGCGCGCGCGTTCCAGCGTTTTGGGTATA  
ACCCGGAGCCAGCATTTCCATATCGCGTTCAAAGACCATTTTCCGCTCAACTTTGAATTGCGGCATTACGCGTTAACGG  
ATTCGTCACGCTTGGTCTGTTTTCTGGAGTTATACCAGTCAAGATTGGTTTGTGATAATGGGTTGCCAGCAACTTCGCT  
TCGGTATTGATGCTGCCAGTTATTAGAGAGCGGCAATTTGATGGTTCAGGTGAACACGGGTTGCTTCAGGCAT  
GTCGTCCTGGTGAACAAAGTGCACCTGCTGGCCGTAATACGCGTATCAAACGGACCAACATCATTCTGGTAGTAAT  
TAACGTCTAATCGCGCTCTGCCAGTAGCTACTGGTGTCTGTTTCGCTGAAAACCTGGAACCTGCTTGGTTGAAACGGTG  
GCATTGAAGTTTTGCACCGCATAGCCAACGCTGAATTTTTGCGTTGCGTAGCCGTCAGTACTGGAACCGTACTTGTTATC  
GAAATCATTGAAGTAGCTAGGATCGCTGACCTTGGTGTAGTCGACGTTGAAACGCCACACCTGATCCATGACCCCGGAGT  
GGTTCAGTAGAATAACCAACGACGTGAACGTGCATCGTTCCGGTGTTCATCTTCATAGACTTTATCTGAAGGCAGATAG  
TCCAGTTCATCAAGCCAGCGCCCGCTGGGAGAGGTAGCGGAATTCGTTCTCCACATGATGTTGCCACGACGATGCAT  
ATAATGCGCGTGATGGTGGCATCCATATTTGGCGCGATGTTCCAGTAATATGGCAGGTAGAATCAAAGTAGTTGGTGG  
TGGTGTACTTGGCGTTCCGGATCAAGAAACAGAGCGACGTTTGTACCCACCGGCAACTGCAAAATAGGGGCTATAAAAG  
ATCGGTACCGGACCCACCTTAAAGCGGGCTTCAGATCTCCGCAACTTGTCTTCGCGGTGATGAATAATTTGCTACC  
TACCAGCTCCAGGTGTCAGAACCCGGCAGACAGGAGTAAAGTACCCTTATCCAGAATGGTATAGCGTTTTTCGCCAC  
GTTGTTTTCATCAGGTCGCTTTACCGCACCTGGCGACCCACCATCTGGTAATCACCTTCCAGACGTTGGTATCTTTG  
GTGTTAGATTCGCCAGCTTTCCGGCCTTTGAGGATCACCTGGTATCGTCGTAATGGACATTACCGAGCGCATCAAC  
GGTACGTACCGGCTCGGTTGCTGCTGCTTTTTGATGGAGTGCACCTCGCTCGCCCTGCAGACGCTGTTACCCCT  
GCATGATATCCACGCTGCCAGTAAACACGGCGTCATCCGGGTAGTCCCTTTTCGCGTGGTACGATTGATAGTCACGGGT  
AAGTCATTGGTATCGCCCTGTACCAGAGGACGGTACATAGCTTGGCACGCCCAACATGCACTGTGAGGCGAGGTGGCTGC  
CAGTCCCTGTTGACTATAAAGGGCGGTGGCAATCATGGTGGCCAGGAGAGTGGGGATACGTTTTTTCATACGTTGATTTT  
ATTGTTCCATCATCGGTAACGTTGCGCGTGACAAACGGTACAGACTAACGTAATCTGTCATCTCTACGCTAGTGTTAATC  
CTGTCCGAATAGCGTCAGTGGTGTAGGCACGGCATTGAATGACAGGTATGATAATGCAAATTATAGGCGATGTCCACAA  
ATTGACCGCAGCCGAAACGGTAAAGCACCTTTATATTGTTGGGAGATAGCCCTGATATCCGTGTGTCGATTTGGGGAA  
TATATGCAGTATTGGGAAAAATCATTGGCGTGGCCGTGGCCTTACTGATGGCGGCGGCTTTTGGGGCGTAGTGTTAGG  
CCTGTTAATTGGCCATATGTTTGATAAAGCCGTAGCCGTAATGGCGTGGTTCGCCAACAGCGTGAGCGTCAGGCGC  
TGTTTTTTCACCACCTTTTGAAGTATGGGGCATTAAACCAATCAAAGGTGCGGTACGAGGCTGATATTATATC  
GCCAGCCAGTTGATGGACCGAATGAATCTTCATGGCGCTTCCCGTACTGCGGCGCAAAATGCGTTCCGGGTGGGAAATC  
AGACAATTACCGCTGCGCGAAAAGATGCGCCAGTTTCGCAAGTGTCTGTTTTGGTCTTTTTGACTTAATTCGATGTTTC  
TGGAGATCCAGATTACGGCGCGTTTTGCTGATGGTTCAGTGCACCCGAATGAACGGGCGGTGCTGTATGTCATTGCAGAA  
GAATTAGGGATCTCCCGCTCAGTTTACCAGTTTTTTCGCGATGATGCAGGGCGGTGCACAGTTTGGCGCGGTTATCA  
GCAGCAAACTGCGGTTGGTAACTGGCAGCAAGCGCAGCGTGGCCAAACGCTGGAAGATGCCTGTAATGTGCTGGGCGTGA  
AGCCGACGGATGATGCGACCACCATCAAACGTGCCTACCGTAAGCTGATGAGTGAACACCATCCCATAAGCTGGTGGCG  
AAAGGTTTCCGCGCTGAGATGATGGAGATGGCGAAGCAGAAAGCGCAGGAAATTCAGCAGGCATATGAGCTGATAAAGCA

GCAGAAAGGGTTTAAATGACCCTGTAATGATGCTGAGTAACTGCCACGATTAAGGTGGCCGCCCTGGCGGTCACCTC  
TTTGAGAAAAGGCGTTTACTCAGAATGGTGGACAGGCTCAATGCACGGTTTACGGGAGGGTCTGTAGGTTTTATCGCG  
TTGACCCTGCTTAAGGTTGAGAGCTTTACGACGAGCGGAATTATATTTTTACGCTTAAAAATAAAAAACACATACCTGA  
ATGAGCGATTTTTGAAAGTATATTTATTCAGAACCGCATCATGAGTTTTAACTCAATGCGAGGCTATTACCATGAAAG  
TATCAGTTCAGGCATGCCGTTACACTTTTTAAATATGAGCAAGAACGATATTTATAAGATGGTGAGCGGGGACAAGATG  
GACGTGAAGATGAATATCTTTCAACGCTTGTGGGAGACGTTACGCCATCTGTTCTGGTCAGATAAACAGACTGAGGCTTA  
TAACTTCTGTTCAATTTCTGTAATAACCAGACTGGCAACATCAACGCCCTCAGAATACTTTACTGGGGCTATCAACGAGA  
ATGAGAGAGAAAAGTTTATCAATAGCCTGGAATTATTCAATAAACTTAAAACATGCGCAAAAAATCCGGATGAGTTGGTC  
GCAAAGGGCAATATGCGCTGGGTCGCCAGACCTTCGGGGATATCGAGTTAAGTGTCACTTTTTTCATTGAAAAGAATAA  
GATATGACTCAGACGTTGACGCTGCATAAGGGCCAAGGTAACCTGGGCGTTGATCTTAGAAAAGGCTTACCTTCCGGCG  
TTGACATGAGGGATTGTTACCTTGGTAAAAAACAATGAAAGGTAGCAATGATATCCTTTATGAGAGACCTGGGTGGAAT  
GCTAACCTGGGCGTGCTACCCCGACGGTGCTACCCCGACGGTGCTAACCCGACGGTGCTAACCTGGACGGTGCTACC  
GTGAACGGTGCTACCTCCTTATATGATGAGGTAATTATTATTAATAAAATCCCCCAAAAAATTGATACTAAAGGAGT  
TGCTACTGAAGAAGTTGCTACTAAAAAGTACTGCTGAACAAATTAAGTACTGACAACGCAATTATTGAATGAGCCAGAATAAG  
CTAAGGTTGAAGGGGCTGAACGCCCTTCAACCTTAGCAGTAGCGTGGGATGATTTCACAATTAGAAAAGACTGCATGA  
TGAGCTAGAGAAGAGGCTAGTGACGCAAGGCGTCTGCAGGACACGGATCACCAGATGGGCATCGCCAACAGACTGCT  
AATTAGCCATGAATAACAATCAGAAAAGGACCATAACAGACCCGTTAAAATGAAATATAAGAGACGGTCAACGGGTGAAG  
AAAAAGTTCAAAAAATTGCTGTGGAGCAGGAAGGGAATTACCGAATGAAAGCGTAGCCACACGCAACAACCTGAAAGCAG  
TTTGGCAGAAAACAAAAATCCCCGACTCGGGGATTATGTACAAGAGGAGCCCTTAGGATGAGGGTATAAACGTACAG  
GAAAGGTTAAAAATCCGCTGGCGCTTTAAACGTCATACTATTGCCATACGCCGATGGGTAATCGTCAACATCTCTGCAT  
GTAGCAACAAACGTGGTGCCATCGCTCTCGCTTCTGGTGATGCATAAAAAACGATCGCCGAGAATCGGATGACCCAGCGCC  
AGCATATGCACACGCAATTGATGCGAACGCCGGTAATCGGTTTTAACCACTCTTGCCGTGTTATCCGCCGATACTC  
CACCCTTCATATCCGCTGCGCAGGTTTACCCGTTTCGTAACAGACTTTCTGTTTCGGGCGGTTTGGCCAGTCGAAA  
TCAGCGGCAGATCCACCAGACCTTCTGCGGGGATGGATGCCCCAGACGCGGGCCACATACTGCTTTTTCGGCTCGCGC  
TCGCGGAACTGGCGTTTTAACTCCCGCTCGCGGCTTTGGTCAGCGCCACTACAATCACGCCGCTGGTAGCCATATCCAG  
ACGATGCACCGATTCTGCCTGCGGATAATCACGCTGAATGCGCGTCATCACGCTGCTTTGTGCTCTTCCAGACGACCCG  
GCACTGACAACAAACCGCTCGGCTTGTGACCACCATAATATGGTCATCCTGATACAGGATAACCAACCAGGGTTCCCTGC  
GGTGGATTGTAGTTTTCCATCCCCATTTTCGGCTCCGTTACTGATGCGTTACAACGATCAAACGCAGGGCATCCAGACGC  
CAACCTGCCTGATCCAGGCTTTCCATTACCTGCTGACGGTTGCTCTCAATGGCGGTGAGTTGCTGTCAGCAATGTTCCG  
GTTCACTGCACGACAGGCTTCCAGACGAGACAGCTCGGCAGACAGTTTTTTCGTCGGCTTCTTACGCGCTGCATCAATCA  
ATGCACGGGCAGATTTCTCGATCTGCGCTTACCCAGTTGAAGGATAGCGTGAACATCCTGCTGCACGGCGTTAACCAGT  
TTGCTGCCGGTGTGACGGTTAACCGCGTTAAGCTGGCGGTTAAAGGTTTCAAACCTTACCTGCGCCGCCAGGTTGTTGCC  
GTTTTTATCCAGCAGCATACGTACCGGCGTGGTGGCAGGAAGCGGTTGAGCTGCAACTGCTTCCGAGCCTGGGCTTCAA  
CCACATAAATCAGTTCACCAACAGCGTACCTACCGGCAACGCTTTGTTTTTAAACAGTGAATCGTGTCTACCGGTA  
TCGCCAGAAAGGATCAGATCCAGACGTTGCGGATCAGCGGATGCTCCAGGTAATAAACTGTGCATCTTACGCGCCAG  
CGCCACTTACGATCAAAGTGATGGTGATGCCATCTCCGACAGGCCAGGGAAGTCCGGCACCAGCATATGATCGGACG  
GCGTCAGCACGATCATGTTGTCGCCGCGATCGTCTGATTGATACCGATAATATCGAACAGGTTTCATGGCGAAGGCGATC  
AGTTGGTATCGTCATCTGCTCTTCAATGCTTTCTGCCAGTGCCTGGGCTTTTTGCCACCGTTGGAGTGGATTTCCAG  
CAGGCGGTACGACCCCTGTTCCAGCTGTCTTTACGCGCTTATGTTGCTCGCGGCAAGTTTTGATCAGATCGTCAAAGC  
CTTCGGTTGATCCGGTGAAGCCAGATAGTTAATCAGATCGTTGATACGCTATCGTAAATAGTGCCTCCGGTCGGGACG  
GTGTGCTCAAATGCATCCAGACCTTCTGATACAGCGCACAGCACCAGCTGAGCGTTTTTCTCCAGATAAAGGCACATG  
GATCTGAATATCGTGCCTGGCCGATACGATCCAGACGACCAATACGCTGCTCCAGTAGATCCGGGTTGAATGGCAGGT  
CAAACATCACCATGTGGCTGGCGAACTGGAAGTTACGTCCTTCAAGAACGATTTCTGAGCACAGCAGTACCTGTGCGCCG  
GTGTCTTCTTCCGCAACACAGGCGGCAGCGCGTACGTTTCGATAATCGACATACCTTCTGGAACACCGCAGCGCAAT  
ACCTTACGTTTCGCGCAGTACCTGCTCCAGTTGACGCGCAGTGGCAGCTTTGGCGCAGATCACCAGCACTTTCTGAGAGC  
GATGGCTGGTCAGGTAGCCATCAGCCACTCAACGCGCGGATCGAAGTTCCACCAGGTGGCGTTATCACCTTCAAATCC  
TGATAAATACGCTCCGGGTAGAGCATATCGCGAGCACGATCTTCCGCACTTTTACGTGCGCCATAATGCCGGAGACTTT  
AATAGCCGTCTGATACTGCGTCGGTAGCGGCAGCTTAATGGTGTGACGCTCGCGTTTTGGGAATCCTTTACACCGTTAC  
GCGTGTACGGAACAGCACGCGGCTGGTCCGTTGGCGATCCATCAGCATCGAAACCAGCTCCTGACGGGCGCTCTGGGCA  
TCTTCGCTGTGCTGTTTGTGCTGCAACAGCGGCTCGATATCCTGCTCGCCGATCATCTCGCCGAGCATGTTCAAGTTC  
GTCATTGCTCAGTTTGTACCTGCCAGCAGCATGGCAACGGCGTCCGCAACCGGACGATAATTTTTCTGCTCTTCAACGA  
ACTGCGCAAAATCGTGAAACGGTTCCGGTCCAGCAGACGACGCGGCGAAGTGGCTTTCCATCCCCAGCTGTTCCGGG  
GTCGCGGTGACAGCAGAAACGCCCGGACGCTGCTTCCAGGTTGTTCAATGGCCTGATATTCAGGCTTGGCGCATCTTC  
GCTCCACACCAGGTGATGCGCTTATCGACCACCAGCAGGTCCATTCGGCTTACAGAGATGTTCCAGGCGCTGTTTGC  
TACGACGGGCAAAATCCAGCGAGCAAATCACCAGCTGTTCCGGTGTCAAACGGGTTGTAAGCATCGTGCTGAGCTTCGGCA  
TAACGCTCATCATCAAATAGCGCAAAGCGCAGGTTGAAACGGCGCAGATTTCTACCAGCCACTGATGCTGTAAGGTTTC

CGGGACGATAATTAGCACACGTT CAGCAGCGCCAGAGAGCAGTTGCTGATGCAGGATCATCCCGGCTTCAATGGTTTTCC  
CTAAACCCACTTCGTGACCCAGCAGGACGCGCGCGCTGGCGGCGACCAACATCATGAGCGATGTTGAGCTGATGCGGG  
ATCAGGCTGGTACGCTGACCGCGCAGGCCGCTGTACGGCATAACGAACTGTTGCTGGAATATTTACGCGCGGATAACG  
CAGCGCAAAGCGGTCCATACGGTCAATCTGCCCGCAAACAGACGGTCTGCGGTTTGCTGAACACCAGTTTGCTATCAA  
GGAAAACCTTACCGCAGGGCTACGCCGACTCTTTCAGTATCCAGGCGAGTACCGATATAGGTGAGCAAGCCATTTTCTTCT  
TTTACTTCTTTCGACTTGCATCTGCCAGCCGTCATGGCTGGTAATGGTATCACCAGGGTTGAACATCACGCGGGTCACGGG  
GGAATCACTGCGTGCGTACAGACGGTTTTACCAGTAGATGGGAAAAGTAAAGTGACAGTTGCGCATCCACC GCGACAA  
CGTTCCAAGTCCAATTCGCTTCTGTATCGCTGATCCAGCGTTGACCAAGTGAAAAGGCATATGTGTTGCGGCTCTAT  
ATCTTTAATTG CAGGCAATAACCACCCGCTACCGTGCTTATGAGGTAGTGGTGTATTTCAGGTCCAGGAATGGAAAGGGC  
GCTATGGTACTGGATGGCAAAGCATTCTGCACGCATCAAAATGGTATCTGGCGAACTCTTTTTTTGCTCAAAATAGCCC  
AAGTTGCCCGTCCATAAGTGTAGCAAAATATCCTCAATAAAAGGGAGTATTCCTCCGCCACGGGTTGTAGCTGGCGGG  
TCAGATAGTGTTCGTAATCCAGTGGTGAACGTTGGTAGTCCAGCGGCTCCGGGCCGTTGGTGGTCCATACGTAATG  
GTGCCGCGATTCTGATATTGCAAGGGGCGACCACGCTTTTGGTTTTCTTCATCGGCAAGGCGAGCGGCGCGTACATGAGG  
CGCACATTACGCTGATACTCGCTCAGCGGACGGCGAAGGCGTTTACGGTAAACCAGTCGCGCATCCAGTTCACCCGCCA  
TCAGTTTGCATGGTTTTCCGCTACATATTCCTGATATGGCTGTTGCGGAAGATGCGCAGGTATAGTCCCTGCTGAAAC  
TGCTGGGCCAGCGGCTCGGTGCGCACGGTTTTCCAGCCCTTTAAACACCATCCGCTGCTTGTGCGCCCTCTGAAAT  
CAGTCCGGCATAACGCTTTTTACTGCCGCTATCGGCTCCGCGAATGGTTGGCATCAGAAAACGGCAGAAAATGGGTTTCAT  
ACTCCAGTTCTAATGCGCTGGTCAGCCGTTGTTTTGCAGCGTTTCCGCCACCAGCGTTAACGTGCTGCACCAGTGCA  
CGACCGATTTTCGCGCTTCTTCTTCCGAATGTGCGCCTTTACGCCAGACAAACGTTGAGTCGGTATCGCCGTAGATAAC  
GTCGTAGCCCTGTGCTTCAATCAACGCTTTGGTTTTGCCGATGATCTGATGACCACGCATGGTATCGACGATGCCAGCC  
GCGGATCGAAGAAGCGGCAGGCGGTGGTCCGAGCACGCCATAAAAGGCATTTCATGATGATTTTCAGCGCCTGCGACAGC  
GGTTTGTACCTGGCGTTTGGCTTATCGCGCCCGTCCAGATGTTAGTCACAATCTCCGGCAGGCAATGTTTTTCTCG  
CGAGAACCAGGCATCGAGAAAACCTTCGGTACTGTGCTCTGGATCAGGCTGCGCATGCCTTCCACCAGCCGACGGGAT  
CAATCAGAAAGGTGCGGATGATCGACGGGTACAGGCTTTTATAGTCCAGCACCAGCACTGAATCATAAAGCCCTGGCCGT  
GAATCCATCACGTAGCCGCCAGGGCTGGCGTGGCGGCGCACTTCCGCGAGATTAGGCGCGACATAACCAGCGCGATGCAT  
TCGCGGAAAATAGAGATGACCAAATGCCGCCACCGAACCGCGTGTGGTCCACCAGGCGGCTTACCCTTCCCGTT  
CGAGTAAAAATGGCATGATTTTCAGTTTTGTGGAAGATCTGCGTACCAGCTCGCAATCTTTCAGGTTATAAGTTGCCAGC  
GCAGGTTTATCTTCGGCGAAAACGGCGGTCAATTTCTGCTCATTTCGATCCCACGGTTATCGATAGATTTTCTTCGCCTAA  
TAGCTCCTGAGCGACAGTTTCCAGCGAGAATGAAGAGAAAATCCAGAACCGGATTTTCAGCGCCTCGATACCGTTCGATAA  
TTAGCCGACCTTAGCCTGGGCAAAAAAGACGCCGTTTTTAAAGCCGTGCTCGCGCCACTCCAGCTCGCTATTATCGCGC  
CCAAGACGCAGCGGAAGACGGTAACGCTCGGCATGTTTTTGCAGCATTTCGAGATCGAACTGCACCACGTTCCAACCGAT  
GATCACATCAGGATCGTAGTTGGCAAACAGGCGTTGAGTTTTTCCAGCAACTGCGGGCGGCTGGCGACGTAATCCAGTT  
CGAAATCAAGCGAGGAGGCGTCCGCAATTCCTCGGCCCAGCATATAAACGATGCGCTGCCCGCAGCCTTCCAGGCCGATG  
CAGTACAGCTCACCGTGGCGGGTGGTTTCAATATCTATAGAAACCACTTGAGCGGCGGACGATAGTCGGGATGCGGTTT  
CAGACGGGCATTAACGATAGTGCCATTGTGCATATCACCTCGACCCACACCGGTGAGGTGATAAACCGTCCATCAGAT  
AGCGTTCTGGCGGACGCACATCGGCCCTGTAGACGGTAACGCCACCTTACGCAGGCGCTTTTCGTAATTCATCAATTGG  
CGATGGGCGGACAGTAAAGGCCATACCCGGCTGGCGGTGAAAATCCTTAAAGCCAGCGGTGTAGGCGAAAAGCCTTG  
TTCACCCTGCAAAAATATGCTGAGCGCGGGGAACCTGATCGCGGGAATAAACGCCACGGACTTTGCGGTGCAAGCGTAA  
CCTGCAACGGCCCGTTGCTCGCTCGCAGCCAGAAGGAGACTTCTGTCCTTTCGGGGGTGCCCGCAGTTGCGGTTAAG  
ATAAAACCTGCTGCGCCACGCTGAAAATCCATCAAAAAACAGGCTTGTAGTATAGCCTGGTTTTCGTTGATTGGTGTG  
GTTTTATACAGTCATTACTGCCCGTAATATGCCTTCCGCGCATGCTTACGCAGATAGTGTATCCAGCAGCGTTTGTGCTG  
CATATCCGGTAACTGCGGCGTAACCTGACGGCAGAATATCCCATATAAGCGACCTTCCAGCACGATGGCGTTATGCA  
CCGCATCTTCCGCATTTTTGCCCCATGCAAACGGGCGTGGGAATGGACCAGAACGCCGGGCATTTGCGTGCATCGATA  
CCCTGTTTTTCAAAGTTTTCTACGATGACGTTACCGGTTTTCCACTCATATTCGCCGTTGATTTCTGCGTGGTCAATTT  
GCGGGTGCAGGGAATGGTCCGTAGAAAATAGTCGGCGTGGGTGGTCCGCTTGTGGAATCGACTGACCCGCTGCGCCC  
AGATGGTGGCGTGGCGGAGTGCATATGCACAATGCCGCCAATGGAGGGGAATGCCTGATAGAGCAGCCGGTGGATTGGC  
GTGTCGGAGGAGGGCTTTTTCTGACTTCAACCACTTACCAGTTTCGATGCTAACCACGACCATATCGTCAGCGGTCAT  
GACGCTGTAATCGACGCCGAAGGTTTTGATCACAAGACGCCGCGCTCGGATCAACGGCGCTGACGTTGCCCATGTGA  
GCGTGACCAGGTTGTGTTTTGGCAGCGCCAGGTTGGCTTCAATACCTGGCGTTTGGATCTTCTAACATGTTGACTCCT  
TCGTGCCGGATGCGCTTTGCTTATCCGGCCTACAAAATCGCAGCGTGTAGGCTGATAAGACGCGCCAGCGTCGCATCAG  
GCGTTGAATGCCGGATGCGCTTTGCTTATCCGGCCTACAAAATCGCAGCGGTAGGCTGATAAGACGCGCCAGCGTCGC  
ATCAGGCGTTGAATGCCGGATGCGCTTTGCTTATCCGGCCTACAAAATCGCAGCGGTAGGCTGATAAGACGCGCCAGCGTCGC  
GTGCGATCAGGCGTTACATACCGGATGCGGCTACTTAGCGACGAAACCCGTAATACACTTCGTTCCAGCGCAGCGCTCT  
TTAAACGCTGGCAGGCGTGTGCTTATCAATCACCCTGATTTCAATGTCGTGCATCTCGGCGAATTTGGCGCATATCGTT  
GAGGTTTCAGTGATGGTGAAGACGGTATGGTGGCGCCACCAGCGAGGATCCACGCTTCCGGAAGCAGTTGGCAGATCCG  
GTTGCGTTTTCCACAGCGCATTGCCACCCGGCAGTTTCCGCGAGGAGTGGCGTGTTCACCGTGCATGCAGTTAAC

AGTAGACGGTAACGATCGCCGAGATCAATCAAGCTGGCGACAATCGCTGGGCCGTTTGGGTATTGAAGATCAGGCGGGC  
AGGATCGTCTTACCACCAATACCGAGATGCTGAACGTCGAGGATCGGTTTCTCTTCTGCGGCATCGACGGGCAGACTT  
CCAGCATATGGGAGCCGAGCACCAGGTACCTTTCTCGAAGTGATAGGTGTAGTCTCCATAAAGGAGGTGCCGCC  
TGCAGACCGGTTGACATCACCTTCATGATGCGAAGCAGGGCGGAGTTTTCCAGTCGCCTTCGCCCGAAAGCCGTAACC  
CTGCTGCATCAGACGCTGTACGGCCAGACCAGGAAGCTGTTTTAGACCGTGC AAATCTTCAAAGGTGGTGGTGAACGCGT  
GGAAGCCACCTTGTCCAGGAAACGCTTCATCCCCAGCTCAATACGCGCCGCTTCCAGCACGTTCTGTGTTTTTGGCC  
TGGATTTGTGTGGCAGGCGTCATGGTGTAGCAGCTTTCGTAATCATCGACCAGCGCTTAACATCGCCGTCGCTGATGGA  
GTTACCACCTGCACCAGATCGCAACCGCCAGGTATTGACGGAGAAACCGAACTTGATCTGTGCGGCACTTTATCGC  
CATCGGTGACCGCACTTCACGCATGTTATCGCCAAATCGGCAGACTTTCAGATGACGGGTATCCTGTTTAGAGACCGCC  
TGACGCATCCAGGAGCCGATACGCTCATGGGCTTGTATCCTGCCAGTGACCGGTAACCACGGCATGTTGCTGACGCAT  
ACGCGCGCCAAATGAAGCCGAACTCGCGACCGCATGTGCAGTCTGGTTCAGGTTTATAAAGTCCATATCGATACTGTCCC  
ACGGCAGCGCCGCTTGAAGTGGGTGTGAATTGCAGCAACGGTTTGTGAGCATGGTCAGGCCGTTGATCCACATTTT  
GCCGGGAGAAAGTGTGCAGCCACACCAGACCAGCGCAACGATCGTCGTAATTCGCGTCGCGGCAATAGCGGTGAT  
TTCATCCGGCTGGTGCACGCGTTTCAACACCGATTTGCAGGGCAGTTTTCGCTTCCGATTTCAGCGCATTAAACGACG  
GCTCGGCATGTTGGGTGACCTGACGCAGGGTTTTCCGGCCATACAGATGCTGGCTGCCAATGACAAACCACTTTCATAA  
TTATCAAAAATCGTCATTATCGTGTCTTATAGAGTGC AACCGCTGGGCAGCCTGTGCCGGGCGGAAGTTGGAAGAT  
AGTGTGTTCCGCGCTCATCGCCATTGCTGATAGCGCGATAAAGCTGTTCAAAGCGTTGTGCTGCTGCTGCACGCT  
TGCAGGGTTTTCTCTACCGCACTGGCCATTTTTTGTGAGCTGATGGGATGTCTGCGTGCACCTTTCGCGCGACGGCAGC  
AAAAATCGCCGACCGAGCGCACAGCACTGGTCAGAGGCAACAATTTGCAGCGGGCGATTACGACGTCGCGACGAGCCCT  
GCATAATGACCTGGTTTTTCCGCGCGATGCCGCCAGTGCCATCACGTTATTAACGGCGATCCCCTGATCGGTAAAGCAC  
TCCATGATTGCGCGTGCGCCAAAGGCGGTGGCAGCAATCAAACCGCCGAACAGCAGCGGAGCGTGGTAGCGAGGTTAAG  
ATCGGTAATCACCCCTTTCAGGCGTTGGTTAGCGTTCCGGTGTGCGGGCGCCGTTAAACCAGTCGAGCACCACCGCAGGT  
GATCCAGAGACGGATTTTTGGCCATGCTTCGGTCAGCGCCGGAAGCAGTTGTTTCTGGCTGGCGTTGATTTGCGTTTT  
AGTTCGGATGCTGGGCGCAAGCTGTTCCAGCGCCAGCCGAGTACGCGACCAAAACAGGCGTAGATATACCAAACGC  
CGATTGGCCTGCTTCCAGACCGATAAATCCAGGCACCAGCTGCCATCAACCTGACCGCAATACCTTTAACTGCCCGCT  
CGCAACGCTCTGTTTGTGCGCAATCAGAATGTGCGAGGTGGAAGTACCGATAACTTTTACCAGTGCCTTAGGCTGTGCG  
CCTGCGCAACTGCGCCCATATGGCAGTCAAACGCGCCGCCGAAATCACCACGCTTTCAGGCAGGCCGAGACGCTGCGC  
CCATTCCGGGCATAAGGTGCCACCGGAATATCGGCAGTCCAAGTGTGAGTGAACAGCGGGGAAGGCAAAATGGCGATTGA  
GGATCGGGTCCAGCTCATCAAAGAAACTGGCTGGCGCGAGGCCGCCAGCTTTCGTGCCACAGAGATTTATGCCCGCG  
CTGCAACGTCGCGACGAATATCCTGCGGGCGGGTGTACCGGAAAGCAGAGCTGGCACCCAGTCGCACAGCTCAATCCA  
CGATGCGGCAGATTGCGCCACGGCGCTGTCTGGCGAGTACATGCAAGTTTTTGGCCAGAACCTTCGCTGGAATAAA  
TACCACCAATGTAGCGGGAGTAGTCAACGTTGCCCGCGCGTGGCACAACGGGTAATCTCTTCCGCTTCTTCAACCGCA  
GTGTGGTCTTCCACAATACGAACATCGCGTTCCGGTTTTTCCGCAAACTCCGGGCGCAGCGCCAGCAGTTCGCTGCGC  
ATCAATCGGTGCGGGCGTGCAGCCGTTACTGTCAACGCCAATCCCAGCACAGCTGCGCGCTGTTGACGCTAAGCTCTG  
CAAGCAGGTTTTTCAAGTCCGCTTCCATTGACTCAATGTAGTACGCGGATGATGACGGAAGTGGTTATTCGGGGCATCA  
CAAAATTGCCCTTTCGCAACGGGGATACCACTCTACGCTGGTGGCGATCTTTCACCGGTAGCGCAGTCCACCGCCAA  
AGCTCGACAGAATCACTGCCAAAATCGAGGCCAATTGCAATCGCCATCGTTTCACTCCATCAAAAAACGGGTATGGA  
GAAAACAGTAGAGATTGCGATAAAAAGCGTCAGGTAGGATCCGTAATCTTATGATAAAAATGCTATGGCATAGCAAAG  
TGTGACGCCGTGCAATAATCAATGTGGACTTTTTTCCGCGTATTATAGACACTTTTTGTTACGCGTTTTTGTGATGGCT  
TGGTCCCGCTTGTGTTACAGAATGTTTTAATAAGCGGGGTTACCAGTTGGGTTAGCGAGAAGAGCCAGTAAAAGACGCGAG  
TGACGGCAATGTCTGATGCAATATGGACAATTGGTTTTCTCTGTAATGGTGGGAGTATGAAAAGTATGGCTGAAGCGCA  
AAATGATCCCCTGCTGCCGGGATACTCGTTTAAACGCCATCTGGTGGCGGGTTTAAACGCCGATTGAGGCCAACGTTATC  
TCGATTTTTTTATCGACCGACCGCTGGGAATGAAAGTTATATTTCTCAATCTCACCATTCGCGGTGAGGGGGTGGTAAAA  
AATCAGGGACGAGAATTTGTCTGCCGACCGGGTATATTTGCTGTTCCCGCCAGGAGAGATTCACTACTACGGTCTGCA  
TCCGGAGGCTCGCAATGGTATCACCAGTGGGTTTACTTTCTGTCGCGCGCCTACTGGCATGAATGGCTTAACTGGCCGT  
CAATATTTGCCAATACGGGTTTTCTTCCGCCGATGAAGCGCACAGCCGATTTTCAGCGACCTGTTTGGGCAAAATCATT  
AACGCCGGGAAGGGGAAGGGCGCTATTCGGAGCTGCTGGCGATAAATCTGCTTGAAGCAATTGTTACTGCGGCGCATGGA  
AGCGATTAACGAGTGCCTCCATCCACCGATGGATAATCGGGTACGCGAGGCTTGTGAGTACATCAGCGATCACCTGGCAG  
ACAGCAATTTTATATCGCCAGCGTGCACAGCATGTTTGTGCTGCGCGTCTGTGACATCTTTTCCGCCAGCAG  
TTAGGGATTAGCGTCTTAAAGCTGGCGGAGGACCAACGATAGTACAGCGAAGCTGCTTTTGAAGCACTACCCGGATGCC  
TATCGCCACCGTCCGTGCAATGTTGGTTTTGACGATCAACTCTATTTCTGCGAGTATTTAAAAAATGCACCGGGGCCA  
GCCCAGCGAGTTTCTGCGGGTGTGAAGAAAAAGTGAATGATGTAGCCGTC AAGTTGTCATAATTGGTAACGAATCAG  
ACAATTGACGGCTTACGGAGTAGCATAGGGTTTGCAGAATCCCTGCTTCTGTCATTTGACAGGCACATTATGCAAGCAT  
TGCTGGAACACTTTATTACCAATCCACCGTGTATTGATGCGGGTGGTGTGGTGGCCTTTCTGGAGTCGCTGGCG  
CTGGTCCGTTTATTCTACCCGGTACGGTGTGATGGCGGGGCTGGGAGCGCTGATTGGCAGCGGCGAGTTAAGTTTCTG  
GCACGCTGGCTGGCAGGGATTATTGGCTGCTTGTGAGGGGACTGGATTTCTTCTGGCTGGGTTGGCGTTTTAAAAAGC



CGTTGCATCGCTGGTCATTTCTGAAGAAAAACAAAGCACTACTTGATAAAACTGAACATGCGTTGCATCAACACAGCATG  
TTCACCATTCTGGTCGGTCGTTTTGTTGGCCCGACGCGTCCGCTGGTCCAATGGTGGCGGAATGCTGGATCTGCCGGT  
GGCTAAATTTATTACGCCGAATATTATCGGCTGCCTGCTGTGGCCGCGTTTTACTTCTGCCAGGGATTCTGGCGGGC  
CGCGCATCGATATTCCTGCCGAATGCAGAGCGGTGAGTTAAATGGTTGCTGCTGGCAACAGCGGTGTTTTGTGGGTT  
GGTGGCTGGCTGTGCTGGCGGTTATGGCGCAGCGGTAAGCGACTGACCGTTTGAGTCATTATTTGTCCCGCGGTGCTTT  
GTTGTGGCTGACGCCGTTGATTTCTGCCATCGGCGTGGTGGCGCTGGTGGTGTAAATTCGCCACCCGTTGATGCCGGTGT  
ATATCGATATTTGCGTAAAGTGGTTGGGTTTAGGAGATAGTCTTGTGCGGTTGCCTGATGCGACGCTTGCCGCGTCT  
TATCAGGCCTACAAAACGCACTACCCGTAGGTCCGATAAAGCGTTACGCGCATCCGACAGTGCATACTAACCCGTAAT  
CCCCAATAGTGCCGAAGCACTCGCCTTACCGCTCAACAACCTATTGGTCATACCCTGCCAGGCATGCGCCCGTCCGGCA  
CTACTACCGAGCGGTGGGATCCGCGCCGATCTTCCAGCTGTGCGACACCATCAATAGCGTCATTTTTGTGCTGG  
CAGCTCGTGCTACCAGCGTCAACATCTCTGACGTAACGCCGATCGAGCGCAGAGAACGGTTCATCGAGCAATAAAAT  
CGGCTGTTCCGCTACCAGACAACCGCTAACGCCACTCGCTGTGCTGACCGCCGAAAGCTCGCCCGGTAACCGCGCCA  
TTAAATTATCAATCCCCATCTGGCGGGCGATAGCGTGATTTTCCCTGCTGTACCGGTTCAATTTCAATCCCGGATTT  
AGCCCCAGCCGATGTTTGTGCGACCGTCAAGTGGCTGAACAGTGTGTTCTCTGAAACAGCATCGACACCGGACGGCG  
TGACGGCGCATAGTTGTGATCTACGCCATCGATCAGCGAACCGCTGGCTGGCGTCAGAAAACCGCGCATCAAAAT  
TCAGCAGGTAATTTTACCAGCGCGTGGCCGAGGATCGCCACCTGCTGCGCGGTTCCACCGTTAAGCTAAAACGC  
ATCGGCAAATGGTGGTAAAGCCAGGTGATATCAGTCAGTTTTAACATTTCCGCCGAGTGTTCATCACGGTAAACA  
GCAGAAAACAGAGCAGCAGCAGAATTAACCGGTCACCGCACCCTCTGGCTGCGATAGGAGCCAATTTGCTGGTAGAGA  
TAAAACGGCAGGGTGCAGAAATCATCGTTACCGAACACGCCACCACGCCAAAATCACCATCGACAGCAGCATGAAA  
GGCCAGCGCTGCGCCAGTGGACGTTTTAGGGCGCGCAGCTCCACCCTTTAAGCGTGACCAGCCTTCAATCCCAGCG  
ACTGACATAACATGCTGTAGCGGGCGGTGATATCGCGCATCGGTTTTCCAGCACTTTCAGCGCATAAGGGATCGCCATT  
AACGCATTGGTAAAATCACAATGCCGTGAGCAGATTGTGGCAGGCCGATAGTGTGTTGAGCAGTAAAAAGAAGCCGGT  
AGCCAGCACAATCCCAGCATGGCGAGGATCAACATGCCGCTCATCTCCAGCACCTGACCCGCGCAGCATTTTCTGCCGCG  
CCCAGATTCCGACTGCTCATAGCAGCATCATGGTCAGCACTACGCACAATACACCTGCCGCCAGCGCAATACGCAAC  
GAGGTCCACAGCGCTGCCACAGCACCAGTGTGCCAGCACTCCGGCAACTGGCGATTTACCCCATCGACGATCACCGC  
CAGTAACGGTGGCAGCAACAGCAGCAGCGCCAGCACAATTAACACCGTGTGCGAAATGCGGCTATGCAGACGATCGTCCG  
GGTCCGCCAGCCTTGACAGCAGCGTGGTCCGGGCGCAATGGCCTTACTCAATCGCTGACTCAACAGCACCAGCCCGAGG  
CAGCACACCATCTGGAGCAGCGCCAGCATTGCCGCGGGCAGGATCGTAGTCGTAACCTCAGCGCCTGATAGATTGCCAG  
CTCGATAGTGGTGCCTGCGGACCGCCCCAGCGATAGCAGCGTGGCGAAGCTGGCGAAAACAGAGCATAAAGATAAGCG  
CAGCAACCGCGGGATTTGTGCGCGTAACCACGGCCATTGACGAAGCGAAAAAATGCCAGCTACGCATCCCAAGCTGG  
GGGCAAGTTGACGCTGTTCCGCGGGGATGTTTTCCAGTGCCTGGAGTAATAAGCGGCTCGCCATCGGCAGATTAAAAA  
CACATGGGCCAGCAAAATACCTTGAGGCCGTAGGGCGAAAAGTCCACTCCAGACCGAGCGATTGGCAGAGTGTGCCA  
GCCAGCCCTGGCGACCATAGACGCTAAGAATGCCGAAAACAGCGACCAACACCCGGGAGGATCAAGGTCAATGCACACAGA  
CGCAACAGCGCCAGCCGACCCGAAAGCGCTGCGATAGAGCGCGCGGGCGAGGAATATCGCGGTATGACAGAGAGCAG  
TGCCGAGAGAAACGCCTGCCAGAAGGAGAAGCGCACCATGCCACAGATAGCTGTCTGCCAGACTGCCACCCAGTCAT  
CCTGCGGCGGTTCCACCACAGGGCGAGAAACGCCGCCAGCGCAACCGCTACCACCAGCGTGGTGGCGCTTACACCTGGA  
ATTAACCAGCCGGGAATTAACGGCTGACGGCGGTTGCCATTCGTAATCCATGCCTGACGTTGTGCCGCCACTTCGGCT  
GGCGTGAACCTCAACGTGGTTGCGGGTTTGGTCAATTTTTCAAACCGGCAGGACGCGTACGTTTGCACCCGGATAAT  
CCAGTTGCCGTTGGGATCGCATTCTGAAAGCCGGAGAAACATAAACTGGAGGAATTTTTGCGCCAGCTCCGGCTGCT  
TGCTGGCAGCGGTGCGGGCGGCACTTCCACTTGAGATAGTCACTTTCGCTGAAGTTCCGCGCGGCTAGTTATCTTTC  
TTCTCTTCGAGAATGTGATAAGCCGGAGAGGTGGTAACTCAGTACCAGATCGCTTTACCTTTTTAAAAACAGGCCGTA  
GGCTTCGCTCCAGCCTTTGGTGACCGTGACCGTTTTCTTCCAGTTCCTGCGAGGTTTCTGCCAGGCTTGTGGGGCGTATCGCCATAGA  
CTTTTTGCATCCATAGCAACAGACCCAGCCCGGTGACTGGTGCAGGATCCTGATAAATCACCCGCCAGTTTTGATCG  
CTCTCAACCAGTCTTTTCCAGCTTTGTGGCGGGTTTTTTCAGTTTTTCTTGTGATAAACGAAGGCGAAGTAGCCATAATC  
AAACGGTACGAAAGTGTCAATATTCCAGCCGCGGGGAACTTAACGGCATCCGCTGCCACACCGCTTTTGGCAAACAGTC  
CGTTTTTACTGGCGGCTTAACAGGTTGTTATCCAGCCCCAGCACCATCGGCTTTACTGTTTTTGCCTTCCATCCGT  
AGACGGTTGAGAAGCGAAACGCCATCTTCCAGCGCCACAGTTTCAGTTCGCAATTACAGTCGGCTTCAAAGGCTTTTTT  
AACCACCGGACAGGCCCCAGTCGGCGGCGAAGGAATCGTAGGTATAAACAGTCAGAACGGGTTTAGCGAAAACGGGCG  
CTGTGCACAGCAACAGCAGGGGCGACATTTTTTAACTTTGCACCTCAAAAAGAGTGGCAAAGGACTTGAGAAGGA  
GCCTCAAATCCCTTCCGGCGGTTATCCGGATCAGGTTGACGGGATTTTTCTCAGCGCACGCGTACGCGTGGCACC  
TTGAGAACGGCGTTAGTGTAGTGATTTTTGTTATCAACCAGCAATCATGGATCCGGTGGCGAAAACACGCTGATTTAAA  
TCGAACCAGCCGAGGATTCATGCGCAGGCCGCGCATACTGCGTTGCCCTGAATGATCAGCCAGTGGTGAATAATGG  
CACCATCGCTTTGCTGGCGACAGTTGCTGGCACCAGTTGCCAGATTCATCTGCCATTGCGCCAGCGAGCAGCGTCCG  
CTTGCCAGTCAATGGGAATGCAATGTTGTAGCAGTGGCACTTCGATAAATGTGCGAAAACAGAGAAGTCCAGCGGCGAG  
GTAAGTGGCGCTGTTTAGCCAGATCACTTTGATCTCTCTGTATGCCACTGATCGTAGTCGATCTTTGATTTT  
CAGCGTGACCTGGTGACTTGCCAGAATCTGCTGCATGATCCCGCAATCACCCGATGCTACTGTGATCTGATAAAGG

TTAGGGTGAGGCTTTCCAGGCCAGCCGGTTTTTCGCTCTTTATGGTGCGGGCATGGTGCCAACGGGGGAGCAGTCCATAA  
GCCGGGAACCACAGTTGCTGGTACTGTTCTCAGCGAAATAGACCAGATTAGTTGGAGAAAGCACATAGCTTACCCAGTC  
CCTGACTTGCTGATTCGCCCCGCGATGGGTGCGGCTGTCGAACAGTAAATAGTAGCAACCTTCTCCAGCGGGCTTTCAA  
TCTCTTTTTCTCGCCCTGTGGACCTTTTAGCATCAGCCCTCCGGCTGGCTCGTCGGCAATTTCCGGCAGAACCCAGACG  
TTAACTTCGTGATTAATGCCCGTAACCGAAGAAGTCATCGAATGCCTGAATTTTCAGTTGATTGGTGTGTTGCGAAT  
CACCGCATACGGACCGGTGCCGATGGGATGGCTGGCAAAGTACTGAGGGTTTTCCATTGCGCGGCAGGATCATCGCCG  
GAACTTGCCCCAGCAGTAACGGTAACAGCGGTCCGGTTGCGTGAGATGGATATCCAGCGTCCAGGGCGTCGGCGACACA  
ATGTCAGCAATATGCGAATAGAGCGGCAGCGTATTGATTGTTTTAAAGAGGCGATCACATCGTCCATTTCCAGTTCACG  
ACCATGGTGAAAATGGACTCCTGGACGCAAAAAGAAACGCCAGTGAAGCGGTGAAATTTGCTGCCAGTGGTGGGCGATGT  
CTGCTTCCAGTTCCTCATTTTCTCATTATGCGGCTTAGCGAACTGAAGATTTGCCGGCGATATGGGTTTCGGAACGG  
CGCAATGCGCTGCCAGGTAGCAGATTACGCAACGGACGATAGTAGAGCACGCGCAGGATGTCCGCCCTGGCGGAAGCT  
GCGGCCAGATGAGAAACCAGATTTGCCGCACAGTCGTTTTGTCGCAACCAACTGCACCAGTTGATCGATAACGATCCT  
GCTCCAGCAGTCTTCCGCCGCTGTTGCTGAAGCGCCAGCCGGTATAGAGGAATGTCAGACGCGAGCGTTTACCGCCG  
CCGACTTCCGCTTCCACGTCAGCCAGCCGCGATCCTGCATGGTGTGAGCAGGGTGCGCATATGACGACGCGAGCAGCT  
CAATAACGCTGCCAGTTCGTTGAGCGTTGTCTGCTGCAATTTACCCTCGCAGCATTGCCACAGGCGGATGAATGTTGTT  
GCAGACGAGCAGATGGCATAAAAAGGGGAACCTCTGTGCAAAAGACAGCAATTTTATTTTCCCTATATTAAGTCAATAATT  
CCTAACGATGAAGCAAGGGGTGCCCATGCGTCAGTTTTATCAGCACTATTTTACCAGCAGCAGGAAGTTGTGCTGGTT  
GCGTTGGTTAAGCGTCCCAACGATTAACCATGCTTGAAGGACTGATGCAGTGGGATGACCGCAATTCTGAAAAGTTGAC  
TTGCTGCATCATGTGTACTGAGTATTGGTGTAATAACCCGCCAGCAGATTATACCTGCTGGTTTTTTTTTATTCTCG  
CCGCGCTAAAAGGGAACGTATGATCTGGATAATGACGATGGCTCGCGTATGAACGGTGTACGCGGCATTTATGCTG  
GTCGCTTTTATGATGGGGTGGCCGGGGCTACAGGCTCTACATTGAGCTTATTTCTGAGTCGTGAGGTTGGCGCGCA  
ACTTTTCTGGATCGCCCTTTTTATACGGTGAATGCTATTGCTGGGATCGGCGTAAGCCTCTGGTTGGCAAAACGTTCTG  
ACAGTCAGGGCGATCGGCGAAAACGATTATATTTTCTGTTTATGAGTATCGGCAATGCGCTATTGTTGCAATTAAT  
CGTCATTATCTGACGCTTACCTGTGGTGTGCTTCTGGCATCTCGGCAATACGGCAATGCCACAGTATTGTTGCTCT  
GGCGGGGAATATGCGGATAACTCGGCGCGAGAAGTGGTATGTTAGTCCGGTATGCGTGCGCAGCTTCTCTGGCAT  
GGGTTATCGGTCCACCGTTGGCCTTTATGCTGGCGTTGAATTACGGCTTTACGGTATGTTTTGATTGCCCGGGGATA  
TTCACACTCAGTCTGGTATTGATTGCATTTATGCTTCCGTCTGTGGCGGGTAGAAGTCCGCTCGGAAAATGCTTTATC  
AATGCAAGGTGGCTGGCAGGATAGTAACGTACGGATGTTATTTGTCGCTCGACGTTAATGTGGACCTGCAACACCATGT  
ACATTATTGATATGCCGTTGTGGATCAGTAGCGAGTTAGGATTGCCAGACAACTGGCGGGTTTCTGATGGGGACGGCA  
GCTGGACTGAAAATACCAGCAATGATTCTGGCTGGCTACTATGTCAAACGTTATGGTAAGCGGCAATGATGGTCATAGC  
AGTGGCGGCAGGAGTACTGTTTTACACCGGATTGATTTTCTTAATAGCCGATGGCGTTGATGACGCTGCAACTTTTTA  
ACGCTGATTTATCGGCATTGTTGCGGGTATTGGGATGCTATGGTTTCAGGATTTAATGCCTGGAAGAGCGGGGGCAGCT  
ACCACCTTATTTACTAACAGTATTTCTACCGGGTAATTCTGGCTGGCGTATTTCAGGGAGCAATTGCACAAAAGTTGGGG  
GCACTTTGCTGTCTACTGGTAATTGCGGTTATTTCTGTTGTCGCAATTTTTTAACCGCAAAGGTTAAAGACGTTTGAT  
GACGTGGACGATAGCGGAAAGCCCGGTCATTTGACCGGGCAAGGGGATTAATTCATAAACGCAAGGTTGTTTTGCTTCATA  
AGCGGCAATGGCGTGTGCTGCAAGTAAGCCCAATACTGTCAGACCGTTCATCATGCAAGTGGCGGGCAAGGCAT  
CGATGGTAAAGCGATAGGTTTTCTCTCCGCTTTACCTCTTGCCTCCAGATCCACGTCGAAATGGATCCCGGATTA  
GCTTTACCAGCGCAAACAGTTCGTCCTACTGTCATCGCTTAATTTACCGGCAGCAGCTGGTTGTTAAAGCTATTGCC  
GTAGAAGATGTCAGCAAACTCGGCGCAATCACCACTTAAACCGTAGTCGTTCAATGCCAGGGCGGTGCTCACGCG  
AAGAGCCACAGCCGAAGTTTTCTCGTCCAGCAAAATGGAAGCGCCCTGATACTGCGGGAAGTTCAGCAGCAAGTCCGGG  
TTTTGGCTGTTGGCCTTTTTATCCAGAAAACCGCAGTCTGTTAAACAGATGCGCGCAAAACCCGTACGGGTCACTTTCTG  
CAAAAACGTTTCCGGATGATTGCATCGGTATCGACATTGGCGCATCCAGCGGAACCACAGGCTGTGTGTTGATAA  
ATTTCTCTGCCATGGTGTGCTCCTTATTAATGTTGCGAATGTGCGCGAAATGTCCGGTACAGCAGCAGCGGCAGCCAT  
TGCCGGGCTGACCAGATGCGTGCGCCCGCGCCCTGGCGGCTTCAAAGTTACGGTTGCTGGTGGAGGCACAACGTT  
CGCCCGGATTCAGACGGTGTGTTTATCGCCAGACACATTGAGCAGCCAGGCAAGCGCCATTCAAACCGGCTTCAATA  
AAGATTTTATCCAGACCTTCCGCTTCCGCTGGGCTTTTACCAGGCGCAGAGCCGGGAACCACAGTGCCTGCACGCTGG  
CGGACTTTTTCGCCCTTTGGCGATCTCCGCTGCCGCGGTAATCTTCAATGCGCGAGTTGGTACAGGAACCATAAACA  
CTTTGTCGATAGCCACTTCCGGTCCAGCGGAATACCCGGTTTCCAGCCCATATAGCCAGCGCTTTTTCTGCCGACGCGGT  
TCAACCGGATCGGCAACGAAGCCGGATCGGGAATATTGCTGTTACGGAAATCACCTGGCCGGGATTGGTCCCCAGGT  
GACCTGCGGTGAAATTTCTTCTGCTTGCAGAGTGACAACGGTATCGAAAGTTGCGCCTTCTGCGTTTGCAGGGTTTTCC  
AGTAGGCAACGGCGTGTGAAATCTTTGCTTTTCCGCGCATGCAGACGGCCTTGGACATAGTTAAAGGTGGTTTCTGCC  
GGTGCAACCAGACCGGCTTTTGGCCCATTTGATTGCCATATTGCACAGGGTCATACGACCTTCCATGCTTAAATCACG  
GATTGCTTCCGCCAAAACCTCCACCACATGCCCGGTGCCGCTGCGCTACCGGTTTTACCAGATAATTGCCAGCAGATAT  
CTTTTGGGTAATGCCCGCGCGGCTTTGCCCTGGACTTCAATTTTTCATGGTTTTTTCGCGGCCCTGTTTCAGGGTTTTGC  
GTTGCCAGTACGTGTTCAACTTCGGAAGTGGCGATACCAAAGGCCAGTGCGCCAAACGCGCGGTGGTGGCGGTATGCGA  
GTCGCCGACACAATGGTCAATCCCGCAAGGTGACGCCCTGTTCCGGCCCCATTACGTGGACGATCCCTGATACGGT

GATTCAGGTCATACAGTTCGACGCCAAATCTTTGCAGTTTTTGTATCAGTTCCTGCATCTGGATACGCGCCATTTACCG  
CAGGCATTAATGTCTTTGGTCTGGGTAGAGACGTTGTATCCATGGTAGCGAAGTTTTGCCGGCTGACGTACCGGGCG  
ACCGTGGGCGCGCAGACCATCGAACGCCTGCGGTGAGGTCACTTCATGCACCAGGTGGCGGTGCATATATAACAGTGGGG  
TTTTCGTTTTCGGCTTCGTACACAACGTGAGCGTCAACAATTTTTCGTATAACGTCTTAGCCATGATTACACCCCTTCTG  
CTACATAGCGGCAATGATATCGCCATTTTCATCGTACTAACGGCGGCAGCGCCACGGGCTAAATCCCCGGTGCGAATG  
CCTTCTTAATGCGCGGTTAATGGCGGTTCAATGGCGCAAGCCGCATCATCGGCATCCAGGCTGTAACGCGAGCAGCAG  
TGCCAGCGAAAGGATTTGTGCAATCGGTTGGCGATTTTTGCCTGCGATATCTGGTGCCGAGCCGCCCGGTTTCAT  
ACAGTCCAAAACCTTGCTCGTTCAGGCTGGCGGAAGGCAACATCCCCATCGAGCCAGTGATCATTGCGCACTCGTCAGAC  
AGAATGTGCCAAACAGGTTGGAGCACAGCAGAACGTCAAACGTGATGGATCTTAAATCAGCTGCATGGTGGCGTTGTC  
GATGTACATATGCGCCAGTTCGACATCCGGGATTTCCGTGGCGATCTCGTTAACGATCTCCCGCCATAAAATAGAGGATT  
GCAGCAGTTGGCTTTATCGATCGACGTCACTTTGTGGCGACGTTGCGAGCAGATTCAAACGCGATGCGGGCGATACGT  
TCGATCTCAAACGGTGATACACCTCGGTATCAAAGCTTTTTCATATTGTCGGCTACCTTCGCGGCTTTTGGCTGACC  
GAAATAGATGCCGCCGGTTCAGTTCGCGCACACAGGATGTGCAAGCCGTTTGGCGCAATGTCTGCACGCGAGCGGACAGA  
ATGCTTCAGCCCCTGATACAGTTTTGCCGGCGCAGGTTGCTGAATAATTTGAAGTGTTACGCAGAGGCAGCAGCGCG  
CCGCTTCTGGTTGCTGGTAAATGTTCCACTTCGGGCCCTACCAGGCCAAACAGCAGCCGATCGGCTTG  
CTCAACAACCTTCAACCGTTCGAGGCGCAGTGGTTGCCCGTGGTTATCAATGGCTGCGCCCTACATCGTAATGGCTGG  
TGTTGATGCGCATCGAAAGCGGTTGCGCACGGCATCCAGCACTTCAGCGCCTGGGTATCACTTCGGACCAATACCG  
TCCCCCGCAATACGGAATATGGTAATCTTCGACATCACACGTTTTCTTGTGTTTTCGTTGTGTTGAGCTTTGCGT  
TGCAACTTTTTTCTGACTTCTGCGGCACGCCAGATATTGTTGAGAACGTGCACCATGGCTTTGGCAGATGACTCGACAAT  
ATCGGTAGCCAGGCCGACGCCGTGGAAGCGGCGACCCTGTAGTTAGCGACGATATCCACCTGACCCAGCGCATCTTTAC  
CGTGGCCTTTGGCGGTGAGGCTGATTTACCAGTTCGACGTTATATTAGTGATGCGGTTAATTGCCTGATAGACGGCA  
TCGACCGGACCCTTACCCTGGCGGCTTCTGTTTTGACTTCTTCGCCACAGGCCAGTTGACGGCGGCGGTGGCGATATC  
GTTAGAGCCAGACTGCACGTGAAGTAATCCAGACGGAAATGCTCCGGCTCTTCTGCTGTTACCGATGAAGGCCAGCG  
CCTCCAGATCGTAATCAAACACCTGACCTTTTTGTCCGCCAGCTTCAGGAAAGCATCGTACAAATTGTCTAAATTATAT  
TCACTTTCTTATAACCCATCTCATCCATGCGATGTTTACCGCCGACGCCCGAACGAGAGGTGAGTTACAGCTGGAT  
TTGGTTGAGACCAATAGATTCTGGTGCATGATTTCTGAGTTTTCGCGGTTTTTCAGCACGCCATCCTGGTGTATACCGG  
AGGAGTGTGCGAATGCGCCGCTGCCAACAATGGCTTTGTTGCCGGGATCGGCATATTACAAATCTGGCTAACTAACTGG  
CTGGTGCGCCATATCTCCTGGTGATTAATGGCGGTGTGGACGTTGAGAATATCCTTACGAACTTTGATCGCCATGATGAC  
TTCTTCAGGGAACAGTTTTCCGGCACGCTCGCCGATCCCGTTCATTGCGCCTTCCACCTGGCGTGACCCGCATGTACCG  
CCGCCAGTGAGTTTTCCGACCGCCAGGCCAAATCGTCTGGTATGTACGGAGATAATGGCTTTGTCGATGTTAGGCACG  
CGTTCATACAGGCCGCTGATGATTCCGGCGAACTCAAACGGCATGGTGTAGCCACGGTGTCCGGAATGTTGATGGTGGT  
GGCACCGGCATTAATCGCCGCTTCGACCACTCGCGCCAGATCGGCAATGGGTGTACGCCCGGCATCTTCGCAAGAAAATT  
CAACATCATCGGTGTAATTACGGGCGGTTTTACCATATAGATAGCGGTTTCGATCACCTCGTCCAGCGTGTGCGCAGC  
TTGGTGGCGATGTGCATTGGCGAAGTGGCAATAAAGGTATGAATACGGAAGGCTTCGGCGACTTTCAGGGATTGGCCGC  
CACGTGCATATCTTTTTCCACGCAGCGAGCTAACGCACATACGCGGCTGTTTTAACCTGGCGGGCGATGGTTTGCACCG  
ATTCAAATCGCCGGCGAAGAGACGGGAAACCGACTTCCATCACGTCAACACCCATACGCTCAAGGGCCAGCGCAATT  
TGCAGTTTTTCTTACACTCAAGCTTGCTGTAACGCCTGTTACCCTCGCGCAATGTGGTATCGAAAATAATGACTTG  
CTGGCTCATGGTTTGGTCTTGTCTTTTTAGAGCGCTCGTTCGGGCATAAAAAAACCCGCGCAATGGCGCGGTTTT  
TTTTTTGACTGCGTGTGGCTTAATGCTGGATGCCGCTCACTCGTCTACCGCGCAAAGAAGATGCGTTTAGTAGTAGTA  
GACCGATAAAGCGAACGATGTGAGTCATTAATCAGCTCCAGATGAATGCGATATGCTTTTAGAGTTACTGGATACAAAA  
ACGGATGTCAACCCTGACGCAATAAAAAACGTCCCGCACGCTGAGTTCTGCATCCGTAATAAATTAGCTAATTTGTGCTGCGG  
TGTTAAAGTAAGCGATTAATTTCTGCTTAACCTACCGACGTTTTTCATCGTTGACATATTTACAGCATAAATTTTTGC  
ATCTAATCAACGAGGAAAAAGGGACAAAATGCACGCGTTGCAAAACCTATCCTGATGATTTGATTGAATTATATGTTT  
TGCGATTTTTTTGATATTGATTTGGTGAATATTATTGATCAATTAATGTTAAGAATTAATGCATTAATATATAAATTA  
ATTATTAATAAAGCACATTAATCCATTTGTAGATGATTGAGTATTCGCGGTAGTTATGATTAGATTGTTTTCGCAACA  
AAAAATTATGGATTATTGCTGTGGTAAATGACTCATTCCACGGCAATGGATTCTGTTTTATCAGAACCCTGATCTT  
TATGTTTTCCGAATTTTACTCATTTTGTCTTTTCTATTTTATATGCATGATAAATCATATCTTCAGGATTATTTCTCT  
GCATTCCAATAAGGGAAGGGAGTTAAGTGTGACAGTGGAGTTAAGTATGCCAGAGGTACAAAACAGATCATCCAGAGACG  
GCGGAGTTAAGCAAACCACAGCTACGCATGGTGCATCTCAACTATTAACCGTTTTTCGATGCCGTGATGCAGGAGCAAAA  
CATTACTCGTCCGCTCATGTTCTGGGAATGTGCAACCTGCGGTGAGTAACGCTGTTGCACGCTGAAGGTGATGTTA  
ATGACGAGCTTTTTGTTCTTATGCCCCTGGTATTAACCGACTGCTCGCGATTTCAACTTTTTGGTTGAGTTCGTCAG  
GCATTGCAACTAGTACAAAATGAATTGCCTGGTTCAAGTTTTGAACCCGCGAGCAGTGAACGTGATTTTCATCTTTGTGT  
TTGACGCCCTTAGACAGCATTCTGACCTCGCAGATTTATAATCACATTGAGCAGATTGCGCCAAATATACATGTTATGT  
TCAAGTCTTCAATAAATCAGAACACTGAACATCAGCTGCGTTATCAGGAAACGGAGTTTGTGATTAGTTATGAAGACTTC  
CATCGTCTGAATTTACCAGCTACCATTATTTAAAGATGAAATGGTGTGGTAGCCAGCAAAAATCATCCAACAATTA  
GGGCCGTTACTGAAACATGATGTTTATAACGAACAACATGCGGCGGTTTCGCTCGATCGTTTCGCGTCAATTTAGTCAAC

CTTGGTATGACACGGTAGATAAGCAAGCCAGTATCGCGTATCAGGGCATGGCAATGATGAGCGTACTTAGCGTGGTGTGCG  
CAAACGCATTTGGTGCCTATTGCGCCCGTGGCTGGCTGAAGAGTTCGCTGAATCCTTAGAATTACAGGTATTACCGCT  
GCCGTTAAAAACAAAACAGCAGAACCTGTTATCTCTCCTGGCATGAAGCTGCCGGCGCGATAAAGGCCATCAGTGGATGG  
AAGAGCAATTAGTCTCAATTTGCAAACGCTAACTGATTGCAGAATAGGTGAGACATGAATGTCTGGTTTTATTCTGCATTT  
TTTATTGAATGTAGAATTTTATTCTGAATGTGTGGGCTCTCTATTTTAGGATTAATTAATAAATAAGAGAAATTGCTGTGA  
AGTTGTGGGATTACAGCCGATTTATTATCAATTAATCCTCTGTAATGGAGGATTTTATCGTTTTCTTTTACCTTTTCTCC  
TGTTTTATTCTATTACCCCGTGTATTGTCTCTGGCTGCCAATTGCTTAAGCAAGATCGGACGGTAAATGTGTTTTACAC  
ATTTTTTCCGTCAAACAGTGAGGCAGGCCATGGAGATGTTGTCTGGAGCCGAGATGGTCTGCCGATCGCTTATCGATCAG  
GGCGTTAAACAAGTATTCGGTTATCCCGGAGGCGCAGTCTTGATATTTATGATGCATTGCATACCGTGGGTGGTATTGA  
TCATGTATTAGTTCGTATGAGCAGGCGGCGGTGCATATGGCCGATGGCCTGGCGCGCGGACCGGGGAAGTCCGGCTCG  
TGCTGGTAACGTCCGGTCCAGGGGCGACCAATGCGATTACTGGCATGCCACCCTTATATGGATTCCATTCCATTAGTT  
GTCCTTTCCGGCAGGTAGCGACCTCGTTGATAGTTACGATGCCCTTTCAGGAGTGCACATGGTGGGGATTTCCGCGACC  
GGTGGTTAAACACAGTTTTCTGGTTAAGCAAACGGAAGACATTCGCGAGGTGCTGAAAAAGGCTTTCTGGCTGGCGGCAA  
GTGGTCGCCAGGACAGTAGTCGTTGATTTACCGAAAGATATTCTAATCCGGCGAACAAATTACCCTATGTCTGGCCG  
GAGTCGGTCAGTATGCGTCTTACAATCCACTACTACCGGACATAAAGGGCAAATTAAGCGTGCTGCAAAACGCTGGT  
AGCGGCAAAAAACCGGTTGTCTACGTAGGCGGTGGGCAATCACGGCGGGCTGCCATCAGCAGTTGAAAGAAACGGTGG  
AGCGGTTGAATCTGCCCGTGTGTTGCTCATTGATGGGGCTGGGGCGTTTCCGCAACGCATCGTCAGGCACTGGGCATG  
CTGGGAATGCACGGTACCTACGAAGCCAAATGACGATGCATAACCGGATGTGATTTTCCGCGTCCGGGTACGATTTGA  
TGACCGAACGACGAACAATCTGGCAAAGTACTGCCAAATGCCACTGTTCTGCATATCGATATTGATCCTACTTCCATTT  
CTAAAACCGTGACTGCGGATATCCCGATTGTGGGGATGCTCGCCAGGTCTCGAACAAATGCTTGAACCTTGTGCGCAA  
GAATCCGCCCATCAACCACTGGATGAGATCCGCGACTGGTGGCAGCAAATTAACAGTGGCGCGCTCGTCAGTGCCTGAA  
ATATGACACTCACAGTAAAAAGATTAACCGCAGGCGGTGATCGAGACTCTTGGCGGTTGACGAAGGGAGACGCTTACG  
TGACGTCCGATGTCCGGCAGCACCAGATGTTGCTGCACTTTATTATCCATTGACAAACCGCTCGCTGGATCAATTCC  
GGTGGCCTCGGCACGATGGGTTTTGGTTTACCTGCGGCACTGGGCGTCAAATGGCGTTGCCAGAAGAAACCGTGGTTG  
CGTCACTGGCGACGGCAGTATTGAGATGAACATCCAGGAACTGTCTACCGGTTGCAATACGAGTTGCCCGTACTGGTGG  
TGAATCTCAATAACCGCTATCTGGGGATGGTGAAGCAGTGGCAGGACATGATCTATTCCGGCCGTCATTACAATCTTAT  
ATGCAATCGTACCCGATTTCTGCTCGTCTGGCGGAAGCCTATGGGCATGTCCGGATCCAGATTTCTCATCCGATGAGCT  
GGAAAGCAAATAGCGAGGCGCTGGAACAGGTGCGCAATAATCGCTGGTGTGTTGTTGATGTTACCGTCGATGGCAGCG  
AGCAGCTTACCCGATGAGATTCCGGGGGGCGAATGGATGAAATGTGGTTAAGCAAACGGAGAGAACCTGATTATGC  
GCCGGATATTACAGTCTTACTGAAAATGAATCAGGCGGTTATCCCGGCTGATTGGCCTTTTTTCCAGCGTGGCTAC  
AACATTGAAAGCCTGACCGTTGCGCAACCGACGATCCGACATTATCGCGTATGACCATCCAGACCGTGGGCGATGAAAA  
AGTACTTGAGCAGATCGAAAAGCAATTACACAACTGGTGCATGTCTTGGCGGTGAGTGAAGTTGGGGCAGGGCGCGCATG  
TTGAGCGGGAAATCATGCTGGTGAATTCAGGCCAGCGGTTACGGGCGTGACGAAGTGAACGTAATACGGAAATATTC  
CGTGGGCAAATTATCGATGTACACCCTCGCTTTATACCGTTCAATTAGCAGGCACCAGCGGTAAGCTTGATGATTTTT  
AGCATCGATTCGCGATGTGGCGAAAATTTGGAGGTTGCTCGCTCGGTGTGGTCCGACTTTCGCGCGGCGATAAAATAA  
TGCGTTGAGAAATGATCTCAATGCGCAATTTACAGCCAAACATGTCAGGTTGGCTTTTTTTCGAAATCAGTGGGAACCT  
GGAATAAAAGCAGTTGCCGAGTTAATTTCTGCGCTTAGATGTTAATGAATTAACCCATACCAGTACAATGGCTATGG  
TTTTTACATTTACGCAAGGGGCAATTTGAAACTGGATGAAATCGCTCGGCTGGCGGGAGTGTGCGGGACCACTGCAAG  
CTATGTTATTAACGGCAAAGCGAAGCAATACCGTGTGAGCGACAAAACGTTGAAAAGTCATGGCTGTGGTGCGTGAGC  
ACAATTACCACCCGAACCGCTGGCAGCTGGGCTTCTGCTGGACGACACGTTCTATTGGTCTTGTGATCCCCGATCTG  
GAGAACCCAGCTATACCCGCATCGTAACTATCTTGAACGCCAGGCGCGCAACGGGGTTATCAACTGCTGATTGCCCTG  
CTCAGAAGATCAGCCAGACAACGAAATGCGGTGCATTGAGCACCTTTTACAGCGTCAGGTTGATGCCATTATTGTTTGA  
CGTCTGTTGCTCTGAGCATCCTTTTTATCAACGCTGGGCTAACGACCCGTTCCCGATTGTGCGGCTGGACCGCGCCCTC  
GATCGTGAACACTTACCAGCGTGGTTGGTGCCGATCAGGATGATGCCGAAATGCTGGCGGAAGAGTTACGTAAGTTTCC  
CGCCGAGACGGTGCTTTATCTTGGTGCCTACCGGAGCTTTCTGTGAGTCTCTGCGTGAACAAGTTTTCCGTAAGTGCCT  
GGAAAGATGATCCGCGCAAGTGCATTTCTGTATGCCAACAGCTATGAGCGGGAGGCGGCTGCCAGTTATTGAAAAA  
TGCTGGAACGCATCCGATGCCGAGGCGCTGTTCAACAGCTGTTTTCGTTGTTGCAAGGAGTGTGGATGTCACGCT  
GCGTCCGACGGCAAACCTGCTTCTGACCTGGCAATGGCACCTTTGGCGATAACGAACTGCTCGACTTCTTACAGTGTG  
CGGTGCTGGCAGTGGCTCAACGTCACCGCATGTCGAGAGCGTGTGCTGGAGATTGCTTGGCAAGCCTGGACGAACCG  
CGTAAGCCAAAACCTGGTTAACGCGCATTAACGTAATCTCTATCGCCGCGCGTGTCTAGCCGTAGCTAAGCCGCGAA  
CAAAAATACGCGCCAGGTGAATTTCCCTCTGGCGGTAGAGTACGGGACTGGACATCAATATGCTTAAAGTAAATAAGAC  
TATTCCTGACTATTATTGATAAATGCTTTTAAACCCGCCGTTAATTAACCTACCAGCTGAAATTCACAATAATTAAGT  
ATATCGACAGCGCGTTTTTGCATTATTTGTTACATGCGGCGATGAATTGCCGATTTAACAACACTTTTTCTTTGCTTTT  
GCGCAAACCCGCTGGCATCAAGGCCACAGACGTAACAAGGACTGTTAACCAGGGAAGATATGCTTAAAAATGCCGCT  
CGCGTCGAAACTGACACTTTATATTTGCTGTGGAAAAATAGTGAATGCTTTTAAACCGGTGATGACGATGAGGGATTTT  
TCTTACAGCTATTCATAACGTTAATTTGCTTTCGACGTTGGACGTAATAAACAACGCTGATATTAGCCGTAACATCG

GGTTTTTACCTCGGTATGCCTTGACTGGCTTGACAAGCTTTTCTCAGCTCCGTAACTCCTTTAGTGGGAAATTG  
TGGGGCAAAGTGGGAATAAGGGGTGAGGCTGGCATGTTCCGGGGAGCAACGTTAGTCAATCTCGACAGCAAAGGGCGCTT  
ATCAGTGCCTACCCGTTATCGGGAACAGCTGCTTGAGAACGCTGCCGGTCAAATGGTTTGCACCATTGACATTTATCACC  
CGTGCCCTGCTGCTTTACCCCTGCCTGAATGGGAAATTATCGAGCAAAAATTATCGCGTCTGTCGAGCATGAACCCGGTT  
GAGCGCCGTGTCAGCGCCTACTGTTAGGTCATGCCAGCGAATGTCAGATGGATGGCGCAGGTCGATTGTTAATCGCGCC  
AGTACTGCGGCAACATGCCGGGCTGACAAAAGAAGTATGCTGTTGGACAGTTCAACAAGTTTGGAGCTGTGGGATGAAA  
CAACCTGGCATCAACAGGTCAAGGAAGATATCGACGCGAGAGCAGTTGGTACC GGAGACTTATCGGAGCGACTGCAGGAC  
TTGTCTCTATAAAAATGATGGAAAATAAACTACTACGGTGTCTGGATGAAGCCGTTAATGGCCTCAATATCCGTC  
CTGATGGCATCTACATTGATGGGACTTTTGGTCGCGGTGGTCACTCACGTCTGATCCTCTCGCAGCTTGGCGAAGAGGGG  
CGTTTGTGGCGATCGATCGCGACCCGACGGCTATCGCCGTTGCGAAGACTATTGATGATCCGCGCTTCTCCATCATCCA  
CGGACCTTTCTCCGCGCTGGCGAATACGTTGCCGAGCGCATCTTATCGGCAAGATCGACGGCATTCTCCTCGATCTTG  
GCGTCTCTTACC GCAACTGATGATGCTGAACGTGGCTTTTCTTTATGCGCGATGGTCCGCTGGACATGCGTATGGAC  
CCAACCCGTGGCAGTCAGCCGCTGAATGGCTACAAACCGCAGAAGAAGCCGATATCGCTGGGATTGAAAACCTATGG  
TGAAGAGCGTTTTGCCAAACGATTGCCCGGCCATTGTCGAGCTAACCGCAACAGCCGATGACCCGACCAAAGAAC  
TGGCGAAGTCGTGGCTGCTGCAACGCCGTGAAAGATAAGTTTAAACATCCCGCAGCCGTACCTTCCAGGCGGTGGCG  
ATTTGGGTAACAGTGAACGGAGGATAGAGCAGCGCTAAAAAGCTCGCTCAACGTGTCGCCCCGGTGGGCGGCT  
TTCGATCATCAGCTTCCACTCGCTGGAAGACCGTATTGTGAAACGTTTTATGCGTGAAAACAGCCGCGGTCCGCAAGTTC  
CGCAGGGTTACCGATGACTGAAGAGCAGCTCAAAAACTGGGTGGCCGTCAGCTGCGAGCACTAGGCAAGTTAATGCCG  
GGCGAAGAAGAGGTGGCTGAGAACCCTCGTGCCCGTAGTTCAGTTCTGCGTATTGACAGAGGACGAATGCATGATCAGC  
AGAGTGACAGAAGCTCTAAGCAAAGTTAAAGGATCGATGGGAAGCCACGAGCGCCATGCATTGCTGGTGTATCGGTGA  
CGATCTTTTGCATTTGGGAAGCTGCCACTCTGCCTGTTTATTGATTATTTTACGCGCGGTGACTGTGGTAACCACGG  
CGCACCATAACCCGTTTACTGACCGCTCAGCGCAACAACTGGTGTGGAGCGAGATGCTTTAGACATTGAATGGCGAAC  
CTGATCCTTGAAGAGAATGCGCTCGGCGACCATAGCCGGTGGAAAGGATCGCCACGAAAAGCTGCAATGCAGCATGT  
TGATCCGTACAAGAAAATATCGTAGTCAAAAATAAGGATAAACCGCAGCATGAAAGCAGCGGCGAAAACGCAGAAAC  
CAAAACGTCAGGAAGAACATGCCAACTTATCAGTTGGCGTTTTGCGTTGTTATGCGGCTGTATTCTCCTGGCGCTGGCT  
TTTCTGCTCGGACGCGTAGCGTGGTTACAAGTTATCTCCCGGATATGCTGGTGAAGAGGGCGACATGCGTTCTCTTCG  
CGTTCAGCAAGTTTCCACTCCCGCGCATGATTACTGACCGTCTGGTCCGCCGTTAGCGGTGAGCGTGCCGGTAAAAG  
CGATTTGGGCTGACCCGAAAAGAAGTGCATGACGCTGGCGGTATCAGCGTCCGGTACC GCTGGAAGGCGCTGGCTAACCG  
CTCAATATTCCGCTGGATCAGCTTTCAGCCCGCATTAAACGCCAACCCGAAAGGCGCTTTATTTATCTGGCGGTCAGGT  
GAACCTGACATGGCGGACTACATCAAAAACTGAACTGCCGGGATTATCTGCGTGAAGAGTCTCGCCGTTACTATC  
CGTCCGGCGAAGTGACTGCTCACCTCATCGGCTTACTAACGTCGATAGTCAAGGGATTGAGGGCGTTGAGAAGAGTTT  
GATAAATGGCTTACCGGGCAGCCGGGTGAGCGCATTGTGCGTAAAGACCGCTATGGTCCGTAATTGAAGATATTTCTC  
TACTGACAGCCAGGCAGCGCACAACCTGGCGCTGAGTATTGATGAACGCCTGCAGGCGCTGGTTTATCGGAACTGAACA  
ACGCGGTGGCTTTAACAAGGCTGAATCTGGTAGCGCCGTGCTGGTGGATGTCAACACCGGTGAAGTGTGGCGATGGCT  
AACAGCCCGTCATACAACCTAACAATCTGAGCGGCACGCCGAAAGAGGCGATGCGTAACCGTACCATCACCGACGTGTT  
TGAACCGGGCTCAACGGTTAAACCGATGGTGGTAATGACCGGTTGCAACGTGGCGTGGTGGGAAAACCTGGTACTCA  
ATACCATTCTTATCGAATTAACGGCCACGAAATCAAAGACGTGGCAGCTACAGCGAATTAACCTGACCGGGGTATTA  
CAGAAGTCGAGTAACGTCGGTGTTCCTAAGCTGGCGTTAGCGATGCCGTCCTCAGCGTTAGTAGATACTACTCACGTTT  
TGGACTGGGAAAAGCGACCAATTTGGGTTGGTGGGAGAACCGAGTGGCTTATATCTCAAAAAACAACCGTGGTCTGACA  
TAGAGAGGGCCACCTTCTCTTTCGGTACGGGCTAATGGTAACACCATTACAGTTAGCGGAGTCTACGCAACTATCGGC  
AGCTACGGCATTATCGCCACTGTCGATTACCAAAGTTGACCCCGGTTCCCGGTGAACGTGTCTTCCCGAATCCAT  
TGTCCGCACTGTGGTGCATATGATGGAAGCGTGGCGCTACCAGCGCGCGGCGGTGAAGGCGGCGATTAAAGGCTATC  
GTATCGCCATTAACCCGTTACCGGAAAAGGTCGGGCCGACGGTCCGCTACATCAATAAATATATTGCTTATAACCGCA  
GGCGTTGCGCTGCGAGTCAGCCGCGCTTTCGCGCTGTTGTTGTTATCAACGATCCGCGAGGCGGTAATACTACGGCGG  
CGCCGTTTCCGCGCCGCTTTTGGTGCCATCATGGCGGCGTATTGCGTACCATGAACATCGAGCCGATGCGCTGACAA  
CGGGCGATAAAAATGAATTTGTGATTAATCAAGGCGAGGGGACAGGTGGCAGATCGTAATTTGCGCGACCTTCTGCTCC  
GTGGGTGCCAGACGCACCTTTCGCGAGCACTGCGAGAGATGACACTCGACAGCCGTGGCTGCGGCGGGCGATCTCTTTG  
TAGCTGTAGTAGGTCATCAGGCGGACGGCGTCGATATATCCCGCAGGCGATAGCGCAAGGTGGGCTGCCATTATTGCA  
GAGGCGAAAGATGAGGCGACCGATGGTGAATCCGTGAAATGCACGGCGTACC GGTCTATCTCAGCCAGCTCAACGA  
GCGTTTATCTGCACTGGCGGGCCGCTTTTACCATGAACCTCTGACAATTTACGTCTCGTGGGCGTAACGGCACCAACG  
GCAAAACCACGACTACCCAGCTGTTGGCGCAGTGGAGCCAACCTGTTGGCGAAATCAGCGCGTAAATGGGCACCGTTGGT  
AACGGCCTGCTGGGAAAAGTATCCCGACAGAAAATACAACCGGTTCCGCGAGTCGATGTTACGATGAGCTGGCGGGGCT  
GGTGGATCAGGCGCGACGTTTTGCGCAATGGAAGTTTCTCCACGGGCTGGTACAGCACCGTGGCGGCATTGAAAT  
TTGGCGGCTGGTCTTTACCAACTAAGCCGCGATCACCTGATTATCATGGTATGGAACACTACGAAGCCGCGAAA  
TGCTGCTTTATTCTGAGCATCATTGCGGTGAGGCGATTATTAACGCCGACGATGAAGTGGCCGCGGCTGGCTGGCAA  
ACTGCCGACGCGGTTGCGGTATCAATGGAAGATCATATTAATCCGAACTGTACAGGACGCTGGTGAAGCGACCGAAG

TGAACTATCACGACAGCGGTGCGACGATTCGCTTTAGCTCAAGTTGGGGCGATGGCGAAATTGAAAGCCATCTGATGGGCGCTTTAAACGTAGCAACCTGCTGCTCGCGCTGGCGACACTGTTGGCACTCGGCTATCCACTGGCTGATCTGCTGAAAACCGCCGCGCTCTGCAACCGTTCGCGACGTATGGAAGTGTTCACTGCGCCAGGCAAACCGACGGTGGTGGTGGATTACGCGATACGCCGGATGCACTGAAAAAGCCTTACAGGCGGCGCGTCTGCACTGTGCGGGCAAGCTGTGGTGTGCTTTGGCTGTGGTGGCGATCGCGATAAAGGTAAGCGTCCACTGATGGGCGCAATTGCCGAAGAGTTTGTGACGTGGCGGTGGTGACGGACGATAACCCGCTACCGAAGAACCCTGCCATCATCAACGATATTCTGGCGGAATGTTAGATGCCGGACATGCCAAAGTGATGGAAGGCCGTGCTGAAGCGGTGACTTGCGCCGTTATGCAGGCTAAAGAGAATGATGTGGTACTGGTCGCGGGCAAAGGCCATGAAGATTACAGATTGTTGGCAATCAGCGTCTGGACTACTCCGATCGCGTACGGTGGCGCGTCTGCTGGGGTGATTGCATGATTAGCGTAACCTTAGCCAATTACCGACATTCTCAACGGTGAAGTGCAGATATCACCCCTGATGCTGTAACCACTGATACCCGAAAAGTACGCGCCGGCTGCCTGTTTGTTCCTGAAAGGCGAACGTTTTGATGCCACGATTTTGGCGACAGGCGAAAGCTGGCGGCGCAGGCGCACTACTGGTTAGCCGTCGCTGGACATCGACTGCCGCACTTAATCGTCAAGGATACGCGTCTGGCGTTTGGTGAAGTGGTGCATGGGTTCCGCGCAAGTTCGGCGCGCGTGGTTGCTGACGGGCTCTCCGGCAAAACCTCCGTTAAAGAGATGACGGCGCGGATTTAAGCCAGTGGCGCAACACGCTTTATCGGCAAGTCTCAACAACGACATCGGTGTACCGATGACGCTGTTGCGCTTAAAGCGGAATACGATTACGCAAGTATTGAACTTGGCGCAACCTCAGGGCGAAATAGCCTGGACTGTGAGTCTGACTCGCCGGAATGCGCTGCAACAACCTGGCAGGCGCATCTGGAAGGTTTTGGCTCGCTTGCCTGCGGAAAGCGAAAGTGAATCTTTAGCGCCTGCCGAAAACGGTATCGCCATTATGAACGCCGCAACAACGACTGGCTGAACTGGCAGAGCGTAATTGGCTCACGCAAGTGTGGCGTTTTCTACCCAATGCCGCAACAGCGATTTACCGCCACCAATATCCATGTGACCTCGCACGGTACGGAATTTACCCCTACAAAACCCCAACCGGTAGCGTGCATGTTCTGCTGCCGTTGCCGGGCGTCACAATATTGCGAATGCGCTGGCAGCCGCTGCGCTCTCCATGTCGTTGGCGCAACGCTTATGCTATCAAAGCGGGCTGGCAATCTGAAAGCTGTTCCAGGCGCTGTTCCCATCCAACCTGGCAGAAAACAGTTGCTGCTCGACACTCTACAACGCAATGTCGTTCAATGACTGCAGCAGTCCAGGACTGGCTGAAATGCCGGGCTACCGCGTGGTGGTGGGCGATATGGCGAACTGGGCGTAAAGCGAAGCCTGCCATGTACAGGTGGCGAGGCGGCAAAAGCTGCTGGTATTGACCGCGTAAAGCGTGGTAAACAAAGCCATGCTATCAGCACCGCAGCGGCTGGCGAACATTTTGTGATAAACTGCGTTAATTACGCGCTTAAATTAATGATTGCTGAGCAACAGGTAATTACGATTTTAGTTAAGGGTTCACGTAGTCCGCCATGGAAGAGGTAGTACGCGCTTACAGGAGAATGGGACATGTTAGTTGGCTGGCCGAACATTTGGTCAAATATTATTCCGCTTTAACGCTTTTCTATCTGACGTTTCCGCCATCGTCAGCCTGCTGACCGCGTGTTCATCTCATTGTGGATGGGCCCGGTATGATTGCTCATTGCAAAAACCTTTCTTTGGTCAGGTGGTGCATAACGACGGTCTGAATCACACTTCAGCAAGCGCGGTACGCCGACCATGGGCGGATTATGATCCTGACGGCGATTGTGATCTCCGTAAGTGTGGGCTTACCCGTCCTAATCCGTAAGTCTGGTGCCTGTTGGTGGTGGTGGTGGTACGGTGTATTGGCTTTGTTGATGATTATCGAAAAGTGGTGCCTAAAGACACCAAAGGGTTGATCGCTCGTTGGAAGTATTTCTGGATGTCGGTCAATGCGCTGGTGTGCCTTCCGCTGTACCTTGGCGCAAAGACACGCCCGCAACGCAGCTGGTGGTCCCATTCTTTAAAGATGTGATGCCGAGCTGGGGCTGTTCTACATTCTGCTGGCTTACTTCTGCTATTGTGGGTACTGGCAACGCGGTAACCTGACCGATGGTCTCGACGGCTGGCAATATGCCGACCGTATTTGTCGCCGGTGGTTTTGGCTGGTGGCGTGGGCGACCGCAATATGAACTTTGCCAGTACTTGCATATACCGTATCTGCGACACGCCGGGAACTGGTTATTGTCTGTACCGCGATAGTCGGGCGAGGACTGGGCTTCTGTGGTTAACACCTATCCGGCGCAGGCTTTATGGGCGATGTAGGTTGCTGGCGTTAGGTGGTGCCTTAGGCATTATCGCGTACTGCTACGTCAGGAATTCCTGCTGGTATTGTTGGGGCGTGTCTGTTAGTAAACGCTTTCTGTATCCTGCAGTGGCTCCTTAAACTGCGCGGACAACGATTTTTCCGCATGGCACCGATTATCAACCACTATGAACTGAAAGGCTGGCCGGAACCGCGCTCATTGTGCGTTTCTGGATTATTTCCGTGATGCTGGTCTGATTGGTCTGGCAACGCTGAAGTACGTTAATCATGGCTGATTATCAGGGTAAAAATGTCGTCATTATCGGCTGGGCGCTCACCGGCTTTCTGCGTGGACTTTTTCTGCTCGCGGTGACGCGCGCTGATTGGATACGCGTATGACACCGCCTGGCTGGATAAAATTACCCGAAGCCGTAGAAGCCACACGGGCACTGAAATGATGAATGGCTGATGGCGCAGATCTGATTGTCGCCAGTCCCGTATTGCACTGGCGCATCCATCCTTAAAGCGTGGCGTATGCCGGAATCGAAAATCGTTGGCGATATCGAGCTGTTCTGTGCGGAAGCACAAAGCAGGATTGTGGCGATTACCGTTCTAACGGCAAAGCACGTCACCACGCTAGTGGGTGAAATGGCGAAAGCGCGGGGTTAACGTTGGTGTGGTGGCAATATTGGCTGCTGCGTTGATGCTACTGGATGATGAGTGTGAAGTGTACGTGCTGGAAGTGTGAGCTTCCAGTGGAAACCACTCCAGCTTACAGCGGTAGCAGCGACATTCTGAACGTGACTGAAGTATGATGATCGCTATCCGTTTGGTTTACAACAGTATCGTGCAGCAAACTGCGCATTTACGAAAACGCGAAAGTTTGCCTGGTTAATGCTGATGATGCCTTAAACATGCCGATTCGCGGTGCGGATGAACGCTGCGTCAGCTTTGGCGTCAACATGGGTGACTATCACCTGAATCATCAGCAGGGCGAAACCTGGCTGCGGGTTAAGGCGAGAAAGTGTGAATGTGAAAGAGATGAACTTTCCGGGCGAGATAACTACCAATGCGCTGGCGCGCTGGCGCTGGCAGATGCTGCAAGGTTACCGCTGCCAGCAGCTGAAAGCCTTAAACACATTCACTGGTCTGCCGATCGCTTTGAGTTGTGCTGGAGCATAACGGCTACGTTGGATTAACGATTGAAAGCGACCAACGTCGGCAGTACGGAAGCGCGCTGATGGCCTGCACGTAGACGGCACACTGCATTTGTTGCTGGTGGCGATGGTAAATCGGCGGACTTTAGCCACTGGCGCGTACCTGAAATGGCGATAACGTACGTCTGTATTGTTCCGTCGTGACGGCGCGAGCTGGCGGCTACGCCGGAAGTGGCAGAAACCCGAAACTATGGAACAGGCGATGCGCTTCTGGCTCCGCGTGTTCAGCCGGGCGATGGTTCTGCTCTCCCGCCTGTCCCTCGCTGAAAATGCCGCGCTGCCAGGATTGATATCCTGGTCTGGATCTCCACGGCGTA

AAGGGCTGGGTGATGGGCTCGCGGAAAAAGATACCGACAGCCTGATCATGTACGATCGCACCTTACTGTGGCTGACCTT  
CGCCTCGCGGCGATTGGCTTTATCATGGTGACCTCGCGTCAATGCCCATAGGGCAACGCTTAACCAACGATCCGTTCT  
TCTTCGGAAGCGTGATGGTGTCTATCTGATTTTGGCGTTTATTCTGGCGATCATTACGCTGCGTCTGCCGATGGAGTTC  
TGGAACGCTACAGTGCCACGATGCTGCTCGGATCTATCATCCTGCTGATGATCGTCTGGTGTAGTGGGTAGCTCGGTTAA  
AGGGGCATCGCGTTGGATCGATCTCGGTTTGGTGCATTCAGCCTCGCGAGCTGACAAAACCTGTCGCTGTTTTGCTATA  
TCGCCAACTATCTGGTGCCTAAAGGCGACGAAGTACGTAATAACCTGCGCGGCTTCTGAAACCGATGGGCGTGATTCTG  
GTGTTGGCAGTGTACTGCTGGCACAGCCAGACCTTGGTACGGTGGTGGTGTGTTTGTGACTACGCTGGCGATGTTGTT  
CCTGGCGGGAGCGAAATTGTGGCAGTTCATTGCCATTATCGGTATGGGCATTTACGCGGTTGTGTTGCTGATACTCGCCG  
AACCGTACCGTATCCGCCGTGTACCGCATTCTGGAACCCGTGGGAAGATCCCTTTGGCAGCGGCTATCAGTTAACGCCAA  
TCGCTGATGGCGTTTGGTCCGCGCAACTTTGGGGCAAGTTTGGTAACCTCGGTACAAAACCTGGAGTATCTGCCGGA  
AGCGCACACTGACTTTATTTCCGCATTATCGCGGAAGAACTGGGGTATGTCGGTGTGGTGTGCGACTTTTAAATGGTAT  
TCTTCGTCGCTTTTCCGCGGATGTCGATTGGCCGTAAGCATTAGAAATTGACCACCGTTTTTCCGGTTTTCTCGCCTGT  
TCTATTGGCATCTGGTTTAGCTTCCAGGCGCTGGTAAACGTAGGCGCGCGGGGATGTTACCGACCAAAGGTCTGAC  
ATTGCCGCTGATCAGTTACGGTGGTTCGAGCTTACTGATTATGTCGACAGCCATCATGATGCTGTTGCGTATTGATTATG  
AAACGCGTCTGGAAAAGCGCAGGCGTTTGTACGAGTTTACGATGAGTGGTCAAGGAAAAGCGATTAATGGTGTGCGCAG  
GCGGAACCGTGGACATGTATTTCCCGGACTGGCGTTGCGCACCATCTAATGGCTCAGGGTTGGCAAGTTCGCTGGCTG  
GGACTGCCGACCGTATGGAAGCGGACTTAGTGCCAAAACATGGCATCGAAATTGATTTATTCTGATCTCTGGTCTCGG  
TGAAAAGGTATAAAAAGCACTGATAGCTGCCCGCTGCGTATCTTCAACGCCTGGCGTCAGGCGCGGGCATTATGAAAAG  
CGTACAAAACCTGACGTGGTGTCTCGGTATGGGAGGCTACGTGTGAGTCCAGTGGTCTGGCCGCGTGGTGGTTAGGCATT  
CCGGTTGACTTTCATGAACAAAACGGTATTGCGGGCTTAAACAAATAAATGGCTGGCGAAGATTGCCACCAAAGTGTGCA  
GGCGTTTCCAGGTGCTTTCCCTAATGCGGAAGTAGTGGTAACCCGGTGCCTACCGATGTGTTGGCGTCCGCTTCCGCG  
AGCAACGTTTGGCTGGACGTGAAGTCCGGTTCGTGTGCTGGTAGTGGTGGTCTCAGGGCGCACGCATTCTTAAACCAG  
ACAATGCCGACGGTGTGCTGCAAACTGGGTGATTGACTACTATCTGGCATCAGAGCGGCAAAGGTTCCGCAACAATCCGT  
TGAACAGGCGTATGCCGAAGCGGGCAACCGCAGCATAAAGTACGGAATTTATTGATGATATGGCGCGCGGATGCGT  
GGCGGATGTCGTCGTTTCCGCTCCGGTGCCTAACGGTGAAGTAAATCGCCGCGGCGAGGACTACCGCGGTTGTTTGTG  
CCGTTTCAACATAAAGACCGCCAGCAACTGGAATGCGCTACCCTGGAAAAGCGGGCGCAGCCAAAATTATCGAGCA  
GCCACAGCTTAGCGTGGATGCTGTCGCCAACCCCTGGCCGGTGGTTCGCGAGAAACCTTATTAACCATGGCAGAACCGC  
CCGCGCTGCATCCATTCCGGATGCCACCGAGCGAGTGGCAAATGAAGTGAAGCGGGTGGCCGGGCGTAATTGTAGCGA  
TGCTTTTGCATCGTATGAATTTAAGAAGTTAATGGCGTAAAGAATGAATACACAACAATTGGCAAAACCTGCGTTCCATC  
GTGCCCCGAAATGCGTCGCGTTCCGCGACATACATTTTGTGCGCATTGGTGGTGGCGGATGGGCGGATTGCCGAAGTCT  
GGCAATGAAGTTATCAGATCAGTGGTTCGATTTAGCGCCAAATCCGGTACGCGAGCAGTTAATGAATCTGGGTGGCA  
CGATTTATTTCAACCATCGCCCGGAAAACGTACGTGATGCCAGCGTGGTGGTGGTTCAGCGCGATTCTGCCGATAAC  
CCGGAATTTGTCGCGCTCATGAAGCGCGTATTCCGGTGTGCTGCGGAAATGCTGGCTGAGTTAATGCGTTTTCCG  
TCATGGCATCGCCATTGCCGGAACGCACGGCAAACGACAACCACCGGATGGTTTCCAGCATCTACGCGAAGCGGGGC  
TCGACCCAACCTTCGTTAACGGCGGGCTGGTAAAAGCGGCGGGGTTTATGCGCGTTTGGGCATGGTGGTACCTGATT  
GCCGAAGCAGATGAGAGTGTGATCGTTCCTGTCATCTGCAACCGATGGTGGCGATTGTACCAATATCGAAGCCGACCA  
CATGGATACCTACCAGGGCGACTTTGAGAATTTAAAACAGACTTTTATTAATTTTCTGCACAACCTGCCGTTTTACGGTC  
GTGCGGTGATGTGTTGATGATCCGGTATCCGCAATTGTTACCAGGAGTGGGCGTGGGCGTGGGCGTGGGCGTGGGCGT  
AGCGAAGTCCGACGTCCGTGTAGAAGATTATCAGCAGATTGGCCCGCAGGGGCACTTTACGCTGCTGCCCGCAGGACAA  
AGAGCCGATGCCGCTCACCTGAATGCCAGGTGTCATAACGCGTGAACGCCGAGTGGGCGGTTGCGGTTGCGTACGG  
AAGAGGGCATTGACGACGAGGCTATTTTGGCGGGCGTTGAAAAGCTTCCAGGGGACTGGTGGCGTTTTGATTTCTCGGT  
GAATTTCCGCTGGAGCCAGTGAATGGTAAAAGCGGTACGGCAATGCTGGTGCATGACTACGGCCACCACCGACGGAAGT  
GGACGCCACCATTAAGCGCGCGCGCAGGCTGGCCGGATAAAAACCTGGTAATGCTGTTTACGCGCACCGTTTTACCC  
GTACGCGGACCTGTATGATGATTTCCGCAATGTGCTGACGCGAGTTGATACCTGTTGATGCTGGAAGTGTATCCGGCT  
GGCGAAGCGCAATTCCGGGAGCGGACAGCGTTTCCGCTGTGTCGCAATTCGTTGGACGTGGGAAAATTGATCCATTCT  
GGTCCGGATCCGCGCGGGTAGCCGAGATGCTGGCACCAGTATTAACCGGTAACGACCTGATTCTCGTTTACGGGGCTG  
GTAATATTGAAAAATTGCCGTTCTTTAGCTGAAATCAAACCTGAAGCCGAAACCTCCGGAGGAAGAACAACATGACTGA  
TAAAATCGCGTCTGTTGGGTGGGACCTCCGCTGAGCGGGAAGTTTCTCTGAATTTGGCGCAGCGGTGTAGCCGGAC  
TGCGTGAAGCGGATTGACGCGTATCCTGTCGACCGAAAGAAGTGCAGTGCAGCAACTGAAGTGCATGGGCTTTTACG  
AAAGTGTATCGCGCTACCGGTCCGCGCGGTGAAGTGGTACGCTGCAGGGGATGCTCGAGCTGATGGCTTGCCTTA  
TACCGGAAGCGGAGTGTGATGTCGCTTTCAATGGATAAACTACGCGCAAACTTCTATGGCAAGGTGCCGTTTTAC  
CGTTCGCGCCGTGGTAGCTTAAACCCGCGCAGAGTTTAAAAAGCCTGAGCGATAAGCAGTTAGCAGAAAATTTCTGCT  
CTGGTTTTGCCGTTATCGTTAAGCCGAGCCGCAAGGTTCCAGTGTGGGAATGTCAAAGTGTAGCAGAAAATTTGCTCT  
ACAAGATGCATTAAGATTGGCATTTCAGCACGATGAAGAAGTATTGATTGAAAATGGTAAGTGGGCGGAGTTACCGG  
TTGCGATACTCGGTGAAGAAATTTTACCGTCAATACGTATTCAACCGTCCGGAACCTTCTATGATTATGAGGCGAAGTAT  
CTCTCTGATGAGACAGTATTTCTGCCCCGAGGTCTGGAAGCGTCAAGAGGCCAATTTGAGGCATTAGTGTGAA

AGCATGGACGACGTTAGGTTGCAAAGGATGGGGACGTATTGACGTTATGCTGGACAGCGATGGACAGTTTTATCTGCTGG  
AAGCCAATACCTACCGGGTATGACCAGCCACAGCCTGGTGCCGATGGCGGCACGTGAGCAGGTATGAGCTTCTCGCAG  
TTGGTAGTACGAATTCTGGAAGTGGCGGACTAATATGTCGAGGCTGCTCTGAACACGCGAAACAGCGAAGAAGAGGTTT  
CTTCTCGCCGCAATAATGGAACGCGTCTGGCGGGGATCCTTTTCTGCTGACCGTTTTAACGACAGTGTGGTGAGCGGC  
TGGGTCTGTTGGGCTGGATGGAAGATGCGCAACGCCTGCCGCTCTCAAAGCTGGTGTGACCGGTGAACGCCATTACAC  
ACGTAATGACGATATCCGGCAGTCGATCTGGCATTGGGTGAGCCGGGTACCTTTATGACCCAGGATGTCAACATCATCC  
AGACGCAAATAGAACAACGCCTGCCGTGGATTAAGCAGGTGAGCGTCAGAAAGCAGTGGCCTGATGAATTGAAGATTCAT  
CTGGTTGAATATGTGCCGATTGCGCGGTGAATGATCAACATATGGTAGACGCGGAAGGAAATACCTTACAGCGTGCCGCC  
AGAACGCACCAGCAAGCAGGTGCTTCCAATGCTGTATGGCCCGGAAGGCAGCGCCAATGAAGTGTGACGGGCTATCGCG  
AAATGGGGCAGATGCTGGCAAAGGACAGATTTACTCTGAAGGAAGCGCGATGACCGCGCGCGCTTCTGGCAGTTGACG  
CTGAATAACGATATTAAGCTCAATCTTGGCCGGGGCAGATCGATGAAACGTTTGGCTCGCTTTGTAGAATTTATCCGGT  
TTTACAGCAGCAGGCGCAAACCGATGGCAAACGGATTAGCTACGTTGATTTGCGTTATGACTCTGGAGCGGCAGTAGGCT  
GGGCGCCCTTGGCCAGAGGAATCTACTCAGCAACAAAATCAGGCACAGGCAGAACAAACATGATCAAGCGCAGCGACA  
GAAAACCTGGTAGTAGGACTGGAGATTGGTACCAGGAGGTTGCCGCTTTAGTAGGGGAAGTTCTGCCCGACGGTATGGT  
AATATCATTGGCTGGGCTGCCGCTGCCGATGGATAAAGCGGGGTGAACGACCTCGAATCCGTGGTCAAGTG  
CGTACAACGCGCATTGACCAGGCAGAAATTGATGGCAGATTGTGAGATCTCTCGGTATATCTGGCGCTTCTGGTAAGC  
ACATCAGCTGCCAGAATGAAATTGGTATGGTGCCTATTTCTGAAGAAAGTACGCAAGAAGATGTGAAAAACGTCGTC  
CATACCGCAAATCGGTGCGTGTGCGCGATGAGCATCGTGTGCTGCATGTGATCCCGCAAGAGTATGCGATTGACTATCA  
GGAAGGGATCAAGAATCCGGTAGGACTTTGCGGCGTGCGGATGCAGGCAAAGTGCACCTGATCACATGTCACAACGATA  
TGGCGAAAAACATCGTCAAAGCGGTTGAACGTTGTGGGCTGAAAGTTGACCAACTGATATTTGCCGACTGGCATCAAGT  
TATTCGGTATTGACGGAAGTGAACGTGAACGTTGGTGTCTGCGTCGTCGATATCGGTGGTGGTACAATGGATATCGCCGT  
TTATACCGGTGGGCAATTGCCACACTAAGGTAATTCCTATGCTGGCAATGTCGTGACCAGTGATATCGCTTACGCCT  
TTGGCAGCGCCCAAGCGACGCCGAAGCGATTAAGTTCGCCACGGTTGTGCGCTGGGTTCCATCGTTGAAAAGATGAG  
AGCGTGGAAGTCCGAGCGTAGGTGGTGTCCGCCAGGAGTCTGCAACGTCAGACACTGGCAGAGGTGATCGAGCCGCG  
CTATACCGAGCTGCTCAACCTGGTCAACGAAGAGATATTGCAAGTTCAGGAAAAGCTTCGCCAACAAGGGGTTAAACATC  
ACCTGGCGGCAGGCAATTGATTAACCGGTGGCGCAGCGCAGATCGAAGGTCTTGCAGCCTGTGCTCAGCGCGTGTTCAT  
ACGCAAGTGCATATCGGCGCGCCGCTGAACATTACCGGTTAACGGATTATGCTCAGGAGCCGATTATTCGACGGCGGT  
GGGATTGCTTCACTATGGAAAAGAGTCAACATCTAACGGTGAAGTGAAGTAGAAAAACGTTTACAGCATCAGTTGGCT  
CGTGATCAAGCGACTCAATAGTTGGCTGCGAAAAGAGTTTTAATTTTTATGAGCCGACGATGATTACGCCCTCAGGCG  
ACAGGCACAAATCGGAGAGAAAATATGTTTGAACCAATGGAACCTACCAATGACGCGGTGATTAAGTATCGGCGTCCG  
CGGCGCGCGGTAATGCTGTTGAACACATGGTGGCGGAGCGCATTGAAGGTGTTGAATCTTCGCGGTAATACCGATG  
CACAAGCGCTGCGTAAAACAGCGGTTGGACAGACGATTCAAATCGGTAGCGGTATCACCAAAGGACTGGGCGCTGGCGCT  
AATCCAGAAGTTGGCCGCAATGCGGCTGATGAGGATCGCGATGCATTGCGTGCGGCGCTGGAAGGTGCAGACATGGTCTT  
TATTGCTGCGGATATGGTGGTGGTACCAGGTACAGGTGACAGCACCAGTCTGCTGAGTGGCAAAAGATTTGGGTATCC  
TGACCGTTGCTGTCGCTACTAAGCCTTCAACTTTGAAGGCAAGAAGCGTATGGCATTGCGGAGCAGGGGATCACTGAA  
CTGTCCAAGCATGTGGACTCTGATCACTATCCGAACGACAACTGCTGAAAGTTCTGGGCGCGGTATCTCCCTGCT  
GGATGCGTTTTGGCGCAGCGAACGATGACTGAAAGCGCTGTGCAAGGTATCGCTGAACTGATTACTCGTCCGGGTTTGA  
TGAACGTGGACTTTGACAGCGTACGCACCGTAATGTCTGAGATGGGCTACGCAATGATGGGTTCTGGCGTGGCGAGCGGT  
GAAGACCGTCCGGAAGAAGTGTGAAATGGCTATCTTCTCCGCTGCTGGAAGATATCGACCTGTCTGGCGCGCGCGG  
CGTGTGGTTAACATCACGGCGGGCTTCGACCTGCTGATGAGTTTCAAACGCTAGGTAACACCATCCGTGCATTTG  
CTTCCGACAACGCGACTGTGGTTATCGGTACTTCTCTTGACCCGATATGAATGACGAGCTGCGCGTAACCGTTGTTGCG  
ACAGGTATCGGCATGGACAAACGTCCTGAAATCACTCTGGTGACCAATAAGCAGGTTACAGCAGCCAGTGATGGATCGCTA  
CCAGCAGCATGGGATGGCTCCGCTGACCCAGGAGCAGAAGCCGGTTGCTAAAGTCTGAAATGACAATGCGCCGCAAACCTG  
CGAAAGAGCCGGATTATCTGGATATCCAGCATTCTGCGTAAGCAAGCTGATTAAGAATTGACTGGAATTTGGGTTTCG  
AGGCTCTTTGTGCTAAACTGGCCCGCAATGTATAGTACACTTCGGTTGGATAGGTAATTTGGCGAGATAATACGATGA  
TCAAACAAAGGACACTTAAACGATCGTTACGGCGACGGGTGTCGGTTTACATACCGGCAAGAAAGTACCCTGACGTTA  
CGCCCTGCGCCGCAACACCGGGTCACTATCGTCGACCGACTTGAATCCACCGGTAGATTTCCCGCCGATGCCAA  
ATCTGTGCGTGATACCATGCTCTGTACGTGTCTGGTCAACGAGCATGATGTACGGATTTCAACCGTAGAGCACTCAATG  
CTGCTCTCGCGGCTTGGGCATCGATAACATTGTTATCGAAGTTAACGCGCCGAAATCCCGATCATGGACGGCAGCGCC  
GCTCCGTTTGTATACCTGCTGCTTACGCGGATATCGACGAGTTGAACTGCGCCAAAAAATTTGTTGCGATCAAAGAGAC  
TGTTGCTGTCGAAGATGGCGATAAGTGGGCTGAATTTAAGCCGTACAATGGTTTTTCTGCTGGATTTACCATCGATTTA  
ACCATCCGGCTATTGATTCCAGCAACCAGCGCTATGCGATGAACTTCTCCGCTGATGCGTTTTATGCGCCAGATCAGCCGT  
GCGCGTACGTTCCGGTTTATGCGGTATATCGAATATCTGCAGTCCCGTGGTTTTGCTGCTGGCGCGCAGCTTCGATTGTC  
CATCGTTGTTGACGATTATCGCGTACTGAACGAAGCAGGCCTGCGTTTTGAAAGACGAATTTGTGCGTCAAAAATGCTCG  
ATGCGATCGGTGACTTGTTCATGTGTGGTCAACATATTATTGGTGCATTTACCCTTATAAATCCGGTATGCACTGAAT  
AACAAACTGCTGCAGGCTGTCTGGCGAAACAGGAAGCCTGGGAATATGTGACCTTCCAGGACGACGCAAACTGCCGTT



GGCCTTCAAAGCGCTTCAGCTGTACTGGCATAACGACATTTATACTGTCTGATAAAAATTCGACTGGCAAATCTGGCACT  
CTCTCCGGCCAGGTGAACCAAGTCGTTTTTTTTTGAATTTTATAAGAGCTATAAAAAACGGTGCGAACGCTGTTTTCTTAA  
GCACTTTTCCGCACAACCTTATCTTCATTCGTGCTGTGGACTGCAGGCTTTAATGATAAGATTTGTGCGCTAAATACGTTT  
GAATATGATCGGGATGGCAATAACGTGAGTGAATACTGACGCGCTGGCGACAGTTTGGTAAACGCTACTTCTGGCCGCA  
TCTCTTATTAGGGATGGTTGCGGCGAGTTTAGGTTTGCCTGCGCTCAGCAACGCGCCGAACCAAACGCGCCCGCAAAAAG  
CGACAACCCGCAACCACGAGCCTTCAGCCAAAGTAACTTTGGTCAATTGGCCTTGCTGGAAGCGAACACACGCGCCCG  
AATTCGAACCTATTCCGTTGATTACTGGCATCAACATGCCATTCGCACGGTAATCCGTATCTTTCTTCGCAATGGCACC  
GCAAACTACTGCCGTTGCTGAAGAATCTTTGCCTCTCAGGCGCAACATCTTGCACTACTGGATACGCTCAGCGCGCTGC  
TGACCCAGGAAGGCACGCGCTGAAAAGGGTTATCGCATTGATTATGCGCATTTTACCCACAAGCAAAATTCAGCACG  
CCCGTCTGGATAAGCCAGGCAGGCAAGGCATCCGTGCTGGCCCTCAACGCTCACCTAACACAATAAACCTTTACTTCATT  
TTATTAACCTCCGCAACGCGGGGCGTTTGAATTTTATTATGCTAATCAAATTGTTAACTAAAGTTTTCGGTAGTCGTAAC  
GATCGCACCTTGCCTGGATGCGCAAAGTGGTCAACATCATCAATGCCATGGAACCGGAGATGGAAAACTCTCCGACGA  
AGAACTGAAAGGGAAAACCCAGAGTTTCTGTCACGCTGGAAGGCGAAGTGTGGAAAACTCTGATCCCGGAAGCTT  
TCGCCGTGGTACGTGAGGCAAGTAAGCGCTCTTTGGTATGCGTCACTTCGACGTTCACTTACTCGGCGGTATGGTTCTT  
AACGAACGCTGCATGCCGAAATGCGTACCGGTGAAGGAAAAACCTGACCGCAACGCTGCTTACCTGAACGCACT  
AACCGGTAAAGCGCTGCAGTACTGTTACCGTCAACGACTACTGGCCCAACGTCGACCGCAACGCTGCGCTGTTT  
AATTCCTTGGCCTGACTGTGCGTATCAACCTGCCGGCATGCCAGCACCGGCAAGCGCAAGCTTACGACGCTGACATC  
ACTTACGCTACGAACAACGAATACGGCTTTGACTACCTGCGGACAACATGGCGTTTACGCCCTGAAGAAGCTGTACAGCG  
TAACTGCACTATGCGCTGGTGGACGAAGTGGACTCCATCCTGATCGATGAAGCGCGTACACCGCTGATCATTTCGGCC  
CGGCAGAAGACAGCTCGAAATGTATAAACGCGTGAATAAAATTTTCCGCACCTGATCCGTGAGAAAAAGAAGACTCC  
GAAACCTTCCAGGGCGAAGGCCACTTCTCGGTGGACGAAAAATCTCGCCAGGTGAACCTGACCGAACGTTGGTCTGGTGT  
GATTGAAGAAGTGTGGTGAAGAGGGCATCATGGATGAAGGGGAGTCTCTGTACTCTCCGGCCAACATCATGCTGATGC  
ACCACGTAACGGCGGCTGCGCGCTCATGCGCTGTTACCGGTGACGTCGACTACATCGTTAAAGATGGTGAAGTTATC  
ATCGTTGACGAACACACCGGTGCTACCATGCAGGGCGTCTGCTGGTCCGATGGTCTGCACCAGGCTGTGGAAGCGAAAGA  
AGGTGTGAGATCCAGAACGAAACCAACGCTGGCTTCGATCACCTTCCAGAAGTACTTCCGCTGTATGAAAACTGG  
CGGGATGACCGTACTGCTGATACCGAAGCTTTTCAATTTAGCTCAATCTACAAGCTGGATACCGTCTGTTGTTCCGACC  
AACCGTCCAATGATTCGTAAGATCTGCCGACCTGGTCTACATGACTGAAGCGAAAAAATTCAGGCGATCATTGAAGA  
TATCAAAGAAGTACTGCGAAAGGCCAGCCGGTCTGGTGGTACTATCTCCATCGAAAAATCGGAGCTGGTGTCAAACG  
AACTGACCAAAGCCGGTATTAAGCACAAAGCTCCTGAACGCCAAATTCACCGCAACGAAGCGCGGATTGTTGCTCAGGCA  
GGTTATCCGGCTGCGGTGACTATCGCGACCAATATGGCGGGTCTGGTACAGATATTGTGCTCGGTGGTACTGGCAGGC  
AGAAGTTGCCGCGCTGAAAAATCCGACCCGAGAGCAAAATGAAAAATTAAGCCGACTGGCAGGTACGTACGATGCGG  
TACTGGAAGCAGGTGGCCTGCATATCATCGGTACCGAGCGTCACGAATCCCGTCTGATCGATAACCAAGTTGCGCGGTGCT  
TCTGGTCTGACGGGGATGCTGTTTCTCCGTTTCTACCTGTGATGGAAGATGCGCTGATGCGTATTTTTGCTTCCGA  
CCGAGTATCCGGCATGATGCGTAACTGGGTATGAAGCCAGGCGAAGCCATTGAACACCCGTGGGTGACTAAAGCGATTG  
CCAACGCCAGCGTAAAGTTGAAAGCCGTAACCTCGACATTCGTAAGCAACTGCTGGAATATGATGACGTGGCTAACGAT  
CAGCGTCGCGCATTTACTCCAGCGTAACGAAGTGTGGATGTCAGCGATGTGAGCGAAACCATTAAACGATTCGTGA  
AGATGTGTTCAAAGCGACCATTTGATGCCTACATCCACCACAGTCTGGAAGAAATGTGGGATATCCGGGGCTGCAGG  
AACGTCTGAAGAAGCATTTCGACCTCGATTTGCCAATTGCCGAGTGGCTGGATAAAGAACCAGAAGTGCATGAAGAGACG  
CTGCGTGAGCGCATTCTGGCGCAGTCCATCGAAGTGTATCAGCGTAAAGAAGAAGTGGTTGGTCTGAGATGATGCGTCA  
CTTCGAGAAAGCGCTACTGCTGCAACGCTTACTCCCTGTGGAAGAGCACCTGGCAGCGATGGACTACTCTGCTCAGG  
GTATCCACCTGCGTGGTACGCGACAGAAAGATCCGAAGCAGGAATACAAACGTAATCGTTCTCCATGTTTGCAGCGATG  
CTGGAGTCTGTTGAAATATGAAGTTATCAGTACGCTGAGCAAAGTTCAGGTACGTATGCCTGAAGAGGTTGAGGAGCTGGA  
ACAACAGCGTCTGATGGAAGCCGAGCGTTTAGCGCAATGCAGCAGCTTAGCCATCAGGATGACGACTCTGCAGCCGAG  
CTGCACTGGCGGCGCAAACCGGAGAGCGCAAAGTAGGACGTAACGATCCTTGCCCGTGGGTTCTGGTAAAAAATACAAG  
CAGTGCCATGGCCGCTGCAATAAAAGCTAACTGTTGAAGTAAAGGCGCAGGATTCTGCGCCTTTTTTATAGGTTTAAAG  
ACAATGAAAAAGCTGCAAAATGCGGTAGGTATTATTCGCAACGAGAACAATGAAATCTTTATAACGCGTCGCGCAGCAGA  
TGCGCACATGGCGAATAAACTGGAGTTTCCGGCGGTAATAATGAAATGGGTGAAACGCCGGAACAGGCGGTGGTGCCTG  
AACTTCAGGAAGAAGTGGGATTACCCCCAACATTTTTGCTATTTGAAAACTGGAATATGAATCCCGGACAGGCAT  
ATAACTGTGGTTTTGGTGGTGAACGCTGGGAAGGGGAGCCGTGGGTAAGAAGGGCAACCCGGTGAAGTGGATGTC  
GCTGGTGGTCTTAATGCCGATGATTTTCCGCCAGCAATGAACCGTAATTGCGAAGCTTAAACGCTCTGATGGTCAAGT  
AAGCGTTTTTCCCGCATCCGACATTCGCACACGATGCCTGATGCGACGCTGGCGGTCTTATCAGGCCAAAGGGATTT  
CTAACTCATTGATAAAATTTGTTTTGTAGGTCGGATAAGGCGTTCACGCCGATCCGACATTTGCACAAGATGCCTGATG  
CGACGCTGTCGCGCTTATCAGGCCACTGTCGCGCATCAGACAATGTCACCTGCTTTGGTCTTCGCTCCAGTCATCGC  
TTTTCGAAAGATCGCCACTGCTGGGATTCGTTTTTCTCAGCAGCCATTCTCCGAGGTGATCAGCTGACAACGTTTTG  
GAGCAAAATGGCCGAAACGGGTGATTTACCCACACACCCTTTTTCCCGCAGGTTGGGCAATTCACCGTAATAGTTTC  
TGACATTTTTACTCCTTAGCAACAGGCCAGTTGAAATCCAGACGTTCCGGTACCTGTCCGTTTTAGTGTCCAGCGGCA

TAAACGAATGGCAAACGGCTCTTATGTCCGAAATTTGCGGATAAAGCTGTGAATCGAGCGACAGATTAGGGCGCAGC  
AAGTCGGCATCGCCACCCTTATCCTGATAAAAACCATTCAGGCTGGTTTGTACGGAAGGGGGCCGACTGGCGAATTA  
ATCCAGCACCATGGTAAGTGCCTGGGTGAGCGGGTTCAGGCTGGCAATCCAGGTTTCTACCTGGCTGTCGCGCTGCGCCT  
GGGTAGATGCAGCCAAATGTGCAATGTAGGTAAATCAAAGCTGCAACAGCCGCTGGGATGCTCAGTCGCTGACGCACC  
AGAGCAATCAAACGATCTTCACGCAGAAATTGCCGATACGCGCGCGGAAATTAATACGCTCCCGCCGCTTTAACTG  
CTGAATTAATGCTTCAATACGGCTCTGGTCCACGCCAGGCACGCCAATCCAGGTCTGGAGTTTACGTTGCTGCCGGTCAA  
GTTCTTTCAACAGCTCAGTCGCGACTTCGCCGCGCTCGAAAACATCCAGTAATCACTGACATTACGGAAGAAATGCAGC  
GCGCCAGCGTGGTCAACGATGGGTAATTAACGGTGAAGTGTGAATCAAAAACCAATGCGCAGCCATGTACGCAATTT  
TTCATTTAGTGGATGTTCAAAAAGGACCTGGGTCTGCATTACGGTTTTCTGTGAGACAACTGCGACGCAAGCTGCAA  
ATAGTGTGCGTGCAGGCGGGCAACATCCGATGCGATAGCATCCGGTGCGCCGTTATTATCAATGACGTCATCTGCCACGG  
CAAGGCGGGCTTCGCGCGTTGCCTGAGCAGCAAGGATTTGTTGACATGCTCGCGAGTTACATCATCGCGCTGCATGGT  
CGTTAAGTTGCGTTTCTGGGCTGACATCCACCACAAGCACTCGATTGCTTTTTATACAGTGAGTTTTCTACCAGCAA  
TGGCACAACCCACAGTACATAGGGGAAGTAGCTTGGTCTGGTGTGCTCTTGTGAATCAGCGGATGCAGCA  
GGCGTTAAGCCAGTTTTCTTCCGGTTGGCGAAGATCCGCTCGCGCAAGCCCGCGCTGCAATGTTCCATCAGCA  
GCAATCATGTTAGCGCCAAAGTATCAGCAATGGCATGTAGCGCAGGTGCACCTGGTTCAACCACCTGACGCGCAATAAT  
ATCGGCATCAATGACGTTAATTCCGAGATCAGCAAACGATTGGCAACGGTACTCTTGCCACTGCCAATGCCCTCCGTTA  
AGGCAACTATACCTCATAATTTATATTCCCGGAATTCATCATGATTATCAAAACGTTAAAAATGAGTGCACGAAAGC  
GAAATTGATGAAACGTTGCTCACTATTTACCAGGTAATTTATGGGATTGTAGCGTAAAAAAGACAATTTGCGAGTCT  
TGCGCCGATTGATTAGTGCATGATAGCGTCACTGGAGTTGCGCTTACCCTTATAGCCATTAACCCAGGAATCCG  
CACATGCGTATTGAAGAAGATCTGAAGTTAGGTTTTAAAGACGTTCTCATCCGCCCTAACGCTCCACTCTAAAAGCCG  
TTCCGATGTTGAACTGGAACGTCATTCACCTTCAAACATTCAGGTGAGAGCTGGTCCGGCGTGCCGATTATCGCCGCAA  
ATATGGACACCGTAGGCACATTTCTATGGCCTCTGCGCTGGCTCTTTTATATTTGACTGCTGTGCATAAACTAT  
TCTGTGCAAGAGTGGCAAGCGTTTATCAACAATTTCCGCTGATGTGCTGAAACATGTGATGGTTTCTACCGGTACGTC  
TGATGCGGATTTGAAAAAACTAAACAGATTCTCGACTGAACCCGGCATTAAACTCGTTTGATTGACGTGGCGAATG  
GTTATTCGCAACTTCTGTCAGTTCTGTCGAAAGCGGTGAAGCGTGGCCGACCAAAACATTTGTGCTGTAACGTA  
GTGACTGGTGAATGTGTGAGGAGCTTATCCTCTCAGGTGCCGATATCGTTAAAGTTGGCATTGGCCAGGTTCTGTTT  
TACAACCTCGCGTCAAACAGCGCTCGGTTATCCGCAACTTTCTGCGGTAATCGAATGTGCCGATGCTGCGCACGGTCTGG  
GCGAATGATCGTCAGCGATGGTGGTGCACCACGCCGGGCGATGTGGCGAAAGCCTTTGGCGGCGGTGCCGATTTCTGTC  
ATGCTTGGCGGATGCTGGCGGGCCACGAAGAGAGCGCGGTGCGATCGTTGAGGAGAACGGCGAGAAATTTATGCTGTT  
CTACGGCATGACTCCGAGTCTGCGATGAAACGTCACGTTGGCGCGTTCGCGAATATCGCGCAGCAGAAGGTAACCCG  
TTAAGCTGCCGCTGCGAGGCCCGGTTGAAAAACCGCGCAGATATTTGGGCGGCCTGCGTTGACTGTACATACGTT  
GGGGCTTACGCTGAAAGAGCTGACCAAGCGCACCCAGTTTATTCGTGTGAGGAACAAGAAAACCGCATCTTCAACAA  
CCTGTAATCTCCCAACGCTGGCGTGGAGCAACACGCCAGCGTTATCCCATCCACTCATCGCATCGCCTAAATGGAAAT  
TGGCAGATACATTGCCACCACAGCGTACCAATAATTCCTCCCGTTATGATCAGCAACGCCGGTCCAGTAAGGCTGCGA  
GGTTATCCGCCAGCGCATTGTGTTTTCCGATGATGATGGGCGAGGTTGTCTAACATGAGATCCAGAGAGCCGGATGCC  
TCTCCTGTTCTACTAATTGCAAACAGAGCGGGCTAAACTCACCGGATTTTTTAGCGCCAGCCAGATGGGTTGACCGTT  
ACTGATATCGTGTGATTTGTGTGAGAGTTGCACCCAGTACGGGCAGCGCATTGTTTCTGACGCTCTACGCCCT  
GTAAAAAAGTAATGCCTGCACTTTGTGTGAGCGCCAGAATCGTAAAGATCTGCGTGAGTTTTGTCCCGCATCAGTGAA  
CCCATAATCGGGATGCGTAACAGCAATTTCTGCCGACTATAAGCCAGGTGCGTGGCGCATCAGCAACTTATTGGTAT  
CGCCAGCAGAAAGCCGAACAACACCCAGCAGCTCCATTGCCACTAAAGTCTGCCAGGTCATGATCCCCTGCGTTA  
GTGCCGATAGTGGGGTGTGAAGGCTTATAGATAGCGGCAAACTCCGGCAGAACAAAATGACGATTGCCACAACCACC  
ATGATTGCCATCGCTAAAATGATGATGGGATAACGTAACGCTGATTTCACTTTGTCGGTCAACTGACGCTGGGCTTTTTG  
CTGACGCGCCAGTTCAAAGCAGCATTATCCAGCTTACCAGTTCACCCGTGCGGATCATCGCTGATAGAGCGGCG  
GAAATACCTCTGACCAGGTAATAAGGCATTGAAAAAGCAATGCCCTGTTGAGATCGTGCAGCAGGATTGACGCAAC  
GCTTGCCATTGCTTACTGGGATGCTGTTCCGCCAGCAGAGCCAGCCCTTCAAAAAGCGTTAACCTGCTTTGAGTAGCGT  
CGCCAGTTGATGAATGACTTCCGCGCTTTTATCTCCTGCCACTGCGCAGAATTGATGGCGATTGCTTCCAGGCTTAGTG  
GGGTAACCATCTGTTGCTGTAGTGCCATAAGCAGTAAAGTACGGCTCTTGCCCATAGCATCCCATCTTGCAGATTGCCG  
TCGCCGTTATGCCATGCCAGCGCCAGAGTTGCTTACTCGCCATGCGGCATCCCGAGTACGCGGATTAACCTTCAAAGG  
TGGTTAAGCCTTGTCTACGGCCAGGCAGCGTTTTCAAAGCGTACGCATACCCGCTGTCTGCGTGCCTTCCAGC  
GATTCACGTCGGTATTAGCGGAAATAAGCTGACGAATGACCGCGTATGGGCAGAACTCAAATAAGGCCGTACGACC  
ATAAAAACCGTGGTAGCAATGTACACAACCGGTGCCTGCCAGTGGGCGAGCGCGATGGCCATACATTGTCTGGAATGT  
GGATGGGCTCCCTTGTGTCGGCGACAATGTGGGCAAAGTTGCGTACCAGACGCTGGGCTATTACCAGCGTAAGCGCC  
GATGATAGCATCCAGCGGGCAGCCCCATTTGCTGTAACGTAACAGCGTTTCGAGGTGGAATTAAGTGTGATGGGTAGA  
CAACACCAGGTGACCAGTTTGCGCCGTTAATAGCGATCTCTGCTGTTTCGCCATCGCGGATCTCTCCGATCATGATGA  
CGTCAGGATCTGGCGCAATAACGCACGCAAAACGCCCTGAAAGGTGAGTCCGGCAGCGGATGGATTTGCGTCTGGTTT  
AGTCCGGCTATGGGGATCTCAACTGGATCTTCGACGCTACAAATATTAATGTACGCGGATTCAGTTTTGCAGGGCACT

ATAAAGCGTGACCGTTTTGCCGCTGCCGGTAGGGCCAGTTACCAGCACCAGTCCCTGTGGTGTGCAAGGCATGAGCAA  
AGTCCGCCAGTTGTAACGGCTGCATTCGAAGCGTGTGACATCCAGTGCCTGACCCACCTGCTGTAACAACCTTAATACC  
ACTTTTCCACCACCCGACATGGTAAGGTCGCAATACGAAATGAGACGGCGTTTCTGCCAGTTCGACAGTGAATTGCC  
GTCTGCGGCAGGCGATGTTCCGCAATATCCAGTTTTCCAGCACTTTAATCTGGCGGTTAATGCGACTCCGGCATCCG  
GTGAAACATCCGGTAAAGGATGCAATACGCCGTCGATACGCAAGCGGATGCGGTAGGCATTGTCCGCTGTTTCGATATGA  
ATATCAGACGCGGCTTGTCCAGCGCAGATTGTAACGTTTCGAGTTAGCAACTCTGCTTTGGGCTGATGCTTCTCCTGAAC  
AGCTACGGGCAATGTCTGTTGTGTGCGACTGGCGTGACCTTCCATTTGTTGGCGGTCCAGCAGGTGATCTCAATACGTT  
TGGTGGTAGCGAAATGCAATGCGTCCAGTAGCTCATGCAAGGTGCATCGACTACCGCAACATGAACCACCTCTTCGCTG  
GCATCCAGCAAGACTCCATGATAACGCAGACACAGGGCAGTGAGCTGTGGAATATTCATTGCCGCTCCTTAGTTGGCGTC  
ATCAAAGCGGAAGACATCTTCGAGGCTTGTGCAATGCGCTGCACTTTGAATATTGCAGTTGCGCGTCCAGCCGGTGA  
CGCGTTTTGCGTTATCCCAACCCGGTGTATGACGACGCTTAGCCATTGAGACTTTCTTGCCCGGTGAGCGACACCACG  
CCTTTTGCCACACTCATGGCTGAAACATAGCGGGTGGTGGTAGGCCAGGGAATGCCATTGTGCCACCGTCGAGGTATC  
TAATCCACCATGTTCCAGCGCGCAACTCTACGGCGGTACGGTAAGGCACAAAGGTTTGTAGCATGTCGGTGAGTGGCG  
CTTTGCGCAGTAGTTTTGATAAGCGGGAATACCAATGGCGCTTAAAATGGCAATGATGCCAATAACCACCATCAGTTG  
ATAAGTGAAAACCGCTGTTGCTTGTCCATCTGTTTCGCTCCTTGATTGTTGGTGGCGCTACTTTGGCAACCGCATCAGCA  
CAGCGAGGGGCAAAAACGAAACGGGAAAGCAGATCCGAGGTTTTTTATTTGTTGCGAGGAAAGACAAGAAATTTGC  
GAGGCGTTACGAAGAAAGTTGGGGAAGGGGAGATTATCCGCCCGCATGGAGCGGATAAATCTGTCAACTATTAGCGAAA  
ACGCATTGAAAGGTGAGTGCTTGTACGTGTTTAGTTAGCGCACCGAGAGATAAAGTCCACGCCCGTTTTCGGCAAAAT  
CACGCAAGTTTTGTGAGTACGTTGCCAGACACTTCCAGTAGCGCCTTGCCGTTGGTGGCTTTGACGGCTTCGCGCATC  
TGTCTGTTTTCGAAGTTATCCAGCATGATGATATCGGCTCCTGCTTTCAGGGCTTCATCAAGTTCTTCAGATTCTCTAC  
TTCGACTTCTACTGGCGCATCCGGGTGCAGCCAGGACGCTTTTTCGACCGCCTGGCGCACTGAGCCGGAGCAATAATAT  
GGTTTTCTTTGATCAGGAAGGCATCAGAAAGCCCCAGCGGTGATTGCTCCGCCGCCGCAAAGTACCGCGTATTTCAGA  
GCTGAACGCAGGCCGGTAAAGTTTTGCGCGTATCCAAACTGCGTGTGGTGCCTTCAGCAATTCGACATAGTGGCG  
TACCTTACTGGCAACTCCTGAAAGGTTTTGCACAAAATTAAGCGCAGTGCCTTCCCGGTTAACAGCACGGGATGGGC  
CTTCAAGTTGAAACAAGGATTGATTGGCATTGATGACATCGCCGTATCCACATGCCAGATTATGGTACATCGTCGCT  
GCCAGTTGAATAAACACCTCTCAACCCAGCGTTTTGCCGAAAAGACGCCATTCTCGGGGTGATCACCGTGGCATGAGA  
GCGAGAATTTCCGGTAAAAGTTTTGCCGTAATATCATTGTTGGCATCGACTGTTCCGCTAAATCTTCCCGCAGCGCCT  
GGCCACCGCGCCGGGATATCGAGATTAATGCGTCCAGCAGCTCGTCACGTCCGGGTGTCAGGGTTATAGCGGCGAGGC  
GGCATGTTAAACTCCAGATAGCTAACGAATCATAAGGTAGAAACATGCTACTCTGAACCGGTATTAGCACCATATA  
AGGAGATCCTGCATGTTGTTAGAACAGGGGTGGCTGTTGGCGCGCGCCGCTTCCCTCACACATTACGATTGCCGCC  
GGATGACGAAACACCCACCTGCTGGTGGTGCAATATTAGCCTGCCGCCAGGCGAGTTTGGCGGTCCGTGGATCGACG  
CATTATCACTGGAATATTGATCCGACGGCACATCCTTTCTTGTGAGATCGCCATTTGCGCGTCTCCGCTCACTGT  
TTGATTCGCCGTGATGGTGAATAGTCCAGTATGTTCTTTGATAAACGTGCATGGCATGGCAGTCCGGGAGTCTCTCAGTACA  
GGGGCGCAACGCTGCAATGATTTTTCTATTGGGATTGAGCTTGAAGGCACCGATACGCTGGCGTATACCGATGCGCAGT  
ATCAACAGCTTTCGGCGGTTACGCGGGCACTGATTGATTGCTATCCGGATATCGCTAAAACATGACGGGCCATTGTGAT  
ATTGCGCCGGATCGGAAAACCGATCCCGGTCTGCATTTGATTGGGCACGGTTTCGTGTGCTGGTACGCAAGGAGACAAC  
ATGACGCTATTTACAACCTTACTGGTGTAAATTTTCGAGCGCCTGTTAAGTTGGGCGAGCACTGGCAGCTTGTATCATCG  
TCTTGAAGCGTTCTTTCGGCGGGTGAACATTTTTCTCGGGCGCAGTTAGGCATGACCATTATTGCGATGGGCGTGA  
CTTTTTACTGTTACGCGCATTGACGGGAGTATTGTTCAACGTTCCACGCTACTGGTGGCTGCTGATTGGTTTTGCTG  
TGTATTGGCGCAGGTAAGTTCGTCTTCAATATCATGCTTATCTGACAGTCTTACGTAATGATAGCCATGCCCGTGC  
CACGATGGCTGGCGAACTACCATGATTCACGGCGTCCCGGCGAGCTGCGACGAACGTGAGTATTTGCGTGAGTGCAAA  
ATGCATTGCTGTGGATTAACCTTTGTTTTATCTTGACCGCTGTTCTGGCTGATTGTGGGGGAACCTGGGGACCCGTT  
ACGCTGATGGGTATGCGTTTTTTCGCTGCATGGCAATACTGGCTGGCGCGATATCAGACGCCGCATCATCGTTTACAGTC  
CGGCATTGATGCCGTGCTTCATGACTGGATTGGGTGCCGTTTCTGCTTGGGGTGTGGTATATGCCTTGATCGGTATG  
GTGAGAAAGCGTTACCGCCTGGTTTTGCTTGCCTGGGTGATTTCCATACTTCGCAAGTATCAGGTGTTAACCGCTGCGC  
CAGTTCTCTTGGCGGTGAACCGCATGTCGATAAGGTGGAGACGCCGAAGGCAGCGGTTTCAATGGCGAAGAAAACCTC  
GTTCTGTTGCTGGTGGTATTGCACTACTGACGATTTACGGGCGTTGGTGTAAAGATTATTGCCCTCACCTGTACGG  
GTGAGGGCGTAGAGATTAATGCGCTTTTACGGCTTTGGCGTTTTCTCTTAAACAGATAGCCGATACCTAACACGAT  
CAGCCATACCGGATCAGGTATACCGAAATCGCCATCCTGGGTGATCAGCATAATCACCAGTACCGCCGCATAAACA  
GCAGGCAGATCAGTTACCCAGCGGATAAAGCAGAGCAGGGAAGCGAGTTACCACGCTTGTCTGCTTGGCGCGACGG  
AATTTCATATGCGCCAGGTAATCATCGCCAGTTGATTACCAGTGCAGATACCACCAGCGCCATTAACAGTCCGAAAGC  
GGACTCTGGGGCAAGGTAGTTAATCAGTACGCACAACGCCGTTACCAGTGCAGACACCAGAATGGTATTTACTGGTACAC  
CAGTTTTATCGACAGACGCCAGCGTTTTGGCGCATTACCCTGTTGTGCCAGACCAAACAGCATACGGCTGTTGCAATAT  
ACGCAGCTGTTGTACACGGAGAGCGCCGAGTACGATACCACGATGTTTCAGCGCATTCCGCAAAAGGTATCGCCTAACTC  
GTGGAAGATCAGCACAACGGACTGGTATCGCGGTAACGCGGTTCCACGGCATCAGTGAGAGCAGAACGGCTAACGAAC  
CAATATAGAAAATCAGGATGCGGTAGATAACCTGGTTAGTTGCTTTCGGTATACTTTGCTCCGGGTTATCAGCTTCTGCT

CGGGTATCCCCACCAGTTCAGACCACCGAACGAGAACATGATAATCGCCATCATCATCACCAGCCCGGTGAAGCCGTG  
CGCAGGAAACCACCCTGATCCCACAGTTGCTAACGGTCGCCTCGGGCCCGCTTGCCACTGAATAGCAGCCAGCCGC  
CGAAGATGATCATCGCTACCACCGCGATAACTTTGATAATGGCAAACCAGAACCATCTCGCCAAACACTTTAACGTTG  
GTCAGGTTGATGGCGTAAATCACCACAAAGAATACGGCGGAGAAACCAGGTGGGGATTTCCGGATACCAGAAGTGAAT  
GTATTTACCCACGGCAGTACGCTCAGCCATGGCAACTAAAACGTACAGTACCCAGTAGTTCAGCCAGAGCGAAACCCG  
CAAACTGCCCAGTATTTATAAGCAAAGTGGCTAAAGGAGCCTGCGACAGGTTCTTCGACCACCATTTACCCAGCTGA  
CGCATGATCAGAAAGGCGATAAAACCAGCAATGGCGTAACCCAGGATAATCCCTGGCCCTGCGGACTGTATTACGGAGC  
GCTACCCAGGAATAACCCGGTCCCTATCGCGCCACCAGCGCGATAAGCTGAATATGGCGTTTTTAAGGCCGCGCTTA  
GCTGCTCGCCGTGCTGTTGACCTTCCATCATGAAACCTCGTGGGTGGTTGTTTTTTGATCTACGCAGTGTGCGTGTG  
TAAGTTTGAATTCGTTTTGTTGATTAATTTGTTTACATCAAAGAAGTTTGAATTTGTTACAAAAAGACTTCCGTCAGAT  
CAAGAATAATGGTATGCGGCAGCGAATGCACCCGCTTATGCATGGTTGAAGATGAGTTGCTTAAAAAGAAACCGTTTTGT  
AAAGCTCAGCCTCAACCCCTCTCAATATGTAGAATGAATTTAATTCGTTTTAATTGAATTAATAACACAAAATTGGTA  
AGTGAATCGGTTCAATTCGATTTTTATAGTTTAAATCGTTAAAAACTCCTTCTACGTAAGTCTACATTTGTGC  
ATAGTTACAACTTTGAACGTTATATATGTCAAGTTGTTAAAAATGTCACAGTTTCATGATTTCAATCAAAACCTGTATG  
GACATAAGGTGAATACTTTGTTACTTTAGCGTCACAGACATGAAATGGTAAGACCAATTGACTTCGGCAAGTGGCTAA  
GACAGAACTCATGGCCTACAGCAAAATCCGCCAACCAAACTCCTCGATGTGATTGACGAGCAACTGGAGTTTTGTATC  
CTCGAAGGCACTCTCCGCCCGGGCGAAAAACTCCACCGGAACGCGAACTGGCAAAACAGTTTGACGTTCCCGTCCCTC  
CTTGCTGAGGCGATTCAACGTTCTCGAAGCGAAGGGCTTGTGCTTCGTCGCCAGGGTGGCGGCACTTTTGTCCAGAGCA  
GCCTATGGCAAAGCTTACGCGATCCGCTGGTGGAGCTGCTCTCGACCATCCTGAGTCACAGTATGACTTGTCCGAAACA  
CGACACGCCCTGGAAGGTATCGCCGCTTATTACGCCGCTGCGTAGTACCGATGAAGACAAGGAACGCATCCGTGAAC  
CCACCACGCCATAGAGCTGGCGCAGCAGTCTGGCGATCTGGACGCGGAATCAAACGCCGACTCCAGTATCAGATTGCCG  
TCACCGAAGCGGCCACAATGTGGTTCTGCTTATCTGCTAAGGTGATGGAGCCGATGTTGGCCAGAATGTCCGCCAG  
AACTTCGAATTGCTCTATTCGCGTCGCGAGATGCTGCCGCTGGTGGTGGTACCGCACCCGCATATTTGAAGCGATTAT  
GGCCGGTAAGCCGGAAGAAGCGCGAAGCATCGCATCGCCATCTGGCCTTATCGAAGAAATTTGCTCGACAGAAGTC  
GTGAAGAGAGCCCGTGGAGGTTCTGCGTCGCTGGAGCAACGAAAGAATTAGTGAATTTTCTGGTAAAAATTATCC  
AGAAGATGTTGTAATCAAGCGCATATAAAAGCGCGCAACTAAACGTAGAACCTGCTTATTGAGCTTCCGGCGAGAG  
TTCAATGGGACAGGTTCCAGAAAACCTCAACGTTATTAGATAGATAAGGAATAACCCATGTCAGAACGTTCCCAAATGAC  
GTGGATCCGATCGAAACTCGGACTGGCTCCAGGCGATCGAATCGGTTCATCCGTGAAGAAGGTGTTGAGCGTGCTCAGTA  
TCTGATCGACCAACTGCTTGTGAAGCCCGCAAAGCGGTGTAACGTAGCCGACGGCACAGGTATCAGCAACTACATCA  
ACACCATCCCCGTTGAAGAACAAACCGGATATCCGGGTAATCTGGAACGGAACGCCGATTCGTTTCCAGTCTTCCGC  
AACGCCATCATGACGGTGCTGCGTGCCTGCAAAAAAGACTCGAACTGGCGGCCATATGGCGTCTTCCAGTCTTCCGC  
AACCATTTATGATGTGTGCTTAAACACTTCTTCCGTGACGCAACGAGCAGGATGGCGGGACCTGGTTTACTTCCAGG  
GCCACATCTCCCCGGGCGTACGCTCGTCTTCTGGAAGTCTGCTGACTCAGGAGCAGCTGGATAACTTCCGTGAG  
GAAGTTCACGGCAATGGCCTCTCTTCTATCCGCACCCGAACTGATGCCGGAATTCGTCAGTTCGCGACCGTATCTAT  
GGGTCTGGGTCGATTGGTGCTATTTACCAGGCTAAATTCCTGAAATATCTGGAACACCGTGGCCTGAAAGATACCTTA  
AACAAACCGTTTACGCGTCTCCTCGGTGACGGTGAATGGACGAACCGAATCCAAAGGTGCGATCACCATCGTACCCGT  
GAAAACTGGATAACCTGGTCTTCTGTTATCAACTGTAACCTGCAGCGTCTTGACGGCCCGTACCCGGTAACGGCAAGAT  
CATCAACGAACTGGAAGGCATCTTCAAGGTGCTGGCTGGAACGTGATCAAAGTGAATGTGGGTAGCCGTTGGGATGAAC  
TGCTGCGTAAGGATACAGCGGTAACCTGATCCAGTGAATGAAACCGTGGTACGGCGACTACCAGACCTTCAAATCG  
AAAGATGGTGGTACGTTCTGTAACACTTCTTCCGTAATATCTGAAACCGCAGCACTGGTTGCAGACTGGATGACGA  
GCAGATCTGGCACTGAACCGTGGTGGTACGATCCGGAAGAAAATCTACGCTGATTCAAGAAAGCGAGGAAACCAAAG  
GCAAAGCGACAGTAATCCTTGTCTATACCATTAAAGGTTACGGCATGGGCGACGCGCTGAAGGTAAAAAACATCGCGCAC  
CAGGTTAAGAAAATGAACATGGACGGTGTGCGTCATATCCGCGACCGTTTCAATGTGCCGGTGTCTGATGACAGATATCGA  
AAAACCTGCCGTACATCACCTTCCCGAAGGTTCTGAAGAGCATACCTATCTGCACGCTCAGCGTCAGAACTGCACGGTT  
ATCTGCCAAGCCGTCAGCCGAACTTACCAGAAAGCTTGGAGTCCGAGCCTGCAAGACTTCCGGCGCGCTGTTGGAAGAG  
CAGAGCAAAGAGATCTCTACCACTATCGCTTTCGTTCTGCTGCTGAAACGTGATGCTGAAGAACAAGTCGATCAAAGATCG  
TCTGGTACCGATCATCGCCGACGAAGCGGCTACTTTCGGTATGGAAGGTCTGTTCCGTCAGATTGGTATTTACAGCCCGA  
ACGGTCAGCAGTACACCCCGCAGGACCGCAGCAGGTTGCTTACTATAAAGAAGACGAGAAAGGTGAGATTCTGCAGGAA  
GGGATCAACGAGCTGGGCGCAGGTTGTTCTGGCTGGCAGCGGACCTTACAGCACCACAATCTGCCGATGATCCC  
GTTCTACATCTATTACTCGATGTTCCGCTTCCAGCGTATTGGCGATCTGTGCTGGGCGGCTGGCGACCAGCAAGCGCGTG  
GCTTCTGATCGCGGTAATCCGGTCTGACCCCTGAACGGCGAAGGTCTGCAGCACGAAGATGGTCACAGCCACATT  
CAGTCGCTGACTATCCCGAACTGTATCTTACGACCCGGCTTACGTTACGAAGTTGCTGTCATCATGATGACGGTCT  
GGAGCGTATGTACGGTAAAAACAAGAGAACGTTTACTACTACATCACTACGCTGAACGAAACTACCACATGCCGGCAA  
TGCCGGAAGGTGCTGAGGAAGGTATCCGTAAGGTTATCAAACTCGAAACTATTGAAGGTAGCAAAGGTAAGGTTACAG  
CTGCTCGGCTCCGTTTCTATCCTGCGTCACGTCCTGGAAGCAGCTGAGATCCTGGCGAAAGATTACGGCGTAGGTTCTGA  
CGTTTATAGCGTGACCTCCTTACCAGCTGGCGCGTATGGTCAAGGATTGTGAACGCTGGAACATGCTGCACCCGCTGG

AAACTCCGCGGTTCCGTATATCGCTCAGGTGATGAACGACGCTCCGGCAGTGGCATCTACCGACTATATGAAACTGTTCCGCTGAGCAGGTCCGTAACCTACGTAACCGGCTGACGACTACCGCGTACTGGGTACTGATGGCTTCGGTCCGTCCGACAGCCGTGAGAACCTGCGTCACCACCTCGAAGTTGATGCTTCTTATGTCGTGGTTGCGGCGCTGGGCGAACTGGCTAAACGTGGCGAAATCGATAAGAAAGTGGTTGCTGACGCAATCGCCAAATCAACATCGATGCAGATAAAGTTAACCCGCTCTGGCGTAAAGGTAAGAAATAATGGCTATCGAAATCAAAGTACCGGACATCGGGGCTGATGAAGTTGAAATCACCGAGATCCTGGTCAAAGTGGGCGACAAAGTTGAAGCCGAACAGTCGCTGATCACCGTAGAAGGCGACAAAGCCTCTATGGAAGTTCCGTCTCCGCAGGCGGGTATCGTTAAAGAGATCAAAGTCTCTGTTGGCGATAAAACCAGACCGGCGCACTGATTATGATTTTCGATCCGCCGACGGTGCAGCAGACGCTGCACCTGCTCAGGCAGAAGAGAAGAAAGAAGCAGCTCCGGCAGCAGCACCAGCGGCTGGCGCGGCAAAAGACGTTAACGTTCCGGATATCGGCAGCGACGAAGTTGAAGTGACCGAAATCCTGGTAAAAGTTGGCGATAAAAGTTGAAGCTGAACAGTCGCTGATCACCGTAGAAGGCGACAAAGGCTTCTATGGAAGTTCCGGCTCCGTTTGGTGGCACCGTGAAAGAGATCAAAGTGAACGTGGGTGACAAAGTGTCTACCGGCTCGCTGATTATGGTCTTGAAGTCGCGGGTGAAAGGCGCGGCGAGCTCCGGCCGCTAAACAGGAAGCAGCTCCGGCAGCGGCCCTGCACCAGCGGCTGGCGTAAAGAAGTTAACGTTCCGGATATCGCGGTTGACGAAGTTGAAGTGAAGTGAAGTGAAGTGAAGTGAAGTGGGCGACAAAGTTGCCGCTGAAGTCAACTGTTGGCGATAAAAGTGAAGTGGCTGCTGATTATGATCTTGAAGTTGAAGGCGCAGCGCCTGCCGCGCTCTCCGAAAACAGGAAGCGGACCGCCGCGCAGCAAAAGTGAAGCCCGCAGCAGCACCAGCTGCGAAAAGCGGAAGGCAAAATCTGAATTTGCTGAAAACGACGCTTATGTTACGCGACTCCGCTGATCCGCCGCTGGCACGCGAGTTTGGTGTAAACCTTGCGAAAGTGAAGGGCACTGGCCGTAAAGTTCGTATCCTGCGCGAAGACGTTACAGGCTTACGTGAAAAGAGCTATCAAACGTGCAGAAGCAGCTCCGGCAGCGACTGGCGGTGGTATCCCTGGCATGCTGCCGTGGCCGAAGTGGACTTCAGCAAGTTTGGTGAATCGAAGAAGTGAAGTGGGCGCATCCAGAAAATCTGTTGCGAACCTGAGCCGTAAGTGGTAATGATCCCGCATGTTACTCACTTCGACAAAACCGATACACCGAGTTGGAAGCGTTCCGTAACAGCAGAACGAAGAAGCGCGAAAACGTAAGCTGGATGTGAAGATCACCCCGTTGTCTTATCATGAAAGCCGTTGCTGCAGCTCTTGAAGCAGATGCCTCGCTTCAATAGTTGCTGTCGGAAGACGGTCAGCGTCTGACCCTGAAGAAATACATCAACATCGGTGTGGCGGTGGATACC CGAACGGTCTGGTTGTTCCGGTATTCAAAGACGTCAACAAGAAAGGCATCATCGAGCTGTCTCGCGAGCTGATGACTATTTCTAAGAAAGCGGTGACGGTAAGCTGACTGCGGGCGAAATGCAGGGCGGTTGCTTACCATCTCCAGCATCGGCGGCC TGGTACTACCACTTCGCGCGGATTGTGAACGCGCGGAAGTGGCTATCCTCGGCGTTTCCAAGTCCGCGATGGAGCCG GTGTGGAATGGTAAAGAGTTCGTGCCGCTCTGATGCTGCCGATTTCTCTCTTCCGACCACCGGTGATCGACGGTGC TGATGGTGCCGTTTCATTACCATCATTAAACAACACGCTGTCTGACATTCGCCGCTGGTGTGTAAGTAAAAGAGCCGG CCCAACGGCCGCTTTTTCTGGTAATCTCATGAATGTATTGAGTTATTAGCGAATAGACAAATCGGTTGCCGTTTGTGTTTAAAATTGTTAACAATTTTGTAAAATACCGACGGATAGAAGCAGCCGGTGGTGGTTAGGGTATTACTTCACATACC CTATGGATTTCTGGGTGCAGCAAGGTAGCAAGCGCCAGAATCCCCAGGAGCTTACATAAGTAAAGTACTGGGGTGAGGGC GTGAAGCTAACCGGCTGCGGCCTGAAAGACGACGGGTATGACCGCCGGAGATAAATATATAGAGGTGATGAGTACT GAAATCAAACCTCAGGTCGTGGTACTTGGGGCAGGCCCCGAGTTACTCCGCTGCCTTCCGTTGCGCTGATTTAGGCTT GGAACCGTAATCGTAGAACGTTACAACACCTTGGCGGTGTTTGCTGAACGTCGGCTGTATCCCTTCAAAGCACTGC TGCACGTAGCAAAAGTTATCGAAGAAGCAAAGCGTGGCTGAACACGGTATCGTCTTCCGGCAACCGAAACCGATATC GACAAGATTCGTAACCTGGAAGAGAAAGTATCAATCAGCTGACCGGTGGTCTGGCTGGTATGGCGAAAGCCGCAAAGT CAAAGTGGTCAACGGTCTGGGTAATTCACCGGGCTAACACCTGGAAGTTGAAGGTGAGAACGGCAAAACCGTATCA ACTTCGACAACGCGATCATTGCAGCGGGTTCGCCCCGATCCAAGTCCGTTTATTCCGCATGAAGATCCGCGTATCTGG GACTCCACTGACGCGCTGGAAGTGAAGAAGTACAGAAGCGCTGCTGGTAATGGTGGCGGTATCATCGGTCTGAAAAT GGGCACCGTTTACCACGCGCTGGGTTACAGATTGACGTTGTTGAAATGTTGACCGAGTTATCCCGCAGCTGACAAAAG ACATCGTTAAAGTCTTACCAGCGTATCAGCAAGAAATCAACCTGATGCTGGAAACCAAAGTTACCAGCGTTGAAGCG AAAGAAGACGGCATTATGTGACGATGGAAGGCAAAAAAGCACCCGCTGAACCGCAGCGTTACGACGCCGTGCTGGTAGC GATTGGTCTGTGCCGAACGGTAAAACCTCGACGCGAGGCAAAGCAGGCGTGAAGTTGACGACCGTGGTTTCATCCGCG TTGACAAAACAGCTGCGTACCAACGTACCGCACATCTTTGCTATCGGCGATATCGTCCGTCACCGATGCTGGCACACAAA GGTGTTACGAAGGTACGTTGCCGCTGAAGTTATCGCCGTAAGAAACTACTTTCGATCCGAAAGTTATCCCGTCCAT CGCCTATACCGAACAGAAAGTTGCATGGGTGGGTCTGACTGAGAAAAGAGCGAAAGAGAAAGGCATCAGCTATGAAACCG CCACCTTCCCGTGGGCTGCTTCTGGTCTGCTATCGCTTCCGACTGCGCAGACGGTATGACCAAGCTGATTTTCGACAAA GAATCTCACCGTGTGATCGGTGGTGGCATTGTGGTACTAACGGCGGCGAGCTGCTGGGTGAAATCGGCCTGGCAATCGA AATGGGTTGTGATGCTGAAGACATCGCACTGACCATCCACGCGCACCCGACTCTGCACGAGTCTGTGGGCTGGCGGCGAG AGTGTTCGAAGGTAGCATTACCGACCTGCCGAACCGAAAGCGAAGAAGTAATTTTTCGTTTCCGGAACATCCGG CAATTAAGAAAGCGGCTAACACGCGGCTTTTTTACGCTGCAATTTACCTTTCCAGTCTTCTTGTCCACGTTCCAGAG AGACGTTCCGATACTGCTGACCGTTGCTGTTATTCAGCCTGACAGTATGGTACTGTCGTTTAGACGTTGTGGGCGGCT CTCTGAACTTTCTCCGAAAACCTGACGTTGTTACAGGTGATGCCGATTGAACACGCTGGCGGGCGTTATCACGTTGCT GTTGATTACAGTGGGCGCTGCTGACTTTTTCTTAAACACCTGGCGCTGCTCTGGTGTGCGGACTGAATACGCTCACGC GCTGCGTCTTTCGCTGCTGGTTCTGCGGGTTAGTCTGCATTTTCTCGCAACCGCCTGGCGCTGCTCAGGCGAGGCGGA CTGAATGCGCTCACGCGCTCCCTCTTCCGCTGCTGGATCTTCCGGTTAGTCTGCATTTCTCTCGCAACTGCCTGGCGCT

GCTCAGGCGAGGCGGACTGATAACGCTGACGAGCGGCGTCCTTTTGTGCTGGGTGAGTGGTTGGCGACGGCTGAAGTCG  
TGGAAGTCGTCATAGCTCCCATAGTGTTCAGCTTCATTAACCGCTGTGCCGCTGCCTGACGTTGGGTATCTCGTGTAAT  
GACTGGTGCAGCGTGTGTTGCTGAACTGATTTGCTGCCGCTGACGCTGGCTGTCGCGGTTGGGGCAGGTAATT  
GCGTGGCGCTCATTCCGCCGTTGACATCGGTTTGATGAAACCGCTTTGCCATATCTGATCATGATAGGGCACACCATTA  
CGGTAGTTTGGATTGTGCCGCCATGCCATATTCTTATCAGTAAGATGCTCACCGGTGATACGGTTGAAATTTGTGACGTC  
GATATTGATGTTGTCGCCGTTGTTGTTGCCAGCCATTACCGTCACGATGACCGCCATCGTGGTGATGATAATCATCATTGT  
CATGATGATGATGGTCATGATCGTCGTCGCCAGTCGATGCTGCTGAATAGTGCGTACGTGGTAGCAACGCCCATGCTA  
TAGCCGAATCCCGGTACAAAGCTGTCAACAAACGGTTCTCCGGCTGGTGGTGGCAGATAAACCGGGCGGATACGCAGTATT  
GGCCAGTTCCCGTAAACCACGGTTGGTTGTAGTTGGGAATATAGACCACATCAGGATTGGCGGGCTCAATGGAATGA  
CGTTTGTGCCGGCTCTGTAATGACGGGGTTGGCAGTTAAACTGTATTGGATGGTATGACGGGTGCCGTGACTGTCTGT  
TTACCAGTACAGCTTCTCGTTGTGGTAATAACTTTCTGTTCCGTTGATGACTTCAGCGAGCCGGTTTGTGCGCCAG  
TTGCCGAATCGCTGTACCGAGTCCATCACGTCCTCGGCTGGCCAGAAAAGCATCGCCAGGTTTTGCACCCATTGCG  
GGTTTTCGCCATCAATGCCATCAATTGTGAAAGGCCACCAAGTATTAACGCTGGCGTCCACGGCTGGTCAGATACC  
GCCTGAATAGCAGCATCGCCTTGTAAAGTGGATTATCGTGCAGCATTGACTGCTTGAAGCAACGTTTGTGCGATAGT  
TGATGCCATCAGCACCTGCCAAAAGTAGGGCTCGGGATACAGCCGACGGGCGCAGCCATTGATCTATTGTGACATGC  
TGAATGCGGATTTGACGACGCGGGTGTACGGGAGGTGCGGAAACCGTTGCAGGAAACGTAACCGCGGACGCTCAGAC  
ACAGCCAGTTGTGTCGATTGCGGTTCCACAGGCGCTTCCACTGTGCGGCTTTTTATATATAGCCCGGTAGAGGCGGCACA  
AAGCCCGCACTGCAATTAGCGCCAGCACATGGGGTTTAAACGGCAAAGTCATTTTCATAATTCCGATCTCAAGGAAAT  
CGCAATGGTCGGCGAACTGCCACCCGAGGTGCTGTGAATCCGAGTATAAAGAGGCGGTAGTTTAAATTTGACTAATCT  
TGGGATTCGTTGAGAAAGGTGATTATCACCATGCGAATTAACGAAGTTTTTACGGAGGAAACAATCTCTAGACCATCCT  
TAACGATTCAGCCACTTTTTTATGTTGCTTTTTTGTAAACAGATTAACACCTCGTCAAATCCTGCTATTCTGCCGTTG  
CGTACTGGGCATTTACCCTACAACTGCTGTCTCACAGGAGCGTGAAGAGAATCGCTGCCGCACTATGACAATGAGAG  
CGAGGAGAACCCTGCTGCTAGAAGAATACCGTAAGCACGTAGCTGAGCGTCCGCTGAGGGGATTGCGCCAAACCCCTG  
GATGCAAACCAATGGCCGCACTTGTAGAGCTGTGAAAAACCCGCCGCGGGCAGAGAAGAAATCCTGTTAGATCTGTT  
AACCAACCGTGTCCCCAGGCGTCGATGAAGCCGCTATGTCAAAGCAGGCTTCTGGCTGCTATCGCGAAAGGCGAAG  
CCAAATCCCTCTGCTGACTCCGAAAAAGCCATCGAACTGCTGGCACCATGCAGGGTGGTTACAACATTCATCCGCTG  
ATCGACGCGTGGATGATGCCAACTGGCACCTATTGCTGCCAAAGCACTTCTCACACGCTGCTGATGTTGATAACTT  
CTATGACGTAGAAGAGAAAGCGAAAGCAGGCAACGAATATGCGAAGCAGGTTATGCAGTCTGGGCGGATGCCGAATGGT  
TCCTGAATCGCCCGGCGTGGCTGAAAACTGACCGTTACTGTCTCAAAGTCACTGGCGAAACTAACCCGATGACCTT  
TCTCCGGCACCGGATGCGTGGTCACGCCCGGATATCCCACTGCACGCGTGGCGATGCTGAAAAACGCCCGTGAAGGTAT  
TGAGCCAGACCAGCCTGGTGTGTTGGTCCGATCAAGCAAATCGAAGCTCTGCAACAGAAAGGTTTCCCGCTGGCGTACG  
TCGGTGACGTTGTGGGTACGGGTTCTTCGCGTAAATCCGCCACTAACTCCGTTCTGTGGTTTATGGGCGATGATATCCA  
CATGTGCCGAACAAACGCGGCGGTGGTTTGTGCCTCGGCGTAAAATTGCACCCATCTTCTTAAACACGATGGAAGACGC  
GGGTGCACTGCCAATCGAAGTCGACGTCTTAACCTGAACATGGGCGACGTGATTGACGTTTACCCGTACAAAGGTGAAG  
TGCGTAACCACGAAACCGGCGAACTGCTGGCGACCTTGAACGAAAACCGACGTGCTGATTGATGAAGTGCCTGCTGGT  
GGCCGATTTCCGCTGATTATCGGGCGTGGCTGACCACCAAAGCGGTGAAGCACTTGGTCTGCCGCACAGTGTGTT  
CCGTGAGGCGAAAGATGTCGCTGAGAGCGATCGCGGCTTCTGCTGGCGCAAAAAATGGTAGGCCGTGCCTGTGGCGTGA  
AAGGCATTCGTCGGGCGGCTACTGTGAACCGAAAAAGTACTTCTGTAGGTTCCAGGACACCACCGGCCGATGACCCGT  
GATGAACTGAAAGACCTGGCGTGCCTGGCTTCTCGCTGACCTGGTGATGCAGTCTTTCTGCCACACCAGCGGCTTCC  
GAAGCCAGTTGACGTGAACACGCACACGCTGCCGCACTTCAATTAACCGTGGCGGTGTGCTGCTGCGTCCGGTGTG  
ACGGCGTCATTACTCCTGGCTGAACCGTATGCTGCTGCCGGATACCGTCCGTTACCGGTGGTGAATCCCATACCCGTTT  
CCGATCGGTATCTTTCCCGGCGGGTCTGGTCTGGTGGCGTTTGTGCCGCAACTGGCGTAATGCCGTTGATATGCC  
GGAATCCGTTCTGGTGCCTTCAAAGGCAAATGCAGCCGGGATCACCTGCGCGATCTGGTACACGCTATTCCGCTGT  
ATGCGATCAAACAAGGTCTGCTGACCGTTGAGAAGAAAGGCAAGAAAAACATCTTCTGCGCCGATCCTGGAAATTGAA  
GGTCTGCCGGATCTGAAAGTTGAGCAGGCCTTTGAGCTAACCGATGCGTCCGCCGAGCGTTCTGCCGCTGGTTGACCAT  
CAAGCTGAACAAAGAACCGATCATCGAATACCTGAACTCTAACATCGTCTGCTGAAGTGGATGATCGCGGAAGGTTACG  
GCGATCGTCTGACCTGGAACGTCGATTACAGGGCATGAAAAATGGCTGGCGAATCCTGAGCTGCTGGAAGCCGATGCA  
GATGCGGAATACGCGGACGTGATCGACATCGATCTGGCGGATATAAAGAGCCAATCCTGTGTGCTCCGAACGACCCGGA  
TGACGCGGCTCCGCTGTCTGCGGTACAGGGTGAAGAATGACGAAAGTGTATCGGTTCTGATGACCAACATCGGTC  
ACTTCCGCTGCTGCGGGTAAACTGCTGGATGCGCATAAAGTCAAGTTCGCGACCCGCTGTGGGTGGCACCGCCAACCCGT  
ATGGACGCCGACAGTTGACCGAAGAAGGCTACTACAGCGTCTTCGTAAGAGTGGTGGCGTATCGAGATCCCTGGCTG  
TTCCCTGTGTATGGGTAACAGGCGCGTGTGGCGGACGGTGAACGGTGGTTTCCACCTCTACCCGTAACCTCCCGAAC  
GTCTGGGTAAGCGGCAATGTCTTCCGCTTCTGCGGAACTGGCGGCTGTTGCGGCGCTGATTGGCAAACGCGCAGC  
CCGGAAGAGTACCAGACCTACGTGGCGCAGGTAGATAAAAACAGCCGTTGATACTTACCGTTATCTGAACTTCAACCAGCT  
TTCTCAGTACACCGAGAAAGCCGATGGGGTATTTTCCAGACTGCGGTTAAAAAGTACAGCGCACGCGCTGCGCATAAAC  
GACACAATGCCCGGTGAATGAGATTCCCGGGCATTTTTTTATTTCTAAACCATCGCCGTTCCGCTGTTTTTCTCCGTA

GGCTGCGATAATTACATCAATGGCGCAATGCGATTCGGTGCATTGCCGGGAGCAGAGGAACACACTATGGATTACGAAT  
TTCTGCGCGATATTACCGGAGTGGTAAAGGTGCGTATGTCCATGGGGCATGAAGTGGTCGGGCACTGGTTAATGAAGAG  
GTGAAAGAAAACCTGGCCTTGCTTGATGAAGTGGAAACAAGCAGCGCACGCACTGAAAGGTAGCGAACGGTCTGGCAACG  
GGCAGGGCATGAATACACCTGTGGATGGACGGTGAAGAGGTGATGGTTCGCGCCAATCAACTGGAATTCGCTGGCGATG  
AAATGGAAGAGGGGATGAACTACTACGACGAAGAAAGCCTGTCGCTATGCGGCGTTGAGGATTTCTGCAAGTCTGGCG  
GCTTACCGCAATTTCTGTGACGAGAAGTAAATAAATCTGGCGGAGCTGGGAGCTCCGCCAGAGCCGTTAAACAGCTGGC  
ATATTGCGCCGTAATAAATCTGCGCATTTCTTCCACAGCGCAGCGGTAATTTCTGGCGCTCGCTGTGCGTTAAGTC  
TTCCGGTTTGGTGTGGAACATGTAGTGCTTAAGGTCGAACTCTTAAAGCAACATCTTGGTATGGAAGATATTTCTGAT  
AGACGTTACATCCACCATGTCATACAGCGCCTTATATCGTCAGACATAAAGTTCTGAATCGAATTAATCTCATGGTCG  
ATAAAGTGCTTCATACCGTTAATGTGCGGGTAAAACCGCGCACGCGATAATCAATGGTTACGATATCGGACTCAAGCTG  
GTGGATCAGGTAATTCAGCGCCTTCAGCGGAGAAATCACGCCGAGGTAGAGACTTCAATATCGGCGCGGAAGGTACATA  
AACCGCCTTCAGGATGACTTTCGGGTAGGTATGTACGAAATATGACTTTTATCAAGATGGGCAACGACCGTTTCTGGC  
AGTGGGCCGGGGTGTCTGTTTTGTCGATGAGTTTCGGGTCAACCGGTTCTTCACTCACCAGAATAGTGACGCTGGCACC  
CTGTGGTTCGTAATCTGGCGGGCGATGTTAAGAATATTAGCCCCGATAATGGAACAGGTTTCTGACAGGATTTCCGTC  
GACGGTTGGCATTATAGAGTTTCATCGATATAAGCAATAAACCCTCGCGCTCTTCCGCGAGTTTGGCGTAGCAGATATCG  
TAAATACAAAAACTCAGACTTTTTGGTCAGATTATTAAGCCTGACGTTTTCAGTTTTTCAATTTCTTATCTTCTCCTTA  
GGACGGCTGTGAAGCCAGTGCCTTTCAGATACTGAGGTAAGGCAAAAGCTGCCGTATGGATTGCCGATTGTAATAAC  
GGCATTTCAGGCCAGAGGGGAGAAAACCGCGCCTGAATAATTTGCGTTGAGAGATGGCGTAAGGCGTCGTTATCTGTGCC  
CATGCAAAAGTCATGATACCGCGTAATAGTTCGGGATCGCCGCTGATAAAAGCCAACGTCGCTGAAGTAATGGCTGAG  
TTTTCGATGGCTGTCGATGGCTTCTTCTGCTGTA AAAAGCAGACCGGTTTTGTGCGACGAAGATACCGCCAGGATTC  
GGCAACGTTTTGACGCTTCATAAAATGCCGAAGTAAAAGGCTTTCGCCGGACCGATAGGATCGGTGCAGTCGGAGATA  
ATGACATCAAAGGTCTGGCTGGTTTGATTAACGAAATTGACGCCATCGTCGATCACCAGCTTAAAGCGCGGATCGTCGTA  
GCTACCGCGTTATGTTGGGTAGATACTGACGGCAGAACGATACGACCCCGCATCGATTTCCACCATCGTGATTGACT  
CAACGTTTTATGTGCGGTTACTTCACGCAGCATGGCACCGTCGCCGCCGCGATAATCAGCACATGTTTCGCGTGACCA  
TGGGCCAGTAGCGAACATGGGTATCATCTCATGATAGATAAACTCGTCGCGCTCGGTGGTTTGTACTACGCCATCCAG  
CGCATTACCGCAACAAATGCAGCGTTCTCAAAAATGATCAGATCCTGGTGATCGGTCTTTTTCATGATACAGAACGTTAT  
CTACCGCAAAGTACTGCCAAAATGGTCGTGTAGCGTTTCATGCCACTGTTTTTTTTTTCGGCCATGGGTTGATACCTCCTT  
TGTTAACACCCGTA AAAAAAGGGCGCAACATAATAGCTAACATTGACCGCGGATGCACGGTCAATATTTCTACAAAAAGG  
TATCAGGGATATTTGACGTAGGCAAGCAGGCTTAAGGAATCGCGGGCCAGGGCTTTGCATTTTTTAGCGACGGGAATGC  
CAATGCCGCTGAGATCGCGGTAGCTGTCTTACCAGGGGCTTTCATGTGCAAGGTGTGCTAATTAAGTACTGAGGTCCACTGG  
TTTTGCTGAGCGAAAAAGACCAGTGCAGCGACGAATTTGCCGTTAGGTAAGTTCGGTAACCAATCGTTCTTTCAGAAA  
GACAAAAACTGCCGTTAATTCGGCCATATCTTCCGCTTCAGACTCGCTGAGCGCGTAACGTTTGGCGAGACGGCCATCA  
GGCTGCCGAATAACACTGTTCTGAAAAACGCTTTCATTGCTTCTACCAGGGGCTTAAAGAAGATAAACGTTAGCACACTG  
CGAGCGAGGGCAGCACCATTATTGTCGATTAATTTGTGCTGCGGCTTACCTTCCCGTAAGGGGAAGGACTATGCTCAA  
CGTTTGATTTTGTTCGCTGCTTAAGAATAAGGAAATAACTATGCAACGTCGATTTCTTAAAAATTTCCGTGCGGCT  
GGGTGTGGCTTCGGCTTTCGGCTGTGGAGCCGCGCAGTATTTGCCGCGAACGCCAACGTTACCGATCCCTGATTTGC  
TCACGACCGATGCCGTAATCGCATTAGTAACTATTGGCGCAGGCCAGTCCACCTTTGGCGGAAAACTGCAACTACC  
TGGGGCTATAACGGCAATCTGCTGGGGCCGGCGGTGAAATTACAGCGCGGCAAAAGCGGTAACGTTGATATCTACAACCA  
ACTGACGGAAGAGACAACGTTGACTGGCACGGGCTGGAAGTACCGGGTGAAGTCGACGGCGGCCCCGAGGGAATTTATTC  
CGCCAGGTGGCAAGCGCTCGGTGACGTTGAACGTTGATCAACCTGCCGCTACCTGCTGGTTCCATCCGATCAGCACGGC  
AAAAACCGGGCAGAGGTGGCGATGGGGCTGGCTGGGCTGGTGGTATTGAAGATGACGAGATCCTGAAATTAATGCTGCC  
AAAAAGTGGGTATCGATGATGTTCCGGTGATCGTTCAGGATAAGAAATTTAGCGCCGACGGGCAGATTGATTATCAAC  
TGATGTGATGACCGCCGCTGGGCTGGTTGGCGATACGTTGCTGACCAACGGTGCAATCTACCCGCAACACGCTGCC  
CCGCGTGGTTGGCTGCGCTGCGTTTGTCAATGGCTGTAATGCCGTTTCGCTCAATTTGCCACCAGCGACAATCGCCC  
GCTGTATGTGATTGCCAGCGACGGTGGTCTGCTACCTGAACCAGTGAAGGTGAGCGAACTGCCGGTGTGATGGGCGAGC  
GTTTTGAAGTGTGGTGGAGGTTAACGATAACAAACCTTTGACCTGGTGACGCTGCCGGTCAGCCAGATGGGGATGGCG  
ATTGCGCCGTTTGATAAGCCTCATCCGGTAATGCGGATTCAGCCGATTGCTATTAGTGCCTCCGGTGTCTTTCAGACAC  
ATTAAGTAGCTGCTGCTTACCTTTCGCTGGAAGGGCTGACGGTACGCAAGCTGCAACTCTATGGACCCGATGCTCG  
ATATGATGGGGATGCAGATGCTAATGGAGAAATATGGCGATCAGCGGATGGCCGGGATGGATCACAGCCAGATGATGGC  
CATATGGGGCACGGCAATATGAATCATATGAACCACGGCGGAAGTTCGATTTCCACCATGCCAACAAAAATCAACGGTCA  
GGCGTTGATATGAACAAGCCGATGTTTGGCGGGCAAAAGGGCAATACGAACGTTGGGTTATCTTGGCGTGGGCGACA  
TGATGCTGCATCCGTTCCATATCCACGGCACGAGTCCGATCTTGTGCAAAAATGGCAACCGCCAGCGGCTCATCGC  
GCCGGCTGGAAAGATACCGTTAAGGTAGAAGGTAATGTCAGCGAAGTGTGGTGAAGTTAATCACGATGCACCGAAAGA  
ACATGCTTATATGGCGCACTGCCATCTGCTGGAGCATGAAGATACGGGGATGATGTTAGGGTTTACGGTATAAAAAGACC  
GTATTCGAAATATGCCCGATCTCTCCGGGCAATAAATGATGACAAACGCAATCTGCCTGATGCGCTACGCTTATCA  
GGCTACGCTAGCTGTGCAATCCATTGATTTTGACAATTTGTAGGCTGGATAAGGCGTTACGCGCATCCGGCATGA

ACAACGGCACGTTGTCAGCAATCTGAGCAAGTCTTACTTCACATCATCCGGCAGCGCATAAGCCACAATATAGTCGCC  
ATCTTCGTACCAAATGAACCGTGACCGCTGCGGAGATCACCACATACTGTTACCATTCACTTCATAGGTCATTGGCGT  
AGCCTGACCACCCGCTGGTAAACGACCCTGCCACAGTTTTCCACGTTGCTCATGTTGTAAGCGCGCAGGTAGTTATCTG  
CCGTAGCGGCATAAACAGCACGTTACCCGCGTGGAGATTGGCCCGCCAGCATCGGCATACCCATATTGAACGGCACC  
GGAACCGGCATCGGGAACGGCATACTGTCTGCGCGTACCAATACGTTTCTCCACACCCTTCATTAGTTTTAGATC  
CAGCGCCGAGATATAACCCCATGCTGGCTGTTTACATGGCAGACCAAATGGTGAGAGGAACGGGTTGAGCGTGACACCAT  
ACGGTACACCGTACTGTGGCTGAATGCCGGATTCCGTACCCGTGCCCTTTGGCATCTTTCGGCTGCTCCATCGGGTTGCCA  
GGACCACGCGGGATCAGTTTCGAAACAAACGGCAGTGCCATTGGGTTGGCAATCGCCACTTCACGATTTGGATCAACGGA  
AATCCCGCCCCATTGCAACATCCCCAGGTTACCCGGGAAGACCAGCGTACCCTGTTAGATGGCGGGGTGAAAATGCCCTT  
CATAGCGCATCTGGTGAACATCACGCGGCACACCAGTTGGTCAAACATGGTGGCTCCCCACATATCCGCACCGCTCAA  
TCTTTCGTGCGACGGAAGCTCAGTTCAGAAAACGGTTGAGTTGGGTTACGTAATCGCCTTTCGCTGCACCTTGGGGAAC  
CGTTTTTCCGGTGCCGGAACACCAGTTCGCCATTACGACGATCGAGCACAAAAATGTTGCCGTTTTCCGCGGAGCGT  
AAATAACTGGCACTTCTGACCATTAACGGTGATGTCCGCCAGCGTGGCTGTGCCGGAAGATCCATGTCCACAGGTCTG  
TGTTGAACGGTCTGGTAGCTCCACGCCAGTTTCCCGGTAGTGGCATTACGCGCCAGAATCGAGCTGGCATAACGTTCTGT  
TTCCGGTGTGCGTTACCGCCCCAGATATCCGGCGTGTACGCCCATCGGCAGATAGACCAGATCCAGCTTCGCGTCT  
AGGCCGCTGGTCCCGAGGTTTTGGCGAGTTAAAGTTAAAGGTGTTTCGTGACAGCGGATTGCGTTCCGATCTTTCGCG  
CCGGGATCAAAAGCCACAGCAGCTCCCCGGTGTGACATCAAAACCACGGATCACGCCAGACGTTTTCGCGGGTTGAGAA  
GTTATCGGTAACGAACCGCCATCACGATGTTTTATCGGTGATAATCGGTGGCGAAGTCGGTTCATACAGACCCGGTT  
TGGTGTCTGGCATATTGCTTTCAGATTGAGCACGCCTTATTGGCGAAGGTTTCGCACAGTTTCCGTTTTTCAGCGTTA  
ATCGCAATCAGTCGACCATCATTGACCGGAAGAATGATACGACGCGGCAATCCGCCATCACTTCCGGCGAAGCGGTTTC  
TGCTTGGCTTCATGATAAGAGACACCACGGCAGTTACGTGCTGGAAGACTCGTTGGTTTTAGCTCAGGATCGTAAT  
GCCATTTCTTTGCCGCTGGCGGCATCAAGCGCAAACAGGCGTGGTGAGCGGTACACAGGTAAAGGTTGTCGCCACT  
TTAATCGGCGTCACTTATTGGTGATTTACCCGGATCGTTCCGGTCTTTCACATCGCCAGTACGGAACACCAGGCTTC  
TTTCAGATTATGGACGTTATCGGCGTTAATTTGTTTCAGCGCGAAAAGCGTTGACCTTCTGATTACGACCATAGGCAG  
GCCAGTCTGATCGGCTACGGGGGAGATAGCTTCAGCAGGTGTGGCATCGGCGCTTAAGGTGCCGTTGATCTCTCGCGA  
TCGTTAAATCCGGCCAGGTGAGGATACCACCGTAATCAGCAGTGGCACCAGTGGCGCAACTGCGCCGCTGGCAGG  
AATGACCAGGCGACGCCAGACAAACGGCAGGATCAGCCAGATGCCGAAGAAGACCAGAATGTCGCTGCGCGGAGTCAGCG  
CCAGAAGTCAAACCAACTTCCAGACGCCCAAATCATGGTGGCAGCAGAGGGCTGCGTATAGCCAAAGCGCGGCG  
CGTTTACTGCGCCACAGCATCCAGGCGACGCCGAGCATCAAAAGCCAGCGATAGGGTAGTACCAGGAGCCGCAATCGC  
GACCAGCCAGCCTCCGCCAATGAGTAGATACAGCCCGCAAAGCGTGCAAAAAGGGCTGTTAGCGTGACGAGTAATCGTC  
GCGAGCCTGTATTGTTAATTGCCATAAAGAGACACCATTTCAATTCATTAATATTTTAGTAGCAATTAATTATAGGTTTT  
AACATGTGTGATCGTCATACAATTCGAGCTTTATTAACAGATTCGCGAATGAATAGTTTTACTGGTATACTGCGTGT  
TTGCGCTTTGTTGCGGTGCCAAAACCTGCCCGTGGCAAGTGATTTGTTTTAAATCATATGGTTAGAGATATGAAACATA  
CTGTAGAAGTAATGATCCCCGAAGCGGAGATTAAGCGCGTATCGCCGAACCTGGGTCGTCAGATTACTGAGCGTTACAAA  
GACAGCGGCAGCGATATGGTGTGGTGGTCTGCTGCGTGGCTCATTATGTTTATGGCGGACCTGTGCCGTGAAGTTCA  
GGTATCTCATGAAGTCGACTTTATGACCGCTCCAGCTACGGTAGCGGCATGTCCACCACCCGTGATGTGAAAATCCTCA  
AAGATCTGGATGAAGATATCCGTGGCAAGGACGTGCTGATTGTTGAAGATATCATCGACTCGGGAATACACTGTCGAAA  
GTGCGTGAGATCTTAAGCCTGCGCGAACC GAAGTCGCTGGCGATTTGTACGCTGCTGGATAAACCGTCCCCTGCGTGAAGT  
GAACGTCCCCTGAGAATTTATCGGTTTTCTGATCCCGATGAGTTTGTGGTGGGTTACGGCATTGATTACGCACAGGTT  
ACCGTCACTGCCGTATATCGGCAAAGTGATTCTGCTGGACAGTAAGTGTGAAGTTGCCGATGTGTTGCATCCGGCAT  
GGCATTTTTATTTGTGGTTGGCGTGTTCAGCTTAGGTTGAAAATCCCGTGACGGTAACGTTGCTCAAGGGTTTTCCGCG  
TTGGTGGCGGTAACATCCAGATCACGCAGCAAGCCGTCGTGAATGCCGTAGGCCAGCCGTGAATGGTAACTTTCTGCC  
GCGTTTTCCACGCTGATTGCATAATGGTGGAGTGCCAGGTTATACACCTGTTCCATGACGTTTCACTTACACAAGGTAT  
CCAGACGGCGCTCTTGGCGCATTTCCGGGTTTTCACTGCGGCTGTACGCCCGCAACCGTAGTGGCCACAGATAAATGTGTT  
TTGATAAGCCCGAGTTCGGGTTTTCACTGCGGCTGTACGCCCGCAACCGTAGTGGCCACAGATAAATGTGTT  
AACTTCGAGTACATCCACTGCATACTGAACCACGGAAGGCAGTTCAGGTGAGTGAATGACCAGGTTAGCAACATTAC  
GGTGAACAAAGAGTTCGCCCCGCTCAAGACCGGTTAAACGTTCTGCAGGAACCGGACTGTCGGAACATCCAATCCATAGA  
AAGCGCGTTTTTTCGCTTGTGCCAGTTTCTCAAAAAACCGGGATCCTCTCCACCAGCATTTTTGACCATAGTCATT  
GTTGCTGATGAGTGTATCTATGCTTTTATGGAGGTTAACGACCTGTAACCAAATAATTACGTTTGGCTAATATAGGGCA  
ACTCCGGGACGATTTAAACCACAGATAAAGTGAAGAACGTAAGTAAGTAAAAATTTATGACCATTGCACTGGAACCTC  
AACAGCTTAAAAAACCTATCCAGGCGCGTTCAGGCGCTTCGTGGGATAGATTTGACAGTGAAGCGGGTGATTTTTAT  
GCGCTTCTCGGGCCGAACGGGGCCGGGAAATCGACCACTATCGGTATTATCAGCTCTCTGGTAAATAAAACCTCCGGGCG  
GGTACGCGTATTTGGTTACGATCTCGAGAAGGATGTGTTGAACGCTAAACGTCAGTTGGGACTGGTGCCGAGGAATTTA  
ACTTCAACCCGTTTGAACCGTGCAGCAAATTTGGTGAATCAGGCGAGGTTACTACGGCGTGGAGCGCAAAGAAGCGTAC  
ATCCGCAGCGAAAAGTATCTTAAACAACCTGATCTATGGGAAAACGCAACGAACGTGCGCGTATGTTATCTGGCGGGAT  
GAAGCGCGTTAATGATTGCCCGTGCCTTAATGCATGAACCTAAACTACTGATTCTCGACGAACCGACCGCAGGCGTG



ATATTGAACTTCGCCGCTCAATGTGGGGCTTTTTGAAGGATTTAAACGACAAAGGCACCACCATCATTCTACCACACAC  
TACCTGGAAGAAGCAGAAATGCTGTGCCGAATATCGGCATTATCAACACGGTGAGCTGGTGAAAATACCTCGATGAA  
GGCCTGCTGGCGAAGCTGAAATCGGAAACCTTTATTCTCGATCTCGACCCGAAAAGCCCGTTACCGAAGCTCGATGGCT  
ATCAGTATCGACTGGTCGATACCGCGACGCTGGAAGTTGAAGTGTGCGTGAGCAGGGGATCAACAGCGTATTTACGCAG  
TTAAGTGAGCAGGGCATTACGGTATTAAGTATGCGTAAACAAAGCTAACCGTCTGGAAGAGCTGTTTGTTCCTGTTAA  
TGAAAAACAAGGAGATCGCCGATGATGCATCTTTACTGGGTGGCGCTAAAAAGCATCTGGGCGAAAGAGATCCATCGCTT  
TATGCGTATCTGGGTGCAGACGCTGGTGCCGCCAGTCATCACCATGACCCTTACTTTATTATCTTCGGTAACCTGATTG  
GTTTCGCGTATTGGCGATATGCATGGCTTCAGCTATATGCAGTTTATCGTACCGGGGCTGATCATGATGTCGGTGATCACC  
AATGCCTACGCCAACGTTGCGTCATCATTTTTTGGTGCCAAGTCCAGCGTAATATTGAAGAGCTGCTGGTAGCGCCGGT  
TCCGACTCACGTCATTATTGCCGATATGTGGCGGTGGCGTGGCGCGTGGTCTGTTTGTGGCATTCTGGTGACGGCAA  
TTTACTGTTTTTTGTGCCATTTACAGTGCATTCTGGGTATTCGTTGCCTAACGCTGGTGTACAGCCGGTGTGTTTC  
TCCCTTGCGGGTTTGTGAACGGTGTGTTGCCAAAACGTTTCGATGACATCAGCCTGGTGCCAACCTTTGTGTTAACGCC  
ACTCACGATTTGGGCGGGTCTTTTACTCACTGACTTTGTTGCCCGCTTCTGGCAAGGGCTGTGCGACCTGAACCCAA  
TCGTTTATGATCAGTGGTTTCCGCTACGGCTTTCGCTGATCAATGATGTTCCGCTGGTCACTACCTTTGGCGTACTG  
GTGGTCTTTATTGTGGCGTTTTATTGATCTGTTGGTGCCTGATCCAACGTGGACGTGGTTTGCCTAGCTAAGGCTATTT  
CCTCTCCTCTGGATTTGGGGGAGAGGTTTTGACGGCTATCACCTTTATCAACAATGGTCAGGGTAGACTGATTTTCG  
GCTAAGGAGGAAGGCATGTTAGGTTGGGTAATTACCTGTACGATGACCGGGCGCAAGAGATACTGGATGCGCTGGAGA  
AAAAACATGGGGCACTTCTCAGTGCCGGGCGTGAATTTCTGGCGCGGATTAAGCTCTAATATGCTCAGCCGATGATG  
TGCGATGCTCTGCATGAAGCGGACTCTGGTGAGGGTGCATCTTCTTAACCGATATAGCCGGAGCGCCACCGTATCGCGT  
GGCTTCATTATTAAGCCACAAAACACTCCCGTTGCGAAGTGATTTCTGGTGTACGTTACCGTTAATTGAACAGATGATGG  
CTTGCCGTGAAACCATGACCAGTTCAGAGTTTCGCGAGCGTATTGTGCAACTGGGTGCGCCGGAGGTGAGTAGTCTTTGG  
CACCAACAACAAAAAATCCGCCTTTCGCTCCTCAACATAATTTGTATGAGTATTAACCCGCGATTCTGATGGCGCTTTT  
GCTACAATAAAAGCGTTGTTTACCCTCGGTTATTTTTTTCATGTACAACAAGCTGTTATTCTCTGCTGATGCTGTTTA  
CCGCAAGTGTACGTGCCGCTTACCTGCCGTTATATGCAACCATCGAAAATGCTGCGGTCTGGGCGCAAATTTGGTGAC  
AAGATGGTGACCGTGGGGAATATTCGGGCCGGACAATCATTGCCGTGGAGCCACTGCCGCAAGTTATTACGCATTTAA  
TTTTGGCTTTGGCAAAGTTTTATCGATAAAGGTCATCTCGAGCCGTTTCCAGGGCGACAAAAAGTTGAAGACGGTTTTGG  
GCGACCTCAACAAGCCGCTGAGTAATCAGAACTTAGTTACCTGGAAGATACGCCGGTCTATAACGCGCCGAGTGCGGGA  
AGTGCGCCATTTGGGGTACTGGCGGACAATTTGCGCTACCCGATTTTGCATAAACTGAAAGACAGGTTAAATCAAACCTG  
GTATCAGATCCGTATTGGCGATCGACTGGCTATATCAGCGCACTGGATGCCAACCCGATAATGGCCTGTCCGGTGCTAA  
CCTATCACCATATTCTGCGCGACGAAGAAAAACCCGTTTTTCGCCATACTTCGACGACCACATCGGTACGCGCTTTCAAT  
AACCAGATGGCCTGGCTGCGTGACAGGGGATACGCGCACTGAGCATGGTGCAGCTGGAAGGCTACGTGAAGAATAAGAT  
CAATCTCCCTGCGCGAGCGGTGGTGATTACCTTTGATGATGGCCTCAAGTCCGTGAGCCGCTATGCGTATCCTGTGTTGA  
ACAATATGGCATGAAGGCGACGGCGTTTATTGTTACCTCACGCATCAAACGTACCCGCGAGAAGTGAACCCAAAATCG  
CTGCAATTTATGAGCGTTTCTGAGCTTAAACGAAATTCGCGATGATTTGATTTCCAGTCACATACCCATTTTTTGCATCG  
GGTAGATGGTTATCGCCGACCCATATTACTGAGCCGTAGTGAGCACAATTTCTGTTTGTATTTGCACGTTACGCGCCG  
CTCTGGCGCAATTTAATCCGCATGTCTGGTATCTTTCGATCCGTTTGGCGGATTTAATGACAACGCCGTGAAGGCAGCA  
AACGATGCCGATTTACCTGGCGGTGACAACCATGAAAGGCAAAGTAAAACCGGGGATAATCCGTTGTTACTAAAACG  
ACTTTATATCTTAAGAACGGATTCTGCTGGAGACGATGTGCGGGTGGTGAGTAAACAGCCGAGGGATAACAATCAAGCA  
ACCTGTACCCGAAATCGCTTTCGCGGTACGTTTCAATTCATTGTCGCCCTTCAAATAGGCGACGTTGGGTGCCAGTCCG  
AGCTTCTTCACTGGCATGGTAACGAAGCTGGCGATGATGACAATATCGCCGACACTGGCGCAGTGGGCGCCGCCACCGT  
TAACAGAAATAATTTCTGAACCCGCTTTCGCCGCGATGGCATAAGTGGAGAAAACGCTTGGCGTTGGTGACATTTCCAGATA  
TCAATGGCTTCTGTTTTCGAGAATACCGGCTGCGTCAAGAAAATCCTGGTCAATGGCGCAAGAACCTTTCATAGTGAGGTC  
CGCATGAGTCACTTTCACGCGGTGGAGTTTGCCTGACGATCGTGCAATCATAAATTCTACCTTCTACCTTCTACCTGTCTGTT  
AACGAAGCAGGCGATGCCTGCTTTGAGGAAATTCACGCACTATTGCCCGATTTTTGTTTGTAGTGTCTACTCATCTGACG  
GCATTTGCGTCAGCAGTTTTCGTACCGCGCCGAAGCGTGCATGTATCGCTGTAACGAATTGATATTTCTGAAACGCT  
GCTCGGTAACAATAAAGAGGTGGCTGACGATAGCGCGCTTACTGGATACTGCCTTACGCAAAAGCCACACGGAAGAC  
AGGGAAGATGGATGCACCGAGTACCACACCGCATGACGCGGTATTTAAACAATTTTTAATGCATGCGGAGACGGCTCGCG  
ACTTTCTGGAGATACATTTGCCAGTGAATACGCGAACTTTGTGACCTCAACACGCTTCTTTAGAGTCCGGGAGTTTT  
ATTGAAGAGAGCTGAAAGGACACAGCACGGACGTCTTATCCGTGCAAATGCAGGGCAATCCCGTTATCTGCATGT  
TGTGATTGAACACCAAAGCAAGCCGGATAAGAAAATGGCTTTCGATGATGCGTTATTCTATAGCCGCATGCACCGGC  
ATCTGGAGGCTGACCACGATAAGCTGCCGCTGGTGGTCCGATACTGTTTTATCAGGGCGAGCCACACCTTATCCGCTA  
TCAATGTGCTGGTTTGTATGTTTTACTGCCGGAGCTGGCGCGACGCTCTATAACAGTCTTTCCCGCTGGTGGATAT  
CACCATCACACCGGATGACGAAATCATGCAACATCGCGGATTGCGATTCTGAACTACTGAAAAACATATTCCGCAGC  
GCGACTTAATGTTATTGCTTGAACACTGGTTCACGCTGATCGACGAAGGGTACTAGCGGAAGTCAAGTTAGTTGCCATG  
CAAACTATATGCTGCAACGCGGTCACTGAACAAGCGGATTTGTTTTACGGTGTGTTGAGAGACAGGGAAACGGGAGG  
GGAGTCTATGATGACGCTGGCGCAGTGGTTTGAAGAGAAAGGGATTGAGAAGGGGATTGAGCAGGGAAGACAGGAAGTAA

GTCAGGAATTCGCCAGCGTCTTCTGAGTAAAGGAATGTCTCGGGAAGACGTTGCAGAGATGGCAAATTTACCTCTTGCT  
GAGATTGATAAGTAATTAACCTTATTTAAGTTACCTGTGTTATGACAGATGACGTGGGGTAAATTAATAACTGGCGCCA  
TCAGCCGTAGCGCCAGTTAAGTATTACGCCAGCTCGACCATTTTGTGTGATCAGGCGAGCATCGCCAAGCCAGGCGGC  
TACCAGAATTACTGCCGTTTGTGGTTTCAGAACTTCCAGCAATGTGTGCGCATCGCGAATCTGAATATCATCGGCGC  
GGAAGCCTTTTTTCATTAGTTCTTGCCTCCGAATGGTAATAATTTTCATCGAGATCCCGTTCGCCAGCCTGCAATTTGTCA  
GCAATCGAACTTAAAATTTGTACAGACCAGGCGCAATTTTGCCTGTTCCGCCGTGAGATAACCGTTACGGGAACCTTAG  
CGCCAGACCGTCTTTGGCGCGCATAATTGGCACACCACAATCTCAATATCGAAGCCATATCGGCAACCATTTTGGCGA  
TCAGCGCCAGTTGCTGAAAACTTTTTACCGAAGCAGGCGATGTCCGGCTGGACCAGGTTGAACAGCTTGTGACAATA  
GTCGAAACGCCGCAAAATGTCGGGACGGCTGGCACCTTCCAGCATGGTCGAAAGGCCAGGAACGTCAACGTAAGTGTG  
GGTTTCAGTACCGTTCGGGTAGATCTCTTTACCGAAGGGGCGAAAACTAAATCCACTTTACGTTTGTAGCTTCTCGC  
AGTCTCTGCAAGGTCCGTGGATAACGAGCCAGATCTTCCGGCGGTGCAACTGCATCGGGTTAACGAAAACTGACG  
ACGACCACATCGGCGCGGCTTTGGCTTCGTGACCAGCTTATATGGCCATCGTGCAGTTACCCATGGTAGGCACCAG  
CGCCACGCGCTTGCCTTCCATACGAGCGGCGAATTTGCTGACGACGAGCGGCGAGGTTTCGATAATTAACAACGCT  
GACTCCTTAATGGAACACTGTGTTCTTCCCGGATAAAACGCCGACTCCACTCAGCCATATACTGCCGACAGCCGCG  
GGATGTCGCCGTTTCCGGGAGGAAATTTTAGCGAATTTAGGAATGTGACCGCCGTAATACCAAAGCCGTCGTGCATC  
ACGAGGATCTGCCCGTCAGTGTGCTGACGTTGCCTGCGCAATGCAATAACCGGGATCGCCAGTCTTCGGTAATACGTTTTGC  
CAGTTCAACCGCACGCATTCCAGCACAGCAGCTGTGCCAGCAGCTTCTAAGGCTAATGCATCGCTGAGCAGTTGAT  
CGCCCGCTTATCGCCGCGCCCTGAACTTTGTAGCCACCAGAAATATTCACTGACTGTGGTGTAAACCTAAGTGACCA  
CATACAGGAACGGCACGTTCCGTCAGCATTTGTACGGTTTCTACCAGCCACTCACCGCTTCAATTTGACCATGTTAGC  
ACCGGCACGCATAACCGTTGCGGCGTTTTGCAAGGCTTGTCCGGCGTGGCATAACGCATAAACGGCAGGTCAGCCAGCA  
GCAGGCAGTTTGGTGCGCCGCGACGTACGGCGGCGAGTGTGGTAGGCGATATCGGCAACGGTAACTGGCAGGGTGGAGTCG  
TGCCCTGAACCGTCATGCCAGCGAATCGCCACCAGCATGACGTTAAGCCCTTATCAGCAAAGAGTTTGGGAAGCT  
ATAGTCATAAGCGGTGATGGTGCAGAAACGTTTTTTTTCTGTTTGTACTTCTGCAGTAAGGAGATGGTGGTTCGTTTCA  
TAACGTATCCTGATAAATTGATGTTGTGCTGTCTGGCATTTTATCAGTCACATTGGTGGGGCAATGATTTATCCGTAGC  
AGCACTGCCAGAAGGTGACAGTGTGCTACGTTATCAGGGATAGTTACCTGGAAAGTACTGGTGGCTTTAAATTCGCCG  
GGTTGATAGCAATATCCCGTCTTGTCTTAATGTTGCCTGGAATGAAGAGGCTGTGATGTGCCGTTACCTTGATTAGG  
GTAAACCCCATCGGAGGTGCATCTTCCGTTTTCATAATCTATATAAACAGAATTCGTATCATTAGGTTTTAATGTCATTA  
GCGGATTTTTACTGGTGTAAACCTTCAATGAGTACGCCAACGCCTTTGGCGGCAAGTCTCCAGTAAGCGTATTACCA  
AGCAGTTGTGTGTTTTGAGTACCTACTTTTCCAGTGACGAGTTTTGTTTCAATATTACGCACACGAATACAATTCTGAAG  
CGAGATATCAAAGGGAACAGGTGAAGCGCCATTTTTAATTGCCAGAGCTATATTCTCCATTCTAACCCTTGAACCAT  
TGAATGATGGCCCGTAAGTATGGAGTAAAACATGTTGGTAAGGTTAATTTGACATTATTCAGTGTGAAATTGACATAA  
ATGTGGTGTGCTGATCTACAACCTTTGTACCAGGACTGTAGGCTTAAACGAATAAAGGTAATTTGATGAACTGGATAA  
CTGGACTTGTGATTAAGTGTAGGATCGAAATAGTATCTGTATAAAATTAACAGTTATGTTGTGACTATACCACCAA  
TAGCCCAAACTTATCGTAGTCTGCTGTTTTGTTGCAACCTTAGTTTGTAGATCGCTGTCTGTGACGGAAAAAGAAAAAT  
TCTTGGTTGGAAGGATCTCCGATATAGATTCTGCGGATTGAATGTCAGTTATTGTATCGTATGCAGACCAGACCCTTGA  
TATTAACATGGTGAATACAGACCAGGAACAGATGTATTAATAGTTTATGTCCGCATAATCTTTACCTGAATAGACCA  
TGGCATTTCATAGTTATTGGACCAGGATTCGCTCGCCAGATGATTGCAGTAAAGAATACCACCACCGGTACCTGTA  
TCCAGGTATGACCAGTACATTTTACCCAGTCCGGCCGAGCTGCGTGGGTTTATAAAAAACCAAGTTGCTTGTGTTGA  
TGTGTAATTAAGGTCATCTGTGCGGCGAGTGGAGGGCCCTCGATAGTTATCAACTCTGCATTATTTCCACAATAAAAC  
TTGTATATGCACTGACTGATTACAACAAGAATACAGTGTAAAAAAGAATGTACCTGAAGATAGTCTTCAATTTTTACT  
CCAATGTTTTCTTATTGTTATGGTTTTGCCTGTTTTTGTGTTTATTTCGTAGTAAATATCCACTAACACATGGCTCATAA  
GTTGACCAGATGTAACACTCAATGCAGGATCGATTTTTTGCATTCGGGTGCTAAATTTCCAGGATGAACCATTATGTCA  
TCCGACATTAAGTATAACCGAAGCAGATCCGCTGAAGCATTAAAGAACATTGAATGTATTCGCCGAATCCTGAGTAGA  
AAATATAACTACTCTACATTACTTGTCTCCTGACGAAATTTTATTAGCAAATATTTGCCTAGAGCCAGCAGCCATGACAC  
CGCTAAGGGCTCTAAATCAATATGTAACGATTTAGCACATCGCCAGTTCCCTGTAATGCACAGTGGATACAGTGATA  
GTGAACTCTTTCCACCTGGTTGATAACTTTAGGAGTAACATTACCTGAAAAATATCCACCCCAACGACGCCAAGATC  
AATATTACCCTGGTACTGATTCGCTTTTGCAGGTGCTGTTTTTACATTGGCAACAAGGTAATATCCTGTCCAGCAA  
TGGCTGGACAGGCGATGCAAAACAGTAATGACAGAAACAGAATTATTCTTTCATCAGCTTACGTTGAGTGGGATGCATA  
TATAGTTCTGAACTGTAAAGTCTGTTAGTTATAGGTTACTGAAATGTGGCTGGTGCAGAAAACTTACCCGAGTGACA  
TTGTTTACGGTTTTATTTTTTCCACGACCAGGCGTCACTCATCGGATAATAAACGACCCGATTGGCTGCAGTGGAGAT  
TGTTACCTCTGTGATGCTGGTGTACACAGCTAAATTTGTTGACTCCCTGTTGCCGGAGTTACAGTGTCCAGACTT  
CAACGGCGACAGCACTTGTCTTATCTGCGGCTGTGGAACCATTTGCAAAACCCCGCACCGTATTAGCAGTCCCTCGCAT  
GTGGCTCGCTGGTAAATTTTATTTGCGCTTTTTTATTGGGGATACCCGACAGTCTTTGAATTTGAGTTGAATGTTTT  
TACTTTGGTCTTGGCATTGATTTAGAAATATATACATCAACAAAATCAACAACAGAAATGTCCTGATCAGAGTCATTTA  
CTAATGTAGCGGTACAAGTACCCATTTCTACAGTAGTAATAACGGTCAGTCCAATACTGTCTGTTGCCGATAAGAGAGT  
ACGCTGAACAATGAGGCAGCCAAAACGACACTGCTGGATAATCCATAACGTAATTTTTAAATGTCATCATAATTATCTCT

TCTTATTGATAGATGAAATTAACGTCGCCAGTGCACGAAAATCCCCGGTACGCCTTGCCCTGCATCTGTTTCACGTAG  
CGCAACGGTCATTTCAAGACCCCTTATCGGGCTGCATCTCGTCTGTCTCCAGCGTATCTTTCCGCACTGTTAGGTTTAA  
GGAAAGTGGCATCATCAGTAGTCCGTTTTTTGAAACCCATACCGATATTACTTGTCTCGAAGATGAATCACCAGACTGC  
GGTATAATAAGCTTAGGTGAGCTTGATGATGCATTTCCGGTCAGAGTGGTATCAATCCAACGATGCCACTGCTGCACCC  
ACTGGCAACCAGTTTAAAATCAGCCTGAGATTCTGTGTTTTATTTCGCGATCTTATCCAGACCCATCTTAGGGATTCTCA  
ATGTGTAGTTATTATTGCCATCATTCTGTGACGTTATTACCAGTAAGTGTGATGTTACAGGTTGTGCTTTGACAGTGGCT  
GTAAACTCTACATTAATATCCGTTGCAAATACTGAGGGTGATAATAATATCCCATCAGTATCACTATTTTATGTGGCGT  
TGTTTTTATCATTGACGTCCTTGTAGTTACTGAATCTGACACCGAATTCATTCCAGAATAATAGATTGTGCTATTTTT  
TCTGCTTCTGGGCTTTGTTGATAATGCGCAAGACAACCTACGGGTTTACTTTGTTTCGAGCCATTTAATGTGATATTTCC  
CTGCTGCTCAATACCAGCAAAATGCTTGCCACCCTGTCCAACATTACCAATGACATTGCCCTTGCTCATCAAAATAT  
CTGCAGCAAATGGAATATTTTTACCATCACTTCTGTGTGATGTTTATAATGGCTGATTGCCCTTGACAGGTTTCAAATCA  
GCAAAGACGACTGAACCTGACGCGGTACAGCTACTGACTGGTACTTTTTAATTCAACATCGTTCTCAAGATCGTTGAT  
ATCCAGCGGATACGGTTTTCATGATAAGGAGAAAGAGCGCTGGTACACCATAACCCCATCGATCGATAGTACTGTTGC  
CATAATTTATTCGCGCTCCTTGAGCACCTGGAGCCTGAACTACCCGAGTGTATCGGAGTCGCTAAAACATCATTATCG  
AAAGTCAGTCCACCCTATGCAATACAAAACCCAGCTCGGTGCTGAGAGAAACTTGACGGCTTTATCGTATTTGCAGAG  
AATTGAACTGCCAGCTTCCCCTGACTCATAGCTGGCATAACCCCAACATAAACTCAAATCTTTGCTGGCTTTAT  
TCATCGTATAGCCAGTATTCACGCTATAACTGACGCGAGCGTTATCGCTATAGCCACTGCTGCTAACGTTGAGTTGGTTA  
TTACCCTTAAAGTCACTGCTTATTTGAGTATCAATACTCTGAAAACCTGAAGTACGTTGTTCAAGTCCAAGTAATTTTT  
AATTGGAATGGTGAACCTAAGATAAACGCTATCGTCACTGTCGCCGCTTTCATTCCATGAACGCTGGGCACTGACACTGT  
AGCTGCCCCAGGATGACTGTTACTGTAGCCAATAGAGTAATTGCTACGATTTTGTCCGGAAGCCAGTAATCGGACCAA  
CTTCCGGAAGATAAAATGAACCGTAATCTTTTTCTCAAATTTCAACGTTGGTTAATACTGACCGTAACCTGATTTTT  
CATGCGTGAGTAATTACGCATGGATTTCCGTTCAAGATCTTGTTCGGGATGTTTCACTTCAATTAGAGTTAGTGCAT  
CATTAAAGACCAAGTAATCTGTGTGCAATAGCGATAGGCCGCGATATTCAAGTACTTGTTCCTCGAATAACTTG  
TTCCAGGAAACACGATAACTTTGCCCTGGTATGTTTTATCATCCGGGATACGAACATTGGAATGAGTCACATCGAAAGA  
AAATGCACCAACTGAAGTATTACAGACCAAGACCTAACAAACAGCGGTATAGTTATTATCGGTTATCTGAATACCGGTAT  
AACCCGTGAGATAGTTATTACAGCCGTAGTAGTCTGTTGAAATAAATTAGGCTCATCCTGAATATCATTTTTAAG  
ACCTGACCGCCGTAATATCCCAACGTCACCGCCAGGGCGTAACATTTGAACAACGGATGAGAAAGGTTGCGAGAATGT  
CCGCTTTGAGCCATCGGATTTCTGATGGTAACAATAAGATCGCTGCCGTACCCTGACGGACTCAGATCATCAATGACGA  
AAGCGCCTGGCGGCACCGTCTTTTATAAATCTTATAGCCACCTTGCCTAATAGTGACTTTGGCGTTGGTATTGGCAACG  
CCATGAATGATAGGCGCAAAGCTGGCTAAAGTCCGAGGCAACATGCGGCTGTCACTGTATAAACGAATGCCTCGGATACT  
GACGGAATCAAAGTTTTGCCCCGTCGTATAAGACTACCAAGAATGAGTTGAGAACGCAGCGAGGCGATATCACGCTGAA  
CATACCGATTCTAAAATCATAAATGCTGACGATAAATGCTTTTCAATTTTTGACCGAGGGTTTTCACTATGATATCCGTTGAG  
GTTGATGACAACATGGCCGCATTAATGCCGTTTTCCATAACGATGGATCAACATAGTTTTGGTAATTTTTCAATACC  
AGGCTTGAGGAACGTCTATATCCAGACGTTGATCGTTAACGTCATAACGAACAGAAGCCTGAGGGATAATTTCCGTCAA  
TTGAGGCAATTGCCGAGCGTTTATCCCTGGCAAGCAGAACGGCTTTTTCGTTATTTATATCGGGAGAATTAATAGAAA  
CTGCAATAAATTTTAAATGTGATAACAAGCTGGGCGTTCTTTTTCTTCAATTGCGACAAAATGTAATACTTTGGTTAA  
TGATTGGTTGGTCTTTACATAAACTGACGTCGTAACACCCGGTATAGCGGGGTTACCTTCACTGTACCGGCTGAGA  
TCAATATTAGATGACTTGCCTTACAGGAAAGTATGGTCAATTTCAACGAGTTCAGCACTGAAAGCAGTATTGCAATA  
CAGCAGCGCAGAAAACGTTGGGATACGGGTCAGATGATGATAATTTTTAGTATATTCTATAGTCACGCTATCTTCTC  
GGAATTATATCCTTGCCTGATTACAGCCTGGCATTACCTTCAATTTGCGCCACCAAAGTCATTAATGGCGTAAAAATGCAC  
TTTTGCAGAATTCGCTTTGCCATTAAGGCCATTGACTTTCATGACCTCATCACTAAATGGTGAATCATTTCACATCAA  
TCGGATAGCGTTTACCGTAGCTTCTAAATCACCCTGCTAAAAGAGACGTAGTAAGGGGTTGGATTGGTCACTCGTAAT  
GACGCCCTTACCTTCTGAACCTGACCAGAACCACTTACGGGCTAACGGGGCTTACAGGGGATTTCCCTTCAATCCATCCGG  
GCGATAGAAAAGTTTTATACGTGTGCGAAATGCCAGTTGCAGCAGGCTTTGATTTCGCGACCTTTCTGCATCTGTTTTG  
GTGGAACCTTCCAGTACGTTAAACAGAACACGCTCTCTGTCTTTAGGCAGTGAAGTGTGGCTGTGTACATTAATTTG  
ATTGTTTGCACGTTTGGCATCAATACGCGATACTGGCGCGTAGCAGTAAAAGGGACTGTAATACTGCCAGGCTCAGC  
GTTGTCATCGCCAGTATCTAACCACTCTGGACAAGCAACGGGTTATTTCCCTTATTTTCCAGACGTACGTTGACACTTT  
TTTGATCGTTTTATATATTACGCGAGTACCCGAAATGACAATGTCCGCAATAGACGATGAACTAAAAGCCATACAGGTT  
ACGAAGCATAAAGCTGTTGATGTTTGGTGTAAAAAACAATAACCATCCCTGATAGAGTTAATTAACAGGGAATAAT  
ATAAAATAGAAATTAATTTCCCTGTATATTCAATCAATTTAACTGGTGAATACTTACTGATAAGTAATGGTGTAT  
GCAGTGTAGTTTTTACATAACCAGCAGTTGCTGTTTGGTCTGCGACGGCACGAACGTAAGACGCTTTAAAATCATAAAC  
AGCAGATTTTGTGTTGCATCCAGGGCTTAGTATACACATCGCCAGGGTTGTAATTTGAACCTGTTTGATAGTGGAAC  
CATCAATATTGTGATAGCGGATATTAACGCCGTGAGTGGGTTGTTAATAGACATGTGCTTGTTCAAAGTCCCTTGTG  
TTACCAAAGAAAACAGAACCGAAGGTCATTTAGCCGTGCTACCTGGATTCCGATTTGCTTTGCTGCAGTCAACGGTGAT  
GCTGAAAGGTTAGCTTTAGCGCAACGGTGTCACTCAGTACGCCAGCATCGATTTACCAACGGTTCGGTTTTGCAGCA

GGATCAGACCATCCTTGTACCGCCGTC AACGCGGGTTTCACAGGTGTTATCAACAACCAGACCACTGATATTTAACTGA  
CCGCGTCCATATCAGCAGAAGCAGTACCTGCAACCATCGCCAGCATAAGACCAGACAGGGCAAACCTAATTTTTTAGA  
CATAAAAATCCTTTAATAAAAATTCATTAGTCAGACTACATGTTTGAAGAATGACTATTTCATGACACAAATAGGAGAAAC  
AAATGTTAGATATTAATGAGCAATGATATTTGTTACCCAAATTTACAACCATTGTTTCATTAGGTGCGCTATTGTGCACTT  
TAGAAGCTTTTGAACAAATTAATTTACTTAATTCAAAATTAAGTAAAAATAAGTTTACAAGTGCAATTGGTTAGGGTAT  
GGAGATGGGATTGATATTTATTTATAGGAAGTTATATTATTTCCGCAAAGAGATGTTTAAACTAAAATCGTAATTAAGGA  
AAGAGATGAGATATGATTTTCAGAAAATATTTATATTCGCAATATAAATAAATTACCATTTGTTTAAATTTGTCAAATGCT  
CTTGATGTAAGATTTGACGCAACATCTCCCATCAGGAAACACCAACTCCGGCGCGATTTCAAACAGCGGCCACAGCAT  
AAATCCACGATTTTCATATCGTAGTGCGGAACGGTCAGGCGTTCAGTATTTATCACTTCATTACCAAACAGCATGATGT  
CGAGATCCAGCGTGCGTGGTCCCAGCGTTCAGCTTTGCGGACGCGACCTTGCTGCAATTCATACGCTGTGTGTGATTG  
AGTAGCTCTTCAGGTGCAAGAGAGGTTTCAGCGCCACGGCTGCGTTTAAAGTAATCGGGTTGATCTTGCGGCCCCAGCGG  
TGGGGTGGGTAAAACGAAGAAACGGTAAGAATGTGGCTTTCAGGGATATCGCCTAATGCTTTCAGGGCAGCATTGACCT  
GCTCCAGCGGAGAGGCCAGATTGCTGCCTATGGCAATATACGCCACTGTGATGCGGTACCTCAGCAGTGGTGGCGTT  
TGCGTGGACGACGAGTACGACGACGCGGTGACGGTCTTCATCCAGCTCGTTGAGCATCCCTTTTTGGTCTGGTGGCGCG  
GAAACTGGAACACCCCACTTTACCAGACGTCGAGTTACGCTTACGCTCAACTTCAGCTCGCAAGGCCAACAG  
GTCATAAGCCGACGGAACCTTAGGATGCTCCAGCAGTTCATGCGCGTTTACCCTGACGACGGGACATACGCAACTGCA  
ACTGCCAGATATCGCGGGTTAATGTCGTGACGCTTTCGGGATTGCCAGTGAACGGCAGGCTTCGTCCAGCAGCTCGTTC  
ATCGCCAGCGCAAAGCGTCTGATAGGTGAGGCCGCTTTCCTGGCGATCTTCTGTGCCGTCTCCAGCAGTGGGTACCA  
GAACATGGCGGCAAACAGGAACGCCGGTTCACGCGCATATCGTTATGGATACGCGTATCGGTATTCTTCAGCACCTGTT  
CAATGATCCGCTCCATCGGGCTGTCGCCATTTCCGTGAAGTAGCGGGTAATGGTCGGGAACAGCGGCTGGAACAGATGA  
TATTCACACAACAGCTTATAGGTTTCGTAACCGTAGCCGCTTGTAGCAGTTTAAAGCGATTCTTCAAACAGGCGTGCCGG  
TGGGATATCGTTCAGCAGGGTAGCGAGGCGAGGGATCGGTTCTGCGGTTTCCGGGTGATGCGCATACCAATTTGGCGG  
CAAACGTACCGCGCAGCATACTGACCGATCTTCAGGTAGCGGTTTCCGGGTACCAATCAGACGGATAACGCCG  
TCCTTCAGATCCTTCATGCCCAACGTAATCACGGACGGTAAATCCGCTACGCTGTAATACAGGCTGTTGATAGTGAA  
ATCGCGGCGTGGGCGTCTTCTCGATGGAGCCGAAATGTTGTCGCGCAGCAACATGCCGTTTTGCCGCGTTGGGAGG  
TCGTGCGGTGCTGACGTTACCTTCGTGGTGTCCACGGAAGGTGCAACTTCGATAATCTCCGGGCCAACATTACATGA  
GCCAGACGGAACGGCGACCACCAGGCGCAGTTACGGAACAGTTTGCACCTGCTCAGGCGTGGCGTTAGTGGTTAC  
GTCAAATCTTTCCGCTTTTTGCCAAGTAACAGGTGCGCAGCCGCCGCAACAGCCAGGCTTCGTATCCCGCTTTAT  
TGAGCCTGTACATTACCTTCAGGGCATTTCCTGATATCTTTCGGGAAATAGCATGCTGCTCAGCGGGATCACCGTC  
ACCTGTGGACGGGCGACTGCCTGTTACGCTCGCTTTCCTCGCGGCTTAGCACCTTGCGGCAAATAATAGCGACTCGGGT  
AAAAATAGTACACCTCGGTAGTGTCAAACATCATTACAGGACAAAAAATAGCGGCTAATCATAGCTCAGCATGACGCATT  
TGAGAATGTTGAATTTACAATTGCCGACTCGGGCACGGCGGTAAGCCGCCAGTTTTGACGGCTGACTGAAGGATTTGCT  
CGACGCTGAAATCCTGCCAGTGTGCTTCTGCCTGCTGCCCCAGAAATGAAGTCCGCGATTAGTACCGGGCGTGGATCG  
CCTTTCGGCAACGCGAGGCGCATGATTCTGCTTGGAAAGTTTAGCGCTTGTGGATTAAGCGCCAGCGGAGATGAATGTA  
ATCTGGCACTTTCAGCCAAAAAGCTGGTACAGCGAGATTTGCCTTACTGTTGGTTCAATCAGATCAGCCCCACGCACTA  
TTTCTGTAACGCCCTGGAATGATCATCAACCACAACAGCCAGGTTGTAGGGCAACAACCCATCACGGCGATGAATGATA  
AAATCTTCCGTGCCAGTTTTCTGTCGGCGTGAATAATGCCGCGCAGCTGGTCAGTAAATTCGCTGACCGGATGCTGCTG  
GCGGATACGCACTGCGGCTTGTCTGGTCCATGATGCAACACCCGGAATGACCGTCTGTAATACCGCAATGCTTTGAA  
TACGCGCACGCGTACAGGTGAGTAATAACTTAGTCTTGTTCATGTAACAGGCGAGTGTTCAGATAGGCGCTGTA  
CGTTGCGATTGCCAGAGAATCGCCGTCAGTCCAGTAAATGTTCCAGCTGGCGCAGGATGTTTCTGCGGCCACC  
GGAACTTACGAGGCGGGTGCATATCTTCTATGCGTACCAGCCAGCGACCTTGCCGGGCGGAGCCTGCAAATAGCTGC  
CGAGCGCGGATCAGAGAGCCAAATGAAGCTCGCCGGAAGGAGAGGGGGGAAGCGGCCAATACTGTGTGTCTGT  
ATCTCTTTGAACAAAAAATAAGGCGGGAGCATTTCGCCCTGTGGTAAACGTGATGGAACGGCTGTAATTAGCCAGCCAT  
CTGTTTTTCGCGAATTTACGCCAGCGTTTTGAGTGCATGCACAGATCGGCTGTGCGGCGCGCTTCAGACGGCGAATAC  
CAATTTCAACACCGCAGGATTCGAGTAGCCGAAATCTTCTGCTTCCACTTTTTTCAGCGTCTTCTCGATCTTTTTGATC  
AGCTTACGCTCGCATCGCGGTTACGAGTTCGAGGCTGAACTCTTCTTCTGGGCTGCACGGTCTACCGGGTCCGGGAA  
GTTGGCTGCTTCATCCTGCATATGTGTAACGGTGCATCGACTTCATCCCTGAGTTGATTACGCCATGCTTCCAGAATAC  
GACGGAAGTGCAGCAGTGGGCTTCAATCATATACTTTCGCCCGGCTTCTCCTGATATGGTTCCACCCAGCGATGGCG  
AGAATACTCAGGGACGATGTTTTACGGTTTTGCCCTTCTGATGTTGCTTCTCTTAACACGCACTATCGATCCCATG  
TTCGGGGGAAAAATGAGGCCGTATAAATAGCAGATGCTTTTCCGGATAGCAATTAATAACGTAACACTTGACAACCTG  
TGTGAGGAAAAGCGTATTTGCGCACGCGACCAGAATGTAATTAACAGTACTTACTTTACTACAATGTAACCGGCAGT  
GATTTTTTAAGAGCCATGCCTTCAGCAGAAATTTCCGCTTTGTAAGCCAGAATTTCTACCCCTCTGTTGAGCTTCTGA  
CAATAGTTGCGCGTATTTCTCATCGATGTGGCGCGGGTGAACCCGTGTAATGGCTGAATGCAGCACGGCGAAAAAGA  
TAACCGCACGCTGGCCTTACGCCGCTACGCTCATCAACTCCGAAAGGTGTTTCTGACCTGTTTCAGTACCGCATCGGGA  
AAATATCCCTGTTCTCGTTCAGCTAACGTAACCGATTTCACTTCAATATAGCAGTCTGGACGCGAATCCGCTGCAACAT  
AAAGTCAATACGGCTGCGTTCGCGCGTATTTACTTCGCTTTTCAGCGAGCTATAGCCTGACAGTTCGAAATGATT

CATTAAGGATAGCCTCTTTCGTCAACCTGTTAGCCCAAAGCGTGTGACGCAAATAAATGCGCCGCTCTGGCTTTGAGTT  
AATTCACAGGTGTGTGGGTATTTCCGTTTGGTGTGTCTGAAGTCAATACCAGACGGTATCGCCAGGCGTTGCACAACC  
GGTCATCGCACCCGTATTCGGGCAGTGTAGCGTAAATTCGCGACCATCGGGTGTGATCACATCGGCTAAAAAACGTTTGT  
AACGCTGAATTAGCGTCCGCGCTGTAGAGGGGGAGAAAATCCATTGCGACAATCCTTGTATTGCGTTAGCGCCAGC  
GTTTTAGCGGCGTGTAGCGTGTGCGTCCACGGGCAAACGAGGAGCGTAAAGGGTGAACCTCCGTCACCGCATACGACCAG  
TTAAAACTGGCGGCGGGATTGTACCCGCTCGCTGGCGTCCGCAATAAGGTAATATGTGGATGAAACGGACGATTGCT  
TTGAAAAACAACCGCTGCGGGCAGCCTGTGAACGGAGCATATTCGCCAGCTGGATTAAGCCGCGTGGCGGCTGACGCATCC  
CTAACACACCCACGCGAACGCGACCCATTGTCCGGCGTCATCAAGCGTGTGAAACAGGTTGACGAATCCGTCGG  
GCTAAAAGAGAAAAGCGCCTTCTCTTTCGCGCTCACTTCGCTAAAAATGCCAGAGTCAGATGCAAAATATCGGCGGC  
GACCGGACGTCCCGCCTCAGGTGGGAAGTGTGTGGCGGCCAATGGATAATCTGTTGCGGATTTCTGCAGGTAAGTCGA  
TAGCAAAGAACAGACGTTGCGGTTAGACATGTGAGGCACTCGTTATGAATTACCGCGATGCTACAATGTGGCGCGAAG  
AATGTTAACCTCTGGAGCGTTTTGTGTGCTGTTGCCGTTGCTGCCGCTTACCTGAATTACTTACCGCTCTCGATTG  
TGCGCCGACGATTATTAAGTGCGCCGACCGGGCCGGGAAATCAACCTGGCTGCCGCTGCAACTGCTGGCGCATCCCG  
GCATTAACGGGAAAATTATCCTGCTGGAGCCGCTGCTGTGGCGCGCGTAACTGCGCGAACGGCTGGCGGAGCTGCTT  
AACGAAAAGCCAGGCGATACCGTTGGTACCGGATCGCTGCGCAAAAATGCGTCGGGCGAATAACCCGCTGGAAGTGT  
TACCGAAAGCGTGTGACCGCATGATCCAGCTGACCCGGAATGAGCGGTGTTGGACTGGTGTGATCCTTATGAATTTT  
ATGAGCGCAGCTTGCAGGCGGATTTGGCGTTGGCGCTGTTACTCGATGTGCAACAAGGTCTGCGTGATGACCTTAAACTG  
CTGATTATGTCGGCTACCTGGACAACGACCGCTTGACGAAATGCTGCCAGAAGCGCCTGTCGTCATCTCAGAAGGGCG  
CTCGTTTCCGTTGAACGCCGTTATTTACCGCTGCCCGCATACGCGTTTTGACGATGCCGTTGCGGTAGCCACCGCTG  
AAATGCTGCGTCAGGAAAGCGGATCATTACTGTTATTTTTACCTGGCGTCGGAGAAATTCAGCGTGTGCAGGAAACAATG  
GCTTCGCGCATCGGCAGTGTATTGCTCTGCCGCTGTATGGCGGTTGTCGCTGAACGATCAGCGAAAAGCGATCCT  
CCCGGACCCGCAAGGATGCGCAAAGTGGTGTGGCGACCAATATTGCTGAAACAGTTTAAACATTGAAGGTATTGCTC  
TGGTGGTGGATTGTGCCAGGAGCGTGTGGCGGTTTTGATCCGCGCACGGGGTTACGCGACTGATTACTCAACGCGTT  
AGCCAGGCATCCATGACGCAGCGTCCCGGCGCGCCGGCGTCTGGAGCCGGTATCAGCCTGCATTTAATCGCAAAGA  
ACAAGCAGAACCGCCGCGCGCAAAGTGAACCGGAGATCTTACAAAGCGATCTTCCGGTTTGTGATGGAATTACTGC  
AATGGGGATGCAGCGATCCGGCGCAGATGAGCTGGTGGATCAACCGCCAGTAGTGAATCTACTGGCCGCGAAACGCTG  
TTACAAATGCTGGGGCACTGGAGGGTGAACGGCTTAGTGCGCAAGGGCAAATAATGGCAGCGCTGGGTAAACGATCCGCG  
TTTAGCGGCAATGCTGGTTAGCGCGAAGAACGACGACGAAGCTGCTACCGCGCAAATAATGGCCGCTTCTCGAAGAGC  
CGCCACGGATGGCAATAGTGACCTGGCGTGGCGTTTTCCGCGCAATCAACCGCCTGGCAGCAACGTAGTCAGCAACTG  
TTAAAAAGCTTAAACGTACGTGGCGGTGAGGCGACAGTTCGTTATCGCGCCGCTACTTGGCGGGCGTTTTGCCGATCG  
CATTGCTGCTGCGCGTGGGCAAGATGGACGCTATCAACTGGCAAACGGCATGGGAGCGATGCTCGATGCCAACGACGCGC  
TAAGCCGCCACGAATGGTTGATCGCACCGTTATTATTGAGGGCAGCGCCTCGCCGGATGCGCGGATTTTACTGGCGCTG  
CTGGTGCATATTGATGAGTTAGTACAACGCTGCCCGCAGCTGGTACAGCAGTCTGACACTGTGGAGTGGGATGACGCGCA  
AGGTACGCTGAAAGCCTGGCGTCCGCTACAAATCGTCAAGTGTGACGGTGAAGTGCAGCCGCTGGCGAAACCGTCAGAAG  
ACGAGTTGCATCAGGCGATGCTTAATGGCATCCGTGATAAAGGTTAAGCGTGTCAACTGGACGGCGGAAGCGGAACAG  
CTACGCTTGCCTTTGTTATGCGCCGCAAAGTGGTTGCCGGAATGACTGGCCAGCGGTTGATGATGAAAGTTTATTGGC  
AGCGCTGAAACGTGGCTGCTGCCACATGACTGGCGTACATCACTACGCGGCTGAAATCACTCGACATTTATCAGG  
CACTACGCGGATTACTTGATTGGGGAATGCAGCAACGTCTGGATAGTGAATTGCTGCGCATTACACTGTGCCGACGGGA  
AGCCGGATCGCATTCTGTTATCATGAAGATAACCCGCCGCGCTGGCGGTGAGAATGCAAGAGATGTTTGGCGAGGCCAC  
CAATCCGACGATCGCCAGGGCGCGTCCGCTGGTGTGAGTGTGCTTTTACCTGCCAAAGGCCATTACAAATCACAC  
GAGATTTGAGCGACTTCTGAAAAGGAGCGTACCGTGAGGTGCAAAAAGAGATGAAAGGGCGTTATCCCAAACATGTCTGG  
CCGACGACCCGGCAAATACTGCACCGACGCGACGGACGAAAAGTATTGTAAGGTTGGTTTTCTCCCTCTCCCTGTGG  
GAGAGGGCCGGGTGAGGGCATCAGCGCGCACGTTACCCTCACCTAACCTCTCCCTCAAGGGAGAGGGGACCGATCG  
AGCACAAATTTGAGAGATATCTTCTGTCTTGAACAGAAGAACAGAAAATCGGGCTTTTGCCTGAATATTGCGG  
AGAAAAAGCATGGCCGGGAATGACCGGAGCCAATTGGACGAAAGGAAACCGACGCGTCCGGTCAAACAAAAGGTAAG  
CCGTCGTCGTTACGAAGATGACGATGATTACGACGATTATGATGACTATGAGGATGAAGAACCAGTCCGCGCAAAGGTA  
AGGGCAAAGGCAAAGGGCGTAAGCCTCGTGGCAAACCGGCTGGCTATGGCTACTGCTAAAATGGCTATCGTTTTTGGC  
GTGCTGATCGCATTACCGGCTTTATCTCGATCAAAAATTCGTAGCCGTTATTGATGGCAAGGTCTGGCAACTGCCTGC  
GGCAGTTTATGGCCGAATGGTCAATCTTAGCCAGACATGACCATCAGCAAGAACGAGATGGTGAAGCTGCTGGAGGCGA  
CCCAGTATCGTCAAGTGTGAAAATGACCCGCTCGGCGAATTTACCGTGCAGGCCAACAGCATTGAGATGATTCCCGT  
CCGTTTGTATCCCGGACAGTAAAGAAGGACAGGTGCGCGCGCTGACCTTTGATGGCGATCATCTGGCGACGATCGT  
CAATATGGAGAACAACCGTCAGTTCGGTTTCTTCCGCTTGTGATCCGCGTCTGATCACCATGATCTCTTCCCAAACGGTG  
AGCAGCGTCTGTTTGTCCGCGCAGTGGTTTCCCGATTTGCTGGTGGATACTTGGTGGCGACAGAAGACCGTCATTTT  
TACGAGCATGATGGAATCAGTCTACTCAATCGGACGTGCGGTGCTGGCAAACCTGACCGCCGGACGCACGGTACAGGG  
TGCGAGTACGCTGACGCAACAGCTGGTAAAAACCTGTTCTCTCCAGCGAGCGTTCTACTGGCGTAAAGCGAACGAAG  
CTACATGGCGCTGATCATGGACGCGGTTACAGCAAAGACCGTATTCTTGGCTGTATATGAACGAGGTGTATCTCGGT

CAGAGCGGCGACAACGAAATCCGCGGCTTCCGCTGGCAAGCTTGTATTACTTTGGTCGCCCGGTAGAAAGAGCTAAGCCT  
CGACCAGCAGGCGCTGTTAGTCGGTATGGTGAAAGGGCGTCCATCTACAACCCGTGGCGTAACCCAAAACCTGGCGCTGG  
AGCGACGTAATCTGGTGTCTGCTGCAACAGCAACAGATTATTGATCAAGAACTCTATGACATGTTGAGTGCCCGT  
CCGCTGGGGTTCAGCCGCGGGTGGGGTGATCTCTCTCAGCCAGCCTTTATGCAACTGGTGCCTCAGGAGCTGCAGGC  
AAAACCTGGGCGATAAGGTAAGATCTCTCCGGCGTGAAGATCTTCACTACCTTTGACTCGGTGGCCAGGACGCGGCAG  
AAAAAGCCGCGTGAAGGCATTCCGGCACTGAAGAAACAGCGTAAGTTGAGCGATCTTGAACCTGCGATTGTGGTCGTC  
GACCCTTTAGTGGTGAAGTTCGTGCGATGGTCGGAGGTTCTGAGCCGAGTTTGGGGCTACAACCGTGCAGTGCAGGC  
GCGTCGTTGATTGGTCCCTTGCAAACAGCGACTTATCTGACGGCTTAAGCCAGCCGAAAATCTATCGTCTGAATA  
CGTGGATTGCGGATGCGCAATTGCGTCTGCTCAGCCGAATGGCCAGGCTGGTCAACCGCAGAATGATGACCGTCTGTTAT  
AGCGAAAGCGGAGAGTGATGCTGGTGGATGCGTTGACCCGTTGATGAACGTGCCGACGGTAAATCTGGGGATGGCGCT  
GGGGCTGCCTGCGTTACGGAGACCTGGATTAACCTGGGCGTACCAGAAAGATCAGTTGCATCCGGTCCGGCAATGCTGC  
TGGGGCGTTGAACCTAACGCAATCGAAGTGGCGCAGGCATTCCAGACCATCGCCAGCGGTGGAACCGTGCACCGCTT  
TCTGCGCTGCTTCGGTAATCGCGAAGATGGCAAAGTGTGTATCAGAGCTTCCCGCAGGCGAAACGCGCTGTTCCGGC  
GCAGGCGGCTATCTGACACTATGGACCATGCAGCAGTGGTACAACGCGGTACGGGTCGTACGTTGGGGCGAAATACC  
CGAACCTGCATCTGGCAGGAAAACAGGACTACCAACAATAACCTAGATACCTGGTTTGGGGCATTGACGGCAGCACG  
GTGACCATCACCTGGCCGCTGATAACAACAGCCGACCAAACTGTATGGTGCCAGCGGCAATGTCGATTTATCA  
GCCTTATCTGGCTAACAGACGCAACGCGCTGAATCTTGTCCGCCAGAAGATATTGAGATATGGGCGTGGACTACG  
ACGGCAACTTTGTTTGCAGCGGTGGCATGCGTATCTTGCCGGTCTGGACCAGCGATCCGCAATCGCTGTGCCAGCAGAGC  
GAGATGCAGCAGCAGCCGTGAGCAATCCGTTTGTAGTCTTCTCAGCCGACGCAACAGCCGCAACAGCAACTGCTCA  
GCAAGAGCAGAAAACAGCGACGGTGTAGCCGTTGGATCAAGGATATGTTTGGTAGTAATTAACATCTAAGCGTAAAT  
ACCGGATGGCGAGTTGCCATCCGGTAAAATAACATCCCATCTAAGATATTAACCCTTTCTTTTCTGTTGTTTATTA  
ACCCTTCAGGAACGCTCAGATTGCGTACCCTTGGCAACCCGCGCAGGTTTGAATATTATCTTATCTTTATAATAATCA  
TTCTGTTTACGTTATCATTCACTTTACATCAGAGATATAACATGGCGCTTCCAAAACCTGCTCAGCCAAAACACTCAC  
TGCGTAAAATCGCAGTTGTAGTAGCCACAGCGGTTAGCGCATGTCTGTTTATGCACAGGCAGCGGTTGAACCGAAAGAA  
GACACTATCACCGTTACCCTGCACCTGCGCCGCAAGAAAGCGCATGGGGGCTGCTGCAACTATTGCGGCGGACAGTC  
TGCTACCGGCACTAAAACCGATACGCCGATTCAAAAAGTGCCACAGTCTATTTCTGTTGTGACCGCCGAAGAGATGGCGC  
TGATCAGCCGAAGTCGGTAAAAGAAGCGTTAGCTACACGCCGGTGTCTCTGTTGGTACGCGTGGCGCATCCAACACC  
TATGACCACCTGATCATTGCGGCTTTGCGGCAGAAGGCCAAAGCCAGAATAACTATCTGAATGGCCTGAAGTTGCAGGG  
CAACTTCTATAACGATGCGGTCATTGACCCGATATGCTGGAACGCGCTGAAATTATGCGTGGCCCGGTTCCCGTGCTTT  
ACGGTAAAAGCAGTCTGGCGGCTGTTGAATATGGTCAGCAAGCGTCCGACCACCGAACCCTGAAAGAAGTTCAGTTT  
AAAGCCGTAAGTACAGCCTGTTCCAGACTGGTTTTGACTTTAGCGATTGTTGGATGATGACGGTGTACTCTTATCG  
CCTGACCGGCTTTCGCGCTTTCGCAATGCCAGCAGAAAGGGTCAAGAGCAGCGTTATGCTATTGCACCGGCGTTCA  
CCTGGCGTCCGGATGATAAAACCAATTTTACCTTCTTTTACTTCCAGAACGAGCCGAAACCGGTTATTACGGCTGG  
TTGCCGAAAGAGGGAACCGTTGAGCCGCTGCCGAACGGTAAGCGTCTGCCGACAGACTTTAATGAAGGGGCGAAGAACA  
CACCTATTCTCGTAATGAGAAGATGGTCGGTACAGCTTGCATCACGAATTTAACGACACCTTTACTGTGCGTCAGAACC  
TGCGCTTTCGTAACAAAACCTCGCAAAACAGCGTTTATGGTACGGCGTCTGCTCCGATCCGGCGAATGCTTACAGC  
AAACAGTGTGCGGCATTAGCGCCAGCGGATAAAGGCCATTATCTGGCAGTAAATACGTCGTTGATGATGAGAAGCTGCA  
AACTTCTCCGTTGATACCCAGTTGCAGAGCAAGTTTGGCACTGGCGATATCGACCACACCTGCTGACCGGTGTCGACT  
TTATGCGTATGCGTAATGACATCAACGCTGGTTGGTTACGACTCTGTGCCACTGTCAATCTGTACAATCCGGTG  
AATACCGATTTCGACTTCAATGCCAAAGATCCGGGAAACTCCGGCCCTTACCGCATTCTGAATAAACAGAAACAAACGGG  
CGTTTATGTTACAGGATCAGGCGCAGTGGGATAAAGTGTGCTACCCCTAGGCGGTCGTTATGACTGGGCGATCAAGAAT  
CTCTTAACCGGTTGCCGGGACGACCGATAAACGTGATGACAAACAGTTTACCTGGCGTGGTGGTAACTACCTGTTT  
GATAATGGTGAACACCTTACTTACGCTATAGCGAATCGTTTGAACCTTCTTCGCAAGTTGGGAAGGATGGTAATATTTT  
CGCACCGTCTAAAGGTAAGCAGTATGAAGTCGGCGTGAATATGTACCGGAAGATCGTCCGATTGTAGTTACTGGTGCCG  
TGTATAATCTCACTAAAACCAACACTGATGGCGGACCTGAGGGTTCTTCTTCTCGGTTGAAGGTGGCGAGATCCGC  
GCACGTGGCGTAGAAATCGAAGCGAAAGCGGCGCTGTCCGCGAGTGTAAACGTAGTCGGTTCTTATACTTACACCGATGC  
GGAATACACCACCGATACTACCTATAAAGGCAATACGCTGCACAGGTGCCAAAACACATGGCTTCGTTGTGGGCTGACT  
ACACCTTCTTTGACGGTCCGCTTTGAGTCTGACGCTGGGCACCGGTGGTCTTATACTGGCTCCAGTTATGGTATCCG  
GCTAACTCCTTTAAAGTGGGAAGTTATACGGTCTGGATGCGTTAGTACGTTATGATCTGGCGGAGTCGGCATGGCTGG  
CTCCAACGTGGCGCTGCATGTTAAACACTGTTTCGATCGTGAATACGTCGCCAGCTGCTTTAACACTTATGGCTGCTTCT  
GGGGCGCAGAAGTCAGGTCGTTGCAACCGCAACCTCCGTTTCTAATTTCTTTTGGGGCACGGATTTCCGTGCCCAT  
TTCACAAGTTGGCTGTTATGAGGAATACACGAATCATTCCGATACCACTTTTGCAGTGCCTAATATCTCCTTTCTGTTG  
CCCGGGCGACGCTTTTGCATCCGCTGTGTTAACCTTCTGCGGGGAAAGTGACCGGTCTGATTGGTACAACCGTTT  
TGGTAAATCCACTCTGCTCAAAATGCTTGGCCGTATCAGCCGCGTCCGAAAGGGGAGATTCTTCTGATGCCAACCGC  
TGGAAAGCTGGAGCAGCAAAGCGTTTGGCCGAAAGTGCTTATTTGCCGACGAGCTTCTCCGGCAGAAGGGATGACC  
GTGCGTGAACCTGGTGGCGATTGGTCTTACCCGTGGCATGGCGGCTGGGGCGCTTTGGGGCGCAGATCGCGAAAAGT

CGAGGAAGCTATCTCGCTGGTTGGCTTAAACCGCTGGCGCATCGGCTGGTCGATAGTCTCTCTGGCGGCGAACGTCAGC  
GGCGTGGATGCCATGCTGGTGGCGCAGGATAGCCGTTGCTGTTGCTCGACGAACCGACCTCGGCGTGGATATCGCC  
CACCAGTTGATGTGCTGCTGCTGGTGCACCGTTTAAAGTCAGGAGCGTGGCCTGACGGTCATTGCCGTGTTGCACGATAT  
CAATATGGCGGCACGCTACTGTGATTATCTGGTCCGCTGCGCGCGGTGAAATGATTGCTCAGGGAACGCTGCGGAAA  
TTATGCGCGGCGAAACCCCTCGAAATGATTATGGCATCCCGATGGGTATTTGCGCATCCGGCGGGTGTGCACCTGTG  
AGTTTTGTTTATTGATGAGCGGCTTACCTCTTATTTGCGCGCGTGCAGTGTAAACGGCGATGGCGCTTCTCCGTTGTTA  
TGGCAGATGAATACCGCCCACGCGGGCTATTGATCCCAATCGTATTGTGGCGCTGGAGTGGTTGCCGTGGAATTACT  
GCTGGCGCTCGGCATCGTGCCTTACGGCGTGGCGGATACCATCAACTATCGCTGTGGTCAAGCAACCCATTGCCGG  
ACTCAGTGATCGAGTGGTTTTGCGCACAGAACCTAACCTGAACTGCTGACCGAAATGAAACCATCGTTTATGGTCTGG  
TCGGCAGGATATGGCCCTTACCAGAAATGCTGGCTCGTATTGCGCGGGTTCGGGATTTAACTTCAGTGACGGCAAACA  
GCCGTTGGCGATGGCGCGTAAATCGCTGACGAAATGGCAGATTTACTTAACTGCAAAGCGCAGCGGAAACGCATTTAG  
CGCAATATGAAGACTTTATCCGAGCATGAAACCCGCTTTGTGAAGCGTGGTGCAGTCCGTTATTGCTGACGACGCTT  
ATCGATCCGCGCCATATGCTGGTCTTCGGTCAAACAGCTTGTCCAGGAAATCTTGTGATGAGTACGGCATCCAAATGC  
CTGGCAAGGGGAAACCACTTCTGGGGCAGTACCGCCGTGATATCGATCGTCTGGCGGCGTATAAAGACGTTGATGTC  
TCTGTTTTGATCAGCACAAAGCAGAAAGACATGGATCGCTAATGGCAACGCCGCTGTGGCAGGCCATGCCGTTGTCCGC  
GCCGGACGCTTTCAGCGCGTACCTGCAGTCTGGTTTTATGGTGCAGCTCTCGCAATGCACTTTGTGCCGCTTCTGGA  
TAAACCCATCGGAGGTAAAGCGTGAGTAAACGAATTGCGCTTTTCCCGCGTATTGCTGGCGCTGTTAGTGATTGTCGC  
TACGGCGCTCACCTGGATGAACTTCTCGCAGGCGCTGCCGCTAGCCAGTGGGCGCAGGCTGCCTGGTGCAGGATATTG  
ACGTCATCGAGCAGATGATTTTTCACTACAGCTTGTGCGCGTCTGGCGATTTGCTGCTGGTGGGCGCGGGTCTGGGG  
CTGGTGGGCGTGTGTTTACGAAAGTGTGCGTAAACCGCTGGCGGAGCCGACGACGCTTGGCGTTGCTACAGGCGCGCA  
ACTGGGGATTACCGTCACTACGCTCTGGCGATCCCTGGTGCAGTGGCGAGCCAGTTTGTGCGCAGGACGGGGCTTGTG  
TTGTTGGCTTAAATGTCTTTGGCGTGCCTGGGGGAAACGGCTGTGCGCGTAAACGCTGATTCTCGCGGGGTTGGTAGTG  
AGCCTTTATTGCGCGCAATCAATCAGTTACTGGTTATCTCCATCATGACCAACTGCAAAGCATGTTTCTGTGGAGCAC  
TGAAACGCTGACGCAAACCGACTGGGGCGGCTTGGAGCTTTATGGCCGAGCTGTGGCGGTGTGATGCTGACGTTGC  
TGCTACTTCGTCGTTAACCTGATGGGGCTTGTGATGGCGTGGCGCAATCTCGGGTGGCTTGTGCTTGCAGCTTGC  
CTGGCAGCGTGTGCTGGCGATTGTCATCAGTGCCTGCTGGTGAACGCTGTGGGATTATCGGCTTTATCGGTTGTT  
CGCGCGCTGTGGCAAAAATGCTGGGGCGCGGCTGTGCTGCCACGACTGATGCTGGCGTCTGTTGATTGGTGCAGTGA  
TCCTCTGGCTTCCGATCAAATCATCCTCTGGCTGACTCGCTGTGGATGGAAGTGTCCACCGTTCCGTCACTGCGTTG  
ATCGGTGCGCGCTGCTACTGTGGCTGTTGCCGCTTACGCGCATTAGCGCGCCGGATATGAAGGTCAACGATCGTGT  
CGCGGTGAACGCCAACATGTGCTGGCGTTTGCCTCGCGGGCGGCTGTGCTGTTGATGGCTGTGGTGGTGGCGCTGT  
CGTTTGGTCTGATGCGCACGGCTGGACGTGGGCGAGCGGGGCTTGTGCGAGGATTAATGCCCTGGCGCTGGCCGCGA  
ATTATGGCGCGCTGTTTGCGGGCTCATGCTGGCGGTGGCGGGCTGATTATTAGCGACTGACCGGAAACCCGATGGC  
AAGCCCGAAGTGCTGGGGATTAGCTCCGGCGCGGCTTGGCGTGGTGTGATGCTGTTTCTGGTGGCGGTAATGCCT  
TTGGCTGGCTGTACCTGACAGGAGTCTCGCGCGGCGGTGACGCTGTTGATCATTATGATCGCCGCCGCGCGGTGGA  
TTTTCCACACCGTATGTTACTGGCGGGATGGCGTTAAGCACCGGCTTACCATGCTTTTATGATGTTGAGGCAAG  
TGGTGACCCGCAATGGCGCAAGTGTGACCTGGATTTCCGGTTCGACCTACAACGCGACCGATGCGCAGGTCTGGCGCA  
CCGGAATTGTGATGGTGAATTTGCTGGCGATTACCCGCTGTGCCCGCTGGCTGACCATTTTACCCTGGGTGGTGTGAT  
ACCGCCGAGCCGTAGGAATGGCGCTGACGCCGACGCAATTGCGCTGCTGTTAGCGGCTTGCCTGACGGCGACCCG  
GACGATGACTATTGACCGTTGAGTTTTGTTGGTTAATGGCACCGCATATTGCGCGGATGATGGGCTTTCGACGGACGA  
TGCCACACATCGTAATTTGCGCGCTGGTGGTGGTTACTGCTGGTGTTCGCTGACTGGTGTGGGCGGATGGTGTGTTT  
CCATTCAGATCCCGCGGGGCTGCTGTCAACCTTTATCGCGCGCCATATTTTATCTATTTGTTGAGAAAGCAGAGCCG  
TTAATTTTTCCATATAACGGCCTGTACGCCTGGACGATAAAGCGTTTACGCGACAACGGATGCCCGATGCGACGCTGG  
CGCTTATCGGGCTACAACCGCCCCGAATCGTAGGTGCGATAAAGCGTTACGCCGATCCGACAAACCATGCTGG  
ATCACAACCTCGCAAACACCGACGTGCAGCATCGATGGTGTATTGATATCTTCCATGCTGTGCGCCACGGACATAAAG  
CCCGCTTCAAACGCTGACGGTGCCAGGTAACACCTTCTGTCAGCATCATATGGAAGAAACGTTAAAGCGTTCCACGTC  
ACAGGCCATCACATCCTGATAGCACGTACGGACTCGGCGTGGTAAAGAAAATACCGAACATGCCGCCAACGTGGTTAA  
CGACCAGCGGAATTCGGCTTCTTCTGCCGCTTCCAGCAGACCTTCTGCCAGACGTGTTGTCAGCTCATCCAGCTTTCG  
TGAACGCCCGGCTGCGGACTTCACTCAGACAGGCGAAACCCGCTGCCATCGCAATCGGGTACCAGGAAAGCGTACCCGC  
CTGATAGACCGGACCCGTCGGGGCCAGCGCATCCATTACATCACGACGACCGAATGCGCTACCGGCATTCCACCGC  
CGATGATTTTCCGAGGCGGTTAAATCTGGCACTACGCCGTAATAATCCTGTGCGCCAGTACGCTACCGGAAACCG  
GTCATCACTTATCGATGATCAGCAACCGCCAAATTCGTGCGACAGCGCGCAGACCTGGCAGGAACTCTGGCAGCGG  
CGGAACACAGTTCATATTGCCCTGCCACCGCTGACGATAATACAGGCAATCTTGTGGGATTGCTCAAATGCGGCGC  
GTACAGAAGCCAGATCATTATAAGTACAGGTTAAGGTATATTTGGCGAAATCTGCCGAAACCCCGGCGAGTTTGGCTGG  
CCTAACGTGAGTGCAGCAACCGGCTTACCAGCAGGCGAGTACGCTGACCATGGTAACACCTTCAAATTTAATAAT  
TTTGTGCGACCGGTAACCCAGGCGGATGGCGCTCATGGTGCCTTCACTGCGGAGTTACCATGCGCACCA  
TATCCATGGTGGGACAGTTCCGTCACAGTTGCGCCATTTCACTTCCATTTGCGTTGGTGCACCAAAGCTTAAACCA

CGCTCGGCGGCTTCAATCACGGCATTGCGGATTGCCGGATGGTTATGGCCAGCACCATCGGCCCCAGGAACCGACATA  
ATCGATATAGGCTTTGCCATCAACATCGTACAGATAAGCGCCGTCGCTTTTTCGATAAACAGTGGAGTGCCGCCACGC  
CAGTAAAGGCGCAACAGGGGAGTTACACCCGCCAGGGATCAGCTCGCGCGCTGCGCTGTAAGATTTTTCAGACTTACTC  
ATGGAGGGTTCCTGATTCGTAGAAAAAGTGAATGGCTGCTATTCTATGTTATTCATAACAAGTTAAATACTCGTCAAACA  
TCAGGCTGCTTGTACTGGTGAATCCTGATTTCTTAGAGTATAAAAAGTTTTGTGCATTTGAAACATTACGCTTTGCAAAG  
GATTTTCATGGAACGTGCGAGTAAATGCCGTCATCTTATTTGTATGACCAATAAGTGATCATTGGATGAAAACGATAC  
TCCCTCTTTAGAAACACCGCAGGCCGCGCCTGCGACGCAGACAACGATTGCGCAACTTCTTGAGCGCGATAAAACCC  
CGTTAGCCATTTTGTATGGCGGCAGTCGTGCGCACGCTTGTGGGCTGGCAGCGGTTGCTTTTGACAAAGGTGTCGCC  
TGTTGCGAACAACGTATGGGGGCGCTGGTACATACTGCTGATAATTATCCGCTTCTGTTAACCGTCGCTTTTCTCTG  
TTCGGCGGTGCTGGCGATGTTTGGCTACTTTTTGGTGCCAAATACGCGCCGGAAGCAGGTGGTTCGGGGATCCCGGAAA  
TTGAAGGGGCGCTGGAAGATCAACGTCCCGTTGCTGGTGGCGTGTATTGCCGGTGAAGTCTTTGGCGGGCTGGGGACA  
CTCGGGGAGGCATGGTGTGGGGCGCAAGGGCCAACCGTGCAGATCGCGGTAACATTGGCCGTATGGTGCTTGATAT  
TTCCGCTGAAAGGTGACGAAGCTCGCCATACGCTGCTGGCAACCGGTGCTGCTGCGGGGCTGGCTGCGGCCTTTAACG  
CGCCGCTGGCGGTATTTTGTATTATCGAAGAGATGCGTCCGCAAGTTTCGCTATACGTTAATTTGATTAAGCGGTA  
TTTATTGGTGCATTATGTGCACCATTATGACCGGATTTTAAATCATGAAGTTGCGTTGATTGACGTCGGTAAACTTTC  
TGATGCGCCGTTAATACGCTGTGGCTTATCTGATCCTCGGTATTATTTTTGGCATTTCGCGCCTATTTTTAATAAAT  
GGTGCTGGGGATGCAGGATTTGCTGCACCGTGTGCACGGCGCAATATTACCAAATGGGTGCTAATGGGCGGTGCGATT  
GGCGGTCTGTGTGGATTGCTGGGGTTTGTGGACCAGCAACGTGCGGGCGCGGTTTTAACCTGATTCTATCGCTACCGC  
GGGGAATTTACGCATGGGAATGCTGGTGTATCTTCGTCGCGCGGGTATTACCACCTTACTCTGCTTCTTCCGGCG  
CGCCGGGCGGTATTTTGCCTCGATGCTGGCGTGGTACTGTGCTGGGAACCGCTTTCGGAATGTTGCCGTTGAGCTG  
TTCCGCAATATCACCTTAGAGCGGGGACGTTTGTATTGCCGAATGGGGCATTACTGGCGGCATCTATTGCGCGCC  
GTTAACGGGGATCATTCTGGTCTGGAGATGACCGATAACTACCAGCTCATTTCGCAATGATTATTACCGGTCTTGGCG  
CAACTATTAGCGCAATTTACCGGGGAAACCGTATACTCGCGATTCTTGCGCACGCTGGCAAAACAGGAAGCT  
GAGCAACTGGCGGAAGCAAGCGCATCAGCCAGCAGAATACTTGAACGAAATACCAGGTATTAGATAATGGCGATT  
ATTATTGGTTAGAATTTGCCAATTGCCGATGTCGTTGGAGCAAAATATGAGTGATGACGTAGCACTGCCGCTGGAGT  
TTACCGACGCAGCAACAAAGTTAAAAGCCTGATGCTGACGAAGATAACCCGAATCTGAAATTACGCTGTATATC  
ACGGTGGCGGTTGCAGCGCTTCCAGTATGGTTTACCTTTGATGATCAGGTGAACGAAGCGATATGACCATCGAAAA  
ACAGGGCGTTGGCCTGGTGGTTGATCCGATGAGCCTGCAATATCTGGTGGCGGTTCCGTTGATTATACGAAGGTCTGG  
AAGTTTCTGTTTCATCGTACCAACCGGAACGCGAAAAGCACCTGCGGTTGCGGTTCTTCTTTAGTATCTAATCTGTT  
GTTTCATGTGCCGATAAACTATCCGGCACATCTTCTCTTCAACGCCCATTCATCCAGCGCAAACGTGCGGTAGCTTA  
AGATGCCAACGAATAGCCGCCAGCCGAATCAATAGCGTACGACCATGCCATCATACTGGCTGTTTCCAGTGGTACGGA  
AAATGTGTAATAAGCCGTAGCGTGGACAATACCGCCGATAATACAGGCAGTTGCGTAGATTTCTGTACGTAATAATCATGG  
GGATTTGCGGGCCAGAATCAGCAATGATCCCGCCGAACGCCAGTAATGACGCCATACAAACCGCGATTAACGGA  
CCGGCTTCCGATTAAGGCTTTATTACGCCAATGCCGACAAACACCGCCAGCAACCGCGTCCAGCACCGGCAACAT  
CCATTTGGTAAGCGTCTTGGCTGGCGCACAGCAGATGGTCCAGCATGCTGGTACCATTGCAACGACCAGATCGGTGG  
GATCTTTACCCAAAATACCGGGCCGTGATCCAGCGCATGTCGCAATTGTCGCGCCCTACTGCGGTTACCACGCC  
AGTACCAGAACACAAAAGGTTCCATACGCAATTTCCGGTAACAAAACGCCGGAGATGGCAAATACCCTGTGCCGAC  
TATATCCAGCAATAGACGAGCATTGTTCAATCCCACTGAGCACCTGAAAAGTCCAGGCGTAATCTACCTGTGAAAGC  
GCATTACAGAGCTGTTGTGACGCGAGGATAATACGTGGGCTTGCACGTTCAAACAGTCACTGAGAGGAATAACCGG  
AATTTGAGTGTTACCCAGTATTGTTTGTATTTAGGAATTTGGTCCGGTCCGCTGTAATGACAATCGCTGTGGCG  
AGCGTGCTAACACCTGTTCCGGGCTAATTTGCGGCCAGGGAACCCGGCTGTCTTTAAAGATGTTTTTCCGCCACAACT  
TCGAGTACCTGTTCTGAATCGACTCTTTTCCACTGGTAAATGGCGGATTAATGCCGAATTGCAAAAAACGTTTTTT  
AGTTTTATCAGCATATTGCGCTTTCAATTGCGCGTACTGATCCAGCAGGATTGCGCGGCTTGTTCGGCCTTGTCTGGTT  
GCGGACTCCAGGGGCGCAGTTGACGTAACGCATTGGCAATTTGTTCAATGCTTGTGCATCGACCCACATCACTTTTATT  
CCCAGCGAAGCCAGCTGGTCAACCTGCCGCTCGGCATTACCTCCACGCCAGGCAATCACCAGATCGGGTTTCAGCGCGAC  
AATGCGTTCAGATTCATCCCTGCCAGGTGAAACCTGCTCAATCTTTGCGCTTGTGGAGGATAGTCGGAATAGCTGC  
TGACCCCAACCGCGTATCCCGCGGCAAGGCAAGTTCAAGTGTGGCGGAGAAAGCGTATGACGCGCGCGCGCGG  
TTGAGCCACAGTGGCGCAAGAAAAGACAGGGCGACCAGCGCCTGAACAGTGACTTAGCCATGTGCAAGTTTCTGCACCA  
GTGACTCAACCATCAGGCTGACTGTTTAGCGGCAACAGCCAGGAACTCATCGAAGCTAAGATGAGACTGTTGATCGGCC  
ACGTCGGAGATGGCGGTACGACAACAAACGGGACGTTGAAATTTGGCAGACATGGGCGATTGCCGTCGCTTCCATCTC  
TACAGCAATGGCTGTGGGAAGTTGTGGCGGATTTTCCGAGACCAACAGAACCCTTGTGAAAGCGTCCGCGTAACAA  
TCAGGCCACGTACAGCTTAAGATTAGTTCCGCAATGCAGGCCCTCAGCGGACGATCAGTTTATCGTACGCTTTAAAG  
CCTGCCGACAGCCTGGTAACTGACCGTATTATAACCAAATGCCGTGACATCCGCGCTGTAACGTTGCTTCCGCGA  
GACAACGATATCGCCACTTTCAACGTTGGTGCCAGGCCACCGGCAAGCCGGTGTAAATAATCAATCTGGCTTGCAGT  
GTTCCAACAGCAAAGTGGCACCCAGCGCCGAGCGACTTTACCGATGCCGATTTTCAAGCGCAACCTCGGTTCCATTC  
AGTTGGCCGATAGATTTGCAACCGCCGAGACTGATAGTTTACGTTTTGACGTTTTGTCACGCAGCAGCGTAACCTC



TTCTTCCATTGCACCAATGATGCCGATTTTCATAGATTTACTCGCGATAAGCCCGATTTGAAGGCATAGTTTACCATGCG  
CTTACGGGGAAAGCGTATTTCTCACGCGGGAGAGGACATGGCACAGATTGATTTCCGAAAAAAAAATAAAGTGGCATCGTCG  
TTACCGTTCCACCGAGGGCGTTAAAACCGAACATGAGATCCTGCGGATCTTCGAGAGCGATCGCGGGCGTATCATCAACT  
CTCCGGCAATTCGTCTGCAACAAAAGACCCAGGTTTTTCCACTGGAGCGCAATGCCGCGTGCACGCGCTTACC  
CACTCGATGGAAGTCCAGCAGGTGGGGCGCTACATCGCCAAAGAAATTTAAGCCGTCTGAAAGAGCTTAAATTAAGTGA  
AGCATAACGGCCTGGATGAACTGACCGGTCCCTTTGAAAGCATTGTTGAGATGTCATGCCTGATGCACGATATCGGCAATC  
CGCCGTTTGGTCATTTTGGCGAAGCGGCGATAAATGACTGGTTTTGCGCAACGTTTGACCCGGAAGATGCCGAAAGCCAG  
CCTCTGACTGACGATCGCTGAGCGTGGCGGCACTACGTTTACGGGACGGGGAAGAACCCTTAACGAGCTGCGGCGCAA  
GATTCGTGAGGACTTATGTCATTTTGGGGGAATGCACAAGGCATTGCGCTGGTGCATACATTGATGCGGATGAATCTCA  
CCTGGGCACAGGTTGGCGGTATTTTAAAATAACCCGTCGGCGTGGTGGCGTGGCGAAACGCCTGAGACACATCACTAT  
TTAATGAAAAGCCGGGTTATTATCTTTCTGAAGAAGCCTATATTGCCCGTTGCGTAAAGAACTTAAATTTGGCGCTTA  
CAGTCGTTTTCCATTAACGTGGATTATGGAAGCTGCCGACGACATCTCCTATTGTGTGGCAGACCTTGAAGATGCGGTAG  
AGAAAAGAATATTTACCGTTGAGCAGCTTATCATCATTTGCACGAAGCGTGGGGCCAGCATGAGAAAAGTTTCGCTCTTT  
TCGCTGGTGGTTGAAAATGCCTGGGAAAAATCACGCTCAAATAGTTTAAAGCCGAGTACGGAAGATCAGTTTTTATGTA  
TTTACGGGTAACACCCTAAATAAACTGGTACCCTACGCGGCACAACGATTTATTGATAATCTGCCTGCATTTTTCGCG  
GAACGTTTAAATCATGCATTATTGGAAGATGCCAGCAATGCAGCGATCTTCTTAAGCTATATAAAAATGCTGCTGTA  
CATGTGTTTAGCCATCCAGATGTCGAGCGGCTTGAATTTGACGGGCTATCGGGTATTAGCGGATTATTAGAGATTTATCG  
TCCTTTATTAAGCCTGTCGTTATCAGACTTTACTGAACTGGTAGAAAAAGAAGCGGTGAAACGTTTCCCTATTGAATCGC  
GCTTATCCACAACTCTCGACGCGCCATCGGCTGGCTATGTCGAGGCTGTCAGTAAATTACCGTCAGATTCTCCTGAG  
TTTCCGCTATGGGAATATTATTACCGTTGCCGCTGCTGCAGGATTATATCAGCGGTATGACCGACCTCTATGCGTGGGA  
TGAATACCGACGTCGATGGCCGTAGAACAATAACAGGCTTTTGTAAAGACGAACAATAAATTTTACCTTTTGCAGAA  
ACTTTAGTTCCGAACTTCAGGCTATAAAACGAATCTGAAGAACACAGCAATTTTGGCTTATCTGTTAATCGAGACTGAAA  
TACATGAAAAAACACATTAGCACTGAGTGCAGTGGCTCTGAGTTTAGGTTTGGCGTTATCTCCGCTCTCTGCAACGGC  
GGCTGAGACTTCTCAGCAACGACAGCCAGCAGATGCCAAGCCTTGACCCGATGCTCGAAAAGGTGATGCCTTCAGTGG  
TCAGCATTAACTAGAAGGTAGCACAAACGTTAATACGCCGCTATGCCGCTAATTTCCAGCAGTCTTCGCTGATGAT  
TCTCCGTTCTGCCAGGAAGTTCTCCGTTCCAGAGCTCTCCGTTCTGCCAGGTGGCCAGGGCGGTAATGGTGGCGGCCA  
GCAACAGAAATTCATGGCGTGGGTTCCGGCGTCATCATTGATGCCGATAAAGGCTATGTCGTACCAACAACCCACGTTG  
TTGATAACCGACGGTCATTAAGTTCAACTGAGCGATGGCCGTAAGTTGACGCGAAGATGGTTGGCAAAGATCCGCGC  
TCTGATATCGCGCTGATCCAAATCCAGAACCCGAAAAACCTGACCGCAATTAAGATGGCGGATTCTGATGCACTGCGCGT  
GGGTGATTACCCGTAGCGATTGGTAACCCGTTTGGTCTGGGCGAGACGGTAACTTCCGGGATTGCTCTGCGCTGGGGC  
GTAGCGCCTGAATGCCGAAACTACGAAACTTATCCAGACCGATGCAGCGATCAACCGTGGTAACTCCGGTGGTGGC  
CTGGTTAACCTGAACGGCGAACTGATCGGTATCAACACCGCGATCCTCGACCGGACGGCGGCAACATCGGTATCGGTTT  
TGCTATCCCGAGTAACATGGTGA AAAACCTGACCTCGCAGATGGTGAATACGGCCAGGTGAAACGCGGTGAGCTGGGTA  
TTATGGGACTGAGCTGAACTCCGAACTGGCGAAAGCGATGAAAGTTGACGCCAGCGCGGTGCTTTCGTAAGCCAGGTT  
CTGCCTAATCCTCCGCTGCAAAAGCGGGCATTAAAGCGGGTATGATGATCACCTCACTGAACGGTAAGCCGATCAGCAG  
CTTTGCCGACTGCGTGTGCTCAGGTGGTACTATGCCGGTAGGCAGCAAACTGACCTGGGCTTACTGCGCGACGGTAAGC  
AGTTAACGTGAACCTGAACTGCAGCAGAGCAGCCAGAATCAGTTGATCCAGCTCCATCTTCAACGGCATTGAAGGC  
GCTGAGATGAGCAACAAAGGCAAAGATCAGGGCGTGGTAGTGAACAACGTGAAAACGGGCACTCCGGCTGCGCAGATCGG  
CCTGAAGAAAGGTGATGTGATTATTGGCGCAACAGCAGGCAGTGA AAAACATCGCTGAACTGCGTAAAGTTCTCGACA  
GCAAAACCGTGTGCTGGCACTCAACCTCAGCGCGGCAGCACCATCTACTGTTAATGCAGTAATCTCCCTCAACC  
CCTTCTGAAAACGGGAAGGGTTCTCCTTACAATCTGTGAACCTTACCACAACCTCCATACATCTTTCATCATCCTTTAGG  
CATTTGCACAATGCCGTACGTTACGACTTCTTATGCTAAGCCGTGCATAACGGAGGACTTATGGCTGGCTGGCATCTT  
GATACAAAATGGCGCAGGATATCGTGGCACGTACCATGCGCATCATCGATACCAATATCAACGTAATGGATGCCCGTGG  
GCGAATTATCGGCAGCGGATCGTGAGCGTATTGGTGAATTGCACGAAGGTGCATTGCTGGTACTTTACAGGGACGAG  
TCGTCGATATCGATGACGCGGTAGCACGTCTGACGCGTGTGCGGCAGGGGATTAATCTACCGTTACGGCTGGAAGGT  
GAAATTGTCGGCGTAATTGGCTGACAGGTGAACAGAGAATCTGCGTAAATATGGCGAACTGGTCTGCATGACGGCTGA  
AATGATGCTGGAACAGTCGCGGTTGATGCACTTGTGGCGCAGGATAGCCGTTTGGCGGAAGAACTGGTGTGAACTGA  
TTCAGGCAGAGGAGAATACTCCCGCACTTACTGAATGGGCGCAACGGCTGGGGATCGATCTCAATCAACCGCAGTGGTG  
GCTATTGTTGAGGTCGACAGCGGTGAGCTTGGCGTGGACAGCGCAATGGCGGAGTTACAACAACCTGCAAAACGCGCTGAC  
TACGCCGAGCGTAATAATCTGGTGGCGATTGTCTCGTAACCGAAATGGTGGTGTGAAACCGCGGTTGAACTCTTTT  
GGCGCTGGGATGCAGAAGATCATCGTAAGCGAGTTGAACAACCTGATTACCCGATCGTACGCGGAAAACGACGATGGTGGT  
GGGTAACAGCGGATGCCAGAAAGTGCCTGCTATTTTTATCAGGATCTGATGTTACCTGTGTTACTCGACAGTTTGGCTG  
GCCACTGGCAGGCCAACGAACTGGCGGACCGCTGGCGCGGCTGAAAACGATGGACAATAACGGCTTGGTGGCAGCAACG  
CTGGCGCGTGGTTTCCGCCAATGTGCAACCGCTGGCAACGTCAAAGCGGTTGTTTATTCATCGTAATACCCTGGAGTA  
TCGGCTAATCGTATATCGAACTGACCGGGCTGATTTGGGCAATTTTATGATGACAGGTTGCTGCTGATGTGGCGTTAC

AACTGGATGAAGAGCGGTAGGTTATGCGTTAAGGTTGAGGCGGCGCTGGCTCATTCCCCTCAGCCCGAAGGGTAGAGGGG  
AATGCCCGAATTAACCGTCAGTTCGGGATTATTTACGCGTTAGTTTTCCAGATCGGCTTCAATCTCGTGATCTTATTG  
GTTACGACTGACTCCAGGTGACGTAAGTCGTCGAGGATCTTACGCTTAAGATCAACTTCGTCGCGGTACGCTGGCAGAT  
TTGATCAAGCTCATCAATGATATACCGTAGATTCGGGCTGATTTCTTGACTTCTTTATAACCCTGACCCACACCATCAG  
CGACGACCGTTTTACGCTGACGCGGATATTTAACTTAACGCTCTTGCGGAAAAACTCGCCTTTGCTTTCTGGAAATAG  
ATTTTCAGAATATCGTTGTTGGCTTCCCTGCCGAGGCTGTAACGATCAATTTCTTCAGGATTGGTAATACCCAGACTTTT  
CAGATTGTCGTACATAGCGTTACCTCAAATGAGTCAGTAAATTTGCTTATTTTAGCATTGGCCTGGCCCGCCGGCT  
CGACTGTGATCGCAGAAAGCCTTTTTCTTCAGACTTCTATCATGGCGTAAAAATCAAAAAATTACCTGCTTTATTCTGG  
TGATAAAATTCACGATCTACACCAGTTCAGCATCGTTACTTCCGGGCGGCAGTTCAGACGCAAAACATACAAACTGCC  
ACGCCACGGTTGTGTAGATGTGTCTTTCGCCAAAGGCATTTAATCCGGCGACGTAACGTTTATCTTCGACAGGGGCAAA  
AGTTTACCAACCAACCGTACGCGCAGTTGCCGCCGTGAGTATGGCCGCACAGCATCAGATCCAGGGTTCATCACGCA  
TGACTTCTTTGCTGTGCGGATTATGCGCCAGCACCAGTCTTGCGAGATTGGCTTCGCTGGCGGGAGGCGGTTGCATTGT  
CCGGCCATAAGTACCAGTGCCTACCAGTTCGAATTGCCTGTTCCGGCGTGGCGATCACCGTAGCCTGGTTAAACAACAC  
CGTGATGCCCGCTGATTTCAACGTCTCGCAATTAAGTGATTTTTTTCTGTACCAACAGGGCGATCGTGGTTGCCGAAGC  
AGGCAAACTCGCGCACATTCGGCAAGGGGGAGAGTACGTCATAAACGCCGAAAAATTCAGCGACATACAAATTAAT  
ACGTAATCGCCGCCAGTAATATCAAATCGGGCTTTTGTCTATGCCAAGAGCAATCGCGTCAGAAATCAGGCTTAAAGG  
AACAAAACGAGAGTAATGGAGATCGGCCAGAAAAAGAAATTTGAATGGTGCTGCGTTGCTTTAAAAAAGCGAGGCGGT  
GACGGATTAATTCAAACCAGCTGGCTCACAGTAATGCATATAACCGAAACCTGAGCTCGTGGCTATCGTCGCGGCAGTA  
GCCTGCAAAAATCGCGCGGTGAAATCATCGCTCATCCCTGCAAAAAATCGGGCAGCGTCTGCTGCCCGTGTGCATAC  
TTTTAGTCGATGGTACGCGCAGTTCTTAATGCCGACTTTGCCGCGAGTTTTCGCGTCAACTTTCTTAACGATAACCGC  
ACAGTAGAGGCTGATTTGCCATCTTTTGACGGCAGATTACCTGAAACAACACAGACCCCGCGGAACGCGACCGTAGT  
GGATTTGCCGGTTTACGGTCTAAATACGGGTGCTCTGACCAATGTATACGCCCATGGAATGACGGAACCTTCTTCG  
ACAATCACCCCTCAACCACTTCAGAGCGCGCGCGATGAAGCAATTATCTTCAATGATGGTTGGTTAGCCTGCAGCGG  
TTCAGCACGCCCGGATGCCACGCCACCGAAAGGTGGACGTTTTTACCAATCTGCGCACAGAACCAGCGGTGCCCG  
AGGTATCAACCATGGTGCCTTCATCAACATATGCGCGATGTTGACGTAAGACGGCATCAGCACGGTGTACGGGAATA  
AACGCACCCTGACGTACCGCCGCTGGTGGCACAACCGGAAGCCTTCTTTCTGAAACGTCTTCGTCGATGCGCGAA  
TTTCATCGGCACTTTGTCGAAGTAGCGGCTTTCTGCCCTTCGATCACCTGATTATCATTAAACGGAAGAGAGCAGCA  
CCGCTTTTTTCAACCACTGATGCGTCACCACTGACCGTCAATTTTTTCCGCTACACGCAGTGCGCCGGAATCCAGCAGG  
GCGATCACCTGATTTACCGTTCGCGGTAACGGTGTCTGCATTGGCTGGCGTATCTCGGCACGGCGTTCAAAGCGGT  
TTCAATAATGTTCTGTAAGTCTGCACTTCTGCTGCAACTCGTTATTAAGCGCACGCCGGTACGCGGTGGCAATTATGAAT  
AAATCTTCTACTCGCTCGCAATGGTTGTAATTCGGGCACCATGAAGCGAAATCCAGATCGGCAAAAATTTCCCGAC  
TCGCGCCAGCAGTCCAGGTTGGTCGAGGGCGATCAGTTCGAGGAACGATTTGCCGGTGGTATGGGTCGGCAAAAACGTTA  
CTTCGGTTTCAACAGTAAATGGCGTAATTTGGCGGTTGGCGACGGGGCTGCCGGTGGCTGCCAGTACTTTGCGTCAGT  
ACTTGCTCCAGACCAACCGAATAACCTCATGACGATCTGCGGACAGCGGGTTCATCGGGTTCAGCACGATAAAGGT  
ATCCATCGCCATACCGTCGCGAGTGGTAAAATTTGCGTCTGTAACACTTAAATTCGGCGGTCTAATTCGGCACAGA  
CGCGGCAACAGATAAGGGCGGTCCGGGCTCCAGATAAAAATCTCGGTGCCTCCACGCGTAGCCTGCCGGCTAAGCAAT  
ACCAGCGGTTTGTAAATCATGCTGTAATAAATGGCGGCATGCCAGGCCAGTTGATTTGGGCTATGGCGGACAAAATA  
GTTAGCACGACGCGTACCAGAAATTTGGTGCAGCGCTCTTCGTCGATGTTATCCATGCGCAGTAGTGCAGTGCCTGGA  
GTTGGTGTGCGCAACCCGTTCCGCGCATATCCGGCGTTTTTGCATCCCGCTGATGCTTTTCCGTTGGCAAAAGTAG  
AGCTCACGCAACAGACTTTGCTTCCAGCTATTCACAGCGTTTTGTTGGTGGCGCAAATGTACGCCACAGTCAGGCATAC  
CAGATAGCGCAGACGATTTTCCGTTTGCATTTCTTCGGCAAACCTGCTTATGACTTCCGGGTCTGAATATCGCGCGT  
GGCGGTACCCGACATCAACAGGTGCTGGCGAACACGCGAGGCGACCAGCTGTGTTTCCGCTGAGTTCAGCCCGTGGAGT  
TCGGCAAAATGCACTACATCCTGAGCACCGAGAATGGAGTGGTCCGCCCGCGCTCTTTGGCGATATCGTGAAACAGCGC  
GGCGATGAAAATCAGCTCAGTTGACGGCAGGCGCGGCCAGACGTCACACACAACGGATGGCGCTGGCGGTTTTCTTAC  
TGGCAAACTCTCAGTTTACGATCACGCGGATAGTATGTTTATCCACCGTGTAGGCGTGGAAACAGATCAAATGCATC  
TGCCCGACGATATGCGACATTGCGGCATATACGCGCCGAGCAGCTATGGCGATGATTGGCAATAGCCCGCGCCGAC  
CGCTCCGGGTGACGCGAATGCTCAAAAACAGTTTTCTGCTTCCGGAATATTACACAGCGGTTGTTGCAGATGGCGAC  
GGCATGGCGTAACTGGCGCAGCGTGGTGGAGTAAATGCCGGTATCGCACTGTTGTGCACCATGGTGTAGAACATACGC  
AAGATGGCTTCCGGCTGGCGCATAAATAGTGTTCATCACGCAGTGCATTAGCGTACCAGTACGTAAGTGCATCGTC  
GATTGGACGTGGTTTTCTGTCGGCGGGAAGGCGAGGATGGCTTATCGAACAGTTGCAGCAGCATCTGGTTGAGTTCAC  
TGACGCGCGTGAACCGGAAGTAATCTTATCATCCGCTCGACCGGTTCTTACCTTACCCTGTAATTCAGACGC  
TGGCGACGCTAAGCTGGCGATCGAATAACAGGCGATTATCGTAACGGCTGACGACCAGATGCAGGGCAAAGCGAATACG  
CCACAATATATGACAGACTTCGTTAATTCGCCCGCTCCGCTGAGGTTAAGAAGCCAAACCCGACCATTTTCATCCAGCG  
ATGTTGCGCAAAAATGACGGCGGGCCACCATTCAGAGTGTGGATATCGCGCAAGCCGCCAGGGCTGCTTTTGTGCT  
GTTCAAGGTTGAGTGGTGCATGGTAACGCTGATGGCGTGGTTCTGTTCTCAACTTTCGCCGCTAGAACTTGTCT

GGAAGGCCAGAATCCTTCGCTGAAAATATGTTTTTGCAGTTCGAGGAACAGCGCAACATCGCCAATTAATAAGCGGGATT  
CGATTAATTGGTGGCGACGGTTAAATCCGATAACCCTTCAGCATGCACTCTTCAAGCGTGCGCACGCTATGACCGACT  
TCCAGCTTTACATCCCAGAGCAGCGTTAACAGCTCGCCACTTTTTGCGCCTGATCGTCCGGGAGCTTTTTACGGCTTAA  
AATCAGTAAATCGACGTCTGAAAGTGGATGCAGCTGCCACGACCGTAGCCACCGACGGCGACCAATGCCAGGTCCGGCAA  
TCTGGCTGAATCCCGCTTCAATCATAATCGTTGCAGGAGCTGGTCGATAAACTCGGTGCGCGCTCAATCAACTGTTCT  
GCAGAGATCCCATTGTCAAAGGCATCACCCAGCCAACGCTGAAAAGTATCGATATGGGCTTTTATCCCACCGACGGTTAA  
TTCATCACGGGGCCAGACGCATGGATTTTGCGGTTGACCGGGCAGGGTGGGGAGAGCGGTGTTTTCGCTACTGTTCTGGAA  
GGGTATTCATTGTGCGCCACCATAAGATTAATTTATCGCATTAAAAAGCCGGCATTCCGCCGGTTCATCTTATTCGTC  
GTGCGAGATTATCGCCGGATGGTGTATCCTTGCCTAGCGTCAGAAATTCGACGCCGTTATCAGTCACCACAATAGTAT  
GCTCATATTGTGCAGACAAGCTGCGATCTTTGGTTTTTACCGTCCAGCCATCTTTCATGGTGCAGGATCTTTTTTACC  
GCGTTGACCATTGGCTCGATGGTGAACGCATCCCAGGTTTTCAGTACGACGTTGGTTTACGGGAGTCATAGTGCAGCAC  
CTGCGGTTCTTATGGAAGCCGCGACCAATACCGTGTCCGCAATATTCACGAACGACGGAGAAGCCTTCTGCTTCGACAA  
ATTTCTGAATCGCCGACCGATTTCCGCGAGATTAATGCCTGGTTTTACCATGCGTAGCGCCAGGTACAGGCTTTCTTGC  
GTGATGCGGCACAGACGTTCCGCCATGATGGTCGGTTACCGACGATAAACATTTTCGAGGTATCGCCGTGAAAACCATC  
TTTGATTACGGTGACATCAATGTTAACGATATCGCCATCTTTCAGCAGCTTAGCATCGTCCGGGATACCGTGCACACCA  
CTTCATTAATAGAGATGCAAACGGATTTCCGATAGCCGTGATAGCCGAGGCAGGCAGAAACCGCGTGTGTTTCATTAACA  
ATGTAATCATTACAGATGCGATCCAGCTCGCCGGTGTGACGCCCGGTTTAAACATACGGTTCGATCATCTCCAGCACTTC  
GGCAGCCAGTCGGCCAGCGACGCGCATTTTTTTCGATATCTTCTGGGGTCTTGATTGAGATAGCCATTAATTTCTGTCCATC  
AGCGTCGGTGATACCGACAATATATATGTAAGTGCCGTCAATGGTATCACACCCGGGCAAATGAGAATCATTCTGAATT  
TCGCCAAACGTGCCACTGAAGGTTTTCTATAATAGAAAATTCGACGTCTGATGCTGTACACAGCGCAACAATTTGGT  
GTCCACGACGATTTTGTGGTATAAAGCGCGCCGACTTCCGATCCATTTCTGTATACACAGACTGGACGGAAGCGACAATC  
TCACTTTGTGTAACAACACACAGTATCGGCACATATTCGGGGTGCCTTTGGGGTGGTAATATGGGATACGTGGAGG  
CATAACCCCACTTTTATATAGAGTTTTAATCATGGCAACTGTTTCCATGCGGCACATGCTCAAGGCTGGTGTCACTT  
CGGTACCAGACCCGTTACTGGAACCCGAAAATGAAGCCGTTCTTTCGGTGCAGTAACAAAGTTCACATCATCAACC  
TTGAGAAAACGTACCGATGTTCAACGAAGCTCTGGCTGAAGTGAACAAGATTGCTTCTCGAAAGGTAATAATCCTTTT  
GTTGGTACTAAACGCGCTGCAAGCGAAGCGGTGAAAGACGCTGCTCTGAGCTGCGACAGTCTTTCGTAACCATCGCTG  
GCTGGGCGGTATGCTGACTAACTGAAAACCGTTCGTCAGTCCATCAAACGTCGAAAGACCTGAAAACCTAGTCTCAGG  
ACGGTACTTTGACAAGCTGACCAAGAAAGAAGCGTGTGCGCACTCGTGAGCTGGAGAACTGAAAACAGCCTGGGC  
GGTATCAAAGACATGGGCGTCTGCCGACGCTCTGTTGTAATCGATGCTGACCACGAACACATTGCTATCAAAGAAGC  
AAACAACCTGGGTATTCCGGTATTTGCTATCGTTGATACCAACTCTGATCCGGACGGTGTGACTTCGTTATCCCGGTA  
ACGACGACGCAATCCGTGCTGTGACCCTGTACCTGGGCGCTGTTGCTGCAACCGTACGTGAAGGCCGTTCTCAGGATCTG  
GCTTCCCAGGCGGAAGAAAGCTTCGTAGAAGCTGAGTAATAAGGCTTGATAACTCCCCAAAATAGTTCGAGTTGCAGAA  
AGGCGGAAGCTCGAGAATTCGCGGAGCTTACATCAGTAAGTACCAGGATGAGCGAGCGAAGATAACGCATCTGCGGC  
GCGAAAATGAAGGGGAGAGCCCTTATAGACCAGGTAGTACACGTTTGGTTAGGGGCGCTGCATATGGCCCCTTTTTC  
ACTTTTATATCTGTGCGGTTAATGCCGGCAGATCACATCTCCGAGGATTTTGAATGGCTGAAATTACCGCATCCCTG  
GTAAAAGAGCTGCGTGAGCGTACTGGCGAGGCATGATGGATTGCAAAAAGCACTGACTGAAGCTAACGGCGACATCGA  
GCTGGCAATCGAAAACATGCGTAAGTCCGGTGTATTAAGCAGCGAAAAAAGCAGGCAACGTTGCTGCTGACGGCGTGA  
TCAAAAACAAAATCGACGGCAACTACGGCATCATTCTGGAAGTAACTGCCAGACTGACTTCGTTGCAAAAAGACGCTGGT  
TTCCAGGCGTTCGAGACAAAGTTCTGGACGAGCTGTTGCTGGCAAAATCACTGACGTTGAAAGTTCGAAAGCACAGTT  
CGAAGAAGAAGCTGTTGCGCTGGTAGCGAAAATGGTGAACATCAACATTCGCCGCTGCTGCGCTGGAAGGCGACG  
TTCTGGGTTCTTATCAGCACGGTGCGCGTATCGCGTTCGGTTGCTGCTAAAGGCGCTGACGAAGAGCTGGTTAAACAC  
ATCGCTATGCACGTTGCTGCAAGCAAGCCAGAATTCATCAAACCGGAAGACGTATCCGCTGAAGTGGTAGAAAAAGAATA  
CCAGGTACAGCTGGATATCGCGATGCAGTCTGGTAAGCCGAAAGAAATCGCAGAGAAAATGGTTGAAGGCCGCATGAAGA  
AATTCACCGCGGAAGTTTCTGACCGGTCAGCCGTTCTGTTATGGAACCAAGCAAACTGTTGGTCAGCTGCTGAAAGAG  
CATAACGCTGAAGTACTGGCTTATCCGCTTCAAGTGGTGAAGGCATCGAGAAAAGTTGAGACTGACTTTGCAGCAGA  
AGTTGCTGCGATGTTCAAGCAGTCTTAATATCAAAAAGGAGCCGCTGAGGGCGGCTTTTTTGTGCCATCTTGTA  
ATTAGCTAACCTTGTGGGCTGCGTGAAAAGCGACGTACAATGTCGCTAGTATTAATTCATTTCAATCGTTGACAGT  
CTCAGGAAAGAAAATGGCTACCAATGCAAAAACCGCTATAAACGCATTCTGCTTAAGTTGAGTGGCGAAGCTCTGCAG  
GGCACTGAAGGCTTCGGTATTGATGCAAGCATACTGGATCGTATGGCTCAGGAAATCAAAGAACTGGTTGAACTGGGTAT  
TCAGGTTGGTGGTATTGGTGGGGTAACCTGTTCCGTGGCGTGGTCTGGCGAAAGCGGGTATGAACCGGCTTGTGG  
GCGACCACATGGGATGCTGGCACCATAATGAACGCCTGGCAATGCGTGATGCACTGCACCGCGCCTATGTAACGCT  
CGTCTGATGTCGCTATTCATTGAATGGCGTGTGCGACAGCTACAGCTGGGAGAAGCTATCAGCCTGTTGCGCAACAA  
CCGTGTTGGTATCCTCTCCGCCGTACAGGTAACCCGTTCTTTACCACCGACTCAGCAGCTTCCTGCGTGGTATCGAAA  
TTGAAGCCGATGTTGGTGTGAAAAGCAACCAAGTTGACGGCGTGTTCACCGCTGATCCGGCGAAAGATCAAACCGCAACC  
ATGTACGAGCAACTGACTTACAGCGAAGTGTGAAAAAGAGCTGAAAGTCATGGACCTGGCGGCTTACGCTGGCTCG  
TGACCATAAATTACCGATTCGTGTTTTCAATATGAACAAACCGGGTGCCTGCGCCGTGTTGTAATGGGTGAAAAAGAA

GGACTTTAATCACGGAATAATTCCCGTGATGGATAAATAAGGGTAAGATTCCGCGTAAGTATCGCGGGGGCGTAAGTCTG  
GTTATAAGGCGTTATTGTTGACGGCAGTTTGGTCACGGCCAGCGCAGCAACCGGAGCGTACAAAAGTACGTGAGGATG  
GCGAGCACTGCCCGGGGCAAAATGGCAAATAAAATAGCCTAATAATCCAGACGATTACCCGTAATATGTTTAAATCAGGG  
CTATACTTAGCACACTTCCACTGTGTGTGACTGTCTGGTCTGACTGAGACAAGTTTTCAAGGATTCGTAACGTGATTAGC  
GATATCAGAAAAGATGCTGAAGTACGCATGGACAAAATGCGTAGAAGCGTTCAAACCCAAATCAGCAAAATACGCACGGG  
TCGTGCTTCTCCCAGCCTGTGGATGGCATTGTCGTGGAATATTACGGCACGCCGACGCCGCTGCGTCAGCTGGCAAGCG  
TAACGGTAGAAGATTCCCGTACACTGAAAATCAACGTGTTGATCGTTCAATGTCTCCGGCCGTTGAAAAAGCGATTATG  
GCGTCCGATCTTGGCCTGAACCCGAACCTGCGGGTAGCGACATCCGTGTTCCGCTGCCGCCGCTGACGGAAGAACGTGCG  
TAAAGATCTGACCAAAATCGTTCGTGGTGAAGCAGAACAAGCGCGTGTTCAGTACGTAACGTGCGTCGTGACGCGAACG  
ACAAAGTGAAGCACTGTTGAAAGATAAAGAGATCAGCGAAGACGACGATCGCCGTTCTCAGGACGATGTACAGAACTG  
ACTGATGCTGCAATCAAGAAAATTGAAGCGGCGCTGGCAGACAAGAAGCAGAACTGATGCAGTTCGATTTCTTGAACG  
ACAAAAACGCCGCTCAGTAGATCCTTGCGGATCGGCTGGCGGCGTTTTGCTTTTTATTCTGTCTCAACTGCGATGTTT  
ATGAAGCAACTCACCATTCTGGGCTCGACCGGCTCGATTGGTTGCAGCACGCTGGACGTGGTGCGCATAATCCCGAAC  
CTTCCGCGTAGTTGCGCTGGTGGCAGGCAAAATGTAAGTGCATCGCATGGTAGAACAGTGCCTGGAATTCTCTCCCGCTATG  
CCGTAATGGACGATGAAGCAGTGCAGAACTTCTTAAACGATGCTACAGCAACAGGGTAGCCGACCCGAAGTCTTAAAGT  
GGGCAACAAGCGCTTGCATATGGCAGCGCTTGAAGATGTTGATCAGGTGATGGCAGCCATTGTTGGCGTCTGGGCT  
GTTACCTACGCTTGTGCGATCCGCGCGGTAACCATTTTTGCTGGCAATAAAGAATCACTGGTTACCTGCGGACGTC  
TGTTTATGGACGCCGTAAGCAGAGCAAAGCGCAATTGTTACCGTGCATAGCGAACATAACGCCATTTTTTCAGAGTTTA  
CCGCAACCTATCCAGCATAATCTGGGATACGCTGACCTTGAAGCAAAATGGCGTGGTGTCCATTTTACTTACCGGGTCTGG  
TGCCCTTTCCGTTGAGACGCCATTGCGCGATTTGGCAACAATGACGCCGATCAAGCCTGCCGTCATCCGAACTGGTCTGA  
TGGGGCGTAAATTTCTGTCGATTGCGCTACCATGATGAACAAAGGTCTGGAATACATTGAAGCGGTTGGCTGTTAAC  
GCCAGCGCCAGCCAGATGGAAGTGTGATTACCCGCACTGATGATTCACTCAATGGTGCCTATCAGGACGGCAGTGT  
TCTGGCGCAGTGGGGAAACCGGATATGCGTACGCCAATTGCCACACCATGGCATGGCCGAATCGCGTGAACCTGGCG  
TGAAGCCGCTCGATTTTTGCAAACTAAGTGCCTGACATTTGCCGACCGGATTATGATCGTTATCCATGCCTGAACTG  
GCGATGGAGGCGTTCGAACAAGGCCAGGCAGCGACGACAGCATTGAATGCCGCAACGAAATCACCGTTGCTGCTTTTCT  
TGCGCAACAAATCCGCTTACGGATATCGCTGCGTTGAATTTATCCGTAAGTGGAAAAAATGGATATGCGCGAACCAAT  
GTGTGGACGATGTGTTATCTGTTGATGCGAACGCGCTGAAGTCCGCAAGAAAGAGGTGATGCGTCTCGCAAGCTGAGGA  
TAATCCGGCTACAGAGAGTCCGCTATTTGTTAGCGTAGGGCTTCACTGATATAGTCTGCGCCATCTGATCGTAAGTAGT  
TGGCTTTATAAGGTGAGATATGCCGTGGTTTTACACGGCTTTTTTTGTATAGGCTTCACTGATTCTGATACCGTAAAC  
CCTGTCAGGGAATAAAAAACCGCTGATGTTGCTGCTACTCAACCACTTAGCGAAAAATGGCAGCGCATGGCTGCCGTC  
ATGTTGCGATCATTATGGACGGCAATGGCCGCTGGGCAAAAAAGCAAGGGAAGATTCTGTCCTTTGGGCATAAAGCCGGG  
GCAAAATCCGTCGCCGGGCTGTCTTTTTGCGGCAACAACGGTATTGAGGCGTTAACGCTGATGCCTTTAGTAGTGA  
AACTGGAACCGACAGCGCAGGAAGTCACTGCGTTAATGGAAGTGTGTTGTTGGGCGCTCGATAGCGAAGTAAAAAGTC  
TGACCCGACATAACGTGCGTCTGCGTATTATTGGCGATACCAGTCCGTTAACTCGCGTTTGAAGAAGTATTCTGTA  
TCTGAAGCGCTAACAGCCGGGAATACCGGTCTGACGCTGAATATTGCGGCGAACTACGGTGGACGTTGGGATATAGTCCA  
GGGAGTCAGGCAACTGGCTGAAAAGGTGACGCAAGGAACTGCAACAGATCAGATAGATGAAGAGATGCTAAACCAGC  
ATGCTGTATGCATGAACTGGCCCTGTAGATTTAGTAATTAGGACTGGGGGGAGCATCGCATTAGTAACTTTTTGCTT  
TGGCAAATTTGCTAATCGAGAGCGTCTTTCGGCGGACCGAGCCGTTGATGAAACAGCTGATGGGCGTCCGTTTTG  
TGAAGTATCGCCTGATATGCTTTTTGTGTTAATACCCGCTGTCATCGCGGCTTGTGTTTCTGTTGCGGCGTGGGTTT  
GCCATTGTAACGCTGGTGTCTGCATGCTGGCAGCGTGGGAATGGGGACAGCTTAGCGGTTTTACCACTCGTTGCGAGCG  
AGTATGTTGGCGGTGTTATGCGGGTATTGTTGGCGCTGATGCTTTTTCTGTTGCCGGAATACCCGAAATATTATC  
AACCGCTGTTGAAATCTCACTTTGGGCTTCCGCTGGGTTGGTGGATTGTCGCGCTATTGCTGGTGTGTTTTACCCAGGT  
TCCGCGCAATCTGGCGTAACTCTAAAACATTGCGCCTATTTTTGGCGTGCTAACCATTTGTTCCCTTCTTGGGGCAT  
GCTGGCGTTACGGGCTGGCACTATGACGAGAATCATTACAGTGGCGCAATATGGCTGCTCTATGTCATGATCCTGGTAT  
GGGGCGCTGACTCCGGCGCATATATGTTTGGCAAATGTTTGGTAAACATAAGCTGGCACCGAAGTTTTCTCCGGTAA  
ACCTGGCAAGGCTTTATCGGTGACTCGCTACTGCAGCGTAATCTCATGGGTTATGGCATGTGGGCGAATCTCGACGT  
CGTCCCGTCACTTACTCATTGCTCTATTGTCGACGCTTAGCCTCAGTGTCTGGCGATCTGACCGAGAGTATGTTTA  
AGCGTGAAGCAGGAATTAAGGACAGCGGTCATTTAATCCAGGACAGGTGGTATTTTAGATCGTATTGATAGCCTGACG  
GCTGCGGTACCGTCTTTGCTTGTGTTACTGGTATTACAGGACGCTTAAACGGAAGGTAATATGCTGAGTTTTCTC  
TGGGATTTGGCTTCGTTTCATCGTTGCACTGGGTGACTTATCACCGTGCATGAATTTGGTCATTTCTGGGTTGCCGGCG  
TTGTGGTGTTCGCGTTGAGCGTTTCTCAATAGGGTTTGGTAAGGCGCTTGGCGGCAACTGATAAGCTCGGCACCGAAT  
ATGTTATCGCCCTGATCCGTTGGGCGTTATGTCAAATGCTGGATGAGCGCGCAGAACCAGGTCGTTCCGGAACCTCCG  
CACCATGCCTTCAATAATAAATCTGTCCGCAACGAGCGGCGATTATTGCCGAGGTCCGTTGCAAACCTTCATTTTGC  
TATCTTTGCTACTGGCTGGTTTTTATTATTGGTGTGCTGGCGTACGTCCGTTGGTGGCGAAATAGCAGCCAATTCGA  
TAGCTGCGGAAGCACAATTTGACCCAGGTACGGAACAAAAGCCGTAGATGGTATCGAAACGCTGATTGGGATGCCGTC

CGTTTGCAGTTGGTCGATAAAATTGGCGATGAAAGCACCACCATTACAGTAGCGCCATTTGGCAGCGACCAACGGCGGGA  
TGTAAGACTCGATTTACGTCCTACTGGGCGTTTGGCCGATAAAGAAGATCCGGTATCTTCGCTGGGGATTCTCCTCGT  
GGCCGCAAATGAACCTGTACTGAAAATGTGCAGCCTAACTCGCGGCAAGCAAGGCAGGTTTGAAGCAGGCGACAGG  
ATCGTTAAAGTCGATGGTCAGCCCTAACCGCAGTGGGTGACCTTTGTGATGCTTGTCCGGGATAACCCGGGTAATCCTT  
AGCGTTAGAAATCGAAAGGCAGGGGAGTCCCTTGTCTTTGACATTAATCCCGGAGAGTAAACCCGGGTAATGGTAAAGCGA  
TTGGTTTTGTCCGATTGAGCCGAAAGTCATTCTTTGCCAGATGAGTATAAAGTTGTACGCCAGTATGGGCCGTTCAAC  
GCCATCGTCGAAGCCACGGACAAAACGTGGCAGCTGATGAAGCTGACGGTCAGTATGCTGGGAAAATTGATCACCGGTGA  
TGTGAAACTGAACAACCTCAGTGGGCCGATCTCTATCGCAAGGGGGCTGGGATGACAGCGGAACTCGGGGTTGTTTATT  
ACCTGCCGTTTCTTGGCCTATTAGCGTGAACCTAGGGATAATTAACCTGTTCCGTTGCCGTACTTACAGGGGGGCAT  
CTGCTGTTCTTGGCATGAAAAGATCAAGGGCGGACCGGTATCCGAGCGGGTTCAAGACTTTTGTATCGCATTGGCTC  
GATTCTGCTGGTGTGTTAATGGGGCTTGCACTTTTCAATGATTTCTCTCGTTATGAGAGTTAGTTAGGAAGAACGCAT  
AATAACGATGGCGATGAAAAAGTTGCTCATAGCGTCGCTGCTGTTAGCAGCGCCACCGTATACGGTGTGAAGGGTTCG  
TAGTGAAAGATATTCATTCGAAGGCCTCAGCGTGCCTGTTGGTGGCGCCCTCCTCAGTATGCCGGTGGCACAGGC  
GACACGGTTAATGATGAAGATATCAGTAATACCATTGCGCTCTGTTTGTACCGGCAACTTTGAGGATGTTGCGCTCT  
TCGTGATGGTGATACCCTTCTGGTTCAGTAAAAGAACGTCGACCTGCCAGCATTACTTTCTCCGGTAAACAAATCGG  
TGAAAGATGACATGCTGAAGCAAAACCTCGAGGCTTCTGGTGTGCGTGTGGGCAATCCCTCGATCGACCACCAATTGCC  
GATATCGAGAAAGGTCTGGAAGACTTCTACTACAGCGTCGGTAAATATAGCGCCAGCGTAAAGCTGTCTGTGACCCCGCT  
GCCGCGCAACCGTGTGACCTAAAACCTGGTGTCCAGGAAGGTGTGTCAGCTGAAATCCAGCAAATTAACATTGTTGGTA  
ACCATGCTTTACCACCGACGAACTGATCTCTATTCCAACCTGCGTGACGAAGTGCCGTGGTGAACCTGGTAGGCGAT  
CGTAAATACCAGAAACAGAACTGGCGGGCGACCTTGAACCTGCGCAGCTACTATCTGGATCGCGTTATGCCGTTT  
CAACATCGACTCTACCAGGTGAGTCTGACGCCAGATAAAAAAGGTATTTACGTACGGTGAACATCACCGAAGGCGATC  
AGTACAAGCTTTCTGGCGTTGAAGTGAGCGGCAACCTTGGCGGCACTCCGCTGAAATTGAGCAGCTGACTAAGATCGAG  
CCGGGTGAGCTGTATAACGGCACCAAAGTGACCAAGATGGAAGATGACATCAAAAAGCTTCTCGTGTGATGGTTATGC  
CTATCCGCGCTACAGTCGATGCCGAAATTAACGATGCCGACAAAACCGTAAATTACGTGTGAACGTTGATGCGGGTA  
ACCGTTTCTACGTGCGTAAGATCCGTTTTGAAGTAACGATACCTCGAAAGATGCCGCTCTGCTCGGAAATGCGTCAG  
ATGGAAGGTGCATGGCTGGGAGCGATCTGGTCGATCAGGGTAAGGAGCGTCTGAATCGTCTGGGCTTCTTTGAACTGT  
CGATACCGATACCAACGTGTTCCGGGTAGCCCGGACAGGTTGATGTCGTCTACAAGGTAAGAGCGCAACACCGGTA  
GCTTCAACTTTGGTATTGGTTACGGTACTGAAAGTGGCGTGAGCTTCCAGGCTGGTGTGACGAGGATAACTGGTTAGGT  
ACAGGTTATGCTGTTGGTATCAACGGGACAAAACGATTACCAGACCTATGCTGAACTGTGGTAACCAACCCGACTT  
CACCGTAGATGGCGTAAGCCTCGGTGGTCTCTTCTATAATGACTTCCAGGAGATGACGCCGACCTGTCCGACTATA  
CCAACAAGAGTTATGGTACAGAGCTGACGTTGGGCTTCCCATTAAACGAATATAACTCGCTGCGTGCAGGTTCTGGGTTAT  
GTACATAACTCCCTGTCCAACATGCAGCCTCAGGTTGCGATGTGGCGTTATCTGTACTCTATGGGTGAACATCCGAGCAC  
CTCTGATCAGGATAACAGCTTCAAACGGACGACTTACGTTCAACTATGGTTGGACCTATAACAAGCTTACCGTGGTT  
ACTTCCCGACAGATGGTTACAGTGTCAACCTGACCGGTAAAGTGACCATTCTGGATCGGATAACGAATACTACAAAGTG  
ACGTTAGACACGGCGACTTATGTGCCGATCGATGACGATCACAATGGGTTGTTCTGGGGCTACCCGCTGGGGTTATGG  
TGATGGTTTAGCGGCAAGAGATGCCGTTTACGAGAATCTATGCCGGTGGTTCCAGCACCGTGCCTGGCTTCCAGT  
CCAATACCATTGGTCCGAAAGCAGTTTACTTCCCGCATCAGGCCAGTAATTATGATCCGACTATGATTACGAATGTGCG  
ACTCAGGACGGCGGAAAGACCTGTGTAATCGGATGATGCTGAGGCGGTAACGCCATGGCGGTTGCCAGCCTCGAGTT  
CATCACCCGACGCCGTTTATTAGCGATAAGTATGCTAATCGTACTCGTACTTCTTCTTGGGATATGGTACCGTTT  
GGGATACAAACTGGGATTCAGCCAATATTCTGGATATCCGGACTATAGTGATCCAAGCAATATCCGATGTCTCGCGGT  
ATCGCATTACAATGGATGTCCCATTTGGGGCTTGGTGTCTCTACGCCAGCCGTTCAAAAAGTACGATGGAGACAA  
GGCAGAACAGTTCCAGTTTAAACATCGGTAACCTGGTAAAGTGTCTCCACAAAGGAATGTAGTGGTAGTGTAGCGATGA  
CTTTAGCGGATCAATATAAGATCGCCGGCCACGCAAAAGAACTGCACCCTCCGGTGCAAATGGGATGGTAAGGAGTTTAT  
TGTGAAAAAGTGGTTATTAGCTGCAGGCTCTCGTTTACACTGGCAACTTCTGCTCAGGCGGTGACAAAATTGCAATCG  
TCAACATGGGCAGCCTGTTCCAGCAGGTAGCGCAGAAAACCGGTGTTTCTAACACGCTGGAAAATGAGTTCAAAGGCCGT  
GCCAGCAGACTGCAGCGTATGGAACCGATCTGCAGGCTAAAATGAAAAAGCTGCAGTCCATGAAAGCGGGCAGCGATCG  
CACTAAGCTGGAAAAGACGTGATGGCTCAGCGCCAGACTTTTGTCTCAGAAAGCGCAGGCTTTTGGAGCAGGATCGCGCAC  
GTCGTTCCAACGAAGAACCGGCAAACTGGTTACTCGTATCCAGACTGCTGTGAAATCCGTTGCCAACAGCCAGGATATC  
GATCTGTTTGTGATGCAACGCCGTTGCTTACAACAGCAGCGATGTAAGACATCACTGCCGACTACTGAAACAGGT  
TAAATAAGTAATGCCTTCAATTCGACTGGCTGATTTAGCGCAGCAGTTGGATGCAGAACTACACGGTGTGGCGATATCG  
TCATCACCGCGGTTGCGTCCATGCAATCTGCACAAACAGGTACATTACGTTTATGGTTAACCCAAAATACCGTGAGCAT  
TTAGGCTTGTGCCAGGCGTCCGCGGTTGTCATGACCAGGACGATCTTCTTTCGCGAAAAGTGCCGCACTGGTAGTGAA  
GAATCCCTACTGACTTACGCGCGCATGGCGCAATTTTATAGTACCACGCCGAGCCCGCGAGAACATTGCACCCAGTG  
CGGTGATCGACGCGACGGCAAGCTGGGTAACAACGTATCGATTGGCGCTAACCGGGTATTGAGTCCGGCGTTGAACTG  
GGCGATAACGTGATTATCGGTGCCGTTGCTTCTGATAGGTAAAAACAGCAAAATCGGTGCAGGTTGCGCTCTCGGGCAA  
CGTAACCATTTACCATGAGATCCAGATCGGTGCAAAATGCTGATCCAGTCCGGAACAGTGGTAGGCGCAGACGGCTTTG

GTTATGCCAACGATCGTGGTAACTGGGTGAAGATCCACAGATTGGTCGCGTAATTATTGGCGATCGCGTGGAGATCGGT  
GCCTGCACAACCATCGATCGCGGCGCTGGATGACACTATTATTGGCAATGGCGTGATCATTGATAACCAGTGCCAGAT  
TGACATAACGTCGTGATTGGCGACAATACGGCGGTTGCCGGTGGCGTCATTATGGCGGGCAGCCTGAAAATTGGTCGTT  
ACTGCATGATCGGCGGAGCCAGCGTAATCAACGGGCATATGGAATATGCGACAAAGTGACGGTTACGGGCATGGGTATG  
GTGATGCGTCCATCACTGAACCAGGCGTCTATTCCCTCAGGCATTCCGCTGCAACCCAACAAAGTCTGGCGCAAACCGC  
TGCACTGGTGTGAACATTGATGACATGAGCAAGCGTCTGAAATCGCTTGAGCGCAAGGTTAATCAACAAGACTAACGTT  
CCATCTTTTGTTCGCCAAACCTTACGGCTGTCTATTCTTACGATTGCGGCAGGCCGTGTTATTATTGTCGTTTCTTAT  
ATTTTGACAGGAAGAGTATCTTGACTACTAACACTCATACTCTGCAGATTGAAGAGATTTTAGAATTCTGCCGACCGT  
TTCCCGTCTTACTGGTGGATCGCGTGTGGATTTTGAAGAAGTCGTTTTCTGCGCGCAGTAAAAATGTCTCTGTCAA  
TGAGCCATTCTTCAGGGCCATTTCCCTGGAAAACCGATTTTCCCGGGTGTGCTGATTCTGGAAGCAATGGCACAGGCAA  
CAGGTATTCTGGCGTTTAAAAGCGTAGGAAAACCTGGAACCGGGTGAAGTGTACTACTTTCGTTGGTATTGACGAAGCGCG  
TTCAAGCGCCCGTGTGCTGGCGATCAAAATGATCATGGAAGTCACTTTGAAAAACCGCCGCGGCTGACCCGTTT  
TAAAGGGTGTGCTGTGGTCGATGGTAAAGTAGTTTGCAGCAACGATGATGTGTGCTCGTAGCCGGGAGGCTGATACG  
TGATTGATAAATCCGCTTTGTGCATCAACCGCATTGTGGAAGAGGGCGGTCATTGGCGCAACGCACACATTGGT  
CCTTTTTGTATCGTTGGACCCCATGTGAAATTTGGTAGGCTACCGTACTGAAATCTCACGTTGTCGTAATGGTCATAC  
TAAAATTGGCCGATAATGAGATTTATCAGTTCCCTCCATCGCGGAAGTTAACAGGATCTGAAATATGCTGGCGAAC  
CGACCCGTGTGGAATCGCGCATCGTAACCGCATTCCGGAAGCGTCACCATTATCGTGGCACAGTCCAGGGCGGTGGA  
TTGACGAAGGTGGGCAGCGACAACCTACTGATGATCAACGCGCACATTGCGCACGATTGTACGGTAGGTAACCGCTGTAT  
TCTCGCAACAACGCAACGCTGGCGGGTACGATCGGTTGACGACTTCCGATCATCGCGGCATGACCGCAGTCCATC  
AGTTCTGCATCATTGGTGGCAGCTGATGGTTGGCGGCTGCTCCGGTGTGGCGCAGGACGTCCTCCTTATGTCATTGCG  
CAGGGTAACCACGCAACGCCGTTCCGTGTCAATATCGAAGGGTGAAGCGCCGCGGATTACGCGTGAGGCGATTACCGC  
TATCCGCAATGCGTATAAGCTGATTTATCGTAGCGTAAAACGCTCGATGAAGTGAACCGGAAATGCTGAACTGGCGG  
AAACATATCCGGAAGTGAAGCCTTACCATTCTTTGCAGCTCAACGCGCGGCTGATTGTTAATGACTGAACAGC  
GTCCATTAACGATTGCCCTGGTCGCCGAGAAACCTCCGGGATATCCTGGGGCCGGTTAATCCGCGCTCTGAAAGAA  
CATGTGCCAACGCCGCTTTGTTGGTGTGCCGGCCACGAATGACAGGCTGAAGGCTGCGAAGCCTGGTACGAAATGGA  
AGAACTGGCGGTGATGGCATTGTTGAAGTGTGCTCGTCTGCGTCTGCTTACTGCATATTCGTGCCGATCTGACAAAGC  
GTTTTGGCGAACTGAAGCCAGATGTTTTGTTGGTATTGATGCGCCTGACTTCAATATTACTTTGAAGTAACTCAA  
AAGCAGGGTATCAAACCATTCATTACGTCAGTCCGTCAGTCTGGCGTGGCGACAGAAACGTGTTTTAAAATAGGCAG  
AGCCACCGATCTGGTGTCCGATTTCTGCCTTTGAAAAAGCGTTTTATGACAAATACAACGTACCGTCCGCTTTATCG  
GTCAATACCATGGCTGATGCCATGCCATTAGATCCAGATAAAAAATGCCGCCGTGATGTGCTGGGGATCCCTCACGATGCC  
CACTGCCTGGCGTTGCTACCGGGGAGCCGTGGTGCAGAAGTTGAAATGCTTAGTGCCGATTTCTGAAAACGGCCAGCT  
TTTGGCCAGACATATCCGGATCTCGAAATCGTGGTCCACTGGTGAATGCCAAACGCCGCGAGCAGTTTGAACGCATCA  
AAGCTGAAGTCGCGCCAGACCTTTCAGTTCATTTGCTGGATGGATGGGCCGTGAGGCGATGGTCGCCAGCGATGCGGCG  
CTACTGGCGTCCGGTACGGCAGCCCTGGAGTGTATGCTGGCGAAATGCCGATGGTGGTGGGATATCGCATGAAGCCTTT  
TACCTTCTGGTTGGCGAAGCGGCTGGTAAAACCTGATTATGCTCTGCTGCCAAATCTGCTGGCGGAGAGAGTTAGTCA  
AAGAATTATTGAGGAAGAGTGTGAGCCGAAAAACCTGGCTGCGGCGCTGTTACCGCTGTTGGCGAACGGGAAAACAGC  
CACGCGATGCACGATACCTTCCGTGAAGTGCATCAGCAGATCCGCTGCAATGCCGATGAGCAGGCGGCACAAGCCGTTCT  
GGAGTTAGCACAATGATCGAATTTGTTATCCGCACACGAGCTGGTTGCGGGTGTGGATGAAGTCGGACGCGGGCCGTT  
AGTTGGCGCGTCTCACCCTGCGGTGATCCTTGACCGCGCGCCGATTGCGGGTGAATGATTCGAAAAAGCTGA  
GCGAAAAACCCGCTGTGGCCTCTATGAAGAGATCAAAGAGAAAGCGTTGAGTGGAGTCTGGGCCCGCGGAACCCAC  
GAAATCGACGAGCTGAACATTTCTTATGCGACCATGCTGGCGATGCAGCTGCCGTGCTGGGCTGCATATTTGCGCCGGA  
ATATGTGTTGATTGATGGTAACCGCTGCCGAAATACCGATGCCCTGCGATGGCTGTGGTGAAGGCGATAGCCGCTAC  
CGGAAATCAGTGCCGCTATCCTGGCGAAAGTGACGCGTGACGCCGAAATGGCGGCGCTGGATATTGTTTTCCCGCAA  
TATGGTTTTGCCAACACAAAGGTACCCAACCGCTTTTATCTGGAAAAACTGGCTGAACACGGCGGACCGAACACCA  
TCGGCGCAGCTTTGGCCTGTCAAACGCGCACTGGGACTTGCCTGCTGATTCTTGTGTCGAGATTAAGTAAACCGGAATC  
TGAAGATGTCTGAACCACGTTTCTGACACCTGCGGGTGACAGCGACTACTCGATGATCGATGGCCTGGCCAAAACCGCA  
CCGTTGGTAAAAAGGGCGGCGGTTGGGTATGCCAGCACTGGCGATCACCGATTTACCAACCTTTGTTGGTCTGGTGA  
GTTCTACGGAGCGGACATGGCGCAGGATTAAGCTATCGTGGGGCAGATTTAACGTCAGTGGACCTGCTGGGTG  
ATGAGTTAACCACTGACGGTACTGGCGGCAACAATACCGCTATCAGAATCTGACGTTGCTGATCTCAAAGCGTAT  
CAGCGCGGATACGGTCCCGCGGCGGATCATCGATCGGACTGGCTTATCGAATTAACGAAGGGTTGATCCTTCTTC  
CGCGGACGATGGCGACGTCGGACGAGTCTTTTGCCTGGTAAACAGCGCGTGGTAGATGAGTGTGTCGCTTTTATG  
AAGAACAATCCCGATCGTATTTTCTCGAGCTGATCCGACCGCGAGCCGATGAAGAAAGCTATCTGCACGCGGCG  
GTGGAATGGCGGAAGCGCGGTTTTGCCGCTGTGGCGACCAACGACGTGCGCTTTATCGACAGCAGCGACTTTGACGC  
ACACGAAATCCGCGTCCGATCCACGACGGCTTTACCTCGACGATCCTAAACGCCCGGTAATCTGCCGCGAGCAAT  
ATATGCGTAGCGAAGAGGAGATGTGTGAGCTGTTTCCGACATCCCCGAAGCCCTTCCAACACCGTTGAGATCGCCAA  
CGCTGTAACGTAACCGTGGCTTGGTGAATACTTCTGCGCAGTTCCCGACCGGGGACATGAGCACCGAAGATTATCT

GGTCAAGCGTGCAAAGAGGGCCTGGAAGAGCGTCTGGCCTTTTTATTCCCTGATGAGGAAGAACGTCTTAAGCGCCGCC  
CGGAATATGACGAACGTCTGGAGACTGAACTTCAGTGTATCAACCAGATGGGCTTCCCGGGCTACTTCTCATCGTTATG  
GAATTTATCCAGTGGTCAAAGATAACGGCGTACCGGTAGGGCCAGGCCGTGGCTCCGGTGGGGTCACTGGTGGCCCTA  
CGCGCTGAAAATCACCGACTCGATCCGCTGGAATTTGACCTGCTGTTTCAACGTTTCTTAACCCGGAACGTGTCTCCA  
TGCCTGACTTCGACGTTGACTTCTGTATGGAGAAACGCGATCAGTGTATCGAGCACGTAGCCGACATGTACGGTCTGTAT  
GCGGTATCGCAGATCATCACCTTCGGTACAATGGCGCGCAAAGCGGTGATCCGCGACGTAGGCCGCGTGTGGGGCATCC  
GTACGGCTTTGTGATCGTATCTCGAACTGATCCCGCCGATCCGGGGATGACGCTGGCGAAAGCGTTTGAAGCCGAGC  
CGCAGCTGCCGGAATCTACGAAGCGGATGAAGAAGTTAAGGCGCTGATCGACATGGCGCGCAAACCTGGAAGGGGTACC  
CGTAACGCCGGTAAGCACGCCGGTGGGGTGGTTATCGCGCCGACAAAATTACCGATTTTGGCCGCTTTACTGCGATGA  
AGAGGGCAAACATCCGGTCAACCAGTTTGATAAAAGCGACGTTGAATACGCCGGACTGGTGAAGTTCGACTTCTTGGTT  
TGCGTACGCTCACCATCATCAACTGGGCGCTGGAGATGATCAACAAGCGCGGGCGAAGAATGGCGAGCCCGCGTGGAT  
ATCGCTGCGATCCCGTGGATGATAAGAAAAGCTTCGACATGCTGCAACGCTCGGAAACCAGCGCGTATTCCAGCTTGA  
ATCGCGCGGATGAAGGACTGATCAAGCGTCTACAACCTGACTGCTTGAAGATATGATCGCCCTAGTGGCACTGTCC  
GCCCCGTCGTTGCAATCAGGGATGGTGGATAACTTTATCGACCGTAAACATGGTCTGGAAGAGATCTCCTATCCGGAC  
GTACAGTGGCAGCATGAAACCGTAAACCGTACTGGAGCGCAACCTACGGCATTATCCTGTATCAGGAACAGGTGATGCA  
GATTGCGCAGTGCTTTCTGGTTATACCCTCGTGGCGCGGATATGCTGCGTCTGCGATGGGTAAAGAAAAGCCGGAAG  
AGATGGCTAAGCAACGTTCTGTATTTGCTGAAGGTGAGAAAAGAACGGAATCAACGCTGAACTGGCGATTGAAAATCTTC  
GACCTGGTGGAGAAATTCGTGTTACGGATTTAACAAATCGCACTCTGCGGCCTATGCTTTGGTGTATATCAAACGTT  
ATGGCTGAAAGCGCACTATCCTGCGGAGTTTATGGCGCGGTAATGACCGCCGATATGGACAACACCGAGAAGGTGGTGG  
GTCTGGTGGATGAGTGTGGCGGATGGGGCTGAAAATCCTGCCACCAGATATAAACTCCGGTCTTTACCATTTCCACGTC  
AACGACGACGGCGAAATCGTGTATGGTATTGGCGCGATCAAAGGGTTCGGTGAAGTCCGATTGAGGCCATCATCGAAGC  
CCGTAATAAAGCGGCTACTTCCGCGAACTGTTTGTCTCTGCGCCGATCCGACACCAAAAAGTTGAACCGTCCGCTGC  
TGAAAAACTGATCATGTCCGGGCGTTTACCCTCTGGCCACATCGCGCAGCGTGTGAACCTGCTGGCGATGCG  
TTAAAAGCGGCAGATCAACACGCGAAAGCGGAAGCTATCGGTACGGCCGATATGTTCCGGCTGCTGGCCGAAGAGCCGGA  
ACAAATTGAACAATCCTACGCCAGCTGCCAACCGTGGCCGGAGCAGGTGGTATTAGATGGGAACGTGAAACGTTAGGCC  
TGTACCTGACCGACACCCTATCAACCAGTATTTAAAAGAGATTGAGCGTTATGTCGGAGCGTAAGGTGAAAGACATG  
CACCCGACAGAACGTGGTAAAGTCATCACGGCTGCGGGGCTCGTTGTTGCCGCGGGTATGGTCACCAAGCGCGGCAA  
TCGTATCGGTATCTGCACGCTGGATGACCGTTCCGGCGGGCTGGAAGTATGTTGTTTACTGACGCCCTGGATAAATACC  
AGCAATTGCTGAAAAAGACCGCATACTTATCGTCAGCGGACAGTCACTTTGATGACTTCAGCGGTGGCTTAAAATG  
ACCGCTCGCGAAGTATGGATATTGACGAAGCCCGGAAAAATATGCTCGCGGGCTTGGTATCTCGCTGACGGACAGGCA  
AATTGATGACCAGCTTTTAAACCGACTCCGTCAGTCTCTGGAACCCACCGCTCTGGGACAATTCCAGTACATCTCTACT  
ATCAGAGGGCGGATGACGCGCGCGGTTGCGTTTTGGCGCGACGTGGCGTGTCTCTCCGAGCGATCGTTTATTAACGAT  
CTCCGTGGCCTCATTGGTTCGGAGCAGGTGGAACGGAGTTTACTAATACAGGAATACTATGAGTCTGAATTTCTTTGA  
TTTTGAACAGCCGATTGCAGAGCTGGAAGCGAAAATCGATTCTCTGACTGCGGTTAGCCGTGAGGATGAGAACTGGATA  
TTAACATCGATGAAGAAGTCATCGTCTGCGTGA AAAAAGCGTAGAACTGACACGTA AAAATCTTCGCCGATCTCGGTGCA  
TGGCAGATTGCGCAACTGGCAGCCATCCACAGCGTCTTATACCCTGGATTACGTTCCGCTGGCATTGATGAATTTGA  
CGAACTGGCTGGCGACCGCGGTATGCAGACGATAAAGCTATCGTGGTGGTATCGCCGCTCTCGATGGTCTCGGTGA  
TGATCATTGGTCTCAAAAAGGTCTGAAACCAAAGAAAAAATTCGCCGTAACTTTGGTATGCCAGCGCCAGAAGGTTAC  
CGAAAGCATGCGTCTGATGCAAAATGGCTGAACCGTTAAGATGCCTATCATCACCTTTATCGACACCCCGGGCGTTA  
TCCTGGCGTGGGCGCAGAAGAGCGTGGTCACTGAAAGCATTGACGCAACCTGCGTGA AAATGTCTCGCTCGGGCTAC  
CGTAGTTTGTACGTTTATCGGTGAAGGTGGTTCTGGCGGTGCGCTGGCGATTGGCGTGGGCGATAAAGTGAATATGCTG  
CAATACAGCACCTATTCCGTTATCTCGCCGGAAGGTTGTGCGTCCATTCTGTGGAAGAGCGCCGACAAAGCGCCGCTGGC  
GGCTGAAGCGATGGGTATCATTGCTCCGCGTCTGAAAGAACTGAAACTGATCGACTCCATCATCCCGGAACCACTGGGTG  
GTGCTCACCGTAACCCGGAAGCGATGGCGGCATCGTTGAAAGCGCAACTGCTGGCGGATCTGGCCGATCTCGACGTGTTA  
AGCACTGAAGATTTAAAAAATCGTCTGTTATCAGCGCCTGATGAGTACGCTACGCTAATTCGAAAAGTTCTGAAAA  
GGGTCACTTCGGTGGCCCTTTTTATCGCCACGGTTTGGAGCGGCTATGATTAAGGAAGGATTTTCCAGGAGGAACACAT  
GAACATCATTGCCATTATGGGACCGCATGGCGTCTTTTATAAAGATGAGCCCATCAAAGA ACTGGAGTCCGGCTGGTGG  
CGCAAGGCTTTCAGATTATCTGGCCACAAAACAGCGTTGATTTGCTGAAATTTATCGAGCATAACCCCTCGAATTTGCGGC  
GTGATTTTTGACTGGGATGAGTACAGTCTCGATTTATGATGCGATATCAATCAGCTTAATGAATATCTCCGCTTTATGC  
CTTCATCAACACCCACTCGACGATGGATGTCAGCGTGCAGGATATGCGGATGGCGCTCTGGTTTTTTGAATATGCGCTGG  
GGCAGGCGGAAGATATCGCCATTCTGATGCGTCACTACCGACGAATATCTTGATAACATTACACCGCCGTTACGAAA  
GCCTTGTTTACCTACGTCAAAGAGCGGAAGTACACCTTTTGTACGCCGGGCATATGGGCGCACCGCATATCAAAAAG  
CCCGGTTGGCTGTCTGTTTTATGATTTTTTGGCGGGAATACTCTTAAGGCTGATGCTCTATTTCCGGTACCGAGCTTG  
GTTGCTTGGCTCGACCACCCGGCCACACCTGGAAGCGGAAGAGTACATCGCGCGGACTTTTGGCGCGGAACAGAGTTAT  
ATCGTTACCAACGGAACATCGACGTCGAACAAAATTGTGGTATGTACGCCGCCATCCGGCAGTACGCTGTTGATCGA  
CCGCAATTGTCATAAATCGCTGGCGCATCTGTTGATGATGAACGATGATGTCAGTCCAGTCTGGCTGAAACCGACGCGTAATG

CGTTGGGGATTCTTGGTGGGATCCCGCGCGTGAATTTACTCGCGACAGCATCGAAGAGAAAGTCGCTGCTACCACGCAA  
GCACAATGGCCGTTTCATGCGGTGATCACCAACTCCACCTATGATGGCTTCTACAACACCGACTGGATCAAACAGAC  
GCTGGATGTCCCGTCGATCACTTCGATTCTGCCTGGGTGCCGTACACCCATTTTCATCCGATCTACCAGGGTAAAAGTG  
GTATGAGCGGCGAGCGTGTTCGCGGAAAAGTGATCTTCGAAACGCAATCGACCCACAAAATGCTGGCGGCGTTATCGCAG  
GCTTCGCTGATCCACATTAAGGCGAGTATGACGAAGAGGCCCTTAAACGAAGCCTTTATGATGCATACCACACCTCGCC  
CAGTTATCCCATTGTTGCTTCGTTGAGACGGCGGCGGCGATGCTGCGTGGTAATCCGGGCAAACGGCTGATTAACCGTT  
CAGTAGAACGAGCTCTGCATTTTCGAAAAGAGGTCCAGCGGCTGCGGGAAGAGTCTGACGGTTGGTTTTTCGATATCTGG  
CAACCGCCGACGGTGGATGAAGCCGAATGCTGGCCGTTGCGCCTGGCGAACAGTGGCACGGCTTTAACGATGCGGATGC  
CGATCATATGTTTCTCGATCCGTTAAAGTCACTATTTTGACACCGGGGATGGACGAGCAGGGCAATATGAGCGAGGAGG  
GGATCCCGGCGGCGCTGGTAGCAAAATTCCTCGACGAACGTGGGATCGTAGTAGAGAAAACCGGCCCTTATAACCTGCTG  
TTTCTCTTTAGTATTGGCATCGATAAAACCAAAGCAATGGGATTATTGCGTGGGTTGACGGAATCAAACGCTTTACGA  
TCTCAACCTGCGGATCAAAAATATGCTACCCGATCTCTATGCAGAAGATCCCGATTTCTACCGCAATATGCGTATTGAGG  
ATCTGGCACAAGGGATCCATAAGCTGATTCGTAACACGATCTTCCCGTTTGGTGGTGGCGGCGATTGATACTTTGCCG  
GAGATGATCATGACGCCACATCAGGCATGGCAACGCAAAATTAAGGCGAAGTAGAAAACCTTGGCTGGAACAACCTGGT  
CGGTAGAGTATCGGCAAATATGATCCTGCCTTATCCACCGGGCTACCGCTGTTGATGCCTGGAGAAATGCTGACCAAG  
AGAGCCGACAGTACTCGATTTTCTACTGATGCTTTTCCGTGCGGCAACATTACCCCGTTTTGAAACGGATATTCAC  
GGCGGAAAACAGGACGAAGACGGCGTTTACCCTGACGAGTCTAAAAATGGCGGGATAACTTGCAGAGCGGCTTCCGG  
GCGAGTAACGTGCTGTTAACAAATAAAGGAGACGTTATGCTGGGTTTAAACAGGTTACCATATTGCGATTATTGCGAC  
GGATTATGCGGTGAGCAAAGCTTTCTACTGCGATATTCTTGGTTTACGCTGCAAAGCGAAGTCTATCGGAAAGCGCGCG  
ACTCATGAAAAGGGGATTTGGCGTTAATGGGCAATATGTGATTGAGTTTTCTCATTTCCGTTCCCGCCGGAACGACCC  
AGCCGACCGGAAGCTTGGGTCTGCGTCATCTGGCTTTAGCGTTGATGACATCGATGCGGCGAGTGGCGCACCTTGAAG  
CCATAACGTGAAGTGTGAAACCATCCGTGTCGATCCATACCGCAAAAACGTTACCTTCTTTAACGATCCGGACGGGC  
TGCCGTTGAACTGTATGAGCAGTAAGGCTTGTATCGCCGATTTGCCCGTAACGTGCCGGCATTGCTACTGTA AAA  
TCGCACCATCATGACACTCACGCTCAATAGACAACCTTACCTCACGCCAGATTCTGGTGGCCTTTAGCGGCGGGCTT  
ACTCCACCGTTCTGCTGCATCAGTTGGTGCAGTGGCGGACGGAAAATCCGGGTGCTGCTCTGCGCGCTATTGATGTCAT  
CACGGTTTAAAGTGCCAAATGCCGATGCCGTTACGATTGCGAAAACGCTGCAACAGTGGCAGGTGCCGCTGGTGGT  
CGAACCGTACAACCTTGCGAAGAAGGACTGGGCATTGAGGCCAGCGCGGCGAGGCATATCAGGCATTTGCCCGCA  
CCTTGTGCCCGTGAAGTCTGGTACCAGCGCAACATCTCGACGATCAATGTGAAACCTTTCTGCTGGCGCTAAAACGC  
GGCAGTGGCCCTGCCGGGCTTTCGGCTATGGCGGAAGTCTCGGAGTTTCCCGGAACGCGGCTTATTCCCGCTTGGTCCG  
CCGACGCGGGGGAACTGGTGCAGTGGCGCGTCACTATGATTTACGCTGGATTGAAGACGAAAGTAATCAGGACGACT  
CATACGATCGTAACTTTCTGCGCTGCGCGTAGTGCCGTTATTGCAGCAGCGTTGGCCGATTTTCCGGAAGCAACGGCC  
CGCAGCGCCGCACTTTGTGCTGAACAAGAGAGCCTGCTGGATGAACTGCTGGCAGATGATTAGCACACTGTCAATCGCC  
GCAGGGGACGCTGCAGATTGTGCCAATGCTGGCGATGAGTATGCCCCGCGCGGCGATTATCCGCGCTGGCTGGCAG  
GGCAGAATGCACCGATGCCTTCCCGGACGCGTTGGTGAAGTCTGGCAGGAAGTGGCGCTGGCGGGGAAGATGCCTCA  
CCCTGTTTACGTTTGGGCGGTTTGAATCCGACGCTATCAGTCGCAACTGTGGTGGATTAATCCGTACCGGGCAAAG  
CGAAAACATTTGCCGTGGCAGACGTGGCTTCAACCGCTGGAATTACCGCGGGGCTGGGAAGTGTACAGCTTAATGCGG  
GAGGCGATTTCCCTCCGCTGCAGACGAAGCGTCAAGCTGCGTTTCAAAGCGCCAGGATTGCTGCATATTGTCGGG  
CGTAACGGCGGACGTAAGCTAAAGAAAATCTGGCAAGAGCTGGCGTGGCGCTGGCTACGTGACACCACGCCACTGCT  
GTTTTGTCTGGCAGAAAACGCTTAAAGTAAAGGAAAGCCGGAATAAGACGCATCAAACGTCGATCCGGCGAAAGTCAATCA  
GGATTCCGTTACCACCACCGTACCATTTCGGGTGGCTAAAGCTGGTAATTTTATCCAGACGACGCTCGCGGGTTTCGC  
CAGCGGCTCGACGACCAGTACTCCACATTTTTGCGGAGACTAAATCACTGGCTTTTGCCTGCAATTTTTCGCCATCT  
TTCAGCTCAAGTGTGACGATTAATGATGCTGGCAGGCGAGCTCAAGATTATCGTAATCATCACAATTGATTGGTTGATA  
CGTATCATTATTGACATAATCGCTCACAGTAAGTTTCCGCGAGCGTATGCTGCTTTTTCCCTGACAGCCTCAGAAAGG  
GCGTCGTCGGCAGCCATTTCACTCAGCACTTTCAAACGCAGCCAGCGCTCCGGAACGATCCTAAGTCTCCGCTGGC  
GATTTCCGCTACCGTTGCGTATTAACCTACAATATTTTTCCACATGCCCTCCTGTCAGCACTCTGACTTAACCGTGG  
TGCAAGTCTAAGCCTACGAAGATAAATCTGTTTCGCAAGGTGACTATAACCACACTCATTTCTGCAATATCAGCGCCGCA  
ACTGCACGATTCCGTTACAATGGCTCCTGATTCGAAAGGAGTTTTCTTATGGCGCTTAAAGCGACAATTTATAAAGCG  
ACGGTTAATGTGGCGATCTCGACCGCAACAGTTTCTCGATGCCTCTGACGCTGGCGCCATCCTCAGAAACCCA  
GGAGCGTATGATGCTGCGCTTGTGGCGTGGCTGAAATATGCTGATGAACGCTGCAATTTACCGTGGTTTGTGTGCCG  
ATGATGAGCCGGAAGCGTGGCTGCGTAACGATCACCTGGGCATTGATTTGGGATTGAGCTGGGGCTGCCGATGAGCGG  
CGGATTAAGAAAGCCTGCACCCAGGCCGAGAAGTGGCGCTGTTACCTATAATAGTCGGGCGGCGCAAATCTGGTGGCA  
GCAAAATCAGAGCAAATGTGTGAGTTTGCCAATTTTCCGCTGGTATCTGGACGATGAACAACCTGGCGAAAGTAAGCG  
CCTTTGCCGATCGTACCATGACGCTGCAGGCAACGATTCAGGATGGCGTATCTGGTTATCCGATGATAAGAATAATCTG  
GAAGTGAACCTAACCGCCTGGCAACAACCTTCATGATTGTGATTTCCCGACATGTTGCTATTTCCGATGGTGGAGCTTGG  
ATCACCGCCATTCTGTGCGCAGGGCGCGGGCGGGCAGCATGTTAATAAGACCTCAACGGCTATTCTGCGTTTTGACAT



TCGGGCGTCCAGCCTGCCAGAGTATTACAAAGAGCGTCTGCTCGCCGCCAGCCATCATTTGATCAGCAGTGATGGCGTGA  
TTGTCATTAAGGCACAGGAATACCGCAGTCAGGAACGAACCGCGAAGCAGCTCTGGCCCCGCTGGTGGCTATGATTA  
GAATTAACAACAGAAAAAAGCCCGACGCCACCGCGGCCACCGTGCATCGAAAGAGCGCAGGCTGGCATCGAAAGC  
ACAAAAATCAAGCGTGAAGCGGATGCGCGCAAAGTGCAGCGGTTCGGGAATAAAAAGAAGGAATGGATGGTGAAAAA  
GCGATAGTGACAGCGATGGCTGTAATCAGCCTCTTTACTCTGATGGGATGTAATAATCGGGCCGAAGTCGATACGCTTC  
TCCGGCGCAGGCTGCCAACTGAAACCGATGCCGCAAAGTTGGCGCGCGTGTGCCGTGTGCCGATTGCGAAGGAATCG  
AAACCTCTCTGTTCTCGAAAAAGACGGAACATGGGTGATGAATGAGCGTTATCTCGGTGCTCGTGAAGAACCTTCTCC  
TTCGCTTCTACGGTACATGGGCGCAACCGCTGACAAGCTGGTATTAACCGACAGCAAAGGTGAAAAGTCATATTATCG  
GGCGAAAGGCGATGCGCTGGAGATGCTCGATCGTGAAGGCAATCCGATTGAATCGCAGTTCACTATACTGCTGGAAGCGG  
CACAAATCCAGTTTACCTATGACGCCGATGACCTGCGGGGCATGATTTTTATATGGCTGATGCGGCGACCTTCACTGAT  
TGCGCGACCGGAAAACGTTTTCATGGTAGCGAATAACGCAGAGCTGGAGCGTAGCTACCTGGCTGCGCGCGGTACAGTGA  
AAAACCGGTGTTACTGTGAGTAGAAGTCACTTTACGCTTGAGGGTAATCCGGATACCGGTGCGCCGACTAAAGTATTGG  
CACCCGATACGGCAGGAAAATTTTACCCCAACCAGGATTGCAGTAGTTTGGGGCAGTAACCCGTTTGGAGACAGAAACAA  
ACGCAAAACAGGCCAGAAGGATATATTTCAACATTTTGAATTTGCAGTTTTTTGTAGGCCGATAAAGCGTTTTACGCCG  
CATCCGGCAATGGTGTCAACGCCTGATGCGAGCTGGCGCTTATCATGCCTACAACCCCTCATACTTAAGGCGG  
GATAAGGCATTTACTTTATCACCGGGTCAAACCAACAAAGCGACCCGCTTGATATAAATCCCAGGCTTCAGGTGCCCAA  
CATACTGTAACGCGTTTTCTGGCTTAAACGCAGAGACATACCAATACGCATATGCATCAGATCGGCAGGCTAATCCAG  
CCCGATTGCGCCAGTGTAAGTGATGCCCGCTTTGGCAAAGGCATCCGTGACAAATTCCGAACAAAACACGACTTTTT  
GTCTCTTTCGCCACACTGCTTAACTGCGCTTTGCGCAGGCGCTGACGCACTGTTGGCGAAAATCCTCGGAGAACGGAT  
TCAGTGAGCACATCTGGCGAGTCACCATAAAGGGAATAAATTCGACAATGCCGCGATAGTTATAACCGCTATCTTTGATT  
TTATTGGCAAACGCGGTGATATCTGTGGCTTGTGCGGGTAAGATCCGGGACTCGTAAGACGAAAAGCTTATCACTATG  
CTTCATCGCTTTTTAAGGGAACGATCTGGACGCCAGCGCTGTCGCTTTCGCAACGTTATTATCACCCAGAAAGATTG  
CAACGTGACTCACAGAGGAAGTGTGAAGACGCGGATTCCAAATGAGGTTACCCCAAGGCTTGAGGAGAACGAAATCG  
CCGGTTTTGAGATCAGGTGCCGTTATTTCTTTTATTGATTGTTCCGGTAAAGAGCTTTGATGCTGGAATTTGACAGCCCA  
TGTTTTGCTCGCATCTACTGCTGTGGCTGATGGGTCTGGCTGGCTGATATCAACGGTACAAGCCGAAAGTAAAGAA  
AGCTGGGGAGAAACAGGGCGCAGTACGCCTTTGGTTTTATCCATTTTATACAATCCATGTAAGGAGGGCCCTGAAATTC  
AGGACCCTTTCTGGCATCAGCCTTTAATCTGTTTACCAGATATTCGACGATGTCACCAGTCTTAATTAAGTGTTCG  
CCGTTGCGACGATATTTATATTCGATATCGTCGTTGTCGAGGTTACGGTCCGCCAGCACAATAGTGTGCGGAATACCGAT  
CAGTTCCATATCAGCAAACATCACGCCGGACGCTCTTTGCGGTATCCAGCAGCACTTCGATACCTTGTGCACGCAGTT  
CGCTGTACAGTTTCTCAGCAAGCTCTTGTACGCGGAAGGATTTGTGCATGTTTCATCGGCAGAAATCGCCACCTGGAACGGC  
GGATAGCGTCAGGCCATACGATGCCTCGTTCGTGATGTTCTGTCTCAATCGCCGAGCTACCACACGCGTTACCCCGAT  
ACCGTAGCAACCCATCGTCAGGATTTGGTTACGGCCATCTTACCCTGTACGGAGGCTTTCACTGCTTCGGAGTACTTGG  
TACCCAGCTGGAAGATGTGACCAACTTCGATACCACGTTTGTACAGCAGCCTACCCTGGCCATCCGGGCTGGATCGCCA  
GCCACCACGTTACGGATATCTGCAACTTCCGGGGTAGCGACATCGCGATCCCAGTTGATGCCGAAGTAGTGTTTACCATC  
GATGTTAGCACAGCAGCGAAATCACTCATCGCCGCAACGGTACGGTCAATCACCACCGGAATCGGCATGTTTACGGAC  
CCAGTGAACCCGACCGGCTTAAACCACGGCACGAATTTCTTCTCGGTGCGGAAAGTACAGCGGGCTTCAACCTGCGGC  
AGTTTTCTGCTTAACTTCGTTCACTCGTGTATCACCAGCAGCAGCAGCGCAACCTGCGGGAAGCTGCTGCCTTCAAC  
CGCTTAAACCAGCAGAGTCTTAAACCGTTTTCTCAATCGGCAGATGAACTGTTCAACCAGTTCGCGATGGTTTTCGGT  
TCGGCGTATCAACCAGCAGTCTTAAACCGTTAGCAGCAGCGCGGTTCTTTGCGCGGATAGCTTTCGCGAGTTCAATG  
TTCGCTGATAGTCAGAGGTGTCGAGAAAGACACATCGTCTTACCAGCTGCGCCAGCACCTGGAATTCGTGAGAGGC  
GCTGCCCGGATAGAACCGGTGTCGGCTTGTACGGCGCGGAAATCCAGCCCCATGCGGCTGAAGATTTGCTGTAGGCCG  
CATAATTGCATCGTAGTTTTCTGACGGGATTCTGAGAAGTATGGAAGAGTAAGCATCTTTCATCAGGAATTCGCGG  
GAACGCATGACGCCGAAACGCGGACGCACTTCGTCGCGGAACCTGGTCTGGATCTGATAGAAGTTCAGCGGCAGCTGTTT  
GTAAGAGCTAAGCTGTTACGAATCAGGTCAGTGATAAATCTTTCATGAGTTGGGCGAGTACGAACGGACGCTCGCCAC  
GGTCAACAAAACGAGCAGTTCCGGACCGTACTGTTCCCAACGACCACTCTTTCGCAAAATCGGCTGGCTGAACCACC  
GGCATCGACACCTCGATCGCACCGGCTTGTTCATCTTTCACGCACGATGTTTTGACTTTTTTTCAGAACGCGCACGCC  
GGTCCGCGAGCCAGGATATAACCCGGAGGCCAGCTTGGGATCATCCGGCGCGCAGCATCAGCTGATGGCTGATCACCT  
CGGCGTCCGCGAGGTGCTCCTTGGAGAGTGGAGAGCAGGATTGGCTAGTACGCATGTTGTTACGGTTCAGTTGGAAGGT  
AGAACAGGCTCAAGGCGAGCCTGGGACAAAAAAGTATTTAGTTTACCAGTGCAAAAGAAATGTCAAAAGAGAAGGGC  
GTGAATTTAACCGGTTCCAGCGCAAAGACTTCAAACCTGCGTGGTGACGCGCCAGCGAACGTTAAAATCATGTAGCC  
AGACGGCATAGTTTTGCCGTTTTCTCACCTTTACGATAGGCCGGGCGCGGTCTGCGCCAGTACTTCGCGGATAAAC  
AGCGTTAACTGCGGATAACGCTTCTCCAGCGTCAAAGCTGCTTTTCGACCTCTGCGGTAACCTCACCGCCATCTCTGC  
AGCTGGCGCACTTTGCGCATAGCTGGCACTGGCATCGGAAGCGATTTCGGCAAAGGGGAGATACGGTTTTGATATCCACTA  
CCGGCGTACCATCGACCAGATCCAGACTGCCGAGCTTCAGAATCACGCTGTCTTATGGCAAACAACCTCTTTCAGCTCT  
ACCAGCGACATGCCAATTGGGTTAGGGCGGAAAGTAGAGCGTGTTCGAAAACCCCATCTGGCGTTACCGCGAGGGC  
CGGTGGACGCACAGTCGGACGCCAGCCGCTTCCATCGTTGATGAAAGACGAAAAGGATCCATAAATGGCTGAACGCTT

CCAGGCCGGAACGGCGTCCGCTGGTTGTAGGGAGCAATGAGATGCAGTTCGCCGTTGGCGCTTTTTACCAGACCTGGC  
TGCGCGGAACGGCGAATTTTTCTTTATAGGGCGAGCGAATAACGCCTATTTGCTCGAACTGAAAACCTGCTATTTCCGC  
GTAATGTTAAGCGCAGAACCATACATACAGCCTGACGATAGCAGCTGGCGTACCGCTGGTACTTCGACGCTATGCAG  
TAATACAGCATTGGCTTTTCAATTTAGAGCGCTTGATTTGCATCCGCTTACGTGCGGTTGGAATGCTCGGCGGAGAGTCCT  
GATTAGAGGCTGGCAAGAGTCGCCACTGACTTCACCGAGATCGCGGAACGGTTTGGCGACTAATTTCTCTGCATTGGTA  
TAAATTCGGACCGGCGTGGCGCGGGCGCTTTCCGTTTTGCAGGCTCCGCTTTCCGCTGGGGTGCAGTGTCTTGAACGGG  
TTCGACAGGGGATCTGCTTAACATGGAACAGCCGCTTAGCATGAGTGCTACTAAACAGATCGGTAAAGCAGCATAGTAT  
TTCCTCAATGTATGATCAAAACGTCAATATTGAATCAGGAGCTTGTAAAAATGACAAGACGGGCAAGCGCCCGTCTGAA  
TGATATTACAAATTGTGGAACAGCCTAAAAATTACCAGCCTTTAACAGCTCCGCCGTTAAACACTTTGTTTGTGCTTC  
GTAACTTCGTGACTGATAAGCCTGGACGAATTTCTCACGTTCTCGCGCTTTGTTATCTTCACGCGTCACGATCA  
GGTTTACGTACGGGACTCTTTATCTTCAACAAAGATACCGTCTTTCCGCGGAGTCAGGCCAATCTGGCTGGCATAGGTG  
GTATTGATAACTGCCAGAGCAGATTTGCCGCTCGTCCAGAGAACCGGCGAGTTGCGGTGCTTCCAGTTCAACAATTTTCCAG  
ATTTTTGGGGTCTCAACAACATCAAGAACGGTCGGCAGCAGGCCAACGCCATCTTTAGTTTGCATCAAGCCACTTTTT  
GCAGCAGCAGTGAACGACCAAGGTTAGTTGGTCTTTGGCAGCGCAACCTGCGAACCATCTGCAGTTCATCCAGT  
GATTTGATTTCTTGGAGTAACAGCAATCGGATAAAACAAAGTGTTCCTACTGCGACCACTTTGTAGCCAGCATCTTT  
CAGTTGCTGATCAAGGTACGGTTTATGCTGGAAGGCTTGGCGTGCATATCGCCTTTGCTCAATGCTTTGTTGGCAGAA  
CATAGTCGTTGAAGGTTACCAGCTCAACGTCCAGGCCATATTTGCTTTCCGAACTTTCTGCGGACTTCTGCAACCTGC  
TGTTCCGACCAACAATCACGCCACTTAAATGTGTTTTGATCTTTTTCATCTGACCGCAGCCTACCAGTGCCAGTGA  
TCCGATCAGGGCTCCACTGCCGCAAAGTTTTGAATTTGAACGCCATACTTATTCTTCTTCAATTTTATGTTGTG  
TTGAACGTTACTTGGAGTGACAGCCCGACGATGCGGTGCGCTGCGAACTGAATTAATAAACAGAAATGACCAGCAAT  
ACCAGTACCGTATTATCACCGTCCGCTTATAGCCGATGTAGCCATACTGATAGCCAATCTGACCTAAACCACCGGCACC  
GACTGCACCACCCATCGCGGAATAACCGACAGGGTAAATCAGGGTATAGTTGCCGATTACCCAGACCCGGCAGCGCTT  
CCGGTAACAGCACCTTACGGACGATCTGCATCGCGTGGCACCCATTGCGCGGGAAGCTTCAATTAACCCGGTTGGGATC  
TCCAGCAGAGCGTTCTGACCATAACGGCAATAAACGGTGTGCACCAACGGTTAACGGAACAATCGCTGCCTGCAACC  
AATCGATGTACCGACAATAACCGGGTAAACGGAATCATCCATAAGCAAGATAATGAACGGGATGGAACGGAAAATGT  
TCACAAATCGCAGAAACGGTACGATACAGCTTCCGCTTAGCAATAATTTGCCCGGACGCGTGACATAAAGCAGAACGCCA  
ACCGGACAGCAATCACAAAGCCAAAAAACCGGATACGAAGTCAATGCCAGCGTTTCCCATACGCCACGAACCAGCAG  
CCACATCATCGGCTCAGACATAACCCAGTACCTCTACTTTTACATGGTGTCTGACGCCAGGCAATGGCGGCTTGGTGA  
TCTTGTGTGTCGGTGCAATTTAGTCAGCATGATGCCGAACCTAACGCCACCGCGTAATCCATCTGCGCGCTAATAAT  
GTTGTTGTTGACGTTGAAACGACGCGCGGTTTTAGAAAAGCAGTGGGGCATCGACCGATTGACCGGTAACCTCCAGACGCA  
GCATCGGCACGCGAGTCAATAAGGCTCCGCTTGCAGACGTTCTGGTAATCTTCCGGGATATCCAGATGACAGGGTCCGAC  
TGAATAAATCTTGCGCCAGCGCGTTTTTCGGATGCGGAGAACCTTCACTTACCCTGTCCTGCTCGATCAGTTTCTCCATT  
GCTGATGACCGCCACGCAATCACAAATGCGCTTCAACAGTCCATTTCTGGGTGATCAACAGAATCGTCAACCCAGAC  
GGCGGTTGATGCTTTTACGAGTTCGAGAATAGAACGTGTCGTTGCCGGTCCAGCGCGCTGGTGGCTTCCATCACACAGC  
AATACTTTGGGATTGCTGGTAAACGCACGGGCAATTTGCCACAGTTGTTTCTGCCACCGGAAAGATTCCAGCGGTAGCT  
ATCATGCTTATCGCAAGACCAACCAATGACAGCAATTCGTCACGCGACGTTTACCTCGTCTTTCCGTTGTTGTCCA  
GCTCCAGCGGACAGCCAGTTGCCAAAAACAGTACGCGAAGAGAGCAGGTTAAAATGCTGGAAAATCATACCAATCTGG  
CGGCGAGCTTTGGTCAACTCGGATTCTGACAGCGTGGTCACTTCCGCGCCTGAGGCACCGATAACGCCATAAATTTGTCAGCTG  
GCATATGCAGGCTGACGTTGTTCAACGCTGGATGGTGGCGGCTGGCTGGTGAACACTTTGGTGATTTGCAAAATTTT  
ATCATTGATTATTTATTATCGTCAATTAAGTTAGTCGTGGCATCTCGAATGCCTGAAACCGGCAACCGCTCAATGAAATG  
GATGTTAAGGCATCCAGACGCTAAATCAATCAGGTTTATGCGAAGAGCACTTTCTTGCAGGTCGAAACATGCGATACTA  
GCGTCACATGCCTTATTAAGGAGCTATAAAAAGTGGCGAAGAGCGTACCCGCAATTTTTCTTGACCGTATGGCACCATT  
AATGTGATCAGCGCTATGTCCATGAGATCGACAACCTTTGAATTTATCGACGGTGTATTGACGCCATGCGCGAGCTAAA  
AAAAATGGGCTTTGCGCTGGTGGTAGTAACCAACAGTCTGGCATTGCTCGCGGTAATTTACCGAAGCAGCTTTGAAA  
CGCTGACCGAGTGGATGGACTGGTCCGTTGGCGGACCGAGATGTCGATCTGGATGGTATCTATTATTGCCCGCATATCCG  
CAGGGTAGTGTGAAAGATTTCCGCGAGTCTGCGATTGCCGCAACCCACATCCGGGGATGCTTTTGTGACGACGCGATTA  
TTTGATATTGATATGGCCGCTTTATATGGTGGGCGATAAATTAGAAGATATGCAGGCAGCGGTTGCGGCGAACGTGG  
GAACAAAAGTGTGGTGCATACGGGTAACCTATTACGCTGAAGCAGAAAACCGCGCGGATTGGGTGTTAAATAGCCTG  
GCAGACCTGCCGAAGCGATAAAAAAGCAGCAAAAACCGGCACAATGATTAAGAGATGAGCGGTTGAAATAAAAATGCAT  
TTTTCCGCTTGTCTTCTGAGCCGACTCCCTATAATGCGCCTCCATCGACACGGCGGATGTGAATCACTTACACAAAACA  
GCCGGTTCCGTTGAAGAGAAAAATCCTGAAATTCAGGGTTGACTCTGAAAGAGGAAAGCGTAATATACGCCACCTCGCGA  
CAGTGAGCTGAAAGCCGCTCGCAACTGCTTTTAAACAATTTATCAGACAATCTGTGTGGGCACTCGAAGATACGGATTC  
TTAACGTCGAAAGACGAAAAATGAATACCAAGTCTCAAGAGTGAACACGTAATTCATTACAAAGTTTAAATCTTTGAGCA  
TCAAATTTTTAAATTGAAGAGTTTGTATCATGGCTCAGATTGAACGCTGGCGGACGGCTAACACATGCAAGTCAAGCGGT  
AACAGGAAGAAGCTTGTCTTTGCTGACGAGTGGCGGACGGGTGAGTAATGTCTGGAAACTGCCTGATGGAGGGGAT

AACTACTGAAACGGTAGCTAATACCGCATAACGTGCAAGACCAAAGAGGGGGACCTTCGGGCCTCTTGCCATCGGATG  
TGCCAGATGGGATTAGCTAGTAGGTGGGTAACGGCTCACCTAGGCGACGATCCCTAGCTGGTCTGAGAGGATGACCAG  
CCACTGGAAGTACGACACGGTCCAGACTCCTACGGGAGGCAGCAGTGGGGAATATTGCACAATGGGCGCAAGCCTGAT  
GCAGCCATGCCGCGTGTATGAAGAAGGCTTCGGGTTGTAAGTACTTTTCAGCGGGGAGGAAGGGAGTAAAGTTAATACC  
TTTGCTCATTGACGTTACCCGCGAGAAGAAGCACCGGCTAACTCCGTGCCAGCAGCCGCGGTAATACGGAGGGTGCAAGCG  
TTAATCGGAATTAAGTGGGCGTAAAGCGCACGAGGGCGTTTGTAAAGTACAGATGTGAAATCCCCGGGCTCAACCTGGGAA  
CTGCATCTGATACTGGCAAGCTTGAGTCTCGTAGAGGGGGTAGAATTCAGGTGTAGCGGTGAAATGCGTAGAGATCTG  
GAGGAATACCGGTGGCGAAGGGCGCCCTTGACGAAGACTGACGCTCAGGTGCCAAAGCGTGGGAGCAAAACAGGATTA  
GATACCCTGGTAGTCCACGCCGTAACGATGTGACTTGGAGGTTGTGCCCTTGAGGCGTGGCTTCCGGAGCTAACCGGT  
TAAGTCGACCGCTGGGAGTACGGCCGCAAGGTTAAACTCAAATGAATTGACGGGGCCCGACAAGCGGTGGAGCAT  
GTGGTTAATTGATGCAACGCGAAGAACCTTACCTGGTCTTGACATCCACAGAATTTCCAGAGATGGATTGGTGCCTT  
CGGAACTGTGAGACAGGTGCTGCATGGCTGTGTCAGCTCGTGTGTAATGTTGGGTTAAGTCCCGCAACGAGCGCA  
ACCCTTATCTTTGTTGCCAGCGGTCCGGCCGGAACTCAAAGGAGACTGCCAGTGATAAACTGGAGGAAGTGGGGATG  
ACGTCAAGTCATCATGGCCCTTACGACCAGGGCTACACACGTGCTACAATGGCGCATACAAGAGAAGCGACCTCGCGAG  
AGCAAGCGGACCTATAAAGTGCCTGATGTCGATGTCGATGTCGAACTGCAACTCGACTCCATGAAGTCGGAATCGTAGTAA  
TCGTGGATCAGAATGCCACGGTGAATACGTTCCCGGCTTGTACACACCGCCGTACACCATGGGAGTGGGTTGCAAA  
AGAAGTAGGTAGCTTAACCTTCGGGAGGCGCTTACCCTTTGTGATTCATGACTGGGGTGAAGTCGTAACAAGGTAACC  
GTAGGGAACTCGCGTTGGATCACCTCCTTACCTTAAAGAAGCGTACTTTGCAGTGCTCACACAGATTGTCTGATGAAA  
ATGAGCAGTAAAACCTCTACAGGCTTGTAGTCTAGGTGGTTAGAGCGCACCCCTGATAAGGGTGGGTCGGTGGTTCAAG  
TCCACTCAGGCCTACCAATTTGCACGGCAAATTTGAAGAGGTTTAACTACATGTTATGGGGCTATAGCTCAGCTGGGA  
GAGCGCTGCTTTGCACGCAGGAGGTCTGCGTTGATCCCGCATAGCTCCACCATCTCTGTAGTGGTTAAATAAAAAAT  
ACTTCAGAGTGTACTGCAAAGTTCACTGCGAAGTTTGTCTTTAAAAATCTGGATCAAGCTGAAAATTGAAACACTG  
ACAATGAAAGTTGTTGCTGAGTCTCTCAAATTTTCGCAACACGATGATGGATCGAAGAAACATCTTCGGGTTGTGAGG  
TTAAGCGACTAAGCGTACACGGTGGATGCCCTGGCAGTCAGAGGCGATGAAGGACGTGCTAATCTGCGATAAGCGTCGGT  
AAGGTGATATGAACGTTATAACCGGCGATTTCCGAATGGGAAACCCAGTGTGTTTCGACACACTATCATTAACTGAAT  
CCATAGGTTAATGAGGCGAACCGGGGAACTGAAACATCTAAGTACCCCGAGGAAAAGAAATCAACCGAGATTCCTCCAG  
TAGCGGCGAGCGAACGGGAGGAGCCAGAGCCTGAATCAGTGTGTGTTAGTGAAGCGTCTGAAAGCGCGCGGATA  
CAGGGTGACAGCCCCGTACAAAAATGCACATGCTGTGAGCTCGATGAGTAGGGCGGGACACGTGGTATCCTGTCTGAA  
TATGGGGGGACCATCCTCAAGGCTAAATACTCCTGACTGACCGATAGTGAACCAGTACCGTGAGGGAAAGGCGAAAAGA  
ACCCCGCGAGGGGAGTAAAAAGAACCTGAAACCGTGTACGTACAAGCAGTGGGAGCATGCTTAGGGCTGTGACTGCGT  
ACTTTTGTATAATGGGTACGCGACTTATATTCTGTAGCAAGGTTAACCGAATAGGGGAGCCGAAGGGAAACCGAGTCTT  
AACTGGGCGTTAAGTTGCAGGGTATAGACCCGAAACCCGGTGTACTAGCCATGGGCAGGTTGAAGGTTGGGTAACACTAA  
CTGGAGGACCGAACCGACTAATGTTGAAAAATTAGCGGATGACTTGTGGCTGGGGGTGAAAGGCCAATCAACCGGGAGA  
TAGCTGGTTCTCCCGAAAGCTATTTAGGTAGCGCTCGTGAACATCTCCGGGGTAGAGCACTGTTTCGGCAAGGGG  
GTCATCCCGACTTACCAACCGATGCAAACTGCGAATACCGGAGAATGTTATCACGGGAGACACCGCGGGTGCTAACG  
TCCGTGCTGAAGAGGGAAACAACCCAGACCGCCAGTAAGTCCCAAAGTCAATGGTTAAGTGGGAAACGATGTGGGAAGG  
CCCAGACAGCCAGGATGTTGGCTTAGAAGCAGCCATCATTTAAGAAAGCGTAATAGCTCACTGGTTCGAGTCGGCCTGCG  
CGAAGATGTAACGGGGTAAACCATGCACCGAAGTGCAGGAGCAGCCTTATGCGTTGTTGGTAGGGGAGCGTTCTG  
TAAGCCTGTGAAGGTGACTGTGAGGTATGCTGGAGGTATCAGAAGTGCGAATGCTGACATAAGTAACGATAAAGCGGGT  
GAAAAGCCCGCTGCGCGAAGACCAAGGTTCTGTCCAACGTTAATCGGGGAGGGTGCACCCCTAAGCGAGGCG  
CGAAAGCGTAGTCGATGGGAAACAGGTTAATATCTGTACTTGGTGTACTGCGAAGGGGGACCGGAGAAGGCTATGT  
TGGCCGGGCGACGTTGTCCCGTTTAAAGCGTGTAGGCTGGTTTTCCAGGCAAATCCGAAAAATCAAGGCTGAGGCGTGA  
TGACGAGGCACTACGGTGTGAAGCAACAATGCCCTGCTTCCAGGAAAAGCCTTAAGCATCAGGTAACATCAAATCGT  
ACCCCAAACCGACACAGGTGGTCAGGTAGAGAATACCAAGGCGCTTGAGAGAACTCGGGTGAAGGAACTAGGCAAAATGG  
TGCCGTAACCTCGGGAGAAGGCACGCTGATATGTAGGTGAAGCGACTTGTCTGTGGAGCTGAAATCAGTCGAAGATACCA  
GCTGGCTGCAACTGTTTATTAAAAACACAGCACTGTGCAAAACGAAAGTGGACGTATACGGTGTGACGCTGCCCGGTG  
CCGGAAGGTTAATTGATGGGGTTAGCGCAAGCGAAGCTTGTATCGAAGCCCCGGTAAACGGCGGCGTAACTATAACGG  
TCCTAAGGTAGCGAAATTCCTTGTGGGTAAGTTCGACCTGCACGAATGGCGTAATGATGGCCAGGCTGTCTCCACCCG  
AGACTCAGTGAATTTGAACCTGCTGTGAAGATGCAGTGTACCCCGGCAAGACGAAAGACCCCGTGAACCTTTACTATA  
GCTTGACACTGAACATTTAGCCTTGTGTGATGTTAGGATAGGTGGGAGCTTTGAAGTGTGGACGCCAGTCTGCATGGAGCCG  
ACCTTGAATACCACCTTTAATGTTTGTGTTCTAACGTTGACCGTAATCCGGGTTGCGGACAGTGTCTGGTGGGTAG  
TTGACTGGGCGGTCTCCTCCTAAAGAGTAACGGAGGAGCACGAAGTTGGCTAATCCTGGTCCGACATCAGGAGGTTA  
GTGCAATGGCATAAGCCAGCTTACTGCGAGCGTACGGCGGAGCAGGTGCCAAAGCAGGTCATAGTATCCGGTGGTT  
CTGAATGGAAGGGCCATCGTCAACGGATAAAAAGGTAACCGGGATAACAGGCTGATACCCCAAGAGTTCATATCGA  
CGGCGGTGTTTGGCACCTCGATGTCGGCTCATCACATCCTGGGGCTGAAGTAGGTCCCAAGGGTATGGCTGTTCCGCTT  
TAAAGTGGTACGCGAGCTGGGTTTAGAACGTCGTGAGACAGTTCGGTCCCTATCTGCCGTGGGCGCTGGAGAAGTGGG

GGGCTGCTCCTAGTACGAGAGGACCGGAGTGGACGCATCACTGGTGTTCGGGTGTCATGCCAATGGCACTGCCCGGTAG  
CTAAATGCGGAAGAGATAAGTGCTGAAAGCATCTAAGCACGAACTTGCCCCGAGATGAGTCTCCCTGACTCCTTGAGA  
GTCCTGAAGGAACGTTGAAGACGACGACGTTGATAGCCGGGTGTGAAGCGCAGCGATGCGTTGAGCTAACCGGTA  
ATGAACCGTGAGGCTTAACCTTACAACGCCGAAGCTGTTTTGGCGGATTGAGAGAAGATTTTCAGCCTGATACAGATTA  
ATCAGAACGCAGAAGCGGTCTGATAAAACAGAATTTGCCTGGCGGCCGTAGCGCGGTGCCACCTGACCCCATGCCGA  
ACTCAGAAGTGAACGCCGTAGCGCCGATGGTAGTGTGGGGTCTCCCATGCGAGAGTAGGGAACTGCCAGGCATCAAAT  
TAAGCAGTAAGCCGGTCATAAAACCGGTGGTTGTAAGAAATTGGTGGAGCGGTAGTTGAGTCCGTTAGAAATACCTGCC  
TGTCACGCAGGGGGTCGCGGGTTCGAGTCCCGTCCGTTCCGCCACTTATTAAGAAGCCTCGAGTTAACGTCGAGGTTTT  
TTTTCGTCTGTATATCTATTATTGCCAGAATCGAAAAATCCTCTGCATTTTACGCTCTTTTTCTCAACAGTCTGAAGC  
CCATAATCACCTCAGTTAACGAAAATAGCATTAAAAGAGGCATATTATGGCTATCCCTGCATTTGGTTTAGGTA  
GTCTGAAAGACGACGTTGTTATTTTCATCTGTGATAACGGCGCTTGAACCTGGTTATCGCGCAATTGATACCGCACA  
TATGATAACGAAGCCGAGTAGGTGAGCGATTGCAGAAAGTGGCGTCCACGTCATGAACTACATCACCCTAAAT  
CTGGATTGAAAATCTCAGCAAAGACAAATGATCCCAAGTCTGAAAGAGAGCCTGCAAAAATTGCGTACCGATTATGTTG  
ATCTGACGCTAATCCACTGGCCGTACCAAACGATGAAGTCTCTGTTGAAGAGTTTATGCAGGCGCTGCGGAAGCCAAA  
AAACAAGGGCTGACGCTGAGATCGGTATTTCCAACCTCACGATCCCGTTGATGGAAAAAGCGATTGCTGCTGTTGGTG  
TGAAAACATCGCTACTAACAGATTGAACTCTCTCTTATCTGCAAAACCGTAAAGTGGTTGCCTGGGCTAAACAGCACG  
GCATCCATATTA  
TCTCTATATGACGCTGGCGTATGGTAAGGCCCTGAAAGATTGAGGTTATTGCTCGTATCGCAGCTAAA  
CACAATGCGACTCCGGCACAAGTGATTCTGGCGTGGCTATGGGGGAAGGTTACTCAGTAATTCCTTCTTACTAAACG  
TAAAAACCTGGAAAGTAATCTTAAGGCACAAAATTTACAGCTTATGCGCAAGATAAAAAAGCGATCGCCGCACTGGATT  
GCAACGACCGCCTGGTTAGCCCGGAAGTCTGGCTCCTGAATGGGATTAAGCCTCTCTGACAGCTCCTCCGGGAGCTGTT  
TTTACATGCTCGTAAGGAAATCGATAAAAGCCGGATGCGCGTACTTACCGCACGGTTCGTAATAGACGGCACTGAA  
TGGCATTTCCTACTGGCAACTTTATCTGCCATTAACCTCCACCAATTCCTCCGCGAGCGATTCTTTGTCGATCATGTAGT  
CGGACAAACACGCAATCCCGTTGCCACTCAGGCAAAGCTGTTTTCAGTGTTCCTCCACTATTGGATGACAAACCGTACTTC  
ACCTCATGTAATGTCCATCGTACGGGCTATCGGCCAGGTATTGAGGGAAGCGGGTTCAGTGAATCCAGGCAAAATATG  
TTGCTTTAAATCGTCGATCGTTTCTGGCTCCCGTAGCGGGAATATAATCGGGGAGGCGATAATTTTTCGATAACTGT  
TAAATAACGGCCTGGCACGTAAGCTGGAATCCGTTAACGTACCAGCGGTATCGCGACATCCACTTTTCTTCGATCAA  
TTAATAATCGTTTCGGAGGAGACTAGCGACAAAGTACTTCCGGATAGCGTTACGGAAAGGCTTAATTAACGGCATCAG  
AAAGTGCAGCACCCTGGAGTTGCGGCATCGATCCGTAACAGTCCACGCGGTGATTACCGCTCTCCATAATTTCTGATT  
CTGCCGCTGCCATCTCTGCAAAATTGACTGTACGGACGAAAATAACGCTCGCCTTCTCCGTCAGGCTAAGTTGTCCG  
GTGGTCCGATTAAGCAGGCTAACGCCAAGTTTCATCTCCAGCTTTTTACCCGCCGGCTTACCGCTGAGTTTGCTTGCCC  
TAATTTGCTCCGCTGCCCGCTAAAGCTGCCGCTTTCGACGACCGAAAACAAAATGGCGAGTCTTCCGACGTGGCTTCA  
TTTTTGTCTCTGTTGCAAAATAGAAGAGATATTTTGAATTTATTTGTCATTAAACCATCAGGATGCGTGATATGTCATGC  
GATTTAATGTTCTCCATAATGAGCAAAATTTGACCCGGTGAAGCACTTGCTTACATAACAATATACAATTGCTCGTTGA  
AAGAGTGAGCTAAAATCCCTATAACAGTAGAACCCTCCCGAGTGCAGGAAAGGTTGACGTAATAGAGGTTTCAAAGTCAA  
AGTGCAGAAAAACACCTATGCCATGCGCTATGTTGCCGGACAACCTGCGGAAAGGATCTTACCGCCGGGGTCTTTTGGCA  
GCATCGCCAGGCAATACCACCTGGGGAACCGTTAAGTACCGAAGAGCGTATTGCGATCCTGGTGTGGAACATATACAAA  
CAGCAACGCGCTGAATGGTTGTCGGTATTAAGAATACGGCAAAGATGCACATCTGGTGTATTGACAGGAAGCGCAGAC  
AACGCCAGAGTTAGTACAGTTTGGCACCCTAATCTTGGCCGATCAGGTACCCGCTTTCGTCGCTGCCACAACATC  
CTTCTGGCCTAATGACCTTTCCGGCGCACATCCAGTGTATTGCTGCCGTTACGTGAACGAGAACCCATTTTGCCTCG  
GCGAAGTCCGCACTGGTGACGGTCTATCCATTACCTGACACCCCGCTGTTGATGGTGGTTAATATACACGCGCTCAACT  
CAGTCTGGGCGTGGATGTCTATAGTAAGCAGTTACTTCTATTGGCGATCAGATAGCTACCACAGCGGCCGGTCAATTA  
TGGCGGAGATTTCAATGCCTGGAGCCGTAGAAGGATGAACGCGTTATATCGCTTTGCGCGGGAATGTGCTGCGCCAG  
GTGCGTTTTACCGATGATCAGCGCCGTGGGGCTTTGGTGCGCCGCTCGATTTTGTCTTACCGTGGTCTGAACGTGAG  
TGAAGCTTCTGTACTGGTTACGCGCGCTTCCGATCACAATCCGCTACTCGTTGAATTCAGTCCCGGAAGCCTGATAAAT  
AAGGTATGTCAGGCTGCCACAGGGCAGACCAACGTTTGGCGCTGCGCAAAACGTGAGCGCGGTGGTGGCGTATGACTTA  
TCTGCCACATGCTGGATGTCGTGGCACAAGCTGCCGAAGCCCGCAACTGAAAAATATCACCACCCGCCAGGGATATGC  
CGAAAGTCTGCCATTTGCCGATAACGCATTTGATATTGTTATCAGCCGTTATTCTGCCATCACTGGCATGATGTTGGTG  
CAGCACTGCGAGAAGTGAATAGGATATTGAAACCTGGCGGTAGGCTGATTGTGATGGACGTAATGTCTCCGGGTCA  
GTGCGGACATCTGGTTACAGACGGTAGAAGCATTACGCGATACCTCTCACGTACGAAACTACGCCAGCGGTGAGTGGTT  
GACGTTAATCAATGAAGCCAATCTGATAGTTGATAATTAATTACAGATAAGTTACCGCTGGAATTTTCTTCATGGGTCG  
CGAGAATGCGTACGCCAGAAGCGTTAGTAGACGCTATTCGATTTACCAACAGAGCGCATCGACAGAGGTGAGAACGTAT  
TTTGCCTTGCAGAATGATGGCTTTTTACCAAGTATATCATCATGGTAGATGCACATAAAGCGGCATAAATAAAAAAGGC  
ACCGGGGAATCGGTGCCTTTTTATTATCTGGTTTGTGAGGAATCTGGCATGTTGTTGTTTTTCAAAACACGTCAGCT  
TATCGCCTGGTTGAGATTCGACAGTGTGCTGTTCCAGCGCATCATATCTTTGATGTTACGCCGTGGCGTTTAGCAATG  
CTTGAAAGCGAATCGCCTTTGCGCACACGATACGTAATGCTATCGCTGTTGTTTGCAGTCCGCTGTGGCTACTGCCTGC  
ACCAATCGTCAAACTTTGGCCTGGCTTACGTTAGATCCGCGCAGTTTGTCCACTGCTGCAAACTTTTGGTGCTTACGC

CGAGACGTGAAGCGATACTTAAAGCGTGTGCCAGAGCGTACGGTGTAACACGGCTGTTAAGCGGCGTATTGTCGGCA  
ACCAGCGTCTGACTGTACAGCAGCAATTCGCCTGAAGCCAGAGATTACGCAGTTGATCTGCATGCTTCTTTGGCACCAT  
CAGTACTGCGGGCCACTTGCGCCAGCGTGGAGCCTTTACGCCAGCGTTGAATGTCTTCAGCTTGCTGACGGAAATCC  
CCGCCATATCTGCTACCTTGCCTATTTCAACCGGGTCTCAGGTGCACACGCCAGAGCACGGCTTTCATCGGTCGTT  
GGCAGACGTAGCCATAACGCTTGTGTTTTGAGAATATCACTCAATGCCAGATTTTAGGCACGTACTGCTTCGTTTT  
CTGCGGCAACGGTAACGACCAGAAGTCCGTGGATTTCCACGCGCTTTGTTCTGTTTTAATTGCCTTCATGACCCGACCTT  
CGCCGCTGTTATAAGCCGCTACGGTCAGAAGCCAGTCGCCGTCAAACATTTTGTTCAGACGCTGCATCATATTCAGCGCG  
GCAGTTGTTGAAGCAACAACATCGCGACGCGCTCATAATTGCGGGTCTGTTTCAAACCATAAATTGCGCCCCGTCGTCGG  
AATGATCTGCCAGATGCCTGCGGCATTGGCGCCAGACGTTGCGTGAGGATCAAAAGCGCTCTCCACTATGGGTAGTAGTA  
CCAGTTCATAGGCATGTTACGTTTTTAACTTGCCTGCTATCCAGTACATATACGGCTCTGCCGTAAGTTACATCG  
TGGAGATAGCTCTTATTGCGTAAATATTTCTGTTTTCTGTTGCGGAATCCGGTCATTTTCCGGAATCCCATCTTTAGCTC  
GTCGCCAATGAAAGCCCACAAGTCACCATCTGGCGCATAGACGTCCCATCGTCCATCCATCGTGCCTGACTTGAAACT  
TTGCTGCTTCCCTTGACCAGCTGCAGAAAGGCTCTGTGCGTGTGTTGAACGTTGCCGGTACTCTGGCAACCCACGAGC  
AGGACAGAGCGAGTAATATCGCTTTTGCCTTATGTGTGTCAATAGTTGCTTAAAAGACGACCGATCATAACGGCGA  
ACGGAGCGGATGACAAGAAAAGTTTTATCAGAACCATCTTTCTTTGACCTTAAACATGCAAAACGCTCTTCAGTTGTTG  
CAATAATGTTTTCTTCAATTAATTACATTAATAATCAATATCTCCGTTCTTAAAAAACATTAATTTGCCGCTCATTTT  
TCAGAATTACGGGTAGTGTTATTTGATTTTTGCCCCGTAACCTTAACTTTACGATAATAATCATTTATGGACAAATCG  
TGCGGAAGAATACTCAAAGCAAACCTCATATTTGATAAGGTATATTCATGAGCACAAACATACCAATGTATCGTCAGGTAA  
CGCACTTAACTTTTTAAGTGATTGATACATTTGTGATGCTGTCCCTTCAAACAACCGACCACACCCACCAGAAAACAGTG  
TGTCCGCGCAAATAGATAAGGTTTACTGAAGTAACAGATATGCTTAAAGTGTGACCCGGCGTAGCAATTACACTAAAT  
TCATGCCCCAAACGAAGGCAGTTTCCGCATCTTTGACTACCTGTGTTGTTCCCTTATCTTGTGCTCTTGTGGACCATA  
CACCACAATTTGTGAAACTTTTCCACCAGTTCTTTTACGCCGCCAACGTGATCGTGGTATGGTGGGTGAGAAATATGG  
CCTCCGTTGCCAGTTATTGGCGCAATGGCGTTTAACTGCTGCTGCTCCGGATCGACAATCAGGCAGCGACCT  
GCTTCATCATTCAAACCCAGATGTAATTGTCATCAAAGCGGGAATACTGTTAAGATTATAGATTACCTCTCAGTGTG  
AAACGGAAGGTTGTGATGAAACCGGAAGAGTCCCTCAAAGTGTGCTGGCTCCTGATTGCTGGGGCGATTTGCCCTGGGG  
AAAGCTTTATCGAAGGCGCTGGAGCGCCAGCTCAACCCGTGGTCACTAAAATGTATGGTTTTTCTGCTTAAAGATTG  
GCAATTTAAGCGCAGAAATCAATTGCGAAGCGTGCAGGTTTTCTCATCAAGTGAATGTTTCTGCGCAAGGAATGCCCGTC  
CAGGTACAGGGGACCCACTTCATCTTCTTTTGCAGATAAATCCGTTGATGTTTGTCTACTGGCACATACATTGCCGTG  
GTGACCGATCCGCATCGTTTATTGCGTGAAGCCGATCGGGTATTGATTGATGATGGCTGGCTGGTCATTAGTGGCTTCA  
ATCCCATCAGTTTTATGGGATTACGCAAACCTTGTCGGGATTGCGCAAAACCTCGCCCTATAACAGCCGGATGTTTACT  
CTGATGCGGCAGCTGGACTGGCTCTCTTTGTTGAATTTTGAAGTGCTACACGCCAGCCGTTTCCACGTTCTCCCGTGGAA  
CAAACACGGAGGAAAACCTATTGAATGCGCATATTCCTGCGCTTGGTTGCTTACAACCTATTGTTGCCCGGAAACGGACTA  
TTCTTTAAGCGTAAATCCGATGAAACAGAGTAAAAACAAGCCACGAATTCGCCAGGCGGTTGGAGCCACCCGGCAATGT  
CGTAAACCACAGGCTTAACTTCAACTTGGTAGCCTGTATCTCCAGTGTGGGATTTCATCGCCGCGGCACGAGCCAGTTC  
ATCAGACGTTGCTTTTCCGGGTGTCGGCATGGCTTTAACCATTCCCATTTGATTTGATGCTGCCCAATGCAGCAT  
CAAGACGTTGCCAGAGATCGACATTTTTACTGGTTTTTGTCTGCGTTTTTCCAGCCAGTTTTTTCCAGTTATGGATC  
CACTGGGTGATACCCTGGCGGACATACTGGCTGTGCGTACTCAAATGACTTCGCAATGTTCTTTAACGCCCTCCAGCGC  
GACAATAGCGGCCATCAACTCCATACGGTTGTTGGTGGTGCAGGTTAGCCAGCGCTAAAGTTTTCTCGCGTCCGCGAT  
AGCGTAAAATAGCGCCGTAACCCCAAGTCCCTGGATTGCCAGACGAACCATCGGTGAAAATTTTACCTGTTTAAAGC  
ATCTCTGGTAGACTTCTGTAAATGAATCGAAGTAAAACGACAAGTCTGACATAAATGACCGTATGACACTGAGCAAT  
TACACGCCAGATCGTTCTCGATAACCGAAACCCGATGAAACAGATTGGTGCACACTATGAAGGCCACAAGATCATTG  
AGATTGGTGCCGTTGAAGTGGTGAACCGTGCCTGACGGGCAATAAATTCCATGTTTATCTCAAACCCGATCGGCTGGTG  
GATCCGGAAGCCTTTGGCGTACATGGTATTGCCGATGAATTTTTGCTCGATAAGCCACGTTTGCAGGAGTAGCCGATGA  
GTTTCATGGACTATATTGCGGGCGGAGTTGGTGTATCCATAACGCAGCGTTCGATATCGGCTTTATGGACTACGAGTTTT  
CGTTGCTTAAAGCGGATATTCCGAAGACCAATACTTTCTGTAAGGTACCGATAGCCTTGCAGGTTGGGAGGAAAATGTTT  
CCCGGTAAGCGCAACAGCCTCGATGCGTTATGTGCTCGCTACGAAATAGATAACAGTAAACGAACGCTGCACGGGCATT  
ACTCGATGCCAGATCCTTGCAGGATTTATCTGGCGATGACCGGTGGTCAAACGTCGATGGCTTTTGCAGTGAAGGAG  
AGACACAACAGCAACAAGGTGAAGCAACAATTACGCGCATTGTACGTGAGGCAAGTAAAGTTACGCGTTGTTTTTGCAGCA  
GATGAAGAGATTGAGCTCATGAAGCCCGTCTCGATCTGGTGCAGAAAGGCGGAAGTTGCCTCTGGCGAGCATAAAT  
ACCTGTGAAAGGCGCTAAAATAGCGACTTGGGCGATTTTTGCAGCAAACGATTCAAAGATGAGAAAAACCGTTGACGA  
AGGTCGAGGCAATCCGTAATATTGCCTCGTTCCCAACGGAACACAACGCGGAGCGGTAGTTCAGTGGTTAGAATACCT  
GCCTGTCACGACGGGGTGCAGGTTTTCGAGTCCCGTCCGTTCCGCCACTATTCATCATGAAAATGAGTTCAGAGAGCCG  
CAAGATTTTTAATTTTGCAGTTTTTTTTGATTTGAATTTCCACCATTTCTCTGTTCAATGATTTTACTCTGCCGTAGGTGC  
GTGATTCTCGCTTGTGTTCTCATTCAATTAATAATGATATCGAACCATTACAGTTAAATATATTTCTAGAGAAAT  
AAATTTATATTGATTAATGAATGATATTTCAAATGATTTTGTGTTTATTATTAAGTGAAGTATATAAATTAGAGTC  
GTTTATCAATGCTAAATATTCTAATCATTATGACAGGCGAGGGAGTGTCCAATTATGAATTCAAAAAGCTTTGTTGCAT

ATGTGTGTTATTCTCGCTGCTTGCAGGATGTGCCTCTGAATCTTCTATTGATGAAAAGAAGAAAAAGCTCAAGTCACAC  
AAAGTAATATTAATAAAAACTCCCCAGCAACTGACAGACAAAGATTTATTCGGTAATGAAACCACTCTGGCCGTATCC  
GAAGAGGATATTCAGCTGCGCTTGATGGAGATGAGTCCGCGTCCCTTAATTCTCCTGTAATACTTGTTCATCCGG  
CAACCGCGCACCGGAAACCATTATGCAGGAGGAGATGCGAAAATATTATACTGTTCCACATTCTCTGGTATCCCGGACA  
GGCAAAAGCCTCTGACTTGTAAACAAAAACAAAGATAAAAAATGAGAACGAGGATGTTGCCAGTGCTGAGAATATGAACGG  
ATGCAGGCACTGCGTTTTGTGGCTGCAAAAGGACATCAGAAAGCGATTATTGTTTACCAGGATATGTTGCAGACAGGAAA  
ATATGACTCTGCGCTGAAATCAACAGTATGGTCCGACTATAAAAAATGACAACTCACTGACGCTATCTCCCTGCGCTACC  
TGGTACGTTTTACGCTGGTGGATGTGGCAACAGGTGAGTGGGCTACCTGGTCGCGGGTGAATTATGAATATAAAGTGCTT  
CCACCATTGCCGACAAGAATGAAGCCAGTACGACTGATATGACAGAGCAGCAAATCATGCAACTAAGCAAAAGACCTA  
TAAAGCGATGGTAAAAGATTTGGTTAACCGCTATCAATAATAAATTATATCTGCCGCCAGGAATTTCTGGCGGCAATAAT  
ACAAAATCTTTGCATAAGAAATTTTTCTTGACAAAGACAGTGAAGAAAGGACATGGAATCCGGAGTTAAAACTGTTT  
GTTTTAGAATATTTAATTATTTAACTGCTGAATCTTCTTGCAGAAAATATATCCATTATTACATTTTCATGCCATTTTTA  
ATATAGATTGCTCCTGGGAAAATCCCGTATTATTACCGCAGGGGTGATAATTAGTATTGACATATCCTGTGACAAAAGG  
AGCTATTAAGGTGCTATTACGATAGCTATTAGTAAAAATAAGAGTTAGCTGATTGTTATGTCTGTGGCGAAATTGA  
CTACCTTCGTTTTTTGATTAAGAATGATTTTTATTATCGTAAGTAAAATTACATGAATATTTAAAAAGGAAAACGACATG  
AAACCGAAGCACAAGAATCAACATTCTCCAATCATAAAAAATTTCCGTGGAGCATTTTTATTATTGAATATAGAGGTTAAC  
TCCGGTAAAAACAAAGAAGCATTGAATGCAGGGAAAAATAATATGGCCATAAAAAACATCGAAAGAACTCTTTTTAATT  
TAACATGTAACGCATGGTTAATCCTCATATCACGGGTGGAGTGTAAAGAACATACATAAATGGAGTCATGTTTTCCCTT  
TTCCATTTATCAAGTTCTGTTGCCGTTTTAGTCCATCTCTAATTGCATATTTAATTTTTCTGATAAATGGCATTGAGC  
ATCGATTTTCAATTAACAACACTGTACACACTATCCCTGTGAGTAAAATTGCTCCTCCGACAAGAATTACTGGAAAGCCAA  
AGCTAACACAGGCAAAAGAAGCCAGACTTCCAATAGCGGTTGCAACACCACCGGCTATAACTGCTTTGGCCACATCCATT  
GAAAAATCGCCAAGAAAATTAACCAGATCTCGCTCTGAACTCATAATAAATTCTATGGTTCTGCTGATTTAACCGCAGAG  
AAGTTCCGCACAGCAATCCGAAACCACTGGCACGTGGAGAATAAGCTGCACAGGCGTCTGGACGTGGTAATGAATGAAGA  
CGACTACAAAATAAGAAGAGGAAACGCAGCAGAATTATTTTCAGGATACGGCACATTGCTATTAATATTTTACGAATG  
AGAAGGTATTCAAGGCAGGGTTAAGACGTAAGATGCAAAAGCAGCCATGGACAGAACTACCTGGCGTCAGTCTTTGCG  
GGGAGCGGGTTTTCGTAGTAATACCCGACTCTCCCGTCTTAAACACAACCCCACTCACCAACCTAAACTCATCC  
GCATCCTGCCATGCCGAAACTTTTTCTATATTCCCGCAATGCTGCCATCGACAGCTCCGCATCAATGCCGTTGCCGTG  
ATGCCGCTCGGCAGTAGCGATAATCTCTCCTTGGCGATTAATCACCCGGCTGTACCCGCGATAATGGCAGCCGTTGCCAT  
CGCTGCCGACGCGATTGCATCCCGCCACATACGCTGATTCTCAATCGCGCGGGCCGTGAGCAATGCCTGCCAGTGCAGA  
GAGCGCGGAGCAGGCCAGTTGGCGACGTACAGGGCGAGGTCATAATCGTTGAGATTGCGCGACCACACAGGAAAACGTA  
GTCGTAGCACACCAGCGGCAAAATACGCCAGCCGCGCCATTCCACAATCACTCGCGCATTGCCCGTTTTATAATGTAGAT  
GCTCATCTGCCATGCGGAACAGATGACGCTTATCATAAAAAATGTACCGTGCCGCCC GGCTCAACCAGCAAAAAGCGGTTA  
ACCGAACAGACTCCGTTTTGAATGCAACACTGCCTGCAATCAGCGCATTGCACTGCTGCGCCTTAGCTGTCATCCAGTT  
CACTACGTCATCTTGTGCTAGCGACGAAGCTGCCGCTTCCATGGCAAAGCCGCTGGTAAACATCTCCGGTAGAACGATCA  
CATCGCGCCCGGTAATACCTTCCAGTTGACGATCAAATGACGCAAGTTGGCAGGACCATCCACACCAGTGGTTGC  
TGCAAAAGCGTAATCTTCAAACAGGCACGGTGTACAACTCTTTATGCGAAGGGTTTTATAACTTTAACACCTTATCAG  
GCAGTTGCCTTAGCGCAGAATAAATTGATAACAAATGCTGATATTGAAAATATCTGATTTGCAAAATATCGTGTTATCGC  
CAGGCTTTAGGAGGTTAATAACATGGGCAGGATAAGCTCGGGAGGAATGATGTTAAGGCAATAACGACAGTCCCGCTC  
TGGTCATCGCCACCAGTGAATGGCGCAGGATGATTTAACATTAGCAGCCTTGCAAGGGCGAAACCACCAAAAGTGA  
TTAATCAGATGGTACAAGGGCATAAGCTGCCTGCTGGGTGATGAAAGGCGGTACTTATACTCCCGCACAAACCGTAAC  
GTTGGGAGATGAGACGTATCAGGTGATGAGCGCTGCAAAACCGCATGACTGTGGCTCGCAACGTATCGCTGTGATGTGGT  
CCGAGAAATCTAATCAGATGACGGGGCTGTTCTCGACTATTGATGAGAAAACGTCGCAAGAGAAAACCTCACCTGGCTGAAT  
GTGAACGATGCGCTTTGATTGATGGTAAAACGGTGTGTTGTCGCGCGTTGACCGGCAGCCTGGAAAACCATCCGGATGG  
CTTTAATTTTAAATAATTAGCGGATAAAGAAAACGGAGCCTTTCCGCTCCGTTATTCAATTTACGCGGCTTCAACTTTCCGC  
ACTTTCTCCGGCAACTTTACCGGCTTCTGTCGCCAGCTTCCGGATCAAAGTCATCAACGTTAATACTGCGCAGACGGCT  
TTCTTCAGCTTTCACCAGAAATAGCGGCTTTCATCTTTATCAATCAGCCCTTACCAGCGGCTTGTGCGCCAGTTCATCCA  
GACGGGTAACGGCAGGTTTTTACCAGCTTTTACAGATCCGCTGATGAATTGGTTCGGCGGCAATCACATCCACCAGC  
GCCTCTCCAGCAAGCAACCGGATTATGCTCGCTCGGCGTCAAGTACTGACCGGACCAATGCGGGAACGGGTGGCGTT  
CGGCACTTGTAAAATCTTCCCACTTTATGATCCAGCTTGTGAGAAGGTGCCAGATAATGACGTCCGGTCCGGAAGATCA  
CCACATTGACGAGCCCGCAACACCGGTTCCGGAAGTTTTGCAGTAAATCATCCATCGCTGTTGAGCTGATACAGC  
GCATCTGTACGCCCCAGTGACACAGCGCAGGTGCGCTTATTACGGCTTCTGTCGTATAACGCTTACGACGGCAGA  
GGCGAGGTAGAGCTGGCTTAAAATATCCCCAGACGGGCCAGATGCGCTCGCGACGTTTTAGGCTGCCGCCAGCACTG  
CCATCGAGACATCAGAAAGCAGGGCGAGGTTGGCGCTCAGGCGGTTAGGTTGCTGATAGTAGCGTTTAGTGGCATCGCCG  
GTTGGCGTGTGCTGTTAAACCGCGCTCAGGCCAGCCAGAAGCTGCGAACTTTGTTGCTACCGACGTGACCGATATG  
TTTGAACAACAGTTTATCGAACGCGTTGACGTCAATTGTTCTTCCCGCTTCCATCTCTCCAGCACGTACGGATGGCAAC  
GAATCGCTCCTTGTCCGAAGATCATCATGCTGCGGGTCAGAATGTTAGCCCTTCAACGGTATGGCAATCCGGTGGCC

TGGTAAGCACGCGCCAGGAAGTTGCTTTGCCCGAGCATAATGCCTTTACCGCCGTAATATCCATCGCATCAATAATCGA  
CTGCTGCCCGCGGTGGGTACAGTGACTTAACGATAGCCGACAGCACGGCAGGTTTTTCGCCGAGCATAATGCCGTAGG  
TAATCAGCGATGCCGAGCATCCATCACGTAGGCATTACCGGCAATACGCGCCAGCGGCTCTCAATCCCTTCCATCTTA  
CCAATAGAGATTTTGAAGTACGGCGAATGTGAGCATAACGCGCCGTTGCCAGCGCTACCGATTTACGCCCGCGGTTGA  
GTTGGAAGGCAGGGTGATGCCGCGGCCTACCGAGAGGCACTCCACCAGCATCCGCCAGCCTTGCCCGGCCATTTTCGGCC  
CGCCGATGATGAATCGATCGGCACGAAGACATCTTACCAGCGCTCGGTCCGTTCTGGAACGGTACGTTTACGCGGGAAG  
TGCGCAGACCAATTTCCACGCCCGCGGTGGTGGTTGGGATCAGCGCACAGGTAATGCCTAAATCTTCTGCACCGCCGAG  
TAATTTTTCCGGGTCCGAGAGTTTAAACGCCAGCCCAAGCACGGTCGCAATCGGTGCCAGCGTAATGTAGCGTTTGTCC  
AGGTCAGACGCATCCCAGCACCTGCTGGCCCTGCCATTGCCCATGCAGACAAATCCCGGTGTCCGGAATCGCGCCCGCA  
TCGGAACCCGCTTCCGGGCTGGTCAAGTCAAAGCAGGGGATCTCTGACCACGCGCCAGACGCGGCAGATAGTGATCTTT  
CTGCTCGTCAAGTCCGTAATGTTGCAACAGTTCCGCCGGCCTAATGAGTTTGGCACGCCGACGGTAATCGCCAGGATCC  
CGCTCACGCCGAGAGTTTTTGCAGCACGCGAGACTGGGCATAAGCCGAGAATCCAGCCCGCGTACTCTTTTTGATG  
ATCATCGCGAAGAAACGATGCTCTTAAAGGTACGCCCAACTCCGGCGGAGATCCGCCAGCTCATGGGTGATCTGGAA  
ATCATTGCCATCCGGCAGGCTTCTTACCAGGCGGTCGAGAAACGCTTCTTCCGGCGGTGAGGCGCGGCTGGGAT  
AGTTATGACGCTTTTTCCAGTCCGGCTGCCCCTGGAACAAGTCCCTCCACCAGGTGGTCCCGCATCAATCGCTTCT  
TTCTCAGTCCGCGACATCGCGGCATCACCTTACGGAACCGCAATACCGGCGCGAAATCATCGACTTACGCATAGG  
CGAAAGTTAAATGGCACGAGGATAATGGCCAGAGGACCAGTACCACGCCACCACAGACCAGCAACGCCGAGGGCGG  
CTGTCCAGGCGAGCAAAATCAGACTGCTGATAAATAAGCTCACGCGGTGATAGAACAACGCGCCGAGCAGGACAACCGTA  
GCGAGAATACTCAAAATCATCATAACGAAAAGCCCTTACTTGTAGGAGGTCTGACCACCTGTGATGATATGGTTGTAGT  
GGATGTAAAAACATTTAGCAATATGTTTACAATATAATTACAACAAAGCTCACATTGTTGCTGTTTTTATCCGCACTTCA  
GGTCAAAAAGTCTGGTATAGCACCTGCCGACTTCTCGCTTTTGGCGGTATCCGGTACACTGCATTTTGTCTATTAC  
ATTTATGCTGAAGGATATCCTCATGTACCAGGATCTTATTGTAACGAACTGAACGAAGCGGCGGAAACGCTGGCTAACT  
TTTTAAAGATGACGCCAATATTACGCCATTACGCGCGCGGCGTCTGTTAGCAGACAGCTTTAAAGCCGGTGGCAAA  
GTGCTTCTCGCGCAACGGCGGTTCCATTGCGACGCTATGCACCTTCCGGAAGGTTGACCGGTGCTACCGTAAAA  
CCGTCGGGCTACCCGGCGATTGCTATTTCTGACGTTAGTCATATTTCTGCGTCGGTAATGATTTCCGTTTCAATGATA  
TTTTCTCCCGTACGTTGAAGCGGTAGTCCGGAAGCGGATGACTGCTGGGGATCTCCACCTCCGGTAACTCTGCAAC  
GTGATCAAAGCGATCGCAGCGGCGGTGAGAAGGGAATGAAAGTATCACCCTGACCGGTAAGACGGCGGCAAAATGGC  
TGGCACGGCGGATATCGAAATTCGCGTACCGCACTTTGGTTATGCCGACCGCATTCAGGAGATTCACATTAAGTGATCC  
ATATCTGATCCAGTTGATTGAAAAAGAGATGGTTAAGTAAGTCTGGCGTAGGCCGGATAAGACGTTTACGCCGCATCCG  
GCATTTGTGCGCTGATGCCTGATGCGACGCTGACGCGTCTTATCATGCCTACAAATCTGTACGCGAACCGTAGGCCGAAT  
AATGCGTTCACGCCGCATCCGACCTGAAAATTTTAAATCAATCTTCCGCCGGGGCCATGCGCTCCCGCTGTTGTGGAGG  
TTACCCATGTGCGAATTGCTCGGGATGAGCGCAACGTCCCTACCGATATCTGCTTTAGTTTACCGGGCTGTACAGCG  
TGGTGGTGAACCGGGCCACATAAAGATGGTGGGGCATTACCTTTACGAAGGTAAGGCTGTGCGACATTTAAAGATC  
CACAAACCCAGCTTTAATTTCCCCATCGCCAACTTGTCCAGGACTACCCGATAAAATCCTGTTCCGGTGGTGGCTCATATT  
CGCCAGGCTAATCGGGGCGAGGTGGCGCTGGAATACTCACCTTTACCCGCGAGTTATGGGGGCGTAACTGGACTTA  
TGCCATAACGGCAACTGACGGGCTACAAATCACTGGAACCCGGCAACTTCCGCCGGTAGGCGAAACCGACAGCGAAA  
AAGCCTTCTGCTGGCTCTGCATAAATTAACGCAGCGTTACCCGCGCACACCGGGCAACATGGCGGCGGTATTTAAATAT  
ATCGCCTCACTGGCGGATGAACTGCGGCAGAAGGGCTTTTCAACATGCTGCTTTCGGACGGGCGTATGTAATGGCGTA  
TTGCTCGACTAATTTACACTGGATCACCCGCCGCGCGCTTTGGCGTGGCAACGTTGCTGGATCAGGATGTGGAATCG  
ACTTCAGCTCGACACCACCCGAATGATGTGGTACGGTGATTGCAACACAGCCGCTGACGGGCAATGAAACCTGGCAA  
AAGATTATGCCAGGCGAATGGCGCTTATTTTGCCTCGGGGAGCGTGTAGTTTGTGATGCCAGTTGTGGCTGCACAACTTCGT  
GGCTTAACGGCTTGTGACCACGTAACGACCATGACCACAGAAACGGTTGGTGGCTTACGGGTTTGTCAAAGTAGTCG  
TAACCCGGCTTCAAGTGTCCAGAAAGTCTTAAAGTTGGAATATTTATGGCGCTTCAATTTGGCGTGGTCTGCGGAA  
CGGGTAAATACTCACTTGCACGCTCGGCTGACCAAACACCAGCGCACCGAAGCAACTGGAATATCTCATCAATACCTT  
GATTGGTCAATGCGTAGCAGCCGATGGAAACAAATCGCCGTGGATCATCAGGTATTTCCCTTATAACCATGCGCACGG  
TCATAGGCATTGGGGAACCAATATTAATCGCTTTGTAGTAACGGCTGTCTGGTTTTAACTGATTACGCTGGACGCTATA  
AAACCTTCCGGGCTTTTGAATCGCCCTGACGCTTTTTGGCCCTAAGCCGCCGGAATATTTACAGATTTTATAGCTGT  
CGAGCAGTTGATATTGCTCGCCATTTTACGCTAGAGATCGAGCGTACGTTCTTCTTGAAGATCTGGATGTAGACAGGG  
GATCCCATCAACTGCTGCTTATACTCTTGTCTCACAGGCGTGGTAGAGTACTGCTGCCAGCAAACCGGCAATGAAAC  
GCACGGGATCAACAACATCGCAAGAATTAATGCGATTTTACGCATACTGCTTATTCCTTGATAAAACGGTTACACACGCC  
AGGACGGCAAAATGGATCCAAATCGGAATAGTCTGGATTTGGAAGGCTCACATTATCACCAAAGAGTTTTACGCAAGC  
CTGTCGGCGCAGGGTTTACAAATTTTATCGGAAGCGGGCTTTACCAAAGAGCGCCGCGTGTGAGTTCCAGTTCTCTCAAAT  
CGTAAAAGTTTATCGGTAAGTTTGAATCAGGATCCAGTCCGGTTCGACATGAGCATCGCGATAACCTTTCCATGAACC  
TTGACGCGGGTGGTCTTTTAAACAGCTGGAAGCGGTAAGTATTATTGATAAAGCGTCAATAAGATATTTCAATTTAT  
TCATATCTTATGACGCTTTTGTGCAAGTTTACATCCTTTGAATATTGTCGGAGTATTCATATCCCTTTGAATCATA  
TTAAATTCCTAATTTATCAATAATCATCGGCGTCTTGGCCTTATGAACATCAATGCCAGCTTCCGCTGTTTTGATT

GATTGAATGGTTAATTGATTAGGCTCGCGTAAATCAAACGGCAATGCCTTTTACGCGCGACCTTTGTGAGGGTTATGCG  
AACCAGGTCAGAGATGGTCAGCCCCATCCCGCCAGTACGTCCGCTGCCTGATTCTTCAGATCTTCATCGATTCCGGGCGC  
GAACAAACGCGTTAGCAGCATTGGGGTATCTCCTGTGCTGTATATTTATTAGCTTGAATTGTAGCTCAAATGAGCAAC  
AGCGACAATCCATGAGTAATTTAATAAACGGATGTTTTACATAATTAAGTAAATATATATGTTAATTTTATAATAATG  
GTTTATTAAGTTTGTTCAGAAACGATCCGGGATACACTGCAACATTAAGCATGACCAGCCATTATTGAGTATGTCCTTG  
CCGTCGATTCCATCCTTTGTATTGTGCGGGATTACTGTTGATTTGTTTGCCGTTTTCTTCATTTGCCAGCGCCACCACATC  
ACATATCTCTTTCAGCTACGCCGCCGCCAGCGGATGCAAAACCGTGCAGCTTTATTAACAGTACCAAACCTCATCTGA  
AAAAGCAGGCCAGCTATATTGTGGAAGGCAATGCCGAAAGCAAAGGGCGCTACGCCAGCACAAACGGGAGCAGATAAAA  
CAGCATCCAGAATGGTTTCTGTCTCCGCTCAAGGCGAGTGACAGACGCTGGCAGGCGCTGGCGGAAAACAACCACTTTTT  
AAGCAGCGACCATCTGCATAACATTACCGAAGTGGCGATTACCGCTGGAGCAGCAGCTTGGCAAGCCTTACGTCTGGG  
GCGGTACGCGGCTGATAAAGGCTTTGACTGTAGCGGGTGGTTTTTATGCCCTACAACAAGATCCTTGAGGCTAAGCTC  
CCGCGCACGGCAATGAGATGTACCACTATCGCCGGCAACGATTGTGGCGAACACGACCTGCGCCGGGAGATTTGCT  
GTTTTCCATATCCACAGCCGCGAGATAGCCGATCATATGGGCGTGATTTGGGCGATGGGCAATTTATCGAGTCGCCAC  
GTACCGGCGAAACCATTCGATAAGCCGATTAGCCGAACCTTTCTGGCAGGACATTTTTGGGCGCGCGCAGGATTTTG  
ACGGAAGAGACGATTTTGTAGGACGGATAAGGCGTTTACGCGCAGTCCGGCAGTTGTACGCAAGTGCCTGATGCGACGCT  
GGCGGTCTTATCATGCCTACGAGCCCGCAATATTTGCGAGCCGCTTTCCCGATATAAAACAACCTCATTGCCAACCTT  
TCCTTTTCTTCTTACCGTTGAGAAAAGGAGTCGCCATGTCTGAATATCGTCTGTTATTACATCAAGGGGGGAACATGGTT  
TTTACGCGTGAATTTACGAATCGTCAAGCCAACCTTTGACCACCCAGTACCAGATGCTCCGTCACGCCATTATTAAG  
TTAAGCAGACAGGCTTTTGAATCAACGCTGGGTGTTTTGCCAGAGCATATGCACTGTATCTGGACATTACCTGAA  
GGCGATGATGATTTTTCTCGCGCTGGCGGAAATTAAGCAATTTACCCATGCTTGTGGATTGAAAAATATCTGGCA  
ACCACGTTTTTGGGAGCACGCCATCCGCAATACCAAGATTATAGGCATCATGTTGATTATATTTATATAAATCCAGTAA  
AGCATGTTGGGTAAAGCAAGTGAAGTATTGGCCATTCTCAACGTTCCATCGCGATGTCGCGCGAGGGTTATATCCCATC  
GATTGGGCGGGGACGTAACGGATTTAGTGCCGGGAGCGTATCATTTATAATTGTGCGCAGATGCCTGATGCGACGC  
TAGCGGTCTTATCATGCCTACAACTTGTGCCGATCGGTAGCCGGATAAGGCGTTTATGCCGATCCGGCAGTTATG  
CGCAGATGCCTGATGCGACGCTGGCGCTTATCATGCCTACAACTTGTGCCTGAACGGTAGGACGGATAAGGCGTTC  
ACGCCGATCCGGCAGTTGTGACCAATGCTGGATACTTACATCAACGCCCCATAATCTTCAACTCCAGCTCATCCGGC  
ACTTCGTTATACGACAGCAGATGCAGCCCGCGCAAAACAACCTTGATAACGCGCCAGCAAAGGGCGCAGCTGCGGTGG  
CACCAGCAGCACCGGCTTTCCCGCGCTTTTCTGCTCTTTACCTGTGGCATCGTACTCTGGAACCTGGTTGAGCA  
TATTCGGATCGACCGGCACGCTGTGAGCATCACTTTCCCGCCGTTTGGCGCTGATTACCACGTTGGTCAGCAGATTT  
TCCAGCTCATTATTACAGCTATACACCGTCAGCTCCTGCTTGCGAACGAACGGATGGGTAATGCTGCGCCCAATGCCAG  
GGCACATCGGCCGCCAGCAGAATATGATCTTTCTGTCACCGTGCTACTGGCGACCAGCACGGTGGCGATGGTGACGATAT  
CGCGCAGGAAACGCCTTCGGTCAGCAGCGCCCGGTACACTTTAGCAACTGGCTGTAATTGAGCGCCGCGCTCAAATCT  
TCCGCCAGACGCGGTGCCGTCGACGATAAACGGTTATGCAACTGCGTAATATCATCATAGTTAAACAAATCAGGAATATA  
GCTGCGCAATCTTATTTACATGGGTAGCGATCACGCTGGCGCTGTGATCACCTGATACCCCATATTCAGCGCCTTCG  
CTTTCTGCGCCGCTGGATCCAGGTGACCGGCATCCCGTACGCGGGTGTTCCTGCACGCCGTCATCTCGCCGTAG  
GTTTCGCTGGAGGGCAGGGCCATCAGTTTATCCGCCGAATATCCGCTTATCAGCCTTTATGCCGTTGATGAAAATGGC  
GTACTGACTGGGCTTAAAGCGGAAGTTTTCCGAATGCGGATCTCCGGCAGCAGCACGCCGTTGCCGTCAGAAATCACCT  
GCCGACGCCGCAATCCGCTGGGTGAGCGGTTACCTGTGCTTTGTCCACCAGCGCCACAGTTTGTAAACCGAGGCTT  
AACTGATAGGCTCGATCAGCGGAATGGTTTCCAACTGACCTGCTCGCTGCTGTTTCCGGTATGGTGGGTCAGCGT  
TTCGAGGCTTTTCTTCCGCTCCGCGCAGCGCTGTTTGTCTCATCCGACGCCGTTAAAACAAGCAGGGCGCTGA  
ACAGCAAAAACGGCAGGTGCGGCAATCCCGGTACCACCGCCAGCACGAACATAATCCCGGTGGCGGTGTAGAGCACCGAC  
GGCTTGGCAGCAGCTGTTACGACGTCATGGCGATATCGCCGTTGTGCTGACGCGGGTGACGATAATCGCCGCCG  
GGTGAGAGAGCAGGGAAGGGATCTGCGCCACCAGGCCGTGCGCGATGGTCATCAGCACATACTGCTGGAAGGCAGCAT  
CGGCGCTCAGGTTGATTTGAAGATCCCGATACAGACGCCCGGATCAGGTTGATCGCCAGAATCATCATCCCGCGATG  
GCGTCCCGCGCACAACTTCGATGCCCGTCCATCGCGCGTAGAAATCGGCCTCGTGGCAACATCTTACGCCGGT  
TTGCGCCTGCGCTGTTGATCAATCCGGCTTAAAGATCGGCGTCAATCGCCATCTGTTTGGCGGATCGCGTCTAAGG  
TAAAGCGGGCAGAAACCTCGAAATACGCTCGGCCCTTTGGTACGACAATAAAGTTGATTGTCAACAGCGTCAGTAA  
TCCGAGCGTAAAAGCATTATCGCCGCTGCACGGGAGTCGATTTTAAACGGTGGTGGGCTGTCGCCGTTAAATAAAT  
CAGCCGCTCATCCGCAAAACCTGCCACCGTGGCGGTGCCGGAAGAGACGGAGAAAAAAGCGGTGATGTGAATGAGA  
AAACGGCGCTGCTGAAGAAGAAATCCGCCACCGAGCTTGGTGAAGTGGCAACCAGTATCAACACCATTGCCGCTGATGCG  
CATATGGAAGCAATCTGGAGATGGAGATTGTTCCAGGGATTACGCTGCTGATTAAGACGACGAGAACCGCAATAT  
GTTTGAACCGCGCAGCGCAAGATTATGCCGTTCTTAAACGCTGCTGGTGGAGCTCGCGCCAGTGTTCGACTCGCTCG  
ATAATAAAATTTATTACCAGGTCATACCGATGCGATGGCCTACAAAACAATATCTACAACAACCTGGAACCTTTCCGGT  
GACCGCGCGCTTTCGGCTGCTCGGGTGTGGAAGAGCCGGAATCCCGGAAGATAAAGTATGTCAGGTAAGCGCAATGGC  
GGACCAGATGCTGCTGATTCCAAAATCCGCAAGCGCGGCAACCGCGCATTGAGATTATGGTGTGACCAAAAGTG  
GTCCGATACGCTGTATCAATACTTTGGTCAGCATGGGGATAAAGTGGTGCAGCCGCTGGTCAAAAGCTGGATAAGCAG



CAGGTGCTTTTCGAGCGAACGCGTAAATGCTGAATCTTTACGCATTTCTCAAACCCTGAAATCACTGTATACTTTACCA  
GTGTTGAGAGGTGAGCAATGCGTAAAATCATTATGTTGATATGGACTGCTTTTTCGCCGAGTGGAGATGCGCGACAAT  
CCCGCCTGCGGATATCCCTATTGCTATTGGCGGAGCCGCAACGTCGGGGGTGATCAGCACCGCAATTATCCCGC  
GCGTAAATTTGGCGTACGTAGCGCTATGCCGACAGGGATGGCGCTCAAATTATGCCACATCTCACCTTGCTTCCGGGGC  
GCTTTGACGCCTACAAAGAAGCCTCAAATCATATCCGTGAAATCTTCTCGCGCTACACCTCGCGCATTGAACCGTTGTCA  
CTGGATGAGGCTTATCTCGATGTCACCGATAGCGTCCATTGCCACGGTCTGCGACCCTCATCGCCAGGAAATCCGCCA  
GACAATCTTCAACGAGCTGCAACTGACGGCGTCTGCGGGCGTGGCACCAGTAAAGTTTCTCGCCAAAATCGCTCCGACA  
TGAATAAACCCAAACGCGCAGTTTGTGATTACGCCGCGAGAAGTTCGGCATTTTTACAAACCTTACCCTGGCAAAAATC  
CCCGGCGTCCGCAAGTCTCAGCGGCAAACTGGAAGCGATGGGGCTGCGGACCTGCGGTGATGTACAAAAGTGTGATCT  
GGTATGCTGCTTAAACGCTTTGGCAAATTTGGCCGATTTTGTGGGAGCGTAGTCAGGGGATTGACGAACGCGATGTTA  
ACAGCGAACGTTGCGAAAATCCGTGCGCGTGAACGACGATGGCGGAAGATTTCACTACTGGTCTGAATGTGAAGCG  
ATTATCGAGCGGCTGTATCCGGAACCTGAACGCCGTCTGGCAAAGGTAACCTGATTTACTGATTGCTCGCCAGGGGGT  
GAAATTAAGTTTCGACGATTTTCAGCAAACACCCAGGAGCACGTCTGGCCGCGGTGAATAAAGCTGATCTAATCGCCA  
CCGCGCGTAAAACCTGGGATGAACGCCGCGCGGGTGTGCGTCTGGTGGGGCTGCATGTGACGTTGCTTGACCCG  
CAAATGGAAGCAACTGGTCTGGGATTATGATGATACTATTATGATATTTCTGGTGTGCATTATTAGAGGGTATCA  
CTGTATGCATCGAATTCGCTGAAAAATCGGTCAATACACTGAGTTACGTAACCAACCCAGCTAAATACTTTATTGATC  
AACCGGTTGCGGTTCTTTCTAATAATCGCCCGCAGGATATCTCTTAAGTGCCAGCGCATTGGAAGCGTTAATGGACATG  
CTTGCTGAACAAGAGGAGAAAAAGCCATAAAGGCGCGCTTCCGTCCAAGTGCTGCAAGATTAGAGGAAATTACACGCCG  
CGCTGAACAATATCTAATGATATGACGGATGATGATTTCAATGACTTTAAGGAATAAGGATGCGGGTATTCAAAACAAA  
ACTTATTCGCTGCAACTTACAGCAGAGGAACTTGTGCGTTAACGGCGGATTTTATTTCTATAAGCGTGACGGTGT  
TGCCAGATATATTTGGTCCGATGCACTCTACGACGACTCCTTTACCTGGCCATTAATCAAATTTGAGCGAGTTGCTCAT  
ATTCATCTGGCAAATGAGAATAATCCATTTCCGCCACAGTTGCGCAATTACGACAGCAATGACGAAGCGCATTGTTG  
ATATTGTCAGGGGGCTTTGATGAGCAAGCATGGTTGCTCATTGCCATTCTGAAACCTGAACCTCATAAACTGGCTCGAG  
ATAACAACCAAATGCATAAAATGGGAAAATGGCAGAAGCGTTTCGCATGCGTTTTTGAATTTATATTATGAATAACATA  
CAAATAAGAACTATCAGCTGGCGATTTTCAGCAACTATGCGTATTTTCATTAGAGCGTTACGATGACCGCCAGTCA  
GCATTATTCACCACAACAAATTTCCGCTGGGCGCAGATTGACGAATCTCGTGGAAGGAGAACTCGCGAAATCACAAG  
TGTGGGTTGCGATCATTAAATGCACAACCGTTGGTTTTATTTCCGCGATTGAACATTATATCGATATGTTATTTGTTGAC  
CCTGAATACACCCGCGTGGGGTGGCAGCGCTTTGTTAAAACCTTTGATTAAGTCTGAATCCGAACTTACGGTGGACGC  
AAGCATAACCGCAAACCTTTTTTGAACGTTATGGTTTTAGACAGTTAAGCAGCAGCGGTTGAATGCCGGGGAGCGT  
GGTTACTAATTTTTATATGCGATATAAACCGCAACATTAATCCAGCTTGCAATGAAAATAACGCCCGCTGGTATGTG  
CGGTTTTCTGATTCCACAACTGCAAGGAGGTAATCATGACAAATCCTTTATCAATGACTCTTTGCGACCTTTCCAG  
GATTAATCTTTTTTTCTTGCCCTGGATTGCTGCGCATTCTGATTTTTATATTTATATACTCTAAATAATTCGAGTT  
GCAGGAAGGCGACAAGCGAGTGAATCGCCAGGAGCTTACATAAGTAAAGTACTGGGGTGAACGAACGCAGTCGCAGTACA  
TGCAACTTGAAGTATGACGAGTATAAATGGAATGGTACATGGGCAATATATTCGTCCCTTATCCGATGCGGTATTTACC  
ATCGCATCTGATGACCTGTGGATCGAGAGTTAGCGATCCAACAATTACACACCACGGCAAATTTACCCAACATGCAGCG  
CGTAGTGGGGATGCCAGATTTACACCCCGACGCGGTACCCGATTGGCGCAGCGTTCTTCTGTTGGTGGTTTTTACC  
CGCAAGACGTCGCGTAACGGTGTGGAACAGAAACGGGCCGCTACTCTGACACACTGCGTTCGGCGCTGGTTTTCTCT  
CGATGGCGATAACGCATGGGCATTAAGCGAAAGCTGGTGTGGCACTATTAGTGGATTTGTCCGAGTCCGATCGGCCCT  
ATCATGGGCGCAAAAACGTTTTCTGGGCATTGGCGTTTTACCCTGATGAGCAGGAACAATCGGATCGCAATCCGTTAT  
GAGACGCTGCGTTGCTGCGGGCCGGGCTCAACTGTCAATAAAACCGACTCGCGGTTACGCGCCAGCTTTGGCATC  
CGGTATTAGCGTGAAGTTTCAGTCAGAGCGTAGTCAGCATGCTAACAAGCGGCTGGCACGATTGCTGATTGCCCTGGAAGC  
TGGAGCAACAGCAACAGGAAAATAGCGCGGCGTGAATCGCAGCGGCAATGTTCCATCACCAGATTGAACGTGGCAAC  
CCGCGACGACATTTACAGGGATGGCTTTTATCGAAGGATAATGAAGGATGAAACTGCCGGAAGGCGATTAAACGCCATC  
CGGCAGCAAATCAAATAACTTCTCGCCGGAATTTCTTTCAGCAGTTCAGTCAGCAGTGTCCAGTAATGACCTACGCTTT  
CGATGTGAACCTGCTCATCCGGAGAGTGTGGACCGGTGATAGTTGGCCGATAGAAACCATGTCCATTTCCGGATACGGT  
TTTTTGAACAGACCACATTCAGGCCCGCGTGGATAATCTGGATGTTGCGCGTCTTGTGTAACAGGCGCTGATAGGTTTC  
ACGTACCAGATGCATCACCAGGAGAATTAGCGTCCGGCTGCCAGCCAGGATATGCGCCTTTGCTTCCGTTTTGCGCCAG  
CCAGTTTACCCAGCGAATCCAGCATGCTCACCACGTAGTCTTTACCCTGTCGATCAGTGAACGGATCAGGCAGTGAATT  
TCTACGTTATTGTCAGTCATGGTCAACACACCGACGTTCAAGGAGGTTTCAACCACACCTTTGGCTACATCGGAGTTACG  
AATCACACCGTTCCGGGTGGCGTTCAGCAGACGAATAAAGGTATCGCGAGATTTGCAATCAGGGCAGCTTTATCGTTCCG  
CTACAGAGTCCAGCAACAAGGCCAGATTTTTCTTTTTCTGCCAGCTGTTTTTCAGGATCTCCTGATAGGATTTACC  
AGAGATTTGAGACGTCGACTTTATCAGCTGCGACAGCAATGGTGCAAAAGGCTTACGCGGGATGGCGTTACGCGAGTGT  
GCCGCCGTTGAAATCGATAAGGCGCAGATCCAGTTCTCCGATGACCCGCCAGGAAGCGCACCGAGTTTGTGGCAT  
TACCAGCCAAACGTGGATTTCCCGCCGGAGTGACCGCTTTGAGACCTTTTAAAGGTTAACTTGAAGGTTTTAAAACCA  
GCTGGAACCGCTTACGATCTAAATGCAGGTTGGAGGTGAAGTCGATACCCCCGCACAACCCATGTAGATTTACCTTC  
TTCTTCGAGTCCGGTGTAAATCAGAATATCAGCCTGCAACCAGTTGCCCTGTAAGCCGAACGCACCGTCCATACCGCTT

CTTCGGTCATGGTCAGCAGCACTTCCAGCGGGCCGTGAACCACGTTTTCTGTCAGCCAGAACCGCCAGCGCAGAGGCCATA  
CCAAATGCCGTTATCCGCACCAGCGTGGTGCCGCGCGCTTTAACCATTCCGCATCAATATAAGGCTGGATAGGATCTTT  
CGTGAAGTCATGCACGGTGTGTTATTTTTCTGCGGCACCATATCGAGGTGGCCTGTAAGACGACCGGTTTACGATTTT  
CCATACCTGCGGTAGCAGGTTTACGAATCAGGATATTACCTACCTGATCGCGTTCGACATGGAAACCTTTCTCTTTTGGC  
CAACCAACAATGTATTACGCGAGTTGCTCTTCATGATTAGGACGGGTGAGGAATAGAACAGATTTTGGCAAAAATATCCCA  
CAGCGGCTGTGGAGATAATTGAGACAGTTCAGACACGTTAAGTCTCCTTGTCGATCACCCGCAAAACAGTATTGCAGGTC  
ACAGGGTTAGCAGAAAATGTTGTCAACACAAGACAGGCTTGCAGATATGTTTGAGAATACCACTTTATCCCGCGTCAGG  
GAGAGGCAGTGCCTAAAAGACGCGGACTCATGTGAAATACTGGTTTTAGTGCCAGATCTCTATAATCTCGCGCAAC  
CTATTTTCCCCTCGAACCTTTTAAAGCCGTAGATAAACAGGCTGGGACACTTCACATGAGCGAAAATACATCGTCACC  
TGGGACATGTTGCAGATCCATGCACGTAACCTCGCAAGCCGACTGATGCCTTCTGAACAATGGAAAGGCATTATTGCCGT  
AAGCCGTGGCGGTCTGGTACCGGTGCGTTACTGGCGCGTGAACCTGGTATTCTGTCATGTCGATACCGTTTGTATTTCCA  
GCTACGATCACGACAACAGCGGAGCTTAAAGTGTGAAACGCGCAGAAGGCATGGCGAAGGCTTCATCGTTATTGAT  
GACCTGGTGGATACCGGTGGTACTGCGGTTGCGATTCTGAAATGTATCCAAAAGCGCACTTTGTACCATCTTCGAAA  
ACCGGCTGGTCTGCGCTGGTTGATGACTATGTTGATATCCCGCAAGATACCTGGATTGAACAGCCGTGGGATATGG  
GCGTCGATTCTCGCTCCCAATCTCCGGTCGTAATCTTTCAACGCTGGCACTGGCGGGGCTTGTCTTTTTAACTTC  
AGCGGGTTACAATAGTTTTCCAGTAAGTATTCTGGAGGCTGCATCCATGACACAGGCAACCTGAGCGAAAACCTGTTCA  
AACCCCGCTTTAAACATCCTGAAACCTCGACGCTAGTCCGCGCTTTAATCACGGCGCACAACCGCTGTGACGTGGCC  
CTTGATGGTAAAACCATCCCTCACTGGTATCGCATGATTAACCGTCTGATGTGGATCTGGCGCGCATTGACCCACGCGA  
AATCCTCGACGTCAGGCACGTATTGTGATGAGCGATGCCGAACGTACCGACGATGATTTATACGATACGGTATTGGCT  
ACCGTGGCGGCAACTGGATTTATGAGTGGGCCACCCAGGCGATGGTGTGGCAACAAAAGCCTGTGCGGAAGACGATCCG  
CAACTCAGTGGTCTGCTACTGGCTGCATGCGGCTACGTTGTACAACATTGCCGCTATCCTCATCTGAAAGGAGATGACCT  
GGCCGAGCAAGCGCAGGCTTTGTCAAACCGCGCCTATGAAGAGCCGCTCAGCGTCTACCGGGCAGATGCGGCAGATGG  
AGTTTACCGTACCGGCGGTGCGCCCATACCGGCTTTTTGCATATGCCGAAAGGCATGGCCGTTCCCGACGGTATTA  
ATGTGTGGTGGTCTGGATGCGATGACGACGACTATTACAGCCTGTATGAACGTTATTTTGCGCCGCGCGCATTGCGAT  
GCTGACTATTGATATGCCGTCGGTGGGCTTTTCTCAAATGGAAGCTACCCAGGACTCCAGCCTGTTGCATCAGCACG  
TCTTAAAGGCGCTGCCTAACGTACCGTGGTGGATCACACTCGCGTCGCGGCCCTTGGTTCCGTTTCCGGCGCTAACGTT  
GCCGTGCGTCTGGCATACTTGAATCGCCGCGTCTGAAAGCGTTGCCTGTCTTGGTCCGGTAGTTCATACCCTGTTGAG  
TGATTTAAGTGCCAGCAACAGGTGCCGAAATGTATCTTGACGTTCTGGCCAGTCGTTTGGGGATGCATGATGCTTCCG  
ATGAAGCGTTGCGCGTGGAGCTGAATCGCTATTCAAAAAGTGAAGGATTGCTGGGACGTCGCTGCCAACGCCAATG  
TTATCAGGCTACTGGAAGAACGATCCGTTTCAGCCCGAAGAGGACTCACGCTTAATCACCTCATCATCTGCTGACGGTAA  
ATTATTAGAGATCCCATTTAACCCGGTGTATCGAATTTTGAACAAGGTCTTCAGGAAATCACCGACTGGATCGAAAAAC  
GCTTGTGTTAAAAATTTGCTAAATTTTGCCAATTTGGTAAAACAGTTGCATCACAACAGGAGATAGCAATGACGTTACCG  
AGTGACACCCGAAGAGCAGATTGATCAAAAAATTTACCGCACTAGGCCCGTATATTCTGTAAGGTAGGTAATGACTCCA  
ACTTATTGATAGTGTTTTATGTTTACGATAATGCCGATGACTTTGTCATGCAGCTCCACCGATTTTGAAGACGACAGCGA  
CTTCCGTCCCAGCCGTGCCAGGTGCTGCCTCAGATTAGGTTATGCCGCTCAATTGCTGCGTATATCGTTGCTGATTA  
CGTGACGCTTTCCCTTACGCGGGGATTACATACAGCGCCAGCCATCCGTATCCATATCACACGTCAAAGGGTACAGC  
AGGCTCATAAGACGCCCCAGCGTCGCCATAGTGCCTTACCGAATACGTGCGCAACAACCGCTTCCGGAGACTGTCATA  
CGCGTAAAACAGCCAGCGCTGGCGCGATTAGCCCCGACATAGCCCCACTGTTCTGTCATTTCCGCGCAGACGATGACGT  
CACTGCCCGGTGTATGCGCGAGGTTACCGACTGCGGCTGAGTTTTTAAAGTGACGTAATAATCGTTGAGGCAACGC  
CCATAATGCGGGCTGTTGCCCGGATCCAACGCCATTATGGCATAATCAATGATTTTCTGGTGCATCCGGGTTGAGAA  
GCGGTGTAAGTGAACGACTGCATGTTTACGGCAGTGAGAGCAGAGATAGCGCTGATGTCCGGCGGTGCTTTTGGC  
GTTACGCAACACCCGTCAGTAGCTGAACAGGAGGACAGCTGATAGAAACAGAAGCCACTGGAGCACCTCAAAAACACC  
ATCATACTAAATCAGTAAGTTGGCAGCATCACCTGAAGGTAAGTGCAAAGATAATCGATTCTTTTTGATTGCTGGC  
TGATGCGTCAACGTGAAACCGGCACCGGAAGTGCCTGAATTCTGGGGCTGGTGGATGGAGCTGGAAGCGCAGGAATCCC  
GTTTTACCTACAGTTACCAGTTTGGTCTGTTTCGATAAAGCAGGCGACTGGAAGAGTGTCCGGTAAAAGACACTGAAGTG  
GTTGAACGACTGGAGCACACCCTGCGTGAGTTTACGAGAAGCTGCGTGAACCTGCTGACGACGCTGAATCTGAAGCTGGA  
ACCGGCGGATGATTTTCTGACGAGCCGGTGAAGTTAACGGCGTGAAGTGAATGTGCCGGATGCATCACATCCGGCAATA  
TTCATTAATACTGATACGTCATGCCAACCAGCAATATCATATTATAATTTCAATTTGTTATCGCTATCCAGTTGG  
TTGATTTTATAATCAACAAACGCTGACATATTTTGTGAAATAATACGTAGCACCGACGTCGATATAATTGACCAGATC  
TTCATCACCGATACCTTCAATATCTTTCCCTTTCGATAAGACATAAACCAGCGATGGACGACAGACAAAGTCAAACCTGGT  
ATTGAGCGACCGCTTCAAAGTCTGTGCTTATTGGCAAAGCCGCAAGTATTGGCGTCATTTTGCCTGTTTCCAGATAG  
AAAGTTGCCAGATAAATATTATTGGCATCGATTTTACAGACCTGTTGCCATGCTTCTGCACGCTTGCCTGTGCCACGGCT  
TTGACGTTTCTGCTGTTGGTGCATCTGAGTTGGTATAGCCCCACTAATGGCGAAATCGCTGCCGCAAAAGTCATATG  
TCAATGACGTGCCGAAAGCCATCGCCGTTTTGCTTTTTAACGTCGCGGTTTTCTGTTTTTCCCTTGATATTGACAGGTTAAG  
TTCAGGCCATCGATAACGCCGAAGAAGTCCGGTTCGATACGTCGCCAGACCGCTGGCGGTTTTGGTATAAAGTTGTC  
GGTCTGCGCCGAGGAATCGCCACCAAAATTCGGGAACATATCGGTCCAGGCTTCCACGTCATAACAACGCCCCAGGTTAC

GACCATAATCGAAAGAACCCAAATCTTTATATTTCAACCCGGCAAAGCGAGACGCGTTTTTGTGTGAGTATCACTC  
TCTGCTTTATTACCGGCAAACCTCTGCTTCCCAACGACCATAACCAGTCAGTTGATCGTTAATTTGTGTTTCGCTTTGAA  
ACCAAAACGGATATAACTCTGGTCGCCATCTTTACTGGCGTTACTACTCATATAATGCATGGCTTTAACTTTGCCATAGA  
CATCCAGTTTTATTACCGTCTTTATTATATATTTCTGACGCTGTACAGATGCAGATGCCACAATGCCCATACCCTAAT  
GCCAGAGTGCTCTTTTTATTCTTCTGATTTAATTAACGGCGAATATTCAGCGGGAGAGTCCCCTTGAAAACAG  
GAAAGTTTTAACTGAGATTGTTAAAGATATATTACAGATTAATAATATTCTTAAAATGTGGTAATTTATTAATCTGT  
AATAAAAGCGTAAACAACCTGCCCTAGGCTTGTGATCCCAGCGCAACAAAACGCCATGCTTTGCTCGCAGATGGTTGGCA  
ACCGACGACAGTCTGCTAAAACGTTCTGTTGATATCATTTTTCTAAAATTGAATGGCAGAGAATCATGAGTGACAGCC  
AGACGCTGGTGGTAAAACCTGGCACCAGTGTGCTAACAGGCGGATCGCGCCGTCTGAACCGTGCCCATATCGTTGAACCT  
GTTCCGACAGTGCAGCGAGTTACATGCCGCCGGGCATCGGATTGTTATTGTGACGTCGGGCGCGATCGCCGCCGGACGTGA  
GCACCTGGGTTACCCGGAACCTGCCAGCGACCATCGCCTCGAAACAACCTGCTGGCGGCGGTAGGGCAGAGTCGACTGATTC  
AACTGTGGGAACAGCTGTTTTGATTTATGGCATTACGTCGGGCAAATGCTGCTGACCCGTGCTGATATGGAAGACCGT  
GAACGCTTCTGAACGCCCGCAGACCCTGCGAGCGTTGCTCGATAACAATATCGTCCGGTAATCAATGAGAACGATGC  
TGTCGCTACGGCAGAGATTAAGTTCGGCGATAACGATAACCTTTCTGCGCTGGCGGCGATTCTTGGGGTGCCGATAAAC  
TGTGCTGCTGACCGATCAAAAAGTTTGTATACCGCTGACCCGCGCAGCAATCCGAGGCAGAACTGATTAAGATGTT  
TACGGCATTGATGACGCACTGCGCGCGATTGCCGGTGACAGCGTTTCAGGCCTCGGAACCTGGCGGCATGAGTACCAAAT  
GCAGGCCGCTGACGTGGCTTGCCTGCGGGTATCGACACCATTATTGCCGCGGCAGCAAGCCGGGCTTATTGGTGATG  
TGATGGAAGGCATTTCCGTCGGTACGCTGTTCCATGCCAGGCGACTCCGCTTGAAAACCGTAAACGCTGGATTTCCGCT  
GCGCCGCCGGCGGGTGAATCACGGTAGATGAAGGGCAACTGCCGCCATTCTGGAACGCGCAGCTCCCTGTTGCCGAA  
AGGCATTAAGCGTACTGGCAATTTCTCGCTGGTGAAGTCATCCGATTTGCAACCTCGAAGGCCGCGATATCGCCC  
ACGGCGTACGCTTACAACAGCGATGCATTACGCCGTTTCCGGACACCCTCGCAAGAAATTGATGCAATACTGGGA  
TATGAATACGGCCCGTTGCCGTTCCCGTATGACATGATTACCGTTAAGGAGCAGGCTGATGCTGGAACAAATGGGC  
ATTGCCGGAAGCAAGCCTCGTATAAATTAGCGCAACTCTCCAGCCGCAAAAAAATCGCGTCTGGAAAAAATCGCCGA  
TGAACCTGGAAGCAAAAGCGAAATCATCTCAACGTAACGCCAGGATGTTGCTGACGCGCAGCAATGGCCTTAGCG  
AAGCGATGCTGACCGTCTGGCACTGACGCCCGCACGGCTGAAAGGCATTGCCGACGATGTACGTCAGGTGTCAACCTC  
GCCGATCCGGTGGGGCAGTAATCGATGGCGGCTACTGGACAGCGGCTGCGTCTTGAGCGTCGTCGCTACCGCTGGG  
GGTTATTGGCGTATTTATGAAGCGCCCGAACGTGACGGTTGATGTCGCTTCTGCTGTGCCTGAAAACCGTAAATGCGG  
TGATCCTGCGCGTGGCAAAGAACGTGTCGCACTAACGCTGCAACGGTGGCGGTGATTACAGGACGCCCTGAAATCCTGC  
GGCTTACCGCGGGTGCCTGACGGCGATTGATAATCCTGACCGTGCCTGGTCAAGTAAATGCTGCGTATGGATAAATA  
CATCGACATGCTGATCCCGCTGGTGGCGCTGGTTGCATAAACTGTGCCGTGAACAGTCGACAATCCCGGTGATCACAG  
GTGGTATAGGCGTATGCCATATTTACGTTGATGAAAGTGTAGAGATCGCTGAAGCATTAAAAGTATCGTCAACCGGAA  
ACTCAGCGTCCGAGCACATGTAATACGGTTGAAACGTTGCTGGTGAATAAAAACATCGCCGATAGCTTCTGCCCGCATT  
AAGCAAAACAAATGGCGGAAAGCGGCGTGACATTACACGCGAGATGCAGCTGCACTGGCGCAGTTGCAGGCAGGCCCTGCGA  
AGGTGGTTGCTGTTAAAGCCGAAGAGTATGACGATGAGTTTCTGTATTAGATTTGAACGTCAAAATCGTCAGCGATCTT  
GACGATGCCATCGCCATATTCGTGAACACGGCACACAACACTCCGATGCGATCCTGACCCGCGATATGCCGAACGCCCA  
GCGTTTTGTTAACGAAGTGGATTCTCCGCTGTTTACGTTAACGCTCTACGCGTTTTACCGACGGCGGCCAGTTTGGTC  
TGGGTGCGGAAGTGGCGGTAAGCACAAAAACTCCACGCGGTGGCCCAATGGGGCTGGAAGCACTGACCACTTACAAG  
TGGATCGGCATTGGTGATTACACCATTCGTGCGTAAATAAAACCGGGTATGCAAAAAGTAGCCATTTGATTCACAAGGCC  
ATTGACGCATCGCCCGTTAGTTTTAACCTTGTCCACCGTATTACGTTGTAACATGTAACAGCTGGTAAAGTAAATCTATCAACGAAGA  
TCAATCTTATCTACTGACAAAAAGCCCTGATAGGGCTTCTGCTACTATACATCCTTGGCTGACGTTTTAGTTGTACACC  
ACTCCTAAATTAATGTGTTGGCAATGTGTTCAATAAAGCTCGAACAAATAGCTCATTATGATCGGTTAATACTTCAAC  
TTCTGGTTGCATGATTGTTGTCCGTA AAAAGATAACGCGCTGCCGGTAGTAGCAGGCGCATTACGCAATAGGTA AAC  
AAGGGAGGAAGTTCAGAAATGTAATCGGGAAGGTTGACGCAATGTTATCGTACTACGTTGTTACGGCTTTGCCGCAA  
CAAGCCAGTTGCCCTGCCGCTCGCAGAAATGTCTGCAGCCGGAGATAAGGAGATTGTTCTGCCAGCTAAATCCCTTCC  
TGTCGATACGAACAGCTCGTATTTTTCTACCAGAAAATTACGGCATCGGCTAGGGTGATACCGGCATCGATGTGTTCC  
TTAATCACAGCCTCATTGCAGAATGGCGTGTGTTTTATTGTGACACCATAGTGTGTTCCAGCAGACGTGCAGTAACAT  
TTGCCAGACAGCCACGGGTGACAGGCAGGCTTACCAGCCGCTGAGTTATTGCAGGTAAGTTTTTATGTTTGTCTCG  
TGATAGTAATTAACGCTGAGTGGGGTAAATGGCGATGTATACGTAGCCGCAACTGCCAAGGGTGTGCGCTTCCGAGGTTA  
AATCGTTGTTGACAGGTAACGCAGTGGGCATGGTGGGGCTGAGTTCACCGTGGTCAGCATCGATTCATCTGGAGG  
ATAAAGTGCGGGAATGTTTATCCAGCTTCCGGCATTGATGTACTGAACTTCCGGTGTGCTGGCCCGTCCAGCCAG  
ATAATGCAGTCGGTTGCCTTCTGCACAGACGGGCTCCAGGCGCAGTGAATCTCCGCTGACGGCCCTGGTAGGGT  
TGCTCATTACAGTTCTCCACTATTGTGCTGAGTTAGGGTGTGCTCATCAGGCAGGTATAGGGCCATTGCGGTCTGGCGG  
CGTTCCGGCTATACCGCAGGACTCCGGCGATATCCGGAACGTCCTGCCGGTGAATGACAGACGCTACCGTGCCACTG  
GATTTGCCGGTGCAGTAGCGAAAGATTCCGGACTCAGGATGCTGGCGGTATATCGTCATTGCCCTGCGTTACTGATAA

TTTTCATGTAATACCTCAAAGCAGACCGTGTCTGCGAACGAATAGATTTGCCTGCCACCGACAATCAGATGGTCAGGGA  
CACGGATATCCACCAGCTGAAGCACCTGAACCAGTCGCTGCGTGAGGGTTTTGTCCGGCCTGGCTAGGTGTCGTCTCGCCG  
GAAGGATGGTTATGCGCGAGTATCACCGCCGCCGCGTTGAAGTGCAGAGCACGTTTGACCACCTCCCGGGGATGCACCTC  
GGTCCGGTTAATCGTGCCGGTGAAGAGCGTTTCATGGGCAATCAACTGATTCTGGTTGTCCAGATAACAACCCCGAACT  
CTTCCCCTCAAGCGCGCCATATGCAGTCGCAGCCATTACGTACGGCGTGGGTAGAGGTGAAGGCTACGCCGGGCTCA  
TGCAGGTGGCGGTCCAGAGCCCTGAGCGCCCGCTGAATGAGACGCCGGTCTGTGGCGTCACTCTCGCCGGGTAAAAAGGA  
AAGCTGTTTCACTCTGTTGCTCCTTCGGTCAGTCGATAATACGCAGAATGGCGTGAGCCTCTGGATGTTGCATGGCATACT  
CCCGCAGGCGGTAATAGTGTGCGGTATCGCGTCACATTCTGTACGGCAGGCATGGTGGCTATACGCAATCAGGCAGACA  
GCAATACCTGCTGCTTCTGCACTCATTGGGCATCGTTACCGTTCAGGCAGTTAAACAGACGCCATGTCTCATCGTTGTC  
AGGCTCGGGGGACATAAATGCGCCGCCATTGCTGAGGGTGTAGAACGACCAGATAACCACCGCTGTAGCCCTCACAGAAGC  
GGTCCATCCAGGCGAAGATATGCGGCTCCAGGAGTAGCCTGCGGGATAGCGCAAAGTACTGTGGCCAGAAATCGATA  
CGCTGTTATCGGGGACCGCGTGACGGTCAGTTCAAATTCGGTTGGTTAGCGGGTGCAGGTCGTGCTGCGTCTGTGT  
TGTGATGGGTATGCTCCGTCAATAAAAAACGCCAGCGGCGATGGCTGGCGTATGGGGATATAAAGTGTGTTCCGGGAGGT  
GAATGCGGGTAAATGCTTCGCGATCAGCGGGTGGCCGTGTCTGTACGGATCCCTGAGGTGCGGATATAGCGGTTAAGACC  
TTCACCGCATCCGGCTCAAAGTTCATGCCCGCAGACCCTCCGGCTTCAGTATCACGAACCACCGAGCGGAAGTGAC  
TGCCCTGGTCTCTTCGAGTGTGATATTGCTGTACGTGGTAGTGACCGCTTGCCTTGTCTCCGGGTAAAGGCCCCCGGT  
GGCAGCAACACGGATTGGTTCATTTTCGGCTCCTGATAAAAGAAAACCCCGGACGCTGCTAGCTGTCCGGGTGAATTT  
GCTGGGGAAGATACTACTATCAGTCGTTGCTGCAGTCTCCGAGAGTGACAGAACTTTCTCAGCGTTCCTCCGGTCCGCA  
GTGAAGGTCCCTGCTTTGTGGTCATTGACGTAGACGTGCAACTGCCCGCCTCAGAGATATTGCTGATGAAGTCAAACCA  
GGCGTTATCGCCGTTACGCCAGCCAGGCTGGACGGAATAATGTACTGCTGGTATCCATCACTACGGTATAGTAGTGT  
CGTCATCGTGCAGTACCATCTTGTATCGGCAAGGGTAAGAAAGACTGAATGCTGATAGAAACATTCTGGTCCGGG  
TTCCCTGTGCAGTTGATGGTAAACGTCTTTCGCTGGCTTCGGTCACGCTGTATTCCGTATTGCCCTGACCGTAACCCTG  
CTGCCAGAACCCCGGATAGCAGAGGCATTAAGCTCGCGAGCAGTACACCCGCCAGCATAAACCGACTTAGTGAAAGTA  
TTGTCACTTCTGCTCCTTTGCTGTTGTTTTATTCTGATTGTCAGGGTTCGAGGGTATCAGTAGCTGCCCATCAGTTT  
GCCGTGATGGGCGTACTCAAAGTATTTTTCTTTGGTATACGGTCCGTCACCTCCTGGTATTCCAGTTTGATGTTATCGG  
CAATACACAGCGCATTATCAGTGGCTGGACGGTTTTTCTGTCATATCCACGAGGTAGTAGTAACTGCCATCCTCGCAG  
CCATCGGGCGACTGGCGGTACGTA AACCTGCAAGGTGGGACCGGATAAGTAGTCAACCTGTGACCATCTTCGCTGAC  
ATCATCCTGGTGGCTGACCACATCACTGAAACCGGGTGGGGTGGAGTCTTAAATTTACTGATGGCCTTCAGGTATCAC  
TTCTGTCATCGATGCGATGAGAAACAGAGTGGTGGCAACCAGCGCCAGCAGAGGCAGTGTTCACGTTTATTATTTTT  
TTCTGAAATCAGACGAACCACTTTGGCAAAGACATAAATGCCACGAAAATACCCACCGGCACGCCGACGAACGGTGT  
AGCGCGACACTGGCAGCACCGGCTGCGCCACCTCCCGTCAGCAGTGCAGCAACAGTGGCAAGGGTCAGGGCCGCGAGACT  
GTCGGACACCCCGTTTTGTTTCAAGATGATGACGATGACAACAATGGCGATAATGGCAATATCCGGACTGATACTCCAGG  
TCCAGATACATCAGCCGCTCACGAAAATCACGCCGAGCGTGCACCCGACACCAAACCTCAGCGGCAAGCTTACGCAC  
ACTCAGCGTTTCCCTGCCACCAGACGGCTGATTATCAGTGCAGCCTGACAGCCAGCCGGTATGGCGGCGTTCGCT  
GTGTCATGAGACGTTCTCCGTGAAAGTAACTGACTGAAAATGATGTGATTACTTTAAAGAGGGGGTCCGACAGGGTATG  
GACACCACAGAAACTATTTTTCACTTCTGAAAAGCCAGAGGCAGCGGGGTTACAGGCCTTCCCTCGGTGAGTGAGGAC  
CGTCAGCACGGTGCATGCGGACAGGTGGTGTCCGATTAACAAAAGCAGCAACATTAACGGTCACTGCAGTTGCGTGA  
GCAGGGCTTCCGCATCACCCACAGTCCCGGTTAAGTTTACGTCCCGTCGATACCGCAACGGCACGGGTATGTGAC  
CGTCTCCTTTGGCATTACGCCCACTGAGCCCGCCCTAATCAGTTCCTGAAATACGCTGGTACGTGCCACAGGTC  
ATTGCTCTCATCCTGCCAGCGGCGAGGGAGAGGATCTGCGATTACGTACCCGGCTGGTGGTCTTCAACAAAAGCGGTATG  
TGAGGGCGGCTTTTCCAGTGCCTGCTGTGCCGGGGTGGCAACAGCAACGACTGCATGGCATCCCGTTTTCTCCTCCACC  
CGGTCAAAAATCCCCAGCACCTCATAACGCGCTTCAATCACTGACTCACACGTCCTTGTGTGGCACCCGACCTC  
GCCAAAAGACTCACCGCAGACGAGCCGTTCTGACAAAACCGCAGGAAATAGTCCCGGAACATCTGATACGAACTGGTTC  
CATCGTGAGAGTTGAGTAGAATAATTTCCGGCACCTGTTTACCGGTGATCTGCCCTTCCCGCCGACAGCAGCATATGC  
TTTGTATGTTACGACGACCCGGGTCACGCACGCGGGTCTGACAGGCAAAGAATGGCTGGAAGCCTTCTCGCTGTAGGCT  
GTCGAGCAGGGAGATGGTGGGTATATAGGTATAACGCTCACTACGGGACTCGTGTGTTGCTCACTGAATACACTGGGCA  
CTACGCAAAACAGCTCTTACGGGTTAACGGACGGTGCAGCGGATAAGGTTTGTGCGCCAAAGCGCAAGCCAGACGG  
GTCATAAGCAGACTCCTCATAACGGGAAAACAAATAAAAGGGATCCCGTCGCATCGCGACAGGGGAGGGAAGTAACA  
GGGATGGGTTAAATACTCAGAAGAAGAAATCCAGACGGCGCGGGCCACTGACACCACCGTGGTGCACAGCCCTGAATG  
ACGGCCCGACCGGGGCGGTATCAGGGGAAAGGCACTGATGCTATCGAGTACGGCCCCGACGGTTTACCAAATCGCT  
ACGAGCCTGTTCCCGACTACCGTCTGCGAAAGGAAGGATGGAGTTGCGACACCACCGGGCTGGTGGCCTCACGTGGCA  
GGCACTTAATCATCCGCTCGCCATCACCTTAAGCCCCATTGTAGACGGACCACACAGCACACCCGGATGGACGGGC  
TGAAACAGCTCATGCAGCAGGCAGATTTTGGCGTGAATTTCTGCTTCTGCGCCGTGGACAACCTGTCCCCACCGCTGGT  
AGGTTCCGGCTTATCCGACTGGCTGATAACAACAGCACCTTATGCCGGTATACCTCTCCAATCACCTGATGATAAAAAAT  
GTTTATCCACCGTCAGCGCCCGGTATCGGCCTTAATCAGCCACAGTACCAGGTCGAGGCGAGGAAGCTGTTCCGGGTAC  
AGCGCAGCATACTCGGTATCGCGAGCGCCACTTTCGCCACCGCGGGCAGATCCATCAGCGTTATATAGCGGTGCGCCAG

TTGCAGGCGAAAGCGCAGTGGCTCACGTGTACAGGCCGCCACATCGCTGACCGGTGATATATCTCCGGCAAACAGGGCAT  
TGCACAGACTGCTCTTCCCAACACCGGTTTTACCCATAATGCCGATCACTGGCTCGTAGTTAGTTAACTGGTTAATTTGC  
TGCAGAAGCCGCTCTGATACCCATTGCGGCAGATCAGCAAGCGATTGCTGAAACGACTTCAAACCTTCAGAATTATTCAT  
CACTACTCCTCTGAAAAATAATAAAAAACGGTAGAATCGTGAGATTCCGCCGTTAATTGCGTATGTTGAGAGTGATGATA  
TATATCTGAAGATTTTTTCAATCCTCTGCGCTTGAGGCAGCTGCGCGACTGCTGGCTCAGGCAATGAATGAGTTATAATA  
GCAGCATTTACTAACAGGGATTTATTGAGAGTATGAGCCGCCGTGATACACCTTAAAATCTCAACCCAGCAAAGTTTCGG  
AGCCGCGAGCAAAGTGAGAGCCTTACAAAATAATGCTTAGTAATAAAGTTACTTTGAATTGAGAGCCCGGATTAATGT  
GAACATGATCAACGAATTTTACCCAGATTGAGTTCATTGAGTAGCCAGGTTTTGAACACATCAAGCGCAGAATGCATGTG  
TTGGTGTGGGGGAAAACCAATAATGACCGATGTAATGTATTTGCTGGTACTGTTTACAAGTGGGCATACCAGTTTAC  
CGTAGCGATTTACGTTTACGCCAGTAGTTTTGATTCAAGCAAACTCCAAGCCGTAACGCGGCAGCAATCGCCATA  
AAGTACGGTCAAATCGAAGGCCATAATTATTGGTGGCGTATCTTATTCCCTCAAACCATCTTTCCACTGGTACAA  
CTGCACATCGCACTGAATCAATGTCAACGCATAGAGATCCTCTGGTTTTTTAGCCGCTCAGCCAGTTGGGGAGAACA  
GTGGCGTAAGTTCTTCAACAGCAAGCGGGATCTTCTCATAGGGTATGGGCGGGTTTACCCTAGACTATATCGAGATCA  
AAATCATCTGTTCAAACGTGCATATTCTGTGCTGGCTGAAAGTCGAGATCGATGCTTGGTTCTCACGTATGAACCT  
ACCAAGACGTGGTAAAAGCATTGATGGGCAAAACTCGGTGCAGTATGAAGCGCAAAGGCTGGATTCATCAGCCGTC  
CTAATGCCAACCCCTGCTGTAATTCGTTAAATCCCCGCTGATGTGCTCAAGCAGTATTTACCTTTCTTCGTCAGCGTA  
ATTTCTCGCTACTGCGCTGAAAAGGGGTACATCAAGCAAGTTTTCCAGTTTTCGGGATGGCATGGCTGATCGCACTGGG  
TGACAGTTCCAACCTCAGAGCGGCCAACGCAAAGCTCCGGTACGACCAGCCGCTTCAAAGCGCGTAACAGATTTAGAG  
GTGCTTTTGTAAAGACTTCATTGATGAATCCTTTTCACTAGGGATGAAGTGGTTTACTGAATTTGGCCACTGAACAGA  
GGTGATATGCTCACCTCAGAACAACACAGGTGTATAATGAAAAAAGAAATTTAGCGCAGAGTTTAAACGCGAATCCG  
CTCAACTGGTCGTTGACCAGAACTACCCGTGGCAGATGCAGCCAGCGTATGGATGTCGGCCTTTCCACAATGACGCGA  
TGGGTGAAACAATTACGTGATGAACGGCAGGGCAAACACCAAAGCCTCCCCATTACCCCGAACAATTTGAAATCCG  
TGAGCTCAGGAAAAAGCTACAACGTATTGAAATGAAAATGAAATATTAAGGCTACTGTAGATTCAATTTGGTCAAC  
GCAACAGTTATGTGAAAACATGGGGTTGCGGAGTTTTTTGAATGAGACGAACATTTACAGCAGAGGAAAAAGCCTCTGT  
TTTTGAACTATGGAAGAACGGAACAGGCTTCAGTGAATAGCGAATATCCTGGGTTCAAACCCGGAACGATCTTACTA  
TGTTAAGGGTACTGGCGGCATAAAACCCATGAGCGTAAGCGGGCTGTAGCTCACCTGACACTGTCTGAGCGCGAGGAG  
ATACGAGCTGGTTTGTGAGCAAAATGAGCATTGTCGATAGCTACTGCGTGAATCGCAGTCTTCGACGATCTCACG  
TGAAGTTGAGCGTAATCGGGCAGACGCTATTACAAAGCTGTTGATGCTAATAACCGAGCCAAACAGAATGGCGAAAAGC  
CAAACCGTGCTTACTGGATCAAATTTACCATTGCGAAAGCTGTTCTGAAAAGCTGGAGATGAAATGGTCTCCAGAG  
CAAATATCAGGATGGTTAAGGCGAACAACCAACGCTCAAAAACGCTGCGAATATCACCTGAGACAATTTATAAAACGCT  
GACTTTTCTGAGCCGTGAAGCGCTACACCACCTGAATATACAGCATCTGCGACGGTCGCATAGCCTTCGCCATGGCAGGC  
GTCATACCCGCAAAGGCGAAAGAGGTACGATTAACATAGTGAACGGAACACCAATTCACGAACGTTCCCGAAATATCGAT  
AACAGACGCTCTCTGGGGCATTGGGAGGGCGATTTAGTCTCAGGTACAAAAACTCTCATATAGCCACACTTGTAGACCG  
AAAATCACGTTATACGATCATCGTTAGACTCAGGGGCAAAGATTTCTGCTCAGTAAATCAGGCTCTTACCAGCAAATTC  
TGAGTTTACCGTCAGAATCAGAAAATCACTGACATGGGACAGAGGAATGGAATGGCCAGACATCTAGAATTTACTGTC  
AGCACGGCGTTAAAGTTTACTTCTGCGATCCTCAGAGTCTTGGCAGCGGGGAACAAATGAGAATACAAATGGGCTAAT  
TCGGCAGTACTTTCTAAAAAGACATGTCTTGCCCAATATACTCAACATGAACAGTACTGTTGCTGCTCAGCTAAACA  
ACAGACCGAGAAAGACTGAAGTTCAAAACACCGAAAGAGATAATTTGAAAGGGTGTGTCATTGACAGATTGAATCTAC  
AACCGCGCTCTTATGTCAGACTCCCTGAACAGTTCTGATAAATCGGAAACTCAGGGCGGTTATCTGTGGCCACTCT  
CTGCCATGTGTTGCGGGTTCATCGCAGCAGCTACAAACTGGAATAACCGTCTGAAAAGCCAGACGGCAGACGGGCTG  
TATTACGAGTCAAGTACTTGAACGTCATGGCATCAGCCACGGCTCTGCGGAGCAAGAAGCATCGCCACAATGGCAACC  
CAGAGAGGATACCAGATGGGGCGCTGGCTTGTGGCAGACTCATGAAAGAGCTGGGGCTGGTCAAGTTGCCAGCAGCCGAC  
TCACCGGTATAAGCGTGGCGGTGATGAGCACGTTGCTATCCGAATCATCTTGAAGCAGAGTTCCCGTAAACGGAACCAA  
ATCAGGTGTGGTGCAGTGTGACCTATAGTGTGCCCGGAGTTCAGGGCGGGCATGGATGCTTAAATGAACCGGAGTCT  
TGCTGGAATATTGAACCGTAACTCACGATGAGAAACCAACAATCCACCGGGTGTGACGGTGGAGAACCAGCGGC  
AGTGACCTGCGGCATGCCCGCAGGGTGTGTAACCCGCTGACAACGGGGATTGAGGCGAGATCACTAAGCCGAGATGATC  
CTCAAGTTAAGTACTGAAAGTTGAAGAATGAACCCGTTAATCCGCTCTGTGGTTGAAAACGTCACCACGGCCTA  
CGTGATCTGACAGGCGTGCAGGAGGAAGTGGCAGTATACGTAAGCACTGCCGGTGAAGGTGTTTTGACATGATGCG  
AAACACCGGGCAGCAGCTATCACGTTGCGTTGCTGACTTCTGCAACTTGGCGAAGCAAGGATAAAGAGTGGCA  
CGGGCAGCCTCTCAGTATGCTGAGTCCAGGCAGTAAACCGGGGAAGGTCAGCGACGGATGTTAAGGGGGCATGGCTC  
CGATGACGCGTGGCTGGCGGAGCTTCCGTAGTAGTCCGCGATGGGAAAGCCATTACATGGCGAAGGGAAGCAGTTG  
AATGTGTTTGCAGCTGAATTAACGACCTAACGAGGTGAAGACCTTTGATAATCAGCGAAATGCAACGCAAGCTTGCCA  
CATGGGCAGCCACCGATCCGTCCTACGATTCAACGGCTGCTGCGTCTGATAACACAACCAGAATGGCTGGCTGAAGCG  
GCCGCGATCACGCTTTATCAAAGGGGGCCATACCCCGGGCTTGTGGCGTGAACAAAACAATGCTACAGGCCAGACT  
GGCTGTTGAGCTGCAAATCCTCAGGGATGAATTAATCTCAGGCCACTACCAGCCCTTGCCCGCAGACGGGTTTACATCC  
CTAAAAGCAACGGCAAACCTGCGACCACTGGGTATCCCCGCTTGGGGATCGTATTGTTACGCGGGCCATGCTGATGGCG

ATGGAGCCGATATGGGAGAGTGATTTTCATACGCTCTCATATGGCTTCCGGCCTGAGCGCAGTGTCACCACGCGATCCG  
CACGGTGAAATTACAGCTCACAGACTGTGGTGAACCCGGGACGCTGGGTGATTGAAGGCGACCTGTCCAGTTACTTCG  
ACACCGTACATCATCGACTGCTGATGAAGGCTGTACGCCGAGGATCAGTGACGCACGTTTCATGACTCTGCTGTGGAAA  
ACCATCAAGGCGGGACATATCGATGTCGGTCTCTTTCCGGCGGCCAGTGAAGGTGTGCCACAGGGCGGTGTTATATCGCC  
GCTATTATCGAACATCATGCTGAATGAGTTCGATCAATACTGCATGAGCGCTACCTGAGCGGGAAAGCCAGAAAAGATC  
GGTGGTACTGGAATAACAGTATCCAACGGGGCCGAAGTACGGCGGTGAGAGAAAAGTGGCAGTGGAACCCCGCGGTGGCG  
TACTGCCGCTATGCCGATGATTTTGTCTCATCGTCAAAGGCACCAAAGCACAGGTGGAAGCCATCAGGGAGGAGTGTCCG  
GGGTGTGCTCGAAGGCAGTCTGAAACTCAGGCTGAACATGGATAAGACTAAAATCCCCATGTTAATGACGGCTTTATCT  
TTCTGGGGCACAGGCTCATTGCAAACGCAGTCTGTTATGGCGAGATGCGAGTGGTCTCAACGATCCCGCAGGAGAAAAGCC  
AGAAACTTCGCCGCATCGCTGACAGCACTGTTATGGAAGGTGCGAATAAGCGGGGAAATTTCTCGGCTGACTCAGTCA  
TTTCATTTCTCATGTTTGAGCCGATTTTTCTCCCGTAAATGCCTTGAATCAGCCTATTTAGACCGTTTCTTCGCCATT  
TAAGGCGTTATCCCCAGTTTTAGTGAGATCTCTCCACTGACGTATCATTTGGTCCGCCGAAACAGGTTGGCCAGCGT  
GAATAACATCGCCAGTTGGTTATCGTTTTTCAGCAACCCCTTGTATCTGGCTTTCACGAAGCCGAAGTGTGCTTGTGA  
TGCGAAATGGTGCTCCACCCTGGCCCGATGCTGGCTTTCATGATTCGATGTTGATGGCCGTTTTGTTCTTGCCTGGA  
TGCTGTTTTCAAGTTCTTACCTTCCCGGGCGCTCGCCGATCAGCCAGTCCACATCCACCTCGGCCAGTCTCGCGCTG  
TGCGCCCTTGGTAGCCGCATCGGCTGAGACAAATGCTCCTCCATGCAGCAGATTACCCAGCTGATTGAGGTGAT  
GCTCGTTGGCCGCGGTGGTGACCAGGCTGTGGGTGAGGCCACTCTTGGCATCGACACCAATGTGGGCCTTCATGCCAAAG  
TGCCACTGATTGCCTTTCTGGTCTGATGCATCTCCGGATCGCGTTGCTGCTCTTTGTTCTTGGTCGAGCTGGGTGCCTC  
AATGATGGTGGCATCGACCAAGGTGCCTTGAGTCATCATGACGCCTGCTTCCGGCCAGCCAGCGATTGATGGTCTTGAACA  
ATTGGCGGGCCAGTTGATGCTGCTCCAGCAGGTGGCGGAAATTCATGATGGTGGTGGCGTCCGGCAAGGCCTATCCAGG  
GATAACCGGGCAAACAGACGCATGGAGGCGATTTCTGACAGAGCATCTCCATCGCGCCATCGCTCAGGTTGTACCAATG  
CTGCATGCAGTGAATGCGTAGCATGGTTTCCAGCGGATAAGGTGCGCCGCCATTACCAGCCTTGGGGTAAAACGGCTCGA  
TGACTTCCACCATGTTTTGCCATGGCAGAATCTGCTCCATGCGGGACAAGAAAATCTTTTTCTGGTCTGACGGCGCTTA  
CTGCTGAATTCAGTGTGCGGCAAGGTAAGTTGATGACTCATGATGAACCCTGTTCTATGGTCCAGATGACAAAATGAT  
CTCATATCAGGACTTGTTCGCACCTTCCGGAGGCGTTATGAGCTGGCGGCCCTTTTTGTATCTGATTATTAATCCCCAC  
CCGCTATTAAGCGCCCGCGCGGCATCTGCGTCTGGTGCAGGTTGACTTTGCATTCTGTTAACAACGCGGTATAACA  
AACCTTCTTTGGATGTTTAGATGTCCATACGTTTAGAAGGTTATATGCAAACAACAACAATAATGCGCCACTGAAGCGC  
ACAATGAAAACGCGTCACCTGATTATGCTTTCCTTGGCGGCGTATTGGCACAGGATTATCTTCAATACCGGGTACAT  
CATTTCACCAGTGGAGCGCGGGAACGCTGCTGGCCTATCTGATTGGTGGCTGGTGGTCTGGCTGGTTATGCAAGTGT  
TGGCGAGCTGTCGGTCCGATGCCGGAGACCGAGCGTTTACGTTTATGCCGCGCGCTATCTTGGTCCGGCTACCGGG  
TATACCGTGGCCTGGCTTACTGGCTGACCTGGACCGTGGCGTGGGTTGAGCTTTACCGCCGCTGGATTCTGTATGCA  
GTAAGTGGTTTCCACAGGTGCCGGTATGGGTCTGGTGGTGGTGTCTGCGCGATTATTTTTGGTCTGAATGTTATCTCCA  
CGCGCTTTTTTCCGAAGGGGAGTTCTGGTTCTCGTGGTCAAAGTGGTCACTATCATCGCCTTATCATCCTCGGTGGG  
GCGGCGATTTTCGGCTTATTCCGATGCAGGATGGCTGCCCCGCGCCGGGCTGAGTAATATCACGGCAGAAGGCTGGTT  
CCCGCACGGTGGCTTACCATTGTTGATGACTATGGTGGCAGTGAATTTGCTTTTTCGGGTACCGAGCTTATCGGCATTG  
CCGCCGGTGAACGGAAAACCCGCGCAAAGTTATCCCGTAGCGATTCTGACTACCATCGCGGACTGATTATTTTTCTT  
ATCGGCACCGTGTGTTGCTGGCAGCGCTGATCCCGATGCAGCAGGTGGCGGTGGAGAAAAGCCGTTTGTGCTGGTATT  
TGAGAAAGTAGGGATCCCGTACGCCGCTGATTTTTAACTTCGTGATCTGACGGCTATCTTTCTGCAGCGAACTCCG  
GGTTATATGCTCCGGCGCATGCTGTGGTCTGATGCTCGATGAACGTACGCTACCAGCCTGTTTTGCGCGAGTAAACGAAA  
AACGGCGTGGCCTGACCGCGCTGTCGGTCAAGTATGCTCGTGGTGTGCTGGCGCTGTTTTCCAGCGTGGTGGCCCGGA  
CACGGTATTTGTTGCGCTGTCCGCAATCTCCGGTTTTGCGGTGGTAGCGGTGGCTGAGTATCTGCGCCTCGCATTTTTG  
TTTTCTGTCGCGCTCATCTGCAACAAGGTAAGGCATTGAGTGAATTACATTATCGCGCGCCGTGGTATCCGCTGGTGCCA  
GTATTAGGTTTTGTGCTGTGCCTGGTGGCCTGTGTTGGGCTGGCATTGATCCAGCGCAGAGAATTGCGTTGTGGTGGCG  
GTTACCGTTTTGTGCTGTGCTATGGTCTTATTTCTTACTCAACCCGAAACGAAAACAGGAGCCAGAACATGTCCG  
CAGAATAATCCGTTACGCGCTCTTCTTGATAACAGGATATCCTGCTGCTGGATGGCGGATGGCGACGGAGCTGGAAGC  
GCGAGGGTGAACCTAGCCGACAGCCTGTGGTCAAGGCTGGTAGAAAACCCGGAGCTTATCCGCGAAGTGCATC  
TTGATTACTACCGGGCGGGGCGCAATGCGCGATCACTGCCAGTATCAGGCGACGCGCGGGCTTCCGCGCGGAGGT  
CTGGATGAAGCGCAGTCAAAGCGCTGATTGGCAAAGCGTGGAGCTGGCGGTAAGCCCGTGAAGCGTATCTGGCAGA  
GAACCCGACGGCGGAACGCTTCTGGTGGCGGGATCCGTCGGCCTTACGGCGGATCTGGCGGATGGCTCTGAATACC  
GTGGCGATTATCATTGTAGCGTTGAGGCATTTAGGCGTTTATCGCCCGCGCTGGAAGCCTTGTGGATGCCGGGGCC  
GATCTGCTGGCCTGCGAAACCTGCCGAATTTTTCCGAGATTGAGCGTTGGCCGAGCTGTTGACCGCATATCCGCGTGC  
GCGGGCGTGGTCTCATTACCCTGCGCGACAGCGAACACCTGAGCGACGGTACGCCGCTGCGTGACGTGGTTGCGTTGC  
TGGCGGGTTATCCGAGGTGGTGGCGTAGGCATTAAGTGTATTGCGCTGGAACACACCAGCTGCGTTGCAGATTTA  
CACGGTTTAAACGGTGTGCCGCTGGTGGTGTATCCGAACTCGGGCGAGCATTACGATGCCGTGAGCAAAAACCTGGCATCA  
TCACGGTGAACATTGCGCGCAGCTGGCGGATTATCTGCCGAGTGGCAGGCCGCTGGCGCACGGTTGATTGGCGGGTGT  
GTCGCACCACGCTGCGGATATCGCCGCTTAAAGCGCGAAGCTGAGGGTTTATCGGGTCTACATCGTTTATTGATGGC

CTGATAAGCGCAGCGCATCAGGCATTGCCGGATGGCGGCACAAGCGCCTTATCCGGCCTACAAAACACAAAACGTTATG  
CCGCATCCGCCAGAACAACATGCCGTACGGATGGATTCAAGATAATACTGCTCGCCGACGTCGGTTCAGACGCGTA  
GCGTTGACCTGCAATAATATCTCTGCCCGTGCATTCCACCGTCACTTCATACTGCGGCCCATATAGGCGACATGGCG  
GATCACGCAGCGCTGGCTCTCTCGCCGCGATCGCTGAGCGTGATCGTTCGGGGCGCACACCGACCATCCCTTCACCCT  
GTGTACCAAAGTGCAGCGGGCGCGGAGATGATAGCCGTAGATATCAACGTATCCGTGCTGAAGGTTGCCGGGAACAGG  
TTGGCATCGCCATAAAGCTCGCCATAAAGCGGGAGGCGGGTGGCGGTAAGATCCTGCGGTGAGCCGATCTGCATGAT  
GTGTCCCTTGTTCATCACCAGCACAGTATCAGAAACCGCAAAGGCTTCGCTCTGATCGTGGGTGACGTACAGCGAGGTGA  
TATCAAACCTGCTTTTGAACCTCGCGGATCTTGTGCGCATGCTGCGACGAGTTGGCGTCGAGGTTACTCAACGGCTCA  
TCAAACAGCAGCACTTCGGCTTGAGGATCAGCGCGCGGGCCAGCGCCACCGCTGCTGCTGCCCGCCGGAGATCTGATC  
GACAAAGCGGTCTTGAATCCTTCCAGATCCACCATCGCCAACGCTCTTTGACGCGGGCTTTCAGCTCTGCGCGCGTA  
CGCCGAGCATTTTCAGGCCATAACCGACATCTCTCCAGCGACATATGCGGGAACAGGGCATAGGACTGAAACACCATA  
CAGATATCGCGCTGCTGAATAGAGCGATGGGTGACGCTTTCGCCATCAATGAAAATTTGCCCTTCGCTCGGTTTTCCAG  
CCCGGAACAGGCGCAAATAGTGGTTTTGCCGACGCGGACGGCCGAGCAGCGTACCATTTGCCCTTCGCGGATGG  
TGAGGTTGATATTGTCGATTACCGTATTACTGCCAAATCGTTAGTGACGTTGCGCAGTTCAACGAAATTTTTCTGAGTC  
ATAGTGCCTCCATTACCGCTGGTTTTGGCTTTTGAACGGGAGTACGTGATTCACCGATCAGCCAGTCAAAGATGAAA  
ATAATCGCCAGCATCACCAGATCAGAATGGAACCGTAGGCAATCGCTACACCGTATTCCGCATCTTCCACGCGGTTGAG  
GATGTAAGCCGTGCTACGCGGGTATCCGGCGTGACGAGGAACACAATGGCGCTGACGGTGGTAATGGCGCGCAAAAGC  
TGTAATCAGCGCCGAGAGGATCGCCGGCGCAGCAGCGGAGGATGTGCGTAATGGTACGAGGGAACCGCGCGC  
AGGCTGAGTGAGGCTTATCGAGCGATTTATCGATTTGGCCCGTAATGACTCCAATTTATGATAGTGTTTATGTTCA  
GATAATGCCGATGACTTTGTCATGCTGCTCCACCGATTTTGAAGACGACAGCGACTTCGGTCCAGCCGTGCCAGGTGC  
TGCTCAGATTGAGTTATGCCGCTCAATTCGCTGCGTATATCGTTCGTTGATTACGTGCAGCTTTCCTTCAGGCGGGA  
TTCATACAGCGCCAGCCATCCGTCATCCATATCACCACGTCAAAGGTTGACAGCAGGCTCATAAGACGCCCCAGCGTCG  
CCATAGTGCCTTACCAGTACGTGCGCAACAACCGCTTTCGGAGCCTGTCATACGCGTAAACAGCCAGCGCTGGCGC  
GATTTAGCCCCGAGTATCCCCACTGTTCTGCTCATTTCGCGCAGACGATGACGTCACTGCCCGGCTGTATGCGCGAGGT  
TACCGACTGCGGCTGAGTTTTTAAATGGCGGAAAATCGTGTGAGGCCAACGCCATAATGCGGGCGGTTGCCCGGCA  
TCCAACGCCATTATGGCCATATCAATGATTTTTCTGGTGCCTACCGGTTGAGAAGCGGTGAAGTGAATCGAGTTGCC  
ATGTTTTACGGCAGTGAGAGCAGAGATAGCGCTGATGTCGGCAGTGCTTTTCCGTTACGCACCACCCCGTCAGTAGCT  
GAACAGGAGGGACAGCTGATAGAAACAGAAGCCACTGGAGCACCTCAAAAACACCATCATACTAAATCAGTAAGTTGG  
CAGCATCACCAGAACACAATGGGCTAATTCGGCAGTACTTTCCTAAAAAGACATGTCTTGCCCAATACTCAACATG  
AACTAGATCTGTTGCTGCTCAGCTAAACAACAGACCGAGAAAGACACTGAAGTTCAAACACCGAAAGAGATAATTGAA  
AGGGGTGTTGCATTGACAGATTGAATCTACAGCAGCTTTTTTAAATATGTCCCGTTTCGTCGGTAACCCGTTTCAGCTCTT  
TCTGGAGACGGCGGATCTCGGCCTGAGCATCTGACTGTTCTTTATTAGTGAAGAATCCGGACCGTACTTCTTTATCCAG  
GCATAAAGGCTGTGGGTGGTATATCGAGACGTGTTGCAACGCTGGCAACAGAATAACCGAGATCAACAACCTGTTTAC  
TGCTTCAAGTTTAAACTCTTCGGGATAACGCTTACCCTCATGGGCACCTCTCTTAAAGCCATTTTAAATGACTCGGAGG  
TGCTGTAAACCCGTGGCGATTCAAATTTGCGATATACATACCCATGACTGCCAGCGTATCGGCTTACCAGTCAG  
CCCGTTACGGTACAGTGACACAGTGCAGTACCTGGGATTCAGCTCACAGGAGAGCAGCATCAGCTCCAGATGTGCGA  
CAAATGCGGGAAGGCTTCCAGTTGTAGAGTCTGCACCTCACTGAATGAGCCGGTGAATCCAGCCCGGTGAGCCAGA  
AAATGACAGCAGTACCTTCTGCACCGTCTGCTCCGAAACACGGTGTGATATCTCGTTAAGCCCCAAGTTTGTGAGT  
AGAGTCTTTTATCATAATTTTATTCTGTTAAAGAAGACCATGTTCCGGCAATGAGAATATTTGCTGCCCGGACAATC  
AGGTGGTCGGGGACATGGTGAACACTTTTTAACCTCTTTACCCATGGTATCGACTTTTTCTCAGGTCGATCACCCTCC  
ACTTTCGTGCTGTACCACACACCTGTAGCTGCCGCTTCTCTGCATCTCCTTCAGCCCGACCCGTTCTCCCTGAACGC  
CTTGCTGCGCTCAGACTTACCCTTTACGCTCAGCTTTCCGCTGATATCCATTTTCTGACCATACCCCTTTCATCGT  
ATTCCGGGGGCTTGTGTTGCCGCTGACTGCCGCGTGACGGCTGATACCGGAGCCCGTACCGCCATATCCAGCGCC  
TCGTGCGGGGCTTCAAGGTTATAGACCGTCCGCCAGTGGTCAAGGCGCGCTGCAGTTCACCGCTGTCTGCAACCATTT  
TCCCTGCAGCACTTCCGCTTTCAGGCTGCGGTGAAAACGCTCCAGCTTCCCTGCGTCTGCGGATGATAAGGCCGGGAGT  
GCCCCACCCGGATACCCAGGCGCATCAGCCACAGCTCCAGCGCGTCCAGGTGCCGGTGGTGTGCCCCACGGTGGAGCCG  
TTATCCATGGTCATCCGGTCCGGCAGGCCGTAACGCTCAAACACGCTGACCAGTGTGCTGTCACGGTCTCGCGCGTTC  
ATCGGTACAGTGCAGGACAGGCAAGGAAAAACGGGAGTGGTGTCCAGCAGGGTGAAGCGGATGGCAGCGTCCACCGCAA  
AAGGAAAGTGGCCCTTAAATCCATCTGCCAGAGGCGGTTCCGGCGCTGCTGTTCAACCGGCCCGTGGCGGGAATGCC  
GGTGAAGCGCCCGCAGCAGGCCATGGCGGGCCATCAGGTTATGGACGGTGTGAAGGCGGGCATGGTGTGCCCTGGTC  
CTCGAGCCAGCGTTAATCTTGGGGTCCCCAGGTTTCATGACGGTGTGAGGCGATACGCAGCAGGGCCGTGATGTCGT  
CAGATGAGCGGTTCCGGGAATGGTGCAGGATGCGCGGGCGGCTCTGAAGACCGCGGCACCTTCTGAGCCAGCGCTGG  
AGCCACTTGTAGCCGGTGGCAGGTGAAATGCCGAAGCGACGGCAGAGGGAACGGATGTTCCGCCCGTCTGCGAGGCGAA  
CAAAACAACTCAGTACGTAATGACATGGTATCTCTCGCATCCAGGGCATAAGCGACTCCATAAACGGGTTCTTATGCC  
TTAGTTGTAAGTGTCTACCATGTCCCCGAAAGTGTTCATATGTCCCCGACCGTACACCCCAAAGGGGAGAGGGGAC  
TGCACCGAGCCATCTTTCCCTCGCCCTTTGGGGAGAGGGCCGGGTGAGGGGCAATATGTGATCCAGCTTAAATTT

CCCGACTCCCTCTTCCCTCCGATTTACCTCTCCTTGTCTGCGTCATAGTATGATCGTTAAATAAACGAACGCTGTTCTATAATGTAGAACAAAATGATTCAGCAAGGAGATCTCATGCCGCAGTCCGCGTTGTTACGGAATCATTCCCCTGTCTCCACCATTTTTACCGCCGACGGCCAGCTCGATAAGCCGGCACCGCCGCTGATCGACGATCTGATCAAAGCAGGCGTTGACGGCCTGTTCTTCTGGGCGAGCGGTGGCGAGTTCTCCAGCTCGGCGCCGAAGAGCGTAAAGCCATTGCCGCTTTCGCTATCGATCATGTGATCGTCGCGTGCCTGTGCTGATCGGCACCGCGGCACCAACGCCCGGAAACCATCGAACTCAGCCAGCACGCGCAGCGGGCGCGGACGGCATCGTGGTGATCAACCCTACTACTGGAAAGTGTGGAAGCGAACCTGATCGCTATTTGAGCAGGTGGCCGACAGCGTCAAGCTGCCGGTGTGCTCTATAACTTCCCAGCGCTGACCGGGCAGGATCTGACTCCGGCGCTGGTGAAAACCCTCGCCGACTCGCGCAGCAATATTATCGGCATCAAAGACACCATCGACTCCGTGCCCCACCTGCGCAGCATGATCCATACCGTCAAAGGTGCCCATCCGCACTTACCCTGTCTGCGGCTACGACGATCATCTGTTCAATACCCTGTCTCGGCGGCGACGGGGCGATATCGGCGAGCGGCAACTTTGCCCGCAGGTGTGGTGAATCTTCTGAAAGCCTGGCGGACGGGGAGTGGCGAAAGCGCCGGTATCATCAGACCTTGTGCAAATCCGCAGATGTATCAGCTGGATACGCCGTTTGTGAACGTATTAAGAGGCGATCGTCTGCGGTGCTCCTGCTCCACGCAGTGTGCCGCCGCCTCGCCGCTGGACGAGCCGCGCAAGGCGCAGCTGAAAACCCTGTGCAACAGCTCAAGCTTGTGAGCCGGACGATAACGATGACCATTTGAGAAAATTTACCCCGCAGGACGACGCTTTTATGCGGTGATCACCCACGCGGGGGCCGAGGGCTCTGCCGCTGACCCCGCAGATGCTGGAATCTCCAGCGCAACTGTTCCGATGACGCAGAACGCCGGATGGCTGGACGCCAACAGCTCACGGCAAAGAGGTGCTGATTATCGGCACTCAGGGCGCATCCGCGCCGGAGACGCCCAATCGCGCTGGCTACCACACCGGCATTGGGAGATCGGCATGCAGATGCAGGCGCGGCGAAGGAGATCACCCGCAATGGCGGGATCCCGTTCGCGCCCTTCTGTCAGCGATCCGTGCGACGGGCGCTCGAGGGCACGCACGGTATGTTGATTCCCTGCGTACCGCAACGACGCGGGCATCGTGTTCGCCGCTGATCCGCTCCCTGCCGACGCGGGCGGTGATCGGCGTAGCGACCTGCGATAAAGGGTGCCCGCCACCATGATTGCGCTGGCCGATGCACGACCTGCCGACTATTCTGGTGGCGGGGGCGGCGACGCTGCCGCCGACCGTGGGGAAGACGCGGGCAAGGTGCAGACCATCGGCGCGCTTCGCCAACACGAACTCTCCCTGCAGGAGCCGCCAACTGGGCTGTGCGCCTGCGCCTCGCCGGGCGCGGGTGTGAGTTCTCGGCACGGCGGGCACCTGCAGGTGGTGCGGAGGCGCTGGTCTGGCGCTGCGCACTCCGCGCTGGCGCGTCCGGGACGGCGGTGGCTGGAGATCGCCGCCAGTCCGGCGCGCGGTGAGCGAGCTGGATAGCCGGCATCACACGCGGGATCCTCTCCGATAAAGCCATCGAAAACGCGATGGTGTACCGCGGCTTCGGCGCTCCACCAATTTACTGCTGCACATTCGGCCATCGCCACGCGGGGGTGCACGATCCCGGACGTTGAGCACTGGACGCGCATCAACCGTAAAGTGCCGCTGTTGAGCGTGCTGCCAACGGCCGGACTATCACCCGACCGTGCAGCGCTTCTCGCGGGCGGCGTCCGGAGGTGATGCTCCACTGCGCGACCTCGGCCTGTGCATCTGGACGCCATGACCGTGACCGCCAGACGGTGGGCGAGAACCCTGAATGGTGGCAGGCGTCCGAGCGCGGGCGCTTCCGCCAGTGCCTGCGCGAGCAGGACGGGTAGAGCCGGATGACGTGATCCTGCCCGGAGAAAGGAAAAGCGAAAGGGTGAACCTCGACGGTCTGCTTCCCGACGGGCAACATCGTCCGGAAGGTTGGTGATCAAGGCCACGGCGATCGACCCGTGGTGGGCGAAGATGGCGTATACCACCACCCGGCCGGTGGGGTGTGTCTCGGAAGCGCAGGCGATCAAGGCGATCAAGCGGAAGAGATTGTGAGGGCGATATCATGGTGGTGTGATCGGCGGGGGCGTCCGGCACCGCATGGAAGAGACCTACCAGTCACTCCGCGTAAAGCATATCTCGTGGGGCAAGACGGTGTGCTCATCACCGATGCGGCTTCTCGGGCGTGTGACGGGCGCTGCTTCCGGCACGTGTGCGCGAGGCGCTGGCGGGCGGGCCGATTGGCAAAGCTGCGCGATAACGACATCATCGAGATTGCCGTGGATCGTCTGACGTTAACTGGCAGCGTGAATTCATCGGCACCGCGGACAAACCCGCTGACGCCGGAAGAGGGCGCGCGAGCTGGCGGGCGGACAGCACCCGGACCTGCACGCCACGACTTTTGCCGACGACACCCGGCTGTGGGCGGCACTGCAGTGGTGGCGGGCACCTGGAAGGCTGATTTATGACACCGATAAAATATCGAGGTAATTAACGCCGGTAAAAAGCGCTCGGAATTAATTAATTTAAGAGATAAACCCGCTGCGGAATATTTTCCGACAGCGCTTTGTTGTTTTGAAATTTAATTTAAACAATTAAGTAGATATATCGTTGGCGTCAAAAAGCAAATAACGTAATTCGAAATAAGATATGACCATTGCTGGTTAATTTGAATAGCTCATTACACTCCATTAACACGATGTTGTAATTCGGCACACTACATAAGGGTGAATTTCTGATGACGCAATTAACCATGAAAGACAAAATTGGCTACGGGCTGGGAGACACCGCTGCGGCTTCTGTCGAGGCCACGATGTTCTGCTGGCTATTTCTACACCGAGCTTTCGGCTGTGCGGGATTATGGGCACGCTGTTTTTGGTCTCCCGCGTGTGACGCCGTACCAGCCGCTGATGGGGTGTGGTAGACCCGACCCGACGCGGCACGGCCAGTTCGCCCGTTCCTGCTGTGGGGGCCATCCCGTTCGGCATCGTCTGCGTGTGACCTTCTACACGCCGACTTCTCCGCACAGGGCAAGATCATCTACGCTGCGTACCTTACCTGACCTGGTCTACACCTTCGTTAAGTGGTACTGCGCATGCCGGCGTATCACCGCCGACCCGAAAGAGCGTACGCCCTGCAGTCTGGCGCTTCTTCTGCGGGCGGGGCTCGCTCGCTATCAGCGCATCGCGCTGCCGCTGGTGAGCATCATCGGCAAAGGGGACGAGCAGGTGGGCTACTTCGGCGCATGTGCGTGTGGGGTGGGCGGTGGTGTGCTCTACGCTGCTTCTTCCAGACCAAAGAGCGCTACACCTTTGAGGTGCAGCCGGCTCGTGGTGGCGAAAGACCTTAAGTGTGCTGGGCAACAGCCAGTGCGCATCATGTGCGGTTCAAGATGATGGCAGCTGCTCAACGTGGTGGCGGGCGGGGCGAGCTCTACTTCGTGAAATACGTGATGGATCACCCGGAGTTGGCGACCGATTTTACTTTACGGCAGCCTGCCACCATGTTCCGGCTCGCTTGGCTCCACGCCTGTGGGCCGTTCCGACCGCTCACCGCTTCAAGTGGATCATCGTGCCTACTCGCTGATCAGCCTGTGATTTTCGTACCCCGGGGAGCACATCGCGCTCATTTTTGCCCTCAACATCCTGTTCTGTCTTTAATACCACCAGCCGCTGACGTGGTGTGAGCTTCTGACGTGGTGGACTACGAGGAGAGCCGACGGTCCCGCTCGACGGCTGGTGTCTCCACCTACCTGTTACAGCTGAAGATTGGCTGGCGATTGGCGGGCGGTGGTGGGCTGGATCCTGGCGTACGTCAACTATCCGCCAGCAGCAGCTGCAGCCGGTTGAGGTGCTCACACCATCAAATTTCTGTTCTGCGTGGTGGCGGTGCTCT



ACGCGGGCATGTTTCATCATGCTGTGCTCTACAAGCTACCGATGCCCGGTGGAGGCCATCAGCCGGCAGCTGATTAAG  
CACCGCGCGGCGCAGGGCGAGGCCGTTCCCGACGCCGACAGCCGCATCCCATTAACCGGAGGCAATATGGAAATCACT  
AACCCGATACTCACCGGTTCAACCCGACCCGTCCTGTGCCGCCAGGGCGAGGACTACTACATCGCCACCTCGACCTT  
CGAGTGGTTCCCGGGCGTGCATCTACCACTCCCCTGACCTGAAAACTGGTGCCTGGTACGACCCCGTTGGACCGG  
TGTCGATGCTGGACATGAAGGGCAACCCGGACTCCGGCGGCATCTGGGCGCCGTGCCTGAGCTACGCCGACGGTAAATTC  
TGGTGTCTACACCGACGTGAAGATTGTCGACTCGCCGTGAAAAACGGCCGCAACTTCCTGTCACCCGCGCCCTCCAT  
CGAGGGCCATGGAGCGAGCCAATCCCGATGGGCAACGGCGGGTTTGACCCGTCCTGTTCCACGACGACGATGGCCGCA  
AATACTATATCTACCGCCGTGGGGGCCGCGCCACCACAGCAACCCGCAACACCATCGTGTACAGGCGTTTGACCCG  
CAGACCGGCACGCTCTCGCCGAGCGCAAAACGCTGTTTACCGGCACGCCGCTGCTACACCGAAGGCGCGCACCTGTA  
TCGCCACGCGGGATGGTACTACCTGATGGCCGCCGAGGGCGGCACCAGCTACGAGCAGCCGTCGTGGTGTGCGTTCCA  
AAAAATCGACGGGCGTACGAGCTGCACCCGGACGTAACGATGATGACCAGCTGGCACCTGCCGGAACCCGCTGCAG  
AAGAGCGGCCACGGCTCGTGTGCAGACGCATACGGGTGAATGGTACATGGCTACCTCACCAGCCGCCGCTGCGCCT  
GCCCGGCGTCCGCTGCTGGCCTCCGGCGGACGCGGCTACTGCCCGTGGGGCGGAGACCAGGCGATCGCCCGATTGAAT  
GGCGGACGGTGGCCGTACGTGGAAGCGGCAAGCAGCGCAGCTGACCGTAAAGGCCCGCAAGTAGCCGAGCAGCCT  
GCAGCCGTTCCGGGCAACTGGCGGGACGATTTCCAGCCAGTTGCTTACCCGGAGCTGCAGACCCTGCGCATTCCGTT  
CGACGACACCTCGGCTCGCTCACCCGCGCCCGGGCTTCTTACGGCTCTATGGCAACGACTCGCTCAATTCGACCTTCA  
CCCAATCGACCGTGGCGCGCCGCTGGCAGCACTTCCGCTTCCGGCGAGAAACGCGGATGGAGTTCTCGCCGGTGCATTC  
CAGCAGAGCGCGGGGCTGACCTGCTACTACAACAGCAAAAACGGAGCTACTGCTTTGTGGACTACGAGGAGGGACAGGG  
TAGAACCATCAAAGTTATCCAGCTCGACCACAACGTGCCGTGTCGGCCGCTGCACGAGCAGCCATTCCGGTGGCGAAC  
ATGGCGAGAGCGTCTGGCTCGGGTGGACGTGGATACGCTGGTCTACCGCTACAGCTACTCGTTTGTGGCGAGACGTGG  
CACACCGTCCCGGTGACGTATGAGGCGTGAAGCTGTCGGACGACTACATCGGCGGGCGCGGCTTCTTACCGGCGCGTT  
TGTGGGCTGCACTGCGAGGACATCAGCGGCGACGGCTGCTACGCGGACTTCCGACTACTTACCTACGAGCCGGTCTAAC  
GGCTCAGGCCGGTAGCCAGCGCGCGGAGAGCGGAGCCCGGCTGCTGAAGCTGCTCGCGGAAATTAGCCAGCTCCG  
CGTGTCCACGCGGGAGGTGAGCTGCAGGCTCAGGGCGGCGATGACGCGGACTCGTGGTTCCACACCGGCACCGCC  
ACGACGCGACGCCCTGCTGTTCTTCTGCTGTCCAGGGCGTAGCCTTGTCTCGGGTCTGCGCCAGGGCGCTCATTA  
GGCTTCCGAGACGCGAGGGTGGCGGGCTAAAGGTAGTGTACTGATAGCCCTCAGCAGGGCGTTCCAGCTGGCCTCGC  
CCAGCCAGGCAATCAACACCTTCCGATGGCGGTGGCTGCACCGCAGGCGCGGCGGATGCGTGAATAGCGGATGGCG  
GCCAGTTGCCCTCAATCTTCTCGATATAGACCCCTTACGCCGTCAGGATCCCCAGATGGGTGGTCTGCCCGTCCG  
CCGGGACAGCTCCGTCAGCCAGCCTTTTCCCTTCTGCCGAATATCGATGGAGCCACGACAAAATGGCCCGCTCGACCA  
GTTTCATGCCGAGGCGATACTTCCGTTCTCCGGTCTGATCGATATAGCCGTGAAGCTGCAGGGTTTTTATGACGCGAG  
TGGAGGTACTCTTGCTCAGCCCATCAGTTTGTGATGTCGGTATCTTAAGCTCGGTGGCTGCTCGTTGAACAGGTC  
GAGGATCTGCAACGCACGTTCAACAGACTGAATAATCGGCATAATGCTGGCATGTCCACGCTGGAATTAAGGCGAAAACG  
TACCTTTTTCCGGATGAAAAATCAATGAAATGGAGCCGGTGTCTCCCTCTCCCTGTGGGAGAGGGCCGGGGTGAAGGCA  
CCAACGCGCAGCGGACCCAACTACTCCCAAGCGTTGCCATCATCACCGCCTTAATCGTATGCATCCGGTTTTCCGCTG  
GTCGAACACGATGCTCGCCGCCGACTCAAACACCTCGTCCGTACCTCCATCCCGCCGTGCAGATCGAATCCTTCCGCA  
TCTGCTTCCGAGCGTAGTCTGGTGTGATGGAACGCCGCGAGACAGTGCAGGAACTTACGTTCCGGTTGTGCGTCA  
GCCATCATCTGCGGTTACCTGATACCCGCGCAGCAGCGCAATCCGCTCTGCCACTTCTCTTTGGCCTCGCCATCGA  
CACCCACAGTCGGTATAGATAAAGTCCGCGCCCTTAAAGCCTGCCGCCAGCTTCCGTCAGAGTAATTTCCCGCGT  
GCTTCTCCGCGAGCGGCTGCACTCCGCCACAGGCTCTTCCGGCCAGCAGGCTTCCGGGCAACAGGCGCAGATCC  
AGCCCGGTCAGCGCCGCTTCCAGCATCGAGTGCCTGTTGTTGTCGCGCATCGCCCGGTAGACAGCGCTCATCTC  
GTTAAACGCCCTTGGCCGGCAGGTGCTCCTGCATGGTATCAGGTCGCCAGCAGCTGGGTCCGGTGAACACTCGTTGGTCA  
GCCCGTTCCACACCGGCACGCCGATACTGCGCCAGCGTTTCCAGCACTTCTGCGCGTACCCGCGATACTGAATGCCG  
TCATACATCCGCCGAGAACCCGCGCGGTGCTCTTAATTGACTCTTATGCCCAATCTGGCTGCCGCTCGGCCCTAAATA  
GGTAACGCGCGCCCTGGTCAAATGGCGCAACTTCGAAAGAGCAACGGGTACGAGTCGAGTCTTTTTCGAAGATGAGCG  
CGATGTTTTTACCGTAAGCTTCTGTACTTCTTCCATTTTTTTATCGGCTTTGAGCTGTGCGGCAAGGGTCAAGCA  
GAAGTGAAGTGTGAGGGTAAAGTCGAGCAGTTTTCAGAAAGTGTTTTTGTATAAATCGGACATTTTATCTCGCATGG  
CGAACGCCACTTATTGAATTAATACTTTATATGTGTAATTATTTGCAACCCCATTTTACAATTTCTTTCTTAC  
AAAGGTGGAGGCAACCCGTCGCTGTGTGAAAATAATCGTATCTGCTCCGATTCTCTGCAGAAGCAGAAAGACATTGGA  
TCGAATTTACAACAGGTCGAGTCAGAAATGAGAATGATTGGCCTTCTTTATGATTTAAGGATTATGCTTCTAAAATG  
GCGGAGAACATGGCGAGGCTTGTGCTTACTTACTTACGCGGTGATGGAGGCGATATATCTGTTACCGGGTAATG  
ACTCCAATTTATTGATAGTGTATGTTTGTGAGATAATGCCGATGACTTTGTCATGCTGCTCCACCGATTTTGAAGCA  
CAGCGACTTCCGTCAGCCGTCAGGTCGCTCAGATTCAGGTTATGCCGCTCAATTCGCTGCGTATATCGCTTGC  
TGATTACGTGACGTTTTCCCTTCCAGGCGGATTATACAGCGCCAGCCATCCGTCATCCATATCACCGCTCAAAGGGT  
GACAGCAGGCTCATAAGACGCCAGCGTCGCCATAGTGCCTACCCGAATACGTGCGCAACACCGTCTCCGGAGCCT  
GTCATACGCGTAAAACAGCCAGCGTGGCGGATTTAGCCCGACGATCCCACTGTTCTGTCATTTCCGCGCAGACGA  
TGACGCTACTGCCCGGTGTATGCGCGAGGTTACCGACTGCGGCTGAGTTTTTAAATGGCGGAAAATCGTGTGAGGCG

CAACGCCATAATGCGGGCGGTTGCCCGCATCCAACGCCATTTCATGGCCATATCAATGATTTTCTGGTGCGTACCGGGT  
TGAGAAGCGGTGTAAGTGAAGTGCAGTTCATGTTTACGGCAGTGAGAGCAGAGATAGCGCTGATGTCCGGCAGTGT  
TTTGCCGTTACGCACCACCCGTCAGTAGCTGAACAGGAGGGACAGCTGATAGAAACAGAAGCCACTGGAGCACCTCAA  
AACACCATCATACTAAATCAGTAAGTTGGCAGCATCACCGAATTTTCAGCCCGGATGTTTCACGTACCTATGTGCAAT  
ATCTGGCCGATAAGGTTGCGGATCGAGAAGAGGATGCAGAGGAATATCTGGAAGCAATCATGGAGGCTCGTGTACCGTT  
GCTGGCATGGGGCTGGTGTGGAGGTGCAGGATTCTCGATGGCGAGGCCGATAGACTGGCGAAGGCGTGGCTGGCCGA  
GTACACACCGCAAATCAAGTCGTTGAAAGATGAGCGTAAAGAGGCCATTCGTCAAAATCGTCGAAAATGAGTACCGAACCGC  
AGGATGTGGATCTGGTCAGGCCGGCGAACAGTTTGAATGACCAGGGTGCCTGAAAGGTGAAAAGGAAGCTGACCTTCCA  
GTCTGGAACACCATTGTTGTGTGACGAAAGCGGGAACTATCCGGCTCTGTTGAACCATTTGGGAAACCAAGGTTTTTGA  
GATCGAAACCAAACGTGAAGGATTTGCTTTCTGGTATCGTAATCCACAGTACACAGGGCAGTGCCTACTGGGAATCGCTT  
ATGTTGAAGCTGAACAGTACAAGATTGTCGTCGCGATTTCTGTTCTTTGCCGAACAGGATGGCAAATGGTTGTGGAC  
CTGGTAGATCCACATAGCCTACATCTGGCTGATGCTTTGCCAAACTGGAAGGACTTGCCTATATGCCGAACATCATT  
TGATGCTTACAGGCGAATCGAATCTGTGCGCGAAGTAAAGGGTAAATTACGAGTGTAGATTTGAAACGGCAGGATGTGC  
AGGATGCTGTTGCTACCGCTGAAAATGCAGAAACGTTATTTAGTAGCGGACTTGCTGATGACTATCAGTAATCTATAGAA  
AATTGCGTAACGAACTGCATTTTAGTAATTTTTGAAACAATAACAAATAAGGCTTCTCACTGAGAAGGCCATTACCGA  
CTTACAGTTGATTTGGCTACAGCCGAAGTTACGGTCTCCTTCCAAACACTTTGCTTTCAACTTTGGTCAGGTAGTCC  
AGTCGGGTTAACAGCGCCTGGTAGTTCTGCTGGAAGTCAGTACTATTGGTGTCTAGCACATACTTACAGTTTTTCAGGAAA  
ATGGACCAGACCAGGGTATCGTCTCTCCAGTCTCAGGGCGCTGTACCAGGCTCCTGTGATCATCCCTCTAAGGTTAT  
CGTCTGATCGTAATCCCGAGGTGGTAGTAAGCGTCTTTGTTGAACAACAGGCAAATGTGATAGTGGCATTACCTGAT  
TCAGAATACTCTTTGCCCATATAATAAATAAAGGGCAACGGTAAATGCGTTTATCCTCACGCACCTTACGGGTACGGTC  
AGCCTCCAGCTTAGCTCTGAGGGATTACGCATCCGGGATATCACCCAGGTTCCAGGTTAGGGAAGCAACAGATATTGT  
CACCGTTATCAACTATTTGGGATAGTGGAGATCGACACGTACAGCAATTAACCTAGGATACCGGTTAGTCAAATAACAT  
AATAATTTATTAATCTTACTCTGATATTCGAGGATATGACTCCATGAGTACCTTGATATGTTTTATAATATATACCTG  
TATTTGGTCTACGGTCTATAGCAGACCGTACAGGGATGCCATACAGGCAGGGCTATTCTGGTCACTGTTGTGCGGTATA  
TACTGGTATCAGATTTAGTACGGACATACTGATCTGATTACTACTTACTGGTGAATACAGGTAGTAAGAGTACACAA  
TGCCATTATATAATACCTATCCAACATCTAAATTTGAGACGAAGGTAGCCCCAGCCTGTGATGGCTGTTAAAAAGTTACT  
CTGCAATTAGCTTCTGGAATTAACCGATGATTCCGTTATTCCAGTGCCGCTTACAGTCGATAAACTGATACTCAATTT  
TTTGAATCTCAGCCTGAGTAAATCCACCTTTCTAAGTATTGTGATATCACGTCGGTATTTGCTTCCCTCCTTTTCGTC  
TAATTTTTTCTTAACATGTCGATATCGGCTTTTAGTTGATTTAGATTGTGAATGTCAATCGTATCCTGACGAGCAATCA  
AAAAAGACAAGCAACTTTAGCAGAAGGCTCTATCCTTGAAGCTGGATGGTAGCTGTAGATAAACATTTCTTTTTGAAGG  
CAAAAAATAAATAATTCTGTAAGTCTCCACAGTTCTGCAAGACAGCTTAGATCTGGAATGACAAGCGTGTCTCGCCG  
GTTCAATTCATGATGAATCAATTGCTGAGTAAACGTTGCTCTGAAACAACCTCTTAAATATCTACCTGCTCGATCACAA  
CATGTTCCAGGTAGAATATTAATTTTTGGCATACTCAGCAAGTGAAGTATGATCTGTAATGCTTTCTTGGCTGTTCCGTA  
CTGCATATGGTGTAAAAAATGAACGCATCTGATGCACTCCGGTGTGATAAATATTTTTGATACCTGAATAATGTCAT  
TTTGATAAAAAACAACCAAAATAGAGAGTGAATGCCAGCGATACTTAACTGGTAAAGTAGTATTTACCTCTATAA  
TTGTTTGTCTTTCTTTGTTACCTCTTAGGTTCTGCTCTTTGTGAGTATGGGTTATAATGATGTCATCCGGTACATTA  
CACGTTGGAAACATCTGTTTTGCGGAGCACTGGCAGCATAACCACCATTTTATTGACATGGTAAATATCAATCCAACA  
ACAACCGGATAAAGGCATAACAATCCCTTTCTTCTAAGAACTTCAATTTATCCGAATATAATCAATTTGGGATGTTGACAA  
GAGTAGAGCTGCCCGGCATCAAAGTAATAACCTCAAAGGTTTCTATGAATAAGAATAATGTTTGAATATCTGAGA  
CACTTTGATGCTTTACATCAAAATGCTTTGATTGTAATGTAATGGCTTTTTCCATATCGTAATTTCCCTTAGCGAG  
GATAGCCTTTACGTATAACTGTTTTTTCATCTTTCCCATGAATTCATCATTAGCGTTAGTTGAAAGTAATCTGCAAT  
GGGATTTTTAATGGACTCATGATGTTGTTTTCCAGATTAACGAACAGTACTTCCAGAGTTACTTCTGTTTTACCTC  
GGCTTCGATTGATGCTTTCTTTATAGAGAACTTAAACAGGTCATTTTTTATTTCAATTTATTGACCAGTTATGACGATTG  
CATTTTTCTAATATAGGGATAGCCAAATCCACAACCTCCGCTATTACGGAAGAGTGAGATTTATTTGTTAGTCTGGCATA  
ATGATCAATTAATCTAATGAAGATTGATTTTTGAACGTGACTGAGTGTTTTTTATGGGAGTAGTCTGACTACCTGTG  
ACTCATTGTTTTGCCTTGACAAGGTTTTTTCTGGTAGAACGCTGCTCATCTCAAATAGTAACACTATTAGACATT  
TTAAGGAAACCTCTTTGTTATCTCAATATAAACTACTATCTGAAATTTCTCAGTGTGCCCCATTTTTCTCGGGCAA  
CATCGCTATAAATCAATAAAATTAATCTGTAATTTATTACAGACTTTCTCGTACAGAAAATGATCTATAAAATCGAGG  
ACATCTTACGTAACAGTAATGGCGCCATTGATTTGTTTTGGCGAGGTAGCCCTCAGGCAATTTGCTGACAAAG  
CCATTTACGAATGGTTTGTAGATTTGTAGCTAATGATTTAGCTAACTCAGCTGTTGAAATGAGCTGTGATTGAGATGTAT  
CCGGGAGTTTGAATGCGCTCAATTTGCCACCTCAGTATTGAGATATTGGCAAAGAAAGCTTAAAGCATTATTGAATTAG  
TAGGGGTAGTAATGAAGGCAGAAGGAAACGTTTCCGGCTCGGGTCTGGGCTCACTACCATCACCTGAATCTGATGATAAG  
GCACTTTTAGCTGATTTAGCCGTAAGTGTGATGCGATCTGGATGCCTGATTTTTACATGACATCAGACGCGGAGAAAGTT  
AGTAGCATTTTGCATTTTGTAAAGATGTAATAATTTTTCAGTTTGGCGCATGCGACAGACTTGGCAAGAGCTGAGTATG  
TTCTTTGAGATACTCGACAACCTCTCCATGGACGCAAGATCGTTAAAGGATTGAGTTGTTTTACTTGAATTAATACAC  
CAGCGAGCTCTGATAGCTGCCAGAGTGGGTTCTATGGATACAGTTGCTGGGGTTCATTGGCTTATCTCCTGTGATGT

GCTGTATCATTGACTAACTGTGTATTACGATACATGAAAATCTATCTTGATCAATAGTTGATGATATTTTGTAAATATGT  
TGATTTTTAATGGAATCAACGCATATCAACGTTGTTTTTATGGTAATACCTGCTTCATTTAAGATCCATGTCTCAATTT  
TCTCGTGCCATTTTCGTAACAGATCTAACGGACGACGGCGATAGTGTTCGCAAGAGCGCTGGGTTTGTGTCCATA  
ATTTGAGCAACAATACCAGTGGGAACCTCAACCCACTCGGCCAAAGTACAAAACACTACGACGTAACCCGTGAAGGCTGAT  
ATGTGGTAACTCAGCCAGCACTAATGCTCTGTTGTGCGCTGAACGCGCTCAATAATTTTGCCACTTTTACTGTTACTTC  
TGAAAACCCAACCTCCTATTTACGTGAGAATTTGGGGATTGCGCTAGTACATTTAACAATTCAGAAACATAAGGAGTG  
AGAGGGATGATACGTTACACCTTCGATCTTGTCTTAAATTCGCATGCTTGACCATTTGAAATCTACGTCTGACCAGCGAAG  
CGACGCAATTTCTTACGCCGAGCACCAGTGAGCAAAAGTACTTGGAGATAGGCCGATGCAATAGGATTATTGAGGCTAC  
GCACGGCACTAAACCAGCTTTTGTGTTCTTTTGCAGGCAATCATCAGCTTACTCGTGACACGGGAACCATTTTT  
CTTACGTTGTAATCTTGTGCCAGATGCCAGGAATGATCCCTTGATATTTTTCTGATAAATACTCCATTTGATGAAAGC  
ACGTAGTAGCCGATAAGCGTGAGCAGTGACGGTAGGTCTATTTTGCTTTCTGTACTCAGCCACGCTGCTATGTAATCTG  
GGTTAGCTCCGATAACGGCAGGTTGAGCAAAGTACCAATGGTCCAGCCGAAGTCGGGCTTGGCCTTTTTTTACTT  
TCGCCTCCAGACTGGACAAGTTAATGTATCGGCAATGTATCGAGTAGAATATGGGCGTTAGTTTTGCACTGATACC  
GGTCTCAATCTTGAAGATAGTCTTCCAGGCGACGGAGAAAGTCACTTTTGTTCACGTGATTCTGCCTGCAGGGATT  
CTGCTTCTGCGATTTTACAGCCTTAGCAATTCGTGATCTATCCCTGTATCGATCAATGTTTGAACCGCTTTGCCTCG  
GCTCTCGCATCAATCTTCCAGTCGTTAATGTTGCCAATAGTCATGCGAAGGTTTTCCCGCATATACGCTTTGGAA  
TACAAAAGGCTTTTGTCCGCTAGTTGCTCGGCATGCCAGGTTTGTACATCTGCATCCCAAAGAAAAGTTTGTTCCTC  
CTTCCGGTAAGGTGAATCTGCGAAGTCTTTCGAAGTAAATTTTTGTCTTGAAGCGCCATTTTTCGGCTCCAGTTGAGA  
ATTGCTGTCTTACAATAATGTAAGTCTGGTGAAGTAAATGGAGGGAATAAACATCAACTTTTGTAAATTTCAATCAAC  
GGTTTTATTGCTATAACTTGGTGTATAATAAAGTATGTTGTTTTGATTGATTGCTCAAGTAGTAAAAATGCATT  
AACATCGCATTGTAATGCGAAGGTCGTAGGTTGACTCCTATTATCGGCACCATTAATAAAGAGTTACCCCATATT  
TAAATACACCAGCTTCTCCTGTGCCGATTTGTGCCATTGTAACCTTGGCAATTCATCAAATACTGTTCTGACATCA  
GGCAGTGCAGGTGACAGATTTAAGCCAATTGCTGCCGCACTTTTACGCTAGTCAATCAGGGCGCGGAGCTTTGGTGC  
AATATTGCGACGCTGTGGGAAATACAGATAGAAGCCGAAATTTGGAAGAAAGTCAAGCAGCGATACAAGCTTAC  
CGCTTCAATATATGGCCTGAAAGTTTCTGAGTGGCAATTGTTATCTCCCGCGCAAGAGCCAGCCTCAACATCAGA  
CGCAGATCATTAGTCGTAATCTGCGGTTCAATCGAAGGTCGAAAGTCTCCCGTTTTCTCAAATGGCCAGCGATAAGG  
CGCAACCTCCGGGACTGACGCCAGCCGATACACTTATGGGTATTTCCCGGAGGCGAGAAAGCACTCTCCACGCCCCG  
CCGAAGGATCAGGACGACGGGGCAGGCATGAATCCTCCTGATGGAGACGTACAGAGGCGACTTCTGCCAGCACGG  
AGAGTGCCAGATATGCGCATCCCGGCTTTGGGGAATATCCCGACGGGTGCCCGATTGCGTTGTTTCTCCTGGAC  
CATCCAGCTCGTGGAGTTTTGACAGCGTAACGTGTGGGTTGATAGCTGCCCAATGCGCCGAGATAAAAGGGTTTTGC  
TTCTCGCGCGCTGCAACTGGCAGCTCCCGTTGAGATCATGGCACAGCAAATGACCGCCGATCGGTATCGATCT  
GAGCGCTGGCTGAGGCCGAAAAAGATCGAAGATATGGCTGTCATAGCCTGTGGCTGCTGCAAGACTCGCGGTTGCCTGC  
GCCTCAAGAGAACGTCCGTAATCATCAGCCTGACGCATGGCCTGAACCCACCTCAAAGCCATTGAGATTCCAGCCCGT  
CCGGGTTTGCCTGGGCAGGCACACCAGCGATTGTGCTTGGGATCGTAGCGCAGCCCCACCGTTTTCTCTGTTCCAGGC  
GGTTCAGCACGGCAGCAGAGGCTGTGCCGAGCGTAGTTTATGGAGCGTCAGCGTATCCACCGCCGAGGCGAGAACG  
ATGTCAAACCAGGCGAACCTTCGCCATAGCGAATTCGCGATCGCGCCTGAGCCATCATCTCCAGCGCTTCAAAGC  
GGCAGCGCCCTCCACGCAGCCGCCAGAGACAAAACCGCAGTAAACGACCATCTTCCGCGACCACCATCTGCCCCCCGAGCG  
GGCGCGCCGCCCGCGTATCTCCACCAGCGTACCAGCACCCTCCTTACCAGGACATTAGCGCCTTACGGCGAAG  
CGCAGAATGGTCCGGTGTATCGGTGAGAAACGCTGCTCTGGCTTATGCCAGTGTTCGCTTTGTCAAAGCGGGTA  
TGACATTGTTCTCTTAAACCATCCGGCAGCTTATCGAGCAGCTTATCCAGAGTATGGGATAATCCCGTACCCGAA  
TACCGGTGGCGTTATACACCAGGTTGGGATAGCCGCGCTCACGCGCACAGGCCAGCTACCCGACACCTTTGGCCTTC  
ATCGGGGAGGATATGGGGTGGTATCATCCAGGAAAATCACCTCCTGTTTTGGGATATCCGCATGAACCGGCACCTCATA  
CCCCGCATATCGTGATTAACGAAGTAGCCCAAACGGTCATCCACCGCCAGCTCCTCCATCAGTGCCGCGCCATGCCCA  
TAGTCATTGCGCAATGACCTGGCTGCGCGCAGTTTTCGGATTAGGATGCGTCTGACGACACACAGCGAGCATAACGC  
CGGACCCGAACCTTCCCGTGCAGCTATGACGCGGACCTCCACAAAATGCCCGCAAAGGTCGACTGCTGGTACTCTTT  
GCTCAGTGTCCGAATCAATGCTCTCTTCCGCTGTGAGTCTGCCGCTGCGGTGGCTTATGTAGCGTGGCGTTCGGG  
TACCGTTGGTAATCTTGGCTCGGCAAACCTGCGACTGCTCAGGATCAAACCCGACTGCCGAGGCAATCATTTGCGAAGC  
TTCATACAGGCGCGTAAACGCCGGAGGTGGAGGATTTGCGCCCCATTGTCCACCAGAACCCGAGAAACCGGAAACT  
GGAATCGCCGAGGTGAACCGCAACCTGCTCCAGCGTACGCCAAGCATTCCGCTGCCGTGGGCGAGAATGGTGTAGC  
TGCCGGTGCAATGTCGGTATGTCGTTTCTACGGTAAACGGTGGCCTTTGTTGAGGTTGAACCCGAGCACCAGATTT  
TCCAGCAGATTATTGCGAAAGCCCGCCGAACACCGTGGCCGACTAGCCACTCCCGTCCGCGACCTGTCCGGGTGTGGC  
GTTGCGCTGCTCCAGCCAAATTTATCCGCTCCGGTGCGAAGCACTCGATAAGCTGACGGCGAGAGAAGCAGCGCGTGC  
GGTCCGCGGGTCAACCTGAGTGTCTTACAGGATGCGAAACTCGACGGGATCGATGCCCGTTTTTCCGCCAGTTCTGTCG  
ATCCGATTTGAGCGCCATCAGACCGGGGCTTCCCGGGCGCACGATGGCGTTCCCTCCGGCAAATCAAGCGTGGC  
GAGCCCGAGGCCGGTATGACGATTGCCCCGGCGTAGAGTAATTCGCTTTGCTGTACCGCGTTTTCCGGCGTGGCCGG  
CGAGGTTCCAGACCAGCTTTCATGTGAGATAGCGGTGATTTCCCGCTCTGGTCCGACCGATACGCAAGTGTGAAGG

GTGGCGGGCGGTGCGTGGTGTATTGGGAATAGAGGGCGGGGAGCATCACTTTAACCGGACGTTTCACCGCTCGGGC  
GGCGAGGGCCGCCAGCAGCGCATCGCTTCTCAGGAACAGCTTGCCGCCAAACCCTCCGCCGATATACGGGGAGATAATAC  
GCACATTCTCCACGGGAACTTTCAGCGTTTTTGGCAGATCGGTGCGGCACCAGTCAATCATCTGATTTGAGGTCCAGAGG  
GTAAGCTTATTTCCATCCCAGACGGCCATCGAGGCATCGGGCTCCATCGCCATATGGCTCTGGTCCGGGGTCTGTAGGT  
AGCATCAATCTTCACCGCAGCGGAGGTGAAAGCCCCGTCAAAGTCAACGACGTTTTTGTGGGCGTGTCTCCGGCGGCT  
GATTGACGGCTGTTTTTCTGCCAGGGAGTAAGCTCCTTTATTACGGCGATAGTGTGCCTGCACCAGCGAGGCCGCC  
GCTCGCGCCTGTTTCAAGGTCTCGGCCACTACCAGCGCAATGGCCTGATGATAGTGCTCAATAGTGGGGCCGCTAACAG  
CCTGGCGGTGTTTTTGTGCGCTTTGCCGAGTGCCCCGGCGTACTGGCGTAATGACAGCCAGTACGCCCGGCGTTTTT  
GCGCGGCGTCCGTATCAAGGGCGGTGAGGCGTCTTTGGCAATGGCGGAACCAGCAGATATAGCCATAGGCGGGCTGGGG  
GCTTCTTATGCCATTCTGAGGCGTAGCGTGCCGTGCCGTAGTTTTAGCGGTCCGTGATGCGGTGATGGGGACGACC  
GACAACCTTACGTGATCGATCGGGTTTTCCCTGCGGGTTTTACAAATTTATGCCTGTGCCCTCGCTTACGCCAGTAC  
GGAGGCAAGCGTTTCGCTTCCGAACAGGAGTTTTAAAGGTGTTTTAGCGGTGGGATGGGCGCTGGCGAACAGCGTGCAT  
ATACGGCCTGCGCCCCCTGGGATAGCTGAGCATCCGACGCTCAATGCGCCAGGGCTTATGTGCTACTCCGCCAGCGCG  
ACGCGCCCGTGCCTGAGGCTGAATAATCGCCGCGACCGATACCAGGGCAAAGCGTAGGAGGCGCGATCGCGCACCTT  
ACGGTAGATGTTTTCCGCGGAGCGGTGAGGTAACGTCAACGCAACGATAAGCTCAACGGGAAGCAGGGCGGTTTTCAA  
TGTGCGGCGTTTTTCCGGAGGGTGATAAAAATCAGCCAGTGTGATACTGCGAGTCTTTCCCTCCGGCGTATGGTTTTCC  
ACCACCGCATCCAGCAACCGCATTGCGACCGCCATATCGCTCGGATGGGTGGCAATGCAGGCTTCGCTTACGCCCTACCAC  
CGGTGCTGACGGCTAAAGCCTTCAAGCGCCGCGCAGCCGCTCCCGGCGAGGCGCTTATTGCAGGGCTGATTGGTGTGCT  
AAAAATAGGGGCGAGCGGTGCGCTGGAGCAGATTACCTGCGGTGGTTGCCTGATTACGTAAGTACCAGACGCGCCAGCG  
AGCAGGGCGCGGGAGAGTACCGCGTAATCAGCAGCAGCGCTCGTGAGCCGCCAGGTCGGTGTTCGTTACCAGTGCGCC  
GATGCGCAGCCACCCGCGTCCGTCACCTTCAATCTTATCGAGCCCGAGGCGGTTACATCGATAAGGTGGGTGGGCGTTT  
CAATTTCCAGTTCATCAGTCCAGCAGATTGGTCCCGCCGCGATAAATTTGCGCGGGTACGCGCTGAGCGCTAAGT  
GCCGCTCGGTGGGGTATTCACTCGTTCATAGGTAACGCTTCATGATTTTATCTCCCCGCGAGCATCTTCAATGGCG  
GCAAGGATGTTAGCGTATGCACCACAGCGACAGATGTTGCCGCTCATACTTACGGATCTCATCGGCAGTGTCTGG  
AGCGGAAACCAAATCGACCGTACGCTGACTGGGAATGCCGCTGAATCTCTTTAGCACCGCTACTGATGAGCAAATTT  
GCCCGGAGGTGAGTAGCCGACTGGAAGCCATCATGCTTGATAAAGCCGCTGCATGGGGTGAAGATTATCTGGCGAA  
CCCAGGCTTCAATGGTGGTATCTCGGCCCTGATGCATGACTGCAAGCGTCAGGCAGGCTTAAGCCTGCGACCATT  
GACCAGCACGGTACAGGCTCCGCACTGCTCGTATCGCAACCTTTCTTGGTACCGATCAAATGCAGATTTTCACGCAAAG  
TGTCCAGTAGCGTGGTTCGGGTATCCACCTCAAGCTGCTCGGTTTTGCCGTTACCTTCAGTGTGAGGGGATTATCTCT  
GGCGCGGTGTAGCTGCCGGAACGCTTCCGCCAGCGTAGAATGAGGATAAACCACGGCGGTGCGCGCTGTTGCGGCGCT  
CACTTTAATCAGATCGCGACGGGTCAAACCTAAATCGTGGGCTCGTGTCTCCCAACCCGATTATCTTCCGGGTATTCCG  
CTTGGTTGCTCATACCAGGCTCCGGTATTCTAAAGGGGAAAATAAGAGTGCCTTGCAGAGTGTGATGCTTTTTTAA  
CGTTAAGCATAGTCCGGCAGCAGGAGGATTATCTTAAACCGCAATGCAGCTATGAGCCCGGCTAATAAATTCATGT  
TCGCCGGGATGTTGATGATGATGGGAGCTGGTTATTGCTTTAGTTGTACGATGCAAAAACCAATAAGGAAACCTGTGAT  
TTTTCAGTCTACATCACCTGCAAATCTCTGCTACTTCAATATAAAAATAGGGAGAAATGATGGAGCTTATATTATTG  
GCGATTAGGAAACTATCTTGTATACAAAACAATACAGTTCCTTACATTTGCCCTGTTTTATGAATACTCCTGAAGAGT  
GTATAACATAATGGTACAAGCAGGGTAGATATGAATATATTTGAACAACTCCACCGAACCCGAGACGTTATGGTCTTGC  
TGCATTCATTGGGCTGATTGCTGGCGTTGTTCCGCATTCTGGAAGTGGGGGCTGAAGTTCATTGCCGCCAGTACGG  
CGGTGGATATGTTAATGACGCGTGTGGCCGGAATCATAATCAGGGCTGCAGGCCAAATGATTGCTCGCGTAATTTT  
CTCAATCACCGTATATTTTTCTCGAGACTGGTTGGGCTGACAGATCCCAATGCGGCTGTTTATACCTTTGCCGGGCA  
TGTCTTTAAGTGGTGGTGTACGCACATTATCTTTTCGATAGTGTGTTGCTGTGCGGTTATTGTGTGCTGCTGAAGTAT  
TTCCAAAATTAACCTGCGCAGGGCTTACTGGCAGGTGCTTTAGCCCAACTTTTTGTTTATATGATTTTATTCCCTCTC  
ATGGGACTGACGCCACCTCTGTTTATCTCCCGTGTATGAGAATGTTTCTGAAATTTTTGGACATTTAGTCTGTTTCTG  
GTCTATTGAAATTTATCGCAGAGATTTACGAAACAGAACTACTCATGAGCCAGACCCTGAGATCCCTTTAGGCTCAAACA  
GATAATGCATTGAATGATAAAAATGGCGCAAATACAGCGCCATTTTTATAGGTTAAAACATTGCTTTTTATATTCTGAT  
GCAGATAGTCAGTGAGTATATCGCGCTACTTCAGGATGATGTAGATCCGAAGAACGCTACAGAAGAGAGGCTGTTGCT  
GGCAAATAGAAGAAGTATCGGGTTTTGTACCCCTGAAAACGAAGCCCGCTATTATCGTGGCGGGGAGTGAATTA  
ATTATTGATGTTTATAACGGTGTGAGCCGATTTTAGCCCTGCACGATTGCAAGCCTCATTGACGACTCCGTTCTCAC  
CAGACATGGCGAATTTCTGATGTGGACGATCGATTTTTATATATCGTGCAGCAGGCTTTTTGCCCGGGTCTGCA  
AGGGCAATACATCGGGGTTTTCTGATTGGTACCCTCATGCATCGGTGAAAAGGGGATTTTTGTTTCAAGTGGCTGGC  
GGGAATAGTACCGCCAGCATCGTGGCTTCCGCCAGTAAAAGAGACGCGGAAAATGCACAACAGGCACCACACGTCA  
TGATGGATTGAGATTGCTCATAATTCACAGTACAGCTAAAATCGTAAAGAGAACAGCGGTACATCGTATGTAAGAAC  
GTACCGCGTTGGCTGGGAACTTTCCGATAGTGTGAGTATTGAATGATTTCCAGCCGTTACCGATTTTACGTTACTAATTC  
GTGATTAACCACTCGTTAGCAGGCTGCCTGATACCTTTCCGTGTCTCTGAACACTATGGTGTGCATATGAGAAAGCCC  
ATCGTTACAGGTGATATTGACGATCGCTTCCACATCATTTAAACGATTTTTGGGGCTCTGAGGTGGAATTTCCCTCGA  
CCGATGGATAAGTCTTAGTCCGCCAAGGGGCTTAGCCGACAGGAATCGCTAATCTAATGAATTTGTCGTTATAGAC

CAGATAGTGATTCCCCGGCTGACGTAACCTCAGGCTGATGAACCACGTCTCCCGACGTAGATACCAGGCATCGCCTTCCT  
CTTCGGTGAATCACATCCTGGCTTAATCAGTAGCTAAACCATGTGTTGCCAGTGTTACTTACCCTTCCTGTCACCTG  
TCGAAGGACCATTTAAACTGAACCTGACGTGGTCTACTACCAGAATGGTATCCATCACCACCACCGGCTCCGTGCTGAC  
CAGCCCGCGTGGGCTGCGTCTTGTATGGTTACGAGTGGGGACCTCGCGAAATGAGACCCGGTAGTAGCGCTCGCGGT  
TATCCCGTGGACCATGATAGTAAAATTTAAAATACTCGCTCTACCAGCCTGCAACGCCAGCTGGCGGGGGGCGAAAAGC  
AGTTCACCATCCACCGGTGGGTGCGCAATTCAGTCTGCCCGGGTATCAATAGCACTGATGGCAATACGGTATATCCG  
TGCGCTTTTGTGTTATTCACCTACACGTTTGTGACAAAAGTCACTCTCGACGGCAGCGAAAATGTCAGATTGCCGACCG  
AAATCGCCTGTGCAAAGGTGCCGCCAGCATACAGACCCTGTGACGAGGGCTTAGTTAATGTTACGCCACGTGCGCTG  
AACATGAATCTCTCCTGAAGCGTGAATTCGCCAAACCAGCCGTTATCATCTACCGTACGCAGCGAAAATGGCGTTATCCA  
TTGGAATCGAAAATTTGACTGTGGTCTTATCCATCTGCCCCACTTCGCCAGAGATATCAGTCCACGGTGTGGTCAACCAC  
AGCGCATCGGTATATCCCGCCAGCTATCATCGACCCGGCATCGTAGGTTTTGTAGCTCCGTTGCGGGTAATAAAGGA  
AAGTGTGCGCGGGAACGGTACTTTGCGCTTACCGTCATCGGAGCTGAAGACACAATAGGAGCGCCCGCAATCACCTGCG  
CGGTCCGGTACCTTGTACGACTTCGTGCGCAGCTGTTTTACCGCTGGTGGTTACGATATAGCGAAAATCGAGTCC  
GACTCGCGCTGCCAACATATCCCTCCCGCAGCGTGTCTGAGTATATTATCGGAGATAATACTGATGCTGAAATCACG  
GGTTTTGATAATCAGCGTGTGGAGGTAGAAAATTCATACCAGCCAGACTCCGGTGTGTTGTTGAAAAGCGAAAAT  
TGAATAGACTTTTGGTGTGATATCGTATCCCGAGGTTACCCTCTGCTTAAAGAAGTTGCTCGAGAAGAAAACATAG  
ATCGAGTCTGCGCTCTTCATCTCGTTGAAGGTGTAGTAATAGGCGGTATTGCTCACCAGTTCCATGAACCTGCCATTAG  
ACTGAACTGCATATCGTACGCCCGCAGCGCCGAGGCTAACGACGAGTTGGCGATCGCCGGGAATATATGGATTGAGGTG  
TGCTGAGTCCGTTTGTGTCAGGGTATAGTTAACCATCTTACAACCTAATCCTGAACGGCTGCCGATGGTTTGCCTCCGG  
CAGTCCGGCTTCCCTCGCCAGAGTCCGTACTCCGTGCTGTTGATAAATACTTCCGCCAGCGAGTGGGTATTTATCAA  
CCGTAGATTTGCTGCTTTCGTATGGGTGACGTTGCGAACATACCAGTTGCCGGAGGCTGATCCTTACAGCGTGCGCCG  
TGCTGGCGTCATAGTTACAGAGGTCTGGCAGGCATTGATGGTATTGTAAGCTGCTGCCGACGGGCATTTGTTGCATA  
TACTGGTAAAACGCGTCTGACAACATGCCGTGCATCCACTTCGCGCCCGCTGGTACCCTCGCGCCATAAAAATCCACT  
GGCGTCCGTGGTTTGGCGCAGGATAAGACTGGTGGTCAATTACACCAGCGTACCAGTTGATGCAGCGCAAGCCAGTTA  
AAGGAGATGAAACTGGTGAATTTCCAGCCACATATCAAATCCAGTTGGTATAAAGGCCGGTGTGTAACCGTTATCA  
ATGAGCCGAGGCTTTGCTGATAGATGGTTCCTGAACCAGTGTATTTAAACCAGTCCAGCGGTTGGCACCGGTGAGGCG  
CGGATCCAGCGCCCGCCAGGAGTACGAAAAGTTGTCGTCTGAGTTGTTTTGACAAAACAAAATCGCGTCCCGGTG  
CATCCGCCAGGTTGTTTTGCTCACTGCCGCTCTGAGCGCAGTACTGGCCAGATTAGCGGAAAATATCATCGTTATT  
AGTAGGTTAACTCTCATTCTCTTCTCCTGTCTGCGTACCGCCGCCACGATGAGAGGCCGCTGCAGACCACATACCAG  
CCAGACGGCACCCGCGCCCTGGTTGAGTTCAGAGCCACTTCGAGGTTTTATTGCCACTGTAGCGAAAATCGATAGTG  
GGTATTTCTTATCCACGTCATGACAAAATCGCCGTTTTATCGGTTCCGGTTCGGCCGATATGGTTGTTAATCCGTGC  
GTTAGCCAGCAGTGTGCCGCTTCCGCACGGATACGACCCGAGACGGTAACCATCTGCTTACCTCTGGCTCAATGACAG  
CGACATTGCCCTGGATAGAGAGTACAGCAGCTTTTGGCGCCGCTGACGATATCGTAACTGTCGAGTGAGTTTTTGTGTT  
TGTAATCCACCTCATATCTTCCATAGGGAGAGAGCGGGAGATAGTTACGCTTCCGTTAAGCGGAAAATCCGCCCGTT  
GATTTTGGCGTGTCTGACCGTCTCCTCCAGCCCGGTGTTGAATATACCCAGCGTTCATCAGTCCGCGCCGCTGG  
CAGCAATGTTTTACCCTGCCAGCCGACGCTGCCATTGGCGGTCAAGTTGGTATTGACGTAGCCGTCGCGCCGCTATTG  
ACGTTACAGGTTCCGCTGGCGTAACGAGCGTCAATTGTGCATACGCCCCGCGCTGAGGGTTTTGTATCACCGGTATC  
GCCGAGATGGCAGTACAGATTGGCACCAACAGTGCGAATGGTTCTTATCAAATGTTTGCCTGTACAGGTTTG  
CCATGGTGTAGCCGTTTTGATGAGTATCCCTGCGCTAAACCAGTTGCCAGTGGTAGCGAGATCGAGAGCGATAT  
TTTCTGTATTGGCGTTGCTGCGGCTGTTATAGCGCTGAATACCGCCCGCAGGCCAAGCGAACCAGGTAACCGT  
GTAGACATTTTGATAGTAATCTGCCGTGTAATAATGGCTGTTGTAACGGCGGTATCATTGTAGCTGATGCTGAATGTC  
CCAGCTTCAGCACAGTGTAGTTAGGTTGAGTGTGCGCCGATTGACGTTGTCGGCATCGTACGTGCAATTGATTG  
CCAATGCGGGTTTTTCTGATTAACCACAGCGAACTAAAGCCTCCCGGTAGAGTGGCGCTGATGCTGCCGATGCTGCT  
CCATGAGCTGTCACTGGCCAGCATATTTGACGTTAACGTTGATCGCCCCCAAGCGGCAGCGTACAGCGGGTTTAC  
CCACCGCTGATTATCGTATCCATATCCCGTTGCCGCCAGCTAAGCGTACTCAATGAGCCGGAGGTCGAGGCACCTGCT  
AGCCAACTCTCTTAGCTGGTCCGCTTTTTCCCGTTTTCCGACCAGCGATCCATATGAAAGCTACCGCCCATACCTG  
CCACGCCAGTGGTGCACCGACCGCGCCCGGCTAAACAGCTTATTGACCCGCTGGGTGCGTTTGTGATCACGCGAC  
CGTTAACGATCACCTCAACTTCCACATCGTAAATCCCGTACGGTAGACCCCGGTATCCACTTATGATTGCCCATAGT  
AAGTTCTGAACGCTTAGTAGCCGCCATACGGGTGAGATGTACTTCGCGCCGCGCGGTAATAAGGCGATCACTGGCGT  
GGCTGACTGGTGTGTCGAAGATGGTGGAGTGGCTGGTTTTCCCGAGGAAAGCCGTAATCTTCCCTGCTGAAATGG  
CGGTATCGGCCCTAAGGACTGCAAGTCCAGGTGTGAGCATTCCACGGCAATCGGTGACCGGCAAAATCGCGTTCA  
TACATCGCTTATATAATCACTGTCTGTTGACCGCTACCGATCCCGTACAGCGAGCCGTCGAGCACCATGATGTT  
GCCAGTGCAGTAACGTTATTCAGCGACAGATAGCTGGATGTGTTGCTCCCGCGTTACGCAACTGGTTGTTATAGACGC  
CCAAGTTATAGCTCAGTTACTGCTGAGGGTGTAAACTGGACTGCCCGATGCTTCCGCTACGTGAGCGTAGTACGGT  
CCAGCGCTTCCGCGTTGACCACTAGCTGCAGCAGCAGTTGGCGCAAGCTGAGATCCAGCTGCGCGTTGTGAGTACGGG  
GATGGTAAGGGCTCATTGAACGGGGCTTGGCCAGAGCCATCAGCTGCTGTCGAGTTGTTGCTGACACTGGCGTTAT

CTTACTCTCTCCAGCTGTATTTCCGGATGCGTAGCTGTCCATCGTCCAGCCAGATAAAAGCGCTGCCGATTCGCTGA  
TCGTCTGGCGACCCTGGCTACCGGCGAGATGAATATAGAGCGGGACGCTCATGCCGTCTGAAGCGCTGACTGAAGGC  
CTGCGGAATAATCACCCACCTATTTGCTGCGCACTTATGTCAGCAGCGCTGGCATCGGGCTGAACGAACAAAAAGACCA  
TGCCGAAGGCAAACTGGGCTTTAGTCTGGGGAGAACCCTGCTAAAGGCATTGTCGTTATCCATCTGCACAGCTATCTA  
TTTCACGGGAATGAACCTTATCACCTGCCAAAGTGCACCCGTCCTTTGTTATCCGCAGTGTCCACGCGGGTAAACGAC  
GCGACTTGCCCGGCATCAGGTAGTAATTTCTTTTACTCCTTACCGTTGGCGGCTTTAGGCAAGGTCCGTAGGCGAGG  
ATCCGCAGCGTCGCATTTCTGTATTTGTGAGGGAGCCGTTGGCGTACTGAAAGTGGTAGTTGCGCTGACGAGGGGCGAC  
GACCAGAATGGTGCCGATGCGGGCGGAAGCAGTGGCCACAGCGCTGCGGTTGGCATTATCGCGCTGCGCATCACTGAGGG  
CCTGATCAAACCAGACAATGCGGTAGTAGCGCTTTTTTATCTGCGGGTCCCTTATAGAAGAAGCGGATCACTTCGCTG  
GCTTGGGCGGGTAGCAGCAAGCTGGCGGGAGTGAGTAGCAACTCATCCGGCTTGTCCATTGAGATAACCTGCCCGTCGT  
AAGCGGTGAAGAGAGCCGTTGAGACGGATATTGATAAGGCGACCACTGTCCGTTACTGTTTTGATCGTTTTGCTCAGCG  
TGCTGTGTACTGTTATAAACGATGATATCGCCGACATCCAGCGCTGGCCGGAGATATCCGAAAAACAGCAGA  
GCGAGAGGCAGAAGGTGCTTTTTATAACAATTCGTCAGGAATAAAGCAGGGGGCTACCCCTGCTGGTACATCAGAG  
AGATTAACGGTCCAGGTGCGTCAACTGTACGCTAACGTGCGCGCTCCAGATGCCTTCCGGTAGAGTGCTGTAATCTG  
TTACTGCGGTGATACCATTGGTGGTACCGTGTATGATGGAGAAGTGAACCATCCTGTGCGGTGGTACGATTGCTGGCA  
TTGTAAACGTTAGCCAGCGGCTAAGGTTGCCGCCAGTACGCCGTTGGCGGTATCGATCATCACGGTATGCCAGTTTT  
TTGACTGCCGCGCGTTATAATCCACGCCCACATTCAGTGTGGAACCTGAGGTATCCAACGGGTTAATGTGTTGGTGA  
TAAGACGTGAGGTCAGTTTTAAAGCGGTAGCCGTTGAGTACCCTCGATAGCCACGTCAAATAGACCTTTCTGTGAGTTA  
AAACCTTTAATGCCTTCCGCATACTGGAACGCCAGGCTACCGAGTGGCGTCACAACCAGCTTACTGGTGGTGTCTTTTTT  
GGCTGTTGCCGACCAGGTGCTACAGCCTGAGCTGTTACGTGAGCAGCCTGCGCCACACCCATGCCGTTAAACCCGTTA  
CCAGAGCTATTGCCAGAACCTTTTTTTTATTGCTTTCTTCCGAGTTGAATTGAGGACGTGATGTCCAGTGAGTCAT  
TTTTTAAACTAATGCTGGAGTTTACTGAACCACTTATATTTTTGAGTACAGCTTGGCCTCAGCATTACGCCGA  
TGGGTATACACTGTCTTACACTACAATTTCAATCTGGCAATCGATTTAGGTTGCATTCCTGGCCGTCATGCCGAT  
AATTTCCATTTCCCGTCCGTGATTTTATCTTTCTAATATCTTTCTCAGGAACCTGCCATTAATCACATAGACCAGTT  
CTTTTCTAATATCAGACTCAGTCCAGCGTATACCAGCCCCTAATATTGCTATTGTAATACCAATAATTTGCTAAGGCC  
TCTGACTTTTGGCCGCAATCAATACGACCTGTTTCCCTTTACCAGGATAACCATTATTATCACGGTTTATAAATTC  
AGATAAAGAATCCGACTGAGATTGATAAACACGAAATCTTTTCTAATTTTCTCAACGATAGATAAATTAATCTGTGCA  
TATCCACAATCAGTTCAGATAGTCTTTATAGAAGTAGGCGTCATGGGGAGACCAGATGTATTTATCAGAACGGTTTTGA  
CATTCCATATGGTTTTTAACTCATAGTCCCTACTGTAATCACTTTGCCATGTCACTACTTTCAAACCTGTAATTTTTA  
CAGGTGCATTCAGTTTCTTAGTAAACCGGAAGTAAATAAGATACGTAGTACATATCAATAAAGGTTAAACGAGATTAAG  
TTAATTTTTTTCGATTGGGCTTAAATTTATGTTTTTTTTCCCGATGAGTGTCAATATGTGAACGAAAAAGGAATCAAT  
GGTTAAGTCAATATTTAGAAAACTGAAATATTGCTTTTTGATAAGAAGAAAAAGACATTTGGTTTATAAGGTTATT  
GGCAATATAACGTTCAATTTACTTGCATTTTATATTGGTCAGGAACCTTGCCTGAAGTGTAGGAATAGTCTTAATG  
CGCTGTGTGATGGACTAGTAAAAAACAAGTTTTAAGGGTAAGGGATAGAATATAAACTATGATGAGCTGTCAATTGAAG  
ATGATTTGCCAATCAGTAAGATATTTAATGGATTAACATGCCGCACAAAATGGTTACAGGTGTTCAATCCAATAAGTAA  
TGGAAAATTAACGGGCGTATGTACGTCTGTTCCGTAAGCCCCAAGAGCCAGATTAAGTGAAGTTAAACGAAGGCT  
GCCAGCTGTACAGGAACGATGGCCTTTTTGTGAGGCACTGCATTAGTTATCTGTGCGGTTACTCTAACTGGCACTC  
GAACGTGCGGACGGGGTACCAGTGGATCAGACTGTTCTGTGGCGTAAACGTTTTTATGTTAGTACCAACAGATTTAC  
CACATTTATCATCTTAACAGTTTGAAGTAAATGCAAGCTGCGCCGCAAGGGAGGAGACTGAGTGGCGTGTTCAGTCTA  
AAAGAGGGTTGATGCCAGCATAACAGGGCGAAGCTGGTCAACAAGTCAACATTAAGATAATGGAATATTCGGAGAAAC  
GTCAGGCAGTTGGCCTCAAATGAACAGGAAGAATATATCCCCAGGAAAATTAATGTTGGTGTATAAACACACCAACATT  
AATCCGATCTGATTATTAATCAGACAAATATCGTTAATCCGTGCAATTTTGAATCAACGTTTTTTCTTACGACCCTGAAC  
GGCCTTAAACGTTGATTAGATTTACAAATCACATATAGCCGCTCTTTTCGCTTACAATCTGACAGTCTGGATGGCGTT  
CTTTTGGGTCACGAGAGGTTAAGAATTTTATCACGCCCTTTTTCTGTGCTAACAAAACGACCAAAACGTTGGGTGA  
ATCGTGCAACATTTCTTCTGATGCCACTGTTCTCAGCTTCCCTGTATAGAACGGGTGCGATTTAGAAGAGACATCAATT  
GTCACGTATGGATACGTTACGCCATCCAGCTCAATCTCAGGTCTGTTTTGATAGTCGAGCCGATTTTAAAGTACTCATC  
AACACTGGTGTGTTGAACACCACAGTACGATACTCAGGATGGATATTGGGCTTATCATTTTTTACCTGTTATGTTATAA  
CATAACCATAAAGATACATGCTCATCCGGATCATTTCAACTCAATCCCTGTGACTCTTTGGGATGTGGAATTTTCGC  
AACGGGAACTCTGGCATTGTTAGCAGCATTGGTACGCTCCATAAACCGCTGGATGAGTGATTGATGATGGTTTTGC  
TGAGAGTATGGATTTTTCGAGAATGGAGTTATCTCACTTTACTGGCCGATAATTTATCGCAGTATGATTGATTACCTG  
ACAGCGTATTCTCTCCACGGATATAATAATTACTTACAAAAAGGGAGAGGATGCATATTTTAAATATCACTGAAG  
TGAACAGTTTTATTTCCGTTATTAATAGAAATGGAGAAATAAATAGCGTATTCTACAATTGCGACAAAAACAACGATATT  
AATCAGTTTATGACTGATTTGCTGTACTTTATTCTTTTATTGTTACTTCTCGCTTTAAAAAGAGTGCATTCGTA  
GTGCCCTTATATAAATAACGAGTTTGGTCAACCAATTTTTTACATGATATCACAAATTTGAATAGATGATTACATCAAC  
TATCTTTTATTGCACCAACGTCATTGATATATGTGCGCTGAAGTCAGTTCGGGAATGAGTCTGATCTCAAGACTGGCC  
AGTCCGGGCGTTGATTGGTCTGAGGAGCATATCGCATCTCATATAATGTCGTATCTCCTGGGGTGTATACAAGATAT

CGTTGTTGGTGACCTGGGAGAGGAATTGAGTTCTATTAACCGTCAACTATGCCGGATACATACTGGATTACACTGCAGG  
CACGCCATTATGAGAGAACGTGCCGAGTGACGGGTTAATTATCTGAAAGAATTTGTGAGGCTGTATCGGTTACTCATTGA  
TTTGATAGTTTTACTCTCGGGAGAATAATAGATATTTAATCCATTAACGGAAACCAGCCAGTTCCTTTTCGATGCCTGAAT  
TTGATCCCATAGTTTATCCGGAATGGTTAATTATGAAACAAGTTGTGTTATCGTTCATGAGAAGCATAACGTAAGGGAA  
AAGCTCGATTAGACGGCAGAATTTGTAGGGGTTATGAACGAAATTCATAAATCTGTTTGAGTGTTCGATGGGTAGTGC  
AAGTTTCGATATCTCCGCAATTTACAGTCCGATGAAGGAAAATGAATATCCATAAAAAATATATTGGTTTTATCCTGGCATA  
TATACCTATTTTCGACGATTTCCAATAGTTTTAATTAAGGCAGGTCATTGTTATTCACCTGAATAGTGAATTATTCAC  
TGTCGCGAGAGTAAGAAATAAATTAAGTATCTATTAATGACTTGCACAAAAAGCTAAATTTTCCCCATAAATAAAA  
ATATAATCCCAGCCCAACCACTGATGAGTGGCTATAGGCACTGGATATATTAGTGGCGGTGCACTTTCTTACATAAA  
GGTATTTCTTTTCTGCGGAAAAGGAAATCGGAAATCCCCGTTTTTCTGACAAGCAGACGCCATTATTTGTGTCTGCC  
TATGTTTCGTTAATTCGTTTATCAGGAAATATCTCAATGTCACATTATAAAACAGGTCATAAAACACCACGATTTCTGTA  
TTCAGTTCTGGCCCGCTGCTGGCGTGGGCAAAATCTCTGTTGAGTTCCTTTTCCACTCGCTGTACCTTTACCCAG  
TAATGGCGGCAGTGCAGCAGATGCGGTTAGCCACGGTTGAGCATGGGAAACTACGGTAACTGCTGATAATAACGTG  
GAGAAAAATGTCGCGTCTTTGCCGAAATGCCGGGACATTTTTAAGCAGTCAGCCAGATAGCGATGCGACACGTAACCT  
TATTACCGGAATGGCCACAGCTAAAGCTAACCCAGAAATACAGGAGTGGCTCGGAAATATGTTACTGCGCGCTCAAA  
TGAATGTCGATAAAGATTTCTGCTGAAGGATTTCTGCTGAAATGCTTTATCCGATTTATGATACGCCGACAAATATG  
TTGTTCACTCAGGGGCAATACATCGTACAGACGATCGTACTCAGTCAAATATTGGTTTTGGCTGGCGTCATTTTTCAGG  
AAATGACTGGATGGCGGGGTGAATACTTTTATCGATCATGATTTATCCCGTAGTCATACCCGCATTGGTGTGGTGGCG  
AATACTGGCGGATTATCTGAAACTGAGCGCAATGGTTATATTCGGGCTTCTGGCTGAAAAAATCGCCGGATATTGAG  
GATTATCAGGAACGCCCGCGAATGGCTGGGATATTCGTGCTGAGGGCTATTTACCCGCTGGCCGAGCTTGGCGCAAG  
CCTGATGTATGAACAGTATTATGGCGATGAAGTGGGCTGTTGGTAAAGATAAGCGCCAGAAAGACCCGCATGCTATTT  
CTGCCGAGGTGACCTATACGCCAGTGCCTTACCCAGCAATAGTGGACACGCGGTAAGTGAAGTAACTCTCAGTCAGA  
GGTACTCACATGACAAAAACAGTATCAACCAGTAAAAACCCCGTAAACAGCATTGCGCTGAATTTGCGAGTGAAGCCC  
TGAAGCTTGTGAACGCATCGGTGTTACTGCCGAGCCGTGAACCTCAGCCTGTATGAATCACAACCTCTACAACCTGGCGC  
AGTAAACAGCAAAATCAGCAGACGCTTCTGAACGTGAACGGAGATGTCTACCGAGATTGCACGTCTCAAACGCCAGCT  
GGCAGAACGGGATGAAGAGCTGGCTATCTCCAAAAGCCGCGACATACTTCCGGAAGCGCTGAAATGAAGTATGTCTT  
TATTGAAAAACATCAGGCTGAGTTCAGCATCAAAGCAATGTGCCGCTGCTCCGGTGGCCCGCAGCGGCTGGTATACGT  
GGTGTGAGCGCGGACAAGGATAAGCACGCTCAGCAGTTCGCCAACACTGCGACAGCGTTGCTCCTCGCGGCTTTTACC  
CGTCAAACAGCGTTACGTTGCCACGCTGACGGATGAACCTGCTGCTCAGGGTACCCCTTAACTGAAAAACCGT  
GGCGGCAAGCTGCGCCGTGAGGACTGAGGGCAAAGGCTCCCGGAAGTTCAGCCCGTACGCTACCCGCGCACACGGCC  
TGCTGTGTGAGAAAATCTGTTGGAGCAGGATTTTTACGCCAGTGGCCGAACCAGAAGTGGGAGGAGACATCACGTAC  
TTACGTACAGATGAAGGCTGGCTGTATCTGGCAGTGGTCATTGACCTGTGGTACAGTGGCCTTATTGGCTGGTCAATGTC  
GCCACGCATGACGGCGCAACTGGCCTGCGATGCCCTGCAGATGGCGCTGTGGCGGCGTAAGAGGCCCGGAACGTTATCG  
TTCACACGGACCGTGGAGGCCAGTACTGTTGAGCAGATTATCAGGCGCAACTGAAGCGGCATAATCTGCTGGAAGTATG  
AGCGCAAAGGTTGCTGCTACGATAATGCCTGCGTGAAAGCTTCTTTTATTGCTGAAAGTGAAGTGTATCCATGGAGA  
ACACTTTATCAGCCGGGAAATAATGCGGGCAACGGTGTAAATATATCGAATGTGATTACAATCGGTGGCGGCGGCACA  
GTTGGTGTGGCGGCTCAGTCCGGAACAATTTGAAAACAAGAACCTCGCTTAGGCCTGTGTCCATATTACGTGGGTAGGA  
TCATAAAGTCTCGGGTCTGTTGCTCACTCTTTTGGCATGTGAGCATATTACATACCGTACCAGCAAAAGTTTCAACCGT  
GAGCAAATCGACCGATTTTGTGACGGTCAAACGTGAAACGAAATAGATATCCGTTTAAAATTTTACATACATCTGG  
CTAAATGATGACGCTGAGTGTGACTTCTTCACTCGGTGATTTATTCGACACTTCAATGTCAATTTAAATGAGTGGCA  
AAAAATAGGTGTCTCAGGAAAGTTGATTAATCTACACTCCGCTTTTTGCTGTTGACGTATTAAGAAAGGAAAGATATT  
TGCAGATCCCAATAATCACGGTGGCGGTATTACGGGGAGAGCAGCCGAATAACTTTTTAAATTCGCGGCTGAATGACT  
GCTGTGAATCAAAATGCAAAGAGAGTGAATATCAAGCATAGATTTGCGGGTGAAGCGGACAAGAATGGCGGCACGACAA  
AGCCTTCGTTTGCATGATTTCTCCAAAGGCACATGCATGAAATTTGGAACAGAAGCTGGATGTTGCGTCTGCTGTA  
GCCAGATTTCTGTGCGATATCTCGATTGAAATAGGGTGTCAAGATTGCACTCAATCCACTCCAGGAGCTGCTGTAGAA  
TCTTCTGCTGATCATCTCATTCTCCGTTAATTTCTTGTGATATCGCACATTTTCTGTTATACCCTGGGCCCTAAGTGTAT  
CAAAAATAGCAAGGGCGAAGGCAAAAGCACTGGTAGCGTCTGCTTCTGTTGTCGCGGAAATAGAGAGGTTTTCAGTCTAC  
ATTATTAATGAATTTTTTGCATAAGTATCAAAAATCCACATACTACTTTGAGGTTACGTTTTAACGTAGACTCATTGT  
TCATGCCTAATGGAGGACTGACAGTGAATTTTCCGATAGTCTGCTTACAGTATTGAGATGCCATCAAAAATCGA  
TTTCTCACTGACAGATAAAGAAATGGCACAATTTAGTTCGTTGATTTGGGTTATGTTGGGAGTCCGTAACATTTTA  
ATCCTGAATTTGTTGCTGTTGCTTGTGTAATAAATACATGATTGATTAATCATGATTTTACCTAAGACGACAAAA  
ACCTTTTAAACAGGGAGTGAATTTGATCTTCACTCTGTCATATCTCCGTAATATGGCGTCAGGCTTCATCATCAGAAAGG  
GGCCTGACGCTGAAAAAGTGAACAACAGACAGTGTTCGGATTATCAATATTCAGTTTTTAACTGGAAGTGGATTAT  
TACTGCGTTGTTTAAAGATTTCCCGCGCCGAATCTGCCATTATCATGACTGCACCTGCCAGCATCAGAGTATCTTTCAAT  
ACCAGGCGACCAGCACCGGATAAATAAGGAAACCATGATGAGCGTCACCCAATGCGGGTACCCATGCCTCCGGGTGGT  
GATTAATAATGAGAGTGTACCAGCGCGTGGTAAATGCCATCAGTCTCCCAATAAACCTAACCCAGCGATTGACAGGAT

TAGCCAAAACCAGCAGAGCAATAATCACCTCCACGACGCCAAGACCGTTGGAAAAACCATAGGTATTATTGGCCGTTTGC  
CATGCCCTTGCTTCTGGTTTGTATTGCCTTCGTGAGTCAGATACTGTTTATAGTCTTCCGGGTGTTCAAAAAGAACGA  
CATTAGTGGACTGTTTGGCAGCAATGGTGAATGCTGTCTGCCTCGTAAGGGACAACTTTAATAACCCAATCCACATAA  
AAACAATTGCAATACTCAGACGAATCAATGTCAGGCCAATTTTATCTCCCGACTTAACAGGTGCAGGTATTTTCCATT  
GTGAACATCCTTATTTATACAATACTGCTGTTGCGGTTGAATTATTATCAATTGCGATCGATGTGACTTTCCAGGATGAA  
GCATTATATTTTCTGGCTATATCAGCAATGGTATCCTCCAGAAGTGTGCGGTGATGCTGATACTGACGAGACGCTGATATG  
TTTCAGAATTATTTTATCATCTGCATTGGTGGAAAAATGCCATAACGCCAGATAAATAGTGTGCAAATAAAACAGATTTT  
TAAACATATAAAAATACCATCAATGAAGTGATTAAGAAGTTATAGAGTAACAGAGAATTAATAAGATTCTTTTCTCTGAGA  
CGCCAGAATATTTGTTCTGGCGTCTGATTTTGGATTTTACTAATGAAAATAGATCATTGAGTGATTCGCTCATCGA  
CGGATGAGTAAATATCTGATCGCGTAATATGCTATAAGGCAGCCCGCATCCATCACCATTTTCACTATATTGATCATCT  
CGTGGGAGTCAACACACAGCAGTGTGCCCTAACATACGTTGGGTTTTATTATCAACAATCGCTTTTAATACCCACGA  
GTATCATTCACTCTGGCAGCGGAATTGCAGCTACAGGCAATGTCACCACCTGAATATCAGCACCCTCTCTGCG  
TTGTTCTTCTGCATACCAACCCTGGACAGGGGCGGTGCATAAATACGGAATAAGGCACATTTTCCGATCATCAGTAC  
TACGTTTGCCTTACCAGTAATCATCACGTACAATGCGGTAATCATCCAGTGATATGTAAGTAAATGACGCCCGCCG  
GTAACATCCCATCGCCAAATATTGCTGCGGTGATGTAATCGTTGTCAACGACAATTGCCCGCGCTCGTTTAC  
TGCGATACCGCATTTTCTGGATGTAACGAAGCGGTAGCCGGTTGACGACCGGAAGCTATTAACAGTGCATCCACGCCA  
GTTGGGCGTGCTCGTATGCACTTGCACCTTGATTTTTCATGGTGACTGATTGCTCCACATGGGCATTGAGGATAATATCG  
ACGCCCTGATCGCGTAAAATCGTCGCGATATTATCAGCAATATCCCGATCTTCCCGAGGCAAAAAACAGCGAAGCTGCTT  
TAAAATGGTTACCTTGCTGCCAAAATAGCGAACATAGAGGCGAACTCAACGCCAATATATCCGCCGCCAAAATACCTA  
AATGCCCAGGCAATCTTTTAGATTAAGTAATCCGGTGTGTCATATACTCCTGGCGTGGTGGTAATCCAGGAATTGGC  
GGAACCACGGTTTGTGCACCGGTATTAATAAAAAATTTCTCGCCATGAATTTCCAGATTTCCCTCAGGCCGATGAACACG  
CAGGCTATGATTATTGATAAACTCCGCTGGCGTCGATCAGTCGATATTGGGCATATCCGCAAGATTATGAAAATCT  
TATTACGTAATAAAATTAACCACTTCATTTTACGCTGTATGGCACGGACAAAATCTGTGTGCTGTGTGCGTCATGAACC  
AATGTTTTGGTTGGGATGCAGCCGATTAATAACAGTCCCGCCATACATTGCATTTGATTGTTGATGAGACCCACTCG  
CCAACCTGCTTTTGCAGCGTGACGGTAATGTTTTCCAGCCTGCCAAAACCAATAACTACTGCCTGATATTTATCA  
TGATGATTTCTGTGAAACGCGTTCATTTGACATCATGACTATAGACGCAAAAGAGCAAATAACATTTCTTCAACGC  
TTGATATTTTGTCTTATCGTCTGATATTTTCTTTTCTTAATCAGAATCACAAAACAAAATCATGATTAACATTTGAT  
GGTATTAGATTAGTTATTTACTAAGATTGTTGGTGTGTAATCAAAAACCACTCAGGAGTCTGATATGGATGCCCTTAG  
CCGTTTGTGATGCTAACGCTCCACAAGGAACGATCGATAAGAATTGCGTGTAGGAAGTACTGGCAGCTTCCACATG  
GTGCCGGGGAATTATCGGTTATTGTTGGCATGCGTTAACGCAAGGAGCGGCGAAGCTGGAATGCCGACGGGGGAGATT  
TTTACATTACGCCGGAAATGTGGTCTGCTACCACAAAATCAGCTCATCGCTGAGTCATGTCGATAATGAATCGAC  
CTGTATTGCTGCGGCACTTTCGTTGCAACATTCGGCGCGTATTTTTAACGCTTTTGGCGGAAACGCTGTTTTAG  
CACCGGTTAACACAGCGTGAATATAACTGGCTGAGGGAGGCGATCCCGTTTTTACAACAGGAATCCAGATCGGCAATG  
CCGGGAGTGGATGCACTGTGTAGCCAGATCTGCGCTACATTCTTACCCTCGCGGTGCGTGAGTGGATTGCACAGGTTAA  
TACTGAGAAAAACATTCTCAGTTTGTCTTGCATCCACGTCTTGGTGCAGTAATACAGCAAATGCTGGAATGCCAGGAC  
ACGCTGGACCGTGAATCGCTGGCCAGCATCGCTCACATGTCCCGGCAAGTTTTGCCAGCTTTTCCGTGATGTTTCC  
GGAACCACGCCGCTGGCTGTATTAACAAAGTTGCGTCTACAAATAGCGGCCAGATGTTTTCCGGGAAACGCTCCCTGT  
TGTGGTGTGCTGAGTCAGTAGGCTATGCCAGTGAATCATTTTTACAAGCGTTTGTCCGCGAGTTTGGTTGTACCC  
CGGAGAATATCGGAAAGGTCAGACAGCTTGCACCTGAATAAAACCGCCAGAAATCAGGGCAAAGATAATCCGCATT  
CCGGGAGTTGTGACCTTTCAACTATTTCTATTTCCAACGGTGTGGGCTTTATATATTTTTTCTGATGGACTATGC  
TCAGTTTTTAAATAAAAATGCAAACTAAATTGCTTCAATTAATAAAAATCCGACTATTACTTGATACGTGATTATTGTC  
GGTATTTTTTTGTACACCATCAGTGTATATCTCAATAACCCCTGAATAAGTAGCTCTGAATAGGTATAAGGGATGTAGC  
CATTTTTAAATGGATTTCTTATGCCAAAATGATCGTCTGATTTCCCATAAAATGTGAGCGATGCCGAAAGAAAATAAAT  
TAGTTATTGCATTTGACGTTTGGATGAAAGATTATCATTTGTCATACAAATGAGGGGTGGTATGTTGCTAGCCAATTA  
AAAGAACGCCATATTTATTGATGATTGATCCCCGGTGGGGGGAAACATCGGGCATAAATGGGCATGAAGTAATGGAGT  
ATTAGTTGTGAATGTCAATTTCTTGTACCTGTATTGGTGACGCCCTGAAATCAAGAATGGCAGGACTCCGTGCTGC  
TACTGAAAAACTCGCTGTGCGTAAATTTCCCGGAGAAACAGGATGCTGCGGTGAGCTGCGATCAATAGCGGTTAT  
ATCAAGAAGCGATTCCAGGATGAAAAATCTGATCGCCGACTGGAGGATAACGACGATCCCATTTTACCAGGCTGG  
CTTTGACCTATGCCGTAAGTTACCCGACGTATCTGGCGGATGAACCTGAATGGGCATCAGTGCCGAAAGGTTG  
CCGCGGTATGACGATCTCACCTCTTTATTGTTAATAAATAGGGGTAGTCGATGTAGGTGCCAGTTTGAAGGGAGA  
GCGGTGTATCACCATCTGTAGCCTGGCCGTAAGCTGGGAGTGAAGGACGAGCCACTTACGCTGCTGAAAAATGTGCG  
TGGACTGGAGCTGTTGACCTTGTGAACAGGATACCTGCTGCGGATTTGGCGGACGTTCTCGGTCAAATGGCCGAAA  
TATCCGGCGAGATGGTGAAGAAAAGGTTGCGCACCTGATGGAAGTCCGCCCTGAGATTTAATTGGTGTGACGTGAGT  
TGCTGCTAAACATCAGTGGCGGATTACAACGGGAAGGCGAGAAAGTCAAAGTGTGATGATATTGCTGAAGTGTGATGAG  
CCGCTGAGGATATAAGATGTGATCAAAACAGTAATACAGATTTAAGACACGCATCCGTGAGCAATTAAGATCCG  
ATCATGCGCAAAGCGGTGGCAAACGCGCAGCAGCGTATTGGGGCAAATCGGCAAAAATGGTCGATGAATTGGGGCACTG



GGAGGAGTGGCGGATCGGGCCGCCAGATACGTGATCATGTTCTGAGTAATCTCGACGCTTATCTGTACCAGCTCTCAG  
AAAAAGTGACGCAAAACGGCGGTACGCTCTATTTTGAAGAACCAAGAAGACGCTACCCGCTACATTTTACAGGTTGCC  
CAACGCAAAAATGCCCGAAGGTGGTAAATCTAAATCGATGGTGACCGAAGAGATTGGTGTCAATCATGTGTTGCAGGA  
TGCTGGCATTACAGGTGATTGAAACCGATCTGGGTGAATATATTCTCCAGCTGGATCAAGATCCGCCATCTCATGTTGTGG  
TCCCGGCAATTCATAAAGATCGCCATCAGATCCGTCGAGTGCTACACGAACGCTGCGGGCTATGAGGGGCCGAAACGCCT  
GAAGCGATGACCTTATTCATCCGGCAAAAATCCGGGAAGATTTCTCAGTGCTGAAATAGGTATTACCGGCTGTAATTT  
CGCGGTGGCAGAGACCGGTTCCGGTATGCTGGTGACCAATGAAGTAATGCGCGAATGTGTACCACGCTGCCTAAAACGC  
ATATTGCAGTGATGGAAATGGAGCGTATTGCCCCACGTTTCCGAGGTAGATGATTGATCACCATGCTGGCGCGCAGT  
GCCGTTGGTGACGTTTACCGGGATACAACACCTGGCTGACAGGACCGCGCAAGCTGGGCACGTTGATGGTCTGAAGA  
GTTTCATCTGGTTATTGTCGATAACGGGCGTTCTGAGGTGCTGGCCTCTGAATTTCCGGATGTGCTGCGCTGATTCCGT  
GCGGGGCTTGATGAATACTTGTCCGGCATATCGCCATATTGGCGGTGATGGATATGGCTCTATTTATCCAGGGCCAATT  
GGTGGGTGATTTCTCCGCTACTTGGCGGCTATAAAGATTTTAAAGATTTACCTACGCTGCTCTTTATGCACAGCTTG  
TGACAACGTGTGTCGGTGCGTATTCCGCTGTCAAACCTGATTTTGGCTCATCGTGGGTGATGGCTGAAAAAGGGATCA  
CCGCAAAAGCAGAGAACGGCGGATAAAAATGTTTCGCTTATGCCAATAGTCATCCAGGATTGTGAAAGTCGGGATGATG  
GCCGTTGCTCATGCGGCAAGCTGGTTTATCAATGGCGCAAAAACCACTCAAATTTGGCGGATTAGCGACTGGATGGA  
AGCACGCGATCTTCTGAAGCTGACGGAGAGAGTTCCTGAGTTGGTTTAAAGAAACATCAGGCGCAGGAAAAAGAATG  
GATAATCGAGGCGAATTTTTGAATAACGTTGCTCAGGCACTGGGTGCGCCGCTGCGACTTGAACCGCAAGCAGAAGATGC  
GCCGCTTAAACACTATGCTAACGAGCGGCTTACCCAACCTTAAACACAGCAGCGCTGTGACGCGTTTATTCAGTTTGCCA  
GCGATGTTATGTTGACGCGCTGTGAGCTGACCAGCGAGGCGAAGGCGGCGAGAAGCTGCAATACGCTGTGTAAGAGCTG  
GGAGATCAGTCGGTCTGATTAGCGGTGACACGAGGCTGGAGGAATTGGGGATTAGCGAACGTTTGCAGCAGGAATGCAA  
TGCCGTTGTTTGGGATCCGGCGAAAGGTGCCGAGAATATCTCGCAGGCGAGAGCAGGCTAAAGTGGGTGTTGTGATGCTG  
AATATGTTTAAACGAATCCGGAGGCGTGGTTCTTTTTCCGCGCCGAGCGCGGGCGTTCATTGAGCCTGCTCCCGGAA  
TATTCTTTTTATCCTGCTAAAAGCACTATCCTGCCGCTGTAGCGCAACTCGCAGAAAAATTGCATCAGAAAGCGCA  
GGCCGTTGAACGAATGCCTTCTGCATTAACATCATTAGCGGCCAGTTCAACGGCGGATATTGAGCTTATCAAAGTCG  
TCGGAGTTCATGGCCCGTGAAGCGGTGATCTGATTATTGAGGATTGTTGAGAGAGATATGAAGTCTGGACATAAACC  
TGAAGAAGGCATACGAGGTTGAAAATAGCGTTTAGGACAACCTGACTTAACCCCGTTCCGTCATGGTTATGCTGCTCTC  
TGTAATATCCTGGTATTACCAATGCCAGGATATTTACAGTGA AAAAGACAGGCATCCATTCTGAAAACGGGTTCCCTT  
CCCGGTCATTGCTACTTCAGCTTTATACAGGCACTCTATCAGAATGTTGTTTATTACTGCCAGAGTTTTGTTGGTAT  
TCATCTACCATTTTTTTGACAAGGC AAAACATTACAGAAAATTACAATGCTTAGAAAAAATCCAGAGCCAGGCAAAATGGC  
AGCAGGGTATTTATTTTTATTTCTGGTGAGCTTATAGTTACACAGCCATCACCGTTCCGGATACAATGACCAGTTCCCTGG  
TCAGGTATATCATTTTTGTATAAAGCTCACTGTTAATTGCTGAAGGCGTTTGTATCTCATCGAGA ACTTGCTGCCATTA  
TGATATTCTGACGCATACCAATTTGATAATAGAGGCTGACGCGAGATATTTCTCTTCAGCAGTTGGTAAAGCTCTCTT  
ATCTCTGACCATTCCAGCCTTATTTCTCTGTTCTTGACATCTGGGCTGGTGTGAAAAATGTAGTAATTCGCTGAATAA  
CATCTTCAGTCATTGTAGTCTGACAGGCAAAATTATTATTGCTATCACAGCTAACAAAGTATACCTGGCGTTGCTGGTTT  
ATTTTTAGGCTGTAATCACTTTTATATTGTCTTTATTGATATACAGAAACAACAGCACCATAGCCATACATATAGCCAT  
AATAAAAAGGATAACACGAATCTTTTTCTCAGATAAAAATAAAATCTCAATCAGATCGATATCCTGTTTGATTTGTTTAC  
GCATAATATATCCAGAGAATAAAAATCTGTCGAGATAAGGTTGTATTAATAGTCTGTATCAGGAATGTTCCGGTTAATA  
TCAGCAAAAAGCCGCATCATGAATACTGGATATGAAGCATGAGAGTTACCTCAGTGTTTATAAAGGATTCCGGTCCCC  
TCTCTGGAACGGTAACTCAATCTGATCGGTTCTCGGTTAGTTCACATCACGACTCATTTTTTTCGCTCTCACCGCCAT  
CCCATTTGCCACAAAATATCCCGCGTCTCCTCGGAGCGTCTCCTGTCCACGAATCATATCCGCTATTTTCTCGCCAA  
TCATAATTGTCGTGGCGTTCAAATTCGGGTGATAATCTGCGGCATAATCGACGCATCCACCACACGAGGCCCTTCTAAC  
CCGTGTACGCGCCTTCCGCGTCAACCACGGACATCTCGTCGTAACCCATTTTGCAGGTACCGCACGGATGGAAGGCGGT  
TTCGGCGTGGTTACGCACGAACTCATCGAGCTGTTTATCCGCTGGCATTGACACCGGGGCTGATTTCCGCGCCACGAT  
ACTGATCCAGCGCGGTTGATGCATGATCTCGCGGTGATGCGAATTGCGTCCGCGAACTCCTGCCAGTCTGCTGCTGTC  
GACATGTAGTTAAACAGAATCGCCGATGCTGGTGCGGGTGCGGGGATTTAATCCGCACATGCCACGGCTTGGCGAGCG  
CATTGAGCCGACGTGGCACTGGAACCGTCTCTTTACTGCATTGAGCCGTTATAGTTAATCGCTACTGGCAGGAAAT  
GGTACTGAATATTCCGCCACGAAATTCCTCACGGCTGCGAATAAATCCACCTGCTTCAAAGTGGTTGCTGGCACCAACG  
CCAGTGGCGCCAAACAGCCACTCCGCACCGATTTCCGGCTGGTTCCACCCTGCAGGGCAGGGTAGAGGGAAACCGGTTT  
TTTGCATCATATTGCAGATACATCTCCAGATGATCCTGAAGATTTTCCGCCACGCGGGTAAATTCATGCACCAGCGGAA  
TATCAAACCTCCGCCAGCAGTTCAGCGTTCGCCAGCGGAGCGTTCAGGATCTGCGGTGAGGCAATCGCGCTGCACAT  
AACAGCACTTCTTTGTTGGCGGTTGCGCGGGTGGGATGGTGTGCTGCTGCTTCCAGCCATTGACGCCACCGCGGTTT  
GCCGTCAAAAATGATGTGATCGGTATAGCGTGAGTACGAATGGTCAGGTTAGGACGCGATTTGGCCTGATCGAGATAGC  
CAGCGCGGTGCTGGCGCAGCGCCCTCGGGCTGACGGTGCGATCCATCGGACAAAACCTTCTGCTGATAACCGTTG  
AGATCGTCCGTGCGCGGGTAGCCCGCCTGCACGCCCCGTTCAATCATCGCTTCAAACAGCGGATTGACGCCGGGTTTGG  
GGTAGTGACGCTACCGGGCCATACCGCCGTGATAGTCGTTTTACCCATATCGCGAGTCTCGGCCTTGGCGGTAGTAGG  
GCAGGCAGTCGAGGTAGCTCCAGTTCTCCAGACCGGTTCTTGGCCAGTTATCGAGATCCAGCGCATTGCCACGGATG

TAGCACATGCCGTTGATCAGCGACGATCCACCCAGACCTTTACCGCGTCCGCACTCCATGCGGGGTTATTTCATAAACGG  
TTCAGGTTCCGTTTCATAGGCCAGTTGTAGCGTTTACCCTGTAGCGGGAATGCCAGGGCAGCGGGCATCTGGGTGCGGA  
AGTCAAAGCGATAGTCCGGGCCCGCGCTTCAAGCAGCAGCACGGAGGTATTGGATCTTCAGTCAGACGGGTAGCGAGA  
ACGTTGCCGGCTGAGCCGGCACCAATAATGATGTAGTCAAATTGCAAATAAACCTCCTGGTTAGAATATGGACTGGAATT  
TAGCCATCTCAACCTGGATGGACTTACCTGGGTGTAACCTGGAGCGTCATCACGCCGTTCTCGCGACCAATGCCGGAG  
TGTTTGTAGCCGCCAACGGGCATCTCTGCCGGGATTGCCCCAGGTGTTGATCCAGCAAATACCCGTTCCAGCTGATG  
AATGACCGGATGCGCGCGGTTCCAGGTCCGCTGTACGATGCCCGCCGAGGCCGTAGTCGGTATCGTTAGCGCGGGCAA  
TGACTTCGTCTCCGACTCGTAGGTCAGAATGGACATCACTGGCCGAAGATCTTTCACGCACGATGGTCATATCGTCG  
CTGCAATCGGTGAACACTGTGCGTGAACCCATGCGCCGTTATCGAAGCCATCGCCTTTCAGTACATCGCCGCCACAG  
TACGCGCGCCTTCTCTTTGCCGATATAGCGCAGCACGTTATCGCGATGCGGGAAGCTGACCAGCGGGCCGA  
AGTTAGTTTGGGATCGAAAACGTGCGCCGCGCAATGCGCTCAACGCGCGCCAGAATTTCTGCTCAAATGCGGCTTG  
CATTTGCCGGAACGAAGACGCGGGTGCATTGGTACACACCTGACCGGAGCTGAAGAAGTTTGCATCATGGCGATATC  
GGCGGCGAGATCGAGATCCGCATCATCGAAAACGATCAGCGGTGATTTACCGCCAGTTCATGGTCACTTCTTTACGGG  
AAGAGGCCGCGAGTTAGCCATCACTTTTTTGGCGCTGGCGACACCGCCGTAATGACACTTTGGCAATGCCGGATGC  
TCGTCAGATATTGCCCGTCTCGCGCCACGCCCGCAACACGTTAAATACGCCGTCGCGCAGGCCGCTTCGCTGTA  
AATTTACGCCAGTTTAAACGCGGTAAGCGGGTAACCTTCGCTCGGTTTGAATAATCATTGCGTTGCCTGCCCGCAGCCG  
GGCGGATTTCCACAGGGCAATCTGGATCGGGTAGTTCATGCGCAATCCCTGCCACTACGCCAGCGGTTTCGCGCGG  
GTATACAAAAGGACGTTTTACGCAACGGGATCTGGCTGCCTTCCAGCGCCGGGATCAGCCCGCGTAGTACTCCAGCAC  
GTCCGACCGGTAACGATATCGACGGTTGAGTTTTCCGAATATGCTTTCCGGTGTGAGGGTTTTCCAGTTTTGCGAGTT  
CGTCATTGCGTTCACGCAGAATATCAACGGCCGACGAGAATACGCGAGCGCTCCATGGCGGTCATCGACGCCAGATT  
TTTTGCCCTGCTGGCGCTTTTACGGCGGATCGACATCTCGCGCCGGCGGCTGCACGGTCGCCAGCACGTTACC  
GTTGGCCGGTTAATGGTCTCGAAGGTGCGACCGCTGGTGGCGGAGGTATAACCACCATGTATATAAAGCTGCTGTTCTG  
CCATTCGGGACATCACGTCTCTCGGTTAATCGGTGGGTAGATGCTGAGTGATAAAGTGGCGGGTCAGGGAATTAGCGCG  
GGTTTTATCCAGCGGTTTCCGCTCAGAGCCGCGCGACCCATAATCCATCAATCAGCGCGCCAGGCCGTAGCCCGCTT  
CCTGTGCTGTTCCGCGCGCAATTCGCGACGAAACTCGCTCACCAGATTGACAGCAAGCGCGGCTGCTGACCTGCTGT  
AAACGATAGAGCATCGGCTGATGCATACTGCTGGCCAGAACCAGCCAGGCTTTTCATCGCCGACTGCTCACCTGCGT  
TTCATCGAAGTTTCCGCCAACCAATCGCCTGTAATCGCTGCTGCTGACTGCCCTGCGGAAGTGCATGTAATCGATTAAAA  
CCGCGTCACGCAGCTGACTGGTATATCGCGCATGGTTGCTTCCAGCAGACCATTTTTGTCCCTGAAATAGTGGCTGATG  
ATCCCCGTAGAAACGCTGACGCGGGCGATCTGCGCGATCGTTGCATCGTGCATGCCACTTCATTTATTGCTTCCAG  
TGTGGCGTCGATCAGTTGTCTGCGCCGGATCGACTGCATCCCAATTTGGGCATTTTCGCCACTCCATTCATCAGCGGTG  
TTTATCTATTAAGCGGTTATTGATTGGACGTTCAATATAAATGTGCTTAAATTGTTACGAATTTGATTTAAATAGTA  
ACAATAACAGTGGGGATACTGGATGACAGACCTTTCACACAGCAGGGAAAAGGACAAAATCAATCCGGTGGTGTTTTACA  
CCTCCGCGGACTGATTTTGTGTTTTCCCTGACAACGATCCTGTTTCGCGACTTCTCGGCCCTGTGGATTGGCCGACG  
CTGGACTGGGTTTCTAAACCTTCCGTTGGTACTATCTGCTGGCGGCAACGCTCTATATTGCTTTGTGGTCTGTATCGC  
TTGTTGCGTTTTGTTCCGTTGAAGCTCGGGCCAGAACAATCCAAACCGAATTCAGCCTGCTGAGTTGGCGGCGATGC  
TGTTTGTGCCGGATCGGTATCGACCTGATGTTCTTCCGTAGCCGAACCGGTAACGCAGTATATGACGCGCGCGAA  
GGCGCGGACAGACGATTGAGGCCGCGCGTCAAGCGATGGTCTGGACGCTGTTTCACTACGGCTTAAACGGCTGGTCGAT  
GTATGCGCTGATGGGCATGGCGCTCGGATACTTTAGCTATCGTTATAATTTGCCGCTCACCATCCGCTCGGCGCTGTACC  
CGATCTTCGTTAAACGGATTAACGGGCCGATAGTCACTCAGTGGATATTGCAGCGGTGATCGGCACTCTTCGTTATT  
GCCACTACGTCGATTCGTTGTTGTCAGCTTAACTATGGCTGAGCGTACTGTTTATATTCCCGATTCGATGGCGGC  
GAAAGCGCACTGATCGCTTGTCCGTTGATAATCGCCACGATCTCTGTACCTCCGGTGTGATAAAGGGCATTTCGCGTGT  
TATCGGAGCTTAATGTGCGCTGGCGCTGGGATTGATCCTGTTGTTATTGTTTATGGGCGACACTTCTTCTGCTTAAAT  
GCACTGGTGTGAATGTTGGCGACTATGTGAATCGCTTATGGGCATGACGCTCAACAGTTTTGCCTTCGACCGTCCGGT  
TGAGTGGATGAATAACTGGACGCTCTTCTTCTGGGCATGGTGGTGGCATGGTGCAGGTTTGTGCGCTTGTCTGCGC  
GTATCTCGCTGGGCGTACCATTGCCAGTTCGTGCTGGGCACGTTGATTATCCGTTTACCTTCACGCTGTTATGGCTC  
TCGGTGTTCGGAATAGCGCGCTGTATGAAATCATCCAGCGCGCGCGGCAATTTGCCGAGGAAGCGATGGTCCATCCGGA  
GCGCGGCTTCTACAGCCTGCTGGCGCAGTATCCGGGTTTACCTTTAGCGCCTCCGTCGCCACCATTACTGGCCTGCTGT  
TTTTATGTACCTCGGCGACTCCGGGGCGCTGGTGTGGGGAATTTACCTCGCAGCTTAAAGATATCAACAGCGACGCC  
CCCGGCTGGTGCAGCTTCTGGTGGTGGCGATTGGCTGCTGACGCTCGGCATGCTGATGACTAACGGGATATCCGC  
GCTGAAAACACCACGGTATTATGGGCTGCCGTTACGTTTGTGATCTTCTCGTGTGGCGGGTGTATAAATCTC  
TGAAGGTAGAAGATTACCGCGTGAAGTGCCAACCGGATACCGCACCAGCGGCTGGGGCTTCAGGATCGCTGAGC  
TGAAAAAACGTCCTCGCGCTGATGAATTATCCGGGCACGCGTTACACTAAACAGATGATGGAGACGGTCTGTTACCC  
GGCAATGGAAGAAGTGGCGCAGGAGTTGCGGTTGCGCGGCGGTCAGTGGAGCTAAAAAGCCTGCCACCGGAAGAGGGAC  
AGCAGTTGGGTGATCTGGATTTGTTGGTGCATATGGCCGAAGAGCAAACTTTGTCTATCAGATTTGGCCGAGCAATAT  
TCGGTCCCGGCTTTACCTACCGCGCACGCGGTAATCGACCTACTACCGGCTGGAACCTTCTGTTAGAAGGACG  
CCAGGGCAACGACTGATGGACTACAGCAAAGAGCAGGTGATCCCGATTTCTTGACCAGTACGAGCGGCACCTTAACT

TTATTCATCTCCATCGTGAAGCGCCGGGCCATAGCGTGATGTTCCCGGACGCGTGATTGTTATTGCATAAAACCGGCCA  
TGCTCGCATATGGCGCTGTTTCTCCTACCTCTTGATACGTTATATCTATACGGTTAAGCCCTTAGTATCTATTGATGATT  
ACCGACAACAGATAATAAAAAAGAAAAGAACTATTGCAGCCAAAACCTACATTTGGGCTGTTGCGAATGTTCAATAAG  
TTAGTCTTATTTAATGTAATATTGCTGATCATTTGAAATGACGCATTATTCATGAGAAAATGTGTATCGTAAATCAACT  
GAAATTAACGCAACCATTTGTTATTTAAGGTTAAATATCTGTGTGTGATATTTTATTGAATGTTTTAAATATTGTTTTT  
ATTGGCATTGCTATAATATTGGTTATCATTTGCTGAATGGATTGAGTCTTAATGAGTGGGTTTTTAAGGGACAGGCATAG  
AGTAATGATACGTATGCATAACCAACATCTTTACTCATTATGTCATTGAATGTTGACGCTATGTGTTTATGAGGGAGAGG  
TATTTTCAGTTGATCTGGATTGTTAAATTCATATAATGCGCCTTTGCTCATGAATGGATGCCAGTATGTAGTGGAAATT  
ATAAATATTGAAATAGTCCAACACTCTTTATTACAAAAATGAGTATCTGAATTTTAAATATTGCATTCTTGCGTGATT  
ATCTCCTGAGTTTGACTTGTGATTACCTTTTTAAGGTATTTAGCGTAACTGTTTTGAGCGAGCATCAGAGGTAAAGATA  
ATCTTCTTGATAGTGATGTGGGATGTTATACGTATGGCATCGCTGATGTTTATGGTTACCCCTTATGTGTGCTCAGGAAT  
CGACAGGTAATCACTCATACTGAACAGCGATAAAAGATAAAGGTGTTCATGAATTCATGTGATTTTCGTGTTTTCTG  
CAAGAGTTCGGTACAACGGTTCATTTGCTGCTGGTAGCGTATCCGAGAAAAGAACGACTGCTACTCAAGCTGCTGAT  
GCAGGGAATGTCTGTAACAGAAATATCACAGTACAGAAATCGCAGTGCAAAGACAATTTACATCAAAAGAAACAGCTCT  
TTGAGAAAATGGGATTGAGAGCGATATTACTTTCTGGCGGATATTTCTTTCTCAGTACAATCCGGAGATCATATCCGCC  
ACGGGAGTAATAGTACAGATATTAATGATAAATCACTATCACCATATCGTCACGCCTGAAGCCATCAGTCTGGCGTT  
GGAAAACACGAATTCAAACCGTGGATCCAACCGTTTTCTGCGCGCAGACTGGCGTACTGACGGGCTGTGAGGTGCTTG  
TCCGCTGGGAACATCCACAAACGGGAATTATCCACCGGATCAGTTTATTCCTCTGCGGAGTCATCCGGTCTTATTGTC  
ATAATGACCCGCCAATGATGAAACAGACTGCGGATTTCTGATGCCGTAACATTTGCTGCCGACAATTTCCATAT  
TGGCATCAACGTCTCGCGGGTTGTTTTTGGCAGCGGGATTTGAAAAGAGTGTCTGAACCTGGTTAATAAATTAGGTA  
ACGATAAAATCAAGCTGGTCTCGAGTAACGGAACGTAACCCTATTCCGGTAACGCCAGAAGCCAGAGCGATATTTGAC  
AGCCTTCATCAGCACAACATTACCTTTGCGCTGGATGACTTTGGTACGGGTTATGCGACCTATCGTTACTTGAGGCGTT  
CCCGGTCGATTTTATTAAGATCGATAAGTCAATTTGTCAAATGGCGAGTGTGCGACGAAATCTCCGGTCATATTGAGACA  
ATATTGTGCAACTAGCGCTAAGCCTGGTCTGAGTATCGTGGCGAAGGGGTAGAAACCCAGGAGCAGGCGGATTTAATG  
ATCGGTAAGGCGTTCATTTTTGACGGGCTATTTGACTCTCCGCCAGTACCGGTAATAAATTTATCTCTGAATGGGT  
AATGAAAGCAGGTGGTTGATGTAACCGCTATTACAGCGCATCGGAGGTTGGCAGCGATTAATTCTCCCGATGCAGTA  
AATCCTGATAGATCCCGTTAATATGCCATTTGGCGCAAATGTTTTTAAATCCACTGCGTCACCTGACCCGTAGCAGAA  
TGCTGAGTCGCCAGTAACATGCGCGAATCCTGGCGCGGATTATGGATTTGTCGGGTAACCAGCAGGGATTGCGTCATCGC  
CTCAGCGACCATGTAATCCGGCAAAAAACCAATTCCTTACCTAAAATCTGGCACTGACATTTGGTGTGAAATCTGGCA  
CCAGAATTGACTCCTGCCGTGCGAGCAACCAGCCCACTTTTTTATTAATCGTATGCGCGGTGCTCCACCATAATATTA  
GGGTAGAGACGCGAGTTGGCTTTGCGGATGGGTTCCGGCACAAGGCTAACGGGTGATCCGGGGCGATAGCAAAGCCCA  
GCGAATCGCGCAATTTAGTGAATCAATACCGCCGCCGTCCAGTAGTGTATCGGGTGCGCCGATGGCGATATTGGCCT  
GATTATTAATAATCGCATCCAGACGCCGTTATACACTTCGGTGGTACGGTAATCTGGCAGGTAGGAAACTGCTTTTTT  
AGCACCTGTAACAAGCGTGCAGTGTGTTGGGCGTATAAAGCAGCTGATTAATACAAATGCGCACACGCGCTTCTATGCC  
CTGCGAAATAGTATCGATTTGCGTTTTGATGGCATAAAAAATCATTACAGCAGGTCCGTAGCTTTGCGGAAAAAATAACGCC  
CGGACTCCGTTAACTCAATGCTGCGGGTACTGCGAGTGAACAGCACCATCCAGCCCCGTCTCCATACGCTTAATGGTG  
TAGCTAATGGCGGAAGTGGTTAAACCCAACTCTTCTGCGGCTTACTGAAGCTGCCAAAACGCGCAGCGGTAGTAAATGC  
CAACAGATTCCTTGGTAAAAATTGAGTTCATTAACCAATTCGCCATTACTACTATGAATTTCTCCAGCTATGACT  
GTAGAGGTATCGTTAAAGATAGATAATCATTTTTGAATAACTTTAATACCCGTGCGTTTTAGTCGTGCTTCGCTTAA  
TTTTGTCCACCATATTCTGAAATTAACCCACGAGTACCAGGCAAAAAACCCAGTAACTGACCCGTTCCAGTTCACTCC  
CGTGGCAAAAAACAGCGTATGCGGAGAAAGCCACCGGGAATAAAGGACAGTAACCAGAAAACGCCCTTGCCAGACCACT  
ACCGCCGAGAAGGGTACGGTAGTAATTACGCTCGCCAGAACGCGGACAGTCCACTTACAGAGGCCAGCCAACCAGCAGT  
CAGCGCGGCGAAAAACGCCACACCATCCCGGAATAATTAACCGCCAGACTTCTGATAAACCCCGATTTACCGCCGCTG  
CGGCATAAAAACTGCAAAGGCGACGAAGCCAATGGTTCCTAATAATTTCCATCCTTGAGAGAGCCCGACATGTGAAGAC  
ACTAACTGCCAAAGCCCTGCACAAATACCGACGGTACACCCGTTGCCGTGAGTCCGTTTCTTGTTCCTCTGGTTA  
GACATGGACGAAAGCTACTTACATGTGCAGACTATAGAGAAATAAAACCTGATTGAGTGAAGGGTATCGGGTCAAAG  
AAACAAATATTGCACTACCGCACACTGCGAAAAGATTGTTGAATATTATTCAACAAAAGGCGAGATACGGCGAATTA  
TTAAGCGGGTCTTTTATCAGATTATCGTTGCTATTCTCAATTCATCGAAAACAGCCACAAAAACAGGGGAATGTGAA  
TGAGTATAAAAAATCTACCTGCCGACTATTTATTGGCTGCACAACAGGGTATCGATAAAGTAAAAACCTGCCTTGCG  
CTGGGTGTCGATTAATACTGCGATCGTCAGGGGAAAACGGCAATTACGCTGGCAAGTTTATATCAGCAATATGCTTG  
CGTTCAGGCATTAATTGATCGCGGAGCGGATTAATAAGCAAGATCATACCTGTTTAAATCTTTTTTAAATAGCTGTC  
TGAACGATGATTTAACGCTACTACGAATTTTTACCGGCTAAACCCGATCTAATTGCGTAACCCGTTTTGGCGGTGTC  
GGCCTGACGCTGCTGTGAAAAAGGCCATTTAAGTATTGTAAGAGAGCTTTTGGCGCATACGGAGATTAACGTTAACCA  
GACCAACCATGTAGGCTGGACGCCGCTACTGGAAGCGATTGTGCTTAATGATGGTGGTATTAACAGCAGGCGATTGTGC  
AGTTATTGCTGGAACCGGTGCCAGCCCGCATCTGACCGATAAATATGGCAAAACGCCACTGGAATGGCGCGGGAACGG  
GGCTTTGAAGAGATTGCGCAGTTACTGATTGCCGAGGTGCATAAACCGGGAGGCTTGCTATCAACACACCAGAAAGACC

GTGTGTGTGGGCGCTAACTGCGGATGCGGATTTTCTGGCGCAGCGGGGCAAGGACAGGTTGAACAGGTCTTTGCCAGAG  
CGGTAATATCGACTCCCCTGCTGCCAGCAGTTGCTGACGCTGCTTTGTGAAGAGTACGACAATGCGCCAAACAGTTGT  
CGTTGGCACTCACTCACTTTGATGATCTGTTCCGGCATGGTGATAAGGTTTCAGTTTGACGATCAAGGTATTACGGTTGG  
TCAACATCTTCATATAGAGATGAGTCGTTGTCGGCGTTGGCTGTCCCAACCTTGCAAATGACCGCTGTGAATTTTACC  
TTATCGCCTGGCTACAGTGGCACGACATTATTCATCAGCACCTGGGGGAAAATGAAACCCTGTTTAATTATCGCGGCGAT  
AATCCGTTTTATCAGGCGTTAAATAAAGAATTACATATTAACGACGGGCAGTTATTCAGGCCGTAAACGATAAAACAAAA  
TATCGCCTCAGCGGTCGCCAGTATGATGGGGTTAGGGATTGGCCTTACGCCATCAGCCGACGATTATTTAACAGGTCTGG  
CGTTATTTTTATTTATTTCCCGGGCATCCGGCGGAAAAATACAAAGAGGAATTTTATCTCGGTCTGCAACGCGGCAAAAA  
AATACCACATTATTAAGTGCATAACGCTGGAAGCCGATTACAACAACGCTGCCGGGAAAAATTTTATCGTTTTTATTC  
CAACATTATTTATGACATCCCTGGGAACGCAACTCAGGCAATAGAAAAATTAACATATTGGCTCCAGTTCCGGCTGCG  
ACATGCTGTATGGCATGGCCGATGGTTGTGCGCTGAGCCAAACCTACGGAGGGAATTATGTCAGTTAAAAATAGTCATTA  
ACCGAATACCTATTTTATTCTGTCTCGCTGATGTCATCTCCACGCGTGCAAATAAATCAGCGGCTCGAGCAGGCAT  
TTGTGGCGATGGCGACCGAAATGAATAAAGGCGTGTGAAGAAATTTAGGACTGCTGACGCCGAGCTGGAGCAGGCGAAA  
AACGGCGACCTGATGATTGTCAATGGTAAATCGGGTGGGACAACGAGCAGTTACTGGTGGAGATTGAAGAAGTGT  
CAACCCAAAGCGCAAAGCGCTCGCACGAGGCGGTTACGCCACTATTGGCAGCGCCAAAAAGCATATCCCGGAAAGT  
ACCTGGCGGTGATTTCCGGTCAACGGTCTGTTTCCCGCTCGCGAAGCGCTGAGCGCTGCAAAACGATCTCAACGTGATG  
CTGTTTTCCGATAACGTCTCAGTTGAAGATGAACTGCGCTCAAGCAACTGGCCACGAAAAAGGGCTGCTGATGATGGG  
GCCAGACTGTGGCACGGCGATTATCAACGGCGCGGCTCTGTTTTGGTAACGCCGTGCGTCTCGCGCAACATCGGTATTG  
TTGGCGCATCCGGCACCGGCGAGTACAGGAGTTGAGCGTCCGCATTCATGAATTTGGCGGCGGCTTTCCGAACTGATTGGC  
ACCGGGCGGCGGACCTGAGCGAGAAAAATCGCGGCTGATGATGCTCGACGCCATCGGGATGCTGAAAAACGATCCGCA  
AACTGAAATCATTGCGCTTATCTCAAACCGCTGCGCTGCGGTGGCCGCAAAGTGTGGAACGTGCGCGCGCTGCC  
GCAAGCCGGTGGTCTGCTTCTCGATCGTGGCGAAACGCCAGTGGATGAGCAGGGGCTACAGTTTCCCGCGGCGACC  
AAAGAGGCGAGCTAAAAGCGGTGATGCTCTCCGGCGTAAACAGGAAAAATCTCGACCTGCATACGCTTAAACAGCCGTT  
GATTGCGGATGTGCGTGCCTGCTGCAACCGCAGCAGAAATACATTCGTGGCTGTTCTGCGGCGGACGCTGTGCGACG  
AAACCATGTTCCGGTGTGAAAAACATGGCGATGCTACAGCAACATTACGCCGATCCGGAATTCGCTGAAAGAT  
ATCAACCGCAGCATCAAACACCTTCTCGACTTTGGCGATGACGACTTACCAATGGCAAGCCGACCCGATGATTGA  
CCCACCAACCGCATCAGTCGTTGATCGAAGAGGCGCGATCCAGAAGTGGCGGTGATCGTGTGATGATTTTGTGCTCG  
GATTTGGATCGCATGAAGATCCGGTCCGCTCCACCATCGAGACGATCAAAGAAGCGAAAGCGATCGCCGCTGCCGAAGGA  
CGGAGTTGATCATTCTCGCTATGTGCTGGGTACCGATCTTGATACGCCATCGTTAGAACAACAAAGCCAGATGCTGCT  
TGATGCCGGAGTGATTCTGGCGAGCAGCAGCAATACCGGATTGCTGGCGCTGAATTTATCTGCAAAGGGGAGGAAAG  
CCTGATGAGCCAGTCACTGTTTAGCCAACCATTAACGTTATTAACGTCGGCATCGCCATGTTTAGCGATGACCTGAAAA  
AGCAGCATGTAGAAGTCACTCAACTCGACTGGACGCCCGCGGGGCAAGGCAATATGCAGGTGGTGCAGGCGCTGGATAAC  
ATTGCCGATTCGCGCTGGCGGACAAAATCGCCGCCGTAACCAGCAGGCGCTGGAGCGTATTATCCAGTCGCATCCGGT  
GCTGATTGGTTTTGATCAGGCGATTAACGTTGGTGGCGGCGATGACGGCGAAAACCATTTCTCACGCGGGCGCGGATCA  
CCTGGGAAAAAATGTGCGGCGCGATGAAAGGCGCGGTACCCGAGCGCTGGTGTTCGAAGGACTGGCGAAAGATCTCGAC  
GAGGCGGCTGAACTGGCGGCTTCCGGGAGATCACCTTCTCGCGTGTACAGGACGACTGCGTGGGATCGATGGCGGG  
TGTTACCTCGGCTCGATGTTTATGCACATCGTAAAAAACAACCTACGGCAACATCGCTTATACCAACATGAGCGAGC  
AGATGGCGAAGATTTGCGTATGGGCGCTAACGACCAGAGCGTATTGACCCCTGAACTGGATGCGTGTGTCAGGGA  
CCAATACTGCGCAGCGCATGAAAATATCGGCGAAATCGATCGCGCTAATGCTGGCGCAGGCGCTGCATATGGCGGA  
TGAGTGCATAACCGCAATAACGCCGGGACGACACTGCTGATTACGGCGCTGACGCCGGGATTATTACAGGCGGGTATT  
CCGTCGAGCAACAGCGCAAGTGTGGTGGTGGTGGTGGTGGTGGTGGTGGTGGTGGTGGTGGTGGTGGTGGTGGTGGTGGT  
AAAGCGCGATGGATGCGGCGCATGGCATCGAATACAGCACCGTGGTACCACCATGGCGGTAACGGCGTGCAGTTCCG  
CCTGCGGGTACGCGGCTGCCGGGCAATGGTTTACCGGCCGCGCAGCAGGTGATCGGCCCGATGTTTCCCGGTTATA  
AGCCGGAAGATTCCGGGCTGGATATCGGCGACAGCGCCATCACCGAAACCTACGGTATTGGCGGATTTGCTATGGCGACC  
GCGCCGCTATCGTGCCTGGTGGGCGGACGGTGGGAAGCTATTGATTTCTCCGTCAGATGCGCGAAATCACCT  
CGGTGAAAACCCCAACGTCACCATTCGCTGCTCGGTTTTATGGCGTGGCGTGGCAATCGACATCACCCGCTGGGTA  
GCAGCGCATTCTGCCGGTATCAACACCGCCATCGCCATAAAGATGCGGGCGTGGCATGATTGGCGCGGCGATTGTG  
CATCCACCTTTTGCCTGCTTCGAGAAAGCATTCTGGCTGGTGCGAACGTTACGGCGTCTGACCTACATGTTTCATGCCG  
GATGCGGCGTGAACGCTTATCCGGCTACGAATGGCGCAAGAATCTGTAGGCTGATAAGCGTAGCGCATCAGGCATTT  
GTCACCATTTGCCGATGCGGCGTGAACGCCTTATCCGGCTACGAATGGCGCAAGAATCTGTAGGCTGATAAGCGTAGC  
GCATCAGGCATTTGCCACACTGCCGGATGCGGCGTGGACGCCTTATCCGGCTACGAGTGGCGGAGAAATCTGTAGGCC  
TGATAAGCGTAGCGCATCAGGCATTTGTCACCATTCGGGATGCGGCGTGAACGCCTTATCCGGCTACGAGTGGCGGGA  
GAATTGTAGGCTGATAAGCGTAGCGCATCAGGCAGTCTGGCGTTGGTGCATAACCCCATCACCTCTGTAGCGGACATAA  
CAACATGAAAGAGCTTGTGGTCTGGCATTGGTGGCAACAGCATTATCAAAGATAACGCCAGCCAGTCGATTGAGCATC  
AGGCGGAGGCGGTGAAAGCGCTGCCGATACGGTGTGAAATGCTGGCTTCCGATTACGACATTGTGCTGACCCACGGC  
AACGGGCGCAGGTCGGGCTGGATTTACGCCGTGCGGAGATTGCCACAAGCGCAAGGGCTGCCCTAACGCCGCTGGC

GAAGTGTGGCAGATACGCAGGGCGGCATCGGCTATCTGATCCAACAGGGCTGAATAACCGGCTGGCGGTCACGGCG  
AGAAAGAAAGCCGTACCGTGGTGACTCAGGTGGAAGTGATAAAAAACGATCCAGGTTTTGCCATCCCACCAAGCCCATC  
GGCGCATTCTTTAGTGACAGCCAGCGTGACGAATTACAAAAGGCAAACCTGACTGGTGTGGTGAAGATGCCGGGCG  
GGGCTATCGCCGCGTGGTGCCTCGCCGAACCGAAACGTATTGTGGAAGCACCTGCCATTAAGCGCTGATCCAACAAG  
GTTTTGTCTAATTGGCGCGGGCGGGTGGAAATCCGGTAGTGCTACTGACGCGGGAGATTACCAAAGCGTGGACGCG  
GTTATCGACAAAGATCTCTACCGCGCTGCTGGCCGTGAAATTCACGCCGACATTCTTGATCACCCTGGCGTGA  
AAAAGTGTGATTCACTTTGGCAAACCGCAGCAGCAGGCGCTCGATCGGGTGGATATTGCCACCATGACCCGCTATATGC  
AGGAAGGGCATTTCGCCCGCGCAGCATGTTGCCAAAAATCATCGCCAGCCTGACATTTTTAGAACAAGGCGGCAAAGAA  
GTGATTATCACCACGCCGGAATGCCTGCCTGCGGCGCTGCGCGCGAAACGGGCACTCATATTATTAACCGTAAGGACG  
TAAGATGAAAGAAAGCAATAGCCGCGGTGAATTTCTGAGCCAGAGCGGTAAGATGGTCACCGCCGCGCGCTGTTTGGTA  
CCTCTGTGCCGCTCGCCATGCGGCGGTAGCTGGCACCTAACTGCGAAGCGAAACACCATGAAAATCACTGACCCG  
CATTACTATCTCGATAACGTGCTGCTGGAACCGGTTTTGACTACGAAAATGGCGTGGCGGTGACAGCCCGCAGCGCG  
CCAGACCGTGGAGATTGAGACGGCAAATTTGCTGCCCTGCGCGAGAACAAGCTGCATCCGGACGCCACGCTGCCGCACT  
ATGACGCTGGCGGTAAGCTGATGCTGCCACCCCGCAGCATGATATTATCTCGACAAAACCTTTTACGGCGGGCCG  
TGGCGCTCGTCAATCGCCGCGGACCCACCATCCAGGACATGATCAAACCTGAGCAGAAAATGCTCCGGAATGCA  
ACCGTACACTCAGGAGCGGCGAGAAAACCTGATTGATTTATTGACGTCGAAAGGCACCCACTTGGCCGACCCACTGCA  
ATATCGAACCGGTTTTCCGGCCTGAAAAATCTGAAAAATTTGACGCGGGTGTGCGCGGACGTCAGGCGGGCTTTGAGTGT  
GAAATCGTCGCTTCCCGCAGCAGGTTTGTGCTGTCGAAATCTGAACCTTTAATGCGTGAAGCGATGACGCGGGGGC  
GCATTACGTCGGCGCCTGGACCCGACAGTGTGATGGCGCGATGGAAAAATCCCTCGACACCATGTTCCAGATTGGCG  
TGGACTACGACAAAGGCGTGCATATTACCTGCACGAAACCACTCCGGCAGGCGTGGCAGCCATCAATTATATGTTGAA  
ACGGTAGAGAAAACGCCACAGCTGAAGGGCAAGCTGACCATCAGTCACGCTTTGCGCTGGCAACGCTCAACGAGCAACA  
GGTAGATGAACTGGGAACCGGATGGTGGTGCAACAAATTTCTATCGCTCGACGGTGGCGATTGGCAGCTGCATATGC  
CGCTCAAACAGTTGCACGACAAAGGCGTAAAAGTGTGACTGGCACTGACAGCGTTATCGACCACTGGTCGCTTATGGT  
CTGGGCGACATGCTGGAAAAAGCCAATCTGTACGCGCAGCTCTATATTGCTCTAACGAACAGAACCTCTCCGCTCGCT  
GTTTTTAGCCACTGGCGATGATTGCCGCTGAATGAAAAGGCGAGCGTGTATGGCAAAGCGCAGGATGACGCCAGCT  
TTGTGCTGGTGGACGCCCTCTGTTCCGCCGAGGCGGTGGCGCGTATCTCGCCGAGAACCAGCAACGTTCCATAAAGGGCAA  
CTGGTGTGGGGGAGTGTGGCAGGTTGATGCGCATTGAAACGCCCTGCAACGGTGAATAGTAAGAGATTTAAGCCCCAGGG  
AGTGGGGCAATCTGAATATGAGTGTGTCGGCAGAAATGGACATTATCTTTGAGGAATATGCCCTTATTGACGTTGTGTAG  
ATAACTATTTGTCTACGTGAAAAGATCATCAGTTTTGCCGATTTTAGTCTTTTACAGATAGCAAATATCACACTTACAGG  
CGCTCGCTTATGGGGAACGTTGCTGCTCTGTTTCACTCAGGCTCGCGGCATGTTGGGGCTGGATCGGGTGGTTAAATA  
TTGGCTATATTCAATGGACGCGTTTTGCCGCGATGACATATCAGGCGTTGCCAAATACACATAGCTAATCAGGAGTAAAC  
ACAATGAAGATCAAAGCTGTTGGTGCATATTCCGCTAAACAACCACTTGAACCGATGGATATCACCCGGCGTGAACCGGG  
ACCGAATGATGCAAAATCGAAATCGTTACTGTGGCGTTTGCCATTCCGATCTCCACCAGGTCGTTCCGAGTGGGCGG  
GGACGGTTTACCCCTGCGTGCCGGGTGATGAAATTTGGGGCGTGTGGTAGCCGTTGGTGTACAGGTAGAAAAATATGCG  
CCGGGCGATCTGGTGGTGTGCGCTGCATTGTGACAGTTGTAACATTGCGAAGAGTGTGAAGACGGGTTGGAAAACATA  
CTGTGATCACATGACCGGCACCTATAACTCGCCGACGCCGACGAACCGGGCCATACTCTGGGCGGCTACTACAACAGA  
TCGTGTTTATGAGCGATATGTTCTGCGTATTGTCACCCGCAAGAGCAGCTGGCGGCGGTGGCTCCTTTGTTGTGTGCA  
GGGATCACACGATTCGCCGCTACGTCAGTGGCAGGCCGGCCGGTAAAAAGTGGGCGTGGTGGCATCGGCGGCT  
GGGACATATGGGGATTAAGCTGGCCACGCGATGGGGGCACATGTGGTGGCATTACCCTTCTGAGGCAAAAACGCGAAG  
CGGCAAAAAGCCTGGGGCGCATGAAGTTGTTAACTCAGCAATGCCGATGAGATGGCGGCTCATCTGAAGAGTTTTGAT  
TTCATTTTGAATACAGTAGCTGCGCCACATAATCTGACGATTTTACCACCTTGGCTGAAGCGTGTGGCACCATGACGCT  
GGTTGGTGGCGCTGCGACACCCGATAAATCGCCGGAAGTTTTCAACCTGATCATGAAACGCGGTGCGATAGCCGTTCTA  
TGATTGGCGGCATTCCAGAACTCAGGAGATGCTCGATTTTTGCGCCGAACATGGCATCGTGGCTGATATAGAGATGATT  
CGGGCCGATCAAATTAATGAAGCCTATGAGCGAATGCTGCGCGGTGATGTGAAATATCGTTTTGTTATCGATAATCGCAC  
ACTAACAGACTGAAAAAATTAATAATACCCTGTGGTTAACATATTAACCTTCCGCTCTCCACTTAACTTTTTAGTTAAGG  
AGAGCGAAATAATATCAAAGTAGCAGTAAAACCTATAACGTAAATTTAAATTTGTTAAATTAACGCCCTCCAGTACACAAT  
ACTTCACACGTTAGTTATGAGCGATTTCTGATAGTGCTGGTTTAAATCAGAGCTTTATTATCTGCGACGTTTATTTTTAT  
TTAAGAGAGATCGCGATGATATCATAAAAGCTCCGCACAATAATTTGATGCCATATACGCAACAAAGCATACTTAATAC  
GGTTAAAAACAATCAGTTACCAGAGGATATCAAAGCTCCCTGGTTTCTGTGTCGATATATTCAAGGTTTTGATTAAC  
AATATTATGATTATCCTTATGATTGTCGTGATGATTTAGTCGATGACGACAACTCATTATCTCATGGCTGCCGTACGA  
GACTGTGAGTGGTACGACGATAACGCACTCACCATAAATGTGCGATTTAATGATTTCCCTGGATTTTATGACTGGATGGA  
TTACCCTGATCACCCGTTAAGTTTTGTTTTTACATACTTAAAAATCAAAAAGGGACAGTTTTGGGTATATGACCAGGATG  
ATCGGTTTTCTGATATTAAGCAAACGTGACGGCTGGACGCTTACCAGGCTTAAAGAAATTTAGTGCAGTTTTATCGATTC  
GTGCGAACAGATTGCAAATGATTCTTCTTGAATACCATATGCCTTTGCTGAGAATTTTCCCTAAAGGGAAGAGTGTAT  
GCATGTGAAAAATGGCTTCGCGAAATGTCGCTATTCCGGAGACAGACGCGCCATTAAGCAGGCGCTTGGCGATGGAT  
TATTATTACACTTAAAAATATCTACCCTGTTTTCTGAATCACTGGTGTGTTATTGCTCTGTTCTGGACGTA

ACATACAGAGATGATGCGGATTAATGAATGGATATCTAATAGAGTGCAGGAATTAGGTGACAGATATTATCCTGTAAA  
TAAGCACGTTAAAATCCGCTACACTCTTGTAGTTCAGAAAAGGGTCCACCTGCAAGTTGTTATTCCACCTGAGAGTGAATC  
GCAATGCAGGTAATCATTTCATCTGTATATCTGTATGCCAACTGGCATTCCATCTCTTTTTTCGCCGATATTTTGTGTG  
ATCGGGCAGACTTCGCTTAAAAAAGCACCAGTAGTGGTTTTCGCAGCCATGCGGTGTATAAAAAATGATCTCATGCAGATG  
TTTTGTGAATGTGTTGGTTGACATTCATATGAAAAAATCATAATTCATCATGTTTGTGTGGGGTCTTTTCTGTATCTT  
ACGCATCGCACTCAAGCCTGACAGAAAATATGCTGTAAAGGCTCATATCAAAAACCGCCATTAGCTCATCAGGAAGAGCAG  
ACGACAACCAGGATTGTTGTATGGTACGGGGTTCGAGGCCCTCGATGGCGGTCCAACTTTTCAAACCTCTTCTGAATCAGA  
TCCCCTTATTATCATCCCTGCAAAGTGGAAACATTGCCATTGTTTGGCTATTACAGGATGGGGCAGACCAATGAAAAAGCC  
CACACAGGGGAGAGTGGGCTGAAATGGGAAGCTAAAGACTCAAGTAACTTATCGGAAATAAGGACCACGCATTACGGGG  
GCTATCATCGCCGATGGCCGTGATTCCGCAAATCAGGTTGATTACGTAGAGAGTAAATTATCTGCTCACCCTGCGTCAC  
CCCTTCGTAATCAGGCGTAGCGCAATACCCAATAATTGCACCAATAACCCGACTGGCAACGCGTTGCATACGCCCAT  
AAGCAGCAGCACAGCGGGCAAAGAAAACGCCTGACTAAGAAAACTCGCCAGATAATTGATGCGAGCACAATCCCCGC  
CAGGCCATTAACGTGCCATGTTGGTGTTCGGCATTTAATGTTACTGAGAAAATACTGATAAAAAATAAACGGTTTG  
CGGGTAGAGAGATCGGTAATTAATCCGCGGCGAAAAAAGACATAACCAGGGGGCGCTAATCGGTTGTTGTAGTGTGTCA  
TTTGGCGTGTGACTGGCGGCGCATGCTGCACCAGCAAACCATAAGAGATAAGCGCCGCGCATTGATAAGCGAA  
AAAATCTCCTCACACTGCTAATTAGCGTTGCAAGACCAAACAAACCCCAACCCGGAATAAAATGCATCGCCAGCGCC  
GCCAGCCCGTACAGCACCCCTGCGCGTGCAGCCGGAAGCCAGGCTGGTTTGTACTACCACAAAGAGATTGCTCCCGAT  
TAAAAAAGTAATCACGAACAGTCTACGGTCAGGTAACGGCATGCAAAGGATCCATAGTGATTTTATCCATAAATAAG  
TGAACCTAAGTGCATCATATTTTACCAAAAAATAATCGGGTGCAGAGAGATCACAAGTGTCTTATTTCCGGTACTGGC  
GTTTATGCCCTGACTGAACTAATTATTAATCAACCAATAATGTGGGTGGGTGATAGTGTGATAACAACCTCTGGAGCCGT  
AATATGAAAATAATCTCTAAATGTTAGTCGGTGCCTTAGCGTTAGCCGTTACCAATGTCTATGCCGCTGAATTGATGAC  
CAAAGCGGAATTTGAAAAGTTGAATCGCAGTATGAAAAATAGGTGATTTTCAACCAGCAATGAAATGTCGACTGCAG  
ATGCAAAAGAAGATTTGATCAAAAAGCGGATGAAAAGGGGCTGATGTGTTGGTACTGACCTCCGGTCAAACCTGACAAT  
AAGATCCACGGCAGGCAATATTTATAAGAAGAAGTAATTCTGAATCCTATGTAACATCTCCGATGCGTAAGTTTATC  
GGTGATCATCTATTGAAATTTATGCCGATAAAGCGTTCGCGCTGCATTCCGAGTTCAGCTTTTCCAGCCGCGCCAGAA  
CGTCGTCGGCTGATGCCTAAATAATTCGCCGCTGCTGTTTTATCGCCATTAATTTTCCAGTGCCTGTTGTGGTGTCA  
GTAAGCGTGGAGCGGGAGTTTTCCGCCACTCGCGGCCAGTTCGGCAGTAGCAGTTGCATAAACTGCGGCGTTAAATCC  
GGCGTCGGTCCACACTTAAAAACAGCGCCAGTTCATCATATTGCGCAGTTCACGAATATTGCCTGGCCAGTCGTA  
GTGACGAGCAGATTTTCACTTGCCTGTAAACCCCTGCGGTAATGCAGCAGAAAATGGGGCGGAGAGCGCCGCCAGAGACA  
CTTTCAAAGCTTTCCGCCAGCGGAAGAAATATCCGCCACCCGCTCGCGCAGTGGTGGCAATTGCAGACGCAAAATACTC  
AGCCGATAAAACAGATCACGGCGAAAACGTCCTTGCTGCATATCTTCTCCAGATTGCAGTGAGTGGCGCTAATGACCCG  
TACATCTACCGGAACAGGCTGATGCCCCGCGACGCGGGTGACCTTTTTTCTCCAGCACCCCGCAGCAGCCGGGTCTGCA  
AAGGTAGCGGCATTTCCGAATCTCATCCAGAAACAGCGTACCGCCGTGGGCAATTTGAAACAGCCCGCGCGACCTCCG  
CGTCGCGAGCCGTAACGCCCCCTTCTCATAGCCAAACAGTTCTGCTTCCAGCAGCGATTCCGCAATCGCCCCGAGTT  
GACGGCAACAAACGGATGCGACTTTTTGCCCTGTGCGCATCGTGGCGGGCAAAATATTTCCGATGAATCGCCTGGGCCG  
CCAGCTCTTTGCCGTCCCGTTTTCCCTCAATCAACACCCGCGCACTGGAGCGGGCATAACAGCAAAATAGTCTGCCGT  
ACTTGTCCATCTGTGGTATTGACCGAGCATATCGCCAGCAGTAACGAGTACGAGGGCGTTGCGGGTGGCATCGTG  
AGTGTATGGCGTAACGACATGCGCGTCATATCCAGCGCATCGTGAACGCCTGGCGCACGGTGGCGGGGAATAGATAA  
AAATTCGGTCATTCCGGCTTCTTCTGCAAAATCGGTAATCAGCCCTGCGCCGACCACCGCTTCGGTCCGTTAGCTTTT  
AGTCGTTAATCTGCCCGGTGCGTCTTCTCGTAAATGTAGTACGTTGGTGGTGGCGCAAAATTAAGGTTTTTTTTGAAA  
CGCCACCAGCGTGGAATGTTTTCTGATAGGTGACAAACGCCGATAGAAGAGGTGAGTTTTTCCGGCTTTTCCAGTGCCT  
GTAACACATCGTAGCCGCTCGGTTAATCAAAATAACTGGCACTGACAGGGCGTTTTTCCAGGTACGCGCGTTAGAGCCA  
GCCGCGATGATGGCGTCACAGCGTTGTTTTGCCAGTTTCTTGGGATGTAGGTCACTGTTTTTCAAAGCCAAGCTGAAT  
AGGGGTAATGTTCCGAGGTGATCAAACCTGAGGCTGATATCGCGAAACAGCTCGAACAGGCGGTTACAGATACCGTCC  
AGATAACCGGTTTTGTCGTATTAAGCCGTGGTGGATGTCCATAGCGCACCGCAAAGTTAAGAAAACGAATATTGGGTTT  
AGTCTTGTTCATAATTGTTGCAATGAAACGCGGTGAAACATTGCCTGAAACGTTAACTGAAACGCATATTTGCGGATTA  
GTTTCATGACTTTATCTCTAAACAAATTGAAATTAACATTTAATTTTATTAAGGCAATTGTGGCACACCCCTTGCTTTGTC  
TTTATCAACGCAAAATAACAAGTTGATAACAAGGATGGGCTATGTCTTACACTCTCCAGTAAAGCGTTTTGCGCTGCA  
CTGACTAAAGAAAATCCATTGCAGATTGTTGGCACCATCAACGCTAATCATGCGCTGTTGGCGCAGCGTCCGGATATCA  
GGCAATTTATCTTTCTGGCGGTGGCGTGGCGGAGGTTGCTGGGGTCCCGATCTCGGTATTTCTACCCTTGATGATG  
TGCTGACCGACATTCCCGTATCACCGACGTTTGTGCTGCCGCTGCTGGTGGATGCGGATATCGGTTTTGGTTCTTCG  
GCCTTAACGTGGCGCGACCGTGAATCGATGATTAAGCCGGTGGCGAGGATTGCATATTGAAGATCAGGTTGGTGC  
GAAACGCTGCGGTGATCGTCCGAATAAAGCGATCGTCTGAAAGAAGAGATGGTGGATCGGATCCGCGCGCGGTGGATG  
CGAAAACCGATCCTGATTTTGTGATCATGGCGCGCACCGATGCTCTGGCGGTAGAGGGGCTGGATGCGGGCATCGAGCGT  
GCGCAGGCCTATGTTGAAGCGGGTGGCGAGATGTTGTTCCCGAGGCGATTACCGAACTCGCCATGTACCGCCAGTTTGC  
CGATGCGGTGCAGGTGCCGATCCTCGCCAACATCACCGAATTTGGTGCCACGCCGCTGTTTACCACCGACGAATTACGCA

GCGCCATGTCGAATGGCGCTGTACCCACTTTTCAGCGTTCCGCGCCATGAACCGCGCCGCTGAACATGTCTACAACGTC  
CTGCGCCAGGAAGGCACGCAGAAAAGCGTCATCGACACCATGCAGACCCGCAACGAGCTGTACGAAAGCATCAACTACTA  
CCAGTACGAAGAGAAGCTCGACAACCTGTTTGGCCGTAGCCAGGTGAAATAAAAAACGCCCGTTGATTGTATTTCGACAGC  
CGATGCCTGATGCGTCGCTGACGCGACTTATCAGGCCTACGAGGTGCACTGAACTGTAGGTGCGGATAAGACGGATGGCGT  
CGCATCCGACAACCGATGCCTGATGCGCCGCTGACGTGACTTATCAGGCCTACGGGGTGCCTGAACTGTAGGTGCGGATA  
AGACGCATAGCGTCGCATCCGACAACCGATGCCTGATGCGCCGCTGACGCGACTTATCAGGCCTACGGGGTGCCTGAACT  
GTAGGTGCGGATAAGACGCATAGCGTCGCATCCGACAACCGATGCCTGATGCGCCGCTGACGCGACTTATCAGGCCTACG  
GGGTGAACTGAACTGTAGGTGCGGATAAGACGCATAGCGTCGCATCCGACAACAACTCTCGACCTACAAATGATAACAATG  
ACGAGGACAACATGAGCGACACAACGATCCTGCAAAACAGTACCCATGTCATTAACCGAAAAAATCTGTGGCACTTTCT  
GGCGTTCGGCGGGCAATACGGCGCTCTGCACCGTGGGTAAAAGTGGCAATGACCTGCATTACCGCGGTACGATATTCT  
TGATCTGGCGAAAACATTGCGAATTTGAAGAAGTGGCGCATCTGCTGATCCACGGCAAACCTGCCACCCGTGACGAACTCG  
CCGCTTACAAAACGAACTGAAAGCCCTGCGCGTTCACCGGTAACGTGCGTACCGTGTGGAAGCCTTACCGCGCGCG  
TCGCACCCGATGGATGTTATGCGCACCCGGTGTTCGCGCTCGGCTGCACGCTGCCAGAAAAAGAGGGGCATACCGTCTC  
TGCGCGCGGGGATATTGCCGACAACCTGCTGGCGTCTAGCTGATTCTCCTTTATTGGTATCACTACAGCCACAACG  
CGAAGCGCATCAACCGGAAACCGATGACGACTCCATCGGCGGTCACTTCTGCATCTGCTGCACGGCGAAAAGCCATCG  
CAAAGCTGGGAAAAGGCGATGCATATCTCGCTGGTGTGTACGCCGAACACGAGTTTAAACGCCCTCACCTTTACCAGTGG  
GGTATTGCGGGCACCGCTCTGATATGATTCCGCGATTATTGGCGGATTGGCGCACTGCGCGGGCCAAAACACGGCG  
GGCGAATGAAGTGTGCTGGAGATCCAGCAACGCTACGAAACGCCGACGAAGCCGAAGCAGATATCCGCAAGCGCGTG  
GAAAACAAAGAAGTGGTCATTGGTTTTGGTCATCCGTTTTACCCATCGCTGACCCGCGCCACCAGGTGATTAACGTTG  
GGCGAAGCAGCTCTCGCAGGAAGGCGGCTCGCTGAAGATGTACAACATCGCCGATCGCCTGGAAACGGTGTGTTGGGAGA  
GCAAAAAGATGTTCCCAATCTCGACTGGTCTCTGCTGTTTCTACAACATGATGGGCGTCCACCCGAGATGTTCA  
CCACTGTTTGTATCGCCCGCTCACCGGCTGGGCGGCGCACATTATCGAACAACGTCAGGACAACAAAATTATCCGTCC  
TTCCGCAATTATGTTGGACCGGAAGACCGCCGTTTGTGCGCTGGATAAGCGCCAGTAAACCTCTACGAATAACAATA  
AGGAAACGTACCCAATGTCAGCTCAAATCAACAACATCCGCCCGAATTTGATCGTGAATCGTTGATATCGTCGATTAC  
GTCATGAACTACGAAATCAGCTCTAAAGTGGCTACGACCCGCACATTACTGCCTGCTCGACACGCTCGGCTGCGGTCT  
GGAAGCTCTCGAATACCCGGCTGTAAAAAAGTGTGGGGCAATTTGTTCCCGCACCGTCTGATCCCAACGGCGTGGCG  
TCCCGGAACTCAGTTCCAGCTCGACCCGCTCCAGCGGCATTTAACATCGGCGCGATGATCCGCTGGCTCGATTTCAAC  
GATACCTGGCTGGCGGGGAGTGGGGCCATCCTTCCGACAACCTCGGCGGCATTCTGGCAACGGCGGACTGGCTTTCCG  
CAACCGGTCGCCAGCGCAAGCGCCGTTGACCATGAAACAGGTGCTGACCGCAATGATCAAAGCCATGAAATTCAGG  
GCTGCATCGCGCTGGAAAACCTTTAACCGCGTGGCCTCGACCACGTTCTGTAGTGAAGTGGCTTCCACCGCCGTG  
GTCGCCGAAATGCTCGGCCTGACCCGCGAGGAAATCTCAACGCCGTTTCTGCTGGCGTGGGTGGACGGTCACTGCTGCG  
CACCTATCGCCATGCGCCGAACACCGGCACGCGTAAATCCTGGGCGGCGGGGATGCCACTTCCCGCGCGGTACGTCTGG  
CACTGATGGCGAAAACGGCGGAAATGGGTTACCCGTGAGCCCTGACTGCGCCGTTGTTGGGCTTCTACGACGCTCCTTT  
AAAGGTGAATCGTTCCGCTTCCAGCGCCGTAACGTTTCTACGTTATGAAAAATGTGCTGTTCAAATCTCCTTCCCGGC  
GGAGTTCCTCCAGACGGCAGTTGAAGCAGCGATGACGCTCTATGAACAGATGCAGGCAGCAGGCAAAACGGCGGGCG  
ATATCGAAAAGTGAACATTCGACCCACGAAGCCTGATTCGCATCATCGACAAAAAGGGCCGCTCAATAACCCGGCA  
GACCGCGATCACTGCATTAGTACATGGTGGCGATCCCGCTGCTATTCGGGCGTTAACGGCGGACAGATTACGAGGACAA  
CGTTGCGCAAGATAAACGCATTGACGCCCTGCGCGAGAAGATCAATTTGCTTTGAAGATCCGGCATTACCGCTGACTACC  
ACGACCCGAAAAACGGCCATCGCCAATGCCATTACCTTGAGTTACCGACGGCACAGATTGAAGAAGTGGTGGTG  
GAGTACCCCATTTGGTCATGCTCGCCGCTCAGGATGGTATTCCGAAACTGGTCGATAAATTCAAAATCAATCTCGCGC  
CCAGTTCCCGACTCGCAACAGCAGCGCATTCTGGAGTTTTCTCTCGACAGAGCTCGCCTGGAACAGATGCCGGTCAATG  
AGTATCTCGACCTGTACGTCATTTAAGTAAACGGCGGTAAGGCGTAAAGTTCAACAGGAGAGCATTATGCTTTTTAGCGAA  
TTTTATCAGCGTTGATTAACGAACCGGAGCAGTTCTGGGCCGAGCAGGCCCGCGTATTGACTGGCAGACGCCCTTTAC  
GCAAACGCTCGATCACAGCAATCCGCCGTTTGGCGTTGGTTTTGTGAAGGCCGAACCAACTGTGCCACAACGCCATCG  
ACCGCTGGCTGGAGAACAGCCAGAGGCGCTGGCGTGATTGCCGTCTTTCGGAACAGAAGAAGAGCGCACCTTTACC  
TTTCGTCAGCTGCATGACGAAGTGAACGCGGTGGCTCAATGTTGCGTTCATTGGGTGTGACGCGGGCGATCGGGTGT  
GGTGATATGCCGATGATTGCCGAAGCGCATATTACTCTGCTGGCCTGCGCGCGCATTGGCGCTATTCACTCGGTGGTGT  
TTGGTGGATTTGCTCGCACAGCGTGGCGGCGCAATTTGATGACGCTAAACCGGTGCTGATTGTCTCGGCTGATGCCGGA  
GCGCGCGGTGGCAAAATCATTCCCTATAAAAAATTGCTCGACGATGCGATAAGTCAGGCGCAGCACCAGCCAGCCATGT  
TTTGTGGTGGATCGCGGGTGGCGAAAATGGCGCGCTCAGCGGGCGGGATGTCGATTTTCGCTGTTGCGCCATCAAC  
ACATCGGCGCGGGTACCGGTGGCGTGGCTGGAATCCAACGAAACCTCCTGCATTCTTACACTTCCGGCACGACCGGC  
AAACCTAAAGCGTGCAGCGTGCAGTGGCGGATATCGGTTGGCGTGGCGACCTCGATGGACACCATTTTTGGCGGCAA  
AGCGGGCAGCGTGTCTTTTTCGCGATCGGATATCGGCTGGGTGGTGGGGCATTGATATCGTTTACCGCGCGCTGCTGG  
CGGGGATGGCGACTATCGTTTACGAAGGATTGCCGACTGGCCGACTGCGGCGTGTGGTGGACAATCGTCGAGAAATAT  
CAGGTTAGCCGGATGTTCTCAGCGCCGACCGCATTTCGCTGCTGAAAAAATCCCTACCGCTGAAATTCGCAACACGGA  
TCTCTGCTGCTGGAAGTGTCTATCTGGCTGGAGAACCCTGGACGAGCCGACCGCCAGTTGGGTGAGCAATACGCTGG

ATGTGCCGGTCATCGACAACACTGGCAGACCGAATCCGGCTGGCCGATTATGGCGATTGCTCGCGGTCTGGACGACAGG  
CCGACGCGTCTGGGAAGCCCCGGTGTGCCGATGTATGGCTATAACGTGCAGTTGCTTAATGAAGTCAACGGCGAACCCTG  
TGGCGTCAACGAGAAAGGGATGCTGGTGGTGAAGGGCCGCTGCCCGGGGTGATTAGACCATCTGGGGCGACGACG  
GCCGCTTTGTGAAGACTTACTGGTTCGCTGTTTTCCCGCCCGGTGTACGCCACCTTTGACTGGGGCATCCGTGACGCTGAC  
GGTTATCACTTTATTCTCGGGCGCACTGACGATGTAATTAACGTTGCCGGGCATCGGCTGGGGACGCGCGAGATTGAAGA  
GAGTATCTCCAGCCATCCGGGCGTTGCCGAAGTGGCGGTGTTGGGGTGAAGATGCGCTGAAAGGGCAGGTGGCGGTGG  
CGTTTGTCAATCCGAAAGAGAGCGACAGTCTGGAAGATCGTGATGTGGCGCACTCGCAAGAGAAGGCGATTATGGCGCTG  
GTGGACAGCCAGATTGGCAACTTTGGCCGCCCGCGCACGCTGTGTTTGTCTCGCAATTGCCAAAAACCGCATCCGGAAA  
AATGCTGCGCCGACGATCCAGGCGATTTGCAAGGACGCGATCTGGAGATCTGACGACCATTGATGATCCTGCGTGTG  
TGATCAGATCCGCCAGGCGATGGAAGAGTAGGTTATTGTGCGATGCGTCCGCGCGGTGCATCCGGCACTGTGTGCCGATG  
CCTGATGCGACGCTGACGCGTTTTATCATGCCTACGGACCTGAACCGTAGGTCGGATAAGGCGCTCGCGTCGCATCCGAC  
ACCATGCTCAGATGCCTGATGCGACGCTGACGCGCTTATCAGGCCTACCCACTGTTTTTACACCGATAAATTTTTCCCC  
ACTTTTTGCCTCATTATATAAAAAATATATTTCCCGCAAAAACGATTGCTTTTTATCTTCAAGATGAATAGAATGCG  
GCGGATTTTTGGGTTTTCAACAGCAAAAAGGGGAATTTCTGTGCGAAGATAACAACCTTAGCCAGGGGCCAGTCCCG  
CAGTCGGCGCGAAAGGGGTATTGGCATTGACGTTCTGTCATGCTGGGATTAACCTTCTTTCCGCCAGTATGTGGACCGG  
CGGCACTCTCGGAACCGGTCTTAGCTATCATGATTTCTTCTCGCAGTTCTCATCGGTAATCTTCTCCTCGGTATTTACA  
CTTCAATTTCTCGGTTACATTGGCGCAAAAACCGGCCTGACCCTCATCTTCTGCTCGCTTCTCGTTTGGTGTAAAGGC  
TCATGGCTGCCTTCACTGCTACTGGGCGAACTCAGGTTGGCTGTTTGGCGTGGTGTGGCGATGTTTGGCATTCCGGT  
GGGTAAGGCAACCGGGCTGGATATTAATTTGCTGATTGCCGTTTCCGGTTTACTGATGACCGTCACCGTCTTTTTGGCA  
TTTCGGCGCTGACGGTCTTTCCGTGATTGCGGTTCCGGCTATCGCTGCCTGGGCGGTTATTCCGTGTGGCTGGCTGTT  
AACGGCATGGGCGCCTGGACGATTAAGCGGTCGTTCCCGCACAAACCGTTAGATTTCAATGTCGCGCTGGCGTGGT  
TGTGGGTCATTTATCAGTGGGTCACGCTCACCCTGACTTTGTCCGGTTGGTGCATGCAAACGCGGCTGGTGG  
TGCGATGGTGGCCTTTTTCTCGCACTGTTGATGTTATTTCCGGTGCAGCGGGCGTGCAGGCACTGGCATGGCG  
GATATCTGATGTGATGATTGCTCAGGGCTGCTGCTGCCTGCGATTGTTGGTGTGGGGTGAATATCTGGACCACCAA  
CGATAACGCACTCTATGCGTGGGTTTAGGTTTCGCAACATTACCGGGATGTCGAGCAAAACCTTTCCGGTAAACAACG  
GTATTATCGGTACGGTCTGCGCATTATGGCTGTATAACAATTTGTCCGGTGGTTGACCTTCTTTCCGGAGCTATTCT  
CCAGTGGGTGGCGTATCATCGCCGACTATCTGATGAACCGTCCGCGCTATGAGCACTTTGCGACCACGCGTATGATGAG  
TGTAATTGGGTGGCGATTCTGGCGGTGCCTTGGGGATTGCTGCAGGCCACTGTTACCGGGAATTGTTCCGGTCAACG  
CGTATTAGGTGGCGCGTGAAGTATCTGATCCTTAACCCGATTTGAATCGTAAAACGACAGCAATGACGCGATGTG  
GAGGCTAACAGTGTGAATAACGCTTTACAAACAATTATTAACGCCCGGTTACAGGCGAAGAGGGGCTGTGGCAGATTC  
ATCTGCAGGACGGAAAATCAGCGCCATTGATGCGCAATCCGGCGTATGCCATAACTGAAAACAGCCTGGATGCCGAA  
CAAGGTTTAGTTATACCGCCGTTTGTGGAGCCACATATCACCTGGACACCAGCAAACCGCCGGACAACCGAATGGAA  
TCAGTCCGGCACGCTGTTTGAAGGCATTGAACGCTGGGCGGAGCGCAAAGCGTTATTAACCCATGACGATGTGAAACAAC  
GCGCATGGCAAACGCTGAAATGGCAGATTGCAAACGGCATTACGATGTGCGTACCCATGTCGATGTTTCCGGATGCAACG  
CTAACTGCGCTGAAAGCAATGCTGGAAGTGAAGCAGGAAGTCCGCGCGTGGATTGATCTGCAAATCGTCGCTTCCCTCA  
GGAAGGGATTTTGTGATCCCAACGGTGAAGCGTTGCTGGAAGAGGCGTTACGCTTAGGGGAGATGTAGTGGGGGCGA  
TTCCGCATTTTGAATTTACCCGTGAATACGGCGTGGAGTGCCTGCATAAAAACCTTCCGCTGGCGCAAAAATACGACCGT  
CTCATCGACGTTCACTGTGATGAGATCGATGACGAGCAGTCCGCTTTGTGCAAAACGTTGCTGCCCTGGCGCACCATGA  
AGCATGGGCGCGGAGTACCGCCAGCCACACCGCAATGCACTCCTATAACGGGGCGTATACCTCACGCGCTGTCC  
GCTTGTGAAAATGTCCGGTATTAACCTTTGTCCGCAACCCGCTGGTCAATATTATCATCTGCAAGGACGTTTTCGATCGTAT  
CCAAAACGTCGCGGCATACGCGCGTTAAAGAGATGCTGGAGTCCGGCATTAAACGCTGCTTTGGTACGATGATGCTT  
CGATCCGTGGTATCCGCTGGGAACGGCGAATATGCTGCAAGTGTGCATATGGGGTGCATGTTTGGCAGTTGATGGGCT  
ACGGGCAGATTAACGATGGCCTGAATTTAATCACCCACCACAGCGCAAGGACGTTGAATTTGCAGGATTACGGCATTGCC  
GCCGAAAACAGCGCAACCTGATTATCTGCGGCTGAAAATGGGTTTGTGCGCTGCGCCGTGAGGTTCCGGTACGTTA  
TTCGGTACGTGGCGCAAGGTGATTGCCAGCACACAACCGGCACAAACCCGTTATATCTGGAGCAGCCAGAAGCCATCG  
ATTACAAACGTTGAACGACTGGGTTACAGCGAGCTTAGTTTATGCCGGATGCGGCGTGAACGCCTTATCCGGCTACGTA  
GAGCACTGAACTCGTAGGCTGATAAGCGTAGCGCATCAGGCAATTCAGCCGCTGATCTGTGTCAGCGGCTACCGTAT  
TCATTTCCGCCAACAAACCGCGCATTCTCAACGCCATGTGCAAAAATGCCTTCCGAGCGGCTGTCTGCCAGCTGTAGTT  
TATGCCGGATGCGGCGTGAACGCTTATCCGGCCTACGTAGAGCACTGAACTCGTAGGCCTGATAAGCGTAGCGCATCAG  
GCAATTCAGCCGACGACCTGTGTCAGCGGCTACCGTATTCTTCCGCCAACAAACCGCGCATTTATCCAACGCCATGT  
GCAAAAATGCCTTCCGCGGCGCTGTCTGCCAGCTATTTTTCCGCCGAACAAAACCGCGTCTCTCCAGTAGTGGCGGG  
GCAAGAGAAAATAGCTTTAAGCCCGTCATGTTGTGTGGCAATCGTGTGTTAAACATGTGGAAGGGAAGTGGCGGCAAT  
CAGCTCCAGAACCAGCTAATTGAGTTCCCTCAATGACCACCTGTGGATGTAGCCCGCTTCTCGCAGTAGTGGTCAA  
TTTGCTCTCTGGTGGCAATTTCCGCGCTGAGCAGGACAGTTTTTTCATCATGCAAGCGACTCAACGCCACCTGTTATGG  
ACGGCCAGCGGATGATGTTGCGCCACGACTAACGCTAACTTTCTGTGAGTAAAGGAATTGCTCCAGCTCCGGCGAATG  
CACAGGCGCAAGGCAATCCAACGTCCTGTCGCGGCAAGCATATCCTCGATTTTCTCCTGCGACATTTCTGTA



GCTGGAGCGTGATGCTGGGATAGCGGCATAGAAATCCGCCATTAAGGGGCCGATAAAGTAGCTCGTAAAGGTGGGGTG  
ACGGCGATACGACGGATCCTCGCGTCAGATCGGCAACATCATGAATCGCCGTTTACCCGCCCCAGTTCCTGTAACGC  
CCGGCTGGCGTACTGTGCCAGACTTCTCCTGCATCAGTGAGACGAATCGTTCGCCGCTACGGTCAAACAGCGGCACGC  
CTAAACTCTCCTCTAACTGGCGAATCTGCTGGGAAAGCGCAGGTTGGGAGACGTGCAACGCACTGGCGGCACGGGTGAAG  
CTGCCATGTTACGCCACGGCAAGAAAATAATTGATATGTCGAGAGAGCATTGCGAACCTATAAGTAAATCCAATGGAAT  
CATCATAAATGAGACTTTTACCTTATGACAATCGGCGAGTAGTCTGCCTCTCATTCCAGAGACAGACAGAGGTTAACGGT  
GAAAGAGATTATTGATGGATTCTTAAATTCCAGCGCGAGGCATTTCCGAAGCGGGAAGCCTTGTTTAAACAGCTGGCGA  
CACAGCAAAGCCCGCGCACACTTTTTATCTCCTGCTCCGACAGCCGTCTGGTCCCTGAGCTGGTGACGCAACGTGAGCCT  
GGCGATCTGTTCTGTTATTCGCAACGCGGGCAATATCGTCCCTTCTACGGGCCGGAACCCGGTGGCGTTTCTGCTTCGGT  
GGAGTATGCCGTGCTGCGCTTCGGGTATCTGACATTGTGATTTGGTTCATTCCAACGTGGCGCGATGACCGCCATTG  
CCAGCTGTGAGTGCATGGACCATATGCCTGCCGTCTCCACTGGTGCCTTATGCCGATTACGCCCGCGTCTGTTAATGAG  
GCGCGCCCGCATTCCGATTTACCGTCAAAAGCTGCGGCGATGGTACGTGAAAACGTATTGCTCAGTTGGCTAATTTGCA  
AACTCATCCATCGGTGCGCTGGCGCTCGAAGAGGGGCGGATCGCCCTGCACGGCTGGGTACGACATTGAAAGCGGCA  
GCATCGCAGCTTTTGACGGCGCAACCCGCCAGTTTGTGCCACTGGCCGCTAATCCTCGGTTTGTGCCATACCGCTACGC  
CAACCGACCGCAGCGTAACCTTATTTTAAACCATCAGGAGTTCACCATGATTGATTGACGCAAAATTAACCGCAATATTCG  
TCTTGATCTTGCCGATGCCATTTTGTCTAGCAAAGCTAAAAAGATCTCTCATTGCGGAGATTGCGCAGGCACCGGTC  
TGGCAGAAGCCTTTGTAACCGCGGCTTTGCTGGGTACGAGGCGCTTCTGCCGACGCCCGCCGCTGGTGGGGCGAAG  
CTGGATCTCGACGAAGACTCCATTCTACTGTTGAGATGATTCCACTGCGTGGCTGCATTGATGACCGTATTCCAACGTA  
CCCAACGATGTATCGTTTCTATGAAATGTTGAGGTGTACGGTACAACCCTGAAAGCGTTGGTTCATGAGAAATTTGGCG  
ATGGCATTATTAGCGGATTAACCTCAAACCTGACGTTAAGAAAGTGGCGGACCCGGAAGGTGGCGAACGTGCGGTATC  
ACCTTAGATGGTAAATATCTGCCGACCAAACCGTCTGACAGCCATGCGCAACCATCAAAGACGTTACAGATGCTGCTG  
GTACTGGTGTGATTGGTCTTAATATGCGACCACTGCTCACCTCCGTGGGCCACTGCTACCGCAATTGCGCCAGGCGAG  
CGAATGAGCTTTAGCGTGGCTGCCCTGTTGACCGCTCTGCCGTGGTTACCATGGCGGGCTGGCGCTGGCCGGAAGCT  
GGCTTCATCAGCATGTCAGCAACGTGCGAGTGTGCCATCAGTCTGTTGCTGATTGCCGTGGTGCATTGATGCGTGAG  
CTTTACCCGCAAAGTGGCTGCTGCTTAGCAGCGCACTGCTGGTGGGGTGGGATCGGCATCATTACGGCGGTGATGCC  
TTCGGTGATTAACCGCGGTTTTCAGCAGCGCACGCCACTGGTGATGGGGCTGGTCCGCGGCTCTGATGGCGGGCGGTG  
GGCTTGGTGGCCATAACGCCCTGGTATGTTCAACATAGCGAAACCTGGTATCAAACACTGCCTGGTGGCGCTGCCT  
GCCGTTGTTGCGCTCTTTGCTGGTGGTGGCAAAGCGCCGCGAGGTGCGCTTCCCACAAGACAACAACCACTCCGGT  
TCGCGTGGTATCACTCCCCGCGCGTGGACGCTGGGTGTTTACTTCGGTCTGATTAACGGCGGTTACGCCAGCCTGATTG  
CCTGGTTACCCGCTTTCTATATTGAGATTGGTGCCAGCGCGCAGTACAGCGGTTCTTACTGGCATTGATGACGCTGGG  
CAAGCCGACGAGCTTTGCTGATGCCTGCTATGGCTCGCCATCAGGATCGGCGCAAACCTGTTAATGCTGGCGCTGGTGT  
ACAACCTGGTGGGGTCTGCGGCTTTATCTGGCTGCCGATGCAATTGCCGGTATTGTGGCGGATGGTGTGGGTTAGGTC  
TGGGCGGCGGCTTTCCGCTCTGTTGCTGCTGGCGCTCGATCACTCTGTGCAACCGGCTATTGCTGGCAAGCTGGTGGCG  
TTTATGAGGGAATCGGTTTTATCATCGCCGGGCTTCCCCGTGGTTTTCTGGCGTGTGCGTAGTATCAGCGGCAATTA  
CCTGATGGACTGGCATTTCATGCGCTGTGCGTCTGGGCTGATGATCATAACCCTGCGTTTTGCACAGTACGTTTTT  
CGCAGCTGTGGGTCAAAGAGGCATGATGCGACGCTTGTCTCGCTTTGTTTCATGCCGATGCGGCTAATGTAGATCGC  
TGAACCTGTAGCCTGATAAGCGCAGCGTATCAGGCAATTTTTATAATTTAACTGACGATTCAACTTTATAATCTTTGA  
AATAATAGTGCTTATCCCGTCTGTTTATTTGCGAATAACCCGACAAGGAACGCCAGCCGCCACGACGTTTGGTGAATG  
TCTTTTGTGACGATACTACCCGCGCAATAACAGAATTATCCCGATGGTGACGCTGGATTAATAAACCATGACTTCC  
GATCCAGAGCTTATTGCCAATCGTTATCGGAAAAGTACATCTCGCCGTTTTTTCTCAATTCATGGTGTACAGGGTGT  
CCGTAACGGAAGAGTAACGTTGGGTGCAATCAGTACGTTATCACCATTGTTACCGTGTAGTCATCGACAATGGTTAAA  
TTGAAATTTGCATAAAAATTGCGGCTATATGGATGTTGGAACCGTAAGAGAAATAGACAGCGGTTCTACCCAGGCGTT  
TTCCCTACCGTGGAACAATTTCTTTAATCAGGCTTTCTCTTTTTCAACTTCTGATGGATGCGAGTGATTAACCTCAT  
ACATTAACGTTTTCCACGAAGTCTTTTTCCGTAAGCCTTCGCACATATCGGTAATAGCTTGCTGCTCTTATTCTT  
TCGGTCATTGGCATGTTCAATGCGATCACTCCGTTATGATATGTTGGTGGATAAGGCGCTCGCGCCGATCCGACATTG  
ATTGCTTAAGCGACTTCATTACCTGACGACGACGAGGAAAGCGGGCCGGGCTAAGCGTGAACACGGAAATTA  
GGTGAAGCCCAGCGCCACCAGACCCAGCACCAGATAAGCGCCCTGGAACCGATGCTTTCATACATATTGCCCGCCAGTA  
CAGACATAAAAATCATCGCCAGTTGCTTAAAGAAGCAGAAACAGACCAGATAAATCGTCGCTGAAAAACGCACTTCAAAC  
TGGCTGGAATATATTTAAAGCAGCCACCAGCAGGAACGGTACTTCAAACATATGACGCTTTTTCAGAATAACCACTT  
CAGCGCTGAGGTGGCGAACGATGAGCCAATAATACGTACAGACATAATAGTCCAGCCAGCAGCGGGCTTTTTCCAC  
CGATGCGATTAATGATCAGTGGCGCAAAGAACATAATCGAGGCGTTAAGTAATTCGCCATTGCTGTTACGTAGCCAAAT  
ACCCGCGTACCCTGTTACCAGTAGCAAAGAACGAAGTAAAGAAATTAGCAAACCTGTTGGTCAAAAACATCGTAGGTGCA  
GGAAACGCCAATAACATACAGTGACAAAAACCAAGTTTTGGCTGTCTGAACAGTTCCAGTCCAGCTTAAAGGCTAAATG  
CCGAATGGTTGGCACCTACCGCATTGGCAACCGTGGCAGAAGAGGGCGCATCCGTTTTGGCGAAAAAGAGTAAAACGGCG  
AGGATGAGTGACAGCCAGAGCCAGCCAGAAAACAACTGATTATTGATGGTGAACATGATGCCGACAATCGAGGCACA  
CAGCGCCAGCCAACACAGCCAAACATCCGCGCGGACCAATTCGAAATTAAGTGCAGCGGCTGACTTTCTCAATAAATG

CCTCTACTGCTGGCGCACCGGCGTTAAAAAAAAGCCTAGATAAATACCACCAACAATCGATCCTACTAAAAATGTTGTAT  
TGTAACAGTGGCCGAAGATAAAAAATAAAGAACGGCGCAAACATCACTAACATGCCGGTAATAATCCACAGCAGGTATTT  
GCGCAGCCCGAGTTTGTGAGAAAGCAGACCAAACAGCGGTTGGAATAATAGCGAGAACAGAGAAATAGCGGCAAAAATAA  
TACCCGTATCACTTTTGTGATATGGTTGATGTCATGTAGCCAAATCGGGAAAAACGGGAAGTAGGCTCCCATGATAAAA  
AAGTAAAAGAAAAAGAATAAACC GAACATCCAAAAGTTTGTGTTTTTAAATAGTACATAATGGATTTCTTACGCGAAA  
TACGGGCAGACATGGCCTGCCCGTTATTATTTTTGACACCAGACCAACTGGTAATGGTAGCGACCGGCGCTCAGCT  
GGAATTCGCCGATACTGACGGGCTCCAGGAGTCGTCGCCACCAATCCCATATGGAACCGTCGATATTCAGCCATGTG  
CCTTCTTCCGCGTGCAGCAGATGGCGATGGCTGTTTCCATCAGTTGCTGTTGACTGTAGCGGCTGATGTTGAACTGGAA  
GTCGCCCGGCCACTGGTGTGGGCATAATTCAATTCGCGCGTCCCGCAGCGCAGACCGTTTTGCTCGGGAAAGACGTACG  
GGGTATACATGTCTGACAATGGCAGATCCAGCGGTCAAACAGCGGCGCAGTAAGGCGGTCCGGATAGTTTTCTTGGCGC  
CCTAATCCGAGCCAGTTTACCCGCTCTGCTACCTGCCAGCTGGCAGTTTCCAGCAATCCGCGCCGGATGCGGTGTATC  
GCTGCCACTTCAACATCAACGGTAATCGCCATTTGACCACTACCATCAATCCGGTAGGTTTTCCGGCTGATAAATAAGG  
TTTTCCCTGATGCTGCCACGCGTGAGCGGTGTAATCAGCACCAGCTCAGCAAGTGTATCTGCCGTGCACTGCAACAAC  
GCTGCTTCGGCTGGTAATGGCCCGCCGCTTCCAGCGTTCGACCAGGCGTTAGGGTCAATGCGGGTCTGCTTCACTTAC  
GCCAATGTGCGTTATCCAGCGGTGCACGGTGAACACTGATCGCGCAGCGGCGTCAGCAGTTGTTTTTATCGCAACTCCACA  
TCTGTGAAAGAAAGCCTGACTGGCGGTTAAATTGCCAACGCTTATTACCCAGCTCGATGCAAAAATCCATTTCTGCTGGTG  
GTAGATGCGGGATGGCGTGGGACGCGCGGGGAGCGTCACTGAGTTTTCCGCCAGACGCCACTGCTGCCAGGCGCT  
GATGTGCCCGGCTTCTGACCATGCGGTGCGGTTGCGTTGCACTACGCGTACTGTGAGCCAGAGTTGCCCGGCGCTCTCCG  
GCTGCGGTAGTTCAGGCAGTTCAATCAACTGTTTACCTTGTGGAGCGACATCCAGAGGCACTTACCCTTGGCAGCGGC  
TTACCATCCAGCGCCACCATCCAGTGCAGGAGCTCGTTATCGCTATGACGGAACAGGTATTCGCTGGTCACTTCGATGGT  
TTGCCCGGATAAACGGAACCTGGAAAACTGCTGCTGGTGTGTTTCTTCCGTCAGCGCTGGATGCGGCGTGCAGTCCGCAA  
AGACCAGACCGTTTATACAGAACTGGCGATCGTTCCGGCTATCGCCAAAATCACCGCGTAAGCCGACCAGGGTTGCCG  
TTTTCATCATATTTAATCAGCGACTGATCCACCCAGTCCAGACGAAGCCGCCCTGTAACGGGGATACTGACGAAACGC  
CTGCCAGTATTTAGCGAAACCGCAAGACTGTTACCCATCGCGTGGGCGTATTGCAAAGGATCAGCGGGCGCGTCTCTC  
CAGGTAGCGAAAGCCATTTTTGATGGACATTTCCGACAGCCGGGAAGGGCTGGTCTTCATCCACGCGCGGTACATC  
GGCAAATAATATCGGTGGCGTGGTGTGCGCTCCGCCGCTTACTACTGCACCGGGCGGGAAGGATCGACAGATTTGAT  
CCAGCGATACAGCGCGTCTGATTAGCGCGTGGCTGATTATTCCCAGCGACCAGATGATCACACTCGGGTATTAC  
GATCGCGCTGCACCATTCGCGTTACGCGTTCGCTCATCGCCGGTAGCCAGCGGGATCATCGGTGACAGATTCAATGGC  
ACCATGCCGTGGGTTTTCAATATTGGCTTCATCCACCACATACAGCGCGTAGCGGTGCGACAGCGTGTACCACAGCGGATG  
GTTCCGATAATGCGAACAGCGCACGGCGTTAAAGTTGTTCTGCTTCATCAGCAGGATATCCTGCACCATCGTCTGCTCAT  
CCATGACCTGACCATGCAGAGGATGATGCTCGTGACGGTTAACGCCTCGAATCAGCAACCGGTTGCCGTTGACGAGCAGC  
AGACCATTTTTCAATCCGACCTCGCGAAACCGACATCGCAGGCTTCTGCTTCAATCAGCGTGCCGTGCGGCGGTGTGACG  
TTCAACCACCGCAGATAGAGATTCGGGATTTCCGGCTCCACAGTTTCCGGTTTTCCAGCTTCCAGCGTAGTGTGACGC  
GATCGGCATAACCACCAGCTCATCGATAATTTACCGCCGAAAGGCGCGGTGCCGCTGGCGACCTGCGTTTTACCCTGC  
CATAAAGAACTGTTACCCGTAGGTAGTACGCAACTCGCCGCACATCTGAATTCAGCCTCCAGTACAGCGCGGCTGAA  
ATCATCATTAAAGCGAGTGGCAACATGGAATCGCTGATTTGTGTAGTGGTTTTATGACGCAACGAGACGTACGAAAAA  
TGCCGCTCATCCGCACATATCCTGATCTTCCAGATAACTGCCGCTACTCCAGCGCAGCACCATCACCGCAGGCGGTTTT  
TCTCCGGCGGTAAAAATGCGCTCAGGTCAAATTCAGACGGCAACGACTGTCCTGGCCGTAACCGACCCAGCGCCGTT  
GCACCACAGATGAAACGCCGAGTTAACGCCATCAAAAATAATCGCGTCTGGCCTTCTGTAGCCAGCTTTCATCAACT  
TAAATGTGAGCGAGTAACAACCCGTCGGATTCTCCGTGGGAACAAACGGCGGATTGACCGTAATGGGATAGGTGACGTTG  
GTGTAGATGGGCGCATCGTAACCGTGCATCTGCCAGTTTTGAGGGGACGACGACAGTATCGGCCTCAGGAAGATCGCACTC  
CAGCCAGCTTTCCGGCACCGCTTCTGGTGCCGGAACACAGGCAAAGCGCATTGCGCATTAGGCTGCGCAACTGTTGGG  
AAGGGCGATCGGTGCGGGCTCTTCTGCTATTACGCCAGCTGGCGAAAGGGGGATGTGCTGCAAGGCGATTAAAGTTGGGTA  
ACGCCAGGTTTTCCAGTACGACGTTGTAACGACGCGCAGTGAATCCGTAATCATGGTCATAGCTGTTTCTGTTG  
GAAATTGTTATCCGCTCACAATTCACACAACATACGAGCCGGAAGCATAAAGTGTAAAGCCTGGGGTGCCTAATGAGTG  
AGCTAACTCACATTAATTGCGTTGCGCTCACTGCCGCTTCCAGTCCGGAAACCTGTCGTGCCAGCTGCATTAATGAAT  
CGGCCAACGCGCGGGGAGAGGCGGTTTTGCGTATTGGGCGCCAGGGTGGTTTTTTCTTTTACCAGTGAGACGGGCAACAGC  
TGATTGCCCTTACCCTGCGCTGAGAGATTGACGCAAGCGGTCCACGCTGGTTTGGCCAGCAGCGGAAAATCCTG  
TTGATGGTGGTTAACGGCGGGATATAACATGAGCTGTCTTGGTATCGTCGATCCCACTACCAGATATCCGCCAAA  
CGCGCAGCCCGACTCGGTAATGGCGCGCATTGCGCCAGCGCCATCTGATCGTTGGCAACCAGCATCGCAGTGGGAACG  
ATGCCCTCATTGACATTTGATGGTTTTGTTGAAAACCGGACATGGCACTCCAGTGCCTTCCGTTCCGCTATCGGCTG  
AATTTGATTGCGAGTGAGATATTTATGCCAGCCAGCCAGACGCGAGACGCGCCGAGACAGAATTAATGGGCCGCTAACA  
GCGCGATTTGCTGGTGACCAATGCGACCAGATGCTCCACGCCAGTTCGCGTACCGTCTTATGGGAGAAAAATAACTG  
TTGATGGGTGCTGGTGCAGAGATCAAGAAATAACGCCGGAACATTAGTGCAGGCAGCTTCCACAGCAATGGCATCCTG  
GTCATCCAGCGGATAGTTAATGATCAGCCACTGACGCGTTGCGCGAGAAGATTGTGACCGCCGCTTTACAGGCTTCGA  
CGCCGCTTCTGTTACCATCGACACCACCGCTGGCACCCAGTTGATCGGCGCGAGATTTAATCGCCGCGACAATTTGC

GACGGCGCTGCAGGGCCAGACTGGAGGTGGCAACGCCAATCAGCAACGACTGTTTGCCCGCCAGTTGTTGTGCCACGCG  
GTTGGGAATGTAATTCAGCTCCGCCATCGCCGCTTCCACTTTTTCCCGGCTTTTCGAGAAACGTGGCTGCCTGGTTCA  
CCACGCGGGAAACGGTCTGATAAGAGACACCGGCATACTCTGCGACATCGTATAACGTTACTGGTTTTACATTACCACC  
CTGAATTGACTCTTTCCGGGCGCTATCATGCCATACCAGGAAAGTTTTGCGCCATTGATGGTGTCAACGTAAATGCA  
TGCCGCTTCGCTTCCGGCCACCAGAATAGCCTGCGATTCAACCCCTTTCTCGATCTGTTTTGCTACCCGTTGTAGCGCC  
GGAAGATGCTTTTCCGCTGCCTGTTCAATGGTCATTGCGCTCGCCATATACACCAGATTGAGACAGCCAATCACCCGTTG  
TTCACTGCGCAGCGGTACGGCGATAGAGGCGATCTTCTCCTGATCCCAGCCGCGGTAGTTCTGTCCGTAAACCTCTT  
TGCGCGCGCGCCAGAATGGCTTCCAGCTTTAACGGTTCCCGTGCCAGTTGATAGTCATCACCGGGGCGGAGGCTAAC  
ATTTGATTAATTCCTTGGCGTCTTGTCCGGGCAAAGGCCAGCCAGGTCAGGCCGAGGCGGTTTTAGAAAGCGGCAA  
ACGTCGCCCCGACCATTGCCCCGTGAAAGGATAAGCGGCTGAAACGGTGAAGTTTTCGCGTACCACCATTGCATCAACAT  
CCAGCGTGACACATCTGTCGGCCATACCACTTCGCGCAACAGATCGCCAGCAGTGGGGCCGAGTGAGAAATCCAC  
TGTTGTCACGAAATCCTTCGTTAATTGCCGCACTTTCGATGGTCAGTCAAACATATCATCGAGGGGCTACGGCGGAC  
ATATCCCTCTTCTGCAGCGTCTCCAGCAGTCCCGCACAGTGGTGGCATGCAGGCCGCTGAGTTCGCCAGCAGCCCGA  
CGCTGGCACCGCCATCAAGTTTATTTAACATATTTAATAACATTAGACCGCGGGTTAAGCCGCGCACGGTTTTGTATTC  
GTTGCTCATTGTTCTGCATATTAATTGACATTTCTATAGTTAAAAACAACGTGGTGCACCTGGTGCACATTGGGCTAGT  
TTTTGATGTAGCCGAAACACCCTTCTATACTGAGCGCAACAATAAAAAATCATTTACATGTTTTTAACAAAATAAGTTG  
CGCTGTAAGTGTGCGCGCAACGACATTTTGTCCGAGTCGTGAGGTAAGTAAATGGCAATACAACACCCTGACATCCAGCCT  
GCTGTTAACCATAGCGTTAGGTGGCGATCGCTGGTCCCGCCCGGTTGGGCTGATGATGGCGAACTATCTCGCCAGAT  
GGCATTGACGTGCTGGTGGTGAGAACTCGATAAGTTGATCGACTACCCGCGTGCATTTGTTGATGACGAGGCGC  
TGCGCACCATGACGTGCGTCCGCTGGTGGTGGTCTGCTGATGTTCTGCCGCACTACGCGTGGCACGCGATGCGTTTTCTACC  
CCGAAAGGCCGCTGTTTTGCTGATTCAGCCAATGACCGATGAATTTGGCTGGCCGCGCCGTAACGCTTTTATTAGCC  
GCAGGTCGATGCGGTGATGCTGGAAGGGTGTGCGTTTTCCGAATGTGCGTCTTGTGTTTTCCCGGAGCTGGAGGCT  
TCAGTCAGCAAGATGACGAAGTACCTTGACCTGAAAACGGCAGAGGGCAGCGGAAATAGTCAAAGCCAGTGGCTG  
GTAGCTGTGACGGTGGAGCAAGTTTTGTCCGTCGCACTCTGAATGTCCGTTTGAAGGTAACACTGCGCAAAATCAGTG  
GATTTGGTAGATATCGCCAACGATCCGTTAAGTACCGCATATCTATTTGTTGCGATCCGTTGCGCCGATGTTT  
CTGCCGCGCTGCCTCATGCGGTACGTGCTTTGAATTTATGGTATGCGGGGAGAAACCGAAGAGCAGTGCCTGAGCCG  
CAAAATATGCGCAAGCTGTTAAGCAAAGTGTGCTAATCCGGACAATGTTGAATTGATTCGCCAGCGTGTCTACACCCA  
CAACGCGCAGTGGCGCAACGTTTTCCGATTTGATCGGTAAGTGGTGGCGGGGATGCGCGCATCATGCCGATGCG  
AGGGGAGGGCTATAACAGTGGTATGCGCGACGCTTTAACCTCGCATGGAAACTGGCGTTGGTTATCCAGGGGAAAGCC  
CGGATGCGCTGCTCGATACCTATCAACAAGAAGCTGCGATCACGCCAAAGCGATGATTGACCTGTCCGTGACGGCGGG  
CAACGTGCTGGCTCCGCCGAAACGCTGGCAGGTTACGTTACGTGACGGCGTTTTCTGGCTGTTGAATTATCTGCCGCA  
TAAAACGCTACTTCTCGAAATGCGCTTCAAGCCGATGCCGCAATATTACGGCGGTGCGCTGATGCGTGAGGGGGAAGCG  
AAGCACTCTCCGGTCCGCAAGATGTTTATTAGCCGAAAGTACGCTGGAAAACGGCGACGTGACGCTGCTCGATAACGC  
GATCGCGCGGAACTTCCGCGTAATTTGGCTGGGGATGCAATCCACTGTGGGGATGAGCGACGAGCAAATCCAGCAGTGGC  
GCGGTTGGGCACACGCTTTCATTAGGTGGTGGCGAAGTCAAATTCATACCAGCAAGGATAACACGACGGGCTACTA  
CGCGTGGGCGATACGCAAGTCCGCTGCTAGCTGGTTCGCGCAACACAATGCTTCGCTGGTGGTATGCGCCCGGATCG  
CTTTGTTGCCGCCACCGCCATTCCGCAAACTGGGCAAGACCCTGAATAAACTGGCGTGGTGGTATGACGCTGACCCGCC  
CTGATGCCAGCTTTCTGTCGAAAAGTAGCCTGATATGACGCTTACTTTCACTGTCTTTCCACTCGCCGCTGGTGGG  
GTATGTCGACCCGGCGCAAGAGGTGCTGATGAGTCAATGGCTGATTGCCAGCGCCCGGAGCGTATTGGCGCATCT  
CCCCTGAACTGGTGGTCTGTTTTGCGCAGATCACTACAACGGCTTTTTCTATGACGTGATGCCACCGTTCTGTTTAGGC  
GTTGGAGCGACGGCAATTGGTGATTTCCGCAAGTCCGCGCAGGAGAGCTGCCCGTCCCTGTGGAGCTGGCGGAGGCTGTGC  
GCATGCCGTCATGAAGAGCGGGATCGATCTTGCCGTTTTCTACTGTATGCAGGTGGACCACGGGTTCCGCCAGCGCTGG  
AGTTCTGCTCGGTGGGCTGGATAAGGTGCCAGTTCTGCTGTGTTCAACGGTGTCCGACGCGCTGCCCGTTTT  
CAGCGTACCCGCATGTTGGGTGAAGCCATTGGACGTTTACCAGCACTCTCAATAAACGCGTGTCTGTTCTGGGTTCCGG  
TGGGCTTTCCCATCAGCCGCCGTTGCCGAACTGGCGAAAGCCGATGCCATATGCGCGACCGTCTGTTGGGGAGCGGGA  
AAGATTTACCCGCCAGTGAGCGCGAATTGCGTCAGCAACGGGTGATTAGCGCCGCTGAGAAGTTTGTGAGGATCAGAGA  
ACGCTGCATCCGCTCAACCCGATTTGGGATAACAGTTCATGACTTTGCTGGAGCAGGGACGCATACAGGAACTGGATGC  
CGTCAGTAACGAAGAGCTTTCCGCCATTGCCGAAAGTGCACACATGAAATCAAAACCTGGGTGCGCGTTTTGCGGCTA  
TTTCTGCTTTGGCAACTGGCGTAGCGAAGGGCTTATTACCGCCAATCCCGAGTGGATTGCGGATTGGCTCGTTA  
AGCGCCAGAACAGAGAATGAATATGCAGGAGAAGATGATGAGTTATCAGCCACAACCGAAGCCGCCACCAGCCGTTTT  
CTGAATGTAGAAGAAGCGGGTAAAACGCTGCGCATCATTTTAACTGACTGCGGACAAGGGCAGAAACCGTGTCTGCT  
GCATGGTTCCGGCCCGGTGCTACTGGCTGGGCGAACTTCAGCCGCAATATCGATCCGCTGGTAGAGGGGCTATCGGG  
TGATCTGCTGGATTGTCGGGTTGGGGCAAGAGCGATTCCGTCGTTAATAGTGGTTCGCGATCGGATCTTAATGCACGA  
ATCTGAAAAGCGTGGTGGATCAACTGGATATCGCCAAAATCCACCTGCTGGGCAACTCGATGGGGGGCCATAGTTCTGT  
GGCGTTACCCTTAAATGGCCGAGCGCTCGGCAACTGGTGGTGGTGGTGGTGGTGGTGGTGGTGGTGGTGGTGGTGGT  
CGCCGATGCCAACCGAAGGTATTAAGCGACTGAATCAGCTTTATCGTCAGCCGACTATCGAAAACCTGAAGCTGATGATG

GATATCTTCGTTTTTATACCAGCGATTTGACCGACGCCCTGTTGAAGCGCGCCTGAATAATATGCTGTGCGGCCGCGA  
TCACCTGGAAAACCTTCGTTAAGAGCCTGGAAGCTAATCCGAAACAGTTCCTCGGATTTTGGCCACGTCTGGCGGAAATCA  
AAGCGCAAACCTGATTGTCTGGGGCGCAACGACCCTTTGTGCCGATGGATGCGGGTCTGCGTCTGCTGTCCGGCATT  
GCCGGTTCTGAACTGCATATCTCCGCGACTGTGGTCACTGGGCGCAGTGGGAACATGCCGACGCTTTCAATCAACTGGT  
GCTGAATTTCCCTGCGACGCCCTTAAGGAATGGTCATGACGAAGCATACTTTAGCAACTGCGGGCGGATTTACGCCGCG  
CCGAGAGCAGGGCGAAGCGATTGACCCGCTGCGCGATCTGATTGGTATCGATAACGCTGAAGCGGCTTACGCCATTACG  
CACATAATGTGCAACATGACGTTGCGCAGGGGGCTGCGTGGTAGGGCGTAAAGTGGCCTGACACATCCGAAAGTGCA  
ACAACAACCTGGGCGTTGATCAACCGGATTTTGGGACGTTATTTGCCGACATGTGTTATGGCGATAACGAAATCATTCTTT  
TTTCCCGTGTCTGCAACCCCGCATTGAAGCGGAGATCGCACTGGTGTGAACCGCGATTTGCCCGCAACCGATATCACC  
TTCGACGAATTGTATAACGCCATTGAATGGTACTTCCGGCGTGGAAAGTGGTGGGAGCCGCATTCCGCGACTGGTCGAT  
TCAGTTTGTGATACCGTGGCAGATAACGCCCTCCTGTGGGGTGTATGTCATCGCGGGTCCGGCGCAACGTCGGCGGGGT  
TAGACCTGAAAACTGCGCCATGAAGATGACGCGTAATAACGAAGAGTTTCTAGCGGGCGCGCAGCGAATGCCTGGGA  
CATCCGCTTAATGCGGCCGTCTGGCTGGCAGCAAAATGGCCAGTCTGGGTGAACCGCTGCGCACCGGAGATATCATTCT  
TACCGGGGCTTAGGTCCGATGGTGGCGGTGAATGCGGGCGATCGTTTTGAAGCCATATTGAAGGCATAGGTTTCAGTTG  
CTGCGACATTTCAAGCGACCCCAAAAAGGAAGTGTGTCATGAGTAAGCGTAAAGTCGCCATTATCGGTTCTGGCAACA  
TTGGTACCGATCTGATGATAAAATTTGCGTCACGTCAGCATCTGGAGATGGCGGTGATGGTTGGCATTGATCCTCAG  
TCCGACGGTCTGGCGCGCGCAGAGCTATGGGCGTCCACCACCATGAAGGGGTGATCGGACTGATGAACATGCCTGA  
ATTTGCTGATATCGACATTTGATTTGATGCGACCGCGCGGTGCTCATGTGAAAAACGATGCCGCTTTACGCGAAGCGA  
AACCGGATATTCGCTTAATTGACCTGACGCCCTGCTGCCATCGGCCCTTACTGCGTGCCGGTGGTTAACCTCGAGGCGAAC  
GTCGATCAACTGAACGTCAACATGGTCACCTGCGGCGGCCAGGCCACCATTTCAATGGTGGCGGCAGTTTACGCGTGGC  
GCGTGTTCATTACGCCGAAATTATCGCTTCTATCGCCAGTAAATCTGCCGACCTGGCACGCGTGCCAATATCGATGAAT  
TTACGGAACCACTTCCCGAGCCATTGAAGTGGTGGCGGGCGGCAAAAGGGAAGGCGATTATTGTCTTAAACCCAGCA  
GAGCCACCGTTGATGATGCGTGACACGGTGTATGTATTGAGCGACGAAGCTTACAAGATGATATCGAAGCCTCAATCAA  
TGAAATGGCTGAGGCGGTGACGGCTTACGTACCGGGTATCGCCTGAAACAGCGCGTGCAGTTTGAAGTTATCCCGCAGG  
ATAAACCGGTCAATTTACCGGGCGTGGGGCAATTCTCCGACTGAAAACAGCGGTCTGGCTGGAAGTCGAAGGCGCAGCG  
CATTATCTGCCTGCCTATGCGGGCAACCTCGACATTATGACTTCCAGTGCCTGGCGACAGCGGAAAAAATGGCCAGTC  
ACTGGCGCGCAAGGCAGGAGAAGCGGCATGAACGGTAAAAAATTTATATCTCGGACGTCACATTGCGTGACGGTATGCA  
CGCCATTGTCATCAGTATTCGCTGGA AAAACGTTCCAGATTGCCAAAGCACTGGACGATGCCCGCGTGGATTGATTG  
AAGTGGCCACGGCGACGGTTTGAAGTTCCAGCTTAACTATGGTTTTCGGCGACATAGCGACCTTGAATGGATTGAA  
GCGCGCGCGGATGTGGTGAAGCACGCCAAAATCGCGACGTTGTTGCTGCCAGGAATCGGCACTATTACGATCTGAAAAA  
TGCTTGGCAGGCTGGCGCGCGGGTGGTTCGTGTGGCAACGCACTGTACCGAAGCTGATGTTTCCGCCAGCATATTCAGT  
ATGCCCGCGAGCTCGAATGGACACCGTTGGTTTTCTGATGATGAGCCATATGACCACGCCGAGAAATCTCGCAAGCAG  
GCAAAGCTGATGGAAGGCTACGGTGGCAGCTGTATTTATGTGGTGGATTCTGGCGGTGCGATGAACATGAGCGATATCCG  
TGACCGTTTCCCGGCCCTGAAAGCAGAGCTGAAACCAGAAACGCAAACTGGCATGCACGCTCACCATAACTGAGTCTTG  
GCGTGGCGAACTCTATCGCGCGGTGGAAGAGGGCTGCGACCGAATCGACGCCAGCCTCGCGGGAATGGGCGCGGGCGCA  
GGTAACGCACCGCTGGAAGTGTATTTGCGCGCGGATAAACTGGGCTGGCAGCATGGGACCGATCTCTATGCGTTAAT  
GGATGCCCGCGACGACCTGGTGCCTGTCAGGATGACCGGTACGAGTCGATCGCGAAACGCTGGCGCTGGGATACG  
CTGGTGTACTCGAGCTTCTGCGTCACTGTGAAACGGCGGGCGCGGTTATGGCTTAAAGTGGCGGTGGATTTCTCGTT  
GAGCTGGGCAACGCCGATGGTTGGCGGCCAGGAGATATGATCGTTGACGTGGCGCTGGATCTGCGCAACAACAATA  
ATGATGACTGCCGAGAACGTGCATTTGTATGCCATCCAGCAGCACTGCCGATGCGCGGTGAACGCTTATCCGGCC  
TACGGATGGCGTGAGAATTTGTAGGTCTGATAAGACGCGTTAGCGTCGCATCAGGCATCTGCGCACGACTCCCGGATGCG  
GCGTGAACGCCTTATCCGGCTACGGATGGCGCGGGAATTTGTAGGCCTGATAAGACGCGTTAGCGTCGCATCAGGCATC  
TGCGCACGACTGCCGGATGCGGCGTGAACGCCTTATCCGGCTACGGGTGGCGCGAGAATTTGTAGGCCTGATAAGACGC  
GTTAGCGTCGCATCAGGCATCTGCGCACGACTGCCGGATGCGGCGTAAACGCTTATCCGGCTACGGATGGCGCGGGAA  
TTTGTAGGCCTGATAAGACGCGTTAGCGTCGCATCAGGCATCTGCACAGACTGCCGGATGCGATAAACGCTTGTCCGG  
CCTACATTTCCGCCGTAGGCAGTCATTAATAGTTCTGATTACGCGGCTGGCAATGTATCAGTCGCGATTACCTGCACT  
CGCAACGAGGTTATCTTATGTCGACTCGTACCCCTTATCATCTTATCCCGCTGATGCTGACCATCGGGCTTTGTTT  
TTTGGTCTGCTGATGGAAGGGCTGGATCTTACGGCGGCTGGCATTGCGGCGGGTGGCATCGCCAGGCTTTGCACTCG  
ATAAATGCAATGGGCTGGATTTTAGCGCGGAATACTCGGTTTGTACCCGGCGGTTGGTTGGCGGAATGCTGGCG  
GACCGTTATGGTCGAAGCGCATTTTGTATTGGCTCAGTTGCGCTGTTTGGTTTGTCTCACTGGCAACGCGGATTGCCG  
GGATTTCCCTCACTGGTCTTTGCGCGGCTGATGACCGGTGTCGGCTGGGGCGGGGCTTCCGAATCTTATCGCCCTGA  
CGTCTGAAGCCGCGGGTCCACGTTTTCTGGGACGGCAGTGAACCTGATGTATTGCGGTGTTCCATTGGCGCGGGCTG  
GCCGCGACACTGGGTTTCCGGGGGCAAACTTAGCATGGCAAACGGTGTGTTGGTAGGTGGTGGTGGCGCTTATTCT  
GGTGCCGCTATTAATGCGCTGGCTGCCGGAGTCGGCGGTTTTCTGTGGCGAAAAACAGTCTGCGCCACCCTGCGTGCCT  
TATTTGCGCCAGAAACGGCAACCGCGACGCTGCTGCTGTGGTGTGTTATTTCTCACTCTGCTGGTGGTCTACATGTTG  
ATCAACTGGCTACCGCTACTTTTGGTGGAGCAAGGATTCAGCCATCGCAGGCGGCAGGGGTGATGTTTGCCTGCAAT

GGGGGGCAAGCGGGACGTTAATGTTGGGCGCATTGATGGATAAGCTGCGTCCAGTAACCATGTCGCTACTGATTTATA  
GCGGCATGTTAGCTTCGCTGCTGGCGCTTGAACGGTGTGCTCATTAAACGGTATGTTGCTGGCGGGATTTGTCGCGGGG  
TTGTTTGGCAGAGGTGGGCAAAGCGTTTTGTATGCCCTGGCACCCTTGTGTTTACAGTTCGAGATCCGCGCAACAGGTGT  
GGAAACAGCCGTGGCGGTAGGGCGTCTGGGGCTATGAGCGGTCCGTTACTGGCCGGGAAAATGCTGGCATTAGGCACTG  
GCACGGTCCGGCTAATGGCCGCTTCTGCACCGGATTTCTTGTGCTGGGTTGGCGGTGTTTTATTTGATGAGCCGGAGA  
TCACGAATACAGCCGTGCGCCGATGCCTGACGTGCCTATTAGGCAGGGGCGAAAGGGACTTCACCCCAATACACCTACG  
GCGTTTACAGGTATACTCGTAAAAATTATTAGCGGGTTTGGAAACAAAGATGGCAAACCTTACCTTACAAGAGCAGTT  
GCTCAAAGCAGGATTAGTACCAGCAAAAAAGCGCGGAAGGTGGAGAGAACGGCGAAAAAATCGCGCGTTTCAAGGCGGTG  
AAGCTCGGGCGGCGGTAGAAGAAAATAAAAAGGCACAGCTTGGAGCGTGATAAACAGCTTAGCGAACAGCAAAAAACAAGCG  
GCGTTGGCGAAAGAATAAAAGCTCAGGTGAAGCAGCTTATTGAAATGAACCGAATCACCATTGCCAATGGCGATATTGG  
TTTTAACTTACTGACGGCAATCTGATTAAGAAGATTTTTGTCGATAAGCTCACACAGGCGCAGTTGATTAATGGTCGTC  
TGCGGATTGCCGCTTGTGGTCGATAACAATAGCGAAGGTGAATACGCCATTATCCCGCAGCGTTGCCGATAAAATT  
GCTCAGCGCGATGCCAGCAGTATAGTGTGACAGCGCGCTCAGCGCCGAAGAGCAGGATGAAGACGACCCGTATGCCGA  
CTTCAAAGTCCCTGATGATTTGATGTGGTAAACATAGATAAGTCGTGCGCAGATGCCTGATGCGACGCTATGCGCGTCTT  
ATCAGGCCTACGTTTTATGGGCGAAGGTAGACCGGATAAGGCGTTCACGCCGATCCGGCAGTCGTGCCCATGCCTGA  
TGCGACGCTTTGCGCGTCTTACAGGCTACGGCTTACGGGCGAAGTGTAGGCCGATAAGGCGTTACGCGCATCCGG  
CAGTCGTGCTATTATCAACGCATATTCAGTTTTATTGGCGTGGTAGGCAATATGCTCGCCAATAAAACTGGAGACAAAATA  
ATAGCTGTGATCATAACCCCTCGTGATAACGGATTAACGCTTGTGATTTTATCTCCTGGCAGATCTTTTCAAGATTTGGAG  
TCCGCGAGCTGTTCTCGTAAAAATCATCACTCAACCCTGATCAACCATGATTTCCGCAACGCGTTGACCTTGTGAAATA  
AGACTCACCGGTCGTAATCCAACAGGCATCTTTATTTTTCAGCAAGATATGCAGCAAAGGCTTGTGTCCCCACGGCAC  
TTGCGATGGGGAGACAATGGGCGAAAACGCCGAGACGCTGACATATTCATCTGGGTTACGTAACGCCAGCACCAGCGCGC  
CCAGCCCGCCATAGAATGACCAGAGATAGACTTTTTGGCCGTTGCCGAAAATGATGCATCACTAAATCCGGCAGCTCG  
TTGCGGATATAGTCATACATTTTGAATGTTCAATCCAGCGCGCTTGCCTCGCGTTTCAAGTAAAACCCGGCACCTTGGCC  
GAGATCGTAACGGTCAGCATCTGCGACATGACTGCCTCGCGGACTGGTGTCCGGCGCAACAACAATAATGTTGTGCTCAG  
CCGCGTAACGTCGATCCCCGATTTAGTAATGAAATCTGCTCGTTGACGGTCAGGCCTGAAAGCCAGTACAGCACCGGC  
AATTTTTTATTGCGGCTTTTGGTGGGAGATAGACGCCGACATTCATTTTACATTTTCAAGTATTGGGAATAATGCCGATA  
CATATTTTCCAGCCGCCAAAGCTGACATGTTTTTCAATGAGTTCATCAGTCATTATCTCAGGGTTAATCCCCCGGACG  
GCTGCCCGGGAGAGTATTAAGAACCCCCGCTGAAGTGGACGGGTAAACCTCGGGGAAATCAGTAACGAATTACGGTT  
CGAATGGATTTGCTTTCATGATCAGGTGGAAGCGTCATTAATTTTCCATCCAGGCTCATGGTATGCGTGACAAACGGTTC  
CAGATCGATATCACCTTTTATCGCATCTTCAACCATGCCCGGTAACCTGGGAACGACCTTTACGCGCCAAACGCGGAAC  
CTTTCCATACGCGACCAGTGACCAACTGGAATGGACGGGTGGAGATTTTCTGACCGGCAACCCGCGACCCCGATGATCAC  
GACTGACCCAGCCGCGGTGCGCACTTTCCAGCGCCGACGCATCACGTTGACGTTACCGATGCAATCAAAGGTATGGTC  
GATACCCCATTTGTTGATATCCAACAGGACATCTTTTATCGGTTTGTGCTAGTCAATCGGGTTAATGCAGTCGGTAGCAC  
CGAAGCGACGCGCAGATCGAATTTCTCGGGTGGTATCGATAGCGATAATCCGACCCGCTTTGCGCTGACGCGCGCCC  
TGAACCACTGCCAGACCAATCGCGCAAGACCAACACGGCAACAGAATCACCTGGCTGGACTTTAGCTGTGTTGTGTAC  
CGCGCAATACCGGTGGTCACGCCACAGCCAGCAGGACGCTGTTTATGGTTTCTTCTGGATTAATTTTGGCAGAG  
ACACTTCCGCGACTACGGTGTATTCACTGAATGTAGAGCACCCATGTAGTGATAAAGCGGCTGCCGTTGTAAGAAAA  
CGGGTGGTGGCTCTGGCATCAGGCCTTTACCCTGGGTTTTCGGAACCGCAACAGAGGTTAGTTTTGCCAGAACGACA  
GAACTCACACTCGCCGACTCCGCGGTAAAGCGGGATCACATGGTCGCGAGGTTTACGCTGGTTACGCTTACCCGTTCA  
CTTCAACCACAACGCCGCCCTTCTGACCGGAGAACCCAGGGAATACACCTTCCGGGTCATCGCGGAGAGGTTAAAT  
CGCTCGGTATGGCAAACGCCGGTATGGGTGACTTTAATTAGCACTTACCTTTTTTTCGGTGGTGAACGTCATTTCAAC  
GATTTCCAGCGGTTTACGGGAGCAAATGCAACGGCAGCAGTATTTTATCTCTCGCTTCTTCAATATGGTAATAGA  
TTCAGTATTTAAGATAGGCACGAACCAGTTCAATAGTGTGCTCAACGGATTGGCTGACTTCGCGGCTGTAGCAGTCATT  
TCGGTCAAACGTTTTCCGGATATGGCTTTCAAGCACTTCTGCCATCAGCCATTAGCCGCGCCCCGAACGGCAGCGATCT  
GTTGGAGTATGGCACGGCATTGCGCATCACCTCCAGCGACCGTTCCAGAGCATCAATCTGCCCCGAATACGACGAACT  
CGAGTAAGGACCTTTTTCTTCTTCCGGAGTACTGGGCACTTCGCACCTCATCATCTGCATGCAATATACTATAGGGG  
GTATTCTATATGTCAATGCATACCCCTATAGTATATAACACTGGAGAATAAAATTTATCCGGTGAATGTGGTCGGAAA  
ACAAAGAGGAAAGGGGGGGGCTAATCGGCAGGGAAGGCCGCCCGGATAGCGGGCGCAGAAGGAATCAGAATTTCCA  
GGTCAGACGGGCTGCAAGTTGACAGACCTTAAAATCATCGGTTGGGTGTCGTACCACACTTTACTGCGCTCAGCCCCGA  
GATTAAGTTGCTCAGTCAGCGGTTGAATACGTTGACAGACTGACGCTTTCATGCTGCCGTAGCGTGTCTTGGCGTCCAG  
TCATAGGTGTAAGCACCTGTTCCGCGGCTTAGCCATAGTTGCGTATAACCAGTCCGCGCGGGTCATTACAGCGCACGGA  
AATCATATTGCTATAACTACCACCTGCATCGCTGGAGTCATAATGGGTATAGCGGTAGCTGGTGTATCACCAGGCGAGTAT  
AGAGTGATACCCGCTTGGCAGGCATGACTTCGACATCATCTGTAATTTTATAGTGTAGCGATAACCGGTCGTGAAAAGC  
GTTTTTGGTAACAGGGCCAGGTTAATATCCTGACGAAAATCCTGGCGGGCAAAGACCGGCGTATTATCCGCAAAGGCAAT  
ACCCGTTCCGGTTGTCAGCCAGTTATCCATTTATACCAGACCGCACCTGACCGCGAGTGGCATTGAAATGTTCAAGTTT  
CATAATCACGACGCCCTGGGAAAGATTA AAAAGCAGCGTTGCGTTTTCAACTTTCGCCACCAGTTACAGCATACGCTAAA

TTACGGTTGCCATGATCGCCAGAATAATCGGTAAAATCGTAGCCCGGTAATGGAAGTTAACCCGGCATAAGCGGGCAA  
TGCCTAAAAATGGCCGCCGCTAATAACGTCCGTTTTATCATTAAATCTCCTGTACGGATAAGTTCTTGTGGAGTGAA  
TAAGTTCGGTAGGTAATACGTTCTACAATCACGCGGGCAAGTTGCGTGTTCGGGAAATAATTCGCCAGGCAA  
AATAAATCTGTACGCCAAGGCGTGAACGCTGCCGATATAACAACCTAATTTATCGCATCCGGTAGCGATAATCCCT  
CTGGAGTTCGAACAGACACGGGCTGTTTATCCAGACGATGATTACTGGTACGTAATTTGTGCGCCTAAATATGCTGGTTT  
GCAACTACCGAGTCGGCAATAAAACATTGCGGACCAATCGTTGCTTCCGCTTCAATAACCGCATTAAAACTCTGGTGGC  
AAAACCAATTTTTACGCCATTGCTGATTATTGTGCCAGGACGAATAAACGCATAATTAAGACTGGCCCCCTGAATCTC  
CAGACAACCAATATCACTTAAATAAGTGATAGTCTTAATACTAGTTTTTAGACTAGTCAATTGGAGAACAGATGATTGATG  
TCTTAGGGCCGGAGAAACGCAGACGGCGTACCACACAGGAAAAGATCGCAATTGTTGAGCAGAGCTTTGAACCGGGGATG  
ACGGTCTCCCTCGTTGCCGGCAACATGGTGTAGCAGCCAGCCAGTTATTTCTGCGGTAAGCAATACCAGGAAGGAAG  
TCTTACTGCTGTCGCCGCCGGAGAACAGTTGTTCTGCCTCTGAACTTGTGCGGCCATGAAGCAGATTAAGAATCC  
AGCGCTGCTCGGCAAGAAAACGATGAAAATGAACTCCTCAAAGAAGCCGTTGAATATGGACGGGCAAAAAAGTGGATA  
GCGCAGCGCCCTTATTGCCGGGGATGGGAGTAAGCTTAGTCAGCCGTTGTCTCCGGGTGTCGCGTGCAGTTGCAC  
GTCATTCTGAGACGAACCGATGACTGGATGGATGGCCGCCGAGTCGTCACACTGATGATACGGATGTGCTTCTCCGTAT  
ACACCTTAGATCGGAGAGTGCACCTATGGTTATCGTCCGGTATGGGCGTCTTCGCAGACAGGCAGAATCTGATG  
GTATGCTTGCATCAATGCCAAACGTGTTTACCGGATCATGCGCAGAATGCGCTGTTGCTTGAGCGAAAACCTGCTGTA  
CCGCCATCGAAACGGGCACATACAGGCAGAGTGGCCGTGAAAGAAAGCAATCAGCGATGGTCTCTGACGGTTTCGAGTT  
CTGCTGTGATAACGGAGAGAGACTGCGTGTACGTTGCGCTGGACTGCTGTGATCGTGAGGCACTGCACTGGGCGGTCA  
CTACCGGGGCTTCAACAGTGAAACAGTACAGGACGTGATGCTGGGAGCGGTGGAACGCCGCTTCGGCAACGATCTTCCG  
TCGTCTCCAGTGGAGTGGCTGACGATAATGTTTATGCTACCGGGCTAATGAAACACGCCAGTTCCGCCGATGTTGGG  
ACTTGAACCGAAGAACACGGCGGTGCGGAGTCCGGAGAGTAACGGAATAGCAGAGAGCTTCGTGAAAACGATAAAGCGTG  
ACTACATCAGTATCATGCCAAACAGACGGTTAACGGCAGCAAAGAACCTTGCAAGGCGTTCCGAGCATTATAACGAA  
TGGCATCCGCATAGTGCCTGGGTTATCGCTGCCACGGGAATATCTGCGCAGCGGGCTTGAATGGTTAAGTGATAA  
CAGATGTCTGGAATATAGGGGCAATCCAATTACCTATCAGGCAGTTTGCGCCAATCACTACCGGACCTGAATAACGG  
CACCATGACAAATACGGGTATTCGCGCCGATAACAACCTCACCTGCAGTTTCAATAAATTACCTGGTCTGCAATCTGA  
ATATTTTTCTTTAACATTAAGCTTTCAGATAGTTTTTTCAGTTCTGTGACAGAAGTTGGGAATAAGCGGTTGACGCTT  
CCACCAGTGCGAATAGCGGTTGGGTTTGTGCGCTGAGGTTGCGTCCAGTAAAAAGGCAATAAGTCCATAAATAATC  
CAGATGGCATAAGCTAATAACATACACAACGGAAAGCGGCGTAAAGGCACCAACAACAGCAACGATGAAACCAGGC  
GCTAAAAGCACAATAACACAACTACGCCGACCCAGATAAGCGGAAACATTGCCAACCCACTCCATGCGGCCCGGTGG  
TGATGAATTCATAAACCAGGTAGTGAGATAAATCCCAACGCCATAAAGCACAACCAACAGCATAGGAAATATACTGAAG  
ATACCGAAGCGGCTAAATAAAAAGTCTTTTATGACGGCGCATAACAGCCGCTATCCCAATCCAACGCCCCAGCGACG  
CCACTCCTCACGCGGGCTGTTGCAATCCTGTGGGTATACGATGCAGCGATTGCGCTGCCGAATACGGTAGCCGTTTGCCA  
CCAATGTCCAGGTGAGATCAAGGTTCTCGACTTTAGTACGATCCGAGAAACCGAATTAACGCAATACATCAGTACGGAAC  
ATCCCGCAGGCACCGCTGATAATAACGGTGCGCCACCCAGGAGCTGCTGTAGCGTGCCTTCATAACAATCATCGGCAA  
CTTTACGGTCCGCGGATGTGCGGTAACAGACCCGCGCCTTCAACGCAGTAGAGGGAATGCCGCTACGGCATCGGCAC  
CGCGCTCAATTTCTGCCAGCATATAGCCATTCCGTCTTATCGGGCGGAACATAGGTGTCGGCATCACTAAAAAACC  
TGGTGCAGGTGGCGTAATTGAGGCCATTATCAGCGCACCCACTTTACCGGATTTTTTTTGCCTGACGGCAACAAAGCG  
GTCGCCCATTTGCGTTTACTTCCGCCATGACCGCTTCGGTATTGTCCGTGGAGCCGTCGTTAACGCAATTAACCCGGC  
AAAAATAAGGTTACGCAAGTATTCAGTACTGCGCCAGACACGGCCCTTCGTTATACGCAAGTATAATGGCGTCA  
ATACAGCCTTTCTTTTACTGGGTTTACGTTAGCTACTTAAAAACCATAGCAACATTGCTATGGACATACAGATAAAA  
TATCCAGTTTTTCATGCAATTTGCTCAAAGAATCATTTTTATGAATTAACAAGCCTTCCACCCAGATCGCTATTGACCTGTT  
GTCCGCAAAATTTGCAACTGCACGCAGCGATCATGACGCATATAATCGCGTCTTCTAGCTTTTATGTTTTTTAAT  
GCAGCAAGTTTACTGTGAAATATTCTTTTAAACGGATTCAAAAACCTGAGGCATAAATGAAAGCCAGGTAATTTGGGTT  
TTCGTAGCCGAGAATTTGCGGAATAGTTGCGCAGGCAACCATTAAGCTTGATAAACAGCAAGATGATCCTGATGGCGGT  
CGGCATCATGCATGGTATATACCCGCATGATTTCAACATCAGAAGGAATTTGATTTTTAATGATGTCTTCCAGGGCGGAA  
ATCATATCATTGAGCTGTAATGAGCGCGGTGTCAGCAAAATTAAGATGAATAGTTTGGTGGCACCTAATATCTTTAG  
GGGTTGCGGATTTCTCATGGCGATCGATTATCCATCTGTGCCAGAGTTGCCGGTAGTCATACCACGGCTGCGATAT  
AAATTCCTTTTTGCGCAAGACGAGCAAGCGATGCGCCACAGCCTAATTTCTATATCGTCAGGATGTGCGCAATAGCAAGG  
ATACCTTTCTTTTATTTGCCGAAGAAAGGAGGGCTGAATCTAAAACCTTATCCACTTAATGACACTCCATTTATTTAT  
TATACTACAAGCAACGATGCACTCAGAGACGTAATCTGTGCCAGCCAGATGTTAATTTATAAATGTTAAATGTTGC  
TAATAACTGAAAAGCAAGGGCTTTCCAGACCCGTGGGTTGACTGGGTAATGTTTCTATGCAATTCATATGTTAAGTGT  
GTATGTTTGGTATGTATAGTATTTTTGTTTTATACATTGATTTAGATGTGATTTAGTTTGTCAATTAATTCATTTAAA  
AAATATGTTCTGTGAAACAAGCATTGTTTATATACATTATGTGAATGTAATATGCGAGTGATTGAGAATGATACAGTGATA  
TATACAATGCGAATATAATAGTTTTTATATATGATTGATATTGATAGAAATAATGAAGTAATAAATCTCGTAATGTGGT  
TGTTTATGCATCACTAAAATGAAGTGTAGTAATTTCCCAATTGTTAGAACGGAGTAATTGCATATTTAATCTTTCTTA  
GCCGTTTTTTTGTAGAATAAAAATCATCTGTGCGATAACGACTAATTTTAAATGAATGTTTTTATTCCTGAATACTG

CTCCATAACAAGACAGGGGAGCAGACAATCATGGCAATTTTCATCGCGTAACACACTTCTTGCCGCACTGGCATTTCATCG  
CTTTTCAGGCACAGGCGGTGAACGTCACCGTGGCGTATCAAACCTCAGCCGAACCGGCGAAAGTGGCTCAGGCCGACAAC  
ACCTTTGCTAAAGAAAGCGGAGCAACCGTGGACTGGCGTAAGTTTGACAGCGGAGCCAGCATCGTGCGGGCGCTGGCTT  
AGGCGACGTGCAAATCGGCAACCTCGGTTCCAGCCGTTAGCGGTTGACGCCAGCCAACAGGTGCCGATTGAAGTCTTCT  
TGCTGGCGTCAAAACTGGGTAACCTCCGAAGCGCTGGTGGTAAAGAAAATATCAGCAAACCGGAAGATCTGATTGGCAAA  
CGCATCGCCGTACCGTTTATCTCCACCACCCACTACAGCCTGCTGGCGCACTGAAACACTGGGGCATTAAACCCGGGCA  
AGTGAGATTGTGAACCTGCAGCCGCCGCGATTATCGCTGCCTGGCAGCGGGGAGATATTGATGGTGTATGTCTGGG  
CACCGGCGGTTAACGCCCTGGAAAAAGACGGCAAGGTGTTGACCGATTCTGAACAGGTCCGGCAGTGGGGCGCGCAACG  
CTGGACGTCTGGGTGGTGGCAAGATTTTCCGAGAAACATCCTGAGGTCGTGAAAGCGTTCGCTAAAAGCGCCATCGA  
TGCTCAGCAACCGTACATTGCTAACCCAGACGTGTGGCTGAAACAGCCGAAACATCAGCAAACCTGGCGGTTAAGCG  
GCGTGCCTGAAGGTGACGTTCCGGGGTGGTGAAGGGGAATACCTATCTGACGCCGAGCAACAAACGGCAGAACTGACC  
GGACCGGTGAACAAAGCGATCATCGACACCGCGCAGTTTTTGAAGAGCAGGGCAAGGTCCCGGCTGTAGCGAATGATTA  
CAGCCAGTACGTTACCTCGCGCTTCGTGCAATAAAAGGAGGCGCAGATGCTGCAAATCTCTCATCTTTACGCCGATTATG  
GCGGCAAACCGCACTGGAAGATATCAACCTGACGCTGAAAGCGGCGAGCTACTGGTGGTGTGGGGCGTCCGGGCTG  
GGTAAAACCCCTGCTGAATCTGATTGCCGTTTTGTGCCTTATCAGCATGGCAGCATTCAACTGGCGGGTAAGCGTAT  
TGAGGGACCGGAGCAGAGCGTGGCGTATTTTTTTCAGAAATGAAGGCTACTACCGTGGCGCAATGTACAGGACAACGTTG  
CGTTCGGCCTGCAATTGGCAGGTATAGAGAAAATGCAGCGACTGAAATCGCGCACCAGATGCTGAAAAAAGTGGGGCTG  
GAAGGCGCAGAAAAACGCTACATCTGGCAGCTTCCGGTGGTCAACGTCAGCGGGTGGGGATTGCTCGTGCCTGGCGGC  
GAATCCCAGCTGTTATTACTCGACGAACCGTTTGGTGCCTGGACGCTTACCCGCGACCAGATGCAAACCTGCTGC  
TGAAACTCTGGCAGGAGACGGGCAAGCAGGTGCTGTTGATTACCCACGATATAGAAGAAGCGGTGTTTATGGCGACTGAA  
CTGGTTCTGCTTTCATCCGGCCCTGGCCGTGTGCTGGAGCGGCTGCCGCTCAACTTTGCTCGCCGCTTTGTTGGGGAGA  
GTCGAGCCGACGATCAAGTCCGATCCACAATTCATCGCCATGCGCGAATATGTTTTAAGCCGCGTATTTGAGCAACGGG  
AGGCGTTCTCATGAGTGTGCTATTAATGAAAACTGCATTCCGGCGGCTGAAATGGCGTGGCCGCTCTCGCTCAGG  
TGACCTTAAGCATTGGCACGTTAGCGTTTTACTCACCGTATGGTGGACGGTGGCGACGCTGCAACTGATTAGCCCGCTA  
TTTTTCCCGCCGCGCAACAGGTAAGTGGAAAACTACTCACCTGCGGACCAGGCTTTATGGACGCCACGCTGTG  
GCAGCATCTGGCAGCCAGTCTGACGCGCATTATGCTGGCGTATTTGACGCGGTGTTGTTCCGTTATCCGGTCCGGATCG  
CGATGGGACTTAGCCCTACGGTACGCGCATTCTGGATCCGATAATCGAGCTTATCGTCCGGTCCCGCCGCTGGCTTAT  
TTGCCGCTGATGGTGTCTGTTTTGGTATTGGTGAACCTCGAAGATCTTACTGATCTATTTAGCGATTTTTGCACCGGT  
GGCGATGTCCGGCTGGCGGGGGTGAAGCGTGCAGCAGTTTCGATTCTGCGGCCAGTCCGCTGGGTGCCAGCCGTG  
CGCAGGTGCTGTGTTTTGCTATTTGCCCGTGGCGTCCCGGAAATCCTCACCGGATTACGTATTGGTCTGGGGGTGGGC  
TGGTCTACGCTGGTGGCGCGGAGCTGATTGCCGCGACGCGGTTTTAGGATTTATGGTTCAGTCAGCGGGTGAATTTCT  
CGCAACTGACGTGGTGTGGCGGGGATCGCGGTGATTGCGATTATCGCCTTTCTTTAGAAGTGGGTCTGCGCGGTTAC  
AGCGCCGCTGACGCCCTGGCATGGAGAAGTACAATGAGTGAACGTCTGAGCATTACCCCGCTGGGGCCGTATATCGGCG  
CACAAATTTCCGGTGGCGACCTGACGCGCCGTTAAGCGATAATCAGTTTGAACAGCTTTACCATGCGGTGCTGCGCCAT  
CAGGTGGTGTCTACGCGATCAAGCTATTACCGCGCAGCAGCAACGCGCGTGGCCAGCGTTTTGGCGAATTGCATAT  
TCACCCTGTTTACCCGATGCCGAAGGGTTGACGAGATCATCGTGTGGATACCCATAACGATAATCCGCCAGATAACG  
ACAACCTGGCATAACCGATGTGACATTTATTGAAACGCCACCCGAGGGCGATTCTGGCAGCTAAAGAGTTACCTTCGACC  
GGCGGTGATACGCTCTGGACCAGCGGTATTGCGGCTATGAGGCGCTCTCTGTTCCCTTCCGCCAGCTGCTGAGTGGCT  
GCGTGGCGGACATGATTTCCGTAATCGTTCCCGGAATACAAATCCGCAAAACCGAGGAGGAACATCAACGCTGGCGG  
AGGCGGTGCGAAAAACCCGCTTGTGCTACATCCGGTGGTGCAGAACGCATCCGGTGAGCGGTAAACAGGCGCTGTTTTG  
AATGAAGGCTTTACTACCGGAATTTGATGTGAGCGAGAAAGAGAGCGAAGCCTTGTTAAGTTTTTTGTTTTGCCATAT  
CACCAAACCGAGTTTCCAGGTGCGCTGGCGTGGCAACCAATGATATTGCGATTTGGGATAACCGCGTGACCCAGCACT  
ATGCCAATGCCGATTACCTGCCACAGCGACGATAATGCATCGGGCAGCATCCTTGGGGATAAACCGTTTTATCGGGCG  
GGGTAATACGAGAGTGGACGGTCCCTCGCCCCCTTGGGGAGAGGGTTAGGGTGGAGGGGGCTTACCCTACTTTCAACA  
GGTTAACTCCCTTTCTGAGAGGAAACAAAATTAACGAGAATCTTCTTCTCAGCCAAATCCAGCGCAAAGTAGCTGAA  
AATCAGATCCGCAACCGCACGCTTAATCGAACCTAAGCTTTGAGCAGCACTTTCTTCTCATCTATAGCACCCGCCAGCG  
CGGCAACTTAATCATCGCATACTCACCGCTCACCTGATACGCGCAATCGGCAATTCAGTACGTTACGCGAGCTCACGC  
ACGATGTGAGGTACGCTCCAGCAGGTTAACCATCAGGCAGTCTGCGCCCTGGGCTTCCAGCAGTATTACGAAT  
CGCCTCACGACGGTTCATTGGGTTCTGATAGCTTTTGGGTGCGCTTTTAAATGCGCTTCCGGCAGCTTACGGAACG  
GGCATAAAAGGAGGAGGCGAACTTGGTCAATACGACATAATCGCCGATCTTTAAATCCCGCAGCGTCCAGCGCCTGA  
CGAATCGCCTGTACCTGGCCGTCCATCGCGGCGAAGGGCGATGAAGTCTGCACCTGCAGCAGCTGCAACCACGGCTTG  
CTTGCTAAATTTTCCAGAGTCCGCTGTTGTGACGCCATGCTCGCACAGCACCCGAGTGACCGTGAGAAGTGTATT  
CACAGAAGCAGGTGTCTGACATAACGATCAATTTCTGGCACGGTCTGCTTGCAGATGCGCGACATACGCGCCACCAGTCCA  
TCTTCCCGCCAGGCATCGCTGCCGTTTTATCGGTATGGTGGAGAGATGCCAAAAGTATCAGGAAACGAATACCGGCGTT  
GGCGATGCGTTCAATTTCCGCTGCCAGATGTTTTCTGGAATGCGCATCACGCTGGCATGGCTTCAACGGCTTTGTAGT  
CGTCAATTTCTTCAACAAAGATCGGCAACACCAGGTGCTTAAAGGCTAAGTGTCTCTTCAACATAGCGCGCAGC

GCAGGAGATTTGCGCAGGCGACGAGGGCGTTGGATTAAGTCTGTCATGGTCTGCCTGATGTTTGTGGAATCGAGGGGCAT  
AGTATACCTGAAGCAGGGTAGGGATGTTTTACGAAAGTTGTCGCGATGTTGACAAGAAGAGAATGGAAGAGAGGCCAGGA  
CATCTTTTTAATGAAAACAGCAATAATTTTATATTCCTGAAAATATTTTTAATCTTTATTTATAGCTGTTGGTTATTAT  
TTTTTGGAGTTTGGTTGCGTCTGCTATAAATTGAATAATTAACCTTTGTTGCATATTCATAGGATATTTATCTGGTTTGT  
GTTTGTGATATTTATTATGCGTATGCTTCAAAAACAAAATTATCTGCAACATGTTGAAACTGTGCTTTTATGAATTTG  
ATGCGTGTTTTTCTCCATAAATTATATATGTCCACATTCGACTTAGGGGAAAGAATAATTGAACCATTTCGTCTGTAACG  
CAGCATAATCGTTAGCGCGAAAACATAATATGTTTTCTATGCATTGATAATTGATGGATCAACTTATTACGTCCCTGAGGA  
GGGATGACAAATGCACTCCTGAAAAAGAACTTGTAGTATCACAAATAGCATTGGCTTGCCTGACTCTGGCTATCACCTCTC  
AGGCTAATGCAGCAAACTATGATACCTGGACTTATATCGATAATCCCGTTACAGCACTTGATTGGGATCATATGGATAAG  
GCAGGCACTGTAGATGGCAACTATGTAACCTATAGTGGTTTTGCTATTACAACAACACCAATGGTGATTTGCATCAGTC  
CTTTAACGGCGATACCGTTAACGGCACGATCTCAACCTATTATTTGAACCATGATTATGCAGACAGTACTGCTAATCAGC  
TTGATATCAGTAATTCAGTGATTCACGGTTTCGATTACTTCTATGCTGCCTGGCGGTTATTATGATCGTTTTGATGCAGAT  
GGTAATAATCTGGGTGGATATGATTTTTACACTGATGCGGTTGTTGATACACACTGGCGTGATGGTGATTTTTCACTTT  
GAACATTGCTAACACTACTATTGATGATGATTGAAGTCTTTACTTCACTGATTCTTATAAAGATGGTGATGTAACCA  
AGCACAAAATGAGACATTTGATACAAGTGAAGGCGTTGCTGTTAATCTTGATGTAGAAAGTAAACATCAATTTCCAAT  
AACTCCCGGTTGCAAGTATTGCATTATCTCAAGTAATACTTACAACGAAACCTACACTACCGAATCTCATACTTGGGA  
TAACAATATCTCTGTAAGATTCCACAGTACTTCCGGTTCAAATTATATCCTGGATAGCAATACTTATGGCAAACTG  
GTCACTTTGGCAATTCTGATGAACCGAGTGATTATGCTGGCCCGGTGATGTTGCAATGTCCTTTACTGTTTCAGGTTCC  
GACTATGCGATGAAGAACAATGATTCTCAGCAATTAACGCTGATGGGTGATGTTGCCTTTACCAGCACCTGGAATAG  
TAATTTTATCCGAATGGTCATGATTCCAACGGTGACGGGGTAAAGATACCAACGGGGTTGGACTGATGATAGCCTCA  
ACGTTGATGAACTAAATCTCACTCTCGATAACGGAAGCAAGTGGGTTGGTCAGGCAATTTATAACGTTGCTGAAACGTCA  
GCAATGATGATGTTGCTACAAACAGCCTTACTCTGATGCAACATATGAAAACAATGACTGGAAACGTGTTGTTGATGA  
CAAGGCTTCCAGAGCGGTGATTTAACGTAGCGTTGAATAACGGTTCTGAATGGGATACTACAGGTCGTTCCATCGTTG  
ATACCTTGACAGTTAATAATGGTTCTCAGGTTAATGTTTCGGAATCTAAATTAACCTCAGATACTATCGATTTAACTAAC  
GGTTCTTCGCTGAACATTGGTGAAGATGGCTACGTTGATACCGATCATCTGACTATTAACCTCCTACAGTACTGTTGCGTT  
GACCGAATCTACTGGGTGGGGGCTGATTGATCCTACCCACGTAATATGGACACAGGCTAAGCGAGGTTCTTGTTCAC  
AATTGTTCCGACTGAGGCCGCCACCAACTGTGCCGCCGCCACCGATTGTAATCACATTCGATATAATTAACACCGT  
TGCCCGCATTATTTCCGGCTGATAAAGTGTCTCCATGGATACATTCCACTTTCAGCGAATGAAAGAAGCTTTCCACGC  
AGGCATTATCGTAGCAGCAACCTTTTGGCTCATACTTCCACGCAGATTATGCCGCTTCAGTTGCGCCTGATAATCTGCT  
GAACAGTACTGGCTCCACGGTCCGTGTGAACGATAACGTTCCGGGGCTCTTACGCCGCCACAGCGCCATCTGCAGGGC  
ATCGCAGGCCAGTTGCGCGTCATGCGTGGCGACATTGACCAGCCAATAACGGCACGTGACCACAGGTCAATGACCCTG  
CCAGATACAGCCAGCCTTCTGACGTAAGTACGTGATGTCTCCTGCCACTTCTGGTTCCGGGCACTGGCGTAAAAA  
TCCTGCTCCAACAGATTTTCTGACACAGGCGGCGTGTGCGCGTAGCTGACCGGGCTGAACTTCCGGGAGGCCTTTGC  
CCTCAGTCCCTGACGGCGCAGGCTTGGCCGCCAGGTTTTACGTTAAAGGGTAACCTGAGCACGCAGTTCATCCGTCA  
GGCGTGGGGCACCGTAACGCTGTTTTGACCGGTAAAGCCGCGAGGACAACGCTGTGCGAGTGTGGCGGAACTGCTGA  
CGCGTGCTTATCCTTGTCCGCCGTGACACCAGTATACCAGCCGCTGCGGGCCACCCGGAGCACGGCCACATTGCTTT  
GATGCTGAACTCAGCCTGATGTTTTCAATAAAGACATACTTCATTTACGGCGCTTCGCGAAGTATGTCGCGGCCTTTG  
GAGGATAGCCAGCTTTCATCCCGTTCTGCCAGCTGGCGTTTGAGACGTGCAATCTCGGTAGACATCTCCAGTTACGTT  
CAGAAGACGTTGCTGATTTTTGCTGTTTACTGCGCCAGTTGTAGAGTTGTGATTATACAGGCTGAGTTCACGGGCTCGC  
GCAGTAACACCGATGCGTTACAGCAAGCTTACGGGCTTCACTGCGAAATTCAGGCGAATGCTGTTTACGGGTTTTTACT  
GGTTGATACTGTTTTTGTATGTGAGTACCTCTGACTGAGAGTTTACTCACTTAGCCGCGTGTCCACTATTGCTGGGTA  
AGATCAGATTACAACCTGTACGCCAATACTATACCCTAATAACGGCGGTGATTGGATGTGAACGTTGATCAGTTGCA  
TACTGAAGCTTCCGTAAGTACTGACAACTGGAACCTGACCAGCGGCAACATCGCTGACCATAACGGTAACGTAGTATCTGGT  
TGTTGATATCCATAGCAGCGATTACGTTCTGAACGCTGATCTGGTGAACGACCGTACCTGGGATACTTCCAAGTCTAAC  
TACGGTTACGGTATTGTTGCTATGAACCTGATGGTCACTGACTATCAACGGTAACGGCGACGTAGACAACGGTACTGA  
ACTGGATAACAGCTCTGTAGACAATGTTGTTGCTGCAACCGGTAACATAAAGTTGATCGACAACGCAACTGGCGCTG  
GCGCTATCGCTGATTACAAAGATAAAGAAATTATCTACGTAACGACGTCAACAGCAACGGCACCTTCTCTGCTGCTAAC  
AAAGCTGACCTGGGTGCATACCTATCAGGCTGAACAGCGCGGTAACACCGTTGTTCTGCAACAGATGGAGCTGACCGA  
CTACGCTAACATGGCGCTGAGCATCCCGTCTGCGAACCAATATCTGGAACCTGGAACAAGACACCGTTGGTACTCGTC  
TGACCAACTCTCGTCATGGCTGGCTGATAACGGCGCGCATGGGTAAGCTACTTCGGTGGTAACCTCAACGGCGACAAC  
GGCACCATCAACTATGATCAGGATGTTAACGGCATCATGGTGGTGTGATACAAAATTGACGGTAACAACGCTAAGTG  
GATCGTGGTGGCTGCAGGCTTCTGTAAGGTGACATGAATGACCGTTCTGGTCAAGTCAAGACAGCCAGACTG  
CCTACATCTACTTTCTGCTCACTTCCGGAACAACGCTTTGTTGATGGTAGCTTGGAGTACTCTCACTTCAACAACGAC  
CTGTCTGCAACCATGAGCAACGGTACTTACGTTGACGGTAGCACCAACTCCGACGCTTGGGGCTTCCGTTTTGAAAGCCGG  
TTACGACTTCAAACCTGGGTGATGCTGGTTACGTGACTCCTTACGGCAGCGTTTTCTGGTCTGTTCCAGTCTGGTGATGACT  
ACCAGCTGAGCAACGACATGAAAGTTGACGGTCACTTACGACAGCATGCGTTATGAACTGGGTGTAGATGCAGGTTAT



ACCTTCACCTACAGCGAAGATCAGGCTCTGACTCCGTACTTCAAACCTGGCTTACGTCTACGACGACTCTAACACGATAA  
CGATGTGAACGGCGATTCCATCGATAACGGTACTGAAGGGTCTGCGGTACGTGTTGGTCTGGGTACTCAGTTTAGCTTCA  
CCAAGAACTTCAGCGCCTATACCGATGCTAACTACCTCGGTGGTGGTGACGTAGATCAAGACTGGTCCGCGAACGTGGGT  
GTTAAATATACCTGGTAATATTCTTCACTCCGAAGAAATACTGGTAATTTAATCTAAATAATGCCCGTCAAGGATTTGAC  
GGGCATTACTGCAAAGGACGCGCAAATGTTATCTGTAGTTAAACCTCTTCAGGAATTTGGTAAGCTCGATAAATGTTTGT  
CCAGATACGGTACGCGCTTCGAGTTTAAATAATGAAAAGCAAGTTATATTTTCCAGTGATGTCAATAACGAAGATACTTTC  
GTTATTTTAGAGGGAGTTATCTCTCTGCTAGAGAAGAAAACGTAATCTATCGGTATTACCCAGGCTCCTTATATTATGGG  
GCTGGCTGATGGTTTAAATGAAAACGATATACCATACAAATTAATATCAGAAGGAAATTGTACGGGATATCATCTACCAG  
CCAAACAAACCATTACGCTTATTGAACAAAATCAACTCTGGCGAGACGCTTTTTACTGGTTAGCCTGGCAAAATAGAATT  
CTGGAATTACGCGACGTGCAGCTCATTGGGCATAATTCCTACGAACAAATCCGCGCAACATTATTATCAATGATTGACTG  
GAATGAAGAATTGCGATCACGTATTGGTGTGATGAATTATATCCATCAACGTACACGCATATCGCGTTCTGTCGTCGCAG  
AAGTTCTCGCTGCTTTGCGTAAAGGCGGTATATCGAAATGAATAAAGGCAAACCTGGTCGATCAACCGTTTGCCTTCA  
GAGTATTAATCAGGACGCGGGGATAACCAACGGTTTATCCCGCTTAGCTCGGTACCAGGTCATTGATGCCATCGCTCA  
TATTTTTAAAGCGCGTCAACGGCGAACGAGTGACCACCACAAACGCGCAATATTCTTCTGCGGGATCATCGCCATATG  
GTAATGAAACCGCCACCACCGCTGTCTTCTGAATAATCCCGGACGACCCTCTTTCGGGGCCATATATACCCAACCTAA  
ACCAAGCGCATCCGCTTTGCGGGACATCCATGCCAATCACTTTCTGTAACCTGCGCGCGCTGATAAATCAACGTCTGCA  
TGGCATCTGCCTGGTTACTGCGCTGATAAAAATCAGATGACAAATACTGCTGCATCCAGCGCATCATATCGCCAGGCGTG  
GAATAGACGCCCGCTGCCAATTGCCGCCAGCGTGTATTGCACGGACTGGCACCGCGCTCAGCAACCATTAAACGGCG  
GCACTGATCCGGTGAGGGGGTGTAGGTGGTGTCTTTCATCCCCAATGGACGGGTAATCTGCTCTTCAAACAACTGGGTAT  
AAGGCTTCCGGGACGCATTCGCCAGTGCATCTGCCAGCAGGTGCAACGCAAGTTAGAGTACGCCGCTGACTGCCTGGC  
GCGGCTTTCAGCTTCCCGTAGAAAGGTATTTCCAGCGTGTCTGCGCGTGGCCAGACAAACACCGGACGATGTGCCGC  
GCCACCGGGCTGTTACGGGGCAGGGCGTGGTATGGGTTGCCAGATTGACCAGCGTAATGGGCGTCCCATTGTAGGTTG  
GCACGCGTGCCTGGCGGAGCATATTTACTTAGCGGATCGTTTAACTTACCGTCCCCTGGTCGAGCAATTTACCAGC  
ATCTCACTGGTCATTAGCTTGGTGAGGGAAGCAATACGCACGACCGAATCCAGCTGCGGGCGAACGTTATTACCAGGTCG  
CGTTTCGCCATAACTGCGAAAGACGCGCTGGTTACCCTGATAACAACAGAGCCATCCCCGTGGCACCGCTGCCGTA  
AAATATGATCGGCATAACGATCGACAATATCAGAGGCAAACCTCCGGTTCAGTGATCGGCTGCGCCGATGGACGGAGGTC  
AATGACGCCGCACACAGCACGGCAGAAAAAGCAGACTACGTTTCAACGGTGGTGTCCATAGATTGAATGAAGGTAACGT  
AGCGTATTTATACTACTCATTGATAGATTGCAAAGGCGAATTAGTGCAATAATAGTGTTAAAAACGTAACGGCGCGTAA  
ACACGATCTTTTTCTGCTACCAATGCCTGCATTTGTGATCCTGCGCGTGAATCCGCTTATGTAAACAATCTTTGGT  
TTGTGAAATCCGTCGAAACAATTCTTATGGTCAGGCTGGCGAACTAAGCGCCTTGCTATGGGTCACAATGGGCGGTTTCA  
TTTGGCTGACGCTTTGTAGCGGTATGCGGTTAATACACAGCAGTTGTTAAAACGATAAGAAGTTAGCAGGAGTGCATAT  
GTTTAAAGTCTTTTTCCCAAAGCCGGGAACGTTTTTCTCTCGGCCTTCTGTTGGGCATTGATTGCCGTTATCTTCTGGC  
AAGCCGGTGGGGGTGACTGGGTGGCGGTATCACCGCGCTTCCGGGCGATCCCGATTAGCGCCGCGGTTTCTGGTGC  
TTGGATTTCTGATTTTTACGCTTACTACATTGTTTGGTAGGACTTTTTGCATTGTTCTGGTTTATCTACAGCCCGCA  
TCGTTGGCAATACTGGTCAATACTCGTACTGCACTGATCATCTTCGTCACCTGGTTTTTGGTGAAGTCGGGGTCCCG  
TCAACGCTGGTATGCGCGTCTATGATCTGATTCAAACCGCGTAAGTTCCCGCATAAAGTACCATCGAACAAATTT  
TACCGGAAGTGGGCGTCTTCTGGGATTGCGTATCGCTGTGGTGTGATCAGTGTGCTGAACAATCTTTTGTGATCA  
CTACGTGTTCCGCTGGGTACAGCGATGAACGAATATTACATGGCGAACTGGCAACAACCTGCGTCATATCGAAGGGGGC  
CACAGCGTGTGAGGAACACCATGCGTTTTGCTTCAACGCTGGAGAATATGGGCGTCAGTTTTATCAACGCCATCATG  
ACGTTGATCGCCTTCCGCGTGGTAAACGCTCCTCCGCGCATGTGCCGAGCTGCCGATTATCGGGCACATTTCCGTA  
TGGTCTGGTGATTGCCGCAATCGTCTGGTCTGATGGGGACCGGATTGCTGGCAGTGGTAGGGATCAAACCTGCCGGGC  
TGGAGTTTAAAAACAGCGTGTAGAGGCTGCCTACCCTAAAGAGCTGGTTTATGGTGAAGACGATGCCACGCGCGCAGC  
CCGCTACGCTACGCGAGCTGTTTAGCGCGTACGGAAAACTATTTCCGCCTCTATTTTCACTATATGTATTTCAACAT  
CGCCCGATTCTCTATTTGCAGGTCGATAACGTTTTCGGTTTGTCTTGTGCTGTTTCCGTCATTTGTTGCCGTACGATTA  
CGCTCGCCTGATGACGCGATTACCAACGTTTTTGGTCCAGGTTCCGCGGTGCTTCCAGTACCTGATTAACCTCATGGACC  
ACACTGGTTGAGTTGATGTCTATCTACAAACGCTCTGCGCAGCTTTGAACATGAGCTGGATGGTGACAAAATTCAGGAAGT  
AACCCATACCTTGAGCTAAAAAGGAGAAGTAATGTCGCGCGTCAATCCTCTATCTTCGCTGTATTGTTGGCGGTTCTGG  
TTTTAGCGGGGTGTAGTAGTCAGGCTCCGCAACCGTTGAAAAAGGGCGAAAAAGCGATAGATGTAGCGAGCGTGTGCCG  
CAGAAGATGCCTGCGAGCGTAAAGACCGGATGCTGGGCGAAAGATCTGCCACCACCTTTGAAAGTCAGGGGCTGGC  
ACCGACGCTGAAAAACGCTGCTCGGTGCTGGCGGTGGCGCAGCAGGAGTCAAATTATCAGGACGATCCGGCGGTTCCGG  
GCTTAAAGCAAGATCGCCTGGCAAGAGATTGACCGTCTGCTGAACGGATGCACATTCCTGCTTTTCTGGTTCATACCGC  
CTAAAAATCAAATCGCCAAACGGCAAAAGTTATAGCGAACGGTTAGATTCCGTGCTACAGAAAAGCAATTGAGCGCGAT  
TTTTGACGATCTGATCAACATGGTGCCAAATGGGGCAGACGCTGTTGGTTCCGCTCAATCCGTTGCGCACCGGTGGGCGGA  
TGCAGGTCAGCATTGCTTTTGGCAACAGCATAACAAAGGGTATCCGTGGAAAAATGGACGGTACAGTCCGTCAGGAAGTC  
TTCAGTCCCGCGCGGGGTTGTGGTTGGTACTTACCATTTACTGAATTATCCCGCCAGTTATAGCGCACCGATATACCG  
TTTTGCTGATTTAACGCTGGCTGGTACGCCAGCCGTAATGCCCGGTTTCAAGACGCGGTGAGTAAGGCCAGCGCGTGA

AGCTGGCACTGGACGGTGATTTAATTCGTTACGACAGTAAAGAACC CGGAAAACCGAACTGGCAACGCGCAAACCTGGCT  
GCAAAACTGGGGATGAGCGACAGCGAAATTCGCCGTGAGTTAGAGAAAGGTGACAGCTTCTCTTTTGAGGAGACGGCGCT  
GTACAAGAAAGTTTATCAACTTGCCGAAACGAAAACGGGTAAATCACTCCCCGCGAAATGTTGCCTGGCATTCAACTGG  
AAAGCCCGAAAATCACCCGCAACCTGACTACGGCCTGTTTTGCGAAGCGCTAGACGAACGCGGGCGCTTGTATGAAA  
CAGTGATCAAACAGGAATGTCAGGCCAGATAAGGCCTTTTAGGCCGATCTGACAATGTAAAACCTACTGGCGCGATGT  
CGCCAGTGCAGCCATAGCGCCACCCTGCAAAAATGAGGCAGCCTACTAAAAACGGGATCAGCCCAAAATGGTGCCGAC  
ACCTAAACCAATTTCCACCCGTGGGCGACCTGTTTCTGGACCTGCATTAACGCTCATAGACGCCGGGCGCATGACTA  
ACAGTTTACGCAATTGCGCCCCAGCCAAAAGCAAAACAGCACAAAACGCATAGGCAATGTTGCCAGGCGTTGAAGAG  
GCATTGCGATATTTCCGCTAAACAGCGATTTTGACAGGGTGAATCAGCCATAAAAACCTCCGGAAGTCATCTGCTTCT  
CTTCTGGTGTGATACCAGCGGCTTATGGCAAGTCTGACAGGTCATTTAGATTGTCAATATCAGAATCATGGTAAATTTGAT  
GTTGGGAATATTTCCGAAGCGTGAATCTTCGTTGTGAGTCAAAAATGGCAACCTTAAGTTAAATTTATTAACAATTACG  
AAAATGTTGTACACCACAGACGGTGTGCGAATATGCAAGGATGTTGTTTTCTGTTAACGGAGCTGCCATGAATCT  
GCCTGTA AAAATCCGCCGTGACTGGCACTACTATGCGTTCGCCATTGGCCTTATATTATTCTTAATGGCGTGGTGGGGT  
TACTGGGATTTGAAGCAAAAGGTTGGCAGACCTATGCCGTGCGTCTGGTACGTTGGGTGATTAGTTTTCTGGCTGGCGGG  
TTGATTATTCGTCTGCGGATGAAGAAAACGAAAACGCCAATAAGAATATTATCGGGCGTTAAAATATTACATTTGGT  
TTTTAATGCGTTATCCGAGCGTGACGCTCCAGCGCAGTTCAATCAAACGTTGATCAGATCGGTGTAACCCAGACCCG  
TGGCTTGCCACAGCTTCGGATACATACTGATATTAGTGAAGCCAGGCGGGTGGTATCTCGTTGATCACCACCTTCGTT  
TCTGGGGTTAAAAACAGCTACACGCGCCATGCCTGCGCATCCCAACGTTTGATAAGCCTGAACGGCAATCGCCCGAT  
CTTATCGTTGATTTCTGGCGCAATGGCTGCCGGAACCTACTTTTCGCGCCATCTTCGTCAATGACTTGGTGTGCTAGG  
CATAGAAATCGCTGGTGAAGTACGATCTCTCCACAGGTGCTGGCTTGGGATTGCTGTTGCCAGAACTGCGCATTTCGATC  
TCACGACCTTTGATCCCTTGCTCAACGATCACTTTATGATCGAACTCGAACGCCAGATCGACGGCAATTCGCTACTGTT  
TTCCTGGTACTTTGCTGACACCAACAGAGGCCCTGATTAGCCGTTTTACAAACAGTGGTAACCCAGTTTAGACT  
CCACTTCGGCAAAACTAATGTTGTGACGATTGGCGCGCTCAGGGTAATAAATGGCGCAATGTTAGCCCGCATCGCGT  
AGCAGACGTTTGGTACATCTTTGTCATACAGGCTGCTGAAGCCAGAACATCAGAACCTACAAACGGTAAATTTGGCGAC  
CCGACGATCCCTGCAAGGAACCATCTTCGCCAGCGTACCGTGGACAATCGGGAAAATGACATCCACCGTGGCAACG  
GCTGACCGTTTTGCGCGTGCATAAGCTGATGCTCATGTTTACCTGGCACCTGCGCAAGGCTGGTGGCCGAAAGGGCGAAC  
GCAATATGGGCAGGATCGTCTGCATTTAGCAGATAATTGCTGGCATCGCTGACGTGCCATTGCCCTTGTATCAATGCC  
CAGCAGCACAACTGCAAGCGACTTTTATCAATGGCATCGACAATGTTTTTGGCGATTGACAGACACTTCATGTTCCG  
CTGATTTACCACAAAACGATTCTACCCGAGTTTTTCATCTTAAAAACCTATCCCGTAAACACAAAGTGCATACA  
TTACCACGACAAAACGGGGATTTCGCGCCCTTCTGAAAGATTGTTGCAATCTTCTGCTGACAAAAGCTGCAACGTA  
TGAAGAAAGTGCCTTATCTCAAAGATGTGCGCAAGATCACAAAATGATGAACGGGAAGCTAATTTATTCCTGGCTTAA  
TGCCCATGCGGTGAGTTTTTTCTCTTAATTATAAGTTAACGAAGAGAATATATTTATAACTTTTATTTATAATAAAGG  
TTGATAATTAAGCCTATATTTGTGTGGGTAATTTAAATAAGAGAAACGTTTTGCTGGTAATCAAACAAAATA  
TTTGGCAAAGTATTTCTTTGTCATAAAAATAACTTCCAGACACTATGAAGTTGTGAAACATAATGTTAACTTCTCC  
ATACTTTGGATAAGGAAATACAGACATGAAAATCTCATTGCTGAGTTGTTATTTAAGCTTGGCCAAAAGAGAAGAGT  
CGAAAGAACTGTGTGCGCAGGTAGAAGCTTTGGAGATTATCGTACTGCAATGCTTCGCAATATGGCGCAAAATGACCAA  
CAGCGGTTGATTGATCAGGTAGAGGGGGCGCTGTACGAGGTAAAGCCGATGCCAGCATTCTGACGACGATACGGAGCT  
GCTGCGGATTACGTAAGAAGTTATTGAAGCATCTCGTCAAGTAAAGTTAATCTTTTCAACAGCTGCATAAAGTTG  
TCACGGCCGAGACTTATAGTCGTTTTTTTTTTTTTAAATGATTTGTACATGGAGAAAATAAAGTGAACAAAAGCAC  
TATTGCACTGGCACTTACCCTTACTGTTTACCCCTGTGACAAAAGCCCGACACCAGAAATGCCTGTTCTGAAAAAC  
GGCTGCTCAGGGCGATATTACTGCACCCGGCGGTGCTCGCCGTTTTAACGGGTGATCAGACTGCCGCTCGCTGATTCT  
CTTAGCGATAAACCTGCAAAAATATTTTGTGATTGGCGATGGGATGGGGGACTCGGAAATTAAGTCCGACGTA  
TTATGCCGAAGGTGCGGGCGCTTTTTTAAAGGTATAGATGCCTTACCGCTTACCGGGCAATACACTACTATGCGCTGA  
ATAAAAAAACCGGCAACCGGACTACGTACCGACTCGGCTGCATCAGCAACCGCTGGTCAACCGGTGTCAAACCTAT  
AACGGCGCGCTGGGCGTCGATATTACGAAAAAGATCACCAACGATTCTGGAATGGCAAAAGCCGAGGTCTGGCGAC  
CGGTAACGTTTCTACCGCAGAGTTGCAGGATGCCACGCCCGCTGCGCTGGTGGCACATGTGACCTCGCGCAAATGCTACG  
GTCCGAGCGGACCAGTGA AAAATGTCCGGTAACGCTCTGAAAAAGGCGGAAAAGGATCGATTACCGAACAGCTGCTT  
AACGCTCGTGGCGACGTTACGCTTGGCGGCGGCGAAAAACCTTTGCTGAAACGGCAACCGCTGGTGAATGGCAGGGAAA  
AACGCTGCGTGAACAGGCACAGGCGCGTGGTTATCAGTTGGTGAAGGATGCTGCCTCACTGAATTCGGTACGGAAGCGA  
ATCAGCAAAAACCCCTGCTTGGCCTGTTTGTGACGGCAATATGCCAGTGCCTGGCTAGGACCGAAAGCAACGTACCAT  
GGCAATATCGATAAGCCCGCAGTCACCTGTACGCCAAATCCGCAACGTAATGACAGTGTACCAACCTGGCGCAGATGAC  
CGACAAAGCCATTGAATTTGAGTAAAAATGAGAAAGGCTTTTTCTGCAAGTTGAAGGTGCGTCAATCGATAAACAGG  
ATCATGCTGCGAATCCTTGTGGGCAAATTTGGCGAGACGGTTCGATCTCGATGAAGCCGTACAACGGGCGCTGGAATTCGCT  
AAAAAGGAGGGTAACACGCTGGTCATAGTACCCGCTGATCACGCCACGCCAGCCAGATTGTTGCGCCGATAACAAAGC  
TCCGGGCTCACCCAGGCGTAAATACAAAAGATGGCGCAGTGGTGGTACGGGAACTCCGAAGAGGATTAC  
AAGAACATACCGGCGAGTCAGTTGCGTATTGCGGCGTATGGCCCGCATGCCCAATGTTGTTGGACTGACCGACAGACC

GATCTCTTCTACACCATGAAAGCCGCTCTGGGGCTGAAATAAAACCGCGCCCGCAGTGAATTTTCGCTGCCGGTGGTT  
TTTTGCTGTTAGCAACCAGACTTAATGCAGATCACGGGCGCATACGCTCATGGTTAAAACATGAAGAGGGATGGTGT  
ATGAAAATAACACTTACTGGTTACCTTGTCTTTTCGGTCTGGTTTTTTAAACCACGTCGGCGCTGCCGAGAGAACCTTAAAC  
CCCACAACAACAGCGTATGACCTCCTGTAATCAGCAGGCGACGGCGCAGGCGTTGAAAGGGGATGCTCGTAAGACCTACA  
TGAGTGATTGCCTGAAGAACAGCAAGTCTGCGCCTGGCGAAAAAGTTTTGACGCCACAGCAGCAAAAGATGCGCGAATGC  
AATAATCAAGCAACAACAATCTCTGAAAGGTGATGATCGTAATAAGTTTTATGAGTGCCTGCCTCAAGAAAGCCGCTG  
ATACCTGATAGTGCTAACGGGTGAGCTACGAAAATGGCTCACCCGAAATATCATACTTCTGCCCTTAGCTCCGTCTCTAT  
AATTTGGGAAAATTGTTTCTGAATGTTCCAAAAATAATGAATGATGAAAACCTTTTCAAAAAAGCGCGCGCACGGGG  
AGGAACCTCCTTAACTCCTCAAAACGAACATCAGCGGTCCGGGCTGCGCTTCGCCCGTCGCGTACAGCTACCCCGTGG  
GTTGGCCTGGCTGGCATGTTCTTACCGATTGCTTCAACGCTGGTTTACACCCGCCCGCGGGCTGGTGGTGGCTGGTGT  
GGTCGGCTGGCGTTCGCTGCGCCGATTTAGCCTGGCAGATAGCAGCAGGGCCGTCGATCCGCTTAGCCGGGAAATTT  
ACAACTTAAAAACCGATGCAAGTATTAGCGGAATGTGGTAGGCGTAATGGGCGTAAACGTGCTGCCTTCCACCGCGATG  
TTGATGATTATGTGTCTGAATTTGATGGGGCAGGCGGCCCCGCTGTTTTGTGCGGGTCTGGTGTGATGGTGGTTTC  
CTGCCTTGTACCCTCGAGCTGACGGGCATTACCGTGTCTTCAATAGTGCGCCGCTGGAATGGTGGCTCCTTCCCA  
TTATTGTCAATTTATCTGTCTGTTGGCTGGTCACTACAGACGGCAACCAACTGGCGGAACATAAACGCAGTTG  
CAGGTGATGATTACCCGCGACGGCATGACGGGCGTATAACCGACGTCATTGGGAAACTATGTTACGCAATGAATTTGA  
TAACTGTGCGGGCATAATCGCGATGCAACGTTACTGATTATCGATATCGACCATTTCAAGAGCATCAACGATACCTGGG  
GCCATGATGTGGCGATGAAGCGATTGTGGCGTTACCCGACAGTTACAAATTACCCTGCGCGGTAGCGATGTGATTGGT  
CGTTTTGGCGCGATGAGTTGCGAATCATGTCCGGTACGCCAGCTGAGAGCGCATTACCGCATGTTACGGGTGCA  
TGAAGGGCTAAATACATTACGTTTGGCGAATACGCCACAGTAACTTTACGATTAGTGTGGGGTTGCGCCGCTGAACC  
CACAAATGAGTCACTATCGTGAAGTGGTAAATCGGCGAGTTTGGCGCTTACAAAGCAAAGAAAGCCGGACGTAACCGC  
ACCGAAGTGGCGGCTGACGTCGGCGAAAGTCATCAGGATTTGCTGAGTTTTTCTGATTTTTCCATACACTTCGTATC  
GCTTCGATCACTGCAGCACGGAAGCCTTCTCTCCAGTACGCGTACCGCTTCAATGGTGGTGCCTCCCGGTGAGCAGAC  
CATATCTTTCAGTGCCCCGGATGTTCTCCGTTTTCCAGCACCATTTTTGCGGAACCCATTACCGCTGAGCGGCAATTT  
TATACGCTGGGCGGTGGCATCCCGCCAGCACGGCGGCTCGGCCATCGTTCGATAAACATAAATACGTAGGCTGGC  
GAAGAACCCTCACACCGACCACCGGGTGGATCATCGGCTCAGCAATTACTTCCGCTTCGCAAAGCAGCGGAAAATATT  
CAGCACATCAGCGGTATCTTCTGGGGTACCAGCGCTTTGGCGTTACGGAGTTCATCCCGCATTAACAGTGCGGGAG  
TGTTCCGATGGCGGGATAATTTCCGGTCATGGCCAGCGCGGGCAAGCTGGTGCAGCGTGACACCTGCAGCAATA  
GAAACGACCAGAGAGTCTTTATTACGGCTGGAGGTGATTTTCGTAAGCACTTTAATCATGATGCCAGGTTTAAACGGCAGC  
AAAAATGATGTCGGCGATTTGCGCCACTTCTTGGCGGATTCTGCGGCGTTGATGCCGAACCTGGTGCAGGGCGGGCA  
CTTTATCCGGGGAGGGGGTGTATACCCAGATTTGCCCTGGAAGCACTGACCGCTGGCAATCAGACCGCCGAGAATGGCT  
TTTTCCATATTGCCGAGCAATAAAACCGATTTTCTTTCCATTGCCTCACTCCTGCCGTGAAATTCATTGTTTTGATA  
ATCGCTGGCAGAAGCATAAACAGAATATGCCGGAAGGCAAAGCGCGACACAATAGAGGATTACCCAACAAAGGATGAC  
TTATGACAATTTGGGTGGATGCCGACGCGTGTCCCAATGTAATTAAGAGATTTTGTATCGCGCGGGGAAACGATGCA  
GATGCCGCTGGTACTGGTAGCAAACAGAGTTTACGCGTGCGCCATCGCGATTTATTCGTACGCTGCGCGTGCGGCAG  
GTTTCGACGTTGCCGATAACGAAATTTCCGGCAGTGTGAAGCGGGCAGTTTGGTATCACCAGATATACCTTTGGCT  
GCTGAAGCCATCGAGAAAGCGCTGCGGCGCTTAATCCGCGCGGCAACGTTACACGCCAGCGACCATTCGTGAGCGCT  
GACGATGCGGATTTTATGGATACCTTACGTGCCAGTGGGATCCAGACCGGGGACCAGATAGCCTTTACAACGTGACC  
GCCAGGCTTTGCGCGGAGCTGGAGAAGTGGTGGTGAAGTGAACGTAAGTCTGTTAAATGTAATTTATTTATTTAC  
ACTTCATTTGAATATTTATTTGGTATAGTAAGGGTGTATTGAGATTTTCACTTTAAGTGGAAATTTTTCTTTACAATC  
GAAATTTACTAGTTTTGATGGTATGATCGCTATTCTCATGACACCGGCTTTGCGCGATTGCGACCTATTGGGGAAAACC  
CAGGATGACACAACCTCTTTTTCTGATCGGGCTCGGGGCTGTGGTAAAACAACGGTTCGGAATGGCCCTTCCGATTCCG  
TTAACCGTCCGTTTGTGATACCGATCAGTGGTGAATCACAGCTCAATATGACGGTCCGGGAGATCGTCGAAAGGGAA  
GAGTGGGCGGGATTTGCGCCAGAGAAAACGGCGGCGTGAAGCGGTAACGCGCATCCACCGTTATCGCTACAGGGCG  
CGGATTTCTGACGGAATTTAATCGTCACTTTCATGCAAAATAACGGGATCGTGGTTATTTGTGTGCCAGTATCAG  
TCCTGGTTAACCGACTGCAAGCTGACCCGGAAGAAGATTTACGGCAACCTTAAACGGGAAAACCGCTGAGCGAAGAAGTT  
CAGGAAGTGTGGAAGAACGCGATGCGCTATATCGGAAGTTGCGCATATTATCATCGACGCAACAACGAACCCAGCCA  
GGTATTTCTGAAATTCGACGCGCCCTGGCACAGACGATCAATTTGTTGATTTTCGAGCGCTATACTTAACTTATCCC  
GTGAAATAAGGAAGAACGATGCCAACGAAACCGCTTATCCTCGTGAAGCATATATAGTACGATTGAAAAAGGAAAGCC  
AGGACAGACGGTAACCTGGTACCAACTCAGAGCCGATCATCTAAACAGACTCGTTGATCAGTGAACATCCGACCGCTC  
AGGAAGCGATGGATGCGAAAAACGCTATGAGGACCCTGACAAAGAGTGACCGCATCAGACTGCTCGGAAGGGATTCTGA  
GTGCCACTACAAGGGATCTGCGTACATTTTTTATAATTCATGTTTTTCTAATAATTAGAATATTAACAATAACAATCC  
ATTACTGGAATCATTTGGAATCTTTACATTATGCCGTGCACGCTGCTGCTACGCTTTTTGTCAATTTGTAGCACAGTAA  
GTGTCAGCAGTGGTGTTCACACTTGGCCGGTAATTAACGACGAAAGAAAAGTAAGGTGGATGAACAATGAGTGCCTGCT  
TGCGGATCCTGACCATCGGCATTGTACCTATGACGGAAGTTTTGCCGCTCCTGACGGAATACATTGACGAAGATAATATT  
TCCCATCATAGCCTGCTGGGGAAGTTAAGTCGTGAAGAAGTATGGCGGAGTACGCGCCAGAAGCAGGCGAAGACACCAT

TCTCACATTATTAATGACAACCAGCTGGCCCATGTTTCGCGTCGCAAAGTGGAGCGTGACCTGCAAGGTGTGGTTGAAG  
TGCTCGATAATCAGGGTTATGACGTCATTTTATTAATGAGTACAGCAAACATTAGTAGTATGACTGCGCGTAATACGATC  
TTTCTTGAGCCGTCGCGAATATTGCCTCCACTGGTTTCCTCTATTGTTGAAGATCATCAGGTGGGGTTATCGTTCCGGT  
TGAGGAGATGCTGCCGTTCAAGCGCAAAAATGGCAAATTTTGCAGAAATCGCCGGTATTTTCATTGGGTAAACCCATT  
ATGATTCAGAACAAAAAATCATTGATGCCGGGAAAGAACTACTGGCAAAAGGGCTGATGTATCATGCTGGATTGTTA  
GGATTTACCAACGTCATCGCGATTTACTGCAAAAACAGCTCGATGTTCTGTCTTGTCTAACGATTGATTGCACG  
GCTGGCTGCGGAATTACTGGTGAATTTTGCCTGACAGCCAGCGCCTCTGGCCCTATAGTGAAGTAGATGTTCAACTAC  
CAACAGGGCCAGTTTATGCTTCAAAGTAATGAGTACTTTCCGGCAAAGTAAATCAATCGGCTTTTCCAGCAGCAGCA  
CTGGTGCGCCAGCGTGGTGTATGTTGAAGGCAATACACCTCAGCACCGCTGAGCCGGAAGAGATGACGGTAATC  
AGTGGCGCGCTGAATGTGTTACTGCCTGACGCGACCGACTGGCAGGTGTATGAAGCCGGTTCGGTGTAAATGTTCCCGG  
TCACAGTGAGTTTCTGCAAGTTGCCGAACCCACTTATCTGTGCCGCTATCTGTAATTCCTCGCCTTCCCTTGA  
ACGGGAGGGCATTCTGAAATATCCTTTCTTAGCCATAAATAATTTCTTTGCTGCGATTTTTCAATTTCCGAT  
ATATTCATAATTTATCAAGTTGATATAAATATCAGTGAAGATCTCCAGATATTGTTGCGGAACTGGCTACGATAAAGA  
TAAATCAGATGATGAATGGTGGCGTGCATTGCTGCAAAGTCGCAATGATCATTACGCCAAACGGCATTGCGCAACGCAC  
ATACCCCGGCTGTGTTAACGACATTGACTGAGCTCAGGATCGTGGCTGCTGCTATTAATAATCCACAGCTGGCTGCC  
GATGTGAAAACCGCGTGGTTAAAAGAGGATCCATCATTACTTATTTTGTGCAACAACCCGATCTTTGCTGTTACGTGA  
TTTGTGAAAACCGGGCAACGCGGAAAATTCGAGTGAAGCGCGTACCAGGCTTGAGGAAAAACAATGACACAACGCTC  
ATGGAGCAAGTTACAGCGTAAAACGCATAATATTGCTGCGCTAAAAATTATTGCTGCGCTAGCAATAATTATATGCCT  
GGTGTGGCTTCGTACGCCGATAAGACGCGGAGCGCTCGCATCCGGCATTAAAGGAAAATCAGCAATTAACGTTGTGCT  
TCGCCACCTAATCCTTCAATCAGGTTTTGAATTAACGCTGCCAGTTCACCAGTCATCAGGATGAAATCGGCATCAAAACG  
CTGGGCAAAATCTTACGGTGCATATCTCGTTTTGATCGCGCAGCTCGTCGAGAATTCCAGACGTTGAGCGAACCAT  
CGTCGCACATCACAACCTGAATGCGCTGCTGCCAGTCGAGCGCCAGTTAGTCACCACTTTTCCGGCTTCAATGTGATTG  
GTGATCTTTCGCTGGTCAAGTCTTGTCTTTCGCGCGGATCAGCGCCCATCTTCCAGCAACGATTTACGCTCGGCTC  
ATCAAGCAGCTGGAAGCCCTGTGCCGCACTACCGGAGCGAACCCATTCCGGTCAAGCTCAGTTCAATCGGGTTTTCCATGC  
TCAATGGTACAACCGGTAACGACCCAGGCTTTTACGAGTAATGCCAGCGTATCTTCCGCTTTTTTGGCACTGGCGCAG  
TCCACCATAATCAAACCGTTAACCGTGTGATCCACATCATTGTCTGGCTAAAACGGCTGAAAGCACGGCGCAGCAGAGA  
GTGCAGCACTTCGTCTTTCAGCGAATCTTTTCCGTTTTCTTCCAGCTTACGCGCCTGTTCCGCTTCCAGTTTGGCGATT  
TCGCTTCCAGCGCTGTTAATCACCGGAGACGGGAGGATTTTTCTTCTTTCGCGCGCAGATAACAATTTGACCATTG  
GCAACGTGCGTTAACGCATCGCTGTGCGATCCCATCGGAGGAACCCAGCCCATCTTCCGATGTCCTGGCTGCCGATGG  
GGTAAATGCCATCGAGGCTAGCTGTTTTCCATCTTCTGCACGCGAGCGAAATCTCGCGGCTAAGACGGTAAACCATTA  
AATTTTTGAACCACAGCATGATAATTTCCACGGCCTTGTGCTTAAATTTAGCGGGCATGATAACGAATTGTCGGCGGCCT  
TGCAATTGCCAATCCGGTTGTCCGTCTACGCTATTGATATTGAAAAAATAAGGAGAGTACCCTGCGTATAGGTATCGA  
TTTAGGCGGCACAAAATGAAGTGATTGCACTGGGCGATGCAGGGGAGCAGTTGTACCGCCATCGTCTGCCACGCGCG  
GTGATGATTACCGGCAGACTATTGAAACGATCGCCACGTTGGTTGATATGGCGGAGCAGGCGACGGGGCAGCGCGAACG  
GTAGGTATGGGCACTTCTGGCTCAATTTGCCTTACACCGGTGGTGAAGAATGCCAATTAACCTGGCTCAACGGTCA  
GCCATTCGATAAAGACTTAAGCGCGAGTTGCAGCGGAAAGTGGCGTGGCAAATGACGCTAACTGTCTGGCGTTTTAG  
AAGCAGTAGATGGCGCGCAGCGGGAGCGCAGACGGTATTTGCCGTGATTATCGGCACGGGATGCGGCGCGGGCGTGGCA  
TTCAATGGGCGGGCGCATATCGCGGCAATGGCACGGCAGGTGAGTGGGGACACAATCCGCTACCGTGGATGGACGAAGA  
CGAATGCGTTATCGCGAGGAAGTCCCTTGTATTGCGGTAACAAGTTGATTGAAACCTTTATTTGGGCGACGGGAT  
TCGCGATGGATTATCGTCTGTTTGGCGGACATGCGTGAAGGCGAGTAAATTTATCCGCTGGTTGAAGAAAGCGGATCCG  
GTAGCGGAACCTGGCATTGCGTACGAGCTGCGGCTGGCAAATCGCTGGCACATGCTGTAATTTCTCGATCCGGA  
TGTGATTGCTGGGGGGCGGGATGAGCAATGTAGACCGTTTATATCAAACGGTTGGGAGTTGATTAACAATTTGTCT  
TCGGCGCGAATGTGAAACGCCGTTGCGTAAGGCGAAGCACGGTATTCCAGCGGCGTACGCGGCGCTGCGTGGTTATGG  
CCACAAGAGTAAAAACGTAAGGCAATTGGCGCATCATGCTGATGCGACGCTTCCGCGCTTATCAGGCCATACAAAAGG  
TGCCAGAACCAGTGGCCGATAAGGCGTTCACGCGCATCCGGCAATAAGTGTCCGATGCCTGATGCGACGCTTCCGCG  
GTCTTATCAGGCTGCAAAATGTGCCAGAACCAGTGGTTCAGGCGGATAAGGCGTTCACGCGCATCCGGCAATAAGTAATGA  
GCACCGAGACTATAACCTACCCAGTGGTTTCGCCAGCACCGGATATCCGCGCTTGTGGCGCTTATAGCGACCATA  
AGCAGCAACGACGACATCGCAGCAAACGAAAGCAGGGCGGAGGCGGACGCGCACGTAATTATATGCCAGCCCCAGCGTCA  
CATCATACCTCCGAATATGCGCGACGGCGTACCAGGTTAAACGCTATTTGCCACCTGCGGCACCTAATAACTCTC  
CGCTTTGGCGTTTTGTAGTAACAATATTTGTAGCGGTGCTGAAAGGCAAATAATCCCGCAACAATAAAGCAAAA  
ATAAGCGACGTTGTTTTATGCCCGCGAGAAAAGAGCATCAGCAGTCCAGTACAATTATAAAGTCAGTCACTGCTGC  
AATGCGCAGTGGTGAATAACGTCCTGAAATCCTGCCACTTAGCATATTTCCAGCACCATCCCTAGCCCAACTAACATCA  
TAATAAAGGTATCGCCGTTTCCGAAAACCGGAAATAAACATCATGATGGCTTTACGTAGCTGAACAGGCAACACA  
CCTGCGTTGCCAAACATCGTGGCGGCAAAAATTAACACGGGGCCGGGCTGCGCAAAAAGTAAATTTGTCGCGCAGATT  
TCCTTTCCGCTCGTGCAGATATCTGGCACCCAAAAATAGACCGATGCCATCACCGCAATATTAATAAACAGCGATCAATA  
AAAAGGTGAACGCCAGCTAAATCCTGACTTAAATACGTTCCAGCGGAATGCCAGCAAATTTGGCGACTGTCATCCCG

GAAACCATCCCGCCACGGCGGCGGTGACTTTCCGGGTTTGATAATTTTGATAACACGATCGCTCCGACGCCAAAAA  
TGCGCCATGCGGAAAGCCGATACCAGCCGACCAATGGCGAGCATCAGGTAAGACGAAGAGAGCGTGAACATGGCGTTGC  
CAATGACGCACAACGCCACCAGAAACAAGAATATGTTTGAGTGAGTAGCGGCTGGAAAAGAGTGCGATGATTGGCGCA  
CCGACCACCACCCAGTGCATAATACGAGATCATATGCCCGGCGCAGGAATCGAAATTCCTACGTTATGCGCCAGCTC  
CGTGAGCACGCCATAATGCCAAATTCGCCATCCCAAACCAACGTGCCAGAGCAAAGATAAAATGACTTTTTTCA  
TACCACCATCAACAACCAGAACGGCTACCAATCACCGTAGCCAATAAAGTGATAGCTTGCAAGATAACGACCAGCAAG  
GCCAAGAGATAATTGCCCCCTCTGTATTATTCTGCTGAATAGTTATTTCACTGCAAACGTACTTTCCAGTTTGCTG  
TAGCCAGGCGTTGATCTTTTTCACTTTGATCTGCACCGAATACGCTCTTTCATCGCTTCTACGTGGCTAATCACACC  
GATGGTTTTGCCACTGGCGTTTCAGGGCATCCAGCGCATCAAGGGCGGTATCCAGCGTTTCGCTATCCAGCGTGCCAAAAC  
CTTCATCAAGGAACAGCGAGTCAATACGTGTTTTATGGCTGACCAGATCCGAAAGCGCCAGCGCCAGCGCCAGACTAACG  
AGGAAACTTTGCGCGCGGAAAGGGTACGGGTACGCGTACCGCATCTGCCTGCCAGGTATCAACAACCTCGACTTCCAG  
CGCTCGCTGGCTTTGCGCTGTAACAGATAGCGCCGTGCAGCCGGTAAGTTGCTGATTAGCGAGATGGACTAAATTA  
CCAGCGTACGCCCTGGGCAAACCTTGCGAATTTATCGCCCTCTTTGAACTATTAGCGAATTCAGATATCCCAGTCC  
TCAACCTGCTGCTCATTTGAGCAATTTGCTGCATTAAGGTTTTGTTGTTGCTGACGGTTATCTGCATCTGCTTCCAGCTG  
CTGGCGAATTCGCTTACTCGTGGTGTTCACGCAACTTTTGGTGAGTTGCGCTAACTTTGCTGAATCTGCTCCA  
CCGTCACAGTGAGAGCAAACCGTCGTCAGTCCGTTGTTGATGCTGTGCCAGCGTTTCTGCTGTCTGAGTGACCAGA  
GTTTGCGCCTGACGGCGCTGGTTTTCCAGATTCTGCTTGGAGCTGTTCCAGCTGCGTTAGTGTGTTGTTTCATCCATTAGCGC  
CGCAAGGAACGCTGCTGATCGTCAAAGACGCTGGCCTGTAGCGCGGTGTCAAACTGCGCCTGGGCTTTTTGCGACTTT  
GCGCCGCCAGAACATCTGTGCTGTAACGTCTGCTGCTGGTGTGTAATGCGAGACATTGTTTATGTACCTGCGCCAG  
TTTTCCAATACCACAGTTTCTTGCAGTGCGGGAGTTCATCACTTTGCGGCAACGTTTCCAGAATCGCGCTCAGCTGCTG  
AATACGTTTTTGCAGCGGTTAATTCGTTCTGGCGTTGCTGCCAGCTCTGCGCTTCTTGTGACGTGTCGCCAACCAGC  
TCTCTTCTTATCTTCTGTGGCAATGTCAGTGCATAACCCGTCAATGTCGTTAAAAGTAGTTGCTGGCGTTGTTCAATT  
TGCTGTTGATACTGGATAATTTGCTGATTATGCGCGCAATCTGCCCTTGAATTCATGCCGTTGGCTGAGTAACCGCAG  
CTGGCGTTCTGCTCATCTTGTGCATCCAGCCACGGTTGAATATCGTCCAGTGGCTGCAAGGTGATATTGAGGCTGGCCG  
TGACGGCTTGCATTGTTGAGTAAGTGTGCTCATCTTGTGCGAGGCTTTGCGCTTCTGTTTTCATCACGCTGAAGCTGC  
TTTGTATGGCGTCCAGTTGCCACGTAGCGTGCACCTTCTTACCAGCTTTTTAACTTCTGTTTTCCAGCGCCAGTAA  
TCGAGACTGATTAACGCCAGGCTCCAGCGCTGATACGCTCGACCGCCGGGTGGCTGGTGAACCACAAAGTGGGCAAG  
GCTGACCCGCTGTAACGTGCACGTTGAGCTTCCAGCGTTTTGATGCGCGCTTCTGCTCGCAAATGGTTTTTACATCG  
GCAAGTTGCTGCTCTTTTTCTTATAACGCTGGCGATTTCTGTTAAGTGGCGGTTACGTTGCGCTGTTCTTTCGCTGAC  
ATTTCTGGATAGCGACCTGTAACGCGCCAGACGTTTTTGTGGGGAACAATCTGTCCATGCAGCGCAGCCAGGTGCTGAC  
GCAGTGGGCGTTGCTCAGCATGTTGCGCCAGGGCGGTAGCAACTTCATCGGCGGTTAACGTCAACGTGATCGCCGAAGC  
GCATTAAGTTTTTGTCTCAGCATGGGTTAACTGTTGCTGCCATTGCCCGAGATGCTCGCGATCGCTGGTTTTGTTGGGAGAA  
CTGCGCACGCCAACCCGCGGTTGTTGTTCCACTGACGGAAGCGGTGCTGTTCTGTAACCAGGTATTCAGGCTTTGTT  
GCTGCTGCTGTAATCTGCTGACTGCTTCCGCGGTGGTGGCGAATGCTCGCGCAAGCGCCATTGTGCTCTGTAAGCGA  
GTATTTACTTCTTCAATCTGCTGGCGAATATGCGCCAGCGCCGCTGTGTTCTGCGATGCGTTCCAGTGTGGACGAAG  
ATTTCTGCGCGTTGTGCCAGACTAAGCGCCGAGTTGAGGTTGCGTTTTTCTTCTTCCGCTAACGCCTGTTGCAAGG  
CCTGCTGACGGCGGCTGGCTTCTGCTGCAATTCGCTGACGCGTTAACAGTTTAGCGATTGTTGTTCTTGTGCTGCTGC  
GCGGTAATTAAGTGTGTTTTCTTCTGTCAGTAAGTACCTGCAAACCTGCTGTGACGATTGCACTTGTCCGGCGTGAGCAA  
CGTGACGCCGCTGGCTCGCTTGCAGCTTCTCCAGCTGTGCGGGCGGATTGTGCTGCTCAAAAACCATCGCCGAGA  
TTTTGCGCGTAGATTTTCAAGTCCGCTTAACTCTGAGCAATTCGCGCGTTCTTTGGGTTTGGCATTGAGGAAGCGACA  
AATTTGCCCTGCGAAAGCAGCATCGAAGGGTGAAGCGCCGTAATCCAGCCGTTAACGTGCTGCTGCTGCTGCTGCTGCT  
ATCTTTCACTTTGTCGGCGAGAATTTTCCGCTGCGCGCAGCGCGCAGCTCTACGCGTGGCACCTGCAAATTAACGTCGG  
GTTGGTTACGCGCCGATTCTGGCTCCAGAATGCACGGTACGCTTCACTTTCACTTCAAACCTCCACCTCCGCCAGACAT  
TCGGCGGTATCGCGGTCATGAGATCATTTTTGCGATTGTGAAACGTTAGAGAGACGCGGAGTTTCTGATACAGCGCCAG  
ACAAATGGCGTCCAGCAGGGTGGTTTTCCCGCACCTGTTGGGCCGTAATAGCAAACAGCCGTTGCTGGCGAACGGCT  
CGCGGTGAAATCAATCTTCCATTGCGCTTTAATGAGTTCAGTTTTTCCAGCGCAGGCTGAGAATTTTATGCTTCCG  
GTTCTCCGGCGAGGATGCAACGTCGTGGTGAAGATGCTGCAGACGTTGCTGCTGCGATTATCCAGTTCTTCCAGT  
GCCAGACGGGATTGAACACCTCTTCCAGCTGAGTTGCTGAGGTTTTACGCTGTTGGCTGAGTAACACACGCTCGCG  
CTGTTACGACTCCGACGTACCAGCAATACTTCCAGCGCAATGATTGCGTTAATGCTGGATTTTGCCTGAATATCAT  
GCAGATACTCATCAGTAGTATTTGATATCCAGCCAGACAGGTGGCTCCTGCGATACATCGGCCACTGTTCCAGCTGT  
GCGGTAATCGACGCCAGATGCCTTTCCAGACTGCCATGGGTTGCGTTACCGGTACGTTTCCAGTTTTCCAGCTCTCTAA  
TTTGCGTTTTGAAATGTACCAGATGGACATATTTACTCTTACCATTTCATCAAACCTCAGTGAATGGGGAGCCGC  
AATAGCGAACATGTTCCATCCCGCCAATAATCTGTGCGCGGTGAATATGCCCGAGCGCATGATGCTGCGTGGTGAAG  
TTTTGTGCCGAAACGCGTCCAGCGTGCCAATAAATGTACGACGCGGCTCACTTTTACTGGCCCCACGGTCTGTTAA  
ATGTCCCGTGGCGATGATGGGAGAGGCTGATCGCCGCGCAGTTTGCAGGCATCGGCATAGTGTGTTGTTGTAATAATCGG  
TAATCGCTGCCAGTAAATGCTGCTGTTTTCAATACCGTTAAGCCCCGCTGGCTGGTAATAATGTACGCGGACGTA

AACGGAATGGGGCACAGCACTGCGCCTGGCGTCCCCTGCGGACGAGGCAAGATTTGCGGCGCATGTCCGGCGCTGGCGAC  
CACGGTAGTATTGAGGAACGCCATGATATCGCGGATTCAATTCAGCGTGGCGACCGAGTCATGGTTTCTGCCAGTACCA  
CCAGATGACAGCCAGTTTGTGTAAATTGACAACAAAACGGTTGTATAACGTGCGGGCGTAACTGGGCGCGGAGCCGGTA  
TCGAAAACATCACCGGCAACAATAATCGCATCCACCTGATGGGTTTGTGCTGTCTCCAGCAGCCAGTCAAGAAAAGCCTG  
ATGTTTCAGCTTCGCGGCTTTTACTGTAGAAGTTCTGGCCGAGATGCCAGTCTGAGGTGTGAAGGATGCGCATAACGGTTC  
CCTGGCGAAAAAGCATGGGCGCGATTATACCCAAACAGATGTGCCATTTGCTTTTTTCTGCGCCACGGAAATCAATAACC  
TGAAGATATGTGCGACGAGCTTTTCATAAATCTGTCATAAATCTGACGCATAATGACGTGCGATTAATGATCGCAACCTA  
TTTATTACAACAGGGCAAATCATGGCGAGACGTATTCTGGTCGTAGAAGATGAAGCTCCAATTCGCGAAATGGTCTGCTT  
CGTGCTCGAACAAAATGGCTTTTCAGCCGGTGAAGCGGAAGATTATGACAGTGTGTGAATCAACTGAATGAACCCTGGC  
CGGATTTAATTCTCCTCGACTGGATGTTACCTGGCGGCTCCGGTATCCAGTTCATCAAACACCTCAAGCGCGAGTGCATG  
ACCCGGGATATTCAGTGGTGTGTTGACCGCCAGAGGGGAAGAAGAAGATCGCGTGGCGGCTTGAACCCGGCGCGGA  
TGACTATATCACCAAGCCGTTTTTCGCCAAGGAGCTGGTGGCGGAATCAAAGCGGTAATGCGCCGATTTTCGCCAATGG  
CGGTGGAAGAGGTGATTGAGATGCAGGGATTAAGTCTGACCCGACATCTCACCGAGTGTGGCGGGCAAGAGCCGCTG  
GAGATGGGGCCGACAGAATTTAAACTGCTGCATTTTTTATGACGCATCTGAGCGCGGTACAGCCGCGAGCAGCTGTT  
AAACCACGTCTGGGGAACCTAACGTGTATGTGAAGACCGCACGGTGCATGTCCACATTCGTCGCTGCTAAAGCCTGG  
AGCCCGGCGGATGACCGCATGGTGCAGACCGTGCAGGACAGGATATCGTTTTTCAACCCGCTTTTAAACGCTTGCT  
CATCGGACGACAGCAGGCGTTATGATTTCTTAACTGGAGTATCTTACGTGCTGGAACGGCTGTCGTGAAAAAGGCTGGT  
GCTGGAGCTGCTACTTTGCTGCCTCCCGCTTTCATCCTGGGTGCATTTTTTGGTTACCTGCCCTGGTTTTTCTGGCAT  
CGGTAACAGGACTGCTTATCTGGCATTCTGGAATTTATTGCGCCTTTCATGGTGGCTGTGGGTGGATCGCAGTATGACC  
CCGCCACCGGGCGTGGTAGCTGGGAACCGCTACTATACGGCTTACACCAGATGCAGCTGCGAAATAAAAAACGCCGCCG  
TGAACGGCAATCTGATTAACGCTTTCGTAGCGGCGCGAGTGCCTGCCGACGCGGTGGTGTGACCACGGAAGAGG  
GCGGTATTTTTCTGGTGAACGGTCTGGCGCAACAATTTCTGGTTTGGCTGGCGGAAGATAACGGGCAGAACATCCTT  
AACCTACTGCTTACCCGGAGTTTACGCAATATCTGAAAACGCGTATTTTTTCTGCCCGCTCAATCTGGTGTCAACAC  
CGGGCGCATCTGAAAATTCGCGTCATGCCTTATACCCACAACAGTTGCTGATGGTGGCGCGTGTGTCACGCAAATGC  
ATCAACTGGAAGGGCGCGCGTAACTTTTTGCACCGTGCAGCATGAGTTACGTACGCCATTGACCGTGTACAGGGT  
TACCTGGAGATGATGAATGAGCAGCCGCTGGAAGGCGCGGTACGCGAAAAAGCGTTGCACACCATGCGCGAGCAGCCCA  
GCGGATGGAAGGACTGGTGAAGCAATTGCTGACGCTGTCGAAAATAGAAGCCGACCGACGATTTGCTCAATGAAAAGG  
TTGATGTGCCGATGATGCTGCGGTTGTTGAGCGCGAGGCTCAGACTCTGAGTCAGAAAAAACAGACATTTACCTTTGAG  
ATAGATAACGGCTCAAGGTGTCTGGCAACGAAGATCAGCTACGCAAGTGGGATTTTGAACCTGGTCTATAACGCCGTGAA  
TCATACGCCGGAAGGCACGCATATCACCGTACGCTGGCAGCGAGTGCCGACCGTGCAGAAATTTAGCGTTGAAGATAACG  
GACCGGGCATTGCACCGGAGCATATTCGCGCCTGACCGAGCGTTTTTATCGCGTTGATAAAGCGCGTTCGCCGAAACC  
GGCGGTAGCGGATTAGGGTTAGCGATCGTGAAACATGCTGTGAATCATCACGAAAGTGCCTGAAATTTGAGAGTACAGT  
AGGAAAAGGAACACGTTTTAGTTTTGTTATCCCGAACGTTTAAATGCAAAAAACAGCGATTAATCCGCCCTTTGTCATCT  
TTTATTGCCATAAGCCAGTGCATGCTGGCTTATTTTCTTGCAGTCAAAATACGGGCGTTAGATTTTACAACGATTGGTG  
ATTTTTGTTGCGATGATTAGCCATGCTTTTTTACGGAAATAGTGTTTTATACTGGTTGGTATTCTTATCGCTATAT  
ACCTCTGGTTTTTAGATCCCTCCTTGCCTTAAAACGTTATAAGCGTTTAAATGCGCTTCAAGTGTGTCATACTGACTG  
CATTAAACGCGTAAATCGAAAACTATTCTTCCCGCGCCTGGTTGGGAGTATTTCCGCTAAAATTTGTTAAATATACC  
GCTGTATCATCCCAGGGATTGGCACAAAAATTTAACGTTACAACACCACATCCACAGGCAGTATGATTTATGACCCATC  
AATTAAGATCGCGGATATCATCGCTGCGGCTTATGACATTTGCGTTGTTGCTGCGGCGAGGTAACATTTATTTCCCT  
CCAAATGGTGGCTTACAGGCAGGCAACACGCTGGACTGCGGCTTCCCTCATTACTGCCCTGGCCTGCCGCTGCGGTT  
ATTAACGGTAGTGGCTGGCAAAAGTTGGCGGCGTGTGACAGCCTCAGCACGCCAATCGGTAAGTGCCTGGCGTAC  
TGCTGGCAACGTTTTGTTACCTGGCGGTGGGGCCGTTTTTGCCTACGCCGCTACAGCTACCGTTTTCTTTGAAGTGGG  
ATTGCGCCGCTGACGGGTGATTCCGCGCTGCCGCTGTTTATCTACAGCCTGGTCTATTTGCTATCGTTATTCTGGTTT  
GCTCTATCCGGCAAGCTGCTGGATACCGTGGGCAACTTCTTGCGCCGCTGAAAATTATCGCGCTGGTATCTGTCTG  
TTGCCGCTATTGTCTGGCCGGCGGTTCTATCAGCACGGGACTGAGGCTTATCAAACGCTGCGTTTTTCAACGGCTTC  
GTTAACGGCTATCTGACCATGGATACGCTGGGCGCAATGGTGTGGTATCGTTATTGTTAACGCGGCGCGTTCTCGTGG  
CGTTACCGAAGCGCTGCTGACCCGTTATACCGTCTGGGCTGGCTGATGGCGGGTGTGGTCTGACTCTGCTGTACC  
TGGCGCTGTTCCGTCTGGGTCAGACAGCGCTGCTGGTGCATCAGTCTGCAAACGGCGCTGCTATTCTGCATGCTTAC  
GTTACAGCACCTTTGGCGGCGCGGTAGCTTCTGCTGGCGGCTTAACTTTCATCGCCTGCCTGGTAACGGCAGTTGG  
CCTGACCTGTGCTTGTGAGAATTTCTTCCAGTACGTACCGCTCTTATCGTACGCTGGTGTATCTCCTCGGCGGCT  
TCTCGATGGTGGTTTCTAACCTCGGCTTAAAGCCAGTGCATCCAGATCTCCGTACCGGTGCTGACCGCTATTTATCCGCCG  
TGATCGCACTGGTTGATTAAGTTTTACACGCTCATGGTGGCATAATTCTCCCGCTGATTGCTCCGCCGATGTTTAT  
CAGCCTGCTTTTTGGTATTCTCGACGGGATCAAAGCATCTGCATTCAGCGATATCTTACCGTCTGGGCGCAGCGTTTAC  
CGCTGGCCGAACAAGGTCTGGCGTGGTTAATGCCAACAGTGGTGTGGTGGTTCTGGCCATTATCTGGGATCGCGCGGCA  
GGTGTGAGGTGACCTCCAGCGCTCACTAAATCACTGAACATTTGTTTTAACACGGGGCTGCGATGCCCGGTGGTTTTT  
TATTGTGTTGATGGGTTAGGAATTGATGGAAAGTAAGAACAAGCTAAAGCGTGGGCTAAGTACCCGCCACATACGCTTAA

TGGCACTGGGTT CAGCAATTGGCACCGGGCTGTTTTACGGTTCGGCAGACGCCATCAAATGGCCGGTCCGAGCGTGTG  
TTGGCCTATATTATCGGTGGTATCGCGCGTATATCATTATGCGTGCGCTGGGGGAAATGTCGGTACATAACCCGGCCGC  
CAGCTCTTTCTCGCGTTATGCGCAGGAAAACCTCGGCCGCTGGCAGGTTACATTACCGGCTGGACCTACTGCTTTGAAA  
TCCTTATTGTCCGATCGCCGATGTGACCGCTTTTGGTATCTATATGGGTGTCTGGTCCCGACGGTGGCCGACTGGATT  
TGGGTA CTGAGCGTGGTGTGATCATTGCGCCGTAACCTGATGAGCGTGAAGGTATTGGTGTGAGCTGGAATTCTGGTT  
CTCGTTCTTTAAAGTCGCCACCATCATCATGATTGTGCGCGTTTCGGCATCATCATCTGGGGGATTGGCAACGGCG  
GGCAACCGACCGGTATTATAACCTGTGGAGCAACGGCGGCTTCTCAGTAACGGCTGGCTTGGCATGGTAATGTCGTTG  
CAAATGGTGTGTTTGTCTACGGTGGGATCGAAATTATCGGGATTACCGCCGGTGAAGCGAAAGATCCTGAGAAATCGAT  
ACCGCGTGGGATTAACCTCGGTGCCGATGCGTATTCTGGTGTCTACGTGCGGTACGCTGTTCTGTCATTATGTCTATCTACC  
CGTGGAAATCAGGTTGGCACTGCCGGTAGCCGTTCTGTGCTGACGTTCCAGCATATGGGCATTACCTTTGCCGCCAGCATT  
CTAACTTTGTTGTGCTGACTGCTTCGCTGTGCGCAATTAACAGTGATGATTTGGCGTAGGCCGATGTCTCCACGGTAT  
GGCAGAGCAGGGCAGCGCGCGAAAATTTTCAGCAAACGTCGCGTCGCGGTATTCCGTGGGTTACGGTGTGGTGTGATGA  
CTACCGCGTGTGTTTGGCGGTGATCTGAACTACATCATGCCGAAAACGCTTCTGTTGATCGCTTCGCTGGCAACC  
TTCGCCACGGTGTGGGTGTGATTATGATCCTGCTGCGCAAATTGCTTCCGTGCGCGTTTGGCCGAGAAGAAGTTAA  
GGCGTGAAATTTAAAGTCCCGGTGGGTAGCAACGACCATCGCGGGCTGATTTTCTGCTCTTTATATCGGGTTGA  
TTGGTTATCACCCGGATACGCTATCTGCTGTATGTCGGTTTTCCGCTGGATTGTTGTGCTGTTGATTGGCTGGATGTT  
AAACGCCGCCACGATCGTACGCTGGCTGAAAACAGTAATCCTTCCGTTCTGTAAGCCGGTTCAGGAGGAAATCCTGATC  
CGGCTATTCCGAAAGTTATCCGCCCGCTCCTCCTCCCCAAATATCCTTCAGATGATGAGTGATCCTGCATTAGGCTAT  
GGCAAGGTGATCAGATTTTCATCACAGGGGAATTATGATGTTAAATGCATGGCACCTGCCGGTGGCCCCATTTGTTAAAC  
AAAGCAAAGATCAACTGCTCATTACACTGTGGCTGACGGGCGAAGACCCACCGCAGCGCATTATGCTGCTACAGAACAC  
GATAACGAAGAAATGTCAGTACCGATGCATAAGCAGCGCAGTCAGCCGACGCTGGCGTACCCGATGGCGTGGCGGAT  
TGATCTCTCCAGCGGACAACCCCGGGCGTTACAGTTTCAAAGTGTGTCGACGATCGCCAGCGTTGGTTTACACCGC  
AGGGCTTACGCCAATGCCCGCGCACGACTGGAGCAGTTGCCGTCGATGTACCGGATATCGGCCACAATGGGCTGCG  
GATCAGATTTTTATCAGATCTTCCCTGATCGTTTTGCGCGTAGTCTTCTCGTGAAGCTGAACAGGATCATGTCTATTA  
CCATCATGCAGCCGACAAGAGATCATCTTGCCTGACTGGGATGAACCGGTCACGGCGCAGGGGGGGATCAACGTTCT  
ATGGCGCGATCTGGACGGGATAAGCGAAAACCTGCCGATCTGAAAAGCTTGGCGTGACAGCGCTGTATCTCAATCCG  
GTGTTTAAAGCTCCAGCGTACATAAATACGATACCGAGGATTATCGCCATGTGATCCGAGTTTGGCGGTGATGGGGC  
GTTGCTGCGTTTGGCACAAATACGCAGCAGCTGGGAATGCGGCTGGTGTGGACGGCGTGTAAACCACAGTGGCGATT  
CCCATGCTGTTTACAGGCATAATCGTGGCACGGTGGTGTGTCACAACCCGAATCGCCCTGGCGCGACTGGTAC  
TCGTTTAGTGATGATGGCACGGCGCTCGACTGGCTTGGCTATGCCAGTTGCCGAAGCTGGATTATCAGTCGAAAGTCT  
GGTGAATGAAATTTATCGCGGGGAAGACAGTATTGTCCGCCACTGGCTGAAAGCGCGTGGAAATATGGACGGCTGGCGGC  
TGATGTGGTGCATATGCTGGGGGAGGCGGGTGGGGCGCGCAATAATATGCAGCACGTTGCCGGGATCACCGAAGCGGGC  
AAAGAAACCCAGCCGAAGCGTATATTGTGCGGCAACATTTGGCGATGCACGGCAATGGTTACAGGCCGATGTGGAAGA  
TGCCGCCATGAACTATCGTGGCTTACATTCCCGTTGTGGGATTTCTTGCCAAATCCGATATCTTTACGATCCGACG  
AAATTGATGCCAAACCTGTATGGCCTGGATGGATAATTACCGCGCAGGGCTTCTCATCAACAACAATTACGATGTTT  
AATCAGCTCGACGCCACGATACTGCGGATTTAAACGCTGCTCGGTGGGATATTGCGCGCTGCCGCTGGCGGTGGT  
CTGGCTGTTACCTGGCCTGGTGTACCGTGCATTTATTACGGTGTGAAGTAGGACTGGATGGCAAAAACGATCCGTTTT  
GCCGTAACCGTTCCCTGGCAGGTGAAAAGCAGGATACGGGTTATTGCGCTGTACCAGCGAATGATTGCGCTGCT  
GAATCAGCAACGTGTACTGGTGGCAATCAACCGTGGCGAGGCTGTGAAGTGGTGTACCCGCTCACCGTTCTCAATG  
CCGTGCAATGGCAATGCAAAGAGGGCATGGGCAACTGACTGACGGGATTCTGGCTTTGCCCTGCCATTTGGCTACGGTA  
TGGATGAACTAACGTTTTATAACGCCCTTGCCTGACGCTGCGCCATCATCCGCGGATAAAAACCTGCCAGAAGCGGGTTTCG  
AGGGCGTCATAATGAGCGTCTAAATCGTACCAGGAGTCACGCAGGGCATCCAGACGTGGGCGGCGCTTGGCATGCCGTT  
TAACACGTTCTGGATGAAATCCATATCGCGATAGCGCACCGACTGCTCTGACCACAAGTAATTGTTGAGATTGATAA  
AACGTGGCGGTGAGTCCGGCAAAATCGTCATCACTTGTGCTGCGGGCATAACAGACAAATCCTGTAGCGGAAAGTCCGGC  
GACAGCTGCGACCGTGGCGGAAAGAAAGTATCCACATGACATCCAGCGTAATAGGCGCAACCGGGCGGTTTCACT  
ACGAAACCACTCCCGTCTTCCGGACTTCCGGCAGATTGTGAGTCAATACGTCGATACGTCGATGCATATGAATGCCAG  
CCACGAGCTGGGCGGAAAACCTTTCTCAGGATTTCCGCGTACGAAATCAGCCAGTAAATGCGGAAAGCGAGCTTCC  
GCGAGATGGGCTAAATGCAAGTGTGCTAAAAAATTCATCGATTATTTCTATCCAAAAGGGGGTAAAGGTTGACGGGAGA  
GCGCCCCGGCACTAGACTACCCGCTCTATTTTAGTCTGAGTCAAGTGTGATGCGGTTACCGATTTCTCCTTTGAATTG  
CCCGAATCCCTGATTGCCACTATCCCATGCCTGAACGCAAGTGTGCTTTACTGTCGTTGACGGGCGGCGGGCGC  
GCTGACGCACGGTACTTTACCGATTTACTTGATAAGCTCAACCCCGCGATCTTCTGGTTTTAATAATACCCGCGTGA  
TCCCGGCGCGCTGTTTGGCGTAAAGCCAGCGGGCGCAAGATTGAAGTGTGTTGAACGGATGCTCGACGACAAACGC  
ATCTTGGCATAATTCGCGCTCGAAAGCGCAAACCTGGCGCAGAACTGCTGCTGGCGATGACGAAAGTATTAACGC  
AACAAATGACCGCGCGCCACGGCGACTGTTTGAAGTGAATTTAATGATGAACGCTCGGTGCTGGATATTCTCAACAGCA  
TCGGCCATATGCCGCTGCCCGCTATATCGACCGTCCGGACGAAGACGCTGACCGCAACTTTATCAAACCGTTTATAGC

GAAAAACGGGCGCGGTTGCAGCCCCGACCGCAGGTCTGCATTTTACGAGCCTTTGCTGGAAAAATTGCGCGCCAAAGG  
CGTGAGATGGCGTTTGTGACGTTGCACGTTGGTGCGGGCACCTTCCAGCCGGTGCAGCGTGCACACCATTGAAGATCACA  
TCATGCACTCGGAATACGCTGAAGTACCGCAGGATGTGGTAGACCGGTAAGTGGCGGCGAAAGCGCGGTAACCGGGT  
ATTGCGGTTGGCACTTACAGTACGTTGCTGGAAAGCGCGGCTCAGGCAGCGAAAAACGATCTCATTGAACCGTTCTT  
CGACGATACCCAAATCTTTATCTATCCGGGCTTCCAGTACAAAGTGGTGCATGCGCTGGTACGAACTTCCACTTGCCAG  
AGTCGACGCTGATTATGCTGGTTTTCGGCCTTTGCCGTTATCAACACACCATGAACGCCTATAAAGCAGCGGTAGAAGAG  
AAATATCGCTTTTTAGTTACGGTGTGCGATGTTTATCACGTACAATCCGACGGCAATTAATGAGCGCGTCCGGGAGTA  
ATTCCGCGCGCTGGTTTAAACGTTGGACTGTTTTTCTGACGTAGTGGAGAAAAAATGAAATTTGAACTGGACACCACC  
GACGGTCCGCGCACGCCGTGGCCGCCTGGTCTTTGATCGTGGCGTAGTGGAAACGCCTTGTTTTATGCCTGTTGGCACCTA  
CGGCACCGTAAAGGGATGACGCCGGAAGAAGTTGAAGCCACTGGCGCGCAAATTAATCCTCGGCAACACCTTCCACCTGT  
GGCTGCGCCCGGGCCAGGAAATCATGAACTGCACGGCGATCTGCACGATTTTATGCAGTGGAAAGGGCCGATCCTCACC  
GACTCCGGCGGCTTCCAGGCTTTCAGCCTTGGCGATATTCTGAAAATCACCGAACAGGGCGTGCATCTCCGTAACCCGAT  
CAACGGCGATCCGATTTTCTCGATCTGAAAAATCAATGGAGATTACAGTACGATCTTGGTTCGGATATCGTCATGATCT  
TTGATGAGTGTACGCCGATCCTGCTGACTGGGATTACGCAAAACGCTCCATGGAGATGTCTGCGTTGGGCGAAGCGT  
AGCCGTGAGCGTTTACAGTCTCGGAAACAAAAATCGCTGTTTGGTATCATCCAGGGCAGCGTTTACGAAGATTTACG  
TGATATTTCTGTTAAAGGCTGGTAGATATCGGTTTTGATGGTACGCTGTCGGCGGTCTGGCTGTGGGTGAGCCGAAAG  
CAGATATGCACCGCATTCTGGAGCATGTATGCCCGCAAATTCGGCAGACAAACCGCGTTACCTGATGGGCGTTGGTAAA  
CCAGAAGACCTGGTTGAAGGCGTACGTCGTGGTATCGATATGTTTACTGCGTAATGCCAACCCGCAACGCCCGAAATGG  
TCATTTGTTGTCGACCGATGGCGTGGTAAAATCCGCAATGCGAAGTATAAGAGCGATACTGGCCACTCGATCCTGAGT  
GTGATTGCTACACCTGTGCAATTATTCACGCGCTTACTTGCATCATCTTGACCGTTGCAACGAAATATTAGGCGCGCGA  
CTCAACACCATTACAACTTCTGTTACTACCAGCGTTTATGGCGGGTTTACGCAAGGCTATTGAAGAGGGTAAATTAGA  
GAGCTTCGTAACCTGATTTTTACCAGCGTACGGGGCAGAAAGTACCACCTTTGAACTGTTGATTAATTAATAATGAGGGA  
AATTTAATGAGCTTTTTTATTTCTGATGCGGTAGCGGCAACGGGTGCACCGCGCAAGGTAGCCCGATGCTTTGATTTT  
GATGCTGGTGGTATTGCGTCTGATTTTCTATTTTATGATCCTGCGTCCACAGCAGAAGCGCACAAAGAACAAAAAGC  
TGATGGACTCCATTGCCAAAGGTGATGAAGTTCTGACGAACGGTGGCCTGGTGGTGCCTAACAAAGTAGCGGAAAAAC  
GGCTACATTGCTATCGCGTGAATGACACCCTGAAGTAGTTATTAACGTGACTTCGTAGCTGCCGCTCCTGCCGAAAGG  
CACCATGAAGGCGCTGTAATTAATAATTTTCCCTAAGGGAATTGCCGTGTTAAACCGTTATCCTTTGTTGAAGTACGTCA  
TGCTGATCGTGGTATTGTCATCGGTCTGCTGTATGCGCTTCCAACTGTTTGGTGGAGGATCCGGCTGTTGAGATCACT  
GGTGCAGCGGAGTCCCGCAGTGCAGCAACGCTGATCCAGGTCAGAAAACGTTACAAGAAAGAAAAAATAACTGCTAA  
GTCTGTGGCACTGGAAGAGGGCGCTATTCTTGCAGCTTCCACTGACACCCAGTTGCGCGCTCGTGAAGCATTAA  
TGGGCGTTATGGGTGACAAATACGTCGTGGCGCTTAACTTGCCTCCGGCAACGCCGCGCTGGCTGGCAGCTATTCACGCT  
GAGCCGATGAAGCTCGGCCTTGACCTGCTGGCGGCTTACTTCTGATGGAAGTGGATATGGACACCCGCGCTTGGCAA  
ACTCCAGGAACAAAATATCGATAGCCTACGCAGTACCTGCGGAAAAGGGCATCCCGTATACCACTGTTTCGTAAGAAA  
ACAACACGGCCTGAGCATCACTTTCCGCGATGCTAAAGCTCGTATGATGAAGCCATTGCGTATCTGAGCAAGCGCCATCCG  
GACCTGGTATTAGCAGCCAGGGCAGCAACAGCTGCGTGCAGTAAAGGATGCTGCTGAGTGAAGCGCGTGAATA  
TGCGGTGCAGCAGAACATTAATATCCTGCGTAACCGTGAACCAACTTGGCGTGGCGGAGCCGGTGGTTCAGCGTCAGG  
GTGCTGACCGTATCGTTGTTGAACTGCCAGGTATTCAGGACACTGCGCGTGCAGAAAGAGATTCTGGGTGCCAGCGCAACG  
CTGGAATCCGCTGTTAAACCAACGTTGACCAAGCCGCTGCGGCATCCGGTCCGCTACCGGGCAGCTCTGAAGTAA  
ACAGACCGAATAACAACCAACCGCAGGTTAACATCTCGTATGCGCTGGTGGTAAACATCATGTCTAACTTCACTAAG  
GACAAATCGGCAACCGATGGCAACCTGTTTGTGGAGTACAAAGACAGCGTAAGAAAGATGCAAATGGTCCGCGT  
TCTGGTGAACAGGAAGAGGTGATTAACATCGCAACATCCAGTCTGCTGCTGGTAAACAGCTTCCGATACCCGGCATCA  
ACAACCCGAACGAAGCCGTCAGCTGTACTGCTGCTGCGTGGCGGTTGCGTTGATCGCGCCGATTGAGATTGTTGAAGAA  
CGTACCATTGGCCCAACCTGGGTATGCAGAACATTGAACAGGGGCTGGAGGCTTGCCTTGCCTGCTGCTGTTTCTAT  
TCTGTTTATGATCATCTTCTATAAGAAGTTTGGTCTGATTGCGACAGTGTCTGATTGCCAATGATCTTAATCGTCG  
GCATTATGTCGCTGTTGCCAGGCGCAACGCTGAGTATGCCAGGTATCGCGGTATCGTCTTAACTTGCCTGGCGGTC  
GATGCGAACGTAATGATCAACGAACGATTAAGAAGAGTTGAGCAACGGACGTAATGTTCAACAGGCAATGATGAAGG  
TTATCGTGGCGCATTGAGTCTATCTTCGATGCGAACATCACACGCTGATTAAGTATCATCTGTACGAGTGGGTA  
CCGGGGCAATTAAGGGTTCGCGATTACTACCGGTATCGGTGGCGACGTCGATGTTTACCGGATTGTCGGTACGCGT  
GCCATCGTAAACCTGCTATATGGCGGCAAGCGCTCAAGAAGCTGTCAATCTGAGGAGTGCATGTGGCACAGGAATATA  
CTGTTGAACAATAAACCACGGCCGTAAGTCTATGACTTTATGCGCTGGGACTACTGGGCTTTCGGCATCTCTGGTCTG  
CTGTTAATCGTCTATCGTTATTATGGCGTGCAGCGCTTAACTGGGGGCTGGATTTACCGGTGGTACGGTTATTGA  
AATTACGCTGAAAAACCGCTGAAATGACGTAATCGGTGATGATTGCAAAAAGCCGGTTTTGAGAGCCGATGCTGC  
AAAACTTTGGTAGCAGCCATGACATCATGGTCCGATGCGCGCTGCTGAAGGCGAAACCGCGGTCAGGTGTTGGGCAGC  
CAGGTTCTGAAGGTGATTAACGAATCCCAATCAGAATGCAGCAGTGAAGCGTATTGAGTTCGTCGGTCCGAGCGTGGG  
GGCAGACCTTGCAGAACCGGTGCGATGGCGTTGATGGCAGCGCTGCTGTCTATCCTCGTGTACGTAGGTTTCCGCTTG



AGTGGCGACTGGCGGCAGGGGTGGTTATTGCGCTGGCGCACGACGTTATCATTACGCTGGGTATTTTGCCTTATCCAT  
ATCGAGATTGACCTGACCATTGTGGCATCGTTGATGTCGGTTATCGGTTACTCGCTTAACGACAGTATCGTGGTATCGGA  
CCGTATTCTGAAAACTTCCGCAAGATCCGTCGCGGTACGCTTACGAAATCTTAAACGTGTCCTTGACCGAGACGCTGC  
ACCGTACCTTGATCACATCCGGTACTACCTTGATGGTTATCCTGATGCTGTACCTCTTCGGTGGTCCGGTACTGGAAGGC  
TTCTCGCTGACCATGCTTATCGGTGTTCCATCGGTACTGCATCTTCCATCTATGTGGCATCTGCGTTGGCTCTGAAACT  
GGGTATGAAGCGCGAACACATGTTGCAGCAGAAAGTGGAAAAAGAAGGGGCGGATCAGCCGTCAATTCTGCCGTAATCAA  
GTTCCCGTTGATGTTGAAAAATCCCGGTGAGAAGATCGGGATTTTTTTTATGATGTATGGAGATTGCGAAAAATCCCGCATCT  
TGGGAAACTGCGCGTAACCTTACATTTTCCAGGTAACCTTTTTCATGGTATCATCCAAAAAACTATGCGCGGTTAGAA  
AGCGGTATCGCGAAAAAGCATTAAAAATCTATCCGTGGGTCTGCGGTGCTGTTCCCGCGAGTTTGTATTCCAACCT  
GCGTGAACCTTACCGTTCACCACATTGATCAGCACCATAACAAACCCGGAAGATGGCAGTAACTGGGAATTGTTGTGTC  
TCTATTGCCACGATCATGAGCATTGAAAATATACCGAAGCGGATCAGTATGGTACGACCGTTATCGCAGGGGAAGATGCG  
CAGAAAGATGTCGGTGAAGCGAAGTACAACCCATTGCTGACCTGAAAGCGATGATGAACAAGAAGAAGTATTAAAACG  
TAAAATTGCTGATGCGCTACGCTTATCAGGCCTACGTTATTTTTCAGCAATATATTGAATTTACGTGCTTTTGTGGCCGG  
ACAAAGCGTTTACGCCGATCCGGCATGAACAAAGCACAGTGTGTTAAACAATCAGAAATGCCGGGAATAAATCCCGGCAT  
TTTCATAATCAGAAGTTGTAACCTACTACCAGTAAACACCCCGGTAGAGCGAACGTTGAAGTTGCCGTTGCCGAA  
GTTCAATCTGCATCGTCTGTTCCACTGACCACCGTGCAGTAAACGAGTACGACAGAGTGTGCCAGTGTATCGTAGT  
TCAGAGCCAGAAATATGGCTGGAAGCGATAGAGTTATTAGTACGGTCTTAATACCGTTGATTGCGTTACCCTGTCATCC  
CCTAAATCGGAACCCAGTGAAGTTGGTGAAGCCGATGTAGCTCAGCTGACCGCCCCACAGATCGGTAATCGGCACAAA  
GTATTTAATTTGAAACGGTAAACCGTCCCACTCGTTTTGTTGCTGCGCCATAGTTCTGCCACTGGTATTTGCGATAGA  
CGTTCATGGACAGGCTCATCGGCAGGCCAGTGTGATATCGGTACCCAGACCCATGTACCAGGTGCTCTGGCGACCATCT  
TTATTACGACCATGTGTAATGTAGTTGTTGCGGAAGTACCACTCTTTGAAACGGACCGAAGCTAAGGTGAGTATTGGT  
CAGCTTGTGATGGAGAAACGTGGTTCGATTTCCATAAACAGCGGAGAACCCTGGTCCAGATACCTTTAGCATCGGAGT  
TACCGCCGAAGAATACCGGCGCATCCGCATAACCATAGAAAGTGAACCGTCTTTTTTAGCGAATGCTTCGTAAGG  
TAGGTATCGTTGCGGATCTGCGGTCCGAAACGGGTGTGATAGTCTCCGACAACGTTAACGCTCTGGTCCACCAGTCCGA  
AAGATACTGCGGTTTGTGTTTTGAGTGTGACAGTAAAAGACGAAGAGAGCGCCAGTACCGCACCGGCTGCCAGTA  
ATGTTTTTTTTCATATGTATGCCACTGTTTAAAAATCCCTTGCAGGAGTAAAAAGGCGCAAATGCGTTTCTAAATATTT  
CGTATACAGAGGAGCCTATTATAAAAAATCATTGCTCAGAAAAATATGTTTCGTTTACAGTCTATCATTACGTAATCG  
ATTGCGTTTACGTTTACACACATTCCGGCGGGGATTGACTGACTTTGCGCCCTGTTGCAAACCTTTTACTATCAATCCAG  
GTGATGTAAGCAGAGTAAACAAAATGACGGGAAAGATGTTGCGGGACGCACAAAATCGTCCGAAATACGTTTACTGCAT  
AACAGGTTGAATGTCGTGGATACGTACAAAGCCTAACTGATCCACAGAAATCCCTTTAACTGTAACGGAATATCAACAT  
CGCTGGGGGCGAGGACGCTGGCAGGGGCATTAATCAATTGATTCTGCACATTGATTTCTGAAAGTTGTCTATTGTTCCC  
TGAATTTGCCCATATTCAACAGTTCGGCTGAATGCGGGCAAGGGATCATTGACTCACCTGAATACGTAGTGAAGGGT  
GGTGCCATCTGCATCAGGCGTAATATCCAGCGACATACGTAAGTACCGATCTGGCTTCCAGTCTTCCGGTGT  
TCGCTCCAGGCAGAAGGTAACCCCACTGCTGGATTTTGCATTGACGCTGTTTTGCTGAGTGTATTTGACTGTTTCTTGA  
TTGAGTTGCGTCATCTCCTGGTTGAGCGTGTGACGCTGTGTTTCATCTGTGCGACTTCACTTTGCTGCACACAGGCGCT  
AAGGCTGAACAGGCTTCCAGCAGGAGCAGTCAAAAAAGTATGATTTATAGTGTGTCCTTTCTCGTCGCAATTAGCC  
TAATGGTAGAGGGTAAAAGCAGCGAAAGCATCGATCCTTTATCTAAAAGCGTTGCGCCTTGTGTATCGTCAGTTCAG  
GGTAAAATAGATTTCCGTTAACCACCTGGTCAAGGACCGGATGATTGCCCCATTCTGTTTCGCGTGGACACTAAGGTA  
ATTGACTCTGCTCGTGGGCGAGGGTTCATCCGTACGCCCGCTGCGCAGTGTCTGGTGTGTAATGAACGTTTACCAC  
CTTTGAAGTGGCGGAGTGGTTATGCCGCTGTTGTTAAAAAGCAACGACGTCGCTGAAACCGTTAATGAAGAGAAATTCG  
GTAGCGGAATGCTGCGGGCGTGGAAAAACGTCGGTGAAGTCCGATGACGTCGAAATGGCAATCAATCATATTAATCG  
CAGTCTGCGGCCACCGGTGAGCGGAAGTGGCAGCAAGATGATTGGCAATCTGGTGTGAGCAATTGAAAAAGCTCGA  
TAAAGTCGCTATATCCGTTTTGCTCTGCTACCGCAGTTCGAAGATATCAAGAATTTGGCGAAGAGATCGCGCGCC  
TGGAGGACTAAGCCGTGCAGGACGAGTATTACATGGCGCGGGCGTAAAGCTGGCGCAACGAGGACGTTTTACCACGCAT  
CCCAACCCGAATGTCGGGTGCGTATTGTCAAAGATGGCGAAATTTGCGGTGAAGGTTACCACCAACGTGCGGGTGAACC  
ACATGCCGAAGTACACGCTTGGTATGGCGGGTAAAAAGCCAAAGGTGCGACCGCTATGTCACTCGAACCTGTGA  
GCCATCATGGTCGTACGCCACCGTGTGTGACGCACTCATCGCCGCTGGCGTAGCGCGCTGGTTGCCTCGATGCAAGAT  
CCTAACCCGAGGTCGCTGGGCGTGGACTTTACCGTCTGCAACAGGCTGGCATTGACGTCAGCCACGGCCTGATGATGAG  
TGAAGCCGAGCAATTGAATAAAGGCTTTCTCAAGCGGATGCGCACCGGCTTTCTTATATTGATTAAAACCTGGCGCAT  
CGCTTGATGGTGCACGGCGATGGCGAGCGGCGAAAGCCAGTGGATCACTTCCGCCAGGGCGGGCTGATGTAACACTA  
CTGCGCGCGCAAAGTCAATGCAATTTAAACAGCAGCGCCACGGTGTGGCGGATGATCCTGCCTTAAACGGTGCCTGGT  
TGAAGTGGATGAACAAACTCAGGCGCTCTATCCGCAACAAAATCTCCGTGAGCCGATACGATTTGATTGATAGCCAAA  
ATCGCGTACGCCGGTACATCGCATTGTGACAGCAGCCGGCGAAACCTGGTTGCGCGTACGCAAGGATTTCTCGTGA  
TGGCCGAAACGGTGCATCTTGTGATTCCAGAGCATAAAGGTGATCTGGATCTGGTGTACTGATGATGCAACTGGG  
TAAACAGCAAATTAACAGCATCTGGGTGGAAGCGGGGCCAACGCTCGCTGGCGCATTGCTGCAGGCGGGTTAGTCGATG  
AGCTGATTGTCTATATCGCACCTAACTATTAGGCAGCGACGCCCGGATTATGCACGCTGCCAGGGCTTGAGAAATTA

GCCGACGCCCCCAATTTAAATTCAAAGAGATACGTATGTAGGCCCGGATGTTTGCCTGCATTTAGTGGGTGCATGATC  
TCCCGGCTCGAAAGGGAAGCAGCGCACGAAATATTATGCTAAAATCCGCCCCCTGCGGGGCCATACTCGAACCCGAAGG  
AAGAAAATGAACATTATTGAAGCTAACGTTGCTACCCCGGACGCTCGCGTCGCCATCACCATCGCGCGTTTCAACAATT  
TATCAATGACAGCCTGCTGGAAGGTGCAATTGACGCACTGAAACGTATCGGTCAAGTAAAAGATGAAAACATTACCGTTG  
TTTGGGTGCCTGGTGCCTATGAGCTGCCGCTGGCGCGGGTGCCTGGTAAAACCGGTAAATACGACGCGGTGATTGCG  
CTGGGTACGGTTATTCGTGGTGGCACTGCCACTTTGAATATGTCGCTGGTGGTGAAGCAACGGCCTGGCGCATGTTGC  
CCAGGACAGCGAAATCCGGTTGCTTTTGGGGTTCTGACCACTGAAAGCATTGAACAAGCGATCGAACGTGCTGGCACCA  
AAGCTGGCAACAAAGGTGAGAAGCTGCACTGACCGCGCTTGAATGATTAATGATTGAAAGCCATCAAGGCCTGAAAT  
TAGTAAGGGGAAATCCGTGAAACCTGCTGCTCGTCGCCGCTCGTGAGTGTGCCGTCCAGGCGCTCTACTCCTGGCAGT  
TGTCACAGAACGACATCGCTGATGTTGAATACCAGTTCCTGGCTGAACAGGATGTAAGACGTTGACGTCTGTACTTC  
CGTGAGCTGCTGGCCGGGTGGCGACTAATACCGCATACTCGACGGACTGATGAAGCCATACCTGTCCCGCTGCTGGA  
AGAACTGGGACAGGTAGAAAAAGCAGTACTGCGCATTGCGCTGTACGAACTGTCAAACGTAGCGATGTGCCATACAAAG  
TGCCATTAACGAAGCGATCGAACTGGCGAAATCGTTGGCGCAGAAGACAGCCATAAGTTCGTC AACGGCGTACTCGAT  
AAAGCAGCACCTGTGATTCCGCTAACAAAAAGTGATATCCAGGCCGGTAGATTACGGAAGACCGTTCCATGATCGCCG  
GCCTTTTCTTTTACCTGCTGAGGCATAACGTATGGCATGTGGCGAGTTCTCCCTGATTGCCGTTATTTGACCGTGT  
AAGAAGTTCTCGTCTTGATGTCGAACCTGGCATCGGCGACGATTGGCGCACTTCTCAATATCCCCGAGAAACAGACCCTGG  
CGATCAGCACTGATACGCTGGTGGCGGTAACCATTTCTCCCTGATATCGATCCTGCTGATCTGGCTTATAAAGCACTG  
GCGGTGAACCTAAGCGATCTGGCAGCGATGGGGCCGATCCGGCCTGGCTGACGCTGGCATTAACTTACCGGACGTAGA  
CGAAGCGTGGCTTGAGTCTTCAGCGACAGTTTGTGTTGATCTTCTCAATTATTACGATATGCAACTATTGGCGGCGATA  
CCACGCGTGGGCCATTATCAATGACGTTGGGTATCCACGGCTTTGTTCCGATGGGACGAGCCTTAAACGCGCTCTGGGGCG  
AAACCGGTGACTGGATCTATGTGACCGGTACACCGGGCGATAGCGCCGCGGGCTGGCGATTTTGCAAACCGTTTGCA  
GGTTGCCGATGCTAAAGATGCGGACTACTTGATCAAACGTATCTCCGTCCATCGCCGCGTATTTTACAGGGGACAGGCAC  
TGCGCGATCTGGCAAATTCAGCCATCGATCTCTGACGGTTTGATTTCCGATCTCGGCATATCGTGAAGCCAGCGAC  
TGCGGGCACGTATTGACCTGGCATTGCTGCCGTTTCTGATGCGCTTTCTCGCCATGTTGAACCGGAACAGGCGCTGCG  
CTGGGCGCTCTGCGGTTGAAGATTACGAGTTGTGTTTCACTGTGCCGAACTGAACCGTGGCGGCTGGATGTGGCTC  
TCGGACACCTGGCGTACCCTTACCTGTATCGGGCAAATGACCGCCGATATCGAAGGGCTTTGTTTTATTCTGACGGC  
GAACCTGTTACATTAGACTGAAAGGATATGACCATTTTCCACGCCATAAAGATGTCGCGAAAAGTCGCTGAAGATGA  
GTAATCCGTGGCATCTACTTGTGTCGGATTGGAAGTGGATTAAGCCGATGTTCTGGGACGATGGGCTCGCTGGCA  
GCGATTCGTTCTGGTATCTGATGACCTTTTCCCTGGCAGCTCTACTCGCTGGTGGTATGCTGGGGATCTGATCCG  
CGTCTATCTTTGTCATCAAACGCGGAAAGACATGGGTGTGCACGATCATGGCAGCATTGTCTGGGACGAATTTATTGGTA  
TGTGGATCACGCTCATGGGCTGCCGACCAATGACTGGCAGTGGGTTGCCGCGGGTTGTGATTTTCCGTATTCTGGAT  
ATGTGGAAGCCGTGGCCGATCCGCTGGTTTATCGCAATGTGCATGGCGGCATGGGGATCATGATCGACGATATTGTGC  
CGGGGTGATTTCCGACGGCATCCTGTATTTTATCGGTCACTGGCCGCTGGGTTATTCTGTCTGATGTTGACCCGATG  
CCTGATGTGACGCTTGTACGCTCTCATCAGGCCTGGACTCTTATTTAAATCCTACGACAGGATGCGGTTTATACGGCGTT  
TCCAGTTCGGCAATCTGTTCCGGCTTCAAAGTGATATCCACCGGTTCAATAGCTCATCAAGCTGTTCTTCGCGGAAGT  
TCCGATAATCGGTGCGGCAATGCCCGTTTACTCAACAACAGGCCAGCGCAACTTGTGCTCGTGTGCCCCAGTTCTT  
CACTGACGCTGTTAACCCTCTGCGATCTGCGGCTATTTTATCGCTTTCTTTATAGAGATTTTCCCCACCTCATCA  
GACACAGTCGTGCGGTAGTTTCTCCCCACGGACGCGTCAGACGGCCCTTCCAGCGGGCTCCATGGAATTAACGGCCAC  
GCCCTCTGATAACACAGTGGTAGCATCTGCGCTTCTTACGATAAAATCAGATTGTAGTATCTGCATACTAGACAA  
ACTGCGCCGACCGCTGCTGTTTTTGGAGTTCAGTGCCTGAGCAAACCTGCGAAGCGTGCATTGATGACCGCCGATATAA  
CGCGCTTTCCCGGCTTTTACCACGTCGTTGAGGGCTTCCAGGCTCTTTCGATCGGCGTGTGTAATCCACAGCGATGAAT  
TTGACGATATCGACATAATCCATGCCGAGACGTGCGAGGCTGTGCTGATAGAGCGCAAAATTTGCGCACGGGATAATC  
CTTCCGGTAAATCACAACGCGATGGAACACTTTGGTGCACACGACCGTCTTACGACGGGCGAAATCCCCGAGTGGC  
CGACCGACGATCTCTCGCTGCTGCCGTGAGAATAACTGTTGGCGGTATCAAAGAAATTTATGCCGCTTCCAGTGCACG  
TTAATTATGGGACGGCTGCTTTCTTCCGGCAGTGTCCATGCGTGATTACCAGCGATCTGGCTGCCAAAGGTGATACAGC  
CGAGGCAAAGTCGGGAAACGGAAGGTGCGTTTTTCTAAGGGGTTGATTGATGCTGCCACTCCTGCTATACTCGTCA  
TACTTCAAGTTGATGTGCTGCGGCTGCATTGTTACCCAGTCACTTACTTATGTAAGCTCCTGGGGCTTCACTCGTT  
TGCCGCTTCTGCAACTCGAATTTTAGAGTCTATGAATAATTTCTAAGCATAGCAGGAGTGGAGTAGGGATTATGC  
CAGCCAGGCCCTGATTTTGGCTTCCATACCAGCGGCATCGAGGCCGAGTTCGGCGCGCATTTCTTCTGAGTTCCTTGGC  
GAATAAAGAAGTCGGCAGGCCAATGTTACGACGGTACTGGTTTACGATGGCCATCAGCACTTCTTACGCGCGTG  
CCTGCGCCGCCATAATGGCGTTTTTCTACGGTGACCAGCGCTTATGGCTGGCGGCCATTTCCAGAATTAACGCTTC  
ATCAAGCGTTTCAAAAACGCATATCGACCAGCGTGGCGTTACGCGATTCCGGCGACTTTCCGCGCTTCTGGCATCAGCG  
TACCAAAGTTAAGGATCGCCAGTTTCTGCCACGACGCTTCAATGCTTTGCCAATTGGTAGTTTTTCCAGCGGCGTC  
AGTTCCACGGCAGCGGTTGCCACGCGGGTAGCGACCGCTGACGGGCATCGTTATAGTGATAGCCGGTATAGAGCAT  
CTGGCGACATTCGTTTTATCGCTCGGGTCAATGACCATTTCCGGTATGCAGCGCAGGTAAGAGAGATCAAAGCAC  
CCTGATGGGTTGACCGTACGACCAACAATGCCCGCGGTCGATGGCAACAGGACCGGAAGCTTTTGAATCGCCACG

TCATGCAGCACCTGATCATAGGCGGTTGCAGGAAAGTGGAGTAAATCGCGACAATGGGTTTGTACCCACCAATCGCCAG  
ACCCGAGCAAAGGTCACCGCTGTTGCTCGGCAATTGCCACGTCGAAGTAGCGATCCGGGAATTTACGTGAAAACCTCGA  
CCATGCCGGAACCTTCACGCATCGCCGGAGTAATCGCCATCAGCTTGTGCTTTCTGCTGCCGTTTCGCACAACCGATCG  
CCAAAGATTTTTGAATAGCTCGGCAAACCGCGCTACTTTTCGGCAAACAACCGCTGGAGGGATCAAATTTAGGCACGGC  
GTGGAAAGTGATCGGGTCTTTTTCTGCCGGTTCATAACCACGACCTTTTTTGGTCATGATATGCAGGAACTGCGGGCCTT  
TCAGGTCGCGCATGTTCTTTAGCGTGGTGATAAGCCCCAGCACATCGTGACCGTCCACCGGGCCGATGTAGTTAAAGCCC  
AGCTCTTCAAACAACGTGCCAGGCACTACCATGCCTTAAATATGTTCTTCGGTGCGTGTGAGCAGCTCTTAAATGGCGG  
CACGCCAGAGAAAACCTTTTTTCCCGCCTTCGCGCAGTGAAGAGTAAAGCTTACCAGGAAAGCAGCTGTGCCAGATGGTTGT  
TGAGCGCGCCGACATTTTCGGAAATCGACATTTTATTGTCGTTGAGAATCACCAGCATATCAGGACGGATATCGCCCGCG  
TGATTCATCGCTTCAAACGCCATGCCTGCGGTAATCGGCCATCGCCAATGACACAGACGGTGCAGGATTTTTGCCTTC  
TTTTTCGGCAGCAACCGCAATACCAATTCGGCACTGATGGAGTTGATGAATGCCGACGCTTAAATACGTCATATTCGC  
TTTTCGCCGCGCCACGGGAACGGGTGCAGACCGCCTTTCTGACGGATGGTCCGATTTTTGTCGCGGCGTCCGGTCAAAT  
TTATGCGGATAAGCCTGATGCCCCACATCCAAATCAATTGGTCAAACGGGGTGTGTAGACATAGTGCAGCGCCACGGT  
CAGTTCGACCGTGCCAGCCGGAGGCAAGTGCCTGGAACGGCTCACGCTGTCGAGTAAATAGCGGCGCAGTTCTG  
CGCAGAGTTTCGGTAAACTCTTTTCGGCAACAGTCTAACTCTGGGTGGAGTGCAGCAGTGCAGGGTCCGGTATTTG  
GCAATCAAACCTCATCAGGGGCTATTAATACTTATTGTTTTATTACGCTGGATGATGATAGTCCGCTAGCGTTTC  
CAGTGCCGAGGTATCGAGTGACTGTTACGCCAGTTGTTTCAGCGACTGACGGGCATCGTCGATCAGATCCCGGGCTTTCT  
TCCGGGCTTGCTCAAGACCCAGAAGTGCAGGGTAGTACTTTTACCAAGTTGCTGGTCCGACCCCTGGCGTTTTTCCCAAC  
GTTGAGTATCTCCACCACATCCAGGATGTCATCTGAACCTGGAAGGCAAGGCCGATGCTCTGCTACTTGTGAG  
TACCGGCAGAGCACGACGCTCTTATCTCCGGCGCTTAAATGCACCAAGGCGAACGGCGCGCGAATCAATGCGCCGTTTT  
TATGACGATGAATACGCTCAAGCGCTCCAGAGTACGTTTGCCTTCCGCTCTAAATCAATGCCTGACCACCGCAC  
ATTCCGGCAATACCACTGGCGCTCGCCAGTTCAGAAATCATCGAAATTCGTGCGGGTCCGACACTTCCGGCATATCGGC  
ATCGCTTAAAATCGAGAACGCCAGCGTTTGTAAAGCGTCCAGCAGGAGAATCGCGTTTGTTCGCCAACTTCACATGGC  
AGTTGGCAAACCGGACGACGATCGTCATCATCCATTGCCGGTAAATCATCATGAATTAATGAGTAAGCGTGGATACAC  
TCAAACGGCGGACGGGTGCGTCCAGCGTGTGTGCTAACGCCGAACATATGACCGGTGGCATAAACAGGAAAGGTCG  
CAGGCGCTTACCACCTAATAATGCGCCATACTGCATGGTTTCCAGCACGGGAGTGTCTGAAAGGGCAGTGGGGCGATAA  
AACGGCTCAGCGCTGGTTGCCTGCTTAAACGCAGGCTTCGAGTTGCTGCGGAAAGTCCATTACTCATTGTCGGGTGTA  
AAGGGTTAGAGAGGCGTCTTATTGTCAGACAGCAGAATTTGTACGCGCTGTTCCGGCTGTTGTAATTTGGCCTGCCCC  
TGACGTGCCAGCTGCACGCCGCTTCAACTCGTTACGCGCTTTCAGCGGCGAGGTCGCCACTTTCAGACGGGTTAC  
AATCTGTTCCAGCTCGCTCAGCGCCTTTTCAAAGCTGGCGGGCGCCTCATTTTTCTTCGGCATAATGAATGTCTGACTCT  
CAATATTTTTCGCCCCGTATGTTAACGGACTCAGGGCAAATAGCAAATAACGCGCAATGGTAAGGTGATGTGCACAGCA  
AAGCGATGTTAGTGGTATACTTCCGCGCTGGATGCAGCCGAGGTGTTGGGCTGCTGTATTTTTCCCTATACAAGTCGCT  
TAAGGCTTGCCAAACGAACATTGCCGCCATGAAGTTTATCATTAAATTTGTTCCCGGAAATCACCATCAAAGCCAATCTG  
TGCGCTTGGCTTTATAAAAATCCTTACCAGGAAACATTGTAACGTTTTAAAGCACTATGATGAGACGCTCGCTGTGCTC  
CGCCACTGGGATAACATCGAAGTTCGCGCAAAAGATGAAAACCGAGCTGCTGGCTATTCCGCGACGCTCTGACCCGATTC  
GGTATCCACCATATTCTGAAGTCAAGACGTCGCGTTTACCAGATGCACGATATTTTCGAGAAAGCGTTGGTTGAGT  
ATCGGATCAGCTGGAAGGCAAAACCTTCTGCGTACGCGTGAAGCGCCGTGGCAAACATGATTTTAGCTCGATTGATGTG  
GAACGTTACGTCGGCGGCGGTTTAAATCAGCATATTGAATCCGCGCGCGTGAAGCTGACCAATCCGGATGTGACTGTCCA  
TCTGGAAGTGAAGACGATCGTCTCCTGCTGATTAAGGCGCTACGAAGGATTGGCGGTTTCCGATCGGCACCCAGG  
AAGATGTGCTGCTCATTTCGGTGGTTTCGACTCCGGTGTTCAGTTATATGTTGATGCGTCCGCGTCCCGCGCTG  
CATTACTGCTTCTTAACTTCGGCGGCGCGCATGAAATTTGGCGTGCCTCAGGTGGCGATTATCTGTGAAACCGCTT  
TGGCAGCTCCACCGCTGCGTTTTGTGCTATTAATTTGAACCGGTCGTCGGGAAATTCGAGAAAATCGACGACG  
GTCAGATGGGCTTATCCTCAAACGTATGATGGTGCCTGCCGATCTAAAGTGGCTGAACGTTACGGCGTACAGGCGCTG  
GTCACCGGCGAAGCGCTCGGCCAGGTGTCAGCCAGACGCTGACCAACCTGCGCCTGATTGATAACGCTCTCCGACACGCT  
GATCCTGCGTCCGCTGATCTCTTACGACAAAAGAGCACATCAACCTGGCCCCGAGATTGGCACCAGAACTTTGCTC  
GCACGATGCCGGAATATTGGTGTGATCTCAAAGCCCGACGGTGAAGCAGTTAAATCGAAGATTGAAGCGGAAGAA  
GAGAAGTTCGACTTCAGCATTCTCGATAAAGTGGTTGAGGAAGCGAATAACGTTGATATCCGCGAAATCGCCAGCAGAC  
CGAGCAGGAAGTGGTGAAGTGAACCGTCAATGGCTTCGGCCCCGACGCTGATCCTCGATATCCGTTCTATCGATG  
AACAGGAAGATAAGCCACTGAAAGTCAAGGGATTGATGTGGTTTCTCTGCCGTTCTATAAACTGAGCACCAAATTTGGC  
GATCTCGACCAGAACAAACCTGGCTGCTGTGGTGTGAGCGCGGGTGTGAGCCGCTGCAGGCGCTCTATCTGCGCGA  
GCAGGGCTTTAAACATGTGAAGGTATATCGCCGTAATTTGTGGTTTTTACGTCGCATCTGGTCAGATGCAGCTTTGCC  
GCATCCGACACTACTCGTAATAATTATAAATCCCTGCCGCATCACCAGTTGTGATGCCACTTCATGGGCTTTTTACCGTGC  
CCAAACACAGGTCGATAATTTTACAGCAAAGTGCATAGCTGTACCCGGCCCTGGCTGGTCAGCAATTTTACCCGTGC  
ATCCAGACGACGCGCTTGTCCAGCCATTGTTCCGGCGGAAATTTGTCTTTACGCGTCGGGAAGCCGGTCAATTACCAA  
TCGGGAAGATATCGTGGCGCACCAGCAGGTTGGTGGCGCGGCGCAAATAGCCGCGACGATACGCCGGAACGGTGAAC  
GTTTAACGGTTTCAACCAGCAGAGTGTATCGGAAAAACTCCGCGCCTTAAATGCCACCAGGCAGCACGATCACGTC

ATATTGCCATCAGCCACTTCGACCAGCGGCGCATCCGCCAGCAGCTTCACGCCGCGGAGCAGGTAATCGCCAGGTTAC  
CATCGCTGGCGACGCTGGCAGTGGTGACTTTGATACCGCCGCAACCAGCAGATCGATAGTGGTGACGGCTTCAGTCTCT  
TCACTACCAGGGGCGAGGCAAACAGTCCGATGCGCTCATATTTACTCTCCTTTCTTTTTACCATTTCAAACAGGCGGG  
TGTTTTCCGGTACGGCAATCCCATGCGCGCGGGCGCGGTAAGAGAAAACCATTGATATAGTCGATTTCAAGTGTGGCGC  
AGCGCGCGGATATCCTGCAACATCGACGAGATATTTCCGCTGTGGCATCAATCACCTGCATCACGTAATCACGCAAATC  
TTCTGTGAAGTATGATGCCCTTCGCGTTTCGATCACCGCCGCGACTTCTTCGCATATCTGCATAATTTCTTGGCGATGAT  
GACGTAATTCACCGTTCCGGCAATTCCAGATGGCAGTCAAGTGAATTAATCACGCGTTCAGTCCAGCTTCCGCCACAGC  
TCGGCGCAATATTGTTATGCCAGGCAACGTGAGGCAACACGTTTGCAAATATCCGCCAGATAACTGTAATCCCCGTC  
CTGTTGCCGTGCCGGCCAATATGCGTGATACCGTTTGCCACATGAATAATGACATTGCCGTGCGGGCGGGCTGCATGGG  
TGGTGGTGCCCATCAGTAATGGCTGCTGAATGTTTTGCAACTCTTCGATGGTGGCCATGCCGTTGTGAATTAACAGTATT  
GGCGTAGTTACAGGCAAGTGGACGCGAGGCTTTTACGGCATCGGAAACCTGCCATGCTTTCAGCGTACCAGGAGCAG  
ATCGCTGGTGGCGAGAAAATCGGGATCGTTGGCGGTGAGCGATTGTTAAATATCGAACCATCTGTCTCAACCAGATTCA  
CGCTACAATAAGGTTGCGGTACGCGCAGCCAGCCCTGAACCTCATGACCTGTTTGCAAAGTGTGTAAGCCATAATTGC  
CCTAAGGCACCGCATCCCAATACGGTAATTTTTCATTGTTCTCTCTCACCCGCAACCACTCCGGGTGTTCAATAAGGCTAT  
CCGTTAATTGTGCATGTTTGCAGTATGCACAATTAAGGGATACGTCCTGGTGCAGGACTGTCGGTATTAACTTTG  
CGGTATTATGCTTCGCATCAAAAATGAAGGGAGAGAAAAGATGCCATCTTTGATATTGTCTCTGAAGTTGATCTTCA  
GGAAGCACGTAACCGCGTGCATAACCGGAGCCGCGAAGTGGAGTCCCGTTTTGACTTCCGTAACGTTGAAGCCTCATTG  
AGCTGAACGACGCCAGCAAAACCATCAAAGTGTGAGCGAGTCCGATTTCCAGGTCAATCAGTTGCTGGATATTCTGCGT  
GCCAAGCTGCTGAAGCGCGCATTGAAGGCAGTTCGCTGGATGTACCGGAGAATATCGTTCATAGCGGTAACCTGGTT  
TGTGGAAGCGAAACTGAAACAGGGCATTGAGAGCGCGACCCAGAAGAAAATCGTCAAGATGATCAAAGACAGCAAACGTA  
AAGTGCAGGCGCAAATTCAGGGCGATGAAATCCGCGTAACGGGCAAATCTCGTGATGATTTGCAGGCTGCATGGCGATG  
GTACGTGGTGGCGATCTCGTCCAGCCGTTCCAGTTCAAAAATTCGCGATTAATCGCGACTATGTGCGTTTTGTTTCATG  
TCAGATGCGGCATGAACGCTGATTCCGGCTACAAAGGTTTGAATTCAGAACTTTGTAGGCTGATAAGCGTAGCGCA  
GCAGGCAATTCGCGCGTTTTTTATGCCTGACGAATGCCTGTTCTATCTCAAAGCGATTCTGCACTTTGCTGTGCGATTT  
TCACATAAGCTGAATGTTCTTCTTCTGCAATCAACACTTCTTTGATGCCTTCAGTTTCTAGCAAACGCACTTTTAACGCC  
TCGTTTGGCGCAATGTTCCGCGGATTTCAATGCGCAAACCTGCTGACATACGGCGGTTCTTTTCATGGTACTGGCGACTGT  
CAGCCACACTGCGGCCAGCATTGCGCCAGCGAGAAAATACCCCTGACCGTCAAACATGCCGTTAATCCAGCCGCCAGCG  
AACCGCAATCGCCACGCCAAGAAACTGGCTGGTGGAGTAAACACCCATCGCCGTACCTTTGTAACCTGCTGGCGACTCT  
TACTGATAAGTGAGGGCAGGAGGGCTTCCATCAAATTAACGCCCAAAGAAAAGCTGCAGCCGACCACAGTTGCCA  
GAACTGCGTTTTGCGGTTCCACAACACAATTTCCGCAACCACGATCAACCCGACGCGAGAAGACAAAGACTTGCTTCATTT  
TGCGCTTAACCTCAGCGTAGATAATGAAAGGCACGACCCAGCCAAAGGCGATTAGCATTGTCCGAGATAGACCTTCCAG  
TGTTTCAGCCCGCGGAACCTTCATCAGCCAGTGTCCGGGAGGCAACAAACGTCGACATCAGCAAAATATGAGACA  
CATAATGCCAAAGTTGAGTTTCAGCAGCCGCGTTCGCCAGCACTTTACTGAAACTGCCTTTACCATTCCGGACTCAC  
GATTAAGTACGTGAGTGTACTGTTGGGCACAACCCAAATGGTCAACGCAATGCCGGTTCGTTGCCAGAATAGCGATCATC  
CAGAACAGCGCGTGCAGCCAAAGTTTGTGAGTGTGATCGGGCAAGCACCATCGCAATGGCAAAGGTAATGCCAAAGCT  
CACGCCGATAAACGCCATCGCTTTGGTGGGTTTTGTTGCGCGTGAGATCGGAAAGCAGCGCCATAACGGCGGGCGCAA  
TTGCTCCAGAGCCTGTAGCGCCCGGCCAGAATAATCCAGATGGAGTCGGAAGCGCAGCGATAACGCTACCGGCG  
GCAAACACCGCCAGCCACCAGCAATTAATGTTTTGCGACCAATGCGGTGCGAAAGCAGGCCAAACGGAATCTGAAAAAC  
GGCTGAGTCAGACCATAAATACCAATGGCAATACCAGTAAATGCTTCGTTGGCACCTTGCAGAGCCATGCCGTACGTGG  
TCAGAACCAGCGAGAACCATAAATACCCAGCATGCCAAGCAGAAATACGGTCCCTAAACCCAGTCCGCGCTCTCA  
CCTGGCGTCATTTTATAATCGTTTATTACCACCTCTGTTTTAAATTCGCGACTAGTGTAAGCGGGCAAACGAATGGGGTA  
AACATGCGGATTTTTTAGTAAATATTTTCGAGAGGGATATGTTTCTAATGCTAAGAAAAAGGTGCCGTAGCACCTTTTTTA  
ATAGAGAGGTTTTGTTACCACACAGCAGCCAGCAGCGTATGCGAGTCCGGTACCATAAAATCAACGGACATCATACCGA  
GAGGGCAGTGTGGCGATGATAGAGAAGCCGAACAGCTTGCAGCGCCAGATTCTGTATCAGCAACTTTATAACCGCGCA  
GAGCCATACCTAACCCAGACGCTAACCGCGCGGCGACCACAGATATTTATACCCAGCGTAACCGCCAAGAGAGAGC  
ATCAGCGTGGCAACGGCAAAGGCGATGATATACAGCGTGTGATTCTTCGCCACCGAAATGCCTTTTACCCTGGCAA  
TACCGGAATGTTTCCGCGCTGGTAATCCTTAAAGCGGAAAATGGCGATGGCATAGGAGTGAAGGATCTGCCACAGGCTGA  
AGATAGCCAGCAGGATCGCTGCGCGCTATCGAACTCACCGGTTACCGCACAGTAGCCGATCACGGCGGCGCAGCGCCG  
GAGAGCGAACCAATCAACGTGCCGTAGACAGAGTGGCGTTTCATGTACAGGCTATAAACGCCGACATAAACCAAAAGCC  
CATCACCCAGCAGCAGGAGGATTCGCGCCAAACACAGCAGCATAAAGCCAGCAATACCAGCAACGTGGCGT  
ACACCAGCGAGACAGCAGGAGAGATCAGGCTTTACCAGCACCCGATTCTTCGCTCTTTCCATCTTTCTGTGATATCC  
CTGTGATGTAGTTGTTAAACACACAACCCGACGCCACAACAGTACACCCCAACAGCGTGTAGATAAACAGGGGATA  
ATCAATGCTGCCCTTTGAGGCCAGCAGGAATCCCCAATCACCGAGATCAGGTTGCCAAAGATGATGCCTGGTTTTGTTA  
CTTGAGGTTATTGCTTAAACATCATAACCGCGCTTTAGTGCATCATCATGTTGTAGTTGAGGTTCCACATAATCCAGA  
TGAGCCTACAACAGGATAGCGATGATTAGCACGGTGAAGACAAACGCCGTATGTTCCAGCCTTCATCTGATTTGGTA  
TTCATGTGCAGGAAGCACACCAGATGCACCAGAACCTGTACCCTGCCATTGCCAGGATTGTTCCAGAATTACGGCCGG

AGAGGCAGCTCCTGTCATCACCATCCAGAACGGAATCACCGTCAGAATGATCGACAGGATAAAGCCTGTCATGTAGGTTT  
TTACGCTGCCATGGGACGCGCCGCTGTGATCGGTAGAAATGACTCATTACATCGCCCCATCAGATAAACAACAGTGAACA  
CACAGATCCAAACCACATCCAGGAAGTCCAGAACAGGCTCAGGCACATGATGCGGGTACGGTTAGTGCTGGTCAGGCCG  
CGACGGGCGATTTGCACCATCAGCACCGCCATCCAGATAAGACCAGAAGTGACGTGCAGACCGTGCCTGCCAGCAGCGC  
AAAGAACGCTGACAGGAAGCCGCTGCGATCCGGACCATGCCGTTAAACAATCAGGTGATGGAATTCATAGATTTCCATCC  
CGATAAATCCGGCACAAACAACAGGTCAACGCCAGCCAGGAGATAACCTGGCTTTTGTGTTTTGTACATGGCGATA  
GCCGCCATGCCGTAGGTGATGGAGCTGAACAACAGCAAGAAAGTTTCAACCAGAACGAACGGCAGTTCGAAAATGTCCTT  
ACCTGTGCGGCCGCTGCGGTGCCGTTACCAGAACGGCATAGGTAGCAAACAAGATAGAGAACAGAATGCAGTCGCTCA  
TCAGGTAGATCCAAAATCCGAAGATTTTGGTTCCGCTGCATCGTGGTGCCCGTGTTCGTGCGCGTGGGCAGTCGCGTGC  
GTCAAAGTATCAGTTGCCATTTTTAGCCCTGCCTTAGTAATCTCATCGAAATGCTGGTTTTCCAGTTTTCCGATTTCTG  
CCACCGGCACGTAGTAATCCACGTCTCGTGAAGCTTTTACGATCCAGGTGATGATCATGCCTGCGAAGCCAACAATC  
GCCAGCCACAGATATGCCAGATCATGGCGAAACCGAAGATGGTGAGAAAGCTGCAATGACGATACTGCACCGCTGTT  
TTTCGGCATATGAATTTCTCATAGTGGTCAGGCTTTTATACGCTTCGCTTTCTCTTTTCATTTCCAGAATGCATCAC  
GTTCTGTAAGTGCAGGACTACGGCAAAGTTATAGAACGGAGGCGGGAAGAGGTTGCCACTCCAGCGTACGGCCACCC  
CACGGTACAGTACTGCACCGCTGGTGAATCATCAGCATGGTGTGGAACGTCGCGGTCAATCTGCTGGCTCAAACGAC  
GGTTCATGCCATGAAGCCAGCGCATACAGTGGCATAAAGGCAACGAAGAAGCCGATGATCCAGAACCAGAACCGCGCT  
TTACCCAGGTTTCGTTAGTTTGAACCGAACGCTTTAGGCCACCAGTAGGTATCCCTGCGAAGCAGCCGAAGACCAC  
GCCGCCGATGATCACGTTATGGAAGTGCGAATCAGGAACAGGCTGTTATGCAGAACGAAGTCCGCGCCCGGTACGGCCA  
GCAGCAGCCAGTCATCCCGCCACCAGAAAGGTGACGATAAAACCGATGGTCCACAGCATCGCAGAATGGAACACGATG  
CGGCCCTGATACATGGTGAACAGCCAGTTGAAGATCTTACCCCGGTGCGGATGGCGATAATCATTGTGGTGATACAAA  
GAAGGCGTTTACGTTGCGGCCCGCACCCATCGTAAAGAAGTGGTGCAGCCAAACGATGAACGACAGCAGGTCATACAGA  
CGGTTGCCATACCAGCGAGGTATAACCAAACAGACGTTTACGCGAGAAGGTTGCCGCAATTTGAGAGAACACCCGAAA  
ACAGGCAGGATCAGGATGTAACCTTCCGGTGGCCAGGCCAAATCAGGTTGATGTACATCATCATGTTGCCACCCAT  
ATCGTTGGTAAAGAAATGGTGGCCAGATAGCGATCCAGGTCACAACGCGACGGTAACCGTCAGAATTGGAAGGAAG  
CAATAATCAGTACGTTGCGGCACAGTATGCCAGGTAAATACTGGCATCTTGAACATGGTCATGCCCGGTGCGCGCATC  
TTCAGAATGGTAAAGAAAGTTGATACCGTAAGCGTCGTACCTATACCGGATAGCTGGAGACTCCATATCCAGTAATC  
GACACCGACTCCCGACTGTACTCTATCCCGATAGCGGTGGATAGGCCAGCCAGCCGGTCTGCGCAAATTCGCCCACGC  
CGAGAGAAACGTTAACCAGAATCACACCAACAACGTTAAACCAGAAGCTTAAGTTGTTGAGGAACGGGAACGCAACGTC  
CGCGCGCCGATCTGCAGCGGAACCACAGGTTTCATCAGACCGATAACGAAAGGCATCGCCACGAAGAAGATCATAATCAC  
GCCGTGCGCGGTAAGATCTGATCGTAGTGGTGAGGTGGCAGGAAGCCCGCTTCGCCCAGGCAAGAGCCTGCTGGC  
TACGCATCATAATGGCGTCAGCAAAACCAGCAGCAACATCAATCGCCACGATGATATACATGATACCAGGCGTTTA  
TGGTCGACGGAGGTCAGCCACTCTTCCACAGGTAGGTCCACTTACCGAAGTAAAGTATCAGGCCAACGAGCGCCAGACC  
TCCAAAATAATGCCAGCGATCGTAACCATGACGATAGGTTTATGGAACGGGACTGCATCAAGTGATAATTTCCGAACA  
TCTTTATCTTCTCAACCCCTTAAATGGGCGGATTCGCGTGGCTCATGTCCATGCCTTCCATACCTTCGTGTGCGCTG  
TGCTCACCTTCTGGTGGTTCATGTCCATGCTCTTACCGTGAAGCATAAACTTGTAAATTACATCGGCAAAACAAGTCTGG  
TTTACGTTGGAGAAATATCCACCTGGTTGATTCGCTAGGCGCGCCAGTTTTTTCGAACGAGCCATGTCAGACATGG  
TGTTGCGGACTGCTTCGTTTTGCGACCCACTGGTGAATGCGGCGGATCCGGTGTGCAATAGCTTTGAACTTCATG  
CCTGAGAAGCCCGGCGCTGTAGCTGGCGGAGATACCGTCATAAGTGCAGGTTTCGTTGGCGATCAGATGCAGGCGACT  
CTGCATACCGCCATGGCAATACTGGCTACCCAGACGCGGAATGAAGAAGGAGTTTCATCACGGAGTTGGAGGACTT  
TGAAGTACACCGGAGTGTTCGCGGGAAGCGATTTTCACTCACGGTAGCAATGCCCTGTTCCGGGTAGATGAAGAACCAT  
TTCCAGTCCATGGAACCCTTCGATGGTAATGGGCTTCTCGTGTGCCAGCGGCTTGCTAGGCTCAAGAGCGTGAGT  
GGTTTTCCAGTCTAGTACTGCAAGGAAGATGATGATTAAGATAGGTACCGTCCAGACCACAGCTTCCACTTTATTGGAGT  
GTGACCAGTTCGGGCTGTACTTAGCATCTTTATTGCTGCGACGGTACTTCCAGGCGAAACCAACAGCCATCAAGATTGCG  
GGAATAACGACAATCAACATCAGGCCAAATGCCGTGATCAGTGAACGTTGCTCCAGACCAATCTGCTCTTTGGGATC  
TAACAGCGCAGAAATACAGCCACTGAGCAATACAGTGCCTGCAAATAATGACAACCATCCCAAATTTTATTGATTTCC  
TGAGTCTCATTAAACGACCTCAATTCACGGGATCTGGTGGCGTTTAAAGTGTGTTGGGCATTTTACGGGAAGGTTACATT  
ACTGTAACATGATTAATCTCTGTTACTTGGATTTGGCTGCCAGGTCACATATGTTGCAAAAACATATCAGGTTGATTTT  
AAGAAGCTGTTGCAAAAGGGCGTTATAACAAAAGGGGAGTCTGAAGGAGTCTGGCGGGCAATTGGTATAACCAATGTG  
AAATAAAACAATTTAATAAATAATTATCATTAGAGTGACAACCTGGGTGATGAGAAAATAAAGACTCATTAGCTGAAT  
CGTGAAGAAAAATAGAATTTATAAATGGCGCAATAATTTCAAACGCTAAGCCGCACAAAAGAACAATAATTAATAAG  
CGATACTGATGTTTATTTAGCCGTAATAATTACGGCGAGTGATTACTACAGCTAAATAATTTACAGATTACGTCAGAT  
GCGTTTTTTCGTAGCGCCAGATAATCCAGCAAACCACCAAGCAGCAGCCAGAAAGGGGACTAAAACCCGACTTCCAGC  
AGAGCAGGCAGGAAAGAGAAGTGCCTCAAATCCAGCGCGTCCATCGTCAATAGCAGTAACCACACGGCCAACAGGCTGAC  
GCCCCGCGCAGTGTCCACATGGCAAAGGCATAACCTGCCGATATGCGGTACGGGAGATAAAGTTGTCATTTACTCGTG  
TATATCAAGCGTCTGGCGGCAACACAGCAGCAAAATAAGCCCTGGTACGGCAGCGGCGACGGAGAATAGATAGAATGTC

GACCAGCCGTGTGCTTCAACAAACCAACCCGCCACGGGGCCGACATAAACTCGCCCTACAGCAGAAAGCGCTGAGAGCAG  
GGCAAATTGAGTAGCGGAAAATGACTTATTACATAGCGTCATTAACAGCGCGACAAAGGCTGATGTGCCCATCCCGCCAC  
AGAGGTTTTGAAAAAGACGGCTGCGCCCATGCTGTAGAGATGCTTATCAGTAATCGACAGCAGCCAGTAACCGGCGTTA  
GACGCACCTTGTAAAATGCCGAAAATCAGCAGTGCCCGGAACAGTGACAGGGCGCTGCATCAAAATCCACCGTACAATGC  
GCCAAATGTTGCTAGTAAGCAGCGTTTTGTTAACACGCTACTTCACCCGCATCAAAACCGACGCCGCGAATCA  
AAAACTGGTTGTCAGGCTCATGGCGAATGCGTCGCCCAGCTTATACAGCACGATAAGAAGCAAATAAGCCAGGCATTA  
TTGCGACCAAAGAAAATCTCGCAGAGGTGCAACAACCGCTTGTCCAGCGTTTTGGGCACAGGAATGGTGTGCGTTGGTTC  
TGGTGCAAGCAACGTGCGGATAATACAGGGGATCAACAGTGCCGCCATTAACAGTACATGCCCTGCCAGCCAGCCATT  
TATCTGCCAGCCACAGGGCTAGGCCGCCGAAACCAGCATCCCTAAACGGTAACCCAGCAGCTGATTGCCGCGCCCGCA  
CCACGTTCTTCTGCCGGAAGCACATCGTTTTCCACGCATCGAAGACTATATCCTGGGAAGCAGAGCAAAAAGCGATCAC  
CACTGCCAGCGCCGCATCCAGCGGAGTTGGGTGCTGTTGAGAAAAACCCATCGCCGCAATGGCGACTAATAACAGGA  
TTTGGTGGCAGCAGCAACCGCGCCGCCAAAAAATGGAGGCGTGTAGCGGTCCATCAGCGGTGACCAGAGGAAT  
TAAAAACGTAAGCCTGGCTACCAGAGAGAAGAAACCAATGGTTTTGAGATCGATATTCTCGACCGTATCCAGGCCGT  
TAAGGTACCGGATGTAGGGCAGCGGTAGCCCCGGAAGCAAACCCAGGATCAGCAATATGGCTGAACCGGCTGTTGAA  
AAATACGTAATAATTGACTGGACATGGCGCTCTACAGGCCCGGCTTGACCCGGCCAGAGGCGAGAAATTAACCGCGCT  
CTGCTTGATGAATTCGTGGATGCTGGTGTCTGAGACATATCAGCGATGGTATCGGTGACGACACTGTTAACCGCATCGG  
CGATATTTTTGTTGGAGGCTTGAACGCACCTTCAACGTTGTAGCTGGCAGATAGTTTTGGTCATTTTGTTGCCATTC  
TGCGCGGTAGCGATGATGGCGATATCCGCTTTGGTGGCGATGTTGTAGCGCACGTTGCCCTGGGACACGTGACATACAG  
TTGGCTAACGATGATTTGCAGATTAACCGGGCCATTGACCAACCATGTAACCACGCGCGGTGATCTGTTTTCCAGCA  
CTTCTTGACAGCAGAAACGCAGATCGCGGGAGGCGGTGAGGTAACGATTTGATTATCGCGGGTACTTTTTGCCAGCGCC  
TGATCGGTACGCTGATCGGCACCATTAATGCTTACGGTGACGCCCATCAGGCTTGGATCCTGCTGTGGCAGTGAATCGT  
CGGGGAAACTTCAATAGTTGTTGGCGTTTTGCGCATCTGCAAGCATAAACAGAGCAACTAACGGGAAGAGGATTTTTT  
TGAACATGTTCCGGCTCTCAGAGACTTAAAGCGTGTGGTAAAAATTCCCGCATCATAACATTGCCAACGGCGAGGG  
GAAGTGGGTAAGGCATGTAATTCATCATGTTGACGAAATAATCGCCCTGGTAAAAGAAACACTGATGCGAGGCCTGTG  
TTTCAATCTTAAATCAGTAACTTCATACGCTTGACGAAAAACAGGACGAAACCTAAATATTTGTTGTTAAGCTGCA  
ATGAAACGGTAAAAGCGGCTAGTATTTAAAGGGATGGATGACATCTCAGCGTTGTCGGAGGAGATATTCATGATGATA  
CGTGAGCGGATAGAAGAAAAATTAAGGGCGGCTTCAACCCGATTCCTCGAAGTAGTGGATGAAAGCTATCGTCACAA  
TGTCACCGCCGCTCTGAAAGCCATTTAAAGTTGTGCTGGTCAGCGATCGTTTTACGGGTGAACGTTTTCTGAATCGTC  
ATCGAATGATTTACAGTACTTTAGCGGAGGAACTCTACTACCGTTTCATGCGCTGGCTCTGCATACTTACACTATTAAG  
GAGTGGGAAGGTTGAGGACACCGTCTTTGCTCTCCTCCTGTCGTGGAGCAGGAAGCATCGCGTAAAAACGCATTTG  
CAACTGTGCGGCTTTTTCCAGTATGTTGCTAAAGATTTATGAAAAACGGCCTGCGGGCGTTTTGTTTTGTCTGGATTT  
TGCGCTTTTTGCCAGCATTGACGAAAAATGCCCCGGAATTGTAAAAAATACGCGACAGCGCGCAATAACCGTTCTC  
GACTCATAAAAGTGATGCCGCTATAATGCCGCGTCTATTTGAATGCTTTCCGGGATGATTTGGTAACAGGGAATGTGAT  
TGATTATAAGAACATCCCGTTCCGCGAAGCCAACAACCTGTGCTTGGGGGTAAGAGTTGACCGAGCACTGTGATTTTT  
TGAGGTAACAAGATGCAAGTTTCAAGTTGAAACCACTCAAGGCCTTGGCCGCCGTGAACGATTACTATCGCTGCTGACAG  
CATCGAGACCCTGTTAAAAGCGAGCTGGTCAACGTTGCGAAAAAAGTACGTATTGACGGCTTCGCAAGGCAAAGTGC  
CAATGAATATCGTTGCTCAGCGTTATGGCGCGTCTGTACGCCAGGACGTTCTGGGTGACCTGATGAGCCGTAACCTTCA  
GACGCCATCATAAAGAAAAAATCAATCCGGCTGGCGCACCAGCTTATGTTCCGGGCGAATAACAAGCTGGGTGAAGACTT  
CACTTACTCTGTAGAGTTTGAAGTTTTACCGAAGTTGAACTGCAAGGCTGGAAGCGATCGAAGTTGAAAAACCGATCG  
TTGAAGTGACCGACTGACGTTGACGGCATGCTGGATACTGCGTAAACAGCAGGCGACTGGAAGAAAAAGACGGCG  
GCTGTTGAAGCAGAAGACCCGCTAACCATCGACTTCAACGGTTCTGTAGACGGCGAAGAGTTGAAAGCGGTAAGCGTCT  
TGATTTCTACTGCGGATGGGCCAGGGTCTGATGATCCCGGGCTTTGAAGACGGTATCAAAGGCCACAAAGCTGGCGAAG  
AGTTCACCATCGACGTGACCTTCCCGAAGAATACCACGCAGAAAACTGAAAGGTAAAGCAGCGAAATTCGCTATCAAC  
CTGAAGAAAGTTGAAGAGCGTGAACCTGCCGAACTGACTGCAGAAATTCATCAAACGTTTCGGCGTTGAAGATGGTCCGT  
AGAAGGTCTGCGCGCTGAAGTGCCTAAAAACATGGAGCGGAGCTGAAGAGCGCCATCCGTAACCGCGTTAAGTCTCAGG  
CGATCGAAGGTCTGGTAAAAGCTAACGACATCGACGTACCGGCTGCGCTGATCGACAGCGAAATCGACGTTCTGCGTCGC  
CAGGCTGCACAGCGTTTTCGGTGGCAACGAAAAACAAGCTCTGAACTGCCGCGGAACTGTTGGAAGAACAGGCTAAACG  
CCGCGTAGTTGTTGGCCTGCTGCTGGGCGAAGTTATCCGACCAACGAGCTGAAAGCTGACGAAGAGCGCGTGAAGGCC  
TGATCGAAGAGATGGCTTCTGCGTACGAAGATCCGAAAGAAGTTATCGAGTTCTACAGCAAAAACAAAGAAGTATGGAC  
AACATGCGCAATGTTGCTCTGGAAGAACAGGCTGTTGAAGCTGTACTGGCGAAAGCGAAAGTACTGAAAAAGAAACCAC  
TTTCAACGAGCTGATGAACCAGCAGGCGTAATTTACGACGATAACGCGCTAAATTCGCACAAAGGCCCGTACCGCCAG  
GTGGTGGGCTTTTTTTTGTGATGAATTTTGCATGGAACCGTGCGAAAAGCCTTTTCGGTGTAGCGTAAACAACAAAAGA  
TTGTTATGCTTGAATATGGTATGCCGTACCCATAACACAGGGACTAGCTGATAATCCGTCATAAGGTTACAATCGGT  
ACAGCAGGTTTTTTCAATTTTATCCAGGAGACGAAATGTCATACAGCGGCAACGAGATAACTTTGCACCCCATATGGC  
GCTGGTGCCGATGGTCATTGAACAGACCTCACGCGGTGAGCGCTTTTTGATATCTATTCTCGTCTACTTAAGGAACCGG  
TCATTTTTCTGACTGGCCAGGTTGAAGACCACATGGCTAACCTGATTGTGGCGCAGATGCTGTTCTGGAAGCGAAAAAC

CCAGAAAAAGATATCTATCTGTACATTAACCTCCCAGGCGGGGTGATCACTGCCGGGATGTCTATCTATGACACCATGCA  
GTTTATCAAGCCTGATGTCAGCACCATCTGTATGGGCCAGGCGCCTCGATGGGCGCTTTCTTCTGACCGCAGGGGCAA  
AAGGTAAACGTTTTTGCCTGCCGAATTCGCGCGTGATGATTCACCAACCGTTGGGCGGCTACCAGGGCCAGGCGACCGAT  
ATCGAAATTCATGCCGTGAAATTCGAAAGTTAAAGGGCGCATGAATGAACTTATGGCGTTCATACGGGTCAATCATT  
AGAACAGATTGAACGTGATACCGAGCGGATCGCTTCTTTCCGCCCTGAAGCGGTGGAATACGGTCTGGTTCGATTTCGA  
TTCTGACCCATCGTAATTGATGCCAGAGGCGCAACTGTGCCGCTATACTTATCCAGGGCGGCACAACGCTGTAAGCGGCT  
TGCGCCTGAGAATGGCATTTCGCTCGTGTGCGGCACAAAGAACAAGAAGAGGTTTTGACCCATGACAGATAAACGC  
AAAGATGGCTCAGGCAAATTGCTGTATTGCTCTTTTTGCGGCAAAAGCCAGCATGAAGTGCACAAGCTGATTGCCGGTCC  
ATCCGTGTATATCTGCGACGAATGTGTTGATTTATGTAACGACATCATTGCGGAAGAGATTAAGAAGTTGCACCGCATC  
GTGAACGCAGTGCCTACCAGCGCCGATGAAATTCGCAACCCTGGACGATTACGTTATCGGCCAGGAACAGGCGAAA  
AAAGTGTGGCGGTGCGGTATAACAACATTACAACGCTGCGCAACGCGGATACCAGCAATGGCGTCGAGTTGGGCAA  
AAGTAACATTCGCTGATCGGTCCGACCGTTCCGGTAAAACGCTGCTGGTGAACGCTGGCGCCTGCTGGATGTT  
CGTTCACCATGGCCGACGCGACTACACTGACCGAAGCCGGTTATGTTGGTGAAGACGTTGAAAACATCATTGAGAAGCTG  
TTGCAGAAATGCGACTACGATGTCCAGAAAGCACAGCGTGGTATTGTCTACATCGATGAAATCGACAAGATTTCTCGTAA  
GTCAGACAACCCGTCATACCCGAGACGTTCCGGTGAAGCGTACAGCAGGCACTGTTGAAACTGATCGAAGTACCG  
TAGCTGCTGTTCCACCGCAAGGTGGGCGTAAACCTCCGAGCAGGAATTCCTGACGTTGATACCTCTAAGATCCTGTTT  
ATTTGTGGCGTGCCTTTGCCGGTCTGGATAAAGTGATTTCCACCGTGTAGAAACCGGCTCCGGCATTGTTTTGGCGC  
GACGGTAAAAGCGAAGTCCGACAAAGCAAGCAAGCGAGCTGCTGGCGCAGGTTGAACCGGAAGATCTGATCAAGTTG  
GTCTTATCCCTGAGTTTATTGGTCTGCTGCCGTTGTCGCAACGTTGAATGAACTGAGCGAAGAAGCTCTGATTGAGATC  
CTCAAAGAGCCGAAAACGCCCTGACCAAGCAGTATCAGGCGCTGTTAATCTGGAAGCGTGATCTGGAATCCGTGA  
CGAGGCGCTGGATGCTATCGCTAAGAAAGCGATGGCGCGTAAACCGGTGCCCGTGGCCTGCGTTCATCGTAGAAGCCG  
CACTGCTCGATACCATGTACGATCTGCCGTCCATGGAAGACGTCGAAAAAGTGGTTATCGACGAGTGGTAATTGATGGT  
CAAAGCAAACCGTTGCTGATTTATGGCAAGCCGGAAGCGCAACAGGCATCTGGTGAATAATTAACCATCCCATACAATT  
AGTTAACCAAAAAGGGGGGATTTTATCTCCCTTAAATTTTCTCTATTCTCGGCGTTGAATGTGGGGAAACATCCCC  
ATATACTGACGTACATGTTAATAGATGGCGTGAAGCACAGTCTGTCTGATCTGATTACCTGGCGGAAATTAACCTAAGAGA  
GAGCTCTATGAATCCTGAGCGTTCTGAACGCATTGAAATCCCCGATTGCCGCTGCGCGATGTGGTGGTTTATCCGCACA  
TGGTCTATCCCCTATTTGTCGGGCGGGAATACTATCCGTTGCTGGAAGCGCGATGGACCATGATAAAAAAATTATG  
CTGGTCCGCGAGAAAAGCTTCAACGGATGAGCCGGGTGTAACGATCTTTTACCGTCCGGACCGTGGCCTCTATATT  
GCAGATGCTGAAACTGCCTGACGGCACCGTCAAAGTCTGGTTCGAGGGGTTACAGCGCGCGGATTTTCTGCGCTCTCTG  
ACAAATGGCGAACACTTTTCTGCGAAGGCGGAGTATCTGGAGTCCGCCACCTTATGAGCGGGAACAGGAAGTGTGGT  
CGTACTGCAATCAGCCAGTTCGAAGGCTACATCAAGCTGAACAAAAAATCCCACCAGAAGTGTGACGTGCTGAATAG  
CATCGACGATCCGGCGCTCTGGCGGATACCATTGCTGCACATATGCCGCTGAAACTGGCTGACAAACAGTCTGTTCTGG  
AGATGTCCGACGTTAACGAACGCTGGAATATCTGATGGCAATGATGGAATCGGAAATCGATCTGCTGCAGGTTGAGAAA  
CGCATTGCAACCGGTTAAAAAGCAGATGGAGAAATCCCAGCGTGAGTACTATCTGAACGAGCAAATGAAAGCTATTCA  
GAAAGAACTCGGTGAAATGGACGACGCGCCGACGAAAACGAAGCCCTGAAGCGCAAAATCGACGCGGCGAAGATGCCGA  
AAGAGGCAAAAGAGAAAGCGAAGCAGAGTTGCAGAAGCTGAAATGATGTCTCCGATGTCGGCAGAAGCGACCGTAGTG  
CGTGGTTATATCGACTGGATGGTACAGGTGCCGTGGAATGCGCGTAGCAAGTCAAAAAGACCTGCGTCAGGCGCAGGA  
AATCCTTGATACCGACCATATGGTCTGGAGCGCGTAAAGATCGAATCCTTGAGTATCTTGGGTTCAAAGCCGTGTCA  
ACAAAATCAAGGGACCGATCCTCTGCCTGGTAGGGCCGCGGGGGTAGGTAACAACTCTCTTGGTCACTTATGCCCCA  
GCCACCGGGTAAATATGTCGATGGCGCTGGGCGCGTGCCTGATGAAGCGGAAATCCGTGGTACCAGCGTACTTAA  
CATCGGTTCTATGCCGGTAAACTGATCCAGAAAATGGCGAAAGTGGGCGTGAAAAACCCGCTGTTCTGCTCGATGAGA  
TCGACAAAATGTCTTCTGACATGCGTGGCGATCCGGCTCTGCACTGCTTGAAGTGTGGATCCAGAGCAGAACGTAGCG  
TTCAGCGACCACTACCTGGAAGTGGATTACGATCTCAGCGACGTGATGTTTGTGCGGACGTCGAACTCCATGAACATCC  
GGCACCGCTGCTGGATCGTATGGAAGTATTGCGCTCTCCGTTATACCGAAGATGAAAAACTGAACATCGCCAAACGTC  
ACCTGCTGCCGAAGCAGATTGAACGTAATGCACTGAAAAAAGGTGAGCTGACCGTGCAGGATAGCGCCATTATCGGCATT  
ATTGTTACTACACCGTGAGGCGGGCGTGGTGGTCTGGAGCGTGAATCTCCAACTGTGTCGAAAGCGGTTAAGCA  
GTTACTGCTCGATAAGTCATTAACATATCGAAATTAACGGCGATAACCTGCATGACTATCTCGGTGTTGACGTTTTCG  
ACTATGGTCCGCGGATAACGAAAACCGTGTGCGTCAAGTAACCGGCTGGCGTGGACGGAAGTGGGCGGTGACTTGTG  
ACCATTGAAACCGCATGTGTTCCGGTAAAGGCAAACTGACCTATACCGTTGCTCGGCGAAGTGTGACGAGTCCAT  
TCAGGCGGCTTAAACGGTGGTTCGTGCGCGTGGGAAAAACTGGGATCAACCTGATTTTTACGAAAAACGTGACATCC  
ACGTCCACGTACCGGAAGTGCAGCGCGAAAGATGGTCCGAGTCCGGTATTGCTATGTGACCGCGCTGGTTTTCTG  
CTGACCGGTAACCGGTTCTGTCGATGTGGCAATGACCGGTGAGATCACTCTGCGTGGTCAAGTACTGCCGATCGGTGG  
TTTGAAGAAAAACTCCTGCGAGCGCATCGCGGCGGATTAACAACTGCTAATTCCGTTGAAAAATAAACCGCGATCTGG  
AAGAGATTCCTGACAACGTAATTGCCGATCTGGACATTCATCCTGTGAAGCGCATTGAGGAAGTTCTGACTCTGGCGCTG  
CAAAATGAACCGTCTGGTATGACGTTGTGACTGCAAAATAGTGACCTCGCGCAAAATGCACTAATAAAAAACAGGGCTGG  
CAGGCTAATTCGGGCTTGCCAGCCTTTTTTGTCTCGTAAGTTAGATGGCGGATCGGGCTTGCCCTATTAAGGGGTG

TGTAAGGGGATGGCTGGCCTGATATACTGCTGCGCTTCGTACCTTGAAGGATTCAAGTGCATATAAATTATAAAGAG  
GAAGAGAAGAGTGAATAAATCTCAATTGATCGACAAGATTGCTGCAGGGGCTGATATCTCTAAAGCTGCGGCTGGCCGTG  
CGTTAGATGCTATTATTGCTTCCGTAAGTGAATCTCTGAAAGAAGGGGATGATGTAGCACTGGTAGGTTTTGGTACTTTT  
GCCGTTAAAGAGCGTGTGCCGCTACTGGCCGCAACCCGACAGCCGGTAAAGAGATCACCATCGCTGCTGCTAAAGTACC  
GAGCTTCCGTGACAGTAAAGCACTGAAAGACGCGGTAAGCTTGTCCCAAGTGGGGATGTGACGAAGTTCAAGGG  
CGCATCTACTGATGTGCCTTTTTATTTGATTTCGGTGACTTTCTGCGTCTTGTGGGCTGACAATTGCCCCGTTTTCTG  
TCACAATAGGCCTTTGCGCGCATCGATACGTTGCGTGAGGTACACAGTCATCTACAGCGGAGTGTTGTTACACCATGATG  
GACAGCTTACGCACGCGTGCACAAACAGTCTCGTGCTCAAGATTATTTTCGGTATCATTATCGTGTGCTTACATTGACCCG  
CGTGAGTGGTTACCTGATTGGCGGAGGCAATAACTACGCCGCAAAAGTGAATGACCAGGAAATCAGCCGTGGGCAATTCG  
AGAACGCCTTCAACAGCGAGCGTAATCGCATGCAGCAACAGCTGGGCGATCAATACTCCGAGCTGGCAGCGAACGAAGGC  
TATATGAAAACCTGCGTCAACAGGTGCTGAATCGTCTGATCGACGAGGCGCTGCTGGATCAGTACGCACGTGAGCTGAA  
ACTGGGTATCAGCGATGAGCAGGTTAAACAGGCGATTTTCGCGACCCAGCCTTCCAGGTTGACGGCAAATTTGATAACA  
GCCGCTATAACGGTATCCTCAACCAGATGGGGATGACCGCCGATCAGTACGCCAGGCGCTGCGTAACCAGCTCACTACC  
CAACAGCTGATTAACGGCGTTGCCGGTACCGATTTTATGCTGAAAGGTGAAACCGACGAGCTGGCGGCATGGTCCGCGCA  
ACAACGCTGGTGCGTGAGGCGACTATCGATGTTAACGCGCTGGCGGCAAGCAGCCTGTGACCGAACAGGAGATTGCCA  
GCTACTACGAACAAAACAAAACAAATTCATGACGCGGAAACAATTCGCGGTGAGTTACATCAAGCTGGATGCCGCAACG  
ATGCAGCAACCGGTTAGCGATGCGGATATCCAGAGCTACTACGACCAGCATCAGGATCAATTCACCCAGCCGCGAGCGTAC  
CCGTACAGCATCATCCAGACAAAACGAAGATGAAGCGAAAGCGGTACTTGATGAGCTGAATAAAGGCGGTGATTTTG  
CTGCATTAGCCAAAGAAAAATCTGCCGATATTATCTCTGCTCGTAACGGCGGCGATATGGGTTGGTTAGAAGATGCCACT  
ATCCCGGACGAACTGAAAAATGCTGGTCTGAAAGAAAAAGGCCAACTGTCTGGTGTATCAAAATCTTCGGTCCGTTTTCT  
GATTGTACGTCTGGACGACATTCAGCCAGCGAAAGTGAATCGTTAGACGAAGTACGTGACGACATTGCGGCGAAAGTGA  
AACACGAAAAAGCCCTCGATGCGTACTACGCGTGCAGCAGAAAGTGAAGCGATGCGGCAAGCAACGACACCGAGTCTCTG  
GCCGGTGCAGAGCAAGCTGCCGGCGTTAAAGCCACTCAGACGGGTTGGTTCAGCAAAGATAACCTGCCGGAAGAGTTGAA  
CTTCAAGCCGGTTGCCGACGCTATCTTAAAGCGGCTGTTAGGTGAAACGGCGCGCCGGGCATCAACTCTGACATCA  
TCACCGTAGACGGCGACCGCATTCTGCTGCGCATCAGCGAGCACAACCGAAGCGGTGAAACCGTTGGCAGATGTT  
CAGGAACAAGTTAAGGCATTGGTTCAGCACAACAAGCTGAACAACAGGCGAAAGTGGATGCTGAGAACTGCTGGTTGA  
TTTGAAGCCGGCAAAGGTGCGGAAGCTATGCAAGCTGCCGGTCTGAAATTTGGCGAGCCGAAACCTTAAAGCCGTTCCG  
GTCGTGACCCGATTAGCCAGCGGCGTTTTGACTGCCACTGCCAGCGAAAGACAACCGAGCTACGGTATGGCGACCGAT  
ATGCAAGGTAATGTGGTTCTGCTGGCGCTGGATGAAGTGAACAAGGTTCAATGCCGGAAGATCAGAAAAAGCGATGGT  
GCAGGGTATCACCCAGAACAACGCACAATCGTCTTGAAGCTCTGATGAGTAACTGCGTAAAGAGGCGAAAAATCAAAA  
TTGGCGATGCGCTGGAACAGCAATAATCTGAAGCCGCTCGAAAAAAATGCGTTGACGCTGTAACAAGAAAAGGTGCG  
TTTTGCGGCTTTTTCCATTTCTGAACATTGCCATTTGTTTACTGTTTTACTGCCGTTAAGGTGATTCCACTGTTAACAA  
ACAAGGAGAAAACAGTATGAAACACGGAATTAAGCACTGCTCATTACCCTGTCCCTGGCCTGTGCCGGAATGTCTCATA  
GCGCGCTGGCGGACGCTTCTGTGGCGAAACCGACGGCGGTAGAAACCAAAGCGGAAGCTCCTGCAGCACAAGTAAAGCA  
GCAGTACCGCGGAAAGCCAGTGACGAAGAAGGCACCCGGTACGATTAATAATGCCAGCGGGAAGAGCTAGCCCGCGC  
GATGAATGGCGTTGGCCTGAAGAAAGCGAGGCGATTGTAGTTATCGCGAAGAGTACGGTCCGTTTAAACTGTGGAGG  
ATCTAAAGCAGGTGCCGGGATGGGCAATTCGCTGGTGAACGTAATCTGGCGGTATTAACCTGTAATTAATTTGCATA  
GTGGCAATTTTTGCCAGACTGAAGAGTTCATACAGTTATGACCTCTGTACTTATAACAACAACGTAAGGTTATTGCGC  
TATGCAAACACAAATCAAAGTTCGTGGATATCATCTCGACGTTTACCAGCAGTCAACAACGCCCGCTACCTTGAATTT  
TCGAAGAAGCCCGCTGGGATGGGTTGGAAAATAGCGACAGTTTTTCAAGTGGATGACGGCCATAACATCGCCTTCTGCTG  
GTCAATATCAATATTAACATATCGTCCGCGGATTAAGTACCTGTTAACTATTACCAGTCAGTTGCAGCAATTA  
CGGTAAGAGCGGCATCTTAAAGCCAGGTATTACTGAGCGGAAAGGCGAGTGGTAGCGGATGCGCTTATTACGTTTTG  
TTTGATTGATCTTAAACGCGAAGCATTAGCTCTGGAAGGGGAATTGCGCGAAAAGCTGGAGCAGATGGTTAAGTAA  
ACGTTTTGTGGTGCCGATGCTCAAGCCGCATCCGCGACACCCGGAATAATTACCTCAACCCGTTTTCTGCTTATCG  
CTGCCATCACCGTCCGTTTTATCGCCAGATAATGATTCAAACCGTTGGCGGTAATACATGCCGACAATGACCGCAA  
CCGTCGCTTTAAAGCCGTTATAGCAGGTCAACGTTTCTGTACGGACTAAATCCAGTTTCCGTAATAATCTGCCAGCGC  
CCAGGTTTCCGCTTATCAATCCACATCAGCGGCGTTTCAAACGAATATCTTTCGCCATGCCAAACTGACGGCATGGT  
TTAGTGCTTTCACAACTCATCGCGCAATCCGGTAGCCGAGAAATCCGTTTCCGAGACGCCAGTAATTACGGCTTCT  
GCTTTTACCTGATACGCATATATTGCCCGCAGCTCAGGAACAAAATATTACGCCCTGGGACAAACGTAATCCGGATACC  
ATCGGCTTCCAGTTTCAATCAGGCACCGAATGCTGTACGCGTCAGGCTACTGACCGCCAGCTCGTTGAGCAGGGTGA  
CATCCAGCACCTTATGCGCGCTGCCCCAGTTTACGCGCCAGTTCGCGTCCAGCTCGATTTCTGCGCGATGCCGCTGA  
CCGTAATCGAACGTCACGCAATGGACTTCATCATATTGTTGTAATGCCTGCACCAGACAGGTGGTGAATCCTGACCTCC  
ACTGAACACAACGACAGCAGTTTTATAGATAATCTGCTTGAACAATAAAAGCGTTATGGTAACGCCTGCGATTAACCC  
GGACCAGCTATTCATTGCGATGGCGCGGGAAGCCAGGCTTCCGTTAAATCAAACAGCCGCGCGGTGTCAGTCCGACACC  
GTTACGCGCGGAGGGGCACTAATGCGATAGTGATGTTGAACAGCGCGTCAGCGTCGCATCTGTCAATTAAGTAA  
AAACCGTTTTAGGGCATTAAATCGGTTTTCTTATCAGGCATTTTGCACGGCATCCAGTGTGATTGATGTGCG



TATGCTGGAGCGTCGAAAACATGTGGCCACAGCGGATCGCAGCGCAGCCATTGCTCCAGAGTATATCCGGTGCTTCGCC  
AATTAATCTGTCGCCCATCATGAGGTCTGCGTGTGCCTGTAGGGTCGTGTCGCCAGTTTTTTGCGTTATGAAAAATAA  
TTGTGAGTTCACAGCCTCCGCTGCCAGTGTGCGCTGTAGGCGTTCTGCCATGGTATGAAGTTCTATCGGTAGGTGATAA  
ACCAGCGTCAAGGTTTTCGGTAGTTTGACTTCATCCGGTACCTGCCAATGCGGAATAGTCCAGCCTGGCAGTAATGCATG  
ACTGGCGGTGATCAGGTTTTCTCCGACTTCTAACGTTTGAATAAACCGGATTGATGAATAATGGAGATCACTTTTCGCG  
CCTGCCAGAGGGAGAGTCGGGGACTTTTTGCGCAACGTCAAATAGCAAAAACCTAAACTGATGCCGCTACTGACCTGGCTG  
ACCCGTTGACGCTCCTCCGTTTGGCGATGGTGATTTGACCGGATGCCGACAACCTGGTTCCCAAATCTTTTTGAAAAAG  
CGGCGGAGTTATCCAGTACTCAACCGCTTAAGCAGCGGATGACGTAAATGGTAATAATCATGGCTTTCCAGGCGCACCA  
GCTCTGCTGTGAATTGTGTTAAGCGAAAAAGACCCGTGCCGATCAGTGGGAATTGCGGATGCCGAGATGGCTGCAATAG  
CTCGCCAGCCGGTGCAGCAAGCCAGTAATCAGGGCGATGTAAGAAGGTCAGACACTGCGGATGGGTGACTTCAATACG  
CTTACGCTAATAAATAATTGATCCAGTGTGGCAGTTGTAACAGCATCAATAATCGTGGTGAAGTGTGAGGCTTTTA  
CTGCATCGCGTTATGCCAGTGTAGGTTGAACGAAGATAAAAGTCCAGCGTAACCCGTAGAGGTTTCCAGTGA  
TGCCTAAATCGCAATCGGGCGCTGAGTATTATCGAAGCGGGTCAGGCCGAAAAATATCTGCCGCGGAGATGCTG  
CTCGGCACGGCCGGGCAAAAAGCCTGGTTGAGCGGTTGAGCGGGGATAGTAGGGAATACGCAACGTGGGTGTATCGT  
TTTGCATTGTCGCCCCATAAACGGCTGAACAGAGTGCAGCTACCTGGGGCAGTTGCCGACACTCCAGCACATCT  
TGTGCTTTCCGGTTTTCCAGTGCCTGTTCCATATCGCATTCGATTGCGTACGATTCCGGCGTGACCAGAAAGCGTAATTGTC  
GCGTTTTCCGGCTCTGACTGCGCCTGCCACTCCAGCCATCCCGCTCTGTGCTGACGCAACAGCGTACGAACATGGC  
GTTGCTGCAAAAACAGCGTTCCGGCAGTTGCTGACGGTGACGGTTTTGCGGTTTTCCGGCGAAGGTTGCCACAGACGT  
TGATACTGGTTAAGACGGTTGAGCAATCGCATATAAACCCGGAACAATATTATTTAACTATCACTATTACTTCCGTATA  
TATCAGGTGATACTCAATCACCATTAACCGTGTACAGAGTGGAGAAAGAAATGGCTCGTCTGGCAGCATTGATATGGA  
TGGCACTTTATTGATGCCCGACCATCATTTAGGTGAGAAAACCTCTCTACTTTGGCGGACTGCGTGAACGCGACATTA  
CCCTCACTTTTGCACGGGGCGTCATGCGCTGGAGATGCAGCATATTCTCGGGGCGCTATCGCTGGATGCGTATTTGATT  
ACCGGAACGGAACGCGCGTGCATTCTGGAAGGTGAACCTTTACATCGTATGATTTACCTGCGGATGTCGCGGAGCT  
GGTGTGTATCAGCAATGGGATACCCGAGCCAGCATGCATATCTCAATGACGACGGTTGGTTTACCGGAAAGAGATCC  
CTGCGTTGTTGACGGCATTGTCTATAGCGGTTTTGTTATCAGATAATCGATGTCAAAAAATGCCACTCGGCAGCGTC  
ACCAAGATCTGCTTCTGTGGCGATCACGACGATCTACACGCTTGACAGTCCAGCTATACGAAGCATTAGCGGAGCGTGC  
ACATTTGTGTTTTTCCGCCACGGATTGCCTCGAAGTCTGCCGGTGGCTGCAATAAAGGCGCTGCATTGACGGTGCTGA  
CCCAACATTTAGGTTTATCGTTGCGCGATTGCATGGCCTTTGGTATGCGATGAACGATCGCGAAATGTTAGTCAGCGTC  
GGTAGCGGATTTATTATGGGCAATGCGATGCCGCAACTGCGCGGGAGCTCCCGCATTACCGGTGATTGGACATTGCCG  
AAATCAGGCTGTCTCACTATTTGACGCACTGGCTGGACTATCCACATCTACCTATTCCCCGAATAACGAGATCCCT  
TCCAGCACCGGCAATTGCCCGTTTTTTTTGCGTTGAATTTGCATTTTGTGCCGTGGTGTAAACCCGCACAGAATAA  
ATTGTCGTGATTTACCTTTAAAATAAAATTAAGAGAAAAAATTCTCTGTGGAAGGGCTATGTTAGATAAAAATTGAC  
CGTAAGCTGCTGGCCTTACTGCAGCAGGATTGCACCCTCTTTGACGGCACTGGCTGAAGCCGTTAATCTGACAACCAC  
CCCTTGCTGGAAGCGCCTGAAACGGCTGGAGGACGACGGTATCCTTATCGGCAAGTCCGCTGCTGGATCCGGAAAAAA  
TAGGCTCGGCTGACCGTTTTGTGTGATAAAAACGCAACATCACAGCAGCGAATGGTATTGCCGCTTTGTCACGGTG  
GTTACCGAAATGCCAGAAGTGTGGGTTCTGGCGCATGGCTGGTGAATACGATTATCTGATGCGCGTCCAGGTTGCCGA  
CATGAAACGCTACGACGAGTTTTATAAGCGTCTGGTAAACAGCGTGCCGGGGCTGTCGGACGTCACTCCAGCTTCGCGA  
TGGAAACAGATTAATAACCACTTCTTACCATCGAATAAATACCAGAATCAGGTGAGGACACAACCGCTGCGATTAT  
TTGCTCAATTAAGCTGGTATTTCCGTGCGGAATGGCTGCTATCTCGGGCTGTCGCTTGTCTTATTATCGCGATG  
CTGCAACTGGTCCGCCAAAAGTGGTGGTATTGTTGTCGATGGCTGACAGAAACAACCTTTACTACGGGCGATCCCT  
GATGTGGATCGCCACCATTGTGCTGATTGCCGTTGGTTTTATCTCCTGCGTTACGTCTGGCGGGTATTGCTGTTGGTG  
CGTCTTATCAACTGGCTGTTGAACTGCGTGAAGATTATTACCGTACGTAAGCCGCGCAGCATCCTGAGTTTTACCTGCGT  
CATCGCACCGGTGACCTCATGGCTCGTGCACCAATGACGTGATCGCGTCTGTTTTGCCGCGGAGAAGGGGTGCTGAC  
GCTGGTGGATTCACTGGTATGGGCTGCGCTGTGTTGATTATGATGTCTACGCAAAATAGCTGGCAGTTGACCTATTTT  
CCCTGTTGCCGATGCCAGTATGGCGATCATGATTAAGCGCAACGGCGATGCTTTGATGAACGCTTTAAGCTGGCACAG  
GCGGCGTTTTCCAGTCTTAATGACCGCACCCAGGAAAGCCTCACCAGTATCCGCATGATCAAAGCCTTTGGTCTGGAAGA  
TCGCCAGTCCGCGTTATTTGCCGCGGATGCCGAAGATACCGGCAAAAAAACATGCGGGTGGCGCGTATTGATGCTCGTT  
TCGACCCGACCATCTATATCGCGATTGGTATGGCGAATTGCTGGCGATTGGCGGGTAGTTGGATGGTGGTGCAGGGC  
AGTTAACGCTGGCCAGCTCACCAGTTTTATGATGATTTAGTCTGATGATTTGGCCAATGCTGGCGTGGCATGGAT  
GTTAACATTTGGAACGTGGTGTGCTGCTACAGCCGATTCGCGCGATGCTGGCGGAAGCGCCGGTGGTGAACGATG  
GTAGCGAACCCGTGCCGGAAGGGCGTGGCGAACTGGATGTAATAATTCACCAGTTCACGTATCCGCAACTGACCATCCT  
GCGCTGAAAAACGTCAATTTGCCCTGAAACCCGGTCAGATGCTGGGTATCTGCGGGCCGACTGGTTCCGGCAAAAGTAC  
CCTGTTGTCGCTCATTACGGCTCATTTGACGCTCAGCGAGGGGATATTGCTTTTCATGATATTCCTCTGACGAAGTTAC  
AACTCGATAGCTGGCGTAGCCGCTGGCGGTAGTTAGCCAGACGCCATTCTTTTTTCTGACACTGTGGCGAATAACATC  
GCGCTGGGTTGCCGAATGCCACCCAGCAAGAGATTGAGCATGTCGCGCGGTTAGCCAGCGTACATGACGATATTTTGGC  
TCTACCGCAAGGTTACGATACAGAGGTGGGCGAGCGCGGTGTGATGCTTTCCGGCGGGCAAAAACAGCGTATCTCCATTG

CTCGTGC GTTATTAGTCAACGCGGAAATCCTCATCCTTGATGATGCGCTTTCGGCGGTGGACGGACGCACTGAGCACCAG  
ATCTGTCATAACCTGCGTCAGTGGGGCAGGGAAGAACGGTAATCATCAGTGCCATCGCCTTCTGCACTGACGGAAGC  
CAGTGAAATTATTGTGATGACGACGACATATCGCCAGCGTGGCAATCATGATGTGCTGGCACAACAAAGCGGCTGGT  
ATCGCGATATGTATCGCTATCAACAACCTGGAGGCGGCTCGACGACGCTCCGAAAATCGCGAGGAGGCCGTCGATGCG  
TAGTTTTAGCCAACTGTGGCCGACTCTCAAGCGCTGTAGCGTACGGTTCGCCGTGGCGTAAACCGCTGGGGATTGCGG  
TCCTGATGATGTGGGTTGCGGCGGCGGAGAAGTCACTGGGCCGTGCTTATCAGCTATTTTATCGACAATATGGTAGCG  
AAAAATAACCTGCCGTTGAAAGTGGTTGACAGGGCTGGCTGCGGCTATGTTGGGCTGCAACTGTTGCGCCGGGCTACA  
TTACGCGCAGTCGCTGCTGTTAATCGGGCGCAGTAGGCGTAGTGCAACAGTTGCGTACCAGCTGATGGATGCTGCGT  
TACGCCAGCCATTAAGCGAGTTTGATACCCAACCCGTCGGGCAGGTGATTTCCCGCGTCACTAATGACACTGAAGTGATC  
CGGATCTCTACGTTACCGTAGTGGCAACTGTCCTGCGCAGTGCCGCGCTGGTGGGCGCGATGCTGGTGGCGATGTTTACG  
CCTCGACTGGCGAATGGCACTGGTGGCGATAATGATTTCCCGGTGGTGTGGTGGTAAATGGTGATATACCAGCGTTACA  
GCACGCCGATTGTCCGTCGTGTGCGCGCTATTTGGCGGATATCAACGACGGCTTAAACGAAATCATCAATGGCATGAGC  
GTTATCCAGCAGTTTCGTGACGAGCGGATTTGGCAACGTATGGGGGAGGCCAGTCGTTCACTATATGGCGAGGAT  
GCAAACCTGCGCCTCGACGGTTTTCTGCTGCGTCCGCTGCTGAGTCTGTTTTATCGCTATTCTTTGGGCTTGTGA  
TGCTGTTTGGCTTCTCCGCCAGCGCACCATTAAGTGGGCGTGTATGCGTTTTATCAGCTATCTTGGGCGAGTTAAC  
GAACCATTAATCGAACTGACCACGCAACAGGCGTAGTGTGCAACAGCTGTTGTTGCTGGTAGCGCTGTTTGAAGTAT  
GGACGGACCGCCAGCAATATGGCAATGATGATCGCCGTTACAGAGTGGCACCATCGAAGTCGATAACGTGTCATTTG  
CTTATCGCGATGACAATCTGGTGCTAAAGAACATTAATCTCTCTGTGCTTTCGCGCAATTTTGTGGGCGTGGTGGGCAT  
ACCGGCAGTGGCAAAAGCACCTCGCCAGTTTATTGATGGGCTATTACCCGCTAACGGAAGGTGAGATTGCGCTTGATGG  
TCGTCCATTAAGTTTCGCTAAGTACAGCGCGCTGCGCCAGGGCGTGGCAATGGTGCAGCAAGATCCGGTGGTGTGGCGG  
ATACCTTCTCGCAACGTGACGCTGGGGCGGATATCTCCGAAGAACGCGTCTGGCAGGCGTGAAACCGTGCAACTG  
GCGGAGCTGGCGCGTAGCATGAGCGACGGTATTTACACGCGCTGGGCGAGCAGGGGAATAATCTCTCAGTTGGGCAAAA  
GCAACTGCTGGCACTGGCGCGCTGCTGGTGCAGACCGCAATCTGATCCTTGATGAGGCAACCGCCAGCATTGACT  
CCGGTACTGAACAGGCGATTCAACATGCTCTGGCGGCGTGCCTGAAACATACCAGCTGGTAGTGATTGCTACCGCTTA  
TCGACCATTGTTGATGCCGACACCATTCTGGTCTCATCGTGGCAAGCCGTGGAGCAGGGCACTCACCAGCAACTGCT  
GGCGGCCAGGGACGCTACTGGCAGATGTATCAACTGCAACTTGGGGCGAAGAGCTGGCAGCCAGCGTGCCTGAAGAGG  
AATCATTGAGCGCCTGAATAGCGCAATATTTATCGTTGGTGCAAAAATGTAACGCACTGTGCACTGTCATAGTGCCTT  
TCATTTTCAAACCTTCTAATCTCTGCTCTTTCTCGTTTTTCAATTTCTGGCACACCGCTTGCAATACCTTCTTCGTGT  
AGCAGAACCATTACCAATCTGACCGGAGGGGATCTATGAAGCTGGTGACCGTGATAATCAAACCTTCAAGCTGGAAG  
ACGTTTCGTGAAGCGTTATCTTCCATTGTTTACGGCCTGACCGTCACCGAAGTGAAAGGTTTCGGGCGTCAGAAAGGG  
CATGCCGAGCTGTACCGGGGGCGGAATACAGCGTCAATTTCTGCCAAAAGTAAAAATTGATGTGGCGATTGCTGATGA  
CCAACCTCGATGAAGTGATCGATATCGTCAGTAAGGCGGCTTACACCGGAAAAATTGGCGACGGCAAAATCTTCGTCGCTG  
AATTGCAACGCGTCATTCTGATTCGTACCGGCGAAGCCGACGAAGCGGCGCTGTAATCTCTGGCACACAGCAACAGGAAC  
GAAAAATGAAGATAGCGACGATAAAAACCTGGGCTTGCTTCACTGGCGATGCTTCCGGGACTGGTAATGGCTGCACCTGCG  
GTGGCCGATAAAGCCGACATGCGTTTATGATGATTTGACTGCGCTGGTGTGTTTATGACTATTCCGGGGATTGCCCT  
GTTTTACGGTGGGTTGATTGCGGGCAAAAACGTGCTGTCGATGCTGACGCAGGTGACCGTGACATTTGCACTGGTCTGTA  
TTCTCTGGGTGGTTACGGTTACTCGCTGGCGTTTGGTGAGGGCAACAATTTCTCGGCAACATTAACCTGGTTGATGCTG  
AAAAACATCGAACTGACGGCGGTGATGGGCGCATTATCAGTATATCCACGTGGCGTTTCAGGGATCGTTTGCCTGCAT  
TACCGTCCGGTTGATAGTTGGGGCGCTGGCGGAACCAATCCGTTCTCAGCTGTTGATTTTCTGGTGGTATGGCTGA  
CGCTCTTTACATTCGATTGCGCATATGGTGTGGGCGGTTGGTGTGCTGGCTTCTCACGGTGCCTGGATTTCCGGGT  
GGCACCGTGGTGACATTAACGCCGAATCGCCGCTGGTGGGCGCGTATCTGATAGGAAAACCGCTGGGCTTCCGGTAA  
AGAGGCGTTTTAAACCGCACAACTGCCGATGGTCTTACCAGGACTGCCATTCTATATCGGTTGGTTTGGCTTAAACG  
CCGGGTGACGGGCGCGCAATGAAATCGCGCACTGGCATTGTGAATACTGTGGTGCACAGCGGCGGCAATTCTT  
GGCTGGATCTTCGGTGAATGGGCGCTGCTGGTAAGCCTTCACTGCTGGGGCGTGTCTGGCGGATTGCCGCTGGT  
CGGCGTGACGCCAGCCTGCGGTACATTGGGGTTGGCGGCGGTTGATTACGGCGTGGTAGCTGGTCTGGCGGCTTGT  
GGGGCGTTACCATGCTCAAACGCTTGTGCGGGTGGATGATCCCTGCGATGCTTCCGGTGTGACGGCGTTTGTGGCATT  
GTCGGCTGTATCATGACCGGATTTTTGCGCCAGCTCGTGGCGGCGTGGGCTTCTGCTGAAGGTGTGACGATGGGCCA  
TCAGTTGCTGGTACAGCTGGAAAGCATCGCCATTACGATGCTGGTCCGGTGTGGTGGCATTATCGGCTACAAATGG  
CGGATCTGACGGTTGGTCTGCTGTACCGGAAGAGCAGGAGCGAGAAGGGCTGGATGTCAACAGCCACGGCGAGAATGCC  
TATAACGCGTAAACAGCACTGCAAAAAACAGCCGGACGGTTTTTACCTCCGGCTATTTTTTAAATTGTGATTACGCATCA  
CCCCTTCTGAACGGTTCGAGGCAACAGTACGCCGCTTGGGTATAAAAACCTCACCGCGACAAAGCCACGTGCGCTGGAC  
GCCGAGGTGCTCTCCAGCTATACAGCAGCCATTCAATCAAATTAACGGGCGATGGAACCATGGAATGGTCAATGGT  
GGCAATCTGAATCCCGGTTTCGAGAAAACCGATGCCGTGCGGCTGTAGAGCTACCGGCAGGAAGTTAAGATCAGAAGCGT  
AACCGAGCAGATACTGATGAACGCGCAGTTCATCCGCGACGCTACCAATTTGCGCGGATCCACACTGACGATGTGGTTCT  
GCGACGTGACCTTTCAGTGGGTTATGAACTCCACCGGACGACTTCCAGCGGACGATCGCAGATGAATTTATCTTTCAG  
CACTGGCGGACGAGGTGCGCCAGCGATTGGGCGATTTGCGTTTTCCGAAGGGAGGCCATCAGGCGCTGGCGCGGACGGCA

TTGTTTTTGTATGTTGAAACCCGCTTCTGGTGCCTGGAAAGAGGCAGTCATATAAAAAATCGTTTTGCCGTTTTGAATA  
GCAGCAACCCGGCGGGCGCTGAAGCTGTTACCGTCACGCAGCGTTTTGCAGATCATAAATAATCGGCTTCTACTATCGCC  
AGGGCGAAGAAAGTAGCTGTGAAACGAATGTACCAGCCGCTCTCAGGGACGGTCTCTTTTGCAGCATAACAAGCCCTGAC  
CCACGACCTGGCCGCAAACACCTGGCGTAAACCTAAATCTTCACTCTGGCCGCGAAAGAGTCCTTCTCAATTTTTTCC  
AGATTTAACAATGTACAGTAAATTTTTAGCGCCTGACTCATATAACTCTCCAGTAAACAAAGCTGCCGAGCAAGCCAAAG  
TGAGTTGAGTATAACGCAAATTTGCTACTGGTCCGATGGGTGCAATGGTCTGAATTACGGGCTAATTACAGGCAGAAATG  
CGTGATGTGTGCCACACTTGTGACGTTACTATTTTGTAAACCACTCTTCCGGCGAGGAAAGTTAGCCCGCTGGTGCATT  
GATAATAAGGAGAAATGAATGAAACTCGTGACATGGCCAGTGGTTTAGCGGTTGCGATTGCGTTGGCGGCTTGGCAGAA  
TAAAAGCGCGGATATTACAGACGCCAGCACCGGCTGCAAATACGCTATTTTACAGCAACAACAACCAGCTATCCAGCAAC  
CGAATGTCTCCGGTACCGTCTGGATCCGTGAGAAAGTGCAGTCCCGCTGATGCTGTGCTGACCGTGACACTTTCTGAC  
GCGTCGTTAGCCGATGCACCGTCAAAGTGTGGCGCAGAAAGCGGTGCGTACTGAAGGTAACAGTCACCATTACAGCTT  
TGTCTGTCAATTAACCCGGCAGATGTTACGCCGAACGCGCTATTCTGTTGAGTGGCGGATTACCGTGAATGACAAAC  
TGGTATTTATACCGATACCGTTACGCCGGTGTCAACAGGGCGGAACTAAAGCCGACCTGACATTGGTCCCGGTACAG  
CAAACCGCCGTGCCGTTACAGCCAGCGGTGGCGCAACGACTACCGTACCTTCGACTTCACCAACTCAGTGAATCCGTC  
TTCGGCAGTTCAGCTCCTACGCAATATTAAGCGACCTAACCTCTCCGCCGAGAGGGTTAGTAGTCCAGCGATAA  
CGTGCAAGTGCATTTGCCGCTTCCCGATACCATCACACTTCTGCCAGTAATGCCTGTGCTGACGTTGAAATCCGG  
TCCGGTTAGCGAAATTTGCCGTTGGCGATTAACCACCCGGTGCCAGGGTAAGGTGCTGCCTTACGGGAGACGCTTTAAACA  
CACCCGCCACCTGGCGCGGGCGGGGGCGATCCCGCCAGTTTCCGCACATCACCGTAAGTGGTGACATAGCCTTCGGGA  
ATAGCGGCGACGATTTGCCAGACGCGTTGGGAAATGAATCTTCTTTTCCATCTTTTCTTCTGAGGTAATTTTTCAGC  
ATAATCTGAAAAACGCCGAGTGAAGTGCATTGCGCAAGAAACCAGCATCTGGCAGCGATGGGTTGCAATTAGCCGG  
GGCAGCAGTGATAATGCGCTGCGCGTTGGTTCTCAACGCTCTCAATGGGGCTCTGTTGGTTCTCCCGCAACGCTACTC  
TGTTTACCAGTCCAGTCCGGAAGGAAGCAGCAAGGCAGATGACGCGTGTGCCGGATGTAGCTGGCAGGGCCCCACC  
CATTTCTGCCTCCACCGTTTCTGCAAAAAATCCCAACATGGCTAACTTTAACCAACTGACGTGCAAGAATTGTCT  
GGCTGCGCAGTACGTTCCGAGGTATGTCTGATGAAGTATGTTGATGGTTTTGTGGTTGCCGTTCTGCCGATAAAAAGG  
ATGCCTATCGGAAATGGCCGTAAGGCTGCGCCATTGTTAAAGAGTTTGGCGGCTTCGATTGTCGAATGCTGGGCC  
AGCGATGTACCGATGGCAAAGTACCGATTTTCTGATGGCGGTGAAAGCGGAAGAGAATGAAGAGGTTGCTTTAGCTG  
GATTGAATACCCTTCAAAGAGTCCGCGACGCTGTAATCAAAGATGATGTCGACCCACGGATGAAAGAGTTCCGGCG  
AGTCCATGCCGTTTACGGCAAGCGAATGATCTATGGCGGATTGAGTCAATCATCGACGAATAGGTAGCGTGACGGGCT  
GTGCCGCGTGGCTCAGCCAAAATTCACAAATGTTGCTCGGCCAGCGTAAGAAATCTTCTTTCGGTAAATGCCTTGCT  
GTAGAGCCAGCCCTGACCGTAGTGACGCCATGCTGGCGTAACCACTCTTCTTGTTTACTGGTTTCGATTCCCTCCGCTA  
CCATTTTCAAGTTTCAAGTGTGTTTCCATTTGATGATATGCGGCGTGACATTTTATATCCAGCGCATCAACGAAAGAT  
TTATCGATCTTCAAGATGTCGACATCCAGATCCTGTAATAACTTAACTTGAATACCCCGTACCAAATCATCAAGATA  
AATTTATGGCCCGCTCCCGGTAGCGAGAAATTTACGGGGCGCTGGTTTTCGGATCGGCAAACCTCGCGTTCAGTGAGTT  
CAAGCGGATCTGTCTGGGATTAACCTGATAGTGATTGATCATGTACGCAGCAATTGCGGGATTTTTTCCGAGGTGAGC  
ACGGGGGATTAAGATTGATCGAAATATGCTGCTGTGGATGCTGACGCAGCCAGTCGCCATATCTTCAAAGACGCTTCT  
TATAATCAGTAGCGTCAATGGCTCAGAAAGGCCGTTTGTGTGCCAGCGGAATAAAACTATCTGGTGACAACCAACTAC  
CGTCTGTCTGCGGCCAGCGGCCAGTGCCTCAGCACGCAATTTTCCATTGGCTAAGGAGACAATCGGCTGATAGTGC  
ACGCAAAATACAGATTTTGCATAGCATCCTGCAGCCGATGATGCGGTGACTGAATACGGCGCAAAATACGCAGCAGAAA  
CATCGTCCAGCAGGCCAATCACCAACCCGAGCGGTAACCAAATAAGACTTCCGATGCCAGCCTTTCTGCAACATTT  
TCGTTGAAGCCATGTGATGATCGAAATATTCATCTCCGGTAAGGGCAGGATATCGTAAATGATTCCATTATTTTCGATA  
TGCTCACCGGTGTTTTTTGTAGCCTGGTAATAATCCCTGAGCAATTTTATCGCTGCTGGTTATGACAACGTTATGGGC  
ATTGCCAATAATGGCGGCATCAATTTGCCATGAGCTATAGGGAATGACATCAATAAAGGAAGCGGGTGCATCATGACGA  
CATAATGTGCCGTTCCATGGCGACCATGTAACGGATAATGCCTAAATCGTTATGCGATGTTAACCAGACACGATAACCA  
TCTTTGAAATTTTACCTGGCTCGGGGAAGGTATCGGGCGACTTTCATGCTCCAGAGACGAACACTGGGGAACGTTGTT  
ATCGATATAAGCCACTTCTGAATATAGCGATAACTGTAAGATACCCGACGATTTCCATGAGATGGGCTTCGCTACAGG  
CAGCGCCTTGCATCTTTCCAGCTCCTGCAGCGCATCTTCCCTTGTGTGCCACCTTATTGGCTCGAATAGCGACGCGG  
GAGGAATAGGTATCCAGCTTCAATAAACGATGTTTCACTGCTGATGGCCAGCCAGATGCTTAAGCCGACAGGCAG  
CAATACTGAAAGAATCAGTACTCCGAAATAAGGCCAGCAGATGTCGTGTTCTACCAGCATATCCTTATTAACACAGT  
GTAGGGAAGTATATCTGATTGTGAAAAAGGCTGGCTGGAGATAAGGAGGTAGAGCTGGTATTTTATGAAGTATGGGT  
GGAAACGATCATTGTCTTTGACAGGCGCAGAGCTTACGCCTGGTATGTAACCCTAACTAAGATGTTGATTCCGGCG  
GAGCGAGGGTAAAAATATCGTAAAAAGACAGTTCACCTTACGGACGATCATTTTTTGCAGTTGTTCTTATGAACATCC  
CGCACACGCGGAGAGTTCAAGATGGCTTCAACCAGCGCGGAGGTACAAAGCGCGTGTGTACCATTCCCGGTTATAGCA  
AACGCGGAAATCCAGCAGTCGATATCTCATAGCGGTAGCGTGGGTAGACATCGAAAAAGAAAGAAACCTTAAGCAGGA  
TAAATAATACAACCAGTAGCCAGACAGAGCCTGACAGCGTTTTCGACTGCAACATCACCGCCAGGGTGGCAAAAAAGCA  
ACGTACATACCATAAACAGCCCGGATGTTTACGGATAAACTGATACTAAAGCGGGGTTTGTGTCGCGTTTTTCCGG  
GGTATTCAGAGACTCAATCGTTTTGGTTCAGCAGCGGTTGATTTCCGGTCATCGTTTTGCCTCGTGGTATCTGCAACTTC

CAGGGAACACCCTATTTTAACTGGGAATAGTAGAGGGGAAGTAACAGATCTACCACAATTTTGCATAACAGTTGCGAAA  
AACCGATTACAATTTTTTAAATTATTCTGGCTGGATTACCGCCACGACAACGTTGTCCGGGACATCTTTTGTGACAACGT  
CACCTGAGGCTACCACGACGTTATACCAATGGTCACACCAGGGTTAATGACC GCGCTCCGCAATCCAGACGTTATTA  
CCGATGGTGACGGGTTTCCCGAGTTACAGCACCGCTATTACGTGCTACAGGGTCGATGGGATGTGTTGCCGTGTAGATATG  
AACGCTGGTGCCAACATACAGTTATACCGATGCGAATAGGGCAGACATCAAGCATCACGCAATCGAAGTTGGCGAAAA  
AATTATTACCGAGAAAAATGTTATAGCCATAGTCACAGCGAAACGTTGGCTCAATATAAGCCTCTGTACCTGACCGAAT  
AGATCAGCGAGAAATTTGCTGGCGTAATGTGTGCTTCCGCCAGGGAATGATTGTATCGGTGAATAAGCTGACGAGCGCG  
CAGGCGATCGCGAGATAACGTTCTCATCTGCCGAGCGATACTCAACAGCAATCATCTTTTCTTTTCTGTGCTCATT  
CTGACCTCCGTTGCTGAAAATGCGGCAACACAGTAAGACGAAAAGTCAGTGAAGAGAACGTTCCATTACATCTGTGTG  
ATAAAGATCACATAGGGTATGTCTTATGGCGAAAAAGTATAAAATTTCTTAATAAACAGCCGGTTATAGCTCCGAAAGCG  
AATTATTTATTAGCGAATAAATTTCCATACTGAGGAAGGGATCTTGTGCTACAGTTTATTCATGGTCAATTCGGCGAGGC  
GGTATCTGCGGCTGAGTAAAATACCGCCAGTTTATTATCTGATAAATTCGATTTATTTTTCTCGATAACACGCTCCAGC  
GTGTCAATTGTCTGGCAACGACGTAACGCATTAATAATCGTTTTGTTAAAGGTTTTTCGGACATACTTCTACCTAT  
GGTTGTAATAATTCTAACAGATAAACTCGCAGGATCTCTTTGTCGATTGACAAAACAACGGAATAGCTGATTACCT  
GACTTCCGCCATTTCTGAAGATCCTGCATATTAATACCATAACTACTGAACAACATAAAGGTGTCCATCCAGATATTCGTC  
GATCTGCTCAATGAGCTTATTGTCTTCTTATTACTTAATTTTGAATTAAGTGAAGGTCGAAGGTCGAATATGCTCAATCAGTT  
CATTCAACTGGAGGTTGATCGCCGAGGTTGGGTGTTTTACCCAGCCATGATTGCTTTTCTCAAGGTTTGCAGGCGAGTCA  
TGATACAGGGTTTACAGAGAACTTAAGCTGTGCGATATCATGTCTTTGGGTGAGTATTCATCCATAACGCGTCCCT  
TCTTAGCGTTGAACTAACGGACACCTTTCGGGATGAAAAAACTTACTGACCTGGACTTGCCTCTCGTTTGTAGCTT  
AACTATAAGCCACTCTTTCAGGTTTTTCATCGCATTATTACGAAAAATTACAATTAGGAAGGAAGCGGGACAGGACTCAC  
TTTTTCATACTAGCACTAACCCGACGAGGTAAGCAGTTTGTCTGAACTATTATAACATTTTCCAGGATTATCGCCAGA  
TGAAATTGGTGACACTAATACCAGGATTGCTCTGAATATGACGTAATAACCGAGGAATGAATAAAGAATTACCGAAATA  
ATTAAGAATAGCCTCTAAATGATTATGGATTATTAATCTATTAGCGCTACTTAATAAATTAACCTAACATCAGTATT  
TTTTATGAATTTTATCCGTGGTTAATACTGGTTTTGCTATGAGATCTGAGTTGGTGGTTCAATTACTCCTTAATGTTG  
TAGGTTATGCATAAAAAAGCCGCTTACGCGCCTTAGTGATTACAGTTGTATCAATGATGATCGACAGTATGGCTGTG  
CTCGATATCTTATTCTTGGGCTAAAGCGGCGGCAACCACCACAAAGAATACCGGAACGAAGAAGATTGCCAGTACCG  
TTGCGGTACCATCCCGCCATTACACCGGTACTACTGCTTCTGCGCGCCGAAACCAGCACCAGTACTGATAACCAGC  
GGCATAACCGGAGGATAAACGCCAGCGAGGTCATCAGGATCGGACGTAACGCATCCGCACCGCATCAAGCGTCGTT  
AATCAGACCTTTACCTTCTTATCCATCAAGTCTTTGGCGAATTCGACGATAAGGATCGCGTTCTTCCGCCACAACCCAA  
TGTTGTGAGCAGGCTACCTGGAAGTAAACGTCATTGGTCAGGCCACGGAAGTGGCAGCCAGCAACGCACCGATAACC  
CCAGCGGAACGACCAGCATAACGGAGAACGGAATCGACCAGCTCTCGTACAGCGCCGCGCAGACACAGGAACACGACAAT  
CAACGAAATCGCGTACAGTGAAGGTGCTGTTGCCGGAGAGACGTTCTGATAGGACATCCCGTCCAGTCATAGCCAA  
CACCGGTAGGCAGTTTGTCTGCCAGTTGTTCCATCAGCTCCATTGCTTACCAGGTACTTTTACCCGGTGCCGCTGGCCT  
AAGATTTCCATGGATGGCAGGCCGTTGTAACGTTCCAGACGCGGCGAACCGTACTCCCAACGAGAAGAGGAGAACGCCGA  
GAATGGCACCATCTGACCATCAGCAGCACGAACATACCAGTCGCCGATATCATCCGGCAGCATACGGTATTTGCTTCTG  
ACATGACATAAACTTTCTCACACGACCGCGGTGATAAAGTCGTTACATAGCTGCCGCCCATGCAGCGCCAGAGTG  
GTGTTAATGTCGTTGATAGAAAACCCAGCGCTGCGCTTTTTCTGGTCGATATCAATCTTAAACTGCGGGGTATCTT  
CAGACCGTTTTGGACGTACGCTGGTCAACATATCAGGGTCTTCTGCTGCTTCTGCAAGCAACTGGTTACGCGCCTGAGTCA  
GTTTTTCTGACCAAGGCCAGCCTGGTCAATCAGTCAAAGTCAAAGCGGTTGACGATCCAGTTCCACGATTGCGGGC  
AGGTTAAAGCGAAAACCATCGCATCTTTGATTTGCGAGAAAGCGCTGTTGCACGCATGGTAATCGTCTCAACTGTT  
TTCTTCCGCCGACGATCGGCCAGTCTTCAAGGAAACGAAACGCAATACCGGTATTCTGACCACGTTCCGCAAAGCCGA  
AGCCGTTAACGGCGAACCCGACTCAACGTTGTTCTTTCTTGGTCAGATAGTAATGCGTTACCTCATTGAGCACTTTC  
TGTGTACGTTCTGCGTTGCACCTGCTGGCAGCTGAACCATGGTCATAAACACGCCCTGGTCTCATCTGGCAAGAAGGA  
GCTTGGCAGACGCACGAACAGATAGGCCATGCCGACCAGATGATCAGATACAGCACCAGGTAACGCCCGTACTGCGCA  
GAATACCGCTACGCTGTGGTGTAGTGGTGGTGTCTTCTCGAACATGCGGTTAAACCAGCCGAAGAAGCCTTTTTTA  
CCTTCCCGTGATCGCTTTGGCAATCGGTTTCCAGCATGGTGGCACAAGAGCTGGAGTCAGGATCAACGCCACCAGTAC  
CGACAGCGCCATTGCTGAAACAATGGTAATAGAGAAGTACGATAGATAGCACCAGTAGAACGCCAAAGAAGGCCATCG  
GTACGAATACCGCGACAGTACCATCGCGATACCGACCAGAGCGCCTGAATCTGCCCCATCGACTTACGGGTAGCTTCT  
TTTGGCGGCAAACCTTCTCCGCATAACAGCTCAACGTTTTTACCACAACGATGGCGTCATCCACCAACAGGCCGAT  
GGCGAGCACCATCCGAACATTGTTAGCGTGTATCGAGAAGCCAAAGGGCGCAAGGACGGCAAAGGTTCCGAGCAATA  
CCACCGGTACGGCAATGGTCGGAATCAACGTCGCGCGGAAGTTCTGCAGGAACAGATACATAACCAGGAACACGAGGATG  
ATCGCTTGCACAGCGTTTTAACCACTTCGTGAATAGAGATTTTACGAACGCGGTGGTGTGATGGGTAACAATTTT  
CAGACCCGACGGGAAGAAGCGTTCCATCTTCCGAGTTCAGCACGGATTGCCGACGCGGTATCCAGCGCTTTGACCCGG  
TCGCCAGCTTATCCCAGACCGGAAGCCGTTGGCCGTTAAACTCTGCGATGATGTCGTAGTTCTCACCAACCAGCTCA  
ATCTTCCGACGTCACGCAGCAGCAGCGGGAACCATCCTGATCACTTTTACGAGGATTTTGGCGAACTCTTCAAGTAGA  
GGTCAGACGCTGTGAGCAATAATAGAGCGTTAAGCTGTTGGCTTTTACCAGCGCGGTACCACCGAGCTGACCCGCCG

CAACCTGGGCGTTCTGCGCTTTGATGGCGGTAATGACATCAACCGGCGTTAGCTGGAATTTGTTTCAGCTCATTGCGGTTT  
ATCCAGATACGCATCGCTACTGTGAACCGAACAACGAACATCACCCACGCCGACGTACGGCTGATGGCATCTTTTCAT  
ATTCGCCGCCACGTAGTCGGAGATATCCTCCTGCGTCATGGTGCCATCGGTGTTGATAACGCCGACAACCATCAGGAAGC  
TGCTGGATGATTTCTCAACGCTCACCCCTTGTCTGCTGAACTTCTTGCAGCAGCAACGGCATCGCCAGCTGCAGTTTGTTC  
TGCACTGAACCTGCGCGATATCCGCATCAGTACCAGACTCAAAGGTCAGGGTGATCTGCACGGTACCCGTGGAGTCACT  
GTTAGAGGACATGTACATCAGGTTATCGATACCGTTTCAATTTCTGTTTCGATAAACCCTGTGTACCGTGTCTGCACTGTTT  
TCGCATCAGCGCCGGGTAGGAGGCGGAGATCGTTACTGCCGGCGGTGCAATCGTAGGATATTGCGCCACCGGCAGTTTG  
AGGATCGCCAGCCCCCTGCCAACATGATGATAATGGCGATCACCCACGCAAAAATCGGGGATCGATAAAGAAATTAGG  
CATGTCTTAACGGCTCCTGTTTAAAGTTAAGACTTGGACTGTTTCAGGCTGAGCACCGCTTGGCGTTGCTGGTTATTATCA  
GGGTAACCTTCTGTGCTTTTACCTGGACACCAGGACGCACTTCTGCAGCCACTTATTACTACGCGATCGCCTGCTTT  
CAGACCTTCTGTACCAGCCACTTATCGCAATAGCCTGGCTTGAACGATCGGACGGGTTTCACTTTGTATCCGCGC  
CAACTACCAGTACGGTGGCATCGCCACGCGGCGTACGGGTTACGCCCTGTTGCGGGACTAAAATAGCGTTTGGATTAAGC  
CCTTCTCCAGACGTGCGCGCACGAACATACCCGGCAGCAGAGTGTGATCCGGGTTGCGGAAGATAGCGCGTAGGGTGAT  
AGACCCAGTGGTCTGATCAACGGTAACGTGAGAGAAATCCAGCCTACCGTCTGCGGGAACCTAATGCCGTCACTGGTGA  
TCAGTGACACTTTGGCTTTGCCGTTCTTGTTCAGCGTGCATTGCCAGTTCCTGTTTCAGGCGCAGGAAGTCACTGTTG  
CTGGACTGGGTACATCAACGTAGATCAAGTTCAGTGCACCGTTGCCAGCGCAGTGCCTGACCGTTGCTGTACCAA  
TGCGCCTTCCGTACGTTGACTTACCAATGCGACCCTAATCGGAGAGGTGACTTTGGTGTAAAGCCAGATTGATCCGCG  
CAGTTTCAACGGCAGCTTTGCGCGCAGTTACCGCAGCATTGCGCTGTTGCGCATCAGCCAGAGCCTGATCGTACTCTTGC  
TACTGATGACTGAGTACCAGCAGTTTCTGATAACGATTACCGTCAATTGCGCGATATTGGCTGCAGCCTGGGCTTT  
CGCCAGATCACCTTTGCACTGTGATGTGCGCTGATAGTGCAGGATCAATCTGATAGAGAGAGACCTGCTTCGA  
TGTCGCTACCTTCTTTGAAATTACGCTTACAGATAATCCCGCTAACTTGGAGACGAACTTCTGCGATCCGGTAGGCACTG  
GTGCGACCCGGAAGCTCGGTTGTGATCTGCAGAGGTTGAGTTTACTGTTACTACGCCAACGGCGGGCATCTGCTGGCC  
ACCTTGTGGGCTGTTTGTGCTCACATCCTGTTAGGGCTAAGCTGCCTGAGAGCATCAGAACGACCGCCAGAGGCGTAA  
ACCCTCTGTTTTTGTTCATATGTAACCTCGAGTGTCCGATTTCAAATTGGTCAATGGTCAAAAGTTAATAAACCCATTG  
CTGCGTTTATATTATCGTCGTGCTATGGTACATACATTACAAATGTATGTAATCTAACGCCTGTAATTCACGAACAT  
ATGGCACGAAAAACAAACAAGAAGCGCAAGAAACGCGCAACACATCCTCGATGTGGCTCTACGTCTTTTCTCACAGCA  
GGGGTATCATCCACCTCGCTGGGCGAGATTGCAAAAGCAGCTGGCGTTACGCGCGGTGCAATCTACTGGCATTAAAG  
ACAAGTCGGATTTGTTGAGTACTGGGAAGTGTGAGAATCCAATATTGGTGAAGTACTAGAGCTTGGATATCAGGCAAAA  
TTCCCTGGCGATCCACTCTCAGTATTAAGAGAGATTAATTCATGTTTCTGAAATCCACGGTGACAGAAGAACGGCGTGC  
ATTATTGATGGAGATTATATCCACAAATGCGAATTTGTCGGAGAATGGCTGTTGTGCAACAGGCACAACGTAATCTCT  
GTCTGGAAGTTATGACCGTATAGAACAACGTTAAACATTGATTGAAGCGAAAATGTTGCCTGCGGATTTAATGACG  
CGTCGCGCAGCAATTATTATGCGCGGCTATATTTCCGGCCTGATGGAACACTGGCTCTTTGCCCGCAATCTTTGATCT  
TAAAAAGAAGCCCGGATTACGTTGCCATCTTACTGGAGATGTATCTCCTGTGCCACCGCTTCTGTAATCCTGCCACTA  
ACGAATAACCTGAATCTGACTCCAGGATTTTCTGGACATTTTCTGCTGTTGCTATTCTGGTTCACTGCGTCTGATAT  
TCTTGGCGTTTACTTTTTGAGTCTTTTCTGAGTCTTTTCTGAGTCTTTCAGTCTTTCAGTCTTTCAGTCTTTCAGTCTT  
GATCACGGCATTGTTTTTCTGAGTCTTTTCTGAGTCTTTTCTGAGTCTTTTCTGAGTCTTTTCTGAGTCTTTTCTGAG  
TCATCGAATGGTATCTGCCGACAAAAGCGGACCTGCAGGCGCAACTGACTCACTAAATAAAACAAAAGATCTTTCTGC  
TCAGGACAACTGGTGCAGCAGGATCTGACAGATACATTAGCCACCCTCGATAAAATCGATCGATAAAAAGAGAGACAG  
TTCAGCTACGGCAAAAAGTCTGAGCAGGCTGTCGTTGCGCCAGTGGAAACTGCGGTTGCCAGGCTGCGTTGCCAGGCTGGA  
GATAACGACGAAGAAACCGCAAAAATCTGAGCAGCTGTCTGCGCCAGTGGAAACTGCGGTTGCCAGGCTGCGTTGGA  
CGATTTGCAAAACGCAAAAACGATCTGGCGTCTTATAACAGCCAGCTGGTTTCTGTTACAGACGCGAGCCGAAACGCGTGC  
AAAATGCGATGTATAACGCTTTCGAGCAGCTGCAACAAATTCGAGTCTGCTGGATGGACTGATGTGCGGAGACAGCC  
TTACGTCCCAGCCAGAAAGTGTAAATGCAAGGCCAGCAGGCGTTGCTGAATGCGGAGATTGACCAGCAGCGTAAAGCCT  
GGAAGGGAACACCGTCTTGCAGGATACCTTGCAAAAGCAACGTGATTACGTGACGGCGAACAGCGCTCGTCTGGAGACC  
AGTTACAACCTGTTGCAAGAAGCGGTAACAGCAAGCGCTGACTTTAACCAGAAAAACGGCGCAGGAAGCCGCTCCTCCCG  
GATGAAGCCGCGGATTCAGGCTAATCCGCTGGTGAAGCAGGAACTGGAATTAACCAGCAGTTAAGTACAGCGTCTGAT  
TACCGGCACTGAAAACGGTAATCAGTTGATGACGCAAAACATTAAGTCAAAAACCTGGCTGGAGCGGGCGCTGCAATCGG  
AACGCAATATTAAGAGCAGATTGCCGCTCTGAAGGCGAGCCTGCTGTTGTCTCGTATCCTTTACCAGCAACAACAACG  
CTGCCCTCGGCGGATGAACTGGAACATGACCAACCGCATCGCGGATTTGCGTCTCGAACAGTTTGAAGTTAACCAGCA  
GCGTGATGCACTTCCAGAGCGATGCGTTCGTCACAAACTGGAAGAAGGTACACCAACGAAGTCAACAGCGAAGTTC  
ACGATGCGTTATTGCAAGTGGTTGATATGCGTCCGCAATTGCTGGATCAACTCAACAAACAGTTGGGTAACCAGCTGATG  
ATGGCCATTAACCTGCAAAATCAACCAGCAGCAGTTAATGAGTGTGTGCAAAAACCTGAAATCCATCCTGACTCAGCAAA  
CTTTTGGGTGAACAGTAACCGTCCAATGGACTGGGACTGGATCAAAGCGTTCGCAAAAGCCTGAAAGATGAATTTAAGT  
CGATGAAAATCACGGTGAACCTGGCAAAAAGCCTGGCCCGCGTTTTTATCGCTTTCCTCGCTGGTTTGGCGCTGCTGTTG  
ATTGCCGGGCTGATCCACTGGCGTCTGGGCTGGCTGAAAGCGTATCAACAAAACCTGGCTTCCGCTGTGGGTTCCCTGCG  
TAACGACAGCCAGCTCAACACACAAAAGCGATCCTTATCGACCTGATCCGTGCGCTGCCGGTGTGCCTGATTATTCTCG

CGGTTGGCCTGATTCTGTTGACCATGCAGCTCAACATCAGCGAACTGCTATGGTCGTTGAGCAAAAACTGGCGATATTC  
TGCTGGTGTGGCCTGTGCTGGAAGTACTGGAGAAAAACGGCGTTGCCGTACGTCACTTCGGCATGCCGGAACAGCA  
GACCAGCCACTGGCGTCGGCAAATTGTCCGCATCAGTCTCGATTGCTGCCTATCCATTTCTGGTCTGTGGTGGCAGAAC  
TTTCCCCGCTGCATCTGATGGATGATGTCTGGGGCAAGCGATGATTTTCTCAACCTGCTGCTGATTGCCTTCCTGGTA  
TGGCCGATGTCCGCGAAAGCTGGCGTGATAAAGAGTCGCACACCATGCGACTGGTCACCATTACCGTGTCTGATAAT  
CCCGATTGGCTGATGGTGTGACTGCTACAGGCTACTTCTACACTACGCTGCGTCTGGCAGGACGCTGGATTGAAACCG  
TTTATCTGGTGATCATCTGGAACCTGCTGTACCAGACGGTACTGCGTGGCTTAAGCGTAGCGGCGCGGCTATCGCCTGG  
CGTCGTGCGCTGGCGCTGGCAGAATCTGGTGAAGAGGGGCGCAGAAGGTGCTGAACCGCCGGAAGAACCACCATTGC  
ACTGGAGCAAGTTAACAGCAGACGCTGCGTATTACCATGTTGCTGATGTTTGGCTGTTCCGGTGTATGTTCTGGGCAA  
TTTGGTCCGATTTGATCACCCTGTTACGATATCTCGACAGCATCACGCTCTGGCATTACAACGGCACTGAAGCTGGCGCT  
GCGGTGGTGAACAAAGTCCACCATGGCAGTCTGTTGTTTGGATTATCGCCTCAATGGTGGCTGGGCGTTGATTCCGAA  
CCTGCCTGGTTACTGGAAGTGTGGTGTCTCGGACTGAATATGCGCCAGGGCGCTGATGCCATTACTACCATCC  
TTAACTACATCATTATTGCTGTTGGTGCATGACGGTTCGGATCGCTGGGCGTCTTTGGGATAAACTCCAGTGGCTG  
GCCGAGCATTATCCGTAGTCTTGGTTTTGGTTTACAAGAAATTTTCGGTAACTTCGTCTCCGGTTTGATCATTCTATT  
CGAACGTCGGTGCATTTGGCGATACGGTAACCATTTGGTAGCTTCTCGGGACGGTAAGTAAGTAACTTCGTATTCGTCGA  
CAACGATTACCGATTTGATCGCAAAGAAGTATCATCCCGAACAAAGCGTTTGTACCGAGCGTCTGATCAACTGGTGC  
TTGACTGACACTACTACGCTCTGGTATCCGCTCTCGGCGTGGCCTATGGCTCCGATCTGGAAAAAGTGGTAAAGTGTT  
ACTGAAGGCGGCGACTGAGCACCAAGGGTATGCACGAACCAATGCCGGAAGTCTTCTTTACGGCATTGGTGCCAGCA  
CGTTGGATCATGAGCTGCGTCTGTATGTGCGTGAACGCTGACCGTAGTCTGACTGTCGATGAGCTGAACCGTACTATC  
GATCAGCTGTGCCGTGAAAACGACATCAACATTGCCTTTAAACAGCTTGAAGTGCATCTGCACAACGAGAAGGGCGATGA  
GGTGACGGAAGTAAAACGCGACTACAAAGGCGATGACCCGACGCCAGCGGTAGGGTAAAACGAAAGGGGCAACATTTA  
GTTGCCCGAGATTGCTAACAAAGTGCAGTGTTCATGCCGATGCGGCGTACCCTTATCCGGCTACGAAACCGC  
AAGAATTCAATATATTGAGGAGCGGTGAGGCTGATAAGCGTAGCGCATCAGGCAGTTTTGCGTTTCCCGCAACCTT  
AGGGACATTTAGCGACCCATTTATTTCTCACTTTCCGCTCATCATCGCGGTTAATTTCTTTTCATAATCACGCTT  
TACAATATCCAGCGCGCAGCAGCGTACTGGCAGGATCTGATTTTCTCCAGCAGCACAATCAAATCGACAGCCAGTT  
TGACATCGTACGGGGCATTTCCAGTGACATATTCTCTCATTGCTAGCGGGTAAACCGCGTAACTGTTTTCGATTTT  
TTCCAGCGCATGGCGCAGCGTCCAGGCGCGTTCATAGGCTTCCACTTACGATGCAGCGTTTGTGTTCCACGAGAT  
CGGTACCCCGCCAGACGGCTCTGCGTTCGGCAACCATCTCAGTAGCCCGCTCAAAATCCTGATGCTGAATACGT  
TTACGCTGCCAGCGGCAATTTTCCGTGGTGCATGTCCTCAGTCCGCAATGACCAGGCGGAGGCTTACGCGCGATGGC  
TTCCAGTTGTGCCCGCAGATGTTCCGCCAGCCAGGCCACTTGGCGAGCTGTTGCTGCTCAACTGCATGACGAAGCGCAG  
CCAGATTATCGCCCGCTCTGTCGAGACAAGCCTGTAGTGTGTCGCACGAGTCTGAAAAAGATGCCTGTGAAAACGAGCA  
CTTAGCGTGGCGAACTGTGACACCGGGGCACAACGCTGACGCAGCGTAGCGAGCTGTCTTCCAGTTTTTCCAGCAGCAG  
GGCGTTTTACGATAAGACCTCAATGAAAATGATAATTGTTATGCTAAAGTAGCCACTCTGTAAGCTGACAACACTCAA  
TATGCAACGAATCATTTTAAATCATATTGGCTGGCTGGCGGTAGTGTGGGTACGCTGGGCGTGGTATTACCGGTATTAC  
CGACGACCGCTTTATCTGCTGGCGGCTGGTGTGTTGCCGTTCTTCCCGCGCTTTCACGCTGGTTGCTGTACCGC  
TCATGTTTTGGCAGTATCTACGTTTCTGGCAGAAACATCATGCGATGCCGCGCGGCGTCAAACCGCGGGCGATTTTGT  
TATTTTGTACGTTTGCATTTCTCTGTGGTTCGTCAGATGCCATGGGTGCGCATCATGTTGCTGGTAATTCTCGCT  
GTTTGTCTTTCTATATGTGGCAATTCGGTGTATTGATGAAAAGCAAGAAAAGCACTGAAGCACAACAATCGCAGTTGCA  
ATTATTGCGTACAGCCAGTACATTTGCGTTTTGAGCACAGGCGCAGGCGGTCAAAGTTAAACAATGTTACTTTTG  
ATACGTTTAAAACGCGCGTGGTACCACCGTAACAAGCAGGCATACACTTATGACCGGACTGCACAGCAGCTTGAGTA  
TCTCAAAAATAGCATCAAAAGCATTACAGACTACCAAAAACCCGGCATTCTTTCCGCGATGTCACCAGCTTACTGGAAG  
ACCCGAAAGCTTACGCTCTCAGCATCGACTTGTGTTGAGCGTTACAAAATGCGGGCATTACCAAAGTTGTGGCACC  
GAAGCGCTGGCTTCTGTTTGGCGCTCCGGTAGCTCTGGGTCTGGGCGTTGGCTTTGTACCGGTCCGTAACCGGGCAA  
ACTGCCGCGTGAACCATCAGTGAACCTACGACCTGGAATACGGCACCGATCAGCTGGAGATCCACGTTGATGCCATCA  
AACCGGGGACAAAAGTTCTGGTGGTGGACGACCTGTGGCAACCGGCGGCACTATCGAAGCGACCGTTAAACTGATCCGT  
CGTCTGGTGGTGAAGTGGTGGCTGACGCTGCGTTTATTATCAACCTGTTGATCTCGGCGGCAACAGCGTCTGAAAAACA  
GGCATTACCAGTACAGCCTTGTCCCGTTCCCGGGCCATTAATTATCGCCAGTCTTGTGCTGCCACGCTACGGACAGC  
ACAAGATGTGCATTCAGCCTCGCGTTTGTACGGGGCTGTGTTAGCATTACCCCTTCTGTAATCCACCTTCCAGCGTTT  
AGAGCCTGCCAATGAGTTATCAGGTCTTAGCCGAAAATGGCGCCACAAACCTTTGCTGACGTGCTCGGCCAGGAACAT  
GTGCTGACCGCACTGGCGAACGGCTTGTGTTAGGGCGTATTATCATGCTTATCTTTTTTCCGGCACCCGTGGCGTCCG  
AAAACTCTATCGCCGACTGCTGGCGAAGGGCTAAACTGCGAAACCGGCATTACCGCGACGCCGTGGCGGTGTGCG  
ATAACTGTGTAAGTTCGAGCAGGGGGCTTTGTGATCTGATTGAAATCGACCGCGCTCGCGACCAAAGTTGAAGAT  
ACCCGCGACCTGCTGGATAACGTCCAGTACGCTCCGCGCGTGGTCTGTTCAAAGTTTATCTGATCGACGAAGTGCATAT  
GCTGTGCGCCACAGCTTAAACGCACTGTTAAAAACCTTGAAGAGCCGCCGAGCACGTTAAGTTTCTGCTGGCGACGA  
CCGATCCACAGAAATTGCCGGTACGATTTTGTACGCTGTCTGCAATTTATCTCAAGGCGCTGGATGTGAGCAAAT  
CGCCATCAGCTTGGACATCTCAACGAAGAACATATCGCTCACGAGCCGGGCGCTGCAATTGCTGGCACGCGCCG

TGAAGGCAGCCTGCGAGATGCCTTAAGTCTGACCGACCAGGCGATTGCCAGCGGTGACGGCCAGGTTTCAACCCAGGCGG  
TCAGTGCATGCTGGGTACGCTTGACGACGATCAGGCGCTGTCGCTGGTTGAAGCGATGGTCGAGGCCAACGGCGAGCGC  
GTAATGGCGCTGATTAATGAAGCCGCTGCCCGTGGTATCGAGTGGGAAGCGTTGCTGGTGGAAATGCTCGCCTGTTGCA  
TCGTATTGCGATGGTACAACCTTTCGCCTGCTGCACTTGGCAACGACATGGCCGCCATCGAGCTGCGGATGCGTGAAGTGG  
CGCGCACCATACCGCCGACGGATATTAGCTTTACTATCAGACGCTGTTGATTGGTTCGAAAGAATTACCGTATGCGCCG  
GACCGTCGATGGGCGTTGAGATGACGCTGCTGCGCGCGCTGGCATTCCATCCGCGTATGCGCCTGCCTGAGCCAGAAGT  
GCCACGACAGTCTTTGCACCCGTCGCGCCAACGGCAGTAATGACGCCAACCCAGGTGCCGCCGCAACCCGCAATCAGCGC  
CGCAGCAGGACCGACTGTACCGCTCCCGGAAACCACAGCCAGGTGCTGGCGGCGCGCCAGCAGTTGCAGCGCGTGCAG  
GGAGCAACCAAAGCAAAAAGAGTGAACCGGCAGCCGCTACCCGCGCGCGGCCGGTGAATAACGCTGCGCTGGAAAGACT  
GGCTTCGGTACCAGTACCGCTTTCAGGCGCGTCCGGTCCATCGGCGCTGGAAAAAGCGCCAGCCAAAAAGAAAGCGTATC  
GCTGGAAGGCGACCACTCCGGTGTGACGCAAAAAGAGTGGTCCGACGCCGAAAGGCGCTGAAAAAGCGCTGGAACAT  
GAAAAACGCCGAACTGGCGGCGAAGCTAGCGGCGAAGCCATTGAGCGCGACCCGTGGCGGCGACAGGTGAGCCAACT  
TTCGCTACCAAACTGGTGAACAGGTGGCGTTAAATGCCTGGAAAGAGGAGAGCGACAACGAGTATGTCTGCATTTGC  
GCTCCTCTCAGCGGCATTGAAACAACCGCGTGCACAGCAAAAAGTGGCTGAAGCGTTGAGCATGTTAAAAGGTTCAACG  
GTTGAAGTACTATCGTTGAAGATGATAATCCCGCGTGCCTACCGCGTGGAGTGGCGTACAGGCGATACGAAGAAAA  
ACTTGCAGCAGGCGCGAGTCCATTATTGCGGATAAATATTACAGCCCTGCGTCCGGTTCTTCGATGCGGAGCTGGATG  
AAGAAAGTATCCGCCCATTTGATCGTAAGCACAGCTTACGTTCTCATCCTTAACGTTGATTGAGAGAGAAACCTATGTT  
TGTTAAAGGCGGTCTGGGTAACCTGATGAAGCAAGCCAGCAGATGCAAGAAAAATGCAGAAAAATGCAGGAAGAGATCG  
CGCAGCTGGAAGTCAACCGCGAATCTGGCGCAGGTCTGGTAAAAGTGACCATCAACGGTGCACACAACCTGCCGTCGCGTA  
GAGATCGACCCGAGCCTGCTGGAAGACGCAAAAGAGATGCTGGAAGACCTGGTGGTGCAGCATTCAACGACGACGACG  
TCGTATTGAAGAAACGCAAAAGAAAAATGGCCTCTGTATCCTCCGGAATGCAGCTGCCGCTGGCTTTAAGATGCCGT  
TCTGATGCAAACAGCCGCTGTTAACACAGCTTATGGAAGCACTGCGTGTCTGCCGGCGTTGGCCCGAAGTCCGGCG  
AGCGTATGGCGTTACGCTGCTTACGCGCATCGTAGCGGCGGATGCGTCTGGCGCAGGCGCTACCCGGGCGATGTCG  
GAAATCGGCCACTGCGCCGATTGCCGCACTTTCACCGAACAGGAAGTCTGTAACATCTGTTCAATCCGCGTCTCAGGA  
AAACGGTCAAATCTGCGTGGTGGAGAGTCCGGCGGACATCTACGCCATTGAGCAGACGGGGCAGTTTTAGGTCGTTATT  
TTGTGTTGATGGGCGATCTGTACCGCTGGACGGCATCGGTCCGGATGATATCGGGCTTGATCGTCTGGAACAGCGTCTG  
GCAGAGGAAAAATCACTGAAGTATCCTCGCCACCAACCCACGTTGAAGGTGAAGCTACCGCTAACTACATTGCCGA  
GCTTTGCGCGCAATATGACGTGGAAGCCAGCCGAATCGCTCATGGCGTTCCGGTTGGCGGCGAGCTGGAAATGGTGCAGC  
GCACCACGTTGTACACTCCCTTCCCGGCGCTCATAAGATTGTTTTAAGCAAACGAGAGCAGGATCACCTGCTCTCGC  
TTGAAATTATTCTCCCTGTCCCATCTCTCCACATCCTGTTTTAACCTTAAATGGCATTATTGAGGTGAGACCTACA  
TGAAAGGACAAGAAACTCGTGGTTTTAGTCAAGAGTGAACAGCTTCTGCACCTGATGATCCATTCTCTTATTCCAAT  
AAAGAAATCTTCTGCGTGAAGTATCTTAACGCCTCCGATGCGGCGGACAAGCTGCGTTCCGTGCGCTCTTAACCC  
GGACCTGTACGAAGGTGATGGCGAACTACGCGTTCGTGCTCTTTGATAAAGACAAGCGTACGCTGACCATCTCCGATA  
ACGGCGTGGGATGACCCGCGACGAAGTATTGACCATCTGGGACTATCGCTAAATCCGTTACCAAATCATTCTCGAA  
TCCCTGGGTTCTGACCAGGCGAAAGACAGCCAGCTGATCGGTGAGTTGGTGGTGGTTTACTCTGCGTTTATCGTGGC  
CGACAAAGTACCGTGCCTACTCGCGCGCAGGCGAAAAACCAGAAAATGGCGTCTTCTGGGAATCGGCTGGCGAAGGTG  
AATACCCGTTGCCGACATACCAAAGAAGATCGTGGTACTGAAATCACCTGCATCTGCGTGAAGGCGAAGACGAGTTC  
CTCGATGACTGGCGGTGCTTCCATCATCAGCAAACTCCGACCATATCGCGCTGCCGTTAGAGATCGAAAAACGCGA  
AGAGAAAGACGGCGAAACCGTTATCTCTGGGAGAAAAACAACAAAGCGCAGGCGTGTGGACTCGTAAACAAGTCGGAAA  
TCACCGATGAAGAGTACAAAGAGTTCTACAAACACATCGCCACGACTTTAATGATCCGTTGACCTGGAGCCACAACCGT  
GTTGAAGGTAAGCAGGATACACCAGCCTGCTGTACATCCCGTCCAGGCTCCGTTGGGATATGTGGAACCGCGATCATAA  
ACACGGCCTGAACTGTATGTTAGCGTGTGTTATCATGACGACGCGAGAAGTTCATGCCGAATATCTGCGTTCG  
TGCGTGGTCTGATTGACTCCAGCGATCTGCCGCTGAACGTTTTCCCGTGAATCTCCAGGACAGCAGGTAACGCGTAAC  
CTGCGCAATGCGCTGACCAAGCGTGTGCTGCAAATGCTGGAAAAACTGGCGAAAGACGACGCGGAAAAATACCAGACCTT  
CTGGCAACAGTTTGGCCTGGTACTGAAAGAAGTCCGGCGGAAGATTTGCTAACCGAAGCGATCGCCAACTGCTGC  
GTTTTGCTTACCCATACCGATTCTTCTGCGCAGACCGTATCTCTGGAAGACTACGTTTCCCGCATGAAAGAAGGGCAG  
GAGAAAATCTACTACATCACCGCAGACAGCTATGCGGCGAGCAAGAGCAGCCCGCACCTGGAAGTCTGCGTAAGAAAGG  
CATCGAAGTTCTGCTGCTTCCGACCGCATCGATGAGTGGATGATGAACTATCTGACTGAGTTCGACGGTAAACCGTTC  
AGTCGGTGTCTAAAGTTGACGAGTCCGTTGAAAACTGGCTGACGAAGTTGATGAGAGCGGAAAGAAGCGGAGAAAGCA  
CTGACTCCGTTATCGACCGTGTGAAAGCCCTGCTCGGCGAGCGCGTGAAGATGTCGCTGACTCACCGTCTGACCGA  
TACGCCAGCGATCGTTTCGACCGACGCGGACGAAATGAGCACTCAGATGGCGAAACTGTTGCTGCGGCGGGCCAGAAAG  
TGCCAGAAGTGAATAACATCTTGAACGAAACCCGATCACGACTGGTGAACGTCGCGGAGATACTGAAGATGAAGCG  
AAGTTCAGCGAGTGGGTAGAAGTCTGCTGGATCAGGCGCTGCTGGCAGAACCGGCGACGCTGGAAGATCCGAACCTGTT  
TATTCGTCGTATGAACCAGTCTGCTGGTTTCTGATGTAATGCCGATGACCTTCGTGTCATCCGGCATTTTTCTTTTCA  
CATCTGCATTTCCGCAATTTATCTCGCCATTAACCGTTTTCAGCCCCAGGTGCCTTTCTTGAAGCAATCGCCTGTTGGT  
GTATCGTTTATCGTTTTTCAAAAAATTCGACACATTTAAGGGGATTTTCGAATGCGTATCATTCTGCTTGGCGCTCC

GGGCGCGGGAAAGGGACTCAGGCTCAGTTCATCATGGAGAAATATGGTATTCCGCAAATCTCCACTGGCGATATGCTGC  
GTGCTGCGGTCAAATCTGGCTCCGAGCTGGGTAACAAGCAAAGACATTATGGATGCTGGCAAATGGTACCCGACGAA  
CTGGTGATCGCGCTGGTTAAAGAGCGCATTGCTCAGGAAGACTGCCGTAATGGTTTCTGTTGGACGGTTCGCCGCTAC  
CATTCCGCAGGCAGACCGATGAAAGAAGCGGGCATCAATGTTGATTACGTTCTGGAATTCGACGTACCCGACGAAGTGA  
TCGTTGACCGTATCGTCGGTCGCCGCTCATGCGCGTCTGGTCTGTTTATCACGTTAAATTCAATCCGCCGAAAGTA  
GAAGGCAAAGACGACGTTACCGGTGAAGAACTGACTACCCGTAAGATGATCAGGAAGAGACCGTACGTAACAGTCTGGT  
TGAATACCATCAGATGACAGCACCGCTGATCGGCTACTACTCCAAAGAAGCAGAAGCGGTAATACCAAATACGCGAAAG  
TTGACGGCACCAAGCCGGTGTGTAAGTTCGCGCTGATCTGAAAAAATCCTCGGCTAATTCGAAAGCGCGCACGGACAG  
TCCCCTCGCCCCCTCGGGGAGAGGGTTAGGGTGAGGGGAACAGGCCCGCACAAAGCAAATTCAGCAATCTCAGGCCGG  
ATATTCATTCCGCTTTTACAAAACCTCAATCTGCGCTATTCCTTTTCTGATTTGACCTCTCACAGCAATTAGTTCTT  
CTTCTCACTTTTCCGCTACAATTATCAACAAGTTGAATCGATAAGAGGGCGTAATGCGTCAGACTAAAACCGGTATCCT  
GCTGGCAAACCTGGGTACGCCGATGCCCCACACCTGAAGCGGTAACCGCTATCTGAAACAATTTTAAAGCGACAGAC  
GCGTGGTTGATACCTCACGGTTGTTATGGTGGCCATTGCTGCGCGCGTATTTTCCGCTGCGCTCGCCGCGTGTGGCG  
AAGCTGTATGCCTCTGTCTGGATGGAAGTGGCTCGCCGCTGATGGTTTACAGCCGCCAGCAACAGCAGCGCTGGCACA  
ACGTTTACCGGATGCGCTAGCGTGGGAATGAGCTACGGCTGCCATCACTGGAAGGCCGCTAGATGAACTCCTGG  
CAGAGCATGTAGATCATATTGTTGGTGTGCGCTTTATCCGCAATTCCTGTTCTACGGTGGTGGTATGGGATGAA  
CTGGCACGCTTCTGGCGCGCAAACGTAGCATTCCGGGATATCGTTTATACGTGATTACGCCGATAACCACGATTACAT  
TAATGCACTGGCGAACAGCGTACGCGCTTCTTTTGCAAAACATGGCGAACCGGATCTGCTACTGCTCTTATCATGGCA  
TTCCCCAGCGTTATGAGATGAAGGCGATGATTACCCGCAACGTTGCCGACACGACTCGTGAAGTGGCTTCCGATTG  
GGGATGGCACCGGAAAAAGTGATGATGACCTTTCAGTCGCGCTTGGTGGGAACCTGGCTGATGCCTTATACCGACGA  
AACGCTGAAAAATGCTCGGAGAAAAAGCGTAGGTCAATTAGGTGATGTGCCCGGGCTTGGTGGGATTGTCTGGAGA  
CGCTGGAAGAGATTGCCGAGCAAACCGTAGGTCTTCTCGGTGCCGGCGGAAAAAATATGAATATATTCCGGCGCTT  
AATGCCACGCCGAACATATCGAAATGATGGCTAATCTTGTGCCGCTATCGCTAAAGCTGAGCGGTAAGAAGTGAAGC  
GCCGTCCGGAAGAGCCTCGTGGCGGTTTTATCATCCGTGAATAATGAAAAAGCGTGCAGCGTGCCTGGGTAGAGTT  
TGAAGTACAGGGCTGCTGATGCGCCGTAACGCTGGTAAAGCAGACGGCTGTCATCCAGCAGCGGATCGAACTCCGCC  
CCGGCAATAAAACAGGGCGAACTTCGCGAGTGAGTCAATTATTAACAGACAGTAATACGGCGACTCGCGGTCCGCGTC  
GTTGCTTAAATATGCCTCTCGTACATCTGCAAATCCTGTTGCGTTAAGCCATCCAGACACCGCCAACAGACGACGAG  
TCACGGAATCCGTAATCCGTAAGGCCATACCACAGCAAACGCCGCAACTTACCGCAATCGATCTGTTTATCACGC  
AACCAACGCACTGGCGAGCGCCAGCATGGCACCTGCGGAATACCGGCAAAGCCAATGCGGGACATATTGATTTGATA  
ATCCTCCGCTGCTGGTGGAAATAACAACAAGCAGCCACAATTCCTCTATCGTTGCGGAAAAACGCGCTTCAGGTGAAA  
GGGTGTAATCAATACCAATCACCGTACATTGGCTGTAGCTTGGCAGCAGGCGCATGATGCGATCGTGGGTATCGAGATTG  
CCGAGAATAAAACCGCTCCATGCAAATAAAATAGCGTCTGGCTATCTGGCTGCGGACAAAAGAGACGTGTTTCCAC  
CTGCCATATTTTGTGGAACCATGTAAGCTCTGGTTGCCATTTCTGGAGCGCCGCAATCCAGAATCGGCGCTCAAGCG  
TGTAATACTGTCTGTCAGCAATCGTTCGTTCCGTTGCGGGCCAGGGCGGTAATCCGGCTGAAGAGTATTCACAACGGTC  
TTCATTTAGCAGAAATAAGGTCCAGAACAGGTAGTTTGTTCGGCTTACATAAAAACTCCTTCAAATACGTCAT  
TGTAAGGAACCACTGCCATGAAATGCGATCCCGCTGCTGATATTGAAACTGGCTGCGTCTCGCGCGTCCCGTCAAGT  
TGTGTTAACATTCGCGCTCAGTTAACACCCGTAACCAACCATGAAATTCGCGGTAACGTAATCCAAACATTAC  
TTCCCCTAAACGCACGCGATCCGCTGCTTACGCAATTCAGCCAGAAAACGAAACAGCGCTGCCTGGGTAGTGGGTAT  
CGATCAAACGCTGGTGCATATTGAAGCGAAAGTGGATGATGAATTTAGCGTATGGATTAAGCGCCGGGCATTAC  
TGGTGATTGAGGATGATGACGCAAGCGCTTTATCAGGAACAAAACAGAAAAACCTGATTACCCATCAGTTTCCGGGT  
GGCACCATTTGTAACCCATGCACAACCTACTCGTGTCTCGCGGACCGTTCGGTGTCTGGGCGTCAATGTGCAGCAA  
TATTGAAATTGGCAGTTATGCCTATCGTTACCTGTGTAACACTTCCAGCCGTACCGATCTTAACTATCTACAAGGCGTGG  
ATGGCCGATTGGTCTTGTCTTACGCTGATTGGCGAGTCCGGGGAACGTACCTTTGCTATCAGTCCAGGCCACATGAAC  
CAGCTGCGGGCTGAAAGCATTCCGGAAGATGTGATTGCCGAGCCTCGGCACTGGTTCTCACCTCATATCTGGTGCCTG  
CAAGCCGGGTGAACCCATGCCGGAAGCAACCATGAAAGCCATTGAGTACGCGAAGAAATATAACGTACCGGTGGTGTGA  
CGCTGGGCACCAAGTTTGTCTTCCGAGAAATCCGAGTGGTGGCAGCAATTCCTCAAAGATCACGTCTCTATCCTTGGC  
ATGAACGAAGATGAAGCCGAAGCGTTGACCGGAGAAAGCGATCCGTTGTTGGCATCTGACAAGGCGCTGGACTGGGTAGA  
TCTGGTGTGTGCACCGCCGGGCAATCGGCTTGTATATGGCGGGCTTACCAGAACGAAAGCGAAACGTAACCCAGC  
ATCCGCTGCTGCCGGCGCTATAGCGGAATCAACCAGTATGAGTTAGCCGCGCCATGCGCCACAAGGATTGCCAGAAT  
CCGCTGCGTGTATATTGCACATTGCGCCGTACATGGCGGGCCGAAAAAATCATGAACACTAATGGAGCGGGGGATGG  
CGCATTGGCAGCGTTGCTGCATGACATTACCGCAACAGCTACCATCGTAGCAACGTACCAAACCTCAGCAAACATAAAT  
TCACCTGGTAACTTATTCATCGTTAGCGCAGGTGTGTAATATGCTAACCGTGTGAGCTATCAGGACTGAACCAGCAT  
TCACCTCGTTAACGCGCGCTTCCGGAGCGTGAAGACAGCCTGGAAGAGTCTTACTGGGATCGTTAAGTTATCGTCCG  
TTCGTAGGCCAGATAAGGCGTTACGCGCATCTGGCAATTTGGCTCTCGATGCCTGATGCGACGCTGGCGCGTCTTATCA  
TGCTACATATTTTTCATATTTTACATCCGGCAACCACGTTTACCCGTCACCACCTCACCCGCGGTGGCGTTTCCAG  
CAGTTCCAGCATGGTACGGCGATTTCACGCTCGCCATCACTACCTGATTCGCACCACGTTCCGGTATATACGCCACTT



CATCGTCATAATGGGCGGGCAATAATCTCAATATCCGATTTTTTCGCGGGGAGATGCCACAATCTACCCGTTCA  
TAACCGTTGGGAATCGTCAGGATCAGCCATTTTGCACATTCAGATGCGCCAGTTGCATAATTTCTTCGTTCCGCGCATT  
GCCCAACTACTGCGGGACCCCGCTCTCGAGCTCATCAACACGGTTCGTGACGTCTCAATCACCACCAGCGGAATAT  
CAGAGGCGAGCAATTTCTCCCCAGCAGGCTGCCTACACGACCGTAACCCACCAGTAGCGCATGGTTGCAAAATATCCACT  
GGGATCTGTTCTTTCTTCGATTGCCTTTCCAGCGTCTGCTTTCCAGCGTTTCGGTCTTCGCCAGATATTTCTCCAG  
TAGTGGAACAGTACCGGTTGAGCATAATCGACAGGATGCCCTGCCAGTACCAGGTTTTGTCCGGCTCGCGCAGTA  
AATTCATGCCATTCCCAGTCCCAGGATAAACCGGAACTACCAATCTGCGCCAGGCTGGCGCGATGGTTAATGCC  
GTACGTTGGGAGTGACCAAACAGTCGCACCAGGAAAAATGCGGTAACGACTTACCAAACAGAATAATCGCCAGCGTCGC  
CAGCACTGCCAGCGGTTGCTGAATCAGAAATTAACGGATCAAACAACATCCCAGCGGAGACAAAAACAGCACCGCAAACG  
CGTCGCGCAATGGCAGCGTATCGTGGGCGGCACGGTACTCAGTTCAGACTCGTTAGTACCATCCCAGCAAAGAACGCA  
CCGAGTGCAAAGGAGACATCAAACAGCTCTACCGCACAAAGGCAACCCCTAACGCCAGCGCCAGCACCGGACAGGGTAAA  
CAGCTCGCGAGAACCAGTTGCCGCGTGCCTGCCATAATCCACGGCACCAGACGGCGACCTACCAGCATCATAATGGCGA  
TAAATGCGATCACTTTGCCGATGGTGTCCCATATCGACTGCAAGAGTGGCAAAGCCACATCGCCCTGTTCCATCATT  
CCTGCCACTGCCGGCAGCAACACCAGCGTCAGAACCATTACCAGTCTTCCACAATCAACCAACCGATGGCGATTTGCC  
ACGCTGACTGTCAATTAATGCGGTTCTCAAGTGCAGCGAGTAACACCAGTACTGGCGGTGGAAAGACATAAACCGA  
ACACGATACCGGTCATTAACGACAGCCAGCCAGCAGCGAGAGCGCCATACCCAGCAGCGTCCGACCGTATCTGGGCG  
ATCGCACCGGGAATGGCGATGGCCTTTACCGCCATCAAATCCTTCAGCGAAAAGTGCAAACCGACGCCAAACATCAACAG  
AATGACGCCAGTTCCAGCCAGTTCCGGGGCAAGCTTGGTATCGGCAACAAAGCCCGAGTGAATGGTCTGCCAGCACAC  
CCGCTAACAGATATCCACCAGAGGAGAAATACGTAGTTTATTGGCCAGCATGCCGAGGATAAAGGCGAGCACAAGGCCG  
CCAACAATGGTGGTGATAAGCGGGTGGCGTGATGCATTCCGTCTCCTTTCTGGTGGTTATTGTCCATTTTTGGCCGG  
GAAAACAAAATTACAGGTAATAGTTTATGACAATTCATTGATGATGTTTCATGAATAATTATTGAATTTTGCAGAAAA  
TGGAATTAGCTGCAAAAAAGCACGGATCGGAAAACAGAAGGCGTTTAAACAGAGGAAAGGCTTATGGCGACTGTAAAC  
GATGCAGCCAAAGTTTGCCTTTGGCTGCAATGAAATCAGTCTTTATGCCGTTATCAGGCAGGAATATGGTCAACATCCC  
CAATAGTGGCAGGAAAGCACAGATTTTATAGACTAACTCGATGCTGGTGTGATCGGCGATAAGCCCCAGAAGTCCGCTC  
CCAGACCTCCCATGCCAAAAGCAAACCGAAAAGAGTCCAGAAACCATACCGATACGTCCTGGAAGCAGCTCCTGAGCG  
TAGACCAGAATGGCAGAGAATGCCGAAGCGAGGATAAATCAAATAATCACCGTAAAACCCCGTCCAGTGCAGGCTGGC  
GTAGGGTAAAATCAGCGTAAACGGCGCAACGCCGAGGATAGAGCCCCAAATCACATATTTCCGCCAATTTTATCCCCTA  
CAGGCCCGCCGATCACCGTACCTGCCGAACGGCAAACAGGAAGGCAAACAGATGAAGCTGAGCATTCTGGATAGATAAT  
CCGAATTTTTGCATCAGATAAAAAGGTGAATAGCTGCTGATGCTGCCATATAGAAATATTTCCAGAAAAATGAGGATTA  
CAGAATGCTGACCGCCAGTACAACCTTTATTGCGCGGAGTGGATTGATAATCGTCGCTTTGGGTTTTCTTTATTATT  
GGTGTGTGCCGAGTACCAACGGCTGATTTGCGCAACACCACGATCGCCAGCAGTGGCGAAGCACAACCCAGGCAACG  
TTGCCTTTGCCATAAGGCGCGATAATCACCGCCGCCAGCAAGGTTCCAGGGAAGTCCCAAAGTTGCCGCGACCTGAAA  
GATAGATTGCCAGGCCATGCCGCGCCGGAAGCCATACGGGCCACGCGAGAAGATTCCGGATGAAAGACCGATGAAC  
CGGTACCGACCAGCGCCGCCAGCAGAACTGCGCCAAAACCTGCCGCGCAGCGCAAGCAGCACCCAGACCCTTAAGGTA  
AAGCACATGCCAATTGGCAACGACCATGGCATCGGATTTTATCGGTCCAGTAGCCGACCACTGGTTGCAGTAGCGAAGA  
GGCGAGCTGGAAGGTGAGGGTTATCATGCCAATCTGCATAAATGTGAGAGAAATTTGACTGAAGCAGCGGATAAATCG  
CCAGAATCAGCGATTGGATCATGTCGTTCAGCAGATGTGAGAGGCTGATAGCACCTAAAATACCAAACGATGTTCCGGCC  
TTGGTGTGACGCGAGCCGCGCCGCCACAGGCTGGGGTTGTTCACTCATTGCCATAGGAAAGTCACTTTTTCCAGGGTTG  
CGATGTAAGAATGATCTTATTTGTGATTATTACCAGACTAACCTACCTGTATGCGTCGTGTAAGGAAGTCTCAACGCC  
GAATACAGAATTTCTAATCTGGATGCAGATTTATCTTACCAGGACGAGACTTGTCTATGATGTCGCTCATACTATTTT  
TCAAACACGTTGAAATCAGGTACGGGAGAGAAGTATGAAATTTTGCAGCGGGCGTGGCGTTAGCGCTGTTAACACATT  
TACTACTGGCGAGTGAAACTGCTCTGGCGTATGAGCAGGATAAAAACCTACAAAATTAAGTTCTGCATACCAATGATCATC  
ATGGGCATTTTTGGCGCAATGAATATGGCGAATATGGTCTGGCGCGCAAAAAACGCTGGTGGATGGTATCCGCAAAGAG  
GTTGCGGCTGAAGGCGGTAGCGTGCTGCTACTTTCCGGTGGCGACATTAACACTGGCGTGCCCGAGTCTGACTTACAGGA  
TGCCGAACCTGATTTTCCGGTATGAATCTGGTGGGCTATGACCGGATGGCGATCGGTAATCATGAATTTGATAATCCGC  
TCACCGTATTACGCCAGCAGGAAAAGTGGGCCAAGTCCCCTGCTTTCCGCGAATATCTACCAGAAAAGTACTGGCGAG  
CGCTGTTTAAACCGTGGCGCTGTTTAAAGCGTCAGGATCTGAAAATTGCCGTTATTGGGCTGACAACCGATGACACAGC  
AAAAATTGGTAACCCGGAATACTTCACTGATATCGAATTTGTAAGCCCGCGATGAAGCGAAGCTGGTATTGAGGAGC  
TGCAACAGACAGAAAAGCCAGACATTATTATCGCGCGACCCATATGGGCGATTACGATAATGGTGGACGCGCTTAAC  
GCACCGGGCGATGTGGAGATGGCACGCGCTGCCTGCCGGATCGCTGGCGATGATCGTGGTGGTCACTCGCAAGATCC  
GGTCTGCATGGCGGCAGAAAACAAAAACAGGTCGATTACGTGCCGGTACGCCATGCAAACAGATCAACAAAACGGCA  
TCTGGATTGTGAGGCGCATGAGTGGGCAAAATACGTGGGACGGGCTGATTTTGGATTTCTGTAATGGCGAAATGAAAATG  
GTTAACTACCGCTGATTTCCGGTGAACCTGAAGAAGAAAGTACCTGGGAAGACGGGAAAAGCGAGCGCTGCTTTACAC  
TCCTGAAATCGCTGAAAACAGCAAATGATCTCGCTGTTATCACCGTTCCAGAACAAAGGCAAAGCGCAGCTGGAAGTGA  
AAATAGGCGAAACCAATGGTCTGTAAGGCGATCGTGACAAAGTGCCTTTTGTACAGACCAATATGGGGCGGTTGATT  
CTGGCAGCCCAATGGATCGCACTGGTCCGACTTTGCGGTGATGAGCGGAGGCGGAATTCGTGATTCTATCGAAGCAGG

CGATATCAGCTATAAAAACGTGCTGAAAGTGCAGCCATTTCGGCAATGTGGTGGTGTATGCCGACATGACCGGTAAGAGG  
TGATTGATTACCTGACCGCGCTCGCGCAGATGAAGCAGATTCAGGTGCCTACCCGCAATTTGCCAACGTTAGCTTTGTG  
GCGAAAGACGGCAAACCTGAACGACCTTAAATCAAAGCGGAACCGGTCGATCCGGCGAAAACCTTACCGTATGGCGACATT  
AACTTCAATGCCACCGGCGGTGATGGATATCCGCGCCTTGATAACAAACCGGGCTATGTGAATACCGGCTTTATTGATG  
CCGAAGTGCTGAAAGCGTATATCCAGAAAAGCTCGCGCTGGATGTGAGTGTATGAACCGAAAAGGTGAGGTGAGCTGG  
CAGTAATCCGAAAGTGCCGGATGTTTGCATCCGGCACAATGCTTAATCGCGGCGGGCGATATCAGCAAATTTGGCATCGA  
GGATCTTTGCCAGATCGCCTGCCGCCAGTTTCGATATCCAGTCCGCGCTTGCCGCGGAAACATAAATAGTGGCAAATCT  
TGTGCGGGGGCGTCGATAATCGTTGGCAGACGTTTTTCTGCCCCAGTGGGCTAATCCCCCAACCAGGTATCCCGTCGA  
ACGCTGCGCGACCATCGGATCGGCCATCTCACTTTCTTGGCACCAGCGCTTTTGTACTTTTTAAGATCCAGTTGAC  
CTGCGACCGGCGTAACGGCCACGGCAAGGTGTTTCATATCACCGTTCCTGACCAGCAGCGTTTTGTAGACCTGATCC  
GGATTCAAACCTAATTTTTGACGACTTCATCGCCAAAATTGGTTTCAGCCGGATCGTGCTCGTAGGTATGGATTTGAAA  
CGAAATCTGTTTTTTTCGAGTAATTTAACTGCGGGTGTATGTAATTTTCTGCCTTAAACAAAAAACGAAGCAAGC  
ATACGCCTGATGGCGGTCCAAAAAAGAGTCATCTTGCTAAGAGTATTGGCAGGATGGTGAATTGAGCGACAATCGA  
GTTACACCGTCGCTTAAAGTGACGGCATAATAATAAAAAAATGAAATTCCTTTGACGGGCAATAGCGATATTGCCA  
TTTTTTAGCGCAACATTTGCGGCAAATCCCTTCCATACAGTGTAGTGCACCGACCGGACACATATCGCCCCG  
CGCATGGCGGTAATTTATCCCGCAGCGAGATTTTCGCTGATGCATCAGCACATCGTACAGCGACTGACTGAACTGAT  
TGGCAGCGTTATATCATTATTTTGGCGCGGTGCATTACAGCCACCAGCTCATATTTGTTGCAGCAACCGTGCCTGGTA  
TGCCAGTGGTTCAGCGTATCGTCCAGCAGCGCCAGTCTTTGTAGGGAGCTGGAGCAACATGGCAATCTGGTTTTCAGC  
CCCTTCAGTTCAATCACGGGTTTATGTTGTTGCTTCGCCCTGCAATAGCTGGTAATCGATACCGTATTCTGCCCGCA  
GCCCCAGTTTTTGTGCTGCGTGCCTGAAGAACCATCGGATTTGCCACAGCGGTTGGGTAGAAAAGAGTGAGGGAGAA  
ATGCCCATCTCCTGGTAATGTGCTGCAGGTTTTGGAGTTGCTCCTCGTAATGCGCTCTTCAGCGCTCGCAGGCAGG  
CAAATTAGCAAAGGCGTATCGCTGGTGGAAACATCCGCTCGACGATCAGCGCATCGCGTTTTTGGCTTTTTGAGCA  
AACGGGTGGCAGGGGAGCCATATCGTGGCTACCCATGAATACTGCCAATCAGATGAAAATGGCGATTGCCGGGAGG  
GTGATATCGATGGCAGGCCAGGTGTAATGATTACCGCGCAGCGCGGCCAAAGCGTTTTTACCCGGTACAACAGATCCAT  
ACGACCTCCCTTTGTGAAATATCATGCTAGCGCGCGGTGAGGGATGGCGCAAATGGAGTTGGAGACTTGTTAATGTGT  
TGATGATTAGTATGTTCTTGCATCGCTATTCACAAGGAAGCAACAGTTAAAAACCATGAAACAGGCAACAAGAAAACC  
GACGACACCCGGAGATATCTTCTCTATGAATATCTGGAACCGCTCGATTTGAAAATCAATGAGTTAGCAGAGTTGCTGC  
ATGTTTCATGTAATAGCGTCACTGACTGATCAATAACAATCGTAAACTCACTACTGAGATGGCATTTCTGCTGGCGAAA  
GTTTTTGATACCACAGTCGATTTTTGGCTAAACCTCCAGGCGCGGTTGATCTTTGGGAAGTTGAAAACACATGCGCAC  
CCAGGAAGAATTTGGGACGGATTGAAACAGTGGCTGAATATTTGGCACGCCGTGAAGAGCGTGCAAAAAAGGTGCGTAAG  
GCCAAAACATCGCTTCATCTCGTAGGCCGGATAAGGCGTTCACGCCGCATCCGGCATCCGAGCACCATTGCTGATGCGA  
CGTTACCCGCTTATCAGGCTACAACTTGTGCTGAACCGTAGGCGGATAAGGCGTTTACGCCGCATCCGGCATCC  
GAGCACCATTGCTGATGCGACGCTTACGCGTCTTATCAGGCCTACAAACCTGTGCTGAACCGTAGGCGGATAAGGCG  
TTTACGCCGCATCCGGCAGTCATGCGTCGATGCCAATGCGCCACCCTAAAGCAGCGCATCCGCAATGATGTAATTT  
CTTCGGTTAAACCGCAGCAACCGGTTGGCGTTACTCACTACGGTAATCGACGAGAGCGCCATTGCCGCTCCGGCAACTA  
CCGGGTTAAGCAGTGTCCAGTGAACGGCCACAAAATACCGCGGCGACCGGAATACCGATACTGTTGTAGATAAACGCA  
CCGAGCAGGTTCTGCTTCATGTTGTGCAGCGTTGCGCGGGAATAGCGAGCGCATCCGCAACGCCCATCAGGCTATGGCG  
CATCAGGTAATCGCCGCGGTTTCAATGGCAACACTACTGCCCCACCATCGCAATGCCGACATCCGCTGAGCCAGCG  
CTGGCGCTGTTAATCCGTCGCCACCATTGCCACTGACGCTCTTCACTTTGCAGATGTTTGCCTTCGGCTTTA  
CCGTCACCGCAGCACCCCGCGATCACTCAATCCCTGTTCTTTGGCGATCGCATTGGCGGTGGTTATGTTATCCCC  
GGTCAACATACCAGACGATATCCCGTTTTATGAGGCGGTTGAGCGCGCCACGCTATCACTACGCAACCGGATCGCGTA  
CTGCCAGCAGGCTACCGTTTTCCGTC AACCGCCAGCAGCACAGGCGTTGCCCTTGCATGCTGAGCAGTAATCTCC  
GTTTCGATAGCTTTGGTACCAACCTGTTGCTCATTTAACAGCGCCTGATTGCCAGCAATAACGCATGACCTTCAGCTC  
ACCGCTCACGCCAGCCGCGCAATGTGCGGAAACGTTGACCTGCGGTAGCTGCATATCACCTGCTTTATCGAGGATCG  
CTCGTGCCAGCGGATGGCTGGAACCTTGTCCAGTGCCGCGCCAGACGCAATGCCTGCGCTTATCAACATCAGCAAAT  
GTTTTCACTGCGACAACCTGCGGTTCCCTTCAGTCAGCGTCCCGGTTTTATCGAACACTACAGTGTGAGTGTACTGGC  
GCGTTGACGCGCTCAGCGTCCCGCACCAGCAGCCAACTCAGCCGCCCGCCGACGCGGAAATAATCGACATCGGCG  
TCGCCAGCCCCAGCGCACACGGACAGGCAATAATCAGTACCGTGGTGGCAATCACCAGGGTATAGACAATCTGCGGTGCC  
GGACCAAAGAAATACCAGATTGCCGCACTGACAAGCGCAATAACCACCCTACCGGCACAAATACGGCTGAGATTTTATC  
CGCCAGCTGACCGATTTCTGGCTTGTGCTCTGGGCTGGCGACCATGCGAATGATTCGTGACAGCGTAGTATGGCTGC  
CAACCGCACTGGCAGAAACAGCACACTGCCGTCTGTACCCTGCTCCCGCATGGACGCTATCGCTTCGCTTTTTGTC  
TGCGGGATTGGTTCGCGCTCAGCATCGCTTCATCCAGCCATGCTTCGCCCTGGGTAATCTGCCATCTACCGGCACGCG  
ATCGCCGGTGTGAGGCGAGCAACATACCTGGCTGCACTTCTGCCAGAGGACGCTTTTTTACCTTCTGTCAGTAACCA  
GGCGTGCCGTGCGCGGGGTTAAATCGAGTAACTTTCCAGCGCTTGAAGAAGCGTGGCGTGCAGCGGCTTCCAGCATA  
TGCCCGAGATTGATCAGACCGATAATCATCGCGTGGCTTCGTAATAAAGATGTGCGGCTTCCATCGGGAACCACTGCGG  
CCACAGGTTGACGCTCATCGAATAGAGCCACGCCACGCCAGTACCAGCGCCACCAGCGTATCCATCGTCCGCCACCGT

TCAGCAGGCTTTTCCATGCACTGCGGTAAAAATGGCCGCCGGCGAAAACCATCACTGCCAGGGTTATCAGGCCGATAACC  
AACACAGGCTGCGGTTGTCAGCGGTGACCATCATGTTATCGCCGATCATCCCCAGACCATACCCGGGATACCCACCGC  
CAGTGCGACAATTGCCTGCCAGCGGAAGCGCTTCATCGTAGCGACGGCGTTTCTTGCTGGCGCTCGCGCGTTTAGCGT  
CATTTCAATCGCTTCCGCGCCGTAGCCCGCTTTTCCACCGCTGCACTAAATCTTGTTGGGAGGCACTGCCCATACC  
AGCGCAGTACGCTCCGCCAGGTTTACCCGTGCTGAGTGACGCCCGGTACGCTTTCAGCGCATTGTTGACGCGGGTGAC  
ACAGCTGGCGCAGCTCATGCCGCTCAGCAGCAACTGCTGGCTGTCATCGTCATCGGCGGTGCTGCCGGAAGCGCTCAG  
AAACCGCTGTCAGTGCTTCCGACGGGATTGATGACTCCGCCAGCGGTTTAGCCTTTGGGTGGCTTACAGATGCGTCATAA  
CCCGCTTGTGATGTTTCGATCAGCTGTTCTGCACTGGCAGTCCCGGTAACGTGCGCTTCAGTGATAGACACATCCGC  
CTGCTCAACATCCGGACGCTGTTCAAGACTTTCTTTCACGCGTTTAAACGAGTGACCGCAGGACAGGCCGTCCAGGGTCA  
GGTGCATAGTTTGTACATAAAACACTCCTTAAAGACAGTTTACTGGCTGTGATAAAGTTAAACCTTCCAGCAAGGG  
GAAGGTCAAGAAATTAATAAAACAGGCGGGTAAAAGTCCGTAAAGATTAAAAATCGGCTCGATTTGCATCAGGATTAGA  
CATTTATCTCTTTGTTTTCTGTAGTTAAGTTGCGGGTGTAAAGTTAAATCAGGATGCCTGAAAATCGGCACCGGGGTGA  
GGAATTACCTCCGCATCTATAAAAAGGAGTTAACAAAAGATGTTAGATGCAACAAATTACAGCAGGCAAGTGGATCAGG  
CTTACACCCAAATTTCACTCACTTAAACGGCGGACAAAATGCCGATTACATTCCTTTCTGGCGAATGTACCAGGTCACTG  
GCGGCAAGTGTACGTTAGCCTGCGATGGCAACGCTATAGTGCCGGTGACAGTGATTACCGCTTTGCACTGGAATCCAT  
CTCGAAAAGTGTACGTTAGCCTTGCCTTGAAGATGTCGGCCGCGAGGCGGTACAGGACAAAATGGCGCTGACCCGA  
CCGGATTGCCCTTAACTCAGTTATCGCCTTAGAGTTGCATGGCGGCAAACCGCTTTCGCCACTGGTAAATGCTGGCGCT  
ATTGCCACCACAGCCTGATTAACGCTGAAAATGTTGAACAACGCTGGCAGCGAATTTTACATATCCAACAGCAACTGGC  
TGCGCAGCAGGTAGCGCTCTGACGAAGTCAACAGTCGGAACAAAACAACCAACTTCCATAACCGGGCCATAGCCTGGC  
TGCTGTACTCCGCCGATATCTCTATTGTGATGCAATGGAAGCCTGTGACGTGTATACCCGTCAGTGCTCCACGCTCCTC  
AATACTATTGAACTGGCAACGCTTGGCGCGACGCTGGCGGAGGTGGTGTGAATCCGTTGACGCATAAACCGGTTCTTCA  
GGCCGACAACGTGCCGTACATTCTGGCCGAAATGATGATGGAAGGCTGTATGGTCGCTCCGGTGACTGGGCGTATCGTG  
TTGGTTTACCAGGCAAAGCGGTGTAGGTGGCGGTTTCTGGCGGTCGTCCTGGAGTGATGGGAATTGCCGCTTCTCA  
CCACCGCTGGACGAAGATGGCAACAGTGTTCGCGGTCAAAAAATGGTGGCATCGGTGCTAAGCAACTCGGCTATAACGT  
GTTTAAAGGCTGATCATGATGAACACGGAAGGTAATAACGGTAACAAACCTCTCGTCTATGGAACGTCGTTTCCATCGG  
CATTGGGGCAATGGTGGGGCGGGGATCTTCGCGCTGCTGGGGCAGGCTGCATTGCTAATGGAAGCCTCGACCTGGGTCG  
CCTTTGCTTTTGGCGGTATTGTGGCGATGTTTTCCGTTATGCCTATGCGCGTCTGGGGGCGAGCTATCCAGCAATGGC  
GGCATTATCGACTTCTTTCGTCGCGGATTAGGCAACGGCGTCTTTTCGCTGGCGCTCTCGTACTGTACCTGTTGACGCT  
GGCGGTGAGCATCGCCATGTCGCCCCTGCTTTTGGCGCTTATGCCGTGACGTTTTTGCATGAAGGCAGCCAGGAGGAGC  
ACCTTATTTTGTCTACGCGTTGGGGATCATTGCGGTGATGACGTTTTCAACTCCTTAAGCAACCATGCGGTAGGGCGG  
CTGGAAGTGATCCTCGTCGGCATTAAAATGATGATCCTGTTATTGCTGATTATTGCCGGTGTCTGGTGCCTGCAACCGG  
GCATATTTCCGTCTCTGCGCCCCCAGCTCCGGTGCCTTCTTCTCCTGTATTGGGATAACTTTCCTTGCCTATGCGGGCT  
TTGGCATGATGGCGAACGCGGGGATAAAGTGAAGATCCGCAGGTCATTATGCCACGGGCGTTTCTGGTGGCGATTGGC  
GTTACCACGTTGCTTTATATCTCGCTGGCACTGGTTTTGCTTAGCGATGTATCGGCATTAGAGTTAGAAAAATATGCCGA  
TACCGCCGTAGCGCAGGCTGCTTCTCCGCTGCTCGGGCATGTGGTTATGTGATCGTCGTCATCGGCGCTTACTGGCGA  
CGGCTTACGCCATTAACGCGAACCTGTTCCGCGTGTAAACATCATGGACAACATGGGCAGCGAACGCGAACTGCCGAAG  
CTAATGAATAAATCCCTGTGGCGCAGAGTACCTGGGGCAACATTATTGTCGTGGTGTGATTATGCTGATGACGGCGGC  
ACTGAATTTAGGCTCACTCGCCAGCGTTGCCAGCGCCACCTTTTTGATTTGCTACCTGGCGGTGTTTGTGGTGGCGATCC  
GCCTGCGTCATGATATTCACGCTCGTTGCCGATTCTATCGTTGGTACGTTGGTGTGTTGTTGGTGTGCTGTTGGCAAT  
ATCTACAGTCTGTGTTCCAGGGTAGCCGTGCGTTGATATGGATTATTGGCTCACTTACTCAGCCTTATTGTTGGCAAT  
GGTCATGAAGCGCAATAAAACCGTATAACATCTCTGTGCGCAGTACTTCTGTATTATTGTGGTGGCGGTGATATTCC  
GCACTGGCAAAAAACGTGCTTGAATATCTGTTGAAACCTTTAACAAAAGCACAGGAGGCGTTGCGGCAACGATGAACAT  
CAGCGATGTAGCAAAAATTACCGCCTGACCAGCAAAGCCATTGCTTCTATGAAGAGAAGGGGCTGGTGACGCCGCCGA  
TGCGCAGCGAAAACGTTATCGCACCTACACGACGAGCATCTCAACGAACTGACCTTACTGCGCCAGGCACGGCAGGTG  
GGCTTAACTGGAAGAGAGCGGCGAGCTGGTGAATCTGTTAAACGACCCGACGCGCACAGCGCCGACGTCAAACGGCG  
CACGCTGGAGAAGGTGGCGGAGATCGAACGACACATTGAGGAGCTGCAATCCATGCGCGACCAGCTGCTGGCACTGGCGA  
ATGCTGCCCTGGCGATGACAGCGCCGACTGCCGATTATCGAAAATCTCTCCGGCTGCTGTCATCATCGGGCAGGGTGA  
TTAAGACGAGACGGCTCGGATATGTAGGGTTATCCCTTCTATCGCAATGACTTCAACATGCGTACCTGCACCGAGATCCT  
CGCTGGCGCTGACAGGCCATGAACTGTCACCGACGCGCATATGACCAGCGCCGTTGACCAGCGGAGATCCAGCACAAAA  
CGTCGGCAATCAGCTGCTGCCGCGTGGTTTTAAATGACTATCGCTGTGCTTTTGTTCGCGCACCCGCCGCGACAACCA  
TTTCCACCACAGCCAGGCGGCGAGCAGCGTCAGGATGGCAAACATTACCCCTTGGCACTCCCAACCCAGCGGCACCAGCC  
AGACCACCAGCCGGTAATCACCCTGCCACGCCGCTCCACAACAAATAACCATTTCCGCCAGCATCTCGGCTGCCAGC  
AGCAAACCGCGGAGACTGAGCCAGAAAATATGTGGATGAACGACCATTAACCTCATGAGTCCGTTTGTGGCG  
CTGTCTTTCACAGCTCGGCAATCCCGGCAATCGACCCATCAGGCTGCTGGCTCTAATGGCATCATCACTACTTTGCT  
GTTACTGGAGGAACCGATCTGCTGTAACGCTTCCGTGATTTCTGCGCTACGAAGTAGTTCACCGCTGAATATCACCGG  
AGCGGATAGCTTACAGACCCATTTTGGTGGCGGGGCTTCTGCTTCCGGCAACGTTACGCGCTTACGCTGTAAAAAC

CCCGACTGACGTTGCGCTTCCGCTTTCAGGATTTGCGACTGTTTTTACCTTCGGCTTTGAGGATTTCCGCTGACGGAT  
CCCTTCCGCTTCAAGAATGTAAGCGCGTTTGGTACGTTCCGCTTTCATCTGCGCGTTTCATTGAAGAGATAAGCTCTGCCG  
GTGGGCGCACGTCGCGAATTTCAATACGGGTGACTTTAATCCCCACGGGTTGGTGGCTTCATCGACAATACGCAGCAGG  
CGTGAGTTGATGCTGTGCGCTGAGAGAGCATTTCTGCAAGTTCCATTGAACCCAGCACGGTACGGATGTTAGTCATGGT  
CAGGTTGATGATCGCCAGCTCCAGATTGCTGACTTCATAAGCCGCGCGCGGCGTCAATCACCTGAATAAAGCACACGG  
CGTCGATGGTAACGTTGGCGTTATCTTTCGAGATAAAGTTCTGGGAAAGGGATATCGAGCACTTGTCCATCATATTGATC  
TTGCGACCAATGCGATCCATAAACGGCACCACCAGACTGAGCCCCGGCTGTAACGTTTTGGTATAGCGACCAAAGCGTTC  
TACTGTCCACTGATAGCCCTGCGGTACGATTTTACACCCGCGCCGACAATGACCAGCGCGACAAAAATGAGAATCGGGAA  
TAAAGATAAGCATCGAAAAACCTCCTGTTGTACCGTCCATAATCAGCAAAATTGCTGCTTATTAAACAAATTATACCT  
GATTACTGAAAGAGAGTTCCCTTATTCTGCGAAGGATAAACTGTTTTTAGTAAAAATCAGAAAAAGGGAACAGCGAT  
GCAGGAAAATAGTCCTTGTTCAGCTACAAAACGTAGGATATCTGGCGGGTATGCGAAGATTCTTAATAACATCAATT  
TTTCGCTGCGTGTGGCAATTTAAGTTAATTACCGGTCTTCTGGTTGTGGCAAAAGTACGCTGCTAAAAATAGTTGCT  
TCATTGATCAGCCCAACCAGCGAACGTTACTGTTGAAGGTGAGGATGTCAGCACACTAAAGCCAGAAAATCTACCGCCA  
ACAAGTCTTACTGCGCCAGACACCAGCGTGTGGCGGATACGGTATACGATAATCTGATCTTCCCTGGCAGATCC  
GTAACCGGCAGCTGACCCAGCCATTTTCTCGATTTTCTCGAACGCTTCGCTTGGCGGACAGCATTTTACGAAGAAT  
ATCGCCGAGCTATCTGGTGGTGA AAAACAACGCATCTATTGATTGTAACCTGCAATTTATGCCGAAGTTTTATTGCT  
GGATGAAATAACAGTGCCTGGATGAAAGTAATAAACATAACGTC AATGAGATGATCCATCGTTATGTGCGCGAGCAAAA  
ATATTGCCGTGCTGTGGGTGACACACGATAAAGACGAAATTAATCATGCGGATAAAGTGATTACACTGCAACCGCATGCC  
GGAGAAATGCAGGAAGCACGCTATGAACTCGCATAATATACTAACAATCATTAGCACTGGCATTAAATGCTGGTGGTGG  
TGGAATCTTAATTAGCCATAAAGAAAAACTGGCGTGGAGAAAGATATTCTGAGAGCGTGGGGCGAGCGATAATTAG  
CTGATTATTGTCGGCTATGTGCTGAAGTATATTTTACAGCGTGGATGATGCCAGCCTGACATTATTGATGGTGTATTAT  
CTGCTTAAATGCGCGTGGAAACGCGCAAAAACGCAGTAAATATATTGCTAAAGCTTTTATCTCATCGTTTATTGCCATTA  
CGGTGCGGGCGGGAATTACCCTGGCGGTGCTGATTCTCAGGGTGCATTGAATTTATCCCGATGCAGGTGATCCCTATC  
GCCGGGATGATTGCCGTAACGCCATGGTAGCGGTGGGTTGTGTTACAACAATTTAGGGCAACGGGTGATTAGCGAACA  
GCAACAGATTACAGGAAACTGAGTCTTGGTGCAGCGCGAAGCAGGCTTCAGCGATATTGATTGCGGACAGTATCCGCG  
CGCTTTAATCCGACGGTGCATTAGCAAAAACGGTTGGCTTAGTGAGTTTACCAGGAATGATGTCGGGCTGATATTT  
GCCGGGATTGATCCGGTGAAGGCGATTAATATCAGATTATGGTGACCTTTATGCTGCTCTCAACCGCCAGCTTGTGCGAC  
CATTATTGCCTGCTATTTAACCTATCGTAAGTTTTATAATTGCGCCACCAGTTGGTGGTGACGCAATTGAAGAAGAAAT  
GATGCGATGCCGGATGCGCAGCATCGCATCCGGCGTTGTGGTTATGTGCCGATCAACGGAATATCAATACAACAATGCA  
TACAGTGGCGCGGATACTTCGACGCCAGTGATCACCCGTACCCAGCGCAGCGAGGATCTCCTGGAACGTTTTACGCGT  
CTGACCGTCTGCGGCGGTGAGATCTTTACGCAGATGCCGAACAGCAACTCCAGCGCCTTTCATTGCGCCAACTGAT  
GCAGTTGCAGCGCCAGTTGCGTGCAGTGCAGCATCTTGGATTCTCCGCCACCTGCTGTTGCAACTGTTGAATTTCC  
GGCGTATCAGCCGCTGCTTACGAGTTGATTTGCGCCACCAGCCCCTGGTAGCGGGTGCCTGATCCTGCAACGGAAT  
GGTTTTACGACCGCTTCCGCATCTTACAGACGGTTACAGCGCAATCAGCGTTTCTGCCAGCAGCAGGCCGATCTCCCGT  
TCTGATTGACAACCTGCCAGGCGTCTTACGCAATGGCAGGGCATCGGTGTAATTGCTTCTGATCAGTTGCATCGCC  
TGCTGCGCTTTCAGCTCTTTCGCGCGGCGACTTTATCCAGCAGGGCGCGGATCGCTCTTCCGGTTGCGGCCCCG  
GAAGCCATCTACCGTTGCCGTTCTGGAACAGATACAGGTGGAATCGCACGCAGACCAAACTGCGCGGAATCATCT  
GCTCCGCGTGCAGTCCAGTTCGCCAGAATAAATTGCCGTTGACTGCGCCGCGAGGCTTTCCAGAATTGGGGTTAAC  
TGCAACAGTGTGGTACGTTACAGACAAAAATAGAACAGCACCGGAGTGGTATCGACTGTTCAAGAACCTGTTGGCAG  
GTTAGATTGTTAATGTTGACAATATTTTCTACGGACATGGAGTGCCTCTGTTGTGCGATATTTTCTTGACATGGGGG  
CTTAAGCGCGCTTCAACTCACCCCTGCAATATTTTGTCCATCACGCGCCCCGCGAGCAGCGCTTAAGCACCATACC  
GCCAGGTACCCAGCGTACCCGGATAGCGCATCTTCCGCTTCTCGCTAATAAAAAGCATGGCGTACTTTGTCCACCACCGC  
TTCCGGTCCCAACGTAAGCGGGCGGCGATGCCGGATTTTCTGACTGGTTTATCACTTTGCGTCTGGTTGACGTTGTGCG  
TGAAGCGAGTACGAATGGGACCGGTTGATCAGGCTGACTTTAATTCCGCTGTGGCGCAGCTCCATGCGCAGTGCATCT  
GACCACGCTCCAGCGCATATTTACTGGCCGTAAGCGCCACGACCCGGCGTGGAGATTAATCCCATCACCGATGATGT  
CATACAATACGCCCTTACCGTGCAGTAACATCGCGGTAACAGGCGCATGGTGGAGTGGTGGCGCGAAAAAGTTGG  
CGAAAACTGCTGTTCCATCTGCGCACGGCTGATGGTGGAAAGGGGGCCATACATGCCGAATCCGGCATTGTTAAAGATC  
CCATACAGACAATTATCGGTGAGGGGATCACCTCGTGGCTGCGGATCAACACTTTCTGGTGAATCCAGATCGATCAA  
CACGCGGTAATCCCATGCTTTCATGCGCTCAACATCATCCGTTTCCGGCAACCTGCCAGCATGAAAACCTGGC  
GTTTTAATTCAGCGCGCTTCCAGGCCAATCCACTGGAACATCCGTAATTAAGACCGATTTTTGCATAACTTTACCT  
GTCAGGATCTCCGTTGCTTATGAGTCATGATTTACTAAAGGCTGCAACTGCTTCGCCATCCAGTCCGCAATAAACGGCT  
GGCGTGCAGGTTGGGATGAATACCGTATCCTGCATCCATTGTGGCTTGGGTAGACCTTCCATAAAAAAGGGCAGC  
AGCGGAACATCAAATCTTTGGCGAGTTGGGGTAAATGGCGCTAAAGGCTTATTATAACGGCGACCATAGTTGCGAG  
CAGACGATTTGCATTAACAATGGTTACGCTTGGCGGCTTTGACATCTGCAAAATCTGGCGCAGCGTTTGTGCGTTT  
GCTGTGGTGA AAAACACGCAACCGTATTGCCGCCAGTTCAACCAGCACCAACGCGGCTGATGCTGTTTACGAGAA  
GCCGGAAGGCGCGCAGTCTTGTGCGAGGTGTCGCCGCTGATGCTGGCATTAACTACCGACGTTTTACTCTGCCACTT

ATCATTCAACAAGGCAGGCCAGGCCGCGCTGGCAGACATTCGATACCCGGCGCTCAGGCTATCACCCAGAATCAATAACG  
TGTCGCGCTGCGCGGCACGGAAGGTTAACAGGACCAGGAACAGGAAGGGCAAATGCCAGCGGAAAACATTGTTGAAGTTC  
ATCATCTTAAGAAGTCCGTCGGTCAGGGGAGCATGAACTCTCCATCCTCACCGGAGTTGAGCTGGTTGCAAACGTGGC  
GAGACCATCGCACTGGTGGGCGAGTCGGGATCGGGTAAGTCAACCTTGCTGGCGATCCTCGCCGGGCTTGATGACGGCAG  
CAGTGGCGAAGTGAGTCTGGTGGGACAACCGCTACATAATATGGACGAAGAAGCGCGGGCAAAGTTGCGCGCGAAGCACG  
TCGGCTTTGTTTTTTCAGTCAATTTATGTTAATTCCTACCCTAACCGCGCTGGAAAACGTCGAGCTTCCGGCTCTGCTGGC  
GGTGAGAGTAGCGCGAAAGTCGTAACGGGGCGAAAGCGTTGCTCGAACAGTTAGGGCTGGGTAAACGCTTGATCATCT  
TCCGGCACAGCTTTCCGGCGGTGAACAGCAACGAGTGGCGCTGGCACGAGCCTTAAATGGTCGACCTGATGTGCTGTTG  
CCGACGAACCCACCGGAACCTTGACCGCCAGACGGGCGATAAAATTGCCGACCTGCTGTTTTCCCTCAACCGTGAACAT  
GGCACCACGTTGATTATGGTGACCCACGACCTGCAACTGGCGGCACGCTGCGACCGCTGCTTACGGCTGGTGAACGGGCA  
GTTGACGAGGAAGCATGATTGCACGTTGGTTCTGGCGCAATGGCGTTCGCCGTGCTATTAATTGCTGGCTGGCGCT  
AAGCCTGGCGGTGGCCTGCTGCTGGCGCTGGGCAATATCAGCGATCGCATGGAGAAGGGCTTAAGCCAGCAAAGCCGTG  
AGTTTATGGCGGGCGATCGGGCTTGGCAGTTCACGCGAAGTGCCGAAGCGTGGCTGGAGGAAGCGCAAAGCGCGCG  
CTGAAAGTCGGCAAGCAGCTGACTTTCGCCACAATGACCTTTCAGGCGGACACACCGCAGCTGGCGAAGCTCAAAGCGT  
GGATGATATCACCCGATGATGGCGATCTGAAAACCTAACCCCTGGCCTGAAACCGCAGCGGGCAGCTATTGCTGG  
CCCCAGCCTGATGGCACTGCTTAACCTGAAAACGGGCGACACCATTGACGTGGCGATGCCACCTTGGCGATTGCCGGA  
GAAGTGATTACGGAACCGGATTCGGTTTTAACCCCTTCCAGATGGCTCCGCGTCTGATGATGAATCTGGCGGATGTCGA  
TAAAACCGAGCCGTGCAGCCGGGAGTGGGTACCTGGCGTTATAAATTCGGCGCAACGAGAACCAGCTCGACGGCT  
ATGAGAAATGGTTGTACCTCAGCTTAAACCCGAACAACGCTGGTACGGTCTGGAACAGGACGAAGGCGCGCTGGGGCGA  
TCGATGGAACGCTCGAACAGTTCTGCTGCTTTCGGCGCTTCTGACCTTGCTGCTGGCAGTGGCAGCGGTGGCGGTAGC  
GATGAATCATTACTGTCGAGTCGCTACGATCTGGTGGCGATCCTCAAACGCTGGGGCAGGGCGAGCGCAACTGCGTA  
AGCTAATCGTCGGTCAGTGGTTGATGGTCTGACGCTTTCAGCCGTTACCGGTGGGGCCATAGGCCTGTTGTTGAAAAC  
GTGTTGATGGTCTGCTCAAGCCGTTTCTGCTGCTGACTACCGCCAGCCAGCCTCTGGCCGTGGCTGTGGCGCTTGG  
CACCATGACGGTCATCTCGTCTGGTGGGGCTACGACCATATCGCTTGTGCTGGCAACGCAGCCTTACGCGTATTAC  
GTAATGATGTGGTAGCGAACGCTGGCCGCTGAAGTTTTATCTGCCGATTGTCAGTGTGGTGGTTGTGCTGCTCGCC  
GGATTAATGGGTGGCAGCATGCTGCTTGGGCGGTGCTGGCGGGCGGGTAGTACTGGCTTGTGCTGCGGTGTGCTGGG  
CTGGATGCTGTAATGACTTCGCCGATGACGCTGAAATCGCTGCCTCTGCGCTGGCGGTTAGCCGCTGTTACGTC  
AGCCGTGGTCAACGTTAAGTCAGCTTTCGGCATTTCGCTCTCCTTTATGCTGCTGGCACTGCTGCTGGTGTGCGTGGC  
GATCTGCTCGACCGCTGGCAGCAGCAGCTACCTCCAGAAAGCCGAACTACTTTTTAATTAACATCGCCACAGAACAGGT  
AGCACCGCTAAAAGCGTTCCTCGCGAACATCAGATAGTCCCGGAATCGTTTTATCCGGTGGTGGCGGGCGGGCTGACGG  
CGATTAACGATAAGCCGACAGAAGGTAATGAAGATGAGGCGCTTAAACCGCAACTCAATCTTACCTGGCAAAAATACGCGG  
CCCGATCATAATCCGATTGTCGCGGTAACCTGGCCGCCAAAAGCCGATGAAGTGTGATGGAAGAGGGGCTGGCGAAACG  
CTTAAACGTTGCCCTCGGTGATACCGTGACTTTTATGGGCGATACCCAGGAGTTCGCGCTAAAGTGACCAGCCTGCGCA  
AAGTGGACTGGGAAAGTCTGCGGCCTAATTTCTATTTTATTTTCCCTGAAGGGCATTAGACGGGCAACCGCAGAGCTGG  
CTTACCAGTTTCCGCTGGGAGAATGGCAACGGCATGTTGACACAACCTCAACCGCCAGTTCCCGACCTTAGCCTGTTAGA  
TATTGGCGGATTTTAAACAGGTGGTCAAGTGTGGAGCAGGTAAGTCCGGCGCTGGAAGTGTGGTGGTACTGGTCA  
CCGCTGCGGTATGTTGCTGTTGCTGGCACAGGTGCAGGTGGGAATGCGTCAGCGTCATCAGGAGCTGGTGGTGTGGCGC  
ACACTCGGTGCGGGGAAAAAAGTCTGCTGCTACCAGTGTGGTGTGAGTTCGCCATGCTTGGGTTTGTTCGGGCTGGT  
GGCCGCAATTGGTGGGAAACGGCGCTGGCAGTGTGCAGGCGAAAAGTGTGTTGATTTCCGTGGGAGCAGACTGGCGAT  
TGTGGATTGTTCTGCGGTGAGCGGAGCGCTGCTGCTGCTTTCGGCGGCTGGCTGGGTGCGGACTGTTAAGGGT  
AAGGCGCTGTTACGCGAGTTTTCGGGGTATGAGAGTAAATAAGGGGCGTTCTGGTTGAATGGAACGCTTGTGTTAAAT  
AATTCTACAATATGTTTCATTGATGATGTTATTGAATTGGTATTTCCTATCTTTCTATTGCTGATATTAATCTGAATCG  
GTGGAGTTTATTGATTTTAAATATAGCCCTACAAAAATAACTCAGACTAATAAAATCATAAATCATATGCGTTGAATGGA  
TATTATCCATATAGTGAATTTGTTGATGATGAATTCATCTGTGCTAAAAATGTTAGTTAATAAAATATTGAAAGTGACC  
TGTAATAACAGTTGTTGTTGATTGAGAACAATAAGTTTATGTGAAAAATATATAAATACATTAGCTGGTCTTGTGTGTC  
ATTTTATTTTTTTTTTTGTTGCTAACACAGGGATATGAACAATAACTAAAAGGGCACTTTATATGAGCGGAAAACAGCGGC  
GCGTCAGGGAGATATGACTCAGTATGGCGGTCCCATTTGTCAGGGTTCGGCAGGTGTAAGAATTGGCGCGCCACCGGGC  
TGGCGTCTCGGTGTGTCGGGCGGGATGACTTCGGGCAACCCGGTAAATCCGCTGCTGGGGGCGAAGGTGCTGCCCGGC  
GAGACGGACCTTGCCTGCCCGCCCGCTGCCGTTCTCTCCCGACCTACAGCAGCTACCGACGAAGACGCCTGC  
ACCGGTGGGCTTTTTCGGCCCGGCTGAAAAGCGCCTTCTGATATCCGTTACAGCTACGTGATGACGGACTGATACTCA  
ACGACAACGGCGGGCGGAGCATTCACTTTGAGCCGCTGCTGCCGGGGAGGGCGGTGACAGCCGAGTGAGTCAATGTGG  
CTGGTGCAGGTGGTAAGGCAGCACAGCCGACGGCATAACGCTGGCGCGGCTGTGGGGGGCGCTGCCGCGGATATCCG  
GTTAAGCCCGATCTTTACCTGGCGACCAACAGCGCACAGGGGCGTGGTGGATACTGGGGTGGTCTGAGCGGGTCCCGG  
GTGCTGAGGAGTACTGCCAGCGCCGCTGCCCGCTACCGGGTGTACCGGGATGGCGGACCGCTTCCGGCGGACGCTG  
ACGTACCGGCTGAGGCGCGGGTACCTGGCCGGGAAAATACCCGGCGTACGGGACGGTGGCGGGGGAGTTCGCTCT  
GGTCTGACCACGCAGGCGCAGCTGCGGAAGAGGCCCGCACCTTTCGCTATCTTCTGACAGTTCCCGCCCTCTCT

CAGCCTCAGCGTTCCCCGACACACTGCCCGGTACCGAATACGGCCCCGACAGGGGTATCCGCCTTTCCGGCGGTGTGGCTG  
ATGCACGACCCGGCATACCCGGAGAGCCTGCCCGTGCGCCACTGGTGCGGTACACGTATACGGAAGCCGGTGAAGTGT  
GGCGGTATATGACCGCAGCAATACGCAGGTGCGCGCTTTCACGTATGACGCGCAGCACCCGGGCCGGATGGTGGCGCAC  
GTTACGCGGGAAGGCCGGAGATGCGCTACCGCTACGACGATACGGGGCGGGTGGTGGAGCAACTGAACCCGGCAGGGTTA  
AGCTACCGCTATCTTTATGAGCAGGACCGCATACCGTACCGACAGCCTGAACCGGCGTGAGGTGCTGCATACAGAAGG  
CGGGCCGGGTGAAACGGGTGGTGA AAAAAGAACTGGCGGACGGCAGCGTACGCGCAGCGGGTATGACGCGCAGGAA  
GGCTCACGGCGCAGACGGACGCGGGCGGACGGAGGACAGGTACGGTCTGAATGTGGTGTCCGGCGATATCACGGACATC  
ACCACACCGGACGGGCGGGAGACGAAATTTACTATAACGACGGGAACAGCTGACGGCGGTGGTGTCCCGGACGGGCT  
GGAGAGCCGCCGGGAATATGATGAACCGGACAGGCTGGTATCGGAGACATCGCGCAGCGGGGAGACAGTACGCTACCGCT  
ACGATGACGCGCAGGTGAGTTACCGGCGACGACAAACGGATGCGACGGGCGAGCACCCGGCAGATGACCTGGAGCCGCTAC  
GGCAGTTGCTGGCGTTCACCGACTGCTCGGGTACCAGACCCGTTATGAATACGACCGCTTCGGCCAGATGACGGCGGT  
CCACCGGAGGAAGGCATCAGCCTTACC CGCGCTATGACAACCGTGGCCGGTTAACCTCGGTGAAAGACGCACAGGGCC  
GTGAAACCGGTATGAATACAACGCCGACGGCGACCTGACTGCCGTTATCACCCGGACGGCAACCGGAGCGAGACACAG  
TACGATGCGTGGGAAAGCGGTGAGCACCACGCAGGGCGGGTACGCGCAGTATGGAGTACGATGCTGCCGGACGTGT  
CATCAGCTGACCAACGAGAACGGCAGCCACAGCTCTTACGTTACGATGCGCTGGACCGGTGGTACAGCAGGGCGGCT  
TTGACGGGCGGACGCAACGTTATCATTATGACCTGACCGGAAAACCTCACACAGAGTGAGGATGAGGACTTGTCTATCCTC  
TGGTACTACGATGAATCGGACCGTATCACTACCGCACGGTGAACGGGCAACCGGCAGAGCAGTGGCAGTATGATGGCCA  
CGGTGGCTGACAGACATCAGCCACCTGAGCGAAGGCCACCGTGTGCGCTCCACTATGGCTATGACGATAAAGGCCGCC  
TGACCGGCAATGCCAGACGGTGGAGAACCCGGAGACGGGGAACTGCTGTGGCAGCATGAGACGAAACACGCATACAAC  
GAGCAGGGGCTGGCAAACCGCTCACGCCGACAGCCTGCCCGCGGTGGAGTGGCTGACGTATGGCAGCGGTTACCTGGC  
GGGAATGAAGTGGGCGGGACCGCTGGTGCAGTATACGCGGACAGGCTGCACCGTGGAGCGGTGGCAGCTTCGGCA  
GCATGGCAGGCAGTAATGCCGATACGAACTGACAGCACATACACCCCGCAGGCCAGTTACAGAGCCAGCACCTGAAC  
AGCCTGGTATATGACCGTACTACGGTGGAGTGACAACGGCGACCTGGTGGCAGTACAGCGGCCCGGACAGACGGGGA  
ATACGGCTACAGCGCCACGGCAGGCTGGAGAGTGTGCGCACCTCGACAGACCTGGACATCCGCATCCCGTATGCCA  
CGAACCCGGCGGGCAACCGCTGCCGGACCCGGAGTGCACCCGGACAGTACACTCACAGTGTGGCCGGATAACCGCATC  
GCGGAGGATGCGCACTATGTCTACCGCCAGGATGAATACGGCAGGCTGACGGAGAAGACGGACCGCATCCCGCGGGTGT  
GATACGGACGGACGACGAGCGGACCCACACTACACTACGACAGCCAGCACCGCTGGTGTCTACACGCGGATACAGC  
ATGGCGAGCCACTGGTGCAGAGCCGTACCTCTACGACCCGCTGGGACGGCGAATGGCAAAACGGGTCTGGCGGGGGAG  
CGTGACCTGACGGGGTGGATGTCGCTGTGCGGTAACCGGAGGTGACGTGGTATGGCTGGGACGGAGACAGGCTGACGAC  
GGTGCAGACTGACACCACACGTATCCAGACGGTATACGAGCCGGGAAGCTTACGCGCGCTATCCGGGTGAGACAGAGA  
ACGGCGAGCGGAAAAAGCGCAGCGGGCAGCCTGGCAGAGACGCTCCAGCAGGAAGGGAGTGAGAACGGCCACGGCGTG  
GTGTTCCCGCTGAACTGGTGCGGCTGCTGGACAGGCTGGAGGAAGAAATCCGGGCAGACCGCGTGAGCAGTGAAAGCCG  
GGCGTGGCTTGCAGTGGCGGCTGACGGTGGAGCAACTGGCCAGACAGGTGGAGCCGGAATACACACCGGCGGAAAAAG  
CTCATCTTTACTGCGACCACCGGGGACTGCCGCTGGCGCTTATCAGCGAAGACGGCAATACGGCGTGGAGCGCGGAA  
TATGATGAATGGGGCAACAGCTTAATGAGGAGAACCCGCATCATGTGTATCAGCCGTACCGTCTGCCAGGGCAGCAGCA  
TGATGAGGAATCAGGGCTGTACTATAACCGTACCGGTAACGATCCGTTGACGGGGCGGTATTAATCAGGACCCGA  
TGGGTTGAAAGGGGGATGGAATTTATCAGTATCCTTTAAATCCACTACAACAAATTGACCCTATGGGATTATTGCAG  
ACTTGGGATGATGCCAGATCTGGAGCATGTACGGGGGAGTTTGGTGTCTTTACAGTATAATAGGACCAAGTAAAT  
TGATAGTACTGCAGATGCTGCGTTAGATGCTTTGAAAGAAACGCAGAATAGATCTCTATGAATGATATGGAATACTCTG  
GTATTGTCTGTAAGATACTAATGAAAAATTTTTGCATCTAAGGCAGAAACTGATAATTTAAGAAAGGAGTGCATATCT  
CTGAAAAAGAAATGTCCACAGGTACAGATAGAGTTGCTGTTATCATACTACGGTGCAGATAGTCATGGCGATTATGT  
TGATGAATTTTTTTCAAGTAGCGATAAAAATCTTGAAGAAGTAAAGATAATAATCTTGAAGCATTATCTCGCAACAC  
CTGATGGACGATTTGAGGCGCTTAATAATAAAGGAGAAATATTTTTATCAGAAATAGTGTCCCGGATTGAGTTCAGTA  
TGCATACCGTATCATGATTAATTTTAGTGCTTTTATTAGTGGGGCTATAAGGAGATTCAATGAAATATAGTTCAATATT  
TTCGATGCTTTTCATTTTTATACTATTTGCTGTAATGAGACAGCTGTTTACGGTCTGATGAAAACATTATTTTTATGA  
GGTATGTGAAAAAATTACATTTAGATAAATACTCTGTTAAAAATACGGTAAAAACTGAAACAATGGCGATACAATTAGCT  
GAAATATATGTTAGGTATCGCTATGGCGAACGGATTGCAGAAGAAGAAAAACCATATTTAATTACGGAACACCAGATAG  
TTGGGTTGTTGAGGGAGCAAAGTTACCTTATGAAGTGGCGGTGGTGTATTTTATAGAAATTAATAAGAAAAATGGAT  
GTGTTTTGAATTTCTACATAGTAAATAATGCTGGCGCTGATGGATGCGGATGGAAACATTGCGTGGAGCGGGGAGTATG  
ATGAGTGGGGCAACAGCTGAATGAAGAGAACCCGCATCACCTGCACCAGCCGTACCGGCTGCCGGGGCAGCAGTATGAT  
AAGGAGTGGGGCTGTACTACAACCGGAACCGGTAACGATCCGTTGACGGGGCGGTATATCACTCAGGACCCGATAGG  
GCTGGAGGGGGGATGGAGTCTGTATGCGTATCCGCTGAATCCGGTGAATGGTATTGATCCATTAGGGTTAAGTCCCGCAG  
ATGTAGCGCTAATAAGAAGAAAAGATCAACTAAACCATCAAAGAGCATGGGATATATTATCTGATACTTATGAAGATATG  
AAGAGATTAATTTAGGTGGGACTGATCAATTTTTCCATTGTATGGCATTGTCGAGTGTCTAAATTAATGACGCTGG  
TGTTAGCCGATCGGCGAAAGGGCTGGGTTATGAAAAAGAGATTAGAGATTACGGGTTAAATCTGTTCCGGTATGTACGGCA  
GAAAAGTAAAGCTATCCATTCTGAAATGATTGAAGATAATAAAAAAGACTTGGCTGTAATGACCATGGGTTGACATGT

CCATCAACAACAGATTGCTCAGATAGATGTAGTGATTATATTAATCCAGAGCATAAAAAACGATAAAGGCTTTACAAGA  
TGCTGGCTATCTCAAGTAATCTATCAAAGATGATAATATTTATTTTTGCTATTATAATCATTGTTGTTTTATGCGTAATT  
ACTTATCTTTATTTATACAAAGATGAATCTCTTGTAAGTAAACATTACATAAACTATATGGCAATACCAGAAAATGATGG  
AGTTTTTACATGGCTCCCAGATTTTTTTCCGCACGTAGCGGTGGATATATCAATATACACAAATGTAGAAGATGATTATT  
TTTTTCTTATTTTTCCCTAACAAATGATGATGGGGGTAGGTTTAAAGAAAACATTGACAGTGAGGGCCAGGGAAACAAGTGG  
CGAAAATCGTATCAAAGAATGATCCAGATACAAAAAAGTGTGGTGTAAATATGGTAAGATACCAGGGCAAGGGGATGGT  
GTAAACCTTTTTTTTTGTTGGTGAATTAATGTTACGCATTATTTTATAACAAATATTGGAGCTGGATTGCCTGATGCTTG  
TGCAGAGTAATTGCTTGAATTAAGAGTCTATCCCATATCGAAGTCGTCAACTTCGTAGTGAGGAAAAGTAAAAATTCCTGA  
CTGAGAAAAGACATGTCCGCTATTGTGTAAGGCCATATAGCTCAGACGATGAATATCTACTCGTATTCAGTTGTTTTATTG  
AGGGTGAGTCCGACCCTGAAACAACAAATAAAATGAACAGTCAGAGAGTTTACATAGAATTGCACTGGTCTTTTACGAT  
ATCTGACATTGTGAATACATATTCAGCCATGCATTAATTAATGTTACGTGTTTAAATGTGAGTCCCTATCTGAAAATA  
AATAATCCTCCGGATTAATAAATTTCTTGCCGGGAAAGAAAGAGGAAATAAACCATAGCGGAAAACAGCGGCACGC  
CAGGGTGACATGCCCCAGTACGGCGGCCGATAGTCCAGGGTTCAGCGGGGTACTGATAGTCGCGCCGACTGCATCGAG  
AACTCCATACAACCTTTTTACGGAACGTACCTGATAAAATTTGTTAGTATCGTCTTTTGGATTCTCAAGGTTATGGAG  
TAACCAGACAGAACGGACACCACTGTCCGAGATAAAAAACCCCTGTTTACGCAGCTCGTTGCTGGCCCGTGTGACCAT  
GTGTCCGGAAAGCGACGGCTAATCAACAACAGCCTGTTCCAGTTCCTCATCGGTACGGTCTTAAGGTTAGGAGCGCGG  
CGACTACGATTAATCTGCGCATCCACACCGCCTTACGCGACCAGTTCGCGGTAAACGATAAAACGTATCACGCGAAACGCC  
CATGATTTTACAGGCTTTTGATACGTTGCTGAGTCTTTCAGCCAGATTGAGCAAACCGGCTTTGTGTTTATGACGGGAT  
TGGCAGTATGAAGCATGAGAGTTACCTCTTGTGTTTGGATAAGGATTGACACTCATATCAAAAACCGTAACTCTCAACCT  
TTCAAGGCCATGTGTCAGATCAAGTCGCGACTAATACAAATACGTCCCTCATTACCGCGCCTTAACCCATTCCGCCACTT  
CCGCCACTCACCGGAAAGACAACCTTTTTCCGCTTTTTCTCAAGCTGATAGCGATACATCGGGTCTGAATATTCTTCA  
AGTAACGGCACCAGCCAGCCAGATGACCGTCCGGTGTCCGGTGGTGAAGTTCGTTGTCAGTGTGCATCCAGCCTTGC  
AGCCAGTTCGTTATAGCGCTGTAGCCCCAGCCGACGCTTAATCGCCGAAAGTCCGTGATGCAGGTATTCCGAATACTCCT  
GCCAGCCCTGTTGTCGCGCTACGCGTGGGTAATCATGATGCATACGCAAGAAATACTTTCGTTCCAGCGCTCAAGA  
CGGATCTCAAACGGATCTTCTACCACCGCAATCGCCGCTGAGTCATTGCTCGCGCAGGCATTCCGGCAGGTGATTCTGA  
ACCGATCATCCGGCTTTGCTCTTCCAGCACCCACAGCGCAAATCTGACGGGCGTCCGTTTTTATGATTTCCGGCAGCCA  
GCAGTTTTTCAAACCTCGCCTGGCTAAGTTGTGGTGTAACTGCGACCAAAACGCCGAACCGCGATGACGCGCAACCCCT  
TCCAGATCAACACCGTTCGCTGTTGCTGCACTAACAGCGTTTTACCCTGCGGTACAACCGCAATCAGCACTATCCG  
TTTTTGTGCCAGTTCAATAGTCGCTGAATCGCGGTCTGGCGAGTGCCTTATAACCGCCTTCCACCAGCGGATAATCAA  
TCCCCGCTGCATGCAACCAGCTTTCACAATATGTGAGCGCTGACCGCCACGGCGCAGCAGAGAATACCTTTCGGGATTT  
TGCAAGCAGCTGCCCGCAGGCGTCCATGCGCTGTGACGAATTTACCCGCCACAGTTTATGTCACGCGCCAGCGC  
TGCGTCTGAGCCTTGCTGTTATAGCAGGTGCCAACGGCGCGCTTCATCGTTATTATTAACGGCAGATTGATAGCGG  
CGGGCATTGCGCCGTGCTCAAACCTGATAGGGGCGCGAACATCAATAATGGGCGTATCAGCAATCAGCAGGGCAGATAG  
TCCTGTTCCGTGTGCTCTCTTGCATAGTTAAAAGTGAACCTCAAATCAGCTTGCAGCTATTTTACGCGCAACGCGCA  
AGGAAACTTGATTTTTAACTGCGTGGGTTGCCGAAAATTTCTAAAAATCCGCTGATTTCCGGCCTGCGCTGGGTAACAA  
GGTCAAAATCTTCTACCGCTTTCGCGCTGCCAAATTTGCGCATGCCAGACTCAATGGCGAAGGAGGGCGCATCGTTG  
GGATTACCCGGCTGACAGTTGTTGATTATCGATCATTGACTGGCAAAGCGATTTTGGCAAAAACCAATGCCAACGCC  
GCCAGATGGGCGGCGATTTTCTGTTCCATATCGGGAACAATAATCTTTTTGCCCTGGCAATCGCCAGGCGACGCGTTT  
GGTTAAGGTGCGGCGCTGCTTCAATATTGACCGCGGAAAGCGCCGAACCTGCGCTTCTGTTAGCGGCTCTTCAACGT  
TCCGACGGATGATCCGCGCCATGACAAAGCGCCATTGACCGATCCTAAGGGATCAAGACTAAAGGATTTTCCAGC  
GCCTCAGTTCCCGTGACCGCGATAGCCAGCGAAAAACCTTCTACAATAGCGAGTCCAGACGCCCATATAGATTTGTCG  
GGAGATGTAAACTGGGTAAGGGTAACGCTCATTAGCCACGCCAGCAACTGGGCGACGGCCTGGGGTTGTAGAGCA  
GGTTGTTGATGACAATATTCACCTGGCGTTCACGCCATCATTACCTGTTGCAGCTCGCTTGGCATACTTTCCAGCCAG  
CTCAGCCAGTCTCTGGCCTGGGAAAGTAGATGCTCGCCAGCCGCTGTCAACGTACGCTGCGAGTCTACGGAAAAACAG  
CGTACTCCGGTATTCTCTCCAGAAGTTAATGCGATAACTGATCGTCCGCGTGGTTTTACATAATCGTTCTGCCGCTT  
TTGAAAAACTCTGTTTCCAGCAACCGCAATGAAAGTCCGCAAGTTTTCTGGATCGAACATCTTCCAGGTATCCCCTTTA  
AATCCGCAAGTTGCGTGATTTTTCTTATCCTCTGATTTATCAGTATTTTTACATGATAACCTGTTCAATTTGTGGACTAA  
ATCTAGTTTTGAAAAATATTTCAACTTTTTGATTGATGTTGTTCTTAAAGTTTTAGATTGCCTGTTATTGAAACCAA  
GCTGACCGGTGCGCGGTGGTTGAACGGAATTATGTTACAAGGACAAAAAGATGAAACTTCAGGTATTACCGTTAAGTCAG  
GAAGCCTTTAGTGCTTATGGCGACGTAATCGAAACGACGAAACGGGATTTTTCCATATTAACAATGGCCTGGTGGAGCG  
TTACCACGATTTGGCGCTGGTTGAGATTCTTGGCAAGACTGTACGTTATCAGCATTAAACCGCGCAACCGGCGAATC  
TGCCGCTGACCATTACGAACTCGAACGTCATCCGCTGGGTAACAGGCTTTATCCCGATGAAAGGTGAGGTGTTTGTG  
GTGGTCTGGCGTTAGGTGACGACAAACAGACCTGTAACGCTCGGGCGTTTATCACCACGGCGAACAGGGAGTGAA  
TTACCATCGTAACGTCTGGCATCACCACTTTTTCGCCTGGCAGCGGTCACCGATTTTCTGACCATCGATCGCGCGGCA  
GTGACAACTGTGATGTTGAAAGTATTCTGAAACAGGAACTCTGTTTTGCGTGACGCTGCAACCGACTTGATAAGATAA  
ACTAATTGTTTATTGTTTATGCTCACTTGTAGGTCCGGAGTTAACGTAGGTATGACGGAAGTTAGACGGCGCGCAGGCCA

GGACAGGCGGAGCCTGTGGCACAGAAGGGCGCACAGGCGTTAGAGCGGGGAATTGCGATTCTGCAATATTTGAAAAAAG  
TGGGGGAAGTTCGTCGGTATAGCGATATTTCTCTCAATCTGGATTTGCCGCTCTCCACGACCTTTCGTTGCTGAAGGTTT  
TACAGGCAGCGGATTTTGTCTATCAGGACAGTCAATTAGGCTGGTGGCATATAGGATTAGGTGCTTTAACGTCGGTGCG  
GCGTACATCCATAACCGCATGTCCTCTCCGTCCGCGGGCCGTTTATGCGCCGCTGATGTTACTTCCGGCGAAACGGT  
CAATGTCCGATCCGTAACGGCAATGAAGCGGTATTAATTGGTCAGTTAGAGTGTAAATCGATGGTCAGGATGTGTGCC  
CACTGGGCAGTCGTCTGCCACTGCATGCTTCCGGTCCGGGCAAAGCGCTGCTTTATCCGCTGGCGGAAGAGGAGTTGATG  
AGCATATTCTGCAAACCGTTTGCAGCAGTTTACGCCAACTACGCTTGTGGATATGCCACCTTGTGAAGGACCTGGA  
ACAAGCGCGTGAACGGGCTATACCGTAGATAAAGAAGAGCATGTTGTAGGTCTGAATTGCATAGCTTACGCAATTTACG  
ATGATGTCCGTAGTGTGTTGCCGCTATCTCCATCTCCGGCCTTCAAGACTGACAGAAGATCGTTTTGTCAGTCAG  
GGTGAGCTGGTCAGAGACACCGCCCGCATATCAGCACGGCGTTGGGACTGAAAGCACATCCATAATGTCTGTGCATCC  
CGCTCTGCGGAGCGGTTTTTTGACAAAATTTGAAAGTTGAAAAATTTTCCAATAAATAGAGGTAGGAATAAAATGGC  
AAAAATGAGAGCCGTTGACGCGCAATGTATGTCTGGAGAAAGAAGGTATCACTACCGCTTCCGGTGTCCGGGAGCTG  
CAATCAATCCGTTCTACTCAGCGATGCGTAAGCACGGCGTATTCGTACATTCTGGCGGTCATGTGGAAGGTGCTTCG  
CACATGGCGGAAGTTATACCCGCGCAACGGCAGGGAATATCGCGTATGTCTGGGGACTTCCGGTCTCGGGCACGGA  
CATGATACCCGCTCTATTCCGCTTCTGCTGATTCATTCTATTCTGTGCATTACCGCCAGGCACCCGCGCCCGCTG  
TGCATAAAGAAGATTTTTCAGCCGCTAGATATTGAAGCAATTGCTAAACCGGTCAGCAAATGGCGGTTACAGTTCTGTA  
GCGGCGCTGGTGCCTCGCTGCTGCAACAGGCATTTTCACTGATCGGTTCTGGTCTGCCGGTCCGGTACTGGTGGATTT  
ACCGTTCCGACTTTCAGGTTGCGGAAATCGAGTTTGTCTGACATGTACGAACCGCTGCCGGTCTACAAAACCTGCTGCCA  
GCCGTATGCAGATCGAAAAAGCTGTAGAAATGTTAATCCAGGCCGAACTCCGGTATTGTTGCCGGGGCGGGTAATT  
AATGCTGACGCAGCTGCACTGTTACAACAGTTTGTGAACTGACCAGCGTTCGGGTGATCCCAACGCTAATGGGCTGGGG  
CTGTATCCCGGACGATCATGAACGATGGCCGGGATGGTGGTCTGCAAACCGCGCATCGTTACGGTAACGCAACGCTGC  
TGGCGTCTGACATGGTGTGGTATCGGTAACCGTTTTGCTAACCGCTACCCGGCTCGGTAGAGAAATACACCGAAGGG  
CGCAAATCGTTCATATTGATATTGAGCCGACGCAAATTTGGTCCGCTGCTGTGTCGGATCTCGGTATTGCTCTGATGC  
TAAAGCGGCGTGACACTGCTGTTGAAGTGGCGCAGGAGATGCAAAAAGCGGGTCTGCTGCCGTGCTGTAAGAATGGG  
TCGCGACTGCCAGCAGCTAAACGCACTTTGCTGCGCAAAACCCACTTCGACAACGTGCCGGTGAACCCGACGCGCTG  
TATGAAGAGATGAACAAAGCCTTTGGTCCGATGTTGTTATGTCACCACCATTGGTCTGTCAAAATCGCTGCGGCACA  
AATGCTGCATGCTTTAAAGACCGCCACTGGATCAACTGTGGTCAGGCTGGTCCGTTAGGCTGGACGATTCCGGCTGCC  
TAGGGTTTTGTCGGCTGATCCGAAACGCAATGTGGTGGCGATTTCTGGCGACTTTGACTTCCAGTTCCTGATTGAAGAG  
TTAGCTGTTGGCGCGCAGTTCAACATTCGATACATCCATGTGCTGGTCAACAACGCTTATCTGGGGCTGATTCTGTCAGTC  
ACAACGCGTTTTGACATGGACTACTGCTGCAACTCGTTTTGAGAATATCAACTCCAGTGAAGTGAATGGCTACGGT  
TTGACCACGTAAGTAGCGGAAGGTTTAGGTTGTAAGCTATTCGGGTCTTCAAACCGGAAGATATTGCCCGACGCTTT  
GAACAGGCGAAAGCCTTAATGGCGCAATATCGGGTACCGGTAGTCGTGGAAGTATTCTCGAGCGTGTGACCAATATTT  
GATGGGCAGCGAACTGGATAACGTCATGGAATTTGAAGATATCGCCGATAACGACGCGGACGACCCGACTGAAACCTGCT  
TCATGCACTATGAATAAGGGAGATAAATAATGTTACGTTTTCTCTGCTAATTTATCGATGTTATTTGGAGAATATGATTT  
CTCGCCCGTTTTGAGAAAGCTGCGCAGTGTGTTTTGCGGCGGTTGAATTTATGTTTCTTATGACTACGACATTGAAGA  
ATTAACATGTGCTGGCGAGTAATAAAGCTGAACATACGCTGCACAATTTACCGCGGGTACTGGGCGCGGGGGAGC  
GCGGATTGCTGTATTCCTGGCCGTGAAGAAGAGTTTCGGGATGGCGTAGCAGCAGCGATTGTTATGCCCGTGGCGTG  
GGTAATAAAAAAATTAACGTCTGGTCCGTAACGCGGCTGGTTTTCAGCAGTGAACAGATTACGCAACGCTTGTAGA  
AAACCTGCGTTATGCCGGAATATGCTGATGAAAGAAGATATTTTATTACTGATTGAACCTATTAACCATTTTATGATTC  
CTGTTTTCCATCTCACCGAACTCGGCAGGCGCTGAAATGATTGATGATGTTGGTTGCTGCAATTTGAAATTCAGTAT  
GACATTTATCATATGACGCGGATGGAAGGTGAATTAACCAACCCATGACTCAGTGGGCTGATAAAATTTGGTCCACCTGCA  
AATTGCCGATAATCCGCATCGCGCGAAACCGGAACCGGAGAAATTAATTATGATTATCTCTTTAAGGTAATCGAAAAT  
CTGACTACAACGGTTGGGTTGGGTGTGAATATAAACCCCAAACCCACGGAAGCCGGTTTACGCTGGATGGATCCGTAC  
CGTTAAACGTAACGCTATTGACACAATGCTTTTTTAGGCCGCTAAGTTGGCAGGGGATCGTGTGCTGAATTCAGGAA  
AAGCGAAATTTAAAGAGGTTAATTATGAAACTGGGATTTATTGGCTTAGGCATTATGGGTACACCGATGCCATTAATC  
TGGCGCGTGCCGGTCAATACATGTCAGCACCATTGGACCGTTGCTGATGAATTACTGCTACTGGGTGCCGTCAGT  
GTTGAAACTGCTGCCAGGTAACGGAAGCATCGGACATCATTTTTATTATGGTGCCGGACACACCTCAGGTTGAAGAAGT  
TCTGTTCCGGTGAATGTTGTACCAAGCCTCGCTGAAGGGCAAACCATTTGTTGATATGAGCTCCATTTCCCGATTG  
AACTAAGCGTTTCGCTCGTCAAGTGAATGAACTGGCGGCGATTATCTCGATGCGCCAGTCTCCGGCGGTGAATCGGT  
GCGCGTGAAGGACGTTGTCGATTATGGTTGGCGGTGATGAAGCGGTATTTGAACTGTTAAACCGCTGTTGAACTGCT  
CGGTAATAATATCACCTCGTGGGCGGTAACGGCGATGGTCAAACCTGCAAAGTGGCAAATCAGATTATCGTGGCGCTCA  
ATATTGAAGCGGTTTTCTGAAGCCCTGCTATTTGCTTCAAAGCCGGTGGGACCCGGTACGTGTGCGCCAGGCGCTGATG  
GGCGGCTTTGCTTCTCACGTATTCTGGAAGTTCATGGCGAGCGTATGATTAACGCACCTTAATCCGGGCTTCAAAT  
CGCTCTGCACCAGAAAGATCTAACCTGGCACTGCAAAGTGGCAAAGCACTTGCCTGAACCTGCCAAACACTGCGACCT  
GCCAGGAGTTATTAATACCTGTGCGGCAAACGGTGGCAGCCAGTTGGATCACTCTGCGTTAGTGCAGGCGCTGGAATTA  
ATGGCTAACATAAACTGGCCTGATACCCGCAATAAAAATGGCCGATATCAGAAAATGAATCGGCCAGCAATATTAATAA



AGAAAGCAGCCAAAGATGTTGCTTCAGTATTAATAAATATTTTTATTTTATTTGTTCCATAGCTAGATTAACAA  
CGTTATTGATACGTGAAATTAAGAGGGATTTATGGAACATCAGAGAAAATTTCCAGCAACGCGGCTATAGCGAAGAT  
CTATTGCCGAAAACGCAAAGCCAGCGGACCTGGAACATTTAACTATTTTACCTTATGGATGGGTTTCGGTTCATAACGT  
TCCCAATTATGTGATGGTCGGCGGCTTTTTATTCTCGGCTTGTCTACCTTTAGTATTATGCTGGCAATTATCCTCAGCG  
CCTTTTTATTGCCGCGGTAATGGTATTAACCGGTGCTGCGGGCAGTAAATACGGTGTGCCTTTTCCATGATCCTGCGT  
GTTCTTACGGTGTACGTGGTGCACCTGTTCCCGGATTATTAAGGGGCGGAATTGCCGCCATCATGTGGTTTGGTTTGA  
ATGTTACGCGGGGTCACCTGGCCTGCTTGATTCTGATTGGCAAAATCTGGCCGGGATTTTAACTCTCGGTGGTGATTCA  
CTCTGTTAGGCCTTTCTCTACCGGGCTTAATTACTTTCTTAATCTTCTGGCTGGTCAACGTTGGTATAGGTTTTGGCGGT  
GGCAAAGTTTTAAATAAATCACTGCCATTCTTAACCCGTGCATCTATATCGTTTTCGGCGGTATGGCGATTTGGGCGAT  
TTCCTGGTGGGATCGGTCCAATCTTTGACTACATTCGAGCGGTATTAGAAAAGCAGAAAACGGTGGCTTCTGTCC  
TGGTGGTGATTAACGCGGTAGTTGCGGTCTGGGCGGACCGGCGGTGAGCGCATCCGACTTACGCAAAACGCCACTCG  
TTTCGTGAGCAGGCGCTGGGCAAACGCTGGGTTTGTGTGGCTATATTCTGTTTGGGTGCGCGGGGTATGATTAT  
TGCCGAGCCAGTATTACTACGGCGTGATACCTGGAACGTGCTGGATATTGTTTACGCGTTGGGACAGCCTGTTCCGCT  
CGTCTTTGCGGTACTGGTATTCTGATGACAACCTATCTCACTAACGCGACCGGTAATATTATTCCAGCCGGTTATCAG  
ATTGCCGCCATTGCACCGACAAAACGACCTATAAAAAACGGCGTACTGATTGCCAGTATTATCAGCTTGGTGCCTGCC  
GTGAAAATTAATGAAAATCAGGACAGCATTATCTTTTCTCGATATTATCGGCGGAATGCTTGGTCCGTAATTGGTG  
TCATGATGGCGCATTATTTTGTGGTATGCGCGGACAAATTAATCTTGATGAACTGTATACCGCACCTGGCGATTATAAA  
TATTACGATAACGGTTTTAACCTCACTGCGTTTTAGTAACCTCTGGTGGCCGTTATTTTATCTTGGCGGTAAGTTTTAT  
TCACTTTATGGAACCGTTATCGCGTGTTCATGGTTTGTGCGGCTCATCGTCGCCTTTGCGGCCTACGCCTTATTAAGA  
AACGTACAACAGCAGAAAAAACAGGAGAGCAAAAAACCATAGGTTAATTAATCCCGATATTGAACATTGAGTTAAAAACC  
AATCTGATTTTACAAGGAGTTTGTATGTCTTTTATTAAATCAATAAAAACGGCACCGTTATTTAGAAAAACGAAGCT  
CGCGTTGTAGATATCGCCGTTAAAGGGGAAAAATTGCTGCTATCGGTCAGGATCTGGGCGATGCAAAAGAAGTTATGGA  
TGCGTCTGGTCTGGTGGTTTTCGCGGGCATGTTGATGCGCACACCCATATTTCTGAACCGGGTCTAGCCACTGGGAAG  
GTTATGAAACCGTACTCGCGCAGCGGCAAAAGGTGGTATCACCACCATGATCGAAATGCCGCTCAACAGCTGCCTGCA  
ACGGTTGACCGCGCTTCAATTGAACTGAAGTTCGATGCCGCTAAAGGCAAGCTGACTATTGATGCGGCACAACCTCGGTGG  
CCTGGTGTCTTACAACATCGACCGTCTGCATGAGCTGGATGAAGTGGGCGTTGTCGGCTTCAAATGCTTCGTTGCGACCT  
GTGGCGATCGCGGTATCGACAACGACTTCCGTGATGTAACGACTGGCAGTTCTTCAAAGGTGCGCAGAAGCTGGGCGAA  
CTGGGTGAGCCGGTGTGGTGCACCTGCGAAAACGCGCTGATTTGTGACGAACTGGGCGAAGAAGCGAAGCGTGAAGGTG  
CGTAACCGCTCATGACTATGTGGCTTCCGCTCCGGTATTTACCGAAGTGAAGCAATTCGCCCGGTACTGTATCTGGCGA  
AAGTTGCTGGTTGCCGTCTGCACGTTTGCACGTCAGCAGCCCGAAGGTGTTGAGGAAGTACTCGTGACGTCAGGAA  
GGTCAGGACGTTACTTGTGAATCCTGCCCCATTACTTTGACTGGATACCGATCAGTTCGAAGAAATCGGTACTCTGGC  
GAAGTGTTCACCGCCGATCCCGCATCTGGAAAACGAAAAGGCATGTGGGAAAACTGTTTAAACGGTGAATCGACTGCC  
TGGTTTTCCGACCACTCTCCATGCCCGCGGAAATGAAAGCCGGTAACATCATGAAAGCATGGGGCGGTATCGCCGGTCTG  
CAAAGCTGCATGGACGTGATGTTGATGAAGCGGTACAGAAAACGCGGTATGTCTCTGCCAATGTTCCGCAATTAATGGC  
GACTAACGCAGCAGATATTTTCCGTCTGCAGCAAAAAGGCCGATCGCCCCAGGAAAAGATGCCGACTTCGTCTTATT  
AGCCGAATAGCAGCTATGTTCTTACCAATGACGATCTGGAATATCGCCACAAAGTCAGCCCGTATGTTGGCCGTACCATT  
GGCGCGGTATCAGAAAACCATCTTACGTGGTGTGATGATTTACGACATTGAACAGGGCTTCCCTGTTGCGCGAAAGG  
TCAATTTATCCTTAAACATCAGCAGTAATCTGGCCCTGCAATGCCGCTCTTGGCGGGGCACTTCCGGTTAAGGTG  
GTTTATGTTCAATTTTTCAGTACAGCCGCAAAAGCCTGTTATCAGGATTTTCAAGTGGTTTTTTTATTTTTCGAACACGG  
TTGTGGTCTCTACGCTACTTTCTGTTTTAGTTGCCGAAAGTACGCTGTTACGCTCAGCAATATGCTTTTTCTT  
GCTACCGCACTGGCCTGCTTCCGCTCAGGCGTTTTGCGGTATCGTCGCGCTATTATGGAAGGGCCAGGTGGCCTGTGGTG  
GGAAACCATCCTTACTATACCCCTTGGTGAAGCATCGCGGGACACCGATCAACGATATCGCCACCAGCCTGGCAGTGG  
GGATTGCACTCTCCGGCGTGTGACGATGTTGATTGGTTTTAGCGGATTAGGCCATCGCCTGGCACGTTATTTACGCCG  
TCGGTGATGGTCTTGTATGTTGATGCTGGGCGCGCAGCTGACCACTATCTTTTTCAAAGGTATGCTCGGGCTGCCGTT  
TGGCATAGCCGACCCGAATTTTAAATCAGTTACCGCCGTTCCGCTCTCGGTGGCGGTGATGTGCCTGGTACTGGCGA  
TGATTATCTTCTGCCGCAACGTTTTGCCGTTATGGCCTGCTGGTGGCACCATAAACCGGCTGGTTGTTGTTGTTACTTT  
TGCTTTCTTCTTGCACCTCGCTCTCCGGTGAAGTGCACCTGGCAGTGGTTCCCGCTCGGCAAGTGGCGGTGCTTTGTCGCC  
GGGAATTTCTGACGGCGGTGATTACAGGTCTGGTAAATATCAGCAATACCTACGGTGGCATTGGGGCACGGATGTTT  
TTTATCCGAGCAGGGCGCAGGGAATACGCGTTATCGTGTAGCTTTGTGGCGACCGATTATGACGCTGATAACCGTA  
CCGCTGGCGGTAATTCATTTTACCCTTTGTTTATCCATTGGTTTATTAACCCAGACTGGCGATTACACGCGGCTTC  
GTTTATTTATGGCAGCGTATTTGCTGCTGGTGGCCTGTTTCTGCACTCACGCGACTGTTTTGAGTATCCCTTAC  
CCGTGAGTAGTGGGTGATGCTGGTTTTCTTATCTGCCTTACTCTTTTCCGCGTGGTGGTTAGCCAGCAATAACGTTT  
ACCGCTCGCAATATTTATGACTCGCATTGCCGTTATTTGTCGGCATATTTTAAATGGCATTACCGCCTGTGATCTGCA  
AGACCTTCCATTAACGCTTCTGCTCTGCTCAGTAAACGGCTTATTTGGTGGGATTTTACTGGCTGTTCTTATGGATAACC  
TTATTCGTTGGAAACGCATCGAATAATTTGTTGAAAAGGATTGATAATGAAGATTGTCATTGCGCCAGACTCTTTTAA  
GAGAGCTTAAGTGCAGAAAATGTTGTGAGGCAATTAAGCCGGTTTTCCGACCTCTTCCCGATGCGAACTATATCTG

TTTGCCGATAGCGGATGGCGGCGAAGGGACGGTGGATGCGATGGTCGCCGCGACGGGCGGCAACATCGTGACGCTTGAAG  
TCTGCGGGCCGATGGGCGAAAAAGTGAATGCTTTTTATGGCCTTACCGGCGACGGGAAAACGGCGGTGATTGAGATGGCG  
GCAGCAAGTGGCTGATGCTGGTCGCGCCTGAAAAGCGTAATCCGTTGCTGGCCTCCAGTTTTGGTACGGGGGAGTTAAT  
TCGTCATGCGTGGATAACGACATTGCCATATTATCTCGGCATTGGCGGCGAGTGCACGGTCGACGGCGGTATGGGCA  
TGCGCGAGGCGCTCGGTGTGCGTTTTCTTGATGCCGACGGTCAGGCGCTGGCGGCAACCGTGGTAATTTAGCGCGCGTG  
GCAAGCATTGAGATGGATGAATGCGATCCGCTCTGGCGAATTGCCATATTGAAGTAGCATGTGACGTTGATAACCCGCT  
GGTAGGGGCACGCGGCGCGGCGGCTGTTTTGGCCGCAAAAAGGGGCAACGCCGAGATGGTCGAAGAACTTGAACAGG  
GGCTGCAAAATTACGCCCGTGTTTTACAACAGCAAACTGAAATTAATGTCTGCCAGATGGCGGGCGGCGGCTGCGGGC  
GGTATGGGTATTGCGGCGCGGTATTTCTCAATGCGGATATTAACCGGGCATTGAAATTTGTTGAATGCGGTCAATCT  
TGCGCAGGCAGTGCAGGGCGCAGCACTGGTGATTACCGGGGAAGGGCGCATCGACTCGCAACGGCAGGCGGTAAAGCGC  
CGCTGGGTGTGGCGTCGGTGGCGAAGCAGTTAATGTACCGGTGATTGGGATTGCTGGCGTATTGGGTGATGGCGTGGAA  
GTGGTGACCAGTACGGCATTGACGCGGTATTGACATTTTGCCTCGTCTGGCACCTTTAGCCGAAGTGTGCGCAGCGG  
TGAAACCAATCTTTCAACAGCGCGCAAAATATTGCCTGCGCCATTAATAAGTGCAGGAATTAATAACCTTAC  
CTTTAAAGCGGATGCGATTTATATCGCATAAGAGTGCAGTACTCATGCCGGATGCGGCATGAGTACCATATCCTTCTGA  
AAATCGCGCAAAATCTATATATTGCGAGATCATGTAGGCTGATAAGCGAAGCGCATCAGGCAATGTTACAAAAAAGC  
CACGGTATAAACCGTGGCAAAATCCAACATAGCTAAAAATAATCAGGCGAGTGGTATGACTTAAATCTCTACGTCGCGGT  
TACAATCTTTGAGTAAATATAGCTGAACGCTTACCACGCCCTACACCATAACAGCCTGTAAAGAATAAGCGCCATA  
AAGATGTAATCGCCTTTTTTACCAGGATCCAGTTATTGTCGAGGTTATAAACCCCTGACCGGAAAGAATATAGGCACC  
GTGTTCTGAACGTGTGTTTCGATATAACCGTGGCTGGCACCTGGTGCAAAAGAGAGGATATGCATGTTTCAATCAAAAC  
CTAACTCTTTGGGCGAGAAAATCCAGCAGAATAACATCGTCCATGCCTTATAATGAATGCGTTCAGTTCGCTGGCATTG  
CCAGAAACCAGCCACGGTGCATAGCCTTCTACCGGAACATAGCGGCGCTTATAAAAAAGATTTGGCTGTCTTGGCGCTG  
GGCGTTAAACAAACGTCAATTAAGGAGCTGGCGGGCAATAAAGATAGCCACCTTCGCTTAAGGCAAAATGTTTTGCCTTCGG  
CTTTGGCAGTGATTTCCAGAGATCACATACAGGAACGTTTCAATGCCTTCGCCACCGAAGCCCTGTTGGTTGCCACCG  
TTTTGATGCAGTGTGACCAGATAATCAACAAAAGAGGCACCCAGCTTTGGCGTGAGAGGATTGTCGCGTACAATTTT  
AAAGCCGGAATAATATTTTTTACCAGACCATCCGGGGTAAACAGTGCAGAAATTACCGTGTAAACAATCGCACGGTTAG  
CCAGTAAATCTTCGCGGTAACCGGTGACGTTATTTAAATATCCCATTATGACTCCTTATTTCTGCCAGGCAAGTTGATA  
AAGCATGAGTGCCAAACGTTTTGACCCCTTCGGCAAGTTCGGTAATATTGGTGCCTTCGCCGGGTTATGGCTGATCCCGT  
TGATGCTGGGATAAAAATCATGCAGGTTGGTACGCGAGGCGGCAAAATTTGCGCGTCTGCCCGGCACCACTGTGCATC  
ACCCGGTAATTCAGTTTTTCTTTTACACAATTCGTGAGGGTGGCGACCAGCTCCTTATTCATCGGCACGGGTTCTTC  
GTCCATCCATAAATCGATATCAATACCAATGTCCATTTTCATCGCAAAATCGCCCGCATGTGTTTTCTAACTGTTGGGTGA  
AATCGCGCAGCACGGCAGCGTCCGATGACGACAATCAATGGTGAACGTGGTTTTACCCGGCACCACTTACCGTATTC  
GGGCGCGGCTCTACTTTGCCAAAGGTGAGAACAGCGGATCGCCATCCTTTTTCGCTTTTTCGACCGACTGATGGCAAAAT  
GCGACTGAAAGCGTAAACTGTATCACGACGATAACCCATCGGCGTGGTGCCTGCATGGTTTTGATTCGCCGTTTCAGCGTTA  
CCGTATAACGACGCTGCCGACAATTGCATTCACCACGCCAATTGATTGCCATTACTTTCCAGCACACAGCCCTGTTCA  
ATATGCAGTTCAACAAAGCTTTAATATCCTGACGCGGAGTTAGTGGGCGTTTCGGAAGAGTAAATCCGCAAGCCTTCAT  
CGCATCGCAAAAATCTTTCTTTGGCATCACAGATATTCGCACGTCGTGAGATTGCCAGCCAAAAATATTTTTAC  
TGCCCGAGAAGACATACGGGAAGCGGCTGCCTTCTTCTTCCATCGCCACCACTTCGACCGTACGTAGCGGCGCGCCG  
TATTGCGTTTTTCAGCCAGTCAATTGCCAGCCACGCCAGCGCCGAATTGCCGTCAGGTTACCGCGTTAACCAC  
GGTATCGATGCGAACCCTCAGAACCCTTCTGTGGATTTCCGTTGCCATTGAGGCGACCGTATAAATTCACCACTT  
CATCGAAACGTGTTTTCCAGCCGCTTGCCTTCTTTTTTAAATTTGCTGCTGGGTTTTCCAGCCATTCCGGCGAATAA  
AGTAAACGGGTCACTCCACCCGCTGGGTGAGCGCAAAAAGAGGAAAGCCAGGGCAGCGTTTTCTTATAGCTTGACGGAA  
ATGTGTAATCATAAGAAAGTCTGTCTCAATAATTATTGCGCAAAAGGATTTTTCGTTTTGATGACGTGTATAAAGCG  
CGTCGGAATTAATACTGGTAAATATCATCAACAATTTGATGCCTTCGACGCGGCTTTGCGTTGTTAATATCCTGA  
TCCTGTCCGGGATAATAAACCTGATTAACCGGGCGGGGGAATGGCATTAAATTCGCGCATGGTCTGGCTAAGATG  
TTGACGGAATAATTGCTGGAGGAGAAAAAGTTGCGATTAATAACTATATGTAATTGCCCAAAATACGCCCTGCGTGA  
AATCGTCATACATCGAACTAACCTGTGCGCCGAACGGTAAGCCGAGTAAGACGCCTGAGAGGACGTCAATCATCATC  
AGGCCATACCTTTTTGGCCCGGCGGGGAGCAGAGCATGTACCGCAACGGATCGGTTGTTGGTACACCGTTTTTATC  
GACCGCCAGGTATCCGGGATAGACATATTACGCGAGCGGGCGTCGAGCACTTTTCCCATGCCTGTACGGTAGTCGCCA  
TATCAAAGGTAAGGATCTCGTCGCTTCTCCCGGCGGCAAAAGCCAGGGGTTAGTACCAGTAAATTTCCGCGCCG  
CCAAACGGCACCACTTGGATCGGACTGGCACATCGAAATGCCAATGAATCCGGCGCGGGCTGCCTGTGCACAAAATA  
AGAGATTGCGCCGCTGTGACCCATCCGGCTGATACCAGCACCGCAACGCCATTTTGTGGCGGTTTTGATGGCATGTT  
CCATACCCATTTTCCGCGGACCTGTCCGGCGGCTTGTGCGCATGTAATAATGCCGAGCACGGCCCGGTTTCTCAAGA  
CGAAACTCCGTTTCGCGGTTGGTGGCGCTTTTGAATGCGTTCCGCGTAGTATTCACGCGCACCGCGCATGAGAGTG  
GATCCCTCTGGCATCGGCGTAAACCAACTTTCAGCCACGGTTCAGCGTGTCTCACGTTTTAACCCAGCCTGGCAGAGTT  
TATTCTCAATTAGCTGGTGGAGTTTTCCCGACTGATTTTCTGTCTTCTTTTTAACGACGGTGTGAAGCATGACTG  
CAATTAACATACAGGAAAAATATCTGGATTATGTGATCCAGACAGGCAAAAAATATAGTTAGAATTTATTTGATAATCC

GCTCACTTTTAACTGATTTTTAAACAACAACGCTTATTAATAAATAATGAGTAATAGCCTGGTGGTTATTTGAATTCT  
TTTGTAAATAATCCTGTGTGATATTCATCACCTTATTTACTCGTTGTCATCGATACCGTAATCGCCACATTAACACTGC  
TCGTGCAATTGCCATGGGTGCAATTTTTAAGGAGTTGTTATGATCCACGCCTTTATTAATAAGCCACGCCGAACGATATTTGCGTGGCA  
GGTCAGTTTAAATGATTATTTACGAAAACCTCAGCGAATCAGAAAATGTTGATGATGTTTCCGTAATGATGGGTACGCCCC  
CCAATAAAGCGTTATTAGATACCACAGTTTTCTGGCATGACGATTTTAATAACGCCACGCCGAACGATATTTGCGTGGCA  
ATTCGTAGCGAAGCGGGATGCGGGGATCGCGCAGGCGATTATGACAGCAGCTTGAAGAGGCGCTAAAACAACCTGGCGCA  
GGGTGTCAGGCAGCAGCCAGGCGTTGACGCGAGGTGCGTGCCTGTCAGAAAATTACCCGATGCCAATCTGG  
CGCTGATTTAGTGGCTGGCGAGTATGCGGGGAGCTGGCAAACAGGCGCTGGATCGCAACCTCAACGTGATGATGTT  
TCCGATAACGTCACGCTGGAAGATGAAATCCAACCTAAAACCCGCGCGGGGAAAAAGGCTTGTGGTGGTGGGGCCGGA  
CTGCGGTACGTCGATGATTGCCGGCACCCGCTGGCTTTTGTAACTGATGCCGGAAGGCAATATTGGCGTCATTGGCG  
CTTCCGGTACCGGATTACAGGAGCTGTGTTGCGAGATTGCGCTGGCAGGGGAGGGAATTACTACGCGATTGGCCTTGGC  
GGGCGGACCTCAGCCGTGAAGTGGCGGCATCAGTGCCTAACAGCGCTGGAATGCTCAGTGCAGACGAGAAAAGCGA  
AGTGTGTCATTTGTTTCAAACACCTGCCGAAGCTGTGCGTCTGAAAATTGTTAATGCCATGAAAGCAACCGGCAAC  
CGACGGTGGCGCTGTTTTAGGTTATACCCGGCGGTGGCCCGCAGCAGAAATGCTGTTTGCCTCCTCGTGGATGAG  
GCCGCACCTGGCTTGCCTTTCACGCGTCACGGCGCGAACGCAATAGCGCCTGTCAGCAGCGGATTTATTTG  
CGTTTTGTATACCGGCGGTACGCTGGCTGCCGAAGCGGGGATTACTTGGCGACACCTTGGCGTGGAAAGCCGACGATA  
CCCATCAACATGGCATGATGCTGGACGCCGATAGCCACAGATTATTGACCTCGCGCATGATTTCTACACCGTCGGCGT  
CCCCATCCGATGATCGACCAACCTTACGCAACCAGTTAATTGCCGATCTCGCGCTAAACCGCAAGTGGCGTGTGCT  
GCTTGATGTCGTGATTGGCTTCCGTGCGACCGCCGATCCTGCCGCTCGCTGGTGGAGCGCTGGCAAAAAGCCTGTGCCG  
CGCGTTTAGATAATCAACCACTGTATGCCATTGCCAGGTGACAGGCACTGAACGTGACCCGCAATGCCGCTCGCAGCAA  
ATCGCCACGCTGGAAGATGCGGGGATTGCGGTGCTGAGTTCGCTACCGGAAGCCACCTTGTGGCGCAGCGTTAATCA  
TCCGCTCTCGCTGCCGCACAGCAACACACACCGTCACTACTGAAAACGTGCGCGTATTAACATCGGATTACGCAGCT  
TTGCGTGGAGCTACAAAGCGCCAGCAAAACCGTGTGATTACCAATGGTCCGAGTCCCGGTGGCAATAAAAACTG  
GCTCGTTTTATTAGAAGCTTGAATAAGGGTCCCATGTTTACATCAGTGGCGCAAGCAATGCTGCGTTATCGAACA  
AATTCGTGCGCTCGTCCACTGGCTGGATGTGCAACCGCTTCTTCACTTACAGCGAACTAAACGAGGGCAAAACAC  
TGCTTACGCCGGCCGAATGCGCTGGCAGGAGATGACCGACCATGAAAGGGCGTGGCTGGGCGCATGTCTGTT  
GAAGTTGGCGAAAGATGAAGCGCAGGCGCTGGCAATACTGGAGCAGGGGGAAGTGAACCTCATTCTTGTCAACATGT  
GAATGCCGTGGGCAATGGCGGTACTTCTGCCAGTATGCCGATGCTGGTGGTTGAGAAGCTGACCGACGGCAAC  
GGCGTACTGCAACCTCAACGAAGGTATCGGCAAGTATGCGTTTTGGCGTTACGGCGAAGATGCTCTGACTCGCCAT  
CGCTGGATGCGCGATGTGTTAATGCCAGTATTAAGCGCGCGCTGGGGCGCATGGAGCGCGGTATCGATCTACGGCGAT  
GATGGCGCAGGGCATTACGATGGGCGATGAGTTCATCAACGCAATATTGCTTCTCTGCACTGTTAATGCGTGGCGTGG  
CCCCACAAATTGCTCGCCTCGATCATGATAAACAGCACATCGCCGAAGTATGGATTTCTCAGCGTGACCGATCAGTTC  
TTCTCAACCTCGCGATGGCTTACTGCAAGGCGGGATGGATGCTGGCGCGATGATCCGCGCAGGCAGCATGTCACGGC  
AATGACCCGCAACGGCAATATGTTGCGGATTGCGGTAAAGCGGGCTGGGCGAACGCTGGTTTACTGCGCTGTAACACTC  
CGCAAGGTCTGTTTTTACCAGGCTTCTCGCAGGAGCAGGCGAACCCGGATATGGGCGATAGCGGATTACCGAAACCTT  
GGTATCGGAGGTGGCGCAATGATCGCAGCGCTGCGTAACGCGCTTTGTGGTGGGGTGGCATGGAAGCGGCAAGAGC  
GGTATCTGAAGAGATGGCGGAAATTTACCTTGAACGCAATATGCAGTTGCAGATCCCAAGTGGGATTTTACGGGCGGT  
GCCTGGGGCTGGACATTCGTCGCTGGTAGAAACCGGCACTACGCCACTCATCAATACCGGTATCGCCATAAAGAGGCG  
GGGATCGGGCAGATTGGCGCAGGCAACCGTGGCGGACCGCTGGCTGCTTTGAACAGGCGCTGGAAGCAGTGGCTGAAAG  
CATGGGTATTGGTTGAGGAACCGCAATGACGATCATCCATCCTGCTTGGCAGTAGTAGCCACCGAATATCGCCAG  
TCCTGGCGGTTAGCGGGAGTGTGGCGGGGGGATTAACCTGATGACGGAAGCGGCGAAGTGTAAACGTTGCATCGTCA  
GGGTAGTGGTTTTCGGCCCCGAGGATGGGTGCTTCCGCGTGGCAATTCGATGCGTTATGGGTGGATTATGCGGCAATG  
AACGACCACAGGTTGTGGCTCAAGGGATTGCGCTCGGGGCTTTCACGGTTAAACAGCCACAGCGTTATTGTTTGTGCGT  
ATTACGCCGCTGCGCATCTCAACCACTTGCAGCTGCATGGATGCAACGCGCGGAGGAAACCGGGCTTTTTCGGGCCACT  
GGCGTTGGCGGCAAGCATCCGCTGCCTGCTGAGTTACGCCAGTTTCTGCACTGTTTTTACGGCCGCGCTCAATGGCGTTA  
AGACCGACTGGCGCACTGGCTGGGTAAGGCCCGGATTAACGCCGAGTCATGATGACACGCTGAGCGGAATGCTGCTG  
GCGGCTGGTATTATGGCGCTTATAGTGCAGCTCCGGTCTGCTGTTTTTGCCTGTTCCGACAATCTGCAACTCGTTAC  
CACAGCGGTGAGCGTCAGTTATTTACGTTATGCCGCGCAAGGATATTTGCCTCGCCACTCCTGCACTTTGTTTATGCTC  
TGAGTTGCCGAAACGTACCCTGTTGCGATTGATTGCTGCTGGCGTGGGCGATACGTCAGGGGAGATACGCTGCTG  
GGTTCGCTGGTGGCCAACAATTATTACAAGGAAACCATGAAACACTGGTTGTGGCTCTTGGGGGCAACGCCTTACTC  
CAGCGCGGTGAGGCGCTGACGGCAGAAAATCAATATCGCAATATGCCAGTGTGTACCCGCGCTGGCACGCTGGCCG  
TTCTTATCGGTTGGCGATTGTTACGGCAACGGGCCAGGTGGGCTGCTGGCATTGCAAGTCTGGCGTGGAAAGAGG  
TAGAACCTATCCGCTGGATGTGCTGGTTGCGGAAAGCCAGGGGATGATTGGCTATATGCTGGCGCAGAGTTTGGCGCA  
CAGCCGAGATGCCGCCGCTGACGACGGTGTGACGCGCATGAGGTTTTGCCTGATGATCCGGCGTTTTTTCAGCCAGA  
GAAATTTATTGGTCCGGTTTATCAGCCAGAAGAACAAGAGGCACTGGAAGCGGCTTACGGCTGGCAGATGAAACGTGATG  
GTAATATTTGCGCGGGTGGTGGCGTCTCCGCAACCGGTAATTTCTCGACAGCGAAGCCATCGAGTTGTTGCTCAA

GAGGGGCATGTGGTATTGTCAGTGGCGGGCGGTGTGCTGTGACGGATGACGGAGCAGGGAGTGAAGCAGTGATTGA  
TAAAGATCTCGCCGCTGCGTTGCTCGCCGAGCAGATTAATGCAGATGGACTGGTGATCCTCACCGATGCTGATGCGGTAT  
ATGAAAACGGGAACGCCGAGCAACGTGCCATTCGCCATGCCACACCGGATGAGTTAGCGCCATTTGCCAAAGCCGAT  
GGTTCGATGGGGCCGAATGTAAACGGCGGTGAGTGGTTATGTGAGAAGCCGTGTAACCCCGGTGGATTGGGGCGTTATC  
GCGAATTGAAGAGACGCTGGCGGGCGAAGCGGGGACCTGTATTTGCTGTAGTCGTAGGCATTAGACATTTGTGCTGAT  
GCGACGCTTGACGCGTCTTATCAGGCCTACAACCGGTGCCGCATCCGGCAATTGGTGACAATGCCTGATGCGATGCTTG  
ACGCATCTTATCAGGCCTACAATGGGTACCGGATCGGTAGGCCGGATAAGGCGTTTACGCCGCATCCGGCAAGAATAGAG  
CACCAGTTAACCGAATTACTCTGCGCCAAATCACGCCGCTGGCATATTCCGGCGGCAGCAGCGGGATTAAGGCTTCCA  
GCGTCGAGTCAGACGCGATGTGTCGCTGTGGTCAAATTCAGATGCCCCACTTTACGCCCCGGACGGACTTCTTTGTGCG  
TACCAGTGCAGATGCACCAGCGGCAGTTTCAGCCAGTCATAATTCACATCGCTACCAATCAGATTGATCATCACCGACGG  
ATTATTCACCACTGGTTGCGGTAACGGCAGATCGGTAATCGCCCCGAGATGCAGCTCAAATGGCTGATGCTGGCACCGT  
TTTGTGTCCAGTGACCGCTTATGCACACGCGGTGCCAGTTCGTTGATCAACAGACCTTGGGGGTGACAAAACACTCC  
ATCGCCATCACGCCACATAGCCCAGCTCCTGCATAATCGCCGACAGCATCTTTCGGCTTGGCCTGCTGCTGTGCGTT  
GGCCTGCGGAAAAGCGACGCTGGTGGCAAAATACCGTCTGATGCAGGTTATGCGTCAGCGGATAAAAACACGGTGTCC  
CATCAAAGCCGCGCGCAACACAGCAGCACTTACCAGAGAAGTTAATGCCCTGCTCGACAATACATTCGCCGTAACAC  
TCTGCCGGTAACTGTTGCGTTTCATTTGCGCGTAAACGCCATTGACCGCACCCTATAACACCAGTGCAGCGCTTAAAC  
AATCGCCAGCTCACCTAAACGATCAAACACCGCAGGCCACTCGCTGCGTTTCGGCAAGTAACCTGCCACGGTGCAGTCGGCA  
GGTGAGCTTATCGAAAAGCTGCTTCTGAGTCAGACGGTCAGCAATAATCGGGAACACATCGCGGTTACAAAAGGCCGGA  
TGCGCGCCAGCTCGCGGTTAATGCGGTTTCCGGCCAGGCTTCTATCTCAGCGGTAATCACGCTTTGTTGAAAAGGCAC  
CGCCGCGGTTAGCGTCCAGCCGACTGGCCAGACAGCAATGCCTAACGGTTCGCTGCCTGACGCAGCATACGGCCTA  
ACTGCCGTTACCGAGGACGCAAACCTGTTTCATGCCGCACCTCGCGGGTCCGGGTTTCCAGCACTTCGTCGGTCTGGG  
CTTTGCGCCAGTCATTAGACGCTGGTGCAGTTCCTTATCATGAGTCGCAAGAATTTGTGCTGCCAGTAACGCCGCTTT  
GCCGCGCCAGCTTACCAATCGCCAGCGTACCCACCGAATGCCGCGCGGCTTTGTACGATGGAGTAGAGGCTATCGAC  
ACCGCTCAGTGGCGGCTCTGACTGGCAGCCAGCACCGGCACCAGCGTTTTGGCGCAATCATGCCTGGCAGATGCG  
CTGCGCCGCTGCGCCCGCAATAATCACCTGATAACCGTCTCTTCGGCGCTTTCGGCGAAGCTGAACAGTTTATCGGGG  
GTGCGGTGAGCAGAAACCACTTCAACGTGGTGGCGGACATTAGGATTTTCAAGATTTTCGGCGCGCAACTGCATGGTAGC  
CCAGTCGTTTTGGACCCCATCACGATGGCGACACGCGCGGATTATTGCGGGAAGACATGCGTCTTAAACTCCTGTGG  
TGCACAACTCTCGGCTTTAGAGGGCACAGAGAATAGCACGAAAGAGAGCAAGGAAAACGGTTGCGTGGCTGTGAAATCA  
GCAAAGTTGCGGGTTTTTAAAACGAAAATGAATCAGCTCAACGTCATCCGCCGTGACTTTCACCATTGAACCTTCCGT  
ATGCCAGGCACCCAGTACCACGCGAAAAGCAGGTTGCTGATTGGCGATAAGTTCATGCACCGCCGGGCGATGGGTATGCC  
CGTGATCAGCCATTGCACCTGATGTTTTCCATCGCACTGACCACCGGTTTTGGTTAACGTCCATGATCGCCAGCGAT  
TACTGCTGTTGGCTTCTTGTGTTGCGCGCATTGCGCGGCAATGCGTTTTGCGCACAACAACGGCAGGGCGAGGAA  
TAGCGTCTGCAGCCAGGTTTGTGGACCTTGGCGCGAAAAGCCTGATAACCCGCGTCATCGGTGCACAGCGTGTGCCAT  
GCATAATCAACACCCGGCGACCATAAAGTTGAGACCTTTTCTTCCGGCAATAACGTCATGCCACTTTCACGGGCAAAG  
CGTTTCCGAGCAGAAAATCACGGTTCATGAATGAAATAACAGGGAACGCCGGAATCGGACACCGCTTTGATCGCCGC  
CGCCATCTTGCAGTGGAGTGGGTTGGGATCGTCGTCGCAATCCATGCTTCAAACAGATCGCAAGAATATACAGCGCGT  
CGGCTTGGCGGCTTCCCCGCTAAAAACGCAGAAAACCGCGGTGATCGCCGTTCTTCCACGCAGAGATGAAGATCT  
GCAATAAAGAGTGTGCCACGATTACTCGCTAACGGTACGCTTCAATGATAACGCTTCTTTTGGCACGCTCCTGGTGC  
ATACCGTACGACCGGTTGCAACACCTTGTATTTGCTACCAGTCCATGCCGTCACCACTTCAGCAAAACACGCAGTA  
GCCCAAACCTTGACGGTTCGCCAGAGAAGTTGAGGAAGTTCGTAACACCGTTGATGAAGAACTGTGCAGTGTGCAG  
AGTGGGAGCCTGAGTACGTGCCATTGCCAGCTACCACGGGATTTTTTCAGGCGGTTGTTGGCTTCGTTTTGATCGGT  
TCTTTGGTGGCTTTTTGTTTCATGCCCGTTCAAACCGCGCCCTGAATCATAAAGCCGTTGATAACACGGTGAAAAAT  
GGTGTGTTGTA AAAACCTTCGCGGCAAGTCCAGGAAGTTTTAACTGTTTTCAGGTGCTTATCGTCAAAAAGTTTTGA  
TGACAATATCGCCGTGATTGGTGTGGAAGTAACCATTTTTGCATCCTGTTCCGTTTGATTGGTGCTTCAACCCAGTTCG  
GGTCATATATAGGGTGGTGTATAGCATAACCGCACGATCGGATCATCACGCAATGTATGCTGATTGCGCGGGAAATAT  
GGGTATTATACGCAACTCAATTACCCACACATGTCTAAACGGAATCTTCGATGCTAAAAATCTTCAATACTCTGACACGC  
CAAAAAGAGGAATTTAAGCCTATTACGCCGGGGAAGTGGCATGTACGTGTGGAATCACCGTTTACGATCTCTGTCA  
TATCGGTACGGGCGTACCTTTGTTGCTTTGACGTGGTTCGCGCTATCTGCGTTTCTCGGCTATAAACTGAAGTATG  
TGCGCAACATTACCGATATCGACGACAAAATCATCAAACGCGCAATGAAAATGGCGAAAGCTTTGTGGCGATGGTGGAT  
CGCATGATCGCGAAATGCACAAAGATTTTGTGCTTTGAACATCTGCGCCCGGATATGGAGCCGCGCGCACGCACCA  
TATCGCAGAAATATTGAACTCACTGAACAATGATCGCAAAGTACGCTTATGTGGCGGACAACGGCGACGTGATGT  
TCGACGTCCCAGCGATCCAATTATGGCGTGTGTCGCGTCAGGATCTCGACCAGCTGCAGGCAGGCGCGCGCTTGAC  
GTGGTGCAGCACAACCGCAACCAATGGACTTCGTTCTGTGGAAGATGTGAAAAGAGGGCGAACCGAGCTGGCCGTCTCC  
GTGGGGCGGGTTCGCTGCTGGCTGGCACATTGAATGTTTCGGCAATGAACTGCAAGCAGCTGGGTAACCACTTTGATATCC  
ACGGCGCGGTTTCAGACCTGATGTTCCCGCACACGAAAACGAAATCGCGCAGTCCACCTGTGCCATGATGGTCAGTAT  
GTGAACTACTGGATGCACTCGGGGATGGTGTGTTGACCGCGAGAAGATGTCAAATCGCTGGGTAACCTTCTTACCGT

GC GCGATGTGCTGAAATACTACGACGCGGAAACCGTGC GTTACTTCTGATGTCGGGCCACTATCGCAGCCAGTTGAACT  
ACAGCGAAGAGAACCTGAAGCAGGCGCGTGC GGGCGTGAGCGTCTCTACACTGCGCTGCGCGGCACAGATAAAACCGTT  
GCGCCTGCCGTTGGCGAAGCGTTTGAAGCGCGCTTTATTGAAGCGATGGACGACGATTTCAACACCCCGGAAGCCTATTC  
CGTACTGTTTGATATGGCGCGTGAAGTAAACCGTCTGAAAGCAGAAGATATGGCAGCGGCGAATGCAATGGCATCTCACC  
TGGCTAAACTTTCCGCTGTATTGGCCCTGCTGGAGCAAGAACCGGAAGCGTTCTCTGCAAAGCGGCGCGCAGGCAGACGAC  
AGCGAAGTGGCTGAGATTGAAGCGTTAATTCAACAGCGTCTGGATGCCCGTAAAGCGAAAGACTGGGCGGCGGCGGATGC  
GGCGGTGATCGTCTTAACGAGATGGGGATCGTGTGGAAGATGGCCCGAAGGGACCACCTGGCGTCTGTAAGTAATTGC  
GCTATTGCCGATGCGAGTTTTCGCATCCGGTTATCGTCTGCGCCACCACAACATTTCCATCAGTAGCATCCCCGGCAAC  
CACACCCACATCAATTGAGAAATAACACCTGATGCCCGTACGGCGTGGTGTAAACGAGACAATGCAAACGGCGCGACTTT  
TATCACCTGCCAGGGAGCGAAAAAGCGTTCATCTGACCACGGCCACAGCCAGCCAACGCCTTTACCGCCAGTGGTTACCG  
AATCCAGCAAGCTGTGCGATAGCAACGAGACGGTAAAAACAGCCAGCAGCGAATCAGCCCAGCCCTGAACCATCGGCGT  
CCAATAAACACACATAACAGCGGGACAACAACGCAAACACCAGCGAATGGTAAACCCGCGATGACCAAAAAATTGCC  
GTAAGCAACGCCAAATTTAAACGACAATACGTGCGCGTGGGCGAGCATGCCAGGATGATTCCGGCAAATAACAGACGCG  
GAGGGATGACTTTCGAACCAACCCCTAAACCAATGCATAGGGGAACGGCGGCGTGC GTAATAACGGTTGGCATGATGGT  
GCTTCGGCAAATGTCGATGCTATCAGCATGGATGAACGGGGCTAGAGGGCAAAGTCTGAAAAGAAACCGCGCTGTT  
GATACAGGCCGGGAAAGGATCAGGCAACAACCTGTACGCTGTGACCTGCAAAACTCACTGTCTGACCGGCGACGATTTT  
GCAGCGTTTGGCGTTTTCAACCGCACCGTCTGACTTTACCTGGCCTTCGGCAATCGCGATTTTTCGCTGCGCGCGCTTT  
CGCTCCAGCCTTCCAGTTTTAGCAAGTGCACAGCTCAACGTGCGGATGTTTACCTAAAGAAAATGTCGCCATGTTACTC  
ATCCTGTGGATCATGATTTCAACGCACGCTGTAGCGTGT TTTCAATCAGCGTGGCAACCGTCATCGGGCCAACGCCGC  
CGGGAACAGCGTAATGTATGAGGCGGTTTTAGCCGCGTCTTCAAACACGACGTGCGCCACAACCTTTGCCATTTTCCAGA  
CGGTTGATGCCGACATCAATCACAATTGCGCCTTCTTTGATCCAGTACC GGGGAATAAAGCCTGGCTTCCAACGGCAAC  
GATCAATAGATCGCATTTTCTACGTGATGACGAGATTTT TAGTGAAGCGGTGAGTCACTGTAGTGGTGAACCTGCCA  
GCAGCAGTTCCATGCTCATCGGCGGCAACGATATTCGATGCGCAATCACCACGGCGTTGAGGCCGAAGGTATCAATG  
TTGTAACGCTCAAGCAGCGTACGATACCGCGGGGTGCAGGGACGAGACGCGGCGCGCTGGCACAGACGACCGAC  
GTTGTAAGGATGAAACCGTCCACGTCTTTGTCCGGATGAATACGTTCCAGCACTTTGACGTTATCAATACCGCGCGTA  
ACGGCAGTTGAACCAGAATGCCATCGATGGTGTGTCGGCATT CAGCGTATCGATAAGCTCCAGCAGCTCCGCTTCGCTG  
GTGGTTTCCGGGAGGTATAAGAGCGGAGACGAACCCGACTTTCACAAGCCTTGC GTTTGCTTGGCAGATAAATTTG  
CGATGCAGGGTACTACCCACCAGCACAAACGGCCAGTCTG TGGTGGCCGAGTCCGGCTGCAATACGCGCCTGAACTTTT  
GAGCAACTTACAGAGCGACCTGCTGCGCAATCGTTTTACCGTCAATAATCTTTGCTGCCATCAGAGAGAGGATTCCATCT  
GTTACGTAGATCGAAGGGATGCGCCTATTTTGTGAGAAGCGGGCGCGCTGT CAGGTTTCGTTTCAGATTTATCGCGTG  
AAGCGACCTCTTGCGAAGGTGAGGCGCACCGTGCCTGAGACTGAAAGCTTCATTTTTCGTCCATGATGGCGTTGTAATC  
TGAACTGATTTATTTCTTGTCTAAGGATTAAGATAATTTAAGAAAACCTGACAATATAAAAAGAATTTTTCAGCCTGG  
TAATTTACCGTTCAGGTCTATATTTGTGTTGAATATATTTTGGCGGGAAGTATTCATCTAACGGGGCTCTATTTTTT  
AGAATAGAGTGCATATTTTCAATTAAGACATTCTTAGAGGATAAAAAGGAATTTACTACTATCAGTGTCTTAAATAAAGT  
AATCGGTTATATACGGATGTGGAGTCGATAAATGAGATTGAAGGAATATATGAAATTAAGATTTATTTCTGCTGCGCT  
GGCTGCCGACTATTCGCCGCTACGGGTAGTTATGCTGCCGTTGTAGATGGCGGTACAATTCATTTTGAAGGCGAAGTGG  
TGAATGCTGCCTGTTGAGTAACTGACTCGGCAGACCAGGTTGCACACTCGGTCAATATCGTACCGATATTTTCAAT  
GCTGTTGGTAATACCTCTGCATTAATTCATTACCATT CAGTTGAACGACTGCGATCCTGTTGTTGCCGCTAATGCTGC  
CGTTGCATTTCTGGTCAAGCTGATGCAATCAATGATAATTTATTGGCCATTGCATCCAGTACCAATAACAACAACGCAA  
CGGGTGTCCGTTATTGAAACTCTTATAATACATCCGCAATTTCAAACCTGATGGGAATAGCTTCTCAACCAACGAGAAC  
TTGATCCCCGGGACCAACGTTCTTCATTTTTCTGCAGTTATAAAGGCACCGGTACAAGTGCATCAGCAGGGCAAGCAAAA  
TGCTGACGCGACTTTTATTATGAGATATGAATAATCAA AACCCAGTGTGTTTTGAATTATATATCACGTTTATAACAAAG  
TAATGTACCGTTGTCTGAAGCGGTATGGTGGCAATGTA AATCGAAATCATGTTCACTTTGTATCATGCCGCTTTATTTAA  
ATGAAAAGGGAATGATGTGTTGTAAGAAACCAAAGCAAT CTTTTCTTATATTCCTTATTTTTGCCGTCAGGAATACACA  
AGGCGTATTAACCTATGATGACTAAAATAAAGTTATTGATGCTCATTATATTTTATTTAATCATTTTCGCCAGCGCCATG  
CTGCCGAGGGATCGCATTAGGTGCCACGCGTATTATTTATCCCGCTGATGCTAAACAGACTGCGGTATGGATTAGAAAT  
AGCCATACCAATGAGCGCTTTCTGGTCAATTCGTGGATTGAAAACAGCAGCGGTGTAAGAAAAGTCAATTCATTAC  
ACCGCCACTGTTTGTAGTGAACCCAAAAGCGAAAATACTTTGCGTATTATTTACACCGGTCCACCGCTGGCAGCAGATC  
GTGAGTCTCTGTTCTGGATGAATGTTAAGACGATCCCTTCGGTAGATAAAAATGCATTGACGGCAGGAATGTTTTGCAA  
CTGGCGATTTTATCGCGCATGAAATATTTCTCCGTCCAATTC AATTACAAGAATTACCCGCAGAAGCGCCGGACACACT  
CAAGTTTTTCGCGATCCGGTAACTATATCAATGTTCAATCCATCACCTTTTTATGTCACCCTGGTTAATTACAAGTGG  
GCAGCCAAAAGTTGGGAATGCTATGGCTGCACCCAGAGTTAATTC ACAAATCCCTTACCCTCAGGAGTGCAGGGAAAG  
CTGAAATTTAGACCGTTAATGATTATGGTTGAGTAACTCCGGT CAGAGAAGTGAACCTAAACTAACCGAATCATCTGAC  
AATATCAGAGCTAATTATGAAAATACCCACTACTACGGATATTCGCAGAGGTATACCTGGTGTCTGGCCGGAATTTGTT  
ATTCATCTCTTGCATTTTACCCTCTTTTTAAGCTATGCGGAAAGTATTTTCAACCCGGCATTTTTATTAGAGAATGGC  
ACATCCGTTGCTGATTTATCGCGCTTTGAGAGAGGTAATCATCAACCTGCGGGCGTGTATCGGGTGGATCTCTGGCGTAA

TGATGAGTTCATTGGTTCGACAGGATATCGTATTTGAATCGACAACAGAAAATACAGGTGATAAATCAGGTGGGTTAATGC  
CCTGTTTTAAACAGGTACTTCTTGAACGAATTGGCCTTAATAGCAGTGCATTTCCCGAGTTAGCCAGCAGCAAAACAAT  
AAATGCATCAATTTACTGAAAGCTGTACCTGATGCCACAATTAACCTTTGATTTTGCAGCGATGCGCCTGAACATCACTAT  
TCCTCAGATAGCGTTGTTGAGTAGCGCTCACGGTTACATTCGGCCTGAAGAGTGGGATGAAGGTATTCTCTGCTTTACTCC  
TGAATTATAATTTACCCGGTAAACAGAGGTAATGGTAACGATAGCTATTTTTTTAGTGAGCTCAGCGGGATTAATATTGGC  
CCGTGGCGTTTACGCAACAATGGTTCCTGGAACATTTTTCGCGGAAATGGATATCATTAGAACAGTGAATAATATTGG  
CACCTGGGTACAGCGCGCCATTATTCCGCTGAAAAGTGAAGTGGTAAATGGGAGACGGCAATACAGGAAGTGAATTTTCG  
ATGGCGTTGGATTTCTGTTGTACGGCTTATTCTTCTGATAATATGTATCCTGATAGCCAGCAAGGGTTTGCCCAACG  
GTACGTGGGATTGCCCGTACGGCGGCCAGTAACGATTGGGCAAAATGGTTTTATTATCTATCAAAGCTATGTTTCCCC  
CGGCGCTTTTGAATACAGATTTGCACCCGACATCTCAAATGGCGATCTGGACGTCAACATCGACGAGCGCGATGGCA  
ATCAGCAGAATTACACAATTCGGTATTCAACAGTCCAATTTTACAACGCGAAGGGCGTTTCAAATTTGACCTGACGGCG  
GGCGATTTTCTAGCGGTAATAGTCAGCAATCATCGCTTTCTTTTTTTCAGGGTACGGCACTCGGCGGTTTACCACAGGA  
ATTTACTGCCTACGGCGGGACGCAATTTCTGCAATTAACCCGCTTTTTTATTAGGGCTGGGGCGCAATCTCGGAACT  
GGGGCGCAGTCTCGCTGGATGTAACGCATGCGCGCAGTCACTTAGCCGACCCAGTCTCATGAGGGGATTCTATTTCG  
TTCCTCTATGCGAAATCGATGAACACCTTCGGCACCAATTTTTCAGTTAATGGGTTACCGCTATTTCGACACAAGGTTTTTA  
TACCCTTGATGATGTTGCGTATCGTCAATGGAGGGTACGAATATGATTACGACGGTGAACATCGCGATGAACCGATAA  
TCGTGAATTACCACAATTTACGCTTTAGCCGTAAAGACCGTTTGCAGTTAAATGTTTCAACAATCACTTAATGACTTTGGC  
TCGCTTTATATTTCTGGTACCCATCAAAAATACTGGAATACTTCGGATTGAGTACGTTGATCAGGTGGGTTATACCAG  
CAGCTGGGTTGGCATCAGTTATTGCTCTCATTTCGTTGGAATGAATCTGTAGGGATCCCCGATAACGAACGTATTGTGCG  
GACTTAATGTTTTCAGTGCCTTTCAATGTTTTGACCAACGTCGCTACACCCGGGAAAATGCGCTCGACCGCGCTTATGCC  
TCCTTTAACGCCAACCGTAACAGCAACGGGCAAAATAGCTGGCTGGCAGGTGTAGGTGGGACCTTACTGGAAGGCCACAA  
CCTGAGTTATCACGTAAGCCAGGGTATACCTCGAATAATGGGTACCGGGCAGCGCCACGGCAAACTGGCAGGCCGCTT  
ACGGTACGCTGGGGGGGGGTATAACTACGACCGCGATCAACATGACGTTAACTGGCAGCTGTCTGGCGGTGTGGTCCGG  
CATGAAAATGGCATAACGCTGAGCCAGCTTTAGGGGATACCAATGTTTTGATTAAGCGCCTGGCGCAGCGGTGTACG  
CATTGAAAATCAAACCTGGCATTTTAACCGACTGGCGCGCTATGCGGTGATGCTGTATGCCACGGTTTATCGGTATAACC  
GTATCGCGCTGATACCAATACGATGGGAATTCATCGATGTTGAAAAAATATTAGCAGCTTGTGCCGACGCAAGGC  
GCGTTGGTTCGTGCCAATTTTATACCCGCATAGGCGTGGGGCGCTCATTACCGTTACCCAGGGCGGAAAACCGGTGCC  
GTTTGGATCACTGGTACGGGAAAACAGTACCGGAATAACAGTATGGTGGGTGATGACGGGCAAGTTTATTTAAGTGGTG  
CGCCATTGTCTGGTGAATTAAGTGGTTCAGTGGGGAGACGGCGCGAACTCACGCTGCATTGCGCACTATGTATTGCCAAG  
CAAAGCTTACAGCAAGCCGTCACTGTTATTTCCGGCAGTTTGCACACATCCTGGCTCATAAAGGAAATTAATAAAGATA  
ATCTGCAGATTATTATTGGCGATGGCATGTTTGTGTCTGGCAAACATATCCTGGGCTACTGTTTGTGCAAATAGTACTGG  
CGTAGCAGAAGATGAACACTATGATCTCTCAAATATCTTAAATAGCACCAATAACAGCCAGGGCAGATTGTTGTTTTAC  
CGGAAAAATCCGGCTGGGTAGGTGTCTCAGCAATTTGTCCACCCGGTACGCTGGTGAATTATACATACCGTAGTTATGTC  
ACCAACTTTATTGTTTCAGGAACTATCGATAATTATAAATATATGCAATTACATGATTATCTATTAGGTGCGATGAGTCT  
GGTTGATAGTGTGATGGATATTCAGTTCCTCCCGCAAAATTAATTCGGATGGGAACAGATCTAACGTTTCGCAAAACC  
TTCCATTCCGGGTGATGGATTCTCGTTAATATTTTCGTTTAAAGTTATTTCGTCCTTTTAAACATGGTGGAGATCCCC  
AGACAGGTGATGTTTACCGTGTATGTGACATCAACGCTTACGATCCGTTGGTTACACCTGTTTATACCAATTAGTTTTGG  
TGCCCGGTTGAAGTACCGCAAACTGCAATTAATGCGGGCAGATTGTTGAATTTGATTTTGGTGTATCGGGCAT  
CGTTATTTAGTGCAGGCGGGTAAATCGACCTGCTGGTGCATGCCGAAACCAAGAGCATTGCGGTCAAATGATACG  
AATGTTGCTGCGCAGGCTTATTTAACAAATGCGTCTGGAAGCAGTCCGTTTTCTGGTCAGGCGATGGTGTGCGGATAACA  
GGATTTTAGTTTTATTGTCGCCGATCAGAACGATACGCCGATCAGCCTAACGATCTCAATAGCGTTATTCTTTCCGTC  
TGATGACGCTGCGGCAGCAATGTCACACTTCGCGCTGGCCTATCAGTATTACCGGTCAAAAACCGACCGAAGGGCCG  
TTTAGCGCGCTGGGTTATTACGCGTGCATTATCAATGAGGTACGGAGAATGAGAAGAGTACTCTTTAGCTGTTTCTGCG  
GGCTACTGTGGAGTTCAGTGGATGGGCAGTTGACCCTTTAGGAACGATTAATATCAATTTGCACGGTAACGTTGTTGAT  
TTCTCTGTACCGTAAACACAGCGGATATTGATAAGACGGTAGATTTAGGCAGATGGCCTACGACACAACACTGAACGC  
TGCGGATACCACGGCACTCGTCCCTTTTAGCCTGCGGCTGGAGGGATGTCCTCCGGTTTCAGTTGCGATTTTATTACGG  
GAACGCCGGCATCCGATACCAACCTGTGGCTCTGGATGATCCCGCAATGGCACAACCGTCGCCATCGAATTACGTAAT  
AGCGATCGCTCCCGCTCGCACTGGGGAGGGCAGCCGACTGAGGAAGTAGATGCAAATGGCAATGTCACACTAACTT  
TTTTGCCAATATCGAGCTTAGCCAGCGGTGTTTCGGCCAGGTGTGGCGAAAGCGGATGCGATATTTATGATCAATTATA  
ATTAATATTATTAATTCGTATAATTTGGCGTAGTCGATAAGCTCTACAATGAATGCAAACCTAGCTTGCATAAATA  
TTAGATTTATGCGCACTAACTGTTTTATTGCTAAGTAATAACTTATCGGCAATTTCTTTATTAGATAATCCGCTAACCCAG  
ATAACGTAATATGGTCACTTACGATTAGATAGCACAGTGACCGTTGAACTATTCGTACTACATTTATTGCTTTTTATAT  
AGTTAAGCGTTTCGCTGGGAAAAACGTTATCCGGAGAGGATCATCTGAACGGCATGAAAAATATCATTCTGATCATTG  
CATTACTGACAAAACCGTTAGCACCAGCTTGTATCGCTCTGCCAGCATAAAAAGCATTCTGATTTTCGATGATAAAAATAA  
CACTTTCACTGTGCTCTGGATTTGTTTGTATCCTTTTTCAGGAAGGTAACCGCTCTGTTCCGGGCAAGTCTATATCCATAA  
TGATTAATCAACAGGACGGGTTCCGAGATAATCGATGGTTATGCGATAATCATCCGTTTTTCAGGACAATCTGCAATCA

CTGTTTTTTTTGCAACAGAACTTCAATAGACATTCTGATGATAGGATGAGTATCCATAATGATCACCGACGTTGGTTTCAT  
AGTTACCAGTCTCATAGGAGCGGACAATTTCCGTTAGGTCGGGAAATTGTACTTTGATACATGAAAATACGGGTTTTCT  
TGATTCAGACGCGCAGCGGTGTGCGTTTGTTCGCCCTATAGCGAAATAAATCAGAAAATCAGACGCGGTTCGTTCACTTG  
TTCAGCAACCAGATCAAAAAGCCATTGACTCAGCAAGGTTGACCGTATAATTACGCGATTACACCGCATTGCGGTATCA  
ACGCGCCCTTAGCTCAGTTGGATAGAGCAACGACCTTCTAAGTCGTGGGCCGAGGTTTCAATCCTGCAGGGCGGCCAT  
TACAATTCAATCAGTTACGCCTTCTTTATATCCTCCATAATTTAGAGTGGGACATATTTGGGACATTATCACCAAAAAAT  
GTCGTCTATTTTCTCGCATGCTCTGTCAAATGATTAGGCGCAAGGTGAGCATACCTACGAACCATTTCTATGGACTCCC  
ATCCGCCCATTTCTGAAGCACTGATAATGGGACGCCTGACTGAATCAGCCAGCTTGCCAGGTGTGTCTGAGGTATGG  
AAACGGAAATCTTCAATTCCTGCACGACGACAAGCTGATAGCCATGATGTCTTGCTGTGCGATGCGCATCTTCTGACCGC  
AGGCGTTGATGTTCCATCTGCTCGCTTAGCCGCTTGGTATGTACAAACACCCATTTGTGATGCTTGCCTATTTGATCAC  
GCAACACTTTACAGGCGGTATCGTTCAGCGCCACACCAATGGCGCGGTTTGTATTTGCTCTTCTGGATTACCCAGGCA  
ACTCGTCGCTGCATGTGATTTGTTGCCATTCCAGATTTATGATGTTGACTTTCTCAGACCAGTTGCCAGCGCAAACCT  
GACGACAGATTTAGTGGTTCGGGGCACTCATCAATAAGGCGTTTTGCTTCTCCTTTTCCAGCCATCTGACTCGCTTGT  
TTCTGACCGCTGGTATCTTGATGACAGGCGCTTTTTCCAGCCACTCCAGTCGCGTTCTGCAGCACGGAGAATGGCCTTT  
ATCATGGAAAGATGCTTTGCTTTGTCTGAGTTGATACTGGCTTTGGTTATAAACAGGCAGTTCCTTACCTTTCTGAT  
GGCGGCTGAACCTTTCCATATTTCTTTCTGTTTCTGTTATGCATTCTGCTTACAGCAGAGATAAATCCTTTGCCT  
CCGAGATATCTTTAAGCCTTATACCCTCAAATGTTCAAGCCAGAACTCAATCCGGCTTTTATCTGAATCGAGAGATTTT  
TTATCAGCTTTTTCTCAAGCCATCTTAGGCAGGCCTTTCAAAGTGACATCAGGTAAATCCCCTAGCTTTTTCTACTCG  
CCAGAGTTCTGCTTTTCTGCTGTGCGTGAACCTGAGCTTGCCGTTTGTCTTTGTGCCAAGAGATTCTTAATTCGTT  
TCCCCCGGGAGCGAATACGAGGCATACCATATTTCTGCGGAAGAGTGACATTTTCTTCTGTTATGCCAT  
CACCCGCGCTCACCTGGACAGTATGCAGCGGAGACTGAAGCGCCGAATGCAGGCTTGCCGTGTTGTGAGGTACCCGGAT  
ATTATCGTGAGGATGCGTCATCGCCATTGCTCCCCAAATACAAAACCAATTTAGCCAGTGCCTCGTCCATTTTTTCTGAT  
GAACTCCGGCACCATCTCGTCAAACCTCGCCATGACTTTTCTTCCGCTCAATCAGCATAAATGCAGGCTTACGCT  
TCATGCGCGGTCATAGTTGGCAAAGTACCAGGCATCTTTTCCGCTCACCCACATGCTGTACTGCACCTGGCCATGTAA  
GCCGATTTTATTGCTCGAAACCACCGAGCCGGAATTTATGAAATCCCGGGAGGTACGAGTATTGCCGGAAGCGTGGCC  
TGATCCGGATGCAGAGTCTTATCCGTGGAATCGAACGCGCATTACTGGTTGGTTACCACTTGTACCAGAACATGCGG  
GCCAATGCGCTGGCTGACGCGGAATTACGGCGCAAGCTGCCGATGAACTGACCTGTATGACAGCGCAATTAACCGTGG  
TGAGACGATACCTGAACCAGTAAAACAACCTTCTGTTATGGGCGGTAGACCTCTAAATCGTGCACAGGCTCTGGCGAAGA  
TCGCAGAAATTAAGCTAAGTTCCGACTGAAAGGAGCAAGTGTATGACGGGCAAGAGGCAATTAATCATTACCTGGGGA  
CGCATAAGAGCTTCTGTGCACAGGACGTTGCCGCGTAAACAGGCGCAACCGTAATCTGATCTTACCCAGCAATAGTGGAC  
ACGCGGCTAAGTGAGTAACTCTCAGTCAGAGGTGACTCACATGACAAAAACAGTATCAACCAGTAAAAAACCCGTA  
CAGCATTGCTGAAATTTCCGAGTGAAGCCCTGAAGCTTGTGAACGCATCGGTGTTACTGCCGAGCCCGTGAACCTCAG  
CCTGTATGAATCAAACTTACAACCTGGCGCAGTAAACAGCAAAATCAGCAGACGCTTCTGAACGTGAACCTGGAGATGT  
CTACCGAGATTGCAGTCTCAAACGCCAGCTGGCAGAACGGATGAAGAGCTGGCTATCCTCCAAAAGGCCGCGACATAC  
TTCGCGAAGCGCTGAAATGAAGTATGTCTTTATTGAAAAACATCAGGCTGAGTTCAGCATCAAAGCAATGTGCCGCGTG  
CTCCGGGTGGCCGACGCGGCTGGTATACGTGGTGTGAGCGCGGACAAGGATAAGCACGCGTCAGCAGTTCCGCCAACA  
CTGCGACAGCGTTGTCTCGCGCTTTTACCCGGTCAAACAGCGTTACGGTGCCCCACGCCTGACGGATGAACTGCGTG  
CTCAGGTTTACCCCTTAACTGAAAAACCGTGGCGGCAAGCCTGCGCCGTGAGGACTGAGGGCAAAGCCCTCCCGAAG  
TTCAGCCCGGTGAGTACCCGCGCACACGGCTGCCTGTGTGAGAAAATCTGTTGGAGCAGGATTTTACGCCAGTGCC  
GAACCAGAAGTGGGACGAGACATCAGTACTTACGTACAGATGAAGGCTGGCTGTATCTGGCAGTGGTCAATGACCTGT  
GGTCACGTGCCGTTATTGGCTGGTCAATGTCCGACGCATGACGCGCAACTGGCCTGCGATGCCCTGCAGATGGCGCTG  
TGCGCGGTAAGAGGCCCGGAACGTTATCGTTACACGACCGTGGAGGCCAGTACTGTTGAGCAGATTATCAGGCGCA  
ACTGAAGCGGCATAATCTGCGTGGAAGTATGAGCGCAAAAGGTTGCTGCTACGATAATGCCTGCGTGGAAGCTTCTTTC  
ATTGCTGAAAGTGGAATGTATCCATGGAGAACACTTTATCAGCCGGGAAATAATGCGGGCAACGGTGTAAATTATATC  
GAATGTGATTACAATCGGTGGCGGCGCACAGTTGGTGTGGCGGCTCAGTCCGGAACAATTTGAAAACAAGAACCTCGC  
TTAGGCTGTGTCATATTACGTGGTAGGATCAACCAGCATAAATCAGGCTGCGGCTAAAATGGCGCGGCAGGAATCC  
TGGTCTGTTGATGGAAGTCTGGCGAACGGTGTATTACCGTTGCTACCAGAGAAGAATGGGAAGGAAAGGTGAGCACG  
AATCTGATTTTAAAGGAGTGTCCGAGAGTGCAGGATGAAACGGGTATTGAGGTATATAAAAGAACATCAATGGGAAC  
ACAATGATGAAACAGGTGAGTTGAGTTCAAACCTGTAGTACAATCTCTCAGTTTGAACAGGAAAGAATATGCTATGAAC  
CCTTATATTTATCTTGGTGGTGAATACTTGCAGAGGTCATTGGTACAACCTTAAATGAAGTTTTTCAAGGTTTTACACG  
GTTATGGCCATCTGTTGGTACAATTTTGTATTGTGCATCATTCTGGTTATTAGCTCAGACGCTGGCTTATATTCCTA  
CAGGATTGCTTATGCTATCTGGTCAGGAGTCGGTATTGTCCTGATTAGCTTACTGTCATGGGATTTTTCGGCCAACGG  
CTGGACCTGCCAGCCATTATAGGCATGATGTTGATTTGTGCCGTTGTTGATTATTAATTTATTGTCACGAAGCACACC  
ACATTAATAAATTTGTTTCTAAACGACTAAAATATGGAGGCTTATATTTATATGAGCCTCGTTTTATGCTTTTTGTT  
AATGCTTTATTTTTATGTATTCTTTTGTGCTTTCAAGATTATGGCGTAAGAAAATTGCAATACGATTATTGTTGTATA  
TTCAAGATAATGTGACCTAATTGTCTTTTTAAATAAAAAATAAACAAAAATATATCCCACCACTAAGGTTTATAAAAG

CATACGTTAGCAGGTGTCACCATGAAAAAGCCATAGCATATATGCGATTTTCATCACCAGGTGAGATGTCTGGCGACTC  
ATTAACCCGACAGAGAAGACTTATTGCTGAATGGTTAAAGGTAATAGTGATTATTATCTTGATACCATAACATATGAAG  
ATTTAGGATTAAGTGCATTCAAAGGAAAGCATGCACAATCAGGAGCTTTTTCGGAATTTTTAGATGCTATAGAGCATGGT  
TATATATTGCCAGGAACACATTGTTAGTTGAAAGTCTGGACAGACTTTCAAGAGAAAAAGTCGGTGAAGCGATTGAACG  
TCTGAAATTGATTTTGAATCACGGTATTGATGTTATAACTCTTTCGCGACAATACAGTCTATAATATTGACTCTTTGAATG  
AGCCATATTCATTAATAAAAAGCCATACTTATAGCACAAAGGGCAAATGAAGAAAAGCGAGATAAAGTCAAGTCGGGTTAAA  
TTATCATGGAAGAAAAACGGCAGGATGCACTGGAATCAGGTACGATTATGACGGCGTCTTGTCCGAGATGGCTCTCCTT  
AGATGACAAAAGAACGGCTTTTGTCCAGACCCCGACAGGGTAAAACTATTGAGCTAATTTTTAACTCAGGATGAAAA  
GGCGCTCATTGAATGCAATAGCCAAGTATTTAAATGATCATGCTGTAAGAATTTCTCAGGAAAAAGTGCATGGGGA  
CCTTCTGTAATTGAAAAATTATTAGCGAATAAAGCTCTGATAGGTATTTGCGTACCTTCATATCGTGCAAGAGGGAAAGG  
GATAAGTGAATCGCTGGCTATTATCCAGAGTCATATCAGATGATTTGTTTTACGCTGTACAGGAAATTCGGTTGGCAC  
CTTTTGGTATTAGCAATAGTAGCAAGAATCCTATGCTAATAAATCTACTTCGAACAGTTATGAAGTGTGAGGCTTGTGGT  
AATACCATGATTGTTTCATGCGGTATCTGGAAGTTTGCATGGCTATTATGTTTGTCCGATGAGAAGATTACATCGATGTGA  
CAGGCCATCAATAAAAAGAGATTTGGTTGATTATAATATCATTAAATGAATTGCTTTTTAATTGTAGCAAAATCAACCG  
TTGAAAAACAAGAAAGATGCTAATGAAACTTTAGAGTTAAAAATATTGAGCTTCAGATGAAAAATTAATAATTTAATCGTT  
GCATTGCTGTGCGCCTGAAGTTACCGCTATAGCAGAGAAAAAAGACTATTAGATAAGGAATTACGAAGGGCTTCGGT  
ATCATTGAAAACTTTGAAGAGTAAAGGTGTAATTCATTTCAGTGATTTTTATGCTATTGACTTAACCAGTAAAAATGGAC  
GAGAGTTATGCGGTACACTTGCCTATAAAAACATTCGAAAAATCATAATTAATACGGATAATAAAACCTGTGATATCTAT  
TTTTATGAATGGCATTGTTTTTAAACACTATCCTTTAATGAAAGTAATATCCGCCAGCAGGCGATAAGTGCTCTCAAATA  
TATGGTTGATGGTGAGATTTATTTCTAAATAATGATCTCGATTTTAAAGTTATGCTATGGTGATAAAGTGCAAGACAGAA  
TTAATTATCTTTGACGAACTTAATGGGTAATTACTTTGTTTGTCCACAAGCGAGTTTTGTACGGCTGTATTGGGGTA  
GTAAATGAGCTATACAATCTTAATCATTTGTTAGGTGAGAAGTCTTGGTCGAGATTCAAATACTGAAAAACGTGACAA  
ATTATTATGAGCAAAATGGTGTATGTCACGATTTTTGAATGGTAGGTTAAAAAATAACACCGACTTTCGTAGGTGTTACT  
AATAATAAAGCAGAGTTTTTAGATAGTATCAATGTGCTTTGTGTATATTGTGGCAAATAATTGGGTTGGGGGTACAATTG  
TGATTGCTTTTGCATGAACATTGCGCCTTATGCATAATGAGATAAAGGAATATCAAATAAAAATAACGATAGGTATAAC  
AAAGAGTTTTTATGAAAACACTTATCGTTTCAACTGTATTGGCATTATAACATTTTCTGCGCAGGCTGCAGCATTCA  
GGTCACTAGTAATGAAATAAAAACAGGAGAGCAACTTACAACGTCTCATGTCTTTTCTGGATTTGGGTGTGAAGGTGGTA  
ATACATCGCCCTCATTAACTGGTCTGGTGTTCCTGAAGGTACCAAAGCTTTGCCGTAACGTATATGATCCAGATGCA  
CCTACAGGCAGTGGTTGGTGGCATTGGACTGTTGTTAATATTCCAGCAACAGTAACATATTTGCCCGTTGATGCAGGGAG  
ACGTGATGGAACAAAACCTGCCGACTGGTGTCTTCAAGGCCGAAATGATTTTGGCTATGCTGGGTTTGGTGGCGCATGTC  
CTCCTAAAGGAGATAAACACATCATTACCAGTTTAAAGTATGGGCTCTAAAACTGAAAAGATTCCTGTAGATTCTAAC  
TCCAGCGGAGCGTTAGTTGGTTATATGCTTAATGCTAATAAAATCGCAACCGCTGAGATAACACCAGTTTATGAGATAAA  
GTAGGGTGAGAGTATGCTGGCAAGAGGTAAGACTAACTTAAAGATCGAAGAAATACGGATGCATAAACATCATGAGATTC  
ATAGGGTTAAGCCTTTATGCCAGCTTTGTGTCGTATCCGTGAGGAAAGAAAGTTATCAATTGGGAGACGCATACTTTA  
ACTGTTGATAATAATCAAATAATATTATTTCTTGTGGTTATGAATTTTATATTGAGAATTATCCTGAAGCAGGGCTTTA  
TCTTGACAGAAATGCTTTACTTACCCATTGATTTAATTGAGAGTTTCAAAAACTTTATACGGTAACTGATCAAATACGTA  
ACAAAACAAGTTTCTTTTACCTCAGAATCCTGAGTTAATATAATTGTTGGGAGCACTAAAAACATCTGTTTCCCGAGGC  
TTCTCAACTAAAATTCAGGAGCACTTAGCAATGGCGTTTCTACTTTGTTAGGAGTGAATCATGTTAATCATTTACTTTT  
ATCATATAGTAAACAATCATTGATAAGTCTGTTGTTAATCTGCTATCCGAACCCGGCAGAAATGGACAGCAACA  
AGTTTGTCTGATATCTACATTTCTGTTTCTACATCGCCGCTAGCAAGCGAGGGGGTAAAGTTCCAAAGTATA  
CTGGACGATGTGAGGTTAAATAATGCGTTGTCTGCTATACAAACGACGGTAAAACCTATAAGCGAGATTGCCAGAGAAAA  
TGTTTATAAGTGTCTTCTCGTTTTACTGAAAGATTCATAATCGTTTTAATATAACACCAAGAGAGATAAGAAAAGCTT  
CCAGAGAGTAAAAGTGTTTTAAAGAGGAGCAATTCTATCGATTTTGATTTTGGGAAATCAACACGGCATAATTATGTCAC  
CGGAGCCTGAACAACCTCCGGTGACTTCTGCGCTAAACGGGGACGTTTATGCGCACATACAATCAAACCTCTTCTCCCT  
TCACAGATGCAGAAATGCACCTGCAATCTTTGCATCTAGCGTTTGACCTCTGCGGAGGGGAAAGCGTGAACCTCTCACA  
GACGGCATCAAATTACATCGCGCAACTTACCAGCTATCGGTGCGCAGATCCAGCCTTATCTGGAGGAGGGCAAATGCTT  
TCGCATGGTGTAAACCGTGGCGTGAGAAACGCAGTCTTTCCAGAATGCACTCAGCCACATGTGGTACAGCGAAATCA  
GTGAATACCTCATCAGCAGGGGTAAAACGTTCCGCACTCCAGCTTGGGTAAGATGCTCTCAAACACACATATCTCGGT  
TATGAAACCAAAGACCTGGTTGATGTCGTAACCGGTGATATCACCCTATCCAGTGTACGCATACCTCCGATCTTGA  
TACCGAGAGATGATGTCTTCTGTGTAAGGTTGAAGCCTGGGCGATGAATATTGGTTGCCACCTGACTATTCCACAGA  
GCTGCGAGTTCAGCTGCTGCGGACAAGCAGGAGGCGTAATGGCTACACCGCTTATTCGTGTGATGAACGGACACATCT  
ACAGAGTACCAAATCGTCTGAAGCGTAAACCTGAGTGAAGCCATCCGAAATACCAACACTGCTCGGATATACCGCCAGC  
TTGGTTGATAAAAAATGGTTGCGACTGGCAGCAAGGAGGAGTCATGGCTGATTTGAGAAAAGCAGCGCGTGGTGGGAAT  
GCCAGGTAAGAATCCCTGGCGTATGTAATGGCAACCCTGAAACGCTGTACTGGCACATATCCGGCTGACTGGATTGTGC  
GGCACCGGTACGAAACCGCCAGACCTGATTGCCACCATTGCATGTTCTGCTGCCACGACGAAATCGACCGCCGACGCA  
TTTTGTTGACGCTGGATATGCAAAAAGAAATGCGCGCTGGAAGGTATGGCGAGAACACAGGTTATCTGGCTGAAAGAGGGGG



TTATTAAGGCGTGAATACCTACAGCATCACATTACCCTGGCCTCCGAGCAATAATCGCTATTACCGCCATAATCGCGGGC  
GCACGCACGTACAGCGCAGAGGGGCAGGCATACCCGCGATAACGTGCGCCGAATCATTAAAAACGCAATGCTGGATATCGGC  
CTGGCTATGCCTGTGAAAATCCGCATTGAGTGCCACATGCCGGATCGCCGTGCGCGTGACCTGGATAATCTGCAAAAAGC  
CGTTTTGACGCACTCACTAAAGCAGGTTTCTGGCTGGATGATGCTCAGGTCGTTGATTACCGCGTTGTGAAGATGCCTG  
TTACCAAAGGTGGGAGGCTGGAACCTACCCGAAATGGGAATGAATGATGTTTGTAGTTAATATGGCAGAATCTC  
TTCCGCCACCGCTGGGGGCTCTGCGCTTATATCGTTTTCCCGGTTCTGTTTTGACCGATTACCGAATACTGAAGAATTAC  
GCCAAAACCTGACAGGAGCAGGAGTATGAAGTCAGAGATAACAATACTAATACTGTTTTGTTGATTTTTGCTTGTAA  
TTGGCGTTCTGGTCTGATTTTTGTGGAGTAAGTTGATGCGTGATTCAGATGGTTCTTGAGCGTTGGGGAGCGTGGGCG  
GCTAATAATCATGAAGATGTGACCTGGTCGTCATTGCCGCGGTTTTAAGGGATTAATTACTTCAAAGTAAAATCTCG  
CCCGCAATGTTGTGACGATGACGCGATGATCATTGCGGGTGCATGGCCCGTCTGAAAAAGAACACAGCGATTTGCACG  
ATTTATTAGTAGATTATTATGATGTCGGTATGACATTCATGCTACTGGCAGGTAAGCATTGCTGCTCTGATGGTTATATC  
GGGAAAAGGTTACAGAAGGCTGAGGGCATAATTGAAGGGATGTTAATGGCATTAGATATCCGGTTAGAGATGGATATCGT  
TGTTAATAACTCTAATTAATATGCCAATTGTTTACTAAAAATTATAAAAATGGGGCGTTGAGACGCCCCAAAAATAAA  
GGTAATATAAACAGAAGGTTTATATAGTTAGAAGCAAGGTTGTCTTCTAAAGGAAGTGGCTTGAGGGAGCCACTTAT  
ATGTTGGGGAGGCAACGCTCCCGCAACATATCTTTTTCGTAATCAGATTAGAACTGGTAAACCAGACCTACAGCAACGA  
TGTCACTAGTGCTTACACCGAGTGCTTTAGGGAAGTGCGAATAAGCGGGAAATCTTCTCGGCTGACTCAGTCATTTTC  
ATTTCTTCATGTTTGTAGCGGATTTTTCTCCCGTAAATGCCTTGAATCAGCCTATTTAGACCGTTTTCTCGCCATTTAAG  
CGTTATCCCCAGTTTTTGTAGATCTCTCCACTGACGTATCATTGGTCCGCCGAAACAGGTTGGCCAGCGTGAAT  
AACATCGCCAGTTGGTTATCGTTTTTTCAGCAACCCCTGTATCTGGCTTTCACGAAGCCGAAGTGTGCTTGATGATGCG  
AAATGGGTGCTCCACCCTGGCCCGATGCTGGCTTTCATGATTCGATGTTGATGGCCGTTTTGTTCTTGCCTGGATGCT  
GTTTCAAGGTTCTTACCTTGCCGGGGCGCTCGGCGATCAGCCAGTCCACATCCACCTCGGCCAGCTCCTCGCGCTGTGGC  
GCCCCTTGGTAGCCGGCATCGGCTGAGACAAATTGCTCCTCTCCATGACGAGATTACCCAGCTGATTGAGGTCATGCTC  
GTTGGCCGCGGTGGTACCAGGCTGTGGTCAAGGCACTCTTGGCATCGACACCAATGTGGCCTTATGCCAAAGTGCC  
ACTGATTGCCTTCTTGGTCTGATGCATCTCCGGATCGCGTTGCTGCTCTTGTCTTGGTCGAGCTGGGTGCCTCAATG  
ATGGTGGCATCGACCAAGTGCCTTGTGATCATGACGCTGCTTCCGCCAGCCAGCGATTGATGGTCTTGAACAATTG  
GCGGGCCAGTTGATGCTGCTCCAGCAGGTGGCGGAAATTCATGATGGTGGTCCGGTCCGGCAAGGCGCTATCCAGGGATA  
ACCGGGCAAACAGACGCATGGAGGCGATTCGTACAGAGCATCTCCATCGCGCCATCGCTCAGGTTGTACCAATGCTGC  
ATGCAGTGAATGCGTAGCATGGTTTTCCAGCGGATAAGTGCGCCGCCATTACAGCCTTGGGGTAAAACGGCTCGATGAC  
TTCCACCATGTTTTGCCATGGCAGAATCTGCTCCATCGCGGACAAGAAAATCTTTTTCTGGTCTGACGGCGTTACTGC  
TGAATTCATGTCGGCGAAGGTAAGTTGATGACTCATGATGAACCCTGTTCTATGGCTCCAGATGACAAAACATGATCTCA  
TATCAGGGACTTGTTGCGACCTTCTTAGTGAAGTCATTTTTGTCAAGCAGGTTGATTTTGTAAATCAACGAAAGTAGACA  
TATTTTTGTTGAAGTAATAGGTTGCACCTACATCAACATATTTGACTAAGTCTGATCGCCCCATACTCCAAGATCCTTA  
CCTTTAGATTGCAGGTAAGCAACGGACGGACGCAGACCGAAATCGAACTGATATTGTGCAACAGCTTCGAAGTTTTGGGC  
TTTATTAGCAACGAAGTGATCAGCAAATACAGTCATATCTGGGTTTTCAGAATAGGTAGTGCCAGGTAATGTTGTTAG  
CGTCATATTTAGACCTGCGGCCAAACTTCTGCATTTTTACCAGGAACTACTTCAGGAAGAACTTTCCCTGCATTA  
ACTTGAGTGTCCGTACGATCAGATTTTCGATAAGTTGCACCGATACCGAATCCTTCGATTCATAGGTAGCAGAGAAACC  
GAAGCCATCACCGTTACCTTCAAGTGTAGTTATCGAAATCGCTACGATCGTTTTTGCCTTGGTACTGAGCAGCAAAGTTCA  
GACCATCAACCAGACCAAGAAGTCGTTGTTACGATAGGTTGCAACACCAGTTGCACGTTGAGTCATGAACACGTCGGTT  
TGAGTCCAAGTGTACCACCGAATTCGGCAGGACGTCAGTCCACGCACCGATGTCGATGCTACACCGTAGTTACGGCC  
GTAATCGATGGAGCCGTAGTCACCGAATTTCAAGGCAAGCAAGGCAAGGCAAGGTTTTATCTTTGGAGGAACCTTGTAGATT  
CAGCGCGTTGCTTTGAATTCATATTTCCACTGACCGAAACAGTCAGTTGATCGTTGATTTGGGTTTTCACTTTGAAG  
CCAAGACGGGCATAAGTAGTATCACCATCATCTGCATCATTAGAGGAGAAGTAGTGCTTAGCATTAACTTTCCCGTACAG  
ATCCAGCTTGTACTGTCTTTATTATAAATTTAGCTGCTGAGCAGACATCGCCATTAGTACTGATGCAGCTACAGCAG  
AAATTGCCACTGTTAATTTTTTTCATCGTGAGCCCTTTTTTGAACTATTATTAATAAATGATGCTACTGCGCGATAAATA  
TTCATCTAATCAATGTGATTATTTCAAGATGTAAGTTTTGTTTTCTGTTTTGATTTGTGAAGTAGATCTCTATTTTTATC  
TGAACCTTTTTCTATCGAATCCTATTCATGGCTCTTGGCTGAATAAAAAATAAATCTATTAGCCAATTTATATTAACGGCT  
GTTATTTATAAGTGTCTATAATTTGAAGGTTCAATTTAAACCGGCTAAAAATAAACTGGAATTTATTTTTGTTTATT  
TGTTGAGATTTGCTTATGATTTGTAGTGGTGTTCATAACTCGGTAGCATTCTCTCAAATATCATTTAGTGGTTTACG  
TACGTAATAAATTTGTTATGCTGTTAAGAGTGGTACTTCTGCACACAGCTTAAACCCGCCGTGAGCGGGTTTTCCAT  
TTTTGAGTCTCGATATTAGCTGATAACCAATACCTGAGTTATCTACTGACTCCGAGTCTGTTACGTTTCTGATGATTC  
CCTCAATTTACACCGCTTTGTCTGCGAGGTGGGGTTATGAAATCCATGGATAAGTTAACAACGGGTGTCGCTATGGCA  
CCTCAGCAGGTAGTCCGGTACTGGTTTTTACAGTCTAGATAAAGTCACTCCCTCACAGTGGGCAGCAATAGGTGTG  
CTGGGTAGCCTGGTATTTGGCTGCTGACGTACCTGACAAACCTTATTTCAAGATTAAAGAAGATAAGCGCAAGGCTGC  
GAGAGGTGAATAATGCCTCCATCATTACGAAAAGCCGTTGCTGCTGCTATTGGTGGCGGAGCAATTGCTATAGCATCAGT  
GTTAATCACTGGCCAAAGTGGTAACGATGGTCTGGAAGGTGTCAGCTACATACCATACAAAGATATTGTTGGTGTATGGA  
CTGTATGTCACGGACACCCGAAAAGACATCATGCTCGGTAACGATACCAAAGCAGAATGCAAAGCACTCTTGAAT

AAAGACCTTGCCACTGTGCGCCAGACAAATTAACCCGTATATCAAAGTCGATATACCGGAAACAACGCGCGGCTCTTTA  
CTCATTTCGTTTACAACGTGGGTGCTGGCAATTTTAGAACATCGACGTTCTTCGAAAATAAACAGGGCGATATCAAAG  
GCGCATGTGATCAGCTGCGTGCCTGGACATACGCTGGCGTAAGCAATGGAAAGCCTGATGACTCGTCGTGAGATTGAG  
CGTGAAGTCTGTTTGTGGGGCAACAGTGAGCAGAGTAACCGCGATTATATCCGCTCTGATTATCTGCATCATCGTCAGC  
CTGTCATGGGCGGTCAATCATTACCGTGATAACGCAATCGCTACAAAGTCCAGCGCGACAAAAATGCCAGAGAAGTAA  
GCTAGCGAACGCGCAATTAAGTACATGCGATGCGTGCAGCGTATGTTGCTGCGCTCGATGCAAAATACACGAAGGAGT  
TAGCTGATGCGAAAGCTGAAAATGATGCTCTGCGTATGATGTTGCCGCTGGTTCGTCGCTGTTGCACATCAAAGCAGTC  
TGTGAGTCAAGTGAAGCCACCAGGCTCCGGCGTGGATAATGCAGCCTCCCCGACTGGCAGACACCGCTGAACG  
GGATTATTTACCCTCAGAGAGAGGCTGATCACTATGCAAAAACAAGTGAAGGAACCCAGAAGTATATTAATGAGCAGT  
GCAGATAGAGCTGACCATATCGATGGGCAACTCATGCAATTTTTGAGCAATACACACGCGCTTCCAGCGGAGTATAAA  
TGCTAAAGTAATAAACCGAGCAATCCATTTACGAATGTTTGTGGGTTTCTGTTTTAACAAATTTCTGCGCCGCCA  
CAATTTTAGCTGCATCGACAGTTTTCTTCTGCCAATTCAGAAACGAAGAAATGATGGGTGATGGTTTCTTTGGTGC  
TACTGCTGTCTGTTTGTGTTTGAACAGTAAATGTCTGTTGAGCACATCCTGTAATAAGCAGGGCCAGCGCAGTAGCGAGTA  
GCATTTTTTTCATGGTGTATTCCCGATGCTTTTTGAAGTTCGCGAATCGTATGTGTAGAAAATTAACAAACCCCTAAA  
CAATGAGTTGAAATTCATATTGTTAATTTTAAATGATGCCAGGTGCGATGAATCGTATTGTTTCCCGGATTAA  
CTATGCTCCACAGCCCTGACGGGAACCTCTGCGGGAGTGTCCGGGAATAATTAACAAACGATGCACACAGGGTTAGCG  
CGTACATGTATTGTATTATGCCAACACCCCGGTGCTGACACGGAAGAAACCGGACGTTATGATTTAGCGTGGAAAGATTT  
GTGTAGTGTCTGAATGCTCTCAGTAAATAGTAATGAATTATCAAAGGTATAGTAATATCTTTTATGTTGTTGATATTT  
GTAATCCATCGGAAAACCTCTGCTTTAGCAAGATTTTCCCTGTATTGCTGAAATGTGATTTCTTTGATTCAACCTATC  
ATAGGACGTTTCTATAAGATGCGTATTTCTTGAGAAATTAACATTTACAACCTTTTTAAGTCTTTTATTAACACGGTGT  
TATCGTTTTCTAACACAATGTGAATATTATCTGTGGCTAGATAGTAAATATAATGTGAGACATTGTGACGTTTTAGTTCA  
GAATAAAACAATTCACAGTTAAATCTTTTGCACCTGATCGAATATTTCTTTAAAAATGGCAACCTGAGCCATTGGTAA  
AACCTTCCATGTGATACGAGGGCGGTAGTTGCTTATCGTTTTATCGCTTCAATCTGGTCTGACCTCTTTGTGTTTT  
GTTGATGATTTATGTCAAATATTAGGAATGTTTTCAATTAATAGTATTGGTTGCGTAACAAAGTGGGCTCTGCGCAT  
TCTGGAGGGAAATACAACCGACAGATGTATGAAGGCCAAGTGTCAAACCTCATAACAGAAAGATTTGAAGTAATATT  
TTAACCGCTAGATGAAGAGCAAGCGCATGGAGCGACAAAATGAATAAAGAACAATCTGCTGATGATCCCTCCGTGGATCT  
GATTCGTGTAATAAATATGCTTAATAGCACCATTTCTATGAGTTACCCTGATGTTGTAATTGCATGTATAGAACATAAGG  
TGCTCTGGAAGCATTGAGGCAATGAGGCAGCGTGGTGAAGCACGATAATAATATGAAGGATTATCCCTGGTGGTT  
GACTGATCACCATAACTGCTAATCATTCAAACCTACTTAACCTGTGACAGAGCCAACACGAGTCTGCTACTGTCAGGAAA  
GTGGTAAAACCTGCAACTCAATTAAGTGAATTTACAATATCGTCTGTTGCGAGGGAAGAA  
CGCGGGATGTTCAATCTTCACTTTAATTGATGTATATGCTCTTTTTCTGACGTTAGCCTCCGACGGCAGGCTTCA  
ATGACCCAGGCTGAGAAATCCCGGACCTTTTTGCTCAAGAGCGATGTTAATTTGTTCAATCATTGGTTAGGAAAGCG  
GATGTTGCGGGTGTGTTGTTCTGCGGGTCTGTTCTTAGTTGACATGAGGTTGCCCGTATTCAAGTGTGCTGATTTGTAT  
TGCTGAAGTTGTTTTACGTTAAGTTGATGCAGATCAATTAACGATACCTGCGTCATAATTGATTATTTGACGTGGT  
TTGATGGCGTAGATGCAGTTGTGACATGTAGATGATAATTATTATCATTGTTGGGTCCTTTCCGGCGATCCGACAGGT  
TACGGGGCGGCGACCTCGCGGGTTTTGCTATTTATGAAAATTTCCGGTTAAGGTGTTCCGTTCTTCTGTCGTAA  
CTAATGTATTTATTTAAAATACCCCTGAAAAGAAAGGAAACGACAGGTGCTGAAAGCGAGCTTTTTGGCCTCTGTCGT  
TTCCTTTCTGTTTTGTCGTTGAAATGTGCAATGGAAGTCAACAAAAGCAGCTGGCTGACATTTTGGTGGCAGTAT  
CCGTACCATTGAACTGGCAGGAACAGGGAATGCCGTTCTGCGAGGCGGTGGCAAGGGAATGAGGTGCTTTATGACT  
CTGCCGCGTCATAAAATGGTATGCCGAAAGGGATGCTGAAATGAGAACGAAAAGTCTGCCGCGGAGGTTGAAGAATCG  
CTGACGGCCAGCGAGACAGATCTCCAGCCAGGGACTATTGAGTACGAACGCCATCGACTTACGCGTGGCAGGCCGATGC  
ACAGGAGCTGAAAAATGCCAGAGACTCCGCTGAAGTGGTGAACCCGATTCTGTACTTTCTGCTGTGCGGATCGCAG  
GTGAAATTGCCAGTATTCTCGACGGGATCCCCCTGTCGGTGCAGCGGCTTTTTCCGGAACCTGGAAAACCGACATGTTGAT  
TTCCTGAAACGGGATATCATCAAAGCCATGAACAAAGCAGCCGCGCTGGATGAACTGATACCGGGGTTGCTGAGTGAATA  
TATCGAACAGTCAGGTTAACAGGCTGCGGCATTTTTGTCGCGCGGGCTTCGCTCACTGTTGAGGCGGAGCCACAGACC  
GCCGTTGAATGGGCGGATGCTAATTAATCTCCCGAAAGAATCCGCATACCAGGAAGGGCGCTGGGAAACTGCCCTT  
TCAGCGGGCCATCATGAATGCGATGGGCAGGACTACATCCGTGAGGTGAATGTGGTGAAGTCTGCCCGTGTGCTTATT  
CCAAAATGCTGCTGGGTGTTTATGCTACTTTATAGAGCATAAGCAGCGCAACACCCTTATCCAGCTGGCTTCGTGGCT  
GTTTTCAACAGTATGAGTCATCGTGGCATCTGTTGAAGATCATCGGGTAAAACGGTTTATGACGTAGCGTCAGGGGA  
CGCGTATTTATTTCTGAACTCGGTCCGTTACCGGAAAATGTTACCTGGTTATCGCCGGAAGGGGAGTTTCAAGAAGTGA  
ACGGTACAGCCTGGGTGAAAGATGCAGAAGCAGAAAACTGTTCCGATTCCGGAGGCGGAAGAAACAAAAACAGCCTG  
ATGACGGTAGCCAGTGAAGTATTGCGCCACTTCAGGATGCTGTAGATCTGGAATCGCAACGGAGGAAGAAACCTCATT  
GCTGGAAGCCTGGAAAAATATCGGGTGTGCTGAACCGTGTGATACATCAACTGCACCTGATATTGAGTGGCCTACGA  
ACCCTGTGAGGAGTAATCATTGGGATTATGCCGACGACGCTTAAAGCAAGAACATGCTGCGGTTGGATGCTATTTTTT  
TCCTGAAGCGGAAAACATTAAGTACAGTACCTGAACCTTGGTTTTAACATTTCTGAAAATGCTCTGAGAGTATATGTGTTA  
AGCCTTCTCGGAATCTTTTGTGTTTGAAGAGTGCCTTTCTGATTGTAATGCGCATCAGTTTTTGACCGAAGCTATTG

TGCACAACCTCCATCGCCAAGAATTGTGGCTCCGTATAGAGTTCATCGTCAGTTAAGGCCTGCGCCGATTGCGTATTAC  
ACAGCTTTTTGTAGATATATTTCCAGGCAGGCAGTGAAGAAGGTAAGACATGGAAATGGAATCAAATTGACCATGTAACG  
CCGCGGGATAAGGTTCAAAAACATCATGGCTAATTTTATGTTTAAATTTTTGATTCCCCAGCCCTTGATAGTCCGCGTTC  
AGGCTAGCTTCGTTCAAATCCATTAAGATATCAGACTACTCTCAGGTACGTGAGTAAGGTAACCCAGTTCACACACC  
AATATCCAGATGGTTGTTACCCTAAATGTTCCAGAAAAGTGTGGAAGAAGGTGTTCTTTGTAGGACATCCCCATGCAAGCC  
GATTTGATACTCCCAAACCCACCAGTCATAAAGCTTTAGGGTAAGTGGTGTGTAATTTCTAGCCCCATCATCTGTGTTT  
TTTTATTAATTTACCATGTTATAGTTTTATTTGTGAATTAATCAATTATGGCAATGAATTACAAGGGTTAAATGCTG  
CCGACGATAGCGATATTGAAATAGCCTGGTATGCTTCAATACAGCAGGAGCCGAATGGCTGGAAGACCGTCACCACACA  
GTTCTACATCCAGGAATTCAGTGAGTATATTGCGCCACTGCAGGATGCTGTAGATCTGGAAATCGCAACGGAGGAAGAAA  
GATCGTTGCTGGAAGCCTGAAAAAGTATCGGGTCTGCTAAACCGTGTGGACACTTCCGTAGCACCAGATATCGAGTGG  
CTTATTCACCATATAAACAGTATGTATATCATAGTTATTAATTTGTGAGTTTTTTCGGTGTGTTATTTGTTTGTGTTGA  
TGTATGCTTTTGCGCCAAAAGGTTGTTTAGATGATTTTTATCAATTGATTTTCAATATCGTTTAAATAAGAAAAATT  
AAGCAAGCTGGATGTTGGTTTTTGTAAATGAATTTTAAATTTGCAAACTATAATTTTGTGTATAAAAAATAAATGCACA  
GAAATGCAAGTAAAAATGACTCTTTTTATTTTAAATTCAAACGGTTGACATATATATAGCAAGAGGTTTCAGGTGCGT  
TGTAGTGATTTATGTTAATAAAAAAGCATAGTAAGCGTTGAAAAATGTAACCTTGAAATAAGTTAGAATAAAAAACAACA  
TACATATAATAATTTAATCTTAAATGAAATTTTAAATTTGCAAACTATAATTTTGTGTATAAAAAATAAATGCACA  
TCATCTGATTATGATTGTGATTTAATTTGGTTGTTATTTGACTACTATCAACTTGTTTTAATTTTATGATAGGTGCAAG  
ATGGATTATGTTTGTCCGTAGTTTTCATCTGTCAATCATTTGATTTAATTATAAACAGGAGAGTTATCTCGTTCAAAAA  
AAATTCATTGTTTATTGTAAGCGACAAAATTAGAAGGGAGTTACCAGTATGCCCTCTAAACTAAGAATTGTTGATATAG  
ATAAGAAAACATGTTTATCCTTTTTTATCGACGTGAATAATGAGCTGCCTGGCAAAATTTACTCTTGATAAGAATGGCTAT  
ATTGCTGAAGAGGAACCTCCATTATCGCTTGTTTTTCTCTGTTTGAAGGGATTAAATAGCAGACTCACACTCCCTTTG  
GTTAAAAGAAAGACTATGTATATCCTTACTTGCCATGTTCAAAAAACGCGAAAGTGAATTCATTTATACTAACAATA  
TAAATACATTTACTGTAAAATTACTGGAATAATCAGTTTTAATATTGAGCGGCAATGGCATTTAAAAGATATTGCGGAA  
TTGATTTATACGAGTGAAGTTAATAAAAAAAGATTAAGGGATGAAGGAACGTCATTTACTGAAATATTGAGAGATAC  
TAGGATGAGGTATGCAAAAAAATCATAACTTCAAACCTTATTCTATCAATGTCGTAGCCAGAAATGTGGCTATAACA  
GTACTTCATATTTATATGTGCATTTAAAGATTATTATGGTGTACGCCATCTCATTATTTTGAAGAAAATAATCGGCGTC  
ACAGATGGAATAAACAAAACAATTGACTGATAATGTTTATTACAAGTTGTCTACATGTTAATTATAATATTATACAGCGT  
TTTTTTTATGATGATATTCTGGAACCATTAATTTGAATTTGGGTTGCTGTGCGCTATTTTATACATACTATAATTGATGG  
TTTTCTATGTGATTTAGTTAATAACCTTCTGGGTTTATTTAAGGGTTAATTGTTACATTGAAATGGCTAGTTATTTCCC  
GGGCGATTTTACCTCGGGGAAATTTAGTTGGCGTTCTTAAATGTGTACTTAAGACCAGCAGTAGTGATGAAGTTAT  
AGTTTTCTATACCTGCTCCATTTTTGCTGTAGTCTGAAGTGTATTATTGTGATCATAAAGTGAAGTATTACCTTTTTTA  
TTCGTAACCCGATTCCATGCGCCTTCAACATAAACTTTTGCCTTGGTGTGACGTAATAACCTGCATTGACTGCAACAGA  
ATAGTAATTTTGGTCTTTGACCTTACTGCGATAAGTGAATCTTTTTCCCGGTTCATAGTGTTCATCGTTATCAGATGATT  
CCACCCAGCCGCTGATTTAAATGTGCCACCGAGTTCAAAATCTCATAACGATAAATCCAGTCAAGCCAATGTAGGGC  
ATTTTAAAACGTTGTTTGTAGCCGATTGCTTTTCTCATTGCGGAAGGAGCCGATATCATCTCTGAATCCCTCCTCAGA  
ACTGTAGATATAGGAACCACCTCTGGCTGTAAGCTATAACGGCTTTCTGATATCCGGCCATGAGTCCAGGCGGTAAT  
TGGGTTGTTGAGGAGCCAGCCTTTGATATTCAGATCAAATTCGTTGGCATAATTGAGTTGTGATCAGGGTGTCTACTT  
TCATCCGTCCAGGTTCCGGGTTACTGGAATCCATCCAGTCTGATCGACCATATTGCCACCTCGGCTCCGAGAGTTG  
CCAGCCAGCAGCCCGATAGATATCTGGGGCATCAAATCCAAATTAATTGCACCTTTAATAATTGCAGCGTTATTGAATT  
TCCAGTCTGAGTTGACTGATTTTTCGGCCCTTTCTCGGCTAGATAAACACGCTCTTTTTGTTTTCCGCTCAGAGTTCCA  
AGACTAATGTCCGCATTTATGTTGTCAGGAGTAAACGATAAAGTCTCGGTAGAAGCAAAGAGCTGATCGCAATAGGGGT  
TGTGAGGACTATTTCCAGAAGTTTCCGCCGATAAAAGTTCTCCATTCAATCGTTTTAATGATTGAATATGATTTTTTA  
TATCTAACTTAATGAGTCAATTACATATTGCTCCACTGTTTATATTTTGTAGTATTGAATGATTATCACAATGCGCTA  
TCTGTTTTTGGTTAATTATCTGTTATTGTTTCATATTTGCTTTTTACTGTGTGGTTTTTTTATGCTTTTGTGGTCTTT  
TATCTATTTAAGTGCCATGCCTTTAGAGGCATATAAGCGAAAATAGCATGAGGTTTATCCTCAATTACTATGTTTTTATG  
TACAAAAAAGAGGGACAAAATGAGACACATAAGGCCTCGCAATGGCTTGAAGGCTTTACATGTTTTGAGGTAGTGGGA  
CGTGTGAGCGCAGAGATGGCGCGTAAGTTGTTGACTTAAATGTCGTTCTAGGAACCTTAAAGTCTGGGCGCAGGTT  
CGAATCCTGCAGGGCGGCCATTTCTTCTCATTATGCCCCGTTTATCCGTTTCCGCTTTGCCCTTACCACATCACTT  
TTTGTGCTGTTTGGCGAGATAATTCAACGGTGTGAGGCCGTAACCGCTTAAAAACAGAGATAAAGTACGACGTGCTG  
CTATAGCCACATAAATGCGCCACTGAGTGATATTTTTGTTATCCATCAATAACATCTGTACGGCGTAACGCATACGACA  
CTCTGTGACAATCTGGCTATAGCTGGTATTTTCTTTTTTAAATTTCTTTTTGAGCAGGCTGGGGCTTAAACATAGCGAAC  
TGCGGACAATTCGAGATTCAGTAATGCTGAATATCGCTTTGAATAATGCGGCAGACGCTGTGCGGACGCTGCTGCGT  
AAGATATACATCAGTAGGGCAATAACCGCGATTGCTCAAGAAAGTTAGACAATACGGTAAAAAGCAATCGCGCGTCAA  
CTCCGTTTCCAGGGTCTGCTGGGTTGCTGCTTGTGTTGGCGGCTAGCCGGAACACTTCCGGTGTACGGCTATGAC  
AAGCGATAACCGGGTTCAGCAGCCGACAGGGCTTTACACAGGTTAAGTTCTTATTTAAAAACAACAGATAATCGTTG  
ATGATGTTACGGTTGATGTGGGTGATTAACGTGATTTAACGTTGAGAGTTCAATGACGTTATTGTTGCACGGAAGG

GCCAGGTAGTTTTTCGGAAGGTTAACGTAGCATGGTTATTGACGCTTACCTCTACCTCTTTTTCGGTCAGGATCACCA  
CGCAAGGTTCACTGCTGCTCAATTGCATTTGCGACTCCTCAGATATCAGAACTCCGCTCAAAGGATCTATGCTTCCTGC  
ATGAGTGATCGGCCGTTTCGCCGATAACGATCTTCTTTCTTTAGCACGCTTTTTAGCAATTAATCTTGATGGAATTCTGA  
TGAGAGCGAAAGAGGTAAGCCAGGTCGTACCCGACTTACCTGGAGGAGATTTAATACTCGAGAATGCCGTGCGCGACGGG  
CAATAGCGCAGAGAGAAATAGAGAGTGTCTTTACCGCAAGAGGAACGTTTCGCTAACAGCGAGGCAATTTCTGCGTCCG  
GTTTTCGTTTTCGCTGTAAGGTTTTGCCTTTGCCGGCGACAAAAAGTTTCATAAACAACGCCGCTGGCAGGGGGCGGACTT  
TGGAATCGGCCGCTGGCCTGTAATAACGTTACGCTGTTACGCGGTGAGTTTATCCACGCCGCTGCCATCCTGTACCCA  
GACATTAACGCCGTTGCTTAAACGTTCCAGCAGTTGGCGATAGCCATCGGGCGACATGTTTCCGGCGAAAAAATACTAC  
TGATATAAACCGGTTTTGCTGAAACATCGCTAATCAGCCGCTGCGCGTTGTTTAAACCATGTTAGCAAAGGCTGACGGGCG  
GCTTCGCTGCGCCAGTTCAAGTCGTAATTTCCGCGCTGATGTACCAGCCATCCGGCGTTATGCCAGGCGCGGCGCTCCA  
TAATCTGGCTTGTGGAGATCGGCAGCCAGCAGCGGATTAAGATAGCTTTCCAGCGCTGCGGACGACTGTTTCTGGTGCA  
TAAAAAATCCGGATCGCGGTTACGCCGACAATAAGCTTACAGCCAGCCTGTTGCGCAGCTGCGGCCGCTTAAACAAT  
AACGTGCGCTGTTCTGGCTGGGTAATGCATCGCCGTAACGGGTCATTGCAAAAACAAGGGTATCGAAGCCTTGCAAACG  
TAACTGACTCATCAGCCCTGCCACTGGGTATCGGTAACCTGACTATCTCGTTTTGTGGTTGCCAGATAAATACCTTTCA  
TCGCAAAAGGAAAAAGGGTGACCAAAAGCAGTGTACGCAATACGAAAATGAACCTACGCATTTACCAGTCACTCCAATG  
GTGAAAACGCGTTGTTGCGCTCTCCGTTACGTTAATCGCCTTAAAGGTATGTTGATACTCGACGCGAGACTGAC  
TTTTGTGCGCCAGGCGTCTAGTGCCTCGCCGCTCAGATATTCAGCGGACCCCGACTCCGCCAAGCTGCGCGCCCT  
GAGTGCCTTTATCACGATAGCCGTTGCTCTGAACGTGAGCGTAAGGCTCAATAGTCTGTCCGTTAGCTACCTTCTGATGC  
CAGCTGACGCGATAATCTGCCGTCACGCCTGAATATCCTGGCGGATATATTGCGCCGATCGAGGTACAGGTTTTGGGC  
AAACCAGCCTGAACGTTCCGGTGCCATTCTGCTGCTGATTTGCCGCCATTAAGAATGAGGCGCTGGCGCGCAGCATGG  
TATCGGATGCGCCATTTGGCCGTTACAGCGCAACTGCTGTTGACGCGGATGAAAAAGATCTGATCGCGCAGCGGCTTC  
CAGCGCAGACCCGGTGCCGGACATCGGATTTTTACCAGGATCATCACCCGTTTTCTCCGGTATCGGCAAAGACGGGCT  
ATAAAGTGAAGCAGGTCGCTTCCAGCAGCATATTGCGTCCGATGCGGTAAGTCCAGTTGTCGCTAGCTACGAT  
AGCTTTTCCCTGGCGCTGCGCCGCGACATTATTGTTAGCGGTAAGTCCAGTTGTCGCGGAAACGCAAGCCGATGGAAGAATCG  
AACTGAACGTCCAGCGGCGACCGACCTCTCATGCAACGGCGAAATGAAGCGTTGTTGATTTTGTCTGGGGTACG  
TGGGGTTATCAGCGCCTGATTATCAATGTCATCAATCACCAGCCGGCGTAGTGTGCTGCGTGCAGGCATGTCATCCAGAC  
GCTGGTTCACGTAGGCCAGTTGTCGGATCAGTCCGGATCGTCCGGAAGCCCTTATGCGCCGTTTCGAGCATTTCCCGC  
GACTGTGCGATATCACCGCTATCCACAAGGCGTAACCAAGCGCTGCCTGGGTGTTGCTATTATTCGTTCCAGTTCCAG  
CGCGGCGCGAAATCACTACCCGCGGCGGGACATTATGACGTTGGCGATAAATGTCGCCCGCGCAACGTAAGCGTTGG  
CAGAAGGCGCAATATTGATTGAGCGCGTGAGATCGTTCAGTGCAGGTTCCGGCTGACCAGGAATGTAACGTTGCGCATGC  
AGCCACCAGTAGAGGGCATTGCTTCCCAGTCCACGTTTTTCTGCCTGTTGTAGCCAGCGATCGCGAGCCGCACCATTTCC  
TGCCGCTGGGCGGATTGGCAGCAGCAAGCAGATCCTCATTGCTCATGTCGTGAAGACTGATTTTCTGCCAGGCGGCCA  
GTGCGGTGGCGTAGTCTCAACCTGATACGCCTGATAGGCTACCCGACGATGTTGCCAGGCGCTCGGTTGCTGTTGTTG  
GCCTGAAGCCATGCATACAACGCCACACCCGGTAGCGTGTCCCGATAACACTTTGCCAGACGGTCCAGGCGGCGGCATC  
GTAGGAAGGCGACATATCGCCAGCAAGCGAACTATTGCCGGCAATTATCTGCAATACCCGGCAACTGACTTTGCCACT  
GACGTTGCTCCGCCAGCGGTAAGGGTTTCGATAAAATCGCCACCTTCGCCGGCGTTGCCAGTAAGGATGACTTTCCAGC  
AGAGACGCCAGTGCGCCATTAAAGTCTGGCTGACACGCGCATCGCCCTGAAAAGGATAGCGTTGCAGCAATAAATCGGC  
AGCTTCGCGTACTGCTGTTCTGCATCAGTTGCCAGGTTAGTTGATCCAGGCGGGTAAGATTTGCCGTTCTTGTGAT  
ACAGCAATCGTCCAGCAGCAGAGCTTACGCTTTGACGGTTCGCCAGCTGACAGCATAACGCTCCTCAAGCATTTCA  
TTGGCGGGGAGGGTGGCGAGCAGTTTTGCGCTGCGTACTGACCTTTCTTTAACAGCACCCGTAAGCTGCGCCAAAC  
AACATACTGGCGGTTGTCGGCAAACTGTACCGTATAAATTCGCCAACGCTGAACGGGTTAGCGCTGATTTAGATAACA  
GATAGAGCCAACTTTTCTTGTGCGTCCGTTGTAATAAGTGGCTTATTTTCAATGAGATAATGCTGGAGGCGTGCTTTT  
TCGCCACGATAAGCCAGCGCGTGCCTGAAGTAATATGACTGAGGATCGGTGAAGATCCCTGTGATTGCAGTGCCAG  
GATCCGATCGTCCAGCTGCCCGCAAGAAGCAGCTCAAACACTGACGGCGTTCTGCCGCGCTTAATGTGTTCTGCTGGC  
GTGCTTCAATTGATAGCGTATCTGCCTGGGACCATTTTTCAGGTAGATTGCCCGTTGCAGCAGATCGGTTGCGAGCGTT  
TTTCTTCCGGCGATGCAGCAAACGTCGCATCGTTCAAGTTGCGCTCTGGCGACAGGTAAGTGTGCCAGCCGAGGGCATT  
CTGCCCAGTTCAGTGCACAAACGCGAGGTCGGCGCAGCATCGCACGCTTTTTGCTGGCAAGCAGTTCTTCAACTGTGCG  
TAACGCTTTTCACTTCAACCGGAATAGCCGCCAGACTGCGCTCAAGTCCGGCATCTCCTGGGTGACGTTTCAAGTATCC  
TCAAGCAACAGCCGCGCCCGGTCATCATGACCAAAATGGCGATAGGCTTCCGCAAGGTATAAAGTCAAGCGAATATTATC  
CGCACCTGCTGGTGTATATATTCAAATTCGCGGATGGCGGTTGCTTGTGCTTATTTTTCTGTGCTTACAGCGCTTAT  
CGAGACGGGGATAAATAACAAAATGGCGATAATCGTCAAGCCAGCTCTTCTGCGCTGGTCCGATATTGTCTGCGAGT  
GCGCTGGTACTCAATAAAGACGTCAAGCAGTAAACAGACCATCCGATGACCGGATTAAGGTTATTCTCCTTCAATTTCCG  
ACTCCAGTTGCCAACCTGTTCTGTGTTTAAACCTGCTTTGAGTAATAGTGATTGCATCGAAACTGTAATTCGCGTTGA  
ATTGTCAGGACGCGATCAAACGTTTTCTGGCTGATAACGCCTTCCGGTACCAAAAACTTCCGAGCGGCGAGAGAAGTGG  
TTCATGGCGCAATAACAACAGTAAATGCTGAACGATTAATGACCGAGCGTGGTCAAGTATTTCCGGCGAACAGGAAGT  
GATGCGGCACATATTGCCGCCAGATTTACCAGCCTGCTGTTCCGTGAGCCACTGATGCTGAACCGCATTGTACAACATT

GCCC GGGATCGTGACCGCGTCGGCGTGCATACCAGTGACGTAACCTGTGACAATTTGTCCCGCAGAACAAATGACGTA  
ACGCACTTTGCGTCCGACTTACGCGTCAGGGCCGCAGCGAAACCGGGTCAATACCATCTTACTGCCGACAATTAAC  
CGTCATTTTCCAGACGCAGCGGCAGTACCGCATAATGCAGCGCCACGGAGGCCGCATTTTCGCAATCAGCGAGGAAGG  
ATCTGCCAGGCATCGATGGATTCCACGCCACGCCGTTTTGCTCTGCCAGCGCTGTGCCAGCTGCTCGGCGCTAATCAG  
CCCTGCATCAGCATTGAACCGCCAGCGTAGACCTTCGACGCGATTACGCACTGCTGTATCGAGTTGTTCTTCAGTGA  
TGACCTGATTTTCCAGCAGAATTTGACCTAACGGGCGCAACGAGCGGGTATCGCCAGTCACGCTGGGGAAGTCATGCGTT  
GTTTTATCCCACGCCACGGACGTGGATCGCCGTGTTGAAGTACCTGTTTTAGCGCGCGCCAGTTGGCCATGAAGTTAAT  
CAGGTTGCCCGAGAAAAGACGCAGGACGGAAAGCAGCCCTGCGTCAGGCCGTAGTAGCCAGTAACGAAAATCACCCGCT  
GCACGATGCGGTTAACCATCAAACCAAAGTTAGCCACAGCAGGGTCATTAACCATGCGCTGCCGCTGAAAAAGAAAAG  
AAATGCCAGGCATCGGGCCAAACTTTCATACGCCAGCAACAGCAAAAGCTGGATCATCACCAGCATCGCGAGGAAGCT  
GACAAAGTTACTGATTGCCCTTTGCGGTGCGGCCAGAAAAGTAGTTACAGCGTCAGGCTGGAGGTCCATTTATGGGTTT  
TAAAGCCTTGGAAAACAATGCCGATGATCCAGCGGGATTTTTGTGCAACCGCAGTCGAAAAGGTATCGGGGAAAATATTCG  
CGCAGCAGATCATGTTTGTGTCGCGCGTGTGTAAAAATTTACGCTGCTCGGTTCTTTGGCTTCGTCACCACCGG  
AAAACGGACAAAAATTTCCGTCATACCTTTTTCTTCAGGCGGAAGCCAATGTCGTAATCTTCAGTAAGACTCTGCACGT  
CGAAAAGCAATACCGTCACCTCAGCTAACAGTGCCTGACGGCGCGCGGCTGAAAACAGGTGCCGACGCTGCGCTGGGC  
ACTTGTCCGGCGAGGGCTTACGCACCGGAACATCTTTGCCATGCACTCTGAAAACCTCATCAATGTAAGTCATGCTGGT  
GAAGTGCCTCATTTCGCTTTCGAAACGGATACACCGGATCTGAATCAGATCTTTACGCTCGACCAGATAGTTGAACAGAC  
GCAATTCATCGGTGAAATCACATCTTCGGCGTCATGCAGAATAAAAACAGCAAAAAGCGAAATTTGGCGCTACGCTCAAAT  
TGGGTGATGGCGTCCAGCACGTTGTTAGACAGTCGGCTTTGCTGGTGGGGCCAGGACGCGCGCAGACTACCTTATGCAC  
ATTCGGGAAGCGAGCGCACACTTCGTCACATCAGCTGAGTATCGGGTCTGTTGGGTAGGTGCCAACAAAGATATGAT  
AGTTTTCTAGTCGAGCGTGGTCCGCCAGCTCGGCCATATTGCCGATGACGCCGTTTCATTCCACGCCGGAACCATA  
ATCGCTAACGGTTTTTTCATCTGTTTTATACAGTTCGCGGTAACCTATTCCGGGTAGCGGGGATAAACTCAACTTGGC  
TTAATGCGCGTACCCAGTAGACGACATCAATAAAAAATCGTCCAGCCGCTGATGAACATGATGACCCTAACGTTA  
TCGCGATTACTTTAAGCCGTAGAGCCAGGTAGCAAAAACATCAAGAAGCCAGTCCACACAAAAACCTTACATTAACGCT  
GGTTATGTTTAGGGTGGCGTATATTAAGTTTTTTATGAATTGTACAGCTTTTACCATTAATAGGTATGACTATTGCG  
GCACGTTATTTTTACTGTTATAAAAAGTTGCCGTTTGTGAAGGATTAAGCGGGTAAATGTGATAACAAACCTTGTCCC  
CCGCGCATCCGACGTTACCGCAACCGTGCCTTTATGCGCGACAACAATCGATTTCACTATCGCCAGGCCAATACCGCTAC  
CTTACCTTTTCGCTGGCGGGAGGGTCAACGCGATAGAAACGGTCAACAATCGCGGTAAGTGTGCGGCGCAATGGGC  
GTACCGGGTTTTTCGACGATAACTTGCACAGGTGATCGACCGTCTGACAGCGCACTACAATTTGCTCTCCGGTTGGCGT  
ATAACGCAGGGCGTTTCGAAAGCAGGTTGCTTAGCGCCGACGCGCATCAGCGGATCGCCCGCAGCTGACACTTGTCC  
CAACAAACCGCAACTCCAGCCCGCATCTTCGCTAACGCCTCGAAAAATCGAACACTTTGCCGACTTCATCCGCCAGG  
TTGAGCATTTTCTTTTCGGGATTAGCTGGTTGTTATCGGCCTGAGCGAGAAACAGCATATCGCTGACCATTTTCGCCAT  
TCGCGTCAGCTCTTCGAGATTAGAGTAGAGCACATCTTCAGCTCCTTTCGGCTGCGCGACTGGCTGAGGGCGATTTCCG  
TTTTCGTTATGAGATTGTAATTTGGTGTGCGAATTTCTGAGCGATATCCGCTGAGAAATTTGGACTGGCGGGTAAAGACA  
TCCTCAATACGCTCGATCATATGGTTGAACGACAGTACCAGCTGTTCCAGCTCAATGGGCACGGTCTGCGGGTCCGAGCG  
AACGTCGAGATCTTTCGAGGTAATATTCTGGATTTGACGGCTGACGCTGCGGATCGGCGCGTGACCTTTATGACCGCCA  
ACAGTACGATAAAGACGATCAGGATGCTGATTACCGATGCGGTATAATAAGTTTATTCAATCAATCATTATGTAATGA  
AGATGAAAATCGATCGAAAGCGGATGTAGAGCGTATAAATCGTTTTGCCGTCACCAACGGGCAACCGGCAAGTTAAT  
CATCCGCCAGTTGCTGTGTTCCATATGCCGTCGACCGTGGCCTGGCATCATCATCGTCCGGCCGAAAGGAGATACACCT  
CGCCACCCTGAGCGTCTTTATCGGGTATGGCGTCACGCGTAAACTCGCGGATATCCGGCGCACCAGGGGAGTGATACACC  
GTTTTACCCTGACTATCTGCCAGGAAAATCAACACATTTGGAATAACCACTGACGATATCTTCAGCGTCATTAAGCGTCCG  
GGCTTTCGTTTTTCGTCAGGGTATTTAGTACCCGTTCAAGGGTGGCGCTAATCTTTTTAAATCATTAATATCCTGCTCGG  
CAAAATGAACTTTTACTGAGTGATCATGATCCATGCAAAAGCGAAAAACGCCGCGATGGTGGCCAGGCTGATAAAAAAG  
GTCAGGCGGGTTGCCAGCGAAAACGGGCGCTGAAATGGCTTACTGACCATCCGGCACCTCAAGCATGTAACCCACGCCGC  
GCACGGTCTGAATTAGCTTCGGCTCAAAGTCTGTTGTCGATTTTCCGCGCAGCCGCTTACCAGCCACATCAATAGCATTG  
GTATCGCTGTCAAAATTCATGTCCATACCTGCGAGGCGATAAGCGAGCGGGGAGCACTTCGCCCTGATGGCGAAGGAA  
GAACTCCAGCAGAGTAAACTCTTACTGGTCAAAGTGTGCGCGTCCGCTGCGGGTACTTTGCGGCTGACGAGATCGA  
CCATCAATCGGCAACCTGAAACTGACTTTGATAATCACCGCCGCCCGCGCCGAGTAATGTGCGCACCCCGCCAGC  
AGTTCAGCAAAAGCGAATGGCTTACCAGGTAGTCATCTGCCCAACTCCAGCCCTTGACGCGATGTTCAATGGTGCC  
AAGCGCGGTAAGCAACAGAATCGGCATCCCTTTATTGGCGGAGCGTAACATGCGCACGATATCCAGCCGTTACAGTCCG  
GCAGCATAATATCGAGGATTATCAGATCATAATCACCGGTCATCGCCAGATGGTAGCCATTACGCCGTTGTCGGCCAAA  
TCGACCACAAAACCGGCTTCGGTTAACCTTTGGTCAAGTATTCTCCGGTTTTCTTTTCATCTTCGACAATCAACAGTTT  
CATATTTCTCCGATGTTGCCCGGGCAATTCTAGAGTAGCGGGATCAGATGGCAATCGCTTATTGGCAAAATGACAATT  
TTGTCATTTTTCTGTCACCGGAAAATCAGAGCCTGGCGAGTAAAGTTGGCGGATAAAAATCACCAGAAATTTAGAGCCTA  
TGCTCCTTGTAAACTTCTGCCATTTTGTGTGGCCCTTGCCTAACCGGTTGTTCACTGGCACCGGATTATCAGCGTCCG  
GCAATGCCCGTCCGCGAGAGTTCTACTCAGCCAGAACGGCCTGGTTAACGCAGCAGATAACTATCAGAACGCGGGCTG

GCGCACCTTTTTTGTGATAATCAGGTGAAGACGCTGATTAGCGAGGCGCTGGTGAATAATCGGGATTTGCGCATGGCGA  
CGCTGAAAGTGCAGGAGGCAGGGCGCAATATCGTCTGACCGATGCCGACCGCTACCCACAGCTCAATGGCGAGGGCAGC  
GGCAGCTGGAGCGGTAATCTTAAAGGGAATACCGCCACGACACGGGAGTTTTGACCGGCCTTAACGCCAGCTTTGACCT  
CGATTTTTTTCGGTTCGCTTAAAGAACATGAGCGAAGCCGAGCGACAAAATTATTTAGCCACTGAGGAAGCTCAGCGCGCGG  
TGCATATTCTGCTGGTTTCTAATGTCCGCAAGCTATTTCAATCAGCAACTGGCGTATGCCCAATTGCAAAATAGCCGAA  
GAAACGCTGCGTAATTATCAGCAGTCATATGCGTTTTCGAAAAACAACCTGTTGACAGGTAGCAGTAATGTTCTGGCGCT  
GGAACAGGCTCGCGGGGTGATAGAAAGTACCCGACGCGACATCGCTAAACGTCAGGGGGAACCTGGCGCAGGCCAATAATG  
CATTGCAACTGTTGCTGGGAAGCTACGGCAAGCTGCCGCAAGCGCAGACAGTAAACAGCGACAGCCTGCAAAAGCGTTAA  
TTACCGCGGGGATTGTCGTCGCAAATCTTATTGACGCGCCCGATATTATGGAAGCTGAACACGCGTTAATGGCGGCTAA  
TGCCAATATTGGCGCTGCACGCGCGGCATTTTTCCGCTCTATAAGCCTGACCAGCGGAATATCGACCGCCAGTAGCGATC  
TATCGTCATTATTTAACGCCAGCAGCGGGATGTGGAATTTTATACCCAAAATTGAGATCCCATTTTTAATGCCGGACGC  
AACAGGCCAATCTGGATATCGCCGAAATTCGCCAGCAGCAGTCGGTGGTGAATTATGAACAGAAAATCCAGAACGCCCTT  
TAAAGAAGTGGCAGATGCGCTGGCATTACGTCAAAGCCTGAACGATCAAATTAGCGCCAGCAGGTTATCTGGCATCGC  
TGCAAATTAATTTGCAACGGGCGCGGGCATTATATCAGCACGGCGCAGTAAGTTATCTGGAAGTGTGGATGCCGAGCGT  
TCTTTATTTGCAACCCGACAAACTTTACTTGATCTGAATTATGCCCGTCAGGTTAACGAAATTTCTTTGTATACCGCACT  
TGGTGGCGGTTGACAGCAATATACTCGTCATACTTCAAGTTGCATGTGCTGCGTCTGCGTTCCGCTACCCAGTCACCTTA  
CTTATGTAAGCTCCTGGGATTTCACTCGCTTGTGCGCTTCTGCAACTCGAATTATTTAGAGTATGACTTTTAACTCCAG  
GAGAGAATAAATGAAAAAAGCACTGCAAGTCGCAATGTTCACTGCTGTTTACCCTTATTGGCTTTAATGCCAGGCTAACG  
AACATCATCATGAAACCATGAGCGAAGCACAACCACAGTTATTAGCGCCACTGGCGTGGTAAAGGGTATCGATCTGGAA  
AGCAAAAAAATCACCATCCATCAGCATCCGATTGCTGCCGTGAACTGGCCGGAGATGACCATGCGCTTTACCATCACCCC  
GCAGACGAAAAATGAGTGAATTTAAACCCGGCAGCAAAAGTGGCGTTAATTTTTGTCCAGCAGGGCAACCTTTCTTTATTAC  
AGGATATTAAGTCAGCCAGTAACCCAGGTTAATGAGATGAAAAAATCGCGCTTATTATCGGCAGCATGATCGCGGGC  
GGTATTATTTCTGCGGCAGTTTTACCTGGGTTGCAAAGCGGAACCGCCTGCAGAAAAACGTCGACCGCAGAACGTAA  
AATCTTATTCTGGTACGACCAATGTATCCCAATACCGGTTTCGATAAACCCAGGTAATCGCCGTTTATGGATATGGATC  
TGGTGCCGAAATATGCCGATGAAGAGAGTTCTGCGTCTGGTGTGCGCATTGACCCGACTCAGACGCAGAATCTGGGGGTG  
AAAACGGCTACCGTCACGCGCGGACCGCTGACTTTTCCCAGAGTTTCCCGGCAATGTCAGTTACAACGAGTATCAGTA  
TGCCATTGTGACGGCTCGCGCTGCCGGTTTTATCGACAAGGTGTATCCGCTTACCGTGGGCGATAAAGTACAAAAGGGCA  
CACCGCTTCTCGACCTGACCATTCTGACTGGGTGGAAGCGCAGAGTGAGTATTTACTGCTGCGCGAAACCGGCGGTACG  
GGACCCAGACTGAAGGCATTCTTGAGCGGCTGCGACTGGCGGGAATGCCGGAGCGGATATTCGCCCGCTGATCGCCAC  
GCAAAAAATCCAGACTCGCTTTACGCTCAAAGCGCCATTGATGGCGTGATCACCGGTTTTGATCTGCGCGCGGGAATGA  
ATATCGCCAAAGATAACGTGGTAGCGAAAATTCAGGGTATGGACCCGGTGTGGGTCACTGCTGCGATCCCGGAGTCTATC  
GCCTGGCTGGTGAAAGATGCCTCGCAGTTTACCCTCACCGTTCGGCGCGACCCGGATAAAACACTCACCATCCGCAATG  
GACGCTGCTACCTGGCGTGGATGCCGCGACCCGACGCTGCAGCTGCGTCTGGAAGTCGACAACGCCGACGAGGGCGTAA  
AACCGGGCATGAACGCCTGGTTGCAACTCAACACCGCCAGCGAACCGATGCTGCTCATTCCGTACAAGCGCTGATTGAT  
ACCGGCAGCGAACAGCGGGTATTACCGTTGATGCCGACGGCGCTTTGTACCGAAACGCGTTGCTGTTTTCCAGGCATC  
GCAAGGCGTACCGCATTACGCTCTGGTCTGGCGGAAGGTGAAAAGTGGTTTTCCAGCGCCCTGTTCTGATTGATTCCG  
AAGCCAATATTTCTGGCGCACTGGAGCGGATGCGCTCTGAAAGTGTACCCATGCGCATTGAGGGAATAACCAATGATTG  
AATGGATTATTCGTCGCTCGGTGGCGAACCGTTTTTGGTGTGATGGGCGCGTTGTTTCTGAGCATCTGGGACCTGG  
ACCATCATTAATACGCCAGTGGATGCGCTGCCGGATCTCTCCGATGTGCAGTTATTATTAACCAGCTATCCCGGTCA  
GGCACCAAAATCGTTGAAAATCAGGTGACTTATCCGCTAACACCACCATGTTGTCGGTGCCTGGCGGAAGACTGTGC  
GCGTTTTCTCACAGTTTTGGCGACTCTTATGTGTATGTCATTTTCGAAGATGGCACCGATCCGTACTGGGCGCGTTCCGCG  
GTGCTGGAGTACTCAACCAGGTACAGGGTAAGCTGCTGCGGGAGTCAGCGCCGAGCTGGGGCCAGATGCCACGGGTGT  
TGCTGGATCTATGAATATGCACTGGTGGATCGCAGCGGTAAGCACGATCTGGCCGATTTACGCTCATTACAGGACTGGT  
TTCTCAAATATGAGCTGAAAACCATCCCTGACGTTGCGGAAGTGGCGTGGTGGGCGGTGGTGAAGAGTATCAGGTG  
GTTATCGATCCCGAGCGCTGGCGAGTATGGCATCAGTCTCGCCGAAGTAAAAAGCGCGTGGATGCTTCAAACAGGA  
AGCGGGCGGTTTCGTCGATCGAACTGGCGGAAGCGGAATATATGGTGCAGCCAGCGCTATCTGCAAACGCTCGACGACT  
TTAATCACATCGTTTTAAAGCCAGTGAATGCGGTGCCGTTTATCTGCGCGATGTTGCGAAGGTCCAGATTGGCCCCG  
GAGATGCGCCGGGCATTGCCGAATAAACGGCGAAGGCGAAGTGGCGGGCGGGTGGTATCCTGCGATCCGGCAAAAA  
CGCCGAGAAGTATCGCCCGCTGAAGGACAACTGAAACGCTGAAAAGTAGTCTGCCGGAAGGCGTGGAGATAGTTA  
CAACATACGATCGCAGCCAGCTCATTGACCGGCCATCGACAACCTCAGCGCAAGTTGCTGGAAGAGTTTATTGTGGTG  
GCGGTAGTCTGTGCGCTGTTTCTGCGCATGTGCGCTCGGCGCTGGTGGCGATTATTTCTGTTCCGCTGGGGTTGTGTAT  
TGCTTTTATTGTCATGCACTTCCAGGGACTGAATGCCAATATTATGTCGTTGGTGGCATTGCGATTGCCGTGGGGCGA  
TGGTGATGCTGCTATCGTATGATCGAGAATGCGCATAAACGGCTGGAAGAGTGGCAGCACCCAGCATCCTGACGCCACG  
CTGGATAATAAAACGCGCTGGCAGGTGATCACCGATGCGTCTGTTGAAAGTGGGGCCGGCGCTATTTATCAGTCTGCTGAT  
TATCACGTTGTGTTTTATCCCGATCTTACCCTGGAAGGGCAGGAAGGGCGTCTGTTTGGCCCGTTGGCGTTCAACAAA  
CGTATGCGATGGCGGGTGGCGGCTGCTGGCGATCGTAGTGATCCCGATCCTGATGGGCTACTGGATCCGTGGCAAAAT

CCGCCGAAAGCAGTAACCCGCTCAATCGCTTTTTGATTCTGTTTATCATCCGCTGTTGCTGAAAGTACTGCACTGGCC  
GAAAACCACGCTGCTGGTGGCGGCGCTTTCGGTGTGACGGTCTCTGGCCGCTCAATAAAGTTGGCGGGGAATTTTTAC  
CGCAGATCAATGAAGGCGACTTGTGTATATGCCATCGACGCTGCCGGGATTTCCGCAGCAGAGGCGGCGAGTATGCTG  
CAAAAAACCGACAAGCTAATTATGAGCGTACCTGAAGTGGCGCGGGTATTTGGCAAAACCGGGAAAGCGGAAACCGCCAC  
CGATTCTGCTCCGCTGGAGATGGTAGAAACGACCATCCAGCTTAAGCCGAGGAGCAGTGGCGGCCAGGCATGACGATGG  
ACAAAATCATTGAGGAACTGGATAACACCGTGGCGGCTGCCGGGGTGGCGAATCTGTGGGTGCCGCCAATTCGTAACCGT  
ATCGATATGCTCTCAACCGCATTAAAAGCCCATCGGCATTAAAGTTTCCGGCACTGTGCTGGCGGATATCGACGCGAT  
GGCTGAGCAAATTGAAGAAGTAGCGCGAACGGTGCCAGGCGTAGCTTCTGCGCTTGCCGAGCGGCTGGAAGGTGGGCGCT  
ATATCAACGTTGAGATTAACCGTGA AAAAGCCGACGTTACGGTATGACGGTGGCGGATGTGCAGTTGTTTGTGACTTCT  
GGGTGGGCGGGCGATGGTTGGCGAAACGGTGAAGGGATTGCCGTTATCCAATTAATCTGCGTTATCCGCAAAGCTG  
GCGGATAGTCCGAGGCACTGCGCCAGCTGCCGATCTGACGCCGATGAAGCAGCAAATCACCTGGCAGACGTGGCCG  
ACATTAAGTCTACCGGACCGTCGATGCTGAAAACCGAGAATGCGCGCCGACGAGCTGGATTTATATCGATGCCCGC  
GATCGTGACATGGTGTGGTGGTTCACGATTTGCAAAAAGCGATAGCTGAAAAGTGCAGTTAAAACCGGCAACGAGCT  
GGCATTCTCCGGGCGAGTTCGAGCTACTGGAGCGGCCAACATAAGCTTAACTCATGGTGCCGATGACGTTGATGATTA  
TCTTCGTGCTGTGATCTGGCTCCGTCGGGTGGCGAAGCGTTGCTGATTATCAGCAGCGTACCGTTTGGCGTGGTG  
GGCGGACTGTGGTTGCTGTGGTGGATGGGCTTTCATCTTCCGTGGCGACGGGCACTGGCTTTATCGCCCTCGCCGGGT  
CGCCGCGAATTTGGCGTGGTGTGATGCTGATGATTTACGTACGCCATAGAGGCCGTGCCGCTGTTGAATAATCCACAAA  
CATTGAGCAGCAGAAGCTGGATGAGGCGTTATATCACGGCGCGTCTGCGCGTGGCGCCGAAAGCGATGACGGTGGCG  
GTGATTATCGCCGCTGCTGCTGCCGATTCTGTGGGAAACGGGGCTGGTTCAGAGGTGATGAGCCGGATTGCCGCGCGAT  
GATTGGCGCATGATCACCGCACCTTGTGCTGCTGTTTATTATCCCGCGGCGTATAAGCTGATGTGGCTGCACCGAC  
ATCGGGTACGGAATAAAAGCAGGATACCCGTTTAAACCGTGTGGATTGTGCTTGGCAGCATGGGCACTAAATGTTAAA  
AGGTGCCCTCAACAAAAAGACACACAGGGAAAGCGTGA AAAACCGTCAACCGTATCGGAAGATACTGCGTGAAT  
CAAGAGCCGACGTTTCATCGCGGATTACATAACCGTCAATTAACCTGATTGCGTTGGGTGGCGCAATTTGGTACTGGTCT  
GTTTCTTGGCATTGGCCCGCGATTACAGATGGCGGGTCCGGCTGATTGCTGGGCTACGGCGTGGCGGGATCATCGCTT  
TCCTGATTATGCGCCAGCTTGGCGAAATGGTGGTGGAGGACCGTATCCGGTTCATTTGCCACTTTGCCTATAAATAC  
TGGGACCGTTTGGCGGCTTCTCTGCTGGAACACTGGGTAATGTTCTGCTGGTGGGAATGGCAGAGCTGACCGC  
TGCGGGCATATATGCAGTACTGGTCCCGGATGTTCCAACGTGATTTGGGCTGCCGCTTCTTTATTATCATCAACG  
CCGTTAACCTGGTGAACGTGCGCTTATATGGCGAAACCGAGTTCTGGTTTGGCTTGATTAAGTGCTGGCAATCATCGGT  
ATGATCGGCTTTGGCCTGTGGCTGCTGTTTTCTGGTACGGCGGCGAGAAAGCCAGTATCGACAACCTTGGCGCTACGG  
TGGTTTTCTCGCCACCGGCTGGAATGGGCTGATTTTGTGCTGGCGGTAATTATGTTCTCCTTGGCGGCTGGAGCTGA  
TTGGGATTACTGCCGCTGAAGCGCGCATCCGGA AAAAAGCATTCCAAAAGCGGTAATCAGGTGGTGTATCGCATCCTG  
CTGTTTTACATCGGTTCACTGGTGGTTTTACTGGCGCTCTATCCGTGGGTGGAAGTGAATCCAACAGTAGCCGTTTTGT  
GATGATTTCCATAATCTCGACAGCAACGTGGTAGCTTCTGCGCTGAACTTCGTCATTCTGGTAGCATCGCTGTCAGTGT  
ATAACAGCGGGTTTTACTCTAACAGCCGATGCTGTTTGGCCTTCTGTGCAGGGTAATGCGCCGAAGTTTTTACTCGC  
GTCAGCCGTCGCGGTGTGCCGATTAACCTGCTGATGCTTTCGGAGCGATCACTTCGCTGGTGGTGTAACTAACTATCT  
GCTGCCGCAAAAAGCGTTTTGGTCTGCTGATGGCGCTGGTGGTAGCAACGCTGCTGTTGAACTGGATTATGATCTGTCTGG  
CGCATCTGCGTTTTCTGTCAGCGATGCGACGTCAGGGCGTGAACACAGTTTAAGGCGCTGCTCTATCCGTTGGCAAC  
TATCTCTGCATTGCCTTCTCGGCATGATTTTGTGCTGATGTGCAGGATGGATGATATGCGCTTGTGAGCGATCCTGCT  
GCCGGTGTGGATTGTATCTGTTTATGGCATTAAAACGCTGCGTGGAAATAAGGCATTACGCTACATCCGCAACAAA  
CGATGTCAACCATCCGAAACCGCTCTCATCCATTGATGAGAGCGGTTTTTTTTAATTACTGTTAAATGCACCCGCCAGA  
GAGCGAATATCATTGCCGTTGGCGACTGATGAAGTCGACAGCAAACTCTTCGACAATCGCAAATATGTGATCGAATAT  
ATCAGCCTGAATGCTTTCATATTCCAGCCACACCAGGTGTTAGTAAACGCGTAGATCTCGAGCGGTA AACCGTTATCAC  
CTGGAGCCAGTTGGCGTACCATTAAGTGCATATCTTTACGAATCCGCGGATGGTTACGCAGATATTGTTGAGATAGGCA  
CGAAAGTTTCAATATTGGTCATTGCGCGCAGATTTAATAACCGACTCCGTAGAACCTTGTGGCGATTCCACTCATTAAT  
TTCCTGATGGCGGCTGGTTAAATAAGGCTTTAACAATGCGCTTATTACAGAGTTGCATTTCTGCTTTCATCAAGAAAAC  
GAATACTGGTGACATCAATACTGATACTGCGCTTAACGTCGCCGCCAGATGCTGACATCCCGCTCCAGTTTTTAAAG  
GAGTCAGAAACAGAGACCAGTGGGAATAGTGGTAATGGTATTGTCCCAGTTACGCACTTTGACGGTGGTTAACCCAAT  
ATCGATCACCGGCCATCCGCGCGTATTTGGCATCTCCAGCCAGTCCCGAGTTTTCAGCATATCGTTCCGCGAAAGCT  
GAATACCTGCCACCAGACCAAGAATCGGATCTTTAAATACCAACATCAGCACGGCAGCCATTGCACCAAGACCGCTGATC  
AGAATCGCTGGCGACTGACCAATCAGCAGCGAGATCATAAAATGCCGACCAGAATCGCGCCGATCAGTTTAAATCCCCTG  
AAATATCCCTTTCAGCGGTAACAGATGCTGCCGGGAATTTCTGCGCCAGATTCAAATAACATCCAGCAACGAGAAGA  
CTGAAAGCAGCGCATAATCATGATCCACAACCTGCGCGCAGGTAGTCAGAATATCTGCCGCTTCCGGTGCCTTTTTGCAGC  
CAGAATACCGCTGAATATTGACGATAATCCCCTGCAGGGTAAAAGCTAAACGGTGGAAAGTTTTATTCTGGGTAATGAT  
TTGCAACCAAAGCCGTGAACCTGGCGATGGCACGTTTTTTCGAAGTCCGAGTACCACCAATGCAAAAATAATATGCACCA  
CGACGGCGGTGAGAAAATAATACGAAAATCATCACCATCGAGGTGGTGTGATCGATCTCAATACCCGCTAAATCTTCA  
ACCTGGGATATTAATCCTGCATAACGCTCCTTTATACAACAGCAGCCTATGATGACGGCTGAAACAGGGTTATGCAA

TCAGGAGAATCTGAGAGGAAATAGCCGGGAGATGCCCGGCAAGAGAGAATTACACTTCGGTTAAGGTGATGTTTTGCGG  
CAGACGAGATTTCCGCGAGCTAGCGTTAAAATCTTCAACGCTGTGATGACCTACCGGAACAACCACCAGACTGGTGTAGC  
CTTTCTCTTTAGACCAAATCTGCATCGAGGATGGCGGCGTCAAACCTTCGATGGGTACCGCGTCCAGACCCAGAGCC  
GCCACGCCGAGCAGGAAGTTACCGACGTTGAGATAAACCTGTTTTGCCATCCACTCTGCATCATCATGCAGATCTTTACG  
GTGCATATCAGCGAAGAACTTGCACCTTTATCGTTCCGCGCTTTCCGCTCCGCGCTGGCAAAGCGGCCATCGGCATCTT  
CCTGGTCAACAACCAGCTTCAGCCAGACATCGTCCATCGCGGTTTTTGCACAGAACACCACGACGTGCGAGGCATCAAGC  
ATTTTACGCTCGTTGAACACGTAATTACCGGCGAGCGGATTTGGCAACACGCGCTTTACCTTCTCCGTGCTGGCAACAAT  
AAAATGCCACGGCTGGGAGTTGGTGTGGATGGGCTGATTGCAGTAGCGTTTTGATCTGCTCGGCCTGTTCCGGGGTAA  
GTTTTTGTGGCATCAAATGCCTTAGTGAATGACGCTTTAAGGCGACAGAAATGATATCCATAAAGACTCCATGTGAA  
AGTAATTTTGCCTGCCAGCAGATTACAAGGTTCAACGAGAAATGGTAAGCGAGAAAAATGCGCTATAGATTTCCGCTTA  
GCCTGGACGCACTCTTTTTGATCGCGTTAGCCAGACCATCAACCACCAGATTCCACGAATCGTTGATCAGATCGCGAA  
GTAACGCTTCGGAGATTTCTTCCGCGGATACACTGAAATCCAGTGCTTTTTATTCATGTGATACCCTGGCTTAATGCTT  
GGGTATATTTGCTGATTTAACAGGGATTTTTGTGGATCGGACTTCAGATTGATAAAGGGGACGCCGCTAGCTCCGACGA  
CAGCATAAAAATCTTCCGCAATTTAAAAACATCGAACTCCGGGCCAAAAGGCCAGCAAAGCTCGACAAAGGGTAACT  
CAAGGGCCAGGCTTTCCGCGTTTTCTGTCAGTGATTGCTTATCCATAAACGTTCTTTAGCGAAGGAGAATAAGCAAAG  
TATGCCCGGAAGTACGGCGATAATCGACGTTAATCCGCCAGCGAGAACCAGCGTCCGAGATAAAGCGAGAAACAAAAT  
ACTCAATAGCGCCAGCACTAAAAACACAGACAAAACAATAAAGTGTAAGCTGACTAAGATCCATCAGATGGAACATG  
GTCACCAGTTTTTGTGCCAGCGCCAGCCAGTGCAGGGGCGGGCAGCAGGCAAGAGAGGAAAGCCATCAGCAAAAAT  
GCCTGCTCGGTGGTCAAGGTTTTCTAAAGGGTGTTCATAACATTGTTAAATGTAAGTTAAAAACCATTGTCAGGGATA  
TTCTTGTGAAGCAATTCGCGTTAGTCAACGGCCAGATCTCACAATGCTTTTTACCAGCCCAATCAGCGAGCCGC  
CATCGGCGACGAAATCGCGCATTAGCTGCGCTTCATTAGACCGCTGACGACCTGGCGATGCAGGGCCTCAATCGCGCTC  
GATGCACCAATTTTATGTGCGGAAGGGGCGATTTTTTCCAGCAATCGCAAGGTATCTTCCGTTAGCGGTCGACGATCTCC  
AGTGTGCGGATCGGTGATGACGCTTCAAGCCATAGCGACAGGCTGGAACCGGTTGAATTTATACAGCAGGTAATCTT  
TTTCTGATGTTAAACGGGCTTCCGTCAGTAACCAGTGGGCGTAGCCTGAATTAATCCCGCCATTTACTGCGTGG  
CTAAGGGTTAACGGGGTATCCATCACCCGAACCTCCACCGTCCAAAATGAGGACTGGGGCAATATCCAGTGCAGATC  
TTAATGCTGTCGATCATCGTGGTGAATCAGACAGCGAAACAGGGCTTCAAATGTTGCCAGTTACTGACCCACGGCA  
TCGGGCCATTATCAGGAAAGCGGAAAAAATATTCGGTCTGAGGAGGCAAAAACGCGTATCCGTTCCCTGCATATATGGC  
GACGCGCGGAAAGGGCGATAAAGTGGCGCAAAATCGTGACAAGCCGTGCAGCAAATAAATGGCGTCATCGCCACTGGC  
GCAGCCAACATGGACATGCTGACCAAAAACGGTCCGCTGCTGAATGAGATAACCAAAGTTTTCCAGCGTGCCTTGATAGC  
GTTGCTTATCGCATACCTCCTGACGCTGCCATTTCTGAAAACGGGTGCGTGCCACCGCCGCAAAATTTCCAGATGATGGTCT  
GTGGCTGCCTGCAATACGACTTTCTGCATCGCTGAAAACCTGCCGGCAGCCTGGTTGATATCACGGCAACATCCGTGCG  
CAGCTCCAGCATACTTTCCGTTGATATCGTGTCTTACCTCTCCGGCCGTGATCTTATTTTTAACCGCGTCAATCAGCATTG  
AAGAGTCCGCTTAAGTCATAGCCCGGCGGATTAACCACCTGCATTTCCAGTTCAATACCAGGGTAAAAGGTTGAGAA  
ACATGAAAATCGGGTAATGGCATAGGTTTTCTTATGTTGGGTTTTCTATTAGTATAGAAGTCGGAGCGGCTGGGCGA  
GATGCGGAAGTTCTGGAATGTTTTTTTTTGGTATGGTGAAGTATGTTGCTGAAGCAATTTGGCTACTTTTGCAA  
TGTGACAAGTTATGGCAGTGTGACTGGTGGCGAAGAATTTTACGATTGAGTCATGCAGAAAAAACGGGTTGAGCTTC  
AGTTGATTAATGAGGAGTGAGAAGTCCGAAACAGGACTCACTGTATAAATAAACAGCTATTTTGTGAGGAAGGGTAAAG  
ATAACGGCGGGTGCCTGAAGCTTTCCGGTTTTAGGTTTACTCTGAGGCTGGAAGATGAAGCCCAGGAGATATTTCTA  
TCAACCCTGGGCTGCCATCCAAACCGAACAATTTGGATGGTAGTCCCTTCTCGCATGGAGGCAATAAACAATGCT  
GACGAAATATGCCCTTCCGCGAGTATAGTGTGTTTAAACGGTGTGGGATTTACGCTTCTGGTGGGACTCGTGT  
GTGAGTTTTACGGTGAAGGAACGTAATATTGAGTTTTAAGGCTGTTCTCGCTTACGAACCGAAGAGTAGCCGTTGTGCGGG  
GAGTAATCCATAAAGCGCTAACTTAAGGGTTGTGGTATTACGCTGATATGATTTAACGTGCCGATGAATTAATCTCACG  
ATAACTGGTCAGCAATTTGGCCCATATTGGTAAGCCGAAAGAACTGGATACTTCGGCACGTAATGCCGGGGCTCTAACCC  
CGCCCGCGGAAATTCGTGATGCTGCAACTCTGCTACGCTGCGGCTGGCTTACGGCCCGGGGGGATGTCATTACGTGA  
AGTCACTGCATGGGCTCAGCTCCATGACGTTGCAACATTATCTGACGTGGCTCTCTGAAGCGGCTGCGGAATGCCGCCG  
ACTGGTTTGGCATACTTCCGCAACAACACTTGTGTACGCGCCGAGTTACGGGTTGTACAAGCGGAAAGAGATTGCGT  
CTTGTGATGGAACAGCAATCAGTGCGCCGGGGGCGGAGCGCTGAATGGCGACTACATATGGGATATGATCCTCATA  
CTGTCAGTTCACTGATTTTGTAGCTAACCGACAGCAGAGACGCTGAACGGCTGGACCGATTTGCGCAAACGGCAGACGAGA  
TACGCAATTGCTGACCGGGGATTCGGTTCGCTCCCGAATGTATCCGCTCACTGCTTTTGGAGAAGCTGATTATATCGTC  
CGGGTCACTGGCAGGATTGCGCTGGTTAACTGCAGAAGGAATGCGCTTTGACATGATGGTTTTCTGCGCGGGCTGGA  
TTGCGGTAAGAACGGTGAACCACTGTAATGATAGGCAATTCAGTAATAAAAAAGCCGGAGCTCCCTTTCCGGCACGTC  
TCATTGCCGATCACTTCTCCGAAAAAGCATTAACTAGTAAAACCGACTGCTCAGCGAGAATCGTCGAAAAGGACGA  
GTAGTTGAGCGGAAACGCTGGAAGCAGCGGGCCATGTGCTATTGCTAACATCATTACCGAAGATGAATATTCAGCAGA  
GCAAGTGGCTGATTGTTACCGTCTGCGATGGCAAATGAACTGGCTTTAAGCGGCTCAAAGTTTTGCTGCACCTGGATG  
CTTTGCGTGCAAAGGAACCTGAACTCGCGAAAGCGTGGATATTTGCTAATCTACTCGCCGATTTTTAATTGACGACATA  
ATCCAGCCATCGCTGGATTTCCCCCAGAAAGTCCGGATCCGAAAGAAAGAACTAACTCGTTGTGGAGAATAACAAAAA



TGGTCATCTGGAGCTTACAGGTGGCCATTCTGTTGGACAGTATCCCTGACAGCCTACAAAACGCAATTGAAGAACGCGAGG  
CATCGTCTTAACGAGGCACCGAGGCGTCGATTCTCAGATGGTTCAACCCTTAAGTTAGCGCTTATGGGAGTAATCCCC  
GCATATCCGGTTGTCAGGTGAGGATGGTAAGGCACCTGCTTTACACTTTCCGCCGTGGTCAGTGATGGTGCAGGCGAAT  
CGTACCAGATGTTGTCAATTAATCGTGTGGCACAGCGTTATGACTATCTTTCTTTTATCTGCCAGTGACAGCAAACA  
TCTCATTCTACAGATGAATGATGACCTGCTGTTTATTCCAGCTAATTATCTGATAGTCCAGAAAACCTGCATCAGTTTGG  
ATCTCACTTGCCTTAAATGCGCTCTCTTTGGCGGAAAATGCCAGTGTGACGCGCCAGAGAAAAGGCTAAACCCGAGTCTGC  
GAGTCGCTCGTGTCCGCTGGTGTAAATGTTGTCTGTCAATTCTTTCGGTGTGTACAGAAAAAATTTCTTCTATAT  
CAATGCCAATCGGTTGACGAGATACCACGGCTAATGCCGTAGTCCCACAGTGGCTAATACTGCCGTATACCTCCGACGGC  
CAGACAGGTTGGCGTAGCTCGCCGATTGGCGGCACACATTTATAGCCATATTTCCCGCAAAGCATAAACAGCAGCGATCCG  
TCCGGCTAAATGCTCTGTTTACGTTTACGTCCAGCGTGTTCAGTGTGCGTAGTGCGGCAGCCAGAGTAAATCCTGCT  
CACAAAAATTCGCCGGATCGAACTCAACAAAATGCAGCGTATGTCGGCAAAGGGGAGGGAGGTATGCGTAGTTTTATA  
TCGACCATATTCGAGACTGATGACAAACGCAAACTGCCTGATGCGCTACGCTTATCAGGCCTACATGGTCTGCAATAT  
ATTGAATTGGCAAGATTTTTGTAGGCCGATAAAGCGTTTACGCCGATCCGGCATGAACGACGCGCACTTTGTCAACAA  
TCTGACGTTAGCATCAGAAGTGGGTGTTACGCTCATATACCAGTACGTCGCCGCTCGTTATAGGTATACGCCCGGCA  
CCGGCGATATAGTTGGCCCTGCCAAATCGCCGTTCTGGGCATTACCCGCACGCCAACAAACGTTTGTGCAACAGATT  
GTCCACGCGCCGTCAGACTGACATTTCTGTCACATCCAGTCCGCGCTCAGGCCAACAAATGCTGAAGGACTAATTT  
CTTTGGTTTTCCGGTCCAACCGCTGGCTGACCTTTATAGTTGTACTTCTTCGGCTGCTGCTTCCGCTACCGGTGAAGGTC  
GTTTGCATCGACAAATCTTCCCGTGCCTGCCAGCTCAGCGTTGAGTTCAACGTATACTCCGGGATGATCGACAAACGGTC  
GCCCCGTTGTTTTGTTTTCACTCTTTCAGCATATAAGTGTATTGGTCCACATCACCGTTTTCGTAACCCGTACGTTTA  
ACGATCCTTCCAGACCTTCAACCACCGCTTTCCGGCACGTTATCCCACTGATAGAGATCGGTGCCGACTGCGTTTTGCCCT  
ACAGCCACATAGCCCGTCAATCTTATTGCGATAATCGTTACGGAACAGGTGACGCCGCCAGCCACCCGTCGCGTTT  
GAACTCCAGACCAATCTCTTTGTTGATGCTGTTTTCTGTTTTAGGTCATCGTTACCTTGCAGATAGCAGCCGCCCGCGC  
TGGCATAGCAACCCTGACCTTACTGTAGAGAATGTAGTTCCGGTTAGTCTGGTACAGGCTCGGCGCTTTATAAGCACGG  
GCGATGCCATTTTCAGCGTGAAGTCATCGCTAAACCTTGCATATGTTACGCGCCGGGCTCCAGTTATTGCCGACAAT  
ACTGTGATGATCGAAACGACGCCCCGGGCTACGATGGTGTGCTCAGTCAGCTCCATGTTGTTTTCCGGCAAACAGCGAGA  
AAATTTCTGTTTTGAATACGGGCTACGGTCCGGTACTCACGCCATCAATAGCGCCACCGGTATTCGTTCCGGTCAGT  
GCCTGGGTGTTGGAACCTAAGTCTTCATCCGTTGCTGATTCCAATCCGTACCAGCGTCAGCGTCTGGTTAACGAGGAA  
ATCAATCGGCAGGTTAATTCGCTGTGACGATCACGTCATCAAGATCGATATCGACGAAATCCTGTGTCGTTTTTTCGT  
TAAATTTCCCTTCGGTACCGCCCGCCAGACCTTCCGGAATACGCGAGTTACGGGTGTGTTCTGTAAGTCCAGTTGCTG  
GTGGTCACGCCGTTATCCAGCCACCGTTCCAGGTGACGCGTAGTTCTGGCGATACAGACCGTTGGTTTCATCGCCATA  
TTTCCAGCGGGTATAGGAATCGGAGTTGGTATTCTGGGTGTCGCCCGCATACAGGTTACCTTGGCGGCTGTAACCTGCTT  
CCAGTTCCAGCGATTGCAATGGCGCGAAATCCCAGCGCACCCAGCCATTAATATCTTTGTTGATTACCCCTTCCGCGCCG  
GCTGGTAACGTCGTGGCATACTTCCGGCACGCGCGGACTGATGGCCCTGGTTGATATCCACGCGTCAGCCTGGGTTTT  
GTCGAGGTTGCCATACAAACGGAAGCTGAATTCGTCGCCAGCGGACCGGTGAGGCTAAAGTTAGTGCCTTTGGTGGCAC  
CTTCTCTTTATGTTCTGGCGCATTGAAATATGCGTCCCAGGAGCCGTGCCACTCGCCGCTGCCTTTTTTGGTAATGATG  
TTAACACGCCCGCCCGCGCCGTTGCCATAACGCGCAGCTGCCGACCCAGCAGAACTCAATACGTTCAATCATTTT  
AGGTGGCACCCAGGAAGTATCACACGGGTATCGCGCTCGCCAGCCAGCCCTGACGCACCGAGTTACGGCTGCTTACCG  
GCTTCCGTCATCAAAATCAGCGTGTTCGCGACCCATACCGCAATATCAATCTGTGCTTATTCACCGCTGACCA  
CTGGTGGAGTTACCGGTGAGTTAACGCTGGCATGGTACGGATGATCTTCGACACATCGCGGGCAACCGGTTTTTGGC  
GATTTTCATCTGCGGTGATGGTCAAACGCCAGCGCCTGTAAGTTCTGCTCGCGCGGTAACGACAATGATATCGTCAT  
GTGAAACAGGAGTATCGGTGCGCTCTTGTGCTGCGCTACCCATAAATCCCAAGATTGACCAACAAGCCAGGGAATGA  
ATCTTCTGTTGTTGTTTATTCTGCAATTTTGGCCAGAAATGCAACTGTGCGGCATGGTGTGATCAACACGACGCA  
TCCCGCTACCGCGAAAACCTTTGATCCTGAAAGACACGAGTGCAGTTGGTTAATTAATGTCCGCGCTTCCACGGCGCG  
CCATTACGCTATTGCAAATGCAAATAGTTATCAATAATATTATCAATATATTTCTGCAATCAATGAAAAATTCACAGTA  
AACATGGGGTTATGGTGTGACGGCGTTAAAAGTAGGAAGTGAAGCTGGTGGCAGTCGAAACATGGCCCGGAATGGCAGC  
GTCTGAATGACGAAATGTTTGGGTCATTTCTGGTGGCGTATCCCAAGTTCTGAAGAATACTCGACGATAAAGCGC  
GTATGGGTCTACATCACTGGTGTGACCGATCACCATCAGAACAGCCAGCCCCAGTCGATGCAGCGAATTGCAGGCACTAA  
CGTCTGGCAGTGGACGACAACTCAATGCCAATGGCGCGGAGCTACTGCTTTATTCACCGAAGCGGATGACATTT  
TTTCTGTACCATCCCCGATCGCTCGAATTGCGCGAAGGCTGGCGAAAATATTACCCAGGCGATAGCCGATCCGCTG  
AACCTACAAAGCTGGAAGGCGGGCGAGGCGACGCTGTTTCTGCACTCGAAATGCCGCAAGCGCTCTGCAACCGGGATG  
GGATTTTCCGCAAGCGCCAGAAATACCTGCCAAAGAAATATCTGAAAAGTGAACGGTTGAAAAGTACGGCGGTGAT  
GGATTTTTACCACCGCGATGCAACAGCAGAAGAACGCCGCTGGCAGTTTTGCTCGATGGCGAATTTTGGCGCAAAGT  
ATGCCCGTCTGCCAGTGTGACTTCCGCTGACCCATCGTCAGCAACTTCTCCCGCGTGTATGTGTTGATGACGCTAT  
CGACACCACGACCCGCGCCACGAACTGCCGTGTAATGCGGATTTCTGGCTCGCAGTACAGCAAGAGTTATTACCCCTGG  
TGAAAGCTATTGCCCTTTTAGCGATCGTCCGATCGCACCGTGGTTGCCGGGCGAGTTTTGGTGGGCTTTCCGCGCTG  
TATGCCGACTGCACTGGCTGAACGCTTTGGCTGTGATTAAGCCAGTCAGGATCGTACTGGTGGCCGATCGGGCGCG

GCAGCAAGAGGGCGTGTACTTGAAAAGCTAAAAGCTGGTGAAGTTAGCGCCGAAGGTCTGCGCATTGTGCTGGAAGCGG  
GTATTCGCGAGCCGATGATCATGCGGGCCAATCAGGCGCTGTATGCGCAATTACACCCATAAAAAGAATCCATTTTCTGG  
CGTCAGGTTGACGGCGGACATGATGCGCTTTGTTGGCGCGGTGGCTTGATGCAGGGGCTAATCGACCTCTGGCAACCACT  
TTCCATGACAGGAGTTGAATATGGCATTAGTAATCCCTTCGATGATCCGACAGGGAGCGTTTTACATATTGCGCAATGC  
GCAGGGGCAATTCAGTCTGTGGCCGCAACAATGCGTCTTACCGGCAGGCTGGGACATTGTGTGTCAGCCGCACTCACAGG  
CGTCTGCCAGCAGTGGCTGGAAGCCCACTGGCGTACTCTGACACCGACGAATTTTACCCAGTTGACAGGAGGCACAATGA  
GCCAGCATTTACCTTTGGTCGCGCACAGCCCGCATCTGGATGGCAGAAAACTGTCAGAATTACCTCCGCTGGAGC  
GTGGCGCATTACGTTGAGTTAACCGGAGAGGTTGATTGCGCATTACTGGCCCGCGCGTGGTTGCCGGACTAGCGCAAGC  
AGATACGCTGCGGATGCGTTTTACGGAAGATAACGGCGAAGTCTGGCAGTGGGTGATGATGCGCTGACGTTTGAAGTGC  
CAGAAATTATCGACTACGAACCAACATTGATCCGACGCTACTGCGCAGGCATTAATGCAGGCGGATTTGCAACAAGAT  
CTGCGCGTCGATAGCGGTAACCACTGGTCTTTTATCAGCTGATACAGGTGGCGGATAACCGCTGGTACTGGTATCAGCG  
TTATACCATTGCTGGTCGATGGCTTAGTTTTCCCGCCATTACCGCCAGATCGCAATATTTACTGCACATGGCTGC  
GTGGCGAACCAACGCCTGCTTCCGCAATTTACGCTTTCGCTGATGATGAGTGAAGAGTACCAGCAATACCAGCAAGCGAA  
GCCTGGCAGCGTATGCGGCATTCTGGGCAGAACAGCGTGTCAACTGCGCCGCGCGCTCACTTTCTCCGCGACCTTT  
ACCGGGCGCAGCGCTCGGCAGATATTCTGCGCTGAACTGGAATTTACCAGCGGGAATTCGCGCAGCTGGTACGC  
AACTTTTCAAGTGTGCAGCGTACCGATTTAGCCCTTTCGCTGGCAGCCTTGTGGCTGGGGCGATTGTGCAATCGTATGGAC  
TACGCCCGCGATTTATCTTTATGCGTCGACTGGGCTCGGCGCGCTGACGCGTACCAGCCCGTGTCAACGTTTTGCC  
GTTGGGATTACATTGCGCGCAAGAACGCTGCCGGAATGGCAACCCGACTGGCAGCACAACTGAAAAAATGCGTC  
GTCATCAACGTTACGATGCCGAACAAATTGTCCGTGACAGCGGGCGAGCGGAGGTGATGAACCGCTGTTTGGTCCGGTA  
CTCAATATCAAGGTTTTGATTACCAACTGGATATTCTGATGTTAGGCGCAAACCCATACCCTGGCAACCGGTCCGGT  
TAATGACCTTGAAGTGGCCCTGTTCCCGGATGTACACGGTATTGAGTATTGAGATCCTCGCAATAAACAGCGTTACG  
ATGAGCCAACGTTAATCCAGCATGCTGAACGCCTGAAATGCTGATTGCCAGTTTCCGCGGATCCGGCGCTGTTGTGC  
GGCGATGTCGATATTATGCTGCCAGGTGAGTATGCGCAGCTGGCGCAGCTCAACGCCACTCAGGTTGAGATTCCAGAAAC  
CACGCTTAGCGCGCTGGTGGCAGAACAAGCGGCAAAAAACCCGGATGCTCCGGCGCTGGCAGATGCGCGTTACCTGTTCA  
GCTATCGGAAATGCGCGAGCAGGTGGTGGCGTGGCAATCTGCTGCGTGAGCGCGGCTTAAACCAGGGGACAGCGTG  
GCGGTGGCACTACCGCGCTCGTCTTTTTGACCCTGGCACTCCATGCGATAGTTGAAGCTGGAGCGGCTGGCTACCGCT  
GGATACCGGTATCCGGACGATCGCTGAAATGATGCTGGAAGATGCGCGTCCGTCGCTGTTAATTACCACCGACGATC  
AACTGCCGCGCTTTAGCGATGTTCCCAATTTAACAAGCCTTTGCTATAACGCCCGCTTACACCGCAGGGCAGTGGCCG  
CTGCAACTTTACAACCGCATCACACGGCTTATATCATCTTTACCTCTGGCTCCACCGGCAGGCCGAAAGGGGTAATGGT  
CGGCAGACGGCTATCGTCAACCGCTGCTTTGGATGCAAAATCATTATCCGCTTACAGGGCAAGATGTCGTTGCCAAA  
AAACGCCGTGACGTTTTGATGTCTCGGTGTTGGAGTTTTTCTGGCCGTTTATCGCAGGGGCAAACTGGTGTGGTGA  
CCGGAAGCGCACCGCGACCCGCTCGCTATGCAGCAATTTTGGCCGAATATGGCGTAACGACCACGCACTTTGTGCCGTC  
GATGCTGGCGGATTTGTTGCTCGCTGACGCCGCAACCGCTCGCCAGAGTTGCGCGAGTTGAAACAGGTTTTCTGTA  
GTGGTGAGGCTTACCGCTGATTTATGCCGCAATGGCAACAGTTAACTGGCGCGCGTTGCATAATCTATATGGCCCG  
ACGGAAGCGGCGGTAGATGTCAGCTGGTATCCGGCTTTTGGCGAGGAACTGGCACAGGTGCGCGGAGCAGTGTGCCGAT  
TGTTATCCGGTATGGAATACGGGTCTGCGTATTCTTATGCGATGATGCATCCGGTCCGCGCGGTTGGCGGGTATC  
TCTATCTACTGGCATTCAACTGGCGCAGGGCTATCTCGACGCCCGATCTGACCGCCAGCCGCTTTATTGCCGATCT  
TTTGCCCGAGTGAACGGATGTACCGTACCGGAGACGTTGCCCGCTGGTGGATAACGGCGCGGTGGAGTACCTCGGGC  
CAGTGATGATCAGTAAAAATTCGCGGGCAGCGTATCGAACTGGCGAAATCGATCGGTGATGCAGGCGCTGCCGGAT  
TCGAACAAGCGTTACCCACGCCTGTGTATTAACCAAGCGGCTGCCACCGTGGTGTGATGCGCGTCAATTGGTGGGCTAT  
CTGGTGTGCAATCGGGCTGCCGTTGGATACCAGCGCATTGCAAGCGCAGCTTCGTGAAACATTGCCACCACATATGGT  
ACCGGTGGTTCTGCTGCAACTTCCACAGTTACCACTTAGCGCCAACGGCAAGCTGGATCGCAAAGCCTTACCGTTGCCG  
AACTGAAGGCAACAAGCGCCAGGGCGTGCGCCGAAAGCGGGCAGTGAACGATTATCGCCGCGGCACTTCTCGTCGTTGCTG  
GGGTGTGACGTGACGATGCCGATGCTGATTTCTTCCGCTTGGCGGTCATTGCTACTGGCAATGAACTGGCAGCGCA  
GTTAAGTGGCAGGTTGCCCGCAGGTGACGCCGGGCAAGTGTGGTGCAGTCAACTGTCGCAAACTGGCAACGATTA  
TTGATGCTGAAGAAGACAGCACCCGGCGTATGGGATTCGAAACCACTTCTGCCGTTGCGTGAAGGTAATGGCCGACGCTG  
TTTTGTTTCCATCCTGCGTCCGTTTTGCTGGCAGTTCAGCGTCTCTCGGTTATCTCGATCCACAATGGTCGATTAT  
CGGCATTAGTACCAGCGCCCAATGGCCCATGACAGCGCGGCAACCTGGATGAAGTCTGCGAAGCGCATCTGGCAA  
CGTTACTTGAACAACAACCGCATGGCCCTTATTACCTGCTGGGTATTCCCTTGGCGGTACGCTGGCGCAGGGTATTGCG  
GCGGACTGCGTGCCCGTGGCGAACAGGTGGCATTCTTGGCTTGTGGATACTGGCCCGCAGAAACGCAAACTGGCA  
GGAAAAAGAAGCTAATGGTCTGACCCGGAAGTGTGGCGGAGATTAACCGCAACGCGAGGCCTTCTGGCAGCACAGC  
AGGGAAGTACTTCAACGGAGTTGTTTACCACCAATTGAAGGCAACTACGCTGATGCTGTGCGCTGCTGACGACTGCTCAT  
AGCGTACCGTTTACCGTAAAGCGACGCTGTTTGTGCTGAACGCACACTTACGGAAGGTATGAGTCCCGAACGCGCCTG  
GTCGCCGTGGATAGCGGAGCTGGATATCTATCGTACGAGATTGTGGCATGTGGATATTATCTTCCAGGGACGTTTAAAA  
AAATTGGGCCGATTATTCGCGCAACGCTAAACAGGTAATTAATATTATTTATAAACCCATAATTACAGAAAAATAATTAT  
GGTTTTTTATTTGTTTATAGGTTTATAGGTTTATAGGTTTATAGGTTTATAGGTTTATAGGTTTATAGGTTTATAGGTTT

TTACAACTTCAGCTTCGGATAATTATCACCAACTGGTAAAGTGAGCGCCGTGGAGATTTCCCCTATTGACTCATTTT  
CAGGTTATACCCCATGTCATCACTGAATATTAACAGGGAAGTGACGCTCATTTTCCCATTATCCTCTGGCGTCGCCCA  
GTAATAATGAAATTGATTTACTTAATCTAATCTCAGTTTTATGGCGGGCCAAAAAACGGTCATGGCGGTGTTTTTGGC  
TTTGCTGCGCAGGCTTGTCTGATCTCTTTCATCCTGCCGCAAAAATGGACCAGCGCGGGTGTGCACGCTCCAGAACC  
TGTTCAAGTGGCAAGAGTTGGAGAAATCATCTACTAAGCTTCGTGTGCTGGATCTGGATATCAAAATGATCGTACAGAAG  
CATTTAACCTGTTTATCAAGAAATTCAGTCGGTTAGCTTGTCTGGAAAGTACCTGCGTTCATCACCTTATGTGATGGAC  
CAATTAAGAGAGGCGAAAATCGACGAACCTGGATTTGCATCGCGCAATTGTGCGATTGAGCGAAAAATGAAAGCGGTTGA  
TGACAATGCCAGTAAGAAAAAGATGAACCGTCACTGTATACCTCCTGGACGCTAAGTTTTACCGCGCAACCAGTGAAG  
AGGCGCAGACCGTTTTGAGCGGGTATATCGATTATATCTCTACGTTGGTGGTGAAGAGTCGCTAGAAAACTCCGTAAT  
AACTGGAGATCAAAACCGATTTGAAAAAGAAAACTGGCTCAGGATCGCATTAAACGAAAAATCAACTTGATGCAAA  
CATTAGCGCTCAATTATCTACTCGACATTGCCAACGCGGCAGGAATTAAGAACCCGTTTACAGTAATGGTCAGGCCG  
TTAAAGATGACCCGATTTTTCTATTTCTCTCGGTGAGACGGTATTGAACGCAAACTGAAAAAGAAAAAGCGGCTACT  
GACGTTGCGGAACTGAACGGTGAATTACGTAATCGGCAGTATCTTGTGAGCAATTAACAAAAACATGTCAACGATGT  
GAATTTTACCGCTTAAATATCAGTTAAGCCCGTATTGCCAGTAAAAAGACGGTCCGGGTAAGGCGATTATTGTGA  
TCCTTTCCGCTTGTGATCGCGGGATGGTGGCTTGTGGTGGCGTGTGGCTATGCGATGGCATCCAGAAAAACGGTAT  
GCCATGATGGCAGACCACTTAACTTAACTATTTGCGGTTGAAGGTGCCGTTCCGTCGAGCGGCACCACAAGCGGGCTTCC  
GGCAACTGGATCGTCAATGATCATGCAGCGCAGACCATAAATGCGCTCAATCAGTTTACGAGTGACAATCTCCTTCGGCG  
CTCCTGAGCAACAATTTCCCTTCCCGCAATGCAATCAAATGGCTGGCGTAACGACAGGCCTGATTAAGATCGTGCAGC  
ACCGCCGCCAGGTTATAGCTTTTTGCGGTTTCACTTCCGTTAACAACCTCCAGCAAATCAATCTGATGACTGATATCCAG  
CCAGGTCGTGGGTTCTGTCGAGCAGCATAATTGCCGTTTCTGGGCCAGCACCATCGCGATCCAGCTCGTGGCGTTGTC  
CGCCAGAAAGGTTATCCACGCTTGTGATCTGCCAGATGAGTTATCCCGTGGCTGCATTGCTTTGTTACCGCTTCTTCA  
TCCTTTTGGCCAGCGGTTAAACAGCGGTTGATGCGGATAACGTCCACGCGCCACCAGCTCCTGCACGGTATATCGCC  
CGGCGTGGTAGATTTTGGCCAACAGACCAATCCGGCGTGAACCTCTTACTGGCGTAATGTTGAATGTGCTCGCCAT  
CCAGCCAGACATGCCATGAGCAGGCGTATCAGGCGGCTAAGTACGAGTAACTGGATTTTACCGCAGCATTGTC  
CCGATAATTGCCGTGAAGTACCATCAGTATTTTCTACAGTCAAGTTTCCGCAACGGTATATTTGCCATATCCAGGGT  
TAACTGTTCCGCGCAACGGGCTACTGATTCGGTCATTTTTTCGAGACTCCTGAATTAACAAGACGATAAGGTAAT  
ACCGCCGAGGTCGACGTTAACGACGCCAACCGGAAGTTGATACGCATAAACAGTTGTTGGGCGCAGAGATCGGCCGCCA  
GCAGTAACAGCGCCCCGATAGCGCCGCTGGGTTAGCCCCAGCGAGCGGTGCCGTAATGCGTCCGGCAATGTGCGGT  
GGACTAAAGCAATAAAGGAAATCGGCCCGGCAAGCGCTGTTGCCGAGCGGTAAAGCACCCTGCAACCAGCATCATTAA  
CAGACGCGAACGTTTCCAGCGTACGCCAGCGCACAGCGGTATCATCGCCATTTCCAGCAAGCGCATCCGGCGTACCA  
GTAAGGCGGGCAATGAGCATCAATATAATGATGGGTGCGGAAGGCGAGGTTTTTGGCCAGTCCAGGCGTTGAGCGAT  
CCGGCATTCCACAAACCTGCTGTTAGCGCCGTTTCTAAAGACGCTTTCAGCAACAGCCAGGTATTAAGGCCACCAGCAT  
GGCGCAACGCCGATACCGATAATAATCAACCGAAAGGTGTCGATGCCGTTGCCGAGGCGAGCAGCCAGACCAGCAGCG  
AAGTGACAATGCCGCCACCATTGCTGACAGCGCGATAGCCGTGAGGTCCTGACCAAACAGCACCATCGCCACCAGCAGC  
CCGCTCCAGCCCCGGTGTAAAGCCATTACGTGAGGCTGCCGAGCGGTTACGCATCAGCGACTGAAAAATCGCGCC  
ACTGACGCCAGTGTGCGCAATCAACAGCGCCATCAGCAGCGGTGTAACGCCATTGCGTACCACCATCGTCATAC  
TGCGCGGCGCATCGCCATCAGCGCGGCAATACCTGCGAGGTTCCAGCGTACGGCACCGCTGCGTAATCCCAGATA  
CCTGCAACCACAGGCGGAAACAGCAGCAACAGGTGATGAGTAATCGGCGAGAGACGTAATCATGCACCACCTCGC  
GTTTTACGTGCGCAGGAAAGATCAGCACCGGTGCACCAATAAACGCCTGACACAGAAACGCGCAGTTCGCCGGGCAC  
AATCACCCGCGGATGATATCGGCAAAACAGCAGCAGGCGAGGGTAGCAAGTAGCGTGACGGGCAGCGCAGCAGCGATGAT  
CGCACCCACCAGCCAACGCGCCATATGCGGCATCATCAGGCCAATAAAGGCAATCGGGCCAACTATTGCCGTGCGACTA  
CCACAAAGCAGGTAATCGCCAGCAGACCAATCAACTGTGTGCGCGCCACGCGACTGCCAGCGCGTGCGGTGTGCT  
GCCGAGGCTCAAATGTTACGCGCGACTCAGTAATAGCGAGTTGCTCCGGCGATCAGCACCGGGATCAGCACCCTT  
TTAAGGTATGTAGATTGCGAATATCCAGCGAACCGGCTTCCAGAAACGCAACTGATCGTAGACGTGAGGATTAAGCAGG  
GCGATGCCGCTGGTCACTTCCAGCACCGCGCCAGCGCCAGCCGCGGTTAAACGCACCGGACTTAACTGCC  
GCCGCCCTGACTGCCGTAAGGCAACAATCAATGAGGCCACCAGCGCCCCGGCGAAGGCCATCGCCAGTTGTTCTGCG  
CGGAAGAGTAACCAACAGCGCCGACCCAGCACAATGGCAAAGTGGCTCCGGCGTTCACGCCAAGCAAGCGGGTTCG  
GCAAGTGGGTTTTGGGTGAGGTTTTGCATTAACGCCCGGCAAGGCCAAGCGCGCCGCTGCCAGTAACCGGCAAGGTT  
ACGCGGCAGCCGCGGTGAGCAGCATGGTGCAGTGGCGCTCTGGCAGGTGCCGAGAAGGCTCCAGCACTACGGAAG  
CGGGAGTGATTTTCCCAATGAGCAGGCTTAAATGCCGTGCGATAATCAGTAATAACAGCAATCCGGGCAGGCAATG  
GCGGTGTACGGCAACAGAACCAGACATACGAATCCATGATAATGAAATTAATTATCGTTATCGATCTTATTTGGAT  
ATGTTAGCATGTGACGCTAAGAATAGGTATTTAAATATTTGATGGCAAGGCATTGTAATGAATAAACAATCCTGGCTG  
CTTAACCTCAGCTGTTGAAACGCACCCGGCGTTTTGCGCGAGTATTCCTCGCTCGTTTATCTCAATTGTGCTCTGGG  
TTTGCTCGGCTGCGGGTGGCGGTGAGATCCAGATGATGACACATTCACCTGGCAGGTGGGGCTTTGGGTGACGCTGA  
CCGGCGGCGGATGTTTGTGGCTGATGGTCCGGCGTGTGCTGGCGGATCGCTATGAGCGCAAAAAGTGATTTTGTG  
GCGCGGCGCACCTGTGGCATTGGCTTCAATGGACTGTGCTTAAATGCACTGCTGCCGAGCCGTCATTGCTGGCAATCTA

TTTACTTGGTTTATGGGATGGTTTTTTCGCATCGCTTGGCGTTACGGCGCTATTGGCGGCGACACCAGCACTGGTAGGGC  
GTGAAAACCTAATGCAGGCCGGGGCGATCACCATGTTGACCGTGCCTGGGGTGGGTGATTCGCCCATGATTGGCGGT  
TTATTGCTGGCGACCGGTGGCGTAGCCTGGAACACGGGCTGGCGGCGGGGCGGACGTTTATTACCTTGTACCGTTGTT  
AAGCCTTCCGCGCTTGCACCGCCACCAGCCGCTGAGCATCCGTTGAAATCATTACTGGCAGGATTCGTTTTCTGC  
TTGCCAGCCCCGCTGGTGGCGGGGATTGCGCTGCTGGGTGGTTTATTGACGATGGCGAGCGCGGTGCGGGTACTGTATCCG  
GCGTGGCTGACAACTGGCAGATGTCAGCGGCACAGATTGTTTTCTCTACGCGGCGATCCCGCTCGGCGCGGCTATTGG  
TGCCTTAACCAGCGGGAAGCTGGCACATAGTGCAGCAGCAGGGTATTGATGCTGCTCTCCACGCTGGGATCGTTCCCTCG  
CCATTGGTCTGTTTGGCCTGATGCCGATGTGGATTTTAGGCGTGGTTTGTCTGGCGCTGTTCCGGCTGGTTGAGTGGCGTC  
AGCTCGTTGCTGCAATACACAATGCTGCAAAACGCAACCCCGAAAGCGATGTTAGGGCGGATTAACGGTTTGTGGACGGC  
GCAGAACGTGACGGGCGATGCCATAGGCGCGGCGCTGCTGGTGGTTTGGGCGCGATGATGACACCGGTTGCTTCCGCAA  
GCGCGAGCGGTTTTGTTTTGTTGATTATCGGCGTGTGTTATTGCTGGTGTGGTGGAGTTGCGACATTTCCGCCAGACG  
CCGCCGAGGTGACAGCGTCCGACAGTAAATGCTTAAACAGCGCCTAAGCCTATCCAGCACTTGCATGGCGCTGTAGT  
AATCCAGACGGAACGTCTCGGTTCCAGCGCATAAACCTGCTTGTGTTTGTACTGCAGGCAGGTGCGGAGCAGCGGATTA  
GCATAAATAGCATCGGCATCTTTCTGATCACCGGCGAACAGGAATAGTGACTGCCATTTAACCTGCAGCCAGATTTTC  
CCCACCAAGCTGAATGATGTCATGGCGTTTACCCTGACTTTGGCTGGCATTAAACCCTGCGGGTAACTTCGCCAGCTAA  
AGCCGAGTTGTTCCAGCATCTGCCCTTGTGCTGATTCTGGCGTCCAGAGATTGGCACTGTGTGCAGCGGCGATAGACA  
ATGGCAGTGACCGGCTGCGCGGTAATTTGATTTGCTTTTCGCCGCCAGTTGCTTATCAAACCTGCGCAATCCGCTC  
TGCCGCTTGTCTCATGCCCGTAATTTCCGCAAGTTGCGTAAACAGCGACTGCCAGTTTTGTGCTGCTAATTGATGA  
TTAATGTGGGGCGATGGTGGAAAGCTGATCATAAGTGCAGCGCCGAATCCCGCGGTTGCGCTAATTAATCAGA  
TCCGGCATTTCGCGCGCAACGGCTTCGGCGCTCGTTTCGCCGATATAGAGCCGTTGAGTTTGGCTTCTTTCGCCACCTT  
GCTCCACTGGCGTAAAAGCCCTGGTATCCGCGACCGGTTATTGCGGTGGTTCGCGCGCTGGCGATCACCAGGAT  
CAATCGCCAGCAGTGAGCCGGTCAAGGTGACGCTGGTGGAAACAATACGCTGCGGCTGGCTTTCAGTGTATGTGTCCA  
CGGCTGTAGTAACTGACGCGGCCAGTCAAGCGCCTGAACTGCGGCTATTCTGAAAGCAAAAGTCTGTTAATAGAAG  
GGGCTTGGGTTAGAGCGGGGCGAGTCTCAAAATCAGCTTCTGTTAATAAAGGTTAAGGGCGTAATGACAAATTCGA  
CAAAGCGACAATCCGCTCCCTCGCCCTTTGGGGAGAGGGTTAGGGTGAAGGGAACAGCCAGCACTGGTGCGAACATTA  
ACCCTACCCAGCCCTCACCTGGAAGGAGAGGGGGCAGAACGGCGCAGGACATCACATTGCGCTTATGCGAATCCAT  
CAATAATGCTTCTCATTTCATTGTAACCACAACAGATGCAACCCGAGTTGCAGATTGCGTTACCTCAAGAGTTGACA  
TAGTGCGCGTTTTGCTTTTAGGTTAGCGACCGAAAATATAAATGATAATCATTATTAAGCCTTTATCATTGTGGAGGA  
TGATATGGATACGTCAGTGGCTGAGGAAGTACAGCAGACCATGGCAACACTTGCGCCAATCGCTTTTCTTTATGTGCG  
CGTACCGCAGTTTTACGACGTCAGGATGTTTCGCCCGCTTCGATGAACCGGCTGTGAACGGGGATTGCGCCGACAGTCCC  
TTCCAGCAAAAACCTCGCCGCGCTGTTTGGCGATGCCAAAGCGCAGGGCATCAAAAATCCGGTGATGGTGGGGCGATTCC  
CTTCGATCCACGTCAGCCTTCGTCGCTGATATTCTGAATCCTGGCAGTCTTCTCCCGTCAGGAAAAACAAGCTTCCG  
CACGCCGTTTACCCGACGCGAGTCTGATGATGTTGGTGGAAACGCCAGGCAATTCGGGAGCAAAACAGCTTGAACAGATG  
GTTGCCCGCGCCCGCCTTACCGCCACGCCGAGTTCGACAAAGTGGTGTGTCACGGTTGATTGATATCACCAGTGA  
CGCCGCATTGATAGTGGGATTGCTGGAAACGGTTGATTGCGCAAAACCCGGTTAGTTACAACCTCCATGTTCCGCTGG  
CTGATGGTGGCGTCTGCTGGGGGCCAGCCGGAATGCTGCTACGTAAGACGGCGAGCGTTTTAGCTCCATTCCGTTA  
GCCGTTCCGCGCGTCTGTCAGCCGATGAAGTCTGATCGCGAAGCAGGTAATCGTCTGCTGGCGTCAGAAAAAGATCG  
CCATGAACATGAACTGGTACTCAGGCGATGAAAGAGTACTGCGCGAAGCAGTAGTGAAGTTACAGCTTCTTCTTCTC  
CACAGCTGATCACCAGCCGACGCTGTGGCATCTCGCAACTCCCTTTGAAGGTAAGCGAATTCGAAGAAAAACGCATG  
ACTCTGGCTGTCTGTCATCCGACCCCGCGCTGAGCGGTTTTCCCGCATCAGGCCGCGACCCAGGTTATTGCTGAACT  
GGAACCGTTTCGACCGCAACTGTTTGGCGGCAATTGTTGGTGGTGTGACAGCGAAGGTAACGGCGAATGGTGGTGACCA  
TCCGCTGCGCGAAGCTGCGGAAAATCAGGTGCGTCTGTTTGGCGGAGCGGGGATTGTGCTGCGTCTGACCGTTGGGT  
GAGTGGCGGAAAACAGGCGTCAAACCTTCTACCATGTTGAACGTTTTTGGATTGCATTAAGGAGCGAGGATGAGCATTCC  
ATTACCCGCTGGCCGGAAGAGTTTGGCCGTCGCTATCGGAAAAAGGCTACTGGCAGGATTTGCCGCTGACCGACATTC  
TGACGCGACATGCTGCGAGTGACAGCATCGCGTTATCGACGCGGAGCGACAGTTGAGTTATCGGGAGCTGAATCAGGCG  
GCGGATAACCTCGCGTGTAGTTTACGCCGTGAGGCGATTAACCTGGTGAACCGCGCTGGTACAACCTGGGTAACGTCGC  
TGAATTGTATATTACCTTTTTCGCGCTGCTGAACTGGGCGTTGCGCGGCTGCTGGCGTTGTTAGCCATCAGCGTAGTG  
AACTGAACGCCTATGCCAGCAGATTGAACCCGATTGCTGATTGCCGATCGCCAACATGCGCTGTTTAGCGGGGATGAT  
TTCCTCAATACTTTCGTCACAGAACATTCCTCCATTGCGTGGTGAACCTGCTCAACGACAGCGGTGAGCATAAATTGCA  
GGATGCGATTAACCATCCGCTGAGGATTTTACTGCCAGCCATCACCTGCTGATGAAGTGGCCTATTTCCAGCTTTCCG  
GTGGCACCACCGCACACCGAAACTGATCCGCGCACTCATAACGACTACTACTACAGCGTGCCTGCTAGCGTCGAGATT  
TGTCAGTTCACACAACAGACAGCTACCTGTGCGGATCCCGGCGCTCATAACTACGCCATGAGTTCGCCAGGATCGCT  
GGCGCTCTTCTTGGCGGAGGAACGGTTGTTCTGGCGGCCGATCCAGCGCCAGCTCTGTTTCCATTGATTGAAAAAC  
ATCAGGTTAACGTTACCGCCTGTTGACAGGTCGGCGGCGCACGTCTTCTGCCACCTTGGCGCGGATTTCCCGCTGAGAT  
TGCTGTGAGTTGACAGAGGTTTGGCATGGCGGAAGGGCTGGTGAACACCCGACTTGTGATAGCGCGGAGAAAA

TTATCCATAACCAGGGTTACCAATGTGTCCGGATGACGAAGTATGGGTTGCCGATGCCGAAGGAAATCCACTGCCGCAA  
GGGAAGTCGGACGCCTGATGACGCGCGGGCCGTACACCTTCCGCGGCTATTACAAAAGTCCACAGCACAAATGCCAGCGC  
CTTTGATGCCAACGGTTTTACTGTTCCGGCGATCTGATCTCTATTGATCCAGAGGGTTACATCACCGTGCAGGGGCGCG  
AGAAAGATCAGATTAACCGTGGCGGCGAGAAGATCGCTGCCGAAGAGATCGAAAACCTGCTGCTGCGCCACCCGGCGGTG  
ATCTACGCCGACTGGTGAAGATGAGCTGATGGGCGAAAAAGCTGCGCTTATCTGGTGGTAAAAAGAGCCGCT  
GCGCGCGGTGCAGGTGCGTCTTCTGCGTGAACAGGGTATTGCCGAATTTAATTACCGGATGCGGTGGAGTGTGTGG  
ATCACTTCCGCTGACGGCGGTGCGGAAAAGTCGATAAAAAACAATTACGTCAGTGGCTGGCGTCACGCGCATCAGCCTGA  
AGGAGAGAACACGATGGCTATTCCAAAATTACAGGCTTACGCACTGCCGGAGTCTACGATATTCCGAGAATAAAGTTG  
ACTGGGCTTTGAACCGCAACGTGCCGCGTTGTTAATCCATGATATGCAGGACTATTTTGTGCACTTCTGGGGCGAGAAC  
TGCCCGATGATGGAGCAGGTGATCGCGAATATTGCTGCGCTGCGCGACTACTGCAAACAGCACAAATATCCCGTTTTATTA  
CACCGCCAGCCGAAAGAGCAGAGCGATGAAGATCGGGCGCTGTTGAATGATATGTGGGGCCGGGCTGACCCGCTCGC  
CGAACAGCAAAGGTGGTGGATCGCTGACGCCAGATGCCGACGACACGGTGTGGTGAAGTGGCGCTACAGCGCGTTT  
CATGTTCTCCGCTGGAGCAAATGCTGAAAGAGAGTGGACGTAACCAGCTGATTATTACCGGGTATATGCCACATTGG  
GTGACGAGCATTTGATGTCGCTGAAATATGTGGCCGACGTTCTGGCCGGTGGTGTGATGACTGAAGAATTACTGCCAGCA  
CCTATCCCGCCAGCAAAGCGGCTGCGTGGGTGATCTGCCGTTGCTGGACGAGTCCGATGAACCGTTTCGATGACGA  
CAACCTGATCGACTACGGTCTGGATTCCGTCGCGATGATGGCGCTGGCGGCGGCTGGCGCAAAGTGCATGGTATATCG  
ACTTTGTCATGCTGGCGAAAAACCCGACCATCGACGCTGGTGAAGCTACTCTCCCGGAGGTGAAATAATGGATTTCA  
GCGGTAAAAATGTCTGGGTAACCGGCGCAGGTAAAGGTATCGGCTACGCCACGGCGCTGGCGTTTTGTTGAGGCGGGAGCG  
AAAGTTACAGTTTTGATCAAGCGTTCACTCAGGAGCAATATCCCTTTGCGACCGAAGTGTGGATGTTGCCGACGCTGC  
GCAGGTGCGCAAGTGTGTCAGCGACTGTTAGCTGAAACGGAGCGACTGGACGCGCTGGTCAATGCGGCGGGAATTTTAC  
GCATGGGCGGACCGATCAGCTCAGTAAAGAGGACTGGCAGCAGACTTTTGGGTTAACGTCGGCGGTGCGTTTAACTG  
TTCCAGCAAACCATGAACAGTTTCGCCGTGAGCGGGCGGGGCGATTGTCAGTGTGGCGTCCGACGCCGCGCACACGCC  
GCGTATTGGCATGAGTGTATGGCGCATCGAAAGCGGCGTGAAGAGCCTGGCGTTGAGCGTGGGCTGGAACCTGGCGG  
GTAGCGGCGTGCCTGTAATGTGGTTTCGCTGGCTCCACCGACCCGATATGCAACGCACGCTGTGGGTGAGCGATGAC  
GCCGAAGAACAGCGTATTCGCGGCTTTGGCGAGCAGTTAAACTCGGCATTCCGCTGGGAAAATCGCCCGTCCACAAGA  
GATCGCCAACACGATTTTGTCTCGCTGACCTGCCAGCCATATTACCCTACAGGATATTGTGGTGCATGGCGGCT  
CAACGCTGGGGGATAAGCATGATCTGGAACGCCATTTAACGCTCGACGAACGCAACGCCACCAGCGATAACACAATGG  
TGGCGCATCTGGGAATTGTATACCCGCTGGGCGATGATGTGCTGGAAGCCGAAATGCCGTTGATACCCGACTCAT  
CAGCCGTTCCGTTTTACTACATGGCGGCGGCTCGGCGGCGTGGCGGAAAACGCTGGGATCGATGGCCGGATTTATGATGAC  
CCGCGACGGACAGTGTGTGGTAGGCACAGAACTTAATGCAACACACCATCGCCCGGTGTCTGAGGGAAAGGTACGCGGCG  
TCTGCCAGCCGCTGCATCTTGGTCGGCAAAATCAGAGCTGGGAAATCGTCTGTTTTGATGAACAGGGGCGGCGTTGCTGC  
ACTTGTGCGCTGGGTACGGCAGTTTTGGGATGAACCCGACAGAATTAGATGAGATTGCAGGAAAACCTCGTTAACGGAGT  
GATCGAGTTAACATTGTTAAGTTAAATATTGGTTTTCAACTCCGATTTACATGGTTGCTGTGTTGTTAAATTGTACAAAGA  
TGTATAGAAAACAAAATGTAACATCTCTATGGACACGCACACGGATAACAACTATGAACAAATCAGGGAAATACCTCGTC  
TGGACAGTGTCTGTAAATGGGAGCATTGCTCTGGGATACATTGCTTTAAATCGTGGGAAACAGATCAACGCGCTGTG  
GATTGTGGTGGCGTGGTCTGTATCTATCTGATCGCTTACCGTTTTATGGGCTGTATATCGCCAAAAATGTGCTGGCGG  
TTGACCCGACGCGTATGACGCCAGCGGTGCGCCATAACGACGGCTGGACTATGTGCCAGGACAAGAAAGTGTCTGTT  
GGTACCATTTTGGCGGCTTGGCGGAGCAGTCCGCTGGTGGGCGCGTACTGGCGGCGCAAATGGGCTACCTGCCGGG  
GATGATCTGGCTGCTCGTGGGTGGTTCTCGCCGTTGCGGTGCGGATTTTCAATGGTGTGTTTGTGTTTACGCGCCGCTG  
ACGGTCTGCTCGTGGGTGAGCTGGTCAAAGAAGATGGGGCCAACCGCGGGGTGATTGCGCTGGTGGCCTGCTTTATG  
ATCATGGTCATTATCCTTGCAGTGTGGCGATGATCGTGGTGAAGCCCTGACTCATAGCCGTTGGGAAACATATACCGT  
TGCGTTACCACTTCCGCTGGCGCTGTTTATGGGATCTACCTGCGCTATCTGCGTCCGGGGCGTATTGGCGAAGTGTGCGG  
TCATCGGTCTGGTATTCTGATTTTCGCCATTATCTCTGGCGGCTGGGTGGCAGAAAAGTCCGACCTGGGCACCGTACTTT  
GACTTTACCGCGTGCAGTTGACCTGGATGCTGGTGGGTTACGGTTTTGTGGCGGCGGTGCTGCCGTTGGTTACTGCT  
GGCCCCGCGTACTACCTCTACCTTCTGAAAATCGGGACTATCGTGGTCTGGCGGTAGGCATTTTATTATGCGCC  
CGACGCTGACCATGCCTGCGCTGACCAAATTTGTCGATGGCACTGGCCCGGTATGGACCGTAACCTGTTCCCGTTCCTG  
TTTATACCATCGCTGTGGCGGCTGTCTGGCTTCCATGCGCTGATCTTCTGGACCACGCCGAAGATGCTGGCGAA  
CGAAGGGCAGGCGTGTATCGGCTACGGTGGGATGTTAATGGAATCCTTCGTGGCGATTATGGCGCTGGTTCCGCT  
GTATCATCGATCCGGCGGTGATTTTGCATGAACAGCCGATGGCGGTGCTGGCTCCGGCAGGGACGGCGGATGTGGTC  
GCTTCTGCCGCGCAGGTGGTGAAGTAGTGGGCTTTAGCATTACACCAGATACGCTAAACCAGATTGCCAGCGAAGTGGG  
TGAACAGTCGATCATTTCCCGTGGCGGCGTGGCCGACGCTGGCGGTGGGATGGCCTACATTCTGCACGGCGCGCTGG  
GCGCATGATGGATGTGGCGTTCTGGTATCACTTCCGATTTTGTGTTGAAGCACTGTTTATTCTGACGGCGGTGGATGCA  
GGTACGCGTGTGCGCGCTTATGTTGACAGGATCTGCTGGGCGTGGTGTCTCTGGCCTGAAGCGGACCGATTCACTGCC  
TGCTAACCTGTGGAACAGCGCTGTGCGTACTGGCGTGGGGCTACTTCTCCATCAGGGCGTGGTGCATCCGCTGGGCG  
GCATTAACACTCTGTGGCGCTGTTTGGTATTGCCAACAGATGCTGGCAGGGATGGCGCTGATGCTCTGTGCGGTGGT

TTGTTCAAGATGAAACGTCAACGTTACGCTGGGTGGCGCTGGTACCAACGGCCTGGCTGCTGATTTGTACCTGACCGC  
AGGCTGGCAGAAAGCGTTTAGCCCGGATGCGAAAGTCGGCTTCTGGCCATTGCTAATAAGTTCCAGGCAATGATCGACA  
GCGGCAATATTCGTCGAGTATACTGAGTCACAGTCGGCGCAACTGGTGTCAACAACCGTCTGGATGCCGGGTTAAC  
ATCTTCTTTATGGTGGTCGTGGTGGTCTGGCACTGTTCTCGATTAAGACGGCACTTGGCGCATTGAAAGATCCGAAGCC  
AACGGCGAAAGAAACGCCGTATGAACCAATGCCGAAAATGTCGAGGAGATCGTGGCGCAGGCAAAAGGCGCACACTAAA  
GTCAGAGTGAGGGGGGATGTTGGCGAATGTTGGCTTAGTGCCAGGGTTCCTCTCACCTAACCTCTCCCCGGTGGG  
GCGAGGGGACTGACCGAGCGGTTGATAGCATTGTAGGCCGATAAGGCGTTCACGCCGATCCGGCACTCTTTCAGCA  
ACATGGTTAGCGGAGGCCAAGATGTTTGATTCACTGGCAAAAGCCGAAAATATTTAGGTCAGGCGGCGAAGCTGATGAT  
TGGTATGCCTGATTACGACAATATGTCGAACATATGCGGGTTAACCATCCCGATCAAACGCCGATGACCTACGAAGAGT  
TTTTCCGTGAGCGGACGCGCGCTACGGTGGAAAAGGCGGCGCGCTGCTGCTAAATTTGTACGTCAGGCTTTAAA  
CGATTCCACTTTTTGAACGCTGCACGCAACGTATCTGGTGTGAGCGTACTGGCAGGTAATGAATGGACTCCACGGAC  
GCAGGTGTGGCAATCACTTTGTCGATCTCCGCTGATTATTGATATCCACTCCAGCTCCGCCAGTGTAGTCGGCAGA  
TGAAAACGCTGATACGCTCCAGTTAATTGCGCCAGCACATCATCTGACCCAGCAAGGCGCTTTCACCAGAATTCGTA  
GGCGACTTTGGTCCGCTGGAGAAAATCTCGGTTTGGCGCAGCACGGTCAGACCGTTATGCACGGCATGAGCTGCCCA  
CACGCGTAAAACGATCGCCAGACCAACCACTCCACCAGCAATAATAGCATCCACCACATCGAAAATGATTGC  
GTTAACTGTTGATTTTGTGATCGCTCAGCGCTGTTTCGCTACTGTTTAAACAAGACGTCGCGAATGGCTTGGCGATT  
GATCCCCAGTCGACGGTTAGCGGCAACGTTTCTGTTTGGCGAGCCAGCACCGCTTACATACCTTTCGCCAGCGTGT  
CACCGATCCCCGCCAGCAGATATTGTTGCGGTGCATTGAGGATAATCTCCGTTCCACCAGCACATAAAAATTTGGCGT  
TCGAAAATCTCATAATGCAGCGCTGTCCGGCATATTATACCAGACGGAGAGCGGTGTCAGGCGGCGCAGGTGGCGGC  
GATCGTCGGAACGGCAACAAACGGCAGACCAGACGGCGGCGAGGGCTTTCGCGGTGTCGAGCAGTGCACCGCCACCGA  
CGCAATCACCGCTGCGGTGTCACCGGACTCAGCCGCGAGTTGTTGTACATCGCTTTCGCTGCAATGACCGGAAAC  
AAAATATGCTTTGCCCTGGCAGTCAAACGCTGGCGGAAGTTTGGTTTGGCCGAGCAATGGCGGTTTGGCGTAGAT  
CCACACCGCGGAGAAAGTTGTTTATCAGTGAAAAATCGTGCAGGTGATTGAACTTCTGGATGTAAAAAGTAGTTAG  
CCGGGCGGACGACCACGCGGATAGGATTGTGAGGCATGTTGTGTTGCTTATTGTTTTATTAGACATCTAAACGCTT  
GATTGCCAAATACTAGCATCGTGTATAGTGCTTCAACACGCAACTTCGTCAGGTACAATAAAAATGACAAATAACCT  
CTGATCCACAAAGCAAACCTCCACAACCTGGCACCCTATTTTACCCAGATGAGCGCGTGGCGCAGCAACACCAGG  
GATTAACCTGTGCAAGGCTTCTGATTTTGTGTTGCTCGGCTATTTACAGGAGCGGCTGGCGCACCACGTTGCACAG  
GGCAAACCAATACGCGCCATGACCGCGTGCAGGCTTGGCGGAGGCGATTGCTCAGAAAACGGAACGTTTGTATGGC  
TATCAACCAGATGCCGATAGCGATATACCGTAACGGCAGGGGCGACGGAAGCATTATACGCGGCGATTACCGCACTGGT  
GCGCAATGGCGATGAAGTGAATTTGTTTATGATCCAGCTATGACAGTTACGCCCCGCCATCGCGCTTCTGGGGGAATAG  
TGAAGCGTATGGCACTGCAACCACCGCATTTTTCGCTTACTGGCAGGAATTTGCCGATTTAAGCGAGCGCACCAGA  
CTGGTGATCTCAACTCCGCATAACCCAGTGAACCTGCTGGCAGCAGGCTGATTTCCGCGCTTGTGGCAGGCGAT  
CGCCGGGACGAGATTTTGTATTAGCGATGAAGTCTACGAGCATCAACTTTTCAACAGGGCCATGCCAGTGTGC  
TGGCGCATCCGCGAGTGCCTGAGCGGGCAGTGGCGGTTTCTTATTGGCAAGCCTATCATATGACCGGCTGGAAAGT  
GGTTATTGTTGCGCCAGCGCCATCAGCGCCGAAATTCGAAGGTACATCAGTATCTGACCTTTTCGTTGAATACCC  
GGCAGAGTGGCGCTTGTGATGCTACGTGCAGAACCTGAGCATTATCTTGCCTTACCGGACTTTTATCGCCAGAAG  
GCGATATTCTGGTGAATGCTTAAATGAAAGCCGGCTGGAGATTTACCGTGTGAAGGTACATACTTTTGTGGTGGAT  
TACAGCGCGGTTTCTACCTGGATGATGTTGAGTTTTGCCAGTGGCTGACGCAGGAGCACGGCGTAGCGGCGATTCCGCT  
GTCGGTGTTTTGGCGCCATCCCTTCCACATAAACTGATTGCTCTGTTTTGCAAGAAGGAATCGACGTTGCTGGCAG  
CAGCTGAACCCCTGCGCCAGCTTTAGCTATTTAACCTGACCGGCGGGAATATTGACGGTGGCAAAACAACTCTTGCAG  
GCCGTTAATTTGCTTACGGCGCAGCACTTCGTCGCTGCCATTCCAGCTTTTGCATTTTATTATCGTCCCATCCCA  
ACTGGCTAAGTTCACGGACGATTTCCGACATGGCGGTGATTTGATGGCGTCCACGAGCGGATTATGACGAATAGTCGG  
GCGATGCGTTGATTACGCGTACCTTCCAGACAGGTACCGGCAAATAACCTTTTAAAGCGTAATTTAATGATGATGAGCC  
TTTACCAATTTTATGCGGTGAAAACCATCCAGATTTCCATGGCATTTTTATCCGTATGTGTGACCACAATGGGTTGGG  
TAAAACCATCTATTTCAATGGATTTTTGCAGCAGTTTTTTTTCGGGTGGTGGCACGTTGTTTGGGTTGAATCATTAGGC  
ATAAGTTGGCTGTTTTTAAACCCACAGAACGCAATCCACTGGCTTTCACGAAAGGGGCTAACCTGATGGATCGCCATGCG  
GATTTTATTAATCGCTTTGATGCGATCATCTTCCGGCAAGCTGGCGAGAAATGCGTTAAATCCTGCGTTAATCGTTGTT  
GCATAGTATCCCCATTCTGACGTTTTCTTTTATCCGTTGTTATAACGCTGATAGTCTTTCGATTTTGTGGGCTAA  
ATGATAATGCCGACACCAGTAATCGTTATTGAGTAAAATTTGCATATCCGCCGCGAGGAGGGGATATCTTTCGCGCCA  
ATGTCCTTGTGGTGGTGGTGGTGGTGGTGGTGGTGGTGGTGGTGGTGGTGGTGGTGGTGGTGGTGGTGGTGGTGGTGGT  
ATGCTCAGCTGTTTTTCCGGCATGCTATTGAGCAGCAATAATGCATATTCTTCCAGTCTAAATGTTCTGGCTTGGGA  
TTTTCCGATGCCATAGAAATGATTGTCATGTCCGGCTAAATGCCGCCACTTTTTACCCGCTGACTCGTGCACATA  
GCAGCCAGCGATCCGGTTCGATAACGTGATAGAGCCATAATCTTGTGCTTCCGGGCAAAAGGTTTCGAAATTCG  
CATATGACGCAGAGGAACGCTGCCTGATACATTAGTTATACAGTGGGTTGCAGAGACTTTGATGATTTGCATACCAGG  
TCCAGATATCAGCCACTTTCCAGTCGTAATGGGGTAAATGTACCAGCTATGACCGCTGGTGCGGCCGATGTCAGGGT  
TTATCGTCGGCAAAACGTTGTTATTTAACTGGCGATGGCGACAAAACGTTGTAGGACTCATCCGACGGATGCCGAT

CATCATCGCCCGGACGTTTTGTGAAAACCATTTCGGCAAACCTCACGTACAAATTGTTCGAAGGTCATGCCTGGCTGGT  
AAAAGCAGAAAAAGTCAGGGTCGGTTATCGCATCTTGGGGAGGTTGACGTACCCATTTCGACATCAGGTTCCAGCACTGC  
CATTGGGTTGGTATTGTGAAAGGGAATTTTGCCTGTAAGCGGGAGCGCAACCAGTAAACTCTTCGATGACATCGGT  
GTACAACTCGCGCAGGGACTGAACATAGTTAATGGTGAAGAGAATTGCGCCTCCAGTGCATAAAACAAAACGCAGATTT  
TTTTGCCATTTGTCGGGCAAGTTCGGCTGTGAGATGCAGCATTAAACCAGAGTCTTTGCCGCCAGAAAATGAGACACAA  
ACGCGGGGTAGGGTGTGAGTGTCCAGGTAATACGCTCTCGTGCAGCTTCCAGAATATTGAGCGGAAGAGGAATTTTATA  
AATAGACATCTGAAGACGCTCTCTGAACGTTACAGGGTGATCAGTGAGATAAGTCTGTTAATTATAAAGTAAACACTGTA  
AAGCAGAGTGTATTTTTTATTTCGCGCTGTGAATAAATAGATGAAAGTTATAGTAGCTGTCTGTAGTTATATATCAA  
AACTCTCATTTAGACGGTCAATAAATCGGGAGAACCACAAATTATTTAAAGAAGATTTATTATAGGAAATGTAAAGCTTT  
ATTGAAGGTAACGGATGTTCTAGTTTTATCTCTTTAAGTTAAGAAAGTCACGGTAGGAATTATAAAGTTATAGGGGAC  
TATCCCAGTAAATCTGAACTGCAATGCTATTAATGATTGTCAGCAAAGAGGAACCACGAAATGAGATTTTGCATTCA  
TAAATCTCTCGTCTATTTCCATTTGAATATCATCAACCCTGCTGATTTAGATATTAATTGGGTGAACCTTCTGCCATA  
ATTTGTTTATAAGTGTATTGTGAGTAATTCGTGGATGCCTATTACTACAAATTAGAGTATTGCGAATCGTATGCAATGG  
CATGCAAATGACGGAACGGCTGATCACTGGCATTGGGTGATCACCAGATCGGCTTTGCGGTGAACCAACAGTTCTTCAG  
CATTCTCTGCTGACATGAGGATATCATGGCACTCAATCTCGACAGAGGAATCTTGCCTAGCAGGGATCAGCACTACTA  
TTATTAGAGCAAGAAATGAGCTGAGGGCCGTAGATAATAAAGTTTTCTTTAGTTTCGGACTTATTGACTATTAATTTGT  
TTGTTCAAGGCTCTGAGATTTTTCTCAAGATGGTGTGAGATTTAACCCTGTTGTCGTCGGCGGATACCTTTTTCTG  
AGCGAATGAATAAAGGTCATTAATTTGCGCACGTAAGCGTTGTAACGACTGGCTCACGGCTGATGGGGTATATATAGT  
GATTCAGCAGCTTTGCTAATGCTTAAATGCTGGTAAATACACTCAAATATGACAAGAAGATTTAAGTCAACTTTTTCAA  
GTCGTAGAGATTGGCCATACACTACTCCGGTTATTTTTCTCCATGATATATTTCACTTAATCAATGTTTTTTGCGTAT  
ATATTTTTATTGATTATGTTTTTTGCTAACTCAGGATTAAGTTTTCTAAAATAGCACAGCCACTTAGGGCAGAGCGA  
GCAATTCATGCTTTTTTAGGATGGTTGAAAAGCAGGGATATAGTTCAACCATCCATGAATTACCTTTATTTATTCCCA  
TAATGATATTAAGCGTTTTCTGATCGGGCAACCCACGGCCTGTTGTAGCGTATTTTCTTACTCATGTAATAGATAGCC  
GGCGTGACATTTGCCCCAGATCGTCCATCAGTTTTCTATTGTCACTTAACACTTTTCAATTTGCTCTGTACTTACGTTTGC  
AGGCAGTTTTAGCTTAAGCTTGCACCAGAGGCTTCATATTGTTGCCAGGTTTTGCGGGATCTTTGGAGGCAAGAATTG  
CCGCTGCTGTGCGCGGGCTTTCTGGCTGATAACCCCAACCAACAATGTTCTTAATTGCATTTGCCAGAATCTACCCAC  
GGCGCGCCTGCTGCCAGAACTGTTTACAATATGGGAGAACGGATCGGCGAAGACGTAGACAATGACCGGCGCATCTTT  
TTTACCCTCGAGGAGCCAGTGGGATTGTTCCATCCGTTGCCACATTTGCGCTCCGGCTGGTGCCTAAATTTCTTTTTCGA  
TAAGTGTGTTACTCAGGTTTTACCTTTCTCGTTGTACATGTAACCAGAGATAGCGTGCTTACCATCTGGAGTCAGGTAG  
ATGGTGACGCCATATCCTGATACTTTCCGAGATAACCTTTTATTCTCCGGGGGCATCGAATGTTTTGATGATTGTAAT  
GCCCTGTTTTCAATCGTTTTACTGGAGCAGGAAGTTCCTCTGCGAAGGCGATTGCAGGAAGCAGAGCCAGTAAAAGTA  
TCTTTTTTAACATTAATTTGTCTTTTAGTCAAGTGCAGTCAAAAAGTTCGAGTAAAAGGCATAACCTATCACTGTATAGGTAAG  
AGCTTAGATCAGGTGATTGCCCTTTGTTTATGAGGGTGTGTAATCCATGTCGTTGTTGCATTTGTAAGGGCAACACCTC  
AGCCTGCAGGCAGGCACTGAAGATACCAAAGGTTAGTTCAGATTACACGGTCACCTGGAAGGGGGCCATTTTACTTTTT  
ATCGCCGCTGGCGGTGCAAAGTTACAAAAGTTGCTTACGAAGTTGTAAGGTAAAACCTTATCGATTTGATAATGAAAC  
GCATTAGCCGAATCGGCAAAAATTGGTTACCTTACATCTCATCGAAAACACGGAGGAAGTATAGATGTCCTTGATTAACA  
CCAAAATTAACCTTTTAAAAACCAGGCATTCAAAAACGGCGAATTCATCGAAATCACCGAAAAGATACCGAAGGCCGC  
TGGAGCGTCTTCTTCTTACCCGGCTGACTTTACTTTGATGCCCCGACCGAACTGGGTGACGTTGCTGACCACTACGA  
AGAACTGCAGAAACTGGGCTAGACGTATACGCAGTATCTACCGATACTCACTTCAACCAAAAGCATGGCACAGCAGCT  
CTGAAACCATCGTAAATCAAATATCGGATGATCGGCGACCCGACTGGCGCCTGACCCGTAACCTCGACAACATGCGT  
GAAGATGAAGTCTGGTGACCGTGCACCTTCGTTGTTGACCCGACGGGTATCATCCAGGCAATCGAAGTTACCGCTGA  
AGGCATTGGCGTGACGCTGCTGACCTGCTGCTGATAAATCAAAGCAGCACAGTACGTAGCTTCTACCCAGGTGAAGTTT  
GCCCCGCTAAATGAAAGAAGTGAAGCAACTCTGGCTCCGCTCTGACACTGGTTGGTAAAATCTAAATTTCTTCTGTC  
TTTACGCCATAGCGCGTTGGCGTCGCCGCTCACCCGGTCACTTACTTGTGTAAGCTCCCGGGATTACAGGCTAG  
CCGCTTGTCTGACGCGAAATACTTCGAAATTCACCTAATTTCTCGGTGCTGCGGCACCCGATTTTCTTCCCGCAC  
CATGATGCAAGCTGCATCCAGGTAGCCGAGAGGCCGTTGCATGATGATGTTTAAAGCCAGGAGATAAACATGCTCGA  
CACAAATATGAAAACCTCACTCAAGGTTACCTTGAGAAATTGACCAAGCCTGTTGAGTTAATTGCCACGCTGGATGACA  
GCGCTAAATCGGCAGAAATCAAGGAAGTGTGGCTGAAATCGCAGAACTGTCAGACAAAGTCACTTTAAAGAAGATAAC  
AGCTTCCGGTGCCTAAGCGTCTTCTGATCACAACCCAGGTTCCAACCAGGGCCACGTTTTGACGGCTCCCCGCT  
GGCCACGAGTTCACCTCGTGGTACTGGCGTTGCTGTGGACCGTGGTTCATCCGTCGAAAGAAGCGCAGTCTCTGCTGG  
AGCAGATTCGCATATTGACGGTATTTGAATTCGAAACCTATTACTCGCTCTTGGCCAACTGCCCGACGTTGGTG  
CAGGCGTGAACCTGATGAGCGTACTGAACCCGCGCATCAAGCACACTGCAATTGACGGCGGCACCTTCCAGAACGAAAT  
CACCGATCGAACGATGAGGCGTTCCGCGAGTGTTCGTAACGGGAAAGAGTTTGGTCAGGGCCGCATGACGTTGACTG  
AAATCGTTGCCAAAATGATACTGGCGCGGAAAACGTGCGGCAGAAAGCTGAAACAAGCGTGATGCTTATGACGATTA  
ATCGTCCGTTCCGGCCCGCGGGTGCAGCGGAGCAATTTACTCCGACGTAAGGCATCCGTACCGGTCTGATGGCGGA  
ACGTTTTGGTGGTCAGATCTCGATACCGTTGATATCGAAAACACTATTTCTGTACCGAAGACTGAAGGGCAGAAGCTGG

CAGGCGCACTGAAAGTTCACGTTGATGAATACGACGTTGATGTGATCGACAGCCAGAGCGCCAGCAAACCTGATCCCAGCA  
GCAGTTGAAGTGGTCTGCATCAGATTGAAACAGCTTCTGGCGCGTACTGAAAGCACGCAGCATTATCGTGGCGACCGG  
TGCAAAATGGCGCAACATGAACGTTCCGGGCGAAGATCAGTATCGCACAAAGCGTGACCTACTGCCCCACTGCGACG  
GCCCCGTGTTAAAGGTAACCGCTAGCGGTTATCGCGCGGCGTAACTCCGGCGTGGAAGCGGCAATTGACCTGGCGGGT  
ATCGTTGAGCACGTAACGCTGCTGGAATTTGCGCCAGAAATGAAAGCCGACCAGGTTCTGCAGGACAAACTGCGCAGCCT  
GAAAAACGTCGACATTATCTGAATGCGCAAACCACGGAAGTAAAGGCGACGGCAGCAAAGTCTGTTGGTCTGGAATATC  
GAGATCGTGTGACGCGGATATTACAACATCGAAGTGGCCGGTATTTTCGTCAGATTGGTCTGCTGCCGAACACCAAC  
TGCTCGAAGGCGCAGTCGAACGTAACCCGATGGCGGAGATTATCATTGATGCGAAATGCGAAACCACTGAAAGGCGT  
GTTGCGAGCGGGTACTGTACGACGGTTCCTGACAAGCAGATCATCATCGCCACTGGCGAAGGTGCCAAAGCCTCTCTGA  
GTGCTTTTACTACCTGATTGCGACCAAACTGCATAAGAAGAAGTAAGATTCACCTGCAATTGCTTAGCCGCGGGGTC  
AACTGGCGGCTTTTTATGGCATTAAAAAGCCCCGCGGATGGCTCCGGGCAGGGCGGGATACTTATTCTGGCAATT  
AACGCAACACAGCACCGGCAGATTGGCGTGGCGGATCAGCTCGAGGCGTTAGAACCTAACAGATGGTTCGAAATCGAT  
GGGTTGCGAGAACCAATAACTACAACATCAGCCCCAGTCTTCTGCCAACTCATTGACTTCATCCCGCACGCTACCAAA  
ACGACATGTTGTTAATGCGGGAAGGATCGATGGTGAAGTGGCTGACCATCGTTTGCAGACGTTCTTGTCTTCATGTT  
GCAGATGCTCTTCAAACGACGCACATCAGCGGCAAAACGGTGCAGGCTCAGGCTGACCCGGGTAGTACGTGAAGT  
AGATGAATAAATCCGTCATCCTGGGCGAGGAATTCAGCTGGCGAACAGCTTTGCTCGCTCAATTCCATTTCAAATACATC  
AACTGGCATAATGATTGCTTATACATAAACCTTTCTCCCTGTTAATCATGAACAAATCATTCCGCATGATTATAATATT  
TATCCCTGATATTTGCTGGTTCTTTTTCTTACGAACTGTTTCTGTGATGAATATATTCTCACTGAACACCAGGAATTC  
TCCCAAAACCTGTGGTACCGCCGTTTTCCCGCTGTGATAGCTACCCTTAAAGACTGACTTTTTTTGAACTGTCTCTGG  
AGGTTGCATGAAAGCATTGACTTATCACGGCCACATCACGTTAGGTTAGAAAATGTTCCCGATCCGGGCGTTGAACAGG  
CAGATGATATTATTCTGCGTATTACGGCAACGGCGATCTGTGGCTCTGACCTCCATCTTTATCGAGGCAAAATACCTCAG  
GTTAAACATGGCGATTTTTTGGTTCATGAATTTATGGGGAAAGTAGTTGAAACCGGAAAGGACGTAAAAAATTTGCAAAA  
AGGCGACCGAGTGGAATCCGTTCTGTCATTGCTTGTGGCGACTTTTTTTCTGTCGATTGCAACAATATGCCGCTGCG  
AAAATACCAATGCGGGTAAAGGCGCTGCGCTCAATAAAAAACAGATACCAGCTCCAGCGGCATTGTTTGGTTATAGTCAC  
CTGTATGGCGGCTTCTGGTGGGCGAGCGGAATATGTCGCGTCCCTAAAGGGAATGTGGGGCGTTTTAAAGTACCGCC  
TTTGCTTTTTCAGATGATAAAGCGTTTTCTTTCTGATATTCTGCCAACGGCATGGCAGGCAGCAAAAAATGCGCAGATCC  
AACAAAGTTCAAGCGTTGCAGTCTATGGTGTGCTGCTGTGGGATTGTTGACAATCGCCTGTGCACGGTGTCTGGTGCG  
GAACAGATTTTTGTTGTTGATCATCATCCCTACCGTTCGATTTGCGCGCCGACCGCTACGGCGCGATCCCGATTAATTT  
TGATGAAGACAGCGATCCGGCACAGTCAATTATTGAACAAACGGCAGGTACCAGGGGCGTGGATGCAGTAAATAGACCGCG  
TCGGTTTTGAAAGCGAAAGGCGAGCACCAGGAAACGGTCTGACTAACCTGAAACTGGAGGGGAGCAGCGGTAAGAGCGTTG  
CGTCAGTGTATTGCGGCGGTGAGGCGTGGCGGCATTGTTAGCGTACCGGGCGTCTACGCTGGATTTATTCACGGTTTCT  
GTTTGGCGACGCTTTGATAAAGGTTGTCTGTTAAATGGGACAGACCCACGTTACGATGGCTGGGAGAATTATTAC  
CGTTAATTGAGAAAGGATTACTGAAACCAAGAAGAAATTGTTACCCACTATATGCCGTTTGAAGAGGCCCGCCGGGATAT  
GAGATTTTCGAAAAACGTGAAGAGGAGTGCCGTAAGGTGATTCTGGTACCCGGTGCACAAAGCGCAGAGGCGGCGCAGAA  
GGCGGTTTCAGGTCTGGTGAATGCGATGCCGGGGGGAACAATATGATCGTCAGGAGTGGTTTTCGAGGTAAGGACAGCC  
ATGACGATAATCGCCGCAATCAGAAATCCTATCAGGATGTAATAATGCTTCTGCCATGGTTATTCCCAAAACGAAAC  
GGAATAATTTGAGCAAAAGTGAACAGTGAGAACCAGGAAAAATTGCTGATTTTGCATAAAGAGGATGCGAGTGCATCC  
TCTGGGCAAGCGAGTTATCGTTGTGCAGATGGGATTAAGCAGGTAGTCCAGCAGCTTCTGGCTGGTATTGAGTTT  
CCAGCACTTCAAGTGGGTTGCAACGCCGCCGGAAGTTCCAGTGAATGGAATCGCAACCGCGCAGCCCAAGCAGTGC  
GCACCTACCGGAGCCATAACGGAAGCTGAGTATTGCTATCGGTCAATTTTTGCCGATACACCAGCGTGGCAGCAGCAC  
TTGCCATCGTAAGATTGCGGAATTTAACCCGGCTGTTCAATTGTCACCAGTCTGTGGCATCTCTTCTGGCGAACACA  
TTTTGGGCGGATCCAACCTGCGTTTTAACCGCTCGGCGATTGGCAAAACAGCATAGGCGGGTGTCTCCAGCAGAATATCG  
ATGCGTTGCGCATCCAGGTCGTTAATGATGATAGTTGGTCTGGACATTTTTACTCCATGTCGTCGGTGTGCGAGTGTGCG  
CAGATAAACATACCCAAAAGAAAACCTCACCGTACGGCGGCGAGGGTTAACTCACATGATGATACTGACTGTTGCTCA  
CTCTTTGAAGTGAATTTGCGTACATTCAGGGAATTCCTCAATGCAGCGCATTATGTATAAATCTTAATCGCCTTGGTTA  
TGGAAGACGAATTAGCGTGTGTTGTAATCAGATGATTAATAACCCGCTTTATCAATCACAAGGTTTTGCCACAGTTAC  
CTGGGTGAGTTGTGGCAAGAAAGTGTGAGTTGAGAAAGCGGAGCGTTGATGGCGTCAGCTTTGATCGAGATCTGAATTTCA  
GTCAAAATACGAGGGTTACCCTGGCACGTTAGCTTAACTGCTTTCACGTTCTTTTTCCCCAGCTTTTGGCAAAGGCGGC  
GTCAAAGTACGCGGCTCACTGTTTTACCGTAATTATCCGCAAGGAATTTCCGGCTTCTCTTTAATTTCTTGAT  
TCAGGCGTACCATCGTACCGAAGTATGCTCCGGATCAAACCAAAGCAGGCACCGTGTGGCATATTCGTAGCGTTCC  
AGGACGAAACGTCGCCAGCTCCTGGCATGACTTCACTTACTAGTTTAGCGGCCGTTCCAGTATAATCCGTTTTCCGGCGA  
TGAACACATTCGCTGGCGCGCTTCTGGTAGATTGGGATTGGCGAGTAGCGCAACCGAAGCGCATCCAGCGGCGTT  
CATCAACACCAGGGCAGCAACCGATTTAGGCAATCCTGGCCACAGACCATGTACGGTCAGAAAATCAGCTTTGTTGGT  
GTTTCGGTTTTGAGGCGACATTCATCTGTTCTGTTACGATTTGATCGTGTGACTCTGGCAAAATCCGTTTTGCCAGGA  
GAGGGCCAGGACATAGCGATCAAAATCGCCATACTGTTTTGCCTGCAACGCTAAGGCGTTGGCAGAAGAGAAGGGAAGCA  
GAGAAACCGGAGCAACGCGGCTTACGCCAGAATGTTTTATAATGGGTGTGGAACCTACATACACTGAATACTATC



TATTAATCATAAAAAAGCCGCCAGGTGGGCTTACCTGGCGGGCGTGATGATTTATTCAGCGTTTGGCGAACGTATTAG  
TTCCACATGGCGAGAATCGGCCAGCCAACCAACAGCAACATAGAGATGTAATCACCCGAAGATTGCGCAAGACGCCA  
GTAATCTTTTGTATTTACATAGCCACAGCCGTAATAATCACCCAGGACCGGTTGCATACGGCGTCAGACAGCCATGA  
TACCAGTAGACAGCACCAGCAGGATACACAGTTGTTCCATTGGTACGCCCGAATACCTTTACCGACGGCCAGAATAACC  
GGCAGCATGGTTGCGGTGTGCGCAGACAGGCTGGAAAACAGGTAGTGTGCAAAGTAGAACACCAGAACCAGTACAATCAC  
CGTTGCGTTTTGGTGAGAATCCTTCCAGGTGCGTACTCATGGTACCGGCGAACCAAGTCAATAAAAACCAGAACCAGTACAGG  
CGTTAGCCATCACAACCAGAGTTGCCAGGTTGACCAGTGTGTTCCATGCGCTGTTATAGCGGGTAATGTCTTTCCAAGG  
ACAACGTGCAGGGCCAGCATTAGCGAAACTGCCAGCAGACCAACCGCAGTAGCATTAACTTCACTGCCAAATACCCA  
CAAACCTAAGCTGAGCAATAAAGGCCAATCAGTGTCCACTCTGCGTGTGACGCGACCCATGGTTTTAGTTCATCAC  
CCGCCAGGTTGCCACTTCTTCACTGTGTGATTTCCGGTTGTACAGCACGTAGGAAAGCCAGGGCGCAATGATAAGC  
AAGATAACCCCAACCGGCAGGAAGCAGAGGAACCACTGCAACCAGCTAATCTGGATACCGCAATTTTGTGACGAAC  
CAGACCCAGCACGTTTGGTCCGACCCGGTGACAAACATGGACGAACTCAGACTGGTACTAATGACCATCATCCACATCA  
AATAGCCGCAATACGACGCGCGGACGGATCGTTCGGGAATGATTTAAACAACGGCGCAGTTTTTAAAGACGGAAAA  
ACCGTACCCCGGTACGCGCGGTGTTGGAAGGTGTAACCGTGCCAGCAGAATGTCGATAATGACAATGCATAACCCAA  
CGTCAGCGTGCCTTTGCCCATGAATTTACCAGGAAAAGGGCAATGCGACGACCTAACCCGGAACTTCATACCTTAATG  
CAAAAATAAATGCGCAAATACCAGCCATACCGTGGTGTGAAAAAACAGCCAGGCCCAATTTTCCAGCGCTGTTTTGC  
GCATTAACGCTGGGTGAGCTAATTTTGGCATCAAAGAGCAGTAATTACTGCCAATAACGCAAATAGTAACCGCAAT  
AAAAGTATGCTGTTGCCGGAATTGGCTCGAGGATCATGCCGACAATCATTGCCACAAACACAGCGAAGTAATGCCATG  
CCTGCGGGCGCATACCGTGGGGACAGGGATAAGAAACATGACACCCATCACCACCAGTGGGGCAATAGTTTCCATATA  
TTATCTTTTGTAAAGACATACGGTTCTCGAAAATTAATATTTCAAATTTATCAAGTGCTTAAATAATTAATCTGT  
GCTAAAAACCAGGTAAGGATCAGTAGGTCAGCACTGCCGCTGGACTGAGATTTGTTGATAACTCCCTGTGCAACTG  
CCGGAGATAATCGAGATCGGCGGGGTTGAATGCCCTTTTGAATAATGTTTGGCCTCGCGTGTAGCCAGCGCA  
GGCCCCCTCGCCACCGCGCATGCAACGTTGGTATCGCGTTGATCGCCATCAGTAGGAGCAAGGTATCGAGCAATGCC  
AGTTCAGGATTAACCCCTGATCCAGCAGAGTGAAGTAATGCGGCAAGGCGTGATTGATCACCAGTGGATAACCCGCTT  
GGCTTACCGCGTGCAGGCAAGGCAAGCTGTTGGTACAACCGTTGACCTGCCGTGAGTTGTAATTATTGGTACGCA  
GTTCCGATCGGTGAGGCCAGGCAGAACTTCCGCGCTAGAACAACCGTTGTTGGCGTACCGGTTGGTTGAGTTGA  
AGCAAACGGCAATTGCCGCACATAGCAGCCCTAAAGAAAAAATGCTGCCTTATGCGTGTACGCCCCAGTGGCGCG  
GAACATATCACCTTCCGAAGCCATAACCAATTGGGCGTAATCCGTGGAGTACCGCTTCTGGTGCATTTCCGCACTACAGG  
CACCAAATTAATGAAACGGGGTAGCCAGCCCTGAATCGCCAGCGCGCTGCGGTGGAAATCTTCCAGCGCATATCTTTG  
TGCGCACCGCAGTTAATGCGATCCACGAGGCTGGTTTCCGGTACAGATTGACTTCAGTCAGCATGGCGGCCAGCCAG  
CAGGGCGTACTCATCGATTAATGACGTGCAAGCTTTGTGGTTTTAGTTGACGTTGACGGCATCGACATCGTTTACAGC  
GCCTCCATGCGGTTGAGTAAATCGGTGAGTTGATGGTTTTTCCACGCGCGCAGACGGCTGCGCTTTGTTGCAACAG  
GCAGCGGCGAGGCGGCGAGTGAATAGTCGCGGCGGAGAGAATTTGCGCTTGGGCGTCAGGACATCGATATCCATAACC  
GCCCAGAGGATGACTATGTTCAAGCTCAATGGTGGCGAGCTTGAAGTCCGAGCCGGGGCGCAATGCTCAACATGCC  
TCCGGCCCGCTGGCGAAACAGTGCAGCCTGCTCTGAATTTGCCAGCCCTGTTTTGCGGTAAGGCACGCAAGGCTGT  
CACGCCATGATTAATAATCGCGGTGTGACCTCGCTGTCTTAATCGGCCAGCGCAACCACGGTAAAGGAGACCAGT  
GAACAGGATGGCGCTTGAAGCAGACGTTGCCGTGCTTGCCTTCACTCCCGGTGACGAGCAGCTCGGGAATTGATACC  
GCATGGTGGCTGGCGAGTTAGGAAGCAGGTGCATGGCTTATCTTACCTGATGCACAACATCGATCACCAGCCATC  
GCGGTAACGCACAACGGCAACGACGCGGTCTGTGAATTAATCGGCTGTGGTTACCGGTGACGAGCAGCGCAGCTTCCG  
GCAGCCACTCAATGAAACCACTTTAATGCCCGTCTCTGCGAGCAGTTCTGCCAGTTCCGGACGTGCCGGTTAATCGG  
ATACCGTGGTCTGTGACCAGAATATCGACACTGGAGCCTGGGGTATGCAGGTGAGTACGTTATCCACAGAGTCGGAAT  
ACGACCGGTACAGCGGCGCAGCATGATGAAAGCGCAGAGGCAATCGCGGTATCGAGTGACCACCGGAAGCACAC  
GCAGTACCGCTCAGAGCCGGTACGACGTTAAGTGAAGTGGGTGTAATTTCCAGCGCGCTCAGTACCACACGCTCG  
AGACGATCAACCGATGCGCTTTTGAACCCAGTTAGCGTACTGGTTGGCGCTGATTTGATGTGATTGGGGTTACGGG  
CAGCGATTGCGCAGCATGGCTGTCAAAGCTTGCACATCCAGCAGTTTGGGATCAGACCTTTTTGTCGAGGTCAACCA  
TCGTCGCGGTAATACCGCAAGGGCGAAGTGGCGCAATATCGCGGCTACGCATTTTGTCTTCCAGGAAACGGGTTACC  
GCCAGCGATGCGCGCGGTTGCCGTTTTGCATGGAGAACTTCTTTGAAGTAGCCAGAGTTGACAATCACATCCGACG  
GCTACGGGCAATAAGCAGTTCCGCGGGTTAGTGGTCATACGGGTGCGCCAGCGCGATTTTTGAGCATCGCCAACGC  
GGTCACTTTGACGATCAATCAACCTGATCTTGTCAATGCTTCCGGATTATGCGGATAAAGCAGCAGTTCTTCCGTA  
AGCATCACGACCTGTTTTGCGTGTGCGCATCAACTATTGCATAGCCGAGGGAGCCGACGAGGCTTTACCGGTGTAGCC  
GTTGGCATTACGAATTCATCACAGGACGGGACGCCAGGAAAGCCAGTGCATATTAGTTCGCGCTGTACCAGAT  
GCACACGACCGCGTGAAGTGGATCTGACCGGTTCTGCCAGCAGACCAGGAGATCTTCCGCCAGTGGACCACGC  
AGGCCGGAGGTATAAATGCGGGTAACCACGCCCTGGCGAATGTGTTCTACCAGCGGCGCATGGCAATCACTCAGGGAGCT  
GGACGCCAGGTTAGGTTTTTAAAGCCATCTTCCGATGACGTCCATCACCATATTGACGGTCAAGTACCGCCACGGA  
AAGCGTGATGGAAGGAAACCGTCATGCCGCTCTGTAACACAGAGCGCAGTAATCGCTTCTCCAGGTTGGCGCACAGTTG  
CGATCGCGCTTTTTAGCCTGGTAGGTTTGTGTTGGCGAGTCTGAAAGCGGCAAGATCGCATTACGCGCAGCATT

CCAGGCCGCTACCGTTCTTGTGCTTGTGAGATTGTTCAATTTCTGCGTCATTTTGATTGCCTTATTCTTCGCGGATGCCG  
GAAAGTTCTGCACGGGAGAGCACCAGACGGGCGCATCGATAACCGGACCGTCCACCATCTTGCCGTTACAGGAAACCAC  
GCCGAGGCCTTCGCGAGCGCGGCTTACGCGGCTTACGACGCGCGGGCGTGATCCACTCTTTCTGGGTCGGTGCCT  
AGAGGTTGTGACGAGATCAATCTGACCGGGTTGATCAGCGATTTGCCGTCAAAGCCCAGCTGTTTGATGTGGGCGGCT  
TCTTGAGAAATCCGGCTTCTGTTAGCGTCTGGAATAGACGGTATCGAACGCCTGAATACCCGAGAGCGCGGGCTG  
CAAATGGAACAGCGTGCGAACAGCAGTTCAGTTCTTCCGGGAGCGTTCGTACGCAGGTTGCGCACATAGTCTTCTG  
CACCGAGGGCGATAACCGATCAAACGCTCGGAAGCGTGAGCGATTTCCACTGCGCGGTAATCCCAGCGGAGATTCAATC  
GCCGCCAGCAGGCCGGTGTGCCGGTTCACGACCACAGGCTTTTTCGATACGCAGGATCTCTTTTCAATATCCAGAAC  
ATCTGAGCGGTATCGGTTTTCCGCGAGACGCACAACGTCGCCACCACCGCAACGACGGCTTCAGGTCGTTAACCCCC  
ATTCGGAATCCAGCGGTTGACACGCACAATGGTTTCAATATCGCGATACAGCGGATGTTGCAGCGCGTGGTAAACCATG  
CGGCGGGCGGTGTCTTTTACGCAATGCTACGGAGTCTTCGAGGTCAAACATCAGGGCATCAGCCGGGTAGATGAAGGA  
GTTGCTGACCATCGCGCATTGGCACCAGGCACAACAACATGCTGCGGCGGTGCGAGTTTTACGTTGTTGAGCGAAG  
CGAAATCATTGGCAATCTCCATGGCAGAGCCGGATACCGCTGCGCGGTGCCAGCAGGCTTCAGTCGTGCACGTA  
AAATGCAGTCCAGTGCCTTTGTATCGACATTACGCTGTACGCCGCGCACGTTGTAGCGGGGAGAACGTCAGAAATG  
GTGTTGCAATTGCATCGCAAACGTTTCTCAACGCTGCTATTGATTTGCAGGTCGATATCCTGCGTATCGAGTGGGCG  
GATGCGTATCATACATCCAGATCAAGGGTGCCTGCAACGGCGGGCTGGTTATTTTCAATTTTACCTGTTTCTCA  
TGCGGGGCTTTTACGAGCTGCCGCTCTGGCGGAGTGCTCAAGCAGGTTCTGCAAATAATGCAGCGTGACTGCAG  
GGACCAGCGCGCATAGCCGTGAGATCGTTTTTCCGCGAGGTTGACGTACCCGGAAGCGGATATCGGCATCTCCTGG  
TAACGCAGCCGCTCAATTTCAACCAGTTCGATGGGCGGTGCGGAGATAGTCCGCGTTTCCAGCCAGTAGCGCATATCCTG  
GTTGTAAGTGGCGGTAACCGCACAAGGGTTAGTACCGACAAAGCGGTGAGTTACACCCAGCGGGGAGCGAGGTAAT  
GACGGAATCTTTCAGATCAATTTCCGTTGTAACAATGGTTAATGACGCTCTGTTCTTTAATGAAGTAGCAAGGAAACGTA  
GCGCGGGAGATGATGATTCGGAGCCACGATGCACAGTCAAGCGTGGAAATATCGGCGGTGCCTTTAACACCAAATCCAG  
CCGGTCTTATAGGGGAAAGCGTGAAGAATCTTCTTACTAAAACAGATGCAACCAGTGCAGTGTGCCGAGCCTGTT  
GAATCAGATAACGGTACCATTGTAAGGGATTGGCGTTCATCACAATGCAGCAATCTGTTCCCTGGATGACGAAAT  
TTTTTCAGCGATTCCGCATAGCGTTTCAGTCGCGTGGCGTGTTCATCAGCACCATCACGCCGGTACGCTGGTCAG  
CGTGAAAAACCGCACTGGCGGAACAGCGCTCGTATTCGGTTTTGGTATAAATAAACAGATGCGTGTGTGCCGCTCAT  
AGCGAGGTTTATCAATTCAGTGGCTAATGTCAGCGCCAGTCTTACCAGCGGACGGATTCAGTATAGCAACGCATTTA  
ATAATTTTCCGCAATTCACCGCACGCGATAAGCTTTTTCATCGCGGGTACGGTAATAAATACTTCGACTGTGGTGTG  
AACGCTCAAATCATTTTCATGCAGGAATTTGGGCGATTTCCGCCATTTTTTATTTTCTGAACGTTTTACGCGGGTAAAA  
TATCATTGCCGAACATAAATAAGTATCCTGAAGTGCATGTTGTTATCGATTTGCAACGAATGTTGTTCAATGTTGCA  
AACTGATAACCTTTTATTTTCACTTGGGAGAAAGGGGTGATCGAGGTATATCTTTTCTCCTTTCGCTATACATCCTAA  
GGAGTATTTCCGCGTGAATTTTATTATTTACATAGAGTTAGTGGTTTTTATTTAATGATTTAAGTTTTT  
AATTAATGTAATTACGAATGACTCGCAGGTTAAGTGATTTAATTGATTTAATGAATAAAATTTGCCACGATCATAATT  
AATATCTATGATTTTATTCAACATTTAATTACATCCGTCAAAGAGGCTCGGGACAACCCGCAAGGAAAAAATGTTG  
CAGCTTAACGAGAATAAACAGTTTGCATTTTCAAAGACTGGCATTTCCGCTGCGTATCTTTTGTGATTCTGGTGT  
CTCAATATTTGTCATTGCAGCCTGGCGCAATTTTACGGCCAGTTTTGAGGACTATTTAACGCTTCATGTACGCGACA  
TGGAATGAATCAGGCGAAAATTATTGCCTCAAATGACAGTGTATCTGCGGTGAAAACGCGTGACTACAAACGGCTG  
GCGACCATCGTAACAAATTACAAAGAGATACCGATTTTATTGATGTTGGTATTGGGGACCGCACTCGATCCGCTTAA  
CCATCCTAATCCGAGAAAATTGGTTATCCTATGAGTTCACCAAACAGGGCGCGTGGAGAAAGGGGAGACTACTTCA  
TTACCGGAAAAGGGTCAATGGGGATGGCGATGCGCGCAAAACGCAATCTTTGATGACGATGGAAAAGATCATCGCTGTG  
GTGTCGATTGGCTACCTGGTGAGTAAAATCGATAGCTGGCGGGCTGAGTTTTTATTACCGATGGCAGGTGTGTTGTCGT  
GCTGTTAGGGATTCTGATGTTGCTGTCGTGGTTCCTGGCCGCGCATATCCGTGCGCAGATGATGGCATGGAGCAAAGC  
AAATCGCACGCGTGGTCCGTGAGCAAGAGGCGCTGTTAGTTCGGTTTATGAAGGGCTGATTGCGGTGGATCCGCATGGT  
TACATTACCGCATCAATCGTAACGCAAGAAAGATGCTGGGGTGGAGTCCCGGACGGCAATGTTGGGTAACCCAT  
TGTTGAAGTGGTCAGGCCCGCGATTTCTTACCAGACAGATTGATGAAAAACGTCAGGATGTTGGGCAACTTTAACG  
GTCTGAGCGTTATTGCCAACCGGAAGCTATTGTTGAGGTGATGTTGCTGGGGCCATTATCAGCTTTCGATGATAA  
GACGAAATTTCCACCCTCAATGCGCAACTGACGCAATAAAACAATACGTTGAGAGCCTTCGTACATTGCGACACGAGCA  
TCTCAATTGGATGTCGACGCTCAATGGTCTGTTGCAGATGAAAGAGTATGATCGCGTGTGGCGATGGTGCAGGGGAGT  
CTCAGGCCAGCAACAGCTTATTGACAGCCTGCGGAGGCGTTTCCGATCGCCAGGTGGCGGGCTGCTTTTTGGTAAA  
GTGACGCGCGCCGGAACTGGGGCTAAAATGATCATTGCCCCGTAGCCAGCTTTCGCAACTGCCCGCAGGACTGGA  
TAGCACCGAGTTTGCAGCCATTGTTGGCAATTTACTTGATAACGCTTCAAGCCAGCCTGCGTAGCGATGAAGGAAACA  
AGATCGTTGAATTTCTCAGCGATGAAGGCGATGATGTTGATTGAAGTCCCGATCAGGGCTGCGCGGTTCCAGAG  
TCTCTACGAGACAAAATTTGAGCAGGGGGTCAAGCAGCGTGTGACGAGCCGGTGAACATGGCATTGGGTTGACTT  
GATTGCCAGCTACGTAACGCGCTGCGGTGGTGTATCACTCTGAAAGATAATGATCCCTGCGGTACCTTATTTTCAATCT  
ATATTCCGAAAGTGAACCTAATGACAGCTCCATTAACCTATTGATCGTTGAGGACGAAACGCCGCTGGCAGAGATGCA  
TGCGGAATATATTCTCACATTCGCGATTGAGTACGATATTACTGGCGGAAATCTGGCGCAGGCCCAATGATGATCG

AGCGTTTTAAGCCGGGGCTAATCTTGCTCGATAACTATCTTCCTGACGGTAGAGGGATTAATTTACTGCATGAACTGGTG  
CAGGCGCATTATCCCGGCGAGCTGGTGTACCCTGACGCCAGCGATATGAAACGGTGTCTGAAGCCGTACGTTGTGG  
TGATTTGATTATCTCATTAAAGCCATTGCTATGAACGGCTGGGGCAAACGCTAACCCGTTCCGCCAGCGTAAACATA  
TGCTGGAAAGTATTGATAGCGCCAGCCAGAAGCAAATTTGATGAGATGTTAATGCTTATGCTCGCGGTGAACCTAAGGAC  
GAGCTACCGACCGCATTGACCCCTTGACGCTAAACGCGGTGCGAAAACCTGTTAAAGAGCCTGGTGTGCAACATACGGC  
AGAAACGGTGGCGCAGGCACTGACCATCAGCCGACCACTGCCAGGCGTTATCTTGAATATTGCGCCAGCCGCCATCTGA  
TTATTGCTGAAATTGTTACGGCAAAGTTGGCAGACCACAACGCATATACCACAGTGGGTGACATGATAAAGCCGGAGGA  
AACTTGCTCCGGCATTACTATTTACTTGGCTGTGACCCTGCTGCCGTTCTGGCACCATCAGCTCTGTAGCAACGATA  
ACAATCACCAACCAACAAGCACCGGTACCGAGGTGCGTTTTACGACTTCAAACGGCGAGATCTTCGCCATCCCGGCAAC  
CGCAACGACTACGCCAGAAACGGGCGAAAGGGTACGGCCAAGGTTGACGCCTGACGATCGGGATAGTCAAATACGCCG  
GGTAAATGCCGGAAGAGTGCGCCAGTTTCGGGATCATCTCAACAAACGCATAAAACGGCGCATTGCTGAACCGGTGCTG  
ACTGCCGCCAGCATTGTCAGAATCACCATAACAGCATCAGGATGATACTCGCCGAACCAACGAGGTAGCGATAGAAAT  
CAGACTTTGAATAAAGCCGATGGTGTAAAGCCCTGAGCGAATACCCAGCGCAACCAGCAGCATCACCACGTTAGCAA  
ACGCATCTGCCATCCCGCGATAAGCCACTTCCAGACCAGAGAAAACCTTTCTGGTATTAAGCTGCGGAGGAACTCCAGA  
ATGGAGGCAATCAGCATAACAATCACCAGAATAGTGATGATGTAATTGCGGACCCCATTTACCGTCAAAAATCAGTAC  
ACCGATGATCGCGTGAACGGCAAAAATGGCATAAAAACGCAAGGAGCAGTGGTGGTGGTTCCTGACTGACATCAACATTCAT  
GAGAGATGTGCTTTTTTATCCAGATAACGTTGCCAGAAGAAGTGGGCGATGCCATGCCGATAATTGACGCAATTGAG  
ATAGGCAGCGTCTTTTTGAAGGCGAAGTCAATCAGCGACATTTCCGGAAGCTTGCGCCGCCAGCACCATCCCTGAAGT  
CGGTGCGAGAATAATCGCCGCCGGGAGGCACAAATGGCAGCAGCTGCGCCACGACTGATACCAACGTTTACCATCACCG  
GAAATAGGGTTGCCATCAGCAAAACACCCAGACCGTTGCGGAAGAGACGGCCAGAGACATCAGACAGGCGCAAAAATAG  
GCGGCAATCATCAGCAGGTAAGGGGAGTTAATACTGCAATGGTTTTGACGCCAGCTTGACCACCATATCATTGCGGCC  
GATATGGGTGATGTAAGCGGCAAATCCACACAGCATATAATCATCATGCCAGGTGCGGCCGCGGCTCATTAGTAATA  
TTTTAACGTATTCAACGATATCCGTGGCCTGTAGCCTGTTGAAGCTGGCTGGACGGTAACACTTTGTGCCCATAAATG  
GCACTGATAATCAGCAATAACAGGCCACCGACAAATAACACACCAGTGGCGGAATACCTTTAATGATGTAGCGAGCTAC  
ACCCACAATAACCACAACCCCAATAAGGAGCTCAATGAATGTCAGCATAATTTTTCTGTCTCCAGGCCCAAAGTAAAT  
AATAAAAAATTCCTAAAGCTTAAGGAAAAATATGCCCAATAAATTGGCGATGAATGCTGATTAATAAAGAAAACTG  
CCATTAAGACATTGAAGTTGCTGTTTTATACATAGATAACAAAACGCATATTTAGCGTTGGCAATTATCACATAATAA  
TGTGTGCAAATTTGATGGTGGATTGATGCAAATTTGTTAATTGCAATGGTGTAGCTGCGGCTGTGCGCTCAAAAATAAT  
CTAATATGAGCATAGGTTGACGATATATATTATATACTTCGTTAAGATGATTGTTGTATCTCGTTAAAAAATAAATAAT  
TTTTCTTGATTGCAATTTGTCATCAAAAAGACTTGGTTTTCTTTTTGACTATTTCCATCGCAGAAAACGACGCATC  
ATCTTTAATCGATGCGCGGAAATATTTAACTTGAACAAGCGGAAATAAATAGAGCAGCTATTCAGATTATCTTTATGTT  
GGGTCTATTAAGGTTATGTTAATTGTAGCTTTGCTATGCTAGTAGTAGATTTTTGATAAATGTTTTATGGTCACAAATGA  
ACGTGAGTAAATATGTGCTATCTTTTCTTTGTTTTATTAGTTAATCAGCGTTGGTAAAGTTTTGTAAACGCAGAT  
GAGTGGATGACAACGTTTAGAGAAAATATTGCACAAACCTGGCAACAGCCTGAACATTATGATTTATATATTCTGCCAT  
CACCTGGCATGCACGTTTCGCTTACGACAAAAGAAAAACCGATCGCTATAACGAGCGACCGTGGGGTGGCGGTTTTGGCC  
TGTCGCGTTGGGATGAAAAAGGAACTGGCATGGCTGTATGCCATGGCATTAAAGGACTCGTGGAACAAATGGGAACCG  
ATTGCCGATACGGATGGGAAAGTACCTGGCGACCGCTGGCGGATGAAAATTTTCAATTTAGGTCTGGGATTACCCGCTGG  
CGTAACGGCACGCGATAACTGGAATTACATCCCTCTCCCGTTTACTGCCATTGGCCTCCGTGGGTTATGGCCAGTGA  
CTTTTCAGATGACCTACATTCCGGTACCTACAACAATGGCAATGTGTACTTTGCTGGATGCGCTTTCAGTTTGGAGAC  
AAATGAAGTTTTAGTAACCTTTAAAATCAATAGTAAAATAAGTAAACATCAAAAATAACCGCACTTTTATCACTTTTTT  
AGTAAAGTTACACTGGACAAAGCGTACCACAATTTGGTGTACTGGTAACCGACACAGCATTGTTGTCTATTTTTCATGTAA  
AGGTAATTTTGTGTCTAAGATTAAGGTAACGTTAAGTGGTTAATGAGTCCAAAGGATTCGGTTTTACTTCCGGAA  
GACGGCAGCAAAGACGTGTTGCTACACTTCTCTGCAATCCAGACTAATGGTTTTAAAACCTTGTCTGAAGGTGAGCGCGT  
AGAGTTCGAAATCACTAACGGTGCCAAAGGCCCTTCTGCTGCAAACGTAATCGCTCTGTAAGATACGTGACGCAAGAATTC  
AAAACCGCTTAATCAGCGGTTTTTTTTGGTCTTATGTTGCGGTTGAGGCCGAAAACAGCCAGAATGCCAGTGGCGT  
ATGGCAAAGACCCAGAAGGTTGACGAAAACGTTAGTAATGCCAGCCAAAGCGGCCCTTGTAAACAAAACACCAC  
TTCTGCCGAAAATGTTGAGAAGGTTGTTAGACCGCCACAAAATCCGGTGGTATTAATACTTTCCACACTGGATCAATGT  
TCGTCATCCTGCTGAACCATGCGAATCCTATTCTATGATGAATGCCCAATCAGGTTTGTGTCAGCGTCCCAACGGA  
ATCGCTGATGAGTGGGTTAAATCGCATACTTAACAGCCATCTGCCACGCTTCCCGTACCACCGCAATAAAAACTGC  
TAAAAGAAGTTGTAACACTGCAAAATCCTGCTATTTGATTTGATGAGTATAAGTGAACGCCGAATAATCGTCGTTGG  
CGAATTTTACGACTCTGACAGGAGGTGGCAATGCTGGTTGCCGACGACAGTTTGTGTTACATCTGTGTGGGAAAAGAA  
CGCTGAGATTTGTGCTCGTTGATGGCGCAGGCGGGGAAAACGACGCATCGCTGTTTGCCTGCCGGAAGCATTGCTGG  
CGCGGATGATCATGATGACGATCTATCGGTTAAATCAGCACAGCTGCTGGAAGGCGAATTCCTCGGACTTTACGGCGAG  
AAAGTAAACGTAACATGATGACGACAATTCGACGATTCATGTTCCCTTCAACCGCGGGGCGCGCATGGAATATGCTGGT  
GCACTTCAGGCAGGAAACATCGTCGCCGTTATGCCAACTGCATCTCTATGATGCAATTTGCCATTGAGGAATCACGCCG  
GTGTTGATGCTGTAATGAAATCGCTCCGTTACTGGAGGTGGAAGGGATGAAGGTGCGTCTGATGACCTGTTACTTAC

GCTTTCAGAGCTGGCGCTGGCACAGGCATTACAGGGAGCTGAAATCCTGGTACTTCTGCCGCTGGGTTGCGGGGCCG  
CTCAAAGAGCATCACTGGTCAACGTTGCTTGCCGCTCGTGCCTGGATACCACCTGTTATATGGTGGCGCGGGGGAGTG  
CGGGAACAAAAATATCGGTCAAAGCCGGATTATAGATCCCTTTGGCGTACCATTGCGGCAGCGTCAGAAATGCCTGCAC  
TCATTATGGCGGAAGTGACGCCGAACGTGTGCGTCAGGTGCGCGCAACTGCCGTCTTAAACAACCGTCGCTTTGCG  
CCGCCGCAATTATTATGATGTTTTTTACTCGGGCCTTGATTACCTTGTACAGATTGCTATTGTGTGCGCGCTCGAA  
TGACCGTTAATATTCTCTGGTTTTTAAGGCGGTTCTGTTGCCGTTATATGTCAAGAAGGTATCTATGGGTGAGATTAG  
TATTACCAAATGCTGGTAGTTGCGGCGTGGTCTGCTGTTGGGACTAAGAAGTTACGTACGCTGGGCGGAGACC  
TTGGAGCGCCATTAAGGGTTCAAGAAGGCGATGAATGATGACGATGCTGCGCGAAAAAAGGCGCAGACGTTGATCTT  
CAGGCTGAAAAGCTCTCTATAAAGAGTGACGTGGCGAGCAGGACGCTCCCTCAATATCTTGTTCGATACAAAAACCCG  
CTTCAAAAAGCGGTTTTTATCAGACAGATGTAAGTAATTATTACAGGATTACTTAACTCCATCCCTTTCGCCTGCAA  
ATCGGCGTGGTAAGAAGAGCGGACAAACGGACCGCATGCAGCATGGGTAAAGCCATCGCCAGCGCTTCGGCTTTCATTT  
CGTCGAACATCCTCGGGTAAACGTAACGTTGAACCGCAGGTGATGGCGGCTTGGCTGCAATATTGCCCCAGCGTTAAC  
ATCGTCACACCATGACGGCGCAGGTGCGCATTACCTCAATAATTTCTTATTGGTTTTACCCAGTCCCACCATCAGACC  
AGACTTGGTCGGGATTTCCGGATGCGCTTCTTAAAGCGTTCAGCAGCTTCAGCGACCAGTTGTAATCTGCACCAGCC  
GTACCTGACGTTAAATACGCGGTACGTTTTCCAGGTTATGGTTGAACACATCTGGTGGCGTTCAGTCAGAATATCCAGA  
GCACGATCCATACGACCGCGAAATCCGCGCAGAGTTCATTTTGAATTTGATTTGCGGGCTTTTTCCGAATGGCAGTAAT  
GCAATCCGCAAAGTGCTGGGCACCGCCATCGCGCAGGTTCATCACGGTCAACGGAGGTGATAACACATAACCGCAGCGCCA  
TATCGGCAATGGTCTGCGCCAGTTTACTGGTTCATTGGCATCAGGAGCTACCGGGCGACCCTGGGCAACATCACAGAAC  
GGACAACGGCGGGTACAAATAGCGCCGAGGATCATAAACGTTGCTGTGCCGTTGTTGAAGCATTCCGCCAGGTTAGGGCA  
GGAGGCTTCTCGCAGACAGAATGCAGGCCATTTTTGCGCATTGCGGCTTGTATGCCCTGGATACGTGTAGAGTCCGCTG  
GAAGCTTGAATTTTATCCATTCCGGCTTGGCGCAGCAGGCTTCCGCTCTGTTGCCACGTTTTTAAACGGGATAAGGGCC  
ATCTTATCGGCATCGCGTATTTAACACCGGTTCCATCACAATGGGTTTACTCATAGCGTGCCTGTTCCAGTTGCGAAT  
TACGAAGGAAAGCGTTTCAATTCATAGATTGTTGTAATTATCAACTATTTTTGAATTAACGACTGGCAGTATATCATTG  
AAACGGACCTGAAAGCAGCAAAGCGGTGCGAAAAATGAAAATTGTTGTTGGATTGTGCCATTTTATCGTTCTGCGCTG  
TGATCTGGCTGTAACAATACTTTTTCAAATGCATTACGGATAACATCTATTACTCCGTGCAGGATGGGATCACGCAGGC  
TGAATTTGTTGATGGATAGAGAAATCTATTTGCTCCTCATTTAAGGACGGAAAAGGCAGTTTTTCCAGCGCCAGCAG  
CGGCTAAACAGGTTATAAAAACGGCTGGGAATAATCGTAACATGCTACTGTTGCAACCAGTGCAGCGATTGTCAAAAT  
GTTGTAGCTGGTGAATTTGATTTGCCGTCGGAAACATTTCTTGAATCTCTGCCGACAGCCGCTGAAATTTTGTCTT  
CCGTAACAGAAAGTACATGCGCAGCGTTGTCGATAGTCTCTGTGATCTTCAAAGAGAGTAGTGGATTTCCCTCGCGG  
CAAATTAACACCATATTGTGCGTGAACAGAACATGATGTTGCACCGTACGATTGGTGCAAAACATGTTATCGATGATGAG  
ATCGGTTTGAACCTGACTGAGTTGGTTTTCCGCGTCTGATGGGCGGGTTCGCGAGTAAAAGCTGCGGATAGTGAGTTT  
TAATCGCCGATAGATGACAGGAAGGACCAGTGCTCCGACCGAGGGAGTGGTCGCAATAGTTATCGTTGTTGCTTATCA  
TAGCTTCTTCGATATCCAGCGCGCAAGAATGGACTCAAGGCCCTGACTGATATACTCATGTAGATGCATCGCAAATGC  
GGTAGGAGTGACACCCTGGCCTTTCGGAATAAACAATGGGTCAGGGAATATAACCGCGCAGTTTCTGAATAGACTGACTGA  
TTGCCGAGGGGTGAGTTAAGCACTTTCGCTGCATTAACGATCCCTTATGTACATATACAGCTTCAAAAATAGTCAGA  
AGGTTAAGATCAATATTTGTAAGGTTGTAATATTTGTTGTTACCTTCTGACGACTTCTGCTTAAACAGGGTTCAAT  
TTGATTACTATCCACGCACTTACTCCAATTTTATTCATGGAAAAATAATATTTAAAAAATTACAATAATCTTATGTC  
TAATTTGAACGGAACGCTTTTGTCCACATAATCAACTATTTCAATAGGTTAATCAATGGGGTGAAGTTACGGAGCAAGGC  
GTGGCACCGCATTTCTGCAAGTGATAAAGAAAATATAACACCGGAAGGAGATGTAAGCATTAGCAGATATTATGAGTA  
ATGACCCAGTGAATTTGGCCATTGATGATGGAATTAAGCGGTAATATATTCGAAGTCCGGATTGTTTAGTAGCCGTA  
AAATATTTTCCAGTAAACGTGGAGCAATATTATTAGTCGTCGCTTCGGGTTTTCCATTGTGATATTTTAGCCATTTCCATT  
CCGGCATACCACAAGGATTAATACGTAAAAATGGTGAAGATCCATATTGACGTTTAAATGCCAGACCCTGGAATGAACA  
ACCGCGTGAATACGTAACCCAGTGAGCAAATTTCTTTCCCAACATAGACACCTGGCGCGTCAGCCGAGGATGCG  
CTTCTATACCCAGTTCAGCCAGGGTATTCACCACTGTTTGTCAAGCAAGGTCACCAGTTCACGCACACCAGTTTACGG  
CGTTTACGGTTAAGCAACACATACATCACCTGTTGCCCGGCCGCGTATAAGTACCTGCCACCGCGATCGCTCTGGAT  
CACCGGAATATCACCCGGCATTAAATGTGCTCCGCTTTTCTGCCTGACCTTGGGTGAATACCGGATAGTCTCGACCA  
GCCAGATTTTATCAAGGGTACTATCATCGCGGTATCGGTGAATTCATGCATAGCCTGGGAGATTGGCTCGTAAGGCTGA  
AGACCGAGCTGGCGGACAAGAATTTTATCCTGATACAAAACGGCATCTCCGTGGAGAATGAGTAAAAGTGGGGGAAAAGT  
ATATCACAGCGAGGAGAGGGGAGTTACCCGACCAGGAGCCGGTAACGGAGAAGCGAGTTACAGAACCATGCGGACAATA  
TCGATTTTGCCAGTTCTTCATACAGTGTTCACCTGCTCGATATGAGTGGCGTTGATAGTGATAGATACCGAGTGGTA  
GTTGCCTTTTGCTGTTGGTTTTACCGTTGGGGTGTAGTCACCTGGCGCATGGCGCTGTACCACTTCAACCACCTGATCAA  
CCAGCTCAGGTAACGCTGCCCCATAACTTTGTAAGTAAAAGGAGTAGGGAATTCAGCAGTTCGTTAAGTTTGGTTTTT  
ATGTCAGCTCCGGCGTAACGTAATTAATAGCAACTCCCGCCAGAAGGCGGGAGTTTTTACTGATGCTTAGTATATGGG  
GACGGAAATTACACTTTCAAGTGTAAATTTTAAACCAAACAGTGATGGAACATTAATTTAATGTAATCAATGATTTTTG  
CCGAAGAAGTTACCTTCCGGGATTTCTTGAACACAACCGAGCGGGCTTGTGCTGATCGTTTTGCCATCAAGCTGGAAGTT  
GATAGTTCCGACGACCTGATTTCTTTGACAGCGCGCATGCAATCACTGCTGTTTACGCACATAGCTGGCTTTCAGATCTT

TCATGCGACCACGCGGAATGGTCAGGTACACGTCTTTATCAACCCTAACGAAGCGGATCAGAATCACCAAACAAACC  
GGTTCAGAGGGCAACTCTTTACCTACTTTAGTGGGTTAACGGTTTCAAAGAAACGGAAGCCCAGGTTAGCAGTTTTTT  
ACTTTCGGCTTACGGCCTTTAAAAGTACGTCCGCCATTACCGCAGAAATCAAGCGCATCTGGCCTTACAGTCGAGAAG  
CAACAAGGTTGTAACCTGCTTTGTAGTGTGCCGTTTTGATGCCGTGACATTCAGGCTGTTATCCATAACAGGCCG  
TTACGGTTCAGCTGGCGAATACCGTTAAACGTAAATCTTTTTCTTTATAGATCGAGTATTCATTCCGGTACGTACGGAT  
CAATGCCTGGCCGATCAGCGCCATATCTCGCGGGAGCTGACTGACCATCAGCATCCAGACCATGTACCGTCTGGAAGT  
GGGTATTTTTAGGCCAGTGCCTAACGTAGCTGTTATCAAGCCAACAAAAGCGTCTGGTACCAGCGGCAAAATCG  
GCCATGGCGACACAAGCATCGTTACCCGATTGCAGGTTAATACCGCGGATCAGCTGAGAAACCGGAACCTGCATGCCCGG  
TTTGAGGAACATCAGCGAAGAACCTTTAAACACCGGGTTACCGGTGGCCATGCGTCTGGCAGTAGTACTAAATCAG  
TTTTCTTTAAATTTACCGCTTTTATTGCTGGCCGATAACGTAATGGTCATCATTTTTGGTCAGGCTGGCAGGATCGCGG  
CGGACATCTGCGTTCTGTTCCGGCAGCACTTTGCCGGAGTTATAGTCAATCAGGATGTAGGACTCCGCATCGATCTGCGG  
TACACCCGGGATCATAGTTTTGATATTCAGGTATCGGCATGTGCAGCAGAGATAAAGGCTGTGCAAAGAGCCGTGGTGA  
GCGCCAGGCGCTTATGATACGAGCGGAAAAATGGTATTATGGTCTGAACTACGACATCCGTGATGGAATTAAGAAAG  
TGCCCTACTATAGCAAATGCACTACCGCAGGCATCTGACTTTCCGCGTGACTTTGTTAACGTCAATACAGAAATGAC  
ACATCAGATCGCTGCTTACGCTACTGCGCGGTAGTAATAAATGACTGTAATTGGGCTTCGGTTTTGCAAACCTGTCTGCA  
AGTACTGGTTCGGCTTTGCTGGCGAATGGGCCAAGCTGGATCCGCCAGACCAGCCATTTTTGAGTTACGGCAGCCGGG  
ACGCCGAACCTTGTCCAGTTGCTGTTGGTACTGTTGCGCACAGCCTGATCGCTTACGGCCCCGACTTGCACCATAAAA  
GTTGCCGCTGGCGCTTTGCGAGACGGCTTGCAGTGTACCATTGCAGCGAGGTTGCAGGCGTTGTCGACGGAGCTGTAA  
CAACGGGCTGTGGCGCAGGCGTCCGTTGCTGCCTTCCAGTACACCAGGCGCTAAGGTCGTTGGTGGCCGAGGAAACCG  
CTACTGTTACCGGCGCGCCGGTCCGATCTTCCGTTTTAGCGTCAATTAATGACTGACCGGAAGAATGTCACCCTGCGGGC  
AGACTGAACCTGTTCCCGCGCCACCCTTAAATCGGGAGGTGCAGGCGGCGTAAGTCTGTTGGCGACTGTGGTAC  
AAGCCATACCAGGACCAGAAAGCGAACCATCTGGGCAACAATAATCGGATCGATACGAACCTTTGGTGTGTTGACGTG  
TTAAGACGGTCAGCTGCCGCGGAGAAAGTAAATAACGCGGTGTTGCCGTAAGGCGCGGATCATAATGCGCACCCAC  
GATCATTGCCCGTTAGCCAGGTTAGTGATTCTGGCGTAGCTGGGATCGGAAGCGTTGGATGGGCTGCCGTGAGCTGTG  
TCGGATCGAATGCTTCCGAGAGGCCGTAGGTTACTGCCGGTTCGGCATCATAGATTGCCGCCAGTCCCGCTGGCTA  
AATCGAGACGGATCTGCACGATTTTTGAGCTTTTACCCTGCGGCTGGAATCCTGATTTGCCGTGCGTTCAGTGGTTC  
GAAACGCGGGTCCGCCCCGTAATTTCAACTATAGGCGGTTACATAACCGCAGGCTGCGGTACACTTACCCTGCTGTTGCT  
GACCATCATCGCTTGTACATGCCGCGAGCATTCTGCCGCGATGCAGATCCCGAGCCACTGCTTACGCATTGCGCACCTC  
TTACACGCTTTTGCACAACATTTTTCTGTGGGTGTGATTGACATTAACAATCCGAACCCAGCCATCAGACAATTAGCG  
CCGATCCTCCATAAATGACCAGTGGGAGCGGAACCCCTACAACCGGCGAGAATACCGCTTACCATACCAATATTTACGAAG  
ACATAAACGAATAATATCAGCATTAAAGCCGCGCAGCCATGACGCGACCAAAGGTGGTTTGGCCTCTGGCGGCTATCCACAG  
CCCGCATGATCAGCAGAAATGTAGAGAGCGAGCAGAAATCAGAATGCCCACTAATCCAGCTCTTCCGCCAGTACCGCGA  
AGATAAAGTCAGTATGGCGTTCCGGGAGAAATCAAGCTGTGACTGAGTGCCGTGCAGCCAGCCTTTGCCGCGTAATCCG  
CCGGAGCCAATAGCAATTTAGACTGAATAATGTGATAGCCCGCGCCGAGTGGGTCTGATTCCGGGTCCAGGAGCATCAT  
TACGCGCTGGCGCTGGTAATCATGCATCAGGAAGAACCACAGAATCGGAATGAACGCGCCTACCAGCACTACTGCGACGC  
CAATCAGACGCCAGCTAAGGCCAGAGAGGAACAGTACAAAACAGACCGGAAAGCGAACGAGGATTGATGTTCCAGGTCA  
GGCTGTGACGCCACCAGCAGCGTGGCATAAATATCAGCACCAGCGGATGCCAGTGTCTTCAACGATGGCGGGCAAAC  
GTCGCGGTTGATAAAGCGCGCAACCATCAGTGGTACGGCTATTTTGGCAATTTCCGACGGTGAACCAACGAACAATACCGA  
AGATAGGGGGCCAGCTTATAAACCGCTGGAGGAATTTGCGCCATACCACCATGATGACCAGACCCATCGCGATTTG  
GCCGATTTTACGCTCCATCATGCCAATATCCTGACCCTGCGGCTCCAGATAAACCAGGGCGCTGTAACCAAGCAATGCCA  
GTAAGATCAGCAGCATTGTGGGATCGAGATGGACTTTATCCAGAATGTTTTTTTATTCCGATTATCCGTGATGATTAAT  
GGTCTCCGCTGCGGCAACCGCTGGATTTTCCGAGGCGAGATCGGTGTTGTTATCACCCAGCATAATGTGGTCCGAGGATC  
TGCGCATCAGTGTACCAACCGCGGACCCGACCCGTTCTCCAGAATCATGGCGACAGCCACTTGGCGATTGTTGTA  
TGCGCAAAGGCGGTGATCAGTTTGTGGTACGTAACCGTCCGCAATTTTGTGCGCATTATAGGTTTCTGCTTCA  
GACCGAAGACCTGAGCGGTACCGGATTTCCGCGCAATTTGTACGGTGGCTAGCAAAGTATTTATGCGCGTACCGTTA  
GGGCGTTAGCAACACCGTACATACCGTCTTTCCGAGCTCCAGTAACCGGAATGAATATCGCCGACGGCGGTTTCATG  
CGGCTGATCCCATGGCACCTGTTTCCGCTTCCGCGGTGCTCATCAGCAAATGAGGAACCTTACGATACCGTCATTA  
TCAGGATCATCAGTGCCTTACTCATCTGGATTGGGGTGCCTGTCCAGTAACCTGACCGATACCAACCGGAATGGTGTCA  
CCCTGATACCAGGTTTTTAAAGCGTTTCTGTTTCCATTCCGCGGTAGGCATGTTGCCGGAACGTTCTTCCGCCAGGTC  
GATACCGGTGTAATGACCATAACCGAATTTACCCATCCATTCCGAGAGGCGATCGATCCCCATATCGTAGCCACCTGAT  
AGAAGAAGGTATCCGAGATTTCTCCAGCGATCTTGTGACATTGACAGCGCCGTTGGCCCCATTTTTTCCAGTCACGATAA  
CGTTTTTCCGAACCTGGCAGTTGCCACCAGCCTGGGTAACACAGCGTCTGATTTGCCGCTGATCACCCCGCGCTCAATGC  
CGAAACCGCCACATAGGGTTAACTGTAGACGCGGGAGGATAAACCCCTGTGTGGCGCGGTTACCAGCGGTGATTCG  
GATCGTTCAACAAGGCGGAATAATCTTTGCTGGAGATACCGTCAACAAACAAGTTTGGGTCAACTAGGCGTGAAACC  
AGCGCCAGCACCCACCTGTACGGGATCGGTGACTACCACAGCTGCGCGGCTACCCGCCAGCAGCGTTTCAATATATTG

CTGGAGTTTGAGATCCAGCGTCAGGTAATATCGTGTCCGGCTTGCAGGTTACTTCTTTAACTGGCGAATAACACGCC  
CACGGTTGTTAACTTCAACCTCTTCATAACCGGTCTGACCGTGCAGCACATCTTCATAGTAACGCTCAATGCCAGCTTA  
CCGATATCATGCGTTGCCGATAGTTGGCCAGTTTCCGCTCATTATTCAGGCGTTCGACGCTTTATCGTTGATTTTCGA  
CACATAGCCGATGACGTGGGTCAACCGCGAACCGTAAGGATAGTAACGACGTTTATAGCCTTTAACTTCGACACCCGGAA  
AACGGTACTGATTGACCGCAAAGCGAGCTACTTGTACTTCCGTCAGGTTAGTTTTACCCGGAATAGAGGTTGAAACGGTGT  
GAACGTGCGCGCTCTTTTCGGAATGCAGCAATATCGTCATCGGTGAGATCTACCACGCTGCGCAAAGCGTCCAGCGTTG  
CTGCACGTTATCGACTTTCTCCGGCATATTTCTATCTGGTAGATAGTGCAGTTCGAGGTCAGAGGATACCGTTACGAT  
CGTAGATAATGCCGCGGCTGGGCGGATAGGCACCAGCTTAATGCCGTTTTCATTAGAGCGGGTCTGGTAGTCGGTAAAG  
CGAACAATTTGAGATTATACAGGTTGGCGATAAGCACGCCGTCAGCAGCAAAATCCCCAAAAGGCGACCAGCGCCCG  
GCGCACAACAGCGCGGACTCTGCCGTATAGTCGCGAAAAGAGTTCTGTAGTTTCATCCGTCGCTTTTCTACTCAAAGC  
TCCCTTATCACTACGCGTATAAGGATGGTTGGTGGTATGCTCCACGCCCGGTACAGACTCTCTGCGACCAGCACGCGA  
ACCAGCGGATGGGGGAGGTAAGCGCCGACAGCGACCAGCTCTGCTCAGCCGCCGTTTACAGGCAGGCGACAACCCCTC  
AGGCCGCCAATCAGTAGACTGACGTCGCGACCATCCAGCTTCCAGCGTTCAGCTCAGCGGCTAACTGCGGCGTATCCC  
AGGCTTGCCTGGAATATCGAGGTTGACAATGCGGTTTTTGCCTGCGGCCCAACATCTGCTCACCTCTTTGTGAGT  
ATGCGCTTGATGTCGCGATTCTTCCGCGTTTTCCGGCCGGAATTTCAATCAGCTCGAAGGCGATATCTTTCGAAAACG  
ACGCAAGTACTCGGTAACCCGTTTTGTACCCAGTCCGGCATTTCGTTCCACGGCGACAAGTTGACGTTTCACGCATT  
AACTCCAGAGTTTTTCCAGTTCATACAGCGACGGCTCTTCCCTGCATGACATGGACAATCACATCGCCCAATCCACG  
ACAATCCAGTCGCGCTGTTTTACCTTCTACGCCGAGCGGTAACAGGCCCGCTGCGCGAGACTCTGCACAACGTGGT  
AGCAATGGACATAACATGACGGCTGGAGTACCCGTACAGATGATCATGCAGTCGGTATGCTGGATTTGCCCTGAACGT  
CTAAGGCGATGATGTCCTGACCTTTGAGGTCATCAATTTTGTGATAACAAAATCCTGGAGTGCTTTACCTGCAAGTTT  
TCCCCCTGGGTGAATCAAATAGATAAAAATGGTCTGTGAGTATACCTGAACCAGAGGCGATTTGCGGACAATTTGCGCCG  
AATCGGCTTTGAAAAGTGGGCTATCATCCACCCCGCGCCGAGATTGCATCGCATTTTTTGTAACAATTTCTACAAA  
GTCGTGTCTGGCGAAAAGTCTGGCTGCGGAGAATATCAGCCTGCCCGGTCTGTCAATGGTCTGCGGCTTACCCGT  
AAAAAACAGAAAAGTATGCATTCTGACCCCGATGGCACGGCTATTGAGGACGCGTAGCGTCGCGAATTTTTGGTTGA  
TATCAATGGCGCTCCAACACCCTGGTCAACGCGAAAATGCCACATAGTTCGGCAGGCATGCCAATTAACGGGCGATT  
AACAGACTCAGTACACCCTGATGGCTGACGACTAAAATATTCTGATAGTCTGAAATTCACTAAGCCTTGCATAAAGCG  
TTCCACACGTTGCGAAAATGCCTGAAATCCTTACCCTTCTGGGGATTGCATGCTGCCAGTCATTGCACCACGCGCTAT  
AGTTTTCGGCATCTTCTGCATGAGGTCGCGATGATGTCGCATCTCCAGTCGCCAAAAAACATTTCTGTGAGTTCAGGT  
ATGATTTGCACGGGAGCTGGCGGTCAGTGAAGACAGTCGCGCGGTATGCTGTGCCCGTTCCAGTTCAGTGCATAAAAC  
CAGATCAAAGGAAAACACCATGTAGCAGCGTATGCAGATTTTGGCTTGTCAATACCGCGCGGTCAGGGGGTGGGCG  
CATGACCGCTGTAAGACCATCGATATTCGCTTGCCTTACCATGACGAATTAACCACAGTCGCATCATGCCCTCCGTA  
ACGACAGGTATCAGCGATACAAGCCTTGTGGTAAATGTAAGTCACTACCGGTTCCGGCAATAAATCCTCACATGATTA  
CCGTTTTGCAAACGTTCCGGGATGATGGTCCGCGAGATGTTAAACCACGGCGTTTCAGCCAGATAAATTTTACCGGCAGG  
CTGAAGGTGAAGATCTTCCGGGTTATGTGTCAAATGATCTTCCAGCCATTGCTGGTATTGCGGTTGCGCCATTTCAAGTG  
GGTAACCTGGACGCCGACAGACGATCAAATGTGCATTGTGAGTATCGTTTTCTGATTTCGTACCAGGTCGGAAGGTCAGC  
AGTGAATCCTGACCAATAATAAACGCCAGCGGCAGTCCGGTCTTGTCTGCCGCCACTCTTTCAGTGTTCGCGAGT  
GTAAGAGGGGGCATTGCGCTTTAGCTCGCTTATCAAGAGTAAATAATGGCTTGTGCGCAATCGCCAGTTCAAGCATGT  
GTTTACGCTGCACGCTGTTCCGCTTCCGGCTGGGACGATGCGGAGGAACATTATTAGGGATGATTGTACCCGCGTCCAGA  
CCAATCAAATCGCCAGCTTTCCACGGTTTTAGATGACCATAGTGCACCCGATCAAAGTGCAGGATAACCTTCCAGCTCT  
TAAAGATTTTATATCAACCGTCGATAAATACGTCGCGCAGGGTTTATGGCACAACAGAGATAACCTTCCAGCTCT  
GCCACACTGACTGACCGTAATCTTGTGAGGGTGAATTCGGTTCGTGTCAGGAGTTGACGGCCTGACGTAACCTGCGT  
CTGACTTAAGCGATTTAACGCCTCGCCATCATGCCCGCGGTTCTGCCATACCCGATGCTTATCAAACAACGCACGCA  
GTGGCGTATGGGCGACTGGCGTTTTAGGTTAACAGTAACAACAGTTTACGTTGTAATGTGCGCAACAAAATAACCGGT  
TCGCTGCCTTCCAGACGCGATTGCTGAAGAATATGCAATGCGCGCTTACTTTTTCCCATCAACAAAGCATCAACCCAATG  
AAAAGGGTGAATGCGCGCATATTACCCTGTTCAACGCGCGGTAATGTCAATTTGCCGCTGCGCAGAGCAGCG  
ATAAACGCTCCAGTGCCTGAGCCAGCGCCAGCAGTTACCTTTCATAACAGTAGCAGAGCACCTGATTTGCCGCGTATCC  
AGTTCTAAGTTGAGCTGTTTTGCGCGCGCAGCAACCCAGCGGGAAGCTGAGCTGCTCCGGTGTCTGACAGGTCACCTG  
CACGCTGCGATTGCAAGCGCAGTAACCCAGCGGCAATTTTCTGCGCTTGTCTTAATTTATTACCGCGGACGATCAACA  
GCAGGTCGTCATGAGAAGTCCGGTGAAGTGTGAGAAGTTGCTCATTGATCGCCGATTCGGTCCGTTTTCTGGTAACAAC  
AGCAATAGCGTTTGTGACTGGCAAACAGACTCATAGCCTGGCATAACGAAAAGATCGATTCCAGTCAGTGTGGGATC  
AATGAAAAAGTGTGGTGTCTTCAATCCTTGTGCCGAGCTACCTGACGAACAGCGTCTGGCTTTCCTGCAATAACA  
GAGGATCGTTACCAAGTAAAAGATACGCCGCGCGCAGCCCTTATTGAGCTGCGCGGAGTTGTTCCGGGTACAACCGA  
ATCATCAGTTACCCAGCGTGGTGGAGACGCTGCAGCGTTGCCGGAGTATCCGTTGTGGTGCAGCTGTCTTCTTCGTCG  
GAACGAATATCCGAGCACGGATGCTTGGCAGCTTACGAATCAGCTGTTCCGGCAGCACGGTCTACATCTTTTTACGAT  
CATGTCTTGTTCGTTATCTTTCGCTAACGCCATTTGCGGGTATCGAAGAACGAACGGAAGACTTTGGCGCTAATCGGGT  
AGATATCACGGCCGGGATCAACACGGTCGCATTAACCGTCATGATCATCTGATACTCTGCTGTTGACCGTTACGGAAT

ACCGATGCGGTATCTTTGCGATGCTCACTTTACCCAAACGCAAGGATGGAACGTCCTTACGCGTGGTTCTTTATCAAG  
CAACTCGACACCATTAGACGTAAGTGGTTACGCACCGCACGGCTTAATGGCCGTTCCGGATCGCCTGAGTCCAGGATCA  
TGACCTTCATAGTGAAGGAACCTGCGTGGTATCACGCAGATGCCAGCCACACCCGGCGGTGATTAACACCGCCAGAGAT  
AACAAACATGTTGCCAGATATCGCACGCTTCTCCCGCCTTAGCCAACGACCAGATTGAGGAGTTTACCTGGTACGTAA  
ATCACTTTACGTACAGTAACGCCATCAAGATATTTTGTACCAGATGTTCTGCGCCAGCACGTTTCGCGAACCTGTTCTTC  
CGTTGCGTCCACCGGAACGGTGATTTTGGCACGGACTTTACCGTTAACCTGCACCACGACCAGCGTGGAGTCTTCCACCA  
TCGCTTTTTGTCAGCAACCGGCCACGGCGCTTGTGATATCGCCTTCGCCTTTCAGTTCCTGCCACAGCGTGAAGCAG  
ATGTGCGGGGTGAACGGGTTAAGCATAACGGACAACGGCCAGCAGTGTCTTCTGCATCAGAGCGCGATCCTGCTCGCCATC  
GGTTGGTGTCTTCCAGTGTTCATCAGTCCATAATCGCCGCAATTGCGGTGTTGAAGGTCTGACGACGGCCGATAT  
CATCGGTCACTTTAGCGATCGTTTTATGCACATCGCGACGCGCCTTCTGATTTTTCAGTCAGCGCATCAACGTTTCAGT  
GCCGCAACATCACTTTTGCTGTGTGCTGTAACAGTTCAGACAGCTTTCAGGAAGCGGTTAGCCCTTCCACACC  
GGATTCCTGCCATTCGAGAGTCATATCAGCCGGAGAAGCAAACATCATAACAGACGAACGGTGTCCGCGCCGTAACGTT  
CAACCATCACCTGCGGGTCGATACCGTTGTTCTTCGACTTGGACATTTTGTGCATGCGGGTATAAACCAGTTCATGGCT  
GCCGCATCTTTCGCTTTCAGGATACGGCCTTCTCCTCAGCTTCAACGATAGCATCAACCGGGGAAACCCAGTTACGTT  
GCCGTTTTCCCAACATAGTAAGGCATCTGCCAGCACCATACCTGACACAGCAACTGTTTCGCTGGTTCGTGAGT  
TCACCATGCCTGCATCAGCATCAGTTTGTGGAAGAAGCGGAAGTAGAGCAGTGCATAATGGCGTGTCAATACCACCA  
ATGTAGATATCCACCGGCAGCCAGTAGTTAGCCGCTTCGGAATCCAGCATACCTTCTTTGTAAGTGCAGGCAAGTGTAGCG  
CGCATAGTACCAGGAGACTCCATAAAGGTGTGCAAAGTGTGCGTTTTACGCAGTGTGGCATAACCGTTAACGGTAGTTT  
TCGCCCCTCCGGATCTGCTTAAATCGGGCTGGTAATGCCGTCATTACCACATCTTCCGGCAGGATCACCGGCAGCTGG  
TCGTCCGGGGTCGGCATTACGGTACCGTCTTCCAGCGTCACCATCGGAATCGGGCGGCCCCAGTAACGCTGACGGGAAAC  
ACCCAGTCGCGCAGGCGGTAGTTCACTTTACGCTCGCCAACGCCATCGCAGTCAGTTTTATCGGCGATGGCGTTGAAGG  
CCGTTTCATGGTCAAGACCGTTGAACTCGCCAGAGTTGAACAGCACGCTTTTTTCAGTCAGGGCTTGTGAGAAAGATCT  
GGCTCAGAGCCGTGAGTGCAGGATAACCGTTTTGATGTTTCAGGCCGATTTAGAGGCAAACCTGATGTCGCGCTGGT  
GTGCCCCGGTACCGCCATAACTGCGCCGTGCCGACTCCATCAATACGAAGTTTGTGCCCCAACGGGAATTTCTTCGC  
CCGTTAATGGGTGAACCGCTTAAAGCCAGTATCGACGCTTTTTTCTCCATCGTCGCCATTCAGCTTCGGCAACTTTG  
GTGTTACGGCATTGCTCAATAAAGGCCCGCAGTTTCAGGATATTTTCCGCCGCTTCTGCGCCAGCGGATGACCCGAGC  
TACCGCCAGGTAGGTACAACCATAAAGGTGTCCGGCGGGTAGTGTAAACGGTCAGCGTGTGTCATAGTCGTTAACGT  
TGAAGGTGATCTCCACGCTTCGGAACGACCGATCCAGTTACGCTGCATGGTTTTAACGGTGTCTGGCCAGTGTCCAGT  
TTATCCAGATCGTTGAGCAGCTCGTCAGCGTAAGCAGTGTATTTGATAAACCCTGCGGGATCTTTTACGTTCAACTTT  
GGTATCGCAGCGCCAGCAGCGCTCGATAACTTGTTCGTTCCGCAAGTACGGTCTGGTGTTCGGGCACAGTTGACCCG  
CAGAAGTCTTCTATATACCAGGCCTTTTTTATACAGCTCGGTGAAGAATTTCTGTTCCCAACGGTAGTATTCCGGCGTA  
CAGGTTGCCAGCTCGCGGCTCCAGTCATAACCAAAGCCAGCATTGAGCTGGTTTTTTCATATACGCGATGTTGTCGTA  
CGTCCACGGTGCCGGAGCGGTGTTGTTTTTACCAGCCGCGCCTTCCGAGGCAGACCAAACCGCTCCAGCCGATCGGCT  
GCAGGACGTTTTTGGCCAGCATACGCTGGTAGCGGGCGATCACGTACCAGTGGTGTAGTTACGTACGTGGCCCATGTGT  
AGTCGACCAGAAGGATAGGAAGCATAGACAGGCAGTAATACTTCTTTGCTCTGCTCTTCGTTACTTCAAATGTGCG  
CTTCTCATCCCAATGAAGCTGACTTTGGATTCTATCTTCCGGGCGGATGCTCTTGCATGGCAGCCAGTGGTCCGTG  
TTTTCAATACGGCTACAAATGTAGCGTTGAGGTGGTTTTTTCAGATCCGCATAGCATAGCCCAAACGTCGCGTCAAACA  
GCCTTTCGCGCACTCGACGTTGAAATGATGCCGGATTATTCATACATTAATTTACAGAGTTTGTGGCGTATTAGCAA  
GCAAGGAACAAAGAACGTCTATTATTAAGTCAGTTAACGACCCGGGAGATGAAACGATGAACAAGGTTGCTCAATATTA  
CCGTGAACGTTGCTGACTGAGCGAACGCTCGCAATGGCAACGTCATATCGACGCACTGGTGAACAGGCGCGCG  
AGCGCGTAATAAAAAACAGGGGAGTTAACGCGAACCAGGTGATGAGCTGACGCGAGCTGTGAGACGCTGACCTGGAAGAG  
TTCGCCATGAGCTATGAAGAGAGCCTGAAAGAAGAATCTGACAGCGTCTTTATGCGGGTGATTAAGAAAGCTTGTGGCA  
GGAGCTGGCAGACATACCGATAAAACGCAGCTTGAATGGCGCAAGTTTTCCAGGACCTCAATCATCATGGGGTTTATC  
ACAGCGGAGAAGTGGTGGGCTGGGAAATCTGGTCTGCGAGAAATGTCACCTCCATCTCCCGATCTACACACCGGAAGTG  
CTGACGCTATGCCGAAATGTGGTCATGACCAGTTCAGAGACGCCGTTTTCAGCCGTAATAGTCTGATTTTCGCACAGCA  
ATAAAGAGAATATGGCCGAATGAAATCCCGGCCCTTGTTTTTATCTCTACAGTAAATCTTCAGTCTCACGAATTTCC  
TGACTGACATCTCGTTCCGGATGACTGAACTTTACGATACAGTGCAGAGCCTGTCGGAGATCGACAGTCTTCTCTC  
TCCGTAGTGATACATAATGGCCAGGTTATACCAGGCAGTGGCGTCATTGCATTACGCGCTTTCGTAACCATCAAAGG  
CAGCCTGATAATCTTCTCAACGCTTGTCCGTGTTTATACATATAACCGATGTTGACGTAAGCGCCGACGCTCCCCTGA  
GCGGACGCTTCAGATACAGTACATCGTTGCTTATAGTCTGGTCCACCCCTTCGCCAGCGTTATAATCCCATGCAAT  
TTGAAACTGGGCGTGCCGATTACCCTGCTGTGCGCTTTTCAAATACCAGAATGCGGCGAGTGTCTGTTTTGAGCAACGC  
CTTTCCGCTTCATAAAGATCGGCCAGATTGTTTTGCGCGTCACTATGGCCTTGAATGCAGCTTGTGTTGACAGAAA  
AATGCCAGCGCATAGTCTTTTGCAGTCCGTTGCCATTTCTGTACATCCACCAAGATTATTTTGCAGTAAAGACATTC  
GCTCTCCGCGCTATCTGATACCAGACAACCGCTTCTTTATAATTGGGGGCTTCTCCACGATCCAGTGTCCAGCCAAGGG  
CGTTGGAAGCGAAAGTATGGCCTGTAGGGCAGCTTTTTTTCAGCCAGAAGATGGCTTGTCTATTATCTTTATGACGGCTT  
TTATCTCGGTATACTTTTGCCTAAGGAATACTGTGCTTCAATGACCTTGTCTCAGCGCCAGCTTACGCCAGTAAAA

GGCTTTTTCGTCGTCGGAGAATCAATTGCGCTATCGCGATTATAATAAAAACCCAACAATATATTGAGCCTCGCAATCGC  
CTTTTTCAGCACGTTTCGATAATCTCATCTATTGATAAATTATCGCAGCAACTTGACGTGAAAATCATTATCATTTTCCTTA  
TGGTTGCAGATAAAAACATATTATATTTTTATGTGTTCCATTTTTGCGTAAGCCTTATTTTTATGCGTATTATGTCGCGTCA  
GAAAAGTATAAATAAACGAGCCTCGCAATGCGGCTAATATTCAATTAATGAATATTTAAGGATAAATTATATGGACATGG  
AGTCGCAAAAAATATTGTTTGCACCTTCCACTCCGATGGAAAACGCAATGAATGCTGTTTACCTTCGCATTCATCACCC  
AAAAATGATTTAGGTACATGCTTTTTGACCTTCTCCTCATGGGAATTGATGACCGTGATGACCTGCTGCGCACAAT  
TCACCGAATGATCGATAACGGTCATGCCGCTCGGTTGGCAGGGTTTTATCACCGCTGGTTTCGTTATTCGCCATGTGAAT  
GGCGTACTATCTTGTGAACTAAATGAGCAAGGTCAGGCTTATGCGCAATTTGTCGCCAGCACCGCCGAATGCTGTGGC  
GAAGGGGAATCAAAGCCTGGGATTATGTCCGGATGGGTTTTTAAAGCCGAATGGGCGTACTTAATAACTGGTTGAGCGA  
AGAAGAAAGTCTATGGATCCAGTCGCGCATTCACTACGGGCTCTACGTTATTATAGTAACTGGCGGCAACTTTGCCG  
GTTATACCTTTGGTCGGCAATATTGGCAGTCTCCCGAAGATGATCATCTGCCTTTATTACGCGAATCTTAGCGCGTAAA  
GAATACGACGATTCGGCAATGATATGTTTTATCAATTATTTGCCAGTGATGATGCGTATTACCCTACCTTGCTCGGCA  
ACCATTGGCTTACTATTCTGCATGCCCCGAAACGCTAAGGATATGAGCGACCTATGAAAAATTGCTGGAAGATCCTCGA  
TATAGAGGAAACGACTGACGTCGATATTATCCGCCGCGCTTATCTGGCGTGTACCCTGCTTTTATCCAGAAACCGATC  
CGCAGGGTTTTAAACAACCTCGTCAGGCGTATGAGGAGGCGCTACGGAATTGCGCAGTCGCCTGCTAAATCTGTTTGGCAA  
CCAGAAGAATATGAGGTAGCAGAACATGAAATTTGCTCGCCTTTGTCGCGTTACTTGCCTGATAGTGAACGTTTTCT  
GCCCTCCGCTGGCAGCGATTTCATTACGCAATTAATAATTATTGCTCGATGGAGGAGATTGATGAATTACGCTGGTCGCTGT  
GCACAATCGCCATGAACACTGCCATTTATCCTTCGAGTGCCTGGTGTATTAGCAGAAAGATTGCGGTGGTTACAGGAG  
GAAAATACCGGGGAAATAGACGAAGAAGAACTGGAATCCTTTTTATATGCCATTGCGAAGGGGAATGTTTTAACTTCCA  
GACCATTCTGCATCTGCCGTTGCGGTGCAAAATGACACCATCGATTTTTACCAAATGTTGCTCGGATTTGGTCATCGC  
ATCCACAATGGCTGACATTTGATTTAGCGCAACATCGCGCAGTGATTATCCCCGATGATGCAAAACTGCACAGAAATTA  
CTCCGCTGGTATAGCGCAGTGCCTGGATATCCCCGAACTTCTGGATTACGCCAGTCATGGCGGAAACTGAACCTGA  
TAATGAAGATGCGCCTTATTATGAATACGCGCAACGCGTCTATTGTGGAGAAGCGAAAGCCTGTTGGCAGAACTTTGTG  
ACTACTGGCGGAGTATCCCTCCACCCAGGCGGATGCTTTAATGTTGCAATGGTCCGTCAGCATCGGGTCGATTATTAC  
CCATTACTGGTGATGATGATTGAAGCGCGTGATCTGGTTAACGATCAGGGAAAACCGCTACTTTATGCCCCGGCGACAG  
CGCCGTACCGTTTTTATTATACGAAATACTCAGCGATGAAAACTCTCTGCGCTGGGGCGTTCACTGGTCGAGATGG  
TTTTGCACAAAGGACGTAAGCCGCGGATCTCACTCACGCGTGATACAGAACATACCTTATGGCCATTATATCTAGTTGCC  
AAACAATTAGTGACGGCCTGCCAACCTACAGAAGAATCATTAATGCCGATTGTGAGCCGCTTGATGCAGAAAATCGTTG  
TCCACTGGAAGCATTAAATTCGTCGATTATTAATTCAGGCGGGAATTTTACCGAGAAGCAAATGTTGAACCGGAGC  
CGCAACCGCAGCAATGCCGTTGACGATGGTGGGCCAGGCTGTCTGGGCATCATTAAAATATTTTTCTATATTTTTATC  
TTTGCTGGTTTGATAGGGAAAATACTCCATCTGTTCCGGTGACAGTGCAGGTTAATGTGCGGGAAGCCCGGCAAGTAATC  
TTTCCGATTTTTGTAATGTTGTTGGCGGTGAGTTTTAACCATTTTTGAGATTATAATGGTTAACATTAATACCTGAG  
CCATTTCTGTAGATCAAACCTAAAGTATATTGAGCATGAGCATACCCTTGTTCAGCTGCTTCTTATACCAGAGAATTGC  
TTTACGGGTGTCGGGTTTACCCTCAGACCTTTGAGGTAGATCCACCCAGTTTACTTTGCGCGCGTGGATTTTCTGTT  
CCGCTGATTGCTCATACCAGTATCTCGCTGTGATAATCCAGTGGTTTACCCTGCTACCATGAAGATAAAATTTCCCA  
AGGCGATATTGCGACGTTGAGTGACCATGAATCGCGGAAAGCTCCGTGGCTGCCGTGGTGAATGGAAGACTGCCCGTGA  
GCTTAAATAATCAAAGGCATAATTACCATGGCTTTATCACGCAACGTCGTTTTCTTGGGTTGGCTAATACAGGTAATTG  
CTGCAACTATAAAAATTTGCAATATATACATTAATTTTTTATTGATGTGGAATGCTTCGATTTTCTTTTTATTTTTGAAA  
GCGTCAAGTTTATACTCATCAATAATAAAAAAGTACAGTTAATGCACTTAAAGGATTATTAACAAATGAATAAGGAAG  
AAACAATCTTCTTTTTGCGCTTTCTGCGCCATGGAATACTTAAATCAGGGTTGCAAACCCGCGCATGACTCGCCAAAA  
ATGTATACTGGGATAAAAAGAATTCGAGCTCTCATCCTCGGGAATAAATAATCGTGATGATTTAATTCAGACTATTTA  
TCAGATGACTGATGATGGTCATGCCAATGATTTAGCTGGCTTATATCTGACATGGCATCGCTTTCCTGAAAGAGTGG  
AAGCATTAATTGCTGGTGGCTCGGAGAGAGGGTTGATTTATACCAATTCGTTGCCCAAACCGCTATGTGCTGTGGGGAA  
GGGGGAATCAAAGCCTGGGATTATGTTGCAATGGGTTTTCTGTACGGGTCGGTGTGCTCAACAAGTGGCTGACGGAAGA  
AGAGAGTTTATGGCTGCAATCGCGCTCTATGTACGAGCTCACCATTACTATCACAGCTGGATGCACTATTTTTCCGCCT  
ATTGTTAGGACGCTCTACTGGCAATCTTCTCAGTGCGAAGACAACACTTCGCTACGCGAGGCGCTAACCTGTACAAA  
TACGATAGCGCCGGAGTCTGATGTTGCAAGAGCTGGCAGCGGGAAGCGATCGTTTCTATGCCACGCTTCCCTGGCAGCC  
ATTAAGTGTCCAGTCTGAATGCCCGGTAACGCTTAAAGGATGTGAGCGACCTATGAAAACATGTTGGCAAATCCTCGAAAT  
TGAAAGCACGACGCAATAGACATTATCCGCCAGGCTTATCTTGTCTGCTTACCCTGTTGTCATCCCGAAACCGATCCGC  
AAGGGTTTTAAAGCATTACGCCAGGCTTATGAAGAGGCTGCGACTGGCGGTAATCCTGTGAGGAAGCAGATGATGAA  
GAAAAAGATGCTGCCGCTGAACATGAAATACTACGTGCATTACGACATTACTGGATTGAGAAAGTATCGTTTTACGCC  
TTCCGCTGGCAGAAATTTATTCAGCAATTAATACTGGAACATGGAGGATGTCGATCAATTACGCTGGCCGCTGTGTG  
CAATCGCCATAGAAGCGGATATCTTTTATTAAATTTGCTTCTTTGCTGGCAGAGCGTTTGAATGGCATTCAATTAAT  
GACAGCGAAGGAATGGATGAGGAAGAAAGGGAGGCTTTTTCTTGGGCCATTACGCTGGTGGTATTGTTTCGATTTCTTAG  
CCTTCTGGAATATCCATTGCGTTGCGAACCAGACTGTTGAGTATTACTTCGCGCTGGAACGTTGCTGCCGTTACCATC  
CTGACTATGCTACTGCGTTTTTGGCGATGGAAGTCCGTGGTTAATTCCTGATGATGCAAAGTTACATCGCAAATGTTG



CGCTGGTACAGCTCGGTGCAAAACAGGTATGGCGAACTCATTCTGTGCTCAACAGTGGCAAACGGAAGAACCAGAAAAG  
CGAAGATGCCCGGTATTACTTGTGTGCACAACGTTTGTACTGCGCGAGGGGGAAAGCCTGCTTGCCGATCTCTGCGCGT  
ACTGGGAAAGTTACCCATCTACACAAGCTGATAATTTGTTGTTGAGTGGAGCAAGCGTCATTGCCCGGATTATTTGCGG  
TTATTAGTGATGGTTATCGAAGCGCGGAGCATGGTAGATGCGCAAGGTCAACCGCTGAAATATGTTCTGGTGAGAGCGC  
CCGACCGCGTGTATTGGGCGGAGATTTTACATAGCGGAAAATTATCGCCGTTAGGTCAATCGTTTATTGAGTCGTTAT  
TCTTCAAGCGCAAAGCATGGGCGTGGTGGAAATCGAGAGTCGGTAGCGAGACAGAGCAAGATTCACCGTTCTGGATTTG  
TATCGGGTAGCGGAACAGGTAGTACTTGAAGCGTTTCCGAAACAAGAGATGCTGGCCCGTCTTAATACAAGGCTGGAAGG  
CGGAGATGCTCATCCATTAGAGGCCATTGTCACCCGGATGCTTTTGACGAAAGTGAAACTCGAGCCGAGGATGAAGATG  
TCGATGAGCCAACACCTGAAATCATGAAGAAAAAATGATGAGGGTGAAAAACACAGAGCATTACCAGCATTATCAAA  
ATCAGTTTAAACGGTGTGGTATAGGTTATGCTCTCGGCAAAATCGCGATGTTGTTTAGCTGACGATGTTTTTTGCGC  
CGATGCCGGATGCAGCGTTTACGCCGATCCGGCAGCCGTGTTTATGGGATCTCAATGGCTAAATAATCGCTCGCCCGC  
GCCGAATTCATCCACGCGGGCCATATCGTTTACTGCAACGCCGATCAAAATCGGTGATCACCCGGCCGATCTCTTCT  
CGCTCGTACCAGCGCCCGCGCCACAACCTCTTCCAGTTTGGCTTTAAAGGTGCGATTGATGAGCATATCGCGGGATA  
AATTTTCAATGCGGATAACCGCGTCCGACTCTCTTCAATCTGCTGCGCGCTCAATGTTACCGGGCTGTGGTTAATCACTC  
TGGACTTAAAGCTCGCTTCCAGAAGCAGTCAACTCAAGCAACCCGTTGATATCATAACTAAAGCGAATATCAATC  
GACTGATAAGCCCGGTTTTCTTCAACGGCACATCGAAGGATTCACCCAGAATGTTGTTTTAACTTTGTGTTTTCTCC  
CTGATAGACGTTAACCCTAATTGAATCCTGTTCCGGGTGCATGGTTGAATAAGTTTTCTACACGCGACACGGGCACAGTGG  
TGTTTCTTCAATAATCGCGGAGAAAATGCCGAAACGCCCTGGCGGTTAACTTCAACGCCAACGAGTAAGGGCAAATA  
TCAGTGAGGATTACCTCTTCAATATCTTCACTGCGTAAGCGGCAGCGCGCCTGGATTGCTGCGCCAGCGCGACAATGGT  
GCTCGGATCGTAACTTTGATACGTAATTTGCCAAACAGACGCACGGCGATTGCTGCACCAGCGGCATTTGTGACGCGC  
CGCAACCAGCACCAGACTGTGATTTGACTCGGCTTCCAGCGCATCGCGCAACGCCTGTTCAATCGGCACTCGCAAG  
CGATTGAGCAGCGCAACCAACAATCTTCCAGTTCGTTCTCGTAAAATTCGATTCCCGCGTTTTCTTCTGATACTGCCA  
GCGAATGTGAATGGCGATTGATTGCTACATTTTCCGCTTCCACACAGGCGTACAAGGCTGCCAGTTCACTCTCGTTAA  
GCGTGGTCTGGCAGATCCGCGGTTTTAAACCTCATCGACCAGCATATGGGTAATACTTCCGCCAACGAAAGTTG  
TCGCCAGCGGAGCGTGAATTCATCACCGCGTGGCGTACTCAAGCACCGTAACGTCAACGTGCCGCCACCGAGATC  
AAACACCAGCGAACGGGTATTTTGTGGGTATGCAGGCCATACGCCATCGCAGCTGCTGTGGGTTTATTAATTAAGCGTA  
CCGATTTAACCCTGCTAACTCCGCTGCTAAACGGGTATGCTTGCCTGTTTTCATCGCTGAAATAAGCCGGAACGGAGATC  
ACCACATCTTAAATCGGACGTTGCAGAAATCTTCCGCATCTTCTTAAATGAGCGTAATACCAAAGAGGACAGTTCTGG  
CGGTTAAATGTGTCGCTGCTAACCGCCAGTTGGTATTACTGCCATTGCAGTTTTAAATAACGCTGCCGTTTTATCCG  
GATGCGAAGTACGCCGTGATACAGCCGTTTTCCGACTAAAATATGATTATTTTCATCCATGCTAATTATGGATGGTGT  
AAATATTCACCGAACTTATTTGGAATTAATTGCGCGCACCGTCTTCCAGACGGCAATTAACCTATTGGTAGTACCGAG  
ATCGATACCAATGGCGAGTTCTGCATTATCCATTGCATTTATATCTTGAAGAAAAAGAGATAAACAGATTAAGACCACC  
CAGGTAACCGGTGGTATCTTAATCAATGACGTGTGTTAAGCGTAAAATTTCCAGACGATCAGCCAGTAAATCAACAAAGC  
CTGACGATCAACATCGACCATTACGGTGGCATTGCGTTTTATTGCCTGTCAGATAATAATAATCAACAACCGTCATACCC  
TGGGTATATTTCCCTGTGTTTTCCAGCCAACCCAGCGCTCAACAGAGGTAATAACTCCGGTTTTCAACAGCCAGGCGAT  
GGTGCATGGTATGACGTGGTGCAGGCAAAAGCCCATTTTTCGTCTTTATGATATTCGAGGAAGAAATCCAGCAGTT  
CGGCAACAATGGTTGAAACAGGGTTACCAATCGCGCGAAACGCTCGGTGCTTCAACGTGGATTTGTGCTTTATGAGTA  
ACATCCAGACCGCCATCACACCGGGATCCCTGACTGGAAGACAATTTCTGCCGTTCCGGGTCAACGTAATAATTTAA  
TTCAGCCGAGCGGTCCAGTTACCCAGCCCATAGCGCCACCCATAATCACGATACGGGCAATTTTCTATGCAATCCG  
GATGGCTATTGAGCAGCAAGGCAACGTTAGTTTGGGTCGGTAGACACAATGGTGACAGGTTCCGCAATTTCCAGCAGC  
GTTTTCCGATCAGCTTACCCGCGTACAGTTTTGCGGTGCGAATGTCGGTTCCGGTAATGCCGGCCGTCGAGACCGCT  
TTCGCCGTGCACATTGTCGCGATAATCAACTCACGATTAACGTTTTTACCAGCGCGCTGCTACCGGAATATCGGTGC  
GATTAAGCAAGGTCAGCATAACGAGAATGCGTAAGGTTTTTCTGGTGTCTGGTTCCGGCGGAAGACGTAATTGCT  
TTGACATCAAGCTCTGGTAGGCGAGGGCGAGAATATTGCGATAGCGTCGTCATGACCTGGGTGCAATCTAACAGAAT  
TGGCAGTGCCATTGTTGCTCCTTGTGTGCTTCTTTCGACAAGGGTAACGCCAGGATGTAACAGATACGAGGGGCGA  
AACGATAAAGCGTGAGATGGCGCGCAATTTGGGTATGCGCGCCAGAGTGATTAATGCAGGATTTTCCGAGGAAAGTCTTT  
GCGCGGTCCGATTTCCGATCATCGAAGAAAGCGTCTTTCGCGGAGTCTTTCGACAATTTTACCCTCGTCCATAAAGATCAC  
CCGATTCGCCACTTTACGGGCAAAGCCCATTTCTGGGTCACCACCATCATGGTCATTCTTCTGTTCCGCCAGTTCCACCA  
TCACGTCCAGTACTTCTGTTGATCATCTCCGATCCAGCGCGATGTCGGTTCGTCAAACAGCATCGCAATAGGATCCATA  
CACAACGCGGAGCGATTGCCACACGCTGCTGCTGACCGCCGAAAGCTGCGCCGAAACTTATTGGCGTGAGCAGAAAG  
CCGACACGCTCCAGCAGTTTCCAGGGTTTTTCCAGAGCCGGCGTTTTATCGCGTTTAAAGCACTTTTACCTGCGCCAGGG  
TCAGGTTTTGATAATCGACAGATGAGGGAACAGCTCGAAATGCTGGAATACCATCCCGACCGGGAACGACGCTTTGCC  
AGATCGGTTTTCTTGTGCTTAACCACGATACCATCGACGGTATTTACCTTGTGTCACCGGTTTCGAGGCCGTTGACGGT  
TTTAAATCAGCGTTGATTTGCCGGAACAGACGGGCCCAAACCACCACCTTTCGCTTTTTTCACTTCCGTTGAGCAGT  
CGGTGACACCTGAAAGTGACCATAACATTTTGAACATTTTTAGGGTAATCATTATGCTGTCTTCTTTTCAAGTAGC  
TGACCAACAACGACGCGTAAGACTAATAACGAAATAAACAAATCCGGCAAACAGGATCATCTCAACCTGCGTACCATCA

CGCTACCAATGGTTGAGGCGGTACGGAAGAAATCGGCCAGGGATAACACATACACCAGTGAGGTATCCTGGAACAGTAC  
GATGCCCTGAGTGAGCAGCAGCGGCACCATCGCGCGAACGCCTGCGGCAGAATAATCAGTTTCATCGACTGCCAGTGAG  
TCATTTCCCAACGCCAGCGCGCGCTCGATTGACCACGAGAAATACTTTGAATACCAGCACGGATAATCTCTGAATAGTAG  
GCCGCTTCAAACATCGAAAACGCCACCATCGCCGAAATTAACGGATATCATTTTTTGGCGATAATCCCAGCACGTTTTG  
CAGAAAACCCGGCACGATCAGGTAAAACCACAGCAAAACCATAACTAAAGGAATCGAGCGGAATACGTTAACGTAGGCTT  
TGGCAAACCACGCCACGGGCGCAAAGCTGGATAAACGCATCACCGCCAGCATCGTGCCCCAAAAATACCAATCACTACC  
GCCGTGACGGTGATTTTCAGGGTGATCACCAGCCGTCGAGCAGATATGGCAGGGAAGGGACAATGGAATCCAGTCAA  
CTCGTACATTATTTGCCCCCATGTTGCCAGGCAGGCGAACTTACGTTCAACCAGCGTCATCACCAGCATGATAAAAGC  
GTTAATCAACACATACGCCAGCGTAATGGCGGTAACGACTCCCAGGCATGGGCTGAGTAATCGAGCAATTTACCCGCCT  
GGCGGCCATATCCACCAGACCGATAGTCGAGGCGATGGCGGAGTTTTTACCAGGTTTCATCATCTCTGAGGTCATCGGC  
GGGACGATAACCGGATAAGCATTAGGCAGCAGTACGTATCGATAAGCCTGCGGTAGCGTCAGGCCATCGCCAGCGCGGC  
ATTTTTTGCCTCGCGGACGACTGAATCGCGGCGGTACCTGTTTCGAAACACGGGCGCGGTAACAGCCCCAGGC  
AGAGCATGGATGAAAGGAAAAACTGAATATTGGGATCCAGCTCGGCCTTAACCACATGCCGATTTTCTCCGGCAGCAGC  
TCCGGGATCACCAGATACCAGGTAAGAATTGCACAATCAACGGCACGTTGCGGAACAGTTCGACATAACAACGTACCAG  
ACCAGAGAGAAAAACGGTTTGAACGGTACGTAATAATGCCGAAAAATGAACCGACGAGGAAAGCGATAATCCAGGCGCAGA  
TCGACAAAGCGATCGTCACCTGAAAACCACTCCAGATCCAACCAAGATAGGTGGTGGTGGCCGAACGGGGCTTGTGTAAA  
AAAAATACCCAGTTCCAGTCTATAGACATAAATCTACTCCAGAAAAAAGAGGGTAGCAGCGTTAACTGCTACCCTCGAAG  
ATTGTTACCCAGCGTATTGCGGTTTTAGGCCGATGGGGAACGACCATCAGGCGTATAGTCTGTCCGTGCTACGTAACA  
ATCGAGAGGGCTGGAATTTCCGCCCTGGTCTTGTAAATTAGTTCAGTGCCTTGTTCATTGCGTTCTTTGAACAGTGCTTT  
CATTTGCTGACAGTTCGAAATTCATGTTGAGTTTTTGGCGGAATTGGATTTTTGAACCACTTATCAAACATTTTT  
CCGCTTACCCGAGGCTGACCTGAGCGATGGTGTATCCATCAGCTTTTTGAACTGCGGATCATCTTTACGCAACATA  
CAACCGTAGGCCTCTGAGACTGCGGCTTCCGACGATTTCCAGTTGTCTGGTTTTCTCGCTTTCGACGTTACCCGGC  
CAGCAGAGCGTCATCCATCATAAGGCAACGGCAGCAGCCGTTTTCCAGGTGCGGAAAGAGTACCCTGATCTTTGGCGC  
TGATGATGCGCATATTATTTTTGCTCTTCATTAGTTTTGTTGAGCAAACTTCAGAGGTAGTGCCGGAAGTGACGACT  
ACGGCTTGTCTTTCAGGTTGGCAAATCTTTGATATGCCACCCTTTTTGGTCAACAGGCGGTACCGACCACGAAAAAT  
AGTGTGAGAGAAAGCCGCTGTTTTTGGCGTTGACGTTGTTGGTGGTAGAACACATTCAAATCGAAAGTGCCGTTTT  
GCAGCAGTGAATAACGGTTTTGTGAGGTAATCGGAATCAGTTTTACCTGCAAGTCCGGTTTTGTTGAGTTTTCTTTTTACT  
GCTTCAAACATGGCGTTGGAGTAATCCTGCGAGTAACCCACCCTTTTTGCTGATTGTCGTAATAAGAGAAAGGCACTGA  
AGATTCACGGTGACCGACGACAATCACACCGTTTTTGGCGATTTTGTCCAGAGTACTGCCCGCTGCCGGGCGCGTCAT  
CTGCCTGTGCCAGTCTGCGGAAAGCGCCAGGGCGAGGATTGCTGTGGCAGGTTTACGTAATTGCATATCCAACCTCTTT  
ATCTTCTGCGTTAAGAACGCATGGATACCCGTTGTGAGTGTTGTGTTGTTATCGTCTGCAACTTTATTGTGCAAGTGTG  
TGCTGTTAGGGAAGGTGCGAATAAGCGGGGAAATCTTCTCGGCTGACTCAGTCATTTTATTCTTATGTTTGGAGCCG  
ATTTTTTCTCCGTAATGCCTTGAATCAGCCTATTTAGACCGTTTTCTCGCCATTTAAGGCGTTATCCCGAGTTTTTGTAG  
TGAGATCTCTCCACTGACGTATCATTGGTCCGCCGAAACAGGTTGGCCAGCGTGAATAACATCGCCAGTTGGTTATC  
GTTTTTTCAGCAACCCCTGTATCTGGCTTTCACGAAGCCGAACTGTCGCTTGTGATGATGCGAAATGGGTGCTCCACCCTGG  
CCCGGATGCTGGCTTTCATGATTCGATGTTGATGGCGTTTTGTTCTTGCCTGGATGCTGTTTCAAGGTTCTTACCTTG  
CCGGGGCGCTCGCGATCAGCCAGTCCACATCCACTCGGCCAGCTCCTCGCGCTGTGGCGCCCTTGGTAGCCGGCATC  
GGCTGAGACAAATTGCTCTCTCCATGCAGCAGATTACCCAGCTGATTGAGGTGATGCTCGTTGGCCGCGGTGGTGACCA  
GGCTGTGGGTCAGGCCACTTGGCATCGACACCAATGTGGCCCTCATGCCAAAGTGCCACTGATTGCCTTTCTTGGCT  
TGATGCATCTCCGATCGCTTGTCTTTGTTCTTGGTCGAGTGGGTGCCTCAATGATGGTGGCATCGACCAAGGTT  
GCCTTGATCATCATGACGCTGCTTCCGCCAGCCAGCGATTGATGGTCTTGAACAATTGGCGGGCCAGTTGATGCTGCT  
CCAGCAGGTGGCGGAAATTCATGATGGTGGTGGCGTCCGGCAAGGCGCTATCCAGGATAACCGGGCAAACAGACGCATG  
GAGGCGATTTGCTACAGAGCATCTTCCATCGCGCCATCGCTCAGGTTGTACCAATGCTGCATGCAGTGAATGCGTAGCAT  
GGTTTCCAGCGGATAAGGTGCGCGCCATTACCAGCCTTGGGGTAAAACGGCTCGATGACTTCCACCATGTTTTGCCATG  
GCAGAATCTGCTCCATGCGGGACAAGAAAATCTTTTTCTGGTCTGACGGCGCTTACTGCTGAATCACTGTCGGCGAAG  
GTAAGTTGATGACTCATGATGAACCCTGTTCTATGGCTCCAGATGACAAACATGATCTCATATCAGGGACTTGTTCGCAC  
CTTCTTAGGTAACATTTAGTTTGGCTAAATGTAAGATATTGCTGTTTTATTGTTTGTTTTTGCGAGATGCGCCGACC  
ATTCCGAAGCAAAATTTAAAATGCACTTTTTAGTGCTACCGTGGATTACTGTGGTGAACACTAGGTTGACTGATGC  
TGTTTTAGGGTTTTGCCTGTATAACAAAGCAATAGATGTGCCAAAGTTGGATAGGAGAATATTGTTATCCGGATAATGCA  
CTGATGCCGATCCGGTGAAGCTGCCGAAATATGGGATGATTTCCGGCAGGATAAGAAGGGATTATTTACGTCGCTGACG  
CAGACTCATCAACACAGCAGCAAAACCAACAATGCCGTGACACCACAGCGCCAGTTGCCGGTACGTGCGTATGGTG  
TGAGTCCGGTGGTGGCGTACGTTAGTGGTTAACCTCAGCGGTGAACTGCGGGATCATCGCTGAATCTCACCCCTGC  
GGCCAATCACCGCCGTAATGCCGTTGTTGGTGTGCGCAACAGTGGGCGCGCCAGCTCCAGCGCACGCATTCGCGCCAT  
CTGGAAGTGTGGCATGGACCAATAGATTTACCAAACACGCATCGTTGGAGATAGTCAGCAGATAGTCGGTATCCGGGC  
GGAAGTTATCGCGCACTTGTCTGCCGAGAATGATCTCGTAGCAAATAGCCGAGTAAGCTCAATACCATTTGCCGACAGC  
GGCGGCTGGATATATGGCCACGGCTGAACGACGACATCGGCAGATCAAAGAACGGTGCTAACGGACGCAAGTCACTC

CAGCGGGACAAACTCGCCAAACGGCACCAGATGGTTTTTGTATAGCGATCGGCTGATTCGTAGCTGTACGGCGCACCTT  
TACCAGCGTGATGATGGTGTGTAGGTATCGTAGCGGTTCTGCTTATTGAGACGCGCTCGACAATCCCGGTTACCAGC  
GAGCTACCTTTATCACGCAACTCACCGTCCAGTGCTTTGAGGAACGGTTGCTGATTAATTTCCAGATCGGTTATCGCCGA  
CTCCGGCCAGATAATCAACGATGATTTGCCATCAGCGGTGCCGTTGCGTTGTAGTAAATCTTCAGCGTATTAAGAAGCT  
GGCCTTCGTCCCATTTACGCGATTGCGGAATATCGCCTGAACCATCGAAACCTGAATGGTTTTCTCCGGTTGTGGGGTA  
AACCACTGGATGTAACGCAGCGGAAGGGGAAGGGCAACAGCACGACGGCCACCACCAGCGGACGCCAGTTGCGTTTGAC  
CAACGCCAGTGCCAGCAGGCCACTAACCATCATCAGCAGGAAGTTAATGGCTTCCACGCCATTATCGGTGCCAGCCCTT  
TTAACGGGCCATCAATCTGGCTATAGCCGAACTGTAACCACGGGAAGCCGGTCAGTACCCAACCGCGCAGAAAACCTCGGT  
ACTTGCCAGAGGGCAGGGGCGCAATCGCTACGCGCAGCCAGGTGGTTTTCGGCCACAGACGCGACAGCACGCCAGCAAA  
CAGTCCGGTATACAGCGACAAATACGCCGCCAGCAGCACCACCAGGAAGATGTTAACGGGCCAGGCATTCCGCCAAAGG  
TCGCGATGCTGACATAGACCAGTTAATACCGCTGCCAAAGAGGCCAAATCCCAGCAAAAGCCAATAGCGGCAGACTGG  
AGTGAGCGCGGTTAAAGGTCAACGCCTGAAGCCCCATCAGCGAAATAATCGCCGACGGCCAGACGTCGTAAGGAGAGAA  
GGCCAGCGTTCCGACGGCACCAGTAATAACGCCAGCAGCAGCGAATGCGCTGGCGTTCAATTAATGAGGCAAAAGCCA  
TGTAGTTATCTATCCAGTTTCGGTTTTATTATCCAGCTTCGGCTGGGGTGAATCATCCGGGATTTTGACATGAACCTGA  
ATAATACGCGACTGTCCGCATCGCCACTTTGAACCTGTAACCTCGATGTCGATGTCGATAGTTTCGCCACGCGCCGGAAGTGA  
CCCAATGCCTGACTCACCAGACCACCGATAGTGTGACTTCTCATCGCTAAAGTGGTGCCGAACCGTTCGTTGAAGT  
CTTCAATGGAAGCCAGTGCCGCTACGGTCCAGGTATGACGACTCAGCTGACGGAAGTCGATATCATCTTCTTCGTCATAC  
TCGTCTTCAATCTACCAACAATCAGTTCAGGATGCTTCAATGGTCAACCAGACCGGAAACCCACCAGTAATTCGTAAT  
AACGATCGCCATGTGGTAACGCTGAGAGCGAAACTCTTTCAGCATCCGGTCTACGCGCTTACTTTTCAGGAACGACAACCG  
CCTGACGTAACACTTTGTCCATGCTGAAGGCTTCAGCATCGCTGCGCATAAACGGCAGCAAGTCTTTCGCCATCAGAATC  
CCTTCAATGTGATCTTGTCTTCGTAATCACGGGAAACGTGAGTGGGCGGACTCGATGATGACATCAAGACATTCGTC  
CAGCGTCTGGTTGCGTTTCAGGGTAATCATCTGGGAGCGGGGATCATGATGTCGGAACGCGTTGGTCTGCGATGTCCA  
TCACCCCTTCGAGCATATCGCGCTATCTTCGTCGATAAGGTCGTTCTGCCGGAATCACGGATCAGCGCCAGCAGTTCCG  
TCACGGTTTTTCGGTTCACCGTGGAAAAGTTGGCTGAGTAACAGGGAGAAAAATCCCTTCTGTTGCTTATCGTGTCACT  
ACTGTGTGAATTGTCGTCGCTCATGGCGTCGATGGGTTCTCATGTTAGTTAATCAAACGCGCTCGTTAATCACCACG  
GCGGGGACGTCGCCAGTCAAATGCCTGGCAAATTATCTTCTCGCAATGTACGGATCCTCATAGCCAGAGCAAGCA  
TAATCTCTGTTTCGAGGGCTCCATTTCTTCGCTTCGTCATCTTCGATGTGATCGTAACCTAACAAATGCAGACTGCCG  
TGCACCACCATATGCGCCAGTGCCTCCAGTGGTTTTGCCTTGTCTCCTGAGCTTCCTTCTCAACCACCTGACGGCAGAT  
AACAGATCGCCAGTAGCGACATTTCCATGCCAGGCGGCACTTCAAACGGGAAGGAGAGCACGTTGGTGGGCTTATCCT  
TACCAGGATAGGTCAGATTCAGACTGTGGCTTTTCGGCGGTATCGACCACGCAATCGTCACTTCCGATTTCTCTGAAAC  
TGCGGGATCACCGCATTAGCCATGTCTGAAACTGGCTCTCTCCGGTAACCCGGAATTATCTTACATGCCAGTTGTA  
ATCGAGGATCACTGACTCATTTTTGTTCTTTCGCGCTTTCGCTTTCGCTGCCAGCGCCGCTTTTCGTTTTTGTTC  
GGCTTCTCCAGGCTTCATAGGCGTTAACGATACGCGCCACCACAGGGTGACGAACCAGTCTTCGCTGTGGAAGAAGT  
TAAAGCTGATCTTTCGACATCGGCCAGCACTTCGATGGCGTGACGTAAGCCTGATTTAGTATTACGCGGAGGTCGATC  
TGTGTGACGTCGCGGTGATAACCGCTTTTGAAGTAAACCGATACGGGTGACGAACATCTTCATCTGTTGATGGTGGT  
GTTCTGGCTCATCGAGAATGATAACCGCTGTTTCAGCGTACGACCACGCATATAGGCCAGCGGTGCCACTTCAATAA  
CGTTGCGCTCAATCAGTTTCTGACTTCTCAAAGCCAGCATTTCAAACAGCGCTCGTACAGCGGGCGCAGATACGGG  
TCTACTTTCTGGCTTAAATCGCCAGGCAGGAAGCCAGTTTCTCACCGGCTTCTACTGCCGGACGAGTCAGCAGAATACG  
GCAATTTCTGACGCTCCAGGGCATCAACTGCCAGCAGCCATGCCAGGTAGGTTTTTACCCTGACCCGGGCAACGC  
CGAAGGTAATGTCATGGTCGAGAATATTGGCGATGACTGCGCTGGTTTTGGCGTGCGCGGCTTAATTACGCCGCTTTG  
GTTTTGATATTGACCGCTTTGCGTACTCCGGCACGCTCTCCGCGTTTTGCTCCAGTACCCGCGCTTCTTTAATCGCAAG  
GTGGATCTGTTCCGGTTCGATATCCTGAATCTGACCAGCATCGGGGAGTATCGACATACAGGCTACGCAGAATGTCTG  
CCGACGCGGTGACGCAAATCGGACGGCCGGTTCAGTTTAAAGTGGTTATCGCGGCGATTGATCTCGATGCCAGACGGCGT  
TCGAGCTGCTGATGTTGTCATCAAACGGGCCGACAGGCTCAACAGACGCGCATTGTCTGCTGGCTCCAGGGTGATTT  
GCGAGTGTCTATGTTCAAACGTTCTCTTATCTGTATGCCGCGGAAGCTGAACATTACCAGGCTATAAGGAAATTTAT  
TCACGCCACAGGAAAAGGCCAAGCATTGCAATAAAGATGGGATAAAGAGAGAAAAACAAGGCCACCGGAACGGCA  
GGCTGAGAATTACGGCTGATAATAACCCAGCCAAGTCTGTTTTCTTTCGGGTACGGGCAATCACTGATTCGGTGT  
TCTGCCACGCGCAGACCCATTTCTTTCAGTACGCACCACTTACCAGCAGAGGTTCCGGTAGACGTCGTAATTT  
TACATCGACGAATTTACCGATCATATCCGGCGTCCCTTCAAGTTGACCACGCGGTTATTTTCCGTACGCCCGGAAAGCT  
CCATGATGCTCTTACGGATGTACCTTACCAGAATACGCTGGTGGTGCCGAGCATCCGGCGGCTCCACGCCATCGCT  
TGCTGATTAATGCGCTCTTGAGAATATACAGACGCTGCTTCTTCTTCTTCCGGAACATCATCAACCATATCGGCGG  
TGGTGTACCCGGACGTGACAGAGAAGATAAAGCTGTAGCTCATGTGAAATGACGTCGGCAATCAGCTTTCATCGTTTTCT  
CGAAGTCTTCGGTGGTTTTGCCAGGGAAGCCAACGATGAAATCAGAACTGATCTGAATATCTGACGCGCCGACGCGAGT  
TTACGGATGATCGTTTTGACTCCAGCGCGTATGGGTACGGCCATCAGGTTTCAAGTCCGATCGGAACCGCTCTGTAC  
CGGACAGATGACGGAAGCTCACAGCTCCGGCGTGTCCGATACACTTCGATGATATCGTGGTGAATTCGATCGGATGGC  
TGGTGGTAAAGCAATACGATCGATCCGTCGATCGCAGCAACCAGACGCGAGATCGGCAACGATCCGGTGGTCCG

TCGTAGTTTTACCACGCCAGGCGTTCACGTTCTGACCGAGCAGGTTGACTTCACGCACGCCCTGAGCCGAAGCTGGGC  
AATCTCAAACAGAATATCGTCGGACGGACGGCTTACCTCTTACCACGGGTGAAGGCACCACGCAGTAGGTGCAATATT  
TATTGCAGCCTTCCATGATGGAGACAAACGCGGTGCGCCCTTCGCGCGCGGTTCCGGTAGACGGTCAAACCTTCTCGATT  
TCCGGGAAGCTGATATCTACAACCGGGCTGCGGTGCCACGCACGGAGTTGATCATCTCCGGCAGACGGTGCAGCGTTT  
CGGCCAAAAATAATATCGACATAGTGGGCGCGCTGCGCAATGTGCTCGCCTTCTTGCATGCCACGCAGCCACCGACGC  
CGATAATCAGGTCTGGATTCTTCTTTTTAACAGTTTCCAGCGACCCAACTGATGGAAGACTTTTTCTGAGCCTTCTCG  
CGGATTGAGCAGGTGTTGAGCAGCAGCATCCGCTTCTTCCGCCACGTCGGTCAGTTGATAGCCGTGGTGGCATCCAG  
CAGATCGGCCATCTTCGATGAATCGTACTCGTTCATCTGACAGCCCCAGGTTTTAATATGGAGTTTTTGGTCATCGACT  
TGCTCTTGCGAAATAGTAGCCAGGAATGCAGGGCGCATAGTGAATGCTTGTGTCGGTGTGACCAGTATGAGCGTTAT  
CAGCCCTTAGGGGAAAACTCTGTAACTTAAAGCATATTGCTAACAGGATGATTGACCATGACAAATCAACCAACGGA  
AATTGCCATTGTCGGCGGAGGAATGGTCGGCGGCGCACTGGCGCTGGGGCTGGCACAGCACGGATTTGCGGTAACGGTGA  
TCGAGCACGCAGAACCAGCGCCTTGTGCTGATAGCCAACCGACGTGCGGATCTCGCGCATCAGCGCGGCTTCGGTA  
TCATTGCTTAAAGGTTAGGGTCTGGGATGAGTACAGGCTATGCGTTGCCATCCTTACCAGACTGGAAACGTGGGA  
GTGGGAAACGGCGCATGTGGTGTGTTGACGCCGCTGAACTTAAAGTACCGTTCAGTGTGCCAGGCTCGTATTGCGTGCAT  
TGCAACAGGCTTGTGGCAGGCGCTGGAAGCGCATCCGAAAGTAACTTACGTTGTCAGGCTCGTATTGCGTGCATGCAT  
CGCCATGATGATCTTCCAGGCTGGAGCTGAAAGGCGTAAAGGCGGTTGAAAGTATTGCGCGAAGCTGGTGATTGGTCCG  
AAATTCGAGGTGCGGCAGATGGCGGGAATTGGCGTTCATGCATGGCAGTATGCGCAGTCTGCATGTTGATTAGCGTCC  
AGTGCAGAACGATCCCGCGCAGACACCTGGCAGCAATTTACTCCGACCGACCGCGTGCCTTCTGCGGTTGTTTAT  
AACTGGGCATCGCTGGTGTGGTATGACTCTCCGCGCGTATTGCGCAGTTGCAGAATATGAATATGGCACAGCTCCAGGC  
GGAAATCGCGAAGCATTTCGCTGCGCTTGGGTTACGTTACACCGCTTGGCGTGGTGCCTTTCGCTGACGCGTCCG  
ATGCGTTCAGTACGTGCAGCCAGGGCTTGGCTGGTGGGCGATGCCGCGCATAACCATCCATCCGCTGGCGGGGAGGGA  
GTGAATCTTGGTTATCGTATGTCGATGCCCTGATTGATGTTCTGGTCAACGCCCGCAGCTACGGCGAAGCGTGGGCCAG  
TTATCTGTCTCAAGCGTTACCAGATGCGGCGCATGGCGATAACTTCATTATGCAAAGCGGATGGATCTGTTTTATG  
CCGATTGAGCAATAATCTGCCACCACTGCGTTTTATGCGTAATCTCGGTTAATGGCGGGAGCGTGTGGCGTGTG  
AAACGTGAGCGCTGAAATATGCGTTAGGTTGTAGCCTTACAACATTGCCGGATGCGTGCCAACCGTAGGTGCGATAAG  
ACGCGGAGCGTGCATCCGACATTGAAGGATAAGACGTGTCAACATCGATTGACATTGAATGAACGCAGAAAAGCAA  
AAAGCTCGCCGAAGCGAGCTTTTTAATGTGGCTGGGTACGAGGATTCGAACCTCGGAATGCCGGAATCAGAATCCGGT  
GCCTTACCCTGGCGATACCCAACTGGGTGCACTTACAAGTAAGCGTCTTGAATAAATTGGCTGGGGTACGAGGATT  
CGAACCTCGGAATGCCGGAATCAGAATCCGGTGCCTTACCCTGGCGATACCCAAACAAATTGGTTTTGAATTTGCCGA  
ACATATTGATACATTGAGAATTTGGTGGCTACGACGGGATTCGAACCTGTGACCCCATCATTATGAGTGATGTGCTCTA  
ACCAACTGAGCTACGTAGCCAGATTGTTCTTCGATGGCTGGGGTACCTGGATTGCAACCAGGGAATGCCGGTATCAAAA  
ACCGGTGCCTTACCCTTGGCGATACCCAAATAACCGGGCGGTGAACCGCTTACTCGAAGAAGATGGCTGGGGTACCTGG  
ATTGCAACCAGGGAATGCCGGTATCAAAAACCGGTGCCTTACCCTTGGCGATACCCATCCGTACAACGCTTCTGGTG  
AATGGTGGGGAGGCGAGACTTGAACCTGCACACCTTGGCGGCCAGAACCTAAATCTGGTGCCTTACCAATTTGCCA  
CTCCCGAAAAAAGATGGTGGCTACGACGGGATTCGAACCTGTGACCCCATCATTATGAGTGATGTGCTTAACCACT  
GAGCTACGTAGCCATCTTTTTTTCGCGATACCTTATCGGCGTGGGGGCGCATTATGCGTATAGAGCCTTGCAGCGTC  
AACCTCTTTTTCAAGGAAAATTGCTCGAAAGTACTGTTTGGTTAGGTTGCGAACAGCGTGGCGCTATATTGCTCAATTA  
TTGTTTACTTTGTGTTTTTCCACCCTACAGCCATTCTTTTGTACATACAGGATGAAATTCGGAATTTAAACAATAGTGGT  
GGGAAATTAATCTATGAAACTGGCCTACAGTGAATGAGTTGTCAAACAGTGAATGGCAAACCCGGAACATTTCTTAC  
TGATATCAGAATCAACAAGCACCTCAATAACTGAAACAGCCCCGATTTACCGGGCTGTTTCGATTCTTCTTAT  
ACGCCGACTGTTGAACACCAACCGCGGACAGACGATCGTCCATTTTCTGAAACGCTTATCCCATTCGATCGCTTTA  
GCGGAAGAACAAGCGACGGAAGGACCGCCGCGCAGCAGTACGCGCGCTCGGAAGCGGGAATAGTTCTTCAAAGATCTC  
CCGATACAAGTACGCTTCTTTAGAGGTTGGCGTGTGTACGGGAAGCGGAAGCGGGCAGTTTCCAGTTGCTGATCAGAAA  
CCTGCTGCGCAGCCACTTCTTTCAGGGTGTGATCCAACCTGTAACCGACGCCATCGGAGAAGTGTCTTTCTGCGCCAG  
GCCACGCTTGCAGGCAGATACGCTTCAAAAACATTACGCAGGATGTGTTTTCCATTTGCCGTTACCGCACATTTTATC  
CTGTGGGTTAATACGCATCGCCACATCAAGGAATTTTTGTGCGAGGAACGGAACGCGTGTCCACGCCCCAGGCTGACA  
TCGCTTTGTTGGCAGCGCGCAGTCATACATATGCAGGGCCAGCAGTTTACGCACCGTCTCTTTCATGCAGTTCTTTGGCA  
TTCGGTGTCTTGTGGAAGTAAAGATAACCGCGAACACTTTCATCAGAACCTTACCAGGACAGCACCATTTAATGCCCAT  
CGCCTTGTCTTACGCGACATTAATAACATCGGTGTTGAAGCGCAATAGTGGTACATCATAAGTTTCGATGTGGTAAA  
TCACGTGCGGATGGCATCCAGACCTTCTGTACAGTGAAGTGAATTTCTGATGCACCGTGCAGATGGTTTGCCT  
TCCTGGGCTGCTTTCAGATCCGGTGAACCGGCGAGCTACAGCAAAGGAGTGAATGCGGCCACCGAGCTTTCAGAGCG  
TTCCTGATCTTCCACGCGAGGGCTGCGTATTTCTGGTGTAGCGGAAATAATTGAGGAATCCAGACCACAGAAAAGCA  
GCACACCGTAAGGCACATCAGACATCAGATGGCTTTTAACTGAATCTTCCAGTCCGTGACGAGCTCGTTTTTGTGCGTC  
ACGTTATCTTTCACCGCATCGTAGTGAACAGTCCGATGATAGTAAAGACGGATTTCCGCGTCTGGCTCCACAAATA  
GCTCCCCGCGGGAATCTTTAATCGTGGCGAACTGGCACCAGCGCTTTCATTTCTGAGGCCACATACAGCTGACCGT  
GTTGCTATACCCCATATACAGTGGGATGATCCCCAGATGGTCCGACCAATCAGGTAGGCATCTTTTTGCTGTGCTAC

AGTGCAAAGGCAAACATGCCCTGCAAGTCGTCGAGAAATTCGGGCCCTTTTTCTGATACAGCGGAGGATCACTTCACA  
GTCAGACCCGGTCTGGAACCTGGTAACGATCGCCATATTCGGCGCGCAATGCCTGGTGGTTGTAGATTTACCGTTTACCG  
CCAGTACGTGGGTTTTTTGTTGGTTGTAGAGAGGTTGCGCCCCCGCTTAACGTCAACAATTGACAGACGTTTCGTGGGCG  
AGAATGGCGTTATCGCTGGCATAAATACCGGACCAGTCCGGGCCACGATGACGCATCAGGCGTGACAGCTCGAGGGCTTT  
CTTACGCAGCTCAACTGCGTCTGTTTTGATATCGAATACGCCAAAAATTGAACACATAACCTTCTCCGTTAACCTGGTAT  
TTGTTGCTTGTGTGTTGCTTGTAAAAAAATGCCGCAAAGCAGCACTGTGCGCAAGCGATTTGGCGGTGAAAAAATA  
AAAAACGTAATGGTGATTGTGATTGGTAAAAAAGGTCTGGTGTGAGGATATATTTATTGATGAATCGATAATTTTTAG  
CGGGTTTTATTGAATGTTTTATTTTTACGGGGGCCAAATTGCTGACAAAGTGCATTTGTTTCATGCCGGATGCGGCGTGA  
ACGCCTTATCCGGCTACAAAAGCATGAAAATTCAATATATTGACAGGAGCTGCGTAGGCCTGATAAGCGTAGCGCATCAG  
GCAGTTTGGCGTTTGTATCAGAGCCAACACGTCGCGAGCGTGGTTGCTATTAGATAACGTCGATTTAGCGACTGA  
CGGGTAAATCCAGCTGGGGCGGAAAGGCATACTGTCGATATCGTCGAGCGACGAAACACCAGAAAGCACCAGAATCGTCT  
CCAGACCTGCCTGGAAGCCGGCCAGAATATCGGTACGAGGTTATCGCCGACAATACCGTTTCTTCCGAATGCGCCTGC  
ATTTTGTAAATGCTGCGCGGATGATCCACGGGCTGGGCTTACCAACATAGAACGGTTTGCGCCGGAGATTTTCTCAAT  
CCCTGCACACAACGCGCCACAAGCGGGATAAAAAACCGCCCGTGGTGTCCGATTGGTGGCGATAAAACGTGCACCGT  
TAGCGCAGAAATAGGCTGCTTTATGCATCATGTCCCAGTTGTAGGAACGCGTTTCGCCAACAAATCAGAAATCAGGGTTC  
ACATCGGTAATAGTGAACCGGCTTTGTACAGTTTCAATGAATCAGTGCCTTCGCCACCACATACGTTTCTTGCCTTC  
CTGGCGACGCAGGAAATCGGCAGTCGCCATCGCAGAGGTATAAACACGCTGTGAGGTACATCGACACCTGCGGTGGCAA  
AGCGGTTGCCAGATCTTGCCAGTCTGCGAAGGATAGTTGGTACGAAACACCAGCGGAGGCTTTATCCATAATCCCG  
TGAAAAATTCGCTGCACCCGGTACGGCGAGTTCGTCGATCAGCACGCGTGCATATCGCAAATACATTTTTAAT  
GGTCATGGACTACCCAGAATATTGACAACAATAAGCGCCACTATAAAAGCACATTAATTTCCAGCAAATGCTGGAGCAA  
AATACCGTTGAGCATGGCGGTTTTACCAGCGCAAAGCGCGGATTGCCGAGCGGTGATCCAGCTCAGAACGTACCACCG  
GCAGATTAGTGCGAAACGCTTCAGCGCTGGGTATTAATGCAGCTTTCAATAGCAGGGAGCAGCACTTTATCGGCTTCG  
GTGATTTACCGGCAATAACAATTTTTGCGGATTAATAAGTTGATAGCAATGGCGATGGTTTTACCAGATGACGACC  
GACATACTCAATTACTTCCGACGCCAGACTATCGCTTTGTTGCGGCTTTGCAGATAGTTTTGATGGTGCAGTCGTCCA  
GCGGCACGCGGCTCTGGTAGCCCTGCTTAAACAGATTCAACACCCGTTGTTCAATGGCAGCGTTGGCAGCGATAGTTCC  
AGGCAGCAAAGTTGCCGAGTGGCAGCGTTCACCCAGCGGTTGACCTGAATATGGCCAATTTACCGACGTTGCCGTT  
GCGGCCAATAAAAAATGCGCCGTTAGAGATAATCCCGCCCCGGTTCGCGATGGACACGCACCAGAATGGAGTCTTCGC  
AATCCTGACTTGACCGAAGTAGTGCTCCGCCAGCGCCAGACTACGGATATCGTGACCAACGAAACAGGTCACTTTAAAA  
CGTCTTCCAGAGCTTACACAGCCCCAGTTTTCTACCTGAATATGCGGCATGTAATGAATTTTCCCGCTGTCGGGTC  
AACAAAGCCCTGGCAGGATACCGAAATCGCGATCAGCTCGCGAGTTTGGCTGGTAGCTATCAATAAACTGAGCAATGG  
CATTCAACAGGGCATGTTCCAGCGTTTGTGGTACGTTCCGGCAGCGGTAATGTTCTTCTGCCAGCACTTTGCTGCTG  
AGATCAAACAGAGTGATGGTGGCGTCATGACGACCAAGCCGTACGCCGATTGCGTGGAATTCGCGGTTTTCGGTGACGAT  
GGAGATAGCGCGGCGGCCCGGTGGAGGCTGCTGATCAACTTCTTTGATCAGCCCGGTTGATAAGCTGACGCGTAA  
TTTTGGTTACGCTGGCGGGGCAAGCTGGCTTTGCTCGGCAATCTGAATCCGCGAGATTGGCCGTAATCAGG  
CGATAAACCGCGCGCTGTTAAGCTGTTTTACGAGATCAACATTACCTATCTGAGCTTGTCCGCTGGTGCATACTTTC  
TCTTATTGAGTTACGACCTGTTACCGTTAACGATGGTCTTGGTGATTTTAAAAATCAGGTGTGAATGCAGTCAGGTTGGC  
TACTTTACCTGCGGCGAGTGTGCCGAGACGTTTCTCAACGCCAATCGCACGCGCCGATAGAGCGTCCGCATACGTAGCA  
CTTCATCCAGTGCAGTACCGCAATGTTGACCCAGATTACGCACGCTTCAATCATGGTTAAGGATGAACCGCTTAAACGTA  
CCGTTCTCATCACACAAAGTCCGTTACGGTAGTATATTGTTTTACCGCAAATAAATGAAGTTCATGTTGGCACCTGC  
TGGCGCGGTGGCGTCAGTAACAGACACAGTTTGTGCTTTGACAGGTTTGGCGTTGCGAATGTTGGCGTAAATCAACAT  
GCAGGCCATCAGCAATAATACCGCAATAAATGTGAGCTTCTGCGAGGATCGCGCCCCGAGGTTACAGACCGGTA  
ATATACGGCATCGGTTGTACAGATGGGTGGCAAAGGTAATCCCGCGCGGAAACCGGCTTTTGTCTTTCAACGTCGC  
GTTGGAGTGACCGGCAGAAACCACAATCCCGCATTGCCAGTTTGTGATGACTTCCGCAGGAACCATTTCCGGTGCCA  
GGGTCACTTTGGTAATGACGTCGGCGTTTTACACAGGAAATCGACCAGCGCGCATCAGGCTTACGCACAAAATTCGGA  
TTATGGGTGCTTTTTTTTACCAGATTACGCCAGGACCTTCCAGATGACAGACCTAACGCCTGATTCGGATGTTTTGCCAG  
GTAATCGCGCATAACGCGCACGCCCTGTTTCATCAGCTCATCGCTGGTGGTATAAGCGTCCGCGAGATAGTTAGTACAGC  
CTGATTTCTATTGGCTTTCTGCATGATTTCCAGCGTTTCCACGCTGACCGCTTACGCGGTGTCGTTAAACTGTACGCCG  
CCGAGCCGTTAACTGCACATCGATAAAACCGGGGAGAGAATGGCCCCGTTAGTGAACGTTGTTGATCTCTGGCGG  
CAGTTCCGCTACCGGACAGACGCTTTTAAATCAGGCCATCAGCGATAACAACCGCGTGGTTCATCAAGAAATTCGTGGCCGG  
TAAAGATCCGGCCTGGGTTAATGCATACATTCTGACCCCGATTTTAAAAAATATTGCCCTGAGCAAGGAGCCAGGGCA  
GGGATAACAATTACAGACCTTTGATATTTCTGCTTCTAATTCATTGAAATATCTTAAAGTCTTAACTTTAGCTCCATG  
GTGGAAGGTTATCGCACACCATGATCGCTTTCGGATGCAGTTGCAGACAGCTGATGGTCCACATATGGTTCACGCAACC  
TTCAACGGCGGCTGCGCGCCAGTGCTTTCGGTACCCAGCACCAGAATCATCACTTCTCGGCATCCAGCAGTGTAC  
CAACACCGACAGTCAGGGCATATTTTGGCACCTGATTAACATCGTTATCAAAGAAACGAGAGTTTGGCAGCGGAGTGTCA  
TGAGTCAGGGTTTTGATACGAGTACGAGAAGCCAGAGAAGACGCCGGTTCGTTAAATGCAATATGACCGTCGTTACCTAC  
ACCGCCATAAACAGATGAATTTTTCCGTAAGAACGGATTTTTCTTCACTGCGGCACTCGGCGTCGATATCCGGG

CGTTGCCGTTGAGAAGGTTGATGTTTTCTGCTGGAATATCAACGTGATCGAAGAAATTACGGTGCATAAAGCTGTAGTAG  
CTTTCCGGATGCTCTTTCCGACAGCCGACATATTCGTCATGTTGAAGGTGACAACGTGCTTAAAGCTGACCTGGCCTGC  
TTTATGCATTTGACTAACGCTTTATAGGTGGTCATCGGCGTCCGCCAGTCCGAGGCCAGTACAAACGGACGATCGG  
CAGTCGGTTTTGAACGCATTGATACGATTGACGATATGGCGAGCAGCCATTTGCCGACCTGTTAGCGGTAGTCAGGGG  
ATCAGTCTCATTATTCACCTCAATAAGTAAAATGTAAGCCGTTGGCGGATTAGGCATCTTTAAGCGTAACTGGATTTGC  
GCAGACAGGCGTCAATCCGACCTGATTTTTGAATGATAAAATAAGTTTTCTGGTTTAGCCAGTAAAAGGGAGTGATAAT  
AACGATATTTGGTGACAAAACCTCACAAGACACGCGTTTAAATTTGCGATACGAATTAATTTTACACACTCTGTAGCA  
GATGATCTAACAATCTGATTACAGAACATCGGCAGTACAATTTGCAGCAAAATAAAATACGGCTTGAACGAGCCAAAT  
AGGGTCTCGTAGGGGAATAAGATGAATATTTAGTTTTTCCAGCGACTCGGTAGGGCGTTACAGCTCCCTATCGCG  
GTGCTGCCGGTGGCGGACTGTTGCTGCGATTGGTCAGCCAGATTTACTTAAACGTTGCGTTTATTGCCAGGCGGGCGG  
TGCGATTTTTGATAACCTCGCATTAACTTCGCCATCGGTGTGGCATCCAGCTGGTCAAAGACAGCGCTGGTGGCGGG  
CGCTGGCGGGTGGGTAGTTACTTTGTGTTAACCAAAGCGATGGTGACCATCAACCCAGAAATTAACATGGGTGACTG  
GCGGTATCATTACCGGTCTGGTTGGTGGCGAGCCTATAACCGTTGGTCCGATTTAACTGCCGACTTCTGAGCTT  
CTTCGGCGGCAACGCTTTGTGCCGATTGCCACCGGATTTCTGCTGCTGGTGTGGCGGCCATTTTTGGTTACGTCGGC  
CGCCGATACAGCAGCTATCCATGCAGGCGGCGAGTGGATGTTCTGCGGGCGGCTGGGTTCCGGTATCTTTGGTTTC  
ATCAACCGTCTGCTGATCCCAACCGGTGTCATCAGTACTGAACACCATCGCCTGGTTCCAGATTGGTGAATTCACCAA  
CGCGGGGGTACGGTTTTCCACGGTGACATTAACCGCTTCTATGCCGGTGACGCGACCAGCGGGGATGTTATGTCCGGCT  
TCTTCCGATCATGATGTTCCGGTCTGCCGGTGGCGGCTGGCGATGTACTTCGAGCACCAGAAAGAGCGTCTGCCGATG  
GTTGGCGGTATGCTGTTTTCTGTTGCTGTTACTGCGTTCCTGACCGGTGACTGAGCCGCTGGAATTCCTGTTATGTT  
CCTTGCTCCGCTGCTGTACCTCCTGCACGCACTGCTGACCGGTATCAGCCTGTTTGTGGCAACGCTGCTGGGTATCCACG  
CGGGCTTCTTTCTGCGGGGGCTATCGACTACGCGTTGATGTATAACCTGCCGGCGCCAGCCAGAACGCTGATG  
CTGCTGGTATGGCGTTATCTTCTCGTATCTACTTCGTGGTGTTCAGTTTGGTTATCCGCATGTTCAACCTGAAAAC  
GCCGGTCTGAAGATAAAGAAGACGAGATCGTTACTGAAGAAGCAACAGCAACTGAAGAAGGTCTGACTCAACTGG  
CAACCAACTATATTGCTGCGGTTGGCGGCACTGACAACCTGAAAGCGATTGACGCTGTATCACCCGCTGCGCCTTACA  
GTGGCTGACTCTGCCGCTAACGATACGATGTGTAACGCTGGGTGCTTCTGGGTAGTAAACTGAACAAACAGAC  
TATTCAGGTGATTGTTGGCGCAAAGCAGAATCCATCGGCATGCGATGAAGAAAGTCTGTTGCCGTTGGTCCGGTAGCCG  
CTGCGTCACTGAAGCAACTCCGGCAACTGCCGCGCTGTAGCAAACCGCAGGCTGTACCAAACCGGATCTATCGCG  
GAGCTGGTATCGCCGATTACCGGTGATGCTGCGGCACTGGATCAGTTTCTGACGAAGCATTGCCAGCAAAGCGGTGGG  
TGACGGTGTGGCGGTGAAACCGACAGATAAAATCGTCGATACCCAGCCGACGGACAATCGTAAAATCTTCAACACCA  
ACCACGCTTCTGCTGAAACCGAAAAGGCGCGGAGATCGTCGTCATATGGGTATCGACACCGTAGCGCTGGAAGGT  
AAAGGCTTTAAACGCTGTTGGAAGAGGGTGGCGAGTAAAGCGCAGGGCAACCGATTCTGGAATGGATCTGGATTACCT  
GAACGCTAACGCCGCTCGATGATTAGCCCGGTGGTTTGCAGCAATATCGACGATTTCAAGTGGCTTATCATTAAAGCTC  
AGGGCCATATTGTGGCGGTCAAACACCGCTGTATGAAATCAAAAAGTAATCTGCTTTATGCCTGATGCGACGCTTGA  
GTCGCATCCAACAATGACAAGCGGTGGAGATCTTCTGCGCTTTTTTTTTTCAATCATCCCCATAATCCTTGTAG  
ATTATCAATTTAAAAAATAACAGTTGTCAGCCTGTCCCGCTTATAAGATCATACGCCGTTATACGTTGTTTACGCTTT  
GAGGAATCCACGATGAGTGAGGCAGAAGCCGCGGACTAACTTATCCGTGATCATCGATGAAGATCTGGCCAGTGG  
TAAGCACACCACAGTACACACCCGTTTCCGCGGAGCCGAATGGCTATCTGCATATTGGCCATGCGAAATCTATCTGCC  
GAGTATGTTGAGTCGATCAAAAACGACGTAGAGTGGTTAGTTTTCACTGGTCTGGTAACGTCGTTACTCTCCGATTA  
TTTTGATCAGTCCACGCTATGCGATCGAAGTCAATAAAGCCCTGGCGTACGTTGATGAACTGACGCCGGAACAGA  
TCCGCGAATACCGCGCACCTGACGCAACCGGGTAAAAACAGCCGTAACCGGACCGCAGCGTTGAAGAGAACCTGGCG  
CTGTTGAAAAAATGCGTGCCGGTGGTTTTGAAGAAGTAAAGCCTGCTGCGTGCGAAAATCGACATGGCTTACCCTT  
TATCGTATGCGCGATCCGGTGTGTACCGTATTAATTTGCTGAACACCACCAGACTGGCAACAAGTGGTGCATCTACC  
CGATGTACGACTTCAACCACTGCATCAGCGATGCCCTGGAAGGTATTACGCACTCTCTGTGTACGCTTGAAGTCCAGGAC  
AACCGTCTGTACGACTGGGTAAGTGGACAACATCACGATTCCTGTTACCCGCGCCAGTATGAGTTCTCGCGCTGAA  
TCTGGAATACACCGTATGTTCAAGCGTAAGTTGAACCTGCTGGTACCAGCAAGCAGTTGAAGGCTGGGATGACCCGC  
GTATGCCGACATTTCCGGTCTGCGTCTGCTGGTTACTGCGGCTTCTATTCTGAGTTCTGCAAACGCATCGGCGTG  
ACCAAGCAGGACAACACCATGAGATGGCGTCTGGAATCCTGCATCCGTGAAGATCTCAACGAAAATGCGCCGCGCGC  
AATGGCGGTTATCGATCCGGTGAACCTGGTTATCGAAAATATCAGGGCGAAGGCGAAATGGTTACCATGCCGAACCATC  
CGAACAAACCGGAAATGGCAGCCGTCAGGTGCCGTTTACGGGTGAGATTTGGATTGATCGCGCCGATTTCCGCGAAGAA  
GCTAACAAAGCAGTACAAACGCTGGTGTGGGTAAGAAGTGGTCTGCGTAATGCTTATGTGATTAAGGAGAACCGGT  
CGAGAAAGATGCCGAAGTAATATCACCAACATCTTCTGACTTATGACGCCGATACCTTAAAGCAAAGATCCGGCAGATG  
GTCGTAAGTCAAAGGTGTTACTGCGGTGAGCGCGGCACATGCGCTGCCGTTGAAATCCGTTTGTATGACCGTCTG  
TTCAGCGTGCCTAACCCAGGTGCTGCGGATGATTTCTGTGCGGTGATTAACCCGGAATCGCTGGTATCAACAGGGCTT  
TGCTGAACCGTCTGTAAGGATGCGGTTGCGGGTAAAGCATTCCAGTTTGAAGGTTACTTCTGCTCGATAGCC  
GCCATTCTACGGCGGAAAACCGGATTTAACCGCACCGTTGGGCTGCGTATACCTGGGCGAAAGTAGGCGAGTAATTT

TAAGTTTCGCTATGCCGGATGGGGCGTTTACGTCGCATCCGGCAAGGAACAGACAAACAGTTTCAAACGCTAAATTGCCT  
GATGCGCTACGCTTATCAGGCCACATGATCTCTGCAATATATTGAGTTTGGCTGCTTTTTGTAGGCCGGATAAGGCGTTC  
ACGCCGCATCCGGCAAGAAAACAGCAAAACATCCAAAACGCCGCGTTCAGCGCGTTTTTTCTGCTTTTCTTCGCGAATTA  
ATTCCGCTTCGCAATTTATCCATAAAAATAAATTTAAAAAACAACAAACATAATTAATAAAAATGTAACCGCTTTCATCTTG  
CTGGAATTTACGCTTTTATTCTTCTGCAAGCCTTTCAACCGAACTTAAGCCTTGTAACAAAAATCATCAAAATATGT  
GCGGTTGCTCATGTTCTTACATTCTGGTTACAGAAAAGAGATTGATAATTCGCGTCGCGAAAAATAGTCTGTTCTGTAGT  
CAGCGAGACTTTTCTCAACGCTACTTTTTTAATTTTTATTTTTTCGCTGTTACCTTTGGTGCAGCAATTTATACGTCAA  
AGAGGATTAACCCATGCGTACGTTTAGTGGCAAACGTAGTACGCTGGCGCTGGCTATCGCCGGTGTACAGCAATGTCCG  
GCTTTATGGCAATGCCGGAGGCTCGCGCCGAAGGATTCATCGACGATTCAACCTTAACCGGCGGTATCTATTACTGGCAG  
CGTGAACGCGACCGTAAAGATGTTACCGACGGCGACAAATACAAAACCAACCTTTCTACTCCACCTGGAATGCCAACCT  
CGATTTTTCAGTCCGGTTATGCTGCTGATATGTTCCGCTTGATATTGCTGCGTTTACGCGGATTGAAATGGCGGAAAACG  
GCGACAGCTCCACCCGAACGAAATCGGCTTTTCAAAAAGTAATAAGCCTATGACGAAGACTGGTCCGGCGACAAAAGC  
GGTATAAGCCTGTATAAAGTGCAGGCAAAATTTAAATACGGTCCGGTTTGGCGAGGGCAGTTACATTACGCCAACTGG  
TCAAACGCTGTAGCGCCGACTGGAGCTTTATGCCAGTACTTATCAGGGGGCGGAAGCCGGGGCAATTTTGATTACG  
GCGATGCTGGTGCCTTGTAGTTTCTCTACATGTGGACCAACGAATACAAAAGCCTGGCATCTGAAAATGGATGAGTTT  
TATCAGAACGATAAAAACCAAGTTGATTATCTGCACCTCTTTGGGGCGAAATACGACTTCAAAAATAACTTCGTACT  
GGAAGCGCATTGTTGGTACGCGGAAGGTATATCGATCAATATTTTGCCAAAGCCAGCTACAAAATTTGATATCGCCGGTA  
GCCCCGTTAACACCAGCTACCAGTTCTACGGTACCCGAGATAAAGTTGACGATCGCAGCGTCAACGACCTTTATGACGGC  
ACCGCTGGCTGCAAGCGTTGACCTTTGGTTACCGGGCGGCTGACGTAGTGGATTTGCGCCTCGAAGGCACCTGGGTTAA  
GGCTGACGGTACGAGGGATACTTCTGCAACGTATGACTCCAACCTACGCTTCTCAAACGGTGCCTGGATATCTGGT  
GGGATAACCGTTCTGACTTCAACGCCAACGGCGAAAAAGCGGTCTTCTCGGTGCGATGTATGACCTGAAAAACTGGAAT  
CTTCCAGGCTTCGCCATCGCGCTTCTACGTTTACGCATGGGATGCTAAACCTGCGACCTGGCAGAGCAATCCGGATGC  
GTACTACGACAAAAACCGGACTATTGAAGAGTCTGCCTACAGCCTGGATGCGGTCTATACCATTACAGGACGGTCCGCCA  
AAGGCACGATGTTCAAATGCATTTACCGAATACGACAACCACTCCGACATCCAAGCTGGGGCGGTGTTACGGCAAC  
ATCTTCCAGGATGAGCGTACGTGAAATTTATGGTAATCGCACCATTACCATTCTTCTGATGCCCGACGCGGAGGTTTT  
GTGCTGCCGACGTTTTGAGGAATTTGCTATGAAAAACTGATTCTCATCGCCATAATGGCATCGGGGCTGGTAGCTTGT  
GCGCAATCAACCGCGCCACAGGAAGACAGTCGTCTGAAAGAGGCATACAGCGCTGTATCAACACCGCACAAAGTTCCGC  
AGAAAAAATTGAAGCCTGCCAGAGCGTGTAAACGTGCTGAAGAAAGAGAAACAACATCAGCAGTTTGGCCAGCAGGAAA  
GTGTACGCGTACTGGATTATCAGCAGTGTCTGCGTGAACGCAACCGGAAATGATCAGGCGGTGAAAGCCGATTGTGAT  
AAAGTCTGGCAGGAAATACGCAAGTAATAACAAATAAGTGAGAGCTGTAACCTCTCGCTTTTCTATTCCCTTGCATAAAA  
AAGCCAACCCGCAAGTTGGCTTTTCTCGTTACGGCTGGCTATTTGCCTTCTGTCGATGTTTATCTTCGCGCAATCGC  
CTTCCGACAGTGACCGTAAAGATAGAGACTGTGGTTAGTCAGGCGAATGCCATGTTTTGCGGCAATTTACGCTGACGC  
GCTTCGATGGAATCATCACTAAATTCGATAACCTTGGCCGAGTCGAGGCAGATCAGGTGATCGTGGTGTGTTGCTGTGT  
CAGTTCAAATACGGATTTACCGCTTCAAATTTGTTGGCGGGTACGATACCAGCGTCGTCAACTGGTTACGTACGCGAT  
ATACCGTAGCCAGACCAATTTCTTCAACCATATCGATCAGACGTTTGATAAATCTTCCGCACTGACGTGATGGTTGCC  
GGCTCCTGAAGAACTTCCAGGATTTTTAAACGAGGAAGCGTTACTTTACGGCCAGCTTTCTTTAGGGCGGTATTGTTATC  
AGTCATGCGGAATCTGTCTGTTACTAAGCGGTTCACTTATTAGAAGAAGTACAGAAATTTGCTCTTGAGATAATGCGT  
ATCATTATAGAATTTGCCACGCTAAATGAAAACCAAGTCCCTGGCAAATATTGTTAATAAAAACGTGGCACAGCTTAC  
ATTTACAACGGCAAGGCCACTTGAACACCGGGACATTGTACAGTACAACAGCAAAGTTACAAAATTTGTAGCAATTAAT  
TTGATTGGCATTATCTATTAATACGGCGTAGACATGAGTCTACGCCGATCAGGCATTGAGAATTTGCTCGAGAT  
GCAACTCTTACAGAAATCTGTTAAACCCATTTTTCTACACGTTTACGCGGTGAGTTCCGGCTGACGGTCTTCTCGTATAGCC  
AGACCGACAAAGTGGTGTGTCATCTGCCAGACCTTTTGTGCTTGAATGATAGCCCGAGTTGGCCAGTGACCAACGAT  
GGTTGACCCGCGCGGTTCAATGATGTGCGGATGGTCCCAATGCGTGCAGAAATATTGCGGTAATCTTCTGTTGTCAC  
CACAACCAACAGCGCAACCAAGTTTGGCGTTGAAATCAATCTTCTGAGAGTCCGGAAGAAGTACCCAGTCACACTGC  
GCTTCCGCGTAATACCAGTTGGGATGCCAGCAGCAGAATGTCATAAGCTTCCAGATCTTCTTGTGCTTTTTGCAAT  
GTCATGGACATCGGCAACGTCTTACCAAGCTGTTTTGAATCATTTTTGCGATATTTTGGTATTACCGGTGTCGCTGC  
CGAAAAAGATGCCAGTGATAGCCATGAGTGAATAACCTCTTGAACCTTATTGAAATGGGGGTGAAAATTTGCCACGGA  
TAAAGGCAATCATAGCAGAACAGGCAGTCTTGGGAATCAGCAAACGAGCAGGACTGCACACTGTGCTACATGAAAGTGG  
AAATTTAAACGATGCCCTGACTACGCAGCGCCGCGAGTTGCTGCATTAACATCTTCTGATCAGTTGCTACGGCTCATA  
TTGCGGACTCCGCCAGCTGTTACGCGCTCGACAGCTTCCGCGTTCAGCTTACGTTGACACGCTTAAGGCCACGTAC  
TTTGTGCGTTTTAGCTGGTTGCGTTTTAATAACGACGCTGTTATCGCGGAAAGCGGATTAGTTTTCGGTGCTCCCG  
GTCGACGCTGTCGCGAACAGATCTAATGTCGTACGGTCCGTTTGTCTTTGGCCATGATCTTGGTACTTCGGGGGAA  
ACAAATCAGCCAGGCTCTGCCCGGATGGATAGCGCGCCATAATACATCAGCGGATGAGTACGCCAACGCCACCGCGG  
GAAAAGCAGCGGACGCTGGGTTTTAATCAGTTGCGTTAATCATTGAGATAGCGACGGATAGCGCGTAATACCGCATCC  
GGTTTTTACGATGGACCAAGTACCCGCGCCTGCAATCATGCGCCCGTGCCTGTGAAATTTGAGCCAGTAAATCATC  
ACGGTACTGCTCGCTAACATACGGAGAATTCGCCAGGGATAAACAGGGCAGGGTATCCCATGCCGGATTTTCTCC

AACCTACAATATGCGGATACTGATCCCAATACCGGCACGTTAAAGCGCCACTCCCCGTCAACAAAAGATTTGAGCAGA  
AACTGAATCACCCCTTCTCATTAAAGATGCTGGCGCATTATTGCTGCTGCTGCGGAGTTTGTGCGTCCGATCACT  
GACCGGTTGATAGCCGCAAAAATCTCATCATGACGGCGTACGTGATAGTCGACCGGCGGATATCGATCGCCACCAGTT  
TATCGATGCGATCGGAGGCTAGTGCAGTAAGTGCCATTACCGCTTACCGCCATGGAGTGACCGATAAATGTTGCTTTG  
TCGATCTGCTGTGCATCCAGAGTATCAACAAGATCTCGGCCATCGCCGGTAATTCATTACCGGATCTCTCGGTGAAA  
ACCGTGTTACGCATATCAACCTGGATGATATTGTGATCGTTTACCAGATCGCGAGCCAGTACGCCAAGGTTGTCGAGGC  
TGCCAAACAGACCGTGGACAAGAACGATGGGAGAATTATTGTGCTGGTTTTGTGCAGTTTGCAGCGGATATTCAATTC  
ATGGCAAAGTTCTTTTTCTCGCTTGTGCGGTTAGGGTATTATGTTGACCATTGTGCCACAGGGCTGCAACAAAAGGT  
TTATTCCGAGTTTTCTGCAAGCCAGGCTTGACGCTATCCGCTGCCGGGATTTATTCATATACTCTGGCGACTTGTATT  
CAGCTAAGACTGCACTGGATTAAGATGAAAACGATTGAAGTTGATGATGAACTCTACAGCTATATTGCCAGCCACT  
AAGCATATCGGCGAGAGCGCATCCGACATTTTACGGCGTATGTTGAAATTTTCCGCCGATCACAGCCTGCTGCTCCGGT  
GACGAAAGAGTTTCGCTTTCGCTCACCTGCTATCGTGAAGCGAAGCCGGTCAAACGATTAAGACAAGTTTCGCGCAA  
TGCGTGAACCTCTGCTTTTCGGATGAATACGCAGAGCAAAAGCGAGCGGTCAATCGCTTTATGCTGCTGTTGTCTACTA  
TATTCTCTTGACGCCAGGCTTTGCCGAAGCAACGAATCGTTGCACGGTCGTACACGCTTTACTTTGCGGCAGATGA  
ACAAACGCTGTAAGAAATGTAATCAGACCAAGCCGAAACATGTCAGGACGCGCTATTGGGTGATCAGCAACACCA  
ACACCGGCTGAAATGCAGCATGATCGAACACATCATGCAGTCGATGCAATTCGCCGGGAATTGATTGAGAAGGTTTGC  
GAACTATCTAAAACGTTGCAGACAAAGACAAAGCAATGGCAATCCACAATCGTGCAGGCCAACCTGCACAACAGAGTG  
ATTTGATTAACGTCGCCAACTGACGGCGCAATATTATGTAAGTAAACAGAGGAAATGCGGAGCAGCGGTGAAA  
TTCGGTACTTCCGGTACCGTGGCAGTGCAGCGCCACAGCTTAAACGAGCCGACATTTGCGGATCGCTCAGGCAAT  
TGCTGAAGAACGTGCGAAAAACGGCATCACTGGCCCTTGTATGTGGTAAAGATACTCACGCCCTGTCCGAACCTGCAT  
TCATTTCCGTTCTGGAAGTCTGGCAGCGAACGGCGTTGATGTCATTGTGCAGGAAAACAATGGCTTACCCCGACGCCT  
GCCGTTTCCAATGCCATCTGGTTCACAATAAAAAAGGTGGCCCGCTGGCAGACGGTATCGTGATTACACCGTCCATAA  
CCCGCCGAAGATGGTGAATCAAATAACAATCCGCCAATGGTGGCCCGCTGATACCAACGTCACTAAAGTGGTGAAG  
ACAGGGCAACGCACTGCTGGCCGATGGCTGAAAGCGTGAAGCGTATCTCCCTGACGAAGCGATGGCATCCGGTCAT  
GTGAAAGAGCAGGATCTGGTGCAGCCGTTCTGGAAGGCTGGCCGATATCGTTGATATGGCCGCGATTAGAAAGCGGG  
CCTGACGCTGGCGTTGATCCGCTGGGCGTTCCGGTATCGAATACTGGAAGCGTATTGGCGAGTATTACAACCTCAAC  
TGACTATCGTTAACGATCAGTTCGATCAAACCTTCCGCTTTATGCACCTTGATAAAGACGGCGCGATCCGTATGGACTGC  
TCCTCCGAGTGTGCGATGGCGGGCCTGCTGGCACTCGGTGATAAGTTCGATCTGGCGTTTGCTAACGACCCGGATTATGA  
CCGTACGGTATCGTCACTCCGGCAGGTTTGTGAATCCGAACCACTACCTGGCGGTGGCAATCAATTACCTGTTCCAGC  
ATCGTCCGAGTGGGGCAAAGATGTTGCCGTCGGTAAACGCTGTTTTCATCTGCGATGATCGACCGTGTGGTCAACGAC  
TTGGGCGTAAACTGGTAGAAGTCCCGGTAGGTTTCAAATGGTTTGTGATGGTCTGTTGACGGCAGCTTCGGCTTTGG  
CGGCGAAGAGAGTGCAGGGGCTTCTTCTGCGTTTGCAGGCGACGCCGTGGTCCACCGACAAAGACGGCATCATCATGT  
GTCTGCTGGCGGCGGAAATCACCGCTGTACCGGTAAGAACCCGAGGAACACTACAACGAACTGGCAAAACGCTTTGGT  
GCGCCGAGCTACAACCGTTTGCAGGCGCTGCGACTTCCGCACAAAAAGCGGCGCTGTCTAAGCTGTCTCCGAAATGGT  
GAGCGCCAGCACCTGGCAGGTGACCCGATCACCGCGCGCCTGACTGCTGCTCCGGCAACGGTGTCTTATTGGCGGT  
TGAAAGTGTGACTGACAACGGCTGGTTCGCGCGCGTCCGTGAGGACGGAAGACGCATATAAGATCTACTGCGAAAGC  
TTCCTCGGTGAAGAACATCGCAAGCAGATTGAGAAAGAAGCGGTTGAGATTGTTAGCGAAGTCTGAAAAACGCGTAAAC  
ACATTTAATAAAAAAGGGCGTGCAGATCGCCCTTTTTACGTATGACAAAACAGAAATTGCCTGATGCGCTACGCT  
TATCAGGCCACGAGGATGGTGAATATATTGAATTAAGCGATTTTGTAGCCGATAAGGCGTTACGCCGATCCCGG  
CAAAAACAACGAACATTTGTCAACAACTGAGTAGCTCAAGGAAATCCCAATGAAGACCAACAGGAGTCTGGTCTCAT  
AGTGTCACTAATTACCGCCACATTAAGTGTGACTGCATGCGCCCAACCTGAACAATCATCATTAGCTGGCGACTGGTTAC  
TGACCCCTAAAGATAAAACAGAGGATTAACGGGTAGCATTGCGGTAATATTGCACCTTTCCGGTGAAGACAAATTGC  
CGTGGTGATAACTTACCTGATAATACCCGCGCTGGCAGTTGTGAGGCGGAAACGAAAAAGAACTTACTTATCTTATAA  
TATGTCAGCACAAAGAAAGTCCGTTTAAATCCCGTTGGCAATGCTACACCTCATTTTTTATGCGGTTTGGCAGGGCA  
AGCCCGCACTCGACCGATAGTCAATGAGGATTATGTCAGCGAAAGCGGATTTTTTGGCTCGATGATGCATGTCGGGATT  
ATTGAGTTACGACGCTGCCAGTCAGAAAATTGCCAGCAAGAATTGAAAGCGATAAATACACATTAATAAGTGAAGTCCGG  
GAATGAAACCCGGACCTGAACATGTCTTATTGCGTGAATGTTTCTTTTATTTGATACTGCATTTCCAGAGTTGAGTAA  
CGAAATAACTTTTCTGTTCTTCTTCTTCACTTTGTACCCATAAGAAAGGGTAGAACGTGAAGGCTTCCGTTGCCGATA  
ATTTTATTACGCTTCTCGCATTGCTGCCATCGTACATTTTATAGAAGGTATCTAAATCACCGGATAATGCCACTGA  
AGAACTCAGAATATCCAACCTTCCAGACTTTCCCAATTCAGCGTATCTGGCGAAAATAATAAACGCAGCCAGTATCTT  
CCCAAGATCGCACCATTAAGAGCAAAAATTACCCCTGCGACATCGTCAGCGATGGGTAAGCCCGCACGCCTGCGAATT  
CAGGGCGTTGTGCCAATTAAGTCTCGTGGCAACCGGGGTGACCAGATCCTGCTATGCGTAACCTAACCATTATCA  
ATCAGCAGACCTCCGGAGCCATAGACAAGCGCACCCATCGGTGATTTTGTGTCACCTGTAATTGATAAAGTGGCGTTT  
GGCTAAATCTTTATTAACCGGTAAGAGTTCGGTATGTTTTGTGGCGTCTTTTAAACAGTTCTGGATTATTGGCCAGGCTG  
AATCTTACGATTTACTAAGTATTTCACGCATCGTACTTGTCTTGTGCTACGGTGTCAATTATGATGAGG  
AATTGTATGGAACATTTTTTAAATATTAAGTTCCTTATTTGAATAAAAAATGACTTTATCCATACATTGCCACTTTTT



TCAAAGCATAAACCGATACCCAATACCGGTTTCAGTAATAAAATGGCGAGGCCGGGCGGATCCTGTTCCAGTTTTTGTG  
GCAGATGCCCCATATAATTACGCAAATAGTTGCTGTGTTTCGATCGCGTTTAGACCCTACATCTGCCGGATGCGGCATAAA  
TAACGAACTATTTGCCAACAAACAGAAAGGGCGATCATTCAATCGCCCTTTTTACTTTGTTTTATTAACCGTGTTTATT  
TTTCAGTTCAAAGCGTGGTGATACCAGACCATAACAGTGTCCAACCAAGGAAGGTCACGATGGAACCGTACAGCATGGCTT  
CTCCCCCGGATGAGTACAGCGCATAAAAGCTATACATCGCGCCAAACAAAGCAAAAGTTTGCAACTTTTCGCTTTTGG  
GGGGCACATTAGCGACCTTCTGAATAATGACTAATGCCGCCATTGACAGAATATACGGAATGATATTGGTCCACCACGGC  
CAGGTTAACAGCACGTTGAACTGACTGTTTAGCGACGGGCTAATGGTCATCAGTGCCAATCCACTCTGAATAATCACAA  
TGGTCAACATTCCTGCACCGGTGCATCCACTTTGGTTACACGGGAGAAAATTTTAGGGAAGTAGCCTTCATCAGATGAA  
GATTTAAACACCTGGGCAATGGTGAATGCCAGCCAAGTAGCGAACCGCAGCAGGACATCACCATCAGCGCCATAATGAC  
TTTACCCTTCCGGCGTGAACATCTGCGCGAAGGCCAGACCAAATGGTGCCGTTGAATTTGCCAGCTCCATATTTGGCA  
CAATCCCGCAATCAGTTGGTGGAGACGATATAAATCACCGCCGACCTAACGTACCGCCGAGTACCGCGATTGGCACA  
TTACGTTCCGGGTTTTCACTACATCAGTATTGCGACACGCAGACTCCAGACCAAGAAAAGCCACAGCGTCATAGCGAT  
GGAAGAACCTACCGACTGAAGAACGGTGCATGATGCGGATTCAGGAATCAACGTACAGCGTCGGGCTAAACCAGAACC  
AGCCAATAATGCACAGACCGACGACCGGAATAATGACCCCCACACGGAATGCTACTGATTTGCCGGTAATGCGCGCA  
CCACCAAGTTAGCCACGGTACAAATCCACAGCACCCCGATGGTGCAGAACCAATCTGCACTGGCAGCAAACTCGCGCC  
GAGCAGTTGCGTAAACCAACCGCGAAATAGCAATCGCGACGTTAGCAATCAGCAGTGAGACGCCGTAGGTATAGT  
TCGCATAAAGTTACCGGATTTACCGAAAGCATACTCGGCATAACCGCCATACCGCCTGATTTACGGCTGAACATACCG  
CATTTTGCAATGCCATGCCAGTGCCATTGAGCCTACGGCTGTACCAGCCAGGAGATAATTGAGATTGTCCCGACTTC  
GGCAAGCTTTGTGCGCAGCATGATGATACCGGAGCCATCATGTTGACCATCGTCAGTATGGTTAACTGAACGACGCCCA  
TTTTGTTGATTTAGCCTGACTCATAATTTTTCCCTTTCAACAGGGTGCTTTGCGCATCACGAGGCTTGATGACATAGC  
ACCAAACCTTGTTACGACCATCATGTTCTTCGATATAGACACCCTGCAGCTCCGGTGCAAAACCTGGCAGCAGGTTGATC  
CCTTCTCCAGAGCGCTGAAGTAACGCAGAACAGCACCCAGATTTACCCGGAACAACACACAGCACACCCGGAGG  
ATAAGGAAGCGCACCTTCGGCAGCGATACGGCCTTTCGATCCGGCAGACGAACCGATTCCACTTCACCGCGTAAATAGG  
CGTAGTTGGCTTCTTGGGATTGATGCTGACGCGTGGGAAGTGCTCCTTACGGAACATCTTTTTGCAGTTGTTTCACG  
TTGTGGCGGCATACAAATCATGCATTTCTGACACAACCTGACGCAGGGTATAACCGCGTAGCGCTTTCATGCTGTTT  
GTAGATGGAAGGTAGCACTTCTGCTAATGGCGCTCGGACTCAAGCAGTTTTTCGAAGCGTACCAGCAGGGCAACAAGTT  
GCTGAAGTTTGGCCATATCTTCTGCCGAGTCAGCAGGAAGAGGATGGAGTTAAGATCGCATTTTTCCGGCACTACGCCA  
TTTTCGCGCAGGAAGTTAGCAAGAATCGTCGCGGTACACCGAACGCTTCATATTCGCCGTTACGTGCATCAATACCTGG  
GGTGTGAGCAACAGTTTGCATGGATCGACAAAGTATTGATTCTTCGATAGCCTTCAAAGAATGCCAGTGTTCCTTG  
GTACAAACTGGAAGAAGCGCAGATCAACCGCAATTTGCGCTGTTTCATACGACTGCCAGGGTTTACCATCCACCAGTTCA  
GGTACGAACGGACGAATATGCTGACAGTTATCGAGGATCAGTTTTCGGGCAATTAATGCCATTTACCACACAATCCATCCA  
CATATTACGACCGCTGACACCTTCATGCATTTTGGCGTTGATATTAGTGCAGGCAACAGCGGATAGAACGGGCTGGTGG  
AGGCGTGCATCATAAAGCGGTTGTTATGCGTTTTGTGCGGTACATAACGCTGTTGCCCTTTGATGTGGCTGTCTTTTTTA  
TGAATTTGTGAAGTCTGAGAAAAACAGCCTGTTGTTTATGCACAGATTGCGTAACCAGAATACCCGGATCGTTCTCATT  
AAGATCCAGCAACAGCGCGAACAGTCCGCCATCATCGGAATAAACTGTTATAGCCGACCCATGCTGAGTCAAACAGGA  
TGTAGTCACACAGATGACCAATTTTATCCACCCTTGGCGGGCTTATAAATCGTACCGTCGTAGGTGCCAACTGAATC  
ACAGCGAGGCGAAAGGACGAGCCTCTTTGCCCGTGCAGTCCGCGATCAGCTCAGCAGGTAACCTTTCTC  
AAAAAGTGCATCAATGCCACCGATAAAGCCATACGGGTTACGTGCCGTTTCCAGATAAACCAGGTTGACACAGCCT  
GTAGCAACGCTCCGTGGTGGTTAGATTTGTGTTATTGCGATCAAACAGCACCAGATCACCAGGTTGACAGGGCGTTT  
AAAAACACTTTGTTAGAAGATGAAGTGCATTTAAAAACGAAGTAGGTTTTATCGGCATTAACACTTTTGGCGCATG  
CTGTGCAATGCATGGCGCCCTTCGTGAATCAGCAGATCGCCCATCGCTACGTCCGGCTTGCAACAAGTCGCACGGAACA  
GCGCCTCACAAAGTATTCCACAACTGATTCGCCCGGATGGCGACGAAAAATTCGCCGCTGATGACCAGGGCAA  
TCAAACGCGCTGTACCTTGATTGACATAATCGACCAGTGCAGGGAAGAAAGTTGGGCGCAGTTGAGTTTCATAATGGCT  
GGCAGCGGTTTCTAACTGGCGACCATAAAATTCCTGTCGATTCGCAATTCTCAAAGACACCCGAAATACGGGCAAAAT  
ACTCTGCGGTACACGTTCTTGATTTTTCAGTAGCAATAAATACCGGGATGCCATAACCCGTGGCATCGATTTTCATCGAGT  
TTTCCGATGTAACATCGTTGAGCGATAAAACTATTGCCGCCACATCGATATTACGACTTTCATTAATGTAGATACATTC  
TCGCTGCGTGGTAAAACAGTCCGGGAAGAATCACTAACCGCAATTTTTAATTTTGCATTTTTTCATCTCTTTATTTTAG  
GTAATAGCAGGTCCTCAATTTCTGAATGAGAAATCGATCGTCCGGAAGAAAGCAAGTTACCCGCTGATAAATAAAT  
CAGGTAGATTGCTTTTTTTCAGAAATGCAGAAACCTTACCAGTCAGGTGGCTGATAATACAAGGTTAACAGAGAATGAGC  
ACTGCGGAATACAGGCATATGCCTGTAATACAGAGAGTCAGGAAGACCTGTACGCTGAAGTGCCTTAGTCGGTAGACTA  
ACGGCATTGAAGAAGTGAAGTGAAGTATTGCGATGAGCAAACTTCATAATATGAGTTGTCGGCCTTATATGGGGCA  
TAGTGCGGCTGTTATTTTCCATTTAATTTACCTTCTGATGTGAATGAAGTGAAGATATTCTATCCAGGAAATACGGT  
TGAAGTGTGAAGTGAATCAATAAAAAATGATCAATCTTAATTTATTTAATGATGAGCTTTTTACTCAGTAATATAAAATA  
TTGAATGTTATTTTTGTGTGTTGTTTAAAGATAAAAAGCCGATTTTATTATTACGGCTTAAATTAATAAAAAGGCAGGCTG  
TATTAATAATTAATTAACAAGCATAAACCGATAGCCAATACCGGTTTTCAGTAATGAAATGGCGTGGGCGGGCGGATCCT  
GTTCCAGTTTTTGTGCGAGATGCCATATAAATACGCAAAATAGTGACTGTGTTTCGACCGGTTTTGGCCCCACACCTGG

TTAAGGAGCTGGCGCTGGGTGAGTACTTTTCCGGCATTGTTGAGCAGCACCGCCAGCAGGGGAACTCAATTGGTGTGAG  
ATGCACCTCTCTCACCCCGGTGAATCACGCGGGCGGCTAAATCGACGGTAACATCGGAAAATTTTACCAGCGGATCGG  
GCGCGGTGGTGGCAGAGTGGCGGCGTAATGCGACGCGCAGACGGGCTGCAATTCGCAATGCCAAACGGCTTACTCAGA  
TAATCATCCGCTCCGGCATCCAGCGCGCGATTTTGTCTCTTTCGCTGCGTGCAGGAAAGCACAATCACCGGCACCGC  
GCTCCACTGGCGCAGGTCGCGGATAAACTCAATCCCATCACCATCGGGCAGGCCGAGATCGAGAATAATCAAATCTGGCT  
TACGGGTTGCCGCTTCCAGCAAGCCGCTTGCAGCGTTTCCGGCCTCAAAGACGCGCATCCCGTCCGCTCCAGCGCCGTG  
CGCAGAAAGCGACGAATAGCCTGTTTCAACAATCAGAACGTTTGTACATATCCTCATGAAATCTTCAAGTTCA  
GGGGCAGTTTGGTGGGAAGTGAACACGAAAACAGGCACCACCTCCGGTCCGTTGAACGCGGTAATAGTGCCCCGTG  
TACATCCACTATCGCCGACAAATTGCCAGTCCAAGCCCTACCCCGGACTGCGGACTCTTATTCCCGCGAGCAAAT  
TATCAAATATCGTCTGCTCCTGGCCTGGCGGAAGACCGGGCCGTTATCCAGACATCCAGTTGTAGATTTTCCGCTCA  
ACGTGGGCATCGATACCAATTTCCGGCTGCGCACCCGCATATTTACCGCGTTCAGCAGATTAATCAGCACCCGTTT  
AAAGAGTGGCCGTCAACGTGGATTAAGTCAAGGTCAGCGTTCTGGCAGAGAAAGATTGATGGCGACGATAAACCCGTTTCA  
GCATTTGCAGCGCGTCCGACTACTTCTCCAGCGTTAACACTCTTCTTCAAATTAAGCCGCGGACTGAATTCGC  
GCCATATCCAGTAGATTATCCAGTCCGGTAGTGTTCAGCACATGCTGACGATCTCGTGGCCTGGCGGGCGTGGGG  
TGATCTTCGCTTGCAGATCGAGCTTAAGATTTCTGCCTGACCAAACAGCACCGTAAGCGGCGTAAATCATGCG  
AAAGCGCCGACAGAGGCTTGGCGATCTGTTACGTTCTGCTTCCGATCCGCGCTTCTTCTCGCTGGCGGTTAGCGTC  
AGCCGCTCAAGGGCATTGGCGACTAACAGCGTAAACGTTCTCCAGCAGGCGTCTGTTCCGGGATCATCAACTGGCGCAG  
ATTTCCCGGCTCCACCACCAGCCGTTAGTTTTCTCGCCGTTTTTCCGGGCAAAATCTGGTACGGTACACCGGGTA  
ACGTGTGGTGGCCGCGCCGAGGCAGGCTTTATCAAACCTCACTGCGCGATGGCATCGTCCACGGCGTATTCTT  
TGCGGATGTGTTAACGGCTGCAATTTACCGTTGTATCGGGCAACAACACTGACTGCGGGCATGAAACGTGGAGGCAAT  
AAATTGTTGCTGGTGGCAGCGATATCTGCGGACTGCGGCCACCGCCAGAGCTTTGACATTTATATAAGTGCCGTG  
TGCGTTGCTCGCGTAACGGGCTACCCGCGCCTGATAACGCACGCCAGCAGTAAGGTTCCCGATCACCAGCCGACGGTT  
AACATCACCGCAAGGTCAAGCAGATATTGCATCAGAGACGGCGAGCGTCCGCGTGGGGCGATAAAAAAGAGATCGAA  
ACTACTACATTAATGACGGTGGCAACCACTGAAGGCCAGCGTCCATAAAATAGCGCCACCACCACGCCAAGCAGAT  
ACAGCATCACAGGTTGGCGCATCAAACGCCATCAGCCACTGCATGGCAATTAAGGTGATAACGGCGCATAACGCGGCG  
GCAACCACGCATCCCTGAATTTGTACACGCCACTTGTCTTAAAAGAGCGGTTATCCGGCGGTTGTTAATCGTGGGGC  
GGTGGTTCATCAAGCGGACAGCACCTGATCGAGATCGGGGGCGATGCGCGCCAGTCCGTGAGCAAACGTTTCCCGAC  
GCCACCAGCGCGGAGGCCGGGCGACCGAGAATAATCTTCCGAGATTATGTTACGGGCATAACGCACTACCGCTTTC  
TCTTCCGCTGGATCAGAAAGTGTGGCGTCTCCGCGCCAGTTCTGCGCCAGACGTAAGGCGCTGAGAATTTGCCGACG  
TTTTTTTTCCGGTAAGCGGTGACGGGCGAGGGTTTTCAACATACACCGCGTCCAGACGCTACCCAGCCGTGACGCCAGCC  
GCGCCGCTGCGCGGACAGTTTTTCCGCTGCGCGTGTATGGCCGATGCATAAAAGGATCGCGTCCGCGGTGTCACACT  
TTCTCTTCCGAGGATGCCCCGCCAGGCGCGCATTTGCTCATCAACGCGATCGGCAGTACGGCGAGTCCAGTTCCGG  
CAGGGCGATCAGATTACCTTTGCGGAAAAATGTTCAATGGCGGCTCCGCCTGCCCGCAATATAGACTTTGCCTTCTT  
TCAGCCGCTGGCGCAGATCGTCCGGGGCAAGTCCACCAGCACCGTCTGCGCGGCATCGAAAAAGGATCGGGCACG  
GTTTCCCGTACCTGAATTTCCGGTGACCGCGTACCACATCATTAGACTTTCCAGATGCTGAACGTTGACGGTAGTGAA  
AACATCAATGCCAGTTCAGCAGTCTTTCGATATCCTGCCAGCGTTTGGGATGACGGGAACCTGGCGCATTACTGTGCG  
CCAGTTCGTCATTAAGATCAGCGCCGGCGGGGCGAGGGCGGCATCGAGATCAAATCGCTGATATGCCGCCACGG  
TACGCTGGCGTTTTAACGGCAGAAGCCAGCCCTCCAGCATGGCGGCGGATCTTTTCCGCGGTTTCTACCAC  
GCCAACCAATATCCAGCCTTGGCGCCGAGTTCAGTTCAACAATGTTGACAACCGGCTGGCCGATATATTTACCA  
GCGGTTGTTGGCTGATTTTTGCGATCAGTTGCGTGAGCTGTTCAACGCTGAGATTACGCGTTTTCCGACGCGTGGGATT  
TGCCAGGCCGCGCTTGGGGGTGATATTATTGTCAGCCGCTTCCGATGCCGTACCAGTTCAACGGAAACGCTCGC  
GCTGGCATCCGGGTTAGCGGCCGTAATGCAGCAACGCGTGGGCTATTAGTTTATCCAGCTCAGGGTACTGACCGCCA  
GATTGCTCCCGCCAGAAGCTGTGGATTATAGGGCATTCTGCGGTTGCGGACGGGCGACCATGAAAATAGCCGTTGCCG  
GTAAAATTCTGCCGATTAATGCCGAACCGGCACCGTATCACCTTACGAATCAACGAACCATGGCCTGCCAGGGAAA  
CCACCATTGCCCGTACGGTGGTCAAGCAGCGGGTAAACGCGCCAGTAATCAATAACAGAAAAGATAAATGTTGATAATG  
CCGGACGTAATCCACTCATGGTAAACCTCACACCAGACCGAAACGGTCAAGCAGTAAATCAATGACTTTGATACCGATAA  
ACGGCACAGCAGCCACCAGACCGTAAATCCATAAGTTACGGCGCAACATGGCAGAAGCGGTAAGCGGTTTATAACTC  
ACGCTTTTTAACGCCAGGGAAATCAAAAAGCAGATAATCAAGGCGTTGAAAATCACCGCACTGAGGATTGCGGAGTCCGG  
CGAATGCAGGCACATGATGTTAGCGCATTTAACTGCGGATACGTTGCCGCAATGCCGCCGAATAATGGCGAAGTATT  
TCGCCACATCGTTGGCAATGCTGAAGGTGGTCAAGGAGCCAGGGTTCATCAGCATCTGTTTCCAATGTGACCCACCTCG  
ATCAAATTTGGTGGGTTAGAGTTCAGATCGACCATATTGCCCGCTCTTTCGCGCCTGGGTGCCGGAGTTTCATCGCCAC  
CGGACATCTGCTGCGCACGCGCGGAGCATCGTTGGTGGCGTCCGCGTCCGCTACCAAACGACCTTCCGCTGAT  
ACTGACGGATCAATGCCAGCTTGGCCTCCGGTGTGCTTCCGGCAGAAAATCATCGACACCCGCTTCCGAGCAATCGCG  
CGGCGAGTCAAGCGTTATCGCGGTAATCATCACCCTTTAATGCCATTTTCCGCGAGTGGGCGAAGCGCTCTTAAAT

ACCGCCTTTGACGATATCTTTCAGCGCAATAACGCCAGCACACGAGAACCTTCCACCACCACCAGCGGGCTGGCTCCCT  
GACGCGCAACCTGATCGACTTTTTGATCAACATCGGTAGGGAAGTGACCACCGTTAGCCTCAACATGGCGACGAATGGCA  
TCGACAGAACCTTTACGGATCATGCGGTTGTCGATGTTGATCCCGCTCATCCGGCTTTGCGCAGTAAACGGTACAAAGGT  
GGCATGGAGCGACTGCACATCGCGCTCGCGCAGGTTAAAACGCTGCTTGGCGAGGATCACAATACTGCGGCCCTCCGGCG  
TTTCATCAGCCAGCGAAGCCAGTTGTGCGGGCTCAGCCAGCGTTTTTTCATCCACGCCCTGCGCGGGGATAAACTCCGAC  
GCCTGACGGTTACCGAGTGTGATGGTGCCGGTTTTATCCAGTAGCAGAACGTCAACGTACACCTGCCGTTCAACTGCACG  
TCCGCTGGTGGCAATCACATTGCGGCCTAGCATCCGGCTCATCCCGGCGACGCCGATCGCTGACAACAGGCCGCAATAG  
TGTTGGGATCAGACAGACCAGCAGCGCCACCAGTACCCTTACGTGACTGCATTACCGCCCCACGCGGAAAAACGGCCAC  
AGCGTGGCGGTTGCCAGTAAAAAGACGATAGTCAGGGCAATCAGCAGAATGGTCAGGGCAATTTGTTCCGGCTTTTGGC  
TCGCTGTGCGCCTTCCACCATCGCGATCATCCGATCCAGAAATGTCTCGCCGGGTTAACGCTACACTCAATCACCAGCC  
AGTCAGAAAGAATACGCGTCCGCGCGGTGACGGAGGCAAAATCGCCGCGGATTACGGATCACCAGTCCGATTCCCCG  
GTGATGGCGCTTTCATCGACCGATGCACCCCTTCAATAACTTACCATCGCAGGGATAATATCGCCAGCTTCTACCAG  
TACGATATCGCCTTACGAAGTTGGTCGGCAGGAACTTGTCCGCCGAGCGCCATATTTCCGGCTCACGCAGCTTGGCGG  
CAAAGGCAGTTTTTTTACCCTTTTACACTGTTGGCTGCGCTTACTGCGCCTTCTGCCAGCGCCTCGCGGAAATTA  
GCCAACAGTCCAGTCCACAGCCAACCGCTAATGCCCGCGCTAAACAGCGCATTGCCGGCATCGCACCCGTTGCCAT  
CGCGTGCTAATACAGTGGTCAGCAGACTGCCGATCCAGAGCATAAACATCACCAGTATGGCCATTGGCCCTGGCGGT  
TTAATTTTTTACCCTTCTTTCAGCGCCTGAACGACAAGTGTGGTTTCAATAGCGCCAGTTGTTTACGACTCATATTC  
AGTGCTCACTCAATATCATCAGGAGAGATATCCGCCACCAGCAAGCGCCAGGGCAGGGATAAAGGTGAGTGCGCCAA  
CCAGCAACACGGTGGCGATTAACAGGCCAACAAACAGCGGGCCGTGCGTTGGCAGCGTCCGGAGCTGGCGGCTTGGCTC  
TTTTTACTCACCAGCGAACCGCAATTGCCATCACCAGGATAATCACCCGAAGCGACCGACAAAATGCAGAACGCCAG  
TAAACAGTTCAGAACGGAGAGTTGGCGTTAATCCGGCAAAGCGCTGCCGTTGTTGTTAGCGGGGATGACACGGCGT  
ACAGCACTTGCCTAAAACCATGCGGGCCAGGTTGAGCATGGCGTACGTCCGGCGTGGTTCATCGCCAACGCCGCG  
CCCATCAGCACCAGCGTCCGGGTAACCAGAAATTGCCAGTGCAGTCACTTTCATCTCGGTACGTGATTTTTTTACCCAG  
ATATTCCGGTGTACGACCAATCATCAGCCGGCAATAAACACCGCCAGCAGGACAAACAGCATCATGCCGTAAGACCAG  
AACCGACACCGCCGAACACCCTTACCAATTTGCATCAGCCACATCGGCACCATGCCACCAGAGCGGTAAACGAATCA  
TGATCGCAATCACCGCCACAGGAAGCCGCGTGTGACGACCCAAACAGGCTACTGACCAGCACGCCGAAACGGCT  
CTCTTACCTTCCATATTGATGCTGCTGCTGCCAGTGCCAGCAGATGAGGATTACCCTGAACCTTCTGCCACATCA  
CCACGCTACGCAGATGACAAAAATCACTGACATCGCCACAGCAACATGCGCCCTGGCGGCGATCGCCCATCACTTCA  
CCAAAGGCAAAGCACAGCGCGTGGGATCAAGAAGATCGCCAGCATCTGCAGGAAGTTGGTCAGTGGGTTGGGTTTTT  
AAACGGATGCGACGAGTTGGCATTAAAGAAGCCACCGCCGTTAGTACCAGCATCTTGATCGCTTCTGAGAAGCTACAG  
GCCCCATGGGTAACAGCTTTGCGCTCTTCAACGGTATTACAGCCTGATAAGGCAGAAAGTTTTGACGCGCACCTTGT  
TGAATAAAAAACAGTGAATCAACAACGCCACAGGGACTAGCACCATAACGTGATGCGTAGCAGATCGACCCAGGCATT  
CCCGAGCGTGTCTATGCTCTGGCGGTAACGCACGGATGAGGGCAAAAATCACCGCAATCCCGCTGGCGGCAGAAAGAA  
AGTTTTGCACCGTTAAGCCCGCATCTGGCTGAAATAGCTCAACGTGGTTTTACCGCTATAAGATTGCCAGTTGGTATTG  
GTGACAAAGCTGACGGCGGTATTACGCGCCAGATCCACGACAGCCCTGGCAACTGCTGTGGATTAAGCGGCAGATAGTG  
CTGACCGAGCAACATAAAAAACAGCACCGCCAGCCAGCATGTTAGGCGGAGAAATGGCACAAGATATTGCTTCCAGT  
TCATCTACGGTCAGAGACGCCAAGTGCAGGAAAAAGTACGCGCTCAACGCCGTTGTACCGGGAAGAGGAATGTCATTA  
ATCAGCCGCGCCAGCCGCTGCCTAAAGGACGCGCCAGCACCATTAACACCAGTAAAAACGTGGCGATCAGTAAGAACC  
TTGCGCAGCATCAGAAGCCTCCGATTGATCAGGCATAAACCCAGATAAACCCAGTAATAAAAAACACCAGCAATACGCC  
GGTTATCAGCCTGCACCTCAGTGCACCTCCAGTGGCCTAAAAGTGATACCGGAAGGGTGAATTTGCTGCAAAGAT  
TTGCAAAAAATCTGCGGGCGGGGTGTAAAAAAGTATAAAAAATGGCAAAAGCCATGATTTAACTAATGTTTATTAAT  
TTAACTTTTGTGTAACCTTAATTACAGGATGAATGTAATAAACCATCAATAAGCAAAAAATAAGTGGTCGGATGAGTAGTA  
AAATTACACAAAAGGCGGTACTATTTTTCATCAGATAAAACAAATTCATTTTTCCGGTGCCATTACCCGGTAGATACAAAA  
GGGGGAGAAAAGTATGGAACCTACAGAGAATATCTGATGGCTTATCTTTTTACGCCGACTTATGCGGTTGACGCGG  
GCGTTCTGGCGCTGCCTTTCATGCTTTTCTGAAAGACCGCGCCGCTTTTACAGTACCTGCATCGCGTCTGGTCGAAA  
ACCAGCGATAAACCGGTGTGGATGGATCAGGCCGAAAAGGCAACTGGTGATTTTTATTGATTGCTGAGTTTTGAATACAT  
TGAAAACCGCCAGCGAAACGCTGGCGGTTTTTTGTATCAGGAAGATGTTTACAGGAATATTTAGACATCGTTATACCAA  
TCGAAAACATATATTGAAATATATATAAATTTTTCTAATTGTTCTTATCTGACAGATATCTCACTTAAGGCTTTCT  
TATAAATCTGTAGGTTTTCCGCTGTCAGCAGACAAATAACCCGATAAAACAAGGATGAGCAGATGAGCGGAAAACCGCG  
GCGGCTCAGGGGACATGACGCAGTATGGCGGTAGCATTGTCCAGGGTTCAGCCGGGTACGCATCGGTGCCCCACCAG  
CGTGGCCTGTTCCGGTGTCCCGGGCGGGGTGACGTCCGGCATCCGGTCAATCCGCTGCTCGGTGCAAAGTCTTCCCG  
GTGAAAACCGACATCGCCCTGCCCGGGCGCTGCCGTTATTCTCTCCCGCACCTACAGCAGTTACCGGACAAAACGCC  
GCGCGGTGGGAGCCTCGCCCCGGCTGAAAATGCTGCGGATATCCGTTACAGCTGCGCGATAACACACTGATACT  
CAGTGATAACGGCGGAGAAAGCCTGTATTTTGGACCTGTTTCCCGGTGAGGACGGTTACAGCCGACGCGAGTCACTGT  
GGCTGGTGGCGGGCGCGTGGCGAAACTGGATGAAGGTACCAGGCTGGCCGACTCTGGCAGGCGCTGCCGGAAGAACTC  
CGCTAAGTCCGCATCGTTATCTGGCGACAAACAGTCCGACGGGGCGTGGTGGCTGCTCGGCTGGTGTGAGCGGGTGC

GGAAGCGGATGAGGTGCTGCCTGCGCCGCTGCCGCCGTACCGGTTACTGACCGGGCTGGTGGACCGCTTCGGGCGCACAC  
AGACGTTCCACCGGAAGCCGCCGGTGAATTCAGCGCGGAAATCACCGGCGTGACGGATGGTGCCGGGCGTCACTTCCGG  
CTGGTACTGACCACGCAGGCGCAGCGGGCAGAAGAAGCCCGCAGCAGGCCATTTCCGGCGGGACGGAACCGTCCGCTTT  
TCCTGATACCTGCGCGGTTACACCGAATATGGCCGGGACAACGGCATCCGTCTGTCTGCCGTGTGGCTGACGCACGACC  
CGAATACCCGGAGAATTTACCTGCCGCGCCGCTGGTGGCTATGGCTGGACGCCCCGCGGCGAACTGGCGGGCGGTGTAT  
GACCGCAGCAATACACAGGTGCGCAGCTTTACTTACGATGATAAATACCGGGGCCGGATGGTGGCGCACCGTACACGGG  
CCGACCGGAAATCTGTTACCGTTACGACAGCGACGGCGGGTACAGAACAGCTAAACCCGGCAGGCTTAAGTTACACGT  
ATCAGTATGAGAAGGACCGCATCACCATCACCAGACGCTGAACCGCGTGAAGTCTGCACACGCAGGGTGAAGGCGGG  
CTGAAGCGGGTGGTGA AAAAGGAACACGCGGACGGCAGCGTACGCAGAGTCAGTTTGACGCGGTGGGACGGCTCAGGGC  
ACAGACGGATGCCGACGGCAGGACAACAGAATACAGTCCGGATGTGGTGACGGGCTCATCACGCGCATCACCACGCCGG  
ATGGCAGGGCATCGGCGTTTTACTATAACCACACAGCCAGTTAACGTCAGCCACCGGGCTGACGGGCTGGAATAACGC  
CGGAATATGATGAATGGGCGCTGTGATTCAGGAACTGCCCTGACGGCGATATCACCCGCTACCGTTATGATAATCC  
ACACAGTGACTTACCCTGCGCAACGGAAGATGCCACCGCAGCCGAAAACCATGACGTGGAGCCGTTACGGTCAGTTGC  
TGAGCTTCACTGACTGTTCCGGTTATGTAACCCGCTATGACCATGACCGTTTTGGTCAGGTGACGGCGGTGACCCGCGAG  
GAAGGCTGAGTCAGTACCGCGCATAACGACGCGTGGACAGTTAATTGCCGTGAAAGACACGAGGGCCATGAAACGCG  
GTATGAATACAACGCCCGGTGACCTGACCACCGTATTGCCCGGACGGCAGCAGAAACGGGACACAGTACGATGCGT  
GGGAAAAGCCATCTGTACCACGACGGCGGTCTGACGCGCAGTATGGAATACGATGCTGCCGACGGGTGATCCGCTG  
ACCAGTGA AAAACGGCAGCCACACCCTTCCGTTACGATGTA CTGACCGGCTGATACAGGAAAACCGGCTTTGACGGCCG  
CACACAGCGTTATCACCACGACCTGACCGGCAA ACTTATCCGACGAGGATGAGGGGCTGGTCACCCACTGGCACTATG  
ACGAAGCAGACCGCTCACGCACCGCACCGTGAATGGCGAAACCGCAGAGCGGTGGCAGTATGACGAACGCGGTGGCTG  
ACAGACATCAGCCATATCAGCGAAGGGCACCGGGTACGGTGCATATGGTTATGACAGTAAAGGCCGCTCGCCAGTGA  
ACACCTGACGGTGCATCATCCGACAGCAATGAACTGCTCTGGCAGCATGAGACCAGACATGCGTACAACGCACAGGGAC  
TGCGGAACCGTGTATACCGGACAGCTGCCCGCGTGAATGGTACCTACGGCAGCGGTGGCTGTCAGGCATGAAA  
CTCGGGACACACCGCTGGTGGAGTACACCCGCGACCGCTGCACCGGAAACGCTGCGCAGCTTCGGCCGTTATGAACT  
CACCACCGTTATACCCCTGCCGGCAGTTACAGAGCCAGCACCTGAACAGCCTGCTGTCTGACCGGATTACACCTGGA  
ACGACAACGGCGAACTCATCCGCATCAGCAGCCCGCCAGACCCGGAGTTACAGCTACAGCACCACCGGACGGCTGACC  
GGCGTTCACACCACCGCAGCGAATCTGGATATCCGCATCCCGTATACCACAGACCCGGCAGGTAACCGCCTGCCGACCC  
GGAGCTGCACCCGGACAGCGCCCTCAGCATGTGGCCGATAACCGTATCGCCCGTACGCGCACTATCTTTACCGGTATG  
ACCGTACCGCAGGCTGACAGAGAAAACCGACCTATCCCGGAAGGGTTATCCGCACGGATGATGAGCGCACCCACCGG  
TACCATTACGACAGTCAGCACCGGCTGGTGCATACACGCGGACACAATATGCAGAGCCGCTGGTCGAAAGTCGCTATCT  
TTACGACCCGCTGGGCGCAGGGTGGCAAACGGGTATGGCGCGTGAACGGGACCTGACGGGCTGGATGTCGCTGTAC  
GGAAACCGCAAGTGACCTGGTACGGCTGGGACGGCGACCGCTGACCACGATACAGAACGACAGAACCCGCATCCAGACG  
ATTTATCAGCCGGGAGCTTACGCCACTCATCAGGTTGAAACCGCACCGGTGAGCTGGCGAAAACGCAGCGCCGACG  
CCTGGCGGATACCTTACGAGTCCGGTGGCGAAGACGGTGGCAGTGTGGTGTTCGCCCGGTGCTGGTGAGATGCTCG  
ACCGGCTGGAAGTGAATCCTGGCTGACCGGGTGAAGTGAAGAAAGCCCGCTGGCTGGCATCGTGGCGCTGACGGTG  
GCGCAGATGAAAAGCCAGATGGACCCGGTATACACGCGCGCGGAAAAATTCACCTGTACCACTGCGACCATCGCGCCCT  
GCCGCTGGCCCTTATCAGCACGGAAGGGACAACAGCGTGGTACGCAGAATACGATGAATGGGGTAACTGCTGAATGAAG  
AGAACCCGCATCAGCTGCAGCAGCTTATCCGCTGCCGGGCGCAGCAGTATGATGAGGAGTCCGGCCTGTATTACAACCCG  
CACCGCTATTATGACCCGCTGCAGGGGCGATATACTCAGGATCCGATTGGGCTGAAAGGGGGATGGAATTTTTATCA  
GTATCCGTTGAATCCGATCAAATATAGATCCATTAGGATAGAAACACTAAAATGCATTAAGCCACTGCAATCAATG  
GCCGAACTGGTGAAGAAGCGGTCCAGATATATGGGGAAATCCGTTCTATCATCAATATCTTTGTGTCCAGATGGTAAA  
GGGACTATACTTGTGGTGGCAAGACCAACGGGGAATCAAAAAGGAGATGGTCTATGGGGGCCAGGTAAGCAAGTAA  
TGATACAAAAAGAGCTGCTGGCCGTTGTGACCTCGTTGAAACCGATAATAGTTGTGTGGAGAACTGTTTAAAAGGGAAGT  
TTAAAGAGGTAAGGCCGCTTATTCTGTATTGCCTGATATATTACACCTATAAATTTAGGGCTATTTAAAAACTGCCAA  
GACTGGTCTAATGATTCTTTAGAAACATGTAAGTGAAGTGTCCGGAATAACATTGGACGTTTTATTAGATTTGTATT  
CACCGGAGTGATGTAATGAAATATATTATTTTTTTTATTAGAGCTATATGGCTGGCTTTATCGCTTTTAATACTATTCTT  
TTCCATGCATAGACTTTCACTATTAGACTCCACTCGTATGTGAGCGAGTTAATTAGTCTCATGTCTTATGGAATGATGG  
TAATATGTTTTCCAACAGGCATAGTATTCTTTATTGCTCTAATATTTATAGGGACTGTATCAGACATTATTGGCGTAAGG  
ATTGATAGTAAGTATATTATGGCGATAATAATATGGCTTTATTTCTGTGAGGAGGTATATTCAATGGTTTGTATTAAG  
TAAGCGCATTATAAACAATAAATTAAGTTAATTGCTCTTATTATTATATGTAACCTGGGCATTGATATCCCGTATGCCA  
CAGACCCGGCAGGTAACCGCTGCCGACCCGGAGTGCACCCGGACAGCACCTCAGCATGTGGCCGGATAACCGTATC  
GCCCGTACGCGCACTATCTTTACCGGTATGACCGTACGGCAGGCTGACGGAGAAAACCGACCTCATCCCGAAGGGGT  
TATCCGCACGGATGATGAGCGACCCACCGTACCATTACGACAGTCAGCACCGGCTGGTGCATACACGCGGACACAAT  
ATGACAGACCGCTGGTGAAGCGCTATCTTTACGACCCGCTGGGCCGAGGGTGGCAAAAACGGGTGTGGCGACGTGAA  
CGGGACCTGACGGGCTGGATGTCGCTGTACGGAACCCGCAAGTGACCTGGTACGGCTGGGACGGCGACCGCCTGACCC  
GATACAGAACGACAGAACCCGCATCCAGACGATTTATCAGCCGGGAGCTTACGCCACTCATCAGGGTTGAAACCGCCA

CCGGTGAGCTGGCGAAAACGCAGCGCCGAGCCTGGCGGATACCCTTCAGCAGTCCGGCGGCGAAGACGGTGGCAGTGTG  
GTGTTCCCGCCGGTGCTGGTGCAGATGCTCGACCGCTGGAAAGTGAATCCTGGCTGACCGGGTGAGTGAGGAAAGCCG  
CCGCTGGCTGGCATCGTGGCCCTGACGGTGGAGCAGATGCAAAACCAGATGGACCCGGTGTACACGCCGGCGCGAAAA  
TCCACCTGTACACTGCGACCATCGCGCCTGCCGTGGCGCTTGTGAGCAGGAAAGGGGCAACAGAATGGTGGCAGAA  
TACGATGAATGGGGCAACCTGCTGAATGAAGAGAACC CGCATCAGCTGCAGCAGCTTATCCGCCTGCCGGGGCAGCAGTA  
TGATGAGGAGTCCGGCCTGTATTACAACCGCCACCGCTATTATGACCCGCTGCAGGGGAGGTATATCACTCAGGATCCGA  
TTGGGCTGAAGGGGGGATGGAATTTTTATCAGTATCCGCTGAATCCGGTTCAGTATATAGATTCAATGGGACTGGCATCA  
AAATATGGACACTTAAATAATGGCGGATATGGAGCGAGACCAACAAACCGCTACGCCGATCCAAGTAAATGGCCGA  
CATAGCGAAACAATTAAGACTGCCATATCCTATTGACCAGGCCAGTAGTGCCCTAATGTTTTCAAACATTCTTCAGAG  
CATTAAAGCCCTTACGACTACACACTGTATTGCAGGAAGTGGGTAAAACCAAATCTGACTTGTACGCCACAGGATGATCC  
CAGTATCCAGGGATGGATACAAAGACAGCAAGTATTACCTGCCACAGACAAATGGCCAACAACCTCAATTACCACCAGG  
ATATACTTGTGAGAACCCTATTTATCCAGACATTAATAAACCCGATGGCCAGCAACAGCAGGGATAGATGATTTGG  
GTGAAATTTTAGCTAAGTGAACAGAGAACATCGAGAGGAATAAGAAAATGAAAAGAGTTTTGTTCTTTTTGCTGATGA  
TATTTGTTAGTTTTGGTGTATAGCTGATTGCGAAATAAAGTAAAGATCATGATTGTTTTACTATTTTCGCTAAGGGT  
ACTATTTTTCCGCGTTTTCTGTCTTAAATAATAAAGCCATGTGGAGATGGTATCAGAATGAGGACATCGGTGAGTATTA  
TTGGCAAACAGACTGGGTACATGTAATAATAAATTCACACCAAGCGGGCGAGACTCTTAATTCGCGTCGGGTAC  
TACGCCCTTAATGAAAATCATGCCATCAAAGGAACGTTGCAGGAGTTGATAAATACAGCAGAAAAAACGGGTTTTCTCGC  
GATCGGTTTTAGAGTTATATAAGAGCGGTATCTATCAAAAAAGAGCAGTGATCCAGTTCAGTTGTTGGCAGTCTTGA  
TAATTCATCATGGTAAAATTTTTAAAGATGAGAAACCAACTTATGCTCGAATGACAGCAGTCTCCCGAAACAAAATG  
AGTCTTACGAATGTTAATAAAGATACAGCATGAAC TAATTCGTAGTGAAGAGAAAATAAATCTCTTCTGAGAAAACAA  
ATTAATCATTGTGAAAAATTATATAACTCATGGAATAGGTGTTTTATTTGCGTTCATTTGCAGGAAAGATCACGTAAC  
GCTACTTTTTGTACTAAATAATTCGAATTTAAGTTCAACAATTGAGATACTACTTATTGTCAAAGCTGTTTTTCATA  
GCTTATACATGATCAAATACTCCTTACATAAATAAGGTGAACAAATGGAAC TAAAAAATTGATGGAACATATTTCTATT  
ACACCCGATTACAGACAAGCCTGGAAAGTGGTGCATAAATTGTCAGATATTCTACTGTTGACTATTTGTGCCGTTATTT  
TGGTGCAGAAGTTGGGAAGATATAGAGGATTTCCGGGAAACACATCTCGATTTTTGAAGCAATATGGTATTTTGAAA  
ATGGTATTCCTGTTACGATACCATTGCCAGAGTTGATCCAGGAAAGATCACGTAACGCTACTTTTTGTACTAAAT  
AATTCGATTTTTATGTTTAAAATTTGAGATATTCCTTATTACCTAAAGCTGTTTTTCATAGCTTATACATGATCAAATAC  
TCCTTACATAAATAAGGTGAACAAATGGAAC TAAAAAATTGATGGAACATATTTCTATTATTCCTGATTACAGATAAGC  
CTGGAAAGTAGAGATAAATTTGCAGGCATCCTACTATTGACTATTTTTGCCGTTATTTCTGGTGCAGAAAGTTGGGAAG  
ATATAGAGGATTTCCGGGAAACACATCTCGATTTCTTGAAGCAATATGGTATTTTGAAAATGGTATTCCTGTTACCGAT  
ACTATTGCCAGAGTTGTATCCTGTATCAGTCTGCAAAATTTACAGAGTGCTTTATTAAGTGGATGCGTGATTGCCATTC  
ATCAAATGATAAAGACGTCATTGCAATTGATGGAAAAACGCTCCGGCACTCTTATGACAAGAGTCGCCGACGGGGAGCGA  
TTCATGTCAATTAGTGCCTTCTCAACAATGCACAGTCTGGTCATCGGGCAGATCAAGACGGATAAGAAATCCAATGAGATC  
ACAGCTATCCCTGAACTTCTAACATGCTGGATATTAAGGAAAAATCATCACAAC TGTGCGATGGGTTGCCAGAAAGA  
TATTGCAGAGAAGATACAAAAACAGGGAGGTGATTTATTTTCGCTGTAAGGAAACAGGGGCGGCTTAATAAAGCCT  
TTGAGGAAAAATTTCCGCTGAAAGAATTAATAATCCAGAGCATGACAGTTACGCAATGAGTGAAAAGAGTCACGGCAGA  
GAAGAAATCCGCTTTCATATTGTTTGCATGTCCCTGATGAAC TATTGATTTACGTTTTGAATGGAAAGGACTGAAGAA  
ATTATGCGTGGCAGTCTCTTTCCGTCAATAATAGCAGAACAAAAGAAAGAGCCAGAAATGACGGT CAGATATTATATCA  
GTTCTGCTGATTTAACCGCAGAAAAGTTCGCCACAGCAATCCGAAACCACTGGCACGTGGAGAATAAGTGCCTGCGCT  
CTGGACGTGGTAAATGAATGAAGACGACTGCAAAAATAAGAAAGGAAACGCCGAGAAATTTTTCAGGGATACGGCAT  
CGTATTAATATTTTTAACGAATGATAAGGTATTCAAGGCAGGGTTAAGACGTAAGATGCGAAAAGCAGCCATGGATAGAA  
ACTATCTCGCTCAGTCTTTCGCGGGAGCGGGCTTTTCGTAATCTTTCCCTGCTTTTTGTACTAAATAATTCGATTTTTAT  
GTTTAAAATTTGAGATATTCCTTATTACCTGAAGCTGTTTTTTATTGCTTATACATGATCAAATACTTCTTACATAATTA  
AGGAGAACAAAATGGAAC TAAAAAATTGATGGAACATATTTCTATTATCCCGATTACAGACAAGCCTGGAAAGTGGAA  
CATAAATTATCGGATATTCTACTGTTGACTATTTGTGCCGTTATTTCTGGTGCAGAAAGGCTGGGAAGATATAGAGGATTT  
TGGGGAACACATCCCGATTTTTTGAAGCAATATGGTATTTTGAAAATGGTATTCCTGTTACGATACCATTGCCAGAG  
TTGTATCCTGTATCTGCTCCTGCGAAATTTTATGAGAGCTTTATTAAGTGGATGCTTGACTACCATTCTTCAGATGATAAA  
GACGTCATCGCAATTGATGGAAAAATACACCGGCATTCTTATGACAAGAGTCGCCGTAAGGGAGCGATTGATGCTATTAG  
TGCGTTCTCAACAATGCACAGTCTGGTCATCGGACAGATCAAGACGGATAAGAAATCCAATGAGATCACAGCTATCCCTG  
AACTTCTAACATGCTGGATATTAAGGAAAAATCATCAAACCGATGCGATGGGTTGCCAGAAAGATATTGCAGAGAAG  
ATACAAAAACAGGGAGGTGATTTATTTTCGCTGTAAGGAAACAGGGGGCGCTAAATAAAGCCTTCGAGGAAAAATTT  
TCCGCTGAAAGAAATTAATAATCCAAGCATGACAGTTACGCAATTAGTGAAGAGAGTCACGGCAGAGAAGAAACCCGTC  
TTCATATTGTTTGCATGCTCCTGATGAGCTTATTGATTTACGTTTTGAATAGAAAGGGCAGCTATGGTTAGAAACTACC  
TGACGTCAGTCTTTCGCGGGAGCAGGCTTTTCGTAATTTGTCCTGCTACAACAGGATTAAC TTCACAAATATCATTCTC  
AACGCTACACTTACTCCTGTAACCGCTCAGGAGCAGTAATGAATCTACAACGATTTGATGACAGCACCCATAATCCGTA  
TCTTTGCCCTTCATGAGTTACATCGACTGAAAGAACATGGCTTAACGCGCGGGGCGCTTCTCGATTATCACAGCCGCTAT

AAACTCGTCTTTCTGGCGCATTCTCAGCCGAGTACCGCAAACCTGGCCCGTTCGTGGCTGATATTCACCACTGGCAAAA  
TCTGGATGACTATTACAACAGTACCGCCAACGCGTAGTTGTTTTGCTTTCTACCCCCGCAACCCGCGCATCACACCA  
ATGTTTTGATGCACGTTCCAGGGTATTTTCGCCGCATATTGATTCCACAGAACGCCAGCAGCTGGCTGCGCTTATCGAC  
AGTTATCGCCGTGGCGAGCAACCACTTCTTGCGCCGTGATGCGTATCAAACACTATATGGCGCTTTATCCTGACGCCTG  
GCTTTCAGGGCAGCGTTATTTGCAACTTTGGCCGCGTGTGATTAACCTTGCGCCATTGAGGAGTTTTATGACTACCCATCT  
GGTCTGTTTTGCGCAGGATTTACGTCTGCACGATAATCTCGCACTGGCTGCCGCTGCCGCAATTCGTCTGCACGCGTGC  
TGCGTGTATATCGCTACACCACGCCAGTGGGCGACGCATAACATGTCCGCCGCTCAGGCTGAACCTTATCAATGCTCAA  
CTGAATGGGCTACAAATAGCGCTTGGCGAAAAAGGTATTCTTTATTGTTCCGTGAAGTGGATGACTTTGTCCAGTGT  
CGAAATAGTTAAACAGGTGTGCGCGAAAAACAGCGTTACCCACCTGTTTTATAACTATCAGTATGAAGTGAATGAGCGGG  
CGCGGATGTGAAGTTGAAAGAGCGTGCCTAACGTGGTGTGTGAAGGATTTGATGACAGCGTATCCTGCCGCTGGC  
GCGGTGATGACCGTAATCACGAGATGTACAAAGTCTTACGCCTTTTAAGAATGCCTGGTGAACGGCTGCGGGAAGG  
GATGCCGGAGTGCCTGCTGCGCAAAAGTTCGTAGTAGCGGATCGATAGAGCCCTGCCATCCATTACGCTGAATTATC  
CTCGTCAGTCTTTCGATACTGCGCATTTTCCGGTGGAAAGAAAAAGCGCGATTGCGCAATTACGCCAGTTTTGCCAGAAC  
GGTGGCCGAGAATATGAGCAACAACAGAGATTTCCGGCAGTGGAAAGCACCAGCCGTTTGTGCGCCAGCTGGCAACGGG  
CGGTTATCGCCTCGCCTGCTTGCATCGCTTGTGGCTGAACAGCCGAGGCGCTGGACGGTGGGCGGTAGTGTCT  
GGTTAATGAGCTGATCGCGCGAGTTTTACCGTACCTGATAACGTATCACCCCTCGTTGTGTAACATCGTCCATTT  
ATTGCTGGACGGATCGTGTACAGTGGCAGAGCAATCCCGCACATTTACAGGCTGGCAGGAAGGCAAAACGGGATACCC  
GATTGTTGATGCCGCTATGCGTCAGCTTAAACAGCACTGGCTGGATGCATAACAGGCTACGGATGATTACAGCCAGTTTTT  
TGGTGAAGATTTATTGATCGACTGGCGCGAAGGCGAGCGATTTTCATGTGCGAGCTGATTGATGGTATTGGCAGCC  
AATAACGGTGGCTGGCAGTGGGCGCTTCAACCGAACCGATGCAGCGCGTATTTTTCGATTTTTCAACCCGACAACCCA  
GGGCGAGAAATTTGATCATGAGGGCGAGTTTATCCGCCAGTGGCTACCGAACGCGCGATGTCCAGGGAAAGTGGTGC  
ATGAGCCGTGGAAGTGGGCGCAGAAAGCAGGTGTGACGCTGGATTATCCGCAACCGATAGTCGAGCACAAGAAGCGAGA  
GTACAAACGTTGGCAGCGTATGAGGCGCGCGGAAGGGGAAATAACAGACGCGTCAGGCAATCGAGCCAGATGCCGGAT  
GCGGCGTGAACGCTTATCCAGCCTACAAATTTGTGCAATTCATAAATTGCAGGAAATACGTAGGCCCTGATAAGACGC  
GTCAAGCGTCGCATCAGGCATCGGTGCTGGCCTATTAAGACTCCAGCGCCAGCGCGGTTTTCTGAATTCAGCGCCTGA  
TACAGCCAAATCATCAGTACCAGTCTACACACGCCAGTGCGCCAGGTAATTTGATCAAACTTCAATATATGCATT  
GATGGAGTAGTTGATCGCCCCGAAGCATCAAACGAAGCCTGCGATGTCTGATCGGCAATCACGCCGCCAGATAGTTCG  
CGATCGCGCCAGAAAGCAGCATGTAGATGCCGTTAATACGCCGTCACACCGGGGATTTCAATGCGCGTAATTTGCGAC  
ATGGCAACCGGTCGATAAACAGTTCGCAAAAGCCATCACCGCCAGGCTAATACCATCAGTGGCAGAGAAGAGTGACC  
ATACATTGCGGACCAGCGGGCGCTTAAGTGCAGAATGCAGAATCCGGCGCTCATCAGGCCAAGGCCAAGAGCAAATTTCC  
CCAGATGCGCACGGTACGATTACCCGCGCACTCTCTTTTACCACCCACGCCAGGAACACACCCGACAGCATAACTGCG  
AAGGCATTAATCGACTGGAACATCGCGGTGGAACGGTATAACCAAACATATCGCGGTTAACGAAGCGGTGATATAAAG  
GCTAATCGAGTACCGCCCTGTTGTGCGAAGGCCGAGAACAACATACTGAAGAAGGTGAGCGTCAATCAGCCCCAGCT  
CCTTCCGCTGTTTCTGGTTTTCTGCTTTCGATAAATTTTTGCCAGTACACCAGGCCAATAATAGTCGCGACAATTAAG  
GCGTATACCGACCACTCTTCCAGAACAGTATGGTAATCAGTGCAGGCGTTGCCACCAGCAGAACCCAGCAGCCATCCCCA  
GTTCCGCGAGGAGAAAGTTTGTGCGACGCACTTTTTTTGTTAACCGCGGGTATGAGTGAATGACGATTGCCACATA  
AGAAAATGACCAGACCCGCGATCATGCCAACCGCCGAGGCCAAAGCCATCGCCAGCTGTACTCTTCTGGGCGTAA  
CCACAGGCGATAGGTGCGATAATAGACCCACGTTACCCGCGCATAACATCAGCGAGAAACCGCCATCACGACGCGGATC  
GGTTGGCTACATACAGTCCGCGAGCAGACAGTTACGTTAGATTTAAACAGGCCATAGCCGAGACGATAATCGCCAGGG  
ACAGATAGAGGAATGACGATGGATCTCACTGCCACCCAGCACCACATGACCATGCCATCAACAACCCGCCAGCATC  
ACCGCATGCGATTGCCGAGAACTTTATCCGCAAAAAGCCACCGAGGATTGGCGTGACATACACCAGCGAACAGTAGGC  
GCTAAATAACTCGTAGGCGTGAGTATCGTTGATTTTATGTTGATTGGTGAGATAGAGAATCAGCAGGGCACGCATGCCGT  
AAAAGCTAAAATATTCCAGATTTGCAGCGCAACGACATAGTAAATAGCGCGCGGCTGTGATGCGTGTATTATCATAATA  
ATTCCACAATTGACGGCAACGTCACGTAATAGTTGCGCGGCGTGTGTTTTCTTAAAGTTAAAACCTTGATACAGAT  
CTGATTATTTATGCAATATGCTGTCTGATTGCATAAATATACATTAGCTGAAGCGTGATGATATAACAATTTGCGTCTT  
TTGGCGTGGGTTTTGTTTCTTAATATGTCAAAGATTGGCTATCGACGAACTGGCGAGGTAACGCTATGTTAACGGTGA  
GCTATCAGAATACGGAAGGCGGAAGATGAAAAACCCGAACTGGAACAATGATTAACGAAAAACTGAACAGCGCGGCG  
ATTAGTATTACGCGCCGAATGGTTTGCAGGTGGAAGGCAAAGAGACGGTGCAAAAAATTGTTACCGGTGCACCGCCAG  
CCAGGCTTTGCTCGATGAGGCACTGCGTCTGGGCGCGGATGCGGTATTGTGCATCATGGTACTTCTGGAAAGGAGAGT  
CTCCGGTATTGCGGAATGAAGCGTAACCGTTTTAAAACGTTGCTGGCGAATGATATCAACCTGTATGGCTGGCATTG  
CCGTTGACGCACATCCTGAGCTGGGCAATAACGCACAGCTGGCGCGTACTGGGGATCACGGTCATGGCGAAATTTGA  
GCCGTTGGTGGCTGGGCGAACTGACCATGCCTGTGCCGGGACTGGAGCTGGCTTCTGGATTGAAGCGCGTCTGGGAC  
GTAAGCCGTTATGGTGTGGCGATACCGGACCTGAGGTGGTCCAGCGCGTCCGCTGGTGCACGGGCGGCGGCAAGTTTT  
ATCGATAGCGCCGCGTTTTGGCGTGGATGCTTTTATTACTGGCGAAGTTTTCTGAACAGACCATTATTACGCCCCGGA  
GCAGGGATTGCAATTTTATGCTGCAGTCAACATGCCACTGAACGTGGTGGTATTGCGCATGAGCGAGTGGCTGAATG  
AAAATACCGATCTTGATGTGACCTTTATTGATATTCCTAATCCTGCATAACGAATAATCAGAGGGATCGAAAGTGAACG

AGCGGTTGTTATCTGATAGGTGAAACGGCGGTAGTGCTGGAACGGAAACCGCCGGTGACGCTGGCTAGCCAGAAACGGA  
TCTGGCGACTGGCGAGCGTCTGGTGGATATGCCGAATGTGGTTGAAGCCATCCCAGCATGAACAATATCACGGTGATT  
TTGCGTAATCCTGAGTCGCTGGCGCTGGATGCCATAGAGCGTTTGAACGCTGGTGGGAGGAGAGCGAGGCGCTGGAGCC  
GGAGTCTCGCTTTATTGAAATTCGGTGGTTACGGTGGTGCAGCGGACCGGATTTGGCGGTGGTTCGCGCGCATTGGC  
GGTTGAGCGAAAAACAGGTTGTTGAATTGCACTCCTCCGTGGAATACGTGGTCTGGTTTTAGGTTTTCAACCGGGCTTC  
CCGTATCTCGGGAGTTTGCCGGAACAACCTACACACGCCACGGCGCTGAACCGCGCTTACTCGTTCCGGCAGGTTCTGT  
CGGGATCGGCGGGCCGAGACTGGTGTATCCGCTGGCAACGCCGGGTGGCTGGCAGTTGATTGGTCATACCTCACTCA  
GCCTGTTTGATCCGGCGCTGACGAACCCATCTTATTACGTCCGGGAGACAGCGTGGCCTTTGTACCGCAGAAGGAGGGA  
GTATGCTGAAGATTATTCGTGCGGGCATGTATACCACTGTGCAGGATGGCGGTCTCACGGTTTTCCGACGTGGGTATC  
AGCCACTGGCGCACTGGATATGCCCGCTTACGCATTGCTAACCTACTGGTGGGTAATGACGCCAATGCCCCGCGCT  
GGAGATCACGCTCGGTCACTAAGTGTGAGTTCGAAACTGATGGTGGTTTTGCTCTGACGGGTGCGGTTGCGAAGCGC  
GGCTGGATGATAATGCCGCTGGACCGCTGGCGATTGCCGATGAAAGCAGGCCAGCGTTTAAACGCTTAAACGCCCGCAG  
CACGGGATGCGCAGTTATCTGGCGTGGCGGTGGTATTGATGTTCCGCCGTAATGGGCTCATGCAGCACCGATCTCAA  
AGTGGGGATTGGCGGGCTGGAAGGGCTTTACTGAAGATGGTACCAGCTCCCGATTGGCAAATCGAAGCGTGATTCTA  
TGGAAAGCGCAGGCGTTAAACAGCTGTGGGGCAACCGATTCCGCGCTTGGCGGGCCGGAATATCATGAGTTCGAT  
CGCCCTCGCAGGATGCATTCTGGCGTTCGCCCTGGCAGCTTAGCTCGAAAGTAACCGCATGGGCTATCGTTACAGGG  
GCAAATTTTAAACGCACCAACCGATCGGAACTGTTATCTCACGTTTTGTTACCGGGCGTGGTGCAGGTGCCACATAACG  
GGCAGCCGATTGTGTTGATGAACGACGCACAGACCACCGGTGGTTACCCGCGTATTGCCTGTATCATTGAGGCTGATATG  
TACCATCTGGCGCAAATTCGCTCGGTGAGCGATTCATTTTGTCCAGTGTTCCTGGAAGAGGCACTAAAAGCACGGCA  
AGATCAGCAACGTTATTTTGAACAATTAGCGTGGCGCTGCACAATGAAAATTGACCTGAACGCCGATCTGGGCGAAGGC  
TGCGCCAGCGACGAGAGCTATTAACGCTGGTTTCTCTGCCAATATTGCCTGTGGATTTTATGCAGGCGATGCGCAAAT  
CATGCAGGCTTGCCTGCGTGAAGCAATAAAAAATGGTGTGCGGATTGGCGCTCACCCGAGTTTTCCGACAGGGAAAATT  
TTGGTGCAGCGCCATGCAGCTGCCGCCAGAACCGTTTACGCCAGACGCTGTATCAAATTGGCGCGCTGGCAACGATT  
GCCCGTGGCAAGGGCGCTAATGCGTATGTCAAACCGCACGGCATGTTGTACAACAGGCGGCGAAAGAAGCACAACT  
GGCAGACGCCATGCCAGAGCGGTATACGCTTGCATCCAGCATTGATTCTCGTCGGGCTGGCGGGAAGCAGCTGATTC  
GTGCAGGCAAGCAATATGGTCTGACAACGCGGAGGAAGTGTGGCGATCGCGGTTATCAGGCTGACGGCTCGCTGGTG  
CCGCGAAGCCAGTCAGGCGCTTATTGAAAACGAAGAACAGGCGCTGGCGAAACGCTGGAGATGGTGAACACGGCAG  
AGTCAAAAGTATCACCGCGAATGGGCAACGGTCGCGCGCAAACGGTCTGCCTGCATGGCGACGGCGAGCACGCACTGG  
CGTTCGCCCCGCGACTACGCTCTGCATTTGCCGAAAAGGGGATTGTTGTGCGAGCATAACCCCGATTAATAAAGAATGAA  
AAAAGGATATCACCATGCCTGAAGGCCCGGAGATCCGCCGTGCAGCGGATAACCTGGAGGGCGGATCAAAGGCAAACCA  
CTAACTGATGTCTGGTTTGCCTTCCCGCAGTTAAAACCTTATCAATCACAACCTATCGGTCAACACGTTACCCATGTGGA  
AACCGGTGGTAAGGCGTTGTTAACTCATTTTTCAAACGACTTAACGCTCTACAGCCATAATCAGCTTTACGGCGTCTGGC  
GCGTGGTTGATACCGGCGAAGAGCCGAGACCACGCAGATTGCGGGTAAAACGCAACGGCTGACAAAACCATTTCTG  
CTTTATAGCGCCTCGGATATTGAGATGTTGACCCCGGAACAACGACCACGCATCCGTTTTTACAACGCGTTGGTCCCGA  
TGTGCTGGATCCGAATCTGACGCCGAGGTGGTGAAGAACGATTATTGTGCGCCGCGCTTTCGTAACCGTCAGTTTGTG  
GATTACTGCTCGATCAGGCGTTTCTGGCTGGGCTTGGAATTTTGGGGTGGAGATCCTCTGGCAGTTGGGTTGACT  
GGAAATCATAAAGCGAAAGATCTCAATGCGGCGCAACTGGATGCACTCGCACACGCGTTACTGGAGATTCCTCGATTTT  
CTACGCTACCGGGGGCAGGTGGATGAGAATAAGCATCATGGGCGCTGTTTCGCTTTAAGGTTTTTATCGAGATGGCG  
AACCGTGGCAACGTTGTGGCAGCATATTGAGAAAACGAGCTGCATCTCGCCGTTTTACTGGTCCCTGGCTGCCAG  
CACTAGGCCCAGCGCTTCCGCGCATAGGTTGAAATAAACCAGCAATGGCAGGCCCTGTGAGCAAAAATACTGAACAGCGG  
TAGGGTTTTGCATCGCATAATGAGCGCCATATCGGCATTGCTCCCTGCGGCGATGACCGCCACGGTATCAAGCCCGCCGG  
GGCTGGTGGCGAGGTAGGAGTCATAAAATCAATGTGCATAAACCGGGTCCAGCCCCACGCCATACCCGCACAAATAGCC  
AGCAGAGCAAAAATCGACAGCAGGATTTGCGGTAGCGGGCGTAGTGCCCGCAGTAAGATTTGTTTATCGAAACCAAGACC  
AATCCGCCAGCAATTGCCATATACGCCATCGCCAGCAGCATTCCGGTAGTTCGATGGTGTGAGCTGACCAGACTGGA  
GCACTGCGCCCGCAGCATCGGGATGAGCATCGTCCGGAAGGAAGCAGCAGCAGGATCCCACTGTACCGGCAACGACC  
GCGAGCAAAATAGTAAGCAGGAGATTAATGCTCACTGGCGGGAACAGACGATATGCTGGTTAACCGCTTACGCTTATC  
GCCAGCATCATGCGGGTACCAGAACAGCGCCCCCGGACGAACAGCACTCGCAGATATTGCATAAACGCCACCAGGC  
GAATATCTGCGCCGTAATCTTGCCTATAGCGACCATTTGCCCGCCGCGCCAGGAGAGGAGCCCAGGCACCGGATTT  
CCAGGCAATGAGCTATAGCGCACCAATAACCAACCCACAATGGCGCTGGAAAGCAGCGTTACCAGTAAAATTGCAAGCAC  
GATCGGCCAGTTGACGGCCAGGTTGGTGAAGATCGAACAGTGAAGTTTTGCGCAATCATGCAGCCAAGAATGGCCTGGG  
CGCGGAGAAAAGCAGAGCGGGGAAGTTGAGAGTAATCCGCGCATACTAAAGATGATCCCGCGATCATCGGCCAAGT  
AATAGCGCCCGGGAGATGTACCGGAGGAAACCAATAGAAAGGAGAAGTATAGCACACATAACATTTCCCACTGCAA  
AACTGGCATCCTTCGCTCCCTCATTATTTTCTTTGGTGTATGCATACAGCATAAAGAAAGCTGGGCCAGGAAAAATA  
ACAGCAATCAAGGAAAAGGGGAAAATCAGCAATTTTCTGAAAGAGATGCCCTTTCCGGCGGCAAAGGGCATCATGGTAAA  
TCAGTTATAGTTAATCTTAAAAAGCACCCTGTATCGAAGGGGCCAGCCTCGATGGGGTGGCTGGAATGGACGAAAGTT  
CAGCCGTATAGTTTTTTCTGATAGCAACATGCTACTGGTGAATCGCGTATTTCAGCATATTTATTGAAGGTAAAGG

GAGGCGTTTTATCCAGTAAACGTAGCTTCAGACCATTACCAATCAACAATGCTTTATCTTCTTCAACCAACGTTTCTT  
GGTATAAAAGGAGGAAGTACTTTAAATCCGTCGGTGCATTGATCGTTTTGGCTCTTGGTCGTTTTAATACTGAACGTTT  
TCGACATTGTGTGGCGACGTATATCCAGCAAATTAATTTACCAAATCAATCACCTGTGTTCCGGTGAATGGAAAA  
TTGACGCTGCAATCCAGCAGCGAATGTTTTCCAGACCAGTAATATGATATTTAGGTTTTGGCAGTAGGGTCTTCGTT  
AACGCTACCGGCACCGTCAAATTCACGACGATATAGTCGCTAAGCGTACTTTGATAATCATGCGGCGGCATTTCTCGTA  
TTTTGACGTATAACCGCATGCGAGCGAGAAAGGTACGCGACATATGAATATTAGCGGGATCGCCGAGCAAATTTTGTTC  
TGCCATCCCATCGCGATGATCTGCTCAGGGGTATAAATATCAATGTTCTTACTGTGATACACTGGTTAGTGTGCGATGCG  
ACTTTTTCCAGACTGGCATCGTAATCGACACCGTTGATGTCACGCGGAGTTGATAATAACGATCCTGCACCCCGGAT  
AGGGGTTTACCAGGCGTAGACATGCTCGCTTCAAAGTTGCCGTTGGTATTGTTGTCACAATAGACGGGAATTTTAATA  
TCGTGACATCCCAGATCTTATCACCGGTTTGGCATTGCCTGGTACAGCAAACGGTTGAATCGCTTCTGATTTTTCTAC  
TGCGCCACCAGATGTACCAAATAGCAGTTGAGCGCATTGCAGACTTCAACGGCAGAAATAACAGGCAGATGACGAGCA  
ACAATCCCTTGCCAGCACTATTTCCCTCCACTGCTTGTAAACGGCATTGTCGCTGCAGTTGAGCGTCGTATGCGTA  
ATGCGCCGTAATCATCCATGTAACCGAGATAAACTGGCTGCCGCTATAACTCCGGTGTGTTGTTGACCGTACTAAAA  
GGTGAACCATCACGGTTTTGAAGCCTGGGAGAACGCTTTTTTCAATTTCTCCAGATAGGCAATGGTCAGATAATACGC  
GGTAGGATTTTTAGTGTGTTGCTGCTGCTGACCTGTAAGTGCAGTTGACCTTTTCTCCTGCTTTCTGCTTTCTG  
GTAATGCAGCCGCTCGCCAGAACAAATTAATACGACTTTGAATAGCGACTGAAGTATCGCATGGTCGCTTTTTATCC  
GGAGCGGGAGGAATTTCCGCGCATATTGTAGAAAAATAGCGTTTCCGCGATCGCCAGGTAATTGTGTGGTTGAGGCTTGT  
CACAAACCGCACCTGCGATGTCGTTTTCGGTTCCAGACGTTGAATAGGGGGCAAAGCGACCAGAAGAGCATCGTTTTCT  
CCCTTTTTCTATTTCTATCCAGGAATAAGCAAGATAAGGCAGTTTGTACTTTGGTTTTCGATACGAGGCTGGTGGCT  
TTGTCATTGGCGTTAAACACAATGCGTGTGCGATCGGGTGCACCGCAGCATTGCAACCCAAGCTGATGGTTAAACAAT  
TAAGGGTAATCCTTTAATAAATGTCATTCTTTTTCTTAATTAATGACAAGTAAATCAGGCGTTTGGTCGTGCTTTC  
CAGACGTTCTGGCAGATGAATAATGCAGCTTTGCTCACCCAGACCAGGTAACAGTTGATTTTCAGCGACACCGCTTA  
ACCAGGCATGTCCTTCTCGCAACCATACCCACGTAATGCCGCTGTCATCCTGGCGGATATCCGCACCGAGGGGAGGG  
AACTGACCGCTGGCGTTGCGTATGATGACGTTAACGCTTTACCAGAACGGGAAGCCAGTATTTGTAACCTATCGCGCC  
TTCAATCCATGTTTCTTGTGATGACGTTTTCTGCAACTGTTACGCCGTCGGGTAAGTCATTGATGTTACCGCCACGGTGG  
AAGGCTGGTAAGTGAATCAACGGCACCCGCAATGCCAAATGGTTGGTGTAGTCGAGATTGCCCTGAACCGGAATA  
TCTGCCACGCCATCGGTGCTGACCATCAGGCGTGGTTCATTGGTGGAGCTGCGGCGATGAAATGCTGCACCATATTGGGT  
TGCGGTGAAAGAACCGCTCCAGCTGCTGCTGACGGAAGTGAATCACTGGCGGCATAGGTACCAGAAATATCCCACTCAC  
CCGCTGAACTCAGGTGCTGATAGTTACCGCTCACCTGGGCTCCATTGTCCGACGATCGGATTGCAGTCCGGCAGACATG  
CCCAGCTATTACGTTATCCAGCGTATCGTTCCACGACATGCGGTGATAGGTGCTGTGGCTACTGTTTTGCATGTCATA  
GCCAAACCGCACCGTTACCAGAGGGGAGCGAAATCGACAGATAAATCTGGTTGTGCGGATCTTTATCTTCGTAGTGGG  
TCGTATTGAATGACGTCGAAATCGAGATATCTCTCCAGTCACCAATATCAACATTAACCTGCTGTGATGTTGGCGGTC  
GTGGAGGCGTCTGATTCCACCAGGTTGATGTAGCAGGTTGGCGTAAAGATTGAGGTTTAGTGGGGTAATCGGTTGGCC  
CACGGATAAGCTGATCGTCTGTTTTCTGCTCCTGCGCATCGCTGTCGTTGATTTGTGATCCAGATAGTTGGCGTAGCTGT  
GAAAATGACGATCTGAGAAGCGATAAGCGGCGAGCGAAATCGTGTGTTGGTGGCATCCACTTGTGTTGCTGTAATTA  
CGGTAGCTTAAGCCCCGCTCGTCTGCTGAGTATCAAAATGGCTACTGGCCAGGTGACATCAAAGGACAGTGCGCCAAG  
CCACAGCATATTTGCCCCGATACCCATTGCGGCAGAATGGTAGTCATCATCAGAAATCAGCAGGCCCGCTACAGCGAGG  
TGTTTGAGAGCATCCCCAGGAACTTCAATGCTAAAAAGGTTTCAATTTAGTGTGATGACATGGAAGGCCGTTGGC  
TGACCCGCGGCAATTTATAGCGAACCTGTCCCTGGCGAGTCAGGAAGGGCGTCGATGCTGCCGAAACCTGGAATTTG  
CACCCGACCATCTTTCCGTCATTTGACATCCAGCGTGCCTGAAACAGACTGATTGAGGTATCAATAAATAAACGGGC  
CTGGCGGACTTTTTCTGTTAAATGACGCGCCTGATTGACTGATCGTCACCGTGGCATTGGTCTGTGCAATACCGCTA  
ATTTGTGGGGCTAGCCACGCACTCCACGGTAACATTGATCGTCACTCGCCAGTGCCGCGCCGTTAAGAAAAACC  
ATCGAAAATATTGAACTGAAATCGGTTTCCGCGAGGGTTAACTTAGAGCCTAATTGCGGTAATGACGAAAAAGATAGG  
TGCGCGATATCCGCTGACTGGTCATGGTTATCTTCGCTATCGGCTTATTAAGCTGGTAATCACTGCGTAAGCGCCAT  
GCCCCGGCGTTAATCCGCGGTTACCGTAGGCATTAGGTTAGTGTGCTGCTGCCGCTGTGGCGGTAGCTGCTGGC  
AAACAAGTTGTAATCCATCAGGACACCGGCAACACCTTCTTTCCATGTAGAGGGGGGAGCCAGTTTTCTGAGTGCCACG  
CCAGCCAGGCTTGCGGAATACTAATATTCAGTTGCTGATTGGCTGATCGAAATGAAGAGCATTTCAGTCCGGAACCTG  
AAATCAATACACCGATCTATCTGTGGCAAGGACTGACGGATATCTGGTTTTAAACCAAATTTATCGACAGTGAATCATT  
GATGATGGAATGTTTTGTACCCTTTTTTCCAGTTAATTTTTTCCCATTAATGATTTTGTGTTATTACCAGCAA  
CGCTAACAAAATATTACCAGGAGCAATGACTCCTTTTTCTTTAATAATGAAATATCAATGCGGTGCGCATTGATTTA  
TCGAGAACATTGAGATTGAATTCGACCGCATTGCGCAAGGCATGCCATGACCAGGCAGGATACAAAAGAGAGTCGATA  
AATATTCACGGTGTCCATACCTGATAAATATTTTATGAAAGGCGCGATGATGCCGCAAAAATAATACTTATTTATAATC  
CAGCACGTAGGTTGCGTTAGCGGTTACTTCACTGCCGTGACATCGACTGCATTATCAATTTGTTCCATCCAGGCGAAAA  
AGTTCAGCGTCTGTTCTGATGAGCTTGCATCCAGGTCAAGATCTGGCGCGGCTGAACCTAATACGATGTTACCGTCATTT  
TTGTCCATCAGTCGTACCCGACCCAGTTGCTTCCCTGCACTGGTGTGCTCAACAAAGGCGTAGCACCAGTTGTCTT  
AGCCGTGCTATCGAAGGTTACGCCAATTTGGATACCGGCATTCCGCTACCGTTGTGAGAAGCAGGCAGATCACAGTTGA



TCAAGCGAATGTCGACGGCCACTTTATTGCTATGATGCTCCCGGTTTATATGGGTTGTCGTGACTTGCCAAGATCTATG  
TTTTTATCAATATCTTCTGGATGAATTTACAAGGTGCTTCAATAACCTCCCCCTAAAGTGAATTTCCGCCAGAACCTTC  
ATCAGCAGCATAAACAGGTGACGTGAACAGCAGAGATACGGCCAGTGCAGCCAAATGTTTTTGTCTTTAAACATAACAG  
AGTCTTTAAAGGATATAGAATAGGGGTATAGCTACGCCAGAATATCGTATTTGATTATTGCTAGTTTTAGTTTTGCTTA  
AAAAATTGTTAGTTTTATTAATGCAAAACTAAATTTATTGGTATCATGAATTTGTTGTATGATGAATAAAATATAGGGG  
GGTATAGATAGACGTCATTTTCATAGGGTTATAAATGCGACTACCATGAAGTTTTTAATTGAAAGTATTGGGTTGCTGAT  
AATTTGAGCTGTTCTATTCTTTTTAAATATCTATATAGGTCTGTTAATGGATTTTATTTTTACAATTTTTTGTTTTAGG  
CATATAAAATCAACCCGCCATATGAACGGCGGGTAAAATATTTACAACCTTAGCAATCAACCATTAACGCTTGATATCG  
CTTTTAAAGTCGCGTTTTTCATATCTGTATACAGTGCAGCGGACGGGCAATCTTCATACCGTCACTGTGCATTTGCT  
CCAGTGGGCGATCCAGCCACGGTACGTGCCATTGCCAAAATGACGGTGAACATGGAAGACGGAATACCCATCGCTTCA  
GGATGATACCAGAGTAGAAATCGACGTTCCGGGTACAGTTTCTTCTCGATAAAGTACGGGTCGTTACAGCGCATGTTTTCC  
AGCTCCATAGCCACTTCCAGCAGGTATCCTTCTGTCGCCAGCTCTTTCAGCACTTCATGGCAGGTTTACGCATTACGGT  
GGCGCGGGTTCGTAATTTTTGTACACGGGTGACCGAAGCCCATCAGGCGGAAAGAATCATTTTTGTCTTTCGCACGAC  
GAACAAATCCGGAATGTGTTAACGGAGCTGATTTCTCCAGCATTTTCAGCGCCGCTTCGTTAGCACCGCCGTGCGCA  
GGTCCCCACAGTGAAGCAATACCTGCTGCGATACAGGCAAACGGGTTCCGACCCGAAGAGCCAGCGGTACGCACGGTGA  
GGTAGAGGCGTTCTGTTCTAGGTGACGTGCAGGATCAGAATACGGTCCATAGCACGTTCCAGAATCCGATTAACCTCAT  
ACGGTTCCGACGGCGTGGAGAACATCATATTCAGGAAGTTACCGCGTAGGAGAGATCGTTGCGCGGGTAAAACAAATGGC  
TGACCAATGGAATACTTGTAAACACATCGCGCCATGGTCCGCAATTTTCGACAGCAGGCGGAACCGCGCAATTTACGGTG  
ACGAGGATTGTTAACATCCAGCGAGTCTGTATAGAACGCCCGCAGCGCGCGGTAATACCACACATGACTGCCATTGGAT  
GCGAGTCGCGACGGAAGCATGGAACAGACGGGTAATCTGCTCGTGGATCATGGTATGACGGGTCACCGTAGTTTTAAAT  
TCGTCATACTGTTCTGAGTCGTTTTTACCATTCCAGCAGGATGTAACAACTTCCAGGTAGTTAGAATCGGTGCGCCAG  
CTGATCGATCGGAAACCGCGGTGCAGCAAATACCTTCATCACCATCAATAAAAGTAATTTAGATTCCGAGGATGCGG  
TTGAAGTGAAGCTGGTCAAAGGTGAACACACCTTTGAACCGAGAGTACGGATATCAATAACATCTTGACCCAGCGTG  
CCTTTCAGCACATCCAGTCAACAGCTGTATCCCCGTTGAGGGTGAAGTTTTGCTTTTGTATCAGCCATTAAGGTCTCCT  
TAGCGCCTTATTGCGTAAGACTGCCGAACTTAAATTTGCCTTCGCACATCAACCTGGCTTACCCGTTTTTATTTGGC  
TCGCGCTCTGTGAAAGAGGGGAAAACCTGGGTACAGAGCTCTGGGCGTTGCAGGTAAGGATCCATTGATGACGAATA  
AATGGCGAATCAAGTACTTAGCAATCCGAATTATTAACCTTGTCTACCACTAATAACTGTCCCGAATGAATTGGTCAATA  
CTTCCACACTGTTACATAAGTTAATCTTAGGTGAAATACCGACTTCATAACTTTTACGCATTATATGCTTTTCTGGTAA  
TGTTTGAACAACTTTGTTGAATGATTGTCAAATTAGATGATTAATAAATAAATGTTGTTATCGTGACCTGGATCA  
CTGTTCCAGGATAAAACCCGACAACTATATGTAGGTTAATTGTAATGATTTTTGTGAACAGCCTATACTGCCGCCAGGTCT  
CCGGAACACCTGCAATCCCAGCCAGCCAGCGTTGTAACGTGTCGTTTTCGCATCTGGAAGCAGTGTTTGATGACGC  
GCAGTTATAGAAAGGACGCTGTCTGACCCGCAAGCAGACCGGAGGAAAGAAATCCCAGCTCTCCAGGTAACAGAAAGTT  
AACCTCTGTGCCCGTAGTCCCAGGGAATAATAAGAACAGCATGTGGGCGTTATTCATGATAAGAAATGTGAAAAACAA  
AGACCTGTTAATCTGGACCTACAGACCATCCGGTCCCCATCAGGCGATAGCGTCCATTCTCCATCGCGTTTTCCGGTGT  
GATCACCTTTGTTGAGTGGGCATCCTGCTGTGGCTTCTGGGTACCAGCCTCTTCCCCTGAAGTTTTCCGAGCAAGCTT  
CCGCGATTATGGGAGCTTCTTCTGCAATTTATCATGTGGGGCATCCTTACCGCTCTGGCGTATCACGTCGTGATAGT  
ATTGCCACATGATGATGGATTTGGCTATCTGGAAGAAACATTCGAAGCGGGTAAACGCTCCGCCAAAATCTCCTTTGT  
TATTACTGTCGTGCTTCACTTCTCGCAGGAGTCTCGTATGGTAAGCAACGCTCCGATTAGGACGCAATGGCGTACA  
TGATTTTCATCTCGTTCGCGTACCCTATCGTCTGACGCTCATACATTTATATGGTCCGTTTTTTCGCTACCAGTG  
GCGAGCTGACATAGAAGTCTGGATCGGTTCTTCTCGCTCTGCGTTACCAAAGTGTTCACCCTGCTGGCGCTGTTTTCT  
ATCTTGATCCATGCCTGGATCGGCATGTGGCAGGTGTTGACCGACTACGTTAAACCGCTGGCTTTGCGCCTGATGCTGCA  
ACTGGTGATTGTCGTTGCACTGGTGGTTTACGTGATTTATGGATTGTTGTTGGTGTGGGGTGTGATGAAATTGCCAGT  
CAGAGAATTTGATGCACTGTTGATTGGTGCCGGTGGCGCAGGATGCGCGCGCGCTGCAAATTTCCAGAGCGGCCAGA  
CCTGTGCGCTGCTCTTAAAGTCTTCCGACCCGTTCCCATACCGTTTTCTGCGCAAGGCGGCATTACCGTTGCGCTGGGT  
AATACCATGAAGATAACTGGGAATGGCATATGTACGACACCGTGAAGGGTCCGACTATATCGGTGACCAGGACGCGAT  
TGAATATATGTGTAACCCGGGCGGGAAGCGATTCTGGAACCGAACACATGGGCTGCCGTTCTCGCTCTCGATGATG  
GTCGATCTATCAACGTCGTTTTGGCGGTGAGTCAAAAACTTCCGCGCGAGCAGGCGGCACGCACTGCCGCGACGCT  
GACCGTACCGGTACGCACTGTTGCACACGCTTTATCAGCAGAACCTGAAAAACACACCACATTTTCTCCGAGTGGTA  
TGCGCTGGATCTGGTAAAAACAGGATGGCGCGGTGGTGGTGTACCGCACTGTGCATCGAAACCGGTGAAGTGGTTT  
ATTTCAAAGCCCGCTACCGTGTGGGACTGGCGGAGCAGGGCTATTTATCAGTCCACCACCAACGCCACATTAAC  
ACCGGCGACGTTGCGCATGGCTATCCGTGCCGGGTACCGGTGACGATATGAAATGTGGCAGTTCACCCGACCGG  
CATTGCCGGTGGCGGCTACTGGTACCAGGTTGCCGTGGTGAAGCGGTTATCTGCTGAACAAACATGGCGAACGTT  
TTATGGAGCGTTATGCGCCGAACGCCAAGACCTGGCGGGCCGTGACGTGGTTGCGCGTTCATCATGATCGAAATCCGT  
GAAGGTGCGCGCTGTGATGGTCCGTGGGGGCCACACGCCAAACTGAAACTCGATCACCTGGGTAAGAAGTTCTCGAATC  
CCGTCTGCCGGTATCCTGGAGCTTTCCCGTACCTTCGCTCACGTGATCCGGTGAAGAGCCGATTCCGGTTATCCCAA  
CCTGTCACATGATGGCGGTTATCCGACCAAAGTTACCGTCCAGGCACTGACTGTGAATGAGAAAGCGAAGATGTG

GTTGTTCCGGGACTGTTTGGCCTTGGTGAATCGCTTGTGTATCGGTACACGGCGCTAACCGTCTGGGCGGCAACTCGCT  
GCTGGACCTGGTGGTCTTTGGTCGCGCGCAGGTCTGCATCTGCAAGAGTCTATCGCCGAGCAGGGCGCACTGCGCGATG  
CCAGCGAGTCTGATGTTGAAGCGTCTCTGGATCGCCTGAACCGCTGGAACAATAATCGTAACGGTGAAGATCCGGTGGCG  
ATCCGTAAAGCGCTGCAAGAATGTATGCAGCATAACTTCTCGGTCTTCCGTGAAGGTGATGCGATGGCGAAAGGGCTTGA  
GCAGTTGAAAGTGATCCGCGAGCGTCTGAAAAATGCCCGTCTGGATGACACTTCCAGCGAGTTCAACACCCAGCGCGTTG  
AGTGCTGGAAGTGGATAACCTGATGGAACGGCGTATGCAACGGCTGTTTCTGCCAATTCCGTACCGAAAGCCGTGGC  
GCGCATAGCCGCTTCCGACTTCCCGGATCGTGATGATGAAAAGTGGCTGTGCCACTCCCTGTATCTGCCAGAGTCGGAATC  
CATGACGCGCCGAAGCGTCAACATGGAACCGAAACTGCGCCCGGCATTCCCGCCGAAGATTCGTACTTACTAATGCGGAG  
ACAGGAAAAAGAGACTCGAGTTTTCAATTTATCGCTATAACCCGGATGTTGATGATGCTCCGCGTATGCAGGATTACACC  
CTGGAAGCGGATGAAGTTCGCGACATGATGCTGCTGGATGCGCTTATCCAGCTAAAAGAGAAAAGATCCAGCCTGTCGTT  
CCGCGCTCCTGCCGTGAAGGTGTGTGCGGTTCCGACGGTCTGAACATGAACGGCAAGAATGGTCTGGCTGTATTACC  
CGATTTCCGCACTCAACCAGCCGGCAAGAAGATTGTATTCCCGCTGCCAGGTTTACCGGTGATCCGCGATTTGGTG  
GTAGACATGGGACAATTTATGCGCAATATGAGAAAATTAAGCCTTACCTGTTGAATAATGGACAAAATCCGCCAGCTCG  
CGAGCATTACAGATGCCAGAGCAGCGCAAAAACCTGACGGGCTGATGAATGATTCTCTGCGCATGTTGTTCAACCT  
CTTGCTCGTCTTTCTGGTGAATCCCGATAAGTTTATCGGCCCGCAGGCTTGTAGCGGCATATCGTTTCTCTGATTGAT  
AGCCGTGATACCGAGACTGACAGCCGCTCGACGGTTTGAAGTGTGATGATTCAGCGTATTCCGCTGTACAGCATGAA  
CTGCGTCAGTGTATGTCCGAAGGGGCTGAACCCGACGCGGCCATCGCCCATATCAAGTCGATGTTGTTGCAACGTAATG  
CGTAAACCGTAGGCTGATAAGACGCGCAAGCGTCGCATCAGGCAACAGTGCCGGATGCGGCGTGAACGCCTTATCCGG  
CCTACAAGTATTACCCGTAGGCTGATAAGCGCAGCGCATCAGGCGTAACAAAGAAATGCAGGAAATCTTTAAAAACTG  
CCCCTGACACTAAGACAGTTTTTAAAGGTTCTTTCGCGAGCCACTACGTAGACAAGAGCTCGCAAGTGAACCCCGGCACG  
CACATCACTGTGCGTGGTAGTATCCACGGCGAAGTAAGCATAAAAAAGATGCTTAAGGGATCACGATGCAGAACAGCGCT  
TTGAAAGCCTGGTTGGACTTCTTACCTCTCTGGCGCAAACAGAGCTGGATAGAACAGCTCTATGAAGACTTCTTAAC  
CGATCCTGACTCGGTTGACGCTAACTGGCGTTCCAGCAGTTACCTGGTACGGGAGTCAAACCGGATCAATTCC  
ACTCTCAAACGCGTGAATATTTCCGCCGCTGGCGAAAAGCAGCTTACGTTACTCTTCAACGATCTCCGACCCTGACACC  
AATGTGAAGCAGGTTAAAGTCTGCAGCTCATTAAACGCATACCGCTTCCGTGGTACCAGCATGCGAATCTCGATCCGCT  
GGGACTGTGGCAGCAAGATAAAGTGGCCGATCTGGATCCGTCTTCCACGATCTGACCGAAGCAGACTTCCAGGAGACCT  
TCAACGTCCGTTCAATTTGCCAGCGGCAAAAGAACCATGAAACTCGCGAGCTGCTGGAAGCCCTCAAGCAAACTACTGC  
GGCCGATTGGTGCCGAGTATATGCACATTACCAGCACGAAGAAAACGCTGGATCCAACAGCGTATCGAGTCTGGTCCG  
CGGACTTTCAATAGCGAAGAGAAAAACGCTTCTTAAAGCGAACTGACCGCCGCTGAAGGTCTTGAACGTTACCTCGGCG  
CAAAATCCCTGGCGCAAAACGCTTCTCGCTGGAAGGCGGTGACGCGTTAATCCCGATGCTTAAAGAGATGATCCGCCAC  
GCTGGCAACAGCGCACCCGCGAAGTGGTTCTCGGGATGGCGCACCGTGGTCTGTAACGTGCTGGTGAACGTGCTGGG  
TAAAAAACCGCAAGACTTGTTCGACGAGTTCCGCCGTAACATAAAGAACACCTCGGCACGGGTGACGTGAAATACCACA  
TGGGCTTCTCGTCTGACTTCCAGACCGATGGCGGCTGGTGCACCTGGCGTGGCGTTAACCCGCTCACCTTGAGATT  
GTAAGCCCGGTAGTTATCGGTTCTGTTCTGTCGCCGCTGGACAGACTTGTAGAGCCGAGCAGCAACAAAGTGTGCCAAT  
CACCATCCACGGTGACGCCGAGTGACCCGGCAGGGCGTGGTTCAGGAAACCTGAACATGTGAAAGCGCGTGGTTATG  
AAGTTGGCGGTACGGTACGTATCGTTATCAACAACAGGTTGGTTTACCACCTAATCCGCTGGATGCCCGTTCTACG  
CCGTAAGTGTACTGATATCGTAAGATGGTTTCCAGCCCGATTTTCCACGTTAACCGGACGATCCGGAAGCCGTTGCCCT  
TGTGACCCGCTGGCGCTGATTTCCGTAACACCTTTAAACGTGATGTCTTTCATCGACCTGGTGTGCTACCGCCGTCAG  
GCCACAACGAAGCCGACGAGCCGAGCGCAACCCAGCCGCTGATGTATCAGAAAATCAAAAAACATCCGACCCGCGCAAA  
ATCTACGCTGACAAGTGGAGCAGGAAAAAGTGGCGACGCTGGAAGATGCCACCGAGATGGTTAACCTGTACCCGATGC  
GCTGGATGCTGGCGATTGCGTAGTGGCAGAGTGGCGTCCGATGAACATGCACTTTTTACCTGGTCCGCTACCTCAACC  
ACGAATGGGACGAAGAGTACCCGAACAAGTTGAGATGAAGCGCCTGCAAGGAGCTGGCGAAACGCATCAGCACGGTGCCG  
GAAGCAGTTGAAATGCAGTCTCGCTTCCGCAAGATTATGGCGATCGCCAGGCGATGGCTGCCGGTGAGAAACTGTTCGA  
CTGGGGCGGTGCGGAAAACCTCGCTTACGCCACGCTGGTTGATGAAGGCATTCCGGTTCGCTGTCCGGTGAAGACTCCG  
GTCGCGGTACCTTCTTCCACCGCCACGCGGTGATCCACAACAGTCTAACGGTTCCACTTACAGCGCGTCAACATATC  
CATAACGGGCAGGGCGGCTTCCGTGTCTGGGACTCCGTAAGTGTCTGAAGAAGCAGTGTGGCGTTTGAATATGGTTATGC  
CACCAGCAACACGCACTCTGACCATCTGGGAAGCGCAGTTCGGTACTTCCGCAACGGTGCAGGTTGGTTATCGACC  
AGTTTCTCTCTGGCGAACAGAAATGGGGCCGGATGTGTGGTCTGGTGTGTTGCTGCCGACGGTTACGAAGGGCAG  
GGGCGGAGCACTCCTCCGCGCTCTGGAACGTTATCTGCAACTTGTGCTGAGCAAAACATGCAGGTTTGGTACCGTC  
TACCCCGCACAGGTTTACCACATGCTGCGTCGTCAGGCGCTGCGCGGGATGCGTCTCGCTGGTGTGATGTCGCCGA  
AATCCCTGCTGCGTCATCCGCTGGCGGTTTCCAGCCTCGAAGAACTGGCGAACGGCACCTTCTGCCAGCATCGGTGAA  
ATCGACGAGTGTGATCCGAAGGGCGTGAAGCGCGTGTGATGTGTTCTGGTAAGGTTTATTACGACCTGCTGGAACAGCG  
TCGTAAGAACAATCAACACGATGTCCGATTGTGCGTATCGAGCAACTTACCCGTTCCCGCATAAAGCGATGCAGGAAG  
TGTTGCAGCAGTTTGTCTACGTCAGGATTTTGTCTGGTGCCAGGAAGAGCCGCTCAACCAGGGCGCATGGTACTGCAGC  
CAGCATCATTTCCGTGAAGTGATTCCGTTTGGGGCTTCTCTGCGTTATGCAGGCCGCGCCGCTCCGCTCTCCGGCGGT  
AGGGTATATGTCCGTTACCAGAAACAGCAACAAGATCTGGTTAATGACGCGCTGAACGTGAATAAATAAAGGATACAC

AATGAGTAGCGTAGATATTCTGGTCCCTGACCTGCCTGAATCCGTAGCCGATGCCACCGTCGCAACCTGGCATAAAAAAC  
CCGCGACGCAGTCGTACGTGATGAAGTCTGGTAGAAATCGAACTGACAAAGTGGTACTGGAAGTACCGGCATCAGCA  
GACGGCATTCTGGATGCGGTTCTGGAAGATGAAGGTACAACGGTAACGTCTCGTCAGATCCTTGGTCGCCTGCGTGAAGG  
CAACAGCGCCGTTAAAGAAACCAGCGCAAATCTGAAGAGAAAGCGTCCACTCCGGCGCAACGCCAGCAGCGCTCTCTGG  
AAGAGCAAAACACGATGCGTTAAGCCCGGCGATCCGTGCGCTGCTGGCTGAACACAATCTCGACGCCAGCGCCATTA  
GGCACCGGTGTGGGTGGTCTGACTCGTGAAGATGTGGAACAACTCTGGCGAAAGCCCGGCGAAAGAGTCTGCTCC  
GGCAGCGGCTGCTCCGGCGGCGCAACCGGCTCTGGCTGCACGTAGTGAACAACTGTGCCGATGACTCGCTGCGTAAGC  
GTGTGGCAGAGCGTCTGCTGGAAGCGAAAACTCCACCGCATGCTGACCACGTTCAACGAAGTCAACATGAAGCCGATT  
ATGGATCTGCGTAAGCAGTACGGTGAAGCGTTTAAAAACGCCACGGCATCCGTCTGGGCTTTATGTCCTTCTACGTGAA  
AGCGGTGGTTGAAGCCCTGAAACGTTACCCGGAAGTGAACGCTTCTATCGACGGCGATGACGTGGTTTACCACAACCTATT  
TCGACGTGACGATGGCGGTTTACGCCGCGCGGCTGGTACGCGGTTTCTGCGTGATGTCGATACCCTCGGCATGGCA  
GACATCGAGAAGAAAATCAAAGAGCTGGCAGTCAAAGGCCGTGACGGCAAGCTGACCGTTGAAGATCTGACCGGTGGTAA  
CTTACCATACCAACGGTGGTGTGTTCCGTTCCCTGATGTCTACGCCGATCATCAACCCGCCGAGAGCGCAATTCTGG  
GTATGCACGCTATCAAAGATCGTCCGATGGCGGTGAATGGTCAGTTCAGATCCTGCCGATGATGTACCTGGCGCTGCC  
TACGATCACCTGTGATCGATGGTCGGAATCCGTGGGCTTCCGTGAACGATCAAAGAGTTGCTGGAAGATCCGACGCG  
TCTGCTGTGGAGTGTAGTAGTTTAAAGTTTACCTGCACTGTAGACCGGATAAGGCATTATCGCCTTCCGGCAATTG  
AAGCCTGATGGCAGCTGACGCGTCTTATCAGGCCTACGGGACCACCAATGTAGGTGCGATAAGGCGCAAGCGCCGATC  
CGACAAGCGATGCCTGATGTGACGTTTAACTGTCTTATCAGGCCTACGGGTGACCGACAATGCCCGGAAGCGATACGAA  
ATATTCCGTCTACGGTTTAAAGATAACGATTACTGAAGGATGGACAGAACACATGAACCTTACATGAATATCAGGCAAAA  
CAACTTTTTGCCGCTATGGCTTACCAGCACCGGTGGGTTATGCCTGTACTACTCCGCGCAAGCAGAAGAAGCCGCTTC  
AAAAATCGGTGCCGTCGTTGGTAGTGAATGTGAGGTTACGCTGGTGGCCGCGGTAAGCGGGCGGTGTGAAAGTTG  
TAAACAGCAAAGAAGACATCCGTGCTTTTGCAGAAAACGGCTGGGCAAGCGTCTGGTAACGATCAAACAGATGCCAAT  
GGCAACCGGTTAACCAGATTCTGGTTGAAGCAGCGACCGATATCGCTAAAGAGCTGTATCTCGGTGCCGTTGTTGACCG  
TAGTTCCCGTCGTGTGGTCTTATGGCCTCACCGAAGGCGGCGTGGAAATCGAAAAAGTGGCGGAAGAACTCCGCACC  
TGATCCATAAAGTTGCGCTTATCGCTGACTGGCCGATGCCGATCAGGGACGCGAGCTGGCGTTCAAACCTGGGTCTG  
GAAGGTAACCTGGTTGAGCAGTTCACCAAAATCTTATGGCCTGGCGACCATTTTCTGGAGCGGACCTGGCGTTGAT  
CGAAATCAACCGCTGGTATCACCAACAGGGCGATCTGATTTGCCTCGACGGCAAACCTGGCGCTGACGGCAACGCAC  
TGTTCCGCCAGCTGATCTGCGCGAAATGCGTGACCAAGTGCAGGAAGATCCGCGTGAAGCACAGGCTGCACAGTGGGAA  
CTGAACTACGTTGCGCTGGACGGTAACATCGGTTGATGGTTAACGGCGCAGGTCTGGCGATGGGTACGATGGACATCGT  
TAAACTGCACGGCGGCAACCGGCTAACTTCTTACGCTTGGCGGCGGCGCAACCAAGAAGCTGTAACCGAAGCGTTCA  
AAATCATCCTCTCTGACGACAAAGTGAAGCCGTTCTGGTTAACATCTTCCGGCGGTATCGTTGCTGGCAGCTGATCGCT  
GACGGTATCATCGGCGCGGTAGCAGAAGTGGGTGTTAACGTACCGGTCGTGGTACGCTGGAAGGTAACAACGCCGAAC  
CGGCGCAAGAAACTGGCTGACAGCGGCTGAATATTATGACGAAAAGTCTGACGGATGCAGCTCAGCAGGTTGTTG  
CCGAGTGGAGGGGAAATAATGTCCATTTTAAATCGATAAAAACACCAAGGTTATCTGCCAGGGCTTACCAGGTAGCCAGG  
GGACTTTCCACTCAGAACAGGCCATTGCATACGGCACTAAAATGGTTGGCGGCTAACCCAGGTAAGGCGGCACCACC  
CACCTCGGCTGCCGGTGTCAACACCGTGGTGAAGCCGTTGCTGCCACTGGCGCTACCGCTTCTGTTATCTACGTACC  
AGCACGTTTGCAGAACTCCATTCTGGAAGCCATCGACGCAGGCATCAAACCTGATTATCACCATCACTGAAGGCATCC  
CGACGCTGGATATGCTGACCGTGAAGTGAAGCTGGATGAAGCAGGCGTTCTGATGATCGGCCGAACCTGCCAGGCGTT  
ATCACTCCGGTGAATGAAAATCGGTATCCAGCCTGGTCACTTACAAAACCGGTAAGTGGGTATCGTTTCCGTTT  
CGGTACACTGACCTATGAAGCGGTTAAACAGACCACGGATTACGGTTTTCGGTCAGTCGACCTGTGTCGTTCTCGGCGGTG  
ACCCGATCCCGGCTCTAACTTTATCGACATTCTGAAATGTTGAAAAAGATCCGCGACCGAAGCGATCGTGATGATC  
GGTGAGATCGGCGGTAGCGCTGAAGAAGAAGCAGCTGCGTACATCAAAGAGCACGTTACCAAGCCAGTTGTGGGTTACAT  
CGCTGGTGTGACTGCGCCGAAAGGCAAACGATGGGCCACGCGGTGCCATCATTGCCGTTGGGAAAGGGACTGCGGATG  
AGAAATTCGCTGCTCTGGAAGCCGAGGCGTGAACCCGTTGCGAGCCTGGCGGATATCGGTGAAGCACTGAAAACCTGTT  
CTGAAATAAATATCTGTAATAAGAAATAGCCCTCGCCGCTTCCCTCTACAGGAATGGCGAAGGGCTGTCGGTTTTGACAT  
GGTTGGCCATCGTATGATGGCTTTTTTGTGCTTATCGCGATGATTTTCTGCTGCGCTATCAGGGTAAATTTATAGTCATC  
GGTATTAAGCGTTGCGGCTATATTCAAACACCCGACCATCAACTAAATATCCACGCGATACTTTTTCAAGAATCGGCT  
TTGTCTGGCTGATTAAGCAGACGGCTCATCTCTCGGTTGGCATCAGAGGAATGATTTCTGTTGCTACGATCGATA  
ACCATTTTCTCACTTCTCGATAAAGTGAATTTTCAATTTTCCATGACCTGCCAGGTGAGATCCGGGAACAACGCAAG  
CGCATCCAGTTTTTCCAGCGCCATTGGCTTTTGTGCGATAGCGCACGCGCTTACATGCCACACACGATCCTGCG  
GGGTGATTTGTAGCTGTTGCTGAAGAAAATCGTCAGCCGGAATCACTTCAATATCAGAATTCAGTGTGTATCGACG  
TGACGGTCCGACAGTTTTTCACTAAACTGGTTAACTGAAAAATATCGTAATTGACCCGCTCTTCTTGGACGTAAGTCCC  
GCTGCCCTGAATGCTTTCGAGGATCTGCTGCTGACTAGCTGGCGCAAAGCCTGACGCACCGTAACCCGGCTGACGCCAA  
ACTCTGTTTGTAGCGCTGATTCAGTGGTAAACGCATCGCCAGGTTTAAAGCTCGCCACGCGCAATTTGTTACGAATGCGA  
TCGGCAATCTGCCGATAAAGGCTTGTGTCCTTTTTAGTATCTCATAATACGAATTTAACCATTTATGCCCGATAAA  
TTCATCCTGTAATAATACAATAACAATAAATTTCAATCAAGTGAATTTGATCACATAATGGTATTGTTTTATCG

GGCACACTGGCGCGACTATAAAAAACGATCAAGTGAGGATCATGATGAATCTGACGACTCTGACCCACCGCGATGCGTTGT  
GTCTGAATGCGCGCTTTACCAGCCGTGAAGAGGCCATCCACGCGTTGACTCAACGTCTTGTGCTCTGGGAAAAATTTCC  
AGTACTGAGCAATTTCTGGAAGAAGTGTATCGCCGTGAAAGCCTTGCCCGACCGCCTTAGGTGAAGGGTTGGCTGTGCC  
GCATGGCAAACTGCTGCGGTAAGAAGCGGCGTTTGGCGTCCGACACTCAGCGAGCCGCTTCAAGTGGGAAGGCGTTG  
ATGGCCCGAAGCAGTTGATTTAGTGGTCTGCTGGCGATTCCCCCAATGAAGCGGGTACTACGCATATGCAACTGCTG  
ACAGCGCTGACCACGCGCCTTGGCGATGATGAGATTCGGGCGCGTATACAGTGGCGACGACGCTGATGAGTTGCTCTC  
GGCGCTGGATGACAAGGGAGGCACGCAACCTTCTGCCTTTTTTCCAACGCGCAACTATCGTCTGCGTAACGGCCTGTC  
CGGCGGTATTGCTCACACCTATATGGCTGCGGAATATCTGAAAAAGCCGACGCAAACTCGGCGTAAATGTTTACGTT  
GAAAAACAAGGCGTAACGGCATTGAAGGGCGTTTAAACGGCGGATCAACTCAATAGTGAACCCGCTGTATTTTTGCGGC  
TGAAGTCGCCATCAAGGAGAGTGAGCGTTTTAATGGCATTCCCGCGCTTTCAGTGCCTGTTGCCGAGCCGATTGCCATG  
CAGAAGCGTTGATCCAACAAGCGCTTACCCTCAAGCGTAGCGATGAGACGCGTACCGTACAGCAAGATACGCAACCGGTG  
AAAAGTGTCAAACGGAGCTGAAACAGGCACTGTTGAGCGGAATCTTTTTGCCGTACCGTTGATTGTCGCGGGGGGCAC  
GGTGCTGGCGGTGCGGGTATTACTGTCGCAAATCTCGGGCTACAAGATCTGTTAATGAAGAAAACTCTGGCTGTGGA  
TGTAACCGAAGCTGGGCGGCGGGCTGCTCGGAATTTGATGGTACCGGTGCTCGCGCCTATACCGCCTATTCTCTGGCA  
GATAAACCGCGTTAGCGCAGGCTTGGCGCTGGACTTGGCCCAACATGATCGGCTCCGGTTCCTGGCGGGTCTG  
TGGCGGATTGATAGCCGTTACTTGTGCGCTGGGTGAAAACTACTTGGTCTTAGCAGTAAATCAATGATTCTCTGA  
CTTTTTATCTCTACCGGTGCTCGGTACGTTGGGAGCGGGCAGTCTGATGCTGTTTGTGGTGGGGAACTGTCGCCTGG  
ATCAATAACTCGCTTACCCTGGCTGACGGTCTGTGAGGAAGTAAACGCGCTGTTGCTGGGTGCCATTCTCGGTTTTAT  
GTGTTCTTTGACCTTGGAGGGCCAGTGAATAAAGCCGCTTATGCATTCTGCCTGGGCGCAATGGCGAACGGCGTTTACG  
GCCCCATGCCATTTTCGCCTCCGTCAAATGGTTTCGGCATTACCCTAACCGCTTCCACGATGCTCGACCCGCGCCTG  
TTAAAGAGTTTGAATGAGACCGGAAATCCACCTGGCTGTTAGGGCTGGCAGGTATTACCGAAGGGGCGATCCCGAT  
GGCGATTGAAGATCCGCTGCGGGTATTGGTTCGTTTGTGCTGGGCTCTATGGTAAACGGGCGCTATTGTCGGTGGATGA  
ATATCGCCTTTCGACACCCGGTCCCGCATTCTCGCTTTTTACTTTCATGATAATGGCGCGGGCGGTATTGGCG  
GCAATTGGCTGGTTTGGCGCGCATTGGTGGGGCTGCAATCTCGACTGCAATTCTCTGATGTGGCGGCGTCACGCGGT  
TAAGCATGGCAACTATCTGACTGATGGCGTAATGCCATAAACAAGAAACGACGATGAAAGCAGTATCTCGGTTCA  
CATCACCCCGCATATGACTGGGATCGAGAGTGGTATTTACCACCGAAGAGTACGATTTCTGCTGGTCAATAATATGG  
AAGAGATCCTGTCCGACTGAAACAGGACAACGAATACAAATATTACGTACTCGACGGCAACCGGCGATCTCGAAGAT  
TATTTGCGGGTAAACCGGAAAAACAAGACCGTGTGAAGAAACAGGTAGAAGCCGGCAAGTTGATTATCGGCCCCTGGTA  
TACCAGACCGATACCAGATTGTTTCTGCGGAATCCATCGTCCGTAATCTGATGTACGGAATGCGTGACTGCCTCGCGT  
TTGGCGAGCCGATGAAAATAGGTTATTTACCAGATTCCTTTGGCATGTCCGGGCAACTGCCGATATCTACAATGGATTT  
GGCATTACCCGCACCATGTTCTGGCGCGGATGTTCCGAGCGCCACGGTACTGATAAAACCGAGTTTTTGTGGCAAAGCAG  
TGACGGTAGCGAAGTGACGGCGCAGGTGCTGCCGCTGGGCTACGCCATCGGTAAGTACTTACCTGCCGACGAAAACGGAT  
TACGTAACGCCTCGACAGTTATTTTACGCTGCTGGAAGAAAGCCTGTAACCAAGAGATTTTGTGCCGAATGGGCAT  
GACCAGATGCCATTGCAGCAAAATATCTTGAAGTATGGATAAGCTACGTGAGATCTACCCTCAACGTAAGTTTGTGAT  
GAGCCGCTTTGAAGAGGTATTTGAGAAGATCGAAGCGCAGCGAGATAATCTGGCAACCCTGAAAGGGGAATTTATTGATG  
GCAAAATATATGCGCGTGCATCGACCATCGGTTCTACGCGTATGGATATCAAAATGCCCACGCGCGTATTGAAAATAAG  
ATTGTTAATCTGCTGGAACCGCTGGCAACTGGCTGGACGTTGGGTTTTGAATACCACCACGGCTTGTGGAGAAAAAT  
GTGAAAGAGATCTTAAAAAATCATGCCACGACAGTATCGGCTGCTGCTGTAGTGACAAAGTTTATCGCGAAATCGTCG  
CCCGCTTCAACTGGCTGAAGACATGGCGGATAATCTGATTCGTTTCTACATGCGCAAAATGCGGACAAATCGCCGAG  
AGCGACCGCAAACTGCTGTTTAACTGATGCCCTGGCCGCTGAAGAAGTTATCAACACCCTGTCGGGCTGCG  
CGCCAGCCAGTTTAAATTTGCGGGACGATCGCGGTACCGCTGTACCGTATTTTATTCGCCATGCCCCGTGAGATCGATCCAG  
GCCTAATCGATCGGCAAAATAGTTTACGTAATTACGATCCCTTATGGAGTTTGTATACAGATCAACCAGATTGTC  
CCTTCTATGGGCTATCGACGCTTTATATCGAAGCGAATCAGCCTGGCAACGTAATTGCGGCAAAAAGTACGCTGAAGG  
GATACTGAAAAATGCTTTCTGGCAAATGCGCTCAATGAGGATGGTTCTCTGCAACTGGTAGATAAAGACAGCGGTGTGC  
GCTATGACCGGTATTGCAAATGAAGAAAGCTCTGATGATGGTGTGATGAATATGACTATTCACCCGAAAAGAAGAGTGG  
GTAATTACCGCAGCGAACCGGAAACCGCAATGCGATATTATTCATGAAGCCTGGCAGAGCAGGGCTGTTATCCGCTATGA  
CATGGCAGTCCGCTCAATTTGTCAGAACGACGCGCCCGCAATCCACTGGCAGAGTAGGGTGGTGTGGTTGTCCTC  
TTAGTCATAACAGCAGGCGTATTGATGTGGATATCAATCTTGATAACAGGCTGACGATCATCGCCTTCTGTCTGGT  
CCTACACCTTTTAAACCCGACAGTGTCTGGCAGATACGAGTTTGGTTCGCTAACGCGCCCCGTGAACGACAGTGAAT  
GAACAATGGCAGCAAGAAGCTGAAAGAAGCGCCGTTCCGGTATGGAATATGCTCAACTATGTTGCCTTACAGGAAG  
GGCGTAACGGCATGGCTGTCTTATAGCGAAGGGTTACGTGAATTTGAAGTATCGGTGAAGAGAAGAAAACCTTTGCCATT  
ACGTTGCTGCGTGGCGTGGGCTTACTGGGCAAGAAGATCTGCTTTTAAAGCCCTGGGCGGCTTCGGGAATTTAAATGCC  
AGTCCCGACTCAAACTACGTGGTCTGCTTTCTGTGCTAAGTTTATTGAGTTATACCGGTACGCCAACCGCCGCTG  
GTGTAGCTCAGCAGGCGGAGCATGGCTGACTCCAGTACAGTGTACAACAAAATCCCATGGGATGTGATGAAGCTCAAC  
AAAGCCGATTCAACGTGCCGAAAGTTATAGTTTGTGAAAATGCCCCAGTGGGATGCCTGATAAGCGCACTTAAGAA  
AGCTGAAGACCGACAAGAAGTGATTTTACGGCTGTTAATCCGGCTGAATCAGCAACCTGTGATGCGACTGTTGCTTTCA

GTCGCGAGGTGATTTCTTGCTCAGAAACGATGATGGATGAACACATTACCACCGAGGAAAATCAAGGTTCAAATCTATCG  
GGCCTTTTTTACCCGGCCAGTCACGGACGTTTCAGTTACCGGCTTGCTGAATAGCAATCAAACCGAAGCCACATATGCG  
CGCCAGATTGTTGACAAAGGGCGCTTTGTTTCATGCCGGATACGGCATGAACGCTTTATTCGGTCTACAAAAGCAGGCAA  
ATTCAATATATTGCAGAGATGATGTAGACTGGCAAGCGTAGCCATCAGGTAATTTTGCCTTATCTTCACTCTCAAG  
CCACGTATATGTGGCTTTATTTTTAACAAAATAATAACCTGGGTGAGTTAATTATAATATAAATTATAAGTTAACTAAAT  
GTTAATATTGGCGGGTGGATTTATGCCTTTATTAGTAATCCTGAACTCTGCGTCTGATTAGCCAGTGACCAAAAAAAG  
AATTAAGGTCAACCGTGCTTTTTGCTTCGCTCTTTTTATCTTTAATTGCCAACCGAACTAATTTAGCCTTATAAC  
TCACACATTTTAAACATAAATGTCATAAAGTTACCTTATTGAAACATGATTAACATAAATTGTAGGAATTGATATTTAT  
CAATGTATAAGTCTTGAAATGGGCATCAAAAAGAGATAAATTGTTCTCGATCAAATTGGCTGAAAGGCGGTAATTTAGC  
TATAAATTGATCACCGTCGAAAAATGCAATTTGCTTCAACAAAAACCTGTTTATTGTAAGGATTTTGGCGGTAATATA  
TACGTGGGATCAATTTGAGTTTTTATTAACATGTTTGAACCTTTCTTACGCCGTTTTTGTGTGCATTACATGGTATG  
ATGAAAGTGTCAAACAATTTCTATTGGGCATGCGTGTGACCTTTCTAACGGGTTCACTCTCGGAGTCTTTCATGCG  
ATGAGCAAGGAGTCATGATGTAGATAGTCGAACTGTCGCGTTACAGTTTGCCTTGACCGGATGTACCACTTCTT  
TTTGTGCCACTGACGCTCGTATGGCGTTCCTGCTGGCCATTATGAAACGGTCTACGTCCTTCCGGCAACAGATTA  
TAAAGATAGACCAAGTTCTGGGCAAGTTGTTGGTATCAACTCTGCTCTGGGTGGCTACCGGCTGACCATGGATGGAG  
TCCAGTTCCGGACTAAGTCTTACTATTCCACTATGTAGGGATATCTTCGGTGCGCCGCTGGCAATCGAAGGCTG  
ATGGCCTTCTTCTCGAATCCACCTTTGTAGGTCTGTTCTTCTCGGTTGGGATCGTCTGGGTAAAGTTGAGCATATGTG  
TGTACCTGGCTGGTGGCGCTCGGTTCAAACCTGTCCGCACTGTGGATTCTGGTTGCGAACGGCTGGATGCAAAACCCAA  
TCGCGTCCGATTTCAACTTTGAACTATGCGTATGGAGATGGTGAAGTCTTCCGAGCTGGTCTTAACCCGGTTGCTCAG  
GTGAAATTCGTTCACTGTAGCGTCTGGTTATGTACTGGCGGATGTTTCCTCGGTATCAGCGCATGGTATATGCT  
GAAAGGTGCTGACTTCGCCCTTCGCTAAACGCTCCTTTGCTATCGCTGCCAGTTCGGTATGGCTGCTGTTCTGTCTGTTA  
TTGTTCTGGGTGATGAATCCGGCTACGAAATGGGCGACGTGCAGAAAACCAAACCTGGCTGCTATTGAAGCCGAGTGGGAA  
ACGCAACCTGCGCTGCTGCCTTACTCTGTTCCGCTTCTGATCAGGAAGAGGAGACGAACAAATTTGCGATTGAGAT  
CCCTTACGCACTGGGCATCATTGCAACGCTTCCGTGGATACCCCGTTCGCGCTGAAAGAGCTGATGGTGCAGCATG  
AAGAAGCATTGTAACGGGATGAAGGCTACTCTGCTCGAACAACTGCGTCTGGTCTACCGACAGGCGGTTTCGT  
GACCAGTTCAATAGCATGAAGAAAGACCTCGGTTACGGTCTGCTGCTGAAACGCTATACGCCAAACGTGGCTGATGCGAC  
TGAAGCGCAGATTCAACAGGCAACCAAAGACTCCATCCCGGTGAGCGCCGCTGACTTTGCGTTCGATCATGGTGG  
CGTGTGGCTTCTGCTTCTGCAATCATCGCGCTCTTTCTGGAGTGTATCCGCAACCGCATTGGCGAGAAAAAATGG  
CTTCTGCGCGCCGCTGTACGGTATCCGCTGCCGTGGATTGCTGTAGAAGCGGGCTGGTTCGTGGCTGAATATGGCCG  
CCAACCGTGGGCTATCGGTGAAGTGTGCCGACAGCTGTGGCAACTCGTCACTGACCGCAGGCGATCTCATCTTCTCAA  
TGGTGTGATTTGCGGCCTGTATACCCTGTTCTGGTGGCAGAATTGTTCTTAATGTTCAAGTTTGCACGCCCTCGGCCA  
AGCAGCCTGAAAACCGGTCGCTATCACTTTGAGCAGTCTTCCAGCACTACTCAGCCGGCAGCTAAGACAGGAGTGTCA  
AATGATCGATTATGAAGTATTGCGTTTTATCTGGTGGCTGCTGGTTGGCGTTCTGCTGATTGGTTTTGCAGTCACTGACG  
GTTTTGACATGGGGTGGGCATGCTACCCGTTTCTCGGTGTAACGACACCGAGCGTGAATTATGATTAACCTCATT  
GCACCACACTGGGACGGTAACAGGTTTGGCTGATCACCGCGGGCGGCACTTTTGTGCTGGCCGATGGTCTATGC  
CGCTGCGTTTCCGGCTTATGTGGCGATGATCCTCGTGTGGCGTCTTTGTTCTTCCGTCGGTGGTTTTGACTACC  
GCTCCAAGATTGAAGAAACCGCTGGCGTAACATGTGGACTGGGCATCTTATTGGTAGCTTGGTCCGCCGCTGGTA  
ATTGGTGTAGCGTTCCGTAACCTGTTGACAGGCGTACCCTTCAACGTTGATGAATATCTGCGTCTGTACTACCCGGTAA  
CTTCTTCCAGTTGCTTAAACCGTTCCGCTGCTGGCAGGCGTGGTGAAGGATGATCATTACTAGGGCGCAACCT  
ATCTGCAAAATCGTACCGTGGCGAAGTGCACCTGCTACCCGCAACGGCTCAGGTGGCTGCGTGGTACACTGGTCT  
TGTTTTGCACTGGCTGGCGTATGGGTGATGTACGGTATCGATGGTTATGTCGTGAAATCGACAATGGACCATTACGAGC  
CTTAACCCACTGAATAAAGAGTGGTTCGTGAAGCTGGCGCATGGCTGGTTAACTTCAACAACACGCCAATTCTGTGGG  
CTATTCCGGCACTGGGTGTGGTTCTGCCGCTGCTGACCATCCTGACTGCACGTATGGATAAAGCCGCTGGGCGTTTTGTG  
TTCTCCTCCCTGACGCTGGCCTGCATCATCCTGACAGCCGGTATCGCAATGTTCCCGTTTGTGATGCCGTCCAGCACCAT  
GATGAACGCAAGTCTGACAAATGTGGGATGCAACTTCCAGCAGCTGACGCTTAAACGTCATGACCTGGGTTGCGGTGGTTC  
TGGTACCGATCATTCTGCTTACACCGCCTGGTGTACTGGAAAATGTTCCGGTCGATACCAAAGAAGATATTGAACGT  
AACACCCACTCTGTACTAAGTAAGGAGCTAAAAATGTGGTATTTGCGATGGATTCTGGGAACGCTTCTTGCCTGTTCCG  
TTTTGGGTAATCACCGCGTGGCGCTTGAACACGTCGAATCAGGCAAAGCCGGTCAAGAAGACATCTGATGAGTAAGATT  
ATCGGACTTTGTATGCGGTAATGGACAAGCGCCCCCTGCGGGCCTTTCTTCTGATGGCGCTTCTGTTAGCAGGATG  
TATGTTTTGGGACCCATCTGTTTTGCCGGAAGACCAGTGAAGTGGAAATCTGGCATGGTTTATTGCTGATGTGGGCCG  
TCTGTGCTGGTGTGATTACGGCGTGGGCTTTCGTCGCGAAGAGTCTTTGGCAAGGGATTTTTTGGCCATTGCTTGC  
GATATTGTTCTCATTGTCGGGCTGATTTTCTTCTTTTAAATCAGAATTCTTTAAAAAATTATGGGCCGCTCCAGG  
CCATAAATTTTTACGCTCCCTTAACTTGCCTCATTCCCAAACCTCAATCGCGCGCTATAGTAGCAGCGTTTTAAAGC  
TCTAACTTTTGTGATTACCGGGATGTAAGTGAATACAACGCTGTTTCGATGGCCGGTTCGCTACTATGAAGATA  
CCGATGCCGGTGGTGTGGTGTACCACGCCAGTTACGTGCTTTTTATGAAAGAGCACGCACAGAGATGCTGCGTCATCAT  
CACTTCACTCAGCAGGCGCTGATGGCTGAACGCGTTGCCTTTGGTACGTAATAATGACGGTGAATATTACGCACCTGC

CGGGCTCGACGATATGCTCGAAATACAGACTGAAATAACATCAATGCGTGGCACCTCTTTGGTTTTACGCAACGTATTG  
TCAACGCCGAGAATACTTTGCTGAATGAAGCAGAGGTTCTGGTTGTTTGCCTGACCCACTCAAATGAAGCCTCGTGCC  
CTTCCCAAGTCTATTGTCGCGGAGTTTAAAGCAGTACTGACATGAATATCCTTGATTTGTTCTGAAGGCTAGCCTTCTG  
GTTAAACTTATCATGTTGATTTTATTGGTTTTTCAATCGCATCTTGGGCCATTATTATCCAGCGGACCCGTATTCTTAA  
CGCAGCGGCGCGGAAGCCGAAGCGTTTGAAGATAAATTCTGGTCTGGAATCGAACTCTCTCGCCTCTATCAAGAGAGCC  
AGGGGAAACGGGATAATCTGACTGGTTCGGAACAAATCTTTTACAGCGGGTCAAAGAGTTTGTGCGCCTGCATCGTGCC  
AATAGCCATGCGCCGGAAGCCGTAGTGAAGGGGCGTGCCTGCTATGCGTATCTCCATGAACCGTGAACCTGAAAATCT  
GGAAACGCACATTCCGTTCTCGGTACGGTTGGCTCCATCAGCCCGTATATTGGTCTGTTTGGTACGGTCTGGGGGATCA  
TGCACGCCTTTATCGCCCTCGGGGCGTAAAACAAGCAACTGCAAATGGTTGCGCCCGTATCGCAGAAGCGTTGATT  
GCGACTGCAATTGGTCTGTTTCCGCTATCCCGCAGTTATGGCTACAACCGCTCAACCAGCGCGTAAACAACTGGA  
ACTGAATTACGACAATTATGGAAGAGTTTACCAGGATTCTGCACCGCCAGGCGTTTACCCTTAGCGAGAGCAACAAGG  
GGTAAGCCATGGCCAGAGCGGTGGACGAGGTCGTCGCGATCTCAAGTCCGAAATCAACATTGTACCGTTGCTGGACGTA  
CTGCTGGTCTGTTGCTGATCTTTATGGCGACAGCGCCATCATCACCAGAGCGTGGAGGTCGATCTGCCAGACGCTAC  
TGAATCACAGCGGTGAGCAGTAACGATAATCCGCCAGTATTGTTGAAGTCTGGTATTGGTCAGTACACCGTGGTGG  
TTGAGAAAGATCGCTGGAGCGTTTACCACCAGAGCAGTGGTGGCGGAAGTGTCCAGCCGTTTCAAGGCCAACCCGAAA  
ACGGTCTTTTCTGATCGGTGGCGCAAAAGATGTGCCTTACGATGAAATAATTAAGCACTGAACCTGTTACATAGTGGGG  
TGTGAAATCGTTTGGTTAATGACGCAGCCTATCTAAACATCTCGGTTTCCCTTGTGTTGAAAGAGAGCGGGTAAACAGGCG  
AACAGTTTTTGGAAACCGAGAGTGTCAAAGGCAACCGAAACAAACGACAAGCTCAAGCGGGCGATAATTATTTACGAGT  
GCTGCATGTATCTTATTTGCGGCGTGTATCTGGAGTTCGTTGATGAGAATATAGAAGCTTCAGCCGGAGGCGGGCGTG  
GTTCTGCATCGACGCTGTATGGTTGATTACAGTGCAGTGTAGTGTAGCAGTACAACGCATGCAAAGCCAGGAATCAAGC  
GCGAAGCGTTCTGATGAACAGCGCAAGATGAAGGAACAGCAGGCTGTGAAGAACTGCGTGAAGAAACAAGCGGCTGAACA  
GGAACGCCTGAAGCAACTTGAGAAAGAGCGGTTAGCGGCTCAGGAGCAGAAAAAGCAGGCTGAAGAAGCCGCAAAACAGG  
CCGAGTTAAAGCAGAAGCAAGCTGAAGAGGCGCAGCGAAAGCGGCGCAGATGCTAAAGCGAAGCCGAAAGCAGATGCT  
AAAGCTGCGGAAGAAGCAGCGAAGAAAGCGGCTGCAGACGCAAGAAAAAGCAGAAGCAGAAGCCGCAAAAGCCGAGC  
CGAAGCGCAGAAAAAGCCGAGGAGCCGCTGCGGCACTGAAGAAGAAAGCGGAAGCGGCGAAGCAGCTGCAGCTGAAG  
CAAGAAAGAAAGCGGCAACTGAAGCTGTGAAAAGCCAAAGCAGAAGCTGAGAAGAAAGCGGCTGCTGAAAAGGCTGCA  
GCTGATAAGAAAGCGGCGAGAGAAAGCTGCAGCCGACAAAAAGCAGCAGAAAAAGCGGCTGCTGAAAAGGCGAGCAGC  
TGATAAGAAAGCAGCGGCGAGAAAAAGCCCGCAGACAAAAAGCGGCGAAGCTGCAGCTGAAAAGCCGCTG  
CAGCAAAAGCGCCGAGAGGAGATGATTTTTCGGTGAGCTAAGCTCTGGTAAGAATGCACCGAAAACGGGGGAGGG  
GCGAAAGGGAACAATGCTTCCGCTGCGGGAGTGGTAAATAAAAAAATGGCGCATCAGGGCCGATATCAATAACTA  
TGCCGGGAGATTAATCTGCTATCGAAAGTAAGTTCTATGACGCATCGTCTATGCAGGCAAAACCTGTACGCTGCGCA  
TAAACTGGCACCCGATGGTATGTTACTGGATATCAAACCTGAAGGTGGCGATCCCGCACTTTGTCAGGCTGCGTTGGCA  
GCAGCTAACTTGCGAAGATCCCGAAACCACCAAGCCAGGCGATATGAAGTGTCAAACCGCGCCATTGGACTTCAA  
ACCGTAATCGCGATGTTGACTGTTCCGACGGTCAACATCAGGCACCGGTTGCCACGGGTTCTGGTAGTTTTGTGATTT  
TAGTTTTGTTAACATTCTGCTAAATTATCGTGGGCCATCGGTCCAGATAAGGGAGATATGATGAAGCAGGCATTACGAGTA  
GCATTTGGTTTTCTACTGTGGGCATCAGTTCTGCATGCTGAAGTCCGATTGTGATCGACAGCGGTGATATTCCGG  
TCGTCTATTGGTGTGTTCTTTCCAGTGGGCGGGCCTGGTGGCGCACCTGAAGATATTGGCGGCATCGTTGCTGCTG  
ACTTGGCTAACAGCGGTAATTTAATCCGTTAGACTGCGCTCGTCTGCCACAGCAGCCGGTAGTGGCGAGGAAGTACAA  
CCAGCTGCATGGTCCGCACTGGGCATTGACGCTGTAGTTGTGGTCCAGTCACTCCGAATCCGGATGGTCTTACAATGT  
TGCTTATCAACTGTTGACTGGCGGCGCACCGGTTACTGTACTGCTCAGAACTCGTACAAAGTGAACAAGCAGTGGC  
TGCGTTATGCTGGTCATACCGCCAGTGTGAAGTGTGAAAAACTGACCGCATTAAAGGTGCGTTCCGTAATCGTATT  
GCCTACGTTGTTACAGACCAACGGCGGTGAGTCCCCTATGAAGTGCAGCTGCTGACTATGACGGTTACAACAGTTTTGT  
CGTTACCGTTACCGCAGCCGCTGATGTCTCCGGCGTGGTACCAGACGGTCTAAACTGGCTTATGTGACCTTCGAAA  
GCGGTGCTTCCGCGTGGTATTACAGACGCTGGCAAATGGCGCTGACGTCAGGTGGCTTCAATCCCGGCTCACAACGGT  
GCACCTGCATTCTCGCCAGACGGCAGCAAATGGCATTGCGCTTGTGAAAACCGGTAGTCTGAACCTGTACGTAATGGA  
TTTGGCTTCTGGTCAGATCCGCCAGGTGACTGATGGTGCAGTAACAATACCGAACCGACTGGTTCCCGGATAGCCAGA  
ACCTGGCATTACTTCTGACCAGGCCGGTCTCGCAGGTTTATAAAGTGAATATCAACGGCGGTGCGCCACAACGTATT  
ACCTGGGAAGTTGCGAGAACCAGGATGCGGATGTCAGCAGCGACGGTAAATTTATGGTAATGGTCAGCTCCAATGGTGG  
GCAGCAGCATTGCCAAACAAGATCTGGCAACGGGAGGCGTACAAGTTCTGCTGTCACGTTCTGGATGAAACGCCAA  
GTCTGGCACCTAACGGCACTATGGTAATCTACAGCTCTTCTAGGGGATGGGATCCGTGCTGAATTTGGTTTCTACAGAT  
GGCGTTTTCAAAGCGCTTCCGGCAACTGATGGACAGGTCAAATCCCTGCCTGGTCCCGTATCTGTGATAATAATT  
AATTGAATAGTAAAGGAATCATTGAAATGCAACTGAACAAAGTGTGAAAGGGCTGATGATTGCTCTGCCTGTTATGGCA  
ATTGCGGCATGTTCTTCAAACAAGAACCAGCAATGACGGCAGCGAAGGCATGCTGGGTGCCGGCACTGGTATGGATGC  
GAACGGCGGCAACGGCAACATGTCTTCCGAAGAGCAGGCTCGTCTGCAAATGCAACAGCTGCAGCAGAACAACATCGTTT  
ACTTCGATCTGGACAAGTACGATATCCGTTCTGACTTCGCTCAAATGCTGGATGCATGCAAACCTCCTGCGTAGCAAC  
CCGTCTTCAAAGTACCCTAGAAGGTCACGCGGACGAACGTGGTACTCCGGAATACAACATCTCCCTGGGTGAACGTCG

TGCGAACGCCGTTAAGATGTACCTGCAGGGTAAAGCGTTTTCTGCAGACCAGATCTCCATCGTTTTCTTACGGTAAAGAAA  
AACCTGCAGTACTGGGTCATGACGAAGCGGCATACTCCAAAAACCGTCGTGCGGTACTGGTTACTAAGAGAATTGCATG  
AGCAGTAACTTCAGACATCAACTATTGAGTCTGTGCTTACTGGTTGGTATAGCGGCCCCCTGGGCCGTTTTGCTCAGGC  
ACCAATCAGTAGTGTCCGGCTCAGGCTCGGTCGAAGACCGCGTCACTCAACTTGAGCGTATTTCTAATGCTCACAGCCAGC  
TTTTAACCCAACTCCAGCAACAACTTTCTGATAATCAATCCGATATTGATTCCCTGCGTGGTCAGATTACAGGAAAATCAG  
TATCAACTGAATCAGGTCGTGGAGCGGAAAAGCAGATCCTGTTGCAGATCGACAGCCTCAGCAGCGGTGGTGCAGCGGC  
GCAATCAACCAGCGGCGATCAAAGCGGTGCGGCGGCATCAACGACGCCGACAGCTGATGCTGGTACTGCGAATGCTGGCG  
CGCCGGTAAAAGCGGTAATGCAAACCGGATTACAATGCAGCTATTGCGCTGGTGCAGGATAAATCCCGCCAGGATGAC  
GCAATGGTGGCATTTCAGAAATTCATCAAAAATTACCTGATTCAACTTACCTGCCAAACGCCAATTATTGGCTGGGTCA  
GTTAAACTACAACAAGGGTAAAAAGATGATGCGGCGTACTATTTTGCTTCGGTAGTGA AAAACTATCCGAAGTCACCAA  
AGGCTGCAGATGCGATGTTAAAGTCGGCGTCATCATGCAGGACAAAGGTGACACCGCAAAGCGAAAGCCGTATACCAG  
CAGGTTATCAGTAAATACCTGGTACTGATGGCGCTAAACAGGCACAAAACGTCTGAACGCGATGTAATGCATAACACA  
CGACCAGAAGTCGATTATTTCTGGTCGTGCTGCGAATCATAAGCAGTTGAGTGATCTACATCGAAATTTTTGTTGCG  
CTCAAGTCTGAAATCAGTAAATATATGCCGCCGTTGCCACGGGATATCAAACAAACCGAAAGCAACGAAAAAGTGGGTGCT  
TAGCTCAGTTGGTAGAGCAGTTGACTTTAATCAATTGGTTCGAGGTTTCAATCCTGCACGACCCACCAATCGTAAGGT  
GGAAGCGGTAGTAAAACGTGAAGGATAACGTTGCATGAGCAACGGCCCGAAGGGCGAGACGAAGTCGAGTCATCCTGCAC  
GACCCACCACTAACATAGTTAGTTGATGATCCAGCGTAGTATCCGGGTGATTAGCTCAGCTGGGAGAGCACCTCCCTTAC  
AAGGAGGGGTCGCGGTTTCGATCCCCTCATCACCCACCACCGGTCGTTAGCTCAGTTGGTAGAGCAGTTGACTTTTTAA  
TCAATTGGTCGAGGTTGCAATCCTGCACGACCCACCAGTTTTAACATCGAAGACAGATGTTAAGCGTGTAGGATAACGT  
TGCGTCAGCAACGGCCCGTAGGGCGAGCGAAGCGAGTCATCCTGCACGACCCACCACCTAATGACGGTGGGTTTCGGTGGAA  
GTAGTTTGTAGTATCCAGCGCAGTATCGGGTGATTAGCTCAGCTGGGAGAGCACCTCCCTTACAAGGAGGGGGTCGCGCG  
TTCGATCCCCTCATCACCCACCCTCGGGTCGTTAGCTCAGTTGGTAGAGCAGTTGACTTTTTAATCAATTGGTCGAGGT  
TCGAATCCTGCACGACCCACCAGTTTTAACATCAAACCTCAGATGTTAAGCGTGAAGGATAACGTTGCGCCAGCAACGGCC  
CGTAGGGCGAGCGAAGCGAGTCATCCTGCACGACCCACCAATCTAAAGATTGGCCCGAGTAAAAATCTTTCAGGTAAC  
ACCCGATGGGTGTTAGCTCAGTTGGTAGAGCAGTTGACTTTTTAATCAATTGGTTCGAGGTTTCAATCCTGCACGACCC  
ACCAATTTAAAGTTGGTTACTGGTAGAGAACGTGAAGGATAACGTTGCGTTAGCAACGGCCCGAAGGGCGAGACGAAGTC  
GAGTCATCCTGCACGACCCACCATCCTGAATGATTAAGGCAGCATAATCCCGCAAGGGGTCGTTAGCTCAGTTGGTAGAG  
CAGTTGACTTTTTAATCAATTGGTTCGAGGTTTCAATCCTGCACGACCCACCAATGTAAAAAAGCGCCCTAAAGGCGCTTT  
TTTGCTATCTGCGATACTCAAAGATTGCAACCTGCAGCAGTTTTGAGTTGAGCGCAGCGAAACAACGGAGCCGCTCGCGG  
CGACGGCCCGAAGGGCGAGCGAAGCGAGTCATCCTGCACGACCCACCAATGTAAAAAAGCGCCCTAAAGGCGCTTTTTTG  
CTATTCAGGCATCCTCAATTTCACTTTGTAACCTGATGACATCGTCAGAGCTTACTGTGCAAGCAACTCTATGTCGGTG  
GAATTAGGCGTAAAATGACGCATCCTGCACATTAGGCGTAATTCGAGTGACTTTTTCCCACCATTGACTATCTTGTTA  
GCATATAAAACAAATTACCCGATAACAGCGAATATTACGCTAATGTCGGTTTTAACGTTAAGCCTGTAAAACGAGATGG  
TAAGATGAGCGTAATGTTTGATCCAGACACGGCGATTTATCCTTTCCCCCGAAGCCGACGCCGTTAAGCATTGATGAAA  
AAGCGTATTACCCGAGAGAAGATAAAACGTCTGCTAAAAGAACGTAATGCGGTGATGGTTGCCACTACTATACCGATCCC  
GAAATTCACAACCTGGCAGAAGAAACCGTGGCTGTATTTCTGATTCTCTGGAATGGCGGCTTCGGTGCAAAGCATCC  
CGTTCTACTTTGTTAGTCGCTGGGGTGAGATTTATGGGAGAAACCGCAAAATTCAGTCCGAAAAAACAATTCGTA  
TGCCGACACTTCAGGCTGAATGTTCACTGGATCTCGGCTGCCCTGTTGAAGAATTTAACGCATTTTGCATGCCATCCC  
GATCGTACTGTCGTGCTACGCCAACACTTCTGCTGCGGTAAGGCGCGCAGATTGGTGGAATTCGAGGTTTACGATGTC  
CGTGAACCTTATTGATCATCTTGATAGTTTGGTGAAAAAATCATCTGGGCACCCGACAAACATCTGGGCGGTTACGTGC  
AAAAACAGACGGGTGGAGACATTTCTATGCTGGCAGGTTGCTGATTGTCATGATGAATTTAAGACTCAGGCGTTAACC  
CGCTTGCAAGAAGAATACCCGGATGCTGCCATACTGGTGCATCCAGAATCACCACAAGCTATTGTCGATATGGCGGATGC  
GGTCCGTTCCACCAGTCAACTGATCGCTGCTGCGAAAAATTGCCACATCAGAGGCTTATTGTGGCAACCGATCGGGGTA  
TTTTCTACAAAATGCAGCAGGCGGTGCCAGATAAAGAGTTACTGGAAGCACCAACCGCAGGTGAGGGTGCACCTGCCGC  
AGCTGCGCGCATTGTCCGTGGATGGCCATGAATGGCCTCAGGCCATCGCAGAGGCATTAGAACAGGAAGGAAGCAATCA  
CGAGGTTTCATGTTGATGAAAGGCTGCGAGAGAGGGCGCTGGTGCCGCTCAATCGTATGCTGGATTTTGGCGCTACACTAC  
GTGGATAACGAATAATAAGCGTAACGTTACGCTTTGGGGAAAGATGGATTTTTTTAGTGTGCAGAATATCCTGGTACA  
TATACCAATAGGGGAGGCGGTTATGATCTCTCATGGATCGAAGCGGTAGGCACGATCGCCGGGTTGCTGTGATTGGCC  
TTGCCAGTCTGGAGAAGATCAGCAACTACTTCTTTGGCCTGATCAACGTACCTTGTGGCATTATTTCTTTAGATT  
CAGCTGATGCCAGCCTGCTATTACAGGTGTTTTCTTTGCCGGAATTTTACGGTTGGTATGCGTGGTTCGCGACAAAC  
CAGTCAGAACGAGGCGGAGTTGAAAATTCGCTGGTTGCCATTGCCAAGGCACTCAGCTGGTTGGCGGTTTGCCTGTTT  
CGATTGGTCTGATGACGGTATTTATCAATCCGGTGTGTCATTTTACCCGCTGGCAGTCATGATCATGCAAGCATT  
GGATTACAGGTTGTGATGCCTGAACTGCAACCGGACGCTTTCCGTTCTGGGATTCATGCATGATGGTGTATCTATCGT  
GGCAATGATTCTGATGACCGTAAGTATGTGAAAACTGGCTGTTGTGGGTGATTATTAACGTGATTAGCGTCTGTTATT  
TTGCACTTCAGGGCGTTTACGCCATGTCTCTGGAGTACATCATCCTGACCTTTATTGCGCTCAACGGCAGCCGGATGTGG  
ATCAACAGCGCACGTGAAAGAGGCTCACGCGCGCTGTCCATTAATGGTGTGATGATGTAATGGCCAGACACCCCTTCATT

CAGGTGGCAGTCTGGCCATGACAAGTTGATATCCATCTGAATGGTGGCGTGCTCAATCTGATAGTGATCCATCAGGT  
AGTGTGGATCTGATCCAACAAGGCATCGTGATCGTGGCGGGATCACCTGCACATGCAACGTCATCACGGCTTCTCG  
CCTACCATCCATACATGTACATGGTGACATTGCGGACTTCCGGGATTTCCCGGCACATACGACGTTTCAAGTTCAGCGAT  
ATCCAGCGATACCGGTGCACCTTCAAGTAATTCATTCACGCTATCTTTCAACAGTCGCCACGCGCTACGAGAACCAGAA  
GGACACCAGTATCGAGAGAATGGGGTCAAGCAGGTGCCAGCCAGTCCAGATAATAATCAACGCGGCAATAATAGCCCCA  
ACCGAACCCAGCAGGTCCCCGAGCACATGCAAGTGGCGTCTCGTACGTTGAGGTTTTCTTTCGCTGCCGTGATGAAG  
TAACCAGAAAGAAAGTATATTTGCCAGCAACCAGCCACGGCAATTGCCATCATGCGCCCTCGACCGGACGCGGGC  
TGCGGAAGCGTTCTATCGCCTCCAGACAATCAAAATGGTAATTACCACGAGGGCTATGGCATTCAAAAACGCCGCGAGC  
GTGGTCAGTCTTAGCCAACCGAAAGTGTGGGAATGGTGGGAGGACGACGTGAAAATTGCACGGCGAGTAGGGCGAAAAG  
CAGGGCGGCAGTATCGGTCAACATGACCCGCATCGGCCAGCAATGCCAGAGAACCAGAAAGAAAACCAACGACTT  
CTACCAGCATAAAACCGGCAGTCACGCCGAAAGCATACAACAAGCAGCAGCATTATTATCTTCTGGCAGGTGTGAGGAC  
GTGTGTGAGTGTGAGTGCACATGACGAGTATCCCTAATTAATCTCACTTAACCTTATGACATCACTGCTTTTAGA  
AGTGA AAAAATAAAAGGGAGAGACTCCGCTCTCCATTATTGGCTATTTGCAGGGTACTGCGTGGTACCGTCGGTTTT  
GGTATCGACATCATTATTGATGCCATCACCGTTTTGACCTTTTTATTGATATCCGGACAGCGACCATCTTGCACATGG  
TGTCTTGTGCTCTTTCATCTTGGTCATTCCGTCAATGTTTATTGAAGAACCATCCGAATGCAGCATTGCGCCGCAAG  
CCGCTATTTACCCGTTATTGTGACGTTATTTGGCGGACATTTTACGGGCTCAGGGGCTACCTGGCCCGCATCAG  
TGCGGGCTTTGCTGGCCGTTATTAGTTTGGCTCCGCTATCGGCAGCCAGTGCGGCACCGCTGGCAAGGCTTAGAGTGG  
CAGTCAGAAATAATGTGGCCAGTTTTGCATTTTATAGGATGCTCCTGTTATGGTCGTTATGTCGGATAACCTCTTCCA  
ACAGTGCATTTGCAGGTGAATATAAGGCATTGGTTAAGATTTACGCCAGGTTATGAAACGCAGCAGAGAATCTTGAAT  
AATTAACAAACAAAGGAGTTACAGTTAGAAAATTGTAGGAGAGATCTGTTTTTTCGCGACAATCGGCGTTTTTCTTGCTA  
ATTCCAGGATTAATCCGTTTATAGTGTAAAACCCGTTTACACATTCTGACGGAAGATATAGATTGGAAGTATTGCATTC  
ACTAAGATAAGTATGGCAACACTGGAACAGACATGAATTATCAGAACGACGATTTACGCATCAAAGAAATCAAAGAGTTA  
CTTCTCTGTGCGATTGCTGGAAAATTCCCGCTACTGAAAATGCCGGAATACGGTTGCCATGCCGAAAAGCGAT  
CCATAAGATCCTGAAAGTAATGATGATCGCCTGTTGGTTGTGATTGGCCATGCTCAATTCATGATCCTGTGCGGGCAA  
AAGAGTATGCCACTCGCTTGTGGCGTGCCTGAAGAGCTGAAAGATGAGCTGGAATCGAATGCGCGTCTATTTTGA  
AAGCCGCTACACGGTGGGCTGGAAAGGGCTGATTAACGATCCGCATATGGATAATAGCTCCAGATCAACGACGGTCT  
GCGTATAGCCGTAATTTGCTGCTTATTAACGACAGCGGTCTGCCAGCGCAGGTGAGTTTCTCGATATGATCACCC  
ACAATATCTCGTGCCTGATGAGCTGGGGCGCAATTTGGCGCAGTACCACCGAATCGCAGGTGCACCCGCAACTGGCA  
TCAGGGCTTTCTGTCCGGTTCGGCTTCAAAAATGGCACCGGACGTTACGATTAAGTGGCTATCGATGCCATTAATGCCGC  
CGGTGCGCCGACTGCTTCTGTCCGTAACGAAATGGGGGCAATTCGGCGATTGTGAATACCAGCGGTAACGGCGATTGCC  
ATATCATTCTGCGCGCGGTAAGAGCCTAACTACAGCGCAAGCACGTTGCTGAAAGTAAAAGAGGGCTGAAACAAAGCA  
GGCTGCCAGCACAGGTGATGATCGATTTAGCCATGCTAACTCGTCCAACAATTCAAAAAGCAGATGGATGTTTGTGC  
TGACGTTTGGCAGCAGATTGCCGGTGGCGAAAAGGCCATTATTGGCGTATGGTGGAAAGCCATCTGGTGGAAAGGCAATC  
AGAGCCTCGAGAGCGGGAGCCGCTGGCTACGGTAAGAGCATCACCGATGCCTGCATCGGCTGGGAAGATACCGATGCT  
CTGTTACGTCAACTGGCGAATGCAGTAAAAGCGCGTGCAGGGTAAAGTTAATTGTCGGATGCGCCGTGAGAGTGGCGTA  
TCCGATGAATCACACAGGCTGATAAGTCGCGCAGCGTGCATCAGGCAATGTGCTCCATTGTTAGCAACAAAAAGCC  
GACTCACTTGCAGTCGGCTTCTCATTTTAAACGAATGACGTTTACTTTCGCTTACCCTGGTTTGAACCCGCGCTGCTT  
TCGCTGCGATCTGTCAGCATTACCCAGATAATAGCGTTTTCAGCGGTTTGAATTTCTGTCGAACTCATAACAGCGGC  
ACGCCAGTCGGATATTAAGCTCAAGAATCTCTTTCGCTCATGTTATCAAGATATTTACCAGCGCAGTAAAGGTT  
ACCGTGTGCAGCAGTATCAGCGCTCACCCTCTCAGCGGCGAATAGTTTTCATTCCAGTAAGGATCAGCGGTT  
CAATGGTCAGCGCCAGGCTTCCGTCAGCGGCAGTTCTTCTCGCTCAGTTTTCGCGTAACGCGGATCGTGACCCGATAA  
CGTCTCATCTTTAGTCAGTTCCGGCGGAGTCACTGCAAAACCAGCAGCCACTGTTTCACTGCTCGTCCGATACTT  
TTCAGCAGTTTCCGCTTGTTCAGACCCTGCAACGCACCGTAGTGACGTTTCTGTTTCCAGGATTTCTCAACGGGCA  
GCCATGCCTGATCCAGTTCTGTCAGCACATTCCACAGGGTATGGATAGCGGTTTTCAGCACAGAAGTGAAGCAAAGTCA  
AAGCTGTAACCTTCTCTTTCAGCAGCTTACCTGCTGCTTTTGTTCGTTACGCTTTTCTCAGACAGATCCACGTCGTA  
CCAACCGGTGAAACGGTTTTCTTGTCCACTGACTTTGCCATGACGAACCAGAACAGCTTAGTTACAGCCATATACT  
TACTCTCAAATCATCTTTAATGATAATAATTCTCATTATATTGCCGCGACGAAGCAACAGCAATGCTTACGCATAACC  
ATAGCGAAAATAGTGGCGCAGTGAAGTTGTTGTGAATATTGAGTTGCAAATATGTCGGTGTGTTGCTGGTATTTGAAC  
AATATGAGATAAAGCCCTCATGACGAGGGCGTAACATTACTCAGCAATAAACTGATATCCGTGAGGCTGGAATACTCTT  
CGCCAGGACGAGGAAGCAGTCCGGTTGCGGCCATTAGGGTGGTTCGGGCTGTCGGTAGAAACTCGCTTTCAGAGCC  
AGCCCTTGCCAGTCGGCGTAAGGTTCCGGTCCCCGCGACGGTGTGCCGCGAGGAAGTTGCCGGAGTAGAATTGCAGAGC  
CGGAGCGGTGGTGTAGACCTCAGCTGCAATTTTTATCTGCTGACCAGACATGCGCCGCCACTTTCTTGCATCGCCTT  
TGGCCTGTAACAAGAATGCGTGATCGTAACCTTTACTTTGCGCTGATCGTCTGCGCAAGAACTCACTGGCGATGATT  
TTGGCGCTGCGGAAAATCAAAAGACGTTCCGGCGACAGATTTAGGCCGCTGTCGCGGAATGCCGCTTCTCAACCGGCA  
ATATTGTCGGCCAGAATCTGCAACTTGTGATTGCGCACGTCAGACTGCTCGCCGTCAAGATTGAAATAGACGTGATTAG  
TCATATTCACCGGCAAGGTTTATCAACTGTGGCGGATAAGTAATGGAGATACGGTTATCGTGGTCAGACGATATTGC



ACCGTCGCGCCGAGATTACCCGGGAAGCCCTGATCACCATCATCTGAACTCAGGGCAAACAGCACCTGACGATCGTTCTG  
GTTACAATCTGCCAGCGACGTTTTGTCGAACCCCTCCGGCCCGCGTGCAGCTGGTTAACGCCCTGACTTGGCGAAAGCG  
TCACGGTTTCACCGTCAAAGGTATAACGGCTATTGGCGATACGGTTGGCATAACGACCAATAGAGGCCCCAGAAACGCG  
GCCTGATCCTGATAGCATTCCGGGCTGGCACAGCCGAGCAGCGCCTCGCGGACGCTGCCATCGGAAAGCGGAATACGGGC  
GGAAAGTAAAGTCGCACCCAGTCCATCAGCGTGACTACCATCCCTCGCTTGTACGCAAAGTTAACAGTCGGTACGGCT  
GACCATCGGGTCCAGTGCGGGGAGTTTCGTTTCAGCACTGTCCTGCTCCTTGTGATGGTTTACAAAACGTAAAAAGTCTCTT  
TAATACCTGTTTTGCTTCATATTGTTTCAGCGACAGCTTGTGTACGGCAGGCACCAGCTCTTCCGGGATCAGCGCGACG  
ATACAGCCGCCAAATCCGCCCGCGTATGCGTACGCCACCTTTGTCGCCAATCACAGCTTTCAGGATTTCTACCAGAGT  
GTCAATTTGCGGCACGGTGAATTCGAAATCATCGCGCATAGAGGCATGAGACTCCGCCATCAACTCGCCCATACGTTTCA  
GGTCGCCTTGTCCAGCGCGCTGGCAGCTTCAACGGTGGCGGCGTTTTTCAGTCAGTATATGACGCACGCGTTTTGCCACG  
ATCGGGTCCAGTTCATGCGCAACAGCGTTGAACTCTTCAATGGTGACATCACGAGGGCTGGCTGCTGGAAGAAACGCGC  
ACCGTTTTCGCACTGTTACGACGGGTGTTGATTCCGCTGCCAACAGGGTACGTTTGAAGTACTGTTGATGATGACGA  
CAGCCACACCTTTGGGCATGAAACTGCTTTGGTCCCAGTGAGCGGCAATCGATCAGCAAGGCATGATCTTTCTTGCCG  
AGCGCGAAATTAGCTGATCCATGATCCCGCAGTTACAGCCTACAAACTGGTTTTCTGCTTCTGACCGTTAAGCGCGAT  
TTGTGCGCCGTCAGCGGCAGATGATAAAGCTGCTGCAATACGGTTCGACCGCGACTTCCAGTGAAGCGGAAGAATTA  
ACCAGCACCTTGCAGCACATTGCCGCTGATCACCATGTCACGCCGCCGAAGCTGTTGTTACGCAGTTGCAGATGTTTC  
ACCAGCCACGAACGTAGTTAGCCATTGATAGTTTTCATGTGCGACAATGGGCGCATCGAGGAAAACCTCGTCGAGCTG  
ATTTTCATAATCGGCTGCCATCACGCAACTTTACGGTTCATCGCGTGGTGCACAACGATCACGGTTTGATAATCAATCG  
CGCAGGGCAGAACGAAACCGTCTGTTGAGTGGTGTGTTACCAATCAAATTCACGCGGCCAGGCGCCTGAATGGTGTGA  
GTGGCAGGGTAGCAAATGCGTTGGCAAACAGAGATTGTGTTTTTTCTTTCAGACTCATTCTTACACTCCGGATTCCGC  
AAAATGGATATCGCTGACTGCGCGCAAACGCTCTGCTGCTGTTCTGCGGTACGGTCTCGTGGGTCTCTGCCAGCATT  
CATAACCAACCATAAATTTACGTACGGTGGCGGAGCGCAGCAGAGGGGATAAAAAGTGCAGTGCAGCTGCCAGTGTGA  
TTCTCTTCCGATTAATGGCGCGCGTCCAGCCATAGAGTAGGGGAAGGAGCACTGGAAGAGTTGCATAACGACT  
GGTCAGTTTTTCAACGCCAGCGCCAGATCGCTGCGCTGGGCGTGGTCAAATCGGTGATCCGTAAAACGTGGGCTTTGG  
GCAGCAGTAGCGTTTGAACGGCCAGGCAGCCAGTAAGGCACGACGGTAACCAGTGTCCGGTTTCGACAACGGTACGG  
CTACCGTCTGCCAGCTCGCGCTGAACATAATCCACCAGCATTGGTGAATTTCTGTTCCGGAAAATATTCTTTTTGCAGGCG  
GTCTTCGCGCTCAGCTTCGTTAGGCAGGAAGCTATTTGCCAAATCTGACCGTGCAGGATGCGGGTTAGAGCAGCCATCG  
CCGCGCCTTTGTTTTCAAAAACCTGCACCCATGGGTACGTTTTCCCGAGTTCTGCGGTTTGTCTCTGCCAGTTTTGACG  
ATTTCCGTCAATGCTGCAACGCTGAGCTCTGGCAGCGTTTTACTGTGATCCGGTGAAAAGCAGATCACCCGGCTGGTGCC  
GCGCGCTCTGGCAACGCATCAGCGGATCGTGACTTTCTGGCGCATCTGGCGTGTGAGACATCAAAGCCGCAAAGTCAT  
TAGTGAAAACGTAAGTCCCGGTGTAATCGGGGTTTTATCGCCTGTACCCGCACATTACCTGCGCAGAGGAAGCAATCT  
GGATCGTGCGCAGGTAACACCTGTTTGGCTGGCGTTTTCTGCGCCCCCTGCCAGGGGCGCTTAGCGCGGTGCGGTGAAAC  
CAGAATCCATTGCCCGGTGAGCGGGTTGTAGCGCGCATGTGGATGATCAACGGGATTAATTTGCGTATGGTCTGTTCTT  
AATCGGGATATCCCTGTGGATGGCGTACTGCCAGTGCAGGTGCTCTGCGCCATTTATCGAGTGTGCGCGTTACGCGC  
CAGTTTCAGTTCACGGTGGCTTTGCTGGCGTCCGCCAGTAGGCCGGAAGGTGCGCCTCGCGACGCGGTGCAAAATGATA  
ATTAACCGTTTTGCCGAGGCTTTGCTGAAGGCATTAACCACGTCCAGCAGCTGTTGCCTACGCCAGCGCCGAGGTTGT  
AGATGTGTACGCTGGCTTGTTCGCCAGTTTTCCATCGCCACGACGTGACCGTCCGCCAGATCCATTACGTGGATGTA  
TCGCGTACGCCAGTACCATCTCGGTGCGATAATCGTTACAAAAATCGCCAGCGAGTCCGACGCGGCTACAGCAACCTG  
GGCAGTGTATGGCATCAGTTATTTCGGAATGCCTTGGGATCTTCGCCATATCGCCGACGGATGCGCGCAACCGGGT  
TGAAGTAGCGCAGCAGGGCAATGCTCCAGTCCGGCTGGGCTTTTTGACAGATCGGTGAGGATCTGTTCCACCATCAGTTG  
CTTTTGCCTAAGGGCTTTGCGGTGTGCGGTCGGGAAAGCTTTCACCGTATGGAATTTTGGGCTGATCGCCATAAACGCT  
GGCGGAGGAGTAAAAATAAAGTTTTTACGTTAGCGGCGCGCATGGCGTAATCAGGCGCAGAGTGCCGTTGACATTGT  
TGTCGTAATATTCCAGCGGTTTTTGTACCGATTGCCCCAGGCTTTCAGCCCGCGGAAGTGGATCACGGTGTGATAGCG  
TGATCGTGAGGATCTCGGTTCATCAACGCTTCGTTACGAATATCGCCTTCAACAAAACGTTGGATGTTTGGCCCTAAACG  
CTCGATAACAGGCAGTACGCTGCGCTTACTGTTACAGAGGTTATCAAGAATGATGACATCATGACCGTTTTGAGTAATT  
GCACACAGGTATGACTTCCAATGTAACCGCTACCACCGGTAACAGAACTCTCATAATTCGCTCCATTAGGCTTATGGTA  
TGAATAACCATAGCATAACAAAGATGCGAAAAGTGTGACATGGAATAAATTAGTGAATCGTTTACACAAGAATTTAGC  
CGTTTTTTATGCGGATTAAGTGATTATAAAACAGAGGTTTTATGAATGATTGCGTTTTTATCTGAAAAAGACGCGGT  
TTCATGCTGCATGCGTCAACCGTTGGCCGGAGAGGGTGTAAAGCCGCTCCGGCAAGGTGAGCACTACCGACTCAAT  
ATATTTTTGTCAGCACATAGCGATAGAGTCCACCGTCCGGCACGAACTCAAGACGATGGGTAATACAGGCAGGCGCATCT  
TCAGCGTGGTGCAGAAACAAACAATTCGTTTTACCTTCGTAATCAGCACATCAACAAAACGGCGGATAAGCTGGCG  
ATTACGCGGATCAAGCCCTGTAGTGGTTCATCGAGAATAAGCAACGTCGGATGTTTACCAGTGCAGCGGACAATCAGCG  
CCAGACGCTGCTGCCCCAGGAAAGACTATGGAACGGAGCGTACCGGTGCGTTTATCAATGCCGAGAATATCCAGCCAC  
TGCTGCACCAAGTTTTTGTGGCGATCCGAAACGGCCTGATAAATGCCAATCGAATCAAATAGCCAGAAAGAATCACATT  
ACGCACGGTAGTGCTGACCCGGTAATCCAGATGCAAACTACTGCTGACGTAACCGATATGCTTTTTGATATCCAGATGG  
TTTCGCGCTGCCGCGACGTCGTCGAAAAGCGTCAAATCGTTGCTGTAACCTTGGCGATGATCGCCAGTAACCGGCTT

AATAACGTCGATTTTCTGCACCATTTGGCCGACAATTTGCCAGTGTTGCGCTGGATTACCTGCCAGCTAAGGTTATT  
AGAATGGGGCGATCGTTATAAGAAACCACGCCATTGTTGAGCACAATGCGCGGTTGTTGGCGGGTAAGGCGTGACGTG  
CTGAAGTTTCATCCGGCTCCGGCAGTTGCACACCTCAAGCTGTTACTATGCGCCAGTTGCGCGACGAGTGCTTGTGG  
AGCAGTTCTCTTTAGCGCCAGTTTCCGTAACGTGCAATCCGCCAGCACGCCAGCAAACCTGGACAAACTCCGGGATCTC  
ATCGAAGCGATTGAGCACCAGTACCAGAGTAATACCGGACTGATGTAACGAGGCGAGTCGCTCAGCCAGCTGCTGACGTG  
AGGCAACATCCAGGCCATCGAACGGCTCATCAAGAATCAACAAGTCAGGCTCCGACATCAGCGCTGACACAGCAGGGTT  
TTTCGCGTCTCGCCAGTGGAAAGGTATTTAAAGCGTCGGTCGAGGAGGGCGGTAATACCGAACTGCTGCGCCAGTTGCAT  
GCAACGCGGTGCATCCTTACTTATCCTGAATGATCTCAGCCGAGTGCCTCCGGTGTATCTTTCGCCAGGGCCGAGCA  
TATCGGTGTTATTCCGCTGCCATTCTGTCGCTGACGAGTTTTTGAATTGCTCGAAGGAGAGACGAGTGATGTGGGAAAC  
TGGCTTTGCCGTTACCTTTCAAAGCGGAAGTTCCCCGCCAGCGCGGGCCAGGGCCGATTTCCCGTTCATTTCGA  
ACCGACAAACGCCAACTATCACCCGCGTTTAAAGTTAGCTGAGGCAATTGCAGCGTTTTTGTGTCGCTAAGACGAAACG  
TGCTTTCGAAAATTTGCAACGATGACATTTATATCCACTTTGTGACGCGATTACTGACAGGGATACGTGTTTCATAAC  
AAATTGTCAACACGCTTAGCACAGCGTGGCGATAATCAGCTGTCCGATTAAGTAGGCCGTGACATTTCTGCTTGT  
GAAGAGAAGTCGCTTCAATTAACCGGACTGTGGCGCACAGTGTTCGCGTCCGGTAGCGCCATTAATAACTTCGCAGTC  
TCTGCGCCGCTCAATATGACTAATAATACCCGTAATTTGTTGTCAGCGTTTTGCGCGACCGCTCGCTGAGTAAT  
ACCTACCCACGGCGTTTTAGCAATATCAACACTTCTTTGCTTTCATCCAGCCAGACGCGCGCTTGTGCGGTAA  
TTGCGACTTTTCAAGCGTGTTTTTCCGTGACCCAGTAAGACATCAACATGCTGTTGAACGTCATCATGATCGCGGGCGGTG  
ATGGTACCGAACCACTGTTACGGGCGTGGTTTGCAGTGAAAAACGTGAGATCGCGGCCAGCAGGCTGTTGAGCGGCAG  
GGCGTCATCGTCACTTAACACATCAAAGGCTTTTTGCTGGATTTGCGCCAGTAAGTCATAGAGCTGAATCAGTCGCTGAC  
CATAGCGGGTCACTACTGCGCCGCCACCTTTACCGCTGTTGCGCGCTCGACCAGAATATGCTCACTTAACTGATTC  
ATCTCGTTAATGGCATCCAGGCGCTTTTATAGCTAATACCGCATCTTTCGCTCCCTGGTAATGGAACCGGAAAGCGC  
AATGTGTTTTAGTAGCGAAATGCGGCGGGTGGCGAATAATTTTTGTTGGAGCTAAGGGTGAGAAGGATTTCCGGCT  
GCATAACAATGCTCGGCAAAAGTCTTATTGTGACGAAAACGAACGCCACGCAAAGCTGACCGCACAAAAGGGGAGTGC  
TTTTCTGTGCTTAGCGGTTAGAATAGTCTCATGACTATATCTGGAGTTGACCATGTTAGAGTTATTAAGGCTGCTGAT  
TCGCGTAATCATGGTACCTGTCGTGATGGCCATCATCTGGTCTGATTTACGGTCTTGGTGAAGTATCAACATCTTT  
TCTGGTGTGGTAAAAAAGACCAGCCCGACAAAATCATTGATCCCTGAATGCCGCTTAGTCGGGCATTTTCTTTTT  
TCAACTTCTGCTTTTCTGCCGATATTTTTCTTATCTACCTCACAAAGGTTAGCAATAACTGCTGGGAAAATTCCGAG  
TTAGTCGTTATATTGTCGCTACATAACGTTACATTAAGGGGTTACCAATGGCTCGTAAATGGTTGAACCTGTTTCCGG  
GGCGGCACTCTTTTCGCTGTTGCTGGCAATGCACTGGCAGATGAAGGGAAAATCACGGTGTTCGCCCGCCATCACTGA  
CTAACGCAATGCAAGGACATTGCTACGCACTTTAAAAAGAGAAAGGCGTGGATGTGTTTTCTTCTTTCGCTTCGTCATCT  
ACTCTGCCCGTCAAGATTGAAGCGGTGCGCCTGCGGATCTGTTATTTCTGCCGATCAGAAATGGATGGATTATGCGGT  
TGATAAAAAAGCGATCGATACAGCTACCGCTCAGACTGCTCGCAATAGCCTGGTCGTTGTAGCACCAGAAAGCCAGCG  
TGAGAAAGATTTACCATCGACAGCAAAACCACTGGACTTCACTGCTGAATGGCGGTGCGCTGGCGGTTGGCGATCCG  
GAACATGTTCCCGTGGCATTATGCAAAAAGAAGCACTGCAAAAACCTGGGCGCATGGGATACGCTCTCTCCGAAACTGGC  
CCCAGCGGAAGATGTTGTTGGGCGCTGGCGCTGGTCGAACGTAACGAAGCGCTCTGGGCATTGTCTACGGTCTGACG  
CAGTTGCCAGCAAAGGGTAAAAGTGGTTGCCACCTCCCGGAAGATTACATAAAAAAGTGAATATCCGGTGTCTGTT  
GTGAAGGGCATAACAATGCGACAGTAAAGCATTTTATGATTATCTGAAGGGACCGCAGGCAGGCAAGCAAGTCTTTAAACG  
TTACGGATTTACAATCAAGTAATGATACTGACCGATCCAGAATGGCAGGCAGTTTTATTAAGCCTGAAAGTTTCTCCCT  
GGCTGTGCTGTTTAGCCTGCCGTTTGGGATCTTTTTGCTGTTACTGGTACTGTTGCGTTGCACGTTTCCGGCAAAGCTGTC  
TCGACAGCGTACTGCATCTACCGCTGGTGTACCGCCGCTGGTGTGCTGCTGTTACTATTATTAGTTTTCGATGGGACGGCG  
GGATTTATCGGTGAACGCTGTATGACTGGTTTGGTATTACCTTCGCTTTAGCTGGCGCGCGGTTTCTCGCTGCCGC  
CGTCATGTCGTTTCCGCTGATGGTGGCGCAATTGCTGCGCGTGAAGGGGTTGATGTCAAACGGAACAGGCCGCAA  
GAACACTGGGGCCGGGCGCTGGCGGTTTTCTTACTATCACGTTACCGCTGACCTTACCGGGAATTATTGTTGGTACG  
GTAAGGCTTTTCTCGTCTCTCGGTGAGTTTGGTGAACCATCACCTTTGTGTCGAACATTCTGGTGAACGCGAAC  
CATTCTTCTGCCATGTATACCCTGATCCAGACCCCGCGGGGAAAGTGGAGCGGCGAGACTGTGCATTATTTCTATTG  
CGCTGGCGATGATCTCCCTGTTGATTTAGAATGGCTGGCCAGAATCAGCCGTGAACGGCGGGGGCGCTAATCATGCTGG  
AACTGAATTTTTCCAGACGTTGGGCAACATTGCCTGACTATTAATGAAACGCTGCCCGCAATGGCATCACTGCTATC  
TTTGGCGTCTCCGGTCCCGGAAAACCTTCGCTGATTAACGCCATCAGTGGACTGACGCGCCCGCAAAGGGCGGATTGT  
CCTCAATGGCGGGTACTAAATGATGCCGAAAAGGTATCTGCTGACGCCGAAAAGCGTCCGTTGGCTATGTTTTT  
AGGATGCGCGGCTGTTCCCGCATTACAAAGTGGTGGCAATCTGCGCTACGGCATGTGCAAAAAGTATGGTCGATCAGTTC  
GATAAGCTGGTGGCGTTTTAGGCATTGAACCGTTGCTTGACCGTTTACCAGGCAGCCTGTCCGGAGGCGAAAACAGCG  
CGTGGCGATTGGTCCGGCTTGTGACAGCACCGGAATTGCTGTTGCTGGATGAACCGCTGGCGTCACTGGATATCCGC  
GTAACGCGAACTGTTGCCATTATCTGCAACGGCTGACACGGGAAATCAACATTCGATGTTGTATGTCAGCCATTCCGCTG  
GATGAGATCCTCCATCTGGCAGACAGAGTGATGGTACTGGAACCGGTCAGGTGAAAGCCTTTGGCGCGCTGGAGGAAGT  
GTGGGCGAGTAGCGTGATGAATCCGTGGCTGCCGAAAGAGCAACAAGTAGCATTCTGAAAGTGAACGGTCTTGGAGCATC  
ATCCGCATTACCGGATGACCGCGCTGGCGCTGGCGGATCAGCATTGTGGGTCAATAAGCTGGACGAACCGCTGCAAGCT

GCCTACGTATCCGATTAGGCTTCCGATGTTTCTCTGGTTTTACAACCGCCGAGCAAACCAGCATTCTGTAACGTATT  
GCGGGCAAAAGTTGTTAATAGTTATGACGACAACGGCCAGGTGGAAGTGAACTGGAAGTCGGCGGTAACCGCTGTGGG  
CGGTATCAGCCCGTGGGCCAGGGATGAACTGGCGATCAAACCTGGCCTGTGGCTGTACGCGCAAATTAAGTGTGTCG  
ATAACCGCCTGATTAATCAGGTGGCTATAAATGAACTGGGCAATGCTGTGGTGGTGTATACCAATCACAATGTTGG  
CGCGCGTTTTACCGCGTATCGGCGTTGCCATCGCCACGCCTGTACCAGCGCTTCCAGCATACTGATATCATTAAG  
TTATCGCCGAATGCCACGACGTTTTCCATCGACCAACCTTGGCCTCAACCCATTTCTGCAACGTTTACCTTTGCTGTT  
GCCGCCGCGTGAATATCAACCTGATCGTGCCAGGACCATTCACTCCAGTCCAGTTCATGTTTCGACATGCTTACCAA  
AATGCTGCAATTGCGGCAGGTCATCGTGCGTCAGGGCGAACTTCCATACGGCGTTAACTTGTTCGCGCTTTCAGCCAGA  
GAAGCGACTTGTGTGAAAGTCGGACGCTGTTCCGGCCGAGGGTTTGGCCAGTTAGATGTGCGAATGACATGCCCGGT  
CGGGTGCTCATAGACCATTGCATCATCGACATACATCAGACCGTGAATGTGGTGTTCATTCAGCATCTCAATGAGTTGCA  
GGCTTTAATAACGGGCATTGGGTCCGCTTCCAGCACGTTTTTTCATGATAATCATACAAATAGGTGCCATTACAGCAA  
ATAGCAGGTGATCCAGCGCCAGCGCTGATAAAAAGGATGAATAGCGACGTGATGGCGACCTGTGACGATGATTAATTG  
ATAGCCTGCTTCGCGAGCGCGGGCCAGGGCTTCTATCGATGAAGGAAGCAGGGTCTTTTTCGGGGTCAATAAGGTGCCGT  
CTAAGTCGAGAGCAATCACGCGTGTGGTCATGGCGTATTCCAGATTAAGGTTAAGAATTTTCGCTCGCGGAATGGTACA  
CCGATACCCTATCGACAAAATTCGCGTTTTAATCAGCATTACCGCCAAAAGCGACTAATTTTAGCTTTACAGTC  
AGTTGCTAAATGCAAAGGAGCATTATGAAGCAAACAGTTTTATCGCCAGCCCTGAGAGCCAGCAAATTCAGTCTGGA  
ATCTGAATCATGAAGGCGCACTGACGCTGACACAGTTGTCGATGTGCCGGGGCAGGTGCAGCCGATGGTGGTCAGCCCG  
GACAAAAGTTATCTATGTTGGTGTTCGCCCTGAGTTTCGCGTCTGGCGTATCGTATCGCCCCGACGATGGCGCACT  
GACCTTTGCCGCGAGTCTGCGCTGCCGGGTAGTCCGACGATATTTCCACCGATCACCAGGGGCAGTTTGTCTTTGTAG  
GTTCTTACAATGCGGGTAACGTGAGCGTAACGCGTCTGGAAGATGGCCTGCCAGTGGGCGTCGTCGATGTGGTCGAGGGG  
CTGGACGGTTGCCATTCCGCCAATATCTCACCAGCAACCGTACGCTGTGGTTCCGGCATTAAAGCAGGATCGCATTG  
CCTGTTTACGGTCAGCGATGATGGTCATCTCGTGGCGCAGGACCCTGCGGAAGTGACCACCGTTGAAGGGGCCGGCCCG  
GTCATATGGTATTCCATCCAAACGAACAATATGCGTATTGCGTCAATGAGTTAAACAGCTCAGTGGATGTCTGGAACTG  
AAAGATCCGCACGGTAATATCGAATGTGTCAGACGCTGGATATGATGCCGAAAACCTTCCGACACCCGTTGGGCGGC  
TGATATTATATCACCCTGGATGGTCGCCATTTATACGCTGCGACCGTACCGCCAGCCTGATTACCGTTTTAGCGTTT  
CGGAAGATGGCAGCGTGTGAGTAAAGAAGGCTTCCAGCCAACGGAACCCAGCCGCGCGGCTTCAATGTTGATCACAGC  
GGCAAGTATCTGATTGCCCGCGGGCAAAAATCTCACCACATCTCGGTATACGAAATTTGTTGGCGAGCAGGGGCTACTGCA  
TGAAAAGGCCGCTATGCGGTCCGGCAGGACCAATGTGGGTGGTGGTTAACGCACACTAACCGCTGATTTACCCGGCGC  
AGTCTCTCCTCGCCCGGTGATTAACCTATCTCCTGTAACGCGTGTCTTGGCGTTTCGACGATATTGGTCCACAAATGT  
CTTTATCGTCAGTCCATAAATTAATCAGCAAGGCAAAAAGCGTTCTGCTGCTGGAGAAAGTACGGCATCTTTACGGCGA  
ATTATCCCAATGTTTCGACGTATAACGGTTCACCAATGGGATACCAATAATCGAAGAATAGGGCGCATGAGGCATTGC  
CAGGCCAGGAAGCGCCGAAATCCCGAGTCCCGCCTCCACCGTCTAATGACGTCGAAAGATGACGCACTTCGTAACCC  
AGTCCAGCTTCCAGGGCTTGTCCGCCAGCTGTTGTTCTATCAACAGTCGTTTCCGCTGGAGGAGCGTACGCCAATCATT  
TTGTAACCCACTAACTCTGCCATTCTACAAGCTGCTTTTTGGCCAATGGATGGTCACGCCGACAGGCCAGCACGAACGG  
CTCGTTGACCAGTGGGGTAAATCAATGGATGAATTTGTGACGTTGTTTCATGTTTATGCCAAAGTCTGATTGTTACACA  
GCACCGATTCCATGCAATATTCGTGCCTTGTCCAGAATCCGCACTTTAATATTGGGATACAGCTCATTAAATTTACCG  
ATTGCCAGCGTAAAAATAAAATACTGCGGTCCGAATACACGCTAACGTCACCATACCACGATGATAAGCATTATATC  
ACGAATATTAAGCGTTTCATCGAATTTCTTTATTAATTTCCCGCGCTCCGGGAGCAACCTTTTTCTGCTTTTGTGA  
ACGTAACCTTGCAGTTGACGCTCAAATAGTTGAACATGAAATCTTCTCCATCTTTTTTATTCTTCGCGTTAATGCA  
GGTTGCGTAATTTAGTAAATTTAGCGGCATTGTTAAACGAACCTGACTGCGCAGTATGACAAATGCCTTCATACGTA  
TAATTCATGCTTATTACTCCGAAAATGGAAGCGACGATTTTGGGTGGCTGGCCGTTAAAAATTTAACTGCATTT  
AGCCAACCTAAATTAATGAAAAATGTTATTAATCGTTGAGCTAAAGTCATTAGAGATGCTTTGCCCTTAATGTAACCAT  
ATCGCAATAAGTTATGTTTTAAATGAGGGCATTATTATGAAAAAATACCCTGCGTGATGATGCGAGGTGGAACCTCG  
AGGGGCGGTTCTGTTAGCGGAACATTTACCCGAAGATCAAACGACGCGGATAAAAATATTGATGGCAATTATGGGTTT  
CGGTAACGATCTGAAATGACGATTTGGCGCGGTAATCCACTGACCAGTAAAGTCGCCATTATTAGCCGTTCCAGCG  
ATCCGCGTGTGATGTCGATTATCTGTTTGGCAGGTAATCGTTCATGAGCAACGTGTCGATACCACGCCTAACTGCGGC  
AATATGCTGTCTGGTGTGGGGCATTGCCATTGAAATGTTTTGATTGCAGCGACTTCGCCAGTTACTCGCGTACGTAT  
CCGCAACGTCAATACGGGTACGTTTCATCGAAGCTGATGTGCAACGCCAAATGGTGTGTCGAGTACGAGGGTAGCGCCA  
GAATTGACGGCGTACCGGTACTGCCGACCGGTTGCGCTCACTTTCTGAATGCCGCTGGAACAAAACCGGAAAAGTT  
TTCCCGACTGATAATCAGATTGATTATTTGACGATGTCCGGTACCTGTATCGATATGGCGATGCCAGTCGTATTAT  
TCCGGCTGAATATCTGGGAAAAACAGGTTATGAATTACCGCGGAACTGGATGCCGACAAAGCATTATTAGCCCGCATTG  
AATCTATCCGCTACAAGCGGGTAAAGCAATGGGCTTAGGTGATGTCAGTAATATGGTTATCCCTAAACCTGTGCTTATT  
TCTCCAGCGCAGAAAGGCGGGCAATTAATGTGCGTTATTTATGCCGATTCTTGCCATCGCGCGTGGCGATAACCGG  
TGCTATTGCTATTTCCAGTAGTTGTGCAATTGGAAGGACCGTCACCCGACAAATCGTCCCTTCTGTAGGATACGGCAATA  
TCAATATTGAACACCCAGTGGTGGCTCGACGTTCAATTAAGTAATGAAGGTGAGGATGCCACGACGTTACGCGCATCT  
GTTATTCGACGACAGCAAAAATATTTCCGGTGAAGTTTATCTTCCCTGAAAAATTCGTTGTCAGGATAAGGACAATC

AATAAAGGACTTCTGTATGAGTCATACAGAAAGAACAGGATTTTAAATGAATAAGAAATCGTTATGGAAGCTAATTCTGA  
TATTAGCGATCCCATGTATTATTGGTTTTATGCCAGCTCCGGCAGGATTAAGCGAACTGGCGTGGGTGCTTTTTGGTATT  
TACCTGGCGGCCATTGTGGGGCTGGTTATCAAGCCTTCCCGAACCTGTCGTAATGCCGTTGCTGCCTCAAT  
GGTGGTGGTCCGTAACCTATCCGACGGTGCCTTTAAACCACCGCGTATTAAGCGGTTACTTTCAGGTACCACCTGGC  
TGTTGTTCTCGCGCTTACCTTAAGCGCCGATTTGTGACCACCGGTTAGGTAACGTATTGCCTATCTGCTGATTGGT  
AAAAATCGGTAACACCACGCTGGGTCTGGGTACGTTACGGTATTCCTCGATCTGGTACTGGCTCCGGCAACACCGTCTAA  
CACCGCGCTGCGGGCGGCATTGTGTTACCGATCATCAACAGCGTGGCGGTGGCTTTGGGGTCCGAACCGGAAAAAAGTC  
CGCGTGTGTCGGACATTACCTGATGATGTCATTTACATGGTCAACAAAACACCAGCTATATGTTCTTTACCGCAATG  
GCGGGGAACATTCTGGCGCTGAAAATGATCAACGACATTCTGCACCTGCAAATAGCTGGGGTGGATGGGCGCTGGCAGC  
CGGATTGCCGGGCATCATTATGCTGCTGGTCAACCCGCTGGTATTACACCATGTATCCACCAGAAATTAAGAAGTGG  
ATAACAAAACCATCGCTAAAGCGGGCCTTCCGAAC TAGGACCGATGAAAATCCGCGAAAAAATGCTGCTCGGTGCTTT  
GTGCTGGCGCTGCTGGGCTGGATTTTCAAGTCTCTGGGGTGGTGAATCCACCGTGGCAATCGTTGTTATGGCAAC  
CATGCTGCTGCTGGGTATCGTTACCTGGGAAGACGTGGTAAAAATAAAGCGGCTGGAATACCTTAATCTGGTACGGCG  
GTATTATCGGCTTAAGCTCCTTATTATCGAAAGTAAATTCTCGAATGGTTAGCTGAAGTCTTTAAAAATAACCTGGCA  
TTTGTAGTGCACGGTAACGTTGCTTTCTGTTATTATTTCTCAGCATTATCGTGCCTATTCTTCGCTTCCGGT  
TGCCTATATGCTTGTATGTTACCGGATTTGCCATGCTGGCGAACGTCCTCCGGCGCACCGTAAATGTTAACCGCGTGG  
CACTGTTGTTCTCAACTCCTATGGCGGCATGGTACTCACTATGGCGGCGCGCAGGTCCGGTCATCTTTGGCGTGGGT  
TATAACGATATTAATCCTGGTGGTGGTGGTGGTGGTGGTGGTGGTGGTGGTGGTGGTGGTGGTGGTGGTGGTGGTGGT  
GTGGTGGTGGTGGTGGTGGTGGTGGTGGTGGTGGTGGTGGTGGTGGTGGTGGTGGTGGTGGTGGTGGTGGTGGTGGT  
GTTGCTCACCCAGTCACTTACTTATGTAAGCTCTGGGATTCACTCGCTTGTGCTTCTGCAACTCGAATTATTT  
AGAGTATATCCATTTATTATCTTTCTGCGCACTTACGGTGGCAGATATCTGGAGCATTGATGATCAAGTTATCTGAA  
AAAGGCGTGTCTCGCCAGTAATAACGAAATAATTGCCGAAGAACATTTACCGCGGAAATTAAGAAAGAAAGCCAA  
AAAAGGCACTATTGCTGGTCTATTCTCTTCTCGCATAATACGTCGGAAATATGGATAAACTAAAATTAAGTTTGATT  
CATTAGCCTCTACGATATTACCTTTGTTGGTATTGTACAGACCCTAAAGCGTCCGGTATGGAACGTTTCCGCTGCCG  
TATGTGCTGACCAACTGCCATAACTCACTCTGCGCCGTCGGCGGCACTATTAACGGTGGTGGTGGTGGTGGTGGTGGT  
GGCGGCCAGCGTTATGGCGGATTTTTGTGCTCCGCATATTGGGTGATCCATCAATATATGCGTGAGATGATGGCAG  
GCGCGGCAAAATGATCCTCGGGTCCAGACAGCCACCCGTTACGGTGCATTAGGGACAATGCAGTCCGGTGGGGCGGC  
GGTGGTGGTGGTGGTGGTGGTGGTGGTGGTGGTGGTGGTGGTGGTGGTGGTGGTGGTGGTGGTGGTGGTGGTGGTGGT  
ACCTGCGCCGATGTTGGGGCCACAGGATGTTGGCGTGGCTATCATTGGCGCGGTGTTCAAAAACGGTTACGTCAAAAACA  
AAGTCATGGAGTTCGTTGGACCGGGCGTTAGCGCGCTCTACCGATTTCCGTAACAGCGTTGACGTGATGACCACTGAA  
ACGACCTGTTAAGTTCTGTCTGGCAAACCGATGAAGAAGTCCATAACTGGCTGGCGCTGCACGGTCCGGCCAGGATTA  
CTGCCAGCTTAACCTCAACCGATGGCGTACTACGATGGTGCATCAGCGTTGATTTAAGCGCCATCAAAACCAATGATTG  
CGCTGCCGTTCCACCCGAGCAACGTGTATGAAATCGACACACTGAACCAGAACCTGACCGACATTCTGCGTGAGATTGAA  
ATTGAGTCCGAACCGTGGCGCACGGTAAAGCCAACTCTCGTGGTGGTGGTGGTGGTGGTGGTGGTGGTGGTGGTGGTGGT  
GCAGGGGATTATCGCGGGCTGTTCTGGCGGTAACACGAAACGTCATCGCGGCGGCGAATGCACTGCGCGGTCAATCCT  
GTGGCAATGACACCTTCTGCTGGCAGTTTACCGTATCACAGCCGGTGTATGATGCTCGCAAAAAAGGTGGTGGTGA  
GCAGATTTGATTGGCGCAGCGCAATCATCAGAACCAGCTTCTGCGGCCATGCTTTGGCGGGCGGATACGCCAATCAA  
CAACGGTTTGGTATTGCCACACCACGCTAACTTCCGAACCGCAAGGCTTAAGCCAGCTAATGGGCGATGTCAG  
CGGTGGCGTTGATGGACGCTGTTCTATCGCTGCGACTGCGGCAACGGTGGCTATTTAACCTCTGCCAGCGAACTGGAT  
TGCTGGGACAACGTTGCCGAGTACGCTTCCGATGTAACGCGTATAAAAAACCGTGTATATCAGGGCTTTGTAAAGGGGC  
AACTCAGCAACCGCTGATTTACGGGCCGAACATTAAGACTGGCCGGAATTGGGTGCGCTGACTGACAATATCGTCTGA  
AAGTGTGCTCGAAGATCCTCGACGAAGTGACCACCACCGACGAACTGATTCCTTCCGGTGAACCTCTTCTTATCGTTCA  
AATCCGATTGGTCTGGCGGAGTTTACCCTGTCTCGCCGCGATCCCGGTTATGTTAGCAGAAGTAAAGCGACTGCTGAGCT  
GGAAAAATCAGCGTCTGGCGGGGAATGTCAGCGAGCTGACAGAGGTGTTTGGCGCATTAAGCAGATTGCTGGTCAAGGAGC  
ATATTGATCCGCTGCAAACCTGAAATGGCAGCATGGTCTATGCGGTGAAACCAGGCGATGGTCTGCGCGTGAACAGGGC  
GCGAGCTGCCAGCGTGTGATTGGCGGTCTGGCGAATATTGCCGAGGATACGCGACTAAACGCTATCGTTCTAACGTCAT  
CAACTGGGGGATGTTACCGTGCAAATGGCGGAAGTACCAACCTTTGAAGTGGGGGATTACATTTACATCCCTGGCATT  
AAGCGGCGCTGGATAATCCGGGTACGACGTTTAAAGTTATGTATCCATGAAGATGCGCCGGTAAACGGAAATTACGCTC  
TATATGAAAGTCTGACTGCTGAAGAGCGGAGATTATCAAGCGGGTAGTTTGATTAACCTCAATAAAAACCGTCAGAT  
GTAAAAAGCGCATGTGAATGTAGGTCGATTGGCCTTATTGTCGGATGCGATGCTTGGCATCTTATCCGACCTACG  
AATCGCATCGAATCTGTAGCCAGATAAGGCATTTTCGAGCATCCGGCACTTATTGTCGGATGCGATGCTTGGCATCT  
TATCCGACCTACAATCGCATCGAACCCTAGGCCGATAAGGCCTTACGCCGATCCGGCAATAGTTAATTGCTCTTA  
CTTCTTCCGCTCTGCAACCACTTTACTACCCACGCCGCGGTTATTGTATTCCACATGCGGTTGTAGTTAGTGTCTTCA  
GATTGCGCTGATTTCTGCTTATCATCTACGCTGCCGGTATTACCCGAAACGGACGATTAGAGATCACCGCATCGGCC  
CACGGTTTAGCCGTGTTAAACCTTCTGTGATGGCGTATCACGGATCACCACTGACCGTTGGTATTGGCATCAACATC  
CAGCGAGCGGCCAGTTGCGCCACACCATCACCGAAAGCATTGAAACGGCTGTTACGGCGAGGAAACCGTAGTAAATG

TGGACAGCGTAGCCGGTGC AAACACATACGCTTCTTGCTGAGTACGTGAGTTACCACGCGGAATTCGGTGTTATCGAAC  
ACCACTGCGCCGCGACCAGAAACGATATCCACATCCCCTTCAATGTAGCTGTTGGTCACCAGCGTACGCGGCTGACGATT  
CGTTTCAGACGGTCTGCACACCGCTGTTGGTGACAAAGAAGGTGTTCTGACGACCGAGAATGTTAACGTTGTTAATCT  
GTACCTGGTACCATCAGTACGCAGTGCACCGCCGGATGGTTACCTGCATCTACGCTATCGCCAGCGTGTTCGATG  
GTAGATTTTGCAGTTGCAGGCCATTGTTTTGTGACCAGAAGACCGCAGAGCAGAGAACACCGATACTGTGCTGCGTTT  
GCTCTGGCAGCTATCGTACATATACCAGCTGGTTTACCTGGCATATATTTGCCGCGCGGGTTGACGTCGTGACGCCAGT  
CGGCAGGGCTCATGCCACATCAAGGGAAAGCCCAATCTTACATCAATCGGTTTTTACCTGTACCGTACAGAGTAATT  
CCACCCGGAGCGGCAGGGACATATACCGTTCCCTGATACTACCAGGCATCACGGCAATATACTGGCGCTTGTGGTACG  
CTTGATAATTGCCGATCTACCGCCGCTGAATCGTGGTATGCGTTACACCTTGTAGTGCCTGCGGGCCGACAACAAAGT  
CAGGTTGCGCAGGCAGGGTAATCGGGAAAGATTCCACGCTGCAGCACCTGGTGTGAGGATGCAAAATAGTGTGAGCA  
TCGAAATCTGCGCTTCTTTGCCGACAGAATCGGGCAGAGAAGAGGTACCAGGCGCGGTTTGTATCAGAAGACGTTGATC  
GGGCGGGTGTGAGCTACAGCGGTGACGCTCACGCCAAAAGCCAAATGCCAGCGCCAGACGGGAAACTGAAATGTGTCA  
CAGGTTGCTCCGGCTATGAAATAGAAAAATGAATCCGTTGAAGCCTGCTTTTTATACTAACTTGTAGCGAAACGGGAA  
GTAAAAAGACAAAAGTTGTTTTAATACCTTAAAGTATACAGATGGCATTGCGCCATCGGCAGAGTATTAATAA  
ACATCGCAGTAATCGAGCGCTTGCAGAGAGTGAATAAAGTAAACCCGACCATCGCGCCGCTGGCACCTTTCATCG  
ACATCAATACGTTCTATATCCAGCGCTGAACGGTAAAAATGTAGCGTATGAGTTTTCGCTTTCGGCGGTGCGCCATC  
GTACCCGGTTTTACCAAAGTCGGTACGCGCTGCAAAACGCGCTTGGCATTGCTACCAGACCAGAGCCAAACCTTGGC  
GTAATACGCGGTATCAGCGGGTAAGTTAACTACCCAGTGCCACCAGCCGAGCGGTTGGCGCATCCGGGTCGTAG  
CAGGTGACAACAAAATTTTCTGTTCCCGCAGGAACATCATCCACGCCAGATGCGGTGAAATATTATCGCCATCGTAACC  
CATGCCGTTAAAGACATGACGATGCGGCAATTTATCGCCATCGCGCAGATCGTTACTGATGAGTTTATGAACCTCCTT  
TCTTGTGTTGCAGAAAGTGTAGCCAGAAACCTCACGCGGACTTCTGTTATTGGCAAAAAATGTTTCATCTGTACCGC  
GCGGTTAACCGCTGCGGTGACGCTGCAACTGTTGCGGGAGAATAATATAGGGCGGCATCAGGTAATCAGTTTGCAC  
AAGGCCGATCCAGACACCTGTTGACAAAGAATTTTGCAGCGCCGCATATTCACCGGATGAGTGGTTTGCACCAG  
CCAATGGCCCCAGTACGCGCATCGGCAACATTTGGCATCACGGGCGGGGCAAGTGTGCGCGAGCTGTACTTC  
AATATCCGCCACCTGTTGCTGCCAGTGCAGATTCGAGAATCGCAGGCTGGCGTTTGTGCGCGCAGGCCAGCGGAT  
TGCCATAAAAGTTGGCCATGCATAAAGCAACCGCTTACCCTTACTGATGGTTTCTGCAACCTCGCGCTGGTGTAGT  
GTGGCGAAAGGTCATTGTGCCCGCGTTAAGGCTTACCAGGCGACAAAATGTCCGGCGGATTTCTGCATGTTACA  
GGCAAACAGTTTCCCGTACGACCAAATCCAGTGGCGATCTCGTGGCAATCAGCAAGATACCTTCGCGATCGCATATTT  
TGCGGATTCGTTTTAACCATTCGGATGTACATGCGCATCCCGCTGCGCCCTGGACAATCGGCTCAATGATCACCGCC  
GCGATTTATGACGATGCGCCGCATCAGGCGGGCAAAAGCCACCATATCGCGCTCATCCATTGCCATCCATGCGGCT  
TTGCGGGGCGGGAGCAAACAGGTTTTCTGGCAGGTAGCCTTCCACAGACTGTGCATTGAGTTATCCGGATCGCACACCG  
ACATCGCGCAAAGGTATCGCCATGATAACCATTTGCGGAAGGTGAGAAAACGCTGGCGCGCTTGCCTTTGGCTTGCAG  
TACTGCAACGCCATTTTATCGCCACTTCCACCGCTACGGAACCGGAGTCCGCGAGAAAAACGCACTCCAGCGGTTGCGG  
CGTCATCGCCACCAGTTTGCGGCACAGCTCAATGGCTGGCGCATGGGTGATACCGCAAACATCACATGCGACATGGCAT  
CAATTTGCGACTTATCGCCGATTAAGTGCAGGTTGATTGTAGCCGTGGATCGCCGCCACCAGGACGACATACCGTCA  
ACCAGGCGTGTCCGTGACAAAAATCAGCTCGCAACCTTCCGGCTCACCACCGGATAAACCAGGAGGGGAGGTGAT  
GGATGTGTATGGGTGCCAGATATGGCGTTGGTCAAAGGCAAGATCGTCCGTTGCATAATCGACTTGTAAACCAAATGA  
AAAGATTTAGTGTACAAGTCTACACCGAATTAACAACAAAAACACGTTTTGGAGAAGCCCATGGCTCACCGCCACG  
CTGGACATTCGCAAGTACAGAATTTTGA AAAACCGTTGCTGGATCTGCTGTTTGAAGCGCAGCAGGTGCATGCC  
AGCATTTCGATCCTCGTCAAGTGCAGTGCAGTGCAGCTGCTGCTGATTAAGACCGGAGCTTGTCCGGAAGATTGCAATAC  
TGCCCGCAAAGCTCGCGCTACAAAACCGGCTGGAAGCCGAGCGTTGATGGAAGTTGAACAGGTGCTGGAGTCCGCGCG  
CAAAGCGAAAGCGGAGGATCGACGCGCTTCTGTATGGGCGCGGCTGGAAGAATCCCACGAACGCGATATGCCGTACC  
TGGAACAAATGGTGCAGGGGTAAAAGCGATGGGGCTGGAGGCGTGTATGACGCTGGGCACGTTGAGTGAATCTCAGGCG  
CAGCGCCTCGGAACCGCGGCTGATTACTACAACCAACCTGGACACCTCGCCGGAGTTTACGGCAATATCATCAC  
CACACGCACTTATCAGGAACGCTCGATACGCTGGA AAAAGTGCAGGATGCCGGATCAAAGTCTGTTCTGGCGGATTG  
TGGGCTTAGGCGAAACGGTAAAAGATCGCGCGGATTATTGCTGCAACTGGCAAACCTGCCGACGCGCCGAAAGCGTG  
CCAATCAACATGCTGGTGAAGGTGAAAGGCACGCGCTTCCGATAACGATGATGTCGATGCCTTTGATTTTATTGCGAC  
CATTGCGGTGCGCGGATCATGATGCCAACCTTACGTGCGCTTTCTGCCGACGCGAGCAGATGAACGAACAGACTC  
AGGCGATGTGCTTATGGCAGGCGCAAACCTCGATTTTCTACGTTGCAAACCTGCTGACCACGCCGAATCCGGAAGAAGAT  
AAAGACCTGCAACTGTTCCGCAAACCTGGGCTAAATCCGAGCAAACCTGCCGTGCTGGCAGGGGATAACGAACAACAGCA  
ACGCTTGAACAGGCGCTGATGACCCCGACACCGACGAATATTACAACGCGGCAGCATTATGAGCTGGCAGGAGAAAAAT  
CAACGCGCGCTCGATGCGCGGCTGCTGCCGATGCCCTGCTGCGCTTATCCGGTGGCGCAAGGAGCCGGACGCTGGC  
TGTTGGCGGATGATCGCCAGTATCTGAACTTTCCAGTAACGATTTTATAGTTTAAAGCCATCATCCGAAATTTATCCGT  
GCCTGGCAGCAGGGGGCGGAGCAATTTGGCATCGGTAGCGGGCTCCGGTACGTCAGCGGTTATAGCGTGGTGCATCA  
GGCACTGGAAGAAGAGCTGGCCGAGTGGCTTGGCTATTGCGGGCACTGCTGTTTATCTCTGGTTTCCGCGCTAATCAGG  
CAGTTATTGCCGCGATGATGGCGAAAGAGGACCGTATTGCTGCCGACCGCTTAGCCATGCCTCATTGCTGGAAGCTGCC

AGTTAAGCCCGTCGAGCTTCGCCGTTTTGCTCATAACGATGTCACCTCATTGGCGCGATTGCTTCCCTGTCC  
GGGGCAGCAAATGGTGGTGACAGAAGCGTGTTGATGATGACCGCGGATAGTGCCTACTGGCGGAAATCCAGCAGGTAA  
CGAACAGCACAATGGCTGGTTGATGGTCGATGATGCCACGGCACGGCGTTATCGGGGAGCAGGGGCGCGCAGCTGC  
TGGCTGCAAAAGGTAAAACAGAATTGCTGGTAGTACTTTTGGCAAAGGATTTGGCGTCAGCGGGGAGCGGTGCTTTG  
CTCCAGTACGTTGGCGGATTATCTGCTGCAATTCGCCCGCACCTTATCTACAGCACCAGTATGCCGCCGCTCAGGGC  
AGGCATTACGTGCGTCGCTGGCGGTCATTGCGAGTATGAGGGTATGACGCGCGGAAAAACTGGCGGCACTCATTACG  
CGTTTTCGTGCCGGAGTACAGGATTTGCCGTTTACGCTTGTGATTATGACGCGCCATCCAGCCATTGATTGTCGGTGA  
TAACAGCCGTGCGTTACAACCTGGCAGAAAAACTGCGTCAGCAAGGCTGCTGGGTACGCGGATTGCCCGCCAACCGTAC  
CCGCTGGTACTGCGGACTGCGCTAACGCTAACCGCTGCGCATGAAATGCAGGATATCGACCGTCTGCTGGAGGTGCTG  
CATGGCAACGGTTAATAAACAAGCCATTGCGAGCGCATTTGGTCGGGAGCGCCACACTATGAGCAACATGCAGATCTAC  
AGCGCCAGAGTGTGACGCTTACTGGCAATGCTTCCACAGCGTAAATACACCCACGACTGGACGCGGGTTGTGGACCT  
GGCTGGATGAGCCGCACTGGCGGAACTGACGCGCAGGTGACGGCCTTAGATCTCTCGCCGCAATGCTTGTTCAGGC  
ACGCCAGAAGGATGCCGAGACATTATCTGGCGGGAGATATCGAATCCCTGCCGTTAGCGACTGCGACGTTGATCTTG  
CATGGAGCAATCTCGCAGTGCAGTGGTGCAGTAAATTTACACGGCACTCCGCGAGCTGTATCGGGTGGTGCGCCAAA  
GGCGTGGTCCGCTTTACCACGCTGGTGCAGGGATCGTTACCCGAACTGCATCAGGCGTGGCAGGCGGTGACGAGCTCC  
GCATGCTAATCGCTTTTTTACCAGCTGAAATCGAACAGTCCGTAACGCGGTCATTATCAACATCATATTCAGCCCA  
TCACGCTGTGGTTTTGATGATGCGCTCAGTGCCATGCGTTTCGCTGAAAGGCATCGGTGCCACGCATCTTATGAAGGGCGC  
GACCCGCGAATATTAACGCTTTCGAGTTGCGAGGATTGCAACTGGCCTGGCCGCAACAGCAGGGGCGATATCTCTGAC  
GTATCATCTTTTTTTGGGAGTGATTGCTCGTGAGTAAACGTTATTTTGTACCGGAACGGATACCGAAGTGGGGAAA  
GTCGCCAGTTGTGCACTTTTACAAGCCGCAAAGGCAGCAGGCTACCGGACGCGAGGTTATAAACCGGTGCGCTCTGGCAG  
CGAAAAGACCCCGAAGGTTTACGCAATAGCGACGCGCTGGCGTTACAGCGCAACAGCAGCCTGCAGCTGGATTACGCAA  
CAGTAAATCCTTACACCTTCGAGAACCCACTTCGCCGACATCATCAGCGCGCAAGAGGGCAGACCGATAGAATCATTG  
GTAATGAGCGCCGATTACGCGCGCTTGAACAACAGGCTGACTGGGTGTTAGTGAAGGTGCTGGCGGCTGGTTTACGCC  
GCTTTCTGACACTTTCACTTTTGCAGATTGGGTAACACAGGAACAACTGCCGTTGATACTGGTAGTTGGTGTGAAACTCG  
GCTGTATTAATCAGCGATGTTGACTGCACAGGTAACAACACGCGGACTGACTCTGGCGGTTGGTGGCGAACGAT  
GTTACGCCCTCCGGGAAAACGTCACGCTGAATATATGACCACGCTACCCGCATGATTCCCGCGCCGCTGCTGGGAGAGAT  
CCCCTGGCTTGAGAAAATCCAGAAAATCGCGCAACCGAAAGTACATAAACCTTGCTTGTGTAGCCATTCTGTATTT  
GGTAAATTGGCAGCGAGATCGCGTCTTCGATTGACTGCAATTTAACCAATTAATTTCTAAAATAATCACGAAAAAAT  
TACTTCCGCTCATGCGCGAATGTGGGAATTGCCAGGCGCGGGGATAGGGGCTGGAGACAGTTATCCACTATCC  
TGTGGATAACCATGTGATTAGAGTTAGAAAACACGAGGCAAGCGAGAGAATACGCGGCTTGACGCGAATTGGCGTTAA  
AGACGGCTCAAAGAAATATCTTTATTTTAACTGTTAGATAAATGCAATGGCAGTCACTGAACAGGCATCTCTTGCC  
ATAAACTGTCATCACTCATCTTGACAAATGTTAAAAAAGCCGTTGCTTTGGGGATAACCCGGTAAGGCCGAGTTTTAT  
CTCGCCACAGAGTAAATTTGCTCATGATTGACAGCGGAGTTTACGCTGTATCAGAAATATTATGGTGTGAACTGTTTT  
TTTATCCAGTAAATTTGTTGGCATAATTAAGTACGACGAGTAAATACATACCTGCCCGCCAACTCCTTCAGGTAGC  
GACTCATGAGTAAACCGTTCAAATGAATTCGCTTTTAACTTCTGGCGATCAGCCAGAGGCGATTGACGCTCTCGAA  
GAGGGGCTGGAAGATGGCCTGGCGCACCAGACGTTACTTGGCGTACTGGCTCAGGGAAAACCTTACCATTGCCAATGT  
CATTGCTGACCTTCAGCGCCAAACCATGGTACTTGCGCCAACAAAACGCTGGCGGCCAGCTGTATGGCGAAATGAAAG  
AGTTCTTCCCGAAAACGCGGTGGAATATTTGTTTTCTACTACGACTACTATCAGCCGGAAGCCTATGTACCGAGTTCC  
GACACTTTTATTGAGAAAGATGCCTCGGTTAACCAACATTTAGCAGATGCGTTTTGTCCGCCACCAAGCGATGTGGA  
GCGCGTGTATGTTGTTGGTGGCGTGTGTTCCGCGATTTATGGTCTGGCGGATCCTGATTTATATCTCAAGATGATG  
TCCATCTCAGGTCGGTATGATTATCGATCAGCGCGGATTCTGGCCGACTGGCGGAGCTGCAATACGCTCGTAATGAT  
CAAGCATTCCAGCGTGGTACTTTCCGCGTTCGTGGCGAGGTGATAGATATCTTCCCGCAGAAATCGGATGACATTGCACT  
TCGCGTGGAACTGTTTACGAGGAAGTGAACGATTGTCGTTATTTGACCCGCTGACCGGGCAGATTGTTTCCACTATTC  
CACGTTTTTACCATCTACCCGAAAACGCACTACGTCACACCGCGGAGCGCATCGTACAGGGGATGGAGGAGATCAAAGAA  
GAGCTGGCCGCGAGACGCAAAGTGTGTTGGAACAACAACCTGCTGGAAGAGCAGCGGCTGACCCAGCGTACCCAGTT  
TGATCTGGAGATGATGAACGAGCTGGGCTACTGTTCCGGGATTGAAAATACTCGCGCTTCTCTCCGGTCTGGACCGG  
GTGAGCCACCGCCGACGCTGTTTATTACCTGCCTGCCGATGGGCTGCTGGTCTCGATGAATCTCACGTCACCATTTCCA  
CAAATTTGGCGCATGTATCGCGGTGACCGGGCGCTAAAGAGACTGGTGGAGTACGGCTTCCGCTGCCATCAGCGCT  
GGATAACCGTCCGCTTAAGTTTGAAGAGTTTGAAGCATTAGCGCCGAAACCATCTATGTTTCCGCGACCGCGGTAATT  
ACGAGCTGGAATAATCCGGCGGATGTGGTGGATCAGGTGGTGCCTCAACCGGATTGCTTGACCCGATTATCGAAGTG  
CGCCGGTGGCGACACAGGTTGATGATCTTCTTCCGAGATTCTCAGCGAGCGCAATTAACGAACGCTACTGGTAC  
CACACTGACCAAGCGGATGGCGGAAGATCTTACCGAATATCTCGAAGAATGCGGAGCGGTCGTTATCTTCACTCAG  
ATATCGACACCGTCAACGATGAGGATTATCCGCGACTTGGCTGGGTGAGTTTCGACGCTGCTGGTAGGATCACTTA  
CTGCGCGAAGTCTGGATATGCCGGAAGTGTGCTGGTGGCGATCCTCGACGCTGACAAAGAGGCTTCTGCGTTCCGA  
ACGTTCTGTTGATCCAGACATTGGTGTGCGGCACGTAACGTTAACGGTAAAGCGATTCTTACGCGGATAAGATCACCC  
CATCAATGGCGAAAGCGATTGGCGAAACCGAACGTCGCCGTGAGAAAACAGCAGAAGTACAACGAGGAACACGGAATTACG

CCGCAAGGCTTGAACAAGAAAGTGGTCGATATCCTGGCGCTGGGGCAGAACATTGCCAAAACCAAAGCGAAGGGCAGAGG  
AAAATCGCGCCCGATTGTTGAGCCGGATAATGTGCCGATGGATATGTCGCCTAAAGCGTTGCAGCAGAAAATCCATGAGC  
TGGAAGGGTTGATGATGCAACACGCGCAGAATCTGGAGTTCGAAGAAGCGGGCAAATTCGTGACCAGTTGCATCAGCTG  
CGTGAGCTGTTTTATCGCGCATCGTAACAGGATAGCGAAGAAGACTGATGACAAACGGAAAACAGCCTGATGCGCTACGC  
TTATCAGGCCTACATTTCTCCGCAATATATTGAATTTGCGCGGTTTGTAGGCCGGATAAGCGTTACACGCCGATCCGG  
CATAAAACAACGCGCACTTTGTCTTCAATAGGAAGCCGGAATTTTCCTTCGGATTTCCGTTAACCTAAAGCCTGTAACGCC  
TTTTCCAGCGGTTATGTAACAACCTGGCGGTCATGACGATACGGAATATCGCTGGCCTCCAGTACCTCCTGGATCAAAAT  
CCGCTCTTTCACCGCCGAGACATCCACTTTTGGCCCGACGATGACCGCATCAATGACCTTTTTACCAACATACTGCTCCA  
TAATTGCCAGCTTGCTTTCCAGCTTCAAATAGCCGAGGTAACCTCAACTCACGCCCCAGATTGCCGATATAAACCATC  
GGCGCTGGCGTGCGGCGTAATGCCTGGGCGATTTCTTCAGCAGCAGAATTGGCATCAGGCTGGTATAAAAACTGCCAGG  
CCCAATAATGATGAGATCCGCTTATTGATAGCGTGAACCGCCTCACGCGTTGCGGGTACATTAGGCGTTAAACAATACT  
CTTGAATCGGCGTAGTTAACTGGTCGATATTGACCTCGCCGTAACCTTATGCCCTGATCGTCAATCGCCATCAGATCA  
ACAGGATGCTGACATTGGAATCAAATGCGTATCCACTTTGAGCAGATTACGAATTAATTGATGGTTCCAGAGGCCG  
CACGCTAAGGTGATCCAGCGCTTTAACATCAAGTTCCGAGATTATGACCGGAAAGTTCCGATTGCCACCAAAACGGT  
ATTCAAACATCGCGGAGCGACGCTCGGTTCCGTTATCAGCTGGTTGAGGCAGTTGCGCATATCGCCAGGCAACCGC  
CCTTCTGAACGCGGAATACGCCCGTCCAGTCCATGCCCTCCGCGGAGAGCAACGACGATCAAGATCAGCCAGCGTACGAT  
CGAAAGTGATGAGAGAACGCGTCCAGTCCATGCCCTCCGCGGAGAGCAACGACGATCAAGATCAGCCAGCGTACGAT  
TGCGCATATAGTTTCTGGAGTCAGATTATCCGCGCTACAGTAGCGCAAATTCGCGGGAACAGCAATTAACCTGCCAAT  
ATTGAGGATACAAAATTTTTCTTCTACCTCTAAAGGACGATGCACGCTATGCCTCCCTGATGATGATATCAAAGTAAA  
ACCGCCATTTTCCCTTATTCTGTAGCGAAATAGCACGATCATGACGCTATATACATGATTACATAGCGAAAGTGTTGATG  
GTAAAAATCTCATTTACAGCTAGTATCGGCATAACCACTAAACTCTAGCCTCTGCACCTGGGTCAACTGATACGGTG  
CTTTGGCCGTGACAATGCTCGTAAAGATTGCCACCAGGGCGAAGGAAGAAATGACTTCGCCTCCCGTATCTGAAAGGTG  
TACATGGCTTCAACTGACTGATGCATTTGCGCGTAAAGTTTTACTACTTGCCTGTCGATTACCGATGTGTGTAACCT  
TCGTTGCACCTACTGCCTGCCGGATGGCTACAAACCAGCGGCGTACCAATAAAGGCTTTCTTACCGTCGATGAAATTC  
GCCGGGTTACGCGCGCTTCCGAGACTGGGCACCGAAAAGTGGCCTGACAGGAGGAGACCGTCTTACGCGCGGAC  
TTTACCGATATCATCGCCGCTGTGCGGAAAACGACGCTATCCGCCAGATTGCGGTCAACAACATGGTTACCGTCTGGA  
ACGCGATGTGGCGAGCTGGCGGATGGCGGACTTACTGGCATTAACTCAGTGTGACAGTCTGGACGCCCGCCAGTTTC  
ACGCTATTACCGGCAGGATAAATTCAACCAGGTATGGCAGGGATTGATGCTGCATTTGAGGCCGTTTTGAGAAGGTC  
AAAGTCAATACCGTGCTGATGCGTGATGTTAATCATACCAGCTCGACACCTTCTGAACTGGATCCAGCATCGCCCTAT  
CCAGCTGCGTTTCATCGAACTGATGGAACCGGGCAGGGCAGCGAGCTTCCGTAAGCATCACATCTCTGGTCAGGTTT  
TGCGTGACGAGCTACTGCGTGCAGGCTGGATCCACCAATTACGTCAACGACGCGACGGTCCCAGCGCAAGTCTTTGCCAT  
CCAGATTACGCCGGAGAGATTGGCCTTATCATGCCGTATGAAAAGACTTCTGCGCCACTTGAACCGCCTGCGCGTTTC  
CTCCATTGGTAAACTCCATCTCTGCCTGTTTTGGTGAAGGCGGCGTTAACCTGCGCGATCTGCTGGAAGACGATACCCAGC  
AACAGGCGCTGGAAGCGCGTATTTACGCGGCGTGCAGGAGAAGAAACAGACCCATTTCTGCATCAAAACAACCCGGT  
ATTACGCAAACTTATCGTACATTGGCGGCTAAAACGTCAAAGGAGAGATCAGATGAGTCAGGTAAGCACTGAATTTAT  
CCCGACCGTATTGCTATTCTTACGGTTTCTAATCGTCGCGGTGAAGAAGACGATACCTCCGGTCACTATCTGCGCGATT  
CGGCGCAAGAAGCGGGCCATCACGTTGTCGATAAAGCCATTGTGAAAGAAAACCGCTACGCTATTGCGGCTCAGGTATCT  
GCGTGGATCGCCAGCGACGATGTACAAGTGGTATTGATTACGGTGGTACTGGCCTGACGGAAGGTGATCAGGCTCCCGA  
AGCATTGCTGCCGTTGTTGACCGTGAAGTTGAAGTTTTGGTGAAGTGTCCGGATGTTGTCGTTTTGAAGAGATTGGCA  
CTTCCACGTTGCAATCTGTCGCGTAGCGGGCTGCCAACAAAACCGTATTTTCGCCATGCCGGGTTGACCAAAAGCG  
TGCCGTACCGCATGGGAAAATATCATCGCGCCGAGCTGGATGCCCGTACCGTCCGTTGTAATTTCCATCCACATTTGAA  
GAAATAAGTATGTCGCAACTGACCCATATCAACGCCGCTGGCGAAGCGCACATGGTGGATGTCCTCCGCAAAAGCGGAAAC  
CGTGCGTGAAGCGCGGGCGAAGCCTTTGTCACCATGCGCAGCGAGACGCTGGCGATGATTATTGATGGTGCACCACCA  
AAGGCGACGATTTTGCCTGCGCGTATTGCCGATTACAGGCGGCAAAACGCACCTGGGATCTGATCCCGCTCTGTGAT  
CCGCTGATGCTCAGCAAAGTTGAAGTCAATTTACAGCCGAGCCGGAGCACAATCGGGTGCATAGAAAACCTTATGCCG  
CCTGACCGGAAAACCGGTGTCGAAATGGAAGCATTAAACCGCGCCTCCGTTGGCGGCGCTGACCATTTATGACATGTGCA  
AAGCGGTGCAAAAAGATATGGTGAATGGTCCGGTACGTTTCTGGCGAAGAGCGGCGGCAAGTCCGGTGAATTTAAGGTG  
GAAGCGGATGATTAAGTTCTTTTTTTCGCCAGGTGCGCGAGTTGGTGGGAACAGATGCAACCGAAGTGGCTGCGGATT  
TCCCAACTGTTGAAGCGTTACGCCAGCACATGGCTGCGCAGAGCGATCGCTGGGCGCTGGCGCTGGAAGATGGCAAATTA  
CTGGCTGCCGTAACCGACGCTGGTGAATTTGACCATCCGCTGACTGACGGCGACGAAGTAGCTTTTCTCCGCGCGGT  
AACCGGAGGTTAAGATGGCAGAAAACAAAATTTGTTGTTGGTCCGAGCCGTTACGCGTAGGAGAAGAGTACCCGTGGCTG  
GCGGAGCGTGACGAAGACGTTGCGGTAGTCACCTTTACTGGTAAGGTGCGCAACCATAACCTGGGCGACAGCGTCAACGC  
ATTAACCTCGAACACTATCCGGGGTACTGAAAAGCACTGGCAGAAATTTGATGAAGCGCGTAACCGCTGGCCGC  
TGGGGCGCGTCACTGTGATTCACCGCATCGGGGAATTTATGGCCGGGCGATGAAATCGTTTTTGTGCGGTGTCACCAAGTGG  
CATCGCAGCAGTGCCTTTGAAGCCGGGAGTTTATTATGGATTATCTCAAACCCGCGCACCGTTCTGGAAGCGCGAAGC  
CACGCCGGAAGGCGACCGCTGGGTTGAAGCTCGGGAGAGCGATCAGCAGGCGGCAAAACGCTGGTAGTTTTTTGTTAGCC

GGATAAGGCACCGCTGCGTCCGGCAATTCACCGCTCAGTACATACGTTTACGCTGCGTCGATGCACAGCCTCATCATT  
TGAGTATCCTTAAGATATTCCTTATATCTTCAGGAGATCGTCATGGACAGATCCCACGTTCTGATTCAATCGTACAAC  
CCCGGGCTGGCTTGCAAACCTTATATGGCTCAAGTCTATGGCTGGATGACCGTTGGCTTGTGCTGACCGCATTGTTGCC  
TGGTATGCGGCTAATCCCGGGCCGTGATGGAGCTGTTGTTCACTAACCGTGTCTTTTAAATCGGTCTGATCATCGCGCA  
ATTAGCATTGTTATTGTGTTATCAGCGATGATTCAAAAGCTGAGCGCAGGTGTAACGACGATGCTCTTTATGCTTTATT  
CGGCGTGACGGGTCTTACGCTTCCAGTATATTATTGTCTATAACCGCTGCTTCTATCGCCAGTACTTTTCGTCGTTACT  
GCCGGGATGTTCCGGCGCAATGAGCCTGTACGGTTACACCACGAAGCGCGATTTAAGTGGCTTTGGCAATATGCTGTTTAT  
GGCGTTAATCGGCATTGTGCTGGCATCGCTGGTCAACTTCTGTTGAAAAGCGAAGCATTGATGTGGGCGATTACCTACA  
TCGGCGTATTGCTTTGTCCGATTGACGGCGTATGACACGCAGAACTGAAAAATATGGGTGAGCAGATTGATACCCGC  
GACACGTGCAACCTGCGCAATATTCCATTCTTGGCGGTTAACCTTGTATCTGGACTTCAACCTGTTCTGATGTT  
GTTGCGGATCTTCGGCAACCGCGGTTAATTCTTTTTACCATCACTATCCCGGCCATGTGTCGGGATTTTTTTCTACTA  
AAAAAGCACTTAAACAAGTACCAGGTATAAAATATGCCTTATGGACGAGCGGAAGCGTTTTCTGTATCCATAAATGCAA  
AGTATTTTGTATGCGTGGTTTTAAATTTATTGATGGTGAATATTAATATTTTTCTAAGGATAACTAAAAGAAATGGAATC  
ATACTCGAAAAACAGCAATAAATTAGATTTTCAGCACGAGGCCAGGATATTAACCGGTATATGGCTCATTACCGCTTTAG  
TTTTGGTGGCAACCGCAGGACTAGCCTGGGAGCTAAGTATATCGAAATTACGGCAACCAATATGATTCACCACCAATG  
TATGTCGCCATAGGGTTATTACTTTGATGTATGTCGGCTTAAGTAAAGGATATCAACAAGATAAATGCCCGCATCGCGG  
CGTAATATATCTGTTTTACTCTCTTTGGTGGCGATTGTCGTTGCAAGTTTAGTTCTGTATATGCCATTATCATCGTGT  
TCAGCACTGCGGGCGCGATGTTTTAATCAGTATGCTGGCCGTTTTATTATTTAATGTTGATCCTGGTTCTCACCGTTTT  
ATCATTATGATGACGTTGACAGGGTTGGCCCTGGAATCATCGTGAATGCGGCATTAATGAGTGAACGGCCATTGAT  
AATAAGTTGCTTAATGATTGTGTTATGGTCAGGCATTATCTCGCATGGACGAAATAAGCTCCTGAATTGGCGGGAAAT  
GCCATAGTGAAGAGTTGTGGAGTCCGGTTCGTTGCGCTTTTACAGGTGCATTAACACTCTATTACTATTTTATCGGCTTC  
TTTGGGATACTTGCCCGATAGCTATAACGCTTGTCTGGCAAAGGCATACGCGTTTTTTTTTATTAGCCGTAATGCACAT  
ACTAAAGAACTTAACTAACTTACATCGCCGCTTCATTTTTCGCCGTAAGTCTTCTCGCTGGCTTTCCAGCAACAGGT  
AACAGATCAGCGCCAGCAGCAGTGGGATAAAGTAATACAGCACACGGTAAGCGAGTAGGGCGGCGATAATTGTACCTTTG  
GAGGTATGCTCCCGAGCAGTAGTGGGATAAACCAGCTTCCAGCACACCGATCCCGCCGGAATATGCACGATGACGCC  
AGCAATACTACTAACCAGTAACACGCCAGTACAAAGAAATAGTTCAGCTTTGACCAAGTAACAGCCAGATAATCGCCC  
CCATTACCATCAGTTAACGCTGGAATCAGCATCTGAGCGAGGGCGAATTTCCATGAAGGCAGCACCAGCTTTTGGCCT  
TTGATGGTCATATGGCGGTGCTTCGCGAAAGCGAAAACCACAAATAAACCCGCGATAATCATCAGTAAGCCAATGCCGAG  
AATACGCAGCGTAGTTTGATCGACATACCAGTGATCCGGCAACTCCACCACGCTGCGGTAAGATAATCCCTGCCAGTA  
AAATGTAGCCAGCCAGTTGGTGGTAATCTGAGCGAGAAAATCCGCGTAATAGTGCTACCGGGCAACCCAGACGAGAG  
TACAAAAGATAGCGCATACCAATGCCGCCAGCCAGGTAAGTGGTGAAGGCGTAGCAGATAAACGACACCAG  
CATCACCTGGCGCTTCGCCAGTTTGTGACCGCAGTAAAAGCGGGCGAGCAGGTGATAGCAGCCGTAATCAGATAGCTGA  
CGACCACCAGCCCAGCCGACTAAGCAGCGCAACGCGATTGTAGTCGCGGATGACCTTCCAGACCTTCTCCAGTCCACT  
TTTTTGGCGTAGACCACCAGCAACACAATCACCGCGATAAAAAACAGCCAGGTGAGGATCTTCTTTGCTAAGCGCCAGCG  
CGGGTGTGATTTACTCATCAGGGTTTTACCCCGTGTTCAGTTTTACCCGATCCTGCGTTTTCAATTGTCGGTTGTGC  
GGGCGGATCAACCTGCGCCAGAGCTGGCGTGTGTCCGGAAGCCAGCCAACCAGCGCCGGGAAGTGGCGTAAAAAGTGG  
ACGCCAGCAGCTTTTGGTCAAGTTCACCCAGGTGCGTTTGGGCGAGCATGGTTTCACTCCACTGCTGACAATCTGCGGCA  
ATAATGCCGTTTCAAGTATCGCGCAGCGTCTGGTAAAATGACGATCGTGGATGATGACATTTGCTTCGAGATTGATGA  
CAAACCTGAGCGGATCGAGATTACTGGACCCTACTGTCCGCGAGTATCGTCCATCAATGCCACTTTGCCGTGGAGCGGGC  
GGCGGCGTACTCAAAAACCTGAACCCCGCTTTAACCCAGATAGTTATACAGCAAGCGCGCACCAGCTTGAACAATCGGC  
ATATCCGGTTCCGCTGAATGATCAGTTTGATCCGACCCCGCGCGTGGCGTTTTACGCAAGGCGTGTAAAAATCGATA  
GCCGGGGAAGAAGTAGGCGTTGGCGATAATCACTTCCCGCGCGCTGAGTGAGCATTTCAAATAATGGCGTTCAATAT  
CATCGCGATGTTCTTCGTTATCGCGCCAGACCAGCAATACCTGCGCTTCTCCCGGCTGGCGTTTCTTCCGCTTTGTGA  
TGACGTCGCCACCAGCGTGTGCGCGCTCTGTCCAGGCGAGTTTTCCAGCTCAAACCTGGAGAATATCTTCGACAATCGG  
CCCTTCAAGGCGTACCAGGTAATCCTGTTTAGCCTCTGGACCGTAGCTGGACATATGCTCGGCGGAGTAATTCAGCCCGC  
CAATAAAGGCTATACGCGCGTGCATCACCACAATTTTGGGATGCATCCGGCGAAACACATTGGTGGCGATACAAAAAGG  
CGAGGGCGGGGATCGTAGCGGAACACTACGCCAGCTGCCGTCAGTTCATTGACAACTCATCGCTGAGATCCGGCGA  
ACCGTAGCCATCCAGCAAGACTTCCGCTTAAACCCCGCTTGGCGTGTGCCAGTAGTCCCGCATGCAGTTGTTTGGCGA  
CGTCATCTCAAACAGATAAACGTTTCAAGAATGATGCGTCTTGTGCTCGCAATCGCCTTAAACACCGCGGGATAA  
TATTGCTCGCGTTTTCCAGCAACTGGATCTTATTGCTTTCGCGCAGCTACATTTATAAATGAATCTCCGCACTTAAA  
GGGCGATGATCAGAAAGGTGTCGCCATGTCCGACGCGCAACGCGTTGGCGCGCTGGCGTGGCATTTTTTGACGTAGAT  
CCTGTCCAGTCGTAGTAGAGAAATGACCCGGAACGTCGCGCGCGGCGTCCGTGGGCGCGGGTAAAAATCTCATCCA  
GTCCGGCTGCACTTTTAAACGGATGATTAGCTTTTTGCGCCAGTCAATTGAAATCACCCGCCACCAATACCGGTTCCGCG  
TCCGGTAGCTCATTACCCATTCGGCGAGCATCGAAAGCTGCGCCTGACGGTGGCGCTCACGCGAGCCAGATGTACGCA  
CATCACATGAATCGCTTTTTCCGGTCATCGGCGGCACAATGCGGCGAGTAGAGCACGCGCGCTTTTCCGCAACATCGACCG  
AACATCGCGATTCTCATAATGTTCAATGGGATAACGCGACAGTACGGCGTTGCCGTGATGCCCTCCGGGTATACGGCA



TTGCGACCGTAGGCAAATCGCTCCACATAGTGTCGGCGAGAACTCGTAGTGCGAGGTATCGGGCCAGTTTTCCACATG  
CAGCGGATGAACTTCGTGCGCGCCCATCACTTCCTGCAGGCAAACAATATCGGCCTGACGGTACGCACGGCGTCGCGAA  
GTTCCGGCAAATGAAGCGTCGGTTAAACGCGGTAAAGCCTTTGTGAATATTGATGGTGAGCACCTTGAACGAAAATTGT  
TGTGTTTATCGGGCATAATTTTCTGTCTTTGCCTTTATCTCATTGAAATAGTGTAGTCGGCGTCACAAAAAGGTGGC  
GTCTTACGGAATTTTCCGTAAGTTCCGGTACTCTGAGTAAGTAGAGATAAATTTTCAGGAGAGAAGCCATGAAGTGGCA  
ACAACGTGTTCTGTGTCGCAACGGGTCTAAGTTGCTGGCAGATTATGTTGCATTTACTGGTAGTGGCGCTGCTGGTGGTGG  
GCTGGATGAGTAAGACTCTGGTTCACGTGCGCGTGGGATTATGCGCACTGTATTGTGTCACGGTAGTGATGATGCTGGTGG  
TTTCAGCGCCACCCGAGCAACGCTGGCGTGAGGTGGCAGACGTGCTGGAAGAGCTGACCACGACCTGGTATTTTGGCGC  
AGCGCTGATTGTGCTGTGGCTGTTGTCCCGCTTCTGGAAAACAATTTTTGCTGGCAATTGCAGGGCTGGCAATCCTTG  
CCGGCCCGGGTAGTGTCTTTGCTGGCGAAAGATAAGAAGTTACATCACCTTACGTCTAAACATCGCGTACGCCGCTGA  
CCCTGTCTGTGGCGTTATCACCAGTAGCGGCCACAACTATTCCACACAATATCCAGACTCGCATCCTTCAAATAAATCT  
GCTTGGTAATGTCGTAAGTGGCGAATAGGGTTAATCCACGTGAGTGGTGGCAGCCATACCGGCATGTTTTCCACCGGA  
GAAACGTAACCGAAAGGAGAATGGCGGGCATATAAAGACAAACACGCCGATAAACGCCTGCTGTTGTGTTGAACAGAG  
TGATGAAATCAACAGACCGAATCCACCAGCGATAAACATAAATCACCATCGTAAAGTAGAACAGCGCCAGCGATCCGG  
CGAAGGGGATTTGATACGCCAGATAACCAATCGCCAGCACAATGGTGGCCTGGAAGTGGCGACAATTAACGCCGGTACG  
GCTTTGCCGATGAAGATCTGCCAGTGGTGAGCGGGCAAACAGTAGCTGATCGAGCGTACCTTGTTCACGTTCCGGCGC  
GACGGAAAGTGAAGTGACGATCATTACGCCGATAGTGGTGATCATGGCGATCAGTGACGGCACCAAAACCATTTGTAGT  
CGAGATTCGGTTATAACAGTTGCGTACCACCAGCTCGCTGTTGTTAGGTTTTCGGTTTTCTTCCAGCAGCTCCTGCTGA  
TAATTTTTGACGATCTGTTGCAAGTAGTTGGCGCAATTTGCGCACTGTTGGAGTTACGCCGTCGAGGATCAACTGCAA  
AGGCGCGGTCTGGAAGGTATCCAGTTTGCAGGAGAAAGTACGCCGGAAACGCACCAGTAGTAACGCCTTTTGTGTGTCGA  
TGTTTGGGCGGATCTCCTGTGGCTTTTCCAGCAGCAGCATGAGTAAAGGCGCTGGCGGGGCAAACGTTGGGTGAGC  
TCCACCGAATGCTCGCGTTATCTTCATCGTAGATGGCGATGGTGGCGTTAGTCACTTCCAGCGTGGCGGCAACGGGAA  
CAGGATCACCTGAATTAGCAGCGGTAATAAGCAATCGCGCGGTTTGGCGTTCGCGCAGCAACGACTGCAACTCTTTCG  
GGATTAACGTCATAAGCGATGAAACATGCTCTTCTCCCTAATCCAGCCGACGTTTGGTTTTAGCCACGTCAGGCCGAT  
AAACATCACCGCCGAAGCGATCAAAAACAGCACGTTTACCACCAGCACCCTGGAATATTTCCGGCGAGGAACAGGCTTT  
GCAGGGTGTGACGAAATAACGAGCGGGAATAATGTACGTACCAGCGCGGATCACCAGCGGATCAGTGCATCTGAAAA  
ATAAAGCCGAAAGCATAATCGACGGCAGAAAAGCGCGTTCAGGGCGACCTGAGCGGCATTGAACTGGTTGCGGGTAAT  
CGTGAAATCAGCAGCCCATCCCCAGGGTACTGAGTAAAAACAGGCTGGAGATAAAAAACAGAATCAGCAGCGACCCGC  
GATACGGCACGCCGAGAATAAACACTGACACCAGCATACAGCAACATCGCCAGCATCCCGAGAAAGTAAAGGGATC  
AGCTTACACAGCAGCAGTTCCTGCGGGTAATCTCCGTAGAGAGCAGAGCCTCCATGGTGGCGGTTCCCATTTCCGGC  
CACCACCAGCGAGGTGAGAAATCGCGCCGATGACCGTCATGATAATGGTACCAGCACCGGGGATAATGAAGTGTGGCTAA  
TCGCCCGCGGGTTAAACCAGTAGCGGGTTTGTACATCAATAAGCGGTTCAAAGTCTGCCCGTTGTCTCCGCTCGCTGC  
ATTTGCCAGATCTGCCAGATCCCTTGCACATACCCCTGTACAAAGTTAGCGGTATTCGGCTCACTGCCGTCGGTGATCAC  
CTGAATCGGTGCGGTGGCGTTGGCGCGCTCCATCTGTTCCGAAAATCCACCAGGAAATACCACCAGACCGCAATTTTCC  
CCGCTGCATTTTGGCGATCAGTTCCTGACGTTATCGCTGATGGTGGCGTCGATGTAGGGCGAACCGGTGATGGTGGTGG  
GTGAAATCCAGCGCGCTTCCGTACGCTGTTCCAGTAAATCCCGACCCGACGTTGCTGGAGTCGAGGTTAATGCCGTA  
ACAAAAATAAACAGCAGTAGCAGCGGGATCACTACCAGCAATCAGCCAGCTACTCGGATCGCGAACGATCTGCCGCTCT  
CTTTAACGCACAGCGCCGTACGCGACGCCAGGACAGGATCGGGTTACTCATTGCTATGCTCCTTATCCAGTCTGGAT  
CAACTGAATAAAGGCTTGCATGGTGGGATCGGGTTGCTCATCGTTAGCCGACTGTGCTTCAAATCGTCCGGCTGC  
CGTGGCGATTAATTTCCCGGTTACACCAGGCCGATGCGGTCGCAATATTCCGCTTATCCATAAAGTGGTGGTGGTACC  
ATCACCGTGACGCCCTTCTTACCATGCTGTTGATGTGACGCCAAAATTACGGCGGGTGAGGGGGTCAACGCCGGAAGT  
CGGTTCTGTCGAGAAACAGAATGTCCGGTTCATGCATCAGCGAACAGGCCAGCGCCAGCCGCTGTTTAAAACTAATGGCA  
GTTTCATCGGTGGCGTGGGAGGCGATACTTTTCCAGGCCGAACGCCTCGCTCATGCGGGAGATTTTTTCTGTTCTGCGCCGA  
CCGCGTAAGCCATACACACCAGAGAAAAGCGTAAATTTCTGTTGACCGTCAGGTTACCGTAGAGCGAAAATTTTTGCGC  
CATATAGCCGAGATGCTGGCGCGCTTTACCAGCACTCTTTTCCAGATCCATCCCGAGCACCAGCGCTGGCCGGAAGTCG  
GCACCAGCAAACCGCACATCATCTTAAAGGTGGTGCATTTACCAGCGCGCTTTGGCCCCAGCAAACAAAATCTCCCCA  
CGTTTAAACGGCAAAGTTGACGTGATCGGTGGCGGCAAATCCCCAAATTTCTGGTCAAGTCTTTTCTGCTTCCGATCACCGT  
CTCGCCGGGTGTGCTTCTACCGTATGTAATATTGCGCCAGCGCGATTCCGAGGTTCCGGCACCGCCAGCAAATCAA  
TAAACGCATCTTCAAACCGCGGTAGTTTCTGTTGATGTTGATTTCCGGCATCCCGTGGCATGGCGAATATCGTCTGGT  
GTGGCTCTTTTTGAGGATCAGACGTACCGATTTCCCTGAATCATGCCGTCGCTGACCTGCGGCAGTTTCAAGGCGCG  
TTGCAACAGTTTGGGTTGCCCTCGTGTGGACTGGTATCAGAAAGTGGTCCGGCCATGGTTTGTGTCAGGGCTTTTGG  
GTTCTCCCTGATACAGCAACTCGCCTTCGTTTCATCAGTAACACGTACGGCACTGCTCGGCTTCGTCGAGATACGAGGTA  
CTCCAGAGGATTAACATCCCTTCCGCCAGCTCATGCACCATCTGCCACAGTTCCGCGCCGTGAGATAGGGTCAACGCC  
GACGCCGGGTTATCAGCAGCAACACTTTCCGTTCCGCCACCAGGGTACAGGCCAGACCGAGTTTTTGTTCATCCAC  
CGGAGAGCTTGGCCGCGAGGCTCCGTTAAACGGCCAAAGAGACGTAAACTCCAGCAGGCGAGCAAAGTTTGTACGT  
GCCTCGCCGGTACGCTGCGCAAATCCCGTACAGATTGAGGTTCTCATCACCGTGGATCTTCATACAGACCAAATTT

CTGCGGCATATAACCGAGCACGGCGTGCAGCGGCCGTCGTTTTGATCGGATCAAAGCCAATCACCGTGGCACTGCCGC  
TGTCGGGTTTTAGTAATCCCGCAACATCCGCATCAGCGTGGTTTTACTGCACCGTCCGGCCCCACCAACCCCGTCACA  
TAACCGGCGTGAATGGTACAATCGAGCGCGGACGGCGGGCTTGTCCATGCCGGAAAGCGTTTTCCAGGCCGTTCCAG  
CGTGATAACGGCATCATTATGTCCTGCCTCGTCACCGAATTGTACCGTCACTGGCATTCCCTGGCGTAACGCATCATCG  
GCGTCGGTCACCACAATACGCAGGCGATAGACGAGGTCCGTACGCAGATCCGGCGTTTTCGACGGTTTTCGGGTAAATTC  
AGCAGTCGGCGAAACGAAACCAATCTGCCGTGATACGGCTTGTCCGGGCGACCATCGGTATAAAGCAGCACTTTGCGCC  
CCGGCTGGGCTGGTCAAGATTACGTTTCAACATAAGCGCGCACCCACACCGGACGCGTTAGTGAAACGGTAAACACC  
GTGCCACCTTCATTGAGGACCGTGCCTGGCTCCACCGCGCGGTTAACAGCGTGCCATCAGACGGGGCTATCAACGTTGA  
GTCCTGTAAATCAACTCCGCTGCGCCAGTTGCGCCTGCGCCTGTTTCGAGGCTGGCTTTGCGCTGAGCGATGTCCTGTT  
CACGGTTACCGGAACGGTACTGACGCAATTTATCCTGTGCTGATTTACGCGTTGCTGCGCCTGGTCGCGCGAGGAGCGG  
GCATTTCCAGGTCATTTGCCGAAATAGTGGCGTTTTCCACAACCTTGTGCGGTTATAGAAGTTCTGCGCATAGTC  
ATAGGCGGCTTGCCTGTTTACCCTGCGGCGCCTGAGCGATTTCTTATTGCGATACCCGGCAAGCATCAGGTCAT  
ACTGCGCCTGTGCCACCGAAACCCCGTTTTGCGCTGCATCAGGGCAATCTCATACGGCTTGTGATCCAGTTCGCCACG  
ACCTGGCCCCGTTTTGATAGCATCACCTTGTCCACCGCCAGCGATTCAACGCGCCCCAACACGGAAACTAAGATTTAC  
CGTACGAATATCCAGTTGCCATACAGCGTCAGGCGTTATCCTGGCGGTTTTGATACCACAGTAGCCTCCGGCAACCA  
CGGCGCAAGTACCACTACCGCAATCCGATCACGACAGGTTTTTTCATCACTACAAACTCCTTTGCGATAATCCTTGCA  
AAATCAGGTCGATATGACAGGTCACCGTCTGGTTGATCAGTTCGGTCTTTTTCTCATCGAACGCGGTCCAGCCGGTACGT  
AACAGAATTGTTTTCTTTGCCAAGACGGAACGCCAGAATCTACCAATCAACGCATGGGTATGAAGGATCATGCGGGTGT  
ATTGGCGTCGACCGGTCAGGCGGCAATCAGGCGTGTGAGGCTGTGTAGCGGACTAATCACCTGTTGTCGACCA  
GGTGGTAGGCTGCCGTGGGAGAGAGCTGCTCACGGGAGATAAACTTGTGAGGTTGACGGTGTATCCTGGGTGAGCAGC  
TTAATCATGTTCTGCAGGCGGAAGGATCAGTTCACGGATGGCAGCCGATCAGGCTGTGGTTGCGCGAACAAGCGTTC  
GGCTTCTCGGCATGCGGACGGAAGTCTCGCAATAAAATCGGCAATCCACTGGGCGCAGGCGAGGTACAAATCTTCTT  
TCGAACCGAAGTAGTAGGTGATGCGAGGATTTCTGCCGCGCTGGGCGGCTATCTCGCGAGTGGTGGCGTTTATTCCA  
TATTCACAAACTGCGCCAGTGCAGGAGCAATCAGTGTTTTTGCGCTGTTACCCCTGATTGTCATGGCAGGATTATT  
CATCGCACAGTCCATTCTTAATCAAATGATTGATTAAGATTATGACTCCATAGGGGAGTTGTCCAGTATGGCTAAGAATT  
TTAGCAACGCCAGTACAGGGATAATTTATGCGCTGCGTCACAAAACTGCTACACTCCGCTCCCTCATGACATTGTTGGT  
TTTTGTCATTTCTTTTTAGTATCTCCCTGAAACTACACCGGTAACGGTCCGGGCGGTTCCGGAGTAGTTATGTCCTTC  
GATTCTTTGGGTTAAGCCCTGATATCCTGCGCGCCGTTGCCGAGCAGGGTTACCGTGAACCCACCCCTATTTCAGCAGCA  
GGCGATCCCTGCGGTGCTGGAAGGCCGCGACCTGATGGCTAGCGCCAGACCGGCACCGGCAAAACAGCGGGCTTTACGC  
TGCCGCTGTTGCAACACCTGATCACTCGCAGCCGACGCCAAAGGGCGTGTCCGGTACGTGCGCTCATTCTTACCCCG  
ACCCGTGAACCTGGCGGCGCAGATTGGCGAAAACGTCCTGATTACAGCAAATACCTGAACATTCGTTGCTGGTGGTGT  
TGGTGGTGTGAGTATTAACCCGAGATGATGAAACTGCGTGGCGCGGTTGATGTGCTGGTGGCAACCCCGGGACGTTTGC  
TGGACCTGGAACATCAGAATGCAGTGAAGCTGGATCAGGTTGAAATCCTCGTCCCTCGATGAAGCTGACCGCATGCTCGAC  
ATGGGCTTTATCCAGATATCCGTGCGGTGTTAACAATACTACCTGCGAAGCGCCAGAACCTGTTATTCTCCGCGACCTT  
CTCTGACGATATTAAGCCCTGGCGGAAAAACTGTTGCACAACCCGCTGGAATCGAAGTGGCAGCCGCAATACCGCGT  
CTGATCAGGTGACCCAGCAGTTCACCTTGTGATAAGAAACGCAACCGCAATTGCTGTGCGACATGATTGGGAAAGGG  
AACTGGCAGCAGGTGCTGGTGTTTACCCGTACCAACACGGCGCTAACCATCTGGCTGAACAGCTCAATAAAGATGGCAT  
CCGTAGTGGCGGATCCACGGCAATAAATCGAAGTGGCGGCTACTCGTGGCTGGCTGATTTTAAATCGGGCGATATC  
GTGACTGGTGGCAACTGACATCGCTGCGCGCGGCTGGATTTGAAGAGCTGCCGACGTCGCAACTGAACTGAACTGCCA  
AACGTACTGAAGATTATGTCACCGTATCGGGCGTACCGGCTGTCGGCTGCTACCGGTGAAGCGTTGTCGCTGGTGTG  
TGTTGATGAACACAAACTGCTGCGTATATCGAAAACTGCTGAAAAAAGAGATCCCGCGATTGCGATTCGGGGCTATG  
AGCCGACCCGTCATCAAAGCCGAACCGATCCAGAACGGTCCAGCAACGTGGCGGCGGCGGTCGTTGGCAAGGTGGT  
GGTCCGCGTCAACAGCAACCACGCCGTGGGGAAGGTGGCGAAAACTGCAAGCGCGAAACCTGCAGAAAAACCGTCTCG  
CCGCTCGGCGATGCCAAACCGGCAGGCGAACAACAACGTCGCGCCGTCGCGGTAACCTGCCGCTGCGCAGTAATCTT  
TTATGCCGGGCTATGCCCGCATCAGGCTGATGAACAAACGCAAACTGCTGATGCGCTACGCTTATCAGGCTACGTTG  
AACTCTGCAATATATTGAATTTGCATGCTTTTGTAGCCGGATAAGGCGTTTACGCCGATCCGGCATTTCACAACAAGC  
ACTTGTGACGAATTTGAGAACACGGGAAAAAATTTATCTGTTTTACGCCCATAAAGCCACCGAGACGTTACTTCTCTATA  
GCCAATTTGCGGCAACTCCATTAAGGTTAGCCAGTGCATTTGCTTACCCTTACCATGACCACCGTCTCCCGAGTAAGC  
ATCGTTTTCCGTATGCTCAACAGTTTTGCGGGCGCGGTTGCCAGCAAGAGCGCACGAGTTCTGCATGCTGTTGCAATT  
TAGCGGAAGTGTCTTTGCGATCACCTGTTCTTTGACCGACTCCAGTTTTTACGCAGAGGCTTAGAACGATCGCGCCCC  
ATGCGTGGCGGACCATAGGGGAAGAAACCCGACGGATCTCTTCCGGTATTTTTCATCAAGGAATTTTTGTGCTGAAA  
ATAGTGTCTGAGGTAGGCCAGTTTTCCGTCACCTTGTGGCCAGGCGGCAAGTTAGAAAAATCACCGTAGTCAT  
CGCTGGTGTGATGAAATTTATGATGGTGTCTTGCATGACGTGTTGGATCCTTTGTGCTCGAACGGGCATTAACCCGCAT  
TATGTTGGTGGTTATTGCGAGCCGTTTTCCAGAAACAGAAAAACCATACCCCTGAAAACCGAAAAATGCCACAATATTG  
GCTGTTTATACAGTATTTAGGTTTTCTCATGGCATTAAACCGCCGCGTTAAAGCGCAATTTGCCGCTGGTATAAGGCG  
CTTCAGGAACAGATCCCCGACTTTATCCCCGTGCGCCGACGGCGAGATGATTGCGGACGTGCCAAAAACGCTGGCCGG

AGAAGAAGGGCGACATCTGGCGATTGAAGCCCCACGGCGTTGGGAAAACGCTCTCTTATTTGATTCCCGGCATCGCCA  
TTGCCCCGGAAGAGCAAAAAACGCTGGTGGTGGTACCGCCAACGTGGCATTGCAGGATCAGATTTACAGCAAAGATTTA  
CCGCTGCTGAAAAAGATCATTCCCATCTTAAATTTACTGCCGCTTTTGGGCGTGGGCGCTACGTTTGTCCGCGTAATCT  
GACGGCGCTCGCCAGTACTGAACCCACGCAACAGGATCTGCTGGCGTTTCTTGACGACGAACTGACGCCGAACAATCAGG  
AAGAGCAAAAAACGTTGTGCGAAGCTGAAGGGCGATCTCGATACTTATAAATGGGATGGTCTGCGCGATCATACTGATATC  
GCTATAGATGACGATCTCTGGCGTCGTTAAGTACCACAAAGCCAGCTGCCTCAACCGCAATTGTTACTACTATCGTGA  
ATGCCCCGTTTTTGTGCTCGTGGGAGATTGAGGAAGCGGAAGTGGTGGTGGCAAACCATGCGCTGGTGGTGGCGGCGA  
TGGAAAAGCGAAGCGGATTGCTGACCCGAAAAATTTACTGCTGGTGGTGGACGAAAGGCCATCACCTGCCGGATGTGGCG  
CGGGATGCGCTTGAGATGAGCGCCGAAATCACCGCGCCGTTGGTATCGGCTACAGCTGGACTTGTTCACGAAACTGGTGGC  
TACCTGCATGGAGCAGTTTCGCCCCAAGACCATCCCACCGTGGCGATCCCTGAACGTTTGAATGCGCATTGTGAAGAGT  
TGTATGAGCTTATCGCCTCGTTAAACAACATTCTCAATCTCTACATGCTGCCGGGCGAGAGGCGAGACCGTTTTGGC  
ATGGGCGAACTGCCAGATGAAGTGTGGAGATCTGCCAGCGGCTGGCAAACTCACCGAGATGCTGCGTGGCCTGGCGGA  
GTTATTTCTAACGATTTAAGTGAGAAAACCGGCGAGCATGACATTGTACGCTGCATCGTTGATTTTGCAGATGAACC  
GCGGCTTGGGATGTTGAGGCGCAAAGCAAACCTTGGCGGCTGGCTTCGCTGGCGCAATCTCCGGTGCACCGGTGACC  
AAATGGGCGACGCGGAAGCGCGAAGGGCAGCTACACCTCTGGTTTCACTGCGTGGGAATACGTGTCAGCGATCAGCT  
GGAAGGCTGCTGTGGCGCAGTATTCCGACATTATTGTACCTCCGCAACCTTGCCTGCTGAAACAGTTTTTTCGCGTT  
TGCAAGGAGATGAGTGGTCTGAAAGAGAAAGCGGGCAGCGTTTTGTGGCGCTGGATTCCCCCTTAAACACTGCGAACAG  
GGCAAAATTTATTCCCGGATGCGCGTTGAGCCTCCATCGACAACGAAGAGCAGCATATTGCCGAAATGGCGGCCCTT  
TTCCGTAAGCAGGTGGAGAGCAAAAAACATCTCGGTATGTTGGTACTGTTTGCAGCGGACGGGCGATGACGCGTTTT  
TCGACTATGTGACGGATTTACGCTGATGTTGCTGGTTGAGGGCGATCAGCCGCGTTACCGTTTAGTTGAACTGCACCGC  
AAACGCGTCGCCAACGGTGAAGCGCAGCGTGTGGTGGGCTTACAGTCATTTGCCGAAGGGCTTGATTTGAAAGGTGATCT  
GCTCAGCCAGGTGCATATCCACAAAATCGTTTTCCGCCATCGACAGCCCGGTGGTATCACCGAAGGGGAATGGCTGA  
AAAGCCTCAACCGCTATCCGTTTGGGTGCAAAGCCTGCCGAGCGCTCGTTTAACTGATTCAGCAGTTGGGCGACTG  
ATTCGAAGCCACGGTTGCTGGGCGAAGTGGTTATCTACGACAACGCTTGTGACCAAAAATTTGGAAGCGACTACT  
GGATGCATTACCGGATTTCCGATAGAGCAACCGGAAGTCCCTGAAGGTATAGTTAAAAAGAAAGAAAAACGAAATCCC  
CACGCCGTCGGCGGCTTAATGATGTGAGTCAAGTAAAGGAGTCTAAATGGACTATCGCAAAATCATTAAAGAGATCGGG  
CGCGGAAAAACACGCGCGGATTTAGACCGGGATACTGCGCGCGTCTGTATGCTCATATGCTCAATGGTGAAGTCCC  
TGACCTTGAGTTGGGCGGCTATTGATTGCGCTGCGTATCAAAGGAGAAGGGGAAGCAGAGATGCTCGGCTTTTACGAAG  
CCATGCAAAATCACACCATCAAGCTGACGCCCGCAGGCAAGCCGATGCCGATTGTCATCCCCAGTTACAACGGCGCG  
CGTAAACAGGCCAACCTGACGCCGTTGTTGGCGATTCTCTGCACAACTCGGTTTTCTGTGGTGGTTACGCGGGTTAG  
CGAAGATCCAACCCGCGTGTGACTGAAACATTTTTGAATTGATGGGTATTACGCCAACGTTGCACGGCGGGCAGGGCG  
AGGCGAAGCTCGACGAACATCAACCGGTGTTATGCCAGTCGGCGCGTTTTGCCCGCGCTGGAAAAACAACTGGCGATG  
CGCTGGCGGATGGGCGTGGTAACAGTGCACATACCCTGGCGAACTGGCGACGCCATTTGCCGAAGGTGAGGCGCTGCG  
TCTTTCCAGCGTTTCGATCCGGAATACATTGGACGCGTCCGGAAGTTCTTTAGCGATATCGGCGGGCGGGCGCTACTAA  
TGATGGTACTGAAGGTGAAGTGTATGCTAATCCGACGCGTCCCGCAGATCAATCTCATTGACCGTGAAGGGATGCGG  
GTGCTGTATGAAAAACAGGACTGCTGGTAGCGAGTTACTGCCACAAGCAAAAGATCCGGAAACACGGCGCAGTGGT  
TGAGCGTTGCCTTGTGGCAGCGAACCATTCCGAAATCGTGAATCCAGATGGCTTGTGCTGCTGGTGGTACGGGTG  
AAGCGGCAACTATCAGCGACGGCTGGCGCGGTTAATCAGGCATTTAATCTTTTCTCAGCCGGATGAGCCATGTCAT  
CCGGCTTTTACCCACCGCAATATGAAATTCCTGCATCTTTATTGACCTTCCACGCCCCGGCTGCAGCATAAAAAACA  
ACAAACACATAACATAAACAGGAGTTAACCATGAAAGTGGTCAATCGCTTGGATGCTCAGACGCTGCACAGTTTTATTCA  
GGCTGATTTTCTGTCAGATGGGTAGCGAGGAACAAGAAGCGAAATTAAGTTGCCGATCATTAAATCGCGGCAAACTGGCAG  
GGCATGATTACATGGTATTGGCATGATCCCAAGCTATGTACGCTCCTGGAGTCAGGGCACCTGCAAAATTAACCATCAT  
GCCAAAACCGTTAAAGAGGCGGGGGCGGTCACGCTCGATGGCGATCGCGCATTTGGTCAGGTGCGGGCACATGAAGC  
GATGGCGCTGGGATTGAGAAAGCGCATCAGCACGGTATTGCCCGCTGGCGCTACATAACTGCATCATATCGGCCGTA  
TCGGTTACTGGGCGGAGCAGTGTGACGCGGGGGTTTGTCTCTATCCACTTTGTTAGCGTGGTGGTATTCCAATGGTC  
GCGCGTTCCACGGTCCGACAGCCGCTTTGGCACCAATCCGTTCTGTGTGGTTTTCCCTCGTAAAGATAATTTCCCGCT  
GTTGCTTGATTACGCCACAGCGCATTGCATTTGGCAAAACCCGCTGCGCTGGCATAAAGGCGTCCCCGTGCCGCCAG  
GTTGCTGATTGACGTTAACGGCGTCCGACGACCAATCCGGCGTAATGCAGGAGTCGCCGTTGGGTTGCTGTTGACC  
TTTGCCGAACATAAAGGCTACGCCCTTGACGCGATGTGTGAAATCTTGGCGGGCGCTTTCCGGCGGTAACGACGCA  
TCAGGAAACGTTACAAACAGTCCCGATGCCATTCTTAACTGCATGACCACTATCATCATCAACCCGGAACCTTCCGGC  
CGCCGATTGTAACGCGCAGACCGAAGCCTTCCGAGTGGTGAAGCCTCGCCGATGATGATGATAAGCCGATTTT  
CTACCGGGCGAGTGGGAAGTGAACACGCTCGCGAACGGCAGAGGATCCACTGGATGCGGGAAAGCTGGCAGGC  
CATTGTGATGACGCGCGCAGATTGGTATGCCGGAAGAGACGTTGACGGCTTCTGTGACGAGTTAGCCAGCTAAAAAA  
AAGCCCGTCCAGTGGCGGACGGGCAACAAGGGTAACATAGGATCAATGAGGGTTAGAGCATATGCGTCTGTGCGAAAC  
AGACAGGAAATACTTGTGCTGGACGTAGCGTAAACGCTGATCCGTCACCGGTTGCGATTTTGTAGGCCTGATAAGAC  
CGGTAGCGTCGCATCAGGCATCTGTTGCCGGATGGCGGTAACGCCTTATCCGCTCTACGAATTACTTATAAATTACC

GCAGTACCGCTTAATTTATTGTTGTTGGTGGCGGAAGTGATGCTGTATCCACTGGCACCGGCTGCCGCGGCTTTCTCAGC  
CAGTTTCGCTCCAGGGCATCGAGGGTGGATGCGCCATCGGCAGAAACCACGCCGATTTTATTATGTTCTGTGCCTGGG  
ATGCCGTTACCGGTTCCGCCGCGAACACGCCAAATGACAGAGTTGAAAGAGCCATAGCAGCAACAACAGTATTGATAGTT  
TTCATAATTAATCTCTCGCAGGTGATTTTTGTATAAGTGACGTTGTTTCGTGATGTGATGAGTATCACGTTTTTTTACG  
AGAGATAAAATCGAAGAGAATTGACCGCCTTGTTCAAATAAATTGATTGATATCTAACCTACTGATAAACCATTTATTTG  
TTGTAATTATGAACCTGTTTTATACCGCGTGGCAGTCACAGCAGCGTTAAAGGCACGGAATGACACGCAAAATACAAATT  
ATACTCGCTATGCATCTCGCCAGTTGTAGTTAACGTAACCTGGCTGTCTTTCGAACCTCTGCGATTATATCCTGTATAAGC  
TGGTTTTTTGAAATCTTTCTCTGCTGACAATGAATACATAAGCGCACGCCAGGAATGGCTTCCCGACGGGCTGCGGGA  
TGGGGGCACCGCACTCTTACATTCATCCAGGCTTTCCGCCGCGGGAATTTACCCCGAGCGGGGAATCGCATCTTCA  
ATTGTAAGTGTGATCTGTTGTTGACGGCGTCATCGTTAGCCCAACCGGATGCCATATCGACCTCCCCATATCAATACTT  
GTACAGTTAAGTGTAGCTAATCCAGGGACGAACTCGGGCAGTTCAAGCATCAGATCTCCGACCATTCCCGCAGCAGATTA  
TGATAAAGATTAAGCAGCGCAGAGATCTTTCATTTCCCGTAGCGGCTTTTACGCGACTGAATATTGTTGTCCAGTTC  
AAACAGCATGGCGCGCTTTTATCATCGCGGATCATCGACTGGATCCACATAAATGATGCCACTCGTACGCCGCGGGTTA  
CGGGTGTACGCAATGCAGGCTGCTGGAGGGATAACAACAGAGATCGCTGCCGGGAGTTTTACCCGATGTTGTCCGGAAG  
GTGTCATTAACGACCAAGTTCGCCGCCCTGTAGCTTTGTGGATCGCTTAAAAACAGCGTGGCAGAAAGTTCAGTACGCAT  
CCAGCCGTTTTGTGGATGGCTGCTACTGCGCCATCCACATGGAACCATAGGTTTTATTGTTCTGATAGCGATTAACA  
GCCGCGTGAAAGGGTACGCGGCAAGGCCGCGGCAAGAATAAAGCATGTTGGTTAACCGGTTTACGACCTCATTTCG  
AGGGCGCGGTATAACGTGCTGCGGGTGTGACCTGTTGATTGTTCTTAACTTGGCACCTTGTGCGCCGGTGGTGACGCG  
TCCATCCACCCATTCCGGCTGTTCCAGTTGTTCCGCAAAACGAGCGACGTCCTGTGGCGATAACACGCCGGGAATGTGGT  
ACATCATACAATTTCTCCAAAAAGTGGGGCTGCGCCACATCTGAATCAGAAATGCATATTGGCTGTGAGCAAGAAGG  
TTCTTGGCTCGCCGGGTGATAACGGTAGCCGCTCTTGTGATTGAGGCGACGTAATCGGTATCAAACAGGTTGTAACG  
TTAGTGGAAAGTGCAGATTGCGATTAACCTCGATACCCAGTTTGGCATCGGCGACCCAGTAACCTTCGGTAAACGCTGG  
CGTTCCACCGCGCCGCTGTAACCTTTATGCATACTGCCGATATAGCGTGCGCCCGGCCAACAGAGATATCGTGGTTG  
CCTGATATTGGCTCCATAAGGTGAAGGCGTGTCCGGGTATACGGCAGCGATGAGGAACCATCCTGGGCAACATCTTTG  
CCGTTTTTGTGTTGCTTTTTGCTGGGTATAGCCGCAATCACCTGCCACGCGGGAGTGATATCCCGCCACGGATAT  
CTCATAGCCTTCGACGCGTTTCTTACCCTATTGCGAGTAAGTCCGTCATCATTTTTGCTCAACTTCATTTTCGATATCAG  
TGCGGAACAGCGCGGCGGTGAGCAACAGACGTTTATCCAGAACCTGCCATTTGGTGCCAATCTCGCTGGTGTGGCTTTT  
TGCGGTTTTAAATCGGTGCGGTTGGCACTGTTACCCTGCCAGACTGCGCAAGGGCGAAGTTGTTGCCGCCGGAGGCTG  
CTGGGAAACGGCATAAGTTAATATAGACATTGCCGTTTTCCGTCAGGTGATACAGCGCCCGGCTTTCCAGTTCATCAGAT  
TGCCCGACTTGCCGGTGTGACGCGTGGTACCAGGAAACCTTTTGCCACACCAGTTGGGCAGGTGATGGACCGCGTCCG  
CTGCCGCCGACGGCGGTGGCACTGTCATATTAGTATGATAATTATCCAGACGGATCCCGCCGTTCCAGCTCAAAATCACG  
GGTATTTGACGCGTATCAAAGGCGTAAATTGCGAAGGTATCCGCTGACCATTGGCGTTTGGCCGTTGCGCGTCAGGC  
CGCCGGGATGAATGCTGCTGTCAGGATGATAAATTTACCAGCGGTAACGTCACCCGATTAACGCCGTAAGTTAGTCTGC  
GTTTCACGGTAAATTCACGCCGGTACTGACATCATGACCGATAGAACCGGTATAGAACGTCGAGGTGAGGTTGGTCTG  
GTTGGTGAGAAATTTTACTCACATCTTTGGTATTCGCCGTGCGTGACCAGGTCCAGCTATTACATCGCTGGTGGGCT  
GAGTAATATTCGACGCCCCGCCATAATCGCCGTCATCAGGTAATCCTGCTTACGCGCGACCAACGGGTAGTATTGCGA  
ATGGTGGTGTATCGTTGATGTCGTGCTCAAAACGCATGGTGGCGGTGTCGGTGGTCAATCGTCGTAATCGGAATCCGT  
GCCGTAAGTTATGAGTATCACTTTTCCGGAATGATTACGGCCGCCGTTCCCGCAGATGGGGCAGAATAGCCCCGCA  
AACCGATGGTCCGAATGCCCGCTGTCGGCTGTTGCTGGGTGACATGCAGATAATTAAGATACAAACGATTGCTGTA  
CCAAGGCCAAAAGCGACAGAAGGGGCGACGCCGTAACGCTCATTTTTGACTTTGTCGCGTCCGGCATCGTGGCTTTTTT  
GCCATTACATTCAGGCGCACCGCGGTGATACCAATGACCTGATTGACGTCCAGCGTCCGCGGCGGAACCGGCGC  
TGCCAATACTGGCGGAGGCGTCAATGCCGAATCATTGCGCGGCTGCTTGTGATCATATTGATCGAGCCTGTGCGTGGC  
CTGCGCCCGTAGTGGTGGCGGACGGCCCTTAACTCACTTCGACCTGCTCGGTATTGAAGGTGTCGCGCGAGACGCTGCC  
GATATCGCAATGCCATCAATATAAATACTGTTAGAGGTATCGGCACCACGCATATAAATGGCGTCGCCAGTGGTGGAGT  
TACCCTTCCACCCGCAAAAACGCACCCACGCCGGGACGTTTTTGGCGCGTCGGTAAGGTTGGTTGCGCCCTGATCT  
TTAATCACTTGTTCAGAAATTACCCTCATCGTGGGGTAGTATCCGCTACCGGACGCGAGAATTTCCGATCGGCAGATTG  
TTGTGGCGCATAAAGCGAAGGCGTTGATGCTTCGACAACAGCGTGTATCCGCGTTAGTTTGCCTTCGGCGGCGAGTG  
CCTGAGCCACAGGCGTATGCCAATACAAAGACCGGCAAAGAAGTGTGAGCGAATGAAATTGCTGGCAGGAAATTCGCA  
TTGTTTTCCATTTTGCAGGTGACTTTTTCTTATATGTTGAAATTTTCACTGCCACGAGAAAGCCTCTCTCGGATGCGAT  
GCCACTGTTAATCCCGTATAGTGTCTGTAAGTATAAATTTGATAAGCATTATCACTTGGAGCGATTTTCTATC  
ACCCATTGCGCAAAAAGAAATACATTTATTTACATTGAGTTCATATTTGATGTTTTTTGATTACAAAACAGACGAAAAC  
TGATCCAGAGGCGAATGCAGTTACGTTGGTGGGGTATTTGTAGATGGTTGCAGTACCGAACATCTGGTCATTTCCGCC  
TGCGGAATTAATGACATAACCTTTCCGCCCTTGTTCGCGCGCTTTTTCTGCCAGTTTATCCTCCAGATCGCTTAGGTTTG  
ATGCGCCAGTTGCCGAAACGGTACCAGGCGGGCCGTAGCTGACCGCTGTCCAGGTTACTCATCGGTTGCGCGGCATAAGCC  
GTGAGAGAGATTCCGCTCAGGACGGTGGCAATCAGTAGTGTGAGGCACTTTTTCATAATGACATCCTCATAAATAACAACG  
GGTAGTGCCTGATAAGTGTAGGTCGCCTGCGCGATGCAAAATGACGCAAAAATTGACAGAGATGTGCTTATTTTTTGAAC

GATATATTTTTACAAAATAAGACAAATCAATGACATGCATAATGCTGATTTTTATGATGAATTGCCATAAACCATAGCCA  
TGTTAAGGTTTTGGGGAATGATAAACGCAGCCAGATATTTACCCTGTCGCGTTATGCGGGTATCTTACGCCGCTGCTTAA  
AGGAGAATGCTATGTCCGCCAGAAACCGGGTTGCATCCGCGCAACCGTCATCACAGCCGCTACGATCTGCCACGCTT  
TGTCAGGTCAATCCTGAACCTCAGGCAATTCCTCACGCTTACACCCGCCGGGAGCAAAGCGTAGACTTTGCCAATCCGCT  
GGCGGTGAAGCGCTCAATAAGGCGTTGCTGGCCATTTTTACGCGTAGCGAACTGGGATATCCCCAGCGTTTTCTCT  
GCCACCAGTACCGGGCCGGCGGATTATATTCATCACCTTGCCGATTTACTGGCAGAAGCAAAGCGGAACAATTCAGCG  
AATGCCAGCATTCTGGATATCGGCGTTGGTGCGAATGATTTATCCGCTGATTGGCGTACATGAATATGGCTGGCGTTT  
TACCGGTAGTAAACCAGCAGCCAGGCGTTAAGCAGTGCAGCGGATTATCAGTTCTAATCCGGGGCTTAACCGCGCCA  
TTCGCTGCGTCGGCAAAAAGAGAGTGGGGCGATTTTTAACGGCATCATCCATAAAAACGAGCAATACGACGCGACCTTG  
TGTAACCCGCCATTCCACGATTCGCGCGCTGCGGCACGGCAGGTAGTGAGCGTAAACGCCGTAACCTGGGGCTGAACAA  
AGACGATGCACTGAACTTTGGCGCCAGCAACAGGAGTTGTGGTGTGAAGGCGGTGAAGTCACCTTTATCAAAAAGATGA  
TTGAAGAGAGCAAAGGCTTCGCGAAGCAGGTGATGTGGTTTACATCACTGGTATCTCGTGGTAAAACCTACCGCGTTG  
TATCGTGCCCTGACGGACGTGGGCGCGGTGAAGTGGTTAAAAAGAGATGGCCAGGGGCAAAAAGCAGAGTCGCTTTAT  
TGCCTGGACCTTTATGAACGACGAGCAGCGCCCGCTTTGTCAATCGCCAGCGTTAAAGCGTTGGTTCCCGCGGCTGAAA  
ACGTTTCAGCCGGGTCGCGCCGGAGCAGGCACCTGATAAGTCTGCACTGGCGCGCAACGCCCGCAGGTCGAAA  
TGTTTTTTCACCTGGCTGTGAGGGCAAAGCGTACCCTCACTGTTTGAGTGGCAGCGTGGTGAACGAAACGACGAGTGT  
AAACGCGGTATTGCTTAAGCCGACAATCCCGCAAAAATTCGGTTACCAATAATCAGCCCGCAATTTCTCGTTTTCCA  
TTAATTCGCTACCGCATCTTTCAGTGCCTGATTGGCTTTATCAGCATCTTCATGGCGATCAACATCATAATTTGCCACC  
ACCGAACCAATGCCGCGACAAAGTTAGCAAAGGTGGTTATCGAAGACCACGGAATGATGTGATACGCCCGGTATCCTG  
TCGTACGCCACGAGCGAATCGACATCCGTTCCACTGTGCGCGTCAACGGCCGATAGTACCAAATCTCCAGTGTTC  
TGCCGTTTTCAAAGTGAATAAATACCCCGGTGATAATATCTTTCACAGCGTTTGCAGCAACAAACGAGATAGCCAGACCT  
AATGCCCGGCACCTGCCAGCAATGGCGCGATATTGACGCGGATTTCCGACAACACAATCATGATGGTGTGTTACTGAT  
AATCACCGCCAGCGGTTACGAAACAGCGTAAGCAGGGTACGCGTGCAGGCGCTGGGTAGCGGGCGGCCATGAATATCCG  
AAGCAGCCGTTTTTCGATCAAAGTGGCAGCACCCTCAGCCAACCGCGAGAAGAAAAGAATGAGTGCATACGGATC  
AGGATATCTACGGTTTTCTGCCCGCGCGTTTTGCAGCCAGTTCAGAAATCGAACAATCCCATGCGCTCAACAGCAA  
CATTACCGCCACGAGACTGTCAGAATACGCGCCGTTTTCAGCGCCGCCAGCAGCCATTCAACCGTTTTTGCAGCT  
CCGATAGTTACGCTGAGTATGTGGCGAGAGAGTGTGGTTTTGCCAGCCAGCGGAAAACATACCGGAAACAAACGCT  
GCGATACCAATAATCGCCAGGCTGCGCACCGTTGCACCCATCATAAATTTAGGCTGTTGCCCGGATCGAACAACGAAAA  
GAAAAACAGCAGATAAAATAGGCGCTTGCCAGCCAGTGCACACCAGCGCAAAGGCGCGGATAAACAGGCTGAAAAAGG  
CCAGCGAATGCTCCGCGAAGTTGAGCAAATGCTGGGTAATCTCTTTTTATTACGAAAGATCAGGTACAACGCCAGACG  
GTCATGCACAGCATAATGATGACGTTGCGCAGCGCACCTATCTGTACATTCACCTGATTAGAGATAATCGGCACGGCCAC  
AATCAGGCCATAACCTATCAAAGTCTTAAACAGCTCAGGCGAGGACTCCAGTAACGGGCGCTCTCGTCTGAATCGTGA  
ACGGGCGCAGCTCCGCCACGTTTTGGGCAAAAATCAGGCGTAGTACGGCTTTGAAAAATTCATGAGGGCAAAGGCGTTG  
AGAAACAACTTTGTTGAAAGCGATGGTGGCAGTGCCTGCATTCAGGTTGTCGCTTAATACCTGGCCGACAAATAATGT  
CAGGGCCAGTAACAGCAGGTGATAATAAACGCCCGATAATCATCGCCGAAAGCTGCAACCAGTTGCTGCGCTCACGAT  
TTTTTTCGCCCGCCACTGACCCATTTTGCATACAGCGGCGAGTGCACAGGCGAATCAGCCAGTAAAAACCAAACACT  
AATACCGCTAACATTGAAAAATGGGTGAGCGCATTGCTGAAGGTTTGTGGATTAACCGGCTTATGCGGGGAGCCGGTGT  
ATTGCGATAAAGTTGCCCGAAGCGGGCGGAAAGGGTTCACCATAATGGCGGCTGACTTCGGTGACCTTTTGCAGCACGG  
TTTGCTCTTCGACCAGCTCGCGGCACTATTTTTGGTACCGGTTCAGCAGGGGGCGTAGCGGCAACGTTGCGCAACTGG  
TCGATCAACTCTTACGCGAGGTGTCATTATCCAGCACATCCGCGCATAGGCCATAGGCCGCTTTTTTTGTTGCGATC  
CGTTCCGGGGCCGGTTTCAGTCCGTTGAGTCCGTTGTGTTGTGGTTGTAACGCCGGGTATGGATACCGCTGGGCGAGTG  
CGCCAGCAGGCGAAGAGGATGAACAGGATCCACCAGTACTCCTCAGTGAGAAAATAGAGCAAAAAGATAAGTATA  
GATGCTGGAGGAGGGCGATTTTAAATGAGAGGAATCTGGTGTGCTCCCTTTCGGGTGAAAGGGAGGAAGGGATATTA  
GCAGGTTGCTGACAACGTGCGGGCTTTTTTGGCGATGCGGCGTGAACGCCTTATCCGCTCAACAAGTTCATGCAATTTT  
AATAAGTTGCCAGATATCTGTAGGCTGATAAGCGTAGCGCATCAGGCAATGTGTCTTATTAAGAGACGTGCTGCAAAA  
ATTCTGCAAGCGCTGGCTCGCGGGTCTTGATCAACACCTGCGGATTGCCATCTTCCGCAATCCGGCTTTTGTGATA  
AAGATCAGCCGCGAAGCTACTTTCTCGGCAAAACCGATTTCTGGGTACGATCACCATCGTCATCCCTTCTCAGCCAG  
ATCTGCATAACCTTTCAGCACTTCATGGCGCAGTTCGGGTCAAGAGCGGAAGTCGGTTCATCAAACAGCATATTTTCG  
GCTTACCAGCCAGCGCGGGCAATCGCCACACGCTGCTGTTGACCACAGAAAGTTGGAAGGGTAGTGATGTGCACGT  
TCTGCCAGACCGACTTTTCGCGAGCAGCTCAGTGCCAGTTTTTCCGCTCTTCTTTGTTGCGCCACGCACGCTAGCGG  
GCCAAACATGACGTTTTCCAGCGCTGTGAGTGCAGGAAAGAGTAAAACCTGCTGGAACACCATACTGCTTCTGGCGAA  
TCAGGCGCTGTCAACTTTCCGATCGTTAACCTTACAGCCATCGACAATCAGATCGCCGGAGGTGATTTCTCCAGTTT  
TTGATGACGCGCAGCAGGTCGATTTACCGGAACCGCAGGCCGATAATCACCACGACTTCGCCCTGGGCAATGTTCAA  
ATCGATATTGTGACGACCTGGGTTGGGCAAAAGTCTGGAGAGTTTTTAAATTCATCACAGGATTTTCATCCTTCT  
TTCCAGACGACGAGAATAAAGCTCAGCACCAGGTAATAATCAGATAGAACACCGCCAGCGCTCCAGATCTCAAGGG  
CGCGGAAGTTACCGCAATAATTTCTGCCCTGACGGGTGAGTTCCGCCAGCCGATCACAATAAACAGCGAGGTGCT

TTAATGCTGATGATCCACTGGTTACCCAGCGGGCAGCATAACGACGCAGTGCCAGCGGTAATAATGACGTAGCGAATGGT  
TTCCAACGTGAAAGACCGAGCGCCAGTCTGCTTACGAAAACCTTTGTGGATAGACAGCACCGCACCACGCGTGATTT  
CCGCAATATACGCGCCGGAGTTGATCATGATGGTGACCACCGCCGAGTAAATGGGTCGATGCGTAAGTCGTTAAACGCC  
ATCGGCAGGGCGAAATAAATAAACATCACCTGGACGACGATAGGTGTGCCGCGATCACTTCAATAAAGACCAGCGCGAC  
GTGTTGGCTATCCAACCTCGAAGGTGCGTGCAAAACCTGCCAGCAATCCGATTACCAGACCGCCTGCCAGACCGAGGA  
CCGAAATCCACAGGGTCATTTTGGCACCTTCAATCAGAAGCGGAATGGCAGGCCAGATGGCACTCCAGTCAAAGTGCATA  
TGTTGTTCTGTTACCGTGGTGAATAATCAAATTCAGGGTAATTAATGGCCCCGAGCGGGTTTGGCCCCCTCACCT  
AATCCTCTCCCATAGGGGAGAGGAACTGCCAGTGCCTTTTACAGGTGTAGCGTTATTATTTGCGTTACGTACCGAAC  
ATTTTTGTAGATTTGTTGTAAGTTCGGTTCTCGCGCAGGGTTTTCAACGCGCCGTTGACTTTGTCACGCGACTCGTCG  
CTACCTTTGCGGAACGCAATACCGTATTGCTGCGCTTCCAGAGAGTCACTACCGCTTTGAACTGACCGTTACCGGCGGT  
TTTGATGAAGTACAGAATGTTTGGCGTATCGTGCAAGCGGCTGCGCGGTTGGTGCCAGTTCATATAGGCGTTAT  
CGATGTTGCGGAACTGACGCGATCTTTAGTTTTGATGTTTGCCTTTCGCGTAATCAACGGAGCCAGTACCGCTTTCACA  
GCAACCACTTTCCCGTCGAGATCTTTACGCTTTTACATCGTTATTGTTAGCTTTACCATCACTAACAGGCCGCTTTT  
GTAGTAGCCGTGAGAGAAATCGATCGCTTTTTACGCTCGTCGGTTCAGTTTCGTAATCCAGCTCTTACGCTTTT  
TGGTTGTCAGTGCCGGAATGATCCACTGAAATCCACTCGGCTTTCAGTTTCGTAATCCAGCTCTTACGCTTTT  
GCCCACAGATCAACGTCAAAGCCACATATTTATCGCCTGTTTAAATCAAACGGAACGAAGCGGTATCCGTGCGGAC  
AACTAATTTTTATCCGCGCATGAGAAGAAACCGCAAAAGCCAGGGTCAGTGCAAGCAGTAAACTTTTTAATACAGACT  
TCATAGCATTTCTTTTTCTATCCACGGGACGATCCCTGCGTGACATTACATATATGAAAAAATCGTGCCAGTTTTG  
CACTCCTTGATTTTTGAGATGCGGCAAAAACGTGATGCACGATTTATAGGGCAATACCCTGAAGATGCACCATTCTGG  
GGCACCAATCTGGTGCCTAAAATTGTCACTCAACACAGTGATTATTTAGCGTAAAACCTGATGAAAAACAATCTTTA  
TGTAACGATTGTGATGATGTGGATACAAAAAATTACTTAATCAGCTGGAGATAGCAGATGGATGCCTAAATAAGTG  
CGTTGAGGTGGCTGCAAAACAAAACGGCCTCCTGTGAGGAAGCCGCTTTTATCGGTAATAAGTTCTGCACCATCAGC  
GATGGATTTATTCGATGTTAGACTCGATAAACACAGGAATTTATCCAGTTCGCGAGACCGGCGGTGAGATATCTGCG  
GTGTCGTCATCTTTCGCTTCGCAATCGCTTTGCGTACGTATTAGCGACGATTGCGTAACGGTCAGCCAGTTCTTTCAG  
GTGATCCTGAACGTTGTGGATGTCCAGCGGTAACCTTTTACGCGGGTTTTGCTGTTGATAACTTGAGTGGTCCCAGAG  
CTACACCGCCAGCTGCACTGCACGTTCTGCCATGGTATCCAGATGATCGATCAGTGCCTGCGGAAGCCATCCAGCATT  
TCATGTACGGCAATGAAGTTAGCGCCGCGATGTTCCAGTGCCTTGTGGTAATCAAAGAAAGATCAATAAACTGGAT  
AACCTGGCGATTGAGCAACTCTACTGTTGCTTTTTCTCGCTGTCGGAGACATCGTTGCGGGTATAAAGCAGATTGGTGC  
CTTTTGATTTAACTAATTTAGCGGTACTCATAATTTATATCCTCTTGATGTTATGTCAGTAATTAACGAGATTAAGT  
ATAGCACCGGCTATGTGTTCCGCTATTCTGGCTGTTCTATCACACTAATAGTGGTAACAAGCGTGAAAAACAAAATAA  
TAAAGATTCAATGAGTTAGATATATTGATAAGAACAATTTCTATTTATCTGCTCGCCAGGAATTTTCCGGAATAAATATGC  
TTTTGCATAATTCGATATATAAAGACGGTGTAGAGGAAAAGTAGCGAGAAATTTCTGCATGGTTATGCATAACCATGCAGA  
AATGTAATTTAATTAATGTCTAATTTCTTTATTTGCTCTCTTTGCGTACTGTGAGCGTAGACCCCATTAAGCGGGCA  
TGATAGCGCCGAGCGCCAGTAGCTGTATGGGTGTCAGTGTCTCCGAGGAAAATCATCCCGAAACGGCAGCCAGCGCC  
GGTTCCATGCTCATCAGCGTACCAATGTCCGTGTTGGCAAACGGGTGAGGGCAATCATTTCCAGCGAATAAGGCAGAGC  
GGTCGAGAGAATAGCGACAGCCAGACCAATGGAATAACCGACAGTGCAGAGTGCTTACCAGCCTGAAGCGCTCCAA  
TTGGCAGGAAAATTAACGCTGCAATCAACGAACCAATTGCCACCGTGCAGGGCCATGTTCCGCTCCTGCGGTTGCCA  
CTTAAAATGTAATAGCCCAACAAGCCCCGGCCCCAGTGCCAGCGCACAGCCGGTTAAATCGACATGGGAAACGTCTTG  
CCCAGCGGTAGCAGGAACACAGACCAAGAACCGCCAGCACAAACCAGACGAAATCTACCGGGCAGCAGAGAAGAGAACA  
GCCACCGCAGTGGTCCGGTGAACCTCAGCGCCACCGCAATACCCAGCGTACTGTCTGAATAGAAAGATAAAAAAGA  
TAATTCATCCACCCAGCGAAACGCCGTA AAAACAACAGCGGTAACCGTTGCTCTTTGGCAAAAGCGCAGTCGCCATGGCTT  
AAAGAACGCGATGAGGATCAGCGTTCTAATGCCAGACGACGCGAGTGACACCCGGTGCGCCACCAGAGGAAAAAGTG  
ACTTAGCTAACGAGGCTCCACCCTGAATAGACGCCATGGCAACGAGCAATATGACTATTGGTAACCAGACCGGCATTTTA  
CGTAATGAACCAGGCATCCTTTCTCCCAAAATATCTAGACTTAAGTAAAGCGTGGAGTGTACTGGATATACCAATGCT  
GGTTGAGCATTTGTTGAAAAATTTTCCCGTTTTGACTAAAATGCGCCAGGATTGATGGAATCATTAGTCTGGTGATT  
AGGAATAATCTGGATGAATGACAGGGAAAAACATGCGTAATACTTACGCGATTCTGAAAAAGTGATTTAAATTTAGATG  
GATAGCGGTGATGGAACGTTCTGTTACATGAAATGGCCGTTAGACATCACAAATCGCGAAGAGTTTCCCATTAATTT  
TTGATATATTTAAACTTAGGACTTATTTGAATCACATTTGAGGTGGTTATGAAAAAATTCATGCTTTTACGACTGG  
CCGAGTTCTGGCTTTACCAGCAGGACTTCCGTAGCTGCGACTTCTACTGTAACGGCGTTACGCACAGAGCGACGCT  
CAGGGCCAAATGAACAAAATGGGCGGTTCAACCTGAAATACCGCTATGAAGAAGACAACAGCCCGCTGGGTGTGATCGG  
TTCTTTCACTTACACCGAGAAAAGCCGACTGCAAGCTCTGGTACTACAACAAAAACCAGTACTACGGCATCACTGCTG  
GTCCGGCTTACCGATTAACGACTGGGCAAGCATCTACGGTGTAGTGGGTGTGGTTATGGTAATTCAGACCACTGAA  
TACCCGACCTACAAACACGACACCAGCGACTACGGTTTCTCCTACGGTGCGGTCTGCAGTTCAACCCGATGAAAAACGT  
TGCTCTGGACTTCTTACGAGCAGAGCCGATTTCTGATGCGTTGACGTAGGCACCTGGATTGCCGGTGTGGTTACCGCT  
TCTAATCACTTTGGTGATATAAAAAATCCGCTCTCGGGCGGATTTTTGTTTTAAGGTTTCCGGTGCAAAAATATCGGT  
TCCGAGATGGTTGAATCCACTTCTGTAAGTGGTGTATATCGGCCCGCTTCTTCTCAGATATAAACG

GGTATTTGATGTTAATTTCTTCGCTTAATCCCCGTCCACTGGGAGAAAAAGCCTAAGAAGTCATTGGCTGAGCGGGC  
GCTTAATCACACGATGCGCTTTATCGTCGCTGAAATGACCATAAAAGGCACCTGGAAATTTTGGCTGATATTTATCATC  
ATGGGCAAGGTATTGCACGCTTTTACCAGCTCTTTAAAGGCCAGACCGTGGTCAGAAAAGTAAACCAGCGAGAAGCTGC  
TGCCGCTGTTGCGTAACTGATCGTACAGCTTTCGCGAGTAAATCGTCCGTTTGCCTCATGGTATAGAGATAGCACGACGTT  
TCTTTCGATTGCACAAAGTTTTGATTTTTCTTGTGTCTGTCCGAGGCTGCGGATGTAGGCCATCAGATGTAGAAC  
AATCAGCTGCGGTTGCGAGTGCTCTTGCGCCAGCACTTGAGCGGTGATATCCAGTAACGCTTCGCTTTTGGTGTTTTTAT  
CTGCTTCAAATTTACCTTCTTTCAGGAAGTACACTTCATCTGCTCGTTTGGCGATGCTGGCGATAGCGGTATCGTATTCG  
CCGATTTGACCCTGGTTGAAAAACCACAGGTCTGGAAGCCCGCGGATTTGCCAGGGTGACAAAAGTTATCCTGAACTG  
TGGTTTTGCCATCGACAACGCGATTGAGCGTTAAGCCAAGCGATTTCTGCGTGGAGCCACTGGCGGCAATGTAGTCAGCAA  
ATATCAAACGTTAACGCTGCTGGCAAACGGGGTATTGTCCAGTGACCGCAAAGGCACCGAGGGCATCGCGACGCGCG  
CTTTCACCGATCACCACCACATAGGTCTGATACTTCGGCTAACGGCAGTGACCGTCCAGGTATCTTTCATTCCGAAAAG  
TTTTGCCATCCGTTCTTGTCTTCAATCACCTCGTTATTATTGACGATGACATCCTTAGCAAAAACGAAATACCGGATAGC  
CAGTATCTTTCAGTTTAAATACGCCACCCAGGCCAGGTTTTGCACGGGAGCAACAAAAATGTCGCCACACTGAATACC  
AGACACAGGCTGTGCAAGTATTCCAGCGCTTTTTTATTCTTTTTTTTTCGCTGATTGCTATTACGCCGAGCGCAAA  
AATAAATAAGCCGACAGTGTGTACCACGAAAAATCGTCAGGATTTTCGTCGACTTCCATATTGGTGGAGTGA  
ATGCCAGCAATGATTGAAATAGGCGCGCCGTAGGCTGAGCAAAAAGGAAATAACAAGCCGCCACCGAACTGACA  
CCGACCAGAACTTTTTGTACGCGAGGCAATGTTCCGCATAGCAAAAAGCAAAATAGCCGTAACCGCAGCGGTGTAGAGCAA  
ACTGAAGGGGTAACCTAAGCCGAGGTTAATTAATAGCGACTGTAAAAAGTAGAACGCGAGTCCACGGGCTAAATACCCGGC  
TACGGGTAACAAGCGATTCTTTGAGGGTTAAATTCATATGCCACTATCGTAACAAACGCCATGTGCTTACCCTGGCGTCA  
AGGGTCAATACCTGCAAGAGTGCCTGAAGAGTGGAAAGGGTCCGCATCCGCGAGCCGCAATATACGAGGGCTGCAAGA  
AGATAGAGCGAGCCGCGTTAGGTCACACTACTGACGAACAACTTTTTGCGAAGGGGATTGCAAAATCCGACAAAAAGTG  
GGTTTTTTCAGACAAAACGCGTTATGCCTGCATGAAAGCAGGAGTGAAGCGGCGTACCAGCGACGCGCTATTTATCGGA  
AGTTTTATCTTGTGCGGTTGTTGTTGACCATATCGACAACATAGAGAGCAGATTAACCGTACTTTAAAGGGAGAAT  
GACTAAACACGCGCATACACTCTTGAACCTATTATAAGACCTCTGACTTGCTAATCCCGTGCATCTTGAGGGATGA  
TTGCATTACATACAGATATAGCACAGGCTATATTATATAGCTATTGCTAAAACGTTAATTTTTTGTACCTTCGCAACTCT  
GGTTTACAATGTGCGCACGAAATGAGAACGCTATGTATGCGTCACCATAATGAGGAAGCACAATGAGTCGTGCGCAGGT  
ACGCCAACAGCAAAAAAGTGACGCGTGTAGTGAACGTGGAAGAGCAGTTGAAGGGTCCGCCAGGTGAGAGGGCGCA  
TCGCGCGAGCTTATTGATGATTACGTTGAGCTGATTTCTGACTTGATCAGGGAAGTGGGGGAAGCTCGTCAGGTGGACA  
TGGCTGCTCGTCTGGGAGTTTCGCAACCGACGGTGGCTAAAATGCTTAAGCGGCTGGCAACCATGGGGCTGATTGAAATG  
ATCCCTGGCGTGGCGTGTTTTTAACGGCAGAAGGAGAGAAGCTGGCGCAGGAAAGCCGCGAGCGACATCAGATAGTCGA  
AAATTTCTTGTGGTGTGGCGTCACTCCGAAATCGCCGTCGCGACGCGGAAGGCATGGAGCACCATGTTAGTGAAG  
AGACGCTCGACGCTTTTCGTTTGTACCAGAAACACGGTGCCAAATGAGCCTGCCTTTTTTACGCACGCTGCAAGGCG  
ATCGTTTTTTTTCAGTTATTAATTTCTTGTGGTATCGGATTAAGCTTTTTTCGTCGCCCTTTCACCGAAATCCTGGCCTGCT  
GCTATCGACTGGCACACCATCATCACCTTAAGCGGCCTGATGTGCTGACCAAGGTGTGGAGTTAAGCGGTTATTTTGA  
TGTGCTGGGGCGCAAAATGGTGCGCCGCTTTGCTACGGAGCGTGGCTGGCGATGTTTATGGTGTGGCGGCGCGCTGC  
TTTCTACCTTCTGACCAACGATGTGCGCTGTTTATTGTTGTTCCGCTGACTATCACGCTAAAAAGACTGTGTGAGATC  
CCGGTAAATCGGCTGATTATTTTTGAGGCGCTGGCAGTCAACGCTGGTTCGCTACTGACGCCAATTGGCAACCCGCAAAA  
TATCTTATCTGGGGACGTTCTGGTCTTTCGTTTCCGGATTTATTGCCAAATGGCACCGCTGGCTGGCGCAATGATGC  
TGACGCTCCTGCTCCTGTGCTGGTGTTCCTGAAAGGGCGATGCAATACCATACGGGGGTGCAAAACACCGGAGTGG  
AAACCGCGGCTGGTGTGGAGTTGTCTGGGGCTGTATATCGTCTTCTGACGGCGCTGGAGTTCAAAACAGAGCTGTGGGG  
ACTGGTGATTGTGGCGGACGGCTTTGCGCTGCTGGCACGTGCGTGGTGTGCTCAGTGTGGACTGGACGCTGCTGCTGGT  
TTATGGCGATGTTTATCGACGTCCATTTACTGACCCAGCTTCCAGCGTTGCAAGGCGTGTGGGTAACGTGAGTCATCTA  
TCTGAACCCGGGTTATGGTTAACGGCAATCGGTTTATCGCAGGTGATCAGTAACGTGCCGAGTACCATATTGTTGCTGAA  
CTATGTGCCGCGCTTTTACTGGTATGGGCGGTAACGTAGGTGGCTTTGGGTTATTACCCGGATCGCTGGCAATTT  
TGATTGCGCTACGTATGGCGAACGATCGCCGATCTGGTGGCGTTTCCATCTCTATTCAATACCGATGCTGTTGTGGGCG  
GCGTTGGTGGGATATGTTTTGTAGTTATACTCCCGCCAACTAGGGTCTGGCAATAAAAAAGGCGGATTATGAGTCCG  
CCTTTTGTCTTAAAGTTTTGAAGATTAATTCAGACGAACCGGCATCCCGAGCGGTTTTTAATCGCTTCATCAAGAACAAC  
CTGGTCAACATCTGGCTGACCGGTCACTGTGACGCTCTTCGTAGGGTAATTGGCACAATTTCTGACCTTCAAAC  
GGCTTCGGTGGTAGACAGCGGTTATGGACTTCAATATAACGGCTGCCGTCTGGCTCGGTGGTGCCTTTTACCGGCTCA  
TCAATAAACTGTACGCGGTACCGACCGTACTTTCTGAACAGGAATTTGATGTCTTCGTTACGCAGACGCACACAACC  
ATGACTTACACGAGGCCGATACCGAAGTTGGCGTTGGTGCATGGATAGCATAACAGGCGACCGATATAGAGTGCATACA  
GCCCCATCGGTTATCCGGACTGCCGGAACGACAGCCGGAAGCGGTTCCGCCGAGCGCGTACTCTGCGTGCATTTTG  
GCGTCCGCGTCCAGGTCCGGCCTGCTTTTTTACGCTCAACTTTGGTGGTCCAGTTGATAGGCGTATCTTTGCCAACTG  
ACCAATGCCGATCGCGCAGCACGATAACGGTGTGGTCCCTTTCGATAGTAATAAAGACGCATCTCAGCACTGTTAATGA  
CGATGCCTTATGAACGGTATCCGGCAGGATCAGCTGCTGCGAATGTTGAGTACAGTACCGCCTTTCGGCAGGAAGGTA  
TCCACACCCGGGTTGCTTCCATCATATTGAAAGCCCATCTGGTACTCGCGGCAAAATACTCCAGCGGCTGAGTGT

ACCTTCAGGAATGGTGATCACCTGATTCTGACCAACCAGGCGACTCCCGTCGGTTGGCAGAGGATAAGTTACCGCAGAGG  
CGTACTGCAAAAGCCGACAACAGCGAAGGCCGCTGCAATAATGTTTTCAATTCATATTCATGTTAAGCGAGATTTTG  
TGCCTGGCAGGCCATTGGGTTGAGAATATTAGAGTATTGGAAGCGCATTATAAGTTCATTCCAGCTCACAGTGAAATCAG  
ATGTGTACGAAATCACATTTTTTGCCTTTGGCTTGAGTGTAGACCTTAAGCGAGGAGCAGGATCTTCTTTAGACTTATG  
GCATAATGCGCGGTTTGTATATCTCTTTTCAGGATACGCCTGTGTTAGTTTTCCAGTAACGTCACCATGCAGTTCGGCAG  
TAAGCCGTTGTTTGAACAACTTTCCGTCAAATTTGGCGGCGCAACCGTTACGGCCTGATTGGCGCGAACGGTAGTGGTA  
AATCCACCTTTATGAAGATCCTCGGCGGCGACCTTGAGCCGACGCTGGGTAACGTTTCCCTCGATCCCAACGAGCGCATT  
GGTAAACTGCGTCAGGATCAGTTTGCCTTTGAAGAGTTCACTGTGCTGGATACGGTGATCATGGGGCATAAAGAGTTGTG  
GGAAGTGAAGCAGGAGCGCGACCGCATCTATGCTTTGCCGAAATGAGTGAAGAAGACGGCTATAAAGTGGCCGATCTGG  
AAGTTAAATACGGCGAAATGGACGGTACTCTGCCGAAAGCTCGCGCCGGTGAAGTGTGCTTGGCGTGGGAATTCAGTG  
GAACAGCACTACGGCCCGATGAGTGAAGTTGCTCCTGGCTGGAAGCTGCGTGTGCTTCTGGCGCAGGCGCTGTTTGTGA  
TCCGGATATTCCTGCTCGACGAACCGACCAACAACCTCGACATCGACACCATTGCTGGCTGGAACAGGTGCTGAACG  
AGCGTGACAGCACCATGATCATCTCGACGACCGTCACTTCCCTTAACATGGTCTGTACCCACATGGCGGATCTGGAT  
TACGGCGAGCTGCGGCTTATCCGGTAACTACGATGAGTACATGACGGCGGCGACCCAGGCGCGTGAACGTCTGCTGGC  
CGATAAGCCAAAGAAGAAAGCGCAGATTGCTGAGTTGCAATCTTTCGTTAGCCGCTTTAGCCCAACGCTCGAAATCTC  
GCCAGGCAACTTCGCGCGCGCCAGATTGATAAAAATCAAACCTGGAAGAGGTGAAAGCCTCCAGCCGTCAGAACCCTTC  
ATCCGTTTTGAACAGGATAAGAAACTGTTCCGTAACGCGCTGGAAGTGAAGTCTGACCAAAGGGTTTTGATAACGCTCC  
GCTGTTAAAAATCTCAACCTGCTGCTGGAAGTGGGTGAAAAACTGGCGTACTGGGTACCAACGGCGTGGTAAATCAA  
CGCTGCTGAAAACGCTGGTGGGCGATCTGCAACCGACAGCGCACCGTAAAATGGTCTGAGAACGCGCGCATTGGTTAC  
TATGCTCAGGACCACGAATATGAGTTTAAAATGATCTGACCGTGTTCGAATGGATGAGCCAGTGAAGCAGGAAGGCGA  
TGACGAGCAGGCGGTACGCAGTATTCTCGGTGTTTTGCTGTTAGCCAGGACGACATCAAAAAGCCAGCTAAAGTGCTTT  
CCGGTGGGAAAAAGGGCGGATGCTGTTGGTAAGTAAATGATGCAGAAGCCGAACATTCTGATCATGGACGAACCGACC  
AACCACCTGGATATGGAATCATTGAGTCGCTGAACATGGCACTGGAAGTGTATCAGGGCACGCTGATCTTTGTTTACA  
CGACCGTGAGTTCGTAAGCTCCTGGCGACCCGCTTCTGAAATCACCCCGAAGCGGTGATCGACTTTAGCGGTAATT  
ACGAAGATTACCTGCGTAGTAAAGGGATCGAGTAAGTATTATCCGTACCCCGATACTGTCGGGGTACGGCGGCTGAT  
GACAAATGAAAATAGCCTGATGCGCTACGCTTATCAGGCCTACGACGTACCTGCAATATATTGAATCTGCAGGACTTTG  
TAGCCCGGATAAAGCGTTAACGCCGCATCAGGCATTAACAAAGCGCATTGTCAGCAATCTGAGTAACGTGCAATCGATT  
TTCTTAATCCACATCAATTCATTCCATTAATTCTCAAACATCCATGCCAACGCTCGTTACCGTGAATGTTGAGGTC  
GGCAAGCGTAAAGCGTCTTCCAGTTTGTTCATAGTCTCGCGCGGGAAGTGCAGCGGATGCGCCTTTTTCCAGTG  
CGCCTTACCTTGTGCGCGTAGGCAAGATTTTTCTCGACATCGGTGCCGAGGAATGTACATCACGTTGCCCAACCT  
TGTTGATTTTCAACGGGGCAACGGAATGGATGACGTCGACGTGCCACCAGACGGAGTCTCCGGCTTCGAGTTTTGGAAT  
GCTGGTAAACGCTCAATCAACAGTGGATGCCATTGCTCTGATACCGGAATACTCTTCCGGGCGCTACGCCGACAGTT  
CATCCTCCGGCACATCATCAAGCAGCGGACGTAACAGTACGTACGCCATAGCTTCCAGGAATGGGCACGACGTGCAGCAGC  
CCCTGACCAGGAGCATATCAGAGAGCGCTGTCCAGCCCTGGAATGTCCGAAACACGGAACATTTGGTGGTGTGTCAC  
CGTGTACTCTTCAACTTCCGTACGATGTCCGCATGCCAGGGATCATATTGCCCCAGATTGCCATTAAGACGTTGGCGA  
AAACGCGCTGATACGCTGGAAGCAGCCAGCGTCCAGTGCAGCGGAGTGGTATGCGCTCCAAGACCTTTGGAGGTCGTT  
CCGGGCGGACGGCGGCGGATACGGTACGGGTAGATGACGCTCACATCCGGGTTAAACCATTGCTTTCCATCACTTTCAA  
TGTCACAGACGATTGAGAAACGACTGCGCATTGCGCATTTCTTCACTCTGGCGGGCTGCATTTGCGCTGCGACCAAT  
AGATGGGTAATCTCGGACGTGAAGCGCTGAGCTCCCGAAGAAATTATCGCCGGGGCTTTGTAGACCTCGTCAAAG  
CGTTGCGGTCAGATCCAGCATCGACTGATCCAGCCTAGCGCTTGTTCGCGGGGAAATGGCCTTTTATCACCGC  
ACAACCGCAGCTTTAATCTGTTCCGCTGCTCTGCAGTAACATGACCTGCTTTGATATCGGCATAAGACAGCACCGGCC  
AGACGGCATCGCCTGTGCTTTGAGTGCCTGATTTAGCCACTCGCGTGGCAATGTCATCGCTTAGCTGATTAAGATC  
TGCTGGACGTCGCAAGCTGCGCCCGCAGCGCTGCTTCACTGACGGATAGCTGCTTTGTGATCGGCAGGCAATGTGTC  
GCTGGTAAAAGTAGAAGCCATAACCACCTCTCATTAACCTTTATTGAAACCATTCTGATTTGCATGTGACAATATAAGT  
TATAAATAAGTTAATGCAAGTTAATGATTTGATGTGATGTACAGGATGTAAGAAAGAGGGAAAAACGGAGCGCACGGCT  
CCGGTAGAGAGGTGAGCTGTTAAAAGGGGATGTGTTATCCAGCACCGCTGAATCACATTCAGCGCGCTTCATGATTAT  
TATCATCGGTAGCGTAACGGGCGATTTGTTAATGTTTTCCGAGCATTGCCATCGCAAAGGAATAACGCGCCATTTTC  
AGCATCTCCGCATCGTTACCGCTGTCGCAATCGCTACCACATTTTGGCGTGACAGATCCCAGCGTTTTCAGTAACCGCGA  
AATACCGTTTGTCTTATGTAGACCGGGAATAATCAGGTGATAAAGCCAAAACCACTGGTAACGGGTTTTCATAATGCCAT  
CGAGCGCTACGTGAGTTTGTGATCACTAACGGGATTTGTTTATCCGGCAGGTTGAGCGAAAACTTGAACAGTACGTCG  
TCAATCTCCTGATAATCTTTACAGGTTTTCAGGCGATGGTAGTGTGTTTCCATCAGTGCAGCAAAATGCTTCGGGGCATT  
TTCGCTGACATATGCACTTTGACAGCCGAGGCGACAAAATTGAGTTGCTTATCTTTTAGCAACTCGCCAATAACAATCC  
GCGATTTCATGTCGGGTGAGTTCGCGGTGGAACAACCTGCTTGCATGTTTCTGTAACCAAGTGCAGCGTTTTCCGCGACAAA  
GAGATCTCATCTTTAGCTCAGGAAAGAAATGAAATAAGCTGGTAATACTGATTACCGCTGGCAACAACGAACTTAATGCC  
GCGCTTTTTAGTTCTGATATTGCGCCATAAACGTTGGTTGGTTGTACGTTTTGGCGTGGTAAAGAAAAGTACCGTCCA  
TGCTGTGACGATAACTTTTACGCTCATAGGTGTGCTCCTGGCTCGAAAATGAAACCGTAACAGTGAATAACAATGTGA



CGCAGAGCACAAATTATATTTTGAATGAAAGTAAGGATGAAATTGATGATGTGAATGATTTAGCCCGGCGACGACGCCG  
CGGGCCGAGGAGATTACAGCATATGTTTACGTACGGCGATGATATCGTCCTGAGCGTCTGGAGAGAGCGCGGTGAAGAAC  
GCCGAATAGCCCGGACACGCACTACCAGATCGCGATACTGATCGGGATGTTTTTTCGCATCCAGCAGCGTTTCGCGGGA  
AACGATGTTGACTGAATATGCCAGCCTTATGCACCTCAAAGAAGGTACGCAGCAGGATCATCAGTTTTCTGCTTGTCAG  
ATTGCTTCTCCAGCGTTGCCGATTAGTTTTCTGGTTGAGCAACACGCCCGCGAGAATCGCTGCCGTAGGCAGTTTTACCC  
ACTGAGCCAATGACCGCAGTAGGGCCAAGATGGTCAGTACCGGAGGCCGGGCTTGCGCCTTCTGCCAGCGGGGTGTGGGC  
TTTACGCCCCTCCGGTGTGCCATAGTCTGCGCGCCAAACGGTACGTTAGCGGAGATTGATGACGTACCCGCGTAATAGT  
TGCCGCCAACCAGGACACGACCGTAGCGCGGATTATGGTACTGTTTACGTTCTGTCGATATAGGTCTGATAAGCGCGAGCC  
AGCAGCGTATCGACAGTATCATCGTCGTTGCCGTACTTCGGCGCACCGTTAATCAGCCGCTGACGCAGCTGCTCGTGAGT  
CAGGCCGTGCAAGTATCTGCCAGTGGCGAGCAAGCTGTTGCTGACCAATCGCACCTTGTCAAACACCAGTTTTCTTCA  
CTGCCGCCAGGCTGTTGCCGAGGTTGGCAATGCCGACTGCAGGCCAGAAACCAGTCAATTTCCGCGCCGCTTGCTTG  
ATACTTTTTCGCTCGCTCAATACAGTATCCACCAGCGCCGAGCAGAGAATATCGTGACGTTCTCTTCCAGCATGGTGT  
GACGACATATTCGATTTGATTGATTTGCGGGTGTAGTAACGGATTTGCGTATCCACGCGTCCATCACTTATCGAAGT  
TGTTGAAGTTACCTGCCGACAACGCTTTTTCTTGTGGCAGGAACACTTTGCCGCTGGTGGCATCATGCCGCTTCCAGC  
GCCGCCAGCATCACGCGGGCAAGTTGATAAAGCTGCGGTTACAGCGATAGCCCCATTTGCCACCAGCGCGGTTTTTC  
TATAACAACCAATCGCTGCGTAGTCATAAAGCGTCTGCGGTTCAATACCGAGTTTAAATAAATCCGGGATCACGATTTCT  
CGTTGTTGAACGCCGGCATCCCGAAGCCGCAACGGATCACCTGTACGCAGGCGTCGAGGAAATCGTTGCTATTCTCGCA  
TGTTAACGCACGCTGAGGTTAGGCTGAGTGGAACGCAGGCGACCCGAGGATTCGAGGATCGCGTAAGAGAGTGATTAC  
CGCGTCCATTGGTTGACCATCAACCAGATTTTGCCTCCAAATAGTGACGTTCTGATACAGCGGACTTCCCGCAGAGGCTT  
TTGAGTGTGAGCCGAGCGGATCTTGTCACTTCCAGCAGTTTACGCCAGCAGCTATGCAGCATCTCGATGGCGTGTTCG  
CGATCCAGCGTCTGGTTGAGTTCAACGTGCGGGGATAGTACGGGTAGAGATACTGGTCCATACGACCAAACGATACTGA  
GTGACCGTTAGATTGATCTGCAAAATCAACTGGATGAAGTAACACAGTTGCAGCGCTGCCAGAAAGTCTGCGGGGCT  
GGTGGGCGATAAGATCGCAGTTTTCTGCCATCGCCAGCAGTTTATCGCGACGGCTTTCGCGGGTTTGGTTCGCGGCCATT  
TCACGCGCCAGGGCAGCGAAACGTTCAATGTGTTCACTGACTGCCACCAGCACGATATCAATCGTTTTAGGAATTGCTC  
ACCGTGAAATCTTCCAGCACCGTCAGGTTGATGCGCGAGCGACGTTCCGCTACTTCTCGCGCAGACCATCAAGCCCTT  
TTTCCAGCAGCAGCGGAAATTCACCGCCAGGTGCGCATCGCCGAGGTCATATTGCTTCCGCTTAAATGATTCCGGTC  
GCCAGCAGACCTTTTTGCTCATCGGTAACATGCCGTAGCAGCGATCCTGTACGGTCTGACCGCGCCACCACGGGCACAC  
TTCATGCAGAACGCGTTTTGTTCTTCTCGCTCACCGCAAAGCCAGCACCGGGACGATCTGCCAGATCATCAATCTTTTT  
CGATCCACGAGACAGTATATTTCCGGGAAGATCGGGCGGGCGCAACTTTCGTTGCTTGGTTGCCAATGATCAACTCATCG  
TGTTTATCCAGATGGTGGCATTGCCAGGTGATGCGCCAGTGCCAGCGCGGACGTACCGGGATCGGCTTATCGAGATG  
TTGTTGATACATCTCGGTATAGTGCTGCGCGGCTCGGTACAGACTGGCGGTTTCAAAATATGCACCAGCGCATTTTTTGT  
GCGCTTAAATGCGGTGCTGAGCGTGTCCAGTTTACGTGTTGATGTTTATCCTCGTAAGGTGCGGGTTAACCCCTT  
TCTGGCAGGCATACTGCTGGGCAAAGTCGAGCAGTTCTGGCGCATCAAGCGTTTTTCCGGGGCGTATAGGGCAGATTA  
AGTAAGTGATATTTGTTGATGCCAGCGTGTGGTAGGGCAGAAAATGAATTTCCGCAACGTGCAGCTCGTCCGGCGCAA  
ATCGGTAATGGCTTTTACAGAGTTTTCTGCGGCATTAAGCCCTGAATCAGCGGCACGCGGATAATGATTTTTTTCGCCG  
CTGCGGCGAGTTTTTTCAGTTATCCAGCACTTGGCGGCTTACCGTGGTCCACTGTTTAAACGGCGCGTCCGCAACG  
TGTTTTAAATCGCAAGAAACAGATCGATATAGGGCAGAGAAGGGGCGATATATTTCCACGGCACATGCAGACAGTTTT  
TACCGCAGTATGAATGCCTGCTCGTGGCTGGCTTGCAGTAGCCCATCGCCATTTCCGGTGCATAAAGGGCTCACCA  
CCGAAAGCGTTAAACCGCCCGCTGCGATCGTAAACGGTTTATCGCGCAGAACGGTCTGATGATCTCTCAACGCTT  
TTCACTTACCACACCGTTAATGCCTGTGTCGAGCAGCAGTGGTTAACCGCGTCAAGTCTCCGGGTTAACTTTTTTC  
CCGATGAATAAGCAAACCATTCAGCGCGCTCAATCACTTCCGGCGCGGCTTACGCGCAGCTCGCAGCTTCCAGAC  
ACAGTCTGTCGTCATACAGCAGATCCTGCGTGGCGCGGCTTTCCGGTTTCTGACACCAGCGGCAGCCAGCGAACAG  
CCTTAAAGAAATACGACCGTGCAGTACCGGGGCCATCATGGTTCGAGTAGCGCTGAATATTGAAAATCATAGTTGCCCTC  
TCTATTTCTGTTCAAGCATTAAAATACTTTTGAATGAAAGTTAGATTGATGTGCGTCAACTGTTTCCAGAGAGTTTTCCCGTG  
ATAGTCTACATTACAGACAAAAGTACATTTTGGAGTGGTTATGGAAGTGTATCTGGATACCTCAGACGTTGTTGCGGTG  
AAGGCGCTGTCACGATTTTTTCCGCTGGCGGGTGTGACCACTAACCAAGCATTATCGCCGCGGGTAAAAAACCGCTGGA  
TGTTGTGCTTCCGCAACTTATGAAGCGATGGGCGGTGAGGGCGTCTGTTTCCAGGTAATGGCTACCACTGCCGAAG  
GGATGGTTAATGACGCGTTAAGCTGCGTTCTATTATTGCGGATATCGTGGTAAAGTTCCGGTGACCGCCGAGGGGCTG  
GCAGCTATTAAGATGTTAAAAGCGAAGGATTCCGACGCTGGAAACCGGATATATGGCGCAGCACAAAGGGCTGCTGTC  
GGCGCTGGCAGGTGCGGAATATGTTGCGCTTACGTTAATCGTATTGATGCTCAGGGCGGTAGCGGCATTACAGCTGTGA  
CCGACTTACACAGTTATTGAAAATGCATGCGCCGAGGCGAAAGTGTGGCAGCGAGTTTCAAACCCCGCTCAGGCG  
CTGACTGCTTACTGGCAGGATGTGAATCAATTAATCTGCACTGGATGTGGCACAAACAGATGATTAGCTATCCGGCGGT  
TGATGCCGCTGTGGCAAGTTTGGAGGACTGGCAGGGAGCGTTTGGCAGAACGTCGATTTAACCGGACGTTCTGCATC  
CTATAAATTGCTGATGACGTGGCGGAGTGCCGCGTCTTATCAGGCTGGAGGTGGCAATTAATGCCACACACCTCACA  
CCCCGATTACGCATCAGTTTCAATTCGCGAAACTGACAGGTCATCGCATCGTACATGACGATTTTCCCGCTGGCGGTT  
TGCCATAACCTGCCAGCATTTTATGTCGTTCCATTGCTGCAACGAACCAATTACGCCGATCAACGGTGCATTACGCT

GCTTCCACGCAGGTTAATGCATTTTACCAAAACAAACGGCTAAGGCAGCGATAGCACGGTTCACCGTCTGATAAGTAAA  
GACGGTGATTTGACCTTCCATACGAATTGCCGCGCCGAAACCAGCGGTACCTTCGCGGCAAAACAGCCTGCGTTCAGTT  
GATTACGTACCGCAACGTTATCCGTACAGTCGAGCACCAGATCGTGTTCAGCAATCAATGCTGCAAGTTCGCGTCATCC  
AGCAGTGCATTGACTGGCGTAATCGCGATATGTGGTGTGATCCGCGTCAGGGCGTCACGGGCGGATTCCACCTTCGTTG  
CCCAGCCGTGGCATCACTGTGCAGTGTCTGGCGTTGAGATTCGAGAGCGAAACCGTGTGCAAGTCGAGCAGCGTCAGGT  
TACCGACACCGGCGCTTGCCAGATACTGCGAGGCTGCACAGCCGAGGCGCCAGGCCACTATCAGCACGCGAGAATCT  
TTCAGCGCCTCCTGGCCGTCAAAATCAAAGCCGCGCAGAATGATTTGCCGGTGTAGCGCAGCATCTCCTGATCGCTGAG  
TTCCGCCATTACAGGCCTCCGAACAACGCGTTAAACGGTCTACTTCCACCCATTGCCCCACTTCCACATTGCCGCGATC  
GCGTTCCAGCACGATAAAGCAGTTGCCGAGGCTAAAGGAGCTAAATATATGTGAACCTGATGTCCGGTGGTTCGTCACTT  
CCAGTTCGCCATCGGCGTTCGTTGCAGCAGCCGCGCTGAAATCAAGACGTCCTGGCGTTTTTTTCAGGCGGGACGCT  
GTGCGTACGCGCTGGCGCGGGCAGGCCGCTGGCGGTGTACCGCTTAGTTTTGCCAGCAAAGGCTGTACCAGTTGATA  
GAAGGTCAGCGTCGCTGAAACCGGTTGCCGCGCAGGCCGAGAACCAGCTATTGCTGAGTTTACCGAACGCGAACGGTT  
TACCTGGTTAATCGCCAGTTCAGAAAGGCGATCTCCCCAGCTTCAAGAATCGTTTTGGTGTAAATCCGCTCACCC  
ACTGAAACACCGCGGAACGATCACCACATCCGCTGGCTGTCCGCTTCAATAATGCGGCGCGCAGGGCATGGGGATC  
GTGCGGATAAATCCCTAAGTTAATTACCTCGCATCCCACTGTTCTAACATCAGGTGTACGGCGAGACGGTTGGTATCGT  
AGATTTGGCCGTCGCCAGCGGCTGACCGGCAACTGGAGTTCATACCCTGAGAAAAAGCGCTACACGCATTTACGA  
ATCACCGGAACCTTCGGAATCCCCAGTGAAGCAATTAAGTGGCAGCTCTGCGGTAGTCAGGCGAGTTCGCCCGGGAAAAAC  
AACCGCACCTGCAGAGATATCTTACCGCGCAGCGCAATATTTTCCCGCTACGCACTTACGAGTAAAAACGACGCCAT  
TGTCATTTGTTGAGTCTGCTCCTGCATCACCACCGCTTCGAGCCTTCCGGCACCGGCGACCGGTGATAATACGAATG  
CAGGTACCCGCGAGGCCATTACCATGGTATGGCTGACCGGCAAGGATTTACCGGCAACGGGCGAGCGTTGCCGAGGC  
AATATCGGCTAAACGACCGCGTAGCCGTCATTGCGGAGTTATCAAACCCGGAACATCAAGCGGCGAAACGACATCGC  
TCGCCAGAATACGACAAAACACTGTACCAGTGGCAGCGTTTCTGGGCGGTGAGTGGGTGACGCGAGAAAGCATCTCA  
TTAAGCGCGGTGTGAGCGACATCAATCCGGTGGTAAATTCATGAAAACACTCCTGCGGAGGCAAATCGAATTTGCCT  
ATTATGTCAGAAAAACGCCACAGACTGTATGCCACCTCGGGCGTAGCGCTGGTCTGCCTTACATGCCATATCCATCT  
TTCTATATTCAAAAATTGAATGAGTAATTCATAAAAATTCTGATATTTATAGCAAAAGTGGCGAACACCCTTAATGGAC  
GAATACTATGGGCAAAGCAGTCATTGCAATTCATGGTGGCGCAGGTGCAATTAGCCGCGCGCAGATGAGTCTGCAACAGG  
AATTACGCTACATCGAGGCGTTGTCTGCCATTGTTGAAACCGGCGAGAAAATGCTGGAAGCGGGCGAAAGTGCCTGGAT  
GTGGTGACGGAAGCGGTGCTGTCTGGAAGAGTGTCCACTGTTAAACGCCGAATTTGGCGTGTCTTACGCGTGATGA  
AACCCATGAACTGGACGCTGTGTGATGGATGGTAAACCCCTGAAAGCCGGTGGTGGCGGGCGTTAGTCATCTGCGTGA  
ATCCGGTCTTTCGCCCGCCGCTGGTATGGAGCAAAGCCCGCATGTGATGATGATTGGCGAAGGGGCGAGAAAATTTGCG  
TTTGCTCGTGGCATGGAGCGCTCTCGCCGAGATTTTCTCCACGCTTTTGGCTTATGAACAACACTACTGGCAGCGCGCAA  
GGAAGGGGCAACCGTCTCGACCATAGCGGTGCGCCACTGGATGAAAAACAGAAAATGGGCACCGTGGGGGCGTGGCGT  
TGATTTAGACGGCAATTTGGCGGCGAGCCAGTCCACAGGCGGAATGACCAATAAATTACCCGACGAGTTGGCGATAGT  
CCCTTAGTGGGTGCCGATGCTACGCCAATAACGCCAGTGTGGCGGTTTCTTGTACCGGCACGGGCGAAGTCTTATCCG  
CGCGCTGGCGGCATATGACATCGCCGCGTTAATGGATTACGGCGGATTAAGTCTCGCGGAAGCCTGCGAGCGGGTAGTAA  
TGAAAAACTCCCTGCGCTTGGCGGTAGCGGTGGCTAATCGCTATCGACCATGAAGGGAATGTCGCGCTACCGTTTAAAC  
ACCGAAGGAATGTATCGCGCCTGGGGCTACGCAGGCATACGCCAACCCGGTATCTACCGTGAAAAAGGGGACACCGT  
TGCCACACAGTGTGAACCTGATGCCGTAATGTCTGGCGGTTGAAAATCTGAATATTGCCTTATGCAGGACAGCAG  
AAAATAGCTGCGGTCCGCAATCTCTCTTTAGTCTGCAACGCGGTGAGACGCTGGCAATTTGGCGAATCCGGCTCCGG  
TAAGTCAGTGACTGCGAATTTGGCATTGATCGCCTGTTGGAACAGGCGGGCGGTTAGTACAGTGGCGATAAAAATGCTGTTGC  
AGCGGCGCAGTCGCGAAGTGATTGAACCTTAGCGAGCAGAACGCTGCACAAATGCGCCATGTTTCGCGGTGCGGATATGGCG  
ATGATATTTACGAGCCGATGACATCGCTGAACCCGATTTTACTGTGGGTGAACAGATTGCCGAATCAATTCGCTGCA  
TCAGAACGCCAGTCTGGAAGAAGCGATGGTGCAGGGGAAGCGGATGCTGGATCAGGTACGCATTCCTGAGGCACAAACCA  
TTCTTTACGTTATCCGCATCAACTCTCTGGCGGGATGCGCCAGCGAGTGTGATTGCGATGGCGCTGTCATGCCGCCCCG  
GCGGTGCTGATTGCCGATGAGCCAACCACCGCGCTGGATGTCATTTACGGCGCAGATCTGCAATTAATCAAAGTATT  
GCAAAAAGAGATGTGATGGCGTTATCTTTATCACTCACGATATGGGCGTGGTGGCAGAGATTGCCGATCGGGTACTGG  
TGATGTATCAGGGCGAGGCGGTGGAACGGGTACCGTCAACAGATTTTTTATGCACCGCAACATCCTTACACCCGTGCG  
CTGTTAGTGTGTTCCGCAACTTGGTGCATGAAAGGTTAGATTATCCCCGACGTTTCCCGTTGATATCGCTTGAACA  
TCCAGCGAAACAGGCCCCCCCCATCGAGCAGAAAACGGTGGTGGATGGCGAACCTGTTTTACGAGTGCATAATCTTGTCA  
CCCGTTTCCCTTTCGCGAGCGGTTTGTGAATCGCGTAACGCGGGAAGTGCATGCCGTTGAGAAAGTCAGTTTTGATCTC  
TGGCCTGGCGAAACGCTATCGCTGGTGGCGAGTCTGGCAGCGGTAATCCACTACCGGGCGGGCGTTGCTGCGCCTGGT  
CGAATCGCAGGGCGGCGAAATATCTTAAACGGTCAAGCAATCGATACTTGTACCCGCGAAACTTACGGCATTACGCC  
GGATATTCAGTTATTTTTTACGACCTTACGCTTTCGCTGGACCCAGTCAAGCCATCGGTGATTGATTATCGAACC  
CTGCGTGTACACGGTTTATTGCCAGGTAAGACGCGCTGCACGGTTGCGTGGTGTGCTGGAGCGCTGGGCGCTGTTACC  
TGAACATGCCTGGCGTTACCCGATGAGTTTTCCGGCGGTGAGCGCCAGCGCATCTGCATTGCTCGCGGTTGGCATTGA  
ATCCAAAAGTGATCATTGCCGACGAAGCCGTTTCCGGCGCTGGATGTTTCTATTTCGCGGGCAGATTATCAACTTGTGCTC

GATCTCCAGCGTGATTTCCGGCATTGCGTATCTGTTTATCTCCCACGATATGGCGGTGGTAGAGCGGATTAGTCATCGTGT  
GGCGGTGATGTATCTCGGGCAAATTGTTGAAATTGGTCCACGGCGCGCGGTCTTCGAAAACCCGCAGCATCTTATACGC  
GTAAATTAATGCGGCGAGTTCGGTGCCTGAACCGTCCCGACAACGACCGCAGCGTGTACTGCTGTCGGACGATCTTCCC  
AGCAATATTCATCTGCGTGGCGAAGAGGTGGCAGCCGTCTCGTTGCAATGCGTGGGCGGGGCATTACGTCGCACAACC  
ACAATCAGAATACGCATTATGCGTAGATAACATTCAGGCGGAGAATAAAATGGCAAGAGCTGTACACCGTAGTGGGTTA  
GTGGCGCTGGGCATTGCGACAGCGTTGATGGCATCTTGTGCATTGCTGCCAAAGATGTGGTGGTGGCGGTAGGATCGAA  
TTTACCACGCTCGATCCGTATGACGCAATGACACGTTATCTCAGGCCGTAGCGAAATCGTTTTACCAGGGGCTGTTCCG  
GTCTGGATAAAGAGATGAACTGAAAAACGTGCTGGCGGAGAGTTATACCGTTTCCGATGACGGCATTACTTACACCGTG  
AAATTGCGGGAAGGCATTAATTCAGGATGGCACCATTCAACGCCGCGGGGTGAAAGCGAATCTGGACCGGGCCAG  
CGATCCGGCGAATCATCTTAAACGCTATAACCTGTATAAGAATATTGCTAAAACGGAAGCGATCGATCCGACAACGGTAA  
AGATTACCCTCAAACAGCCGTTCTCAGCGTTTATTAATATTCTTGCCCATCCGGCGACCGCGATGATTTACCAGGACGG  
CTGGAAAAATATGGCAAGGAGATTGGTTTTATCCGGTGGGAACCGGACCGTATGAACTGGATACCTGGAATCAGACCGA  
TTTTGTGAAGTGAAAAATTCGCGGGTACTGGCAGCCAGGATTGCCAAACTGGACAGCATAACCTGGCGTCCGGTGG  
CGGATAACAACACCCGCGCGCAATGCTGCAACCGGTGAAGCGCAGTTTGTCTTCCCATTCTTACGAGCAGGCCACA  
AAAGCCGTTTCGATAACCCGAAGTCCGTGAGGCGTGAATTACGCCATTAACCGTCCGGCGTGGTAAAAGTTGCTTTG  
CGGCTATGCAACGCCAGCTACTGGTGGTACCGCCAAGTATCGCTACGCGCAAAGTTATAAACCGTGGCCTTACGAT  
CCAGTGAAAGCGCGCAATTACTGAAAGAGGCGGGATATCCAACGGTTTCAGTACCACGCTGTGGTCTGCACATAACCA  
CAGCACCAGCGCAGAAAGTGTGCAATTTACCAGCAGCAGTTAGCGCAGGTGGGATTAAGCCAGGTGACTGCGATGG  
ATGCCGACAGCGGGCGCAGAAGTTGAAGGTAAGGGCAAAAAGAGAGCGCGTGGGATGTTTACTACTGGCTGGTGGT  
GCTTCAACCGCGAAGCGGACTGGGACTATCGCCGCTGTTTGCCTCGCAGAACTGGCCACCGACGCTGTTTAAATACCGC  
GTTTTACAGCAATAAACAGTGGATGACTTCTGGCTCAGGCACTGAAAATAATGATCCGGCGGAAAAGACCCGCTTAT  
ATAAGGCGCGCAGGATATCATCTGGCAAGAATCGCCGTGGATCCGCTGGTGGTAGAAAACTGGTGTCCGACACAGT  
AAAAACCTGACCGTTTTTGGATCATGCCAGACACCGGCTTCACTTTGAAGACCGGATTTGCAATAAGCAACGCAGGG  
AGTGAATGCTTAATTACGTTATCAAACGCTTACTGGGTTGATTCCGACGCTGTTTATCGTCTCGGTGCTGGTGT  
ATTTGTCCATATGCTGCCCGCGGATCCGGCGGATTGATTGCCGGCCCCGAAGCTGATGCGCAGGTTATAGAATGGTGC  
GTCAGCAGCTGGGTTGGATCAGCCGCTGATCACCAGTTCTGGCACTATATCAGCAATGCTGTGCAGGGGGATTTTGGC  
CTGTGATGGTGTGCGTGTCCGGTGGCGATGAGATTGCCAGCCGCTTTATGCCAACGCTGTGGCTGACCATAACCAG  
TATGGTCTGGGCGGTTATATTTGGTATGGCGGCGGAATTATCGCCGCGCTGTCGGCTAACCGTTGGCCGGATCGATTGA  
GTATGACCATTGCGGTGTGGGGATCTCGTTTCCGGCATTGCTCTGGGGATGCTTTAATTCAAGTATTCTCCGTTGAA  
CTGGGCTGGCTGCCTACCCTGGGAGCAGACAGTTGGCAGCACTACATTTTACCCTCCCTGACGCTCGGCGCGCAGTGGC  
CGCCGTGATGGCGCGCTTTACCAGCGCGTCTGTTTGTGATGTTTTAAGCGAAGATTATATGCGTACCAGGAGGGCGAAAG  
GGGTGAGCGAAACCTGGGTTGCTCCTCAAACACGGGCTACGTAACCGCATGATCCCGGTAGTGACCATGATGGGCTTACAG  
TTTGGCTTTTTGCTCGGTGGTTCATCGTTGTGGAGAAAGTTTTCAACTGGCCGGGACTTGGACGCTTACTCGTTGACTC  
CGTAGAAATGCGTGATTACCCGGTATTACAGCGGAAATCTGCTTTTCTCGCTGGAATTTATTCTTATCAACTTAGTGG  
TGATGTGCTTACGCCGCCATTAAACCGGCTATCAGGTACAAGTAAGGATGCGACTATTTAACTGGCGACGTCAGGCGG  
TGTTAAACGCCATGCCACTGGTCAAACCTGACCAGGTACGTACACCGTGGCATGAATCTGGCGACGATTTCCGCGTCAG  
CATATGGCGATGACCGCCGATTATTCGTTATTTTATTGATTGGTGGCCATTTTGCACGCTGGATCGCTCCCTATGA  
CGCCGAAAATATTTTATTATGACAATCTGAATAACGGACCTTCTTGCAGCACTGGTTTGGCGTGGATCACTGGGGC  
GTGACATTTTCAAGCGTGTCTGGTGGTGGCGCAAACTCCTGGCGGGCGTGGTGGCGGCTGTTTCCGCTGTTTATCGTGGCGC  
ATCGGGACGTTGCTGGGCTTGGTCTGCTGGATATTATGAAGGCTGGTGGATCGGCTGATCATGCGCATTTCGATGTGCT  
GTTTGCCTTCCCGGATTTTACTGGCGATCGCTGTTGTTGCGGTGTTGGGAAGCGGCATTGCTAACGTGATTATTGAG  
TCAGCAGCAGTATTGGTGCACGATATGACCGTTTTGTTGCGTCATATCCTGCTGGGACCGTCTCTTCTATCGTGGT  
GTTTTTACCATGCGCATTGGTACCTCGATTATCTCTGCCCGCAGCTCTCATTCTCGGCTCGGTGCGCAGCCGCCGA  
CACCAGAGTGGGAGCAATGCTCAATGAGGCTCGAGCGGATATGGTTATCGCGCCGATGTCGCTGTTTTTCCGGCCCTG  
GCTATTTTTCTGACCGTACTGGCGTTCAATTTGTTGGCGATGGTTTACGCGATGCGCTGGATCCGAAAATTAAGGATA  
GTTACGTTTGAATATTGCTTAAAAGGTAATCACCTCACAGGAAATATTGCCCTAAGCAAGTGTGTAACCTTCTGCTG  
ATTTTGTAGAATCGGTAATTTGGTAAAAAGCCGAGCAAGGGACAATTTTGCAGCGGCACAGCGTTCAGATAGTTAT  
TTTGTAAATGATTAACATGCTGAGTTTATACGAAAAGATAAAGATAAGGCTGATAATTTTATTTTATTGGCAGCACT  
GTCATTTATTGGTCTTTTTTTCATCATTAACTATCAACTGGTATCGGAGCGCGGTAAAACGTGCCGATAGCCGCTTTG  
AACTTATTCAGAAAAACGTTGGCTATTTCTTTAAAGATATTGAACGTTCCGGCCTGACATTAAGGACTCACTGATTTA  
TTAAAAATACAGAGGAGATTCAACCGCCGCTGATTCTTAAAATGAAAATGATGCCATTTTAGACTCGGTGGGACTGGT  
ACTTGATGATAATAAATATTATCTTTTTTCCGGGAGGGCGAATGATAAAATCGTTGTTTATCATCAGGAACAAGTAAATG  
GACCGCTTGTGACGAGTACGGGCGGTTATTTTTGCGGATTTTAAACCATCGAAACGACCGTGGTGGTGGCTTCAGAT  
GACTCTAACACAGCTGGAATCCGGCATAACAATTGCTTTGATCGTCCGGTAAAAATGTATCTTTTTACGCTACACAT

CAACGGCAAAGATCACGATTTGTTAGCGGTGGATAAAAATTCATGTCGATTTAACTGGCGATATCTGAACGAGTATCTTG  
ATCAATCAGCGCTAATGATGAAGTTCTATTTTTGAAACAAGGCCATGAGATCATTGCAAGAATCAACTCGCTCGTGAA  
AACTGATTATTTATAATAGCGAAGGTAATTATAATATTATTGATTCTGTGATACTGAATATATCGAAAAACATCAGC  
GGTGCCAAACAACGCATTATTCGAAATCTATTTTTATTATCTGGCGGTAATTTATTGAACGCATCAGATAAACTTTTTT  
ATCTGCCGTTTGCCTTATTATTATCGTATTGCTGGTGGTTTATTTAATGACCACTCGTGTTCCTGCGCAATTTTCT  
GAAATGACAGAGCTGGTTAATACGCTGGCGTTTTGCTGACTCAACGGATCAAATCGAGGCTCTGAAAAATTCGTGAAGG  
CGATGCGAAAGAGATTATCAGCATCAAAAATTCGATCGCGGAAATGAAAGATGCCGAAATGAACGGTCAAATAAATTC  
TCTACTGATCTTACGATCAGGAAAGTGGTTTTATTAATAATATGGCGATTATTGAGTCTAACAATAATCAGTATCTG  
GCTGTGGGGATCATCAAATGTGTGGTCTGGAAGCCGTGGAAGCGGTGTTTGGTGTGATGAGCGCAATAAAATCGTCAG  
GAAATGTGTGAGCAATGCGGAGAAATATGCGCAATGCTGCGATATCGTGACATTCAATGCCGATCTCTATTTACTTC  
TGTGTGCGGAAATGTACAGACATTTACCGTAAAAAGCGATGGTAAACGATTTTGACAGCAGCTTTGGCTACCGCAAT  
CTGCGCATCCATAAGTCTGCCATTTGTGAACCTTTGAGGGGAAACCGCTGGAGTTACGCAGAAAACTGAACTGGC  
GATTTCCAGTATCCGTGACCATATGTTCTCAGAGTTATTTTCTGTGATGACGCGAAACTCAACGAAATAGAAGAGAATA  
TCTGGATTGCGGTAATATTCGCCATGCAATGAAATGGCGAACTATTCTCGTCTATCAACCGATCGTTGATATTAAC  
ACCCGCGCATTCTGGGCGGAGGCGTTGTGCCGTTGGGTGTCTGCCGAGCGGGGATCATTTACCCGCTGAAGTTCAT  
TACCAATTGCTGAAGATATCGGTTTTATCAATGAGCTGGGTTATCAGATTATTAACCGCAATGGGTGAATTCAGACATT  
TTAGTCAGCGTGCCTGCTGAAAGGATGATTTCTACTGCATATTAATGTTTCGCCCTGGCAGTTAAACGAACCACACTTT  
CATGAGCGTTTTACCACCATCATGAAAGAAAATGGCCTGAAGCGAACAGCCTCTGTGTTGAGATCACTGAAACCGTGAT  
CGAGCAATTAATGAACATTTTTATCTCAATATTGAACAATGCGTAAACAAGGGGTACGGATATCGATTGATGACTTTG  
GCACCGTTTTGTCAAACCTGAAACGTTTTATGAAATTAATCCAGACAGCATAAAGGTGGACTCGCAATTCACCGCGGAT  
ATTTTCGGTACTGCGGAAAAATTTGTGCGCATTATTTTCGACCTGGCAGCTATAACCGGATCCCGGTGATTGCGGAAGG  
CGTAGAGAGCGAAGACGTTGCGCGCAATTAATCAATTAGGATGTGTTGAGGCTCAGGGTATCTGTACCAGAAACCCA  
TGCCATTCTCCGCTGGGATAAAAGTGGAAAATTAGTAAAAGAGTAGTTACGTATGTCCAGAATCAATAAGTTCGTA  
TACAGTCAGTCTGCTGATTTTTATCATGATTTGAGCAGTTGCCTGCGGGATCTACTCAATGGTAAAGGAACGGGTGT  
ATAGCCTGAAACAGTCCGTTATTGATACTGCTTTTGGCGTGGCAATATTGCTGAATATCGGCGTAGCGTGGCAATTGAT  
CTTATCAACACGCTAAATCCACGGAGGAACAGCTGTTGGTGGTTTGGCACAGCTTACGCCGACTCGGTTTCCCCCTC  
TTATTTGTACGATGTCGGTCTTATCTGATTTCCAGTGACGAATGTATTGAGTAAAGGAGTTCGAGAAAAATTATTGTG  
CAGATATTATGACAGTGTGAAGTATCGACATGTCAAAAATACAGGGTTTATCTTTTTGACGGTAAACCTTCGTCTAT  
TACCCTATCCGGTAACTACAATCGTAGTCTGATTTTTGCTGGTCTGGAGCGTTTTTCTTTACTGTCAAAATCGCT  
GGCGATGGACAGCGAGAACCCTGATGTTCTCTATTTAAGAACGGTAAACCGGTGACCGGTGATGAATATAATGCTAAAA  
ACGCCATCTTCACCGTTTCGGAAGCGATGGAGCACTTCGCCTATTTGCCGACCGGATTGTATGATTTGCGTATAAAAA  
GATGTTTATTTGCGGGTTTGTACATTGATTTTTCTTTGCCGATTGGTGGCAGTGATATCGGGTGCCAGTTGCCTCTA  
TCTGGTACGCAGAGTGATTAATCGTGGTATTGTGGAGAAAAGCCATCATTAAACCATTTTGAACCGGACTGCGATG  
GCGGGCTTTTTCTTTGCGCTGCCGATGTCAAAAATCTACAGTATGTATAACTCGGCGTTCTGGACGACCTGACCAA  
GCAATGGGCAGAAAATCCTTTGACGAAGATTTAAAGCGCTGCCGAAAAAGCGGTTATTTGTGCTGTTTACGTCGA  
TAAATTCAAAAACATTAACGACACCTTCGGTCATTTGCTGGGCGATGAAGTGTGATGAAAGTGGTAAAAATCCTTAAAT  
CACAGATCCCGGTAGATAAAGGTAAGTCTACCGCTTCGGCGGTGACGAATTTGCGGTGATTTATACGGGTGGAACGCTG  
GAAGAGTGTATCGATTCTAAAAGAAATCGTTTATTTCCAGTGGGAAGCATTAAATTAAGTACCAGTATCGGTGTAGC  
ACATTCAAATGAATGTCTACCGTGAACGCTTAAAAATGCTGGCGGATGAGCGGCTGTATAAGAGTAAGAAAAACGGCA  
GGGCACAGATTAGCTGGCAGTAATCATTATTCGAGCGCCGACAAATGATTTTCCCGGCTGAATTAATTAACCCGGC  
TACCCCAAAAATCGTACTCATCGGCTGCTCGACTTTACACAGCAGGATATCACCCGGCTTAAACGTTGGTTTACCATTG  
AGATAAACCGCGCGTGCATTTCCGGTGCATCTGCCATGCTGCGACCAATCGCGCCTTCTTCTGCTCCACTTCGTCGATAAT  
CACCAGAATTTACCGCCACTTTCTTCTGAGGCGCTCGCGGAAATCTGCTGCTGCAGCTGCATGAAACGGTTCACGC  
GTTCTTCTTTAACTTCTTCCGGAACCTGGTCAGGCAGGGCATTGGCGTCTGCACCTTCAACCGGGCTGTATTTAAAGCAG  
CCAACGCGATCCAGACGCGCTTCTTTCAGGAAGTGCAGTAGCATCTGAAATCTTCTTCTGCTCGCCAGGGAAGCCGAC  
AATAAAGTTGAGCGTAGGGTCAAGTTCGGGCGAGATTTGCGGCCACTGTTTGTGCGCGCCAGTTGGCGATCTACAGAAC  
CCGGACGCTTCATCAGTTTGAAGTGCAGCGGGCTGGCGTGTGCAACGGAATGTCCAGATACGGCAGGATTTTGCCTTCT  
GCCATCAGTGGGATGACGCTGTCACATGCGGATAAGGTAACGTAAGTGCAGACGTGTCCAGATCCCGAGTTTCGATAA  
CTGTTGCGACAGGCTGACCATGCTGGTTTTTACCGCTCGCGTGTGGAAGCCAGTACGATGTTTAAACATCAACGCCAT  
AGGCGGAAGTATCCTGCGAGATCACCAGAATCTCTTAAACGCCGCATCTACCAGACGTTTCGCTTCACTTAACTTCG  
CCAATCGGACGGCTCACCAGTTCGCCGCGATAGACGGAATAATGCAGAAGTGCAGCGGTGATTACAGCCTTCAGAAAT  
TTTTCAGATAGGCATAATGACGCGGCGTCAAGTTTACACCTTGTCTGGCACCAGGCTCAGGAATGGGTTGTGTTTCGGTT  
TTGGCAGTAGTGATGAACGTGCTCCAGAACCTGCTCATAGCTATGAGGCCCGGTGATTTCCAGCACTTTCGGGTGGACT  
TCGCGGATCTGATCTTTTTCGCCCCAGACAACCGGTCAATAAACCTTGGCGTTTTTCACTCAACGCTTCAACCAATGGC  
TTCCAGTATTCTGTACCGCGCTGTCAATAAAGCCGAGGTGTTGACGATCACCATGTCCGCATCGTATAGCTCGGTA  
CCACGTCATAACCTTCAGTGCAGGATTCGGTGAATAACGCTCTGAATCAACAAGGTTTTTTCGGACAGCCAAGGAAACA

AAGCCGATTTTCGGCTGGGGAGTTACTTTGCTCATAGCTTAAAAAATATTCAGTTACAGGAAAGGTCAGGGCAGGGATT  
TACAGAGTTCTGGATAAAATTTGTATCGCAATCTCATTGCTGGCGGAGGCGAAGGAAATGTAATTTTTGTTAATTCGGC  
GTGAAGAATTGATCCTGGACAGCATTTCCTCAAAAAATAGCCATACTATTTAATTGCAACAAGGCTGGGAGAGGAGGA  
TCGAAGTATGTTGCTTGACAGACAGCGAATCGATCTGCTGAACCGTTGATCGACGCACCGTTGACCTGCCGCATACG  
TGCAACTGAGGAAGGCAAAAGGATACATGTCCTGACGCAAGCAATCATCTACGAGATAACTTTTTTAACTGAATCCG  
GAACTGCACGATAAATCGCTGCGGTTGAATCTTCATCTGGATCAGGAAGAGTGGAGTGCTCTTCATCATGCTGAAGAAGC  
ATTAGCGACAGCCGAGTATGTTTGTAGTGGGCACCATGATTGCCCGACTGTTATTACCGTCAACGCCGATAAGCTTG  
AAAATTGTCTGATGAGCTAACGCTGAGTATCCAGAGCCTGCAGAAGCACGCCATGCTTGAGAAGGCCTGAAAACTAAGG  
GGGAGAAAGCGTCTCCCCCTTCATGTTTAAAGTTTTGTAAAAATGAATTTGTTATCTCCTCCACTGACTACGCTTTAAGC  
CAGAGTCAATCCGAGGCGTTATGCATCGACAATCCTTTTTCTGTGCCCTTATTTGTCTTTCTCCGCTCTCTGGC  
GGCTCTGCAACGGTAAATGTCGAAGTACTGCAAGACAACTCGACCATCCCTGGGCACTGGCCTTTTTACCCGATAATC  
ACGGTATGTTAATCACTCTGCGCGGCGGAGTTGCGTCACTGGCAAGCAGGAAAAGGATTATCTGCGCCGCTTTCCGGA  
GTTCCGGACGTTTGGGCGCACGGGCGGCGCTGCTGGACGTGGTTTTAGCGCTGATTTTGTCTGAGTCTGCGCCAT  
CTGGTTAAGTTATCCGAAGTTGGCGATGATGGCAAAGCCGGAAGTCTGTGGGTTATGGCCGCTTAAGTGATGATCT  
CAAAAGTGACGACTTCCGACCGTCTTCCAGATGCCAAAACGTCTACCAGCAACCTTTGGCGGGCGGCTGGTA  
TTCGACGGTAAAGGTTATCTTTTTATTGCTCTGGGCGAAAACAATCAGCGCCCGACGGCGCAGGATCTGGATAAATTACA  
GGGCAAACTGTTGCGTCTGACCGACCAGGGCGAAATCCCGGATGATAATCCTTTTATAAAGGAATCCGGTGGCGCGCCG  
AGATCTGGTCTTATGGCATTGTAATCCGCAAGGAATGGCGATGAATCCGTGGAGTAATGCACTGTGGCTGAATGAACAT  
GGCCCGCGCGTGGTGATGAAATTAATATCCCGCAAAAAGGCAAAAACACTACGGCTGGCCGCTGGCAACCTGGGAATCAA  
CTATTCAGGCTTAAAGATACCGGAAGCGAAAGGGGAGATCGTCCGCGGACCGAGCAACCTGTTTTTACTGGAAAGATT  
CGCCCGCTGTGAGCGCATGGCCTTCTATAACAGCGATAAATCCCCAGTGGCAGCAAAAATTTTTATTGGCGCGCTG  
AAAGATAAAGATGTCATTGTGATGAGCGTCAACGGCGACAAAGTACAGAAGATGGCCGTTTTTAAACGGACAGAGGGCA  
GCGAATTCGTGATGTTGCACTGGACCCGACGGTTATTTATACGTTCTCACCAGCAGTCCAGTGGGGAATTACTTAAAG  
TTAGCCACGCAATTAGCTAACGGGAATCATCACCCTTTGCGCACTGCGGGCGTTCAGTGAGTTGCTGATACCAGCGT  
TGCAAGTTGGACGCGGTGCCAGGTGAGGCAACGTTAAACAATTTAGATGAACGGTGGCAGATAGCGATATGCCCCAC  
ACCAACTCGTCCAGAGAACCATTTTACTTTTTGCCAGTTCCGATCGAGCAGGGCAACAGGGCGTCCGACTCTTGC  
AACTGGCATCAATGGCGGCTGATCGCGCTCTCCGGTGGTGTCTGACTAATCCCATCAGGATCCCGCGATGAGCATT  
CTGAGCGTCTGGTTTGGCCAGTCCATCCATTTTCCGTTCCGACGACGTGCCGGTGAGTCGATCCACAGGCGTTTTG  
CCGTAATGTCGCCAGATAGCGGACAAATGGCGTTGATTCCAAAGAATGAGATCACTTTCGTCGTCACGCAACAACG  
GCACCAGCCGTTAGGGTTCATCGCCAGAAAATCAGCATCGTGATTTATCCCAAACTCACGGCCCGGAGAAATTTGCTCA  
TAAGGTAGTCCAGTTCTTCGAGCGTCAGCAATACTTTTTTACGTTAGTTGAATATTCCGACCCACAGCGTAATCAT  
ACTACCCCTTTTCCGACAGGCAGCCACAGGCTGAACAGGACTCCGATGGTGAAGTAAAGTAACTTTTTAAGCAACAGCT  
GGCAAAAAATGACACCAGAAGCAGCGAAGCGGCAGGATATGCATAAACTTTAAAACTTTACCAACTTACGGTTTCTT  
TAAGTTTGTGTGCGTTATTAATCACAACTTATCATACGGCGATATAACGTATTTTTTTTTGAATGGATACTCGGGT  
GCATTTATGACCAATACTCCTCTCTCTCTCGTGGTCTTGACGCGGGTCTGCATTTTTATCCTTTTTGCCCAACGGC  
ATTCGCGCGGAACAAACCGTTGAAGCGCCGAGCGTGGATGCGCGTGCATGGATTTTAAAGGATTACGCCAGCGGTAAG  
TGCTGGCAGAAGGCAATGCGGATGAGAACTGGATCCCGGAGCCTGACTAAAATCATGACCAGCTATGTGGTTGGGCAG  
GCGTTAAGGCCGATAAGATTAACCTCACCGATATGGTACGGTCCGTAAGATGCCTGGGCGACGGGAAATCCGGCACT  
CGGTGTTTCTCGGTAATGTTCTCAAACCGGCGATCAGTTTCCGTTGGCAGACTTGAACAAAGGTGATTATCCAGT  
CCGTAATGACGCTGTATTGCGCTGGTATTACGTTGCGGGAGCCAGGATCATTTATTGGTCTGATGAATGGTTAT  
GCCAAAAACTGGGTTGACCAACACTACCTTCCAGACGGTGCAGGCGCTGGATGCGCCGGGCGAGTTACGACCCGCG  
CGATATGGCATTGCTGGGTAAGCATTGATCCAGATGTGCCGGAAGAGTACGCCATTATAAAGAGAAAGATTACCT  
TCAACAAAATTCGTCAGCCTAACCGTAACCGTCTGCTGTGGAGCAGCAATCTGAATGTTGATGGCATGAAGACAGGAACC  
ACGGCAGGCGCGGATATAATCTGGTTGCTTCCGCTACCCAGGGCGATATGCGTTTAACTCCTGATGTTGGGGGCGAA  
AACCGACCGTATCCGTTTTAATGAGTCTGAGAAATTTGACCTGGGTTTTCCGCTCTTTGAAACCGTGACGCCAATTA  
AACCTGATGCCACCTTTGTGACTCAGCGCTCTGGTTTGGTGATAAGAGCGAAGTGAATCTCGGGCAGGTGAAGCGGGC  
TCAGTGACCATAACCGTGGCAGCTGAAAACTGAAAGCGAGTTATACGTTAACGGAACCGCAGCTTACCGACCCGCT  
GAAAAAAGGTGAGTTGTCGGGACCATGATTTCCAGCTTAAACGTAATCCATTGAGCAGCGTCCGCTGATCGTGATGG  
AAAATGTGAAGAGGGCGGATTTCTTGGTCCGGTGTGGATTTCTGATGATGAAATTCATCAGTGGTTCGGCAGCTGG  
TTCTTTAATCTTCTGATAACCGGATGGCGGAAACGTATCCGTTATACGTCATTAATACATCAACTAATGCGCTGC  
GTCTGCGGTAATCACATACTCATCTCCGGGCAACAATCGCTACCACAATATAAAGCGTTTCAGGTACCCATGCG  
CGCCGACGCACCTTCCAAATTTACTGTGGTGCACAACAGCAGCATGCTTTTGCCTCATGACATGGCCAGTGTTTTA  
CCGCAACTCTCAAGATTAACAGGTAGCGCTTTACTGACATGCACGCCCGCCGAGAAATAAAGCGGATATCCGGG  
CAAAAATTTACAGCTTTGCTGAAAATCGATGGGTTTAAAATGGCGTTGCTGGCGTGAATTCACCACCGCAAGAAA  
CGCGCGCAATGGGGTTTCTTTTCCAGCGCCAGAAAGGATTTAGCGAATAACAAACGGCGGTAAGGGATTTTATTAT  
CAATCGCTTCAATAATCCACGGCGTGGTGGCCACAGTCAAAAAAGAGGCTGATCGGGTCTACCAGCGTCGACGC

AGTTTTGCCGCCGGCGTTTTTCTCCACCAGGCGGGATTTTTGATCGCTTAACAGGTAATGGCTGGCACTGCGCGGTTCC  
CAGAACAATATAGCCGCCGAGCAAAACGACGGGCGCACTGTGGTTGTTTCAGATCGCGACGAATCGTCATCTCCGAAACCC  
CAAGCAGGGCGCGGGCGTCTTTAAGATGTAACCTTATCGCTGCGTTTTAATTCTTGCAGCAGCTGCCGATACGCTCTTCG  
CGACGTGTTTCCATAATCCCTCTGAATAGTTATTGAAGCGAGCCGCTCAATACTACACTTTTTAGCAGAGATCAGTCACG  
CACCAGCCTTTGCGGATCGGTAATGCAAAACAGACGCGATACCAGATTGCAGACGTTGATAGAGTTTTATGCCCATCG  
CTTGCCAGATAATCTGGGCACTAAGGCAGCCAATCATACTGCCAGCAATCCACCGAGCATATCCAGCGGCCAGTGGACG  
CCAAGATAAACGCGCGACCAGGCAATGACGACGGCCAGCACCATTAAAAGTGAGCCGGACCACAGGCGATGCCAGCATAA  
AAATGCCAGTGCAAAGGTGAAAATCACCGTACCGTGATCGCTTGGGAATGAGTCATCCGCCGATGATGCAGGAAGTTAT  
AGCCGATATTTTGCAGAAAGGGTGGTCTGCGGAAAAAGATGCCCATCGTCCAGGACACAAACAGGCTGACCGCCAGC  
GGATAGCGATTTTTATCACAGTTGCCGTTGTGCTGTAAGCCCCACAACCAAAGTACCACGGCCAGCAACGGCACCAC  
GGTAATCAAATCTTTAGCAATAAAAATCGCCAACGAGATCATCCACGGAGCCGAGTCTGGCGTCGCGTTAATAAGAGAGA  
ATAGAGAGAGATTCAAATTTCCAGCATAACTTTCCGACGCAAAGTGATTAAGGGGAGCCAATACAGGCAAGTCGTTGA  
GAATAAAGTGACAGTTAACTGGGTAAGCGGCATCGTCTATTTCCCTCAAGCGGCTGTTTACGGTGGGTGATTGTAA  
CGGCATAGTTAAATAAAAATTAAGAAAGCGTAGCTATACTCGTAATAATGTAAGAATGTGCTTAACCGTGGTTTCAG  
CTACAAAATTCGTTTTCTCGTTAGCTGCGTTTTTAAACTCTGCGGATTATTATTGGCGAAGAAATGCATGCAAAA  
TAAATTAGCTTCCGGTGCCAGGCTTGGACGTCAGGCTTACTTTTTCCCTCTGTCTGTCTTTCGAATTTTCAACCT  
ATATCGGCAACGATATGATTCAACCCGATGTTGGCCGTTGGGAACAATATCAGGCGGGCATTGATTGGTTCTACT  
TCGATGACCGGATCTGCGGGCGGGATGTTTTACAATGGCTGCTGGGGCCGCTGTCGGATCGTATTGGTCCGCTCC  
GGTGATGCTGGCGGGAGTGGTGTGGTTTTATCGTACCTGTCTGGCAATATTGCTGGCGAAAAATTGAACAATTCACCC  
TGTTCGCTTCTTGCAGGGCATAAGCCTCTGTTTCATTGGCGCTGTGGGATACGCCGAATTCAGGAATCCTTCGAAGAG  
GCGGTTTGTATCAAGATCACCGCGCTGATGGCGAACGTGGCGTGATTGCTCCGCTACTTGGTCCGCTGGTGGGCGCGC  
GTGGATCCATGTGCTGCCCTGGGAGGGGATGTTTGTGTTTGGCCGATTGGCAGCGATCTCCTTTTTCGGTCTGCAAC  
GAGCCATGCCTGAAACCGCCACGCGTATAGGCGAGAACTGCACTGAAAGAACTCGGTCTGACTATAAGCTGGTGTG  
AAGAACGGCCGCTTTGTGGCGGGGGCGTGGCGTGGGATTGTTAGTCTGCCGTTGCTGGCGTGATCGCCAGTCGCC  
GATTATCATCATTACCGGCGAGCAGTTGAGCAGCTATGAATATGGCTTGTGCAAGTGCCTATTTTCGGGGCGTTAATTG  
CGGTAACCTGCTGTTAGCGCTGTGACCTCGCGCCGACCGTACGTTGCTGATTATTATGGGCGGCTGGCCGATTATG  
ATTGGTCTATTGGTCTGCTGCGGCAACGGTTATCTCATCGCACGCGTATTATGGATGACTGCCGGGTTAAGTATTTA  
TGCTTTCCGATATTGGTCTGGCGAATGCGGGACTGGTGGGATTAACCTGTTTGCAGCGATATGAGTAAAGTACGGTTT  
CTGCCGCGATGGGAATGCTGCAATGCTGATCTTACCCTGGTATTGAAATCAGCAAACATGCTGGCTGAACGGGGC  
AACGGACTGTTAATCTCTTCAACCTGTCAACGGAATTTTGTGGCTGTCGCTGATGGTTATCTTTTTAAAGATAAACA  
GATGGGAAATTCACGAAGGGTAAAAAATGCCTGACTGCTTGTGCGATCAGGCATTCTCGAATTAATGGTGTGGT  
GTCAATCTGGTGTTCGATAACCATCCCTTACCTACGCTGGCAAGATGGCGAACATAAGGATGCGGGCGTAAGCCGGAG  
CTGGCGCAGGAGCCATAGACGGTTTGGCGACAGTCGCGACGCTGACCGCTTGTGGAACGCTGACTGAATCAGGAACC  
ACAACCACTTTGTATCCACTCGGCACATCGACGGTGACACTTTGCGCCATCGCCACACCAGTAAAGCCCATTAAAGCGC  
GCCAACAGTAGACAATTTTTCATAATCATTTCCGCTGAAATAATGCAGCGGGTTAATTTCCGCGAATTAAGCAGCCTC  
ATTAGGCAATTGTGTTGCCGGGCGTGTGCGGTTTTATTGGTCAAATGGCGCTTCTGTGTTAAGAACTTTATCGATCAC  
ATCCAGTACGCCTTACGGTTATTGGAGCCTGCGCGGATTTTTGCCGCTGCGACGACCGCGCTACCGGCAATTTCCATTG  
CAAACTAAAGCCTGCCTGACGAGCATCTCAATATCGTTACCGCCATCGCCAAAGACCACCACTTCGCTGTGCTTATT  
CCCATAATTTCTGCAGTTGGCGAAGGCCATTGGCTTTATGTACGCCGGGATAATCAGATCGATGCTGCCGTTGCCGTT  
GTGGACCGACACCATAATATCGCGATGGCCTCATGTAATGCTTTTTGTACTTGTGGAATCAGTTTCATCGGAAAGATTCA  
GGCCAAACTTAAAGAAGATACCTCTAAGTTGTCAAAGTTATCGACGATTTCCAGACGGTGATAATACATTTCCGCCACC  
GTTTTATGGCATCGTATAATTTTTGAGTGTATAGGCACTATTTTTCCGACGGCAATAATTTCCACTTCCGGGCGCGT  
CAGCAAATGTTCCACGACAGTAGCAAACGCATCCTTCGATAGCTCGCCATTAAAAAATCTTTGCCTTCGCTCACTACC  
AGCCGCCGTTTTAGCCACAAGGCAATTTTATTAGCAATTTAGGGAAGAAAGAGATCAACTGATAATATTGATTCCCG  
CTGGCGACTACAAAGCGAATTCCTTGTGCTTTCATTGCTGATACTGAGCCATAAACCGCTCACGGTTATAGGTTTTTTG  
ATCGCTTAAGAAAGTACCATCCATGTCTACCGCAATTAATTTAATGCTCATCAACTATTCTCCATCGCCGCTGCGTTTT  
GGTATCGGTTTTGGCGACGGCTTTTCGCGACAATAGCCGCGAGAATAACCAGCGCAGTACAACCAGCATTGCACTACGTA  
ATCCATAATGTTCCGCGAGATAGCCAGCAGCGCGGCCGACGAGGAAAGCCAGATAACCGGTCGTTGCTACCACACTG  
ACGCGGTTGGTGCATCGGGCCGGTATCGTGGCGCAGAAATGGTCAAGCGGAAAGCCAGCGAGGCACCCAGTCCCCA  
GAGTACAACAGACACCCAGCGACCCAGGCGCTATCGACAAAAATAATCAGCCCAATACCCAAACGCCCCATTAGTGCAC  
TGCCCCGAACCACGGCAACGCGACTGTAACGGTTCGATGAACCAACCGCGGTGAAGCGTCCAACGGTCATCCCCAGGTA  
AAACCGGCATAAATCAGCGAGCCGGAAGTAGGGCTAAAACCGTGACCGTCAACCATTAATAAGGGTAACCACTGTTGGC  
AGAACCTTCGCGAAAGGCCATCGCCAGCACCAACACCTATCAGCAGCAACTGGATATCGCGATAAAAAGGTACGCCCTT  
TTTTCGCCATGTGGGTGCCATCGGCAGCATTTTTTGCCCGTACCGTCAAGGATTGCTGAATGGCGATATAAATAGGTGGC  
ATACCTACCAGCGCCGCAATAAAAATGTGACCGTTGCCGGAACGCCAAAGGCCGTCAGTGCCATCCCGACACTGCGCC  
TGCCAGCGTGGCCAGGCTATAAAAACCGTGATCATCGGCAAAACCGTCTTATTCTCGCTCAACGGCAGCACCTT

CAACGTTTATCGCCACTTCCGAGAACAAAACCTTGCCCCAAAGACGCCGAGACCAACGGCAAAGAGCAGGGGCGATGT  
AGCCAGAGTGCAGACTTAATATCATCATCCCGATCAATGCGCAGGACATCGTGACCAGGATGACATTACGTGTCCCAA  
GCGTTTCACTAACACGCCGAGCAGAGAATACCGCTCATCGAACCGATCGACAGACCAAAGAGAACCACCGCCATTTAG  
CGATCGAGACAGAGAGAATATCGCGGATAGCAGGCGTACGGGTTGCCAGGACGCCATTAACAGGCCTGGCAAAAAGAAG  
AACATAAACAGCGCCAGGTTTCGGCGTTTCAATGCATTACGTGAAGAATTTACGGTCATAGATCACGTCAAAAATAAGAAG  
AGGGAAGACAACATTAGCAAGGTTGTGTACATTTGTACACAATTGACAGAGAGGAAATGACATGCGTCGCGCTAACGAT  
CCGCAACGGCGAGAAAAATATCCAGGCCACGCTGGAGGCGGTGAACTTTACGGAATACATGCTGTTACGCACCCGCAA  
AATTGCTACCCTTGCCGGGTACCGTTGGGATCGATGACCTACTATTTTTAGGAATTGATGAGTTGTTACTGGAGGCGT  
TCAGCAGTTTTACTGAGATCATGTCCCGCAATATCAGGCATTTTTAGCGATGTTAGTGATGCTCCGGGCGCATGCCAG  
GCTATCACCGATATGATCTACAGCTCACAGGTTGCAACGCCGATAACATGGAGCTGATGTACCAGCTCTACGCGCTGGC  
TAGCCGAAAACCGCTATTAACAAACGGTAATGCAAACTGGATGCAGCGCAGTCAGCAAACGCTCGAACAATGTTTTGAA  
CCGGAACCGCCCGCGCTTATGCGTTTATTGAGGGGATGACGCTGCATTTTGTACCCGACCGTAAGCCGCTATCGCGC  
GAGGAGATTTGAGGATGTTGAGAGGTTGACGGGTAGTAGATAAGTTTTAGATAACAAAAACCCATCAACCTTGAAC  
CGAATGGCGGGTGTGATGGCTCCACAAAATGGGGACATCAAAGAAAAGCAGTGGCACTAATTAAGACTGATGCCCTGC  
GGAAAAGTTTGCGGTTGCAAAAAATTTCAATTTAGGGCACTTCAGTTTTATCCTAATCCTGGCCATACCATGAC  
GATGATTGTCCTGCCAGCTCAGCAGGACGTTGGCGATTGCATAGGTGCCCGCATAGCCAGCCGCGGATGTTACTGC  
GAGCTGTATCACTGATGATCTCCATTGCCGGCGCGAGGTACGTGCGCCATCATTGCGCCGAACAACAGCGCGGTTT  
ATTGCAATACATAAGCACCGAACAAGAAACAGATAACCACGGGCACCAGACTGACAATCAATCCGGCAATCAACATCTG  
ACCGCAATCGCGCCAGGCGTTATTAATACCGCTACCGGCGCTCAGACCAACGCCTGCCATAAACACCATCAAGCCGA  
ACTCTTTCACCATGCTTAATGCACCCTGCGGAATGTAACCGAAGTCCGGTGGTTAGCACGCATAAAGCCAGCATAATT  
CCGGCGAATAACAACCCGGCAGCGTCCCATGCCGAACTGAATGTGCTGAACTGGAAGGTGATCATCCCGATCATCAG  
CCCAATAACAAGAAGGGCGAGAATGCCAGCAGGTGACCTGGCTGTGAATCGAGATAAAGCCGATGCGATCGGCGA  
TGGTTTTTACGCGCGGGCATCGCGCTGACTTGTAAACGTCACCTTTGTTAAGCACGACGTTGTCTATCTCGGCATC  
TCAATCTGGCTACGAATGACGCGGTTAAGGAAGCAACCGTATCGGTCAACTTCAGTTGTGCGAGACGTTTACCTACAGC  
GTTATGTTTTTAAACGACCACTTCTTCAGTGACGATACGCATGTCGAGAAGTCAGGATCGAAAACCTTTTACCGTTAC  
GGAAGCTGGGATCGAGTCGGCATGGGCTCGGGATAGCCTACCAACGCTATTTATCGCCATTTGTAGCACGGCATCA  
CCGTCTGGATTTGCCAGAATCCCGTTACGTCGAATACGTTCAATGTAGCAGCCGTTTGTGATAAATACCCAGTTCACG  
CAGATTTTTGCCGTCCAGGCCACGTTCCGGGCGGACGCGATAGGCGCGGATCACCGGTAATAAACCTTACCGT  
TGGCATCAGTGTCCAGGCCAGTTCGCGGGCGATTTGCTGGGCGTGGTCTGTAAGTCTGATGCTGCAATTTCCGCAAG  
TAACGCGCACCAACAATCAAACCTACCCAGACCGATTAATAGGTTAAGGCATACCCGAGGCTCAGATTATCCAGTGCCAG  
TGAGAGCTGCCTGTTTTCCATGCCGAATGACGCGATGATCGCCAGCACCGACCAGAACCGGTGTCGACGTCATAGAGC  
CTGCTAACATACCGCCGTCAGGCCAATATCCAGCCAAACAGCTTACCTAACCCTAAGGGCATCACCCAGCGCACTGCCA  
ACCATCACCACTGCTAACATTAGGTAATTTTTCCATCGCGAAAAAAATGGAAAAAAGTTCCGGTCCGGCTTCGACCCC  
GACGCGAAAAATAACAGCATAAAGCCAAAGATTAAGCGCATCGGTGTTAATGCTGAAATGTTGTTGGCCTAATAACAGCG  
ATACGACTAAAACGCCAATGGAATTACCCAGTTGGATCGAACCAAGTCGTAACCTTCCGAGACATAGCCCAAGCGCGAGG  
ACCACAAATAATAACAGAATGTAATCCCATTTAACAATTCGGCGACGTTTATATTACGGAGGCTAACTTCTTGTTTAC  
TAGTAAGCTGTTGAAAGAAATGGTAATTTACGATAATGTTTTTACCAGAATTCAGGGCGCAGATTATTACGCGCACCT  
AAACGATAGTAAAGTAACAATATATTTACTAGTGAATCACATTAGGTATCAACGGCTATATGAATTGCGTTGGCCTAT  
ATTAGCATGGAATGCGAAGCGGCTTTATCTTACTGAACGCCACACTGGCGAAAAATGTGTTGATAGACGCAAGTGTTCG  
AGGAACGAGTGAACATAAACAACGTTGGGCGGGGCAATCTGCTGTTTTGCTCTTTCATTGTGGTGTGCTTTTCTG  
GCGACGCACATGAAAGGCGTTTTCCGGCTGCCGGGCATCTGAAATCGGCTTCTATTTTTTATTCTTCCCTGGAGCAGT  
CGCCAGCTTTTTTACAGCGTAGAGAAGTCTGAAACCTCTGTTTTGGCGCAATGCTGGCGGCACCCTGTTGATGCTCA  
TTATGCGGCTGTTTTTTTACCAGCGCGCTCATTCTGGCAAGAGCTGGCATGTTACTAAGCGCGGTGTTCTGGTGTGCG  
CTGGGGGCACTGTGTTTCTATTTATCAGTAGTTTGTTTAAACCACAGCACAGAAAAATCAGTAAAGCCCTCAACGCGA  
GGGCTTGTGACGATCAGGCGTCCAGATTTTCTTCCACCATGCAGCAAAATCGGTATAGCCGCGATATGTTGCTGAT  
CGACAAAAATCTGCGGCACGGTTTCTACGGGTTTACCTGCCTTTTGTGTAGATCTTCTTATGATCCCTTCCGCACGA  
ATATCTACATACTGATACTGAAATCATCGGTTTATTGCTCAATTTCTCAGCCAGATCTTTTGCACGCACACAGTAAGG  
GCAACCCGAACGACCAAAAAATAACGGTTTGCATTATTTCTCTCCTCATAGATTTATGCCTGTAATGATCACGCTAAAATG  
TATTCGCTGAAAGTAGGTTAACTGTTGCATTAATTGCTAAAAGCTATAACTGTTAAACACAATACAGTAAAAGTTTT  
AGACTGAAGGCTCACTTTGCAGAGGGAAGCGTATGCGCGGATCGGTAATTTGCCTAAAGGCGTGTGATACTGGAATTT  
ATCGGAATGATGCTACTGGCGGTGGCGCTGCTGTCGTAAGCGACTCCCTGTCGCTGCCTGAGCCATTTTCTCGGCCAG  
AGTGCAGATTCTGATGATTTTTCTCGGTGTTTTGCTCATGCTCCCGCTGCGGTGGTGGTTATTCTTACGGTGGCAAAAC  
GTCTTGGCCACAGCTGATGAACCGTCCACCGCAATATTCAGTTTCAAGAAAGAAAAAGATAATGACGCCAACCATTTGA  
ACTTATTTGTGCCATCGCTCCATTGCCATTTCACTGATGAACCCATTTCCGAAGCGCAGCGTGAGGCGATTATTAACA  
GCGCCCGTGGCAGCTCAGTTCCAGTTTTTGCAGTGCAGTAGCATTATTCGATTACCGCAAAAGCGTTACGTGAAGAA  
CTGGTGACGCTGACCGCGGGCAAAAACAGTAGCGCAAGCGCGGAGTTCTGGGTGTTCTGTGCCACTTTAACGCCCA

TTTACAGATCTGTCCGGATGCTCAGCTCGGCCTGGCGGAACAACCTGTTGCTCGGTGTCGTTGATACGGCAATGATGGCGC  
AGAATGCATTAATCGCAGCGGAATCGCTGGGATTGGCGGGGTATATATCGCGCGCCTGCGCAATAATATTGAAGCGGTG  
ACGAAACTGCTTAAATTACCGCAGCATGTTCTGCCGCTGTTTGGGCTGTGCCTGGCTGGCCTGCGGATAATCCGGATCT  
TAAGCCCGCTTTACCGCCCTCATTGTTGTCATGAAAACAGCTATCAACCGCTGGATAAAGGCGCACTGGCGCAGTATG  
ACGAGCAACTGGCGGAATATTACCTCACCCGTGGCAGCAATAATCGCCGGGATACCTGGAGCGATCATATCCGCCGAACA  
ATCATTAAAGAAAGCCGCCATTTATTCTGGATTATTTGCACAAAACAGGGTTGGGCGACGCGCTAAAACCGCCACGTGGA  
TGTATGATACGCGGGCTTTTGACCAGTCTGACAGAGAGGTGCAGGGTAAAATTGCCATATTGTCCCGGATGGAACGC  
TCTATTCGTGAAGCGGCTGCGTGAAGCCGCTATACAGCGCGTCACCTGGTTGAAATTCTTGATCCGCTTTCTTGCTAC  
ATGAACATAAATCCTGCGGCGTCTTCTATTCACTACAAAGGCCGCAAGTTACCCCATTTTGACGCAAGTATCCCGCTAT  
TGGCACCGCCATTACCTTTATGGGACGGCGGCACTGCGCCAGTTCGAGATGCTGGGGAGCTATCCGCTCAATGAGTCGG  
TCGCCATTGCCCGGGCGCGTGACAAATTGCGTTCATGCAACTGCTGGCGCGTCAGGGCATCGACCTGCCTGTCACGGGC  
ATTGCGCATTGCGCGGATGATACCAGCGATTTAATCGACATGGTCGGTGGTGCGCCGCTGGTGGTCAAGTTGGTTGAAGG  
CACGCAAGGAATTGGCGTCGTGCTGGCGAGACGCGTCAGGCGCGGAAAGCGTGATTGACGCTTTCCGCGGTCTGAACG  
CGCATATTCTGGTGCAGGAATATCAAAGAGGCGCAAGGGTGCATATCCGCTGTCTGGTTGTTGGCGATGAAGTGGTC  
GCTGCGATTGAACGGCGGCGAAAGAGGGCGATTTTCGTTCAATTTGCATCTGGCGGCGGCAAGCTCGCCAGTAT  
CACCCACAGGAGCGTAAAATCGCGATAAAAGCCGCGCAACGATGGCGCTGGACGTTGCTGGTGGATATTCTGCGTG  
CTAATCGCGGGCCGTTGGTATGGAGTGAATGCGTCGCCGGGCTGGAAGGAATAGAAAAAACCCCGGTATCGACATC  
GCGGGTAAAATGATCCGCTGGATCGAACGCCACGCTACGACAGAATATTGCCTGAAAACGGGTGGTTAGTCGCAATCACA  
TACTGATCATGGTTTTGCTGCGCTTTTTGCGTAAGCTGTGCCGGTCTTTTTATCGAAAGAGGTTGTACAAAATTATGA  
CATCGCTGGTCTGTTCTGGTCTGGATACGCTGCGTCAATGGCTCGATGACCTGGGGATGAGTTTTTTTGAATGTGATAAC  
TGTGAGGCTCTGCATCTGCCCATATGCAGAATTTGACGCGTGTCTTTGATGCCAAAATCGATCTGATCGATAACACGAT  
CCTGTTTTCTGCCATGGCGGAAGTCCGACCTTACGCGTATTGCCGCTGGCGGCGGATTTATCTGCCATCAATGCCAGTT  
CGCTGACCGTGAAGCATTCTTGTATGCAGGATGATAATCTGCCAAAGCTGGTGGTTTGCAGTCTTTATCCGTTATG  
CAGGGCGTAACCTATGAGCAGTTTGCATGGTTCGTGCGTCAGAGCGAAGAGCAGATTTGATGGTCATTCTTGAAGCTAA  
TGCCCATCAACTGCTGTTACCGACTGATGATGAAGGCAAAAACACGTTACCGAAAATTTCTCCACTGATAACTCC  
TTTCGAGCACGAGTCGCTGGTGCAGTGGCTGCGCGCTGCAAAATATCTGCTGTTTTAACCTTTCTTAAAGATTATT  
TCACTTCTCTGTGTCGATTTGGCTTTATCACATAGAGCAAATATGCATAAAAAATTTGTTAAATACCGTTTTTAAATCCG  
AGCTATAGTCTCAAACCCCTGGCTAAAGTTATTCTTGCATGCTTTTATATAGCGAGCAGTGTGGCCGGGAGAAAGTTCT  
CTTTCTTACACCGCGCCGATAAAAAATATGCACGTTTATTGCATATCTTTCAGTGTGACAACTTTTGTTCGTTTGTAA  
CGAACTTTAGAAAGGAAAGAGATATGACCGCCTTAAATAAAAAATGGCTATCGGGTCTGGTTGCGGGTGTCTGATGGCC  
GTCTCTGTCGGCACGCTGCGGGCTGAACAAAAAACACTCCACATTTATAACTGGTCTGATTATATCGCCCCGGACACGGT  
GGCAATTTTAAAAAGAAACCGGATTAAGAGTCGTCTACGATGTTTTGACTCTAACGAAGTACTGGAAGGCAAAATTA  
TGCCCGGAGTACCGGCTTTGATCTGGTGGTCCATCTGCCAGCTTTCTGGAGCGCCAGTTGACTGCGGGAGTTTTCCAG  
CCGCTGGACAAAAGCAAATTGCCGAGTGAAGAATCTCGACCGGAACTGCTGAAGCTGGTCGCAACACGATCCCGA  
CAATAAATTTGCTATGCCATATGTGGGCGACGACCGGATTGGCTATAACGTTGATAAAGTTAAAGCGGTGCTGGGCG  
AAAACGCGCCCGTGCATAGCTGGGACTTGATCCTCAAACCTGAAAATCTGGAAAACTGAAAAGCTGCGGTGCTCTTTC  
CTGGATGCGCCAGAAGAAGTTTTGCTACCGTGTGAATTATCTCGCAAAGATCCCAACAGCACTAAAGCGGATGATTA  
CACCGACCGGCAACAGATCTGCTGTTAAAGCTGCGCCGAACATTGCTTATTTCCATTCTCAATACATTAACGACC  
TGGCAAACCGGATATTTGCGTCGCTATCGCTGGCAGGTGATGCTGGCAGCGCTCAAACCGCGCAAGGAAGCGAAG  
AATGGCGTGAATGTCTCGTTCTGATTTCAAAGAAGGGGCGATGGCGTTCTTTGATGATTCGCCATCCCTGCGGATG  
CAAAAAACAAAGACGAAGCCTATCAGTTCTGAATTACCTGCTGCGCCCGATGTAGTAGCGCATATTTCCGACCATGTGT  
TCTATGCCAACGCCAATAAAGCAGCCACGCCGCTGGTGAAGTGCAGGATCCGAAAATCGACCGTGTGCGCACCCGCGCTGGACAAAGT  
GAAGAGCGAAATAATCCGAGTCGTAGATGCCGAGGGGCGCACACACCCGCCGGCAATTGACACCATATGTTGCG  
CTTGACACATTCAATGCCGGAGAGCAGCGTGAATGACGCTATCCCTCGCCCCGAGGCGAAAACCGTAAGGCGCTGAC  
GCCGCTATTAGAAATCCGCAACCTGACCAAATCCTACGATGGTCAACATGCGGTGGATGATGTCAGCCTGACCATCTACA  
AAGGTGAAATCTTCCGCTGCTGGGCGCATCCGGCTGTGGCAAGTCCACGCTGCTGCGTATGCTGGCAGGTTTCGAACAA  
CCTTCTGCCGGACAGATAATGCTTGTGGCGTGCATTTGTACAGGTTCCGCCCTTACCTGCGCCCCATCAATATGATGTT  
TCAGTCTTACGCGCTGTTTCCGATATGACCGTGAACAGAACATCGCTTTTGGCTGAAACAGGACAAACTACCGAAAG  
CGAAATTTGCCAGCCGGTCAATGAGATGCTCGGCTGGTGCATATGACAGGATTCGCCAAACGCAACCGCATCAGCTT  
TCCGGTGGTACGCGACAACGTGTGGCCCTGGCCGAAGCCTTGCAGAGCGCCGAAACTATTACTGCTCGATGAGCCGAT  
GGGCGCGCTGGATAAAAAGTGCCTGACAGGATGCAGCTTGAAGTGGTGGATATTCTGGAGCGCTCGGTGTGACTTGTG  
TGATGGTCAACACGATCAGGAAGAGGCGATGACCATGGCGGGGCGCATCGCCATTATGAATCGTGGGAAATTTGTCCAG  
ATTGGCGAACCGAAGAGATCTACGAGCATCCGACTACCCGCTATAGCGCCGAATTTATTGGCTCGGTAACGCTTTTGA  
AGGCGTACTCAAAGAGCGTCAGGAAGATGGCCTGGTCTTATTGCTCGCCGGGCTGGTGCATCCACTGAAAGTTCGACGCGG  
ATGCCTCGGTGGTGCATAACGTGCCGTACATGTGGCGCTGCGCCGGAAAAATCATGCTTTGCAAGAGCCGCCCGCC



AATGTTGTAACCTTCGCGGTGGGGAGGTGATACACATTGCCTATCTCGGCGATCTTTCGGTGTATCACGTTGCTCTGAA  
AAGTGGGCAGATGATTAGCGCCAGCTACAAAACGCCATCGTCATCGTAAAGGTTACCGACCTGGGGCGACGAAGTGC  
GTTTGTGCTGGGAAGTGGACAGCTGTGTGGTGTGACGGTTAAAGGAGCAAAGATGAGTACACTTGAACCTGCTGCCAG  
TCGAAACCGCCGGGCGGATTTAAGCTGTGGTGTGCGAGCTGCAAATGAAGCATGGGCGCAAACCTGGTCATTGCGTTGCC  
ATATATCTGGTTGATCTTGTCTGTTTCTGCTGCCATTTCTGATTGTCTTTAAAATAAGCCTGGCGGAGATGGCGCGCCTA  
TTCCACCTTATACCGAAGTATGGAGTGGGCTGACGGGCAACTGTCCATCACTCTTAATCTCGGTAATTTTCTGCAACTG  
ACCGACGATCCGCTCTATTTGATGCTTATCTCCAGTGCCTACAGGTGGCTGCGATTTTCGACATTTTGTCTTTACTGAT  
CGGCTATCCGCTGGCGTGGGCGGTGGCGCACAGTAAGCCTTCGACCCGTAATATTTTACTACTGGTATCCTGCCGT  
CGTGACCTCGTTTCTGATCCGCGTTTATGCCTGGATGGGAATATTAACCAACCGGTGTGCTGAATAATTTTCTGCTG  
TGGCTGGGGTTATCGATCAACCGCTGACCATTCTGCATACCAATCTGGCCGTTTATATCGGCATTGTTTACGCTTACGT  
GCCGTTTATGGTACTGCCGATTTATACCGGTTGATTGCTATTGATTATTCGCTGGTGAAGCAGCGCTGGATCTCGGTG  
CACGACCGCTGAAAACGTTCTTTACTGTATCGTCCGCTGACTAAAGGTGGGATTATTGCCGGATCGATGCTGGTGT  
ATCCCGCTGTGGGCGAGTTTGTGATCCCGAAGTCTCGGTGGCCCGGACAGCATCATGATCGGGCGCTGCTATGGCA  
AGAGTTTTCAATAACCGGACTGGCCGTTGGCTCGGCGTGGGAGAACAGGATGAATAATTTACCGGTAGTTCTGTTCCGCTGGCGGA  
TTGTGATTTTGTCTGGCTTTACCTTTCTCTACGCGCAATGCTGATGCTGGTTATCTATTCTGTTTAAACAGCTCGAAG  
CTGGTGACGGTGTGGCCGCTGGTCAACGCGCTGGTATGGTGGTATTGCGCGATGACGCGATGATGAGTGGCGTTGG  
TTAAGTCTGACAATTGCGGCTGTGCGGCGACGGCGGCGGATCCTCGGAACATTGCGGCGGTGGTGTGGTGGCGCT  
TTGGCAGGTTTCGCGGATCAAATGGCTTTGCCTTTATGATCACCGCGCGCTGGTAATGCCAGATGTCATCACGGGCTTG  
TCGCTGTTGTTATTATTCGTCGCGCTTGTCTATGCCATTGGCTGGCTGCGGACCGCGGTATGCTCACCATCTGGCTGGC  
GCATGTCACTTTTTGTACGGCTTATGTGGCGTCTGTTATTTCTCAAGATTGCGGGAACCTGGATCGCTCGATAGAAGAAG  
CAGCGATGGATCTCGGTGCGACCGCTGAAAGTGTTTTTCTGCTATTACGCTACCGATGATCATGCCCGCATCTTTCT  
GGCTGGTACTGGCTTTTACTTTGTCGTTGATGATCTGGTATCGCCAGCTTTGTTTCCGGGCGGGAGCCACCACGTT  
ACCGATGCTGGTCTTTTCCAGCGTGGGATGGGGTGAATCCGGAATCAACGCCCTGGCAACATTGATCCTCGGCGCGG  
TCGGAATTGTCGATTTATCGCTGGTATCTGATGGCTCGCGCAGAAAACAGCGGATACGCGACATCCAGCGTGAAGA  
CGTGGCTGAAGACACTAAAATTTGCCAACCTGGCTACATAATGCCGCGCATGTCGCGGCTGTTTTCATGGAAGACGAA  
ACGTTGGGATTTTTAAGAAAACATCTTCATCTCATGCTCGCCTGAATGTGCTGCGCTGGTGCAGGTGGCGGCGCTCGC  
CATTATTATGATCCGTTGGCTCGACGTGCTGATGATTTTCAATACGCTGGGCGTGGCGGTATTGGCGAGTTCATTATC  
GCAGCGTACAAACCTGGAGTTTAAACGCTGGTCTTTTTAAGCAGTCTGGTGTGTTTTTATTGAGATCTGGTGTGGCTTT  
TCACTGGTGAAGGGCGTGGCTGGGCGGCTGGCTATATCTGCTGACACAAATCACCGCCGCAAGTTACTTGTGGGCGGC  
TTCGCTGGGGTACGGTTATCCGGAGCTGTTTACGATTTCCCGGTGAATCAAAACGTGAAATCTTCCATAGCCTGATGCTGC  
AGAAGCTGCCGGATATGCTCATCTGATGCTGCTGTTCCCTCGACCAGTGGCGGTTCTTCCAGTTGCAATAATGT  
GTATAATCGTCGCCCCTGATGATGTGAAGGCAATGTATGCAGTGCACACTTACGACGCGGGTGGCTGCTGTTCTGTC  
AGTGGATAATGCAGCCGATTCCAGAGCAACTCTCCGCTAAAACCGCCGATCTTAAAAATCTGCTCGCCGACTTTCCGGTT  
GAGGAATGGTGCAGCGCGGTGTCAGGCCCGGAACAAGGTTTTCGTAATAAAGCCAAAATGGTGGTGGTGGTGGTGGTGG  
AAAACCACTGCTCGGTATGCTGCATCGCGATGGCACACCAGAAGACCTTTGTGACTGCCGCTTTATCCTGCCTCATTG  
CGCCGTTTTTGGCGGCTAAAACCGTTTATCGCCGAGCGGGTTAACGCCCTACAACGTGGCGGTAAGCGTGGCGAA  
CTGAAATACATTCTGCTGACTGAAAGCCAGAGTATGGAGGATGATGCTGCGCTTTGACTGCGTTCTGATACCAAGT  
GGCGCAACTGCGTAAGGCTGCGGTTACACGAACAACCTGACGAGTAAAGTATTACCGTCAATATTGACCGG  
TACATATGGCATTATGGAAGGGGAGACGGAGATCTACCTGACCGAACAACAGGCACTGGCGGAGCGTTTAAATGACGTA  
CCGCTGTGGATCCGTCGCAAGTTTTCTCCAGACTAATCCGGCGTCCGAGCCAGTTGTACGCCACCGCGCGCATG  
GGTACGACAGTCCGCTTAAACATATGTGGATCTGTTTCTGCGGTGTGGGGGCTTTGGTTTAACTGCGCGACGCGCTG  
ACATGCAGTTAACCGGATCGAAATGTCATCAGAGGCCATTGCCTGTGCAAAGCAGTACGCGCTGAACTGGGCTTAAACG  
CGTTTGAATTTACGGCGTGGACTCCACTCAGTTTGCACCGCTCAGGGGATGTGCCGAGCTGGTGTGGTTAACCC  
GCCGCGCGCGGCTTGGTAAACCGCTGTGTGATTATCTCAACGATGGCACCGGTTTTATCATCTACTCCAGCTGTA  
ACGCCAAACTATGGCGAAAGATATCCGCGAAGTGCCTGGGTTTTCGATTGAACGGGTGCAGCTTTTCGATATGTTCCCG  
CATAACCGCGACTATGAAGTGTGACGCTGCTGGTGAAGCAATAAAAAAGCCGATGTGCGGCTTACGATTGCTGACAAA  
GTGCGGCTTGTATGCCGATGCGGCTAAACGCTTATCCGGCTACAAAAGCGTGAATTTCAATACATTGCATGGG  
CCATGTAGGCTGATAAGCGTAGCGCATCAGGCAATTTTACCTTTGTCATCAGTCTCAAGCCGCGTTGCGGCTTTCTGA  
ATCTTACTGTGGAAACCACTGGTCACTGATTTTTGATAAGTACCGTCACTTTAATTGCTGCCAGCGGTTATTACGTT  
TTTCCAGCAGGCTTTGTTATCCGGACGTACAGCGATGCCAGGCGGTGCCAAAATATTGCGGATCGGTCACTTTCTCA  
GTAGCAACACCAAGTTGTGGATTGGTTTTAGCCATTGTTTTACCACCGCTGTGTCACCAATACCCCATCAATACGACC  
ATTTTTAGATCGATAAAGCATTCTGATAACTGTCATAAGAGACAGTTTTCACTTCCGGGTGCTGATCCTGAATATATT  
TCTGGTGCATGACGTTTTCCATCCCAATACGTTTTGCTTTTCAAGTCCGCAACGTTTTGTAGGTATCTTTTTGGCA  
ATCACGACGGCTGAGTTTTCATAGTAGGGCTGGTAAACGATACCTGTTTGTACGCTCCGGGGTATATCCATACCGGA  
GATTACGGCGTCATTTTTCTGAATTTACAGGACGGGATCAGGCTGTGCAACCGGTGATTAGTAAAAGTACATTCTGCCT

GCATTTGTTTGCACAAGGCTTTTCCAGATCGATATCAAAGCCGACAATCTCATTATTAGCACCTATAGATTCAAAGGGT  
GGATAGGTGGCTGAAACGCCAAAATTGATTTTCTCTCGGGCAGAAGCACCGAAAAGTAAAGGAAGCAAGTAAAGCGGCAAG  
AACTAACTTTTTCATGATGGAACCTCCCGTCTGTCAATCTTATGATTTTTGGCCGTGTCTCGGGCATGGGATAACAATGCC  
ATCAAGTGAATTTATATGCAATAAACATGATTAATAATTTAAATGAAATAAAAAAGACGGACAACCTTAGTGGGTTGTCC  
GTCTTCATTATAAGAATTTATGCACTATGTAGGCCGATAAAGGCGTCCCGCCGCATCCGGCACAGGCACCGTGTGATG  
TCTGATGCGACGCTGGCGCTCTTATCAGACCTACAAAACCCCCGGCGAATGTACGCAGCCACATTAATTTCCCGCTT  
GAATGCCAGCGCTTTGCGCTCGATCAGACGCATCATCAGCGTCAGCAGGCCGTTAACGACCAGGTAATAATCCCTGCCG  
CACCGAACACCATTACATCGTAGGTGCGTCCGTACAACAACCTGGCTGTATCCCATCACTTCCATCAGCGTAATGGTGTAT  
GCCAGAGAGGTACTTTTGAATACCAGCACCACTTCTGTTGGAATAAGAAGAGAGCGAGCGTTTAAAGGCATACGGCAGCAG  
GATCGCCAGCGTATCTTTTTGCTCATTCCCAGGGCGCTACAGGACTGCCACTGACCTTCCGGGATCGCACGAATTGCAC  
CGTAAAACAGTGCCTGATACGCCGCACTATTACAGCGACAACGAATCAGCGCACATAACCACGGTCTGACAACAAA  
TGCCACAGTGCCGGATACTCTGCAAAGTCGAAACTGGCCCGGCCGTAATAAATCAGGAAGATCTGCACCAGCAGCGG  
CGTACCGGTAACAGCGTGATATAACCCCGCACCAGCCACACCAGCACCAGCGGCTTTTCCAGCGTCAAGTATGGTAAAA  
TCAATGCCAGAATCAGTGCCACAATCAGCGAGGCAACGGTTAGCGTCAGGCTGGTGTGTAGCCCTTTTCATCAGTTCGGGT  
AAATACTCAAACATTAGCTGGCCTCCGCTCAAACGTGTCCGCGCAGGTCAATGCCTTTGAGAATGACTGACTGACTGAGC  
AGGGTGATCACCAAGTAAATCGCCGCCACAATGTACCAGGTAATGGTTCCTGGGTACGAGTAGCGATGCTTTTTGT  
TTGCAGCATTAAATCATTACACTAATCAAACCTGACCAGCGCGGTATCTTTTACGAGCACCAGCCACTGTTTACCGAGGC  
CAGGCAGCGCATGACGCCACATCTGCGGCATCACCAGACGAAAAAGATAGCCGATTTTCGACAGCCCCAGCGCTGACCA  
GACTCCCACTGACCCACCGGCACCGCTTTCAACGCGCCCCGAAGCGTTTGGAGGCATAGGCGGCATACAGCAGTGACAG  
AGCGATGACACCACAAAGGAACGGGCTAACGTCGAAGTTCTCAATGTCCATCTGCACTGGGATCTGCACGAACCCAAGAT  
TGATAGTGAAGCCATCCGAAAGCGTCAGCAGCAGCTGCGAGGAGCCAAAATAGATAAACAGCACCACCAGAATTTCTGGC  
AGGCCACGCAGAATGGTTACAGCGCTGAACCTGCCACGCGACAGGACGCCATTTTGGCGACTCCCATACCGCAAAGAA  
CATCGCCAGCGCCAGCCGACAATCAATGCACAAACGGCAAGGCCAGCGTCATCCCGCGCGCTTGTCTAAAGGAAAA  
ATTCAATCATCAGGAATTAATCTGGAACATTTGTTGTAGATGGTTTCGTAAGTGCCATCTTTCTTCACTTTTTCCAGC  
GCAGTGTGAGTTTCTGCTGCAGCTCAGTGTGCCCTGACGTACCAGCGATGCCGAGGCCAGTGCCGAAGTAAATCTTTATC  
GGTCACTTTGTGCCCCACCGCCCGCAGTTTCGGGTTATCTTTACGCCACTCAGTGACCCTGCGGTGTCACCGAAGACGC  
CGTCGATACGCCCGTTTTGACAGATCCAGTTTTGCGTCTGGTAGCTGCATACGGAACGGTAGTGATTTCCGGGTGCTTA  
TCCATAATGAATTTCTGGTGTGTCGTCCCGTTCTGTACGCCGACTTTTTTGCCTTTTACGCTGATCAACACTGGTGTATTT  
GCCTTGCTGACCCACAAACAGGGCAGAGTTGTATAGTACGGGGTGGTAAACAGCACCTGCTTTTACGCTCCGGAGTGA  
TATCCATGCCCGCCATCACGGCTTCTACGCGACGGAATTTTCAAGGCTTGGGATCAGGCTGTCAAACGCCTGTTTAGAGAAA  
GTGCAGGTTGCATCAATCTCTTACACAGCGCTTGTGCCAGGTGACGTCAAACCAACGATCTGTTTGTGTCATCAAT  
CGATTCAAACGGAGGATAGGAGGCTTCGGTAGCAAAACGAATGGTTTTCGGCAGCTGTGGCGGAAAGACTAAAACCTGCAA  
TTAACCGCGCAATCAGAATTTTTTTCATTGTTGTTATCCCGAATCTTAGTGAGAGAGATAGTTTTTAAATGCTTCGGTTT  
GCGGCTCGGTAAGCAGCTCGCGTCCGCTTGTCTACGATATGACCATTTTCCATATACACCCTCGGCTGGCGGTTTTA  
CGCGCCACTTCAACTTCTGGGTGACGATCACCTGGGTAATATTCGTTTCTGCCAGCTCACGAATGATGCTGACGATTTG  
TGCCGTAATTTCCGGGTCCAGTGCGGCGGTGGTTCATCGAACAGCAGTACCTGCGGTTCCATCATCAACGCACGGGCAA  
TAGCAACACGCTGCTGCTGACCACCAGAAAGATGCAGCGGGTAACGATCGCTATAAGGTTTGAAGCAGACGTTCCAGC  
AGTTTTTCTGCACGGGCCAGCGCTGATCTTTACTCAACCCAGTACACGGCAGGGCGCTTCAATCAGGTTTTGCTGCAC  
GGTCAGATGCGGCCACAGTTGATTGCTGAAACACCATGCCAACGTTACGACGCAAATCGCGAATCGTTTGTGACAGG  
GTTTTTGGTGAATCGAAATGGTTGCTGCAATGTTGAGCGTACCAGGCGCGCATCTCAAGCAGATTGAGTACACGC  
AGCAGCGAGCTTTTACCGCGCCGCTGGGGCCAAGTAAACACCAGCGTTTTCCCGCTGTGGGCAATCCAGCGTGATATCGAA  
CAGCGCCTGATGCGCGCCGTAAGAAGCAATTAATGCCGTTTAAATGAATACTCATTGACACTCGTATACTGGCAGTCTGAT  
AGCTATTGAGGTGCAAGATAGTACCTTTGACAGAATAATTATGCAATATTTCTGCTTTAAAAGTTAAAAGCAAAGCGCAT  
TATTCAATAAACATAGCACAAAATAACGGGGCGGTGGTGGCGGAGCATAAATGTCGGCATTCTCACGAATGCCGGAC  
AATTTACGGGTTTTATTGGTTGATCAAGGCGTTAGCGATTCTCGATGGACTGACGGAGCGTACCCGCCGTGGCATGAACG  
CTACCGCTAAGTAAACGCACATCGTCGATGACCCAACACTGGCCTTCTGAATCATTAACTTATCTGCAACCCCTG  
GTCACCCTGTTTGAATCCACGCGCAATGGAATGTTACGGGCATCACGATTAGGGATAGTCGATGCACTGGCAACGTGGG  
CGCTATCTGGCAAGGTGGTTCGACTGGAGAATGGATCGTTGGTCAAGTATCCCGATGGTTATTATCCCGGGAGGCATCG  
CTAAGCAGTGTGCCAGTTTGTGCTCAGATAAGGGCGCAAGGCGGTGATGTCGTTGCTGCGGTGCAAAAATGCGGTAGTC  
ATAAAATTGCTGGGCCACGTTATCCGGGCTCCTTCAACGCAAGGACCCTGCGTGTGCCGTTATCTTTATAAGCTGGAG  
TGACTGTGGTGCAGGCACTGAGGAGCAGTGCGCAGGGGATAAGCATTGTCAATTTGCTGTAGCGCATAATGATTTCTTA  
TAAGCGATCGCTCGAAAGCGTTCTACGATAATAATGATATCCTTTCAATAATAGCGTATCAGTCTGATAATGCTTTTGA  
GATCGAAGGCTTAGCAAACAAGGAGATCGATCATGCAATTTTCTACAACCCCACTCTGGAAGGCCAGACCATCGTTGAA  
TATTGCGGTGTGGTGACCGCGAAGCGATTTTAGGTGCCAATATTTTCCGTATTTCTTTGCGGATCCCGCATATCGT  
TGCCGACGTTCCGGTGCATGAAAAAGAACTGCGTAAAGCACGGGAGATCGCCTTTGAGGAATTAGGCTCCAGGGCC  
GGGCGTGGGGCCGATGCCGTCGCTGATTGATATCGACTACGAAACGGTGGGCAAAACGGCAGTATGCTGATGTTT

AGCGTCAGCGGTACGGCGGTGAAAACGCGTCGATGAGAAGATTCTTCTGGCTGGTCGCTGCCGCTCTGTTATTGGCAGGG  
TGTGACGGCGAAAAAGGCATTGTGCGAGAAAGAGGGATATCAGCTTGATACCCGACGCCAGGCGCAGGGCGGCTATCCGCG  
CATTAAAGTGTGGTGATCCACTACACCGCAGATGATTTTATAGCTCGCTGGCGACACTGACCGATAAGCAGGTCAGCT  
CGCATTATCTGGTCCCTGCGGTACCACCGCAGATACAACGGTAAACCGCGCATCTGGCAACTGGTGCCGGAACAAGAAGCTG  
GCCTGGCATGCGGGGATTAGCGCCTGGCGCGGGGCAACCGCCTTAAACGACACCTCTATTGGCATTGAGCTGGAAAACCG  
TGGCTGGCAAAAATCGGCCGGAGTGAAATATTTTGCCTGTTGAACCGGCACAGATTAGGCGCTTATTCCACTGGCGA  
AAGATATTATTGCCGTTATCACATCAAGCCGAAAACGTAGTGGCACATGCGGATATCGCACCGCAGCGCAAAGACGAT  
CCGGGGCATTATTTCCCTGGCAGCAACTGGCGCAGCAGGGGATTGGTGCCTGGCCGGATGCGCAGCGGGTTAACTTTTA  
CCTTGCCGGGCGCGCGCCGACACACCCGGTAGATACCGCGTCAATTGCTGGAGCTTTTGGCGCGCTACGGTTATGACGTTA  
AACCTGATATGACACCGCGCAGCAGCGCGCGTATTATGGCATTCCAGATGCATTTCCGCCCAGCTTATATAACGGC  
GAAGCGGATGCAGAACTCAGGCGATTGCCGAAGCATTGCTGGAGAAATACGGGCGAGATTAGCGCGGAGTTTTCCGTG  
GTCGCGTAGCCAGGCGGCGAGTTTTCTCGATACCTTCATCCAGGATGATGACCGGCTGATAACCTAACTCTTCTGCGCAC  
GCGTAATATCCAGCGTAAAGTCAAAATCAACTGGAGACGCCGATGAGTGGTGCAGCGCGGCTTTTTGCTGACTTGGCG  
CCTAAACGCTCCATGCTGCGGGCGATCATATCCAGCATCGGGTAGGGGACGGAACGAATACGACAGTCAATATTCAACTC  
GTCGATCAGCTTCTGCACGATGCTGCGCAGTGTGCGATGCTCGCCGTTGGTGTGTTGTACACACGCCCCGGAAGGTAGCT  
TATCGCAGGCTTCTGGCTTCCAGCCACATTGCGTGACCGCATTTTTCATAGTAGGTCATATCGACCGCAGCTGCGG  
CCATGCGGTAACAGAATACTGCCGTAGTGGTGCATCATATGCGCCAGACGGGGAATAAAGACTTTATCGTGCGGTCCGAA  
CAGACTTTGTGGGCGCAGAATAGTAAAGCGGTTTTGTGGATTGCGCTGCGAAAGCATATTGATCACTTCTTCGCTGGCTG  
CTTTGCTGCGGGCAAACCTGTTGGCGAAGCGGTGAGGGCGAAAATCTTCTTAAATATCGCGATGGTGGTGATAATCGAAG  
TACAGGGAGGGGAAGAGATATGAATAAAGTTACGCACACCCAGGCGACAGCCATTACCCAGGCGCGAGTGGCGCG  
AACGTTAGCCAGATCGAAAGCCTGTTGTGTCCTCCAGGGTGGAGTAAAGCTGGAGCAGTGCACAGCGTATCAATGCCCG  
CGAGCATCACTTAGCTTGTGATGAAACCAGCTCGGTGATCCGCGGAACAACTCTGCGCCATTTTTTCCAGCAAT  
TTGCCATTGCCTGTTGCGACCGGTGCTGCGCAGCTGATGCCTTTCTGGCATAAAAACCTCTACCGGTTTTCCAGCTAA  
GCCGCTGGTGGCGCCGTAACAGTACCTTCATATCAATCCACTGTTGTTGAGAAAATAACGTGCGCATTCTTCCGTGAT  
TTCCCCATGATGCAATGGGAAACATGAAAGAATAACGAGGTTTTGTCGATTAATCTGTGCTTTGTTCTGCCAGTCTGG  
CGATTTGTTTTGCCATTCCGCGAAAAATAACAGATGCGCGGGGATCATCAATAACCAGTAAAACAGCCCCGGCATAACCG  
TGCGGATGCCAGAAAGCGCGGACATCGATAGTACGATAGTGCCTTTATCTTCCAGGCTAAAACACAGTCTCCAGCCC  
CGGCGTTTTATGCCAAATAAACACGTAAGTTGTTTTCCGGTCAACGACAATCACTTCCAGCTATCCACCGCATCGC  
CAGTCTGTAATATTGCGCTCCGGGCGGCTTTCCGCGAGCTTATGACCGATCGCGCGGTCCATCAACGCCCGTGTCTGC  
CACAAAATATTGCCAAAGAAATAACGCTCTTACCGCCGATTTGGTTCACTACCTGCCATAAAGCAGCAAGGCTGGCGGA  
CGTTTTAACGGTAAACCCCGCTGTTTGGCAAAAATAACCGTACTCCGGTCCGACGCGGCAAAGGCTGAGCGTCGTAGC  
CCAGTCGCTGGAGTTGACCAGTTTTTCTCCTCTTCAACGTGCTACGTACCAGCGTCATCGAAAGCGATCAGCCGTTGT  
GGGATGAGTGACGATAGCGCGGTATCATCCGCCAGCAGATCGTGTTCAGCCCTGAATCAACGCCCTGGCGGTGGTGGG  
CGGTACGGAAGTAATCACATTGAGAAACCACCCGAAATCCAGCGGGTGGGGAGGGGGATGGGGATCAACCAGCGGCGCT  
TACCGCTCACCGCATAAAATGTTCAAACCTGTTGCTGATAACTGAGCACCTCTGGTCCGGCGGCTTGAAGATGCGGTGT  
TCGCTGGCCGGATGATCTAACACGCAACCAGATAGTGCAGCAAGTTTTCCAGCGCAATGGGCGTGGTGCCTGAACGAAC  
CCAGCGGGAGGCGTTAAGACTGGCAGTTGTAGACCATATCGCGCATGACTTGAACGCCGCGGAACCTGCGCCAACGA  
TAATTCGGCCCGCAGTTCCGGTACGGGTACATTGCTTACGCGAGAATGTCCGCCGTAGCTGACGAGCAGCAGATGA  
TCCGACTGCTCATGTGGCGGGGCTGCAACGAATAAGAAAGATAATTGCTTAACTGGTACTTACAGTACGCGCATCGCG  
GACGTTGAGAGCCACCTGGCGCTCTGAGCGATAAAAATCGCCCTTCCGCAATGCTGTGACCAGAAAATAGACCTGAT  
CGATATCTGCAACAGGGCCGGTAGGTTATCCGGCCAGCTGAGATCGACTTTATGGCAACTGACGTTTTGCCAGTTGCGAGC  
TTTGCAAGCCTGTCGACATGACGTGCCGCGCCAGGATCTGATGCCCTTGTGGCTGAGTGTGCGCACAGATGCTGACC  
AATGTAGCCACTGGCACCGAGAATAAATGCGTTGCGGCACGTCTCTCCTTAAACGCGCCAGGAATGCACGCCAGTGG  
GCGGCGACTTCCGCCAGTTGTTGCGCGGAGACGTCAAGATGCGTCACCAGGCGGACAATCGGCGAGGCGTTAATCAGCAC  
GTTTCTCGTTTTATGATTGCGCTAACGCGGCAGCATTCTTCCCGACGCGAACAACAGCATATTGGTGTCTGAC  
GCATCACATCCGCGCCTGCTTACGCGAGTGTCTCGCCATCCAGGAGCGTTGTCGTGGTCTTCTGCAAGCGCGCAACG  
TTATTTTTCAGGGCATATATCCCGGCGGAGCCAGAATGCCGACTGGCGCATCCCGCCACCTGTCATTTTCCGCCAGCG  
AATGGCACGTTAATGTAATCACGATTACCGACGAGTAATGAACCGACTGGCGTCCCAAGACCTTTGACAGGCAAATGG  
TGAACGAATCACAAATATTGCGTGATCTTTTTCAGTTGCGAGCCGTAAGCCACCAGGCAATTAAGATGCGCGCACCGTCA  
ACATGACGCGCAGATTGCGCTCGCGGTAATTTCCATGCTTCTTTCAGGATTTCCCGCGGCAACACTTTGCCGTTGTG  
GGTGTTCAGACTGAGTAATTTGGTGGCGGAAATGGATATCGTGGGTTGATTTTCATCGCCACTTATCCAGCG  
GTAGCGTGCCGTGCGCAGCCGCTATGGGTTGCGGTTGAATACTGCCAGCACCGCCGCGCACCGGCTTCAAACAGA  
TAGTTATGCGCGGCTGACCACAATAACTCTTCCGCGGTTGCGAGTACTGAGCAGAGCGACCGGTTGGCCTGAGT  
GCCGGTAGGCAAAAAATGGCGGCTTCTTACCGAAAAGCTCTGCTGCGTAGTCTGACAGCATTAAACGGTAGGGTCTG  
CTCCGTAACGTGCTCCCAACCGGGCGGCCATCATCGCTTCCAGCATGGCGCGGCTTGGTGGGTAACGGTATCACTG  
CGTAAATCAATCATGGCATGTCCTTATTATGACGGAAATGCCACCTTTTTACCTTAGCCAGTTGTTTTGCGCAGTTC

GATCACTTCATCACCGCGTCCGCTGATGATTGCGCGCAGCATATACAGGCTGAAACCTTTGGCCTGTTGAGTTTGATCT  
GCGGTGGAATGGCTAACTCTCTTTGGCGACCACCACATCCACCAACACCGGACCGTCGATGGAGAAGGCGCGTTGCAGG  
GCTTCATCAACTTCAGACGCTTTTTCTACACGGATACCCGTAATGCCGCACGCTTCGGCAATGCGGGCAAAGTTTGTGTC  
GTGTAGTTCGGTGCCGTCAGTCAAATAGCCACCAGCTTTCATCTCCATCGCCACAAAGCCAGCACGCTGTTGTTAAAGA  
CGACAAATTTTACTGGCAGTTTCATCTGCACTACTGAGAGGAAATCGCCATCAACATGCTAAAACCGCCATCGCCGCAC  
ATGGCGACCACCTGACGTTCTGGCTCTGTGCGCTGCGCACCCAGCGCCTGCGGCATGGCGTTAGCCATCGAACCGTGGTT  
AAACGAACCTAACAGGCGACGCTTGCCGTTCATTTTAGATAACGTGCCGCCACACCGTTGGCGTACCAACGTACAGG  
TGAAAATAGCGTCATCGGCGGCAAAATGACTAATTTGCTGCGCCAGATATTGCGGGTGAATGGCTTCTCGCTCGGTTTA  
GCTAAATCGTCCAGCCCTTTGCGGGCGTCGCGGTAATCTTCCAGCGCTTATCCAGAACTTGGCATCGGCTTTTTCTTC  
CACCATGGAAGCAATGCACGCAGAGTCGACTTGATATCGCCGACCAGTGCCATATCCACCTTGCTGTGAGCGCCGATGC  
TGGCTGGGTTGATATCAATCTGAATGATTTTGGCATCGGTGCGGTAGAAGGCGCGGTAGGGAAATTGCGTGCCGAGTAGC  
ACTAACGTGTCGGCGTTCATCATGGTATGAAAACCTGACGAGAAGCCGATTAACCCGGTCATTCCAACATCATACGGATT  
ATCGTATTCGACATGTTCTTTACCGCGCAGGGCATGAACAATAGGCGCTTAAATTTCCCGGCAAACCTCAACTAACTCTT  
TATGCGCCCCCGCGCAGCCGCTGCCACACATCAGGGCGATATTGCTGGAATAACGCAGCAGTTGCGCCAGTTTGCGTAA  
CTTCTTCTCCGGCTCAGCACTGGTTGTGGCGCATGATACCAGTGCATGGTTGCCCTTCTGGCGCAGGTTTTAACGC  
CAGCTGCGCTGGTAAACACGACAACCGAAACGCCACGTTAAGCACCGCTTTGCGCATGGCAATCGCCAGTACTTGTGGGA  
TCTGCTCCGGCTGGAAACCAGCTCGCAATAGTGACTACATTCGCGGAATAGCTCTTGTGGGTGGGTTTTCTGGAAATAG  
CCGCTGCCAATTTCTGCTGGAGGGAATATGAGCGGCAATCGCCAGTACCGGAACGTGATTGCGGTGGCAATCGAACAGGCC  
GTTGATTAAGTGCAGTTGCGGGGCGCACGATCCGGCGCAGACCGCCAGTTCTCGCTAAGTTGTGCTTCAGCGCCAG  
CGGCAAAGGCCCACTTCTCGTGGCGGGTGGACATCCACTCGATGGTGCCCATGCGATTAAGACTGTCACTAAGACCG  
TTCAGAGAGTCGCTGTGACTCCCCAGATGCGTTTTACCCCTGCCGATTGAGTGTTTTGGCGATATAAGCTGCAACCGT  
TTGTTTCATGGTTCTCCATCTCCTGAATGTGATAACGGTAACAAGTTTGTTCATCTGACGGAGGGGGAAGGGATGGGAG  
AGAAAGGAGGCACTAACGGTTAAATAGCCGATGAAAGGAATATCATCGGCATAAGGCGATTATGCGAGAACCAAATCC  
CCCTGCGGATGGCAGGAGCAGGCCAGTACGTAACCTTACGCGATTTGCGCGTGGTCAGCGTCATTGTGCTGCTCACCGT  
ATATTCACCGGAAACCACTTTTGTCTTACAGCAGCCGAAACACCCGACGGCAGGCAGCGACAACCGGAACGTTATTGC  
TTTCCAGCGCCTCCAGTAGCGTGGTGCAACCGGGCGTAAAATTCTCGTGCCGTTGCGATTTGGTGAATTTAGACCG  
CTGGTCCGCGTCTGCTACTGGGGTGAAGAATTTCTTTAAAGAAACGCGTCACGCCGAGCGCTTCACTTCTGCTC  
TACCAATCCATATACGGAGCCGGGCCGAGGTCATCACGGTACGTGAAGCTAAGTCAGGTACACCTGCCAGCAGTTCCG  
GAGTGAGACGACCAGCGATAAAGCCTTGGTAACGTTATTTCTGCCACCAGCGTTACCGGATAGTTACGCCACTCATCG  
GGAAAATAACATCCTGCGCGTACGCACGTTGTAGATCACCCGCACATCGGCCTGTGGACGGTTCTTCGCAAGCCAGCG  
ACGCATCGACATAATCGGCGTGACGCCGAGCCTGCCGCCAGCAACAGGAATTTATCTTCTGCTTTATCGTGCAGGTA  
ATTCCCCATCGCGTCCGAAAGCCAGAGATAATCACCGGTTTTACATCGCGCGTCAGCCACTGGGAGCCGACACCGTCA  
TCAATCCGCGGCACGGTCAGGGTGATATTTCACTCACGCCTGGCGTGGAGGAAATGGTGAAGCACGCAGCGTTTCCGC  
TGAGTTTGCACGCTGACCAGTGCATATTGCCGGCGCGATATGGGTAGTAATCGTGGCAAATCAGGGAAATCGTCCACA  
CATCCGCGGTTTTCTGCGTAATGTGATGAACCTGCATCCGCCACGGGATTGATTGCTTGGCATCGTCATCGACAACTC  
CTTACGCGCTCAACAGTTGCTTTCATGTCTTCAACAGTGGTATAGAACGCAGGCCGAATTTCTCGTTAGCAGCCGCC  
AGCAGGTCTGGTGTGAGGAAACAGGTGCAGTGGGCGCGTACGATATTTTACGCCAGAGAAAGCAGCGTCAGCAG  
AATGACGATCGTTTTCTGTTCAAACAGGAGAGCACCAGCGACAGCGGCAGATCGTTGACACCGCAGCCAGTTTCTCTG  
CCAGAGTACAGCCAGAATAATCGTGAAGTAAATACCAAGGATGTTTACCTGACCTGCATCTACCAGACGCGGCAGACCTT  
TCGCCAAACTCAAGTTTTGTTAAAGCGATATTTACCAGCGAGGGTCAGGATCAGGATCAGGATCAGGATCAGGATCAGG  
GAAATCGGTGAAGTAGTGGCGCTCGCCGCGTGCAGCCACAGCCACCAAGCAGGAAGATATGACGCAGTTTTTACGGC  
TCACCAGATCAATCAGCGTATCAGCAGCGCAAGCAGCGTCTGGCGACCAAAAACCCAGGTTGATAAGGTGCGGAATTTG  
CTGTACGGGAAGCCTGCCATCTGTTGCGCCTGGGTGATAACCGCAGAGAAATCATCACCGTCCAGATGACGCACGCCAGG  
CCAGCCAACAATGCTGCGGGTCCAGATACGATCGTCATAAGCGCTACGTTGGGTGATGATGACGTTGAGGTCATCA  
CGATGGGGCCAGGAAACGAGCGAACTCACTTGTGATTCTGCCAGCCGCTGCCGTAGTTACCGACCAGATGCTTGAAT  
TTACGCAGCTCCGGTAGCCATGCGCAGGCAGCATTTCGCCGTGGGTGTAGACATTAACGCCCGTGCCTTCCGGTCTGTT  
CAGCAGGTTGTAGAGATCTTTGAGATCGTGACCGGAAATCAGAATGCATTTACCCGCGTGCCTTACGTTGACCTGGG  
TTGGCGTGGGTGACCGTATTTACCGTTTTGCTGATCCAGAATGCTCATCACTTTGAAGTTTCTGCGCGATTTC  
ATTGAACACTCAAGAAGCGGTTATATCGGCAGGCCAGTCCCAGCCAGCCATGATTTTATGGTACTGGGCATAAAT  
ATCGTTGCTGATTGACCGAGAATGCGCGTGTCCATATAGGCCGCCGCACCTTTCAGGCCATACAGGCACAGCAGAC  
GCAGGCCGAGAATGTTTTCCCAATCGCCGCTTATCTTTGTTAGGGTAAATCTGCTGCCTGACGTTGACGCTCGCCG  
AGATCGTGCCTACCAGTTGACAGTACCCATCGGGTTATCGACGCGCGGTTGGCATCTACAGCCAGGCATTGCGCTT  
CAGCGCCTCGCGCAGGGCAATCGCTTACGAGCGTAGCCGACAATACGCGGAGAATCGAAGTTAACGTTGGTCAGGGTTG  
AGAAAAAGGCAGTGGCGCGAAGCTGTCAACATCGTGGTTGATGATGCCGATTTCACGCGTTTTTACCGCCAGGCAGAA  
AGCCCTTGCAGCGCCGATGAGTAAATCCTGAAGTCAAGGTTTCCGCCGTTTTTACCACACATCCCCTGCGCGTATGA  
GCAGCCGTTTTCTGCCGAGTACGGATAGTTTGTTCACATTGCACACAAAACATGATCACACCTTTTAAAGTTATATTTA

ATATACATGTTTAAAGGTTAAGACGCTTAACGCGGGGATAAAAAGGGATTTTTTCATGCAACTTAAAGGGAGATTGATTTAGC  
GCAATTTTGGCGGCAGGGATCTACCGCCAGAGAGGTATTACGCAGAGAAAAAGCGGATGAGGATCGGCACTAACAGGCTA  
AGAATAAAACCGTGAACAATTGCCGCCGGGACCATATCCAGCCCCCAGTACGTTGAAGAACGGGCAGGGTGAAATCCAT  
TGATGTGGCACCGCATAAGCCAGTGCAGTAGAGCGCTGCGGCGAATCAGCCAGGGATCAACATAATAGCAATCAGTT  
CACGGGCCAGATCATTAAAAAACGCCGCTCCCGATTACCGACCAAAAGATTCGGTCAATAAAATACCGGAAAGAGAA  
TACCAGCCGAAACCGGAGGCCATTGCCAGCGCGTATTGATGGGGAGATCAAGAATAAAGGCGTTAATTAACCACCAAT  
TAATGAACTGACAACCACCACCGGCGACAATCATTCCCCGGGATTAAGGACAATCTGCTTTAAGGTCATGCCATTAT  
TGCGCAACTGAATACCAACGAGGAAAAGTAGCAAAATTAACGTGTATTACTGGCTTCGGTCGCGTGTGTAAGAAAGCC  
AGTCCACTTAGACCAATGGCAAAACCAATCACTACTACGCCGACAGTTTTAGCGACTCCAGCGCCATCGCAATACGCGA  
CGGGAGTTTTTCTGTGATGGTGGTTGCCACGGCAGGCTCGCTCCAGCCACATCAGGGCGGCAATATTACACAGTA  
AAATAACGGTAATACTGACGGCAGAATAATGCAGAAATCGCCAACAGGTTACTGGCGAGGTTATCGAGAAACGCCAGACTG  
ATACCCATAAAAAAGAGAATAAGGTAACCATCCAGCTTAATAGCTGATTAATAACTTTTAAACGCAGCTTGTGGCGAAG  
CGAATGAGGTAACCCACAATCAGGGGAACCAGAATGATTAACAGCCAGAAAAATGAAAACCCAGTCTTGCAAAGAT  
GAAGTCGAAATGCGCGATGACACACTACTGAAAGCGGAAGGACGAGTAAAGTTGCAATTAAGGAAAATGTTATGCATAA  
GGAGCAGTAGAGTATTCGTTTTTCATTTAAAGATATCTTGGCTTTAATTACAAACTGCACCGATGTTGGTGGCGTCAAA  
ATCGCCGAGGCTTCCCTGAAGGCCGGGACGCCACATGGATGGGCTGAGGGCGCGTTTTACAGGGATGTTACCTCG  
CGCCGACCCGTTAGCCGTAAGGGATAAGTCGAGGGCACCGCCAGCGGCGATTTTTGTTCCGAGAGCCCGGGGTGCAG  
GGGCGCGCGGATTGGCCGCCCTGCGCGCTCCTTGGCCAGTGGCAATATGTTGCTTAGCTCATGAAAGGAGCGCAA  
CAAGATGATGAATCAACATATAACAACATCTTAAAAAAGGCCTGACATTACGCCAGGCTTCTGCGTTAATTAATCACG  
CTTTTCCAGCAGGGTCCGGTAAATCAGACCACCGATAATGCCGCCGACAATTGGCACCACCAGAAGAACCACAGTTGTT  
CTAATGCCAGCCGCCCTGGAAGATAGCAACCGGGTCTGCGCGCCGGTTAACAGAAGTGTAGTCACCGGAATACTA  
ATTAAGTGAATCAGGGTTAAGGCCAGACCAATAGCGATCGGCGCAAAACCTGCCGGCGCAATTTGTCGGTTGCGCCGTG  
GATCACCACAGGAACTGCACTCAATACCAGTTCAACTACCAGCGGAAAGCATGGAATAACCGCTGGTGAATGCT  
CGCCATAACCGTTAGAAGCAAAACCGTGGCTGCCGCGTCAAACCCGTTTTACTGCAATTAATACAGCAGCGCC  
GCTGCAACAATACCGCCGACAACCTGGGCAATTACGTAGCCAACGACTTCTTTTCCGAAAAAGTCCGCCAGCCATAA  
ACCAATAGTGACCGCGGTTAAAATGACCACCAGAAATATGACCAACAGCAAAGGCCATCGTCAGAACGGTCAGACCGA  
ACGCCAACGCCACGCCGCAAAACCAATGCCTAATTCGGGAAGCCTGCGGCCAGTACAGCACTACCACAGCCACCAAAA  
ACAAGCCAGAAAGTACCAAAACATTAGCTGCTAATTTTCTGAACATATCCACCACAATTAATAAATTGACCTGTGAAAA  
ATATGGTCTTTTTATAGGGTCTGCTGTAATAAAGTGACGACGGAATAATGCGCGGCTATTTTTAAAAACGAAGGCGAGTCA  
TTCACCAGATAAATAAATCCAGTAAATTTGATTTAGGGCAACAGCGGGTTGCCCATATAGTCATTTGTCTGATTGACAG  
TGTAGTGCACGCAAAAGATTTAATCCTTTAGGCGTAATAAAAAATAATTTATCATGCTAATTTTATTGTTTTGTTGTTTT  
TGAGACTTATCAGCAAGAGGGAGTATAACGCGATTATTCGCTCATTTTTTCCAGACATTTGCCATGCTTAAATGTGATGTC  
ATCACGATTAGCAAGGCCTTTTCCGTTACTGCCAGCGTAAAGGATAAGTCACATATTTCTGGAGGGGATGATTTCT  
TGAGCGCTTGAATTTGTTGGTTTTCGCGGTATCAACCGTTTGTGCTGATGCTGGAACAAAAACAGTCTGATTGGGG  
AGAACCGTGGGGTAAATCCAGCTTGTGGACGCTTAACTCTGCTGCTATCGCCAGAATCAGATCTCTACCATTTTGGAG  
CGGACGATTTCTGGTCCCGCGGGAGATATCAACGGGCGAGAATCATCTGCATATTTTTGACCTCCGCGAATC  
GCTGCCAGGCCGACATCGGGTTCGCCGTTATCGCCGCTGGAAGCGTGTGGACGCCATGCACCGATGGCTATCACCCTA  
TTTTTATCGTCTGGAAGGGGAGAGTGGGAAGACGGCAGCGTATGACACTGCGCAGTTTTCTCGATAAAGACGGACAT  
CCGATTGATGTCGAGGATTAACGATCAGGCACGCCATCTGGTGCCTTAAATGCCGGTGTGCGCTGCTGCTGATCCTCG  
TTTTATGCGCGTATTCTGTAACGGCACGGTGCCAAATGTCCCTAATGTGGAAGTCACCGCGCCAGCTGATTTCTCCG  
CCCGTGAGTTATCCTCACATCCGCAAAATCTCTGATGGGACAGATTCGTCAGGGACTTCCGCAATGGTACAGCTGCTT  
GAGCATTATTTCTGAGCAGGGGGCCGACAGGCGGATATCGTTAATGCGGCGGCGAGCCAGCAATGAGCAACGAAG  
CTGGCGCTATCTGGATATCATCAACCGGATGATTGACCGACTGGTGGGCGCTCGTATCGGGTTATTTTGTCTGGCCTAT  
TTGCTACTTTGTTGAGGCAAAAGGCACATTGCGACTGGATAAAGACGCCCGTCCATTGTTGCTGATCGAAGATCCAGAA  
ACCCGTTTACACCCATTATGCTTTCAGTTGCTGGCATCTGTTGAATCTTCTGCCATTGCAGCGATTGCCACCACCAA  
CTCGGGTGAAGTCTTTCGTTAACGCCGTAGAGCATGTTTGGCGACTGGTACGTGAGTCTCGCGGTTGCCGCTGGC  
GTCTGGGGCCGAGTGGCTTGTGAGTACCGAAGATAGCCGACGCATATCCTTTCACATTCGTTTTAACCGTCCGTCATCGCTG  
TTTTGACGCTGCTGGTGTGGTGAAGGGGAAACGAAACCTGGGTTATCAATGAACTGGCGCGTCAAGTGGGACATCA  
TTTTGATGCCGAAGGGATCAAGGTCATTGAGTTTGGCCAGTCCGGCTAAAGCCACTGGTTAAATTTGCCCGCGAATGG  
GGATTGAATGGCATGTAAGTGTGATGGCGATGAAGCAGGGAAGAAATATGCCGCTACGGTACGCAGCTGTTGAATAAC  
GATCGGGAAGCCGAACGAGAACATTTAACGGCGTTACCGCGCTGGATATGGAACATTTTATGTATCGCCAGGGATTTT  
CGATGTGTTCCACCGCATGGCGCAATCCCGAAAAATGACCGATGAATCTACGCAAAATATCTCGAAAGCGATCCATC  
GCTCTTCAAACCCGATCTTGCCATTGAAGTGGCAATGGAGGCGAGACGTCGTGGTGTGGACTCCGTACCAGCGCTGCTG  
AAAAAATGTTCTCACGCGTGTGTGGCTGGCGCGGCTGCGCGGATTAACCGGAAACATCGTGGCCATTTGTGGCTG  
AATAGCGTCGAGCATCTCATAGCGCCGACGGTATTCAGCCGTTTTTACTGGCGATTTCCGCAATCTTTTTCTGTGCTA  
TCTGTGCTGGAAGGCGGTAATGGCGTTCAGCATCACATACGCCCAACCGATTCCAGAAAGCGTTGTAATCAGCGTGG

ATCTTGCCTTCTTTATCGCGATAACGCAGGCTGCGGTAAATATGCGTTTCATTGCTGACGGCAATAATCTGCTCTACCTG  
CAAACGTTGGGCAAACAGACAGGCCGCTTCCATCACGAGGCGTTTGGGAAATAGCCCGTGGCAGGCTTTCGTCGCATTCT  
GGATTTCTGATGTGGAATTTCCATTTTGCCTTGCAGTCCGCCAATAAACATCGTTCTTTTCCCCTGATATTCACAC  
AGGGTAAACGTGATCTCTGCCAGAGGAATACCTTCCGCTGTTGCGGAACAGGATTGTGCTGTACCTTCTTTATCCATTGA  
GATCATCATGGTCAGCTCAAGCGTGAAGTCTCGCCGTTTTTGCCTTCCAGCTTCGCCAGTTGCAGCCCCGGGGTATTC  
AATAAAGCTGAATCTTCCGCCGACATACATTCGCGGAGTAACGCATAATGGTAACGTAACGCCTCCAGCAATTGCTTA  
CGGCTAAGATTCGCCGCAAGGTAAGGGCGATGCAGACGCACAGGCAGTCCGGCTGGCGGTTAAACAATACATTGAGATT  
AGGCCAGTGGGAAAGTTCGTTTCCACTCAACGCTTAAACGCGGCATAATCAACGAGCGCAGCAAAAATTTCTGGCGAA  
AACTACGGCGATGCCAGAATTTACCCGGCCGACACTGTCCACGTGCCAGACTAAGAAAAAGTGACAGGCTGTGAGAGAT  
TCAGATGGCGTAAAGGTCGTTTCACTTACGCTGCGACATATTCATGAAATCAATGGTTATACATGGCGTCGATTTCCCAT  
TGCGTATCTTAAACAAACATCAATAGTGTGATTACTAACGTAAATTTTAGGGTTTTGTTGATATTTGTTGAAGTTAATG  
ACCCGATTGGCATATGGAGTATTCAGAAAATTTATGAAAAAGCGGAAAACCGTGAAGAAGCGTTACGTTATTGCGCTGG  
TGATAGTATCGCCGACTGATTACGTTATGGAGAAATCTTAAACGCACCCGTGCCGACTTATCAGACGCTGATTGTGCC  
CCCGGTGATTTACAGCAAAGCGTGTGGCGACCGGAAAGCTGGACGCGCTGCGTAAGGTTGATGTGGGCGCCAGGTCAG  
CGTCAAGTTGAAAACCTTGTGCGTGGCGATTGGCGATAAAGTAAAAAAGACCAGCTTTTAGGGTTATTGATCCTGAAC  
AGGCTGAAAACCAAGTCTAAGGAGGTGAAAGCAACGCTGATGGAGCTACGTGCGCAGCGGCAGCAGGCGGAAGCGGAGCTG  
AAACTGGCGCGGGTGACGTTTCCCGTACGCAACGCTTGGCACAACGAAGGCTGTTTACAGCAGGATCTCGACACCCG  
CGGACGAGATGGCTGTGAAAACAGGCGCAAATGGCACCATTCAGCGCAAATCAAGCGCAATCAGGCTTCTCTCGATA  
CGGCTAAAACCAATCTCGATTACACTCGCATCGTTGCCCGATGGCCGGGAAAGTACGCAATCACCCTCTGCAAGGC  
CAGACGGTATTGCCGCACAACAAGCACCGAACATTTGACGCTGGCAGATATGAGCGCCATGCTGGTAAAGCGCAGGT  
TTCTGAAGCGGATGTAATCCACTGAAGCCGGGCAAAAAGCCTGGTTTACGGTGTGGCGATCCACTGACGCGCTACG  
AGGGGCAAATCAAGGATGTACTACCGACGCCGAAAAGGTTAACGACGCTATTTTCTATTACGCCGTTTTGAAGTCCC  
AACCCCAATGGTTTGTGCGGCTGGATATGACTGCGCAAGTGCATATTCAGCTCACCGATGTGAAAAATGTGCTGACGAT  
CCCTCTGTGCGGCTTAGGCGATCCGGTGGCGATAATCGTTATAAAGTCAAATGTTGCGTAATGGTGAACACGCGAGC  
GTGAAGTGACGATTGGCGCACGTAACGATACCGATGTTGAGATTGTCAAAGGCTTGAAGCGGGCGATGAAGTGGTATT  
GGTGAGGCCAAACAGGAGCTGCACAATGACGCTTGTCTGCAATTAAGGATATTCGTCGAGCTATCCTGCCGGTATT  
GAGCAGGTTGAGGTGCTGAAGGCGATCAGCCTCGATATTTATGCGGGTGAGATGGTCGCGATTGTTGGCGCTTCGGGTT  
CGGTAATCGACCCTGATGAATATTCTCGGCTGTCTGGATAAGGCCACCAGCGCACCTATCGCGTCCGCCGTCAGGATG  
TTGCCACGCTGGACGCCGATGCGCTGGCGCAACTGCCCGCGAGCAATTCGCTTTATTTTCCAGCGTTACCATTGCTT  
TCGCATTTAACCGCCGAGCAGAACGTTGAAGTACCCGCCGCTATGCTGGTCTTGAAGCGGAAAACAGCGACTGCTTCTGC  
CCAGGATTGCTGCAACGGCTGGGGCTGGAAGACCGTACAGAGTATTATCCGGCACAGCTTTCGGGTGGTCAGCAACAGC  
GGTCAGCATCGCGCGGGCATTGATGAACGGTGGTCAGGTAATCTTGGCGATGAACCAACCGGCGCACTGGACAGCCAT  
TCTGGCGAAGAGGTGATGGCGATCCTGCATCAGCTGCGCGATCGTGGGCATACGGTATTATCGTCACCCACGATCCGCA  
GGTCGCTGCTCAGGCCGAGCGGGTATCGAAATTCGCGACGGCGAAATGTGCGCAATCCTCCCGCATTGAAAAAGTGA  
ATGTTACTGGCGGGACGGAACCTGTTGTCAACACGGTGTCTGGCTGGCGGCAGTTTGTGACGGTTTTAACGAGGCGCTG  
ACGATGGCATGGCGGGCGTGGCAGCGAATAAAATGCGTACTTTACTGACCATGCTGGGGATTATTATCGGTATTGCGTC  
GGTGGTTTTCCATTGTCGTGGTGGGTGACGCCCAACAAATGGTGTGCGGATATTCGTTCTATTGGTACGAATACTA  
TTGATGTCTATCCCGGAAAGATTTTGGCGATGACGATCCGCAATATCAGCAGGCGCTGAAGTACGACGACTTAATCGCC  
ATCCAAAAACAACCGTGGTTCGCTCAGCCACACTGCCGCTCGCAAAACCTGCGCTGCTTATAACAATGTTGATGT  
TGCTGCCAGTGCAATGGCGTGAGCGGGGATTTTAAATGTCTATGGCATGACCTTCAGTGAAGGAAAACACCTTTAATC  
AGGAGCAGCTGAACGGTCTGCGCAGGTCGTGGTTCTCGACAGTAATACTCGCCGCGAGCTTTTCCCCATAAAGCAGAT  
GTGGTTGGCGAGGTGATTCTGGTCGGCAATATGCCCGCAGAGTATTGGTGTGGCGGAAGAAAAACAGTCGATGTTTGG  
TAGCAGTAAAGTGTGCGTGTCTGGCTACCTTACAGCACGATGTCGGGCGAGTTATGGGCCAGTCGTGGCTTAACTCCA  
TTACTGTCAGGGTGAAGAAGGATTTGACAGCGCCGAGGCGGAACAGCAACTCACGCGTTTACTTTCACTGCGCCACGGA  
AAGAAGGATTTCTTTACCTGGAACATGGACGGCGTCTTAAAACGTTGAAAAGACCACACGTAATTTACAACGTTTCT  
GACGCTGGTGGCGGTGATTTGCTGGTGGTGGGCGGATTGGTGAATGAATATTATGCTGGTGTGAGTACCGAGCGGA  
CGCGGAAATTTGCAATTCGATGGCTGTAGGTGCGCGAGCAAGCGATGTTTTGCAACAGTTCTGATCGAAGCCGTAAGT  
GTTTGCCTGGTGGTGGCGGCTTGGGAATAACACTGCACTGTTAATTGCTTTACCTTGCAGTTTTTCTTACCCGGCTG  
GGAGATTGGTTTTTACCCTGGCGCTGCTGCTGGCTTCTCTGCTCGACGGTACCCGGGATTTTATTTGGCTGGTTAC  
CCGCAGAAATGCGGCACGACTGGATCCAGTAGATGCTCTGGCACGAGAGTAATTTTTGAGATAAAAATGCCAGCCGATC  
GGCTGGCATTGCTTTAGGATGTACACAATGAGACAGAAGAGCTATGCGACTGCCGCTTCTACTTGCAGGGCACAA  
TAACTGGCGTATTGCTTTTGGCCCTGGTGGACATCAAACGTAACGGATTGTCCAGTTTTAGCGTCTGTAACCA  
TCCATCTGAATGGTGAATAATGAGCGAAAATATCTTCCGCCCGCCCTTCCAGGCGAGATGAAACCAAACCTTTGGCATT  
GTTGAACCACTTAAACAGTACCCTTTTCCATGCTTGCACATCTTCCGAAATCTTATAACAAGTAAAGTGAATAAACCGG  
GTCAGAGAGGGGGCTGTTCAAACCTCGCAACTCTAGAAATACAATTTAGAGAATTAGGGCGAGCCGTCAAGCATTGTA  
CAGGGGACAAGGGGCGAGTATGAATCAAAAATTTGAAGCAGTTAACGCTATTGACAGGAATGTGACAGATGTCGCTGATG

CCAACGATAGATGATAGTTATCTATCATGTGGAGTAGATTGGTCAGGCAAATAAGCTCTTGTGACGGCAGGGCGTTCTG  
CCGATAACCGTAACCGAAGATGATAACTGACAATGGGTAACCGAAGGACTGGCTGGACTTTGATCAACTGGCGGAAGAA  
AAAGTTCGCGACGCGCTAAAACCGCCATCTATGTATAAAGTGATATTAGTCAATGATGATTACACTCCGATGGAGTTTGT  
TATTGACGTGTTACAAAAATCTTTTCTTATGATGTAGAACGTGCAACGCAATTGATGCTCGCTGTTCACTACCAGGGGA  
AGGCCATTTGCGGAGTCTTTACCGCCGAGGTTGAGAAAACCAAAGTGCGGATGGTGAACAAGTACGCGAGGGAGAATGAG  
CATCCATTGCTGTGTACGCTAGAAAAAGCCTGAATGCAAGCATAAAAAATTGGGGGAGGTGCCTATGCTCAATCAAGA  
GAACTCAGTTTAAATATGGCTTTCGCCAGAGCGCGCAGCACCCTCATGAGTTTATGACCGTCGAGCACTTGTACTGG  
CGCTGCTCAGTAACCCATCTGCCCGGAGGCGCTGGAAGCGTGTCTGTGGATTTGGTTGCGCTCCGTCAGGA  
GAACTGGAA  
GCCTTTATTGAACAAACACACCCGTTCTGCCTGCCAGTGAAGAGGAGCGCGACACACAGCCGACGCTGAGTTTTCAGCG  
TGTA  
TACTGCAACGTGCGGTCTTCCATGTCCAGTCTCCGGTCGCAATGAGGTTACCGGTGCAACGTTCTGGTCGCTATCT  
TTAGCGAACAGGAGTTCGAGCGGCATATCTGTTGCGTAAACATGAAGTCAAGCGTCTCGATGTGGTGAACCTTTATCTCT  
CATGGCACGCGTAAAGACGAGCCGACACAGTCTTCTGATCCTGGCAGCCAGCCAAACAGCGAAGAACAAGCTGGTGGGA  
GGAACGTATGGAGAATTTACGACGAACCTGAATCAGTTCGCGCGTGGCGGAATCGACCCACTGATTGGTCGTGAGA  
AGGAGCTGGAGCGTGTATTGAGTTCTGCGCTGCGCGTAAAAACAACCCGCTGCTGGTGGGGAAATCTGGTGTCCGT  
AAAACCGGATTCGGAAGTCTTGCCTGGCGAATTTGAGGCGATGTGCCGGAAGTGAATGCTGACGATTTA  
CTCTCTCGATTCGTTCTCTGTTAGCGGACAAAAATATCGCGCGACTTTGAAAAACGTTTTAAAGCGTTGCTCAAGC  
AGCTGGAGCAGGACACTAACAGCATCCTGTTTATTGATGAGATCCACACCATTATCGGTGCGGGTGCAGCGTCTGGTGGT  
CAGGTGCGATGCGGCTAACCTAATCAAACCGTTGCTCTCCAGCGGTAAAAATTCGTGAATTGGTTGACAACCTATCAGGA  
GTT  
CAGCAACATTTTCGAGAAAAGACCGTCTGCTGCGCGCTCGCTTCCAGAAAATTGATATTACTGAACCGTCGATCGAAG  
AAACTGTTCAAATCATCAATGGCCTGAAACCGAAGTATGAAGCGCACCACGACGTGCGTTATACCGCAAAAGCGGTGCGT  
GCGGCGGTAGAGCTGGCGGTGAAATACATTAACGATCGTCATCTGCCGATAAAGCCATTGATGTTATCGACGAAGCGGG  
CGCTCGCGCACGCTGATGCCGTAAGCAAACGCAAGAAAACCGTTAATGTGGCGGATATTGAGTCCGTGGTGGCCCGTA  
TTGCACGCATTCCAGAGAAGAGTGTCTCAGAGTATCGTGATACCCTGAAAAACCTCGCGATCGCTTAAAATGCTG  
GTCTTCGGTCAGGATAAAGCATTGAGGCGTGAAGCCATTAAGATGGCGCGTGCAGGTTTAGGTACGAACATAA  
ACCGTTGGTTCGTTCTGTTTCCCGCCCTACCGGGTGGGAAAAACAGAGGTGACGGTACAGCTTTCGAAAGCTTTGG  
GCATTGAGCTTCTGCGCTTATGATATGTCAGATATATGGAACGCCATACCGTCAGCGTCTTATTGGTGCCTCCGGGA  
TACGTTGGTTTTGATCAGGGCGGTTTGTGACTGATGCGGTATCAAGCATCCACATGCGGTGCTGCTGCTGGACGAAAT  
CGAGAAAGCGCACCCGACGTGTTCAATATTCTGTTGCAGGTGATGGATAACCGTACGCTGACCGATAACAACGGACGCA  
AAGCAGACTTCGTAACGTGGTGTGGTATGACCACAACCGCGGGTACGGGAAACTGAGCGCAAATCCATTGGTCTT  
ATCCACCAGGATAACAGCACCGATGCGATGGAAGAGATCAAGAAGATCTTACACCGGAATTCGTAACCGTCTCGACAA  
CATTATCTGGTTTATCATCTGTCAACCGACGTGATCCATCAGGTGGTGGATAAATTCATCGTCGAGTTGACGGTTCAGC  
TGATCAGAAAAGGTGTTTCTGGAAGTGAAGCAGGAAAGCGCGTAACTGGCTGGCCGAGAAAGGTTACGACCGGGCAATG  
GGCGCTCGTCCGATGGCGGTGTCATCCAGGACAACCTGAAAAACCGCTCGCCAACGAACTGCTGTTTGGTTGCTGGT  
GGACGGCGGTGAGTCAACCGTCGCGCTGGATAAAGAGAAAAATGAGCTGACTTACGGATTCCAGAGTGCACAAAAGCACA  
AGGCGGAAGCAGCGCATTAATCTGATTGTTAGGTAGTTGGTCAAGTCCGTAATCTCGAAAGAGGTTACGGACTTTTTGT  
TTATGGGGTGGAGGAGGTTAGACCTTTTTTAAATGATGATGGAAGTTGTTGATAATTAGTGTGCGGGAAGGTAAGG  
ATAAAAAAGGGTGTGTCAGGAGAATGGATGTTTTGCTTTATTAACAACGGGCTAAACGTGATGATTTGAGTTCACTG  
CCGTACAGGCAGCTTAGAAATTCACAGGTAACATACTCCACCCGCCACCATGTTCACTGCCGTACAGACAGATAAAATG  
CGAAAAAAAAGCTCGCATTTCGTACGAGCTCTTCTTAAATATGGCGGTGAGGGGGGATTCGAACCCCGATACGTTG  
CCGTATACACACTTCCAGCGGTGCTCCTTCAGCCTCGGACCTCACCAAATTTGTTTTGCTACCAACCTCATGGGT  
GGCAACGGGGCCTACTATAGGGAGTTGGAGTAAAACGGTCAAGAAGAATTTAATGATAATTATTGTTTTGCTCATACTG  
TAAACAAGTTGTGAGTATATCTACATCGAGACAAGTTACGGACTTATACTTCAAAGTACTTCATACATATCACAAAAT  
AAAAAGCCGGTTAAACCGACCTTTTACTCGTTCTTCTCTCGCCATCAGGCGGTAACAATCAGCGACTACGGAAG  
ACAATGCGGCTTTGCTCAGGTGTCAGGGGTGAGTTCAACAGTCACTTTGTCGCCGTCAGGATGCGGATGAGTTTTT  
GCGCATTTTACCGGAGATGTGTGAGTAACACGTGACCGTTTTCTAACTCTACGCGGAACATGGTATTAGGCAACGTTT  
CAAGAACGGTACCTTGCATTCAATATTGCTTCTTGGCCATCTAATCCTCTGGGGTACTACTACCGTAATTTGAACCG  
GCAAGATAATGCCAAGTTCTGTAATAAGTAAAGATTTGCGCGTAAATCGCAACAAACAGGTTGCGCACATTACTCCG  
AAAAACACCGGTAAGCCGACCAAAGCGCAACGTATAAGGGAGCGGTGAGATAAACGATGGGCGTTACCTGACGCGAA  
AAATTCCTTATCGGACGCGGGTAAAGAGCGTAACCACTCTGCGACCGCAATTATAACACTCTGGGGAGAAATGTGCCG  
AAAAATTCTTCTGTTGTAACAAGCATCGTGGTACCCAGAAATTTTCGGAATCGTCCGAGGCGCATTTGATTG  
AGATAATTAAGGTAATCCCGCGGGGAATTTGCGAGCACCAAGCGATGCTGTGTGATCGTTAAGGACCTGGCAGTCGAT  
AAGCTTACCGCATGACCGATAAATCCTCACAGAATACCAGAAGCGCCGTTTTAGACGCATTTTCCATCCGGCTGAACA  
TGGACTCGCCAAAAATAGCGTTCCCTGGCCACCGGTACATACCGCCGACAAGCTCATCTTCACGCCAGACTTCAATG  
GAGTGGGCATGCCCAGTTCGTGAAGGCGATGGTAGGCTTCGACCACGCCACGCGTATCCAGGTTCTTCTTCGCGATC  
GCTGGCACAGCCTTCAATGACCTGACCAAAAGCGTAATTCATCGTGACACGATAGGGCGAGCGTTTATGAAATCGCTTCA  
TACTACGGCTGATATGAGTATTCTGGCCATAGCACCGCGCGGGGATCGGGCGACCACCAGAGGATGGGGTGCCTGGA

GAAAACCACGAAAAATACCAGCTGGTAAGCCATTAACAGGCGCGCAGGGCTAAGATCGCCCCAAGTGCCAGCAGGCC  
GTTAGGCTCACGTAATGCGCCTTCGGGGAAGGGAAGGCTATTGAATGGCGAGAAAGCTGAACCAGGCGCATGACCCGAA  
AACTCCACGCAAGTCGGATCGTTCAATAATAGCTTACAAACCCTGCTTGAAGTGGTAATAACGCCCTGTCTGGCAAGCA  
GTTCTGCGTGAGTACCTTGTCTAATAATTTGCCCGTTGTCATCACTATTATTTGTTGGAAACGAGAGAGTCCGCGAAGT  
CGATGGGTGACCATTAACACCGTTTTCTCACGCATCATTTCTGCAAGCAATTAAGGATCTGGCTTCGGTTGTGGCATC  
TAAGCCTTCGGTAGGTTTCATCCAGCAACACCAGTGGCGCATCATGTAACAGCGCACGGGCGATAGCCAGACGGCGCAGTT  
CACCACCGGAGAGCTGGCGTCCGCCTTACCTAACCAACTGTTGAGACCTGCATCCTCGAGCAGCTTTCCAGGCCAACG  
CGACGCAAGATCTCCGACAGAGCCTCATCACTACTGCCAGGCGAGGCGAGTAAAAGATTATCACGCAGCGTGGCGCTAAA  
CAGATGCACTCGCTGAGGAACAACGCTGATGGTCTGTCTGATAGAGCCGCTTATTGAGGCTGGCTATGGGGCTATCGTTAA  
GCAAAATCTCGCCCTGTTGCGGGTCCCATGCGCGGGTCACTGTTGTAACAGTGTGATTTGCCGCATCCGGTTCGCCCC  
AGAATCGTATATGTTCCCCGGCGTTTACCTGAAGAGAAATCCCTTAAAGTGCCTGTTGAGATTGCTCCGGATAAGTGAA  
CTGAACATCCCGTAACGTGAGGCAACGCGATCGGCAACACGAGTTTGGGTATCAGGAAAGGTGACCTCCGGTTTTGAT  
CCGTTAAGTCAGAGATACGTACGGCAGAGGCAATGACTTGCCTCAGATGCTGAAATGCACCCGTTACTGGTGCCAGTGT  
TCAAACGCGGTAACGCGCAGAAGACAAACAGGGCAATTAACGCGCCGGGTTGAGCATTGCCGCCAACGCCAGACGC  
CATCCACAGCATCAGGATCACCCTAACGCGCAATGAGCAGCATTAATCGCTTGCAGCAATGCGGTGAGTTGAGTTGAC  
GGCTTGGCGTTCAGCCATTGAATTTCTGTATTCTAGTTGCGTGCGATAACGATCGCTGGCACAAAAATGGTCAGC  
TCAGCTTGGCCTTGCAGCCAGGCGCTCAGTTGTTGGCGATACTGTCCGCGAAGATGAGTCAGATTTTGGCCGGTCTTTT  
TCCCGCACGATAAAAACAGCGGTGGCATCAGGAAAAGCGTCAGTAACATAATGCCGCCAGCGTAAAGGCGAGGGTGAAT  
CAAGGAAACTTAACCCGATTGTACCACCATAATACCACAAAAGCGCCACCAGCGGCGAGATAACGCGCAGGTAAAGA  
TGATCGAGCGTATCAACATCCGCCACCACGCGATTGAGCAATTCGCCCTGACGATAGCGCGCCAGTCCGGCAGGGGAGAG  
GGCAGCAATTTGCTGAAGGTGTAATGCGCAGATGCTGCAACACGCGGAAAGTCGCGTGTGACTTACCAGACGTTCAA  
AATAGCGCCCGCAGTACGGGTGATTGCTGCGCCACGACGCCCGCAGCGGGTAGCATATAGTTGAAGCTGTACAGTCCG  
GCAACCCCGCAACCGCTGAGGCGGAGAGGAACCAGCCGAAAGTGTCAACAGACCGATACTGGCGAGCAGCGTCACAAT  
TGCCAGCACAATACCAAGACTTAACATCCATTTATGACGTTTATACAGTGCCAGATAGGGTAGCAAAGCGCGCATTTAAA  
TCTCCTCTGACGATGGCCAGTAATGTGGCAATGGGCCACCAGCCACACTTAATTCGCGTAACGTCCTTGTCTAATA  
ATCCGGCCATCCTGCATAACCCAAATGACATCCAGTCAGCAAGATCTTCTAACTGGTGGGTGACCATTAACGTTGTCTG  
GCGCAGAGAGGCGGCATTACGCGCCTCATTACGCGCTGTTCACTGTGAGCATCAAGGCTGGCAGCGGGTTCATCCAACA  
GTAATAGCGAACAGGGATTTAGTAACGCACGGGCCACGCCACGCGCTGCGCCTGCCCCACGAAAGGCGGGCAGCCTGG  
TCGCCAACAGGCGTATCAACGCCTTGTGGGAGGAGCGGTAGAAACTCGCTGACCAGGCGTTATCCAGCGCTGCTGTAA  
TTCTTGTTCGCTGGCATCAGGTCGCGCCAGTAGTACGTTATCCCGCAATGTTGCTGCGCGTAATTGTGGGTTTTGCCCAA  
CCAGGAGAGATGTTTACGCCATGATTCTGGTGATAAATCGCGTAATTTCTATCCCGTTGATTGCTAGCGATCCCTGATAT  
GAGAGAAAACCAGAAAGCGGTTGAGCAGTGAGCTTTTACCTGAACCGCTGCGACCAACCAACACCCGACGTTGGCCTGC  
TGGCAAAGTAAAGTTCAGCGGTCCGGCCAGCGTTTTACCTTCCGGCGACGTGATAAACAGCTCCTCGGCCTCAATGGTCA  
CCGGATCGGTGATGCTAATTCGCGCTCACACGTTGCGGATGGGCGAGCGGGGTTCCATAAACGTTTTTACAGTGTCA  
GCTGCGCAACAGCCTGGGCTTTAGCATGATAAACGTACCGAGATCGCGTAATGGCTGGAAAAACTCTGGCGCAAGGAT  
CAGGGCCAGAAAACCCGAGCCAGCGTCACACCGGTATCGTAGTGACCAAAATCCAGCTCGCCGAGATAGGAAAAACCAA  
AGTAGACCGCCACCAGAGCAATTGACAGCGAGGTAAAAAATTCGAGAATGCCGGAGGATAAAAAACGCCAGCCGTAGCACT  
TCCATTGTCCGTTGGCGGAAATCTTCCGAAGCAGAACAATACTTTCAATTTGAGCTTACCACGACCAAAAAATACGCCAA  
TGTTTTCCATCCGCGCAGGCGATCGAGGAAATGCCACTTAAGCGAGCAAGAGCGAGAAAGTTACGTGCGTTAGCATCGG  
CAGCCCCATTCCAACACGCGCCATAAAACAACGGAATTAACGGTGCAGTGCCAGCAGAATGAGCGCCAGCCAGTTA  
GAGGGGAAGATTGCCACCACAATCAGCAACGGCACCGACTGCCAGCGCCATTTGCGGCAGATAGCGTGCATAGTAATC  
ATGCATATCGTCAATTTGCTCGAGTACCAGCGTCCGCCAGCTCCCGCAGGTTTACCCTGAATCCACGCTGGCCCTGCTT  
GTTGCGACGCTGAGAACCTGACGGCGGATGGCAAAGCGGATATGCTGCCCGCGTGATAACCCACCCGTTTCGCGTAAC  
CAGACCACCCATGCGCGCAGTACAAAGGTCAGAACCAGTAACGTAAGGGAAGCAGCAGGGCTTACGGGGAATATTCTC  
CATAATCATATGTTGAGAAATTCGCGCCATGAACCAGGCTGGGCAATGATCAATATGCCGCTCACAAGCCAGCAGAC  
GAGAAATATTAGCCAACGTTGGGAGATGACGCTTTGCTGTTTTAACAGCGGGTTAACTCTTTTTGACGAGATTTATTC  
ATTGACGCTTAGCAGGTGAGTTATCAGAATTTTGCAGAGCAATGTTACAACGGGGAATAAAGGCGACCCATAG  
TCGCATGGTGTGCGCTTCTTACTTTTTGTTACTGATTTGTAATAATTTTTCGCTCAGCTAAACCATCGAGGTAGCGTTC  
CGCATCAAGTGTGCGCATGACGCTGTACCGGCCAAGTAATGGCCTGGCGATAAATGTGATCCATCACGTCGCTGCGG  
CAAAGACGCCAGGAATGCTGGTCTGGGTGGCATTACCATGAATACCCGACTGTACTTTGATGTAGCGTTTTCCAGTTC  
AGCTGCCCTTCGAAAATCGCAGTATTCGGGCTGTGACCGATAGCAACAAACAGACCGGCAACGTCGAGTGACTCGATGTT  
ATCGCTGTTTTGCGTATCGCGCAGACGAACGCCAGTGACACCCATTTGATCGCCGGTCACTTCTTCCAGCGTACGGTTGG  
TGTGAGAATGATGTTGCCGTTCTCCACTTTATCCATCAGGCGCTTAATGAGGATTTTTTCCGCGCGGAAACCGTCACGG  
CGGTGAATCAGATGCACTTCCGAAGCGATGTTAGACAGATACAGCGCCTCTTCAACCGCGGTATTGCCGCCCGGATGAC  
CGCAACTTTCTGGTTGCGATAGAAGAAACCGTCGCAGGTTGCACAAGCAGAAACCCACGGCCTTTAAAGGCTTCTTACG  
AGGGCAGGCCGAGATAGCGTGCAGAAGCTCCGGTGGCAATAATCAGCGCGTGCAGGTGATTCGCGCTTATCGCCATTC



AGACGGAACGGACGGTTTTGCAGATCCACCTTGTTGATATGATCAAAAATGATCTCAGTTTCAAACCTGGTGGCATGTT  
GTGCATGCGCTCCATTAATAACGGACCGTCCAGATCGTTTGGATGCCAGGCCAGTTTTCCACTTCCGTGGTGGTGGTCA  
GTTGGCCGCTTTTTCCATGCCGGTAATCAGCACAGTTGCAGGTTGGCGCGCCGCGTAGACAGCAGCGGTGATCCC  
GCCGGGCTGAACCCAGGATAAGCAGTTTACTGTGTTTGGTCTGCCATGAGATCCCATAGTTGTTGGCAGACAATGG  
GCAGGATTGTAGGGAATTTACAGACGTAAGAAAAGAGTATGACGATTTTGTAAACAATTTGTGCAATCGGCAGCATCGAT  
AAGCAGGTCAAATTTCCCGTCATTATCACCTCTGCTACTTAAATTTCCCGCTTTATAAGCCGATTAATGATGAATAAA  
CGCCCTGTTAATGAATATCTGGCATGTTGTAATAAAAATCGATGTTTTGCTTTGACAATCCCCTGGTGTGTTTGGAAAA  
CATTGAGGAAGAAAAAACAAGTATTCTTATATGCGCATAACCATGCATGTAATACCATGTTTACCCTGCTAGTGAAA  
TCTACGTATGGCGTGGACAGACGCCATTCTGTATGTCGATAGCTGCCACAAGGCAACGGTCTTCTCACCGTAGACCCAGG  
CATTGCGCGCCGTGAATCTTATGATTTCCGTCTATCGTGACGGGTAGCGACTCTGAACAGTGATGTTTCCAGGGTCCAGC  
AGGAGTAGGGAAGGAATACAGAGAGACAATAATAATGGTAGATAGCAAGAAGCGCCCTGGCAAAGATCTCGACCGTATCG  
ATCGTAACATTTAATGAGTTGCAAAAGGATGGCGTATTTCTAACGTCGAGCTTTCTAACGTCGTTGGGACTTTCCCA  
ACGCCGTGCCTGAGCGTGTGCGTCCGCTGAAAAGACAAGGGTTATTCCAGGGCTATACGGCGCTGCTTAAACCCCATTA  
TCTGGATGCATCACTTCTGGTATTCTGTTGAGATTACTCTGAATCGTGGCGCACCGGATGTGTTGAACAATCAATACCG  
CTGTACAAAAACTTGAACAATTCAGGAGTGTCAATTTAGTATCCGGTGATTTTCGACTACCTGTTGAAAACACCGCTCCG  
GATGTGTCAGCTACCGTAAAGTTGCTGGGGAAACCTGCTGCGTGCCTGGCGTCAATGACACACGGACATACGTTGT  
TATGGAAGAAGTCAAGCAGAGTAATCGTCTGGTTATTAAGACCGCTAACACGGAACAGGTGCAAAATCGCGGTATTTTG  
ATTACACTCCTGTTAATCCATACAGCAACAGTACTGGGTAACCTGGTACTGTTGTCCGTTTTAGCATCGGGCAGAAAA  
GCCTGTAACCTGGAGAGCCTTTCTGAGCCAGGAATACATTGAAGACAAAGAAGTACATTGACAAAGTTAAGTAGCGGC  
CGCCGCTTCTGGAGGCGTTGCTGATCCTTATTGCTGTTTGGCGTCTGGTTGATGGCTGCCTTACTAAGCTTTAACCC  
TTCGGACCCAGCTGGTCGCAACGGCCTGGCATGAACCTATCCATAATTTAGGTGGGATGCCCGGTGCGTGGTTGGCAG  
ATACGCTGTTCTTTATTTTTGGCGTATGGCTTACACCTTCCCGTCAATTTGTCGGCGTTGTTGGTTTGCCTGGCGT  
CATCAGTCCAGCGACAATACATTGATTATTTGCCGTTTCTGCTACGCATCATTGGCGTTTTGGCGCTCATCCTTACCTC  
CTGTGGTCTGGCGCAATCAACGTCGACGATATCTGGTATTTGCTCCGGTGGCGTCAATGGCAGCTTACTAAGCACTA  
CGCTACAACCACTGCTACACAGTAGCGGGGAACCTATTGCGTCTGCTGCGTTTGGCAGCGGGCCTGACGTTGTTACC  
GGTTGGTCATGGTGACCATTGCTGAAAACTCGCGGCTGGATTTTAAACATTTCTCACCTTCCGAGTAATCGTACCCG  
TCGCGATGATACCTGGTGCATGAAGATGAGTATGAAGACGACGAAGAGTATGAAGATGAAAATCACGGCAAACAGCATG  
AATCACGCCGTGCCGATTTCTTCCGCGCGCTAGCGCGTCTGAAACGGTTGGCGGAAAAATTCATTAATCCGATGGGG  
CGCAAACAGACGCTGCGTTGTTCTCCGTAAGCGGATGGATGATGACGAAGAGATTACCTACACTGCACGCGGTGTCG  
TGCCGACCCGACGACGCTCCTATTTTCCGGCAATCTGCAACGCAGCCAGAATATGACGAATACGATCCATTATTAACG  
GTGCGCAATTACCGAACCTGTCGCTGTAGCAGCTGCTGCTACCACGGCGACACAAAGCTGGGCTGCGCCGGTTGAACCT  
GTGACTCAGACGCCGCTGTTGCTCTGTTGATGTTCCACCTGCGCAACCTACAGTAGCCTGGCAGCCTGTACCGGGTCC  
ACAAACGGGAGAGCCGTTATTGCTCTGCAACGGAAAGTTACCCACAGCAGTACAATATGCGCAGCCTGCAGTGCAAT  
ATAATGAGCCGCTGCAACAACAGTACAGCCGACGAGCCGATTTATGACCTGCAGCTGAACAACCTGCGCAACAGCCG  
TATTATGCCCTGCGCCAGAACAACCGGTGGCAGGTAACGCTGGCAAGCCGAAGAGCAGCAATCCACTTTTGTCCACA  
GTCTACATACCAGACTGAGCAAATTTATCAGCAGCCAGCCGCTCAGGAGCCGTTGTACCAACAGCCGCAACCCGTTGAA  
AGCAGCCTGTTGTGGAGCCTGAACCCGTTGTAGAAGAGACAAAACCCGCGCTCCGCGCTTTACTACTTTGAAGAAGTT  
GAAGAGAAGCAGCCGTTGAACGTTGAACAATTTGCGGCTGGTATCAACCGATTCCAGAACCAGTTAAGAACCAGAACC  
GATCAAATCTTCCGTAAGACACTTCTGTTGCAGCAGTACCTCCAGTAGAAGCCGCTGCCGCTGTTTCCCGCTGGCAT  
CTGGCGTGA AAAAAGCAGACTGGCAGCGGGGCTCCGCAACCGTTGCCGCGCAGTCTTCACTGTTGCAAAATAGCGGT  
GGACCGCTCCTCAGGTCAAAGAGGGGATTGGTCCGAGTTGCCACGACCGAAACGTATCCGCGTCCCAACTCGTCGTGA  
ACTGGCGTCTTACGGTATTAAGCTGCCCTCACAGCGTGCAGCGGAAGAAAAAGCCGTAAGCCAGCGCAATCAGTACG  
ATTCTGGCGATCAGTACAACGATGATGAAATCGATGCGATGCAGCAGGATGAACTGGCAGCTCAGTTCCGCCAGACACAG  
CAGCAACGCTATGGCAACAGTATCAACATGATGTGCCGTAACGCAGAAGATGCAGATGCTGCGGAGAGGCTGAACT  
GGCTCGTCACTTTCGCAAACTCAACAACAACGTTATTCCGGCGAAACCGGCTGGGGCAATCCGTTCTCGTGGATG  
ATTTTGAATTTTCGCAATGAAAGCGTTGCTGGATGATGGTCCACACGAACCGTTGTTTACGCCAATTTGTTGAACCTGTA  
CAGCAGCCGCAACAACCGGTTGCAACCGCAGCAGCAATATCAGCAGCCGCAACAACCGTTCCGCCAGCCGAGTATCA  
GCAGCCACAACAGCCGTTGCGCCGAGCAGCAATATCAGCAGCCGCAACAACCGTTGCGCCACAGCAGCAATATCAGC  
AGCCGCAACAACCGTTGCGCCGAGCAGCAGTATCAGCAGCCACAACAGCCGTTGCGCCACAACCGCAGGATACCTG  
CTTCATCCGCTGTTGATGCGTAATGGCGACAGCCGTCGTTGCATAAACCGACGACGCCGCTGCTTCTCTGGATTTGCT  
GACACCGCCGCGAGCGAAGTGGAGCCGTTAGATACCTTTGCGCTTGAACAATGGCTCGCTTGAATTTGAACCTGGCACC  
GGGTA AAAAGCGCGCATTTCTAACTTGTACGGACCTTCCCGTTCACTTTCGACGGTGGCGGTGCGTGTGCTGTA  
AGTTATTTCTGCAAAACCTATGATAGTCTGGAGTTACCGAATAAAAAACGACAAACCGTTTATCTGCGGAAAGTTTTGG  
ATAACGCCAAATTCGCGATAATCCGTGCCATTAACCGTGGTGTGGGTAAGATATCGCCGGTGGAGCCGTTGGTGGC  
GATCTGGCGAAATGCCGCACTTGTGTTGCGGGACTACCGGTTCCGGTAAATCTGTGGTGTGAACCGCATGATCTT

GAGCATGCTTTATAAAGCACAGCCAGAAGATGTGCGTTTCATCATGATCGACCCGAAAATGCTGGAGCTTTCGGTTTATG  
AAGGCATCCGCATCTGTAAACGGAAGTCGTTACTGATATGAAAGATGCCGCCAACGCGCTGCGCTGGTGTGTTAACGAG  
ATGGAGCGTCGGTATAAACTGATGTCTGCGCTGGGTGTGCGTAATCTGGCGGGTTATAACGAAAAAATTGCTGAAGCCGA  
TCGCATGATGCGTCCGATCCAGACCCGTAAGGAGCCGGTGACAGTATGGATGCCAGCATCCGGTCTGAAAAAAG  
AACCATACATTGTGGTGTGGTTGACGAATTTGCCGACCTGATGATGACGGTAGGTAAGGAGCTGATAGCA  
CGTCTGGCGCAAAAAGCCCGTGCCGCGGGTATCCACCTCGTACTGGCAACTCAGCGTCCATCGGTTGATGTTACTGG  
TCTGATTAAGCGAATATCCGACCCGTATCGCCTTACCCTATCCAGTAAGATTGACTCACGTACCATTCTTGATCAGG  
CTGGCGCGAATCACTGCTGGGTATGGGGGATATGCTCTACTCTGGGCCAACTCCACGTTGCCGGTACGTGTCCATGGT  
GCTTTTGTTCGCGATCAGGAAGTTCATGCCGTGGTGCAAGACTGGAAAGCGCGTGGTCCGCCACAGTATGTTGATGGCAT  
CACCTCCGACAGCGAAAGCGAAGGTGGTGCAGGTTTTCGATGGCGCTGAAGAAGTGGATCCGTTGTTGATCAGGCGG  
TGCAAGTTTGTCACTGAAAAACGCAAGCGTCAATTTCTGGCGTACAGCGTCAGTTCCGATTGGTTATAACCGTGCAGCG  
CGTATTATCGAACAGATGGAAGCGCAGGGGATTGTCAGCGAACAGGGGCACAACGGTAATCGTGAAGTGTGCCCCACC  
GCCGTTTACTAACTAATGCATCGTATGCCGATAAGGCGCGGTAGCGTCCGACTCTATCAACTGAAAAATCA  
GTATTTTCTTCTTCTCAAGCTGATTATTAGCCTGGAATAGAGAGTAGAGGGAAGTCCCGATCGGGAGTGACGTAATTT  
GAGGAATAATGATGAAAAAATTGCCATCACCTGTGCATTACTCAAGCTTAGTAGCAAGCAGCGTTTGGGCTGATGCC  
GCAAGCGATCTGAAAAAGCCCTGGATAAAGTCAGCAGCTTCCAGCCAGCTTACACAAAAAGTACTGACTGACGGTAGCGG  
CGCGCGGTGCAGGAAGGTGAGGGGATCTGTGGGTGAAACGTCCAAACCTATTCAACTGGCATATGACACAACTGATG  
AAAGCATTCTGGTTTCTGACGGTAAAACACTGTGGTCTATAACCCGTTCTGTTGAGCAAGTACGGCAACCTGGCTGAAA  
GATGCCACCGTAATACGCCGTTTATGCTGATTGCCCGCAACCAGTCCAGCGACTGGCAGCAGTACAATATCAAACAGAA  
TGCGCATGACTTTGCTCTGACGCCGAAAGCCAGCAATGGCAATCTGAAGCAGTTCACCATTAACGTGGGACGTGATGGCA  
CAATCCATCAGTTTAGCGCGGTGGAGCAGGACGATCAGCGCAGCAGTTATCAACTGAAATCCAGCAAAAATGGGGCTGTG  
GATGCGAGCAAAATTTACCTTCAACCCGCCGCAAGGCGTACGGTAGATGATCAACGTAAGTAGAGGCACCTGAGTGAGCA  
ATCTGTGCTCGATTTTTTGGATAATACTTTTCAACCTCTGGCCGCGGTATGCGGCCAGAAAAATTTAGCACAGTATATC  
GGCAGCAACATTTGCTGGTGTGCGGGGAAAGCCGTTGCCGCGCTATCGAAGCCGGGCATTTACATTCTATGATCCTCTG  
GGGGCCGCCGGTACCGCAAAAACACTCTCGTGAAGTGATTGCCCGTATGCGAACGCTGATGTGGAACGATTTTCTG  
CCGTACCTCTGGCGTGAAGAGATTCGCGAGGGCAGTGCAGCGCGCCGGCAAAACCGCAATGCAGGTGCCGCACTATT  
CTTTTTGTTGACGAAGTTCACCGTTTCAACAAAAGCCAGCAGGATGCATTTCTGCCACATATTGAAGACGGCACCATCAC  
TTTTATTGGCGCAACCACTGAAAACCCGTCGTTTGGCTTAATTCGGCACTGCTTCCCGTCCCGTGTCTATCTGTTGA  
AATCCCTGAGTACAGAGGATATTGAGCAAGTACTAACTCAGGCGATGGAAGACAAAACCCGTTGGCTATGGTGGTCAGGAT  
ATTGTTCTGCCAGATGAAACACGACGCGCCATTGCTGAACTGGTGAATGGCGACGCGCGCCGGGCTAAATACGCTGGA  
AATGATGGCGGATATGGCCGAAGTCGATGATAGCGGTAAGCGGGTCTGAAGCCTGAATTACTGACCGAAATCGCCGGT  
AACGTAGCGCCCGCTTTGATAACAAAGCGATCGCTTTTACGATCTGATTTCCGCACTGCATAAGTCCGGTACGTGGTAGC  
GCACCCGATGCGGCGCTGTACTGGTATGCGCGAATTATTACCGTGGTGGCGATCCGTTATATGTCGCGCGTCTGCTGTCT  
GGCGATTGCGTCTGAAGACGTGCGTAATGCCGATCCACGGGCGATGCAGGTGGCAATTGCGGCCTGGGATTGCTTTACTC  
GCGTTGGCCCGCGGAAGGTGAACGCGCCATTGCTCAGGCGATTGTTTACCTGGCCTGCGCGCAAAAAGCAACGCTGTC  
TACACTGCGTTAAAGCCGCGTGGCCGATGCTCGGAACGCCGGATTATGACGTGCCGGTTCATTTGCGTAATGCGCC  
GACGAAATTAATGAAGGAAATGGGCTACGGGCAGGAATATCGTTACGCTCATGATGAAGCAAACGCTTATGCTGCCGGT  
AGGTTTACTTCCCGCGGAAATAGCACAAACACGCTATTATTTCCGACAAACAGGGGCCTTGAAGGCAAGATTGGCGAA  
AAGCTCGCTGGTGGCTGAACAGGATCAAATAGCCCCATAAAAACGCTACCGTTAATGTTATCGTTGCGGTAATGTTGT  
TACTGTATCCCTGTGGTGCAGGCTGTGGCCACATCTCCATTTAATTCGATAAAGCACAGGATAAGCATGCTCCATCCCA  
ATCTGCTGCGTAATGAGCCAGACGCGTGCCTGAAAAACTGGCACGCGGGGCTTTAAGCTGGATGTAGATAAAGCTGGGC  
GCTCTTGAAGAGCGTCTGAAAGTATTGACAGTCAAAACGGAACCTGCAAGCGGAGCGTAACTCCCGATCGAAATCCAT  
TGCCAGGCGAAAGCGCGGGGAAGATATCGAGCCTTACGCTGGAAGTGAACAACTGGGCGAAGAGCTGGATGCAG  
CAAAAGCCGAGCTGGATGCTTTACAGGCTGAAATTCGCGATATCGCGCTGACCATCCCTAACCTGCCTGCAGATGAAGTG  
CCGGTAGGTAAGACGAAATGACAACGTTGAAGTCAGCCGCTGGGGTACCCCGCTGAGTTTGACTTTGAAGTTCGTGA  
CCACGTGACGCTGGGTGAAATGCACTCTGGCCTCGACTTTGACGCTGCAGTTAAGCTGACTGGTCCCGCTTTGTGGTAA  
TGAAAGGGCAGATTGCTCGCATGCACCGCAGTGTGCGAGTTTATGCTGGATCTGCATACCGAACAGCATGGCTACAGT  
GAGAATATGTTCCGTACCTGGTTAACAGGACACGCTGTACGGTACGGTCAACTGCCGAAATTTGCTGGCGATCTGTT  
CCATACTCGTCCGCTGGAAGAAGAAGCAGACACCAGTAACTATGCGCTGATCCCAACGGCAGAAAGTCCGCTGACTAAC  
TGGTGCAGGTAATCATCGATGAAGATGATCTGCCAATTAAGATGACCGCCACACCCCATGCTTCCGTTCTGAAGCC  
GGTTCATATGGTCTGACACCCGTTGGTCTGATCCGATGCACAGTTCGACAAAGTTGAAATGGTGCAGATCGTGCGCC  
AGAAGACTCAATGGCGCGCTGGAAGAGATGACTGGTCTGCAGAAAAAGTCTGCAGTTGCTGGGCTGCCGTACCGTA  
AAATCATCCTTTGCACTGGCGACATGGGCTTTGGCGTTGCAAACTTACGACCTGGAAGTATGGATCCCGGCACAGAAC  
ACCTACCGTGAGATCTTCTCTGCTCCACGTTTGGGATTTCCAGGCACGCTGATGCAGGCACGTTGCCGAGCAAGTC  
GGACAAGAAAACCCGCTGTTTATACCTGAAACGTTTGGTCTGGCTGTTGGTCTGACGCTGGTGCAGTAATGAA  
ACTATCAGCAGGCTGATGGTCTGATTGAAGTACCAGAAGTCTGCGTCCGATATGAACGGACTGGAATATATTGGCTAA

TACCAATTTTTCTGAATCTAAAAAGCGCTGCGGGCGCTTTTTTTGTCTCCCTTTGATACCGAACAAATAATTACTCCTC  
ACTTACACGTAATACTACTTTTCGAGTGAAAATCTACCTATCTCTTTGATTTTCAAATTATTCGATGTATAACAAGCCTATA  
TAGCGAACTGTATAGAAAATAATTACACAATACGGTTTGTACTGGAATCAATCGTGAGCAAGCTTGAGTGAGCCATTAT  
GAAAACGAAAATCCCTGATGCGGTATTGGCTGCTGAGGTGAGTCCCGTGGTTTGGTAAAAACGACAGCGATCGGGCGCC  
TGGAATGGCCAGCAGCGCATTAACTTACCTTTTGTGCGATTGCGCACGCTGTGATAGCGCCATTCCAACAAAATCA  
GACGAAAAGGTTATCTGGAGCGCTGTACAGTAACTGTGGTAGTCGCTGCCCGCTACGTATGCACGTGCTGGACGGTGA  
AATCAAATATGTCGAAACGGACAATACCGGCGATGACAATTACGACGGCCTGCACCAGGTTGCGCCTGCCTGCGTGGC  
GTTCCATGCGTCGCCGTGTACAATCCGGACCGCTGAAATATCCGATGAAACGAGTCGGGGCGCGCGTGAAGGCAA  
TTCGAGCGCATTAGCTGGGAAGAAGCCTACGACATCATCGCGACCAATATGCAGCGCCTGATCAAAGAGTACGGCAACGA  
GTCTATCTATCTGAACTATGGCACCAGTACGCTGGGCGCACCATGACCCGCTCCTGGCCGCCGGAAATACCCTGGTCCG  
CGCGGTGATGAACTGCTGCGGCGCTATCTGAACCATTACGGCGACTACTCCTCCGCGCAAATTCGGAAGGTTTGAAC  
TATACCTACGGCGGTGGCAGATGGCAACAGCCGTCGGATATCGAAAACAGTAAGCTGGTAGTGTGTTTGGTAATAA  
CCCTGGCGAAACGCGAATGAGTGGCGGTGGGGTACTTACTATCTTGAACAGGCAGCCAGAAATCTAATGCCCGCATGA  
TCATCATCGATCCGCGCTATACCGACACCGGTGCCGGCGCGAAGATGAGTGGATCCCTATTTCGTCGGGAACAGATGCC  
GCACTGGTTAACGGTCTGGCGTACGTATGATCACTGAAAACCTGGTGGATCAGGCATTCCCTCGATAAATATTGCGTGG  
CTACGATGAGAAAACCTGCCAGCGTCCGCGAAAATGGCCACTATAAAGCTTATATTCTGGGTGAAGGCGCAGATG  
GCGTGGCTAAAACGCGGAATGGGCGCTCGAAATCACTGGTGTTCGGCGAGACAAAATCATCAAATGGCTCGTGAATTC  
GGTAGTACCAAACCGCGTTTATCAGCCAGGGATGGGGCCCGCAGCGTCACGCTAACGGTGAATCGCAACCCGTGCTAT  
CTCGATGCTGGCGATTCTGACCGGTAACGTTGGTATTAACGGAGGCAACAGCGGCGCGCGTGAAGGTTACATACGCTTAC  
CGTTTGTCCGTATGCCGACCTTGGAAAACCCGATCCAGACCAGCATTTCGATGTTTATGTGGACCGATGCCATTGAACGT  
GGCCCGAAATGACGGCGCTGCGTGTGGTGTACGCGGAAAGATAAGCTGGATGTGCCGATCAAATGATCTGGAACATA  
TGCCGGTAACGCTGATTAACAGCATTCTGAAATCAACCGTACCCATGAAATCCTTCAGGATGATAAGAAGTGGCAGC  
TGATTGTGGTTATCGACTGCCACATGACCTCATCGGCGAAATATGCTGACATCCTGCTGCCTGACTGCACCGCTCCGAA  
CAGATGGACTTTGCGCTGGATGCATCCTCGGGAATATGTCTTACGTGATTTTCAACGATCAGGTGATTAACCGCGCTT  
TGAATGTAAGACCATCTATGAAATGACCAGCGAAGTGGAAAACGCTTGGCGTTGAGCAACAGTTTACTGAAGGCCGTA  
CCAGGAAGAGTGGATGCGGCATCTGTATGCCAGTCCGCGGAAGCGATTCTGAACTGCCAACGTTTGAAGAGTCCGC  
AAGCAGGGGATCTTTAAAAGCGCGACCCACAAGGGCATCACGTTGCTTATAAAGCCTTCCGTGAAGATCCGAGGCAAA  
CCACTGACTACGCCATCGGCAAAAATTGAGATTTATTCGAGGCGCTGGCTGACATTGCCCTACCTGGGAATTGCCGTG  
AAGGCGATGTGATCGATCCACTGCCGATCTACACGCGGGCTTTGAAAGTTATCAGGATCCGTGAACAACAGTATCCG  
CTGCAGCTTACAGTTTTCACTATAAATCTCGCTTCACTCAACTTACGGCAACGTTGATGTGCTGAAAGCGGCTTGCCG  
TCAGGAAATGTGGATCAACCCGCTTATGCCAAAAACCGGATCCACAACGGCGATAAAGTCAGGATCTTTAACGATC  
GTGGTGAGGTTTCAATTGAGGCGAAAGTGACGCCACGAATGATGCCGGGTGTGGTGCCTGCACTGGGTGAAGGTGCTGGTAT  
GACCCGGATGCAAAACGTGTCGATAAGGGTGGTTGTATTAACGTAAGTACTGACCACTCAACGTCCTCCTCTCGTAAGG  
GAATCCGTACATACAACTTGTTCAGGTTGAAAAGGTGTAAGGAGTAACCGATGACAACCCAGTATGGATTTTTTATT  
GATTCCAGCCGTTGACCCGTTGCAAAACCTGCGAGCTGGCCTGTAAAGACTACAAAGATTTGACGCCAGAAGTCAGCTT  
CCGCCGATTTATGAATATGCTGGCGGCGACTGGCAGGAAGATAACGGTGTCTGGCACCAGAACGTGTTTGCCTACTATC  
TGTCGATTTTATGTAACCACTGCGAAGATCCGGCTTGTACTAAAGTCTGCCGAGCGGTGCGATGCATAAACGTGAAGAT  
GGTTTTGTTGTGGTCGATGAAGATGTGTGCATTGGTGGCCTACTGCCATATGGCTTGGCCGATGGCGCACCGCAATA  
TAACGAAACGAAAGGCCATATGACCAAATGCGATGTTGTTATGACCGTGTTCGGAGGGTAAAAAGCGATCTGTGTTG  
AATCTTGTCCGCTGCGGGCGCTGGATTTCCGGCCTATCGACAGCTGCGTAAAAACATGGCGATCTGGCGGCGCTTCCG  
CCGTTGCCGCGAGCTCACTTACCAAACCGAATATTGTGATCAAACCCAATGCCAATAGCCGCCCCGACCGGGATACCA  
TGGCTATCTGGCAAACCCGAAGAGGTGTGAGATGGGAAGTGGATGGCATGAATGGCCGCTGATGATCTTACGGTCTTC  
GGCAATGTGTAGCAGGTGGTTTTATCGTTCTGGCTTTGGCGCTGCTCAAAGGCGACCTGCGAGCAGAAGCCAGCAGCG  
TGTATCGCTGCATGTTTGGTTTATGGGTGCTGATGGGCATTGGCTTTATCGCCTCTATGCTCCATCTTGGTTACCAA  
TGCGCGCTTTAACTCGCTCAACCGGATAGGGGCTTACGACTCAGTAACGAAATCGCCAGCGGTTGATCTTTTTTGGC  
GTAGGCGGCATCGGCTGGTGTGCAATGCTGAAAAGCTGTACCAGGCTTGGTACGCTGTGGCTGATAGTGACGAT  
GGTCTTGGCGTCATCTTTGCTGGATGATGGTGCCTGTGTATAACAGCATTGATACCGTTCCGACCTGGTACAGCATCT  
GGACCCGATGGGCTTCTCCTGACGATGTTTATGGGCGGCCGTTACTGGGTACCTGTTGTTGAGTCTGGCTGGCGTC  
GATGGCTGGCGATGCGTCTGCTGCCAGCAATTTCTGACTGGCACTGGTAGTGGTGGCGTGGTGTGAGTGTGACAGG  
CGCAGAGCTGGCGACTATTCATAGTTCTGTGCAGCAGGCGCAGCGCTGGTCCGACTATGGTGGCTGATGCTCCTGGC  
GGATCGTGTCTTTGGCCGTTGCCCTGTGCTTGTGGATTGCACCACAGCTAAAAGGTTATCAGCCTGCGGTTCCGCTACTT  
TCTGTATCATTCTGCTTCTGGCAGGGGAATTAATCGGTGCGGGCTATTCTATGGTTTGCATATGACCGTGGGGAT  
GGCCGTCGCAAGCTAATCATAACAACCGGGTTTCGCCCCGTTCTTTTTATTTCTGCTTCGTTAACGTGCATAACT  
GGTCATCAAATACGATAATCAGGAATGTGGTTAGAGAACAACGTCGCCAGTCTTCAATATCATTACGCCAGTCCGGAT  
GCAGCTCGCACGCCACCGGAACCATGTCATCAATTGCGCACCGCTTGGCACAAGCGATCCCATGCCGAATGCCGGGTA  
ATTTCAATAAAGGTCCTGACGCGTACGTACGACAAAAGCGTCAAACCTTCTTCAATGGCTGAAAGCGCCGGAAATGC

CACGAAACTTCGGTTACACACCGGCAATAATTAAGTGTGTTTTTACCTGTCGCTTTGACAGCTTTTACAAAATCTTCGT  
TATCCCAGGCGTTAATATTTCCCGGGCAGCAATGTAAGGTGTATCGGGGAATTGTGCTTTAGTTCTGGAATAATGGG  
CCGTTAGGACCGTTTTAAAAGTGGTGAAGAATAGTTGGTAAGTTGAAATACTTAGCCAGGTACCCAGCGCCAGCAC  
GTTATTTTTAACTTATCGGGTTCGATATCCCGTACAAGGGAAAGTAAACCAGCCTGGTGTCAACAAGCAAACCGGCAG  
CATCATTTTTATCAAGACGAACATACGGTTTTGGTATCCTCTTCTCTTTTCGAGAGTCAGTGGTACGTCTGAAATCGATC  
AGACCGGATGCATTGCTCTGAAAGCATAGACGGAAATATGAGTTTGTGTGACCATGAAATTTTTCGACTGAACGAAGC  
GTATGAAATTTGTGTTAGTTCAATAAAAAAATCAGATGAGACTAATCATCTTTCAGCATTAGCGTTATGAATGAGTAA  
TATAAATCGATAATACCGCCGCTGGGATATCGCGTATTTTACCCATTGACAATGTTTTTGGCGGTGGCATGATGCGCAT  
GAAATTTGAACTTCTCACGGTTTTAATTCATGTCCACGTATACCCAGCCTGTATGCTTTTTGCTGTCTGGCCTGCTTTT  
GTTGACTCTGGCGATTGCGGTGTTAAATACACTCGTCCGCTTTGGCTCGCCAGGAACACATGTCCACATGGCAGGTAG  
GCGTTGTACAGTCATCTATTTTACCAGCAACCTTGTCCGTACATTGCTGACAGGGTATGTCATTAAGCGCATTGGCTTT  
AACCGCAGCTATTATCTGGCCTCCTTCATTTTTGCCGCTGGCTGTCCGGCCTTGGCCTGATGATTGGATTCTGGAGCTG  
GTTGGCTTGGCGTTTTGTGCGGGCGTCGGCTGTCCATGATTTGGTGGTTGTTGAGAGCGCGCTGATGTGAGTGGGA  
CGTCACGTAACCGTGGCGTTTTGCTTGTGCTGATGATGTTTATTACGTGGAAACGTTTTTAGGCCAGTTACTGGTC  
AGCAAAGTTTCAACCGAGTGTATGTCCTGATTGCCGTGGGTTACAGTTTTGACGTTGGCAGGGATCTTACCCTGTTT  
TACGCGTGTGCTGAATCAGCAGGCTGAAAACCATGATTCGACGTCAATTACGTCAATGCTAAAACCTCCGTAGGCGCGGC  
TTGGCGTGAATGGCTGCATTATCTCAGGAATCGTTCTGGGATCTCTATATGGCCTGATGCCCTGTACCTCAATCACAAA  
GGGGTGAGCAATGCCAGCATTGTTTTCTGGATGGCGTACTGGTCAGTGCGGGTATCCTTGGACAATGGCCGATTGGACG  
TCTGGCGGATAAGTTTGGTCGACTGCTGGTGTGCGTGTTCAGGTCTTTGTGCTCATTCTCGGCAGTATCGCGATGCTTA  
GCCAGGCGCGGATGGCCCGAGCTTATTCATCTCGGTGCCGCTGGCTTTACGCTATATCCGGTGGCGATGGCATGGGCT  
TGCGAGAAAGTTGAACATCATCAACTGGTGGCGATGAACCAGGCCTTACTGTTGAGCTATACTGTGGAAAGTCTGCTTGG  
CCCGTCATTTACCCTATGCTAATGCAGAATTTCTCCGATAATTTATTGTTTATCATGATCGCCAGCGTATCGTTTATCT  
ATTTGCTGATGCTGCTGCGCAACGCCGTCATACGCCGAAACCCGTTGCTCACGTGTAATGAATTCAAGCAGAGTGTGA  
ACTTACTGTTTCACTCTGCTTTTTTGTCTTCTATCTGACTTGTCTTATCCAAATTTTATTGTTTTAAAAATAAAA  
TGTGACGAGGTTATAATTTGCAATTCGCTATTTCCGCACTTCTATTTGCCGCGCATAATCCCTCGTTTTACCGATGC  
CCTTTTAATTTTGGCGAAGGATTTGTCTATGGCTGGGAATGTTACAGAAAAACAGTTGCGATGGTACAACATTGCGCTGA  
TGTCTTTTACTACTGTCTGGGGTTTTGGCAACGTTGTTAAACTATGCCAACAGGGGCTGGTGGTTGTTTTTTCATGG  
GTGTTTATCTTTGCACTCTATTTACACCTTATGCGCTAATTGTTGGTCAAGTATAGGCTCGACCTTCAAAGATGGGAAGGG  
CGGGGTCAGTACCTGGATTAACACACGATGGGACCCGGACTGGCTTATCTCGCCGCTGGACCTACTGGGTGGTGCATA  
TTCCCTATCTGGCACAACCAACCCAGGCAATTCTGATTGCGCTCGGTTGGGCGATGAAAGGCGACGGTTCGCTAATCAA  
GAATATTAGTCGTAGCGTTACAGGGGTTAACGCTGGTGTGTTTATCTTCTTATGTGGGTTGCTTACGCGGTATGAA  
ATCGCTGAAAATCGTCGGTCTGTGGCAGGGATTGCTATGTTGTTATGTCACCTCTGTATGTGGCGATGGCGGTAACCG  
CGCTGCAATTAAGTGCATATTGCGACCACAAACATTACCTGGGAAACGTTTCAATCCTCATATCGACTTTACCTAC  
ATTACCACTATTTCAATGCTGGTTTTCGCGGTTGGCGGAGCAGAGAAGATTTCTCCTTACGTTAATCAAACGCGCAACCC  
AGGAAAAGAATTTCCAAAAGGGATGTTATGCCTGGCGGTGATGTTGCGGTTTGTGCCATTCTGGGCTCGCTGGCGATGG  
GGATGATGTTTATTGCTGCTAATATCCCGGATGACTAATGACCAACGGTCAAGTATTACGCCCTTTCAGAAGCTGGGCGAG  
TATTACAACATGGGTAATACTTTAATGGTGATTTACGCCATTGCGAATACCTGGGACAAGTAGCGGCGCTGGTATTCTC  
GATTGATGCCCCGTTAAAGTGTCTATTAGGTGATGCTGACAGCAAATATATTCAGCCAGTTTATGTCGTACCAACGCTT  
CTGGTACGCCGTTAATGGCTATTTTCTGACCCTGGTACTGGTGGCGATTCTGATTATGCTGCCGACTCTCGGCATTGGT  
GATATGAACAATCTCTATAAATGGCTTTGAACCTTAATTCGGTAGTGATGCCGCTGCGTTATTTATGGGTATTTGTTGC  
ATTTATTGCAAGTCGTTTCGCTTGGCGCAGAAATATAAACAGAAATATGTCTTTATTCGTAATAAGCCTCTGGCAATGACCG  
TCGGGATTTGGTGTGTTTTGCCCTTTACCCTTTGCTGTTTACGCGGGATCTTCCGAAAATGGAAGCCTTACTGCAGAG  
TGGACCTTCCAGTTGGCGCTGAATGTTGCAACGCCGTTTTGTGCTGGTAGGATTAGGACTGATATCCCGCTGCTGGCGCG  
TAAAGCGAATAGTAAATAATTATTGTGGTGGTACGCTGACTCTGGCAGATCTGACCCGTTTTTACATAATCGAGAAAT  
GCGCGCAAGCCGAGGACATATACTGGCGGTTTGGATAATAGATCTGGAAGCCTGGACGCTCTGTGCTCCAGTCTTCCAG  
TACACATTCTAAACGACCAGTATCAAGGTAATCCTTGTATCTGTTATAGAGCAGATACCCGATACCAGCACCCATCAAAA  
CGGCTCCAGTTCAGCATCAACATCATCCAGAATGATTTTCTGCGACAGCAATTTCCAGCTCCTTTGCAAATGGCAG  
TGGAAAGGTTTTGCCGCTGGGATAACGAAAAACAACACATTGATGATTAAGCAGATCATGAGGATGGCGGGGTTTTGCCATA  
TCTTGCAAAGTACTCTGGCGTTGCTGCTACACATAATTTACTGGCGGGCCGATCGCCACGCTGATCATATCTTTTTCGA  
CGATGCAACTAAGTCGAACGCCAGCGTCAAAGCCCTGTTGGACGATATCGACAAGAGAGTCTGATGTTGTGAGCTCGACT  
TTAATATCAGGATATTACGTGTGAAACCAACAGTAAAGACATTAATAATATACGTGCAGCTACCCGGGCGGCATTGAT  
TTTGAGCGTTCCTGTCCGTGTCAGACGAAAATCATTATCTCATCTAACATGATCTGAATTTGCTCGAAAGCTGGGCGCA  
ATCGTTTATAGAGATTAGAACCCTCCGTTAACGATACGCTTCCGGTTGTCCGATTGAATAAGCGAATTTAAGACGT  
TGTTCCAGTGTGTTAATACTATGGCTAATGGCGGACGAGGATAAGCCTAACTCATCGCCCGCTGCACGAAAGCTTTGATT  
ACGGGCCACGGCAAAGAAAGTGGCAAAGTCAAGCATATTATCCGCATTAGTAAAATCCTTCATTAATCATCTGAAT  
CATCACGTTTACAGGATTATGCCGCTGCGTAAAGTGCCTCCAGAACTAACGTGGAGGTAATAATATGCACTGTAAC

GTATTTATTTGGTATGGGCCATCCTCGTCATGATTATTGACCGCACATATTGCTGATGCGATCCATCAGCGGGCAATG  
GAGCGGAAAATACAGGTGACGGAACCTGATTTATATCGGCCTAATTTCAACCCAGTGATGACGCCGGAAGATGAACCAGA  
CTGGAAGAATATGGATAAACGTTATTCTCCAGAGGTTTCATCAGCTTTATTAGAGCTGCTTGAACATGACACGTTAGTGG  
TGGTTTTCTCTCTGGTGGTACAGCTTCCCGGCAATGCTAAAAGGATATATTGACAGAGTATGGAATAATGGGCTGGCT  
TATGGAGATGGGCACAAATTACCATTCAATAAAGTTGCTTGGGTGGCGCTGGTTGGAGGAGACAAAGAATCATTTGTCCA  
GATGGGCTGGGAAAAAATAAAGCGATTATTTAAAAAATATGTGCGATTATCTTGGTATTGAAGATGCCGATGTCACCTT  
TCTTGTGTAATACAGTGGTATTTCGATGGGGAAGAACCTCACGCGAGCTATTATCAGTCGTTATTATCTCAGGTACGGGAT  
ATGGTAGATGCACTATAAGATGTGTTAAAAACGCTGTAGCAGAATGAAGCGCGGAATAAAAAAGCGGCAACTCAATAAAG  
TTGCCGTTTTACGGGAAATTAGAACATTACCTTATGACCGTACTGCTCAAGAATGCCTTTACGCGTCCATGGTCTCT  
TTCTTCGGTGGTTAACACCGTCGAGTTTGTACTCTTACCCATTGCCACCCATTTGTGTTGCCAGCTCGTGGTAGGG  
GAGAAGCTCGATTTTCTCAACGTTGCCATATCACGGGTAAATTCACCGAGGCGATGCGCTGAATCGTCATCGTCAGACC  
AGCTGGGACAACAACGTAGCGGATCCACACCTTACATTTTTGTTCGCCAGATATTTAGCGAACTCCAGCGTGGGTGG  
TTGAAACTCCAACAGATTTTGGTGGATCTCGTCGTTTCATCTGTTTGGATCGAGCATTACCAGGTCGTTACTTCCAG  
CAGTTCATCAATCACCGGATCGTAACGACGAACAAAACCGTTGGTGTCCAGACAGGTATGAATGCCTTCTTTTTGCAGG  
CGCGGAACCACTCAGGAACAACTCAGCTTGCAGGATTGCTTACC CGCGGATGCGGTAACGCCCGCGGAAAGCGTTC  
ATAAAGTGGCGATAGGTACCACTTCTTCAATCAAATCTTCAACGGTAACTTCTTTACC CGCATGCGTGTCCAGGTGC  
GCGGTTATGACAATACAGGCAGCGCATCAGGCAGCCCTGGAAAAAGGTGATAAAGCGAATACCTGGGCCGCTACGGTTC  
CACAGGATTCAAAGGAGTGAATGCGACCAATAACTGACATTGCGGTGTTTCTCCAGATGTGGCCATCTGAGGCCGTGT  
GGTGCAGCTCGAAGGCTACGTCGAGTCTGTTTTGCGAGTCACTTAAAGTATAGATAGCTGACAAAAAGGCTCTCGC  
GCTAAAAAAGGCCACTTTCTGAGGAGCTTTATTGTACGTTTTTACTGTACGATTTTCAATCTAATTACATAGA  
TTGAGTGAAGTACGAGTAATAACGTCCTGCTGCTGTTCTTTAGTCAGCGAGTTGAAACGTAAGTGCAGTACAGGATAC  
GGATGGTCACTGCGGATTTTTTCCGGTTTTCCATCGCTCGAGCAGTTCACGGTTCATCAGTTAACGTTACGG  
TGCTGACCACCTTCGATGGATGCTTGGTGGAAAGTAACCATCCATCAGACCAGCGGTTGGTCTTACGAACTTCGTC  
GTCTTTACCCAGTGCCTTCCGAACGATAGAGAAGGTGAGGAGATACCATCTTAGCGTAAGCAAACGGCAGTTAGCAA  
CGAAGTCAAGAGGCTACTGCACCTTCTGGTACGACCGTGCATCGGGTTAGCACCCGGTCCGAACGGCGCGCCAGCA  
CGACGACCGTCTGGGGTGTACCCGTTTTCTTACCATACACAACGTTAGAAGTATGGTCAAGCAGACTGAGTCCGGAT  
AGCGTCACGGTAGGTGTGAGTTTCTGAATTTCTTCAATGAAACGTTCTACCAGGTCAACAGCCAGGTTCATCAGCGC  
GATCATTGTTACCAAACGCGGATTCGCTTTCGATTTTCAAGTGCATAGCCAGACCGTCTTCGTCACGAATCGGTTTA  
ACTTTTCGATATTTGATTGACAGACAGGAGTCAAGCAGCAACCGACAGACCAGCGATACCACAGCCATGGTGCAGGATAAC  
GTCACGGTCTGCAGCGCCATCAGAGAGGCTTCTGAGTCTGACTTGTCTGTCATGTAGTGGATGATGTTCACTGCACTG  
TGACTGTTTAGCCAGCCAGTCCATGAAGTATCCATGCGCTCCATCACTTCAATCATAGTTTCAAGACATCGCCTTTGATC  
GGTTCAGACTTCGGACCAACCTGCATTTTTCAGTTTTTCTGCAACGCCCGCTTATTGCGTACAGCATGGTTTTTCGCCAG  
GTTTGCACGCGCACCGAAGAAGTGCATTTGTTTACCAACGATCATCGGGCTTACGCAGCAAGCAATAGCGTAGTCATCGT  
TGTTGAAGTCCGGACGCATCAGGTTCATCGTTCTCATACTGCAGAGAAGAGGTGTCGATGGACACTTTAGCGGCAATTC  
TTGAAGTTCAGCGCAGTTTTTTCAGACCAGAAATGGTTCATGTTCCGGTCCGGAGACCGGACCCATGGTGTACAGGGTGT  
CAGGAAACGGAAGCTGTTTTTGGTAACAGGGTACGACCGTGCAGGCCATACCACCGATAGATTCGGTTGCCAGATCG  
GGTCCAGAGAACAGTTCATCGTATTCGGAGTACGAGGAAGCAACCATACGCAGTTTCATGACCAGGTGGTCAACC  
ATTTCTGCGTCTTGTTCGGTATCTTGCAGCTTTCAGGTACGTTTCGATGTACACATCCAGGAAGTGGAGGTACG  
ACCGAAGGACATTGCAGCACCGTTCTGAGACTTAACAGCAGCCAGGTAGCCGAAGTAAGTCCACTGGATAGCTTCTGAG  
CGTTGGTAGCCGAGAGATGTCGAGCCGTTTTCGAGCCATTTCTTTCATCTGACCAGAGCGGGTGTCTGTTCA  
GCGATTTCTTCCGCGCAGACGGATAGTCTGTTCCAGGTTTTACGCCGTTTTCCAGATCAGCCTGCAGAGAAGTGAAGTGTGC  
CAGTTTTGCTTTTCATCAGGTAGTCGATACCGTACAGCGCAACGCGACGGTAGTCACCGATGATACGGCCAGGCCATATG  
CATCTGGCAGACCGGTGAGAACCAGATTTACGGCAACGAGGATGTCGGAGTGTAAACGTCGAACACGCCCTGTTG  
TGAGTTTTACGGTATTCACTGAAGATTTTTTATGATCATCGGATCCAGTTCGCGGTTGTACGCTTTGCAGGAACCTTCGAT  
CATTTTGTATACCACCGAACGGGATAAGAGCAGTTTTCAGCGGAGCTTTCAGTCTGCAGACCAACGATTTTCTCAAGCTGCT  
TGTTGATGTAGCCAGCGTGTGAGAGGTGATGGTGGAAAGCAACAGCGGTGTCAAAGTCAACTGGCGCGTGTGCGGTTT  
TCCAGTTTAAACGCTTCCATTACTTTGTCCACAGGGTGGTGGTCGCTTTCAGTAGCGCCAGCCAGGAAGGACTCGTCACC  
CTCGTACGGAGTGTAGTTTTCTGAATGAAGTACGGACGTTTACTTCACTTCTGCCAGTCACTTTGGTAAAACTTCCC  
AGGCTGTGGCTAACTTTTCAATTAAGCTCGACATGTAACACCTACCTTCTTAAGTGGATTTTTTATTTACTGCGTACTTC  
GACAACCATTAATGGTGGTCTGTTTTACGCGAGGTAATGACCCAGTATGTCAACCAACCAACAAACCACCAGGATAAT  
GTTGCCGATCGTAACCGAATCAGGTTATCAGTGTAAATTCATCAGGTCAGGTGAGAAAAATTTCCGGTGCAGAAC  
CGACTGCGGTCCAAAATTCGGGGATGCGAAGTCCGGATTACAATACCCATCGGGATCATAAACATGTTTGCAGTACTG  
TGCTCAAACCGCTGGCAACAAACATCGCGACCGGACGACCATAATGAACGCTTTGTCCATCAGGCTGCGGCCAGAAATA  
ACTCATCCATACTGCCAGACATACCATCAGGTTTGCAGGATACCAAGACAGACGGCCTCAATAAAAGTATGGTGCACCTT  
TGTGGTCCGGGTTTTGTAGGACGTTTGTCCCATTTGACCATTTGCGGTTCATATACTCGCCGAAAGCCACATTAAGT  
ACAAACAGCAGTGCGCCGACAGGTTGCCAAAATAGACATTTAGCCAGTTTTTCCCAACTGACCCAGGTGATGCGCCC

ACTCGCCTTAGCAACAACAATCAACACGGTGAAGTAAAGAGATCGGCTCCGCAGACAACACAAGAATCAGCCCCAGAG  
AGAAGCAAATGCCCAACAGTTTTGCCATGCCGAAGGGCATTGTGCCTGTGCCAGTGGTTGCTGTGATATAGAAGACG  
AATGCGATTGAGATGAAAACACCGGCGTAATCGCCAGATAGAAAGTCTTAAGCGGATGTTTCGTTGCTTTATAGACACC  
CGCCTCTTCGGCCACTTTGGCCATTGCAGCAGGAAGTAAAAGATCAAAGGGTTGTGAGCTTTCACACTAACTCTCTCTT  
TATTAAGTCGCGCAGAGATACTAACAAGCATTATAGATGAGAAATTGATATAGATCATATCTCGCCTGGCTTATAGGC  
CCGTAACCTCGCATGGTTTTATGCAAATACGGAGTAAATATTTGATTATCCAAATAAAAATAAATTTTAAAAATTAACAA  
ATGAGTTGAATTTTTCCGCATCCTCCGCTAAAACAGTTAATTAAGGGAGCATCAGGCGAATAAAGTAACAATATCGA  
TCGTATTTATTAATAACAAATTACCGATATTTAACCTTATAATTACAATTATTTATTAATGCAAATATATGTAAAGCGG  
GGCATTAAAAAACGCCCGTAATATAACTCAGACTAATCATTAAAGCCTACATTGCGTAGGCTATTTGATTTTATTTTGC  
CCAGAATGCTGCTTTGGCGCGCTGCAGCTTTTCGTAGGCTTCAACAACGACTGATGTGCAGCAAACGCGTGCAGATCGC  
TATCTACCGGTTGAGGCGGTAACGCGCTTCGCGCTCATTGCCGACTGGCGGCTTCTACGGCATCTGCGCCGTAC  
ATGCGAACAACGCATTAGATATTGCAGCGGCTGGCGATCTTCTTCTGTGCCAGTAATAACAACGTTTGCAGGCAGCG  
ATAATAGTTGGCGGTTCCGGACTAAACTGATGAGTTAACTCCATCGTCCATTGCGTCCAGACCAGAGCCTGTTCCA  
GATCGCCACCAGCCAGCGCCAGCATGGCTTTAATTACCAGATACGCAGGGTGTACCAACCGTTATCCGACCCGGTCCG  
AGACCCAACAGCTCAGCGCAGCGGTAAGTCAAAAACCTTTCATCCAGTTGCTCGATGAGGTTGAGGTTAATCTTC  
TTTTTCCACTCGCTGCCTGCTAGCGAAAGAATCGTTTACGTAAGTGGCTGCCATACTGTTATTCCGAGCCACAGAT  
CTTCAGCCGATAAATATCGGACATGCCAGGCAGATAATACGGCAAGCATAAACGCCAGATGCTCGTAATCGGCAATA  
TAAACTTCTTATCTTCTTGTGAAGATAGCCATCAGTGTGGCGAACTCTTCTTCGTGGTGCCGGAGAAATCCAGTC  
CACAAACGGATAATCGGCATCCTGCTTGAACAGTCCAGGAGATTAACCGCTGGAATCGATAAAGTGCCTTTCGAGGT  
TGGTATGTTACGCGACTTCTTCATCATCGAAGGTTGGCGGAGTAAACACATCCAAATCTTTCAGGCCACGACCTGACGC  
AGCTCGGTACGGTACGTTCCAGTGCTACGCCAAAATCAGGATGCGCACCGAAAGAGGCAAAGCAGGTACCGTTAGCAGG  
ATTGAACAGTACCACGCAATACCCGGATACTGGCCGCAAGCGAACCGTCATAAGCGAAGATTGGGAAACCTCCGCTT  
CCAGCGTTTCGATGGCTTCAACTACTGCTGGTAACGCGCCAGCAGCTGCGCGGATCTCTGGCAGGCTGATGCTTCA  
GCAATAATGCGGTTTTTACGTAGCGTTCGAAAACCTCAGACAATCCCTGAACGCGTGCTTCGTTGCGGGTATTACCTGC  
GGACATACCGTTGGAGACGTACAGGTTACCAATGATATTCATCGGAATATAAACGGTCTGATTGTCGGACTGACGCGTAA  
ACGGCAGGCCGCAATACCAGATCTTCGTTACCGGATTGTAGGTCAATCAGCATGCTGCCGGTCACTTCTCCGGA  
TCATAAAACGCGCGCAGACGGTTCATCGAGCAGCCCTTCTGGCACATCGTCATTTTCGGTCAAGTGGGAACCATTTTCGTT  
GGGATAATGCACGAACGGACCGTTGGCGATGGTTTTCGCCAGCCAGAAGTCCGCAAAAAGTAGTTGGTTGAGAGACGCT  
CGAAATATTCACCGAGTGCAGAAGCCAGCGCGCTTCTTGGTTGCGCTTTACCGTTGGTAAAACACAGTGCAGCACTCT  
TTGTCGCGAATATGTACAGACCAGACGTTAGGCACGGGATTAGCCAGGAGGCCTTCAACTGAAAGCCGAGGTCTGA  
AAGTTTTGCTGGAAGCGAGCGATGGAATCTTCCAGAGCGGCATCTTTCGCGGGGATAAATGTTTGCCTCATGAAAATCA  
CTTTAGTCGTACGGAAAGCGCGCAATAATACGGGTTTTATCTCAAAGGCGCTATCACCGCCGCATGCCGATGAACTGTT  
GACTATGCTTTTAGCGGATAAACCAGGTTAAGAGCATAAAAATGAAGGCGTTCGATCTCCACCGTATGGCATTGATAAA  
GTGCCTTTGATTTCTTGGCGAAGTTGCACTACGTAGTCTTTATACCTTTGACTGGTCTTTTTGTTCTCAAATGAC  
CGGAAGACGCGGTGTGCGGCAGATGTCGCTGTTGAAGTTTAACTATTCTGACGCTGGGATCAGCGCGGGAGATGTGG  
CGTTTTATGATGATGTGCCGATGGTCCCGTACTTATCGTCTTTACTCTGGCGTGTATACCGCTGGTAATGTGG  
TTGATGGCGCACAGTAAAAACTGGAAGATCTTCTGGAAGGCAAGCCAGTTGTATTATTGAAGATGGCGAGCTGGCCTG  
GTCGAAACTCAATAACTCCAACATGACGGAATTTGAGTTCTTTATGGAGCTACGATTGCGTGGCGTGGAGCAGCTGGGGC  
AGGTACGTCTGGCGATTCTGAAACCAACGGGCAAACTAGTGTCTATTTCTTGAAGATGACAAGGTAAACCGGGTTA  
CTATTTTACCAGTATTGTACGCAGGTTACAAAAGTGGTGCCGGAGTCCGGGACTATGCCTGTATTCTGTTAGTGA  
AATCATTATGATAAGCGGGGAAAAACAATTATGTCGCGCTGTGCAAATCCAGAATGGACGAAGGCAAGTCCGGCAA  
AACGGGTGACCTGACAGTAAAAACATCGCTTTTTGCTAATAATCCGAGAGATTCTTTTGTGTGATGCAAGCCACATTTT  
TGCCCTCAACGGTTTTACTCATTGCGATGTGTGCTACTGAATGATAAAACCGATAGCCACAGGAATAATGTATTACCTGT  
GGTGCGAATCGATTGACCGCGGGTTAATAGCAACGCAACGTGGTGGAGGGAAATGGCTCAAATCTTCAATTTTAGTTCTG  
GTCCGGCAATGCTACCGGCAGAGGTGCTTAAACAGGCTCAACAGGAACTGCGCGACTGGAACGGTCTTGGTACGTCGGTG  
ATGGAAGTGAATCACCCTGGCAAAGAGTTCATTAGGTTGCAGAGGAAGCCGAGAAGGATTTTCGCGATCTTCTAATGT  
CCCTCCAACATAAGGATATTCTGCCATGGCGGTGGTCCGGTCACTTGTGCGGTACCGCTGAATATTCTCGGTG  
ATAAAACACCGCAGATTATGTTGATGCCGTTACTGGGCGCAAGTGCATTAAGAAGCGAAAAATACTGCACGCCT  
AATGCTTTTACGCCAAAGTACTGTTGATGGTCTGCGCGGTTAAGCCAATGCGTGAATGGCAACTCTCTGATAATGC  
TGCTTATATGCATTATTGCCGAATGAAACCATCGATGGTATCGCATCGACGAAACGCCAGACTTCGGCGCAGATGTGG  
TGGTCCCGCTGACTTCTTCAACCATCTTTCCCGTCCGATTGACGTGAGCGTTATGGTGAATTTACGCTGGCGCG  
CAGAAAAATATCGGCCCGGCTGGCCTGACAATCGTCATCGTTCGTGAAGATTTGCTGGGCAAGCGAATATCGCGTGTCC  
GTCGATTCTGATTATCCATCCTCAACGATAACGGTCCATGTTTAAACACGCCCGGACATTTGCTGGTATCTATCTG  
GTCTGGTCTTTAAATGGCTGAAAGCGAACGGCGGTGTAGTGAATGGATAAAATCAATCAGCAAAAAGCAGAATGCTA  
TATGGGGTATTGATAACAGCGATTTCTACCGCAATGACGTGGCGAAAGCTAACCGTTCCGGGATGAACTGCGGTTCCA  
GTTGGCGGACAGTGCCTTGACAAATTGTTCTTGAAGAGTCTTTTGTGCTGGCTTTCATGCACTGAAAGGTCACCGTG

TGGTCGGCGGAATGCGCGCTTCTATTTATAACGCCATGCCGCTGGAAGGCGTTAAAGCGCTGACAGACTTCATGGTTGAG  
TTCGAACGCCGTACGGTAAATGCCGAAATTTTGTAAATCCCCACAGCCAGCTGTGGGGTTTTTATTTCTGTTGTAGA  
GAGTTGAGTTCATGGAATCCCTGACGTTACAACCCATCGCTCGTGTGATGGCACTATTAATCTGCCCGTTCCAAGAGC  
GTTTCTAACCCGCTTTATTGCTGGCGCATTAGCACACGGCAAAACAGTATTAACCAATCTGCTGGATAGCGATGACGT  
GCCCATATGCTGAATGCATTAACAGCGTTAGGGGTAAAGTATACGCTTTCAGCCGATCGTACGCGTTGCGAAATTATCG  
GTAACGGCGGTCCATTACACGCAGAAGGTGCCCTGGAGTTGTTCTCTCGGTAACGCCGGAACGGCAATGCGTCCGCTGGCG  
GCAGCTCTTTGTCTGGGTAGCAATGATATTGTGCTGACCGGTGAGCCGCGTATGAAAGAACGCCCGATTGGTCATCTGGT  
GGATGCGCTGCGCCTGGGCGGGGCGAAGATCACTTACCTGGAACAAGAAAATTATCCGCGTTGCGTTTACAGGGCGGCT  
TACTGGCGGCAACGTTGACGTTGATGGCTCCGTTCCAGCCAATCCTCACCGCACTGTTAATGACTGCGCCTCTTGCG  
CCGGAAGATACGGTGATTCGTATTAAGGCGATCTGTTTTCTAAACCTTATATCGACATCACACTCAATCTGATGAAGAC  
GTTTGGTGTGAAATTGAAAATCAGCACTATCAACAATTTGTCGTAAGGCGGGCAGTCTTATCAGTCTCCGGTACTT  
ATTTGGTGAAGGCGATGCATCTTCGGCTTCTTACTTTCTGGCAGCAGCAGCAATCAAAGGCGGCACTGTAAAAGTGACC  
GGTATTGACGTAACAGTATGCAGGGTATTCGCTTTGCTGATGTGCTGGAAGGCGGGCAGTCTTATCAGTCTCCGGTACTT  
CGATGATTATATTTCTGCACGCGTGGTGAACGCTATTGATATGGATATGAACCATATCTGATGCGGCGATGA  
CCATTGCCACGGCGGCTTATTTGAAAAGGCACCACCGCTGCCAATATCTATAACTGGCGTGTAAAGAGACCGAT  
CGCTGTTTTGCGATGGCAACAGAAGTCCGTAAGTCCGCGGAAAGTGAAGAGGGGCACGATTACATTCGTATCACTCC  
TCCGGAAGAACTGAACTTTGCCGAGATCGCGACATACAATGATCACCGGATGGCGATGTGTTTCTCGCTGTGGCGTTGT  
CAGATACACCAAGTGACGATTTGATCCCAAATGCACGGCCAAAACATTTCCGGATTATTTGAGCAGCTGGCGCGGATT  
AGCCAGGCAGCCTGAATGAACAACGGGCAATAAATAGCCAAATCTTTCTTTATCAAACGTCGGCACATTGTCGGCGTTT  
TTTTTCGGACCTGTGAGTCATTTTGATTAATGGTAGCGTCTGTTGCAATGTAAGTTGTTGATACATAATATTTATATA  
TGATTAATCAACGGATGATTACATGAAGAATACTAAATGCTGGCGATTGCGACCTCTGCAGCATTACTGACAGGG  
TGTCAAAATACCCACGGTATTGATACCAATATGGCTATCAGCTCCGGTTAAATGCCTATAAAGCAGCAACATTAAGCGA  
TGCCGATGAAAAGCGATTGCCAATCAGGGTGTGCCGAAATGGACAGCGGCAATCAAGTCGCAAGTAAATCCAGCAAGT  
ACGGTAAACGCTGGCAAAAATCGCCAAAGCATTGGGTAACAATATTAATGGCACGCGGTCAACTATAAGGTTTATATG  
ACCAGCGACGTAACGCATGGGCGATGGCGAACGGTGTGTTCTGTCTACAGTGGCCTGATGGACATGATGAATGACAA  
CGAAATTGAAGGCGTTTCCGGCCATGAACTGGGCCAGTCCGCTGGGTCACTCGCTGGCTGAAATGAAAGCTTCTTATG  
CGATCGTTGCCGACGCGATGCCATTTAGCTACCAGCGGTGGCTTCCAGCTTTCCCGCTCACAATTAGGTGATATC  
GCAGAAGGCGTATCAATGCTAAATACTCCCGTATAAAGAGTCCGAAGCAGATGATTTCTCTTTGATCTGTTGAAGAA  
ACGTGGCATACGACCCAGGGGCTGGTTGGCAGCTTTGAAACACTGGCTAGCCTGGATGGCGGTGCGACCCAGTCCATGT  
TTGACTCTACCCACCATCAACAGAGCGTGCGCAACACATCCGTGATCGTATCGCCTCTGGTAAGTAAATCATTGTCATC  
TTTCGGGCTGTTCTTCTGCCAGCCGCTATAATTGGCAATAAATCCCATCTGAATACAGACAAAACCTGGTTTTTGCAC  
ACAACGTTAACGATTTGTGGCGTGGCGCGTATAATGCGCGCGTTATGTTAACGGTACGCTGTTTTAAGGAGATAAAG  
ATGACGGCAATTGCCCGGTTATTACCATTGATGGCCAAAGCGGTGCAGGAAAAGGCACCTTGTTAAGGCTATGGCGGA  
AGCGTTGCAATGGCATCTGCTGGACTCGGGTGAATTTATCGCGTACTGGCATTGGCGGCATTACATCACCATGTTGATG  
TTGCGTCGGAAGATGCGCTGGTACCGTGGCATCCCATCTGGATGTACGTTTTGTGTCGACCAATGGCAATCTGGAAGTG  
ATCCTCGAAGGGGAAGATGTGAGCGGCAAAATCGTACTCAGGAAGTGGCGAATGCAGCTTCAAAAGTCGCGCATTCCC  
ACGCGTTCTGTAAGCATTATTGCGTCGCCAACGCGCTTTGCGCAATTACCAGTCTGATTGCCGATGGCCGCGACATGG  
GAACGGTGGTATTCCTGATGCACCAAGTAAAATTTTCTTACGCGCTCTCGGAAGAACGTCGCGATCGCCGATGCTA  
CAGTTGACAGGAAAGGGCTTTAGTGTAACTTTGAGCGCTTTTGGCCGAGATCAAAGAACGCGACGACCCGATGCTAA  
CCGAGCGGTAGCGCCACTGGTTCCGGCAGCCGATTTAGTGTGGATTCCACCACCTAAGCATTGAGCAAGTATGTTG  
AAAAAGCGCTACAATACGCGCGCCAGAAATTTGGTCTCTGCATAAGCGACCGAATTTGACGTAACCCCGTTGCAATGGAAT  
GACAGCGGATGTTAAACAACCCATCCGGCATGGAGCCAGGTGGACGTTAAATATAAACCTGAAGATTAAACATGACT  
GAATCTTTTGTCAACTCTTTGAAGAGTCTTAAAAGAAATCGAAACCCGCGGGTCTATCGTTCTGGCGTTGTTGT  
TGCTATCGACAAAAGCAGTAGTACTGGTTGACGCTGGTCTGAAATCTGAGTCCGCCATCCCGGCTGAGCAGTTCAAAAACG  
CCCAGGGCGAGCTGGAATCCAGGTAGGTGACGAAGTTGACGTTGCTCTGGACGCAAGTAGAAGACGGCTTCGGTGAACCT  
CTGCTGTCCCGTGAGAAAGCTAAACGTCACGAAGCTGGATCACGCTGGAAGAAAGCTTACGAAGATGCTGAAACTGTTAC  
CGGTGTTATCAACGGCAAAGTTAAGGGCGGCTTCACTGTTGAGCTGAACGGTATTCGTGCGTTCTGCCAGGTTCTCTGG  
TAGACGTTCTGCGGTGCGTACACTCTGCACCTGGAAGGCAAAGAGCTTGAATTTAAAGTAAATCAAGCTGGATCAGAAG  
CGCAACAACGTTGTTGTTTCTGCTCGTCCGTTATCGAATCCGAAAACAGCGCAGAGCGCGATCAGCTGTGAAAACCT  
GCAGGAAGGCATGGAAGTTAAGGTATCGTTAAGAACCCTCACTGACTACGGTGCATTGTTGATCTGGGCGCGGTTGACG  
GCCTGCTGCACATCACTGACATGGCCTGAAACGCGTTAAGCATCCGAGCGAAATCGTCAACGTGGGCGACGAAATCACT  
GTTAAAGTGTGAAGTTCGACCGCAACGTACCCGTGATCCCTGGGCTGAAACAGCTGGGCGAAGATCCGTGGGTAGC  
TATCGCTAAACGTTATCCGGAAGGTACCAAACCTGACTGGTCCGCTGACCAACCTGACCGACTACGGCTGTTCTGTTGAAA  
TCGAAGAAGGCGTTGAAGGCTGTTACACGTTTCCGAAATGACTGGACCAACAAAACATCCACCCGTCAAAAGTTGTT  
AACGTTGGCGATGTAGTGAAGTTATGTTTCTGGATATCGACGAAGAAGCTCGTCTGATCTCCCTGGGTCTGAAACAGTG  
CAAAGTAACCCGTGGCAGCAGTTCGCGGAAACCCACAACAAGGGCGACCGTGTGAAGGTTAAATCAAGTCTATCACTG

ACTTCGGTATCTTCATCGGCTTGGACGGCGGCATCGACGGCCTGGTTCACCTGTCTGACATCTCCTGGAACGTTGCAGGC  
GAAGAAGCAGTTCGTGAATACAAAAAGCGACGAAATCGCTGCAGTTGTTCTGCAGGTTGACGCAGAACGTGAACGTAT  
CTCCTGGGCGTTAAACAGCTCGCAGAAGATCCGTTCAACAACCTGGTGGCTCTGAACAAGAAAGGCGCTATCGTAACCG  
GTAAAGTAACTGCAGTTGACGCTAAAGGCGCAACCGTAGAACTGGCTGACGGCGTTGAAGGTTACCTGCGTGCTTCTGAA  
GCATCCCGTGACCGCGTTGAAGACGCTACCCTGGTCTGAGCGTTGGCGACGAAGTTGAAGCTAAATTCACCGGCGTTGA  
TCGTA AAAACCGCGCAATCAGCCTGTCTGTTCTGTCGAAAGACGAAGCTGACGAGAAAGATGCAATCGCAACTGTTAACA  
AACAGGAAGATGCAAACTTCTCAACAACGCAATGGCTGAAGCTTCAAAGCAGCTAAAGGCGAGTAATCTCTGACTCT  
TCGGGATTTTTATTCCGAAGTTTGTGAGTTTACTTGACAGATTGACAGTTTCGTCTGTAATCAAGCACTAAGGGCGGC  
TACGGCCGCCCTTAATCAATGCAGCAACAGCAGCCGCTAATTTGCCTTAAAGGAACCGGAGGAATCATGACCAAGTCAG  
AATTGATAGAAAGACTTGCCACCCAGCAATCGCACATTCGCGCAAGACGGTTGAAGATGCAGTAAAAGAGATGCTGGAG  
CATATGGCCTCGACTCTTGCAGGCGGAGCGTATTGAAATCCGCGGTTTCGGCAGTTTCTTTGCACTACCGCGCACC  
ACGTACCGGACGTAATCCGAAGACTGGCGATAAAGTAGAACTGGAAGGAAAATACGTTCTCACTTTAAACCTGGTAAAG  
AACTGCGCGATCGCGCAATATTTACGGTTAAGTTTTTACTCAAACCTTGAACGAGAGAAAAGCACCTGTGGGTGCTTT  
TTTCATTTCTAATCTGGAACCTGGAAGCTGCCTCGCAGAGTTTTGAACAGTTTTACCCTTTGTTAAATCTTCTGAA  
TATGCCTCGGGAACGCAAAATCCACCAGACAACCGCTCAACAAGTTGCACACTTCCATAAACAGGGAGGGGTGCA  
TGAAAATAACGACAGTCGGTGTATGCATAATTAGCGGAATTTTTCCGTTGCTGATTTTGCCCAATTGCCTGGGACATTA  
ACCCTTGCGTTTTCTGACTCTTTCGCTCGCTACTGGCATTATCCCTGTTAAAACCGTCCGTTATATCGCGCTGACGTT  
GCTGTTTTTCTGTTGGGGCATATTATCAGCAAAGCAAATTTTGTGGGCAGGAGAAAACCTTAACTGGCGCGACGCAGGATG  
CAATTGTTGAGATCACTGCAACTGACGGCATGACCACTCATTACGGTCAAATTAATCATCTACAAGGTCGACGTATATTC  
CCTGCGTCAGGTCCTGTGATGTATGGCGAATATCTTCCGAAGCGGTTTGTGCTGGACAACAATGGTCAATGAAACTCAA  
AGTTCGTGCAGTTCATGGCCAACTTAATGATGGCGGCTTTGATAGCCAGCGTTATGCCATTGCCAGCATCAGCCGCTCA  
CCGGCGTTTTCTGCAGGCAAGTGTATTGAACCGAATTGTAGCTGCGTGCACAGTATCTGGCGTACTACAAACAACG  
CTGCAACCCTATCCGTGGAATGCGGTTATTCTTGGTTAGGTATGGGGAACGGTTATCCGTCCCCAAAGAAATCAAAAA  
TATCATGCGGATACTGGAACGGCGCATTTAATGGCGATATCGGGATTGCACATCGTTTTGCGGCGTTGCTGGCTGCCG  
GACTCATTGCGAGTGACAAAATTTTTCTGCTGGCGCTGGATCCACTGGCAAATACCATTAATTGGCGGAATCTGCTGT  
GCTGCTTTTTATGCTGTTGACGGGAATGCAACCTCCTGCATTGCGTACCATGGTGGCGCTTGTACGTGGGGAATGCT  
TAAGTTAAGTGGGCGACAGTGGAGTGGCTGGGATGTATGGATATGTTGTCTGGCGCAATTTTGTGATGGATCCTGTTG  
CCATTCTCTCGCAAAGTTTATGGCTCTCTGCCGCTCGGGTTCGCGCATTGATATTTTGGTATCAGTGGTTCCCTGTCCCT  
GAGTGGCAACTGCCGCCGATTGCGTGCAGTTGTTCCCTCATCCATCTGCAACTGGGAATCACACTTCTGCTTATGCC  
CGTGCAAATCGTCATATTTATGGCATTAGTCTGACCTCGTTATTGCAAATCTATTAGCAATTCCTTGGTGACATTTA  
TCACGGTTCGTTGATCCTCGCCGCGATGGTGTGCATTTAAGCGGGCCGTTAATCCTGGAGCAAGGGTTATGGTTCTT  
GCCGACCGGTCTTTGGCTTACTTTTTCTGGGGGTTAAAGAGTTTCCCGGAAGGGTGGATCAACATTGCTGAATGTTGGCA  
ATGGCTATCATTTTCCCATGGTCTTACTGGTGGTATGGCGATTAACGCCTGGCGAACGTTGCCAGCAATGTGTGTGG  
CTGGAGGCTTGGTGTGCTGGCCGCTGTGGCAAAAACCTCGACCTGACGAGTGGCAGCTGTACATGCTTGATGTGCGG  
CAAGGGCTGGCAATGGTGTATAGCCAGAAACGGCAAGCGATTCTATGACACAGGACTGGCTGGCCTGAAGGGGATAG  
TGGGCAACAACGATTATCCCTGGCTCCACTGGCATAATCTTGAACCGGAAGCGTTATTTCTGAGCCATGAACATCTGG  
ATCACCGGGGAGGGCTGGATTCAATATTGCATATATGGCCGATGTTATGGATCAGAAGTCCGTTAAACTGGGAACATCAT  
CAGCCCTGTGTGCGTGGCGAAGCGTGGCAATGGCAAGGATTGCGTTTCAGCGCGCACTGGCCTTTACAAGGTAGCAACGA  
TAAAGGAAATAACCATTCCTGTGTGGTTAAGGTTGATGACGGGACGAATAGCATTCTTCAACCGGTGATTTGAAGCCC  
CAGCTGAACAAAAGATGCTAAGCCGTTACTGGCAGCAAGTGCAGGCAACATTGCTTCAGGTACCTCACCATGGCAGTAAT  
ACCTCATCATCGTTGCCATTAATTCAGCGAGTGAATGGAAAAGTGGCACTCGCATCGGCATCGCGCTATAACGCATGGCG  
ACTGCCCTCTAACAAAGTTAAGCATCGCTATCAACTGCAAGGATATCAATGGATTGATACTCCACATCAAGGTCAAACAA  
CGGTCAATTTTTAGCGCAAGGCTGGCGGATTAGCAGCCTCAGGGAGCAAATTTTACCTCGTTGGTATCATCAGTGGTTT  
GGCGTGCCAGTGGATAACGGGTAGAATATGCGGCTATTTCAACAATGCTGTTTTTTGAATGCATAACGACAAAGATCT  
CTCTACGTGGCAGACATTCGCGGACTGTGGCAACCATTGCGCTTTCAAAGCGGGTCTGATCGTGGCGGGGCTAGCGT  
TAATCCTCAACGCAGCCAGCGATACCTTCATGTTATCGCTCCTTAAAGCCACTTCTTGATGATGGCTTTGGTAAAACAGAT  
CGCTCCGTGCTGGTGTGGATGCCGCTGGTGGTATCGGGCTGATGATTTTACGTGGTATCACCAGCTATGTCTCCAGCTA  
CTGTATCTCTGGTATCAGGAAAGGTGGTAATGACCATGCGTCGCCGCTGTTTGGTACATGATGGGAATGCCAGTTT  
CATTCTTTGACAAACAGTCAACGGGTACGCTGTTGTACGATTACCTACGATTCCGAACAGGTTGCTTCTTCTTCTCC  
GGCGCACTGATTACTGTTGTGCGTGAAGGTGCGTGCATCATCGGCTGTTTCATCATGATGTTCTATTACAGTTGGCAACT  
GTCGATCATTTTATTGTTGCTGGCACCATTGTTTCGATTGCGATTGCGGTTGATCGAAGCGTTTTTCGCAACATCAGTA  
AAAACATGCAGAACCATGGGGCAGGTGACCACCAGCGCAGAACAAATGCTGAAGGGCCACAAGAAGTATTGATTTTC  
GGTGGTCAGGAAGTGGAAACGAAACGCTTTGATAAAGTCAGCAACCGAATGCGTCTTCAGGGGATGAAAATGGTTTCAGC  
CTCTTCCATCTCTGATCCGATCATTACGCTGATCGCTCTTTGGCGCTGGCGTTTTGTTCTGTATGCGGCGAGCTTCCCAA  
GTGTCATGGATAGCCTGACTGCCGGTACGATTACCGTTGTTTTCTTCAATGATTGCACTGATGCGTCCGCTGAAATCG  
CTGACCAACGTTAACGCCAGTTCCAGCGCGGATGGCGGCTTGTGACAGCTGTTTACCATTCTGGACAGTGAGCAGGA



GAAAGATGAAGGTAAGCGCGTGATCGAGCGTGCGACTGGCGACGTGGAATCCGCAATGTCACCTTTACTTATCCGGGAC  
GTGACGTACCTGCATTGCGTAACATCAACCTGAAAATCCGGCAGGGAAGACGGTTGCTCTGGTTGGACGCTCTGGTTCG  
GGTAAATCAACCATCGCCAGCCTGATCACGCGTTTTACGATATTGATGAAGCGGAAATCCTGATGGATGGTCACGATCT  
GCGCGAGTATACCCTGGCGTCGTTACGTAACAGGTTGCTCTGGTGTGCGAGAATGTCCATCTGTTTAAACGATACGGTTG  
CTAAACAACATTGCTTACGCACGGACTGAACAGTACAGCCGTGAGCAAATTAAGAAGCGGCGCGTATGGCCTACGCCATG  
GACTTCATCAATAAGATGGATAACGGTCTCGATACAGTGATTGGTGAACCGCGTGCTGCTCTGGCGGTGACGCTCA  
GCGTATTGCTATCGCTCGAGCCTTGTTCGCGTGATAGCCGATTCTGATTCTGGACGAAGCTACCTCGGCTCTGGATACCG  
AATCCGAACGTGCGATTACGGCGGCACTGGATGAGTTGAGAAAAACCGTACCTCTCTGGTATTGCCACCGCTTGTCT  
ACCATGAAAAGGCGAGACGAAATCGTGGTCTGCGAGGATGGTGTGATTGTGGAACGCGGTACGCATAACGATTTGCTTGA  
GCACCGCGCGTTTACGCGCAACTTACAAAAATGCAGTTTGGCCAATGATCGAAAAATCTGGTCTGGTGAATCCCCTT  
GTGGCGCTATTGCTGCCACTCTCTGGTTGATGGCTGGTGGTGGCGGATCCGCTTTGCTATAAACTAAAACGTA  
AGCGCGCTGGCGTGCCCCGTACCGTTGTCGTTGGTAAATCTACCGCAGGCGGCAACGAAAAACCCCGGTGCTT  
GTCTGGCTGGTGAACAGTTGCAACAGCGCGTATTGCGTGGGGTTCGATCGCGGGGATATGGTGGTAAAGGCTGAATC  
TTATCCGCTGTTATTGTCGCGAGATACCACAACAGCACAGGCGGGTATGAACCTGTGTTGATTTATCAACGCACTGATG  
CGCTGTTGCGGTTTCTCCGTTCTGTTCTGATGCGGTAAGCAATCTGGCGAACACCCCTGATGTGCAGATCATCGTA  
ACCGACGACGTTTACAGCATTACCGTCTGGCGGTGATGTGGAATTTGCGTTATTGATGGTGTGCGTGCCTTTGGCAA  
TGGCTGGTGGTTGCCGGCGGGCAATGCGTGAGCGAGCGGGCGCTTAAAGTCGGTTGATGCGGTAATCGTCAACGGCG  
GTGTCCCTCGCAGCGGTGAAATCCCCATGCATCTGCTGCCGGTCAAGCGGTGAATTTACGTACCGGTACGCGTTGTGAC  
GTTGCTCAGCTTGAACATGTAGTGGCGATGGCGGGATTGGGCATCCGCCGCGTTTTTGGCACGCTGAAGATGTGTGG  
CGTACAACCGGAAAAATGTGATCCGCTGGCCGATCATCAGTCTTTGAACCATGCGGATGTCAGTGCCTGGTAAAGCGCCG  
GGCAACGCTGGTAATGACTGAAAAAGATGCGGTGAAATGCCGGCTTTGCAGAAGAAAAATGGTGGTATTTGCTGTGA  
GACGCACAGCTTTCAGGTGATGAACAGCGAACTGCTTACGCACTAACCTTGGCTTCTGGCACTAGTTACGCCG  
CGGCAGCGTTCGATTGATGGAGTCAATGATGTCGCTGCCGACCTCTCCCTGCTGATGCGCGTAATCTTACCTTGGCG  
CACAAGGCTGTTAAACAACCCCGCGCTCGAGCGTCTGGAGGATATTCCGGCAACGATCTCCCGCATGCTCTTGGCTG  
CAATCGATACCATCAATATTGTTGCCGTAGTCCATATCTGGTCTTTTTCAGTCGCTGGGAAATATCCTGCCAGTG  
GCTGGATGAGTCTCTGGCGGTGGCGAATTAATGGAATACTGGGCGCATGAAGCCTGCTTTATGCCGCTAGCGACTTTC  
GTCTTATTCGCCACCGCATGCTGGCACCTGAAAAAATGGGCTGGAATAACAAGACGCCTGGATGCAGGAACATGAGGCG  
GAAATTGCACAGTTAATTCAGCATATTCATGATAAGGGCCGGTACGTTACGCCGATTTTGGACATCCTCGTAAAGGTGC  
AAGCGGCTGGTGGGAATGGAAGCCGATAAACCGCATCTGGAAGTTTATTTACTGCCGAAAGGTGATGGTGAATGAAC  
GGCGCAACTTCCAGCGCTTATGATTTAAACCACCGTGTGATGCTGACTGGGATGATGAGCGCGATCTCGTTTCGCAA  
ACAGAAGCAGAAATCATCATGCTGGATAACAGTGGCGTAGCCTGGGAATATCCGCGAACAGTGGTGGCAGATTACTA  
TCGGCTGAAACGTCCGGCACTGGCGGCGTGGCGCGAAGCGAGGGCTGAACAGCAGCAATCATTGCTGTGCATGTTGAAA  
AATTGGGCAATCTTTGGTGCATGATGATTTGCTGCCGCTACTCGAGCGAGCGCTGGCCGAAAGTCACTGCAACGCAC  
AGCGCGTACTTTGCGCTTTGATCCTGTTGCTGGGATCGCAACGCGCAGAGCAGCTTTTTGATTTTAGTACCGGCT  
GGAGTGTATACCCAGCGCCGAAACGCCAGTATGGCTATTTTGTCTGCCGTTATTACATCGTGGGCAATTAGTTGGC  
GAATGGATGCCAAATGCATCGCCAGACAGGCATCCTTGAAGTTATCTCTGTGGTTACAGGAAGGTATTAACCAACG  
ACAACGCTGCAAAAAGGGTACGTGAGCGGATTACTGATTTGCTAACTGGCAGCAGGCAACGCGGGTACATTAGGATG  
CTGCCCGAAGGCTCTTACTGATTGCCGACCGGCTGGGAAATAGACCCGTCGCATAAATGATTATGATAAGATTTA  
TGATTTCATAACCCGATCCATCTGGAGAACTATGGATCATGCTGCTTGAATCATTGCCTGCCGTTTGCACGGA  
AACTTTGGTATAACAGGAAAAACAAGAGCTTATTTGCAAACTGGACAACCTCGCTTCCCGCTGCGTATGGCATCTCC  
AGTGTTCGAAACGGAAGCCCGCTGCTGACTGCTGATGAGAGTAAATCATGAGTTTTGTTGTTTATTTCCCGCGCG  
CTACGCGTCCAGCGTCTGCCCCGTAACCATTTGGTTGATATTAACGCAAACCCATGATTGTTTATGTTTGAACGCG  
CGCGTGAATCAGGTGCCGAGCGCATCATGTTGCAACCGATCATGAGGATGTTGCCCGCGCGTTGAAGCCGCTGGCGGT  
GAAGTATGATGACGCGCGCGATCATCAGTCAAGAACAGAACGCTCTGGCGAAGTTGTCGAAAAATGCGCATTACGCGA  
CGACACGGTATCGTTAATGTGAGGGTATGAACCGATGATCCCTGCGACAATCATTGTCAGGTTGCTGATAACCTCG  
CTCAGCGTCAAGTGGTATGGCGACTCTGGCGGTGCCAATCCACAATGCGGAAGAAGCGTTTAAACCGAATGCGGTGAAA  
GTGGTTCTCGACGCTGAAGGTATGCACTGACTTCTCTCGGCCACCATCTTGGGATCGTATGTTTTGAGAAGG  
CCTTGAACCGTTGGCGATAACTTCTGCTCATCTTGGTATTTATGGTACCGTGCAGGCTTATCCGTCGTTACGTCA  
ACTGGCAGCCAAGTCCGTTAGAACACATCGAAATGTTAGAGCAGTTCGTTGTTCTGTTGACGGCGAAAAATCCATGTT  
GCTGTTGCTCAGGAAGTTCCTGGCACAGGTGTGGATACCCCTGAAGATCTTGAAGCGGTTCCGCTGAAATGCGCTAATT  
TCACTTACGCACTTACGCAATTTTGGGAGGAGTGTGATACCCTTACGATTTTCTCAATTTTCTTTTCAACAATTG  
ATCTCATTGAGTGCATCTTTTATATTGGCGCTCATTATGAAAGCAGTAGCTTTTATGAGGGTAACTGAAATGGAACAG  
CTGGCTGCCAATTAAGCAATTTACTGGCGGAAAACTCAGTCGATTGAGTGCCTCAATGAAAAAGCGGATACGGCGTT  
GTGGGCTTTGATGACAGCCAGGAAACCAATGCCGTTAATGGCAAGAAGCTTTAGTACGCCGAAAAAGCCGACAA  
TGGCATGAAAAACCATGCTGGCAAGAAGTGGGACTGTCCGATGCGGACTATTTATGGTGTGATGACGCATGAAGAA  
CACCCCGGCCCGATGCTCTGCTACTGGAGCGGATGCGTGGTGTTCGGTGGAGGCACCAGCCGAACACCGAAGCGT

GGAACAACCTCAAAGACCAAATCGTTGAAGCCTTACTGGCCTGGCACCGTCAGGACAGTCGCGGTTGCGTCGGCGCGGTCG  
ACAATACTCAGGAAAATTTCTGGCCCTCATGGTACCGCAACATGTTGAAGTGTATGGACCACGCTCAATCAGTTCAAT  
AACACCGGTCTGACGATGCAGGATAAGCGGATCCTGTTTCGCACTCGCAATGTCTCCCGCATTATTTGAAGGCTTTAA  
CGACAATTGTGTGCTGATTCACGGTAACCTTCTGTTTACGCAGCATGTTGAAAGATTCGCGCAGCGATCAGTTACTGGCGA  
TGGTCTGGGCGGGACTAATGCTTTGGGCACCGCGAGAATACGAACTGTTCCGACTAATGGATAAATCTCTGGCGGAAGAT  
TTGCTCTGGAGTTACCTGCAACGCGCGCCAGTGGCGGAGTCGTTTCATCTGGCGGCGTTGGTTGTATGTGTTATGGGATGA  
AGTTGCGCAACTGGTTAATACCGGACGATTTAGTCGGCGCAACTTCGATCTGGCATCAAAATCACTCTTGCCGTGGCTCG  
CCTGACGAACCTTTTAGCCACTGCCAGATACGGCCAAGCGTTTCATAGCCAACACGATCGCTATGCATCAACCAGACCGG  
AGAAGGGATTGCCCGTCCACGGGTTAAGCGGCGAGTCGATGGCCAACGATTCGCGGGGCTGGTAGCGGATTTAACCC  
CTTCTGCTGAAAAAGATCATCGCCCGCGCAGATGTGATGCGGAGGTCAACAGCAGGAAAGGGGCGTCACCAATCGCC  
TGTTTCACTGCTGCAGCTTCTTCTCGGTATCTTTTGGCAAATCCAGGGTGATAATTTGCTCGCGCGGCACGCCAGCGA  
TTGCGCAACTCTGGCACCTACTCCGCTGTAACACCGTATTGGTTTTGCTACGCCTCCCGTGAAGATCAGTTTTGATC  
CCGGATTTTCGCGCATAAGCGAATACCTTATTAGGCGTGGCAGACTGTTATTGATTAATTAGAGCTCGGTGCCAC  
TGCGGGTCCAGGTATAACCACTCCGAGCACCAGATATAGTCCACTTTTTGCGAATTATCCATGTCGGATAGGTGCT  
TTCGATGGGACGCAGCAGCGGTCGGCTACCGGTTGCAACTCAATAACAAGAGCGCCAGCCACCCAATGCTAATAAAAA  
TCTCCCGGTTTTTTGAAAACGGCTAAACCACAGCAGCGCCAGGCCAGCCAAATAACAACATCAGCGGAAGTGGC  
AGCAACATATTGCCAATCACTTTTTTCAAGTGTAAAAAGCATCCTTTCTGGTTCCTTTTTTAACCATATAGCAAGGGATCG  
CCAGCGATATTACACCAGACGGGTTTCTCTCGCCGTGGCTGTGACAAAATAGCGTCTTTATCAGAAAACGCTTTAGCCA  
ACCGGTGGAGAAAAGCAATGCAGGATCGCAATTTTGTGATGATTGCGGAAAAGTTTTCCCGTAACATTTACGGCACCA  
AAGGGCAGCTTCGACAGGCTATTCTGTGGCAGGATCTCGATCGCGTGTGGCGGAAAATGGGCCGCAAAAACGCGTGTG  
CTGGATGCTGGCGGTGGAGAAGGGCAGACCGCAATCAAAATGGCCGAGCGTGGGCATCAGGTCATTTTATGCGATCTTTC  
TGCGCAGATGATCGACCGCGCAAAACAGGCGGCAGAAAGCAAAAGGTGTGAGCGACAACATGCAATTTATACATTGCGCCG  
CTCAGGATGTTGCTTCGATTTGAAACGCCGTTGATCTGATATTGTTCCATGCGGTGCTCGAGTGGTGGCTGATCCC  
CGCAGCGTATTGCAGACCTCTGGTCAGTGTGCGTCCAGGCGCGTGTGTCGTTAATGTTCTACAATGCGCATGGTTT  
GTTGATGCATAACATGGTCGCCGGGAATTTGATTACGTGCAGGCGGAATGCCGAAAAGAAAAACGGACGCTTTTCGC  
CAGATTATCCACGCGACCCGGCGCAGGTTTATCTGTGGCTGGAAGAAGCTGGTTGGCAAATATGGGTAAGACGGCGTT  
CGCGTGTTCATGATTATCTGCGCGAGAAACACCAGCAGCGCAGTCTATGAAGCATTACTTGAATTAGAAACGCGTTA  
TTGCCGTGAGAACCGTATATTACCCTGGGGCGTTATTTTCATGTACCAGCGCGCAACCCGAGAGCAAGGATAAAGTAT  
GAGTGAATTTTCCAGACAGTCCCGAACTGGTTGCCCTGGGCCAGAAAAATGACTTCTCCATCTCGCTGCCGGTAGACC  
GACTCTCTTTTCTGCTGGCGGTTGCCACGCTGAACGGCGAGCGTCTGGATGGTGAAGGCGAGCTGGTGGAT  
GCATTCGCCATGTGAGTGTGCGTTTGAACAAACAGCGAAACCATCGGCGTGCAGCGCAATAACCGCATCAACGACAT  
GGTGCGTCAACGTCTGCTGAACCGCTTACCAGCGAGCAGGCGGAAGGGAACGCAATTTACCCTGACGCCGCTCGGCA  
TCGGCATTACTGACTACTACATCCGTACGCGGAGTTTTCTACGCTGCGTCTTTCTATGCAGTTGTGCGATTGTGGCGGGT  
GAGCTCAAACGCGCAGCAGATGCCGCCGAAGAGGGCGGTGATGAATTTCACTGGCACCGTAATGTCTATGCGCCACTGAA  
ATATTCGGTAGCAGAAATTTTCGACAGTATCGACCTGACGCAACGTCTGATGGACGAACAGCAGCAGGTAAGGACG  
ATATCGCCAGTTGCTGAACAAAGACTGGCGGGCGGATTTCCAGCTGTGAATTTGCTTTTCGAAACTTCGGAACG  
CTGCGTGAATTCAGGATACGCTGGAAGCGCAGGCGACAAATTCAGGCTAATCTGTTGCGCATTAGGATGCGACGAT  
GACCCATGACGATCTGCATTTGCTCGATCGTCTGGTGTGATCTGCAGAGCAAACTCGATCGTATTATCAGTTGGGGCC  
AGCAATCCATCGACTTGGATTGGCTACGACCGCCACGTACACAAATTTTATTCGTAACCGCATCGATATGGATAAAAA  
CGCGTCTTTGCTCAGCGGTTACGTCAGTCGGTACAAACCTATTTGATGAGCCGTGGGCGTAACTTATGCCAATGCCGA  
TCGCTCTGGATATGCGTGACGAAGAGATGGCACTGCGCGATGAAGAAGTACTGGGGAACCTTCTGAGGATCTGGAAT  
ACGAAGAGTTTAAACGAGATCCGCGAACAGCTGGCGGCGATCATCGAAGAACAACCTTCCCGTGTACAAAACAGACAAGT  
CCGCTGGATCTTGGTCTGGTGGTACGCGAATATCTGTACAGTATCCGCGTGCACGTCACCTTTGACGTTGCGCGTATTGT  
TATTGATCAGGCGGTACGCTTTGGCGTAGCGCAAGCAGATTTACCAGGACTGCCAGCGAAATGGCAGCCGATTAATGATT  
ACGGAGCAAGGTACAGGCGCATGTCATCGACAAATATTGAACAAGTGTGCGGTTAAGCTGGCGCAGGCGCTGGCGAA  
TCCGTTATTTCCGGCGCTGGACAGCGCTTACGTTACAGGACGCCATATTGGCCTCGACGAACCTGGATAATCATGCATTC  
TGATGGATTTTCAGGAATATCTGGAAGAGTTTTACGCGGTTATAACGTTGAGCTTATTCGCGCACCAGAAGGGTTCTTC  
TATTTACGCCACGTTCCACCACGCTGATCCCTCGTTCGTTGCGGAACTGGATATGATGGTGGGAAAAATCCTCTG  
TTATCTATCTCAGCCCGAACGGCTGGCGAATGAGGGGATTTTCAACCAGCAGGAACTGTACGACGAACCTGCTACCC  
TGCCGATGAAGCAAACTGCTGAAACTGGTGAACAACCGTTCAACCGGTTACAGCGTTGACCGTCAGAAGTTGACGGAG  
AAAGTACGTTCTCGCTCAACCGTCTGCGTCGTTTAGGCATGGTGTGGTTTATGGGCCACGACAGCAGCAAGTTTCGCAT  
TACCGAATCGGTGTTCCGCTTCGGAGCCGATGTGCGTGTGGCGACGATCCCGTGAAGCACAGCGTCGCTGATTCGTG  
ATGGCGAAGCAATGCCGATTGAAAATCATCTGCAACTCAACGATGAAACCGAAGAGAATCAGCCAGATAGCGGAGAGGAA  
GAATAATGATTGAACGCGGTAATTTTCGCTCACTGACGCTGATTAACGGAACGGCTTTTTTCCCGAACTTTTACCTT  
GACGAGCTGGTACGACGCTTTCTGGCGTAACGGGGCGGTAATCCACCACCATGGCGGCGTTCGTTACGGCGCTGAT  
CCCCGACCTGACCCTGCTGCATTTCCGTAACACTACGGAAGCCGGGGCCACCAGCGGTTCCGCGGATAAAGGCTGCACG

GTAAGCTGAAAGCGGGTGTCTGTTATTTCGATGCTCGACACCATTAACCTCGGCCACCAGCGCTGGTGGTCGGTGTGCGT  
CTGCAACAGGTTGCCGGACGCGATCGTAAAGTGGATATCAAGCCGTTTGCCATTAGGGACTGCCGATGTCGGTGCAGCC  
GACACAGCTGGTGACCGAAACCTGAACGAACGCCAGGCGCGCTGCTGCCGCTTAACGAGCTGAAAGACAAGCTCGAGG  
CGATGGAAGGCGTGCAGTTTAAACAGTTCAACTCCATTACTGATTACCACTCGCTGATGTTTCGATCTGGGCATCATCGCG  
CGTCGTCTGCGCTCCGCATCTGACCGTAGCAAATCTATCGTCTGATCGAAGCTTCGCTGTATGGCGGGATCTCCAGTGC  
CATTACCCGTTCTCTGCGGACTACCTGTTGCCAGAAAAACAGCGCGTGCCTAAAGCGTTCAGGACATGGAAGCGGGC  
TGCGTGAAAACCGTATGACGCTGGAAGCGATTCTGTGCACCCAGTCGGACCGCGACCTGTTAAGCATCTGATCAGCGAA  
GCCACCAACTACGTGGCGGGGACTACATGCGTCACGCCAACGAGCGCCGTGCCATCTCGACAAAGCCCTGGAGTTTCG  
TCGCGAGCTACATACTTCGCGTCAGCAACTGGCGGTGAGCAGTACAAAACAGTCGATATGGCGCGTGAGCTGGCAGAGC  
ACAACGGTGCCGAAGGCGATCTGGAAGCGGATTATCAGGCGGCCAGTGATCACCTGAACCTGGTGCAAACCGCACTGCGT  
CAGCAGGAGAAGATCGAACGCTACGAAGCGGATCTCGATGAGCTGCAGATCCGCTCTGGAAGAGCAAAATGAAGTGGTGGC  
AGAAGCCATCGAACGCCAGAGAATGAGGCTCGTGGGAAGCTGCCGAACGGAAGTGACGAGCTGAAAAGCCAGC  
TTGCTGACTACCAGCAGGCGCTGGACGTCCAGCAACGCGCGCATCCAGTATAACCAGGCGATTGCTGCGCTTAATCGT  
GCCAAAGAACTGTGCCATCTGCCGGACTTAACCGCCGACTGCGCCGCCGAATGGCTGGAACCTTCCAGCGAAAAGAGCT  
GGAAGCGACTGAAAAAATGCTCTCTCTTGAGCAGAAAAATGAGCATGGCGCAAACCGCGCACAGCCAGTTTGAGCAGGCTT  
ATCAGCTGGTGGTGGCAATCAACGGCCACTGGCGCTAACGAGCGTGGGATGTCGCTCGCGAACTTTCGCGGAAGGG  
GTCGATCAGCGTCACCTGGCAGAGCAGGTTTCAGCCGCTGCGGATGCGATTAAGCGAACTGGAACAGCGCTTACGCGAGCA  
GCAAGAAGCTGAGCGTCTGCTGGCAGATTTCTGCAAACGTCAGGGCAAGAATTTTGATATCGACGAACTGGAAGCCCTGC  
ATCAGGAACTGGAAGCACGCATTGCCTCTCTTCCGATAGCGTGTCTAACGCCCGTGAAGAGCGCATGGCACTGCGCCAG  
GAGCAGGAACAGCTGCAGTCTCGATTAGAGTTTGATGACGCGTGCAGCGGTTGGCTGGCAGCGCAAAACAGTCTCAA  
CCAGTTGAGCGAACAGTGGCGGAAGAGTTTACCTCCAGCAGGACGTCACCGAATATCTGCAACAGTTGCTGGAGCGTG  
AGCGAGAGGCGATTGTTGAACGCGATGAAGTGGCGCGCGCAAAACGCGTCGATGAAGAGATCGAACGTTAAGCCAG  
CCTGGCGGCTCTGAAGATCAGCGTCTGAACGCGCTGGCGGAGCGTTTTGGTGGTGTGCTGCTGTCAGAAATTTATGACGA  
CGTTAGCCTGGAAGATGCGCGTACTTCTCAGCGCTGATGGCCCGTCACGCCACGCCATCGTGGTGCAGATCTGTCAC  
AGGTAACGAAACCTGGAAGGCTTGACCGATTGCCGGAAGATCTATCTGATCGAAGGAGATCCGCGAGTCATTTCGAT  
GACAGCGTGTTCAGCGTTGATGAGCTGGAAGGCGGTAGTGGTAAAATCGCCGATCGTCAGTGGCGTTATTCACGTTT  
CCCGGAAGTCCGCTGTTTGGTCTGCTGCGCGTAAAAGCGTATTGAAAGCCTCCATGCCGAGCGTGAAGTGCCTTCCG  
AACGCTTCGCCACGCTCTCCTTTGATGTACAGAAAACCTCAGCGTCTGCATCAGGCGTTCAGCCGCTTATCGGCAGTCAT  
CTGGCGGTTGCGTTTGGTCTGACCCGGAAGCAGAAATCCGTCAACTGAACAGCCGTCGCGTGAAGTGGAGCGGGCGTT  
AAGTAATCATGAAAATGATAACCAGCAGCAGCGTATTAGTTTGGCAGGCGAAAGAGGGCGTTACGGCGCTGAACCGCA  
TTCTGCCGCTCTCAACCTGTTGGCTGATGACAGCTGGCGGATCGCGTCGATGAAATCCGCGAACGCTCTGGATGAAGCC  
CAGGAAGCCGCGGTTTTGTTGAGCAGTTTGGCAATCAACTGGCGAAACTGGAACCGATTGTTTCGGTATTGCAGAGCGA  
CCCGGAACAGTTTGAACAGTTAAAAGAAGATTACCGTACTCTCAGCAGATGCAGCGCGATGCCCGTCAGCAGGCGTTT  
CCCTGACGGAAGTGGTGCAGCGTCTGCGCACTTATGCTACTTCTGACTCGGCAGAAATGCTTAGCGGTAACAGCGATCTC  
AACGAAAACCTGCGTGAACGCTCTGGAACAGGCGGAAGCGGAGCGTACCCGCGCTCGCGAAGCGTTGCGCGGTACGCAGC  
GCAGTTGAGTCAGTACAACAGGTGCTGGCTTCTGCTGAAAAGTCTTACGACACCAAAAAGAGCTACTCAACGATCTGC  
AACGTGAATTGCAGGATATCGCGTGCCTGCTGATAGCGGGCAGAAAGAGCGGGCGGCTATTGCGCGTACGAGCTGCAT  
GCGCAACTGAGCAATAACCGTTACGCGCAATCAACTGGAAGGCGCTTACCTTCTGCGAAGCGGAGATGGACAACCT  
GACCCGCAAACTGCGCAAGCTGGAGCGGATTACTTTGAGATGCGCGAGCAGGTAGTGACCCGCAAAAGCGGGCTGGTGTG  
CGGTGATCGCATGGTAAAAGATAACGGCGTTGAGCGCCGTTACACCGTCTGAGCTGGCTTATCTCTCCGCTGATGAT  
TTGCGTTCCATGTCGGATAAGGCGTTAGGTGCGCTGCTCTGGCGGTGGCGGATAACGAACATCTGCGCGACGTGCTGCG  
CATGTCGGAAGATCCGAAACGTCGAGCGTAAAATTCAGTTCTTCTGCGGTTTTATCAGCATCTGCGTGAACGATTT  
GTCAGGATATTATTTCGATCCGATGATCCGGTGAAGCTATCGAACAGATGGAGATTGAACTTAGCCGCTGACCGAAGAA  
TTAACTCCCGTGAACAGAACTGGCGATCAGTTCCCGCAGCGTGGCGAACATCATTGCAAAACCATTCAGCGCGAGCA  
GAACCGTATCCGATGCTCAACCAGGGTTGCGAAGCTATCGTTTTGGTCAAGTGAACAGCGTGCCTCTCAACGTAACG  
TGCGTGAAACGACGCCATGCTACTGGATGTGCTCTCTGAACAGCAGCAGCAGCATCAGGATCTGTTAACAGCAACCGT  
TTGACCTTCTCGGAAGCGCTGGCGAACTGTATCAACGCTTAAACCGCAGATTGATATGGGGCAGCGCACGCCGAGAC  
CATCGGTGAAGAACTGCTGGATTACCGCAACTATCTGAAATGGAAGTTGAGGTTAACCGTGGTCCGATGGCTGGCTGC  
GCGCAGAGTCTGGTGCATTGTCGACCGGTGAGGCGATTGGTACCGGTATGTCGATTCTGGTATGGTGGTACAAAGCTGG  
GAAGATGAATCTGCCCGCTGCGCGGTAAGATATCTCTCTTCCGCTGCTGTTCTCGATGAAGCAGCGCGACTGGA  
TGCTCGTTCTATGCCACGCTGTTGAATTGTGTGAGCGTTTGAAGTGAACCTCATCATCGCAGCGCCGAAAATATCA  
GCCCCGAGAAAAGCACCCTATAAACTGGTGCCTAAAGTCTTCCAGAATACCGAACACGTTTCATGTCGTCGGCCTGCGA  
GGATTTGCGCCGCAACTCCCTGAAACGCTTCCAGGAACTGACGAAGCGCCTTCTCAGGCGAGTTAAAATTAAGGCGGCG  
CAATGCCGCTTTTTCTTTTTCCGAAAACCTCCGTTTCTGCACTAAAAAAGTGGCACATTACGCGCGCTTTTTCTTTAACT  
TCTTTACATTAGGTTATGTAAGAAACGATCGCGGTTTATATACTGAAGATAAGCCTGATGAGTAACAGGCTTGTCTGCTCA  
TACTTTCTGAGTATTGGCGTTGTACAGGCAAGTCGTAATAACAGCCTGGCTATTAGAGTATGATAAAAAACAGGGG

CAAGGGATGTTGCTTAATATGATGTGTGGTCGTCAGCTGTCGGCAATCAGTTTGTGCCTGGCCGTAACATTGCTCCACT  
GTTCAATGCGCAGGCCGATGAGCCTGAAGTAATCCCTGGCGACAGCCGGTGGCTGTCAGTGAACAGGGCGAGGCACTGC  
CGCAGGCGCAAGCCACGGCAATAATGGCGGGGATCCAGCCATTGCCTGAAGGTGCGGCAGAAAAAGCCCGCACGCAAAATC  
GAATCTCAATTACCCGCAGGTTACAAGCCGGTTTATCTTAACCAGCTTCAACTGTTGTATGCCGCACGCGATATGCAACC  
CATGTGGGAAAAACCGTGATGCTGTTAAAGCCTTCCAGCAACAGCTGGCAGAGGTGGCGATTGCCGGTTTTCCAGCCGCGAT  
TTAATAAATGGGTAGAGTACTGACCGATCCTGGTGTAAACGGGATGGCACGCGACGTGGTGTCTCTGATGCGATGATG  
GGCTATCTCCATTTTATTGCAAATATCCGGTCAAAGGCACTCGCTGGCTATATAGCAGTAAACCTTATGCACTTGCAAC  
GCCGCCGCTCTCGGTGATTAACCAATGGCAGCTGGCGCTGGATAAAGGTCAATTGCCTACGTTTTGTTGACGAGACTGGCAC  
CGCAGCATCCGCAATATGCGGGCATGCATGAATCGTTACTGGCCTTACTCTGTGACACCAAACCGTGGCCCAACTGACC  
GGCAAAGCAACGTTGCGCCAGGGCAGTGGAGTAACGACGTACCGGCGTTGCGCGAAATATTGCAACGACAGGCATGTT  
GGACGGGGGGCGAAAATTACTCTACCTGGCGATGACACGCCAACTGACGCGGTAGTCAGCCCATCCGCTGTTACTGTTG  
AAACAGCAGAACTAAGCCGATGGATAAGCAAACGACGTCTCGTAGTAAACCTGCGCCTGCCGTTGCGCCGCTACGAT  
AATGAACTGGTGAAGCCGTTAAACGTTTTAGGCATGGCAAGGATTGGGGGAGATGGTGTATTGGCCGGCAACACG  
TGACTGGTTAAACGTAACGCCCGCCAGCGTGTGGTGTGTTGGCTCTCAACATCCAGCGATTGCGCTTGTGCAACACG  
AGCTTTCTACCGGATCATGTTAAACATTCCGGCCTATTGCTGGTCTACTATCAGAACGGCAATCAGGTGCTGGATTCCG  
CGATCATTGTGGTCCGCCGATCGCAAACGCCGATGATGAGCAGTGCCTTAAACAACGTAGTGGTAAACCCGCCGTG  
GAACGTACCTCCAACCTGCGCACGCAAAGATATTCTGCCAAAAGTGGCGAACGATCCGGGATATCTCGAAAGCCATGGCT  
ATACGGTGATGCGCGCTGGAAACAGCAGAGAAGCGATTGACCCATGGCAGGTTGACTGGTCTACAATCACGGCCTCGAAT  
TTACCGTTCGGCTTCCAGCAGGCTCCAGGCCACGGAACCTCGTGGGGCGCTATAAATTCAATATGCCGAGTTCAGAGGC  
CATTATTTGTCATGACACGCCGAACCAATCTGTTCAAGCGTGATACACGCGCATTGAGCTCAGGCTGTGTACGAGTGA  
ATAAAGCTTCCGATCTGGCGAATATGCTGTTGACGATGACGGCTGGAATGACAAAACGATTTCTGATGCGCTGAAGCAG  
GGTGATACAGTTACGTCAATATTCGGCAGTCGATTCCGGTGAATCTCTACTACCTGACGGCCTTTGTTGGTGCAGATGG  
TCGTACCCAGTATCGTACAGATATTTACAATTATGATCTGCTGCGCGATCCAGCTCGAAATCGTATCGAAAGCGGAAC  
AATTAATCAGGTAAATGAAGTAGTTCCGGGAAATCAGTTGTCGTAATAATTAGCATGATTGGGGGCGATTCTCTGCAGCC  
CCCGTCACTGCTGGGGTTGAGTCATCTTGACGTCTGCTTACGGGCGGTTAAGGTGCCTCTTGTGCGCCAGAAGTGCATA  
TAAACGATAACATTGACCTGTAGACTTGATTATCATGGACAAATTCGACGCTAATCGCCGCAAATGCTGGCGTTGGTG  
GCGTTGCACTCGGTGCCCATCCTGCCGACCCCTGCGTTTGAACACTCTTACCCACGCCCGCGCATTTTGACACTC  
AATAATCTTACACGGAGAGTCAATCAAAGCGGAGTTTTTCGATGGCAGAGGCTATATTCAGGAAGAATTGGCAAAACT  
TAACCATTTTTCCGCGATTACCGCGCAACAAAATAAAGTCCATCGACCCAGGATTATTCGACCAAGTGTATCGCCTGC  
AAGGGTTGTTAGGCACGCGCAAACCGGTGCAACTCATTTCCGGTTATCGTTCTATTGATACCAACAATGAACTACGCGCC  
CGCAGCCGTGGAGTAGCGAAGAAAAGCTATCACACTAAAGGCCAGGCGATGGATTTCCATATTGAAGGTATCGCGTTAAG  
CAATATTGCAAAAGCCGCTTATCTATGCGCGCAGGTGGTGTAGGATATTATCCACGTAGTAACTTTGTGCATATTGATA  
CCGGGCCAGCACGGCACTGGTAGTAATTGCTTAAACGAAACAGGGGCGAGTGAACATATCGTATTATCCGGTCAACGCAT  
TCTCCAGAATGTTCAATTAATCTGGTGTGAACAAACCCGCTGCGCCGCACTGGTGCATCTGGCGGCGATGCGGAAAAA  
ATCAAACAGGAAGTTGATGACAGCGCCCTGACACTGATGCAGATCCTGCTGACGCATGGTCACTGGACCACGTTGGCGC  
AGCGGCGAACTGGCGCAACATTACGGCGTGCCGGTTTTCCGGCCGAAAAAGAAGATGAGTTCTGGCTGCAAGGCTTGC  
CTGCGCAAAGTCGATGTTTGGTCTGGAAGAGTGCCAGCCGCTGACGCCAGATCGTTGGCTGAACGAAGGCGATACCATC  
AGCATAGGGAATGTGACTTTACAGGTGTTACATTGCCCTGGGCATACGCCGGTCACTGTCGTTGTTTTGATGATCGGGC  
AAAGCTGCTGATTTCTGGCGATGTTATTTCAAAGCGGAGTAGGGCGCAGTACTTCCCGCTGGCGATCATAATCAAC  
TGATTTCTTCAATCAAAGATAAATTGCTGCCACTGGGGGATGACGTGATATTTATTCCGGGTACGGACCATTAACACA  
CTTGGTTATGAACGCCTGCATAAATCCCTTCTGCAAGACGAAATGCCCGTCTGGTAAGGCACATAAAAAAGCCCGTTTT  
AATGCTGGCCTGGATTTCTGGCAAAGTGCCTTTGTTTATGCCGGATGCGGCACGAGCGCCTTATCCGGCTACAAAATC  
GTGCAAAATCAAATATTGACGGGACGCGTAGGCCTGATAAGCGTAGCGCATCAGGCAATGTTGCGTTTTGCATCAGTC  
TCAGCCCGTTTTAGCGGGCTTATTGTTTTAATGCTTACAGCACTGCCACAATCGCTTCCGACAGCGGAGCCATGTT  
ATCTGGTGCATCCCGGCCACATTTACCGGACCAGAAGCAACCGCATATACGCCAACTCTTCCGCGACAGCGCAGCACTT  
GTTCTTTTGTGACGGCACTGAAGGAGAACATGCCGTTCTGTTTATGATAAAGCTGAAGTCGCGGTTTTGCGCCTTTTTCC  
TGCAGCGTATTGACGAACAACGACGCATACGCTGAATACGCTGGCGCATATCAGTCAGCTCTTGTCCCAAATCGCACG  
TAACGCATCGTTGCTCAGGATGGTGGCAACAACAGAAGCGCCGTGTGCTGGTGGGTTAGAGTAGTTAGCGCAATCGCCG  
CTTTCAATTTGGCTGAATGCGCGATCAACGGTTTTCACTGTGCGCAGCAACAGAGTACAAGCGCAACACGCTCGTTGTAC  
AGGCCAAAGTTTTTAGAGTAGGAACTGGCAACAATCAGCTCTTTATGCATAGCCGGAAGCGCGAGTCTTACGATC  
TTCTCCAGACCACGGGCAAACCTGGTAAGCGAAGTCAAACAGCGGTAACCAGCCTTTCTCAACGGAGAGTTGTGCCA  
GTGTTTGCCATTGTTCCAGCGTAGGGTCGATACCGTTGGGTTATGGCAGCAGCCATGGAACAGCACTACGTCGCCAGCC  
TGAGCTTCATTAGGCTGTTAATCAGTGATCGAAGTCAAGAGTGTGATTTCCGCATCATAATAAGCGTATTCACGAAC  
TTCCAGACCTGACAGTTAAAGACGCTCTTATGGTTCCGGCAGCTTGGGTTGCTCACCCACACAGCTTAAACGCTGGTAT  
TTTTTCCAGGAAATCGGCAGCCACGCGTAGTGCGCCAGTGCCCCCCGAGTCTGTGCCGTGCGAGCACGTTTTGTCATTG  
ATCAGGGCGCTACCTTTACCAAACAGCAGTTCCTGAGTGACGCGACCAAATTCAGGGATGCCGTCAATGCCGAGGTAATT

TTTGGTGGTTTCATTTTCGAGCAGATACTGTTTCAGCCTTTTTACGCTGGTCAGTACCGGGTTTTGCCGTCTCATCTT  
TATAGACACCAATCCCGAGGTTAATTTTCCGGGACGTTTCATCGGCACGAAACAGATCGGCCAGGCCAGAATCGGGTCG  
GCAGGAGCGCGGTAATGTTCTCAAACATGACGAGGTTCCATTATGGTTACAGAAGGGAAGTCCGCTATCAGGGTAACGG  
GAGATTTACAAAATCCAACTATTACTGATGAAAACGCAGGCTGTTTTGCAAGACGTGAGATTGCTCTGGAAGGTATAA  
AAAAACAGGACCAAAGTCTGTTTTTCCGGCATTAAACAAAGAGGTGTGCTATTAGAAGTAAACGATACCCACAGC  
AACGGTGTCTGTAACCTACGCCAGTTTGTGTCAGAATCGATCTGGTTGATGATGTAGTCAACATAGGTGGACATGT  
TTTTGTTGAAGTAGTAGGTTGCGCCACTTCAAAGTAGTTCACCAGATCAACATCACCGATACCTTCTACGTCTTTCGCT  
TTAGATTTGGTGAAGCGATGGACGGACGCAGACCGAAATCGAACTGGTATTGCGCAACTAACAGAAGCTTTCGTTTTT  
GTTGGCAAGCCGCTGGTGTGTTGTAATTTATTAGTGTGCGGTAGCGTTACGGGTTTACCAGTGTTCGCTGCCAGGT  
AGATGTTGTTGCGCTGACTTTCAGACCAGTAGCCACTGTTTCAGCTTTTTTACCAGTTGCCAAGAGGTTGAGCTTTCG  
AGTTGGTACGGTCAGCTGCACCATAAGCACCAACGATACCAAAGCCTTCGATTTCGTAGCTGATAGAACCGCCAACACC  
GTCGCCGTTAGAACGGCGTGCAGTGTACGCTGTTTTTACCAGGACTGAACAGCGAAGTTCAGGCCATCAACCAGAC  
CAAAGAAGTTGGAGTTACGATAGGTAGCAACGCCCAACACGACCAACGAAGAAGTTCATCGCTGTATGCAGTATCACC  
CCAAATTCGGCAGCATACGGTGTAAACCCAGTGCATATAAACACACCCGATGTTACGGCCGTAATCGAAAGAACCAAC  
GTCAGCGTATTAAAGACCCGCAATGCCAGACGCGTTTTGTTACCAGTTTTGAGCGTCAGCGCTTCAGAGTTGTTACCCT  
GGAAGTTATTTCCACTGACCATAACCGTCAGATCGGAATTGATTTGAGTTTTCCCTTTAAAACCAAGACGGGCATAG  
GTATGTCGCCATTGCCACCGTAACGTTTTTACCCTTGGAAAAATAATGCAGACCAACAGCTTTACCCTACAG  
ATCTACTTTGTTGCCATCTTTGTTATAGATTTCTGCAGCGTTTGCAGTACCTGCTACTAACAGAGCAGGGACGATCACTG  
CCAGAATATTGCGCTTATCATTATTTATTACCCTCATGGTTTTTTTTATGACACCTGCCACTGCCGTCAATAAGTTCTG  
TCAATAAAAAATTTACGGAATATTGATGAGAGTTTGGTGTCTTTATGTGTCTGCAGGCATCTTTCCATTCAAATAACGT  
TTCGCTACCGTGAAAGTGTACAAAGATAAAGATTTGGTTTCAAAAAGAAAAAATATGTAACCAAAAGTAAAATTTAAGG  
AACTTTGTGAACACCGTCATATTTCCATAGAGACGTGATGATATTTACAGCAATTTTAACTATTTATATGATTTCTTA  
TATTTAAATTAACATAACGGAAATTTGTTTCTGATGGAACTTTATCGACCTGGCACAATACTTTTCAGACATCCA  
GAATGCCAAAAATAGTATGAAATTTGCTATTAGCTAAGAAAAAATAATCCGCAATAAGAATGCGGATTAGTTTTTG  
CGCGTAAATGTTGCAATGTAATATTCCGTAACAGGATGATCGTTATGGCGGGTTGCAAATAGATTGCTTGACTTAACAA  
ACAGATAACTTGACAGAAAAAGATAAAAAAGAGCCAGCGGGCGCTGGCTCTTGAAGACGCTAAATTAAGAGTGGCGTTA  
CGCGGAGTACGTGGGAACGGAATCACATCACGTACGTTTTGCACGCCAGTTACGTAAGCAATCAGACGTTCAAACCAAG  
ACCGAAACCTGAATGCGGAACAGTACCCTAGCGACGCAGATCGCGATACCACAGTAATCTTCTTTATTCAGGCCATTT  
CCAGCATACGCTCGTCCAGCACGTCCAGACGTTCTTACGCTGGGAGCCACCAATGATCTCACCGATGCCCGGAGCCAGA  
ACGTCCATAGCCCAACGTTTTTACCCTTTCGTTAAGGCGCATATAGAACGCTTAAATATCTTTCGGATAGTTTTAAC  
CACTACCGGTGCTTAAAGTGTCTTCCGCCAGATAACGCTCATGCTCAGAAGAGAGATCGACTCCCCAGTAAACCGGGT  
TTTCAAATTCCTGCCGAGTTTTTCGAGAATGGTCACTGCGTCCGTATAATCCACCTGCGCAAAATCGGCTTCAATGAAG  
CGTTCCAGACGTGAAACGGCATCTTTATCTACGCGTTCAGCGAAGAATTTTATGTCGTGACGCGGTTCTTCGAGAACCGC  
TTTGAAGACATATTTAGCATGGCTTTCAGCCAGACCCGCAATATCGTTTACAGTTAGCAAACGCCACTTCCGGCTCCAGCA  
TCCAGAATTCGCCAGGTGACGGCTGGTGTGGAGTTTTTACGACCGAAAGTCCGGCCGAAGGTATAAATTTGGACAA  
GCGCAAGCGTAGGTTTCCCGTTTCACTGGCCAGATACGGTACGAAAGACTCTTACCAAAGAAGTCTTGTGAAATC  
CACTTTGCCCTGATCGTTACGCGGCAGTTTTTCCAGATCCAGCGTAGAAACCGGAACATTTGCTGACCTTCGGTAT  
CAGATGCGGTAATCAGTGGCGTTGAAACCCAGAAGAATCCCTGCTGTTAAGAAGCGATGCAGCGCCTGCGCCAGCGTA  
TGGCGAACGCGCGACGCCACCAATCAGTTTTGTCGCGGACGAGGTGAGCGACTTCACGCAGATACTCAATGTGTG  
GCGTTTTGCCCATCGGTAAGTCTGGATCTTCAACCAACCAAGCACTTCAACCTTGTGCTGGCATAATTTCAAAT  
GTTGCCCTGGCCCGGACGCCAGACTTTACCCTGCAATGACCGAGCAGCCGGTGGTGCAGACGAGGACGTCCTTCA  
TTGTAATTGGGACAGAAATTTGATGACAGCCTGTACAGGATCAAAGCAGGAACCGTCATAAACGGCGAGGAAGGAGAT  
GCCAGTTTTGAATCTCGCGGGTACGTACCCATCCGCGCACGGTACTTTCGCTGTCAACGGCTACACGGCCCTGGAGTA  
CGTCCGCTACAGGCACAACGCTCATAATATTCTCTCTGTTAATAGTCCGAAAAAATAAACACTTGTCCACCCGTAATGG  
GGGGATACCTATGTTACCTGGCATCTGCAATCAGACAAGCAGAATTCGAAATGCAGCGAAAGATTTCCGAAATTAAGGT  
AAAAAAGGGAGCCGATTAGCTCCCTGATGATATTAAGTGGCTTTTTTAAATATGCGGAAGGTGAAACGCTTTCGCGACGG  
CCCGAACAAACGCTTTATCATGGCAGATAGTTTTGCCAGGGCTGTGAGAAAGTTTCCGCCACCGGTTTACCCTTACTCT  
ACCAACTTAATGACAATATTAGGGGTTTTACTGGGGGATATCGCAGGTGAGCGAGTCCCAATACCAAACTTAATTG  
CACGCGGAAGAGAAGTGGCGGTATAGCTCAACCGCTTTCGTAATCCAGATTGTGAGAGAAAACAGCGTTTTACTCT  
GTGGATCAATTCAGCTTTTATAATGTGCAATGGCTTTTTTACCCATTCAACCGGGTCCGAGAGTCATGACGCAGG  
CCCTGATACCGACTAGCGAACTCGACACCGAAATCACGAGGAAAGCATCCATAGTGTGAGTGCAGTCCGTTAATGCAATGCC  
AAGTTGGTCCGGATACTTCCAGCCAGCGCAAGTGCAGCTCGCTGGCTGTTGGCTAGATCCGGGCTGATTTGCTGAT  
GTGCTTGAACCAATTCGTGTGCTGTGCCATCGCGGTGAGGGAAGCCGACGCGCCAGATCGTAGTTGCTGGTGGCC  
ACAAACAGGATTCCTGTTGACAGCGTTAACGATGTTTTCTGACTTCCGAGAAAAACGGCGACGGGTGCCAAAATC  
CATCAGATGGAAGCGGACATATCAAGACCGCGGTTAACGCCGAGAAGTGCAGTAAATTTGCTTTCAGCGGTGTCGAGGG  
CTTGCACAACGTCGGCTGCGGTGAGCGATAGCGATGTACCATTTACTGATAACCGCCAGCAAAGGAACCTCCAGAGG

ATGACTTCACGCCACGGGCCGCTTAAACGAATATCCAGCTTGCCATTATCGTTGGACACGGTGACTTGTCCGGGTTAAA  
GCGGAACTCGCGTAACCAGTTAAGATAGTCGGCCTTAAAGAAAGGCAGGGCAGAAAGCCACTGATATTCATCATCTCGCA  
GGCGCAGGTGTCATCGCCTGAACCTGTTACGAATAGCATCGGCATAAATACCCAGCAGATCGTCACCTCGGCAACGA  
AACTCCGCCGCGACATGCACATCGTAATAGTGATGAAACACGGCTTGCTGCATATGCAACTTATAAGCATCTGTATCCAG  
CAACGAGTGCAGAACAGGAGAAGCGAATTGTGTATAGGTGCGCAGTAGCGTCTCTGTACAGGAGCGTTTGTAGTACAATA  
ACATCTTCAGGAACTGCTGGAGTATACCTTGTTCGCAATTTATTGAACCCCGATCACACCATATGCCACCTTTCTGGTC  
GATGGCATTACGCGGTGTATGTTATAAAAATGTAGCAATAAAGGCGTTTGTACCTGAAAAGATGAAGATTCTGCATAGCG  
CGATTTACGCAACAGGAATAGACTGAACACCAGACTCTATAAAAGATGCTAAAGGTTATTTATGACTCAACAGCCACAAG  
CCAAATACCGTCACGATTATCGTGCGCCGATTACCAGATTACTGATATTGACTTGACCTTTGACCTCGACGCGCAAAAG  
ACGGTGTATTACCGCGTACGCCAGGCTGTCCGTCATGGTGCATCAGATGCTCCCTTCTGTCTCAACGGCGAAGACCTCAA  
ACTGGTTTCTGTTTATTAATGATGAGCCGTGGACCGCTGGAAAGAAGAAGAGGGCGCACTGGTTATCAGTAATTTGC  
CGGAGCGTTTTACGCTTAAGATCATTAAATGAAATAAGCCCGCGGCAATACCGCGCTGGAAGGGCTTTATCAGTCAGGC  
GATGCGCTTTGACCCAGTGTGAAGCCGAAGTTTTCCGCATATTACGTATTATCTCGACCGCCGGACGTGCTGGCGCG  
TTTTACCACCAAATTTATGCGGATAAAATCAAATATCCCTTCTGCTTTCCAATGGTAACCGCGTTGCGCAAGGCGAAC  
TGGAAAACGGACGCCATTGGGTACAGTGGCAGGACCCGTTCCCGAAACCGTGTACCTGTTTGCCTGGTGGCAGGCGAC  
TTTGATGTACTCGCGATACCTTTACCACGCGTTTGTGTCGGAAGTAGCACTGGAGCTGTACGTGATCGGCGCAACCT  
TGATCGCGCGCTGGGCGATGACCTCGCTGAAAAACTCCATGAAATGGGATGAAGAACGCTTTGGCCTGGAGTATGACC  
TCGACATCTATATGATCGTCGCGGTGGATTTCTCAATATGGGCGCAATGGAGAATAAGGGGCTGAATATCTTTAACTCC  
AAATATGTGCTGGCCCGACCCGACCCGCCACCGACAAAGATTACCTCGATATTGAACGCGTTATCGGCCATGAATATTT  
CCATAACTGGACCGGTAACCGAGTGACCTGTGCGACTGGTTCCAGCTCAGCCTGAAAGAAGGTTTAAACCGTCTTCCGCG  
ATCAGGAGTTCAGCTCTGACCTTGGTTCCCGCGCAGTTAACCGCATCAATAATGTACGCACCATGCGCGGATTGCAGTTT  
GCAGAAGACGCCAGCCCGATGGCGCACCCGATCCGCCGATATGGTCATTGAGATGAACAACCTTCTACACCCTGACCGT  
TTACGAGAAGGGCGCGGAAGTGATTGCGATGATCCACACCCTGCTTGGCGAAGAAAACCTCCAGAAAGGGATGCAGCTTT  
ATTTGAGCGTCATGATGGTAGTGACGACCTGTGACGACTTTGTGACGGCGATGGAAGATGCGTGAATGTGATCTC  
TCCATTTCCGCCGTTGGTACAGCCAGTCCGGTACACCGATTGTGACCGTCAAAGACGACTACAATCCGGAACCGAGCA  
GTACACCCTGACCATCAGCCAGCGCACGCCAGCCACGCCGGATCAGGCAGAAAAACAGCCGCTGCATATTCGGTTTGCCA  
TCGAACTGTATGATAACGAAGGCAAAGTGATCCCGTTCGAGAAAGCGGTCATCCGGTGAATTCGGTGTGAACGTCACT  
CAGCGGGAACAGACCTTTGTCTTTGATAATGTCTACTTCCAGCCGGTGCCTGCGCTGCTGTGCGAATTCTCTGCGCCAGT  
GAAACTGGAATAAAGTGGAGCGATCAGCAACTGACCTTCTGATGCGTCATGCGCGTAATGATTTCTCCCGCTGGGATG  
CGGCGCAAAGTTTGTGGCAACCTACATCAAGCTGAACGTGCGCGTCATCAGCAAGGTACGCGCTGTCTCTGCCGGTG  
CATGTGGCTGATGCTTTCCGCGCGGACTGCTTGTGAGAAGATTGATCCAGCGCTGGCGGCGAATACTGACGCTGCC  
TTCTGTCAATGAAATGGTGAATTGTTGATATCATCGACCCGATTGCTATTGCCGAAGTACGCGAAGCACTCACTCGTA  
CTCTGGCGACTGAACTGGCGGATGAGCTACTGGCTATTTACAACGCGAATTACCAGAGCGAGTACCGTGTGAGCATGAA  
GATATTGCAAAACGCACTCTGCGTAATGCCTGCCTGCGTTTCTCGCTTTTGGTGAACGCATCTGGCTGATGTGCTGGT  
GAGCAAGCAGTTCCACGAAGCAAACAATGACTGATGCGCTGGCGGCGCTTTCTGCGGCGGTTGCCGCACAGCTGCCTT  
GCCGTGACGCGCTGATGCAGGAGTACGACGACAAGTGGCATCAGAACGGTCTGGTATGGATAAATGGTTATCTCGCAA  
GCCACCAGCCCGCGCGGAATGTGCTGGAGACGGTGCAGCGCTGTTGCAGCATCGCTCATTTACCATGAGCAACCCGAA  
CCGTATTCGTTGATTGGCGGTTTTGCGGGCAGCAATCCGGCAGCGTTCATGCCGAAGATGGCAGCGGTTACCTGT  
TCCTGGTGGAAATGCTTACCGACCTCAACAGCCGTAAACCCGAGTGGCTTACGCTGATTGAACCGCTGATTGCGCTG  
AAACGTTACGATGCCAAACGTGAGGAGAAAATGCGCGGCGCTGGAACAGTTGAAAGGGCTGAAAAATCTCTGCGGCA  
TCTGTACGAGAAGATAAATAAGCACTGGCTTGATAAATAACCGAATGGCGCAATAGCGCCGCAATTCGGGGAATTTAC  
CCCTGTTTTCTCAGGCGAGTTTTCAGATTACACCGTTGCATCACCCGTTGCAACACCTCCGCTTCCAGCTCCGCTAATCG  
CACCGACCCTAATCGACGCGGACGGGGATATCCACTGTCAAATCCAGACCAATTTTTCCCTCTTCAATTAACAGCACCC  
GGTCAGCCATCGCTACCGCTTCCGTCACATCATGCGTACCAACAGTACGGTAAAGCCGTGCTCCTGCCAAAGTGACACA  
ATCAAATCCTGCATCTCGAGTCGCGTTAAGGCGTCCAGCGCCCGAGCGTTTCAAGCAACAATAATCCCGGTGATG  
AATCAACGCTCTTGCCAGCGCCACTCGCTGTTTCTGCCCGCAGAAAGTGGCGCAGGCCATTCCCTGCGCGATTCTCCA  
GTCCTACCGCAGCCAACGCTCGACGTGCGGCATCGCGCCACTGGCCTTAAAGCCTAACCCAACGTTATCAATCACCGAT  
TTCCACGGTAGCAGACGCGCATCTGAAACATCATTGCGGTGCTTCTGAAATTCAGCCAGCGGTGTGGTGCCCGCTAA  
CACATCGCCTGCGGTTGGCGTTTTCCAGACCTGCCAGCAGGCGCAGCAGGGTACTTTTCCACCACCGCTGCGGCCACCA  
CCGCCACAACTGACCTGCCGAATATGTAATCCAGTTGGTTTCCAGGACGATATTTTCCGCGTAATGTTTGTACTGCA  
TTGAGCAACAATGGCGTGCCTGGTTCCAGACGAGCAGTATTACATACCGTGGCTCCTTCAAATGATAAGCCGGTTCAG  
CGCAACCAGAGCGCTCTAACAGCTGCGCGCTGACGTGACCCAGTTTGGCGAGCAGGGCGTAAAGAATAATAGCGACTAC  
CACACGTCCGTTTTGCAAAAACCTCCCGCATTATCGCCAGATAACCAATGCCTGAATTGGCAGAAATGTTTCCGGCAA  
CAATCAGCGTACGCCACATCAGGCCAACGCAAAACGCACGCCAGCCATAATTGAGGGCAGGGCACCAGGAGGATCACA  
TGATAAACAGCGGTATGCCGGATAATCCATAGCTACGCGCATCTCCACCAACCCGCGATCGATATTACGGATGCCATG  
CCAGGTGTTGATATAAATGGGGAATAGCGTACCGAGCGCCACCAGAAAGATTTTGGCGATTATCAATGCCAAACCACA

AAATCACCAGCGGGATCAGCGCCAGATGCGGCACGTTGCGCAACATCTGAATTGAGGTATCCAGCAGCCGTTCTCCCCAG  
CGAGATAGCCCGTAATCAGTCCCAAAATCAACCCAGCGATCCGCCAATTGAAAAGCCAATCAGCGCCCGCAGGAGCT  
GATCGCCAGATGCTGCCACAGTTCCGGCTGGCGGAGAGCGTCCAGAACGCCGTACCCTCTTCCGGTGAAGGCAAAA  
TACGCTCGACAGCCAGCAACCGAGGAGGCCAGTTGCCACACCGCCACGATGCCACCGGTAAAAACCAGGGGCAACG  
CGCAATAACCACTTCTTCACTGGCGTTGCCATTATTTCTTCTTACGTTTGGCGGACTTTACGGGGGATAAAAATCATTG  
CCACCGCTTCCGCTTGGCGATTGAGCGGCTGCGGCTGGGGAATTTCCGGGATGGCGACATCCAGAAGCGGGAACAGCAAC  
TCGCCAACCCGATACGCTTCTTCCAGATGCGGATAGCCGAAAGCACAAAATGTCGATGCCAAGCGCGGCATATTCGTT  
GATTCGCGCAGCGACCGTAGGACCATCGCCACCAGCGCGTCCCGGACCGCCGCGCACTAAGCCAACGCCCGCCATA  
AATTGGGGCTGATCTCCAGATTGTCGCGCTTGGCGTTATGTAACGCCGCATTCGCTGTTGCCCTACGGAATCCGTCGG  
GCGAATGCGGCCTGTGCTTTGGCGATAGTTTCATCATCAAGATGCGAGATTAACCGCTCGGCGGCCTGCCACGCTTCGT  
GTTAGTTTACGAACAATCATATGCAGACGAATACCGAAACGAATTTTTCGCTCCATGCGCGGCAGCTTTCGCCCCACTT  
GTTGATTTTCTTTAACCAGTTCGGCGGTTCCGCCAGGTGAGGTAGAGATCAACCTGTTCTGCCCCAGCTCTGG  
GCGACATCTGACGATCCGCCAAAGTAAAGTGGCGGATACGGCTGTTGAATCGCCGGGAAGAGCAGTTTTGCTCCGCGCAC  
ATGAATATGTTACCGTTGAAATCGACGGTTTCTCTCTGCAATAAACGCCCGCAGACCTGGGTAATCCGCGGAGGCTT  
CGTAGCGCTCGCTATGATCAAGGAACACTCCGTCGCTGCCAGCTTTGTGGATCGTGCCTGTGACCGAGTTAAACAAAC  
GCACGTCCATTTGAGAGACGGTCAAGCTGGCGGCCTGGCGGGCGCAACCGGTAGGTGAGGTTACGCTGGGACGCGAGGC  
GACAAGAACTTCAGCCGCTGCGTCACCGGGATCATCGATGCGGCAACCAGCCACGCATCTTCGAGGAGCGCCCCGTTG  
GAATTAGCACACCGGTATAGCCAAGACGATCCGCCGCTTGGCAATTTGTTGAGATAACCGTGATCAACCGGGCGTGAA  
CCTTCTTCCGTTCCAGATAATGCCCGTACCCTGGGTGCGTAAAAACCAGAACATATTAGACTCATAATTGTTTTCT  
TCCAGTTGAGTGGGCTGCCAGATGCGCTGGCGAATATCGACTTTTTTCGGCACCAGACGATTTTCATAAAACAGATCTGC  
CGTTTGTGCTGTAAGGCGGCAACCTCGGCGTTAACCGTTTATGTTGGTGGTAGGAGGGCGATGATCTAAGTAAGAGGCAA  
TCACCGGTGCCGTAAGCCCATCGTTTTTCCAGTAAAGCGATGCTTTGCTCGCGCTGGCTGCGGGTTAACGCATCGGCC  
TCACTAAAGTTGCCAGTACGCCCTGAATAAAAGCGCCGTTTTTTTCTGCATAGGGACGAGCTGCCAGATAAAACGATCC  
AGTTTGATTGAGATCGGTGCCGCTTTTACGACCCCGCAGCGCCCTGTAATAATGCAGCAGAGTAGTAGGGATCCAGA  
TAGCCAGGCGTCAACGTTACCTTGTGGAACGCGGCGGGCATCAGCGGGCGTCAAGTAAGTGGGTTGGATATCGGTA  
AACTTAAGTCCGGCTGACGCAGTGCACGCAGTAAAGGTTGTGTAACCTTTTCTGAAAGGCAACTTTGTGACC  
TTAAGATCGGCTACGGTTTTGATCGGGCTGTTTTCTGCCACCAGAATCACTTCGGCTTTGGGCTTCGGTGGCTCGACGC  
CCACGTACACCAAATCAGCCCCGCGAGCTGGGCAAAGATTGGCGGAATATCCCGGTAAGTCCGAGATCAATACTGCCA  
ACGTTTAAACGTTCCAACATTTGCGGACCCGCGGGAACTCCACCAGGAGATTTTTGATTCCGGATAGCGTTTTTCCAG  
TAACTGGTGGCTTTTTGCCAGCACCATAACCAATACTGCCTTTCTGATAGCCTATACGTAACGTTTCAGGCGAGGATTCTG  
CAGCAACCGCAAAAGTAGAGACGCTAAGCAATCCCGCCAGCGCCAGTTAATGATGTTACGCATGGGCATTACCTCGCAG  
AGACAGAAGGTGAGGAACCTGAACATCGCGGCGGTGCAATGCCTGCCAGAAAGTTTCTAGCGCGGTATCAAGACGGGTTT  
GCAGATTTGGCGTGAACCTGGGGTCTGTGATGGTAATCAATTACTTGTGAGTCATCGGCAACACGCGGTGACGAGTCTCC  
TGAGCTTTCAGTGCCTTAAACTGGTTAAGGGCATAATCGACCCGACGAGATGGGCCACGGTACCGCCCGTCCGCGAG  
CGGTAGCACCCTTTGCCTTCAAAGCGGTTCTGGCAGCAGGTGCGAGCAGGTTTTCAACGCACCGGAATAGGCGGCTT  
TATACACAGGCGTGGCGACAATCAGCCATCGGCTGTTGAGCTGTTCCGTGAAGGTCTTGAAGTCCGCGACTATCGAAA  
CGAGCATAAAGTAGATCTCCGGGGCGAAGTTTTGCAGATTCCAGTGATAAACCTCTACATCCAGGCCATTTAGTTTTTC  
CCGCGCATATTCAGCAAGGAGCTGGAGCGAGAAGGAAAGCGAGGACTACCCGCCAGGGTATGACACGCATACTCTCTC  
CTTATAACCAATTGTTCTTTTTTTGTTAACATTGATAACAATTCGGTCAGTCTGTCGGAGAGACAAGAAAATTCAAATA  
TAAATTTTGTATCTTTTTCTGAAAATAAACTAAAGAAAGGCTTTATATATCACGCATATTTATTTATTGGATAGTCA  
TTAGATGTTGAATCAATGAATTAAGTTTCAAGTTAATTTAAATATTCATGAAATCTATAAATTAAGATTTTGCACCTT  
ATTGATTTAGTATGCTTAAATGCGGACAATTATTGTTATTATTAAGTCTAATGTCAATTAAGGCATTATCAT  
ATTTACGAAGAGATCAGGATGATAACGATGAAAAAAGTGTATTGACGGGTTTATAACTGTGGTATGTGCAACGTCCAG  
CGTTATGGCTGCTGATGATAATGCTATCACGGATGGCTCAGTAACATTTAATGGTAAAGTTATTGCTCCAGCTTGTACCC  
TGGTAGCTGCGACGAAAGATTCCGTGGTACTTTGCCAGATGTTAGTGCCACGAAGTTGCAAACCAATGGTCAGGTTTCT  
GGCGTGCAATTGATGTGCAATTGAATTAAGATTGTGATACTACCGTAACAAAAATGCAACGTTACCTTTAATGG  
CACTGCGGATACTACTCAGATTACAGCGTTTGTAAACAGGCCTCATCTGATGCTGCTACAAACGTGGCCCTGCAATGT  
ATATGAATGATGGTACAACGCCATCACGCCAGACACAGAAACCGGGAACATTTTGTGAGGATGGAGATCAGACGTTG  
ACTTTTAAAGTTGATTATATCGCTACGGGAAAGCGACTTCAGGTAATGTGAATGCGGTAACAAATTTCCATATTAATA  
TTATTAATAGAATCATTAATTGTTTTATTAATTAGTACCCTCCAGTGTCTGGAGGGGATATTCATATTTTTTAAGAG  
TGACTATTTATGAAAATTCATAACAAAGGAATTGTGACCGTAAGTTAACGGCAATTAATCAGCTGCTCATCCGC  
ATGGGCGGAGGTAAGGCGGGATTGGACTTGCAGCAACACGCTTGTATTATCAGAAGGTGAAGAGCAAAATTTCACTGG  
GTGTACGTAACACCAGTCCGGATGTTCTTATCTTATTCAGTCATGGGTGATGACCCAGATAATAAAAAATCAGCAGAC  
TTTTATTACACCACCGCTATTTGTGCTGAATCCGGCAAATGAGAACTGTTACGCATTATGTACATTGGAGCGCCGTT  
GGCGAAAGACAGAGAAACCTTTTCTTCACTAGCGTACGGGACGTCCTTCAACAACGAAGCGGAAAGAGGGAAATACCC  
TGAAGATTGCCACACAAAGCGTCATCAAATTTTCTGGCGACAAAGGTTTAGCGTATCCCTTAGGCGAGGCTCCGGCG

AAACTGCGTTGCACTTCGTGACGCTGACATGGTTACGGTCAGTAACCCAACACCTTATTTTCATTACCCTGACAGACCTGAA  
AATAGTGGAAAAGTAGTAAAAATCAAATGATTTCCCTTTTGATAAATACCAATTTTCTCTGCCAAAGGGGGCCAAAA  
ATAGCAGCGTAACGTATCGAACCATCAATGACTACGGGGCGGAAACGCCGCAACTCAACTGTAATCGTAAGCCGTCTTC  
AGTTAAGAGAGCGAGATGTATAGAACTCATCGACAACAGCCTGTTAAGCTCTGGTGGAGTGCCATCGTTTATTGGTGG  
GCTGGTGGTGTGTGTGTCGGCAGCGTTCAATGCACAAGCTGAAACCTGGTTCGATCCTGCTTTTTTCAAAGATGATCCCT  
CAATGGTGGCCGATTTGTCTCGTTTCGAAAAAGGACAAAAATAACGCCAGGGGTTTATCGTGTGATATTGTTCTGAAT  
CAGACAATTGTAGATACGCGCAACGTCAATTTTGTGAGATAACGCCAGAGAAGGGGATTGCCGCTGTTTGACGACTGA  
AAGCCTGGATGCAATGGGTGTTAATACTGATGCGTTTCCGGCTTTTAAACAACCTGGACAAACAAGCGTGTGTGCCATTGG  
CGGAGATTATCCGGATGCCAGCGTAACGTTAATGTGAATAAATCCGTCTGGAAATTTAGTACCGCAAAATCGCCATC  
AAAAGTAATGCCCGTGGTTATGTCCCCCTGAACGTTGGGATGAAGGGATCAACGCGCTATTACTGGGATATTGTTTAG  
CGGGGCTAACAGTATTATAGCAGCGCAGACAGTATTCTGGCGACAGCTATTTTCTGAATTTAAACAGTGGCGTTAATT  
TAGGCCATGGAGATTGCGCAACAATTAACATGGAGTCGTAGTAGTGGCCAAACCGCAGAATGGAAGAATCTCAGCAGC  
TATTTGCAACGGGCGGTTATTCCTCTGAAAGGCGAACTGACCGTAGGTGATGATTATACTGCAGGCGATTTTTTCGATAG  
TGTGAGCTTTCTGGTGTGACGCTGGCGTCAGATGACAACATGCTGCCAGACAGCCTGAAAGGGTTTGGCCTGTGGTGG  
GTGGTATCGCCAAAAGCAATGCCAGATAACGATTAAGCAAAATGGTTACACCATTTACCAAACTTATGATCGCCTGGT  
GCTTTTGAATTAGTGATCTTATCCACGTCGTCGAGCGGTGATTTGTTAGTTGAAATCAAAGAAGCGGACGGCAGCGT  
CAATAGCTACAGCGTACCCTTCTCCAGTGTGCCATTACTCCAGCGTCAGGGGCGAATCAAATACGCGGTGACACTGGCGA  
AATACAGAACCAATAGTAATGAACAGCAGGAGAGCAAAATTTGCCAGGCCACGTTGCAGTGGGGCGGACCGTGGGGAACG  
ACCTGGTATGGTGGTGGACAATATGCTGAATATTACCGTGCCGCATGTTTGGTCTGGGATTTAACCTCGGCGATTTCCG  
AGCAATTTCTGTCGATGCGACCCAGGGGAAGAGTACGCTAGCAGATCAAAGCGAACATAAAGGTGAGTATATCGTTTTT  
TGATGCCAAAACGCTCAACCCTTGGGCACTAATTTCAATTGATGGGCTATCGCTATTCGACGTCGGGTTTCTACACC  
CTTTCCGACACCATGTATAAACATATGGATGGCTACGAATTTAATGACGGTGTGATGAAGATACGCCGATGTGGTCCG  
TTATTACAATTTGTTTTACACCAAACGTGGCAAACCTGCAGTCAATATCTCCAGCAATTAGGCGAGTACGGTTCGTTTT  
ATTTAAGTGGTAGCCAGCAAACCTACTGGCATAACGATCAACAGGATCGGCTATTACAGTTTGGCTACAACAGCAAAT  
AAAGATCTTTCTGGGATTTCTGGAACCTACAGTAACTCCCGTGGTCAACCTGATGCTGATCAGGTGTTTGTCTAAA  
TTTTCCCTGCCGCTCAATCTGTTGCTCCCGAAGTAATGATAGCTATACCAGGAAAAAAATACGCCTGGATGACCT  
CTAACACCAGTATCGATAACGAAGGGCACACTACACAAAACCTGGGTTTAAACGGAGACATTACTCGATGACGGTAACCTG  
AGCTACAGCGTGAACAGGGATATAACAGCGAGGGGAAAACGGCTAATGGTAGCGCCAGCATGGATTACAAAGGGGGCGTT  
TGCGGATGCCCGAGTGGGCTACAACCTACAGCGATAACGGCAGTCAACAACAACCTGAACTACGCTCTTTACGGCAGTTTAG  
TTGCCCATTCACAGGGCATTACCCTGGGGCAATCGCTGGGGGAAACTAACGTTCTGATTGCAGCACCAGGCGCAGAGAAT  
ACTCGTGTGGCGAACAGCACCGGGCTGAAAACCTGACTGGCGCGGATATACCGTTGTTCTTATGCCACTTCTTATCGGG  
AAATCGAATCGCACTTGTGCGGCGTCTTAAAACGTAACGTGGATCTTGAAAATGCAGTAGTCAACGTGGTCCCACCA  
AAGGGGCGTTGGTCTGGCGGAGTTCAATGCCATCGGGGTGCAAGGGTATTAATGAAAACATCAAAGCAGGGTATACCG  
CTGCGTTTTGGCGGATAGCGACGCTGGACGGCGTACAGGCTAATAGCGGCATAATTGATGATGATGGCTCGCTCTATAT  
GGCGGGTTTACCGCGAAGGGAACAATAAGCGTGCCTGGGGCGAAGCTCCCGATCAAATTTGTCATATCAATTACGAGC  
TTACCGAACAAATAAATCTGCGATTACCGGAATGGATGCCATATGCAGATAATCTTTGGAGAAAAATGCGTGTGAT  
TACTACGACTATTTTTGCGCGCTTAATGTTATGGTGCCTCAAACCGTCTTATAGCGGGCAGTGCATACTACT  
CAGGGGAATCCGTATATTGGCGTCAATTTGGCGTTAAAACCTGGAGGAAGAAGCAAATACGGCAGGGGTAGTTAAAGA  
CAAATTTTATCAGTGAACGAATCGAATGATTATTATGTTTCTGTGATTGCGATAAAGACAATGTGAGAAGTGGCCGAT  
GGCATTGCGCGGATTACCGGTTAGTCTATTTAGCGCAACATGGTACAAAATTAATGACTATCTTCCGCGCAAGTT  
TTATTGCAAGTTAAAGGCGTTCTCTACTGCGGTTCTTTTCGAAAACCTGGGCACAGGGGGGATACCGGATGGCATAT  
TTGCGACCCTGGCGTCAACGTTTAGGTGGGCGAGGGGCAAGCGTAATAGCGGTAGCTTTTTCCCTGAAAATATTGCAGC  
CGTTCGTTGGCTCGTCTCATTCTCTATGGCGCTGGCGGATTATATGAATGCTACAACATACCCGACGGTATTCC  
TGACGACTACAGGTACACCGGTTTTAGTGATTACCTGTCTGGTACGATCAATTCATTGGCTCATGTTCCGTCATGC  
CGGAGAGACAATTGAAGTTGATTTAGGTGATGCTTCGCTGCCAATTTCCGTGTTGTAGGGCATAAACCTCTTGGGGCCA  
GAACGGCAGAACTTGAATTCAGTCAAGTGAACACGGGAAACGCGGGATTAGTTAATGTCAACCTGAGTCTGACGGCA  
ACCACAGACCCAGCTATCCCAGGCGATTAAGACGTCACGTCCTGGCGTGGGCGTGGTGGTACCGATAGCCAGAACAA  
CATTATTTCCCTGCTGGTGAACATTACCGCTCTTATTCTGATGATGCAGACAGTATCGCGCAATGAATGTCTATC  
CAGTCAGCACGACAGGTGTACCACCAGAAACCGGGCATTGAAGCCACGGCAACGGTGAATAAATTTTATTAAACGC  
GTGAACGTATGAAGAAAAAACGATATTTAGTGCCTTATCTTGTCTTTAGCATTCTAACATCCATGTCGGGATGGCT  
GGCCTGAACAAGTTAGTATGCATATTTATGGGAATGTGGTGCATCAGGGCTGTGATGTCGCCACCAAAAGTGCATTACA  
AAATATTATATTGGTGAATTTAATATCAGTGAATTTTACGGCCGGAATACCGTAAGCACTGCTGCTGATTTGAATATCG  
ATATCACCGTTGTGCCGCTGGTATTACTGGCGCGGACGTCCTTTTTAGCGGCGAGGCTGACACCCTTGCCTGACACTG  
CTCAAATACTGACACAGGCGGAAGCGGTGGTATGCAACGGGGATTGCCGTGCAAAATCTTGTGTCGCAAAAGTGCAGCA  
AGAAATCCCGTCAATCAGGTCCAGCCTTACGCCCTTAAAAGCCGGGGATAACACACTCAAATATCAACTTCGTTATA  
AGTCCACAAAGGCGGGAGCAACGGGCGTAATGCGACGGCGTCTCTATTTTATGCTGTTTACCAGTGAAGGAGTGTAT



GTTGAAACGGATAATCTGGATTCTGTTCTTATTGGGATTAACGTGGGGCTGTGAGCTATTTGCCATGATGGCACGGTCA  
ACATTAGCGGATCGTTTCGCGTAATACATGCGTGTGGCACAGGATAGCAAGCAAATCAATGTGCAGTTAGGCGATGTC  
TCGCTGACACGTTTTCTCATGGGAATTATGGCCCGAGAAATCTTTCATCATTAAATTTGCAGGATTGCGGAACAGATGT  
CAGCACGGTTGACGTACCTTTTCAGGAACCCCCGACGGAGTGACAGAGCGAAATGTTGTCCATTGAAAGTGGTACGGATG  
CAGCCAGCGGGCTGGCAATTGCGATTCTGGATGATGCGAAGATATTGATTCCGCTTAACCAGGCGAGTAAAGACTACAGC  
CTACATAGCGGTAAGGTGCCATTAACCTTTTTATGCGCAATTGCGACCTGTCAATAGCGATGTGCAGTCCGGTAAAGTAA  
TGCCAGCGGACATTTGTACTTCATTATGACTAATACGTGGAACAGATTGGCGCTCTTGATTTTCGCCGTTTTATCGCTG  
CTGGTGGCGGGTGAATTGACAGGAGGAGTGGTGGTGGCGGAACGCGATTTATCTTCCGGCAGACAGAGAATCGATATC  
TATTTTACTGACTAATACAGTCAGGAATCCTGGCTTATTAACAGTAAAATCAACCGCCCAACGCGTTGGGCCGGGGGG  
AAGCGTCGACAGTGCCAGCACCATTACTGGCCGCTCCGCCACTTATTCTCCTGAAGCCCGTACGACAGGACGTTGCGC  
TTGCTGAGAACGGAAAGCGACATCTTGCTGTGGATCGGAAACGCTATTTGAGTTAAGCATTGCCAGCGTGCCATCCGG  
CAAAGTTGAAAATCAGAGCGTAAAAGTGGCGATGCGCTCGGTATTTAAACTGTTCTGGCGACCCGAAGTTTTGCCGGCG  
ACCCGCTGGAAGCTTATCAACAATTACGCTGGACACGGAATTCGACGGGTGTACAACCTACTAACCAACGCCTTATTAC  
ATTAACCTGATTACAGGTGAGTGTAAATGGTAAAGCTTAAGTAATGTGGGAGTTGTGCCCTAAAAGCCAGCGTCAGAC  
AAGCTGGTGTGACGCAATCGCACCGTGCATGTGCTGCGTGGCGGGGATAAATGATTACGGCGGGTTGAGTGCAAAGAAG  
AGCAAATCTGCCCTGAAACAGGTTCCGAAAACGTTTTGCGTTTTTTTTGCGCAGGTCAATTCCTTTTTGGTCCGAAC  
GCACATAATACGCCCCCGTTTTGCACACCGGAATCCAGGAGAGTTCATGTACTACCCCTTCGTTTCGTAAGCCCTTTTC  
CAGCTCGATCCAGAGCGGCTCATGAGTTACTTTTTAGCAATTACGCCGATTACAGGAACGCCGTTTTGAAGCACTGGT  
GCGGCAGAAAGTGCTGCGAAACCTGTTAACTGCATGGGCTGACGTTTTAAAAATCCGCTTGGTCTGGCAGCCGGTCTTG  
ATAAAGACGGGGAGTGCATTGACGCGTTAGGCGCGATGGGATTTGGATCGATCGAGATCGGTACCGTCACGCCACGTCCA  
CAGCCAGGTAATGACAAGCCGCGTCTCTTTCGCTGGTAGATGCCGAAGTTTTGATCAACCGTATGGGCTTAAATAATCT  
TGCGCTTGATAACCTCGTAGAGAACGTAAAAAGGCCATTATGACGGCGTCTGGGTATTAACATCGGCAAAAATAAAG  
ATACGCCAGTGGAGCAGGGCAAAGATGACTATCTGATTTGTATGGAAAAATCTATGCCTATGCGGGATATATCGCCATC  
AATATTTATCGCCGAATACCCAGGATTACGCACGCTGCAATATGGTGAAGCGCTGGATGATCTCTTAACCGCGATTAA  
AAATAAGCAAAATGATTTGCAAGCGATGCACCATAAATATGTGCCGATCGCAGTGAAGATCGCGCCGGATCTTTCTGAAG  
AGAATTGATCCAGTTGCCGATAGTTTAGTTGCCATAATATTGATGGCGTTATTGCAACCAATACCACACTCGATCGT  
TCTCTTGTTCAGGGAATGAAAAATTGCGATCAAACCGTGGCTTAAAGTGGTGTCCGCTTCAAGTTAAAAAGCACCGAAAT  
TATTCGCCGCTTGTCACTGGAATTAACGGTGCCTACCGATCATCGGTGTTGGCGGCATCGACTCGGTTATCGCTGCGC  
GTGAAAAGATTGCTGCGGGTGCCTCACTGGTGCAAATTTATTCTGGTTTTATTTTTAAAGTCCGCCGCTGATTAAGAA  
ATCGTTACCCATATCTAATTATTTCTCGAATTCCTCTTTATAAGATAATCAGGGCTTTATTTTCAGCCCTGGTTGTTTT  
ATATTCATCGCTGTTGCTTATTTAGACATTTTGTACTTTTTATTGTTGAGGTTATTAAGCGAAGCGACAATGGATTGTGTT  
GCTGCGGTTTTATAGGTTAGGGGAGAGGCAGATGCGAATTAACCAGACGATAACTGGCGTTGGTATTACGATGAAGAGC  
ACGATCGAATGATGCTCGATTTAGCCAATGGTATGCTATTTTCGCTCACGTTTTGCGCGCAAGATGTTGACTCCAGATGCC  
TTTTCTCCCGCAGGCTTTTTCGTTGACGACGCCGCGCTCTATTTCTTTTTGAAGAAAAGTCCCGGATTTTAAATTTATC  
TAAAGAACAAAAGCCGAATGTTGCTGAATGCACTGGTAGCAATTCGCTATCTCAAACCGCAAATGCCGAAAAGCTGGC  
ATTTTGTTCATGTTGAAATGTGGGTGCCATGCCGGGCGATGCGGCTGCGTTTGGTTGAGCGATACTACGAGCAG  
GTCAATTTGCTGGTGTGAAATCTGGCGAAAATGCCGACTATGCCTGCTGGCACAACCTGCGTTGTTATTGCGGGTCCG  
CGGATGCAGTTGGGCGACGCCATTAATCATGAACGACAGGCTGAAACCGCAGGTTAATGTTGACAGCTTCAGCCTCG  
AACAGGCAGTCAACGCGCAACTTAAGTGCAGTCTTCGGTACACAGCTACAGCAAAGAATGGTCCATCATCGCCATT  
GCTGATTTTTTCAGCGCGTGACTTCGCTTCTAAAAGCTGAACACGGCAACTCCACAATGCCCGCGGCAAGATA  
AGGGATACGAATTCCTGATTTTCTAATTGCTCCAGCAACACCTGTTGGTTATTTCCACGAATGCCTGTCCCTGCCAGT  
CAATATCTACATTTGCGTCCGGTGTGTCGTGATGTTGGCGGTATCATCAGCGGCAGCTGCGCCGTAATTTTTGCCGGA  
GCCGTTGCCAGATTTCCACCTCATCGCAACGCGAATCACGCCGCTATTACGGGCAATTAATTTCTGACCAAAATCGAC  
ATCGCCGTTATCTGGGCGATGCGGAAAGATTGCAATGTTTTTAATGGTTCGCTGCCGATGTTTTTGCCTTTTTCTG  
GGCTGACGGTGGTAAAATACAGCGGCTACAAGTTAACCACATCAAACACCACATACCAATGCGAATCACTTTCCAG  
CGATCTTCTCCAGGCTGACGCGCCGGAACCACAGATTGGGGCGAATTGCTCCATTTTTACTGCGCCGACAACG  
TTGTTGAGATCACGTAACGAGGCTTCGTTAGCAAGAAGGTAAGGATAGCCATCAGCAAATGACAGAGGTACAGTGTGTT  
GGCGTTTACGCGCCGGTCAATTTGTGGCCCCACCCAGCGTAATTGCACTTCGCGGGAGAAAAATCCACTTAGCCATTTG  
TTGATCGCTCTGGCGCAATTCGCGCGGTAATAATGTGTGCCCAAACCTCGGTTGGTGCCTTGTGTGGCGAAATCAGC  
AAAACGAACATATGCGCTACTGCCATCTGGTGGGTGAGATGCAAGCCATCATGCACAGGTGAAGGAGTAAACCGTACCA  
TCTGGGGAACCTGGCGAGCGTAATAAACGTACCGTCAAGTTCGCTGATCATAAAGATGCGATCGAAGGCCAGACCACTG  
ACATCTGCCAGAGCATGTGTAAGACCAATGCCGCGCATCGATTTAACAGGATGAATAAAAAGCCGGATTAATGTGCCAC  
GGTGGGCTCCTCAAATGAAAATAAGCCCTCAACTTTATGACATGACGCGCTTATTAGCTATAATGCGCAACAATTTCTT  
AGCGCTGTCCATTAGGCTATTTTATTTGTGAGTTTGGCCCTGGGTTATGCTCGAAATCCTCACGACTTGTGTACGCT  
CCGGTTTTCTCCGCGCTGTCCATGTCCAGACTGACTGCAACAATTACGCTACTGCGGTAGGCTCTTAGAGTAAAAGTGAC  
GATATGAATCTCTGTTGCCAGTACGGCCGTTGGGCTGGAAGAGCTGTTAAAACTGAACTGGAAAACCTGGGGCCGT

TGAATGCCAGGTGGTTTCAGGGTGGGGTCCATTTCAAGGGCGACACACGGCTTGTACCAGAGCCTGATGTGGAGCCGCC  
TGGCCTCGCGTATTATGTTGCCGCTGGGCGAGTGTAAAGTTTACAGCGATTTAGACCTCTATCTCGGTGTTTCAGGCGATC  
AACTGGACAGAGATGTTTAACTCCTGGCGCGACCTTCGCTGTCCACTTCAGTGGTTTGAATGACACCATCCGCAACAGTCA  
GTACGGCGCGATGAAAGTAAAAGACGCGATCGTCGATGCTTTCACGCGGAAAAATCTGCCGCGTCCAAATGTTGATCGCG  
ATGCGCCGGATATCCGCGTTAACGTCTGGCTGCATAAAGAAACCCGACGATCGCTCTTGATCTGAGTGGTGATGGTTTA  
CATCTCGGTGGTATCGCGATCGTGTGGTATTGCGCCGATCAAAGAAACCCTGGCAGCCGCTATTGTGATGCGATCCGG  
CTGGCAGCCAGGAACCCGCTGCTCGATCCGATGTGTGGTCCGGTACGTTGCTGATTGAAGCAGCGATGCTGGCGACCCG  
ATCGCGCACCAGGCTTGACCGTGGGCGTTGGGGCTTAGCGGCTGGGCGCAGCATGATGAAGCTATCTGGCAGGAAGTG  
AAAGCGGAAGCGCAAACCTCGCGCCCGTAAAGGCCTGGCTGAGTATAGCTCTCATTTTTACGGTTTCGGACAGCGACGCACG  
GGTGATTCAACGTGCACGCACTAACGCCCGTCTTGGGGGATTGGTGAAGTATCACCTTTGAGGTGAAAGATGTGCGGC  
AACTGACCAATCCGCTGCCGAAAGGGCGTACGGCACAGTGTGAGCAACCCGCCATACGGGGAACGTCTGGACAGCGAA  
CCGGCGCTGATTGCGCTGCATAGCCTGCTGGTGGATCATGAAAAACCAGTTTGGTGGCTGGAATCTCTCTTTGTTTAG  
TGCTCGCCGGATCTGCTAAGCTGCTGACGCTGCTGCAGACAAAACAGTACAAGGCGAAAAACGGCCCGCTGGACTGCG  
TACAGAAAAATTACCAGTTGCCGAAAGCACTCCAGACAGCAAACCCGGCGATGGTAGCGGAAGACTACACCAACCGCCTG  
CGTAAGAACCTCAAAAAATTCGAGAAGTGGGCTCGCAGGAAGGATTGAATGTTACCGCTGTATGACGCCGATCTGCC  
AGAATAAACGTTGCCGTTGACCGTTATGCCGACTGGGTGGTGGTGCAGGAGTATGCCGCCAAAAAATTTGATGCTC  
ACAAAGCGCGTCAGCGTCTGTTGATATTATCGCTGCAACATTTTCGGTACTGGGGATTGCCCAAACAACCTGGTGGCTG  
AAAAACCGTGAACGCCAGAAGGGCAAAAAACCAATACCAGAAACTGGGCGAGAAGGGCGAGTTTCTTGAAGTTACCGAATA  
TAACGCTCACTTGTGGGTGAACCTGACGGATTATCTCGATACTGGTCTGTTCTCGATCACCGCATCGCCCGTCTGATGC  
TCGGTCAGATGAGCAAAGGCAAAGATTTCTCAACCTGTTCTTATACCGGCAGCGCCACCGTGCATGCGGGATTAGGC  
GGTGACGCAGCACCACCACCGTGGATATGTCGCGTACTTATCTGGAATGGGCGAGAACGCAACCTGCGTCTGAATGGCCT  
GACCGGGCGTGCATCGCCTGATTACGGCCGATTGCTGGCGTGGTGCCTGAGGCAAATGAACAGTTCGATCTGATCT  
TTATCGATCCGCCAACCTTCTCAACTCAAACGAATGGAAGATGCGTTTATGTTGATGTTGAGCGGATCATCTGGCGCTGATG  
AAAGATTTGAAACGTCTGCTGCGTGCAGGTGGGACGATCATGTTCTCGAACAACAACGTTGGCTTCCGATGGATCTCGA  
CGCCTGGCAAACCTGGGACTGAAAGCACAAGAAATTACGCAAAAAACGCTCTCCAGGATTTGCCCGTAAACGCCAGA  
TCCACAACCTGCTGGCTGATTACCGCAGCTGAAAGGAATAGTAATGTCATTAATCAGTATGCATGGCGCATGGCTGTCGT  
TCAGCGACGCGCCGCTTCTCGATAACGCAGAACTGCATATCGAAGATAACGAACGTGTTTGTCTGGTGGGCCGCAACGGC  
GCAGGCAAATCGACGTTAATGAAAATCCTCAACCGTGAACAAGGGCTGGATGACGGTCGCATTATTTACGAGCAAGATTT  
GATTGTAGCGGCTCTGCAACAGGATCCGCGCGTAAACGTTGAGGGTAGCGTTTATGATTTCGTTGCCGAAGGCATTGAAG  
AACAAAGCGAATATCTGAAACGCTATCACGATATTTTCGCGCTGGTATGAACGACCCGAGCGAGAAAAATCTCAACGAA  
CTGGCGAAGGTTACGGAACAGCTGGATCACCAACCTGTGGCAGCTGGAACCCGATCAACGAAGTGTGGCGCAACT  
GGGGTTAGATCCTAACGTTGCGCTGTGCTGCTTTCCGGCGGCTGGTTGCGTAAAGCGGCATTAGGACGCGCGCTGGTGA  
GTAATCCGCGCGTGTGTTGCTTATGAAACCGACAACCACTGGATATTGAAACCATCGACTGGCTGGAAGGGTTTTTG  
AAAACTTCAACGGGACGATTATTTTTCATCTCCACGACCGTTGTTTATCCGCAATATGGCGACGCGCATTGTTGATCT  
CGATCGCGGCAAGCTGGTACCTATCCAGGGAATTACGACCAGTACCTGCTGAAAAAGAAGAAGCCCTGCGCGTGGAAAG  
AATTACAAAATGCCGAGTTCGATCGCAAACCTGGCGCAGGAAGAGGTGGATCCGCCAGGGGATCAAAGCACGCCGTACC  
CGTAATGAAGGCCGCTACGCGCCCTGAAAGCGATGCGTGCAGAACGTTGGTGAACGTCGCGAAGTGTGGGTACCGCAA  
GATGCAGGTGGAAGAGGCCAGCCGCTCCGGTAAAATCGTTTTCGAAATGGAAGACGTTTGTACCAGGTTAACGGTAAGC  
AACTGGTGAAGATTTTTCTGCCAGGTTCTACGTGGCGACAAAATGCCCTGATTGGTCCGAATGGGTCCGGCGGCAAAAC  
ACGCTGCTAAAACCTGATGCTCGGTACGTTCAAGCGGACAGCGGGCGTATTACGTTGGCACCAAACCTGGAAGTGGCTTA  
TTTTGATCAGCACCGCGGAACTGGATCCCGATAAAAACGGTATGGATAACCTTGCCGAAGGTAAGCAAGAGGTGATGG  
TTAACGGCAAGCCACGCCACGTATTGGGCTATTTGCAGGACTTTCTGTTCCATCCGAAACGGGCGATGACGCCGGTACGT  
GCGCTTTCTGGCGGTGAGCGGAACCGCTTGTGCTGGCGGTTTTGTTCTCAAACCAAGCAACTTATTGATTCTTGACGA  
ACCGACCAACGATCTTGATGTCGAAACGCTGGAACGCTGGAAGAAGTATCGACAGCTATCAGGGCACGGTATTGCTGG  
TTAGCCACGATCGTCAGTTTGTGATAACACCGTTACAGAATGTTGGATCTTCGAAAGCGCGGTAATAATTGGTCTGTTAT  
GTCGGCGGTTATCATGATGCCCGTGGTACGAAAGCAGTATGTGGCGCTCAAACAGCCTGCGGTGAAAAAAACCGAAGA  
AGCCGCGCGGCAAAAGCAGAACTGTAAAACGACAGTACGAAACTAAGCTATAAATTGACAGCGCAACTGGAGCAGC  
TACCGCAATTGCTCGAAGATCTGGAGGCGAAGCTGGAAGCCCTACAGACGCAAGTGGCGGATGCTTCTTCTCAGTCAG  
CCGATGAGCAGACGCAAAAAGTCTTGTGATATGGCTGCTGCAGAGCAGGAGCTGGAGCAAGCCTTTGAAACGCTGGGA  
GTATCTTGAAGCGTTAAAAAATGGTGGCTGATCGAAAATAGTCGATTTAAACAGAGACAGCTGACAACGGTAAAAATGC  
CTGATGAACTGGGTTTATCAGGCATGAAAACCAACTTTGTTAGTCATCTGAAAATAGCGCATCATTAAAGGAGTACCA  
ATGTGCGAACATCATCATGCCGCGAAGCACATCCTGTGCTCGCAGTGTGACATGCTGGTGGCGTTACCGCGCCTTGAGCA  
TGGTGAGAAAGCGGCATGTCCCGGTGTGGCACAACGTTAACCGTGGCGTGGGATGCCCTCGGCAGCGTCCACCCGCT  
ATGCGTTGGCTGCACTGTTGATGCTGTTGCTGTCCAACCTGTTTCTTTTGTGAATATGAACGTTGCAGGAGTTACCA  
GAAATTACATTAAGTAAATTTCCGCGGCTGCTTTTTCTGAGGACTACGCCAGCCTCGGCACCTTTTTCTGTTGTTTGT  
GCAACTGGTCCCGCGTTTTGTCTGATAACCACTTCTGTTACTGGTGAATCGCGCGGAATTACCGGTCCGTTTAAAGAGC

AACTGGCACGGGTGCTTTTTCAACTCAAACCTGGGAATGGCGGAGATTTTCCTCGCGGGTGTGCTGGTCAGTTTCGTT  
AAACTGATGGCTTACGGCAGCATTGGGGTAGGCAGCAGCTTTCTCCCTGGTGTATTTTTGTGTCCTGCAACTGCGCGC  
TTTTAGTGCCTTATCGTCGCTGGTTATGGGACGACATCGCCCCGATGCCAGAACTGCGCCAGCCGCTAAAACCAGGCG  
TCACGGGGATACGTCAGGGGCTGCGTTCTGTGCTCCTGTTGTACGGCAATCCTTCTGCTGATGAACCCGTGTGCCCGCT  
TGTAGTACCAAAGGTACGTTTCGGCGTAGAAACAGCCTGCAGTGGACACTCGCGCTGCTTGTAAACGTCCATCATGCTGTA  
TCTTCCGGCTAATATTTGCCATCATGGTGACGGATTTATTAGGCTCGAAGATGCCGTGACGATTCTCGCTGGGGTCA  
TTCTGTTATGGAGCGAAGGCTTATCCCGTCGCTGCGGTGATCTTTCTGGCCAGTATTATGGTGCCAACGTTAAAGATG  
ATCGCCATCGCGTGGCTGTGTTGGGATGCCAAAGGGCATGGCAAGCGCGACAGTGAAAGAATGCATTTGATTTATGAAGT  
TGTTGAGTTTGTAGGCCGCTGGTGCATGATTGACGTTTTGTTATCGCGGTGCTCTCGCGCTGGTGCATGGGAGGTT  
TAATGAGTATTATCCGGCAATGGGTGCATTAATGTTTGCTTTAGTCGTATAATGACAATGTTTTCTGCTATGACGTTT  
GACCCGCTTTGTCGTGGGATCGTCAACCTGAATCAGAGCATGAGGAGTCTGACAGTATGGAATCTAATAATGGGGAAG  
CCAAAATCCAGAAAGTGAAGAACTGGTCTCCCGTGGATATTTCTATCGTACGGCGCTCATTGGGCCTGGGTTCTT  
TTTTATCATTACAGCCATCAGGGACCGGAAGTGACCCTGATCACCCGAATGCCGAAGGAATTGAAGTGGCAAAACCAC  
CGCGGTGAATCCGGTATGAAAAATTGCTGCATAAAGACACCCTTTTTGGGTGGTGAACCCGAGATTGGTCCGGAA  
GGATTAGCGGCTGGGAACGCTGCTGCTGGAGTTTATATCGAACTGCAGCCAGGCGGAAAGGCAGCAAAATGGATAA  
ATACGATTTGCTGGACTCGCCACCCTGGCCCCGCTGATGCGAAAGGTATCCGTGTGATTCTCGATAGCAAAAAGCCG  
GGCAGCTCTCGCCAGGAGATCCGGTGTGTTCCGTGGCTATCGGGTAGGTTGCGTTGAAACCAGCACCTTCGATACACAA  
AAACGCAATATCAGCTATCAACTGTTATCAATGCACCTTATGACCGACTGGTGACCAACAATGTTGCTTCTGGAAAGA  
TAGTGGCATTGCGGTTGATCTGACGTGACGAGGATGCGTGTGGAGATGGGCTCATTGACAACGCTGCTGAGTGGCGGTG  
TCAGCTTGTATGTGCCGGAAGTCTGGATTTAGGGCAGCCAGTGGCACCGAAAACAGCTTTGTTTTGTATGATGATCAG  
AAGAGCATTACAGGATTGTTGTACACCGATCACATTGATTATCTGATGTTCTTTAAAGATTCGGTACGCGGTCTGCAACC  
GGGAGCTCCGGTAGAGTTCCGGGTATTCGCCTGGTACCCTAAGCAAAGTGCATTCTTTGCGCCGAATATGCGTCAGA  
CATTTAACGATGATTACCGTATTCCGGTACTGATTCGATCGAGCCAGAGCGGCTGAAAATGCAGCTTGGCGAAAATGCG  
GATGTTGTTGAGCACCTTGGCGAATTGTTGAAACGTGGTTTACCGGATCGTAAAACCGGAAACCTGGTCACTGGTGC  
ACTGATGTTGATCTCGATTTCTATCCAAATACGCCTGCAATAACCGGTATTCGTAATTTAATGGTTATCAGATTATCC  
CGACGTTAGCGGCGGCTGGCGCAAATCCAGCAACGACTGATGGAAGCGTTGGATAAGATCAACAACTGCCATTGAAT  
CCGATGATTGAACAGGCAACAGTACGCTTTCTGAAAGTCAGCGACAATGAAAACCTGCAACGACGCTGGATAGCAT  
GAACAAGATCCTCGCTAGCCAGTGCATGACGAGTTCGCGACGGATATGCAGTCAACGTTGCGTGAATTGAATCGCAGCA  
TGCAAGGCTTCCAGCCTGGCTCCGACGCTACAACAAGATGGTGGCGGATATGCAGCGCTTATCAGGTGTTGCGAGAA  
CTGCAACCGGTGCTGAAAACGCTCAATGAGAAGAGTAAACGCGTGGTATTTGAAGCGAAGGACAAAAAGATCCAGAGCC  
GAAGAGGGCGAAAACATGAAAAAGTGGCTAGTGACGATTGACGACTGTGGCTGGCCGGATGCAGCTCCGGCGAAAATTA  
TAAAACTATTACAGTTACCTGTGGTGCAGAGCGGTACACAAAGTACCGCCAGCCAGGGCAATCGTCTGTTATGGGTAG  
AGCAGGTCAGTGTCTGACTATCTGGCGGGAAATGGTGTGGTTTATCAAACAGTGCATGTGAAGTATGTGATTGCCAAC  
AACAACTTGTGGGCCAGCCGTTGGATCAACAGTTGCGCAACACCCTGGTTGCCAACCTGAGTACGCAACTGCCCGGCTG  
GGTGGTTGCCCTCCAGCCTCTGGGAAGCGCCAGGACAGCTCAATGTTACCCTAACGGAGTTAACGGTTCGCTATGATG  
GCAAGGTATTGTGAGTGGTGTGAGTGGCTGTTGAACCACAGGGACAATGATCAAACGTCCTGTTCCGCTGGAAGGAGTG  
CAAACCTCAGGATGGTTACGATGAGATGGTTAAAGTGTGGCCGGTGTCTGGAGTCAGGAAGCCGCTTCTATTGCACAAGA  
GATAAAGCGTCACTTAATATAAAGATTTGTAATAAACCCTCCGGTATGTTGCCTGAGGCGGTTTTTTGTCTC  
TAACGTGCGGAAAAATTTGCTCTTACATTTTTGTACAACCCGACATGCCGCTGAGTCACAAATATGACAGTGGC  
GTGAATTTTGGCATTGACGGCAGTTATGATTCGCGGATTGCTTAACCTGTGATTGCACATTTAGTAATCACTGTTTTCT  
TTTTACCAGAAACAGTATGAGGGAAACGAGGCATGAAGAGACAAAAACGAGATCGCCTGGAAACGGGCACATCAACGTG  
GTTATCAGGCCGGCATCGCCGACGCTCAAAGAAATGTGTCCCTATCAGACGCTGAATCAAAGGTACACAATGGCTGGGA  
GGCTGGCGAGAAGCCATGGCGGACAGGGTAGTAATGGCCTGATTCTGTCTTTAAAAAGAAACCTCCGCATTGCGGAGG  
TTTCGCTTTTGTACTCTGTCTGATTATAATCAGAAGGCAGACGTATCCTGGAACAGACCGACTTTCAGGTCGCTGGCG  
GTATAGATCAGACGACCATCAACCAGCACTTCGCCATCCGCCAGGCCATAATCAGACGACGGTTAACAATGCGTTTAAA  
GTGAATACGGTAGGTCATTTTTTCTGCTGTGCGCAGTACCTGACCAGTGAATTTCACTTCGCCAACGCCAGCGCGCGC  
CTTTACCTTCGCCGCCAGCCAGCGAGGTAGAACCCTACCAGTGCACATTGCGTCCAGGCCAGGCATCCCGGCATA  
ACCGGATCGCCAAATAAGTGGCATCCGAAGAACCACAGATCCGGATTGATATCCAGTTCGCTTCAACATACCTTTGTC  
GAAGTTACCACCGTTTTCGTCATTTTGACCACACGGTCCATCATCAGCATGTTCCGGTGTGCAATTGCGGGCCTTTAG  
CGCAAACAGTTCACCGCGACAGAGGCAAGAAGTCTTTTTGTATAGGATTCGCGTTTATCTACCATGTTCTCTGTA  
AGCCTTATTTTATTGAAGCACGAGGATAGCTAACACGTGTACGCTGAACAAGTCCGATCAGTTCGGAATAAACCAGTTC  
AGCCAACGTAATGGCCATGGAACCGGTGACGTCTTCTGTTGCGATGCTTGGCGGATACGTTCTGGATGGTTTGCAT  
CAGCGTCGTTTTGGCTTCGCCATCCACACCAGATTTAATAATAACGGCAGTGCCTGAGTCAACATCGTCTACTGCCAGA  
TGGTGAATTTGCTTCTTACCGTTTTACCGTTCACCGTTCAGTGTGAAGACTTAAATGGCGAACGTTAGCTGTGGGGATAATG  
ACACCTGTTTCCCGTTAACTCACGTTGCTGGCAAATAGCAAAGAAGCCTTCGATTTCTCATTTAAACCACCGACCGG

CTGGGCGGACCGAACTGATCGACTGAACCTGTGATAGCGATACTCTGATTACCGGCACATCGGCGAGGGCGCTTATCA  
GGGCGCAGAGTTCAGCCATCGAGGCATATCTCCATCAACTTCACTGTATGACTGCTCAAATGTCAGCGATGCTGAGAAAG  
GGATCTGTTGCTCAAGCTGTAGTTCGACATCAGGAACGCTTGCATGATCATCATCCCTTTCGCATGGATATTGCCGCC  
AAGCTCCGCTTTGCGTTCGATGTCGGTGAATTACCATCGCCAATATGCACAACGCAGCTAATGCGAGAAGGTTCCGCCAA  
AAGCGCGTGGATGACCCGAAATCAATGACCGAAAGGGCGTTAATTTGCCCGATGCGTTCGCCTTCGGTTTCAATCAGG  
ATTTGCTCCTGAAGGATCTCATCTGCATACGTTACGCGAGGAAACCTTCGCGCCATTACGCTGCTGCAGCATTAAAGTT  
TAGCTGCTCGCCGGAGAAGTGTGCCATCACACAGGGAGGCGACCTCTTACACTGGCGGAGGATCCACTGCGGGCTAA  
GCGGAAGTGTTCCTGTTACCAGGTGTAGCGTGTCTTCGCGGATAAGTATCGGCCAGGCATCCGCTCCCGGTGCAGGT  
AAGTGATTATGCTGGCGGTAATGTACCCAGCGACACCACTGGGTTACTGACTCCGCATCGACAATCTGCAGAGTATC  
TTCAAATTCGCTATAAATAGCCTGCTCTGAAAGCTCTGGTCCATCTCCTGAAATCAGCCAATGATTGCGGTTCCGCTA  
CCAGAATGACTTTAGCTTCAATGGCATCGAAGGCACAGAGACGGGGAGAGGGCGGACTCATCAAACGCAACCCAGTCA  
AAACGCTCGCGGTTAACGATATTTTTAGCCGCATCCACAGCAGAGGTTGCCAGCAGTGTACGCAAAGAGATAATGAG  
AATACCGCCATTTGCCTGATGCACCAGACCAGGCTGCAGGGTAATGTCGCCATTAACCTGGCGCAGGCAGCCAAAGAGTT  
GCTCCGCTTACCCAGTCGGCAGCGACAACCTGCGTTAAAGTCGAAAATTATCATCTGCACTACTGCGTGCAGTAAAG  
CGGATGGAGTGGCCGAAACCTCATAGTGACCGCCACCAGTTGGCTGCATCGCTTTGTAGCGTACGCGCGGCACTGGC  
AATAAGATTAGATACTCAGACTCTTCGGGGCTTCGCCAGCATAAAAGAGGAGGATGCTCGCGTATGCAGCAATGCT  
CCAGCGCAAATTCAGCCGCGGTTGAGTATCACTGAATAAAGGATCGTTTTCTGCAATCAAATGTGGCTGAGCAAATATT  
TCCTGATAGCTATCGGTATCAGGAACAGGTACGCGCATGCAAGTTTCGTAATGGTCAAAGTTGATGTTTTTATGCTGT  
TGTCAAAGCCGCGATTATACCGTAACCGCACTACAGCACAGTAAAGCACCAGCAATACTCCTGGCATGGGCGTTAA  
AGCTCACAGGATGGAGATTCTTTCTTCACTGGCCTAAAAAGCTGATATTCTGTAAGAGTTACACGTTAACATTGAGAT  
CGCTATGAAATATCAACAACCTGAAAATCTTGAAGCGGTTGAAATGGAAGTATCTGGTTAAGAAGCATCGGAAGGGG  
AGTTAATCACCGTTACATAGAAGCCAGTGCCGCCAGGAAGCCGTCGATGTGTTGCTCTCGCTGGAAAAATGAACCCGTG  
CTGGTAAATGGCTGGATTGACAAGCATATGAATCCGGAACCTGGTCAATCGCATGAAGCAAACCATTCGGGCAAGACGAAA  
GCGCCATTTTAAATGCGGAACACCAGCATACGCGCAAAAAATCGATCGATCTGGAATTTATTGTCTGGCAACGCTGCGCTG  
GTCTTGGCAGCGTCCGGTAAAACGCTTCTGAAACGATTGTTAGCTGATTGAAGATGCGGAAAACAAAGAGAAATAC  
GCGAATAAAATGTCTTCTGAAGCAGGATCTGCAGGCATTGCTGGTAAGGAATAACTGACGAAAGTCAGTTCAATTTA  
CTAAAGGCAAAAAAACCCTGCAGCAGCGGGTTTTCTACCAGACGAGAATTAAGCCTGCGGCTGAGTTACAACGCTCT  
TTGATACCTTTAACTTCGATCTCTACGCGACGATCCGGAGCCAGGCAGTCGATCAGTGCAGCACGCTGTTTCACGTTGTC  
ACAGGTGTTGCCAGTAACCGGTTGGATTTCGCCATACCACGTGCGGAGATCTGTCTGCCGGATACCTTTGGAGATCA  
GGTAATCAACAACAGACTGAGCACGGCGCTCGGACAGACCCTGGTTGTAAGCGTCAGAACCAGTGCAGGTCGGTGAACCC  
AGAACAACCTACGGAACCGTCTTTCGGATCCAGGTTGCTCAGCTGGCTGTACAGCTGATCCAGAGCAGCCTGACCTCCGG  
TTTCAGGGTTGCTTTGTTGAAGTTGAACAGAACGTCAGACTTCAGAGTGAAGTCTTGGTCTGTACTTCCGGTGCCGGAG  
CTGGAGCCGGAGCAACTACTGGAGCTGCTTCGCCCTGACCGAAACGGTAGGAAACACCCAGGCTCAGCATGCCGTTGTC  
GGACGAGTGCCGATGGTGTGTGCGTACCAGTGTGTTGGTCCACTGGTATTCAGACGGGTAGCGATTCAGGAGTGT  
CGGTACTCAACACCGCCAGCGAAGACCGGAGAAACCGGTTGTCGTTGTTTTACCATAAACGTTGGATTTAGTGTCTG  
CACGCCATACCATGCCACCAGACGAGTGTAGATGTCCAGGTCGTAGTATTGGGTAACCCAGTTTAGCGGTGAGTTGA  
ACGCCCTGAGCTTTGTATGCACCGTTTTCAACGCTGCCTTTGTACGGCATAACGCTAACCCAGTGCATAACCCATTTCAA  
GCCAACATACGGGTTAACCTGGTAACCACCAAAAGCACCAGCGCCAGTTGGTTTTCATGGTTCGGGCCATTGTTGTTGA  
TGAAACAGTGTATGGTACTGGGACCAGCCAGTTAGCACCAGTGTACCAGGTTATCTTTTCGGAGCGGCTCGGCT  
ACGGTACGAAACAGCCAGTGCCTGCAATCGGATAGCTGCTTTTTTCAATTTTTGCGCCTCGTTATCATCCAAAAT  
ACGCCATGAATATCTCCAACGAGATAACACGGTTAAATCCTTACCAGGGGATCTGCTCAATATTAACCTACCGATATC  
TTCCGCTTATGCCGAGCACCCCTGGCGATGTAAAGTCTACAACGTAGTTGAAAACCTTACAAGTGTGAACCTCCGTCAGGCA  
TATGAAAAAAAAGTCTTGTATAAGGTATGTTAATCTTTTTTGTACGCGACAATTTACAGAAGAGAATCGCGGAAACCGC  
TTCAGACAAGCCTCCGCAAGGAAAATAGTACGACTGAAAGCATTGGCTGGGCGACAAAAAAGTTCCAGGATTAATCC  
TAAATTTACTTAATGATACAAATAGAGTGAATTTTTAGCCCGGAAAGTTGTCTCGTGGCGTGAGAGGATGCGCTTACCG  
GACGCATAATAAACCCCATAGCGTTACCTTCATTTGCCGCATCAACAAGTTCAGCATGCTCTTCTCAGTCAAATCATCT  
GCCAACCAACCGATCACCACACTGTAATTGCCCGTGCCTAAAGCGCGAACCATTTGACTCCACAGTGTGGCAAGGGGAGAG  
CTGGCTAATCTGCATTACTTTCGTTAAGGGTAGCCAGATGCCTGAACCCATTCGACTCAGTTTTTGTGCGGTGTTA  
ACCAGAGTTGCCAGCGGATTGCTGACCGAGTTGCTGTAACAATGGCAACAGTGAAGTTGCGTCATCATGGGCTGATCT  
TCGCGATAGACAACTTCACTGATAAGCCCGGCTGTAGTGTTCGTTAGAGACACGCGCAATTTTACTTGTGCGGATGA  
GAACGACGAAGAACGATGTGCATAGCCTGAAGTGTACATAATCAATCCAGCCCTGTGAGTACTGTATGGATGTACAGT  
ACATCCAGTGACAACAAAGATCAACCCTATTTTCGAAAGAGCCTCGAAAATTTGTGCTTGGTGACGGGAAAACATAAAA  
TTAATCTTGCCCTTAAGAATAAGTTGCCTATTTTCGTAGTTAACGGATCCGTTAATGTGAATCATTCTTTTATGTTATG  
ATTTTAAAAGGAATTTTATGAAAAGCCTCTCTATAAGCGGATCTATAAATCAAGAATACCTGGCAACGTTGGGCACA  
ATTGAATACCGATCATTGTTGGCAGTTACAGCCTGACCGTTGACGACACGGTGTTCGATGGTTTCTGATGGTGAGTT  
GTATCTTCGGGCTTGAGCAAAGTGCACAGTACTGTAAAACATCCGCTGTCTGGCTGACATATAAAAAGTGTGGCC

GATCCGTTACCTCAATTACTATCGGGTTGATGAAAGTCTATGGCGAAATCAACTGAAGCTGGTGCCTGTGCGAAATAT  
TCTCTCGATGCAGCGCTGAAAGAGAAAAGCACGCGCAATACCCGGGAAAAGACTGAAAGATTTGCCAATATGCTTTTTCA  
TCTGGAAGCGATTCTCGGGGAGGTGGGGATTAAGGATGTACGGGCGTTACGTATACTTTGGGGCAAAAATGTGTTGGTTGC  
GACTGCGGCAGCAAAACAGTCTGGTGACAGAAAAGATTCTGTTTATGCTTGAAGGTGCCATTATCGGCATTCATGAAGCT  
GCGCTCCCGGTGGCACGCCGCCAGGAGCTTGAGAATGGGCTGACTCTTACGCCGAAACAGGAGTTTCTGCGGAACT  
TGAGTAATCTGGCGTTGACAGACGACCAATCTCAGGCAGTAATGCAATCAATAATCCAACCTGTTGTACGACCAGAGGTTT  
TTTGCTGTCTGCCGTGGTTCAAGTTGCTGCATCCGCTGTTTCAGGCTAGCTAATGCCTCATTGACGCGTTCCTCATCAG  
CAGGTTGATGATGTAACGCGTCATCAACATAGCAAACCTGCGTCATCAAGAAACGCCAGAATTTAGGATTAGTTAACTGC  
TCCCAGTGAGCACCGAGGGCTGAGATATAGCTGGTAAACGATGGTTAAGGCACAGCAACCGAAACGCGGCTTCGCGAAT  
TTGCGGGTAAACGTTCCGCTCGCTGGACATATTTGATACCACCGACGCCAGCTCAGCATCACGTTGTGTGCATCGCGGC  
GGCAATACGATACGCCAGACGTTATCACGCCCCTGATGGTATTGCTCCAGTATGGCATCGAGATACCGACAGTTGGCC  
TCTGTGGCGGTTTCGAGCATGCGCGGCAGATTGCGAAAACGTCAGTACAGGCCAGATGTAGTCACTGCCGCCACGCAAT  
GGCAACCAATCAGCGTATCGATTACGCGAGGTAACGCTACTTCAAAACCTTACCCAGTAAAGTTAAACACAGTAGCA  
CCAAAAGTGTGATGAACATCGTTGCATGAGCGTATTGCAGTTACGGAAGGCAAAAAGAGCACGCGGTAATAACCCAGC  
AGCACCAGTCCCTTCCAGTATGGCACAACACAGCACAGGAATGCCAATGGCGATACCTACCAGCTACCAATAAT  
CCTCAACTTCAGCGGTGGCGCTGGCGTTATAGTTGGCTGGCAGACAAAACAACTTGTACAGCAAGTCCAATACCCGT  
GATGCATTCGCGTTATCTGAATGATGGCGTAGCCGAAGCACAAACAGCGACATTCTTACCGCATGACGGAAGAGGGCG  
GATTCCGGCGTGAAGTGACGGCTAAGACGCGAGCCAGATATCACTCAACCCGTGCGGGCTGCATCAGCGAGCTCATTTTC  
GTCATTATTATGGGGTAGTGCCTGGGCTGTTCTGATTCAATTGTTGCCAGTTGGGCATCAATGGCGCGTAAATTGTTCA  
GCAAAAATCCAGTGTTTTGGTAAATCGGCGGGTGCAGGTTATCGCGCATCCGCTCCAGCGCAGCATCAATATGCGTA  
AAAGCGCGCTCAAAATGCGGATCATGTTGATAAGGCTGACGCAACAAAATACAGCGTGACAGTTGCTGGCACGCTGGCC  
CTGCATCGACATCAGCCGCTGAAAACGGAACAGCACGTCGCTGTGGCGAAAATGTTACGCAATGTTTACTGAATAT  
GAGAAGAGCTGGCAGCTCGTAATATCCTGTGCGCAAAAGTAATAATGCAGCGTGCGACGCTTCCCGTTGACCACGA  
TCGCCACGTAAGCGGGTACGAGCGAGAGTTTCTGCTGATTCAATGTCGCCATCAGCAGACCGTTGGCGAGACCAATC  
GTACAGCGGTGCCTGGCTTTGATCTTCAATATCAGGATCAAACATGCGCGACTTGAGCTCAAGATAACGCGCCAGTTGTT  
CATAGCAACGCGCCAGGTTGCTGTCAGCGGGCGGACCGGAACAGCAGATGACCAATAAGTGTGAGGACGTTGACCAG  
ACGGCACCGGCCAGCAGATACATCGGCTGCTGATACAGTGTCTACAGTGTGTTCCCAACATAGTGTAAATGGCGAT  
CAGCAATGCACCGAAGGCAATTGTTGCATAGCGTTGACCCAGACCGCCGAGCAAAATGAAGCCGCTGGTAGAGAGCGTTA  
AGCAATCGCAATAGCCAGGGCCAGGAAAACAGCAATTCTACTGAGGCCGAGCGGATAAAAAAGCAGAACGCGTAATG  
ATGAGGTTACGCAACGTCGCCAGTCCGCGAGTCCGTCATCGAGATCGGTGAGCGCCGCTGCCACCATCCCGAGCGTTAGCGGAAT  
CGTCAGTTTTACATCACCCAGCCACCACGGAAACGCTGTGGTTCCACAAAGCGCAATAAAAATACGCGCGTAATACAGCC  
AGGCGCTGTTCCAGGTATAGCGTTGAGCAAAGGACTTAGCATAAAGGCCATATTAGTGGATTATCAAACGACGACGCT  
GCATTGGCTTACGCGCAGCTTGGCGTCTTCTACCAGTACCAGCGACGACCAACCGCCATAGTGCATAGCGGCAAT  
TTTAAAGTTCCGAATGCCGACAGGAATGCCAATGATTGAAATACATTGTGCGATGCCGTTGCAATGTGCATCAGGCATA  
ACCACGACCAAGAAAATCAGCCAGAAAATATTCAATACCGTACCAGTATTCAGCAGCACATTTTTGCCAGCCGGG  
TTCAGTTTATCGACATGAATAGCTTATTGCCATAAGGCACCAGAGACAGTTTAGTGATCTCCAGCAGGATCGTGTGAG  
CGGTAAGGTAATAAATCAGCACAATACTGACCAGAGTGCACAACAGCCAGCCAGAGTGGTGCAAAATCCGCCAAGCACAA  
AGTTCAGAATGTTCAAAACGGTACGCATAAAACCTCGCTTTACTGTGGTTTTAGTAATGGCGGCAATTGTAACGTTTT  
TTTGGGCTGGAGCAGTTTTCTGACGGTTACACTGATAAGAAATAATTTCTGTGGATCTACAGAGCATGGAAGTGA  
AAGCGACAACGCTTGGAAAACGCTGGCACAGCACCTTACGATCGGGCGGTGATCCTCAATGCCGGATTAAAGTCTCC  
GGCGATCGCCACGAATACCTTATTCTTTCAATCAATTAAGGCAATTAAGCGCGGTCTGGTATGGGGCGAGCT  
GGAATTTGACTGCCGAGCAAAAAGTGGTGCCTGTCACGGCACGAATGGGGCGAGACGACGCTTTTTACCATCATC  
TTGATGCTCACTGGCGGCGTGGAGTGGCGAGATGAGCGAAATTCGCTGCTGGTGTTCACGCCAGCAACTGGATTTGATT  
GCCACGCGCACTGGGGAAAATAAATGGCTGACGCGTGAGCAAACCTCTGGCGTGACGCAACAAATCCGCCAGGCTTTGTC  
GGCGTTGCCGTTGCCGTTAACCGACTGGAAGAATTCGATAACTGCCGTGAGGCGTGGCGTAAATGTCAGGCCTGGTTGA  
AAGATATTGAAAGCGCTCGGTTGCAGCATAACCAGGCGTATACCGAAGCCATGCTTACCGAGTATGCGGATTTTTCCGC  
CAGGTCGAGTCTTACCAGTGAATCCGGCGCAGGCCGGGCGAGTCTTAAATGGCGAGCATTCTCTGTTAGTGTGCGAGG  
TGCAGGAAGCGGAAAACGTCGGTGTGGTGGCCCCGTCAGGCTGGTTGCTGGCGCGTGGTGAAGCGTCCCTGAGCAAA  
TTTTATTGCTGGCGTTTGGTCGAAAGCCGCTGAAGAGATGGACGAGCGGATTCGCGAACGGCTACATACCGAAGACATT  
ACCGCACGACGTTTTCATGCGCTGGCGCTGCATATTATTCAGCAGGGCAGCAAAAAGTTCGATAGTACGCAAACTGGA  
AAATGATACCCTGCCGTCATGAACTCTTATTGCTGAGTGGCGAAGCAATGCAGCGAAAAGAAAGCGCAGGCGAAGG  
GCTGGCGGCAATGGCTGACGGAAGAAATGCAGTGGTCAAGTGCAGGAGGTAACCTTCTGGGATGATGAAAATACAGCGT  
CGCTTGCCTCTGCGCTCGATCGCTGGTAAGTCTGATGCGGATGCACGGTGGTGCACAGGCAGAAATGATTGCCAGTGC  
ACCCGAAGAGATTCGCGATCTGTTCAAGTATCAAGTTGATGGCCCCGTTATTAAGCCTGGAAGGTTGCGCTGA  
AGGCAGAAAACGCTGTCGATTTTTCGGGCCTTATTCATCAGGCGATTGTGATTCTGGAGAAAGGTCGCTTATCAGCCCC  
TGGAAGCATATTCTGTTGATGAATTTAGGATATCTCGCCGACGCGGCGAGGCTGTTAGCGGCATTACGCAAGCAAAA

CAGTCAGACGACGTTGTTTCGCTGTTGGTATGACTGGCAGGCGATTTACCGATTAGCGGTGCGCAAATGTCGCTCACCA  
CCGCTTTCCATGAAAACCTTTGGTGAAGGCGAACGCTGTGATTTAGACACGACTTACCGTTTTAACAGTCGTATCGGTGAG  
GTGGCAAACCGGTTTATTACAGCAGAACCAGGCCAGCTGAAAAAGCCGCTAAACAGCTTAACCAATGGAGACAAAAAAGC  
CGTCACGTTATTGGATGAGAGTCAACTTGACGCTTTGCTGGATAAGCTCTCTGTTATGCCAAACCGGAAGAGCGCATT  
TGATCCTGGCGCGTTACCATCACATGAGGCTGCCAGCCTGGAAAAAGCGGCAACACGCTGGCCGAAGTTGCAAATCGAC  
TTTATGACCATTATGCCAGCAAAGGGCAACAGGCGGATTACGTCATCATCGTTGGCTTGCAGGAGGGAAGTGATGGTTT  
TCCGGCTGCGGCGCGGAGTCGATTATGGAAGAGGCGCTACTGCCACCGTTGAGGATTTCCCGGACGCTGAAGAACGGC  
GGTTAATGTACGTGGCGCTGACCCGGGCACGCCATCGGGTATGGGCACTGTTTAAACAAAGAGAATCCCTCTCCCTTTGTG  
GAAATACTGAAAAATCTGGATGTGCCGGTGGCGAGAAAAACCGTAAGAAACAGGTGGCGTTTGCACCTGTGCAATATTAC  
TTCAGACGGTCCGCGAGATAACGCTGATAATCGGGATCAGAATATCGACCGCTCGTTGAAATGCGGCGACTGGATTAT  
GAAGTCTGCCGTTGCCAGTTGGTGGCGACCGGAATGTTCCATACCGTCGCCAGACGCAGCAAGGCTTTCACGTCAGGAT  
CGTGGCGCACGGCATTAGTGGATCCCAGAAGAAAAAACAATACATCAATTTTCCCTTCTGAGATCAATGCCCAACCTGC  
TGTTCAACCCATTGGCCACTCAACATCGGTTGACGTTTATGCCGTCGCGGGAATTAAGTTACCGGTAGTGCC  
TGTTGCATACAGTACGTGTTTCCAGTAACGGTTGATGCCGTTCCACCCAGCTCATCAGCATTGTTTGCAGTGATCGT  
GTGCCACCAGCCAATATGTTTCCGCGCAGGTAAGAGTCCGAGTCCAGTTCATAATGTACATCCGATGTTAACTTCC  
TACAGATTACTGTAAGCATTATCGCTGCAAGATAAGACCGAAAAAGCCTGCGCACAGGCACAAAAATCTCAGGAAGAT  
GGTTGTTTTTCCGCCACTGCAGGAAAGTATTTCCGCTTTTGGGTCAGCCAGTTTAAACCAATACTTCAGCCGTTGTT  
TGTGAGCACCTGAGACTGCGGTGGAATAGCATCCAGCTCGAAACACCCGAAAGCAGCGTACTGTCATCTGCCATCATCG  
TGCAAATTGCGGTAGTGAAGCGGTTTTCGCGATTGTTATAGCGTTCAACCTCGACCTCATAATCAATCGTTTTTGGC  
GTTGAGGTAATGGCGAGAATATCCAGCTTTACCGGAATCGGCGTCGCATCGCCATCCAACAATTCAAGGCGCGGCGCGG  
ATCAAAATGGTTAGCTTCCCGCTCATTCTCCAGGCGAGGCGAGGCGAAAAATTGACCTGGTTGATGAGCTGGGTATTA  
TGACCACCAGCGGTGGGAGATATACAGCGTTCTTCACTATTGAAAGATGAATCGTCTTCTCAACGCGAAACACTAAC  
TGATGCGGTCCATTATCCAGTTCAATGCTGTCCGCACCGCGCAGCAGAGAGTGGAAACCTTCTTCCGTCGAGTACCAG  
AAGATCGACATCGTTGAAAGCCGAGCGTGGTGGCAAAACGGATACCGGCAACATAATGCAATCAAGGTGGTCACGA  
TGCCGTTTTTATAGGTAGCTCCTGTCAAAGACCGCCGAATAAATGTGTCAAATTTTTCTTTAATCATACTTACT  
AACATATAGACATATTTCCCGTTTTGCTCTCATTCTCGTATTAGCTGCATGGTTGGCATGTCGGCTTTGTCGTACAC  
TTTGTAAACAGTCTGGAGGAAATAATGAAAGAAACCGATATTGACGCAATTTAACGTCCTCACACCATTGCGCTGG  
TGGGGCAAGCGACAAACCCGATCGTCCAGCTATCGCGTATGAAATATCTACTCGACCAGGGGTATCACGTCATTCCG  
GTTTCGCCAAAAGTTGCCGCAAAACGCTGCTGGGCGAGAAGGGTATGGCACGCTGGCAGACGTTCCGGAAGTTCGA  
TATGGTCGATTTTTCCGTAATTCAGAAGCGGCGTGGGCGTGGCACAGGAAGCTATTGCCATTGGCGCGAAAACTCTCT  
GGATGCAACTGGGGGTGATTAATGAGCAAGCGGCAGTACTGGCACGGGATGCCGGGTTAAATGTGGTGATGGATCGCTGC  
CCGGCTATTGAGATCCCTCGCTGGGCTGGCCAAATAAAAAATCCCGGAAGGCAAAAACCTTCCGGGGATTTGTTTCCAG  
GGATTAGTTACGCAGACGCGGGCCTGGAGTTGTTTGGGATGGTCTGCGCCAGCTCATCCATGGATGGCTGTTCCAGGAT  
GTTTATCTGCAATTCGCTACTTAGCTGGGCTTCCAGCAGGTAGGTATGAACCGGTAGGCGTTATCGTCTCCATCACT  
ACGTGATACCAGGAGCGGCGGAAGCTCGTCAATCACCGCCAGCTCATCAGGCGACGTTTCCAGAGAGCGAATAACCGG  
GTCGATATCCACGACCACTCCGAGATAACCTAACAGGGAATGGCGGACCTGCTGGCCGATACCGAATTTGCTGGCAATCA  
TAGTCACCTCCCGGAAATCTTTACCTTTGATATAAGGGTAAAATTCACATTTCAAGTTACATGACGCGACAGGCAAAAC  
CCTTTAGATATAGCCCTTCCGATAGGTAGCGATCACCGGATGATCGGCTGCCTGACGGAAGTCTCTATAAATTTGATC  
ATCACGACCGGCATCAATTCGGCATCCGCGATGATTTTCTGAAATAAATCGTGGTATCAGACCGGAACAGGAGAAAG  
TCAGGAGAATACCGCCTTCAATTCAGCAGCTGAATCGCCAGCATGTTGATGCTTTATAACCCAGCACACCGCCCAAC  
TGCTTTTTATTCTCAACAAACTTCCGCGGCTCATCACGATAACGTCAAATTTTTTCCCGGATCGCGATAAGTACGCGAG  
CAATTTAAAGACATCATCACGGAACCTCAGCCTTCTCAGATCCAGTTTGTTCAGCTCAACGTTTCTGCGTGCAATAT  
CCAGCGCTTCTGGGAGGTATCAACGCTGACAACCTGGCTGCAACCGCCATCAGTGCCGATACGGCGAAACCCCGGTA  
TAGGAGAAACAGTTTCCAGCACGTTTTATTTTCAACGTAGCGGCGGTTAGCCAGGCGGCTATCACGCTGGTCCAGGTAGTA  
GCCCGTTTTGTGTCGCTGTAATATCCACCAGCAGTTTATTCCGTTTCTTCAATCGGCAGCAGGGCAGGTGGCAACT  
CGCCGGTACAGCGTTTGCAGGGCACTAATTAATGCCGCGCTGATATTCTGCCCCAGCACTCAGCAGTTGCAGCACCAG  
AAAATTACCGAAACGATCGATAGTAATACCGGCGAGCCATCAGATTCTCCGGCGATTAACGATAGCTGTCGAGGCCAT  
CTTTTTGCGCCAGCCAGTACGCCATTTTTGTGCTTGTGCAACGGCGGAAAAAAGCAATGTCGATAGACTCAGAC  
GGGTCAAACGTCAGACGCGCGCCGGATTTGCGAAGCTGGCGAATAAGCGCCGCTGCTAACCATTTTTCCCTGATGATC  
ACAATATCGATGGTTTTACCGAGGCTGGCTTTACCTCCATGCGGGCAACGCCCCGAAAAAGCCACGGATGGCGAC  
GAAGTAATGATTTTTCGCGCCTTTGGCTAACACTAAACGTACTCATAATTTACTTTTTCTGTCGATGCAAAGAAATGG  
GCTGATTGTCGGAGTTTTCCATGGATTTGCAACGCTCCATTAAGGATAAGGAGAGCAGCAATGTCGAAAGTCTGCAT  
AATGCTGGTTTTACGGGCGAGTTTACGGGCGTAGGATTTCTGCTACACCACACAGTACGAAGCGAAAAGACTGGGTTTAA  
CCGGGTACGCCAAAATCTTACGATGGCAGCGTGAAGTGGTTGCTTCCGCTGAAAGAGGCGAGGTGAAAAAATTAATG  
CAGTGGTTAAAGAGTGGCGGCCCGCTTCTGCGCTGTAGAACGGGTGCTCAGCGAGCCGATCATCCCTCGGGGAATT

AACCGATTTTCGTATCCGTTAAATACATTTTACCGGTTTTGGCAGGCCAGCAATTTTGGTGGCTTGCTTAGCCGGACCTT  
TCGGAAACAGTCGGTATAAATAGCGGCTGTACCTTTTTCTTCGCCAAATTTATTCGCCATCGCTTTTACCAGCATAACGA  
ATCGCCGGAGAAGTATTGAATTCAGATAGAAATCACGCACAAAACGCACCCTCCAGTGTCCGGTGACAGCGAAAT  
CCCTTCGTTCTCTGCAATCACACAGCCAGCGGCTCACTCCACTGGCTGCTTTCTTTGAGATAGCCTTCGGTATCCGTTT  
CTATCTCTTTACCTTCGAAGATCAGCATAATTACTACTCTTAATCAGACTGGCGGCAGTGTAACAAAAAACAAGCCC  
CGCATAAAGCGAGGCTATGAAAGTGTTAGCGGGTGAGATTAATCGCGGCTAGCGAAGCCCAGAATGCTCAGCAGGCTGAC  
GAAGATGTTGTACAGCGAAACATACAGGCTAACCGTGGCACGAATATAGTTCGTCTCACCGCCATGAATGATGTTGCTGG  
TTTCAAACAAGATAGCGCCAGAGGAGATCAGAATGAAGACCGCGTGTATCGCCAGATGCAGAGCAGGCAGCTGCAGGAAG  
ATATTGCAACCATAACCAATCAGCACCACCACAATACCCGCCATCAGCATAACCGCCGAGGAACGACATATCTTTGCGGGT  
GGTCAGCACATATGCAGAGCAGCAGAAGAACTAACGCCGTTCCGCCAGTGCATAGCGATTACGTACCCATTCCGG  
CAGACAGATAGGTGTTGAGAATAGGTCCGAGGATATAACCCAGAAAACCGGTAAGGCGAATGCGGAGATAATCCCGGT  
GGCTTATTCGCGGTTTTATAGGTGAGGAACATCAACCATACATACCCACCAGCGTCAGAATCAGACCCGGAGATGGCAG  
CATCAGCACCCTACTGGCAGTTGCGGTAATCGCCGAAAAGGCCAGCGTCAGGCTCAGCAGAAAATAGGTATTACGCAGCA  
CCTTATGGGTGCTAAGCAGTGATGTACGGTCATGTGAAGAACAACAATACGATCCATTGAGTCACTCTCTATGACAGAT  
GTAATTAATTAAGCAGCATAATGATAATGCGTAAGGACCCAGAAAGTTTTACCCATCTTTACGCATTTGATCTGGAACA  
GGTTTAAACAGCGATTATCAGGTCAATTAAGCAAATATAACGCCCTGAGAATTTGCAGAGGCAAAAAGGGGTTAGC  
ATTTAGCTAACCCCTTATCTTATTTGGCGGAAGCGCAGAGATTGAACTCTGGAACCTTTTCGGGTCGCCGGTTTTCAAG  
ACCGGTGCCTTCAACCGCTCGGCCACACTTCCGGAATGACGCGCACTATAAACATCCCAGTGCAGCGGTGTAACCCCTAA  
TTTGTGTTGTTTGCCTGAAAAACAGCCAAAAGTGCATTGATAGCGTGAAAATAACAGCAGATTGATCATTTCATCACCATGA  
ATTCCTTCTTTTTACTCGTTTAGCAACCGGCTAAACATCCCCACCGCCGCAAAAAGAAAAATAGGTCCATTTTTATC  
GCTAAAAGATAAATCCACACAGTTTGTATTGTTTTGTGAAAAGTTTCACTACGCTTTATTAACAATACTTTCTGGCGAC  
GTGCGCCAGTGAGAAGGATGAGCTTTCGTTTTAGCATCTCACGTGAAGCGATGGTTGCTTGTACAGGACGTCGC  
TTGCCGACCATAAGCGCCCGGTGCTCTGCCGGTGCAGGAGGAGAGACGTGCGATATGAATAACGAGGAAACATTTT  
ACCAGGCCATGCGCGTCAGGGCGTTACCCGGCGCAGCTTCTCAAATATTGTAGTCTGGCTGCCACGTCGCTGGGATTA  
GGCGCGGAATGGCACCAGATTGCCTGGGCGCTGGAGAACAACCGCGCATTCCGGTGGTATGGATCCACGGTCTGGA  
ATGCACCTGCTGTACCGAATCTTTTATCCGCTCCGCTACCCACTGGCGAAGGACGTCATCCTTTCCCTGATTTCCCTCG  
ATTACGACGATACTTTGATGGCTGCCCGCGGAACCCAGCGGAAGAAGTCTTTGAAGACATCATCAGCAATAACAATGGC  
AAATATATCCTCGCAGTAGAAGGTAATCCGCCGCTGGCGGAGCAGGGGATGTTCTGTATCAGCAGCGGTGACCGTTTAT  
TGAGAACTCAAACGTGCCGCTGCCGAGCCAGCGGATTATCGCTGGGGAACCTGCGCGTCTGGGGTCTGCGTGCAGG  
CCGCGGACCCAATCCGACGCGAGGCAACGCTATCGACAAAGTATCACCGACAAACCCATTATCAAAGTACCTGGCTGC  
CCGCCGATCCCGGATGTGATGAGCGCCATCATTACTTACATGGTGACCTTTGATCGCTTGCCAGATGTGACAGAATGGG  
CCGTCCGCTGATGTTCTATGGTCAGCGAATCCACGATAAATGCTATCGCCGCGCCACTTCGACGCGCGGAGGTTCTGCC  
AGAGTTGGGATGATGACGCTGCCCGCAAAGGTTACTGCCTGTACAAAATGGGCTGCAAAGGGCCTACCACCTATAACGCC  
TGTTCTCCACACGCTGGAATGATGGCGTTTTCTTCCAAATCCAGTCTGGTCACGGCTGCCTGGGCTGTGCGGAAAATGG  
TTTTACCGCGCTTGGCGTGGTGGCAGCGGCTGTTGGTGTGCACGAGTCGCCAGCGCGTGGACCAGCGCAGACGTCAT  
AACCAGCAACTACAGAAACCGAACATCAGCCAGGCAATGAGGATAAACAGGCATGAGCACTCAGTACGAAACTCAGGGA  
TACCATCAATAATGCCGACGCCGCTGGTGGTGCACCCGATTACGCGCATCGAAGGCCACATGCGCTGCGAAGTGAA  
TATTAACGATCAGAATGTGATCACCATGCCGTCTCTGCGGCACCATGTTTCGCGGGCTGGAGATCATCCTACAAGGCG  
GCGACCCGCGGATGCTGGGCGTTCTGTTGAACGTATCTGCGGCTGTGACTGGCGTACACGCCCTGGCTTCGTTTAC  
GCCATCGAAGATGCTATCGGTATTAAGTGGCGGACCAACGCAATATCATCCGCAACATTATGCTGGCAACGCTCTGGTG  
CCACGATCATCTGGTCACTTCTATCAGCTTCCCGGATGGACTGGATCGATGTGTTAGATGCGCTGAAAGCCGACCCGC  
GGAAAACCTCCGAACTGGCGCAAAGTCTCTCTCTTGGCCGAAATCATCCCCTGGCTATTTCTTCGACGTACAAAACCGC  
CTGAAAAAATTTGTTGAAGCGGGCAGTTGGGGATCTTCCGCAATGGCTACTGGGGGACCCCGCAGTACAAACTGCCGCC  
AGAAGCTAACCTGATGGGCTTTGCCACTATCTCGAAGCTCTCGATTTCCAGCGTGAAATTGTCAAATCCACGCGGTCT  
TTGGCGGTAAAAACCCGATCCAAACTGGATTGTCGGCGGGATGCCTTGCGCCATCAACATTGACGAAAGCGGCGGGT  
GGGGCAGTCAATATGGAACGCTGAACCTGGTGCAGTCAATTACCCCGCACGGCGACTTCATTAACAACGTGATGAT  
CCCCGACGCTTAGCCATCGGTGAGTTCAACAAACCGTGGAGCGAAATCGGCACTGGTCTTTCTGATAAATGCGTTCTCA  
GCTACGGCGCATTCCCGATATTGCCAACGACTTTGGCGAGAAAAGTCTGCTGATGCTGGCGGCGGGTATTAAACGGC  
GACTTCAACAATGTGCTGCCAGTGGATTTGGTTGATCCGAGCAGGTGCAGGAGTTTGTGACCACGCTGGTATCGATA  
TCCCAACGATCAGGTCCGGGCTCATCCGTTGATGGATCACCGACCCGTTGACAACCCCGGATGTCAAAGGCAGCG  
ATACCAACATTCAGCAGTGAATGAACAGGAACGCTACTCGTGGATCAAAGCGCCACGCTGGCGCGGTAACGCGATGGAA  
GTGGGGCCGCTGGCGCGCAGTTAATCGTTATCACAAGGCGGATGCTGCGACCGTTGAGTCGGTGCATGATGTC  
GGGTTGAACCTGCCGCTTTCCGGTATCCAGTCAACGTTAGGCCGATTTTGTCCGCGCGCACGAAGCGCAGTGGGCCG  
CAGGTAAGTTGAGTATTTCTTCGACAAGCTGATGACCAACCTGAAAAACGGCAATCTCGCCACTGCTTCCACGAAAAA  
TGGGAACCTGCAACCTGGCCGACAGAGTGCCGTGGTGTGTTTTACCGAAGCGCCGCGGGGGCTTAGGCCACTGGG

CGCCATTGCGGATGGCAAGATTGATCTCTACCAGTGCCTGGTCCGACCACCTGGAACGCCAGCCCGCGGATCCCAAAG  
GGCAGATTGGCGCTTATGAAGCGGCGCTGATGAACACCAAATGGCGATCCCCGAGCAACCCTGGAGATCTGCGTACT  
CTGCACAGCTTTGACCCGTGCTCGCCTGTTCAACACACGTGCTGGGCGACGACGGTAGCGAGCTGATCTCCGTGCAGGT  
GCGTTAACAGCGAAGGAGAATCATCATGCAACAGAAAAGCGACAACGTTGTCAGCCACTATGTCTTTGAAGCGCCAGTGC  
GCATCTGGCACTGGTTGACGGTGTATGATGGCGGTGTTGATGGTCACCGGATACTTTATCGGCAAGCCGCTACCTTCC  
GTCAGCGGCGAGGCGACGTATCTGTTCTATATGGGCTACATCAGGTTAATTCACCTTCAGCGCCGGGATGGTTTTTACCCT  
GGTTTTGCTGATGCGGATCTACTGGGCTTTTGTGGCAATCGATACTCCCGGAGCTGTTTATCGTGCCGGTATGGCGTA  
AAAGCTGGTGGCAGGGCGTGTGGTATGAAATCCGCTGGTATCTGTTTCTGGCAAACGTCAGGAGTCCGATATAGGCCAT  
AATCCCATCGCCAGGCGGCGATGTTCCGCTATTTCTGATGTCGGTCTTTATGATCATCACTGGTTTTGCGCTGTACAG  
CGAACACAGCCAGTACGCTATTTTTGCGCGTTCGTTATGTGGTGGAAATTTTTCTACTGGACGGGTGGCAACTCAATGG  
ACATTCACAGCTGGCATCGGCTGGGGATGTGGCTGATTGGCGCTTTGTGATCGGTCATGTCTACATGGCGCTGCGTGAA  
GACATCATGTCCGACGACACGGTATCTCCACCATGGTCAACGGTACCGTAGCCACAAATTTGGCAAATAAGTAACAA  
GGAGCGTTCATGAGCGAGCAACGCGTGGTGGTATGGGGCTGGGCAACCTGCTGTGGGCCGATGAAGGCTTCGGCGTGG  
GGTGGCGAAGCGGCTGATGCCATTACCACTGGCCGAGTATGTGGAGATTGTCGATGGCGGTAACCTGGAACGACTGAA  
TGCTGGGTATGTCGAAAGCGCCAGCCATCTGTTGATTCTCGATGCCATTGACTACGGGCTGGAACCTGGAACGACTGAA  
ACCTATGCCGGAACGCATTCGCGTATCTCAGCGGAAAGAAATGAGCCTGCATCAGAACAGTTTTCCGAAGTGT  
GGCGCTGGCGGATATCCGCGGACATCTGCCAGCACATATTGCCCTCGTCGGTCTGCAACCCGCAATGCTCGACGACTACG  
GCGGTAGCCTGAGCGAAGTGGCACGGGAGCAACTGCCCGCTGCGGAAACAGGCGGCGCTGGCGCAGCTTGTGCGTGGGGA  
ATTGTGCCGCAACCGCTAATGAATCGCGCTGTCTCAATTATGACTGTCTGTCGATGGAAAATTACGAAGGCGTTCCGCTT  
GCGCCAGTACCGGATGACACAGGAGGAGCAGGGATGAGCAACGACACGCCATTTGATGCGTTGTGGCAACGAATGCTGGC  
GCGCGGCTGGACGCCAGTCAAGTGAATCCCGTCTTGACGACTGGCTTACGCAAGCGCCAGACGGCGTGGTGTATTAAGCA  
GTGACCCGAAACGCACGCCAGAGGTCAGCGATAATCCGGTAATGATTGGCGAATTAAGTGGCGAGTTTCCCGACTATA  
TGGCAGGTGGCGATTGCTGACCTTGAGCAGAGCGAAGCCATCGGCGATCGCTTTGGCGTCTTTGCTTTCCGCACTTT  
AGTGTTCACCGCGGAAACTATCGCGCGTGTGAATGGTATTACCCGTTGGCGGAACTGATAAACCTGATGCGCGGGC  
TTGTGCAACCGCAGCAGGAGCGTGCCTCATGAGCGAAACTTTTTCCATCTGCTGGGGCCAGGAACGCAACCGAACGATG  
ACAGTTTCAGCATGAATCCACTGCCGATCACCTGTCAGGTGAATGATGAACCGAGTATGGCGCCCTGGAGCAATGTGCT  
CACAGCCGCGAGGTGATTGCGCTGTTAAACGAGTTACAACATCAACTAAGCGAACGCCAACCGCGTTGGCGAGGTGCT  
GGCAGTCGATCTGTTAAATCTCAACCGCGACGATCGTCACTTTATCAATACGCTTCTCGGGGAAGGGGAAGTGTGAGTGC  
GCATTCAGCAGCTGACGACAGTGAAGTGAATACAGGAGGCGATCTTCTGCGGATTATGGCGGGTGGCGAGACGTCGC  
GGCGAAAAGTTGCTGGAGGCAAACTGGAGGCTGGCTGCGCGCCGCTGGCGTTGTGGCAGGCGGCAACGCAAATCTCTT  
GCCGACAGATTCGCTGTTACCGCGCCCATGATGGCTGATGAATGGCCTACCGTTGGCGCATGAGTTACTGGCACATG  
TACGTAACCCCGACGCGCAGCCGCACAGCATTAACTGACGCAATTACCCATCAGCGAGGCTGATCGGCTTTTTCTCTCA  
CGTCTCTGTGGGCCGGGAAATATTAGATTGCTACCATGGCTATGGCGAGAGCTATATCAACGCCACGGGGTTACGCCA  
TGCTGGCATTACGCTGTACGGACACCTAAAAGGCCGTTACTGGAAAGTTATGAAATCTGCCAATACCGGAAGTGG  
TGCTGGCAGCGCCAGAAGATTTGGTCACTGCGCAGCGGCTTAGCGAGGTATGTCAGTGGCTGGCGGAAGCTGCACCG  
ACGTA AAAAGACGGAAGTATCGCTTTGAGTCTTATGAATATCGCAATCGGCGAATACCTTGGTCTGATAGTTCAGGA  
TAAAGAGGGAGATCTACCATTATCGGGTATTTTTCTCTTTCGCTACAGGAGTGCAGTGTGGGATGTCATTGATTA  
TCGCGCTGGCAGTTTGTCTGACCGCGCTGTATCACTTTTTATTTGATCCCTTACCCTGGGGCTGATTTTTTGTGGC  
TATTATGGAACCATTTACGTGGTCAACCGGCAAAACAACTACCCGATATGACGCGCTTCTGGGGTAAGCTCTTCGGTA  
TCAATTTTGTCTTTGGCGTGTACCGGCTGACCATTTTGTGACTAATGTTGTTGTTGTTGTTGTTGTTGTTGTTGTTGTT  
GTGGGCGATATTTTTGGCGCACCGCTGGCGATGGAAGCATTAAATGGCCTTCTTCTCGAATCCACCTTTGTGGGCTGTT  
CTTCTTGGCTGGCAACGGCTGAATAAATACCAGCACTGCTGGTACGCTGGCTGGTGGCGTTTCGTTCAAATCTCTCTG  
CGTTGTGGATATTGAATGCCAACGGTTGGATGCAATACCCGACCGGTGCGCATTTTTGATATCGACACCCTGCGTATGGAG  
ATGACCAGCTTCAGCGAGCTGGTCTTTAATCCGGTACGCCAGGTGAAATTTGTGCACACCGTAATGGCGGGCTACGTGAC  
CGGGCCATGTTTATTATGGCGATCAGCGCTGGTATTTACTGCGCGGACGGGAGCGCAATGTCGATTACGCTCGTTTG  
CCATCGTTCCGCTCTCGGTAATCTGGCGATTATCGGTACCCTGCAACTCGGAGACAGTTCTGCGTATGAAGTGCAGCAA  
GTACAACCGGTA AAAACTGGCGGCGATGGAAGGGGAGTGGCAAACGGAACTGCACCTGCACCGTTCCATGTGGTTGCTG  
GCCGGAACAGGATCAAGAGCGTAACGCCCTTTGCCCTCAAATTTCCCGCGCTGCTAGGGATCCTCGCCACTACTCATTAG  
ATAAACCCGTGCCGGTCTGAAGAATTTGATGGCTGAAACCTACCCAGCTTGAACGCGGACGATGGCCTGGCTGTTA  
ATGACGAAATATCGCAAGGCAATCGTAGCCGATGTGTTGACGCACTCCGGGACTGGAAGGTGACCTGGGCTACGG  
CATGTTGCTCTCCGCTATGCGCCGGATGAATCATGTCACAGCCGCACAGTACCAGGCGCGATGCGTGGCGGATAC  
CTCAGGTTGCGCCGATTTCTGGAGTTTCCGCATCATGGTGGGCTGTGGTCCCTGCTGCTACTGGTGTGCTGATTGCG  
CTTGTCAGACGCTGCGTGGCAAATCGACCAGCATCGCTGGGTGCTGAAAATGGCGCTCTGGAGTTGCGGTTGCCGTG  
GATTGCGATTGAAGCCGGTGGTTTATGACCGAGTTTGGTCTGACCCGTGGGCGATACAGGACATCTTACCCGATACT  
CCGCGCACTCCGCTTTAACACAGGACAACCTGGCTTTCTACTGATCATGATCGTAGGGCTTTACCCCTGTTCTTAATC  
GCCGAAGTCTACCTGATGCGAATAATGCCCGTCTGGGGCCGAGCGGATGACAGTGAACAACCGACGCAACAGG



GTAAAGGAGAAAATCATGTTTGATTATGAAACATTGCGCTTCATCTGGTGGCTGCTGATTGGCGTGATCCTGGTGGTCTT  
TATGATCTCCGACGGATTTGACATGGGGATCGGCTGTCTGCTGCCGCTGGTGGCGCGTAATGATGATGAACGCCGGATAG  
TGATAAACAGCGTTGGTGCACACTGGGAAGGCAACCAGGTCTGGTTGATCCTCGCTGGTGGGCATTATTTGCCGCTGG  
CCCAGAGTGTATGCAGCGCGTTTTCCGGCTTTTATGTGGCGATGATCCTGGTCTGTGCTACTGTTCTCCGCCCGCT  
GGCCTTTGATTATCGCGAAAAATCGCGGATGCACGCTGGCGTAAAAATGTGGGACGCCGGTCTGGTCATCGGCAGTCTGG  
TGCCGCCGGTAGTCTTCGGTATCGCTTCGGCAACTTGTGCTCGGCGTGCCGTTTGCCTTACACCCGAATTACGCGTG  
GAGTATCTCGGCAGCTTCTGGCAACTGCTGACGCCATTCCCTTATTGTGCGGATTGCTCAGCCTGGGATGGTGAATTT  
GCAAGGTGGCGTCTGGTTACAACACTGAAAACACTGTTGGTGTGATTCACTGCGTTCACAGCTGGCGACCAACCGCGCTGCAC  
TGTTGGTGTGCTGTGCTTTTTGCTGGCGGGTACTGGCTGTGGGTCCGGTATTGATGGCTTTGACTGCTCGCCAGGAT  
GCTAACGGTCTTCCAATCCGTTAATGAAACTGGTGGCAGTGCTACCTGGTGCCTGGATGAATAATTTTGTGCGAGTCGCC  
CGTTTTGTGGATCTTCCCGTGTGGGATTCTTCTGCCATTGCTGACGGTGTGGCGATTATCGTGGTCCGCCGGT  
GGGATTTTTGATGGCATATTGATGCAATTTGGCGTATTTTACGGCAGGCATCACGCTGTTCCCTTTGTATGCCG  
TCAAGCGTGAGTCCGATCTCAGCCTGACGTTGTGGGACAGTACTCCAGTCAGCTGACGCTGAGCATTATGTTGGTAA  
CTCTCCGCTGTAACGAAAACGAGTTGACTAAGGAGCAGAAACAATGTGGTATTTACTTTGGTTCGTCGGCATTGTTG  
ATGTTTCCGCTCCACCCTTGTGTTGGTATGGCTGGACCCGCGTCTGAAAAGTTAACGAACGTAGGCCGTGATGGCGC  
ATTAGCATCGCATCAGGCAATCAATAATGTCAGATATGAAAAGCGGAAACATATCGATGAAAGCGATCTTAATCCCATT  
TTATCTCTTGATTCCGTTAACCCCGCAATCTGCATTGCTCAGAGTGAGCCGGAGCTGAAGCTGAAAAGTGTGGTAT  
TGTCAGTCGTATGGTGTGCGTGCTCCAACCAAGGCCACGCAACTGATGCAGGATGTCACCCAGACGCATGGCCAACCT  
GGCCGGTAAAACACTGGGTTGGCTGACACCCGCGGGTGGTGGAGCTAATCGCTATCTCGACATTACCAACGCCAGCGTCTG  
GTAGCCGACGGATTGCTGGCGAAAAGGGCTGCCCGCAGTCTGGTCAAGTTCGCGATTATTGCTGATGTCGACGAGCGTAC  
CCGTAACAGGCGAAGCCTTCCGCCCGGGCTGGCACCTGACTGTGCAATAACCGTACATACCCAGGCAGATACGTCCA  
GTCCCGATCCGTTATTTAATCCTCTAAAAACTGGCGTTTGCAACTGGATAACGCGAACGTGACTGACGCGATCCTCAGC  
AGGGCAGGAGGTTCAATTGCTGACTTTACCGGCATCGCAACCGCGTTTCCGCAACTGGAACGGGTGCTTAATTTCC  
GCAATCAAACCTTGTGCTTAAACGTGAGAAACAGGACGAAAGCTGTTCAATTAACGAGGCATTACCATCGGAACTCAAGG  
TGAGCGCCGACAAATGTCTCATTAAACCGGTGCGGTAAGCCTCGCATCAATGCTGACGGAGATATTTCTCTGCAACAAGCA  
CAGGGAATGCCGAGCCGGGTGGGGAAGGATCACCATTACACCAGTGGAAACACCTTGCTAAGTTTGATAACCGCGCA  
ATTTATTTGCTACAACGCACGCCAGAGTTGCCCGCAGCCGCGCCACCCCGTTATTAGATTTGATCAAGACAGCGTTGA  
CGCCCATCCACCGCAAAAACAGGCGTATGGTGTGACATTACCACTTCAAGTGTGTTTATCGCCGGACAGGATACTAAT  
CTGGCAATCTCGGCGGCGCACTGGAGCTCAACTGGACGCTTCCCGTCAAGCCGGATAACACGCCCGCCAGGTGGTGA  
GGTGTGTTGAACGCTGGCGTGGGTAAGCGATAACAGCCAGTGGATTAGGTTTTCGCTGGTCTTCCAGACTTTACAGCAGA  
TGCGTGATAAACGCGCTGTCATTAATACGCCGCCGGAGAGGTGAAACTGACCCTGGCAGGATGTGAAGAGCGAAAT  
GCGCAGGGCATGTGTTGTTGGCAGGTTTACGCAATCGTGAATGAAGCACGCATACCGCGTGCAGTTTGAATGCAT  
AAAAAGAGCATTAGTTACCTGAATGCTCTGAGGCTGATGACAAACGAAGAACTGTCTAATGCGTAGACCGGAAAAGGC  
GTTACGCGCATCCGGCCACTTTCAGTTTTACTCTTCTCGGAGTAACTATAACCGTAATAGTTATAGCCGTAACCTGTA  
AGCGGTGCTGGCGGTTTAAACACACCATTGAGGATAGCGCTTAAATATTGACGCCTGCCTGTTCCAGACGCTGCATTG  
ACAACTCACCTCTTGGCGGTGTTCAAGCCAAAACGCGCAACCAGCAGGCTGGTGCAACAGAACGCCCCACGACCGCG  
GCATCACTACCGCCAGCATCGGCGGCTATCGACAATCACCAGATCGTAATGGTGTGTTCCGCCATTCCAGTAATTGACG  
CATCCGATCGGCATCAGCAGTTTACAGCGGTTAGTGGCACCTGACCGCGAGTAATCACATCAAAGCCCTCTTTGCCAA  
AATGCTGGATCACTTTGTTGAGTCTATCTTACCTGCCAGATTTCCGACAAGCCATGTTTCACTACTCACGGTAAACAGG  
TTATGCGAATAACCCAGGCGTAAGTCCGATCAATAAATAACACTTTTTGATCGGACTGGGCGATCACCGCTGCCAGAGT  
TGAAGTACAAACGTTTTTACCAGTGTCTGGCGTCCGACCGGTGATCATTAGAATGTTATTCTCCGTCTCCATCATAGCGA  
AATGCAGACTGGTTCGTAGCGCACGTACGGCTTCCACAGCAGAATCCGCCGGTTATCCACCGCCAGGAAGGGGATATTT  
TTAGTACGATGGCGCTGCTGATTAGAAAATAAATTTTTCTTACGACAGCGGTGCGTTTATCCAGCCACTCGGACATTGG  
GATAGTGGCATAAACGCTGATGCCGTGCTTCCAGTTGTTCCGGGGCTTACACCACGACGCAACATCGCACGCGCCA  
GCACGGCACCCACAGAAATAAACAGGCCAAGAATAAAACCAAGCACCACGTTCAACGCTTTTTTCCGTTTCACTGGCTGC  
GGCTGAGTACTGCCGGTGCATAATCCGCACGTTACCAATGGCACTGGATTTGAAATACTCAACTCCTGCTGGCGGTT  
AAGTAATTGCAGATATACCGCACGGCCGCTTCTACGTCACGACTTAAACGCAACACTTCTGTTGGGTGGAAGGCATTG  
CCGATACCCGTTATTACGGCGTTTGGTCTTCTGCTCCAGCGTCTGGCGTTTTTCCAGCAGCGCACGATAAGTTGGGTGA  
TCTTTCTTATACAGCTGGGAGATCTCTGCCTCGCGGAAGGTGAGTCAATTGAGTTGATTATCAACGTTTACAATCTGCTC  
AAGAACGGCTTTGGCTTCCAGGTTAAGTCAACCGAATCGCGCTGCTGGCGATAAACGTTGAGTTTTTCTCCGCTTGGT  
CCAGCTCGCTGCGCACTTACGGTAACTGGCGCTGTAAGAATCAAGGCTTTGTGAATCCTGCGCCGCTGGCGAGCGATA  
TTCTGTTGCAAAATAGTTGTTAGCGATGCTGTTGAGAATACAGTAATCAACTGGGGATCATACCAGTCAATGGTAAGTTC  
CAGCATCCCGTTTTCTTACTGCGTTGCTAACGGTAAAGTTTTCTGCAATGCGTTAATCGCTTCCAGTTCGGTACGCT  
GGCTCAGGACAACTGTGTTCTGGTTTGGCCTTAAATGTCGCGATAGTCAGCGCAACGCCATTTTTTCCAGACGCTGG  
CCGACCATACCATTGACGGTGAACCTTACCTTCCAGTGTATAGTGGCCGTTTTTCCCAACCGTGGTGTGCTGCTG

ATCCTGACCATTAGTTGTGGAATATGCATCCAGCTGATCGCCAGCTCACCTGGTTTTCTTTGGTTAATCTCGCCCAGC  
CGCGACCCACAATCGGAAAATACTTCTGCTCAACTATGTCGCGCAGATTAGTTAGGATCATATCGCTCAGGCCGCTGAGAATGGC  
CGCGATTGCAGCAGTTGGATCTCCGGTGCAGACTCGGGCGATGAGTTAGGGATCATATCGCTCAGGCCGCTGAGAATGGC  
GTTGCCCTGTTTTGCTCAACCTGGACCAGAGTATCTGCCTGATAAATTGGTGTGCTTAACAGCGAGTAAGCGACAGCGA  
TCAGCGTGAATAACCGCGTACGCTGATAATAAACTTACGGTATCCATAACTCGCCGACCAGACGAAGCAGATCGATC  
TCATTTTCTGAGTGTGCTGCTGGTGGCGTATTATATTTTTAGTTGTCATCGTATTTTTATAAACTCAAATTACCGGCTGA  
GGCGCTTCGCCATTCTGACTGGCGCGTCCAACATACCGTAGACATGTTCAAATGCGTCCTGACTTTTACGATAGGGA  
TCCGGGATCTCTTTCTGTTCCAGCCATTGCCAAACAGCATTGCTTCCCGCGACCTCGGGAGCAATTGCGGTAACCTG  
AGCAATATGTTCCGACTCCATTGCCAGAAATCAGATCGTAATTTCTGCCATCTCAGCAGTGAGCTTACGTCGGCATGTC  
CTTCAAGAGATACGCCATGATTAGCGGCAACATCTGCCGCTGTCGCATCTGCAGGGTGTTTTACCAGACCATGAACCT  
GCCGATTTGACTTTTACGCCCGCAGACGTTTACGCAGCAAGCGCTCGCCAATGGCGAACGGCAAATGTTGCCGGTACA  
AACCACCAGGATTGAGTTAAATTTAGTTGGCCATGTTTGAATCCACCGTGAAGTCTCTGTCAGGTGATGACCCCGGA  
AATCGTCGGTACCAGCAGAGAAATCACACGTTCCAACGAGCCAGCGGCGGGTAGTGACATAAAATGTCGTAAGGTT  
CAAGTGAATCCGTTCCGAGTATCATTGCCGATCGCTCCTTCGATTAGCTGATAAATATTGGCGATTTTGCATTC  
TGCTTGTGTTGCGTTGCAGAAATAACAAAAATCCCCGTCGCATCAGCGACATCCTGATTACACCTCAGCGTTACCCAG  
CGTTCCGCCAGGGTCATACCGCTGCGGTCCATTTTACGCTGCTGTTTACCACCTCACCCATCACGAAGACTTTCA  
GATCATCGTTGCGCGAATAAATAAAATATCGCCCGGTGCGAGTTTGTCTGGCGCAAGTCGCCACGCTGCATCAGC  
GCATAGAGTTCACTTTGCTTTACGCCATTCTGGGTGAGCACCACGTTGCGCCAGTCTGCATCTGCGGTGAGCCGCC  
CGCGGCTTAATCGCATCCATGATGGTCCAGAGGAATATTGGAATCGGCTGCTGACCCGATTTGCTGACTTCGCCGGTGA  
CGTACGCTTTTTGCGATCGGAACGCCGCGACGCTGACATCGACTTGCAGGCTTTCAATGACTGAATCGAGACGCGCTGTA  
ATCTCGTTGCGTACCTGGTAAGTGTTCGCCGCACTTTAGCGGACCAATATAGGGGTAGAAAATCGCACCATCGGC  
GTTAACCCAGTTGCCGGTACTGCGCTACGGTATTGCCCTGCCGGGGTGGTTAGTTCCGGGTGATCCAGACCGTAA  
CCATCAACACATACCAATCCGATACGATATTAGTTTGGATTTGCTGCTCCAGCTCCGGGTAGCCTGCGACATA  
ATCGGTTTGGCGCAACTGATCAATCAATCCTGCCGTGACGGGATAGATATTGACATTTTGTCCAGGTCACTGATT  
GTCAGGTAGTTCAATGACATCCTTGTACTGGTCGATAAATCTGACCAGGAACAAGGGTACATGCTGTCAAAGACAGAA  
CAGCCAATGTCAGTACCGAAAATTTAAAAATGTTCTTTTTATTGGTTTATATTTATCAGTCAATGTAATGTTATGAATT  
ACGTCAGGTTATTGTCCAACCGGTACTTCTCGCTGCTGCCGTCATTGGATAGAGCTGGTATTTGCGTGACAGCATTGTCC  
ACCATCACGCTCAATGGTGTCCACGAAACCACCGCGGGTTCGGGTTAGGTCCAATGGTCATCAAGTGAATGGAATCG  
AGATATAAAAACCTTTACTAAAGCCGCTTCGCCGTAGTCATTTAGATACGTTACTGATTGCCGCCATACCCCTACC  
GCCACGCCGCTGTCAAAGCGTTTGGCGACGTCGATCGTTGCGCCTTTATCTTTTGCAGATATTGCCAACGCTAAGTTT  
CATCAGTACGCCATTGAGCGTCCGGCGGTTCCAGTAAGCCGTCACGAAACCTGTTGGCGTGAATAATCGGTGAAACGCA  
TCATGTTGTCCAGTCACGTTGCTTACGTTAGTTAACGTCACACCCAGCGCCAGCAGGCATCTAGCGGGCGATAAAGC  
AGCTCGAACCAGACCCGGCTACATCGTTTCCAGATAACCGCCATACACCTGGCCATAGAAAACATTGCCTAAGTCAGC  
AAAATAGTTCCGCTGCAAGTTGTTGAGATAAACGTCATTGCGAACGTAGTCACGGATATGCGTGCGCACGGGGCAGGG  
TAGAGTCCGCGGGCAACAGCGAAGACTTAAACTTGTGCTAGTTGTTGTAATATTGGTGAATAACCGCCATCAAGCAGC  
AGGTGGTCCGTAACCCAGTAGCGGGCACTGGACATCAGCCCAGCTGGAACATATAGAAATCTTCCGGGCCGCCAGCGA  
CTGTGAAAGTGTGGGTTGAAAGAGTAGCTAAAGCGATCTTACGAAATACGGTAGCCCCGACCAAGGCAGAAAGATCTT  
CAGCTTCAACACGTTGTTGTTGAGTGGCTCTGATTGACCAGGCGCTGTACCTGCCAGCTGTTTGGCAGGCTGGCTACG  
TCGGTTTCCGTTAGTACCATCGCCATATGCTCGCGCTTTTGGTACGCTAATCTTCTCAACGCTTGGCGCAGGTTATT  
CACCAGAATCCGGTTGGCAGATCGACCGCTTACGAGAGTACGGTATTTGATTGCTGACCAGACATACAGTGTCT  
TATCGCGTAGCTGAATTTCTGGCGCGTCAAAGCCCGGTTATACTTACGGGCGGTAAGTTGTTTGTACCCTGGTGTAC  
TGCAATCCTTACAGATTAGGCGCAGGTTGATATGCCGTTTTGGCGTATCGCGCAGGGCAGGGCGCAGATCGTTGAAATT  
GGTCCGTAACGTGAAGCCAAACATCAACGTGTTACCAGCTTATAACTCAGGTTGAGATCTGCCAGCTGGCAGCGCGAT  
AAACTGCGCCGACGTTGAAATGGCTTGCCTGAGGCAGTTTGCAGCGAAATCATTCTGTTAATTGTTCCATCGTATTCCG  
AGTTTACAGCGCAGGGGATTCCACGGGCTTTGATACTCAATGCCGCCAAAGATGGAAGCCGGGCCACGAAAGATATCGCT  
AAAGCTGATATCGCCGATCGTGGACTCTGCGCGATGACAATATTTATCGCTCACCCGGCAAACGGGTTGGTAATAT  
TGCCCGCATTACCGCGTAGCCCCATGCCATCCGAGGGTGAATCAAATGGCCCCGCTTGTCTGCTGGCCACCAGATAC  
TCACCGTCAAACAGACCCGTACCAGCAATATCACGTTTACCAAACGCCACTTGGGTAGCCAGTAACCTTCTTCCACAG  
GCGAAGTTTAAATCGAATGATTTGCTTTGATGACTGATCGCCGCTGAAATCTTCCACTGGCTATATTTGCGTGTGC  
GCACATCCGTATAACGAATGGTGCCTTCCAGCCATGGGAACAGCGCCACGGAGGTGGAGTAGAACCGGTATTGATCGTTA  
TCCCGGTAGTTGACGCTGAATTCACCTCCGGTGCATGCGCGCATTTGGCATCTGCAACAATCCTGTGCCGCCAAAGTC  
TGATTGCGACGAACCCAGCGGATCCGGTAGGTTAATACTTACGATGACAGGCACTGGAGACGGCAATGGCCAGGCAGC  
TTAAAAGATAAGAATTTCTTTCATCAGTCAGGAACACGTTGCGTAAAACAGACACAATCTGGTCATTTAAATCAGCAT  
ATTTTTCGGGCAGTACATGCGCAGAAAAGCCAAACAAAGCTGGCTGCCAGGCGGTGGTTCCACATGTCTTTTATTCCAC  
AGGGCAACAGGGGCGACGACAGTCTACCCCTCAGGCGTAATCACCATAACGTTATTCTGTCCGCGCCTGCAAGGCGGG  
GTGATCTTGCAGATAATCGGTAACGCTACGGCTGCCTGCCAGGGCAATTGCCCGGCCAGAAACCGCACCCAGCAGAG

TAATAGTACCCGGACGCTGTACGGTATAGAGCGTATAGTCCCCGACCAACGGGGGATTGCTGTTCTCATCCACTCGTACA  
AAATCAGGGTCCAGTTTGACCGGTAAGCGACCGAGTATATTGAGATTGAGTAACTGCTGGCGCACGGATTAATCGTTGC  
CGCCACATCGTCGTCAGCTTCTGCTTCCAGGAAGCAAGCTGTGCCATGACATGTTGGTAGTCTTTAAGCGCTTTAGCTT  
TCGCCGAGAGTCGGTCAGCAAGGCACAGGCCACAGAGGCGATCGCGCAGTTGCGGTTGTGTCCAACTGGACAACA  
TTTTCCACGGGGCCAACGGAAAAGTGTCTGTTGTTCCAGGCAGATAAAATAGTACCCTTCCCTTGCAGAAAGGCATGGGG  
GTGCATTACGTAAAGTACGCTGGCAATGAAATACGACTGTAATTTATTCATGGTGCAGGTTTAAAGAAACGTCATTTCTAC  
GGGAATAACCCCTGCGCCTAACATTTGCCGACTTTGACGAACCTGGCCAGTAGCCGAATCGACCCAGAATGTGTTTTGCC  
ACTGTTTTCTGGCCGCTGGAAGTACCTCTTCTGCCAGACATTACACAGCACATTGCGACCCGCAATATTCAGCGTC  
TCTAATCCAGCAAAGGAAAAAGTAGAACTCAGGGTCGAGAGCGAAAAATGGTTGTCTTCACTCCAGAGAATATCGCGCGT  
CCAGCGGCTGCCATCTTTTATTGCCAGCGGTTACGAGAGGGTCTGCCGGAAATTTGCACTTCCAGCAGATTATTAT  
TAAGTTTGACGGTTTTTAAAGACGTCATTGTGGTAAACCAGCATGGCGTTATCCTGGGATAACCATTTGCTTTGTTCT  
TGTCTATATATCCAGTACCACAAAGATTGTTGCCCTTCATTAAGGCGTAAATACATAGTGAATAAGGCAACGCCTG  
GATCTGCTGATCCGCTACGGTGATATCCTGATTATCGAAAAGGCTGGCGCGAAATGTATCGACCATACTTTGCTGGCTGT  
GCGTACATCCCGCAAGAAATAGTGCGAAAATCGATAAAATAAGAGGGCGCACCTTAATCCTTGAAAGGTTAATTA  
AATGCAAATCTCTAAAGCCGGTACGAATATCGCAACCGGGTATCATTTAACTTTAATTTGACGCGTTAAAGCAGTATT  
AGCGTGTAGTGGACGTGGTGTGAGGTGTTATGAGAACCGCCATCGCCACTGTCAATTTGCTGCAACAACGCAACGTC  
GCCACACCAACAGCGTTGCCACACCGCAACTGTGCCGTGCCGACAGCGCCAGCAGCCAGCCACCGCAGGTTAGTAGC  
AGTCGTGGTTGCGCCGTAGTGGTCTGTTGGTGCCAGTAGTACCCGTCGTTGCCTCGGTCCCGTTTTGTTGCTTCAGGGG  
CAGCAAACGACGCTGGCGTCGTCACATGAAGGCCATAAGGATTGCAGAAAGCTTGTGTTTCATAACTTTTCTTTATTC  
ATCGCATGGACAATACGGGTGATGCTGCCAATTACTGATTTAGTGTATGATGGTGTGTTTTGAGGTTCTCCAGTGGCTTC  
TGTTTCTATCAGCTGTCCCTCTGTTGAGTACTGACGGGGTGGTGCCTAACGGCAAAGCACTGCCGGACATCAGCGCT  
ATCTCTGCTCACTGCCGTAACATGGCAACTGCAGTTCACCTACACCGTCTCAACCCGGTACGCACCAGAAAATC  
ATTGATATGGCCATGAATGGCGTTGGATGCCGGCAACAGCCCGCATTATGGGCGTTGGCCTCAACACGATTTTCCGCCA  
TTTAAAAAACTCAGGCCGAGTCGGTAACCTCGCGCATACAGCCGGGCGAGTGCATCGTCTGCGCGGAAATGGACGA  
ACAGTGGGGATACGTCGGGGCTAAATCGCGCCAGCGCTGGCTGTTTTACGCGTATGACAGGCTCCGGAAGACGGTTGTTG  
CGCAGTATTCGGTGAACGCACTATGGCGACGCTGGGGCGTCTTATGAGCCTGCTGTACCCTTTGACGTGGTGATATGG  
ATGACGGATGGCTGGCCGCTGATGAATCCGCGCTGAAGGGAAAGCTGCACGTAATCAGCAAGCGATATACGACGCAAT  
TGAGCGGTATAACCTGAATCTGAGGCAGCACCTGGCACGGCTGGGACGGAAGTGCCTGTCTCAAAATCGGTGGAGC  
TGATGACAAAAGTCATCGGGCATTATCTGAACATAAAAACACTATCAATAAGTTGGAGTCATTACCGACAATACGTACGCT  
TGAGATCAGGATTGTCTACTTTGAGTATAACATCCTTGTGAAATCTCCCTTTCCTCATACCGCTTGCACTATATACTGGG  
GGTAGGAAAGGCGCGCAGAGGGAAATATAAGATTGTTAACTATCCCCCTCTGGAATACGACTTGTGAGCATAAGATAAA  
TCTTAGCAAAATACAAATTAAGATAAGGAAATTGTTACGAAAGCTATTAATATTGTTGGTAATATAGTTTCAAGTGGT  
ACTATAACTGGCTGTTAAATGGCATTATAACTATTAGGTGCAGAGATATTCGCTTAAATGGATTAGTTTCTTTGTGGAA  
AAGTAACTGATGTTATAATGATGATGTTGACTATTTCACTATTTCAATAAAACCAGTCAGCTTTAAACAAGCAGCGTCA  
TATTAAGAGAGATAAACATTTGCCGCTGTTGGTCTCGCAGGCCATTTACGCGGCAAAATCCACACGTAATCCTGGTAT  
AAGCACTTCTGCGTCGCGGGGAGTGAATGCGGAAATATGGACCTGAACCTTTACGACCGTCGGAGGGGATAATGAATC  
CTTTGCCGTTTTGCGATCAAAGGTTTTGACAATCCTGTCAATTTACGGGACAAACAAATTCCTTACTGAAAATACTGC  
GCTGCACTATACGGGGTTAATAAAATAAAGCCAGCGATATTTAAGACCGCCGACGGCTAAAATAAAATTTGCTTAATCT  
CAATTCATGCGTTAATAGCTGCGTCGGTTTGAAGACAGACAGCATACAAAGTAGTTTACTAAAGCAGTTCTCATTAT  
CAGGCATTATCCCCTTTTGTGAGTCTCTCCTGAACACTAAGTAGTTTTCTGTATTAAGCCCTGTTTCCGCGAAAGCC  
CAAAATGAAGGAAGTAAATATGTCTAATAAAATGACTGGTTTAGTAAAATGGTTTAAACGAGATAAAGTTTTGGCTTT  
ATCACTCCTGATGATGGCAGCAAAGACGTTTTCTGCCATTTACCGCCATCCAGAGCAATGAATTCGCGACGCTGAACGA  
AAATCAGAAAGTTGAATTTCTATTGAGCAGGGGCAACGTGGCCCCGCGGCAGCGAACGTTGTACGCTCTAAGGTTGCC  
ATTATACTCAACATCTCCATTTCCGCTGTCCATGTTGTCATGGTTCACAGTACCGCACATCGGCATTGATGTGACGGA  
GCGAAACCCTTTGGGCGCTAAGTGTATTTTTGTAATCGACGATGATCACCTTTGATAACGTCGCGCTGCAAAATACGCA  
CTGACCATGCGCCGCTGGATTTACAAAATAATACAGGCTCCCTCGTGAGCCTTTTTATATCTGCCTTATTTTTCTT  
CAACGCTGTATGTATAGTAAGCGATAACCTGTTGATTATTGAATCTTTCCGGGAGATGGCTTATAACATTTCTTACCTGA  
CCAGGTTACCGGAAACCAACACCTTACTGGCGTGTGCTGCTTTAAGACCAGAAGAGGTTAACAGTGAATATTGAAGA  
GTTAAAAAAACAAGCCGAAACGAAATCGCCGACTTATCGCGCAAAAAATCGCCGAGCTGAACAAGAATACAGGGAAAG  
AAGTCTCTGAAATTCGCTTACCAGCACGAGAAAAATGACCGGGCTTGAAGTTATGATGTCAAATCAAATAATGTGA  
TTTTGTGAACATACCCCGTGCAGGTTGATGTTCCGCTTGTGCTAATTTAGTGACCAATCATTGGCGCTTGTGGAATTA  
AGCGTCGGTACAATTCCTCCGGCACCGGGCTTTGCCATACTCCCGCATACTTGCCTAACCAATCACCGCAAACATAATC  
CCAGAACCAGTAGCGTCATTAACCAGCCAGACAACGCAAAGGCTTTTTTATTTGCCGAGTTTTTGCAGTGAAAAGGT  
CAATGTTGAGGCTACCGGACATGACTCTACGCAAGTATACAGCCGGTACATTTCACTGTTGCTACCTGAATTAATTTAT  
CGACCGGATCCGTGATGGGCAATTTTTTGGCATTGTCACAGTCGATACAACTTTCCGCAATGCGACGAATCTTAAAC  
GGCGACAATAGCGAAACCACGCCATCAGCGCGCATATGGGCAAAGATAACGACACCAGGCATGGCGAATAAACAGGCT

GGCAATCAGCAAAACGGTCACGCTGATTAATGTCGCGGTCCCCATATGACGAAAGAAATCGAGCATTTTAACTCCATCA  
CCACGCTGTAGGGCGACAACATAAAATAGTGAATCGCTGAGCGGGCATCAATAACGCGATATAGATAAAAAAACTCAAC  
AGCAAATACTTACGCGCGCAGAGGAATATCCAGCCAGCGGGGAAGGACACATTGCCGACCAAACAGTTTGTACCGAG  
ATCGCCGATTAATTCAGAAAAGCGTACCAACCGGGCATAACCATGAGCAAAAGGCCTTTTTGAGTAATAGACTGATGACGA  
TAAAAGCGACCAATAACAGCATCGCGCGGGCGTGGACGGACGTTAACTGACCTGTTACAAGGCTATATTTTTCAGATTATC  
AGCCCGGAATCGGTAGCCAGCCTTCGATACCTCCCGGTCTGGCGACAAATGTCGTGCTACTTGCCGTTTCGTAATAGCG  
CACCAATACCAGAACGTGATGGCAATATAAATATTATTGCCAACAGTAATAATTGCGTCGCTTTACGCCAGGTCTGG  
CATTACGCCAGTCATTCCACGGTAATTTGCCGCCGTCTGTCCTGGCCGCCGTGCCAGCGGGTTCTTTTATTCTCTGCC  
ATGATTTTGGCAGTCCGTTAAGTTGTATACCAAATGCCACTATTCTAGTTGTTCTTAAGTGGCTGATATTGATTCAAATC  
GCGTTCAGGTCTTTCTTATGCAACCATGCTTCCAGAGCGGCAACTGCGTGTAAATTTCTCGTGTGGAAGGGGGCAGA  
TAATGGCTGCTGCTCCAGTTGTGCGCATAGCTGGCTGGCGATATGATTCCAGACTCGAGCAACTGCTTTTTCAGCTGAT  
GCGCGGCACGCTTTATTTCTCGCTATCTGACTGGCGGGCAATGTCGATTTTCATCGAGAAGCGGCAGGGCATGTTGT  
GTAAATAATACCAGCCATTCTGGATCTTCTCGTCCCCATTAAGTGGCTGATCTTCTGAGTTGCGATACATCCAGCGA  
TTGATCATTATTGACTTGCAGTTGGAGATAGTGGCCAGTAAGTACCAGGACTTCCAGCGGACCGGTTTAGGGATAA  
TCCCGCGGAATAATGAACGTGACGCTGGCGCAGCTTTCGTAATGACATGGGCGCTAAAGCCAATCAAAACAGCGAC  
GGATATTGCTGTGCCAGTTGTCGGGAAGCGTAATGCCGTGATATCCGGCAGATCAAAATCCACCAGTCCGGCAGCAAA  
CGTTTCGCTATTTTTCAGTGTCTCTAAAGCCTGCGCGGCTTCCCAACAGCAACAATCTGCGCACCAGTGGTTTTTCAGCA  
TCTCAATGGTAATTCGCTGGGTTAGCGGGTTATCTTCAATTAACAGCAAAACGTAACCGTCAAGACGCACCCGCTGATTG  
ACTGTTTTTGGCACGGGTGCCGTGGCAACACGTAACGGCAAGCGTAAACAAAAACAGCTTCCAACCTCCGGCGTGTGGT  
GGCGCTCAGTTCGCGCCCATCGCTGGCCAGACGGCTACTGATAGTCAAGTCCAGCCCGGTGCCGCGCGTTCGCGC  
TTACCTGCACAAATGGCTGGAAGATTTCTGCCAGTTTCGCGGGATCAATACCGCAGCCGCTGTCTTCCACTTCGACCAGC  
CATTGCTCGCCATCAGTGCAGTACGCAGGATAATGTACCCTTCTGTCAGTAAACGCAGGGCGTTGCTCAACAGGTTGGT  
TATAACCTGACGAATACGTCGTGGATCGCCATTAACGCGCACGGCATATCATCGCAATTGCCGTTGCCAGGCGAATCG  
GGCGACCTTTACCCGTCGCTCATTAAATGCAAGGTAATTTCCAGCAGCGGGCGGGTCAAAGGGCTCATCGCTGACC  
GAAACATTCTGCCACCTGCTTCGATAGCGGAATAATCGAGAATATCGTTGAGGATGGTCAGCAACGATTACCAGAGTC  
AGTAATTGCCCGAAATCATCAGCTGGGCGTTAAGTGGGGGTTATCTGCCAGCAGTTGAGCAGTGGCAGAAATACCGT  
ACAGCGGTGTGCGGATCTCATGGCTCATCGCCGCAAAACGCCGATTTTGCCTGGCTGGCTTTTTCTGCTTCCGCCCGT  
GCCTGTCGGTGTCTATACCAGTTTCTGCAATTCAGCTGTACGCGCTTTGACCTGCGCCGCCAGCTGTTCCGCGTGGCG  
ATTCAAGTGCATGAACATTGTCGGAACGCATCCATCAGCCGCCGATGGTATCCAGCTCCCGTACGCCAGCGGTTCCG  
GGAAAGGGGAGTCAATATACCCTCCAGCAGCCGTTGAGCGCCTGCGTTTTGTTTCGGAAGTGGACGCGTACTGAGCGA  
TAAACCACGCGCCAGAGGATCAGAATCAGTGCGCAAAGTGAACCATCCCAGCAATAACAGGCTGTATTGCCCGCGTGC  
ACTCGCTTTTTCCAGATGCGCCAGTCCGTGCTGATTACGCAGCTCAATGGTGTGACCAGCTGACTGACTTCGCTACTAA  
ACTGCGGAACTGGGCGATGTTATTTTGTGCGAGAGTTGTAGGTGATTGCTGATTACTGTCTGCTGATACAGCGCC  
AGCAAATCGCTATATTGGCTAACGGTAGTTAACGTTGTTGCGACTGCGCACGAACACCCGGATCTTCAATGCGTATTTG  
CCGACGTTGCAGAAATTTTACCAGCATTATTGAGCTGTTTTCCAGCGTTGGTGCATTTTTCTGGATCTGCTCCAGCCCCA  
GATTCATCACCATTTGCTGCACCCGAGAGCGCTAAGGCGCAGTTCATTATCTGGTAACTCAAGATCGATATCA  
ATCAGCCGATCGAGTGCATTTTCAGCAGCCTGACGCTGATCTTGTTCGATCAAAATCGTAAATCCCGCCCTGGGTGCTCC  
AGCGGAAGTTGTCGATTTTCCCTGACCTTGGCCAGGCGTGCATCTCATCGCGGCAGCGACTATCTGCTGACTGA  
GTTGCTGTTGTTGCTGGCGCAGTTGCAAAACGCTGCCACAGTCCCCTTGGTGCAGTAAACGAACGGAGATCTCCTGC  
TCCTGTTGTTCAATAGCGGTGGTATCAAAACCTGTTCCCGTAACGCTTGCAGCAACGCATTAATCTTTCAGGCTTTGTC  
GGTGAACATTCGCCCCGCTGCCACATCTTTTCTGTTATCGGCACTGGTCAAGTTCTGCGCGGCAAAAGTTCCAGG  
CGCTGGCTTCTGCTCAACTGGCGGCCATATTCATGGTAGGAATCAATGCCTGAGTGTGCTTTTTTCCACCTGGCTGATA  
AAGCGCAGGTTTACCATCCACCAGGTTACTGGTCAAGGTTAACAGCGCCATCAGGGCAAAGCCCATCCAGAGTCTTCG  
GGTCAAGGTTAAATTCACGGTCCGTGCACTTTAGGTGAAAAAGGTTGAGTGCAAAAGCGGAATGCATCTAGCATAAAGCC  
TTATTATTGATGAGGCTATCATGCGGCTACTGCTATTTTTACTTCTTTCCCTTTTTCATGTTGCCGGCATTTCGCTGAT  
AACCTGTTGCGCTGGCATGATGCGCAGCATTTCACGGTGAAGCCTCTACGCCGCTTAAAGCAAACGCGCATGAAACT  
GTGCGCGCTTTATCCAGCCTGAAAGATTCAATTTGTTATCGTTGAACTATGGTATGCAGGAGGCTGCTCGCCGCTACG  
GTGTGGATTTAAAAGTGTGGAGGCGAGGCGCTACAGCCAGTTGGCTACCCAGCAAGCACAATCGACCAGTGTAAACAG  
TGGGGCGCAGAGGCCATTTTCTCGGTAGTAGCACGACCTCATTCCCGACCTGCAAAAGCAGGTAGCAAGTCTGCCGGT  
GATCGAACTGGTAAATGCTATTGATGCTCCCGAGTGAAGCCGCTTGGTGTGCCCTGGTTTCAGATGGGCTATCAAC  
CGGGCGATATCTGGTGAATGGGCGCACGGTAAACACTGAATGTGCTGTTGATGCCCGACCCGATAACGCCGGGGC  
AGTAAGGAGATGGTGCAGGGTTTTCGCGCAGCCATTGCCGGAAGCCCGTGGTATTGTTGATATTGCGCTTGGTGATAA  
CGATATTGAAATCCAGCGTAACCTGTTGCAAGGATGCTGGAACCCATCCAGAAATCGACGTCGTTGCCGGAACGGCCA  
TTGCCGAGAGGCGCAATGGGGGAAGGCGTAACCTGAAAACGCCGCTTACCCTGGTGTGTTTTATCTTTACATCAG  
GTGTATCGCGGCTGAAGCGGGGAAGGTGATTATGGCTGCCAGCGATCAAATGGTCTGGCAGGGGAACTGGCGGTTGA  
GCAGGCCATCAGGCAATTACAGGGGAATCGGTTTCTGATAATGTCAGCCACCAGTTTTAGTTCTGACGCCGAAAAATG

CCGACCGTGAACATATTCGCCGCTCGCTGTACCAGGGGATTCGTCGGTCTATTTTTATCAGCACACATCAGCGGCT  
AAGAAATAACCTTCACCATGTTGCGTCACCAGTAAATCCGCGCTGAGTTTATGACGTAACGACGAATTAACACATCGAC  
GGTGCAGGTCAGGGTTTTCCACCCGACGCGCAGAAAGCATACTAGCAGACGTTACGGCTGAGAATTCGCCCGGAT  
TCGTCAAAATGCCACCAACATTTCACTCTGCGCGGGTCAGTTAATCGGCTCGCCATCCCGCTCCAGCGTATGGCGC  
GACACATTCAGGCAATAACCGGCAAAGCGATAGCAGTTGCTCTGAGTGTGCGGTTGAGCTTGTGCGCGAGGTCGATTCG  
CCAGAGCAGATTTTTACCCGTAACAGTTCCGCGCAGTTCCAGCGGTTTGGTGACGTAATCGTCTGCGCCATTTCCA  
GCCAACAAATACGGTCAATCCGATCGCTGCGTCCGTAACAGAATAATCCCCACCGTTGAGCGTTCTCGCAGGGCGCGG  
GTTAACATCAGGCCATTTTCATCGGGTAAAGTTGATATCCAGCAGAATTAATCTACCGACTGATTCTGCATAATTTCCCG  
TAGCCAGCACCCTCGCGTAACGGAACGGTATACCCCTCCTGAGTGAAGTAGGATTGTAATCGCGCTGGGTAACCG  
GCTCATCTTCAACAATAAATGTGATGTGGCATCAGAGGGTTTTACTATTCTGTTTATCTGTTTATCTGCGCT  
AAGCCGTTATCTGACCAAGTGCCTGTTTATTTGCTCATTAAAGATCGCTTCACTAACCAATAATTTACAGGGGTT  
ATTATGCGAAACTCTGGAACGCGCTACGCCAGCCAGTGTCTGGTGGTACTGGCGCTGGTGCATTTGGGATTGT  
GATTGGCATTGCGCTGATTGATTGCCACAGTTGGGATCAAAGTACCAGCACAACCGAATTTTGTGCAGTTGCCACA  
GTATGCAACCGGTGTATGAAGAATAAACAAGTCCGATGTTGCAAGCGAACTGGAAGCGAGCAATGATATCTACAGACTTTATTGC  
TCACTCCATTGTAACACCTGAAAAATTCGAAGCCAAACGCGGAACTTCCGAGCGTGAATGGGCGCAATGAAAGAAA  
ACAACTCGGAACCTGCCGCTCCTGCCATAACTACGATGCGATGGATCATGCGAAGCAGCATCCTGAAGCAGCACGTCAG  
ATGAAGGTGGCAGCGAAAGATAATCAATCCTGCATCGACTGTCATAAAGGATTGCCACCGATTACCGGATATGAGTAG  
CGGCTTCCGTAAGCAGTTGATGAGCTGCGCGCCAGTGCTAATGACAGTGGTGACAGCTGTAATGATATTAAGC  
CAATTTATGCGGCGAAAGCGATAAAGAAGCCTCTGTTTCTGCTGCTGCTTCCGAAAGTAAAGTCTTAAACGTGAC  
GGCGACTGGCTGCAAATGAAATTACCGCTGGACGAAAGCGCCGACGTCAGCGTGTACTACCCAATTTCCAGGTAA  
ACGCATCTTTGTTGCTCGATTGTTGGTGTGTCAGCAGCAGGTAAAAACGCTGGAGAAAACCAACCGTTGCCGACCA  
ATACCGAGTGGAGCAAGTTGAGGCCACTGCGTGGTGAAGAAAGCGACATGGTGAACGATATCAAACCGATCTGGGCT  
TATGCGGATTCGTTGTACAACGGCACCTGAACAGTGCACGGCGCACCGGAAATCGCCACTTTGACGCTAACGGTTG  
GATCGGCACGCTCAACGGCATGATTGGCTTTACCAGTCTCGATAAACGTGAAGAACGCACCTTGTGAAATATCTGAAA  
TGAATGCGTCTGACACCGCAGGTAAGGCTCACGGCGATAAGAAGGAAAGAAAAATAATGAACAATAACGATCTTTTCAGG  
CATCAGCTCGCGTTTTCTGGCACAACCTGGCGGCTTAACCGTCCGCGGATGCTGGGGCCGTCATTGTTAACGCCCGCA  
CGTGGACTGCGGCGCAAGCGGCGACTGACGCTGTATCTCGAAAGAGGGCATTCTTACCGGGTGCAGCTGGGGGGCTAT  
CCGCGCAGCGTGAAGGATGGTCTGTTTGTGGCGGCAAAACCGTTGAACTGGATAAATATCCGTCGAAAATGATTGCCG  
GATTGCCGGATCACGTACACAACCGCGCGGCTATTCTGTTATCCGATGGTACGCGTGGACTGGCTGCGTAAGCGCCATCTC  
AGCGATACCTCCCAGCGCGGTGATAACCGTTTTGTGCGCGTGAGCTGGGATGAAGCCCTCGACATGTTCTATGAAGAACT  
GGAACGCGTGCAAGAACTCACGGGCCGAGTGCCTTGTGACCGCCAGTGGTTGGCAATCGACGGGGATGTTCCATAACG  
CTTCGGGGATGCTGGCGAAAGCTATTGCCTTGCATGGTAATAGCGTTGGTACGGGCGGAGATTACTTACCGGTGCTGCG  
CAGGTGATCTGCGCGCGTAGTCGGTTCGATGGAAGTGTATGAACAGCAAACCTCCTGGCCGCTGGTATTGAGAACAG  
CAAAACCATTTGCTGTGGGGCTCCGATTTGCTGAAAAACAGCAAGCGAACTGGTGGTGGCCGGATCACGATGTTTATG  
AATATTACGCGCAGCTAAAAGCGAAAGTCCGCGCGGTGAAATGAGGTATCAGCATCGATCCGTTGTACATCCACC  
CATGAGTATCTGGGGCGGAGCATGTGAAGCACATTGCGGTTAACCCGAAACTGACGTGCCGCTGCAACTGGCGCTGGC  
ACATACGCTGTACAGTAAAACCTGTACGACAAAACTTCTTGTAACTACTGTGTGGTTTTGAGCAGTTCTGCCGT  
ATCTGCTGGTGAGAAAGACGGTCAGCCGAAAGATGCCGATGGCTGAAAACTGACCGGCTGATGCCGAAACCAT  
CGTGGGCTGGCGCGGAGATGGCGGCAACAGAACGAAATATTGCTGGCTGGTGCAGCGTATGCAGCAGGTTGA  
ACAGTGGGCGTGATGATTGTGGTTCTGGCGGCGATGCTGGGGCAAATTTGGCTGCCAGGTGGTTTTGGTTTTGGCT  
GGCACTACAACGGCGCAGGCACGCCGGGCGTAAAGCGTTATTCTGAGTGGTTTTCTCCGGCTCTACGTCGATTCCGCCT  
GTTACGACAACAGTGACTACAAAAGGCTACAGCAGCACTATTCCGATTGCCGTTTTATCGATGCGATCTCGAACCGGG  
GAAAGTGATCAACTGGAACGGTAAATCGGTAATAACTGCCGCGCTGAAAATGTGATTTTTGCCGGAACAAACCATTC  
ATCGCCATCAGCAGATCAACCGCATTATTGAAGGCTTGCAGCAAGCTGGAACGGTTATCGCCATAGATAACAGTGGACC  
TCAACCTGCCGCTTTGCCGATATCGTACTGCCTGCGACACGAGTTTGGCGTAACGATCTGACCAAGTACGGCAATCA  
CTCAACCGTGGCATTATCGCCATGAAACAGGTGGTCCGCGCGCAGTTGAGGCGCGCAACGACTTGCATATTTCCGCG  
AGCTGTGCCGTCGTTTTAATCGCGAAGAAGCCTTTACCGAAGGGCTGGACGAAATGGGCTGGCTGAAACGCATCTGGCAG  
GAAGGTGTACAGCAAGGCAAAGGACCGCGGCTTTCATCTGCCAGCGTTTGGTACTTCTGGAATAACAAGAGTACGTCGA  
GTTTACCATCCGAGATGTTTGTCCACAGGCTTCCGCGAAGATCCGGATCTCGAACCGCTGGGACGCGGAGTG  
GCCTGATTGAGATCTACTGAAAATATCGCGGATATGAACTACGACGATTGTAGGGGCATCCGATGTGGTTTTGAGAAA  
ATCGAACGCTCCACGGTGGCCTGGCTCGAAAAGTATCCGTTGCATCTGCAATCTGTGCATCCGGATTTCCGACTTCA  
CTCGCAGTTATGTGAGTCGGAACCGCTGCGTCAGCAATATACGGTAGCGGGTAAAGAGCCAGTATTATTAAACCGCAGG  
ATGCCAGCGCGCGGATTCGTAACGGTGTGTTGACGCTTTAACGCTCGCGGTACGGTGGTGGCAGGGGACAGTGG  
GTTTCTGACCGCTATGACCCGGCGTGGCACGAATTCACGAAGGGGCATGGTACGATCCAGATAAAGGCGGCGAGCCTGG  
TGCCTGTGCAAAACCGTAACCCCAACGTGTTGACCATCGACATCGGTACATCGCAGCTGGCGCAGGCGACAGTGGC

ACACTACGCTGGTGGAAATTGAGAAGTACAACGGAAACAGTGGAGCAGGTGACGGCGTTTAAACGGCCCCGTGGAGATGGTG  
GCGCAGTGCGAATATGTTCCCGCTCGCAGGTGAAATCATGACCACGCTGACAGCACAACAGATTGCCTGTGTTACGCC  
TGGCTAGCGCAGTTGTTCTCCCGTGGAGCTGGACGATGAACAACAGTACGCAAATCGCCAGTGCAGATGGCTGAATGGTT  
TTCGTTGCTGAAAAGCGAACCGCCGCTACTGCGGCGGTGAACGAGCTGGAAAACCGTATTGCCACGCTGACAGTACGTG  
ACGATGCCCGTCTGGAACCTGCCGCGGACTTTTGGCGCTGTTTCTGATGACCGACAACAAGCGGCGCTGCCGTATGCA  
TCGGCTACAACAGGACGAGCAAGAGATTAACGCTTGTTAGTTGAGGCAGGGATGAAAACAGCGGCAATTTCAACGA  
ACCGGACAGTATCTGGCGATCTATCTCGAATTGCTCAGCCATCTGCATTTTTCGCTGGGAGAGGGGACCGTTCTCGGC  
GAAGAATCGACAGTTTGGCGCAAAAAACACTGACGGCGCTGTGGCAATGGTTACCAGAGTTTGTGGCGTTGTCGTGAG  
TATGACAGCTTTGGTTTTACGCGGCACTAAGCCAGTTATTGCTGGTGTAGTGGAGTGCACCAAAAAACAGATAACG  
TCGTTTGTGGCCTGAAAAGACGCGTTTAGCGTCGCATCAGGCATTATGGCGCAGTTGCCGGATGCCGCGTGAACGTCTT  
ATCCGGCCACAGGAACTGTAATCTTTGTAGACCGTTAAGATGCGTCATCGCATCCGGCAAAACACATCAGCGATGAG  
CTACAAACCGGAAAGCCGCTGGCGCAGCAGGCGTTTTCTGCTCAGGTGCGCAATATCATCCATTAACGTGACGCGC  
ACCGGATCCCGGCCAGTCCAGAGCCAGTTCATGACGAGGCGTACCGCGGTTGCACCACAATGGCGGCATGGTCGT  
AAATACCCAGTTGTTTCTGGATCTCAGCGGTTCAACACCCCAACCGACAATTTCACTCACTCTTTAGAGA  
TGCCGATGACAGGCAAAATTCGTAATAGTAAAAGTACCGTAACATTAGCCATTATGCTTTCCCAATCTTTACGTTG  
GATCAAAAGACGACTGGGCTGCTGCCAGTTGCTGCCACAGCGCGCAGTGTTCATCCGTTTCCGGCGCATCACGATT  
TTCAGTACCGCATACAGATCGCCGGTCTGTTTTTGTCCACAGACCTTTGCCTTTAACGCGCAATCGTTGCCCGGCTG  
GCTGCTGGCGGATAGTCAGCAAAATGCTTTCTTTAGTGTGGAAACGGTACTTTAGCACCCAGCGCCGCTTCCACG  
GGTAACCGGCACCACAATTTCCAGATCTGGCCGACAATATCAACAGCGGATGTGGCGCAATATGAATCACCAGCCAC  
AAATCGCATTGAGACCGCGTTTTCCGCCGGCGTCCCTGGCCTTTAGACGGATGCGTTGACCATTGCCGACGCCCGC  
CGGGATCTTACATTGAGGTTTTCGGAATTTCTGTTGATCATGCCAAAGCGTTATAAACCGGCAGTTATAGCTGA  
TGGTACGCTTATGCTCAGTAAGCGTTTCTCGAGGAATACCGCCACTTCGATTTCAATATCGTGGCCGCGTGGCGGGG  
CGTTGACGGCTCTGGCGGCATGCTGACGAAAATTGACGAGAAGATATCGTCAAAATCTTGGCGTTAAAACCTGACC  
GTCGCCATGGTGAACGACTGACGGTTAATTGCGGATCGTTGCGATGTTGCCACATCTGATCATACTCAGCGCAGCTTGT  
CATCACTTAACACTTCCAGGCTTCCAGGACCTCTTGAAGCGGGCTTGGCATCCGGTCTTTGCTGACATCAGGATGG  
TATTTGCGGGCAAGTCGACGATAGGCGGTCTTGATTGCTTGGAGATCGTCCGTCGGTTTACGCCCATGATGGCGTAATA  
ATCCTTTAATTCATAGCGTTATCTCGCGTAAATCAACACAAATGAAGGAACCCCTGTAAGGTAACCTCTATAAGTGA  
GGTAATCCTCAAAATTTATATGCCAACACAGAATATGTTATTGAAATCATCGCGGAGAGGAGGTGCCATCAAGATGG  
GTTGCTGAACATATTTAAACAGGTGAAAAGGGTGAAGGATTTTTGATAGTTGAACCAGGCACTTTAAGTTAACTAGG  
GCCTCATTATTTATTAATTTATAGACGCTATATATGGGTAGTAATATACATGGAATTAGTTGCACTGCAAAATAATTA  
TTGAAACAGGCCTGGAACGATATAAAAAATGAGTACGAAAAAAATCAACATATTCAATCACGCTTTTTGAAAACACACT  
GGTGTGTTTTATGCGGTTATAAATGAACTCAGACGTAAGTAAATGAAGAGGATACTCCATGCTGGAATGTGAATCAC  
TAGAAAAAGAAATTTGAGGAAATGCAGAATGATAATGATCTATCATTATTTATGAGAATATTGCGTACTAATGATACAAA  
ATTTATTCAGGGGTTTCCAGGAGGATTTACATATACTATAAATATGTTTCCAGATATTGATATTGTTAGAGTGTCTTGGC  
GGCAGAGCTTCCAGAGTCTATCACAGATTTTAAAGTTATTATTGGTATAACTTTATGGAGTATTGAAAACATTAATG  
CGTGTGATGATGTTTTTCTGAGTATTGTTTTGATGATGAAAATATAAGTGTCCAGCCAGAGCGGATAAATACGCCGGGA  
ATATCTGATTTGGATTCTGACATTGATTTGCTGTTATATCTTTTATTGAGCGTGAACCTAACCGGCATTAGGATTA  
ATATGCTCCTGATGATGGGATGGATATTGCTGTTAAGAGCTATACTGGTTTTAAACAACATGATTATTCATGGCGC  
TGTCAGTTATAAGATGCAAAAGGAAGTTTCAACGAATTCATTAATGTTGATAAAAAACGATCGAGGCTCTTGT  
GATACGGCATTCTATAATCTCAGGGAAGATGTAAGACGTTATTGGCGTTGATCTACAATCTGACAACCAAAATCAGGG  
GCAGAGTAGTCTTATGTCATGGAGCTTTCTGTTTTTAAAAAACAATTCATTGATAGTTGCTTGAATAACGAAAAATGTA  
TCCTGCATTTACCCGAGTTTATTTAATGATAACAAGAACTTGCTTGTCTTTAGATACCGACAGTCCGATAGGATTA  
GCGGTGAAGAATTTTCTGTTGTTCTTTAGATAGCATTGCTCATTATTTATTGTTAATAGTAATGTGGCATCAATCTC  
CTTGGGGAATGAATCCTTTTCAACAGATGAAGATCTTGGATGTTTATTGTTAATGAACACTGGCAATCATTATGACGTTT  
ACCTCCCTCCTGAACTTTTTGCTCAGGCTTACAAGTAAACAATAAGGAAATGAATGCGCAACTCGACTATTTAAATCGT  
TATGCAATTTAATGGCAAAGGCATATGCTAAAACCATTTGTTATTAGTCTCACACTTTTTTATTGGTAAATATTGTCTCT  
GTATTGGTAACCGCGCAGATATTCTGTTTAGCCACAGGTGCAATTATCAGCGGCGTACGCGAGGCAGGGGCTAATCAGGC  
ATAGTTTGGTCAACCTTGCCTGTTTTGAAAGTGTATATAGAAAAACAGGCGTTCAACAAGCCATTTTGCGAACCTGT  
TCCCGAAAAAAGTCATATTTCTGTCACACTCTTTAGTATTGATAACAAAAGAGGTGCCAGGAATGAACAAAACGCTAA  
TCGCCGAGCTGTGGCAGGGATAGTTTACTCGCTTCAACGCTCAGGCACAAACCGTACCGGAAGGCTATCAGCTACAG  
CAAGTGTCTGATGAGCCGCATAAATTACGTGCGCCGCTGGCGAACAATGGCAGTGTGCTGGAGCAGTCGACGCCGAA  
TAAATGGCCAGAAATGGGACGCTCCCGGTGGGCAACTCACCACCAAGGTGGCGTGTCTGAAGTGTATATGGCCATTACA  
TGCGTGAATGGCTGGCAGAGCAGGGGATGGTGAATCGGGGAAATGCCCGCCGCTACACCGTTTATGCCTATGCCAAT  
AGTCTGCAACGTACCGTTGGCAGCCGACAGTTCTTTATTACCGGCGCATTCCCGGGGTGTGATATTCTGTGCATACCA  
GGAAAAATGGGCACTATGGACCAACCTTTAACCCGGTATCACCAGTATTCCGCCGATTGAGTGAACAGGCGGTGG  
CGCAATGGAGAAAGAGCTCAGCAACTCCAGCTTACCGACAGCTACCAGCTACTGAAAAAATCGTTAACTATAAAGAT

TCCCCTGCCTGTAAGAGAAACAACAGTGTTCGCTGGTGGATGGCAAAAATACCTTTAGCGCCAAGTATCAACAAGAACC  
AGGTGTTTTCCGGGCCGCTGAAAGTCGGCAACTCGCTGGTAGATGCGTTTTACTTTGCAATATTACGAAGGTTTTCCGATGG  
ATCAGGTGGCCTGGGGAGAAATCAAATCTGACCAGCAGTGAAGGTGTTGTCGAAGCTTAAAAACGGCTACCAGGACAGC  
CTGTTTACCTACCGGAAGTGGCGCGCAATGTTGCGAAACCGCTGGTCAGTTATATCGACAAAAGCTCTGGTCACCGATCG  
CACCAGCGACCAGAAATACAGTGTGGTTGGGCAGACTCCAACATTGCCTCTCTGTTAACGGCGCTGGATTTCAAAC  
CGTATCAGTTGCATGACCAGAACGAACGCACGCCGATTGGCGGCAAAAATCGTTTTCCAGCGTTGGCATGACAGCAAAGCC  
AATCGCGATTTGATGAAAATTGAATATGTGTATCAGAGTGCAGAACAGTTACGTAATGCCGATGCGTTAACCCCTGCAGGC  
ACCTGCGCAGCGTGTGACGCTGGAATTAAGCGGTTGCCGATAGACGCTGATGGTTTTGCCCCGATGGATAAGTTTTGATA  
GCGTGTGAATGAAGCGGTGAAATAACAGAAAACCCCCGCGAGAAGCGGGGGAGTCGCTGGTTAAACGTTTTTACGTT  
CGATGGTCTGTTCCGCCCCAAAAAGCGAATCTTTATCGGTCTTAGCAAAGGCTTTGACTAACACTTCACTACTCTCT  
TCCCAAATCTTTCCGCCATTTTTCTGTCGTACCCGGCGACTTCGAAAATGGCTCGGCTATTTCCGGCGACGATTGCG  
CAGAGATGCCCATTCACCGACGTGATGAGCTTTCGTTCTTGAGTTGGCATGCGTATCCTCCTGTTGAAGATTAGCCGTT  
AAGTTTAACTGCCAGACCTGCGACATATCCCTTGATAACGAGCAATAGACAGTTCCTCCTGGCTGGCTGGCGTGAAC  
CGTACCCGCTGCGATGTTGTTGCGCCGTACGGCGTACCGCCGCAACCTGTGAAACGTCAAATAAATCTCGCGTCCG  
TAGCCAATAGGACAATACCATGCCGTGATGCGCAAGGGTCTGCAGGTGGATGTGATGGTTTTGTTCTGACCGCCGCC  
AGTACCGGTGGAATAAAGACGCTCGCCAGTTTTCCGTATAGTGCAGCCGGAAGCCACAGGCCCGCTGGTTCGAGGA  
AGGTACGCATTTGACCGACATGTTGCCAAAGCGGGTAGGTGTACCAAAAATAATGGCGTCTGTAATCGGCCAGTTCTTGC  
GGGTTGCAACCGGTGCAGTTTGCCTTTACCGCTGCTTTTTCAAATAATTGCGGCGGCATGGTTCCGGTACACGCTT  
AACGACAACCTCAGCGCCATCCACTTTGCTTGCACCCTCAGCGACTGCGCGTGCATCGTTTCAATATGTCCGTACATGG  
AATAATAAAGCACCAGAATTTAGCCATTTCTAACCCTCCTCGTGTATCTCTATTCCGTAGCGATTGCTACCACTTA  
TTTAAAGATAAGACGTCCTTTTTCAGAGTGCAATTTCAACAACCTTATTTGATTTATAACAACCTTTCACAAGCACGTAA  
TTTTGTGCAAAATGACACATTTTTATCTCATCGCTTTTTTAAATCATAAGAGCGGCTTATGGATAATTATTGGAGATG  
ATATCTATTCTCGTAAGAAGCTGTTGCAGGATATTACCAAACCGGGTCTGCCCGCTCAGTTCACTAAGCTTAGTCCC  
ACGTAGCGAAAATATGGCAGCGCCATACGCCGCTAATTCTATGCAATATGATGTCTATACCCAGACGGAGTCACTA  
ATGGCAAACCATCGAGGCGGTTCCGGCAATTTGCGAAGACCGCGAAAGAGCATCAGAAGCAGGTAAAAAGGTGGACA  
GCACAGCGGGGTAATTTCAAGAATGACCCGACGCGCATCTGAAGCAGGTAAAAAGGTGGTAAGAGCAGTCAAGGCA  
AAAGCGACAAC TAGCCGGGTAATCAATGACGAATGATTTTTGTCTGTAGCTGTCAAAAAGCCATCACCGCCGGTTAC  
CCGTGGTTGATACTGATGACAAATGTAAGCTTGCCTGATGCGCGATGCTTATCAGGCCTACCAGAAGATTGCAATATAT  
TGAATTTGCACTGTTTTGTAGGCCGATAAAGCGTTTTACGCCGATCCGGCATGAACAATCGGTACGTTGTCAACAATCT  
GCACCGCCGTTAACCCCGCGGTTTTCTGTTATGGCTCTGATGAACAACCTCTGGCGGTGGAACGTCAACCAACTTTC  
TGCTTAAACAACGCATTGAGTAAAATCGCGCAAAGGTTGCTGTACCAATCCCTCCCAACGTAAAACCGCCAGCGTGAGA  
GCAAAAATCACCCGCGCCAGCACTAAGGTTACTGCGACCATAATCAAATTACCGTTCTGGCTTAAATCGACACGTTTTG  
TACCCATATCCTTGGCCTGCGACGGCAATCAGCCCGAACACAACAATTGATGCACCACCAATAACCGCGCCGGAATGG  
TATGAATCAGCGCACCAATTTCCGGTGAAGGCCAACAGCATGGCGATGACGGCAGCAGCAACAACACCAGCGTCGAG  
TAGACTTTGGTCACGGCCATCACACCGATTTTTCAGCATAGGTGGTACGCCGCTACCGCCGACAGAGCCGAAAGCAT  
CGTTGCCAGACCATCGCTACGAATGCCCGCCCATATACGGGTCATATTGCTCCGGTCATCCCGGCGACTGCCTTGA  
GATGACCTAAGTTTTCCGCCACCAGAATCACCGCCACGGGCGCAATCAGCATCATTGCCTGACCATTAAGCAGGAGTG  
GAAAAATGTGGCAGACCGAACCCAGGCAGCATGGCTGACGAGAGTAAAATCGACGGCTTTTCCAGCCCTAAAACGTTGGT  
CATCAGCCATACAGCAGACAGGCAGCAATTAATCTACGAGAATCAATAACCGCTGGATCATGCCACGGGTAACACCG  
CCACCAGCCCAATACACAGCACCGTCAATACCGCATCCAGCTATCAAAAGGCCGAAGCCGATACACTTTTCACTGCGATA  
GGCGCTAAGTTTCAGGCCAATCGCCATACCACCGCACCCGTCACCACCGCGGCATCAGTCTTCAATCCAGCGCGTACC  
GATTTTTCATACCACCAGGCCAATGACGGTATAAACAGCCACAGGCGATAATCCCGCCAGCGCAATGCTGATATTCG  
GGTTAATGCCCTGACCGTTAAAGCCCGTGCAGCGGATCACCACGCCGACAAAAGCCGCGCTGGAGCCGAGATAACTGGGG  
ACGCGCCCGCCGGTAATAAAGAAAAACAGTAACGTGCCGATCCCCGACATTAATAATGAAAGATTGGGATCCAGCCCCAT  
CAGAATCGGCATTAACACCGTGCAGCCAAACATCGCCACCGCGTGTGAACGCCATTACTGCCGTCTGAGCAAACGGCA  
ATCGTTTATCCGGCGGACACGCGCTCTCTGTAGAGTTCGATTTTAACTGCCAGTGAGGAAAACCGAACATTGCCATC  
AGCTGTCTCTTAAAGGAGTTAAACAAGCAGGGCGCATCAGCGCTGATAACTGCGATCGAACCACACCAGCCGTTAGGGT  
GTGGTGTGACGATGAATCGTTTCGATGGCGAAAACAGAATGTCGTGGTGCCGACGCTACCACCTGGTGTACGGCA  
GTCAAACGAAACAGAGCTCTTCCAGTTGCGGGCATCCGGTACCCCGTCTGCCAGCGGGCGGCGGCAAAAGCGGTGTT  
CCATGGGCGTTTTGCGCCAAAAGGTTTGAAGCGGCTCTGCCCGCGCTAAGTGTATTTACACACAGCGTTCGATTT  
TCATTGAATGCCGGCCAGACGGACGCCCCAGATTACGGCACACCAGTAATGTGGGCGGCTATCGGTACACTGCAGAC  
GGCGTGGCGGTGAACCCGCGCGCCCGCTGGACCGTCCGTGGTATAATATTGACCGCCCGCCCATGCAGGACATCG  
CATCGGAAAAGTTTTGTTGATCGACAATGTTTATAGTTTCTCTTACAACAGCCCGCAGGCTTCTTCAAAGGACAGACG  
TGGCAGGCGCGATAAAGCTTGTGCTATCGCCATAGCCGATTAATCAGCAGATTGCTCTTACAGCGTGTGCCCGTAA  
AAAAGCGTGTCCACGTGTTGACGGTCAAAGCCCGACATCGGGCCGGTATCCAGTCCAGCGCCCGGACGGCGACGATC  
AGATAGGCCCGCTGCATGGAATGTTGCGAAAACGCTGTTTTCTCGGCAAGTTGTGGGCTGGAGGTAACCAACTGCGGGC

ATCACCGTGGGAAACAGTAGTGGTAACCGTTCATAAAATTCCTGTCCAGGCGACGATAGCGGTGACGGGCGGGTCA  
GGTTTTTTGACAGATTGCCGCTGGAAAGTGCCGGGCGACAGGTTCTTTTCTTCTGCCGTGCGGGTAAACACGATCCGT  
GCCGGAGAACAGTTAGCTGATGTCGGCCCCATTTTCATCAGGGCATAAATCTCCGTAACGTCTCATCGCTGACGGGTGT  
CTCCCGCCAGCGTTGTGAGTGCGGGCATCGGTGAACAGGGTGTAAAGCGCACCTGGGCTAACGGCTTCTTCATAGCAA  
TTCTTACAGGGCGGCTTACCGGTGATGTAACAGGCTGGCAAGCCGTTGAGTAAACAGAGCATTAAACGTTTCGGGATCG  
GTCACGTTGCAGGCGTGTCCGCCATAGGGCATACCATTTTTCTGGCTATCGGGCAGGGCGGCATGAAGTTCACTGGAACA  
TGCTGTTGGCACCAGCAGATCATCACTGGCGCAGATGATTTGCACCGGGCAGCGGATGCGATCCGATGGTACTAAAGT  
CAGCGCGTTTTGAGGGCGTTAAGTCGACGCAGTAAATTTTTTGCCTGAAAATGCGCCAGTGCCAGCGCGTCTTCTGCC  
TCCAGGCGAGGTGCGCGGGCCGATCCAGTCGGCGGGATAGAGGAACAACGGCTGCGCTTCCACCCATGCTGCGCGCC  
GCCGCTATACAGTAATCGTTCGCGAACCTGAAAACAGCGGGCGGTATGGGCGTTTATTCTAGCCAGCCGTTAACGCTGA  
TCAGCACAGTTACCGACGCGGGATAATCCAGCGCCAGCTGCATTTCCACCAGCGCACCGAGCGCATGGCCGACCACTGCG  
TAATGCTCAATCCCTGCGGTACCAGCGCTGATGCAGTTCGCTGCCATCTGGGCGATACTGTAATCTTCTGCCAGCGT  
GTCGGGATTATTGCCGTTGCCGCGTGGTGTAAACAGACTACCTGATACTCTGCTCCAGCACCGCAGTTGCGGTAACC  
AGTAACTGCCGCTACCCCAAGACCCGAAATCAACACCACTACGGGCGCATCAGCATAAGGGGGAGGTGAGAGTAAAGT  
TTCATCGCGGCTCACTGGCGATATGCGCAATTGTGGCGATTTCCACCAGCGCTCAGGTTTTACCAGTCCGCACTGAA  
TGCAGAATCGCGCGGTTTTATCACCCGAAAAAATCGGCGTAGATTTCTGTTAATCGCGGCGTAATTTTTCTCAGTCGGTA  
ATAAAGATGCTGTTGAAGTTCACATCCGCCATCGTGCCACCCGCGTCTCGATCACCTTCCGATAGTTTTCCAGAACGTG  
GCGGTTTTGCGCTTTGGTTCATCGGCAACAGCACGTTATTATGTTGATCAAAAGCCAGCGTACCGGAGACATAACCA  
CGCCATCAGCCAGCGTCCGGGAACGAAGGGGGCCAGCGTGGCTGCTGCCAGCGGAATAATTACGGATTTTGGCATC  
GTTAAACTCCTTAAGCGATATGAGCAAAGGACGTGGGAGAAAGCGCTGCGAGAATGTTTCGACGTCGCTGACCCAGCCA  
AAAAAGTTTTCGATATTGAACAACGCGGCTTTCTGCGCAAATTTCCGCCCCGCTGGTGGTGGTCTTCAAGCACCA  
GCCGAAATACTCCAGAAAAAGCGTCCGCTAGCGTGCATTCGACGCAGACGTTGGTAGCGATGCCGGTAAAAACCAGAT  
GGCGTATCCGCGGCTGCGCAAATGTGTCCAGCGCGTATTGAAGAAACCGCTGTAGCGCGGCTTCCGCGACACAATA  
TCGCCAGGCTGCGCACCACTTTCATCCACCAGTTGATAATCCAGGAGCCTTTCGCCAGCAATTTCCCTGCAGCTGCGG  
CTGTTACGCATGTTTTTACGGGCGTTCGATTTATGAAAATTCGGTGGAGCCGGTCCGCCAGCCTCGACATACTGTTT  
CCCAGCCATTTTGAACCAGATGATCAGCATCCCTGCCGCTGCGGCTGCGGTACGGCGGTTTGAATGTTGGCAATGACC  
GGCGAGTGGTTGAGACATCAAACCCGCGAGATCTAAGTAGCCGCTGGCGTGGCATAAGCGTTTTTGCATATCCACCAC  
GATCAGCGCACTTTGCTGCGGATCGAAGTAATGGTTCGGTTCGAGCGGTTAAGGTGTCATCATGCCACCTCCTGAGT  
CAGCGCAGGTAGATGGGCGCGGATTGCATCAGTGGTTGAATGCGCTCGCCGAAGTTTTGATTTCCGACAGAAAATCGT  
CGAAGGTTAACAGCACGCTTCCGCCACAGGCGAGCTTGGCAGTTCATTAACATGCGCGGACACTGGCGTAAGAACC  
ACTAACGTCCCATATTGATGTTTTACCGCGAAGTGGGATCGGCCATCTGACGAACGTTGGTGTGAGTACCGGAGCGGGT  
ATCTTTCTGACTTTGTTGCGTTAGCCAGCTTAAACGCTTTCATCCGCGCCCGTTTTGAGTGTTCCTTTGGCGCGAG  
CGGCATCGTGGTTTTATCGGCAATCACCATAAACAACATAAGAGCCAACGTGCGGTCGGTTTTGCTCTGCGGCTGT  
TTCATCCGCGCAGCGTCCGGGCGAAAGCGTGGTGTATTTACGCTTTGCCGAAACAGAAGTTGAAATCGGCATACCG  
GGCGGAGAACGCCATGCCAGCGTCTTTGCCGGCGCAGATCACTTTTCATGGGGACACTCGGTTGCGGACTCACGCGAC  
AATCATTATGGTAAAAAATCGCTTTAAAATCGCTTTTCCCGTGCCCCACAGGTGCGCGACACCTGAACATATTG  
GTGAGATAGTCGTAACGACGGGAGAAATAGTCATCGCCAGGCCAGATAACCATCTGCTCATACTCGGGCTTTTGGCAGCC  
AGTCAGGAGTTGACGCCAAAACGCCCCCAGAGATGGAGTCGATGGTTGCGGCATACGGGCGACGATTGCCGGAGGTA  
ACGTTAAGGTGGCAGCAGTGGCGTAAATCTGAATGCGCGAGGTACGCGCCAGCCCCGCCATCAAGTGAACGACTCA  
AGTTTGTGATCCAGAACTCAGTTTTGCCGCAAAGCCACGAGTTTGCATCATCGACAGGGCGAAATCGAAATGGTATG  
CTCCGTTTTTTGCACAATGGCTTTATTACAGTTCAAAGGTGCGCATGTACTGCGGCGCGTGGTTCGAAATGAGCCAGCCG  
TGTGGCAATAGGTACGAATACGCAATTTTTCATCATCAACCTCTCTTCTGTCGTAAGTGAAGTCAAGCGGGCGCT  
GCATCTGCATATCCTTTTACGCCGCTATTGGCTTGTGCAAAGCGGATGCCAGTTTTTAAAAAGTTAATGTTATTA  
TCTGTTAACATTACGTTATCTAAAATATCTGGTAAAAAGTGGACTAAACGCTCAAACAGTTGCACATAAAAACATGCATC  
TGTGCGGATGAGAGTGCAGAAGTTCGAGGCCGGGCGGGGTTTTGCTATCCTGTTGCCAATCTACAAGAGGGGAGAGCG  
CATGACGCAAGGCGCAGTAAAAACAACGGGTAACGTTTCGCGCGCAGTAAGCGCGAAGAAAAAAGCGATTCTTAGCGCAG  
CACTGGACACTTTTTTCACAATTCGTTTTTACGGCACAAAGGCTGGAGCAGATCGCAGAGTTGGCGGGTGTTCAAAAACC  
AATCTGCTGTATTACTTTCCGTCAAAGAGGCGCTGTATTTGCCGCTGCTGCGGCGAGTTCTGATATCTGGCTGGCACC  
GTTAAAAGCGTTTTGTAAGATTTCCGCCGCTGGCGGCGATCAAAGAGTACATCCGTCTGAAGCTGGAAGTCTCACGCG  
ATTATCCGAGGCTTCCGCGCTGTTCTGTATGGAGATGCTGGCAGGCGCGCCGCTGTTAATGGATGAACTGACGGGCGAT  
TTGAAGGCATTAATTGATGAGAAATCGCGCTGATTGCCGTTGGTCAAAGCGGCAAACCTGCGCCGATTGATCCGCA  
GCATTTGATTTTTATGATTTGGCTTCCACTCAACATTACGCCGATTTCCGCCCTCAGGTGGAGGCGGTGACAGGCGCGA  
CGTTGCGGATGAGGATTTTTCAATCAAACGTTGAAAACGTGCAGCGGATTTATTATTGAGGGGATTGACCACGTTAA  
AGATGCCGGAGAGGTTGTAACATCCTCCGGTACCTGTTAACCTATAGTCATTAAGCTGCGGTTACCGCCAGCGGCGAG  
CGGTATTCACACTCAGCGAACGCTCGATATACAGCCGTTCCAGAAGGATATTGCTTTCCGCCACGGGCAAACCTGCACC  
GAAACAATTGTCCATCCCGCGCGGCAACTGCTTACACAATGCGCGAAGCTGATCCGAATCACCGTGAAGATCACCGC



ATCAAACGGTTGAGCGGTTATATTTCCGCTTTCGCCAGTTGAATACGTTTCGCTGACTGCCGATGGCAATGCCTTACTA  
ACTGACGATGCAGCGCTCATCCGGCCACAGTACCTGGCTGCCACCGCCAGCACGGCGGGAGCTGAGTCAGCGCATCC  
TGCTCATCATCGGAATACACAACACGCGCTCACGGCAGCAGCGTCCAGGTGTTGCGTTACCCGTCGGCCCCGGCAG  
CAATCGTTGTCTCCTGCGCTGCGCCAGCTCGCCATATTGCGTACATAACGCCTGCAATTCTGGACGATTTGCTGCCATT  
CCCGCAGTGCATTTAGCGGCTGAGTCAATGCGGCTTCAACTGCCATCGACCGGATACTTTGCATCCTGACGCGCGAGC  
GTCACTGCCAGCGCACTTTCGGGGGATTTCGCCAGCAGACGGTAGAGATAGAGCGGACCGCCTGCTTTCGGCCCCGTACC  
GGACAACCTTTCGCCGCCGAACGGCTGCACACCAACCACTGCGCCACCATATTACGGTTAACATACAGTTACCAACAT  
GGGCCGAGCCAGTGACCTGGGCGATGGTTTCATCAATGCGCGTATGGACGCCAAGCGTCAGACCATAACCGGAAGCGTTA  
ATCTGCTCGATCAGCTCTGGTAGCTGGTTACGGTTGTAACGCACCACATGCAGCACCGGACCAAGACCTCTTTTGCAA  
TTCGGCAAAGTCATCCAGTTCGATCAGCGTCGGGGCGACAAAGGTGCCGCTTTCGCAATTCACGGGCATCTTCGCTGTTTT  
CCCGCACCGCTGGAACACCGGACGGCCTTGTACGCATGGTCTGAATATGGCGCTCAATATTGGCTTTCGCTTCGCTA  
TCAATCACTGGACCGATATCGGTGGTCAGGCGACCCGGATTACCCATCCGGCATTTCGGCCATTGCGCCGCGCAGCATTTT  
CAACGTGTGGTCGGCAATCTCATCTTGACGGCACAGCAGCGCAGCGCCGAACAACGCTGACCCGCACTGTCGAACGCCG  
AGGCCAGTACATCCACGACGACCTGTTCCGGTCAGTGTGAAGAATCGACAATCATCGCTTCATGCGCCGGTTCAGCG  
ATGAGCGGAATAGGGCGACCTGAGCGTCCAGGCGGTGGCGATATTGCGCTGCAGTAACGTAGCGACTTCGGTTGAACC  
GGTAAACATCACCCCGCAGCATCATCACCCGTAGTTGCGCGCCACGGTTTTACCCGCACTGGCAGCAATTGCA  
CCACGCTGGCGGTACACCCGCTTCCAGCAAAATGGCGATCCCTTTCGCGCGCAATCAGCGCGTTTTGTTCTGCCGTTTT  
GCCAGCAGCTGTTACCTGCCGCCAGTGCAGCGCGGATCTGCCCGGTGAAAATAGCCAGCGGGAAGTTCCACGGACTGAT  
ACACACCACAGGCCCTAATGGACGGTGGTTTTGTTAGCGAAATCATCCCGACCTGTCCGGCGTAGTAGTGAGAAAAAT  
CGACCGCTTCGCGCACTTCGGCAATGGCGTACTGAAGTTTTTCCGGCCTCACGCACCAGAATACCAATCAGTTGCTGC  
ATCTGGCTTTCATCAGCACGGCAGCGCGGTGCAAAATCGCTGCGCGTTCAGCCGAGGCGTGGAACACAGATTGGCGC  
GTTATTAACCGCACTTTCAGCGCCTGTTCTACTTCACGCGCGTGGCTTCACGCACATAGCCACAATATCTTTCGGTT  
CCGAGGGTAAATAACGGGCGACATCTCACCTGCCGCTACCGTTGTTCCAGCATTGGCAAGGCTGCCATTTTTGCAGT  
GCACTATTGAGCAGGGCAGAGGAGCGAGGCCAGGCGGTGTTGTTAGCGAGATCCAGCCCTGCCGAGTTGTCGCGCCC  
GTGACCGTAAAGATCGCGCGCAGGGGAATTTTCGGATGCGGTAATCCAGTTTGCCTTCTGTTGCGCCAGTTTTTCTA  
CAGCAGTGACCGATCGGCGACCGATTACAGTGGCAAAGAGGTGTCGGCAATACGGTTAAACAAACGAGGTGTTAGCA  
CCGTTTTCCAGCAGGCGACGCCAGATACGCCAACAGCGTTTCATGTGTGCCAACCGGAGCATAAATACGACACGGACG  
GTTAAGTTTCCGCTCGGCAACTTTCGGGTGACCTGCTCATAAGTGGCTCGCCATACCATGCAGGCACTGGAACCTGT  
ACTGACCCGGTAGTAGTTCTGCCCGCCAGTTGATAAATCGCCGCCAGCGTATGGGCGTTGTGCGTCCGAACTGCGGG  
TAGATTAGATTCGGCACCGCCAGCAGCTTTTTCGCACAGGCGAGATAAGAAACGTCGGTATACACCTTGGGGTATAAAC  
CGGATAACCTCAAGGCCGTCCATCTGCGCACGCTTAATTTCACTATCCAGTACGCGCCTTTCACCAGGCGAATCATCA  
GACGGCGACGGCTGCGGGTGGCGAGATCAATCAGGTAATCGATCACCAACGGGCGAGCGTTTTGATAAGCCTGAATAACA  
AAACCGATGCCGTTCCAGCTGCCAGTTCCGGCTCGAAACAGAGTTTTTCCAGCAGATCGAGGGAGATCTCCAGGCGATC  
GGACTCTTCGGCGTCAATGTTGATACCAATATCGTACTGACGCGCCAGCAGGGTGAGTGATTTAGACGCGGGTAAAGCT  
CTTCCATTACCCGGTCACTGCGGCGGCTATAACCGGATGCAGCGCCGACAGTTTGATTGAAATGCCCGGCCCTTCA  
TAGATGCCACGACCGTTAGACGCTTACCAGTGGCGTGAATCGCTGCTGATAGGAAACCATATACGCTGTGCATCTGC  
GGCGGTGAGCGCGCTTCGCCAGCATATCGTAAGAGTAACGGAAACCTTCTCTTCCAGCTTGGGGCATTGGCTAACG  
CTTCCGCGATGGTTTCGCCAGTGACGAACTGCTCACCCATCAGGCGCATCGCCATATCCACACCTTTCGGGATCAGCGGT  
TCACCGCTTTTACCAGATAATGCGGTTGAGCGAGCGGAGAGGCTGGCTTTCGTTATGGGTGGAACAGTTTGCAGTAAA  
CAGCAGCCCCAGGTGGCGGCAATTAACAAACAGTGCAGGGCTACGACCAATGTGTGACTGCCAGTTACCGTTGCTGATTT  
TGTGCGGAATTAACGCGTCCGCGGTGGTTTTGTCGGGAATACGCAACAACGCTTCCGCCAGACACATCAGCGCCACGCT  
TCCTGCGATGACAGCGAAAACCTCTGCAATAACCCCTGACCATACTGCGCGACCACTGGCATTTTTTGATTACGAG  
TTTATCGGCCAGCTGATACGCCAGTTTGTGCGCCTGTTAGCAACTGGCTGCGGCGAGGCGGGCTTGTCCAGCAGCATAG  
AAACCGCTTCGGTTTCCGGGCGGCGATAGGCCGCGGTGATCGCGCGCGGAAACCGACTGGGGCAATATTTGCTCGGCA  
AAGTCGAGGAATGGCTGGTGTGTTTCTCTGCCGAGTGGTGTTCATCGCTCTCATTGGCCGCGCCAGAAAGCAGCGC  
AGGTAGCTCCGGCAGAGTATCGCTGTTTTCCAGTTGTTGAGATAAGAAAAAATCGCTGCTTAATTAACAGTGTGGTG  
TGCGATCGATACGTGTCGCGGCAGACTTAATACGCTCACGCGTCCGCTGTCAGCTTAACCCCATGGTGGTGGTTCCC  
ATGCCATTACTCTGTTGTTAGAAAGGTGCAACTTAACGTTATCGTGAAATATCCATGATGTTGCAACTTTGTGCAACC  
ATGTTAAATGTGACATGCGTAGCAAGCTTAAAAATGAATGAAATGTTAATAAAAGAAATCGATATGACAGGGATTA  
AATAACTCAGACTTTTTCTCTGCGGCAGTTAACATTTTTGAAAGGTGCAACCGCAAAAAATGTGAGAGAGTGCAACCTGA  
TGAAAAATAGTGTGCTGAGCACTAAAATTAATGAAATGGTGTGTTAAATCGATTGTGAATAACAGCGCTTCCGGCA  
GGATACGGTCCCTGGTAAAACATAAACTCTGTTACCCGTTCCGGTGGCAGATATAACGGCAAGTTTCGACATTGCCG  
ATAATAATTTTTGGAGACTTTAGATGGCTATTAGCACACCGATGTTGGTGACATTTTGTGTCTATATCTTTGGCATGAT  
ATTGATTGGGTTTATCGCTGGCGATCAACGAAAACTTTGACGACTATATTCTGGGCGGTGCTAGTCTTGGGCCATTG  
TGACGGCATTATCGCGGGTGCCTCGGATATGAGCGGCTGGCTGTTAATGGGTTTCCGGGCGCTGTTTTCTTCCGGG  
ATTTCCGAAAGCTGGATCGCCATTGGCCTGACATTAGGCGCGTGATTAAGTGGAGCTGGTGGCCGGCGGTTGCGTGT

GCATACCGAATACAACAATAACGCCTTAACACTGCCGATTATTTACCGGGCGCTTTGAAGATAAAAGCCGATTTTGC  
GCATTATCTCTGCGCTGGTTATTTTGGCTGTTCTTACCATTTATTGCGCTTCGGGCATTGTGGCAGGCGCGCTGTGTT  
GAAAGTACCTTTGGCATGAGCTACGAAACGGCTCTGTGGGCGGGCGCTGCGGCACGATCCTTTACACCTTTATTGGCGG  
TTTCTCTGCGGTGAGCTGGACTGACACTGTACAGGCCAGCCTGATGATTTTTGCCCTGATCCTGACGCCGGTTATCGTCA  
TTATCAGTGTCCGGTGGCTTTGGTGACTCGCTGGAAGTGATCAAACAAAAGAGCATCGAAAACGTTGATATGCTCAAAGT  
CTGAACTTTGTTGCCATTATCTCACTGATGGGTTGGGGGCTGGGTTACTTCGGGCAGCCGCACATTCTGGCGCGTTTTAT  
GGCGGCGGATTCTCACCACAGCATTGTCCATGCGCGTCTGATTAGTATGACCTGGATGATCCTCTGCCTGGCAGGGGCGG  
TGCTGTGCGCTTCTTTGGGATTGCTTACTTTAACGATCATCCGGCGTTGGCTGGTGCGGTAAATCAGAACGCCGAGCGT  
GTGTTTATCGAACTGGCGCAAATTCTGTTTAAACCCGTGGATTGCCGGGATTCTGCTGTGCGCAATTCTGGCGGCGGTAAT  
GTCAACCTTAAGTTGCCAGCTGCTGGTGTGCTCCAGTGGCATTACCGAAGATTTGTACAAAGCGTTTCTGCGTAAACATG  
CCAGCCAGAAAGACTGGTGTGGGTAGGGCGTGTGATGGTGTGTTGGTGGCGCTGGTGGCGATTGCGCTGGCGGCAAAC  
CCGAAAACCGCTGCTGGGCTTAGTGAGCTACGCGTGGGCGAGCTTTGGCGCGGCTTTGGTCCAGTGGTGTCTGTTCTC  
GGTGTGTTGACGCATGACGCGTAAACGGTGCCTGGCGGGGATGATCATCGGTGCGCTGACGGTTATCGTCTGAAAAC  
AGTTCGGCTGGCTGGACTGACGAAATTATCCGGCTTTATCTTCGGCAGTATTGGGATTGTAGTGTTAGTTTGATTTGCTG  
GGTAAAGCGCGTCAGCGCGGATGCAAAAACGCTTTGCCGAGGCCGATGCGCACTATCATTCCGCTCCGCGTCACGGTT  
GCAGGAAAGCTAAGGGACTTAGCTGCGCGGTTTTGTTTTGGCTTACGAGCGGTTGCGCTCCCTTAATGTGCTCGCC  
ATATAAATTGAATGGTGCAGGGAGCGCGCAGGGGGCGGCAATCGCCGCGCCCTGCTGTCCCGGCTTCGGGGAACG  
CTTCAGCGATTTTACGCCACCAACACCCGAGCTGTTATTATGTTCCGGGCAAAAAGTTAGATTTGATAATCGCGGATGG  
ACGAAAATTGCTTGATACACCCGCTTATCAGTTTTACATGGAAGCTCTGATGCATTGAGTCTGGACAGTTTTGTGCGCTGG  
ATACGGCGTTTACGCGCATCCGGCAAGAACACATGTTTCTTTCGAAACAATCCCATCTTCTACCCTGGAATAATCGTT  
TATATCCCTTGGCATTACCTCTCTTTGTTTACATCCAACATCATTTTATAAACATTCCGCTTGTGTTTTTCTTGGCGT  
AATGATAATCGCTATCACTGCGATTTACTTTTCTTTCATAGATTGACTCAGAAAAACGTTTAAAGGTGGGTGGCATGTT  
TGTTCCGTTTTCTATTATGTTGCGCGAAGGACTTGAAGCCGCGCTGATTGTCAGTTTGATTGCCAGCTATCTTAAGCGTA  
CCCAGCGAGGCCGATGGATTGTGTGATGTGGATTGGCGTGTGCTTCCGCTGCGTTGTGCTGGGCTTGGGTATCTTCA  
TTAACGAAACCACCGCGAATTTCCGCAAAAAGAACAGGAAGTGTGAAAGTATCGTGGCGGTGATCGCCGTGGTATC  
CTTACCTGGATGGTTTTCTGGATGCGCAAAGTGTGCGCAACGTCAAAGTGAAGTGAAGTGAAGTGAAGTGAAGTGAAGT  
GCAGCGTGGAAATCATCATGGCTGGGCGCTGGTGTGATGGTCTTTTTTCCGCTTGAAGGGAAGGGCTGGAGTCCGGTCT  
TTTTCTGCTGGCGGCTTTCAACAAGATGTCGGGATCTGGCCGCGCTGGGTGCAATGCTCGGTCTTGTACTGCCGTG  
GTGCTAGGCTTCTGCTCTACTGGGGCGTATTGCGCTCAATCTTGGTGCATTTTTTAAATGGACCAGCTGTTTATTCT  
CTTCGTCGCGGAGGGCTGGCAGCTGGTCCATTGCGCATTTTATGAAGCCGATTGTGGAACCACTTTTCAAGAAATCG  
CCTTCGATATGAGTGCAGTCTCAACTCACTCGCTGTTGGCACGCTGATGGAAGGGATTTTTGGCTATCAGGAAGCG  
CCGAGCGTCAGCGAAGTCCCGTCTGGTTATTTATCTCATCCCGGCGCTGGTGGCATTGCTCTGCCACCACGCGCAGG  
GGCGACAGCGTCTCGCTCCGCGTAACAAATACGACGCAAACTCTTGTAGTTACAACATACTTTAAAGGGATAGTCTCG  
TCATGACCATTAACCTCCGCGTAACGCATTGCAGTTGAGCGTGGCTGCGCTGTTTTCTTCTGCTTTTATGGCTAACGCC  
GCTGATGTGCCGAGGTCAAAGTGACCGTGACGGATAAGCAGTGCGAACCGATGACCATTACGGTTAACGCCGGGAAAAC  
ACAGTTCATTATTCAGAACCACAGCCAGAAGGCGCTGGAGTGGGAGATCCTCAAAGGCGTGGTGGTGGAAAGAGCGGG  
AAAATATCGCCCTGGCTTAGCCAGAAAATGACGGCGAATTTACAGCTGGCGAATACGATATGACCTGCGGTCTGCTG  
ACTAACCCGAAAGGGAAGTTGATCGTCAAAGGTGAGGCAACGGCGGATGCGCGCAAAGTGTGCGCTGTTAAGTCTTGG  
TGGTGAATTAAGTGCATATAAAGCGTATGTCATGGCGAAACCGCAGCTGGTGAACGACACCAAAGCTTTACCGACG  
CGATTAAGCAGGCGATATGAAAAAGCGAAAGCACTGTATGCACCGACGCGCCAGCACTATGAGCGATTGAACCGATT  
GCTGAAGTGTCTCCGATCTGGATGGCAGCATTGACGCGCGTGAAGATGATTACGAGCAAAAAGCCGCGCCGCAAAAATT  
CACTGGTTTTCCACCGTCTGAAAAAGCAATTTGGTGGCACAACACCACCAAAGGGATGGATCAGTACGCTGAGCAGCTTT  
ATACCGATGTGGTTCGATTTGCAAAAACGCATCAGTGAAGTGGCTTTCCACCTTCAAAGTGGTGGCGGCGCAGCCGGA  
CTGATTGAGGAAGTGGCAGCCAGCAAAATTAGCGGTGAAGAAGATCGCTACAGCCACACCGATCTGTGGGATTTCCAGGC  
TAACGTTGAAGGCTCGCAGAAAATTGTCGATTTGCTGCGTCCACAACGCAAAAAGCCAAACCCGGAAGTCTGGCAAAAG  
TCGATGCCAACTTTAAAAGGTCGATACCATTCTGGCGAAATACCGTACTAAAGACGGTTTTGAAACCTACGACAAATTG  
ACCGATGCCGACCGGAATGCACTGAAAGGACCGATTACTGCGCTGGCGGAAGATCTGGCGCAACTTCGCGGTGTGCTGGG  
ACTGGATTAAGCGTTATGCAGTATAAAGATGAAAACGGCGTGAATGAACCGTACGCGGACGTTTACTGAAAGTGTAGG  
TGCAGTGGCGTGGCGGGAAGTTGTCGGTCTCATGCACAAAAACGCAAAGTGCAGCGGTACGCTTTCACCGGATG  
CTCGCAATGAGAAACAGCCGTTTTATGGTGAAGTACAGGAGGATCCTGACGCCACAACAGGCCGCAATGATGCTGGT  
GCGTTTTGATGTGCTTGGCAGCGATAAAGCCGATCTTGAAGCGTGTTCGCTTGTGACTCAGCGTTTTGCTTTTCTGAC  
TCAGGGCGGAGCAGCACCAGAAAACGCCAAATCCGCGCTGCCACCACTCGATTCCGGCATTCTTGGCGGCTACATTGCGC  
CCGATAATCTACCATCACGTTATCGGTGGGTCATTGTTTATGAGCGCTTTGGCCTTGGCGCCACAGATGCCAAAA  
AAGCTGCAGAAAGTACGCGTTTTCCCAACGACTCGCTGGATGCGCGGTTATGTCATGGTGTGTTGCTACAGATTTG  
CGCAACACCCAGGACACGGTTATCCATGCGCTGCGCGATATCATCAAACACACGCGGATTTGCTCAGTGTGCGCTGGA  
AGCGGGAAGGGTTTTATTTCCGATCACGCGGCGGTAGTAAAGGCAAGAGACGCGGATTAATTTGCTGGGTTTTCAAAGAC

GGCACTGCCAATCCCGATAGCCAGAATGATAAGTTGATGCAAAAAGTGGTGTGGGTAACGGCAGATCAGCAGGAGCCTGC  
GTGGACAATCGGTGGCAGCTATCAGGCAGTACGCTTGATTGAGTTTCGAGTGAATTTTGGGACAGAACGCCGTGAAA  
AACAGCAGACGATTTTTGGCCGTGATAAGCAAACCGGTGCGCCGCTGGGAATGCAGCATGAGCATGATGTGCCTGATTAC  
GCCAGCGACCCGGAAGGGAAGGTGATCGCGCTGGACAGCCATATCCGGCTGGCGAATCCCCGCACGGCGGAGAGTGAGTC  
CAGCCTGATGCTGCGTCTGGCTACAGTTATTACTGGGCGTACCAACTCCGGGCAACTGGATATGGGGTTGCTGTTTG  
TCTGCTACCAACACGATCTGGAAAAAGGCTTCTGACAGTACAAAAAGGCTCAATGGCGAAGCGCTGGAGGAATACGTT  
AAACCTATCGGCGGCGGTTATTTTTGCGCTGCCGGGGTGAAGGACGCGAACGATTATTCGGAAGCGGCTTATTGCG  
GGTTAATGTTTTAGGCGGATAAGGCATTTGTGCGCAGATGCCTGATGCGACGCTTGCGCGTCTTATCATGCCTACAAT  
CAGTGCGGGTTTGGTAGGCTGGATAAGGCGTTCACGCCCATCCGGCGATCGTGCACTGATGCCTGATGCAAACTCTGCT  
GAAAGCACACAGCTTTTTTATCACTGTCACTCTGTCACTTTCCAGTAGAAAATAATGCACTGAAATGGTGTGTTT  
ATAGTTAAATAAAGTAAATATATTGTTGCAATAAATGCGAGATCTGTTGTACTTATTAAGTAGCAGCGGAAGTTCCCGG  
CAGTGATAGTCAGTCACTATGGAGATCGCGGATGTAACGTCTGTACTGGACATGTTTTAGATAATCAACGCGCCACCA  
CTCGCGGAGTTTTCTCTCCGGTAGTCATCTCGTCACTTTGCATTTTCAACCTCATCCTTTCTTTTATGTGTTACCGAC  
GCCGTAAACCGTGCAGTAGCCGTTTTTCCGATTTTATCCAAAAGCAAACATGGCTTACAAGGAAGCCAACCTCTGA  
TGTTCGTGCGCATAATCGCGCTGCCAACGGCGCTGTGATGAATACAAAACATCAAGGTGCTCTCATGGGAAGACAAA  
AAGCAGTGATCAAAGCTCGTGCAGAGGCAAACGTGTGCTGAGACGGGATTCCGCGCAGCCATAAGCAGCTGAAGAAGAA  
TCGGTCACTCGCTTGTCAGATGGGCGCGTAGAAGCCATTGGTATGGCCCGCAGAGTCCGCGATACTTCGCCATCCT  
CGCGCAAATGAAGCGCAATTGCACTATCTGAAGGCTATTGAGAGTAAGCAGCTGATATTCGCCACGGGCGAAGCCGGGT  
GCGGAAAAACCTGGATCAGCGCAGCAAAAGCGGAGGCGCTGATACATAAGGATGTCGACAGGATTATCGTCACCCGT  
CCAGTTCTGAAGCCGATGAAGATCTTGGCTTCTTACCTGGAGATATCGCAGAAAAGTTTGTCTCCTATTTTCCGCCGT  
CTACGACGTGCTGGTCCGGCGCTTAGGGCTTCTTTATGCACTGCTGCTGCGACCGGAAATAGGGAAGGTGGAATTG  
CGCCGTTGCTATATGCGTGGACGTACCTTTGAAAATGCAGTCTGCTATTCTTGACGAGGCGCAGAATGTGACTGCCGCG  
CAAATGAAAATGTTTTAACCCGCTCGGGGAGAACGTGACGGTTATCGTCAACGGTGATATCAGCAATGCGATTTGCC  
TCGCGGCGTGTCTCCGATTAAGTGACGCGCTGGAACGTTTCAAGAAGATGAAATGGTGGGATCGTCCGGTTCCGTA  
AAGAGGACTGCGTACGTTCCGCACTTTGCCAACGTACGCTGCATGCCTACAGTTAAGTGTGTTATCGGTGCAGAGCCCGG  
GCGAACCGGCTTTGTTTTGGGTGTTTATGCCCGACTAGCGTTTTTCTGAAACAACCATTTTTATTTGCCCTGGCTG  
GTGAAGTGTACGCTCATCTGTGGCTTTTTGTAGTTGCTGATAGAGCTCATCAGGTATTGCTAAGCTCTCTGCATATC  
TTGCGGCGTATATTGGTAGGCTGCATGATGCTGCTGTTTTTGA AACGCAGCTTATTGTACAGCGCCAGACAATTAACA  
CGACGGCATTCCGCACTGCCAGCAAAAATAGAAGTGAAGTCCGCTTCTGGCCTCGCTTTCGCAAGTAATAACCCGTCAGC  
AGATCCATGGCGAATAAGAATATGAACAACGCAAAATATGTCCACAAGATGGTTGTGGCAACATAATCAACCAGTAAACG  
TACTGGTGATTGTCCGGTCTGAATAATTAATTTGTTTCAATTAACCTCTCAGAATCCCAGGATCGGGACTTACCAACGG  
GCGGCTGCTTTTTAGGCATCAACATGACTCGTGTAATGATACCAATGTCGTTGCCAGGCTCAGCATCCAGAAAATAAC  
CGGGAACCAATAATCCAGAAAAGCGATGAAGTCAGATTATGCTCATAGCGATTCTCGATCATCAGGCTGACAATAAATT  
GCAGTAAACATAACGTACACAATAATTTCCGGCAGTATGTGTCGAGCGATATGTGTCAATTAATATTTAACGGTACA  
CCGGCAAGTTGGACTGCGTAAATAATGAAACCGACAGGAGGTAAGGCCCATATTGTGCTCAGGCAGTATCAAAAA  
CAGCGGCCACATTCGAAAGTTTTCTTGGCCACAACCTTGTCAATTTTTGAGGAATACTTCTGCACCGCCCTGAGCCC  
AGCGCAGGCGTGTTCACAGCCCTTTAACGTTTCCAGCATTAAATCCAGCACAGTCCCGTGGCTCGTAAAAAATC  
GTCCACTGATCAACTGCAGCTTCCAGTAATATCAATATCTTCCGGTATCATATCGTCACTCCAGTAACCCACTTCTGC  
CAGGGCGCTGCAGCAAAATGCGGCAATAACACCGGAAACGGTAAATACGTTTTCCATAGATACGCTGGTTCGTTGATCA  
AACCAATAATTGAGGAATACTCGCCAACCTGAATTTTACCACAGGGTGAACGTTTGAATAACGAGGATTACCGGTT  
ACGGCACCCACACGCGGTTGTACAACATCGGTTCCACAATATATGCCCGCCGATCGCGGTCTAATAACGCATCGCCATC  
AATGCACACCAGATATTCACTTTTCCGCGCGCAGCTCCGTTTTTAAAGCGCAATGGCTTCCCTGGTTTTGCGCCAGAT  
GAATGACCCGCAAATGGGAATTTGTGACGCGATGCGATCCAGGATGGCACGGGTTTTATCTGTTGAACCGTCATTTACG  
GCAATAACTTCAATGTTCTCATAACGCTGTGCTAAAGCGGCGTGTATGGTTTCTCAACGTTTTTCTCTCATTA AAAACA  
GGGAATGATAATGGAGATAGACGATTATCTTTCAACTGGGAGCTGGTGCGTTTTCTCCCCAGGCCAGTGGCGTTTAC  
GATAGACCCAGAAATAGACGCCGCAACAATCCACATAATGGACATAAAAAACGGCCAGAAGAAAACGAACCTCATCATC  
AGTTCACCAGAGTGAAAGTACGCTACGCATAGGGGTATGCATAACACCAGACATAATATAAAAAACGATACGATGCGATT  
AATCATTTTTCGGATACCAGGCTGTTGAAAACCTCAGGACGAATAAGGTCTATTTAGGTTGGTTATGCAGAAAATTGTCG  
GGATAATAACCATAGTTTTTCACTCCATTGATTTGAATAGGCTCATCCAGTGAGCGAGTTGTTGCGAAGAAATAGCCTG  
ATGCTGACCATTTTTCTGCCAGTTTTGTGCTGTAATTTAAAATAGATTTGCTTTAGCCTGAGGGATTTTTTAATTT  
GATTGGTCAATTTGATTAACCATTTGGTCAGCCGATTTTTCTGCGACACCTTCCAGATAAGGCATAGCCATAATAGCGGTC  
CAGTCATAGCTTTTTAGGAAATCAGCATAAATCTGTGCAAACAGGCTTCACTTTCAGGTTGTATTACCGGAAGTGCAAA  
AATATTTCTGTCAGTTTTAATATGTGGACCGCAATGGCTTTACGCGCGCACTAAGTTCTAAAGTGAAGTCAGTTAACG  
CACGACTTTTAAAGCGGGCCACTGTTTTAAATTTGCTCCGGTTTTGTCGAATTTCCGCTCAGACTCCCGCTAAAGCCTGCT  
TGCTGATAAGCCGTGATAGCCGGTGCATCTTCAATCTGAAAGCAAAGCATCATCGTGAACAATATGCCATC  
AAAAGCAGCATGTCCGGCAAGATCTTCAATAACATGCCAACTTTGCTCTGACTCTGTATCGAAAGGAGAGACGGT

GATATTGTTTCAGGATGAATTTGTGCTTTTTCTCCCCTGTTGGTAAGTATTTTACTCGCGTAAATGTGGGATCTAAATCC  
CAGCTTAATACCGGCATCCACGCATAGATGTTTACACCTGAGCGGTACGTAATTGCCAGGCAACCCGACTAAAAATATC  
TGCTTTTCATTGGTAGCAAACGATTTGGAAACCAGACCTCTTTGACCAGCCCATACCATCGGGATCAGCAAATGCCTGCA  
AATACACGGTTGATATTTGCATATCTTTACCCCGCTGAATTAGCATCAATATTGCGATCCATTTGCTGGAGGTTTTCG  
TCATAAACGTAATCAAGATCGATATGCATTATCCGTTGTGGTGATTTTTCTGTACGGTAATAATTTGCTGGGCAAACCTC  
TTTTAATGAGGGATTATTGGCGATTAATACCCGCGGAATGGAATCCAATTGCGACGATTTGCCAAACCTGATTCAAGGG  
TGAAGAACATGTCATAACCGAGTTTTTTAATTCCTCTATCGCTATGCCATTCGCTTCGCCATAAGGCCAAAACAAAACG  
TGTGGATTTACCTCAACCTTTGTACGCAGGTATTCCGTCATTTTTACAGCATCCAGACGAATTCCTTCCCGGTATTCTGC  
TGCGGTTTCATACCGTGCCTGGTACGTAATAATGCACGATTTACATATACAGGCAATAAGCTGCCGGTGGCATTAGCCT  
GAATACCGTAGTGAGAATTCATGTATGAGAAGCGAGCTCAACGAGCCGGGAACCGCAACTTCTCGACTTGTGCCAC  
GTGGCAAATATTCTCGATCGACCAACTCATCGCAAATTTTACTTGTATTCGCTGGCGTATCGACCAACTGCCGAC  
GGGGCCCACACAGCAGGCCACTGGAAGGCTGAAGAATTGGGAAGACGCGGTATAAAAACTCTGGTAGCCGTATCAA  
AAGTCAGCACTACAGCTTTTCCGGTAGCGTTTTCTCCTCGATGTGCTTACGAATTTGAGCAATACTGACCGGTTGA  
TAACCGTTCTCGCGCAGCCAGGCAAATGTTACGCGAGTGTGATGTCCGCACTGACATAAAACGCTGGTCGGCAGCTTC  
GTCTTCAACGTTATGCCATGAAATCGTACAAAACCATTAATGCGGCCACGTTGCTCGGCGAGTAAAGATTCCGATCCT  
GTGGCGGTATAAATGATGTTCTTGACTGGCTAATGCACGCGGTGAGCATAATTATACTACCAGCATCAGGAGATTTTA  
TTTTCCATTACGTAACATATTTATCCTTAAAATCTGAATGTCATATCGAATTCACGTAATAAGTTGTGTTCTCTGCACCG  
TCATAAGGTCGTTTTTCCAGCGTAGCGTTGCGCCAGCATCAATCACGTCATTTCCAATAATGCGTTGCCGTTAGCCGAG  
TTGGGTGACGACATCCGTGCCATAATGTTTTGCCAGGAGCACCAACACCTGCGCTGAATATTTGCTCCAGCTATTTT  
CATAGCTTCGCCATAACAAATGGCTTGCCTCAAATGCCGGAACAATATCGAACGTTTTTATAGGGTTGTAGTATGGGGTA  
TCGTGTTCTGTATTTTGTTCGTAATACAGACTGGGTAGGAAATCGACAATCAAATATGGTGAAGACCAGATGCGTTCCTG  
ACCCTCAAGTGAGACTTCATGACGCTGGTACTGTCGGAAAAATCAGTGAAAGCCAGGAGACACCGTACTTACGCCGCT  
CATTTTGATACCAGCGAACATAAGCCTGAGCACTGTTGCTGTAACACCATTTTTTATTGCCCGTAATGGAACGCGGTGA  
GAGAGGCGTTCAGTTGCGAACCAATACGCCAGTTATCATTAAAATCATACCAGCCAGACAGGCGCGCGCGGGTTTTATG  
CTCATGATTGAAAACGCGTTGAGCGTACTCTGCCTGAGCCAGATATTACGTGACCGCCACTCAACACCCGCAAGCCAGT  
CGCGAACAAATCCCTTTTCTTCGCTAAATGTCCATCGGCATAACCGAATCCAGCAAACCCGCGCAGTTATCCTTCAGC  
GGTGGTGAATAAACGATGGTGGTAAAGTCGACATCATGTTTACCCTATCCGGGCTTCGCGATCAATTCCTGTTGAGCC  
AGCGATACGAAGCTCTGCAAGATTATGTACATCAACCGCACGTTTTAATCGTACAACGCCGGGATCTTGGCGTTCACGTT  
CGACAACATCGTGCCTAAGACAGCTGCCTGCTGCCATTTCTGTAACGTTAATGCTGTCCAGGCTTGTCAACCTCCAGA  
TTAATATTACGTGGCTCGATCACTTCTGCTTTTTTAAATCATTCTTCTGCTGCACGAGGCCAACCCGCGGGCTTGAACAC  
ACTCGCGTAATCAATGCGCAGTCCCTGATTTCTGGTGCCTTATAAGCAAGCTCTCTGGCTGTCAATTCAGCCTGAGGAA  
GATCATTACTATATTTTGTACGGTTGAGAGAAACGAATGCCCTGTAACCAGGTATCATTCCGGATGCTCGTAGGCGTG  
CCCATTAACCGAAGGAAAGCGCGCAAGTATTAATGGTATGTTGGGTGACAGTTAGCGCGCCCGGATAATTTTCACTCTC  
CAGGTGGCTGTAAAAGAGATCCGCAAGTCTTATCGGATAAATCCGGGGCAATGGTCTCCTTGTGATAAAAAGAGCTCGG  
TCATTATTGACTGTGCTTTTTTCCGGCTGATGATCTTTGAGATAAGCCGATGCAACCCAATATTGCCCCAGGGCGGAATA  
ATTTGCCCGTCTTTTTTAAATCGCTGATAGTGAGAAATAACGCTTTTATAACGATCGCGAGTTAATAACGCGCAAGATG  
ATCAACCTGAATACGCTGGTACTGGCAGTGCCTGTTGGTTATCGTGCCACAGAATTTCTAATGCAGCGTATTGGCGCA  
GGCGCGATCGGCAATGGCATAACGTTCACTTTCACTGCGCGTAGGCATAAACGACAGTCTGACCAGTTCCGCGATGAATA  
TCAGCGCAATATCTGGCGTTAAATGGCATCGTCAATCGCGGAGCAAGTTGATTATTACGTAATGCCTGCACGTATTC  
TGTGGGATATTGTTGCGTAGATGCAATTTTCAAGTAATGACTCTGTATCGCCGTAATTCATCCTGATGACGCCCCGCA  
GTTTATAGATATAGGCTTTCGCGAGTAAATGGCTTTGTCCGGTGTCCAGAGTTAAGCTGTTAAGTTTAAACCGCGCA  
GTATCATAGTGACCAGCATCTGCCAGGTTAAAATTTGTCCTGTTGATAATCCTTATTTTGGCGCTCCAGAGAGAGCGC  
CTTTTGCACAGTGTAAGCGAGTTTTGCCATTGTTGACGTTACGATAAGCGACGGCGACAGCTGCATAACCACGCGCTG  
GTAATTGCTGATGACGGTAGCGTTGTAACCGTAATAACCTGTTTATCTTGGCCGGCCATAAGGCAATCTGTAACCAG  
TCAGCAATTTGGTTATTGCTGAGTGTGATTTTGTAGTCAAACCATGACAAAGCTGGCTGAGTATTACCCTTGCAGCTTC  
AATAATCAATGCATCATAGCGTTATTAACAGCACTCTCGCCGCGGACTCGCTGCTAAAAATGCGGCAGTAAGAAGTT  
TCAAAGCCATTTGGTTTTCGGGCACCTTTTTCTGCTACTTGAATACATCCTGTATTACTCCATGTATTGCCAAAATCTC  
TCTCTGTATCTAATTACAGTAACTGAAAAGAAAGATATTTTTGCACCTCATAATCCGTTATTAACGCGGAAGAGAGAC  
GTGAATTGTTGATGATGAGAAGAAGAAATGATGAGCAGAGTGTCCATATAAAATCCTTTTCTCGCCGAAAATCCATTCC  
AATGATGAGGATCTTCAGGAATACGGCATAAATCCCAATGCCTTTTTCAAATAAATTAGGATTAATAAATTAATCAG  
TAAATTCGATGCATGATTTCCGATTTTTCGAAAGTCTGATGAAAGGCTGCGCTACGGCACTCACGGATTAATTTGTTA  
TTCCTAATGTATCATGAATTAATGTTTTATAAGGATTTCTATAACCATTTATAAGTATTTTCAAGCCTGGCTTGTGC  
AAACAATGTATAAAGCACTTAGGCAATAATAATTACATTCAGCACTATCATCATCGGTATTGTTTGTGGCGGAATTTT  
ATATTGACAACAGTACAGTCTTATATCTATTAATAATAGAAAGGATCTACAACCTACAGATTGGTGTAGCTTTATGGA  
AAAAGACTATTTGAGAATTAGTAGTACTGTATTAGTGAAGTATTGTTTGGGCTTGTGTTGTTTGGTGAATAGTTGGT  
TTAATCAGCCAGGCGTTGAGGAAGTTGTTCCACGATCAACCTATCTGATGGTAAATGATTGCTTATTTTTTATCGATACT

GTTGCATTTATTTTTATGCAGTTGATTTTCAATTTATGACCGTAGGCAATTTTCAAACCTGTGTAAGTTAGTTTGGCTTTTCT  
GAGTTGTTTGAATTTACTTTGTTATAACCGTCATTATCATTGAGCAAAATTATTGAGGAGCGTTTGACAAGCAGTGTTGTCC  
AAAATGACATTGCAATCTATTATTTGTTTCGTCAGATGAGTTTGTGCATATTAATTTTCTGGCATTGGTGAATAAAGTT  
AGTGAACACAAAACAGCGCAATTTATTTTCAAAAAAATGACTTTGTGCATAAGTTTGTGTTTTTGGGGGGCC  
GATAGTTGCTCACATACTTTCTAGTCATTATGAGAGCTACAATTTACACATTGCCGAGTTAACCAATGAAATGGTCAGG  
TGGTTTGGAAAGCCTCATATGTTACCATAATGATTTTCATGTGGTTAACCTTGCTTTCCGGTTAATCTATACTTTAATGGT  
TTACGCTATGATATCTGGAATGGAGTGACGGTGATTGCTTTTTGTGCCGACTGTACAATATCTCTGTTATTTATGAG  
CAGGTATAGCGTGTCCACTTGGTATATTAGTCGCACTATTGAAGTAGTCAGTAAGTTAACCGTTATGGTAATATTTATGT  
GCCATATATTCAGTGCGCTACGAGTAACAAGAACATTGCACATCGCGATCCCTAACCAATATATTTAACAGAAATTA  
TTTTTAATGAACTGACAGTTCAATCAGCATCAGCCAAAAACGCCATTATGCGTCATGATTATGGATATCGACCATT  
CAAAAAAGTCAACGACACCTGGGGGCATCCGTTGGCGATCAGGTGATAAAAACAGTGGTGAATATCATTGGGAAAAGCA  
TACGACCAGATGACCTTTAGCGCGCTCGGCGGCAAGAGTTTGGCGTCTTGCTGACGGACATCGATACTGAACGTGCG  
AAAGCTTAGCGGAAAGGATTGGGAAAATGTTGAGCGTTAACTGGCGATAATCCTGAATACGCTATACCACAAAAAGT  
GACGATTAGTATTGGCGCTGTTGACTCAGGAAAATGCGTTAAACCCAAATGAGATCTATCGACTGGTGATAACGCAC  
TTTACGAGGCGAAAGAGACGGGCGTAATAAGGTGGTTGTGAGGGATGTGGTGAATTTTTGTGAGTACCATAAAGCGGC  
ATTTTGATCTACCCAGTAATATGGACACAGGCCAAGCGAGGTTCTTGTTCAAATTTCCGGACTGAGGCCGCCA  
CACCAACTGTCCGCCGCCACCGATTGAATCACATTCGATATAATTAACACCGTTGCCCGCATTATTTCCCGGCTGAT  
AAAGTGTCTCCATGGATACATTCCACTTTAGCGAATGAAAGAAGCTTTCCACGCAGGCATTATCGTAGCAGCAACCTT  
TTGCGCTCATACTCCACGCAGATTATGCCGCTTCAAGTTGCGCCTGATAATCTGCTGAACAGTACTGGCTCCACGGTCC  
GTGTGAACGATAACGTTCCGGGGCCTTACGCCGCCACAGCGCCATCTGCAGGGCATCGCAGGCCAGTTGCGCCGTCAT  
GCGTGGCGACATTGACCAGCAATAACGGCACGTGACCACAGGTCAATGACCACTGCCAGATACAGCCAGCCTTCATCTG  
TACGTAAGTACGTGATGCTCTGCCACTTCTGGTTGGGCCACTGGCGTAAAAATCCTGCTCCAACAGATTTTCTGAC  
ACAGGCAGGCCGTGTCGCGGTAGCTGACCGGGTGAACCTCCGGGAGGCCCTTTCCTCAGTCCCTGACGGCGCAGGCT  
TGCCGCCACGGTTTTTACGTTAAAGGGGTAACCTGAGCACGCAGTTCATCCGTGAGGCGTGGGGCACCGTAACGCTGTT  
TTGACCGGGTAAAAGCCGCGAGGACAACGCTGTGCGAGTGTGGCGAACTGCTGACGCGTCTTATCCTTGTCCGCCG  
TGACACCAGTATACCAGCCGCTGCGGGCCACCCGGAGCACGGCGACATTGCTTTGATGCTGAACCTCAGCTGATGTTT  
TTCAATAAAGACATACTTCAATTCAGGCGCTTCGCGAAGTATGTCGCGGCCCTTTGGAGGATAGCCAGCTCTTCATCCG  
TTCTGCCAGTGGCGTTTGAAGCAGTGAATCTCGGTAGACATCTCCAGTTCACGTTCCAGAAGCAGTCTGCTGATTTTGT  
GTTTACTGCGCAGTTGTAGAGTTGTGATTCATACAGGCTGAGTTCACGGGCTCGGGCAGTAACACCGATGCGTTCAGCA  
AGCTTCAGGGCTTCACTGCGAAATTCAGGCGAATGCTGTTTACGGGGTTTTTACTGGTTGATACTGTTTTTGTGATGTG  
AGTCACCTCTGACTGAGAGTTTACTCACTTAGCCGCGTGTCCACTATTGCTGGGTAAGATCAGTGCCTGGCACACGCGTT  
TGATGGAAGACGGCGTTCAGGCAATGCGCGATTATCTTCCGGACTGGATATCGCTTCGCCAGAGCATCAGGTTCTGATG  
AACGTAACAGCAAAAAGCGAGGTGCTCCGTCATTAATCAAAGAAAATCTCTCATTACCTAACTCATAACGGTGAATG  
GACTGAATCTCTCGATACATTTCTGAATATGCCAACCCGGTAGCTTTCTTGAATAAGTAATAAGCCCTATTTGGGGA  
ATATGTTAAATGATTTTGTGGCGTGGATCAGCAACGAGTTATGCATTGTCGTAAGCATTAGTGATGCAAAGGTATTC  
AAATGATTCCTGATATTTAACTTTTATTCGCTTTCAGGATAAACGAAATCTGATATACATTTATGCTATTGGACTTATT  
CTGATAGGCTTTTATTGGAAGAATGCAGGTTTACTTTTCCATCAGAGGATATTGGTGTAGTTAGTGGGATTCTGGCTCT  
GGTGTGTATAATTTTTATTTTTGATCTCAAGGCGTACTGGGCTTATAATGCGTCACGAAGAATATCGATTTTTCGTGGT  
TTAAGAAAAAGCAGAACCACAAAATAGAATATTTTACATAACCTCTGGTGGCAGGATTTCTGTGTTAATCATGTTG  
AGTGAATGAGTTGGGGGCTATACCAGTCTACCTCGTTATATGCGCTGTTCTGATTTCTGTTACTTGGGCGCTGGT  
CATCTTTCTGCTGTTTTCGATGATCCGACCAAGTTATGTCAAGCAGGTCGCTATTTTCAGTAGCGAAAAAAGTAAAATATA  
AAAGTCTGACTCGCTATGTGCTGCTTTCCGGTGTGCATCTCAACGGTTGTTAACCTGCTTACTATCAGCCCGTTGCGTAAC  
AGTGATTCTTTTGTGACAGAGGGGCGAGTGGTTAACGTTAAATCGATAATTGCATTGCTCATTCTTTGTGGCGTAGTGT  
GGCGATTAATCTGTTTTTCTGCGCTTCTCAAGCGGTACGCTTTTCTGGCAGGCTTTTTTTGACAGAAATCGATCTGT  
TTTTCTCCAGTGAATGCGTTGTGCGACTTTTTTGGCAAGCCGCTTTGGCTTCGGTTATTCATATTGCTGGTTATTGAA  
GTGATGTGGATTACGCTGGTGTGCGTATTGGCAACGCTTGTAGAATGGCGGATTTGGTTTGAAGCCTATTTTTTACTCTG  
CTATGTACCGTGTCTAATTTACTATTTTTTCTATTGTCGATTCCTCTGGCATAACGATTTTATGATGGCATGTGACATGT  
ATTTCCGTTGGGGCATTAAATAAGTGAAGGATGATAGGAAGTACCAGATAATACATATATGTTCTGACTCTCTTG  
CGCATTTTGTGTTGACTGAGTAACCAGACAGTTGATGTGCAGATTTCCCTCGCCCTAACAGACGTGGGCGGGGGCA  
CCCGGTGTGCAATATACGAAAAAAGCCGTACTTTCGTACGAGCTCTTCTTAAATATGGCGGTGAGGGGGGATT  
GACTCGCTTCCGCTCGCCCTCGGGCAGCCGCTCACTGCGTTCACGGTCTGTCCAACCTGGCTGTGCCAGTTGTGACCC  
CCGTCGGGGCTTCTCATCCCCCGGTGTGCAATACACGAAAAAAGCCGTACTTTCGTACGAGCTCTTCTTAAA  
TATGGCGGTGAGGGGGGATTGACTCGCTTCCGCTCGCCCTGCGGGCAGCCCGCTCACTGCGTTCACGGTCTGTCCAACCTG  
GCTGTGCCAGTTGTGCAACCCCGGTGGGGCTTCTCATCCCCCGGTGTGTGCAATATACGAAAAAAGCCGTACTT  
TCGTACGAGCTCTTCTTAAATATGGCGGTGAGGGGGGATTGACTCGCTTCCGCTCGCCCTGCGGGCAGCCCGCTCACTG  
GTTACAGGCTGTCCAACCTGGCTGTGCGCAGTTGTGCAACCCCGGTGGGGCTTCTCATCCCCCGGTGTGTGCAATAT

ACGAAAAAAAAAGCCCGTACTTTTCGTACGAGCTCTTCTTTAAATATGGCGGTGAGGGGGGATTGAAACCCCGATACGTT  
GCCGTATACACTTTCCAGGCGTGCTCTTCAGCCACTCGGACACCTCACCAAATTGTCGTTCTGTCTTGTGGAACG  
GGCGTAATTTAGGGAAATCATGACCTGAGGTCAACAACTTTTTGAAAAATCGCGCGTTTATTCAAACTTCAATCAAT  
GTGTGGTTTTAATAAGCGAAATCTGCTTTTTTCCACCGACCACGGATTTGTTATGCTGGTGGCCTTTGTAGATCATAA  
CGATAAGTGCGAATAAATTTTCGCACAACGCTTTTCGGGAGTCAGTATGGATATCATTTTTATCACCCAACGTTTCGATAC  
CCAATGGTGGATTGAGGCACTGCGCAAAGCTATTCTCAGGCAAGAGTCAGAGCATGGAAAAGCGGAGATAATGACTCTG  
CTGATTATGCTTTAGTCTGGCATCCTCTGTTGAAATGCTGGCAGGGCGCGATCTTAAAGCGGTGTTGCGACTCGGGGCC  
GGTGTGATTCTATTTTGGAGCAAGCTACAGGCACACCTGAAATGCTGAACCTTCTGTTCCACTTTTTCGCCTGGAAGA  
TACCGGTATGGGCGAGCAAATGCAGGAATATGCTGTGAGTCAGGTGCTGCATTGGTTTCGACGTTTTGACGATTATCGCA  
TCCAGCAAAATAGTTGCGATTGGCAACCGCTGCCTGAATATCATCGGGAAGATTTTACCATCGGCATTTTGGGCGCAGGC  
GTACTGGGCGTAAAGTTGCTCAGAGTCTGCAAACCTGGCGCTTCCGCTGCGTTGCTGGAGTCGAACCCGTAATCGTG  
GCCTGGCGTCAAAGCTTTCGGGACGGGAAGAACTGTCTGCATTTCTGAGCCAATGTCGGGTATTGATTAATTTGTTAC  
CGAATACCCCTGAAACCGTCGGCATTATTAATCAACAATTACTGAAAAATTACCGGATGGCGCGTATCTCCTCAACCTG  
GCGCGTGGTGTTCATGTTGTGGAAGATGACCTGCTCGCGCGCTGGATAGCGGCAAAGTTAAAGGCGCAATGTTGGATGT  
TTTTAATCGTGAACCTTACCGCCTGAAAGTCCGCTCGGCAACATCCACGCGTGACGATAACACCACATGTCGCCGCGA  
TTACCCGTCGCCGTGAAGCTGTGGAGTACATTTCTCGCACCTTCCAGCTCGAAAAAGGGGAGAGGGTTCGCCGGCAA  
GTCGACCGCGCACGCGGCTACTAATAAAGCATCAGGATTCCTGCTATCCTTGGCGGGAATTGAATACAGGAGAGAGTTAT  
GTATCCCGTCGACCTTCATATGCATACCGTTGCCAGCACATGCATATAGCACATTAAGTGATTACATTGCCCAGGCCA  
AACAAAAGGGCATTAACTTTTTGCGATCACCGATCATGGCCCGATATGGAAGATGCGCCGCATCACTGGCACTTCATT  
AACATGCGTATCTGGCCGCGAGTGGTTGATGGGGTAGGGATCCTGCGCGCATCGAAGCTAACATTAATAATGTTGATGG  
TGAAATTGACTGCAGCGTAAAATGTTTGACTCGCTGGATCTAATTATTGCCGTTTTTCATGAGCCGTTTTTGGCCAC  
ATGACAAAGCGACCAATACACAAGCGATGATCGCCACTATCGCCAGCGGCAATGTGCATATAATAAGCCATCCCGAAAT  
CCCAAATAGAAATAGATGTGAAAGCCGTTGCTGAAGCAGCCGAAACATCAGGTGGCGTGGAAATCAATAATCCTC  
ATTTTTACTCAGTAAGGCGAGTGAAGACAATGTCGTGAGGTAGCCGAGCGGTACGTGATGCTGGAGGTTGGGTGG  
CATTAGGCTCGGATTCTCACACCGCTTACCATGGGGAAATTTGAAGAGTGTCTTAAATCCTCGACGCGGTAGATTTT  
CCGCCAGAGCGCATTTTGAATGTTTCTCCGCGCCGTTACTGAACTTCTTGAATCTCGCGGTATGGCACCGATTGGGA  
ATTTGCAGACCTTAATTAAGTAAATGAAATATATTAATGAACGAGTTTTCTATCCTCTGCTGTGCTGGGTTGCT  
CTATTACCGCAACCAAGATCCTTTACTGGTGCCGCTGTTTACCCTGATTCTGTGAGGGGAAACTGGTGCGAACTGGC  
CACTGGAGCAGGATGAGTTGCTGACACGTTTGCAGAAAAGCTGTGATATGACGCAAGTCTCTGCCGATTACAATGCGTTG  
TTTATCGGCGATGAATGTGCTGTGCCGCCATATCGTAGCGATGGGTTGAGGGCGCGACGGAAGCGGAAGTGGCGGCTTT  
TCTTTCTGAGCGAGGGATGCCATTAGCGGATACGCCAGCCGATCACATCGGCACATTGCTGCTCGAGCTTCTGGCTGG  
AAGATCAGTCAACGGAAGATGAGAGCGAAGCACTGGAAACTGTTTCAAGTATCTGTTACCCTGGTGTGGTGGCTTC  
CTTGGCAAAGTGGAGGCCATGCAACCACGCCTTTCTGGCGCACCATGGCACCGCTAACCCGCGATGCCATTAGTGCAAT  
GTGGGACGAGCTGGAAGAAGATTCTGAAGAATAAGTGTGATCTACGTCACTCATAACTGCAACGGATAATTTGTTGTTGC  
ATAAAATGTGTGCTCGATCTCATTATGGCCGCTTTTCTGCTATCATGCGCGCATGAACATACTTCTCTATTGCAA  
TCACAACAGGCATTCTCCTCCGATCTGGGGATGGGTGGCTGTTCCCTGGGCTTACTAAGCTGGGCGGGCTTCTGGG  
TGTACGGCCTACTTTGCCTGCCGCAAGTGGGTGAAAGGGTGGCGATCTCCGCTGCAACCCTGCTTGTGGCGTGGT  
GTGGGCGATGGTCATTATTTACGGTAGTGCCTGGCACCATCTGGAATTTCTCGGTTATGTCATAACCCGATTTGTCG  
CGTTTCTGATGTGATTACAGCCAAACAGTCTGCTTTTCAATTTGTTCCGGGACGTTTATAGGCGCATGCGCGACGTTT  
GCCGGGCAAGGCTGACTGAAACTGGTGTACCTTCTGCTGGCGTGGGCTGATATTTGGTTACGCAATGAAAAACAGTGG  
CCTGTGGCTGCGCGCGTAGTGCAAAGACGGCGCACCGTGAGCAGGAAATCAAAAATAAAGCGTGAGGGGCACTCACGC  
TTTTGCTTAAACAGTAAATGCCGGATGATAATCCGGCTTTTTTATCTGTGAGGATTCCGGTGAACCGACATATGGCG  
GTATTTACCAGAATGTCATTCTGCCGTTCTGCTTTATTTGCAAATCCACAGACCACGGTGCATACCATCATTAATCA  
GGAAAATGACCCTGTTTCGATAGCCGACATCAGGCACAGCATAACAGGTTCTGTTGAGGTGTAACCCACTTCCCTTCA  
AGCAAGCGCTGGTAGTCAATAAAGCGGAAAACCCCGCCTGAACTTCATAGGAAAGTATCGTCTTACTGGTGTTCACCGA  
AGAAAGGATCTCGCCGTAATCATTGACGACGCGCAGGTTACGGCAATCTGATCGAGCTGGTATTGCGTGTGCGCAC  
CGATGCCAAAATATCTTGCCTAACCCCGCCAGATTTGACGTTGCTTTTATAACCGATAATCGAACCTTCAACCATGATA  
TTTCCGCGCTTAAAGATTGACAGCGGATTCCGTTATTAATGGCAACCGTCCGTTTTCTTGTGCCGACGAATAATCTT  
GCGCTCGTTAAGCAGTTTTGTAAGCCCTGGCGCTCAGCGGTATAAACCAGCGAGAATCTTTCAGTGCCGTGACCAGCA  
TTGCCGTGGCGCTTTGCGGAACAGCAGTGGAGAAGTACTTCCGGGTAGGGTTTAAATTGCCCGTTTTCTGCTGAATG  
TTGTATACCGAAACAAAGATTTTACCCGTCGGCGCTGGCAGATGGTCAAATCTTGTAGCTCTGAGCACGAGGCATTA  
TGTCGGTCTGGCGGCTTCTTAGGCGGGCGGTTAAGCATCCGCTCAGTAACATGACGGCAACAAAAGAAATAAGCGCT  
GCATGATTATTTCTTATGAAGCTGGGCTTAAAAATCGGTTGAGTTATTTTGAACCCGAAACCTGGATGGTCCGAGG  
TTTTGTCGGTTTTTACGATCTGTACGTTCAACTGCAATTGACCATCGCGGTTGCAATATCGACAATATAATCGTTGGTC  
ACCATGCGGCCGGTTTTACCGGTATTAATATTCGACAGTAGCCACCTAAAATTTGTGACTGGATGGCCTGAGTAAAGTT  
ATCTAACGCTGAGGGTGTTCATACCAAAGTCATGTTATAGCTCGGATCTTTATAAGAGTTTTGGCCTGAGCGCTAT

TTAATAAAAAAGCGCCATTATTTGGGTTACCACCAAAGTTTGGATTACGGAAGTGGAAAGTCATGGTTCCAGCCCACTT  
AATGGCGAAATAAGCATGAGTAGAACTACTGCATGTTTGACACGCATTGCAGCCTCCGAACAATTTTTTATTAGAATTC  
ATCATGCGCCAAATCGCCCGTACTTAATAACGCCTGATTTATCTGGCGACGATTTAGTGCTTCTTCAGTTTGAATCAGTG  
CAAAGACGACAGTTTTCTCGAAGTCTCTTTTCAACGGAAATAAAAAAGTCTGGAAAATAACGTCCTGATTGACCGTTATA  
GTGATCCAGCTTCCCCATCGTGCAGTGGCCTTTTCAATTAATCGTTAAGTTACCCGTATAGTCACTTTCCATTTATCACT  
AAAGGCTCGGTAAAAATCATGGCCAATAGATGAAACAGTATGGTCAGTTAGCAATCCCGGGACTTCTACCTCAACGGCGT  
GAAGATTCCCTGCGGCGAACAGAAATTCTGCCGCCACAATCCAGCGTAAATAACGTTTCATGGCTTTATCGCCTGAGGTT  
ATCGTTTGGCCAGGAAACCGCTTGTGTCGGGTTTTTACGGCTATCTTCTTAAAAAGATTATAAAGATGCGTTTTAACCG  
TATTTTCGCTGATGAACAACGAACGAGCGATCTCGTTATTAGACGCGCCGATACGCAGCTTATTCAGGATCTCTTTTTCC  
CGATGAGTAAGGAGGGCTGATTCGCTGCTGTTATAACGATAGTTACCTGAATGCGTAATCAGGTAGCTGGCAAGCTTTTG  
CGTAAAGTAGCATTTCGCCGCGCAGGACGCCTTGAACCCATTGACAACACGTTCTTGATCTCCATGGAATAAAAAACGC  
CGTTGATATGAGGCCAGTTTTCAATGTCGCGGTACGGGTAATCTTCAGGCGTATTTAGCAACAATATTTTGATATTGTTG  
TTTTCTGCTCAAAGTATCCTGCCAATAATGGATAAGCTTTTTATCCGCTTCCATCATATCCAGAAGAATAATAGAGCC  
TGAAGAGATATCGTCCAGAGAACGTTGAATATTATGTAATTTTCTGTAATTGCCAGCGATTGTTAAAGTGCTGCAAGA  
GAGCTGTCGCTGCAAAGAAGATTTAGTGATCAACAATAAGTATGACCATGAATACTATGGACTTCATTAACATGATG  
AAACCCCGCTTTTTTATTGATCGCACACCTGCAGCTGCCTCTAAAATAGAAGCACCAGAACTACTGACAGATGTTGCA  
CTGCTGTGTGTAGTAATAAATCAGCCCTAAATGGGTAAAAATATAAAAACTAATGGATTACATCTGATTTCAATCTAGCCAT  
TACAAATCTTAAATCAAGTGTTAAACATGTAACATAATGTAACCTGTTATATTTAAAATGTTAACCTTAAAGTTTTATTA  
GTTTAGAAATGATAGAAAAGTTGTACATTTGGTTTTTATTGCACAATTTTAAAAATCATACAAATGGTGATAAATTACT  
AATAATGCATATAAAAAATATTTCCGTGTAGTCCTTTCGTCATGTAAAACGTTCTTGTTTTTTCTCCACACCTCCGTGGA  
CAATTTTTTACTGCAAAAAGACGAGGTTTGTACGGCTTGTGCGCAAGACATATCGCAGCAATCAGCGACGGGCAAGAAG  
AATGACTGTCTGGTGCTTTTTGATAGCGGAAAACGGAGATTTAAAAGAAAACAAAATATTTTTTTGCGTAGATAACAGCG  
TATTTACGTGGTTTTAATACTTTGGTATGAACTAAAAAGAAAAATACAACGCGCGGGTGAAGTTATTAATAATTTCC  
GCAGACATACTTTCCATCGTAACGCAGCGTTAACAAAATACAGGTTGCGTTAACACCAAGTTGAAATGATTTAATTTCT  
TAAATGTACGACCAGGTCCAGGGTACAACATGAAAAACAAATGTTATTTATGATGTTAACAACTACTGGGTGCGCCTGG  
GATTGACGCCGACGAGGTTATGATTTAGCTAATTCAGAATATAACTTCGCGGTAATGAATTGAGTAAGTCTTCATTTA  
ATCAGGCAGCCATAATTGGTCAAGCTGGGACTAATAATAGTGCTCAGTTACGGCAGGGAGGCTCAAACTTTTGGCGGTT  
GTTGCGCAAGAAGGTAGTAGCAACCGGGCAAAGATTGACCAGACAGGAGATTATAACCTTGCATATATTGATCAGGCGGG  
CAGTGCCAACGATGCCAGTATTTCCGAAGGTGCTTATGGTAATACTGCGATGATTATCCAGAAAGGTTCTGGTAATAAAG  
CAATATTACACAGTATGGTACTCAAAAAACGGCAATTGTAGTGACAGAGACAGTCGCAATGGCTATTCCGCTGACACAA  
CGTTAATTTCCATTGACTTTTTAAATCAATCCGATGGGGGTTTTACATGAACTTTTTAAAAGTAGCAGCAATTGACGCAA  
TCGTATTCTCCGGTAGCGCTCTGGCAGGTGTTGTTCCCTCAGTACGGCGGCGGGTAACCACGGTGGTGGCGGTAATAAT  
AGCGGCCAAATTTCTGAGCTGAACATTTACCAGTACGGTGGCGGTAACCTGCACTTGCTCTGCAACTGATGCCCGTAA  
CTCTGACTTGACTATTACCAGCATGGCGGGTAATGGTGCAGATGTTGGTCAAGGCTCAGATGACAGCTCAATCGATC  
TGACCCAACGTGGCTTCGGTAACAGCGCTACTCTTGATCAGTGGAACGGCAAAAATTTGAAATGACGGTTAAACAGTTC  
GGTGGTGGCAACGGTGTGACGTTGACCAGACTGCATCAACTCCTCCGTCAACGTGACTCAGGTTGGCTTTGGTAACAA  
CGCGACCGCTCATCAGTACTAATACATCATTTGTATTACAGAAACAGGGCGCAAGCCCTGTTTTTTTTCGGGAGAAGAAT  
ATGAATACGTTATTACTCCTTGGCGCACTTTCCAGTCAGATAACCTTTAATACGACCCAGCAAGGGGATGTGTATACCAT  
TATTCCTGAAGTCACTTTACTCAATCTTGTCTGTGCAGAGTACAAATATTGTCCTGCGCGAAGGCAGTTCAGGGCAAA  
GTGACAGCAAGCAAGAAAAGACCCTTTTCAATGCTGCTAATCAACCCATTGCTTTGACGAAGTTGAGTTAAATATTTCC  
CCGGACGATCGGGTAAAAATAGTTGTTACTGTTTCTGATGGACAGTCACTTCATTTATCACAACAATGGCCGCCCTCTTC  
AGAAAAGTCTTAATTTGTTGAAATATCGAGCATAAGATGAATCTGGAGAGAATGGTCTGCTGCGAATCAGCCAACCTGAA  
AGTATGGATAACACAACCCTCAAGGATGACTAATCATTGAGGAAATAGAATAAATGTTGAGACCTTTTTTAAACTCTCTT  
ATGCTCGGCAGTTTTGTTTTTCTTTTTATTGCCATTGCTGGAAGCACCGTGCAAGGGGGCTGATCCATTTTTATGGCCA  
AATTGTGGAACCGCATGTGACGTCAGCACCCAGTCATCACCCGTAGAAATGAACTGCCACAGAATGGTTCTATTCCGG  
GCAAAACCTACTCCAGCAAAGCGTTAATGAGCGGCAATGTCAAAAACGCGCAAAATAGCCTCAGTAAAAGTGCAGTATCTT  
GATAAACAGAAAAAGCTGGCTGTAATGAACATCGAATAACTAAGTTTCTGAACAACCTCACGTTGCTGAGCAGAAAAAT  
GCGATTTAACCAAAAAGCCTGCTGTACACTTAAGAAACAAGAAGGTGAAGGAGGCTTATGAAAACGCGTATTGATGTT  
GTGACGGGTGATATTACCAAACTGGCCGTTGATGTGATTGTGAATGCGGCTAATCCGTCATTAATGGGAGGCGGCGCGT  
CGATGGGGCCATTATCGCGCAGCGGGTCCGGCCCTGCTGGATGCTTGTAAAAGTCAAGCAACAGCAGGGCGATTGCC  
CTACGGGGCATGCCGTTATTACGCTTGCAGGCGATCTCCCGCTAAAGCCGTAGTGACACCGTCGGGCCAGTCTGGCGT  
GGTGGTGAACAAAACGAAGACCAGTTTTGCAGGATGCCTATCTCAATAGCCTACGACTGGTGGCGGCAACAGCTATAC  
GTCAGTGGCTTTTCTGCAATCAGTACTGGGGTTTTATGGTTACCCCTCGTGCGGACGCGGCTGAAATCGCAGTAAAAACCG  
TTTCAGAATTTATTACCCGTCACGCTTTACCCGAACAGGTATACTTTGTCTGTTATGATGAAGAAAACGCCACCTCTAC  
GAAAGACTCCTTACCAACAAGGAGATGAATGATTTGCCCCGGCTGGCGAGCGCGGTGCTGCCACTGTGTTGCAACATC  
CCGGTCAGTGTGGCCTTTTTCTCTGGAGAAAAGTCTGGATGCGTTTGGCGCCCGGATCGTCTGGCCGAAATGGCAGAG

CATACGCTCGATGTTTCAGTATTACATCTGGCAGGACGATATGTCCGGTCCGGTACTGTTTTCCGCCCTGTTAGCCGCAGC  
AAAGCGTGGCGTTTCGCGTCCGTTTTGTTGCTGGACGACAACAATACGCCCGACTTGACGACATTTTACGCTTGCTTGACA  
GTCATCCACGCATTGAAGTCCGGCTTTTTAATCCTTCTCGTTTCGCTTGTGCGTCCGCTTGGTTATATCACCGACTTT  
TCCCGTCTTAATCGCCGATGCACAATAAAAGTTTTACTGTGCGATGGCGTGGTACCCTGGTGGGAGGACGAAATATTGG  
TGATGCCTATTTTGGAGCAGGGGAGGAGCCACTTTTTTCGGATTTAGATGTCATGGCAATAGGACCCGTGGTAGAGGACG  
TTGCCGATGATTTCCGCCGCTACTGGTATTGCAAATCGGTTTACCCCTTACAGCAGGTGCTGGATGTCCCGGAGGGTGAA  
ATGGCGGATCGCATCGAGTTACCCGCCTCCTGGCATAACGATGCCATGACGCATCGTTATTTACGCAAAATGGAATCCAG  
TCCATTTATAAATCATCTGGTTGATGGAACATTGCCGCTTATCTGGGCGAAGACACGTTTTATTAAGTGATGATCCGGCGA  
AAGGGGAGGGCAAGGCAAAACGGCATTCACTGTTACCCGACGCGCTGTTTCGATATCATGGGCTCACCCAGTGAACGCATC  
GATATTATCTTCTTCTATTTTGTACCGACACGCGCAGGTGTGGCGCAACTCTTACGGATGGTGAAGAAAGGGGTAAGAT  
TGCGATCCTAACCAATTCTTGGCGTAACGATGTTGCTGTGCTCCATGCCGGATACGCGCGCTGGCGCAAAAATTGC  
TCCGCTATGGCGTGGAATTATGAATCAAGCCGACGCGTGAACAAAGTAGTACGTTACACGATCGCGGCATAACCCGT  
AATTCGGAGCCAGCCTGCATGCTAAAACCTTTAGCATCGATGGTAAAACGGTGTATCGGCTCTTTCAATTTTCGATCC  
GCGTTCAACATTGCTCAATACTGAAATGGGCTTCGTGATAGAGAGCGAAACGCTGGCACAGTTAATTGATAAACGCTTTA  
TTCAGAGCAGTATGATCGCGCTGGCAGTCCGCTGGACAGGTGGGACGGATCAACTGGGTTGATCGTATGCAAG  
AAAGAGATTATTTCTCAAAAAGAACCACCAGTTTCTGGAAGCGGGTTATGGTCAGACTGGCGTGCATATTGCCCGT  
GGAATGGTTATTGTAAATGTGGCTTAACGGGCTGGTCTTTATCGTTCTCACGCTTAACAACCGGTTTACCAGAGAACA  
AACTTTCAGTAACGGGATGCGCAAATGAATTTACATACAGAATTATCGCAATCCCTACTACAAATATCAGGCCACAGAGAA  
AACCAAGCCAGTTGGAGGTGATGTGCGGTGTAATGTATGCGCCGAAAAACAGCGTTAACGGGTGGTGAACAGATAGATA  
AACAGCGATGCGTTAACAAAATAAGTACCCGCGCTGACTGGAAGTTAAGCAAACGGTGGCCAAAGGAGAAGACCACATT  
CACCATCCACAGACCGAGGACCATGGTGTACCCGACTCGTTTTCGTACATCCAGGCATCGCCACTGCCATAGCGCTGGT  
TGAGTAAATAAGCGACAAACGCCAATGCTGCTGCAAGGGTACAGCCAGAGACGGCGTGGTAAACAAGGCTTTAAGATGA  
GGGAAAATGAAAGCCAGTGCGCCGAGGATAAAGAACGGCAAATAAAACAGCGTTTGCATGACAATAAAATTGAACATGCC  
ATTACTCAGAATGGGCGGATACACAATAAAAATCGTTCTTCTTATTACCGCATAACCGATGCCGAGGCATAAAAAATCA  
CCGATAGTTTTACCATCGAGAATTTTTTATTGTTTTATCAGAATTTTCTAAATTTTCTGATGCGCTTAAATATCCAT  
ACGCACAGCGTGTGATGACCACTAACACCAGTAAAAACCACAGTGTGATATTAATTCAGGCCAACGTATTATATTT  
GTCATACAATGACAGCCAGGCCAACTTTCCGCTTTTCTTTGACATATTGCAGCATAATAAATTGCGGTAATGTCAGTA  
GGGGGATGGCTGTTAACATCGGGATACCTACACGTTGACACGACTTTCCACCATTTTTTCAAGGGATAGCGTAAAAAA  
AGCATGTAGGAAAAGTAGCCGGATATAACGAAAAATACCTGCATGCGGAACGAGTGGATGAAGTCATTAAGGAGGGTACAG  
CCACAATGATGATTCGGCGCTATTACATGCCATGTATGGCTCGAATAGATTAAGAAATATGAAAAGGTATCCCTAAC  
ACATCAGCCAGGCGCGGATGGAGTCGAGGAAATATTACGTTGCGCGGGTACTGGGTTCATATATGGTTAACTAATCTCG  
GATTTTTCGTCTTATCCCTGTCCGGTTATGCCTTTAGGCTTGTGCCATAGTGACACCGACTGACCCGCGCCAGGCGCAG  
GCTTCAAGGTTTTTATGCATAGCATCATCGCTACCCTAACAGAAATGGAAGCGTCTGTAAGACGGTTGATAAATAAATT  
TGCTGGCAAACCTACACGAAGTCGATGCTTCTGTCTTTAGGAGAAGCACGGAAAGTGAACCGGTTGCAATCAGGTGCT  
TAATCCATGAGCCAGCGTGTGAACGATACCGGGATTCTGTTGTCGGAATGGCTGGTTATCCATTAATAAGATCGGATC  
GATATAAGCACACAAAGGGGAAAGTGTACTAATTATGAAACATAAACTACAAATGATGAAAATGCGTTGGTTGAGTGC  
TGCAATGTTAACCCTGTATACATCTTCAAGTGGGCTTTTCAAGTATTGATGATGTGCGAAAAGCAAGCTCAATCTTTAG  
CCGGAAAGGCTACGAGACGCCAAAAGCAACTTGCCTCCGTTTTCCGCGATATGAAATACGCGGACTATCAGCAGATC  
CAGTTAATCATGACAAAGCGTACTGGAACAATCTGAAGACCCCAATCAAACCTCGAGTTCTACCATCAGGGTATGTACTT  
CGATACCCCGTCAAAAATAAATGAAGTACTGCCACCGCAGTCAAACGAATCAAATACAGCCCGGATTATTTCACTTTTCG  
GCGATGTTTCAGCATGACAAAGATACGGTAAAAGACCTTGGCTTTGCGGTTTTAAAGTGCTTTACCCGATCAACAGCAAA  
GATAAAAACGATGAAATCGTCAGCATGCTCGGGCCAGCTATTTCCGCGTGATTGGTGCAGGTCAGGTTTATGGCCTTTC  
TGCCCGCGCCTGGCAATTGATACCGCTTGCATCGGGTGAAGAATTTCCGCGCTTCAAAGAGTTCTGGATCGAGCGTC  
CAAAACCGACTGATAACGTTTAAACCCTATGCATTGCTTGACTCGCCGCGTGCACAGGTGCTTACAAATTCGTGGTT  
ATGCCAGGGCGTGACACGGTTGTGGATGTGACGTCGAAAATCTATCTGCGCGATAAAGTCGGCAAACTGGGGGTTGCACC  
GTTAACAGTATGTTCTGTTTGGGCCGAACCAACCGTGCCTGCAAATAACTATCGTCCGGAGTTGCACGACTCTAACG  
GTCTCTATCCATGCCGTAATGGCGAATGGATCTGGCGTCCGTTGAATAACCCGAAACATTTAGCGGTGACGAGCTTC  
TCCATGAAAACCCGCAAGGCTTTGGTCTGTTGACGCGCGTCTGATTTCTCCGCTTTGAAGATCTCGATGATCGTTA  
CGATCTCCGTCGAAGCGATGGGTGACTCCGAAAGGGGAGTGGGGTAAAGGCAGCGTTGAGCTGGTGAATTTCAACCA  
ACGATGAAACCAACGATAACATCGTCGTTACTGGACGCCGATCAGCTGCCGAGCCGGTAAAGAGATGAACTTTAAA  
TACACCATCACCTTCAGCCGTGATGAAGACAAACTGCATGCGCCAGATAACGCATGGGTGCAACAAACCGCTCGTTCAAC  
GGGGATGTGAAGCAGTCGAACCTGATTCGCCAGCTGACGGTACTATCGCCTTTGGTGCATTTTACCGCGCAGAGA  
TGAAAAACTGCCAGAGGATACCCCGTACAGCGCAAACAGCATTGGTGATAATGGTGAAGATGCCAAGAAAACACTGAAATGCG  
CGCTATAACCCGGTTACCAAGGCTGGCGTCTGGTGTGCGTGTGAAAGTGAAGATGCCAAGAAAACACTGAAATGCG  
TGCTGCGTGGTGAATGCCGATCAGACGTTGAGTGAACCTGGAGCTACCAGTTACCTGCCAATGAATAAGACAACCTGAG  
TACATTGACGCAATGCCATCGCCGAAGCGAGAAAGCGGCATTGCCGAAGACTGATATCCGCGCCGTTTCATCAGGCGCT



GGATGCCGAACACCGCACCTGGGCGGGGAGGATGATTCCCCGAAGGCTCGGTAAAGGCGCGTCTGGAACAAGCCTGGC  
CAGATTCACCTGCTGATGGACAGTTAATTAAGACGACGAAGGGCGGATCAGCTGAAGGCGATGCCAGAAGCAAAACGC  
TCCTCGATGTTTCCCACCCGTGGCGTACCAACCCGGTAGGCCGTTTCTGGGATCGCTGCGTGGACGCGATGTCACGCC  
GCGCTATCTGGCTCGTTTGACCAAAGAAGAGCAGGAGAGCGAGCAAAAGTGGCGTACCGTCCGTACCATCCGCCGTTACA  
TTCTGTTGATCCTGACGCTCGCGCAAACCTGTCGTCGCGACCTGGTATATGAAGACCATTCTTCCTTATCAGGGTTGGGCG  
CTGATTAATCCTATGGATATGGTTGGTCAGGATTTGTGGGTTTCTTTATGCAGCTTCTGCCTTATATGCTGCAAACCGG  
TATCCTGATCCTCTTTGCGGTAAGTCTGTTGGGTGTCCGCCGATTCTGGACGGCGTAAATGGGCTTCTGCAACTGC  
TTATTGGTCGCGATAAATACAGTATATCTGCGTCAACAGTTGGCGATGAACCATTAAACCCGGAGCATCGCACGGCGTTG  
ATCATGCCTATCTGTAACGAAGACGTGAACCGTGTTTTTGCTGGCCTGCGTGAACGTGGGAATCAGTAAAAGCCACCGG  
GAATGCCAAACACTTTGATGTCTACATTCTTAGTGACAGTTATAACCCGGATATCTGCGTCGCAGAGCAAAAAGCCTGGA  
TGGAGCTTATCGCTGAAGTCGGTGGCGAAGGTCAGATTTTCTATCGCCGCCCGCGTCCGCCGTGAAGCGTAAAAGCGGT  
AATATCGATGACTTCTGCCGTGCGTGGGCGAGCCAGTACAGCTACATGGTGGTCTGGATGCTGACTCGGTAATGACCGG  
TGATTGTTTGTGGGGCTGGTGCCTGATGGAAGCAACCCGAACGCCGGGATCATTAGTGTGCGCGAAAGCGTCCG  
GTATGGATACGCTGTATGCGCGCTGTGACGAGTTCGCGACCCGCGTGTATGGCCACTGTTTACAGCCGGTTTGCATTC  
TGGCAACTTGGCGAGTCGACTCGGACATAACCGGATTATCCGCGTGAACCGTTTATCGAGCACTGCGCACCTGGC  
TCCGCTGCCGGCGAAGGTTCTTTGCGGTTCAATCCTGTACACTGACTTCTGGAAGCGGCGTTGATGCGCCGTGCG  
GTTGGGGGGTCTGGATTGCTTACGATCTCCCGGTTCTTATGAAGAATTGCCGCTAATTGCTTGTAGCTAAAACGT  
GACCCCGATGGTGCCACGTAACCTGATGAACTTCCGTCTGTTCTGTTGGAAGGTATGCACCCGTTACCGTGC  
GTTCTGACGGCGTGTATGCTTATCTCTCCGCTCCGCTGTGGTTATGTTCTCGCGCTCTACTGCATTGCAGGTAG  
TGATGCGTTGACCGAACCGCAATACTTCTGCAACCACGGCAGTTGTTCCAGTGTGGCCGAGTGGCGTCTGAGCTG  
GCGATTGACTTTTTGCTTCGACCATGGTGTGTTGTTCTGCCGAAGTTATTGAGCATTTGCTTATCTGGTGAAAGG  
AACGAAAGAATACGGCGCTTCTGGCGGTTACATTATCGTTGCTGCTGGAAGTCTTTTTTCCGTGCTGCTGGCTCCGG  
TACGATGCTGTTCCATACGGTCTTCTGTTGTCAGCGGTTCTTGGCTGGGAAGTGGTGTGGAATTACCCGACGCGTAT  
GATGACTCCACTTCTGGGTGAAGCGTTCAAACGCCACGGCTCACAGCTGCTGTTAGGGTATGTTGGGCTGTTGGGAT  
GGCGTGGCTGGATCTGCGTTTCTGTTCTGGCTGGCACCGATTGCTTCTGTTGATCCTGTCACCGTTTGTTCGGTGA  
TTTCCAGCCGTGCCACCGTTGGTCTGCGCACAAACGCTGAAACTGTTCTGATCCCGGAAGAGTATTCGCGCCGCGAG  
GTGCTGGTTGATACCGATCGTTTCTTGAAGTGAATCGTCAACGCTCCCTTGTGATGATGGCTTATGCACGAGTGTAA  
CCCGTCATTTAACGCTCTGGCAACCGCAATGGCGACCGCGCTCACCGGCCAGTAAGGTGCTGGAAATCGCCCGTACC  
GCCACGTTGAACAGGCGCTGAACGAGACGCCAGAGAAGCTGAATCGCGATCGTGCCTGGTGTGCTAAGCGATCCGGTG  
ACGATGGCCGCTGCTGATTTCCGTGTCTGGAATTCCCCGAGAGATATTCTTATGGGTGAGTTATTACGAAGGGATAAA  
GCTCAATCCACTGGCATTGCGTAAACCGGATGCGGCTTCGCAATAAAAACGTAGTTGCCTGATGCGCTACGCTTATCAGG  
CCTACATCGTTCTGCAATTTATTGATTTTGAAGACTTTGTGGGTGCGATAAAGGCGTTACGCCGCATCCGGCAAAAAC  
AACGAGCCAATAAAAATACCGGCGTTATGCCGTTATTTTTTACGAAAGAGGTATCAAATGCGTTAATTGTGGTGAGCA  
TCATGGTGACCTTGTGAGTGGCTGTGGCAGCATTATTAGTCGCACTATACCGGGGCGAGGGGATGGCAACCAATATTAT  
CCCGGTGTGAATGGGATGTGCGTACTCCGCTGGCGTTATGTCACGATCCTTGTGCTGCCATTCTCTGTTTTTGA  
TACTTTACTGTGCCGATCGACATTCATGCCCCGATGAGTGATTAACGTTTATCCACTCATCAGCTGCTGCGCGT  
CCTTCTCGGTATCCAGCGTGGCTCAAGCTGAAATCCCCCTGTCCTTATGTAATGATTCTCTTCTGCCACTC  
CTGGCGTATCTATCTCATATAGTCGCATCAAAAACACTTTGCGCGGCTTACCGCTAAGCATAGGTAACATTAC  
CTTCTTCCCTTCTGCGGCAAAAACACTCAACTTCCACATGATGTCGCGGCTTCCGCAAAAACGTAATTTTGGGCGATTGAAC  
TGTTCACATTCGATCTTCCGCGTGCATGCGGGGTTGTCTGCAAGAAATTTCTGCGTGCAGCGTCAATGGCTTCTT  
AAGCGTTGCGTACATGGTACACGATTTCTCCCTTTGAGTTGATGAGGTTTACGGGAAAAGGATAGCTGATTTCTCCGCTT  
TTGCAAGTATGAAAGGCGAAAAATCAGTTCGATACCTGGGGTATTGACGACGACGCTAGACTGTTCCATGAATAGACTGC  
GTTGAATAACACTACGCCAGCGGTGACGAGAAATACCGCTCTGAAACCGTAGTTGCTGAAATCGCTGCTCCCATCAATG  
GTCCGGTAACGTTGCCAATATCACGAAACGATTGGTTATAGCTGAAGATACGCCCGGCGATCTGGTTGCTCGAGTTGTAA  
ACCAACAGTGTCTGTACGGCGGGGAGTAGTGACCATCGGCGGCACCGAGCAAAAACGTAATAATCCCAAGTTGCAATGG  
CGTCTGAACGTAAGACATTGGGATCAACAGCAGTACAGAAAAGATCAGCGCTGTAATCAGGATCTTTTCCGGTCCGATT  
GATCGCAAGTTTCCGAGTCTGGTGCCTTAGCAGAGCCGCCACGCTGGCACCGAGGGGATCATGCCACTGATAAAG  
GCGACGTTACTGACGTTACCCGCCAGTTCGCGGACATACAGCGTCAGAATGGGGCAATTGAGCCCGTCCACCTGGAT  
GATTAACGTAGTGACAAACAGGCTGAGTACCAGTTTCCGGTTTTAAGTGTGTCACCACTTCCCGCATGTGACGATCT  
CTTTTTTGTGACCGGCTGGAATTTTTCTGATGCAAAAACAGGGTACGAAAAAGCAGAGTATGAGCACACTGGCGGTA  
ATAAAGAATACCGGACGTAAGCCGTAGCTATCGGCGAGCAGGCCGCCAGCCATTGGGCGGAGCAACGCACCACTAACGCC  
GCCTGTGGAGAGCGTACCCAGCGCCAGCCGTTTTATTACGCGTACTTGTGTGGCGATAAGAGCATTAGCGTTGGGGA  
CAATCCGCCAAGTAACCAAGAAGCGCCCGAGGATCAAAAACGTCAGATATTTTGTGCCAGCCCCATCAACCCATC  
ACGATGCCCATGCCGAGGGCAGAGCGTAATAGCATGATTTTTCGGCTTTACGGTCCGGGAGTCCACCCCAAAACGGTGA  
GGCGATGGCCGAAAATAAAAATGTAATGCTGAAGACAATACCGGACCACATATTAGGGCGGAGTGACCGGTAACGCCAA  
GCTGCTCAACGTAGAGGGGTAAGAAGGCATTACCAGACTGAAGCGGCACCGGTAAGAAAACAGCCTAGCCAGGCGACG

ATCAGGTTTCGTTTCCAGTTTATAGGGGTGTCATTTTACAGGGTGACATAGCAATCCGCTGTTGGTGCCAGGCGGG  
TGAACATAAGAAGAAAAGATAAGCACACTAATTATGCGCCGACTTCCAGGGGGCGCAATCCAGAGAGCTTTTATCGCTA  
AATCAGGGGGATTGCTGTGTAATGCCGGATGCCATTCTGAAGCATCCGGCATGGGAGATTTAATAGCGTGAAGGAACG  
CCTTCCGGGCGTGTAAAAAGCGACGGTGAACACATATACTGCTCTGGTGCCATCATGATGCATTTTTCGACCACCTT  
GTTTCATCCACGCGGCGGTAGTTTCGGCATCATCCAGTGGCGGAGAACTCTGGCGGCAGCATAATCAATTGATACCCTT  
TGCCATCTGGCTTACGGCGTGGAACGAAGGGCACCAGACATGCGCCGGACATCCGTGCCAGCATCCAGGTTCCGGTCTGT  
GTCGCAGCCTGCTCAACGGCAAAACACGGGACGAAAACGCTTGAGCGCGGGCCGTAATCATGATCCGGTGCCTACCAGAC  
CACTTCGCCTTTTTTTCAGGGCTTAAATCATGCCTTTTAAATCTTTGCGGTGAGCATCGATTTATTTGAGCGCAAACGGC  
CCCAGGTTTGTAGCCAGTCAATCAGTGGATTATCGTTCCGGGCGATAAACGCCAATACCCGGTTCCTGCATACCAAACCTGC  
CGCGACCCAGCTCCAGTGTGAGAAAATGGATGCCAACTAACAGGATGCCGCGTTTTTTCGCGCTGCACGTACGAATGTG  
TTCCATGCCGATCACTTCCGTCCAGCGGGCGATTCCGGCGTCCGGCCAGAACCACGCCATGCCGGTTCCATCAGGCCCA  
TGCCAACGGATTGAAATTTTACCACCATTTTACGGCGTCTTGTTCGCTCATTTCCGGGAAGCACAGTTCAGGTTG  
CGATGCACAATTTTTGCGCGTGTTCATAAAACGTAACGCCAGTTTTCTAATCCACAACCGAGGCGGTAGATAACCGG  
GTAGGGCAATTGCAGGACTAACCAAAGTACGCCAATACCCAACAGGTTAACCAATAACCGGGATGAAGCAGTGGCGTG  
AGAATTGGGTAGATTCGTCATATCAATCTGTTTTTCAACCTATTCCGGCAATTGTATGTATTGTCGCATTTTTTCGCC  
CGCAACCAAAATTTTGGTGAAGACTGGGCGAAATTCGCCGCTTGTAAATAACAAATAATTTTTAATCGCAAAATGTA  
GCGTAAATGTGTGGATGTTAATTATCGATAATTGCTATATCATGCCGCGGATTTTTACTTTCCCATCTCGCAGGAACCG  
TACACCATGCCAGTGTTACACAACCGCATTTCCAACGACGCGCTAAAAGCCAAATGTTGGCTGAGAGCGAACCGCAAC  
CACCATTTGTTTTACAAGTATTTCCACATCGCCGATCCTAAGGCGACCCGTGACGCTTTATATCAGCTGTTTACCGGC  
TGAATGTTTTTGGGCGAGTGATCTGGCGCATGAGGGCATTACGCGCAAATCAGCGTACCTGCGAGCAATGTTGAAACA  
TTTCGCGCGCAGCTCTATGCCTTCGACCCGGCTTTAGAGGTTTACGCTGAATATCGCGTTGGATGATGACGGGAAATC  
CTTCTGGTACTGCGCATGAAGGTACGCGATCGCATTGTTGCCGACGGTATTGACGATCCTCACTTTGATGCCAGCAATG  
TTGGTGAGTATCTGCAAGCGGCGGAAGTGAACGCCATGCTTGACGATCCCGATGCACTATTTATCGACATGCGTAACCAC  
TATGAGTATGAAGTGGGCACTTTGAAAACGCGCTGAAATTCGGCAGATACCTTCCGTGAGCAGCTGCCAAAAGCAGT  
CGAGATGATGCAGGCACATAAAGATAAAAAAATCGTCATGACTGCACCGCGGCATTCTGTTGAAAAGGCCAGTGCCT  
GGATGAAACATAACGGATTCAACAAAGTCTGGCATATCGAGGGCGGAATTATTGAATACGCCCGTAAGGCGCGGAGCAG  
GGCTTCCGGTGCCTTTTATTGGCAAAAATTTGTTTTGACGAGCGGATGGGCGAACGTATATCGGATGAGATTATCGC  
GCATTGCCACAGTGCGGCGCGCGTGGCAGACCCATACCAACTGTAATAATGATGGCTGCCACCTGCTGTTTATTCAGT  
GTCCAGTATGCCGCGGAAAAATACAAAGTTGTTGTAGTGAGATTTGCTGCGAAGAAAGCGCTTACCGCCAGAAGAACAG  
CGACCGCTCGGGCAGGACGTGAAAATGGCAATAAGATCTTTAATAAGTCTCGTGGACGTCTGAATACAACACTGTGCAT  
TCCTGATCCAACAGAATAAATATCATTGCCGGATGCGTGCCATCCGGCAACATTTACGCTTACTTCTGCTGTACGCCTT  
CCTGAAATAATCAGATCCACTTCTGAGAAGCTGGACCTAAATCTGTCTTGATATTGAAGTCTTGAGCTTAATTTG  
CCTTCGGCCTCGAAGCCTGCACGTTTACCACCCCATGGGTCGTGCGCCTGACCAATTAATTTGCTTCCAGCGTGACGGG  
TTTGTTACGCCATTACGCGTACAGTCCGCGGTAATATCCAGTTCGTACCGCTTTTCTTACGCTGGTGGAGGTGAATG  
TTGCCTGTGGATATTTTGGGTTATTGAGGAAATCTGCACTGCGAAGATGTTTATCGCGTTCGGCGTGATTAGTATCGACG  
CTGGTGGTGAATTTGTCACATTCATTTATCGGACGCGGATTTTTTTTCGTCAAAGGTAAGTACCGTTCGAAATCTTT  
AAAGGTGCCGTATAACCAGTATAGCCAAGGTGCTGGATGCGGAAATTAACAAAGGCGTGTGACCTTCTTTGTCAATTT  
TGTAATCGGCGCAACCGCTGAACCGGACAGAAATCAGGGACGCGAAGGTTAAACCAAGCAGGCTTTTTTTTCAATTTT  
TATACTCCATAGTCAGATGACGACTTTCCAGCATCGCTTCCAGAGTGTGCTTTATCGATGAAATGATGCTTCAGGGC  
CATAAATCCGTGCATAACGGACAGTACTACGACGCTCCACGCGAGCCAAAATGCAGGGCACCGGCAAAGTCTGCCTGTG  
CGCCAGCGTCCGCAAGGGTCCGCGGGACGTCAAACACGCAAAAACGCTGATCGGTTTACCATCGGCAGTTGAGATCAGA  
TAGCCGCTGATGCCGATGGCGAAAAGCAATAGGTACAATGCGAGATGTCCAGCTTTCGCGCAAGACGAGTCATGGGCGA  
ATAACTCGGCAGCGGACCCGGCGGTGGAGATATGACACGCCACAGAACGCGAATAACCAGCCCATCATTAAACAAAATAC  
CGATGCTTTTTATGCGATTCGGGTGCTTTGTGATACCAGCCATCGTAATAACTGAGCGTGACCATCCACAGACCTAAAGCA  
AACATGCCGTAGACAATAATTGCGCTTAGCCAATGGAAGGCCGAGATATAACACCATAGCGTTCCAGGGGATTTGTGAA  
TGACATAAGTGCATCCAAAACGAATTTGCGAGAGAAAAGAAAATGGCGTGTGCGGAGAATGAATTGCAACACAAAATAACA  
AATTGAATGATATTTATTTTTATTTCAATAATTTTGAATTAATAATGAAAGAATCTTCATAAGTTTAGTGGGTTACGCAT  
CAGAGATGTCTGGTGTGCTGTAGAAGCAGGAATAATCTCATTCAATTTTTACGCTAAATGAAAGGGAGATTAATAT  
TTGTCAGTTTTATGTCAGTGCAGAAAATAAAAAATAAACATAGATCAGATCCATAATTGCCAACAAATCCCAGAGAAA  
AAGATAAAGCATCAGATGCTCGGAATATTATTGATGAGATAGTGAACAGCCGACGCATTAATACTCTGTAAAAACG  
GCCTCATTCTGGAGGCCGTAATGATGATTATTGGAAGCGGAAAGCCTGAATGGCGTCAAATCAAATCGCTTTTTTTGT  
CTTGCGCAAAATCGGCAGCTATTTCCCTAAAACGACGCAAAATTTAAAACCGTCCCCTCAGGCGGTAATGAGCAGT  
GTATTATCGTGGCGGGTAGGGTATCGATAATAAAATCTTCGTAGGCGAATTATCATAGGTGAGGCGAGCGCGTACAG  
GCAGCAACCGATACCCGGCAATACATTGCGCAAGAACGGGAAGGCTTCTGACCCATCACTGGCCACTTCGCAAAACGGAA  
CACGTTTCATCCGCTGAATGGATAACCTGGCTCCGTTATGTTGCCAATCTTCAACGCGTCTTTTTCTGCCGAAAACCA  
TAATATTGATCGCCATTGGGCGATTACCCGGTAAACGCCGGAATTTATTCTTACGCTATAGCGCCATCGGCCTGATA

CCAGGCAAATACTTTGCGTACGGGCTGGACAGGCAGCTCCGGGAGCAGGTCTTTTACCCATGTTCCCGCGCAGACAATCG  
CTTTTTTCGCCTGATACTCACCGTCAGCCGTTTCAATAGTTACGCCATCATCGTCATGACGAATTGCGGTGACCGGGCAG  
TTGAACAGTTGCGCACAGCCGCTTCCCTTCGCCAGTTGGATCCAGGTTTTAATCGCCAGTTCGCTGCGCAAAAAACCGGA  
ATCAGTTTCAAATAAGCCGATGTAGTTGTCCGGGACGCGTATTTCCGGCCAGCGGGCCATAATCCCTTGGCGATCGAGCT  
TTTCAACGTTGAGTTGCCATTGTTCCGGGCTGTGGGCGACGTTGGCGAGAAATGTGAATCAGCCGGGCCAAGGTTAATG  
ACGCCAGAGCGTACAAAAATGGGATCTTCTTCGTTGTGGCGGGAGAGTTCATCCACAGCGTTTGGCGCGGAGGACCAG  
CGGGACATACTTTTCGCCTTACCATAAGCATGGCGAATTAATCGCGTATCGCCGTGGTGGCTGCCGTGTTGATGCGGTG  
GCATATGGGCGTCCGTCATTAGCACGTTTAAACCGCGCGGGTTCATAATACCCGGCGGCAGCGCTACGGAACCGCTG  
CCAATAATGATGAGATCGTATTTTCATTTTTTCTCTCTGCTCTCATGGTTTAAAGCAGAGTAATTAAGTGAATGCAGATAT  
ACAACCCAGAAATGGTAAAGGCACCGGTGAGGTGCCTTTTGGTGGATGGTCATGTCATGTTAATGACGCCGATACTCGT  
TTACCTGGAATCACCAGTTCATTTTGGCGATTCTGCTTCTAATATCGAAATAAATGTTCTGGCAACATCAGTGGTT  
AACCAGAGCGTCTGACCACTTCAGTCCCTTCTGCTCGGACTTATTTGGGGTCTGGTAGTCAAACGCAACATCAGCGC  
ATCATAGCTATCAACGGTGTGATGTCCACCCTACGAGCGGATGAGTCTGAATGACTTCATTATTTTTTCCATCATGG  
CCCCCTAATTCGTGTTACTAGACAACGTTATTCGAGGTTCAATGCGTTTTTATCTGAAGCAACTTCAGTATACCAATAAG  
TAAGGGTATTCACCGAATTTTTAAAGGGGAAACAGATAAAATTTCTGCTTTTAAAGATTTATGAACAATAAAACAGCAT  
GTCATTCATTTTTTTAGCATATTTGCAATTTATTTGAGGAAGTGTAGAAATTTTGTACTCAAATTCGTAAGTAAAA  
TAAAAAAGCCGGGCGACCCGGCAAAAAAATCACTGCATATTATTCGCTGACAAACAGTCATCGGCGCTTTCCACGCT  
TTCTTGAGAATTTCACTAATGCGCTGTTTATCTTCTTTTGTGCGCCAATAACCGATAAATTTATTCGCTGCGGCATAAC  
GTACCGATACGTGGCCTTATTATCAGGAAACGCACTGAATACGGCGGAAAGTTCCGACAGCCAGGGCGTCAATAGCC  
CCAGCTGGCAATGGAGAAGTTTTGCTATGGTGACTTCAATTCGCATAATAGCCCCCTGTTGAATATACTGGTTATTTAT  
ACAGGTAATAAACCATAAGACAACAGGAAGCTACGATTTTTATTGTTTAAACGGACCAGCGTACCGTTTTCCCGGCGAGG  
AATGGCACCAGCGTGTATCAGTCACTGCGATGCTTTCAGCACTGTTGCTCTTACGTACCAGTTCGATGAATGTGTC  
GTTGACCGCAACCCATAGAATGCGGGCGTTTACAGAACAGAATGCTTCAAAGTGTCAAAGCATTTCATTTCTTCAA  
AGACGGTAGCGTAACTGCCAGCGGTTGGGGCGTTGAAGCAGCCGCGCAGCCGCAACTGCTCTCTTTCGATGACGT  
GCATGTGGCGCAGAATCCGTACCGAGGAATACTCGATTAACCCGCTGGCGACCAGTTCACGCAATGCCTGTTGGTGAAT  
ATTACGTTTGAGGATGGGTAGACAATACAGGTGCGGACGCACGCTCCAACCAGCATATGGTTGCGGTTAAACATCAGAT  
GCTGCGGAGTGATGGTGGCAGCCAGCCGTTTCTTCCGTCACGGACATAGTCCGCGCAGCATCTTTGGTGGTGATGTGCTCA  
AAAACGACTTTACGCGCAGTCAGGCGCTGGCGCAGAGTTCATCACGCTTTCTATAAAGCGCGCTTACGATCAAAAAAT  
GTCGATATCTGCATGTGTACTTACCATGCACCAGTAGCGGCATACCGATTTTTTTCATGCGCTCAAGTACCGGCATGA  
TTGCGTCAATTTGACGTACCGCCGTGGCTGGAGTTAGTGGTTGCGTTTCCCGGTAAAGTTTTGCAGCGGTGAACACGCCT  
TCGTTAAATCCCGCTCCAGCTCATTAGGATCCAGCGAATCTGTTAAATAACAGGTTCATCAATGGGGTGAATCGTGCCC  
GGCAGGTACGGCGTCAAGAATACGCTGGCGATACGCCACGGCAGCCTCAACGGTGGTACGGGGCGGAGCCAGATTGGGCA  
TTACGATAGCCCGTCCATAAATTTGCTGGTATATGGCAGCAGTTTTTAACATGTGCCATCGCGGAGGTGAAGGTGC  
CAGTCGTCTGGGCGGCGGATCTTAACTGGGATGGTGCAGTCATTAATCTCTATGCTCCGGCTGAAGGGATGTTTTT  
GCCGGACACAAAGGATAAGCGGAAACGTTTTCTTTGCAGAAAAATAAAGGGCGGAATGCGCCCTCGTGATTAATCAG  
TAAATGGAATGACAATTTGCGCTGGCTTCACTTCAATGCCTTTCCGCAAGTTTTTCCGCTTGGCTTCCGCTGGCTGCCA  
TCTTCGCGCAGGACGTAAGCAGGTTGCTGGTTAAAGTAATGCGTAATGCCTGGTTCAAATAGGGAAGCAACGTTTGCAT  
CACGTTTGCATTTTTTCCGTTGTACCGTCGCATCGACCACTTCATCTCTTTCAGGAAGATCGCACCTTTTTCTTTAT  
CAAACACGGGACGCGCTTTCAGCTTTCAGTTTCGCGTCTTTCGACTACCGAACAGGGAGTTCATGTCAGATTGGCG  
TCTCCGGTTAGGGTAACTTATTCGGCTCTTCGCGCAACTTTGGCTGGTGGTGTGTCAGAAACAATATGGGCGTCAAGC  
CAGCCCGGTAACCGATATCTTTGAGAAATTTATGTTTTGCAAGCGACTGGTTAATTTCTTGTTCGGTGATGGTGT  
ATTGGGTGAGTTGATTACAGCCAACGAGCAGGCCACTGACGATCAATGCAGCGGCAATAAAAACTTGTTCATGGTAGTC  
CTCGACATGAAATCTGCGTCAATATCCTGACACAACGCAGCATGTGTACCAGCGATAAACTCGCCAGCAGAAAAAACTG  
AAAACGGCGGCAACCCGGAATACAGGCTGCCGCGGCGGGTCAAGGATTAATCGCCATTGATGATAACAAATTGATTTGT  
GTCTGTTTCCGATATTATCGCGGTAATCAGCAACGCGGCTTGGCCAGTTAATTCGGCTACCAGCGTCAGATTACGCAG  
TAGCGGGAATAGCTGAATATCATCTTCCGAAAGTTCGCCATTACGGCGTTCGGTTTACGATCAGTTTGTCCAGCGCAC  
GTAAATCATCGCTGATATTCTTAATCAGACCGTCAGAGTGGGCCAGCAGGTCCGCAAAATACCCGCGCTGGCCTCTTTC  
TTGTGACGAAATATTTGCGCGCGGCGGAGTAGAAAACTCATCAAATGCCGATTTGGCAAAACGCGGCAACAGCAGTTT  
GTTGGCGTAGCATTGACCTTGCAGCCACTTCAATGGCAGGGAAACGTTTCCGGTCAAGGTTTGGCGTCA  
GTTTATCGACATAGTGAACGATGTCCATGCTTTCTGGCATATAGCGGCTGTCATCTTTTTGCAGAATGGGAACCTGTTTT  
TGACCGACCATCCGGTGGTGTCTTCTGCGTCTGCTTGGAGCAGAACATGTAATTCGACGGGATATTTTTCAGGCCGAA  
AATCATGCGGGCTTTGAGGCAGTAAGGCAGTGATCGTAAATGTATAGTTCACGTGACTCCTCCATTTGGCTGTCAGTT  
CACTTTAGTATGAAGGAGTCAGGGGGAGTATCAAATCAGGCGTCCGTTCAAGCAAACGACGCGCGGCGGCTTCTGG  
CTAAACTGCCAACCCAGCGCAAGGAAAGTGAAGATGCAATAATGCCAGCATCATCCAGGAAAGCTCTGGCTGGTGGC  
CGATTTGCCAGGTCAAACAGCCAGCCGCCACCGATATAACCAATAGCGCCCAATCGCCAGACCCAGACGGCTAAACC  
CCATATAGCTGCCGCGAGCTTTCGCTCCGCCAGCGAAGCACTTAAAGTTTTACGCGCAGGCTCGGCAATGATCGACCCG

ATATAAACAGACAAATCAGGGTGAAAAGTTGTTGCAGGCCGCTGACCATGCCACCGGCATCATGCTTAATGACATTAT  
CAACAGCCCAGCCATCAACCGGTGTTCCAGACGAAAATGCTTTTACTCCAGCGGGCGATAGGGTAGAGCAACGTTAACG  
ACAGACACGCTTCAATGGCATAACATCCATTTAACCGCAGAGGGCGGCCAGCCACGTCGTTGACCATAATTGGCAGCATC  
AGCATCACTTGTACAGCCAGCATGTAGTAACCCGCCAGCGTCAGAACATAGGTGACAAAACGCTTGTACGCATCACGGC  
GGTCATGCCTTCGCGAACGGGCGTGCCTACGGTGGAGAGTTTCCATGCTGGTAACAACCACGCATTGAACGCCGCACATA  
GCACAAATAGAAGTGCCTGTGGCGCAGACCAGGGGAAAAGTCGATTGCAACAGCCAGCTCCCAACAATGCGCCAATG  
ACCGCACCGGCACTGTCCTGCATCATCAACAGCGAGAAAAACGACCACGCTGCTGGACGGATTAATTCACCACCAG  
CGCCGAACGGCGGATCAAACAACGTGCCACCGAGTCCCAGAGCAGGCATGAAAACCACAATAGCCACGGTTCGTGGG  
CGATACCCATTGTGGCGAATCCGGCGGCGCATCAGCATACCGGTAACAATCATCGGTTTGGCACCAAAGCGGTGGCA  
ATTGCACCGCCGAAAATACCCAGACCTTGTGAATAAATTGGCGTAGACCGAGAGCAATACCGACCATGACGGCGGCCA  
GCCATTTGATCAACGAAGCGGATAGAGATCAGCGGAAGACAACAAAGAACCCAGCAGCAGCAGCATATTATCGATGA  
GCAGGAAATATTTACCCAGTTCTCGCTGCGACACGCGGACATTTCCCTCCCGGAAATAAAAGATGAGCACTTC  
TATTCTGCATTGCCGTAAGACTTTTCCATCACTTCGGGGACAATATTTTTTATCAAACGTCGCTTGTAGAGAGT  
TTTTATCAAATATGTGAATAATGCAGAAAATGGCATTGTTGGACTTTTACAGGGTCTGGTTGCGCAGGTATAGTAATACT  
TACAGCGTATTAAGACGTTACGGGAAGGAGTAGGTATAGAATGTTGGCTATCGCAGTAACGTGCCAAAAGTGCCTTA  
ACCACAGACCGACTGGTGGTGCCTGGTGCATGATCGTATGCTGGCGTCTTGGGATTATTACGCAGAGAATCGCCA  
TTTCTCAAGCCTGGGAGCCAGTGCAGGACGAAAGCCACTGTTATCCATCAGGCTGGCAGGCCAGGCTGGGGATGATTA  
ACGAATTTATAAAACAAGTTTACGCTTCTACTTTGGCTTATTGACCCGACGAAAAGAGATTATTGGCGTTGCCAAT  
TTTTCCAATGTTGTCGTGGCTTTTTCATGCCTGCTATCTCGGTTATTGATTGGGCAAAAATGGCAGGGCAAAGGACT  
CATGTTTGAAGCCTGACCCGAGCCATTGTTATATGCAGCGCACCAACATATTCATCGCATTATGGCTAATTATATGC  
CGACAATAAACGCAGCGGTGATTTACTGGCGGACTGGGTTTTGAAAAGAAGGCTATGCGAAAAGACTATCTGTTGATT  
GATGGACAATGGCGGATCAGTACTGACGGCATTAACTACCCAGACTGGACGCCCGGCCGTAAGGAGAATCTCATGA  
AATATCAACTTACTGCCCTGAAGCTCGCTGATTGGTTGCTTGTGGAAAAGCAGGTGACCACGCCGGAGCAATACCCG  
CTCTCAGTCAATGGTGTAGTCACGGCCTGAATCAGAAAACGAACCGTGAACCGGTGATGAATCTGAGTGAATCCGAAGT  
GCAGGAACAGCTGGATAATCTGGTCAAACGTCATTATCTACGCACAGTGAGCGTTTTGGTAATCGGGTACCAAATATG  
AGCAACGTTTTTGAATTCAGAATTTGGCGATCTGAACTGAGCGCAGCGGAAGTGGCGTAAATCACCACGTTGTTATTG  
CGTGGTGGCCAGACGCCAGTGAAGTGCAGCCGCGCCGCGCAATGTATGAATTCAGCGATATGGCGGAAGTGGAGTC  
GACGCTGGAACAACCTGGCAAATCGCGAAGATGGTCTTTTGTGGTGCCTGGCCCGCAACCGGGTAAACGCGAAAACC  
GCTACATGCATCTTTTCAAGTGGTGAAGATCAGCCGGCGGTGACGGATATGTGCAACGCGGTTGACGGTGATTTA  
CAGGCCCGCTCGAAGCCCTGGAATCGAAGTGGCAGAATGAAACAGCGTCTTGATTGCTGGCCCATCTGGGAGA  
TTAAAGTGAAAAAATTACGTATCGGCGTAGTGGGATTAGGTGGCATTGCGCAAAAAGCGTGGTTACCGGTGCTGGCGGCA  
GGTCTGACTGGACGTTACAAGGAGCCTGGTGCCTACGCGCGGAAAGCCCTGCCAATTTGTGAAAGCTGGCGCATCC  
TTATGCCGATTCGTTATCCAGCCTTGGCCGAGTTGCGATGCGGTTTTTGTGCATTCCAGCACCGCCAGCCACTTTGACG  
TGGTCAGTACGTTACTCAATGCGGGGTACATGTCTGTGTCGATAAACCGCTGGCAGAAAATCTGCGCGATGCTGAACGG  
CTGGTGGAACTGGCGGCGGAAAAAACTGACGTTGATGGTGGTTTTAACCGTCGTTTCGACCCTCTACGGTGAGTT  
AAAAACGCAACTGCCACCAGCCTCGTAAGAATGGATAAACATCGTAGCAATAGCGTCGGGCCACACGATCTTTATT  
TCACGTTGCTGGATGATTATCTGCATGTGGTGGATACCGCGCTGTGGTTGTCGGGCGGCAAGCCTCTCTGGATGGCGGT  
ACGCTACTGACTAACGACGCTGGCGAAATGCTGTTTGGCAGCACCATTTTTCGGCTGGTCTTTGCAGATCACCACCTG  
TATGCATCGCCGTGCCGGAAGTCAGCGTGAACCCGTCAGGCCGCTGACTGACGGTGCCTCATCGACATTACGGATATGC  
GCGAATGGCGTGAGGAGCGCGGGCAGGCGTAGTGCATAAACCGATTCTGGTTGGCAGAGTACGTTTACGCAACGTTGGG  
TTTTGTCGGCTGTGCGCGCACTTCATTGAATGTGTGAAAACAGACAGTTCGCAACCGCCGGCGAACAGGCCGTGCT  
GGCGCAACGTATCGTTGACAAGATCTGGCGGATGCGATGAGTGAATAAACCCGTAAACATCTGGCGGTAGCAATTCACC  
ATAATCCAGGTAGACTATTCGCTCTTTAGCGCCTGCCTGACGGCCTTTTGGCCGTGGTCTGGATTAGAACACCGAT  
GAATTTATTAATAATCGCTGGCCGCGTCAGCTCGATGACCATGTTTTGCGGTGCTTGGCTTCGCACGAGACGCAATTG  
TCGCCAGAATCTTTGGCGCAGGGATGGCAACCGACGCTTTTTGCTCGTTTTTAAACTTCTAACTTGTACGCCGATC  
TTTGCCGAAGGGCATTTCAGGCATTGTACCGATTCTGGCGGAATATAAAAGTAAGCAGGGTGAAGACGCCACGCG  
GGTCTTTGCTCTTATGTTTCTGGCCTGCTGACACTTGGCTGGCGGTTGTGACGGTGCCTGGCATGCTCGCCGACCGT  
GGGTGATCATGGTACCGCGCCAGGCTTCGCTGACACAGCTGACAAAATTTGCCCTGACCAGCCAGCTACTAAAGATTACC  
TTTCCCTATATCTTGTGATCTCCTGGCGTGCCTGGTGGGAGCGATTCTGAATACGTGGAACCGCTTCTCGATTCCGGC  
GTTTGTCCAACACTGCTTAACATCAGCATGATTGTTTTCGCGCTGTTTGGCCACCGTACTTAAACCCACCGTGTGG  
CGCTGGCGTGGCTGTTACGGTCCGGCGCTCCTGCAGCTGGTGTATCAGCTACCGCACCTGAAGAAGATCGGCATGCTG  
GTCCTGCCCGCATTAACCTCCACGATGCCGGAGCAATGCGCGTGGTGAACAGATGGGACCGCGATCCTTGGCGTCTC  
TGTGAGCCAGATCTCTAATCATCAACACCATTTTTGCTCGTTTCTTGTTCGGTTCGGTGTCTTGGATGTATTACG  
CCGACCGCTTAATGGAGTTTTCCGTCCGGTGTGCTGGCGTGGCGCTTGGCACCATTTTTGCTGCCGTGCTGAAAAGT  
TTTGCCAGTGGCAATCATGATGAATACAACCGTTTTGATGGACTGGGGTTGCGTCTTTGTTTCTGTTGGCGCTGCCGAG  
TGCGGTTGCGTTGGGCATCTTTCCGGTCCGTTGACCGTTTCGCTGTTCCAGTACGGTAAATTTACCGGCTTTGATGCGC

TGATGACCCAGCGGGCGTTAATTGCCTACTCGGTGGGTTTATTGGCCTGATTGTAGTGAAAGTGTGGCTCCTGGCTTT  
TATTCGCCAGGACATTAACCGCCAGTGAAAATTGCCATCGTTACGCTGATTTTAAACGCAATTGATGAACCTGGCGTT  
TATTGGTCCGTTGAAACATGCCGGGCTGTCACTTTCTATTGGTCTGGCGGCGTGTCTGAATGCTTCGCTGCTTTACTGGC  
AGTTGCGTAAGCAGAAAATCTTTACCCGCAACCCGGCTGGATGGCGTTTCTGTTGCGTCTGGTGGTGGCGGTACTGGT  
ATGTCTGGCGTCTTTTAGGTATGTTACATATCATGCCGGAGTGGTCATTGGGTACCATGCCCTGGCGTTTACTGCGTTT  
AATGGCGGTGCTGCTGGCGGGGATTGCCGCTACTTCGCTGCACTGGCGGTACTGGGCTTCAAAGTTAAAGAATTTGCC  
GCCGGACGGTGTAAACATGCATTCCGGCTGCGAGTGACGGCCGGAGATAATCTTCAGATCGAAATCTTTTACCGCCGG  
ATGGGTTGTTGAGGTCTGACCGTTCGCCCCATATAGCGTGGTTCCTGATGGCGTTTCAACATTTCCAGCGCCTGTTGAT  
TGCGCTCAATCTGCTTCCAGTAACCGCCTTATGTTGATTCAATTTGGCGTAGTTGCTGCGTTTTCACAGTAATTTCC  
TGCCAGCGTTGACTAATATCAACGCTATTTGCTGTATTGGGTTCTTCTGCGTAACGTTTCGAGGTAATCCAGCGTCC  
CAGCAGTGAGCTTTTTGTTCTGTAATCCATTGCAACTGGCTGCCGTTGATCTGCCCATAGAGAGATGTTGCTGCTCTT  
GATCCATTACCGTTTTGAGATCGTTAAGCACAGCGGACATCTGGTCGAGGATCTCTGCAAGACGTGTACATACGATCAGTT  
ACTCTGCAAGTCTTGTGCGCTTCTGTTGATCAGCGCATCGGCAATTTTCCGGTGTCCATTTTAGTTACCGTTACGAA  
TCGCCAGTTTTAACGCTTCGACACGTTCAAGATTGATACCTGCTGCCGGTGCATCAGTTTTGCTTGCAGCGTCCGTT  
AACGTCAACCTGGTCTGGTGGAGGCGTTGTTTTGCCCGCGCTGTTCTGTTACCGGCGCTCAGTGGTTTTCCGCGCG  
TTGAACGGTGTACAGGCTTCAGAGGCGAAGTGCATCAATACTCATGGTTTATTCTCATTGAGGGCGTTTTATCAT  
GTGTTGCTTATTTATCGGCAAGGGACGGTAATCTTTAACAGCTTACAGTTTTATAAGAATATTCATCTGCATCAACA  
ACGCCGCTGACTACCTGTCCCGATACCATGCGCACCCGCGCATTCTGTGCGACGGCTGCATTGTTCCAGCGCTGACCTT  
TGCGTTGGCGTAAACCCATCACCGCTGGCGATCACATTGACGCGTTGTCCCGTTTTACCCGCCATGCCTGGCGAAACT  
GGGTTAACTGGATAGGTTGATCGGGTATAGATCGCGCAGGCTAATGGCATCAACAAGTTGATTGATATCCAGCACCGTA  
CGCGGTGGCAGGGTATCCAGCGTCCGCGTTTCACTTTGACATTGCCAGCTTCCAGTTTTCTCCCGCGCAATGGGCAT  
CGCGGCAACCACATAATTTCTGTGGCTGTACATTAACCTGTAATATCGTTTGTGTTACCGCAGCGTCCAACACAT  
TCACATTGCCCCAGGGCGGAATTTGCTCATCGAAAGCAATGGCTGCTCGCATGGCGTAGTAGATTGGCGCTGTA  
CGAATAGAAACACGAACCTCATCACTTACCCCGCGAGTTGGCGCTAAAAAGTTGTGCAATTGCGATGTGAGATTGCT  
CGCCGACTTAAACGGACTGAACAGTATCGCGATGATCGCCAGCTACGTTTTATTATCAGCATTTTCCGCCCCAGCCATT  
TCTACAACGTGAATTGTACCTGTCCGCAATGACCATCAACGGCATAAATAGCGACCCATTTTGCCTTTATCCGCCGATA  
ACGCGCGCGTAAAGGCATTTAAGCTGATGGCAGAATTTTGATACCTGCGGAGGAGATATGCTCGATAAGCTCGACGCCG  
CTTACGTTTTCAACAAGAGCGCTCAATCTGCGCGCCAGCGTCAGGAAGTGTGGCAGCAACATCGCCAATGCCGATA  
CCCTGTTTATCAGGCGCGGATATCGATTTTGCCAGTGAACTTAAAAAGTCATGCAACGTGGACGGGATGCAACCGAT  
GTGTTGCACTGACGATGACCTCAACGCAACACATTCGGCGCAGGCGCTGACGCCCTTACCAGCAACTGCAATACCG  
TATTCGGACAGCCTTGCCTTACCGTAATACCGTCGATATGGATCGCGAACGCACCCAGTTTCCGATAACAGCCTGC  
AATACCAGATGAGCCTTAGCGCGTTGAGCGGGCAAATCAAAGGCATGATGAACGTTTTACAGAGCGGAAATTAACGGATG  
GCACTGCTGAATATTTTATATCGCCGGGTCGGCGTTAACTGCCAGTCCCAGCGCCTGAACGTGGCGGCCAGTAATCT  
GGCGAATGCTGATAGCGTGACCGGTCCGATGGACAGCCATATCGGGCAAACAGGTGGTATTCCAGGTTAACGCTGCAC  
CAGGTGCTGCGACAGGCGCGTAAAGTTGCCGATGTTATAGAAAGTCAGGCCCCGGACAACTGGTTTTATGAACGGGT  
AATCCGCTGGCAGATGCAAAGGGCTACGTAATAATGCCAACGTTGATGTTGTGCGAGAGATGGTTAACACCATGTCCGC  
GTCACGCAGCTATCAGGCCAATGTTGAAGTGTCAACACGGTGAAGAGCATGATGCTGAAAACCTTACGCTCGGTCAAT  
AAAGGAGAAAGCTATGTCCATTGCGGTAACCACCACCGATCCGACAAATACCGCGTCAGTACCACCAGCAGTAGTTCCG  
TCACGGGCAGCAACCGCGAGATTTACAAAGCAGTTTTCTGACTTTGCTGGTGGCGCAGTGAAAAACAGGACCCGAC  
AATCCAATGAAAAACAACGAGCTGACGTCGCAATTTGGCACAAATCAGCACGGTCAGCGGGATTGAAAACTCAATACCAC  
GCTCGGATCTATTTCCGGACAGATTGATAACAGCCAGTCGTTACAGGCCAGTAACCTGATCGGTACAGCGGTGATGATCC  
CCGGCACCACTGTTCTTGGCGGAACCGGCAAGTGAAGAGGGGCTGTGACCACGACCACGCCGTTTTGGTGTGAGCTGCAA  
CAGGCGGCAGACAAAGTTACGGCCACCATCACCGATAAAAAATGGCGCGGTTGTGCGCACCATGATATTGGTGAACGAC  
CGCCGGAGTTCACAGTTTCACTGGGACGGTACGTTGACTGATGGCAGCACTGCGCCGAACGGTCTTACAATGTAGCGA  
TTAGCGCCAGTAACGGTGGTACACAACGTTGCCAGCCGCTGCAGTTTGTCTGCTGCGAGGGTGTGATCCGCGGCAAC  
AGCGGTAATACGCTGGATCTCGGCACTTACGGCACCCACCCTCGACGAAGTACGGCAGATAATTTAAGCCTTACATT  
TCAGGAGTCAGTCATGGCTTTTCTCAAGCGTTAGCGGATTAACGCTGCCGCCACCAACCTCGATGTTATTGGCAACA  
ATATCGCAACTCCGCCACTACGGCTTTAAATCAGGCACGGCTCTTTTGGCGATATGTTTGGCGTTCCGAAAGTGGGA  
CTGGGGTAAAAGTTGCCGATCACTCAGGACTTTACCGATGGCAGCACCACCAACCCGGCGAGGTCTGGACGTTGC  
TATCAGCCAGAACGGTTTTTCCGCTGTTGAGACAGCAACGGTTCGGTGTCTACAGCCGTAACGGACAATTTAAGCTGG  
ATGAAAACCGTAACCTGGTGAATATGCAAGGTTTACAGCTGACGGTTTACCCGGCAACCGGTACGCCCGGACTATTAG  
CAAGGGGCGAATCCGACCAATATTTGATCCCGAATACCCTGATGGCAGCGAAAATACCACCACGGCATCGATGCAGAT  
CAACCTGAATCCAGTATCCGCTTCTACTGTTACGCCATTACGCGCCAGCAATGCGGATAGCTATAACAAAAAGGTT  
CGGTGACTGTTTTGACAGTCAGGGTAATGCTCATGACATGAGCGTCTACTTTGTGAAGACCGGGGATAAATAGGCGAG  
GTCTACCCCAGGATAGCAGTATCCAAACAGCATTGCGAAGACAGCGACAACACTGGAATTTAATGCTAATGGCACATT  
AGTGGATGGTGCATGGCGAATAATATCGCAACCGGCGCAATTAACGGTGCAGAACCCGCCACGTTTAGTCTGAGCTTCC

TCAACTCCATGCAGCAAAATACCGGCGCTAACAAATATTGTGGCAACCACCCAGAACGGCTACAAAACGGGCGATCTGGTG  
AGTTATCAAATCAATGATGACGGTACGGTTGTCGGCAACTATTCCAACGAACAAACCCAACGCTGGGGCAGATTGTACT  
GGCGAACTTTGCCAACACGAAGGTCTGGCATCCGAAGGCGACAACGTCTGGTCTGCGACGCAATCTTCTGGCGTGGCGC  
TGTTGGGGACAGCCGGGACGGGAACTTTGGCACCTGACCAACGGTGCCTGGAAGCGTCCAACGTCGATCTCAGTAAA  
GAACTGGTCAATATGATCGTTGCCAGGTAACATCAGTCTAACGCCAGACCATCAAAAACCGAGGACAGATCCTCAA  
CACGCTGGTAACTTACGCTAATCGCTGACGGGATAGCTCAATGGATCACGCAATTTATACCGCGATGGGAGCAGCCAGC  
CAGACACTGAATCAACAGGCGGTAACCGCCAGTAATCTGGCCAATGCCTCAACGCCCGTTTTCTCGCGCAGTTGAATGC  
TTTACGCGCGGTGCCAGTGGAGGGCTTTCTCTGCCACGCGCACGTTGGTACGCGGCTAACGCCGGGCGCAGATATGA  
CGCCCGCAAAATGGATTACACCTCGCGCCCGCTGGACGTGCGTTGACGACGAGATGGCTGGCTGGCCGTGCAGACCGCT  
GACGGCAGCGAAGGTATACGCGTAATGGCAGCATTAGGTTGATCCACCGGGCAACTGACAATTAGGGGCATCCGGT  
GATAGGCGAGGCTGGCCAAATTGCTGTGCCGAAGGGGCGAAATCACTATTGCTGCCGATGGCAATCTCGGCGCTCA  
ATCCGGGCGATCCGGCAAATACGGTTGCCAGTAGGGCTCTTAACTGGTAAAGCCACGGGCAGCGAAGTGCAGCGC  
GGTGACGACGGCATTTCGTTAAGCGCAGAAACCCAGGCCACGCGTGGCCGGTACTGCAGGCAGATCCAACCTTGGC  
TGTGATGTCGGGGTCTGGAAGGCAGTAACGTCAATGCCGTTGCGGCAATGAGCGACATGATTGCCAGCGCGGGCTT  
TTGAAATGCAGATGAAGGTGATCAGCAGCTCGATGATAACGACGCGCTGCCAACCAACTGCTGTCGATGAGTTAATTG  
AAAGGATACATGACAAGTAAAGTTGCCGATGCGCAAGTTTATCGGGTCTATGGGGCAATCGCAATTTATCGATTTTG  
CGAGCACTTGTAGGCCGATAAGGCGTTTACGCCGATCCGGCAAGAAGACATATGCACTTTGTCATAATCCACTACAG  
GACATTTTATGATCAGTTCATTATGGATCGCAAAAACGGGCTTACGCGCCAGCAAACCAATATGGACGTCATTGCCAAC  
AACCTGGCAAACGTCAGTACTAACGGTTTTAAGCGTCAGCGCGGGTGTGTTGAAGATCTGCTTTATCAAACCATTCGCCA  
GCCGGGGCACAGTCTTCCGAACAAACCACTTACCCTCCGATTACAAATCGGCACGGGGTACGCCGGTCCGCACTG  
AACGCTTACACAGCCAGGAAACCTGTGCGCAGACCAACAACAGCAAAGATGTGCGGATTAAGGGCAGGGCTTTTCCAG  
GTGATGTTGCCAGATGGTTCATCAGCCTATACCCGTGACGGCTCTTCCAGGTGGATCAGAACGGGCAGCTGGTACGGC  
TGGTGGTTTTAGGTGCAGCCAGCGATCACCATTCCGGCAATGCGTTAAGTATCACCATCGGTCGTGATGGCGTGGTCA  
GCGTAACCAACAAGGCCAGGCAGCTCCGGTTCAGTTGGGCAGTCAATCTCACCACCTTATGAATGACACCGGGCTG  
GAGAGCATTGGCGAAAACCTCTACACCGAAACGCAATCCTCTGGTGCACCGAACGAAAGCACGCCGGCCTGAACGGCGC  
GGGACTGCTGATCAAGGTATGTTGAAACGTCTAACGTCAACGTGGCGGAAGAACTGGTCAATATGATTAGGTGCAAC  
GCGCTTACGAAATCAACAGTAAAGCGGTGCCACCACCGATCAGATGCTGCAAAAACGACGCAACTCTAAGGCTTAACC  
GGTGGCAGGTTACCGGTTTACTGATTTTTGAAGATGATAGCCATGCAAAAAACGCTGCGCATACTTATGCCATTTCCA  
GCTTGTGGTGTCTTCACTAACCGGTCGCGCTGGATACCCTCCACGCCGCTGTTGCAGGGGGCGACCAAGTGCACAACCG  
GTTCCCGTCCGACGCCGTCGCCAACGGTCTATTTTCCAGTCTGCTCAGCCGATTAACATATGGCTATCAACCGCTGTT  
TGAAGATCGTCGACCACGCAATATTGGCGATACGCTGACCATCGTGTGAGGAGAACGTACGCGCCAGCAAAAGCTCCT  
CTGCGAATGCCAGCGTACGGTAAAACCTAATTTGGCTTTGATACTGTGCGCGCTATTTGCAGGGGCTGTTTGGTAAAC  
GCTCGTGCCGATGTCGAAGCCTCCGGTGGTAACAGTTCACCGAAAGGGCGGGGCAATGCCAGCAATACCTTTAGCGG  
CACGTTGACGGTACGGTTGACCAGGTAAGTCAACGGCAACCTGCATGTGGTGGGTGAAAAACAGATTGCCATTAATC  
AGGGTACCGAATTTATTCGTTCTCTGGCGTGGTAAATCCACGCACTATCAGCGGCAGCAATACCGTACCGTCTACTCAG  
GTGGCGGATGCGCGCATTGAATACGTAGGCAATGGTACATTAACGAAGCGCAAAATATGGGCTGGTTGCAGCGTTTCTT  
CCTAACCTGTGCCAATGTAAGTGAAGCTGTGGTATTAAATTTCTCTGCAATTAATCTTCTACTGGTCACGACGGC  
GGCTCAGGCTGAGCGTATTCGCGATCTCACCAGTGTTCAGGGGTAAGGCAAACTCACTGATTGGCTATGGTCTGGTGG  
TGGGGCTGGATGGCACCGGTGACCAGACAACCCAGACGCCGTTTACCACACAACCGCTTAATAACATGCTCAGCAGCTG  
GGAATACCGTTCCGAGGGCACCAATATGCAGTAAAAACGTCGCTGCGGTAATGGTGCAGCGTCACTTCCCTCCGTT  
TGGACGTGAGGGCAACCAATCGATGTGGTGGTTTTCTCCATGGGAAATGCCAAAAGCTTGGTGGAGGTACGTTGTTGA  
TGACACCGCTTAAAGGGCGTTGACAGTACGGTGTATGCGCTGGCGCAGGGCAATATTCTGGTTGGCGGCGCAGGAGCCTCC  
GCTGGCGGTAGCAGTGTTCAGGTTAACCAACTGAACGGTGGACGGATCACCATGGTGGGTTATTGAACGTGAATTGCC  
CAGCCAGTTTGGCGTCGGGAATACCCTAATTTGCAACTTAACGACGAAGATTTAGCATGGCGCAGCAATCGCTGACA  
CCATCAACCGCGTGGTGGATATGGCAGCGCCACCGGTTAGATGCGCGGACTATTAGGTGCGCGTACCAGTGGCAAC  
AGTTCCAGTCCGTTCTTCCGATATTCAGAATATGCAGGTTAATGTCACCCCGCAGGACGCTAAAGTAGTGATTA  
CTCGCGCACCGGTTCCGGTGGTATGAATCGCAAGTACCCTCGACAGTGCAGCGTAGCGCAGGGGAATCTCAGTAA  
CAGTTAATCGTCAGGCCAATGTCAGCCAGCCAGATACACCGTTTTGGTGGTGGACAGACTGTGGTACTCCACAAACGAG  
ATCGATTTACGCCAGAGCGCGGTTCCGTGCAAAGCGTACGTTCCAGCGCCAGCCTCAATAACGTGGTGCAGCGCTCAA  
TGCGCTGGGCGCTACGCCGATGGATCTGATGTCCATACTGCAATCAATGCAAAGTGCAGGATGCTGCGGGCAAACTGG  
AAATCATCTGATGATCAGCGACAGCAAACTACTGGCAAGTGCAGCGCTGGGATGCGCAATCACTCAACGAACTAAAGGCGA  
AAGCGGGCAAGATCCGGCGCAAATATCCGTCCGGTGGCCCGTACGGTGGAGGGATGTTGTCGATGATGTTGAAA  
AGCATGCGCGACGCTTACCAAAGATGGCTGTTACGAGCGAGCACACTCGCTGTATACCAGTATGATGACCAGCA  
GATTGCCAACAGATGACGCGGGCAAAGGTCTGGGCTTGCAGAGATGATGGTTAAACAGATGACGCCAGAACAACCAT  
TGCCAGAGGAGTCCACGCCAGCAGCACCGATGAAATCCCCTCGAACTGTGGTGGTATCAAAATCAGGCGCTTTCG  
CAGCTGGTCAAAAAGGCCGTGCCACGTAACACTACGATGATTCGCTGCCGGTACAGTAAAGCATTCTCGCGCAACTCTC

GCTGCCCGCCAACTGGCAAGCCAGCAAAGCGGTGTGCCACATCATTTGATCCTCGCTCAGCGGCACTGGAATCTGGTT  
GGGGCAACCGCAAATCCGCCGCGAAAACGGCGAGCCGAGCTATAACCTGTTTGGTGTCAAAGCCTCTGGCAACTGGAAA  
GGCCAGTTACTGAAATCACCACGACTGAATATGAAAACGGCGAAGCGAAGAAAAGTAAAAGCGAAGTTTCGCGTCTACAG  
CTCGTATCTGGAAGCCTTGTGCGATTACGTTGGGCTGTTAACCGCTAACCCGCGCTACGCCCGGTGACGACCGCCGCGA  
GTGCGGAACAGGGGCGCAGGCCCTACAGGACGCGGCTATGCCACCGATCCTACTATGCCCGCAAACCTACCAACATG  
ATTGAGCAGATGAAATCGATAAGCGACAAGGTGAGCAAAACCTACAGTATGAACATTGATAATCTGTTCTGAATAACTCA  
AGTCCGGCGGGTCTGCTGCCGATAATACTCTGTAATTGAAGGCTTATAAGGAACCTCCATGTCCAGCTTGATTAATAACGC  
CATGAGCGGACTGAACGCGGCCAGGGCGGTTAAATACGGCAAGTAATAATATCTCCAGCTATAACGTTGCCGGATATA  
CCCGCAAACCACTATTATGGCGCAGGCCAATAGCACGTTGGGCGCTGGCGGCTGGGTTGGCAATGGTGTCTACGTTTCT  
GGTGTGACGCGTGAAGTATGATGCGTTTATTACCAACAGTTACGTGCGGCGCAGACGCAAAGTAGCGGTCTGACTGCCCC  
CTATGAGCAGATGTCGAAAATCGACAATATGCTCTCCACAGTACCTCTTCGCTGGCAACACAGATGCAGGATTTCTTCA  
CCAGCCTGCAAACGCTGGTGAAGTAAACGCGAAGACCCGGCAGCGCCAGGGCGTGATTGGGAAATCAGAAGGATTGGTG  
AATCAGTTTAAAACACCGATCAATATCTGCGCAGCAGGACAACAGGTCAATATCGCGATAGGTGCCAGCGTTGATCA  
GATCAACAACACTACGCTAAACAAATTGCCAGCCTGAACGATCAAATCTCGCGCTGACAGGCGTGGGGGACGGGCGTCA  
CTAAACATCTGTGGATCAACGCGATCAACTGGTGAGCGAATTAACAGATTGTTGGTGTAGAAGTCAGCGTTACAGGAT  
GGCGGCACCTTATAACATCACGATGGCCAATGGTTACTCTACTGGTTACGGGAAGTACGGCGCGCAAACCTGGCGGCACTTCC  
TTCCAGCGCTGACCTTCTCGTACGACTGTCGTTATGTTGATGGGACGGCAGGCAATATTGAGATCCCGGAGAAAATTAC  
TGAATACCGGTCGCTGGGCGGCACTTCTGACATTCCGTTCTCAGGATCTGGACCAGACGCGTAATACGCTTGGACAACCTG  
GCGCTGGCATTGCGCAGGCTTTCAACACCCAACACAAAGCCGATTTGATGCTAACGGCGATGCCGGTGAAGATTTCTT  
TGCTATCGTAAGCCCGGTTCTGCAAAAACAGAAAACAAAGGTGACGTTGCGATCGGTGCCACGTTAACTGATGCCT  
CCGCGTACTGGCGACAGATTACAAAATCTGTTGATAATAATCAGTGGCAGGTCACCCGCTTGGCAGCAATACCACT  
TTACGGTGACCGGATGCCAACGGTAAAGTGGCATTGATGGTCTGGAGTTGACGTTTACAGGAACGCTGCCGTTAA  
CGACAGCTTACGCTGAAACAGTAAGTACGCCATCGTCAACATGGATGTATTAATCACCAGCAAGCGAAAATAGCGA  
TGCGGAGCGAAGAAGATGCGGGTATAGCGATAACCGCAACGGTCAGGCCCTGCTGGATCTGCAAAGCAACAGTAAACG  
GTGGGCGGTGCGAAATCCTTAAACGACGCTTATGCCTGTTAGTGAAGTATCGGTAATAAAACCGCGACGTTGAAAAC  
CAGTAGCGCCACGAAGTAATGTGGTACGCGACTTCCAATCAGCAGCAGTCGATTTCCGGTGTCAATCTCGATGAGG  
AGTACGGAAATCTGCAACGTTTTAGCAGTATTACCTGGCGAATGCGCAGGTTCTGCAGACGGCAAACCGGATTTTTGAT  
GCGCTGATTAACATTGCTAAGGGGAGATAAGATGCGTTTTCAGTACACAGATGATGTACCAGCAAACATGCGTGGTATC  
ACCAATTCTCAGGCAGAATGGATGAAGTACGGCGAACAGATGTCGACGGGTAAGCGAGTCGTTAACCTTCTGACGATCC  
CATTGCTGCATCAAGCCGTAGTTCTCTCCAGGCACAGGCGCAAAAACAGCCAGTACACGCTGGCGCGTACTTTCCGCA  
CTCAAAAAGTGTCACTGGAAGAGAGTGTACTTAGCCAGGTCAACCTGCTATCCAGAATGCTCAGGAAAAAATTGTCTAC  
GCCAGCAATGGCACCTTGAGTGACGATGACCGGGCTCGCTGGCTACGGATATTAGGGGCTTCTGTGACCAGTTGCTGAA  
TCTGGCAAACCACTGACGGTAACGGGCGCTACATTTTTGCGGTTATAAAACAGAGACTGCGCCGTTTAGCGAAGAGA  
AAGGGAAATACGTCGGTGGAGCAGAAAGTATTAACAACAGGTCGATGCTTCGCGTTCGATGGTGATAGGGCACACGGGT  
GACAAAATTTTCGACAGTATTACCAGCAACGCGGTAGCGGAACAGACGGTAGCGCTTCTGAAACCAATCTTTTTGCCAT  
GCTGGATAGTCCATCGCAGCCCTGAAAACGCGGTGCGGATAGCGAAGCGGATAAAGAAACCGCCGCTGCGGCGTTAG  
ATAAAACCAACCGGACTGAAAACCTGCTGAACAATGTGCTGACTGTTGCGCGGAATTAGGCACGACGCTGAACGAA  
CTGGAGTCGCTGGATTATTAGGTAGCGATCGCGCTTATAGGGCAAACGACGAGATGAGCGATCTGGTTGATGTGGACTG  
GAATGCAACTATTTTACATCATGACGAAACGGCATTGACGGCATCGTATAAAGCATTACCGATATGCAGGGAT  
TGTCGCTCTCCAGCTCAGCAAATAATTTGCTTTAAAACATATCATGAAACTGGGTATGTTTTGTCTGCTGCTCTGGG  
ATCGCTGGGGCGGCAATTTTTTGCCTATTTTGCATTGTTGGTTAGCAAGGATGCCATTGATGAATTTAATATGTTGA  
TTCAAAGATGAAATAAAAAAGCCCTGGCAGTTACCAGGGCTTGATTACTTTGAGCTAATTACTCAACAGGTTGCGGA  
CGCGCAGGAGCGGAGGAGGATGATGTGTTGCCGATGACCACCTGCGGCACCTTTACCTTGAAGGCAAAGTAGGGCG  
CTGCCAGTCACTGTGACGCGGTGCCTCCGGAACATATTCCGGTCTGGAGCGCGGTCATTGGCGCGGTAGCGTGGTTAT  
GCTCAACGGTGACCTCAGGTTGACCCGACGTAACGTTTCAACTTCTGCTGCGACTTACGCGACTACTGGCGGCGCAGGT  
TGAGCAACAACCTCAGGTTACGCAACTACAACCTCAGCAGTTTCGACAACCTTCTCAATATCTGCCGCTCTTCTCGCG  
TTCAACCAACCGGTTCTGCTTGTCTGCAACTTCTGGGCTACGGCAACATCAGACTCGGTAATCACCTGCGGCTGTTACG  
TTACCGCGGACGATCACTTACGATGCGTCTGTTTCAACCACTTCCGGTTCGCGTTGCGCAACCTGAACGGGGCTTCT  
ACGACACCGGCCACTTCTCAACAACCTGGCGGCTAAACACCGGTTGATAGCGGCGGCGACAGGGACCTCAGTACCAT  
CGGCTGCACATGACTTCTTCTGTTGCGCTGCTTCAACCTGTACATCTTGGGACGTACAATTGGATAGCGGATCC  
AGACTTTGCCAGAGGCCAGTTCCGGAGACGCGCAGCTACGGTCAACGGCATTGGCGACTGGGTTGGATAACGCTCGTCA  
CGATAGCGACGACGCTGACCACTTACGCGCAGGTGACGAGGCGAGCGGCGAGAACGACGCGGATGCCACCGTTGTC  
ACGGTTATCAGCATTGTTCTTCTGCTGTTCTGGTGCAGTTTTCGCTACGACTGGCAGCGGGACTTTCACCAAGTTCTG  
TGCGTGGAGCTGGCGCTTCTGAACAATTGGTTGCGCAGCGACAGTTTCTTCAACCAACCGGTCGCGACTACCGCTTCTCG  
GCTACGCTTTGCTCGTAACGCACTTCTGATTGAGCTGACGCTGTTTACGACGCGGCTGAACCGGACGTACACGTTCTTC  
CTGTTGCGTTTCTGAACAGATTGCTCTTCAACATTCAGCGCCTTCGCTTCTGTTGCGCCTGACGTTTATCATATTAC

GGCGGGCTACGTTACGACGCGGGCTTGTGCTCGTCGGCGGTACGCGCTTTTCCGTTACCTCAGCCTGCTGACGG  
CTCTCACGCGTCTCGGCAGTCTGCTGCTGCTGCGTGGCGACGATTACGACGGTTTTCTTCGCGATTATCGCTGCCTTCAGT  
ACGTTCACTACGGGTGTCGCGGGCTCATTACGGTACGCGGGTGTCTGACGAGGCTTGCAGCATCTGTTGACGTT  
CCGTTTTCGTCTGCTTTCCGGTGTGTTGCTCGGTGGTTTTGTTTTCTTACCACCGCTGAACAGCGCTTTCAGTGCG  
CCGAAAGAAGCGGCTCAACAGCCCAGGTTGTGAGGAGCTGCTGGTGTGCCGTTGCAGCTTTCGGTGTGGAGCTACAA  
AGCGCGGAGGTTACGCTGGCGTGGCGCAGGCGGCACATCCGGCATGGCAAAGGTTGCCAGCGCAGGTTGTTCCGGAC  
GTTACGTTACGGAAGTCTTCTTACGACGCGCAGCGCCATCGCTTCTTATGCAGCTTCCGCGAGCATGTAGCTTAAGGTT  
GGGTTTTCTTCCCTTACGACGCGCAGCAGTGGTAGTGCGGGTTTTCCATCTGATCGTTGGCACAATTACACAGCG  
CACACCGTCTGACGAGTTCAATGGCATTACCAGCAGAACGTTTTTATTACGAGGTAAGAAGCGATTGGCACAGGAA  
CAATGGCGTGAAGTCTTGGGTTCTTTCAGCGCTTCTTCTCGATCAGACGCAGAATAGAGAGCGCAGCGATTCCG  
TTGTACGCACGGTGCCAGTACCAGAACACGCGGACAAACGTGATGACTGGATTACCCAGTGTGGCTCAGGCGTG  
ACGGGACATTTCCAGCAGGCCAAAGCGAGAAATATGGCTGATTTGAATACGCGCAGGTCCTGACGCACCGCTTACGCA  
GACGTTTTTACCGCAGCTGGTGGCGTACTGGCGTATGTCGATGAAGTCGATAACAATCAGGCCCGCAGGTCACGCA  
AGCGCAGCTGACGAGCAATCTCATCGGACGTTTCGAGGTTAGTGTAAACGCGTTTTCTCGATATCGCCCGCGGGT  
CGCGCTGCGGAGTTGATGTCGATGGCCGTTAACGCTTCGGTGTGTCGATAACAATGGAACCACGAGCGCAGGAA  
CTTACGCTGGAAGGCGGACTCGATCTGTGACTCGATCTGGTAGTGGCTGAACAGCGGGATCTCGCCGGTACAGTTG  
ATTTTGTGCTGAAATCCGGGCGACCTAATGCAGCGATATGCTGACGTGCCAGTTCGAGCACTTTCGGGTTATCGATAAG  
GATTTCCGCGATGTCCTGACGTAAGTAATCGCGAATGCGCGAACGATTACGTTGCTCTCCTGATGAATCAGGAACGGG  
CCGGGCGGCTTTCAGCGGCTTTTTGATGGCTTCCAGTGTTCAGACGGAAGCTTAAATCCATTGCAGCGCTCAGCA  
GATTTGCCGACGCCAGCGGTGCGCAGGATAAGCCCCATGCCTTCCGGCAGTTCAAGGCTTGCAGTGCTTCTTTAATTC  
GGTACGGTCTGCGCTTCGATACGGCGAGAAATGCCACCCGCGCGGGTGTTCGGCATCAGAACCAGATAGTACCCG  
CCAGACTGATAAAGGTGGTAAATGCCGCGCTTTGTTGCCGCGCTTCTTTATCGATCTGAACAATGACTTCTGACCT  
TCACGCAACACATCTTAAATGTTGGGACGACCATGAGCACTGTAGTTAGCAGGAAATATTCGCGGGCAATTTCTTTAG  
TGGGAGGAAACCGTGACGTTAGCGCCGTAATCAACAAAAGCAGTTCAGACTCGGTTCAATGCGGGTATTACCTT  
TGATAGTGTTCCTTTCTGCTCGTGCCTGGACTTTCGATATCCAGGTCATACAGACGCTGCCATCTACAAGGGCA  
ACGCGCAACTTCTGCTGAGTTGCGTTGATTAACATTTTTCATCGTAACCTACTCATTATTCTTACATTGACGACT  
AAGTGCAGGCAAAGTAACGCTTTCGGGTGTGAACCGATGGCCTCGTGTCTAGTCGCGTCCCAACCTCACGTTATC  
GTCAGCTCAAAGAGGCGCAGAGTGTGCGTTGCCGTTTTTCATGCGGAAAACAGCGCAATTATCAAAGAAACAGACTGG  
GTACTACTCTCAGAAATATTTCCATCTACCGGTAAGGACTGCAACCCGAGCCGCTAATGCCTGAAAGATCAATACG  
TCTTACGCCATTGCTGCGTGGATGATCGGTGCGGAAAATGGGTTATTCCGTAATAATTTCTTGTTTAAACAAGGATGGAC  
ACGGAACGGCCTCATTATCCACTGCAAGCCTTGTATAGCAAGATGACTTTTACCATTTATCACCCGTTACTCACAG  
TTTTTCACTTCTTGTGTTGATTGGTTAATAACCATCAATAAAGTGATCACGCAAGTAATAAGGTGCAAAAGTA  
AATAAAGCATAGAAAATGAGTGGCGGAATCCTGTTGGTAATTAGAATCGCAACCATGAAAACAGAGACTCCATCC  
GTAAAAATTGTTGCTATCACCGTACGGAAGCGGGCAACGTATCGATAACTTTTTGCGTACCCAATTGAAAGGCGTACC  
AAAAAGTATGATTTACCGTATTTTGCCTAAAGGCGAAGTGCAGGTTGAACAAAAACGATTAAGCCTGAATATAAATCG  
AAGCGGGTGTGAGGTGCGTATTCACCGGTTCCGCTTGTGAGCGGGAAGAAGAGGCGGTTTCGCCACATCTGCAAAAG  
GTGGCGGCGTGGCGGACGTCATCTTATGAAGATGATCACATCCTGGTGTGAATAAACCTCCGGTACGGCGGTACA  
TGCGGCGAGTGGTTAAGCTTCGGCGTATTGAAGTTTGCAGGCTTGCAGCGGAAAGCGGTTCTTGAAGTGGTTT  
ATCGTCTTACCGGACACTCAGGTGTTTTGCTGGTAGCAAAAAACGCTCGCGTTCGCTTCTGATGAGCAATTA  
CGTAAAAAAGGATGCAAAAAGATTACCTGGCGTGGTGCAGGTCAGTGGCAGTGCATGTGAAGAGGTTCAAGCAC  
GTTACTGAAAAATATTCTGCAAAAGCGGCAACGTATCGTGCCTGTGAGTCAGGAAGGCAACCGTCGAAACACGCTTTA  
AAGTGAAGAAGCCTATGCAATTTGCCACCCTGGTGCCTGTAGCCGGTAACAGGGGCTACTACCAGATCCGTGTGCAT  
ACACAATATGCGGGTATCCGATTGCCTTTCGATGCTACGCTGACGTTGACGTTTACAGGCGACTACTGAAGCAGG  
CACGGGATTAATCGCTGTTCTGACGCTGCAGGTTGAAGTTTACTCATCCGGGACCGGTGAGGTGATGCGTATCG  
AAGCTCCGATGGATGAAGTTTGAAGGTTGTTTGCAAAAGCTGCGTAACGCGCGTAATACAAGCATATAAACCTGATA  
ATGGGCGGTTGGCCTGATAAGGCGTTTACGCCGATCAGGCCGCCAGCACCGATTGCCGATGCGACGTAACCACATCCG  
GCGCAAAAATATCCCATCAGCGGTTTTTCCCTTCCGACGTAACATCTGACACAGCGGATTAGCGGTAACCAACC  
AGCGTGTAGGATCACGCCCTCTAACGCTCAAACAGCGTAATGCCAAATCTTCACTCTTAAAGCTACCCGCGCAGTG  
CAGGGGATGCTCTTACGCACGTAATTATCAATCTCCGCTCGCTCAGGTGACGAAATGGACGTCAAAGGCTCCACTT  
CTGTTGACAGATGCCATTCGCCGAATTAACAACGCCAGTCCAGTATAGAAGGTGACGATATTGCCGCTGGCTTTCGCT  
AATTGACAGCGGCATTTTCTTCCGTTAACGGTTTACCAGTATTTCGCATCAAGAACACATACTGGTCTGAACCAAT  
AATTAATGATCCGGATAACGTGACGCCAGAGATTGCGCTTTTTCTTGTGCCAGTCGAAGCACCAACTGTCGCGGTGATT  
CGTCGCTGCGTGGGTTTTCTGTCGACCTCTGGTGTGCACATTCAAAAGAGATTTGCAGTTTTTCCAGAAGAGCGCAGCG  
CATGGCGAGGTGGAGGCTAAAATAAGTTTAGGCATATTTTTTCCATCAGATATAGCGTATTGATGATAGCCATTTAA  
CTATGCGCTTCTGTTTGCAGGTTGATGTTTGTATCAGCACTGAACGAAAATAAAGCAGTAACCCGCAATGTGTGCGAAT  
TATTGGCAAAAGGCAACCACAGGCTGCCTTTTTCTTACTCTATGACGTTACAAAGTTAATATGCGCGCCTATGCAA



AGGTAATAATTACCCCTGACTCTCGATCCGGTTCGTACGGCTCAAAAACGCCTTGATTACCAGGGTATCTATACCCCTGAT  
CAGGTTGAGCGCTCGCCGAATCCGTAGTCAGTGTGGACAGTGATGTGGAATGCTCCATGTCGTTGCTATCGATAACCA  
ACGTCTCGCAGTGTTAAACGGCGATGCGAAGGTGACGGTAACGCTCGAGTGTACGCGTTGCGGGAAGCCGTTTACTCATC  
AGGTCTACACAACGTATTGTTTTAGTCTGTGCGTTAGACGAACAGGCTGAAGCACTGCCGGAAGCGTATGAACCGATT  
GAGGTTAACGAATTCGGTGAAATCGATCTGCTTGAATGGTTGAAGATGAAATCATCTCGCCTTGCCGGTAGTTCCGGT  
GCATGATTCTGAACACTGTGAAGTGTCCGAAGCGGACATGGTCTTTGGTGAAGTGCCTGAAGAAGCGAAAAGCCAAACC  
CATTGCGCTATTAGCCAGCTTAAAGCGTAAGTAATTGGTGTCCCGTTGGATCGGGGATAAACCGTAATTGAGGAGTA  
AGGTCCATGGCCGTACAACAGAATAAACCAACCCGTTCCAAACGTGGCATGCGTCTGTTCCCATGACGCGCTGACCCGAGT  
CACCAGCCTGTCTGTAGACAAAACCTTCTGGTAAAAACACCTGCGTCACCACATCACTGCCGACGGTTACTACCCGGCC  
GCAAGGTATCGCTAAGTAATCACGCATCTGCGTGTGAAGCTTAGTGAGGATTTCCCGAGCAACTGGGGAAAGACCA  
AACCGGGCGGCGACGATACTTGACACGTCTAACCTGGCGTTAGATGTATGGGAGGGGATTTGGCCCTTCCGTGACA  
GTGCTGCAGCATTGCAGGCACTGAATCTAATTCGCAACTCACTCTTTTGTAGTGGCAATTCCGACGCCATCACGCC  
ATTACTTGTAAAGCTGACTTTGAACAACGTTCCGCTGTGAGATTATTCTGCGCAGTCAGTTATCGCCAGTGTGCC  
GGCTTCGCAAGCTATCCGCGCCAGTCTGGGAGTCAATGCGCGTGGCCCTGGAGCTGGTGAAGAAGTGGAGCGCAA  
GCCGCGCTGGTGGCGTATTACCACATCAGCAAAAAGGGCAAAAACGGTGGTCTTGACTTAGGGGCAACGTCGATTGTG  
ACAGCACAATGCTGGTGCAATTTGCCATTATGGGCTCAGTTCTGGCTGAAGAGTGGTGGAAATTCCTCAATCCTCGCGTG  
GCGTTGCTCAATATTGGTGAAGAAGAAGTAAAGGGTCTCGACAGTATTGGGATGCCTCAGCGGTGCTTAAAAAATCCC  
TTCTATCAATTATATCGGCTATCTTGAAGCCAATGAGTTGTTAACTGGCAAGACAGATGTGCTGGTTGTGACGGCTTTA  
CAGGAAATGTCACATTAAGACGATGGAAGGTGTTGTGAGGATGTTCTTTCTGCTGAAATCTCAGGGTGAAGGGAAA  
AAACGGTCTGGTGGCTACTGTTATTAAGCGTTGGCTACAAAAGAGCCTGACGAGGCGATTAGTCACCTCAACCCCGA  
CCAGTATAACGGCGCTGTCTGTTAGGATTGCGCGGACGGTGATAAAAAGTCATGGTGCAGCCAATCAGCGAGCTTTG  
CGGTGCGGATTGAACAGGCACTGACGGCGGTGACGACGCAAGTTCCTCAGCGAATTGCCGCTGCCTGGAATCTGTATAC  
CCAGCTGGTTTTGAGCTGTGGACGGTGGCAAAGCGGAACTCTGCGGTAGCAGGACGCTGCCAGCGAACTCGCAGTTG  
CAAGTGACGGTATATAACCGAAAAGTACTGAGCGTACATGTATACGAAGATTATTGGTACTGGCAGCTATCTGCCGAA  
CAAGTGCGGACAAACGCCGATTTGAAAAAATGGTGGACACCTCTGACGAGTGGATTGCTACTCGTACCGGTATCCGCGA  
ACGCCACATTGCCGCGCAAACGAAACCGTTTCAACCATGGGCTTTGAAGCGGCGACACGCGCAATTGAGATGGCGGGCA  
TTGAGAAAGACCAGATTGGCCTGATCGTTGTGGCAACGACTTCTGCTACGCACGCTTTCCGAGCGCAGCTTGTGAGATT  
CAAAGCATGTTGGGCATTAAGGTTGCCCGGCTTTGACGTTGACGAGCCTGCGCAGGTTTACCTATGCAATTAAGCGT  
AGCCGATCAATACGTGAAATCTGGGGCGGTGAAGTATGCTCTGGTCTGCGGTTCCGATGACTGGCGCGCACCTGCGATC  
CAACCGATCGTGGGACTATTATTATTTTTGGCGATGGCGCGGGCGCTGCGGTGCTGGCTGCCTCTGAAGAGCCGGGAATC  
ATTTCCACCCATCTGCATGCCGACGGTAGTTATGGTGAATTGCTGACGCTGCCAAACGCCGACCGCGTGAATCCAGAGAA  
TTCAATTATCTGACGATGGCGGGCAACGAAGTCTTCAAGGTTGCGGTAACGGAACGGCGCACATCGTTGATGAGACGC  
TGGCGGCGAATAATCTTGACCGTCTCAACTGGACTGGCTGGTCCGATCAGGCTAACCTGCGTATTATCAGTGAACG  
GCGAAAAAATCGGTATGTCTATGGATAATGTGCTGGTGGTACGCTGGATCGCCACGGTAATACCTCTGCGGCTCTGTCCC  
GTGCGCGCTGGATGAAGCTGTACGCGACGGGCGCATTAAGCCGGGCGAGTTGGTTCTGCTTGAAGCCTTTGGCGGTGGAT  
TCACCTGGGGCTCCGCGCTGGTTGTTTTAGGATAAGGATTAACAATGACGCAATTTGCATTTGTGTTCCCTGGACAG  
GGTCTCAAACCGTTGGAATGCTGGCTGATATGGCGGCGAGCTATCCAATTGTGAAGAAACGTTTGTGAAGCTTCTG  
GGCGCTGGGTACGACCTGTGGGCGCTGACCCAGCAGGGGCGAGTGAAGAATGAATAAAACCTGGCAAACCTCAGCCTG  
CGCTGTTGACTGCATCTGTTGCGCTGATCGCGTATGGCAGCAGCAGGGCGGTAAAGCACCAGCAATGATGGCCGGTAC  
AGCCTGGGGGAATACTCCGCGCTGGTTTTGCGCTGGTGTGATTGATTTTCGCTGATGCGGTGCGTCTGGTTGAGATGCGCGG  
CAAGTTCATGCAAGAAGCCGTACCAGGACGCGGCGCTATGGCGGCAATCATCGGTCTGGATGATGCGTCTATTGCGA  
AAGCGTGTGAAGAAGCTGCAGAAGGTGAGGTCGTTTCTCCGTAACCTTAACTCTCCGGGACAGGTGGTTATTGCCGGT  
CATAAAGAAGCGGTTGAGCGTGTGGCGCTGCTGTAAAGCGGCGGGCGAAAACGCGCGCTGCCGTTACCAGTGAAGCGT  
ACCGTCTCACTGTGCGCTGATGAAACCAGCAGCCGACAAACTGGCAGTAGAATTAGCGAAAATCACCTTTAACGCACCAA  
CAGTTCTGTTGTGAATAACGTTGATGTGAAATGCGAAACCAATGGTGTGATGCCATCCGTGACGCACTGGTACGTCAGTTG  
TATAACCCGGTTCAGTGGACGAAGTCTGTTGAGTACATGGCAGCGCAAGGCGTAGAACATCTCTATGAAGTCGGCCCGGG  
CAAAGTGCTTACTGGCCTGACGAAACGCATTGTGACACCTGACCGCTCGGCGCTGAACGAACCTTACGCGATGGCAG  
CGGCGCTCGAGCTTTAAAGAGGAAAATCATGAATTTGAAGGAAAAATCGCACTGGTAACCGGTGCAAGCCGCGGAATT  
GGCCGCGCAATTGCTGAAACGCTCGCAGCCGTTGGCGGAAAGTTATTGGCACTGCGACCAGTGAATAAGGCGCTCAGGC  
GATCAGTGATTATTTAGGTGCAACCGGAAAGGTCTGATGTTGAATGTGACCGACCCGGCATCTATCGAATCTGTTCTGG  
AAAAAATTCGCGCAGAATTTGGTGAAGTGGATATCTGGTCAATAATGCCGGTATCACTCGTGATAACCTGTTAATGCGA  
ATGAAAGATGAAGAGTGAACGATATTATCGAAACCAACCTTTTCACTGTTTTCCGCTGTGAAAAGCGGTAATGCGCGC  
TATGATGAAAAAGCGTATGGTCTGATTATCACTATCGGTTCTGTGGTGGTACCATGGGAAATGGCGGTGAGGCCAACT  
ACGCTGCGGCGAAAGCGGGCTTGTGCGCTTCAAGTAACTGACGCGCGCAAGTTGCGTACGCGGTATTACTGTAAC  
GTTGTTGCTCCGGCTTTATTGAAACGGACATGACACGTGCGCTGAGCGATGACCAGCGTGGGGTATCTGGCGCAGGT

TCCTGCGGGTCGCTCGGCGGCGCACAGGAAATCGCCAACGCGGTTGCATTCTGGCATCCGACGAAGCAGCTTACATCA  
CGGGTGAAACTTTGCATGTGAACGGCGGGATGTACATGGTCTGACCGGATTTGCACAAAATGCTCATGTTGCGCGCAGT  
CTGCGTGGTTATGAGTAATAATTAGTGCAAAATGATTTGCGTTATTGGGGGTAAGGCCTCAAATAACGTAATAATCGTG  
GTAAAGACCTGCCGGGATTTAGTTGCAAATTTTTCAACATTTTATACACTACGAAAACCATCGCGAAAGCGAGTTTTGATA  
GGAAATTTAAGAGTATGAGCACTATCGAAGAACGCGTTAAGAAAATTATCGGCGAACAGCTGGGCGTTAAGCAGGAAGAA  
GTTACCAACAATGCTTCTTTGTTGAAGACCTGGGCGCGGATTCTTTGACACCGTTGAGCTGGTAATGGCTCTGGAAGA  
AGAGTTTGATACTGAGATTCGGGACGAAGAAGCTGAGAAAATCACCACCGTTAGGCTGCCATTGATTACATCAACGGCC  
ACCAGGCGTAAGTGAACATCTCCAGGCGGTCTGTTGACCGCTGAGTTTTATCTTTTTGTCCCACTAGAATCATTTTTTC  
CTCCCTGGAGGACAAACGTGTCTAAGCGTGTGTAGTTGTGACCGGACTGGGCATGTTGTCTCTGTGCGCAATACCGT  
AGAGTCTACCTGGAAAGCTGTCTGCGGTCAGAGTGGCATCAGCCTAATCGACCATTTGATACTAGCGCCTATGCAA  
CGAAATTTGCTGGCTTAGTAAAGGATTTAACTGTGAGGACATTATCTCGCGCAAAGAAGCAGCGCAAGATGGATGCCTC  
ATTCAATATGGAATTGTCGCTGGCGTTAGGCGCTCAGGCTATGAGGATTCTGGCCTTAAATAACGGAAGAGAACGCAACCCGCAT  
TGGTGCCGCAATTGGCTCCGGGATTGGCGCCTCGGACTGATCGAAGAAAACACACATCTCTGATGAACGGTGGTCCAC  
GTAAGATCAGCCATTCTCGTTCCGTCAACGATTGTGAACATGGTGGCAGGTGATCTGACTATCATGATGATGGCTGCGT  
GGCCCGAGCATCTATCGCGACTGCCTGTACTTCCGGCTGCACAACATTGGCCATGCTGCGCGTATTATCGCGTATTG  
CGATGCTGACGTGATGGTTGACAGTGGCGCAGAGAAAAGCCAGTACGCCGCTGGGCGTTGGTGGTTTTGGCGCGCACGTG  
CATTATCTACCCGCAATGATAACCCGCAAGCGGCGAGCCGCCGTTGGGATAAAGAGCGTGATGGTTTTGTTACTGGGCGAT  
GGTGCCGGTATGCTGGTACTTGAAGAGTACGAACACGCGAAAAACGCGGTGCGAAAAATTTACGCTGAACTGCTCGGCTT  
TGGTATGAGCAGCGATGCTTATCATATGACGTCACCGCCAGAAAATGGCGCAGGCGCAGCTCTGGCGATGGCAAATGCTC  
TGCGTGATGCAGGCATTGAAGCGAGTCAAGTGGCTACGTTAACGCGCACGGTACTTCTACGCCGGCTGGCGATAAAGCT  
GAAGCGCAGGCGGTGAAAACCATCTTCGGTGAAGCTGCAAGCCGTGTGTTGGTAAGCTCCACGAAATCTATGACCGGTCA  
CCTGTTAGGTGCGGCGGGTGCAGTAGAATCTATCTACTCCATCTGGCGCTGCGCGATCAGGCTGTTCCGCCAACCATCA  
ACCTGGATAACCCGGATGAAGGTTGCGATCTGGATTTCTGACCGCACGAAGCGCGTCAAGTTAGCGGAATGGAATACACT  
CTGTGTAACCTCTTCGGCTCGGTGGCACTAATGGTCTTTGATCTTTAAAAAGATCTAAGTTGCTATTTTCCACCCTTA  
TAAAAGGTCGCTTGGGCGCTTTTTTCTTAGCTTTTATTCCGACTTGTTCGTAAGTGAACATGCTGCCACACTAACAAT  
TCTCTGATAAAGGACCGGTATGTTCTTAATTAACGGTCATAAGCAGGAATCGTGGCAGTAAGCGATCGGCAACCGCAGT  
TTGGTGATGGTTGTTTTACCACCGCCAGAGTTATCGACGGTAAAGTCAGTTTGTATCGGCGCATATCCAGCGACTACAG  
GATGCTTGTGACGGGTTGATGATTTCTGTGACTTCTGGCCTCAGCTTGAACAAGAGATGAAAACGCTGGCAGCAGAACA  
GCAAAATGGTGTGCTGAAAGTGTGATCAGTCGCGGTAGTGGCGGGCAGGGTACAGCACATTTGAACAGCGGACCGGCAA  
CGCGGATTCTCTCGTTACGGCTTATCTGACATTACGACCGTTTGCCTAACGAGGGGATTACGTTGGCGCTAAGCCCG  
GTGCGGCTGGGCGCAATCTCATCTTGCAGGATTAACATCTCAATCGTCTTGAAGCAAGTATTGATTGCTCTCATCT  
TGAGCAGACAAACGCTGATGAGGCGCTGGTCTTGCAGCGAAGGGTGGGTTACGGAATGCTGTGCGGCTAATTTGTTCT  
GGCGGAAGGGCAACGTAGTTTATACGCCCGGACTGGATCAGGCAGGTGTTAACGGCATTATGCGACAATTTGATCCGT  
TTGCTGGCACAATCTCTTATCAGCTTGTGCAAGTGCAGCCCTCTGGAAGAGTGTGTCAGGCAGATGAGATGGTTAT  
TTGTAATGCGTTAATGCCAGTATGCCGATGTGCCTGTGGCGATGTCTCCTTTTCTGTCAGCAACGTTATATGAATATT  
TAGCCCCACTTTGTGAGCGCCGAATTAGTCATGAAAAAGTGTATTGATAATCTTGTATTGCTGGTGGTACTGGGTA  
TCGCCGCTGGTGTGGGCTCTGGAAGGTTCCCATCTTGCAGACGAAATGCTTATCAAGAAGAGACGATATTTACC  
CTGAAGCCAGGACCGGACGCTGCGGCTCGGTGAACAGCTTTATGCCGATAAGATCATCAATCGTCCACGGGTTTTTCA  
ATGGCTGTGCGTATCGAAACGGATCTTCTACTTTAAAGCCGGACTTACCCTTTACACCGCAGATGACCGTGGCGC  
AGATGCTGAAATTTGCTGAAAAGCGGTAAAGAAGCACAGTTCCTCTGCGACTGGTAGAAGGGATGCGTCTGAGCGATTAC  
CTCAAGCAATTTGCGTGAGGCCCCGTATATCAAGCATACGCTGAGCGATGATAAGTACGCCACCGTACGCGCAGGCACTTGA  
ACTGAAAACCCGGAGTGGATTGAAGGTTGGTTCTGCCAGACACCTGGATGTATACGCCAATACCACCGATGTCGCGT  
TACTCAAGCGAGCGCACAAAGAAAATGGTGAAGCGGTGATAGCCCTGGGAAGGGCGTGGGACGGTCTGCCTTATAAA  
GATAAAAACAGTTGGTGACGATGGCATCAATTATCGAAAAAGAAACCGCCGTTGCCAGTGAACGCGATAAGGTTGCCTC  
AGTATTTATCAACGTTTACGCATTGGTATGCGCCTGCAGACCGACCGACCGTATTACGGGATGGGAGAGCGTTATA  
ATGGCAAATTTCTCGTGCAGACCTGAAAACGCCGACAGCGTATAACACCTATACCATTACCGGTCTGCCCGCAGGTGCG  
ATAGCGACGCCGGGGCGGATTCGCTGAAGGCTGCTGCGCATCCGGCAAAAACCGCGTATCTCTATTTTGTGGCGGATGG  
TAAAGGTGGTCACACGTTTAAATACCAATCTTGCAGTCATAACAAGTCTGTGCAGGATTATCTGAAAGTGCTTAAAGAAA  
AAAATGCGCAGTAAGTATATCGTCATTGAGGGGCTGGAAGGCGCAGGCAAACTACCGCGTAATGTGGTGGTTGAGAC  
GCTCGAGCAACTGGGTATCCGCGACATGGTTTTCACTCGGGAACCTGGCGGTACGCAACTTGGCGAAAAGTTAAGAAGCC  
TGGTGTGGATATCAAATCGGTAGGCGATGAAGTATTACCGATAAAGCCGAAGTTCTGATGTTTTATGCCGCGCGGCTT  
CAACTGGTAGAAAACGGTCATCAAACAGCTCTGGCTAACGGCACCTGGGTGATTGGCGATCGCCACGATCTCTCACTCA  
GGCGTATCAGGCGCGGAGCGTGGTATTGACCAACATATGCTGGCAACACTGCGTGATGCTGTTCTCGGGGATTTTCGCC  
CCGACTTAACGCTCTATCTCGATGTTACCCCGAAGTTGGCTTAAAACGCGCGGCTGCGCGGGCGAGCTGGATCGTATT  
GAGCAAGAATCTTTGATTTCTTAAATCGCACCCGCGCCGCTATCTGAACTGGCAGCACAAAGATAAAGCATTATAC  
CATTGATGCCACCCAGCCGCTGGAGGCGGTGATGGATGCAATCCGCACTACCGTGACCCACTGGGTGAAGGAGTTGACG

CATGAGATGGTATCCATGGTTACGACCTGATTTGAAAACTGGTAGCCAGCTATCAGGCCGGAAGAGGTACCATGCGC  
TACTCATTACAGCGTTACCGGGCATGGCGATGATGCTTAACTACGCCCTGAGCCGTTATTTACTCTGCCAACCAACC  
CAGGGCCACAAAAGTTGCGGTCACTGCTGGATGTAGTTGATGACGGCTGGCACGCATCCCATTACTACACCCTGGC  
TCCCGAAAAAGAAAAAATACGCTGGGCGTTGATGCGGTACGTGAGGTACCAGAAAAGCTGAATGAGCAGCACGCTTAG  
GTGGTGCAAAAGTCGTTTGGGTAACCGATGCTGCCTTACTAACCGACGCCGCGCTAACGCATTGCTGAAAAACGCTTGA  
GAGCCACCAGCAGAACTTGGTTTTCTGGCTACCCGCGAGCCTGAACGTTTACTGGCAACATTACGTAGTCGTTGTG  
GTTACATTACCTTGCGCCGCCGCGGAACAGTACGCCGTGACCTGGCTTTCACGCGAAGTGACAATGTACAGGATGCAT  
TACTTGCCGATTGCGCTTAAAGCGCCGTTTGCCTGGCGGGCACTGGCGTTGTTTACGGGAGATAACTGGCAGGCTCGT  
GAAACATTGTGTCAGGCGTTGGCATATAGCGTGCCATCGGGCGACTGGTATTCGCTGCTAGCGGCCCTTAACTCATGAACA  
AGCTCCGGCGGTTTACTGGCTGGCAACGTTGCTGATGGATGCGCTAAAACGCCATCATGGTGCTGCGCAGGTGACCA  
ATGTTGATGTGCCGGCCTGGTCGCCGAACGGCAACCATCTTCTCCCTCGCGCTGCAGGCTATACTGGGGATGTT  
TGCCACATTCGTAACAGTTAATGTCTGTACAGGCATCAACCGCAGCTTCTCATCACCATCTTTTACTGCGTATTGA  
GCATTACCTGCAACCGGGCGTTGTGCTACCGTTCCATCTTAAAGAGAGACATCATGTTTTAGTCGACTCACACTGC  
CATCTCGATGGTCTGGATTATGAATCTTGCATAAGGACGTGGATGACGTTCTGGCGAAAAGCCGCCGACGCGATGTGAA  
ATTTTGTCTGGCAGTCGCCACAACATTACCGGTTATTTACATATGCGGGATCTGGTAGGCGAACGTGACAACGTCGTAT  
TTTTGTGGCTGCATCCACTCAACCAAGATGATCCATGATGTAGAAGATTTACGCCGCTGGCGGCAGAAAGGGT  
GTTGTAGCGCTGGGTGAAACCGGGCTGGATTATTATTACAGCCGAAACTAAAGTACGTACGCAAGAGTCTTTCATCCA  
TCATATCCAGATTGGTCTGGAACGAACAAGCCGTTATCGTCCATACCCGTGACGCCCGTGGCGATACGCTGGCAATTC  
TGCGCGAAGAAAAAGTGACGGATTGCGGTGGCGTACTACTGTTTTACAGAGGACAGAGAAACGGCGGGTAAATTA  
GATCTCGGATTTTACATCTCCTTTCCGGCATTGTGACCTTCCGTAATGCGGAGCAACTGCGCGATGCTGCGCGTTATGT  
CCCCCTGGATCGGTTACTGGTGAAACTGACTCACCTTACCTTGCGCCGGTACCGCATCGAGGAAAAGAGAATCAACCTG  
CGATGGTTCGTGACGTTGCAGAATACATGGCTGTGTTGAAAGGTGTTGCCGTTGAAGAACTGGCGCAGGTAACCACCGAT  
AACTTGCCTGCTGTTTACATCGACGCTTCCCGCTTCAATCCATCCGTTGAATGAGTTTTTTAAAGCTCGTAATTA  
ATGGCTAAAACGAGTAAAGTTCACCGCCGAAAATGGGCGGTGAATAACCACGTTTGAATATTGTGACATATGTTTTGT  
CAAAATGTGCAACTTCTCCAATGATCTGAAGTTGAAACGTGATAGCCGTCAAACAAATTGGCACTGAATTATTTACTCT  
GTGTAATAAATAAAGGGCGTTAGATGCCCTGTACAGCGGAGGCTCTCCCCCTTGCACGCGTGAGAACGTAAAAAAA  
GCACCCATACTCAGGAGCACTCTCAATTATGTTAAGAATGCATTTGCTAACCTGCAAAAGGTCGGTAAATCGCTGATGC  
TGCCGGTATCCGTAATGCTATCGCAGGATTCTGCTGGGCGTGGTTCCGCGAATTTACGCTGGCTGCCCGCGTTGTA  
TCGCATGTTATGGCAGAAGCAGGCGGTTCCGCTTTGCAAACATGCCACTGATTTTTGCGATCGGTGTCGCCCTCGGCTT  
TACCAATAACGATGGCGTATCCGCGCTGGCCGAGTTGTTGCCTATGGCATCATGGTAAAACCATGGCCGTGGTTGGCC  
CACTGGTACTGCATTTACCTGCTGAAGAAATCGCCTCTAAACACCTGGCGGATACTGGCGTACTCGGAGGGATTATCTCC  
GGTGGCATCGCAGCGTACATGTTTAAACGTTTCTACCGTATTAAGCTGCCTGAGTATCTTGGCTTCTTTGCCGGTAAACG  
CTTTGTGCCGATCATTTCTGGCCTGGCTGCCATCTTACTGGCGTTGTGCTGTCCTTCAATTTGGCCGCCGATTGGTTCTG  
CAATCCAGACCTTCTCTAGTGGGCTGTTACCAGAACCCTGAGTTGCGTTTGGCATTACGGTTTTCATCGAACGTTGC  
CTGGTACCCTTGGTCTGCACCACATCTGGAACGTACCTTCCAGATGCAGATTGGTGAATACCAACCGCAGCAGGTCA  
GGTTTTCCACGGCGACATTCGCGTTATATGGCGGGTACCCGACTGCGGGTAAACTGTCTGGTGGCTTCTGTTCAAAA  
TGTACGGTCTGCCAGCTGCCGAATTGCTATCTGGCACTCTGCTAAACAGAAAACCGCGGAAAGTGGGCGGTATTATG  
ATCTCCGCGGCGTACCTGTTCTGACCGGTATACCGAGCCGATCGAGTTCTCCTTATGTTGTTGCGCCGATCT  
GTACATCATCACGCGATTCTGGCAGGCTGGCATCCCAATCTGATTTCTTCTGGGATGCGTGACGCTACGTCGTTCT  
CGCACGGTCTGATCGACTCATCGTTCTGTCTGGTAAACAGCAGCAAACTGTGGCTGTTCCCGATCGCTGTTATCGTTAT  
GCGATTGTTTACTACACCATCTTCCGCGTGTGATTAAGCACTGGATCTGAAAACGCCGGTCTGGAAGACCGGACTGA  
AGATGCAAAAGCGACAGGTACCAGCGAAATGGCACCAGGCTCTGGTTGCTGCATTTGGTGGTAAAGAAAACATTA  
TACC  
TCGACGCATGTATTACCCGCTGCGCGTACGCGTGGTGTCTAAAGTGGATCAGGCCGGCCTGAAGAAAACGGGC  
GCAGCGGGCTAGTGGTTGCTGGTTCTGGTGTTCAGGCGATTTCCGTAATAAATCCGATAACCTGAAAACCGAGATGGA  
TGAGTACATCCGTAACCACTAATCCGTAAGACGTTGGGGAGACTAAGGCAGCCAGATGGCTGCCTTTTTTACAGGTGTTA  
TTCAGAATTGATACGTGCCGTAATGTGAAATTACCGGTGTCCGTAGACGATAGAACCCTTCCACGTTGGTATCGTAG  
GTTTTGTGAACAGGTTATTGACGTTCCCTGTAACGAGAAGTTTTTCTCACCTGGTAGCGGGTGAAGAGATCCACCAG  
CGCGTAGCTACCTTGTGCGCGGGAAGGTGCCATACGGCGTACGGTGTGCGTATACACGCGATTTTGGCAGTTAACAC  
CACCGCCGACCGTCAACTCTGGCATGACAGGCAACCGATAGCTGGTGAACATTTAAACCGTGGTGCCTGGCAGATTAGGA  
TTAACGGCGTTTCTTCTGTTATCTCTGCAATATAGCGGTTGCGCAAATGTCAGCTGCCAGTTGTCGGTAATTGCGCC  
GTTGAGTTCAAATTCACCCCTTACTGACTGTCCATCCACCGTTTATAGGCGGTTTCCGCTTGTGCCGGGATAG  
GTGTACCGGTGGACTGAGCGACATTATCTGCTCAATACGGAAGATGGCTAACGTGGTGGTGGTGGTGGTGGTGGTGGT  
TCCGATTTACAGCCAGCTCGTAGTTGTTACCGGTGATTGGAGCCAGATATTTGCCTGAACGTGCACGATCATTTTGGCG  
CTGAAAAATAGAGGTATAGCTGGCGTAGGTCGACCAAGTTGTCATTGATGTCAAACACAGACCAGCGTAAGGCGTGGTGT  
GGTTTTTCTCCATGCTGTAAGTCAGCGTATCAACCCGCCAGTTGGTATAACGTGCGCCGAGGATCAGATGACGCGGATCG  
GCAAGGGTGACACGAGTGGCAGCATATAACGATTTATATGTGGTATCGTCTGCGCCAGGCTCTGTGGTGACCACTG

GGTTTGTGGGAAATTGCCATTAAAGTTGTAGAACTGCCAATTTTCATCCGGGAAGATGTTGGCCCATGAACTGAAGTAAC  
GATTGTTTTGTTTGTCTGTAAGTCCACCAACATTAGATTGTGCTGACGACCAACAATTCATAACTACCGTCAGCGAAC  
AAATCCAGCGCATCAACTTTACGTTTCCACTGTTCCAACCGGTGCCGCGACATAATCAAAGCCAGGTCATAATTACT  
GTATGGCCCAACCAGCATACCATCCGCTTTGTTTACATAGGCATCGACATACATCATTTTGTCTGTCAAATTCGACTTCAG  
AGTGGGTGGCATTCAAGTGTGCTTCCAGGTATCAGCAAAGTCTGCTTCCAGGTCATAAAGACCTTGTGTATCTTTTA  
TCGTTGTACGCCAGTCAGGTGCGGACTGCGTGCGGATCGTAACTGTTGCTGCTGCCATCAGTATTCCAGCGCGGTAA  
ACCGCCCAGGTAGGGCTATTAACATCAATGCGCTGATTTCTGAACCGGCTGAAAGCGTCGTAAGATCGCTAAATCAG  
CATCGACAATGCCGAGAAGAAGGTCTTTTCACTGTTGTAGCGGTCCAGCCATGAGTCGTTATTCTGGTAGCCGCCGACA  
ATTGCGCGCGGATTTTACCCTTCCGTTGAGTGGGCTTTGTAATCCGCCACATACCGTTCTTTGTTCCAGTACCCTGA  
TTCCGCCGAGACATCGCTTTAAATTCACGACTGGTCCGCTGTTTTGCAACCATATTAATTGCCGAGATGGATTACCCG  
TCCCGGTATGAGTCTGTGCGCCACGCACTACTTCTACGCTTCAAAGAGTCCATATCAGAAAGTCCGTCGCCGACA  
TTCCAGCGGATTCAAAATAGGTGGGATACCATCAACCATATAGTTATCGATCTGGAATCCGCGGGAATAATAAAGAGC  
ACGATCGGAATCCGCTGACTTTTGTGATCCCCAGCGTGTTCATCACTTCGCCAGCGTTTGAATGCTGATCTT  
CCATCCGCTGGCTAACAAATAGTGACCGACTGAGGAATATCAGTTGAGTCATCTGCATTTTGGTACCAGCGAGGTA  
GACGTTACGCTGTAATCATTTTCCCATCATCTGGAGCTGTGGCTGAACCTCAACAATCACGTTTCTCAGTGGCTGG  
TGCAGCAAAAGCGGAGGTAATAGTCCAGTGTGCAACCGCAAGTGTGACGTTTGGTATGCTGATGCTGATATT  
GATTATCCCTGTTAAATTTGTTGAAAGCATTGAAATCTCTGTTTATGTTGCTGTCAGGCTCATGCCGAGGAGGTT  
GATGAGCGATTATTTAGTGTGCAATAATTTTGTGTAATGCAAAATGAGAAATATACGCATTATATTTGTCATGT  
AAACCAACAGAGAATGTCTTTTCCAGCGCATTCCGAGGCGAGAAATGGGAATAATGGCGATATATACGGCAGCAAAACGAT  
TTTTTGTCTAAGAAATCGTGAGTTAAGGTTGAAAGAGCAGGTTTAACTCGACCATACTCTATACTCGCAGTGTGGCGCGG  
CGTAGCATGGCGCAACGCATGGCTATTTGAAAAGGAAAATGTGCTGGCAGAAAGAACTATATTCAGCAAAATTTTCGT  
CGTGAGATCCCTCCGATATCGTCTACCAGGATGATCTGGTAACGGCTTTCGCGATATTTCCGCCAAGCGCAACGCA  
TATTCTGATCATTCCGAATATCCTCATTCCGACTGTGAACGACTCTCAGCTGAGCATGAGCAGGCGCTGGGACGCATGA  
TCACCGTAGCGGCAAAATTTGCTGAGCAAGAAGGATTGCGAAGATGGCTATCGTCTGATCATGAATACCAACCGCCAT  
GGCGGACAAGAGGTTTACCACATCCATATGCACTTGTGGGTGGCGTCCGCTGGGACCAATGCTGGCGCATAAAGGCTCT  
GTAACGATGAGAAAAGGATGCTTTGGGCTGGTGTCTCTGGTGTGTTACTGCTGGTGGGCTGTCGTTACATCCGAAAT  
TCCGGTGAATGATGAGCAATCGCTGGTATGGAGTCATCTTTATTGGCTGCGGGCATCAGTGCAGAAAAGCCCTTCTTT  
CGACGTCTGATATTCAACCTTCAGCATCTCAACGCTTTATAACGAAAGGCAAGAACCCTTACCCTTATTATCGTTTT  
TACTGGTATGACGCCAGAGGCTGGAGATGCATCTCTGAAAGGCCACGCAGCGTTACCATTCCCGCACATTCCGCGGT  
AACGCTGTACGGCAGCGCAATTTTCTGGGGCGCACAAAGTCCAGCTTTATCTATATTTGTAAGGGGTGAATCTTGATG  
ACAAAAATGAGTCGCTACGCCTTGATTACCGCGCTGGCGATGTTTCTCGCCGGGTGTGTGGGGCAACGTGAACCTGCACC  
GGTAGAAGAAGTGAACACAGCGCCGGAACAACAGCCGAGCCACAACAGCCTGTCCCACAGTGCCTCAGTGGCGGACGA  
TCCCGCAGCAGCCAGGCCAATTTGAGCACGAAGTCAAAGTGCACCGCTGCGCCGCATATTCGCCATTATGACTGGAAT  
GGCGCAATGCAGCCGATGGTCAAGATGCTTGGGGCTGACGGGGTACTGCGGGTAGCGTCTGCTGGTTGATAGCGT  
TAACAACCGTACTAACGGTTTCGCTGAATGCCGAGAAGCGACCGAAACGCTGCGAAATGCGCTGGCTAATAACGGGAAAT  
TTACCCTGGTTTCCGCCAGCAACTGTGATGGCGAAGCAACAGTTAGGTTTGTGCGCGCAGGACAGTTTAGGCACCCGT  
AGTAAAGCCATAGGCATTGCCGCAATGTCCGCGCTCATTACGTGCTGTACTCCAGCGCTCTGGCAACGTTAACGCTCC  
GACCCTACAAATGCAGCTGATGCTGGTGCAGACGGGCGAAATTTCTGGTCAAGTAAAGGTGCCGTTTCCGAGCAATAAT  
CCCATCACGCGCAGCAATGCTGTGCGCTTTTCCCGCAGTATCATCCGTACGACGTTTAAATAGTGGGCTTAGTGG  
CGGAGTTTTTCTATTGAACATCAGGCGCAGCGTTTTGTTGTGCGTCAAGCGCAGCATCTGATGCGCCAGTCCGCGT  
TCTTGCGCCAGTATCGGGCTTTATCACAACTACCCGCATGCTTGCACCGAAGCCGATTTTATATCTCCGTGACTGGATG  
GTAGTCGACTATCTGCCGCGCGGTAATAACGATTTTGCAGGATACCAACGAACTGGCAGGCTTGTGTATTATCTACA  
TCAACAACCACGTTTTGGCTGGCGAATAACGCTGTTGCCGTTACTGGAAGTGTACTGGCAGCAAGCGATCCGGCGCGG  
GGACAGTGGTTGGCTGCGAATGTTAAACGCTGCGCAAAAGCGGGGAACCGCCTTTACGCTTAAAGTCCATTGCAT  
ATGGATGTCCACGCCGAAATTTAGTGCATAGCGCGTCAGGGTAAAACCTCATCGACTGGGAGTATGCCGGAGATGGTGA  
TATCGCGCTGGAAGTGGCGCGGTGTGGTGGAAAATACTGAACAGCACCGGCAATTTGGTCAATGACTATGCCACTCGCG  
CGAAGATTTATCCGGCGCAATTTAGGCGTCAGGTACGGCGATGGTTTCCCTGGCTGCTGATGCTCAAAGCAGGGTGGTTT  
GAGTACCGCTGGCGACAACCGCGATCAACAATTTATCAGGCTGGCGATGACACCTGGCGGAGCTATTAATAAAACA  
ATAAGGAGAGCAGTGTGGTCCAGTAATGTTGGATGTCGAAGGTTACGAACTGGACGCGGAAGAGCGTGAATAACTGGCG  
CATCCGCTGGTGGGAGGGCTGATTCTTTACGCGTAACTATCATGATCTGCCAGTTACGTGAAGTGGTGGCCAGAT  
CCGCGCAGCTTCCGCAATCGTCTGGTGGTGGCGGTTGATCAGGAAGGTGGACCGTGCAGCGTTTTCTGTAAGGTTTTA  
CCGCTTCCAGCGCGCAATCATTGCTGCGCTGTGAGGAATGGAAGAGGGTGGCAAACTGGCGCAGGAGGCGAGGTTGG  
TTGATGGCCAGCGAAATGATCGCTATGGATATTGATATCAGCTTTGCGCCTGTGCTGGATGTCGGGCATATCAGCGCGG  
GATTGGCGAGCGTTCTTATCATGCCGATCCACAAAAAGCCCTGGCAATGCCAGCCGGTTTATTGATGGTATGCATGAAG  
CCGGAATGAAAACGACCGGGAAACACTTCCAGGACACGGTGCAGTAACGGCAGACTCACACAAAGAAACACCGTGGCAT  
CCACGTCCACAAGCGGAGATTGCGCTAAAGATATGTCGGTCTCAGTTCCTTAATCCGCGAAAATAAATCGACGCCAT

TATGCCTGCGCATGTGATCTACAGTGATGTTGATCCGCGTCCGGCGAGCGGTTCTCCCTACTGGCTGAAAACCGTTTTGC  
GTCAGGAACTGGGTTTTGACGGCGTGATTTCTCTGACGATTTATCGATGGAAGGTGCCGCGATTATGGCGAGTTATGCC  
GAACGCGGGCAGGCTTCACTGGATGCGGGTTGCGATATGATCCTGGTCTGCAATAATCGTAAAGGGGCCGTGAGCGTGT  
AGATAATCTGTCACCGATCAAGGCAGAACGTGTTACACGTTTGTATCATAAAGTTTCATTTTCGCGACAGGAACTGATGG  
ACTCGGCTCGCTGGAAAGCGATCAGCACCCGCTGAATCAGTTACATGAACGCTGGCAGGAAGAGAAAGCAGGTCACATA  
CCCTGGCTTATGTGAGGAAGCGATGATTATCTATTTACACGGTTTTGACTCTAACAGTCCGGGTAACCACGAGAAAGTCT  
TACAATTGCAGTTTATTGACCCGGATGTACGCTTGATAAGCTACAGTACGCGGCATCCGAAACATGATATGCAGCATCTG  
CTTAAAGAAGTGGACAAAATGTTGCAACTGAACGTTGACGAGCGTCCGCTAATTTGCGGCGTTGGCTTGGGCGGATACTG  
GGCGGAACGGATTGGTTTTCTTTGCGACATCCGCCAGGTGATCTTCAACCCTAATTTGTTCCCTTATGAGAACATGGAAG  
GCAAGATTGATCGCCCGAAGAGTATGCCGATATTGCCACTAAGTGTGTGACCAACTTCCGTGAGAAGAAATCGCGATCGT  
TGCTGGTGTATTTGTCGCGTAATGATGAAGCGCTTAACAGCCAGCGGACATCTGAAGAGTTGCATCATTATTACGAGAT  
TGCTGGGACGAAGAGCAGACGCACAAATTAAGAATATCTCCCCGATTTACAGCGCATTAAAGCGTTCAAACCCCTCG  
GGTAAATGCCCTCGTCGATCAGGTAACCTTGCCGGTACCTGATGCGCTCCGAATCTGTGGGTCGGATAAAGCGTCCAC  
GCCGATCCGACAGTCGAGCATCAATGCCTGATGCGCTTCTATCAGGCCTACCGAACGCCCTGCATACACCCCTCACT  
TATATCCTCACAAATTCGCTCAAATAATAAACAATAAACTGTTTTTTGTCTCACCCGGTAAAGTCGCCTATCTT  
TTCAGCAACAAAACCTTGATTAACATCAATTTTGGTATGACCAATGCACCATTGTTATTCTCAATAGCGAAGAACATT  
TTCATTGCTGTAACCTGTTGTTAATTAAGAGCTATGTTAATAACCATTAATTAACAATTGGTTAATAAATTTAAGGGGGT  
CACGTTGACTACGCCATTGAAAAAGATTGTGATTGTGCGGCGGCGTGTGGTGGGCTGGAAATGGCAACACAGCTGGGGC  
ATAAGCTGGGACGCAAGAAAAAGCCAAAATTACGCTGGTCGATCGTAACCACAGCCACCTGTGGAACCGCTGCTGCAC  
GAAGTGGGACTGGCTCGCTTGATGAAGCGTCGATGCGTTGAGCTATCTGGCCATGCGCGCAATCATGGTTTTCCAGTT  
CCAGCTGGGTTCCGTCATTGATATTGATCGTGAAGCGAAAACAATCACTATTGCAGAACTGCGCGACGAGAAAGGTGAAC  
TGCTGGTCCGGAACGTAATAATCGCTATGACACCTGGTAATGGCGCTGGTAGCACCTTAACGATTTCAATACGCCA  
GGTGTCAAAGAGAACTGCATTTTCTCGATAACCCGCACCAGGCGCTGCTCCACCAGGAGATGCTGAATTTGTTCCCT  
GAAATACTCCGCAACCTGGGCGCAATGGCAAAGTGAACATTGCGATTGTCGGCGGGCGGCGACGGGTGTAGAATCT  
CCGCTGAATTGACAACCGGTCAGCAACTGCACAGCTACGGTTACAAAGGCTGACCAACGAAGCCCTGAACGTAACG  
CTGGTAGAAGCGGAGAACGTATTTTGCCTGCGTTACCGCCACGTATCTGCTGCGGCCACAACGAGCTAACGAACT  
TGGCGTTGCGGTGCTGACGCAACCATGGTCACCAGTCTGATGAAGGCGGCTGCACACTAAAGATGGCGAATATATTG  
AGGCTGATCTGATGGTATGGCAGCCGGATCAAAGCGCCAGACTTCTGAAAGATATCGGTGGTCTTGAACCTAACCGT  
ATCAACCAGCTGGTGGTGAACCGACGCTGCAAACCCCGCATCCAGACATTTACGCTATTGGCGACTGCGCGTCATG  
CCCGCTCCGGAAGGGGGCTTTGTTCCGCGCGTGTGCTCAGGCTGCACACCAGATGGCGACTTGCGCAATGAACAACATTC  
TGCGCAGATGAACGGTAAGCCGCTGAAAAATTATCAGTATAAAGATCATGGTTCGCTGGTATCGCTGTGCAACTTCTCC  
ACCGTCCGTAGCTGATGGGTAACCTGACGCGCGGCTCAATGATGATTGAAGGACGAATTGCGCGCTTTGTATATATCTC  
GCTATACCGAATGCATCAGATTGCGCTGCATGGTACTTTAAACCGGATTAATGATGCTGGTGGGAGTATTAACCGCG  
TTATCCGTCCGCGTTTGAAGTTGCATTAATCGACGTACACTGGCGGATGTGGCATAAACGCCTCATCCGCCCTTGAGGAA  
CAGCGCGATCGGCAGCCGCTTGTATCAGGCATCCTTTCAGACTCCTCCGAATCCTTAAGTATTTCCAGCCATTCGCGG  
CTTTTCATCTTCTGTCTGATAGCTGCTTTCTCCTTGCCTTGCATGATTGGCATAACTGCAAAGAAGGAGGTGTTCCCGT  
GAATAAATCAATGTTGGCGGATCGGGATTGGTGTGCGAGCTGCGCTGGGCGTAGCGGCAGTGGCCAGTCTGAACGTGT  
TTGAACGGGGCCGCAATACGCTCAGTTGTTTCTGCAACCCCAATCAAGGAAACGGTTAAAAACCGGTCAGGAGTGT  
CGCAACGTCACAGTGACCATGCTCGACCCGGTCAGGATGAAAATCGCATTACCGGTCGGTGTCTGGGCTGTTGCTGG  
CGGCTGATAGGGCATAGTTTGGTGGTGCAGCTGCGGTAAGATGTCGCCACTGTTGTTGGGGCGCTGGTGGTGGATG  
CCGGTAACCGATCCAGGGCTCTCTCCAGGAAAGCGATACTTACACGACTACGCAACAGCGTTGTAACCGGTCATGAC  
AAGTCAGAAAAATGCTCGGTTATGATGTGACCTATAAGATTGGCGATCAGCAGGGCAAAATCCGATGGACCGGATCC  
GGGTACGAGATCCCGCTAGATAGCAACGGGCAACTGATTTTGAATAACAAAGTATAACAAGGCTGTACTCTGCAATTTG  
GCCCTCATTGCTCAGGCTGAGGGGCTTTTTTTCGACTTATTTACCAGTTCGGGCCATAAACGCAAAGTCGTTCCGG  
CAATCTGCATCAGTTTTTCCAGCGATGCACCTTTCGCGTGCCTGATCGACATCCCTGAATAATAACAATTAAGGAATCT  
GCCAGATGTGCACGTACAGTGGGGCGGATTTCCCGCGCGCTTGTGTTGACATAAAAACCTGCTGCAAAGTGGGCTC  
TTGCATCGCATGGCGTATTCAACGTATTGGCGATATCTCCTGAATCTGGGAGAGGGTGGTGCAGTTGTTGATCATGA  
AGCAGCCTGCCGGGTGCTTTGCTGGTAAAGCAGTTGGCGATGGCAGCAAAATAGTCAGCCAGCGCAGACTCCACGCTT  
TTCTTTCAAAAACAGCTGTGCTTATGCTTAGCGGCAAAACGATCGATATAGCGGTGAGAACGGCACGAAATAACCC  
CTCTTTGTTGGTAAATCCGCGTATAGCGTGGGCGCTTTGGCTCCGGTGCCTTGCAGGAGTCCGCAAGAGAAGTCGCTT  
CATAACCGTGTGCCAGAACATTTTATGGCCTTATCAAGCGCGCATCCCTGTCGAACACTTTTGGGCGGCCACGGCTT  
TTTTTACACATTGTGTTGAGTCAGTTGCCATGATGCCGTTGACCTGGTACTGTGAATGAAAGTTTATAAAAAATA  
ATCACCTCCGTTACCAGTCCAGATCCATAAAAATAATTGCTTTCTATTTAACTGAAATTTAAAGATTTTTAAATTAAT  
TAATGATTGTTATAAAAAATATCTTGTATGTGATCCAGATCACATCTATCTTATAGTTATCGATCGTTAAGTAATTGCTT  
GCGACGTCATTCATCTGCATAAAGGCCACTATTATGAAAAACGTA AAAACCCCTCATCGCTGCGGCGATTTTAAAGTCCATG  
TCATTTGCCAGCTTTCGGCTGTGCAAGTTCAGTCAACGCCAGAAGGCCAACAAAAGTGGTACAATCAGTGCTAACCG

GGGGACAAATCTGGGATCGCTGGAAGAGCAGCTGGCGCAAAAAGCGGATGAGATGGGCGCAAAATCTTCCGTACTT  
CTGTAACCGGTCCGAATACCCTCCATGGAACAGCAGTAATTTATAAATAAGCATTAAACCCTCATTAAATGCCTGCTACTGC  
TGATTTTTTCCCCGCGACATGCCGTGTCGCGGGATTTTTTATCCGGGCTTACAGCGTTTGTGGGCTCACTTGATGAC  
GGCGGACATCCACCGGCATCCCGGAACGACATCCATCACATGTTGCATCACTTCAGCGTCAGTTTGTGCTGCATCTTTA  
AATGATTGCATTGCGCTATTCAGCGTAATTGGCAGCAGCTGCGGATCGTCATCAATCTTCTCTGACAGCGGCTGATGTAC  
TTCAACCAGACGCGCACCGTTTGGTTCGGCAGAGACTTTTATCGGAGTGTGATGATATTCACTTTGGTGCTGGGGTGA  
CCTGGCTAAAGAGTGTGTTGATATCGTCATCCCGCAGACGAATACAGCCAGAATTACCCGCATGCCAATGCCGAAATCG  
GCGTTTCGTACCATGAAGCAAATAAACGCCGCATAGGCCGCCAGACGAATCGCATGATGGCCATTGGGTATCCAGTCC  
AGCCGGCACTACCGCAGGCAACTCAATTCCTGTGCTTTATAACGGGCGCGGATGTTTGCCGTTGGCGTCCAGGTTGGGT  
TTGCAGTTTTGTGTAACGGTGGTACCATTGTGCGGTGTCAGCGTGTACCACCTAACTGACCAATACCTATTGGATAC  
ACGGTTACCGAATTTTTACCCGGCGGGTAGTAATAGAGACGCAGCTCCGCAATGTTGATCACAAATGCCTTCGCGCGGCG  
ATCTGGAAGTAGGGTTTGAACGGGATCGTTAACACGCTGCCCGCGCGGTACGTAAGGATCAACGCCGGGTTAGCCT  
GTAACAGAGCGAGAAAGCCGACGTTGATTTTTGGCGATGGCTTCAGAGAACCACCGTCATTTCCACCACATGAAAT  
TTGTTTTCGCAACCAGACGACTGCCCGCTGGCGGACGCGGAGGTGTTGGCTTTTCCGCGTACGCCAGCGCCACGCG  
AGCGGCAACTGAAAAACGTTAGCCAGCGAGAAAAACGCGTTTTGATCATCACAAAAATCCATAAAATATAAGGTT  
ATTGTAATAACAGATAAGCCTGAATTAATGGATGGTACAGTGTGCGGATAGTGCAGGGAAGTCAAAGAATTTGTAATG  
TTGCAGATGGGGGCGAGAAACGCCCGGATTTACCATTAAGCGATCGCGTTCTCTCCAGTTCACGCATAAACTGGCGT  
ACCCATTGATACGCGTTTTCCGCTCACTCAAATCCTGAATAAATTTAGGGCGCGTCGACCATCAAGGCGGTAATGCTG  
CGGCTGTTTTGCAGCAAACCAATCAACCAGGCCGATTAACGTGATTCTTCTCGGCAAATTCGATCACCCCGCCTTTCT  
CATTACCTTCCAGCTTCTGATCCCGATTTCTGCGCTTGTGGCGCAGACGGGCAATATCCAGCAGGGTACGCGCCGGA  
TCTGGCAGCAGGCCGAAGCGATCGATAAGCTCGACTTTGATCTCTCCAGTTCGTTTTCCGTTTTGGCGTGGCAATACG  
TTTGTAAGACGACAGACGCGTTCACGTGAGGATGAAATCATCTGGCAATAGCGACGGCATCCGCAGCTCGACTTCTG  
TTTGTGCTGGTGGTGAATCTTCCAGCGACGGCTCGCGTCCGGCTTTCAGTGCATCGACGGCGTTTTCCAGCAACTCCATA  
TACAGCGAGAAACCGATGGTTTTCCATTGAGCCGCTTGTCTTCCGCAAGCAGTTCACCCGCGCCGCAATCTCCAGATC  
GTGCGTTGCCAGCGCAAAACCTGCCCGAGATCTTCCAGCGAGGCAATTGCTTCAAGACGTTTTTGTGCATCGGTAGTCA  
TCGTTTTGGATGCGGTGTCAGCAACCATGCATATGCCTGATGATGCGAACGTCGACGCGACCGGTAACCTGGTGCAGC  
TGCGCCAGACCGAAGTATCCGCGGTTCAATGATAAATAGTGTGGCTGTCGGGATGTCGATCCCGGTTTCGATAATGGT  
TGTAACAACAGCACGTTGAAACGTTGATGATGGAATCATTATCACCCGTTCCAGTTCGCGCTCGCGCATCTGCCCGT  
GACCGATGGCGATCCGCGTCTTGGCACCAGTTCTGCCAGCCGTTCCGGCGGCTTCTGAATGTTTTCCACATCATTGTAG  
AGATAATAAACCTGCTCCTCCGCGCAAAATTTACGCAGGATCGCCTCCCGACCACCATGCTGCATACTCACGGACAAA  
GGTTTTAACTGCCAGACGACGGGCGGGCGGCTGGCGATAATCGACAGGTCACGCATTCCGCTCATTGCCATATTCAGCG  
TACGTGGGATCGGCGTTGCGTAAGCGTCAGAATATCCACGTTCCGCGCATCGCTTAAATGCGCTCTTTATGACGCACC  
CCGAAGCGGTGTTCTTATCGACAATCAGCAGGCCTAAATCTTAAACTTGACGTCACTTTGACGAGTTTGTGCGTACC  
GATCAGAATATCGATTTTCCCTTCCGCCACTTCCGCAAGGATTTGCGTCTGCTCTTTGGCGCTGCGGAAACGGGAGATCA  
TTTTGATACGTACCGCCAGTTGGCGAAACGGTCCGCGAAGTTGTGTAATGCTGCTGCGCGAGAAGGTTGGTAGGCACC  
AGCACCGCCACCTGCTTGTGTTATCTACTGCCAGGAAAGCTGCGCGCATCGCCACTTCTGTTTTACCAAAGCCAACATC  
GCCGACACCAGACGATCCATTGCCAGCGGTGACACATGTGCTAAGTACCGCATTAAATGGCCTGCGCTGATCCGGCG  
TGGTTTTCAAACGGGAAGCTGTCGAGAACAATGATACTGCTCACGATCGTGTAAACCGGAAGCCCTTTTGGCGGCG  
CGTTGCGCGTAGATATCCAGCAATTCGCCCGCCATCACGCATTTTTCCGCGCTTTCTGCCGCGCGTGGACACGC  
ATCGCCGCAAGTTTATGACGCGGGGCTTTTTCTCCGCGCCACTGCGTAACGCTAATCAGATGCGAGTACGACGACCCG  
GAACATAACGTTTTGGCGTCTTGGCATAGGTGAGCATCAGATACTCGCCAGTAATGCCACCCGCTTCCAGCGTGGTCAAT  
CCGGCATAACGACCGACCGCTGCTCCAGATGGACCACCGGTGACCAATATGAGTTCGCGCAAGTTACGGATCAGTGT  
ATCGGGTTGATGGTGGCGGAGAATCCTGACGACGACGGCAACGCGTTCACCGAGCAGATCGCTTTCGCAAAATCAGCG  
CCAGATTACGCACCGTATCGACAAAACCATGTTCCGCGAGCCAAATCATCAGATAACGCCACCGTTCGCTGGCTTACCA  
AGACGCATAATGCGTTGGGAGCAATTTAATTCGTGCGAGCAGTTCACCCAGCGCTTACGGCGACCTTCACTTTCTAC  
CGAGAACACCACCGACCGTCAAAGTCTCGAGGAACTTACGCAGCGCATCCAGCGGCGCTTTTTGTTGTGCTGAACGG  
CCAGGTCTGGCAGTTTCTGGAACCTAAATTGGCATTCCGCGCTTTTGTGCGTAAATGTTGAGTTTTAGCTGCACCCGG  
GGCAGTTTTTCACTCTGAGAAGAGCTCGTCCACCCGAGCCAGAGCGATTGGTGGCAACAGCGGGCGCATCGGATC  
GACGCCGCGATTCTCAAACGCGCCAGCGTGTGAGCTGGAACGTTCCGCACTGGTTCCAGATCGCCAGTATTCACGA  
GCAAGGTATTGGCAGGGAATAACTGAACAGCGGCGCAGTGGTTCGCTGAAGAACAATGGCTGCCAGTACTCGATCCCG  
GCAGGTAATGTGCTTTACTCACTTGTGGTAAATATGTTCTGGATCGCGCTTCACTTGAAGGTATCGCGCCACTGGCT  
GCGGAACAGTCAATTGCCGCTTATCGGTGCGAAATTCGTGCGCGGGCAGCAGATTGATCGCTTCACTTCTCCTCCAGCG  
TGGCTGGCTGTCGACGTAACACCCGACGGTGTGATTTATCATCAAAGAAATCAAGACGATAAGGACGCTCACTC  
CCATCGGGAAGAGATCCAGCAACCGCGCGCGTGGCGTATTCCCGTGTCCATCACCTGGTCAACATGGCGATAACC  
GGCGCTGTCCAGTTGGGTTTCGTAATGCATCTCGTGACAGGCGTACCTTTTTTATCACAGCGCATGACCGTGGAGAA  
AACTGTGTGGGCAACGCGTGCATAAGCGTATTACCCGGAACAATCAGTACGCCACGCTGCATCGTGGTAGCTGGTAA

AGGGTGGAAAGGCGCGAGGAGATAATGTCCTGATGAGGCGAAAACTGTCGTAGGGAAGAGTTTCCAGTCCGCCAGATT  
CATCACCATTTGATCGGTAAACTGGCTGATTTTCATCATGCAAACGCAGAGCATTTCATATCTGGTGAATGAGTACCA  
CCGGACCGGCTGACGTTCCGCAATTTCCGCTACCAGCGTTGCACAGGCTGCGCCGGTAACTCGCCAGCAGACGCTGC  
TACCCCGCTTTGACGGGCAGCGTATAACGATATTGTTACGGCATAACGGTTGTAGATTCTCGTTAGGATATGCCTCAAC  
ATATGGGGGCATATCTCTGATAAGCAATGCTGTTTATTATCCGTAATCGACATGGTTTAGCAAATTGAATCGCCCCGGCT  
GGGGCGATGGCTTAGCGGGAGTAAGTACGCGCAGCGGGCAGTGAAGGCGGGGAGAAACAACAGATCGCTGAATGCACGCTG  
TGAAAGTTTTCTTACCAGCAAGCCCGCAACAGTACAGATGAACAACTGACAAAGGGATAAACCCAGCAGGAGTGTAGTT  
CGACTTGCGGCGACCAGCGTGTGCGTTCATTTGCGCAAGCAGAGTTAAGCTGAATATTTCAACCAGAATGCGATGGGTG  
GTGTAGATAGCAATGGTGTGGAGCCAATCACATTCAGCAGGCTGGTGGAGCGCATACCGAATCGTTGCTCGTATTGATA  
AAACAGCTTCATGATCACCACAATCGATACCAGCGACAACAGCAGCGAGATAGTAAACAACCAGGCACCAGCCGAGAA  
CGGTAAGCAAAGAAGCCATCAGCAGATGGCGGCGCAACGGCACCTCTTAAACACAGGTCATTATTGTTGCGCCAAACCAT  
GCGCAAGGCTGTAATAAGGCAATTGCGGATCACACTGTTTATTCCCACCACGGCGTGGGAACGAAATTAACCGCCAC  
ACTCAGCAGTACAAACAAGCGAATAGTGGCAGCGCCAGACGGCTAAAAATTTACATACCACGAAATAGACAATTAACG  
CATACAGATACCACAAGCTGGTGTGCGGCTGATCATCCCGTGCAGGAACCTACCGGTGGAATCGGCATAAGCGGCATTG  
GAGGCATTGCTTAAATCGCGTACAGTGCAGCCACTGGTTCAGCGCACTAACGCCAGCCACTGCACCACGCCCCAAAG  
CGCCAGCACCAAGAGATGTTCCAGATCCGTTTATCGAGACAATTTCCCCACGGTACGCTGTGATATAGCGGCGAATCA  
AATAGCCGGATATAAAGAAAAAACCAGCATACGAAAGGGGGCAAGGTAAGATTGAAATAGATCCAGCATTGCTCAGG  
ACTTCCGATAACGGATGCTGAAAAGTGGTCAGATGCGGATAAAAGGTAATGACCGAGTGATAAATCACCACCAGACAAAT  
ACATAACCCCTTGATCTGGTTAATCCATAGCTCTTTTTGTTTCATCAGGACAACACGCTCTTTTTAATTTACATGCGGT  
TGATCCTGCGGTTATGACCCGAGGTGAATGGGTATCTGTCTGTATTGGATGATTTTTAGATTAAGATCAGGCGGCAA  
GATTGATGATAAAACATGGCAATTTAGCCGATTGATTTACGGGGCTTTTTAGATTAGCCCTGACGATCACTTACAGTTC  
AGACGTTTACCATCTTGCTTTGCTTATATACTCGTGTCTTTGCTACAGCAACCAGACGGATTTTATGTACCAACCTGT  
CGCTCTATTTATTGGCTGCGTTACATGCGTGGGCGTGACGCGGATCGTTCGGTCTTTGCTCTCTGGCTTTCTACCA  
TCGGCATTACCCTCGGGGTGATGGCGTGGTACAGTATTGTCAGTGTGAACGGCTTTGAGCGGAGCTGCAAAACAAC  
ATCCTTGGCCTGATGCCACAGGCAATTCTCTCTTCTGAGCATGGCTCTTAAACCCGAGCAACTCCAGAAACGGCAGT  
CAAACCTGGACGGCTTAATCGCGTGCACCTATTACTACCGGTGATGTGGTACTGCAAAGCGCGCAGCGTGGCGGTG  
GGGTGATGCTCGGTATCGACCCGGCGCAAAAAGATCCACTTACACCGTATCTGGTCAATGTGAAACAACCTGACCTCGAG  
CCGGGAAATATAATGTCATCCTCGGCAACAACCTGCCTCACAGCTAGGCGTTAATCGCGGTGATCAAATCCGCGTAT  
GGTACCATCTGCCAGCCAGTTCACGCCGATGGGGCGTATTCCAAGCCAGCGCTGTTCAATGTGATTGGCACTTTCCGCG  
CCACAGTGAAGTGCATGGCTATGAAATGCTGGTGAATATTGAGGATGCCTCGCGTCTGATGCGTTATCCGGCAGGCAAT  
ATTACCGGCTGGCGTTTGTGGCTGGATGAGCCGCTGAAAGTGCAGTCAATTAAGTCAAGCAAAAACCTGCCTGAAGGCAGCAA  
ATGGCAGGACTGGCGTATCGTAAAGGCGAGTTGTTCCAGGCCGTACGCATGGAAAAAATATGATGGGTTTACTGCTGA  
GCCTGATTGTCGCGGTTGCGGCGTTTAAACATTATTACCTCACTAGGGCTGATGGTAATGGAGAAGCAGGGCGAAGTAGCG  
ATCCTGCAACGCAAGGCTTAACTCCGCGACAAATCATGATGGTCTTTATGGTGAAGGGGCCAGCGCCGGGATTATCGG  
TGCGATCCTCGGAGCGGCGCTTGGCGCCCTGCTTGCAGCCAGTTAAATAATCTGATGCCGATAATCGGCGTCTGCTTG  
ATGGCGGCGCTGCCGGTGGTATCGAACCTTTACAGGTCATTGTTATTGCGCTGGTGGCGATGGCTATCGCGTCTGT  
TCTACGCTTTACCCTTATGGCGCGTGCAGCCACTCAACCCGCTGAGGCTTACGTTATGAATAAGATCCTGTTGCAAT  
GCGACAACCTGTGCAACGCTATCAGGAAGGCAGTGTGCAACCGATGTGCTGCACAATGTAGTTTACAGCTCGGCGAA  
GGTGAATATGAGCGATCGTGGTAGCTGTTCCGGTAAAAGTACCTTGTGCACCTGCTGGGCGGGCTGGATACGCC  
AACCTCCGGCATGTGATTTTAAATGGTCAGCCAATGAGCAAACTGTCGTCGCGCAGCGAAAGCTGAACCTGCACCAAGA  
AGCTGGGCTTTATTTATAGTTTTACCACCTGTGCCGATTTTACCGCCCTGAAAAACGTGGCTATGCGCTGCTGATT  
GGCAAGAAAAAGCCGCTGAAATCAACAGCCGTGCACCTTGAGATGTTAAAAGCGGTGGGGCTGGATCATCGTGCATCA  
CCGCCATCTGAACTTTCTGGCGGCAACGCCAGCGTGTGGCGATTGCCCGTGCCTGGTGAATAACCCGCGCCTGGTAC  
TGCGGATGAACCTACCGTAACTCGATGCGCGTAAACGCCGACAGCATCTCCAGTTGCTTGGGGAATTGAATCGCTTG  
CAGGGCACCGCCTTCTGGTGGTACTCACGACCTGCAACTGGCGAAACGTATGAGCCGCCAGTTAGAAATGCGTATGG  
TCGTCTGACGGCGAACTGAGCCTGATGGGGCGGAGTAATGGCGATGCCTTTATCGTTATTAATTGGCTGCGTTTTAG  
TCGCGGACGGCGGCGCGGCGCATGGTGTGCTGATCTCCGTTATTTCTACCATTGGCATTGCCCTCGGCGTGGCGGTAT  
TGATCGTGGCTTAAAGCGGATGAACGGCTTTGAACGCGAACTGAACAACCGTATTCTGGCGGTGGTGGCGCATGGTGAA  
ATCGAGGCGGTGATCAGCCGTGACTAACTGGCAGGAAGCACTGGATCACGTGCAAAAAGTCCGGGTATTGCCGCTGC  
CGCGCGTATATCAATTTACCAGGCTGGTGGAAAGTGGCGCAATCTTCCGCAATCCAGGTGAAGGGCGTTAACCCGC  
AACAGGAACAGCGTCTGAGCGCATTACCCTGTTTTGTCAGGGCGATGCGTGGCGCAATTTTAAAGCGGGCGAACAGCAA  
ATTATCATCGGCAAAGGCGTGGCGGATGCGCTGAAAGTGAAGCAGGGGATTGGGTGTCGATTATGATCCCAACTCGAA  
TCCCAGCATAAACTGATGCAGCAAAACGTGTGCGTTTTGACGTTGCCGGTATTTTGCAGTTGAGTGGTCAACTCGATC  
ACAGTTTTGCCATGATCCCGCTGGCGGATGCCAACAAATATCTTGATATGGGTTCCAGCGTGTGAGGATTGCCCTTAAA  
ATGACGGATGTTTTCAACGCCAATAAGCTGGTACGCGATGCGGGTGAAGTGACCAACAGCTATGTTTATATTAAGGCTG  
GATTGGTACTTACGGCTATATGATCGCGATATCCAATGATCCGCGCATTATGTATCTGGCGATGGTACTGGTATTG

CGGTGGCCTGTTTCAACATCGTCTCCACCTTAGTGATGGCGGTGAAAGACAAGAGTGGCGATATCGCAGTATTAAGAACG  
CTGGGGGCGAAAGATGGTTTAAATTCGCGCCATCTTTGTCTGGTATGGATTGCTGGCAGGGCTGTTCCGGCAGCCTGTGTGG  
TGTGATTATCGCGGTAGTGGTTTCACTGCAACTTACCCGATTATTGAGTGGATTGAAAAGTTGATCGGTATCAGTTCC  
TCTCCAGCGATATCTATTTTATTGATTTCTGCCATCGGAATTGACTGGCTGGACGTCTTCTACGTACTGGTCACAGCA  
TTGTTGCTGAGTCTTTTGGCAAGTTGGTATCCGGCGCGGGCGCCAGTAATATTGACCCTGCGCGAGTCTTAGCGGCCA  
GTAAAGGCAGTACATTAACAAGGAGCGGCAATGTATTACGGGTTTGTATTGGTGAACAAAAATTGCGCTTGGCGTG  
TTTGATAGCGGTGCGCAGTTGCAAGTGGGAAAAGCGGGTGGCCGACCCGCGTGACAGCTATGACGCATTTTTAGATGCAGT  
GTGTGAGCTGGTAGCTGAAGCTGACCAACGTTTTGGCTGTAAAGTTCTGTGCGCATCGGTATTCCGGGAATGCCGAAA  
CAGAAGATGGTACGCTGTATGCCGCAATGTCCCGCTGCCAGCGGTAAACCGCTGCGTGCCGACCTGAGCGCACGTCTT  
GATCGCGATGTACGCCTTGATAACGATGCCAAGTGTGGCCTTTCAGAAGCTGGGATGATGAATTTACTCAATATCC  
ACTGGTGTAGGGGTTGATTTCTGGCACCGGTGTTGGCGGGGGCTGATTTTCAACGGCAAACCGATTACCCGTAAGCT  
ACATTACCGCGAGTTTGGCCATATGCGTCTGCCGTTGATGCGTTAACCATGATGGGTTGGATTTCCCGTTACGCCGC  
TGCGGCTGTGGTCAGCATGGCTGCATTGAAAATTATCTGTCTGGTCGCGTTTTGCGTGGCTGTATCAACACTATTATCA  
TCAACCGTTGACAGGCTCCCGAAATTATTGCGCTTATGATCAAGCGATGAGCAGGCAAGGGCGCACGTTGAGCGTTATC  
TGGATTTATTAGCGGTTTGTCTGGGAAATCTCTGACCATCGTTGACCCTGACCTGGTCGTCATTGGTGGTGGCTTATCG  
AATTTCCCGCAATCACAACGCAACTGGCGGACAGGCTGCCTGTCATCTTACCTGTAGCTCGTGTCCGCGCATTA  
ACCGCGCGCCACGGTGATGCGGGAGGAATGCGTGGTGGCGCCTTCTACATCTAACCGATTAAACAACAGAGGTTGCTA  
TGCTGTGCGGTGCGGGTATCGGTTAAGTCGTTTTCTGTAATAAACAACGCCCTGCGCGAGCGTTTGCCTCAGCGTATT  
TTTTTCCAGAGATAAAGTGGTGGCGGAAGCAATGGAATAAACAAGAGTACTCGTACTGACAGGGGACAGGAATTTCTGCGGA  
ATCAGGATTCGTACTTTTCCGCGCCGAGATGGCCTGTGGGAAGAATCGGGTTGAAGATGTGGCAACGCCGGAAGGTT  
TCGATCGCGATCTGAACGGTGAAGCGTTTTATAACGCCGCTGCTGACAGCTGCAGCAGCAGAAATTCAGCCTAAC  
GCCGCGCATCTTGGCTGGTAACTGCAAGACGCCCTCGCGATCGTTTTTGTGGTACGCGAGAATATCGACAACCT  
GCATGAACGCGCAGGTAATACCAATGTGATTCATATGCATGGGAACTGCTGAAAGTGCCTTGTTCACAAAGTGGTCAGG  
TTCTCGACTGGACAGGAGACGTTACCCAGAAAGATAAATGCCATTGTTGCCAGTTTCCGGCACCTTGGCGCCGACGTA  
GTGTGGTTTGGCGAAATGCCACTCGGCATGGATGAAATTTATATGGCGTTGTCGATGGCCGATATTTTATTGCCATTGG  
CACATCCGGGCATGTTTATCCGGCGGTGGGTTTGTTCACGAAGCGAACTGCATGGCGCGCACACCGTGAAGTGAATC  
TTGAACCGAGTCAGGTTGTAATGAATTTGCCGAGAAATATTACGCCCGGCAAGCCAGGTGGTGCCTGAGTTTGTGAA  
AAGTTGCTGAAGGGATTAAGCGGGAAGCATTGCCATGACTACGCTTATCAGGCCTGCAAGGGGACGCAATTAATT  
GAATTTGCGGTTTTGTGGGCGGATAAAGCGTTCCGCCCCATCCGGAATAATACACGCGCACTTTTCCGGCCTTTTT  
ATCGTTTACTCGTCAATAACAATGCGGCAATAAACGTACAGACACCAATTAGCCTGCCAGAGTGGCGATATTCTGGTA  
ATCGCAAAGCTATTATCGATATACAAACATAAAGCCTGATAACCCATATTGGCAATAGTCATCGCCACTGCAATTTTAA  
CGCATAAATAAAGCAGTGTGTAGTAAAAGATCCTGGAAAATAAGATAAACGTCGCGAGCCAGGCGATAAAACCTAATG  
TGTGGTGTGCGCGGGGGAGCATTTCATGCTGTTGCTGATGCGGATAATACGTTAGTGGCGGCGTGCATTGTTTT  
AATATCTGTGCTGTAGAACAGCCAATGCATTATTGATTCCTGATACCAGAGATCTGCATTTAATAAGCCAGCGTGTG  
ATTTTCTATCAGAAGGCCGAGATGTTTATCGTCCAGACCACTTCAACCTGGCCGTTGGTATCATAATTAACCGTGGTT  
CGCGGTTAGTAAATAGTAACAGAACCTTCTTTTACATCACTCAATGAAGATGACGCATGCGCCAGCATCGTTTACCA  
TTTTGTCTGAGACTGGCTTATTATTAATGTCGGGTAACCAATAAACGGTGAATTTCCGTTTTGTTGGCGAAAAAG  
CTCGGCTTTATGCGCGATCTTTCAGCATCTGGTACAGTACCGGTAACGTCGTAATAAAGTGTCTTATTATTGGAATTA  
ATGGCTTGTGGTGTCTGAGAGGAGGAGTATCAGTAACTGAGCAGTATAATGAATTTTTTTCATGGCGGGGACTTCC  
GTTTCTGCTGATTTTTAGAGGAGGAGCATACTTATAATAAACCGGCGGATAAAAAATAACGCCATAATGCCGATA  
AACCCCATTTAAAAAATTAACCCACGGGTTATTTATCTCAGCCTTTTTCAGGATGCCCGGAGAATAATAAACATTAAC  
TTTTATCGCCTTTCGCTGCTTTCATAAAAAATCGCTGCCGATACTGCAATTGAAAATTAGCGTGTAACTGGCGTGGTGGAA  
AGGCAACGACGGGATAACCACGAACCATTTTACCCGTGCGATGAGAATGACTGGAGTGCCAGACGGTATCAACAATGACG  
CCTTCGGTATGAATCGCGTCTTTGCTATAGGTGAAGTGGTTATAAAAAGACAACAACAGAAATGAGGATCAGTACCAGACC  
GATACCAGGAATATACGAAAGAAAATTTACTGTCCTGACTCATTAGCCACATCCTTGCTAACTAAAAACGGGCGGTA  
ATACCACCGCCGCTTGTGAATTAACGTCCTGCTTTCAGCTTCTGATAACTCTTATAAATGCTGCTGGCTGCGCCA  
ACGTCATTCTGCCATTGCCATTTTTAATGGTTTTCAGCATCCGGGTAGAGTGTTTTATCGTTCCGCACTTCTGGACTTAA  
CAGCTTACGCGCCGCAAGTTTGGCGTTGGATAACCGATAGTTTTCAGCAACCTGTTTTGCCACATCCGGGCGCAGCAGGA  
AGTTGATCAATTTAGCGCGCCTTCTTTGTTTTGGCATTGCCGGATCGCCAGGCTGTCCATCCAGAAAATGCCGCT  
TCTTTCGGCCACACCAGTCAATTGGCGTACCCGCTGGCGTGAACGAAAGCAGAACCGTTCAGATCATGCCAGGTT  
AACTTCGCTTCCATGTACGGGTTCCGGGTTATCGGAGTTAAAGGCTGCCACGTTTGGCATCAGTTTTTTCAGCTCGT  
TATATGAGCTTCAATCTTTTTCGGATCGGTGGTGTACCAGGATAGCCAGCTTACGCGAGCCATCTGGAACACTTCA  
CGGGCATCGTGGTCAACAGCAGGCTGCCTTTGACTCTGGCTTCCACAGATCGGCCAGCTGGTGACAGATTTCCGGATC  
CACCGCATCACGTTAACCAATCGCGTGCACCCAGATATACGGAATGGAGTAGTCTTATTCCGGTCAAAAGGCT  
TGTTGAGCATGTCTGGATCGAGATTGCTGAAGTTTGTAACTTCTGACTTGTGATCTTCTGGATCATCCCTTCTTACGC  
ATTTTATCAACGTAATAGTTGAAGGAACCACAGATCATAGGCACCGTCTTTGTATGTTTTAGCTTGGCGTACATGGT



TTCGTTGACTCGTAAGTCGAATAGATAACCTTAATACCGTTTTCTTTGGTGAAGTGTCAAGCAGTCTGGCGGCACGT  
ACTCGGTCCAGTTGTAGAAAACAGCGTGTGTTGTATCGGGCTGAGCGGGCTCATGCCAGTGCCAGAGCACCCGCC  
GCGAGCAGGTGGCGTGACCATTTTTTCATTTAACGTCCCCTGTGTTACCTTTCTTTTTATCACGAGCAATAAGCTGGCTG  
GCAATAACCATCACCAGCGACAGCACCAGTAATATGGTTGCCAGCGCTAACTTCCGGCGATACGCCACTTTGACCAT  
CGAATAAATTTTTAACGGCAGAATTTCACTAATTTGGTCCGGTGACGAACGAAGAACTACCACATCGTCCATCGACAGGG  
TAAAGTTAACACCCAGCCCGCCACCCTGGCATTGCCAGTGGCAGAATGATTTTTCGCAGAATGGTAAATTCGCTG  
GCACCGAGATCTTTCCGGCTTCCAGCATTCCGACGTCAAAAACCTTTCAGGCGCGAATACACCGTCAACCACCAAATGG  
CAGGCAGAAGTGATATGCGAGAACAGCAGCGACCAGAAGCAAGCTGAATACCAGCAGCATAAACAGCACCAGCAGCG  
AAATCGCCATCACGATATCTGGTGACATCATCCACAAACAGCATTCCGCTAACGAACGGCTTACCAGGAAAGCGATAA  
CGGTACAGCGCAACTGCCGTGAGTGAACCGATAAGCGTAGCAAACGTGCGCGAAAACACCGCCATTGTTAGTGAATGCTG  
CGCTGCCTGTAACAGGCTGTCTGTTTCATCAGCAGGCTATACCATTTGGTGGTAAAGCCCTGCCAGTTGATGCCAAAGC  
GCGAGCTGTTAAAGGAGTTCACAATCAAAAATATGATTGGGATATACAGGTACGCGTAGATAGCGGTATAAAAACCGCCG  
CGAAGCAGTCGACCGATCATTGAGTTCACCTTCTTATTAGCAAACGAGAAGCGCGCCAGTAAACCAGCAACATCAGG  
CCCATTACGATAGTCAGCGTAATGCTGGTAGCTGCACAAACGGCCAGTACGAATATTAAGGAACTGGACCTTGCATGAC  
GTTACCGATCAGCAGTTTTTTCGACCGCCCATCAGTCCGATACATAAGAACAGGCCCATCGCTGGCAGCATCACCAGCA  
GACATCCGGCAATAATCCCGCATCGTCAAGTGAATAATGATACGGATAAAAAGTCTGTAACCTGCTGGCACCAGATCG  
CGCGCCGCTCAAGCAACGGCTTATCCAGTTTTTTCGATACTGGAGTACAGCGCATCACCATAAACGGCAGCAGAATGTA  
AACAGACCGATAATCACCAGCACTGGCGGTGAACATGATACGGATTGGTGTGTCGATAACGCCAGCCAGAGCAAAAAC  
CGTTGAGATAGCCTTTGGTGTGAGGAAAATTTTACGCCCTAGATACGAATTAATGAGTTGGTCCAGAACGGAAACAATC  
AGCAGAAAACAGCAGCAGCGGACGCACCTTGTGTGGCAACTTCGCCAGAAACAGGCAACGGGTAGCCAGCACCAGGCA  
GGCGAGGGTGGCGATCAGCGCCATATTAGCAGGTGCAATAGCACTTCAAAAATAGAGCGGATCAGCAGACGCGTGTAGT  
TATCCAGCGTAAAGACCATTTTTGACAAAACCTGGCGTGTGCGGGTCAAAAAGCTGGTCCCAATGATCATCAGGTTGGC  
AGAAAGACAAACAACAAGCAACCGACAATAGTGACAATCACTACATTCTGGAACCTACTTGTGTTCTTCATCAGCCA  
GTACGACCTCCAGCTTTTACCCAATTAATGGCCATTTTTTGGTGCAGAGAGTGGTCAAAGTCAGGATCGTCTTCATTG  
AGAATTCGCTGACCATCACCATCTTGCCATTTCCAGTTCACAACCGACTCCAGCGTCATGCCTTTGTAGTTACGCTC  
GCGAACGTAACCAATCAGCCCTTCCAGCTGGTGTGCTGCTGTTAATCTCTTCAACACGTAAGTCTTCCGGGCGCAGCAGAA  
CATGCAGTTTTTCCCGGTTCAACGGCGAAGTTAAGTATGATATTACATTCGCGGCTTCAACGTTGGCGCGTACGCGC  
TGCTCGTCTAGACGTTGATGACAGTGGCGTTAAACATATTGATTTCCGCAATGAAGCCGGCAACAAACAGGTTTTTCCG  
CTCTTCGTAGATTTACGCGCGCTGCCGTCTGCTCAATGCGACCATCGCGCATCACCACAATCCTGTCTGACATGGTGA  
GTGCTTCTCTGGTCTGAGTCAAAAAGACGAATGTAATGCCAAGCTTACGCTGTAACGCTTTCAGCTCGTTCTGCATT  
TGCTTACGAGTTTGAATCCAGCGCTGAGAGCGACTCATCCAGCAACAACAGACGAGGCTTGTTAACACCGCGCGAGC  
AATGGCGACGCGTTGCTGTTGACCACCAGAGAGCTGATGCGGTTTGCCTGAGCGAAGGTTTCCAACCTGCACCATCCGCA  
GGGCTTCCATCACGCGGGCGTAATTTAGCAGCGGGGTTTTTGCATGCGCAACCCAAAGGCCACATTTTCAACACG  
GTCATGTGGGGGAAAAGTGCAGTCTTTGAAAACAGTGTTCACATAGCGGTTTTCCGCGGAACGTGGGTGATGTCTC  
GTTATCCAGCATGATGCGTCCGGAATCAACAGTTTCCAGACCTGCAATCAGCGGAAGAAGGTTGTTTTACCGCAGCCAG  
AAGGGCCAAGCAGCGTGAAGAACTCCGCTTGTGATAGTCAGATCCAGCTGGGGAATGACCTCTTACCATCAAAGCAT  
TTGCGAATCCCGCAATTTGACCCAGCGGTGAAAGCGAACTCGGTTGTTTATCAATTTTTACTCTGTCCCATGTAAC  
GCAACGGATGGCTTACCGATGCGGGGTTGTGGTTAACCACCTTGGTACTTAAATGAGGGCGGTAATTTACGGCAAA  
CCGCTTGAATCGCAATTTTGTGTAATTACTGCTTAGCTTATATTCAATTAAGGTAATGCTGATAAATATTTCCCG  
TTGACGGGTTAAAAGTACTGACGCAATATTTGTCTTTTCTGCTTCTTAATAATGTTGTCACAAAAGTGGGGTGAC  
TACATGGATAAACTACTTGAGCGATTTTTGAACACTAGTGTCTCTGGATACCCAATCAAAGCAGGGGTGAGACAGGTTCC  
CAGCACGGAAGCCAATGGAAGTTATTGCATCTGCTGAAAGAGCAGCTCGAAGAGATGGGGCTTATCAATGTGACCTTAA  
GTGAGAAGGGCACTTTGATGGCGACGTTACCGGCTAACGTCCCTGGCGATATCCCGCGATTGGCTTTATTTCTCATGTG  
GATACCTCACCAGGATTGCAGCGGCAAAAATGTAATCCGCAAATGTTGAAAACCTATCGCGGTGGCGATATTGCGCTGGG  
TATCGCGGATGAAGTTTTATCACCAGTTATGTTCCCGGTGCTGCATCAGCTACTGGGTGAGCAGCTGATTACCACCGATG  
GTAAAACCTTGTAGGTGCCGATGACAAAGCAGGATTGACAGAAATCATGACCAGCTGGCGGATTGCAACAGAAAAAA  
ATTCCGATGGTGAATTCGCGTGCCTTTACCCCGGATGAAGAAGTGGGCAAAAGGGGCGAAACATTTTGTGTTGACGC  
CTTCGATGCCCCGTTGACTGTTGATGGTGGTGGCGTAGCGAACTGGAGTTTAAAACTTCAACCGCGCTCGG  
TCAATATCAAATTTGCGTAACAATGTTATCCGGCACGGCGAAAGGAGTATGGTAAATGCGCTGCTGCTGGCGCA  
CGTATTATGCGGAAGTTCCGGCGGATGAAAGCCCCGAAATGACAGAAGGCTATGAAGTTTCTATCATCTGGCGAGCAT  
GAAAGGCACCGTTGAACGGCGGATATGACTACATCATCCGTGATTTGACCGTAAACAGTTTGAAGCGGTAAACGTA  
AAATGATGGAGATCGCAAAAAGTGGGCAAAGGGTTACATCCTGATTGCTACATTGAACTGGTATTGAAGACAGTTAC  
TACAATATGCGCGAGAAAGTGGTTGAGCATCCGATATTCTCGATATCGCCAGCAGGCGATTGCGCGATTGCGATATTGA  
ACCGGAACTGAAACCGATCCGCGGTGGTACCGACGGCGCGAGTTGCTGTTTATGGGATTACCGTGCCCGAACCTGTTCA  
CTGGCGGTTACAACTATCATGGTAAGCATGAGTTTGTGACTCTGGAAGGTATGGAAAAGCGGTGAGGTTGATCGTCCGT  
ATTGCCAGTTAACGGCGCAACGGAAGTAAGCGAAAAGGGATGCGGCATGTGATGCCGATCCGGCTTAAATCCAACTT

ACCTTCGAAGAACCAATACCCGCTATTGACCAGCGCCGCGAGCATCGCGAGGAATGACGGATCTTCCAGCGCATCGCCA  
AAATTTCCCGCAGTCAGCGCAATGTTGCTGGCGAGTGCATCCAGTGCCGGACGGTGCGGGGAATCGATCTTCTACCATT  
GGCATAACAGTCGTCGCCAATGCGCAATACGCGCAGACCACCCAGGCGCACCAGCACTTACCTTGTTTCAGCGCATCGT  
AGATTTTCATCCGGCTGATAAGGCGGCTCTGGCGGCGGATATCCAGTTTCATGACGTGACTGGGATATAAACTCGCCAAAC  
CATTGCTTAAAGTGTTCCGGCTGGTTGATCAATTCGAGCATCATCTCACGCAGTTTATCCATCTCTTGGCGCAGAACATC  
CGCAGGATGAGCGCGAGGTGGAACATCCGGATCGCTGTAGTAGTTGCCGCCAGTTACGTTGCGAGCACATAATCGGCAA  
ATCCACTAATCAGTTCCCGCTATTTGGCGCGGAAAGCCACGGAATAGTTTCATCGCATTTTCCAGCGCGTAGCCTTCA  
TGCGGGAATCTGGCGGAATATAAAGAATATACCAGGCTCCAGCTTTCATCGATGATGGCTTGAACGGATCGACCTG  
TAACAGATCCGGATGTGGGCGAGTGCTGTTTCATTTGACGTTTTTCGCCCACTCGCCAGCGACGACGTCCGGTACCCTGAA  
TGATAAACACGTCGTAATGATCGAGATGCGGGCCGACGCCGCCCGGGTACAGAAAAAGAAATCATCAGATCATCAATA  
CGCCAGTCCGGTAGTTACCGAACGGTCGCATCAGCGCGGCGGTCCGCTCATGCCAGTGGTTCCTGCTGTACCAGTAA  
TGACCAGTTGGTTTACCAGATGATCGTAGCTTTCGAACGGGCGGTGGCTGACCTGCCATTTGCCATCTGGTGACTGA  
CCAGTGCAGTGAACCTTCCATCGCCAGACCCGCCAACTCGTCTGGAGAGATCGGGTCAATAAAATTTATTAAG  
CCGCGTTTTAACACCACCGGCGTTTTCTGCCAGTGACGTTCAAGAAAATCGGGCCAGTTAAGAGTGAGTTGGTATTCCAT  
GTTAAGATCCACAGTGGTATCTGCAACCGATTATAACGGATGCTTAACTAATGCGTGAAGTATGGGCATATTTATT  
CATCTTTCCGGCGCAAGTGTGGCGACAAAAATCACCTCCATCCGCGCACCCGCGCATGCTCTCTCCGGCGACGATT  
TTACCCTCATATTGCTCGGTGATTTCCGCGGCTACCCAGCCCTACACCTTCCCGAGGGCGTAAAGTATCAACCCGTTG  
ACCACGGTCGAAAATGACCTCTCGCTTGTAAATGGAATACCGGGCCATCATCTCGACCACAATATAGAGATGCTCGT  
CGTTTTGCCTTGAGAAATTTGCAGAACTCGAGGCAATATTTACAGGCATTATCCAGCACGTTGCCATCACCTCGACA  
AAATCGTTCTGCTCACCGACAAAGCTGATCTCTGGCGAAATATCGAGAGAGATATTGACCCCTTTGCGTTGATACACTT  
GTTCCAGCGTGGGAGATTGTCCAGCAGTGGGGCAGCCGATGCAGCTCGCGGTTGAGCAATGTCCCGCCGCGCATA  
TGGCAGGATGCAGGTAGTAGCAATTTGCTGTGAAATGCGGCTGATTTGCTCCAGCATTACCGGCTCAGCATCACTGACG  
CTCATCTTTTCACTACGAGAGAACGCGAGCTACTTTGAGCACCAGGAGTGGCGTTTTCCAGACTATGGGTGAGTCCGTT  
GAGCGTGTACGGTATTTGCTGTAACGTTCCGCTTCACTTTTTAACAAATCGGTTCCAGGTTTCCAGACTGGTCCAGT  
CTCGGTTGTGGCTGGATTGAGCAATTCGCGGTTATGTTCTTCCAGTTCGCGGACTTCTTTTCCAGGGCTTCCGATGGG  
CGTAAACTCCACCAGGCGGCGACCCACAGCAGCGGGATCACTAACAGCAGATTGGCTGAGAGCACATAGATAAACCAGCT  
CCAGACCATATAGGAATTTTTAGCTCCACCGGAATGGTATCCACCACCACAATGGTTAATTTTGGCATCCGCGATGTTG  
CCGGGTAGACGTTTACTGCCACCGAGTGGGTCTATCTCCGCGTGTATCATCTTCCCGCACTTCTGCAACTGTTGCTGT  
ATCGAATGATCTCCACTCAGCAAGAGGCTGGTATCGTTAATCCGCTTCAATTTTCATGAAAACCATTCGATTTCCAGCCA  
GTCAGGCTGGATCATCTTATCAGCCAGGGCACGTCACGTTGCGCCATAAAAAGCTGCCGTTCTCATATAAAATTAGCG  
TCATGGTGGGGCTTTGCTTGTGATATTTTCCGGTAACTCGACATGCAACTTATTGTTTTCCCACTTCGCAAGGGTATAG  
AACAGATTGCTCTCGCCAGTAAACAGCCGAAACGTAGTTTTATCGAAACTGACGCTATAACCGATCAGCGCGACCATCC  
GTAGGCAAGCGAAAGCAGTACTACCGCTGCCGTTGCCAACAGAAAACGTACCCGCGAGGAGCGGGAAAAAAGAC  
GCAGTAATTTTTTTCATCAGCGCAATTCGAACAGATAGCCCTGGCCGCAACGGTGGTAATCACTTCTTGGGGATATTGTG  
CCTGAATTTTTTTGCGCAGACGTCATCAGTACATCAATGGTATGGCTTTCCCGCAGCTCCGCATCCGGATAGAGTTGG  
AGCATTAAACGAATCTTTGCTGACCACTTTGCCATTATTGCGTATCAACGTTTCCATAATAGTGTATTGAAACGCGGTGAG  
TTTGATCACTTCGTCATTAATAGATAATTCACGGCGAGAGAGATCAACCTGAAACGGGGGAGCGAAATGACCTGTGAAG  
CCAGACCGCTATTACCGCATTAAATGCCTGCATTCGCGCCATCACCTCTTCAATATGAAACGGTTTGTGACATAATCA  
TCAGCACCGGCACTTAATACTTGCATTTGCTTCCAGCTTTTACGGCGGTTAATACCAGAAATCGGAGTGAACATC  
GTTGCTACGCGCAGCGGCAATCAGTGACAGACCGCTCTGCTGGCAATCCGAGATCGACAATCGCAATTCGCGTATAT  
GTTCAATTGAGATAAATAATCGGCTTCTTTGGCATCTTCTGCGTCTGACCTGATGACCAGCATCCTGAATCTGAACTTTA  
AGGTGGTGACGTAACAACGCATTGCTTCAACAACAGTACGCGCATTTTTTATTCTCCCTGTCTTAATTATTAATAAG  
TGTAACCGATTATGTGGTTATGGGGTAAACATTAATAAACCAGCGGGGAGGGGAGGTAAGTGAATAAATAAAGC  
GGATAATCTTAATAAGCAGGCCGACAGCATCGCCATCCGGCACTGATACGAGGTTTATTTCCAGCTCATCAACCATCGTG  
ATAGCTCGACCAATATAGTTAGCCGGCTCATCGCTTTCCAGCGGGCTTTCTCTTCTTGGCAACGCCAGACCATCGAT  
AACTGCTTATGCTTCCGGCTCAACGCGCTTACCAGGAGTCACTCTTTCCAGCTTCTGTCAGGTTTTTCCGATGCCAT  
AGCGACGCATAACTGTCTGGATTGGTTCAGCCAGCACTTCCAGTTGTGATCCAGTTTCATCCAGCAGATGGTCACGGTTC  
ACTTCCAGTTTGTCCAGCTTTCCAGGTTGGATTGATATGCAATCAAGGCATAACCGATACCAGCGCGAGGTTACGCAG  
CACGGTAGAGTCGGTCAGGTACGCTGCCAGCGGAAACCGGAGTTTCTTCCAGATGCTGCAATACCAGGTTGGAAA  
GGCCAGATTTCCCTTCCGAGTTTTGAAAGTCGATCGGGTAACTTTATGCGGCATGGTGGAAAGAACCAATCTCACCAGCA  
ATGGTTTTCTGTTTGAAGTGGTTAAGGGCGATATAACCCAGACGTCACGGTCAAAGTCGATCAGAATAGTGTGAAGCG  
CGCAACGCAATCAAACAGTTCGGCAATGTAGTCGTGCGGTTGATCTGGGTGGTGTACGGGTTCCACTGAATACCAGCG  
AGGTGACGAACTCTTCCGTAAGTGCAGTCAACTTCCGGTAAAGCGGCGATGTGGGCTTATAGTTACCAGCCGCG  
CCGTTGATTTTCCGAGGATCTCCACCTGGTTAAGCTGGCGGTTACTGGCGCTCCATACGGTAGGCGACGTTTGCATCTC  
TTTACCAGTGGTTGACGGCTGGCTGGCTGACCGTGGGTACGAGACAGCAGCGGGATATCGCGATACTGAACGGCGAGAT  
CTTAAATGCCATCAATCAGTTGACGCCAGTATGGCAGGATCACTTTCATCACGCGGTTTTTCCAGCTTAAATGCGTGGGAG

AGGTTATTGATATCTTCCGAAGTACAGGCAAAGTGGATGAATTCAGAAAACCGGTGCAGTTCGGGATCTCCGCCACTTT  
TTCTTTTTCAGGAAATACTCAACCGCTTTAACGTCGTGGTTAGTGGTACGCTCGATAGTTTTGATGCGCGCCGCATCTTCTT  
CGCTGAAACTGGCGACGATTGCATCAAGGTAACCGATTGCGTCGCGCAGCAAAAGCAGGAACCTCCTTGATCGCTGCGTGC  
GCGGCCAGTTTTTTCAGCCAACGTACTTCAACTTGTACACGGAATTTTCAGCAAACCATATTCGCTGAAAAATCCCGCGCAG  
CGCGCTGACTTTATCGCCGTAGCGTCCATCGACAGGGGAAACGGCGGTGAGTGAGGATAATTCATAGATCAAACTCCG  
GGTTAAATGAGCAAGAATTTGTTTTGCCTGAGTGGTCAGGCGATTACGAGAAAACATCAGTTGACAGCTCCGCCCGCCG  
ACCTGGTGCCAGAGCACGGCGGCGCAATGCCTGCCAGCAGGGTTGCGCGAACTTTTCGCTGCACTTGTGGGCTTTGACG  
TACAGCAGGGGAAACCGGTGACCTGAATGCGCGGGCAAGCGGGCTAATCACATCAACATAGATAGCAGCCATCGCGCTCA  
TCAGCGTTTCGGACTGTAATCGAAGTGTTCGAGCTGGCGTTGACAGGCCGTTGATCCGTTGCCAGAGTGTGAGCGCG  
CCTTTGCTGAGGAGAGTTTGCCTCAAGCACCATCAAGCTGAGTGTGTAGCGGGTTAATTCGGCGTTTAAAGCCCTGGCG  
ACTGCTGGCATTGAGCACGCCGAGCAGGGTTCCAGCCGACGCGCAGGTTGGCTTCGCTACCGCCAAAAACCGCCAGCG  
TCGAGCTGGGTTTCATATCAATAATACTGTTGAGTGAGACGTGTAGCGCATCGGCATCAAAATGCCCTGGTGAGCGAGT  
TGTTGACCCAGGCGTCCGACTGACAAATACCGCCAGGGCGAGGGTGTATGTCATAGTAATCTTTGCCAGTTCACCTGC  
TTCCTTGTTTTAAAGTAAAGATAATAATCAGACCGGCGAGCGGACGCTGCTCAATAATACCGCCACCGAGGCACACTTC  
ACCGTTATAGAAGACGGCAGACTGGCCCGGCGTCACGGCGGCAACCGTTTCATCGAAAATCACTTCAATGCGATCATCGT  
CCAGCGCCTTGACGGTGCAAGGGATATCGGTCTGGCGATAGCGGGTTTTTACCCTGCAACGCATAGTCCCGGTGAATGGT  
TCGCGATCGACCCAGTGCAACTGCTGGGCAATCAACCCGACAGACATCGCCGCGGGTGTTCATGGCCCTGAGCGACAAAC  
CAGAATGTTGTTTTGACGCTCTTTGTCCACCACATACCACGGTCTTCGGTACCTTCTTTGGTGCCACCAGATAACCCAGAC  
CTTTACGCTGACCGAGAGTGTGATACATCAGCCCTGGTGTCCCAATTTTCATCGCCATCGACGGTAATGATTTTGGCC  
GGTTGCGCCGGGAGATAACGGCCAGGAATCGCGAATTTACGTTCCGCAATGAAGCAAATGCCGTTAGAGTCTTTTTT  
CTTCGCGGTGACCAGACCAAGATCTTCAGCAATCTTACGCACCTGCGGTTTTTCCAGTTCCGCCACCGGGAACAGGCTTT  
GCGCAATCTGCTCATGGCTGAGCGTATAAAGGAAGTAGCTCTGGTCTTTATTGCTGTCCAGACCACGCAGCAGGGCGGCTC  
TTGCCATCGACATCGGCCGACGTACGTAATGACCGGTAGCGATATAATCGGCACCTAAATCTTCGGCGGCAAATTCGAG  
GAAGGCTTTAAATTTGATCTCTTTGTTGACAGAATATCCGGATTGCGGTGCGACCGGCTTTATATTCGGCAAGGAACA  
GTTGCAAGACGTTGTCCAGTACTCGGCAGCAAAGTAAACGGTGTGAGTTCAATGCCGAGCTTGTGCGAGACAGCCTGG  
GCATCAGCCAGATCCGCTGCCGCTGTGCAATATTCCTCACCGTCTTCTTCCAGTTCTTCATAAACAGGCCTTCGAC  
CTGATATCCCTGTTGTTGCAACAGCCAGGAGCAAACGGAGGAATCGACCCGCGGACATGCCGACGATTACTTTTTTTG  
CGTTTTCAGACATTGGATCACTCACGACATTGAACTTCAAGGGCGGCTATTCTATCACGCAGCCTTTTAGATGACACCCT  
TTGTAAGAGCCAGTTAAAAATCGCCAATCATCTCCAGCGGATAACGTTGCCCGCTTTGATAACAACGAATACTTTCCGCC  
ACCAGCGGCGAACGAAGATTTGACGCCTGAAAATTTCTTCGGCGCTGACCCAACGGCAGCAGTCGATATCGCTGTCATG  
AGGCTGGTTCGGGCATATTTGCTCAAGCTCAATGGCAAAGAGGAAACGCAAAAACGGCGTTTTATCTGGCGCAATCCACT  
GATGCATACGAATAAAGTGTTCGGCTGCGCGCTGATGCCGTTTCTTCCACAGTTACAGGGCGGCGGCTTCCACTAAG  
GTTTCATCGGCTTCAGATGCCCGCAGGTTGGTCCATAACGCTTTACCATTAATCGTCTTCAACGACTAAAAATTT  
GCCTTCTGCGTGCACCACGCAAGCAACGGTAACGTGCGGTTTAAACATTTTGCATCCTTAATCTGTCACTTCTCGCCATT  
CACCATTGGCAAGATTATCCAAAGAGTAAATCACCATCGCATAGCGAATCAGTCGCAGCGTGGGGAAGCCAAATGGGCG  
GTCATGCGGCGCACCTGGCGATTACGTCCTTCATATAAGGTGATCTTCAGCCAGCTGGTGGGAATACTTTTGGCTTACG  
AATTGGTGGATTCCGCGGCCATAACCACGCGGGTTCGTCAACCAGCTCCGCGCCGGCGGCGGAGGTTAGGGCCATCATTTA  
AGTTACGCCATTGCGCAAGGCTTCAAGTGCCTTGTGTGGGAATACCTTCCACCTGCACATAATAGATTTTTCCGGTG  
CGTTTACCCGCTGGGTTAAACGCGCCTGCAACGCGCCGTTATTGGTGCAGCACAGCAACCCTTCGCTATCGCGGTCAAG  
GCGACCTGTGCATAAACCCCTGAACCGGGATGAATCTTTTAAATGTTTTGCTGCGGCTTTCATCGGTGAATCGCGGAA  
GAACATCGTAGGGTTTTATTGAACAGGATCACACGCGTGGGCTGGTTTTTCAGGTTTACGCTGGTAGAACGTTGCGAGCTG  
AATCGCTTAACTGGTATTCTAAAAGAAAGTTTTTTCATGTTATTTTTCAGAGATTATGAATGCGCATATATAGCCTA  
ATAACGCGCATCTTTCATGACGGCAAACAATAGGGTAGTATTGACAAGCCAATTACAAATCATTAAACAAAAAATGCTCT  
AAAGCATCCGATCGCAGGACGCAACGCATATGCAACGTGGTGGCAGACGAGCAAACCAGTAGCGCTCGAAGGAGAGGT  
GAATGGAAAGTAAAGTAGTTGTTCCGGCACAAGGCAAGAGATCACCTGCAAAACGGCAAACCAACGTTCTGAAAAAT  
CCGATTATCCCTTACATTGAAGGTGATGGAATCGGTGTAGATGTAACCCAGCCATGCTGAAAGTGGTGCAGCTGCAGT  
CGAGAAAGCCTATAAAGCGGAGCGTAAAATCTCCTGGATGAAATTTACACCGGTGAAAAATCCACACAGGTTTTATGGTC  
AGGACGTCTGGCTGCCTGCTGAAACTCTTGATCTGATTGCTGAATATCGCGTTGCCATTAAGGTCCGCTGACCACTCCG  
GTTGGTGGCGGATTTCGCTCTGTAACGTTGCCCTGCGCCAGGAACTGGATCTCTACATCTGCTGCGTCCGGTACGTTA  
CTATCAGGGCACTCCAAGCCGGTTAAACACCCTGAACTGACCGATATGGTTATCTTCCGTGAAAACCTCGGAAGACATTT  
ATGCGGGTATCGAATGGAAAGCAGACTCTGCCGACCCGAGAAAGTGATTAATTCCTGCGTGAAGAGATGGGGGTGAAG  
AAAATTCGTTCCCGGAACATTGTTGATCGGTATTAAGCCGTGTTGGAAGAAAGGCAACCAACGCTGTTGTTGCTGCAGC  
GATCGAATACGCAATTGCTAACGATCGTACTCTGTACTCTGGTGCACAAAGGCAACATCATGAAGTTACCGAAGGAG  
CGTTAAAGACTGGGGTACCAGCTGGCGCTGAAGAGTTTGGCGGTGAACTGATCGACGGTGGCCCGTGGCTGAAAGTT  
AAAAACCCGAACACTGGCAAAGAGATCGTCATTAAGACGTTGATTGCTGATGCATTCTGCAACAGATCTGCTGCGTCC  
GGCTGAATATGATGTTATCGCTGTATGAACCTGAACGGTACTACATTTCTGACGCCCTGGCAGCGCAGGTTGGCGGTA

TCGGTATCGCCCTGGTGCAAACATCGGTGACGAATGCGCCCTGTTTGAAGCCACCCACGGTACTGCGCCGAAATATGCC  
GGTCAGGACAAAGTAAATCTGGCTCTATTATTCTCTCCGCTGAGATGATGCTGCGCCACATGGGTTGGACCGAAGCGGC  
TGACTTAATTGTTAAAGGTATGGAAGGCGCAATCAACGCGAAAACCGTAACCTATGACTTCGAGCGTCTGATGGATGGCG  
CTAAACTGCTGAAATGTTTACAGAGTTTGGTGACGCGATCATCGAAAACATGTAATGCCGTAGTTTGTAAATTTATTAACG  
GGAGCGTAACGCTCCCGTTGTTTTTGTAGGCTGCTAACGGTTATCAAAATTTTATCAAAAAAAGTTATCAAAACCCCT  
CGGTAGTTTTGGGGTAGGCTGGCCGGTCAGGTGGTAGTTTCTACTACTAGTCTCCACATAGATATTCCTTAGCTTTTTAT  
TATTGCTGGCGGACGCTCGTTAATATTTAAGGCTTTCATTGATTAAGACATCCCCAAAGTTAGTTATGTATTCACTGTTA  
TTAGGACAATTATGAATTACCACTCCTTACACCCGCTCAAATATTGTTAAATTCGCCGTTTTGTATCAACTACTCACCCG  
GGACTCGCCAGGGGACAGCCAACAGGCATTGGGTGCAATCACCTTAGCGTTCAGGTACATGCGGAATGTAAAAAAGGCCG  
CGAGCGCGGCCCTTACATACATCTTACTGACTGAGACTGTTTAACTAGGGAATTATTATCGTATTATATTGCATTAC  
AACTCCCAACAGTGACATATGAACTTCTGCTTACTCCACGACTTTAATATTTCAAGGCCATGTGAAGAACATATTTCT  
TGCACTGCGAGTTCATCGAGTAATCCATAGTAAGAAACACTTTTTGAATTTTGTAAATGTATCCGTAAGATGTTTTCT  
TCCTGTTTCGTATTTTTGAAGTATGAGCTTTTATATTGATTTACAATAAGAGTCTCACCTCTGATTTTAGTAATCTCT  
TGATGCTAAGAATATTTTTGTCGATTGTATCCCGACAAGGAACGGCAGAGAGAACATTAGAGCAAAGGATGAAATCGTAA  
CCCCAATATTTTTGTCGACATCTCGAAAGCAACTGATTTGCAATTTTTATAATATCGTGGGACATAGTCAATAATTTT  
AGTTTTAATCTCTAATAAATTTGCTCTCTTTCAAGTTGCCTTTTCGAGTCTAGAAAAGTAACTTCATCAAATTTACTGA  
TTAATTCATCAGAATATCTAAGTTTTCCGACGCCAAAATCAAGGGCGTGGCCATTTTTCTCAATGCTTCTAATACTCG  
CAAAGATATCTAGAGGCATCGTATGAGTTTTGCTGCATTCTCTGAGCGAATATTAACCTCCGTGCATATTATAGTTCAA  
AGCAAGTACCATTCAATTAATGTTATTTTTAGTGAAAAATCTTTTATTTTATCGTCCGGGATTTTTCCGACTTGACTTT  
CAGTTCTGGGCTTAACTGTCAAAGCAAAGATAATACCACTCACTGAGAATGATAAAAATTACAAAAAGAATAAAGACAGC  
AAAGAACCTTCAACATGAAAAATATCCATTTGTTTGCAAAAAAGATTATTAGGAAGGAAATTAATGCAATTATCGAAAA  
TTCAAAAAATATCAAAAAATAGTATACTTTATTCCAGAAGAGTTCAATATAATGTTTGTCTTCAATTTTTCTACTTCAG  
GGTAATATAGATTGCTCATTACATTGTGAGCTTCATCTTTATTTAATTTTCTGTTGACTCCAGCTCTCCGTGATAACGGT  
TTTATAATTAGATGCTTATCCCAAAGATATCGCACCCGAAGTAGTTTGGCTGCATTGTTATGTAGGTCTAACGCACCGCT  
AATTAATATGCAAAAAATCGCAAAGCACAAGGTAATATACCAAAGATAGTGCCCAATTAATAAAGCTCTCATGATCTT  
TAATAGGTGGGACATACTTGGTTGGTAATGTTATTAAGGGATGATTCTGAAATAACTAGAAGTATGCAATATATTAGC  
GTATTTAAGAAAGTTGCTTATGAAGTTTAGGCAACATTTTATTATAATTTTTGGGGGTTTCAACATATTATTACCTG  
AGTCACGCTTAGGATAGTGAATGGTAATATTTAATTAAGTGTATTATATACTTTTTCAGTAGGTTAGTTACAATTTTT  
TGATCTGTTACAGGCTGACCTAGCTTCGCTGACAGACAATATTGTGATCAGTAGCACGTATCGAGGAGGAGTAGCGCTAC  
AAATTTGACGCTGGGTGAGAATCTGAAATGATAGAAATGAAATAATGAAATAATGAAATGATGAAATGATGAAATGATG  
AAATGATGAAATGATGAAATGATGACAGAGTGTCCAGTGGGCACGGATGGTGTCTTACGACATGCTTACCTTAATCGTTC  
CCAGTGTGCCTATAGCAGATATTCTAAACATGTCGATAATTCATTACGCATATAGTATCGAACATAGAAAAAAGTGAAGA  
TTCATCTTATTTTTGTATATACTACCTAGCCCAACAATGTAGAGGTTAACGAAAAATGCGCTCACCAATTTGTCATCTTT  
CTCAGCAATTAATTCATCACCATTTAAGATTGCACCAGAGAAGGAGCAAGATCTTAAAACGATAGTTGACGACAAAAAA  
TTATAATTTAGTTGTGAGTGAACCTGGTTTTAATATCCGAGTCAGGAAGAATGAGAGTAATAATTCACATGAAATAGTT  
CTAACAGTAGCTTCACTTGAATATATTTGGGCATTTTCCAATTTCTTTGGGTTTTTACGCAAGAGTACTCCAAATCTCA  
GAAAAATAATGATGAGCACTTTGATTTAACAGGAAAAAATAGGCTTAAAAAGTCTGATGAACTTCTTAAATGGGCAAGGA  
AAAACTTGCAAACAACAGTTGCGAATCATGGCCTAAAAAATGTCCAAAGCCAGAAGCATATTTACAAGGAAGCGAAGAC  
TCACAAGTTGCTAGCGAGATATTTCTTTGCTATTGCTTGGATTCTTCATCATGAAATAAGTATGTTGTTTTACAGCA  
TCCATTGGTCACTACAGCATTCTCCACTCAAGAGGAGCGTGAAGCAGATTACATGCTACAAAATGGATATTAGGCAACC  
TGTATGAATCCGCTCTGAATTAAGAAACGTGCATTTGGCATTGCTACGGCAGTGCTTTGTATACAAAGCTTAGAAGTT  
GAAAATTAATCTGTTTACAAAATACACACCCAGCTGCATATGAGCGTATATATTCGAATATTTTATGCTACCCTGTCCG  
AAATGAAGAGTTGATTGAAGCTCTATGTACAGTGTGCTTCAATATCTTTCCATGGCAAAAAATCAATGTGAATCTAG  
ATGGGGAGTCTTTTTCATCGATTTTAGGTGATCTTCTCTGTGATATTTACGCTTACCAGTAACTGATATGGCTGTCCG  
CCGCTCGCTTAAAGTGGACTTTTTAGTTTTTATCATGTGCGGTGAGAAAATCAATGTGGCGTTGAGATGCTTAAAGGTT  
ACAACGCTACTTTGCTCCATCCTTTACCTCGATCATCATGATAACGATCGGTTTGTGTTGTGTTTTATGACCAAGTAGT  
TTTTGTGTGCTAACCCCTGTTCTTTATACAGACGTTAGATAAAGACCTTTGCTCATGGAATGTCGAGGTGAACCCCTC  
TCCCAGTCAATTTGCTAAATCTCTCGCTTACTAAAATTCATCGTCAATGTATTGGCTTAACTGCGCTCCGCGCT  
CTGCTTGTGAAGTTGAACGAAAAAATGCACTAAGTATGACTGACTGCATAGTACGGCAGCGGGCTACTACATCGCGT  
AACTCCAGTTAATCGCATTGAGGCGAAGAGAAAGAGGAATTCGATTTTTGCTCCCGTCTTTTCTGAATGACATGAAG  
ATGATCATCCAAATATCGTAAATTTTATACGCGAAATATCACCTAACCGCTGACCAGTAAACAGCGCTAACAGCATGG  
CATTCCCATGTAACGATGAGTAGCGTCTGCGATATCGAAGATTTTTTCCATTCTTCAAGGCTCAGCCGTTGTCCGGTA  
ATTTTTCTTGTGTTGTTTGTAGTGGCTAATGCTGGTTATAGCCAGGAGTACTTCTCCGTAGTGCTGCGCTCTTTGAA  
AACATCAATCAGGACGGAGCGAACTACTTGTGCCATTTTGGCCGCCAGCGGCGATATACTCATCAAGCAATTTGTGCTA  
TATCTCTGACATCAACGGCTGAGATCAACTTCATTCCTGCTCGTTCTCTGAGCAAGGATACTGGTTTAGCTTTTTGTTA  
TAGGTGTTGAGTCTTATATCACCACTTTAAGCCTGTCATCTGGATCGTTGATAGCGATCTAACAGGTTGACGTTG

GATAGCCTTTCCTTTGCTGGTTGCGATCCTGTCAGTACTGATAGCCAGAATCTGCCGGTTCCTTTGTTTCAGCCAGGCGAGTGT  
TGGCCTCAGTGGCAATAGCGATAGCTTACAGTTCGTTTGTCCCAAAGCATGGAATTTTCTGTCACTGGATGCTTATAC  
CGCCAATAGACTTTATTTACCTTCTACTATAAAGCGGATATAAGTTAGGGACTGAAACATTATTCTTACGCGGTCTGGC  
TGCCATTACTCAAATCCGTTGCAAAAGTAATGAGTCATTTTTCTTGATTACAGGTGTTACCAACTCCCCAACTAECTCG  
GCGTCTCACGCACTCGCCATAACCGGCTTGTTTCATGGCCGGTGGACAAAATAAATTCTGCTTAGCATAACGACGCCAA  
TGTGGACACACTTGGAGGATTACTTCTGTATTTTTAGCAGCCCATTTCTTCAAGAGTTAACATTTGAAGCATATGCGATC  
ACCTTACTACTACTAECTGCTTAGTCTCAGCATATCGACCTGACCGGTGCGGTTAGTTTCTCCAAAAACAGAGAAGA  
GCACCTGTGGCCACAGCTATCAGGATGGGTGGGTTATTAACCGTCCATCCGGGGATACTTCTCTGTTTTGTA AAAAG  
GGCGGTACCAGAAAGGACTAAGGAAAAAACTGGTACCGCAAGACTACACACAGCATAAAGTTGTGGTGTGCGGTGCCCC  
CGGTGCCTGGCGAAGGTTGCACACCAGGCGGGTGGGTATCCACAGAAGGTCGATTGTCAGCCTCAACCTTAACCCGCGTG  
CGCTGAGCCGATTACCCACAACGCTAAGGATTCTCTGTTGAAAATACTTAGCTGTTATGTGCTGTCTTTTACCAC  
CTTCAGGCTCGGTGGTATGCTGGAGTTCTCACACAGCCAGCAAGCAAGGAACTTAATGAACAGTTTTATGTTACGTT  
CGTCTATTTGAAGACACAGCCGAACAGACCAAAAAATTTGAAGAATTAATGCTTAACTTTCTGTACCAGAAAAACAGTTAA  
AGAGTCTGACGATAGCTGTCAGACTGATTCCAGAGGGATATATCTCAAAGTACAATGAACTGCCAACAAATCCTTG  
ATCAAACATTTTCAATTGCTAACAGTCCGGTGTTCAGCCAAATATATTTGTCTGTAATTTGAACAAAGCGCATGCTTA  
CTCCGTCGTTTCTTAGTTGTAACGATTTCTGTTTACTTACGCTTACGCTAAGCCCATCAAGCTGATTCTTAAAG  
CCTTAACCATTTGTGTCGTGATAAACACGCTCACCTTCTCATTGTCATGGCAGAGGGGTGAGTGTGTTAGCCATGAAA  
TTCATGAACTCGGTTGACCCAGGGCTTGCGCCCGCAAGTCTTAAATGCCTGTTTTGCTAACAAAATGCGGGCCTCAGT  
GCCTGCATTTGGCTCTATCTGCTGCAACGTTTAGCGTCTCCAGCAACAATGCGATCACATGCTTCAAATTTCTGCTCAT  
TCATCTATTCTCTCACTGAAATCATCCGCTAACGAATCATCCGGTCTTCGTACGTACCGGGCGGGCTACTTCTGTTGGC  
GTCCTGCTGTTTGTGTTTCTTGGGTACATTATGTATCTCAAAGGTACATTGTCAAGTATAAAAAAACCCTGCCGAAG  
CAGGTTCAATAACATTGATTAGGCTTTGATTTGTATCTTCTGGTTTTCTGAGAAAATCACAGTACCAATTATAGAGC  
AATTACCGTTGATCTAATGTAAGGCTCAGGCCAGTTGGGTTTAAACGTTTGAAGTAAACGCTGTGCTCCATCTTCTATC  
AACCTTTTGAAGGTGGTTTACCTGTATCGTGCATCAATGCAATAACGTCGTACCCTGGCAGGCAGGTAATCAGGATC  
GACAAAAATCATGTCTCCCGGGCGGTAATCATCAATCATTGAATCACCTATTACCCGCAAGATATAAGTCATTTCCCCAC  
AGGTTACAGGGCAGGGATACGTTTCTGCTGTGCTCAAATCAACCTCAGAATATCCAATCTTTCCATGTCCGGCCTGT  
ACCCATGATATGACAGGGACTAATGTGATTTGTTTATTAGTGATTGAAACATCAGGTTTTTTGTGATGTTGTTGCTG  
GTGTTCTTGATCGAGCCATCTACAGGCAGGTGCAACATTTTTCGATGTGTCGTGCCATGCTGTCACCGATATTTTTAG  
TAGCACCATCTCCATAAACCTGCTGGTCTGGGTTGGCTCGCGATCAATCATAGTGGCAAAGGAAGATTCCCGCCAACA  
CCATCTCTCAGTTTTCTGGCGTTAGACCCCGGATGTCATGGATTTTTTATAACGAAATTTAAACCCTTGTACCGTTA  
AGGTACAAGTATCTTGAAGTTTCAATTCATGTAATATGTACACCGGAGGTACATATTGTATGAAAGCGTATTGGGA  
CTCTTTAACCAAAGAACAGCAGGGCGAGTTGGCCGGAAGGTTGGCTCAACACCTGGCTACTTACGGCTGGTTTTCAATG  
GCTATAAAAAAGCCAGTTTTGTGCTGGCTAAAAAATTTGAGCAATACACATCAGGTGCAATTACGAAATCTGACTTAAAG  
CCGGATATCTATCCGAAAGATTAGCAGAACACTTTCAATTTTTAACACAGAACGATGAGGCTAATCGTGGGTAAGCATC  
ACTGGAAAATAGAAAACAGCCTGAGTGGTACGTGAAAGCTGTGAGAAAATATCGCGCGGTTGCCAGTGGTTACGCT  
GAAGCGGCTGACTGGCTCGATGTAACAGAAAACGCTTATTCAACCGCTTCTGTCAGATGGCGATCAGATTTTCCCGCT  
GGGATGGGCAATGTTTTACAGCGTGTGGTGGCACTCACTTCTTCTGATGCTGTGGCGAGTCTGCAAAATGGCGTCT  
TTGTGCTCTTCTGACGTGAGGATGTGGACAACGCCGATATTAACAGCGTCTGCTGGAAGTCATTGAACAGATCGGC  
AGTTATTCAAAACAGATTCGTTGAGCAATCGAAGACGGTGTAGTGAACCGCATGAGAAGACAGCAATTAACGACGAGCT  
GTATCTCAATTTGAAAGCTGCAGGAGCATGCAGCACTTGTCTACAAAATTTTTGCAATTCAGAAAGTAAATGACGCCC  
CGAGTGTGACGCTCCGGGCTGCTGGGCTCGATTGCTTCTGGTTGTGGAGAACTAACGCATGAACAGTTTAAACAACAC  
ACTACCGTCTGCTCGCAACTGATTGCGCTTCTGTACCGGTGGAAGGCGAAGGTGGAATATTGCTATGCAAGTGAATGTA  
CCAGGTGACAGGGAAATTTAAACCCACAGCTTTCAGAGTGGGCTGTGGGTGATTTCAACCGGCAGAAGGAGACAGTCTT  
TTGCGACAAGTTAACCGCTGGTTCAAAGTACTACGGAGTGCCTGTCAGAGTCAATCGTTGGGAGCCGGAACACAACG  
GGTTATCTACCTCCGGAAGGTTATGAGCATGAATGCTTACGCCGCTCGAACAGTTTCGTCGTAATTCAGGGAAATAG  
AGGTCGGTCATGAGCACTAAATTAACCGCTATGTATGGGATGGTTGCGCTGCATCAGGCATGAAGTTATCCAGCGTGGC  
AATTATGGCCCGCTGGCTGATTTAGTAATGACGAAGGTGTGTGCTGGCCATCAATTGAAACATTGCCCGTCAAGTTG  
GCGCGGGGATGAGTACCGTCAAGACGGCTATCGCACGGCTGGAAGCAGAAGGCTGGTTAACGCGTAAGGCGGCTGCCAG  
GGTATGGTTTATCACCCTGTCGCGTGGTGGATGAATATCACGACGACGCCACAGATGCGCTTACACCACGATGCT  
TACCGGGATGGGGCGGACGCCAGCCACTGATGTGGCCATTACCACCGCCGGTACAACATTGAGGGGCGGCTGCTACG  
ACAAACGGCGGAAGTCATCGAGATGCTCAACGGCTCGGTGCCAAACGATGAACTGTTCCGGATCATCTATACCGTTGAT  
GAAGGTGACGACTGGACCGACCCGAGGTGCTGGA AAAAGCCAATCAAATATTGGCGTGTGGTTTTATCGGAATTTTT  
GTTAAGTCAGCAGCAGCGTCCGAAAATAACGCCGCTGTCGCAAACGCTTTAAAACAAAACCTCAATATCTGGGCGT  
CGGCGGTTCCGGCTATTTCAACCTGGTGGAGTGGCAGAGTGGCAGGATAAATCACTGACCTTGGAGGTTCCAGGGG  
CAGCCGTGCTTCTGGCTTGGCTGGCGTAAGCTGGATATGAACAGCATGGCAGCTTTATACCCGCGAGATTGA  
CGGTA AACGCATTACTACAGTGTGGCCCCGCTTCTGGTACCGTATGACACGGTGTACAGCGTCAGAAAAATGAAG

ATCGCCGGACAGCCGAACGCTTTAGAAAATGGGTGGAATGGGCGTTCTGACCGTTACCGATGGTGCGGAGGTGGATTAT  
CGCTACATCCTCGAAGAGGCCAAAGCGGCGAACAAAATCAGCCCCGTGAGTGAGTACCCATCGACCCCTTCGGGGCGAC  
CGGGCTGTACATGACCTTGTCTGATGAAGACCTGAACCCCGTACCATCATTCAGAACTACACCAACATGTCGGATCCGA  
TGAAAGAGCTGGAAGCGGCGATTGAATCGGGGCGCTTTCATCATGACGGCAATCCCATCATGACCTGGTGTATCGGCAAC  
GTGGTTCGGCAAAACCATTCGGGTAACGATGATGTGGTGAAGCCGTCAAGGAGCAGGGCGAAAACAAAATCGATGGTGC  
AGTTGCGCTGATTATGGCGGTTGGCAGAGCCATGCTGTACGAGAAAGAAGACACGCTGTCTGATCACATTGAGTCTACG  
GGATCCGCTCGCTTAACTGAGGTAATTATGATCATGCTGATTCTCGCGCCTCTGGTGGGCGTGTGGGTGCGCTTTTGC  
TGGCGTATGGTGCCTGGCTGATTTATCCCCGGCGGGTTTTGTTGTTGCCGGGGCGCTGTGCCTGTTCTGGTCTGGCTG  
GTGGCGGATATCTCGACCGTACACAGTCGTCTGTCCGGCGAGGTAATAAGTGTCTTTTCGGGATTATTTCAACGAAAA  
AGTGACGCACCGGTGACCACGCCAGCAGAGCTGGCGGATGCCATCGGGCTGTCTGATGACACCTATACCGGAAAGCAGAT  
CAGCAGTCAGCGGGCTATGCGACTGACGGCGTTTTTCTGCGTCAGAGTGTGGCAGAGTCGGTCGGGATGTTGCCCT  
GCAATCTGTATCACTGAACGGCAGCCTGAAGCAGAGAGCCACCGGCGAACGCTGCATAAACTGATCTCCACGCATCCC  
AATGGCTATATGACGCCGAGGAGTTCTGGGAGCTGGTGGTCACTGTCTGTGCCTGAGGGGAAAATTTTACGCCTACAA  
AGTGAAGCATTGGCGAAGTGGCTGAACTGCTGCCGTCGATCCCGCTGTGTGGTATATGCGCTGGGAAGGTGTGAGC  
GATGGCCTGAAGGTGACCGCGGGAGTATTATTAGCGCGATGACCTGGTGCAGTACACGACAACGATGACGATGCAACAG  
CTCCGGTGGTCTGCTGCGCTGCCGATCGCTGCTCAAGTGCAGTGCAGTGCAGTGCAGTGCAGTGCAGTGCAGTGCAGT  
TCCTGGTACGCGCGTGAATGGTCTGCGCTCTCCGGTGGTGCAGCCCTGACAGGCGGATTTGATACTGAAGAGCTG  
GAAACGTGGCGCGCCCGCTCATTGAGCGGTATTACTGGACGCGCGAGGGCGGGCTGACGGGGACTATGTCGTCTGGGC  
TAAAGAAGTGCCCGCATTACCCGCGCATGGACATACCGTCACTTGTGGAACGGGAACTGTGCGTGTGATGATTGCCA  
GCAGTGACCTGATTAATCCATTCCGGAAGAATCAACGAAACGGCGGCAAGACAACATATCGGGCCACTGGCCCCGGTG  
GCAGGCTCTGATTTGTATGTGTTGAGCGCGTGGCAGATACCGTGGATTTTCATATCCGCGTGACGCCGGACACACCAGA  
AATACGGGCTGCCATTACCGCGGAGTTGCGTTCGTTCTGCTGCGTGTGTTATCCGAGGGAGAACTCAAGGTATCGC  
GTATCAGTGAGGCGATTTCCGGTGCAGACGGGAAACAGCCATCAGTTGCTTGCACCGGTGGACAATATCTCCATTGCG  
AAAAACGAACTGGCGTACTGGGGACGATTTTCATGGACGTGACAAACGATGATTACATCCGCTGTTATCGGCACTGTTG  
CCGCCCGTCCGGTGTGGTACGCCAGCGATCCGGCGATTGCCGGTGGCGCACCGTCATTAACCGTGTTCATCAGCGTGC  
GGATGCCCTGATGCGGGAGCTGGATCCGCGCACCACCCTGAAGTATAAACCGCTGGGAGCGTCTGTGCGGTCTGCCGG  
ATGAATGTATCCGGCGGAAACGAGACCCTTCGCCAGCGTCAGCAACGGCTGGATGCGAAGGTTAACCTGGCGGGCGGC  
ATCAACGAGGATTTTTATCTTGACAGCTTGTGCCCTGGGCGAGCCAGATGCCACCATCACGCGATACGACAAAAGCAC  
TTTACCTGCTCATCGCCCTGACTGACGCGGTGAATGCGCCGGAATGGCGGTATTACTGGCAGGTCAACATGCCAGCCA  
CCACCAACTCCACTGGATGACATGTGGCGATCCCTGTGATTCCGCACTGCGTATCTGGGGTGACACCGTTGTGAGTGT  
GTGCTTAACAACTCTGCCCGTGCATACCTACGTAATTTTTAAATATCCGGAGTAATCCATGCATCGTATAGACACGAA  
AACCGCGCAGAAGGATAAGTTCCGGCGCGGTAAGAACGGTTTTACCCGTGGTAACCCCGAGCCGACCGCTGCCACCG  
ATCTGGATGATGACTACTTTGACATGTTGAGGAGGAACTTTCAGCGTGGTGGAGGCATCCGGTGCCAGCCTGGAGAAG  
GGGCGGCACGACCAGTTACTTACCGCACTTCCGCGCTGCTGTTAAGCCGCAAGAATCCGTTTGGCGATACAAATCGGA  
TGGCACTGTGCAACGGCTCTCGAAAACCTTGGTTTGGGAGAAGGAGCAAACTCAATGCAGCAACGGCTACATTAGGAC  
GCACCGTTTTCATAGCTATACCGGTTATGATTGGTGGTATTGAGCAATCAGTAATCATTAGTGGGGTGGAAATGCCGCA  
AAAGCATCTGCCTCTGGGGGGATGAAAATACAGTTGATTCCCGGTTGCGTTAATAATGCCTGTGTTGCCGTTGTTGC  
AATTTATGACAATGTGAGCGACCTATCAATGCAGTGGCAACGGGGGATATACAACCCTTCTGTTTTTATTACGGTGGC  
CAGCTCAAACGGGTAGTTATTACTATAACTGGATTGCTATTGGTATTAAGATGAAAATATACTGTTGCTTAAATACCGT  
TGTTTTTTTTATGATGGCTGTGGCGTATTCCGCGAGATTAAGAAATAACGGCAGAACTGGCAGTCAATTATTA  
AATCTCAAGCTGAAGGAGCGGTGATCGATTTTTCTGTTTTCTCTTTCTATTAAAGAGGTTATCCGTACTCATGATGAT  
GAAGTCGAGATGCGAACTTTCAAAGCAGATGCTTATCTCTGATGCAACTGATTTTATCAATAGCAGACAGTGGCAGGG  
TAAGGCTGCATTGGGAAGACTTAAAGAAGATGAGCTGAAACAATATAATTTGTGGCTGGATTATCTGGAAGCACTGGAAC  
TGTTGATACATCCAGTGCAGCAGATATTGAATGGCTACGCCTCCGGCAGTTCAGGCCAGATGACATCCGGCGCGGTGC  
TGGTATCTGTTGCCGTACCCGCTCAATGTAATCCAGCACAGCGTTAAGTCTGGTTGTTTCTGCTGCGTCAGTTTACGT  
CCGGCTGCAATTTAGTTGAATCAGACTAATGGAAGCATTGCAGCATCAATCAGTACTGGCGCTGTGCTTCTGCCGC  
GTCTACTGCGCGCTATGCTGTGCTTCAATCAGTACCGTCAACCTTTCTCACCATCCATTTATCGTATGGAGATAAAGGGG  
CGATAGTGGTTGATTTTTAGGGTAATCACCCGAGCTTTGATTTCTTTTATTCTCCAGTTTTGGTGTATAGACCGTT  
TCACCGGATGGTCTGGCAGATATCCCATGAGTAAAATCTGCAGAACGGCAGATTGCATAACCAGCCTTATGTGTACC  
AGGGCATCTAAACAGGAACATGCCGGAATGCCGACCAACGGCAAGATATTCATTTGAAGTGGAAATATATCCCGTG  
TTTACCATCGTAGTTATAAACGGTAACATCCCCTGCCTTTGTTGCAATAAGGTCACTATTTAATATTGCTTTATGCATC  
AGGCTGCCCTCACGATATAGTTAAATGCAATATTACCGGACCGGTTTCTGAGGCTGCGGCACCTAAACCATCCACTGAT  
TGTTTATATGTTTTAAAGGTTCCATAATCCGGGGTGGTAATCCGGCATCGTTTGTGTTTCTCTTTTGTAAATGTCAGT  
GCCACTATTTACCATATTTTATCAAAAATAGAAATTAATCGTTGCATCAGTCACAATCGTGGATCTTGACGGTAATCCAT  
GAGCATGATCTCCGTTGCATACCCCTGAATACTTAAAATAGAGCGACCTGTATCAATCCCCCGCCGTCATCCAGCCA  
CGAATAAACTCACCGTAATCAGGCAATTTATTTGTCGGATAAGCCTTTCAGTTCGGGTATTCTTCAGCAGAAAA

AGCGGCACCATTGCATTTACGCCAGCCTGTTGGCGGAGTGGCTGAAGGCCACGGAACCGGGACACCAACAGGTAATGCAG  
AGCCTTCTCCCAAACCAACGTTTATGAAAATGAAGAAATAACAAGCAAATGGCATCATTCTGCTTTTACCAGGGGGATT  
TAACATGCTTATTGGCTATGTACGCGTATCAACAAATGACCAGAACACAGATCTACAACGTAATGCGCTGAACTGTGCAG  
GATGCGAGCTGATTTTTGAAAGACAAGATAAGCGGCACAAAGTCCGAAAGGCCGGGACTGAAAAAAGTCTCAGGACATTA  
TCGGCAGGTGACACTCTGGTTGCTGGAAGCTGGATCGGCTGGGGCGTAGTATGCGGCATCTTGTCTGCTGGTGGAGGA  
GTTGCGCGAACGAGGCATCAACTTTCGTAGTCTGACGGATTCAATTGATACCAGCACACCAATGGGACGCTTTTTCTTTC  
ATGTGATGGGTGCCCTGGCTGAAATGGAGCGTGAACGATTGTTGAAACGAAACAAAAGCTGGACTGGAAACTGCTCGTGCA  
CAGGGACGAATTGGTGGACGTCGTCCCAAACCTACACCAGAACAATGGGCACAAGCTGGACGATTAATTGCGACGAGAAC  
TCCTCGCCAGAAGGTGGCGATTATCTATGATGTTGGTGTGCAACTTTGTATAAGAGGTTTCTGCAGGGGATAAATAAA  
GTTAAAGACACTTTGTGTACAAAAGAAAGTAAAACAACAGCAACTTGTGCAATTTTATCAATAAAAGTAGTATTGTCGT  
GAAAAATTGATTAAAGATTAATATTATGCATGTTTTGATAATAATGGAATTGAACTGAAAGCTGAGTGTTCGATAGGTG  
AAGAGGATGGTGTATGGTCTAATCCTTGAGTCGTGGGGCCGGGTGACAGAAACAAAGATTACAATATCGCTCTTGAT  
TATATCATTGAACGGTTGGTTGATTCTGGTGTATCCCAAGTCGTAGTATATCTGGCGTCATCATCAGTCAGAAAACATAT  
GCATTTTGGATGAAAGAAAAATCCATCCTGGTGAATTTTTACTTTGATTGGTAATAGCCCCGCGATATACGCTTGA  
AGATGTGTGGTTATCAGGCTTATTTTAGTCGTACGGGGAGAAAGGAAATTCCTCCGGCAATAGAACGAAACGAATATTG  
ATAAATGTTCCAGGTATTTATAGTGACAGTTTTTGGCGCTATAAATACGTGGAGAACTATCAGAGCTTTCACAGCCTAC  
AGATGATGAATCGCTTCTGAATATGAGGTTAGTAAATTAATTAAGAAAACGTTGAGTCAACCCGAGGGCTCCAGGAAAC  
CAGTTGAGGTAGAAAGACTACAAAAAGTTTATGTCCGAGACCCGATGGTAAAAGCTTGATTTTACAGCAAAGTAAAGGT  
ATATGTGAAAACGTGGTAAAAATGCTCCGTTTTATTTAAATGATGGAAACCCATATTTGGAAGTACATCATGTAATCC  
CCTGTCTTCAGGTGGTGTGATACAACAGATAACTGTGTTGCCCTTTGTCCGAATTGCCATAGAGAATTGCACTATAGTA  
AAAAAGCAAAAGAACTAATCGAGATGCTTACGTTAATAAACCAGTACAGAAATAAAATTTATTTATTAAGTACACAT  
TTAAGACGTAATACCCTACAGGGTAAAAATTTCTCTGATCTTAACCTTCTGCAATGTTAACTGCTATTTTTATGCTAAA  
AATGGTTATCAAACTCAAAAACACATGTTTATAATCAATGAGTTATAGAAATGCTAAGGGCTAATGAGTTATATGCAAA  
TTAGTAAAATTATGTTGCTATGTCAGATAGTTACGATTTAGTCATCTAACTAATGCTGCGCCATATGGGTTGGACTGAAG  
CGGCTGACCTGATTGTTAAAGGTATGGAAGGCGCAATCAATGCCAAGACCGTAACTTATGACTTCGAACGTCTGATGGAA  
GGCGTAAGCTGCTGAAATGTTGAGAGTTGGTGAAGCGATCATCGAAAACATGTAATCTCTCCATGTGTTAAATATTGA  
AACGGGCGTATAACACGCCCGTTGTTTTATTTATGTGGATATTATAATAGCATATCGAGCATATTTATATGAAGCCCAT  
TACTTGAGCCCATATGGGCATATTTTTATAATGCAACTATTATGTAACATTTATTTGTTATTTTCTCTCTGGAGG  
ACACTCTTGACTGCTTTTGAAGTAACTCCATAAATCCTTGTGAAATGGTGGCATGTGATAAATAGTAATAGGATATCTT  
TATCCTTAAGGATAATACCAGACTTAACCGGTGTAATATACTGCCAGGAGGGAGAAATATAGTAGATTGATACCAGATG  
ATCATTTTCATATTACCCCATATGGCTGAAAAAGATATACCACATGTAGGTTGAATTACCGTGTCAATTAATCCACTT  
CATTTGTTATGCTTATCCACGGTATTTAATATGGTTCATTAGGATGTTTATTTCTTGATTTTGCATATGAGTATATTA  
CCCCCCTCAAAAAATAAATTAATTAATGATGGCTTATATAAAATAAAATTTAAAGCAAGGAATCTCAATGGATGT  
TAAACAAAATGAGATTTTGTGAAAGCAATAAATTTGACTTCGTTTTAGATTTGTTTAGCTATAATGTTATACATTCAA  
ATGACTGAACATCCTGTAATTAACATAGCCTTTATGCTACTTTGTCCAATTTGCTAAACATTATGGTTGCCTTTTTA  
TATAACGATAAATAATGAATAAAGCATGACATGAGAATAAGGTTTCAATTTTGAAGTATATAGGAATGATTTAACCTGT  
TCCTGGCTAAAATACATATAACCGGATGATGACTAAACAAAATACATGTGCGTTAAGTATTGAAACGGACGTGTGGCAC  
GGCGTTGTTTTATAAATATGTTAACGTTATAAAATAACGATCAAAAAGTCAAGTATCACATTTCAAATATCAAGTT  
GATAGTATTAGTCTGGTATTATTTATGGGTGACAAATAAAGACAGTATTAATCATCCATAGAGATAGTCTCTGCACCT  
TTATTTCCATTATGCTAATGCCTTACTGAATTAAGCATTCTTAAGTATCCAACCTTAGCTAGATTAATGGTTTTATT  
ATTTTACATCTTCAATATATAAAAGCGTATTATCAATGGCGTAGTAACCTGCGTTTTGTTATGATTAACATCAGTAACCC  
ACCGGAAAACGCCGCGCTGCCAGTGTGAACAGTATCCCGAAATGTAGATTTTCCGAAATATGAAGCAATGCGGCC  
TCTTTATTTTAGCAGGGTCTTGGTCTACTAACTTTAACAGGTTCTGTTCTCTTAATAACAAAACCGTATCATC  
GTGAGTAATAATTCTGATGTTATCCGTAGCCAGATAATAAATGTAATGTGCAATACGGTGTGTTTTAATCTGAATAAA  
ACCAGGAGAAGTTTTGCTCTTTCTCACTTGCTCAAACATCTTTGAAAAACAACGACCTGATCCATCAGGATAATAACC  
TCTTGTTAGTTGTGAGACTGCGTAGTGTGCACGATCGGTTTTACCACTTCAATCTGGTCTGCTTTGGCTGTGATATGT  
ACAGAGTGTGATAGAGGGAATCTGAATTTCCCGGTGAGCATTGTTGCAACGGACAGCTCCGGTACAAACGCTGTTGT  
GGGTTGAGATTATAACATCTGTCTAAGGGGCGGGATAAAGGTGAAATTAGGGGGCATGAAAGATGACTTTATAACCTTG  
CTCACCCAGTGTGTTAAAGTTGTTTTGCCTTCTGTTGGTGCATGCTGTCCAGACAATCAATGTTTGCCTGGGA  
ACAGTTCGGGCGCGGGATTCAATGGGATCAGCAAGAACAGAAATGTCCATCCTGACAATGATAAACGCCATGCTTCC  
AGCCACAATCGTCTCTCTTCAACATTCACGCCATCAGAATGGCTTCTTACCAGGCTTACGGCGCATTTGAAAAAG  
CGAGGTTGCTGCTATTCAATTAATGCGCGTCAAACATACTGCTCATAATGCGGGAGGTGTTGTGATCAAGCACGAGAC  
GCTGGCGAACGGAAGGTAACATGATTAATCAATTGATCTACTGGTACTCTGACCCAGTGAATAAATCTCGCGCGT  
AGTTTGGCAGGATTAGCCATGCGAAGAATTGACATCATCTCTTCTTGCAGGGCGCTCCAGTCATCTTCCGTATCCTGGCT  
GGTGGTTTCCAGTAATGCTTAACTTTGCCTACAGGGACGCCATTAATCAACGCTTGATCTCTCGATGCGTTGTA  
TGCTCTTCTCATCAAGAGTCGGTGTCCGCTTCACTGCGCTGTGGTTTTAACAAAACCGTAGCGGCGTTCAGGCCGG

AGAGTGACAGGATTAATCCCACAACGTTACGCAACATACCAATGCTGTAATAAGCCACAATTCCTCCTTGGCGTACAAA  
ATCTCCGTCGCTGTACACGACCCAATAATACTTTGTACAATATACGCTAAAATTGTACAAAGTATAAATAAGATTTTCAG  
CTAAATTGGATGAAACATTATTTTTAATGTGGATTAATTTAAACGTAACGTATTCATTTTACAGATGATTTACTGAAAT  
CATGTGAAAGAATGTGCTGAAAATTATTTTTCTCTGGCCACGCTATGGAAGGATACCATTCAATTTAGCTTTAGCAAAA  
CAGATCTCCCTGAAACATCTCAATTCCTGCGGATTCAGGCCACATCCACTCTTCTGGTGTGCCACGCCCATAGCACTGA  
CTTGAATTTCAAGTGATGTACAGCATTATGATCGCTGAATAATTGCCTGCCGTGGCCACTTTTATGAACATTGGTA  
ATCAATTCCTGACTGATTTAATTCTGTACAGGCTGGAAGCGTGACAGGAGTAACAAACCAGCAAAACCTGCGCCAAAATG  
ATCAATTGCTACACTGATACCAGCAGCCTTTAGCGATTTAATCGCTTCGGCAAACCTCATCAAACCGAGATATGACTTAC  
TTTCAGTAAATTAACGATGATTTGTTACAGCACCAGAGCATTGGCCTTTATTTTATTAAAGTAAAAAAGAGACTGCGTCA  
GGTTCGTTAACAGGGTCATAGGTAATAGATTGATTGAAATCATTTTATCACCAGCTCAAGTGCCTGTGCCATCGTGAA  
TGCAAGCGCTTACTTTTGAGATCCGCTGTGTAGATTTCCCGCTTTACGCTGCCAACCCTATGGCTGATGGGCTAT  
CTTCATTTTTTTGACAAATGGCTTCAAAGCGATTATCCGCCCGGATAAGGGATCGACAATAGGATGAAAGGCAAAGTGG  
TCGTTTATAGTTGGTGAAGGGCACAGGAATCAAGTCTTTATCAGATCCGTCAGCGATAAAAAGCCAGGAGTCTTCGGC  
AGGATCTCGAAATAGGTTGATTGTTGCGTTGCAAGGACAAAAGTACGAAAAAATTGTAGCGCTCTGTATCATAAGTTA  
GCTGAAATTTTGATGTGCCTTTGTGCAATACGGCCTGTAACACGTCATCTCGCTCGTGCAGCGCAAATCAAATAATTC  
ATTCGCCGTTTTGCCAAAACGGCAGCAGCGGTAATCGCACAGCAGCTCAACAATATTATAGTGCCTGGATCCTGGCA  
TATAGCCCGATATATCATTTTAACTGTTCTTCCGACCTTCCAGAAGCTGGAAAAAATGAGAACCATTAAACAGTAAGA  
TCCCTGTTACGTCAGACTGCATGTTCTGCGATTTGCTATCGAAACATTTCTTCGATTTTTTTGACAGGTTGCTCGTCA  
CGTATATGGCTACGATAAATAAGGGTGGTAAGCATTAAACAATCCAGGGTAATGGGTGAGGCGAGAGTAAGACGGTAACAG  
ACATATCTTCTGTGCTTTCTTTAATACAAAACATAACCGTTTCTTTACATTGATAAAAAATGAAAAAGTTGAACA  
CTAGTTGGCGAAAAATCTTGATAGATTGTACGTTAAATGATGCAATATGTTTTATCATAACACATTGTTTTATATGCAT  
TAGCACTAATTGCAAAAAATTAATTTATCATTCTGTACACATATTCGTACAAGTTTGCTATTGTTACTTCACTTAACAT  
TGATTAACATTTTTAACAGAGGCGTAGCATGCATCAAATTCAGTGACTTTAGATTCTGCGGGAGCAATCACTCGTTACT  
TTGCAAAAGCTAATTGCATACTCAGCAGGAACTCTCGGGAAATTGTGACTGAGATTTGAAAGATGGACGTAATCTG  
AGTCAAAAGTCGCTTTGTGCCAACTTCTTGGCGACTGGAACACGCGACTGGGGAAGAGGAACAGAAACATTATAATGC  
ACTAATTGGGTTGCTTTTTGAATAATGCAACAGCCTGATTATTTAACAGGTTAGCTATGAAGTCGTTATGAAGACATCTG  
ATAATGAACGTATAAAATATGAAATTAATGACTGGCCAGGCGGTGCTCCAGATACTGCGCATGAAGATAAATTTTTTATTGCAG  
ACTCTTATTAAGCAATTAATCGTAATGAAATCGGCTGAGGAAGATGCTTTCCGACGCGATTTAATTGACAGCATAATTCG  
TGATTTTAGCAATAGTGATTCAGGAGGGCCAAACCGAAGAACAGCGACAGCTGACAATAAAAGTATGTTCAATGGTAAGA  
AAATAAACAGAAATACATTAATAATTTTATAAGTAAGATGAGAGGTTACCATGCTTGAAGATACTACAATTCATAATGCAAT  
AACTGATAAAGCGTTAGCAAGTTACTTTGCGAGTTCGGGTAATTTGTTAGAAGAAGAATCAGCAGTGTTAGGGCAGGCTG  
TCACCAATTTAATGCTTTAGGCGATAATGTTAATAATAAAAAATATTATCTTAAGTCTGATACACTCCTTGGAAACAACA  
AGTGATATTCTCAAAGCTGATGTGATTAGAAAAACTGGAATCGTGTTGCGATACACAGCTGATGATATGTAACCTTCT  
AATTATTAAGTATAAGTTTATAGAAAACCTCATTATCTTATTTTTGTCTGTGCTTTAGACTATACACAGCATAATTTTA  
TTGGGTTAATATTTCTACGAGGCTGACATGAATAATTCAATCCAGAGAGATTTATTTTTCAATGTGCTTTGTTAAAAA  
TCTCGAGAGGGAGGTGTTATGACGCATGGGTATGTTGATAGTCATATTATTGATCAGGCTTTACGCTTTCGCTTTAAAAA  
ATGAAACAGTGTGATCTTTCTGATCTATCTGCAAAATATTGCAGTACATTGAAATGCATAAGACTACACTAACGGAT  
ATCATTATTAATGACAGGGAATCCGTGCTCTCTTAGAACTTGAGTAAGGTTTTAGAATAACATCAGCTGTATCACCATG  
CTGATGCAAAGTGAGCATTTCAGGCGTTATGCTTTCTTATTATGTCGCAATATCAGGTGTCAAGAATGGAGAGTTCTCG  
CTCTCCATTTGACGCCTGATATCCCGCCTAATTTTGTACTGCCTACATTATGCTCAATAATTAATGGGTTAGAT  
CAAGATGGAGAAAAATTTATCTTTCGGCGTGGATATTTCTTATGCTCTCTACCATGCTCTCTGTAGATGCCAGCGCAGCG  
AATGAATGGCATTTTTATGTATTAACCCCTTTGGCCGGACAAGCAAATGCGCAATACACTCATAACCCATCCTCGTTGCG  
ATATGCTTGTATTACCCTGTGCTATTTTGAACATCCAGCTCTGGTATTTCCGCAAAAGCAGAGTACCTGGCGGGAGC  
GAGATATGCCGCCAACAAATCAATCATATACTTGAAGAAGCGTCACAAGCGACTCAAACAGCGGTTAACATTGCCGGGA  
AGGAATGCAACCTCGAGGAGCAATATCAGCTTGGCACTGAAGCAGCTCTGAAACCTCACCTGCGCACAATCATATTCTC  
AAACAGGGAATAGTCTGGTGTACATCCCTGCCTGGGAATCGGGTCTGTTGTCTCGTATTCCTGTTTTCCCGGACAGTAA  
TTTACTGTTGGCTCCAGCAATCGACACCGTTAATAGATTACCTATCCTGCTCTATCAGAACCAATTTGCAGATACGCGCA  
TTTTGGTTACGATAAGCGATCAGCATATTCGTGGGGCACTTAATGTACCCTTGAAGGGGTAAGGTATGTATTACGCGTG  
GCGGATGACATTATTGGACCAACGGGTGATGTGATGACGCTTAATGGACATTATCCCTATACCGAGAAGGTTCACTCCAC  
AAAATATCATTCTACTATTATCTTAAACCGCCGCACTCTTTAGCTTCTACAGACTTATCGATAAAGGCTTTGGGATTT  
TAATATTTATCTGTTAATCGCTGCGCCGCTGCCTTCTGCTTGTATAGATATTTCAATAAAAAGCGCAACGCCTGAAGAG  
ATCCTGCGACGGCAATAAATAATGGGAGATCGTCCCTTTTACCAACCTGTGGTAAATGGTCGGGAAGGGACATTGCG  
GGGAGTTGAGGTGTTAGCCGCTGGAACAACCTCACGGTGGATATATATCACCCGCGCATTTATTCCACTTGTGAAA  
AATCCGGATTAATCGTTCGCTTACGCAAAAGCCTGATGAATCAGGTTGCCAGACAGATGAACGCTATCGCGAGTAAATTTG  
CCGGAAGGTTTTATATTGGAATTAATTTTAGCGCTTCGCATATTATTTCCGCGACGTTTGTGCGACGAGTGTAAATTT  
CCGTGACAGTTTTACCCGCCGATTTAAACCTGTTCTGGAAGTACCAGCGTGAGCCATTGAATGTTGATGAAAGT



TGGTTCAGCGGTTGAACATACTGCATGAAAATGGTTTTGTCATCGCACTGGATGATTTCCGGTACTGGCTACTCAGGGCTT  
TCTTATCTTCATGACCTGCATATTGATTATATCAAAATTGATCACAGTTTCGTTGGCCGCGTAAACGCAGACCCAGAATC  
AACCCGAATTCGGATTGTATTGGATCTGGCGCGTAAACTTTCGATCAGTATCGTCGCTGAAGGTGTCGAAACGAAAG  
AACAACTTGACTATCTGAACCAAATTATATCACATTTAGCAGGGTTATTATTTCTATAAACCTGTTACATACATCGAC  
CTGGTCAAAATTTATCCTTTCTAAACCGAAGGTGAAGTTTGGGTTGAGTGAATAATTGATCAGTAAGGCCATAGTGCGGTT  
TAATTATAGACAGCTAATTAGCTCGTTGCCTCTTGTACTATTGTTCAATTTTTGTTTGCTATAATTGTTTGAAAGTTT  
TGACAGGATTGCCATTAGTAGCATGAACAATAGTAATAATCTGGATTATTTCACTCTCTATATCATATTTCCATTGCAT  
TTATGCTGATCACCTCCTGGTCATCCTATTGCAAAACCCAGTACCGGGCTGGGAGAAGTCTTGTGACGATAAATTTG  
CTAATGCCCTTGTGGCTGGCGATCAATCTGGTTAATCGATTAAGAGAAAGACTCGTCAACCACAGGGATCAGCAATA  
ATCTTTAGTTTCTACTGTGAGTATGCGGCTGAATGGGTTGCTGGCAGTGAACGCCTGGATCATTGAAGGAAAGGCATT  
ATTGCGCAAATAGTTGTCAACCCTGGTGTATCACGTTGTTTTATATACACCGAAATAATCCTCATCGCAACTATTA  
ACAATTTTGATGTGCAAGAGTTATTTGTTAAACAAAATCGTCACTCAAAGTATCAATGTCATGAAAATAAGGTGAAAA  
ATGATAATGCCGACTTATTTATCATTTATATATTGTCGCTGTTTATCTATTTAAATTTTTTGCTTTTTGTTTTGCTT  
TACCCTCCGTTTTGGTAATCTGAGCTCATAGTTATTTGACCAGGAATGTTTGTAAATCCAATGAATGGATGGTTAATCT  
ATGAAACTGAAAAAACTCCCCGGGTTAGTTGGGACTTATTGCTCTGGCGGTGGTAATGCATATGCAACACAATTTGTT  
GGATGATTATAGTATAATTTCTATATGACTGATGAAGAATCGCCGATTGAAATCAAAGATAATAATCCGATAAGTAATG  
GAGAGTATCTAACCCTGAAGACGAAAGCCATGCTGTGAAAGTGGATGACGGTGAATGGAATATAAAATAATGCCAGT  
GTGATGACTAGTGGTATGATCTTATGGTATTTCTGTTGATAGTCAAAACAAAGTATTATATAAAGCGATAGCGATAT  
TAAGACCTCTGGAAGCGTATCTGACAAAGAAAATGGAGGGATAACAGCCAGCGCAGTAGTCAAGTTTGGTGGCACCA  
TCTTTATGAATGGTGATAATTCAGTCGAGTCGGGTGGGGCATATTCAGCGGGACTTTTAAGCCAGGTTAATGATTCTGAA  
AAGATGGTAAATAACACCCGCTTGAACACAGATAAAAACGAACATTGTTACCTCTGGGGAAAATGCAGTAGGTGTTCT  
TGATGTTCAAGTCTGGAGAGTCTCGAACATGTGTCGATGCTGTAGATGATGAAGTTAGTGATTCTAACAGTTACGAAG  
TTATTAGCCGTGCTGATTTAAAAATGAATGGTGGTCCATAACAATAATGGCATTAAATAGCTATGGTGTATGCTAAT  
GGGAAAAAAGCATATATTAATTTAGATTATGTGGCACTTGAACCTGTGGCTGATGGAAGTTATGCAGTTGCTATTCGACA  
AGGTAACATTGATATAAAAAATAGTTCTATTACAACAACAGGCACTAAAGCCCCATTGCAAAAATATACAATGGTGGAG  
AGTTATTTTTTCCAATGTCACCGCGGTATCAAAACAAGATAAAGGAATATCAATTGATGCATCAAATATCGATTCTCAA  
GCCAAAATAGCACTATTAAGTGTGAACCTTCAAGTCTTTGGATAGTATTGATGTTAACAAAACATAACCGGATGTAAG  
TATCCTTAATCGAAGTATTATCACACCTGGTAATAATGTTCTGGTTAATAATACTGGAGGTGACTTAAACATAATTTCTG  
CCGACTCTATTTAAATGGAGCGACTAAACTCGTCAGCGGCACAACCACGCTGAAGCTTTCAGAAAATACAATCTGGAAT  
ATGAAAGATGACTCCGTTGTACCCTGACTAATTCAGACAGTATTATCAATCTTTCGATGATGATGGTCAAACATT  
TACCCAAGGAAAAACATTAACCGTAAAAGGTAATTATGTCCGTAATAATGGTCACTAATATCCGCACCGTATTAGGTG  
ATGATAAATCGGCTACGGACAGACTTATTGTTGAGGGTAATACTTCGGGTTCACTACCGTCTATGTGAAAAATGCTGGA  
GGAAGCGCGCGCGGCCACGCTAAACGGGATCGAATCATAACTGTGAATGGCGATGAATCTCCAGCAGATGCCCTCAGATA  
AGGTGATGCAAGGATTGCAGCTGGAGCTTTCGAATATCACTAAAACAACAAGGCAAAAACCTGGTATTTGACAAGTTATC  
AGTCAGTGAATGAGGAGGATAACAGCTCAGAGGGAAATTCAGAATCAACAGAAACGCCTACCCCGTCTGCGCCCCGAA  
GCTGGAAGTACGTCGCTAACCTGGCAGCTGTAACACTCTTTTTGTTATGCGTCTGAACGACCGTGGGGTGAACCGG  
CTACATCGATCCTGTAACGAACAGGAGCGTTCAAGCCGACTTTGGCTACGTCAAATGGCGGGCATAATGCCTGGCGTG  
ACAGCAACGGACAGTTGAGAACGACCTCGCATCGCTACGTCTCGCAGTTAGGGGGCGATCTGTTAACCCTGGTTTTACC  
GATAGTGACAGTTGGCGTTTGGGAGTATGGCTGGTTATGCCCGGACTACAATACTTAACTCATTCCAGCTGTGCGATT  
TCGTTGAAAGGGAGTGTGAGAGGCTATAGCGCAGGCTGTATGCCACCTGGTTTGGCGATGACATGATGAAAAAGGCG  
CATACATTGACTCCTGGCGCAATATAGCTGGTTTTAAAAACTCGGTGAAAGGGGATGAATTAGCCTATGAATCCTATAGC  
GCGAAAGGTGCAACCGTCTCGCTGGAAGCGGTTACGGTTTTGCCCTGAATAAATCCTTGGTCTGGAAGCGGCAAAATA  
TACGTGGATCTTCCAGCCACAGGCACAGGCTATCTGGATGGGCGTGCATCATAATGCGCACACGGAAGCCAATGGCTCAC  
GTATTGAGAATGACGCAAATAACAACATCCAGACCCGACTCGGCTTCCGCACCTTTATTCTACTCAGGAGAAAAACAGC  
GGTCCGCACGGTGACGACTTTGAACCTTTTGTGAAATGAACTGGATCCATAACAGTAAAGATTTTGTCTCTCAATGAA  
CGGTGTGAAAGTCAACAAGATGGGGCGAGTAATTTGGGGAAATTAACCTGGCGTAAATGGCAACCTGAATCCAGCGG  
CCAGCGTCTGGGGAATGTGGGCGTGCAGCTGGGTGATAATGGCTACAATGACACCGCAGTATGGTGGGCTGAAATATA  
AGTTCTGATCCCGCGTTAGCTAAAAAACCGCTCGTATTATCGACGCGGTACATATGAAATATTATTTTTGCCGATA  
GCACGATGGTGTCAATGCGGTGATCAACAGCATTTCGGGCTTTAGCGCAAACCTGATTGATTTTTCTACCAC  
TTTGGCGCTCAGTTCCGGAGATTGCTCAATTTTTAAATCACGGCTGGCAACGCTGGCATTACCCATTACCGCAACAATTT  
CTGCAACCTGTGCGCTGTGAGTTTTGTCATTTCTGTTGGCTTCTGCGCAAGTAAATAGGTTTCTGACGGCAACCGTTT  
TTAATATTGTAGTCTGCGCCAGGTCATTGGTGGCAAAACAAACAGGCCCGCCAGTAAAGCAAATTTTTTCATCATCAT  
TCCTATTTTCAATTTACCCAGAATTGCACCACCCGTAACCGCAATCACGGCACCTTTAATCGCCCTTCGAGGCCATTGC  
CGGTGAGAAGCCAGTGACAGCAACCGGCGCACCCACTTTTGACCTTTACGCGCATTTTTACCGTGGCGGCTTTT  
TCTGTTACTGCACCAACACCAGCGCAACAGCTGCACCTTTAGTACGCCATTAACACCATTGCCAGTAAAGTAAACCAAC  
GCCTGCGCCTAGCAATGCACCTTTCGTTGGTGGGTTTCAATCCGCCATCGCTGGCGTGGAGCAGAAACAATGCTGAGATA

GCCCGAAGGCAAGTATTTTTCTTCAACTTAGATGTCGGTATTAAGTAAGTTGCACACACAATAATTCGTCTTCAAT  
TAAGATCTGCTTAACTAAAGAACGCTCGCTATTATTAGATAATTCAAAATGAGCGTGGCTGTGATGATAGGAATTATGT  
TTTTACGTGAATGAGAATAATCTTAAATGAGGAATAACTCATTGATTGACAATATTTTTATTCAAGAAGTGCATTGAC  
TGTTAACGCAATGTTGTAAGGTAAGATAATCTGATTTATCAATATTATTGTGTGATTTTTATGTGAGCAGAAGATATTC  
ATCAGCAACGATTACATTAGTCATTTTTATTTGCCGACGGCCTCATTGTCGAAAGATAAGCGTACGACAGTATTATCAGA  
AAAGAGTGATTTTTATCCAACACACTTCAGCGCACTGCGTGTAAAAAATGCCTCTTTCTTATGCGGGATATCATCATT  
TCATCATGATGCTTTGGTGAGCGGTGAACACAATACACCTGCGCTGTCTTTCAGGATGAATCCCCTGGTCTGGTGCCT  
GCGGGCTGATGTTGACGAGAGCTTAGGTCACCTAGACGCTACTATCATTTATCCAATGGCATGGAATCGAAATCAGTCG  
ATACCCGACGATATATCGTGAACGGGTGAACGCTGAGTTACAACATGCGCCTGGGGAACGGTATGGAATGAACCT  
GGCTGAAGGCGGCTGTGCGCAAAGAAATTTGTCGATGATAACCGGGTGAAGGTGAATAATGACGGTAATTCGTCAATGAT  
TTGTCGGGCAGACGTGGAATATACCAGGCAGCTATTAAGCCTCATTAGCAGTACGTTTAGCGGACATCTCGGGGTGGG  
GTATAGCCATGGTGCCGGTGGAAATCCCGTGAACGCGGTGGCTGGTGTGAACGGTCTGACCATCAACGATTA  
AACTGCGCTTCGCGCAGTTTTCTTTACAGGATGTTGAAAGGGAAAATTCGGGGCAAAAAAGCCCGCAGTTACGGC  
GGGAAACCTCATCCTATGGGAGAACAATGAATAATGAAATTCGGGGTATCATCTCCAGTATATCCATACTAACAATA  
AGTTATTTACTCAACCAGGCATAAACATTTTTGTTTTGTGCGTGGGAACAGCCTTAAGGTGTAAAGGGGGAGGTGGAAT  
AGCAATGAGGAGTATCAGCAAGAATACTCGCGCTTTACCACAACGTGGATGAGAGGGATGAAAAACTCAAGGCAGAGAT  
AACTCTGCCTTGAAGATAAATGCGCTTTTACAGCGGGCTTATTTAGCTCTTCTGCTTCCGGTAAGGTACAGTTCAGCTC  
AAGAATAGAAATATCGCCATCTTTTTGCTCAAGCTGTACGTTACCATCTCAGGATCAATTTGTACGATTTTACAAATGA  
CCTCAAGAATATCTTTACGCAACTGCGGCAGATAATGCGGTTCTGCATCGCTGCGACGGGTTAGCAACAATAATCTGC  
AGCCGTTCTTTGCAATGTTGGCTGTGTTTTCTTCCGCGAGAGAAAGAAATCGAGTAATGCCATAACTTATCTCCGAA  
CAAGCGTTTGAGGAAGCCTTTCTTCTCTTCAATGAAGCGAAAGGACGTTCTTCTCCAACAGACGTTCTACGGTAT  
CTGCGTAGGCTTTACCCGCATCGGCGTAAATGTCGAGAATGACCGGTTACCCTGGTTAGAGGCGCGCAATACTGATTGA  
TCCTCTGGGATCAGCGGACGAGTTTGTGCGCAGGATCTCCAGCACATCTCCATGCTCAGCATGTCACCTCTGCTTAC  
GCGGCTGGGTTATAGCGGTTAACAGCAGGTGCTCTTAAATAGGCTCTTCCGCTTTTCTGCGGGCGTGATTTGACG  
CCAGAATGCCTAAAATACGGTCAGAGTCGCGTACTGAGGAGACTTCCGGGTTGGTGAATAATGGCTTCGTCTGCAAAA  
TAGAGTGCCATTAACGCACCGGTTTCAATCCCTGCCGGGAGTCACAAACGATAAATTCAAAATCCATCGCTTTAGATC  
ATCAAGAACTTTGGCGACCCCTTACGGGTGAGGGCATCTTTATCGCGTGTTCGATGCCGCGAGAATATAGAGATTTT  
CAGTACGCTTATCTTTAATTAACGCCTGATTTAGCGTTGCATCGCCTGAATGACGTTGACGAAATCGTAAACGACCCGG  
CGTTCACAACCATAATCAGGTCGAGATTACGCAGGCGGATATCAAATCTATCACGACAGTTTTCTTCCCTTCTGGGC  
CAAACAGTGCGGATGGCCGCGCTGGAGGTTGTCTTACCAACACCCCTTTGCCGAAGTAACAACAATAATGCGTGCCA  
TAGAAATTCCTTGTTAAAAAGGGATCAATTTAACGGTTGAACGGTCAAAGCGTTTTTCTGACTAACTGCAGTCGCGCCGCTT  
TGCCATAAAATTCGTGGGATTTGATCACTCAGCCAGTATTCACCTGCGATGGACACCAGTTCGCCATCAGGTTCTGTA  
CAAAATATTTGCGTTTCCGGTCACCCTTGGCCCTGCCAGCGCACGACCGCGCATCATGCCATAGACATGAATGTTCCC  
ATCGGCAATCAATTCGGCCCAGCGCTAACGTGGCTTGAACAATCAGATCACATTGTGGAGCATAAATACGCTGACCCG  
AACGCACCGGGGATCTATTAACGCGTTTTTGTGACCGGCGTTGATTTTGCCTGGAGCCTGCGGTGTGGGAGCTGGA  
CGTGGCGCTTTTTCTTTCCCTTCCGTGAGGATAGGCAGCCCATCTTTTCAATTTGGCTTAAAGTTGCGCATCTTTGCA  
GCCACTTACGCCAATAACCCGAAACCGGTTGCCGAAACCGCCTTATGCATCGCTGACCAGTTTACCGGGTCTTCCAGTG  
CACTGACGTTGAGTACAACGGGGCATGTTTTAAAAATGCGGGGCTGAGCGATTTTGTCTTCCAGCGCCTGATGGATA  
ACCTTAGGTTCTGCCTATGCAGATGAACCACAGATAAAGTGAAGCTACTGCCTTTAAAGCTGATTGGCGTGTGATGACAT  
CCTGGCCTTACTCAATTAGCTATTAATCATCGCCAGCGCGATGATGTTCCGAAGACTATAAGGCATGTTATAGTCTGG  
ATTATATTGAGCAAGTCACCCCTCCATTTATTAGAGTAAAAGTCTATTCTGTGATAAATGGCGCTGATTCATAGCTTA  
AAAAATACCCTTGCAATCAACCCATTGCCGTGCTACTTTTGATTGTTCTTATTACGCTTCTTTTTCCGACCCCTAAT  
CGTGACAGCATCTCCAGACCTGTTAAATATCCAGTATTGAGGCAAGTGATTTTTTACCACGCCAGGCTTTCTTAACT  
TTCCATTTTTTGCAGCATCATAAAGAACAGATAACCGTTATCTTAATATCCGCCACAGAATTGCTCTATCATAGAAACC  
GCAGAAGACGCTGATACTTCTGTCAGGTCATCGTAACTCGTCCAGGTCAGCGGTTTTGATTACGGATTGATGATGAAAT  
GAGCATAAGTGTGTACGGTTGGATTATCAGGATGTGCTATGAATATGATGCGTATTTTTTATATCGGATTGTCAGGTGT  
GGGGATGATGTTCTCATCAATGGCGTCTGAAATGACGCTGGCGGACTTCAATCTCCGGCGTGCAGCGTTGTTGCGACC  
CGTATATTTGTGTAACCTCAGATGGCATTTCAGAGTAAACAAGGAAATATCTCGGCGAAAAAGCCGCTGAAAACCTA  
CAATCATTACAAGGCTACGATCCAGCGAATTTACATTCGCTAACGGTGTATTTTGCATGTTAAAGAAAAATTATGTCG  
TGATGATCGTTATTTTGGTGTGGATGTAAGCGGAGTGAAAAATCAATCAACACCACAAAAGATGTTATTTATGTGTC  
GTGAGTGATGCTTTTACATTATGTTCTATTGCTCATTAACTCTTGAGCGACAGAGAGGAGTGGGGCATTAAACGTTT  
ATGACGGGGAGAGTCCCGTGGTGGACATTTACTTAATTTGAATATCGACGTTATTTTTTATGTTTTTACGGG  
CGTCTTTTCCGGTTTTGCAACACTCGCAGCTCATATTTGCCAGAAGCAGGGAGTGAATATCAGCGCTTCATTAGAGATACT  
GGGAATATCTGGATAAATCAACTGAATCATCGATTCTGGCCGAAAGAGGTAAAGTATCAGCGCTTCATTAGAGATACT  
CACATGCATTTCTGACCTTTTTTGGCATAGAAGGTATATGTATCGTAATCGTATCCCTTTATTTCCGGGAGTACTGAG  
CGCTGCTATGGCCTTTTCTGAACTCAACATTGACATTTTACCCGACGAAAGCTCGTGGAGGTTAGCAGTGCAAGCAGC

AATACAGCCTTCTGATGCTCTTGATTTTCATTGGTAGTCTCCTGTTGAGAATGAGTACGATGAACTGTTATAATATAAC  
AATCCCTAACGGGAGAATCCAGTGGCTTTCCTGCGTTCGGTAAAATCACGTTGCGGCATTTTTGCCGGGGGATTACTT  
ATAAAGGGGGCATGGACTCAACAAACCGTAGAAATCTACAGCTGGCTGGCTTGTGGCGGGTTCATTGATGTTAGCTT  
ATGCCAAAACCTGGCATCTTAAAGAGTAAAAGTATGTTTTGTGTATTTATCGAAGCAGCAAGCGTGACCAGACCTATTT  
ATATGTCGAAAAAAAAGACGATTTTTCCGCGTGTTCCTGAGGAACTGATGAAAGTTTTGGTCAGCCTCAGTTAGCGATGA  
TTCTGCCGCTGGATGGGCGGAAGAACTGGTCAATGCCGATATTGAAAAGGTTAAACAGGCATTAACCGAGCAAGGTTAC  
TATTTGAGTTACCGCCACCACCCGAAGATTTGCTGAAGCAACATCTTCCGTCATGGGGCAGAAAACAGACGACACTAA  
CAATAACCGATATCCGGCGGTGGCATTATCTTTGTCGGCGGGTTTTCATATCCACGATAAGGTGAGGGGAACGTTAT  
GTATCAACATCACAACCTGGCAAGGTGCGCTGCTGGATTATCCGGTGAGTAAAGTAGTCTGTGTTGGCAGTAACTATGCCA  
AACATATTAAGAGATGGGCAGCGCAGTGCCGAAGAGCCAGTGTGTTATTAACCAGAAAACGGCACTGTGCGATCTG  
CGGCAGCCATTGGCGATCCCATCCGATTTCCGTTTCAGTTTCATCATGAAGTCGAACTGGCGGTGTTGATTGGCGGACACT  
GCGTCAGGCTACGGAAGAGCATGTCCGCAAAGCCATTGCCGGTATGGCGTGGCGCTCGATCTGACATTGCGTGATGTT  
AGGGAAAAATGAAGAAAGCCGGGCAGCCGTGGGAAAAGGCTAAAGCGTTTGATAACTCTTGTCCGTTTTCCGGGTTTTATT  
CCCAGCGGGAATTTACCGCGACCCGCAAATAACAACGCTGAGCCTGAGCGTAAACGGCGAACAACGCCAGCAAGGTAC  
GACTGCGGACATGATCCATAAAAATCGTCCGCTGATCGTTATATGAGCAAGTTTTTTACCCTCAAGGCCGTTGACGTTG  
TGTTGACAGGCACGCTGATGGCGTCCGCTTGGCAAAGCGGTGATGAGCTGACAGTCACTTTTCGATGGGCATTCTTTG  
ACAACTCGCGTTTTGTAATACTTTTTGCCGCTGAAAGCGGGCGCAAACCTGTCATCGCTGTGCCAGACTGGTTATAAGG  
TGCGTTTTAACGTAATGGCGGAACACCTGATGAGCGATGTACCTTTCTGGCAAAGTAAAACCTGGACGAAATGAGCGAT  
GCGGAATGGGAGTCGTTGTGTGATGGTTGCGGTGAGTGTGCCTGCATAAACTGATGGATGAAGACACCGACGAAATCTA  
CTTCACTAACGTCGCTGTCGCCAGCTCAATATTAACCTGTCAATGTCGGAACACGAACGTCGTTTCGAGTTTGAAC  
CCGACTGCATTAATAACCGTGAATACTGCCAACATTGCAATGGCTGCCAATGACCTGCGCTTATCGTTTGTGGCG  
GAAGGTAAGATTTACCTGCGTGGCATCCGCTACTTACTGGTTCGAAAGCGCAATGCATGGTGAACGTATCTCTGTGCG  
TCATATCGCAGTGAAGAATCAGAAGTATTGACTGGCAGGATCATATCTTAAATAAACCTGACTGGCGCAGTGATAAA  
TTAATAGATGCTGATGGGGCTTTCTTAATATACGCTGGATGCTGCCATTTCTGAGCCCTGTTTTGAAAGCGCTCT  
GTCATAATGAGAGTTACCCGATACCTTATTATCAACAGGTAACCTCAATCTTAAAAAACGTCGTGTTTTTAAATGTG  
ATAAACCTTATACCTTGAGTACATGGAGAGAATAATCGTTATCAGACTTCAGGTACCTCAAAGAGTGTCTTTTTACCGT  
GTCTTTCTGATACTCATTACAGGTGTTAATCATTTTTTTGGCCGCTTCTTTTAGCAAAGAAAGCATTAAATCATCATAA  
TCAACGTAGAATCTGTTGTTTCAGTTTCCGTTTTATCTCACCGATGGCGGCTATTTCCGGTGGTTAATTTCAATTTGGC  
GGCATCGATATCTTTATTCGCTGTTTAAACCGTGTAGACAGGGTGGTAAAGAAATTCTGCACAGATTTTAACTGTTCT  
TCAATCTGGAATCAGTTTTCTTCAACTACGCCCGCAGCAATAGAATAGGAAATGATTAATCCAATGGACCGGCGAG  
ACACCGGCTGCGGCACCGGCATATGCTTCTTCTGATTTTATCTACCTGTGACTGGAATAGCTGCTTTTTTCTGAAAA  
ATCATTGGTTAACTGGCTATCTAACGCCAGCAGTTTCCCGAAGCGTTGTTGAACTTTGTGAGCTTACCAGCAGGGATT  
TTTGGCCTTATTAGCTTCGTCATCCAGTACCTTAATGAGAATGTCTTTCTGGGCGGATGCTTTCTTCTCA  
TTGTAATCAATAAGCAAAATATACGCTGCGAGCAATTGCGTCGCAACACCACACCATTCATACACTGTTTGGGTTGC  
TTCAAAATACTTATCCTGGCTATCCATAAGTAAGTTTTAATATCGCCGACTAAAACGGAGGCTGCCTGTGAATACTCCT  
GTTTAAAGCGACTTAACTCTTTATGGTTTCATCAAAGGTCTGCCAGGGGATGACCTGATCGAGATATTTATTATAAAGA  
TCTAATGCTCCATCTGCGTTTTGATTGCGTTTTTAACTACTTCTACCGTTTTATCTGCAACGATTTTCAGTCATAATCAT  
TCGCCTCTTTAAATATATAAATTGTAATGAACTCCTGTTTTACAACATTAATAAATTTACTTTCATTAATTCATAGT  
TAGCCGGGCGGATGCGTCAATGTCTTTATTTCTAATAATGATAAATATCAAACAATGTTAATGTCAATTATGGCGAA  
TGCTTCTATTCTTTTTAGCCGGGTGATTTTTTCACTTCTGCTGGATGAGCGTCGTCGCCAGAAGCCACGTCGAGCA  
CAAGATAAGAGAACGAAAAATCAGCAGCCTATGCAGCGACAAATATTGATAGCCTGAATCAGTATTGATCTGCTGGCAAG  
AACAGACTACTGTATATAAAAAAGTATAAATTCAGGCAGATTATTATGTTGTTTATCAAGCCTGCGGATCTCCGCGAAA  
TTGTGACTTTTCCGCTATTTAGCGATCTTGTTCAGTGTGGCTTTCCTTACCAGGACAGCAGATTACGTTGAACAGCGCATC  
GATCTGAATCAACTGTTGATCCAGCATCCAGCGGACTTACTTCGTCAAAGCAAGTGGTATTCTATGATTGATGGTGG  
AATTAGTGACGGTGATTTACTGATTGTCGATAGCGTATTACCAGCAGCCATGGTGATATTGTCATCGCTGCTGTTGACG  
GCGAGTTTACGGTGAAAAAATTGCAACTACGCCGACGGTACAGCTTATTCCCATGAACAGCGGCTACTCGCCATTACC  
ATCAGTAGTGAAGATACGCTGGATGTCTTTGGTGTGGTGATCCACGTCGTTAAGGGGATGCGCTGATGTTTGCCTCTGT  
GATGTAACCGGTTTTATGCCAGCTGTGAGACGGTGTTCGCCCTGATTTATGGGGTAAACCGGTGGTTGTGCTATCGAA  
TAATGACGGTTGCGTTATCGCCGAAACGCTGAGGCAAAGCGCTTGGCGTTAAATGGGCGATCCCTGGTTCAAACAAA  
AAGATCTGTTTCGTCGCTGTGGCGTGGTTTGTCTTAGCAGCAATTATGAGCTTACGCAGACATGAGCAATCGGGTGATG  
TCGACGCTGGAAGAGCTATGCCCGCGTCGAGATTTACAGTATTGATGAGGCATTCTGCGATCTGACAGGTGTGCGTAA  
TTGTGCGATCTGACTGATTTTGGCAGAGAAATTCGCGCAACGGTGTACAACGTACCCATCTTACTGTTGGTGTGGGGA  
TCGCCAGACAAAACGCTGGCTAAGCTTCCAATCATGCGGCAAAAAAATGGCAGCGGACAGCGGTGGGGTGGTGGAT  
TTATCAAATCTGGAACGCCAGCGTAAATTAATGTCTGCTTCCCCGTGGATGACGCTCTGGGGGATTGGACGGCGGATCAG  
CAAAAACTGGACGCGATGGGGATCAAAACCGTTCTCGATTTGGCGGATACAGATATCCGGTTTTATCCGTAACATTTTA  
ATGTCGTGCTCGAAAGAACGGTGCCTGAACTGCGCGGCAACCCTGTTTGAACGAGTTTGCACCGACGAAGCAG

GAAATTATCTGTTCCCGCTGTTTGGTGAACGCATCACGGATTATCCGTCGATGCGGCAGGCCATTTGTAGTTACGCTGC  
CCGGGGCGGAAAACTTCGAGCGAGCATCAATATTGTCGGTTTATCTCCACGTTTATTAAGACGTCACCATTTGCGC  
TCAATGAACCTTATTACGGCAATAGCGCGTCGGTAAAACTGCTGACGCCACTCAGGACAGCAGGGATATCATTAAACGCT  
GCTACGCGATCTCTGGATGCCATCTGGCAAGCGGGCCATCGTTACCAAAAAGCGGGCGTGATGCTGGGGGATTTCTTACG  
TCAGGGAGTCGCGCAGCTCAATTTATTCGATGACAACGCACCCGCCCGGGAGTGAGCAATTGATGACGGTAATGGATA  
CACTGAATGCTAAAGAGGGCAGAGGAACACTCTATTTTGC CGGGCAGGGGATCCAGCAACAATGGCAGATGAAGCGAGCC  
ATGCTTTACCACGTTATACAACGCGAAGTTCTGATTTACTGAGGGTCAAATAAATATAGCGGCAGGAAAAAGCGCTCC  
CGCAGGAGCGCGAATGGATTAGCGACCGAACAGATCACGTTTTTTCGCTTTAAACGGCTGGGAAATCACCACCAGCACT  
GCGACAATCAGGTAAGCGATAAAAAATACCGAGCAGCCACTGCGGCATTTCCAGACCTAAAAATCCCCTGACGCTCGGC  
GCAATCGCCAGAGGCGACAAACACTTGCAGCACCCTTATCCAGCGGCAGCCATTCCGGGAAACGAACCATAAAATCAC  
AGGTGGCAAACGGCGAAGGATAGAGCTGAAGCATGGTGTGCTCGTAAGTTAACTGCACACCGCGGAACGCACTATAAAC  
CAGATAACCATCGCTACATAACGCAGCGGAGTTTTCCGGGCGATCGCGCCAATCAGCGCAGCACCAGAACGCCGAATAA  
CGCGCAGGTTATAAATACAGAGCACGCAAGTTTTCCGGGCGATCGCGCCAATCAGCGCAGCACCAGAACGCCGAATAA  
CCAGAGCAGTAAACGCCATCAACAGCCACGCGCCCCGGCCTTGTGAACATTGGTTCAAAAAATCGAACATAATCATTTC  
CTGCAATATGCATAGAGTGCAGTTTTAAACCAATTCATTGCTGCCACCAGGAGGCAGCAAAAAATAGGACGCAATG  
GACAAATTATCGGGCGAAAAAGCAAACCGGCATTTATGCCCCGTAAGTTGTTATCAAAGCGTTGCTATCCAGCCCATT  
TGCAATAAACCATTCGGTTACAGGGGCAAGCGTAAACTCGACGCAGAGCAAGCCGACGAGTGTCAAGGACGAGGGTGAAGG  
CAGGGCCATCCACACCATGCGGCCATAAGAGAGGCGAATCAATGCGCGAGTGAGAGGTGAGAGGAAACAGGAACGCGAG  
CCTGACCGTTCCGGCTAGCGACGAGGGCAGATTGGTACCAGTATTAATGGCGACCGCCAGCAGCTCGTATTGCTTCAAC  
GTGATAGCGCCACTTTCCATTGCGCTTTTCGCTTGTGATATAAATCGTCCCACGAAGACGTTATCCGAAATGGATGA  
CAGCAGACCGTTGAAAATATAGAACAGCGACAGCTGAGCATGTTCCGATGCCTGCAACACAACTGAATAATTGGCGAAA  
ACAGTTGTTGGTGCATAATCACCGGACTACCGAGAAAAACCCGTCAACAGTGCAGTGAATGGCAGAGATTCCGGTGAAG  
GCTTTACCGATAGCATGCTCATCGGTGACACCGGTCAATGATGTTGCCAGAATAATGACTGACAAACCAATCAAGCCAAC  
TTCCGCCAGATGCAACGCCAGCGCAGTACCAGCCAGACGCCAATAATCGCCTGGACAATCAGACGGATTTTATCCTGAC  
GGGTACGCTGGTGGCGGCTTTGATCGTCAAACACTGTTGCAACACTTCGCGGACTTTCTCCGGCAGCGTTTACCCTGAC  
AACCAACGCAGCTTCTTACCAGCAGGCAAGTTAACAGGCCACAAATCAGAACCAGGACCGGTACCGGGCAGATGCGCAG  
GAAGAAATCGCAAAATGCCAGCCAGCCGCTTTAGCGATGATCAGGTTCTGTGGTTCCGCCACCATGGTCATTACGCCGC  
CTAATGCGGTGCCGACACCGCATGCATCATCAGGCTACGCAGAAAGCCACGGAACGTTCCAGAACCCTTTGTAATGC  
TTGTGATATGACTATCGTCTTGCAGGTGCGTGTCTTCGGTACGGGAAGAGGCTACGCGGTGATAAATACCATAAAAAAC  
GACTGCAACGCTGATCACCACCGCCACGACGTTAAGGCATCGAGGAACGCGGAGAGGAACGCGAGCCGCCACGAAAAAG  
AGAGCGACAGCAGCATTTTGGAGCGAATGCTTAACAGCAAACGGTAAATATGAACAGCAACAGCTGTTTCATAAAATAG  
ATACCCGCCACCATAAACATCAGTAACAGCAAGACTTCAAGATTTGCCGCCACCTTTCACGGACGTGTTCCGCGCTGGT  
CATGCCGATGAATACCGTTCGATAGCCAACAGACCACCGGGGAGCAGCGGGTAGCATTTCAGGGCCATCGCCAGAGTGA  
AAATAAATCCGCTACCAGCAACCAGCCCGCAGCAAAAGGGCTGATGAGGAAAATTAACGGGTTTACGATTAAGAAAATG  
ATGAGGGCGAGTTTGTACCAGTCCGGGGACTGGCCAAAAAATTCGCCATAGCGCGCGGGCCAGGAGATCTCCATGAT  
GGTTTCCCTTACCTTACAAATAATCAATGATGTTTTATGTTTAAACGCAAAGCTTAACGGTCAGGCAGGAGTGAGGCAA  
GTCTTGATAGTCAAGGGGAAAGAGATGCGGAAAAATGAAGCCTTATGATCCCTTTTCTTCTTTTGTCTGCTATCAGCGTAG  
TTAGCCCTCTGGTATGATGAGTCCAACCTTGTGTTGCTGTGTTATGGAATCTCACTATGGTCATTAAGGCGCAAAGCCC  
GGCGGGTTTCGCGGAAGATACATTATTGAAAGTACTGGAATAACCGCTTCCCTCCCGGGACTATTTTCCCGCAGAAC  
GTGAACCTTTCAGAATTAATTGGCGTAACCGCTACTCGTTACGTGAAGTGTACAGCGTCTGGCAGGATGGCTGGTTG  
ACCATTCAACATGGCAAGCCGACGAAGGTGAATAATTTCTGGGAAACTTCCGGTTTAAATATCCTTGAACACTGGCGCG  
ACTGGATCACGAAAGTGTGCCGAGCTTATTGATAATTTGCTGTGCGGTGCGTACCAATATTTCCACTATTTTTATTCCGA  
CCGCGTTTTCGTCAGCATCCCGATAAAGCGCAGGAAGTGTGGCTACCGCTAATGAAGTGGCCGATCACGCCGATGCCTTT  
GCCGAGCTGGATTACAACATATTCCGCGGCTGGCGTTTGTTCGGCAACCCGATTTACGGTCTGATTCTTAACGGGAT  
GAAAGGGCTGTATACGCGTATTGGTGTCACTATTTCCGCAATCCGGAAGCGCGCAGTCTGGCGCTGGGCTTCTACCACA  
AACTGTCCGGCTTGTGCAAGTGAAGGCGCGCAGATCAGGTGTACGAAACAGTGCCTGCTATGGGCATGAGAGTGGCGAG  
ATTTGGCACCAGATGCAGAAAAATCTGCCGGGTGATTTAGCCATTGAGGGGCGATAATCCCTTCCGTTTAAAGAGCAAAC  
CCCTCAAACGAGGGGTTTTTTGTTGTTTTACAGATTTCCATTCTTGGCGGGCAACGTTCCAGCAACTCGATGCTGCCG  
TCTTCGTTTTGCTGTTGAGCATCACATAAATCCACAGGGCAGTGCATGCTTCCAGACTTCTTTCGCCCCCCGATC  
CAGCGGTGCGGATTATGTGAATATAACGCAGCGTACGGAACGGTCCCGCGCAAATCCAGTTCCAGATCTGAATAT  
TCGGCTCCAGATTACTTAAGTTATATTGCGACGATAACCGGTTACGGATCTCCGATAACCTTCTTATTATGAATAGCG  
GAAATCTCCAGATAATTATGCCGATCGTCATCCAGCACGGTGAAGAAGCGGAAATCACGCATCACTTTCCGGTGACAGGAA  
CTGGCTGATAAACTCTCATCTTTGAAATCACGCATCGCGAAATGCAAGCTTCCAGCCAGTCCGGAACCGCCGATATCCG  
GGAACAGTATTTGTCTTCTCCGTTGGCGACTGACAAATCCGTTTAAATATCCTGGAACATGGCGAACCCGAGGGCATA  
GGTTGATGCCGCTGTACCACGGGCTGTATAGGGGGGCTGGAAGACCACATTTGGTGTGGCTGTGCAAAAACTCCAGCAT  
AAAACTCCGTTACTTTCCCTTATCATACAGATGGTTAAGGATGGTGTAGTGCCAGAAGGTCGCCAGCCTTCGTTCA

TCACCTGAGTCTGTTTTGCGGATAAAAAATACTGGCTCACCTTACGCACAATACGCAGGATTTACGCTGCCATGATTCC  
AGCAGTGGCGCATTTTTCTCATAAAAATAGAGCAGGTTTTCTGTGGTTCGGACGGATAGCGGCGCGCTTACGAACCGT  
TTTCTCTTCTCGCGCTTCCGACAGGTACGCCAGAGCATATTGACCTGACTTTGCAGATACTTTCGCGACTTTTTCTGCC  
GGCTTTCTTCTTGCAGCGAGATTTTTGCGGGCTTTGTACCGGTCCACGCCGTAGTTCATCAGCGCGTGGCACGAG  
TCCAGAAGCCGTTCTACTTCATCAACGCCATAACGCTTTCGACTCGGTAATATATTTACGGGCAAAAATCAGATAATC  
GACAATCGAAGTGGCGTCCGCTCAGCTACGGAATAAGTAATTGTTTTGAAGAAAGAGTTATGCCATAGCAGGCATGAG  
CCATCACCAGCGCTTGCATGGTAATGGTGTCTCTTCCATCAGGTAAGCGATACACGGGTTAGAGTTAATGACGATTTCA  
TAGGCCAGTCTTGTGACCGTGTATACAGCCGTTCACTCTCGATAAACTTTTTACCGAATGACCAGTGGCGATAGTT  
AATTGGCATGCCGACGCTGGAGTAGGCATCCATCATCTGTTCTGAGGTTATCACTTCAATCTGGTGCGGGTAGGTATCCA  
GCCGGTAGAGTTTCCGACCCGGTCTATCTGCCAGATAAACATCCAGCAGGTCGAACGTCAGTCCGGTCCATCGCTC  
AACGTGTGGTGTCTTATTATAGAAATCGATCGTCCGCATACGCCACCTCATTGTTGTCGGCGCTCTCTGTGTGGAGC  
ACCTCATTTCAAGCATAGAACCTGTAAAAACCGCTCGCCGAGAAATTTTTCTTTCGATTCTTATTATCAGAG  
TGCCACTAATCCGCTTGAACGGAATTTATGTGGATAAAAAGGGCGTTCAGCAGGAGATACTAAAGACGCCATATTG  
CCGACAGTCCAGGAGATGTGAGCCAGCTCACCATAAAAAAGCCGATGTTGAATAATTTTTCAACTGAGTTATCAAGA  
TGTGATTAGATTATTCTTTACTGTATCTACCTTATCGGAGTGGCTATGCGAGTTGCATACTGGGAAGTGGTGTG  
GTAGGCGTTGCCAGCCTGGTACTTAAATCAGGCAGGACATGAGTCCACGTCATTGATCGGGAGCCGGGGCCGCCCT  
GGAAACAGTCCGCGAATGCCGGGCAATCTCCCGGATATGCTGCACCGTGGGCGGCACAGGTGTGCCTTTTAAAG  
CGATTAATGGATGTTCCAGCGCCATGCGCCGCTGGCGGTTCTGCTCGACGGTACGCAGTTCAGTTGAAATGGATGTGG  
CAATGTTACGTAAGTGCAGACACCAGCCACTACATGAAAAACAAAGGGCGGATGGTGCCTGTCGGGAAATACAGCCGTA  
TTGCCTGAAAGCATTGCGCGCCGAAACCAATATTAGTATGAAGGGCGTCAGGGTGGGACGCTGCAACTGTTCCGTACCG  
AACAAACAGTATGAAAATGCGACCCGCGATATCGCCGTGCTGGAAGATGCCGGGTACCGTATCAGCTGCTGGAATCCAGC  
CGCTGGCGGAAGTGGAGCCGCGCTGGCAGAAGTGGCGCAAACTGACGGGCGGCTGCAGTTACCAATGATGAAAC  
CGGAGACTGTCAGCTATTTACCCAGAATCTGGCGGGATGGCGGAGCAGGCGGGGGTTAAATTCGCTTAAATACGCCCG  
TTGACCAACTGCTTTCGACGGCGAGCAATCTACGGCGTGAAGTGTGGCGATGAAGTATTAAGGCCGATGCGTATGTG  
ATGGCGTTGGTCTTACTCGACGGCGATGCTCAAAGCATTGTTGATATCCGGTGTATCCGCTGAAAGGCTACTCGCT  
GACCATTCAAATGCGCAGGAAGATGGTGCGCCGATCCACCATTCTTGATGAAACCTACAAAATCGCCATTACCCGTT  
TCGATAACCGCATTCTGTTGGCGGAATGGCGGAGATTGTTGGTTTTAATACCGAGCTGTTGCAACCGCGTCTGAAACG  
CTGGAGATGGTGGTTCGCGATCTATCCACGCGCGGTCATGTCGAGCAGGCGACTTTCTGGACTGGTCTGCGCCCGAT  
GACGCCAGACGCGACCCGTTGTCCGGCGTACACGCTTTAAAAATCTGTGGCTGAATACCGGTCACGGCACGCTCGGCT  
GGACGATGGCTTCCGCTTCCGGTCAAGTTGTTAAGCGATCTGCTCTGTCGACGCCAGCGATCCCATATGAGGATCTA  
AGCGTAGCGCGCTACAGCCGTGGATTTACGCCATCAGTCCGGGCCATTTACATGGCGCACACAGCTAAGGAAACGAGAT  
GACCCGTCCGATACAGGCCAGCCTCGATCTGCAGGCATTAACAGAAATCTGTCCATTGTCCGCCAGGCCGCGACGCACG  
CGCGCTGTTGGTGGTAAAAGCGAACGTTACGGGCATGGTATTGAGCGTATCTGGAGCGGATCGGGGCCACCGAT  
GGCTTTCATTGCTTAACTGGAAGAGGCAATAACGTTACGTGAGCGCGGCTGGAAAGGACCGATCCTGATGCTGGAAGG  
ATTTTTCCATGCTCAGGATCTGGAGATTTATGACCAGCACCCTGACCACCTGCGTACACAGCAACTGGCAGCTCAAAG  
CACTGCAAAATGCGCGGCTAAAAGCACCGTTGGATATTTATCTTAAAGTGAACAGTGGGATGAATCGGTTGGGCTTCCAG  
CCGATCGCGTCTTACCGTCTGGCAGCAGTTGCGGGCAATGGCGAATGTTGGCGAAATGACCCTGATGTCGATTTTGC  
CGAAGCGGAACATCCTGATGGAATTTCCGGCGCGATGGCGGATTTGAGCAGGCGGCGGAGGGGCTGGAGTGTGCGCGTT  
CGTTGTCCAATTCGGCGGCGACTCTGTGGCACCCGGAAGCGCATTGACTGGGTTCCGGTGGCATTATTTGTATGGC  
GCTTCGCGCTCCGTCAGTGGCGTATATCGCAATACCGGATTACGTCGCGTATGACGTAAGCAGTGAAGATTATTTGG  
TGTCCAGACGCTAAAAGCGGGCGAGCGTGTGGGCTACGGCGGTCGCTATACTGCGCGGATGAACAGCAATCGGCATTG  
TCGCCGAGGGTACGCCAGCGTTATCCGCGCACGCGCTACCGGTACCCCTGTTTTAGTGGACGGCGTGGCACCATG  
ACGGTGGGACCGTCTCGATGGATATGCTAGCGGTGATTTAACGCCTTGCCCGCAGGCGGGTATTGGTACGCCGTTGA  
GCTGTGGGGAAGGAGATCAAATGATGATGTCGCCGCGCTGCCGGAACGGTGGGCTATGAGTTGATGTCGCGCTGG  
CGTACCGTCCCGTTGTGACGGTGAACCTGTTGTAAGCCGATCGGAGGCAACGCTTCTGGGTGCAAAAAATCAT  
CCATCCGGCTGGTCCAGCACTGTAGTTGTTAATGTGACAGAGCCATTGCCATGATAGTGTCCATTAAGGATGGACAC  
TATTTCCCGGAACCTGAACTACCGCACAGGCGTTTACATAAAACGTTACGCTTATTGTTGACTCGAACTCGACTT  
CAGATAAATCACGCTTTACCCTTGATGGAGCCTGTACATAGATTTGTGTAATTGCCTGATTTTGATATGTTCAATTAAC  
ATCAAATGAAGGTTAAATATGGACGACAAACAATTGCAGGCTCAGGCTGCGTTCAGCAAAGCATCGCAACCGCGATAG  
ATGCTTCATTAATTTAAGATTGAGTTCCTCTTACGCCACCCGTACGCCAATCTTCAACTTCAATATCTTCTTCTC  
GGCACCGTCCAGATCATCCGGCAAACCTTACCTGGTCAACGACACCGGTGCCGCGCTAACAACTGCTGGACAATTT  
CACCCAGCGTTTGTCTTATCACGATATTCTCGCCGCTTCCAGGCCATATATCAGCGCAACATCAGCATATTTGGCG  
CTGGCTTCGAGAAATGAAGTACCAAAGAAGCGTTGATCCAGCGGACCGGGCGGACTGGCTGAACAGTTTACCGAGCGC  
CGAAGATCGGTTCCCGACCAATTACACACAACACATCGCTTCCGCGCAGTGGGTGCTGCCGGTAGGATGAAGCAACT  
GGTTATCACGAAACAGTGGCGCAATACCGCTCTTTTTGGCATATGCAAAATCGCGCAGTGGCGCGCCACGCACCATTTA  
TCGGCACTCAATTGATAAACAACTGCTCCACGGATTTTCCGGATGAATATCCAGGCCAACCGGTGACACCGGACGCTCC

CACTGGCGGAACCACCACTTTGGCTTTTTAGCCGCCACGAGAGTGATGTTCCCTGCAAGAGCAGTCAAACCAGAACCA  
CAAAGAAGGCGACATTAAGAACAGACGTGCATTCTCCAGCCCCGCATCATCGGGAACACGGCCAGGATGATTGGCACC  
GCGCCGCGTAATCCTACCCAGCTGATAAACACGCGCTCACGCAGATTGAAACC GCGGAAGGGGAGCAATCCAGCAAATAC  
CGAAAGGGGACGGGCGAAGAATATCATCCATGCGGACAAAATGAGCGCCGGAATGGCAATAGGCAGCAGATCGCTTGGGT  
TAACCAACAGCCCCAGCACCAGGAACATGGCGATTTGCGCCAGCCAGGCGAGGCCGTGCAAATTTTGCAGGATGCCGTAG  
CGTTTGCGAATAGGGCGATTACCCAGCAGAAAACCGCACAGATACACCGCCAGAATACCGCTACCTTCCAGCGCAGTAGT  
TAATGAGAAAATCAGAATACCGCCACTTAATGCCAGCAATGGATAAATCCGGCGGGCAGGGCGATGCGGTTGATCATT  
GCAGTAGTAAATAACCGCCGCAAGACCTATTACAATGCCAGACCAAATGTTGCAGAATATCGACAATGAACATCCAG  
CTAATATTGCTCTCATGATGCTGGATCATCGCAATTAGGGTAATCGTCAGAAAAGACCGCCATTGGATCATTACTGCCGGA  
TTCAATTTCCAGCGTCGAGCCAACACGTTCTGTTAAGCCCTTACCACCCAGCAGAGAAAAGACCGCTGCAGCATCGGTAG  
AGCCGACGATAGCGCCGATTAATAAGCCTTCAATCAAATCAAGATTAACAGCCACGCCGCCATCATGCCGTTAAACCA  
GAGGTGATAAGCAGCCAGCGTCGCCAGCGACAGTCCCGTCTAACGCCACACGAAAGGAACTGGCCTGAGTGCCAT  
CCCGCGTCGAGCAAAATAATCGCCAGTCCAGGTTACTTACCATGTAGGCGAAGGGTAATTATCAAACGGGATACCGC  
CGACGCCATCGACTCTGCCAGCATGCCGATGCCAGAAAAATAACCAGAATAGGAATGCCAAGACGGGAAGAAAATGAA  
CTAAGTAATACTGCTGGTGACAAGGATGGATCCTAAGATGAAAAGGCTAATTATTGTTGGCATCCAACGGTCCGTT  
ACTCCTGATTACGCTGTCTTATATAAACCTACCATTAGCGGCAGAGACAGCGTTTTACTTAGCCCTGAAGCGTGA  
TTTTTTTACATTTTAAGAACAGGATGACCGCTAATCGTCAACTGAGTGCCTTCCCGGTGTTATTGAGAATGGCATGTGC  
GCCAACGGCAGCGTAACCGTGCCTTTCATGACCAAAATCGAGGCCGTAATGAGTGGAATCGACAGCGGGAAACGCA  
AAAACGCGTACACTGACTCCAGTTGTAACCTGCGTCATAATCATTGGGCGTGTGCCGCTAAAGCTACCAGAGAATAATC  
GCCTTCTGACGTGGCAAAATTTCCGCATGATAGAGCTGCAACAGCATACGTTCCGACCCGAAAGGGTGTCTGTTAATATC  
TTCCAGCACCAGAATACCGTTCTCAATTTTTGGCATCCAGGTGTACCGATCAGTGAAATCAGCATCGCAAGATTGCCCTC  
CCCACAACGTGCCTTCCGCCGACATGTCGGGCTTCCCTTCCATTCAATGGTGAAGGTTTCATTGCGTAACGCCAGC  
CAGAAATGGTGTCTCGTAAGGCGTTCAGTTCATCCGCCAAAGTTTGTACCAGCATGGGGCCGCTAAAGGTGATGAC  
ATTGCCATGCCCAGAAGACCGCACTGAATGGCGTAAAATCGCTATGTCCGCAATGAGCAACGGGTATGTTGTTGGC  
GAGCCACCAGTGCCTGCCAGTCAATATCTGCCAGTAAACGACTGGCACCGTAACCGCCGCTACAGCCAGCAGATGGTG  
TTGGGGTAGTCAGTCTGGCAAGGGAATTGAGATCTCCAGACGCTCTGTTTCCGTACCCGCAAAACGCTCACACGACG  
GGCAATAACCTCGACGTTATTGACTTGATGCCCCGCTCGGTAAGGCGCTGGATACCACGACGCGGGCTGCTGTTTAA  
TGAGTAACCCGATGGGGCAATTAAGTAAAACAGAGACATGGCAATTCCTTGTGACAACAGAAAACGAAATGTATATCAT  
GCCGCTTAGGTGTCCGTTGTACCTCAACGGCGATTCCAGGCTATAAGGATAGAAGAAGTAAAATTGAGATGGTTGCC  
TTTTTGATTGTATTAGCGGGTTGTTTCATCAAAGCATGACTATACGAACCCGCCGTGGAACCGGAAAGTTCCGGTGCA  
ACGTGCGATGCAGTGGATGCCAATAAGCCAGAAAGCCGGTGCAGCCTGGGGCGTCGATCCACAATTGATCACGGCGATTA  
TCGCTATCGAATCGGGTGGTAATCCGAACGCGGTGAGTAAATCGAATGCCATTGGTTTGTGTCAGTAAAAGCTTCAACC  
TCCGGACGTGATGTTATCGCCGATGGGCTGGAGTGGTGAGCCGACGACCAGCGAGCTGAAAAATCCAGAGCGTAATAT  
TTCAATGGGGGCGGCTTACTGAAATTTCTGAAACCGGCCGCTGGCAGGCATTGAAGATCCGAAGGTACTGCAATATG  
CGCTGGTGGTGCATACGCTAACGGGGCAGGTGCGTGTACGGACTTTCTCGTCAGATCGGAAAAGGGCATCAGCAA  
ATCAACGATTTGGATGCTGACGAGTTCCTCGAACAGTAGCGGAAATCACCTGCGCCGAGGCTCCGCGCTATATCTA  
CAAATTTGAGCAGGCACTGGACGCGATGTAATCAGTCGCGCACTTTGTCCGCTTTTTCCCGGGCTTCTCGCTCGAGAGA  
GAAAATAATCCGCTGTAATTGCCGCTCCACCGTCCGGCTGACGTTAAGAAAACGGAAGCTCAGACGGGGAGTGGTATGG  
TTTCACTTCTGCCATCAATCACTTTGCGCTCGCTGATGGAGATTAAGTGGGCGTCAAAGTAAAAACACCCATTTGCC  
ATGTTGACTTCAATCTGAGCGAAGCGCATGCCTTCTGTAATTCGGCAGGCTTTGCTGTTTCCAGTAATGCGCCATGCC  
GCCTAACGACAAATCATAACGGCGGAAACGTAACGTAAGTATCCGCCAGTTTGGTCTGGCAAAAATAAGGCGGATGGA  
GTGGGGCGGAGATGCGGAAATATCGGCGTCTGTTGTACAAACCATAAGGTGGGAGGCGGTACGGTAATAAATGCCGGAAGC  
TGCAAGTATCACTCTGCTGTAGTTGTTCAACAGTAAACTCGACTTTCGACCCCTGAGTTTCCGGCGTAATGGTAATGTG  
CTGTGCCTTTAGCACGGCGATGTTGTCTTCCGCTTACTGCGGAAATCCAGCACCAGTTTATCCGGGGTATTGCCAGTA  
ATTTGCTGATCAGCTGCCGCCATTCCAATGAGACGCAAAGGAATTGCGGCTTTGTGCAAAATCGCGTAACACGCCCAGG  
ACGGCTAACGGATTTTGTTCAGGAACTGCTCATGGTAATGACTCACGGGAAAAACTCCTGACTGACAAACTGTCTTTG  
GTTTATCGGTACAGTTAACAAAATTAATACAAATGCGTGAATATTTTTTACATGTTGTTCTTAAATCAGCCGACATAC  
GCCAGCATCGATCCCGCCTTGCCTATACTTAGAGCGTTGATGTAAGCATTCTTGCCTCCGATTATCGAAACGAGGG  
CCTGAACATGGGAATTTGCTGATTATTTTTGACCTGATAGCCGCAATATCGCAAGCTAATCATGCCGGGGCGTG  
ATGGTGGTGGATTTTTCTGACCTGTATTCTCGGGATAGTCGGTGGTGGTGGGCGGCTGGCTGGCGACCATGTTTGGC  
ATTGGCGGCTCATCAGTGGTTTTAATCTGCACAGTTCCTGGTGGCGGTGGTGGGAGCTATTCTGTTCTGGGCATATT  
CCGCTCTGCGAAGAGAATAAGATTTTCATAAGGCGGATAGCGATACAGATGCCGCTATCCGCTTTCACATCAGAACGT  
ATACTCGACACCTGCTTACGGGTGAAAAAATCAATATAGCACTTCGATATCCGATAAAGTCGGTCCCGGTAACAACA  
ACAGAATCCTTTTTAATTAATTGTTTCGTTGTTTTGGTGTGATTGAGAAAATAAATATTTTACAGAGTAGCCAGTCAGG  
CGTTAAAAATGGGGCGGATAGTGAGGCGGTTTTGGCTGCGCTATTGAACATTTAGAATTGATCAATCCTTCTGGCAGAT  
TAAGCCAAAATACCCGTTCCGCAATGCTTCAAGTACGCGAAGAGGAATGGTCTGAATCCTTTTTTGGTTGCTAAATCT

CTGGAGTGTCTGGATTATGTGATTATTAATTTAACTCCAGAAAGCAAAAAACGTTGATGAGTGAACACCGTAACAATAT  
TCAGGTAGCAATTGATGCTTATATAGCCAACGTCGGCGTAAATCGCCGGTGATGAAAGTGAACACTTACCCGTAGAA  
ATGACGCTATCTTCGGCAACCACGTATGGCAAACATTTGCGCAACTTCCC GCCAGGACTTGAAAAACCGTCTGTGTAG  
AAAAAACCATAGCTATGGTGTATCTGCCGACAACGCCATCCGGAGAAGCCGAATGACGTTGTCGGAGTAAGCGCTGGTT  
AAGGTGTGGGTTGTGCCTCTTTGGTTGAGGGTTGCGTCGTTGCTGACTTAACGTCGACGCGTCCGCCGAACATTGTCA  
CACGGTTGCTCTTTCCGGCAGATCAAATCCAGCATTTCAGCGTCACGCCATTGGTCCAGCCAAAGCCATCTGTAATGG  
ATATTCGCCACCGCCGCCCTTCCGGTGGTGTGACATCATATTTTCCACCAGCTTTTTCTCCCGTCATAGGTGT  
GCTGAACATTGGTCAGGAAGTGCAGCTAATGTCCATCGCCACCTTTTTGCCCCGATGTTTTGTAATCCTTCTGTCCGG  
ACCCACTGTAACGGTGCCAGCCATTTGGCGCATCCATTGTTGCCACTTTTTACCGACGTGGTGTTCAGGCCGCCGGG  
TTGCAGCAGATGTGTTTTGTCGCCGTCGCCATTTGTTGGCGGATCTTCGTCGCCGATTGACGTACAGCGGGAACA  
GGCGGCCCGGTTAACTGATTGCGCACTTTATGACTTTTCAGGTCGTAATCGGCATACCAGCCTTGTGATCGTTCCAC  
AGGTATTTTCGATCCCTTTTTGACGGGCATTTGCCAGCGTTTCGTAAGTGTGTCATCGCGTTATCTCCGGCAGCTTT  
GCTGGCGCGGGCAGGATTTTTCCATTTAAACATCAGGCTGTCAGATCGACCGGTACGATGCTGGTGGTGCFTAAGG  
TATTTAACTGCTGCGGTTGTCCATCCAGCGCGAGTGAATCCAGCCAGACGAGCGGCAGAGCGCAGGTGCGGGTAA  
ATTCAGTGGCAGGTGATTCCGATTGCTTTGGCGTGGCAATATCTTCCACCCATGACTTGGTCTGGTGGCATTCCGG  
ATCGTCCAGTAGCGGTTGAGAAGGGTACCATCCTGAAGTTTGACAACGCGTTTTCTGTTGTCGGGTTGCAGGTTTT  
CAACACCGTCCATCCAGTAAGCATATTTTTGCAATTTGCGGCAGGTATTGCTTCAACGCGGCATCGCCTTCATGCTGC  
GCCAGTAACTCTACCATCAGGGCAAAGAAGGGCGGTTGCGAGCGGCTTAAATAGTAACTGCGGTTGCCGTTGGGAATATG  
ACCGTAAGTGTCTATTTTCATGAGCAAAATTTGCCACCATATCCGCGACTTTATCCCAGTGACCGCTTTCCGCAAGTCTTA  
ACATGGTGAAGTAACTGTCCAGTAATATACCTCGCGAAAGCGTCCGCCGACGACATAAGGTTCCGGCAGCGGTAAC  
AGAGAATCCCATTTTTCGGTGTTTTCGGTAGAACGCGTTAATACCGGCCAAAGTCCGTCAATATGTTCCGCGCAGTGACTG  
CCCCTCTGGCGGAACATATTTCTGCCTTCTTTCCGCGAGGTTGAAATGACGTTAACGAAATGGCGCAGATCAAATCCGC  
TCTGTTTTGTCGATCCGATAATCAGCAAGGATCATCAGCGGATCGCTGTTCCGCGCAGGCATCGGCAAAGGTTTTTTGG  
TCCGAAAAAGTTTTGGCGTTTTGCACATCATTAAACAGCGGCCCTAATAAAATATCAGGCGGCTGTGGTGTACCGGTGT  
TTCTTCTGCCTGCACCGATAGCGCAGCGAAACACAAAAAGATACAGGCTGGAATTAACGCCATTTTTTCCGGGCGAGAAG  
GTGCGGGGATTTTCATCAATCATTCTCCTTTGGCGAAACGAATAAAACGGTATTCAAGTATCAGAAAACCTTAGTTTCAG  
GATCGCACTAGCTGCATGATCGAAATCTCATTCTGCGAACTGTCAGGCATTTTAGAAAAGGGAATTAAGGGATAAATAA  
CGCGAAATAGAGTGATCAAATAACGTCTGTTTATTAGCCAGCCAGCGGCGTGGGTTGTTGATTAGCGAAGAAAAATCA  
TCATAAATTTGGTGAATAAATAACAGGTAGTTAAAAACCATTAGTCTGAGTAAATGCCGGATGACATCAGAACGATGC  
CATCCGAACAGTGGCTTAAACCTGACGTTGAAACGTTGCGTTTTAACGTCCAGCGTTAGCGTTTTCTTGGTTGTATCG  
CATACAGTTTTCTACCCTGTGCAAAATCCAGCCAATCCCAGTTCACGGGCGATTAGGGCGCTGTGGGATACCGGACTT  
CCGGCGTAAGGCAGATACCTTTTACAACCGCCGGATCCAGTTGCAGTACTGTGGAAGGATAAATGTTCTCCGCCAGTAG  
AATAGTTGGCGAGTAACTGCGGGAGTCTTCTTTGTTGGGTGAGTGGACCAGGGTGGCAGTGCAGAAGATCGTCCA  
CATCAATATAGCGAGCTTGTAGATTTTCATCATCCAGTTGCTGGTATTGCTGGCTAAGTCTTTAAGAATGCTGCCAG  
GCATATTCTGCCGTGCAATGTTTCATGCTGAAGGAGTTGCTTCCGCCGCCAGCAGTTCGGATCATCTAACAGTGTATG  
GTGACCAGAAAAGATTGCGGCAATATCGTCAAGCCCCTGGCTTCTGCTTTGCTGTTAACGTATCAGATCTAATAACG  
TGAAGTCAATAGCCTGGCGTAATCGATCTTGTCTTCTTCCACGGTCAGGGTTGATTTGCTGTACCGTACATAAACT  
GGTTGATAATAAAAGGCTTTACCCGAAACAGCGGAAACGGGACGACAGTAGGTGGAGCGACTTCTCCGTTTACCACAA  
GTTATCTTCAGCCAGCTGACGGAAAGCGATCAGTGCCTCTTACGTTCTGCCCCTTTTCGCAATCAGGCGCAGCGTATCGT  
TATAGCGAACTGTAGTAAACGCAATCTGGTTAATACTCTCTGGTGTGACGCATTTGCCGTTTTTTCCAGCAACATATCG  
GCATTAATGTCGATAAGGTATAAACCAGCCGGGAGCCGACGTACATGCAGGCCGTTACGGTTTTTTATGACCACCGC  
CAGAGAACGGGCTTCTTCATCGTACGAGGACATGTGTCAGAGATTTAGTGTGCGGAGGACGGTAAACCCAGTTGTTAC  
GTTTGGCTTCCAGCGCATGCATGGCGTCAAAGATAACTTTGTCGATATCCGCCCCGAGGCCGCGCTGACCGTTGCTGCC  
AGTGTACTTTCGACCAACGGCGCAGCACACAAACGTAATTTTGGCGCATCTCGGGAGCCAGCAATTCAGCGCAGTTTC  
AGCACTCAATAATGCGCTACCCATATCCATCATGACCAGCACATGGTCCGCATCAGCAACAGATTGATGGCCTCCATCA  
CTTTGACGGCATCGGTACCAATGGGATTTTGTGGATCGTCAATTCGCCGGCAATGGCGATTTTACAACATCACTCATT  
AACATCTGACGGGCTAATTCACCGACACCTTCTCCAGTCGGCTGCTATGTGAAACTATGACCAGGTTTACCATACCCAA  
TTCCTTACTCTTTTGGGCTAACGCCAACATTTGCATCATAAACATCACCGAGGTGCGCCGGGATCCTGGTGACCAATA  
CTGCGTTCACCGAGATAACTGGCGCGGCTTTGCGGGCTTGCATCGTAATCGTACTTTGTGACGCGGATTCCGGCGATGCT  
ACTGGCAGCTTCGAGCGCCACCGGAACAGAGAGATTTGCTCGCTGGACTGACGTAACGATTCCACCACCGGCACCCACA  
CATCACACATGGTTTTATCGCCAGGTTGCGCTTTCCCGGACTGATTACGCCGTCGCGCCATCGGGAACATCTGATAA  
AGCTCTTCCAGTGTGAGGCTTTGCCGTGCTGGGTGCGCTGTGCGGCGCGGATAAAGAAGGTACCGAACAGCGGACCACT  
GGCACCACCGAGCTGGAAGCAGCGTATACCGGATTTCTTGAAGTGAACCGATATCTTTATCTGCGATAGCAGGGA  
GTTTTTCCACCACTTTGCTAAAGCCTCGGTTTCATATTTAGCCCGTGGTCAGCATCGCAATTTCCGCGATCCAGTCCGGTA  
AGATACTCGCTCTCGGTGCTGAAAATATCGCCACAACGAGTGAGCCAGTTAAACAATTTGAGTTCTGCTCAGTGACATTC  
TTTTCTCTTATTTACCCAGTTAAGGGCCGGGTTGGACCGGGCGTCCAGAGTGCCAGCGTTTCTCATCACTTTT

AGTAAGGTGATTGAGAAACCGGTCATATCCAGTGAGGTGCAGTACGCGCCAATTAATTACGTTTCGATAGTCAATCCCCG  
TTGCTGGCAACGTGTGGTCAGGCGGTTATAGACGCCGTACAGCTCAGAAAGCGGAGTTGCGCAAGATTGTTAACCAGCG  
CAATCACCCGATCGCCAGACTGGAGCGGTTGTTTGGTTTGTTCCTGCAACTGCCTTGTGATAATCCCAGAAA  
CGCAAAGTGCGATGGTATGAGCCATTTACCAGCAGGTTGTCGAACATTTTCATCGACGGTTTGATCAAGGGAAGAGAAGGG  
GCGGCGGTCAATACCCGGCTCACCATGAATGCCAGCCAAACTCCATCTCATTATCCGCCAGGGTAAAAGAAGGTTTGC  
CCGCGGAGGAAACGGTACAGGCACCGAGAGCGATACCTATTGAGTGGCCTTGATTATTCAGCTTACGCCCCAGTTCCGCA  
CAGGCGTCCAGTGAGTCGCCACGCTCCGCGCTGCGCTACGAGTTTTTCAATTAATACGGTGTGGCAACGCCGCGTCG  
CCCCGAGTATAAAGACTGTCTTTTACCAGCAACGTGTCATCAATGACCACAGTGGTCACTTTTACGCGGCTATCGTGCA  
GTAACTCGTTCGCTGTTTCAAAGTTAAGAATATCGCCGGTGAATTTTTGATAATCAACAGTACACCTTCGCCGCCATCA  
ACTTGCATGGCGCATTCAAAGATTTTATCGGGCGTCGGTGAGGTGAAAATTTCCGCCGACAGGCCCCCGAAAGCATCCC  
CTGACCGATATAACCACAGTGCATCGGCTCGTGTCCGCTGCCGCCACCCGACAGCAGGGCGACTTTTCTGCAACAGGGG  
CATCAGCTCGGGTGACATACCCGGATCTGATGCAGTGTGAGCGATGGATGCGCTTTCGCCAGTCTGCCAGTTGTTCCG  
TCCAGTACGCTTGCACATCATTGATCAATTTTTTATTATTTGCTCCAGCAATTACGGTAGGGCATGGATGATGTTCA  
ACGACACGGCGACCACTGACTGCCGATGAATCCATTGTGCATCGCAAGGAAAAGAAAATTAGCCCAAATTTATGTTTC  
ATAGTAAAACATATGCTTAAAGTATGAATGTTCCATATTGAAACTTTTACGTGATTAATACTAAAATTGCCAGCCGAAACA  
CCTTTTGTCAATAAGGGATGCGGGATATGAGTGGCGCTTTTAAACAACGATGGTCGGGGCATATCTCCCTTAAATTGCAACT  
CCTGGGAGCGATGCAATAAGCTGATGAAACGGGAGACATGGAACGTACCACATCAGGCCAGGGCGTGACATTTGCTTCT  
ATTTATCGGCGTAAGAAAGCGATGCTGACGCTCGGGCAGGCTGCGCTGGAAGATGCCTGGGAATATATGGCACCGCGAGA  
GTGTGCGCTGTTTATCTCGATGAAACCGCTGCATTCTCAGCCGTAATGGCGATCCGCAAACCTTGACAGCAGTAAGTG  
CACTGGGATCAATGACGGCACGTATTGCGCGAGGGAATTATTGGTACTTGTGCGCTATCGTTAGCGGCTATCTCTGGT  
CAGGCCGTGAAAACGATGGCCGATCAACATTTCAAACAGGTACTCTGGAACCTGGGCTTTTGTGCAACGCCGTTGTTTGA  
CAGCAAGGGCCGATTGACGGGAACAATAGCGCTGGCGTGTCCGGTTGAGCAAACCTCCGACAGTGAATTTGCCGTTGACGT  
TGGAATCGCCCGGAGGTGGAATTTACTGCTGACGGACAGTTTGTGCTGAAACTAACCGTCATTTAAATCAACTT  
AATGCCCTGTAGAAAGTATGGATGATGGCGTATTAGCTGGGACGAGCAGGGTAATTTGCAATTTATTAATGCCAGGC  
GGCGGGGCTTTCGCTTACGCGACGGCAAGTACGGGACGGGCAATCACTGAACTCTTAACGTTACCCGCGTATTGC  
ACAAGCAATAAAACAGGCACATCCGCTCAAACACGTAGAAGCAACCTTTGAAAGCCAGCACCAGTTTATTGATGCGGTG  
ATAACCTTAAACCGATAATAGAAACGCAGGGAACAGCTTTATTTTGTGCTCCATCCTGTGGAACAGATGCGGCAGTT  
GATGACCAGTCAATTAGGAAAAGTCAGCCATACCTCGCTCATATGCCACAGGACGATCCGCAAACCCGCGCTTGATT  
ATTTTGGTTCGACAGGCGGCGCAGTAGCTTTCCTGCTGCTTTGTGGAGAAGAGGGCGTGGGAAGGCACTGTAAGT  
CAGGCAATTCATAATGAAAGCGAGCGTGTGAGGTCCTTATATCGCCGTCAATTGTGAGTTATATGGTATGCTGCGCT  
GGCGGAAGAATTTATTGGTGGCGATCGCACGGACAATGAAAATGGCCGTCTGAGTTCGGTGGAACTGGCACACGGCGGCA  
CGCTGTTTCTTGAAGATTGAATATCTGGCGGTGGAGTTACAGTCTGCTTTCGCTTACAGGTTATCAAGCAGGGGGTTATC  
ACGCGACTGGATGCGCGGCTTTAATACCAATTGATGTCAAAGTATTGCAACAACGACCGCGGACCTCGCAATGCTGGT  
GGAACAAAATCGTTTTAGTCGCCAGCTGTATTACGCGCTGCATGCATTTGAAATTACCATCCCGCCTCTGCGTATGCGGC  
GTGGCAGCATTCCGGCGCTGGTGAATAACAAATTACGAGTCTTGAAAACGCTTCTACGCGGCTGAAAATTGATGAC  
GATGCCCTCGCTCGCTGGTTTCTGTGCATGGCCAGGCAACGATTTTGAACCTTACAGCGTCATCGAGAATCTTGCTCT  
GAGTAGTGATAACGGGCGCATTGCGTCAAGTATTGCCGGAACATCTGTTTACCGAGCAGGCGACAGATGATGTCAGCG  
CCACCCGCTTTCACCAGTCTGTCAATTTGCGGAAGTTGAAAAGAGGCAATTATTAACGCAGCCAGGTACAGGCGGT  
CGCATTGAGAAATGTCCGCTTACTTGGGATCGGCGCACTACGCTGTGGCGAAAATGAAGCAACATGGCATTGATGC  
AGGGCAGTTTAAAGCGCGGATGAAAGACAGAAACGATTTCTGATACATCAGAGTATGATGATTTTCAATCCCGGCGAC  
GCTAACAATTTTTCAGCATCGTTTAAAGGCTTGTCTATCCCGCACTTAAAAGCTGAAGCGATATCCTCCGTTGACTTGCTT  
CTGATCAAAGAGGTTACCCTGCGTGAATCCGCTTTCGAGATAGAATGTGTGCTGTTTGTATACTGTGCACTGACTCCCA  
CGCCGTTATTCAGCCATTACCTTTGAAACTGACTTCTCCCGGAGTTGTTCAACAGATATTCGGTATCCCTGAAAAC  
TCGCGGATAGCGCAGTCTTACATAGACATTACAGTGGCTGTTGCTGCGGTGATGTCATACCCAGTATCATGCTGGC  
ACGCCCCAGCAGCATTCTAGTATTAGATGATATTGAGGCCATTACTCGCTTACATGTCATCTATTCTGGTGGC  
TGATGTAAGTGGGTTTTCGGCTCTATATAGAACCATAACCAGTAGGGGACAGGTTGAACCTTCCCGGCTTCCAGG  
GAGATGCTCATTCCATTGCGAGTGCCTTGGCGTTAACGCCGTTGTTCTGACTGTCCAGTACGTGGAAACTATTTTTCTG  
GCGGATGCTTTTATAACGAGATCGCTGTAACAAACGTTTTGTGCCATGTAACGGCGTACATTCCCATGATGCTGAAC  
GTGCGGTACCGTGCCTCCGCTATAGTCCGGCGATGCATGTTGAGCCAATATACAGACCACATAACAACGGCATTACA  
TCAGAGAGACGTTTATCCCAACAACTGGATACCGCTGTAACCCATGTCAAAGCCGCTCAGTTTCCACTGGCAAAGGA  
GTCCAGGCTTCCCCATAACTGCGCAACCAGATATTACCGTCTTACTCTGATTTGCGAGGTACCCATCCGTTGCATCA  
GCGTACGGTTTTCAACATAGTTCAATAAGTAACCGACATTGAGATAATTGCCCGCAGCATCTGCGGTGCTGGTGGGTTA  
GGCGTGGGAGCGGGTTACGGCTAGGATCGGGGTTGACTATGGGAGGCTGAGCGGGAGCTGGTGTGGGTTAGGATTAGG  
AGTCCGTTCCGGAAGTGTCCCGGAAGCGTAAAGCTCCAGTTAGTGCCATTTTTACGCACATCGTACAGATATCCCCCA  
ACTCAACCTGAGAAGACGCGCTGAACGAGGCCGCGCTCAGTGGTTTTTACCAGTGTGAGAACTTCAATTTCCGTTGTG  
GCCTCGCTGCCCTGGTTGCGGATAGCCAAATACGTGATTACCAGCACTACTCCGCTGATATTAATAATCCCTTTATT



ATTAACGCCATTACCCTCGCCAACAACATCAGCACGCATAATAAAGGTAAGTACTGTTACCGCTCAGGTTCTCTACGTTTAAATG  
TGGCAAATGTGCCGGCAGTTGACCCGTGGCTGGCAAATCGACAGTTGAATGGCTCAGCGCCAGCGTGTGAGATTAGAA  
TTACTTGTTACGTTCCAGACGCTGTTATTCATTGCAACGTCCAGTTTTCCGCCATTGACATTATCGCTGAGGGAGGAACC  
TGTCAAACCGACCCAGGGTGCATATCCAGATTGATTAGCCACCTTTGGAAAGAACGCTACCCTTGATAAGCATAACGAC  
CCGAGGCGTTGATGCGGGCTGGCGGCATAACCATCGTCATGTTGCGTTGCGATGGCCATCTGGTTCGGGTGACTCATATCA  
ATGACCAGATCGCTCGTGAGGTCGATCTGGCTGTTGGTCATGGCATAAAATCCCTGGCTCCTGCCGCGCCGGTGATAGC  
CAAATGTCTCCGTTATTTACCGCCGTGAGAGCCACAAACCCAGCGCCAGACTGCCATTACGATCAACTGTAATAT  
CGGTATTTTGCATGTTGACAACAGCCGTTGCCGTCTGGGCCGAGGCCACATAAGAACCGCCGAAAAGATGCTGTTTCGT  
TGCGCTGCCGTGCCAGTAAATGATTATCGCGTCTGAACCACTGGTGACGAGGCCACCGCCCTGCCGCGAAGAAATATG  
GCTATCTGCACCGATAGTGGTTGTACCACCACGAATTCGACGCCATTGGCCGCGGCTCCAGTTACATCAACAGTGAGTG  
CATTGCGCTAACCTGGCCAAAGCTCCAGAGGCCGTGAGCATTATCGCCATTGGTTTTAATGGTACTGTTTGTCCGAGA  
TCGACAACAGAGTTTTCTGTACGTTTATCCCCATGGCGCTGTAGCCCTGAACATCGATTGTCAGGTCTGTAGCCGTA  
ACGCGCAGCACCATTGGCGTTATTGCCGTTGAGACCACCGATATAAACACCTGACTTCCATCGGTGATTTTACTTC  
CGTTCCAAGATCGACACTGGTGCCATAGTCATTGATGGTTAGGCCTATACCCTTCGAGTTTTCAATGGTGAATTGAGTG  
GCTGTTAGTGTGAGCTATGCCAATAATGATGCCGTATCGTTACTCTTAATGGTGCTGCCTGCTGCTAAGTCAGCATG  
GGTATAGTCACCAATTAAGTTAATGCCGATGGCAGAGTTTTGACCAACAACATCTACTGTGAGTCGGTTAGCTGTAGGG  
AGCTGTTTTTGCCTGAATAATGATTCCTTTGCATATCCAGAGCGTCGTTGACATTGACGGTGACATCATTACCCAGG  
TTGATATTGCCAGGCGTGTTCCTGCTGGGGTCATTACACCATAGAGTTTTCTGATGGATCGGCGGTATCTCCTGTAAT  
TCTGTACCATCATTAAATAGTAATATTGGTGCCATATTGACTTCTGTATCAGCAGCTATCAGCAGGGGGAAAAGATAA  
TTGCATTCAAACCAATAGCGCAAATTTTATCAGTTGAATTGAGGGCGAACGGATTTTTAATTGAGCGAGACGATCTGCT  
TTGGTATTTCCATTGTGTTGTTGATGCCATACCCTCTATATAGTACCCAGACTATGGGTCTATGGATTTTGTCTATT  
TTGTTTAAATCAATGAATAATATCCTCTTATCATCATGATTTTGTATGGTGAATCATGATGAGCTTCTCAGAGAATAA  
TTCTCTATTACCGGGCAAATCAGGAACACAGGAATTAATATATATTTAACATCCCCCTTACAAGGTGAGTTTATATCG  
AGTTATTCCCTAAGTTGTCGTTACTTATTCCAATTCGTTACTATAAATATGGCAAAAATATTACAACAACAGCGGTTAA  
AAAATTTGGTGAAGATTTTTGTAATAATCCTAATTAGTTATGGGAATTTTCGTTGATGTATCTGCATAACAAAAACAAT  
ATGCGCCATTTTTGCATTACTAATAAGAAAAAGCAAAAACATCGATATTCATTTTTGGTCAATGGGTTTTCTGGCCTAT  
CGTTGTTATTGTGCTACTGGTTATCATTTTCATCTTCCAGCATATTGGAGCGTGATCAATTTTATGATCAGCTGTGAAGGG  
GGCTGATGTGATGATACAAAACTTACGTTATATCACTGCTAATGAGATATCCGGCATCTGAACACTTATGTCTTTAA  
TTATTCTCGTGGTTCACTATAGGCAATAAGCACAAAAGTGTAGGATGTTACAAGAATGATTAGGACTCGGTGAAATGAAA  
AATCCACGCAATTTGCGTGGATTTTATATACTTTTGCCTCTTTCATGAGATTTAGCGAAACCTCATGAGACAATAAATTA  
TTAGACGTTGAAAAGGAAGTTCATCACATCGCCATCTTTCACGATGTAATCTTTACCTTCTGCACGCATTTTGCCTGCTT  
CTTTGCGCCTTGTTCACCTTTGTAAGTGATGAAATCTTCAAACGAGATGGTTTGTGCACGGATAAAGCCTTTTTCAAAA  
TCAGTATGGATTTTGCCTGCTGCTGCCGCGCGTTGCTCCAACCGGAATGGTCCATGCACGCACTTCTTTACCCACAGC  
GGTGAAGTAAGTTTGCAGTTTACGAGTTTATAACCGGCACGGATCACACGGTTCAGGCCCGGCTCTTCCAGCCAAAGCT  
CCTGCATAAATCGTCACGTTCTTTCGTCGTCAGTTTCGGCAATGTCTGCTTCAACAGCAGCACAAACCGGAACCAACA  
GAACCTTCTTTCGCGCGATTTACGCACCTGGTCAAGATATGGTTGTTTTCAAACCGTCTTTCGTTGACGTTGGCGAT  
GTACATTGTTGGTTTACGCGTCAGGAAGCTCAGGTAACGAATAGCCGTTTTCTTTCAGCGCTTAAATCCAGCGCGCGCA  
GCATACCTGCATTTTCAACTGGGGCAGGCATTTTCCAGGACCAGCTCAGCTTTCGCGTCTTATCGCCACCTTTG  
GCTTTCTTGTACGCGATGAATCGCACGTTTCGACGGTGTGAGGCTGTCGACGCGCCAGTTCCGGTGTGATAACTTCAAT  
ATCGTCAGCCGGTTAACTTTGCGGAAACGTGAATGATGTTGTCATTTTCAAAGCAGCGAACAACGTTGACCGCATCGCT  
CGTTTTACGGATGTTGGTCAGGAACGTGTTACCCAGACCTTTCGCTTTTCGATGCGCCTTTTACCAGACCGGCGATATCG  
ACAAATTCATGGTCTGGGAAAGCTACGCTGCGGTTTTACGATTTTCAGCCAGTTGATCCAGCGGAGGATCAGGCATTGG  
TACGACGCTGTGTTGCGCTCAATGGTGAGAATGGAAAGTTGGCCGCTTCAATACCGGCTTTGGTGCAGCGGTTGAACA  
GGGTAGATTTCCCGACGTTGGGCAAACCGACGATACCGCATTTGAATCCCATGATTTAAATCACCTTAATATCTTAATAA  
TCAACCTGTTATTGCTAACAGATTGCAGAAATGGAAATAACTTTGCCTATTATACAGGCACTCGGCAAAAATGCCGAG  
ACAACGACTTATTGCGCTTAAAGGCGTGCAATCGGTTGCTTGGTCAAGCCATCTGTAACCACATTTTCAAGTACA  
ACGCGCGCTTCTGCAATGGCTTCAATTAATCTGTTCACTAACAGGCGGTTTGCCTAACACAAAACCGACAACCTT  
TATTTTTATCGCCGGATGACCGATTCCGATGCGTAAACGGTAAAGTTAGGGTTATTACCAATTTACTGATGATGTCT  
TTCAGTCCATTGTGACCACCATGGCCACCGCCAATTTAAATTTGGCGACGCCAGGAGGCAGATCCAGTTCGTCGTTGGC  
CACCAGAATTTGTCGGATTAATGCGGAAAAAATGGCCATCGCCGAACGGCTTTGCCGCTGAGATTCATAAATGTAG  
TCGGGACTAACAGGCGGACATCTTGCCTCCAAGAGTACTCGCGAAGTATAACCAAAGAATTTAGCCTCTTCCGCGCAGC  
GGAGCGCGAAACGCTCTGCCAGTAAGTCAACGAACAGGCACCGCATTATGTCGCGTTGCCGCGTATTACGACCCGGG  
GTTGCCAGGCGACAATCAATTAATCGTCACGTTTTTTGTCCTGAGTGTGTACATAACTGGCGCGTATTACTGGT  
TGCGGCCCCGTTGACAAAAAATGCGTATCAAATGCAGATAACGTAATAATTGCCTGAGTGGACTATTGAAAAGTCAAG  
GTGTTACGGCGTTTATTTGTAAGTTTTGTTGAAATAAGGGTTGTAATTGTGATCACGCCCCACATAACCCACTGGGTG  
TTGTCTATACTTTACACATAAGGAAGAGGGGATTCCTGTTACAACCCAGAAAGTTCCGGAGGTGACATATGAAACGCA

AAAACGCTTCGTTACTCGGTAACGTGCTCATGGGGTTGGGTCTGGTGGTAATGGTGGTCGGCGTGGGGTATTCAATCCTC  
AACCAGTTACCACAGTTTAAATATGCCCCAGTATTTGCACATGGTGCAGTGCTAAGTATTTTCGTGGTCCATTCTCTG  
GCTGGCGGGTGCCCGTGTGGCGGGCATGAACAGGTGTGCGACCGTTACTGGTGGGTTCCGCACTATGACAAACGTTGCC  
GCCGTAGCGATAATCGCCGTCATAGCTAACAAATAATGCAGTTTCTGACAGTCAAGTTCGCTGACTGGTCAATCTCG  
TACTTATAAATCCGCCATCGCCGCGCAGGATTCCGGGAAGAACGCCAGGCGTCCCGGGATCGGTTGAATGCCAGCGCGAG  
CCATAGTGCAGTGGCTGGAAATCCACGTTGCACACGCGCAGTTACATCCCTCGGGCAGACGCTTACAAAACGCTGG  
AACGCATCAAGACCACCAGCATCAAGTACCGGAACGGCATCCCCTTCAAGTACCAATCCGTTTGCCTTCAAGACGTGA  
CTCCAGGTCCGTGAATAAGCCTTACAGCAGCAGCAAAAAACAGCGGGCCAATAACCGCGCAGAACCAGGACATCGTCTGGAA  
CATCTACGACTACCGGTGCCAGGCGAGTCATACGTGCGATACGACGCATAAACAGCAGCGATGCCAGCAGCATCCCCACG  
CTGATGGCAATAACCATATCAAAACAACACGGTCAGCGCAGATGCACAGCAGCATGACGATGATGTCATCTTTCCGGCGCATG  
ACGCAGCAAGTCGACCCTTTGTGCGTTCATCATGTTCCACGCCACCATCAACAGCAGGGCTGCCATGGCGGAAAGCG  
GCAGCCAGGAGAGCAGCGGTGCCAGTACCAGCAGGGCAAGAATAACAGCAATAGAGTGGATCACCGCCGAGATAGGGGAC  
GTTGCCCGGCGCAGGACGTTAGCGGAGAACGCGCGATGGCAGCTGTAGCGGTAATACCACCAAGAACGGAGCGATAAT  
ATCCCCAGTCCCTGTCCAACAGTTCGCTGTTGCGCTTGTGTTTCGTCCCGGTCATACCATCCAGCACCACGGCGCAGA  
GCAGAGATTCCGTTGCGCCGAGCATTGCCATTGAGAATGCCGAGCAGCAGTGTGCGAATAGAATCCCAGGTTAGCTGTG  
AATTCTGAATTAGGCAGATCCCACGGCAGCACCAGTTGCGGCAGCAGTTGCGGAATACCGTTACCCTGAGAACCATCGGC  
CAGGACGTAGTGAATTGCGAACCGATGGTAGCAACATGTCCGCCGAGCAGGTTAACAATCCCATCACCGCGCAACCAG  
CCAGCAAGGCCGGAAGGTGACCGGGTAAACGAATGCCAGACGCGGCCAAAAACAAGAATACCTAGCGTCACAATGCCA  
ATGGCAGCATACCCACATTAATGGTCCGCGAGCGCCATAAATAATGCGCCGACTTTTTGTAGATAATGTTCCGGGACATG  
GGCATTTCAGACCGAGAAAATCTTTAATCTGCATGGTACCGATGGTATCCCGATACCCGAGGTGAAACCTAAGGTGA  
CGGAAACCGGAATATACTCAATCAGGCGACAAAGCGTGCCAGACCCATCAGAATCAAAAAGATCCCCGACAGCAAGGTC  
GCAACCAGCAGTCTGCCAGTCCAACTGTTGCGACACGGGATAGAGAATTACCACAAATGCCGAGTCCGACCGGAAAC  
GCTAAAGCGTGACCCACCCGTCAGAGCAATGACAATCCCCGCAACAGCTGCGGTATATAAACCGTACTGGGGTCCACAC  
CACTACCAATAGCCAACGCCATCGCCAGCGGGATAGCAATAATCCCGACGGTATCCCGGCAATCAGGTCACGGGTAAC  
CGTGCGGCAGTATATTTTTCTTTCCAGCAAGCGTCGATCAGAGCGCGAAAGGCATCACATGTGAGGAAAATATTTTGT  
CACAATAATGTTTCATCCGTGAGCGCATCATCTGTCAACTAAATGGCAGGTGAAGGAGGCATAGGTATACAAATGGATA  
TTACAGACAAAAAACCCGCCGAGCGGGTCTTTGAGCCGGTTCGATTAGTGTTCGAACATGGCAGAGATCGATTCTC  
GTTGCTGATACGACGAATCGCTTCGGCCAGCATACTGACAGGGTCAGAGTACGCACGTTCCGCGAGTATTTGATTTT  
CGCTCAGCGGAATGGTATCGCAGACAAGACTTCATCAATTACAGAGTTACGCAGGTTGTTCCGCCGCTTCCAGAGAA  
ATCGGGTGAGTCGCTACGCAAATACAGTTCAGCACCACGTTCTTTAGAGCTTCAGCAGCTTTACACAGCGTACCGCC  
AGTGTGATCATATCATCGACCAGTACGCAGTACGACCTGCAACGTACCGATGATATGCATCACCTGTGAAACGTTCCG  
CACGCGGACGACGTTTGTGATGATTGCCATATCGGTATCGTTACGACGCTTAGCGATAGCGCGGGCACGACAACGCCG  
CCGATGTCCGGAGAAACCACAATGGGTTATCCAGATTCAGCTGCAGCATGCTTCCAGCAGGATCGGGTACCAAATAC  
GTTATCAACCGGAACGTGCAAGAAACCCTGAATCTGTTACGCGTGAGATCCACTGTCAGCACACGGTCAACACCGACGC  
TGGAGAGGAAGTCTGCAACCACTTTCCGAGTATTGGTACACGAGCGGAACGGACGCGACGGTCTGGCGCGCATAGCCA  
AAGTAGGGGATAACAGCGGTGATACGACTGCGGAAGCAGCAGCGCAGGGCATCAACCATAACGACTAATTCATCAGGTT  
GTCGTTAGTAGGGGACAAAGTGGACTGGATGATGAAAATATCACACCGCGTACATTTTCAATTTGTACGCTGACTT  
CGCCATCGCTAAAGCGACCTACAGCGCGCTCGCCGAGTGAAGTGTACAGGCGGTTGGCAATACGTTGTGCTAGTTCCGGG  
GTGGCGTTACAGCAAAAAGCTTCATATCAGGCACGAGAAGAACCTCAGGCATGCGTCCATTGGTGGAAAGAATCTGCCG  
AAAACGTGCGGGCGAGGCATGATCCTTTCCAGGCGGTGTATTAAGAGCGCGATGCAACGCTGGAACAAAGTCTGCTT  
GTCACCGAAACTCAGCTTCCCGGCTTAAAGCATGGCTCTGTGCAATGGGAAAGATTAGCGCCTTTCCGCCACAAAGCCA  
TTGAGCCATTCGGGGCTTGTCTAGCACCTGGCGGGCTTCCAGCTCTGTATCAAATTCAGCAAAGACACAGGCCCTGT  
CCAGTCAGGCGGACGGGGCTATTCTAACAGCCAGGAAAGCACCGCATCAACCTCGGAAAACGTTTTCTTGCATAA  
CCTCGCAATCATTGCTGAATTCACATTTTAGCAACGTTTCTATTGACCTTTTTGGCGTATTGCGCGGGAGTTCAGGATCT  
TTAAAAATCACCGGAGTCGGAATACTTACACCAGGGTGCGCCACCAGATACCACTTCTCTGGCGGATCCACCGCGT  
TATTTACCAACGCTTCCGCAACCGCGCATGCCCCGAACAAAGACAGGAACATCTGCGCCAGCGTCAGCCCCATTT  
CCGCCAGCTCATCCATGCTTAGCCGCTTCCAGAGATGATTTAATGCCACCAGGACCGTCCGCGCATTGGATGAACCA  
CCGCCGAGACCGCGCCATCGGCAACGCTTGTCAATGCTGATATTGCGACCCTTCCCGTCCGGAAGACCGCCGCTGTC  
TGCCGAGTTTTTCAACAATCGCGTGCGCGAACGATCAGGTTATCTTCATGTTCCACGCCTTCAACGGGCGTTAACA  
GACGAATATCCCATCGTCACGAAGCTCAATGCTGATGGTGTGCGGTAATCAAGAACTGAAACAGCGTTTGCAGCGTG  
TGGTAACCATCCGACGCTGACCGGTAATGTATAAAAAAGATTAAGTTTTGCGGAGAGGGCCACTGTGTCGCGATTAT  
TTCACTATCCAGTTATCCATTTTAACTTGTGCGTTGACCACCGTCCGTTAGTTCATATTGGCTGGCATCGCAGGTTG  
CGTTTTGGTGTATAACCACATAAACACCTTCCAGTTTTTGCATTCTGGCTGTAGGTAATTTCCGCTCAGGCGGTA  
GGTCCGTTGATGTTAGTCCGTTGCATCACCCGTAACCTTAAATCCACTGGCGCAAGCTGTTGAGCGGAATTGGCATT  
CCGGTCAATTTGCCAATCATCTTCCGCGTCATCGCGGTATAACGCTGACCTTTATTGTCGACTAACTGCACGTTACC  
CGTTGAGCATTACAGTCCAGTTCGTTGCTGCCAATGGGTTAGTGAGCAGCAGACGGTAGCGATCTGGCCGGTTGCT

GCCAGAAAAGCGGGCTACACTTTTTGTTGGTCAGAAATATAAGCGAACGCGCCGCGAGTCTGATACTGATTAAGATTG  
CGCAGTCTTGCTGATGCTGACGCCATTGTGGCGAATCCGGGCTTTTCCAGGACCTTTGGGCGTGGTAACGGAACAGGC  
AGTGAGCACAAGAGCAGCCAGCGGTAGCAGGCGGATAAGACGAAAATCGGGCAGGGGCATAGTGATGACAAGTCCTTGAG  
ATACGTTGCAAGTTATAACCCCTTAATGCTAGCGTTACCGTCCGCTATCGTCTATGTTCAAGTTGTCTTAATTGCCAGAATC  
TAACGGCTTTTCGGCAATTACTCCAAAAGGGGGCGCTCTCTTTTATTGATCTTACGCATCCTGTATGATGCAAGCAGACTA  
ACCCATCAACGTTGGTATTATTTCCCGCAGACATGACCCTTTTAGCACTCGGTATCAACCATAAAACGGCACCTGTATC  
GCTGCGAGAACGTGTATCGTTTTCCGGGATAAGCTCGATCAGGCGCTTGACAGCCTGCTTGCGCAGCCGATGGTGCAGG  
GCGGCGTGGTGTGTCGACGTGCAACCGCACGGAACTTTATCTTAGCGTTGAAGAGCAGGACAACCTGCAAGAGGCGTTA  
ATCCGCTGGCTTTGCGATTATCACAACTTAATGAAGAAGATCTGCGTAAAAGCCTCTACTGGCATCAGGATAACGACGC  
GGTTAGCCATTTAATGCGTGTGGCAGCGGCTGGATTCACTGGTTCTGGGGAGCCGAGATCCTCGGTGAGGTTAAAA  
AAGCGTTTGCCGATTCGCAAAAAGGTCAATGAAGGCCAGCGAACTGGAACGCATGTTCCAGAAATCTTCTCTGTCGCG  
AAACGCGTTCGCACTGAAACAGATATCGGTGCCAGCGCTGTGTCTGTCGCTTTTGGCGCTGTACGCTGGCGCGGAGAT  
CTTTGAATCGTCTCTACGGTACAGTGTGCTGGTAGGCGCGGGCGAAACTATCGAGCTGGTGGCGCGTCATCTGCGCG  
AACACAAAGTACAGAAGATGATTATCGCAACCCGACTCGCGAAGCCTATCATCATCAGTTCCACCAGCCGCTTACCGAT  
GTATTGCCCTGAGTGATATCGACGAACGTCTGCGCGAAGCCGATATCATCATCAGTTCCACCAGCCGCTTACCGAT  
TATCGGGAAAAGGCATGGTGGAGCGCGCATTAAAAAGCCGTCGCAACCAACCAATGCTGTTGGTGGATATTGCCGTTCCGC  
GCGATGTTGAGCCGGAAGTTGGCAAACCTGGCGAATGCTTATCTTTATAGCGTTGATGATCTGCAAGCATCATTTCCGAC  
AACCTGGCGCAGCGTAAAGCCGAGCGGTTGAGGCGGAAAATATTGTCGCTCAGGAAACCAGCAATTTATGGCGTGGCT  
GCGAGCACAAGCGCCAGCGAAACCATTCGCGAGTATCGCAGCCAGGAGCAAGTTCGCGATGAGTTAACCGCAAAG  
CGTTAGCGGCCCTTGAGCAGGGCGGCGACGCGCAAGCCATTATGCAGGATCTGGCATGAAACTGACTAACCGCTTGATC  
CATGCGCAACGAAATCACTTCAACAGGCCGCCCGTACGCGGATAACGAACGCCTGAATATTCTGCGCGACAGCCTCGG  
GCTGGAGTAGCAGTACATCATTTTTCTTTTTTACAGGGTGCATTTACGCCTATGAAGCCTTCTATCGTTGCCAAACTGGA  
AGCCCTGCATGAACGCCATGAAGAAGTTCAGGCGTGTGGTGCAGCGCAAATATCGCCGACCAGGAACGTTTTCCGCG  
CATTATCACGCAATATGCGCAGTTAAGTGATGTTTTCGCGCTGTTTTACCGACTGGCAACAGGTTGAGGAAGATATCGAA  
ACCGCACAGATGATGCTCGATGATCCTGAAATGCGTGAGATGGCGCAGGATGAACTGCGCGAAGCTAAAGAAAAAGCGA  
GCAACTGGAACAGCAATTACAGTTCTGTTACTGCCAAAAGATCCTGATGACGAACGTAACGCCTTCTCGAAGTCCGAG  
CCGGAACCGGCGGCGACGAAGCGGCGCTGTTCCGCGGCGATCTGTTCCGATGTACAGCCGTTATGCCGAAGCCCGCCGC  
TGCGGGTAGAAATCATGAGCGCCAGCGAGGGTGAACATGGTGGTTATAAAGAGATCATCGCCAAAATTAGCGGTGATGG  
TGTTGATGGTGTCTGAAATTTGAATCCGGCGGTATCGCGTGAACGTTCTCTGCTACGGAATCGCAGGGTCTGATTC  
ATACTTCTGCTTGTACCGTTGCGGTAATGCCAGAATGCTGACGCGAAGTCCCGGACATCAACCAGCAGATTTACGC  
ATTGATACTTTCCGCTCGTCAGGGGCGGGTGGTGCAGCACGTTAACACCACCGATTCCGCAATTCGATTACTCACTTGCC  
GACCGGGATTGTTGTTGAATGTCAGGACGAACGTTCAACAATAAAAACAAAGCTAAAGCACTTTCTGTTCTCGGTGCTC  
GCATCCACGCTGCTGAAATGGCAAAACGCCAACAGGCCGAAGCGTCTACCCGTCGTAACCTGCTGGGGAGTGGCGATCGC  
AGCGACCGTAACCGTACTTCAACTTCCCGCAGGGGCGGTTACCGATCACCGCATCAACCTGACGCTTACCGCCTGGA  
TGAAGTGATGGAAGGTAAGTGGATATGCTGATTGAACCGATTATCCAGGAACATCAGGCCGACCAACTGGCGGCGTTGT  
CCGAGCAGGAATAATGGAATATCAACTGTTACGTGAAGCAATAAGCCAATTCAGGCGAGCGAAAGCCCGGCGGTG  
ATGCTGAAATCCTGCTGGAGCATGTTACCGGCAGAGGGCGTACTTTTTATTCTCGCTTTGGTGAACGCGAGCTGACTGAC  
GAACAATGTCAGCAACTTGTGCGCTACTGACACGTCGTCGCGATGGTGAACCCATTGCTCATTTAACCGGGGTGCGAGA  
ATTCTGGTCTGTTCCGTTATTTGTTTTGCCAGCGACTTAATTCGCGCCCGGATACGGAGTGTCTGGTGGAGCAGGCAC  
TGCGCGGTTGCCGTAACAACCTTGCCTATTCTCGATCTCGGGACGGGTACCGGGGCGATTGCGCTTGCCTGGCTGACG  
GAGCGCCCGACTGCGAAATTTATCGCTGTAGATCGTATGCTGATGCTGTCTCCCTGGCACAAACGTAATGCCAGCATCT  
GGCGATCAAAAATATCCACATTCTGCAAAGCGACTGGTTTAGCGCGCTAGCCGGGCGAGGTTTTGCGATGATTGTCAGCA  
ATCCGCGTATATTGACGAGCAGGACCCTCATCTTCAACAAGGCGATGTCGCTTTGAGCCGCTCACTGCGCTGGTTGCG  
GCAGACAGTGGAAATGGCAGACATCGTGATATCATCGAACAGTCCGCGTAACGCGCTGGTATCCGGCGGCTTTCTGCTTCT  
GGAACATGGCTGGCAGCAGGGCGAAGCGGTGCGACAAGCATTTATCCTCGCGGGGTATCATGACGTCGAAACCTGCCGTG  
ACTATGGTGATAACGAGCGCGTAACGCTCGGCCGCTATTATCAATGACAAGTTTTTCTACACTGCTTAGTGTTTATCTTA  
TTAGTATCGCGCTTTCTGTTGGGCTATTAACCTTACGTTTCTGGTACGTTATCAGAAGCATCCACAGGCATTTGCTCGC  
TGGACGCGCATTGTGCCGCCGTTGTCGATACGCTGTTACTGTTAAGCGGCATTGCGTTGATGGCTAAAGCGCACATCCT  
GCCATTTCCGGGCGAGGCAGTGGCTGACTGAAAAGCTGTTTGGAGTTATCATTTATATCGTTTTGGGTTTTATTGCAC  
TCGATTATCGTGTATGCACAGTACGAGGCGCGCATTATTGCCCTCCGCTGGCGTTGGTGGTGTGTACATCATCATT  
AAACTCGCCACCACAAAAGTACCGTACTGGGGTAAGTCATGAGATCGTTAGCTGATTTGCAATTTAATAAAGCGCCATT  
GTGCGAAGGCATGATCCTGGCTTGCAGCAATCCGCCGCGATTTCCCTCGCAAGATGTTTACGACGAACTGGAGCGTC  
TCGTTAGTCTGGCGAAGGAAGAAATCAGCCAGCTTCTGCCCTTAGAAGAGCAGTTGGAAAACTGATCGCGCTGTTTTAC  
GGCGACTGGGATTTAAAGCCTCACGCGGTGTTTATCGTCTTTCCGATGCATTATGGCTGGACCAGGTGTTAAAGAATCG  
ACAGGGCAGTGCGGTATCATTAGGTGCGGTTTTATTATGGGTCGCGAATCGTCTCGATTTGCCGCTGCTGCCGGTATT  
TCCCTACGAGCTGATATTGCGCATTGAATGTCGGATGGCGAAATTTGGCTGATTAATCCTTTAACGGTGAATCGTTA

AGCGAACATATGCTGGACGTATGGTTAAAGGGAAATATCAGCCCGTCGGCGGAACTGTTTTATGAAGACCTTGATGAAGC  
TGATAACATTGAGGTAATCCGCAAATTGCTGGATACACTCAAAGCCTCGTTGATGGAAGAAAATCAGATGGAGCTGGCGT  
TACGCACCAGCGAAGCTTTATTACAATCAACCCTGAAGATCCCTATGAAATTCGCATCGCGGGTTGATTTATGCGCAA  
CTGGATTGCGAACACGTTGCGTTGAACGATTTAAGTATTTTCGTTGAACAGTGTCCGGAAGACCCGATCAGCGAAATGAT  
CCGTGCGCAAATAAATAACATCGCGCATAAACATATTGTGCTGCATTAATTAATCGACATTTTACTCAAGATTAAGCGGA  
TCCTATGAAACAAAAAGTGGTTAGCATTGGCGACATCAACGTAGCAAATGACCTGCCGTTCTGACTGTTTGGCGGTATGA  
ACGTGTTGGAATCTCGCGATCTGGCGATGCGCATTTGCGAGCACTACGTAACCTGTGACCCAGAAAAGTGGGTATCCCTTAC  
GTGTTCAAAGCCTCTTTTACAAAGCCAAACCGCTCCTCCATCCACTCTTATCGTGGACCGGGCCTGGAAGAAGGGATGAA  
AATCTTCCAGGAGTTGAAGCAGACTTTTGGCGTGAAAATTATCACCGACGTTACGAACCAAGTCAGGCACAGCCCGTTG  
CTGATGTGCTGGATGTGATTGAGTTGCCGGCGTTTCTTGTGCGCCAGACTGACCTGGTTGAAGCCATGGCGAAAACCGGT  
GCGGTAATTAACGTCAAGAAAACACAGTTTGTGAGCCCGGACAGATGGGTAATATCGTTGATAAATCAAAGAAGCGGG  
CAACGAAAAAGTGATTCTTTCGATCGCGGTGCTAACTTCGGCTATGACAACCTGGTTGTCGATATGCTGGGCTTCAGCA  
TTATGAAGAAAGTGTCTGTTAACTCGCCGGTGATTTTCGACGTGACCCACGCACTGCAATGCCGCGATCCGTTTGGCGCA  
GCTTCCGGTGGTGTGCTGCTCAGGTGGCTGAGCTGGCACGAGCCGGTATGGCGGTAGGTCTGGCGGGGCTGTTTATTGA  
AGCGCATCCGGATCCGGAACATGCGAAATGTGATGGTCCATCCCGCTGCCGCTGCGCTAACTGGAACCGTTCTCCAAAG  
AGATGAAAGCGATTGATGATCTGGTAAAAGTTTCGAAAGACTGGATACCAGCAAGTAATCTTTTTGCTTGAAAAATAA  
AGTATTAGCGTTCTGCGTTAAGACTTTTTTCATGGGTGCCGGATACAAAAAGGCCGAGGCTGTTACCCCTGCGGCCGG  
TTTTCGGGCGCATATTGCCATCACGGCAGCCTGACGCCCGTTTTACCTTACTTCCGTTACGCCACCAGCTGACAATCGC  
TGCGGTAATAATTCCCGCCAGGATCGGTGCTGCCAGGTCTGCCAGAAAATCATGGCAAATGCGCGAGCGTCATATAGC  
CGCCTTGTGTAATGACAACATTTTGGCGCTATTCTTGAATTGTTCTGGTTCAAGATTAGCCCCGTTCTGTTGTCAGGT  
TGTAACCTCAACGTGCGGGGGTTTTCTTTCCAGCAACCAATGCCACCAGGGATAAAGCCCCGCAACATTGCGCCTC  
ACCGGATAACGCCGCTTGGTGTGGATACTACGACTCAATTCATCTTCACTTCATCCCTGAAATGTTTGAATGAAGAGT  
GCATTCCGGTTTTTCAACAGCTGTTACAGTCATTTTCATGAGTCTGCTGGATGAGGCTTCCAGCTCGGGTTGCCAATATT  
ACTTGTGGAAGTGATAAAGACAAAAATGGCCGAGGCTGTTACCCCTGCGGCCGGTTTCCGGCGCATATTGCCATCACGG  
CAGCCTGACGCCCGTTTTACCTTACTTCCGGTTACGCCACCAGCCGACAATCGCTGCGGTAATAATTCCCGCCAGGATC  
GGTGCCGCCAGGTCGTGCCAGAAAGTCATGGCAAATGCGCGAGCGTCATATAGCCGCCTTGTGTAATGACAACATTTT  
GCGGCTATTCTTGAAGTGTCTGTTTTCAAGATTAGCCCCGTTCTGTTGTCAGGTTTTACCTCTCAACGTGCGGGGGTTT  
TCTCTTTCCAGCAACCAATGCCACCAGGGATAAAGCCCCGCAACATTGCGCCTCACCGGATAAATCCGGCTTGGTGTGG  
ATACTACGTCTCAATTCATCTTCACTTCATCCCTGAAATGTTTGCATAAAGAGTACATTCCGGCTTTTCAACAGCTGTT  
GCAGTCGTTTCATGAGTGCTCTGGATGATGCTTCCAGCTCGGGTTGCCAATATTTACTTGTGGAAGAGATAAAGACAAAA  
ATGGCCGAGGCTGTTACCCCTGCGGCCGGTTTTCGGGCGCATATTGCCATCACGGCAGCCTGACGCCCGTTTTACCTTA  
CTTCCGGTTACGCCACCAGCTGACAATCGCTGCGGTAATAATTCCCGCCAGGATCGGTGCTGCCAGGTGCTGCCAGAAAA  
TCATGGCAAATGCGCGAGCGTCATATAGCCGCCTTGTGTAATGACAACATTTTGGCGCTATTCTTGAAGTGTCTGGTT  
TCAAGATTAGCCCCGTTTTGTTGTCAGGTTTTACCTCTCAACGTGCGGGGGTTTTCTTTCCAGCAACCAATGCCACC  
AGGGATAAAGCCCCGCAACATTGCGCCTCACCGGATAACGCCGGCTTGGTGTGGATACTACGTCGCAATTCATCTTCACT  
TCATCCCTGAAATGTTTGAATGAAGAGTACATTCCGGCTTTTCAACAGCTGTTGCAAGTGGTTTCTGTCAGGCTGTGGTA  
CAGGCTCGCAATCTGATTAACGACCTGTCCAGGTAGTATGAAGAAATACAATAAGCAGGAATTTATATTATCTCCCCCG  
ATTACCGTCATCGGAGGAGATAAAGTGTCCAGGCAATATCGTCATCAAATAGCGCGCAACAGTCCAGATGCGCTGCG  
CCATTGAGCACGTTAGTACGTCGGTGGAGAAGGAGATATGGCACAGCACTAAAGAGGCCACCATCACCACTTTCTGG  
CGCACCAAGTGCAAAATGCAATTCGTTACCCGTCATAAAGGCAATTAGCGTGACGACAGGTACGGTAAGCGAAATTTG  
CTAACACTGAAACCAAGAACAGATTCATCGCGCGCTGAACCTGGTTGTTCAACACTGCTTTTAAATGCACCTAAACCTTCC  
GGCGACAGAATCAACAGTGCCACCAGGAAGCCAGTAAAGGCGACAGGGGCATTATGCTGTGAGCAATGTCTCCAGCGA  
GCTGGCGTTTCAATTTGGTACCAGCAATAACGGCAATCAGATGGATAATCAACCAGATAGCATGCCACAGGCTGCTATGGG  
CAGACGTTTTACCGTGTGCGGGTCTGTCATCATCTTCTGCTGCTGCTAGACAAACAAAATTTGATGCGTTTTG  
GTCTGGATCAGCAAAAATACGCCATACATTGCCGAGAAAATTAATGCTACCAGTAACGCCTGACCGGTTGAAAAATTCGC  
CGCAGGCAGAGCCATTGAAATACCAGTACGATTATCGCCAGGGGGAACAGCGCAATTAATACTGCTTGATACCAACA  
GATTCATATATTGGGTGGCAAACCTTACGACCGCCCAACAATAATGAAAAGCCAACAGCCACCGGTAACAATCATAATG  
ATTGAATAGAGCGTATCACGATTAGCGTTGGCGCGCGCTCGCCGGTTGCCATTAAGCTGAAATCAAATGACTTCAAG  
AATAACCACTGAAAGGCTAAGAATAAGCGAACCGTAAGGTTCTCCAGGCGATGGGCTAATACGTCGCGATGACGGACAA  
CACTAAAGGCGCTACTTAAAATAACCAATAAGCGCAAGAAGATTGATGGCAATGACCACTGGTAGTGTCTGGCTGCTCCC  
CACAGGAACAGCACTACCAGCGCCAGAACCGGAAAATAAGCGAAGTCTCCTTGTGGCGGGTTTTTACCCTCTTGGAGC  
ATTTGACATTATGTTTATCCCTTTGCAGATGAATTTATCGAAAATGTAATAAATAGGTAGGAAAAATAACAGAAAGTGT  
TGGATATCGGTAACATTTTACGAATTTTTACCCCGTGTGATTTTTTACTCATTGGGGCATAAAAATAAGTATTACGTT  
TAGACAATGTTTGTAGCGTCTCTTAAAGAGAGTCTGACCTGAAAATTTATGTTTTGGCAAGAGTAGATATTGTTG  
ACCACACTTAATGTTCAACTTTGTAAGAAGGAGTCAACGATGCCGTATAAACGAAAAGCGATCTGCCGAAAAGCGTAAAG  
CACGTTCTACCGTCTCATGCCAGGATATCTATAAAGAAGCGTTCAACAGCGCATGGGATCAATATAAAGATAAAGAAGA

TCGGCGTGATGACGCCAGTCGCGAAGAAACCGCGCATAAAGTGGCCTGGGCTGCTGTGAAGCATGAATATGCCAAAGGGG  
ATGATGATAAATGGCATAAAAAATCGTAAACCGGTGCTTAGTTAAAGCTATTCGTGCGGTGTTGCCTTGAAGTGGTC  
CGTGGATTGCATATTGTCCCGTTAGTGGTTTTCAAAATGAGCAGTAAAAATGTCCGGAAGACACAAAAAGTTGTCGAGG  
GAAGTATGCAGTGGCGGAAGTGAAGGTGATAACCGCTGATTTCTTGATGAATGCCGATTGTAACCGCATTTGGTGCC  
ATTGAAGAATCACTCTTATGGTCAGCAGAAACAACGGGCGGCTTCGCTGGCGGCGACGCTGGCTTGTGACCTGATGAGGG  
ACCGGTGTGGATCTTCGGCTATGGATCGTTGATGTGGAATCCGGCACTGGAGTTTACCGAATCGTGCACCGGTACACTGG  
TTGGATGGCATCGCGATTTTGCCTGCGCCTGACCGCCGGGCGGGGACTGCGCACCAGCCGGGACGGATGCTTGCAGCTG  
AAAGAGGGCGGACGCACCACAGGCGTCGCTATCGACTGCCAGAAGAGACGCTGGAGCAGGAATAACCTGTTGTGGAA  
GCGAGAGATGATTACCGGTGTTATCTGCCAACCTGGTGTGAGCTTGATCTTGATGATGGACGCACAGTAAACGCCATTG  
TGTTTATTATGGACCCGCGACATCCAGAATATGAATCTGATACTCGCGCTCAGGTCATCGCGCCGTTGATTGCGGCGGCG  
AGCGGTCCGCTGGGAACCAACGCACAATACCTGTTTTACTGGAACAGGAGCTTATCAAATGGGAATGCAGGACGATGG  
GCTGAATGATTTGCTGGTATCGGTAAAAAACTGCTGGCGGAGAAATTTCCGGATGGTGTGTTACGTCCGGGATTCCCT  
GAGTAACTTCCCGCATAGTGGGGCGTCAGACGCCCCCTCAAACATTAATAATGTGAGCACTTATCGGCTGACAGCGTCC  
ATTGCGCCAGTCCACAAGAGTACCGATTTCCACCCATCAATCAGAGGAAGTACTAATCCCGCGCCCGTCGGTACAG  
GTTTTGCACAATTTACCGGTACATTTGAGCGGTAAGGATCCAGCATTGCTGAATGTTGTAGCCTTCCCTGGTTTT  
TTGCCCGCAACCCGGTGTGACCGCATCAGACATGAGGAACAGCAGATCCAGATTGCTCTCCTGCTCTCGTAAACG  
CAATGGCCAGCCGCAAGCTGTTAAACAAGGATTCGCTCCCGTAAGGTGCGCCATTGGCAACGATCACGATTTTTTGCATT  
ATTTACTCCTGTATTACGGGAATTAGACACTCATCTTCTACTGCTTCTGCAGCGTCTGACCAATCGGTACATTT  
TTAAGGATTTTCTGAAAGCGCGAGAAAAATACGACAAAAGTTGCCAGTAATCGTTATTCTTTAAGGCTATGGTTTTTTCAT  
TATTACCGAAGTTACCGACGTTTTGAGCCGTTTCGTTCTCGCATTATCCCGTTTTTACTCTTGTTGATGACAGGC  
GGTACAGCTAACGCACAATCACTTCGAGCAAAAAGCGGCAATCCCTTTGATAATAACAATGATGGTCTGCCGATTT  
AGGCATGGCTCCGAAAATCATGATGGGAAAAACACTTTGCTGAAATTGTGAAAGATTTGGGCAAAACAGTATGAATG  
ATAACGGGCTGGATACTGGCGAGCAGGCAAAAGCTTTCGATTGGGAAAAGTCCGCGACGCGCTTAGTCAACAGGTTAAT  
CAGCAGTAGAGTCTGGCTATCACCGTGGGAAATGCCAGTGTGACGTCAAAGTGGATAACGAAGGACATTTACCCGG  
CAGTCGTGGAAGCTGGTTTTGCGGTTACAAGATAATGATCGTTATCTCACCTGGAGCCAGCTTGGTCTTACTCAGCAGG  
ATAATGGGTTGGTGAAGTGTGGGCGTTGGGCAACGCTGGGCGCGGGCAACTGGCTGGTGGGTTATAACTTTTTAT  
GACAATTTGCTGGACGAAAATCTTCAGCGAGCGGGCTTTGGTCCGAAGCGTGGGGCAATATTTGCGATTATCGGCAAA  
CTTTTATCAGCCGTTTGTGCTGATGGCATGAACAGACAGCCACGCAGGAACAACGGATGGCGCGCGGGTACGACCTGACAG  
CTCGGATGCGCATGCCGTTCTATCAACACCTCAATACCAGTGTACGCTAGAACAGTATTTTGGTGATCGTGTGATTTG  
TTAACTCTGGTACGGGTTATCACAATCCCGTCGCGTTGAGTCTGGGATTAATAACCCCTGTGCCATTAGTCACTGT  
GACGGCCAGCATAAACAGGGTGAAGTGGCGAAAATCAAAATAACCTCGGGCTGAATCTTAATTACCGCTTTGGTGTAC  
CGCTCAAAAAACAATTTCTGCGGGCGAGGTTGCCGAAAGTCACTGCTTACGTGGTAGTGCCTATGACAATCCGAGCGA  
AATAATCTACCGACTCTTGAGTACCGACAGCGAAAACGTTAACGGTGTCTTGGCGACACCGCCGTGGGATCTAAAACC  
TGGCGAAACAGTGGCGTGAATTAACAATCCGAGTCTTACGGTATTCCGCAACTGATTTGGCAGGGCGATACGCAGA  
TATTAAGTTTACGCGCGGCGCACAAGCAACAGCGCGGAGGGCTGGACGCTGATCATGCCTGACTGGCAGAACGGGGAA  
GGGGCAAGCAATCACTGGCGATTGTCTGTGGTGGTGAAGATAACCAGGGGCGAGCGTGTCTCCTCAAATGAGATCACGCT  
AACGCTTGTGAACCGTTTCGATGCATTGTCAAACGACGAACTGCCTGGGAACCGTAATCAGAAAATGCCTCCTGATGC  
ACCATACCGCTGCTTCCACGCGAGACTTGAGCTTATTTTCTCAGCATGTGCTTACGCTGACTTTTACTGTGCTTTC  
GGTATATCCAGGCGGGGCAATCATCTTGTTCGCAACCCCTGGGCAATCAGCTTGAAGATATCGGCTCGCTCGGTGGG  
TTAATGGTTAACATCGCTCAGTAGTGGCAGGTTAGCGCGCAAGCTGGCGCCAGAACAGGCGCTTAATGCTTCGCTT  
AATACCATTTCCGAGCAGCTGCCTGATGCAATGCTTTCAGCAGATCTTCCGGTTCCATATCTTTTAAACAGATAGCCATC  
CGCGCCGCTTTCAGTGGGTGACCACATCTTCTCATGGTTAGAGACGCTGAATACCACAATGCGCCCTGAGAGGGACT  
TTTCGCGCAGTTTATCCAGCGTTTCCAGACCGTTTATGCGGGCATATTGAGATCTAACAGGATCAGATCGGGATCAAGA  
GACTCCGCCAGTTCAATACCCTGTTCCGCTTACTCGCTTCCGCAACCACGGTATATCTGGTGCCATACTGATAAGCTG  
TTTTACGCCAGTTCCGAGCATCGGGTATCGTCAATCAGCAGGATAGTAGCCGTTTCTGATTACTCATGGGTATCTCCT  
TGGACGCTGTGAAAGTTTTTTCGGAATAAAGGTGACCACCCTTCCGTGCCACCTGATTCACGACGGCGGACGCGGCA  
ATCGCTCGTAAACTTTGCGCAGATCGCGCATTATTATCATGCCGATGATTGCTGCGGATGGCATTTTCAGGCACGC  
CGCAGCCGTTATCCTGGACGGTCAGTTTACCTGATTATCGTTTTGCGCCACCCTCACCGACTTCACTCGCTTCCGAA  
TGTTTGGGGCGTTACTTAATGCCTCACGGCAATTTGCAACAAGTGGATTGCCTGATGCGAAGGCACCAGGCGAGGGCG  
CAATTGATAATCCAGCTTACCGGGAAGCAAATTTGGCGCTGACTCTTCGCAACTCGCTCCAGCGCCGGACGTAATC  
CAGGCTCGGTGAGCTGCAAGCGGAATGTGGTGAAGCAATTCACGCAACTGCGCCAGGATGCATTAGTTCGTTACGGATC  
TGACTTAACAGTTCGCGGCTGCTTTCTGCGAGCGCATCGCCCTGCATCTGTAACAACCTCACCTGCATCTTCATGCAAGA  
GAGAGATTGGGCAATAGAATCATGCAGTTCGCGCGCAATGGTGGCAGCTCTTCCATCACGATCAACTGTTGCTGACGTT  
CCTGATGGCGATCCAGCGCCAGCGTGGCGGTGAGTTGTTCAACCAGGGTATCCACCAGTTGTTGTTGATCATGGCTAAGA  
TGACGCCCTGCGGCGAGGTCGCCAGCAAAATACCGTACTGCGTATGAGAGTACGCCAGCCGCACTTACGGGTCGTGCC  
CGGATACCAACGGGTAATACGCCGCGGGGAGAGCTGGCAGCCTTATCATCACAAGTCATATCTGGCTGGCAGGTA

ACTCCTGATGATTCTCTTCATCATCAGTGCATACACCCGCAATTTCGATATCACGTAGCAGGGTAAATTCTGTAAGCCG  
TTGAGTACAGGTGACAGGCGTTCACACAGCGGGGCGGGGAATGCAAACGGCGGTTAGCCTGCCATAAAAAAGAGAGGAT  
CTGATTTTTATGCTCCAGCCGGCGGTTTTCTCCTGAACCCGCTGCTCAAGTACGGCATAACTTTTCGGCCAGTTCTGCAG  
ACATATTGTTCAACGCAGTTCGAAGCATTGCGCATTTTCGTTGCGCCGCTGATGTTTTCGCGGTTGGGTAATAATCGCGATGA  
CTGACGGCACTCGCCATTGCCAGCAGTTGCCGCCACGGTTGTAGCAGTCGCGCCGCAACCAGATAATAGTGAACACCCAG  
TAAAAGTGCCATAAATACCGCCATTACCCGATGGACCAGTACCCTGTCTCGATGCGCATTTCCTGGTGCAGGTCAAAAAC  
CAGATACCAGTTGATCAAGCCCGCAACAACTGGCTGACATCCGCTGACACCGTTTTCTCGGTTTTGTGCACGCATCAGC  
GCAGGGATCAGTTCATTACGCCAGTAATCTGTAACCCTGTAATTGCGCCAGTTGTCGCTCTCGTTCTGCTGCTCGAGT  
CAACTCGGCGCTAAATGCCGTTTTGTTCCATCTCTTTAATTAAGGGCTTGCTTTCTCGCTTAATGGCACTGCCGCCAACA  
GACGGTAACTTTGCATGCGCAGCGATCCCGCTTTGTTGATCGCATGGGCGCTGCCCTGAACGCCTTGACCAGCCAGCCA  
GAAACCGCCATCCCTGCCAGTCCAATAGCAGTAGAAAGCAACAATAAGCGCAACCTGATTAACCAGGGTGAGCGGAGA  
GAGACAACGTTAAGCATGTAACCTCTTCTTCAGGCTTTAATGAGCAATAACCTTAATGAATGTGACGATACATTCT  
GGAATGGCAGTATTCTCGGCTATTGGCTGAAGTATACCCATACCCGAAAGAGTTACTCCTATTTGCCGTGTGGTTAGT  
CGTTTACATCGGTAAGGGTAGGGATTTACAGCACCGTAAAAATCTCATAATTTTTATGAAGTCACTGTACTCACTAT  
GGTAATGATAAATCAATGATAGATAAAGTTATCTTATCGTTTGATTTACATCAAATTCCTTTAGCTACAGACACTA  
AGTGGCAGACATCGAAACGAGTATCAGAGGTGTCTATGAGTCACTCATCCGCCCCGAAAGGGCTACTGGAGCTGTAT  
TACAGATTGGCGACCGAAGATCTGCGTTCTGGCAACAACCGGTCACCGTATTGCCAGCCGAACCTGTGGATTTCCG  
TTCCTGTCTGCTGCTGGCGTTTTGCGTATGGATGTTGTTAGCGCTGTTGCGGTGAACCTACCGAAAGTCGGCTTTAAT  
TTTACGACCGATCAGCTATTTATGTTGACTGCGCTGCCTTCGTTTTCTGGCGGTTATTACGTGTTCCATACTCCTTTAT  
GGTTCCTATCTTCGGTGGTCTGCTGGACGGCGTTCAGCACCGGTTATTCTGATTATTCCTTGCGTCTGGCTGGGTTTTG  
CCGTGCAGGATACCTCCACGCCCTTATAGCGTCTTCATCATCATCTCTGCTATGCGGCTTTGCTGGCGCAACTTCGCA  
TCCAGTATGGCAAACATCAGCTTCTTCTTCCGAAACAGAAGCAGGGTGGCGCGCTGGGTCTGAATGGTGGTCTGGGAAA  
CATGGGCGTCAGCGTCATGAGTGGTGGTCTCGCTGGTGGTATCACTGTGATTTTCGAGTATTTGGTAGCCAGGGCG  
TCAAACAGCCGGATGGGACTGAGCTGTATCTGGCAATGCGTCTGGATATGGGTGCCGTTCTTCCATCTTACCATT  
GCGGCGTGGTTTGGCATGAACGATCTTGTACTCTGAAAGCCTCCATCAAGGAGCAGTTGCCGGTACTCAAACGGGGTCA  
TCTGTGGATTATGAGCCTGCTGTATCTGGCAACCTTCGCTCCTCATCGGCTTCTCCGCGGCTTTGCAATGCTGTCAA  
AAACGCAGTCCCGGATGTTGAGATTCTGCAATACGCTTTCTTCGGCCGTTTATTGGTGCCTGGCGGTTCTGCAGGT  
GGTGCATTATCTGACCGTCTGGGCGGAACCTGTCACGCTGGTGAACCTTTATTCTGATGGCGATTTTCAGCGGCTGCT  
GTTCTGACCTTACCAGTACGGGCGAGGGCGAAGCTTCATGGCGTTCTTCGCGGCTTCTTGGCGCTGTTCTGACAG  
CTGGGCTGGTGTAGTGGTTCCTTCCAGATGATTTCAAGTATCTTCCGTAACCTGACAATGGATCGCGTGAAGCAGAA  
GGGGTTCTGACGAACGTGCGATGCGTGAAGCGGCAACCGACACGGCGGCGGCTGGGTTTCATCTCTGCGATTGGCGC  
GATTGGTGGCTTCTTTATCCCGAAAGCGTTTGGTAGCTCGCTGGCATTAAACGGGTTCCGAGTCCGGCGCAATGAAGGTAT  
TTTTGATTTTCTATATCGCTGCGTAGTGATTACCTGGGCGGTATATGGTCGGCATTCTAAAAATAAACCGTTACTCGT  
CATACTTCGGGTTACATGTGCTGCGGCTGCGTTCATTACCCAGTCACTTACTTTAGTAAGCTCCTGGGATTCAATCAC  
TTGCCGCTTCTGTAACCGAATTATATAGAGTAAAAATTTGATTATCCTTTGCGCGCATGATGTGCGGCTTTTTTT  
ATGCGTCATTTAGTTACAACATACTAATGTTATATGGTTTTATTTCGCGGATTTCAATTAAGAGCCATTAATATGTTACC  
ATGGGAATACTCCTTAATACCCATCTGCATAAAAACTTAATAGTTTAAATAACTACAGGTATAAACGTCCTTAATTA  
CAGTCTGTTATGTGGTGGCTGTTAATTATCCTAAAGGGTATCTTAGGAATTACTTTATTTTTATCCCCATCACTCTT  
GATCGTTATCAATTCCACGCTGTTTCAGAGCGTTACCTTGCCTTAAACATTAGCAATGTCGATTTATCAGAGGGCCGA  
CAGGCTCCACAGGAGAAAAACCGATGAGTAAATCTTGACCGGTTTCGCTACTTCAAACAGAAGGGTGAACCTTTGCC  
GATGGGCATGGCCAGCTTCTCAATACCAACCGTACTGGGAGGATGGATATCGCCAGCGTTGGCAGCATGACAAAATCGT  
CCGCTCTACCCACGGGTAAACTGCACCGCTCCTGACGTGGAAAACTACGTCAAACCGGCTGGTACCTGGGAAA  
CCAGCAGACTGACTATCCGCTACCCGTCGGATCTGCCAAACCATGAACCTCGCGGCTGCCGCGGTTGCCAGCTAC  
TCTGATCTTTACAGTGCCAACCGCTGAAATACCCGATGATGCGCAAACGCCTGATGAAAATGTGGCGTGAAGCGAA  
GGCGCTGCATAGCGATCCGTTGAGGCATGGGCTTCTATCATTGAAGACGCCGATAAAGCGAAAAGCTTTAAGCAGGCGC  
GTGGACGCGGTGGATTTGTTCTGTTCTTCTGGCAGGAGGTGAACGAACTGATCGCCGCATTAACGTTTACACCATCAA  
AACTACGGCCCGACCGTGTGCTGGTTTTCTGCCAATTCGGCAATGTCGATGGTTTCTTACGCATCGGGTGCACGCTA  
TCTCTGCTGATTGGCGTACTTGTAAAGCTTCTACGACTGGTACTGCGACTTGCTCCTGCTGCTCCGCAACCTGGG  
GCGAGCAAACCTGACGTACCGAATCTGCTGACTGGTACAACCTCCAGTACATCATCGCTGGGGTCAAACGTGCCGAG  
ACGCGTACCCCGATGCTCACTTCTTACTGAAGTGCCTTCAAAGGGACCAAACTGTTGCCGTACACCAGACTACGC  
TGAAATCGCCAACTGTGCGATCTGTGGCTGGCACCAGAAACAGGGCACCGATCGGCAATGGCGCTGGCGATGGGCCAG  
TAATGCTGCGTGAATTCACCTCGACAACCAAGCCAGTATTTACCGACTATGTGCGTGCCTACCCGACATGCCGATG  
CTGGTGTGCTGGAAGAACGCGACGGTACTACGCTGACGGTCTGATGCTGCGCGCTGCTGATCTGGTTGATGCGCTGGG  
CCAGGAAAACAACTCCGGAATGGAAAACCTGTCGCTTTAATACCAATGGCGAAAATGGTTGCGCCGAACGGTCTATTGGCT  
TCCGCTGGGGCGAGAAGGGCAAATGGAATCTTGAGCAGCGCAGCGCAAACTGGCGAAGAAACCGAGCTGCAACTGAGC  
CTGCTGGTAGCCAGGATGAGATCGCTGAGGTAGGCTTCCGTACTTTGGTGGCGACGGCACGGAACTTCAACAAAGT

GGAAGTGGAAAACGTGCTGCTGCACAACTGCCGGTAAACGCCTGCAACTGGCTGATGGCAGCACCGCCCTGGTGACCA  
CCGTTTATGATCTGACGCTGGCAAACCTACGGTCTGGAACGTGGCCTGAACGACGTTAACTGTGCAACCAGCTATGACGAT  
GTGAAAGCTTATACCCCGCCTGGGCCGAGCAGATTACCGCGTTTCTCGCAGCCAGATTATTCGCATCGCCCGTGAATT  
TGCCGATAACGCTGATAAAACGCACGGTCTGTCGATGATTATCGTCGGTGGGGGCTGAACCACTGGTATCACCTCGATA  
TGAAGTATCGTGGTCTGATCAACATGCTGATTTTCTCGCGTGTGTCGGTACAGAGCGGGGGCTGGGGCAGCTATGTA  
GGTCAGGAAAACTGCGTCCGCAAACCGCTGGCAGCCGCTGGCGTTTGCCTTGACTGGCAGCGTCCGGCGCGTCACAT  
GAACAGCACTTCTATTTCTATAACCACTCCAGCCAGTGGCGTTATGAAACCGTCACGGCGGAAGAGTTGCTGTACCGGA  
TGCGCGACAAATCCCGCTATACCGGACACTTGATCGACTTTAACGTCCTGCGGAACGCATGGGCTGGCTGCCGTCTGCA  
CCGAGTTAGGCACTAACCCGCTGACTATCGCTGGCGAAGCGGAAAAAGCCGGGATGAATCCGGTGGACTATACGGTGA  
ATCCCTGAAAGAGGGTCCATCCGTTTTCGGCAGAACCAAGAAAAACCGTAAAAACCCCGCGCAACCTGTTTCTCT  
GGCGTTCTAACCTGCTCGTTTCTCCGGTAAAGTTCATGATTTATGCTCAAGTACCTGCTGGGACGGAGCAGCGTATC  
CAGGGTAAAGATCTGGGGCAACAGGGCGCGTGAAGCCGGAAGAAGTGGACTGGCAGGACAATGGTCTGGAAGGCAAGCT  
GGATCTGGTGGTTACGCTGGACTTCCGTCTGTCGAGCACCTGTCTCTATTCCGACATCATTTCGCGACGGCAGCTGGT  
ACGAAAAAGACGACATGAATACTTCGGATATGCATCCGTTTATCACCCGCTGTCTGCGCGGTGATCCGGCTGGGAA  
CGCAATCGTCACGCTGCCTATCCAGCATGACTCTGCCGCTGAACGGCGCAGCCGCTGGATGTGAAAGAGTGGAAAAAG  
GCGAGTGGACCTGATCCAGGTAAAACCGCGCCACACATTATGTCGTAGAGCGCGATTATCCGGCGACTTACGAACGC  
TTTACTCTATCGGCCGCTGATGGAGAAAAATCGGTAATGGCGTAAAGGGATTGCCTGGAACACCCAGAGCGAGATGGA  
TCTGCTGCGTAAGCTCAACTACACCAAAGCGGAAGTCCGGCGAAAGGCCAGCCGATGCTGAACACCGCAATTGATGCGG  
CAGAGATGATCCTGACACTGGCACCAGAAACCAACGGTCCAGGTAGCCGTGAAAGCCTGGGCTGCCCTGAGCGAATTTACC  
GGTCGTGACCATACGCATCTGGCGCTGAATAAAGAAGACGAGAAGATCCGCTTCCGCGATATTAGGCACAGCCGCGCAA  
AATTATCTCCAGCCGACCTGGTCTGGTCTGGAAGATGAACACGTTTCTTACAACGCGGTTACACCAACGTTTACGAGC  
TGATCCCATGGCGTACGCTCTCTGGTCTGAGCAACTGTATCAGGATCACCAGTGGATGCGTGATTTCCGTGAAAGCCTG  
CTGGTTTATCGTCCGCGATCGACACCCGTTCCGGTAAAGAAGTATAGGCCAGAAATCCAACGGCAACCAGGAAAAAGC  
GCTCAACTTCTGACGCCGACAGAAAGTGGGGTATCCACTCCACTACAGCGACAACCTGCTGATGCTGACTTTAGGTC  
GCGGTGGTCCGGTGGTCTGGTTGAGTGAAGCCGATGCCAAAGATCTGGGTATCGCCGATAACGACTGGATTGAAGTCTT  
AACAGCAACGGTCTCTGACTGCCCGTGGTGTGTCAGCCAGCGTGTCCGGCAGGGATGACCATGATGTACCACGCGCA  
GGAACGTATCGTTAACCTGCCTGGTTCGAAATTACCAACAGCGTGGTGGTATCCATAACTCGGTACCCGATACACGC  
CGAAACCGACGCATATGATCGGCGGCTATGCCATCTGGCATAACGCTTTAACTACTATGGACCGTAGGTTCTAACCGC  
GATGAGTTTGTGTAGTGGCTAAGATGAAGAACATTGACTGGTTAGATGGCGAAGGCAATGACCAGGTACAGGAGAGCGT  
AAAAAGAAATTCGTTCAACAAGTCGGCATGGTGTGAACTCTGATAAGTGCATCGGCTGCCACACCTGTTTCAAGTACCTG  
TAAAAACGTCTGGACCAGCCGTGAAGCGGTGGAATATGCGTGGTTCAACAACGTGGAAACCAAGCCGGGCCAGGGCTTCC  
CGACTGACTGGGAAAACAGGAAAAATACAAAGCGGCTGGATCCGTAATAACCGGCAACTGCAGCCGCGCATGGGT  
AACCGTGCCATGCTGCTGGGTAATACTTCGCTAACCCGCATCTGCCGGGATCGACGATTATTACGAGCCGTTTCAAGTT  
TGACTATCAGAACCTGCATACCGCGCCGGAAGGCAGCAATCGCAGCCGATTGCCCGTCCGCGTTTCTGATTACCGGGG  
AACGGATGGCGAAAATCGAAAAAGGGCGAACTGGGAAGATGACTGGGCGGTGAGTTTGACAAACTGGCGAAAGACAAG  
AATTTCGACAACATCCAGAAGGCGATGTATAGCCAGTTCGAAAACACCTTATGATGTATTTGCCGCGCTGTGCGAACA  
CTGCCTGAACCCGGCATGTGTGGCGACCTGCCGAGCGGTGCGATTTACAAGCGTGAAGAAGATGGCATCGTCTGATCG  
ACCAGATAAATGCCGTGGTGGCGTATGTGCATCACTGGATGCCGTACAAAAAATCTACTTCAACTGGAAGAGCGGT  
AAGTCTGAGAAGTGCATTTCTGCTATCCGCGTATTGAAGCGGTGAGCCGACCGTGTGCTCAGAAACCTGTGTCGGTCTG  
TATCCGTTATCTTGGCGTGTGTTGACGATGCCGACGCTATTGAACGTGCAGCCAGCACCGAGAACGAGAAAGATCTTT  
ACCAGCGTCAGCTGGACGTGTTCTCGATCCGAACGATCCGAAAGTCATCGAGCAGCGATTAAAGACGGTATTCCGCTG  
AGCGTTATTGAAGCCGACAGCAGTCCCGGTTTATAAAATGGCAATGGAATGGAAACTGGCGCTGCCGCTGCATCCGGA  
ATATCGCACACTGCCGATGGTCTGGTACGTGCCGCTCTGTCTCCGATTGACTGTCAGCAGACGCGGGTGGAGTGGGTA  
GCAACGGCATTCTGCCAGACGTCGAAAGCCTGCGTATTCCGGTACAGTATCTGGCGAATCTGCTGACCGCCGGTGTATCC  
AAACCGGACTGCGCGCACTGAAACGTATGCTGGCGATGCGTCATTACAACGTGCTGAAACCGTTGACGGTAAAGTTGA  
TACCCGTGCGTGGAAAGAGTGGTCTGACCGAAGCCAGGCACAGGAGATGTACCATTCTGGCGATTGCTAACTACG  
AAGATCGCTTTGTTGGTCCGAGTAGTCATCGTGAACGGCACGGGAAGCCTTCCCGGAGAAAAATGGCTGCGGCTTTACC  
TTTGGTGTGGTCCACGGTTCAGATACCAAAATCAATCTGTTCAACAGCCGTCGATCGATGCCATCGATGTGACCAG  
CAAAACGGAGCCGATCCATGATCGAACTCGTGATTGTATCGGCTCTCCTTGAATATCCGGATGCTGCCATTATGGCAGCA  
TCAACAAGAGATGTTTGGGCGATTGCCGCTCGAAAAATCTGCCAAAAGAGGATGCCATGCGCTGGGCATTTTCTGCG  
GCGATTTAACGACGATGGATCCGCTCGATGCCAGGCGAGTACAGCGAACTGTTGACCGTGGCCGCGCCACGTCAGT  
TTGCTGTTTGAACATGTGCACGGCGAATCCCGGACCGCGCCAGCGGATGGTGGACCTGCTGGCGCAGTACGAGCAGCA  
CGCTTGCAGTTAAACAGCCGCGAATTGCCGGACCATCTGCCGCTGTATCTGGAGTACCTGGCGCAGCTGCCGAAAGCG  
AAGCCGTGGAAGGTTTGAAGATATCGCGCCGATTCTGGCATTGCTGAGCGCGCTGTCGAACAGCGTGAAGCCGTTAT  
GCCGTGCTGTTTATGCTGCTGCTGAACTGGCGAATACCGCTATCGACGCGACAAAGTGGCGGAAAAAATTGCCGACGA

AGCGCGGATGATACGCCGAGGCGCTGGATGCTGTCTGGGAAGAAGAGCAGGTTAAATTCCTTGGCTGACAAAGGCTGCG  
GTGATTCAGCAATCACTGCGCATCAGCGTCGCTTTGCCGGTGCCGTCGCGCCGCAATATCTGAATATCACCACCGGAGGA  
CAGACTAATGCAATTCCTGAATATGTTCTTCTTTGATATCTACCCGTACATAGCCGGGGCGTCTTCTGATTGGTAGC  
TGGCTGCGTTATGACTACGGCAGTACACCTGGCGCGCGGCTCCAGCCAGATGCTGGATCGCAAAGGGATGAACCTGGC  
GTCGAACCTGTCCATATCGGGATTCTGGGGATTTTGTGCGTCACTTCTTCGGTATGCTGACGCCGCACTGGATGTATG  
AAGCCTGGCTGCCGATTGAAGTGAACAGAAAATGGCAATGTTTGGTGGTGCCAGCGCGTGTGTGTCTGATTGGC  
GGCGTGCTGTTGCTGAAACGTCGTCTGTTAGCCACGCGTGCCTGCAACCCTACCGGAGCGGATATCTGATCCTGTC  
GCTGCTCGTTATCCAGTGCAGCGCTGGGCTGTTGACCATTCCGTTCTCCGCTCAGCATATGGACGGTAGCGAGATGATGA  
AACTGGTTGGCTGGGCGCAGTCCGTTGACCTTCCACGGTGGCGCTTCTCAACACCTCGATGGTGTGGCGTTTATCTTC  
CGTCTGCACCTGGTGTGGGGATGACGTTATTCCTGCTGTTCCGTTCTCGCGTCTGATACACATCTGGAGCGTACCGGT  
GGAGTATCTGACACGTAAGTACCAGCTGGTGCAGCTGCTCACTAAGCGAATTTAGTTACATAGACCTGCTTCGGCG  
GGTTTTTTTTATGGGCACGGTGCAGGGTGAAGTTGTCGGATGCGCTTCGTTATCCGACCTACAGGGGAGGATATTGTAGG  
CCCGTAAACGTGGTCCATCGGGCAAATAGCTCGAGTAACAGGTTTGTATTATTAAGGAAGCGATGGTGGTGGGG  
GAAGGATTACTCAGCGCTGCAGCTTCGCCCTTCCGGTTCGTTGCTGCGGCAACGCTCTCTCGCTGGCGCTCAAGTCGAA  
CCTTGGTCGAAGCTTCTCATCTTCCCGCTTGGGAGAATTTGATTGCGGATTCGTTTGAAGTCCGGGGCTTTTG  
AAAGTGATGGTGGTGGGGAAGGATTACTCAGCGCTGCAGCTTCCGCTTCCGGTTCGTTGCTGCGGCAACGCTCTCTC  
GCTGACGCTCAGCCGAACCTTAGTCGAAGCTTCTCATCTTCCCGCATGGGAGAATATTTGATTGCGGATTCGCTTG  
AGAGTTCAGGGACTTTTTGAAGTGATGGTGGTGGGGAAGGATTACTCAGCGCTGCAGCTTCCGCTTCCGGTTCGTTG  
CTGCGGCAACGCTCTCTCGCTGGCGCTCGAGTGAACCTTGGTGAAGCTTCTCATCTTCCCGCATGGGAGAATATT  
TAATTGCGGATTCGTTGGGAAGTTCAGGGACTTTTTGAAGTGATGGTGGTGGGGAAGGATTCGAACCTTCAAGTCGAT  
GACGGCAGATTTACAGTCTGCTCCCTTGGCGCTCGGGAACCCACCAGGGTAATTCAAATTTGAGGTAATGCTTGA  
GATGGTGGTGGGGAAGGATTATTCGTCGCTTCCCTCACCCTTCCGGCGTTGCTGTGGCAACGTTCTCTCGCTTT  
CGCTCGAATCGAACCTTAGTCGAAGTCTCACCCTTCCCGATGAGTGCAAATTTACAATCTCACCAGGATACCAC  
ATCGCTGTGGTGAATTATGGTGGTGGGGAAGGATTGAACCTTCAAGTCGATGACGGCAGATTTACAGTCTGCTCCCT  
TTGGCGCTCGGGAACCCACCACGGGTAATGCTTTTTACTGGCTGCTCCCTTATCGGGAAGCGGGGCGCATCATATC  
AAATGACGCGCGCTGTAAGTGTTACGTTGAGAAAAATGAAGTGGTTCGTAATTTTATCCGTAACGGATTAAGGTA  
ACGATTAATTTTCTGCGGATTAAGAATAATCGTTCGATTACCGTAAACAAAGACGCGCTGTGCCAGTACTTTGTATA  
GTGCAGACTTAAGACGTTTTTCTCGACGTCACGACCTGCGCGCATCATATCTCAGCTGTGTAGGTATGATCGACATGA  
ATAACGTCCTGCATGATGATTGGGCTTCGTCAGATTGTCATTACATAGTAGCGGTTGCGCAATAATCTTACACC  
ACGTTTCATAGGCTGGTGATAAGGACGTGCGCAATAAACGCTGGCAGGAATGAATGGTGAATATTGATGATCTTATCG  
GGAAGCGTGCCACAAATTCGGCGTAAATACCCGCATATACTTCGCCAGCACCGTAGTCAGGTTGATAAGCATCAATG  
GCATCCGCCATCTTTGATCGTGCTGTTGCGGGTAAACCCTTATGGCTTACCAGCTCAAACGGAATATCAAAACGCTC  
AACCAGAGAACGTAAGTATCGTGGTTACCAATAACTGCCGCGATTCGACATCCAGGCCCGGTAATTGGCTTTCATCA  
ACAAATCGCCAAGGCAATGCGCTTCTTATGAGTACCAGAATCACTATCCGGCGACGACCGGCAGGATTCAGCTCAGCAGC  
GAGCCTTCTGGCAATGCGTATCGAGATCCGCCAGCAGGTTGAATCATTAAAAATCCCTTCCAGTTCGCTGCGCATAAA  
AAAGCGCCCGTACGGTGATCAACAAATTCATTGTTCTGTACGATATTTAACTCGTGCTTGTAGCAAATATTGGTAATC  
GTGCGATCAGACCTTTTTGGTCCGGACAAATAGTACGAGAATTTACGTTGGAGTGAATGCATTGCTGGAAAAACCTG  
TTGAGAGTGTGTAACCGTACCGTCAACCATTATTGGCCGACGACTTTTTAAATTTTTTACCTGAACCACAAGGGC  
AGGATCTGTTGCGACCAAATGCGGACGTGTACCGTCAATATAGTACCATTGACCGTTTTTCAAAAAATCGCGAACGT  
TCAATTTGACCTGTTTTACCCTTCCGTAATCGAGCAACAAACTGACAAATCCGATATTGTCGGCGCTCGCTGCCA  
ACAATGTTCAAATACGGTCAATCCCAACCATTAGTATGCGCAAATCCGGCCATCAATTCGGCACGTAACGCCGCTGCTC  
CACAAAGGGGATGCCAGGCTTTTATAAATAATCTGCGTCTTGCATCACAAAAGCGCAGTAACCGCAACGCATGAGATGT  
TCTGGATCAGGTGCAACCTTTTACCAGACACATAAGGGTGGCAACATAGGCTATACTCGACAGCACTACCACAGGGACA  
AAGCTGAGACACAAATAATCTCCCTGAAACAATAACGGCGTATTAACCGCCTGAGTAGCACTATGTTAACCGAGCAGTA  
GCGATGTGGCTACGATTGCATTCCAGGGGAATCTTGGCGGAATAATGAGAAAGATAAAAATAGGGCTGGCGCTGGGATCT  
GGCGCGCGAGAGGTTGGTGCATATTGGCGTTAATAATGCGCTAAAAAAGTGGGATTGAAATTGATATCGTTGCAGG  
ATGTTCAATTGGTTGCTGGTGGGCGCTGCCTATGCATGCGATCGATTATCTGCGCTGGAAGATTGGGTGACCTCTTCA  
GTTATTGGGATGTTTTACGCTGATGGATCTCTCCTGGCAGCGCGGTTGGTACTGCGCGGCGAGCGTGTCTTCAATCAA  
TACCGCAAATAATGCCGAAACAGAGATCGAAAATGTTCCCGTTCGCTTTCGGCTGTTGCCACCAATTTAAGTACGGG  
ACGTGAATTATGGTTTACTGAAGGCGATCTCCATCTTGTATTGCGCATCATGCAGTATCCAGGACTCATGGCACCTG  
TTGCACATAACGGCTACTGGCTGGTTGATGGAGCAGTCGTTAACCAATTCCTATTTCCCTCACGCGTGCATTGGGGCT  
GATATTGTATAGCGGTTGACCTGCAGCAGATGCTCATTGATGCAACAAGATTTGCTCTCTTTAATGTCAGTGAAGA  
AAATAGCGAGAATGGTATTCTCTGCCGTGGCATGCGCTGAAAGAAAGGTTAGGCAGCATAACGACACGTCGGGGCG  
TGACAGCGCAACGGCAACAGAGATTAGACCATTCTATCCAGGTGCTGGAGAACCCTTAAAAGGAACCGCATGGCA  
GGTATCCGCCGATATTCTGATTCAACCTGTTTGGCCGAAATATCTACGCTTGAATTCATCGCGCGACGCTGCCAT  
TGCGGCCGACAGCTGGCAGTGGAAGGAAAATGGACGAACTTTTCCGTTGGTACGCACCAACATTTGACCAGAATTTT



TATCTACACTTAAGTTAATTCTGACAGGCGCAGGTGGCAATAGCATGCCACTATTGAGTAAAGCCAGTCAGGGGAGAGAA  
CATGACGCAGCCATTGGTCGAAAACAGATTCTCATTGTTGAAGATGAGCAGGTATTTTCGCTCGCTTCTGGATTCATGGT  
TTTCTCATTGGGAGCGACAACGGTACTGGCGGCTGATGGGGTGGATGCCCTTGAGTTGCTGGGAGGTTTACTCCAGAC  
CTGATGATATGTGATATCGCGATGCCACGAATGAACGGGCTAAACTGCTGGAGCATATACGTAACAGAGGCGACCAGAC  
CCAGTTCTGGTGATATCTGCCACTGAAAATATGGCAGATATTGCCAAAGCGTTACGTCTGGGCGTTGAAGATGTTTTGC  
TGA AACAGTTAAAGATCTGAATCGCTTGC GCGAGATGTTTTGCTGTCTATCCCAGCATGTTAATTCGCGCGTT  
GAGGAAGAGGAAAGGCTTTTTGCGACTGGGATGCAATGGTTGATAACCCTGCCGAGCGGCGAAATTATTACAGGAACT  
ACAACCGCCGGTTTCAGCAGGTGATTTCCATTGCCGGGTTAATTATCGTCAATTGGTTGCCGCGGACAAACCCGGCCTGG  
TGCTTGATATTGCCGCACTTTCCGAAAACGATCTGGCATTATTTATGCCTTGATGTCACCCGAGCTGGACATAATGGCGTA  
CTTGCTGCCTTGTATTACGCGCATTGTTAACGGATTATTACAGGAACAGCTTGCACACCAAAATCAACGGTTGCCAGA  
GTTGGGCGCGTTATTGAAGCAGGTAACCATTTACTTCGTGAGCCAACTCTGCCGGGCGAGTTTCCGCTATTAGTTGGCT  
ATTATCATCGGAACTGAAAATCTCATTCTGGTTTCTGCGGGTCTGAATGCGACGTTAAATACCGGCGAACACCAGGTG  
CAAAATCAGTAATGGTGTCCGTTAGGCACTTTAGGTAACGCTTATTTGAATCAATTGAGCCAGCGATGCGATGCCTGGCA  
ATGCCAAATGGGGAACCGGTGGTCGACTGCGCTTGATGTTGTCTGCAGAATGAGCAAACGATAACCGGGCTAAATTT  
GCATTACCTGTAATGTCCGGCTGGTGGTACTATCGTCGCCATTCTGATAAGTAATTGTCTTAATTATGCTAACTCGCCTC  
CTTTTCAGAACTTAGCCCCCTCGGGGTGCTGATATCTGGGATCGGATACAGAAATATGAACACGTTCAAACACGAAACA  
GTCCAGGAGAATTTAAATGGCTGCCATTAATACGAAAGTCAAAAAAGCCGTTATCCCGGTTGCGGGATTAGGAACAGGA  
TGTTGCCGGGACGAAAGCCATCCGAAAAGAGATGCTGCCACTTGTGATAAGCCATTAATTCAATACGTCGTGAATGAA  
TGTATTGCCGCTGGCATTACTGAAATTGTGCTGTTACACACTCATCTAAAACTCTATTGAAAACACTTTGATACCAG  
TTTTGAACTGGAAGCAATGCTGAAAAACGTGTA AACCTCAACTGCTTGATGAAGTGCAGTCTATTTGTCCACCGCACG  
TGACTATTATGCAAGTTCGTGAGGGTCTGGCGAAAGCCTGGGACACGCGGTATTGTGTGCTCACCCGGTAGTGGGTGAT  
GAACCGGTAGCTGTTATTTGCTGATGTTATTCTGGATGAATATGAATCCGATTTGTCACAGGATAACCTGGCAGAGAT  
GATCCGCCGCTTTGATGAAACGGGTATAGCCAGATCATGGTTGAACCGGTTGCTGATGTGACCGCATATGGCGTTGTGG  
ATTGCAAAGCGTTGAATTAGCGCCGGGTGAAAGCGTACCGATGGTTGGTGTGGTAGAAAAACCGAAAGCGGATGTTGCG  
CCGCTAATCTCGCTATTGTGGTCTGTTACGTACTTAGCGGGATATTTGGCCGTTGCTGGCAAAAACCCCTCCGGGAGC  
TGGTGATGAAATTCAGCTCACCGACGCAATTGATATGCTGATCGAAAAGAAACGGTGAAGCCTATCATATGAAAGGGA  
AGAGCCATGACTGCGGTAATAAATTAGGTTACATGCAGGCCTTCTGTTGAATACGGTATTCTGCATAACACCCTTGGCAG  
GAATTTAAAGCCTGGCTTGAAGAAGAGATGGGCATTAAGAAGTAAACATCCGATCGGTGTTATCCACGAAACGGCGTTGA  
GCAATCGACGCGCTTTTTTATAGCTTATTCTTATTAATTTGCTTAAACCGGACAATAAAAAATCCCGCGCTGGCGGG  
ATTTAAGCAAGTGAATCTACAAAAGATTATTGCTTGATCAGGAAATCGTCGAGGGATTTACCTTGCTCATCCATTGCT  
TTTTGATTACAGCTGGAGTACGGCCTTGGCCAGTCCAGGTTTTAGTTTTCGCCGTTTTCTGCAACGTAGCTATATTTGC  
CGGACGCTGAGCACGTTTAGCTTTGGTGCCAGATTTAACGGCAGCAAGGCTATTTCAGCAGTTCGTTCCGGTCAATACCGT  
CAGCGATCAGCATTTTCGCGATATTGCTGCAGTTTACGAGTGCCTCTTCAACTTCAGCAGCAGCCGCGCTTTCTTCTCG  
CGACGTTGTTAAACAACCTTCTAATTTTTCCAGCATTTCTCCAGCGTTTCAAGTGTACATTCTCTTGCTGCGCACG  
AAGAGTACGGATGTTGTTGAGAATTTAAGTGCTTCGCTCATTGTAGTAATCTCAA CTTATATTGGGGTGGTTGTTGA  
GGTAATAATAGAGCCTTAAATTCAGTTGTGCAATAGCCAGGAATGAAGGAATCAAATTTGTTCTTTATTTTGTGCCG  
CAATAAATATCTTTTCATAAAATTAGCCAGAAAAGACGCGGCATATAGCCCTATTTACACCGATGATTTGCGAGCACGTG  
AGGTTAAAACCTTCTGATTCATGTCACATTTTATGGGAGATTATCGTAGGCTGACGACCTTTCAGTCTTCTGTATTAGT  
TGTGTTTACGAGAATTCCTATTAAGCGAATGATGAAAAGTAGAACAGTCGCAATAAGAGCATGGACTTAGTATTGCAT  
ATCTCTGGAGTCAACAGAGGGCTATTACTTGCACAACAGGTTAAAGATTGTGAATAGTTACCAGCAGTCATTTAACCCG  
CTTATAACAAGCGAGGCAGTTGTAATGATAGCTCAGAAGGATTATGCAAGGCTTCGTAAGGGAGAACGCATATACCCACT  
TCTGTGCATACTGTTGAGCTGAAAAACTGACGAATTATGATAAATCCAGCCAACCTTTATTTTCATATCATTGAGGGCCTG  
TGCTGATGGCACAGCTATATTTCTACTATTCCGCAATGAATGCGGGTAAGTCTACAGCATTGTTGCAATCTTCATACAA  
TTACCAGGAACCGGCATGCGCACTGTGCTATATACGGCAGAAATTGATGATCGCTTTGGTGCCGGGAAAGTCAGTTCCG  
GTATAGTTTTGTCATCGCTGCAAAATTTAACC AAAATTCATCATTATTTGATGAGATTCGTGCGGAACATGAACAG  
CAGGCAATTCATTGCGTACTGGTTGATGAATGCCAGTTTTAACCAGACAACAAGTATATGAATTATCGGAGGTTGTCGA  
TCAACTCGATATACCCGTACTTTGTTATGGTTTACGTACCGATTTTCGAGGTGAATTTTATTGGCAGCCAATACTTAC  
TGGCATGGTCCGACAACTGGTTGAATTA AAAACCTCTGTTTTGTGGCCGTAAGCAAGCATGGTGTGCGTCTTGAT  
CAAGCAGGCAGACCTTATAACGAAGGTGAGCAGGTGTAATTGGTGGTAATGAACGATACGTTTCTGTATGCCGTAACA  
CTATAAAGAGGCGTTACAAGTCGACTCATTAAACGGCTATTGAGAAAGGCATCGCCACGATTAATAAGAATTTCTTACT  
GACAGGGTGTGAGCAGGGCACTTTTATCCTGTCAGTTCGTTTTACGCACTTCTTCCGGCTATATACCCTTCTCGGCAGTTT  
TTTAAACCGCTATACGCTCACAGGGCTCTTAAGCACCGACGTTGACTTGTGACCTGTAAAGTACAATATCCCTGTGTT  
TAGGCGTTATACATCGTCGCAAAATATGATGAAGGCTAATGCTGTGCGTTTATGAAAAGTTGCTTTGGGTAACAAAAA  
TACGGCCCCAGAGGGCAATGCCGTTCACTTAAGAGGAGCGGCACTATGTTTACAGGATAACGGGTTTTTGATATCTTA  
ACCGACCTCGGCTTGATGGTCCGGGGGCTTTTGTATGAACACCACTTCCAGAGCACCCCGAAGATGCTCCAGTCTGTT  
CGGGATGGTCCCTGGTGACGCCGTTTCCAGCTCTATCATTCTGATGCGATATTCTCCACGCGAGGCAGTAGCCAGT

GGCGGTTACAACCTTCTGGTTCAGCGTCAGCAGCAGGTCTTCGCTGTAAAAAGTTTATCAAACAACGTAATAGAGTTA  
TCCGGGATGGTGGCGAGCATGGAGTGGCCAGCACAGTTCGCTCTGCCGGTAAGGTGCGGTACGGCATTACAGCAGAA  
GTGACTTCCCAGGTTTATTAAGGCCACCAGACGCATAACCGGGTAGGCGTTCGCGCTTAGTGGATGTGTTGGCAGACC  
CATAATATTCACGCAGCTCGGGTTTATCAGGTGTCTGAACTGTGCGCCATCAATGGCAAAAAGTTGCAGGCCGTGCCAG  
TCATCCTTCAGGTAACGTTCCGCGCCCCGTGTCTGTGCGGTCTGGCGGAAGAGCCATTCCACTGGGGCGGCCCCACGCC  
TGACCGCCTGGGTGACAGCGCTGCGGGCCAGCAGGTTTATCCCCGTTTCGCCATCCGCGCTCAGGTTACAGCGCGAAC  
AACATCGGTAATTGGCTCATTGCACCACCATCCAGATAACCATGTCCCCGGTAAACGACGGCGGCGAACGGTGCATGA  
GCAGAAAGCGTCAGGCAGTGTGTATCCACTCGGTGGGAAGGTGTTCTGCAAATAGTTGTGCAGAGGGCGGAGGCATAAG  
CGGATGGTCACTGAAATCGAGCAGATCATTGAGAAGTGGCATAAGAAAACGGCTCCCTGTTGTGGAAGCCGTTATAGTGC  
CTCAGTTTAAAGGATCGGTCAACTAATCCTTAACTGATCGGCATTGCCCAGAAGGGCCGTTTATGTTGCCAGACAGCGCT  
ACTGATTAAGCGGATTTTTTCGTTTTTCTCAGCTTAGCCGGAGCAGCTTTTCTTCGCTGCAGTTTACCTTCTAC  
ATAATCACGACCGTAGTAGTATCCAGCAGAATCTGTTTACGCTCGGAGATCAGCGGTAACGCGGGTACGCGCCGGTGC  
ACTGGTCATCGAATGCATCTCAGACAGTTTATCCAGTTCGCCAGGAAGTCTGTTCTGAACGCCAGCTTACGGATA  
GATTTCCGAATACCCAGTTTACGCTTTTCCAGCATTCCAGCCATGCCAGCAGTTTCTGATCTTAGCAGCAGTACGGTCCG  
CGGTGCGCTCAGACCAAGTGGTCCGCAATTTAGCATAACGACGGCGAGCCTCGGACGGTCATACTGGCTGAATGCAG  
TCTGTTGGTGGTTCGTTTCGATTGTAGCGAATAACGTTACAAATCAGCAGGGCGTTTCCAGACCGTGCAGGAATA  
TGGAATGGGAACCCAGTTTGTGCGCCATTGAGTGACATACCCAGGAAGGCGTTTCGAAACCGGATACCCCGGATAGT  
CGCTGCACTGTGAACACGTTACGCGCTACCGGATTTTTAGACCTTCTGTGGTAGGACGCTGGCAGATATTCTTTCAGCA  
GTTTCAGTGCCTGCAGAGCTGACCATCAGAGAACTCAGATGCCAGTACAGAAACATAAGCTTCCATGGCGTGAGTTACT  
GCGTCCAGACCACCGAAAGCACACAGGGACTTCGGCATGTCCATAACCGAGTGGCGTCGACAATCGCCATATCCGGAGT  
CAGCGCATAGTCTGCCAGCGGATATTTCTGACCAGTAGCGTGTGAGTTACAACCGCAAACGGAGTGACTTCAGAACCTG  
TACCAGAAGTGGTGGTACAGCGATCATTTCGCTTTCAGCCCATTTTCGGGAACCTGTAGATACGTTTACGGATATCC  
ATAAAGCGCAGCGCCAGCTCTTGAAGTGAAGTTCGGATGTTCTGACATAACCCACATGATCTTCGCGCGTCCATCGG  
GGAACCACCACCCAGCGGATAATCACGTCTGGTTGAAGGAGTTTCCAGTCTGCACCTTACGAACGATGCTCAGGG  
TCGGGTCCGTTCTACTTCAAGAAGACTTCAAGTTCAGTTCAACGCCTGCTGTTTACGTACGGAAGTATCTGATCAGCATAA  
CCATTGTTGAACAGGAAGCGGTGAGTACGATGAGCGCAGTTTGTGCCATCAGTAATCACTTCCATCCAGCGCGATTGG  
CAGGGAGCCACGGCGGAAGTAGATAGATTTCCGAAGTTTGTGCCACAACATGTTTTAGCTCGCTTAGCAACGGTTTTCT  
TGTTGATCAGGTGTTTCCGACCAACGTTTTAGAGATGGAGTTACCACCCCAAGAACCAACCCAGAGTCAGGGAAGGT  
GCGAGTTTGAAGTTATACAGGTACCCGATACCCCTGAGACGCTGGGGTGAATCAGGATACGCGCCGTTTTTATTTT  
CTGACCGAAGTAAAGAACCGGAGCCGGTTGGTTATCCTGGTCACTGTACAGGCAAGAGGTATGACCGATACCGCCATAG  
CAACCAGTTTTCTGCTTTTTTACCGCGTCTTCAAAATCTTTCAGCGGTACATTGCCAGAGTCGGGGACAGTTTTTCA  
TGTGCGAACGGTTCGTTTTATCAACAACGGTCACTTACCAGTACAGAACTTTGGTGTCTTGGTACAGAGAAGCCTGC  
CAGTTTACGCAATTTTATAGGCTGGCTGACCAACGATAGCCGCTTACGCGCACCCTTTTTCAGGATAACATCCTGAACAG  
CTTTCAGCTCTTACCCTGCAACAGATAGCCGCGTGGGTTGCAAAACGTTACGTAACAGCGTCATAAACAGAGTCAACA  
ACAACAACAGACTGTTGAGAAGCACAGATTACGCCGTTGTGCAAGGTTTTGGACATCAGTACAGATGCAACTGCACGTTT  
GATATCAGCAGTTTATCGATAACAACTGGAGTGTGCCCGCCCTACCCGATAGCTGGTTTACCGGAGCTGTATGCGG  
CTTTAACCATGCCCGGACCACAGTCCGAGGATCAGGTTGATGTCTGGTGGTGCATCAGTGCCTTAGACAGTTCAACA  
GAAGGTTGATCGATCCAGCCGATCAGATCTTTCGGAGCACCGGACGCGATAGCAGCCTGCAGAACGATATCAGCCGCTT  
GTTGGTGGCATCTTTGCACGCGGGTGGGGGAGAAGATAATGGCGTTACGGGCTTTCAGACTGATCAGCGATTTGAAGA  
TAGCAGTTGAAGTCGGGTTAGTGGTGGAAACGATACCGCAAATAATACCGATTGGTTGAGGATAGTGTGTTACAAAA  
GTGTCGCTTTCAGACAGAACACCACAGTTTTTTCATCTTTATAGGCGTTGTAGATATATTCAGAAGCAAAGTGGTTTTT  
GATCACTTTATCTTCAGCATACCCATGCCGATTCCGCAACGGCCATTTTCGCGAGTGGGATTTCAGCATCTGCAGCAG  
CCAGAGCGGGCGCGGAAGATTTTGTACTTGTCTTGTAGTAAAAGTGGCATATTCAGCTGGGCTTTTTTTTACACGC  
TCTACGAGTGCCTAAGTTCAGCGACATTAGTAACAGCCATAATGCTCTCCTGATAATGTTAAACTTTTTTATAGTAAATCA  
TCTGCTCGAATACGAGATAGTCACTGCGGTGATGATTTGCTTAACTATGAAAATCAAAGCTTACTCGCGCTCACA  
CTCACTGTGATTTACTAAAAGATTTAAACATTAGAGTTATTATCTCTAATGCGTCACTTCCAGGTGGCGTAAGCAAGAT  
TACTCACTTCTGGTACTGATTACGTGATCCAAATCAAATTTTTGCAAAGCTGACACCTTTCAGCATCGCTTTTCGCCAT  
TATAGTAAACAGTTAATAAATTGTAGTATGATTTGGTGGCTACATTAGCATGTTTTGCACAACAGATAACAATAACGAA  
TGATAGCAATTTAAGTAGTTAGGAGGTAAAAATGCTGTCAAAGGCGTATTGTCAGCGCGCTTTTTCAACCTTATTTA  
TGGCTAACATTATCCGGCTTTTGTTCGGAGCTAACCGTATTGACCTTTTTTATTTTTCCGTTTACTTCAAATTTT  
TCATCGGGTATTTGCGTGGTCAACCCGGTAGGGATTATCCCGTCTTTATCAGCATGACCAGTTATCAGACAGCGGCA  
GCGGAAACAAAATAACCTTACAGCCAACTGTCTGTGGCCATTATCTTGTGGATCTCGTTTTTCTCGCGCACAGAT  
TCTACAATTTTTGGTATATCAATTGATTCGTTCCGTATCGCCGGGGTATCCTGGTGGTACAATAGCGATGTCGATGA  
TCAGCGGAAGCTTGGCGAGGATAAACAGAAACAGAAAGAAAATCAGAAACCGCGGTACGTGAAAGCATTGGTGTGGT  
CCACTGGCGTTGCCGTTGATGGCGGGCCAGGGCGGATCAGTTTACCATCGTCTGGGGTACGCGTTATCACAGCATTAG  
CTATCTGTTTGGTTTTCTTGTGGCTATTGCATTGTTGCTTTATGTTGTTGGGGATTGTTCCGCATGGCACCGTGGCTGG

TACGGGTTTTACGCCAGACCGGCATCAACGTGATTACGCGTATTATGGGGCTATTGCTGATGGCATTGGGGATTGAATTT  
ATCGTTACTGGTATTAAGGGGATTTTCCCGGCCTGCTTAATTAATTCCTTTCAAATGAAACGGAGCTGCCATGCTCCGT  
TTACTTCGTCATTATTTTTACTTTGTTCCCGCAGTTATCAAAAGCAAAGGAATAGGTAATAATTTCTTCTCAAAT  
ACAGTTAGTTATAAGGATTTCTTAACTGCTTCTCCTCACCATCATGTTATTTTCGCCACATCATAATCCTGGGCTTGCT  
GAAGAATAATTGAAATGATATTATTAATTCCTACTGCCTTTGGTAGAGGAAAGTGCTAAGGAAGGTGCGAACAAAGTCCCTG  
ATATGAGATCATGTTTGTATCTGGAGCCATAGAACAGGGTTCATCATGAGTCATCAACTTACCTTCGCCGACAGTGAAT  
TCAGCAGTAAGCGCCGTGAGCCAGAAAAGAGATTTTCTTGTCCCGCATGGAGCAGATTCTGCCATGGCAAAACATGGTG  
GAAGTCATCGAGCCGTTTTACCCAAAGGTGGTAATGGCCGGCGACCTTATCCGCTGAAACCATGCTACGCATTCACTG  
CATGCAGCATTGGTACAACCTGAGCGATGGCGCATGGAAGATGCTCTGTACGAAATCGCTCCATGCGTCTGTTTGCCC  
GGTTATCCCTGGATAGCGCTTGGCCGACCGCACCACATCATGAATTTCCGCCACCTGCTGGAGCAGCATCAACTGGCC  
CGCAATTGTTCAAGACCATCAATCGTGGCTGGCCGAGCAGCGTCATGATGACTCAAGGCACCTTGGTCGATGCCAC  
CATCATTGAGGCACCCAGCTCGACCAAGAACAAGAGCAGCAACGCGATCCGGAGATGCATCAGACCAAGAAAGGCAATC  
AGTGGCACTTTGGCATGAAGGCCACATTGGTGTGATGCCAAGAGTGGCCTGACCCACAGCTGGTACCACCGCGGCC  
AACGAGCATGACCTCAATCAGCTGGGTAATCTGTGATGGAGAGGAGCAATTTGTCTCAGCCGATGCCGGCTACCAAGG  
GGCCGACAGCGGAGGAGCTGGCCGAGGTGGATGTGACTGGCTGATCGCCGAGCGCCCGCAAGGTAAAGAACTTGA  
AACAGCATCCACGCAAGAACAACAAACCGCCATCAACATCGAATACATGAAAGCCAGCATCCGGGCCAGGGTGGAGCACC  
TTTCGCATCATCAAGCGACAGTTCCGGCTTCGTGAAAGCCAGATACAAGGGGTTGCTGAAAAACGATAACCAACTGGCGAT  
GTTATTCACGCTGGCCAACCTGTTTCCGGCGGACCAATGATACGTCAGTGGGAGAGATCTCACTAAAAACTGGGGATAA  
CGCCTTAAATGGCGAAGAAACGGTCTAAATAGGCTGATTCAAGGCATTTACGGGAGAAAAAATCGCTCAAACATGAAGA  
AATGAAATGACTGAGTCAGCCGAGAAGAAATTTCCCGCTTATTGCGACCTTCCCTAAATAATAATCAATTGTTAAATTA  
TGTGCATTTCACTACTGAACTGTAATCAGAAAAGATAGACATGCTTAGCCAATCTCTATTTGATTGAATTGAAAGATGT  
TTGTTAAGGCATGGATGCAAGCTATAGATTCTGATACGGTCAATAAAAAGAGAATTGCTTAAACAATTTGCAAAATGATT  
GGCGAGTAAGAACCGCATTTGGTACTTTCCGGGCAACCGCAGACGATTCTTTATTGGTAATGAGAATAATTAACAATTA  
AAGAGCGTCGCGAAGAATAATGTGTCTGACAGGGGAGACACAGTACGAATCGACATAAGGTGATCGTCTGAATCACC  
GAATAAATAAAGTCGGTGATAGTAATACGTAACGATAAAGTAACCTGACAGCAGAAAGTCTCCGAGCCTGTGACGGTCC  
CAATCCGGGATTACACATGCTGGTTAATACCAGTAATTATAATGAGGGAGTCCAAAAACAATGACCAACATCACCAGA  
GAAGTTTAGTAGCAGCTGGCGTTCTGGCTGCGCTAATGGCAGGGAATGTCGCGCTGGCAGCTGATGTACCCGAGGCGTC  
ACACTGGCGGAAAAACAACACTGGTACGTAACAATGGTTCAGAAGTTCAGTCATTAGATCCGCACAAAATGAAGGTGT  
TCCGGAGTCTAATATCAGCCGAGACCTGTTTGAAGGCTTACTGGTCAGCGATCTTGACGGTATCCAGCAGCTGGCGT  
CTGAATCCTGGGATAATAAAGAGCGGAAAGTCTGGACCTTCCATTTGCGTAAAGATGCGAAATGGTCTGATGGCAGCC  
GTCACAGCACAAAGACTTTGTGTATAGCTGGCAACGTTCTGTTGATCCGAACACTGCTTCTCCGTATGCCAGTTATCTGCA  
ATATGGGCATATCGCCGGTATTGATGAAATTTCTGAAGGGAAAAACCGATTACCGATCTCGGCGTGAAGCTATTGATG  
ATCACACATTAGAAGTCACCTTAAGTGAACCCGTTCCGTACTTCTATAAATTAATTTGTTACCCATCAACTTCACCGGTG  
CCAAAAGCCGCTATCGAGAAATTCGGCGAAAAATGGACCCAGCCTGGTAATATCGTCACCAACGGTGCCTATACCTTAA  
AGATTGGGTCGTAACGAACGAATCGTTCTTGAACGAGCCCGACCTACTGGAACAACGCGAAAAACGGTTATTAACCAGG  
TAACCTATTTGCTATTGCTTCTGAAGTACCAGATGCAACCGTACCGTAGTGGTGAATCGACATGACGAATAACAGC  
ATGCCGATCGAATTTCCAGAAGCTGAAAAAGAGATCCCGACGAAGTTCACGTTGATCCATACCTGTGCACTTACTA  
TTACGAAATTAACAACGAAACCGCCATTCAACGATGTGCGTGTGCGTACCAGTACTGAACTAGGTATGGACCGCGATA  
TCATTGTTAATAAAGTGAAGCGCAGGGCAACATGCCCGCTATGGTTACACTCCACCGTACTGATGGCGCAAAATG  
ACTCAGCCAGAATGGTTGGCTGGAGCCAGGAAAAACGTAACGAAGAAGCGAAAAAACTGTGGCTGAAGCGGGTTATAC  
CGCAGACAAAACCGTTGACCATCAACCTGTTGTATAACACTCCGATCTGCATAAAAAAGCTGGCGATTGCTGCCTTTCAT  
TGTGGAAGAAAAACATTGGTGTAAACGTCAAACCTGGTTAACCAGGAGTGGAAAAACGTTCTCGACACCCGTACCCAGG  
ACTTTTGTGTTGGCCGTGACGGCTGGTGTGCTGACTACAACGAACCAACTTCTTCTGAACACCATGCTTTTGAACAG  
CTCGATGAATACCGCGCATTATAAGAGCCCGCCTTTGACAGCATTATGGCGGAAACGCTGAAAGTACTGACGAGGCGC  
AGCGCACAGCTCTGTACTATAAGCAGAACACAGCTGGATAAGGATTGGCCATTGTTCTGTTTACTACTGATGAAT  
GCGCGTCTGGTGAACCGTGGGTTGGTGGCTATACCGGCAAGATCCGCTGGATAATACCTATACCCGGAATATGTACAT  
TGTGAAGCACTAATGGCAATACGTGGGGCAGGAGTGTCTGCTCCACGGTGTCTGATTTTTATCGATTACAGAAGGCAC  
AGGCCAGAAGTAGGGCAATGTTAAAATTTATTCTACGTCGCTGTCTGGAAGCGATTCCGACGCTATTTATTCTTATTAC  
TATTTGTTCTTTATGATGCGCCTCGCGCCGGAAGCCCTTTACCGGCAACGTACTTTACCGCCAGAAGTATGGCCA  
ATATCGAAGCGAAATATCATCTTAATGATCCGATCATGACACAGTATTTAGCTACCTGAAACAACCTGGCGACGGTAT  
TTCGGTCCATCGTTAAATAAAGATTATTCCGGTCAATGACTTGGTTCATCCAGTTTTCCGTTTTCTGCCAACTGGG  
AGCCGACGATTTTTCTTCCGGTAATACTGGGTGTTAGTGTGGCTTATTGGCGATTAACAAACAAACACCAATGGG  
ACTATACCGTATGGGGCTGGCAATGACCGGGTGTATCCCAAGTTTTGTGGTTGCACCATTATTAGTCATGATATTT  
GCGATCATTTTGCATTGGCTGCCGGGCGGTGGCTGGAATGGTGGGCGCTTAAATTCATGATATTGCCGATGGTGGCGTT  
GTCACTCGCTTATATCGCCAGTATTGCGCGTATTACCCGTGGCTCTATGATTGAAGTATTACTCCAATTTTATTCTGTA  
CTGCCCGGGCGAAAGGTTACCTATGGCGGGATCATTTTACGTCACGATTAACAACTGCTCTGTTACCCGTGCTCTCT

TATATGGGCCCGCATTGTGCGCATTATTACCGGTTCTATGGTTATCGAAACCATTTATGGTTTGCCGGGGATTGGACA  
ACTGTTTCGTTAATGGCGCATTGAACCGTGACTATTCCTTAGTGTTAAGCCTGACCATCCTGGTTGGTGCTTAACCATTT  
TGTTAATGCCATTGTGCATGTGCTATATGCGGTTATCGACCCGAAAATCCGTTACTGATACTGGAGCTCGCGATGATGT  
TAAGTAAGAAAAACAGCGAGACGCTGGAAAATTTACGTGAAAAGCTGGAGGTCGAAGGGCGCAGCTTGTGCCAGGACGCA  
CGTCGACGTTTTATGCATAACCGTGCGGCGGTTGCCAGTCTGATAGTGCTGGTCTGATCGGTTATTTGTAATCCTGGC  
ACCGATGCTTTCCAGTTTGCCATGACGATACTGACTGGGCGATGATGTCCAGCGCCCCGGATATGGAGTCCGGTCACT  
ACTTTGGTACTGACTCATCCGGTCCGACCTGCTTGTGCGCGTTGCGATTGGCGGGCGTATCTCACTCATGGTCGGTGTT  
GCTGCGGCACTGGTGGCTGTGGTCGTGCGGACACTTTATGGTTGCTTTCCGGTTATCTGGGCGGTAAAGTGGAATCGGT  
AATGATGCGTCTGCTGGAATCCTCAACTCCTTCCATTATGTTCTTTCGTCATTTTGTGGTGACCTTTTTCGGTCAAA  
ACATCCTGCTGATTTTCTGGCGATAGGCATGGTTTCTGGCTGGATATGGCTCGTATTGTGCGTGGGCAAAACCTGAGT  
CTGAAGCGCAAAGAGTTTATTGAGGCGGCACAAGTTGGCGGTGTATCGACATCGGGCATTGTTATTGCCACATTGTGCC  
GAATGTACTCGGTGTGGTGGTGGTCTACGCATCACTTCTGGTGCCAGCATGATCCTCTTTGAATCTTTCCTTAGCTCC  
TGGGTTGGGTACGCAAGAGCCGTTAAGCAGCTGGGTTGATTGCTGAGTGATGGCGGAACTCGATGGAAGTCTCTCCA  
TGTTATTGTTGTTCCAGCGGGATTCTCGTGGTGACGCTGTTTTGTTTCACTTTATCGGCGATGGCTGCGTGATG  
CCTCGACCCGAAAGATGTTAAGGAGTGCAGCCATGAGCGTAATTGAAAATGCAACTGTGCCGCTGCACAACAACAGGC  
TGACGCACTGCTGAACGTGAAAAGATTTGCGTGTACCTTTAGTACCCCGACGCGACGTACGGCGGTCAATGATTTGA  
ATTTTTCCCTACGTGCCGAGAAAACGCTGGGTATTGTAGTGAGTCTGGTTCCGGTAAATCGCAAACCTGCATTTGCGTTG  
ATGGGCTGTTGGCTGCCAACGACGATTGGCGGATCGGCAACCTTCAATGGGCGTGAATCCTCAATTTGCCAGAGCA  
TGAATCAATAAACTGCGCGCTGAACAACTCAATGATTTTTAGGACCCAATGACTTCTTGAATCCCTATATGCGCG  
TCGGTGAGCAGTTGATGGAAGTGTGATGCTGCATAAGAACATGAGCAAAGCTGAGGCGTTTGAAGAGTCGGTGCGGATG  
CTCGATGCGGTAAAAATGCCGGAAGCGGTAAACGCATGAAAATGTACCCGCACGAATTTTCTGGCGCATGCGTCAGCG  
AGTCATGATTGCGATGGCCTTGTATGTGCACCTAAGCTGCTGATTGCGGATGAACCAACAACCTGCGCTGGACGTCACCG  
TACAGGCGCAGATCATGACGCTATTAATGAACTGAAGCGGAATTTAATACCGCCATCATTATGATCACCCACGATCTT  
GTCGTGGTGGCGGGATCTGCGACAAAGTGTGTAATGTACGCCGGGCGCACGATGGAATATGGCAACGCGCGGATGT  
CTTTATCAACCCGTTATCCTTATTCTATCGGTTTGTCAACCGGTCGCCGCTCTCGATGCGGAAGGTGAAACAATGT  
TGACCATCCCGGTAATCCGCCAAACCTGCTGCGATTACCGAAAGGTTGCCGTTCCAGCCACGTTGTCGCGATGCGATG  
GAAATTTGTAGTAGCGCACCCGCTGGAAGAGTTACGCCTGGCCTGCTGCGTCTTGTAAACCGGTGGAGGAACT  
GTTATGAATGCTGAACTGAAGGAAGAAAAGTCTCCTTGAATCGCCGATCTTAAAGTGCATTTGAAATCAAAGATGG  
CAACAGTGGTTCTGGCAACCGCCGAAAACGCTCAAAGCCGTGATGGTGTACTCTTCCGCTGTATGAAGGGGAAACAT  
TAGGTGTGGTAGGGGAATCGGGATGCGGTAAGTCCACCTTTGCTCGGCCATCATCGGTTTGGTCAAGGCGACCGGCT  
CATGTTGCCTGGTTAGGTAAGAGTGTGTTGGCATGAAACCCGATGAATGGCGTGCCGTTGCGAGTGATATTAGATGAT  
TTTCCAGGATCCGTTGGCATCGCTAAACCCGCGTATGACCATCGGCGAGATCATCGCTGAACCACTGCGTACTTATCATC  
CGAAAATGTACGCCAGGAAGTTCCGCGAGCGGTGAAGGCGATGATGCTGAAAGTCCGGTTATTGCTAACCTGATTAAC  
CGCTATCCGCATGAGTTCTCTGGTGGGCACTGCCAGCGTATCGGGATTGCGCGTCTTATTCTTGAACCGAAGCTGAT  
TATCTGTGATGAGCCGTTGTCGGCGCTGGACGTGTCAATTGAGCACAGGTGGTCAACCTGCTCCAGCAATTGCAACGTG  
AGATGGGATTGCATTAATTTTTATCGCTCATGACCTGGCCGTTGAAAACACATTTCCGATCGTGTGTTGGTGTGAT  
CTCGCCATGCGGTAGAATGGGGACCTATGATGAGTCTACCACAATCCACTACATCCTTACACCAGGGCATTGATGTC  
GGCAGTCCCCATACCTGATCCGGATCTGGAGAAGAACAAAACCTCAGTTACTGGAAGGGGAATTACCGTCGCCGATCA  
ACCCGCTTCCGGTTGTGTTTTCCGTACCCGTTGCCGATTGCCGTTCCAGAGTGCGCCAAAACACGCTCTGTTCTGGAG  
GGAGTTTTAGACACTCGTTTTCTTGCCTGAAAAGTGCATCCGTTTTAAAACAATAAGGGCTGACAGTTGTCAGCCCTTT  
TTCACGCTAAAAGCGATTATTTATCCCGCCAGATGATATGGCAAAGTTTGTGATCTTTTTCCGCGCATAACAGAATGCG  
GGCAAAAACATCGTTGATTTACCATCTTCACTGTCCGCCAGACCAATCACCCTTCCGCAAAAAAGTCCGGGTTCAAAT  
CGAAATCAACATGTTCTGCGAGTCTTCCGCGGATCGAATAACTCCGCGCCGCGGCTCTTCAAACCTGAAGATTGAAC  
AGCAGAACATCAGCTGGATCGAGATTGTGCGGAGCCAGTTCGAGAAAAATATCGTAGGCCTGTTCAAGCGTTTTCATCTT  
AGTCAGGCGATTGTTAGATCCATATCCATAGTTACTACCTGTTTAACTCTGTTGGCGACGTTTTACAGCAACGGACTG  
AAGAAGTAAAACAGTCGCTCGGCGACACGTTGCCATAATGGACGTTTTAGCCATAAACGGGCATCGAGCAGACGTGAACG  
CGAAATATAATCGTCTGAACGGCGGCGAGGTGACGACCAAAACCTTTATCGTCGATTGCCAGGGTAACTCGAAATTA  
GCCACAGACTACGCATATCAAGTTAACTGTCCAACAGACTTAGTTCCGCATCGACCAGCAGCTCTTGGTATGCAGT  
AACCCGCTTCAAACCTGATAAATTTAAACCCAGCAGCCAGCAGTTCCGTAAGAATGCGCGACTGGCCAGCCGACCAG  
CATCGAGTCATTTTTTCCGCGAAGGATAAATACTGACATCCACCCGCGCTGCGCGCGCTGCAAAATCGCATGAAGTAAAT  
CATCGTTGGCACAAAGTAGGGCGTGGTATGATCAAAATTCACGCGCCGAATAAGCCGAGTCAATAATGCCTGGTGA  
ATGAGATCTTCCGAAAAGCCGGGGCCAGAAGCAATTGTGTGAATGGTGTGACCCTGGCCTGTTCAAACGGCATAATATT  
GACATCTGGTGGTGGCGGAGAATAACGTTTTCCGGTTTCAATCTCCAGTGCAGGAATAAATAATCCCATCGCGGTGG  
CGATAGGGCTTCCATACGCCCATCAGATCAATCCATTGCCCTACGCCCGCATCTTGTGTTGAAGTAGCGAGGATCGACC  
ATATTCATGCTGCCGGTGTACGCGATGAATATCGATCATGATCATCTTGGATGTTGGCGCAGGTCCATACGGCGTAA  
AACACACGCATCAGATTGACCTTTAAGGCTTCGACCCTTCAATACCGGATTACGCATTAGCTCGGGCCACGGGCTGC

GGAAAAAGCCACACTCCCAGGGAGTCGAGCATCAATCGGCAATGAATGCCGCGTCGCGCAGCCGCCATTAATGATTCA  
GCCACCTGGTCCGCCATGCCCGGGCTGCCAGATATAAACACCATCTCAATATTATGGCGCGGAGCTGGATGTCGCG  
GATTAACGCCTGCATCACATCATCTGACTCGGTCATCAGTTGTAGCTGATTCCCTTTGACCCAGCGATCCCCTGACGAC  
GCTCGAAAGCTTGAATAATGGCGCAGCGACTGCTATTTTCTCGGCGAAGATATGCTTACAGGCTTTAAGGTCGTTA  
AGCCATTTTGGGTGGAAGGCCACATCGCTCTGGCGCGCTCAGCGCGGCTTTGCCATAATGGAGCTCGCCAACGGCAAG  
ATAGGCAATAATTCCGACTAACGGCAGAATGTAATAATCAACAGCCAGGCCATCGCGGAGGGAAGTGGCGTCTTTCA  
TTAGAATGCGTAAAGTTACGCTGCAATGAGCAACCAGTATCCCAGAATGGCCAACCAACTCACCAACGTATAAACGGTT  
GTCATAGATTAGAAATCCTTTTGAAGCGCATTGTTATGAGTTTACGCATATGGATTATCTGGCAAATAAAAACGCGGG  
AAAAGCACTGGTCAGCGTCGGGGTGGGGTATAATGACCATTCTGTTATTGCATAGAGTAGTTAACATGAAGCGGAGTA  
GAACGGAAGTGGGCGCTGGCGCATGCAGCGTCAGGCTAGCCGACGTAATCGCGTTGGCTTGAGGGGCAATCGCGCCGA  
AATATGCGTATCCACAGCATCAGGAAGTCATTCTAAACAAACAGCGTAACCTGTTATTGTTTGCATCTACAATATCTA  
AATGTAAGTGGGACCATTGGGTGCCAATAAGTTTACTCTTCCGCTTTAACTCTATTTTTGCGCCGATTCTTTACTG  
TCAGTTTTCGTTTCTAGTTCATCGTTATCGCTGAAAATACCATGACCTGAGTTCAACAACATTGAAACGAGCATATCATT  
ATTAATCTCTTACCATTAAAACTCGCGCCAGAATTTGCTGCCAAACAGTTGCGGTGAGAGAATGATATCCGGATGTA  
CCATCTTAATCTTATTGAGTTTTTGTCTATCACTGACGGCGAGAAGTGTGTTGACATCACTGCTCATATCTTTTGGCGAG  
AGTACAAACAAACGCGTTATCTGCATGTTATCACTCAGCGCCAGAATGGCCCGCAACGATCGATTCCCCTTTCTTTAA  
TACAGAAGTGTACTACTGTCACCGGGGATAACATCAGCATTATCGCCTAAGCGTTGCTCAAGTTGCTTATCATCTT  
CAGGCAAGTTGCTGATAACCGTTACGTTTTGTCCGCTTGATTGAGTTGCAGGATCGTATTGATGGCGAGAATCGAATGT  
CCGCAAAACAAATAAATGATCTTTACGATGCATTGTATGATTGTTTCTTTTACAAGTTTGTGAATCCCCCGCGGATAAG  
CGGACCAAAAATTGAGGTATAGATGTGGCAAAAACGGTAATGCCGGAATAATGACCGAAATAGTGAACAATCGTGCTG  
ATTAGAAACAGGGACAATATCGCCATAGCCGACGGTTGACATGGTTTCTATCGAAAAATAGAACGCGGTGATCAAACCT  
TCTATTGCGGATTAACCTTTCGCTTAAATAAAGCGCACCGTAGGTTGAGTAAAACAGTAATGTCGTGAAACTAATAAA  
TGCAAAAATTGTCGCGCTGCGCGCTACTGTGGGAGAAGTCTTTCGCGAGTATCAGCAAAAACACCGGTAATAATGC  
AAAATCCAATACTAAATTCAGCCAGGGATAAAAATGCAGGGTGTAAATTAGCGCTATCAACAACAAAATGATACTGATT  
GCCCATGCGAGCTTTGCCCGAACAGTAAGCCAATGGAGTTGAGGACAAGAAAGACGCCGAGCATAAAGAGTGGGGCGTT  
TGCCAGCAAGGAGAGATCCAATCTGAAAATGCTTTGATATGGAAAATATCAAGCAAATTGACCGACATACCATAGATTG  
TTTTAAAAATAAGCAATCCATTTAAAAAGACGGCCAGCGCGAGAATGTCGTGCCGAAGGGTACCCATAAATTTGTTGCT  
GTTTGTGTTGAATGTAGCCAGTGACTCACTGATACCTCTGTAACCACAATTTTGTGTTAATTATCTTAGCGTGACATTTT  
CTGAACATACATGCAGCGCTGAATGTGTTAAACAATAGTAGTAGCTTTATCCGCAAGTAAACAAAGGATTTGAGCGAGC  
AACTGTACCTCAGGAAAGGTCATTTTTCTGAATATGCTCACATCATATAAAGAAATACAGATAAAGTTATTATCTGCTT  
GTGGTGGTGAATGCACTGACCGGCTATAAGGAAAGGCCAAACAAGAACACGGTTGCAAAAACCGTGCCCTTAAATATTGA  
ATCTCTATTCAGAACACTTTCTTAAATGGTTTCACTGAAACGTGTTTATAGACTCTCGCGCTACGTACGGGTGAGCATC  
GGCCAGGCTGAGCTGTTCCAGCGATTCAAATTCAGCAATAACGGTTGAGCCAGTAAATCCCGCAGCCCTGGATCGT  
TACTGTCTACCGCTGGCATTGGACCAGCTGTCAACAACGACCTTCACTATGCAGTAACGTAAACGTGCTAAATGTGCC  
GGACGAACGGAAAGGCGTTTTTCGAGGCTATCAGCTTTGTCTTGAAGGTAATAACATACAACACGGGCAACTCCTTG  
TTCGGGAAAGTTGAAAGTACGTTATTTGAAAGGGCGAAGATCTGCAACGGAAAGATGATGCTTTGTTAAGGCCATGCA  
TAAAGTAAGGGTAATTACGCCAAAAATGACATTTTCACTGATCTGATCGTCTTGCCTTATTGAATATGATTGCTATTTG  
CATTTAAAAATCGAGACCTGGTTTTTCTACTGAAATGATTATGACTTCAATGACCCTTGATTACCTCGCCGCTTCCCCTG  
GCCGACGTTACTTTGCGTTCGATTCATGTTGCTGTTGTTGCGGGTCTGCTCTATACCTCGGTACATCAGGTTATTGAAC  
TACCTGCGCTGCGCAGCCGATTTCTGTCAGATGGTTACGCTGCTGATCTCGAACCAGCCACAAGCCGTTGAGCCGCA  
CCGGAGCCGTTGGTAGAGCCAGAACCAGGAACTGAGCCATCCCGAACCAGCCAAAAGAAGCACCGGTGTTTCAATGAAAA  
GCCGAAGCCGAAACCTAAGCCAAAACCGAAGCCGTTGAAAAAGGTACAGGAGCAGCCAAAACGCGATGTCAAACCCGTAG  
AGTCGCGTCCGGCATCACGTTTTGAAAATACGGCACCGGCACGCTGACATCAAGTACAGCAACGCGTGCACCAGCAAG  
CCGGTTACCAGTGTGGCTTCCAGGACCACGCGATTAAGCCGTAATCAGCCGAGTATCCGGCACGAGCACAGGATTGCG  
CATTGAAGGGCAGGTTAAAGTTAAATTTGACGTTACGCCGATGGTGCCTGGATAACGTACAATCCTCTCAGCCAAGC  
CTGCGAACATGTTTGAAGCTGAGGTGAAAAATGCGATGCGCAGATGGCGTTATGAGCCGGTAAGCCAGGAGTGGGATT  
GTGGTGAATATCTGTTTAAATTAACGGCACCCGAAATTCAGTAAGCAGAAAGTCAAAGCCTCCGACCGGAGGCTT  
TTGACTATTACTCAACAGGTAAGGCGGAGGTTTTCTTCCAGGATCAACCGCGACATACTTAAATAATGCTTCTGTCGCT  
TTATAGCGTTGCCAATTTGTTTCCAGACGCTACTTTTTTCAACCACTTCAATATTAATGCTGACCGATGTCGTCCTTT  
CTGGACACAGCGTGCATAGCAGCACACCACATCGCCGACCGCAACCGGCGTAAGAAAGTCAATCCTTCAACCCGCACAG  
TCACTACGCGACCGTGGGCAATTTCTTTTCCAGAATAGCGCCGCAATATCCATTTGTGACATTAACCAACCACCAAG  
ATGTCACCATTTGGCATTGGTATCGGCGGCGATGGCTAAAGTACGTAACAAGATCGCCCTGAGGGACGTTATGTGTTGT  
AGACATGGTAAACCGACTTAAAGGAAAATCACAGCGCGATGCTACTATGATTTTCTGAGGAGAACAGAGGAGATAC  
AGCGCCAGCCCGAAGGACTGGCAGTCTGGTTAGGATTTATCTTCTGCGCATGTGGCGGTAGATATAGATAACCGCTTA  
ACAAATGTGAAGATTAAGGTAAGGGCGGTGAGCCAAAGACTTTAAAGTTGACCCAAATATTTTGGCGCAGCCAGAATGCG  
ATGTAGATGTTTGCAGACCGCAAAGGATAAAGAAAACAGCCAGGCCAGATTGAGCTTCCGACATACCGGTTGCGGAC

CGTGAGTTCCTTACCCAGCATCCGCTGAATTAGCGGCTTTTTATCACCCATTGGCTGACTAACAGGGCTCCCGCAAATA  
GAGCATAAATGACAGTAACCTTCCATTTAATAAACTCATCATTGTGGAAGAACAGCGTCAAGCCACCGAAGACGACCACC  
AGAACAAAAGTGATCAGGGCCATCTTCTCAACCTTACGAAAGCGAACCCAGCTATAGATAAGCACAATCGCCGTGGCGAC  
GATCAGCGCCGAGTAGCCGCATAGATGTCATAAATCTTGTAACCGCGAAAAAGACAACCAGCGGTAATAAATCAAGAA  
ACTGCTTCATTTTACGATCCGTAATCAAATGCTTAAAGTTATTGGCGAATCAACATATACAGGCGGAACAGATAGATGA  
GCAATATGGCTGAAATCAGGTTGCTCAAGGTGTTCCGCCAGTACGGCACCAATTTCCGGGGTTAATGCGGCAAAAAGAAGAG  
GCAAAAAGCAGCAACAGTGTGTTTGGCCAGCAACCAGCTCAGTACTGCGGGTGCACCAGACGCATATTCGCCAAGTCAG  
CCGCATACTGTACGCATCGAGGCAAAAACGCCATTTTGTCTGTACCAACATCACCGGTGCCAGGGCCAGTAAAATGG  
CCATGATAATTCGGGAACGACCACCAGCATGATGCCAATCTGTACTAAAAGGGTAGTCAGAAAAATCAGAATAAATAAC  
TTTGGAATATCGGGCAGTGGCACCAATAGCTCGCAGCGCACTGACTCTGTACCCGCGAGACACCAGCTGGATAATTA  
TATTACGCCTCCGGCGAGAATGGCGTTACCGATTAATCCTGAAAAAGTGGACGCGCTGAAGCCTGCAGCAAAATTTGTT  
GCTGTTCCGGTGACATATCTGAACCAGTGAACAACCCACTACTGCCGCTAACGGGCACGCCGTATTGAGCTGCGCA  
AGCTGTGCATCACTGGGTGAGAAAACATGCCCTAACCCACTGTGATAAACGCACATAGCAACGATACCAACAGAATGGT  
CATAAATGATTACGGAAGAAATTTCCGGTGTACGGTATACGGACTGCGCCGTGATAGACATGCACTCTCCTTGAGTTT  
TATGCAGGTGTTAATTAGCGGGCAATTGACCTGGTAAAGCCTCGGGTGGCAGCATCAGGCTTGTATGAAAAGCATA  
TCTTTGTAAGCGGAGGTAATTGCTGGCCTTCAGGATGGGCAATCGCGGCAAGTGGCGACCGAGTTAATATTTGCGTA  
GCGAAAATATTTAAAAATTGATTTAAATCACATTAACCAGGATTCCTCAATGCAACTTCTAAATTAATCCAGATCAATAAA  
GGGTGAATTATCATATGTAATGTGATCTATGAGGATCATTTGTTACTCCAATGTAGGTATATTCGTCACGTTTTTATAA  
CCATAACGACGGAGCGGATATGAAAAAGTTAACAGTGGCGGCTTTGGCAGTAACAACCTCTTCTCTGGCAGTGCCTTTG  
CGCATGAAGCAGGCGAATTTTTATGCGTGCAGGTTCTGCAACCGTACGTCCAACAGAAGGTGCTGGTGGTACGTTAGGA  
AGTCTGGGTGGATTACGCGTGACCAATAACACGCAACTGGGCCTTACGTTTACTTATATGGCGACCGACAACATTGGTGT  
GGAATTACTGGCAGCGACGCCGTTCCGCCATAAAATCGGCACCCGGGCGACCGCGATATTGCAACCGTTCATCATCTGC  
CACCACACTGATGGCGCAGTGGTATTTTGGTGTGCCAGCAGCAAATTCGTCCTTACGTTGGGGCAGGTATTAATACTAC  
ACCACCTTCTTTGATAATGGATTTAACGATCATGGCAAAGAGGCGAGGCTTTCCGATCTCAGTCTGAAAGATTCTGGGG  
AGCTGCCGGGCAGGTGGGGTGGATTATCTGATTAACCGTACTGGTTGGTTAACATGTCAGTGTGGTACATGGATATCG  
ATACCACCGCAAATTATAAGCTGGGGGTGCACAGCAACACGATAGCGTACGCCTCGATCCGTGGGTGTTTATGTTCTCA  
GCAGGATATCGTTTTAATTCCGCACAAAACGACCCCGTAATATACGGGGTCAATAAGGACATGGTATAAAGGGTATTA  
TTTCTTCGCTTCTACGCCATCAGTTTTAGAGCGAATTAATAATTTCTCAGTTGTTTGGGAATATTCTGAATCAGCCAGT  
CGGCCATTTGCTTTTCTCATTTAAAATCGCTTCGATGGTTGGAATTGAAGCTGTATCACCGGCATTTTTGCTGCTGCT  
AATAGTGAGGTGTAACAGGCGATTTCAAATTGCTCGAAGACATATCCGCTAATAGAGCCTTTGACTATTTTCATCAGAAGG  
GAATATACCACCGATTGACTGCCAAGCGCAGCCATTTTACTCATGGAATCTTTAATGACTGAACGTGAAATGTCATTAC  
GATCAAGAATAGTTTCCAGTTGAACAATCTGGTTTTGGTTTTCACTAAGATGTTGTTCAATACGAGCGCGTAGTTCCAGGA  
TAATTATCTATACGGCTGGCCATGGATTAAGCATAGATTCGGCTTGTCTTTCCATTGCGTGGGCGTCACGTAACCAGTC  
ATGATAATGTTCAATACGATTATGAAAAATGTCCTCTTTATAAAATGACTAAAAGTTAAAATTCATATTTAGGCTTTAT  
TTTCGGCTTTCTATTTACGTTATTAATGGCCAGATCAGTCAAGTTGATGTCGGTGGCCTTTTCTTCCAGGGTTTTCT  
TTCAGAAGCTTCGCTGCTTACGGTAACCTAATTGTTACGCCAGCGTGCCTAATGTCGCGTAACTGGCAATCTCATAATG  
CTCGACTTCTGTGCTGCGCAATCAGTGCAGCATCACGCACTTCGTTTTCTCGGTACTTTCGATGACCTCATTAGCTT  
CTTCAATAAGACCTTCCATTGCCACACATTTATGCGCTTAATTTTACGTTTCGATTCCGACTCCACAACCTTATCAATA  
CGTTCAATCTGCATGAGTTTCTCGAGGTGCGCATGAAAAGCTGACTTAATTTTTTATTGATGTGCTCTTGGCGAG  
TTTTGCCAGTGCCCGGTTAATTTTTCTGCGCTGATGTTACTGAAAAGCAGGTGAATAAATACATCTTCAATGGCT  
TCATATTATATTTTTCTCAGTGAATCACTGCGAGCCATACGGCCCGCAGATGCAATTTATCTTTATCAGCTGATATTA  
ATAATTAACGTTGAATCAGGATTTGCCTGATTTATACCACCGCTTTGTTGACCGCCTTTTTTACCCGCTTCAGATGCGC  
GTTGCGGATCATTTTTAAAATTACCGCCGCTATGCTGACCGCCTTTACGGCCTGCGTGGATGCCTTCTCACGGTCTTCG  
GCGAAAATTTCTGAACCACCACGATGTTCCGGCATGTTATTTCTCCGTTGCGTTGATTGTTTCATTAATATGAGTGT  
GTGTGTCGACACTCATAAAATTAGTCGCTAATGAGAATTAGTCAAATTAAGCGCAACGAGAAGATAGAGGGAAAATATA  
TTTTGAGGAACATTCTGGATATATTAACAATTACCTGAGGAATAAGTACTTAGAGAAAATTATTGATTTTACTGGTGT  
ATGTTGCGGGATTAATTTGTTTATTATTTACTGTTGGGCGAAAAATGACGTAAGTTGACGTTCCAGCCGGGTAAGCG  
AAACGGTAAAAAGATAAATATTAATGAATTTAGGATTTTTCCGGCTTATTAAGAAAGTTAAAATGCCCGCAGCGGAA  
CTGGCGGCTGTGGGATTAAGTGCAGTGCAGCTTTTATCGGTTGACAAAACTTTCAGTGCAGCCAGCATTTTCTCTG  
GCTCATAATATGTTGCTGATGATTTTAAACAATGGCCGAACCAGAAATCGCGCCGCGAGCTCCTGCATCAATCGCTGCT  
TTTACCTGATCCGGGGCGGAAATACCAATCCCTGCAATGGAGGTGCAGCGTTGACTCTTTCAGCTTCCGAACCAGATG  
ATTGAGGGTAACGCGGGCGGTTTTCTGCGCCGCTCACGCTGCTCGTACAGCAAATAGGTGTAACCACGACCGTAAG  
AGGCTATCTGGCGCAGCAGTGCATCGGCATTTGGCGGGCAGATGAAGATAGGTGCGACATTATGACGCAACGCGGCC  
TGGCGGAAGGGCGCGGACTTTCAACTGGCACATCGCAACCAGCACCAATCGACGCCGACTTTTTCGCACTGGGCATA  
AACTCATCAATGCCTTTGTTAAACACCAGATTGGCATAATCAACAGGCCAATGGGAATGGTTCGGGTGTTTCTGGCGAA  
TCAGTGCCAGCATTTCAAACATTGTGCCGAGTACACCTGCCGCAAGGGCGCAGAGTGGCGTTTTGAATCGTCGGG

CCATCCGCCAGTGGGTCCGAGAAGGGGATACCTAACTCCAGCGCGTCAGCACCGGCTTCAATTAGCGTATCGATAATTTT  
CAATGACTGCTCAATGCCCCGATCACCAGCGTGACGAAAGGAACGAATGCGCTTCTTTGCGCTCCTTCAACTGGGCAA  
ACAGAGATTCTAGCGTTCCATCAGATTTCCCTCGTGCTTTCAAATATCGTGAACGGTGAAGATGTCTTTATCGCCGC  
GACCGGAAAGTTAACCACAGTAGCTGCTTTATCCGGTTTTTCGCGCATATTTTCAACGCATGGGCCAGGGCGTGG  
GAGGATTCCAGCGCCGGGATGATCCCTTCGTGCAGGCACAGCGTTTTGAAGGCTTCAAGGGCTTCATCATCGGTAATAGA  
CACGTAATCAGCGCGTCCAGTGCTGTTAAGATACGCGTGTGTGGGCCGACAGACGGGAAATCCAGTCCGGCCGAGATGG  
AGTAAGATTCTTCAATCTGCCCCGCTTTCGGTTTTGCATCATCGCGCTTTCATACCGAAATAGATACCCACGCGACCATGT  
TTTAGCGGTGCGCCGTGCTCGCCAGTTTCGATACCGTGACCACCTGGCTCCACACCAATCAGGCCGACGTTGGTTTTATT  
GATGAAATCAGCAAACATGCCGATGGCATTGCAACCGCCGCAACACAGGCGATAACGGCATCCGGCAGGCGACCTTCTC  
TTTCCAGAATCTGCGCTTTGGTTTTCTTCGCCAATCATCCGCTGAAACTCACGCACAATGGTCGGATAAGGATGCGGGCCA  
GCTGCGGTGCCAGCATATAGTGCGCGTTTTCGTAACTACCGGACAGTCGCGCAGCGCTCGTTACAGGCATCTTTCAG  
CGTCGCGGAACCGCTATGCACCGGGATCACTTCCGCACCCATTAAGCGCATAACGAAAACGTTAGGCGACTGGCGTTCAA  
CGTCTTTGGCACCCATATAAATACGGCATTTCAGGCCGAGCAGGGCGCTGGCAAGGGCCGACGCCACGCCATGCTGACCG  
GCACCGTTTTCGCGATGATTTTCGGTTTTACCCATCCGCTTCGCCAGCAACGCCCTGCCACGACCTGGTTAGTTTTATG  
CGCGCCCGGTGCAGCAAATCTTACGCTTGAGATACAGCGTGGTGTTCGTCCGGCTGTAATGTTCTGGCATTGGTCA  
GCGCGTTGGACGCCCGCATAGTTTTTCAGCAGGTGTTGAACTGAGCTGAAATTCAGGATCTTTTTGCGCATGACA  
AAAGCTTCTTCCAGTGGCGCAGAGCAGGCATCAGGATTTGTGGCACGTACATGCCCAAACCTACCAAATAGGGGTT  
AAGTAATGTTGTCATTGTTCTTTCTTAAATATGCGCGCAGCGTCTGAAAACCGAGGCCAAAAGACGTGCGTCTTTGAT  
GCCCCGTTGCGACTCTACAGCAGAATTAATCAAGTCCGGCGCAGCGGTTTTGTGCCGCTTCCACGCAGTTATCTGGC  
CTAAGCCCCCGCCAGCAGAACGTTGCCAAGCGATTGACATTTAATAGTGACCAGTCAAAACGTTGCCCGCTTCCACCC  
TGCCGTTGTCTAAAACATATTTATCAACGTGCTGAAACTCGCGGGCGGGCAGGGTTTACCCGACGCTTAATGCTTTCCA  
GATGGCAACATGTGCTGGCAGAGCTTACGCAGCGTATCGATATACAGCTGTTCTTATTACCATGCAGTTGCACTGCCG  
CCAGCGATAACACCTTAGCTTTGTCCACCACATCGGCAATATCGTGATTGCGGAACACGCCAACATACTGCAACGGTGCC  
GCAGCCATCACTTCTGCGCTGTTCAACGTTGACGCAACGCGGTGATGTCGCAACAAAATCAACCCACCGTAAATCGC  
GCCCCGCTCATAAGCTGCTTATAGCATTTGCCACGCGTCAGGCCACATACTTTATTCTACCCAGCAACACCCGGCGCA  
CGCGCGGTGCAAATCGTCATGGGCCATCAACGCCGAACCAATCAGAAAACCGTTAGCGAAGTGGCTTAACTCGCGACC  
TGAGCGTAAGTATTGATGCCGATTTCGCTGATTACCGTCACGTTGTGCCAGTTTCGGCGAAGCTCGCGGGTACGGTT  
GAGATCAATCGACAAATCACGCAGATCGCGGTTGTTGATGCCAACGACCTTTGCTCCCAATGCAATGGCGCGCTCCTGTT  
CCTTTTCACTGACTTCCGGTCAGCACCCCATCTCCAGACTGTGAGCGACGCGGCAAGCTGGCGATATTGGTCGTC  
TCCAGTACTGAAAGCATTAATAAGCAGGCATCGGCCGTTAATAGCGCGCCAGATAGATCTGGTAAGGGTCGATAATGAA  
GTCTTTACATAAAATCGGCTGCGGGGCGATTTGGCTGACGATGGGGAGGAAATTAAGCTCCCCTGAAAATATTTCTCAT  
CAGTCAGCACCGAAATGCGGAAGCGTAATGTTTATAAATGGCGGCAATGCGTGCTGGATCGAAATCATCACGGATCACG  
CCTTTTACGGCGACGCTTCTTGCATCCAGAATAAACCGCGTGCAGCGACCTGTAGCGCATCATAAAATGTGCGGT  
GCTCGGCTGAACCTCATTCTGAAAACGGCCAGCGGTTGCTGCTGTTTGGGGCTTCTACCCAAATCGCCTTGTCTGCGA  
CGATTTTTCGCTAAAACGGTTTGCATCATTACCCTCGTGCCGCGAGTGCGGTGACTCTGTGCTAAGCGGAACCACTGCGC  
AGTACCTCAAGAACGGTTTGCAGTTGGCTTGCAGATCTTATGGCCATGCAGGCGCATTAAACATGGCGACGTTGCGAGC  
GACGGCTGCTCATGGGCGCGTGCCTTTACCTTGAACAAACGTGTTAAAATGTCACGGTTTTCTCCGGTGTCCGC  
CTGCCAGTTGCTCCTGGTGGTAGGGTGCAGGCCAAAGTCTTCTCGGGTGAAGTGCATAGCTTTAATTTGCGCGTATGC  
AGTTCCGCAACGATTGTCGGCGCGTGAATGAAACTTATCCATCCCGCGCTGTGCACCACCGCCGCGGTTGATACCC  
CAGCACGCGCAAGGTTTCGGCAATCGGCAGCAGCTTCCGGACTATAAACACCAATTAACGCCAGCGCGGATGCGCCG  
GGTTAATCAATGGCCCCAGCACATTGAACAGGGTGCGGTTTTCACTTGTGGCGAACCAGCATCGCGTGGCGGAATCCG  
GTGTGATACTTCCGCGCAAAGAGGAAACATACACCTAACTCATCCAGCGCTGGCGGATTTATCGGCGTTCATATCAAG  
ATTAATACCGAACGCCGCCAGCAGATCGGACGAACAGATTTACTGGAGACGCTACGGTTGCCGTGTTTCCGCACTTTCA  
GCCACAGGCCCGCGGACAAACGCACTGGCGGTAGAAATATTGATACTGTTGCTGCCGTACCCGCGAGTACCGACGATA  
TCAGCAAACAGATAATCCGGGCGGGAAACGGCGCTGCGTTTTCCAGTAGCGCGGTTGCTGCCCGGCGATCTGTTCCG  
GTGCTACCCGCAATTTTTCATGCTCACCAGCGCCGCCAGTTGTTCCGGCTTACGCTGCCACGCACCACCGCTGAAA  
ACAGCTGGTGGCTTTCTTGTGGCTAAGCGTCTGCGCTGATACAGTTTTTCCAGAATCGGTTGCAGCGTGTGGCTGGC  
TCTAGTTTCTGCTGCGCCAGGCCAGCGTTTTGTTCCAGCAGGCGAGCGCCCTGGGTGGTGAAGATGGATTCCGGATGGAA  
CTGGAATCCACAAACCGCATCCGCATCGTGACGACTGCCATCCATGCCATTAATGAGGCTGATGGTTAAACCGG  
CCGGAATGTTACTGCAACAGCGAGTGATAACGCGCACCGGCAGCGGTTTTGTTAATCCGGCAAACATCGCTGACCG  
TCATGTTCAATGCTGGAGGCTTTACCGTGGAGAATTTGCCCGCTGACCGACATAGCCCCGTAAGCTTCGACAATCGC  
CTGATGTCAGGCAAATGCCAATAATGGGCGCTTCCACGCAAGCGGGTGAAGGTTCCGCGATACAACCGGCTTCGC  
TCGGCACACCGGGCCAGGAGAAAGCATCAGCACCGGATTGCTCATGGTCCGAGGCTTCAATTAAGGTTTGGCGCGGA  
ATATGGTTGCGGTAATACCCACGTTATGCCATTGCTGCGCAACTGATCTGCCAGGTTGTACGTAAGAGTGCATATT  
ATCGAGCAGCAGAATGTCAGCCATCAGAAAGTCTCCTGTGCATGATGCGCGGTGGCAATAGCGCGCAGTACAGCGCGGGC  
TTTGTACGGTTTTGCTCGGCTTCCGACTGCGGAACAGAATCAAGGACTACCCAGCACCCGCTTGCACGGTGGCGATAC

CGTTTTCCACCAGCGCCGAGCGGATCACAATGCAGGTGTCGAGATCGCCATGCGCGGTGAAATAACCTACCGCGCCGCCG  
TAGTGTCCCGCGCGACGACCTTCCGCCTCGGCAATTAAGTGCATAGCGCGTACTTTCGGCGCACCGCTTAACGTCCCCAT  
ATTCATACAGGCGCGATAAGCGTGCAGGGCGTCAAGATCGTGACGAGTTCGCCGACTACGCGAGAGACGAGGTGCATCA  
CATAGGAATAACGGTCAACTTTGGTGAGATCGGCGACGTAGCGGCTGCCGGGGTGCAAATGCGTGCCAGATCATTACGG  
GCGAGATCAACCAGCATCAGATGTTACAGACGCTCTTTATGATCGGTACGCATTTCCAGTTCAATACGGCTGTGAGATC  
TCTGTCCAGTGAACATCGGCGGACGACCGCGTGGGCGTGTCCGGCAATCGGGTAGATCTCAATCTGGCGGCTGGTGG  
CATCATACTTGAGCGAGCTTTCGGCGACGCGCCAAATAGGGTGAATCATTATCCTGCATAAAAAACATGTACGGGCTG  
GGATTACTCTTTTTAGCACGTAATAGGCCGCCAGCGGTGACGGGCGAGGAGAGAAACGGCGAGATGGCACCACCTG  
GAAAATTTCTCCAGCGCGAATCGCTTTTTGCAACAAACGCACTACGCCACCGAATCTTATCGCTCTGATTACATTCAC  
AACGCATATGCGGCACGGAAACCACTGGCAGCGGGCGCGGCTTCGGTCAGTTGCTGACGTAGTTCTGTTACGGCGAGCA  
GTGAGACGTTGTTTTCTTTCATTCCGAGCAAACAGGCTGGCTGAATACGGGTGCTTTTTTTCTGATGGTCAATCAC  
CATCAGCGTTTCAGCGAGATAAAAAAGAAATCAGGGCAGTTATTTCCGCTGACAGTTGCGGTAAATCTTCAAATCCCG  
CCACAAGGTCATAAGAGAACAGGCCCGCGAAGAACATGGCTTCTCGTTCTTCTTCCGTACATTCAACAGATTCTGCAAT  
AAACGGAAAGCGTCAAAAACCGAAAGGAGCATAAGCGGGCGTTCATCCAGCAGTGGACTGACAGGGGGGAAGCGCAG  
CACACGGCAGTTTGGTGATTGTTCACTTTCCACACCCGAGGCGAGGCGTTATCCAGTAGTCCAGGAGGGCTTCGCCGT  
TGCCGAAAAGTGCCTGGATTGTGACAGTGCACCTAAAGCTGTAATGCGCAGCGCACTGTCTACCAGCAGCGGCTTTTT  
AAATCATCTTTGCTGTGATATCTGCGGATTCAGCAGCAGCGTTGCCGGACGATCCCCACAACTGGTAAAAAGCGC  
GGTGGGATTGTCGCGATAAGCGCCTTCGAGGTTAGCAGTTCGAGAGTCCGTTTTTTGTGTTGCAATTGTTATTCTTAAT  
TTTTGTTCAAAAAAAGCCCGCTCATTAGGCGGGCTGGGTATCTGATTGCTTTACGCATGGTGAATACACTGCCCGTTTTCA  
GGAAGTGCGCCACCAACCTTTCAGTACGAAAATTGCTTTTATTGTCGATACCTTTTTACGTGAACCTGCGTACTAGTTA  
ACTAGTTCGATGATTAATTGTCAACAGCTCATTTAGAATATTTGCCAGAACCCTTATGATGTCGGCGCAAAAAACATTA  
TCCAGAACGGGAGTGCCTTTCGAGCGACAGCAATTATGAGTATTTACGACCTGCACAGCCATACCACAGCTTCGGATG  
GCTGCTGACGCCAGAAGCATTGGTGCACCGTGCAGTGCAGATGCGCGTCCGCCACCTGGCGATCACCAGCCATGACACC  
ACAGCTGCAATCGCGCCAGCAAGAGAGAAATTTACGTTCCGGACTGGCGTTGAATCTTATCCCGCGTGAAATTTT  
CACGGTCTGGGAAAATCATGAAATTCATATTGTCGGCTGAATATTGATATTACTCATCCGCTAATGTGTGAGTTCTCG  
CGCAGCAGACAGAACGGCGCAATCAGCGGGCGCAGTGAATGCCGAAAGACTGAAAAAGCGCAAATACCTGGGGCGCTG  
GAAGGCGCACAAACGACTGGCGCAGGGCGCGCAGTACGCGCGGTCATTTTGCGGTTTTCTTGTGAGTGCGGCAAAGC  
CAGTTCAATGGCGGATGTCTTAAAAAGTATCTGGCGCGGGAAACCGGATACGTTCCGCCACAGTGGTGTACAATAG  
AACAAAGCTATTGATGTCATTTCATCATTCTGGCGGTAAGGCGGTGCTAGCTCATCCTGGGCGGTACAATCTTGTGCTAAA  
TGGCTGAAAAGATTGGTTGCGCATTTCGCCGAACACCACGGTACGCGGATGGAAGTCCGCGAGTCCAGCAATCGCCCAA  
TGAACGTACCCAGCTGGCGGCCCTTGGCGCTCAGCATCATTTATGGGCATCACAAGGATCTGATTTTCATCAGCCATGCC  
CGTGGATCGAACTGGGTCGTAACCTCTGGCTGCCCGCAGGCGTTGAAGGCGTCTGGCAGCTATGGGAACAGCCGAGAAC  
ACCACAGAGAGGGAATTATGAGCCAGTTTTTTTATATTTCATCCTGATAACCCACAGCAACGCTGATCAACCAGGCGGTG  
GAGATCGTGCGTAAAGGCGGGGTGATTGTTTATCCAATGATTCCGGCTATGCGCTCGGCTGTAATAATTGAAGATAAAAA  
CGCGATGGAGCGTATTTGTCGATTCGCCAGCTGCCGGACGGTCACACTTTACCCTGATGTGTCGCGATCTTTCTGAAC  
TCTCGACCTATTCAATTTGTTGATAACGTTGCGTTTCGTTTAAATGAAAAACAACCGCCGGGCAACTATACCTTCATCCTG  
AAGGGGACGAAGGAGTCCACGCGCTGTTGCAGGAAAAACGCAAAACCATCGGTATGCGTGTGCCTTCTAACCTAT  
CGCTCAGGCGTACTTGAAGCATTGGGCGAACCGATGCTTTCCACTTCGCTAATGCTGCCAGGCGAGCAATTTACCGAAT  
CGGACCCGGAAGAAATTAAGATCGTCTGAAAAACAGGTAGATTTGATTATTCAGGCGGCTATCTCGGCAGAAACCG  
ACAACGGTTATTGATCTTACCAGATGATACGCGGTCGTTGCGTGAAGGCGTAGGTGATGTAAGCCCTTTCTTATAACA  
AATTGCGTTCCACGGATGGAAGACTATGGCAGGGAAGTTTCGCTGCATTTTGTGTTGATAGCAGGGCTGTTTGTATCAT  
CTCTAAGTTATGCAGAAAACACGGAGATCCCTTCTTATGAAGAAGGGATCTCGCTCTTTGATGTTGAAGCCACTCTGCAA  
CCAGATGGGGTCTCGACATCAAAGAAAATATTCAATTTACGGCGGAAATCAGCAGATTAAGCACGGCTTTTATCGTGA  
TTTACCACGACTATGGATGCAGCCTGATGGGACGCTGCACTGCTGAACTATCATATTGTTGGCGTACCCTGTGATGGTA  
TTCCTGAACCTGGCATCTTGACTGGCATATCGGGTAAATGAGTATTGTCGTTGGGCGATAAACAACGTTTCTTGCCTCAA  
GGCGACTATCATTATCAAATTCATTATCAGGTTAAAAATGCTTTCCTGCGTGAGGGGGATTCTGATCTGCTAATCTGGAA  
CGTGACCGGTAACCACTGGCCGTTTGAATTTATAAGACCGTTTTTCTCTCCAGTTCTCTAATATTGCGGGTAATCCAT  
TTAGCGAAATCGATCTTTTTACCGGAGAAGAGGGCGACACATATCGTAATGGCCGCATCCTTGAGGACGGAAGAATTGAA  
TCCCGCGATCCGTTTTATCGTGAAGATTTACGGTCTCTACCGCTGGCCTCACGCTTACTTAGCAATGCCTCGGCTCC  
GCAAACGACGAATATTTTACGCCATCTCTTTTACCCTCCACGTCATCGTTGTTAATTTGGTTTCCGTGTCTGTTCTGG  
TTTTGTTGATGTTATATCTCTGGAAGCGCAGGCCGCAATTTACGCCGGTAGATGTGATTGAAACCGATGTCATTCCGCCA  
GATTACACGCCCGCATGTTACGTCTCGATGCGAAGCTAGTTTACGACGATAAAGGTTTTTGTGCCGATATCGTAAATCT  
GATTGTGAAAGGAAAAATTCATCTGGAAGATCAGTCTGACAAGAACCAGCAAATCCTGATTCGTGTTAATGAAGGCGCGA  
CCAGAAATAATGCGGTATTAAGTCCCGCAGAGCAGTTATTAAGTGGAAAGCGTTATTTCTGAAAGGCGATAAGGTGCTTCT  
ACGGGGAGACGCAACAGAGTCTTACGCGAGGGCATTTTTACGGATGCGAAATTTTATCTGCCGCGTAAAAAGTCTTCGTT  
TTACCGGTCTGATACTTTTTGCAATGGGGTGGACTGGCAATATTGGCGGTCACTTTTACGGTAACTTGAGTCTGTAG



GCTGGGCAGGAATGAGTCTGGTGGGCGATATGTTTATTATGATCTGCTGGATTATTCCTTTTTATTTTTGTTCCCTTGAG  
CTTTTGTGGCCGCGATGATGACAAGCCTTGCCTAATCGTGAATCATCACTTTGTTTTTACCCTGATTGTTCCAGG  
CGTGGCCTTCTATTCTCTACATCAATGTCGGAGATGATTCTTTTACTGGTATATGCCAGCGGGTTATTTTACCCTG  
TTTGCCTGACCGTTATCTACTGGCATGGGGTATATTTTCTGCCAAAGTTTACCCAACTGGACAGCAACGTTATGCC  
CACGGTGAAGCTATCGTTAACTATCTTGCCTGTAAGAGGCGAGCAACACACAGTGGACGTCGGCGGAAAGGGGAAACAG  
GAACTGGATTACGCGTTGCTAGGTTGGGCTATATCGGCAATTTGGGGAGGGAATGGCGTTACGCATTGCCCTTCGC  
TTTCTTCGCGGATTTCGCGCTCCAGAGATTGCCCGTAACGGCGTTTTATTCTCATTACAGACGCACCTAAGTTGCGGGGCC  
AATACCAGTTTGTGGGGCGAAGTTATTCGGTGGTGGTGTGGCGGGCGGGTGGCGGAGGCGGTGGTGGCTGGTA  
ATTAAGCTGATGTTAATCGAAAACAGCTTTAACCATAAAGATAGTGTAGTATGTTGCGCCTCAAAGCCAGGCCGATAAAC  
GTCGAGTCTTTACTTAAGGCTGAAGAGTTCAAACAGACTTTACTATCAGTGAAGTGTAGTGTAAAGTTCTGACTCACTGT  
TGCAAAAAGCATATCAGACGCTGGGAAGGCGACACAAAAGGAAGCTCTATGAGCGAAAAGCTACAGAAAAGTGTGGC  
GCGTGGCGCCACGGTCTCGCCGTGAAATCGAATCATTATTGAAGCCGGTGTGAGTGTGATGGCAAAATTGCTA  
AACTCGCGCATCGTGTGAAGTTACCCCTGGATTGAAAATCCGTATCGATGGTCACTGATTTCCGGTACGTGAGTCCGCT  
GAACAAATTTGTCGCGTTCTGGCCTATTACAAACCGGAAGGTGAGTTGTGTACCCGTAACGATCCGGAAGGACGTCCAAC  
GGTGTTTGACCGTCTGCCAAACTGCGTGGCGCACGCTGGATTGCCGTGGGTGCGTTGGACGTTAATACCTGTGGTCTGC  
TGCTGTTACCACCGTAGGTGAACTGCAAAACCGTTAATGCACCAAGCCGTGAAGTTGAACGTGAATATGCCGTGCGT  
GTATTTGGTCAAGTTGACGACGCGAAACTGCGTGTATTGAGTCTGGCGTGCAGTTGGAAGATGGTCCGGCAGCTTTTAA  
AACCATCAAGTTCAGCGGGCGGAAGGGATCAACAGTGGTACAACGTGACTCTGACCGAAGGCCGTAACCGTGAAGTTC  
GTCGTCTGTGGGAAGCGGTTGGTGTGACGGTGGAGCCGCTGATCCGTGTTGTTACGGTGTATATCCACTGCCAAAAGGT  
CTGCCACGCGGTGGTGGACGGAGCTGGACCTCGCCAGACTAATCTGCGCGAACTGGTGGAGCTACCGCCAGAAAC  
CAGCTCTAAAGTCTGTAGAAAAGACCGTCTGCGCATGAAGCGAATCAGATTGCTGCGGTGAAACGTCAACAGT  
AGGTGAGCGGGCGTCTGTTCTGGCGGACGTAATAAATACGGTTAATCAAAGTATGCCGGACGTCAATCCGGCATT  
TACAGATTAATAATCGATCCCTATCTGCGCTTTTACACCGCATCAAACGCATGTTTACGGGGCGTAATCACTTACC  
TATCTGCCAGTTCAAGAATATCCCGATGACAACCACGACCCGTGATAATCACCGTCTGTTGATGTGGACGTTCAATTAAC  
GCCTGCACCACTTCTCCAGTGGCAAATAGTCATACGCCACCATATACGTCAAGTTCATCAAGCAAAACCATATCCAGTGA  
GGAATCAGCAAGCATCCGCTTTGCATGTTGCCAGACTTCGCGGCAGGCGGGGTATCAGACTCGCGGTTTTGTGTATCCC  
AGGTAAGCCCGTTGCCATCACCTGAAACTCAACGCCATGTGGCTCCAGCAGATTGCGTTCGCCATTAGCCAGGTGCCT  
TTAATAAACTGCACGACGCTACTTTTTTCCGTGACCAACTGCGCGTGTGGCGTACCAAATGCCGCGGTGGTTTTGCC  
TTTTCCATTGCCGGTAAAGACGATGATAATACCGCTTCATCCTGGGCTGGGCCACACGAGCATCTACTTTTTCTTTCA  
CTCGCTGCTGACGCTGTTGGTAGCGTTCACTCATTGGGAAATTCCTGGTTTACGGCCCGTTGGGCGTCAAAGGTCA  
TGCCGGTTTTACGGCGGCTGTCATCGCCCATCAGCCAGAGGTAGAGCGGCATGATATCAGCGGGTGTTTTAAAGTTTCTGT  
GGATCTTCGGTCCGGAAGGCGCTGGCAGCATTGCGGTGCGCGTACCGCCTGGGTTAATGCAGTTGACACGCAGGCGCTG  
CTGATATTCATCGCCAGTACCTGCATCATCCCTTCGGTGGCAATTTGACGCTGCATATGCACCCAGTTGGCTCGT  
CCTGACGTCCAACGCTTGATGAAGTAAAGACAGTGAACCGGCGTCCGATTTGAGTAATAAAGGAAGCAGTGCCTGGGTG  
AGCATAAAGGTGGCATTAAAGTTGACCTGCATGACGTCCTGCCAGACTGCGGATTTTGTTCGCTCATTGGGCAACATC  
GCCGAGCAATCCGGCATTATGCAAAACACCATCCAGACGCGGATAATTAACGGCAATGCGCTGTGCCAGTTGTTGGCAAT  
TTTCGGACGTGCAAGTCAAGCAATCGAGAATAAACCCTGTGGCTGACGCCAGTTTCTTCGTTTATGTGGCTGGCTACC  
TGACGTAATTTTTCTTACGGCCCAACAGAATCACTGTGCGACCATAGCGTGCATACGTATCGCGGCTTACAGACC  
AATACCATCGTGGCTCCGTCACAGGATAATGCGATCATTGAGTAAATCTGTTTTGGTGGTAATGCATGGCTACTC  
CTCAACGACGTTGCTGTCGCGCTGCCAGTGTACTTTTACTTTGGGGCTTATGCCTGAAACAGAAGGCAATTTCAAT  
CAGCCTGGGGGATAAACCCGCAAAATGGATACTTTGTCATACTTTCGCTGCAATAACATCTCTGCGAGACGGCTTAA  
TGCTGTTGTAAGTGTGAGCCAAAGCGTTGTTTAAACCAAGGTGGGGACTCGTGAATTTGTTGCTGAATATGGTTTGT  
TTTTGGGCAAAATCGTTACCGTTGTGCTAGCGATTGCGGCGATTGCCGCCATTATTGTCAATGTTGCTCAACGTAATAAAC  
GCCAGCGTGGCGAGTTACGGGTCAACAATCTCAGCGAACAGTATAAGGAGATGAAAGAAGAACTGGCCGCGGCGCTGATG  
GACTCACATCAGCAAAAACAGTGGCACAAGCGCAGAAAGCAATAAGCAAGAAGCGAAAGCAGCAAAAGCGAAAGC  
CAAACGGGCGAGGTGGCAACTGACAGTAAACCCCGCTGCTGGGTGCTGGATTTTAAAGGCAGCATGGACGCCCATGAAG  
TGAACGCTACGTGAAGAGATAACGGCTGTAAGTGCAGCATTCAAACCGCAGGATCAGGTTGTGCTCCGCTGGAAGC  
CCTGGTGGCATGGTGCATGGTTACGGGCTGGCGGCTTCGCAACTGCAGCGTCTGCGCGATAAAAACATTCCTTTAACTGT  
TACGGTAGACAAAAGTCTGCCAGCGGGTTACATGATGGCCTGTGTGGCGGACAAAATTGTTTCCGCACCGTTTGCTA  
TTGTGGGTTCCATTGGCGTGGTGGCGCAAATGCCAACTTTAACCCTTCTGAAAAGCAAAGATATTGATATCGAACTG  
CACACTGCCGGCAGTATAAGCGCACGCTGACGTTGCTGGGTGAAAATACCGAAGAAGGGCGGAGAAATCCGCGAAGA  
GTTGAACGAAACGCATCAGTTGTTTAAAGATTTTGTGAAGCGTATGCGTCTTCTCTGGATATTGAACAGGTGGCAACGG  
GTGAACACTGTTACGGACAACAGGCGGTAGAGAAAGCCTGGTTGATGAAATCAACACCAGTGTGAAGTTATTCTTAGC  
CTGATGGAAGGCCGTGAAGTGGTCAATGTACGCTATATGACGCTAAACGACTCATTGACCGATTACCGGCAGCGCGC  
AGAGAGCGCCGATCGATTGTTGCTACGCTGGTGGCAGCGGGTCAAAGCCATTGATGTAAAAGACAAACCGGAGGCTAA  
GACCTCGCGTTTTGCTTTAATCAACCAGATGATTTTTCTGAAAGCACATGGGCCAGGTGTTTGAACATATTAACACC

GCGGTGCTTTTGGCTGTTGGCAATCCTTGTTTCATCTAAAAAGTAGTCGCCGGTAAATACCAGCACGCCATTACGCTGCGT  
GACGCCGGTGGCTTCAATCCCTGCGAGCGTATCCTCATGCTCACGAATGATTTTGTGGCCTCTTTCAACAGCGTTTCGC  
GGTCGATGGGTTGTGTCTTTTGTTCATTATTTACTCCTTAAACAAGGACATTAGTCTACGCCAGGCATGGCTTGCAGAC  
AAATATAACCACGCTGGTGGCAAGAGCGCCTTACTGGCAACTTTGGATTTTGCATGCTAATAAAGTTGCGTATCGGATTTT  
ATCAGGTACAGTGTGACGCTTTTCGTAATCTGGCAATAGATTTGCTTGACATTGACCAAAAATTCGTCGTGCTATAGCG  
CCTGTAGGCCAAGACCTGTTAACTCAGTCACCTGAATTTTCTGTAACAGAGTACGACAAGGGGTTGATATCCGAGAGA  
GCGAGTCCATATCGGTAACCTCGTTGCCAGTGAAGGTTTATCAACGTGCGACGCATTCTGGAAGAATCAATTAGGTAA  
GGTGAATATGGGTAAAGCTCTTGTCATCGTTGAGTCCCCGGCAAAAAGCCAAAACGATCAACAAGTATCTGGGTAGTGACT  
ACGTGGTGAATCCAGCGTCGGTCACATCCGCGATTTGCCGACAGTGGCTCAGCTGCCAAAAAGAGTGGCGACTCTACC  
TCCACCAAGACGGCTAAAAAGCCTAAAAAGGATGAACGTGGCGCTCTCGTCAACCGTATGGGGGTTGACCCGTGGCACA  
TTGGGAGGCGCACTATGAAGTGTGCTGGTAAAGAGAAGGTCGTCTCTGAACGAAACAACCTGGCTGAAAAAGCCGACC  
ACATCTATCTCGAACCGACCTTGACCGGAAGGGGAAGCCATTGCATGGCACCTGCGGAAGTGATTGGGGGTGATGAT  
GCGCGCTATAGCCGAGTGGTGTAAACGAAATTAATAAAAACGCGATCCGCCAGGCATTTAACAAACCGGGTGAAGTAA  
TATTGATCGTGTAAATGCCAGCAGGCGCTGCTTTATGGACCGCTGGTGGGGTATATGGTTTCGCCGCTGCTATGGA  
AAAAGATCGTCTGTCGGCTGCTGCCGTCGTGTGTCAGTCGGTGGCGGTTCCGCTGGTGGTGCAGCGTGGCGTAAAT  
AAAGCGTTCGTGCCGGAAGAGTTCTGGGAAGTCGATGCCAGCACGACCCGATCTGGTGAAGCGTTGGCGTTACAGGT  
GACTCATCAGAACGACAAAACGTTCCGTCGGTCAACAAAAGAACAACTCAGGCTGCGGTAAGTCTGCTGAAAAAGCGC  
GCTACAGCGTGTGGAACGTGAAGACAAACCGACAACAGTAAACCTGGCGCTCCTTTTATTACCTCTACGCTGCAACAA  
GCTGCCAGCACCCGCTTTGGATTTGGCGTGAAAAAACCATGATGATGGCGCAGCGTTTGTATGAAGCAGGCTATATCAC  
TTACATGCGTACCGACTCCACTAACCTGAGTCAGGACGCGGTAATATGGTTCCGCGTTATATCAGCGATAATTTTGGTA  
AGAAATATCTGCCGAAAGTCCGAATCAGTACGCCAGCAAAGAAAACCTCACAGGAAGCGCACGAAGCGATTCTGCTCTTCT  
GACGTCAATGTGATGGCGGAATCGCTGAAGGATATGGAAGCAGATGCGCAGAAACTGTACCAGTTAATCTGGCGTCACTT  
CGTTGCCTGCCAGATGACCCAGCGAAATATGACTCCAGCAGCTGACCGTTGGTGGCGGATTTCCGCTGAAAGCAC  
GCGGTGCTATTTTGCCTTTGATGGCTGGACAAAAGTATGCCTGCGTTGCGTAAAGGCGATGAAGATCGCATCTTACCA  
GCAGTTAATAAAGGCGATGCTCTGACGCTCGTTGAACCTACACCAGCCAGCACTTTACCAAGCCGCCAGCCGTTTACAG  
TGAAGCATCGTGGTTAAAGAGCTGAAAAACGCGGATCGGTCGTCCGCTACCTATGCGTCGATCATTTGACCATTC  
AGGATCGTGGTACGTGCGAGTAGAAAATCGTCGTTTCTATGCGGAAAAAATGGGCGAAATCGTACCGATCGCCTTGAA  
GAAAATTTCCGCGAGTTAATGAACTACGACTTTACC GCGCAGATGAAAAACAGCCTCGACCAGGTGGCAAATCACGAAGC  
AGAGTGGAAAGCTGTACTGGATCACTTCTTCCGATTTACCCAGCAGTTAGATAAAGCTGAAAAAGATCCGGAAGAGG  
GTGGTATGCGCCGAACAGATGGTTCTGACCAGCATTGACTGCCGACTTGTGGTCGAAAAATGGGGATTTCGCACAGCG  
AGCACCGGGTATTCTTGGCTGTTCTGGCTATGCGCTGCCGCGAAAGAGCGTTGCAAAACCACCTAACCTGGTGGC  
GGAAAACGAAGTGTGAACGTGCTGGAAGGCGAAGATGCTGAAACCAACGCGCTGCGCGCAAAACGTCGTTGCCGAAAT  
GCGGCACGGCGATGGACAGTATCTCATCGATCCGAAACGTAAGTTGCATGTCTGTGGTAATAACCAACCTGCGACGGT  
TACGAGATCGAAGAGGGGCAATTCGCAATTAAGGTTATGACGGCCGATCGTTGAGTGTGAAAAATGTGGCTCTGAAAT  
GCACCTGAAAAATGGGGGCTTTCCGTAATACATGGCTGCACCAACGAAGAGTGAAAAACACACGTAAGATTTTACGTA  
ACGGCGAAGTGGCACCACCGAAAGAAGATCCGGTGCATTACCTGAGCTGCCGTGCGAAAAATCAGATGCTTATTTCTGT  
CTGCGTGACGGTGTGCCGTTGTGTTCTGGCTGCCAACACTTTCCGAAATCGCGTGAACCGCTGCCCACTGGTGGAA  
AGAGCTTTATCGTTCCGCGACCGTCTGCCGAAAAACTGCGTTATCTGGCCGATGCGCCACAGCAGGATCCGGAAGGTA  
ATAAGACCATGGTTCGCTTATAGCCGTAACCAACAGCAATATGTCTTTCGAAAAAGACGAAAGGCGACTGGCTGG  
TCAGCATTTTATGTTGATGGCAATGGGTTGAAGGAAAAAATAACCTTTAATTCTGTCAAGTTTTTATAACAAAGGGT  
CGCGAAAGCGGCCCTTTTTTTTATTGCATATTTTTTTTCTTACACCTATACACTAAGGCTATAAATGATATAGTGGTTAT  
AGTTAGCACCTTTTTTATTATAAATCGTATTAGTACCCGCCAGGTGTGACGAAAAAACGATGTTCTGATGGCGTCTAA  
GTGGATGGTTTAAACATGAAATTACAACAACCTCGCTATATTGTTGAGGTGGTCAATCATAACCTGAATGTCTCATCAACA  
GCGGAAGGACTTTACACATCACAACCCGGGATCAGTAAACAAGTCAGAATGCTGGAAGACGAGCTAGGCATTCAAATTTT  
TTCCCGAAGCGGCAAGCACCTGACGCAGGTAACGCCAGCAGGGCAAGAAATAATTGATATCGCTCGCAAGTCTGTGCGA  
AAGTCGATGCCATAAAATCGGTTGCCGGAGACACCTGGCCGGATAAAGGTTCACTGTATATCGCCACCACGCATACC  
CAGGCACGCTACGATTACCAAACGTCATCAAAGGCTTTATTGAGCGTTATCCTCGCGTTTCTTTGCATATGCACCAGGG  
CTCGCCGACACAAATTGCTGATGCCGTCTCTAAAGGCAATGCTGATTTGCTATCGCCACAGAAGCGCTGCATCTGTATG  
AAGATTTAGTGTATACCGTGTACCACTGGAATCGGGCTATTGTAGTCACTCCGGATCACCGCTGGCAGGCAAAAA  
GCCATTACCATTGAAGAAGTGGCGCAATATCCGTTGGTGCATATACCTTCGGCTTTACCGGACGTTCAGAAGTGGATAC  
TGCTTTAATCGCGCAGGGTTAACGCCGCTATCGTTTTACGGCAACGGATGCTGACGTCATTAACCTTACGTCGGT  
TAGGGCTGGGGTAGGGGTCATTGCCAGCATGGCGGTGGATCCGTCGCCGATCCCGACCTTGTGCGTGTGATGCTCAC  
GATATCTTACGCCACAGTACAACCAAAATTTGGTTTTCGCCGATGACTTTCTTCCGCGATTTATGATGATTTTATTCA  
GCGTTTTGCACCGCATTTAACGCGTGTGTCGTTGATGCGGCTGTGCGATTGCCCTTAATGAAGAAATTTAGGTCATGT  
TTAAAGATATAAAACTGCCGAAAAAATAATTTCTTGCCTTATTTTCCGACCTTTTATGTAGCGAAGGTGCCGGAATATA  
TTCTCTTTTGTACTTATTTCTATACCGTGCACAATTTTTTATCCCTCATATTTATAGGGTAAATACCTGTAAAGTAG

TGCTAATTACCCGCTCGCAAACCTCCAGTTTTCAAATATCTATTTAGGTTCAAAGATTGAATTATTTACTGGAGACGA  
TTCGTAATTCGCTGGATTTTTGACTAAAGTTTTCTTAGGATTTGTCTCATCGTATGATTAATTACACCAATCGTTCAAC  
GTCTTGCTGATAAGTGATGGCGATTATATGAGGTTAGCAATGCCTTCTGGAAATCAGGAACCCCGCCGATCCTGAATT  
AAAACGTAAAGCCTGGCTGGCGTTTTCTTGGTTCTGCACTTTCTGGGTGGTTGTCGCACTGCTGATTTGGAAAGTGT  
GGGATAACTATGGTCGGTCAGGAGCAACTGGAGTCGTACCATTATGCCAGCATAAGTACAAATGAAACGAAACGAAAC  
GGGAATGTTCCGTCGTTATTCAGACGACTGGCAACTAACATCGCAGCAGCAAGCCTTTATAGAATGTTTGTGAAGAT  
GATCAGCCGAAACAATAATTATCATCATTCTTATTACCCATTTTTAATGAATTAAGGGCTTTAATACACCCGAGCAAT  
AACAGCTTGAGTTATCTCAACACAAAATAATAACCGTTAAGGGTGTAGCCTATGATCAACACAAAATGAAATATTGGTC  
CTGGATGGGCGGTTTTCTGTGCGATGCTCTTCTGGGCCAACTCCTCTGGATCATTACTACTGATCCTTGACCCCGC  
TGCGGGGGGTTGTCATTTGCTTGGCCACAAGGTTCTCCTCTTTTATCAATTTGGGTTGTATCAAAATCGTTACGCGAT  
GTTTGTGTTATCTTTAATATTACCCTGAAGAGAATCAGGGCTTCGCAACCCTGTCATTAAGGAGGAGCTATGTCGTCAA  
CCCTACGAGAAGCCAGTAAGGACACGTTGAGGCCAAAAGATAAACTTACCCTACTACAGCTGCCGCTTGGCTGCTAAA  
TCACTGGGCGATACCCGCTACCCAAGTCACTCAAAGTTTTGCTCGAAAACCTGCTGCGCTGGCAGGATGGTAAC  
GGTTACCGAAGGATATCCACGCGCTGGCAGGATGGTGAATAATGCCATGCTGACCGTAAATGCTACCGCCCGC  
CAAGGGTCTGATGCAGGATTTACCGGCTACCTGCCGTTGTTGATCTGGCGCAATGCGCGAAGCGGTTAAACGCCCTC  
GGCGGCGATACTGCAAAGGTTAACCCGCTCACCCTGTCGACCTGGTTCATTGACCACTCGGTGACCGTGCATGTTTTGG  
TGATGATGAGGCATTTGAAGAAAACGTACGCTGGAATGAGCGCAACCACGAACGTTATGTGTTCTGAAATGGGGAA  
AGCAAGCGTTAGTCGGTTAGCGTCGTGCCCGCAGGCACAGGCATTTGCCATCAGGTTAACCTCGAATATCTCGGCAAA  
GCAGTGTGGAGTGAATTGCAGGACGGTGAATGGATTGCTTATCCGGATACACTCGTTGGTACTGACTCGCACACCACAT  
GATCAACCGCCTTGGCGTGTGGGGTGGGGCTTGGTGGGATCGAAGCAGAAGCCGCAATGTTAGGCCAGCCGTTTTCCA  
TGCTTATCCGGATGTAGTGGGCTTCAAACCTTACCGGAAAATTACGTGAAGGATTACCGCCACAGACCTGGTTCTCACT  
GTTACCCAAATGCTGCGCAAACATGGCGTGGTGGGAAATTCGTCGAATTTTATGGTGTGGTCTGGATTCACTACCGTT  
GGCGGATCGCGCCACCATTGCCAATATGTCGCCAGAATATGGTGCACCTGTGGCTTCTCCCAATCGATGCTGTAACCC  
TCGATTACATGCGTTAAGCGGGCGCAGCAAGATCAGGTCGAGTTGGTCAAAAATATGCCAAAGCGCAGGGCATGTGG  
CGTAACCCGGGCGATGAACCAATTTTTACCAGTACGTTAGAATGGATATGAATGACGTTGAAGCGAGCCTGGCAGGGCC  
TAAACGCCACAGGATCGCTTGCCTGCTGCCGATGTACAAAAGCATTGCGCCAGTAACGAACTGGAAGTGAATGCCA  
CGCATAAAGATCGCCAGCCGCTGATTATGTTATGAACGGACATCAGTATCAGTTACCTGATGGCGCTGTGGTCATTGCT  
GCGATAACCTCGTGCACCAACACTCTAACCCAAGTGTGCTGATGGCCGAGGCTTGTGGCGAAAAAAGCCGTAACCTCT  
GGGCTCAAGCGGCAACCATGGGTCAAAGCGTCCGTCGGCACCGGTTTCGAAAGTCGTTTCTGATTATCTGGCAAAAGCGA  
AACTGACACCGTATCTCGACGAACTGGGGTTAACCTTGTGGGATACGGTTGTACCACCTGTATTGGTAACTCTGGGCCG  
CTGCCCATCTATCGAAACGGCAATCAAAAAAGCGATTAAACCGTCCGTCGGTGTGTCGGCAACCGTAACCTTTGA  
AGCCGATCCATCCGCTGGTTAAACTAACTGGCTGGCCTCGCCCGCCTGGTGGTTGCCTATGCGCTGGCGGAAATA  
TGAATATCAACCTGGCTTCTGAGCCTATCGGCCATGATCGAAAGCGATCCGGTTTATCTGAAAGATATCTGGCCATCG  
GCACAAGAAATTGCCCGTGGGTAGAACAAAGTCTCCACAGAAATGTTCCGCAAAGAGTACGCAAGATTTTTGAAGGCAC  
AGCAGAGTGAAGGGAATTAACGTACACGATCCGATACCTACCGTTGGCAGGAGGACTCAACCTATATTCGCTTATCGC  
CTTTCTTTGATGAAATGCAGGCAACACCAGCACCAGTGAAGATATTCACGGTGCAGGATCCTCGCAATGCTGGGGGAT  
TCAGTACCACTGACCATATCTCTCCGGCGGGCAGTATAAGCCGACAGCCAGCGGGTCGATATCTACAAGGTCGGGG  
TGTTGAGCGAAAAGACTTTAACTCTACGGTTCCGGCGTGGTAAACCATGAAGTATGATGCGCGGCACCTTCGCCAATA  
TTCGATCCGTAATGAAATGGTGCCTGGCGTTGAAGGGGGATGACGCGGCATTTACCTGACAGCGACGATGCTCTATT  
TATGATGCTCGATGCGCTATAAGCAGGAGCAAAACCGCTGGCGGTTGATTGCCGGAAGAGTATGGATCAGGCTCCAG  
TCGTGACTGGCGGCAAAAGTCCCGCTGCTTGGTATTCTGTGGTATTGCCGAATCGTTTGAACGAATTCACCGTT  
CGAATTTAATTGGCATGGGCATCCTGCCGCTGGAATTTCCGCAAGCGTAACGCGTAAACGTTAGGGCTAACCGGGGAA  
GAGAAGATTGATATTGGCGATCTGCAAAACCTACAACCCGGCGGACGGTCCGGTGACGCTTACGCGCGCGGATGGTAG  
CCAGGAAGTGTACCCTGCCGTTGTCGTATCGACACCCGCGACGGAGTTGACCTACTACCAGAACGACGCGATTTTGCATT  
ATGTCATTGTAATATGTTGAAGTAACAATATTTGCTTCCGGTTATTTTGTCTCCGCAAGCAAATGAATTACACAAT  
GCAAGAGGGTTATTTGTTGAGCAAATGGCCATTTTCTCGGCTTGGTATCGAGATAATGTTGTTATTGGGGTTACGAC  
CTACAATCAATGGTACGCTTCAACAATATTAATCCCTGCTTCCGTCAGAAATTCGACTTTTTTGGGTTATTGGTTAAC  
AAGCGGACTTCATTGACGCAAGGAGTTTGAACATATCAGCGCAAAGAGTGAAGTGCAGCTCATCAGCGCGAAGCCTAA  
CTGGTGGTTAGCCTCTACGGTATCGTAACCTTATCCTGCAGTGCCTAAGCGCGGATTTTATTGAGCAGACCAATGTTAC  
GACCTTCTGACGGTATACAGCAAAATACCACGGCCTTCTCGCAATTTGCGTCAATGCCGCTTGGAGCTGGAAGCCA  
CAATCGCAGCGAAGCTGAACAGGGCGTACCGGTGACGATTCGGAATGGACGCGCAAGTACCGGGGATGCCCGGA  
AATATCGCCATAGACTAGCGGACATGATCGTGTCCGTTGCCAGTCTTCAAATCCACCATCAGGAAATCGCCCATG  
GGTTGGCAGTTTGGCTTCTGCCACACGTTAAGCTGCATGAAATTTCTCAGATAATGCTGTTCTGTATTGGCTTATTT  
TGCCATAACGAGAAGGGGTTACCTAATCACGACGCTGATCGTTACGGAATGGCACAAATCTGTCAATTTTTCTGG  
AACTGGCGTTTTAGTTATGATTGTGGGACTTATCAAAAAGGAGAGGCCATGCGTTGATTGCCAGACGTACCGCAGTGG  
GAGCTGCACTATTGCTTGCATGCCAGTAGCCGATGGATTTCTGGCTGGCGTTGGCAACCTGGAGAACAAGTTGGCTA

CTAAAAGCGGCTTTTTGGGTACTGAAACTGTCACCCAGCCCTGGGGCGTCATTACACATTTGATTTTATTCGGCTGGTT  
TCTCTGGTGTCTGCGTTTTTCGATTAAGGCTGCCTTTGTATTATTTGCCATTCTGGCGCCGCAATCCTTGTGGGACAAAG  
GCGTTAAATCCTGGATCAAAGACAAAGTCCAGGAACCACGACCTTTTGTATCTGGCTGGAAAAACACATCATATTTCCG  
GTTGATGAGTTCTACACTTTAAAGCGAGCAGAACCGGAAATCTAGTGAAAGAACAGTTGGCTGAAGAGAAAAATATCCC  
ACAAATATTTGCGTTCACACTGGCAGAAAGAGACGGGTTTTGCCTTCCCTCCGCTCACACGATGTTTGTGCCAGTTGGG  
CACTGCTGGCCGTTGGTTTTGCTGTGGCCGCTCGGGCAACGTTAACCATTTGCTATCTTGTGGTCTGGGCAACGGGAGTC  
ATGGGAAGCCGCTGCTGCTCGGGATGCATTGGCCACGCGATCTGGTAGTAGCTACGTTGATTTCTGTGGGCGCTGGTGGC  
GGTGGCAACGTGGCTTGCACAACGAATTTGTGGGCCATTAACACCACCTGCGGAAGAAAATCGCGAAATAGCGCAACGAG  
AACAAAGAAAGTTAACGCTGGTTGATTTTCCGAATTTAGCCCTTAAATCATCAACAATGCGTGTGGATGCCATTTTCGAGA  
CGGCGCAAAAATGGTACTTTAAAGGGCTATTGCGGTAAGTTGACCATAATTTATTCGCTCTAACACATAACGGGAAGTA  
ATGTGAAATATTTACTCATTTTCTTACTGGTGTAGCGATCTTCGTGATTTTCGTACGTTGGGTGCGCAGAACGATCAA  
CAGGTGACGTTAATTATCTGTTAGCGCAAGGGGAGTACCGTATTTCCACATTGCTGGCGGTATTGTTTGTGCGGGGTT  
TGCTATCGGTTGGTTGATTTGTGGCCTGTTCTGGCTGCGAGTTTCGTGTTTCCCTGGCGCGCTGAACGTAATAAAGC  
GACTGGAACCAGCTTTACCCGCGACTGACGTGGCTGTAGTCCGCACTCGTCAGCGCGAAGGAATAACTTTCTATG  
CTGGAGTTGTTGTTTCTGCTTTTGCCTGTAGCCGCTGCCTATGGCTGGTATATGGCCGCAAGTGCACAACAAAACAA  
GCAAGATGAAGCAACCGCTTGTGCGGTGATTACGTAGCGGGGTTAACTTCTGCTTAGTAATCAACAGGATAAAGCGG  
TAGACCTGTTTCTCGATATGCTTAAAGAGGATACAGGCACCGTTGAAAGCCACCTTACGCTCGGAAACCTGTTCCGTTCCG  
CGTGGCGAAGTTGATCGCGCTATTGCGATCCATCAGACCCTAATGAAAAGCGCCTCGCTGACCTATGAACAGCGTCTGTT  
GGCGATTCAACAACCTGGGGCGTGATTACATGGCCGCGGGTTATATGACCGCGCGAAGACATGTTCAATCAGCTGACCG  
ATGAAACTGACTTCCGATTGGCGCGCTGCAACAGTTGCTACAAATCTACCAGGCTACCAGTGAGTGGCAGAAAGCAATT  
GATGTTGCCGAACGCCTGGTGAAGCTGGGTAAGATAAACAGCGCGTCAAATTTGCCATTTCTACTGTGAGTTAGCCCT  
GCAGCATATGGCCAGCGACGATCTCGATCGTGCATGACCTTGTAAAAAAGGGGCGGCGGAGATAAAAAACAGCGCCC  
GCGTATCCATAATGATGGGACGCGTGTATGGCGAAAGGAGAATACGCCAAAGCCGTCGAAAGTCTGCAACGCGTGATA  
TCCCAGGACAGAACTGGTCAGCGAAACGCTGAAATGTTGCAACCTGCTATCAGCAGTTGGGTAAAACCTGCCAATG  
GGCAGAATTCCTGACGCGTGGGTGGAAGAGAACACCGGTGCCGATGCTGAATTGATGCTTGTGATATCATCGAAGCGC  
GCGACGGTAGTGAGGCCGACAGGTCTATATTACGCCAGCTTCAGCGTCATCCGACCATGCGTGTGTTCCATAAGTTA  
ATGGATTACCACTTAAATGAAGCGAAGAAGGGCGTCCAAAGAGAGCCTGATGGTGTGCTGACATGGTTGGCGAGAA  
GGTACGTAGTAAGCCTCGTTATCGTTGCCAGAAATGTGGTTTTACCGCATACACCTCTACTGGCATTGTCCGTCTTGTG  
GGCCTGGTCAACCATTAAACCGATTCCGCGTCTTGTGCGCTGTAAATTTTAAAAAAATCCGACTTTAGTTACAACAT  
ACTAATTATTAATGTTCCATTGTGCTCCGGCAACGACGGCGCAGAAAAAGCCTGCCAGGGGAGAAATCGCAACTGTTAAT  
TTTTATTTCCACGGGTAGAATGCTCGCCGTTTACCTGTTTCCGCGCACTTCCGGTGCCCATCATCAAGAAGGTCTGGTC  
ATGACGTTAACTGCTTATCTTCCCGCGCTGTTACGAATTCTCTGTGGTTGTTGCCCTTGATTATCATAATCGTGA  
TGACGCGCTGGCCTTTGTGACAAGATCGACCCACGCGATTGTGCTGTAAGGTGCGCAAAGAGATGTTTACATTGTTTG  
GGCCACAGTTTGTGCGCAACTTCAACAGCGTGGTTTTGATATCTTCTTACCTGAAATTCACGATATCCCAACACT  
GCAGCGACGCTGTGCTGCTGCAGCTGACTTAGCGGTGTGGATGGTGAATGTTTATGCTCTGGTGGGCGCGTATGAT  
GACCGCAGCGCGTGAGGCACTGGTCCGTTTGGCAAAGATGCACCGCTTTTGTGCTGTGACAGTGTGACCAGCATGG  
AAGCCAGCGACCTGGTCGATCTTGGCATGACACTGTCACTGCAGATTATGCAGAACGCTTGGCGGCACTGACGCAAAAA  
TGTGGCCTTGTGGTGTGGTGTGTTCTGCTCAGGAAGCTGTGCGCTTTAAACAGGTATTCGGTCAGGAGTTCAAACCTGGT  
TACGCCGGGCAATTCGTCAGGGGAGTGAAGCTGGTGACCAGCGCCGATTAAGACGCGAAGCAGGCGTTGTGCGGTG  
GTGTTGATTATGTTGATTGGTCCCGGTAACCGCAATCGGTAGATCCAGCGCAGACGCTGAAAGCGATCAACGCTCT  
TTACAGCGGAGTGATGATGAGTGATTCCAACAGCCGCTCGGTCTACTCAACGGAACCGGACGTATTGATGAGCCAAA  
GCGGCCCTGTACGCCATAAAGGCGACGGTGTGGTGCATTCAGCGTCAGACCAGTGACGTAAGGTAAGGGCGTTTG  
CCTGATTACCGGTGTCGATCTCGATGATGCCGAACGACAAAACCTTGACGCGGAACTGAAGAAAAAATGCGGCTGCGGCG  
GAGCAGTTAAAGATGGAGTTATTGAAATCCAGGGCGATAAGCGTGATTTATTAATAACTACTTGAAGCGAAAGGGATG  
AAGGTAACCTCGCAGGCGTTAACATAAAAAAGCCACGGATATATCCGTGGCTTTCGAATATTTTACTGTGCGTATTATT  
CAGTTATTTCTGACTGAACAGAATCAAGCGTATTATAATTGCGAGTCGATAATCGACATTTATTTACGATTATTTACCGA  
CCTGGTGACCAATAACACCTCCGACAGCTGCACCACCTAATGTACCCAACGTAAGTCCATCGGTCAGTACTGCACCGCCT  
AATGCCCTGCACCCGCGCGATTGCGGTGTTGCGGTCCCGTTTACAGCAGTTAGAACAGGCACTCAGAGACATTGCCAA  
AGTAATTGCCAGAACAGCCGCGGTCAATTTTTTGTGCTGTTACAAACATAATACTCTCTCCTGAATTTATGATTACGGAA  
GTAAGCTCTCTATAACTATAATAGCTAAGAATAAGTCTGGTGAATTTATCCGTGAAATCTGCTCGCGCGCAGGGTTATA  
TCACGAGGTGATAATGACTTCTGTTATATCGCTGATAATAATTTTATATCTTGTGAGAGTGTAAATAACAGGTAAATAGT  
CTTAATTATCAACCAGGAATCATCTTAGAGCGGATGATTTGCCAACTGCAATCATCCGTAGAGAAGGGAAATGGTTAA  
ATGTCAACGAGTGAATGGTGTGAGTTTACTGTGCTCAAGATGCATCAGATCGCTGGCGCGTATTTTCAATCGGTAATCAC  
GCGATTGAATCGCTCAACGGGACCGATGGAGTATGAATGTACAGACCAAAATTTTCGAGCTGTGAGTCAAGTACTCGCTT  
CGACTCTTTTTCCAGCACGGCATTGACCACATCGGTACGCATCATATCGCGACCGGTAATCCAGTTTCAGGTTGCCAG  
CCATCAATACCAATAAATGCTTTGCTGAAATGCACCTGTTGGATGCACTGGCGTGTCAAAGGGCAACCATACTTTGCT

TTTTTCTGATACAGCCACCGAGCAAATAACTTCACAAGGCGCGTCTTTTCAGCAAATGCGCGATGTAGCTGCTGACCG  
TGATGATAGTGACATTTTTCTTCTGCTCGCCAGAGTCCGGGCGAGTAGGGCATTGCTGCTGCCATTTTCGATAAAGATG  
GTTTCGCCCCGTTGAACCAGCGACGCGCAAACCTCGCGGAGTTACAGCTTCAGCGTATAGTTGCTCATACACGGGTTTC  
GACGTCATCACTATCAAGCGAAACAGCAAAGCCATGTGCACGGCGGAGGTAACCTCAGTTTTTCGAGTGTGTTGAGATCCT  
GGCGAATGGTAACTTCAGAACTCCAGTGGCTTTTGCAGATCGTTTACGCTAACCTGACCCTGGTCAATGACCATCTGT  
AGAATAGTTTTGTTGTCGGGAATTCATCGCTGTAATCTTATAACGTTATAATACTTAATAAAAAAATACTGACGCGCCGG  
GCATCCTCAAATAGGAAAACCTGAAGGCACGATTGTTAAATCTCCACGGTGCCTTCGGGATGTCTGGCGTAGATTACGC  
AACCTGGCGCAAGAGTTCTGCTTAAAGTATCTCGAGATTATGGATCGCAGAGTGGTAATCGCTGCCACAAGGATATCTA  
ACACAATATCAATACGTTCCGGCAACGCGCTGGGCATCAAATTCAGACATCAAGGACATCCTTATAGCAAAAAGGGGAAAA  
TGAATAATGCAAAAATTGCCCTAAAAGAGAAGTGTAAACAGCAACGGCTAATTATCATCCAGGAATACGATATATAAT  
GACGGGATATAGCGCTAAGTATATATTCATCTACTTATGCGCGCTTCAGATAGCGTTTTATACCAGCGTTCGAAGCGGA  
CGGCGGCATCGGTTTGGCAAACAAAATCCTTGCCGCTCATTGATCCCCTTCTGGTTAAAAAGCATCTTCTTTGCA  
CTCTACACCTTCGGCGATCACCTGAAGATTCAATGCCTGGCCACAGCGACGATCGCCCGACCAGTGACTGCGAGAC  
AGTTGTTTGTGAATATCTGAACAAAACCTGGTCAAGTTTGTGGCATCGATCGAAAGCGCGCCAGTTGCGAAAGTG  
AAGATAGCCGGTACCAAAATCATCCAGATGCACCTGCGCACCTAGTTGGCTAAATTTGTAATAACAGACAGTGCCAGT  
TCATCATTCTCAATCAGACAACCTCTGTGAGTTCAACATCTATAGGGCAGTATTCAAATTTGAGTTCTCGAGAACCTG  
TTTCAGGGCGGTGAAAATGTTTTGATCGGCGAGCTGACGTGCAGAAATATTTACCGCCACTCGCAGGTTTATGCCTTTAT  
CCCGCCACTTTGCCACCTGGCGTACGACATCGAGAATCACCAACGGCCTAAAGGCACAATTAGCCCTGACTCTTCGGCG  
TAGGAAATGAAGTCCAACGGTGAATCAACCCACGTTACGGTACTGCAACGTAAGTGTCTCCAGACTGCGCACTTC  
GCCACGCCAGGTGATTTTCGGTTGATAGTGAATAACCAACTGATCGTTTTCCAGTGCTTTACGCAAGTTGGTATCCAGCC  
AGAGATATTCAAATACCCGTTGATTCATTTCTGGGGTAAAAACGCAAAATTTGCCTCGTCCGCTTCTTCGCTGTGTAC  
ATTGCTGTGTCGGCGTGACGAATAATAGCCGTGCTGTGTAACCATGTTCCGGGAGAGAGTGAATACTACTGAACAGCT  
GGTATAAATTCAATTAACCAATGCGAAAGGGGAGCCGTAAGCGGGTCAAATTCGTGATGCCATTGCTTCAGCGCGC  
TTTGTGAGGTGTTGGATGCCAGTACCAGAAACTCATCCCACCTGGACGCGCAACACCTGGTCATGTTCCGAGACAGCTT  
AAAATAGCCAATGACACGTCGCGTAATAACTGGTCACCAACAATGCCATAGGCGTCTGACCTTTTTGAAATTATC  
CAAATCAAGATACACAACCCCAACTTTATTGTTATCTGCATGATTAATAGCGTATCGATTAAATCCTGCATTGCGTTAC  
GATTCGGCAGTCCGGTGATACTGTGCGTATTTGCCAGAATACGCAGTGCCTCCTGAGCGCGCGCTCTTCGGTAATGTCG  
GTGCCGGAACAGATTAAAAAATCTCGTTTTTGGCACTGCCGCTGTGGACAAATTTATTGCGAAACAGAAACAGCCGCTG  
GCCTTTACATGTTGGTATCCACAGTTCGACTTCATATGCATTGCCGCTTCGAAAAAATACAGGTTATTGCGCCTGGATG  
CCGAGCTTACGACGGCTCATAAACAGTTTAAACACGCTTTGCCAATGACGTCTGTGTTCTTTCAACCCCTGTGTAATCT  
TCACATAACCGATTGAAGCGTTGGATATTCCTCCGGCTGTGAGAATCACTATTGCGGAATGTGCTTCAGAAACTACCTG  
CTCAGCAAAGGAAAGCCCGTGTGATAAATCACGAGCAACCGCCGGTGTGTCATGCCATGCAGACGCGTTGCCAGCCATT  
CCCGTTTATTGATTTTTCTGCTACCAGATGCACAGAAAGATCGTTTTATCGACGGTCAGACTCATCATCAGGCTGGAG  
GTGATGACCGTCATTTCCCTGATGCGAGCAGCCTGTTCCGGCAGATAACTGCAATGTACGATCAGGTTCTGTGGTTTCGGT  
GGTAGAAAAGCGCAAAACATCGCTGCTTTCCGTCAACCGCCAGTATGGATTGTGCGATCCGAGAAAGTTGTACAACGTTG  
TGGACTCCCTAACGGTTTTCATGATGCATATCTCCGGTTAACAGCGGAGTCCGCGTTAAATAAAAGGAACAACATGAC  
TTACATGAAATTAACGGCGCTAAACGCATTGTTTTTTTATATATTTATTTGTAATCCAGTTTTGAAAAACGCCAGTT  
TTCAAACGAAAGTCAGTTAAAAATCTGCCTGGATAAACGAAGTAGAGCGGGGAAATAAACGGCCCATCCATGAGGAA  
TGGCCGTGAAAGGAGATTACGCGACCGGGCGCGCAATAATGCTCGGGTTTTCCATGCGGACTTCGGCAATAGTGACGTC  
AATAACGTCAGTCACTTTGTAACCCGTTTACCTTTAATTTGTACAGTGCCGTTTTCTGGCTGCAAAACAGTTGATCTGC  
GCACAGCTGTAAGAAAGGTGCCGGAATAAAGGCGATAGCGCCGTTATCAACCAAAACGAACACGCATGCCGCCACGGCTG  
ATATCGACAATTTCCGCTGCGAAACGGGTGTGCGTCCCGCTTTGTCTTTACAGGAAGCGTGTGATAACCAGTACCAAC  
ATCACGTTCTGCCATCCGGTTGAGACGGCGACGCTCGGCCATTTGGACAGTGATTTATCCTGTGGGCGCGTGCAGTTT  
CGCCTTTGATAACCGCTTTCAGCAGACGGTGGTTGATCATGTCCCATATTTACGGATCGGCGAAGTCCAGGTGGCGTAT  
GCTTCCAGACCAGGCCAAAGTGAAGACCGGTTACGTGCTAATTTACGAAATGACTGGAAGCGACGAATGCGGCTGTC  
GAGGAAACAGTTGGTTGCGCGTCCAGTTCACGACGAGTTTGCAGAAACCGTCCAGCGTGAAGCACTTCTTCGGCATCGA  
CATGCAGACCGTGCCTTTTCAGCAACGCTGCCAGCGCTCGGCATTCCGCGGATCAAAGCCCATATGCACGTTATAGATG  
CCAAAACCGAGCTTATCGCGCAGTACGCGGGCCGCACAAATGTTAGCGGCAATCATCGCTTCTTCGACGATACGGTTGGC  
AATGCGACGAGGCTCGGCGACGATATCCAGCACTTACCTTTTTACCGAGAATAAAGCGGTAATCCGGGCGATCTTTAA  
ACACCAGTGCCTGTTATGACGCCACTCGCCGCGGCTGGCAAATTTGCGCTAGCAAACGACTTGTTCGGCAATTGCT  
TCACTTTACAGGCTGCCAGTACCGGATTTTTCCAGCAGTCAAGAACTGGTCATACACCAGCTTTGCTTTGGATTGAT  
GGTGGCGGCAAGAATTCGATATTATCTCAATGGTCCATCAGCGGAGAGCGTCATGCGGATGCCAGTACCGGGCGGA  
CTTCAATTGGCGCGAGTGAAGCAGAGATCGTCAGAAAGCTCGCGAGGCAGCATAGGGATGTTGAAGCCAGGAGATAGTTG  
GTGAATGCGCGAATTTTCGGGCTTTGTCCAGCTTGTGCTTACGAAATCCACGCGGTTGGATCGGCAATCGCCACAAT  
CAGCTGAAGTTTGTATCCGGCAACGCTTAGCGAAAAGGGCGTCATCCATATCTTCTGTGCTGGCACTGTGATGGTGA  
AAAATCCAGCGCGTCAAGTCTTACGAACAGACCTTATCGAGCATTTCCGGTAGCGACCGCTGCTGTTCTTTT

TCCAGATTATGGCGTGCAAGGGTAACCCACCACGGTACAAAGTGATCGTCACCAAAAGTGATGTATTGTGCAGTTCTGC  
ATAGAAAGAACGATCGCCTTTCAGCGGATGACGGCGCATTTTCGGCAACCGCCAGTCGCCTCTTTAAACTCGTGGTTCA  
GGCCACGGGCTGCGCGGCAAGGAATGGCGTCTTTTAAAGAGTGGATGATCAGGAACGATGGCCAGACGGTCATTTTTGCC  
TGAACCTTACCACGAAACGAGTCAGGAACGGTTCAACCAGTTCTTCTGGCTCTGCGGATTACGTTCTTTTTCACTGTG  
GATCACC CGGATAATTCGGTCGCCATGCATGACTTTTTTTCATCTGCGGCGGGCGAATGAAATAACTTTTTTTCGCGTCCA  
CTTCCAGGAAGCCAAAGCCTTTTTCTGTGGCTTTTACCACCCCTTCAGCGCGTGGCGTCTGGGAATGCAGTTGCTGTTA  
AGCTGCGCTAGCAGCGGTTGCTCTGAAACATAATTGTCTATTTTTGGTGGCCATTAGAGCGGCTGACAGTTTTACGCGAA  
TCTGTCTGACGCGCAAGTTAATATGTCTCACCAACGCGATTTTTAAGCGATTTATCCAGCCACACAGCCCGCTCCAT  
ACCAGCAGATTAATAATCTGCGTTGATGATTTTTCTGTTCGAGTAAAGGGTGAAGTGGGCGGCTAAAGCGATCGGG  
TGCTCGGTCAGCCATTGTATCGCCTGAACGGTAGCGCGCTCAACAGAATGACGGTCAGCCATTGGTTAATTTTCAATTT  
CGCCTTGGCATAAGGGTCTGATTTTTTATATTCAATTTGATGAATCCATACAGGTGGCAAAACAAGCAGGACTGCCA  
TTTATACGCGCATAAACACGCGCAAGCTGATTAACGGCTGTGATTGCCCCGTGTGCTGTTTAACTTTTTCGAG  
AAGGAAAGTAAATAGGGTGGAGAGAGATTTTCGGCCAGTTGGCAAAGTTCTGCAGTTGAACTTTTTGTGTGCTCTT  
CAGGTAGTTTTCCACCTCATAGCTGCTTCGCCAGCGTAATGATTCATCAGCAAACAGTGACGCGTGGCGTAGTTTTGT  
ATCTCCAGCCCGGTAACCAAGCAGTACCGGATGCCCGAGATAAGCTGAAATGTGCAATTGTCGCAATTGTCGCGCTGAAAGCCAA  
TAAACCAATGATTTGGCTAATGATCACACAGTCCCAGGCAAGTAAAGCGAGTCAATTGATGCTGGCGGATCGGTTGT  
CGATAATAGAAGGCGAGCTAGCCAGTTGGCGGGCATATTGCGTGATTTGTGCCAACCGATGATTACTTTCCCTGGTGGAA  
TCAGGCCCGGGGAGCGGCTAAGTCGCGCGCAATAGTAGTTACATAACCGCTGGACGCCGCAACCTGAGCAACCGTACG  
GGCGTCGACAAGCGTTCATAAGCGGTGAAGTCTGTGAACGGTTCACGGTAAGCTGGTCAGGGAACAAATCCACTGCAA  
GAACACGCGCAGGGTCCAGCCATGAAAGGAAGGGGGCAGCGTTTCTTTTCAAGGATCACGTCGAGTAGAAAGGGATCG  
CTGACCTTTGCGGCTTCCGGGACCAGAGGCAGAAGTCCACTCCGTAAGTACTGGATTGCGTTTCATGATACAGTGGCT  
TTTGCCGGTGTGTTGGCTGTTCCATGGGCGCTCCTGGTCTGTAAGGAAATCGTTATCTGACGCAAGCGGGGAAGGG  
GAGAAAGACGGATCGCGGATAACAAATATCAGAAAGGTATAACAGAGATAACGGGCGCAGAACGCCGCCATCTTTACC  
AACAGAACGATTATTTAGTTTCGAGTTCGTTCAATTGCAGCAATGCTGAAACCGCGTCAACGTGGACCACTTACCAGGAG  
ATACCGGCAGAGATCGGAGCACAGGAATGCCGAGAGTTACCCACATCTTCAATAGTAACGGTACGGCGAATCGGGGT  
AACGGCTTCGCAATGAGCCAGCATTTTTCGGAAGTCTTTGATACCGGAGGCCCGCAGAGTACGGATCGGACCAGCAGAGA  
TGCGTAAACACGCACACCTTCCGGACCCATCGCGTTCGCCATATAGCGCACGTTTCGTTCCAGAGACGCTTTTGCAGA  
CCATAACGTTGTAGTTCGGGATAGCGCGCTCAGCGCAAGGTAGGAAAGGGTCAAGCGGCAAGAACCCGGATTACGAT  
GGAGCGGAAGCTTTTGCATTGCAACGAAGCTGTAGGAGCTGATGTCGTGGGCAATTTTGAAGCCTTACGGGTAACGG  
CGTTAACATAGTACCATCCAGCTGATCGCCAGGTGCAAAACCAATAGAGTGTACGAAACCGTCAAAATTTTCGGCCAAACT  
TTCCCCAGTTCAGCGAACATGGTGTGATGCTGGCATCTTCTGCAACATCGCACTGCAGAACGATGTCAGAACCCAATTG  
AGCGGCAAAATCTTCTACGCGGCTTTTCAAGTTGTGCTTCTGGTGGTGAATGCCAGTTACGCTCCTTCCGCGGTGCATCG  
CCTGAGCGATACCGTAGGCGATGGATAGTTTGTGGCAACACCGGTTACCAGAATGCGCTTACCGGAAAGAAAACCCATA  
GCTTTAATCCTTATTGTTGATGCTTGTGCTGAAATCAGGCGATTGCTGTTTTAGTAAACAGTACGAACAGATAA  
ACGGTTATTATAATCAACCTGGCTGTGAGTAGCTATAGTTGCCAGGTCCGACCGGAGCAGGCTGCGGCAGGGGGGGCGCT  
TTTCCCCTCACCTAACCTTCTCCCAGAGGGGGCAGGGGACCGTATTGTGCAAATATTGTTACCCAGCAACAAACAGG  
CTCATACAGCCCTAACCTTTTATGGCGATGGCTGGGACGGTTCAGACCTTCCGAATATTCTCCAGCACCGTCTCCAT  
GTTTTACCACAACAGCTATTGGCTCGTCTGCCCCCTGCTCTTTTCCAGGAGAGGGTACCGGCGGTTCAAGTTCTGTC  
AGAATATTCTCAGCACCGTCTCCTCATTACAATCAATCTCGTTATTCCAGAAACGCAGCACGGTCCAGCCCTGCGCATC  
AAGCCAGCTAGTGCCTGGAATCATAGGCAACTGTAATCATGCTGCCACCATCCAGTCAACGCTACACGCGCCG  
AGCAGCAAGCAAAATCGAGAATGTAGTCCCCACTGGATGTTGACGGCGAAATTTGAAATCACTAAAACGTCCGGCTGCCA  
AGATATCGCCAGAGCTTTCTGTTCTGCAAAGTGAGATTGCGTCTTAAATCACGCGCATTGATTTAATTTTATCTATCAC  
CTCATTCTGACAAGATTTAATCTTTTTGTGAGAATGAGGTGAATAACTGGAAGGAGGATTAGAAAATTAGCGATCTTTA  
CGCCACGCATCCGCGTCAATGCCTCGCCAAAATGACCGGCAATCAGCCGTTTGGTGGATTGATGAGCGGCGATGCCAG  
CACATCCGCGGTGCTGCCTCGCTCGACAACCTCGCCCTGATGCATCACCAGCACCTGGTCGCTAATGTGCTTCATCATT  
CGATATGCTGGGTAACATAAATATACGAAATGCCCTGTTTTCTGTAATTCAGCATCAGATTAATCAACTGCGAACGC  
ATCGACATATCCAGTGAAGCGAGGGCTTCATCGGCAATAATGACTTTTTGGGCGCAATATCAGCGCGCGGCCAGACCCAG  
ACGCTGTTTTGTCCGGGTGCCAATATGCGGATAGTAACTGACGTGATCCGGTAGCAGCCAAACCATACGCATCGTTT  
CAATAATCTGTTTGCAGCTGTTCCGGTTCAGGTGGTGTTCAGGCGCAGTGGAAAATCCAGAATTTGCGAGATACGT  
TGACGGGATTCAACGAGGTGGAAGGATCCTGAAAATCATGCGAATACGCTGACTGCGGAAGGAATAATCGCCAAAATG  
CAGTGGATGATCGTCAATCAATAACTCGCCGCTGGTAGGCTCTATCATTCCCAGCAGTTTTTTCAGCGTGGATTAC  
CCGAACCTTCTCGCAATAATCGCCAGTGTCTGGCCTTACGTAGCGTAAAGCTCAAGGGTTTTTACCCTTCTACGGTC  
TGACGACGAAACAGCCGGTCCGGTAGCGGAACGTTTTACTTAAATTACGCACTTCAAGCAGCGTTTTGATCATCTCACT  
CTTTCTCCATGTTTCAGCGGAAATGACAGGCATAGAGATGATTTTTTCGCCCCCGTCAAACGTGGCGTCACAATGCATTC  
CGTTGTGCATACGGGCAACGTGGCCCCAGACGACAACCAATCGGTAAGTGTTCAGCAGTGGGATAGCGCCGGGCGAGCGT  
ATTGAGGCGACTTTTATGCGGCATCGCGCTGCCAAGTCTGGTATCGCGCGATCAGCGCCTGGGTAAAGGATGATGTG

GCATCGTCACCAACTCCTTACTCGGCGGGTTTCCACTGTTTGACCGCAGTAAAGCACGTTAATTTTATCCGCCATTGG  
CTAAGCATTTGTAAGTCATGGCTGATAAGCAAATAGTGGTATTGCTGTTTTGGTTGAGACGCGTCAGCAGGCGAAAGAT  
TTGCGCCTGGGTTGTTGGCTCCATTGAGTTGGTCGGTTCGTCAGCAATCAGCAGACGCGGTTGATTCCGCAGTGCAATGG  
CTATCATCACTTTCTGACATTCACCTTCGGTCAACTCATAGGGAAAACCTGCGCATCGCATCTTTGTGATCTTTAATCCCC  
ACGCGGTGCAGCAGTTCAATGGCACGGGTTTGCGCCAGCCAAAACGCTGCCACCAACGGCCTTTATAGTCCAGGCTGG  
GATGTTTTGCATCAACTGGCGGCCACACGTTCTGAAGGGTCAAGACACGACTGCGGTTCTTGAAAATCATCGACACGT  
TATGGCCAACAGTTTGGCGGTTTCGCGTGCAGGAGACGCGCAAAATCGATATCATCAAAACGCATACGGTCAGCAGTA  
ACACGCCAGTTATCTTTATCACCCACAAAATCGCTTTCGCAATCAAACCTTTCGCCGAACCGGATTACCAACAAGACC  
GGGATTTACCTTCGGTTAAGGTCATACTTACCCGGTCGACGGCTTTAACCCACTCATCACCGGTTTTAAATTCATGG  
TCAGGTTACGAATATCGAGTAATGGCATTATTCCACCCCGCAATAATCGCACGACGAACGCCATCGCCAAGGAGGTTAA  
CCAACAACACGCTAATCATAATTGCCGCACCTGGCAGCATGACAGTCCACGGGGCGACATAAATCAGTTCAGCGCATCA  
CCGAGCATCGTCCCCATTACGGCGAGGGGAGTTGTGCGCCGAGATCGAGAAAGCCAGCGCGGGGATATCGAGAATTGC  
CATCGACAGTGCAGGGTGTCTCGGTGACCAGCCCGGGTGTGTTTGGCATCACAGCAAACAGAGAATATTCAGCG  
TTGATGCGCCATCCAGACGGGCGGATAACGTACTTTTTCCAGTTCGTATGCACCATGCTGTAATCGAACGTACC  
ATACGGCGCAATGCCAGCCAGACGAAACATAGCGTGGGCAAACTCGGTCGGCAAACGCTACAACGATAAATTC  
CAACAGCAGCGAAGGATGCCAGTAAGGTATCCAGAATATGGTTAAGCACCCTGAGCGGAGGCCGTGTGTCGCCCCG  
CGAAGGTGCCAGTACCAGGCCACAGATCGTTCGCGCAAGCGTACCACAAAATGCGCCACCACGGTTGGCGCAGTCCG  
CTCAGTAAACGGCTTAAAACATCGCGTCCGAGGTCGTAGTCCCCAGGAAGAAAGAACTTCGCCATAGCGCACCATGA  
CGCGGCAATAATTGATAACCGAGAAATTGCTGGTCGATGCCGTAAGGCGCAAACAGCCGCCAAAATACACAGTACAG  
CCAGCCCCGCGCAGCCGTACAGGCCGACCATCGCAGAGGCGTCACTATAAAATTTGCGCCAGGCGGTACGCAGCGTCCG  
GGCGGGCGTTTTGCTGTATACGCTATCGTAAGGCATACCATTCTTATGTTTCAGAGGGTTAGCCATGGCACCCAAAA  
TATCAGAAATCACGTTAACAATAATGACCAGTGAGCCACACACCATCACTCCGGCGGAAATGGCTGCGTAATCCTGCTGG  
CGGATGGCGTTAATTAACAGCGCCCTAAACCCGGCCAGCTAAAAACCATTTCCGGTATCATCGCCAGCGTCAGCATGGT  
GGAAAATGTAAGCCAGGCGAGGAATAACCGCGGTAACGCGTTATGCAGAACGTGGCGACGAAAATAGTAAAGCGCG  
ACAAAACCGGGTTCGCCCGCTTTTACATAGTTCTGGTCATACACTTCGATAGTGTGATACGCATCAGGCGGATCACT  
TCAGTTGTTGGCGCAACCGACAGGGTGTACGGGCAATATCATATGGCGGATTGCGCTCATGATCATTTTATCCGCCA  
TGGTGAGTCCGAAAGCCAGGCATCAATCAACGAAAACCGGTAATCGGTTTCACTTCGTAGAGCAGATCGAAACGCCCTG  
AAACGGGAACCAACCTAGCGTGTAGTGAACAAAACAGCGTCAACAGAAGCGCCAGCCAGAACACCGGGATTGAAAAGCCC  
AGTAAGGCGATGGCGTTGATCAAGTTATCCTGCCACTTATGGCGGTAATCCCGGCAATCATCCACGGGGATGCCAAC  
AATCAGCGCAAACCGAAGGCGAGGATGCACAGTTCATCGTTCGCCGGAAGACCTTTTTAACTGTTCCGCAATCGGTT  
GACCGTTAATGCTGGAACACCAAAAATCCAGTGGATCAGGCCGTTAAACAGAACACCCAGGCATTCCACAGTGACGCG  
CCTTGTAACGGCGCATGAGGGGTGAAATAGTCAAGCTGAAGCCAACGAAGGTGAGCAGGAACAAGGTGACAATCAATAA  
CAAAATGCGCGTAAGGTGAAGATAATCATGGTTTTTACCTCATCCTGTTTCTCGGATACACCCAGCAAAGGAGGC  
GTTACCAAACGGGCTAAGTACCAGACCTTTGATATCGTACCGATAGGCCTGCAAACGCAATGACGACGCCAGCGGAAAA  
TGGGCAATTCCTGCGCAGAATACTCTGCGCTTCGTATAGGCTTCAATACGCGCCGCCAGCTGCTGCGAAGAGAGCGCC  
TTACGCAATACGCTGTGCAATTTGGATCGCACCAGTGGGCGAGGTTGGTCTGCGAATGAATTGCCGCGCAGCTCAGTAA  
CGGACGGAAGAAACTGTCCGGTCTTACTGTCCGTGCCCCAACCGGATAACGTGAGTATGAGTTCATATCCATCAACC  
GCGCCTCCTGAAAGCGACCTTACCGGCACAATCACCACTTTTACGCCAACCTGCGCCATATCCGCCTGAATCAGTTCC  
GCAGTTTTCAGTGGACTGGGTTCCACGCCTGCGAAGTGTGGGACCCACAGTTTCAGCGTTAAATTTCCAGCCCAA  
CGACTTCAACTGTTTCGCGGATTTTCGCGGATTGTATTAGTAAATTTAGCCTGTTGTCATAGGCCACAGGCGCCGCG  
GTAAAATAGAGCCCGCTTTCAGCCGTACCATAATAGATGGATTGCATCAGGCGCTGGTTATTAATCGCCAGTGCCAGC  
GCATGGCGGACAGCGGATTATTTAGCGCGGTTTGGCGGTGTTAAATGCCAGATAGGCGACGTTTATCCAGGACGCGAG  
CGTTAAACGCAAGCGCGGTCGTACGCAAAAATGGATAGTGGCTGGCAGCAGGCCAGGCCAGAACGTGCGATTCCCCGG  
TCAGGAGTTTTCGACAGACGTCGGTGGCCCGGAGCCTAAATCCACCACTACCTGCGGCATTAACGGTTTACCGCGCCAG  
AAGTCATCATGACGTTGTAGGCGAATAAATTGCCCGCGCGGTTTCCGACAACTGATACGGACCGGTGCCGACCGGTTG  
ACGGTCGAGTTGCTCCTGGCGATCTTCTTCTCTAACTTCGGGCATATTCTGCCGACATGACCGAAGCATAATGGGTTG  
CGAGGTGCCACAAAAAGAAGCATCCGGCTGGGCGAGTCGGAACCAACGGTATGATTATCCAGTTTGGCGACGCTTTTC  
ACGTTATCGGCAAATTGACGGCTGTGCAAGTAGGGGAAGTTGCTGCCGTTGACGTTATGCCACGGGTTGTTGCGGTCAA  
AATTCGCTGGAAGGTAACACCCACATCGTCGGCATTCATTTTACGAGTGGGAGTAAACAGTCGGTTTTTTGAAACGGAA  
CATCGGACGCGAGGTGGAAGCGATAGGTCGCGCCGTTGTCGAGTACTTCCAGCTTTCGGCAAGTTCGGCATCAGGCGA  
TAGGTATAGGGATCGACATCCAGCAGTCGATCATAAACTGGGCGCAAGGGTATCGACAATTAACCCACTGCTCGCTTT  
GGATGGGTTAAAGGTGTTGACTTCCCCGTGACGCAATAGACAAAACCGCTGTGCGGATATCAGCATGCGGGGGAGATT  
CAGGCGCGGCGATTGCTGACCACTACAAGTCCAGCAATCACAAAAGAGACGATAATACCTGGCGCATAATATTAAGG  
GATTTTATGTAAGAGGGCTATCTTACTAATATTTAATGACATTTGCCATTACCGTTTTGTGTTACAGGGGTGTAATGAGGG  
CCGTGTGGTTGGTCGTTGAACAGGTGACGTCGCCATCTGTTCAACATTCGTACCCGTGATTTCTCTATAACTATAACTCA  
CAGAACAACCTAGCGAGGAGCAGAGCGGTACGATCGTGAGAAACCCATTAAGCACGCTGCAGTGCCTGATTGTTAGC

CAGATGCGGCGTGAACGCTTTATCCGGACAACGATACTGACCGATCGTCTGCAATTAATCATTACTCATTACCCATTG  
ATTCAAAACTCTGCGATCTCATCAATGCGTACGGGATTAATCCCGCTTCAGCAGCCATTTTCATGTTGGGCTTCTTCGC  
TGATCTCTTCATTGTTTCATCAAACGGGTGAGCAGTAACTGGAAGTAGTGGGCCAGCGGTGTGCGTTCAGCCTCTGCGACA  
GGCTCTGCGCATTTCGGTTCGCTACTCATCGGCAATATCAAATATTTTAGCGGGATATCGTGGTTCATTATTTGCCCTG  
GGTTAATGCGCTAAGCATAAAGGGCGGATGATAGCACTCGTGATCCGGGTTCATACATCTTTTTATAGTTAATGGCGCGC  
GCGTTACCCCTCAGGCAGGATAATGCGCCGCGCATCCGACTATTACGTTTTCACTCACCGCGTTCGTGCACCATCATACAA  
CGGCACTTTGCGATAGCGGCGGATCAGATACCATAAATATGCGCCGCTAACGAAGCCATACCAGACCGAGTGTCACTG  
ACGTTGACTCGAGGTTAACCCACAGCACACCCACCGTCAGCGCGCAACCAGCGGCATCAGCAAATAGTGGAAAGTATCC  
TTCCAGCTTTTATTTCATTCTTTACGCCGCCAGAAATGATTAAACACCGACAGATTACGAAGGTAACGCCACCGAGAGC  
ACCGAAGTTAATTAACGCTGTGGCGGTAATAAATCGAAGAACAGCGCCGACAACCGGACAATCCCGACCATAATGACGT  
TGAGTGCAGGAGTCCGCCATTTTGGGTGCACATAGCCAAACACGCGCTCCGGAAACACATTGTCAGCCCCATCACATAC  
AGCAGACGCGACACGCTGGCATGTGAAGCCAGGCCAGAGGCTAACGTGTTACAAACGTGGTGCAGAGGAAAATCGACTG  
GAAGAGCTTCCCGCCGACGTACAGCGCAATTTAGGCACTGCGGCATCCGGATCTTTAAAGCGGCTGATATCGGGAAAGA  
ACAGTGCATAAAGAACGACGCCGCGATAAAGATAACGCCACCGTAGACCGCGTCCAGGAAGATGGCTTTCGGGATCACG  
CGTGCGCGTCCGGCGTCTTCCGAAAGCGTGGTACCAGCATCGAAACCGAGGAAGGAGAAAACAGACAATCGTCGCC  
GGTAATAATCGGATCAGGTGCGGCTTCTCGCTGATAAACGGTGAAGTGACCAGACGGTGCCAAACGCTTCTCTTTAT  
GCAGTCCCTGAACCTACCAGGAAGATAAACACCCACCATGATGGAGATTTGACCCAGTACAAACAGGGTATTGAAGTTAGCG  
ACCAGGTTGACGCTCTTCAGATTGCGCGCGGTTAAAATGGCGACGAAGGTTACCACCCACACCCACGCGCGCACTTCCGG  
GAAGAGGGCGGAGAGATAGATTTTCGCCAAACAAGACGTTAATCATCGGCAAAAAGAGATAATCCAGCAGCGATGACCAGC  
CGACCATAAATCCGACGTGCGGGTTAATCGACTTTTTCGCGTAGGTATAGGCCGAACCGGCCTCCGGAAACTGGCGAAC  
AGTTTCCGCTAGCTGATAGCGGTAACAGCACACCCGCCAGCGCCAGCAAATAGGACGCGGAACGTGACCGTCTGCTAAT  
GCCGGAGACAATACAAAAGTATCAAATACGGTTCATCGGCGTGAAGTAGGCCAGACCCATCATCACCACCTGCCACAATT  
TCAGTGATTTTCGAGACGGGTTTTCGCCGGTTCGCGACGAATATTCAGTGGTGAATTAATAGCCATAATTGCTGCCTCC  
CCTGCGTAATAAGGTTTTCGGTCTGTGACCTGAAATCAAACCTGTTTAGCAAGGGAAGCAAAGGGGGCGGAGTCCAGT  
CAGTAGCAGGAGGGGCGCATACGACGCTCCTCGCATGCGGGATTTAATCATCGGCATCATCTCATTCTCTGTCAC  
AGTCTTAATCGTTAACGGAAGCCGTTGCCGCCGCTCCATAACGCGACATCCGGGAAATGTCTGGATTACCAGCAA  
TGTCAGGCCTGGTCCGCTCAGGCCGATGAAACAACCCGCAAGGGGATTACGCGTTTTCAACATCCACTCAATTTCT  
GTTTCTGTGATGAGGCGCTCAAACGCAACAGCTCATTTTTTACAGGCGTATAGACATGGCAGAAGCGTTCGCCTAA  
ATAGCGGCGCAGGTGATCTTCTCGATAAACTACCCAGGGCATCGCTCTGGCGAATCGGAAAGGGTAAGCCTTCTGT  
CCAGCCGTTGCCCTTCGACTTCTTCTGCAACGGCAGCTCGTTATCAAGGCCATGCAAAATACCGGCAAAAATCGCTGCC  
ATCACCAGATATGGGTTGGCATCGGCACCCGCCACGCGATATCCACGCGGTGATTATGACGGTGCAGCGACGGAATACG  
CAGGGCGACGGTGCAGGTTTATGGCCCCACGACGCTGCGTCCGCACATACATTTCCGGCTGGAAGCGGCGATACGAGT  
TCACGTTTGGTGCCAGCAACGCCATCGACGACGGCATCAGGTCAATCATCCCGCGAGCATCTTTTTCAGCAGCGGCGAA  
TCTTCGCTTCCGCGTCAGAAAGCACGTTCTCGCCACGATTATTTGCACTGATATGGATATGCATTCGCTGCCCGC  
GTGCTTTCATACGGCTTCGCCATAAAAGTGGCGTGCATCTTATGCTTTTTCGCCATCAGACGCCAGGCGTTTTAGTG  
CCAGCGCATCATCGCAGGCTTCAGCACGTTATCAGTATGGTAAAGGTTGATTTCAAACGACCCGGCGAGGCGCTCAGCG  
ACCGGCCATCTGCCGAATCAGCTGTAACGCGCCAGTTCATCAATATCATTGAGCACGTCCGGCAAGTGGTTGAGGTT  
ATCAACGGAGTAAACCTGGCTTTGTGATTGCGGTTCATCGGTGCCAGGCGCGCAGGCGGTTGCAGATACCCTTCAGCGT  
CGCGTGGCGATCCAGTAAATAGAACTCAGCTACCGCTACGACCCGGGAACAATCCGCGCTGGCGCAGCTGCTGCCAC  
AGCGGTTAAGAAGCTTCCCGCGTCAACGTCAAAGGAGCGCCATCTTCATCGACCATGGTCCAGGACATCTGACCGAT  
AAACTCTGGATCGGCGGCGAGAAGGAGTTAAGGAACCGAGAACAGGAACACAGGTACGATCCGGCTCGCCATTTCTGAC  
CCAGACCTGCTTCTTCTACTACGTTGCCAGAATATCCATTGCAAAATACCGAGGCCGGGAAATAACACCCCTTCTCGAGC  
TTCTTCAGGCTTGAACAGGAATACGCTTTCCACGGAAGCAACCATTTAAATCGGTAAGTAAAACATCAACATATTGCGT  
ATTCGGGTAGCGCTCCAGGTAGCGTTTCACTTCTCGCTAAAGGCGCTACCCCGCTCTCTTCTGACTGTGAACAAAGT  
TCTCTACTTCAACGATATTGGTTTCCATGATTCTTCGCTTTGGTTTGGTTTCCGCTCGTTATCAAAGCGTAAAATATAA  
TGACCACCATTCGAATCTGTATGCAAACTAAATGTTTGTCAAATGTTAAATTGAGTTTGA AAAATGAAAACCCACTGCT  
AGATTGAAAAAATATTGAACATAAAGGTCATTTAAAGCGCAGTAATGGCGATAATTTAGTCCACTTTGTGAGATTGAGCA  
TGAAAAATATAATGAACAATCCGGTTATCGGTGTCGAATGTGCAGGAACAGGCTTAAGGGTCATGCGACCCAGACTCTG  
CAAGAAAAGTACCTGAATGCCATCATCCATGCAAGCGGCTTGCCTATTGCGCTACCACATGCGCTGGCGGAACCGTCATT  
ACTTGAACAACTTTTGCCGAAACTCGATGGCATTATCTTCTGGTGTAGTCCAGCAATGTGCAGCCGACCTATATGGTG  
AAAACGGCGATGAGCCTGACGCCGATCCCGGGCGTATCTTCTGAGCATGGCGATAATTAATGCCGACTCGAAAGGCGC  
ATCCCATTTTCGCCATCTCCGGGGTTACAAGAAGTGGTGGTGGCAACCGGTGGTTCGTTGCATCGAAAGCTGTGCGA  
ACAGCCTGAATTGCTGGAACATCGGGAAGATCCCGAAGTCCCGGTGGAACAGCAATATGCACCGTCCGATGAAGTTCAGG  
TTGAAGAGGGGGGATTACTGTCTGCGTTGTACCTGAATGTAGCAACTTTTGGGTAAACTCTTACATGGACAAGGGGGC  
AAGGTGCTTAGCCACGGTTGCGTGTGAAGCTCGCTCGCCGATGGCTTAGTTGAGGCGGTTAGCGTACATCAATCATCC  
TTTTGCGCTGGGCGTACAGTGGCACCCGGAATGAAACAGTAGCGAGTACGCGCTTTCGCGTATATTGTTGAGGGCTTAA



TCACCGTTGTCAGCACCATATCGCTGAAAAACAGCGACTCTGACCACTACAGTTTAAGGAAATGCAAATATGAGTGATG  
AGGGACTGGCGCCAGGAAAAACGTTTGTGCGAAATCCGCCAGCAGCAGGGGCTTTCACAACGTCGTGCCGCCAACTCTCC  
GGGCTGACTCACAGTGCTATCAGTACGATAGAACAAGATAAAGTCAGCCCTGCCATCAGTACGCTGCAAAAGCTGCTGAA  
GGTGATGGTCTGCTACTCTCGGAATCTTTCCGAGCCGGAAAAACCTGATGAGCCGCAGGTCGTCTTAATCAGGACG  
ACTTAATTGAGATGGGTAGTCAGGGTGTGTCAATGAAGCTGGTTCATAACGGTAACCCGAATCGCACGCTGGCGATGATC  
TTTGAACGTACCAGCCGGGCAACCACTGGGAAAGAAATTAAGCATCAGGGTGAGGAAATAGGCACTGTACTGGAAGG  
TGAATTTGTTCTGACGATTAATGGTCAGGATTACCACCTCGTCGCGGGGCAAAGTTATGCCATTAATACCGGCATCCCGC  
ACAGTTTCAGTAATACGTCGGCAGGTATTTGCCAATTATCAGCGCCATACGCCACCACGTTTTAATCTTTTTGTTCT  
GTAAGCCGGTAAGCGCAATGCGCCCGCAATCTATACAAAAATCATTCAAGTTGCATCAAGGCGGCAAGTGAGCGAAT  
CCCGATGAGCTTACTCAGGTAAGTGATTCGGGGAGCGAACGCAGCAAGGCAGAGGGCGCTTGAAGGATGAAGTGATA  
TAAAGAATGTCGCCAGAAATAAACGGGCATACGGCCCGGGATCTCTGCGCCCTGACGTTCAAACTGCATATATCTGA  
TAGACGTGAAACAGGAGTCATAATGAATTTTCATCATCTGGCTTACTGGCAGGATAAAGCGTTAAGTCTCGCCATTGAAA  
ACCGCTATTTATTAACGGTGAATATACTGCTGCGGCGAAAAAGAACTTTGAAACCGTTGATCCGGTCACCCAGGCA  
CCGCTGGCGAAAAATGCCCGCGCAAGAGCGTCGATATCGACCGTGCATGAGCGCAGCACGCGGCGTATTTGAAACGGG  
CGACTGGTCACTCTCTTCCGGCTAACGTAAGCGGTACTGAATAAACTCGCCGATTTAATGGAAGCCACCGCGAAG  
AGTTGGCACTCTGAAACTCTCGACACCGCAAACCGATTCTGCACAGTCTGCGTGATGATATTTCCGCGCGGGCGCGC  
GCCATTCGCTGGTACGCCAAGCGATCGACAAAGTGTATGGCGAAGTGGCGACCACCAGTAGCCATGAGCTGGCGATGAT  
CTGCGTGAAACGGTCCGGCTGATTGCCGCCATCGTCCGTGGAACCTTCCGCTGTTGCTGACTTGTGAAAACCTGGCC  
CGGCGTGGCGGCGGAAACAGCGTATTCTAAAACCGTCTGAAAAATCACCGCTCAGTGCGATTCTGCTCGCGGGGCTG  
GCGAAAGAAGCAGGCTTGGCGGATGGTGTGTTGAACGTGGTGACGGGTTTTGGTCATGAAGCCGGCAGGCGCTGTGCGG  
TCATAACGATATCGACGCCATTGCCTTACCAGTTCAACCCGTACCGGAAACAGCTGCTGAAAGATGCGGGCGACAGCA  
ACATGAAACCGCTCTGGTGGAAAGCGGGCGGCAAAAGCGCAACATCGTTTTGCTGACTGCCCGATTGCAACAGGCG  
GCAAGCGCCACCAGCAGGATTTTCTACAACCAGGGACAGGTGTGCATCGCCGGAACGCGCTGTTGCTGGAAGAGAG  
CATCGCCGATGAATCTTAGCCCTGTTAAAACAGCAGGCGCAAACTGGCAGCCGGCCATCCACTTGATCCCGCAACCA  
CCATGGGCACCTTAATCGACTGCGCCACGCGACTCGGTCCATAGCTTTATTCGGGAAGGCGAAAGCAAAGGGCAACTG  
TTGTTGGATGGCCGTAACGCCGGGCTGGCTGCCGCCATCGGCCGACCATCTTGTGGATGTGGACCCGAATGCGTCTT  
AAGTCGCGAAGAGATTTTCGGTCCGGTGTGGTGTGACGCGTTTCACATCAGAAGAACAGGCGCTACAGCTTGCCAACG  
ACAGCCAGTACGGCTTGGCGCGGCGGTATGGACGCGCGACCTCTCCCGCGCGACCCGATGAGCCGACGCTGAAAGCC  
GGTCCGCTTTCGTCATAACTACAACGACGGCGATATGACCGTCCGTTTGGCGGCTATAAGCAGAGCGCAACCGTTCG  
CGACAAATCCCTGCATGCCCTTAAAAATTAAGTGAACGAAACCACTGGATAAGCCTGGAGGCTGAAATGACCGAA  
CATACCAGCAGTTACTACGCCCGCAGTGCGAATAAATATGACCACTTCGACACGCTGAATGAGTCAATCACTGCGACGT  
TTGCGTGGTTGGCGGCGGTATACCGGGCTCTCCTCCGCGTGCATCTGGCGGAAGCGGGCTTTGACGTAGTGGTTCTCG  
AAGCCTCACGCATCGGCTTTGGCGAAGCGGGCGCAATGGCGGACAGCTTGTGAACTCCTACAGCCGCGACATCGACGTG  
ATCGAAAAAGCTACGGCATGGACACCGCCGATGCTCGGCAGCATGATGTTGGAAGTGGTGAGATCATCCGCGAACG  
TATCAAACGTTATCAGATTGACTGCGACTACCGCCCGGCGGCTGTTTGTGGCGATGAATGATAAACAGCTCGCCACAC  
TTGAAGAGCAGAAAGAGAAGTGGGAACGCTACGGCAATAAACAGCTGGAATTGCTGGACGCCAACGCCATTGCGCGTAA  
GTAGCCAGCGATCGCTATACCGGTGCGTGTGGATCACAGCGGTGGGCATATTCATCCGCTAAACCTTGCCATTGGCGA  
AGCGGACGCCATCCGCTCAACGGCGGGCGCGTGTATGAACTTTCTGCCGTGACGCAGATCCAGCACACCACGCCAGCCG  
TTGTGCGAATGCCAAAGTCAAGTACGGTACGGCGAAGTATGTATTGTCGCCGGAATGCGTATCTGGCGGATAAAGTAGAG  
CCGGAAGTGGCGAAACGCAGCATGCCGTGCGGCGCAGGTCATACCCGGAACGCGTGTGCGAAGATTAGCCCGTTC  
GCTGATCCCGAAAAACTACTGTGTGGAAGACTGAACTATCTGCTTATTACTACCGTCTTACCGCCGCAACCGCTGC  
TGTACGGCGGCGGCGTGGTCTACGGCGCGCGACCCGGATGACGTTGAGCGCCTTGTGGTGCCGAAACTGCTGAAAACC  
TTCCCGCAGCTGAAGGGCGTAAAAATTGATTACCGTGGACGGGCAACTTCTGCTGACCCTGTGCGTATGCGCAGTT  
TGTCGCTCGATACCAACATCTATTACATGACGGGCTACAGCGGCCACGGCGTGACCTGACTCATCTAGCCGGACGTT  
TGATTGCCGAAGTGTGCGCGGCGACGCCGAACGTTTCGATGCCTTCGCAATCTGCCGATTACCGGTTCCCGGCGGG  
CGCAGCTGCGTGTGCCGTTTACCGCGATGGCGCGGCGTATTACAGCTGCGCGATCGTCTGGGCGTTAATTTCCGAT  
TAACCGTGAAGAGTCAAAGGTGTGAAACATGAGCAACAATGAATTCATCAGCGTCGCTTTTCTGCCACTCCGCGCGGG  
GTTGGCGTGTGTAACCTCTTCCGCCAGTCGGCTGAAAACGCCACGCTGAAGGATGTTGAGGGCAACGAGTACATCGA  
TTTCGCCGAGGATTGCGGTGCTGAATACCGGACATCGCCACCCTGATCTGGTCCGCGGCGTGGAGCAGCAACTGCAAC  
AGTTTACCCACACCGGATCAGATTGTCCGATGAAAGCTACGTACCCTGGCGGAGAAAAATCAACGCCCTTGCCCCG  
GTGAGCGGGCAGGCCAAAACCGGTTCTTACCACCGGTGCGGAAGCGGTGGAAGCGGTTGAAATGCTCGCGCCCA  
TACCGGACGCCCTGGCGTATTGCGTTTACGGCGGCTTTCACGTCGTACGATATGACCATGGCGCTGACCGGAAAAAG  
TTGCGCGTACAAAATCGGCTTTCGGCCGTTCCCTGTTTCGGTGTATCACGTACCTTATCCGTGAGTTTACACGGCATT  
TCAACACAGGACTCCCTCGACGCCATCGAACGCTTGTAAAAATCAGACATCGAAGCGAAGCAGGTGGCGGCGATTATTT  
CGAACCGGTGACGGGCGAGGGCGGTTTTCAACGTTGCGCCAAAAGAGCTGTTGCGGCTATTCGCCGCTGTGCGACGAGC  
ACCGTATTGTGATGATTGCTGATGAAGTGAAAGCGGCTTTCGCGTACCGGTAAGCTGTTTGCATGGATCATTACGCC

GATAAGCCGGATTTAATGACGATGGCGAAAAGCCTCGCGGGCGGGATGCCGCTTTCGGGCGTGGTCCGTAACGCGAATAT  
TATGGACGCACCCGCGCCGGGCGGGCTTGGCGGCACCTACGCCGTAACCCGCTGGCGGTGGCTGCCGCGCACGCGGTGC  
TCAACATTATCGACAAAGAATCACTCTGCGAACGCGCGAATCAACTGGGCCAGCGTCTCAAAAACACGTTGATTGATGCC  
AAAGAAAGCGTTCGCGCCATTGCTGCGGTACGCGGCCCTGGGGTGCATGATTGCGGTAGAGTTTAAACGATCCGCAAACGGG  
CGAGCCGTCAGCGGCGATTGCACAGAAAATCCAGCAACGCGCGCTGGCGCAGGGGCTGCTCCTGCTGACCTGTGGCGCAT  
ACGGCAACGTGATTGCTTCTGTATCCGCTGACCATCCCGGATGCGCAATTCGATGCGGCAATGAAAATTTTGCAGGAT  
GCGCTGAGCGATTAATAGCCCAACGCAATAATGTCTGATGCGCTGCGCTTATCAGGCCTGCAAACGACGTATTGATTATG  
TATGCCGAATAAAGCATTACGCGCGCATCCGGAAGTTGTATTGCTCAACTTCGCTAAATCTGGTGCTTTTTCAACAACG  
CGCGAACTGATGATAAGTTAACCCAGTAATTCAGCCGCGCGCTTCTGGTTATATTTCCCTTGTGCAAACGAGTTGC  
AGCAACTCTTTTTCTGTGCATCTGAAACTCACGTAATCCAGCGGCAGTGTGGAAGCGAGGTGGTTTCTGAAACGGC  
GATAGCGTCTTCAGGCGGACGCCGTTTAAAGGGATCAATAATGATGTCATCAAGCGGATAATCGCTGGTGCCGTGGCGAT  
ACACTGAACGTTCCACCAGTTTTTCAATTCACGAATTTCCCGGCCAACGATAATTCAGCAATGTTTCTCTGGCGCGC  
TCCGTAAACCCCGGAACAGAGGCAGCTTGATTTCCCGACACATCTGGATGGCAAAGTATTCTGCCATCAACATTATGTC  
GCTTTCGCGCTCGCGCAGTGGTGGCAGTTGTACAACATCAAAGCCAGTCCGTCGAGCAGGTGAGCGGAAAAGTGCCTT  
CATTGACCATCGCCGGAGATCGGCATTGCTCGCGCATACCAACCGCACATTCACCTGCAATGGTTGGCTGCCGCCAACG  
CGTCCAGTTCACCGTACTCAATCACGCGCAATAATTTCTCCTGACCATCATCGGTGCCGTAGCGAGTTCATCAAGAAA  
TAGCGTACCGCGTCCGACGTTCAAATCTCCCTGGATGACGTTTTTTCGCGACCGGTAAACGCCCCCGCTTCGTGACCAA  
ACAGTTCGGAATCCAGCAGATTTTCAATTAACGCCGCGCAGTTAAGGAAAATAAACGGCCCTTGCCAACGGGAGGAGAGA  
TAATGCAGGCGGTGGAATCAGCTCTTACCGGTGCCGCTTCCCGATGATGAGCACCGTTTTGTCCAGCGGTGCGAG  
ATGCGAAACCTGTTCCAGCACTTCGAGAAAGCTGTTCCGCTCACCAAGTAAATTATCTTTGTATTCTGCCATGATGAAAT  
TCGCCACTTGTAGTGAATTCGTAACCTCATCCTGGCATGTTGCTGTTGATTCTTCAATCAGATCTTTATAAATCAAAA  
AGATAAAAAATTGGCACGCAAATGTATTAACAGTTCAGCAGGACAATCCTGAACGAGAAATCAAGAGGACAACATTAT  
GGGTATTTTTCTCGCTTTCGCGACATCGTGAATGCCAACATCAACGCTCTGTTAGAGAAAGCGGAAGATCCACAGAAAC  
TGGTTCGTCTGATGATCCAGGAGATGGAAGATACACTGGTTGAAGTACGTTCTACTTCGGCGCGCGCTTGGCAGAAAAG  
AAACAGCTGACTCGCCGATTGAACAAGCGTCGGCGCTGAGGTTGAATGGCAGGAAAAGCCGAACTGGCGCTGCTGAA  
AGAGAGAGAGGATCTGGCACGTGCAGCGTAAATTGAAAACAGAACTGACCGATCTGATTAAGTCCCTGGAACATGAAG  
TGACGCTGGTGGACGATACGCTGGCACGATGAAGAAAGAGATTGGCAGCTGAAAACAAATGAGCGAAACACGCGCT  
CGCCAGCAGGCATTGATGTTACGTCATCAGGCGGCAAACTCGTCGCGCATGTGCGTCTCAGCTGGACAGTGGCAAAC  
GGATGAAGCAATGGCTCGTTTCGAATCTTTCGAACGTCGATTGACCAGATGGAAGCGGAAGCAGAAAGCCACAGCTTCG  
GTAAACAAAAATCGCTGGACGATCAGTTTGCCTGAAGCCGATGATGCAATCAGCGAACTGGCACAATTAATA  
GCCAAAATGAAGCAAGACAATCAATAAATCCAGGCGCGCTCCGAACGCGCCCGCTCATCGTCTAAGGAGTACTT  
ATGAGCGCGCTATTTCTGGCTATTCCGTTAACCATTTTTGTGCTGTTGTTTTACCGATCTGGTTATGGCTGCATTACAG  
CAATCGTTCGGTGCAGTGAATGTGCGAAAGTGAGCAGCAGCGATTAGCGCAACTGGCTGATGAAGCAAAACGGATGC  
GCGAACGATTCAGGCGCTGGAATCTATTCTGATGAGAACATCCGAACTGGAGGGATCGCTAATGGCGGGCATTAAATC  
TCAATAAAAAATTATGGCGTATTCCACAGCAGGGCATGGTCCGCGCGCTGCGCCGGGATTGCCAACTATTTTGTGTA  
CCGGTAAACTGGTGCATCCTGGTGGTGTGTCGATTTTCTCGGTCTGGCGCTGTTTACCCTGGTTGCTTACATCAT  
TTTGTCAATTCGCGTTCATCAATGCCGGAACATGGCCTTTGGTGAGCAGTACCTCCAGCAGCGAATTGCTGGATG  
AAGTCGACCGTGAACCTGGCGCAAGTGAACGCGTTACGCGAGATGGAACGTTATGTCACCTCCGATACTTTCAGTTA  
CGTAGCCGTTCCGTCACATGTGAGGAAAGTTATGAATACTCGCTGGCAACAGGCCGGGCAAAAGTTAAAGCCTGGTTTC  
AAATTAGCAGGCAAGCTGTTACTTCTACCAGCTGCGCTATGGCCCGGGTGTGGCGGGCTGGGCGATAAAAATCAGT  
TGCTCGCCGACCGCTGAAAATGTTGCTGGCTGTGGCGCTGGAACCGCTGTTAAGTCGGGCTGCTAATAAACTGGCACAGC  
GTTATAAAAGGTGAGGGGAGTTTCGCAAAAATGTTAAATCTCAGGCGTATAATGGATGGCAATTTTTCATCCATAGAAGG  
ACGCTTACATGTTTAAAAAAGGCTTACTTGTCTGGCACTGGTGTTTTCACTGCCGTTTTTTCGCCGCTGAACACTGGATC  
GATGTTCTGTTCAGAGCAGTATCAGCAAGAGCACGTTACGGGGCCATCAATATTCCCTGAAGGAAGTGAAGAGCGG  
CATTGCCACCGCGTTCCGGATAAAAACGACACCGTGAAGTGTATTGCAATGCCGGACGCCAGTCAGGGCAAGCAAAAG  
AGATCCTTAGCGAGATGGGATATACCCACGTTGAGAACGCCGGTGGCCTGAAAGACATCGCAATGCCGAAGGTCAAAGGT  
TAAAAGAATTCACCATGAGCGCGCTTATGCGCCGTTTTTTTTCTGTACACCTTATTTACATCCCCATAGATTATTTG  
CGTCAGCTCACAATAACGCTTTTTCCCTGGTAAAAAATGATTTCTCGTGACTAAAACCTTGTGCTCAATTGACAGTT  
TATTTTCTGCGGAGTAGTCTCTCGTTTATGGGACCCTACCACGAAAGGCAACATGAAACAGAAAATTACGGATTACC  
TGGACGAAATCTACGGTGAACATTTACCGCAACTATTTACAGAACTTGAACGCGTCTTGAGAGTGCGAAACGATTA  
ATTACACAGCGACGTAAAAAACACTGGGATGAAAGTGTGTCGTTAATTACCTATGCCGATCAATTTACAGCAATGA  
TTTAAAACCATACCCACATTAATCAGTTTTACCATCAATGGCTGCAAAGCATTTTTTCACATGTTCAATTTGTTGCCGT  
TTTTATCCATGGTCATCTGATGATGGCTTTTCGGTAATTGATTATCATCAGGTCGCCAGTGAAGCGGGGAGTGGCAGGAT  
ATTACAGCAACTCGGTGAATGCAGTCATTAATGTTTGTCTGCAACCATATGTCGGCAAAAAGTGAATGGTTTAA  
AAACTATTTACAACAGCATCCAGGTTTTGAAGATTTTTTATTGCCGTTGACCCGCAACCGATCTCAGCGCCGCTCACTC  
GCCCAGTGGCTTACCGTTATTAACGCCATTCCAGATGCGCGATCATTCAACGCGCATTTTATGGACCACCTTATGATGAC

GATCAAATTGACCTGAATTACCGTAGCCCTGAAGTGTGCTGGCGATGGTGGATGTTTTACTCTGTTACCTTGCGAAAGG  
TGCTGAGTATGTCGCGCTGGATGCCGTTGGCTTTATGTGGAAAGAGCCGGGAACAAGCTGCATCCATCTGAAAAAACAC  
ATCTGATTATCAAACCTGTTACGGTCGATTATTGATAACGTTGCGCCAGGTACAGTGATCATTACCGAGACCAATGTTCCG  
CATAAAGACAACATTGCTTACTTTGGCGCAGGCGATGACGAAGCACATATGGTGTACCAGTTCGCTGCCGCCACTGGT  
GCTGCATGCGGTGCAAAAACAGAACGTTGAGGCGCTTTGTGCGTGGGCGCAAAACCTGACACTACCTTCCAGCAACACCA  
CCTGGTTTAACTTCTCGCCTCTCACGATGGCATCGGGCTAAACCCGCTACGGGGCTTGTGCCTGAAAGCGAAATATTA  
GAGCTGGTCGAGGCGTTACAGCAGGAAGGTGCATTAGTAAACTGGAAAAATAATCCCGACGGTACACGCAGTCCGTATGA  
AATAAATGTGACCTATATGGATGCGTTAAGCCGCGGTGAGAGTAGCGATGAAGAACGTTGCGCCAGGTTTATCCTTGCCC  
ATGCGATTTTGTAAAGTTTCCCGGTGTGCCAGCGATATATTTCAAAGTATTTTGGCTCGCGTAATGATTACGCAGGT  
GTCGAAAACTCGGATATAACCGTGCGATTAACCGTAAAAAATATCACAGTAAAGAGATAACCCGAGAATGAACGATGA  
AGCTACATTAAGGCATGCGGTATATCATGAGTTGTCGCGTTAATTACACTTCGTCGCAGCCATAACGAGTTTATCCGG  
ATAATAATTTTACCATTGATACGATTAATTCATCCGTAATGCGTATTTCAAGAAGTAACGCTGATGGTAATTGTCTGACT  
GGATTGTTTAAATGTCAGTAAAAATTTACGATGTAATAATTACTAATCTGCATGGTCGGGATCTGATTAGTGAAGTTGA  
TATATTGGTAATGAAATAACGCTGCGCCCTGGCAGGTTATGTGGATTAATAAAAAGGAACATCTCATGATTAATCA  
AAAATCGTGTGTTATCAGCACTGGTTTATGCGCCCTGATTTTCAAGCTGTAAGAAGAAAAATAAACGAATGTATCCAT  
CGAATTTATGCATTTCTCGTGGAGCAGGAGCGCCAGGCCGTTATCAGTAAATGATTGCCGTTTTGAAAAAGAAAAACC  
CTGGCATCACGTTAAGCAAGTGCCCGTGAAGAAGATGCCTATAACACTAAAGTCATTACTTTTACGTAAGCGGTTG  
CTGCCGGAAGTGATCGAAACCAGCCATGACTACGCCAAAGTGATGGACAAAGAGCAGCTTATCGATCGAAAGCGGTTGC  
CACAGTCATCAGCAACGTTGGTGAAGGCGGTTTTACGATGGCGTACTGCGTATTGTGCGTACCGAAGATGGTAGCGCAT  
GGACCGGTGTTCTGTACGCGCCTGGATTGGCGGTATCTGGTATCGCAAAGATGTGCTGGCAAAGCGGGGCTTGAGGAG  
CCGAAAACTGGCAACAGCTGCTGGACGTTGCACAGAACTGAATGACCCGGCGAATAAAAAATACGGCATTGCGCTGCC  
TACAGCAGAAAGCGTGTGACGGAACAATCCTTCTCCAGTTTGCCTTATCCAACCAGGCTAACGCTTTAACGCCGAAG  
GCAAAATCACCTTGATACACCAGAGATGATGCAGGCACTGACCTATTACCGCGACCTTACTGCCAACACTATGCCGGT  
TCTAACGACATCATGGAAGTGAAGACGCCTTTATGAACGGCACCGCGCGATGGCGATTTACTCCACCTATATCCTTCC  
GGCTGTGATTAAGAAGGCGACCCGAAAAACGTCGGTTTTCTGGTGCACCCAGAAAACTCTGCGGTCTACGGCATGT  
TGACCTCGCTGACCATTACCGCCGGGCAAAAGACCGAAGAGACGGAAGCAGCAGAAAAATTTGTCACCTTTATGGAGCAG  
GCAGACAACATTGCCGACTGGGTGATGATGTCGCCAGGTGCTGCGCTGCCGGTGAATAAAGCGGTGGTACTACCGCCAC  
CTGAAAGACAACGACGTTATTAAGGCGCTGGGTGAACTACCGAATCAGCTAATCGGTGAACTGCCAAATATTAGGTTTT  
TTGGCGCAGTAGGGGATAAAAACTTTACCCGATGGGTGATGTGACGGGTTCTGGCGTGGTGAAGTCAATGGTGCATAAC  
GTCACCGTGGGTAAGCCGATCTCTACTACGCTGCAAGCGAGCCAGAAAAAATGGATGAACTGATCGAACAGCACTA  
AACCCAGGACAGGAATCCGCAATGAACAGGCTTTTTTTCAGGTGTTCCGATATGCCCTTTCGCTGCTGCTTCTCGCGCC  
CAGCTTATTACTGCTGGGCGGTCTGGTGGCGTGGCCGATGGTGTGCAATATCGAAATCAGTTTTTTACGCTGCGGCTCA  
ATCCCAACATCGAGTCAACGTTTTGTTGGGGTGAGCAACTATGTGCGTATCCTCTCCGATCCCGGCTTCTGGCATTGCGTG  
TGATGACGGTCTGGTATACCGCGCTGGTGGTGGCGGGCAGCACCGTGTGCGGGCTGGCGGTGGCGATGTTTTTCAACCG  
CGAGTTCGCTGCGCAAAACCGCGCTTCTGCTGGTATCCTCTCCTACGTAACGCCGTCATTTCTGCTGGTGTTCGCT  
GGAAATACATGTTCAACAACGGCTACGGCATTGTTAACTACCTCGGCGTGCATCTTCTGCATCTCTATGAGCAGGCACCG  
CTGTGGTTCGATAATCCGGGCGTAGCTTTGTGCTGGTGGTGTGTTTCGCCATCTGGCGCTACTTCCCGTATGCCTTTAT  
CTCGTTTCTGGCGATTTTGCAGACCATCGACAAATCGTGTACGAAGCGGCAGAGATGGATGGCGCTAATGCCTGGCAAC  
GGTTTCGTATCGTCACGCTGCCCGAATTATGCCGTCCTGGCAGCGGTGGTGCATGCGCACCATCTGGATGTTCTAC  
ATGTTTCGCGGATGTTTTATTGCTGACGACCAAGGTGCATATTCTCGGTGATATCTCTACAAAACCGCTTTGCTTTAA  
TGATTTAGGAAAAAGCGGCGGATCTCGGTGGTGTCTTTCATCATTATTTTTCGCTGTCTATTCTGCTGACCAAGAAACGGG  
TGAACTCAATGGCAACAAATAAACGCACACTCAGTCGCATCGTTTTTACTGCGGGCTGGGCTGTTTTCTCATCATCAC  
GCTGTTTCCATTTTTTGTGATGCTGATGACCTCGTTCAAGGGCGGAAAGAGGGCGATCTACTGCATCCTACGCTGCTGC  
CGCAGCAGTGGACGCTGGAGCATTACGTGACATTTTTAAACCGATGATTTTCCCGTTTGTGCGACTACTTCCGTAACAGT  
CTGGTGGTGTCTGTTTTCATCCGTGGTGGCGGTATTCTCGGCATTCTTGGGGCTTACGCGCTTCCCGCCTGCGCTT  
TAAAGTTCGGATGACCATCAACGCCAGCTTTTACACGGTGTATATGTTCTTGGCATTGTTGCTGGTGGTGGCGTTTTCA  
AAATCATCACCGCTTGGCATTACGACTGAGATGGCGCTGATCATCACCATGGTACGCAAACTCTGCCACCAGCC  
GTGTTTATGCTGAAAAGCTACTTGCACACCATCCCCGATGAGATCGAAGAAGCGGCGATGATGGATGGCTCAACCGTCT  
GCAAATATCTCCGATCACCGTGGCGTGGCGATGTCGGGCTGATATCCGTGTTGCTACTGCTTTATGGTGGCGT  
GGAACGACTATCTGTTTGCCTGATTTTCTCTCCAGCGCCAGCAATTTACCTTACCGGTGGGCTGAACGCGCTGTT  
AGTACGCCAGATTACATCTGGGACGGATGATGGCGCCTCACTGGTACCGCATTGCCGGTGGTGAATGATGATGCGCT  
TTCGGAACGTTTTATTAAGAGTGGTTTACCAGCGGTGGCGTGAAGGGCTAAAGCGGCCAGTTTCTTTACAAGGAGTTTT  
AAATGAAAAAGTTAGTAGCCACAGCACCGCTGTTGCTGCGCTGTTGAGTATGAAGATCGGGCGATTTTAGCTAATGAA  
GTGAAGATCCGCGTGCCTTTCGGCGCACCGAAACACGGAACGGAAGTGGTGCATTTCCGCGCCGCGGCGGCTTTATGAA  
TGAAGACTTTAACGGCGAATGGCAGATGTTCACTCCGCTCCGGCAGATGCGCCGCGCGGCTTGGTTTTGGCAATCC  
AGCTTGGCAACATGGTGGTTGGCGACATTATCGAGTGGCGCAGCGACGTTACCGACTACCGGTGGGCGACAGCGTATGC

GGCTACGGCCGCTCTCCGAGACGGTCATCATTAAACGCAGTGAATAACTACAAGCTGCGCAAAATGCCGCAAGGCAGCTC  
CTGAAAAACGCCGTCTGCTACGACCCGGCGCAGTTTCCATGAGCGCGTGCATGATGCCAACGTGCGCGTAGGGGATT  
TTGTGGTGGTGGTAGGGCTTGGCGCAATCGGTCAAATTTGCCATCAAATGGTAAACGCGCTGGCGCTTCTGTGGTATT  
GGCGTCGATCCTATCGCCATCGCTGTGATATTGCCGTCGCCAGGGCGCGATTTCTGCCTAACCCATCGGCACCTGA  
TGTAGGTAAGAGATCAAAACGCTGACCGGCAAGCAGGGTGCCTATGTGATTATCGAAACAGCGGCTACGCCAGCGCC  
TGCAATCGGCGCTCCGCGTCTGGCTTATGGCGGCACCATCTCCTATGTCGCGTTTCCAAGCCGTTTGCCGAAGGTTTT  
AACCTCGGACGCGAAGCGCATTTCAATAACGCCAAAATTTGCTTCTCTCGCGCTGCAGCGAACCGAACCCGGATTATCC  
GGCTGGAGCCGCAAGCGTATTGAAGAACTGTTGGAACTGCTGATGAACGGTTATCTCAATTGCGAAGATTTAATCG  
ACCCGGTGGTACCTTTGCCAATAGCCCGGAAAGCTATATGAGTATGTCGACCAGCATCCGGAACAGAGCATCAAAATG  
GGCGTTACGTTTTAATCAAAGGAATGAAAAAATGAAAAATCGGCACACAGAATCAGGCGTTCTTCCGGAAAACATTTCT  
GGAGAAATTTCTGTTATATCAAAGAGATGGGCTTCGATGGTTTTGAGATTGACGGCAAATGCTGGTTAACAAATCGAAG  
AAGTCAAAGCGCGATCAAAGAAACCGTTTTACCGTGACCACCGCTGCGGTGGCTATGACGGATGGATTGGCGACTTT  
ATCGAAGAGCGTCGTCTTAATGGCTTAAAGCAGATCGAGCGCATTTCTCGAAGCGCTGGCAGAAAGTGGCGGTAAGGCAT  
CGTCGTTCCGGCTGCGTGGGCGATGTTACCTTCCGCTTACCGCGCATGACCTGCGCGGTAGCCTGGACGGCGACCGCA  
AAATGGTGAATGATTCCCTGCGGTACTGGAACAGTGCAGCGCGTACCGGAACCGTGTATCTCGAACCGTTAAAC  
CGTATCAGGATCATATGATCAACACCTCGCCGATGCCCGCTTACATCGTGCAAAACGATCTTAAACATGTACAGAT  
TATCGGCGATTTCTATCACATGAATATCGAAGAAGATAACCTGGCGCAGGCGCTGCATGACAAACCGCACCTGCTCGGTC  
ATGTGCATATTGCGGATAACCATCGCTACCAGCCGGCAGCGGCACCCTGGATTTCCACGCGCTGTTTGAACAGCTGCGC  
GGGATAACTATCAGGGCTATGTAGTGTACGAAGGGCGTATCCGGGCGAAGATCCTGCCAGGCGTACCGTGATTCTGTT  
GGCTGTTGCGTACCTGCTAAGAGGTCTTTGTAAAAGTGAATGACAAGCTCTCGCTGCGGGTGCAGATAATAGGCG  
CAGGCCAGGTGGCGGATAAGGTTTCTGTTGACTACTGCACCCGCAACGATCTGGAACGGTGGTGTCTGTGACAGC  
CGCTTTCCAGGCGCAGGCGCTGGCAGAAAAATACGGGAATGCATCCGTGTGGGACGATCCGACGGCCATGCTGCTGGC  
GGTGAACCTGATGTGGTTAGCGTCTGCTCACCTAACCGTTTTTATTACGAACATACCCTGATGGCACTGGAAGCGGGCT  
GCCATGTGATGTGCAAAAACCGCCGCCATGACGCCAGAACAGGCGGGAAATGTGCGATACCGCGCGCAAACCTGGGC  
AAGTGCTGGCCTACGACTTTCACCATCGTTTTGCGCTCGATACGAACAGCTGCGTGAACAGGTGACCAACGGCGTTTT  
GGGAGAGATTTACGTTACCACCGCCCGCCCTGCTGCTGCGGCGTTCCCGCTGGGGTGTCTTTACCAATAAAGAAC  
TGCAGGGTGGTGGCCGCTGATCGACATCGGCATTCATATGCTGGATGCTGCGATGTATGTCTGGGCTTCCGGCGGTG  
AAAAGCGTGAATGCGCATAGCTTTCAAAGATCGGCACGCAAAAGAGCTGTGGTCAATTTGGTGAAGTGGGATCCGGCAAC  
TTACAGCGTGAAGATTCGCTGTTTGGCACCATTTGAATTTATAACGGCGGCTTCTGTGGCTGGAAACGTCATTTGCAC  
TCAACATCCGGCAACAGTCGATTATGAACGTCAGCTTTTGTGGTGATAAAGCTGGTGCAGCGCTTTCCAGCACATATC  
TACACCGATAACAACGGTGAATTAATGACGCTGATGCAACGGGAAATAGCAGACGACAACCGCCATTTGCGCAGCATGGA  
AGCTTTTATCAATCACGTACAGGGCAAGCCCGTATGATAGCCGACGCCGAGCAGGGGTACATCATCCAGCAACTGGTGG  
CGGCGTTGATCAATCCGCAAGAACAGGGACCGGTGGAATTAAGCAGGCCAGTAACGTTATCAGAACCCCATTTCA  
GCCAGCATACCCTGAACAAGTATGCATCGCTGATGGCGCAGGGGAACGGCTATCTTGGGCTTCCGCCAGCCATGAAGAA  
GATTACAGCGCCAGACGCGAGGGATGTATCTGGCGGGGCTGTATCATCGGGCGGAAAAGGTGAAATCAACGAACCTGGT  
GAACCTGCCTGATGTCGTGGGGATGGAGATTGCCATAAATGGTGAAGTTTTCTGTTATCCACGAAGCTGGCAGCGTG  
AGCTTGACTTTGCCAGTGGCGAATTACGCCGAATGTTGTCTGGCGTACCAGCAACGGCTCAGGTTACACCATCGCCAGC  
CGTCGTTTTGTTTCCGACAGCAACTGCCGCTCATTGCGCTGGAATCACTATTACGCCACTGGACGCCGACGCGTCACT  
GTCAGATCTGATGACAGGGAGCTACACCACCCAGGATGGACGAGTGTGGCCATCAGCTGTTGCTGAAGGTGAGC  
GGTATGTGCAGCAATGCTATACCGCAAAGAGCGCGTTTTACTGCAACATACCAGTGCAGCTTTCATGACGGCGAGAC  
AATGACGTTGCAAAAACCTGTTGTTGATCGACTGGCGGGATGACAGGCAAGCTGCTTTAGACGAGTGGGGCAGCGCTCGC  
TTCGCCAGCTTGAATGTGCGCGCAGCAGAGTTACGACCAACTTCTTGCAGCATCAACAGAAAACTGGCGTCAATGGTGG  
CAGAAAACGTCGTATCACGGTAAATGGCGGCGAAGCGCACGATCAGCAAGCGTTAGATTATGCGCTTTATCATCTGCGCAT  
CATGACGCTGCCACGACGAGCGCAGCAGCATTGCCGCAAAAGGCTTAAACCGGCAAGGCTACAAAGGCCACGTTTTCT  
GGGATACAGAAGTATTTTTGTTACCGTTTCTGTTTACGATCCGACGGTTGCCGAAGTTTACTGCGTTATCGCTGG  
CACAACCTGCCAGGCGCGCAGGAGAAAGCGCGACGCAACGGCTGGCAGGGCGCGCTATTTCCGTGGGAAAGCGCGCGCAG  
CGGCAAGAAGAGACGCCGAATTTGCCGCATTAACATTGACACGGGCTGCGGCAAAAAGTGGCCTCGGCGCAGGCGG  
AACATCATCTGGTGGCCGATATCGCTGGCGGTTATTCAATACTGGCAGACCAGGGGGATGAAAGTTTATTGCGCAT  
GAAGGCATGGCGTACTTCTGGAGACGGCAAAGTTCTGGATTAGCCGCGGGTGAAGTAAACGATCGTCTGAAATTC  
TGATGTTATTGGCCAGACGAATATACCGAACATGTCAATAAATGCATACACCAGCTATATGGCCCGTACAACGTT  
AACAGGCGCTGAATATTGCCCGCCAGTTCGGCTGTAGCGACGATGCGTTTATCCATCGCGCGAAATGTTCTCAAAGAG  
CTATGGATGCCAGAAATTCAGCCCGACGCGTTTTGCCGAGGATGATTGTTTATGGCTAAGCCGGCGATTAATCTGGC  
GAAATACAAAGCGGCGGGGGAAGCAAAACATACTGCTGGATTATTCAGCGCGAGAAGTGAACGAGATGAGATCCTCA  
AACAAAGCTGATGTGGTGTGCTCAATTACATGCTGCCGGAGCAGTTCTCAGCGGCATCGTGTCTTCCAATCTGCAATTT  
TATGAACCGCGCACTATTACGACTCGTCATTAAGTAAAGCAATCCACGGCATTGTTGCCGACGCTGTGGCCTGCTGAC

CCAAAGTTATCAGTCTGGCGGAGGGGACTGAAATCGATCTTGGTGCTGATCCGCATAGTTGTGATGATGGTATCCATG  
CTGCCGCAACTGGCGCTATCTGGCTGGGGGCGATTAGGGTTTTGCCGGGTGAGCGTGCGTGACGGTGAATTGCATCTC  
AATCCGGCGTTACCTGAGCAGTGGCAACAGTTGTCTTTCCCTCTGTTCTGGCAGGGCTGCGAATTACAGTCACTCTTGA  
CGCGCAGCGTATTGCGATTGCAACTTCTGCGCCCGTTTCACTGCGTTTGAACGGTCAGCTTATAACCGTGGCTGAAGAAT  
CTGTTTTCTGTTTGGGTGATTTATTTTCCCTTCAATGGGACCGCTACCAAACATCAGGAGGATGAATGAAACTGCAAG  
GGTAATTTTTCGATCTGGATGGTGAATCACCGATACCGCGCATCTGCATTTCCAGGCGTGGCAGCAGATTGCCGCTGAA  
ATTGGCATCAGCATTGATGCGCAGTTTAAACGAATCCCTAAAAGGGATCAGCCGCGATGAGTCTCTGCGGCGCATTCTGCA  
ACACGGGGGCAAGAGGGGCGACTTTAACTCGCAGGAGAGGGGCGCAACTGGCGTATCGCAAAAAATCTGCTCTATGTCCACT  
CACTACGCGAGTTGACGGTCAACGCTGTTCTACCCGGCATTGCTCTTTGCTGGCAGATCTCCGTGCACAGCAGATCTCG  
GTTGGGCTGGCTTCTGTCTCCCTGAATGCGCCGACGATTTTAGCGGCGCTGGAGCTGCGCGAGTTTTTACCTTCTGCGC  
GGATGCTTCCCAACTTAAAACTCGAAACCGGACCCGAAATCTTTCTCGCCGCTGTGCAGGGCTGGGCGTGCCGCCGC  
AGGCATGTATCGGCATTGAAGATGCGCAGGCGGGCATTGACGCCATTAACGCCAGCGGTATGCGCTCGGTGGGGATCGGC  
GCGGGCTTAAACGGGGCGCAATTACTGTTGCCTTCAACGGAATCACTCACCTGGCCGCGGTTATCGGCCCTTCTGGCAAAA  
CGTATAGCAAAGGAATCAACATGGCTCAGCTTTTCTTACAACATATTCAAAAAATCTACGATAACCAGTGCATGTGGTG  
AAGGACTTCAACCTGGAATTTCCGATAAAGAGTTCATCGTGTGTCGGCCCGTGGGCTGCGGTAAGTCGACCACCCT  
GCGCATGATTGCCGGGCTTGGAGGATCAGCGGGCGCATCTGTTGATCGACGGCAAACGAATGAATGACGTTTCCAGCCA  
AAGCACGCAATATAGCGATGGTGTCCAGAACTACGCGTTGTATCCGCATATGACGGTTTACGACAACATGGCGTTTGGT  
CTGAAGATGCAAAAAATCGCAAAAGAGGTGATTGATGAGCGGGTAACTGGGCGGCGCAAATTTCTCGGCCTGCGTGAGTA  
CCTGAAACGTAAGCCGGGGCGCTTTCCGGCGGGCAACGTGAGCGAGTGGCGCTTGGGCGGGCGATTGTACGCGAAGCGG  
GCGTGTTTTTAATGGATGAACCGCTCTCTAACCTTGATGCCAAGCTGCGCGTGCAAATGCGCGCAGAGATCAGCAAGCTG  
CATCAGAAACTGAACACCACCATGATCTACGTGACCACGATCAGACCGAAGCGATGACCATGGCGACGCGGATTGTGAT  
TATGAAAGACGGGATTGTTAGCAAGTAGGTGCGCCGAAAACCGTTTATAACCAACCCGCAATATGTTTGTTCGGAT  
TTATTGGATCACCAGCGATGAATTTTATTCGCGGCACGATCGATGGCGATAAATTCGTTACGGAAACGCTTAAATTAACC  
ATCCCAGAGAAAATTAGCGTTTCTGAAAACACAGGAAAGTTTGCATAAGCCATCGTGATGGGAATACGACCGGAAGA  
TATTCATCCGACGCGCAAGAGGAAAATAACATTTCCGCCAAAATTAGCGTGGCAGAATTAACCGGTGCGGAATTTATGC  
TCTACACCACGGTTGGGGGACGAGTTAGTGGTCCGTGCTGGTGCCTTAAATGATTATCATGCAGGAGAAAAATCACTA  
TTCATTTTATGATGACGAAATGTCATTTCTTTGATGAGAAACGAAATAGCAATTCGCTAAATACAGGGGGAAGGCATT  
CCCCAGGATAATAACAAGGAACAATAATGAAAAAGTTATTACCCTGTACCGCACTGGTGATGTGTGCGGGAATGGCCTGC  
GCACAGGCCGAGGAAAGGAACGACTGGCACTTTAATATCGGGCGCATGTACGAAATAGAAAACGTCGAGGGTTATGGCGA  
AGATATGGATGGGCTGGCGGAGCCTTCACTATTTTAAATGCCGCCAACGGGCGTGGAGAATTGCTCTGGCCTATTATC  
AGGAAGGGCCGGTAGATTATAGCGCGGTAAACGTGGAACGTGGTTTATGATCGCCCGGAGCTGGAGGTGCATTATCAGTTC  
CTCGAAAACGATGATTTCACTTTCCGCTGACCGGCGGTTCCGTAATTATGGTTATCACTACGTTGATGAACCGGGTAA  
AGACACGGCGAATATGCAGCGCTGGAAAATCGCGCCAGACTGGGATGTGAAACTGACTGACGATTTACGTTTCAACGGTT  
GGTTGTCGATGTATAAATTTGCCAACGATCTGAACACTACCGTTACGCTGATACCCGTGTCGAAACGGAAACAGGTCTG  
CAATATACCTTCAACGAAACGGTTGCCTTGCAGTGAACATTTATCTCGAGCGCGGCTTCAATATGGACGACAGCCGCAA  
TAACGGTGAGTTTTCCACGCAAGAAATTCGCGCCTATTTGCCGCTGACGCTCGGCAACCACTCGGTGACGCCGTATACGC  
GCATTGGGCTGGATCGCTGGAGTAACTGGGACTGGCAGGATGATATTGAACGTGAAGGCCATGATTTAACCGTGTAGGT  
TTATTTTACGGTTATGATTTCCAGAACGACTTTCCGTTTTCGCTGGAATACGCGTTTGGTGGCAGGATCAGGACGAAGG  
CGACAGTGATAAATCCATTATGCAGGTGTCGGCGTAAATACCTGTTCTGATAATGGGCTAAATGCGGATGCGGCCG  
GAGTACTTTTACCGATCTATAAATGTAGGCCGGATAAGATGCGCTAGCATCGCATCTGGCATTGAGGCAAGGTAGTGGT  
ATTTATTTACGCGTCATATGCGTGGCAACGGTAATATTCTGTGGTGACGGTTTTCCAGAAATTAAGCGGAATAATAACTC  
GCAGCTTTGTTGACCTAACTCCTGCGTCGGAACATCGATGCCGCCGGTGCAGGCGTTAAAATAAATGACAGCGTTTCA  
TGCTATAACCCACCACCGCTAACTGCTGCGGAATAGCAATATTTTTCTCTGCTGCCGCAGATAAATGCTCATTAAATTC  
AGGCTGTCAGTGGCAAACACCGCTCAGGCAACGGTACTGGCTTAATAATTGCCGTGCTGCTTTTAAATGCAGTTTCATG  
GGTATAACCGCATCAACAATCCATTCATCAGCACTGCAATATTATGCGCAGCAGGCTCTGCTTATAACCATTAACGC  
GATCAACCGAAACATGGACATCAAGCGGAGCATGCAGGCAAGCAATATTTTATGATGCCACTTTCAATTAATGCATCGGT  
AACGCAATGCTGTCGCAAAAATTATCGGTATCGACAGAATAAATGAGGCAATATTGACCTTCAACTTTGCCAATCACCAC  
CACCGGAATATCATATTTATCGAGTTGGGCAAAAAATGACTCATCCGCTGGCGAACTGAGCATAATAATGCCTTTAATCA  
TTTTCTGCTTAAATTTGCTTTCGATTTTTGAGATCTTCTGCCGATTGTGCGAGTTTTGTAATATCACGTCGAAACCT  
TCTTCTCAGCTTTGGCGGTGATGGCATGCAAACTTCAAGAAAAACGGATTACCCGCCGATGTTTTGGTGAACGGGT  
AGAAATCACCATAATGGCATCAAAACCGAAGAGGTGAGCGCGGGCCAGCTTGTGGTGGTACTGTAATTTCTCAA  
TGGCCCGTAACACTTTTTCCGCGCTTCCGGGAGATATTAGTTTGTATTACGACGCGGTGATACGGTGGATTTTATGAT  
ACGCTGCAACCTGGCAATATCATAAATAGTAGGGACATAGGTGAGGAACTCCGTCCGAACGTGAATGCTGCACATCT  
TATGGAGTTCCCGGTGATGACAACAGGGCAGTTGATAATCAATGGCCTGGCCCCACATTCATATCCTTACGAATGA  
TTTTTTTTCTGGTCTTACAGAGCAGCACAGGACAGCAATGAAGCGACTTAAAAATGAACTCAATGCGCTGGTGAATCGGG  
GTGCGACAGACATCTGCGCTGCTGTAAACCGACTTAGCCGACGGCAAAACAGCGTTTATCACCGCATGGTAAATC

AGTTGCTTAATATTCACGCCGAGCACGTTTGCCGCTGTTAAGTGC GG T GCGTGAAGAGCGCCTGCTGGGCGTGAAACGC  
ATCCCCAGCGTGACTTTGGCATTCCGCGCTTACCTATGACGAAGGGCTGGCGCAGTTATATGGCGATCCACCCGCTG  
GCCAACGCCAACGCGCGGCGTCA GTGAAATCCGCTGGCGCTACGTTTTAAATCGAATGATTGCTGCTACGCCACTTTA  
AGGATACCTCCACGCTGTATCTGGAAATTGTGGATTATCCCGCGAATGGTTGCTCGACCTGCCGATGCTGGCGCAGGAC  
TATTTAAGCTGGTFCGCGCCAGATGACGGGCTTACTCAATGGTCAGCGCGGAGAATGGTCCGGCAAATGGCGAATGATGAG  
CGAAGGGCTGGACCCGCTAGCGCCTGCCGACGAAAACCGGCTGGCGGACATTGCCGCCGCTGGACCGATTATCTCCACC  
ACTGTAAAGAGCAGGGGCTGCACTTTATTCAGCCTGGGCGCTTTGTCTTGCCGGGAGATATGGCAGGTGCGCCCGCGCTG  
CAATTCTTCCCGTGGCCGGATGTCGATACCTGGGGCAGTCCAACTGGCGCAGGCCGATAAGCATACCAATGCCGGAAT  
GCTGCGCGAGCGCTTTAATTATTACTGCGAGAAGTGGTGAAGGGGTTCTATAAGAATCATTTTCTGCGCTTTGACCGCC  
AGATTGTGCTGGTGGATTGCCTGCAACCTCTCAACAGTGGGCCACAGGCATTTAATGATATGCGTCTGGCACTGACGCGAG  
CTGATGCAAAGTTTTCACTACGGGCAGCGTACCCTGTTCCGGCGTTTGTTCGCGGTTATCGATAAGCTATTGTTTGC  
TGCCACTAAAGCGGACCATGTGACCATCGATCAGCACGCTAATATGGTTTCATTACTGCAACAATGATTGAGGATGCCT  
GGCAAATGCGGCGTTTCAAGGGATCAGCATGGATGCCTGGGGCTGGCGTCAGTTCAGGCGACCACCAGCGGCATTATT  
GATGTTAACGGTGAGAAAATCCCGGCGCTGCGTGGTAAATCGACTTAGCGATGGCGCACCCTCACTGTTTATCCTGGCGA  
AGTTCGCGACGCTTTGCCTGGTCAGGCGTCTGGGATAAGCAAGGCTTCCAGTTTGAGGCATTTCTGCCGCAAGTGATGG  
ATGTCGACAAACCACTACCGCATATTCGCTTGTGATGCTGCGCTGGAATTTTTAATAGGAGATAAATTGCGATGACCGAAC  
CGTTAAAACCACTGATTGATTTTCAGCGTCTCTGGAGGTCGATCAGAATCCTAAATTCAGGGCGCAGCAGACCTTTGAC  
GAAAATCAGGCGCAAATTTTGCCCGGCCACGCTCGACGAAGCGCAGGAAGAAGAGGGGCAAGTCAAGCGGTAATGGA  
CGCAGCGTTACGTCGAAACGCAGCCTGTGGCGCAAATGGTATGGGAGGGCTGGCTCTGTTTGGCGCAAGCGTTGTCG  
GGCAGGGTGTACAGTGGACAATGAATGCCTGGCAAACCCAGGACTGGGTGGCGCTGGGTGGATGTGCCGCTGGGGCATTG  
ATTATCGGCGCTGGCGTAGGTTCTGTGGTAAACAGAGTGGCGGCGCTTATGGCGCTTGCACAGCGCGCCCATGAACGCGA  
CGAAGCGCGTGATTTATTGCATAGCCACGGCACGGGCAAAGGCCGCGCATTTTGCGAAAACTGGCGCAGCAGGCGGGTA  
TTGATCAGTCGCATCCGGCGCTGCAACGCTGGTATGCCTCAATCCATGAAACGCAAACGACCGTGAAGTGGTCAGCCTG  
TATGCGCATTTGGTCCAGCCAGTTTTAGATGCCAGGCGGGCGCAAATCAGCCGTTCCGGCGGGAATCAACGTTGAT  
GATTGCGGTGACCCGCTGGCGTTGGTCGATATGGCGTTTATCGCCTGGCGCAATCTGCGTTAATTAATCGCATGCCA  
CGCTGTATGGCATTGAACTGGGTATTACAGCCGTTTGCCTGTGTTAAGCTGGTATTGCTGAATATCGCTTTTGGCGGA  
GCCAGCGAACTGGTGCAGGAGTGGGGATGGACTGGATGTCGCAAGATCTCGCTGCTGTTTGTCTACCCGCGCAGCTCA  
GGGATTGGTGCAGGACTTCTGACGGCACGACTCGGATTAAGCTATGGAGCTTTGCCGCCGCTGCCGTGGATTGACG  
ATGACAAACCTCGCCTCGGGGATTTCCGTCGTCAGCTTATCGGTGAGGTGAAAGAAACGCTGCAAAAAGGCAAACGCC  
AGCGAAAATAATGCAATATCGGGTGTGACCGGATATCTTACGCCGAAGTGCCCGTTTTTCCGCTTTTGTGTCAATGA  
TTGTTGACAGAAACCTTCTGCTATCCAAATAGTGTATATCATATTAATTGTTCTTTTTTTCAGGTGAAGGTTCCCA  
TGCGTCTGGAAGTCTTTTGTGAAGACCGACTCGGTCTGACCCGGAATTACTCGATCTACTCGTGTAAGAGGCATTGAT  
TTACGCGGATTTGAGATTGATCCCATTGGGCGAATCTACCTCAATTTTGTGAACTGGAGTTTGAAGTTTTCAGCAGTCT  
GATGGCCGAAATACGCCGATTGCGGGTGTACCAGTGTGCGTACTGTCCCGTGGATGCCTTCCGAACGTGAGCATCTGG  
CGTTGAGCGGTTACTGGAGGCGTTGCCTGAACCTGTGCTCTCTGTCGATATGAAAAGCAAAGTGGATATGGCGAACCCG  
GCGAGCTGTGAGCTTTTTGGGCAAATTTGATCGCCTGCGCAACCATACCGCCGCAAAATGATTAACGGCTTTAATTT  
TTACGTTGGCTGAAAGCGAACCGCAAGATTGCGATAACGAGCATGTGTTAATTAATGGGAGAATTTCTGATGGAGA  
TTACGCTGTTATCTTCAGGATGAAAATGATCAACACGTCCTGACCGGTGCGGTGGTATGTTGCGATCAACGATTGCT  
ATGGGCCCGCAGTTGCAAATGTGCGCCGCCAGGAGTCAAGCGCTTCAAGTCAAATTTGTCGCGGTGACACAGGTAAAG  
GCATGTTGTCGAACAGGCGCAGAACTGGCGATGCTAAGCGCGCGCTGCTGATTACGGGTGACACAGGTACAGGTAAG  
ATCTCTTTGCTACGCTGCCATCAGGCAAGCCCCAGAGCGGGCAAACCTTACCTGGCGCTGAACTGTGCTCTATACCG  
GAAGATGCGGTGAGAGTGAAGTGTGTCATGCTCCGGAAGGGAAGAAAGGATTTTTCAGCAGGCGAACGGTGGTTC  
GGTGTGTTGGATGAAATAGGGGAAATGTCACCACGGATGACGGGAAATTAAGTGTGCTTCTTAAATGATGGCACTTTCC  
GTCGGGTTGGCGAAGACCATGAGGTGCATGTCGATGTGCGGGTATTGCGCTACGCGAAGAATCTGGTGAAGTGGT  
CAAAAAGGCATGTTCCGTGAAGATCTCTATTATCGTCTGAACGTGTTGACGCTCAATCTGCCGCCGCTACGTGACTGTCC  
GCAGGACATCATGCCGTTAACTGAGCTGTTGCTGCGCCGCTTTGCCGACGAGCAGGGCGTGGCGGCTCCGAAACTGGCCG  
CTGACCTGAATACTGTACTTACGCGTTATGCGTGGCCGGAAATGTGCGGCAGTTAAGAAGCCTATCTATCGCGCACTG  
ACACAACCTGGACGTTATGAGCTGCGTCCACAGGATATTTGTTGCCGATTATGACGCCGCAACGGTAGCCGTGGCGGA  
AGATGCGATGGAAGTTCGCTGGACGAAATCACCAGCGTTTTGAAACGCTCGGTATTAACCGCTTTATCGCAATTATC  
CCAGCACGCGCAAACCTGGCAAACGCTCTGGCGTTTACATACCGCGATTGCCAATAAGTTGCGGGAATATGGTCTGAGT  
CAGAAGAAGAACAAGAGTAAGCGCGAATATGCCTGATGGTGAACACCATCAGGCATATTAATTTATGCTTTTCAGTACA  
GCCAGAGCTGCTTCGTAATCCGGCTCGGTGGTATTTCATCCACAGCTGGCTGAAAATCACATTGCTATTTTCGTAAT  
AACCAACCGGACGCGCTGCCAGACCTTTCAGTGGGCCATCAGCAATTGCCACACCGTAAGCTTGCAGAAATTCAGCGT  
TACGGAAAGTGAGAGGGTGATAACGTTGTTTCAGACCTTTCGCGCCGAGAAACGAGACTGGGCGAACGGCAGATCGGCA  
GAGATACACAGCAACCGTGTGTCGATCTCAGTTGCCAGTTGGTTAACTTACGTAAGTGTGCGGCGCAAACCCGGT  
ATCAATACTCGGGAAATGTTTCAGCACTTTGCGTTTACCCGAAACTGACCGAGGGTGACGTCAGACAGATCTTTGCCA

CGAGAGTAAAAGTCTGCGCTTTGCTACCCGCTGCGGGATGGAATTGGCGACTGTAACCGGGTTGCCCTGGAATGAACG  
GTTTGTGACATGATTATCTTCTGTTTACATATAGTTAACGTACACCTAGTTTATGCTAACTGTCAATAACACAGCAA  
ACGCTATTTGCGCTTAATCCGCAGACCACCGCGACAACAAGGAGTAAAGATGAGAACCCTTAAGGTATTCGAGGAAGCCT  
GGCCCTTACATAACCCGTTTGTGATTGCCGGGGAAGTGCAGTGAAGCGCGCTGGTGGTGGTTGAACTGGAAGAAGAG  
GGTATTAAGGCACCGGCAATGCACGCCGATCCGCGTTATGGGAAAAGTATGCCTCGGTAATGGCGCAAATTATGAG  
CGTCGTGCCGCAACTAGAGAAAAGGGCTGACACGGGAGGAGTTGCAAAAAATTCTCCCTGCCGGCGCAGCACGTAATGCCG  
TGGATTGTGATTGTGGGATCTGGCCGCGCAAGACAGCAGCAATCGCTGGCTGATTTGATCGGCATAACGCTTCCCGAG  
ACAGTTACTACTGCACAGACGGTTGTATCGGTACGCCCTGATCAGATGGCCAATAGTGCATCAACACTCTGGCAGGCAGG  
CGCGAAATTAAGTGAAGCTGGATAACCATCTTATCAGTGAAGCGGATGGTGGCAATTCGCACAGCTGTGCCCGATG  
CGACGCTGATCGTTGATGCAAAATGAATCCTGGCGTGCAGAAGGTTGGCGGCGCTGCCAGCTATTGGCGGATTTAGGC  
GTTGCGATGCTTGAACAACCGCTTCTGCGCAGGACGATGCGGCGCTGGAGAATTTTATTCATCCGTTGCCGATTTGTG  
TGATGAAAGTTGCATACTCGTAGCAATTTGAAGGCCTGAAAGGGCGCTATGAGATGGTTAATTAAGCTCGATAAAA  
CCGGGGTCTGACGGAAGCGCTGGCGCTGGCGACTGAAGCGCTGCACAAGTTTTCAGTCTGATGCTGGGCTGCATGTTG  
TGACCTCTCGTGCCATTAGCGCCGCTTACCCTGGTCCGCGAGTTCAGTTTCGCCGATCTTGACGGACCGACTGGCT  
GGCGGTAGATGGAACCGCGCTTTCAGTTCACGACGGCGAATTGCATCTTAGGATGCCAGCGCAGCAAGTTTGCAT  
CGCAAAGAGATAATTTTCGCTGGCTTTCGTCGGAGGATGGGCGGAACTCTGCGGTGATGCAATGCAAGTTTCAGATCTG  
CACACCAACTGCCGAAAGAGCCAGGCGTTTACATAACCGACGCTGTTTACCAGAGGCAATTCAAACGCCTGAGCCAGCCAT  
TCGCCTAATTCGCTGTGTCTGGGATCTTCAATACAGGCCAGTGGATCGTGGAAATGAGACCACCCAGGCAGGTTGAATGCG  
GTGTATAAGCTGGCACAGCGCTGGGTTTCAGGTTCCGAGCCAGGTTTGTACCTGTGAGTAATACGACATCGGTTCTT  
CAGCGGCGCTGTTCCAGCGATAAACGTTTTCACCTTCTTCCAGTTCGCGCGCGGAAAGTTTCTGTTTAAATCCACACCA  
TTAGCATTGGCCGTAACCCCAACTGGCAGCGCTCAGGATTCACACACAGCACCATGATGACGGCGCAAAGAAGGTGT  
CAACGTCCGCAGAGCACAGGAGCGTGACGACCGAAGAGTTTTCATCACCGTGAAGTCCAGCAGCAATCAAACCACTT  
CGCGGCTGGCTGCAGGGCAGGAAACCAGATTAACGGCGCCCAATAATGAACGTCCGTAATGTTCTGTTCCGGGCGGA  
AATGCGCCGCTTCCGCGCTGGGCGGTTACGGTCATGATCGTCTGTTTCCAGGAAGTATTACAGGCAGTGTGTGCA  
AATTTTGGGATTATCAAATCCTTTTCTCAACGCTATGTCATGATCTTGTATCACTTTTTTCCGGAAGTTGTTTGA  
TTTTATTAGTTGGATAGGTTTGTGGATTTTGTGGCTGACGGGCAAATAAAGTTTGTAAATGGTTTGTCTATCTGCC  
AGTTGATTAATACATGGCGGCTATCTGACCGCCAGCACCAAGAATCAGTACATTTTTTTCATGAAAATTATCCAGATTA  
TTGGCAGCAATATGCCAGTCCATATCACTATTGCGGATTTGAATATGTTTTCATTACAGAGTTTCTCAAAGAACGGAGCT  
AATACTGAAATGCTTCCAGCCATAGGCTTTGCCGTCATAAAGATCCATATGGTTTGGCGCTTCAACAATGTGATAGCG  
TTTATCCTGGCTTGTGCTCGATCGTACAGGTCGTCATCCATTTGCTCCCTGCTGGCTGCCCGCCACAATCTGCG  
TCGGCTGAGTCAGGTACTTCCGCCATATGGTAAGCATCATAGGTAATAATCTGGTTAAGGCTGCGCAAAGTAGCGTAA  
CCCGGTGCTGTTGGATACTGCGCGGAGGGGTGGTAATACTCCAGGCCTGACGCAGTCTTCTGTTCCGGCGCATCGGA  
CTCCTTCAATGGTGCCAGTGGCATAATGGCGTATTCCTCGCTGTAATATCGCTGGTCTGGCGTTTGAACCCGCTTCAA  
CGTATGGCAGGCATCAATAGATTTACATTTGTTTTCCAACCATTACGGAATATCGAACCAATATTGACCGCACTAACG  
GTACCGATGGCCTTGTGCGGCGATCCTGAATTGCAGCATTGGCTGTATATCCTGCACCGGCACAAATCCCATCGCAC  
AATTCGGGTATTGTGACATAAGAAAGCGTTGTGAGTAATCAATCACGGCACTGATGCTTTCAGTACGAATGTATGGGT  
TTTCAACTGACGCGGCTCGCCGCCACTTTCACCTTGATAAGATGCGTCATAAGCAATAGTGACAAATCCCTTTCCGCC  
AGTTTTTGGCATAGGTTCCGGCGTTTGTCTTTAACGCCCCACCTGGGTGAGATAACAACAATTGCCTGATACTGACG  
GGTTTTCATCAAATTTTGGAGGAAATAGATCACTGCAGACAAAGAGATGGTTGGATTATTGCTGTTAGTGAAGCTGACTT  
TATTATTCACTTCCGTTCTCATGGAGTTGTGCGTTTTCGTTTTAACGGTTGGTATGATCACTATAGATATTGATCATT  
AGTTGATTAGACCCAAAATCATGATTAGACCTATCATTTAAATGATTAATAGATTGCATGGAGATACTGAATGAAGCGTG  
AAGAAAATCGCTGATCTGATGGCGTTTGTGCTGTTGAGAGGAGCGTAGCTTCACTCGTGCAGCAGCCCGCTGAGCATG  
GCGCAGTCAGCTTAAAGCCAGATAGTGCCTGATAGAAAGACGATTGGGATTGCGGCTTCTGACGCGAACCCAGCGCAG  
CGTTGTTCCAATGAAGCGGGCAGCATCTTTTGTCTGTTCTTGGCCCTATGTTGCATGACATAGATTACGCCATGGCAT  
CCCTGAGCGATCTGCAGAACCGCCATCCGGGACAATACGTATTACTACTGTAGAACATGCAGCAAAAACGATATTGTTA  
CCAGCAATGCGCACATTCCTGAAATCGCATCCTGAAATGATATTAGCTCACCATTGATTATGGTTTACCAGTGTGCT  
TTCTGAACGTTTTGATGCAGGCGTCCGCTGCGGTGGGAGATGGATAAAGATATGATCGCCATTGCAATCGGGCCAGATA  
TACCAATGGCTATTGTTGGCTCACCAGTATTTTTCTCGCCGAAGTGTCCAACGTCAGTGTACAATTAATAGATCAT  
CAGGCAATTAATTTGATCTTCCACATCGGATACAGCAAATCGCTGGAGATTAATACGGGTGGACGTGAAGTTCTGT  
TCGATGGAAGGTGAGCTTTTACTGAATACGATAGACTGATCATTGATGCTGCAATTGATGGCATGGATTGGCGTATC  
TACCTTATGATCAGGTTGAGCGGGCTATTAAGAAAAAAAAGTATACGTTGTTTGGATAAATTCACACCAGATTTACC  
GGTTATCACCTGACTATCCACACCGTCGACATGCTGGCTCGGCATTCTCATTATTTATAGATAGGCTGAAGTATAAAGG  
TGCTGTTTAGCACTACTTGTGATACATTAATTTAATCTTCTTAAACGATTCTCAGTTCTTTCAACGTTTTGGTCA  
TTTTTTATTCTTCGTACAATGGCGACAGATGCTGATTATGATACCGAAAACGGTTTGAACGTGCGAAGCCCGAACGTA  
TGTTCCGAGTTCTATGTGCTTTACCGCATTTTGGAGACTATTATTACACTAAATCTGATTTGATATATTGATACTTAA  
ACATTTGATGCTTCTTTGTCACTTTTTTGTGAAAGTTGTTTGCATTTCTTAAAGCGAAACAAATAATTACGCATCAA

TTTTAATGTCGGTTAGAGGGAACTTATGAAGCACTCTGTTTCAGTCACGTGTTGTGCGCTGTTGGTCAGCAGCATTCT  
CTTTCGTATGCTGCAGAAGTCCGAGCGGCACAGTACTGGCAGAGAAGCAGGAGCTGGTGCACACATTAAGATGAGCC  
TGCGTCGCTGGATCCCGCTAAAGCCGTGGCCTGCCAGAGATTAGTTCATTCCGATCTGTTTGAAGGTCTGGTGAATC  
AGAACGAAAAAGGGGAGATTGTCCCGCGCTTGGCACTCAGTGGAAAAGTAATGACAACCGTATCTGGACTTTTACCCTG  
CGCGATAACGCAAAATGGCGGATGGCACACCGGTAACGGCGCAAGATTTTGTCTACAGCTGGCAACGTCTGGTGGACCC  
AAAAACATTGTCGCCATTTGTCATGTTTTGCCGCGCTGGCGGGAATCAACAACGCACAGGCGATTATTGATGGTAAAGCTA  
CGCTGACCAGCTTGGCGTCACCGCAGTTGATGCCATACTTTGAAAATTAGCTTGATAAACCGTTGCCGTGGTTGTG  
AATTTAACCGTAACTTTGCCTTCTCCCGGTGCAAAAAGCCAACGTAGAAAAGCGGTAAAGAGTGGACGAAACCCGGAAA  
TCTGATCGGCAATGGCGCTTATGTTCTTAAAGAGCGGTAGTCAATGAAAACTGGTCTGGTACCGAATACCCATTATT  
GGGATAACGCCAAAACGGTACTGCAAAAAGTGACCTTCTGCCAATTAATCAGGAATCCGCAGCCACTAAGCGTTACCTC  
GCGGGGATATTGATATCACCGAATCTTCCGAAAAATATGTATCAGAAGCTGTTGAAGGATATTCCGGGGCAGGTTA  
TACGCCGCCGAGCTCGGGACCTATTATTATGCGTTAACACGCAAAAAGGGCCGACGGCAGATCAGCGCGTTCTGTCTGG  
CATTAAAGTATGACGATAGATCGCCGCTGATGACCGAAAAAGTATTAGGGACGGGCGAAAAGCCAGCGTGGCATTTTACA  
CCAGATGTTACCGCGGATTTACGCCGGAACCTTCCGCGTTTGAACAAATGAGTCAGGAAGAACTGAATGCGCAGGCAAA  
AACTTTGTTGAGCGCAGCTGGTTATGGTCCGAAAAACCGTGAAGCTGACGCTTTTGTATAACACTTCAGAAAACCATC  
AAAAAATTGCGATTGCTGAGCATCGATGTGAAAAAGAACCTTGGCGTAGATGTTAAATTGCAAAATCAGGAATGGAAA  
ACCTATATCGATAGCCGTAACACCGCAATTTTGTGTTATCCGCGCCTCGTGGGTGGGGATTATAATGAACCCTCCAC  
TTTCTGACATTATTAACGTCAACGCATTAGGAAAATTTTACGCTTTAACAATCCGGCATATGACAAAAGTTCTGGCCC  
AGGCATCGACGAAAAATACCGTTAAAGCGCGTAATGCCGATTACAACGCGGCAGAAAAATCCTCATGGAGCAAGCACCG  
ATTGCACCAATTTATCAATATACCAATGGACGATTAATCAAGCCGTGGTGAAGGTTATCCCATTAATAATCCTGAAGA  
TGTGGCGTACAGTCGACTATGTATATTGTGAAGCATTGATGTGATGGAACTGGCGTTACCTTGTGCATAACGCCAGT  
GATGTCTGATTAGCGACCTGTTCCGGCGGTGTAATGTTATCCATATACAGCGTCTGGCTGGGGAAGGCAAAAGTCCGCG  
CCGTGTGACTGTACAATATCGATAATCTTCAAATAAACGTCTTGTCTGTCAGCAAGCCATTAGCCCATACCGTGGTTTT  
GGTAAAGCAATAAACATAATATTCAATGAAGAGTCAGCAAACCTGGTGAATAAACAGTAAGGTTTGTGCTGGTCTGA  
TGGCCGGGTGATTTTTCAGCATCTCACGTACAGCTTGCACAATAACGCCACTTTTCCGCGATCCTCATAACGTAACCA  
ATGGTCTGGTAAATGCGCGGTTGGTCAATCGTCTGGTTTTCTACGCTGATCGACGAAAACAGCGAGTTCGGTACGTA  
CAATGGACGATTATCAAAGTCTGAATTTTGGTAATTCGCCAGCAATTTCCGCTACTGTACCTTCGATATTTCTGTCCG  
GTGAACGGATCCAGTCGCAATACTGAAAGGACGGTCAAATAGAGCATAATCCCGAAAAGGTTACTCAGAATATCT  
TTACCGGCCATACCGACAGCCAGACCACAATACCACCAAAGGTAGCAAGCCAGAAAGGCTCATGCCGAATGTTCCGCC  
ATAAAGCAGAACAAAGCACCAATAATGGTGATTTTGTGATACGCGACATAATCCGCGCACTGGTGATATCGCGACCTT  
TTTTAATCTGCTGTTTTTCAAATGATTAATCAGCAGAAAATAGCTTAATCGTCAGAATAACCGCAATCAGGGACGTACAG  
ATAAAATCGATAACGCCTGGGGTGATAAATTTGAGTTTATAGTTTTCTATAACATAATTAATAATGCTACCAACAGCACT  
GATAATTATGGTGTAGATTAATAATTTGCACCGCATGGAATAAAAATCCTTTTCTTTTACGATTTCCACGGCGAAACCAA  
AGCTCATCAGAATCAATGCTGCGCAGTACCAGAAAATGACAGATTAAGCGCATTATTTGTAACAGTTCAGCGATC  
ATTGTTTTATCAGGCTCCTCCAGATAATTGTCGTATGCCGAAACCCCTGGCGGGGCTATTTTACCGCGACAATTCATT  
CAGATCATCAATAGTCAGGGAAGGAAGTAGCAACATTAGCTAAGGAAGGTGCGAACAAGTCCCTGATATGAGATCATGTT  
TGTATCTGGAGCCATAGAACAGGGTTCATCATGAGTCATCACTTACCTTCCGCGACAGTGAATTCAGCAGTAAGCGCC  
GTCAGACCAGAAAAGAGATTTTCTGTCCCGCATGGAGCAGATTCTGCCATGGCAAAACATGGTGAAGTCATCGAGCCG  
TTTTACCCAAAGGCTGGTAAATGGCCGGGACCTTATCCGCTGGAACCATGCTACGCAATTCAGCATTACTGCATGCAGCATTGGTA  
CAACCTGAGCGATGGCGGATGGAAGATGCTCTGTACGAAATCGCCTCCATGCGTCTGTTTGGCCGTTATCCCTGGATA  
GCGCCTTCCCGGACCGCACCAATCATGAATTTCCGCCACCTGCTGGAGCAGCATCAACTGGCCCGCAATTTGTTCAAG  
ACCATCAATCGCTGGCTGGCCGAAGCAGCGTCAATGACTCAAGGCACCTTGGTCTGATGCCACCATCATTGAGGCACC  
CAGCTCGACCAAGAACAAGAGCAGCAACCGCATCCGGAGATGCATCAGACCAAGAAAGGCAATCAGTGGCACTTTGGCA  
TGAAGGCCACATTGGTGTGATGCCAAGAGTGGCTGACCCACAGCCTGGTACCACCGCGGCAACGAGCATGACCTC  
AATCAGCTGGGTAATCTGCTGCATGGAGAGGAGCAATTTGCTCAGCCGATGCCGGTACCAAGGGGCGCCACAGCGCGA  
GGAGCTGGCCGAGGTGGATGGACTGGCTGATCGCCGAGCGCCCGCAAGGTAAAGAACCTTGAACAGCATCCACGCA  
AGAACAAAACGGCCATCAACATCGAATACATGAAAGCCAGCATCCGGGCCAGGTGGAGCACCCATTTCCGATCATCAAG  
CGACAGTTCGGCTTCGTGAAAGCCAGATAAAGGGTTGCTGAAAAACGATAACCAACTGGCGATGTTATTACGCTGGC  
CAACCTGTTTCCGGCGGACCAATGATACGTCAGTGGGAGAGATCTCACTAAAAACTGGGATAACGCCTTAAATGGCGA  
AGAAACGGTCTAAATAGGCTGATTCAAGGCATTTACGGGAGAAAAATCGGCTCAAACATGAAGAAATGAAATGACTGAG  
TCAGCCGAGAAGAATTTCCCGCTTATTCGCACCTTCCCTAACTAATCAATGCGTTGATTGTAATCCAGCTAAGAGGTG  
AGTTTTTTCAGAGCAGACAACGGTGAATGTCATGGTATTGTTACGTTTAAAGTAAACAAGAAATTTGCTGCACAAGGATTA  
CATCATGATTATGGCGAACTGAAGTCAGCGAAAGGGAAGAAATTTCTTTGTTTGGTGGCGTTTTTATTATTGCGG  
CGTCCGTTGTGACTCGCGGACCATCGCGCGGCTTATAGAACAGTACAATATTCGCTGTCTGAGTGGACGACATCAATG  
TATGTGATTAGTCATCGATGATTTTTGTTTATAGCCTGGTCTTACTGTGTTGCTGGCAATCCCGTTGGGAATTTATTT  
CCTTGGCGGCAAGAGCAGTAAGTAAAAAATAGGCCGATAACTCGGCCTTGTGAGTATTGAAGAGTCGTTAATCGTC



TTCTTCGTCATCCAGTTCAACGGGTGCTGATACTGGTCAGGTTAATGACCAGCAGGTCGCAGCGAAGATGATCAATCA  
CCTGTTCCGCCGTGTTGCCGAGGAATGCTGCTGAAATACCGGTGCGTCTACCGTGCCAGAACACAATCCCCGCCTGT  
AAGTGCTCCGCCAAATCAGGAATCACCTCTTCTGGCAGACCTTTTTCTACGTGCGTCATGTTTTATTAAATGCCGAATTT  
CTGCCGAGGGCTTTTCATTGCCAGCAAATGTTGCCACGAATGGCATCGTTATAAACGCTCGGGTCAAATTCGGCAGTT  
CAATCGCGATATTAATTGGCGTTACCGGATAAGCGCCAACCAGATGAACTTCGGTATGGTTGACTTGTCTGCCAGTTCCG  
ATCGTCTCTTTGACCAGTTTTTCATTGAGCGCATTATGATACGGCTCTTCACTGGCGAGATTACCGCCACCAGCGCCTT  
GCCTCTTCCGGCCACGGCTGGTCTTTCACCATCCACACCGGGCTTGGGCATTTGCGTAACAGATGCCAGTCCGTTGGCG  
TAAAAATCACCGCTTCCAGACGGTCATGTTGGTGCGCCATTTTTAGCACAAATCGTGTCCGCCGCTGATCACTTCTGA  
ATGATGGCTTCCGAAAGGACGGTTATGCCAGACCCTTAATTTCAATGGGAACGCCAGCATTGAGATAATATTTTGCCTG  
CTCGTGGATCCAGGCTGTACGCTGGCTGATGACGCCCTGACGCATAGCGGTACGTTTCGTCCGGGGAGAGCAGGGTGGTCA  
TTTCGATGAGAAGTCATAGATCGGCAAAAAGGCTTAAATTTGCCACCAATCCGTTGATGTAATAAACAGCTCGCCGC  
AATGCTGGTTGGTCGTCTGGTTAGGATCGATAACAACGAGCATGTTCTGATACATAGCCATACAGGGTCTCCTTACAAC  
AACTGTCAACGCAATTTGTAATTAAGATTAACCCATATCTGGTGAATGAAACAGTGTAAACCTTCTGCCAGATCAAT  
AAATCAGAAAAATTAATGATATGACAGAAGGATAGTGAGTTATGCGAAAAATCAGGCAACGTTACGCGTATGACCAGC  
AAGCTGGGCCAGCGCATGTTATTTTTGATGGTGTATTTACCTTTGACTGCCAGCATGCCGCTTTTCTGGAAGCGAC  
CCAGCAGACGGCTGATGTTTTCTACCGTCAGGCCAGATAGTTACCGATATCGCCACGAGTATCGTCAGCGGAATTC  
CGAGGGGAGAAGCCGCTTGGGCAAAACGACGGGACAGGTTGTAGATGAATGCAGCCAGACGTTTCTCGCATTTTTCTT  
CGACAACAGCAGGATCATGCTGATCGCCTTTGATTTACCGCTCATCAGACGCATCATCTGCTGACGCAGATTCCGCA  
TTTTACCGACAAATCGTCCAGCGTTTTGAAACGGGATTTACATACCATCGAGGTTTCCAGCGCTGCGCGAAGCTCGGG  
TGATGGCCGCTGCCGATGGCGTCAAATCCCACCAGTGCCTGCTAAATGAAACAGTGAATTTGCTCGTCGCTTGTCTC  
AGTGATGGTATAACTTTAATCGTACCGGAGCGGATGGCATAAAGCGATTTAAGTTCATCACCAGCCTTAAACAGCGTCT  
GGCCTTTCTGAATAGGCTTCTTCCGCTCAATGATATTATCAAGCTGATCAAGCTCATGTTGTTGAGTGTAAACGGGATG  
CAAAGCTGGCTGATGCTGCAATCCTGGCAATGGATAGCACAACCGCCAGACTGAATGCGCCGTATAATTCGCTTTTCCGG  
GATCATAGGTCTGCTCAAGCCGTAATTGATATTTGCAATTTAACATCTTTTTAGGGAGCAAGTAAGTCTAAGCAAACC  
TTAACAGCAGAGAATTCGATATTAGATGTAATATATGTCTATCTATTTGAAAACCTTAAGTTGTTAAGGGTAACCTT  
ACATAAAAGTGTGAACAAGCTGGCACAATTTGTTAATGTTTACAGCAAAAGATAACCTTCATGGCGCAATAACCACTCT  
TTTCGCTGAACTCCGCTGCATATCCGGTTCATGGTGCCGTTTTCGCAATAACCGATGGCAAGGTACGACGATGCTGAT  
GGGATTCGATCCGTTTGGCCACCAACGGCAGCGCCGCGCCAGGACGGCCCAATTTGCTCAGCCAGTTGGCCGTAATGCA  
TTACCTGCCCGCAGGGGATAGTGCGTAGTGTTCAGACTTCGCGCTGAAATGGCGTCCCCCGTAGCAGTGGGAAGC  
GTATCAATAATGCTAAGATTACCGCAAAATATTCAGGAAGCTTGTGCTTAAACCGCCTGGATTGGTGGCAGAAATGGC  
CTCATAGCCTTCTTTCGATAATGGATGTCCAGCAGCTGCACCATGCGTTTCGCTGTAATCTTCCCATTCAACCGCCCGCA  
GGCGAAATTTGCTCATCGAAATCACCCACAGTGGACCCAGTGGCGTGGAATTTTTTTCTTCAAGTAATCTCAGCATCCGT  
TCTCTTTAAGACAAACGTGGGTAATACCCGGACTATCGGCAGACCGACAAGATACCACGCCAGCAACATCAGCAGCC  
ATACCACCAAAAAGATAAGTGGATAGGGCAAGACTAACGAATAGTAAGTACCAGTTTCGCGTCTGGTTTGTAGCGTTGC  
AGGAATCCAAGAAACAGTGGAAACAAAAGGAGATACCGCGCTAAAGGCAATACGGATGAGTCGGCAATACGAAAGAGGAT  
TTGCGCAAATGCCGGGTGAAAGCCAAGTAGCATAAACATTGGTACGAAAATGGGGGCGAGAATCGACCAGATTGCGGAAC  
CGCTGGCAATAAACATGCATAAGAAAGAGGAAAGCAACGCCAGACCAGCAAAACGCCGGGATGCCGCTAAGCCCTGAACCT  
TCCAGTATATCGGTACGCCCCACGGCGATGAATTTCCCATGTTGCTCCAGTTAAACATGGCGACAAATTTGGGCGAGGGG  
AAAAACCATCACGATAAATCCGCCATCTTTTCATCGGTTCAATCATTAAATGCGGTAATCCGCTGACGTCGAATTTG  
TGCGGGTAGCGATGCCATAAGCCAGCGAGACAACAAAAGAAAAAAGAATGATCAGTGGCAGCAGATCCTTAAATAAAGGGT  
GATGGCATCACGGTGTGATTAATCGGATCGCGCAATATCCCGTTTTGCGGGATCACCATCAGCGCAATCGCAGCAATAAA  
AAGTAGCGATACGACACCTGCTATGCGTAAACCAAAACGCTGACTTTTCGGTCAATGTCTGAGTTTTCTATCGCTGTTTC  
CCTGCCATTGACCTAACCCTGGCTCGATGATTTTGTGCGTTATCAGGCCGCAACAATCGTCAGTACGACTACGGAGCTG  
GCCATAAAATACCAGTTATCAATTACTGACGTGCATTTGCGGATTGAACGCAGCTGCCGCTTCCGTGCTGATCCCCGA  
CAGCAACACGTCGTTGTGACAATCAGTAAATAGCCGTAAAGCCGCAACCTACGCCTGCAATGGCAGCCAGTAAACCTG  
CAACTGGATGCCTGCCACCGCCAGAAAAATCAGCGCACCCATCGGTGGCATGATCACTAACGCCGCATCGGAAGAAATG  
TGGCTGAAAAAAGCAATAAACAGCACCATATAACTGGCGTAGCGGGCATTAAACATGCGATGCCATTTTAAACCATTAGTGC  
TGGCAGTAAGCCGACGCGCTCCGCCAGACCGGCACCTAAAACCAGCGCCAGGATCGACCAAGTGGAGCAAAACCGCTAA  
AGTTTTTAATAACATTGGTAAAAACAGTGAATCCTTCCACACTGAGCAGGTTTTTACCACGACCGCGTACCATCG  
GTCGGGTTTTTTCGACTGACGCAAAAGCCGACAAAATTTGCCGCTGCACCATGAGTACGATAATCAAATAGATAAAGAG  
CAGAAAAGGATGGGAACCTTGTACCAATTTCTTTCGACCCAGCCATAGAGTTCCTCGGATTGGGAGGACGACGGTATGG  
ATGACATACTCATGGCATTCTCGGTTGTTGTGTTTGCCTGTTGTTGTTATTTTAAAGGTGACGGTGTACGTTTTTTC  
GGATAGGGCAGTGTACGTTTGCCTGCTCGGTTACTTGTGCTGATGCTTGTGTTGCAATTTGCAATAGCCCTGAATCAAG  
GAAGAGATTGACTGTGGTTGCTGCCATAGTTTTCGCCGCCAGCAGCATTCTTTATGAGCAATAGATGTTTCGCCCTGGC  
TAACCAGTTGCCACGTATGTAGCGGTGTACCGACGGCAAAACAGGGGCTGAAACACTGGGCAACAGGCAGTTTCCAACCTG  
ACGTCGCCGACATCAGTCGATGCCGAAGCACGTTATCGGTGGCGGCATATGGAGCGACTTCATTCCGCAAGTACCGTTTC

ACGATGACGTAGTGCAAAAACCTTGCCGTTTTGCCACCGGTTGCGGCGATATTATTGAGACTGTTTTGCCGATCGTTGG  
AGGTGAGCGTAGCCTGAATTTGTTTCGCAAAAGCCAGTTCTTCGGAGTTCCATTCCGGGGTACCAAAATGGGATAGGGCC  
TGGTACATGGCATTCTTAAGGTGCGATTGCGGAGATAACTGGAACAGGCTTTGTCGAAGCGGCATTCAACCGTGGTTTC  
GGTCATCAATGCCGCACCTTCGGCGATTTTGGCGACCCGATCATAAATATGCTGCACGTCGGTCATTTCCGGGGCGCGGA  
TAAGATAAAGCACTTCTGCCTGCGCCTGGACCACGTTGGGCGAGATCCCGCCGCTATTTGTGATGGCATAGTGTACGCC  
GCTTTTTCAATAATATGTTGTTGAGGAAGTTGGTGCCAGTGGTCATCAACGTTACGGCATCAAGGGCGTGGTCCCAA  
ATGAGGGGAATTCGCGGCATGTGCTGCGATCCCTTTAAAGCGCCATGATGCCTGAATGTTGCCAGCGTGGGGTATTGA  
ACATACCGGCAAGGCTTCCGGGTGCCAGGTGAGTGCCGCATCCACATCAAAATACCCCTCGGAACCATGAACGTT  
TTACCCGAGCCGCTTCTTCGCCAGGACAACCATAAAAAGCGCACCGTGGCCCTTGCCCATATTGTTCCAGCCATTTCTT  
GACGGCTATTGAGCGGCAAGGGCGGCTTCCAGCAAATTTGTGTCGCAACCGTGACCATTTTACCAGGGCGTACGG  
ATGTAGGTTGCGCGCAACCTGCTTGTGACTTAAACCTGCCAGGGCGTCATATTCTCCAGCAGGGCGATAACCGGTTG  
CCTTGACCAAACGAAGCAATAAAGGCATTTGGGATATTGCCTACGTTGCGGGTAACGGTGAAGCTGCAGATTCCAGCGC  
CGAAGCCAGATGCTCCGTGACCAGAACTCTTCAAACGTGTTTCTGGATGATCCAGATTGATCGGCAATATCGGTAT  
AACGTTGGCGATCGGCTTCAATCGCATCGTAAACGATAGATTTCTGCATCAGATACCTCGCGTCCAGGGAAAAA  
TGAGCGCGGTGCGCGCAGCGTTTCGACGGCAATAGCGAGAACCCTGCTGCAAAATCGAATTTTTGTTGTGATGACCT  
GCCGCGAGTGTGTGCCAAACACCAGTGGAGGCTTCCCTTGTGTTGCTGCACGCGGGCCATCATAATGTGGCATC  
TTCCGAACCCGACGGCGCTTCAACACGTTCAATGGCCTGATTGACCCCGCGACCTGAGCCGCTGACTTTGCAACCATG  
CGACCCATTGCGGCGAAGGAGAAGTGGCGGTAGCTGACCCATCAGACGAGTTTCAACGCGACACCATACATGTTGCT  
GCGCCCTGAATCGCTTGTGTCACGTCAAAACATATTGATTAATGACGTCGCTGGCCCGCGTGTTCCTACTTTTACG  
CAACGCGGAGGCGAGGAACAACGTTACGACCGCTTCTGCTGCATAACGCCACGTTTACTCTGGAAGCTCCTTCGCTGT  
GCGGGGCGATTGCATGCAGTGCAAGAGTGGCTTGTGCTGCCGCAACAAGGCATTGTGACCGTCTTCTGGTTTTGCGCCT  
GCGTGAGCGGCGGTACCGGTGAAGTGCAGTCAAATTTGGTGGTTGCATAAAATTACTGCGCACACCACGGTGCC  
CGCAGGTACGCCAGTGCCATGTGCACGGCAGTAAATAATCAACATCATCTACGACACCTGCATCGACCATCGCCCGC  
CGCCACGCGTACCTTCTGACGGTGAATAATCAGTTTGTGACGCCATGTAGTCCGGACTCGAAGTGTAAAGGTA  
TGCGCCAGCCCAAGCCCAATGGCGGTATGTCATCATGACCACAGGCATGCATATTCCGGCGTTACATGACGAAAACC  
GTCGCGGTAGGGCGATGGCTGACATCCTGCTTCTACTGAGATCCAGCGCTCCATATCGACACGGAAGCCATCACCG  
GACCGGGGCGACCGGTATCCAGGTGGCGACGATACAGTGAACCACTTCAAAGCCGCAATCCATTGTGCTAGCGCA  
CCCTGTTGACGAGCGGCTCGAATTCGCGTGTAGAGTGAATTCATCAGGTAATCCCATCCGGCTACTTTACTTA  
TTCCGACCCAGCGCCAGTGAATAGCCGAGCTGGTGCATTTCCGCAACAAGGGTGGCAGTGGCGAATTCACCCAGC  
CAGACTCTGCATAGTGATGAAAATCACGTCGCCAGTGCGATAATTTGGGGCAAGCAATTAACAAATTGATTAAGAC  
TCCATAACCTTTCCGTCATCAGTAAAAAGTGTGACCCGGTTCACGTAGCGATAGTTTTACTTATCACTAACTGATTTT  
TCACAGTTTTAACCGTTCATAAATTACCTGACACAATCATCTGCATTAAGTAGATGCCAGTTTTCTTGGTCTGATAAA  
TAACGGTTATCGGTGGCGTCATGGCTTTTTCAGGTAAAAATTCATAAATTCGGGCTTTTGTGAAAGTGGCTGTCAGGGC  
AGCATTGCGGAGCGAGCCGAATGTTGAATATGTCGCAACCGGCACTGAGTAAATCTATTCAGGAGCTAGAAGAAGGTT  
AGCGGCGCAACTCTTTTTTCGCCGTAGTAAAGGCGTGACGTTAACTGATGCCGGTGAAAGTTTTATCAGCACGCCAGTC  
TAATTTGAAAGACTGCGCGCAGCCCAAGAGGATTTCCGCAACGACAAGGGCAACTGGCAGGGCAGATTAATATCGGC  
ATGGGGCCAGTATTTCCCGAGTCTGATGCCAGCTGCATATCTGTTTTATCAGCAGCATCCGCAGGTAAGTACG  
CATTATGGAAGGGCAACTGGTGTGATGATTAATGAATTCGTCAGGGAGAATTGGATTTACCATCAATACCTATTATC  
AGGACCGTACGACCAGCAATTTACTTTGAGAAATTAAGTAAAGCAATTCGCGATCTTTTCCGCGCCGGGACACCC  
GCCATTGGTCCCCTTGCATCAAACAGTTACTGGATTACAGTGGACAATGCCGACGCCACAGGCAGCTACTACAAACA  
GTTGAGTGAATTTGCTTACGATCAGGCGCAACCGCACAGGTCGGTGTAGTCTGCGAGACGTTCTCAGCCTGTATCAGTC  
TGGTGGCAAAAAGCGATTTTCTCAGCAAACCTGCCTGAAGAAATGGGCTGCGATCCCTTGCACGGACAGGGGCTGGTGTG  
TTGCCGTTAGCGAAATTTTACCAGAAAGCGCCTATTATTTGATTGACGCGGCTGATAGTCCGACAGACCCACTGACCGC  
GTCATTAATCACGCAATTCGGCGAGAATGCGGCTATCTGCAAAGTTAAACTGCATAAAAAAATAGAGTCTGTGACAT  
CCGCCAGACTCTACAGTACACAGCAGTGCATCCGCGCTTAAATCCGGCATTGTCTCTCTGCGCCGGTGACTGTGTT  
ATAACGTTTTAACCTTTAGTTGCCAATTTTCTCAGTGACAGATTTACGAAAATATAAGTTACATTATTAATATCGTG  
AATGAATAATCATGCATAAGTATTTGCTTAAAATATCGGCAATATTTGGAACCTTACTGGAAATTTGGGTAATACGT  
TGTTGGACCGACCGGTCTGGTTATCATATCGCGCTTAAATGCGGGAGGATGAACATGAACCTTGACGACAAATCGC  
TGTTTCTGACCCATGAAAGATGTCCAGCGCTGAAACGTGCTACCGATGTCCACTGGCATCCAACGCGTAACCAACGT  
GCGCCGAGCGTATCGACACGCTGCAGCTTGATAATTTCTCACCACCGGATTTCTCGACATCATCCACTAAGTCAGCC  
GCTGGAGTTTCCGGCGGAAGGGTTGCAACATGGGGTCTGGATAAGTCTGCGCAGTGGTAAATATCCGCAACAGGCGAGCC  
TGAATCTTTTGCAGCCGGTGAAGAGTGCCGCAAAATGGTGTTCAGTTTTATTCAACAAGCCCTGGCGGATGGTTTG  
CGTAACGTGCTGATTATTCATGGTAAAGGGCGGGATGATAAATCGCATGCCAATATTGTCGCGAGCTATGTGGCGCGCTG  
GCTGACCGAATTTGATGATTTAGGCATATTGACCGCGCTACCGCATCATGGCGGACAGGGGGCGTGTACGTGCGAC  
TACGTAACCGGCGCAGGCGAAGCAAGAAAATGGGAGCGCCAGCTAAGCGCAGTCGTTGATCTCGAGACGCATCCCGC  
GCTTATGCCCGCAGCAGCGGTTGCGTCCATCATTTTTCGCCGATACAAAGCATCATCAACCGGTTAAACAGTTCATC

GATGCTTTCATTTCTTCGTGATGCGCCACACCAATGCTGACGGTAAAGCGTGGTAAGCCCGAAATACTCACTTTTGCCA  
CGCTTACGCGGATAGTTTCAGCCAGCGAAAGCGGGTATCCAGTGGGGTCTTGGTAGCAATAAGACAACTCTTCGCCT  
CCCCAACGAAACACCAAATGCCTTTGCGAGCGCAACTTTGAGGGTGC GGCGAGGGCGCATAACACCTCATCACTTT  
AGAATGCCCATAGAGATCGTTAATGTGTTAAAACGATCGGTGTCGATGAGCAACAAGCTGTAATCCTGAGCGATGGCGA  
GATGCTGCATTTGGCCTGGTTCGTAATGTGATAAACTGTCGCCGATTGAGTAATCCGGTCATCGCGTCATGGTGAGCA  
GCATGTTCCAGCTGCTCCTCCAGCCGTTTTGCTCAGTAATATCATGCACAATACATAACATGAGCTTGTGCCATAAAT  
TTCAATCGGTCCGGCATAGGTCTGCACATGACGAGTGAACCATCCGCCAGTTTATGAACAAAATTCAAAGGTTTATGAC  
CACCGGGTAAATGCGAGATTTTCATGCATGATAGGCATGACGCGACGCCCGAGCATATTTATTTCCAGGTATGTTTCTGG  
CACATCGTTTTCATGGTTATAACCATAGAAATTGAGCGCGGCGAGGTTAGCATCGACGATTTGTCCATCTCGTGACGGGT  
AATCAACAACATTGGTGCAGAGTTAGTCAGAAAAAGCGCGCATAAAAACCTTGTTTTTGCGCTGATAATTTGCCGAGC  
GACTGGCTTTAAACCCAGCGTTGCCGGCGCTTCGATACCTTCGAAAATAATCACCGGTTCTGTTTCTGTGAGCTTTCCG  
AAAAAAGCCGACAGCTCAATGCTGTTTCTTCTTTACGCTGAACAGTGAGATTTGATAAATCGTGTGGTTTTG  
CAGATCGGAGAGGTTTTCGGCAGTTCTTTTGTGAGGAGACGGAATAGGGTCCGGTTCGTAGCTGACTAAACGTGAGGT  
CTTGATCAACAGTTTCCGCCGCTATTGGCATAAAATTAAGTCTTCTCAAAGGGCGAAACGATCCAGACAGGACTGGTG  
AGTAAGTCCAGGTATTGAAGTTGTGCGTAATCATTGAGATCCCGTTATTTTTATCAATTTTTGTTGCTATCCGATCGCA  
AAAAAGCCAGTCATATGATCAGATAATTCTGATAATGATAGACGCTATTTAACACTTCACACGGTTTTGTATACGGAAAA  
GCATTTTGTTTTTGTATTCAATTTAGACAGAATTTTATTAATCATTTTCAGGGTAATGGGGTGATGAGATGTTGCGTAAC  
AGGGCCAGAAGGCTAGACTACAAAATAATGCGTTGATGATGGAGGCACTGTGGAAGCGATTAAGGGATCGGACGTTAATG  
TCCCGGATGACGATTTTGCCTGGATGCTGGATGGTAGAGGCGCGCTTAAACCGCTGGAAAATACAGATGTGATTGATGAA  
GCGCATCCCTGTTGGCTCCACCTTAATTATGTACACCATGATAGCGCCAATGGCTGGCGACAACACCGCTGCTTCCCAA  
TAACGTACGTGATGCGCTGGCGGGGAGAGCAGCGTCCCGAGTCAGCCGTCGCGTGAAGGCACGCTGATTACATTGC  
GCTGTATAAACGGCAGCACCATGAACGCCCGATCAACTGGTCGCCATGCGTGTATATATGGACGGCGGTTAATTGTT  
TCGACCCGACAACGAAAGTGTGGCGCTGGACGATGGTGGAGCATCTGGAAGAGGGCACGGGTCGACCGATTGCCG  
GGGATGGCTGGTGGATGTGTGCGATGCGTTGACCGATCATTCCAGTGAATTTATCGAGCAGCTGCACGATAAAATTATCG  
ACCTTGAAGATAATCTCCTTGTATCAGCAAATTCACCGCGTGGATTCTGGCTCTGCTGCGCAACAATTAATTGTGATG  
CGTCGTATATGGCACCGCAACGTGATGTTTATGCTCGTCTTCCAGTGAACGTTTCCCGTGGATGAGCGATGACCAACG  
CCGTCGGATGCAGGATATTGCCGATCGCCTTGGGCGCGCCTTGACGAAATCGACGCTGTATAGCACGGACTGGCGTGA  
TGGCGGATGAAATCGCTCAGGTGATGCAGGAAAATTTAGCTCGTCGTACCTATAAATGTCGTTGATGGCAATGGTCTTT  
TTACCCAGTACCTTTCTGACCGGGTATTTGGCGTCAACCTTGGTGGGATCCCTGGCGGGGTTGGCAATTCGGATTTT  
AATTTTTGTATTCTGTTAGTTGTTCTTATTGGTGGTGTGCTTTATGGTTGCATCGTAGTAAATGGTTGAACAAAAGC  
AATTTTTCCGGCTGTCTGTATACAAAACGCCGCAAAGTTGAGCGAAGTCAATAAACTCTTACCCATTGAGGGCAATA  
TCTCTTTGACGGTGAATGCAACGTCAAGCGATGGGCGTTGCGCTCCATATTGTCTTACTTCTTTTTGAACTACTGCA  
TAGCACAATTGATTGCTACGACGCCGACTTTGATGAGTCGGCTTTTTTTGCTGTTATTTATCAGCGTCTACCCTTTAA  
GAGTCCACCAATGACCAGAGGGAAATATGACGACACTATTTATTTGCAAATTCCTGTCCCTGAACCGATTCTGGCGA  
TCCTGTTCCAGTGCCGATCCGATCCCTCGCCGCAACCCATGCCTGACCCACCACCGATGAAGAACCATTAAATTTGT  
CGCATCGTGAGCGTAGATCTGCGAGGATACGCGCTGCTAACTTTGCGTCGATGACCACGAGAATAGATTGTGACCGCTT  
TTTCTACCTGAATGTTTTGCTCCCGCCAACTCACGAACTTAATGAGTTGGGTTATTTAACCATGACGCCGGTGCAG  
GCCGCCGCGCTTCCGGCGATCCTTGGCGAAAAGATTGCGGTGACGGCGAAAACCGGACGCGGCAAAACGGCGGCTTT  
TGGCCTCGGCTTGTACAGCAAATGATGCGTCTGCTATTTCAAACCCAGGCTTTAGTGTGTCTCTACCGTGAACCTGG  
CGATCAGGTGGCAGGTGAATGCGTGGCTGGCGGTTTTCTGCCAAATACCAAATTTTACGTTGTGCGGTGGTCAA  
CCGTTGATGACGCGTGAATTCGTTGCAACATGCGCCGCATATTATCGTGGCAACGCCGGGGCTTTGCTGGATCACCT  
GCAAAAAGGCACGGTATCACTGGATGCGTTGAATACGCTGGTGGATGAGGCCGACCGCATGCTGGATATGGGATTTA  
GCGATGCCATTGATGATGCATCCGTTTTGCGCCTGCATCTCGACAGACGCTTCTGTTTTGCGCAACCTGGCCGGAAGCC  
ATCGCTGCAATCAGCGGACGAGTGCAACGCGATCCTTTGGCGATTGAAATGACTCAACAGATGCTTTGCCACCCATTGA  
ACAACAATTTTATGAGACATCCAGCAAAGGCAAAATTCCTCTGTTGCAACGGTTATTAAGCTTGCATCAGCCATCCTCTT  
GCGTGGTGTGTTGCAATACCAAAAAGATTGCCAGGCTGTCTGCGACGCGCTGAATGAAGTAGGGCAAAGTGCAATTGCA  
TTACACGGCGATTTGGAGCAACGCGATCGCGATCAGACCCTGGTACGTTTTGCTAACGGTAGCGCCCGTGTACTGGTCGC  
GACTGATGTTGCTGCGCGTGGTCTGGATATTAATCGCTTGGCTGGTGGTGAACCTTTGAGCTGGCGTGGGACCCTGAAG  
TTCATGTACATCGCATCGTGTACAGCTCGTGCAGGAAATAGCGGTCTGGCGATCAGTTTCTGTGCTCCGGAAGAAGCA  
CAGCGGGCCAATATCATTTCTGACATGTTGCAGATAAACTTAAGTGGCAAACGCCCGCAGCTAATAGTCCATTGCGAC  
GCTGGAAGCAGAAATGGCAACGTTGTGTATCGATGGCGGAAAAAAGCCAAATGCGCCCGGGTATGTATTAGGTGCAC  
TGACAGGAGATATCGGGCTGATGGCGCAGATATTGGCAAATCGCCGTGCATCCGGCGCATGTCTATGTGCGGGTCCGT  
CAGGCTGTTGCTATAAAGCATGGAACAGTTACAGGGCGGGAAGATTAAAGGAAAAACGTGCCGGGTGCGGTTATTA  
ATAATGAAATGTTGAATTGCCGGGTGCAAGAGTAAACATCTTATTCGGGATTGCCGGATGCGACGCTGGCCGCGTCTTAT  
CCGGCTCCATAAGAGTAGCCGATACGCTTGCATCGGGCGCTATCCTGGTATTTCACTTCAACCACATTGACCGCT  
AACTCATCAAAGTATTTTCATCTTCTGCTGCGCAGCAGCCGGTGTAGTGGGATCTCTTCCGATCAAACGCCAG

ATCACCCCGTTAACCACTTCAGAACCGTGGGTGATGCCTTTGAAATCGAACAGGTTGGTATCGCACAGATGCGACGGCA  
CCACATTCTGCATCGCGCTGAACATCGTCTCGATACGCCCTGGATAACGTTTATCCCAGTCACGCAACATGTCAGCAATC  
ACCTGACGTTGACGGTTAGGCTGTGAACCGCACAGGTTGCACGGAATAATCGGGAACGCTTTTGCATCGGCAAAATCGCTG  
AATATCTTTCTCGCGCAGTAGGCCAGCGGACGAATAACGATATGTTTGGCCATCATCGCTCATCAGTTTCGGAGGCATAC  
CTTTTCATCTTACCGCCGTAGAACATATTTAAGAACAACGTTTGCAGGATATCGTCACGATGGTGACCCAAACGCGATCTTC  
GTCGCCCCAGTTCGGTTGCGGTACGATAAAGGATACCGCGACGAAGGCGAGAACACAGTGAGCAAGTGGTTTTGCCCCTC  
TGGAATCTTCTCTTTCACGATACCGTAAGTATTCTTCAACAATCTTGTACTCAACGCCAGCTTTTCAAGATACTCGG  
GCAGAACGTGTTCCGGGAAGCCCGTTGCTTTTATCGAGGTTAACAGCCACCAGCGAAAAATTGATTGGCGCGCTTTGC  
TGCAAAATGCGCAGAATCTCCAGCATGGTATAGCTGTCTTACCCCCGAGAGGCAAAACCATGATGCGATCGCCTTCTTC  
AATCATATTGAAGTCAGCAATGGCTTCGCCACGTTACGACGCAGACGTTTTTGAATTTGTTGAGTTGATTGTTCTT  
TCTTTGTAATTTGTTGATTTTCTTGCATTATTTTCTGTTCTCTGGTACTAAATGGGGCAAATTTGGGGCAAACCTTTGCAAC  
TACGATAACCGCGCATTCAACATGGCTATCTGTTGCTGTTTATGTCATCAATCCACATACCGTAAATTTATACACCAT  
CTGCGCAGTTTCATGCCCATTTGGCTGGCTATAAATGCCGGTTCGCTCCTGCCGTCAACAGCCAGCAGGCAAAAGTAT  
GCCGCGTATGGTACGGATTACGGCGGGCAATACCAGCACGTTTTACTGCTGCATTCCACCTTGCCCCAAACTGCTTACC  
GAGTAATAAGGTTTTTTTCCGTTACACACCCTGGGCATGAAAAACAAAATGCAGTTTTTGCCTTTTCCGTTCTGCCGTA  
CTCCCAGTATAAAAAGGTGATTTTCCGTTTGCATGATGCCCGTCAAGTTTGTATTGCTCCTTCAGTGCTCAAGAGCAG  
GCTGCGAGTAGTTACTGTTCCGGATCCCGGCATTTGTTTTGGGGGACCGAACATATCAAGTATCGTCAGTTTTCTTCTG  
ACATTCACTATTTCCCTTTTCCGATCCACATCCTCCCACGCCAGAGCTGCCAGTTCCCCGTGACGAAGTCTGAGTAAAC  
GGCAAATTTCCACAAGTTCTGGCTCTGCCTTTTTCACTTTCCATTAATGCATTGAATTCTGTTTTAGATAACGGATCAG  
GCTTTATTCTGTTTCCGCTGTAATTTTTTACTCCTTCAAATGGTTTGGTTGATATAAATCCCGACTGATACGCAAAACGC  
AACAGCGAACAGAGCAGGGCGATATAGTTATCAACTGTGCGCACGGTTCTTCTTTTTTGTGGATCTTGGATTATCCAG  
GTAAAGCGTTTCTCCATGCAGCAGTTCATTCCGGTAGTTAAGATATCGCTATAACGAATATGTGATATCGGGGTACTTT  
CACAAATTATTATTCTGAGTGTTTTAATTGTGATTTGTTTTCTTATTGTTTTGTTGTTAACTCTGTCTCTTTAATT  
TTTTGTCAGATATCACAAAGCTCTCCGAACGTTTTTATGACTCTGTTGTCACCATTTTTGCCCCAGTGTGGACTGGGG  
AAAACGTCTTAAATACTCAAATTCACCGAGTTTATTTATGAACATCAGCGCTTAAATTTCCGGCCTTTTTAATAT  
TACTGTTTGAATCTCCAGCCTTTAATGTTTCCCGACATCGTTTTCTCGAAACATGAACCAGATGCGAATGTATCTA  
CCTCTAATCTCGACACCTGTTGTAATTTAGACATATCATGAGTCTTTGATAAACTGATTTATCTTTGGATAGTTGTACC  
AGATAATCCCTCGTTTGTCTGGCTTACCTAAAGGAGATACTGTTTGAAGTGAAGCCCTCCACCCAAACAGTTCTGG  
CGTATGCTTCAATTTGCTGGCCCCAGACCAGTGCGAAGCATCAGGCCGATTCAACCATCCACTCTTATTAAGAT  
TACTTGTGCCATCGCATCACCTCTGGCAGGCGCAAATGTTAGACTGAAATTGACGCCCGATGTTGATTATTAATAATCAG  
CTATGAAGTTTTAATTTGAATAACAATGCAATTTCTCGAGGACTGAAGTTTCTCGCAATTAATAATTTATCAGTTTTACTTTC  
TGCTCTCTGGAACGCCTGCTTCTTTTTTACCTGAGAGCATTTTTTCGCATTCTGATTTGTTAGTTTAGATTTGAATA  
TCTTGTCCAGTTAGTAGGAGTGCCACCTTCTTTTCAATAGTGGCGGAATTTTATACATGAACACCTCCATTATTATT  
CCAGTGGTTCGTTTATTCCATCTTTCGAGTGCTTCTTTTTCACTTCCACCATAACCGGTTCCGGATTGCGATCCGTTACA  
CTTCGCTCGGTAATATCTGAAATGGCTTTCACCGTTACTGATGGACAACCACAAAATGGACATGGTTTAAACATTGTCAT  
ATCTCATAATTTTTCTATAAAAAATATTTCAAGTTGGCGGTGCATTACCCGCCAGGTGAATTTCTCTGAAATAT  
CGATTACACTGATTTCCCGGTTAATACAGAGGAATCTGCAGGATCGATTGTCAGTGGTTCCTTTTATCCATTGATACT  
GCACGCTGGATCTCAATTTGATACGGGCAAATATTTGAACAGGCGACGAATAGCCGTTTTCTTGGCATTCTTCCAGTG  
AGTTACCCAGGCCCGTTATTACCAGCTTTACTCAGGCTGCGCACCACTCAATCTGTTTGCAGTCAACTTCAAAT  
GAGTACCTCCGCTCTTTCAGTCTTGCAGCAGCATAGACGTGGGTAAACGGGGCATCTTCTGTTTTCTCCCGGCGGTATT  
AACTTTTTCATCAAGGCCAAAATTCGAAGCTAAACTCGTCACCTTACGGACAACACGGGCTGACAGGCTGGCGATTGACC  
AGAACGGCGAGCCAGATCAATCATGCCGCGATAGCCAATGATTAGCTGAACGTTCTTTTTACCCTCTTTTCTGTTTTTAT  
TACCAAAAAGGCAGTAAATATGCATGACCGAGGGCGTACCTGGCTCAAGTCCGAGCTGTGAACACTGTACGATCGCACTG  
ACAAAATCATAGTGTACAGTTTCTTAAACGCCGAACTTTACGAATTTCTGTGGTGGCGATACGGATCATACTGTCAGC  
CGTCATATGGCGTGGAAGAGCTGCTGCCAGTTGCTCTTTCATTGATGGCTGGTTAATAAACTAATCACGTCGCTATTTT  
TAACTGCTGCTGGTGCACGGTTTTCCCTGAGTTTTTGCAGATCGGCTTTTGGGATTGGTGGTTGCTTAGTCATTTGCATA  
TTCCTTAGCCAGCGGGCAGTGATAATGTCTTAATAGCTGGCCATTCATCGGTATTCAGGCAGTCAGACAGGGTTCGCA  
GATTGCGGTGATATTCTGTTGACCTGCCAGTTTTGCTTCTTCCGCCATCATGAAAATTTCAACCGGATAACGTCGGCAT  
TCAATAGTTGTGCTGGCAACCAGAAAAACGAAAGTTGGCTGCACTCCAACTGTGCTTATAACCGTCACTGTAGAATGC  
ATCTGAACGTGATAGCGGTAGTCGTAATAAGCGGTTTTGAATCGTTGAATATCCGCCGTAGTTTTCACGTCATGATCC  
AGTGAATTCAGGGATAATTTTGTCCGGACGGCACACAAAATTCCTGTTTCCAGGATCTCCAGTAAATTTGATGAT  
TCAGCGTGTCCGGCGTTTTCAACAAGCATTGCCCCAGCGGCAAAAGCCATAACGCTTTGATACATGAGTTCAATTTTCCG  
GCCTTCTCCGAGTGATAACCGTTTTTCTGTGCTTGCAGTCCATCAGAAACGCTTTCTTCTTCTTTTCCGGCGT  
TTGTACGGCGGTTAAATTCAGGTGCTACGATAAAGCGGTTACTGAATTTCTCCGGTTCAAGTACCCGGCAGTGGAAGCA  
GTTCTTAAATCGAGCGTTTTTGTCTTTGTGGTGTCCACGGGGCATTTTTACGCCACAAATATAGTCCGGGAGTATCAGC  
AATGTCATCGAGCTGAGACTTACTGATACCGGACCCCGTGGTAATTTCTATTGAAATTCGTAATAAATACCTGGCT

CTATGTCTTCTACGATTACGGGATCTGCGACTTCGCCAGTTTCATCACTGCAATCGCGATGCGGATCGCTGCCAGCATTCT  
TCATTGTGCGGATGTTACAGCCTTCCATTTCTCCGGATCATTTTCCTTAGCTTCAACCTGACTCTCTTCATCGAATGT  
TTCCTGGTATGTTGCGTCGCCATCACCGCACCACAGTCAGGGCAGTTATCCCCGCCAGTCTGGCCGAGGCATTGCAGG  
CTATTTCCGGTTCCTGTTGCTACTACTGGCTCAGGTTGATTATATCTGGGCTGTTTTTTCCGTTTTCTGGCTGGTTCTGG  
TACACACAATCGCGAGTCTGGATCCCCCTTACCATTTCGGATCGTTCGGGTCGCTAATCCGTCACAAATTCACCACG  
TGATGCAGCAAGCAATTTATCGTCATCGACAGGATTTTTGATGGAATGTTTTTCCGGGCTTCATGGAGTTCTGCCCGCA  
GTTCTGATATTTGCGATCAACAGAATTTACCTGTGACTGAGCATCCAGCGGCTGCGTGTCTCTGATGATGTTTCAGTTGCG  
TCCGGTTCATTGTTTACGCTCTCCCTGTTCAACTGCCGTTGTTCCAGATGGTTGCGGTTTTTCTTCATCATCCTGTTT  
TCCTTCTTCTGTTACTCGCTGCGGCATCGGGCAGAGGAGCGACCCGAGGCAATATCCACGATTTCCGGATCAGGGTTGG  
CATGATCGGTTTCAGTCAGTACTTTGTTTCAGATATTCAGTGACGTGCGCGGGGATGACCTCGATCCCAATTGGTGCTTCT  
TTTACGGACGCAACCACGATGGCGCGGAATAATCCAGCCCGCAGGCATGGTATGAATTTGTCGCGGAAAAACAGAAAA  
GGGCGTTTTATTTTACGCGATAATTTCTCAATGCGTTTAGCGTGTGCCGGATGAAGGTTATAGATGTCCAGATCCATTG  
AACGGGCCAGTACGCCAGTGGCTACGTCGCGGCCAGTGACGTGAGATCGTGTACGAAACCTTCGCCGCGATCGGTGAGG  
TTTCCGCCCGCAGCATTAGCACCAGGAGCCGTGCGAGTGTGTGAAACACGATTACCTTCATCCACTTTTTGTGTCAG  
CAGTCTCGATCGGTGATGTCAGCGTTCAGGTATGCTTCGAAAAAAGCAGTTATCAGTCCCAGGTTTTGAATACAGGAT  
TAGGAAAAACTTTGTGAGTGTACGAAACAGTTTTGTGGAGTTCGGAATTTCCAGCGGGTCGAGCAGGCTGGTTTTGTGG  
GAAAACAGCCAGGGCAGTAACAGCCGGTAGTTCTTACGCCCCGAGCAATGTGTAATGCCTGGAGTCCGTCGCGTGAAACGTG  
CGTTACCGTTTTTTCGCTGCCGTGTTGAGCAAGCCAACGAATGGGCGAGTTCTCGCCAGAAAATTGGGAGTAGCATATTTCT  
CCTCAATCTCAGTCATGTCTTCCCGTGGACGTTGGTATTGCCTTGATAGTGAGCGTTGTCTGGTGTCTCCCGTTTT  
AGTTCCCATGTGATGGAGTCTTTGCTGAGTTGATAGCGTTCCTCCAGGTAATAATCGATCTCACCTTCAGCGGGCAGGTC  
ATTAACGACAGGAAAAATTCGTGGCAACAGCTTTAAATAGCTGCTCAGTTTTTTTACCTGACTTAACGATCAGGTAGTCCA  
GAGTGGCACAGGTCGATTCAAAATCGTTGCTTGCACAGGACGACGTCAGGTTACCCGGATGATTTTTTTCGCTTCCGT  
AACAGGAAGAGTGGTTTTGTGCTCATTGTTTTTAACTCAACTCAGATTAATAATCGTTTTGTTTCAGTGAATGATCTTG  
CCGATACACTGTTATAGCCTGCGCCATACGACAGGCTATTTCTTTCAGATTTACCTTTAATTTTATTGCAATTAG  
AGTTGCCAGAAAATTCGGTTTTTTTTTTCGCGGCAGATTCTTCCGATATGCACCAGGCACATTTTTTTCGACCTTCAT  
CAAGTGTTTTTACGTTGCCATGATGGACCATCGATATCAACCACAGTGAATGGGTTTTCTTTATTTTCTGTTTTAATTACG  
TAGCCAATGCGCTTTCCTTCCAGATTCACCTCGTGAACAATGTCATCGGTAGTTACAACAGTGGCTTCATAATTGGTAAT  
CATGTTTTTCTCCTTAATTAAGGTTGAGCGAATACCTGCCATTTCTGGCATAAATTCAGTTTCGAATAGTCAATTAATTA  
AAGTTCATGTGCCATCTGGTCTTTTTTCGCGACAAGCTTCACTGCAATATTTTCTCGGTTCTGTTTTGATAAAATCCCGT  
GCATGAAGTGAAGCATTCTTTCAATAGCTTTGCTTTCTTCAACGCTTTTTTTCGAAAGGTGTAAGCACATTTTATTTTC  
TTAGTCATCACCATGACTCCGCCTTACAGGTAACCATCACGACCAGGAAGACTTTAATCATGCGGTGAGTAATGAAT  
GTTTTTGTGGTCAGGTTACGAATATATAGTTTTTCGTTTTTAAATATTGTTTGCCGAGGCAATATATGTCGGCCTTCATG  
AAGAACATAATCGCCAGGAGTCACACTGACGTGGTATTTTATCAGTTCGGAAGTGTGCAATCATAATTATCTCCA  
TTTTTACAAATGAACTTTGTTGATGCGGTGTCTGGTGCCTCCAGGTGACTGCAACCAGTTAACAATTACAGTCCGCTTTC  
CCACCCAAACCAATAAGGACTAACATGACTTTTAACTGTGCCAGTGCCTTAGCCGATTCACCGCATCACAAAATTA  
CTTTAAAAAGGGCGACATCAGCCGAACCTCAAGAAAAAACTGATGCCGCCAGGACTACACACAGCAATGTCGTTATTT  
ACAACCGGAGGCGCACTCCACCATTTAAATTTAACAGACAAGACCAGCTCTTATGGATATCGGAAATGCGCTTTCGTG  
TTGTGCCCGTTTTATTTACCACCTCCGGGCTTCGGTGGTCTCGGCTATACCCCTACAGCGAGAGCTTGTGTTAACATT  
TCAATACCTTACAGTTGAGAGTTATTGATATGTTGGATGATTTACTCCATTGTTGAAACTTTTTGCTAACGAGCCACT  
CGAAAGACTTATGATACGATTATCATTTTTTGGTCTCACTCTCGGCTGATACCGAAAGAGTTTACTGTGCAATCAATG  
CTTATACTGAAATACCTTGGCTCTTTTACAGATTATCGTTTTTGCCTTTTCTTTCGTGGTCCGCAATTTCTTCTCAAGATTG  
CGAGCACATATTCAAAAGCATTATTACTTACTACCAGACAACGAGTATTGCTTCGTTTTATCTGAGAAAGAAATCGCTGT  
ATTTAAAGATTTCTTAAAAACAGGAAATCTTATTATCACTTCTCCTTGCCTAACCCGTTATGAAAAAATTAGAACGGA  
AGGGCATCATTCAACATCAGAGTGATAGCGCAAACCTGTTCTTATTATCTCGTCAACGAAAAATACTCCCATTTTATGAAG  
TTATTCTGGAACAGCAGGAGTAGACGTTTTAATCGTTAGCTTACTGTGTGCTTCTCAACCATCGCGCGCACACAGTTTC  
GGTTTTAAATGTTTTGCTTTTGGTATACGTCATGGCAGTGAACGTTCCATCCTGGTTGGGGAACACGCGGCACACAGGG  
ATTGTTGTTGCCGAGGTCGATTTTTTGCATTTTGCGAATCTCACATCTTGTGCTACGTATAGCGACTTCTGCCTGCCA  
GAGATCCAGTCGTTGCTGCGTAAAGCCTGCACAGCCTGGTTGTAAGTGATACCGCAACAATCCATCAAATACTGAACTA  
CTTCGTAATGCACCATCTTATCTCCCCTTAAACGCCGGTGGCGGAACCTGCTGCACTGCAAAAATTTGAATCCCGC  
CGTCATGTTACATACGCTCGGGCTGGTACTTAAACCCCTTACCACTGCTGTAACCTCGAAGTATTGCCCGGCTTCTGT  
GGGCGGGGTTGGTGGTATGCTGGAACATAGGTAATGCCTAATTGATTGTCAATAGGCTATGCCTAATGTTTTGAGCGT  
AACCTAATAGGTGATGGCGACAGCAGAAAGTGTGGGGGGTTAAATAACGGAATCCAGGAGTTTTCCGTGAGACCATAT  
AAGTTTAAAGTTCAGTTTTTGTGATGTTCTGGCTTTTCCGTTTCAGATTCAAGAGCTTTTCAGATACTTACCACCTTTCATT  
TCCATCGCTGCTATGTAGGCGCAACATCGTGGTCAACCAATCTGGTTCGTAGCATTTCAGATAACAGGAAAGCTAC  
AATCGCTCTTATTTTCATCAGAGGCTGCTTGATAAAGTTGTTTATATCTAAAAGTTCACTTTTTGTATCTGAATGGTGG  
GGTTGGTATGGGGTATTCTGTTAAGCCCCAATGCTCTGGACCAACAACATCAGAAAAGAAACGCCATAATTCTGGAAGT

TTATCTTTACTTATAGAGCCTTTCTTAATCCAGTCATAAATTGATGGTGGTTGGACTTTAAAGTGGCGTGCGACCTCCGC  
CTTTGATTTGACGGATCCCATGCGATTTTTTTGTTAATGGCCTGCTCTATCGCTCGGCCTAAGTCTTTACCACTAAGCA  
TTGCTTAATATTCTCCTATGCGCATTACATTAGGCAATCCCTACCCTTACTGCATTAGGCACAGCCTATTGACAATTGCG  
TTAGGCGTCGCTAATATTTCTGTGTGTTTTGGAGTTCATTGCATGAAAAAGAGAACTATTCAATCAAGCAAGCTTGT  
GCTGTTGTCGTTGGGCAATCAGCAATGGCTAGGCTTTTAGGTGTATCACCTCCAAGCGTAAATCAATGGATCAAAGGGGT  
ACGTCAATTGCTGCGGAGAGATGTCCAGCAATTGAACGTGCAACAAGAGGTGAGGTTCTGTGCGAAGAACTTCGTCTCTG  
ATATTGACTGGTCATATTTACGACGTTCCGGCATGTTGTTGCGAGAATATGTCAGTGAAGCAACTAAATGACAGTAACAAA  
TCCTCATTTGATCATACTGAAACATCAAGAGGCAATGATTCATGAAAATCAAGCATGAGCACATCGAATCAGTGTGT  
TTGCCCTAGCAGCCGAAAAAGGCGAGGCATGGGTAGCCAATGCAATTACTGAAGAATATCTGCGCCAGGGGGGCGGCGAA  
TTGCCCTGGTTCCAGGCAAGGACTGGAACAATCAGCAGAATATCTATCACCGTTGGTTGAAAGGTGAAACGAAAACGCA  
AAGAGAAAAAATTCAGAAGCTGATCCCAGCAATTCTGGCAATCCTTCCGCGGAGCTGCGTCACCGACTCTGCATCTCG  
ATACCCTGGAACGCCGTGCATTACTGGCGGCGCAGGAAGCGTTAAGTACGGCAATTGATGCGCATGATGATGCAGTCCAA  
GCCGTTTACCGAAAGCGCATTTCAGCGGCGGCGTTCTTCCGACGATTCTGTATTGTTCAATTAAGCAAAAGTTTCCAT  
GCTGTTTGTGCTTATTCTAAGCCACCGGGCAGCATCATACGGGCAATTATGGCCGATTACCATACATGCAACTGTACA  
TAGCTGATTACCTGGCTGACACCATGCAATTTGTGAGCAGAGGAGCATGGTGGTATTTGCTGATGTTCAATTAATCTGG  
CAACAGGAAAGCAATACCTAAAAACAGGCTGGCAAAAATTGCCGCTGACTAACGAGCATGGGCTGATGTTGAACC  
ATCCTTGCAGGAGTTTTTTTGCATAACGGCGAGGAATGGGTGCATCTTCCGATTGAGGAAGATCTGGCATCAGTCAGGG  
AAAAATTAACCAAAAATCAGCCGAGGAAAAGCATCTGTTAGGCCAGAAAGCAGAAAAGGAAAGCAGATGTTCAAACA  
AAACAAGAGAGAAATTTAACAGGTGTTCAAACAGATGTTGAAGTGGTGTGTTGAACATGATGTCAACACAAAGGCAACTAA  
TAAAGATACAGATAAAGATCTAAAAACAGATCCCCCTAAATCCCCCGGGGAATCGAGGTGTCAAAAAGTTTGACC  
CTCTGGATATTACTTTGCCGAATGGATTCTGTCTCGCTTGGCGTGAGTGGGTTGAATTTGCCAGGCATTGCGAAAA  
CCGATTGAAACGGAGCAGGGCGCTAACGGGGCGATACGGGAGCTGGAAAAATTCGCCAGCAGGGTTTTTACCTGAGCA  
GGTGATTGACACAGCATCGCAATGAATACCAGGGCTTGTTCGCGCGAAAGGTGTTGACCTGAGACGTTACTCCGAC  
AGGTTAACACCGTCTCGTTACCGGATAGTGCATCCCGCAGGCTTCAGGGGGTAACTGACCATGAAAAATATTGCGACA  
GGCGATGTTCTTGAACGTATCCGAGACTGGCCCCGTACATGTAACCGCGCCATTCAAGACGGTAGCGGAGTGGCGCGA  
GTGGCAACTTCCGAAGGCCAGAAACGTTGTGAGGAGATCAACCGTCAGAATCGTCAGTTGCGGGTGGAAAAAATCTGA  
ATCGCTCTGGCATCCAGCCATTGCACCGCAAATGCTGTTTTCGAATTACCAGGTGCAGAACGAAGGGCAGCGATACGCG  
TTGAGTCAGGCGAAATCCATCGCTGATGAACTGATGACCGGGTGTACAAATTTTGCCTCAGCGGAAAACCTGGTACCGG  
GAAGAACCCTTAGCGGCAGCTATCGGAATCGCTGCTGAAAGACGGTCAGACAGTGATTGTGGTTACCGTGGCTGATG  
TTATGAGTGCCCTGCACGCCAGCTATGACGATGGGCGAGTCAGGCGAAAAATTTTGCGGAACTGTGCGAAGTGGATCTG  
CTGGTTCTTGATGAAATGGCATTGACGCGGAGACGAAAAACGAGCAGGTGGTACTGCACCAGATTGTTGATCGCCGGAC  
AGCGTCGATGCGCAGCGTGGGGATGCTGACAAACCTGAACTATGAGGCCATGAAAAATTGCTCGCGGAGCGGATTATGG  
ATCGCATGACCATGAACGGCGGGCGATGGGTGAATTTAACTGGGAGAGCTGGCGTCCGAATGTCGTCCAGCCAGGAATT  
GCGAAGTAATTTTACCGGGAGAAAAATTAATGGAGACTGTTTTGACGCACTGAAAGCAATGGGAAAAGCCACATCCA  
TAGAACTTGCTGCGGACTTGATATCAGTCGTGAAGAAGTGTGAACGAACTATGGGAACTGAAAAGGCTGGTTTTGTT  
GATAAAGCGCGTACCTGGCGTGTGGCTGATAACAATGTTGAGCAGGAACAGCCAGCGCAGGCAGAACTGCCGGAAGA  
AATCACCACAGCAACAGTAGCGAAAATCTCAGAGTGCATTTAACCGCGACGATTGAACAACGAGGACCACAAACGGCTG  
ATGAGCTGGCTACATTGTTTGGTACCACATCACGAAAAGTGGCTTCAACGCTGGCAATGGCAATCAGCAAAGGTGCTGTG  
ATTCGCGTAAATCAGGGCGTAAATTTCTGTTACTGCATACCGGGCGATAATTTACCAGCAGAGCCGAAAGCAGCATCGGT  
ATCTCCGCTCTGGTTATCTGCATCTGCTGCTGTCATGGGGTGTAAATCATTACCGTGATAACGCCATCGCTACAA  
AGAACAGCGCGACAAAAATGCCAGAGAACTGAAGCTGGCGAAGCGGCAATTAAGTGAAGTGCAGATGCGTACGCTGATG  
TTGCTGCGCTCGATGCAAAATACAGAAAGGAGTTAGCTGATGCGAAAGCTGAAAATGATGCTCTGCGTATGATGTTGCC  
GCTGGTCTGCTCGGTTGCACATCAAAGCAGTCTGTGAGTCAAGTGCAGTGAAGCCACCACCGCTCCGCGGTGGATAATGC  
AGCCTCCCCCGACTGGCAGACACCGCTGAACGGGATTATTTACCCTCCGGGAACGACTGGTAATGATGCAGGCCAAC  
TTGAAGGTGCTCAGCAATACATAACCGAGCAGTGTAAAGTAAAATCTTAACATAATATGATTCATTTTATGATGATTGT  
TTCATAAGGAACAGTGAAGTAAAGTCTAAGAGGAGTAAATTTTATACAGTATAATCATAATATTGCAGCAAGGTGGTTA  
TAATGAAAGAATATTTAGATATGAATACATCTCATGTAAGAGTGTACTCATATGTGTGGGTTCTGTTTGGCTCTA  
TAGTCTTTCAATGTTGCCACCAATGGTTGATGATTGTTTTATAAAGAAAAAGCCTGTTTGTCTTTATAACTTTG  
TTATATTTTTTGCATTGGTGGCGGAGCGTGGTATACTAAGAAATCTGGCATTCAATTACGTACCCGTGATGGGTTT  
ATTATAATTGAATGTTTTGGATTTTGTCTGTTATTAGTGCATTCCTTTATGGATTGACTCAGAACTTAATTTAAC  
GTTCAATTGATGCTGTTTTGAAGGGGTTTCTGGAATAACAACAACAGGAGCAACTGTAATTGATGATGTTAGTTCATTAC  
CTCGGGCATATTTGACTATCGGTACAGTAAATTTTATAGGTGGTTTAGGAGTATTGTTCTGGCGGTTGCTGTATTG  
CCATTATTGGGTATTGGTGGTGCAAAGCTTTATCAGTCAGAAATCCCGGGGCCATTTAAGGATGACAAACTCACTCCCCG  
CCTGGCCGATACGTACGGACACTGTGGATAACTTATCTTTATTTAGGTATTGCTTGTATTGTCTGTTATAGACTTGCA  
GAATGCCTTTGTTGATGCTATTTGTACGGGATTTCCACAGTTTCGCTTGGTGGTTTCTCAACTCATAGCGAGAGTATC  
GGATATTTAATAACTATTTGGTTGAGCTGGTGGCTGGTTCTTTTTCCCTGCTATCGGCTTCAACTCACTCTTTGGTA

TATTGTTATTAGCAGGAAAACGATAAAACCTTTAATCAGAGATATTGAACTTCGTTTCTTTCTGTTAATAGCCTTAGGGG  
TGATCATTGTTACCTCTTTCCAGGCTGGCATATAGGTATGTATGACTTGCATGGAAGTTTTATTCATTCGTTTTTTCTT  
GCCAGCTCCATGCTCACTGATAATGGTTTAGCTACGACAGGATTATGCAAGTTGGCCACGCACACGATAGTGTGTTTTGCT  
GTTGTCAAGTTTTCTTTGGGGATGTATAGGTTCAACTTGTGGTGAATTAAGTCACTTCGATTTCTTATACTTTTCAAAC  
AAAGCAAACACGAGATAAATCAGCTTCTCATCCCAGAGCGTTGTTGAGTGTAAATGTAGGAGGGAAGATAGTTACAGAT  
CGTGAATGAGGTCTGTATGGAGTTTTCTTTTTCTTATACTCTCTTACCGGTGTTTTTATACTGGTGTAAATGGTAT  
GGGATATGATTTTCTTACATCATTGCAACAGTGGCTGCATGTATTAATAATATGGGATTAGGTTTTGGGGCTACTGCAT  
CGTCATTCCGAGTGCTTAATGACATTGCAAAAATGCTTAATGTGCATAGCTATGATTCTTGGTCGCCTTGAATTTATCCT  
GTTATTATATTGTTTTCAGGTTTTTTTTGGCGCTCCTAATATATGGCTGATTTATAATTGTGAGTTTAAATATTATGTTGA  
CTCACTCATTGATCCAATACCTAECTTACCAGCAACACCTCCGTCGCCAGTAGCACTGGCTGCTGGGGTGCCTTTTATT  
CATAAAGCAAGGCTGTATGAGCGAGAAATTAAGATAGTCTATCGCCATTACAAGAATTGCACCGTATGCGCACAAACG  
CCAGGACGCACAGTACTGAGCAGGTGGCACAACCTGGTAGAAAGTATTAAGCAATTCCGCTGGACTAATCCGGTGTGATT  
GACGAAAAGGGCGAAATTTGCGGGTACGGTCTGTATGGCGGTGAAATGCTCAAAATGGATTCTGTTCCGGTCAAT  
TGTTCTGTCTGGCCTGACGGATGAGCAGAAGCAGCGATAACGATCAGTATCGTCCCGTAATGCATTAATCCGTCCGCAC  
ATTGAGAAAAATGGATGCCAGTTTGCACGTCCGAACGAAGGATTTGATATTTCAAAGTTTTCCGAGGTGGATTCTGTTGA  
TGATTTACTATTGATAATCCGCTCGTTATCTGCTGAAAGACTGGAAAGGGTTGGTGAATGGTAAATGGTGTGAGG  
TTGCACTGGAATATACGGCAGAACGAGGATCGCGCTGCTTAAGCAGAATCCAGAGTTGACTGGCAGATCCTTGACAGAA  
GCAGCCAGCATCGCCAGGGTAAAGAGCAGCAGAAGCAGGATACGATAAAAAAGCCATAGCTGCCAGCGGTGTTATCG  
GAGTTCCGGGGAGAAAGGGGGAAAAGGCAAGATGGAAGCAGAAAAACTCAGGTTGCCACCGATACCGAAACAGAAAT  
AGACCCGGTGTAAAGGAGTTGTTGTACGCCTATCCGTAATATCCCGTGCCCGACGTTATGCTGGAATGGCTGGGGTGC  
CTTTGCCTTTATCTGACAGAGATAAATGAATATTTAGCCACTCATCCGGTATTGATTGAGCGCGATGAATTTGAAGCA  
GTGATCTTTGCACTGGATGACCAGTATTTTCCAGGAGCAGTGTGTGATGTTGTTAATTACGTACTCTGTTACAGAGATG  
TGATGGTGTCTTAAATTAATCGATGATGCTCCTGGAGAAAAGCATTGCGTGGCCTCGTAATCGTATATCTACTATTAT  
GTCGCTGAAACCACTTCGCGGTGGGTTTTTTGTTGTGAGGTTTTAATAAATGGCAGAGCAAACCTCGCTCTCGCA  
ATAATTATTGATAGCACTGGAGCGAAAAATAATGCTGACAATCTGACCTCCTCATTAGTCAAAATGACGCAGGCTGGGGA  
AACTGCTGCAAAATAGCGCAGGGAAAGTACTAAGGCAACAGAAGATGAGAAGAACGCGCTCGCAAAATAAAAGCAGCTA  
TTGATCCAGTTGGTGCCGAATTGATACTGTCGGTGCAGCTATTCTGAATTAAGAAATTTTTCGATAAAGGGCTTATT  
GATAAAGAAGAATATGAATTTCTGTCCGTAACCTAATGAAACACAGAGGAATTGAGCGGGGTTGCGCAAGCGCAGAG  
AGAAGCCGAGAAGGCCGAAAACCTTGCTGCCGCTCAGCAGGAAGCGCAGGCTCAGGCCTTTCAAAGAATGCTGGACAAGA  
TCGACCCTCTGGCTGCGGCGTAAGAAATCTTGAACAACAGCATGATGAACTTAATGCTGCGTTTTGCATCCGGGAAAATA  
AATGGTTCTCAGTTTGAATAATAGCCGAAAAATACAGGAAACACGGCGAGAGCTTACCGGAGAGGCTCAGGCAGAGCG  
AGAAGCAGCAAAAGCGCATGATGAACAGGTTGTTGCTTTGCAACGCTGATTGCTCAACTTGATCCTGTCCGAACTGCTT  
TTAATCGTCTGGTAGAACACAGAAACAGCTCAATGAAGCAAAAGCTAAGGGGATGCTTTCTCCTGAAATGTATGAGGAG  
CTTTCTGAAAACCTTCGTGCTATGCGGAGTGAGCTTGAAGTTACTCAATCACAATTAAGCAAAACCGGAATGTCGGCAA  
ACAAACGGCTTTTGTATGCGCATGTTGCCTGCACAAATGACGGATATTGTTGTTGGGTTGCTCACTGGTCAGTCGCCAT  
TTATGGTGTAAATGCAGCAGGGCGGCCATTAGCTATGCAGGAGACAAGAATCGCCAGCTTACCGTTACAGCGATACCC  
GCTGGCATGAAGATCCGTGCGTAACCGCTGGTTACGCGTGTGGTGGGGCCGCTGTGCGCGTGAATGAATGGTTCAGC  
GCGTATGCGATGGCGGGTATGGCTTACAGCCGTGTGTCGACTTTCTCCGGGATTATCTCCGCGTAACGACAACAAGG  
AAGGTGCGAATAAGCAGGTCATTTCTTCCAAGCTACTCGCTGATTAATAATTTCCGGGATCTGGCCGATTTTTTTTCCC  
GCAAACACATCGAATCAGCTATTTAGGCTATTTTTCCACCATTTCTGGCGTTATTTCCGGTTTTTACTGAGATCTCTC  
CCTGACGTATCATTGTTCCACCCGAAACAGGTTGGCCAGGGTGAATAACATCGCCAGTTGGTTATCGTTTTTTCAGCA  
GCCCTTGTATCTGGCTTTCACGAAGCCGAACTGCCGCTTGTATGATGCGAAACGGGTGCTCCACCCTGGCACGGATGCTG  
GCTTTCATGTATTGATGTTGATGGCCGTTTTGTTCTTGCAGGATTCTGCTTCAAGGTTTTTACCTTGGCCGGACGCTC  
GGCGATCAGCCAGTCCACATCCACCTCGCCAGCTCCTCGCGCTGTGGCGCTCCTTGGTAGCCGGCATCGGCTGAGACAA  
ATTGCTCCTCTCCATGAAGCAGATTACCCAGCTGATTGAGGTCATGCTCGTTGGCCGCGGTGGTGACCAGGCTGTGGGT  
AGGCCACTCTTGGCATCGACACCAATGTGGGCTTCATGCCAAAGTGCCACTGATTGCCTTTCTTGGTCTGATGCATCTC  
CGGATCGCGTTGCTGCTCTTTGTTCTTGGTAGAGCTGGGTGCCTCAATGATGGTGGCATCCACCAAAGTGCTTGGGTCA  
TCATGACGCTGCTTCCGCCAGCCAGCGATTGATGGTCTTGAACAATTGACGGGCCAGTTGATGCTGCTCGAGCAGGTGG  
CGAAATTCATGATGGTGGTGCATCCGGCAGGGCGCTATCCAGGATAATCGGGCAAACAGGCGCATGGAGGCGATTTT  
GTACAGGGCATCTTCCATGGCACCGTCTGCTCAGGTTGTACCAATGCTGCATGCAGTGAATACGCAGCATGGTCTCCAGCG  
GATAGGGCCGTCGGCCATTGCCCGCTTGGGATAAAACGGCTCGATGACAGCGGTCATATTTCTGCCATGGCAGAATCTGC  
TCCATGCGGGAGAGGAAAATCTTTTTCGGGTCTGACGGCGCTTAGTGCTGAATTCATATCGGGCAAGGTGAGTTGATG  
GCTCATGATGTCCTCTGGGATGCGCTCCGGATGAATATGATGATCTCATATCAGGAACCTGTTTCGCACCTTCCAAGGG  
GAAAACGCACGACGTGCTGACCGGAAGTATGACGGTCCGCACAGCAACACGTCCTGCGCTGGGGAGCTGGCGTGCAGT  
TTAACCCGACCGAATCCGTGGCCATTGATATTGCTTATGAAGGCCCGCAGTGGCGACTGGCGACTGACGGTTTTCATC  
GTGGGTGTCGGTTATAAGTTCTGATTAGCCAGGTAACACAGTGTATGACAGCCCGCGGTTGAGCGGGCTTTTTTGTG

GGGTGAATATGGCAGTAAAGATTTTCAGGTGTAAGAAAGACGGCACAGGAAAACCGGTACAGAAGTGCACAATCCAGCTG  
AAAGCAAACGTAACAGCACCGGTGGTGGTGAACACGCTGGCCTCAGAAAATCCGGATGAAGCCGGGCGTTACAGCAT  
GGACGTTGAGTACGGTCAGTACAGCGTTATTCTGTTGGTGAAGGATTCCCGCGTCACATGCCGGGACCATTACCGTGT  
ATGAAGATTCTCAACCCGGTACGCTGAATGATTTTCTCGGTGCCATGACGGAGGATGATGCCCGTCCGGAGGCACTGCC  
CGTTTTGAAGTATGATGGTGAAGAGGTGGCGGTAACCGTCCCGGTGGCACAGAACACGGCAGCCGGAAGAGTACAGC  
CAGTGATGCCAGCACATCAGCCGTGAGGCGGCAACCCATGCGGTGATGCTGCGGACTCAGCACGGCAGCCAGCACGT  
CAGCCGGACAGCCGCGTCTCGGCTCAGTCAGCGTCTTCCAGCGCAGGAACGGCATCAACAAAGGCCACTGAAGCATCA  
AAAAGTGTGCCGCTGCAGAGTCTCAAAAAGCGCGGCGGCCACCAAGTCCGGTGGCGGAAAACGTCAGAAAACGAATGC  
TTCAGCGTCACTACAATCAGCAGCCACATCTGCATCCACCGCAGCCAGGAAGGCATCAGAAGTCCGACCTCGGCCCGG  
ATGGCGCGCCTCAAAAGAAGCGGCAAAATCATCAGAAACGAACGCATCATCAAGCGCCAGTAGTGCAGCTTCTCGGCA  
ACGGCGCAGGAAATCCGCGAAGGCGGCAAAAACGTCGAGACGAACGCCAGTCTTCTGAAACGGCAGCGGGACAGAG  
CGCTCGGCTGCGGCAGGCTCAAAAACAGCGGCTGCGTCTGCGTCTGCCAGTGCAGCGTCAACAAGTCCGGGCGAGCCCTCAG  
CCAGTGCACCGCCGCGGAAAATCGGCAGAAAGCGCCGATCGTCTGCTTCAACAGCCACAACGAAGGTGGCGAAGCC  
ACTGAACAGGCCAGCGCAGCAGCGAGGTCTGCTTCCGAGCGAAGACATCCGAAACGAACGAAAGCGTCGAAACAAAG  
CGCAGAATCTCAAAAACGGTCCCGCATCTGCAGCAGTTCGGCGGCGTCATCGGCATCATCGGCTGCTGCTTCAAAAAG  
ATGAGGCAGCCAGACAAGCTCAGCAGCGAAGAGCAGCGCCACGAGGCATCCACGAAGGCAGCAGAGGCTGCTGGCAGT  
GCGACGGCGCAGCTCAGAGCAAAAGTACGGCGGAATCCGCGCAACCGCGCCGAGACAGCAGCTAAACGGGCAGAGGA  
TATTGCATCCGCCGTTGGCGCTTGGAGTGAAGTACGACGAAAAAGGGGATAGTACAGCTCAGCAGTGCACCAACAGTA  
CGTCTGAAACGCTGGCGGCAACGCCAAAGGCAGTAAATCAGCCTATGACAATGCAGAGAAAACGCTGCGAGAAAAGACCAG  
AACGGCGCTGATATACCGGATAAGGGATGCTTCTGAACAACATTAACGCGTCCAGTAAACAGACTTTGCTGATAAGCG  
TGGTATGCGTTATGTGGGGTTAACGCTCCTGCAGGTGCAACATCTGAAAAATATTACCCTGTTGTTGTTATGCGTTCTG  
CTGGCTCAGTAAGCGAAGTGGCATCAAGAGTCAATTACCCACGGCAACGCGAACCAGGCGATCCGATGAATAACTGC  
GAGTTTAAACGGATTTGTTATGCCTGGTGGCTGGACTGACAGGGGGCGTTATGCTTATGGCATGTTCTGGCAATATCAAAA  
CAATGAACGAGCCATTCACTCAATAATGATGAGTAATAAGGGCGATGATTTGCGCTCTGTGTTCTATGTTGATGGCGCTG  
CTTCCCTGTTTTGCGTTTATTGAAGATGGCTGTCAATATCCGCACCTGGTCTGATCTCGTTGTTAATGATACGACC  
TATAAGTTTGGGCAACAAATCCGGCGACTGAATGTATCGCGCGGACGTTATCCTTGATTTAAGAGTGGGCGTGTTTT  
TTATGAGTCTCATTGTTAATCGTTAACGATAAATTGCTGCAAAAAAATTTTTGCCACAGACGAAATGTAGCGCGTG  
GTGTAATCAGATTCGAATGATAGGTGGGAGTATGGTGCATTATGGCGTAATGATGGCGTAAAACCTACCTGCTGCTT  
ACCAATCAAGTGATGTTTATGGTGGCTGGAATACATTAAGACCGTTTGGCTATTGATAACGCAACCGGCAACTGGTTAT  
TGAAACCAAATGTCCGCAAGTCTGAACGGTAATGCATTAACAGCAACAAAGCTGCAAACGCCAAGACGGGTTTTCTGGT  
TTGAGTTTATGGTTCCAAAGATATTACTTTAACCGCCGCGCATGTGGCTGCTTTTCCAGAAAGGGCAACGGATACATAT  
GCCGATGCGGATGGTGGCGTTCCATGGAATGCCGAATCTGGCGCTTACAATGTCACCCGCTCTGGCGACAGCTATATCT  
GGTTAATCTTATACCGGAGTCGGAAGTTGCCGGACCTGCAGATGAAGGCGCATTACAGAAATGGTGGTCTGTTCTACC  
GTTCTTCAAGAGACGGTTATGGTTTTGAGGAAGACTGGGCAGAAGTTTATACCTCGAAAAATCTTCCACCAGAAAGCTAC  
CCAGTCCGGCGACCAATCCCGTGGCCATCAGATACCGTTCCGCTGGTTATGCCCTGATGCAGGGGCGAGGCTTTTGACAA  
ATCTGTTACCGAAACTTGAGCCGCTTATCCGTGAGGCGTATCCCTGATATGCGTGGCTGGACGATTAAGGGCAAC  
CTGCCAGTGGTCCGGCCGATTGTCTCAGGAACAGGACGGCATTAAATCGCATAACCCACAGCGCCAGCGCATCCAGTACA  
GATTTGGGACGAAAACCATCGTCTGTTGATTACGGCACTAAATCCACGAATAACACCGGGGCACATACACACAGTGT  
GAGCGCTCTACAAACTCGGCTGGAGCACACACACTCACTAGCCAACGTGAACACGGCTAGTCTAACTCCGGTCTG  
GTAGTGCATCAACAAGATTGTCTGTTGTGCATAATAAAACTATGCAACATCATCTGCTGGCGCACATCCCACTCAGT  
TCCGGCACTGTGCAAGCGCAGGTGCACACGCGCATACTGTGGTATTGGTGTCTATACGCACTCCGTTGCGATTGGTTT  
ACATGGACACACCATCACCGTTAACGCTGCTGGTAACGCGGAAAAACCGTCAAAAACATCGCATTTAATATATTGTGA  
GGCTTGATAATGGCATTAGAATGAGTGAACAACACGGACCAAAAAATTTATAATCTGCTGGCCGAACTAATGAAT  
TTATTGGTGAAGGTGATGCATATATTCCGCTCATAACAGTCTGCCAGCAAACAGTACCGATATTGCACCGCCAGATATT  
CCGGCTGGCTCGTGGCTGTTTTCAACAGTATGAGTATCGTGGCATCTCGTTGAAGTATCGGGGTAACCGGTTA  
TGACGTGGCTCCGGCAACGCGTTATTTATTTCTGAACTCGTCCGTTACCGGAAAATGTTACCTGGTTATCGCCGGAAG  
GGGAGTTTCAAGTGAACGGCACAGCCTGGGTGAAGGATACGGAAGCAGAAAAACTGTTCCGGATCCGGGAGGCGGAA  
GAAAACAAAAACAACTGATGCAGGTAGCCAGTGAAGTATGCGCCGTTCCAGGATGCTGCAGATCTGGAAATTGCAAC  
GGAGGAAGAAATCTGTTGCTGGAAGCATGAAAAAGTATCGGTATTGCTGAACCGTGTGATACGTCAACTGCACAGG  
ATATTGAATGGCAGCACTGCCGTAGGGTAAAACATATAAATTCTATAATTAGATGATCTTTCCATTTACGGCAAGGAA  
GGGGCTTGAAGACGTAAGCATCTCACACCGAGATTTTTTTATATGTCAGGTGTCTGAAGTTTTGCTTTGGCTCTT  
AAAATGTTTTGCCGCGAGTTTTGAATCCCGGGCAATGGCATTATACTTACACCTGACTTAATTGTTGCAATACCAC  
CTGTTTCTGTTCTTATTTAACACAGGAGTTCGACAAAACGTTTCCCTGCGCCGCGGGCTTACTATCCCGGAATGAG  
TGGTTCAAGTAAAAGTCTCGTTCAAATTCAGCGACTGCTGAAATTAATTGATCATCATTTTTCTGTTGGACTGGT  
AGGTCAATGCCACCAATGCTAAGCAATGCACTCTGATACCTGTTTCGGTCAAGTTGTTCCACTGTTTTCTGATATCCAT  
TGCAATTAACCAAGCGATCCAGTTTTGCACAATCAATTGATCACCACATTTAGGCGAGCAAGCAACCGGTTAAAAAC



CAGGACGCTACTGGTTGCTGCTGAGCCGCTAATGTGTTCTTCGATTATTTGCTGAGGTTTGATTTTAAACCTGCACTT  
TCGATTTCCCGCGTTGATTTTCGGTGGTCTGATCCAGCGTTGATATCCGACAGTAAGCAAAAATTCGAGACATAGTGAG  
ACTCTATACGAAATTTGGTGTTCATATCATAATGCATCTCAGAAAATAATTATGATTATTTTGTGCATATTTGTATGTAC  
ACGTTTCGAAAAATAACGAATGCGTATGCAACCCCGTAATTTTGGTGAGACCCAAAATCGATTTTGTGAAAAATGGCTTTA  
ACTCGGTTTTGTTTTTCGAGTTCCGGGCGGACTCAAGGAAGAAGAATAGTGTTGCGTGTTATTTTAACCAGATTTCAAGTT  
GTTTGGTCTGGAAAAAGTGGAGCAAAATGTTGTTAAAGTGGAAAAATGATAAAAAAGTAAGTTTATTATATTACATTTTA  
CCATTTAAATTTTGGTTGCTTTAAGAAGTATGATCGCTGTTTGTAAATAATTCTTTGTTATCCAGCCATGATGTTTTCTT  
TATGTTTCTTCAATGTAATCAAGCAATGTTCTGGTATTGATAGGCTTCCCTGTTTTGCTACTTCCACTACAGCATCCC  
CTAGGATAATCTTACTTCAGGAAGCTGCGCAGGGAACCACTTATAGGTTGCTTTTTGATTTTCAAGATATTTCTTAA  
ATATTATTGATTTTCAATGCGATATTGTATGTCTGATTGAGGATATGTTGACTTATACATCGGTTTTGTCTGGGTTATTG  
GATATGCCAATCCCTAATTTTATTAGAGCATGACTAAAAATGCTGAATATGATAAGGAGCGAAGTGATTATCAGTATGCT  
GTTTATATAGCCTCGAATTAGTAATGTGTATATATGATATAGTTGACAATTTTATCTGGGTGTTCTTAAAGTTCGTA  
GATAAACATTGCTGTTTCAGGTATACAGGAATGCTAACAGGTGGCGGCAAAAATCAGGCGGTTTATGGCGCAAGCTGAAG  
TGGCAACTGCAAACTATTATGCAGAGACTCTACACGGATTGGGTTTAAAGTATACATAGATAACAGTTTTTATCTGA  
AGAAGAAAAATATCAAGTGTATATAGCCTATATGCTTTGATGCGGAGGAATGAATGTGATGGGAGTGATGTATCTGAAT  
AGTTGAAAAACCGCAGTACGTCTGATGCAAGAACGTCTGCGGTTGGTTTACTTTGATTGAGACGTTTTTGAATTTTT  
TTGGTGGCAAAAATGGGCGAAAACGCTGCAAAAAGGGGCAAAAAGAGTGGATTATCGTAGCTTATTG  
TTGTCGCTGATGATATTTAACACATTGAAAAATAAGTAAAATACTTATGAGTCAGAGAGTTGTGATTTTTGCCCTTACTT  
GTTGAGTTGATTGTTCTTTCTTACTAATTTCTTGATTTTGCACATTTAAAAGCGACTCAATTCGTTATATGGCATCA  
GAAGAGTATGCGTCATGCCGGAACGCCAGCATAAGAAATCTGATATAAAAACTGTGGCGTGATGGTACGGATTAGAG  
GGGAAAAATGTCAGCACATTTGCGAAATGAATCAAAAAGCCCGCAGCAATGTGCGGGCGTTAGTGTGAGCGCACACCAGC  
ACGGAGCACTGCGTGACGCACTACAGCTGCGGCTTGAACCGAGCAGATAAGTGGTATATCCGGTCGATGGGAAGC  
AATGATGATCATATGAGCGGGATCTTCTCGCCAATTCAGAATGCGGTCTTTGGGCGAGCCTTCTCAACATGGACAT  
GCACTCTGTCGGTTGGCAGTTAAATTTTTAATGATCTTCCAGTTGCGATTTGGCTTCCGCTTTCAGGTCATCCATT  
GCCGGTAATTCGCGGAATACGCTAAACCCAGAGAGGCATAGTAGGGCAGTGAAGGTATTACCGTCAGGAAATGAACCTC  
TGATCATCAATCTTTGCCCTTCTCAACGTGGCTAATCACGCTTGGATTAATTCTGAATCGGAAATATCGATAGGGA  
CAAGAATCGTCTGTTTATAAAACCTCCTGTTTTAGTATCCGCATAAAGTGAACGCCAGATGACACTTTTTGTGTAATG  
ACGGAGTTCACATTTTTAATTTAGATCAAAGGAGGAAGAATAAGCAGAAAAAGCCGCCATAACAGCGGGCAGGAGGATT  
TAGAACTGATAAACCCAGACCTAAAGCGACAATATCATCGGTAGAGATGCCATTGGCAGCGTGAAGCTGTATCTTCATC  
CAACAGTTGATTTTATAGTCAACGTAGGTGGACATGTTTTTATTGAAATAGTAAGTCGCGCCAATATCGGCGTATTTAA  
CCAGATCTTTATCATCAACACCTGCCGGTGTCTGCACCACCCGACGCTGCAGGTACGGCCTTTAGACATCAGGAAA  
GAGACTGCCGGACGCAGACCAAAATCAAATGGTACTGTGAGTACTTCAAAATCTGGGTTTTGTTGCCACAGCATA  
ATCGCTGTGCGCAAAACGGGGTCATATTACGCGTTTTCTGAATACATGGTTGCCAGGTAATATTGTTAGCATCGTATTTTA  
GCCAGCAGTCCACGCGTCTGTTTTATCACCACCCGCCAGTATGGTTAACCTGGTCAATGGTGCAGTACAGGAGGTG  
TATGCCGCACCAGCGCTAAAGCCCATGCCAAATCATATGTTGTGAAAGACCCAGCCGTACCGTTTTTATGGCGAAC  
ATCAGTCCGTTGTTGGTGCCTTCTGACCATTACTGGCTCTTCTGTTGTTACCTTGATACTGCACCGGGAAGTTGAG  
CATTTACCAGACCGAAGAAATCAGTATTACGATAAGTCGCGACGCCATTGGCTGCAGCAGTACATAAAGTTGTCTGCATTG  
GTATAAGAGTACCGCAAAATTCAGGCAGCATATCGGTCCAGCCTTCGATGTCGTACATTACGCCATAATTACGTCGGTA  
ATCGAAAGAACCGTAATCTGCAAAATTCAGCCGGCAAATGCCAGACGGGTCCATGACTGGTTTTTTGAAGATTGAGTGT  
TGTTTTGCTGAATATTGATTTCCATTCACCGTAGCCAGTGTGATCGTTAATTTGGGTTTCCGCTTTAAAACCCAGA  
CGGCATAGCTCTGGTCGCCATCTTTCGCTGAATTTACAGAAAAATAATGCAGGCCATCAACTTTGCCATACAGATCTAA  
TTTTGTTGCCGTTTTATTATAAACTTCGCTGCATGTGACGACCTGCGGCGAGCAGGGCAGGAATAAAAGTGCAGTA  
CTTTGCTTTTCAATGAATAAATCCTTTAGTTATTTTATTTGCCTTTTATCCCAATTTCCGGGAGTGAAAAACATCCTAAAG  
GAGAAGTTCAGTTAGCCGATAAATATCATTTGTTACGCCTTAAGTAAAACCTTAATCAAATAATTCCTCTGAAATGATAA  
TAAGTCTGGTGAATGTATCGAAGATAACATACAAAAATAAAATTAATACTTTAATTTGCTATACGTTATTCTGCGCGG  
GTTATATGCCTTTATTGTACAGATTTTATTTCTGTTGGGCCATTGCATTGCCACTGATTTTCAACATATAAAAAGAC  
AAGCCCGAACAGTCGTCGGGCTTTTTTTTTAGAAATGGATAATCCTTATCCAGAGCATTTAATCGGTGTTGCTTTTTTC  
CGTTTTCCGGCATTGTGCCAGGAAGTCATAGCGTTTTTCAAATCAGCTGCAGCATCTTCCATAACTGTTCTGCCA  
CTTCTGGCTGTGCGAATTCAGCCGACGGAACGTTGCTCGTGAAGTAACTTTCTCCGGTCTTCTGACGGCGGGCGT  
GAATCCAAGGCCAGCGGAGTTTCCCTCATCGGCACGACGGGATCAAAGCGATATAGCGGCCAGAAGCCGGTAGCTGT  
GAGTTGGCGCATCTGGTCTGGCTGAGTGCCAGATCGTAACCATGCTCTTACACGGGCTATAAGCAATGATCAGCGATG  
GCCCCGATACGTTCCGCTTCTGAATCGCTTTCACCGTCTGGTTCAGCTGCGCGCCGAGAGAAATCTGCGCCACATAA  
ACATGACCGTACATCATACTGACGCCAAGATCTTACGCGCTTACGTTTCCCGTCTGCGCAAATTTAGTTACTGC  
ACCCAGCGGTGTCGTTTTGACGCCTGACCACCGGTGTTGGAATAGCATTGCGTATCCAGCACCAGAATGTTGACGTTTT  
CCGTCAAATCAATACATGATCCAGACCGCAAAGCCGATATCGTAAGCCAGCCATCACCACCAATCAGCCAGATTGAT  
TTTTCCACCAGTGCATCTGCATCACGTAGCAGTTTATGTGCTTCCGCAACATCGTTGAGTTGCTGGCGTAAAGCTGCAAC

CTGTTACGACGAACCTCTGGCGTGGCGTCTGATTTCAACGCCGTAGTAATCCGCCGGGATTTTATCGGCAAATTGAT  
CCAGCAGACGCAGCACGCGGACACGGTGTGATCGACCGTCAGGCGGAAACCAAGGCCAAATTCGGCATTATCTTCAAAT  
AGAGAGTTCGCCCATGCCGCGCCACGACCGTTGGCATCGGTGGTATACGGTGTAGAGGGCAGGTTACCGCCATAAATTGA  
AGAACAGCCAGTGGCGTTAGCGATCAACATCCGGTCCCATAGAGCTGAGTCAGTAATTTAATATACGGCGTCTCGCCAC  
AACCGGAGCAAGCACCTGAATATTTCAAACAGCGGTGAATCAGCTGCGATGTACGAATATCAATACGTTCCAGTTTGCTA  
CGGTGATTTCTGGCAGGTTGAGGAAGAAATCGTAATTGATTTTCTTCTTTCGACATGTTCCAGGCGAGACATCATATT  
GATGGCTTTAATCTCTGGATTCTGACGGTCTTTGCGCCGGCAAACCTTCGACGCACAGGTTACAACCGGTGCAATCTTCCG  
GTGCCACCTGCAAGACATATTTCTGCCCGCGCATATCACGCGATTTACATCCAGCGAATGCAGGCTGGCAGGGGCGTTT  
TCCATCGCTTCAGGCGGCACCACTTTTGC CGAATAGCTGAGTGTGGGCAAGCGGCAACGCAGTGGTTACATTGGGTACA  
GATTTCTCTTTCAGATGGGGATCTTTCGGCGATATTGCGTTTTTCCAGCGGTAGTCCCATCGGCCAGGTGCCGT  
CTGGCGCAGCGCCGAAACGGGGAGGGCGTACCAAGCCCGGCGAGCATCGCAGCGTTACGGTTTTACGAAATCAGGG  
GCGGCATCGGAAACCACTGGCGGTGATTGGCGCTGTGCGGATTTACCGGTTGCAACGGAATTTCTTCTACGATTACG  
CGCCAGCGCAGAGCCTGCCAGTTGCGTTCACCAGATCCTGGCCTTTGCTACTGTAATTTTGGCAATCGACCCTGCA  
ATTCTGCGAGGGCGTATCGCCAGGCAGAATTTGCGTCAGATGGAAAAAGCCATCTGCATGACGGTATTAATACGGGCC  
GCCAGGCCACATTCGCGGGCGATTTTGC CGCGTAAATCACATAGAAGCGCGCTTTTTCTGGTTAACACGGCCTGAAC  
TTCTTGC GGCAAGCGCAGCACTTCATCTGCGTGTACGGCGTGTGAGCAGGAAATGCCGCCAGGTTTTAACGCT  
CAGCCATCTGATATTTATCGATAAACTGCAACTGGTGGCAGCCAACAAAATCAGCCTGGGAAATGAGATAAGCGGAACGA  
ATCGGCTGTTGCTCACTCGAAGGTGAGAAACCGTACGGCCGCCCTTTTTGGAGTCGTAACAAAATAGCCCTGTGC  
GTACCACGGCGTGAATTACCGATAATCTTGATATTGTTTTGGTGC GGAAACGCTGCCATCACTACCAAGGCCATAAA  
ACAAGGCTTCCAGTTTCGCCGAGTTTGGCAGGGTGTTCGGGCAACGGCAGTGACAGATTGGTACATCATCGTAAATA  
CCAACCGTAAAGCGCGCTTTCGGTTTAGCCGCTTGAGCTCGGCAATACCGCCAGTACACAGTCTGGGCCAAATTTCTT  
GGATGAAAGACCATAGCGCCACCAATGACACGGGGCAGAGTTTCGCGCTCGCCATTATTAAGGCTTCTGCCAGTGGG  
TCATTACATCCAGATAGCGGTTCTGCCTGGGCACCGGTTCTTTGGTTCTGTCCAGTACCGCCAGCTGCGTACGGAT  
CCCGGCAGAGCTTGACGTAATGTTTAGCGGAGAAGGGCGGTACAGGCGAATTTAGCAGCGCAACTTTTTGCCCAG  
GGTAGCAATTCATCAACCACTTCTTACAGGTGCCAATGGCAGAGCCCATCAGGATAATCACCCGTTCCGCTTGGGAT  
GCCCATAATTTCAAACGGCTGATACTGACGACCTGTGCGGCGAGAGAAATCATTATCGCCTGTTCAACATGGTCATAG  
ACCGCTTGTACCATGGGTTGGTGGCTTCGCGAGACTGGAATAAGTGTGAGGATTGGCGGACGTACCGCGGATCACCGG  
ATGTTCCGGGTTGAGTGGCCGGGCGGATGAGCATCAATTTGACCTGCGGATGAGATCAAGAATCGTGTATCGGCCA  
GCGGGACAATTTTATTGATTTGCGTGGGACGTGCGGAAACCATCAAAGAAATGAATAAATGGCACGCGGCTTTTACGCGT  
GCGATTTGCGAAATGAGAGCAAAGTCTTGC GCTTCTGACGTTTGTGTCACACAACATCGCGCAACCCGCTTGGCGCAC  
CGCCATAACGTCGGAATGATCGCCAAAAATAGAGAGTGCATGTGTGGCAACGGTACGTGCCGCTACATGCAGGACAAACG  
GTGTTAGTTCCGCTGCCAGTTTGTACAGCGTCGGGATCATCAGCAGCAAACCTTGCATGACGTAACGATGTTGAAAGG  
GCACCCGCTGTCGAAAGCGCCATGCACGGTAGCGATAGCACCCGCTTCCGACTGCATTTCAACCACGCGTGGTGTGTCTCC  
CCAAACGTTCTTTAAGCGTTTCCGGCCAGGCATCAGCCTGTTCTGCCATCGTGGAACTGGGGGTAATAGGGTAGATGG  
CGATAACTTACTGGTGCGAAATGCGACCGAAGCAACCGGCCATTACCGTCAATAGTAATCATATGACACCCTTACATT  
GCGCAAATGAGGGGCGCACGAAATGCTGCGCGCCAGTAGTAATCTTTCAATTTAGCAAATGGCTTTCTTCTGCATTT  
TCGCTTTTGTGTCCTCCACATCAGCGTAATGAATGTTTTGATCAAACAGAGGGCAAAAAAATAGCCATAAAAAAGTAAAA  
ATGCGGGGCAACGCGCAGGACAGCTCTCGACCGCCCTCTGTGCTGCCTATTATTTATGGCGGTGTCGTTTGGCTTGA  
GATCAGAGGAAGAAAAGATGCGAGCAGCGTTCGGTAGGGTGTCCGCTTATTGTTGTCGCGGTGAGTAGTGAACCT  
GTTACAGCGGCGACTCCGCGCACGTAGCGCCAGTTTAAAAGCTCGATGTCCAGTAGTGGAGAAGAAATTTGTCGAAT  
GATCGGCGGTTTCGCTTTCTGTTGCCGTCAACTGGATGGTACGGCGATTGGGATGTGTGCATTACCCAACGGCAACCGCT  
GTAGCGAACAGTCACTTGCCCGGGAGCTGTGGCAGCTATTAATTCATTAATCCGCCAGCTTATAAGTTAATGTCTGT  
TTTGC GGTGCGCAGGTTAACTGGTTCGCGGTGAGATCCACTTGTGCACCTTCTTTCAGCATTTCGCTAATGGTGTATC  
GAGTTCATTAAGCTGCGGTTAGCGCACATCATAAGGGTATTGCCAGCCCTTGGCTGTGAGTTCACCATTAGACAGTT  
TGCTTTCACCGCTAAAGCGGTTACACATGCTGCCGAAATCATCATTTTTTACCAGAAAGCTGATTTCTGGCGGATTTTTA  
TCGCTGGTACGCGGCTTACCGTTTACGCTTTCAGCACAAAGCGATGATGCTGTAGCTGTTCTGGCGTAACGCAATTTT  
GTCATTACTTACACATCCCGCCATCAGCAGGCTTAGCGCAACAAACGCGGCTACTTTCTTCTTCTGTTTCTCAATTACA  
GTTTCTGACTCAGGACTATTTAAGAATAGAGGATGAAAGGTCATTGGGGATTATCTGAATCAGCTCCCTGGAATGCAG  
GGGAGCGGCAAGATTAACAGTTCGTTCCGGCAGGTTTCGCTTTTTCCAGATTGCTTAAGTTTTGCAGCGTAGTCTGA  
GAAATACTGGTCAGAGCTTCTGCTGTGAGGAATGCCTGGTGGCCGTTAAACAGCACGTTGTGGCAGGCAGACAGGGCAGC  
GAATACGTCATCTGGATCAGTCTGTTGATTTATCTTCAAAGAATAGATCGCGTTCGTTCTCATAACGTCATACCCA  
ACGAACCAATTTTCTGATTTTTTACGCGCTTCAATTGCTGCCTGAGAATCAATCAATGCACCGCGACTGGTATTGACGATC  
ATCACGCCATTTTTATCTGTTTGAAGCGGCTTCGTTCAACAGATGATAGTTTTCCGGTGTGAGCGGGCAGTGCAGAGA  
GATAACGCTGATTACAGAGAACAGGGTTGGCAGATCGACATACTCCACACCGAGTTCCAGCGCGCTGCATTTGGATACG  
GATCGAACGCCAGCAGACGCATACAAAACCTTTAGAATGCGCAGCATCGCCACACCGATTTTACCGGTACCGATAACG  
CTGCCGTTTTTGCATACATAGTAAAGCCGGTACAGCCTTCCAGAGAGAAGTTAGCATCACGGGTACGCTGATACGCGCG

GTGAATACGGCGGTTACGCGTCATCATACATACCGATGGCGTGTTACGCAACGGCCTCTGGATCATAGGCTGGAACACGGA  
CTACTTTTACGCCCAGTTCTTTTCCCGCTCAAGGTCGACGTTATTGAAACCGGCACAGCGCAGGGCGATATATTTAACG  
CCGTGCTTTTTACGCTCTCCAGCACCAGGGCGGCTGCCGTCATCGTTTACGAAAATACATACCGCTTCGACGCCATTGGC  
AGTTTTAGCGGTTTTTCCGTCAGCAGAAAAGTCAAAAAATTCAGCTCAAAGCCAAAGGACTCGTTACCTGTTGCAGGT  
ACTTCTTGTCTACTGTTTTGTGCTATAAACGGCGAGTTTCATAAGACTTTCTCCAGTGATGTTGAATCACATTTAAGCT  
ACTAAAAATATTTTACAAAAATTTCAAATTTAATTGAAAGCTATGGCGATATTGAAAAATTCATCAACAATATGCTTAGT  
GTAGGCGCAACCTTCAACTGAACGTTAAACATGCCACAATACCCGATTGAATGCTTAATTTTTCGCTAAATCAGGATA  
TTAACTACCCATGCTGGGTAATAATAAAGCCGTTCTCGCGCTGTTACTGATTATTCTTGTGCCGTTGACGCTGCTGA  
TGACGCTCGGGCTGTGGGTTCCACGCTGGCGGGCATCTGGCTACCGCTCGGGACACGATTTGCATTAGATGAAAGCCCA  
CGCATTACGCGTAAAGGTTAATCATTCCCGATCTCCGTTATCTGGTGGGAGATTGTCAGCTTGGCAGATACCAACGC  
CAGCCTTTCACATCCCAGCCGCTGTTATTGAACGTCGGCAGGTAGAACTTGATTCTGCTTGTCTGGCGAAATTGCCGC  
AGACGGAGCAATCGCCAGCCGCTCCAAAACTCGCGCAGTGGCAGGCCATGCTGCCTAACACCTGGATCAATATCGAT  
AAACTGATTTTTCTCCCTGGCAGGAATGGCAGGGAAAATCTCTCTCGCATTAACTCTGATATCCAGCAACTGCGTTA  
TCAGGGCGAAAAAGTTAAATTTCAAGGCCAGCTGAAAGGGCAACAACCTACAGTCAGCGAACTGGATGTCGTGCGGTTG  
AAAACTCAGCCGCCGTAACCTGGTGGGGAAATTTGCTATGCCGCTCGTGCCGATGGACTTCTGTAAGTGGGCGCTG  
ACTGCGACGTTAAACTTCCCGCAGGAACCGTCACTGGTGGATGCCGAGCTGGACTGGCAGGAAAATAGCGGCAATTGAT  
CTGCTGGCAGGGGATAACGGCGATCCGTTGCTCGATTTGCCGTTGCAAATTACTCGTCAACAATTGACCGTAAGCGATG  
GTCGCTGGAGCTGGCCGATGCAGTTTTCTTTGAGTGGCCGACTGGGTGTCAAAGTCGACAACCTGGCAGGCAGGGCTT  
GAGAACGCTCTGGTCAGCGGACGACTGAGTGTGCTGACCCAGGGGCAAGCGGGTAAGGGCAACGCGGTGCTTAATTTTTGG  
CCCAGGAAAATTAAGCATGGATAACAGTCAGCTGCCTCTGCAGCTGACCGGTGAAGCGAAACAGGCGGACCTCATTTTAT  
ATGCCGTTTTACTGCGCAGCTAAGTGAAGTCTGTCTGACCCAACGCTGACCTTTGAGCCAGGCGGTTACTTCGTTCA  
AAGGGAAGAGTCATCGATTGCTGGACATCGATGAAATCCGCTGGCCTTTAGCGGGTGAAGTCAACCAACGTTGGTGT  
TGACGGACGTTTGCAGGCCATCTGCAGGCGCATGAAAATGAACTGGGCGATTTCTGCTGCATATGGATGGGCTGGCGA  
ATGATTTTTCTCCCTGACGCTGGCCGCTGGCAGTGGCCTACTGGGAAAAGGGAGTTTTACACCGATGAATGCCACCTGG  
GATGTCGAGGAAAAGGTGAGTGGCATGACAGCAGGATTACGCTGACCGATCTCTCCACCGTTTTGACCGATTACAATA  
CGGTACGATGACGGTAGAAAAGCCGCGATTAATTTCTGACAAGCCATCGTCTGGGTACGTGACGCACAGCATCCCTCCT  
TTAGCGGCGCGCTGCTCACTGGACGCCGGCAAACGCTGTTCACTGGCGGAGTGTGTTACCGCCATCAACCTTAAATTT  
AGCGTCGATGGGCGGATCTACCTATTTCTTTAAAGGCGATTTACATGCTGGTGAGATTGGCCCGTTTCGGGTAAA  
TGGTGCTGGGACGGTATTCGCTGCGCGGTAACGCTGGTGGCCTAAACAATCACTGACCGTATTCCAGCCGCTGGTGC  
CACCCGACTGGAAGATGAACTTACGCGATGGTGAACGTATGCTCAGTTGCATTTTCTGCTGCGCCTGAACAAGGATTC  
CGCGCGGAGGACACGGCGTGTGAAAGGCGGTAGTGCCTGGATGCCAGATAATCAGGTTAACGGTGTGATTTTTGTCT  
GCCTTTCCGTTTTGCCGATGGAGCCTGGCATCTGGGGACTCGCGGCCCGTTACGTTGCGAATTGCCGAAGTGATTAATC  
TGGTGACAGCGAAAAATATTACGGCTGATTTGCAAGGGCGTTATCCGTGGACTGAAGAAGAACCCTTGTGTTGACTGAT  
GTTAGCGTCGATGTGTTAGCGGTAACGTAAGTGAACAATTACGATGCCGCAACATGACCCGGCGCTGTTGCGGCT  
GAATAATCTCTCATCCAGCGAACTGGTTAGCGCCGTAATCCGAAACAATTCGCGATGTCGGGGCATTAGTGGTGCAC  
TGCCGTTATGGCTGAACAATGAAAAATGGATTGTGAAAGATGGCTGGCTGGCGAATAGCGGGCCGATGACATTGCGACTG  
GATAAAGACTGCGGATGCGGTGGTAAAAGACAATATGACTGCGGGTTGAGCAATTAAGTGGTGGCTATATGAAAAAT  
TAGCCGTTTCATCGAAAAATTAATTTAGATAATCTCGGTTTATTAACCATGACAGGCCAACATTACAGGTACCAGTCCGG  
TTGATGGTAAAAGCGGTACGGTAAACCTTAATTAACCATCATGAAGAGAATATTTTTACGCTGTGGCGCAGTTTACGCTT  
GGCGATAATCTCAGCAGTGGCTGGAGCAGAACGCAGCTCTGCCGGGAAATGACTGTCCGCAAGGAAAAGAGTGTGAGGA  
AAAAACAATGAAAAATTTACTGGCTGCGTTGACGTCATCTTTATGCTGGTTGGCTGTACGCCCTCGCATTGAAGTCGCTGC  
ACCTAAGGAACCGATCACTATCAATATGAACGTTAAATTTAGCATGAGATCATCAAGGCAGACAAAGATGTCGAAG  
AGCTGCTTGAACCTCGTAGCGATCTTTCTGAGGTGATGATGAAGAAAACATTACTTCTTTGTGCGTTTTCTGTTGGGCT  
GGTAAGCAGCAATGTAATGGCATTGACTCTGGATGAAGCCAGAATCAGGGGCGGGTAGGTGAAACATTTTACGTTATC  
TGTTTGGCTGAAAACGGATGCTGAAACAGAGAAATAGTAGCCGACATTAATGCCGAACGTAAGAGCGATTACCAACAA  
CTGGCAAAGCAAATAATGTGTCGGTAGATGATATCGGAAACTCGCCGGGCAAAGCTCGTAGCTCGGGCAAACCGGG  
GGAATATGTACAAGGGATAAACGGTAAATGGGTGCGAAAATTTTAAAGCAAACCGCAATATCGGGATAACGCTACAGG  
AGAAGGCGATTGATCTATTTTCTGAAACAAGGTGAATATTTCAAAAACTCCTGTCAAATTTGCTTTTGCCTGAAAAATG  
CATAGTCAAATATCTGTTTTAACTAATTTGGCGTTGACGATCATGCAACGCCAATTAAGTTAGCGGAATTTACGTCGATACT  
CGCTGGCGTCATCCAAAGCGTTGCTTAAATACCGTTGAAAAATGACTCTGGTCAGAAAAATCCCAATGAAAGCCGATG  
CCTGCCAGTTTTTTCATCATCTGCGGCATGGCGAATCGCATCTGCACAAAAATCGAGACGACGGTTACGAATATATTGCGC  
GACTACCAAACCTTTATCGGCAAACATTCGGTACAACTACGACTGACATACCTGTCTCTCCGGCTATCCACTCCGGGC  
GTAATATCTTTCGCGAATATTATCGTCTATCAACGTAACCACTTTTTGAAACTGACGTTACGACGAGGTTGAACAGAT  
TCCCCTGATGAAGTACCGGGCGCAGCAGACACACCATCGCTGTAGCGCAGCTTCACTTTCTGTTTTCAGAAAAGTCCCGG  
ATTATTCATGCTCTCTGTAACAGGCGATGACTGAGTTGACCATGGGTAAGTCAGCGTCCAGTCTTTCTGCGCAGATAG  
GTTTTGATGGGGAAAATATTGTTCCAGCAGAGTGCCTGGCAAAGTAATGAAATCTGTTTGAAGACTCCTGCCAGTAA

AGCGAACAGGGGCGTGAGGCATCGAGTAACGTAATATCGCCAGCGCCAATCTGCACCTGACGCTCATCTGCTCCATTAT  
TGCCTGACCACTAAGCTGAAAAACGGTGTAAAACCAGGCATCGTCGCTGCCTTTTACTTCTGCCAGGTGCGGGATAAAT  
TCACCCCGCTGGTTGTCACGGTACTCAGCTTTAGTCCTTTGGCAAATGCGTGTCCAGTACACCCGTGTAACGCTCAGTC  
AGCAGGCGTCCGGTAAAATTTCCGCATACCTGATTGATTTGGGAAAGCCATTGCTGAAACTATTATCCACTGCGGGGTT  
CATGGCACGTTTTGCTCTGTGAAATGATTTTTATTGTTGCATTTGTGTTGCAATAAACGAAGCTAATGAGCCTGACTA  
TAGGAAATAAGTCTTGTGAGGCATAGAGACATAAGCCGGTATTGTGACGATTTGCGGAGCTTGTACAGCTGACAAAGCG  
AATGTCACAGCGAAAAAGTGACTTTTCTGTGCTGCGTACACTGAAATCACACTGGGTAATAATAAGAAAAAGTGAT  
GACAGAGCCGCATGTAGCAGTATTAAGCCAGGTCCAACAGTTTCTCGATCGTCAACACGGTCTTTATATTGATGGTCGTC  
CTGGCCCCGCACAAAGTAAAAACGGTTGGCGATCTTTGATCCGGCCACCGGGCAAGAAATTGCGTCTACTGCTGATGCC  
AACGAAGCGGATGTAGATAACGCAGTCATGTCTGCCTGGCGGGCCTTTGTCTCGCTGCTGGGCCGGCGATTACCCGC  
AGAGCGTGAACGATTCTGCTACGTTTTGCTGATCTGGTGGAGCAGCACAGTGAAGAGCTGGCGCAACTGAAACCCTGG  
AGCAAGGCAAGTCAATTGCCATTTCCCGTGTCTTTGAAGTGGGCTGTACGCTGAACTGGATGCGTTATACCGCCGGTTA  
ACGACAAAATCGCGGTAAAACGCTGGACTTGTGATTTCCCTTACCCAGGGGGCGGTTATCAGGCCTGGACGCGTAA  
AGAGCCGGTTGGCGTAGTGGCGGGAATTGTGCCATGGAACCTTCCGTTGATGATTGGTATGTGAAGGTGATGCCAGCAC  
TGGCAGCAGGCTGTTCAATCGTGATTAAGCCTTCGGAACACGCCACTGACGATGTTGCGCGTGGCGGAACTGGCCAGC  
GAGGCTGGTATCCCTGATGGCGTTTTTAATGTCGTACCGGGTCAGGTGCTGTATGCGGCGGGCCCTGACGTCACATCC  
TCATGTTGCGAAAATCAGTTTTTACCGGTTCAACCGCGACGGGAAAAGGTATTGCCAGAACTGCTGCTGATCACTTAACGC  
GTGTAACGCTGGAAGTGGCGGTAAAAACCCGGCAATTGTATTAAGAGTGTGCTGATCCGCAATGGGTTATTGAAGGCTTG  
ATGACCGGAAGCTTCTGAATCAAGGGCAAGTATGCGCCGCCAGTTCGCGAATTTATATTGAAGCGCCGTTGTTTGACAC  
GCTGGTTAGTGGATTTGAGCAGGCGGTAAAATCGTTGCAAGTGGGACCGGGATGTACCTGTTGACAGATTAACCCTT  
TGGTTTTCTGTCGCACTGCGACAAAGTGTTCATTCTCGACGATGCGCAGGCACAGCAAGCAGAGCTGATTCGCGGG  
TCGAATGGACCAGCCGAGAGGGGTATTATGTTGCGCCAACGCTGGTGGTAAATCCCGATGCTAAATTGCGCTTAACTCG  
TGAAGAGGTGTTTGGTCCGGTGGTAAACCTGGTGGAGTAGCGGATGGAGAAGAGGCGTTACAACCTGGCAAACGACACGG  
AATATGGCTTAACTGCCAGTGTCTGGACGAAAATCTCTCCAGGCTCTGGAATATAGCGATCGTTACAGGCAGGGACG  
GTGTGGGTAACAGCCATACCTTAATTGACGCTAACCTACCGTTGGTGGGATGAAGCAGTCAGGAACGGGCCGTGATTT  
TGGCCCCGACTGGCTGGACGGTTGGTGTGAAACTAAGTCGGTGTGTACGGTATTAATCTGGTTCGCTCATAAGTAAAA  
AACGGCACCTGGTGCCGTTTTTTGTCTGAAACAATCACTTATCTTCTCAGCGCCCCTAGCGTTGGCGTTTCGTCAAA  
GAAGTTCATGGTTTCAGCAGAGTATGTACCCATTCGGTGGCATAATCGGCCACTCTTCGGCGCGGGCCACATGTGTGG  
TGCCGGTGGTATCCAGACAACGGCGTGGTGTTCAGCGACTCGTTATCCTTACTGTATTGTCCAAGACCGGTGTCA  
TGAGTAGAACGGTTCCGATATTTGCCTTCCGGGAAACGCTCGCCAGGATGATAACGCGTTACCCAGAGCTGCTTGTCCAT  
AAAGCTTAAACGATGATAGATCCACTCGTCCGGCGGAACTGGGCACCTTTTGTACCGGGTGAGTACCCTGCATAAG  
GAATAATTTGATAGGAAACCGGATTGCCCATGCGGTTCTTTGTTGCGGTTACTCAACAGACGAATCGTGCCCGGATCA  
AATTTCTGTGCGGCATCCTGTTCAATTGCCGATGTTGTAAGTACTGATTAACCTGATGGTACTGGTGGTGGCCACCGGCAGT  
ATTCGGTTTTACCACTGGTCCATCGCCACCAGGCTGTTATTCTCGCCATCTACATCCAGATCGAGGCGGAAATTATAAA  
TATGTTGGTGTAGTACCACGATATTGTATCGATAAGCGTGCCGTAGCGCGTGTATCTTTGCGCGTCTCATCGTGC  
ATGGTTTTCGCTTTAACACCTTTACCCTTCGATGCGCGTAGCACCGGCATCGATGCCAATAGTGCCGTTTTTATGGAA  
GATCCAGTCAAAAATGTAGTCATAGTTACCCACTGTACTGATCCAGCGCACCACTAACTCCCGCGTTCCGGTACTGACGT  
TGGGCTGGCCATTTCTGATGCTTACTCCGGCCCGCATAACGTTCAAATACCGCGATAGCGCGAGGGATCTCCATC  
GGCACCGCAGTGTAGTCGGCGATGGTTTTCAATAGGAGCACTGCTTAGACGGGGCATCTTACCACGAGCAATTGGTGA  
GGTTAGCGTCCCAATCCGATGACCCAGAGTCCAGATACGCTTAAAGTACCAGCAATATCAGGATCACCGTAAGGCA  
CAATCATGCCCGCAGAGAACTTCGTACATGACTTTGCGTTTTGGTGGCATTGTGTTATAAGTACCGTGGAGATCATC  
GGCCGACGCGAGAGTTCATGCTGAGGTGAAAATCCAGTTCGCGCAGTGAATCATATCGCCAGTAATGGTGAATTTTT  
ACCTTCAGGCTCAATGATTTGCATAGGCTTAACTGCGGAGCAACGCGGTACAGGCCATCAAATGGGCGTGCGGTCATTG  
GCACCGAACTACCGACCTTCTTCAATCTTAAAGATTTTTTTCTGTTCTAAATCAACGACCGCCACCAGTTTTTCGATG  
GGATGTGCCAGTAGTTGCCATCACCGACATCAAGATAGCTGATGACTTTGAGCAACCGGGCATCTTGTTCAGGCCATC  
TTTACCATCGAAATAACCTACGGTCAGCGGCGTGGTAACTACTTTTTTTCGATCAGTAATACCGGTTTTCTCACGGCAG  
CGGCAAATTTCACTGTTGTTAATAATGTTCTGCACACTGGCGAAATCATCCAGCAACACCATAACCGTGGGCGTCTTTA  
ATGGGTTGCCAGGAGAGCAGTTTTGTTGTTTTGCAGATCCACCACCGCTTCGATGATATGTTTGGCGTCGAGCATAATGAC  
GTCGGCTTTGCGCGGCTGGTCAACCGTTTTGTTTTCCAGCGCAAACGCCAGACAGCTTCTTATCTGGCGGTAGCAGGG  
AGATCTCAGTAAAACGGGATTTGGGTTTGAAGTCCGCGGAAGCTTAAACAATTTCAACGGCCTGTTAATTTCTGTCGCA  
GTTAGCGCATTAAGTGGGTGAGGGCGTTTTCTACCTGAAAGGTTTGTATCCAGCCGGACTGAAAACATCGTTAATAAAA  
GGTGTGAGAAACCCAGGCTTATTGTCTTTCATCACTACCGGACTTGCAGTCCAGAGGCTGACCATTAACAATTTGCTG  
TTTGGCACCAAAATTTTAAAGCGTTTTATCCATTGGCACCATATGCGCTTACCACCGTGGGCAAATACCGCGCTTGCCA  
GGCGAAACTTAAAGCGACTGCCAACGCCAGGTTGTTTTACGGGCAGAAATACAGAGAGGGGCTTCCATTATTAACCTCG  
TCAGATGTTGTGTTCTTGTAGCAACCGCTCTGTGGGCGGTTAGTCAGGTTACATTATCAGTACTGATGCAAAGGG

GATTGCCTGCACCTGCCAGTTGTTTGGCAGGTGTGCCAGCTTTTCATACAGTGGATGCCCTGAAAATAGATGTACACAT  
CATGCATAATGTGACAACGTACAAACTTAGTAAAATAAAAGGGCAACTATTCGCCGTTGCCCTTCATTACCGGATTA  
TCGACAAAATCACCGTGCTGCTGGCCACCAGCGTCAGAATTGAATACAGCGCCACCGGGTTTGATGCTGATTGAATAC  
CTCTACAGCCATTCCACCACACCTGTTGGTTTTCTCTGCGCTACGCTGTTTTTTCAGCGTCTTGCGCTTACAGGTGA  
GACGCACCTGGATGGTATCGCTGGCTTTACGGGTCGATAAAAACGCAAGCTTTCAGCCCGTAGTTAGCAATGACCGGA  
CCGACACCGGCATCGACAAAACAGACCCGAGCCGAGAAAGCACAATAACCCATGCACCACCCGCTCACCGAAAATAGA  
TTCGGCAGCAGCAATCTTATCCATATGTGCATAGAAATGATCGCCGCTGAGGCAAGCAAAGTTAAACATATCGGCCTCTG  
TCATTGTGCGCGGGGAGTCAACAGGCTGTCGCTGTTGTAGCTCTCAAAATATTTGCGGAACGGATGAATACGATCT  
TCTTCGACTTTTCGACCCGCGCACCCACTGTTTACTGATAGCGGCAAGCATCGTCGGACTACCCTGAACAGCGGTTGCGTG  
CATGTAATGTTTACCCTCGTAAACCGCCTAATTTTACCAGCTCTGCGCGACCCAGGCCACCATGTACCAGTTGTG  
GCAGTGGGAGCCATGCCGGTGGATTCTTTTGGCGACTCTTCATTGAGGATCTGAATTCGCCATGCGTACGTGCCGCG  
TCGGCAATAAACTGACGCGCAATTTGGGATCAGCCGTACCAGCGTTCCCGCAAGGCTACCAGCCGCTGACAAGCCAG  
TTGCAGAGCATGTCGCTGTTTTGTGTGGCATCAGCGTTCGACAGGGCCAAAGGCTTCTGTTGCATGTACCGCCGGTG  
TTTCATCCGGCTGCGGACAGTACAATAAGGTTGGCGGAAGAAGGCACCCGAGCAGATAAATCCGCTGACCACCGAGG  
CGAATCTCGCATCTGACCGCAGCAATATGTTCACTTTTTCTGCATATCGGCACGCTGCTCAGCAATTTACCAGTCCGCC  
CATTTTTACGCCTTCTGAGCAGGATCACCGACGACTTTTCTGTAATCGCGCAACCAGAGCATCACTGACGATTA  
CCAATGCCTGCGGCACAATAATCCGCCGATTGCCGTACATTTTTGCCCGGCTTTTGTGGTATCTCACGCACAACCTCA  
CGAATAAACAGCGCAAACCTCCGTTGATCCGGGGTACATCTTCGCCAGTACGCAGCAGTTCAGGGAATCAGCTTCCAT  
AGTGAAGGGGATAGATTTGGCGACGATATTTGGCTGAACTCGCAGCATCTGTCCGGTCGCCGCTGACCCCGTGAAGTCA  
CCACATCTGGCTGTCCAGATGATCCAACAAGTCGCCAGCACTACCAGCAGATCAGACTAATTGCGCTTCGGGAACAAGA  
CCACTATCGACAATTGATTTACCATCGCTGAGTCAGTTGGGCCGTGCGGTAGCTGTTTTGATGATGGCTGGCATTCC  
GCCAGCCAGTTGGTGCCAGCTTTTCCAGCATTCCCAGCAGGGGAAGTTAAAGGCGTTAATATGCACTGCCACGCTG  
ACTTTGAGGTGAGTAAATGGCGCGCGCAAATCCACCTTTTTCGATAAGGGGATCAATTCATCTTCGGCCACAGCGTA  
TCGTGAGGCGCTCCCGCTACCAGGCTGGCGTAAGTAAATAACGTCCAATGCCACCTCAATATCAACCCAACCTGTC  
TGCCCGGTTGCGCTGTTTGGCAGAAAAGCATAGAAAACGCTTTTTTCACTCAGCAGATGTTTAGCGACCGCTTTAA  
GCATCGCCGACGTTTCGATAAAGGTCATAGCGGAAGGGCGGGGGCACCTTTTTCAATGGCAAACGGGGGAGCCGCC  
ATATCAAGACCTTCACTGGTCACTTCCATAACGCCTGCCGTAATAGCGTGGTGAATCAAACGGCTACGGCCCCGCC  
AGACTGCCAGTACCAGATAAGAACTGGCTAACTGCTGCATCGCTACTCTCCAGATGTTTCAATTTCTGTTGCTAATA  
GTTAAATCGCGAATCATAAAAAGCAAAGGATCTTTTAAACGAAATGTTAACTATCGGATCTGTATAGCAACTGCGGAAAAC  
ATTAATGCACTGATAAATAATGATTTATAAAAATAGGGTGCAGAAATCCGTCACAGTTCAAACATACAAAATTTGTGATTT  
TACTTAACTATTGTGTAACCTTTCATAAAAACAAATGTGATTCGTGTTTTTAATTAATTCACGAAAACGGAAATCGTAAAGGT  
GATGACGTGACCCAAGAAGAACGCTTTGAGCAACGGATAGCCAGGAAACGGCTATCGAGCCACAGGACTGGATGCCCGA  
TGCTTACCAGAAAGACATTGATCCGCCAGATTGGGCAGCATGCGCACTCCGAGATTGTTGGTATGTTGCCGTGAAGGTAAC  
GGATCACTCGCGCACCAACCTTGGCGGTAAAGCCATTCTGTTGGCAAAGTGCAGGATGAAGCCGGTCAATGGTCTGTAT  
CTCTATAGCGCCCGCAAACACTGGGCTGCGCCAGAGAAGACATCTACAAAAAATGCTCGACGGACGGATGAAATATTC  
CTCCATCTTTAATTATCCGACATTGAGTTGGGCTGATATCGGTGTTATCGGCTGGCTGGTGGATGGCGCAGCGATCGTCA  
ATCAGGTGGGTTATGCCGCACTTCTTATGGCCGATGCCAGAGCAATGGTAAAATCTGCAAAGAAGAGATTTTTAC  
CAGCGTCAGGGTTTGAAGCCTGCATGGCACTGGCGCAGGGCAGCGAAGCTCAAAGCAGATGTTGCAAGACGCCATTA  
CCGTTTCTGGTGGCCAGCCTAATGATGTTGGGCCAAACGATGATAACTCGCAAACAGCGCCAGAAGTCTCACCTGGA  
AAATCAAACGTTTCAACGACGCAACTCCGCCAGCGTTTCTGGATAAACACCGTTCCACAGTTGAAATGCTCGGTATG  
ACCGTTCTGACCCGGATCTGCATTTTGACACTGAAAGCGGTCACTACCGCTTTGGTGGATCGACTGGCAGGAGTTTAA  
CGAAGTAATTAACCGTGCAGGAATTTGTAATCAGGAGAGGCTCGACGCCAAACGTAAGCCTGGGAAGAAGGTACCTGGG  
TACGGGAAGCAGCGCTGGCCATGCACAAAAACAACATGCCCGTAAGGTGCGATAAGGAGATTCAAATGAGTAATGTTT  
ACTGGCCGTTATACGAAGTTTTCTGCGTGGCAAACAGGGCTTATCACACCGCCATGTTGGCAGTTTACATGCTGCCGAT  
GAGCGGATGGCACTGAAAATGCCCGTATGTTACACCGCTGATAGCGAAGGATGTTCAATTTGGTGGTGAAGGCGAG  
TGAAATTGTTGCCCTCGAACCGGAAGAAGCGGTGAATTTTTTATCGCGCTGAAAGCAAGGCTATCGCCATCCAACGT  
TTTACACCATCCCTGATGGCATTGAGCACATGTGAGTTCGAAATGAATCAGTTAACGGCTTACACCTTGCCTGGGCG  
ATAACTGCCTGGTCTCTCCAGCGTTGGTGAATGGTGGGTCACGCACCGGAACTGAAAATCGATCTCGCACTGGCA  
AACATTGGCCTCGATTTATAGGTCAGGCACGCAACTTCTTATCGTATGCCGTAATTAGCGGGAGAAGCGATGAAGA  
TACCCTGGCTTACCCGAGACGAGCGCCAGTTCAGCAACTTATTGTTGGTTGAACAACCAAACCGCAATTTTGGCACA  
CCATTGCACGCCAGTATTTATCGATGCATGGCATGTGGCGCTTTTACCCGCTGATGAAAAGCCGTGATCCGCAACTG  
GCGCGATTTCTGCAAAGCAATTAAGAAGCGCGTATCACCTGCGTTTTAGTCGTGGCTGGCTGGAGCGACTGGGCAA  
TGTTACTGACGTATCAGGGCAAAGATGCAGCAGGCCATCAACAAGTTGTGGCGTTTTACCCGCAACTGTTGATGCCG  
ACGAGATTGATATTGCACTGAGTGAAGAGGGTATTGCGGTTGATCCACGCACCTTACCGCGACGCTGGGAAGCCGAAGTT  
TTTGGCCGGATCAACGAAGCCACATTGAACGTACCGCAAGAGCAGGCGTATCGCACTGGCGGTA AAAAAGGACTGCATAC  
CGAACACCTTGGACCCATGCTGGCAGAAATGCAGTATCTCCAGCGTGCTTGGCCGGTACGCAATGGTAACAGAGGAGAT

GGGTATGCAACGTCTGGCCACCATTGCACCGCCACAGGTTTCATGAGATATGGGCCTACTCAGCCAGATCCCGGACCCGG  
AGATCCCGGTGCTGACCATTACTGATTTAGGCATGGTGCCTAATGTGACACAGATGGGAGAAGGATGGGTGATCGGCTTT  
ACGCCGACATATTCGGTGTCCGGCAACGGAACATTTGATTGGCGGATACGTGAGGCAATGACAACCAACGGGTTTAC  
CCCCGTTCAGTGTGTGCTGCAACTCGACCCGGCATGGACCACCGACTGGATGACCCCGATGCCCGTGAGCGTCTGCGAG  
AGTATGGCATTAGCCCGCCGCGGACACAGTTGCCATGCCATTTGCCGCCAGAAGTACGTTGCCCGCGCTGCGCCAGC  
GTCCATACCACACTTATCAGTGAATTTGGTTCCACGGCCTGCAAAGCATTGTACCGCTGCGATAGTTGCCGCGAACCTTT  
CGATTATTTCAAATGATTTGAGGATGCCATGACAACGTTTATTCTTAACAGTGGCAAAAGTCGAGTCGGAACCCGT  
GATGCGGTGACCATTACCTTTGCGGTGCCCGAGCCTTTGCAGGAGGCGTATCGCTTTGCCCGGTCACATTTGACCTT  
AAAAGCCAGCTTTGATGGTGAAGAATTACGCCGTTGTTACTCCATTTGCCGAGCTATCTGCCTGGCGAAATTAGTGTGG  
CGGTGAAAGCCATTGAAGCGGACGTTTCTCCGCTATGCCCGGAACACATCCGCCAGGGTATGACGCTGGAGGTCATG  
GTGCCGAGGGCATTTCGGCTATCAGCCGAGGCCAACGCCAGGGGCGCTATCTGGCAATTGCAGCAGGATCAGGTAT  
TACGCCAATGTGGCATTATCGCCACCCTTTACAAACCGAGCCTGAAAGTACGTTACCCTGATCTACGGTAACCGTA  
CCAGCCAGAGCATGATGTTTCGCCAGGCACTGGCAGACCTGAAAGACAAATATCCTCAGCGTTTACAGTTGTTGTGCATT  
TTCAGTCAGGAAACCCCTCGACAGCGATCTGCTTACGGGCGTATTGACGGTGA AAAAATTACAGTCACTTGGGCGCTCGCT  
CATTAATTTTCGCTTTATGATGAGGCATTTATTTGTTGTTCCGGCGCGATGATGGATGACCGGAAACCGCTTAAAG  
CACTGGGAATGCCAGATAAAAACCTTCACTGAGCGGTTTAAATACGCTGGCACGCGTCAAACGTAGCGTTAAACGTG  
CAAAGTGACGGACAAAAGTACTGTACGTCAGGATGGGCGGGATCGGGAAATCGTGCTTAATGCCGACGATGAAAGCAT  
TCTCGATGCGGCATTGCGCCAGGGGCGGATCTGCCCTATGCCTGCAAAGGCGGCTGTGTGCGACTGCAAATGCAAAG  
TGCTGCGTGGCAAAGTGGCGATGGAACCAATTACAGTCTGGAACCGGATGAACTGGCCGAGGTTATGTGTTGAGTTGC  
CAGGCACTGCCGCTGACCAGCGATGTGGTGGTTGACTTTGACGCGAAGGGGATGGCATGAGCGAACTGATCGTCAGCCGT  
CAGCAACGAGTATTGTTGCTGACCCTAACCGTCCCGCCGACGTAATGCGCTAAATAATGCCCTGCTGATGCAACTGGT  
AAATGAACTGGAAGCTGCGGCTACCGATACCAGCATTTCGGTCTGTGTGATTACCGTAATGCAGCTTTTTTGGCGTG  
GGCCGATCTCAACGAAATGGCAGAAAAAGATCTCGCGCCACCTTAAACGATACAGTCCGAGCTATGGGCGCGATTG  
CAGGCCCTTAAATAAACCACTTATCGCAGCCGTCAATGGTTACGCGCTTGGGCGGGTTCGAACTGGCATTGTTGTGCGA  
TGTGGTGGTTCGGGAGAGAACGCGCTTTTGGTTGCCGAAATCACTCTCGCATCATGCCTGGCGCAGGCGGAACGC  
AACGTTAATCCGTAGTGTGGTAAATCGTTAGCCAGCAAATGGTGTGAGCGGAGAAAGTATACCGCTCAGCAAGCA  
CAGCAGGCCGGCTGTTAGCGACGTCTTCCCAGCATTTAACCTCGAATACGCCTTACAGCTGGCATGAAAATGGC  
ACGTCACTCGCCGCTGGCCTTACAAGCGCAAAGCAAGCGCTGCCAGTGCAGGAAGTGGCTTTGCAAGCCGGACTTG  
CCAGGAGCGACAGTTATTCACCTTGCTGGCGGCAACAGAAGATCGTCATGAAGGCATCTCCGCTTTCTTACAAAACGC  
ACGCCCAGCTTAAAGGACGCTAATGATGGAATTCCTCAGTCATGTAGAAAAGGGCGTGATGACACTAACGCTCAAC  
CGCCCGAACGCTGAACAGTTTAAATGATGAGATGACAGCAACTGGCAGAGTGCCTGAAACAGGTCGAGCGCGACGA  
CACTATCCGTTGCCTGTTACTTACAGGTGCCGGCGCGGATTTTGTGCTGGTCAAGATCTTAAACGATCGTAACGTTGATC  
CCACAGGCCCCGACCGGATTTAGGGATGTCAAGTTGAACTTTCTATAACCCACTGGTACGTCGCCTGGCAAACTGCCA  
AAACCGGTGATCTGTGAGTCAATGGCGTGGCGGACGGGCGAGGCGCAACACTGGCACTGGGGGGGACATCGTTATTGC  
TGCCCGTTCAGCAAAATTCGTCATGGCGTTTGTAGTAAAGTTAGGCTTAAATACCCGATTGCGGTGGAACCTGGTTACTGCCAC  
GCGTTGCCGGACGAGCGCGCCATGGGCTGGCACTGCTGGGAATCAACTGAGTGTGAACAGGCGCACGAATGGGGG  
ATGATCTGGCAGGTTGTTGATGATGAAACGCTGGCAGATACCGCGCAACAGCTGGCACGGCATCTGGCGACACAACCGAC  
ATTTGGTCTTGGACTTATCAAGCAAGCGATAAATAGCGCTGAAACCAATACGCTCGATACGCAACTGGATCTGGAACGTG  
ACTATCAGCGACTTGGCGGACGGAGCGCAGATTATCGTGAAGGTGTGAGTGGCTTCTGGCTAAACGCTACCCGCACTT  
ACGGGAAAATGACATGATGATAAATGTCAAACCTGTGGCAGTATTGGGAGCGGCACCATGGGGGCGAGGCTTGTGAAG  
TTGCTGCCAGTCAATGGACACCAGTTTTACTGTATGACATTTCTGCTGAAGCGCTGACCCGCGCAATCGACGGGATACAC  
GCGCGGCTAAATTCACGCGTGACGCGGGGAAAACCTGACTGCTGAAACCTGTGAACGCACATTGAAACGCCTGATCCCGGT  
GACCGATATTCACGCGCTGGCAGCTGGGACCTGGTCAATTGAAGCGGCTGTGAACGCTGTGAAAGTCAAAAAAGCGCTCT  
TTGCACAGCTGGCGGAAGTTTGCCCGCCACAAACGCTATTGACCACTAACACTTCGTCATCTCTATAACCCGCGATTGCT  
GCGGAGATAAAAAATCCTGAACGTGTTGCGGGGCTGCATTTTTTAAACCGGCACCGGTGATGAAGTTGGTGGAGGTGGT  
CAGTGGGCTGGCAACGGCGCGGAAGTTGTTGAGCAGTTGTGTGAACTAACGTTGAGTTGGGGTAAGCAGCCTGTGCGCT  
GTCATTCGACTCCTGGATTTATCGTTAACCGTGTTCGCGCTCCTATTATTCCGAGGCTGGCGGGCACTGGAAGAGCAG  
GTTGCTGCACCAGAAGTGATTGACGCTGCACTTCGCGATGGCGCTGGTTTCCGATGGGGCCGCTGGAATTAACCGATCT  
GATTGGTCAAGACGTCAATTTTGTGTCACCTGTTCCGGTGTAAACGCTTCTGGCAGGAGCGTCTTTTTTACCTTCGC  
TGGTGAACAGGAACTGGTATTGGTGGACGGTGGGCAAGAAAAGTGGGCTGGGCGTGTACGACTGGCGCGGGAACGT  
GAGGCAAGTTGTTGGCCTGGAAGCGGTAAGCGACAGTTTTAGCCCAATGAAAGTAGAAAAGAAAAGTACGGTGTACCGGA  
AATTGACGATGTTTTATTGATTGAGACACAAGGCGAGACGGCACAGGCGCTGGCAATACGACTGGCACGCCCGGTGGTAG  
TGATCGATAAAATGGCGGGCAAGGTGGTGACCATTGCTGCTGCAGCGGTGAACCCGACTCAGCGACCCGCAAGGCCATT  
TATTACCTGCAACAGCAGGGCAAACAGTGTGCAAATTCAGATTACCCAGGAATGCTGATTTGGCGAACGGTAGCAAT  
GATCATCAATGAAGCCCTTGATGCGCTTCAAAAAGGCGTGGCCTCTGAACAGGATATCGATACCGCATGCGCTTGGGG  
TGAATTATCCATATGGCCCACTTGCTGGGGAGCGCAACTGGCTGGCAGCGAATATTAAGGCTCCTTAAAAATCTACAG

CATCACTATGGCGAAGAACGCTATCGCCCATGTTTCATTGCTGCGCCAACGGGCGCTTCTGGAGAGCGGTTATGAGTCATA  
AGGCTGGCAAATGCCCATGCAATGTATGAGAACGATGCCTGCGCCAAAGCGCTTGGCATCGACATTATCTCAATGGAT  
GAAGGCTTTGCTGTAGTGACCATGACCGTCACTGCACAAATGCTTAACGGTCATCAAAGTTGCCACGGCGGGCAGCTATT  
TTCACTGGCTGATACTGCCTTTGCCTACGCCCTGCAATAGCCAGGGCTGGCAGCCGTCGCTTCTGCCTGCACGATTGATT  
TTTTGCGTCCAGGCTTTGCCGGAGACACCTTAACTGCTACTGCGCAGGTACGTATCAGGGCAAGCAAACCGGTGTTTAC  
GACATCGAAATTTGTTAACCAACAACAAAAACGGTTGCGCTGTTTCGCGGTAATCTCACCGCATCGGCGGCACCATTAC  
AGGAGAAGCCTGATGCGTGAAGCCTTTATTTGTGACGGAATTCGTACGCCAATTGGTCGCTACGGCGGGGATTATCAAG  
TGTTCCGGGCTGATGATCTGGCTGCTATCCCTTTGCGGGAAGTCTGGTGCGAAACCCGCGTCTCGATGCGGAGTGTATCG  
ATGATGTGATCCTCGGCTGTGCTAATCAGGCGGGAGAAGATAACCGTAACGTAGCCCGGATGGCGACTTTACTGGCGGGG  
CTGCCGAGAGTGTTCGGGCACAACCATTAACCGTGTGTGTTCCGGGCTGGACGCACTGGGGTTTGCCGCACGGGC  
GATTAAGCGGGCGATGGCGATTTGCTGATCGCCGTTGGCGTGGAGTCAATGTACGGGCACCGTTTGTATGGGCAAGG  
CAGCCAGTGCATTTCTCGTCAGGCTGAGATGTTGATACCCTATTGGCTGGCGATTTGTGAACCCGCTCATGGCTCAG  
CAATTTGAACTGACAGCATGCCGGAACGGCAGAGAATGTAGCTGAACTGTTAAAAATCTCACGAGAAGATCAAGATAG  
TTTTGCGCTACGCAGTCAGCAACGTACGGCAAAGCGCAATCTCAGGCATTCTGGCTGAGGAGATTGTTCCGGTTGTG  
TGAAAAACAAGAAAGGTGTTAACAGAAATAACAATGATGAGCACTGCGCCCCGAAACGACGCTGGAACAGTTACGT  
GGGTTAAAAGCACCATTTCTGTCGAATGGGGTATTACCGCAGGCAATGCTTCCGGGGTGAATGACGGAGCCGCTGCGTT  
GATTATTGCCAGTGAACAGATGGCAGCAGCGCAAGGACTGACACCGCGGGCGGTATCGTAGCCATGGCAACCGCCGGG  
TGAAACCGCGCTGATGGGGCTTGGTCCGGTGCCTGCAACTCGCCGGGTGCTGGAACGCGCAGGGCTGAGTATTCACGAT  
ATGGACGTGATTGAACTGAACGAAGCGTTCGCGGCCAGGCGTGGGTGTAACGCAATTGGGGCTGCCTGATGATGC  
CCCACATGTTAACCCCAACGGAGGCGCTATCGCCTTAGCCATCCGTTGGGAATGAGTGGTCCCGCCTGGCACTGGCTG  
CCAGCCATGAGCTGCATCGGCGTAACGGTCTGTTACGCATTGTGCACCATGTGCATCGGTGTCGGTCAGGGCATCGCCATG  
ATTCTGGAGCGTGTGAGCATATCAACCTGCGAGTACCCTACAATGATAACCAATACAAAGCTTGACCCGATTGAAACC  
GCGTCTGTTGATGAGTTACAGGCGTTGCAAACACAGCGTCTGAAATGGACGCTCAAACACGCGTATGAAATGTCCGAT  
GTATCGGCGCAAATTCGACGACGAGCGGTACATCTGATGATTTAGGGAACCTTCAGACCTGCGTAAATTTCCCTGTA  
CCACCAAACAGGATCTGCGCGACAACATCCCTTTGACACCTTTGCCGTGCAATGGAACAAGTGGTGGCATTATGCT  
TCTTCGGGAACACAGGTAACCGACAGTTGTCGGCTATACGCAAACGATATTGATAACTGGCCAATATTGTAGCGCG  
TTCTTTGCGTGGCGCAGGGGCTCGCCCAAAGACAAAATTCATGTTGCCTATGGTTACGGCCTGTTTACTGGTGGGCTGG  
GTGGCACTATGGTGCCGAACGTCTGGGCGCTACGGTATCCCGATGCTGCGGGGCGAGACGGAACAAAGCGCAACTG  
ATCCGTGATTTCAACCAGATATGATCATGGTTACGCCATCTTATTGCCTAACCTGATTGAAGAGCTGGAGCGGAGTT  
GGCGGTGATGCCAGCGTTGCTCGCTGCGGTTGGAGATTTGGTGTGAGCCGTGGACACAGGCCATGCGTAAAGAGA  
TTGAGCGTCGCTGGGATCACCGCACTGGATATTTATGGCCTGTGAGAAGTATGGGGCCGGGGTGGCGATGGAGTGT  
CTGGAAACTACCGACGGCCCAACCATTTGGGAAGATCATTTCTATCCTGAAATTTGTTAATCCTCATGACGGCACACCGCT  
TGCCGATGGTGAACATGGCGAAGTGTATTACCACGCTGACCAAAGAAGCATTGCCGGTCAATTCGTTACCGCACGCGTG  
ATTTAACCCGACTGTTACCAGGAACGGCGCGGACTATGCGCCGATGGATCGCATCAGCGGACGCAGCGATGACATGTTG  
ATTATTCGCGGTGAAATGTCTTTCCGTCACAACCTGGAAGAAGAGATTGTCAAATTCGAACATTTATCGCCGATTACCA  
ACTGGAGGTGAACCGCGGGGGCATCTTGATTCACTTTCTGTGAAAGTGGAGTTGAAAGAAAGTAGCCTGACATTGACGC  
ATGAGCAGCGTTGCCAGGTATGCCACCAGCTGCGCCATCGGATTAAGTCGATGGTGGGGATCTCTACCGATGTGATGATC  
GTTAACTGTGGCAGTATCCCGGTTGAGAAGGCAAGGCGTGTGGGTGTTTGTCTGCGCAATATTGTTGGTGCCTGACG  
TATCGTCTGGCCCTGGTGGGTAAGCGCCAGGGCCAGAAGTCGATACGACCTGTGCTATGATTATAAATCACAAACAT  
AACAAACAGACTGAAGCGAATGAGTAACTTGATACTTTTATCCAACATGCTGTAAACGCTGTTCCGGTCAGTGGCACATC  
TTTTGATCTCCTCTGTATGGTGATTGCTTTCCCATCGTGGTGGTGAATCTGGTTGGGTAGTCTGGCTGCTTTGCTGG  
AAGGGCTGGGATTTGGTGAAGCTTTGTCGCGACCGCTTTGTTTGTCTTAATAAAGAAGGCTGGCTGGATGTTCCCGC  
ATCGGGCGACGAGTTTCTATAGCCTCAGTGATAAAGGCTTGCCTGACGCGACGGGCGAGAAAGTAAATTTATCGCGC  
AGAGCAACCTGCATGGGATGGTAAATGGCTCCTGTTGCTCTCGGAAGGTTTAGATAAATCAACGCTGGCTGATGTAAAA  
AGCAGTTGATCTGGCAAGTTTTGGCGCACTGGCACCCAGCCTGATGGCATCGCCGTCGCAAAAACCTGGCCGATGTACAG  
ACACTTTTGCATGAAGCGGGTGTGGCGGATAACGTGATTTGTTTTGAAGCGCAAATACCACTGGCGCTTTCTCGCGCAGC  
ACTGCGTGCCAGAGTAGAAGAGTGTGGCATTAACTGAACAAAATGCCATGTACGAAACCTTTATTAGTCATTCCGCC  
CGCTGGTGGCGTTTTAAAAGAGGGCGGACAGGTTAACCCCGAGCGGGCATTTCATATTCAGCTTTTACTGATCCAT  
TTTTATCGCCGTGCTGCTTAAAGACCCATTGTTGCCGAGGAGTTGCTTCCGGCACACTGGCAGGGCATAACGGCGC  
TCAGCTGTGATCAACATTTATCAGCGCTAGCGCTGCTGCTTTAGCGTTCGTTAGTAAAAAGGTGAAACCTCGGTCG  
GTGAACTGCCTGCGCCGGGAAGCCTGTATTTCAACGTTTTGGCGCTTGAATATTGAACAGGAGGCGTTATGCCAATTT  
ATCAGATAGACGGTCTGACTCCGGTTGTCCAGAAGAGAGTTTTGTCATCCGACAGCGGTTTATGATCGGCGATGTTATT  
CTCGGAAGGGCGTTTACGTTGGGCAATGCCAGCCTGCGTGGCGATTTTGGTGTGATCGTGGTGAAGATGGCGCGAA  
CATTGAGGATAAATGCGTTATGCACGGTTTTCCCGACAGGATACTGTTGTAGGAGAAGATGGACATATTGGTCATAGCG  
CTATCCTTACGGCTGCATTATCCGCCGAATGCATTAGTGGGAATGAACGCGGTAGTGTGGACGGTGGGTTGATTGGC  
GAGAACAGCATTGTTGGTGCATCCGCATTTGTGAAAGCCAAAGCAGAAATGCCAGCTAATTACCTGATTGTCGGCAGCC

GGCGAAAGCGATTTCGTGAACTCAGTGAGCAGGAGTTGGCATGGAAAAAGCAGGGTACGCATGAGTACCAGGTGCTGGTGA  
CACGCTGTAAGCAGACGTTACATCAAGTCGAGCCATTGCGGGAAATTGAACCTGGCAGGAAACGCCTGGTATTTGATGAG  
AATCTGCGACCGAAACAGTAACAGATGTAATAATTTTTGTCCTTTAATTATAAAGCAGAGTTATGTTAAGCTCTGCT  
TTATTTATTTGAGTATTAATTCATACCGTTTTTTCATCATATAATTTTATAATGAGAATGTGGTTTTAATTTGTAATT  
TATATTATATACACAATTTATATATTTTATGTTCTTTTTTATTACCTGAATTATAATTGTGAATTATAGGAAAGTATG  
TTTGATTAGATAATAATCTACTGGCAATATTGGATGCTTCTATGTTTTAAATAACTAATTGGTCGGGTTAGTGCATCCG  
GCTTTCTTTATATTCCGCAAGGATTATTATGCAAAGGAAAACCTATTGTCCGGCTGTATTGCATTAGCTCTGAGTG  
GTCAGGGTTGGGCGCAGATATCACAGAGGTAGAAACCACCACAGGTGAAAAGAAAAATACCAATGTGACTTGTCCGGCA  
GACCCAGGAAAACCTCAGTCCGGAAGAGCTTAAACGCTTACCCTCTGAATGCTCTCCTTTAGTCGAACAAAACCTGATGCC  
ATGGCTTTCCACAGGCGCTGCTGCGTTAATCACGGCCTTAGCCGTAGTGGAACTAAACGACGATGATGATCATCATC  
GCAACAATTCCTACTCCCACCGACACCCCTGATGATGAATCAGACGACACTCCAGTTCCTCCAACTCTGGCGGAGAT  
GAGATAATACCGACGATCCGGATGATACGCCTACACTCCAAACCGGTTTCGTTAATAATGACGTTATTCTCGATAA  
AACAGAAAAACGTTAACTATTCGCGATTCACTTTTACTTATACCGAGAATGCTGACGGGACTATATCTCTGCAAGATA  
GCAATGGTCGTAAGGCAACGATTAATCTTTGGCAGATTGATGAAGCGAATAACTGTTGCCCTTGAAGGGGTGAGCGCA  
GATGGCGCAACGAAGTGGCAATAATAACAACGGTGAGCTTGTATTACGGGTGATAATGCCACAGTAAACAACAATGG  
CAAAACCACCGTTGACGGTAAAGATTCCACCGGTACGGAAATCAACGGTAATAACGGGAAAGTGATTGAGGACGGCGATC  
TGGATGTCAGCGGCGGGGTACCGTATTGATATCACCGGTGACAGCGCGACGGTGGATAACAAGGGCACCATGACCGTC  
ACCGATCCGGAGTCCATGGGTATCCAGATCGACGGTGACAAGGCCATCGTCAATAACGAAGGCGAGAGCACCATCACCAA  
CGGTGGCACCGGCACCCAGATTAATGGTATGACGCCACGGCAACAACAACGGCAAAACCACCGTTGACGGCAAGGATT  
CCACCGGTACGGAAATCAACGGTAATAACGGAAAAGTTATTACGACGGCGATCTGGATGTCAGCGGCGGGTACCGGT  
ATTGATATCACCGGCGACAGCGCAACGGTGGATAACAAGGGCACCATGACCGTCACCGATCCGGAGTCCATCGGTATCCA  
GGTTGACGGCGACAGGCGGTTGTTAACAACGAAGGCGAGAGCGCCATACCAACGGTGGCACCGGCACGACGATTAACG  
GTGATGACGCCACGGCAACAACAACGGCAAAACCACCGTTGACGGCAAGGATTCCACCGGTACGGAAATTGCTGGCAAT  
AACGGGAAGGTGATTGAGGACGGCGATCTGGATGTCAGCGGCGGGTACCGGTATTGATATCACCGGCGACAGCGCAAC  
GGTGATAACAAGGGCACCATGACCGTCACCGATCCGGAGTCCATCGGTATCCAGATTGACGGCGACAGGCCATCGTCA  
ATAACGAAGGCGAGAGCACTATACCAATGGCGGCACCGGCACTCAGATCAACGGTAACGACGCCACCGCAATAACAGT  
GGAAAAACCACTGTTGATGAAAAGATTCCACGGGTACCAAAATCGCGGCAATATCGGCATTGTAATCTGGATGGTAG  
CCTGACTGTTACAGGCGGTGCGCATGGTGTGAGAACATTGGTGACAACGGCACGGTAAACAACAAGGAGATATTGTTG  
TTTTCCGATACTGGATCGATTGGCGTGCTCATCAACGGTGGGGGGCAACAGTATCCAATACGGGTGATGTTAACGTTAGC  
AATGAAGCGACAGGGTTCAGCATCACAAACAAGTGGGAAGGTTTCGCTGGCAGGCAGTATGCAAGTTGGCGATTTCTC  
GACCGGGGTAGATCTAATGGCAACAATAACAGCGTGACGCTGGCGGCAAAAGATCTAAAAGTGGTCGGGCGAAAGCGA  
CGGGCATAAACGTTTTCTGGCGATGCGAATACAGTGAATATCACTGGTAACGTTCTGGTTGATAAGGATAAAAACCGCAGAC  
AATGCGGCGGAATATTTCTCGATCCATCCGTGGGTATCAACGTTTACGGCAGTGATAATAACGTGACGCTGGATGGAAA  
GTTAACTGTTGATCAGACAGTGAGGTTACTTCTCGTCAGAGTAATTTATTTGATGGCAGCGCAGAGAAAACGTCAGGTC  
TGGTTGTGATTGGCGATGGCAATACCGTTAATATGAATGGTGGACTTGAACGATTGGAGAGAAAACCGCCTTGCAGAT  
GGGTCGAGGTTACTTCTTGGCACAGGATATAGTTATACCAGGTTATTGTCTGTTAGTGGTGGTCTGCTGATATCT  
GAATGGAGATACGACAATCAGCGGAGAATTCCTCTGGGGTTTCCCGGGTTATTCCGGTACAGGATAAAGCTTTGCTGG  
AAATTTGGCAGTGGCGCTACGCTAACAATGCAGGATATTGACAGTTTTGAACATCATGGGACAAGAACCCTGGATTTGCC  
CTATATTTCCAGACATCTGTTATCACTTAACCCATTAACAAGCCCGCTGCCGAGATATTCCCGTGGCGAGCGATAACCCA  
GGCACTATCCGGATGCCATTCTGTTAATGCTCGAACGCTCTCAAGGTTCTTTGCTGCCGTTAACCCGCTGTTGTTG  
GGCATGATACTGATGTAGTACGCTTTATCGTTTTACGAAGCTCTCTGCTATTCCGTTACTCTCCGACTCCGACCCGC  
CGTGTCTTCCGGTTCAAGTCCCAACATCCGGGCAACTGGCGTGTTCATTAGCCCAGTATGCAACATTATCCGTC  
GCCACTCCACTGGAGACGACGGAAGATCGTTGCCGAAGCGGCTTCCACCGCTCCAGCATGACGTCCTGTACTGTTTCA  
CTGTTGAAGCCGCGGTAGTGACCGCCAGTGCAGTGCCTCACGATCACAGCAGTCCAGCGCAACGTGACACGCGTCT  
CTCTCCGTTATCACAGCAGAACTCGAACCCTCAGAGCACCATCGCTGATTGCTTTCTTTACGGCCACTCTGCCTGTAT  
GTGCCGTTTTCGATGGCGGTACAGCAGTTTTTCTCAAGCAACAGCGCATTCTGGCGCATGATCCGGTAAACACGTTTG  
GCATTGATCGCAGGCATACCATCAAGTTCTGCCTGTCTGCAAGCAGCGCCATACCCGACGATAACCATACGTTGGCAG  
CTCTCCGATAACATGGTGTATACGGAGAAGCACATCCGTATCATCAGTGTGACGACTGCGGCGGCCATCCATCCAGTCAT  
CGGTTCTGCTGAGAATGACGTGCAACTGCGCACGCGACACCCGGAGACAACGGTCTACTAAGCTTACTCCCATCCCCGG  
GCAATAAGGGCGCGTGCCTATCCACTTTTTTCCCCGTCCATATTCAACGGCTTCTTTGAGGAGTTCAATTTCCATCGTT  
TTCTTCCGAGCAGGCGCTGGAGTTCTTAATCTGCTTTCATGGCGCAGCAAGTTCAGAGGCGGAACAACCTGTTCTCC  
GGCGGCGACAGCAGTAAGACTTCTTCTGGTATTGCTTACGCCAGAGAAATAACTGGCTGGCTGCTACACCATGTTGCC  
GGCAACGAGGGAGACCGTCATCCCCGTTCAAAGCTCTGCTGAACAATTGCGATCTTTCTGTGTGGTACGCCGCTG  
CGTTTCTCCGGCCCTAAGACATCAATCATCTGTTCTCCAATGACTAGTCTAAAAACTAGTATTAAGACTATCACTTATTT  
AAGTGATATTGGTTGCTGGAGATTACGGGGCCAGTCTAAACCCCGAAGTACTTATGCTGATTCCGGTGCAGAAATT  
GTTAATAAAGTACTTGTAGATTCAATTGGTCAACGCAACAGTTATGTGAAAACATGGGGTTCGCGAGGTTTTTTGAATG



AGACGAACATTTACAGCAGAGGAAAAAGCCTCTGTTTTGAACATATGGAAGAACGGAACAGGCTTCAGTAAATAGCGAA  
TATCCTGGGTTCAAACCCGGAACGATCTTCACTATGTTAAGGGATACTGGCGGCATAAAACCCCATGAGCGTAAGCGGG  
CTGTAGCTCACCTGACACTGTCTGAGCGCGAGGAGATACGAGCTGTTTTGTCAGCCAAAATGAGCATTCTGCGATAGCT  
ACTGCGCTGAATCGCAGTCTTCGACGATCTCACGTGAAGTTCAGCGTAATCGGGGACAGCCTATTACAAAAGCTGTTGA  
TGCTAATAACCGAGCCAACAGAATGGCGAAAAGGCCAAAACCGTGCTTACTGGATCAAATTTACCATTGCGAAAAGCTTG  
TTCTGAAAAGCTGGAGATGAAATGGTCTCCAGAGCAAATATCAGGATGGTTAAGGCGAACAAAACACGTCAAAAACG  
CTGCGAATATCACCTGAGACAAATTTATAAAAACGCTGTACTTTCGTAGCCGTGAAGCGCTACACCACCTGAATATACAGCA  
TCTGCGACGGTCGCATAGCCTTCGCCATGGCAGGCGTCATACCCGCAAAGGGGAAAAGAGGTACGATTAACATAGTGAACG  
GAACACCAATTCACGAACGTTCCCGAAATATCGATAACAGACGCTCTCTAGGGCATTGGGAGGGCGATTTAGTCTCAGGT  
ACAAAAACTCTCATATAGCCACACTTGTAGACCGAAAATCACGTTATACGATCATCCTTAGACTCAGGGGCAAAGATTC  
TGCTCAGTAAATCAGGCTCTTACCGACAAATTCCTGAGTTTACCCTGAGAATCAGAAAATCACTGACATGGGACAGAG  
GAATGGAACGGCCAGACATCTAGAATTTACTGTGACACCGGCGTTAAAGTTTACTTCTGCGATCCTCAGAGTCTTGG  
CAGCGGGGAACAAATGAGAACACAAATGGGCTAATTCGGCAGTACTTTCCTAAAAAGACATGTCTTGCCTAATACTCA  
ACATGAACATAGATCTGGTTGCTGCTCAGCTAAACAACAGACCCGAGAAAGACACTGAAGTTCAAACACCGAAAAGAGATAA  
TTGAAAGGGGTGTTGCAATGACAGATTGAATCTACACTGTTGAAATTCAGAATTTAGGTTTTGCTTTTACTGGTGAA  
AATACAACAGGTATAAATAGTGGCAGCATCTCGTTATTACAAAATGGTAAAGATCCGGCACCGTCTCCCATTTGTTTTACT  
GGCTACTAACGGAGGGAGCGCCACTAATGCAGGTACGATCACAGGTAAGTGACGGAACAACATAGCGTATTTAACAAGT  
ATTCAACGGGCACATCGAATTCATTTATTTTTAATAACGATGTGAGTAGCATAACAGGGTTAGTCGCTCAATCGAATAGC  
ACAATTATCAACTACTGACAGCGGCATCATTGATTTGTATGGTCTGGTAGTGTGCGCATGCTTGTATAGCAGATTCAAC  
AGCAGAAAATCAGGGTAAAATTACTGGATTCTATGTGGGTAGATGCAAATGACACTACCGCAATGCGAGATATAGCTA  
GCAACAGCGCCATTGACTTCGGTACAGGTGTGGGAGTTGGTACTGATAGTTATAGTGGTGCAGGGAAAAATGCAACAGCA  
ATTAACCAATTGGGCGGTGTTATAACTATTTATAACGCCGGCGCAGGTATGGCGGCTATGGCGCCAGCAATACAGTTAT  
TAACCAGGGGACGATTAACCTCGAAAAAATGGTAATTATGACGATAGTCTGGCAGCAAATACTCTGGTAGGGATGGCTG  
TTTATGAGCATGGTACTGCTATCAACGACCAGACGGGTGTTATCAATATCAATGTTGGTACTGGTCAGGCGTTTTATAAC  
GATGGCACAGGAACAATTGTTAACTATGGTACAATTCGCACTTTCGGCGTGTGCCAATCGGGGAATGAGTACAATAATAC  
AGATGATTTACCTCACTGATCTATACCGGTGGCGATACGATTACACGAAGCGGAGAACTGTAACGCTAAATAAATCTG  
CTGCTGTGACTGATAAGCTGGCTGGGAATGTTGTTAATAGCGGAACGCTTTCGGTGATCAAATTACGGTATCAAGCGGT  
CTTCTGAAAAATACCAGCGTGGCATCATCAATAACTTAGTAAAACCTTGACAAGGGTGCCGTCATTAATAATGCCGGGGT  
GATGACGAATAACGTCGATGTTAGCGGTGGAATCCTCAATAATGCCGGAGAAATGACTGCGCAAATTACCATGAATGCTG  
GTGCTGATAGTTCTGTTAGTGAACAACACCGGAACCTCAATAAAAATCGTGCAGAACCGGGGGTATTCAATAATAGTGGC  
AGTGTAAACAGGGCGGATGATGTCGGCTGGCGGGGTCTTAATAATCAAACGACGGGGCGATTATGAGAGGTGCTGCGCT  
GACAGGTAAGTGGCAAATAACGAAGGAACCTGGAACCTCGGAAGTAGTAGTGAGGGTAACAACACCGGGATGCTGG  
AAGTTAATAATAATTCAGCTTTCAATAACCGCGCGAGTTTATTTCTGATAACGACAAGAATGCTGTGCATCAACAG  
TCCGGTACGCTTTATAATACCGGTCACATGAACATCAGTAATCTTCCACAACGGAGCCGTTAATATGTGGGGCGGAAA  
TGGTCGTTTTATCAATGACGGAACGATTGATGTTTTGCGAAGTCACTGGTAGTCAGCGCTAATAATGCCGGGATCAGA  
ATGCTTCTTCTGGAACAGGATAACGGGTCATCAACTTCGATCACGACAGCGCCAGTGGCGTAAAGTCAACACAGC  
AACTTTATTGCCAGAATGACGGCATCATGAACATCAGCGGCACCGGTGCTGTGGCTATGGAAGGTGATAAGAACCGCA  
GCTGGTTAACAATGGCACCATCAACCTCGGTACCGCAGGCACTACTGACACGGGTATGATCGGTATGCAACTCGATGCCA  
ACGCCACGGCGGATGCGGTAATCGAAAAACGGCACCATCAATATCTTCCCAATGACTCGTTTTGATTAGCGTACTG  
GGTACAGTAGTTCATGTGGTTAAACAACGGCAGGTTGATTGCCGATGGGGTTACGGGTTCTGGATGATCAAGCAGGG  
CGACAGCATCAATGTTGAAGGTATGAACGGTAACAACGGTAATAGCAGCGAAGTGCAATTATGGCGACTATACGTTGCCGG  
ATGTGCCGAAGCCCAATACGGTTAGTGAACGTCGGGAAGTATGAGGCTGGTGGCAGCATGAACAACCTCAACGGCTAT  
GTCGTCGGTACCAACGTTAACGGCAGCGCCGGGAAGCTGAAGGTTAAACAATGCCAGCATGAACGGCGTGGAGATTAACAC  
GGGCTTTACCCTGCTGACGGCAGACACCACTGTGAGTTTTGATAACGTAAGTGAAGGTAGCAACCTGACCGACGCTGACG  
CCATCACCTCAACGTCGGTATGGACTGCCAAAGGCAGCACCAGTCCAGCGGTAACGTTGACGTACCATGAGCAAAA  
AATGCCTACACCGATGTGGCAACAGATGCCTCGGTGAATGACATCGCGAAAGCACTGGATGCGGGTTACACCAACAACGA  
ACTGTTTACCAGCCTGAACGTCGGCAGACTGCTGAACTGAACAGTGTCTGAAAACAGGTGAGCGGTAGCCAGGCGACCA  
CGGTATTCCGCGAAGCGCGCTGTTAAGCAACCGCTTATGATGCTGGCAGATGCCGCGCCGAAAGTGGGTAACGGTCTG  
GCGTTCAACGTTGTCGCGAAAAGCGATCCGCGTCCGAGTTAGTAATAATACGAATACGACATGCTGGCATTGCGTAA  
AACTATCGACCTGAGCGAAAAGCCAGACGATGAGTCTGGAGTACGGTATCGCTCGTCTCGATGGTGGTGGCAGAAAAG  
CGGGTATAATGGCGTTACAGGCGGTTATAGCCAGTTTTTTGGCCTGAAACATCAGATGTCGTTGATAACGGCATGAAC  
TGGAATAACGCTTTCGTTACGACGTTACAACCTTACAGCAGCCGCTCGATTGCAATTTGGCAACACGAACAAAACGGC  
TGATAACGACGTGAAACAGCAGTACCTGGAGTTCGCGAGCGAAGGGGGAAGACTTTTGAACCGAGCGAAGGACTGAAGG  
TTACGCCATATGCGGGTGTAAAACCTGCGTCACACACTGGAAGGTGGCTATCAGGAGCGCAATGCCGGAGACTTTAACCTG  
AATATGAACAGTGGCAGCGAAAACGGCGGTGGACAGCATCGTCGGGCTGAAACTGGACTACGCAAGTAAAGACGGCTGGAG  
CGTAGCGCTACGCTGGAAGGGCGGCCGAACTGAGCTACGCGAAGGACCGGTACGCGAAGCCTGGCAGGCGCAGGCA

GTCAGCACTTTAACGTCGATGACGGTCAGAAGGGCGCGGCATCAATAGCCTGACAAGCGTCGGCGTGAAGTACAGCAGC  
AAAGAAAGTTCGCTGAATCTGGATGCGTACAACCTGAAAGAGGATGGCATCAGCGATAAAGCGTGATGCTGAACCTCAA  
GAAAACGTTCTAATTTTTAGCATGTGATCCCTAAACCGCAACGCTGATACAGTTGCGGTTTTTTTATTGCCGGATGTGG  
TACGTGACGCGTTTTGTTTTGTGCTTTTCAGGACAATAGAGCAACTCATCCAGTAATCTTGTTTACACCTTCGCATTATT  
TATCTCTTTTTCGTTTTCTATACTGATTTTTCTTAATCCGTTTTATTACAGGGCAGGGTGGCATGAGCAGCAATACATTTAC  
TCTCGGTACAAAATCCGTTAACCGTCTTGTTATGGCGCGATGCAACTGGCAGGTCCTGGAGTTTTTGGCCCCCACGAG  
ATCGCCACGTGCTATAACCGTGTGCGTGAGGGCGTGGCATTGGGCGTCAATCATATTGATACCAGCGACTTTTATGGT  
CCGCACGTACCAATCAGATTATCCGCGAAGCGCTTTATCCTTACTCTGACGACCTGACAATTGCTACTAAAATTGGTGC  
GCGGCGTGGAGAGGACGCATCCTGGTTGCCCGCATTTTTCTCCGGCAGAGCTGCAAAAAGCGGTGCACGATAATCTACGTA  
ATCTCGGGCTGGACGTGCTGGATGTGGTTAACCTGCGGCTTATGATGGGGGATGGTCATGGCCAGCGGAAGGATCGATT  
GAGGCCAGCCTGACCGTGTGGCAGAGATGCAACAACAAGGCCTGGTAAAACATATTGGCCTGAGCAACGTCACACCGAC  
GCAGTTGCAGAGGCGCGCAAGATTGCCGAAATTGTCTGTGTGCAAAAACGAATACAACATCGCGCACCGTGTGATGATG  
CAATGATTGATGCTTTGGCCACGATGGCATTGCCTACGTGCCGTTCTTCCCGCTCGGGGGCTTTACACCGCTGCAATCG  
TCCACACTTTCCGATGTTGCTGCGAGCCTGGGTGCAACACCAATGCAGGTGGCGCTGGCGTGGCTGTTACAGCGTTTACC  
GAATTTTTGCTGATCCAGGACGCTTTCGGTTGCGCATTTACGGGAGAATATGGCTGCTGAAAAATTGCATCTTTCTG  
AGGAAGTGTGCTACGTTGGATGGTATTTGCGGAGAATAACGAATATACAAAAGGAAAGATGCATTTCCCTTTTTTTT  
TTTTTAATGGCATGGAGTGATATGTTGAAGGCCAGGAATTGCCGCTGGATACGTTTACTGCCCCTGTTTATGCTGAGT  
CTACCAGTACAGGCGAACTTCGATGTGTTGCAATGCAGTTGATATTGAATCATTTTTTTCTGCGGCTACCGCTGAAGA  
TAAACAACAAGTTGAACAAGCTATCAACAGTAGCGTGAATCTTGTCCCCTTCGGTTTTATCTGCATCGAACTGGAAAGTGC  
ATCGTGGCGATTTAGTGGTAGAAGGTAATATAGAGAGTAATCAAAAATTGATTGTTCTTGGGAATTTGACAGTCAAAGGT  
AATATTTCCACTTTCTCTCTTTCTAATCCATGGGTTATTCTCGGTAACGTGACGGCAACGAATATAGTTGCGGATTACC  
ACTGTTAATTACCGTTCGATAAATGCAAGTGGACTGGTATTTATCGACTCATATTACGATAATCCGCTACGATTAAGG  
GGAGTATTAATGCGCGTGGGATTTTTATCAATGACATAATTGCACCTGTTGTTGCGTCTTCGACAAATAGTGAATTCATG  
GTCCGTGCGAGTGACAAACATGACACTGAAAATGTCAAAAAGCGCTGATGATAATAAATCCTGATGCATATTATTGGGG  
GCTAATTAATGATGAAGATGCTCTGAAAGAAATTTTTAAGCGAAGCAATATTCGCATGGCAGGGAATGTCTGTAATCAGA  
TGAAAAAAGAAGCGCTGTTTCGCCCTAAGCCTTCTCCTGAGTTAGTGCAAGAATTGCAAAATGCTGGATGAAGGCAAAGTT  
GCTGCATTTGAAGGACGAGACATTGCGACATTTGATCTTGCCGTAATGCGAACTCTCCAAGCCTTAAAGGAATTTACGC  
TAACTACGCAAAACAACCTATTAATAGCAATGATGAACAAACGATTGAAAGTATGGCGAGATATATGCCTGACAATGAGA  
TTCTGGAGTTGACCGATCAGCAATTGGGTTACCAGCCTGTTGTTCTGGGGTTGCTCGACCGTGAACCGCTCTCTGTGCGAA  
ATAATGACGCGAATGAGTCTGCTACCTGATGGTGTCCGTTGAACTTTCGCTACGTGAAAATCTCCCTCTGGATAT  
CGTCATGACTCTGGCGAAAAGAGATTGGGATATGATCATTAGGAGCTTTATAAAGATGCGTGGTATTGCTGAATCCA  
TTATTGATGGCTATATCCGCAGTGATGATTCCTCTATTCTGTCAGGTGCGTGGTGGAGGACAACCTCACCTACAATCAGGCA  
ATGCAGTTGGCGAACGATTCATCAACAATGTTGTCACAAGCTTAGCGTTCAAGCTGGCAGAGATGAAACACCATGGTCA  
ATTGTTGCGGATGACGCCACAAGAGAGTGACAAAGTTGAGGCTATTTATACCAAAAATTCGAGAATGACGATGATCTAA  
TACGTGTGTTATTTTTAGCATTGCCAGATAACTTACAGTTAATTTTTGTTAAAAGGATGGAGAAAAATCCCCGGCCTAC  
TTTTGCTGTGCGGATATGCAGGTAATTCCTGACGCTGCTTACAACGGTATTGACACGTTTCAACGATCCTGAAGG  
GTGGAGTAATCTGGCGAAAATCAGTATCTGAGCACGTGATGAAACAAAAATTTGGCAACGTGCTTTATCGCATCGGA  
AAAAAATCCGAAAGCAGATTGAGATGCATATGAAACCAGCGCTGATATGATTTTGTCTGAGCTGATTAGCCACGGCGAA  
TTTGATGACCAGATGCTATTAATGCCACCGCCCTGATACGTTTCGGACGACTGGGACTTTTTAGAGAGTCAATTAATTAG  
TTGGGATAATTTACCGCTGTTGTTCTCAAGGAATTACAGCAAAAACACGCCACCAATGATATTTGGGCGAAGTTTTTTT  
TGAGGCAGGAAAAACAGTTCCCGTGGCAGGTTGACGAAGCGTTACGTGTTTATTATGCACTAGACCCCGATGCGTTAGCA  
CAACTGGATGTAAGGCAAAACAACCGGATCGTATATGGTGGAGTACACTGGCGAAAAGCAATCTCACATTTTTTCAAGTT  
CGGCGCACTTAAACAACCGCCACACACCGCCTGCAGTACTGGCGCAGAAAATTGATCCCAGTGGTGGATTGTGGCGATGA  
ATAATCCCCGTTTTCCAGTTGATGATTAAGGCGAGGCTGAAACGTGATCCTTTGCTGGCGTTAGAGCTTGTTAACCTT  
GAACTGGATTTAGTCCGCCAGCTGGCGCTAACGGTAAGACGCGCGCAATACGGGAACAAGCGATGAGAAAACTTGATGA  
GTTGATTTGATCCACAACGTAATGTTTTTAACTATCTGATTAATTGGGGATAATCATTCTGACAGTGAAGTCCCAATA  
CCTTGATATATTCTGAATTTTTAATGAAACGGCGTGTTCGATATCTCCGTGAGGGGAATTGATGCACCATAGCGCAAAC  
CGAATTATCAAGGATTGATAATGACGCTCTACCAGATAAAAACCGCTTTTCAGTCGCTGTTAAGGCCGACGATGTTTTGG  
CTTTATAAGCACCGTTACAGCGAATCACATCACTCTTGTGCACTGGCGCTTCTCTTCTTACCGGATTGCTGTTGAT  
GTTGGCGGCACAACCCATCCTTTTTGCTATTGCCATCGTCTTTTTATCCGTATGGCGCTCAATGCGCTGGATGGCA  
TGTTGGCGGTGAGTGCAACAGCAACACGCTGCGGGCGATTTTGAATGAGACTGGCGATGTTATTTCCGATATTGCG  
CTCTATTTACCATTTTTATTTTTACCGAAAAGTAACGCATCACTCGTACTCATGTTATTTGACCATATTGACCGA  
GTTTTGCGTTTTACTCGCGCAGACGATTAACGGTGTTCGAGTTATGCCGTCATTTGGCAAAAGCGATCGCGGTTAA  
TATTTGGTCTGTGGGCTGCGCCGTTGCCATTTATCCACAGTGGATGCAAGTGAATAATCTTTTATGGAGCATTGCTTCA  
ATTCTGCTTCTGACTGCGATTAATCGTTGTGCGAGTGTGCTTCTTATGAGCGCTGAAATATAATGCTGGAAAAATCT  
CTGGCAACACTTTTTGCGGTTGTTAATTTTAGCAACGCTGATAACCGTTTTCTGCTATGGCGGTTACCGGAGAGAAAAGG

GGGTGAGGTTACATTACGTATTCGTACCTGGTGGGGCATCGTCATTTGTTTTCAATGGTGATTTACAGTCCACGCTGGA  
TGACGTTGACGTTTTTTCGCTGATAAGTTTTCTGGCATTGAAAGAATATTGTACGCTTATATCTGTACATTTCCGCGT  
TGTTATATTGGGGTATTCTCTTAACTATTTGCTTATCGGTTTTAATTGCTTTGAGCTGTTCTGTTATTTATACCTTT  
GGCTGGGTTTTCTGATATTAGCCACCGGCAAGTTTTAGTGGGTGACCCCTCTGGTTTTCTGCATACCGTGAGCGCCATTT  
TTTGGGGCTGGATAATGACCGTTTTTCGCTTGAGTCATGCCGCTGGTTATTAATGTTGCCAACCAAAATATCCAGGGC  
GGGCGTTACTGGTGTTATTTCTTTGGCATTAAACCAGTCAAACGATATTGCACAGTATTTATGGGGAAAATCCTGCGG  
CAGAAGAAAAGTGGTCCCTAAAAGTCAGCCCGGAAAAACATTGGAAGGTCTGATGGGCGGCGTCATCACCATCATGATTG  
CGTCACTGATTATCGGACCGTTACTGACACCGCTAAATACATTACAGGCATTATTAGCGGGTTTGTTAATTGGTATTAGT  
GGTTTTGCGGCGATGTCGTGATGTCAGCCATCAAACGAGATATTGGTGTTAAAGATAGCGGAAAACTATTGCCAGGACA  
TGCGGACTCCTTGACAGGATTGACTCATTAAATTTACCGCTCCGGTATTTTTTATTTTATACGCTACTGCTGTTACT  
GAAGGAAAATAGAGAAAATGAAAATTCACGCATCCCTGGGAAACATTTTTTACCACCAGTGATAATACAGCGTTGTTT  
TATCGGCACTGCCCGCTTACAGCCCGGGCGAAAAAGGTCATCGTCTTATTCATCGCGGGCATGAACATTCTGGTGC  
TCTACAACATCTGTTGATGAACTGGCGATGCCAGATACTGCTTTTTATGCCTGGGATGCCGAGGGCATGAAAAAGTT  
CGGGCCCGCTGGTTATAGCCATCTCTTGCCTGTCAGTGGCGGATGTCGATGAATTTGCTCGTTTTGCTGCCAGCGAC  
AGCCAGTTGGACTGGAAGGTGGTAGTGATCGCGCAAAGCGTCGGCGCAGTGCTGGTGGCCACATGGATTTCATGATTA  
TGCACCTGCAATTCGCGGGCTGGTGGCTTCCGCTTTAAGGTTAAATTGTATGTGCCGCTGGCAGTCCTGCGC  
TGCGTTATGGCATCGTCTGCGTGGTCTGTTTTTATTAATTCCTATGTGAAAGGACGCTATTTGACCCACGATCGGCAA  
CGGGGGCGAGTTCAATAATGATCCGCTGATCACACGGGCGATTGCCGTTAATATCTTGCTCGATCTTACAAAACGTC  
TGAACGTTATTATAGAGATGCGGCGGCGATTACGCTCCCCACGCAACTTCTGATATCAGGCGATGACTATGGTGCATC  
GCCAACCGCAGATTGATTTTTATCAGAGATTACGTAGCCCTCTGAAAGAGCTGCATCTGCTGCCAGGCTTTTATCACGAC  
ACGTTGGGTGAAGAGAACAGGGCGCTGGCATTGAAAAATGCAAAGCTTTATTAGTCGTTTATATGCTAACAAATCGCA  
AAAATTTGATTATCAGCATGAAGACTGCACAGGACCATCAGCGGATCGATGGCGGCTACTTTCTGGTGGACCCGTGCCAT  
TATCGCCGTTGATTTAGCGTATCGCTTATGCGAAAGGCGATGAAATTGTTCCGGACGCACTCTTCCGGCTGCATCTC  
GGAATGAGCACCGCTTTGATTAGGCGATTGCTGATTATGTCTATCAAAATCAACCGCAAGGTAGTAACGCATTCCG  
GCGTTTAGTCGACAAAATCTACCTGAACAGTGTGGCTGGCGGATTCCGCCAGCGCAAACCCATTTACAAATACTGA  
TTAAACAAGCCGTTGCCGATCTCCACGCCAAAGGTTAGCCGTCGCGTGGTTGACATTGCCGAGGGCATGGGCGCTAT  
GTACTGGATGCGCTGGCAAACGAGCCTGCCGTAAGCGATATTTGTTACGTGATTACAGCGAGTTAAATGTTGCACAGGG  
GCAAAGAGATGATTGCTCAACGGGGAATGTCTGGGCGGTTGCGTTTTGAACAGGGCGATGCGTTTAAACCCGGAGGA  
GACTCA  
GCCGTTAACTCCGCGGCTACGCTGGGATTGCTCTGGCCTGTATGAGCTTTTTCCGAAAATGAGCAGGTA  
TCACTCGCAGGCTTGGCAATGCCATCGAACCGGGCGCATTCTCATCTACACCGGCGAGCCGTGGCACCCTCAACTGGA  
GATGATTGCCGGGGTGTAAACCAGTCATAAAGATGGTAAACCGTGGGTAATGCGCGTGCCTTCCGAAAGGGAGATGGATT  
CACTCGTGCCTGATGCCGATTGATAAATGCACACAACGGATTGATGAGTGGGGTATTTTACGGTTTTCGATGGCGGTG  
CGTCGTGATAACTGAACGTCGGAACGATTGCTACAAGGCGCTGGCTGGTATTGTTGCTGGCCCCGTTTTCTTCTTCA  
CCTATGGATCTCTAATCAGTTCACCGCGGTTACAGGACCTAACAGCCATGATATCCCAGTCAGGATTCGTTGGGAA  
ACGGCGATCCCTTTCTTCCCTGGACTATTGTTCTTACTGGAGTCTGGATCTTTTATATGGATTTTCGCTGTTGTTG  
TAGCAGCATTGCAACAGCGCGGACTTGTCCACCGGCTTATTCTGGCAACGGTAATGGCTGCTGCGGTTTTTGTCT  
ATCCGCTGAAGTTTAGTTTTATCCGCTCTGAAGTGAAGTGGGTGACGGGATGGCTATTTTCGCAACTTGAAGTGTGAT  
CTGCCTATAACAGTCTCCTTGCCTGCATATTTCTCTGCTGGCTACTTTGGCGTCACTTTGTCAGCATCTGGCTGA  
GAGGTGGCGTAAAGTCTCGGCGGATGGTTTTACTCATCGCCATTTGACGCTGACGACCTGGCAGCATATTTTATTG  
ATGTCATCACAGGGCTGGCGGTAGGTATGTTGATTGACTGGATGGTGCCCGTCAACCGTGGTGGAAATATCAGAAACCT  
GATCAACGTCGAATCAAAATAGCACTGCCCTATGTCGTAGCGCGGCTCGTGCATTGATTGATGGAGCTAATGATGAT  
GATTCAGTTATGGTGGTCACTCTGGTTATGTTGGCCAGTATTATCGCTACTCATAATTGGCCGTGGGTACGGTGGGCTTG  
GCGCGATAACAACAGGAAAGATAGTCAGGGGAAACTACCGCCCGCTTACTGGCTGACATTGCCCTGCCGATCGGG  
ATGTGGCTGTCTATGCGTTGGTTTTGTCGTGCGCTGGAGCGGTGAGCAAAATGACTGCTGGTGTATTATTAGGGGCGTT  
TCCACGACATATTCGGCACAGAATGCGGTTCTGGACGTCACCTTGAATCCCTCGGGACGAGCCACAAAAGATCGAC  
TCTATTTTTGTGATCCGATGCTGGATCTGGTGGTCCGGAAGAGGGGAGCTCCGACAGGCCGTGGCGATGCTGAAACA  
TTACGGAAGAGCAAGGCAGCGTTCTGGTCCATTGTGCATTGGGATTATCGCGCAGTGCCTGGTGGTGGCGCATGGTT  
GTTATGTTACGGACTGTAAAACCGTAAATGAAGCATTAGCTATATTGAGCCAGACGCCCGCAGATTGTGCTGACAG  
ACGAGCACAAGCGATGCTGAGATTATGGGAAAACAGGTAAGTGGATTGAGATGTGGACTGAATATCTACAGTCCACATC  
AAGACCGTGTCCGTTATGCAGAAACAATGCTGTCGATGGCTGCTTTTGCCTCAGACTGTGCTTTGCTGCCATTTCCGG  
ACCGTATGCGATCCCTTCCGCGAAGACAAATTTACATCGGTAATGCCGATAAAGCCGAGGAACGTGGACAGATACGGCG  
TCACCAGGTCGTTGGTCCATCTTTGTTGATCCCGCGCGGCTGGTAATAACGATGGCTTTTTTACCCGTTACCAGACCT  
TCCGGACCGTTCTCGGTATAGCGGAAAGTAACGCTCGCGGGCAACCAGGTCAAATAGTTTTTCAACTGAGTCGAGAT  
GTTGAAGTTATACATCGGTGCCGAAATACGATAACGTCGTGGGCTTTAGCTCGGCAATCAACTCATCGGAAAGTGCCA  
GAGCTTCTGCTGACGCGGAGTCAGCGGCGCATCGCTCGGACGACAGCGCAACCAGTTCGCCATCCAGTACCGGAATC  
GGATTTGCAGCCAGGTCGCGAACGGTATTTCATCAGCGGAGTGTTTTCGCGCCATTGTTCAACAAAATAATCGGACAA

CTGATTAGACTGAGAGTACCCTGCCAGGATGCTGGATTTAAGAACTAATACCTTGCTCATGGTGTTTCCTTATAGATGTT  
TGAATGGGCGATGCCCCGTTGCTTGTTGACACTTTATTACAATCCTGCCACAGAGATAGCGCAATAAATCGAAGCCTAT  
GTTGCAATTTATTGAACAACGCATAGAAAAGCCGCGATGTTGGTACTCTATATCTATCATTTAAAAGAAAATTAATCAGGCA  
GACTACTGCCACTAACGTTATGACAGAACAAACAAAATTGACCTTTACGGCCTTGACGACGGCTGGATTGCTGATG  
CTGCGTGACAGACTGCGTTTTCTCGCGTCTGCACGGCGTGAAGAAGGTTAAAAATCCTGATGCACAACAGGCCATTTT  
CCAGGAGATGGCGAAAGAGATTGACCAGCGGCAGGGAAAATCCTGCTGCGTGAAGCGGCACGACCGGAAATTAATTATC  
CTGACAATTTACCGGTTAGTCAGAAAAACAGGACATTCTCGAAGCGATTCTGATCACCAGGTGGTATCGTCGCCGG  
GAAACGGGTTCTGGTAAAACGACTCAGTTACCGAAAATCTGTATGGAGCTGGGGCGCGGATTAAGGACTGATCGGCCA  
TACCAGCCGCGTCTGCGGCAAGAACAGTGGCGAACCGTATTGCGGAAGAGCTGAAAACGGAGCCGGGCGGTTGCA  
TCGGTTACAAAGTGCCTTTCAGCGATCACGTAAGTGATAACACGATGGTCAAGCTGATGACCAGCGGTATCCTGCTGGCG  
GAGATCCAGCAAGACCGCCTGCTGATGACGATACGACTATCATTATTGACGAAGCGCACGAAACGCAGCCTGAATATCGA  
TTTTTGTCTCGCTATTTGAAAGAGTTGCTGCCGCGGCTCTGACCTAAAAATCATTATCACTTCCGCGACTATCGACC  
CGAACGCTTTTCGCGCCACTTTAATAATGCGCCGATTATTGAAGTCTCCGGTCGGACCTATCCGGTGAAGTGCCTAT  
CGCCGATTGTTGAAGAAGCCGATGACACCGAGCGGATCAGTTGCAGGCGATTTTTGACGCGGTAGACGAACTGAGTCA  
GGAAAGCATGGCGACATTCTGATCTTTATGAGCGCGAGCGGAAATCCGCGATACCGCCGATGCGCTGAACAAGTCA  
ACTTACGCCATACCGAAAATCTTCCGCTTTATGCGCGGCTTTTCGAACAGCGAAACAAAATAGGGTATTCCAGTCGCACAG  
GGACGGCGCATTGTGCTGGCGACCAACGTCGCGGAAACGTCGCTGACCGTACCGGGATTAATAACGTTATCGACCCCGG  
TACAGCGCTATCAGCCGCTACAGCTATCGCACAAAGTGACGCTTTGCGGATTGAGCCGATTTCCAGGCGTCTGCCA  
ATCAGCGTAAAGGCGCTGTGGTCTGTGTCGAAGGGATCTGTATTCTGCTCTATTCCGAAGACGATTTCTCTCGCGC  
CCGGAGTTTACCGATCCGGAGATTCTGCTACCAACCTGGCCTCGGTTATTTTGCAGATGACCGCGCTGGGGCTGGGCGA  
TATCGTGCCTCCGTTTGTGCAAGCACCGGATAAACGCAATATCCAGGATGGCGTGCCTGCTCGAAGAGCTGGGCG  
CGATCACCCTGATGAACAGGCCAGCGCTATAAATGACGCGCTCGGTCGCCAGCTCTCGCAGTTGCCTGTGACCCA  
CGTCTGGCGGTATGGTGTGGAAGCGCAAAAACATGGCTGCGTGCCTGAGGCGATGATTATCAGTCCGCGCTCTCCAT  
TCAGGATCCGCGCAACGTCGATGGACAACAGCAGGATCGGACGAAAACATCGTCTGTTCCACGACAAAGAGTCTG  
ACTTTCTCGCTTTGTGAATCTGTGGAATTATCTTGGCGAGCAGCAAAAGGCGCTTTCTTCAACGCCTTCCGTGCGCTG  
TGTCGTACCGATTATCTCAACTATCTGCGCTGCGCAATGGCAGGATATCTACACCCAGTTGCGTCAGGTGGTGAAGA  
ACTTGGCATTCCGGTTAACAGCGAACCGCGGAGTATCGCGAAATTCACATTGCGTTGCTGACCGGTTACTTTCCATA  
TCGGCATGAAAGATGCCGATAAACAAGAATATACCGCGCACGTAACGCGCTTTCTCCATCTTCCCGGTTCTGGTTTA  
TTCAAAAACCGCCTAAATGGGTAATGGTGGCGAACTGGTAGAAACAGCCGCTGTGGGGGCGCATTGCTGCGCGTAT  
CGACCCGGAATGGGTGGAGCCAGTTGCTCAGCATTTGATTAACGCGACCTACAGCGAACCGCACTGGGAACGGGCGCAGG  
GCGCGGTGATGGCAACGGAAGGTCCTGTTTATGGTTTGGCGATTGTTGCCGCGCAAGGTCAACTACAGCCAGATC  
GATCCGGCGTTATGTCGTGAACTCTTTATTCGCCACGCGCTGGTGAAGGTGACTGGCAGACGCGTCACGCATTCTCCG  
TGAAAACCTGAACTACGGGCGGAAGTAGAAGAGCTGGAACACAAATCACGTCGCCGCGATATTCTGGTTGATGACGAAA  
CGTTGTTGAGTTCTACGACCAGCGCATCAGCCAGGATGTAATCTCCGCTCGCCACTTCGACAGCTGGTGGAAAAAGTC  
AGCCGGAACCGCTGATTTGCTCACTTTGAAAAAGCATGTTGATCAAAGAGGGCGCAGAAAAATCAGCAAGCTGGA  
TTACCCGAACCTTGGCATCAGGGCAATCTCAAGCTGCGTTTGGCTATCAGTTTGGCCCGCGGATGCTGACGGTG  
TGACCGTACATATTCCGCTGCCGTTACTTAACAGGTTGAGGAAAGCGGTTGAAATGGCAGATCCCGGTTGCGCCG  
GAACTGGTATTGCTCTGATTAATCGTTGCCGAAACCGGTACGCCGTAATTTGTACCCGCGCAAACTATGCCGAAGC  
GTTTGTAGCCGCGTCAAACCGCTGGAGTTACCGTTGCTGACAGCCTTGGCGCGAGTTACGGCGGATGACCGGCTTA  
CCGTTGACCGCGAAGACTGGCACTGGATCAGGTGCCGATCACCTGAAAATTACCTTCCGCGTGGTGGATGACAAAAAC  
AAGAAGCTAAAAGAAGGGCGCTCGCTACAAGATCTGAAAGATGCGCTGAAAGGCAAAGTGCAGGAAACGCTATCTGCGGT  
GGCGGATGACGGTATCGAGCAGAGCGGCTTACATATCTGGAGTTTGGTCAAGTGCAGGAAAGCTACGAACAGAAGCGTG  
GCAACTACAAAGTGAAGGCGTGCCGCGCTGGTGGATGAGCGGACAGTGTGGCGATCAAATGTTGATAACCCGCTG  
GAGCAAAAGCAGGCAATGTGGAACGGTCTTCCGCGTCTACTGCTGCTGAATATTCCATCGCCAATCAAATATTTACATGA  
AAAGTTACCGAACAAAGCAAGCTGGGACTGTACTTTAACCCGATGGCAAAGTGTGGAGCTGATCGACGACTGTATCT  
CCTGCGGTGGATAAATGATCGACGCCAATGGTGGCCCGTCTGGACGGAAGAAGGCTTTGCTGCGCTGCATGAAAAA  
GTGCGTGCCGAACTGAACGACAGCGTGGTGGATATTGCAAGCAGGTCGAGCAAATCCTTACGGCAGTGTCAATATCAA  
CAAACGCTGAAAGGGCGGTTGGATATGACCATGGCGCTGGGGCTTTCTGACATTAAGCGCAGATGGGCGGTTGGTAT  
ATCGCGTTTTGTCACTGTTAACGGCTTCAAACGGTGGGCGACACGCTGCGATATTTGCAGGCGATTGAAAAACGGCTG  
GAAAACTGGCGGTTGATCCACATCGCGACCGTGGCGAGATGCTGAAAGTCGAAAACGTCACGAGGCGTGGCAGCAATG  
GATCAACAAACTGCCCGCCGACGTCGTGAGGATGAAGACGTGAAAGAGATCCGTTGGATGATAGAAGAGTTGCGCGTTA  
GTTACTTCCGCTCAACAACCTGGTACGCCTTATCCGATTTAGATAAGCGTATTTTGCAGGCGATGGAGCAGATTAGCGGT  
TAACCTGCTATTTGCTGATAAAGAAAAACCCGTTAAGCATTTAGCGCCGGTTTTTTATTAATTCTAAAACGGTAAG  
GGTAAAAATTCAGGAATTCAGAAAAATACAATTCTCTGCTGCAAGATGAATAATGTTTATCTACAGCATTTCTTAAAAAG  
ATATGTCAGGCTTGGGAGTGGCGGTTAAGGACATACGATTTCTCTCTTTCAGAGTGTCCGCTTCTCACTATTATCTCA  
CGCAGTATTCTAAGGGAACGATAAGGAGGAACCATGAACATTACCCCGTTTTCCGACGCTTTCGCCGCAACTATAGATG

CCATAAATGTTATCGGACAGTGGCTGGCGCAGGATGATTTCTCCGGTGAGGTGCCGTATCAGGCCGATTGCGTGATCCTT  
GCAGGCAATGCGGTTATGCCACTATCGATGCGGCATGTAAGATTGCCCGCATCAGCAAATTCCTTTACTGATTAGTGG  
TGGTATCGGTACTCGACAACCTTTTTGTATAGCGCATCGCACAGCATCCGCACTACAACACTATCCGCACCACTGGCA  
GAGCAGAAGCGACCATCCTGGCGGATATCGCTCATCAGTTCTGGCACATTCCGCATGAAAAAATCTGGATTGAAGACCAG  
TCAACAACTGCGGTGAAAAACGCACGCTTTAGCATCGCGTATTGAATCAGGCCGTAGAACGAGTTTCATACGGCTATCGT  
TGTTCAGGACCCACCATGCAGCGGCGCACGATGGCGACGTTCCGCCGTATGACTGGGACAAATCCCGATGCACCACGCT  
GGTTAAGTTATCCCGATTCTTCTCAGTTAGGAAATAACGCAGACAGTGAATCTTTATTAATCAGTTACAAGGATTA  
TGCCAGTTGAGCGTTATCTCTCACTACTCACTGGCGAGCTGCCGCGTTTACGCGATGATAGCGATGGCTACGGTCCCCG  
CGGGCAGATTTTATCGTTCACGTTGATTTTCCGGCAGAAGTCATCCATGCATGGCAAACGCTGAAACATGATGCGGTGC  
TCATCGAGGCGATGAAAGTCGCTCGTTACGTTAAAAATTGCCGTTTGTGAACCACTTGTGTTGCAAACGGGCATGACTC  
CTGACTTTTATTTCTGCCTTTTATTCTTTTACACTTGTTTTATGAAGCCCTTACAGAATTGCTCTTTACGATTCCG  
TCTCTGTGATGATTGATGTTAATTAACAATGATTCACCGAAAACAAACATATAAATCACAGGAGTCGCCATGTCAGTA  
CCCGTTCAACATCCTATGTATATCGATGGACAGTTTGTACCTGGCGTGGAGACGCATGGATTGATGTGGTAAACCTGC  
TACAGAGGCTGATTTCCCGCATACCCGATGGTCAGGCCGAGGATGCCCGTAAGGCAATCGATGCAGCAGAACGTGCAC  
AACAGAATGGGAAGCGTTGCCTGCTATTGAACGCGCAGTTGGTTGCGCAAAATCTCCGCCGGATCCGCAACGCGCC  
AGTGAATCAGTGCCTGATTGTTGAAGAAGGGGCAAGTCCAGCAGCTGGCTGAAGTCGAAGTGGCTTTTACTGCCGA  
CTATATCGATTACATGGCGGAGTGGGCACGGCGTTACGAGGGCGAGATTATTCAAAGCGATCGTCCAGGAGAAAATATTC  
TTTTGTTAAACGTGCGCTTGGTGTGACTACCGCATTCTGCCGTGGAACCTCCCGTTCTTCTCATTGCCCGCAAAATG  
GCTCCCGCTCTTTGACCGTAATACCATCGTCATTAACCTAGTGAATTTACGCCAAACAATGCGATTGCATTCGCCAA  
AATCGTCGATGAAATAGGCCTTCCGCGCGGCGTGTAACTTGTACTGGGCGTGGTGAACCGTTGGGCAAGAATGG  
CGGGTAACCCAAAGTGCATGTTGTCAGTATGACAGGCAGCGTCTCTGCAGGTGAGAAGATCATGGCGACTGCGGCGAAA  
AACATCACCAAAGTGTGTCTGGAATTGGGGGTAAAGCACCAGCTATCGTAATGGACGATGCCGATCTTGAACCTGGCAGT  
CAAAGCCATCGTTGATTCACGCGTCATTAATAGTGGCAAGTGTGTAACCTGTGAGAACGTTTATGTACAGAAAGGCA  
TTTATGATCAGTTCGTAATCGGCTGGGTGAAGCGATGCAGGCGGTTCAATTTGGTAACCCCGCTGAACGCAACGACATT  
GCGATGGGGCCGTTGATTAACGCCGCGGCGCTGAAAGGGTCGAGCAAAAAGTGGCGCGCAGTAGAAGAAGGGGCGAG  
AGTGGCGTTCCGTTGGCAAAGCGGTAGAGGGGAAAGGATATTATTATCCGCCGACATTGCTGCTGGATGTTGCCAGGAAA  
TGTCGATTATGCATGAGGAAACCTTTGGCCCGTGTGCCAGTTGTCGATTTGACACGCTGGAAGATGCTATCTCAATG  
GCTAATGACAGTGATTACGCCTGACCTCATCAATCTATACCCAAAATCTGAACGTCGCGATGAAAGCCATTAAGGGCT  
GAAGTTTGGTAAACTTACATCAACCGTGAAAATCTCGAAGCTATGCAAGGCTTCCACGCCGATGGCGTAAATCCGGTA  
TTGGCGGCGCAGATGGTAAACATGGCTTGCATGAATATCTGCAGACCCAGGTGGTTTATTTACAGTCTTAATGAGTGAAA  
GAGGCGGAGGTTTTTCTCCGCTGTGCGCGTCAGAGTTTAGCGAATTTTTGAGGGTGGCAATAAGCTGTGTGACGAA  
GCCATATTCGTTATCGTACCAGGCGACCGTTTTCCACAGTTGTAATCGCCACGGCGGTAATTTCCGTTTGGCTGGCAT  
CAAACACCGAACCGAAATGGCTGCCAATGATATCGGAAGAGACTATTTCTTCATCGGTATAACCAAATGACTCGTTATTG  
GTGGTTGCTTGTAAAGTGCCTTATCACCTCTTCCGCGAGTCACTTTTTCCGAGAATCGATACCAGTTCAGTGACCGAA  
CCTGTTTTACCGGCACGCGTTGCGCATGACCTTTCAGTTTCCGCTCAGTTCGGGATCACCAGACCAATGGCTTTTTGC  
CGCCCCGTAGTGTGGGGAATGATTTTTCTGCCGTGCGCGTGAAGCACGTAATCTTTACCACGCGGGCCATCCACCA  
GTGACTGGGTGCCAGTATAGGCATGAATGGTGTGTCATCGTCCGACTTCTATCCGAAACTGTGATGCAAGGCTTTGGCC  
ATCGGCGCAAGACAGTTAGTGGTGCATGACGCCACGAAACAATGGTGTGTTGCCATCCAGAGTGTGTCATTGACGTT  
ATAAACGATAGTTTTCATTTACCGGCAGGGCGGAAATCAACACTTCTTCCGACCAGCATCAAGATCGCCTGCGATT  
TCTCGCGGAGGTATAAAAGCCAGTACATTCGACAATGATTTCTGCACCTTTCGCTTTCCACGGAATTTTTAGCCTCT  
TTTTCGGCGTAAACCCGATACTTTTCCCATCAACGATAAAGTGAATCTTCCGTAATAATCAACGCTCCAGGGGAATGGTCC  
GTAGTTTGAATCATGTTTACGAGGTAGGCGAGAATTTATGGGGAAGTGAATCATTAAATAGCGACAACGCTATGTTGC  
TTTTGACTTCAAGTAATCGACCCAACACCAGTCGACCGATACGACCAAAACCGTTAATACCAACTTTACTCATGTTTTT  
TCCTGTGAGGAACGTTCCGATGAAAAATTGATCCTTTCAAGCTTAGACCAGGATGGCGGATGGGCAATCTCATTCTCA  
CAGTGAACGTAACGTAAGTAAAACGGGTGAACAATATTTAATGAAATTTTGAAGAAAGCCGTTATGTTAAACGAAAAAT  
TATGTTAAAGCAGGAAATGTTATGAAAAATAATATTAAGGTTACAAATCAGCATTCACTGGCTGGTCTTTTTACTGGT  
TATCGCAGCGTATTGCGCAATGGAGTTTCTGGTTTTCTCCACGTAGCGATCGGCCACTCATCAACATGATTCATGTTT  
CCTGTGGCATCTCAATCTCGTGTGATGGTGTGCTTTTTGTTAAGGCTGAAATACCCAAACCCCGCCGATTATACCT  
AAGCCAAAACCGATGATGACGGGACTGGCGCATTTGGGACATTTGGTGAATTTCTCCTGTTTATTGCGCTGCCAGTGAT  
TGGTTTGGTGTGATGATGATAACCGGGCAACCCGTTGGTTTTGCGTTTTGGTTTACGATGCCTTACGCTTACAGGGCAATT  
TCGAACGGGTAGATAGCTTAAAGTCGTGGCATGAAACGCTGGCGAATCTGGGATATTTGTCATCGGGTGCACGCTGCG  
GCTGCACTGGCACACCACTATTTCTGGAAGGACAACACACTTCTACGATGATGCCGCTAAACGTTCTGAAGGATATT  
TAAAGAAAACGCTGACTAAAACCGACCGTGGTACAGGCGAAGAATACGGGTCTACATCGGAAGCGCCTATTATATTT  
ATTTGTATGATAAATAAAACCATAATCCTTGCCATACGTCATCTGGCTATTTTTAATCAATTCACCCGATCTTTGAT  
CTCATCAACGGTATCAAAATAAACAGGATATAACGTTCAATCGAACATAAGATTCGATAAACCATGGAGGTTATATGA  
AAAACTGGCACTTATTTGTTTATGGGAACGCTTGTTCCTTTTATGCCGATGCCGGGCGCAAAACCTGTTCTGGTTCC

AAAGGGGGATCTCACACTGTACGGCAGGCGGCAAAATTTGTCTGTAATGATGGTTCTATTAGTGCATCGAAAAAACATG  
CACTAACTGAAGTGAAAAGGGGTGCCATGAGAAAAAATCTGCTAGTCAAATGCGCGGGGAAAATCCCCGCGCTTGCC  
CTTACCTGGACGTGCAGGCCATGAGCGCAGCAACCTCCTTATCACCGTCCCAGAACCGCAGTTCGTAGAGCGTTTGTCCG  
GTCAGGAGTGTGAATGTCAGAATCGTAATGCAGATAATGAGCAGACACCACCAGAGGGTGTGCTTCATAGCCTTTCT  
CCTTGCCGGATGGCGGGTAAGAGGCTAAGATCTGAATTGCTAGGTTTCATTTCGTTGGCCTCGGTTGATAGAAATATCGGTC  
GGGCTTCGTTCTTCTGATTCCCGGTTAGCCTGAAAAACAGAAAGTCTCAGGCACCCGAGGCATCCTATGAGGTTTCCT  
TAGGGACGAAAATAATCACTTCACGAAATGCGTGTGTTTTCCAGAATTTTTCGTCATTCCGGGTTAGCCAGTTTAGCCA  
TTCGTTACTCTTTCATTCCAATAGCATTAAATTTCTATGCAATAATTGTTGTA AAAATGTGACGCAAAGAGGTTTTGG  
TCATAAGTAATTACCGTCAAGTGCCGATGACTTTCTATCAGGAGTAAACCTGGACGAGAGACAACGGTAATGAATACAAC  
TCCCTCACAGCGATTAGGTTTTTGCATCACATCAGGTTGGTTCCGTTATTTGCCTGCATTCTAGGCGGTATCTTAGTTC  
TATTCGCATTAAGTTCAGCCCTGGCTGGCTATTTCTCTGGCAGGCCGATCGCGATCAGCGTGATGTTACTGCGGAGATT  
GAGATTCGGACCGGTTAGCGAACAGTTCAGATTTTTTGCCTCAGCCCGGATCAATATGATTGAGCCGGGGCTGCGAG  
TCGTATTGCGGAAATGGAAGCAATGAAGCGAAATATTGCGCAAGCCGAATCGGAGATTAACAGTTCGAGCAAGGTTATC  
GTGCTTATCAGAATCGACCGGTGAAAAACCTGCTGATGAAGCCCTCGACACTGAATTAATCAACGCTTTCAGGCTTAT  
ATCACGGGTATGCAACCTATGTTGAAATATGCCAAAAATGGCATGTTTGAAGCGATTATCAATCATGAAAGTGAGCAGAT  
CCGACCGTGGATAATGTTATACCGATTTTTGAACAAAGCCGTTAAGATACGTAGCACCAGAGCCAACCACTGGCGG  
AACTGGCCCATCAGCGACCCGCTGGGTGGGATGTTTCATGATTGGCGGTTTTGTGCTTGCCTGGTCATGACGCTGATA  
ACATTTATGGTGTACGTGGATCGTTCCTGCTCCACTGCAACATGCCGCACAACGGATTGAAAAATCGCCAGTGGCGA  
TCTGACGATGAATGATGAACCGGCGGGTTCGTAATGAAATCGGTCGCTTAAGTCGTCATTTACAGCAAATGCAGCATTAC  
TGGGGATGACAGTAGGGACTGTTTCGACAGGGCGCGGAAGAGATTTATCGTGGCACCAGCGAAATTTAGCTGGCAATGCG  
GACCTGTCTCTCGACCGAAGAACAAGCGGCGCTATCGAACAACTGCCGCCAGCATGGAGCAACTACTGCGACGGT  
GAAACAGAATGCGGATAACGCGCATCATGCCAGCAACTGGCGCAAGAGGCTTCTATTAAGCCAGCGATGGCGGGCAGA  
CGTTTTCCGGTGTAGTAAAAACGATGGGCGCTATCTCCAGAGTTCGAAGAAAATTTCTGAGATCACCGCCGTCATCAAC  
AGTATTGCTTTCAGACGAATATTCTGGCACTGAATGCTGCCGTTGAAGCCGCGGAGCGGGTGAGCAAGGGCGTGGATT  
TGCCGTTGTCGCCAGCGAAGTACGGCACTCGCAAGTCGAGCGCTCAGGCGCGAAAGAGATTGAAGGCTTGATCAGTG  
AATCAGTCAGGTTAATTGACCTGGGGTCGGATGAGGTGCAACCGCCGGGAAAACCATGAGCACTATTGTTGATGCCGTC  
GCGAGTGCACACATATCATGCAGGAAATCGCCGCCCTCGGATGAACAAAGTAGAGGCATAACGCAGGTTAGCCAGGC  
GATTTCTGAAATGGATAAGGTGACGCAACAGAATGCTTCTCTGGTGAAGAGGCCTCAGCGCGGGCGGTGTCCTTGAAG  
AACAGGCGGCACGATTAAGTTCGAGGCGGTGGATGATTCCGCTGACACAAACATTCTGTGTCGGCAGAACCTCGCGGAGCG  
GGTGAACCAGTTAGTTTCGCTACGGTGTGAAAATGTTCAAGGAGGGATCGACAGATCCCTTACCTTTCAGAACGGCATT  
GATTTTCGAATAGCGTTAATCATCAACTGGCAACAGAGAAGAGCGTCGATCTACGCGGGTCAAGTATCCAATCGGTT  
GCCTGCACCATGTCCCGAACAGGCAGGGCCACCAGCGTGGCATGACGCAGGTCGCTTTTTACAGCGCCAGAAGGGACAA  
ACCACACGTAATCGTATTCAACCGTAAGTTGACGAGATAGCGAAGCAGACAGCGTTTCGATACAACCCGAAGGAATTTA  
CAGCCCTGGCTCTGCACTAATGCATCTGAATGCTGGCGTGGCGCAGTGCCTTCTGGTGATACAACGACCGGCCATTCCAG  
CACCCGGCTTAGCGTTACGTTCTCCTGAAGTAGCGGGTATTAGGGCGGACAACCAGCTTCAACGATTCAAGAAACAGCA  
GTTTCGTAATTAAGCCCGTCATCAGTTCAGGATCTGACATCCGACCAATGCCGATATCGATTTCCCGGTTTTTAAACC  
GCCAGAATCATAGGGTACTCATTGTGCAACTTGAAGGTCGCTCTTTTTGTTGCTGATGAAACTGACCTATAACCGA  
AGTAATATCCCAGTCCCGCAGTAGGTAGTGCACCAACCCTGACGACATCATTATTAAGACCTTCTTTACGATGAAGCG  
ACCGTCCGGCAGTGTGATGGCTCAAGAACTCTACTGATCGCTTAAAAATGTTTCGCCGGTAAGGTAAAGTTGCGCC  
CCCTGACGACCACGCTCAAAACAGCGAGCGCCAGTCAAGTCTCAGTTCATTCAATGTCTTAGAGAGCGCAGGTTGACT  
CAAAATTAAGGTTTTAGCGCGCCCAAGTTCCTTGTGTCGACAGCTACGAATGTATGAAGGTGGCGCAAACGGA  
TGGCTGACTAAACAGACTATTTTTTCCATAAGCGATGTTAAAAACGAAGCGGTGTCGCTGACAAGTGAAGTTGTTTGA  
TTATGATAACTTGATTGCAAAATATTATTAACAATTAAGCAATTATGTTACAGCAAAATGGATAATATTGATGTTTTCG  
CGCGAGATCACAGTTTGTAAATCTTCCCGCAAGAGTGAATGCGGTTACCTACACTCCAGATTACTGACCACTGGAGGC  
AGACACTATGGCGAACAGCATCACGGCGGATGAGATTGCGGAACAGTTTTTCGAGGCAATGTCAGCCATGTACCAGCAAG  
AAGTTCCGCAATATGGCACGCTGCTGGAAGTGGTAGCTGATGTGAATCTGGCTGTGCTGGA AAAACAATCCTCAACTGCAC  
GAAAAAATGGTAAATGCAGACGAGCTGGCGGACTGAATGTTGAACGTCATGGGGCGATTCCGCTTGGGACTGCACAAGA  
GCTTGCTACTCTTCGGCGGATGTTTCCATTATGGGATGTACCCGGTGAGCTATTACGATCTCTCGCAGGCAGGGGTGC  
CGGTACATTGACAGCATTTCCGCCATTGATGATGCTTCTGCGCGTAATCCCTTCCGCTTTTTTACCTCCTTACTC  
CGCTTGAGCTTATCGAGAACGAAATTTGCGCCAGAAAGCGGCGGAGATTCTCGTTCAGCGCGATATCTTACCCACG  
TTGTCGACAACTGTTAGAGGAATATGAGCAGCAGGGCGGTTTTAACGAAACACAGGCACAGGAGTTTGTGAGGAAGCCC  
TGAAACGTTTTGCTGGCACCAGTCAACCGGTAGATGAAGAAACCTATCGCGCATTGCACAACGAACATCGGTTGATT  
GCTGATGTGGTCTGTTTTCTGGATGCCATATCAACCACCTGACGCCACGTACGCTGGATATTGACCGGGTGCAGTCGAT  
GATGCTGAATGCGGAATTAACCCAAAATTTCTCATCGAGGGCGCCGCGCCGCGAGGTACCGATTTTACTACGCCAGA  
CCAGCTTAAAGCACTGGAAGAGACGGTGTGTTTTCGGGGCAGAAAACAGGGCACGCATACCCGCGCTTTGGTGAATTT  
GAGCAGCGTGGCGTGCATTAACGCCGAAAGGGCGCAACTGTATGATGATCTTCTGCGTAACGCTGGAACCGGGCAGGA

TAATCTCACTACCAAATGCATTTACAGGAAACCTCCGCACTTTTCTGACAGTGAGTTTTAATGCGTCAGCAAGGGT  
TGGCATGGTCCGGTACCGTCTGACGCCTTCGGGTGAGGCGCATCGTCAGGCGATTATCCTGGAGACGATCCACAGCCC  
TTAATTGAACGTGGTTGGTGTAGTGGCGCAACCCATCACCTATGAAGATTTCTGCCCGTTAGCGCGGGGGATCTTCCA  
GTCAAATCTGGGTAATGAAACGCAGACACGCAGTACGGTAATGCCAGTCGCGAAGCATTGAGCAGGCGTTGGGTTGTC  
CGTTTTGGATGAGTTCAGCTTTACCAGGAAGCGGAAGAACGCAGTAAACGTCGCTGTGGTTTTGCTTAAAAATCTGACC  
ATCCGCTTTGCAAAAATTTGCCTGATTTTACAAACGAATCAGGCTCATCCCATCGACATAAAAAAATGCCGATTTATG  
CATATTCTCTCAGTTCACAATTTGATTATTAATAAATATTGTCTAGAGTGAGCGGTCATAAATAAGCACTTTCTTGCCG  
CTGAAAACGACCAGCGCGGGACCATTACAACACCAGAAGGACTCACTTTCAGGTATGGATCGTAGACGATTTATTAAG  
GTTCAATGGCTATGGCCCGGTGTGCGGTACCAGCGGCATTGCTTCTTTTTTCTCAGGCGGCATTGCGCGCAGATTTCT  
GATATTGCCGACGGGCAACCCAGCGTTTTGACTTCTCATTCTACAGTCAATGGCGCAGACTTAGCGCAACAGCGTG  
GCGTGGTGCCTCGTCCGTACCTGACACGCTGGCGACAATGACGCCGAGGCTTATAACAGTATTCAATACGACGCCG  
AAAAATCGCTGGCATAACGTTGAGAACCGTCACTGACGCTCAGTCTTCCATATGGGAATGGGATTCGCTCGCCGC  
GTTGATGTTTTCTGTAGATCCAGCAACACATCTGGCGGTGAAATTCATTTGCCCCGAGTGTTCAAATACAACGA  
TGCAGGTGTTGATACAAAACAATTAGAAGGGCAAAGCGATCTCGCTTTGCCGTTTTGCGGTGTTAAAGCCCCGAAC  
TGGCGCGCGTGTAGTATCATTTCTCGGCGCGAGTTATTTCCGCGCGTGTATGATACATATCAATACGGTTTTGTCG  
GCCGCGGCTGGCGATCGACACTTACCCGACAGTAAAGAAGATTCCCGACTTTACCGCTTCTGGTTTTGATACGGT  
AAAACCGGGGCAACTACCTTTACCGTTTTATGCGTTGCTCGATAGCGCCAGCATTACTGGTGCCTATAAGTTCATATCC  
ATTGTGAGAAAAGTCAGGTGATTATGGATGTGGAATAACCTGTATGCGCGCAAAAGACATTAACAGCTGGGCATTGCG  
CCGATGACCAGTATGTTAGCTGCGGTAATGAACGTCGGATGTGCGATACAATTCATCCGCAAAATTCATGACTCTGA  
TCGTCTGTCCATGTGGCGGGCAACCGCGAGTGGATTTGCCGTCGCTGAATAATCCGCAAAAATTCAGTTCATGCTT  
ACACCGACAACAACCCGAAAGGTTTTGGTTTTATTGCAACTGGATCGTACTTCTCCATTATCAGGACATTATGGGCTGG  
TATAACAACGCCAAGTCTGTGGGTGGAACCGGTAACAAGTGGGGTAAGGGCACCATCGGCTGATGGAAATCCCAAC  
AACGGGCGAAACGCTGGATAACATTGTCTGCTTCTGGCAGCCAGAAAAGCTGTAAAAGCAGGTGATGAGTTTGCATTCC  
AGTATCGTCTGACTGGAGTGCACAACCGCTGTTCAATGCCATTAGCGCGGTTATGGCGACGCTACCGGCATGGGC  
GGTTTTCTCGAAGGTTGGGCGCCAGGTGAACACTATCCGAAAAATGGGCGCGTGTGTTTTGCCGTCGATTTGTTGGTGG  
TGATCTGAAAGCTGCCGCGCAAAAGGCAATTGAGCCGGTATTACGCTTTCCAGTGGGGAAGCGAAGCAAATCGAAATTC  
TCTATATTGAACCCATCGATGGTTATCGTATTAGTTTACTGGTATCCGACTTCGGACTCCACTGATCCGGTGCATATG  
CGGATGTATCTACGTTGTCAGGGGACGCTATCAGTGAACATGGCTGTATCAGTATTTCCGCCAGCGCCGATAAACG  
TCAGTATGTTGACGACCGCGTATGAGTTAATCGTTTTTTCTCGGCACCTTCTTCGGGAGGTGCCGTCTGGTTAAACAC  
GATCCCGCTCGCATTTTTCCCTAAGTTAATGAGTAATCTGATGGTGTGATTTTCAGATACACCTTGTACGCCACTAACA  
GGGAGTGCATGTTTTCCAGAATACCGAGATTTAATATCCCGTCTGAAAAACGAAAATCCTCGCTTATGTCCTTGTTCG  
ATAAACACAATAAACTTGATCATGAAATGCCAGAAAGGAAGGTTCCGACGGTCGAGGGTACAATGCGGAAGTGGTCCGC  
ATGAAAAACAAGGCTACAGTTAAAAGATGAGATGCTCAAAATCCTGCAGCAGGAGAGCGTCAAAGAGGTGTAACCTT  
CCTAAGCCGCCAGCCAGGCGCTTTTTTAACAACCTGCATGGATTGACTGGAGATAAGATGACTGAAACGATAAAAAGTAA  
CGAATCACTTGAATTACATGCTGTTGCAGAAAATCACGTCAAACCTTTTATCAGTTAATCTGTAAAAATAAAACCTGGT  
TACAGCAGTCGCTAACTGGCCGAGTTTGTCAAAGTGAAGAGGACACGCGAAAAACGGTGCAGGGTAAATGTGATGTTG  
CATCAACGCGGCTATGCCAAAATGTTGATGTTTTCAAAGAAGATGAACTTATCGGCGTTATCTCGTTTTAATCGTATTGA  
ACCACTGAATAAAACCGTGAATAGGCTACTGGCTGGACGAATCTCATCAGGGCAGGGGATCATTTCTCAGGCGCTGC  
AGGCAATTGATTCATTACGCCAGTCTGGTGAACCTAGACGCTTCGTGATCAAATGTGGGTGGACAATCCGCAAAAGC  
AACCAGGTCGCTTTGCGCAATGGTTTTATCCTTGAAGGTTGCTGAAACAGGCTGAGTTCCTGAATGATGCCTATGATGA  
TGTGAACCTTATACGCGCTATTATCGATTACAATAACCTTCCAGCGGCGTTTCGCGTAATGCGCTCCTCGCCGTTAATG  
ACTTTTTGACCACGGACATGAACCGTGTGCGCATCAAAGGCTTCAACGACGGCGTGGTTCGTTAACTCCACATGTTTTT  
AATTATCACCGCACCTGTAATACGGCTCTCACCTTGTATGACAACGTGCTCGTCGAGCAGAATCGGTCCGCCACGTACCA  
CGGCATTTCCGCCAACCAAGACATGATGTTTTAACACACAATTACCTTCCACAATGGCATATTCGCCACCTGCGAACTG  
TAATGAATCGTCGGAATGGCATCTTCTTCTATGCCAGCTTTACCTGCGCGTAGCCGACTTTAGCGCAATCGCATAG  
CCAGACATTGTTCTTCTTACTTCAATACTGGCAAAATCAAAAATTCGGCGCGATGTTCAATAAAAGCATAACCGGA  
CGACGGCATCGCCATAAATTTGTCCTGGTGGACAATACGCGAGGCGCTAACCTTGCAGGATCATAAATTTGGAGCAGG  
AGTTGATGGTGGGCGTTAAGCCTTGTGCGGCGACGATCATAGAATGTTGATCAATTAAGGCGTGACCAAAATATTCTACA  
TTGCCGTAATAACTAATGAGTCATGAATGGTACGCTGTCACTTATATATGCACCCTGGCTGATTTCACTATTATCGATCC  
AGACGTTATCCGTTGCGTAAACCTCTCCACAGCACGCTGGTGGCGGTGATACGCGTATTACCGGAAATCACCGCTCCG  
CCGAACGCAATAGCATTCTGGTCGTAATCCAGCAATTTCTTCTGTGCTAACACCGTTTTGCGGATCGATCCAGCCGCC  
AGCGGTTCTGCTATCACATCGTTAAAATCGCTAATGGCGATAATCTGCCGTAATAACACATTTTTTTAGTGCCATCTT  
CTGATAACTAAAGGCTCGCTGTTCTTCACTTAGACGATATTTGGCATAGCGTTTTCCACAGGTGACTTACTATAACC  
GTAGCAAATCTGCGGCTCTGGCTATGCTCGAGAAAATTCATAAAATGCATTTCAAATATACTTTATAAATTAACAAA  
ATGAGTAAGAAGATGAGAGCGATAAAGTGTCAATTTGCCGGCAGGCTACTTTGGTATTGTTGGGGACGATAGGGAT  
GGGATTTGCCGCTATGCCAGCCAGGTTTGGCAGGTCAGCCACTGGTATAGGGGATGGGCTGGTATTCTGGCGATGA

TCATCTGGGGATTATTGACTAGCGCATTATTGCCGACTCATACGCTTTCCGCATAGCGTGCTGGCGGAAGTTCCGCAT  
CCAGTGCTGAGCAGTTTTGTGAGTTTTGTTCCGGCAACGACGATGCTGGTGGCGATTGGTTTTGTTCCGTGGTTTTCCGCC  
ACTGGCGGTGTGCCTGTTACAGTTTTGGTGTCTGTTGAGTTGGCTTATGCCGCTGGCAAACCTGCGGGATTATGGCGCG  
GATCTCACCTGAAGAAGCTACCACGCTGGACTGTATCTGCCGACAGTTGCCAAACATTTATCAGCGCAATGGCCTGT  
GGTGCCTGGGCTACACCGACGCGGTCTGGTGTTTTTAGGCGCAGGCGTTTTCTCATGGCTAAGCCTTGAACCGGTGAT  
CTTGACGCGTCTGCGCAGTTCCGGGAGAATTACCCACGGCACTGCGGACATCACTCGGCATTAGCTCGCTCCTGCGCTGG  
TGGCTTGTAGTGCCTGGCTGAGCGTCAACGGCGGCGAGGGTGACACGCTGGCGAAAATGCTTTTTCGGTTATGGACTGCTG  
CAACTGCTGTTTATGCTACGCTGTATGCCATGGTATCTCTCCAGCCATTTAATGCTTCATTCTGGAGTTTTCTGTTCCGG  
CGTATCTGCACTGGCAACCACCGTTTTGCATCTGGGGAGTGGCAGCGATAATGGATTTTTCCATACGCTGGCGGTGCCGC  
TGTTTTATCTTTACCAATTTTATTATTGCAATACTGCTCATCCGACTTTTTGCGCTTCTGATGCAGGAAAATTGTTAGTC  
AGAACCAGCGCGCGTTTTAATGAAAGCAGAGGACAAAGAATGATCATTCTGACGAAAACCTATTTTACTGATAAATAT  
GAATTAACCCGCACACACTCTGAAGTACTGGAAGCGGTGAAAGTGGTTAAACCGGTAAAACGCTGGATCTGGGCTGTGG  
CAATGGTGTAAACAGTCTTACCTGGCAGCCAATGGTTATGATGTTGACGCATGGGATAAAAAATGCCATGAGTATCGCCA  
ACGTCGAGCGCATTAAATCCATTGAAAATCTGGATAATTTACACACCCGAGTCGTTGATCTGAATAACCTCACATTTGAT  
AGACAGTACGATTTTATTCTTTGACTGTGGTGTGATGTTCCCTTGAGGCTAAAACCATCCCGGTTGATTGCCAATAT  
GCAAGTGTGCACTAAACCTGGTGGTTACAACCTGATTGTGGCGGCGATGGATACCGCTGATTATCCATGTACCGTCCGGCT  
TCCCGTTTTGCCCTTCAAAGAGGGGAGAATTACGTCGATATTACGAAGCTGGGAGAGGGTAAAATACAATGAAGACGTCGCG  
GAGTGCACCCGACCGACGCAACCGTAAATCGTATTAACTGCGTTTTGCCACGATGCTGGCACGTA AAAAATGACCCGG  
TAAGCACA AAAACGCGTAAAATTTCCACGCTGAGATGATTTACTGTTCTTCTTTTTCGTAAGCATATTTTTTATCGAAG  
GGATGTGAAATTAATCACAGTAGTCGAAGTTTTTAGCAGCTTAACTTACTGAAATTTAAGTACTGATGATTGACTTAGCC  
CCTTTTTCGGCATTGACTATGTCGTCTGAAAAGGGGCTGAAAATTTATTTTACCAACACTTTTTTTGCCACAACACGA  
AGCGGCGCTTTTTGCTATAACTTAGAAAGTAATAATCATCTCAGGAAACTATTATGCGTACCACATCATTTGCGAAA  
GTTGCGACTTTATGCGGCTTATTGGCTCTGTCTGGTGTGTCATCTAAAATCACCCAGCCAGATAAATATTCTGGTTTTTT  
AAACAATTACTCTGATTTAAAAGAAAACAACTCGGCTACAGGTAAACCTGTTTTACGTTGGGTAGACCCGAGTTTTGATC  
AAAGCAAATATGACAGCATGCTCTGGAACCAATCACTTATTATCCGGTACC GAAACCGTCGACCCAGGTAGGGCAGAAA  
GTTCTGATAAAAATTTGAACTATACCAACACCGAAATGAAAGAAGCGATAGCGCAGCGTAAACCACTGGTTACCACCGC  
TGGGCCGCGTAGTCTGATTTTCCGTGGGGCCATTACCGGTGTAGTACCAGCAAAGAAGGGCTGCAATTTCTATGAAGTGG  
TTCCTGTTGCATTAGTGGTTGCGGGGACGAAATGGCTACAGGCCACCGTACCATGGATACTCGCCTCTATTTTGAAGGT  
GAGCTGATTGATGACGCGACTAATAAACCGGTTATCAAAGTCGTTCTGTCAGGGCGAAGGTAAGACCTGAATAACGAAAG  
TACGCCAATGGCTTTGAAAATATTAACAAGTTATTGATGACATGGCGACCGATGCCACCATGTTTGACGTTAACA AAAA  
AGTAGTCCAGACGCGCCATCGTTAGATGGCGCTTTTTATCCGGTGCGCCGTAAAACCCCATCCTTCAGGGCGGGGATAT  
AAGGCGCGTTTTCCACCTGACCAGGTGTTTGTGTTGTTCAATGTATTGGCGGATGACGGATATTGGCGCACCTCCGCA  
GCTACTGGCAAATAGCCAGGACTCCACAAAACGCCTTTGTAGTAATACCTGAATGCAATATCTGGTCGATCTCGTCGCA  
GTCACCTACCCGATACGCCCTTTGAGGCTGTTACCAGACTGGATATCGCCAGTTGGGAGGATAGTTAATTAACAAATGG  
ACGTGATCTGGTTCCGATCCATTTCAACCAGTTCAAGTTCAAATCAGCACATACATTTGAAAAGTAAGTGCCTAGTTT  
TTCTGTGCGCATGGTCAAAAATCTGGCGTCGGTATCTGGTGACAAAGAGCAGGTGAACATGCATCAGGAAAACACAAT  
GCCTTCCACGCCGATATCGGTTTTTTTTTACAGACCAAAGTATCATTTGACCTGTGAAACGATTACAGGCATTTAAA  
TTCCAGTTAAGACCCGGTGGTCAACAGGAGTGTGAAATGAGGCGCTTCGAGGCGCATGTCGTTTTGTTTTCAATCGTGC  
TCTGGCAGCTCAGAATGAGAATCATGAGGCGGTAATAATACATCCCTTACGGGAAAATGGCTTCTGGCTGGTTGAGT  
GGAAAAATGCCACTGAAACGCAATGGCTTAAAGATTCTCCCTCACAGCCATTGCAACAGTCACTGAAAGACCTTGGCGG  
GCTTACAAAACCTTCTTCCGGAAGCGGGCTGTTTTTCCCGATTCAA AAAAGCGGGACAGAATGATGCATTTCCGCTACCC  
GCAGGGCGTTAAGCTCGATCAGGAAAACAGCCGATTTTTCTGCCGAAACTGGGCTGGATGCGCTACCGAACAGCCGTC  
AGGTCACGGGTGTTGTGAAAATGTCACTGTGACCCAGTCTGCGGTAAGTGGTACATCAGTATTAGACAGAAAAGTGAA  
GTATCAACTCCGGTTACCCCTCAGCATCAATGGTGGGCTGGATGCTGGCGTGGCTAAACTGCCACGCTGTGAGATGG  
CACAGTCTTTGAGCCTGTAAACAGTTTTTCAGAAAACAGAGAAGCTGGCGAGACTTCAGCGACAGTTAAGCCGCAAGG  
TCAAATTCAGCAACAACCTGGCAAAGCAGAAAACGCAAAATACAGCGACTGCATTCTGTATCGCAAATATCCGAGGGAC  
TACCTTCAAAAAGTCAACAACGGCCGTGAGCAAAAACAGCAATGATAGTATTGAGGATTTGAAGGTGACGCAACATGTC  
AAAGTCAGCAGCGGGTACGGTACGCCAGCCGGGGCGCAATGTCCGGGCAAATCAGGTTTTAAACCGTTTCGATACTGGATC  
AGGGCTGGTATGAAATGCGCCGCCAGCTTGCCTATAAGCAGCTCTGGCGTGGCGGTGAGGTGCTTGTGTTCCGCCAGCG  
TATAAAGCCAGCGTTGCGGCTACTGTGGTCATACAGCGAAAAGAGAACCGCCTGTCACAAAGTAAATTCAGATGCCAGGT  
ATGTGGATATACAGCGAACGCCGATGTAATGGCGCTGCAACATTTTAGCGGCGGGGACGCGCTTCTGCTGTGGAG  
AGATGGTGCAGTCAGGCCGCCGTTGAAGCAGGAACCCACGAAATGATTACAGCGACAGCCTGAACGTAGCAGGGATCC  
ACGTCCTTACAGGCGTGGAGGATGTCAATATCGGTTTTCTGTGAGCGATTAATTAACACCCAGTAACA AACGCCTCCGG  
CAATTAATCCCAAAAACGAGAACCAATCCCAGCAGCGTCAATCCACTTGCCGTTACCAGAAATGCCACCACCGCCGG  
TCTCGCTACGCTCATTATGACAGCGCTGATACAAACTGCCGCGGATGGTACTTAACAGCGCCAGACCTGCCAGCATCTG  
GATCCAACCTACGGGCAGGGCAGCCATCATCCCGTAAATGGCACTACCAAACAGACCTGCGAGCAAATAGAAAATGCCTG



CAACGGCAGCGGCCAGCCAACGTTGATCTTTATCCGGATGCGCTTCCGGGCTTTGGCAAATAGCCGCGGTGATTGCCGCA  
ATACCGACGGAATAAACGCCGAAAGGGGAAAAAACCAGTGCCAGCAATCCAGTAAATACAATTAATGGCGAAACAGGAGC  
CGAATATCCAGCTGCTTTTCATTGCTGCGATACCCGGTGCCTTTTGCATGCCATCGTCACCAGAAAAAGGGGAGTGCAA  
CGCTCAGGCTGTGAGCAAACGAAAAATCAGGGGTAATAAAGTGGGAGAACGGGTTAAAGACAACATCAGTTGTGACA  
ACGTCACCTTTCGCGATGACGATCACGATCCCAATAATCATCGCGCAATTACCGCATAGCCGCGGCGAACCGCCTTGGT  
TGCCAGCCATACCAGCAACATACTTCCACACAACGTAATGACCGTCCAGACTGGCAAACGCCTGTAACCAAAGCGTA  
ATAAAATCCCAGCAAGCATTGCCGCCGCAAGCGAGTGCGGAATAATGCGCATCAGACGAGCAAAGAGTCCCGTTATGCCG  
CAGAGGACTATTAGCGCGTTGGTGACAATAAAAACGCCGATGGCTTCGTTAAGTGTAGTCCCTGCAATCCGGTGACCAA  
CAAAGCCGCGCCAGGCGTTGACCATGCGGTGAGAACAGGTACGCGATACCATAATGTCAGAGTCAGCGTACTGACGCCA  
TTGCCAGCCCCAGCGCGTCATCCAGCCAGAGATTTGTGAGTGGTGGCTCCGGCGACAATCGCTGCTTGCCAGATTATT  
GCCGCTGAAGTGGCGTAGCAATTAATACCGCCAGAAACCCGCCAGTAGCGTGGTGGAGGAATAGAAAAACAGACGCAT  
AGTCACCTCGTGCCTTAGCGTACAGGCACCGTAGCATTGTCCGTTATAACGCACAAGTGATAAACTCCGTTTTGCC  
GGAGGAGTCGCATGAAAAATCTCGCTCGCTTTTATCCACCACACTTAAACAACTACGCCAGCAGCGCGGCTGGAGTCTT  
TCGCGACTGGCAGAAGCGCAGGGCGTTTAAAGCAATGTTAGGGCAGATTGAGCGTAATGAGTCCAGTCCGACGGTCCG  
GACATTATGGAAAATTGCCACCGGTTGACGTACCATTTTCAACATTTATTTCTCCGCGCAGTCCGCTACGCCTTCAG  
TTTTATGATCCACAACAGCAGCGATGGTGATCACTTCGCTGTTTCCCTTATGATCCACAACCTGCTTTGAACACTTCTCG  
ATTAGATGGCATCTGGTGAATAAGCGAATCGACGCCCATGAGAAGGGGGTAATCGAACATGTCGTCGTCATTGATGG  
ACAACCTGATCTGTGCGTTGATGGGAATGGCAGACCCCTAATTGTGGGAAGGCGTTCGATTTGCTGCAGACGTCACGC  
ATATCTATCGTAATGGTGGGAGCAAACCGTACATTTTTCATTCCCTCATCCATTACCCGCGCAGTTAAGCGGAAAACTA  
TTTCGCAACGTCGCGCTTGTGGCTAAAATAGCCGCATTTTTCAGCTACTGGATAAGAATGTGACCGTATCTTCTCATCG  
ACTTGAAGTGTAAAGCCCGCAGCGATGCCGCCATTGCCCGGAAGCTATTTTGCACGGTCCGATGCTGTTTTATATCG  
GCGGCCCTGTTTTGGTCCCGTCATAATGCCAGTAATAGCTTGAAGATATTGCCGAGCTGGTGGCGTTTGCCCATCGT  
TATGGTGCAAAAATTTTCTGACGCTAACACCATTTTGCATGATGATGAGCTGGAACCCGCGCAACGGCTGATTACTGA  
CCTCTACCAGACCGGTGTCGATGCGCTGATTGTTCCAGGATATGGGATTCTGGAACCTGATATTCCGCCGATTGAACTGC  
ACGCCAGTACGAGTGCACATTCTGACAGTTGAAAAAGCGAAGTTCCTCTCTGATGTTGGCTTACGCAGATTGTGCTG  
GCGCGAGAGCTGAATCTTGATCAGATCCGCGGATTACCAGGCTACGGACGCGACCATTTGAATCTTTATTCATGGGGC  
ACTGTGCGTGGCTATTCCGGTCACTGCTACATTTCTCATGCGCAAACAGGGCGTAGCGCCAAACCGTGGCGATTGCTCGC  
AGGCGTGCCGTTTGCATACACATTGAAAGACGATCAGGGGCGGGTGGTTTTCTATGAAAAACATCTGCTGTCGATGAAA  
GATAACGATCAGACTGCCAACCTCGGCGCGCTGATTGATGCTGGTGTACGCTCCTTCAAGATTGAAGGGCGTTACAAAGA  
TATGAGCTACGTGAAGAATATCACCGCCATTATCGCCAGATGCTTGATGCCATTATTGAAGAACGTGGCGATCTGGCGC  
GCGCTTTCATCAGGTGCTACTGAACATTTCTTTGTTCCATCGACGGAAAAAGACTTTCCACCCTGGTAGCACAGATTATTT  
GTGAATGCCGTAAGGGGATATTGGCGGTTGATTGCGCGAAATTTATCGGCCTGCCGTTAGGCGAAGTAGTGAAAGT  
GGCGAAAGATCATCTCGATGTTGCCGTTACCGAGCCACTGGCAAATGGCGATGGCTGAACGTGTTGATTAACCGTGAAG  
TCGTCGTTTTCTGTCGAATACGGTTCGAGAAAACCGGAGAAAAATCAGTACCGGCTGTCGGCCAATGAAATGCCAGCAGAT  
TTGCACAAAATTCGTCCACATCACCCACTAAACCGTAATCTTGATCATAACTGGCAGCAGGCACTGACAAAAACCTCCAG  
CGAACGTGGGTGGCGGTAGACATTGAACTGGGCGGCTGGCAGGAACAATGATTCTGACCCTCACCAGTGAAGAGGGTG  
TCAGCATCACGCATACGCTGGACGGCAGTTCGACGAAGCCAATAACGCCGAAAAAGCAATGAACAATCTGAAGGATGGT  
CTGGCAAACTGGGGCAACCTCTATTACGCCCGCATGTGCAAATTAATTTGCCGGGGCGCTGTTTTGACCAAACAG  
AACCGGTTGCTGATCTGCCCGGTTTTATCCGCAAACGCATCTGAGTTTTCTCGCGAAGTATAACAACGAAAGGCGCGT  
GAATTTTATCATCGCTATGGTGTGACGCTGATTGACCGGCGTATGAAGCACATGAAGAGAAGGGCGAAGTCCCGGTGAT  
GATCACCAGCATTGCTGCGCTTTGCCCTTAATCTGTGCCGAAACAGGCGAAAGGCAATATCAAAAGCTGGAAGGGCA  
CGCCAATGCAACTGGTTAACGGCGATGAAGTATTAACGCTAAAGTTTGATTGCCGCCATGCGAGATGCACGTCATTGGC  
AAAAATCAAAAATCACATACTGAAAATGCCGTTACCGGGAAGCGTAGTGGCATCCGTAAGTCCGGATGAGCTGCTGAAAAC  
ATTGCCGAAGCGAAAAGGGTAAAACGCCAGTTTTCTGGTACTCACAATTTATTGAATCTGCATGATATTGCCTGCCGGG  
TAAGGCGTTACCGCGATCCGGCATCAATGACTCAACGTTGTCCGCTTCTGGTTTGCAGGATTTTTGCCAGTAAAAAT  
GCTCGCGCAAACCTTCCGCCGACTCTTCCGCCACAGCAGCAATTCATCGCTGTCGCTTTCATGACGCAGCTGATGATCC  
ACATTTTACCACACAAAATTCATGCTCTTTGTGCCCTGCCATGAGTTGCTCTGAAAACAGAGCACACGTTAATAAGAC  
AACCGATAACGCCTTCGTAACATCCTGCCACCTTTTTCTTACCTTTTCCGCTATGATGCCGATCGTTTCTTGAGGTTA  
TTATTCAGTTTTGCAAATAGCGCAAAGAAATCTGGAATCTTCTTCTGATTTTGCATTGCATTCTGCCGTTGCGGCG  
ATTTAGTGCTATTTTCGAGCAAATACACACGGAGTAAACACTAATGTTTACTTTGTTGATACTCAGCGGCAGGGAG  
GCGATGTGAACAAAGCGAGTTCAGACGTTGGCTCGAATCTCAGGGCGTGCATGTAGCGAATGGCAGCAACCATTTGAAA  
CTCAGGTTTATGGGAGGCGAGTGTGATGCCGCGTACCCCTGCGATGAGATTAAGAACCATTGCGTAAAGCAATCCT  
GAAAACACTCGTTTTGAGTTAATCGCCAATTAAAAAGGTTAATGACATGCGAGAGACAGTCAAATATGCGTTATCCCG  
TCACTCTTACCCCGCGCGGAAGGCGTTATATGGTTTTCTTTGTGGATATCCTGAAGCGTTGACCCAGGGCGAAACT  
GTCGCTGAAGCGATGGAAGCGGCAAAGATGCTTACTGACCGCATTTGATTTTTATTTTGAAGATAACGAGCTTATCCC

TTTACCTTCGCCATTAATAGTCACGATCACTTTATTGAAGTACCTTTGAGCGTCGCCTCTAAGGTATTGCTGTTAAATG  
CTTTTTTACAGTCAGAAATCACTCAGCAAGAGTTAGCCAGGCGAATTGGCAAACCTAAACAGGAGATTACTCGCCTATTT  
AACTTGCATCATGCGACAAAAATCGACGCCGTCCAGCTCGCGCAAAGGCGCTTGGCAAAGAGTTATCGCTGGTGATGGT  
TTAATTACAGTTAACGAAAAAGTTGTCATTTTTAACAACTGATATAGACTGCCGAATCATCTGCACATAATTACGATTCCA  
TAATGAAAAAATACCAGCAGCTTGAGAACAAATTACGCGAGCAGATTGCGTCGGGTATCTGGCAACCCGCGCATCGTTTG  
CCTTCGTTGCGTGACCAGGTGGCGCTTTCAGGCATGAGCTTTATGACTGTCAGCCATGCCTATCAGTTGCTCGAAAGTCA  
GGATATATTATCGCACGACCCGAGTCGGGTTATTACGTTGCGCCACAGGCAATAAAAAATGCCGAAAGCGCCAGTCATTC  
CAGTCACTCGAGATGAAGCAGTCGATATCAACACTTATATTTTTGATATGTTGCAGGCCAGTCGCGATCCGTCGGTCGTT  
CCGTTTTGCCTCGGCTTTCCCGACCCGCGACTTTTCCCTCCAACTAAACCGCTCGCTGGCGCAGGTAAGCAAAC  
CGCCACAGCGATGAGCGTGATTGAAAACCTACCGCCAGGAAACGCAGAACTGCGTCAGGCTATTGCTCGTCGCTATGCCT  
TACAGGGCATCACCATTTCTCTGATGAAATTGTCATTACTGCCGGGCGGTTAGAGGCATTAACCTCAGTTTGAAGCG  
GTAAGTGAACCGGCGATTGGGTGATAGTAGAGAATCCTTGTTTCTACGGTGCCTGAGCGGCTGGAGCGGCTACGGCT  
GAAGGCGTTATCGGTGGCGACGGATGTTAAAGAAGGATAGATCTTCAGGCGCTGGAACGGCTTGCAGGAGTATCCGG  
TGAAAGCGTGTGGCTGATGACTAATAGCCAGAATCACTCGGATTTACCTTAACGCCGCAAAAAAAGCACAACCTGGTG  
GCGTTGCTCAATCAGTACAACGTAACGCTGATTGAAGATGACGTTTACAGCGAACTTTATTTTGGACGGGAAAAACCGCT  
GCCTGCGAAAGCGTGGGATGCCACGATGGCGTTTTGCATTGCTCTTCGTTTTCGAAATGTCTGGTGCCTGTTTTTCGTA  
TTGGTTGGTTCGCCGCCGAAACATGCACGTAATAATCAACGCTTGCAGTTGATGAGTACGCTTTCCACAGCTCACCG  
ATGCAACTTGGCTGGTGGATTACCTTTCCACGCGCGGATACGACGCCCATCTTCGTCGCCTGCGTCGCCAGCTTGGCGA  
ACGTAACAACGTCCTGGCAGGCACTGCTGCGTTATCTGCCTGCGGAAGTAAAAATTCATCATAATGACAGTGTTACT  
TTCTCTGGTTGGAGCTCCCCGAGCCGTTAGATGCCGGCGAATTAAGCCTGGCGGCACTGACGCATCATATCAGTATTGCG  
CCGGGTAATAATGTTTTCTACCGGTGAAAACCTGGTACGTTTTTTCCGTTTTAATACCGCTGGCAGTGGGAGAGCGTGA  
AGAACAGGCGGTAACAATTAGGCAACTTATTCAAGAACGGCTGTAATAGCGTTAATTTAATTCTCTTAGATTGGG  
TAATATGAATTCGAATAGCAGTCATATTTCTAATCCTTGACTATACTCCAGAAGATAACCTTACAGACGGCATAATG  
CGCGGTAGCTCACAACCTGAATAAATTTCTCAGGGGCGAAGGTGCTGCTGCAAGCCGCCGCTATGGTTAAACAAGGAG  
ATATTTTTACGGCACGGCGCTGAACAATTAATTACGACAGGAGTAAGACCTTATGAGCAAGACATTTGCCCGCAGCAGC  
CTGTGTGCGCTCAGCATGACAATAATGACCGCTCACGCCGCCAACCCTACCAATTTAGATAAACCAGGAGGGCGACT  
GGATATTATCGCTGGCCGGATACATCGAACCGGACAACTGATAAACAATACGACTGGGTAACGCAGTTCGAAAAAG  
AGACAGGCTGCGCGGTGAATGTAAAACCGCCGCGACTTCCGATGAAATGGTCAGTCTGATGACCAAAGGGGTTACGAT  
CTGTTACGGCATCCGGCGATGCTCGCTGCGTTTTGATTATGGGTAAACCGCTGCAAGCCGATTAATACCGCATTGATCC  
CAACTGAAAAACGCTCGATCCGCGCGTGGTTAAAGGCGACTGGTTAATGTTGGCGCAAAGTTTACGGCACACCTTACC  
AATGGGGGCGGAACTGCTGATGTACAACACTAAAACCTTCCCGACGCCGCCGGATAGCTGGCAAGTGGTTTTTGTGAG  
CAAAATCTGCCGACGGCAAGCAATAAAGGCCGCTTACGGCTTATGATGGCCCTATCTATATTGCGGACGCTGCGTT  
GTTGCTAAAGCCACTCAGCCGAGTTGGGCATCAGCGATCCGTATCAACTCACCGAAGAACAGTACCAGGCGGTGCTGA  
AAGTGTGCGCGCTCAACACAGTTTGTCCATCGCTACTGGCATGACACTACCGTGCAATGAGCGATTTCAAAAACGAG  
GGTGTGGTTGCTTCCAGTGCCTGGCCCTATCAGGCCAACGCCCTGAAAGCCGAAGGCCAGCCTGTTGCTACCGTTTTCC  
GAAGGAGGGTGTACCAGTTGGGCTGATACCACCATGCTGCATAGCGAAGCGAAACATCCGGTTTGGCCCTACAAATGGA  
TGAAGTGGTCATTAACGCCAAAAGTGCAGGGCGATGTGGCGGCTGGTTTGGCTCGTTACCGGTAGTCCCGAAGGGTGT  
AAAGCCAGTCCGTTATTAGCGAAAAAGTTGTGAAACCAACGTTTTAACTATTTGACAAAAATCGCTTCTGGAAAAAC  
GCCTATAGCAAGAGGGGGCAAGTTTTGTTCCCTACAGTTCGCTGGACGAGATTACATTGCCATTATGGCGGTGCTAAC  
TTGCTGGGGTGTCTTATGACGTACGAGTGGAGTTTGACAACGCTCCTCGCGTTGTACGGTGACGTGCGCGCAGTAGTG  
GCGTCAGTATTGCGATAAAAAGATGGTGAATTTCTCTATGCTGGGCGCTCCGGCTCCGGCAAAACCACTGCCTGCGC  
CTGATTGCTGGCTTGAACAGCTTTCCGGCGGGCTATCTCTATCTTTGGTAAACCCGCCAGCAATCTGCCACCGTGGGA  
GCGGGACGTGAATACTGTCTTTCAGGACTACGCGCTATTTCCGCATATGTCGATTCTTGACAATGTCGCCTATGGGCTGA  
TGGTCAAAGGCGTGAATAAAAAGCAGCGGCACGCAATGGCGCAAGAGGCGCTGGAGAAAAGTGGCGTTGGGGTTGTACAT  
CAACGTAACCGTCACAACCTTCTGGTGGTCAGCGCCAGCGGTTGCTATCGCCAGAGCATTGGTGAATGAACCGCGCT  
ATTGCTGTTGGATGAACCGCTCGGCGCACTGGATCTCAAAATGCGTGAGCAGATGCAGCTGGAACGAAAAACTGCAAC  
AGTCTCTCGGTATCACTTTTATCTTCTTACCCACGATCAGGGCGAAGCGTTATCGATGTCCGATCGTGTGGCGTTTTT  
AATAATGGACGATTGAGCAGGTGATTTCCCGCGCATCTCTATATGCGCCCGCGCACGCGGTTTGTGCGGGTTTCGT  
TGGTACATCGAATGTTTTGATGGACTGATGGCAGAGAACTTTGTGGCATGACGGGAAGCTTCGCCCTGCGACCGGAAC  
ATATCCGCCTCAACCCCTGGTGAACGCAGGCCAATGGCACGATCCAGGCGGTGCAATATCAGGGCGCGCAACTCGT  
TTTGAAGTGAATTAACCGCGGTGAAAAACTGCTTGTGAGTCAGGCCAATATGACAGGCGAAGAAGTGCCTGCCACGCT  
CACGCCCGACAACAGGTGATGGTTTTCTGGTGCCTGATGTGATGGTCCGCTGGTTGAGGAGAGGTGAATGGCGATGA  
ATGTATTGCAATCACCTTACGTCAGGTCTGGGTAAGGTGTCCGTTTTCTTGGCATAATCCGGGGCTGGGGCTGTTT  
TACTGCTGCTTGGCCGCTAATGTGGTTTTGGCATTGTCTATTTCCGCTCGCTGCTGACACTGTTATGGCAGGGATTTA  
TACTTTTACGATTTACCATGTGCGTAAACGCCGAACTGACGCTGGCGAATATCCGTGCGCTGTTAATCCGGCGAATT  
ACGACATCATTCTCCGACGCTGACTATGGTGTGGCAGTCACTATCGCCAGCGCCATTCTGGCTTTTCAATGGCGTG

TATATGGCGCGCTATACCAGCGGAAAATGAAAGCGTTTTTTTATATTGCGGTAATGTTGCCGATGTGGGCGAGCTACAT  
TGTTAAAGCCTATGCCTGGACGTTATTGCTGGCAAAAGATGGCGTGGCTCAGTGGTTTTTACAACATCTTGGGCTGGAAC  
CACTGCTGACTGCGTTTCTTACATTACCTGCGGTGGCGGAAAATACGCTGTCAACTTCCGGGCTGGGGCGCTTTCTGGTG  
TTTCTCTATATCTGGTTGCCGTTTCATGATCCTGCCCGTTTCAGGCGCGCTTGAGCGTTTGCCGCCGTATTGTTGCAGGC  
GTCCGGCTGATCTCGGCGCAGTCCACGACAAACCTTTCGCTATGTGGTGCTGCCGCTGGCAATCCCGGGTATTGCCGCTG  
GCTCTATCTTTACCTTCTCACTCACACTGGGCGATTTTATCGTCCCAGCTGGTTGGTCTCCAGGATATTTTATCGGC  
AATATGGTTTTATTCCCAGCAGGGGGCGATTGGCAATATGCCGATGGCGGCGCATTACCCTGGTGCCGATTATTCTCAT  
CGCACTGTACTGGCGTTTCGTGAAACGCTGGGAGCGTTTCGATGCACTCTGAACGCGCACCGTTTTTCTCAAACCTGGCG  
GCCTGGGGCGCGTGTGTTTTCTACATTTTCCATCCTGATAATCGCCGCTATGCGTTTAACTGAAGATGCGGCGTT  
TAGTTTTCCACCGCAGGGCTGACGCTGCGCTGGTTAGCGTGGCAGCACAGCGTAGTGATATTCTTGATGCCGTGACAC  
TGTCACTTAAAGTGGCGGCGCTGGCGACATTAATTGCGCTGGTGTAGGGACGCTGGCAGCTGCCGCGCTGTGGCGACGA  
GACTTTTTCGGCAAAACGCCATTTTCGCTGTTACTGCTGCTGCCATTGCGCTGCCGGCATTGCTCACTGGTCTGGCGTT  
ATTAACCGCTTTAAACCATCAATCTGGAGCCGGGATTTTTACCATCGTGGTCCGGTTCATGCGACTTTTTGTGTAGTTG  
TGGTGTAAACAATGTCATGCCCGTTTTGCGCGCACCTCTGGAGTCTGGTTGAGGCGTCAATGGATCTGGGGCCAAT  
GGCTGGCAACCTCCGCTACGTAGTGTGCCGAATCTCAGTTCGGCGTTACTGGCAGGGAATGCTGGCGTTTTGCCCTT  
GTGTTTCGATGAAATCATCGTTACGACCTTACCGCAGGTTCATGAACGAACGTTACCGTTGTGGTTGCTCAATCAGCTTG  
GGCGACCGCTGATGTACCGGTAACCTAACGTTGGCAGCTGCTGTTTATGTTGGTAACAACCTTGGCGATCTGGGGGCC  
TGGTGGCTAACCCGGAAGGCGACAATGGTCAATAACCACTGATACAGGAATATGCTATGCAACATAAGTTACTGATTAA  
CGGAGAAGTGGTTAGCGGCGAAGGGGAAAAACAGCCTGTCTATAATCCGGCAACGGGGACGTTTTACTGAAAATTGCCG  
AGGCATCCGACAGAGCAGGTGATGCTGCTGTGCGCGCGCAGATGCAAGCATTGCGGAATGGGGGCAAACCACGCCGAAA  
GTGCGTGGGAATGTCTGCTGAAACTGGCTGATGTTATCGAAGAAAATGGTCAGGTTTTTGGCGAACTGGAGTCCCGTAA  
TTGTGGCAAACCGCTGCATAGTGCCTCAATGATGAAATCCCGCGGATTGTCGATGTTTTTTCGCTTTTTTCGCGGGTGGCG  
CGCGCTGTCTGAATGGTCTGGCGCAGGTGAATATCTTGAAGTCACTTTCGATGATCCGTCGCGATCCGTTGGGGGTC  
GTGGCTTCTATCGACCGTGAATTAATCCGCTGATGATGGCCGCTGAAACTTGTCCGGCGCTGGCGGAGGGAAGT  
CGTAGTGCTTAAACCATCAGAAATTACCCGCTGACCGGTTGAAGTTGGCAGAGCTGGCGAAAGATATCTTCCCGGCG  
GCGTGATTAACATACTGTTTGGCAGAGGCAAAACGGTGGGTGATCCGCTGACCGGTTCATCCAAAGTGGGATGGTGTG  
CTGACGGGCTCTATCGCCACCGGCGAGCACATCATCAGCCATACCGGCTCGTCCATTAAGCGTACTCATATGAACTTGG  
TGGCAAAGCGCAGTGATTGTTTTTATGATGATGCGGATATTGAAGCAGTGGTGAAGGTGTACGTACATTTGGCTATTACA  
ATGCTGGACAGGATTGACTGCGGCTTGTGCGGATCTACGCGCAAAAGGCATTTACGATACGCTGGTGGAAAAACTGGGT  
GCTGCGGTGGCAACGTTAAAATCTGGTGCAGGATGACGAGTCTACGGAGCTTGGACCTTAAAGCTCGCTGGCGCATCT  
CGAACCGCTCGCAAGGCAGTAGAAGAGGCGAAAGCGACAGGGCACATCAAAGTGATCACTGGCGGTGAAAAGCGCAAGG  
GTAATGGCTATTACTATGCGCCGACGCTGCTGGCTGGCGCATTACAGGACGATGCCATCGTCAAAAAGAGGATTTGGT  
CCAGTAGTGAGTGTACGCCCTTCGACAAACGAAGAACAGGTGGTGAAGTGGGCGAATGACAGCCAGTACGGACTTGCATC  
TTCGGTATGGACGAAAGATGTGGGCAGGGCGCATCGGTCAGCGCACGGCTGCAATATGGTTGTACCTGGGTCAATACC  
ATTTTCATGCTGGTAAAGTGAATGCCGACGGTGGCGAGAACTTTCTGGTTACGGCAAGGATATGCTACTTTATGGGCTG  
GAGGATTACACCGTCTCCGCCAGTTCATGGTTAAACATTAAGGATAATATTGAGATCGTAAGAGTATGAGATGATCTT  
GCGTACTGTGAGAGCACTGATTTCTCTGACAGTACGTGCTGCGTGCAAAATCACTACATCAAATAAACAGCCAAATCTC  
ATAGAGATAAGAGTAAACAAACCAACAGCAGCAAGAAATTTATCAGTACTACAGTTCTACTGGAAACATTCATTTTTG  
CACTTTTATCATTGCCCCATGTGTATAGTACGGGTTAAGAAAATCCGCAATAATACTCATTCTGAAGATGGATAAGGG  
CAAGTTGCTGTTTATGATGTTTTTTCTCAAACCTGGTAAAAAATGATGACGCTCAAAAAATGACGCATATTTGCGCGCG  
TTTTATTCTGCTGGCTGGACGCCCGTACATGTCTCTATCAACACATGCTTGTTTTTTATGCGGTTATGGCAGCAATCG  
CATTTCTTATCACCTGGTTTCTTCTCACGATAAGAAACGCATCCGTTTCTTAAAGCGCTTTCTGGTGGGGGCAACATGG  
CCGATGAGTTTCCCGGTGGCGCTGTTGTTTTCACTGTTTTAAATCTTACTCACTGGCTTGACGGCACCCACGCAGACTTAT  
ATCATTTGGATGAATCGATAAATTTCAACAAGTGGCTAAGGAGAAAGTATGTCGCATCTGGATGAAGTCATCGCGCGCTG  
GATGCCGCGATTGAAGAGAGCGTATTGCCCATATGAACGAATTATTAATCGCCCTGAGCGATGACGCGGAGTTAAGTCG  
GGAAGATCGCTACACCCAGCAGCAACGCTCTGCGCACAGCGATCGCCATCACGGTCGCAAGCATAAAGAAGATATGGAAG  
CGCGCCACGAACAGTTAACCAAAGGGCGCACCATCTCTGATTAATAAGAGCTGCTGGCTACCAACCAGGCGCAACCAC  
AAGTAAAATTGCGCCACAAATTGGGCCGAACAACGCCCGTAGTGGTACGCCATGACTGCGGAAGATATCCAGCATCAGAC  
CGCAATCAGTACTGGCGACAGTACAGCAATAGTTGTCGCCGCTCCACATTTCTGATATCCGCTGATACTGGCGAAG  
ACAAAAACGATCCAGCAAGCCAGGTATAAGTGTCCACCAGCGCAGCTGGACACCAGTTGCCAAACCCCGCATGCC  
TTGTTTAAACCATAAAATAGAAAACAAAGAGCACAAATCCCACCAGTGGTTCAGCAACATGGCGATGAGAATGGTAGAGG  
AGGTCTGGGTGATGCGCACCATCAGCGTGTCTGGACAACCAGACCAATTCCGGCGCAATCAAAAAAGCAAGGGTGGC  
GACTGATTCATCAATCGCTCCGGTTAGTGGCGCTGTCGAGTTGCAACTGCATAAATGTGAGATCCAGCCAACGACCA  
AATTTAGTGCTACCTGCGGCAATTTGCGCGGTGACGACAAATCCCAGCGACTGGTGGAGATGACGCGAGGCTGATTTTTG  
CGATTGATCCCGGCGACCATGACATGCTTCCCGCAATCCCAGCGCTTCATCAATCAATCGGCTTAAACAATTTACGCCCA  
GACCTTTGCCCTGATGATCGGGATGGACATAAACCGAATGTTCCACGGTATGGCGAAAACCATCGAACTACGCCAGTGC

CCAAACGAGGCATATCCCGTCACTACGCCGTTTTCTCGCTCACCAGCACTGGATAACCTGCTAAAGTCCGCGCTTCAA  
CCAGGCAATGCGGTTATCAGCATCCACCGTTTGGTCATTCCAGATAGCCGCCGTATAACAACACGGCGTGGTTATAAATTT  
CCGCAATGGCAGCACAGTCGGCTTTGCGGGCAAACGGATGGACATGTCTGGCCTCAATAAAAATAATGATGATGATGTTA  
TCAATACTATCGAAAACAGCCCGAAGCAACGGATTCTCGATGAAATTATTGCTGTTGCAGAGGGGATGTGACGGCTGC  
AAACAAAACCAATCCCGTAGCCTGCTACTATTGATGGATTATGCCAAAAGCACAGGAGAGCATTATGGGGCAACAAAA  
GCAGCGTAATCGACGTTGGGTTCTGGCCTCGCGTCCACATGGCGCACCTGTTCCGGAGAATTTCCGTCTTGAAGAAGATG  
ATGTCGCCACACCGGGTGAAGGACAGGTACTGCGCACAGTTATTTGTCCTTGGACCCGTATATGCGTGGACGTATG  
AGCGATGAGCCATCTTATTCACCGCTGTTGATATTGGCGCGTGTGGTGGCGGTACGGTGAGCCGTGTCGTGGAGTC  
GAATCATCCTGATTATCAGTCTGGCGACTGGGTGCTGGGTACAGTGGATGGCAAGACTATGACATATCCAGTGGTGTATG  
ATCTGGTAAAACCTGGCGATCATCCGCAAAATCCATCGTGGTGTGCTGGGTGTCTAGGGATGCCAGGCTTACCCTTAT  
ATGGGCTACTGGATATCGTCAAGCTAAAGAGGGCGAAACGTTGGTGGTAGCTGCGGCGACAGGACCAGTGGGGGCGAC  
GGTGGGGCAAATCGGCAAACTAAAGGTTGCAGAGTGGTGGGGTAGCCGGTGGCGGAAAAATGCCCCATGCTACCG  
AGGTGTTAGGCTTCGATGTTTGTCTTGATCACCACGCGATGATTTTCCGAACAACCTGGCGAAAGCGTCCCAAAAGT  
ATTGATCTATTATGAAAACGTGGGCGTAAGGTATTGATGCGGTGCTACCGTTACTTAATACATCTGCGCGCATTC  
CGTCTCGGATTAGTGAGCAGCTATAACGCTACAGAGTACCACCCGGTCCGGATCGTTTACCTCTGTTGAGTACAG  
TGCTGAAAAAACCTATTGCTTGAAGTTTTATTATCGCTCAGGATTATGGTACCAGCATCCATGAGTTTCAGAGGGAG  
ATGGGGCAATGGGTGAAAGAGGATAAAATCCACTACCAGCAAGAAATTAAGTACCGGTTAGAGAATGCGCCACAGACGTT  
TATCGGCTGTGAAGGGTAAAACTTCGGCAAAGTGGTATCCGCGTGGCGGGTGTGATGATTAAGTTCACAGCGCGCG  
TAAGCCGCATAAAAAATCCAGGCAAAAAGCTTATTTTTCAGCTTAACTAACTAACACATCATTGTTCTGCTGCTAATAA  
CAACAAAGGTGAGTGGTTTATGATTATCACTTAAACACAGGTGAATTCCTTCTGCCATGACGGCAGGGTGGACAG  
AAAACACGCGAAGGAATTAATGCCTGGAACGGGAAAAATGAAACATGTCAGTTTACTCTGCAGGTTGAGAACGACCT  
GAAACATCAGCTTAGTATTGGCGCATTAAACCTGGCGCACGCTGATTACTAAAAATCTGGCGGAGCAATTAGGTATGA  
GTATTACACCTGTGCGTGAAGCATTATTACGTCTGGTTTGGTGAATGCGCTTCTGTGCGACCTGCACAAGCATTTACA  
GTTCCGGAAGTGGGAAACGTCAATTAGACGAAATCAATCGGATCCGCTACGAACTGGAATTAATGGCAGTTGCTCTGGC  
TGTTGAAAACCTACCCCGCAAGACCTTGGGAACTCCAGGAATTGCTCGAGAAATTACAGCAGGCGCAAGAAAAGGGCG  
ACATGGAACAAATCATTAAATGTAACAGGCTATTTTCGTTAGCGATTTATCATCGCTCAAATATGCCCATCTGTGTGAG  
ATGATTGAGCAACTGTGGGTGAGGATGGGCGCTGGTTTACATTATCTCTATGAAGCGATTAATCCAGCGAATTACGGGA  
GCATATAGAAAATCATCTGTTACTCGCTGCGTAAAAGCAAAAGACAAAGAGGGATGCAGACATTGTCTTGTGAAA  
TTATGCAACAAAATATTGCTATTTTATACCAGCAATACAATCGTTAAAGTAAATGCCCGGCAAAATACCGGCATCAAGGT  
AATTACTCAAATCTCCACGCAATATTATGCGGACACCATAATTTTCGTCGGGCGAAGGTTGTAATATCGCCCGTTTGA  
CTCATTGACAATGACAGAACCAACGATTCTTTATCGAATAAATTATCGACACGACCAAATAAATCCACAGTTAAATTTGT  
GGTAATTGATTTATACCCGGTGAATAAGCCGACGAGAGTATAAGACGGCGCTTTTGGCGTATTTTATCATCTGCCATA  
ATATCGCCATATAACGCGCTTCCGTGCTGCATACCAACCATCTTCCGGTACATAACCTATCGACGCAAGCCCATATT  
ACGGGCGATCCCTGGCATCCGATTACCCTTACAATCCTGTTTATTGCAACATTGCTGCGATAGGTGCGATCAAGCCAGG  
TCCAGGACGCGTTTACGCGAAAATCTCCTGCGAAACGTTGATCCCATGCCAGTTCAGCGCCTTACGACGGGTCTTTCCG  
GCATTTTGTAAAGTGTACGCCACCGCTACTGCTATCGACAACAATTTATCATCAGTGTGCGTCTGAAACAATGCGAG  
ACTAAGCAGCCATCACCAATACGCGTTTTACTGCCGATCTCAATTGTATCGTTGGTGGATGGTTTTAAACCTAAGTTCA  
TACCCTTTGCCATCAGCAGGATAAGACAGCTCATTAAATCGTCGGCGTTTCAAACCTCGCCGGCTGCCAGATAGATA  
TTCCAGGCATCGGTACTGATATTTTAAACGAACCGGACAGTACGATTTATGATAACTGGCATCACCCTGTGATCGCC  
GTTACCCGGAGTAACGTAATGGTCTGTTGGAATCAAACACACGAGCTGTAGCGCACGCCAGCATCCAGCGACATCTTTT  
CGTCAAGTGCCTGCGTCTGTAATAAGGGATCGATGTTCCACATCAGATTGCGTTTCTGCGGACGCAACTCACCTTTT  
TGCCCGTACTCCGGCATGCCGCTATTACGGCGAAGTTATTGTAGCCCTTGGGTTTTCACTCATGTTTTCTGATGTTAG  
GCCGGTAGTGAACGTGACCGGAACGCCAGTTACCACGCGTGTGTCAGCGGCTGTCTATTCCTGGTAATGGCGTTGCA  
GGGTAATCACGCCCGCGCATGTGACGGGTTAAGTTGTGGTGCATGGGATTGACTGGTACTGGGTGTTTTCTCGCTCT  
CCGGCATACTCATCACTCATATCATCCCGCAACTCAGGCTACGCTCATAGCGCAACCAGCCTGAGTTTGTGTTGAT  
GGTTTTTGGGTGTCGACTGTTCTGCACGAGGCGCTTGTGTTGATTAGCCTTCCATTCTGCTTTGGTTAGCCACCTG  
GGTCATCTGCTTTGATATCCACACTATTGAAAATCAGACTTAAATTTGCTGGCTTCAATGCGTACGCCAGTTTGGCA  
TTGGCTAAATTTTCTGTGCGCCACTATGGTCACGATAGCCGTGGGTGTAACCGCGTGGTTGAGACGGTGAATCGAC  
ATCGCCAGGCTGTGTGCCGCTCCCGTTGCGCCGTTGCTTTAGCCCATAGCGCCAGCTGCCAAAACCTGCCGTAGTAAC  
TACTGGCTTCAATGGTTGGTGGCTGTTGTCGGTCTGGGTGGTACATTATTACCCACAGACGCGTTGCCATACAGG  
GCAGAGAAGGGCCACGCGCACTTCCACATTTGCACTGCTTAAATCGATGTTGGATGTTTGCCTTGGCCGTGGG  
CATGGTGGCGGAATACCGTCCACATACAGGCGAATACCGCGAATACCGTAAGTGGAGCGGAGCCAAATCCGCGAATCG  
ACAGCTGTAATCTTGGCATAGTTTCTCGCGTTTTGTACCTGCAAAACAGGACGCGCGGTGAGTTCGGACAAGTTA  
ATGCGCGGTGTTGCCAGGCGCATCTCCTCGCCATCCACCACGTTACTGCTGCTGGGTATCCAGTTCTGAAACCACCTG  
CGGTGCGGCACTGACAATCATAGTCTGTTTATCAGCGGCAAAAACAACGGGGGAAAAGGACAAGCAGTGGGGGAAAACGG  
TCTGTGCGACGAAAAAATCTTATGAAAAAAGCCAGGTTAAGAATGGGAAAACGCCGTCATGGTAATGAAATGTAAT

TTATGAAAAATGAAACGGCACAATACGTTAAGTAATTGAGAAAATTGTAGTCGTAACGGCAAGAAATGCTCCACATTTGA  
GAAAATAATGATTACCATTCCATTTATAACAAGAGCGTAACGATGATTACGCTTAGCGAAGCATTGTGAAGCAGCAAAA  
ATATCGGTTTCATCAAAGGGAGTCGTCATGCAATTTACGTCATCTGTTTTTCATCGCGCCTGCGTGGTTTACTACTGTTAGGT  
TCATTGCTTGTGTTTTATCATTACGACGAGGCCGAGAAGAAATGCTGCGTAAAGCGGTAGGTAAAGGTGCCTACGA  
AATGGCTTATAGCCAGCAAGAAAACGCGCTGTGGCTCGCCACTTCGCAAAGCCGAAACTGGATAAAGGTGGCGTGGTTTT  
ATCGTCTTGATCCGGTCACTCTGGAAGTGACGCAGGCGATCCATAACGATCTCAAGCCGTTTTGGTGCCACCATCAATAAC  
ACGACTCAGACGTTGTGGTTTTGTAACACCGTAAACAGCGCGGTACGCGGATAGATGCCAAAACGGGCGAAGTGAAAGG  
CCGTCTGGTGTGGATGATCGTAAGCGCACGGAAGAGGTGCGCCCGTGAACCCGCTGAGCTGGTAGCTGACGATGCCA  
CGAACACCGTTTTACATCAGTGGTATTGGTAAAGAGAGCGTGATTTGGGTCGTTGATGGCGGGAATATCAAACGAAAACC  
GCCATCCAGAACACCGGTAAAATGAGTACCGGTCTGGCGTGGATAGCGAAGGCAAACGCTTTTACACCCTAACGCTGA  
CGGCGAATTGATTACCATCGACACCGCCGACAATAAAATCCTCAGCCGTA AAAAGCTGCTGGATGACGGCAAAGAGCACT  
TCTTTATCAACATTAGCCTTGATACCGCCAGGACGCGTGCATTTATCACCATTCTAAAGCCGAGAAGTGTAGTGGTC  
GATACCCGTAATGGCAATATTCTGGCGAAGGTTGCGGCACCGGAATCACTGGCTGTGCTGTTTAAACCCGCGCGTAATGA  
AGCTACGTAACGCATCGTCAGGACGTAAGTCACTGTGATTGACGCGAAAAGCTATAAAGTGGTAAAAACGTTTCGATA  
CGCCGACTCATCAAACAGCCTGGCGTGTCTGCCGATGGCAAACGCTGTATGTCAGTGTAAAACAAAATCCACTAAA  
CAGCAGGAAGTACCCAGCAGCATGATTGATTGCGCTGTAATAGATATGGCGAGGTTGAAAACGTTGAGACTT  
GCCTGCCTTTTATCACGGCGTATCCGGCACTTTCTGAGTAATCTGAATTTGCCGGCACGTAGCCGGGCAATTTTGCAA  
TTAACTCGCCGTTTTAGGCTTAAACACAATTTCTGTTTTTCTTCATCTTCTCGACGACTGGCGCAGTGTGTGAATTT  
CAGCAACGCGTTTTGCGCACACCAAACAGCCTATAACCAGCAAAATACCGATAATCGGCAGCGCCGCGATAGTATAAGTC  
CCGTTCCGGTAATCGAACGCCATCAGCACAAAGACTCAGTAAAAACAGTAATGTAGCCAGGAAGTGAAGGGCGCGCC  
AGGCAGTTTAAACTGACATCCGCTGCTTTCCTTTTAAATCGCTTACGACAGGCGCATCTGGCACACGATGATAAACG  
CCATGAAGCGATGATTCCAGCGACGCGAAGTTCAACACAATCTCAAATACGCGGACGGCACCAGATAGTTGAGGAAT  
ACGCCGACGACATACAACTAGTGTCCGAGAATCCCGCATACGGCACATGCTGACGACTATTTTCGCCATAAAACT  
CGGTGCGGAACCGCCATCGCCATTGAGCGCAGAATACGTCCGGTGCAGTACAGACCTGAATTCAGGCTGGAGGGGCGAG  
CGGTGACACCACAATGTTATAATGCTGCCGATATATGGCACACCAGTTTAGAGAAAACGTCACGAACGGACTTTGC  
CCCGCTGATACGCGCTCCACGGCAATAACATAACCAGCAACACCACGGAGCCGACGTA AAAACAGGCCAATACGCCAAAT  
CACACTGTTAATGGCTTTAGGCACCATGTTCTGCGGATCTTTACATTTCTCCGGCAGCTGTACCACCATTTCAATGGAGG  
CAAAAGCAAACACTACGCCCTGAATCAACACCAGCGCAGGACGAAACCGTGGGGGAAGAAGCCGCCATTATCGGTGATT  
AAATGAAAGCCAGTGGTGTGCCATCCAGCGGCTGACCACTACCGAGGAACACTGTACCCACGACCAAAAAGGTCACAAT  
GGCGAGCACTTAAATAAGCGCAAACAGAACTCCATCTCCGCAAACCATTTACACCGATCATATTATGGTGCACACGA  
TGGAAGTGCAGCGAGCGCAAAGACCCACTGCGGCACGCGCCAAACGCACCCAGTAATGCATATACAGAGCGACGGCG  
GTAATATCAACAATCCCCGTATCGCCAGTTGATGAAGTACATCCAGCCAGCAACATAAGCGGCTTTCTCACCCAAAAA  
CTCACGGGCATAAGAAACAAAACGTTGCACTGGAAGGGCGGTGTAGCACCAGCTCACCAATGCACGCAGAATAAAAAACG  
AAAAAAGCCACAATTAATAAAACAGTGCAGTGCAGGCCCCGCCATTTGACGTCGGGCTCCTGCACCTAAAAACAAG  
CCGGTGCAATCGCGCCGCAATGGCGATCATCTGCACCTGGCGATTGCCATCGCTTTGTGATACCCCTCTTGTGGGC  
ATTAAGCCAGCGGCTTTGCGGGCGTGTGATCTGAAGTGTGGTGTGCTGTTACTCATTGCTCTCCCTGATTGCTTTA  
ATGAAAAAGTCATATAAGTTGCCATGAACAATGTTTATTCATCTGGCGATGATAGTTATCACCATTATCTTTATGGGT  
ATAAACTATCGGCGCAGCATCTACCCGTTATCGATAAACGATGCAAAAACATCCCTTACAATCTGAAGGGGATTAAT  
ACAACGACGAAAAAATGACAAATCCTTTTGTGGTTAACTGTGTAAGTACTGCTTACACTTAATCTTTAAAGATTTGAG  
GGCATATGATTAAGTGTATGGCGTACCCGGATCCGGGCTCTACAATCAGTGAAGTGTGATGTAACACTGGCTGATATCC  
TTATCAGTTCTGTTGATGTCAGTGGTTTTGACCACGAGGGAGCTTACGCGAGTTATTGAAAACCCCTGAACCCGTTGTGT  
AGGTTCCGACACTGGCATTGAAAAATGACGAGATTATGACGGAGACAGCGGCGATTGCATTGATGGTTCTCGATCGTCGC  
CCGGACCTTGCACCACCGTTGGGCGCGCGGAACGTGAGCTGTTTCAACGGCTATTGGTCTGGCTGGTTGCTAATGTCTA  
TCCAACATTCATTTGCGCGATTACCCTGAGCGTTGGGCTCCTGACGCACCTGAACAGTTAAAGAAGAATGTTATTGAAT  
ATCGAAAATCGCTTTATATCTGTTGAAATTCGCAGCTCACTGCTGAACCTTATGCGTTTGGTGAAGCACTAACGCTGGTG  
GACTGTTATCTTTGCACTATGCGCACATGGGGCCCTGGGCATGAATGGTTTTAGGATAATGCCACGAATATCAGTGCAT  
TGCTGATGCTGTATGTCAGTTACCGAAATTACAAGAAGTATTA AAAAGGAATGAAATTAATTTGAGTGGGATACCAGAAGA  
TTATGTTATTTATTTAGTAATTTATCCACAATGATGGGCGTAATTAATTAATTCATGGTATGTTTTTAAATTTAT  
ATCACTCTCCTTTTATTCAGCGTGTCTATTTCTTCTCTGAAAAGAACTAACTATTCACATCGTGCAGATGTTTCA  
GTTGTTATCACAGGCATTCTATAATCTCAAATGTTTTTAAATGATGGATATGCTCGGAGTTGGAGATGCAATTAATATTA  
ATACAAATAAAAAATCCGGCAGGTATGCTAAAAGGATAAATGGCGTTCTCTGTATTTATTCGCAATTATCTGTAGGACA  
AATATGGAGAGCTTGATGAGTCAAGCTAAAACAGCAATTGATTAATAAACATGTTGATTTATTCAGAAAATGGATGTA  
TTTTAAATGTTGATTCTTAATATAACCTAATCAATAGATTATCAAGTGAAGCTACACATTATTGGAGGGCAGGGGAAA  
ACACCATTTTGGGAACAATGCATCAGGTAATCTTACCCTGAAGCAAGATCATCCGGCACCGGTTGGTGGTGCAGTGCTT  
TGAAAATGGTCCCTCGGGGAGTTGTCAATTTTTCTATGCTATTTGCTTATTATTCATCAGGTGAATTTAATAAAT  
TCCTAATTTGAAATATCCACTATTAAGCTAGTGTAAACGACGTTAAGATGGCAATGTGCAGATCATGTTATCAGGGTGG

GGCGGTAGCGTATATTCCTTATACAAACCATCATTCAATGATTGTTATTGAATTATTTATTGTTGTGAATAAAAA  
GACATTATGAATATTGGTTTGACTTTGCATATCAGGTTTTTTTACTCGCTGTAATGTACGAGCCTGTCGTGAATAACG  
TCGAGAACCCATCCGTTGCGTTTGTGATTATTTTGTGACTAAACAGACACCCGTTTCTCTGAAGTAAAATCCCAGACTA  
AATCATCACATAACCATGACATTTTTCTGATATTTCCCGGTAACGCCAGATGTCGACTCGCTTAACCACCCTCAGCCATA  
CCAGTGAAGGCCACCGCGTGTGCGTCCACTACGGCTATGACGATAAAGGCCGCTGACCGGCGAACGCCAGACGGTGGAG  
AACCCGGAGACGGGGAACTGCTGTGGCACCATGAGACCGGACATGCGTACAACGAACAGGGGCTGGCAAACCGGTAC  
GCCGGACAGTCTGCCGCGGTGGAGTGGCTGACCTACGGCAGCGGCTATCTTGGCGGCATGAAGCTGGGCGGGACGCCGC  
TGCTGGAGTTCACGCGGACCCGCTGCACCGTGAGACGGTGGCAGCTTCGGCAGCATGGCAGGCAGTAATGCCGCATAT  
AACTGACCAGCACATACCCCCGACGGCCAGTTACAGAGCCAGCACCTGAACAGCCTGGTGTATGACCGTGACTACGG  
GTGGAATGACAACGGCGACTGGTGGCATCAGCGGCCCGCAGACAGCGGGAATACGGCTACAGCGCCACGGGACGGC  
TGGAGAGTGTGCGCACCCCTGCACCAGACCTGGACATCCGCATCCCGTATGCCACGGACCCGGCGGGCAACCGGCTGCCG  
GACCCGGAGCTGCACCCGGACAGTACACTCACAGTGGCCGGATAACCGCATCGCGGAGGATGGCAGTATGTCTACCG  
CCACGATGAATACGGCAGGCTGACGGAGAAGACGGACCGCATCCCGCGGGTGTGATACGGACGGACGACGAGCGGACCC  
ACCACTACCATAACGACAGCAGCACCCTGGTGTCTACACGCGGATACAGCATGGCAGCCACTGGTCGAGAGCCGC  
TACCTCTACGACCCGCTGGGACGGCGAATGGCAAACGGGTCTGGCGGGGAGCGTGACCTGACGGGTGGATGTGCGCT  
GTGCGGTAACCCGGAGGTGACGTGGTATGGCTGGGACGGAGACGCTGACGACGGTGCAGACTGACACCACACGTATCC  
AGACGGTATACGAGCCGGGAAGCTTACGCCGCTCATCCGGTTCGAGACAGAGAACGGCGAGCGGGAAAAAGCGCAGCCG  
CGCAGCCTGGCAGAGACGCTCCAGCAGGAAGGGAGTGAGAACGGCCACGGCGTGGTGTCCCGGCTGAACTGGTGGCGCT  
GCTGGACAGGCTGGAGGAAGAAATCCGGGACAGCCGCTGAGCAGTGAAAGCCGGGCGTGGCTTGGCAGTGGCGGCTGA  
CGGTGGAGCAACTGGCCAGACAGGTGGAGCCGGAATACACACCGCGCGAAAAGTTCAATTTTACCAGTGCACACCCGG  
GGCCTGCCGCTGGCGCTCATCAGCGAAGACGGCAATACGGCGTGGCGGGGAGTATGATGAATGGGGCAACAGCTTAA  
TGAGGAGAACCCGCATCACCTGCACCAGCCGTACCGTCTGCCAGGCAGCAGCATGATGAGGAGTGGGGCTGTACTATA  
ACCGTACCCGGCACTACGATCCGTTGCAGGGGCGGTATATCACCCGGACCCGATTGGGTTGAGAGGTGGATGGAATATG  
TATCAGTATCCGTTGAATCCATACAAGTGATAGACCAATGGGGTTAGATGCGATTGAGAATATGACATCAGGTGGACT  
AATTTATGCCGTATCTGGTGTACCTGGATTGATTGTGCAAACAGCATTACTAACAGTCTTACCAGTTCGGTTATGATA  
TGGATGCTATTGTTGGCGGAGCTCATAATGGGGCCCGCATGCAATGAGACATTGTTACTTGTATGTGCGAATGACTAAG  
ACATTTGGATCAACAATAGCTGACGTGATAGGTAATAATCATGAGCGGCAGGGGATAGACAAGGTGACCGAGCTAAAGA  
AAGAATCATGGATCTTAAAAATAACACTGTCGGTATTGCTTGTGGCGATTTTTCTGCCAAATGTAGCGATGCATGTATTG  
AAAAATATAAACTGGGCAACTCTTCGGTTAGATGGTATAAAAGCAGATAATCCAATAAAAGCAAAGCAAGGGAGTTCA  
GATGCTTCAAATTATTAGAGCAAACCTTGTCAATTTTTTAATTACCCTTTGTTATTTGTTGTTTACCTTGGGTTTGATA  
ACAATTCAAATTCTGACATCGTATTTTATGGACATAAAACACCAAAGAGCGTTGAGATATATCTTTTGAAAAAATATT  
ATTTATAAAATAATTAATGACCAAAAAATTAGTAGAGGGAATGGTCATTTTATAAGTATAATGGTTAATAATTACAGGAC  
GCACTGTGGAGTGGTTGATATAAATCTTAATTTTTCAATGATATTCTTTATAGCGTGGGATTAATAAACATTAGTAAC  
TGGAGAATATGGAGTTCGCGCTACAAAACAACGGGTGATTTTTAGTGATAAAAAACAAGAAGGCTAGTTATAAAATAATT  
AATTATGGAGACTATTATGATGTTGATTATTATGATAACAATTTGAAAAATGAAGTTTTGACTGGATTGGTAAATGGTC  
ATAATGAACAACACCAGAAAAGAGAAAAATATAAAATACATACAGAAAGACATGAGAGCAAGGGACGGGGCAGGGCAAGAT  
CATGAAAATTTGATGTAATCACGATTTTCACTTTGCTTTAACGCCTACAGGTGATCAAAATTTAACCTTTGGAATAA  
CTAAAAAGATAAAAAAGGACGCCAGGTGAGTATTTCAAAGTTTGTGATTATATTTAGTGACCCCTGATATACGACAAC  
AAGGAAAGGTTAAACATAAATATCTGCTATTTTCTCACCCTATGTGCAGTAATTTGAGGTGCCGATGAGTGGCAG  
GAAATTTGAAGATTTTGGACATGAAAGACTTGAATGGCTAAAGAAATATGGTGAATTTGATAATGGCATTCCGGTCTGATGA  
CACATTGCACGCGTTGTGAGTAACATTGACAGTTTGGCCTTTGAAAAGATGTTTATTGAATGGATGCAGGAGTGCCATG  
AAATCACTGATGGTGAAATTATAGCAATAGATGGAAGACCATAAAGAGGCTCCTTTGATAAGGGAAAAAGAAAAGGAGCA  
ATCCATATGGTGAAGTGCATTCTCGAACGAAAATGGTGTGACTGGGCGAGGTGAAAACGGGAAAGCAAAGTAATGAGAT  
TACAGCCATTCAGAGTTGCTTAACCTACTGATTTAAAGAAAAATTTGATAACCATTGATGCTATGGGCTGTCAGAAAAG  
ATATCGCTTCGAGATCAAAGATAAAAAAGCAGATTATCTTGGCAGTAAAAGGCAATCAGGGGAAATTACATCATGCA  
TTCGAGGAAAAATTTCTGTAAATGTGTTTTCTAATTATAAAGGCGATTGTTTAGTACGAGGAGATAAGTATGGAAG  
AAAAGAAACACGTTTGCATATTGTCAGTAACGTAACGCCTGAACCTTTGTGATTTTGAATTCGAATGGAAGGATTA  
AAGCTTTGTGTAGCATTGTCATTGAGGAGAAGAAAGATAAATCAGCAGAAGGTGTAAGCATCCGATATTATATTT  
ATCAAAGGATATGGATGCTAAAGAATTTGCATGCTATCAGAGCGCACTGGCTGATCGAGCACAGTCTTATTGGGTGT  
TAGATGTAATAATGAATGAAGATGCCAGCCGGATAAGAAGAGGAAACGCAGCCTAATAATATCTGGAATAAAGAAGATG  
GCACTGAATTTATTAAGAGATTGCAAAGACATTAAGGGTGAAGAGGAAAAGAAAGAAAGGCTGCGTTAAACACAGGGAAAG  
ATCATCAGAAGTTCACTTTTGTAATAACAATTCGATTTTATGTTTAAAAATTTGAGATATTCCTTATTACCTAAAGCT  
GTTTTTTATTGCTTACACATGATCAAATACTCCTTACATAATTAAGGAGAACAAAATGGAACCTAAAAAATTTGATGGGAC  
ATATTTCTATTATCCCGATTACAGACAAGCCTGAAAAATGGAACATAAGTTATCGGATATTTACTGTTGACTATTTGT  
GCCGTTATTTCTGGTGCAGAAGGCTGGGAAGATATAGAGGATTTTGGGAAACACATCCCGATTTTTTGAAGCAATATGG  
TGATTTTGAAGATGGTATTCCTGTTACGACACCATTGCCAGAGTTGATCCTGTATCAGTCTGCAAAATTTACAGAT

GCTTTATTAAGTGGATGCGTGACTGCCATTCTTCAGATGATAAAGACGTCATTGCAATTGATGGAAAAACGCTCCGGCAT  
TCTTATGATAAGAGTCGCCCAGGGGAGCGATTATGTCATTAGTGCCTTCAACAATGCACAGTCTGGTCATCGGACA  
GATCAAGACGGATGAGAAATCTAATGAGATTACAGTATCCAGAACTTCTAACATGCTGGATATTAAGGAAAAATCA  
TCACAACTGATGCGATGGTTGCCAGAAAGATATTGCAGAGAAGATACAAAAACAGGGAGGTGATTATTTATTCGCGGTA  
AAAGGAAACAGGGGCGCTAAATAAAGCCTTTGAGGAAAAATTTCCGCTGAAAGAATTAATAATCCAGCGCATGACAG  
TTACGCAATGAGTGAAAAGAGTCACGGCAGAGAAGAAATCCGTCTTCATATTGTTTGCATGTCCCTGATGAACTTATTG  
ATTTACGTTTGAATGAAAAGGGCTGAAGAAATTATGCGTGGCAGTCTCCTTTCCGTCATAATAGCAGAACAAAAGAAA  
GAGCTCGAAATGACGGTCAGATATTATATCAGTTCTGCTGATTTAACCGCAGAGAAGTTCCGCCACAGCAATCCGAAACCA  
CTGGCATGTGGAGAATAAGCTGCACTGGCGTCTGGACGTGGAATGAATGAAGACGACTGCAAAAATAAGAAGAGGAAATG  
CAGCAGAATATTTTTCAGGGATACGGCACATTGCTATTAATATTTTACGAATGATAAGGTATTCAAGGCAGGGTTAAGA  
CGTAAGATGCGAAAAGCAGCCATGGACAGAACTACCTGGCGTCAGTCTTACGGGGAGCGGGCTTTCGTAATCTTGCCC  
TGGGCATTATTGTCGATAAAACGCTTTACCGACACATGACATTCACAATGTGTGTTAATTTACTGACATCTTTCAAAA  
GGAGCGAATCATGCCGCACATCGACATTAATGTTTTCCGCGTGAAGTGGACGAAACAACAAAAGCAGCACTTGTGCA  
GATATTACCGAGCTTATTATTCGTCTGACAGTAAAGACAGTTTCGATAAGCATTGCTTACAGCAGATTCAACCCAGA  
ATCTTGGCAAGCTATCTGGGATGCCGAAATCGCGCCCAATGGAGGCTTTGATAAAGAAACCTGGTTATAGCATGAATG  
CTTAAACCCGCGTAACACGCTTCCGCTGGTAACAAACGTCCAGCACTAAATGATGCAACGTATTGAGCTTATCATCA  
TCAAACCTGCCAGCGCTTTCGACAAATACCCGTCGCTGCGCGTCTGATACTACTTCGCCAAACAGCGTGTGCTATTTC  
TTCTTGCAGAGAGTGCAGGTAGCAATCGACACTCCATCCACGCCAGACATTTTTCTCGACCAGAGGCAACCAAATA  
CCGGGCTCTCACAACCGGAATGCCATAGCAATTAATTTATCTTCATCACGCCCCGACACTTCCCACCGCCACGTC  
CAGTTAGTTGTGCAACGCCCGGATAACGATGCCAAATTTACCGTTATGTTCAATCAACTCCCTGGTCCATGTCGATTT  
ATCTACCACAATCGCCACGCGTGGAGGTTCAAACCTCACCGGCATTGACCAGGCTGCAGCCATAATGTTACGCCGCTGGG  
ATTGCTCATGAAACTGGTATCAAGACCGTTGGGCATGATTTAACAGACGGCTGGCATGGTGAATTCATGGGGATG  
AATCGGCTCATGGTATCGCCTCGGAAGAAGTTTTTTAAGCGTAGTCCGTAACGCAATAAGTAACGAAATTAACGGGA  
TTGGCGATTTGCGAACGTGATGCATGTCCGCGATCGCACAAAATAGCCGGTGCGGGCTTATTCCAGGTTATAAGTTGAG  
AAAACCTAAGGAAACGCTGATGACGCCATTCTGAATCACTATTTTGGCCGATTAACCTGGTGGGAGCTGCTGCG  
GTCAATATTGATACGCTTGTGCTGATTGCACTGAAACACAATTGCACCATCCGTTTGAACCTCGACGTTTTGCTGCC  
GAGGAAATACAGCTTGATAATCAATCGCCGGAAGAGAAACTGGTATAGCCCGTCTGTCGGGTTACTGTTTTGAGCAGA  
ATGGCGTGTGAGCGGGTGTACGCGAGCTGGGGTTAACGTTGCGAGCTTGTAGGGCGGCTAGTGTATCAAATCCG  
CCAGCATTACCGCCGCGACCCATCGTTTGTGTTGGTGAAGTGAAGAGGAAAAATGGATTGCTGATGTCGGTTTTCCG  
TGGGAGAGCTAACCGCGCGATTCTGTTAGTTTCCGATCTCGTGACAGACCACGCCACACGGAGAGTATCGGTTGTTGC  
AGGAGGGTATGATTGGGTGTTGAGTTAATCATCATCAGCATTGGCAGTCGATGTACCGTTTTGATCTCTGCGAGCAG  
CAACAAAGCGATTATGTGATGGGCAATTTCTGGTCGGCGACTGGCCGAGTCGATTTTCCGCATCATTGCTGATGTG  
CCGCCATTTGCCGGACGGCGGAAGCTGACACTGACCAATTTTCAATTTACCCATTATGAAAAATGGGCACGCGGTGGAGC  
AGCGAAATCTACCGATGTGGCGTCATTATATGCTGTGATGCAAGAACAGTTTGGTCTGGGCGTGGATGATGCGAAACAT  
GGCTTTACCGTGGATGAGTTAGCGTGGTATGGCGCGTTTGATACGCACCCGGAGGCGGAAAAATAATTTATGTCAGG  
TTGCCGATGCGGCGTAACGCCTTATCCGGCATAACATTAGCCCGGTTGTAGACCTGACAGGCGAAGCGCATCAGACAA  
GGTTTACAGTTCAATTTGCCATTCCGCATGAAACAAAATCACCCTGTGCCTGAAATGGTACTTTTTCCGTTTGGTTA  
TCACGAATGTACCGTCACTTCAATCATAACCGTACGCCCCAATGCGCGCCCTGATGGCTTTAACACGCAACACGTT  
GCCATCGTGGGCAATACGTTGTGATGTACCAACATGCACCCATCGGGCATTGGCATTGCCAGTACCAGTCTTCCA  
CAATACCAATCGCAGGAGAAACATGCGACCATCGTTTTGTTTTGCTGGGCGAATCTGGAACGGGAAAGAACATTG  
CAGCCAATCTTTTTGCTGATAGCGGTACGCGCATTAAGGTGAGGCGAAAGGGGCTCGATATCCACTTCCGTTTTAGTGG  
GATCATCACTTTTGTGAGTGTCTGTTGTTGCCACCTGAATTGGCAAGCCTGGCAGAAATATCGTCTCAGTGAAGCG  
CGTTGATAATCGCCGACGTTTACCTTCCAGCGGTGGCTCAAAGCCCGGCTACCTTGTCCAGCGAAATACGATAA  
TCATCGTTGTGCTTTTCGATAGTACGCGATGTTTTCTGCCAGCGATGTTTGCAGATCGTGAATTTCTAAACCTAA  
CACCTTTCGACGTACATAGTGCAGCTACTGTGCGGTGACCGCAATCGGCACTTCAACCGTTGGCGTAAAGTAGCGGA  
TGCGCACATCGCTGTCGTCGCTGTGCAGCAGAAAAGCAGTTTCCGAATGGCCTAACTCGCGGGCGATAAGCTGCATTTGC  
GCTTCGCTAAGATTATCGCGGGGAAAACAACACCGGCAGAAATGCGCGAAACGGTTGTGAGGTAAGCATCGACGTG  
GTACACCTGCGGTTTCAATTAACGTTCTCTGTGACTGGAGAATATCATAGCCTGCAAGTGGCCGGAGAGCGAAGGGCTA  
TCCGGCCAGGGTGAATTTATCGCCGGAACGCACAATTTGATATCGACGAGTAAAGTACTCAAACGGCGCGCTCCACACA  
TGCACAGTCCGGTGAACGGGAAGAGCAGGAAGATGGTCAATCCCAACACAGATGCAGGCGGAAGACGAACGCTACGCC  
GTTGAGCATCTGACGATCCACCACGAAAGTGAATGCTTTGCGCCAACCCAGCTTTCATCATTTCGCTACCAT  
CAGGATACTGTGCTGAAAACGGTATGGTACTTAGCCCAACAGACTGGATCAGCAAAATGCTCATGATGATGATATCC  
GGGTAGTGAAGTGGCAGCGACGCGTATTTGTCAGCCTGCGCCACAGCAGTCTGCGCCGCAATCAACGTCAACAC  
ACCGCAATACCGCCGAGACCATCGCCATGAGTTGTTTCCGCTGCCACTGGCAAAAACACGCGTACATCCAGTGGCGG  
TTAATGCGGAAACAGTGGCCGAAGAAAATCCCAAAATGCCGATATGGAACAGATTGACCATATCCCATCCCGCGT  
TTATCGAGCATTTGACTTGAAGAGGCGGCCAGGTGACTGCCGTAGTCGAGCGAGCCAGCTGCCGAGGAAAAAC

CGTCGCACAAATGTACGGGTAGATATCGTAAAAAAGACGTTTCAGATACTGAATCATTTCCACCTCCCGACTGATGTG  
GACATATTGCGGCGGACATCCTGGCTAAAGCGTCTGATATTGATTAAGCGGCGAGCTGTACACGCCGTGGCGTTAT  
CTTCAATAAACTTACCTGTTCTCTTCCACACTGCATCAAGCGCTGGCGGGTGTATCGCGCTCTTCGCTGTTTACT  
TGTTTTGTGACTGTCACTTGAAGGGAGCTTCCCGCAGTTGCAGCAGAGCATCAAACAACGCGTACCACGGTGCCTC  
GCGTTGTTTTAAGCGACCGCAAGCAGGGCGAGGATCGGCGCAACATTGAGCAATCCTTCTTTCGCTGATCGTCAGGCA  
GTACGCTTAAATACTCCAGATACAGCGGTAGATAATCGGGCAGTTCCCGACAATCCAGCTGCAGGCCGACCTTTTCATAC  
TCCGCCAGCAGGTCCACCATTGCTGGCCGCGATCGCGGGACTCGGCATGAACATGTTTGAACAGCAGCAGCGACGTGGT  
GCGCCCGGGTCAAACACTTCGACCATTGCGCCTGTTTATCCAGCAGCGGCGGTTAAGCAGGTTGTGGGTGAAATCCG  
TAAGCATCGGCGGTGCGGGCGGATCAACGCCAGCGCTCTCTTGCATTCCACAACAGCTCGTCCGGATACTCCATC  
AACAGGCCGATCACTTTGAGGATCTGCATTATTCGCCCTCCGCTTTGTGCGCACTTCGGTGATGTTGATGGCATCGATA  
CGGCTACTGTTGAACAGGTTGAATTTACTGTCCGAACCGTGGCAACCGTCCGCAAGGTAAAACCGCAGCCGTTGCGTTC  
TGCGAAGGCATCGCCGCCATTTCCCGATGGCTGGTGGGATAACAAAACGATCTTCATAGTTGGCAATGGCAGATAGC  
GATACATCTTTCGACCTGGGCGACGCTCAGGCCTACTTGTGCGATGGCAGCAGTATCAGTAACGCCTTCCACGGTTTGT  
GAACGCATATAGTGGCGCATCGCCATCATCGTTTTCAGCGCCCGCAGTACCAGGACCGGATCGCCGGCCTCAACATATT  
GGCAGATATTGACCCGGAATACGCAGGCTTTCGATGGCGGGCAGCAGCCTTCGCTTTTCGGCAAACCGCCGCATCTG  
CGTAGGACTGAATCGGTGACAGCGGAGAACGTACCAGACTCGGCAGGGTGGGTTTTCAGGGTGCAACGGTAGTGCC  
AGTTTCCAGTCCATCGCCATTTTGTAGACTGGCGAACGCTGGGACGCGTCAATCACATTTTGTGGAATACCTTGTTCAG  
GGTTCTCGATCACTGAGGGATCGTGTGGATCGAGGAACACTTCGCACTGGCGTTTATAGAGGTCAACTTCGCGCTCGG  
TGCTCGCCGCTTCTCGATGCGGTGCGGCTCGTAAAGCAGCAGCCAGATACCAGGATGCGACCCACGCAGGTTTCTGAG  
CACACGGTGGTTGACCGGACTCAATTCGTGGGTAACAGAAGTGCATTTTTCTGACTTGGCGTTTTCCAGTTGAAGTA  
GATTTTTTTGTACGGACAACCGTTATGCACAAACGCCAGCCACGGCATTATCTGATCAATCAGCACAATGCCGTCTT  
CTTCGCGTTTGTAGATAGCGCGTGGGCGAGTGGCCAGCAGTGGGATTGAGGCAGTGTTCGCACAGGCGGGCAGG  
TACATCATGAAGGTGTTTTCAAACGCGTACATCTCTTTTGCATGGCCTCGAAGTTGGGTGCGGGCAGGTTTTTC  
GAACTACCGCCAGCAGTCTTCCAGTTTGGCCCCAGATCACTTTGTCCATCGTTTGGCGTCAATCAGTGAACCGG  
GGCAGCAGTAGGAATATGTTTGCCTTCCGGTGGCTATGCAATGTTGATGTCGAAGGTGAAAGGTTGATAGTAATCA  
TCAATCTGCGGCACCACCGGTTGGCGAAGATTTTGGTTATTACGCCATCTTGTGCCCAGACGCGGGCGTATCTTGCC  
ATTCACATCACGACCCAGCCGCTTGCCTCTTCTGATCTTCCAGTTTTTCGGATAACCAATGCCCGTTTGGTTT  
CGACGTTGTTAAACCATGCGTACTCCATGCCTTCCGCCCCGTCAGACGTTTTTACAGGTACCCGAACAGGTATGGCAG  
CCGATACATTTGTGCGAGTTAAGCACCATGCCGACTTGTGAACGATTTTCATTTTTTCGCTCCTGTACCTGATCGCGA  
CCTTCATCATCCAGCCAGTTAACGTTCTTCATCTTGCAGGATCATGATGAACTCATCGCGGTTGATCCGACGGTGGCGTA  
GTAGTTAAAGCCCCAGGCCAGTGGCGTAACCGCAATCATATGCGTTGGTTTCGGGCAAACGCGGGTAACCGAGTTAT  
GAATGCCGCGCGCATGCCAGTTACTTCCGAACCAGGAATATTCATAATGCGTTCCTGGGCGTGATACATCATGGTCATG  
CCCGGGGTACACGTTGGTGAACCCGCGGGCAGTCAAGCGCGGTTGGCGTTGAATACTTCCACCCAGTGGTTATC  
GACAATGGTCAGTTCTCGGGCATCTGTTTCGCTGATCCAGACAATCGGTCCACCCGCGAGAGAGCGTCAGCATTAGCAGGT  
TTTACTGTAGTTGAGTGAATGCCCCATTTCTGGTGGCGGTGAGGAAGTTAAGTGCTTTTTCCGGGAAGCCGTTTGGC  
GGTATCTGGCGCATCTACTGACGCTACGGGTGTCGATAGGCGGGCGATAAGCCACCAGGCTTTCACAAAAGCAGGCAT  
CCACGGATGATCCTGATAGAGCTGCTGGCGTCCCGACAGCGTGCACGGAATTAACATGAACGTTGGTGTATCCCG  
CGTTATAGGAGACGTGATCGTTTTCCAGACCGGACAGGTGGGCTGGAGATAATTTTACGCGGCTGCGCCTGAATATCG  
CGAAAGCGAATCTTCTCGTCTCTTTGTCAGCGCCAGATGGGTATGTTGCGCCCGGTTGATCTCGCCAGCGCCTGCCA  
CGTTTTGACTGCAACATGACCGTTGGTTTCCGGTGCAGTCCAGAATCACTTGAAGCGTCAATGGCGGTGTCAATCA  
CGGACGCCCCCTGTGCGGGCCATCACGCTTGGTGAATTTAGTTTTGCCGAGGAAATCGATTTTCATCCTGGGTATTCCAC  
GAAATCCCTTTACCGCATTGCCAAGTTTGTCCATCAATGGCCCGAGCGAGGTAAGCGTTTATACGTAGCAGGGTAGTC  
GCGCTCCACCGCCACAATATTGCGCGGTTTTGCTGGAATCAGATCGCATTGCGCTTTCGCGCCAGTGCAGCACTTAC  
ACGGCTGTGAGAGCTCTGCCGAGAGTCATGCAGTAGGGGTTGTAATACCACGTCGGTTTTCTTGGCAAGATGACCCACG  
CACACTTGCAGAAAATGCTTTGGCGATACCTTTGTAGATTTCCAGTCTGCTGCGTATTCCACGCCGATCGACCGCCG  
AGAAAGCGGATGAATAAACGGATGCATATCCGAGGTGTTATATCGTCTTTTTCTGACCAGGTGGCGGTGGGCGAAGCA  
TATCGGAGAACAGGCAGGTAAGTGCAGTGCAGGAGTGCAGCGTACCAGCAGGTCAGGCTTGCCTTCAATCGCTGCAGTT  
TGCCACTCGACTTCTTCCGTTTTGATCCCGTCTGGCAGCGGTTTCTCGCCCTGAATCCCGTTTTCGTCCCCAGCAG  
ATACTTCTGCATATACTCGTGGCTTTTGGCGGAGGACCAAGCAGGTTAGAGCGCCAGACAAAACAATTACGCGGATGAT  
TGCTGCTGCTATCTGTTTGTGCGAGGCATACGTAATCGCCGATTTTCCAGCGCTGGGCGGTAATTTCTGTGGGGGAT  
AATCCGGCCTTGTGCGTTCAGCTTTAATCCCGAGCGGTTACGCCCCAGTGGCGCAGAAAGGTAGCCAGCCCATACG  
TTCGGCGCAACGTTGAAATCAATCAGATGACCGCTGACTTACTGGCATCGGCGAGCGGTGAAAGTAACCTCTGAGCAG  
AGACTTTTTATAGCGCCATTGGCTGGAATGATTGTAGAAAACGAGGTGCTGTTTATTGGCGCGGTGGTGGTTCCAG  
TCGAGCGCAAAGGCCAGTGGCAACCAGCCGTTTTGTTGGGCGCAGTTTTTCTGGCCGACATAGTGTGCCAGCCGCCACC  
GCTTTGCCCGACACAACCGCAGAAGATCAGCATATTGATCATCCCGCGGTAGTTTCATGTCCATGTGATACCAGTGGTTAA  
CACCTGCGCCGAGGATAATCATCGAGCGCCATGCGTTTTATGGCGGATCGGCAAATTCACGGCGATGGTTTCAATA



TACTGGCGCGGCACGCCGGTAATTTGCTACCCCAGGCTGGGGTGTACGGTTTGATTTACGCGTAATCTTTCGCACTGTT  
TTCATCTTCCAGCCCAGGATCGAGGCCGTAATTCGCCAGTACCAAATCATAAACGCTGACCACCGGACAGGTGTTGCCAT  
CGACTAACGTACAGTTTTTAACGGGCAATTGGCGCACCAGCACCGGATTGTGTTTTACGCTCGAAAATCGGGATTTTCA  
ATGCCGCCAAAGTAGGGGAAGGCCACGCCTGCAACAGCGTCATGTTGACCGAGCAGGGTTAACGACAATTCGGTTTCCGT  
ACCGGGCGCAATGGATTCCAGATTCCATTTGCTTTTTCTCCCAAGCGGAAACCAATCGAACCGTTCCGGCACTACCAATT  
CACCTGCGGTATTAAGTCTACGGTTTTCCACTGCGGATTGTTGCTTTCGCCAGTCCATCCACCAGGTGAGATGCGCGG  
ATCATGCGCCCGGAACGTAGTACCATCGTCGCGAGGCTCCAGCATTACCAGCATCGGCATGTCGCTGTAGCGGGCGCA  
GTAGTTGATAAAGTAGTCGCTGGGATTATCGAGATGAAACTCTTTAAAATCACATGGCCATTGCCATCGCCAGGGCGC  
TATCAGTGCCTTGTTCGGTGCCAGCCACTGGTCGCACAATTTGGCCACTTCAGAGTAGTCAGGGGTAATGGCGATGGTT  
TTAGTGCCTTTGTAGCGTACTTCGGTAAAGAAGTGGGCGTCCGGCGTACGTGTCTGCGGTACGTTAGACCCCGAGGCGAT  
GATGTAGCTGGAGTTATACCAGTCGGCAGATTCCGGTACGTGCTGTTGCTCGCCCAAGTCCATCGGCGAGGCGGGCGCA  
GGTCGCAATACCAGTCGTAGAACTTAAACAGGTGCCGCAAGCAGCGACAGATAACGCGTTCCGGCGGCGTAAGAAACC  
ATCGACATCGCCGGATCGGCGAGAAACCGCAACGCGATCCGGGCGTAGGTTTTGATGGTCCAGACGTTAGCGGGCGC  
AATCAGCTGGTTAGTTCCTGCCAGTTGAGCGGATAAACCCGCCGCGCCACGCACTTGTGTTGAGGGCTTCGCCACAGTCAATCAGT  
CGGATCGTTCATAATCGATGCCACGCCAGTACCGGATCGTGTGTTGCTTGGGGCTTCGCCACAGTCAATCAGT  
CGTTTACGAATGAGCGGGTATTTAGGCGGTTAGCGCTGTAAAGATACCAGGTAACCTGGCCACCGGGCGAGCCGCG  
AGTTTCATGATTGGGCAGGTCAGGGCGAGTGCAGCGGTAGTCGGTCTGTTGGATTTCCAGGTCACCAGACCATTTTTAA  
CGTAGATTTTCCAGTACAGGAGCCTGTACAGTTAACACCGTGGGTGGAACGCACGATTTTGTGAACTGCCAACGCTGG  
CGATAGCTGTCTCCAGTCGCGGTTGCTATGCATCACCTGTCCGTGACCATCGGCAAAGTTTTCGCCCTTTTGTGAA  
GTAGCGAAAGCGATCCAAAAGTTTACTCATGACATGACTCCTGCTCCAGGAATGAATTGGGATCTGATGCCTTGTGGAT  
GCGACACGGTTGTACATCAGGCATCGATCTTATTTTTGGCTGAACTTCGCGCCAGCATAAAACCAGCCAGGTCAGCAGC  
ACACAAACGATGTAGAAGATTA AAAACACTTTCATCGCGCCGACCAGGAGCGGTCATATTGAGCGACATGCCAAACGC  
CTGCGGAATAAAAAAGCCGCCACTGCGCAATGGTGAGATAAAGCCAGAGCCGCCGCTTTCGGTGACGGCTTCTT  
TATGAGCTTGCTCATCACTACCGCTTTCATCTTACCAGATAAATGTTATCTGGCGAAAGATGACGGCGATCATCTGG  
AAAGTAGAACCACTTCCAGACCCGAGTCAGAAACAGCCCATAAATACGGCGTAAAAGGCGATGAAATTACGGAGCC  
TGTGCCCGGTAAGGTAAGGAACAGCAGGGCACTGAAAATCGCCATAAAAATAAAGTTGATCAACGTCACCCGCACGCCG  
CGAATTATCGGAAATAGCACCAACCGACCGCGGATGGCACCGATAAATGGGCCAAAGAACGCCAGGCGCAGAATA  
TTCATATCCGGAACTGGGTTTTTGCAGCATGGCAAAACCCGAGAAAACCGATAAACGAACCGAAGGTGGCAAGGTA  
AAGCAGGCTCAGCAGCCAGAGATGCAGGCGTTGTAAGACAGGGAGCTGGTCGGCAATTGAGGCGCGTGAACCTGGCGAT  
CATTCATCCCTGACCATGCGGCGATCGTGGAATCGCCAGTAGCGGTACCCAAATCCATGCGGCATTTCGCCAGCGACATC  
ACCGAACCGTCCGCTGCGGTACGCCATTGACGCCGAGAAAGGCAATACAGGTACAAAATGACCAGCGGTGCAACCAG  
CTGCATTACACTTACACCTAAGTTTCTAATCCGCCATTAATCCCAAGAGCGCTCCCTTGTGGTTTTGGAAAGAAGA  
AACTGATATTGCCATGCTCGAAGCAAAGTTGACCTGCAAAACCGCATAGCAAAGCGATAACGATAAATATCCAAAA  
GGAGTATTCGGATTTTGCACGGCAATTCGAGCCAGACGCAAGGAATAATCAGGATTGCAGTACTAAAACCGTCCATCG  
GCGTCCACCGAATATAGGCACCATAAAGGAGTAGGGAACACGCAATAATGCGCCAGAAACGGAGGTAATGCGGTTAATA  
AAAAGAGTTGATCGGTAGTAAAATTA AACCGATTTTATTGAGATTAACGGTAACTGCGCTAAATAGCATCCAGACACAG  
AAGGCAAGAAGTAGACAACCTGACTGATATCCAGAGATTTCTTCGAGCAATATGTTTTCTTTATTTTCCAGAAGGCCGG  
ATTTTCTGGTTTCCAGTCGCGCAAAAGATAACGACTATTTTTCTATTTTGCAGTGCCATATTGTTCTCACATGCACAC  
ATTGGTAATGAAAAAAGACAAAACACGAGGTAAGGCGCAATAGCCAGTTATTAGAATTAAGGATGAATGGGTGAAGTG  
CTGATTGAAAGAATAGATAAGAAAGCTAACCGGGGGCAGAATGGGGATTAAGTAGCCAGATATGTTACTAAATGT  
AACTAACAAAGCTAACCTTCAAACGGGGTTAATCTTTGAACGTATGTCATGTTTCAACCCTTCAGATCGTGAATCTAAAGG  
GTTACATATTAAGTATATTAACAAGACCAGACACTTATAGAATTAGTGATGATTTATTTACTAAAAGGCCATGAAC  
TGGAGGAAAACGATCTGTCCAGAAGGTCTATCGGTTCTCTTATTGCCTGATTGTAATAATCGTTATTACAGTAAGTA  
TTGTTTTATTTTCTAAGGTCATGTTTTTA ACTTTTATATTCTGTTTACAACCTTCTCTGTCTTGTAAAGTGTGTAT  
ATTATATGGGGTATATGCTTTTTTAATAGGATAGTGAACAATTCGTTATCCACATCTATTCCGTCAGAGTGAACCTCAA  
ATGCACCAGGCGAAAGAATTGCCAGGCCAGTATTAAGCTTAAGTGTGGGAAAAACAAATTAATAACATGAGCTGCATA  
GTAGGGCAATTGTTCTTCCAGAAACATTTAAAAATTTAAGTTTTGCTCTGTTTTATTATGGGGAATAAAGTTCCAATA  
TCGGATGTATTATTAGTATCAATGTGGGTTATTTTATTATTGTCCAGTCTTAACTTTTGATAGATGGAAGATAAGTCAG  
GAAATCAAGATTTATATATTTCAACTGGTTGTTAGCAGCGTTAATGCTGAACATTGCAGAAGTTGCTATAGAATTTT  
TAATTTCAGAAAGCAAATGTTGTTAATAAGTAACGTATTCAAGTTGGGAAATAAGTCATTGTGTAACCTGTTAGTTA  
TTATGGGATAGATCCAGCAGTAAGAGTTCATTTTTATTACCTGCAACAATATCAGTTAATTGATTATGGCTGAGATTGAG  
GTATTGCAGCCATTTCGAAGATTCTAATTGCACAACTCTAGTTGATTATGTGCCGCACTAAAATAAGTAACTGATGAAA  
GCCTATCTATATCAATATTTCTGAGAGCATTATTATTCATAGATATATGTGTAATACTTACATTTCTGCCTTGAGGAAAA  
TTTATTGACTCAAGAGCATTACTATTAGACTTAGCTTTACGAGTCTATCGTAGTTGGTTGCATCAAAATGTGTGAATTG  
GTTATTATCAAGATTGATAGATGTGAAGTTTTGCAGCCCTGGTGGTTGAGTGGTTAAATTAAGTCTGATAAATCAATGG  
TCACTTCATTAGTGTCATCAATTATTTCTTACTGCACTCAGTACTGCATTTGTGCAAGTGGATCATTGTTGATGCCG

TTAACTAATACATGCCAAGATGTTTTGATGATATTAGTTGATCAATGTCATTGGTTGGCAGTAAATTGTTATTGCTTAA  
GTTTAAATATTCCAGTTTTGTAGTGTGTTTTGGCGTTAAATGTGCAATATGGTTGTCGTTTAAAGTGATTGTTTTATCC  
TGGGATGATTGTGTAATATAAGGTCAGTGATCATATTGTGATGGGCACTTAACTCAATCAGAGATTCTTGCCGCGGAGC  
CGTTGGCTTATCGTTATAGCCTTTAAAATCATATCCAGTGACAAAACCAATCATTGATCATTGATTGCGTTTTCT  
CCTTTAAAGCCGAGACGGGCATAAGTTTTATCACCATCGTCACGCTTATCATCAGTAAAATAACGTAGAGCGGTAACCTT  
GCCATAAAGGTCGAGTTTATTACCATCCTTGTTATAGACTTCGGCAGCGTGTGCTACGTTTCGAGCTAACAAACAGTTA  
CAACCACCGCAACTATTTTTAATTTCAATTAACAGAATCCTTTAATTATCGTTAAACGTATTTTCTAAACGAATTTTAA  
ACGGCGTCATTATAAATGACATACTGTTTTAAAATAGAATGGTGATTAAAAAAATGAGAAAAATAGATGAAATAATA  
TTATTTATCGATATGTGATCGAAGTCGAAATGAGATATAAGGTGAATTAAGTTGTTGAAATTTATTTTTTAAATTTG  
TCGGATTTTATCTGATTAACACCGGGCCGTAGACCCGGCAGTTATTTAACCACGACGTGTCGCCAGCCAGCAGAGCAG  
GGAACCGCCGAGACCATCAGCGCGCCTTGCAGAACGAGAACGACAGCGGGGCGCTGAGCAGCACGGTGAAGCGCTG  
AGGAAAGTACAGGCGTAAAATACGAACCTACCGCCATAATGGTGACATTGCCATGCAATATACCGACATTCCATGCAGCA  
TAAGCAAATCCTAAGGTAATGCCGAGAGATGAGTTAATCATGACGGGCGTCTAAATATCATTCTGGTTGTGGCGT  
AAGAAAATAGTAAACCCACAGACTTGTCCCCTTAGCAGGACAAAACGGTAATTCCATTAATCCGCGTGCGTATTTAT  
TCGTTACTGTGCAATAGGTCGCCAGATAAACGCACCAATGAACGCCAGGAAATAACTCAATGGGCTGGTGGTGATATTA  
TTGATGATTTTCATATAATGTAACCCATTGTCACCGCTAACACCCACAGACGCCGAGGGCTAATAATAATCCAGG  
TACAATCAACCAGTTGGTTTTCTGACCATTAAACAGAATGGCAAAGAGAATTGTCAGGCTGGGCCACAGATAGTTACCA  
TACCCACTTCAATCGCTGATGATGGGTCGCGCATACCTAAGGAAAGCGCCAGACAGATTTCATAGCTGACGAATAAC  
AGACTCCCGCGGAGTAAATAGCCTTTTCGGGATTTGCGGAATACGCGGAAATCCAACCGTGAAGATTAACAGCAGCCGCT  
TAATGAATAGATAGCAGCTGCGCGCCGACCGGGCCGAGCCCTCACTGACACCGCAATCAATCCTACCATCGTGCTCC  
ACAGGACGATCGCTATCAGCCCTATGAGCGTTGCTTTTTGTCGTGCATGCTCGCTGTTTTGTCTCTTTCGCGTTAAAA  
ATTAAGCTGAATTTTATAGCATTTTTTTAACTGGCTGTCAGGCAGTGGTGCCTTTTTCTACCCTATTGAGGTAGGTCA  
ATTTGCGAAGGCGGATTATTTGTGGCAAACAGATGTTCTTTTTGATTTGCGCAGAAAAGATTGAGATTTTACTGTTAG  
TTTCTCGCGCAGTAATACCCCTGAAAAAGAGGAAAGCAATGGACGTCAGTCGAGACAATTTTTTAAATCTGCGCGG  
GCGGTATGGCTGGAACAACAGTAGCGGCTTTGGCTTTGCCCCGAAGCAAGCACTGGCTCAGGCGGAAACTACAAATTA  
TTACGCGCTAAAGAGATCCGTAACACCTGCACATACTGTTCCGTAGGTTGCGGGCTATTGATGTATAGCCTGGGTGATGG  
CGAAAAAACGCCAGAGAAGCGATTTATCATTGAAGGTGACCCGGATCATCCGTAAGCCGTGGTGCCTGTGCCCGA  
AAGGGGCGGTTTTGCTGGATTACGTCAACAGTGAACCCGCTGCGCTACCCGGAATATCGTGCAGGTTCTGACAAA  
TGGCAGCGCATTAGCTGGGAAGAAGCATTCTCCCGTATTGCGAAGCTGATGAAAGCTGACCGTGACGCTAACTTTATTGA  
AAAGAACGAGCAGGGCGTAAACCGTAAACCGTTGGCTTTCTACCCTGATGCTGTGCTCCTCCGTTGCCAGCAACGAAACCG  
GGATGCTGACCAGAAATTTGCCCGCTCCCTCGGGATGCTGGCGGTAGACAACCAGGCGCGCTGACACGGACCAACG  
GTAGCAAGTCTTGCTCCAACATTTGGTCGCGGTGCGATGACCAACCACTGGGTGGATATCAAAAACGCTAACGTCGTGAT  
GGTGATGGGCGGTAACGCTGCTGAAGCGCATCCCGTCCGTTTCCGCTGGGCGATGGAAGCGAAAAACAACACGACGCAA  
CCTTGATCGTTGTGATCCCGTTTTACGCGTACCGCTTCTGTGGCGGATATTTACGCGCTATTCTGTTCCGGTACGGAC  
ATTACGTTCTGTCTGGCGTTTTGCGTACCTGATCGAAAACAACAAAATCAACGCCGAATACGTTAAGCATTACACCAA  
CGCCAGCCTGCTGGTGCCTGATGATTTGCTTTGAAAGACGGTCTGTTGAGCGGCTACGACGCTGAAAAACGTCATACG  
ATAAATCGTCTGAACTATCAGCTCGATGAAAACGGCTATGCGAAACGCGATGAAACACTGACTCATCCGCGCTGTGTG  
TGGAACTGCTGAAAGAGCAGTTTTCCCGCTACACGCCGACGTCGTTGAAAACATCTGCGGTACGCCAAAAGCCGACTT  
CCTGAAAGTGTGTGAAGTCTGGCCTCCACCAGCGACCCGGATCGACAACCACCTTCTGTACGCGCTGGGCTGGACGC  
AGCACACTGTGGTGCGCAGAACCTGCTACTATGGCGATGATCCAGTTGCTGCTCGGTAACATGGGATGAGCGGTGGC  
GGCGTGAACGCAATTGCTGGTCACTCCAACATTCAGGGCTTACTGACTAGGCTGCTCTCTACCAGCTGCCAGGTTA  
TCTGACGCTGCGTCAAAAAACAGGTTGATTTGACGTCGATCTGGAAGCGAACACGCCGAAAGCGACGCTGGCTGATC  
AGGTGAACTACTGGAGCAACTATCCGAAGTTCTTCTGTTAGCCTGATGAAATCTTTCTATGGCGATGCCGCGCAGAAAGAG  
AACAACTGGGGCTATGACTGGCTGCCGAAGTGGGACCAGACCTACGACGTCATCAAGTATTTCAACATGATGGATGAAGG  
CAAAGTCAACGGTTATTTCTGCCAGGGCTTTAACCCGGTTGCGTCTTCCCGGACAAAAACAAGTGGTGAGCTGCCTGA  
GCAAGCTGAAGTACATGGTGGTTATCGATCCGCTGGTACTGAAACCTCTACCTTCTGGCAGAACACGGTGAGTGAAC  
GATGTGATCCGGCTCTATTACACTGAAGTATCCGCTGCTGCTTCCGCTGCTTTGCTGAAGAAGATGGTTCTATCGC  
TAACTCCGGTCTGTTGAGTGGCACTGGAAGGTGAGGACGCGCGGGGGAAGCGGTAACGACGGTGAATTTCTGG  
CGGTATCTACCATCATCTGCGGAGCTGTACCAGTCCGAAGGTGGTAAAGCGTGAACCGCTGATGAAGTGAAGTGG  
AACTACAAGCAGCGCACGAACCGCAATCTGACGAAGTGGCTAAAGAGAACAACGGCTACGCGCTGGAAGATCTCTATGA  
CGCTAATGGCTGCTTATTGCGAAGAAAGGTGAGTTGCTGAGTAGCTTTGCGCATCTGCGTGTGACGGTACAACCGCAT  
CTTCTTGTGATCTACACCGGTAGCTGGACAGAGCAGGGCAACCAGATGGCTAACCGCGATAACTCCGACCCGTCGGT  
CTGGGGAATACGCTGGGATGGGCTGGGCGTGGCCGCTCAACCGTCCGCTGTGATAACCGTCTTCCGCGGATATCAA  
CGGTAACCGTGGGATCCGAACCGGATGCTGATCCAGTGAACCGGACGAAAGTGGACGGGTAAACGATTTCTGACTTCG  
GCAATGCCGACCCGGTACGCCAACCGGGCCGTTTATCATGCAGCCGGAAGGATGGGACGCTGTTTGCATCAACAAA  
ATGGCGGAAGTCCGTTCCCGGAACACTACGAGCCGATTGAAACGCCGCTGGGCACTAACCCGCTGCATCCGAACGTGGT

GTCTAACCCGGTTGTTGCTGTATGAACAAGACGCGCTGCGGATGGGTAAAAAAGAGCAGTTCCTGATGTGGGTACGA  
CCTATCGTCTGACCGAGCACTTCCACACCTGGACCAAGCACGCATTGCTCAACGCAATTGCTCAGCCGGAACAGTTTGTG  
GAAATCAGCGAAACGCTGGCGGCGGCGAAAGGCATTAATAATGGCGATCGTGTACTGTCTCCAGCAAGCGTGGCTTTAT  
CCGCGCGGTGGCTGTGGTAAACGCGTCTGAAACCGCTGAATGTAATGGTACGAGGTTGAAACCGTGGGTATTCCAA  
TCCACTGGGGCTTTGAGGGTGTGCGCGTAAAGGTTATATCGCTAACACTCTGACGCCAATGTCGGTGATGCAAACCTCG  
CAAACGCCGGAATATAAAGCGTTCTTAGTCAACATCGAGAAGGCGTAAGGGGGCGAACAGATGGCTATGGAACGCAGGA  
CATTATCAAAAGGTCCGCAACTAECTCCATCACGCCCTTCTCAGGTGCGTGATTACAAAGCAGAAGTCGCAAACTTA  
TCGACGTTTCCACCTGTATCGGCTGTAAGCCTGTACAGGTGGCGTGTTCGGAGTGGAACGACATCCGTGATGAAGTGGGG  
CACTGCGTCGGGGTTTACGATAACCCCGCGATCTGAGCGCAAGTCTGGACGGTGATGCGCTTTAGCGAAACCGAACA  
GAACGGCAAGCTGGAGTGGCTGATCCGTAAAGACGGCTGTATGCACTGTGAAGATCCCGGCTGCTGAAGGCGTGCCCGT  
CTGCTGGTGAATCATTAGTACGCTAACGGGATTGTGATTTCCAGTCGAAAACTGCATCGGCTGTGGTTACTGCATT  
GCCGGGTGTCCGTTTAAATTTCCGCGCTCAACAAGAGGATAACCGGTATATAAATGCACGCTCTGCGTCGATCGCGT  
CAGCGTCGGCCAGGAACCGGCTTGTGTAAAACCTGTCCGACCGGGCTATCCACTTCGGCACCAAGAAGGAGATGCTGG  
AGCTGGCGGAACAGCGCGTGGCGAAACTGAAAGCGCGTGGTTACGAACATGTGGCGTCTACAACCCGGAAGGGTCCGT  
GGTACGCACTTATGTACGTGCTGCATCACGCCGATCAGCCGAGCTGTATCACGGTCTGCCGAAAGATCCGAAGATCGA  
CACCTCGGTAAGCTGTGGAAGGCGCGTTGAAACCGCTGGCAGCGGCTGGCTTTATTGCCACTTTTGGCGGTTGATTT  
TCCACTACATCGGTATTGGCCGAATAAGGAAGTGACGATGACGAGGAGGATCATCATGAGTAAGTCGAAAATGATTGT  
GCGCACAAATTTATTGATCGCGCTGTACTGGACCGTGGTATTGCTTCTTCTGGTGGCGCTGTCCGGGATTTTCGT  
TCTTCTCCCGACGCTGCAATGGCTGACGCAACCTTCGGTACGCCGAGATGGGACGATTTTGCACCCGTTCTTCGGC  
ATTGCGATTTTCGTCGACTGATGTTTATGTTTGTGCGTTTTGTGCATCACAACATCCCGGATAAGAAAGATATTCCGTG  
GCTGTTGAACATTGTGCAAGTATTGAAAGGCAATGAGCATAAAGTGGCGGATGTCGGTAAGTACAACGCCGGGCAAAAGA  
TGATGTTCTGGTCGATCATGAGCATGATTTTCGTGTGCTGGTACCAGGGTATTATCTGGCGTCCGACTTTGCGCAG  
TACTTCCCGATGCAGGTTTTCGTACAGCCTGTGATCCACGCCGCTGCGGGTATCATCCTGATCCACGCCATCCTGAT  
CCATATGTATATGGCATTGTTGGGTGAAAGGATCGATTAAAGGGATGATCGAAGGGAAGGTAAGTCGTGCTGGGCGAAGA  
AACACCATCCGCGCTGGTATCGTAAAATCGAGAAGGAGAAGCGAAAAAAGAGAGTGAAGAAGGGATATAATCTCTTTT  
AACTTTAAGCTGAAAATGGCGCTGAAAAGGCGCCATTTTCATATTGTAGACAACGTAGGCTTTGTTTCATGCCGGATGCG  
GCGTGAACGCCTTATCCGGCATGAAAACCTTCAAATCCAATAGATTGCAGTGAACGTGTAGGCCTGATAAGCGTAGCCG  
ATCAGGCAATGTTGCGTTTGTGCATCAGTTCAAATGGCGCTGTAAAAGGCGTCATTTTCATATTGTAGACAACGTAGGCT  
TTGTTTCATGCCGGATGCGCGGTGAACGCCTTATCCGGCATGAAAACCTTCAAATCCAATAGATTGCAGTGAACGTGTAG  
GCCTGATAAGCGTAGCGCATCAGGCAATGTTGCGTTTGTGCATCAGTTCTAAATGGCGCTTTATAAAGTGCCATTTTTTA  
TTGCGTAACAGACGGCGTAATCGCGACACATCCACTGTTTTTCTGCTCTGCCAGACTCCAGGCGTTTTGCGATTCA  
GCCACATTTGCCGCGAAGTCCGATCACCACGAAAGTTTAAATCGCCATTTCTGGCGTCAAAGCTGCTTTTCTGTGACG  
AATCGGCTTGGCGTTGAGGGAGCAATTTCCATTGCTCTGGCAACTCGCGCAGGCTGACATTAAGTTCGTCCAGTGATTC  
CTGAATAATGTCCCCGGGCGGGGATGATTGGCCATTTTATTAGTGTCTTTACTCTCAGTAGCGTTCCTTCACTGGGAA  
CACTATCATTATTGTTCTTCTACGCAACAATAATCCATTTAGCCATTTTCATGTTGGAGAGTGTGCGATGCTGCGACCC  
GAACATGGCAGTCGAGCAAAGGCTTCTAGTGACGGAAATCAATCACCATGCGGCCACGGATTTTGCCTTCTTCCATCT  
CAGTAAAGATGGTGTGATGTCCGCTAACGGACGACGGGCGACTTTTGGCACCCTTTACCTTCCGGCGCAAACCTGGAAG  
GCTTCAGTTAAATCCTGGCGGTGCCGACGACGCAACCGACCTTCAATACCATCCAGCACAAGACGTGGGATATCCAG  
GCTCATAGACTCCGGCGGTAGACCGACAGCCACAACCGACCGCTGCACGGACAGCATCAACTGCCGAGTTAAACGCGAG  
CTTTAGCTACCCTGTTACCACCGCAGCGTGAGCGCACCAAGTTTCTCCTGCACAATTTTGGCGGCTTTCGGTGTGT  
GAGTTAATCGTAAATCTGCGCCATTTTCGGTTGCCAGTTTTAACTGCTCATCATTGACATCAATGGCGATCACTTTGGC  
GTTAAAGACATTTCTGCGTATTGAGGGCGAGGTTACCCAGACCGCAAGACCGTAGATAGCAATCCACTGCCCTGGAC  
GAATTTTTGACAGCTTAACGGCTTTGTAGGTGGTGACTCCCGCACAGGTAATGTGCTGGCCGCCGCGAGTCCAGACCA  
TCTGGCACTTTTACCAGTAAATCGCGACACGATGCACTCTTCCGCCATCCCGCCATCAACGCTGTATCCGGCATTTTT  
AACTGAACGGCAGAGCGTTTTCGTTACCACTGTTACAGTATTGCAATGACCGCATCCTTCTGAGAACCACGCCACGCTGG  
CACGATCGCTGGTTTTAATGAGGTGACACCTGGACCACTTCTGCCACCACACCGATGCCTTCATGGCCAGAATTACG  
CCGGTTTTGTACCAAATCGCCATTCTTAACATGAAGATCGGTATGACATACACCACAACACTCCATTTTTCAGCAGGGC  
TTCGCCATGTTTCAGTGAGCGAGTGTATATACGTAACGTCAACATGATGATCCTTCTGTAACAACACTGCAGCCTTCATAG  
TTCCTCCTTTTCGGATGATGTTCTGCATAGCAGGTGAGGCAAATGAGATTTATTCGCCACTACCAGTATGGATGAGATC  
TGAAAAAGGGAGAGGGAATAGCCCGGTAGCCTTCACTACCGGGCGAGGCTTAGATGGAGGTACGGCGGTAGTCCGGT  
ATTCCGCTTCCAGAAATATCGTCAATGGCCTGTTGCAGGGCTTCGGCAGAGGTTTTACCGCCACGCCTTGTGCTGC  
GCCATTTTCCAAACCGCAACGCAATTGCGCGGGAGACTTTCTGAATATCTTTCAGTTCGGCAGTACCATACTTCCGCC  
GTTACAGACCAATGGTGAATACTGCGCCAGCGTTTCACTTCCGACATCAGCATCTCATCGGTGATACGTGACGCGCCGG  
AAGCAATAACACCCAGGCGGATGCCCGGGAAAAATAAAGGCGTTGTTACTGGCGGATAGGGTAGATTTTATCTTCCAT  
ACCACTGGATTAACGGGCTGCCCGTGGCGACGAGCGGTTACCTTCGGTCCAGGCGATAATGTCTGCGGTGTGGCTTC  
CACGCGTACGTCGGGTTAGACAGCGGCATCACGATCGGACGCGGACAGTGTATGCATCTCACGGATGATCTTCCCG

TAAACAGCCCGGTCTGTCCTGAGACGCCAATCAGAATATCTGGTTTTACATTGCGCACCACATCCAGCAGTGACAGCACA  
TCGCTGTCGGTATCCCAGTCACTGAGGTTTTCGCGTCTGCACCAGTTTGGTCTGGAAAGGCAGCAGGTTCCGGCATCTT  
GTCAGTCAGCAAGCCAAAGCGATCGACCATAAAGACTTTCTGCCGCGCCGCTTCTCGCTTAATCCTTCGCGCTGGGTCT  
GGGAGATGATCATTTTCGGCAATGCCGATCCCGCTGAACCTGCGCCAAGGAAGACGATTTTTTCTCGCTTAACTGACCA  
CCTGCCGCGCGCTTGTGCGATCAGTGTGCCGACTGTTACCGCCGACGTGCCCTGAATGTCATCGTTAAAAAGAACAAT  
TTCATTGCGATAGCGTTAAGTAACGGCATCGCATTTTTTTGGAGCAAAGTCTTCAAACCTGCAACAGCACGCTCGGCCAGC  
GTTGTTTACAGCCTGGATAAATTCATCAACGAATTCATAGTATTCGTCGTCAGTGATACGCGGATTACGCCAGCCATA  
TACAGCGGATCGTTAAGCAGCTGTTGGTTGTTGTTCCGACATCCAGCACCACCGGAAGGGTATACGCCGGGCTGATGCC  
GCCACAGGCGGTATAGAGCGACAGTTTACCGATCGGAATGCCATCCCGCCGATGCCCTGGTCAACAAGCCCCAGAATGC  
GTTACCCGTCACTCACCACAATCACTTAAATATTATGGTTCGGCACGTTTTGCAGAATATCGTCCATATTGTGCCGGTTC  
TGGAAGAGATAAACACGCCGCGTGAACGGCGGTAGATCTCAGAAAAACGCTCACAGGCTGCGCCGACGTTGGGGTATA  
AATAACAGGCATCATCTCATCAAGATGATTGTTTACCAGACGGTAGAAGAGGGTTTTCGTTAGTGTCTGGATGTTACGCA  
GGTAGATGTGTTGTCGATTTCCGTTTTGAATCCCTGATACTGGATCCATGCTCGTCCGCTTGTCTTCGATGGTTTTCG  
ACCACTTCCGGCAGTAACCCAGCAGGTTGAAGTACGGCGTTCCTCATGCTGAAGGCACTGCCTTTATTCAACAACGG  
AAATTTCCAGCATACAGGGCAGCGTAAGGGATATAAAGCGAACGCTGTTTTTTTTGTTTTTGGTTCCATGCTCACTACTC  
TTTTTTGAATATCCATCCCTGGGGGCTTTTTATCGTCTTTGCTTTACCGCCAGGGCGTCCGCCCTCAAGTATAAAGCAGAT  
AAAAACAACCAACACCATTGCGCAGGCAATGGTGTAAATCGTCTTTGAGGACTGATGGTTATGAATTACTTTTTAGCGGG  
GCGTTTTCTGCCGTTGGTTATTTACTACGCTGGATTTGTCACCTTCGGTAACTATTTTTGCGCTGGTTAGAAAATTTTAT  
GGTCCAGTCCAAGAATATGACGTGCCTGACGTTTCGATTTTCACTTAACTCCTCAATCCTGTAGCTAGTTTTAAGGACAA  
CATCGCCGTAGCGAAGAACACGTGCTAAACCCCTAAATAGGTTGCCGATCAAGCATAGCACCTTAAAGCGTAGGGTGC  
TGCCACTGACCACATAATTGATCGTTTGTGGTAGATATCACTGAGGATGTCGTTATCAGAAGCTTCAACCCATTTGGT  
CAGCTCCATGAGAATGTCATCTCAGTGACAACACCATGCTGTGCCGAAGGCCTTGTCAATGGCATTAAACAGAGCGG  
GTTCTGCTGTTGAATTTTCTGCCTGATAATAAGTAAACATAGTATTCTCCGTGCTGTGATTTATGGTGTCTGCTACG  
GATCGCAGATTTATAAGCACATTGAGCATGGCAAATTTGCCGCTTCTGTTTAAAGATTAGTCTGGTTGATGATTTT  
TATATTTAACACCATGATATTCATAGGGATTGTGATTGGTATGATCCGATTAATATTGATACAATATCTTTGGGTTAT  
ATATCCCAGTAACTATTGTGGGAATTAATTTAAGTGCAGAAGTAATTTTTCGCCGGATTTTATTCGGAATATCCTG  
CTTATCCTCGTGTGTTTCTCACGTAGTCTATAATTTCTTTTTAAGCCACAGGAGAGCAACAATGACAATCCATAAGA  
AAGTCCAGGCACACTGGGAAGGCGATATCAAACCGGGGAAGGGAACAGTATCCACCAGAGTGGCGTGTGAACCAACAG  
CCGTATGGATTTAACACGCTTTTTGAAGGCGAAAAAGGAACCAACCTGAAGAACTGATTGGCCGACGCGATGCCGATG  
TTTTCTAATGGCGCTTTCATTAATGCTGGGGGAAGCGGGATTACGCCAACATCGATTGATACCACCGCCGATGTGTCCG  
TGATAAAGTGGATGCCGTTTTGCGATTACGAAAATCGCACTGAAGAGTGAAGTTGCGGTGCCGGGATTGATGCCTCT  
ACCTTTGACGGCATAATCCAGAAAGCAAAGCAGGATGCCCGTCTCTCAGTACTGAAAGCGGAAATACGCTGGATTA  
CCAGTTGAAATCGTAAAGCATTGCCGGATGACGCGTCAGGCGCGTGAATGCCTGATGCGTTGTTAGCATCTTACAGCGC  
CCGCCAGCACCAGGCTCACGTCCGCTCCTTATTGCTAATGATTGCCGGACTTCACATCCGTGGGTTGCCAGCGGGC  
AACGTTTCGTAGAAAAACAGCCTTGGGGCAACGTGCCGTTTTCCCGGACAGTCCGTTTTACGTAATGCCATTCTTCTCC  
AGCGTTTTATCAATGGCGGGGAGGGAATCCAGCAATAATCGGGTGTATGGATGTGCAGGTGCCGTGACACCTGCTGCCG  
GTCGCCAGTTCTACAATCTGCCGAGATACATCACCGCCACCCGATCGCTCATATGACGTATCACCGAGACATTGTGTG  
AAATCAGCACATAGGTGAGCCGCTGATTTTCTGTAGCGTTACCAGTAAATTGAGGATCTGCGCCTGAACGGAGATATCC  
AGCGCAGAGTTGGCTCATCAAGCACAAATCACGTAGGCTCGGAAGAGAGTGTCTGGCAATGGCAGTACGTTGCCGCTG  
CCCGCCGAGAACGCATGAGGCAGGCGGTGAGATCTCCGGCAATAACCCACCTGCACAGCCAATCCTCTGCCAACG  
CTCGCCGCTGTTGTTCACTACTACGTTAGCTATCCAGAGCGGTTCTGTGATGATGCGCCACACCGGTAAGCGCGGATTA  
AGCGAAGAGAGCGGGTCTGAAACACCATCTGCATAATGCGTTGTGAGCCAGAACGGATGACTGCCCGTGGCTCGGTTG  
CAGCATAACCCATTAAGCTGTGCGAGGGTGTTTTGCCGACGCTGACTCGCCGACGATCCCTAAGGTTTACCACGGC  
GGATCTGTAAATCAATACCATTAATGGCATGAACATGTTCCGTAGTTTTACCAAGCCAGTTTTTACGGGCCGGGAAATTG  
ATATGGACGTCGCGTAAAGTAAATACGTGTCAGACACTTATAACCTCCTGCTGCGGATACCAACAGGCACAGCGTGGT  
TGTTGTCACCACAGCTGTCAGCGCCGGGACGTTTTCACTGTGCACCTGCCGATAGCAACGATCGCGAAAAGCGCAG  
CCGTGAGGCAATGGGTGAGGTTTGGTACCGTCCCTGGAATGGCGGGTAAATAGTGGCGTGGTACTCCATGTTCTGGTGC  
GCATTGAGCAAAACCAATGGTATACGGATGCCGGGATGATGGATAACGCTGCGGTGACGCGCTTCAATTACGCTTC  
CGCATAACATCAGTAAACGCTATCGCACAGTTGCGACACCACGGCCATATCATGGCTGATGAACAGAACCGCAGTTCCA  
CTGGCGGGGCTTTATGTTAAGCAAACGCAGTACCTGCAACTGCACCGTGACGTCCAGCGCGTAGTCCGTTCTGTCGGC  
AATAATCAATTGCGGCTCGCAGGAGAATGCCAGCGCAATCATTACCGCTGGCGCATAACACCTGAAAGCTCAAACGGAT  
AGCGCGACATAACTTCCACGGCATCCGGATTTGCATCTTCCAGCAGGTCATCGCTTTAGCTCTGGCTTCCCGACGA  
CTTATTGGTTGATGATGGCGGATCACGTCCATCATCTGAAGACCTATTGACGCTGTCGGATTGAGGGCGGTATCGGTT  
CTGAAAGATCATCGCCACTCGTGCGCCGCGCACTGACGAAGCTTTTTCCCGCGGTTAAGAACATCTTCTCCAGCA  
GGGAAATCTGCCCGGATGTACGCAATAACTGCCGCTCGGTAGCAGACGATAATCAGCATTGCGGTGACTGATTTACCT  
GAGCCGATTCTCCACAGACCGACAATTTACCGCGGTTAATCTGCAAGGACACATTGTTGAGCGCGTGAACATCACC

GTAAAAACCGGGAAACTCAAATGCAGTTGTTGAATGTCCAGAACGGGTTGGGTCATGACTGCTTTCCTCTGCTTTCGG  
GTCAAGCAGATCGGAATACCATCACCAAAGAGATTAACCCGACGGCGGTAAGCAAATCGCTGCCCCGAAATGCGC  
AATACCACCACTGATCGAGTACATAGTTGCGACCATTTGCTACCATCGCGCCCATTGAGCACTCGGTTGTTGAGCACCC  
AGGCCAATAAATCCCAACGTGGCGGCCATTAATAATCGCGCTACCGATATCCAGCGATGCCTGCACGATCAGCGGGCGGTAG  
GGAGTTACGTAATAATGCCAGTTGATCAGATGCCAACGAGACGGCCAAAGTTTTTCGCCGCTGAACATAGGTATACT  
GGCGTACAATAATGCTTCCCCCGCGCCAGGCGCACATAAAAGGGAATTTCGACAATAGCAATAGCCAGCATGGCGTTA  
AACAAACTCGGCCGAGAGCGGCAGCCAGTGCCATTGTCAGTACCAACGAAGGAATCGACAGCATAATGTCCATGATGCG  
CATGATGATGGCGTCTGCGCGTCCACCAAGCACACCCGGATAGACATCCGAGTAGCGAACCAATCATACCCGCAATGGCAA  
CCACGACTAATCCGGCGAGAATTGATTGCTGACTGCCGACCAGTACGCGGCTAAACAGATCGCGTCCCACCTTCATCGGTG  
CCAAACCAGTGCGCCGAGAAGGGCGGCAAAAGGGCGGGCGTTAAATCAATGGCGTTGGGATCATGCGTGCACAGCCACGG  
TGAAAAATCATCATCAATAGCATTAAACAATGATGACTGCGCTGGTACGGTGAGCGGACTGCCTTTCAGCATCCATA  
CCAGTTTTGCACCGTTAAATCGCGTTTGTGTTTGTGGGCGTACGGCGGACGTTTCTCGCTTAGCATCATTACCACCTC  
CACGTCCGATACGCGGATCAATCCACAAATAGAGCAAATCCACCACAGGTTGACCAGCACATAAGCAAATGAAACCACG  
ACGGCAAAGCCATCACTGCCGGGAAGTCGAGCGCTGTATTGATGTTACTACCCATGCACCATTCCGGGCCAGGCAA  
AACGGTTTTCGTGACACTGCGCCATAACAACAAATGCCAGCGCAAACCAATACGGTAATCGATGGGATCAACGGT  
TGGTAGCGCATAAACATAAAACGATATACCAGCCGGCAAGCCGCTGGCCCGGGGTACGAATGTAGTCTTCACTCAAT  
TGTTCCAGCATCGCTGAGCGGATCTGGCGAGCGACAATTCAGGTGAACGAACGCCAGCGTTAATGCCGGTAAGATGAG  
ATGTTGCAACGCATTGAAGAAGACTTCACCGTTGCCTTCAAGCAGCGCATCGAGCAGATAAAAAGCCGGTAACGTGCGTTG  
GTGGATCCAGCCAGTCATCAAGCCTTCCGCCCGCGGAAGAATTTGCAGATGACCATAAAACAGCACAATGACGCCACG  
CCAAGCCAGAACGCAGGTGTGGAGATTCGGTAATGGCATTATTCGACCAGATGATCCAGCCAGCGATTTCCGCCAGAC  
TGAGAGAGTATGCCAGCGGGATGCCAATCAGGAGTGCCAGCAGCAGGGCACCAAAGCCAGCTCCAGCGTGCAGGGGA  
AAAATATACGCAACTCTCCAGCACCGGACGCCCGTACGAATGGATGTTCCAGGTACCATGAAACAGGTGCTGACG  
TAGCGGTAAAAGTGTACATACAGTGGTGGTCCAGTCCAGTTGCTGGCAATATTTCCAGCATAGCATCGCTGGCGCG  
GTCACCCGCCAGTAACCGCGCCGGATCACAGGGATCAGATGCGAGATAATAAACGTAATCACGCAGACGCCGCCACCA  
CGAGCACAGCCCCAGCAGCGTTGGCGTAAAATACTCCAGAAGTACGTTATTTACTCATGGTATTGATATTGAAGAC  
CTGTTCCAGCATGGGATTGAACACAAAGCCTTTACCTCTTTGTTATCGCCAGTTGGTAGTTTTCTGGAACAGGTACA  
CATAAGCAGCGTCATCAATGACGATTTCTGTGCTGCTGGTAGTCCCGGTACGCTGCGTCTGGTGGTGGTGCAGC  
GCATTGCGCAGTAACCTATCGACCTCACTGTTTTATAGAACGAGCGTTACCCGGCAGACCTTTTTGTCTGACTCAA  
CCAGTAATTCATAACATATACGGGTCCGCAAAATCCGGACTCCAGTTGCCAATCGCAATGTCGTAATACCTTTACCCA  
CTCTGTCGCGCATGGTGGCGTTCCAGCTTTCCAGCTTCACAATGATGCCAGCTTGTGAGACTGGATTGTGTCGCC  
AGAGCAATAGGCTCCAGTTCGGATCGTTATCGGAGTAGAGAAACGTGAGGCTGGTGGGTTGCTCGTCACTTTATCCCA  
TTCGGCTTTGGCTTTCGTTTCGTCATGGTTGATTGCAATGCGCTGCGATCGTAGCCCCACATGCCTTCCGGAATCGGGC  
CGCGCATCTGTTTTCCGTTACCACTCAGAATGCCGTTAACCATGCCCTGATAATCGGTAGACCAGGAAATGGCCCGACGC  
AGATCCGCCTGATTAAGAGGCGCTTGTCTGTTATTCAGATACAGATAGGTAACGCGCAGTGACGGATACTCTGCCACATT  
GACTTTATTTTCTGCTTCCAGGGCGTTGAGTTGATCCACCGGCAGCGCATCGGCAATGTCAATGTCGCCACGGGAGAGCT  
GCAGGCGACGGGAGGCACTTTCACCAATAATTTTACCAGTACCCGTTTGAAGTTCCGTTTATTGCTGGGTAATGCCGA  
TTTGGCACCAAGAACTAATTGCTGACCTTTTTGCCAGTTTTTCCAGATAAATGGTCCGGAACCGGCGGTATTTTGGCGAG  
GAAGCCGCGAGCATCATCCGCTGCATGTTCTTTAAGACCGCCGATTGATAATGGATGCACCGTCATTGCCAGCGTGT  
AGAGGAACGGTGCAGATGTTGGCTAAGGGTAAACTTACCATGATGTTGTCGGGAGCATCAATCTTTAAATCTTTGGGA  
AATGCTTCTGCTGGCCCTGCGCATTTTTAGTAGCCGCTCAAAGAAAGTTTTACTGCTTCCGAGTGACAGGTGGCC  
ATCGGCAAATTTAGCATTATCTTTAGGGTGAACGTCACCTCTTTTTGATCGTCAGACGCTTTCCAGCTACTTGCAGAT  
CGCTTCAACGTCGGTTGAGCCTTATACCGTCCGTTTTGACTGAACCAGCCGCTGATAAGACGGGTAGGTCACTGTC  
CAGTCGTTATTATCTATTGTTACCGCCGGTTCGAGGTTTTGTGGATCGGCGGCCTTACCAATCACCAGCATATCTTTGG  
TACGGCGCGTGCGAACCGGGAAATTTGTGGCAAGGACGAGCGCGAGCAATGTGGGACGAAACGATATCGATCTCTTCA  
TGACAGTTTCTGATTAAGTACGCTGCTGTGTCAGGGGATATAAAACAAGAGAATTGATCAGCGAGCAGAGGGTAAC  
CGCTGCCTGGGTAATTCGAAGTGCACCATTCGCTGGAGATACCACAAAACCGCCACCAGTCATTATCGCATTACGCA  
ACAGCCGATTGCGCTGAGCGGGCGGGGACGGAAGGGTATAGGCATGGGAGCGCTCGTGCATTTTATCGAACCTGCG  
CCCATATCGAGGATGTTCCCGTGTCTATCAGGAAGCGTCAGGTCGATCGCCGTGCCACGGTGTGATTAGAACCACCGT  
CACATCAACAACATATTGCGGGTCTGGGCAGGCTTGCCACAACATCGCTGTGCTTGTGTTGGGCGATACGCATCGTAAA  
TCACCAGTTGTAACCCTGACAGCTGGGCGATGCTGATACTTTTCCAGCGCGGTAATCGCATCCTTGTGTAACAGACAA  
CGCGCTTGTGATAAATAGCTTTACCTGTGATGTTATCAGCGCAGCGTATTTCAATTCGATCTCCAGATCAGGGAAGAT  
TACGGCTAAATCAACCAGTTCGGTGGTATCCGACATAAACGGTCTGTATAAGACAAAAATGCTGCGCTTCCGCTTA  
TGAGATCTCATGCCATGCCGGGATAAGCGCCAGAATGCTGGCTTAAAGTTATTTTTTAACTTTTGTCAACATTTGT  
GCAGCGTAGTGAGTTTTGTTGCAAGAGGGGAAGTTAAGGAAGGAATCTCCCGAATCGTAGCTGAAATCACAGTATTTA  
AGTGACAGTGTACGTTAAATGAAAACCCGCGAGTGCGGGCGAGAGGAATTTGTGAGTTTTAGCGGTAACACGCTGCT  
CATCCAGCCTGGAATTTCTTCCGGGGTAGGGGGCGGGAAAGAAATATCCCTGAATAACGCGACAGTGGATCTTGCCTA

GCATCTCAAATTGCTCTTTGGTTTTGACGCTTCCGCCACGACGGTTAAATTGAGGCTTTGCCAATGCTGGTAATGGCT  
TCAAAGTAAGGCAAGGATGCGTTTTTTCGGTCAGACAACGATCGACAAAACCTTTTGTCAATTTTGATTTCCGTTACCGGAAG  
ACTGACTAAGCGGGATAATCCGAAAAGCCCGTACCAAATCATCTACCGATAAGCCCACGCCATATCACGAGGATCT  
GAATGCGCTTAAAGATTTTCGGTATCGTGTTCATCATGCTTTCCGTGATTTCTACCGTCAGCTGGTGGCCGTAATA  
CCCCAGGCGTGCAATTGCATCAGACACCTGATTAGGCAGTTGATTACTGCGAAAGTGCAGCGCCGACAAGTTCACGGATAA  
CGCCGGATATGAATATTCTGGCTACGCCATTCTGCTAACTGACGGCAAGCTTCCGCGATGACCCAGCGCCCAATTTTT  
CGATTTACCAATCTCTTCTGCGAGAGGAATAAACCGTGAAGGGGACATGACCATGCAGGGGATCGTGCCAGCGAGCA  
AGGGCTTCGATGCCGTACAGTTCACCCGTTTTCTGCGAAGATTTGCGGCTGGTAAACCAGTTTCAGTTGGTTATTGCTAAT  
CGTTCTTTACAGCGCTGCGCCTAAAACCAAACGCTCTTTTACCATTTTCGTTTCATCGCCGGGCTGAAGAATGCCAGCCGT  
TACCGCCATTTCTGCAATATAATCCATTGCATTGTGAGCAGTGGAGAGCAAGTAATCGCGGTTTTTACCAGGTCTGAG  
CTGATGCCAATACTCAAGTAAGCGGGAAAGGTTTTATCGTCAATCATTATCGGCTTGCTGACCACATTCGGTAGCTCATC  
GGCGATTTGGTAATGTTACTGACGTCGTTTTTCGAGGCTCACGAGGACAACTGCGTACCTTCGATACGACAGAGATACT  
GATCCGTTTTGAGTTTTTTCAGAAAGCGATTGACCACTTCAGCAATGCCTGATCGGCCACGCATAGCCAAGGCTATCA  
ATCACATCTGAATATGGTCAACACCGATGAGATACACCACGGGAGAGACGGCTTTGTCGACCAGGTCATCGAGGTAATT  
GTGACGTTATTGCGATTTGGCAGACCGGTATCGGATCAAATTGGATTGAGTTGTTCAATATGCTGACGGCTTTTTCT  
GTTCCAGCGCCAGCGCGGCATATGCTGGCTGATATCTGCCACGCTTCGATAAAGCGCTGGTTTTCTGCTCCTGACGAG  
GTTTTAATTTGACAGATCCCGCAGGCGGCCATACGCTGACGAATGGTCGCTGACCAGCTTTGCGCATTTTGAATTTT  
TGACCCTGGGAAAGATGACGCCAGTGTATCGGCATCCCGTTGCGCAGTGCGAACAGCGAAACATGCGATTCTGTTGAGTA  
CAGATTCGATGTTACGACAATGATTTCCCCATTTTCATGAAATGGCGGGCTGCTGCACATGGCGGCGAGAATATTGCCT  
TCAAAGTGGCGAATCTGCCGTTCTTCGGTGATATCCGAGAAAGTCATTACCAGGTTCTGCAGATGCGCGAGCACGTATA  
AACCGGGCTGATAGAGGCTTAAATCCAGATTTTTTACCAGGTCGCGTCAACAGCAGAAATTCGTCCTGATCGCGGGCGG  
TTTTCCATAGCAACTGTTGTAACGAATGCGGTTATCGGCAGGAATTCAGGAATGTTGAGGAGTGTATCGGGCTGCATA  
CCGCTGGCTTCGTAATGCAGTAACCAAACATTTTCGGTAAATGCGCGATTGCACTGCACAATATGGCGTTCCGGATCGAG  
GACAATCACCGGTGCGTCGAGATGGTCAACGGCAATAATCAATTGTCGGGTCTGTTCTTTTTGCGCCATTTCTACGCTGG  
CATCCCGTACCAGCGCCAGTAATAAACTTTCCCTCGGCGCTCACTTTTCGATAGCGCAAACGGGTCCAGATTTTACTG  
CCGCTTTTTTCTCCAGCTGACGCTCCCGACTCATCCCTCAACACGCGCTTACCAGCTTACGGTTGTGACGAATGTA  
TTCAGGATGCGCAGGACGCAATCCCGCGGAATCAGCATATCAATGTTATTGCCAATGACTTCTTACGTTTGTATCCCC  
AGAGCTTCTGCGGGCGGGTTGAAAAACATCACTTCATCATTTCGTTAATTAACACCGCACCCATCATATTTTGCTCA  
AGGGCGGGGAAAAAATGCCATCGGGCGCATTATCCGCATCGGTTAGCTTCATGATTACCTTCGATCCTGGCGCATCTA  
AAGACTGGCTTTCCAGAGTTCAACACGTTTTCTACCTCGTCTTTTGGCGATATACAGAGCTTCATCGGCTATTTGAATGA  
GGCGCTCATAGTCAGGATGACCATTAACATGGCGGCACCGATGGAAAGTGAGAGGGCAATATCTTCGCCGTTTGGCGCT  
TTCAGTTTGGTTTTTCTCCACCCGACTGCGAATACGTTCTGCGGTACGTAACGTTTCGTTTTCAGAAGCTTCAGTCAAAAC  
AATGATAAATTCATCGCCCCGTAGCGGAAAACATAATCACTACTGCGGACGTTGTCATAAAAGGCCTGAGAGACTTTAC  
GCAGAATTTTCATCACCAGTGTATGGCCCCACGTATCGTTGATCTCTTTGAATTTATCAACGTCAATAATCAGCACTGAC  
AGCGGTGTACCGGTCCGTTGGCATGGGCAATTTTCGGTGAAGATAGTCGGTAGGAAACGGCGTTAAGTAATTTTCGT  
CAGTACATCCATACCGACTTCGTGGCGGATACTTCTTCAAACAATTCACGCAGCAAGGTAATAATTTGCGATACGGTAT  
TTCTTATCTGTAATAAAAAATTTACCCGCACTTCTGTTATTCAAATTTCTGGTGTACGCATGGTTTGATTGAAAATA  
CCGTCGAAATCCTGAATCAGACGGGAGATATGGCCTACTTCGGCAATACCACTAAAATAATGTCGACCTTTATGGTTAAA  
CCACAGGCCAAAATCAGCTGGCTTAAAGGCAAACACTGCTCTAAATCAGAATCCAGCAGGATTTTATAGATAATATCTA  
TTTCCATGAAAAGTATTGAGGCTATTTGCCGTTTTCTTCTTCGGCGTTTTCCAGTAACGAGAAGATACGATAGATTTT  
TCATCTTCTTTGAGGCACTACTGTCACTAAAGGTAACGCGCGAGTCATCACTTCCATCGCGATATCAATACTGTTAAT  
CGAGAAATGGTAGACCTGAAGTTTTTCTGCGGCGGAATAATCCGAAGAGAAGATCACCGGATAGAGGATTTTTTTTCAGCA  
CCCGAAACCCCATCTCGACAATTTCTACCGGAATTCCTATGCGGGCATGCACTTCCGCGACGGTATGCTGGATTTGATT  
AGCCTTTCGACATCGTCAACCTGGGCAGAAAGCACGTTAATAATCCAGCGTTCCATCGCACTCTTCAACTGCCGCTCAAC  
TTGTTCACTTCAAGAATTTCTCGGCATGCGGGTCGATGCGGACAATTCGATAAAACTCGATACTCAGATAATGAGCAT  
GCGCAACGGCAATTTCCGCGGCTTTAGCACGAATGGGCGGATCTGCCTGTTGACAAGTCCGGTCCACTCATCTTTTATT  
CTTTTAAAATACATCTCCATAATTCACACCTTATAAGGCTGGGAAATCAGACGGAATCAAATGAAACGCAACGTGCGA  
GATCGACTAATGCACCATATTCTCCTGAAATATGAAGATATACTGAAAAGAAAATAAGCGATTTAGGACAGTTTCAATCT  
ACGCTACTGTTCTTCAAGAGATATAGCCATCGTAATTTTTTTCGGTACAGCGAATATCGTATGGTTTTTTCATATTC  
ATACATTTTTTATTAGGGATTTATGGCTGTTAACTAAGTGTGGTTAATTTGACTTAAGTAAGCATGATTATTAGTGGGAT  
AGTTAAGAGGGTAACAAGCCGGTGGGTAAGCACCGGCTTGTACAAAGTAAGAATGGGAGTTTAACTGCCCCAGCGAC  
TTTGAGATAGCTGACCGCTTGTGAGTCTGCGTTTTATTAGATAGTCTCACGGAACAAGATGGTGCCGTAATTTTCG  
GGCAGCATCGTTAAGATCGAGCTGCTTTTTTTCAGTTCCGGTACCGCGCTTAATCATCCAGTCTGGCTTATCTTTGA  
AGTTTACCCACTTTATAGAAGGCGATACCGATATACAGGCGGGTCTGGTTCGTTTTAACGACATCCGCCACCATTTTG  
CCAACACGTATAACGCGCGGCACTCCGTGAGAACGGCCAGTAAATTTGGGGAGCAATGTAATCCAGCAATCCTTGTCC  
ACCCATCGACGGGTGTCAGCGTAGGATTCGTATAGGCTGCCGCGCTCGGGTATCGGAACCGAGCGGATCGTGTATCG

GTTACGCCACACGCTGCCGGGCTAACACCAAATTCGACTCCCGGCTTAATGCTTTTAAATGGTGTGCGATACCTTTGCAA  
TAACTGCTGAGTATTGTTGCGCCGCCAGTCTGCTTTTGACGCAAATGCGCCTCCGTATTTACGGTACGTTTCGTTATCA  
TTTAGCCGTGAACCCGGTACTCCGTATAGAAATAGTCGTCAAACTGCACGCCATCTACGGGATAGCGGGAAACCACTTC  
TGCGACTATTGATGTGATCCAGTCTGAACCTCAGGGATGCCCGGTGCGAGGACAAAGCGATGCCAGACGTTCTGATCC  
AGTCGCGGTGTTGCATAGACGCTCGCCGGTGTGGAGACAGAGTGCTATTCAGTTCCCTGATAGTACCGGGCTTCGTA  
TTAACCGATACCGGATAGGGGTTAAACCAGGCGTGTACTTTCATCCCACGCTTGTGGGCTTCGTCGAGCATAAAATTGCAG  
CGGATCGTAACCCGGATTTTACCAATCTTACCGGTATAAGATCGGACCACGGCAAAAATTTTCGATGGCCACAGGGCGG  
TACCGTCCGGCTTGACCTGGAAAAAGACCGTGTATGCGGAGACGTTGAGATGATCCAGTTTGTGATCATCGCCTGT  
TGTTGTACACGGGCCCCGGTGGTGGGGTACTAATGTTAACCGAGGAAACCGGTGGCCAGTCGAGCCGAGAAACCGTGGC  
CAGCCAGATGCCACGCATCGGTTGTGACGATTGTTGCGTCTGGTGGTGGTGGCTTTGAACCTGCTGGTGGTGTACCATTGG  
ACTCTGGAGCGTGCTTTTACAACACAGTAAAAGTGCCAGTGCAACTAGTATCGCTGGTCTTCTAATCGTTAATTTT  
TTGTTTCGGGAGCAGATATCCATATGTCTGGTTTCCGGTAAACAGATGTGCGCTCATTCTCGTACTTATCCCCGTTAAG  
TCAATACGACAGCAAGCACGAAAAAGGAGCGATGAATTATCGCTCCCTTGTCTTATAACCATTAGACATGGTTAGTGT  
TTCTTGTATTATCACAAATATAGTGTGGTGAACGTGCACGCGGTGCAGGAAGAAGTGACCTTTTGGTGGTCTGACT  
GTTGATTGGTCCAGAGTACGCGGATTTTGCCTTTACGATCATGAACAGCATAGAGAATAAAGGGCAGGGCAA  
GTACCACGAGAACTAACACCAAGTAATTCAACATACATATCGGTAGAATCACCTGGATGTTATCCGGCCGAGGAAG  
GAAACAATAAACGCCATAATTGAAGTCAGCAGACCGACAATTGCCACGACGATTTTACCCCTTTACCACGAGGATATT  
AAATGTGCGTTTTAAGTCAGGATGTTTAAAGAACCAACAATGTAGCCAATAAACAGCATGAAATAAGCACACAGATAAA  
TCACCACCGTCAGCGCCAGTGCATCAGGAAGGACATGTTGTTACCGCCACCGTATTGGTGGAGATGATCAACGCGATA  
GACGTAATCACCAGCTGCGAAATGACCAGCGTTACCGGTACGCCATTTTGTTCATTTTAGCGAATGCCGCTGGCAGCAG  
GTTTTTCTGCGCTGTACATACATCCCGCGAGAAGGACCAACAATCCAGGAGCGATTTCCGCCAGAACCCAGCAACA  
GCAGTGGGAGATCACGCGAACCGTCCACTCAATTTCTGGTGCACATGGGACATCAGAACGGTAAAGGTTTGCATTACC  
CCTGCGGAGAGTTGATTTTATTACCCGGAATGACCATCGCAATAGACAAACCACAGAGCTTAAAGCAGATTGCCGC  
CACCATCAGCAGTAACATAGCCAACGGATAGTCGCGCCCTGGGTTGCTCATTTCATTGACGTGGGTTGGGATGCTTCTA  
CGCCATATAACTCAAAATGAAGGCAACAATACTACCAGGTGCCACTTTAGAGAAGTCAGGAAGAAGTCTTCGAA  
TCCATTTTCGATAGCAACGGGGCACCGGAGTGCAGATAAATAGCCGTAATGCATCAAAATAATGCAGGTAACAGGAT  
ACCGGCGAAGAAGCCAATTTAGCAATTCGCGCCGTGATTTCTGCCACCAAACCTGCGTTAATGCCAGCGCCAAAGAA  
TGATGAGTGTGCAATAGTTTTGGTAATGGGGTCTTATTGAGCGTGGCCATTTAGGATGTAGGAGAGTGCCCTAAC  
ACGAAATAGAGCATCGGAATAAAACCAATGGCGATTTGAGATAGCCAAATGAGATCGCTGCAAAATCCCATCTCGGCC  
CAGAGTATTTGATACCCAGCGAAGACACCCTTCTTCCAGCGTCGACGGTGGCCATTTCCGCGACAAAGTCCCA  
CGGGAATAAACCATAAAATCCCGCCTAATAGCAGGAAGAAGACTAATGAAAAGCCCAGTGTGCGAAGGTAGGGTATTA  
TAAACAGCCATTACCATCGATGCCGTTATGGCAAAGAAATCAAAGTAATGTGAGCTGCTTAGCTTTACCTGTCTGACTGA  
TGTAGCCATATTATCCCCATAAACCGTATTCTGTGCGAACCACCTGTTTTGTTCTGAAGCGTATTCAGAACAAAT  
TTTCCGTTGCTAATGCCAGTGAACAGACTTTGGAATTTGCCGAAACCGGTTCTGTTTCGGGACACCGTTACCGTTAAC  
GTTATCAGGTATGTTAAAGCTGTTCTGTTGGGCAATACCCTGCAGTTTCGGGTGATCGCTGAGATATTTAGGGAGGCT  
TTGTAGTCTTCCAGCAACAGTTCAGCAAAGTCCATTTGAAAGCCGCGACGACACATAATGCCATCACCACGATGTCGGT  
GGCTTACCGCCGAGAGTGAAGGCCGAACTGCCAGCCGCGCAGACGACGACGTTAGAGAGGTATACAGGGTGTATC  
CCGATCTTACCATCTTTCAGTTTGAAGCAAACCGCGGGATGCCTTCTCGGGGCGACCGTACAGATGAACTCATA  
GGCCCCAGTTTGGCGATTTTATCGCCAGATAAGCGCAACCTGGTAAGAGGCGTTCTGTACTTTGGTATAGCCTTACG  
ACCGAGGCGCAGGAATTCATAGTACTGTGCAATTAACCTGACCCCGGGCGGAGGAGTTGATGGCAAAAGTACCAATTT  
GACCACCCAGGTAGTCAACGTTGAACACCAGTTCCTGCGGACGCGCTTCTTCTGTCACGCCAGATAACCCAGCCGACGCC  
AGCGGAGCCAGACCAATTTATGGCCTGAAGCACTGATGATTTACACGCGGCGAGCGGAAGTCCAGACGATATCCGG  
GGCGACGAACGGTGCAGGAAGCCACCGCTGGCAGCGTCGATGTGATGTCGATGTCGATACCGGTATCGGCCTGGAATT  
TATCCAGCGCATCGTGCAGCGGTTGTGGGAACTCATAGTTACCAGTGTAGGTACGCGCAAAGTGGCACCACGCCGATG  
GTGTTTTCTGTCACAGGCTTCAATCATGCGTTTGGGTCCATAACAACCTGACCGGGGCGCATAGGGATCTCACGAGCTC  
CACATCCCAGTAGCGGGCAATTTATGCCAGCAGATTTGTACCGGACCGCACACCAGGTTTGGTTTATCCGTTGGTTTGC  
CTGCAGCTTCCATACGCTTGCGCCAACGCCATTTTATCGCCATCCCGCCGAGCATAAGGCTCGGAAGAACCAATGGTG  
TTGGTGCCAACGGCCTGACCATTTTTCGGCGCAGGCGCATGCCACAGATCGGCAACCATATTTACGCAACGAGGTCGAT  
GGCTGCGGATTGCGGATATTCTTCTTGTGATCCAGTTTGTAAATGGATAAATCCATCAATTTGTGGACATTTTCTG  
CGTCCAGGTCTGGCAGAAAGTGGCCAGGTTCTGACGAGCGTTGCCATCAAGATATAATTCGTCATTGATAATCTGGAAT  
GCGACATCGTCGCGCATTTCTGTCAGCGGAAAACGTTTGTATTCTGCGATAGTGAAATAGACTTCGACCAAACGTTGA  
ATCGAGTAGTCCGACCTTAAATCCGTTACTTGTCTTATCCATTTTAAACTCCTTAAATGATTGGATCGCATTAAAA  
AAGTAGGATTTATCGATAAAGTAAGCAAGTGCAAAGGACTCGTGTAAATAACAAAATCCTAATGTTATTTATCGTGAG  
ATATTACGCGAATAATTTTTTTCATTGAAAAACAATAAATATGAAATTTGGGTGGTGGTAAGGTGTTTTATGCTGT  
TATTTTTATGCGCATTCTGTGCTCCTGAATTATCACGTAATAATCAGACCTTAAATATCACTATTAGTACTTGATTAT  
TATTTTTGAACGCATTTATAAAATATTACATAAAAAATAGCAATATTGCTAAAAATCCCGCCAACGATGTGTTGACGGG

CTGTTATTATTTTGGCAATAACTCCGGTATAAGTATTTACCGGATGAGAAAGATATTGTTTAAACGGCAGTGTTAACAT  
TCTCTACCGTCATTTGTTTCAACAATTGCTCCTGCTCAGTCCATGCTGCAGGATCGTCATATTGAATAAGACTATTTACA  
ATAGTGTTTCGTAATTGTTGAACGCTACGCTGTTGGATATCGAGGCTGCGCTGAACGTTTTGCTGGTATTCATTAGTTC  
TTGCTCACTGATCCCTTTAGCCAGACGCTTAACCATCACTTCATTGCTAACGTTAACAGTTCATCATGTCGTTCTGGTT  
GACAAGTAAAAGCCAGCAAATGACTGATATCTTTGGCCTGAGGATCAACCGAGAGGCGAGAAGAAACGCTGTATGCTCCA  
GATGCTGTTACGAATATTAACACGTAGATCTTTTGGCAGTGCGACGTTAAAAGCATCGAGCGCCATACGCGTCGGCAG  
ATTAACAGGTGTCGGGAATCATAACGCTTCCACTGTGAAACCTGTGCCACAGGTTCAATTTGTTCTTTTACAGTAACCG  
ATGCGTTGTCCGTCGCGGAGTTAATGGTTTACCTGCGGCTAATGGCGAATCAGAGTGTGGATTGATCCTAAGTAACGC  
GTAATTAACGCCACGAGTTTGTCTTCTGCGACATTACCGACAATGACAAACGTGATATCCGCTGGAGATGAAAACAATTG  
GCGATCGGCAGCCAGCGCATCTGCGGCAGTAAACTGTGCAATCTGATTTTCTTGCAGTAATTTCTGCGGTCATCAGCAT  
AGCGGCTCTACATCTGCTGGGCGAATTTCTCCGCTGGACGCTGGTCGAGCGTTTTCAACGCTGAATTTGAGCATT  
TGTAGCGATGCCAAATATTATCGTTAATCGTGTGTTGGTGTTCGCTGGTTAATCAACTGAAAACAGGTTACGGGTT  
ATTAGTCCGCGCTAACGGAGAGCAAGTATTCATGCCACTGACTTTACTGCTCATGGTTACCGAATTTCCGCACTCC  
AGCGTTTCAGGCTGGAAGAGGAGGTTCCGCAACGCGCTTCCGCTAACTGCTTTATTTGCCAGCGGATAAGTGATTTT  
TGCTGCGCAGGAAACTTAAATCGCTTTATTTCGATACGGCAATAAATTTGTAGCTTTTGTCTTCCACCCGCGGATTTGC  
CAGAATAACCTGGCACCTTGGAAAGTGTAAATGATGTCAGATTCCTCCGCGAGCTTTCTTTGCTGCTAAATTTCCGCT  
GTGGGCTGCGTCTACTGTTAACGATAAATTTCTGCTGGAAGACGTAAGCCGCCAGCTTTTTGTTGGGCTACTCCTTT  
TCCAGCGCCAGGATAGCCGAGGAGACAATGCTTTTTTGGCGGCAACCTCATTGTTTACCATTTGCTCCCAAATGCGTC  
CTGGTTCTTTCTAACTGCTGCCATTTTTCCGCGAGCTTTGCACGGTAATTTGCTGCCACAGACGTTTCCGAAAGTTGAT  
ATGTCTCTTCCGGCGACAAGAACGGCGTATTATTTAATGAGCTGGATGCCAGGCGACTGGTCAGCATACGTAATCACGT  
TCAGCTTGTGATCAACCGCATTTTTCAGCCAGGTGAGGCGGGTAGATTTGACATCATCGAGTTCTTCCAGCAGAAAACC  
ATGCTGATCAATGGTTGCCAATCTGCCATTAATGCATTTCGAGCATCTGCATATTATCGTCTCGTGCATTTACACGGA  
AAAACAGCGACTGATAATCGGGTGAATTTTAACTGCGCGCAGTGCCGCCAGAAATAGTCTTCAACTCGCCGACTGT  
ATGCGTTCTGACAGCTGATTGAACAGCTGAATAACATGCTCCATTAGCTTGTTCGATAAAGCTTTGCTCATCGTT  
CACTTGTACCATTGGCAGGCATAATAGAGTGCATGCCGTTACCCGGTTTTCTTATCATTAAATGATATTAAGCGCA  
GGTGGTTTTCGGCTTTTGTGCGCCAGACGCGATTTTCACTGCTTTGTTAGCCGGAAGCTTACTTAAATATCCTTTATC  
AGCGCCAGCGCTTCTTACTGTCGATATCGCCGACCAGATAAAGGTGATATTTTGGTTGATACCAGCGTTGATAAAA  
TTGGCGCAATTGTGCCGGTGTGACCGTGGCGACAGTATCCATCAGCCGATAGGTTACCGTCTAAATACGGGTATTTG  
CCAGCAGGAAAGGGCGGCGCCTGAGAGGTGCGCCATTTGCGATCCTGATGGCGACGCCATTCTCAGTAATTACGCCA  
CGTTCAGCGTCTACTTCGAGTTTTTCAAAGGTTGCGGCATTACTCCATTCACTGAAGATTGCCATCACTTGTTCGAGATT  
TTGTTTCTGCGTAGTCGGCAAACCTCACCTGATACACCGTTTCTGCATAGCTGGTATAGGCATTAACATCGCGACAAAAC  
GCAGGCCATTGACTCAATGTTTCGATGACTTTATTACCCGGCCATGTTTTGTGCCGTTAAACATCATATGTTCTACA  
AAATGAGCCACGCGAGCTCATTGCTTCTTCTGCAATGAACCGGTATGAATTTGAGCCATAAATTTACCTGATCCTT  
TGATGAGCATGCGGATAAATCATATATCGCAAGCCATTGTCCAGTTGCCGGTAATTAACTTTTATCTGCGGTAAGG  
CGGCGCAATCAGCCGCCGGGAGCAACAGAGTTGCCACTAACGTGAGTAAGAAACAGAGTTTTCTATAATTATCTCC  
ATGCGAAAACCGGCGAATTTACCCGGTTAAGTAAATCCGAATTTAAATTTTATGCTGACATCAAGCCAGAAAGTA  
CGCCACTGGCGTAGGTGCGCACACCGGTGTTGTTGATCAACAGCGGTTTTGCTATCCAGTACATTGAGAATATCGGC  
ACTGATCGTCAAGTTTTGTTGTTGCAGAAATTTGGCGTCCAGGACAAGCGGTTGCCAGGTGAGGCTGCTATCCAGTT  
TTTTGTTCAACATACTGTTAATCTGAATTTGCTGATGATTTGCCGATTTGCTTACCAAGGATAATGCGAGCTTTA  
CGCGCTTCTTCCAGCCAGCGTATTGCCACACTAACCGTCCGTTGATGCGTGAATCCATGTTTAAAGGAGATCTT  
TAATGGGTTATTAATACTGCCACTGGAACGCTATCGTAAGAGACCAGATTACCGTTATAAACCACTGGTTATCACCGG  
TATTGCTCTCTCATAACCAATGTTTAAACGACAAGTTGCCCTTGTCTTGTATAGCTAAAGACAATTTGTTGGGTTAATA  
TCTACTGCGGATATGCAGGGTTTGGCCAGTTCAAACCTGAGGCTGAACGAATGCGTTTTGTTTTGCCATCGTTGTT  
ATATTAGTAATGGTGGTTTTAGTCGCGCTGTCGGTACGACTGCTTTTGTGATTTGATCATGCGCTTACCGGTAACAT  
AGTTTGCACGCGCAATAACGTTCTTACCGATTTTCTGCTGCAATCCATTGCCAGTTTATCGTTATAAGGCGTTTTCAA  
TCCTGATAACGCGTCAGAGTTTTATTACCTGATACCGATTCCGTCAGCTATTGCGGATATCAGTAATCCCATATCAAG  
AATATCCCGCATAGTAACGGTTATAACCTGCTGTAATCATTGAGGTTTATTAGCAAAAATATCCATTCCGTCATAA  
AGCGCGGGGAGATATTGTTGTTTACAGATAGTTGTATAGTCATACCGCACGCGGGCATTAAATGACACATTACGCCAG  
CTAATGCGATCCGCATATACAGCGTGTAGTTGCAATTTCCAGCGGCTTTACCTTTATGGTAAATGGTATGGTTAGT  
TTTTCTTCCGCGCAGCATTAAATCACATAGGATTGACTGGTTATGGCGTTGAGTCCACGCATCGGAATAGATGATTCCG  
CGCCGAAGTAGGTTGATGCGAAACATTACCCACGGCGAATTTTTGCCAGTCCAGGCGTTTTTGAAGGTGTAATTTCT  
ACAGCCTGGGAAATGTGCTTAATCCGCCACGGGTGCAACGCCCTGTAATATACCATATGTACATGAAAGTTCCGGTGA  
CCAGATGTCATGATCGTACGGGTATAATCACTAATATGATCCCAACCAACGTTGGTACGAGTTTTGGCCATGCGAGCT  
GCGTATCCATATCCCATGCCAGACCATAGGATTTATTACCATTTTCCGATCAGACTGCGGGAAGGTGCTGGTATTATAA  
TCACGGCTGGAGCCGGTATATTTAAGGTTAAATCGTGGGTAAAGCGGTCGCTGGCAAACAGGTAATTTGCTTAATGC  
AGTATCGATAACGTTTTTATACTGTGCCCCAGCGGCGACAATGCCGTCATTCGAAACATAATCCGCGCGGGTGATATCAG



ACTGGCGGCGGATAAACCGGGGTAACGCCGAAGTTATCAGCGAGTTCCTGATTAACGACAAGGTATAAAAGTCTTT  
TTAAATCTGGGGAGTAATAAGTACTTCTGAAGAGCCTTGATTAATGCGCTCTTGTTATTCTCATCGATATGCGATGT  
TAACAGTCCGAACGCGTAGTGCATAACCCAATTTACCTTGCTATCATCAGCGTTGAAGCGTTTGATCTTTGCATCAA  
TTACCCCGCCATTGAAGCGACCAAATTAACCGGCACAAAAGTGTATAAAGCGTCACATTGTCCAGTAAGCTGACATCA  
AGATAATACCCCTGTGACATCCCGCTAATATTGGTTGCACTACTGGCATCGGACTCATTGCTGGGTTACAGGTTATTAGT  
TGCATAATACCGTCAATCAAATAGGCATTCTGGTAGGGCGACGCACCGTGAATAGAGATTTTCTCAGGGCGAATATCTC  
CCTGGTTCAACGAGGTAATTTGCGTTGAATCCATGCGTACCAGGGTGGTTCTCAGCAGATCGCTGATATTGCCATTC  
CCGGTCCGTAACGCTCGATGCTTTACTGGTGAATGCGTGTGCCGTTTACGGGTACAGGGACAGGAGCATAGACCGT  
CATCTCTTCAAAAAATGCATGTACATGTTTTGTGCATCGACGGCCTGCGCCACATCAGCGCCACATAAAATGACGCCAG  
GAATAAGAAGTCTGCTTATTATTTATCTCCGTACAGCAGGGCTTTTATTGTTTTATAAAACCGCGTAATGTCACA  
AATATCATCGGCCAGGTTCCAGACACCGGGTGTGTGTAACCATAATGACGCCGCTTGTTGGGTAGTTTTACGCGACTA  
AACGCGTAAGCGGATAGCCTTGTCTCAAGATGAGAGGTAGTTTGTCAAGAAATATCCATTTCCGACGTCGTAAA  
ATTAATCGTCCAGGGCGATACGTTGTTTTGCGCGCTGAAAGAATATCTCCCAGCGATCGTGGTCATGAATACGGC  
AGCAATTTCCAAGACCAACCTGATGCAGTACTTGCCTCAACGATTTATCGTCTACGGGCAGGGGAAGTCTTTACAAA  
TAATCTCTTTAGTAAGCCGTTTTGATTAACGGTGTGTGACACATAACCAACTGTCAGCAGGAGAAGAAATACACCT  
TTAAACCAGCGCAGCAGTGGATAATGTTTTAAGCAGTGTGGTTTTTCCGCGCCAGAGTAGCCTTTTCAAGTAATAGCCA  
TTTGCTTGGCGAAACATGAAAGTTCAGGTTCTCTAATATGATCTTATTATCAGGCGTACGAATACTCGCATCAGCCACTT  
GTACCGCATGTTGGCAATTTTTAGGCTTATTCGTAGGGCGCTGTTCAAGTGTGATGGAAGTGCATACAAGCGATCGATA  
ACCGCAGCCAGTTCAGCAAGTTCGTCATATTTATAAATAAAACAGCTTAAATGTTGATACCAGCATAAATGCCTGGCG  
CGATTTTATCAGTCCGCCAGATTGATCTGCCGCTAATAAACTGCGGCAATAACAGAAAGTAGGGAAGAAGCGTAAGCG  
AGCGCGAATAAATATTCTGCCAGTAATCAAGCCACCGCTGACGATTCATTAACGATGCCAGTTCTCTTTAATGGTATGA  
AAATTGTGCTCAACTCTGGCGTTGTAGAGACTCAGCATTGCTTAGCGCAATCAGTTCGCTGCTTATTATGCTGCAC  
AAGATTTGTTGAAATGTCGCTTCTGCTACGTTGTTTTCCACATTAAGCGGACGAATACGTTTACCACCTTATGGGTAA  
ATAAAGTTCACCGATCACAATGAGCAGCAGCGTATAGACCATATACCCCTGGATATTCCATTCTGTTCCACCAACAGTG  
AATGAGAGCGTACCCGCGCTTTCCAAAGAATAACGGTAAAGGTGATCAGCATGCTAAGTACTGGATGAAGCCAAATGA  
AAGACTGAGCGTTTTGCTGATCAGTAAGAGAATGCTTCAGCGATACGTTGGTCAGGGTATCTGATTTTTATGCTCGC  
CGTAGATCTGCGTGAAGTAGTATTTTTATCTGCAAACACCGATTAAGGTAGTAATCTGTTAACCATTCCGCGCCAGCGA  
ATAGTCAGTAGTTAATTAACCATGTTTTGTTTACGGATTAATAACAAAGTCCCCAGCAGGGCAGGGAAACCAAAGGAC  
AAGCTGCCAAAGCTTATCGTTTTCTTCTGGCTTAGCGCATTGAAAAATCATTATTCCAGTCGTTTAAACAGACCTGAA  
TTTTAACACGCAAGGATCATGGCGAGGATAATAATGATTAACAACACTGAAGTTTTATTATTCTTACGCGCCAAAAG  
GGCTTCAACAGACAGAGATACTTTGCTATCAACATACGAAGCGTAATGGGAATGGTTATCATTAGCGAAAATTGATTGTG  
CCATCCAATGATTATCTATGGCAATGATTTACTGATGAAATTTATTTAAGTATCATTAAACAATATGAAATATAAAGGAA  
TATTTTATTTTCAAGTGGTTATGGTTATGCTATTGATAATCAAGGATATTGCTAATGCCCTGATGCATACCACGTAAGCCA  
GGATTTTCCGAAGGGAAGATGATGATGACGAAACACCCGACAGGAATTTATGTCGGGTGCCTTGTTAAGTGCATAAGAAG  
GAGGCTAAGAATGGAGTTAAAGAGAGCGTTATTAATTATTCTCCATTTGTTTTGCAACATCCATAATGTGGTAAAGCGG  
TACTCTGTTCTTAGCTAACTCTACCATGGCGTTCATATAAGGTACCATGGTTGAAAAAAGGATTTTATAACCTTCGCAA  
AATAAGAAACAGTCTCATTGTTTACTTTAGTAATACGATGCTTAGGACAACCGCCATTGCAGATAGGTTTATATGCACAT  
TGCTGACATTTGCTGGAATCCGTTTTTTTTGCGCTGTCAGTTGTACACTGTTTCATCGTTTTGAGTTTCAAGTTTATTAAT  
GTTTCCAATTTGACTGTGATAGACAAAATGGTGCATTGCTAAATGTCTCATTACTTTCAACAACAGATTATCCT  
TGCAGGACTCTGGAATAACAACCTGGTATGCCATTTCCCAAAAACGGCTGACAAAAGCTTTCAAACCTGACGGATGAAA  
ATTTCAACCCACATCGTTTTTAAACCATTCATAAAAAATGGTTGACATAAACTTGCCATAAGCCGTGGGAGGCACAGAAAA  
ATCAATGATACGGAATGTGTTCTCACTATGACCACTGAAATCAATATTGGCGTCCCGTTTTCTAGCAATTCGATAAAT  
GCATATGTTTACTGCCGATAGATTTTAAAAAATGATAAACCTCAAGAGGTAATGGACATTAACGTTATTAATGACGGTT  
AACGTATTAACCTCTACTTGATATGATTTAGACGCTCGATGGCTGCTATCACTTTTGCAAAAGTACCGTTACCTGAATT  
ACTGCGTCTGTAACGGTATGTAACCTCTGGGGCCATCGATCGAGATACCAACCAGAAATTCATGTTCTTTGAGAAAGG  
CACACCATTATTATTAATAAAATGCCATTCGTTTGAATGCATTAATAACGTTTTTGGCCTGCATAGCGTTGTTGA  
TAGTGAATAACTTTACGGAAAAATCCAGGCCAGCCAGAGTGGTTTACCAGCTTGCAGGTAATAAGACTGATTGCC  
AGACGCTGCGATATATTGTTGATGAACTCTTTCAGAGTGTGTCATCCATCCATTTTTCATGAGTAACTGCGACTCTT  
TTTCAAGGTAAAAACAGTAATCACATTTGAGATTACATTGAAAACCTGGAGGGCTTGGCTGTAACGTGCATCGCTATCTCG  
CTCAATAAGGGCGGGAATAATCCGCCGATGAAGGTTAGTTATTTGCTTCTGCTTAGTGCTTTCTTGATATTGTTAAA  
CTTCTCTGATTTACCTCGTAAGCGGTGGCTGGCTGCTGCGATAAACTCTTACCACGCCTTGCATCTTTAACGA  
CCTGCGGATTGGCGGCGCAAGGTTATCTTTTTGCTGTAGATCCGTCAGTTTGTAGAGACCTAACTGATTGTTTTCTACT  
GTATAGACAAGCGAATAATCGTTATTTCTCACCGTATAAGAGAATTGGCTTAAAGTCTCAGTGTGGGGTTATGCGGGTA  
ATCGTCTGACTGATGGCGAACAATTTGTGGTAATTTCCAGAATGGAATATTTTCTCGTCAAACAGTGAGAATAAG  
AGGTTATCCAGGTCAGATTTTTATGTGGCTGCCTTGTCTTATCTTGAACCCAGGGCAGCAAGGAAACGCCATCCAGC  
TTAAGGTCTTTTGAAGTGTGATATCGGCTGCATCAAGAGCTGTCGGGTAGAAATCCATTGCGGAAATCAGCTTGTGATA

ATTACCGGGTTGAAGTTTTCTTTCCACCACATAAACATTGGGGTGTGAGTACCGCCAGGATAGGTCTGACTCTTATAGC  
CTTTTTGCGCCCCGTTACGCGGCAGAGGACCATCGATAACCGCACCATTATCGGAGGTAAGAGAATAATTGTATTGTCA  
TACTGTCCGTTTTTTCTTCAAGTTGTTTCGAGAATGCGTTTTACACCCTGATCAACAGAATAAACGGAAGCGTAGTAGTTATC  
TGCTGTTTTGACTACCGGTATTAATTGCTTCTGATATTGATCCGTTGACAGGATTATCATTTGGCAGGTGCGGAGCATTAT  
AAGCCAGGTAAGCATAAAAAGGCTGGTCAAGTGTGGTGGCAGGATCAACAACGCCAATTGCCTCATCGGTTAACTGATCG  
CTGATATAACCTTTTGGGGGACACGTTACGATTTTTGAACAGTGAAGGGGAGTTGTAATATGCCGTTCTGACGCGTG  
GAATCCCATAAAGTAATCAAAGCCACGTTTTGAGGTTGCCATTCTTCCGCAGAAAATGTGGTGAAGTTGTCATGATAGT  
CACGCGTTTTGTTATCTTCCGGTACCGGCACATTACTGATTTTTGACAAGTGCCATTTACCTACTGCTGCAGTGAATAA  
CCATGATTCTGGAATAATCAGGCAAGAAAGTTTCTGTTAGCGGAATACCATCTGAGCATCGGTATTGGAATAGACACC  
AAAGCGGGCGGAGCTCGACCGGTCATTATTGCGGCGCGGGAGGGGCCGAAACACCGTGTCCACATAGCCGTTAGTAA  
AACGTACGCCCTCATCCATTAATGAAAGGAGCGTCGGCGTTGATTTTTGTGCAGCTTCAATGGCTTTATCTATCCCTATT  
TTGTAGGTATCGAACTTACGATTTTCCATTGTTTTGGGTCAAAGATCCCTTATCAAAGGAAGTTGTCCATAACC  
AAGATCATCCATGGTCAGTACGATAATTTGGCTTCTTTGGTACTGTATTCTGTGCGCGTAAAGTCTGAGAAAGCAA  
CGTTTGGTTGGTTGCTTTCAGCTTACATCATCTGCCGATGAGCAGCAAATGCAGCCATACCAGATGCCAGTATCAA  
GATATCGAGGTACTTACGACACTTTTCTTAATGCAGACTTCAAAATGTTCTTCTTATTGTAATTTCAAAGT  
AATTTTACGAAGAGAAAATAGTGGATGTAAGTGAAGTTAGTCACATAAAGAGATAGCAGATTTAGCTAAAAAAGGGAAA  
AAACAGTCCATAAAGCGTTGACATTACTTTCTGTTCTATTAAGTAATTTCTCGCGATAAAACAACTAATTTATTGATATT  
TAATAAATTATTGCATTTTACTGACAAAATGCAGAATTGAGATCATAAATAATCATGCAACAGGTTATGCAAGTGCATAA  
ATATGTGATGGATGTCACCTATTTATTTCAATAATATATCGCCTAAAAACAACGCGGGGACAGGGAATGGCTGCCCCATT  
TAATTTTACGCGAGCGTGTGTGGTTGACTACTCGTTAGCAAATAATCAAATAGCTAAAGCATTATCATGTTTGGCCGAT  
TCATACCCGTGTGACTTTGACAACGGTACTCCTTAGAACTCTTTCGGACTGTTGCCGAAATGTTTGGGAAACGCATAA  
ATAAAATAAGATGACTGGCATAACCACATTGTTCCGCAATTTTATTGACTGAACCTTCTACGCGTATCAAATTTTTTGC  
GTGCTGCATTTTGCATCTAAAAGAATCTGTGAGAATGTCGTTTGTCTTGTCTTAAAGTTTTTCTTCAACAGGCTTTCAC  
TGATGTACAGGAGTCACAAATATCTTTCAGCTTCCATGGGTGCGCCGGCTTATGTTGACAATATTTTCACTTTCCCA  
GAAACGGATAGCACACCGTTAGTTAATAGTGAATGAAACCTTTCATGTCGCGCAAAAATAGACAGGCAAGAAAAAGCAA  
AAGTTCTGAAAAATTATGATGATTGCGTTCTTCCGAGTTGAGATAAGCAATCATTTTATTAAGCAATCCAGTCGGTACAT  
TTGAAGCACGTA AAAACTTCGAGGAACAGGCACCGTCACTGTCTGGATGTTAGTGCATTGTAGATATTTTTAATGGTA  
TTTTCAGTAAATCCGATCTCTTTAAAATGCCGCTCATAAGGTTCAAATGCGTACGAACAGCGTTATCTACCATCAGGAT  
CTCGCCGTCAGAGAAGGCGTAATCTTTATCTAAAATGTTAGCGTTGAAGGCATGATGAATAAATAACAGAACAACGA  
GCGACATTTTATCTCTTAAAACAATAAAGTTTTATCGATACTTTTTAACATTTTATTTATAATTTGCTGTTTGT  
TTCAGCCTTGCAACTATTGATAATGAAATGTGTAAGATCTTTGCAATGCGACCCATTTCTGAAATACTCAGCTGATCA  
ATTGCCGAAAAAATGGCTATCAACGTAAGTGTGAGTAATAAGACAACCACAATTGCAGACATGATTTCTTTATAGTTGTC  
TCTTTGCGTGATTTTGTTTTTCACTGTGGTGCATGCATTTCAAATATGTTTATTTAGCGGATAACGTTAAAAATCGTTA  
ATCAGTATGCTTAATAACAGGCTGGAGAAAAGAGGAAAATAGGACTGGTGTTCAGTACTGAGCGGAGTTTCTTACAGC  
TGTAGGCAGAAGTTTATATCTTATAGTATGTAGTTTAAATTAATCCATGTGAGCAAATTGCGAAATAATAGTCAATGAGG  
AATTTCTGCTGTGCGGATGACAGCAGAAGAAATGAGAAGAGGCATTAATTTGATGGTTCAATTAACCGGAATACTT  
TTATAGCCAGGAATGCCACTTAATGGATCGTGGTTATCAAGTGTAGCATGTGATTGATTCTGGAAAATAGGTCAACAG  
TGAGCGGTGAGCCATAGGTAATGACCACTTTTAACTATCCATGCGGCGTGAGCTGCGCTTACCGTCTGGCGTAAGCG  
CAATAAGATTAACCTTTTCCGCTTTTTACACGGCAAAATTTAGCTTGTGTTAGCACTCATAAAGACCACATCTCGTTGA  
CCGAATACCCCTCGATAGCATCCATCCATAAAATCGTCTGTTGTACTGATCGTGGTGCCTACTGTCGCTGACGCTGAC  
CAGCTTACTGTTAAACGCTGAAGAGGGATCTTCTAACAGCCCTTTGCTGGTAATGAAATTAGCCTTACCTGACGGCGTCA  
TCCAGCGCCTTTCAGCAGCTGCATTTATCAGGTGAAAACACCGGGATGACGGATGCGCTGTTATAGTCGGCGAACTCT  
GGCAGCACAGCTTCAATGTCATTGCGAATGCGATCATAATCTTCCACCAGATACTCCAGGCTACCACGCTCTGGGGTAG  
TGCTGCCTGCGCGATTCCCGCGACCACTGCACACTCTGATTTACGATTACACCGCGGGTTTTAACACGCCACGCGAGG  
CATGAATCATCGACATTGAATCCTCAACGGTTACCGCTGCGACCGTTTTTTTTGCATGTCAATCTCGCTACGTCCAGG  
ACCGGCAGAATATAGCTATGCCGTGCGGTCAACAGATGAGAGCGGTTAAGCTTAGTGGCTACGTGTACCGCCAAATCTAA  
TTGCGTTAACGGTACAGCGCTCGTTCGCCATCTGGCATTGCCAGCGCAAATTTGCCCCCATGCAGATCAATGCTCGAG  
CCTGCCCGTACATATTGCTTGCATGCTGGCAATGTCAGCATGTCAGGTGCATGAGGTGGGGTGAAGCCATAGCGCTCA  
CCCAGACGAGCCAGAACTCTGCAGACGGTTTCTCGGTGATACCGACGGTTCGGTGCCTGTACATTAGAGTGTCCACG  
TAGTGGGCAGATACCGCACCAGGCTTCCAATGTTACCTTTTATCAACAGCAGATTGACCAGTTGCTGTACGTTCTGGG  
TACCATGTTCTGCTGAGTATCCCATTCGTAACAGATAATGGTGCCTTCCGCGAGCGGCATATGCGTCAGCCAGTTCG  
GCGATTTGTGCTGACTTAGTCCAGAAATACGTTGATATCTTTCCACTCGGAATTGAGAAGTCCAGCGGTAGCTCGTC  
AAAGCCGACGTTATGCGTTTTGAATAAACTCGTCATCAAGCAATGAAGGCCGACCTGCGGGCTTGCAGCATCATCGCGCT  
CAATTAACAGGCGCATCATCCCTTGAAGCAACGCCATATGCCACCAATGCGCACGTTATAGTAGGCACTGGCCAATGTA  
GTCTCAGAGTTGCTCAGCATTTCAAACGGTTTTGCGGTGCGGTAATCGCTCCAGGCCAGTTTCTGTAGAGGATTGAT  
GGCGATCATTTTCTGCTCCCCGTTTCACTAAAGCGCGCAACGAAGTCAAGTGCAGATGCGAGGGTGGTTGTACCAGGGTTATGCC

CAATGCAAATGACTAAATCGCACTTCTCAAAGTCTCCAGCAACACGGTCCCTTTACCTACACCGATACTCGCTGCCAAA  
CCCACGCTTGTGCGTTTCATGGCACATGTTGGAGCAGTCGGGAAAGTTATTGCTCCCGTATTACGGGGCAAAAAGCTGATA  
AAGAAAGGCAGCTTCATTGGAAGTGGCGCCCGAAGTATAGAATCAACCTGATTGGGATCACTATAGCTTTGAAGGCGTG  
CGCCAATTTCTGTCGAAAGCTTGTGGCCAGCTTAATGGCTTGTAAACAGTCGCTGACGGCATCATATTTCAAAGGCTGAGTG  
AGTCGCCCCGAGCCTCAAGCTCGTGGTCTCCCCAGGTAAGTAATGATTGAACCGTATTCTCAGCAAAGAAAAGGGCGTT  
TACCTGCTTATCCGTGACTTCCCAGGCGATTGCTTTTGCGCCGTTTTCAAAAATGTGCAATGACGCACTGTGCTTAGGAT  
CTGGCCATGCACAACCCGGACAGTCAAAGCCCTCTGGCTTATTGATGCAAAACATGGCAATAACATCCTGGCGTATATCC  
ATCTGCTTACGTAAGTTCGCTACGGATTTAACAGCACCCCAACCACCTGCAGCACCCCTGGTAGGATTCATTTTTTTT  
CTTCATCTACTTATCCTGTGTGAAATGAATTATTAGGATTTGTAATAGCGATGATGCACAGTACATACAAAGGGATTAT  
CGCCAACATGGATATATAAGAGTAGGGGACTACTCTTTTCTATTTTTAATCTATTATCGTTAAACAATAGATTAATAC  
GATAAGTTAAGCATCATCTCATAGTGTAAATTAACATATTTTTCAATATAAAAAATAAGACTCTGGCTTCAATTGT  
GCGCGGATTTTCTACAGGTGATAGGCTAATAGCCTTCAAAAAAATTTATCCGCGCAATTTTCGTGAATGGAGCGCATAG  
ACTAAGGTCAAATCACAATTATTATAGATAAAAGTGACACCAATGACTGACTGGACGGTTCCGGCTGAAACCTTGT  
CCTGTTTGTCCATAGGTTGCGCTTAAACCCAGAGGACTTTGCTTTTATTTACTGTCCCAGGGAGACATTTTCTCCCGT  
AGCCAGTATTTTTCCATTACGCATTAGAGTGACACCCACTCCCGATGCTTTTTGTTGCATCAGTGCTGTGTAGCAAACA  
CTTGTGCGCTACTGTGAGTGGTGGCACCCGAAAGATAAAATGAGAGCTTTTGTGCTTGGCAATATACGCAAGGGGT  
ATTTCTGCGCTTCCAGGAAAGTCCGGGAGATCCACGGTGACATTTTCGACTATCAACGGTGCAGCCGCTGTTGGCATAAC  
AACATTGTTATTTGAAATAATATTCCACGTAAAATTACGCGGATTTCCGCTTCTAATGTTGCAATTTTTATACATATGAA  
TACGGGCAATGACTTCCCCGCTTTTATGACAACCTCACCGCGCCCAACTGGGGTAATATAGAGTTTTAACGGTAAT  
GGCATCGGTGCTTATACCAATATCCAATACGTTGGTATTTGTCGTCACGGGAAGGGGTAGGTCACATTATTCCAGTA  
CAGCGATCCTTATATGACTGTAGGGAGCCTGCGAAAGCTGAGCCTGTACCAGGTTTATATGATCAGTGTCTGACCAGC  
CGCCGTAATCATTCCAGCAACTTATATGCTGAGACAAGTCTACAACAGATTCTGGCCCGCTGTATTACAGGGTCGAGA  
TTAACAATAACAGAGGTTGTACCTGCTCAATACTTGACCCGCCATCGACATTACAACGAAGGCAAAAATTTGCCTGC  
CATTAAAGATAAATACCGAACAGGACCTTTTACTGATTGTTTTACCCATGATATATCTAAGGTTAAAAATTGAT  
TTAAAAAGAAGGCTAAGAAAATCGAATCGACGTTATTGCCAGGTGATAGTACATTGATTAGCGCCTCGATGTTCCCTG  
GCTTGCCTTCCATTACCCTGATAGCTTTGCCTAAGTGGAACTGTGCATTACGAGTGATCTCATCAACAATAACCG  
TTTTGCTATCGCCATTTTTAACGCAGCATCCTGGTATCCCTCAGCTCTATCTGAATATTTTCGGCAGTACCTTCATTT  
TTGTAATAACCGTATTGTGAGTTGAACCTGTCACGATTGCCGCTACTGCACCTGTTTCAACCGGACAATCGGTTAATGA  
CAAAGTAATATTGTGCCAGCAGATGCAGAACCAGTGTGTGAGATTGCGCGTATAAAGATCCCCGAGATTAACGTTAG  
CTTCTTTGGTTGAATAGTGCAGGGTTTAGCGACTACCCGACCATTAACAGTGATAGTACATCGCGCGCCTGGAGAGTT  
GCTGTGAATAACGCGCAAAACGTAGCTAACAGGAACCTCTGTGAAGCTTTTTCATATCTGACTCTGATTATTGAAATTC  
AAGGGTAAAGGTTGCCGAAGCCCTCACAGTCCCGGATTGACGGACTTCTGAGTTGACTTCAGACGAGCGGAGTAAGGCA  
AAATATTGTTCTGTTCTGGTACCAGTGGGATCCACTGCATCCCGCATGAAGATCATTAGTTTACCAGGACGCATATTT  
GCGTCCAATATTTCTATACCCAAACCGGAGGCGCTATTGCTTCTTCCATCCAGTTTCAACAAAGTATTATTTTCTGCATC  
CTCAATACCGTTAAATGCAACCCGAACCCCGTGTCCCTTGTGCTGATTACTTAAACGTAATCTGAAAAGGGACGGCTG  
GACTTGTGCTACCGGTGTTGAAATGTCTGGCACTGTTTTTTGGAGATCTACGGTAAAATTAAGCGAATCCGATGAG  
ACTGTGCAGCCATAATCGAGGACGCGCCCGCTAATTTAATAACGCTATCTGCGGATAAAGCAGAATAGTGGTTAACC  
CAGACATAAACCGAGGAAAATAATGTTATTGTATTTATAATCTATTGTTCTTAGCGACAGATTGCTGTCTGCTGGTTC  
AGTAAGGTACCAGGAGAAATTCAGGAAGCTTGTACTCGACAATACAGTTTGGAGTTTTATCTTTGCCCATGAAACCTG  
TAATTTGCCCTGACTGTGGAAGTCCAGTCAGATAAACCTGACCAATTTCCGCGACAATGCTGCCATTTTTATTCTCTCCGT  
GTGTGACAATTCACCGAATGGAACGCTTATTACCCTACTTCAACGTCATTAATACTTTCCCGCCGATTTGTGCATTA  
AATGTTGCTCTGGCAATAGCACCGTGAAGTTGGGATGACAGTGACCACGGTTTTATCCAGTTCAACATTATCTGCAAGGGA  
ATTCCGCTTAAAGGACAACACGGTTTTCTCTATATTCTGTGCAAAATGGTAATATGGCATAGCCACGCCAGTCCGATGAA  
TTCCGGTCTGGTTCTCTATTTTACATTATCAGCACCGAGGCTTAAACCAGAACCTTGTGTCGCCAGCGGCTGTCCA  
AAGGTGATGCCATCAGCATGAGCAATAATCCACCCTCATTCCGTAATAAATCTGGCTGTGTCACCACTCCGACTGTA  
ACCGACATTAGTATTACCATAAGCTCCACGATAATTAAGAGAAGTGAACCACTGGTGCCAGACGATGTATTACCTCCGT  
GGGTGTTACCGACTGAACGCTATAATTCAGGTTATTATCCGGCAGCAGAGTCCATAAACCCCGATAGATTGGTCATG  
CCGCTTTCAAATCGTTTGACATACTGTAACCTGGCGTTTGAATTACGAAATGCCGACTGACTGTCTGTACGCATCCAATG  
ACTGAAGGGAACATTAAGCGTAAAAGCGAGTAAATGATCCCGATCGTTTTGCCATATATTATTGGAATAGCTGTAATTC  
GCGAAGTCTGAATATACCAACCGGCACATTTAATCCAATGATATTTGCTGGTCTGCTGCGTGACGTGTTCCAGTAACCT  
TGCGACTGGCACTGAAAAATGTCGTACCGTAATTTCCAAGCTGCTGAGAGATGCTTATTTGTTCTGACCACGCTTACT  
GTAGAACAGATTAATAAATCAATAAATTTGTGCTGCTCATTGGTGTCTCCGGTAGGAGGCTTACCGGTGAACCACTCA  
TTCGACTGTAGGCACTGTCCGATAAGTTATAAAAACCTTCCGTAGAATAGCGATATCCTGCGACCTGGATATTGGTTCCA  
CAACAAGTTTTATTGCTGCACTTGTGGAAGAGAGTATTTGCAAAAACATTTTATGTCGCTAAATAACATGACGATTTCAAT  
ATGCATGTTATTTATAAACCGTACTAAACAGAATATTATTGCGAACAAGGGAAGTGTGAGGAAAGGTCAGGAAAGGTCAGGCTACCA  
ATGGTTAATATGGCTATAAATCATTAGCTATGGTTAATGTTTGGTGTGCTGAAACTAACCCGAATTGCTCTAAACAGATA

AGTGCAGGGTTTATTAAGCTGTCCGACAGACTTTCTTAACCTGGTAATATCTCTCTTGGGTGACTCTCCAAACATCCGC  
GAATATCCCCTGACTGAAATGGGATAGCTTTCGTAACCGACAGCATAGGCTGCTGTGGTGACATCGTAATGTTCAATCAGC  
ATCTGTGCGCTGACTTCATTGAGACGTAGCCATTTCTGATACCGGAGTGGACTCATTCCCCTTGATCCGTCCTTAAATA  
AGTAACAGCACCTCTGGTGTTCGATGACAGTGTCTATGCGACAGACACTGCGCTCTTAGCATGGGGCAGGGAATAAC  
CAGGCTATTTCTCCATGCACAGCCAATTATGAAAGAGGAGAGGCTTAAGTTCTTGAACCCGTAACGAATAACGACTACC  
AGAAAAGCACTTCGCATCACTCAGACATGATTTAACATAATATACATTATGCGCACCAATATAAACCAAGGAAGTCCAA  
GTCGTTGGCGGTGATGTTGTCATGCTCATTAAACATGACCAAACCCCATATCTCACTTACTACCGTATTCTCGGCTTAA  
CCGTCCATGCAACCTCAACACATTGCTTTCAACTGCCGTACCACGTTCTCCGGAAAATCTGTCGGAATGAAGTCTTCA  
CGTTATCCAGTGTGCTGGAATCATTCTGGCAAAGTCACTCAGGATTTTCATGCATCTGCACCTCCGGGAATCTCAGCACC  
TTTGCTGTGCGCAAAAAATGTGCGGATAAAATTTTATCGATTGCCGTTTTTTTGCCTTTGGATGCGTTAAGCCCCATTGC  
CAGTTTGAGATCGCTGATGTGATTCCCGTACCGCCAAGGACCGGAAATGCTGAAATGATGTCGTAATAATGGCGTGAGTC  
GATAACTGCCGCCAGCCTGAATAAATACGGAGAAGTTTTTGCATGACCGTCCGTTGCGCAATCAACCACTGGAAGACC  
TGGAAATTCATAAAATCATAGCGATCTTTCAGCGCTCGCTGGACCCCATCAAAAAGCCATGATCCGCGCATGCCTGG  
GCCTCCATCTGATTCAATTTACCCGATGAAGGTAACCGAATGTCTGACACATATCCTCCTGTGGCAAGCGAAGTAAAA  
CCGTTGCTCAGCATTCCAACGCCTGTCAAACGCTCGACCGTAACGCGCGCACATTTCCCGCTTAAATGATTTCTGCG  
TCCGGAAACATTCAACCCAAGTTCTTTCCAGCAGCAGCAGTAATACTCATTATCAACGCTTTGGTGGATCGAGCTGAGCGT  
CGCATTGGGCTGCTGATTTCCGCAATCGGTAATTTAATGATGTGCGTCTGCGGTTATTCTTTCCGGAATGCACCAAGT  
CATTGCCTATTCTGAGCAGTGTGCTTCTCCTGTGCGCCAGCAACCGAGATGCGAAAGTCAATTTCTTCTAATCATG  
CCTAGCGGGATATCTGCTTTATAAGCCGTTAATACTTCTTCAAGTCTGGCTTCAAGTAAAGCTTTCCATGCCATTATCGG  
ATGCGTTACGTTTTCGTTCTCGGATTAACGTACGGCACCAACGCTGTCTCGCCCTATTCTGACAATAAATCAAACG  
GTTGCTGATTTGGCATGATAACGTTTAAACGATCCGGTACGTACAATCGGGCTATCGGGTAAACAGGTTATCGAAGAAG  
TTAAATACGGCATCAGAGGTGATATCCCCCTCTGCAATGGCAGCGAAAGTGAACCGGTCTGGCATAACGGCTTGCTAA  
CCACTCCGGTGCATACTTAAAGGTGTGCGCGCGGTTGGCTAACTCGTTAACTCGCTACCCGCTGGTTGTTTCAACG  
TGACAAGTTTAGGCATTACCACTCCAGATTTTGTGTTCTGTTGATTCTGGCGAGGCATTTTTCGCGTGCATAGCGTCA  
TTGAGAGTTCAAGCGACTGTAATAATCTTAAAAAATGCTGTGAGCGTGGTATTGTCAGGGTTGTTTTGAAATGGAAATC  
GTCGCTGCTTAAATCAATTTTTTTCCGAGCTCGCTCTGCGTCCAGCATTGCTGGCGAACCAGTTTCATTGCATT  
CGCAATTGCGTTGGGCTATAGATCTTCTGAAAGCTCATCATGTACATGTCACAGCAAGTTTATCCGCTTAAAGGGGAT  
ATTATAAGTTTTATCCTTTAGTGAGGATAAGTCAATCTGGAACACATCTTATCCGCTCTACGGGATAAACGCTGCGATA  
TCCGCGATCGCGGATAAAAAAGGAGGATTTAATAAGCGTTGATGCGCCGTTTGAAGTCCGCAATATTAAGCCGATGCC  
ATCTCGACATGCGGCTTATACGGTTTACCAGCTATATTTCACTCCAGCATGCCTGAGTATCGCTATAGCCTTTATCAC  
CTAGTTGCACACCGACATTTCCCCACAGGCTAAGGTTGTTATTTACTTTCCGCTCAACCCCGGTACGTACTTACCAGGA  
TTACGCGCACCTTACGGCTACGTTTGACCATTATCTTACGGCGTAGACTTTGCTATTGTTGATCCAGTTCGCTT  
AATGTAAGGCTGGAACCTACGCTGTTTACCATCGTACGCTGGTATGGCTGTTGAGGTAGTTTTACCCCAAGTCCGG  
TTTGACATTTCCGTCGCTTCCGTTTCAATGCGGTTCCGCTTTCCGGGTATGGTGGAAATCTTTCACACCCATCCAG  
GTGATTTGCGCTGTGGCTGGACGTACCAGGATTACAGCTCCCTCGCTGCCGCTAAATGTTCCCGCTTCAAAGGTATA  
CCCACCCTCAACAGAGGCCGTACACCCGCGAGAATCATAGTGTGACGAGAACGGTTATCGGAACTGACGCTGTTATCAA  
ACCAGTTATACAGCGCCAGCTGTCAACATAAGCGCCGGTCTTATTCGCATCGTTCTGATACCAGGTGCGGTACAGCCCA  
GCGCTGAACCGCTGATGCGCCATCCGATTTATAACCCACACGATTACTCTGAGTATTACTGTGCTGATTGGCGTAGCC  
TGCCATCACGCAAGATGCCAGCGATCTGCGGTTGCTACTCCACTGCGCCAAATCGCCGCTAGCTGCAATACATAGC  
GGTTAGCTGAGTATTTAGCTGACCGTCAACCGCTTGAACGTTCTGCTGCCCTCCGACATGACGCATCCACATACTGCTT  
GCCGACCCCTGAGAATGCAGTGAATCTGTATACTGCGGCTCACCCAGACGGTCTGTGTAACGATGGCTAAACAGCGAGTT  
GGCTGCGGCAATGTTGCTGATATAGCTTCCGGCCTCCGGGCGATAAACTGATGGGCTTCCGGATCCACAACAGGGGGAT  
TATTGATGGGATCGGGTGTATCCGCTGGCGTTACGCGCTCCATTTACTGGTACAGATACCAGTTTTTCTCGTCAATCCCC  
TTCCCTTAGCCAGCGTGTAGACGTAAGCCCCAGCTTGCACAGTTCGGTGGTACGCGGAAGTTACCTGCAGAATTACC  
GCCAACCTCAATGAGTTCAATACCGTTGACGTTTTGTGACCGACGCGGCAATGTTATCAACCCGAACGCGAGTGTCC  
CTTGGGTATCGCCTTACGTTTCACTTATCGGTGGGCGAATTATCGCCGCCAGCGTCCGCTTGAACGTCATCAGGCCA  
TTGTTTTCCGGTATAGTTGCCGTTAACGGTCAGTACATTTCCCGGTTTTCCCCCTTCCGCTATTCAATTTGAACCGTCCCGC  
ATTCTCCAGGTTGCCGCGATAGTGGTTTTAGCGACACGAGTCCCCCCCCAGGCATAACGTTTCAATACCTGCAGTG  
GTGACATTTCCCGACATCACACCGCTGTTATGGATATTAATGTGTTGACTTGCATATTAATGGCAGAGTCGGAACCGAA  
AGCAATTTCCCCCCCCACGATATCCGTCGTACCCTGATACGCCGCGAATCGTTGTTAAGAGTCAGGATCCCGGTACCCA  
GTTTTGTACATCACCGCTACCGCTGATACTGTGCGTATCGCCAGCTACGCTCAGTGGAGATGGTGGAGCGGCCATTA  
TTGATAACGGAAGCATCACCGAGTTTTCTGCTGTTGACGCTGAGCGCGCTGCCTGTATCAATGTTGAATTGCCCCAC  
AAAGCGGCTATTATCGCCATCCAATCTACATCTGTCTGGCGTTGCGCTCACGATACCCCTCCCGCTTATGCTATTAC  
GCAGTTCCGACGTACGTTTTTTAGCGTTAACAGACCGTCAATGGCAATATTTCTCTGCCTAACCCCTGAGTATTATCG  
AGGCTGACTTCCGCATTTGGGCTAATGCTGGTTAACGCATTGTAGCGTGCAATTAAGCCCCCTCGATAGCCAGCGTTCCCCC  
TGTAACATTCAGGTTCCGCCACCTGTGAGTTCACCCTGACTGATCCACCTTATTTACCCTGAGCGCCCCCTCTTTGA

ACAAAACAGTCGAACCCATCTGCCGGTGAATGTCTCTACCGTCTGCGTCGATCCATTAAGATCGACGATGGCCGCGTTG  
CTGATGTTCCAGTCCCGGGTGTGGCAAGTGCACCATCCGCATCGGTACGTAATGTCCCCATCTGAACGTAGGTTGCCCC  
CTGATAGTCGTTCTGACCGTTGGAAAGCGAAACCTGTCGCACCGTATTGATTGCCAGATCCCCTTACCACCGATTTTTG  
CCGACATATCGGCCGTTGCGCCATAGGCTCCGCCATGTTCCGGTAACGTGAGCTTTTGGCCACCATGGATGTTCCAGCGCT  
TTCAGCCCATAGTTAACGTACAAACCATTACCTGGTGCGGTCTGAGGCGGAATCCATAATCACCTCGCGCACCACCGT  
TCCGTTTTGCGCAATGTGTAACGTTTTGTCCGTTCCACCTCGTCGCCCTGTAATCACGTAACGTTAATGAGCCACCCG  
ACCAATAACCGTTTGGCCCTTACCAGTTGAACGCCGACATGGCTATCGTCGTGTTCCAGCAAATGAGCGTCGTGAGA  
GGTTATTCCGCATGGGATCATTCCACGGTTTAGGCACGTGATAAGCACGTGCCCCGTTCCCGTTTACCTGATAGTTACG  
GCCTTCCAGGTGTAGTCACCCGCGCCGACAACCAGCGTATCGACGCTGATATATCCCTCCGCGAGCGTCGCAGCAGGAA  
TATCCGATCGAAAATGATGGTACCTCCATTCATGGCCAGTCCACCAATGGATTGCTCTCCAACTTTTACCGATGTGGTA  
TTTTCACTGTCAGACTGCAACATCGCGTGAGTAAGCGCAGCGGTGTTGTGCGGTTCCAGAGTGAAGGTAAGTGTCTTTCCAG  
TTGGGCAACACCGGCAATTGAGTCCCTGTTGCATGGGTAAAGCCAAACATCTTGTGCGAGGATGACAGTGCACCTCGCA  
TCAAGCCATCGCTTTGAGCGCATTGGTCAGCGTGAATCTCCTGCACTGTTGTTGATGCGAGAATGTCGAGCGTACCG  
GGTTTTGCAATGGTTACTTCACTCGACCCATGCCGTTACCCCATCTGCCGTATGAGACGCAATGGTCAGGAGGCCGCT  
ATTGACCAGCGTTTTACCCTATAAGTATCCCTGCATTGAACACCGTATGGCCTGCATCATGGATCCTTTCCGTTCTT  
TATCGTCACTGTAATCAGCATATCGACCTGGTAGCCGCATCACTGTTATTGGTATGATTAAGACAAAAACGCTTCCG  
CCAAGACCAAACCTCCACTTTTCGTCGATTGGTGATAAATCCGGCATCTGCCCGCCGCTCACCGTGAGCAGCACCATGTT  
TAGCGTTCCTACAGCAGGCTCAAAAACACCTAAGTAAACTTCCACCTTCGACATTCAGCGTACCGTTATTCGTCAGGG  
TTAACGTACCCGTACCAGATGTCCCTACGTACATATTGAATGTTTCAAGAAGAGAGTTCTGCCATCCACCCTCACGTCG  
CCCTTACTTTTGTATTGAGAGCTATCTGTGATCACGCGCTTAACTATACCTCCGGTGGTAATATTAGTTTACCCTG  
GCCTAATACACCGACCTGTAGCAATTGTGCGTTAGTAGATGATGCTTTAAATTCCAGAGACTGTCGGTTGAAATATTA  
CTATCCCTTACCAGGACCTTTCTCCGATAAATCCATAGCCGTTGAATTAAGGGTGGCACCATTACTGACATTTACG  
ATACCGTACCAAATACCAGCATTGATACCCACAGTATCGAACGATGATGTCGCATCCATCAGTTTCACTGTCGCGAT  
ACCGCTTGTATTATCGCCAAAAAAGTAATATTTTGCATACGAACTTACCGCCATCGTAATATTGAGGTTTCCGACGC  
CCGCAACACCAATGGTGGTATAGACATTTCTATTGACCTCCACATTCCTCCGTTGGTGTGCTGACATTCCTCCGACCCG  
GTTTCTCATAACCGAGTGAATCTCCTCCGTTGCTGACAACAAGCCCTGATTACTGATATTCACTTCCGCGTGGCCGTC  
ATAACCAAGATTAGTTCCGAGATTAGTGATAACGGAGTTCTTATCCTAACAGTAATGTTGCCTGTGCCTGTTTCTTTCA  
TCCCGCAGTGATAATCCCGAATCTACTTTGCCTTCACTCGAGACATTAAGTTCACCGTCCGACGATCACCGATATAG  
ATATAGCGAAAGCTTCCCGGTTCCGAGGAAATCCAAATGCCCTTATCGGTACGTTGACGACACCGTGGGAACCGTC  
CTGAACGCCACCAATGAATATTCTTTGTTAATCAGTCCATTATTGAAATATTGACTGTGCCATTACCGAAATATC  
CATTATAGAGTCTGCGTACCGTGTGACAGAGTCTTGTGCTGCACATTCAGGGTCCGATACCGGTGGCATTGCCACCG  
ATAATCGTATTTTCCAGCCGTAACCAACCCCCCTCGCGAATAGTCGCCTCCCGAGTTTCTTATTACCAATTTGAAATC  
AATTGAGGAATCATTATTTTTATTAGCCACTCGCCACCCTTTTCAACGACAACCTGGCCATTACTGCCCGCTGATAGC  
CTAAAATGGCGACGATTGAACCTGTGACGTAACCCTTATCCGTAATATTTAATGAACCTGTGCCATAGCTACCTATTTCCG  
AATAATTCGGTCGTCAGAACAGAGTCTCTCCCTCAACATTGACCGTCCCGACGCTCCTGTGCAAGAACCTAATCTTAA  
ATAGCCTCCATCGACGTGACCTTCTGTTAATATTGAGCGTCCCGTCCGGATTGACCCACATTTAAAGGCTTGCAT  
TATTTCCGCTATCATAAATCGCCAGGTGCCACCCAAAACATTAACGGTGCCTCTGAGTCTCATTAGCGCAATGACG  
CTGGTAGTAATAGTGGTTAAGGAGGCATTACCGCCAGCCAAAATATTAAGCACTCCAGTCCATACCAGCAACCCAGGTA  
GGCATCATAAGCAACATCAGTATCAATATTGGTAATCTGATCATTATCAACTCCAGACTTGCACCAGACGCTGAACCGC  
TTAGTGCCAGCAAAAACACCCAGCTCAATCTACTGAATTTCTGTTGTCAGTCCAGAGGATTTACGCAAATTAACCGTCGAT  
GTTTTACCTGCCCTGCGAGTTAATTCGAGCAGGCCCTGAAATACCTGTAGAGTGCAATTCATATCACGCGATAGATTCT  
ATTATATAAACGCTCCATATACAAACAATACAGCCACGAAAGAGATGAGTCGTGACACATTAATAAATAAATAA  
ATTGTCAGAGGTCTGTATTGAGTGTAGTTGGAGGTGGGAAGGTGCAATTTGGCTAATTTGCTAATGCTTTTCAATTGA  
TAGATTAATAAATGTCATAGTTCTTATTTTATTTAAATATGAACATGAGTATTGTTGCTAATAAAGAAAATGTTTCTT  
TCAATAGGAAAATATCATCATATTTAAACAAGAATAGCACTAATTGCTAAAAATCGAAGTTTATTAACCCCTTTT  
GCATCCATTAGTGTCTTTAGGAATATTCGCTATAAAATAAGGGTGTGCTTAATGCTTTAAGAAAAATAGCAATTTTCCC  
TTGAATATCGTACTGGTGTGGAACGATGAATCTGCAAGCTGGCTTTTAAACAAGCCAGCTCTAAAAGAAGGGAAATAAGA  
ATAACTATACTCAAAAATAACAGCCACGGTCATCATGATGTGGCTGCAATGAACTATAACCCAGGCGCTTTCCATAA  
CGACGTGTCAGTCCATGATCAACCAGCCCGCTGATCCTGATAAACTGCCTGCCACTTATCGCGTGAATCCTGATAAA  
GTTGATGCTTTTCCGGTCTGGTGTGTGCGTCCGTTCCAGCGAACCAGGCGTTCTCCGGTTTCTGCCATTGATGAAAA  
ATCCGGCACCGACCGCAGTGCATGCAATGGCACATCTAATGCAGTGGCTTCTTTGACCACCGAATATTGACGGTAATCC  
CGAGACATCAGCGAGAATTTGACTCCATAATTTCCCTTTTGAACCTCCGCTGCAAAGACTAACGATGAAGGATGAATAT  
TCGAGAAATCAGCAATTTGCTGCAAGTTACACGCTGATACAATCGCCGATTTTCTTCCAGCGCACGGAACATGTCGCT  
TTGTTACATTTATCCGGGTCAATGGACAAGTTAATAAAGGAAGGGCAGCGTGATAACAGGTTTTAAAGCGCATTCTGTC  
GGAGAAGATCGGCATTACGCCCCACGACCAGGCGGACCCGACTGGCCATCTCTTCCAGCAGCGTATAGGTGTCGATGC  
CTAAACGTTCCGCAATCAGTTTTTCTTCCGACAGAAAAGCATCGCGAACCAGCGCATGGTGTGAGTCCGGTAAAAAGCTT

ATAGATT CAGCTTGTACCATGCCAGGAATAACATGAGGATTAACGCGCACGTTCAATTTCTGGGTCTGTCACCGGCGCGG  
TAAATTTACAACCTTGTGCCAGAATGTGCCGCAAGAACC GCGGTTTGTGCCGACGCACAACGCCTAACCCAAGGCAAC  
CAAGCTGCACGTGCCTCCTCAACGACCACCGGAGTGCCCGCCTTCAGACCGCAGAGTTCGCGCGCTTGTGAACCTACC  
ACGCCAGCAATGTGCCGTTTTCTTTGACAGGAGAAAGAATATCGGCACGTAGGCCAGCCATATCCAGCAATGCAGGTTT  
CCAGTACCGGTGGTTAGATCAAGAAGTCCCGTGGTGCCAGCGTTAGAGGGATCCACCGCCAGTTCGCGCGCTGAGCATA  
AGGCCAGCCAGTGCCTGATCATGGTGATGGTTGATGCTGACGGTAAATATCGGAACGATGGTGCCAGCCAAAGTAAT  
CTGGGGATGGCACTTAAAGCCAGTGTGTCGCGTCCGCGGATAAACTTCGTTTTCAAAGGTATTGTTGTGACGTTCTTT  
AAGTTGCTAACTTCGCGTCCGCTCTGGCATCCACATTGGCGCAGGCCAGATCGGGGCTCCTTCATTATTATATAAAA  
CAATGCCTTACGCATCGAACATGCCGAAACGGCAGCGATATACTCCGGGGCTATGCCGGGTTGTGACGCGCTGGCGC  
ATACACTCACACGCCAGTTGCCAGTTTTTGTGAGATCAAATTCATAGAACCAGGAACGTCCGGTACTGCCAGATGCCG  
CCACTCCGCTGTCCACTGCTATTTGATTGCCTCCAGGTGCAATATCACAGCCGAATACTTCCGGTGCCTGCATCCA  
GCGCCATCAGGTAGTACTTTGATTCTGAAAGGGTAAAGAGTCGAGCCATTAGATTATCCTCGGCTTATGCGTTCTGTCTG  
TTCCTCTATACGTTCTCCATCATTCCCGGTAATAAGGTCATGCAAATTTAACTACGTAAAATCGCCGCTGCTGTGCTCTG  
ATCGGTAACCAAGTGCCTGATATAACCGCCTTTTCATGACGCGCAATTGCTTCGGCTTTATTTTCTCCCTGCCACGC  
CAACCCGGACGGGTATGGTCTCAGCGCTTAAAGGTAAGCCAATCAGTTCGTTATGTATTTGATATTCGTGACAACG  
TCACCTTTTGATCAAAAAAGTAGCCTAAAATGTCGCAACCGCCCTTTTCGCAATCAATTAAGTTCGCTGCCCTGGCT  
GATATAACCGAGCAATGATTGTCGCATCGTCTGTTGACTCACAGCACCATGCCGACAATCGCCACATCCGCTGCTT  
GCGCGCTAACAGAACATCTTTGACGCAATTTTCATTTTTAGCGTACGGCAATGTCAGCGGAGGATGCCCGCAACGGA  
GCCGGAATAATATTCACACTGCACGCCGCTTAAAGTGCCTGATTCCCGTCAATAAGAACCAGCCACCGGAGAGCGT  
GACCAGGCAATTTGCTGTGACGAAATAAAACCACTTAAAGCGTTGACGCGTATTGATGTTGCTCGCCAAAACCAATCG  
CCAGCATCTGTTGTTGAGTAACTCATCAACATATGCGCCGCGCTATCCCCAGTCGCCACCAGCATCAGCATCC  
GCAAGCCAGGATCACCCGACATGTTGACGCAAAACTGACGACGTAATTGAGTTTCATATCCAGACAGCCTTCAA  
GCGAGAATTAATCTGTACGCAATAATGCCGACTGATGCCCTTCTCCAGCAATCGCGACACTTTCAAACGTGTCAGGC  
CGAGACGATCGCTGATCTGCTCTGGGTGAGCCGTCGTGATAGTAAACCACGCGATCCGCGGACCTGTTCTTCTCA  
CACATTCCTGTTCTGAAATTGCCGAATCGTTGATTGCATAATTCATTCTTCACTTTGAACATATTTAAATCTTTAATG  
CAATTGTTGAGTTCTTCTGCTATTTATCTGTGATGGCAACCACAGTTTACTCTACGAGCATGAACAAACGCAACCGTG  
AAAATCAAAATAGCATAAATTTGATCTATTCGTCGGAATATGTCAATGTCCACCTAAGTTATGAACAAATTTAAAG  
CAGAAATACATTTGTTCAAACTCACCTGCAAAACTGAACGGGGAAATATGCAAACGAGTGATACCCGCGGTTACCGC  
TACTTTGCGCCGCTCGGTTTATAACAGTATTAGGGGCAATGTCCTGAAAGGCATCGATTTTACGTTGCATCAGGGG  
GAGGTCCACGCCCTGCTCGCGGCAATGGTGCCGGTAAATCGACGTTAATGAAGATTATTGCCGGTATTACCCCTGCTGA  
TAGCGGTACGCTGGAGATTGAGGGCAACAACCTACGTGAGTAAACGCCAGTTTCATGCTCATCAGCTGGGTATTTATCTCG  
TTCCCAGGAACCGCTGCTTTTCCAAGCCTGTCGATAAAAAGAAAACATCCTGTTTGGGCTGGCAAAAAACAGCTCTCC  
ATGCAGAAAATGAAGAACTTGTGCGCGGCTGGGCTGCCAGTTTGTGATGTCATAGTCTGGCAGGATCGCTGGATGTGCG  
CGATCGCAATGGTGGAATCCTCCGCGGCTGATGCGGACTCGCGGATTCTGATCCTCGATGAACCTACCGCCTCGC  
TTACCCCTGCGGAAACCGAACGCTTGTGTTAGTCGTTGCAAGAGCTGTTGCTACTGGCGTGGGTATTGTTTTATCTCG  
CATAAGCTGCCGAAATTCGCCAGATTGCCGATCGAATTAGCGTATGCGCGACGGAACCATCGCCTAAGCGGCAAAAC  
CAGCGAACTGTCTACCGACGACATTATCAGGCCATCACCCAGCGGTACGGGAAAATCGCTCTTCCAGCCAAAAAT  
TATGGCTGGAGTTACCTGTAACCGCCACAACATGCCGCGGAACGCCGGTGTGACACTGGAATACTGACCGGCGAA  
GGTTTCAGGAATGTCAGCTGACGCTCAATGCCGGAAGAAATTCGGGCTGGTGGGCTGGTGGGGCCGGACGCACAGA  
ACTGGCCGAGACGCTCTATGGTCTGCTACTTTGCTGCGGACGCAATATGCTGAATGGTAAAGAGATCAATAAATTA  
CCTGGAAGAACTTACTGCGCGGTCTGGTTTATCTCCGGAAGATCGCCAGTCACTCCGACTGAATCTCGATGCTTCG  
CTGGCTGGAACGCTGCGCCCTTACTCATAACCTTCGTGGATTCTGGGCGAAAACCGGAAAAGATAATGCCACCCTGGA  
ACGTTATCGTCCGGCGCTGAATATTAATTAACCAACCGGAACAAGCTGCACGGACATTATCCGGTGGCAACAGCAAA  
AAATCCTCATTGCCAAATGCTTGAAGCTTCGCCGCAAGTATTGATTGTCGATGAGCCGACGCGGCGTGGATGTCTCG  
GCCGTAATGATATCTACCAGCTGTTGCGCAGCATGCCGCAAAAATGTGGCTGTGCTGTTATCTCTCCGACTGGA  
AGAGATCGAACTGATGGCAGATCGTGTGATGTGATGCATCAGGGCGAAATACCCACTCTGACTGACCAGCGCGATA  
TTAATGTCGAGACTATTATGCGGTTGCCTTCGGCGATAGTCAGCGTCAGGAGGCGTCATGCTGAAGTTTATTGAGAACA  
ACCGTGAATCACGGCACTGCTGGCGGTGGTGTGTTGATTACCCGTTTTCTCGACCGCAGTATTTAAGTGTG  
CAAACGCTGACCATGGTTTATAGCAGCGCGCAAATCCTGATCCTGCTGGCAATGGGCGGACGCTGGTAATGCTTACCG  
CAATATTGATGTTTCAGTGGTTTCGATTACCGGAATGTGCGCGGTGCTGTTGGGGATGTTACTGAACGCAGGATATTCAC  
TACCTGTTGCTGTGTCGCGACTTTACTGCTTGGTTTCTCGCGGATTTTTCAACGGTGTCTGGTCCGCTGGCTAAAG  
ATCCCTGCCATTGTTGCCACCTTGGCACGTTAGGGTGTACAGAGGCATCATGTTGCTGTGGACTGGCGGCAATGGAT  
TGAAGGGTTACCCGCCAAGTGAACAGCTCTCCGCCCCGCTGCTGCTTGGCGTTTCAGCAATGGTTGGTTGACGATAA  
TTCTGGTGGCATTATGGCTGGCTGCTGGCAAAGACGGGCTTGGACGCGATTTTTATGCCAGGGCGATAATTTACAG  
GGCGCTCGTAACTGGGCTTCTGACTGAAGCCATTGCAATTGTGGCATTTCGTTGAACGGCTGCATGGCGGCACTGGC  
GGGAATTGTTTTGCTTCGAGATTGTTTTATCCCAACAGACCGGTACCGGCTGGAGATGAAAGCAATTGACGCT

CGTGCTGGGCGGCATTAGTTTGTCTCGGTGGTTCCGGTGCGATCATTGGTGCGGTA CTGGCGCATGGTTCTTGACGCAG  
ATCGATAGCGTACTGGTGTCTTTGCGCATTCCGGCATGGTGAATGATTTTATCGCGGGTCTGGTTCTGCTGGCGGTGCT  
GGTGTGGATGACGCGCTGCGTTGTGCGCTGGAACGTAATCTACGGCGGCAAAAATATGCCGCTTTATGACGCCACCGC  
CATCCGTTAAACCCGCTTCTGCAGGTA AAAAACGGGAGGCCGATAATGCGTATTCGCTACGTTGGGAACTGGCTCTTG  
CCGCACTGCTCGTTATTGAGATTGTGCGATTTGGTGAATTAACCCGCGAATGTTAGATCTCAATATGTTGCTGTTACG  
ACCACTGACTTTATCTGCATTGGCATTGTGCGCCCTACCGCTAACGATGGTGATTGTGAGTGGCGGGATCGATATTTCTGT  
TGTTTCGACCATCGGCCCTCTGCGCCATTGCATTGGGCGTACTGTTCAAAGTGGTGTGCCGATGCCGCTGGCGATACTCC  
TGACCTTACTGCTCGGCGCATTGTGCGGGCTGATCAACGCCGATTAATTATCTATACCAAAGTTAACCCGCTGGTGATT  
ACGCTTGGCACGCTGTATCTGTTTGGCGGAAGCGCTCTGCTGCTTTCCGGTATGGCCGAGCGACGGGGTACGAAGGTAT  
TGGTGGATTCCCGATGGCGTTTACAGATTTGCTAACCTGGATGTGCTGGGACTCCCGTTCCGCTGATTATCTTCTGA  
TATGTCTCCTCGTTTTCTGGCTCTGGCTGCATAAAACCCATGCCGGACGTAATGTGTTTTGATTGGGCAAGCCCGCGC  
GTGGCGCTTATAGCGCGATTCCAGTTAACCGTACCTTATGTGCGCTCTATGCCATGACGGGGCTGGCGTCTGCGGTGCG  
CGCTGTGCTGCTGGTATCGATTTTGGTTCAGCACGTTCCGATCTCGGTGCGTCTTTCTGATGCCCGCCATCACCGCCG  
TGGTGTGGCGGGCCAAATTTATGGTGGTCCGTTCCATTATCGGCACCGCCATTGGCGTTTTATTAGTGGGATAT  
TTGCAACAAGTTTTGCAAATGGCAGGAGTGCCAAATCAGGTGTCAGCGCCCTTTCCGGTGGCTACTTATCGTCTGTGT  
CGTAGGTCGTTCCGTTAGCTGCATCGCACGCCAGCAAATTAAGAGTGGCTGGCGCGTCCGGCCAAATAACCCATGCCATAAA  
GGATATCTTATGACACTTCATCGCTTTAAGAAAATCGCCTTACTTAGCGCTCTTGGCATTGCCGCAATCTCTATGAATG  
TGCAAGCCGACAGAGCGTATTGCATTTATCCCAAATGTTGGCGTGGGATTTTTTACCAGCGGTGGCAACGGCGCACAA  
CAAGCGGGTAAAGAGCTGGGCGTTGATGTGACCTACGACGGGCGACAGAACCAGTGTCTGGTACAGTACAGTTGAT  
TAATAACTTCTGCAATCAAGGTTATAACGCCATTATCGTTTCTGCGGTTTCGCTGATGGCTTGTGTCCGGCACTGAAAC  
GCGCCATGCAACGTGGTGTGAGAGTGTGACCTGGGACTCTGATACTAAACCGGAGTGCCGCTTACTACTATTAATCAG  
GGAACGCCCGCCAGTTAGGAGGTATGTTGGTGGATATGGCGCGCGTCAGGTGAATAAAGACAAAGCCAAAGTCCGCTT  
TTTCTACTCAAGCCACCGTTACGGACCAAACAGTGGGTGAAAGAAGCGAAAGCGAAAATCGCCAAAGAGCATCCAG  
GCTGGGAAATTGCTACTACGAGTTTGGCTATAACGATGCCACTAAATCGTTACAAACCGCAGAAGGAATATTAAGCG  
TATAGCGATCTCGACGCCATTATCGCCCCGATGCCAACGCCCTGCCGCTGCCGCACAAGCCGAGAAAATTGAAAAA  
TGACAAAGTAGCGATTGTGCGATTGATACGCCAAATGTGATGCGCCGATGTAGAGCGCGCACGGTGAAGAATTTG  
GCCTGTGGGATGTGGTTCAGCAAGGCAAAATTTAGTGTATGTGCGGGATGCATTATTGAAAAAGGATCAATGAAACG  
GGCACAAGCTGGATATCAAGGGCGTAGGTCAGGTTGAAGTCTGCCAAACAGCGTTCAGGGCTATGACTACGAAGCGGA  
TGTAATGGCATCGTACTGTTACCGGAGCGCGTATTAACAAGAAGAATATCGGCAAATACGATTTCTGATGTGCAT  
TACTTAACCGGAGTAAGTTATGGCAGATTTAGACGATTAAGAATGGTAAAGATTTTCTGACCGATCAACCCGAAAAA  
ATATCCCTTTTACCCTGAAAGGTTGCGGTGCGCTGGATTGGGGAATGCAGTCACGCTTATCGCGGATATTAATCCGAAA  
ACGGGTA AACCCGTGATGCTGGCTTTTACCATGTTATTTTACGGGACCGACTACCGACTTGAACGCATTGATATAAA  
TATCGCCCCGCTGTTGAACATGCCGATGATTAATGTGTACGCGCGGCATTTTGGCAGCGTAGTTCCTCCCTGCGACCA  
ATAGGCCGGTGGTACTGCGGGCGTCAGGTGCGAACTCTATTCTGGCGGAATTAAGTAATGAAGCCGTGGCGTTATCGATG  
GATGACGCCGTGCGCCTGAACAGTTGCGCGGTGGCGGCGCAGGTTTATATCGGCAGCGAATATGAACATCAGTGCATCAA  
AAATATTATCAGCTGGTTGATGCCGGAATGAAAGTGGGAATGCCGACCATGGCCGTGACTGGCGTGGGCAAGATATGG  
TGCGGATCAGCGTTATTTCTGCTCGGACTCGAATCGCCGCTGAAATGGGGCGCAAATTATCAAAACCTATTATGTC  
GAAAAAGTTTTGAACGGATTGTTGCCGATGTCCGGTACCCATTGTTATTGCTGGCGGTA AAAAATTACCGGAGCGCGA  
GGCGCTGGAATGTGCTGGCAGGCTATCGATCAGGCGCTTCTGTTGTGGATATGGGGCGTAATTTTTCCAGTCTGACC  
ATCCGGTGGCGATGATGAAAGCCGTACAGGCGGTGTTCCACATAACGAAACGGCTGATCGGGCATATGAACTCTATCTG  
AGTGAAAAACAGTA ACTGCCGATCTAAGGAGAAGAATTTATGCACGTACACTGTTTGAATTAACGTTTATGAAGACAAG  
GTTGACGATTTTATCGAAGTTTTTCCGCAAGAACCTGGGCTCTGTACAGGAAGAAGGCAATTTGCGCTTCGATGTCTT  
ACAGGACCCGGAAGTGAATTCGCGCTTTTATATCTACGAAGCCTATAAAGATGAAGACGCAGTGGCGTTCATAAAAACCA  
CGCCCCACTACAAAACCTGTGTCGCGAAACTGGAATCTTTAATGACCGGGCCGCTAAAAACGCTGTGTTCAATGGTTTG  
ATGCCGTGAGGCGAATTTATCAATTTTATCTACAATTGGGGTAACGCGCTGACGGGAGTAAAAAATGTCTGACTGGAAC  
CCCTCTTTATATCTACACTTTTCCGCTGAACGATCGCGTCCGGCGGTGGAGCTGCTTGCCAGAGTGCCGCTGGAAAATGT  
CGAATATGTTGCCGATCTTGGCTGTGGCCAGGTAACAGCACCGCCCTTCTACAACAACGTTGGCCTGCGGCCAGGATAA  
CAGGCATCGACTCGTCTCCGGCGATGATTGCTGAAGCGCGCAGTCTTTGCCAGACTGCCAGTTCTGGAAGCAGACATC  
CGCAACTGGCAACCGGTACAGGCACTCGATCTGATTTTTGCTAATGCCTCACTGCAATGGCTGCCGACCACTACGAATT  
GTTTCTCATCTGTTTTCTTACTTAATCCGAGGGCGTGTGGCAGTACAGATGCCAGATAACTGGCTGGAGCCGACCC  
ATGTGCTCATGCGGAAGTTGCCTGGGAACAAAACCTACCCGGATCGCGGGCGTAGCCGTTGGCTGGCGTTCATGCTTAC  
TACGATATTTGAGCGAAGCCGGATGTGAGGTGATATCTGGCGAACCACTACTATCACAGATGCCGTCACACCAGGC  
GATTATCGATTGGGTGACTGCCACTGGATTACGTCCGTGGTTACAGGATCTGACCGAGAGCGAACAGCAGCTTTTTCTTA  
AGCGCTACCATCAGATGCTGGAAGAGCAGTATCCACTGCAAGAGAACGGACAGATACTGCTGGCATTTCGCGTCTGTTT  
ATTGTTGCCCGCGTATGGAGTAAATATCACGTGAGTGGTAATGACGATCGGGAAAGATTTTTGCTGGAATTTCCGCTT  
CATCGTTCATCTGTAACAGGTCAATTTCAATAGCGTTGAGATGGCATCCAGTGGTAAATCATTGTTTTAGTACCGAAC

GGATCTTCCAGTTCTTCCGCCAGACAATCCAGCGAAATAAAAAGTGTAGGAAATCAGCACAGAGATAAAAAGGCGTCATGTA  
ATGCAGGTCCACGACCAGCGCAACCGGCAGCATGATACAAAACAGATAAACGGTACGATGCAAAATCAGGGTGTAGGCCAA  
AGGGAATTGGCGTATAGGCAATGCGCTCGCATCCTGCCAGGACCCTGAAATATCATTAGCCGATCGTTGAGGCTAATA  
AACAGGATATCTGAAAGCTGTCATTGCGGCGCTGAACCGCAACCATTCTCCATTATTAACAAGATACGGTTAGCTGG  
AGAGTTTCAAGCCAGTACACGCTGAAGATCTTCAGTCTTGAGATAATGAGCCAGCACTTCCGCTGTGGCTGTTTGCCTA  
ATGTCATGCGTAAACAGTGGGCGAAAGCGATTTGCAGCCGGGCAAACTCCCTTACACTTGGCGAATCCGGCAATGTCGTT  
TTTACCTCGCGCAGTAACGACCGTGAGGCAATCATCAACTGCCCCAAAGTTTTTCGCGCTTCAACGTAACGGGCGTACCC  
GGCATTATTACGAAAACCAAGAAAAATGGCGATGGCGACACCGAGAATGCTGAACGGTGCAGGGTGAATTTGATGCCCA  
GATGCGTGTACCAGGGCAGCATGAAAATAACAGCGATAGAAAAGAGAAAATTGAGTAGTAAGCGCGAGGATATCTTGGAT  
AATACTGAGCCGTGCCAGACAAAATACGGCGCAGCCAGTGTGTTGTGGACGAACAATCATGGTTATCTTCAGGCGTGG  
AAAAGTCGCCCTATTAACGTGATTACGATCACATTCTCAAGACGCTACTTACAAATTACCTACAAGCTTACAACATTAG  
CAGGCGCTGCATGTGGCACCTGTTAATGATAAAGGCATATAGGATGTTGTAACATAATGTTGAAATAAGAAACCCGGTC  
GAAACCGGGTTCAGAAGTAACGGTGTATTAGCACAAACGGACGTACAGCTTCGCGCATCCCTTTTTCGAGAATCGCATCC  
AGTTCATTAGCAACCTGCTCGACCAGACCAGGCACTTGGCTCAGTCTGCTCCAGTGGTCTTTTTCTGCCAAAACAAT  
CGTACCAGTCTCTGGGTGCCGATAACACGGTCACGATGCTGGTCCAGAGTTGCTGATAACGTTCCAGCAGTGTGCAT  
CGTCTGTACCAGGATATGTTTCGCCGTTACGCTCACACGATAGAACGCAATCAATGCCGTAATGCCGAAAGTAAGGGC  
GCCGGAAGTGTCCGTTTTGCCCTTCCCTGCCAGCAGCTGTGGCAGGATGCGGGTGCAGAACTTGGTACATACCGTTGAG  
CGCGATAGACAGCAGCTGATGCTTAATGTACGGTTACGGAACGCCCGGTGACTGCACTGGCGAAAGATTCCAGTTTAT  
CACGAGGCAAAATCCAGTACCAGGAAATAATTTCTTCGTAGATAGCTTTTTCAACGAATGCGCAAAATTTAGCATCGTTATC  
GCTTACCTACGGTATCCAGCCCTGCCTGGAACGCCACCGGCACCGAGCGGTGTGCGCACCGTTGAGGATTGCCACTTT  
GCGTTCTTTGTACGGTTAATATCGTCAACAATCAGCACGTTGAGCGGATATTTGTCCAGACGCAAGTTCAGTTCGTAAGG  
ATTTCCGGTCCCTGAATCACAAAACAGGTAAGGTTGTTGAGCGGTGTCGAGAAAACCATCGTATAACCCAGTTCCTTCC  
AGTTTAGCCACTTCATCGCGCGGATAACCGTAACGATACGGTCCACCGAGTGAACAGAAGCTGTTAGCCTGATCCAG  
CCATTGAATAAATGCTTCTGGCAGTGCCACTCTTGGCATAGCGCAGCACCAGTTCACGCAACGCGTCCGCTGATGAGT  
CAATCAACTCACAGGAATGATGATCCAACCTTTATCCAGCGCACCGTTGAAATGGCTAAAGCGTTGAAACAGCAGACGG  
GTCAGTTTTGCCGGATAGCTTACCCTGGCGGTCATCGAATTTATCGCCCGCATGGTAGCTGATACCCGCTTCGGTGGT  
GTTAGAGAAAAACAAGCGCATTTCCGGGTTGTGCGCAGTTTCAGGAATTCATCGTATTACTGTAGACGCTGATTTAC  
GATTAACCGAGCGAATCAGACGCGCTGCTGACCGCTTCCCTTCTCATTACGGCCACGGATAATGGTGGTGTACAGA  
CCATCTGCGTCTCAGTACGCGCGGAATGAAGTTCAATCGGACGAACAACGACCACGCCAGAATTAGATCGGTGTG  
CTCATTAGGAGATCGATTTGCCAGTCAACAAAGGCGCGCAGGAAGTTACCTTACCAAATGAATGATACGTTCTGGAT  
ACTGTGCACCGGGAAATCGCGACGATTTAGTGTTCACAATGGGTTCCCTTCTGATTAGTCATACAACCTGTTTGAAT  
TGGTACGACAGGTTAGCAAATTTAATACGCCGAACCCCTGTTTTGATCAACTCCTGATGATTAATGAGCAGTTTTATGA  
GAAAAGTGTGGCGCGGATCATGGTTAATCGAGGAAAAACGCCTTTTCTGGATCATAAAGTGGTAGAACACATTGCATT  
CAAATCGCGGTAATGAATAAAGATGTCAGACAATTCCTCACCGTAACGCATAGTGTGGTACGGTTGCGCCATCTTT  
CTTCGAGCGATACAGACAGTATCGGTTTCGACCATCAATTTATTAAGTATCGGTGAGGTTAGGTACGATGCGCGAC  
CACTACCGACGCCAATACTTACCGTGAGATAAAGCGTTTTTTGTTGCCAGGTGAATGGTTGAGTTCAACGCCTTACGG  
ATTTTTCCGCCATTAGCAGACCATCGACAGGATTCACCGACGGCACTGCAACAGCAAATCTTCGCCGCCATTCGCGC  
CACCAGCCCCATTACCCGACAATCTTCTGAATATGCCGGGCAACACGCTTAACACTTTATCGCCACATTATGTCAT  
AGTTATCGTTAATGCTTTTGAATATCGATATCAAGCAGCATGACAGTCAAGTGTGTTGTTGTTGTTGTTGTTGTTGTT  
TTCAGCGCTCATAAAGACCGGACCGTGAAGTAACTGAGTCAGAAAATCAAAGTCCGCTCGCAGCGCAACTTGTTCAT  
TAGCGAATTGATCGCTGCCACGCTAAAAGAAACCATAATTTGGCATATCGCCATCGTGGCAATACCGAGACGTGCGGAGA  
ACATTTGCCGAATGGAGAACGGCGAACCGACCGAGATCAATACCCGAATTTGCCACCAGTACGATTTCCACCGCACCG  
GTGACAAAGGTCAACAGACATGTTACCTGCGGCGTATAGCGCACTGCACACCAGATTAATGCAGGCAGCGGGAACGCCAG  
ACTCCCCGCTCCGCCAATGACTACCGAGGCAATAACCGACACAATAAGCGCGATGGCGGGCATCATCTGTTCTGCTTAA  
AGCGCGCAGCACTCCAGGAATAGCCAACGTCAGCATAAAGGCACGATCAACACGCCCGTTGAGAATTGCTCACTGAAC  
CAGTCCGCAAGCAAAGGCCAGAAATCCAGACTATCAATACTGACCGAACCAAGATAGCATGTTGCTGACAGCGCGGCA  
AATAAAGGTACCCTGGGAATGCTATTTTGTGTTTTCCGAATTTCTCATGGCTGATTCATCTGTACAACCAGCCAGTGT  
AGATTACCGCCACGATATAACGTTGTTGTTCTTCGTTAACGAAACACCCTGCCGAATGTTATGCCACTTAGCCAGACAA  
CCGCGACAGCAGGTGCGGTTGGCGTGTGAGCGATAAACACCGGATGCCCGCATGGGGTTTTGCTTACCGTCATTAGC  
CGGTAATGCCGGAGCAAGACGTTTAGCGACAAAATCCGCCGATGTTGTTGATGACTGGCGGCCTTTCTCCAGGCAAT  
ACTGACGCTCTTTCATGCCAGACGAAAGCGAGAGCAAATTTTGAACGGGATAAACCGCGGAAGAGTGGATCGAGAGAC  
TGCATTAATAAACCGAACGCCCTAACTGTTTCGTCAATTTGTTCAAGAACGGCAATACCCGCAAGCGAGTTACCTGCATCA  
TCCAGTTCCGACTCCAGACAGCGATGGCCATTTTATGCGGAACAATCGCCACAATACCGCCACCAACGCCAGATTTCCG  
CGTAGCCCCACCCGCCAGGCAAACTCCCCGCTTCTGGTACATACCCTGTTGCGCATCAGCGGTTAATTTGCCGCG  
CCTGCATTGGCGTCACTGTTTCAATATGAATAGTTTTCCCTGATTAGCCAGAAAGACAAACGTCGGGCCAGC  
TCTACACAGCTCATTTTACAGAGCGAGTAATGAAAGTAGTTTTGCAGAACGGTGTGACGTCATGATGAAATTTGCCAAA



CGACTTCATCAGCCAGGCGATAGCCGCATTTGCGCGGAATGTTCAAATTCGGAACGCGCTACCACCGTATCGTAGGAAA  
TATCAGACACACCGCTTAAGCCGCGCAGACTTCCAGCATACGTTGCCGTGGTGCCTTAATCGCCCTTGCAACATATCG  
CAGACCACCAGCGCACCCGCATTAATGAACGGATTACGCGGTATACCCTGCTCATTTCAGTTGCACTAAGGAATTGAA  
CGGTGATCCAGACGGATCTTTGCCGACCGTTGCCAGATTTCTCTTCGGAGTAATGACGCATGGCGACAACGAGACTCA  
GCACTTTGAAATAGACTGAATGAAAAACGTTCTTGCGCGTCTCCGGCCTGAAAAAGCTGTCCGTCAACGGTACAGATA  
GCAATCCCCAATCGGGAACCGTCTACTGTAGCCAGCGCCGGAATATAATCCGCGACTTTACCTGACCAATGAGCGGCCG  
CACTTGCCGCAAGATGTTTTCTAAAATTGCATTATCCATGGCGACTGCCACTTTCTACTCTGGACCGCAGGTCTGAAAA  
GACCTGCGAGTATATCAGAGCTGAATATGTCGCGTCAGATCCGGTCTTTCCACACCGTCTGGATATTACAGAATTCGTGT  
AAGCCGAAATGGGAAAGCTCACGACCAAAGCCACTTTTTACGCCACCAAAGGCCACTCGCGCGTCTGTCGGCACAATA  
ACCATTGATAAACACCCACCGCATTCCAGACGTGCCGCCATCTGTCTGGCCTGTGTTTCAGTGGTAAAAATGGTCG  
CTGAAAGGCCGAACTCACTATCATTAGCCAGTTCAGTGCATGTTCTGCATCTTTGCAATGGTGATTGCCGCAACGGGG  
CCAAACATTTCTCCGAAACGCGGTCACTTCTGGGTAACATTCGCCAGAACCCTGGCGGATAGTAGTTACCTGCCCC  
AGCCATCTTTCCCGCCAGTAACAACGCGCACCTGCGCCAGGGTTTTCTCACCTGATGATGCAGTCACTACAGTA  
AATCAAAACGAGCCATTGGTCCGAGAGCGTCTCTTCGTACGCGGATCGCCATTTTCAAGGCTGCCGAGCTGCCACA  
AAACGTTCCGTAATGCCGAAGCAATCCCTCTTCGATAATAAAGCGTTTTTGGCGTGCACATACCTGTCCGGTATTCTG  
ATAAGTCCGCTACCGCCGTTTTACCGCAGTTCAGATCGGCATCGTTAAGCACAATAAACGGATCCGAACCGCCCA  
GTTCCAGTACGCATTTTTTCAAGTCCGCTCCAGCCTGTGCGCCAATAGCCGCTCCCGCACGAACACTTCCGGTACCGTG  
ACAGCAGCAATGCGCGAGTCTTAATCATCTGACTGACACCGTCTGTGCGCATTAGCCAGCCATATACGCCCTTGTGG  
GATACCCGCATCTTTAAACACTGGGCAATGAGCTGTGCACAGCCATCACATTGCGCGCATGTTAAGTAAAGTAGCCGT  
TACCTGCAAGAATGATGGGAACAGCGCCACGCATCACCTGCCATAACGGAAAATTCACGGCATAATCGCCAGAATCGTC  
CCCAACGGTCGATACTCAATAACCGCCTGCTGATTTTCCACCAGCGTAGGTTCCGCCTTACGATTGCCGGACCATGTTT  
TGATACCAGTACACAAATTCGCCGATTTGCCACTTCAGCGCGCGCTGGTTGATTGGTTTGGCCATTTGCGGGTGA  
TCATTTGCGCCATTTCTCGCTACGAGCGCGCAGAGCCTTACCGATACAGCAGTTTTTACGACGATAATCTATATTT  
GTCTGCGCCAGTCCGAAAGCCTGCTGCCGCCAGTGAAGTGCCTTTTCGATATCGTCAGCGCCAGCCACGGCAGCAC  
AGAAAGTTGTTACCCGTGGCAGGATTTATCGAAATGCATGAGTTGCCGGAGTAATGGTCATCGGGGTATCTCTTTAT  
GAGTCATGGTATGAAGATACGAGATTTACTCTTGTCTTAAAATGAATAATATTAAGCCACTTATTACGAATCGAGAAT  
GCTATGGATCTGACCAACTGGAGATGTTCAACGCGTTGCCGAAGCTGGCAGCATAACCCAGGCTGCAGCAAAAGTGCA  
TCGCGTCCGTCGAATCTACTACCCGCTGTCGCCAGCTGAAACAGAAGTGGGGGTTGATCTGTTTATTCGCGAGAATC  
AGCGTTTACGTCTCTCTCCGCGGCATAACTTTTTACGCTATAGCCAACAATTTCTCGCTTAGTGGATGAAGCGCGG  
AGCGTTGTCGCTGGCGATGAGCCGCAAGGTTATTTTTCTTGGTTGCTGGAAAGCACCGCTGCAGTGGCATTCCAGC  
CACGCTGGCGGAATCAACCGTCTTATCCCAAATTCAGTTTTCACTTTCCACCGCCCTTCCGGCACTATGCTGGATG  
GTGACTGGAGGGAAAATGAATGCGCGGTTTATTGATGGACCCATTAACCATACTGCCATCGACGGGATACCGGTATAC  
CGCGAGGAATGATGATCGTCACGCCACAAGGATATGCGCCAGTAACCCGTGCCAGTCAAGTTAATGGCAGTAACATTTA  
TGCTTCCGCGCAATGTTTCGATCGTCGCCACTTCGAGAGCTGGTTTCATGCTGACGGTCCGCTCCGGGAACTATCC  
ATGAGATGGAGTCTTATCACGGAATGTTGGCCTGTGTGATCGCAGGAGCAGGCATTGCGCTTATTCCGCGCTATGCTG  
GAAAGTATGCCGGGCATCACAGGTTGAAGCGTGGCCGTTAGCTGAGCAATGGCGTTGGTAAACAACCTGGCTGGTCTG  
GCGTCTGGTGCAGAAACACGTCCGCTCGAGGCATTTATTCAACTGCTGGATGTGCTGACTCGGCAAGACAGGGATATC  
AATGAGCTATTTTTGATAGTTCTTGGCGTTAATATGCTCTATATAGTGTGATGTTCCGATGACTTATGACTATATGGGGCAA  
ATATGTTTACGCCAGTAAGCATCAGCAATTACATATCTTCTGATGATTTTTCCGTAAGTAAATTTGACCCGAGGTA  
AAAGAAGTTTTAAAGGATTTTATTGATGCACTTAGTACAATAATATGTAATGAAGAGTGGCGCAGCTTTTTAAACATCAA  
CTCAGCCACAAAAAAGATATTTAATAACCTTGACAACCTTATCATATATTAGAGGACTTTTTTCCGGGTAACGACACGC  
TATAAATGAAAAGGTTCAAGTTTAACTCACTTATCCCGCAGGAATGGAAGACACAAAGAAAATATTGAATTTAGGTA  
GTAATAAATTTAAGCCCTATTTATTTAGATAATTTTCGCCATGATGGAGAAATTAATATTTTTTGGCTCCCAACCCAAA  
GCCTGTCACTATGGGGCGGTATTTTACAGCCGGCGTGCAGCGTACTCTTTCTGTTTCTGAATGATTTTATTGAACAAT  
TTCCAATGATCAACCCTGGTGTCCCATCAAAGAGCGCATAACCCACATATTGAACCCCTGCCTCGGATCACCATACC  
GCTGCAGATTACTTACGCCAGTTGATTTGCTTGTCTGAATTTTATCTCTCGCGGTAATTTTGCATACTCCCCGATT  
ATGGAATAACTCTGAGGTTACAGATGGTTGTCATAAAGATCTAACTTATCACCGCCATTCTCGACATAACGGACA  
GCGAATTAAGAGGATTTGTTGCAAAGCCTGATGGATTCATTAGGTTCTAACAAACATGACTACCCGAAGTCTGCATC  
TGCTTTTTATCCCTTTTAGCAGAACAAGAACTCTCTCATTTCAGAACTGTTTTTATTTTTGCCAATATGTTATTGCA  
CTATACCAATTTATGAATCCCAATGAAAGTGATTTGAATGACGTGTTGATGCCAGCATCATTAAAGTATGATAAAATTA  
TCAAACATATGGCGCGCAGGACCCTCAAACGTTTTGAAAAAATGAAACACCGCCAAAAGTACTCACGAAGACCTGGTG  
AAAAACAGGCTCGCTCCCTGTGACACCCTATACCCGCAACCGCCAAAACGCCAGACCTCCCTGAACGTCATTAAC  
CGTATGTTACCGACTCTCTGACCGTGAAGAATCAGCGTCAGAGAAACGGAAAACGCGATCCAGATCACAAATGCATT  
GTATTCACATCATTAACCGTTTTAAGTCAATTTTCACTTTTTCGCAACTACCCGATAATCTGTTATGACAACAAACA  
CTGTTTCCCGCAAAGTGGCGTGGCTACGGGTCGTTACGCTGGCAGTGCAGCCCTTCTCTTCAACACCACCGAATTTGTC  
CTGTTGGCCTGCTCTGACATTGCGCAAAGTTTTACATGCAAACCGCTCAGGTGGCATCATGTTGACCATTTACGC

ATGGGTAGTAGCGCTAATGTCATTGCCTTTTATGTTAATGACCAGTCAGGTTGAACGGCGCAAATTAAGTACTGATCTGCCTGT  
TTGTGGTGTATTATGCCAGCCACGTAAGTCTGCTTTTGTCTGGAGCTTTACCCTTCTGGTGATCAGTCGCATTGGTGTG  
GCTTTTGCACATGCGATTTTCTGGTCGATTACGGCGTCTCTGGCGATCCGTATGGCTCCGGCCGGGAAGCGAGCACAGGC  
ATTGAGTTTAAATGCCACCGGTACAGCACTGGCGATGGTCTTAGGTTTACCTCTCGGGCGCATTGTGGGCCAGTATTTG  
GTTGGCGAATGACCTTCTCGCGATTGGTATTGGGGCGCTTATCACCTTTTGTGCCTGATTAAGTTACTTCCCTTACTG  
CCAGTGAGCATTCCGGTCACTGAAAAGCCTCCCGCTATTGTTCCGCCGCCGGCATTGATGAGCATTATTTGTTAAC  
TGTGGTGGTGTACCCGCCATTACACGGCATAACAGCTATATCGAGCCTTTTGTACAAAACATTGCGGGATTGAGCGCCA  
ACTTTGCCACGGCATTACTGTTATTACTCGGTGGTGCGGGCATTATTGGCAGCGTGATTTTCCGGTAACTGGGTAATCAG  
TATGCGTCTGCGTTGGTGGTACGGCGATTGCGCTGTTGCTGGTGTGCTGGCATTGCTGTTACCTGCGGCGAACAGTGA  
AATACACCTCGGGGTGCTGAGTATTTTCTGGGGATCGCGATGATGATCATCGGGCTTGGTATGCAGGTTAAAGTGTGG  
CGCTGGCACCAGATGCTACCGACGTCGCGATGGCGCTATTCTCCGGCATATTAATATTGGAATCGGGCGGGTGCCTG  
GTAGGTAATCAGGTGAGTTTGCAGTGGTCAATGTCGATGATTGTTATGTGGGCGGGTGCCTGCTTTTCCCGCTTAAT  
TTGGTCAATCATTATATTTCCCGCTGGCAGTGCAGCTCGAAGAACAGACGCAATAGTTGAAAGGCCATTCCGGCCCT  
TTTAATGGTACGTTTAAATGATTTCCAGGATCCGTTAATAATAAACTGCACCCATACATACCAGCAGGAATCCCAT  
CAGACGGGAGATCGTTCAATGCCACCTTCCACAGCCGCTAATTGCGCCGGAGCTGCTAGGCTTCCCCACAAAA  
TAACCGCCACCAGGAAAAAGATCAGCGCGGGCAACCATCAGTACCCAATCAGCGAAGGTTGAACTCTGACGCATGTG  
GACGCCGAGCTAATAATCATCGCTATGGTTCCCGGACCGGAGTACTTGGCATTGCCAGCGGCACAAAGGCAATATTGGC  
ACTGGGTTTCTTCCAGCTTCCGACTTGGTTTTGCGCTCCGGTGAATCAATCGCTTTCTGTTGCGGAAAGAGCATCC  
GAAAACCGATAAACCGGACGATTAAGCCGCTGCAATTCGAGACCGGGAATCGAAATGCCAAATGTATCCATCACCAGT  
TGCCCGGCGTAATACGCCACCATCATGATGGCAAATACGTACCCGAGGCCATCAACGACTGACGATTACGTTCCGCACT  
GTTTCTGTTGCTGCCAGGCCAAGAAATAACCGGACAGTTGTTAATGGGTTAGCTAACGGCAGCAACACCACCAGCCCCA  
GGCAAATTGCTTAAACAAATCTAACATTGGTGGTGTATCCTGTGATCTGGGTTATCAGCGAAAAGTATAAGGGGTA  
AACAAAGGATAAAGTGTCACTCTTTAGCTAGCCTTGCATCGATTGAACAAAACTTGAACCGATTTAGCAAAACGTGGCAT  
CGGTCAATTCATTCTTTGACTTATACTTGCCTGGGCAATATTATCCCTGCAACTAATTACTTGCAGGGCAACTAATG  
TGAAAAGTACCAGCGATCTGTTCAATGAAATTATCCATTGGTGCCTAATCCATATGGTAAATCAGAAGAAAGATCGC  
CTGCTTAACGAGTATCTGCTCCGCTGGATATTACCAGCGCACAGTTAAGGTGCTCTGCTCTATCCGCTGCGCGGGCTG  
TATTACTCCGTTGAACTGAAAAGGTATTGTCGGTGCAGCTGGGAGCACTGACCCGTATGCTGGATCGCCTGGTCTGTA  
AAGGCTGGGTGAAAAGGTTGCCGAACCGAATGACAAGCGCGGCTACTGGTAAAACCTACCACCGCGCGCGGCAATA  
TGTAACAATGCCATCAATTAAGTTGGCCAGGACCTGCACCAAGAATTAACAAAAAACCTGACGGCGGACGAAGTGGCAAC  
ACTTGAGTATTTGCTTAAGAAAGTCTGCGGTAACAAAAAGAGGTATGACGATGTCCAGACGCAATACTGACGCTATT  
ACCATTATAGCATTGTTGACTGGATCGAGGACAACCTGGAATCGCCACTGTCACTGGAGAAAAGTGTGAGAGCGTTCCGG  
TACTCCAAATGGCACCTGCAACGGATGTTTAAAAAAGAAACCGTCAATCATTAGGCCAATACATCCGAGCCGTAAGA  
TGACGGAATCGCGCAAAAGCTGAAGGAAAGTAACGAGCCGATACTCTATCTGGCAGAAGCATATGGCTTCGAGTCGCAA  
CAAATCTGACCCGAACCTTCAAAAATTACTTTGATGTTCCGCGGCATAAATACCGGATGACCAATATGCAGGGCGAATC  
GCGCTTTTACATCCATTAATCATTACAACAGCTAGTTGAAAACGTGACAACGTCACTGAGGCAATCATGAAACCACTT  
TCATCCGCAATAGCAGCTGCGCTTATTCTTTTTCCGCGCAGGGCGTTGCGGAACAAACCACGAGCCAGTTGTTACTTC  
TTGTGCAATGTCGTGGTGTTCCTCCATCGCAGGAACACCCACCGTTTGAATTAATCACATGGTACTGGCAGTGATA  
AGTCGGATGCGCTCGGCTGCCCTATTATAATCAACACGCTATGTAGTTTGTCTGGCCCCGACATCTCGGGGCTTATTA  
ACTTCCACCTTTACCCTTTACGCCACCGAAGCAAAATCAGTATGATATACAGCCCGGTCATAATGAGCACCAGCACTA  
AAAATTGCAGACCCGTTAAGCGTTTCAACAATAAGTGCAGCACTTGCAGTCTACTACGGGCACCAAGTAAACGATAAC  
GGTGCAACCCGCGAGTTTATAGCGTCCAGTAACGTCCCGAGATCCATAACCAACAATTTGTCGCCACAAACGCCAG  
ATACATCAGAGACAAGATGGTGGTCATATCGATAGTAACAGACTGTGAATCATGGTTGCGGAACCATCGAGAATCAGCG  
AGGCAACAAAGAAAGGGAATGATTGGGATTAAGCGCTCCAGATTACCAGCGACATCACCAGCGGACGCGTTGAGTGCAGC  
ATGATCTTTTTATTGAAGATGTTGCCACACGCCCAACTAAATGCTGCCGCCAGGGTCAACATAAAGCCGAGCATCGCCAC  
ATGCTGACCGTTCAGACTATCTCGATTAACACCAGTACGCCAAAAATCGCTAAGGCGATCCCGCCAATTGTTGCCAT  
GCAGTGCCTCCCGAAAGTAAACCGCGCAAGCATGATAGTAAAAACGCCTGTGCTGTAAACACCAGCGAAGCCAGTCCA  
GCAGGCATACCGAAGTAAATGGCACAAAAAGAAAAGCAAACTGCGCAAACTGATGGTAAATCCATACCCAGCAGCAA  
ATTAGTGGTACTTTCCGGTGTGCGACAAAAAGATAGCCGAAAAGCGACCAGCATAAAGCGAAACCGGCCAGCATCA  
GCGGTGGCATGTTATGAAGCCCACTTTGATGACCACAAAATTTAGCCCCATACGACCACTACCAGTAGCGCAACACC  
CCATTTTTCCGACATTCTACCGCTCTGAATTTTCTTTTTGTAAGCAATCACTTAGCTGAATTTACTTTTTCTTTAA  
CAGTTGATTGTTAGTGCCTGGTACGACGGCATTAAATGCGCAAATAAGTGCCTATACTTCGATTTTTGCCATGCTATT  
TCTTTACATCTCTAAAACAAAACATAACGAAACGCACTGCCGGACAGACAAATGAACCTTATCCCTACGACGCTCTACCAG  
CGCCCTTCTGCTCTGCTGTTGTTAATACCATCGGACGCGGGCTACGCTGCCATTTATGACCATTTACTTGGAGTCCGC  
AGTACAGCCTGAGTGTGATCTAATCGGTTATGCGATGACAATTGCGCTCACTATTGGCGTCTTTTTAGCCTCGGTTTT  
GGTATCCTGGCGGATAAGTTCGACAAGAAACGCTATATGTTACTGGCAATTACCAGCCTTCGCCAGCGGTTTTATTGCCAT  
TACTTTAGTGAATAACGTGACGCTGGTGTGCTTTTTTCCCTCATTAACCTGCGCTATTCTGTTTTTGTACCGTGC

TGAAAGCCTGGTTTGCCGACAATCTTTCGTCCACCAGCAAACGAAAATCTTCTCAATCAACTACACCATGCTAAACATT  
GGCTGGACCATCGGTCCGCCGCTCGGCACGCTGTTGGTAATGCAGAGCATCAATCTGCCCTCTGGCTGGCAGCTATCTG  
TTCCGCGTTTTCCCATGCTTTTCATTCAAATTTGGGTAAAGCGCAGCGAGAAAATCATCGCCACGGAAACAGGCAGTGTCT  
GGTCGCCGAAAGTTTTATTACAAGATAAAGCACTGTTGTGGTTTACCTGCTCTGGTTTTCTGGCTTCTTTGTAAGCGGC  
GCATTTGCTTCATGCATTTACAATATGTGATGGTGATTGCTGATGGGGATTTTGCCGAAAAGGTGGTCGCGGTTGTTCT  
TCCGGTGAATGCTGCCATGGTGGTTACGTTGCAATATTCCGTGGGCCGCGACTTAACCCGGCTAACATCCGCGCGCTGA  
TGACAGCAGGCACCCTCTGTTTCGTATCGGTCTGGTCCGTTTTATTTTTCCGGCAACAGCCTGCTATTGTGGGTATG  
TCAGCTGCGGTATTTACTGTGCGGTGAAATCATTTATGCGCCGGCGAGTATATGTTGATTGACCATATTGCGCCGCCAGA  
AATGAAAGCCAGCTATTTTTCCGCCAGTCTTTAGGCTGGCTTGGTGCCGCGATTAACCCATTAGTGAGTGGCGTAGTGC  
TAACCAGCCTGCCGCTTCTCGCTGTTTGTATCTTAGCGTTGGTGATCATTGCTGCGTGGGTGCTGATGTTAAAAGGG  
ATTGAGCAAGACCGTGGGGCAGCCCGCTTTGTTGATTTAAGTGAACACAATAAAGATTTAATTGAGCCTTCGTTT  
AGTTTACCTCTGCTAATATCTTTCATTGAGATGAAAATTAAGTAAGCGAGGAAACACACCACCCATAAACGGAGGC  
AAATAATGCTGGGTAATGAATGTTTTATGGCCGACTGGGAATAATTTATTTCTGGTTTTCTGGCCGCTATTTCT  
AGCCACAAATGGGATGACTAATGAACGGAGATAATCCCTCACCTAACCGGCCCTTGTACAGTTGTGTACAAGGGCCCT  
GATTTTTATGACGGCGAAAAAACCCGAGTAAACCGGCGGTGAATGCTTGCATGGATAGATTTGTGTTTTGCTTTTAC  
GCTAACAGGCATTTTCTGCACTGATAACGAATCGTTGACACAGTAGCATCAGTTTTCTCAATGAATGTTAAACGGAGCT  
TAAACTCGGTTAATCACATTTTTGTTCTGCAATAAACATGCAGCGATTTCTTCCGGTTTGCTTACCCTCATTACATTGCCCG  
GTCCGCTCTTCCAATGACCACATCCAGAGGCTCTTACGAAATGCGCGACTCACACCTGCTGTCACGGTAATGTTGATAT  
GCCCTTTCAGAAATGTGTATGGCATGGTTATCGACTAACTGGCAAATTTCTGACACCTGCACGACATGCTTCTTCATCATT  
GCCGCTTTGACAATAATGATAAATTCTTCGCCCCGTAGCGATAAACCGTTTCGTAATCACGCGTCCAACCTGGCTAAGTA  
AGTTGCCAGGGTGCGTAATACTACATCGCCGATTAATGCCCGTAGGTATCATTAAACCAATTTAAATCGGTCAATATCCA  
ACAACATTAATAAAGATTGAGAGGCTCAGCGTTGCGTAAGTATGATCAAAGGATTCATCAAGAACCCGACGACCCGGC  
AATCCCGTCAAAACATCCATATTGCTACGGATCGTCAGCAAATAAATTTGTAATCGGTTAATGCCGAGTAAAAGAAAG  
CAACCCCTCTGAAAGGCGTCAAATGCGCGTCTGCCAGTATTTCAACAATAGCCAGCATTAAATCCCGACCCAGT  
TATGCATATGTTGATGGGCAGAATCCATTAGCCGAACGTAAGGTAATTCATCGTTATCGAGTGGCCCCAGATGATCAATC  
CACCGACCAAACCTGGCACAGTCCATAAGAATGGTTATCCGTTATTTCTGGCTTACTGGCATCTCTCGCGACCAGCTGTG  
AAACATACTCACCAGCCACTGGTAGTGGGCATCGATAGCCTTATTGAGATTTAAACAAGATGGCATCAATTTCCGTTGTCT  
TCTTGATCATTGCCACTCCTTTTTCACAGTTCCTTGTGCGCGCTATTCTAACGAGAGAAAAGCAAATACGTCAATATT  
TTCATAGAAATCCGAAGTTATGAGTCATCTGAGATAACATTGTGATTTAAAACAAAATCAGCGGATAAAAAAGTGTTT  
AATTCTGTAATTAACCTCTGCATTATCGTAAATAAAAGGATGACAATAAGCATAACCCAATACCCTAATGGCCCAGTAGT  
TCAGGCCATCAGGCTAATTTATTTTTATTTCTGCAAATGAGTGACCCGAACGACGGCCGGCGCTTTTTCTTATCCAGAC  
TGCCACTAATGTTGATCATCTGGTCCGGCTGAACCTCTCGTCCATCAAAGACGGCCGAGGAATAACGACATTAATTTCA  
CCGCTCTTATCGCGAAAAACGTAACGGTCCCTCTCCTTTGTGAGAAATCAAATACCGCGTAGTGAAACCGAAGCGCCATC  
GTGCATGGTTTTTGCAAATCAACGGTCATTTTTTTGATCATCGGTTCCGCGATAGCCATCTTCTATTGCATGAGGCG  
GCGGTGGCGTGCATCCTGTTTTAAACCGCCCTGGTCATCTGCCAACGCATAAGGCATGACAAGAAAACCTTGCTAATACA  
ATGGCCTGAAATTTCACTAACTCCTAATTGCGTTTGGTTGACTTATTAAGTCTGGTTGCTATTTTTATAATTGCCA  
AATAAGAATATTGCCAATGTTATAAGGCATTTAAAATCAGCCAACTAGCTGTCAAATATACAGAGAATTTAACTACTA  
AAGTTAAGAAGATTGAAAAGTCTTAAACATATTTTCAAGATAATCGGATTTATATGTTTAAAATTTATATTGGACGA  
GCATACAGAAAAAGCAAATCACCTTACATATAAAAGCGTGGACAAAAACAGTGAACATTAATAGAGATAAAATTTGAC  
AACTTGTAGTACCGATACTATTGAAAACCTGACATCCGCTTGTGAGTCAAAGACTTATCGCGGATCAATACGCTTAACT  
ACCGCCGAATCATGCACCGCGGTAAGTTGGCTAGCGCCCTGTGTGCAGCTGAAGATAACCCAAATTTTACGGTGCAGG  
CTTTGTTACTTTCACCGATCAGGCAAAGATGAAAATCCTCAGCGTAAGCCAGCAATCTTGAACGATATTCTGCGGTGA  
GTGAGAAAGTGGCAGCAGAAATGGCAACCGGTGCCATAGAGCGTGCAGGATGCTGATGTCAGTATTGCCATTACCGGCTAC  
GGCGGACCGGAGGGCGGTGAAGATGGTACGCCAGCGGGTACCGTCTGGTTTGGTGGCATATTAAGGCCAGAACTACAC  
TGCGGTTATGCATTTTGTGGCGACTGCGAAACGGTATTAGCTTTAGCGGTGAGGTTTGGCCCTCGCCAGCTGCTGCAAT  
TACTGCTATAACAGGCTGGCTGGCGATATCTCAGGCCAGCCATTGGTGGTGTATATGTTCAAGCCACGATGTTGCA  
GCATCGGCATAATCTTAGGTGCCTTACCGCGCCATTGTCGATACAGGCGTTCAGATCTTCGCTGTTACCTCTGGAAAGG  
ATCGCTCGCGAAAACGAGCCATTTTACGCGTTAATCCGCCCTGCTCAACAAACCACTGATAACCATCATCGGCCAA  
CATTTGCGTCCACAGATAAGCGTAATAACCTGCAGCATATCCGCCACAAAAATATGGGCGAAATAACTGCTGCGATAGC  
GTGGCGGTATAGCAGGAAGATCCATATTTTCCGCCACCAGCGCCGCAATTCAAAATCATCGACATCCTGCATTGCTTCG  
TTTTCTTCCAGGCAATGCCAGCGCATATCGAGAAGTGGCGGCTAAGCAGTTCGCTCATCTACACCTTTGTTGAACAG  
GCTGGCATTACGATTTTCTGTTGAGTTCGTGAGGATTGCTGCCCGCTCTGATAATGCCGGGCTAGCGAGCGAATA  
CCTGCGGATGCGTTGCCAGTGTTCGTTGATTTGCGACGGAAATTCGACAAAATCACGCGCGTGTGGTGGCCGAAAGC  
GTGGCATAACGCTGGCGGGCAAAGGCGGTGCAGCGTATGACCAAATTCATGGAATAAGGTTATGACATCATCCAGAG  
TAACAACGCGAGCTCACCGGCGAGGGTTTCTGATAATTGAGACGTTATAAATACCGGATGTGTTTTATTAAGCGTTG  
ATTGCTCAACAAAATGCCCATCCATGCACCGCCGCTTTTTGAATCACGGGCGAAGAAATCACCGTAAAATAACGCCAGC

CCCACGCCATTATGATCAAAAATTTCCACACACGAACGTGAGGATGGTAGACAGGAATATCAAAACGTTGACAAACTT  
AATACCGAAGAGCTGATTCGCGGTCCAGAATACACCTTCATTTAACACCGTGTTAATTCAAATATGGCTTGAGCTGCG  
CCTCATCAAGATCAAATTTCTCCCGCTACCTGTTCCGCATAAAATGCCAGTCCCACGGCTGCGCGCTAAACCCGCC  
TGCTGCTTATCGATAACCGCTGTATGGAGGCTAATTCATCGCTGCGACGTTGACGCGCCGCTGGAACAATTTCCCGCAT  
AAAGTTAAGTGCTGCTTCAGGTGTTTTGCCATCTGATCGGCGATTTTCATGCGGCATAATGAGGAAAACCAAGTAGTG  
TTGCTGTTGTGCACGGATCTCCACCAGACGTTGAATGATAGCGCGGGTATCATTGGCATCATTTTTTCCGCTGCGCTC  
CAGCCCGAATAAACAGTTTTTACGCGTGCACGATCGCGCATTTCCGCAAGCGCCGTTGTTGGTGGTATTGAGCAG  
CGAATCAGCCATTTGTTATCCAGACCTTCTCGCGAGCCGCTCTGCCAGCGCAATCTTTGCTCACTCATTCCCTG  
CCAGCTGCGGATATCGTTCACAACCAGACCGCCGGATTTATTTGCTGCCAGTAATCGCTGGTTAAACTGGCTGGTCAGG  
GTCGCGACTTCTGATTACAGTACTTTTAAATTTGCTTTATCAGCTTGGCAAGTTTGGCTCCGGCAAGGACAAAACGTTG  
ATGAATCACCTCCACCAGCGGATGGATTCACTATCAAGCCCCAGGGATTACGGCGCTGCCAGACAGCATCTACCCGCG  
CGAATAATTCACGTTGAGATAGATATCATTAGCCAGTTCCGCCAGTTACGCGGAAAACGCTCGTCAAGACGCTGTAAT  
TCATCATTGGTATGCGCCGAGTATCGCAAAAAAGACGCTGGTAACGCGGGTAAGTAATTTCTCCGCTTTGTTCCAGTGC  
CAGAATAGTATTGTTGAAATCAGGCATTTGCGGGTTAAGCGCGATGGCAGCAATTTCTGCCGCTTTTGTGTCATTCCCT  
CATCGAATGCCGGCGATAGTGATGATTGGCAATTTGATCAAAATGGGGAGCCAGATACGGCAGTGTGCTTGCACAAGG  
AAAGATTCAATGTTGTCAATTTTCTTCTCCTGAACGCGAGGTGTTCCATAGCGTAGGCTTACTGATAACGGAGTGCAATC  
TTGCAATCCAGTATTACCCGCTCTTAAGCATCCCGTCTATGTTATTGACACACAAAAGCGTTGAGGAAACAGTGAGATGA  
TCGTTTTAGTAACTGGAGCAACGGCAGTTTTTGGTGAATGCATTACTCGTCGTTTTATTCAACAAGGGCATAAAAGTTATC  
GCCACTGGCCGTCGCCAGGAACGGTTGCAGGAGTTAAAAGACGAACTGGGAGATAATCTGTATATCGCCCAACTGGACGT  
TCGCAACCGCGCCGCTATTGAAGAGATGCTGGCATCGCTTCTGCCGAGTGGTGAATATTGATATCCTGGTAAATAATG  
CCGGCTGGCCTTGGCATGGAGCCTGCGCATAAAGCCAGCGTTGAAGACTGGGAAACGATGATTGATACCAACAACAAA  
GGCCTGGTATATATGACGCGCGCGTCTTACCGGTATGGTTGAACGTAATCATGGTCATATTATTAACATTGGCTCAAC  
GGCAGGTAGCTGGCCGATGCGCGTGGTAACGTTTACGGTGCAGGAAAGCGTTTGTTCGTCAGTTTAGCCTGAATCTGC  
GTACGGATCTGCATGGTACGGCGTGCAGTCCAGCATCGAACGGGTCTGGTGGTGGTACCGAGTTTTCAATGTC  
CGTTTTAAAGCGATGACGGTAAAGCAGAAAAACCTATCAAAATACCGTTGCATTGACGCCAGAAGATGTCAGCGAAGC  
CGTCTGGTGGGTGTAACGCTGCTGCTCAGTCAATATCAATACCTGAAATGATGCCGTTACCCAAAGCTATGCCG  
GACTGAATGTCACCGTCAGTAATTTTTATACCCGGCGTAACTGCCGGTTATTGCTTGTACAAAAAAGTGGTAGACTC  
ATGCAGTTAACTCACTACAAGCAAGAACGAATGACCGTCAAACGCAACTTAATCCCACACAGCCTGTCAATCAGCAGA  
TTTTATCGTATTCTTCGTCGCGACATTGTCATTGCCTGATTGCTCCAGGCACACCGTTGTCGGAAAAAGAGTTTCTGTT  
CGTTTCAATGTGTACGCCAGCCGTTGTTGAAGCCTTTATTAACCTGGCGAAAAACGGCCTGATTCAAATTCGTCGCCGA  
ACGTGGCAGCTACGTCAACAAAATTTCCATGGCCAGGTGCGCAACGGCAGTTTTATCCGTGAGGCCATTGAGTGCGCGG  
TGCGCGCTCGGGCGGCGAGCATGATTACCGAAAGCCAGTGCTATCAACTGGAACAAAATCTTACCAGCAACGCATTGCC  
ATTGAGCGCAAGCAACTGGATGATTTTTTTGAACTTGTGACAACCTTCCATCAACTCCTGACGCGAGTTGCCGACTGTCA  
ACTGGCGTGGGATACCATTGAGAACCTGAAAGCGACCGTTGATCGCGTGCCTATATGAGTTTCGACCAGTTTTCTCCAC  
CAGAAATGCTGTTACGCCAGCATCTTGATTTTTCTGCTGCCCTGCAAAAACGTGATGGCGATGCGGTAGAACGTGCAATG  
ACGCAACATTTGAGGAAATCAGCGAATCCGTGCGCCAGATCCGCCAGGAAAACAGCGACTGGTTTAGCGAAGAGTAATT  
CATTTCTCTCATCCCATCCGGGTGAGAGTCTTTTCCCCGCTTATGGCTCATGCATGCATCAAAAAAGATGTGAGCT  
TGATCAAAAACAAAAATATTTCACTCGACAGGAGTATTTATATTGGCCCCGTACGTGGGCTTCGACTGTAATCAGAA  
AGGAGAAAACACCTATGACGACCTACGATCGTAACCGTAACGCAATCACCAGTGGCAGCCGTTATGGTTAGCGGCGACC  
GGTCACACTGGCAAGATCCTGTCGATTGATACTGAAGTCTGACCGCTGAGCAAAATCCGCCGGA AAAACCGTATGTTGT  
TGAAGGTTGTGAAGAGAAAACCTGGCACCCTGGACCTGATTCTGCTCGGCATGAACTAAGCGTGTGAATGCCCGCATGGC  
GGCATTGCTTTTTTACTTACGGAATATTTTCCACGGTGCCTTTCGCGCCATGCGCTAATAAAGACAAGTACGTTTCCG  
TCACTCTTGCAGTAAACAAAATTTGCTGCGCAATCATACCAAAGATCGCTTAACTCGCCAGCAATGACTGGACGCGC  
GCTTTCCCTTCGGCACTACTTTGTACAGCCTTCTGAATAACAGGTAACAGTGGGTCAGTATTCTATCGGATTTCCCTG  
TTCATCAACACCACCGACATAACGCATCAACCCGCGACGCCAGCGCCAGCAGATCGAATTTGCTGTATGCGCCAGAT  
GCCAGCGAACAGAATCCAACATCCGCTGTGGCAATTTCTGGCTACCATCCATCGCAATCTGCCAGTTTCGATGACGTAAC  
GCCGGGTTGCTATAGCGTGAATTAATCGGTTAGCGTAATCTTGCAAAATCAACGCCCTGCACTTTCAACGTCGGCGCTTG  
TTCCTGCAACATCAAGCCATACGCCGATAACGATAATGTTTCTTCCATACAGTCATTAATGTGCTGATATCCTGCAA  
GATACCCAGATACGCCAGGAATGAATGACTGCCGTTGAGCATGCGCAACTCATCTTTCATAAGGCAGCACATCGCTA  
ACCAGTTCCGCTCCCGCTTTTTCCATTCCGGACGTCGGCAACAAAGTTATCTTCTATTACCCACTGGCGGAAAGGTTT  
ACAGGCAACGCCCGCAGGATCGCGCACACCGGTAAGTTGTTGATTTTCCGCGAGCTATCCTGTGCTACTGCGGGCACAA  
TACGGTCCACCATTGTTGATGGGAAAGTACGTTATCTTCGATCCATTGTGCCAGTTTTACATCAACGGCTTGTGCGTAG  
GAAGTGACAACGTACGCATAACATGACCGTTTTCTGGCATGTTGTACATGACATGACGGTAAATGCCGGAAGTCCCTGC  
CGTTTTACGGGAGCCAGCGCTCAACAATCACCCCTGTTGCTGTTTTCCGCTGGTGGGATTTTGCACGTCGGCAGCTA  
CCATCGGGTATCGAGCATTAACTGTCCGGTCCGGGAGAGTGAAAATACCCTTTTTCCGGTATTGTCAGAGAGACAATC  
CGGATTTGCGGTTACACATCGCTGCCAACACGTTTTAAGCCATCTATCTGTACGTGCAAGGCTTTTTTAAACGACGCC

AACGACGCGAGCCGTCACACATCGGCCGACATTTCCGCAACGGTATAAAGATTATCTTGCTGTTGTAATCGGCAATTT  
GCTGTTCCGCCCGGATTAAGTTGACCTCATAATATCCCGAGTCACTGAAATGTTCCGTAGCAAGAATATCGGCATACACA  
CCCTGATGCGCACGGTAAATGCACCAAAGCCTAAATGAACAATCTTGAGCCAGGTTATTAAGATCATAAACAGGGAG  
TGTCGCTTTTTGCTGATAACAAATTATTTCCATAACAATTCCTTAAATATAAATATGGCAAGCTATATGTTTTGTTATAT  
GAATAAAAATCCCTCTCCGGTAAGAGAAAGGGATTAAGGGTTTACAGACTTCTGGAAGGTTGCGCAGCTCTTACAACACG  
CGTTGATCTTCCGACGCTCTCCAGCGCACTTAAATCACGGTCTTTCACCTCTGGCATTTTCAGCGCAGAGATTAAC  
CAATCACTGAATATGCCATGATCATAATGGCGATCGGATACCAGGATTCGTCATGGTGCAGAAAATACCCGCCAGGATA  
GGACAAAACCGGAAGCGATAAGACCACCAATTTCTTTAGAAATAGCCATCCGGGTAAGCGGTTTTTACAGCCGAACAT  
TTCTGCCATGGTAATGTTTTCCAGAGCAAATAATCCAGCACCGCACAGTTATGAATCACAATCAGTGCAACCATAATGG  
TGCTCGGGCAGATGTTTTATCTACAATGATAGAAAGCATTGGCCATGCCAGACAATCGCGGAGGTATTCATAATAATA  
TACGGGATCCGGCGACCAATTTTATCGGATAACCAACCAAGGAACGGAATGGTCATAAAGCCGAGAATCGAATGATCAT  
CAATGCATCTGTTGGAATTGCTTTGTTAAACAATAACGCTGCTGACTAAATAGCCTGCAAGGAAAGTCTGAATTAACCCGG  
AGTTACCCGCTGACCAAAACGCAGCCCTGTTGCCAGCCAGAAGGATTTGCTCTGGAACATGCTACCAGCAGGTGCAGGT  
TTTGCTGTCGTTGGTTACTGTCGTTAACCTTCTCAAAGACCCGGCTTTCTTTCAGATTCATACGCAACCAGATGACAAA  
GACCATCAGACAACACTGCCAGGAACGGTATACGCCATCCCCACGCCAGCAGTTCCTCTTACTGAGAATGAAGAACA  
TAAAGCCCAGATTGCCGTTCCGCTCAAGGTTCCGAGTTAGTTCCATAGCCACAAATGAGGAGATAATCCGCGCTTA  
CCTTTTGGCGCATATTCGCGCAGCATCTACCGCACCGGAAATTTCCGCACCTGCACCAACCCCTGAATAATACGCAA  
CGTCACCAGCAAGATGGGTGCAAAAACCAATCTGTGCATAGTTCGGTAACACACCAATTAAGGTGGTACAGATCCCCA  
TCATGGTGATGGTAATAAAGAGCACTTTTTACGCCCTATTCTGTCGCCATTTTGCCGAAAATAAATGCTCCGACAATA  
CGCGCCACATAACCTGCACCGTAGGTTCCATTGCCAGAATTAACGCCATTGCCGTTGATGATTCAGGAAAAAATTTT  
ATGAAACACTAACGCTGCGCCGAGCGAATATAACTGGAAATCCATAATTACAGGTGTTTTTCCCATCTGTGGTTTTCC  
TTGGCGTTTTCTAGGTTTTTTCAGATAGTTGCATTTTTTAAAGCATCCTAAGTTCGATCTCAGTGTCTATCTGGGGC  
CTATTTCTGTCCATATATGCCCAAAAAAACTCCCAACAGATAAGTAGTTTTTTCATGGATTTATGCGTAAAATCAAG  
AACGGCTGAAATCATTCAATACTCACACTATCGAAAAATTTACCAGCCAATCGCAGCACGTTCTTGATAAGGTGTGTC  
TGCGGTTTTTCAACTATTCAGATACATCACTCCCATCACATTCATTCTCCGCATCAAAGGCATATAGGCTATATCACCT  
TGATATTTTTCTTTTTCAGATAAAAACTGTTATCTATGTATACTTTTAAACCAATCCGTGTAGAGTCTCTACATAAGAT  
AGTTTGCAGTTGCCGCTCAGCTTGCACATAAACCCGCTGATTTTTGCTGCCACCTGTTAGCATTCTGTATACCTGAA  
ACGACAATGTTTATCTACGAACTTTAAGAACACCCAAGATAAAAAATGTCACCTATATCATATATAACACATTACTAATT  
CGAGGCTATATGAACAGCATACTGATAATCACATCTCTCCTTATCATATTCAGCATTTTTTAGTCATGCCCTAATAAAAT  
AGGGATTGGCATATCCAATAACCCAGACAAAACCGATGTATAAGTCAACATATCCTGAATCAGACATACAATATCGCAAT  
GAAAATCAATAATATTTAAGGAATATCTTCATGAAATCAAAGACACCCTAAAGTGGTCCCTGCGCAGCTTCTGAAG  
TAAGAATTATCCTAGGGGATGCTGTAGTGGAAAGTAGCAAAACAGGGAAGACCTATCAATACCAGAACATTGCTTGATTAC  
ATTGAAGGAAACATAAAGAAAAAATCATGGCTGGATAACAAAGAATTATTACAAACAGCGATATCAGTTCTTAAAGACAA  
CCAAAATTTAATGGTAAATGTAATATAATAAACTTACTTTTTTATCATTTTTTCCACTTAAACAATTTTTGCTCCACT  
TTTCCACGACCAAAACAATTGAAATCTGGTTAAATAACACGCAACACTATCTTCTTCTTCTGAGTCCGCCCCGAACTCG  
AAAAACAAACCGAGTTAAGCCATTTTTCAAAAATCGATTTTGGGTCTCACAAAATTACGGGGTGCATACGCATTCCG  
TTATTTTTCGAACGTGTACATACAAATATGCACAAAAATAATCATAATTATTTCTGAGATGCATTATGATATGAACACC  
AATTTCTGATAGAGTCTCACTATGTCTCAAATTTTTGCTTACTGTGCGATATCAACGCTGGATCAGACCACCGAAAAACA  
ACGCCGGGAAATCGAAAGTGCAGGTTTTAAATCAAACCTCAGCAAATAATCGAAGAACACATTAGCGGCTCAGCAGCAA  
CCAGTGAGGCTCCTGGTTTTAACCGTTGCTTGCCTGAAATGTGGTGATCAATTGATTGTGCAAAAATCGATGATGCGC  
CTTGGTTGTAATGCAATGGATATCAGGAAAAACAGTGAACAACACTGACCGAAACAGGTATCAGAGTGCATTGCTTAGCATT  
GGGGGCAATTGACCTGACAGTCCAACAGGAAAAATGATGATGCAAGTAATTTAGCAGTCCGTGAATTTGAACGAGACC  
TTTTACTTGAACGCACTATTCCGGGATAGTAAGAGCCCGCGGCGCAGGAAACGTTTTGGTCGACCACCTGTGTTAAAT  
GAAGAACAGAAACAGGCGGTATTGCAACGAATTAAGTCAGGTGTAAGTAAAGTGCATTGCCCGGAAATCAAACCTC  
GCGGCAACCATTTTTAAGAGCAAAGCAAACCTTCCAGACCTGACATATAAAAAATAATCTCGGTGTGAGATGCTTTAC  
GTCTTCAAGCCCTTCTTCCGTAATGGAAGATACATCTAATTATAGAATTTATATGTTTTACCTACGGCAGTG  
CTGGCCATTCAATATCTGTGCAGTTGACGTATCAACAGGTTGACGAATACCCGATACTTTTTCCATGCTTCCAGCAAC  
GAGATTTCTTCTCCGTTGCAATTTCCAGATCTGCAGCATCTGAAGCGGCGCAATATGCTCACTGGCTACCTGCATCAG  
GTTGTTTTTTGTTTTCTCCGCTCCCGGATCCGGAACAGTTTTTCTGCTCCGTATCTTCCACCCAGGCTGTGCCGTTCC  
ACTTCTGAAACTCCCTTCCGGCGATAACCAGGTAACATTTCCGGTAACGGACCGAGTTCAGAAATAAATAACGCGTCCG  
CCGGAAGCCAGTCATAAACCGTTTTACCCGATGATCTTCAACGAGATGCCACGATGACTCATCACTGTTGAAAACAGC  
CACGAAGCCAGCCGAATATCTGGCGGTGCAATATCGTACTGTTTCTGGCAGACCTGTATGAGGCGGAATATATGCAT  
CACCTTACCAATAAATTCATTAGTTCGGCCAGCAGATTATAAATTTTTATGGTCCGTGGTTGTTCACTATTCTGAAT  
GCCATTATGCAAGCTCACAAATATAGTTAAATGCGATGTTTTGACGGTGTTCGCGTTACCAGCAGCGTTAACGGTG  
ATGGTGTGTCATGTGAACCAATCGCAACGGAGTGGTATGAGCACCAATACCAGCAGTATGTGCATGCGCGCTGCGCT  
TGACGACGTGCCGGACAGCGAGTGGGTATGAGCACCATCTGATGATGCTTCCCTGCATTACGAGTCTGGCCACTACCGC

TTGTTGTGCTCATAATCCCCGGCTTAGATTTGAAATCGCGGTATAACCATTAGGGAAAATGCTCGTGTTCTGTCACCA  
AATGCACCCGGAACCTTTGTGTTGGTGCACCGGCACTATTTGCGGTCCCGTAATACTATGGGTATGCGCCCCGGTGT  
ATTCGTGGATTTGGTTCCGTAATCAAACGACGATGTGGTTCCGTCCCAAATCCGTAAGTATGCGCTGGCGCTGTGGG  
TGTGCGATTTAATGCCGCTCTGTTCTGAGATAATACGGCCCGACCACTGGCGGGCTTGGCCCTAATCGTCCAGCCACGC  
ATATCAGGGATCACGCTGACGGATAAGCAACTGCAAGTTTCCGGTATGCAGATTTGTCAAAAAGTCTGCCCTGCATCAG  
GGCATAACCAGACGGAACGGTATCTGATGGCCACGGGATTGGTGCACCGACTGGATAAAAACCTGCGAGGAGGATGAGCCG  
AGGTGTAAAGTGCGCCACGGCGACCACTTTGCGTGGTTCGATCCCGTGTGAACGAATAAATGCCGGAGCATGAGCA  
CCGCTTGTACCACTCCAGCCGATGAGTAACTCACCTTCGCAACGGCTGTCATCCCTTTCAGGTGAATGATATTTCCATA  
CGCTGTTGGATATCCGTTGTTATACACCTCGATAAECTCAAGACCTGCTGCCCTGCGTATTGTCTGTGAGCGCGGTTA  
TATCACTCAGCAACCCCGTATCAGTTCATCCAGCGGGCTGCTTTGTTTATGGCTTTGATGATATCCCGTTTCAGGAA  
ATCAACATGTCGGTTTTCCAGTTCGGGAAAACGCCGCTGCACCGACAGGGGGATCCCGTCGAGAATACTGGCAATTTAC  
CTGCGATCCGCGACAGCACGAAAGTACAGAATGCGGTTCCACCACTTCAGCGGAGTCTCTGGCATTTCAGCTCTGT  
GCGTCGGCTGCGCACGCGTAAGTCGATGGCGTTCTACTCAATAGTCCCTGGCTGGAGATCTGTCTCGCTGGCCTGCCG  
CAGTTCCTCAACTCCCGGCGCAGCTTTTCGTTCTCAATTTACAGCATCCCTTCGGCATAACCATCTTATAACGGCGGCAG  
AGTCATAAAGCACCTATTACCCTTCCACCGCTCGAGAAGGGCATTCCCTGTTCTGCCAGTTCTGAATGGTACGG  
ATACTCGCACCGAAAATGTCAGCCAGTCTTTTTGTTGACTTCCATTGTTTCCACGGCCAAAACAGAGAAAGGAA  
ACGACAGAGGCCAAAAGCTCGTTTTACGACCTGTCGTTTCTTTTTCAGGGGTATTTTAAATAAAAAACATTAAG  
TTACGACGAAGAAGAACGGAATGCCTTAAACCGGAAAATTTTATAAATAGCGAAAACCCGCGAGGTGCGCCCGCTA  
ACCTGTCGGATCACCGAAAAGGACCCGTAAGTGAATGATTATCATCTACATATCACAACGTGCGTGGAGGCCATCAA  
ACCACGTCAAATAATCAATTATGACGCAGGTATCGTATTAATTGATCTGCATCAACTTAACGTAAAAACAACCTCAGACA  
ATACAAATCAGCGACACTGAATACGGGGCAACCTCATGTCAACGAAGAACAGAACCCGAGAACAAACCCGCAACATC  
CGTTTTCTAACCAAATGATTGAACAAATTAACATCGCTCTTGAGCAAAAAGGGTCCGGGAATTTCTCAGCCTGGTTCAT  
TGAAGCCTGCCCGGAGACTGTGCTCAGAAAAAGAGTTTCTTCTGAAGCAAAACAAAGAAAAGAGTGACATTACTGAAT  
TGCTCAGAAAACAGGTGAGCCAGATTGAAGCAATTAGATAATCGTGCAGACTACGCCCCCTCATATCACATGGAAGGT  
TTATCTATGGATCAGGTAGTCATTTTTAAACAAATATTTGATAAAGTTTCAAACGATTTAACTATCAATGGTTTTATC  
TGAGCTAAAACGTACAATGTCTCACATTACATTTACTATTTAGCCACAGAGAATGTTTATTTGATTAATAAATGATA  
ATACAGTGTATTAAGGGCCTAAAAACATTGTGTCTGTCAAATTTTCAAAGGATAGGCATCTTATAGAAAACGACCTCT  
AATAAGCTGAAATCCAGAGAGATCACATTTAGGAATACAGAAGAAACCTTGCTAAAGCAGGAGTTTTTCGGTGGGTTAC  
AAATATCCACGAACAAAAAGATATTACTATACCTTTGATAATTCATTAATTTACTGAAAGCATCCAGAAAACCTACAC  
AGATCTTACCAGCTAAACCATAACGTCCGGCTTCTCACTCCTGAGCCGACTGCATTGGTTTAAATAAAAAACCATCAA  
CAATTGTGATTTAGATATTCGGAACCACTTCAAATATAACAAAACCCCGTAAAAACGAGGTTTATGGATAAATTTTATTA  
TGAATACATCAGATTAATTAATCTTGACATCATAGCTTTCAAGACCCGTCATTTTTTCCCGTGGCGTAAACTGAATACT  
GGTAACTTCTTTCCCGTCTTTTTCTTAAAGTTCAATAATTTTTTTGTTATATATTAGAAAATCTGCTTCTGCTTTTG  
TTTTAAGTTTTCAATATTCATCATTCTTTTAGTCTGTTATGACTTTCCAGTTACACAGTAAGTCGATTATATGGT  
GCAAACGTGTAAGATAAGATGAAACATCGCAATAATCAACATACGATAGTCTAAATTTTACACAAACAGACAAAGAGA  
ATTTTCTGAATATCAATGCAATAGCATCAATCAACTCAAGAGCCTTATTGCTGCTCCAGAAATTTCTTCTGAAGTAA  
CATGTCGATCCGCGCTACATAAATGACTTTATGATCTCCGGTCAAGATGGAACCCCTGCGGCCATTACAGTAAGGTGT  
GTTTTTCCGCTTTGGATATTCACGCATGATGGTGAATCCAGTCATCGCTGGCACTACCACTGCTGGTTCAGAGTT  
AAAAAACTATGATTTTTTTCATGATGTTACCGTAGTATGTGAGTATCCATCGAATAGACCAAGCAAAAAAGCTCCCG  
AAGGAGCCTTCAATTTTCACTTTTTTAAATCCAACGACAGCGGCTGGCATTAAAGTATTGAAATATTATCAATGTAA  
TCATCATTGATTTACAAAAGATACATTTTTGCCCGAAAGGATTTCATGTCAGAAACATCAAAAAGATGATGTTCTATACTGG  
GAACCATGACAACACGGCATCTAAAGTGAATATGGTTTGAATATTGTCTACCTCAAAGCCCACTACATGAACAGCGG  
CAGGACCTTTAGTCCGTTCTCAATACCAAATCAACTTCTGATTCTCAGTTAATGTTTTGAAATCGTTGCTCTGAATT  
GCTGAGAAATGGACAAACACATCTTTGCTGCCATCTTTCGGCGTATGAAACCAAACCTTTTTTCCAGGTTAAACCACTT  
CACTAAACCAGTCATTTTGTAGACATAATTATTACCTTTTGAAGAAATTAGCCCTTGGGCAGAAATGGTCCGAAAAAAA  
TATCAGAGAGAAAAACCAACAGGAAATCTCAAGAGGTACAAATAATAAATTAATAACAATGACTGCTTCAGATAAATTT  
GTAACAAACCAGAACACCAATTAACGCATGATTAACCAACCATAGCAAGGATTACTTTTGTAAAGAAAAACACAGCAATGA  
AAGAATAGCTTTATTTAATAAAACGTGTCATTTGATTAAGACCTTTTATCTTACCCTAAGATTTTCAGGAATTTG  
GCTCATGGAAGAGTCTTTTTATTTAAATTTTACATTCGCGATGTAATGTTCCGATTTAATATTACCCTACATTTGAT  
GCTTTTTATCTTAAAGATTATAGATCTGTTGACAAGTCACTCCTGCGATGTAGCGTTCGTGAGCAATTTGAGCATAA  
AGCTGAGCTTCTGCTGCAATATCTCCGAGCATGTTGGTGGAGCATTCTTCCGGCGTTTTGGTTGTTTTGCTCTGACGGC  
AGCGGCAAGATCTGCGGTATGCTTCGCTGCGTCAAGGCGTATGGCATATTTTTTGGCTTCGGCACGCAACTGGTTAACAC  
TATCAGACAGATAAGCAGCCCTGGCAGAAATTTGAGCAGATTTCTGTTGCGCATCTTAAACAGCCTCATACGGGCTATA  
GTTCCGCCCTGTTCAATTTTCGAGCAGCAAATGAGCATTACCTCTTGTGATAATGCGGCAGCATCACGTTCCGCCCA  
TTTTTTTTGCCATCTCGGTGCTCCAGACATTTCCGACGATAAATCCTGACAACACGAGAAAAATCACCATGAATATCT  
GATTCACTGTTCTATCCCCAGCAGGTTAATGCGCTCTCTGGTACGACGAATAACCTGACCGTAACAGTTATTTGAAC

GAATGCGGCAATCGCGTCCGCCATCCTTAATCCACCAGCGAATCGCTTCGCATGCACCTTTACGATCACCAGCATTAGC  
CGTTATAAAACGTCGACGGGAAACACTTACCGGGGCAATGTTATAGGGACAAAATGACGCGATACCCGCTTTTTGTGG  
TTGGTTCAGTGGTACTTTAATATTGCGCTCCACCCATGCCAGCGCCTTATCACGCTCAATGGCGTTGACCTGGTCGCATT  
TTTCCTTCGACAGTTTCATATTGGGAAAAACGGTTTTTCCATCCACCACTGTGGCACCCCGACAGATGGTCCATATGCCA  
GAACCATCGCGGTATGCCATTGTGTGGTTACCTTCTTTTTCGTCCAGAACTGGTCAAGTATCTGAGGAGCAGATGCGCC  
AGCACCAATCAGCGCCAGAACGGCAGCCGACAGGCCGTATCTGATTTTTGTGTTTCATAGATATTTATGATGAGGACGCTC  
GTGCTTATTGGCAGGATTTTCAATCTTAAAGGAGTACTGATGCTGCAGATAAGACTCAACTTTTTCTGACAAATTTTTCTG  
CTACTTCCAGGAAGACTTGGCCGACGCTCCTTCTGGCTGCTGCCTCATAAACTCCAGCGCAGCTCCTTCAACACGGTCC  
ATGGCGACATCCAGGTCAAAAATTTACCGTCAAAGCGTCTTTGTCTGTAAGGCTACAGTTACCGTAACTTTATTCTC  
AAAATTACGGACTCCTTTCACAACCAGTTCATAGTCTTGAGTCATTGGATTACTCTCCTCTCGCAGCCTTACGCCTGTCT  
TCTTTAATCTTGAAATAAAGATTTGTGAGTACGTCAGCAGGCCAAAAACCAGGCTACCCAGCACACCGATTGCAGCCCA  
CTGTGACGGAGTACTTTATCGAGTAACTGCAATGCCAGAAACCAGCATTACCCGCGGATGTGCCATAGGCAACACCTG  
TTGTTAACTTATCCATTGATTTTCATATCTCACCCGATGTACACGGATGGTGAATATGTTTGAAAAGATCGGAGTCTA  
CGGGGTAGTTTTGACAGCACAGTGTCTCAACGGCGCTAAAAAACATACACATTAATAAATGTGGGTAATTTATTTTGA  
AAGAAAGTCATATAAAAAATAATAACGAGAAATGTTTTCATATTTAGTGTACTGTATACGGCCATTTATACAGGAAAA  
GCCTATGTGAGAACGTA AAAACTCAAAATCACGCCGTAATTATCTCGTTAAATGTTCTGCCAAAACGACCCCAAGAT  
CAGAACACAGTTTTTCAAGAGTACAAAAAGGTGCCCTTTTATCTGCCCCTATTGCAACAAAGTATTCCAGACAAATCTT  
AAAGCTGTAGCCTGATTGATTTTTATTAGTAACAAGTATTTTTATATTTAATAATATATTTAAAGCAGATAATAAAAAA  
CCCGCTGAGCGGGTTTGTAGATTGTGGTGCTTTTTGTGGGAGTCACTCACTTACGCACTTTGTTTTGCCATGCCAGCAGT  
TAGCTTCTGCTGTA AAACTATTCATGCAGCAAACTGCACTTACCACAATGGTTAGCATACTTTTCTGATTAAGATTT  
TGCCAAATATGCTAGCCATTGTTTCATGTATTGGACCTCCTTACTTTTTATTAAGAGATCCAATATTTACTACTCTGTC  
CGTATCTACTCAGGCATCAGCCTTCTCGTTATCGTATACAGACGAGCGATGAATTTAATCAGTAATGATGACATTT  
GCTGCTGCAGGACCTTTAGCACCCTCTATAGAGAAGGTAACCTTTGACCTTCAAATAAGGTTGATAATTATCATT  
CTGAATCGCAGAAAAATGCACAAACACATCTTTACTACCATCAACAGGAGAAATAAAGCCGAAACCTTTATCAGCGTTAA  
ACCATTTTACTAAACCAGTCATTTTATTTGACATTTACATTTCTTAACTTGAGCCTTTCCGCATAAATGGTTTGCATAA  
CAGAAACGACTTCGTACTTAATTGGAGAGACTCAAAGAAGGAATAAGTGAATAACACCTGAAATGAGAAGTCTTTAGTA  
AACTACTTCGTATATCGTCTGTTCTTCAAACCGACGCAATCATTAAACGCATAGTTGAACATATGAAGCAATGTTATTTT  
AGACATCCAGCCATCTTCAACCCCATCAAAAACTATAGCTTTCTCAGGAACGTGTGTATAGTGCGCCAAGTTATCAGT  
ATTAAGGAATTTTTTGTCCCGTAAAATGACAGGAATTGTCAAAACCTTTGACGGCAAAAGCGGCAAGGTCCTTATACC  
CCATCCGATGGTTCGTATCGATGTCCAGCTTCATGTTTCAGCGCTCAATCTCCGCGATGCAGAAAGAAATTACCACCGGATT  
ACGCGTGGAATTTTTGCCGGATAAATGGTCTGCGTGGCCCTCAGCTGCCAATGTTTACCTTTCATGAGCTATATTAAGC  
TTAATTTTACGGCCCATCGGATCACACATGGAGAGTTTTATGAATAACCCCGTCTGTCTTGATGACTGGTTGATTGGC  
TTTAAAAGCTTATGCTGTACTTTGGCCGTAATAGCTCTGCTAATAATAATAAAGCAGACTCATTGTGTTAGGGACATT  
GTAATGGAAGAAAAATTTTAAACATCAGGCAAAATAACCAAGTACCAGCTAAATAATAAGTTAACAGACATGAGTCCCG  
GGATGAGATTAACATTACCATTGCCCATTTAAAGCACAAAACCCGCTCATCAGCGGGTTTTCTACTTTTTCTTAACTG  
CGGGTATACAAAGCCCATCGTTGAAAAATTTTATCCATATTTTTTGA AAAATGCAACATCATGTGCCATCTTCAGCA  
AAAAATCATTTATCTGTCACCTTCTCAATTGCGCTTCCGCGTATGCTTCTTCTGCCAGCACTTTGTTACCAGTTTACC  
AATGACGTCGCATACCCCTTATACCACTGATAATCGGTGAGTCTGGTACCAGCTTCTGGACATGACGTCGTGCCAGCG  
TGGTTCGGTAAACGACTAAACCGTTTTCCATTACAACGCCACAATCTTATATACCGGTACGCCATGAAACCGGGTTCTT  
TTTTCATCCAGAACAACTCCTTTACCCTTACACCTCTGCACGCTGTGCTGGCTTACCATTGGCAATGCTGACA  
TAGTTCCTTACCCATTCTTCTTATTACAGATTTCCCGCTGTGAGTGTTCACCACCTTCGCGCAATACATTATAAAA  
ATCCCGTACCTGAACAATGCTCACAGCGAGCCTTACTTGGCGAGACCTGGAGTAATCAGCAAAGGCAAAACTCACGAGG  
TAAGGAATAATCTGTAACCGGATTTCTTCACTCAATTTGTTCAATGTCGGGTTATCCAGTGCCATCGCGTAATTTAGCAG  
GCCTTCAATCGCAAACTGAGGGTCTGAACACCAACTTTTTGCCAGAAATAAGGCCAACCCTAAGTGGTCTTTGACTGCA  
CCATCCCCTGCGTGCATTACATCCGTAATTGTTAAACAACCGGTGCCTGTCGCTGGAGCGTCATCGCTCAATTTTGG  
GATTTTGGGAGTAATATTTTGGTAAGGCTTCAAGGTTTCATGCTCGTTCTTCACTTACGCCAGTACGCCAATTGCCAGCG  
CGGATCGATAAAAACGAAATATCAGCTCCAGTTGGGAGCCATACTTATCTTCAAATGCCACTGTATCCGTATGCAGCTCG  
TTGTGATGCTTTCTGCACAAAGGCAACACAAAGAGATCATGTGCTTTTTGTTCCATTCCGCCCTGCCCGTACCAATCAG  
ATGATGCGGATCGTGGCTGGCATAACCGCAGCAAGCACACGGCTGTGCTTAAACCAACGTGTGATTTTCTCTTAAACC  
AGCGGCGACGTTTAGGCAGTTCATGAAAGATTCGGAGACTCTGGATCAACGGTGTGCTTACCACCGTCTTTTCTGT  
GGTATTTTTGTTGCTGGTGGCGTAAGGCAACGGTCAAGATTTTTTGTGCGTTGTTTCAATATGCTGGTGGCGGTCAG  
CTCTCCCGGTACGATGTCGCTTTCGCGGTACACCGAGCAGATTTTTTCCGCTGGTAATCCAGCGAACGACGCGATACAG  
CCTCAGGTAGTGCATCCACCACCTGATTGCAGACCGCCACCAGGATAATTCAGCCAAAGATAATTCCCGCTCCTGCGTA  
CCGTTATTGCGTGACGGATGACGTCATCAACCATGCTGTCAGATTTTTGTTGAGCAAGCAGCTCCAGTATTCCGATGT  
CTGGTACGCGAGTTGGTTGTGCGAGTCCAGCACAAACCACTTGCGCCGTACCATAACGGTGAATGACTGTTTTCAGTGT  
GATGGTAATCGCCATTAGGCCACTGGCAGGATGTAACATGACGTAATAGCCAGTCCGACAATGCGCAACGCCGCCAGCA

GCACGAATCACCCGTTCTTACTAAAAACGGCAGCAATGTTTTGTCTTCCGCCAGCGGCTGGCGAACGGCAGGAACGAC  
TCCGGATGGCAGATTACGCATGCTTTTTGGTTCCGGTCCACCAGCACTCGAGGATTATGAAATATCTGTATGGATTAC  
GGCCCGGCTTAAGGACCACCAGCCCAAGCTCAGGCACCAGAACAGGTCTAAGTAATACCCGCACGTTACCTCCAGATCCG  
TTGCTGGAAAGTGCGGGACGCACGTGGTGGGCGTTCGGAATAAGCAGCCTGACAGAGATTATCCAGTGCCGATAGTCGA  
GACTGAGAGCTTTCTTAACCTCGAACCCGCGCTGCCGTAAGAATGAATCAGCCATTCCGGCTGTTCTGCAGTGCATGGA  
GGGTGCTGGAACCATTAGACTTGAATGCGTGAGAATACCGCCGTGCGTGCAGGCAAGAACGGGCGAATTATCAGAATT  
GTAATATTTTGCCTGCGTCCATCGTTTTCTCCGGTGGCACGGTGTACTCAGCGGGAGTTCAGCCCCGCGCAAGATT  
GTAGATGAGTTTATTCTCTGAAAAAGCAGAAAAGCCAGCTTTTTATTCCGATCTCTTCAATGCCTGTAATGAAGTGACA  
AACTCACCTTCGCGCAAGATAAATCCGTCCGTGACCCGAGCATCCACAAAATTAATTAACGCAGCCCCATTCTTTGCAA  
ACACATAATGCGGTAATGACTAACAAGATTTCCATTTCAACGCACACAGCATAGAGGCCATCTTCACAAAAATTTTAC  
GCAGTTCTTCGATGTTTATCATCAGAATCCTTCCGGATAATTAGTCTCCCTTTAAGGGACCATCCCTTTATCCCTGC  
GCGTACTTAAGTATTTTATTCTATTCCGGCACCGTCCAGAATTCAAACGCGTTGAAAATAAAAAACAAAAACCCGCC  
GAAGCGGTTAAGTGCGGTGCCTGAGGATGCCTGCCACATCAGAGGTGGCGAGGGATTTCTCCCCCGCGGTCTCTT  
ACTCCTCAGTTCTGAAGCTGTGAAGACAGCGACCTCCGTCTGGCCGTTCCGATTCTGACCTCGCAGAGGTCTTTCCTC  
GTTACCAGTCCGCTACTATGACGGTTAAACAGATACGATCAGGGCGATTAACATCGCCTTTTGTCTTCATAGCTG  
CTTCTCCTGTCAACGCAAAGCAGAAGTGCACCTTCCGTGCGAAACAGAGATGTCATGCTTTGGTTCAGAGAATGCGTTT  
GACCGCCTCGCTATATACTTCCGAGCGTCTCTTTTCCCAACAGAAATCACGAAAACGACAACCTTTCTCGTCTATAACCT  
GGTATAACAAGCGATAGCCTGAAGACCGGAGCTTAATCTTGAACAATCAGGCATACCACGGAGCTTGTGTTGCTTCAATC  
CGGGGTGACTCAAGTACTTCAACCAGCTTCTTTTTCAACTGTTACGTAACCGTCCGAGCCAGCTTTGCGCATTCTTTAG  
TGCCCGCTCGTCAAAATCCAGAAAATACGCCATCAGAGTTCATCCAGCGTCCACGTAAGTGGCTTAGGATTACGAAGCCG  
TTCTTTCACTATCTCCACAAGTTCAGCATCTTCACTCAGGAGTGTCTGTTGAACGGCAAGCGTTCATTGTCAGCGA  
TATACTCGAGCATGAGACGAAGCGCTTCAAGAAGGATTACACCCATTTTTTCAAGCGCGCGTAAGAACGCGCTTAAAGT  
TCATCGTCAATACGAGGTTAATGCTACCCATGTCTTACACCTCTTGAATTACAAATGTCATTACAAGTATCGCACTAC  
AACATGCTTAGGGCAAGTACGAAGGAAGTCAAGAAAGTGTGTAAGAACGGTATCAGTGTCCGCTTTGTCCAGGAGC  
AGCCATTGCTAAGTCCATCTGTATTGTGACGGTACGCTCGTTTTTAAAGAGTCCGGCCATCATCTTACTGGTACAGACA  
CCATATACTTTGTGACGGTACGGTACATATGCACAACCTCAACTATTTCATCTATTTTTTGTCTTAGCATGTCAGTGTG  
CTTCTCGTCCGGGGTGGCGGTGACCTGACCTGTGATAAAGGAACGTAACACGTTTTATGCAACACCCGATGCGGC  
AGAAAATTATTGCCGAACGTTTACCCCTGTCAACAAGCTTTACTTTCTGAGGCGCGCCAGCCCGGAGGAAAACAATCTG  
AACATCAAACAATTAATGACACAAGAAATACGATTAAGATTTTTTGTGCATGCCGATAGTGCTTTTTTAAAGGAGAA  
ATCTATGTCTGCACAATTCAGGGAATACCTCAACCGTTATTTCAAACAACCTCCGCCCGGAAGGAACATCAGAAATAG  
CCAAAATCACAAGACAAATTCAGGTGCTGACTGAAAAGCTTGGGAAAATCTCATCGGAAGAGGGGATGACGACACAGCAG  
AAAAAGAAATGGCTGCATTGGTACAGAAGCAAATGAAAGCCTCTGGGCTCAACTGGAGCAGTTGTTAAGGCAGCAGGC  
AGAGAAAAGAATGAAGACGCGACAGTTCAGCCTGATAAAAAAGAAGAGAAAAAAGACGATACAAATACCCGTGGCACC  
TTGATATTTACGTCTAAGTGACAGCCGATTGTGGCCCTCATCGGCCACTTTTCCGATCAGCCTTTTCTTAAAGACA  
TATTATCTTTGTATCATTCTGATAGTTAACATTACAAGATATAAGTAATGGACGCACTCCAATTAGTCTATTTAAATC  
GCCACGAGTTAACTGACAAACCATGATCAATTATGAATTGCAACTATTTCTGTAGTCACTTTTGTGGGGACAGTCCACA  
AACTGCCAATTCGCTTCTTGTCTTAGCGGACATTAGCATAGGCTATTTACCATAACGCCTCATTACGCGCACCCGCC  
CAGACTGACTCAGCGCTTTCTGGCATATCCCGGTAACAAGTAACAACACCCGAAAATGAACACCAGAAAACGCGA  
CTTAAGAATCTACCCTATGAATGGATGCACTCAACCGAATCGATCTTGGTTTCAATCTTTTTTATCGGGATCAGGCTT  
CTTTTTAGGTAACCTTCGGGGCTTAACTTGTGATGACTTTGCGTTCGGCGCGTAAGCCAGGGATGGTCACTTTAGGTT  
TAACATAGTATTTTGGCGTAAATCAATACGGGCATTATCCACTCGTTTCATGGACACTTTTTTCATCATCCAGTGGTAGC  
CTCCATAATTGACAGCACTAGCGCCGTGAACTTTTACGCTTATCCCTGGTGTGATAGCCTTCCAGCGTTCAAATATCT  
TCACTCGATTAACGCCAAGCGCTCGCTGATCAATCGCGCCACCTTCATATGTGACACGCTGAACATCGATGTTCCGGGCGC  
TCTTTCAAAGCCAGAATGCTTCAGTGATTAATATCGTGCCTGCTCCTGTGTCATTCTGGTTCGACATATCCAGGCATC  
CAGAGCCTCACGAGCCTGTTAGGAGTGATTTTATTGTTCAACCGCCCCGCGCTTCGTTTACGATATTCATCATAA  
ACTTTGGGATCATACTGAAGCTCCCCGCCAGATGCCTCCTGTAGACGCATCGCGGACCTTCGGGAACATAAATCCCCTTT  
CCAGCTATAAAGCGAAGCCAAACGAATACCTGCTGCTTGTGCAAGTTTTGTTTTTGAACCGAAATACAAAAGAGCGTCAG  
TTTTAAGCATTAAAACACCTTTATTGTTAGTCATAACTAACAAGATAGATGTTAACAAAAACATAGTCAATACGATTA  
GCATTAGCTAACTATGGAACAACAAAAATTAACATCGCGAAGCATCAGGTATCGTCGGAAAAACCTCAAACACACCC  
AAAGGTCTCTTGTAAAGCCCTGAAAATCTCCATGTGTCTGTATACAATGGGAACGGGGTATAGTGAACCTACAGGG  
AAGAACCTTTTTGCCCTCAGTAAAGTATTGCAATGCTACCAACATGGATTCTATTTGGCGATGAAGACAAGCAACCAAC  
ACCACCTGTTGAGAAGCCAGTTGCCTTATCCCCAAAGAACTAGAGCTCCTTGAGCTGTTAATGCACTGCCAGAATCAG  
AACAGGATACCCAGCTCGCGGAAATGCGAGTCCAGTAAAAAACTTCAATAAACTCTTTGAAGAATTACTAAAAGCCCGT  
CAGCGGACAAATAAAGATAACATCATCAATGAGTTATCTTTACCACATCAATTATGTTAGCTATAGCATACAAAATCA  
CTTGACCGATATGTTAGTCAATGCTAATCTTGTGTCATCAACACACCCGACGGTGTCTCAGCAAACAGTTCGCTACC  
CCAGCGTTAAGGGGAAATGAGGTGAGCATGGATACTATCGATCTTGGCAACAACGAATCTCTGGTGTACGGCGTGTTC



AAACCAGGACGGCACGTTACCCGCAATGACGTATACAAAAGCAAAACGTTTAAAACCGAAAATGGTGCCCGTCGCTGGC  
TGGAAGAAACTCAGGTGAGTGATATGGATTTCCGACACAATCATGAAAAGGCTTACGAAGAATACTTCAAGGCGCTTGC  
CGAAGGCGAAGAAGCTCTCAGCTTCAGTGAGTTAAACAGGCGCTTCCAGTTCGGCAAAATCTAACGGCTGATAAGCGA  
AACAGCACCGGAGGAATCAGTATGCAGAAACGAGAACCCGTCATCATCGCGCCAGACTATACCGATGATGAACTTTATG  
AGTGATGCGCCAGAAAATTAATGCAGCGCAGGATCTGAAATGGGCTAATGAAGCCAGGGCTAAGCAGGCTGAAAATCTG  
TCCGCTCTGGAGCAGGATATCACCAATCTGAAAAAGCAGCGGCATTAAGCATTGCCAGAATGATTACATACCCGCGTTA  
GTAGCTAATCAACAAAGCTAAGGTTAGTAATTAAGGAGTCTCCACGGGTGAGGTGGAGTGCCTGCGCCGACACGGGTG  
CGCATCCGAACTGACAGTTTACTGAAAGGATATTTCCCTGAAAAGTCAGACCATAACGCGAAAAGCGCATGGCGAGGTAG  
CTGGTTCATAGATAGCCTGTCGTTAAATTTTCGTCGACCGTGCCTTCCGGTTGTGGCAACCCGCAAAATGGCGCGGGG  
TAAGTATGGCGGGGTTATTCCTTCCCGTTGAGGACACCGGGTGTGAGGTTGACCATACGCTTAAGTGACAACCCCGCT  
GCAACGCCCTCTGTTATCAATTTTCTGGTGACGTTTGGCGGTATCAGTTTTACTCCGTGACTGCTCTGCCGCCCTTTTA  
AAGTGAATTTTGTGATGTGGTGAATGCGGCTGAGCGCACGCGAACAGTTAAAACAAAAACAGTGTTATGGGTGGATTC  
TCTGTATCCGGCGTTAATTGTTAACTGGTTAACGTCACCTGGAGGACCAGGCACTGCATCACAAAATTCATTGTTGAGG  
ACGCGATAATGAAAACGTTATTACCAACGTTAATACGCTCTGAAGGTTGTTTTGAAATTTGGTGTCACTATCAGTAACCCA  
GTATTTACTGAAGATGCCATTAACAAGAGAAAACAAGAACGGGAGCTATTAATAAAAATATGCATTGTTCAATGCTGGC  
TCGTTTACTGTGATGCCAAAAGGATGTGCACAATGAATCAGCATTTGTGCTTGTTCGACAGTTTTTCTGTTTCCGG  
AGAGCCAGTTGATATTGCAGTCAGTGTTACAGGACAAATGCAGGAGTGATGACTGCAGCAACCGAACAGAAAATCCCG  
GTAATGTTACCCGGTCGATAAAGTTATTCACCAGGATAATATCGAAATCCCGGCGAGGTCTTTAAAACAGTTCGTAATA  
AATATCCGGTTTCATTCTTATATGCCAGCAATGGCAGGATTTGTTTCATCCTTAAATCTGCATGAGGTTAAAACAAATG  
AGTAAAGTCTTTATTTGCGCCGCTATTCCTGACGAACTGGCAACAAGGAAGAAGGCGCTGTGGCTGTAGCCACAGCCAT  
TGAAGCTGGCGACGAACGCCGTGCTCGAGCAAAATTTCACTGGCAATTCCTGGAACATTATCCGGCTGCTCAGGACTGCG  
CTTATAAATTTATTGTCTGCGAGGATAAACCTGGCATAACCCCGCCTGCCCTCGATTATGGGATGCTGAATATATGCAG  
GAAAACCGCTGGGATGAGGAGTCTGCTTCTTTTGTCCCGTTGAGACTGAATCCGATCCGATGAACGTCACCTTTGACAA  
GCTGGCCCCTGAAGTACAGAACGCTGTCATGGTTAAGTTCGACACATGTGAAAACATCACCGTTGATATGGTTATTAGCG  
CACAGGAATTGTTGCAGGAAGACATGGCAACATTCGACGGACATATCGTTGAAGCGTTGATGAAAATGCCAGAAGTTAAC  
GCCATGTATCCGGAGCTTAAGTTGCACGCCATTGGTGGGTTAAGCATAAATGTATTCTGGTGCTAAATGGCCCGAAAT  
TCAGGCAGAGATGCGCATCTGAAAAAACGTCGCGAAGGTGAACGCAAGGAAACCGGAAAATACACGCTCTGTTGTTGATC  
TCGCCCCGCCAGAGCCAATCAACAGTACACTGAAAATTCACAGGAAAAATCAGCCCGGTCATTGCTGCCATTCATCGC  
GAATACAAGCAGACATGAAAAACACTGGATGACGAACTGGCCTATGGGCGCTGCTTCGAGACAGGCAGAACTTGATGGT  
ATGCTGCGATCAATGCCAAACGTTTACCGGATCATGCGCCAGAATGCGCTGTTGCTTGAGCGAAAACCTGCTGTACC  
GCCATCGAAACGGGCACATACAGGCAGAGTGGCCGTGAAAGAAAGCAATCAGCGATGGTGCTCTGACGGGTTGAGTTC  
GCTGTGATAACGGAGAGAGACTGCGTGTACGTTCCGCGCTGGACTGCTGTGATCGTGAGGCACTGCACTGGGCGGTCACT  
ACCGGCGGCTTCAACAGTGAACAGTACAGGACGTCATGCTGGGAGCGGTGGAACGCCGCTTCGGCAACGATCTTCCGTC  
GTCTCCAGTGGAGTGGCTGACGGATAATGGTTATGCTACCGGGCTAATGAAACACGCCAGTTCGCCCGGATGTTGGGAC  
TTGAACCGAAGAACACGGCGGTGCGGAGTCCGGAGAGTAACGGAATAGCAGAGAGCTTCGTGAAAACGATAAAGCGTGAC  
TACATCAGTATCATGCCAAAACAGACGGGTTAACGGCAGCAAGAACCTTGCAGAGGCGTTCGAGCATTATAACGAATG  
GCATCCGCATAGTGCCTGGGTTATCGCTCGCCACGGGAATATCTGCGGCAGCGGGCTTGAATGGGTTAAGTGATAACA  
GATGTCTGAAAATATAGGGGCAATCCACAGGTGAACTACGCTCCTCTGTTTGTACGCAATAAAAACCTGGTGTTCGA  
CTATGAAAACAGTTTCCCTCCTCACGCAATCTGAAAAATTTGGTGAGGCCCGACAAGATTTAACCATAAAAGAATCG  
CTGAAAAATTTCTGGCACTGAAAGAACTGAAGTCGCAAAAACACTCAACACATACCGTGCCGTCATCAAAAATATC  
CTGAGCATAATCGGTGAAAAAAATCTTGCCCTATCGATTAATAAAGAAAAAATTAAGGAGTTTCGTAAGAGGTTACTGAC  
TGGATACCAGATCCCAAAAAGTAATATATTGTTACACAACAGGAGATCGGCTGTAATGTAATAATTACATGACAA  
ATCTTAACGCCGTGTTCCAGTTTGGTGTGATAACGGTTACCTGGCAGATAATCCGTTTAAAGGGGATCTCGCCATTAAG  
GAATCAAGAACCATTCCGGATCCTCTTTCGCGGGAAGAATTTATCCGCTTATCGATGCGTGCAGAAATCAGCAAGCAAA  
AAATTTATGGTGTGTTTCTGTTTATACTGGAGTTCGCCCTGGTGAAGTGTGTGCACTTGGATGGGAGGACATAGATCTGA  
AAAATGGAACAATGATGATCAGGAGAAATTTAGCAAAAAGACCGTTTACGGTACCAAAAACACAGGCGGGAAACCAATCGG  
GTCATTCTATTATTAAGCCAGCAATCGACGCTCTCCGGAGTCAGATGACATTAACGAGACTGAGCAAGAGCATATCAT  
TGATGTTCACTTCAGAGAGTATGGCAGAACAGAAAAACAAAAATGCACCTTTGTTTTTCAACCTGAAGTGTGAGCGAGAG  
TAAAAAATTTATGGTGACATTTTACCGTTGACTCAATAAGGCAGATGTGGGACGCAGCGATAAAACGTGCCGGACTCCGC  
CATCGAAAATCATATCAGTCGAGACATACTTATGCCTGCTGGTGCCTGACAGCTGGTGCTAACCCGGCATTATAGCAAA  
CCAGATGGGCCATGAGATGCGCAAAATGGTATTTACAGTATACGGAATGGATGTCTGAAAACAATAATGCACAGGTAG  
CTTTGTTAAATACACAGTTAAGCGAGTTTGCCTCAACCATGCCCCATAACGAAGCAATGAAAAATTAATTTAATTTTAT  
CAATAGTTAACACGCATGACTCTTGAATCCATAAATTAAGCGCAGTGCCAGCCATCCCGATACTGCTGCTTTACC  
AAATCCTTAGTGCTTCTTTCGTTTCTATTGTCTAATGGTTATCTCTAAAAAAGAGGTAAGATGCGTACTACTTAC  
TCGCCGTTATTGGTATTATTCAGAAAAAGTGAGTAAGACTTTGCAGCAATGTTTTTGTCTGTTCAAATAAACTAATGG  
CATCAGCAACATGCTGAAAATCAAACGTATGGGTAATTAATTTTCTGGTTAATTAACCTTTACTTAACCAGTCGATA

ACGATCGGGAATTTATTTGCATTTAAGCGTGAAGAGAAAATAGAGAGTTCTTTCCGGTAATTCCTTGCTGAATCACTTCA  
AGACGGTTCCTGAGAACCCCATCAATACAATACGTGCCGCTGGAGAAGCCAGCGTTACGGCCTCTTTAGGATAGAAG  
GATGACAAGCCGCATCGATAATTAATGTCGGCTTGATGCCTTTTTAGTGAATCTCGCCAAAGCGGTGTCTGGCTGTTA  
TTAATCGCCAGTCAGCCCCGCTCTCTTTGCTTTTTCCAGTCGTTCAATGCGATCGGCAACAATCACATTTTTAAC  
GTTATAGACGCCTTTTAATACCTGAACGATCGTCAGCCGATTGGACCGCACCATAAACCGAAGCGGTATCATTTTTAG  
TCGGTTGACCATGTCCGGTTACGTTAGCCGCAATGGTAAAAGGTTTCGATCATTACCGCATATTGATCGGCCACTGCTTCA  
GGAATTTTCCACGCATTTTTTCCGGAACCACGGCATATTCACTGAAACCACCGTCAGCGTGCACACCTAATACAGCCAG  
TGTCGTACAAACGTTCCGTTTACCTATAGAGCACGGATAGCAATGCCACAGCTGACCACGGATCGACAGCAACACGTT  
CACCGACTCTGGCGCTTTCCACGCCTTCACCACTGCATCAATGACGCCAAAGAATTATGACCAATGACGCGGGATAT  
TTCGAAAAGGATTATGCCACGATAAATATGGCTATCTGAACCACAAATTCGGCAAGTTTCACTTTTACTCGTACTTC  
ACCCGCTGACGGGGTGGTATTTACGTTTCGACAATCGCCAGTTGATTGGTTTTTCAATTAATATGCTTTTATTATCT  
TACTCCTTACCAGTTCCACAGCGTCCATCTTCCAGACGTGCGACTGGTAGATAAGCAGGTTATAGGGATATTTCCGCC  
CCAGTTTTTATCGAATTCGATACCAAGACCCGTTTGTCTCCGGATGCATATAGCCGTTATCGAAAGTCCAGTTGTGC  
GGAAAGACTTCGAGCATTGTTCCGAAATAACCATGATTCTGGACACCAGAAATGGGGACCCACAGATCAAAGTGCAG  
CGCCGACCCATGCAGACTGGTGACAAATCGGAAGGACCGTGTGAGCCAGTACCTGATACAGCGAAGCAAAATCGG  
CAATCCGGCGCATACCGGTAATTCGGCTGCATGGTTCAGCGTGGTGCAGGATATAATCGATGAGTTGCTTCAATCAGT  
TGTTTTGAGTCCAGATGCTGTTGAAGACTTCCACCACTGCGATGGGTGTGACGGTATGTTGGCGAATGAGACGGAAGCA  
TTCTGTTTTTCCGACGGCTCGGGTCTTCCATCCAGAACATGCGATAATCTTCAATGCTTTTACCAAAGCGCGCCGCTT  
CAATAGCGTTAAGCGATGGTGCATGTGCATGACGCAATGTTCAATAAAACCAAATGTTACGTACCGCGTCAAACAAT  
TTCGGCATGAAATCGAGGATTTTCCGTCGACCACAGCTGCTTCCGGCCACTGTCCTTTGGTTGCGGGTTCATAAGC  
CAGACCTTTACCTTTGACATGCCGTAGGTGGTTTTTACACCAGGATTCCGCACTGCACGCGGATGGCTTTGAATCCAA  
GCTCTTGATGACGGGCATAATCATCCAGAGCTTCACTACTGTGACCGGTGGTATGGCAATAAACCATCACCCCTTCA  
CGAGACGCGCCGCGAGTAACTGGTAAAGCGGCATGTTGGCAGCTTTGGCTTAAATATCCACAGCGCCATATCAACCGC  
TGAAATGGCCGACATCGTAAACGGACCGCAGCAGTAAACCTTTATAGAAAACTGCCAGATATCTTCGATACGGT  
GCGCATCGCGACCAATAAGTCCGGACAAAGGTGATCCTGCAATAAGAGGCCACGGAAAGCTCACGTCCATTGAGGGT  
GCATCCCAAGGCCGTAATACCGTCTCAGTGGTATTTTTAATGTGACGAAATACGCCCGGACAGGTAACAAAAAC  
TTCAGCCTTTACGATCTTATGTTGATTCTTGCATCGTTGTGCTGATGCATGAAATCTACGCAACTGAGCTACTACC  
ATACAAGTATAAAGATCGAAAAAGCCGAGTGCACAAAAAAGCGGTATATTTGCGCTGTGAATGGTTGACAAAAGA  
TGAAATAGAATACCTTTTGTGAGTGCACCTTCTTATCTTATTGATAAAATGGATTTATGTTCTACGTGCGCCCC  
AGCCCGCAACAATGATCAACATGCCGCAAAGCGCAATCAACGCACCCGTCAGTCATAAAGAGTCAAGTTTACGCCATCC  
ACAACGCGCAGCCACATCAACGCCGTGACAGATAAACGCCACCATAAAGCCGCTAAACACGCCCACTCGCCGCTGGATG  
CAACGTTAACAACCAGACAAACAGCGCCAGTGAATCCCGCCGGAAGCAACAGCCAGATACTGGCGTTTCGTTTTAAC  
ACAACCAGGGCAGAAAGCATCCAATAATTTACACAGCGCAGTAGCAAAAAATAGTAACGTTGTTTTAATCATCTTTGTC  
TCTTATTGACATCATGTATAGTTATAGGGCAGATAATATCATCAATATAAACACCCTCCTGGTACGTTTTGCGTCCGCA  
GTGGATGGTGTAGAATCACCTTTAATCATTACACAGGGAATGAATTAATAAATCACTCTCAGCAAAAGAAATCGCCCTG  
CTCGCTATTCTGCTGCCTTCCGCACTGGCATTGAGCACAATGTTATGCCGAAACTAACAACTGGTATTGAGTCTGG  
CGACAGTGCACAAAGCCGACGACCGCTATGAAAAAGAGCAATGGAATGACACGCGCAATCTGCCGAGAAAGTGA  
ATAAACGCACTGAAAAAGAGTGGGATAAAGCCGACCGCTTTTTGATAACCCGATAAATGTGAGCAAAGCGCAACATC  
AATGCCTACTGGGAGCCCAATACTTTGCGCTGCCTGGACCGTGAATGACGCGCTGTTATTACCCCTAACCTGTTATTGA  
TTAAGGAATGTAAGGACACGTTATGCCAAGCGCCACAGTGTAAAGCTACGCCGCTGGAGCGTGAAGATTTACGCTAT  
GTACATCAACTGCACAATAACGCCAGTGTGATGCGTTACTGGTTGAGGAACCTACGAAGCCTTTGTTGAATCTCTGA  
TCTGTATGATAAGCATATTCAGATCAGAGCAACGCGCTTTGTTGGTGAATGTGACGGGAAAAAGCCGGTCTGGTGG  
AGCTGGTGAATTAACCATGTTTATCGCCGCGCAGAAATTTAGATAAATTATCTCCCGGAGTATCAGGGGAAAGGTCTG  
GCAACCCGTCGCCCAAATTAGCAATGGACTATGGCTTTACCGTTCTCAATCTCTATAAGCTGTATCTGATCGTTGATAA  
AGAGAATGAAAAAGCGATTACATTTACCGCAAGCTTGGCTTTTCCGTTGAAGGTGAATTGATGCACGAGTTCTTTATTA  
ATGGTCAATATCGTAATGCCATTGCGATGTGATATTTCCAGCATCAGTATCTGGCAGAGCACAAAACACCGGGTCACT  
CTCCTGAAGCCGACCGCACAATAGCATTAAATAAATCGATCGTATTTTTGATGGTGTAAACCCGTTCCGACGGCGGTTT  
TACTCCTTATCAACAATGATTAGCTGACAGTCCACCGGATTAGCGTACTGTATTTACAGCTCTGTTTTACATTAC  
CAACCCGTTGATTATTAGTAAAGTAACCGTGTGTAATCTAATTTTTGATCGGATCCGTTGATGGCGTGGCGCTGACA  
GATAATGTTTTGCTGTTACTTTTTGTTGGTTTTACCCAGCGGATAACCTGATCATCATAGCGATTTCCATCTGCATTTG  
TTTGTGCTGGCTTTAATACGAAGCCATTATCATCGTTTTCCAACTACCCCGCAGAAAGTAATTCTGCTAGCTGGC  
ATTTTCCCTGTAACGTAATCTCTTCCAGCGTCTCGGCATCACGGTAATAATTGGCGTCCAGTACCAGAGCGACCACG  
GTATTATTTTCCAGATCCAGTAATTCAGTGAATCAAAACAGCCTTCTTCCGACAAAGTCCGAAACACGTTTTCGTCAC  
TTCACCTTGCTCATCATTAAATGTCTGAGTGAATCTTTTACCGACACGCGGATCAAAATCGAATTCATTAGAGA  
AACTGGCCATCTCAGGGTAAATGAAAGTGTACCTCTGTGCGGTACATCCTGTGAGGAATATCGCGAGTAAGCATGGT  
AGTAATTTGATTTTACAACAGTACCAGAGAGTAGAGATGATTCTCAATCATAGTAGCAATAACAGTACTTTACACGTT

AAATGCTATGCTTAAAGAAGTTATCTTCGCGTAAGGAGCTTATGATGAAACTCTCAACCTGCTGTGCCGCGTTCTGCTC  
GCCCTCGCCTACCCGCGGTAAGTACTCGCCGCGCCGGGATCCTGTGAGCGCATAACAGAGCGATATATCACAGCGCATTATCAA  
TAATGGCGTACCCGAAAGCAGCTTACGTTAAGTATTGTACCCAATGACCAGGTTGATCAGCCTGATTCCAGGTCGTG  
GCCATTGCGCTAATGATACGCATAAAAATCTCTATACCCGACCACCAGCGGTAACGTCTCTGCTCCCGCGCAGTCTAGC  
CAGGATGGCGCGCCTGCCGAACCGAGTAACACATTATCGACTGAACGCCGGATATGACAAATCCGGCGATTGAACATA  
CAACATAATCCACCTTATTACTCATACCCTTCTATTGATATGGATTAATAATTCTTAACCCAAAATGGGTAGACTCCCT  
CTATTGTTAGCGCGCTAAATATTCAATATATAAACTTTTATATAACGATAAAGAACAGGGAGTGAGTTATGTCCAAAAAT  
GAACGAATGGTGGGCATCAGCCGAGAACACTCGTTAAATCTACCAGGATAGTTTCTCTGGCGCTGGCTGCAGGCGGTTT  
TTCTTTGCCGTTTACCCTGCGCAATGCAGCAGCAGCGGTACAACAGGCCCGGAAAAAGTGGTCTGGGGTGCCTGTTCCG  
TCAACTGTGGTAGCCGCTGTGCACTTCGTCTACATGTTAAAGATAATGAAGTGACCTGGGTGGAACTGACAATACCGGC  
AGCGATGAGTACGGCAACCATCAGGTACGCGCCTGTTTGCAGCGTCCATCCGCGCGGTATTAATCATCCCGATCG  
CTTGAATTACCAATGAAACGCGTGGGCAAACGCGGCAAGGCAAATTCGAACGGATTAGCTGGGATGAAGCCCTGGATA  
CTATCGCCAGTAGCCTGAAGAAAACCGTGAACAATATGGCAATGAGGCTGTATATATTAGTACTCTTCGGGGATCGTT  
GGCGGCAATATGACCCGCTCTTCGCCATCAGCCTCGCGGTCAAACGCTGATGAACTGCTACGGCGGTTCACTCAACCA  
GTATGGCTCTACAGCACTGCGCAAATTTCTGTGCCATGCCCTACACCTACGGCAGTAATGATGGCAACAGCACCACGG  
ATATTGAAAAACAGCAAGTGGTCTGTGATGTTTGGTAAACAACCCGCGAGAAACCCGCATGAGCGGTGGTGGCATCACTTAT  
CTTCTTGAAAAAGCGCGAGAAATCGAACGCCAAAATGATTGTTATCGATCCGCGATATACCGATACGGCTGCCGGTGC  
TGAAGACGAATGGCTCCCTATTGCCCCGGCACCGATGCCGCGCTGGTTGCGGGTATTGCCTGGGTATTGATTAACGAAA  
ATCTCGTTGATCAACCTTTTCTCGATAAAATACTGCGTCCGCTATGACGAAAAACCTTACCAGCAGATGCACCCAAAAAT  
GGTCACTATAAAGCCTATATTCTTGGTGAAGGTGACGATAAAACAGCGAAAACGCCGAGTGGGCTTCGCAAATTACCGG  
TATCCCGGAGGACCGTATCATCAAATGGCGCGTGAATTTGGCACAGCAAACCCGCTTATATCTGCCAGGGCTGGGGC  
CACAAACGCCAGGCAAACGGCAACTGACTGCAGCGCTATTGCTATGTTACCTATTTTACGGGCAATGTCGGCATCAGC  
GGCGGAAATAGTGGCGCGGTGAATCGACCTATACCATTACCATAGAACGCTGCCGGTGTGGATAATCCGGTCAAAC  
GTCAATCTCCTGCTTACGCTGGACAGATGCTATCGATCATGGTCCGCAAATGACGGCAATCCGCGACGGCGTCCGCGGCA  
AAGATAAACTGGATGTGCCATTAAGTTCATCTGAACTACGCGGAAATACCCTCGTTAATCAGCATTCTGACATCAAC  
AAAACGCATGAAATTCGACAGGACGAATCGAAATGCAAATGATTGTGGTATCGAAAACCTTATGACCTCATCGGCAA  
ATATGCCGACATTCTGCTGCCAGACCTGATGACCGTTGAGCAGGAAGATATTATCCTAACGACTACGCCGTAACATGG  
GATATCTCATTCTCCAGCCTGTCACCAGCGAAAAATTCGAACGCAAACCGATTTACTGGATCCTGAGTGAAGTCCGG  
AAACGCTTGGACCTGACGTCTATCAAAGTTTACAGAAAGGTGACGACGAGGAACAATGGTTACAACATCTGTACGCCAA  
AATGCTTGCCAAAGATCCGGCGTTACCCTTACGACGAACTGAAAAAATGGGTATCTATAAGCGTAAAGATCCCAATG  
GCCATTTTGTGCGCTACAAAGCATTTCGTGACGACCCCGAGGCAAATCCACTTAAAACGCCTTCCGGTAAGATTGAAATT  
TATTCCAGCAGGCTGGCGGAAATTCGCCGTACCTGGGAACTGAAAAAGATGAAGTGATAAGCCATTGCCAGTTTATGC  
CTCAACCTTTGAAAGGCTGGAACCTCCCTGAACGTAGAACCTTCCCACTGCAACTGTTTGGTTTCCATTACAAATCCCGTA  
CTCACTCGACCTACGGCAATATTGATCTCCTGAAGGCTGCCTGCCGTGAGGAGTGTGGATCAACCCTATAGATGCGCAG  
AAACGTGGGATTGCCAACGGCGATATGGTGGCGGTGTTAACCATCGTGGCGAAGTTCGGTACCAGCCAAAGTAACACC  
ACGTATTCTCCTGGAGTTAGCGCTATGGGCCAGGGAGCCTGGCACGAGGCCAATATGTCTGGCGATAAAATCGACCATG  
GCGGCTGTGTGAATACGTAACCACTCTGCGCCCTTACCAGTGGCGAAGGGAAACCCGACGACACTAATCTGGTCCGAG  
ATCGAAAAATATAACCCACGACAACCATAAATCTGGCATGACATTTTGTGAAAAGCAATAAGTGAGTAATGATGAA  
AATCCATACCACAGAGGCGCTCATGAAGGCTGAAATCAGCCGTAGAAGTCTGATGAAAACCTCCGCACTTGGCAGTCTTG  
CGCTGGCAAGCAGTGTCTTCACTCTGCCATTTTCCAAATGGTCCGGCGGAGGCTCCGGTAGAAGGAAAGCGGCTC  
TGGAGTTCTGCACCGTTAACTGCGGGAGCCGCTGTCTGTACGTTTGCATGTGAAAAGATGACACCGTACTGGGTGGA  
GTCTGATACGACAGGTGACGACGTCTACGGTAATCATCAGGTTGAGCGTGTTCACGCGGGCGCTCTATCCGCCGACGGA  
TGAATCATCTGATAGGTTGAAATATCCCATGAAGCGCGTCCGCAAGCGCGTGAAGGTAAATTTGAACGGATAAGTTGG  
GACGAAGCCCTGGATAACCATCAGTGATAATCTTCGCGGGATCCTGAAAGATTACGGCAATGAGGCTGTACATGCTCTGTA  
CGGAACAGGCGTAGATGGCGGAAACATCACCAACTCAAACGTCCCGTACCCTGATGAACTCTTGGGTGGTTTTCTCA  
GTCGCTATGGCAGCTACAGTACCGCACAGATCAGTGCCGCAATGAGTTATATGTTCCGGTCCAATGATGGCAACAGCCCG  
GATGATATCGCAATACGAACTGGTCTGTTATGTTCCGAAATAACCCGCGAGAAACGCGGATGAGCGGCGGTGGTGTAC  
TTACTACGTCGAGCAAGCCCGCAACGTTCAAACGCACGCATGATCGTCATCGATCCACGTTATAACGACACTGCTGCCG  
GGCGTGAAGATGAATGGCTGCCATTCGCCCTGGCACCAGTGGCGACTGGCTGTGCGATTGCTGGTACTGATTACT  
GAAAACATGGTCGATCAGCATTCTCGACAAATATTGTGTTGGTTACGATGAAAAACGCTGCCCGCAACGCACCACG  
TAACGCGCATTATAAAGCCTATATTCTGGGCGAAGGCTGACGGCATAGCTAAAACGCCGGAATGGGCAGCAAAAATCA  
CCAGCATCCCGCGAGAAAAAATATCCAGTTGGCACGAGAGATCGGTTACGAAAACCTGCTTATATTTGTCAGGGTTGG  
GGCCACAACGACATTCAAACGGCGAGCAAACATCCCGCGCTATTGCCATGCTTCCGTTCTACCCGGCAACGTCCGGCAT  
AAACGGCGGCAACTCAGGCTACGCGAAGGTAGCTGGGATCTGGGGTAGAATGGTTCCCGATGCTCGAGAACTCTGTTA  
AAACGCAGATTTCCGCTTTACATGGACAGATGCCATCGACCATGGTACGGAATGACCCGCGACCCGTGATGGTGTTCGT  
GGAAAAGAAAAACTGGATGTCCCATCAAGTTTTTATGGTGCTACGCCAGTAACACATTGATCAATCAACATGGCGACAT

CAATCACACCCATGAGGTGCTTCAGGATGACAGCAAGTGCGAGATGATTGTTGGCATTGACCACTTCATGACGGCCTCGG  
CTAAGTATTGCGATATCCTGTTGCCGACCTGATGCCAACAGAGCAAGAAGACCTTATCTCTCATGAATCTGCAGGGAAT  
ATGGGCTATGTGATCCTCGCCAACCCGCAACCTCAGCAAAATTTGAACGCAAACCCATCTACTGGATGCTGAGTGAAGT  
CGCAAACGCTTAGGACCAGACGTTTATCAAACCTTTACTGAAGTCTGCAGTACGATGAATGGATCAAATATCTCCATG  
CGAAAACGAAGGAACGTAACCTGAGATGCCGACTACGAGGAGATGAAAACGACCCGGGATCTTTAAGAAAAAATGCCCG  
GAAGAACTACGTCGCTTCCGCGCATTCCGTGAAGATCCACAGGCAAACCCGTTGAAAACACCTTCGGGGAAAATCGA  
AATTTATTCTGAACGACTGGCGAAGATTGCAGATACCTGGGAATTGAAAAAGATGAAATTATTCATCCCCTTCTGCGT  
ATACCCAGGTTTTGATGGCTGGGACGATCCCCTGCGGAAAACCTATCCACTGCAGTTAACGGGCTTCCATTACAAAGCG  
CGTACCCACTCCAGCTACGGCAATATTGATGTGTTACAGCAGGCTGCCACAAGAGGTGTGGATCAACCCATTGATGC  
TCAGGCACGCGGTATCCGTATGGCGATACCGTGCAGGATTTAAACAATAATGGAGAAATGCTGATTGCCGAAAAGTGA  
CTCCGCGTATTCTGCCTGGCGTTACCGCCATCGGCAAGGTGCGTGGCTTAAAGCGGATATGTTTGGTGACCGGGTCGAT  
CACGGCGGAGTATCAATATTCTGACCTCTACCGCCCTTACCAGCTGGCAAAGGAAACCCGTCGCACAGCAATCTTGT  
CCAGATCGAAAAGTTTAAAGAGTAGCCCATGACCACAAATATGGATTTTTATCGATTCCAGCCGCTGACTGGCTGT  
AAAACCTGCGAACTGGCGTGCAAAGATTTAAAGATCTTGGCCCGGAAGTCAAGTTCCGCCGATTTTATGAATACGCTG  
CGCGACTGGCAGGAAGATAATGGCGTCTGGCACCAGAACGTGTTCCGCTTATTATCTCTCCATCTCCTGTAACCATGGC  
ATGACCCCGCATGTACAAAAGTCTGCCACGCGGCAATGCATAAGCGTGAAGATGGCTTGTGGTGGTTGATGAAGAT  
GTTTGTATCGGCTGCCGCTACTGCCACATGGCTTGTCCGTACGGCGCCACAGTACAATGCTGAAAAGGGCACATGAC  
GAAGTGCATGTTGTTATTCTGCGCGTCCGCGAGGGGAAAACAACCCATATGTGTGCAATCCTGCCGCTGCGTGCACTTG  
AGTTCGGTCCAATTGAAGAGCTGCGCCAGAAGCAGGCACTCTTGTGCTGCGGCCACTGCCGCGCGCATTTCACA  
AAACCCAAATATCGTTATCAAACCTAACGCCAACAGCCGCCGACCGGCGATACCACTGGTTATCTGGCTAATCCGGAGGA  
AGTGTAATGGGAAATGGATGGCATGAGTGGCCACTGGTTATCTTTACCGTATTGGGTCAATGCGTAGTAGGCGCGCTG  
ATTGTTAGCGGAATTGGCTGGTTCGCCGCCAAAATGACGCAGACCGTCAGCGTATTGTCGCGGATGTTTTCTCTG  
GCTGTTGATGGCGTGGGTTTATTGCCCTGTGCATGCACCTGGGATGCCACTGCGGGGCTTAACTCCCTGAATCGAA  
TCGGAGCTTGGTCTGAGTAACGAGATTGCTGCCGTTCCATATTTTTGCCGTTGGCGGATTATGGTGGCTGGTGGCA  
GTCATCGGTAATGCGCAAGCGTTGGGAAACTGTTACTTTTTAGCATGGCGCTCGGCGTCATTTTCGTCTGGAT  
GATGACCTGCGTGTATCAAATCGACACCGTGCCAACTGGCATAACGTTTACTACGCTGGCTTTCTTCTGACGGTAT  
TGTTGAGCGGTCCAATACTTGTGCCGCAATTCTGCCGGCAGCTCGGTTACATTTAATACCACACCATTGCCATCATT  
AGCGTTCTGGCGCTGATCGCTTGTGCCGGGTGATTGTGCTGCAAGGTTTGTCTCTGGCGTCTATTCACTCATCCGTGCA  
ACAAGCCAGCGCACTGGTACCAGATTACGCCCTCTTACAGGTCTGGCGTGTGGTATTGTTATGCGCAGGTCTTGGATGCT  
GGCTTTGCCGCTCATTCTGTCGCCGTGAACCTCACGTTGCCGACTTATTCTGGGGCTAATCCTCATACTTGGCGGTGAG  
ATGATCGGGCGTGTGCTCTTTTATGGCCTGCACATGACAGTAGGAATGGCTATTGCAGGTTAACAAATGGTGCGGGGCA  
ACCCGCACATTTAGGATGTTAGGAATGACCCATTTTTACAGCAAGATAATTTTTCTGTCGCGGCGCGCGTGTGGGCG  
CGCTGTTTTATTACGCTCCAGAGAGTGGGAAGCCGCACTCTGGTTGCGGTAATCACCAGTACGCGCTGGGAAACTCAG  
TGGCCTCTACCAGAAGCGTCATTAGCGCCGCTGGTACGGCTTTTACAGACAGTGTGAAGAGACTCACGCCAGGCTG  
GCAGCGTTTGTGTCGGCCGTTGGGCACTGCCGCTCCGCGTGGGGTGGTCTGGCTGGATCGCGAATCTGTGCTGT  
TTGGCGATTCAACATTGGCACTTGTGAGTGGTGGTGGTGGGAGAAATGGTGGCAGACAGAATGCGAAGAATTGCTGGC  
ATGGCACCTTTTTCCGTGGTCAACACGTTTTCTGATGTTTTATCGAAAAGCAGAACACCCTTTCTACCGTGCCTGG  
GTAACTGGCTCGTTAACGCTGGCGCAATGGCAATCAACTGTTAATTTCTGTCGCGGTTAAACCGCTGTTTCGATG  
GATCAACGTAATATTGCCGATGGTACGATTACCGCAATCCGGCAATAATAGGTTACAGTGCACGTTTTTTTTATCTC  
TTAAAGCACGCACTGTTTTGCGGCTGGCCTTTTTGCCGCAAAATAGTCGCCGCTGTTTCATTGCCCTTTCTGCTCAT  
GCATCATCTACACATCTATCCGGATCTGCGCACTATGTTCCACCCTGCTGTTATCGCAACAGTCTGCGTATTCTCGCGG  
CCTTTGCCGTTGCCGGTTTTGTCATGCGATGCTGCTACTGGAGTGGTGTCTCTCAATAATGACTCCGGCAGTCTGGT  
AATGCAGCGACAAACCTTTCCCTGCGGACGGTGTACTCCGGCGCTCGGCGGACTGGCGGGGTTTTGTTGCTGAT  
GGGCTGGCAGAAATTTACCAACAACGCCCTCATGCGCGACCGATTATATGGAAGCGTTGCAAACCGATGGACAGTTCG  
ATTACGCAAGCCTGGTTAAATCGCTTGCCTCTGCTGGTAGTAACCAGCGGCAATGGTGGTGGAGGTTGCG  
ATGATCTTTTAGCTGCCCTTCCGCTCTGTTTTGCCAACGTTTTACGCCAGCCAGGAGTGGAAATATGGATCGC  
CTGTGGGGCCGCGGGGAATGGCTGCGGCTATCGTCCCGCTTGTGGCAGTTATTTATAGCCGAAGTGTGTTG  
GCACTATGATGTTGGCTCTCGGCCGTTGATTATTTCCGCCGCTGGCATTGCTGGTATGCAATCTGATTAATCAT  
AGCGACGCTTACTCTACAACGTACAACCTCAGTACGGTTCAGGCTCGTACTATGCGCTGATTATCAGTACAGGTGT  
GCTGGCAGGTCTGTGCGGCACTGTTGTTAACGTTAATGAACGCTGTCTGTTGGATTTGTGAGTCTCAAACCTGCGC  
CGCCTGGCAACTGGCACTAGGCGGGTGTGCTGGGTTGCTTTCCCTGTTACACCTGCAGTGTGGGCAACGGCTAT  
AGCACCGTACAATCCTTTTTAACCGCCCCACCAGTGAATGATCATTGCCGGATCTTCTTTGAAAACCTGTGCGCGT  
GCTGGCGAGTAGCGGTTCCGGCGCACCCGGTGGGGTCTTACACCGACGCTATTTATCGGTCTTGCATTGGCATGTTGT  
ATGGTCTAGCCTGGGATTATGTTCCCTGATGGCGAAGAAATACACTTTTACTCGGATTGACCGGGATGGCGACACTG  
TTGGCGGCGACCACGCGCGCGGATTATGTCGACGTTGATGATATGTAATGACCGGGAGTATCAGTACTCCCGG

TTTATTGATTGCCTGCGTAATTGCGTCGGTAATTCGCGGACGTTACACCGTGACTCTATCTACCGCCAGCACACTGCGC  
AGCATAGCTAAGCGGATGTATTGCCCCAGTTCACGCTGTTGCGCGCGCGGCAGATAAGGCAGTTCACCAATGAGCGGTGC  
CGGAAGTTTTTACCAGCATCAATGATTTCCGCATAATGCGCCAGTCTGGGTTGATTGCGTTAGCCACCCAGCCAA  
TGAGCGGCAGCCGTCGTTGGCGATCGCCTGAGCTGTTAGCAGTGCATGGTTAATGCAACCTTCTGAATACCGACAACC  
ATCAACACCGGCAGTTGTTCTGCACTACCCATTAGAGAGTGGACGCAAATCATTATCAGACTGCGCCAGCCGCGAT  
CCCTTACCACGACATGATCGACTTTTTCGGTGAGTTTTGCCAGGCCGTTTGAATGAGGGTGTAATTGATTGGGCAAC  
TGTGCGCCACGCTACTTTCTTCTCGCTTAACGCGATAGGATTAAGTCTTATAAGGCAGTTCGATGGTTGAAACACTC  
TGCAACACCAGGGCATCTTATTACGCAGCCCTTGGGTGCTCTTTGCTCCCTTCTGCTACGGGTTTATATCCCGCAAC  
CGTTTTTCCCTGGGAGGCTAACGCTTGTAGCAATGCGCGGAAACCACCGTTTTCCCTACAGAAGTGTCTGTACCGGTA  
TAAAGAAACGCTTACGATCACTAACTCCACCGTTATGCTTACAAAATAAAACCAGGAAAATAATTAACCTTGAAGTC  
TAAGTTATGCTTCTGGCCAAATTGAGATAGCGCAAATTTGGTAGAACAGTTAAAAATGTTAACCTGCAACAGAC  
GAATCAACAAAGAACCGTTATACATCGCTTTTTACCAGTGCAGCGCCTGCCATCGTCCCTGGTTAGAAAAGTGA  
CTCTCAACGCTGATGTGCTGACTATACGAGGAAGGCGCTGCTGACGGATGCTGCTGAGATGACCGGGAAGAGGATC  
TGCCGCTTACTTAACGGTGAGCCAATCAGTATTTTTGTGGGTTAAATAAATCACCATGATGGCAAGAATGCGCCGA  
CATGCGCGCCACCCCGTAATGATGCTTTTTGCCAGTAGATGCGCGCAATGCCGCTGACACAATGAGTCCACGGTT  
AACGGTTGTCATGTAACATCGAGCTCATGGATTGATTAAGACGCAGCTGTGCCAGCTCAAGAATACTGTCCACGTTGC  
GATGGTTTTGAGGCGAGCCGTGATTCGCGCAATAACAGCGTTTTCCATACGGGTGACCTGTGTGGCCCTATTTCCACGA  
GACTACTGCTGCTGCGTGTAGCAGATGACCATCGTAATGACGCGCCGCCCCACGTTGTGATCGATAACCACCTGAATC  
ACATCGCGCGCCCCGCTGAGGCACCAAAACAAGGCTCTGCCATCGTCCATGCGCTGATATCATGCTGAATATAACCGG  
AACGCGGTATGCTGCTCCAGCGCCTCGCCGAGCGGCATCTTTTTACATCCTCGTAGAACGGCATGCGATGTACAATAC  
CATTTTTCCGTATCAATAATCCCGCAAGGTTATGGCAATCGAAGTTAGACGCTCAAGTTTTTCTGGTGGCGGATAAAA  
AACTGATCGATATGGGAAATAATACGATCCAGCAATGGCAAGTATCTTTAACGCCAGTTCCTGCGACTCTCCACCAC  
CAGTTTGTGCTCAGATCGCGCAGAGCAAGGAAATCTCCCGGACTAATGCGCAGAGAAAGATAGTCCAGGCTTCAG  
TTCAACCACCAGCCCCACCGCGGACGGCCACGGTTCCCGCTTCTTTGATTTCCAGCTCTTGACCCAGGTGTGCTTCG  
AGCATCTCACGGACAATTTAGTGATACTGGCAGGAGCCAGTTGCGCCAGACGGGAAAGATCGATACGCGAGACTGGACC  
AAGCTGATCAATCAGGCGATAAACCGCGCCCGCTTGGTCTGCTTTATTTGATCAATGTGCCAGGCTGGTTTTAGCAA  
CCACCGCATACTCCCTATATTTTCGCGCTCCGAAATAATCTGTAGGCTATGGTGAAGCACTTCAATACGTGCTGCA  
TTTTACTTAGGCATGTGATTAACAGCACATTTTTCGGGCTTTTTGCTGAAATTTCCCTCACCTGAGAGCATTACAGC  
TGAATACGAAAGTTACGCGCAGCCGACTTTGTTATGATGTTTCGGCCAGACCAACCACATTTAGAAAACCGCATCCTC  
TTAGCAATCGCACCCAGCGCATTTGTTGAGCTGAACAGTTTAAATGACGCGAGGCAAAATGAAACACCCAGACCGG  
CGGAAACCAGACCGATGATGGTCATTGCCTCGCCACCTCCTGAGTGATGACGGGCGTCAAATGGTAACGTGCGATCAGC  
CCGAGAATATCGTCATACAGCCCTGTCCCGAGCTGCGGATCAAAAAGACAAAGGGTTCTTTCGCCAGTTCAGCCAGCGT  
TACATTCGGGTTATTTGCCAGGGGATGATCGTGGGGATCATGCCATAAGCGGTTTATGGACGATGACTGCGTGTTC  
GCGACTCCGGTAACGCTGTGTTACGCAGCAATCCATATCCAGCGTTCTTCAATGAGCGGAGCGATTTGCTCGGAGTG  
TTCATTTCCGGGTTTGTAAATGGACATCAGGATAATCACGGCGAAACAGCGATAACGTATCGGACACCGCCGAATAAA  
AGGAGCCGACGAAGTAAACCAATGCGCAACTCCCCGCTTACCCTGATGCAGCTTTAGCGCGAGCGGCAGCGTCAT  
CCACCATAGACAGGATTTGCCGACTATCTGCAAGAACTGTTTTCTGCTGCCGTCAGCAATACACTGCGATTGGTTCGT  
GCCAGCAGTCGGGCACCAATTTGTTGCTCCAGCGCTGAATCTGCTGACTTAGCGGCGGTTGCGAAATATTCAGGCGGGC  
AGCGGCGCGCCGAAATGCAGCTTTCCGCAACAGCAACAAAGTAAACGCAGATGACGAAGTTCAATATTCATATTTAAA  
CATCTTATTTGAGATTATTAATATATAGACAGAACAATTCGATTTTCTACCCTATGTATAAGCCTGATCTACAGGCAT  
ATTTAGCAAGGATTTCAAGTGAGCCGTACTACAACGTTGATGGCGCTCCGCAAGCGACACTGACAAGCAAAAGCATTT  
TCAGCCAAATCAATTTATTAACGCGGTACGCCGAATTTATGCGCGTACCCTGGCGCTGTTCTGCGGACTGGCAA  
CATTTGCACTTCTCTATTGTGTGAGCCTATCCTTCCGGTGTCTTCGAGGAGTTTGGCTTAAACCCCGCAACAGTAGT  
ATTTCACTGTCCATTTCCACGGCGATGTTGGCTATTGGTTGCTGTTTACTGGCCGCTATCCGATGCCATTGGTCGCAA  
ACCAGTGATGGTCACGGCGTACTGTTGGCTCCATTTGTACGTTACTTTGACAATGATGACCAGCTGGCACGGCATT  
TGATTATGCGCGCTTATTGGGCTTTCGTTAAGTGGCGTGGCAGCTGTTGGCATGACTTATCTTAGCGAGGAAATCCAT  
CCCAGTTTCTGGCCTTTTCAATGGGTTGTATATCAGCGGCAACTCAATTGGCGCATGAGCGGACGCTTAATTAGCGG  
TGTCTTACGGACTTTTTCAACTGGCAATTGCTTGGCGCAATCGTTGTTTCGCGCTGGCCTCGGCGTTGATGTTCT  
GGAAAATCCTCCCTGAATCACGCCATTTTCGCCGACTTCTGCTGCGCCTAAGACGTTGTTTATCAACTTTCGCTGTCAC  
TGGCGTGACCGGGGATTACCGTTATTGTTGCGAGAAGGCTTTTTGCTGATGGGGTCTTTCGTCAGCTGTTAATTACAT  
CGGCTATCGGTTGATGCTCTCCCCCTGGCATGTGAGTACGCGCGTGGTTGGCTTATTATCGCTGGCTTATTTGACCGGTA  
CATGGAGCTCACCCAAAGCCGGAACCATGACCACCCGCTATGGGCGTGGTCCAGTGATGTTGTTTTGACGGGGTTATG  
CTGTTTGGTTTACTGATGACCTTATCAGCTCGCTGTGGCTGATCTTTGCCGGAATGTTACTTCTCAGCAGGATTCTT  
CGCAGCCACTCAGTAGCCAGCAGCTGGATCGGCCCCGCGCAAAACGCGCTAAAGGCCAGGCTCCTCGCTGTATCTGT  
TCAGTTACTATCTGGGTCGAGTATTGCCGGACGCTGGGTGGTGTCTTCTGGCATAACTATGGCTGGAACGGCGTGGC  
GCATTTATTGCTGATGCTGGTCATTGCTCTGCTGGTGGGACGCGTTGCATCGTCTGACGCGCTGAAAAATAAG

TCCGGACTGCGGTAATACCCGTCGGACTTATTGCCAGCTCAAACCAACGTTAATAGCCATCCTAAAATAGACGAAGCG  
CCAGCCAATCCCAGCGCGTCTAGCGTCATCAGGATTATAAGTACCCAAATAAACGGATTCAATTTGTGTGTGCAT  
TTATTACTGATGCGCAGTTATTCTACTGCTTTGTAAGTAGTAAAATAGTTAACCCGATCAAGACTACTATTATTGGTAGC  
TAAATTTCCCTTAAGTACAATACGTTATTATCAACGCTGTAATTTATTAGCGTTTGTACATATCGTTACACGCTGAAA  
CCAACTACTCAGGAAGTCTGCCATTCCCAGGGATATAGTTATTTCAACGGCCCGCAGTGGGGTTAAATGAAAAACAA  
ATTGAGGGTATGACAATGAAAAAGTATTAGCTCTGTTGTTGCCGCTGCTATGGGTCTGTCTTCCGCCCTTTGCTGC  
AGAGACTACGACCACACCTGCTCCGACTGCGACGACCACAAAGCAGCGCCGGCGAAAACCTACACATCATAAAAACAGC  
ATAAAGCAGCCTGCCAGAAAGCGCAGGCGGCTAAAAAGCATCAAAAAACGAAAGCTGAACAGAAAGCCCCTGAA  
CAAAAAGCGCAGGCGAGCGAAGAAACACGCCAAGAAACACAGCCATCAGCAACCGGCAAAACCTGCTGCACAACCCGAGC  
GTAAGTTTTCAACAGTAATGCTGGCGGCCCTCGCGCTGAAAATTACGGTGCTAAGCGGGTAAACGTTTAGCACCGCC  
TTTAGCGGAGGGTAGTATGGTGGGCCGTTATCGCTTTGAGTTCATTCTGATCATCCTTATTTATGCGCACTGATTACCG  
CCCGTTTTATCTTCTGATTGTAGTTATCTGATTTACTCCACTTTTATCCCGTCCCGTCTATAGTATTTATGAGGG  
TTTGCTTTAATAATCATAATTACCCACCAGAGTGTATATGCGTACAACATTGCTGTAGTGTGGGTGCAATTAGTTT  
GACGCTCTGCTTTGTGTTGAGATAAACCAGACCTTGGCAGATCGGCAACGATGAGGTCAGCACCTGTTTTTTGGTC  
ATGATGACGTGTGCCAGTGAATGACACGACCAATCACCGTGGGATGCGGTTGGGCAACTGAAACCGCCAGCGGCAAT  
TTATGTACGGCGACGCTGATTGACCCCAATCTGGCATTAAACGGCAGGACACTGTTTATTGACACTCCAAAGGGTAAAGC  
CGATAAAGCAGTGGCGCTGCGTTTTGTGTCAAATAAAGGCTTTTGGCGCTATGAGATCCACGACATAGAAGGCCGCGTTG  
ATCCGACACTGGGAAAGCGGTTAAAGCAGATGGGGATGGTTGGATTGTACCTCCCGCAGCCGCGCGTGGGACTTCGGA  
TTGATTGTGCTACGTAATCCCCCTTCTGGCATTACGCCGTTGCCGTTATTTGAGGGAGATAAAGCCGCGCTTACCGCCG  
ATAAAAGCGCGAGGTGCTAAAGTGACTCAGGCAGGCTACCCTGAAGATCATCTCGATACGTTGTACAGTCATCAAACT  
GTGAAGTACTGGCTGGCGCAAACGTCGGTGATGTCACATCAGTGCATACCTTCCGGGTGACAGCGGTTCCGCTCTG  
ATGTTGCATACCGATGACGGCTGGCAATTAATTGGGGTGCAAAGTTCGGCTCCTGCCGCAAAGATCGTGGCGCGCCGA  
TAACCGGGCCATTTCTGTTACCGGTTTTCGGACAAGCTGGATCAACTGTGCAAAAATAATGTTCAAACGCTGCCCGAC  
AGCGCGGCGAGCTTTCATCAGGCAAGTTTACCATGATCATTCCAGCCAACAGCAAGACCAGGCCAATCCAGCCTTA  
CGATTTAACCGTTGACCAACAAGATCCAACCTGCGGCTAACGTGGCGGCAATACCAAACCCGCCCAATGCATAAGC  
GACAGACAAGTCGATCCCTTAAACGGCTTGAAGAAAGCGCACTAAAGCGAGCCAGCACCGCCCGCAGGGAGAGCAAGCCAA  
ATATTTGCGACGAAAGCCGTGAGAAAATTTCAAAAAGACGTTAGCAACGATTTCCAGCACGATTGCCAATGCCAGCCAG  
GCGCGGTGAACCCATTCAAACCTGCGCCATGGTTACCTCCAGTTCAGGTTTACGCGCTTACGGGTACCTGATTTTATCA  
ACACAATCCCAGCGACAGGGTGGTTAACCCGGCAATTTTATCAGCGATAAATTTTCTGCGAATAACAAAACGCTAAAC  
AAGGTAATAAATAAAATACCGATACCTTCCACAGCGCATAAGCTACGCCTAAGGCGATTTTTTTAACGGCGAAAGAGAG  
AAATATATACGACAGAGAAATCATCACCAGCATTAAAAATAAAGCCGCCATTTCCCTCACTGACGCTCGCCCATTTATTG  
ACAGCGTACCGGTAATTTCTGTAGCAATAGCCAGACCTAATAAAATCCAATAAATATACATTGTCTTCTCCTGCAAGAG  
AATTATTTAATTTTCTGCTAATTCAGCGAAACCAAAGTAAAGTGGTCAAGCCCCGCGCATAGCGCAAGCTTTGGCAGAA  
GAAAGGACTAAAGCGGTTGCGCCAGTGTGCTCACCTACGAGCAAGATAGTGGATGAGGTACGAAGTGGGTAAATGTA  
GAAAATAACGCTCTGAACAAATTGTCCATAATTAACAATTATCCGAGTGTGCTTCTCGTCATCGCGGATGATAATTG  
TCCTCGGTAGTTGAACACGCTGATTTGTATCATAGCTTAAGAATTAACCTAAAAATATTTTCACTTCTTACCTGAGCGG  
TTTGATTTTCTTATGATGACGGAGCGAAAAAGACATTATTATTAGCAAAGGAAGAAAAACGGGGACAAGCATGGCAAA  
GCCGATCATCAGCTCAATGGCCTAAAAATCGTCATTATGTTGGGAATGCTGGTCATTATTTCTGCGGTATCCGTTTTG  
CCGCCGAGATCATCGTCCGTTTTATTCTCGCATTATTTATTGCTGTTATTCTTAAACCGCTGGTGAACACATGTTCCCG  
TGGCGTGTGCGCGTGTACTGGCGGTGTCGATTTTGTATGACCATCATCGTGATGGCGATGGTGTGCTATTAGCTTACT  
GGTTCCGCGCTCAACGAGTTGACGCGGACGTTACCAGCAATATCGCAACTCTATTATGACGCGCTGCAAGCGCTTGAAC  
CGTTGTTGCAACGCGTAGGGATTGACGCTCAGTTGACCAGCTGGCGCATTATATTGATCCGAACGCGGCGATGACGTTG  
CTCACCAACTTATTGACGAGTTATCTAATGCCATGTCATCAATATTTTTATTGCTGCTGACGGTGCTGTTTATGCTGCT  
CGAAGTGCCACAATTGCCGGAAAAATTCAGCAAATGATGGCGGCTCCGTTGAAGGGATGGCGGCGATTCAACGTGCGA  
TTGACAGTGTCTCATTATCTGGTGTGAAAACAGCCATCAGCATCATCACCAGCCTGGTCCGCTGGGCGATGCTCGCC  
GCACTCGATGTTGCTTCCGTTTTGTCTGGGATTGCTGGCCTTTGCGCTTAATTACATCCCGAATATTGGTTGAGTCT  
CGCGGCAATCCCCCTATCGCTCAGGTAAGTGGTAAATGGCTTCTACGAAGCGTTGCTGGTGTGGCGGGATATCTGC  
TGATTAATCTGGTCTTCCGCAATATTCTGAGCCGCGTATCATGGGGCGTGGGCTGGGCTTTCCACATTGGTGGTATTT  
TTGTCGTTGATTTTTTTGGGATGGTTGTTAGGACCGGTGGGTATGCTGCTTTCCGTGCCGTTGACAATTATTGTCAAAT  
TGCGCTTGAACAAACAGCGGGAGGTCAAAGCATCGCGTCTGTTAAGCGATCTCAATAAAGAGTGACGGCCTCAGCAGA  
GGCGCTCAGGGTTACAGAGCTTTCAGGATTGCATCCACGCTGGCTTTGGCGTACCAAACAGCATGTGGGTGTTTTCTT  
GAAGAACAGCGGGTTTTGCACACCAGCATAGCCAGTGTTCATCGAACGTTTAAAGACAATCACGTTCTGCGCTTTCCACA  
CTTCCAGCACAGGCATACCAGCAATCGGACTCTTCCGATCATCTCGCGCCCGGGTTAACCGTATCGTTAGCACCATC  
ACAGTACGGTATCGGTATCAGCAAAGTCATCATTGATCTCGTCCATTTCCAGCACGATGTATACGGTACTTTTGCTC  
AGCCAGCAATACGTTTATGTCCAGGCAACGCCCGCGACCGGGTGGATACCGAAACGCACATTAATACCACGAGCGC  
GCAATTTCTCAGTAATTTACAGGACAGGATATTGCGCTGCGGACTGCCATGCCGTACCCCGGAGTAATGATCACTGAA

TGGGAGTTTTTCAGCAGTTCGCTGTCTCTTCTGCGGTGATTTGCGGGTGTCAACCACTTCTGATCATCGCCAGTAGA  
AGAGCCGTCGGTGCCGAACACCCGCAATAACGCTGATAAAGGAACGGTTCATCGCTTACACATAATGTAAGAAAGGA  
TAGCCCCGAAGAACCAGCAGCGCACCGGTCAACAATCAGCAGGTCGTTGCTGAGCATAAAGCCCGCAGCCGAGCCGCC  
CAGCCGGAGTACGAGTTCAGCATCGACACCACCTGGCATATCTGCACCACCGATGGAGGCGACTAAATGCCAGCCGAA  
TACCAGCGCAATTGCGGTCAATTATCAGCAATGCCAGCACTTGACAGCCGACGCTGTCCGTGCGAACAATAACAATCAGCA  
GCAGGAAGGAAACGACCAGAGCCGCCAGGTTCAATTTGTGACGGTTTGGCAGCATCAATGGTTTAGACGAAATCTTGCCA  
CACAGTTTGCCGAACGCCACCACCAACCCGTGAACGTTACCGCCCCGATGAAGATACCGAGGAACACTTCCGTCAGGTG  
AATATTGACCAGAATCGGTGCCATTCCCGCGTCATGATGCAGATAGCTGTTAAAGCCAACCAGCACTGCCGCCAGACCCA  
CGAAGCTATGCAGGATCGCCACCAGTTCTGGCATTTCGGTCATTTCAACTTTCTTGCCAGACGGATACCAATTGCCCA  
CCAATGACCATCGCCAGCAAGATCCAGCCAACATTACCCGTATCCGGTCCAAAAATGGTTGCGATTAACGCAATCGCCAT  
CCCGGCGATACCGAAGTTGTTACCCTGGCGAGACGTTTCATGTTTCGAAAGACCGGCCAGACTGAAGATAAACAGGATCG  
CGCAACAATGATGCAGCTGTAATAATCCTCCAGACATATGTTACCCCTTAATTTTTGCGGAACATTTTCAGCATGCG  
CTGAGTCACGGTGAAGCCACCGAAAATATTAATGCTGGCTATAAGCACCAGCGATAAACTAAGGAAGCTAACCCAGCCGC  
CCTGGCCAATCGAACAGTGTCCGACAACAATAATCCCTGAAATCGCGTTGGTGACCGACATCAACCGGTGATGACCA  
CGGTGCGATACATTCACACACGTAATAACCGACAACGACGCCAGCCGCAAAACGGTGAAGTGCCCAAGGAATCTTT  
CGGCGCAACGTTGCCATCCAGCCAAAAAGAATGATTGCCAGCGCATCAACCGGTATTTACGCCACGGTGAGCAGGTAC  
ATTTTTCTCAGTTTTCACTTCCGGTGCCGCTTTTTGTGCCGCTGCGGCTGAGCTGATACCTGAATCGCGGGTCCCGC  
CAGGTAATTTGCCCCGACGGATCACGGTCACGCCGCAATCACACATCATCAAAATCAACAGTGATATTGCCGCTTTT  
CTCTTTGCACAACAGTTTTCAGCAGATTAACGAGGTTTGTGCCGTAAGCTGTGAGGATTGCGTCGGCAGACGGCCCCGAA  
GATCGGTATAACCAATCACTTTGACACCATTTCCGTAGTGAAGATTTACCCGGCAGCGGTGATTACAGTTGCCGCCG  
TTTTGGGCTGCCAGGTGACAAATCACACTGCCCGCTTCATGGAGTCAACATTTACGGGTAATTAGCTTCGGCGCTGG  
TTTGCTGGAATAAGCGCGTGGTGACAATGATATCGACTCTTTGCTGGGCGGCAAGAGTTCCATTTCCGCTTTGA  
TGAACGCGTCCGACATCACTTTGGCATAGCCATCGCCGCTGCCAGCTTCTCTTTAAAATCCAGCTCGAGGAATTCGCG  
CCATACTTTGAACTTGTCTTTCACTTCCGGGCGGGTGTGCAATGCACGCACAATCGCGCCGAGACTGTTTGTGCGCC  
AATGGCGGCCAGACTGCAACACCCGCACCAATCACCATCACTTTTCCGGTGGCACTTTCCCGCCGAGTAATTTGCC  
CGGTAAGAAGCGCCAAATTCATGTGCCGTTCAACAATGGCGCGATAACCGCGATGTTGCCATCGAGCTTAGTGCG  
TCCAGCGATTGTGCGCGTGAGATACGGCGCACAGAGTCCATCGCCATCACGGTACGTTACGTTCCGCAAGTTTTGCAT  
TAATCCGGATTCTGCGCAGCCAGATAAACTCACCAGCGTTGTCCAGGATTCAGTAACGCAATTTTATCATCTAACG  
GCGATTGACCTTCAGAATGATCTCTGACTGCCAGACGCTATTCCCTTCTACAATTTACGCGCCCGCTTGCAAAACGCT  
TTATCGTCAAACTTGCCAGTTGACCCGCGCGCTCTACCCGCGACGGTAAACCCAGTTTCAGCAGCTGTTCCACTGT  
TTTTGGCGTTGCTGCAACACGGGTTTCATTGGTTAACCGTTCTCTTGGTATGCCAATTCGCATGATATCCCTTCCATCG  
GTTTTATTGATGATGGTTTTGCTGTGCAGGAGCCACACAAGCTGCTCATGTACGAGCTAAATGTTACTCCGTTAAAATA  
AATTAGTAACAAACGCCCTATAACGTAAGTAAATATGCCTGTGATCTAGCGCAAAAATCAGTATTTCCGGCGTAACT  
CGAAAAATATAACGATTAGCCGTGATAGTGGGATAAACACCTTAGAACGCCGGATAAAGACTGATAATTGCTTCGAC  
GGTCCGGTAAAACGAGACATCGCCCCGACGAATCACTACTTAACATTAATTAACCTTATACAATTCAGTTGCTTCAGT  
AGTAATGATGCTGATACGGCTGTTTTTAAGCATAGACGGTCAATTTGAGCAGGATTAATTTGGCTTAAGGAATGTGATA  
TGAAAAATGACGACAGTACACCGTTTTAAATGCAATAATCAGCCAGTTTCTCGTTAATAACAATACCAGTACCTGG  
TTTGGCAAGGCGAAGGATTATTTTTAAGGCTTAAGAACACCTCCTGGCGTGGCACTGCTTTCTGCTATGGCATTG  
TCCGTTAACGACGCAACAGAATGACACCGGAGCAAGCGGCGGTTAAACCTTTGACCGTGTAGTGTTACCGGTCG  
TTTTAATGCTATTGGCGAAGCGGTGAAAGCCGTTTTCTGTCGCGCAGATAAAGAAGGTGCCGCTTTTTTATGTTGTCG  
ACACTTCTGATTTTGGTAACAGCGGTAACCTGGCGTGTGGTCCGCTGACCTCTATAAAGCCGATGCTGAAAAAGCAGAAGAA  
ACAAAGTAATCGCGTAATTAACGGTGTGTGCAACTGCCGAAAGATCAGGCTGTTCTGATTGAACCGTTTTGACACGGTAC  
CGTCCAGGGCTTCTATCGTAGCCAGCCAGAAGTCAATGATGCCATCACCAAAGCGGCAAAAGCGAAAGGTGCCTACTCTT  
TCTACATCGTTCGTAATCGATGCCAACAGGGCGGCAACCAGCGTATTACTGCATTCATCTATAAAAAAGATGCTAAG  
AAACGTATCGTCCAGAGCCCGGATGTGATCCCGGACAGATTCCGAAGCAGGACGTGCAGCTCTGGCTGCCGGTGGCGAAGC  
CGCGAAGAAAGTTGAGATCCCGGTGTTGCGACTACCGCATACCAAGTTCTGAAGTCGGTCGCTTCTTTGAAACCCAGT  
CATCAAAAGCGGGGCTTACACCGTACGCTCCCGGATGGCACTAAAGTGAAGAACTGAACAAAGCGACCGCAGCGATG  
ATGGTCCCCTTCGACAGCATCAATTTCTGGAACACGGAACATGACCGAAGTCTCTATCAGGTTGCGAAACGTGC  
CGCGAAGAAAGGTGCTAAGTATTACCACATACCCGCCAGTGGCAGGAACGTGGTAATAACCTGACCGTCAGCGCAGATC  
TGTATAAATAACTATTAGTACTCTATAAGGCGGCTTGTGCGCCTTTTCGATTTTTAGTCACAAATTTCCCGCGA  
CCATTGCATGCAGACACATCTTTCGTAATAATCCCGCCTTCACTGGCAAACTCCATTTTTATGCGTTTTGCCCTAATAT  
TTATTTCTTATCACGTTTTAATCACTGGATATCGATGGAAAAGAACTGGGACTGAGCGCACTCACCGCGCTGGTATT  
AAGCTCAATGTGGGCGCGGGTGTTCAGTCTGCCGCAAAATATGGCGGAGTTGCCAGCCCGCAGCACTGCTCATCG  
GCTGGGGTATTACTGGCGCTGGCATTATTGCTGGCCTTTGCCATGCTGATCCTCACGCGATTCTCCGAACTTGAC  
GGCGGTATCTTACCTATGCCCCGAAGGGTTGGCGAGCTAATCGGCTTTTGTCCGATGGGGATACTGGCTGTGCGC  
AGTCATGCCAACGTCTCTATCTGGTATCGTTTTTTCCGCTTAAGCTTTTTTACGACACGCCGAAATTGCGCCTGT

TTGGCGATGGTAATACCTGGCAATCGATAGTCGGTGCATCGGCTTTATTGTGGATTGTTCACTTTTTGATCCTGCGCGGG  
GTGCAAACCGCTGCCAGCATTAACTGGTGGCGACTGGCAAATTTGTTGCCGCTGGGTCTGTTTGTGTGCTGGCGAT  
GATGATGTTCAAACCTGGATAACCTTCAAGCTCGACTTACCAGGACTTGCCTTGGCGTACCCGTTTGGGAACAGGTGAAAA  
ACACCATGCTGATCACCTGTGGGTTTTATTGGTGTGGAAGGTGCCGTGGTTGTTTCTGCGCGTGCGCGTAATAAACGT  
GATGTTGGCAAAGCGACTGCTGGCGGTTCTCTCCGCTCTGGGCGTTTACTTCTGCTGTAACGCTGCTTTGCTGGGTGT  
GGTGGCACGTCCTGAACTGGCTGAAATTCGTAACCCGTCATGGCCGGTCTGATGGTGGAAATGATGGGACCATGGGGCG  
AAATCATCATCGCTGCCGTTTTGATCGTTTTCCGTTTGGCGCGCTACTTAAGCTGGACCATCATGGCAGCAGAAGTACCG  
TTCCTGGCCGCACTCATAAAGCATTCCCGCGCATTTTTGCGCGCAGAACGCACAAGCTGCGCCATCCGCTCACTGTG  
GTTGACCAACATCTGCGTGCAAATTTGTCTGGTACTCATCTGGCTGACCGGTTCCGATTACAACACGTTGCTGACCATCG  
CCTCAGAAATGATTCTGGTGCCTATTTCTGGTGGCGGCTTCTTGTGAAAAATCGCAACCCGCTCCACTGCATAAAGCG  
GTAGGTGTCGGTGCCTGCATTTATGGCTTATGGTTATTGTACGCCTCTGGTCCAATGCACTTGTGTTATCCGTTGTTCT  
GTATGCACCGGGGCTGCTGTTTTCTGTACGCGCGCAAACGCATACCCATGATAATGACTGAACCGTCAGGAAATGG  
TGCTGATTGGCATGCTGTTAATTGCCTCAGTTCGGCGACCTGGATGCTGGTGGGATAACGTTTCCATCCATCGTTGGATA  
GCAAAGGAGATAACGATGGTAAAACCCAGCCCTTGCCAATATTAATTAAGTGGCGGAGGTCGTCGATCGGCTCGCCCT  
CGCATGGCATTTCATTAATCAAAGCAACCGGTGATTGTGAGTATCGGACACTATCCAGCCATTGATGGACTGATTA  
ATGAGGTGCGCAGTATTCAAGCTGATTTTTGACCAACGACGTTGTGATGGCGTTTTGCCGATGAAGTACTAAAAAGC  
ACCCATGGTCTGCGTGCTATTTTTGCATAACGCCAGTGGTGGATGGCGGAAAAACCGGGTGGCCACTGGCCGACGTA  
GGCTTGATGATGAGATCCACGTTAATACCCATACCTGCTCAACCATGCGCTGGAAAGATTACTGCGTGGGCACGGAC  
ACGCCGCCAGCGATATCATTCACTTTACCGATTATGTGGTGGAGCGCGTAGCGACAAACATATTGCGTATGCTGCAAGC  
AAAGCGCACTGGATAATATGACCCGCTCGTTTGGCCGAAGCTGGCACCAGGAGTGAAGTGAATTCTATTGCGCCATC  
GCTGATCCTGTTAATGAACATGATGATGCCGAATATGACAACAGGCGCTGAATAAATCACTGATGAAAACCGCGCTG  
GCGAGAAAGAAGTATGACCTGGTGCATTACTTACTTACCAGTTGCTTTGTCACCGGACGAGTTTCCCACTTGTGGC  
GGTGTGATCTGCGTTAATGACGTTTATCCAGCATATAATCAACACCCATGCGCTTATCCCCAACACGCAACAGAACC  
AACAAAAGCGCGGGCAAGCGCATCATTCCGGTGAATACCACAGCGACACCAGGTAACAAAATAGGGAATAATCGACC  
ACATACTAAAAATGATGGTTGCGCGTAAGGCTTCAATGCCGCTTCTGCTGGCAACAATAATGCGCGATAAGCGCAAAG  
GTCGGGAAAAGTGAATCAGCCGCGGATATAATAATTTTTGTTTTGCTAAAACACCAATCAACAGCACTACCAGCGC  
ACCGAGCGCGCTTTGATTACCAGCCCATCTTTTTACCTAACACTTCATAACAAGTCATCAGTAGAATACCTGATGA  
AACTTGTGTTAGAAACGATTGATAGTAAGTAAAAACAGCGCGGTGATTGTGACGTTTTTATATCTACCGTGAATGTTAT  
GAACACTATCGTATTTGTGGAAGATGATGCGGAAGTCGGTCACTGATTGCCGCTACCTGGCAAACATGATATGCAGG  
TTACCGTAGAGCCGCGCGGACAGGCGCAAGAAACCATTTTTGCGAGAAAATCCGGATTTGGTGTACTCGACATCATG  
CTACCAGGCAAGGACGGCATGACCATTTGTCGTGATTTACGCGCAAAGTGGTCTGGACCGATTGTTCTTAACTCTCT  
CGATAGCGATATGAACCACATCCTGGCACTGAAATGGGTGCCTGCGACTATATTCTCAAACGACGCCCCCTGCTGTTT  
TGCTAGCGGTTTACGTTTGCAATTTGCGTCAGAATGAGCAAGCCACTGACCAAAGGTTTCAAGAAACGTTCTGACT  
CCCTACAAAGCCCTGCATTTGGCACGTTGACCATCGATCCATCAACCGCTAGTCACCTGGCTAACACTGAAATCTC  
GCTCTGACAGCTGATTTGCAATTTGTGGAAATAGTACCATGCCGGGCAAATCATGGACCGCGATGCATTGCTGA  
AAAAATTTACGCGCGTCACTTATGACGGACTGGATCGTAGCGTGGACGTTGCTATTTGCGGTTAAGAAAAAACTGCTC  
GATAACGCCGAGAACCTTATCGCATTAAAATGTGCGTAACAAGGCTATCTTTTTGCGCCTCATGCATGGGAATAAGC  
GATGAAAAAATGTTTATCCAGTTTTACTGTTATTGTTTGTCTGCTTCTTGTGATGTCTCTGCTGGTGGGCTGGTGT  
ACAAATTTACGCGCAACGCGCGGGCAAACAGTCTGAAAGAGATGGATTTAAATCTCTCTTTCGATGCTGCGTGCGA  
TTGCGTGAGATCCCCCACAGCTGGGTAAAATCTGAAAGAGATGGATTTAAATCTCTCTTTCGATGCTGCGTGCGA  
GCCACTGAGTAAATACCATCTTGTGATATTTCCATGCACCGACTGCGTGGCGCGGAAATTGTCGCCCTGGACGATCAGT  
ACACGTTTTTGCAGGTATCCCGCGCAGCCACTACGTGCTGGCAGTTGGTCTGTTCTTATCTTTATTTATCTCCATCAG  
ATGCGATTGCTGGATATCGCCCTGATCGTTTTATTGCTATTTCCCTGCGCTTCCGGTGTATCTGGATGCGTCCGCA  
CTGGCAGGATATGTTAAAATGGAAGCAGCGCGCAACGATTTGGCGATGGGCATCTCAATGAACGATCCACTTTGATG  
AGGGTTCGAGCTTTGAACGACTTGGCGTGCATTTAACAGATGGCGGACAATATCAACGCCTTAATTGCCAGCAAAAA  
CAGCTTATTGACGGTATCGCTCACGAACGCAACCCGTTAGTGCCTGCGTTATCGACTGGAGATGAGCGATAACCT  
GAGCGCGCGCAATCCAGCGGTTGAATCGTATATCAGTCAACTGAAGCTTTAATTGAAGAGCTGCTGACTTATGCC  
GACTCGATCGCCACAAAACGAGCTTCTTAGCGAACAGACTGCCGTTGTGGCTGTCAACGCATCTGGCAGATATT  
CAGGCGATAACGCCGATAAAAACGGTACGGATAAAAACGCTCGTGAAGGCCATTATGCGGCGTTGGATATGCGCTTAA  
GGAGCGGTGCTGGATAATTTGCTCAATAACGCCCTGCGGTACTGCCATTCAACGGTTGAAACCAGCCTGCTACTGTCCG  
GGAATAGAGCGACATTAATTGTTGAGGATGATGGCCAGGGATTGCCCGAAAACCGCAACATATCTTTGAACTTTT  
GTTGCGCTCGATCCAGCCGGATCGCTCAACCGCGGCTGCGGGCTGGGGCTGGCAATTGCTCACTCTATAGCACTGGC  
AATGGGCGGTACGGTTAATTGTGACACCAGCAACTGGGTGGTGGCCGCTTCTGTTTAGCTGGCCGTTATGGCATAACA  
TCCCGCAATTTACCTCTGCCTGACACTACGCGCACGATGGTCAAGTCAACAGCTGTGCTATAAAAATAAGTATGTTGTA  
ACTAAAAGTGGTAAATATTATGGCGGTTACGATCTCGTAGACCGACTCAACACTACCTTTGCGCAGATGGAACAAGAGCT  
GGCTATATTTGCCGCTCATCTTGAGCAACACAAGCTATTGGTTGCCCGCTGTTCTTTGCCGGAGGTAATAAAGAGG



ATGAGCATAATCCGCTTAATCGTATTGAGGTAACAACATCTCGGCAACGACGCGCAGTCGCTGGCGTTGCGTCATTTCCGCCATTTATTTATTCAACAACAGTCCGAAAATCGCAGCAGCAAGGCCGCTGTCCGTCTGCCTGGCGTGTGTGTTACCA  
GGTCGATAACCTTTTCGCAAGCAGCGTTGGTCAGTCATATTAGCAGCATCAATAAACTCAAGACCACGTTTCGAGCATATCG  
TCACGGTTGAATCAGAACTCCCCACCGCGGCACGTTTTGAATGGTGCATCGTCATTTGCCGGGGCTGATCACCTTAAT  
GCTTACCGCAGCTCACCGTTCTGCACGACCCCGCCACTTTACGCTTTGGTTGGGCTAATAAACATATCATTAAAGAATTT  
ACATCGTGATGAAGTCTGGCACAGCTGGAAAAAGCCTGAAATCACCACGAGTGTGACACCGTGGACGCGCGAGGAGT  
GGCAAAGAAAAGTGGAGCGAGAGTATCAGGATATCGCTGCCCTGCCACAGAACGCGAAGTTAAAAATCAAACGTCCGGTG  
AAGGTGCAGCCGATTGCCCGCTGTGGTACAAAGGAGATCAAAAACAAGTCCAAACACGCTGCCCTACACCAGTATTGC  
ACTGATTAATCGGGATAATGGCGGGGCGTCCGGACGTTGGTGAAGTTGTTAAATTACGATGCCGACAATGTGCAGCACC  
GTTATAAACCTCAGGCGCAGCCGCTTCGTTTGATCATTCCACGGCTGCACCTGTATGTTGCAGATTAACGCCCGCTTC  
ATACTGCCGACCATCTGTTCTGGCCGTACCCAGCTGTCAAACCTCGGCTTCGTAAGATACCCAGCGCAAGGGCCGCGAGC  
TTTTAAGGTGACGCCCTTCTTTATGCGCTTTTTGGCGATCTCGCGGCTTTGTGATAACCAATGTGGGTGTTAAGCGCAG  
TCACCAGCATCAGCGATTATTGAGTAATTGATTGATTGCTCACGATTGTTCAATACCCACTGCGCAGTGTGTTGTTA  
AACTTTCCATGCCATCTGCCAGCAAGCGCACCATTGCAGGAAATTGTGGATCACCATTGGACGGAAGACGTTTCAGTTC  
AAAGTTACCGGAAGCGCCCAATGTTGATCGCCACGTCGTTCCCATCACCTGACAGCAGAGCATGGTTAATGCCTCAC  
ACTGTGTTGGTTCACTTTCCCGCATGATTGAGTGCCTCGGCTCATTTTCCGGGATTGAGATTTACCAATCCGCGAG  
CGCGGGCCAGAGGCCAGCCAGCGGACATCATTGGCGATTTTTCATCAGTGACGACGCAACCCTTTCAACGCGCCGTGCCG  
CTGAACCAGGGCATCACAGTGCACAGCGCTTCAAATTTGTTGCGCGGTAACAAACGTTGCACAGGTAATGACTGCCA  
GTTTCATCTGCTACGCGACGCGCATACTCCGGATGGGTTATTTAGTCCAGTACCCACCCTGTACCGCCAAGAGCCAGTTC  
GCTACGTGAGGCGAGGCTGTATTGATATGTTGAGATTATGCTCGAGCATCGTACCCAGCCGAAATCTCCTGCCCCAG  
CGTTAACGGCGTGGCATCTGCAAGTGAAGTACGACCAATTTTACGATATCGGCAAAAGCACGGGATTTCTCATTGAGT  
TCTGTGTCAGGTTTTAAGTGAAGTGAAGTGTGCTGCGCAGCGCCAGCAGCGCCGAACGTGCATCGCCGTGCGAAAG  
ACATCGTTGGAACCTTTGGCTTTTGTTCACGTCGTCGTTAGGGTGAACCTTACGTTCCATCCCGCGCACACCAGGAGTAA  
TTCAGTGGCCCGTTAGCCAGCACTTCGTTTCATGTTGTTACTTTGCGTCCGAGCCGCTGTCGAGATAGCCAGCG  
GGAATTCGTCGTCATGCTGCTGCCAGTACTTCATCCGCGCTGACGAATGGCGCTCGCTTTCTTTCAGACAACAAG  
CCTAAATCTTCATTAACCTTTGCGCGTGCAGCTTGGTTAGCGCCAGCGCATGAATCAGTGAAGTGGGCATTTTCTCCGT  
CGAAATGCGGAAATGCTCCAGCGAGCGTTGAGTTTGTGCGCCCCACAGCTTATCTGCCGGGACATCAATCGCCCCATCG  
AATCTTTTTGCTGCGTACTGTATTGATGACCTGCTCCTCACCTGATTAATTTTTCTTTCTGTTTTGCTTTGTTAAGC  
AACTTTTAGCTCACTTATTTACCATTTGATAACAAATGTTTGGTCTTTCTGTCATGTAACAAAACCGCCCGAAGG  
GCGGCTCTGTTTTATTTACACAGCGGGTGCATTGTGTGAGTTGTATCTGCTGGAAGAAGTCAATTCCTTTATCATCCACA  
AGGATAAACCGCCGGAATCTTCCACTCAATTTCCAGATGGCTTCCATTCCAGTTCGGATATTCAACACATTCAG  
GCTCTTAATACTTCCCTGCGCAATACAGCGCCGACCACCGATACTGCCAAGGTAGAAGCCGCGTGTTTTTACAGG  
CATCCGTACCTGCTGGTGCAGTTGCCCTTTGCCAGCATGATCATACTTCCGCCCTGCGCTTGCAGTTGATCGACATAA  
GAATCCATCCGTCCGGCGGTGCTTGGGCCAAGAGAACCAGGAGCATAACCTTCCGGCGTTTTGGCCGACCCGCGTAGTA  
AATCGGATGATCTTTGATGACTGCGGACGCCCTTACCCTTATCCATCCGCTCTTTAGTTTGGCGTGAGCAATATCAC  
GACCGACGATAATCGTCCGTTAAGCGATAAGCGTGTAGAAACGGGATACTGCGACAACGTGCGAGGATCTTTTCATC  
GGACGGTTAAGGTCAACGCGCACCGCTTCGCTTCTCCGCTTTGCGCAGCTTCCGGGATATATTTGCTGGATTATG  
TTCCAGTTTTTCGATCCAGATCCCCTGACGGTTGATCTTCGTTGATATTACGGTCAAGCAGAGCAGGAGACGCCATAC  
CGACCGGCGAGGATGCGCGTGACGTGGCAGCGGAATCAGCGGATGTCGTGAGCGAAGTATTTACCACAAACTCGCA  
CCAGACCAAGATTTTGCCTTCGATCAGCAATTTTTCCAGTCCACATCGCGGAACGCTGACCGTGTCTATTTCC  
TTCCGTTGGCAGTTTCATAGTATTTGCGGGAAGCCAGTTTACCCTTTAAGGTTTCGTTTCTGCAGAAGTTCCACCAA  
TAACGAACGCAATATGATACGAGGACAGGCCGCGTACCCAGCGTGCAGTCTTCTCAACCAGGTAATTTTTAGTTTT  
CCCGCGTCAAGTAACTTTGGTTTCTGATAGAGATACGCTTGTGTTGCCGAACCACCCTTTGGCGATACAGAGGAA  
TTTGTATTGCTGCCATCAACGGCATAAAGATCGATCTGCGCTGGCAGATTGGTGCAGGATTCACTTCTTTATACATAT  
CCAGCGCGGTTTTGCGAGTAGCGCAGATTATCTTCGATATAAGTGTATAGACACCGCGGCCAGCGCCGCTTATCA  
CCACCACCGTCCATACAGCTGCCCTTTTTTACCAACAATAATCGCGGTGCCGGTATCCTGACAGGTTGGCAGAACGCC  
TTTTGCGCGGATGTCGGAGTTACGCGAAGTGCAGCGCCACATATTTATCATTTCGCTGGCTCCGGTCAAGCAGAA  
TGTGCGCCACCTGTTGTTGGTGCAGCGGACGAGCATGAACGACGCATCATGAAACGCTGGCGGCCAACAGGTTAAC  
GCTTCCGGTGCAGCTTTCAAATCTCCTGCCCTTCAAATCAGATACGCTAACGTGTTGCTGTTAGCAGGTAATACTC  
AGTATCATCTTTTTGAGTGAAAAGGAGCCTGATAATGAAAGGTTTTGTTGACATTGTTCTCTCACTACTGCCTGGT  
TTGGTTATGCTCTGGCGGGTGTCCGTTGCCCTGTTAAAAGCGAGTAACAATATCCTACACTTTTTTAAACAAAAC  
GAGACTAGTACGACTTTTTGCGGCTCCAGGTTACTTCCGTTAGGATCTTGTGTTAATAGTGGGATTAATTTCCACATTA  
AAACAGGGATTGATCATGAAAAACTCATTAACTCAGTGCAAAACTATGCTTGGGGCAGCAAAACGGCGTTGACTGAACT  
TTATGGTATGAAAAATCCGTCCAGCCAGCGGATGGCCGAGCTGTGGATGGGCGCACATCCGAAAAGCAGTTACAGAGTGC  
AGAATGCCCGCGAGATATCGTTTCACTGCGTGATGTGATTGAGAGTGATAAATCGACTCTGCTCGGAGAGGCGGTTGCC  
AAACGCTTTGGCGAAGTGCCTTTCTGTTCAAAGTATTATGCGCAGCACAGCCACTCTCCATTGAGTTTCATCAACAA

ACACAATTCTGAAATCGGTTTTGCCAAAGAAAATGCCGAGGTATCCCGATGGATGCCGCCGAGCGTAACTATAAAGATC  
CTAACACAAGCCGGAGCTGGTTTTGCGCTGACGCCTTCTTGCATGAACGCGTTTCGTGAATTTCCGAGATTGTC  
TCCCTACTCCAGCCGGTGCAGGTGCACATCCGGCGATTGCTCACTTTTTACAACAGCCTGATGCCGAACGTTTAAGCGA  
ACTGTTCCGACGCTGTTGAATATGCAGGGTGAAGAAAATCCCAGCGCTGGCGATTTTAAAATCGGCCCTCGATAGCC  
AGCAGGGTGAACCGTGGCAAACGATTCGTTAATTTCTGAATTTACCCGGAAGACAGCGGTCTGTTCTCCCGCTATTG  
CTGAATGTGGTGAATTGAACCTGGCGAAGCGATGTTCTGTTGCTGAAACACCCGACGCTTACCTGCAAGGCGTGGC  
GCTGGAAGTGTGGCAAACCTCCGATAACGTGCTGCTGCGGGTCTGACGCCTAAATACATTGATATTCGGAACTGGTTG  
CCAATGTGAAATTCGAAGCCAAACCGCTAACAGTTGTTGACCCAGCCGGTGAACAAGTGCAGAAGTGGACTTCCCG  
ATTCCAGTGGATGATTTTGCCTTCTGCTGATGACCTTAGTGATAAAGAAACCACCTTAGCCAGCAGAGTGGCCCAT  
TTTGTCTGCTGCGAAGCGATGCAACGTTGTGGAAAGGTTCTCAGCAGTTACAGCTTAAACCGGGTGAATCAGCGTTA  
TTGCCGCAACGAATCACCAGGACTGTCAAAGGCCAGGCCGTTTAGCGCGTGTTTACAACAAGCTGTAAGAGCTTACT  
GAAAAATTAACATCTCTTGAAGCTTATTAAGGCTTATAACACCTTCAGGCGCCAGTCCGCCTGATTTCAATTTAT  
GGATAATCATTATGAATAAATCGCTGGTAGCGGTAGCGCTATTGTTGCGCTAGGCGTAGTCTGGACAGGCGCGCATGG  
TATACAGGCAAGAAGATTGAAACCCATCTCGAAGACATGGTCGCGCAGGCGAACGCGCAACTCAAAGTACAGCTCTGA  
ATCCAACCTGGAAGTGAATTATCAAACTATCATCGCGCGTATTACAGCAGCTTGAAGTGTGGTGAACCCCTGA  
CCGGAAAGAAAATCCGTGGATTAAGCGGTAGCGCTCATCTTCAACGAATCGGTTGATCATGGTCCCTTCCCGCTT  
GCCAGCTTAAAAAAGTGAACCTGATCCCGTGCATGATCAATTCAAAACACGCTGGTTAATAACGAAGTAAAGCAAAC  
ACTGTTTATGATGGCAAAGGTGAAACGCCTTTTGAAGTAACTCGCGCATTGGTTACAGCGGTGATTCCAGTTCGGATA  
TTTCTGCTCAAGCCACTGAATTACGAGCAAAGGATGAAAAAGTGCCTTTAGCGGCGGCGAGTTCCAGTTAAATGCTGAC  
AGAGACGGCAAAGCCATCTCCCTTCCGGGGAGGCGCAAAGTGGTGGATAGACGCAGTTAACGAATACAACAGAAAGT  
GCAGTTGACCTTAAATACTGAAAACCGACGGTCCAGCAGCTGGCAAGTTTGGTGGAGCGGTAGGAAATCAAAAAC  
TGCTACTGAAAAAATGACCATTTTCAAGTGAAGGCAAGAACTGGCACTGCTGGAAGGCATGGAGATCAGCGGTAATCG  
GATCTGGTCAATGACGGTAAACGATCAATAGCCAAGTGGATTACTCGCTAAACAGCCTGAAGGTACAGAATCAGGATCT  
GGCAGCGGCAAGCTGACTTTAAAAGTCCGCGAGATTGATGGTGAAGCCTGGCATCAGTTTAGCCAGCAATATAACGCGC  
AACTCAGGCGCTGCTGGCACAGCCAGAAATTGCCAACACCCCGAACTTTATCAGGAGAAAGTACGGAAGCCTTCTTT  
AGCGCCTGCCGCTGATGCTGAAAGGCGATCCGGTATTACTATCGCGCGCTAAGCTGAAAAACAGTCAAGGTGAAAG  
TGCCCTGAATCTGCTGCTGTTCTGAAAGATCCGGCAACGACTAAAGAAGCGCCGCAAACGCTGGCGCAGGAAGTAGATC  
GTTCCGTTAAATCTCTGGATGCGAAACTGACCATCCGGTGGATATGGCAACTGAGTTTATGACTCAGGTAGCGAAGCTG  
GAAGTTATCAGGAAGATCAAGCGAAAAAAGTGGCGAAACAGCAAGTTGAAGGTGCATCAGCAATGGGGCAGATGTTCCG  
TCTGACCACCTTGAGGACAATACCATACCACCAGCTGCAATATGCTAACGGTCAGATAACGTTAAATGGGCAGAAAA  
TGTCGTTAGAAGATTTTGTGGCATGTTTGCATGCCAGCTCTAACGTTCCGGCTGTACCGCAATTCCGACAGGATAA  
TTCACGGCCAAACGCGGAGAAATTTTCACTCCGGCTTTTATCTGAAAACAAACAGAGATTGCTGATGCGCTACGC  
TTATCAGGCCTACCTTTTCTGCAACACTTTGAATTTATGAGTTTTTGTAGGCTGGATAAGGCGTTTACGCCGATCCGG  
CATAAAAAACGCGCACTTTGTCAACAATCTGAAACGCGGAGATTTTCTCTCCGGCGTTATTTTTACTTCAGCATAAA  
GTCATACTGAATACTCATTTTACATCCAGTAATTCAGGCGATCGCCAGCGTACTGCCATCGCGCTTTTCCCGCCCTT  
TATCGGCAGCAAGAAAGAAATTCATCCCTTGAACGGCCCTTCTGTCGACCGATAGTTTATACCACCTAAGATACCCGTG  
CCTTCAATCCGCATCTCGTTTACTGGATTATAGCCGCGAGTACAATCGGTGCAAATGTCAGCGTAAATTCGCGCGT  
TAAACGATAGTTGACGCCAATTCAGGACTGCATTCCTTACGTTTACGATCAAGACTTAAATGAAAAGGGATAGCCAA  
TGTCGGTATCCACCACGGCACCATTCATTGATGGCGCAAATAACCAACTGCAAATACACTTCCCGCGCGCATTC  
CAGTCAATTTGCCACTAACCAACCGCTTTTCAATGGCTGGTATTACGACTTAAACCTTCGAGTGCAGGCTAAAA  
GCCGAGCAACTCCCTTTCAACGTATAATTCGGGTGAGCGGTATGCTTTTCTGAGAATACTTTGTATCTGATTGAAAA  
CATCTTTCTGTACCGATGCCCCAGAGAAATAGCGACTGGTATCATCATGCCAACTGGCGGCTAAAAAAGAACGTGCGCGA  
TGTTTATCGTATTTTCCCGTCTGGCTGTTATACACCCCTTATCACGAATACCGGTTGTTGAATCAGTCCATAAAAATAC  
TCGTGAACGCCACATTCCCCACAGATCAATATTTGGTGTAAAGCCAAATAACCTAATGCTCCTTCAGAACTGTCGGTA  
ATGTACGTTGCGAACTGCCAGCATTAAACGGAATACGATAAGGTAAGCTACCATAACTATAATCCGTCCCGAAGCGACCT  
AATTTAAGCAGGCTATTTTCACTGGGTTTTATTTTTACTGCCCCAGGGCAAAGCCAAACTTTTATCACCATCAAGATA  
CCACCGGTAATCATATCAGCACGAGCACCTAATTTATAAACATAATACGCCCCGCTTCAACGCCAATAATATTGGAAT  
AATAACCACTATTGAAATCGAGCAATCTCCCTGTACCCATGCGTAAATATCTTCCCGCGCAGCACTGGGCTTATCC  
GCCCTGCGCAATTCGTTTTTCACTGATGCGTAGTCCCGTTCATCGTCAGCCAGTTGCGCCGATAAGCAGAGGTAAG  
GCCAGAGGCGCGTCAAGCAAATAACGGCCATGGCACTATTTTCTCATAGTTGACCTTTGATGTTCTGATTATTTT  
TATTGAATATTAATTAGTATATCGCTGATTAATTGCTGCTGCACTTTTTTACGATTATCAATTTCAACCACGATTTCTT  
TGAATTTTTATCCGTGAGCGGATAAAACAGATAATAACGAATGCCAGTAGCATAAATCCGCAAGGTAAGGCAATT  
GATGTGCGGATGCCATAATAACTTCCGGCGTTTGACCTGATTGGCGATATATCCGCTTAAACCCAAAATAAAGGCGAG  
AATTGAACCTCCGATTGCTGACCGCATTTACGGGTAAATGAGAATAGTGAATAGGTGAGCCCTTCAATTCGCACGCCGG  
TCAGGTATTACCGTATTCTACGGTATCAGTTCAGCGCCACATCACGGTATGGAACGCCCTGACCAATTGAAGCG  
ATGGCCAACGCAACCAACGCCACCGGCGAGTACCGAGCGGAAACCAGAAGAACAGCAGATAACCGCAGGTTCCAGCAA

AGCGCCAATCAGGAAGGTATTCTTTTTACCGATCCTCGGACCATCCCCGGCACCAGCGGTGCCGATGCCACAGTACCAA  
CCAGGTTTTGCACCAGTACCAGCACAGTGAACAGCCGGTATCATTAAACACATAGCGCACGTAGAACAACGACGAGGCG  
CTGACCGCAAAGTTCGAAATCAGCACACACAGCGCACCGATGCACAACATAAACAGCGGGCGATTCCGTTTCAGGGTTG  
CAGACTGATATTCAATGACGGCTGCGCAACGATACGTACCACATTCTCACGCGTCGATTTGAAGCAGATGAAGTAAAGCA  
CCATTCCGGCAATCGCCAGACAATTGTCCAGAAATGGTATACCGACACCATCTCTCCGGGCTGGAGTTCTTAATGCTC  
GGTCTATCAGAAATGCCAGGCAGACAAGGTCAATGAAGCGCAATCCACGAGCCGCGCCAGACGGGCGCGGGATTG  
TGTTGTTGGGTCATCGCGGTAGCAAGTGAACCATAAGGAATATTCACCAGGCTGTAGCAAAGCCGAGGCCATGTAGG  
TCAAATATGCATACCACTTTGCTACCATGGCTCCAGTCGGTCAGCACCCAGAATACCAGCACGCTGAAGATCATTAAC  
GGCGCAGTACCGAAGAGTAAAAAGGGCGGAATTTCCCGAGCGGGTATTCACACTGTCCACCACTCGTCCGGCAAAGAC  
GTCGGCGAAGGCATCGAATACCCGCACCAGTAACAGCATGGTGCCCGCCGACGCGGCACCAGCCAGCGACGTCCGGTGT  
AGTAACTCAACAGGAAGAGCGCCCCATTGCGAAGGCGAAGTTATTGGCGACGTACCCGAGGCTGTAGCCGACGATGGTG  
CGCCAGGAGAGTTGTTGATTATTGTTGCTCCCTGCTGCGGTTTTCCACCGAAGTTCATGCCAGTCCAGCGTTTTTGC  
AGCAGAAAAGCCGCGACTTCGTTTTGCGGTGCGGAGTGAAGATCCCTTTCTGTTACCGCAAACGCGCAATATGCCTTG  
CGAGGTCGCAAAATCGGGCAAAATCCATACCTGTTACCCGACGACGGCGCTGACGCGATCAAAGACGCGGTGATACAT  
CCAGCCATGCACACTGACTCTTCCACTCCACATGTCGGTGTACATTGAGTGCAGCCCGGTAACGTATCCACGCGTAT  
TCGGTGATGATAATCGGTCGATGCAGTTTCTCCTGCCAGGCGAGAAGTTCTTTTTCCAGTACCTTCTCTCGGTTTTCAA  
ATCGCCGCTTTGGACATACCATCCGTAATAACGGTTCAGGCACAGCACATCAAAGAGATCGCTGATGGTATCGGTGTAG  
CGTCGAGAACATTACATTGACGCAGGTGATCGGACGCGTCCGGTTCGAGTTTACGCGTTGCTTCCGCCAGTGGCGCAAA  
TATTCGCGTGCACCTTGGCGACGGGTATCCGGTTCGTTGGCAATACTCCACATCACCACGCTTGGGTGGTTTTTGTACG  
CGCTATCAGCTCTTAATCGCCTGTAAGTGCCTTGTGAGTTTTCCCGTTGACTGCCTCTTCGCTGTACAGTTCTTTTCG  
GCTTGTGCCCGCTTCGAAACCAATGCCTAAAGAGAGGTTAAAGCCGACAGCAGCAGTTTCATCAATCACCACGATGCCA  
TGTTTCATCTGCCAGTCGAGCATCTTTCAGCGTAAGGTAATGCGAGGTACGGTAGGAGTTGGCCCCAATCCAGTCCAT  
TAATGCGTGGTCGTGCACCATCAGCACGTTATCGAATCCTTTGCCACGCAAGTCCGCATCTTCATGACGACCAAAGCCAG  
TAAAGTAGAACGGTTTGTGGTTAATCAGGAAGTTCGCTTCACTGCCACTGACCGGATGCCGACGCGAAGCGGGTAG  
ATATCACACTGTCTGGCTTTTGGCTGTGACGCACAGTTCATAGAGATAACCTTACCCCGTTGCCAGAGGTGCGGATT  
CACCCTTGCAAAAGTCCCGTAGTGCCTTGTCCAGTTGCAACCACCTGTTGATCCGCATCACGAGTTCAACGCTGACAT  
CACCATTGGCCACCACCTGCCAGTCAACAGACGCGTGGTTACAGTCTTGGCGGACATGCGTACCACGGTGATATCGTCC  
ACCCAGGTGTTCCGGCGTGGTGTAGAGCATTACGCTGCGATGGATCCCGGCATAGTTAAAGAAATCATGGAAGTAAGACTG  
CTTTTTCTGCGGTTTTCTGTCGGTAATACCATTCCCGCGGGGATAGTCTGCCAGTTCAGTTCGTTGTTACACAAAACGG  
TGATACGTACACTTTTCCCGCAATAACATACGGCGTGACATCGGCTTCAAATGGCGTATAGCCGCCCTGATGCTCCATC  
ACTTCTGATTATTGACCCACACTTTGCCGTAATGAGTGACCGCATCGAAACGACGACGATACGCTGGCCTGCCAACCC  
TTTCGGTATAAAGACTTCGCGCTGATACCAGACGTTGCCCGCATAATTACGAATATCTGCATCGGCGAAGTATCGTTAA  
AACTGCCTGGCACAGCAATTGCCCGGCTTTCTTGTAAACGCGCTTTCCACCAACGCTGATCAATTCACAGTTTTCCGGA  
TCCAGACTGAATGCCACAGGCCGTCGAGTTTTTGTATTTACGGGTTGGGGTTTCTACAGGACGTAACATAAGGGACTC  
CTCATTAAGATAATAACTGGTCAACCTTAACTGATTAGTTAAACCAATTCGTGTTGCACACAGTTATCTGTGAGAA  
ACCCATGGAAGAGAAATGAAAATAAAAAGAACTGACACCGCGATCAAAAAACAAAACTGCAATACCCACAGCGTGATA  
TAGATCGCATTAACTTTAAAACAGCGTTGACAGAAGCCATAAAAATAAGCAACCGAACGTTTCGTTTCGAGCGTATTGGGAA  
CGATAAACTCTCATGACATATGGCTACAGTGAATATTTGGGGGAATTCTCCGAAGCCGGGAAGGATAATTTTTGCACA  
GAGAAATTACGATATGAAACGCGGGCACAGTTATCACCAGCCCGCCGAAAAAGAGAGAGAATCAGGATCGGGTTAAGATA  
CCGCCAATCATCGCGGTAATCCCTGAGCAAAACGACGCTTACGCGCCAGGTTCTCCGCTTCGATACGGCCAGTACACC  
GTAGGTGAGATCCAGCAGTAAACGTGAAGTCATTGCCGTGTTGATGTCTGGGCTTATCTCGCCTTTTTGCTGGGCATCAC  
GCATCCGCTGGGCAACAAATTCCTGATCGTCATATGCTTATTTTTAAGCATGGCGGCGACCTGTGGGTTACGCATCCCT  
TCCGCCATAATTTCAACCACCAGCGCCCGTTGTCCAAAGGCTTCATGGGTGAGAGAGACAATGGACTCGACCATATAGTC  
AACGAAATGAATCCCTTCAATCGGTTCCCGGAAACGGGCCAGCGCCCTCTCCTGGTCTGTAAGATAATCGCCTGAATCA  
AGGCTTCTTTGGAGATGAAATGGTGATAGAGCGTCCCGGACTAATGGCGCAAGATTTACAGATGGCTTTCATCGAGGCA  
CTGTGAAATCCATTTTCTGAAAAATCTCTGCGCAGCATTGAGGATCCGGGTCGTTGTCGTTGTGCTTCACTGCTGCAT  
GTTATCCATCATTAAACCATTATAGTTAGCGTGAATAACTAGTTTACCAGGTTGTCAGGTGAGCGCCTATCATTGCTGTT  
GAATAGTGCAGGACACTCTATTCTGATACTTTTCACTCTGAAATTTGGTTAAACCAATAGCCGTGATTTGGCTGCCAGT  
TATTTAGCAGAGCGTTGATGAGTTTATCCCGTAAACAACACGCACGGTGTTCACCGTCCGTTAGTGTATTAATTGA  
GCTCCTGTACCCACCACCGGAGACGGTGAAGTTTGTCCGTTACCCAGCTCGCAGCAGGCGAGCAAAGGAACAGCGCT  
GCGTTAGCAATATCTTGGGTTGGCCAGACGTCTGATCGGCGTGTGCTGTAACATTTTTTGTCAATTTCTGGTGAAT  
AACGGATTTACGGGCATCGGTTAATATTGCCCCCGGCGCAATGCCATTTACCCGAATTTTTTTTACCCAGGTCAAACG  
CCATATTTCTGACCAGATGACTGGCCGACGTTTAGATGATGCATAGGAAGTCATGTTTATTTTTATTTTCTGCCGCC  
ATAGAAGTGATGGTCAGAATAACGCCACCGCCATTTTTTTCCATTTCTGGCGCAACAAGTTGTGACAGATGGAAAAAGA  
AAACACATTGAGTTCATAAGCACGGCGAAAATCCGCCATTGGCATATCAAACGGTTTAGGTCCACCGCCACCGCGTGT  
TAACCAGAATATCACTTTACCCAGCTTACTGATAGCAAAGTCTGCCAGTGCAGAGAGTTCCTGTTCCGGAAGTAATATCA

CAACGGCAGGCAAATGCCTGACCACCCAGTTGTTGAATTTCTGCTACAACATGGTTAGCTGCGTCGGCGTTAATATCACT  
GACCACCACAGATGCGCCAGCTGTGCGAATGTAATGGCGATTTCTTTACCAATACCTGCACCCGCACCTGTGATGATGG  
CGCATTTTCCGTCGAGTCTCAGGTTGTCAGAATTAACACATAAACCTCCTGTGAACCTCAGTAAAAATAAAGGCACCG  
CCTGTGTGCCACATTTTTATCATTAACTTTGAGGAAAGGACACTACCAGGTATAGCAGATAAAGAGAGGATTATTTCCG  
TGCAATGAGCCGGGCGGGAATAATAAGATTGCGTGAATGCGTCTCTTCATGGGTGATTTTTTGCATCATGCGATCCGCAA  
GTGTGATACCAAGTCCCGCGCTGGCGTGTGGCCAGGTAACAGGTATATCATCAAGTGTGGTTGGTGTGCGATCGGTA  
AATGCCGCCAGCGAAACCTGTTGCTCAAAGTAACGATCGACTCCGCTTTCCCGCTTTGCCGCCCTGCTTTGAGCAAACC  
AAACCATGCCCCATCGCAATAGTTTCGTTATAGCAAACACGGCACTGATGGTCGGGTTATGACGTAAAAGCGCCGTGA  
TAGCTTCCGCGGCTTGTCTTGCTGGAAGTGCACCTCAACACCCAATCGCTATGAAACGGCAGGCAAATTTTAGTAGA  
GTTGCAATAGCCCCAACCCGTTTGCACGGGTAATGAGGAACTTTGCCCTCCAGCCAGGCGATCCGCTGATGCC  
ATTGCGAATGAGATGCTCCGTCAACAAGTGTGCAGCCTGCATGTTGTCCGGGCGAACCGTATCAACATCATCAAGATAAC  
TGGCAGGGGAAGCGAAAATACCCGGGATAGCTTTTTCTTCCATCCGTCGAGGTATCGCTACTTCTGCAGCTCCG  
GCAATTACCACACCATCGACACCCTGATTAGTAACAGTAAAACCGCTGTGCCAGCTGCTACCCTTTACCGCCGTG  
AAGCAAAAAAACCATCCGTCCCTGCGCTTCCAGAGCTTCCGTCAATCCGGCCGTCATTCGGCGTAAAACGGCGCAGATA  
AATCAGGACGATCAAACCAATGACGCCGCTTTGCCCGCCGACGCGCCGACGCTGGCGATTGCGCAAAATCCGAGC  
TCTTCAATGGCGGCTTAAACGCTTCTCCTGTGGCGTAGAGATTGCCCCTTTGCCACTAAGCACCAGCAACCGTACT  
TACCAGACGCCCCGAGCCAGCGCAACATCATGAATGGTTATTTTTTGGCGGTAGCCATGCAGATGACCTACTCCCTGA  
TTATGTGACAGATAAAACGTTTTACCTTTTATTTATCTTATACCCGCTATTATCGTTGCGTAATGTGATTATGCCTCAC  
TAAAATTTGATAAAACGTTTTATCTTCTCGCGCAATTTACTGAATCCAGATTGTTCTCTACGAGGAGTGTTTTTATGACG  
GCGAAAACAGCACCGAAAGTACGCTGTGGGAGTCTTCCAGCAGTTAGGCAAAACCTTATGTTACCCGTGGCATTATT  
GTCGTTCTGCGGCATTATGCTCGCATTGGTAGTCTCTTAGCAGCCATGATGTCATAACCCTGATCCCGGTCTGGGCA  
ACCCCGTGTGACGGCTATCTTACCTGGATGAGTAAGATTGGCTCGTTTGTCTTTAGTTTCTGCCTGTCATGTTCTGT  
ATCGCCATCCCGCTGGCCCTGGCAGCGAAAATAAAGGCGTAGCGGCATTGCTGGCTTATCGGTTATGCGGTAATGAA  
CCTCGCGGTAACCTTCTGGTTGACCAATAAAGGCATTCTGCCAACACGGATGCCGCGTCTGAAAGCCAATAACATCC  
AGAGCATTCTGGGATCCAGTCGATCGATAACGGGATCCTCGGTGCGGTGATCGCCGGTATTATCGTCTGGATGCTGCAT  
GAGCGTTTCCATAATATCCGCTGCCGGATGCGCTGGCATTCTCGCGGTACGCGCTTCTGACCAATTATCTCCTCGCT  
GGTGTGGCCTTGTGCGCCTGGTATTCCATTAGTCTGGCCGATTTTCCGATGGGTATTAGCGGCTTGGCCATATGA  
TAAACAGCGCGGGTGATTTCCGACCGATGCTGTTTGGTACCGGTGAACGTCTGCTGTTGCCGTTTGGTCTGCATCACATT  
CTGGTGGCATTAAATTCGCTTACCAGCGAGGCGGACGCAAGGAGTCTGCGGTCAAACCGTCAGCGGCGCACTGACCAT  
CTTCCAGGCGCAATTGAGTTGCCCGACCACTCACGTTTTTCTGAAAGCGCCACGCGTTTCTTTCCGCAAGGTAAAATGC  
CTGCGTTTCTCGGCGGTCTGCCAGGTGCAGCGTTAGCTATGTACTGCGCGCGCCGAAAATCGCCATAAAAATTA  
GGTCTGCTGATTTCTGGCCTGATCGCCTGCGTCTGGCGGCACTACCGAACCGCTGGAATTCCTGTTCTGTTCTGATG  
GCCAGTTCTGTATGTCATCCACGCGCTGTTAACCGGCTCGGCTTACCCTCATGCTGTGCTCGGCGTACCATCGGTA  
ATACCGACGGCAATATCATCGACTTCTGGTGTTCGGTATTTTGCATGGTCTGTCAACCAAGTGGTACATGGTGCCAGTG  
GTGGCGCAATCTGGTTTGTGTTTACTACGTATCTTCCGTTTCCGATACCCCGCTTCAATCTGAAAACCCCGGGGCG  
CGATAGCGAAGTTGCCAGCTCAATCGAAAAAGCCGTTGCCGTTGCCGCGGTAATCAGGTTACAACGTTCTGCAATCC  
TCGAAGCATTAGGCGGTGCCGACAATATTGTAGCCTCGATAACTGCATTACCCTGCTGCGTTTGTCTGTGAAAGATATG  
TCGCTTGTAAATGTGAGGCACTGAAGGACAATCGGCAATTGGCGTAGTACAACCTAATCAACATAACCTGCAGGTTGT  
TATCGGGCCACAAGTTCAGTCAGTAAAAGATAAATGGCCGTTGATGCATACTGTCCAGGCATAAGGATAAGATATGT  
TCGATTTTTCAAAGGTCGTGATGTCATGGCAGTGTGTACACAGTGGGATTATGTCGCTGACCGTTTCCGCACTGCT  
GACCTGTTACCGTTACGATTTTACGACATGGATTTTCCACTGCCCTGCATTATCGAGGCGCTGAATCAGCGCCTGAT  
GCACGGCGTATTTGGCTACAGCCGCTGGAAAAACGATGAGTTTCTCGCGGCTATTGCCACTGTTTTCCACCCAGCATT  
ACACCGCATCGATTCTCAGACGGTGGTGTATGGCCCTTCTGTATCTATATGGTTTCCAGAACTGATTGTCAGTGGTCT  
GAAAACAGGTGAAGGCGTGGTGTATCCACACACCCGCTATGACGCATTTTACAAGGCCATTGAAGGTAACCAGCGCACAGT  
AATGCCCGTTGCTTTAGAGAAGCAGGCTGATGGTTGGTTTTGCGATATGGGCAAGTTGGAAGCCGTGTTGGCGAAACCAG  
AATGTAATAATGCTCCTGTGTAGCCACAGAATCCTACCGGAAAGTGTGGACGTGCGATGAGCTGGAGATCATGGCT  
GACCTGTGCGAGCGTATGGTGTGCGGTTATTTCCGATGAAATCCATATGGATATGGTTTGGGGCGAGCAGCCGCATAT  
TCCCTGGAGTAATGTGGCTCGCGGAGACTGGGCGTTGCTAACGTCGGGCTCGAAAAGTTTCAATATTTCCCGCCTGACCG  
GTGCTTACGGGATTATAGAAAATAGCAGTAGCCGCGATGCCTATTTATCGGCACTGAAAGGCCGTGATGGCTTTCTTCC  
CCTTCCGTAATGCGGTTAACTGCCATATCGCCGCTATCAGCAAGGCGCGCCGTGGCTGGATGCCTTACGCATCTATCT  
GAAAAGATAACCTGACGTATATCGCAGATAAAATGAACGCCGCTTCTGAACTCAACTGGCAGATCCCACAATCCACTT  
ATCTGGCATGGCTTGAATACGTCGTTGAATATTGACGACAACGCTTGCAAAAGCACTTATCGAACAAGAAAAAGTC  
GCGATCATGCCGGGTATACCTACGGTGAAGAAGTGTGGTTTTGTCCGCTCAATGCCGCTGCCACGTTCCGAAACT  
GGAAAAAGGTGTGGCTGGATTAATTAACGCCATCCGCGCTGTTGTTAACCCTAATTGCGCAACGTAAAAAATCGTTGGC  
CAATCGTGGATTTTTACCCTGCTTTGTTTTATAATGGTGCACACTTTTATATCCAGAAAAAGAGTGGCACCATGATTGA  
TACCACCCTGCCATTAAGTATCCATCGCCACCTTGTGGCAACATTCGTCGCCAGACCTTCTTGAACCTGGCCGCG

AGTATAATATCTCGTTCCTGCACAATCCCTGGAACACTGATCCCCACGTTCAGGTCATTGCCAACGAACCCGATCTG  
GTGAGCTTTCTGACCAAACCTTGACTGGGGCGTTAAAGTTCTCGCCTCTCTTGATGCCTGTGCGCGGTGGCATTGAAAA  
CATTGAAGATGACGCCCGTACGGCCTGACTATGTGAGCTGCGTTTTTACCAGGCTACATGGCAATGGCACATCAGC  
TGCTGTAGCGGGTGTGTGCAAGCGGTGATCGATGGCGTACGTGAAGGTTGCCGCACCTTTGGTGTGCAGGCGAAGCTT  
ATCGGCATTATGAGCCGACCTTCGGCGAAGCCGCTGTGAGCAAGAGCTGGAGGCCTTTTAGCCCACCGTGACCAGAT  
TACCGCACTTGATTTAGCCGGTGATGAACTTGGTTTTCCCGGGAAGTCTGTTCCCTTCTCACTTCAACCGCGCGGTGATG  
CGGGCTGGCATAATTACCGTCCATGCAGGCGAAGCTGCCGGGCCGAAAGCATCTGGCAGGCGATTCTGAACTGGGTGCG  
GAGCGTATTGGACATGGCGTAAAAGCCATTGAAGATCGGGCGCTGATGGATTTTCTCGCCGAGCAACAAATTGGTATTGA  
ATCCTGTCTGACCTCCAATATTCAGACCAGCACCGTAGCAGAGCTGGCTGCACATCCGCTGAAAACGTTCCCTGAGCATG  
GCATTCTGCGCAGCATTAACTGACGATCCCGGCTACAGGGAGTGGATATCATTACGAATATAACCGTTGCCGCGCA  
GCTGCTGGGTATCCCGGAGCAAATCCGCCAGGCACAGATTAATGGTCTGAAAATGGCTTCTCAGCGCTGAGGAAAA  
ACGCGCACTGCGAGAAAAAGTCCCGCGAAGTAACAAAATGGATGGTGCAAATGCACCATCCATTTTTATGCAAGGCAC  
AAAGTCCGCGATGTTTGGCGGATTGATGCCAGTCAATCACTCCATTACCTGGATTGCCTGGCTTCCCGGAACCGG  
ATTTTACCATCGCCATTTAACGCATCACGAATAGCCGCATAGTAAGCCGGATAATTCCCAGGCACCGTCAACAGCGTTT  
CTTCGACACGTTCTCACCTCCACGCGGGTAAGTACGCCATACGCATATCGTAGCCCCAGTCTTCTCGGGTAGACGC  
TCGCCATTTTTACAGACGTTCTTCTGTGGATCGAGGCCATTTTACATAACTGCCTCGGGATCCATGCAGATATACCG  
TGCTGACTCAGCGCTGCCAGCATGGTACCGTGTAAAATGACTCGCCGCTGTGGATAGGACAAGATGGCGTGAAAATAAT  
CGGTGACTGCGCTCCGGGCGTAACGTGCAAAATCTACCGTATGCTGACCGGTAACCAAAAAGCGTAATGGCCTGA  
TCAAGAAGATGTGGTCTAAATCGTACCAGATACCGTGCCTGGGCCGCTTTCACGCCAACGATCGCGCACCTGGCG  
ACGGAAGCGGTCAAAATGAGACTCAAAGTAAGCAACTTACCCAGCACGCTTCCGCGAGTAAACCTTTTAGCGTCAAGA  
AATCGCTATCCAGCGACGGTTATGGAATACAGACAGCACAGCCCCAGGCTTTTTGCCAGCGCATCCAGCTCTCGCGCT  
TGTGACAGTGTACGGTAAAGGTTTTATCAACGACCACATGTTTACCCGCTCAAGCGCGCTTTGGCTAACGGGAAATG  
GGTATCGTTGGGTGTAGGAATGACAATCAGGTCTATGTTGGGATCGTTAAACAGATGCTTCGGCTCAGAGACAACCGTAA  
CCGTTGGCCAGTCCGCTTTTACTTTTTGTTTCATCACTGCTGGAGATTACCGCCAGTCTCAGCCGGCGTCCCGCAATC  
AGGGGCGCATGGAAGTTTTGCTCGCATAACCATACCAATCAACCAACACGGATGTTGCTGCTCATGCTATTGCCTCT  
CATTGAAGTATGATGGCTATTTGACACTATCCTTTACCCAGCTCAACAGTTTAAATAACCTGCCAGCAATAAGGGATGTT  
GTTTAACTTAAGTCAAAAAAATAGCGAATTTTCAAACGACAAAAGCTAAATATCGAAAAACCTCAGTAAAAATCTTGCT  
GGAGCTATTATTGCTAAGTAACATTTACCCCTGAAGTTAATGGATCAATCAAGAGAGATGTGGGCTGTAATGAATCGTC  
TTATTGAATTAACAGTTGGATCGTTCTTGTGCTTTCAGTCATTCTTCTGGCGTGGCGAGTCACATTGACAACTATCAG  
CCACCTGAACAGAGTGCTTCGGTACAACAAGTAAGCTCTGCACCTGTGGAGCGACATGCTGCCCGTCCGGGTGCATGT  
TTTCACTTGTCCGATATTAACAGGAATTTATTATCTTGTTCGATGTTGTTGGTGATTGTGAGGGATAGTAAAGCGCGT  
TACTCTTTTACAGACAGTTTTTATCCCTGAATATTTGCCATCAGCGCATTCTTATTATTGTAATAACACAAGCGTTTAC  
TTTTGGTGAATTTTATCATCACTAATAATACCTACCCCTTGGTATTAATTTTATGGACCTTTTATGACTGTTTACG  
GACTACTTATTAATAATTCGAAAATCAGTTCACCTGAAAAGTCTGAAAAACTTACGACCATCTTAATTACACCCTGAC  
GGACGATCAGGAACTGATCAATATGTATCGTGTCCGATCACCGTCCGCGCAGAGCTGGTTTCTGGCGGGCGTTTGTG  
ACCTCGCCAGGTACCGAAGTCCGTCTGGCACTATGTCCAATAAAGAAAGTAGCGATCGGTTATAAAAGCCTTATAATA  
CGCCCTAAAATTAGATTTGCTGTTTGGCTGCTATTCTGGAGAACCTATGACCACCACAACGCCACAACGTATTGGAG  
GCTGTTGCTTGGCCGTTGGCCTGGCTTTTGTGCTGCTGTTGAGTACGACGCTGGCGTTGTTGCTGTATACCGCTGCG  
TTATCTTCCGCAAACTTTCAAACGCTCGCGGACAAGCACTGACGACACAAATCTTATGGGGCGTTCTTTTATTAC  
CGCTATCGCTTGTGGTATTACACACTGTGGTTGACCATCGCTTTCTTAAACGTCGGCGTTGTGTTCTTAAACATA  
TTATCTGGCTGCTTATTTCCGTATTGCTGGCAGTAAAAGCATTTCGCTTTTTTACCCCGTGAAGATGGCATAGCCGTTCCG  
CAGTTGCTGTTTACTTTGTTGGCAACCGCATTGATCGTCCCTATTTCAAACGCTCGTCCGGGTAAGCGACGTTTGT  
GAATCCGTAATAACCTTACAGTTAACCTGTTGCTGCGCTGCTCTGGATTAACGGATAATAGGCGGCTTTTTTATTTACGGC  
CGAAAAATGACTGACTACCTGTTACTGTTGTCGGAAGTACTGGTCAATAACTTTGACTGGTCAAGTTTCTCGGTCT  
CTGTCCGTTTATGGGGTTTCAAAAAACTGAAACCGGATGGGCATGGGGCTGGCAACAACGTTTGTGATGACGCTGG  
CGTCTATTTGCGCCTGGCTATCGATACGTGGATTTTATCCACTTAATCTGATTTACCTGCGCACCTGGCATTATT  
CTGGTGATTGCTGTGGTCTGCAGTTCACCGAGATGGTGGTGCGCAAAACCAGCCCGTCTTACCCTGCTGGGGAT  
TTTTTTGCCGTTATCACCACCACTGTGAGTCTCGGCTGGCGTTGCTGAATATCAATCTCGGGCACAATTTCTTGC  
AGTCCGCGCTGTACGGTTTTTCCGCCGCTGTCGTTTTCTGCTGGTGTGGTCTTCCGCCCATCCGCGAACCGCTT  
GCTGTGGCTGATGCTCCGCGACCTTTTCCGGTAATGCCATTGCTTAATTACCGCAGGCTTATGTCTCTGGCCTTTAT  
GGGCTTTAGTGGTTTGGTGAAGTTGAATGAATGCTATCTGGATTGCCGTTGCCCGTGAGCCTGCTGGCCTGGCGTT  
TGCCGCCATTCTGGGTTATGCCTCCCGCGTTTTGCGGTGGAAGACGATCCGTCGTTGAGAAAATTGACGAAATCTTAC  
CGCAGAGCCAGTGTGGTCACTGCGGTTATCCCGGCTGTCGCCCTACCGGGAAGCCATCAGCTGTAACGGTGAAAAAATC  
AACCGTTGCGCCCCAGGTGCGGAAGCTGTGATGCTAAAAATTGCCGAGTTGCTTAATGTGAGCCGACGCGCTGGATGG  
CGAAGCGCAAGAGATAACGCTGCGCGGATGGTGGCGGTTATTGATGAAAATAACTGTATTGGCTGCACTAAATGTATTC  
AGGCGTGTCCGGTAGACGCCATCGTTGGCGTACCCGTGCCATGCATACGGTAATGAGTGATCTCTGTACGGGCTGCAAT

TTATGTGTTGATCCGTGCCGACGCACTGCATCTCGTTGCAACCGGTGCGAGAAACACCTGACTCCTGGAATGGGATCT  
GAACACCATTCCCGTGCGTATCATTCCCGTGAACACCATGCTTAAGTTATTCTCTGCATTAGAAAAATAAAATCTGG  
GATTTCAACGGCGGCATCCATCCACCGAGATGAAAACCCAGTCCAACGGTACACCCCTGCGCCAGGTACCCTGGCGCA  
GCGTTTTGTTATCCACTGAAACAGCATATTGGCGTGAAAGGTGAGTTGTGCGTTAGCGTCCGGCGATAAAGTATTGCGCG  
GCCAGCCGTTACCCGTGGTCCGCGGAAAATGCTGCCTGTTACGCGCCACCTCGGGTACCGTTACGGCTATTGCGCCC  
CACTCTACGGCTCATCTTCAGCTTTAGCTGAATTAAGCGTATTATTGATGCCGATGGTGAAGACTGCTGGATCCCGCG  
CGACGGCTGGGCGGATTATCGCACTCGCAGTCCGGAAGAGTTAATCGAGCGCATACATCAGTTTGGTGTTCGGGGCTGG  
GCGGTGAGGATCCCGACAGGCGTTAAATTGCAGGGTGGCGGAGATAAGATTGAAACGTTGATTATCAACGCGGCTGAG  
TGCGAGCCGTACATTACCGCGATGACCGTTTGTGAGGATTGCGCGGCTCAGGTCGTAGAGGGTATTGCGATTCTTGC  
GCATATTCTGCAGCCACGCGAAATTCTTATCGGCATTGAAGATAACAAACCGCAGGCGATTTCATGCTGCGCGGTTGC  
TGCGGACTCTAACGATTTTCTGCGGGTATTCCAACCAATATCCTTCTGGCGGTGCTAAACAATTAACCTACATT  
CTGACCGGGAAGCAGGTTCCACATGGCGGGGCTTACCGATATCGGCGTATTAATGCAAACGTCGGCACTGCTTATGC  
AGTGAACGTGCCGTTATTGATGGCGAGCCGATTACCGAGCGTGTGTAACCGTACTGGCGAAGCAATCGCTCGCCCGG  
GCAACGTCTGGGACGGCTGGGACGCCAGTGCCTATTTATTGAATGATGCCGATTCTGCCCTCTGCCGATCAAATG  
GTATTATGGTGGCCGCTTAATGGGCTTACCTTGCATGGTGGATGTCCCGTCTGTAAGATTACCAACTGCTGTT  
GGTCCCTCTGCCAATGAACTTGGCGAACACAGGAAGAAACAAAGCTGCATCCGGTGTAGCGCCTGTGCTGACGCTGCC  
CTGCGGATCTTTTGGCGAACAGTTGTACTGGTTACGCAAAGGTGAGCAAACGATAAAGCTACCACGCATAACATTGCT  
GATTGCATTGAATGTGGGGCTTGGCGTGGGTTGCCGAGCAATATCCCTGGTGAATATTTCCGTGAGAAAAAGC  
TGAATGCGGCTATTGTCAGGAAGAAAAGCGCGCCGAGAAGCAAAGCGGTTTGAAGCGCGCCAGGCTCGTCTGG  
AGCGGAAAAAGCGGCTCGCCTTGAACGACATAAGAGCGCAGCGTTCAACCTGCAGCAAAGATAAAGATGCGATTGCT  
GCCGCTCTGGCGGGTGAAGAGAAACAGGCCAGGCTACACAGCCTATTGTATTAAAGCGGGCAACGCCCGGATAA  
CAGTGCAATTATTGCAGCACGGGAAGCCGTAAGCGCAAGCCAGAGCGAAACAGGCGAACTGCAGCAAATAACGACG  
CAGCAACCGTTGCTGATCCACGTAACACTGCCGTTGAAGCAGCTATCGCCGCGCAAAGCGCGCAAGCTGGAACAGCAA  
CAGGCTAATGCGGAACAGAACAGGTCGATCCGCGCAAAGCCGCGTGAAGCCGCTATTGCCGTCGCAAAGCGCG  
CAAGCTGGAACAGCAACAGGCTAATGCGGAACAGAAACAGGTCGATCCGCGCAAAGCCGCGTGAAGCCGCTATTG  
CCCGTCCAAAGCAGCAAGCTGGAACAGCAACAGGCTAATGCCGAGCCAGAACAGGTCGATCCGCGCAAAGCCGCC  
GTCGAAGCCGCTATTGCCGAGCAAAGCGCGCAAAGCGGAACAGCAACCGGCTAATGCGGAGCCAGAAGAACAGGTTGA  
TCCGCGCAAAGCTGCCGTCGAAGCGGCTATTGCACGCGCAAAGCAGCAAGCTGGAACAGCAACAGGCTAATGCGGTAC  
CAGAAGAACAGTTGATCCGCGCAAAGCGGAGTTGCCGCGGCTATTGCCGCGCTCAGGCCAAAAAGCCGCCAGCAG  
AAGTTGTAACAGAGGACTAAATGGTATTGAGAATAGCTAGCTCCCTTATACCATAACAGCGCCAGACATCGCGCAT  
TATGCTGTTGGTGTGCTCGCAGCCGTGCCAGGAATCGCAGCGCAACTGTGGTTTTTGGTTGGGGTACTCTCGTTCAGA  
TCCTGTTGGCATCGGTTAGTGCTCTGTAGCCGAAGCTCTGTAACACTACGCAAGCAGTCGGTAGCCGCAACGTTG  
AAAGATAACTCAGATTGCTGACAGGCTTATTGCTGGCGGTAAGTATCCCCCTCGCGCATGGTGGATGGTCTGCT  
GGGTACGGTGTGCGGTGATCATCGTAAACAGTTGATGGCGGTCTGGGACAAAACCGTTAATCCGGCAATGATTG  
GTTATGTGGTCTTACTGATCTCCTTCCCGTGCAGATGACCAGCTGGTACCGCCACATGAAATTGCGGTCAACATCCCT  
GGTTTTATCGACGCCATCCAGGTTATTTTAGCGGTGATACCGCCAGTGGTGGTATGATGAACACACTACGTTAGGTAT  
TGATGGCATTAGTCAGGCGACCCGCTGGATACATTTAAAACCTCTGTCCGTGCCGTCATTGCGTTGAACAGATTATGC  
AATATCCGATCTACAGCGGTTATTCTGGCGGGCGTGGTTGGCAATGGGTAATCTCGCCTGGCTGGCTGGCGCGTATGG  
TTGCTATGGCAGAAAGCATTCTGCTGGCATATTTCCCTCAGTCTTAGTAACGCTGGCATTGCGGTTATGCGCAATGTTGGGCTG  
GTTGTTCTCACCAGAAACACTGGCAGCACCCGAAATTCATCTGCTGTGAGGCGACCATGCTCGGCGCATCTTTATTT  
TGACTGACCCGTTACCGTCTACGACCAATCGTGGTCTTATTTTTCGCGCGCTTGGGGCTTATTAGTCTGGTTG  
ATCCGAGTTTTCGCGGCTATCCTGACGGCGTGGCTTTTCCGCTCCTGCTGGCGAACATCAGGTTCTCTGATCGATTA  
CTACACGCGTCCGCGCTACGCGCATCGCAAAGGTTAAACCATGCTGAAAATATCCGAAAAACAGGCAATACGTTGG  
CGTATTTGACGCGGTTCAACAGGTTAACTGCGGCCATCAACCAGATGACCAAACGACGATTGCTGAACAGGCCAGT  
CTGCAACAAAAGCGTATTTGATCAGGTGCTGCCAGCGAACGCTATAACAATGCGCTGGCACAGAGTTGCTATCTGGT  
AACTGCGCCAGAGTTAGGTAAGGTGAGCATCGGTTTACATCGCAAACAGGATGACAAACCGGTAGCCGCGTTCTGG  
AAGCAACCGCGCCAGATGGCTATTCCGGTGCATTAGCTGCTGGTGGGAGCCGATTTAACGGCACGGTACTTGGCACG  
CGCGTACAGAGCACCACGAAACGCCAGGCTTGGCGATAAAATCGAACTGCGCCTTTCTGACTGGATCACCCATTTTGC  
GGGTAAAAAATCAGTGGTGCAGATGATGCGCACTGGCGGTGAAGAAAGATGGTGGTATTTCGACCAGTTCACCGCGC  
CGACGATTACTCCCGCGCGGTGGTTAATGCGGTAAAACGCGCCGATTGTACGCTCAGACGTTACCGGCACAATTTCT  
CAACTTCTGCCTGTGGAGAATAAAGCGTGAGCGAAATTAAGACGTTATTGTTAGGGGTTGTGAAAAACAATCTGC  
GCTGGTCCAGTTGCTCGGCTTTGTCCTCTGTTGGCGTACGTCCTACTGCCACTAACGCTCTGGGTTTAGGACTTGCGA  
CTACGCTGGTACTGACGCTACCAACCTGACATTTGACGCTGCGTCACTGGACGCCAGCCGAGATCCGCATTCCATT  
TACGTGATGATCATCGCCTCGGTGGTACGCGCTGTACAGATGCTGATCAACGCTACGCTTTGGCCTGTATCAATCATT  
AGGGATTTTTATTCCGCTGATTGCTCACTAACTGTATCGTTGTGGGCCGCGTGAAGCCTTCCCGCAAAGGTCGGG  
CGTTTTCGGCACTGGACGGCTTTCAATTGGTATGGGCGCAACCTGCGCATGTTCTGCTGGGTTCACTACGCAAAAT

ATCGGCAATGGCACATTGTTTGACGGTGCAGATGCGCTGTTAGGTAGCTGGGCAAAAGTATTACGCGTGGAGATTTTCCA  
CACCGACTCCCCTTCTGCTGGCGATGCTGCCACCAGGTGCATTTATTGGCCTGGGACTGATGCTGGCAGGAAAATACC  
TGATTGATGAAAGAATGAAAAGCGCCGTGCTGAAGCAGCTGCAGAACGTGCATTGCCAACGGTGAAACAGGGAATGTC  
TGATGAATAAAGCAAAACGCCTGGAGATCCTCACTCGCTGCGTGAGAACAATCCTCATCCCACCACCGAGCTTAATTC  
AGTTCGCCTTTTGAATTGCTGATTGCCGACTGCTTCCGCTCAGGCGACCGATGTCAGTGTTAATAAGGCGACGGCGAA  
ACTCTACCCGGTGGCGAATACGCTGCAGCGATGCTTGAAGTGGCGTGAAGGGTGAAAACCTATATCAAACGATTG  
GGCTTTATAACAGCAAAGCAGAAAATATCATCAAACCTGCCGTATCTTGGTGGAGCAGCATAATGGCGAGGTTCCGGAA  
GATCGTGTGCGCTTGAAGCCCTGCCCGGCTAGGTCGTAACAGCCAACGTCGTATTAACACTGCATTCCGGCTGGCC  
GACTATTGCTGTGCACACGCACATTTCCGCGTTTGAATCGTACTCAATTTGCCGCGGGGAAAAACGTCGAACAGGTAG  
AAGAAAAGCTACTGAAAGTGGTCCAGCAGAGTTTAAAGTCGACTGCCACCATTGGTTGATCCTGCACGGGCGTTATACC  
TGCAATGCCCGCAAGCCCGCTGTGGCTCTTGTATTATTGAAGATCTTTGTGAATACAAAGAGAAAGTTGACATCTGAAG  
AAAAGGGGTAAACCGATTACCCATTGATAACCTTTCTTATCCTCTTTTAAAAACATCTTTTAAACGTCATGATGCCA  
TTGCTTAGCGTTATCATCAGGTAATCCGTTTGGGATAACCAAAAATGCAGGTTAATTGTTTTTAAATAGCGAAATTTA  
CTATTCATTGTGATCAAGATCACGATGCTGTGCAATGTA AAAACATTGCAAGAATCAGGTTAAAATCATTAAAATTTA  
CACACGCAACAAATATTGACCTACAAAACATTACACTGGCTATTTTTCAGAAACTGGACTATCTCACTAGTAAAAACGCT  
AAATAGCAGAACATATCGCCGTTAAGCCATCACCCCTCTCAGTGCAGTGAAAAAATCTGCCGTTACGTTTTTTGAAAA  
ATTTAACGCTGGATAACATTTCCCGGAATGGTTGAATTTCCCGCCTCAGTTATATGTAACAGATTATTACAAAGGACTTG  
TCTGAAAGTGCAAGATAGTGAACATTACCTGCCGTTTCCCTCCACTATAACAATTGCGCGTATGTTTTTATACATAA  
CGCGAGAAAGCACCCCGTTAATATGGGATGTA AAAAAAGAGGTA AAGTGTCCACTGCAAACCAAAAACCAACTGAAAG  
CGTCAGTTTGAACGCTTTCAAACAACCGAAGGCGTTCTATCTCATCTTCTCGATTGAGTTATGGGAACGTTTTGGTTATT  
ACGGCTACAAGGAATTATGGCTGTTTACCTGGTTAAACAACCTGGGTATGTCTGAAGCGGATTCAATCACCTTTTCTCT  
TCCTTAGTGCCCTGTTTTATGGTCTGGTCGCTATCGGCGCTGGTTAGGTGACAAGGACTGGGTAACACGCGTAAT  
TATGCTCGGCGCTATTGTGCTGGCGATTGGTTATGCTCTGGTTCCTGGTCTGGTCACGACGCGGTATCGTTTATATGG  
GTATGGCGCTATTGCGGTGGTAACGGCTGTTTAAAGTAACCCGCTTCTCTGCTTTCTACATGCTATGAGAAAAAC  
GACCCGCTGTGGACGGTGCATTACCATGTA CTACATGTCCGTAACATCGGCTCTTCTCTCTATGATTGCTACGCC  
GTGGCTGGCCGCAAAATACGGCTGGAGTGTGCGTTTGGCTTGGAGCGTTGAGGCTGCTGATCACTATCGTTAACTTCG  
CCTTCTGCCAACGCTGGGTTAAACAGTACGGTTCAAACCAGACTTCGAGCCTATCAACTACCGTAACCTGCTGCTGACC  
ATTATTGGTGTGTTGGCACTGATCGCTATCGCCACCTGGCTGCTGCACAATCAGGAAGTTGCGCGTATGGCGCTGGGCGT  
TGTTGCCTTCGGTATCGTGTTATCTTGGTAAAGAAGCCTTCGGGATGAAAGTGTGCTGCGCGTCTGAAAATGATCGTTG  
CCTTCATCCTGATGCTCGAAGCCATTATCTTCTGTGCTGTACAGCCAGATGCCAACGTCCTGAACCTCTTTCGATT  
CGTAACGTTGAGCACTCCATTCTGGGTCTGGCCGTAGAACCTGAGCAGTATCAGGCACTGAACCCGTTCTGGATCATCAT  
CGGTAGTCCGATTCTGGCCGCTATCTATAACAAGATGGGCGATACCCTGCCGATGCCAACCAAGTTTGAATCGGCATGG  
TGATGTGTTCTGGTGCCTTCTGATTCTGCCGCTGGGTGCGAAATTCGCGTCTGACGCTGGTATCGTGTCTGTAAGCTGG  
CTGGTGCAGCTATGGCCTGCAGAGCATCGGGAACTGATGATCTCTGGTCTGGGCTGGCAATGGTTGCTCAACTCGT  
TCCGAGCGTCTGATGGCTTCAATATGGGTAGCTGTTTCTGACCCTGCCGTTGCAAACCTGATTGGTGGTTATGTTG  
CGGTATGATGGCTGTGCCGGATAACGTTACCGATCCGCTGATGCTACTGGAAGTCTATGGTCGCGTATCTTGCAGATT  
GGTGTGCTACTGCCGTTATTGCAGTACTGATGCTGCTGACCCGCGCGAAACTGCACCGCATGACGCAGGATGACGCTGC  
AGACAAAGCGGCGAAAGCAGCCGTAGCGTAAAATTCAGGGAACCTTTTTACAAGCCGTAACCTTTTCGTTAGCGGCTTT  
TTTTTTGTTACGAAACGCCTACCATACTTTAAACACAGACAAAAGGAGTTACCGATGAAATTTGTTCTACAAACCGGGT  
GCCTGCTCTCGCTTCCATATCACCTGCGTGAGAGCGGAAAGGATTTTACCCTCGTCAAGTGTGGATTAAATGAAAA  
ACGCTCTGAAAACGGTGACGATTACTTTGCCGTTAACCCCTAAGGGGAGGTCCTGCATTGCTGCTGGATGACGGTACTT  
TGCTGACGGAAGGCTAGCGATTATGCAATATCTTCCGACAGCGTCCCGACCGCAGTTGCTGGCACCGGTAACAGT  
ATTTCCCGCTATAAAAACCATCGAATGGCTGAATTACATCGCCACCAGCTGCATAAAGGTTTACACCTCTGTTTCGCC  
TGATACACCGGAAGAGTACAAAACGACAGTTCGCGCGCAGCTGGAGAAGAAGCTGCAATATGTGAACGAGGCACTGAAGG  
ATGAGCACTGGATCTGCGGGCAAAGATTTACAATTGCTGATGCCTATCTGTTTACGGTTCTGCGCTGGGCATACGCGGTG  
AACTGAATCTGGAAGGGTTAGAGCACATTGCAGCATTATGCAACGATGGCTGAACGTCGGAAAGTACAAGACGCGCT  
GTCAGCGGAAGGCTTAAAGTAATAGCCATCGGCCACAGGTCGTTGTGGGCCGAAATGAGATATTTAGAGCTTTGTTGC  
GCTGAAGTAATGTTCTGTTTTGGCAATACGATCCTGAGCAGCCACCCTGAGCTCATATTCCTGCATTGCTTTGGTGG  
TCACCATGATTTCTGACTGCAGCGGTACATGTTCCAGCGCTCCTGCAGCGTTGCCCTGAAGCAGTTTACCAGC  
AGTAAACCGCTCGTCACATACCAACACCTACCGGTGGCGCATACCAAAATCCACCAGCGGACGGCTGATATGCCAGG  
TTCATCGGCGGTGACCAGCAGATTTCAAACGGTCACGGCTGTAGCCAGCTCGCGCCAGGTGTTAACCACACAATTT  
GTGGCCCTTGGCAATGAGTTCGCGCGCTGCCAGAACCCTTCTCGACGTTATTTACCGCATGCTCACAGAGTATTTCC  
AGCTCAACCAGATTTGGCGCAATGATATCGCTGGCAGGCAAAACCTGCCGCACATGAAACTCTGCGACACCCGGTGCAAC  
GATACAGCCTTTTCCGGATGACCCATTACCGGATCGCAAAAATATTTGCTGCGGATTCCGCGCTTTACCTGACGGA  
CGATACCGAGGATATGTTACCCTGCTCCGCGATCCAGATAGCCACTTAATACGGCATCACAGGTGTGTAATTTATCA  
ATGGCGCAATGCCTGCACAATTTCCGTTAAATGGCTGGGCGGCATCACGCAGCCAGTCCATTTGCCGATTGGGTGTG

ATTAGAAAATTGAACGGTGTTCAGCGGCCAGACGTTTCGCGCCAGGGCGGCATCGGAACTCTGCCGCACTGTTACCCG  
CATGACCATAAAACAACGTGAGACTGGATAGCGAGAATATTTTTTCATCATGTTCCCTGTATAAAAAACCAGGGGAGTGATT  
TCTCACTCCCCCTTTCCACTTAATGCATTATTTCCAGCAAATCAGACAGTAATCTTTTTACC GCGACGCAAGGTAA  
AACGACCAAACAGACGATCTTCTTTAAAGAAGTATTCAGGATCGGACTGTTTTACC GGTAAATGGTGATGGCATTG  
GAGGCGATAGTTTTACGTGCCTGACCAGGGAAGTTGCAAGTTCAGAATCGACCAGTGCCTGCATCAGGTCTGCGCCCTT  
TTCCATCTCAACCATCGGTACGCCGTCTGCGCCAGCTGTTGCAAGTCCGCTTCACTCAGCGCACTCAAAGAACCGCTGA  
ACAGGCATTGGTAATACGTTTTGCCGCTGTAAACCTTCTCACCGTGAACCAGACGAGTCACTGCTCCGCCAGTACA  
TACTGGGCGCGGGTGTACCGCTGTTTTATCTTCTTCCAGGGCGTTGATCTCTCAATGCTCATAAAGGTGAA  
GAACTTCAGGAAGCGGTAACGTGCGCATCCGCAGTGTGATCCAGAAGTGAAGATTTGTACGGGCTGGTTTTCTTCG  
GATCCAACCAGACTGCGCCGCTTCAAGTTTTACCAATTTGGTGCCATCTGCTTTAGTGATCAGCGGAACGGTCAGGCCA  
AACACCTGATTCTGATGCAGACGACGGTTCAGGTCGATACCAGAAGTGTGTTACCCCACTGGTCAGAACCACCAATTTG  
CAGCACCACACCGTACTGTTGTTGAGACAGGCGAAGTATAACCCTGCAACAGGTTGTAGGAAAACCTAGTGAACGAAA  
TCCCCTGATCTTACGGTTGAGACGCTGTTAACCGCTTCTTTGTTGATCATCTGGTTAACGGAGAAGTGTGGCAATA  
TCGCGCAGGAAGTGCAGCATTATATTGCCGAACAGTATAGTTGTTCCGCGCATAGCAGAGTTTTCTCCACAGCT  
GAAATCGAGGAACGGGGCAACCTGCTTACGGATTTGTCCACCCTCTGAACAGTTTTCTCGGTTCAGCTTACGCT  
CGGCACTTTGAACTCGGTCGGTCCCAATCAGACCCGTCGCGCCGCTACCAGCGCAACCGGCTTGTGGCCGCTGCTGG  
AAGCGTTTTACGCATAACAATGGAACAAGATGCCCAAATGCAAGCTGTAGCGGTAGGATCGAAGCCGCAATAGAGCCG  
GATCGGGCCTTGCAGCTGCTCTGCTAACGCTTCTCTGTCGCTCACCTGGGCTACCAGCCCCGCTCTTGCAATTGTT  
TAATCAAGTACTGCTTGCATCAAACTCTCATGTATATAACGACTGCACCTTTGCCGTTACACGACTTTTCCGAGAT  
GCGAAAAGACATAGAATAAAGTGCCAGAATCAGGAGTACCAGCGATTAAGCAAGATTTTTGCATCTTTTACGGGTGCA  
AGACGATCAATCTTCCACGCATCATTTTACGCTGGTACAAAAGCGGTGATGCAGGCGATGCTCACCACCCTGCCAGAA  
CTCAATCTGTTCAAGGCTGACGCGAAAACCGCCCCAAAAGCTCGGCAATGGCACTTCCGCTGTTGAAACTTCTGCTTCA  
GCTCCAGGAATTTACTTTCAAGGATACCGCGGCGAGAAATGCGACTGGACTGCTTCCGAAACCCATGCACCAATCTGGCTA  
TCACGCGGGCGGCTATGAAAATATTTTCACTTTCGAGAGTGCAGAAAGTGTGTTGCTTTACCGATCACCATCACCTGGCG  
CTCAAGGGTATGCCACGGGAACAGCAGGTAACGCGCGGATTTTTCGATTTGATGTGCTTTACGGCTGCCGAGGTTGG  
TGAAAACACCATGCCTTTTTCGTCGTAATGTTTGTAGTAAAACGATGCGCTGATAAGGCTGACCATGTTTATCCACGGTA  
GCGACCACCATCGCGGTAGGTCGCCAGTTGGCTTACAAGCCTGAGAGAGCCAACGTTCAAAAAGGGTTAATGGATC  
GGCGGGAAGATCGCGGGCGGTAACCCGCTTTGGTGTATTACGCGCAGATGCGCGATTTGCTGCAATTCGTCGTTAT  
CAGACATGGTTTTCTTACGGATTGTCAGTGGGTGACGCTATTGTGCGCCGCCCTGGAAAAATCTCAACGCTGTGGATT  
TTGTAAGTACAGTTATTAAGACGATGCGGTGCGGTTATAGACAGTGCCTTTCATCGCCTTTCCAGCAGAAAACATAGA  
TTCCGTCAGTGAACGCGGCCAGAGGCTGAAATGCCTGTTGAGATGAGTGTGATTATCGTAAACAAAACACTGACC  
TCCTGGCGCGGATTATTCAGTTTACCGTCAACGGTTTTTTCATCACACTGGTATTCCAGCGTATCGGTTTGCATGCGCTC  
AACAGCTGATTAAGGGCTACAGCCGGAGAGAAGGACCGGCAAAATGATAATTAACAGTTTTTTCATAGTCATATCCC  
GAAGACTTCTGCTGGAGGGCAATACGCCCTCCCTAACGTTCCAAGTGAACGGCAGACGCGGTAAGAAAAATTACAG  
TTAACTCTGATATCACGGTTAGCGGGGAAAATAGCCCCAGTACCGTCTCCTGGCTTGCAGCAGTACGGAAGGCAGAT  
TTCCTGGTAATCCCGCAGCGTCCGCCAGGCAAGCCAGGCGAAAGCCAATGCTTCCATGTCATCGCCACTAATGCCAACG  
GCATCGGTGGTGGTACTTCTGTGCTTGGCAGTAATGCCGCCAGACGCGCCATGAGTAGCGGATTACGACTACCTCCACC  
ACATACCATCAATCGTTCCAGCCACCGCTCAACAAAACCTTGTTCAGAAATGGTACGGCGGTGAGTTTCCAGTGTCCG  
CCTGCACATCTCGGGATCAACACCCGAAAATGGCGCAAATGGCGCTCCAGCAACCATAGTTAAAGTATTCGCGCTCCG  
GTGCTTTTTCGTTGCAAGTTGCGAGAAATACGGGTGCTGAGCATATTTTGCAGCAGTGGGAGAATAACTTTACCCGCCCCG  
TGCCCACTCGGCATCTTTATCGTAAGGTTTACCGGCTGACGCCAGATCCAGGCATCCATCAGCATGTTACCGAGGACCGG  
TATCGTAGCCCCAACCGGCTGCCAGGAATGAGCAGTGCAGATTGGCGATGCGGCAATATTGAGCACCATTCTGCGC  
TCGGTTGGGTGAGCCAGCAGCGCATGATGGAACGCAGTACCAGCGGTGCGCCTTGTCTCCCAAGGCAATATCGCGACG  
GCGAAAATCACCGACAACCGTAATTCGGTGGTGCACAAATTTGATTGTTATCGCAATCTGTAAAGTGTGTGGTGCAC  
CGCCCGTGGTTCATGCCAGACGGTTTACCCTGACAACCGATCGCAACTATATCTTGCCTGCAGATTTTGTTCCTTA  
AGCAAGGCATTGACCGCATCAGCAAAAAGTTGCCCGAGTTGAGTATCAAGCTGTCCAACTGCGAAAGTGAAGCTGCTG  
GCCCTGGCAAATATCCAGTACAGCCTGTTTTCAGAGATACCGGGATCGGCCAACTCAAACCTGCCAGCTGTGCGACCCGGT  
GTTTCAATGTTGCGCAACACAACATCAACACCATCAAGGCTGGTGCCTGACATAACGCCAATAAAGCGGCCCGATTTT  
ATAGTTCATCTTTTTCAATCTGACGTTTGCACCACTCAAACATAAACTTTTCTGTAATACCATGCGGAATGACCGAT  
TTTTACCGTTGGTAGTAAAACATTATCTTCAAATCAATAATCATCATGAATGTTTTGTTTATAATTGGTTGATCCTACTT  
TCATTATGATTTGCTCATATTTGGTAGAACATGTAACCATGGATTACATATGCCATATACTTTGACCATGAGGGATGCT  
TGCGTGGCGTTTCATGGTGAACAGGAGATTTTTCAATGATTAACGCGTATTGGTTGTTTCAATGGTAGGTCTGTCTCTT  
GTCGGTTGTGTTAATAACGACACCCTGTACGGGGATGTTTATACCGCTTCTGAAGCGAAACAAGTACAGAATGTCAGCTA  
TGGCACCATCGTTAACGTACGTCGGTACAGATTACGGGCGGTGATGATTCCAACGTTATCGGTGCAATTTGGCGGTGCTG  
TTCTTGGTGGTTTCTGGGGAATACTGTTGGTGGCGGAACCGGGCTTCTGCGTACTGCAGCAGGCGCTGTTGCAAGT  
GGCGTAGCTGGTCAGGGCTACAGAGTCAATGAACAAAACGAGGGTGTGAGCTGGAATTCGTAAGACGATGTTAA



TACCATCATGGTGGTACAGAAACAAGGCAACACTCGTTTCTCTCCGGGCCAACGTGTCGTA CTACTGGCCAGCAATGGCAGTC  
AGGTGACCGTTTTCTCCGCGCTAAATAAGTTTGGCGTGGTCAGGTTACTGACCACACGCCCCCTTCATTTACCCTTTGG  
CCTGTAACCTCAATGATATTATGCTCAAGTTTTGCGATGAGCGTAATCAGTTGCTCCAGTTCCTCTGCGGAGATGCCATGT  
AATATTTCCGCGCGGGTTTTGTTAATAACAGCTTCCATTTGCTGATCAGCGGCTCTGCCTTTTCCGTACAGTTAATACG  
TTTAGCCCCGAGATCGCTGGCACAAGTTTGACGCGAAATTAACCTTTTTTCTCCAGTTGGTCCAGAGTACGGACCAGTG  
ATGGCTGCTCGATGCCAATCGCTTTTGCCAGTTGAATTTGCGACTGGTCTGGAGGTA ACTGATGGATATTGTGTAACGTA  
ACCCAATGGGTTTTGTGTTAACTCCAGCGGTTTACGGCGATGGTCTATCAGAGCACGCCATATGCGCACCAACCGTGCCAG  
ATCAGAACCTAGTGGCGATTCCAATTTTCATCTCCTTATAATTAGCTTGTCTAAGATATTATGCGGCTTTTAGAATAGTGTG  
CAGCAATTGTATTGCTAAAACAATGTATTGCTGCATTTGTTACCGTCAGACATATTTTTCAGAAATTCGCGCTAAATTT  
TTTCGCACTTAAAGAATATTATTAATCTAACGCAATATTCGGTCGTAAGGAATCTACTTTGTGAAGTTTATGCTCA  
ATGCAACAGGATTGCCCTTACAAGATCTGGTGTTCGGTGCCTCCGCTACTTTCTCCGTTTTTCAAAGCATTGCGGTTTT  
GGATTGCTCATCTGGCTTGTGCTACACCGCTGCTTGTGGCTGGATCTACGCCGGTGACATCTGGCATCCCTTGTTAAT  
GGATTTATCGCTGTTTGCATTTGCGTTTGCCTTGTCTGGCAATACTGATTGCGTGGTAACTATGTCAATTAACAAT  
TAAGTATTTCTCAACAATCATTGTAGCGGTAGTTGCGGTTCTTCCGCGATGGTGGCTGTGGAATTATTACATGCAATCTC  
CGTGGACACGCGACGGGAAATACGCGCAGAACAGTTTTCTATCACCCACAGGTGTGCGGACGTAATTGTTGAGCTGAAT  
ATAAAAGACAACAGCTGGTTAACGCGGGGACTCTTCTGCTACGATCGATAAAACGCCCTTTAGATCGCCGAGTGAA  
CGCACAGGCTCAGCTGGCGAAAGCGCAATCTGACCTCGAAAAGCCAATAACGAAGCAATCGTCGCTGCTCATCTCAC  
AAAATTTTATTCTGCCGAAGA ACTCGATACCGCTAACCTCAATGTTAAAGCGATGCAGGCCAGTGTTGATGCCGCACAG  
GCGACGCTGAAACAGGCACAATGGCAACTGGCGCAAACGGAAATTCGCGCCCCGGTGAGTGGATGGGTGACTAACCTTAC  
TACCCGCATCGGCGATTACGCTGATACGGGAAACCGCTGTTTGCCTTGTGACAGCCACTCGTTTTACGCTATTGGTT  
ATTTTGAAGAAACCAAGTTGCGCCATATCCGCGAAGGTGCACCAGCACAAATACCCTCTATAGTGATAACAAAACGTTA  
CAGGGTCACGTTTCCAGTATCGGTGCGGCGATTTATGATCAGAGCGTTGAAAGTGA CTCAAGCCTTATCCGGATGTTAA  
ACCTAACGTCGCCCTGGGTTGACTCGCCCAACGCGTTCCCGTCCGCTTTGCGCTGGATAAAGTCCAGGCCGATGTCACGT  
TGGTGTGCGGCACCACCTGTAGCATTGCCGTAGGTCAATAATGAACGCATCGTCATGGTCTTGC GCAATTTGCCCTGGT  
TCAGGGCCACGCTGGCGCAATGGCGTTATGCGTTACGCAATACCATTGCCATGTGTCTGGCGCTGACGGTTGCCTATTAT  
TTAAATCTGGATGAACCCTATTGGGCGATGACCTCGGCTGCAGTGGTTAGCTTTCCACC GTTGGCGGTATTATCAGCAA  
AAGCCTCGGACGCATCGCTGGCAGTTTGTCTGGAGCATTGCGGCACTGCTTCTTCCGCGGCATACGCTCAATGAGCCGT  
GGTTTTTTCTATTGAGCATGTGCGGCTGGCTTGGCTTTTGTACCTGGGCCTGTGCGCACTTACGAATAACGTCGCGTAT  
GCATTTCAACTGGCGGGCTACACGGCTGCCATCATCGCTTTCCGATGGTTAATATTACTGAGGCCAGCCAGCTGTGGGA  
TATCGCTCAGGCGCGCTTTGCGAGGTAATAGTCGGTATTTTGTGCGGCGGCATGATGATGATGATCCTGCCGAGCAGTT  
CCGATGCTACTGCCCTTTTAAACCGATTGAAAAACATGCACGCCCGATTACTGGAACATGCCAGTTTACTCTGGCAGCCT  
GAAACAACCGATGCCATTCGTGACGCACATGAAGGGGTGATTGGGCAGATACTGACCATGAATTTGCTGCGTATCCAGGC  
TTTTGAGGCCACTATCGTTTTGCGCAGCAAAACGCGCGCCTTAATGCGCTGCTCCACCAGCAATTACGTATGACCAGTG  
TCATCTCCAGCCTGCGACGTATGTTGCTCAACTGGCCCTCACCGCCAGGTGCCACACGAGAAATTTCTCGAACAGTTGCTG  
ACGGCGCTCGCAGTTGCGAAACAGATGTTTACACCGTCGCACGTATTATCGCCCCGCTACGCCCGACCAACGTCGCCGA  
CTATCGGCACGTCGCCTTCTGGCAGCGACTACGTTATTTTGGCGCTTTATCTGCAAAGTAGTCAGGAATTACATCGTC  
TGCAAAGCGGTGTAGATGATACACCAGACTCCCACGGACATCCGGCCTGGCTGTCATACCGATAACGCCGAAGCTATG  
TGGAGCGGGCTGCGTACATTTTGTACGTTGATGATGATTGGCGCATGGAGTATTGCTTCGCAATGGGATGCCGGTGCCAA  
TGCATTAACGCTGGCAGCAATTAGCTGCTACTACTCCGCCGTCGAGCACCGTTTAAAGTCGTTGCTACTTCTGATGC  
GCACGCTGGTGTACTTTGCTATTGCTTTGTGTTCAAATTTGGTCTGATGGTCCAGATTAGCGATTGTGGCAATTT  
TTACTGTTTTCTTTTCACTGCTGGCGACAATGCAGCTTCTTAAATTTGCAGATGCCAAAATTTGCCGATTGTGGGGCA  
ACTGATTGTTTTATGGGTTCTTTTATCGCTGTCACTAATCCCCGGTGATGATTTTGTGATTTTTCTTAACGATAATC  
TGCAAAAATCGTTGGCGTGCCTTGGCGTGTTAGCGTTCGCCATTCTGCGTCCAGGATCGGATGCTCGTAAAAGCCGC  
CGCCATATTGCGCGCTGCGCCGGGATTTGTGATCAGCTAAGCCGCCATCCAACACTGAGTGAAAGCGAATTTGAATC  
GCTCACTTATCATCACGTGAGTCAGTTGAGTAACAGCCAGGATGCGCTGGCTCGCCGTTGGTTATTACGTGGGGTGTAG  
TGCTGCTGAACTGTTCTCATGTTGCTGGCAATTGCGCGACTGGGAATCGCGTTCCGATCCGTTATCGCGAGTACGGGAT  
AACTGTATTTCACTGTTGCGGGGAGTGATGAGTGAGCGTGGCGTTCAGCAAAAATCACTGGCGGCCACACTTGAAGAATT  
ACAGCGGATTTGCGACAGCCTTGGCCGTCATCATCAACCTGCCGCCGTCGAGCTGGCGGCAATTTGCTGGCGGCTGTACT  
GCTCGTTTTGCAACTTGAGCAAGCACCCGCAAGGTACGCTGGCTCTTAATTACTTAATTACACCACAGGCATAGCG  
TTCACCGCCACCGCCAGCGGTTTAGGTTGATCGGACATATTATCGCGCCAACGTGGACCATCAGCGCTTTGTCTTTGA  
TTTCATCCAGTGATTTAGACGAGGGCGGATGACGGCATCGGTAGCTTTGCCGTCATTATTGACGACCAGTGCAGGCAGA  
TCGCCTAAATGCCCGCACCTTCTGGCCCTTTCATGTTTACCGGATTTTGTGGATCAAGATGCCCGCCTGCGGATCCGC  
GGCGCTGGCTTTGCCATCTTTGGTGGCTGGCTGGCAGCTTCTTTGGCATGAATATGGAAGCCATGTTACCCGGGGGTTA  
ATGCTTTAGATCGGGCGAAAACCTCCAGACCTTTATCGGTTTTCAGTAATGGTACGCTACCAATTGACTGCCCTACCCCT  
TGCGACGTGACGAGGTTTCATCTGACTTTTTCTACTGGCAGCTTGTGCGCCGTTGCAACAACAGCGCCAGAATAGCCAG  
ACTAAAACGTTTCATAGGACCTCCGTTTCATTGTGCATTTCTGAATAAGTGTA AACAGTGCACATTTTTGAACGGCGGC

TATTCCTAAAAGTGCTTACGGTACGTCGTACCCAGTGCCGCTTTACGGATACGAAACCATTGTTGACGGGTCATTTTCA  
GTGTTTCTGCTTCGACAGCTGCCCCTACGCGCTCAATTTTACCTGAACCGATAATTGGCAGCGGCTGCGATGGTAAACGT  
AATACCCAGGCGTAAACCACCTGTTCAATCGAGCCCGCTTAACTCCTCTGCCACCACAGCCAGTTCATCACGCAGCGG  
CTGAAATAATCATCATTAAACAGACGACCACCACCAAGGCAGGACCACGCCATCGGACGAACACGCAGTTGTTGTAGTT  
GGTCGAGCGTGCCATCCAGCAGTAACGGCTGATGCACCGGGGATATTTCCACCTGATTAGTGGCAAGGGTAAACGGCAGA  
CGTGATTGCAACAGGGCAAATTTGCGCAGGCGTAAAGTTCGATACGCCAAAATGACGCACCTTTGCCGCTCTGATGCAGATG  
TTTGAACGCGTCCGCCACTTCATCGGCATCCATTAACGGGTCTGGTCCGTGGATTAACAGCAAATCCAGATGATCGGTG  
CGAGATTAATTAGCGACTGTTCCGGCGCTTAAATGATGTGATCGCGGTGAGTGTAAATGACCAATGACGTTTTCTTCA  
CGCGCGTCTGCGGATACCGCATTACTGACGATTTCCATCCGTTACGCGAGGTGAGGTGCCAGTTTCACTGCTCGCC  
AAACGCGCTTCGCACTGATAGCCACCATAAATATCAGCATGGTCCACGGTGGTACGCCGAGATCCAGATGCTCTTCAA  
TAAACTGACCAGCTGGCGGGCGGACATATCCAGTCCATCAATCGCCAGTAGCCATCACAAAACGGGAAAACCTCCGGG  
CCTTGGCGCAATAGTAATACGCTGAACCATAATCGTTCCTCTTATCAGATATGAGAGGAGTATACGCAAGATTAGT  
TCAAAAGAGTGATGGTTGCTCCGGTTCGCTGATGACGCTGGCTATTTGCGCGTAATTTGCGCATTAAATCGCTGCCGAC  
AAAGGCGCAGCACCTCTGTTTTTCGCCATCGCTCATTTTTATTCCAGTTAAAACGCTCATCAGGACTACGAAAACAGCCG  
CGACAAAACCCGCTTCGTCAGACTGGCAAATTTCCCGCACGGCTCTGGACGGGAAAGAACTCTAATTGCTCCGCCAC  
TTGCCCTCCTCAGATAAGATTATTACCATTATTGAAGCTGTTAATGTCAAAGTAGCAACTTTGCTGCACTAGACCGA  
CTGGTCTACTACTCCAACGCATGAACAAACACACCGAACATGATACTCGCGAACATCTCCTGGCGACGGGCGAGCAAC  
TTTGCTGCAACGTGGATTACCGGGATGGGGCTAAGCGAATTAATAAAAACGCTGAAGTGCCGAAAGGGTCTTCTAT  
CACTACTTTGCTCTAAGAAGCGTTTGGCGTGGCATGCTTGAAGCTGTTAATGTCAAAGTAGCAACTTTGCTGCACTAGACCGA  
GTTGCTGCAATCCGGCGAAGGTAACCTACCGGACCGCATACTGGCTTATTACCAGCAAACACTGAACCAGTTTTGCCAAC  
ATGGAACCATCAGTGGTTCCTGACAGTAAAACCTCTGCGGAAGTGTGCGATCTGTCAGAAGATATGCGCAGCGCGATG  
GATAAAGGTGCTCGCGGCTGATCGCCCTGCTCTCAGGGCTGGAAAATGGCCGTGAGAACCATTGTTAACCTTTTG  
TGGCGAACCGTGCACAGGCACAAGTCTTACGCACTGTGGCTTGGCGCAATCTGCAGGCCAAAATTTGCGCAGTT  
TCGAGCCACTGAAAACGCGCTGGCCATGTAAAAAACATTATTGCGACGCTGCCGTTTAGCAGGCATTTTTATCACC  
AGACGACCGGGAGCCTTTATGTCATCTGAAAACCTGATTCCCACTGAAAGTGGCGCGATCACGGCGCAAACCGTAT  
TTTTATGGCACCGCTGACGCTGTCGCGAGTATTGAACCGGTGACATTCTACCCGTTGATGGCGGAATACTATCGCC  
AACGTGCCAGTGCCGGTTTATTATTAGTGAAGCCACGAAATTTCTGCCAGGCAAAGGATATGCAGGTGCGCCTGGC  
ATCCATAGTCCGGAGCAAATGCGCATGAAAAAAATCACCGCTGGCGTTCATGCTGAAAATGGTCAATGATGGCCGTGCA  
GCTGTGGCACACCGGACGATTTCTACGCCAGCCTGCAACCTGGCGGTGAGGACCGGTAGCGCCTTACGCACTTAGCG  
CGGGAACACGTACTTCTGCGCGATGAAAATGGTCAAGCGATCCGTGTTGAAACATCCATGCCGCGTGGCTTGAACCTG  
GAAGAGATTCCAGGTATCGTCAATGATTTCCGTGAGCCATTGCTAACGCGCGTGAAGCCGGTTTTGATCTGGTAGAGCT  
CCACTCTGCTCACGGTATTTGCTGCATCAGTTCCTTTCTCCTTCTTCAAACCATCGTACCAGTACGCGGCGCAGCG  
TGAAAAATCGCGCACGTTTGGTACTGGAAGTGGTCGATGCCGGGATTGAAGAATGGGGTCCGATCGCATTGGCATTCCG  
GTTTACCAATCGGTACTTTCCAGAACACAGATAACGGCCGAATGAAGAAGCCGATGCACTGTATCTGATTGAACAACT  
GGGTAAACGCGGCATTGCTTATCTGCATATGTCAGAACCAGATTGGGCGGGGGTGAACCGTATACTGATGCGTTCCGCG  
AAAAAGTACGCGCCGTTTCCACGGTCCGATTATCGGCGCAGGTGCATACACAGTAGAAAAAGCTGAAACGCTGATCGGC  
AAAGGGTAAATTGATGCGGTGGCATTGGTCTGACTGGATTGCGAACCCGGATCTGGTCCGCCGCTTGCAGCGCAAAGC  
TGAGCTTAACCCACAGCGTCCGAAAGTTTCTACGGTGGCGGCGGGAAGGCTATACCGATTACCCGACGTTGTAATCCA  
ACATTGCGAGCGGCGTAAAGCCGCGCTATACTAAAACAACATTTGAATCTGTTAGCCATTTTGAGGATAAAAAAGATG  
GTCTTCTTACATACCTGCTGCGCTGGCGATTGCAACGCTCCATCGATTTTTATACCAAAGTGTGGGCGATGAAACTG  
CTGCGTACCAGCGAAAACCCGGAATACAAATACTACTGGCGTTTTGTTGGCTACGGCCCGAAACCGAAGAAGCGGTGAT  
TGAACCTGACCTACAACCTGGGCGTGGATAAATACGAACTCGGCACTGCTTATGGTACATCGCGCTTAGCGTAGATAACG  
CCGCTGAAGCGTGCGAAAAAATCCGTCAAACGGGGTAAACGTGACCCGTGAAGCGGGTCCGGTAAAAGGCGGTAACG  
GTTATCGCTTTGTGGAAGATCCGGACGGTTACAAAATTGAGTTAATCGAAGAGAAAGACGCCGGTCCGGTCTGGGCAA  
CTAATCTCCTGCCGGGCGTGAACCTATCGCGCCCGCATCTTACTGCATCGACAAGTAATATTTGTCATAATGCGCGCTG  
CAATTTATCCGTATTAAGAGAATCAGATGTCCGATAACGCTCAACTTACCGGTCTGTGCGACCGTTTTCTGGTTTTAT  
CCTGTTGTGATCGATGTTGAAACAGCCGATTTAACGCCAAAACCGATGCGCTGCTTGAAGTTGCCGCCATCACCTGAA  
AATGGATGAACAAGGCTGGTGTGATGCCGACACCACATTACATTTCCACGTGCAACCATTTGTCGGCGCAAATTTGCAAC  
CAGAAGCCCTCGCCTTCAACGGCATTGACCCGAACGATCCGATCGCGGCGGTCAGCGAATACGAGGCGCTGCACGAA  
ATTTTTAAAGTTGATCGTAAAGGTATTAAGCGAGCGGCTGTAACCGCGCCATTATGGTGGCGACAATGCCAATTTTGA  
TCACAGCTTTATGATGGCCCGCGAGAACGCGCCTCACTGAAACGTAACCCGTTCCACCCTTTCGCCACTTTTGACACTG  
CTGCACTGGCCGGGCTGGCACTCGGACAAACCGTATTGTCAAAGCTTGGCAGACCGCTGGCATGGACTTCGACAGCAC  
CAGGCGCACTCCGCGCTGTACGACACCGAACGCACTGCTGTGCTTTTTGTGAAATCGTCAACCGCTGGAACGCTGCGG  
AGGCTGGCCGCTATCTGCCCGCGAAGAGGTGTAATCGAGTGCATGCTGATGACATGCAATGATTCAGGCATCTATAGT  
AGGCTATTCCACGCATCCTGCATGATTTACGGGGAAATAGCGTTAATGGCAGATAATCCAGACCTTATCGCTCCTGC  
CGACGTGTTTTACCGGCGACCCGCGACTGGTTTTCTGCGCCTTAAACAGCCGACCGCTGTCAGCCGCAAACCTGG

CATGTGGCGGCGGAAGCGAACATGCGCTGGTATTGCACCGACCGGCTCCGGGAAAACGCTGGCAGCATTCTCTACGC  
CCTCGATCGGCTCTTCCGCGAAGGCGGCGAAGATACCCGCGAGGCGCATAAGCGTAAAACCTCACGCATCTCTATATTT  
CACCGATAAAAAGCCTGGGCACCGACGTTTCCAGCGCAACTTGCAGATCCCCTTGAAGGGTATTGCCGATGAACGGCGGGG  
CGGGCGAAAACGGAAGTCAATCTTCCGCTAGGGATCCGTAAGGATACGCTGCACAGGAACGCAGCAAACCTCACCCG  
TAATCCGCCGATATTCTGATCACCACACCCGAATCACTCTATCTGATGCTGACCTCCCGCGCGCGAAAACGCTACCGG  
GCGTCGAAAACGTAATTATTGATGAAGTCCACGCGGTAGCGGGCAGTAAACGTGGTGGCATCTGGCGTTAAGTCTGGAG  
CGGCTCGATGCGCTGCTCCACACCTCAGCACAGCGAATTGGCCTTCTGCCACTGTGCGCTCAGCCAGCGATGTGGCAGC  
ATTTCTTGGTGGCGATCGCCCGTTACGGTAGTCAACCCGCCCGCAATGCGCCATCCGAGATACGAATTGTCGTACCCG  
TCGCCAATATGGATGATGTCTCATCGGTGCCAGCGGCACCGCGAAGACAGCCATGCCGGCCGGGAAGGCTCCATCTGG  
CCATATATTGAAACGGGTATCCTTGTGAAGTGTGCGCCATCGCTCGACCATTGTCTTTACTAATTCGCGGGGGCTGGC  
GGAAAACTGACGGCAGGATTAATGAGCTTTACGCCGACGCTTACAGCGTCCCCGTCTATCGCCGTTGATGCGGCC  
ATTTGAGTCGACCTCCGGCGAACCTTAACCGTGTACAAAGTAGCGACGTTTTTATTGCCCGCTCACACCAGGCTCC  
GTCTCTAAAGAACAGCAATCACCGAACAGGCGCTGAAATCGGGTGAATTACGCTGCGTGGTGGCAACCTCCAGTCT  
TGAATGGGGATTGATATGGCGCGGTGGATCTGGTATTGAGTGGCAACCGCGTTTTCTGTTGCCAGTGGGTTAACAC  
GCATTGGTCGCGCCGACATCAGGTTGGCGGTGTATCTAAAGGGCTGTTTTTCCCGTACCCGGCGTATTAGTCGAT  
TCCGAGTCATTGTAGAGTGTATGTTGCGAGGCGAGGCTGGAAAACCTGACACCAGCAATCCTCTCGACGTCCTTGC  
GCAGCAAACCGTTGCCGCGCGCGATGGATGCATTACAGGTAGACGAATGGTACTCCCGCTACGCCGTGCCGACCGT  
GGAAAAGATCTGCCAAGACGTGTTTTGACGCCACGCTGGATATGTTTTCCGGGCGCTATCCCTCTGGCGATTTTTCTGCT  
TTTTCGCCCCAACTGGTCTGGAACAGGGAGACCGGATATTGACCGCCGACCTGGCGCTCAATTGTTGGCGTTACCAG  
CGGCGCACCAATTCCGATCGTGGCATGTATAGCGTGTATTACCCGAAGGTGAAGAAAAGGCCGTTCCGCGCGGGTGG  
GTGAACTGGATGAGGAGATGGTATATGAGTCGCGGGTGAACGACATTACTCTCGGCGTACCTCATGGCGGATCCAG  
CAAATCACCCGCGATCAGGTGATTGTGACTCCTGCTCCGGTCTTCTGCCCGCTCCCCTCTGGCGTGGTGAAGTAA  
CGGACGTCGGCTGAATTAGCGGAGATGATCGGCGATTTTCTTATTGCTGGCGGATGGCGGTTCTTTCCGGGACTA  
TTCCCCGTGGCTGGCAGAAGAAAATACGATCGCAATATTAGGGTGGATTGAGGAGCAGCGCAACGCGACGGGCATC  
GTTCCGGGGAGTCGCATCTGGTCTCGAACGGTCCGCTGATGAAATTGGTACTGGCGTATTATTTTGCCTCTCCCTA  
TGGAAAGACGGGTGCATGAACCTGGGCGTGGCGATTGCCGGCGAATACATGCGCTATGGGGCGTACGCGTGGTGG  
TCGCCAGTGTGACGGCATTGTTGCACGATTCTGACACCGATGTAATTTGCCGATGCCGCGATTTTTTTGTTTGA  
CCAGAAAAGTTGCTGCAATTTGCCGAGGCGGTAGCGAGCTCGGCACTTTTCCCGCCCGTTTTCCGCAATGCGCCG  
GCGGGCATTATTAATGCCGGGGCGACTCCGGGCCATCGCACCCCGCTTTGGCAACAACGGCTGCGCGCCAGTCAGTTGC  
TGAAAATCGCTCAGGGATATCCGATTTTCCGGTATTCTCGAAAACCTACGCGAATGTCTGCAAGATGTTTATGATCTT  
CCCGCACTGGAACGTTTGTGCGTCCGCTGAACGGTGGCGAAATCAAAATATCCGATGTAACGACCACTACGCCCTCGCC  
TTTCGCCACAAGTTTATTGTTCCGGTATGTGCGGAATTTATGTACCAGAGCGACGCCCGCTGGCAGAGCGCCGGGCAT  
CCGTAATGTGCTGGACAGCGAGTTACTGCGCAATCTACTCGACAGGTCGATCCGGGGGAATTACTCGACCCGAGGTC  
ATTCGCCAGGTGGAAGAAGATTGCAACGACTGGCTCCTGGCAGAAGAGCGAAAAGGTGAAGAAGGATTGTTGACCTGCT  
GCGGCAACTGGGGCAATGACCGTTGAAGACCTGGCGCAACGGCATAACAGGACAGTGAAGAGGTTGCGTCGTATCTGG  
AAAATCTTCTTGCAGTAAAACGAATCTTCCAGCGATGATTAGCGGACAGGAGCGTCTTGCCTGTATGGATGATGCCG  
AGGCTGCGTGTGCTCCGCGTACGACTACCAGAGTATTGCCAGAGATTTATTTACATAGAGTCAGTTACCCGCTTCG  
CGACCTCTTTCTGCGTATCTCCGGGCTCATGCTCTGGTACGGCTGAACAACCTGGCTCATGATTTAGTCTCGGTATTG  
CCATTGTGCAAGAGCAGTCTCAGCAACTGCGTGAACAGGGTCTGGTGTGATGAATCTGCAACAAGACATCTGGTGGAGCAT  
GAAGTATTTGCTGCTGCTGCTGCTGCTGCTGCAAGCCGACAGAGAAGCGACGCTCCCGTTGCAGCCACGACCTATGC  
GCGATTGCTGCTGGAACGTCAGGGCGTATTACCCGCCACCGATGGTAGCCCGCGCTCTTTGCCTCAACATCGCCAGGCG  
TTTTATGAGGGCTAGATGGCGTGTGCGGGTGTGCAACAGCTTCCGGAGTGGTTTTACCCGCTCACTCTGGGAAAAGC  
CAGATCCTGCCTGCCGCTACGCGACTATTCTGAGAAAATGCTCGATGAATTAAGTGGCAACCGGTGGCGTTATCTGGT  
GGGGCAAAAAAACTGGGTGAAGATGACGGCCTGGTGGCACTGCATCTACAGGAATATGCTGCAGAATCGTTCACTCCCG  
CCGAAGCGGATCAGGCGAATCGTTCGGCGCTGCAACAAGCGATAGTCGCTGTTCTGGTGGACGAGGAGCCTGGTTTGA  
CAACAAATCAGCAACGGATACGCGACAAAATCGGCGAATCGGTTGATCTCTGCTGCAAGAGGCGTTATGGGCGCT  
GGTCTGGCAAGGCGTCATCACCAGCGACATTTGGGCACCGTTACGCGCCCTCACCCGAGCAGTTC AACGCACGCACCT  
CAACTCGCCGAGTCACCGGCTCGTCTGGACGTCCTGTCTATGCGCAACCCGCTCGCCGCGGGTATCTTACAACACA  
CCAAATCTGGTGGACGCTGGTCTGTTATTGAGGTGGAGCCACTAAACGATACCGAAAGGATGCTGGCGTGGCGGAAAA  
TATGCTCGACCGTACGGCATCATCAGTCGTGAGCGGTGATAGCCGAAAATATCCCTGGCGGGTTTTCCATCGATGCAA  
CGTTTTGTGCAAGTATGGAAGACTCCGGGCGAATTATGCGAGGTCGTTTTGTAGAAGGTCTGGGTGGCGCGCAATTCGCT  
GAACGTCGACTATTGACCGATTGCGCGATCTGGCGACACAAGCCACGCAACCGCCACTATACACCAGTGGCGCTCTC  
TGCCAACGATCCGGTAATGTGTGGGGAATCTTCTGCCCTGGCTGCACATCCGGCAACGCTGGTCC AACCGCTCGGG  
CGGTGCGCTGGTGGTCTTTCTGGCGGCAAATTTACTCTATCTGGCGCAAGGTGGCAAAAAAATGCTGGTCTGGCAG  
GAAAAAGAGGAATTAAGTCCCGCCAGAGTTTTCCACGCGTACTACCGCACTGCGTCCGGAACACGGCTGCGCTTAC  
GCTAACAGAAGTGAATGATCTACCGTCCGGCAAACGCCGATGTTACGCTGCTGCGTGGGCGGGATTTTCAAGTTCG

CACAAGGGCTGGATTGGGGATAGAGAAAGGACTGACGGATGCCGTTTCGCATCCGTGAGTATTGCAGGACGGATTATTC  
GCGTCCGGCTCTCAGACTTGTATTTAGCGGCAGTTTCTTTGATCAGCTGCTGCAGTTCGCCACGCTGATACATTTTCGAT  
CACGATATCACAACCGCCGACCAGCTCGCCGTCAACCCACAGTTGCGGGAAGGTCGGCCAGTTAGCATATTTCCGGCAGTT  
CCGCACGAATGTCGGATTCTGAGAATCAACATAGGCAAAACGTTTCGCCACATGCGGCAAGCGCCTGGACTGCCTGG  
GCAGAGAAACCGCAGCTCGGCAGTTTCGGTGAACCTTTCATGTACAGCAGGATCGGGTTTTAGCAATCTGGCGTTGGAT  
TTTTTCGATAGTGGTCTATTGTCTTCTCCTCAAACCTTCTTTACGGCAGTAATCTGACATTGTAGCGGGTCAGTGGC  
GCATCGGAAAATAACATTTTCATCACGCTTTTGCTATTTTATCCCTTTGCTCTATTTGTTGCATTTCAAATATTCGTTT  
TTCTCTGATGCCGGCAAACCTGGCGTATTTATAACCATTTTTAGCTTTCACTGCTGCATTTTTTTGCGCTCGCCAACGAAA  
CGTATTTTTTAAACAATAAAGCTATTAACCTTCTCTTCTATGCATTAGAATCATCAAGTTTTGTAATCAGACGCGAG  
GCATGATAGACCTGCCTTACAGAGGGACGCTCAGTGGCGGGATAAACCGTATTTTCGATCACGCTCTGTGCTTTACTTT  
TTACCACCCTGCCTTAAACGCTATGGCCATGCTTCAAAGCAAGCCAGGGAGAGTTCTGTACCACTCATATCACAAA  
AAAGCAGATAAAAAGAAAAGCACGGCAACCACAAAAAGCCAGAAAACAGCGAAAAAGCCGCCAGTAAAAGTACGAC  
CAAAAGCAAAACCGCTTCTTCCGTTAAAAATCTTCCATTACCGCTTCTAAAAACGCCAAAACCTCGCAGCAAAACACGCC  
TCAATAAAACGGCCTCAGCCAGCTTACCAGAAAAGTGTACCAAACGTAAGGGCTATAAATCGCATTGTGTGAAAGTCAA  
AATGCCCGCTCAGGAACCTTGGCGACGCGCACAAAGCGAAGGTGCAAAAAGCTACGAAAGTGGCAATGAATAAACTGAT  
GCAGCAAATTTGTAAGCCATACTGTTGGGTGGCAGCTCACCCTGATCCGGTTTTGATTGCAGCGCCCTGGTTTTATTACG  
CTTATAAAGATTTGGTAAAAATTCGATTCCGCGTACGGCGAATGAAATGTATCACCTGCGTGATGCAGCGCAATCGAA  
CGTAGTGAACGAAAACGGCGACCTGGTCTTTTTCCGTACTCAGGGACGCGGCACAGCCGATCATGTGCGCGTGTATGT  
CGGCAACGGCAAATTTATTCAGTACCAGCGCACAGGTGAGAAATCAAATCACTTCTCTCAGTGAAGACTACTGGCAGC  
GCCACTATGTTGGCGCTCGTCGGGTAATGACCCAAAAACCTTCGCTAAAACCTTACCCTGTTGTTACGGCAACAGGGT  
AAGTTCATCTTTGTCTCACCTTTAATTTGCTACCCTATCCATACGCACAATAAGGCTATTGTACGTATGCAAATTAAT  
AATAAAGGAGAGTAGCAATGTCATTGAATTACCTGCACTACCATATGCTAAAGATGCTCTGGCACCGCACATTTCTGCG  
GAAACCATCGAGTACTACTCGGCAAGCACCATCAGACTTATGCTACTAACCTGAACAACCTGATTAAGGTACCGCTT  
TGAAGGTAATCACTGGAAGAGATTATTCGAGCTCTGAAGGTGGCGTATTCAACAACGCAGCTCAGGTCTGGAACCATA  
CTTTCTACTGGAACCTGCCTGGCACCGAACGCCGGTGGCGAACCAGCTGGAAAAGTGCCTGAAGCTATCGCCGCATCTTT  
GGCAGCTTTGCCGATTTCAAAGCGCAGTTTACTGATGCAGCGATCAAAAACCTTTGGTTCTGGCTGGACCTGGCTGGTGA  
AAACAGCGATGGCAAACCTGGCTATCGTTTCAACCTTAACGCGGGTACTCCGCTGACCACCGATGCGACTCCGCTGCTGA  
CCGTTGATGTCTGGGAACACGCTTATTACATCGACTATCGCAATGCAGTCCCTGGCTATCTGGAGCACTTCTGGGCGCTG  
GTGAACTGGGAATTCGTAGCGAAAAATCTCGCTGCATAATAACTGATGGCAAATGCAGCATTGCCTGAAGCGCTACGCTT  
ATCAGGCCTACGCGGATCATCGATGTAGGTGCGGATAAGGCACTCGCCGATCCGGCAAGATAAATCGCACGTTGTGACGA  
ACTGTAACGCGAGAAGTTATCCTTCTGCGTTTTTGTTAATTAGCTGTTAGCAACGCAAACCTGTTTACGTTGTTTTCTG  
GCTGACATAAACACCAGCAATAATGCCAGTCCCAGGACAATCGCTCCCATCACCGGCACAAAGCTGTATCCCAGCCCAGC  
GGAAATTACCGCACACCAGCAGCTGCTCCAGCGCATTTCCAAGATTAAGGCACCAATATTGACTGATGAAGACAGAC  
CTGGCGTTCACTGGCGACACGCATCACGCGCATCTGTAACGGCGGTACGACCAGCAAGGTTGCTGCGCCCCACACCACC  
ATGCTAATAGCTGCGCCGAACCTATTGCGGGCCAGGAACGGGATTGCCAGCATAATCACCATCAACAACAACAAAAGCC  
TTTCAACGTGCCGTTAACTGAACGATCTGCCAGTTTCCGCGGAGATAGTTACCGATAGAGAATCCGACACCAATCAGCA  
CCAGCATTGCCGTGACGAACACCGGTGTTGCGTGGTAATACTTTGCAGTACCGGAGAGATATAGGTGTAGAGAGTAAAC  
ATTGACCAGCTCCAGTACCGTGTGAGCAATGCAGACAGCACCTGCGGACGATTAATACCGCCAGCTCTTTTTTTCAC  
TTCAGGTGTCGCCCTGACCACCTTTAGGTAATGAGAAGAACAGACTTACCATTGAAATCACTCCAGCCCCGCGGTTG  
CCAGAAATGACATCCGCCAGCCGATGTTTACCCCAACAGGTGCGCCGCGCACCCACCGATATTGCCAGGTTAAC  
CCATAAAACATAGTGGCAACTGCGCTGGCCTGTTTATGTTTTGGCACCACGCTTGGCGCCAGCACTGAACCCAAACAAA  
AAATGCTCCGTGATTCAGGCTGGTCAAATGCGTGAAGCATCAGGGTCATATAATCCGGCGCGATGGCGGAAAGTACGT  
TGCCGAGCGTGAAAATTGCCATCAGGAAAATCAACGCACTGCGCGGGCACGATGAGAAAGTAGAAGCGTCATCAGCGGC  
GCGCCAACCATTACGCCAATGCATAGGCACTGATTAACATTCGGCAGCGGGAATCGAGACATCCACACCAGCGCGCAAT  
GACGGGCAACAAGCCATTGGCGAGAACTCCGTTGTCGATACCAAACGCGCAATCGCCAGCGCCAGCAACGGATAGT  
TAATTTTCATGCCTTATCTCCACCTCTTCGCGTATTACGCGATATTCAATAAAGTGGCGAAAGCATGACAGCAATCACA  
AAAAATGAAAATAACAAAAAGAGAAAACACTTTTTGCCATTTTGTAAACAACAGGAAGGAGATGCGAGGGAGAACGGC  
TCCCTCGAGAGGAAATCAGTGCAGCGCGGAGTCAAACCCACGGTACGATCAAACCGAGGACGATAATCGTTGTTACCA  
GTGAAAATTTAAGGTCGGTCTCATCAAGTTTTCTCTTTTTTATTACCACAAAAAGTGAATATTACGATTTTTTACAC  
ACTGTGATGAAAAATCTCCGTCATTTATAATGATAAGTGTTTTTACCCTTCCCCTTTTCGTAAGATCGGCCAAAAT  
TCCACGCTTACTATTTGCGTACTGGCATTGACCCCTTCTGACGCTCCGTGTCGTTTTTCCGGCGTACCGCAACACT  
TTTGTGTGCGTAAGGTGTGTAAGGCAAACGTTTACCTTGCATTTTGCAGGAGCTGAAGTTAGGGTCTGGAGTGAAT  
GGAATGGCAACAATAAAGATGTAGCGAAACGAGCAACGTTTCCACTACAACCTGTGTACACGCTGATCAACAAAACAG  
TTTCGTCGCTGAAGAAACGCGCAACCGCGTGGGGCAGCGATTAAGAATTACTACTCCCTAGCGCGGTGGCGCGTGA  
GCCTGAAGGTTAACACACCAAGTCTATCGGTTGCTGGCGACCAGCAGCGAAGCGGCCTATTTTCCGAGATCATTGAA  
GCAGTTGAAAAAATGCTTCCAGAAAGTTACACCCTGATTCTGGGCAATGCGTGGAAACAATCTTGAGAAACAGCGGGC

TTATCTGTCGATGATGGCGCAAAAACGCGTCGATGGTCTGCTGGTGATGTGTTCTGAGTACCCAGAGCCGTTGCTGGCGA  
TGCTGGAAGAGTATCGCCATATCCAATGGTGGTCATGGACTGGGGTGAAGCAAAAGCTGACTTCACCGATGCGGTCATT  
GATAACGCGTTTGAAGGCGCTACATGGCCGGGCGTTATCTGATTGAACGCGGTCACCGCGAAATCGGCGTCATCCCCGG  
CCCCTGGAACGTAACACCGGCGCAGGCCGCTTGGCCGTTTTATGAAGGCGATGGAAGAAGCGATGATCAAGGTGCCGG  
AAAGCTGGATTGTGACGGGTGACTTTGAACCTGAATCCGGTTATCGCGCCATGCAGCAAATCCTGTGCGAGCCGCATCGC  
CCTACTGCCGTTCTGTGGTGGCGATATCATGGCAATGGGCGCACTTTGTGCTGCTGATGAAATGGGCCTGCGCGTCCC  
GCAGGATGTTTCGCTGATCGGTTATGATAACGTGCGCAACGCGCGCTATTTTACGCGGCGCTGACCAGATCCATCAGC  
CAAAAGATTGCTGGGTGAAACAGCGTTCAACATGCTGTTGGATCGTATCGTCAACAAACGTGAAGAACCGCAGTCTATT  
GAAGTGCATCCGCGCTTGATTGAACGCGCTCCGTGGCTGACGGCCGTTCCGCGACTATCGTCGTTAATCACCCGTTGC  
GGAGTCTCTTCCGGCTCCCGCAGCCACTCCTTATTCAGCGTCTACTATCGCCGAGATACTCAAGCAACCAGGTTAACG  
CAGGCGACATATCATTTTGTGCCATGTCAGACAACATGCCGAATCCGAAAGGGGTTTTCCAGTTCTAATGCTACCCAC  
TTCCCTCATTAAAGCCACGGTTTTGGCGAAATGTGTTGGACCATCCCTATGCATAATCTGCCGAGATACAGGTTGCCGA  
TGATTCCAGTCAGGCACGAACTCTTTTTGGTTATCCAGCAACCAGGTAATACGTTTAGGTAGCGTTGCGGAGGTG  
CTTCGCGCACCAACGACGGCCAGTTGCGCAACGTATCATCGCTGAACGGGCCATCCATCAACGCCAGCGGGTGGTGACTG  
GCAACAACGCAACTCCAGTTAGCATCCCATATCCCGAAGGCATAACGACCCTACCGGAATCGCGCTGTTGGCGCC  
AATCGCCAGTTCACGCGCCGTCGGAAGCGCATCCAGACACCGTTGAACACTTCTGAAAGACAAGAAGTTGACAT  
CATCAAAATGGCGATAAAAAATCAACGATCATCTGCCGTGACGTTCTGGCCTGACAATATTATCCACTGGGATAGCTAAC  
TGACCGCGCCAGCCGTTGCTATCTGCTGACATTGCTGGCGGGTATCTGCATTTTTTTGACAACAGAGCGCCCTTCTTT  
GAGAAAACACGCTCCAGCAGCGGTGAGCTCCACATCACGGTGCCGTCGTTCAAAGAGCGGCACCGCCAGCCACTCTTCCA  
GCTGACGCACGGTATAGCTGACCGCAGAAGGAACGCGATGACGCTCTGTGCCGAGCGCTAAAACCTACCATTACGCGCT  
ACCGCATCAACAACCTCGAGTGAATATTCTGACCACATAGTCTGCCTGCAAAATTTTTGAAACAGTCATCAAAATTAC  
CGTTTCAACACTAATTTCACTCCCTACACTTTGCGGGCGGTGTTAATTGAGAGATTTAGAGAATATACATGCAACCTG  
GGAAAAGATTTTTAGTCTGGCTGGCGGGTTGAGCGTACTCGTTTTCTGGCAACCGATATGATCTGCCTGCTTTCGCC  
GCCATACAGGCCGACCTGCAAAACGCTGCGTCTGCTGTCAGTGCCAGCCTTAGTCTGTTCCCTGCGGTTTTGCGCAGC  
CCAGCTTCTGTGGGGCCGCTCTCCGACCGTTATGGTCTGTAACCGGTATTATTAATCGGCCTGACAATTTTTGCGTTAG  
GTAGTCTGGGGATGCTGTGGGTAGAAAACGCGCTACGCTGCTGGTATTGCGTTTTGTACAGGCTGTGGGTGCTGCGCC  
GCGCGGTTATCTGGCAAGCATTAGTGACAGATTATTATCCTTACAGAAAAGTTAACCGTATTTTTGCGGCCATCATGCC  
GCTGGTGGTCTATCTCCGGCACTGGCTCCTCTGTTAGGAAGCTGGCTGCTGGTCCATTTTTCTGGCAGCGGATTTTCG  
CCACCTGTTTGCCATTACCGTGGTGGTATTCTGCCTATTTCTGGCTCAAACCCACGACGAAGGCCGTAACAATAGT  
CAGGATGGTCTGACCTTTACCGACCTGTACGTTCTAAAACCTATCGCGCAACGTGCTGATATACGCAGCCTGTTACG  
CAGTTTTTTTTGCATGGCTGACCGGTTACCGTTCATCCTTAGTGAATGGGCTACAGCCCGGCAGTTATTGGTTAAGTT  
ATGTCCCGAAACTATCGCGTTTTCTGATTGGTGGTTATGGCTGTCGCGCCGCGCTGCAGAAATGGCAAGGCAAGCAGTTA  
TTACCGTGGTTGCTGGTGTGTTGCTGTGTCAGCGTCATTGCGACCTGGGCTGCGGGCTTATTAGCCATGTGTCGCTGGT  
CGAAATCCTGATCCCATTCTGTGTGATGGCGATTGCCAATGGCGCGATCTACCTATTGTTGTGCGCCAGGCGCTGCGTC  
CCTTCCACACGCAACTGGTCGCGCCGACGCTTGCAGAACACTTCAACTGGGTCTGTGCTTCTCGCAAGTCTGGTA  
GTTTTCTGGCTGATCAGTATCAGCACGCCATTGCTCACCACCACGCGTATGTTATCAACAGTAGTGTGGTGGCGCT  
GGTTACATGATGCAACGTTGTGAAGAAGTTGGCTGCCAGAATCATGGCAATGCCGAAGTCGCTCATAGCGAATCACACT  
GATCTATATCGATATACTTATACTTAGGCTGCTAACAAAATTTTGTGTATGATTGAAATTAGCGGCCTATACTAATTT  
GAGTTGTTAAAGCTACGATAAATATTATGTTTTACGGGACAGGATCGTTCCGACTCATATGGATGATTCATTTCCGC  
AAGGTTCTCTCTTTCCCTGTTCTACGTCGGATTATAGACTCGCGTTTTTTCTGCGAGATTTCTACAAAAGCCAAA  
AAGCGTCTACGCTGTTTTAAGGTTCTGATCACCGACCAGTGATGGAGAAACTATGAGTTCATCGTGTATAGAAGAAGTCA  
GTGTACCGATGACAACCTGATACCGTATCGCAACGAATTAAGCCGTGCCGGTATAGCCATTAACGTTCTGCCCCG  
GCGGATATTCTGTGAAAAACCCGATTTTTTTAAACGCGTTCTGCAAGAAGGCTCTTTGGGGTTAGGCGAAAGTTATAT  
GGATGGCTGGTGGGAATGTGACCGACTGGATATGTTTTTTAGCAAAGTCTTACGCGCAGGTCTCGAGAACCAACTCCCC  
ATCATTTCAAAGACACGCTGCGTATTGCCGGCGCTCGTCTCTTCAATCTGCAGAGTAAAAACGTGCCTGGATAGTCGGC  
AAAGAGCATTACGATTTGGTAATGACTTGTTCAGCCGATGCTTATCCCTCATGCAATATTCCTGCGCTTACTGGAA  
AGATGCCGATAATCTGGAATCTGCCAGCAGGCGAAGCTCAAAATGATTTGTGAAAAATTGCAGTTAAAACAGGGATGC  
GCGTACTGGATATTGGCTGCGGCTGGGGCGGACTGGCACACTACATGGCATTAATTATGACGTAAGCGTGGTGGGCGTC  
ACCATTTCTGCCGAACAGCAAAAAATGGCTCAGGAACGCTGTGAAGGCTGGATGTCACCATTTTGTGCAAGATTATCG  
TGACCTGAACGACCGATTTGATCGTATTGTTTCTGTGGGATGTTGAGCACGTCGGACCGAAAAATTACGATACCTATT  
TTGCGGTGGTGGATCGTAATTTGAAACCGGAAGGCATATTCTGCTCCATACTATCGGTTCAAAAAAACCGATCTGAAT  
GTTGATCCCTGGATTAATAAATATATTTTTCCGAACGTTGCCTGCCCTCTGTACGCCAGATTGCTCAGTCCAGCGAAC  
CCACTTTGTGATGGAAGACTGGCATAACTTCGGTGTGATTACGATACTACGTTGATGGCGTGGTATGAACGATTCTCG  
CCGATGGCCAGAAATTGCGGATAACTATAGTGAACGCTTTAAACGAATGTTTACCTATTATCTGAATGCCTGTGCAGGT  
GCTTTCCGCGCCCGTATATTACGCTCTGGCAGGTCGTGTTCTCACGCGGTGTTGAAAACGGCCTTCAGTGGCTCGCTA  
AAGGCTATTCTATCGCCCCCTCCGGGGCGATTTTCAAGATCAGGCTTCTGTGCTGGTATTTCATGGCATTCTCTCGT

GCCGCCAGCACACGTTCTACCGTATCTACCACTGCCTGAGTTTGTGGATCGATTTCAATGTTGACGCGTGCGCCAAGTTT  
TTTCTTCCCAAGAGTCGTGCGTTCCAGTGTTCGGAAATTAATGGACGCAAAAACGCGTTGGCGTGACTTCGCCGACGG  
TCAGGCTAATACCGTCGATGCCAATAAATCCTTTGTACAGAATATATTTTCATCAACTGACTATCCTGGACTTTAAACCAG  
ATCTGGCGATTATTTTCTGAGGTTAATATTTTCGCCACTTCAGCAGTGGTCATAATATGACCTGACATTAAGTGTCCGCC  
AATTTTCATCACTGAATTTCCGCCGACGCTCAACGTTTACCAATCCCCACTTTTAAATCGCCAAGATTGGTAATGCGTA  
ACGTTTTCTTCATCAGGTCAAACCTGACATGGTTGCCGTTAATTTCCGTCACGGTCAGGCAGCAACCGTTATGCGCCACG  
GAAGCACCGGTTTTCCAGGCCGTCCAGCATGTGGTCGGGTAACCTCACCACATGCGTACGAAAAATTTGGTTTCTCGTCAAT  
CGACACCAGTTTTGCGGTGCCCTGTACAATCCCCGTAACATACTTACAACCTCTGAAATCAGTTAAGACATTCTGTCA  
GCACAATAGCAGGTGGAACCGCCCTTACCAGTGAAGGGGTAAGAATGGCTATTTTTCTACTGGAGAATTAATAAATCCT  
CGCTACAATAGACTGAATTTCCCCTGCTTCTTTTTGCTGCCATTACAGCGGCTTTTTAGTCTCTCATATAACTACA  
AATAAAAGGTGTTACGTGCAGAAGTATATCAGTGAAGCGCTGTTATTAGCATTAGCAATCCCGTGATTCTCGCGC  
AAATCGCCAAACTGCGATGGGTTTTGTGATACCGTATGGCGGGCGGCTATAGTGCCACCGACATGGCGGCGGTGCGT  
ATCGGTACTTCTATCTGGCTCCGCGCATCCTCTTTGGTCACGGACTGCTGCTGGCATTACGCCGGTTATCGCGCAAT  
AAATGGTCCGGTCGACGTGAGCGCATTGCGCATCAGGTGCGACAAGGTTTCTGGCTGGCAGGTTTTGTTCCGTTCTCA  
TTATGCTGGTGTGGAATGCAGTTACATTATCCGCTCCATGGAACATCGATCCGGCTCTGGCGGACAAAGCCGTG  
GGTTATCTGCTGCGTTGTTGTGGGGCGCGCCGGATATCTGTTCTCCAGGTTGCCGTAACCAAGTGTGAAGGTCTGGC  
AAAAACCAAGCCGGTATGGTAATGGGCTTTATCGGCTGCTGGTGAACATCCCGTGAACCTATATCTTTATTTATGGTC  
ATTTCCGGTATGCTGAGCTCGGTGGCGTTGGTTGTGGCGTGGCTACTGCGGCGGTGATTGGGTCATGTTCTTGCCATG  
GTTTTCTACATTAACCGCGCCGCTCCATGCGCGATTTCTGAACGAAAAAGGCACCGCAAAACCCGATCCTGCGGTTAT  
GAAACGACTGATTCAACTCGGTTTGCCGATTGCGCTGGCACTGTTCTTTGAAGTGACTGTTTGCCGTCGTGGCTCTGT  
TAGTGTCTCCGCTCGGTATTGTTGATGTCGCGAGACACCAGATTGCCCTGAACTTTAGTTCACTAATGTTCTGTGCTTCCA  
ATGTCGCTGGCGGAGCGGTAACCTATCCGCGTAGGTTATCGTCTGGGTCAGGGCTCAACGCTGGATGCGCAAAACCGCTGC  
GCGGACCGGGCTTATGGTGGGTGTCTGTATGGCAACCTGACGGCATTTCACGGTTTACTGCGGGAGCAAAACCGCC  
TGTTGTACAACGACAATCCCGAGGTTGAACGCTGGCTGCGCATTGATGTTGCTGGCGGCGGTATATCAGATTTCTGAC  
TCAATCCAGGTGATTGGCAGTGGGATTTGCGTGGTTATAAGATACGCGTTCCATTTCTATATTACCTTTACGGCTTA  
CTGGGTGCTGGCTTGCCAAAGCGGCTATATTCTGGCACTGACCGATCTGGTCTGTAACCTATGGGGCCAGCAGGCTTCT  
GGATAGGCTTTATTATTGGCTGACGTGCGCAGCCATTATGATGATGTTGCGTATGCGGTTCTGCAACGCTGCGGTC  
GCCATCATTCTGCAACGAGCATCCCGTAATAAAGACAAGGCGCAACCTTACGGGTTGCGCTGTATTTTTACGCAGGC  
TGGAGCGTTGCGCAATCCCGTCTTCGTCTGGCTGTAATTTAGAGCGTTACACAGAGTTTCCGACTGGCATCTGTTAT  
CTCAACGTGTATATCCCGGTAACCTCCCTTTACATTGATGAAGTCAGGTGAAATTTCTTTGCACTGGTTTGCAGGC  
AAATCGCTCCCTCTCCGCGCAGGCGTTTCACTTTCAAGTGCACATGCGTTGCCGTCATCAGTATCAGCCACAGTTTTCCA  
CCATTAGATTGATGTTACCAACAATGAAAGTGACTGTACCTTTTACCGTACTGCCGTCTAGAATCAACACACCGCC  
CTGCTGTACAGTAATCGTTGATTGTTGACGCTCTGCGCCATAACCAATAATCATTGAAGCGCCGTCCAGTAATGCAACAC  
TCCCGGTCAGTTCAACCGGTGCGCGATCTTCTCTACGACAAAATTTTCTGTCGCGCTGGTGGGTGACAAACAGGATCACT  
GTCCACCTTGTATTACCGGTTTTCCAGCGTACCGGCATGCACTTCAGCCCCACCACCACATTACGGACAGGTTTTG  
CGTCTTACCGGAACTGTAGAGCTGAAGGCCATCCGTCAGAGGATAAATGGATCCATTCTCAACAATAGTGTGAGAGT  
CTTACCACCGAGATTATCATGGTGCACCAGCAAGCAACGATCACTGGCTTTCCCGGCCAGCATAAAAAACGCCGCC  
TGATTAATCTACAATTGCTGGCTTCCCACCTGGATACCAACAATTACCACCTTCTACTACCACGACCGGTGAGGT  
TGTCCCATTAAACCAACAGGCCGCCCTTGTGATCGAGAATGATTTTTCCGCGGATGTCCTTCCAGTACACGAGTTAC  
CGCATTTTTCCAGCAACAAACCGCAGGCATAAACCCTTATCAACGCTGAATTCACCTTCCGGATGGCGCCATTAAACGTA  
GCGAGCGTAGAGAGACTAATTGCGCCTCCCTCGACTGAACAATATCTGTGGCAATGGCACCATCGCTGACCGATAGCGT  
GCCATTGTTACCGTACTGTGTGCAATTTGGCGATCCACCGGTTGCCACTTTCAACCAGCCAGCCCCGTTGACCACGGTAT  
TTTTCGGCTCTTCCGCCAGCTTCAACAATCAACTCGCCTTCAAGTGGTGGTGGTGGTGGTGGTGGTGGTGGTGGTGGTGGT  
ATTTGCAGGTTCCCGTCGCTCATCAAGTTTTTTCGCATCAGATCCCATGATTTATTCCTTGTGCTGATCTGTGTGCTTTA  
TTGCTACCTAAGTGTAAGGCTACGGAGGATTTATCCACGACAGATTTGAGATGGTGGCAACAACCTCTGTTAAACTCT  
GATACACGAATTATTGGGTTGTATCAGATGTAATGCGATCCTGAATAAAAATCACCTTGCAAAATCAACAAAATATAGC  
CAATTTGCTTAAAAGCTCTGCAACCGGTGAAATAGCGCAGAAAATTACGTTTTGCCTCTTGCACCTTCCCCTCTGCC  
GCTAATATTGTCCTCCGTTGTCACCTACAACGTTGCGTTCATAGCTCAGTTGGTTAGAGCACCACCTTGACATGGTGGG  
GTCGTTGGTTCGAGTCCAATTGAACGCACCATCCTGCTGCGTAGCTCAGTTGGTTAGAGCACCACCTTGACATGGTGGG  
GGTGGTGGTTCGAGTCCAACCTGGACGCACCAGATTTCTTAATCTGGTCTTCTCCTTTTTCCCTCTGTTTCTTCTGCT  
ATCCAATACGTTAAAAGATTACACTGTCTTCGATGCGTTATCAGAAGGAGAATCGCTATGGCAACTTTGTTACAACCT  
CATTTTCTTTAATGGCCATTTGGCGACGCAATGGCTGAGCAGCTTAAACCCTTCTGAGTTCGATTAATCAGGAACC  
TGGTTTTCTGTGGAAGGTATGGACAGAAAGTGAAGAAGAACACGAAGCCGGTGGGATCTACCTTTTCACTGATGAAAAA  
GCGCCCTTGCTATCTGAAAAACATACTGCCGACTGAAAAATCTCGGCGTTGAGGAAGTTGTGCCAAAGTTTTCGAT  
GTCAATGAGCCACTTAGTCAAATCAATCAGGCAAAACTCGCTGACAGAATTAATCAAGGGCGGTTAGCGCCCTTTTCA  
TCCCTGCTGAAATTTCTCAAATCTAAAAATCTCAACCAAACCTTATCTGATAACACTAAATTCGAAAGAATGCGTACAG

GTAAGTAACAATGAAAAAATTGCTATTGTGGGTGCCGGGCTACGGGGATCTACACCTTATTCTCGCTTCTACAGCAAC  
AAACTCCACTTTCTATTTCTATCTTCGAGCAGGCTGACGAGGCCGGTGTCCGGATGCCATACAGTGATGAGGAAAACTCA  
AAAATGATGCTGGCAAATATTGCCAGTATTGAAATACCGCGATTTATTGTACGTATCTCGAATGGCTACAAAAGCAAGA  
AGACAGCCATCTCCAGCGTTATGGCGTTAAAAAAGAAACCTTGACAGATCGTCAGTTTTTACCAGCAATTCTGCTGGGCG  
AATATTTCCGGATCAATTTTTACGACTAGTAGACCAGGCACGACAGCAAAAATTTGCAGTGGCTGTTTTAATGATCATGC  
CAGGTTACCGATCTGCAAATTAACAATGCTGGCGTCATGCTCGCTACAAATCAGGATTTACCCAGCGAGACGTTTGATTT  
AGCGGTGATCGCCACGGGTACGCTCTGGCCTGATGAAGAAGAAGCAACCCGAACGTATTTCCAGCCCGTGGTCAGGCC  
TGATGGAAGCAAAGGTGATGCGTGAACGTGGGTATTATGGGAACATCCTTGAGCGGACTGGATGCGGCAATGGCAGTG  
GCTATTCAGCATGGTTGTTTATTGAAGATGATAACAACACGTCGTTTTTACCAGCGATAACGCAAGTAAAAAGCTAAA  
TATCACGTTGTTGTCGCGCACGGGTATTTTACCCGAAGCCGATTTCTATTGCCCTATTCCCTACGAGCCCTTACACATCG  
TCACCGATCAGGCATTAATGCTGAGATTCAAAAAGCGAAGAGGGCCTTTTGGATCGGGTATTTAGATTGATAGTAGAG  
GAAATCAAGTTTGGCTGATCCAGACTGGAGTCAACGCATAGCCTTAGAGAGCCTGAATGTCGATTCTTTGCTCAAGCCTG  
GTTTGCCGAGCGCAAACAACGCGACCCATTTGACTGGGCAGAAAAAATCTCCAGGAAGTCGAACGCAATAAACGAGAAA  
AACATACTGTTCCCTGGCGTTATGTCATTCTGCGCTGCATGAAGCCGTACAGGAAATTGTTCCACATCTGAATGAACAC  
GACCATAAACGGTTCAGTAAAGGCTTGCCCGGTTTTTCATCGATAATTATGCGGCAATCCCTTCAGAGTCTATTTCGTCG  
CCTATTGCCTTACGTGAAGCGGGAATCATTATCTCGCCCTCGGTGAAGACTACAAAATGAAATTAATGAGTCGCG  
GCACCGTCTGAAAACGGAAGACAACAGCTACTCGTTTGACGTTTTTATTGATGCCCGCGACAACGTCCGCTTAAAGTG  
AAAGATATCCCTTTCCCTGGGCTACGCGAGCAATTACAGAAAACAGGGGATGAAATCCCTGATGTTGGCGAAGATTATAC  
GTTACAGCAACCCGAAGATATTCTGTTGGCGCGTAGCGTTTGGCGCGTTGCCCTGGTTGATGCACGACCAGCCTTTGTTT  
AGGGACTTACGGCATGTGCAGAAATGGTGAGGCGATGGCTCGGGCGGTGTAAGCCTGCATCCCGTGTCTGTCGGCGT  
CTTTGTTTTGATTAAGGTAAGCTATCAGCACTCAACAACTGATGCTGTTTATTAAAGACGATAGCGGACTCCGGCTCG  
AATATTGTTTTACCTTCAATGGCGACGGCGAAGCGAACTCTTTCGCGTGCATGATATGCCAGTGGCGGCTTCTCCTG  
GCCCCGAGAATAATTGAGTCGACCACGCCGTGCTCACTACCGTTGAATTTTACCAGTGGCAATGATGTGTACATTGTCG  
CCGCTGTTGGCAATTCTGGCGTTTGCGCCAAAGCTGGCGATTTGCACCAGGTACCATTACTGGCGACATGACACCGTTC  
ACCCAATGTACAAACGCGTACTCGCATTCCGGTATTGCAATCCGACTGCTATCTCCAGCGCTGCTTATCCGCGAAGAAT  
TACCGTTACAGCAACCCGTGCGGTTTACCAGGAGTGCCAATGTACTGTTAAAGCCGACACTTCCAATCCGACGCTA  
TAACCCATACTGGCAATTTGCGCGGCATACCCAGCGTTGCGATTCTGGCGTTATCCTCACAAACAGCCGATGCGAGCATG  
ATCGTCGCTGCGGGCAAACCTGACTGCAAATGGTCTCTCTCCGGGTCTGTGGCCAGTTTTTGCATAGAGGAAACTTCT  
GATGCGCGAAGTTTTTATCCGCCAGCCATTTTTTCCACGCATACTCAACCAGACTCTCCGCCAGTCCGTATATCCTTCC  
TCAATCAGTGATGATGAATATCGGCATAACTACCGCCGCTGGGAAATGGCGCAGGAACCCAGCGATACATCACCGCTCC  
GATACGCCATTTCTCGAGGTCTGCTTGTGAATGATCATTGTTAGTGCCGGTGTAGCCATCGACCATGCTTTTAAAGG  
TTTTGTTGGCGTACGCCCCGTGGTGCAAAGATAAAGATGACCGAAGATAAAAAAGAGGCTTATAAATGCCAGAGCAAAA  
TGTGCTGCAATAACAGTATCTTACGCCAGGAAACACATCTCCACGGCTTGGGATAGAGACACAGCAGCCCCGTCAA  
TAGTAACAACGGCAGCAATCCATACATGACACCAACATAGGCGACCTGCTGTAAGGGATTAATTTAGACTGGGTTGTTG  
CCGGGAAAGGATGTTCTTCCCCTGCATAATGCCAAACAAATAAATCGCGTTTGTGTTTGGCGCTCGTCCAGCCACCCC  
TGACGACGAATGCGATAGTGGTACCATTATCCCAACGGCATTGATCAGCACAAAGCCGAGCAGCATGCCAGTAACAA  
AAATCCGCAAACCTTATGCACCGCAACCAGACTTTTAAACCGCAGTTGCGCCACCATCGCAAAGTGATTTATCAGCCAC  
TGCCAGCAACAATAAAGAGTAACGCATTGACCAGTGCATAATCTGACCGCTTGTGTTAAAGATAAATCTTCTCA  
CCATGATCGTGGCTGATTTCTTACGCCACGAGCAGCAAGCAAGGCATGACGCCCCAGCACCAACACATCCCAACCA  
CAATACTCCGCAATGATCAACCACCGCCAAAATTCGGGATGAACTGTGGCACATAGTTCGTAACACTGGCTCTGAA  
ACTGTTTACGATGTTGCGACGGGTTTACATATTTCTTTTTTAAATCAAATGTTGACCGAACCAGGCGATACAGATGCGGTT  
TCCCGCACCAAGGTAGCTGATATTGATAGTATTTATTTTGTGCAACCACGCTGAATTTCTGGGCTATCTTCCGACCA  
AAGATCAATGCGTGTCCGGGACGGGCTGACGCAAATGGCGGAAAGCCTTTTGCAGTCCGGACTCAGCGCAGAAATC  
ACATTTATCTGCCACTTTAGTGACAGGGTTAAGGTAGCGAACCTGGTACGACAAGCGCAATGCAATAACTGCAGCCGA  
TGCACTGCGATTTTTCTACCCGACGATCCCCTGCTCATCACGCCACGACGCCCCCGTGGGCAAACGTCGATGCACGGA  
GCATCTTCCAGTGTGACATGACTGGCGAAAAAGTGATACTGCGTTTTGTTGCTGTTATCGGTGACTGGAATGTGTGC  
TATCGATAAACGGCTTCCCTGAGCGGGGACGTGGTTAGTTTTACGGCATGCGCGGGCGCAAATATTACAGCCATTGCACC  
GTGACTCGTCATGAATCATGGCATAACCGAATCTCTTTTCTTGCCTCGTGTTCGCTAACAGAGAAGACGCAGAACAGTA  
AAAAAGATTACTGTTCCCATCCCAGAACAAATTTGCTGCGAGTGAAGGACATCTGATTATCCCTAATGAGTGGCTGC  
AACTGTCCACCCTATCCATGACATCTCCCTGAAATTTAGGGGTTCTGAAACTGCTCTACCTCGAACCATTGCGATAAGC  
CATAAGCCTTGCCATAGGTATAAATCGCTCGCTAAACAAGTACAACACCGCCGTGATGACTCCACCTGCCGTATATCG  
GCATATTAGGTGCAACATCCATCGCGCGATCGCGGCTTCAATCTGCGCTTCTGGAAGTAAATGGCGCTTGATCAG  
CATGGCGACTTTGTAAGGACGAGGATACGCTGGCACTCAAACGAACGGCGTGTGCAATGGCGGCAAAATGTCCTGCT  
CCACAACCTGCAAAGACATCGCCGCGTAGTTTTTCACTCATGGCCTGCGTTGAGTAATAGTAATCATCCTTCTTCCCGTC  
AAACAAGCGATATCCGCGTAGTCTCCGTTCTGCTTAATGCTTTCCAGCAAACTGACAGTTCCTTCTGCAACCAAATA  
GGGTGGCGAGAGAAACACGGCGCGGCCACCAGCTGCCAGCCGAGAATGCTGGCGAATGAACTCAGCCAGGATTTTCAG

CAGGTTCTGGTTCGGTTACCGTATCAACGGGGTGACGCATCCCCTGCAACCATTGCCGCTTCGCTCGTCAACTTCGCTG  
ACTTTCGCTAACGGCAATTCATCCTGATGGTTCATCTTACCCATTCTTACGCAGGCAGTAGATTGTGTGCTGCCAGATC  
GGCGGCAATATCTTCCAGCCCAGACGCTGCAATGTTTCGCGGGTTGGACAACCAAGCTGTGGGTCCCAGCCATTTCTT  
TGTAAGAACATCGTGAGCGAAGCATGCATATCGTCACGATCCATTTTGTACAGTACCTTCAGTAAAGACCGGGATCTGCGGA  
TCCTTGTGCAATACCCAGGAACAGATAAGATCGTGTTACATTACGCATATCTTTGGTTTGCATCAGTTTTACCGTGTAGGC  
ACGATGCAACGTA AAAATACGCTCTGCAGCTAAATCTAATTTTTCTGAGTCATCTCTTCGCCGGTGATCGCTTTGAAGA  
ATTTGGCTTCAAGCGCCAGATCGCCCCGTAATTACGGCTTTTCAGCGGCGAAACGGTCATTGGCCAGACCCAGTTGCAC  
AGGGTGACGGCGTTATGCAAACAGACCCGCAACAGCGACCCTTTGCATATTTAATTTTTGCGTCATTGATTGGCGTGT  
GTTTTGGTTTCATCGTAAGCATCTTCAGAACCAAAAAGTTCTTTGCCACTTCACGTTGCAGTTTCAATGGCAAGCCGG  
AACCAATAAAGTTGATATGGGTATGCGTCATGCAGTCACGGTTGAACATACAGTTAACAATGGAACCGACCTGCGCTGAC  
GCTTCATTGGCATGGTGAACCGGATAGCCAAACGGCGACCAGAGTTTATTTTTGCGGTAGCCCCAGTACTTTCACCCAA  
ATTCCAGCGTTCTGCGATGGCATATGAACCATCAGCCAGGTGACTCAGCTCACCCACACGATGCGCCAGACGGTAGTAAA  
AATCTTTAATGAAGTTAACGTCACCCGCTTCCAGTTGATCCAGCGAATTTCTGCATACTTTCAGCTGGCAGAACACGC  
TTGAACACACCTTTGCTGTAACAATAAGTAAAGTCGCGATGCAACTGCCCGTAGTTACACCATAGGCCGTAGTCATCGAA  
CAAATCAGACCCACCGAGTTACCAATCACACGACCCTGCTTTATCTTCAAAATCTTTCCGCCCCGTTCCGGGAAGTGG  
TGGTATGGACAAAGTTTGTACACAAGTGTACCACCTGTGCTGGGCACGCCAAACTCTTTACCCGAGGAATATTATT  
TGGGTATACAAACGGATCGGGCAAGAGTGGCAGCCGCTCATTTTTACTGTGTATTTCTCTGCCGCGGTCTTAAGTCAA  
AACGGATTTATAGGTACGAAAGCCGACCGTATTCTGATTGCTGGCGGAATTTACCCGTTTCAATCGGACCACCTTCAG  
CCGCGCCCCAAAACAGCCCTTTACGTGCTGTCCAGCGTGACTTGGGATCTGAATACTCTGCCACGATTGTGGCGTACTT  
GGCAGCATGTTGTTATTTCGCACCAATAAGTTAGTCATCATGTAATCATTGAGACGCTTCATCTCTGACGATCGGC  
AATGTTGACCCCTTTGTCCTTCAACCGCAATCGCTTTCAGGTTTTTGAACCCATTATTGCGCCAGTTCGCCACCCG  
CGCTGTGGTTACGGCTATTCAACATGCCAGAGAGGAACAAGTTTTCCAGCCTGACCAATAGCCGCCACACAGGTT  
TCCGGACTGGTCAATCGACAAATTTCTCCGTCGTTGCGCGCTCCCTTTCCCATAGAAATCGGCTTTTTCCAGGCT  
AACTTTGTCATCTTTAATCTTCAGCCATACCGGTGATTTGCTTCCCTTCGATAATAATGACGTCGTATCCAGCGAATT  
TCATTTGCGCTGCAAAAAGCCACCCATATGGGCATCGACGACTAAATTTCTTTGGTAAAAGTAGAAAGTGAGGTGATA  
TTTACGCGAGAACTACAGGGGGCACCAGATCCAGTTAATGGGCCGTTAGCAAAGACTAATTTATTCGCTTCATCGAAAGG  
TTTCGTGCCTGGCGGTACTTCGTACATAAATTTGTAGCCGAAGCCATGCCACCGACAAAACCTTTAAACTTACTGG  
AATCTTCGAGGGTAATATTTCTGTGCTGAGATTGACTCTTAATATATTACCTGTCCAACCGTTAGCCATGATTTTTTCC  
TTTGAAGATTACACAGTAATATCTTCCACTCGATAATTTTTAACGCCCTGTTGGGCAGGCGTTTGGCATTACCCG  
CATAACACACATTTTCAGGATTTTTACTTTTCGGTATTTACGGTGGCCATCATCCACGGGCATGCCGTAGTACAGGCGCT  
ACAGCCAATACAGCGTTTATGATCGACGGTAATACAGCCTTCTTTCTGCTGCCAGGTAATCGCACCAATCGGGCAGACGT  
TCATGCATTGGCGCTCTTTGCATTGACGGCAGGTGTCCGCGTATAGTTGAGATCGCCATACAGGCCGCCAGAGCCA  
ACCCCGTTGTCGCAAGAATAATTGCGATGGATTTGATACGGGAGAAGAATGTCCCTACTGAGCCATCGTTGAAGTT  
GGTACAAGAGATTTACAGCGGTGGCAACCCGTGCATCGCGCTCGCTGGGTACCAGCACCCCTTTGGGGTATTTATCA  
ACCCTACTGTGCCGCTATCAATATCTTCTGTTGCAACCCAAAAGTGACAGTAACGCAGGGGCAATTGTTAGACCAGCA  
AGGCCTTTCTGATACGCAAGAATCTAATCGCGTTAAGCCAATATCTAATAGTGGACGATCAACCGGGTTCATTTA  
TTTCGATCCTCTTCGAAACACAGTGTGACAATTCAGCAGCCTGATATTAAGCATTCACTAATACGCTGCTGACTCT  
GTCCCCAACACCAGATATTTTCCCTAACCCGATAGTGTATGAGAAAAGATTAACGCCGATAAACTAATCTTTATGGTTA  
GGAGAAAAAATAATGTGATTATTCTGAGCCCTTAACATTGATCGTTATCAATTAATAAATACAAAGCAAGAAATATAAGT  
GAACTGATATTTATTATCTTTGAAATAAATTTAAGCGACAATTTTGTGACTTTCAATTCAGAAAAATAAAAA  
AACATTATCGCTATAAATTAATAATACATACCGAAATTCGTATAATTTTCAGCAGTTGTTATTTAGAATGATTAACCTGGACC  
GCAACTGAAGCAAGAATATCAGGATGAAGCTTACCGCTCATCTGAATGGTCAATTTTACCAGTGCGTAAATGACGGTTT  
CCATCGCTGCTTTTCCAGCTCACTGCGCTGAATGCGTTTATTGGCTAATGCTGTACGTAATACGCTGCGATAACAATA  
TGCTTTGGTTCCTGCCCCAGATCGCGCATTTCCAGCACAACTTTACCGACAACCTCTGCACATTTCTCGGTACAGTTCATC  
CTTTTTGTCCGATTTCCATTCTTTATACCTATTTATCATGCCAATATCAGCATATATCAATCTAACCAATTAACAAA  
AAATCAAACAAAATCAGACAAATAACGCGATAAATTTTAACTGTAGCAATTGAGCGATGATATTTTATACCCGGA  
TGAATTTTCACTTATCTCACACTGACAACCTTCGGCACCAGACGTTGCGCAAACAGTGAAGTTTTTTCGTTAACCTTTTCC  
CTGGAACGTTAAATCTTTGATAACAATTTATTGTCTAACAAAGTTGATATTTTTTGAACGCTGTTTTTGTCTTTCTTT  
GGATTAATTTACGCGTATAATGCGCGCAATTGACTCTTGAATGGTTTTCAGCACTTTGGACTGTAGAATCAACGACTCA  
AAAAACGGCACTCAGTTGGGTGAGACACAAGCACACATTCTCTGCACGCTTTTTCGATGTCACCTATCCTTAGAGCG  
AGGCACCACCTTTTCGTAATACCGGATTCGTTTTCCGGCAGTGCGCCAGAAAGCAAGTTTCTCCATCCTTCTCAACT  
TAAAGACTAAGACTGTCATGAAAAAGACAAAATTTGTTGACCATCGGACCGAAAACCGAATCTGAAGAGATGTTAGCT  
AAAATGCTGGACGCTGGCATGAACGTTATGCGTCTGAACCTTCTCTCATGGTACTATGCAGAACACGGTCAGCGCATTC  
GAATCTGCGCAACGTGATGAGCAAACTGGTAAAACCGCGCTATCTGCTTATACCAAAGTCCGGAATCCGCACCA  
TGAAACTGGAAGGCGGTAACGACGTTTTCTGAAAGCTGGTCAGACCTTTACTTTACCACTGATAAATCTGTTATCGGC  
AACAGCGAAATGGTTGCGGTAACGTATGAAGTTTCACTACTGACCTGTCTGTTGGCAACCCGTAAGTGGTACGATGG



TCTGATCGGTATGGAAGTTACCGCCATTGAAGGTAACAAAGTTATCTGTAAAGTGCTGAACAACGGTGACCTGGGCGAAA  
ACAAAGGTGTGAACCTGCCTGGCGTTTCCATTGCTCTGCCAGCACTGGCTGAAAAAGACAAACAGGACCTGATCTTTGGT  
TGCGAACAAGCGTAGACTTTGTTGCTGCTTCTTTATTCGTAAGCGTTCTGACGTTATCGAAATCCGTGAGCACCTGAA  
AGCGCACGGCGGCGAAAACATCCACATCATCTCCAAAATCGAAAACAGGAAGCCTCAACAACCTCGACGAAATCCTCG  
AAGCCTCTGACGGCATCATGTTGCGCGTGGCGACCTGGGTGTAGAAATCCCGGTAGAAGAAGTTATCTTCGCCCAGAAG  
ATGATGATCGAAAAATGTATCCGTGCACGTAAAGTCGTTATCACTGCGACCCAGATGCTGGATTCCATGATCAAAAACCC  
ACGCCCCGACTCGCGCAGAAGCCGGTGACGTTGCAACGCCATCCTCGACGCTACTGACGCAGTGATGCTGTCTGGTGAAT  
CCGCAAAAGGTAATAACCGCTGGAAGCGGTTTCTATCATGGCGACCATCTGCGAACGTACCGACCGCGTGATGAACAGC  
CGTCTCGAGTTCAACAATGACAACCGTAAACTGCGCATTACCGAAGCGGTATGCCGTGGTGCCGTTGAAACTGCTGAAAA  
ACTGGATGCTCCGCTGATCGTGGTTGCTACTCAGGGCGGTAATCTGCTCGCGCAGTACGTAATACTTCCCGGATGCCA  
CCATCCTGGCACTGACCACCAACGAAAAACGGCTCATCAGTTGGTACTGAGCAAAGGCGTTGTGCCGCAGCTTGTAA  
GAGATCACTTCTACTGATGATTTCTACCGTCTGGTAAAGAACTGGCTCTGCAGAGCGGTCTGGCACAAAAAGGTGACGT  
TGATGTTATGGTTTCTGGTGCACCTGGTACCGAGCGGCACTACTAACCCGCATCTGTTACGTCCTGTAATATTGCTTT  
GTGAATTAATTTGATATCGAAGCGCCCTGATGGCGCTTTTTTTATTTAATCGATAACCAGAAGCAATAAAAAATCAA  
TCGGATTTCACTATAATCACTTATCTAAGATGAATCCGATGGAAGCATCCTGTTTTCTCAATTTTTTTATCTA  
AAAAACGCGTTTCGATGCTTTTGGCGAACGATCAAAAATAAGTGCCTTCCATCAAAAAAATATTCTCAACATAAAA  
AACTTTGTGAATACTTGTAAACGCTACATGGAGATTAATCAATCTAGAGGGTATTAATAATGAAAGCTACTAACTGGT  
ACTGGGCGCGTAATCCTGGTTTCTACTCTGCTGGCAGTTGCTCCAGCAACGCTAAAATCGATCAGCTGCTTCTGACG  
TTCAGACTCTGAACGCTAAAGTTGACCAGCTGAGCAACGACGTGAACGCAATGCGTTCCGACGTTCAGGCTGCTAAAGAT  
GACGCAGCTCGTGCTAACAGCGTCTGGACAACATGGCTACTAAATACCGCAAGTAATAGTACCTGTGAAGTAAAAATG  
GCGCACATTGTGCGCATTTTTTTTGCTGCGGTTACCGCTACTGCGTCACGCGTAACATATTCCCTTGTCTGGTTCA  
CCATTCTGCGTGACTCTACTGAAGGCGCATTGCTGGCTGCGGGAGTTGCTCCACTGCTCACC GAAACCGGATACCCTGC  
CCGACGATAAACGCTTTATCGACTAACTTCTGATCTACAGCCTTATTGCTTTAAATTGCGTAAAGCCTGCTGGCAGTG  
TGTATGGCATTGTCTGAACGTTCTGCTGTTCTTCTGCCGATAGTGGTGCATGACTTCAACATAACGCATCCCGTTAGGC  
TCCACGGAATATTTACCGGTTCTGTTGATCACTTCCACGGCGTCCCGTCCGACGCTGGAGAACAAGGCTTTAATATC  
CGGTGCATTATCGGAATACACCCTGAACTGACGCGCAACCGACGCTGTCGCGCAGCTGGTACCATGAATGAGGTATT  
CGCCATTACCATGCGCGAGGCGCAGTGCCTAACGTCCTAGCGGTTATTTGGTCCGGCAGGAACGACTGGCGGTAATTTA  
ATGCCACGCTCCAGCAACGCTGACGAATGCCTGCCGTAGGCGTCCAGGTTGGTTAGGGATTTTCTGCCAACACGCGT  
TTCCATCACCGCGTTTCCAGCCCCTGCAATCAATACCTATTGGATAAACCTGCACAATATTTTCTCCGGCGGATAAT  
AATAAAGGCGCAGCTCTGCAAGGTTAACGATAATCCCTGACGCGGTGCATCAGGTAATAACAGTTGTGAAGGAATAGTT  
ATCGTCTGACAGGTTTTGGCACCGGGGCGATAGTGTATTGGCTCAAGGATCAACATTGCCGAGTATCAAAACGCTCG  
GGCAATAGCCTGAAGTTTTTATCCCCTTCTTGACCGTATACGTTTGATTTTGCCCAACAGTCCGCTTCCGGTTGGTG  
GTAGCGGATAATCAACCGCCAGGCGCCTGGATGGCGCTAAAAGCGCCGATAAGCGTGAGTGAAGCAAAGACGCGCGT  
TTCATTGTAACCTCCTGTATTTGCCGGAGACTCACGCTGAAACGTCGGATGGCGCTTATGTTACCTGAAACCAAAACA  
CTCCTGTGCAGTCAAGTAAACATTGACCATCCGGCAATGTGAGCAACCGGATGAAAGCTGCTTTTTAGTTTAGCTA  
AGTGCAGCGGCTTTGGCGGAATTGCGCGAATCATCGCTTCCAGACCTGTGAACGAGATGGGGTGAGATGTTGGGTGAG  
CGCATTTTTTCAAAACAGGACGCACATCGAAATTGACAATATCCTGCGGCGTCATCTGATCGTAGAGAATAAAGACGA  
CCGCAATAAGCCCTTTACAATCGCCGCATCGCTGTCGCCCTGTAATTAATAATTCCCTGGGCATTCTGGCGCATGACA  
ATCCACACCTGACTCTGACAGCCCTGAATGCTATTTTGGGACTCTGTCTTCTGTCGCGTAATTCTGGCAGACGCTGGCC  
CAGCTCAATAATGTAGAGATATTTCTTCCCAGTTGGCGCAGCTAAAAAATTACGCAGCAACTTTTTTATCCGGCA  
ATAAAGCCATAGTGCCTCCTGTTATCCAGCAACCGTGAATACGTTGACGGCCGGTACCAGACGATCCACTTCTTCA  
TGGGTGTTATACATGGCCAGCGACGCCGACACATCGAGGGACGTTGTAATAGGCCATCAATGGCATTGCGCAGTGATG  
TCCGGTACGCACAGCAATGCCGTAATTATCGAGAAAACGCAACATCATAGGCGTGGTGTTTACCGAGATTAAGGCAA  
TAACGCCAAGCCTGTTTTGTGGCCATAGAGAGTGAGATCCGGTACAGATTCCAGCTGTGATAGCGCATAATGCATCAGA  
TTCTGTTCACTCGCTATGTTATTAAGCCCAGCGCCGAAACATACTCCAGCGCCGCGCAAGACCAATGATGCCCC  
GGTATTGGGTGATACCGGCTTCAAACCGCATGGTGTCTTGGTCCAGGTAGTGCCTTCACTCAGGCTGACGGTGGCGATCA  
TAGAACCGCCCCCTTCCACGGCGCATCTCCTGCAACAAGGCTTCTTTACATAAAGAATGCCAATCCGGTGGGGCCA  
TACAGTTTATGCCCGGAGAACGTAAGTGCATCCAGCGCCTGAACATCCACCGGATGATGCATCACCGCCTGAGC  
GCCATCCACAGCACTTTTGCCTGCTGGTGCAGCAAGCGTATCATTCCGCCAGTGGATTTTCTGTGCCAAGCACGT  
TGGAGACATGAGTAATTGCCAGCAGGCGAGTTTTCTCATCAACAGCGTAGGCAGCGTCTCCAGTTGCAACGTACCATCG  
GGATTGAGCGGATCACACGAGCTCTGCGCAACGCTGCGCAAAGCATCTGCCAGGGAACAATGTTAGCGTGGTGCTC  
CATCTGACTGATGATGATGTTATCGCCCGCCCGACGTTGCTGTTGCCCCAGCTATTGGCGACCAGATTGATCCCTCCG  
TCGTGCCGCGACGAACACCAGCTCTCCGCCAAGCGGCAATTAATAACAGCGATGCCCGCTTGGCGACGTTCTCCATT  
TTCTCGGTGCGCTGGGCGCTTAAAGGTATGAATACCAGATGCACCGCCGCTAGCCATGACGATAAAACTCGGCCTCGGC  
GTCAATCACCTGGCTCGGTTTCTGCGCACTGGCGGCGCTGTGAGATAAGCCAGCGGCAACCGTTTACCTCACGCGAAA  
GCACCGAAAGTGGCCCGCACTTTGTGACGAAAAAATCATCTTGACCTCTGGCAGCGGTTGACCGATTGGGCCA

GCACCTGCTGTTTAAAGCCCCTCATCACGCAGTGCTCCGTGAGTTCGGCAGCGAAGGCGTAAATGATCATCTGCTGGGCA  
TCCTGCTGATTGATCCCGCGGAGCGCAGATAGAATATCTGTTTCATCATCAATACGCCCCACCGTCGCGCGGTGGCTGCA  
TTTCACATCATCTGCATAGATTTCCAGCTGCGGTTTCGTATCCACTTCCGCCAGTTTGCCCATCAGCAGATTGTTGTTGG  
TCATCTGACCATCCGTTTTGATGGCGTGTGCGCGAGTTCGATCAAACCGTTAAATACCGCGCGGCTTTGTGCTGACG  
ATAGTTTTGTGCAACTGTCCGCTGTTACAAAAACCTTTATTGTGTTCCAGCCAGGTACGGGTATCACACACCTCGTTTTT  
CACCGGCATCGCCAGGCTATTGATCCGCAGCGTGTGTTTTCGCCATTGAGTTGCGTACTGGTGTGTGCTGTAACACTG  
CGCCACCCAGCAGGAACTGTGGCTAAATGCGGTGGCATCCTCAGCCAGCAACAAATCGTTATGAGCAAAGTGGTACTG  
AGCGGGTTTTCAAACGCCAGCTTGATATGCTGCAAGTGGGCATTGCTGCGACGTTGATAGTGAACCGTGCCCGGTAA  
ATGACGAGCATCATTAGGCTGACAAAATGTTGATCACCCTGCTTCGGCACCTTCCGCCAGATCCAGATGATGTCGGT  
AATGGGCAGTGTTCACCTTTCACCTGCCACGCCCTGGGTGATATGCATTAACAGCAATGGCTTTGCCGGCGTTGACCG  
CGTTACAGGCGATATGCGTCACGCTTTGTGCCAGGCTTTCCGTCAAATGCAGAAACACTTCCGCCTGAATAGCGTCGGG  
TAAACCTGACGGTGTGCTTAATGCTCACTTATATCCGCTGCCTTCAGTTGCATCGCTCAGTGCAGGACGTAACGCC  
CATCGACAAACACCAGCCGACGGAGTCTAACGTTAACGCTAAGGCATCACGCTGCTGTGGGATATCTCTCCGCAATG  
CTGACAAACTGGCTATTGATCAGCCCTCCAGCGGCGTATATTTCCAGTTTTCATGTTTACGTGTCGGCAGTCCGGTACG  
CAGCAATTGTGTAATGCTGTGCTGTGCTTGGGGAGCGTTTTGTCCTTCAGCTTCAAACAAGTATGCCACTGTTGCA  
CGCGTTACTGTTTCGGTAAGCCAGCCATAACCTGCTCCTCCAGTTGTTGACCAACGTGAAATCGCCGGATTTCAC  
AATTCGTCCCTGATATAGCACATGAACGTAATCAGGCTTGATGTAGTTCGAGAATGCGTTGGTAGTGCCTAACATGATGA  
ATGAGCGCTTGCCATCACGCAGCGAGTTCACGCCATCGCGACCACTTTTAAATGCGTCAATATCCAGCCCGGAGTCCGAC  
TCATCAAGAATGCATAACTCCGGTTCAGCACCGCCATTTGCAAAATATCGTTGCGTTTTTCTCGCCGCGGAAAAACC  
AACGTTTACCGAACGGGTTAATAAATCTTCCGGCATCTCAGGAGAGCGATTTTCTCTCCATCAAATCTGAAATCAA  
AGCGGTCGAGCGTTTCTGGCCGCGATAGCTGCGCACCGCATTAAGTGGCGTTTGCAAGAAAACTGGTACTGACACCT  
GGAATCTCCACCGGATACTGGAAGGCCATAAAGATGCCTTCGCCCGCGGATCTTCCGGCGACAGCGCAAGCAAATCTTT  
GCCTTTGAACTCAACCGTCCGCGCCGTCACCTCATAATCTTCTCGCCGCAAGCGTTGCCGATAAGGTAATTTGCCCC  
AACGTTTGGCCCATAAATGGCGTGAACCTCGCCGGATGAACGTCGAGGCTAATCCGCGCAGGATAGCTTTATCTCC  
ACGCTGACGTGTAATCTTAATACTTAACATGTTTATCTTATCCGACGCTGTGTTCAAGACTGATGGCGAGGAGTTT  
TTGTGCTTCAACGGCAAATCCAACGGCAGCTCCGAGAACACGCTTTGCGAAACCGTTAAACAATCATCGAGATGGCGT  
CTTCTTCGCTGATCCCGCTTGACGGCAGTAAAACAGTTGATCTTACCAATACGTGATGTCGTTGCCTCGTGTCCAGT  
TGCGCACTATTGTTACGACACTCAACATACGGGAAGGTATGCGCCCAACAATTAGCGCAATCAGCATTGAGTCGCACTG  
AGTGAATGCGCGCATTGTTGCGGTGGCATGATTTTCACTAAGCCGCGATAACTGTTCTGACTATGTCGGCGAGAGA  
TCCCTTTCGAGATAATGGTGCATTTGGTGTTTTTACCGATGTGGATCATCTTGGTGCCGGTATCCGCTTGCTGATGACCG  
CTGGTCAGCGCACTGAGTAAAACTACCAATGGAGTTATCGCCGCGCAAAATGCAGCTGGGATATTTCCACGTAATCGC  
TGACCCGGTTTCTGATTGCGTCCATGACATTTTGTGTTTTCGCCTTCGCACAAAGCACGCTTGGTGACGAAGTTGAGAA  
TACCGCCGGTGTGTTATCGCCAGGAAACAGTTTTGTACCGTGGAAATTTTCACTCGCGGTTTTTATGGATGATGACT  
TCCACCACTGCCGCGTGAACCTGATAGCTGTCACGCACCGGAGCGGAACAGCCTTCAATGTAGCTGACGTAGCTGTCTC  
GTCGGCCACCAGAATGGTGCCTCAAACCTGCCCGTTTTTCTGCGTTAATGCGAAATAGGTGGAAGTTCCATCGGGC  
AGCGCACGCTTTAGGCACATAAATAACGTACCATCAGAGGCTACCGCCGATTAAGCGCGGCAAAGAAGTTGTATT  
CCCGCACACCGGTGCCGAGATATTTACGCACAGTTCGGGTGATCGTGGATCGCTCACAAAGGAACAGAAAAATAAT  
TCCCTGCTCCGCCAGTTTTTTCGCGATAAGTAGTGGCAACCGAACTGAGTCGAAATGGCATCCACCGCCACCTCTTTGC  
CTTCCGCGACGGGAACGCCAACTGCTCAAACGCCGCTCCACCTCTTACTTAAAAAGGCGTTCGCGCCAGTTTTGCTGC  
ACCGCGCAGTTTCAGACGCGCAAGTGTGTCACAAATACCGCACGATGGTGTGAGTAGTAGCTGTAATCCTGATAATT  
CAGCTTGTGCTAGTGCCTTTCAACAGTGCCTTTTCCATCTCCAGCCATGCGCGATAGGCGTTTTAGACGAAACTCCA  
GCATCCACTCCGGCTCATTACGCTTCGCCGAAATTCGCGCACCACTCTTCTGTTTATCCCTTTGCCAGCTCATCGGTG  
GCTAACTGGGTGAAGAATCCTTCTTTATAATTACGGGGCCGCGGTCCAGTTTTGACATCGTCAGTTGCTTCACTATT  
ACGAGACATAGTACCGCTATACCCAAAGCTTTTCGCCACAGCCACATTCATTCTGGGCTTAGGGTTGTGAAATTTGAA  
TATCTGATTAAGTCTTACGAACGAAATCGACTTCCGTGCCATCAATAAACGGCATCGCTTGACGCGGGACAAACAGCT  
TCGCGCGCTGTGTTCAAACAGCAGATCGTCTTTGTCCGGCTCGTAACACTGTCGAGCACATAGCCAAAGCCCGCGCAG  
CCCGTTTGTTCACGCTAAGCGCACGCCACCATAACCGGCTGCTTTGCCACCAGCTCACGGATGTGTATCGCGCTGC  
GGGTGTCAGGTTAAGCCTTGCAGGGCAAATCTTGTGGGTTAAAGTTCTGAATGCATGTCATCGATTTACCTCACT  
TCATCGTTTTAGCGTATAACAGCATGTTAGTGATAATGATTATCAGTTCAACCAGCAAACGAGGGGCTTACCCTAA  
AACATGCTTTTTGCTGCTTTAATAAGCATAGACCCTGATGTGTGGTTAACAGGCACGTAAGAATTAGGTATCTCAT  
TGTTAGATAATGGTTATTATCTAAGGAGCATTAAAGGCTGTGATGAAAAAGAAAAAGTTGATTGAAAATGACTATTTAAG  
AGATAGGTAAGGAAAGTGCAGCGTTAGAAATAAGAAAAACCTTAAAGTCTGTGCGACACAGGCTTAAAGGGTTTCTACCCCA  
TCCGGCGCTTATCTCCGGCACTCTCAGTGGCTTAGCTTTGAAGGGGCGATAAGAATAATCTCATAAAGCTAACCCGCCG  
TTTTAACACAACTGCGATTAGTATTTTTGAACAAATACAGGCGGTAGATAAGCAGTATTAAGAAGTTCATCGAACCC  
TGACGAGGTTAATCCAGGTGATTTGGCGAATTGCGGCATTAAGTCAGGATCAATGCACGCCAGACGCCAGGCAA  
GTAGATTTCTTCTTTAATTACGACAGAGAGAGTAAGCAGGTCAGCAAATCAAGTTCTAGTTGTTTCAGACGTTTTGA

GATATTGGCAGGTGAAAGATTGCTCTGGTCACGGCGTAAAAATTCAATGGCCAGCTGGGTGGGATCAAGTTGAGTAGAC  
ATAGCATCCTCGTTTTAGACAAGACCTGCACAGTATACCACCGTTTACTGTGCAGATAATGACCAAAAGCAATATGCGT  
CACACTTTTCTGGTGACAACGTCAAAAATGGCGGTCTCAATCGTGACGAACAGCACAACGCCCTTCTCATCGAAGA  
TTTCAATCTGCCAGACCTGGTGACGCGAACCGAGATGCAACGGTTTGATACGCCGCGCACCCGCCCTTCTCGTGCCGAG  
CGGACGTGGTTAGCATTGATTTCCAGACCAACCCTTTTTGCTCACCTTCGGTACATAAATAACCGGCAACCGGAACCGAT  
ACTTTCGGCCAGTACCACGGATGCTCCTCCATGCAGCAACCCGAAAGGCTGCTTTGTCCGCGAGTCTACTGGCATTGTG  
CTTCAAGGGTGTATCACCATAATGTTCAAAGCGAATATCCAGGAACCCACCATGTTTCTTACCCATAGCATTAGT  
GCTTCCAGGGTGAATTTCCGTTTTCCATATCATTTAATAATCTCCAGTAAAGCCTGCACAGGATGGCGTACCCCGTGCCT  
TCAACCCGTTTTACCTGGCTACGGCAGGAATATCCGGTCCGAGACAGCGGTTACGCGGCAGTGCCTGCATAGCCTGATG  
CCAGGATAACTCATAGATCCCGAGCGAATTTTATGTTTTTTCGTTTATGTCCGTAAGTCCCTGCCATGCCGAGCAAC  
CCACGCTGACATTTTCCAGTTTTCGCGCAAAAACGGGCAAAATATCGCGGCCATTGTGCTGGCGCACCCGGCAAGGCGGTA  
ACTTCGGTACAGTGACCAAGAAATACCATGATTCACCGCTGACTGTAGCCACTGGCTGTGACTCAAGTGCCTTCCAG  
CCATTTCATTCGCCAGTAAGACGTTAAACTCGCCAGCTCCTCGCCAGCGCCAGTTTATATTCATCGCGATAACAAAGTA  
CCAGCGCCGGATCGACGCCACCATTGGCATAACCAGCTTCGCCATACGGTTGAGGAAATCCGCCGTCTTTTTCGCCGTC  
TTCGCAAAACGATTAAGAAAACCTTTAATATGCTGGCTTTGCCATTTGGCGAAAATGGCAGTAACACAGGCTGAAAAC  
TAATTTTTTCGACCAGCGGACAAAATCCGCCACCATTGCGCATCGTAATAGCTGGTAAAGGGTCTCGACCACCAACA  
CTGTGCGCGTTTTCTGCTCTGCATTGAGAGATTCAAGCTGTTCCAGCGTCATGTTTCCGAGCGATGCCCCACATTTGT  
TGTTGTAGCGAGGGGACCGACAGCAGCGGCAAAATCAACCATGCCGATATGTTTTTCCGAGAGTTTGGCACCAGCGGCTG  
GTTAATGAAGAAGTTAAAGTTTTTCGCGCGCGTGCATCAGCGCGCGTAGCTCTCGACCGTAGCGACGAGGTGGTGC  
GCAGCGGGCGTAAATAACGGGTGTGATAGAGCTGCAGAAAACGAGAGCGAAACTCCGGCACATCAATTTTATGAGGGC  
TGGGTGCAACACGCTTACAGGCCAGACAGCCGACATCGCTCTTACTTCTGTGAGAAAGTCAATTCGCTTTTAT  
CGCATGCCAGCTATTGCGGTGCGGGCAATTAACGTCCGAAACTGACGCCGATTGAGGCAGTCTTGTCCAGTTTGA  
GTGGATCAACGCCGATCCGCCAACAACGCAGCCATTACGCACCAGCGTTGCGCGCCCTTTCGGTGAATGAATCCGG  
TTCTGGGTGATCTTCATCGACGGACACATCGGACTACGGGCATCAAAGTTGAAGCATAAACCGTTGCCGTTACTCCAT  
CGCACCGGCCACTGCTGGCGTACCGCAATGGGGATCTGCCGATCGAATGTACCGCGTTCACCGGCTCCACTTTCATCA  
TCGGCGCATCGAGACCTTTCGGCGGGCAAAATCTCCCTGGGTTGAGTCGGTTATGCGGGTCAAATGCCGTTTCACTTTG  
CGAGTTCTGCAAAAAGTCTCACCAGAAAACGCCGGCTGTATTGAGCGGAAAACCTTTCGCGTCTCGCCCCACAA  
CAAACCACCGTATTTTCGAGTACAGCGCCACCACGTATCAGAGATTTGCTTATCAAAAATCTTGTGAGGATCGCACA  
TATCCAGCGCTGGACGGACGTGCAAGACACCTGCGTGCAGCTGACCGAACATACCGTAGCTTAAGCCGTGCTGTGAGC  
AGCGCGGAAATTCAGCAATATAATCCGCCAGGTGTTCCGGCGGTACGCAGGTATCCTCAGCAAACGGAATTTGGCTTAGC  
GGCACCTTTGGCATTGCCAAGCAGACCAACGGCTTTTTTTCGCGATTGCATAGATACGTTCAACCCCGCCAGCTCACGGC  
ACACCTGCCAGCCGATGACACCTGCTTGTGACTGGCGATCAGCTCATCAACCCGCGCACAGAGTGCATTTACCCGCTCA  
TCAATCAGCGCCTCATATCACCAGCAAAATCCACAATGTTACGCCCAGCATCTCTTGGTCAGGCACATCGGTAATCAA  
CTCGCTGACGGAATGCCAGACAATATCTTCCGCGCCAGATTGAGCACTTTTGTAGTCCACCGTCTTACCAGAAAGCGCC  
GGCCTCAACCATAAACGGCGGTTACGAGCGCAGAGTCAAAGAGTCAATTTGACGTTACCAGACGGCGCACTTTA  
GGCAAGCGTGAATATCCAGCCGCGTTCGGTAATAAAGGCCAGCGTCCCTTGAACCCGTGAGAATGCCGCGTCAAGTC  
GAACTCGGTATCTATCGTTAAAGACATGACGCAGATCGTAACCGGTAAGAAAGCGGTTAAGTTTGGGGAAGTTGTGCA  
TAATTAACCTGGCTTGTGACGGCAACGTTGATAAACCGTGTATAAATTCGCCGATTGTTGATTGGATTTACCCAGC  
GTTTCCGCAATTCGACGGGTAAAGGTTGCGTATCGAGAATATCGCCCCAACACACCCGCGGTACGCCAAGTACGTG  
ATCTGACGTTTTGCCATAGACCAGCGATCCCTGACCGGATGCATCGGTATTGATCATCCCACCGAGCGTTCGCCGTTG  
TGTTGCAAAAGTTCCGCGCAAAAAGTAGCCGAACGGTTTTAGGTACTGATTGAGTTGATCTTTTATCACCCCGCCTCA  
ACGCGCACCCAGCCCTTTCAGGGTAAATTTGATGATGCGGTTATATGGCGGGACATATCAACAATAATCCCCTGGTT  
GAGCGCCTGACCGTTAGTGCAGGTTGCCGCGCCGCGGGGGTAAAGATCAGCGATGAATAGCGTTCCTGCGCGGCAAGAC  
GGCGATCAGCGCCACATCTGCGGTTGAACGCGGAAATACCACCGCATCGGGGAGAAGTTGGTAAATACTGTTGTGCGTC  
GACATTGTGACGATCGGCATAACTTGTGCGCGTATCGCCGTTAAAACCTTGTGCTCCAGCTCTTGCAAAAAATTAAG  
CACCAGTTGAACGACGCCGGTGCCTGGGAAATCTGTGGAATCATTATATTGACCTTTCTGCGGTCTGTGATGTAGGT  
CGATACTATTCTTTCAGGCTGCTGCAATAGCGCACTGAAAGGTGATGTTTGTACTCTATGGATTTCTGTTGCGAGG  
AAGGCGGAAGCGAGTGAATCCAGGAGCTTACAATAGTAAGTACTGGGGTGAACGAACGTAGCCGAGCAGCATGCAAC  
TTGAAATACGACGAGTAAATCGTTTTCGTTGCTGAGTTGTTGTACCACATTTTTTCTAACACGCCCATCAGAATTA  
AGGGCAGAATCGCCTGTTAAAACCGCTGAAATGCTCATATTATGCAGGTGAGTTTTCGCGTGTTCACGTGCGTCA  
CGATTTGACGCACAAAAAGGTGAAAAGTAGTTATGGTAAATGTTGTCAGCCAGGGATGTCGCACAAATCTGCTTTC  
GGTGTGTTTTAGCCATCATGATTGTGGCATGTCTGTGGATTGTTCAACCTTTATTCTCGGCTTTCATGGGCGCGTA  
CGGTGGTTATGCCACCTGGCCGATTGTTACGTTTGCAAAAAGATCATGTTTGGCCGCGCTCTCTCGCGTTCGGTG  
ATGACGCTGTTATTAGTGATGGTGTATCATCCCTATTGCTTGTGTTAACAGTATCGTGCAGCGCAGCGGCCCGCT  
AATTAAGCCATTTCCAGCGGTGACATGACGTTACCCGATCTGGCGTGGCTTAATACCATTCGGTGATTGGCGCAAGC  
TGATGACGGCTGGCACAACCTGCTGGATATGGGGGGACGGCGATCATGGCGAAAGTCCGCCCTTATATTGGCACCACC

ACCACCTGGTTCGTTGGGCAGGCGGGGCATATCGGGCGCTTTATGGTGCATTGTGCGCTGATGCTTCTTTCAGTGCCT  
GCTGTAAGTGGCGGGTGAACAGGTGGCACAAGGCATTCCGCATTTTGAACCCGCTGGCAGGCGTTCGCGGAGATGCCG  
CCGTGCTGCTGGCGGCACAGGCTATCCGCGCGGTGGCCTGGGTGTGGTGGTACGGCGTTAGTACAGGCAGTGCTTGGC  
GGTATCGGCCCTCGCCGATCCGGCGTACCTTATGCAACGTTGCTAACGGTGTAAATGATCCTCTCCTGCCTGTCCAGCT  
TGGCCCGTTCGCGGACTGATTCCGGCGATTATCTGCCTACTGGACTGGCGATAACCACCTGGGGAACGGTATTGTTAG  
TGTGGAGCGGTGTGGTTGGCACGCTGGATAACGTCATCCGCCAATGTTAATTCGCATGGGTGCCGATTTACCGCTGATC  
CTGATTCTCTGCGCTTATTGGTGGTTTGATTGCTTTCGGGATGATCGGTCTGTTTATTGGTCCGGTCTGTTAGCCGT  
TTCTGGCGTCTGTTTGGCGGTGGTGGAGAAGTCCCGCCGCCGACGGACCAACCGGAAGAAATTCGAAGAATTG  
GCGAAATCGAGAAACCGAATAAGTAATTTCTCATCAGGCGGCTCTGCCGCTGATTGTTAACCCGCTAATTGATATTT  
GCTTGCTCTTCCCATATTTTCTGCTTACCGCCATTACAGTGGTAGTACCTGTCGAAATTTTACAGTTTTTAACT  
AATGAGACGAATCTGATCGACGCAAAAAGTCCGATGCCTACTATTAGCTCACGGTTATAAATCAACATATTGATTTATA  
AGCATGAAATCCCTGAGTGAACAACGAATTGCTGTGTGTAGTCTTTGCCATCTCCACGATGGGCTTTTTTTTAACT  
ATTTTTCCGCTTCGCTACCTCGCCCTCACTCTTTCCAATAATGTTGACAAGATACTGTACTCTCTTCAAGCCGTCAG  
CAGGCTGATAATGTTATTTATTTTATTGTTTATTTCATGCAGCCATTACACGATGAACGCTTATGAACTCCAGGCACT  
CCGCCAATTTTGGCATGACTATTGATGAATGCGCGACCTGGATTGCCAGCCGGTGACAGTGAAGCTGGCTCAGT  
GGGAAAATGGCAAGTGTGCCATTCTGATCGTGTAGTGCAGCAACTGTTGGTATGCGTCAGCAAAAGAAAAAATCTT  
CATGCCATCATAGAGAAAATAAATAACCGCATCGGCAACAACCCATGCGTTTTTTCCCGACTTAACCGCATTTCAACG  
AGTCTACCCTGATGGCAATTTTATTGACTGGAAGATCTATCAATCGGTAGCTGCTGAATTATATGCACACGATCTGGAGC  
GGCTTTGTTAATTTTTCCACAGAAAGGAATTGTCGTTGTTACAACAATAATGAACGGATGCTGACACAACATCGCTTAC  
TTTTAAAGCACCTTTGCTAAGTAGAACCTATGAAAAATCCCTATTTCCCTACCGCACTTGGGTTGATTTTAATTACCT  
GGTGCATGGTATGGGCGCTTTTTGATGAGCCTGAATATGGCCTCGCTGGAGACACTTTGGCAGACTAATGCCGCGGGT  
TCTCGATAGTTATCTCATCGCTGGGCATTGGTCGATTAAGTGTCTTGGTTTTTGCAGGATTATTATCCGATCGCTTGGT  
CGCCGCCCTTTATCATGCTCGGGATGTGCTGCTATATGGCCTCTTTTTTGGCATCTGCAGACCAATAACATCATTAT  
CGTTATGTTTTTGGCTTCTGGCGGAATGGCAACAGTTTTCTCGATGCAGGCACTTATCCAGTTTGTGGAAGCTT  
TTCCAGCTCACCTGGGACAGCCAATTTTTAATTAAGCATTGTTTTCCAGCGACAATTTTTATTACCCTAATCATT  
AGCCTGTTAGTGTGGGCTGAACTGTGGTTCGGTTCCTTTATGATTGCTGCAGGCATTATGTTTAAACGCTCTGTT  
TTTATACCCTGTACGTTCCACCCCATCCGGTCTGCTTACCTGTCATAAAGAAAACCACAGCTCTACGGAACATC  
GCTGTTCAATTATCGATTTAGCCAGTTATACCTTATATGGCTATATCTCAATGGCAACGTTTTATCTGGTTAGCCAGTGG  
CTGGCAGATACGGACAATTTGTTGACGGCATGTACACTATGTCGATCAAACACTACTCAGTATCTACACCGTGGGTT  
GCTGCTTTGTGATTTTATTACCCTCCACTCATTGTAATACCCTTCCGCCAACCAACTACTGATGCTGTACACCTTTA  
TCTCATTTATTGCTCTGTTTACCCTGCTGCCTGCATCCACATTTTATGTTGGTGAATAATTTGCTTTTGTATTGGTTTT  
ACCTCTGCTGGAGGTGTTGTGCAAATTTGGCCTGACGTTAATGGCTGAACGTTTTCCCTTACGCTAAAGGTAAGGTACAGG  
GATCTATTACAGTGGCGGAGTATTGGCAGCTTTACTATTCCGTTGATTACGGCTCATCTGTCCCAAAGAAGTATTGCCG  
ATATTATGTGGTTCGATACCGCCATCGCTGCCATCGTTTTTACTGGCACTGTTTATCGGCTTACGCAGCCGCAAAAA  
ACGCGGCATCACTCGCTAAAGGAAAATGTCGCTCCGGTGGGTAATGCAATATCTTTTTCAGGTCATGCAAGATCTTACG  
GATAAATACTCTTTCTGCGCTAACTAAGGAAAATCGCGATCAAAAACAACTATGACATGCAATATCTTGGAAACATA  
AACTTTATGCCATGTACCCAGGGAAAATCATCTTCAGTATAGTAATATGTAACCGTCCGAGAACAAATACGTACGGTAA  
CGAAATTATCTTTTCAGCAAGGAGCTGTGAAAATGTCAAAATAAGGCTTTCCAGCACGCCATTTATCTGGCTGTTCTTT  
GTATTTACTTCAGTACTTCTGACGGCATTAGTGTATTACGCTTCCCAAATAATGTCATCTCTGGCGGAAAAGTTT  
TCCACTGACAACCGGGCACTTGCCTACTTAATTTCCGGTATCGGTTGGGGCGATTGATCAGTATTTTATTCTTCCGGT  
GATCTCCGATAAGTTTTGGTCTGGCGGTGATATTAATGGCAGTAATAATGATCTGCTATTCTTTCTTTGGTATTCCCG  
CTTGCCCGAATTTAACTCTCGCTACGGTCTGGCAGTGTGCGTAGGTATCGCTAACTCAGCGCTGGATACGGGTGGCTAC  
CCCGCGCTCATGGAATGCTTTCCGAAAGCCTCTGGTTCGGCGGTCACTGTTAAAGCGATGGTGTCTTTTGGCAAAT  
GTTCTACCCAATGCTGGTGAAGTATATGTTGCTCAATAATATCTGGTACGGCTATGGGCTGATTATTCCGGGTATTCTAT  
TTGTAAGTACGCTGATGCTGTTGAAAAGCAAATTTCCAGCCAGTGGTGGACGCCAGCGTAACATAAATTACCG  
CAAATGAACAGCAAACCGTTAGTCTGGCTGGAAGGTGTTTTCATCGGTAAGTGTGCGTGTAGCCGATTCTCGACCTTTA  
TGTGATTGTGGTGTGGATGCCCAAATATGCGATGGCTTTTCTGGTATGTCAGAAGCTGAGGCATTAACCAATCTCTT  
ATTACAGTATGGGCTCGTTGGTCTGTGCTTTATTTTTGCGCACTACTGAAAAAATGGTCCGGCCATCTGGGCTAAT  
GTATTTAACTCTGACTGGCAACAATAACAGCAGCCATTATCTACCTGTACCTTCTCCACTGGTGTGCAATGCCGGAGC  
CTTTGTTATCGGTTTCTCAGCAGCTGGCGGCATTTTACAGCTCGCGTTCGGTGTGCAAGTTTTTCCAAAAGCA  
AAGCCAAAGTACCAGTATTTATATGATGATGGGTGGACTGGCTAACTTTGTTATTCCACTGATTACCGGTTATCTGTCG  
AACATCGGCCGCAATATATCATTGTTCTCGATTTTACTTTCCGCGTCTGGCCCTGATTACCGCAATTTGTTTTTAT  
CCGCTATTACCCTGTTTTTATTCTGAAAATGATGTGCGGTTTGGCGAGCGTAAATTTTGCACCCGTTAAACACAA  
TTAAGCATAGAGGTTAAAGGAGTTAATTATGGATGTTACCGCAAATACGAATTGATTGGGTTGATGGCCTATCCTATCC  
GCCACAGTTTATCGCCGAAATGCAGAATAAAGCCTTAGAAAAAGCGGATTGCCATTTACCTATATGGCCTTGAAGT  
GATAACGATAGCTTCTGGAGCAATTGAAGGATTAAGGCTTCAAAATGCGCGGAACTGGTGTATCGATGCCGAACA

ACAACGGCGTGAATATGTTGATGAATTAACACCAGCTGCCAACTGGTGGGGCCATCAACACCATCGTTAATGATG  
ATGGCTATCTGCGTGGCTATAACACCGACGGCACGGCCATATTCGCGCCATTAAGAGAGCGGTTTTGATATCAAAGC  
AAAACGATGGTGTGTTAGGGGCCGGTGGTGCCTCAACGGCAATTGGCGCGCAGGGGCAATTGAAGTTTTAAAAGAAAT  
TAAACTCTTTAACCGTGGGATGAGTTCTTCGATAAAGCCCTCGCCTTCGCGCAGCGGGTTAATGAAAACACCGATTGTG  
TCGTCACGGTACCGATCTCGCGATCAGCAAGCCTTTGCTGAAGCCTGGCTTCCGCCGACATTTAAACCAATGGCACA  
AAAGTGGGTATGAAACCCCTTGAGAATGAATCATTGGTTAATGATATCAGTCTGTTACATCCGGGACTTCTGGTCACTGA  
ATGCGTGTATAACCCGCATATGACGAAGTTATTGCAGCAGGCGCAACAAGCTGGTTGCAAAACGATTGATGGATACGGCA  
TGTGTTGTGGCAAGGGGCTGAACAGTTCACATTATGGACTGGCAAAGATTTCCCTCTGGAATATGTTAAACAGGTCATG  
GGTTTCGGTGCCTGACAGGCTGACCGCTGCAGAAAGGGTAAAAATGAAAACCGTAAGTGTAAAAGATCTGTCATTGG  
TACGGGCGCACCTAAAATCATCGTCTCGCTGATGGCGAAAGATATCGCCAGCGTGAAATCCGAAGCTCTCGCCTATCGTG  
AAGCGGACTTTGATATTCTGGAATGGCGTGTGGACCACTATGCCGACCTCTCCAATGTGGAGTCTGTCATGGCGGCAGCA  
AAAATCTCCGTGAGACCATGCCAGAAAAACCGTCTGTTTACCTTCGCGAGTGCCAAAGAAGGCGGCGAGCAGGCGAT  
TTCCACCGAGGCTTATATTGCACTCAATCGTGCAGCCATCGACAGCGCCTGGTTGATATGATCGATCTGGAGTTATTTA  
CCGGTGTGATCAGGTTAAAGAAAACCGTGCCTACGCCACGGCAGTGTGAAAGTAGTCATGTCCAACCATGACTTC  
CATAAAACGGCAAGCCGAAGAAATCATTGCCCTCTGCGCAAAATGCAATCCTTCGACGCCGATTTCTTAAGATTGC  
GCTGATGCCGCAAAGTACCAGCGATGTGCTGACGTTGCTTGGCCGACCTGGAGATGCAGGAGCAGTATGCCGATCGTC  
CAATTATCACGATGTCGATGGCAAAAACCTGGCGTAATTTCTCGTCTGGCTGGTGAAGTATTTGGCTCGGCGGCAACTTTT  
GGTGCGGTAAAAAAGCGTCTGCGCCAGGGCAAATCTCGTAAATGATTTGCGCACGGTATTAACATTTTACACCAGGC  
ATAAGCAATAATATTTCCGCGGGAACACCCTCCCGCCGAACTAAAAATATATTCAATCGTATTTAATAAAAAATTTT  
GTGAGTCTCTGTGCGTAATTTCTCATTGGCGTAGGGAAAATCACATCTGAATCAGGAATTAACAATGAAACCTGTAAA  
ACCACCTCGTATTAATGGACGAGTCCCGTCTGTGCGCACAGGAAGCGGTGAATTATTTCCGACGAAGCAACACTTT  
GTGTGTTAGGCGCTGGCGCGGTATTCTGGAAGCCACCAGTTAATTACTGCTCTTGTGATAAATAAAACAGACTCAA  
ACACCACGTAATTTATCGATTATTAGTCCAACAGGGCTTGGCGATCGCGCCGACCGTGGTATTAGTCTCTGGCGCAAGA  
AGGTCTGGTGAATGGGCATTATGTGGTCACTGGGACAATCGCCGCGTATTTCTGAACCTCGCAGAACAAAAATAAATTA  
TTGCTTATAACTACCCACAAGGTGTACTTACACAAACCTTACGCGCCGCGCAGCCACCAGCCTGGTATTATTAGTGAT  
ATTGGCATCGGACATTTGTGATCCACGCCAGCAAGGCGGCAAACTGAATGAAGTCACTAAAGAAGACCTGATTAACCT  
GGTCGAGTTTGATAACAAAGAATATCTCTATTACAAAGCGATTGCGCCAGATATTGCCTTCATTGCGCTACCACCTGCG  
ACAGTGAAGGCTACGCCACTTTTGAAGATGAGGTGATGTATCTGACGCATTGGTTATTGCCAGGCGGTGCACAATAAC  
GGCGGTATTGTGATGATGACAGGTGCAGAAAATGGTTAAGAAAGCCACGCTGCATCCTAAATCTGTCCGATTCCGGGTTA  
TCTGGTGGATATTGTGGTGTGATCCGGATCAAACCAACTGTATGGCGGTGCACCGTTAACCGCTTTATTTCTGGTG  
ACTTCAACCTTGATGACAGTACCAAACCTTAGCCTGCCCTAAACCAACGTAATTAGTTGCGCGGCGCGCATTATTCGAA  
ATGCGTAAAGGCGCGGTGGGAATGTCCGGCTCGGTATTGCTGACGGCATTGGCCTGGTCGCCGAGAAGAAGGTTGTGC  
TGATGACTTTATTCTGACGGTAGAAACAGGTCCGATTGGCGGAATTACTTACAGGGGATCGCCTTTGGCGGAACGTGA  
ATACCCGTGCCATTCTGGATATGACGTCCAGTTTGATTTTATCACGGTGGCGGTCTGGATGTTTGTATTTGAGTTTT  
GCTGAAGTCGACCAGCACGGTAAACGTCCGGCTGCATAAATCAATGGTAAAATCATGGGCACCGGTGGATTTATTGATAT  
CAGTGCCACTTCGAAGAAAATCATTTTCTGCGGCACATTAAGTCCGGGCAGTTTAAAAACAGAAAATACCAGCGGCAAA  
TAAATATCGTCCAGGAAGGACGGGTGAAGAAATTTATCGGGAACCTACCGAAATTAATTTACAGCGGAAAAATCGCTCTC  
GAGCGAGGGCTGGATGTTCTGTTATATCACTGAGCGCGCAGTATTCACGCTGAAAGAAGACGGCCTGCATTTAATCGAAAT  
CGCCCTGGCTGCATTTACAAAAGATATTCTGCACAAAATGGATTTACCCAGTGAATTCGCCAGAACTCAAATGATGGA  
TGGACGAAAGATTTTATCGATGCGGCGATGGGTTTTGTCTGCCTGAAGCGGCTCATTAACAGGAGTATAATATGGA  
TTTTCTTTAACTGAAGAACAAGAAGTCTGCTGGCCAGTATTCCGGAAGTATTACGACTAACTTTCCGGAAGAGTATT  
TCCGCACCTGCGATCAAACGGGACATATCCGCGTGAATTTATGCGGCGCTGGCGGATAACGGTATTTCCATGCTTGGC  
GTGCCGGAAGAATTTGGTGGTATCCCTGCGGATTACGTCAACCAATGCTGGCGCTGATGGAAGTGTCAAATGCGGTGC  
TCCGGCATTTTAATTACCAACGGTCAATGTATTACAGTATGCGCCGTTTTCGGTTCTGCAGAGCAGCTACGTAACCGG  
CAGAGAGCACCTGGAACGGGTGATCCCGCTATGCCCTGGCGTTGACGGAACAGGTGCTGGCTCAGATAACAACAGT  
GCCACTACCATTACACGCTAAAAACGGCAAGGTCTACATCAACGGACAAAAACCTTTATTACCGGTGCGAAAGAGTA  
CCCGTATATGCTGGTGTGGCGCGGATCCGCAACCGAAAGATCCAAAAAAGCCTTACCCTGTGGTGGGTGACTCCA  
GTAAGCCCGGCATTAAGATTAACCCGCTGCATAAATCGGCTGGCATATGCTCAGCACCTGCGAAGTCTATCTGCACAAC  
GTGGAGTTGAAGAGAGCGACATGGTGGCGAAGAAGGAATGGTTTTCTCAATGTGATGTACAATTTGAGATGGAGCG  
CCTGATCAACGCCGCGCAGCACCGGCTTTGCCGAATGCGCCTTTGAAGATGCCGCCGCTATGCCAACCAACGTATCG  
CTTTGGTAAGCCATTGGTATAACAGATGATCCAGGAAAACTGGCGCTGATGGCGATTAAGATCGACAACATGCGC  
AACATGGTGTGAAAGTGGCATGGCAAGCCGATCAGCATCAGTACTGCGCACAGCGCGGCTGGCAAACTGTACTG  
TGCAGTACCACAATGGAAGTCATTGATGATGCGATTCAAATCATGGGCGGTCTGGGCTATACCGATGAGCGCGCGTCT  
CCCGCTTCTGGCGTGTGTCGTTGTGAACGTATCGCGGCGGTACAGACGAAATTATGATTTACGTAGCAGGTGCGGAG  
ATCCTGAAAGACTATCAGAACAAATAATCTGAGGGCGGCGAGCTTCTTAACAACTGCGCCGCCAGATTTATCAAACA  
GACTTACCGTTGAGGAAATTCAGATAGGATTTCTGTTCCGCAAAACAGTTTTAAATTTGTCTACGGTAATCGCTGGC

GAACAACCGACATGGCGAAAAACAGTTTGGCAAAGTGATCGACATTTTCATAACCCACACGCCAGGAGATCTCTGCCTG  
TGATAATTCAGTATTAGTGAGTGACCATTTTGTCTCCGTCATACGCCGTTGAATAACATAGTTAATAGGGGAAATACGAT  
ACTCTTTGGTAAATTCATGGCAAATATAACTGACGCTGGCAGCAAATTTTTTCGATAACTGTTCTAAAGTGATTTTTTCG  
CGATAATTATTATTCAGATAGAAAAGAATATCTTTTATCAGAACATCTTTTTTAATATACCCCTGCTCCGAACGATAAGC  
ATTTTTAAATTTTCGTAGTAAAGAATGGCTAACGTATAGGCAAATGCATCCCATAAACGAAGATGTTTGGCTATTTTTAC  
TTTGGCGCAAATCACACTTAGCTCATTAAATAAGTTTTTATGACTTCTTTTCCCTGCCCGCGGCAATTACCGGACAA  
GAATGCGGTTGCACTAGCTGATTTTCTCAGCCCCCTGAAACTGAAAGCCGTACAGCGCACAGGTACACGTGCTTGGCCG  
ATCGTTAACGTGAGAGGCCACCGCATGCAGCCTGCCGCTTCTATCACCACAATGTCATCCGCATGTGCGACATATAACG  
AAGAATCGATGGTAAACCTTGAACCCCTTTCTTGACGTAAATCAACTCGGTTTCATTGTCATGAACGTGATGTCCGGAC  
TCCATTTTGGATCATCGCTAAATGCAAAACGTGAAAGCCGTGGCGTTTTACCAGGCGACAAACAGCGTTTCACTGGCGTT  
ATCAAAACAGCGTTGATACATGACAACCTCCTATTCCATGAGCAAGCAAAAACAATATATGCCGGATAAAAATACGGCGT  
GTATTGGGTTATAACAACCGGTTTAGCGAGAGCTAAACAAGATTATTTACTGAATGCAAGATTGTACGGTCATGGAA  
TAACTATATTGCCGCAAATTGCACTTTTGTAGCGATCGCATTTTTTTGCAAGATTGTTGGCAAGGAAAACAGCTTG  
CTCCGTGCAAAACCCCGCACCGCTATCGCACACTATTTTACGGCCATTTTTACCTTCCATCGGAGATGTTCCGTATGCG  
ACTCACAGGAGAAATCATGAAAATAAATAACCTGCTTAAAGCTGGTGCCTGAAGAACAGGACATTGTTGCTACTCCAGAAT  
ACACCTGAATTTTCGACAATGCCGACGCAAAATCAGCCAGTTGATCTCAATGCCATTGAAGCTGCAAGCCAGCTCGCA  
ACAGATGACGATGAGATAGCCGCTGACCGTTGGCGGCTCATTGTTGCAAGCTGAAAGTGCGCAAAGACGTGCTATC  
CCGCGGCCGCGCACAGCCTGTATTTGGTGCAAGATGCGCAACTGAACATGCACTGCCTCTCGATACCGCAAAAAGCGCTGG  
CGCAGCAATTGAAAAGATCGGCTTCTGATTTACTGATCTTTGGTGAAGGTTCCGGCGACCTTTATGCCAGCAGGTTGGC  
TTGCTGGTGGAGAAATTCTGCAACTTCCGGTGATTAATGCAGTGAGTGCTATTGAGCGTCAGGGCAATACACTGGTGAT  
TGAACGCACGCTTGAAGATGATGTTGAAGTTATTGAACTCTCTGTTCCAGCCGTGCTCTGCGTCACCTCCGATATTAACG  
TGCCACGCATTCTTCGATGAAAGCCATTCTCGGCGCGGTA AAAAACCGGTAATCAGTGGCAGGCAAGTGATATTGAC  
TGGAGCCAGAGCGGCCACTTGTGAACTGGTGGCATTGCGTACCGCCGCAACAGAACGTAAGCACATCATTATCGA  
TAAAGATTGCGCGGAGGCCATTGCGGAGCTGGCGGAACATCTGAAGAAAGCCCTGAACTGAAGCTACGGAGAAGAAACG  
ATGAGTCAATTAACAGCGTCTGGGTCTTAGCGATAATCCTGAACGTTATGCTGAACTGTTTGGCGGCTCAGCAATG  
GGCCAACAGGTGATGCCATTGTACAAAATACCGACCAGGCGCAGGCAATTATGCCTTATGGTCCAAAATGCTTTATG  
TTCTTGGCAAACGACGCGCTGCAACGCACTGAAAATTACGCCGAAAGCATTGCTGCCCTGCTGAAAGATAAACACCCC  
GCTATGTTGCTGTTGGCCGCGACGAAACGTGGTAAAGCGCTGGCAGCACGGTTAAGTGTGCAACTGAATGCGGCGCTGGT  
GAACGATGCCACGGCGGTGATATTGTCGATGGTACATTTGCGCGAACACCGGATGTATGGCGGGTTAGCGTTCCGCTC  
AGGAAAAGATCAACAGCCCGCTGGCGATCATTACCTTGCACCCGGTGTTCAGGAACCGTGCAACAGTGATACCTCTCAT  
CAGTGGCCGACAGAAACGGTACCTTATGTTGCTCCGCGTCATGAAATTTCTGTGCGAACGCCGTGCGAAAAGCCGCAAG  
CAGCGTGGACCTGAGCAAAGCAAACGTGTGGTTGGCGTGGTGGTGGACTGGCGGCGCAGGATGACCTAAAAATGGTCC  
ACGAACTGGCGGCGGTGCTGAATGCTGAAGTGGCTGTTACGTCCTAATGCGGAAGGCGAGAAGTGGATGGAGCGTGA  
CGTTATATCGGTGCTCCGGCGTGTGCTGAAATCCGATCTCTACCTGACGCTGGGGATCTCCGGGAGATCCAGCATA  
GGTTGGCGGCAACGGCGCAAAGTGATTGTCGCATCAATAAAGATAAAAATGCGCAAATCTTCAACTATGCCGACTACG  
GTCTGGTGGCGATATCTACAAAGTGTCCCTGCCCTGATTAGCCAGTTGAGCCGCTAATCCCTTTCAACCACATCTC  
CCGCTGTAACGCAGCGGGAAGGGAGCATAACGCATGTCGGATGACAAATTTGATGCCATTGTTGGTGGTGGCGGCTG  
CTGGTAGCGTTGCCGCACTGGTTCATGGCAGGCGGGCTGGATGTCCTGGTATAGAACGCGGCGACAGTGGCGGATGT  
AAAAACATGACCGGCGGGCTCTTTATGCCACACACTGAAGCAATCATTCCAGGCTTTGAGTATCAGCGCGGTTAGA  
ACGCAAGGTACACGCGAGAAAATCTCTTCTTAACCGAAGAAAGCGCCGTTACCCTCGATTTTCCCGGAGCAGCCAG  
ATGTTCCGCAACACGCATCTTATACCGTATTGCGTAATCGTCTGGACCCGTTGATGGAACAAGCCGAGCAGCGGGC  
GCGCAGTTTATCCAGGCGTTCGCGTCGACGCGCTGGTTCGTGAAGGAAACAAGGTCCTGGCGTGCAGGCTGGGGATGA  
TATTCTGAAGCGAATGTGGTGATTCTGGCTGATGGCGTTAACTCGATGCTTGGCCGCTCGCTGGGAATGGTTCCCGCTT  
CCGATCCGCATCATTACGCTGTTGGTGTAAAGAGGTTATTGGCCTCACACCAGAACAGATCAACGATCGCTTAAATATT  
ACGGGCGAGGAAGGTGCCGCTGGCTGTTTGGCGTTCCCTTCTGACGGCCTGATGGCGGGGGATTTCTCTATACCAA  
CAAGGATCCATATCCTTGGGGCTGGTTTGTGGATTGGGTGATATCGCCATGCGCAAAAAGCGTGGCGCAAATGCTGG  
AAGATTTTAAACAACACCCCGCATTGCGCCGCTGATTAGCGGCGCAAACGCTTGAATATTCCGCGCATATGGTGCCG  
GAAGGCGGTGTCGAATGGTGGCGCAACTGGTTAACGAGGGCGTGATGATCGTTGGTGACGCCGAGGCTTCTGCTGAA  
TTTGGGTTTTACGGTCCGCGCATGGATTTAGCCATTGCATCGGCTCAGGCTGCCGCCACAACGGTATCGCCGCAAAG  
AACGCGGGATTTCTCCGCCAGCAGTCTGGCGCAATACAAACGTGAGCTGGAACAAAGCTGCGTCATGCGTGATATGCAG  
CATTTTCGCAAGATCCCGGCTGATGAAAACCCGCGCTGTTAGCCAATACCCACGAATGGTAGCCGACATCATGAA  
CGAGATGTTACCATCGACGCAAACCAAACAGCCGTACGAAAATGATCATGGGACATCGGAAGAAAATTGGGCTGA  
TCAACTTGGTGAAGATGGCATTAAAGGAGCAACCGCGCTATGAGCCAGAACGCTACGGTTAACGTGACATCAAATTAG  
GCGTCAATAAATTCATGTTGATGAGGGCCACCCGATATCATTCTGGCGAAAATCCCGATATCAATGAATTCATAAAA  
TTAATGAAAGCCTGCCCTGCCGACTTATAAGCAGGATGACGCAAGGAAACATTCAATTTGATTCCGCGGTTGCTGGAA  
GTGCGGCACCTGTGGGTGCTGTGCGGTAACACTATTCTGAACAGTGGCAATATCCCGCAGGCACCTTCGGTATTGATT

TTCGCTACGGCTAATCATGCATCCACAGGCCCGCATCTCGGGCCTGATGTTCTGTTTCGAGAGTCCAACATGAAAGTGA  
CATTAAACGTTTAAACGAACAACGTCGTGCGGCGTATCGTCAGCAAGGGTTATGGGGCGATGCTTCGCTGGCCGATTACTGG  
CAGCAGACCGCTCGTGCGATGCCAGACAAAATTGCCGTGGTCGATAATCATGGTGCATCGTACACCTATAGCGCGCTCGA  
TCACGCCGCGAGCTGTCTGGCAAAGTGGATGTTAGCGAAGGGTATTGAATCAGGCGATCGCATCGCATTTCAACTGCCTG  
GCTGGTGTGAATTTACCGTTATCTATCTTGCCTGCCTGAAAATCGGTGCAGTTTCCGTCGCCGCTGTTGCCCTTCTGGCGG  
GAAGCAGAAGTGGTGTGGGTGCTCAATAAGTGTGAGGCAAAAATGTTCTTTGCACCGACGTTGTTTAAACAAAACGCGTCC  
GGTAGATTTAATCCTGCCGTGCAAAATCAGCTTCCACAACACTACAACAAATTGTCGGCGTGGACAAAAGTGGCTCCCGCA  
CCTCTTCCCTCTCATTAAAGTCAAGTATCGCCGACAATACCTCACTGACCACGGCGATAACGACCCACGGCGATGAATTA  
GCTGCGGTGCTGTTTACCTCCGGAACCGAGGGTCTGCCAAAGGGCGTGATGCTAACGCATAACAATATTCTGCCAGTGA  
GCGGGCTTATTGCGCGGACTGAATCTGACCTGGCAGGATGCTTTATGATGCTGCGCCACTTGGTCACGCAACGGGCT  
TTCTGCATGGCGTAACGGCACCATTTAATTGGCGCTCGCAGCGTGTGTTAGATATTTTCACTCCTGATGCGTGTCTC  
GCGCTGCTTGAAGCAGCAGCGTTGCACCTGTATGCTCGGCGAACGCCGTTTGTCTATGATCTTTTGAATGTAAGAGAA  
ACAACCCGCGGACCTTTCAGCGCTGCGTTTCTTTTTCGCGCGGAACCAATCCCAAAAAAGTGGCGCGTGAATGCC  
AGCAGCGCGGATTAATTAAGTGTGTTATGGTCCACAGAAAGTTCGCCGATGCGGTGGTGAATCTCGATGATCCT  
TTGTGCGCTTATGACACCGATGGTTACGCTGCCAGGTGAGAGATTAAGTGGTGCATGACGCACGCAAGACCTT  
ACGCCAGGTTGCGAAGTGAAGAAGCTCGCGTGGCCCAATGTTTATGGGGTATTTTATGATGAACCTGAATTAACCG  
CCGTTGCCCTGGATGAAGAAGGCTGGTATTACAGCGCGGATCTCTGCCGATGATGAGGCTGGCTATATAAAAAATTACC  
GGACGCAAAAAAGATATTATTGTCGCGGCGGCGAAAATATTAGCAGCCGTGAAGTGAAGATATTTTATTGCGCATCC  
TAAAATTACGATGCCTGTGTGGTTGCAATGTCCGATGAACGTTTAGGTGAACGATCATGCGCTTATGTCGTGCTGAAAG  
CGCCGATCATTATTATCGCTGGAAGAGGTAGTGGCTTTTTTATAGCCGTAACGGGTCGCAAAATATAAATATCTGAA  
CATATCGTGGTAATCGAAAACTACCGCAACTACCTCAGGTAATAACAAAAGTTTTTGTAAAGAAAAGATATTATGCG  
GCGTTTAAACGAGGATGTCTGTGAAGAGATTGAATAAGTTTTCATCTTGGGGATCACATAACCCGCGGACTAAACGCCG  
CCGGGATTTATTTTATTTCTTTCAGTTACGCCAGGCTTAACAGGTTTGCACCAGGTGTCGGGTTTCAGAGACAGGCTA  
TCGATCCCCTCTTCCATCAACCATGCGGCAAGTCTTCTGGTGGACGGACCTGACCGCAATCCCGACATATTTGCC  
CTGTTTCTTTCGCGGACGGATGCCATCGACAGCAGTGTCTTACCAGCATGTTGCGCTCATGAACAATTCAGACACCA  
CGCCGAGTACGGTCCAGACCGAGCGCCAGCTGCGTCATATCGTTTGAAGCAATTGAGAAGCCGTGAAATATTCGAGG  
AACTGCTCGGCCAGCAAGGCGTTGGACGGGATTTACACATCATGATGATTTTACGCCGTTCTCGCCACGTTTCAGCCC  
CTGACGCGCCAGTTCTTCAACCACCGTTTCGCCTGATCTACGGTACGCACGAACGGGATCATGATCTCAACGTTGGTCA  
GTCCCATGTCGTTGCGCACAGTTCCTACTGCTTCCACTCCAGCGCAACAGTCCGCGGAAGCTGTGCGAAACATAGCGG  
CCCGCGCCACGGAAGCCGAGCATCGGGTTCTCTTATCTGGCTCGTAACGCTACCACCGACCGGTTGGCATATTCGTT  
CGATTTAAATCAGAGAGACGGACAATGACGCGCTTCGGATAAAACGCGGCACCCAGCGTCCGCGATCCCTCAGTCAGAC  
GACCAACGTAATAATCAGCGGAGAATCAAAACCTTTCATCATCTCGCGGATTTGTTTGCAACTGCGGTTCTGATCG  
TCAAACCAAGCAGTGGCGGTGGTGGACGCCAATCATACGGTTGATGATAAATTCAGACCGCAAGGCCACGCCTC  
GTTCCGTTAGGCAGGCGAAGTCAAGACACGGTCCGGGTTACCGACGTTTCATCATCACTTCAACGGCAGATCCGGCATCG  
TTTCTACGCTGGAGCTTTTACGCTAAATTCAGCAACTCCGCATAGACGTAACCGGTATCACCTTCGGCACAAGAAACA  
GTGACGTTCTACCGTCTTTCATCCGTTCTGTTGCATCTCCACAGCCACTACCGCGGAATGCCAGTTCAGGAGCGAT  
GATCGCCGCGTACAGGTACGACCGCCACGGTGGTACGATGGCAGATGCTTCTTTCATGATCGGTTCCAGTCCGGGT  
CGGTATGTAGTAACAGCACGTGCGCAGGTTGATGCGGTTTTCATTCGCTGATGTGATGGATGACTTTCACGGACCC  
GCACCGATGCGATGACCGATAGCACGGCTTCGGCGATAATCTTACCCTGTGAATGCAGCGTATAACGCTCCATGACCTG  
ACCGCTGAGCGCAGGTTTCCGGACCGCTGCACAATGAACAGTTTACCGGTGTGGCCATCTTTCGCCACTCAATAT  
CCATCGGGCGACCGTAGTGTCTCAATTTGACCGCCTGTTTGGCAGTTCTTGCACCTTCTCGTTGGTACGCGAGAAG  
ATGTCACGCTGTTCTGCGGTACGTTCTCGATTTTAACTGCTTCCGCTGCTCCTGGGTGCGCGGTAACCATGCGGAT  
TTTTTTCGACCCCATGGTGGCGCACGATAGCCGGCGATTGCGCGCAGTGTGCGTTTATGACGTAATAACTCATCCG  
GGTTAACCGCACCTGCACGACCATCTCACCAAGGCCCATGCGGAAGTATAAACACCACCTGGTCAAAGCCGGATTGCG  
GTATCAATGGAGAATCATCGCCAGATGATGCGAGGTGAGAGCGACCATCCGTTGAACACCGCGGAGAGCGCCACACC  
ACGGTATCGTAACCCTGGTGCACACGATAAGAGATGGCGGATCGTTAAACAGAGAAGCAAATACATGTTTCACTGCCA  
CGAGAACGGCGTCAAACCTGAACGTTGAGGAAGGTTTCTGCTGACCGGCAAAAGAAGCGTCCGGCATATCTTCTGCG  
GTGGCGGAGGAGCGACCGCAAAAGAGGCGTTTTCTGTCATCGCGGAAAGCTGTGCATAGGCTTCGCGGATGGCGTTTT  
CAGCTCAGGCTGGAAGGGAGTGTGATAATCCACTGGCGGATTTGCGCGCCGCTTTCGCAAGCTGAGTAACATCGTCAA  
TATCCGTTTTATCCAGCAGTTCATAAATGCGCTGGTTTACGCCGTTTGGTCCAGAACTGGTTAAACCGCTCGGCGGTT  
GTGGCGAAACCATTCGGAACGGAAACACCATTCGGAAAGATTAGTAATCATTTACCCAGGGAGGCATTTTTGCCCCC  
AACCTGTCTACATCATTCATGCCGAGTTGGTTATACCAAAGCACCGGTTGACGAGCCATTGTTGGACATCGAACAAT  
CCTTTTGTGATAAATGAACGTTTTGAGAAACACATTTCTGCGCATTTATCTTTGCATATTTAACCGGATGAAAAAACGG  
TGAATCGTTCAAGCAAATATATTTTTTACTTTTTAAGACTGATCCAGCGTTGCGCAAATCTGCTCTTTCGACAATTT  
CCACATAAACCATCGGTATAAACGAAACATAAAAAATGAAATGCTGTTTTCATAAAAATAAAATGAAGGTTTATTTTA  
TAAACCAGACATAACGTTTACGCTTCTGTGCGTTTTAATTTATGCTTTCATAGAATTATGTCTGCATCACGGGAAGAA

CAAAATGGATAATGCTGTTGATCGCCACGTTTTTATATTTCTGATGGTACGGCAATAACTGCGGAGGTATTAGGACACG  
CAGTAATGTCACAATTTCCCGTCACTATCAGCAGCATCACGCTGCCGTTTGTGAAAATGAGAGCCGTGCACGGGCAGTG  
AAGGATCAGATTGACGCAATTTATCACCAGACAGGCGTGCGCCCGCTGGTCTTCTACTCCATCGTGTTCGGGAGATTG  
CGCCATCATCTTGCAAAGTGAAGGCTTTTGCAGGATATCGTTACAGGCGCTGGTTGCCCGCTACAACAAGAGATGAAAC  
TGGATCCAACGCCGATTGCTCATCGTACCCATGGCCTTAACCCTAATAATCTCAATAAATATGATGCGCGCATTGCGGCG  
ATTGATTACACCCCTCGCCACGATGACGGCATTTCGTTGCGCAATCTGGACCAGGCTCAGGTGATCCTGCTCGGTGTTT  
TCGCTGTGGTAAAACCCACCAGTCTGTATCTGGCAATGCAGTTTGGTATCCGCGCGGAAACTACCCCTTTATTGCGG  
ACGATATGGATAATCTGGTGCTACCCGCGTGCCTCAAACCGCTTCAGCATAAATTGTTCCGGCTGACTATCGACCCGGAA  
CGTCTGGCGGCGATTGCGGAGGAACGTCGGGAGAACAGTGCCTATGCCTCGCTTCGTCAGTGCAGGATGGAAGTCGCGGA  
AGTGGAAAGCCTTGACCGTAAAAATCAGATCCCGTGGATTAACAGTACCAATTATTGCGTAGAAGAGATTGCCACCAAGA  
TCCTCGATATCATGGCCTTAGTCGCCGAATGACTAGAGAAGTGTGATGATTAGCTTATTTTTTTGTTATCATGCTAAC  
ACCCGGCGAGGTGTGACACACCTCGCACTTGAATCAGCAGCGATTGGTTTATCGTGATGCGCATCACTCCCGGACGTC  
CTGCCGTAGAAGCAACAATTTCTGAGACTTGAATGAACAGAAGTGCAGCACTCCGTAAGTGCAGGATTGAGAGCCTGG  
TAACGCCCGCGAACTCGCGCTACGGTATCCCGTAAACGCTGGCGTGCACCCATGTACCCGACTCCCGCGCAGAATT  
GAAAAATACTGAATGGTGAAGATAAGCGACTGTTGGTCAATTATGGCCCTGCTCGATCCAGCATCAACCGCTGCAAT  
GGAGTACGCCACCCGCTCGAGTGCCTGCGCAACGACTACAGTGCAGGCTGGAAATCGTAATGCGCACCTATTTTAAA  
AACACGAACTGTTGTCGGCTGGAAAGGACTAATCTCCGATCCAGATTTAAACGGCAGCTATCGGGTAAATCACGGTCTG  
GAGCTGGCGCGCAAATTAATTTTACAGGTAAATGAGCTGGGCGTCCCAACCGCGACCGAGTTCCTCGATATGGTGACCGG  
TCAGTTTATTGCTGATTTAATCAGTTGGGGCGGATTGGCGCACGTAACCGAAAAGTCAAGTCCACCGGAAATGGCTT  
CGGCACTCTCTGTCCGGTAGGTTTTAAAAATGGTACCGATGGCAATACGCGGATTGCTGTGGATGCTATCCGCGCAGCC  
CGCGCCAGCCATATGTTCTCTCGCCAGACAAAATGGTCAAGTACCATCTATCAGACCAGCGGCAACCCGATGGCCA  
CATTATTATGCGTGGCGGCAAAAAACCGAATTATCATGCCGATGATATCGCCGACGCTGCGATACGCTGCACGAGTTG  
ATTTACCTGAACATCTGGTGGTGGATTTAGCCACGGTAACTGCCAGAAGCAGCACCGTGCAGTTAGAAGTTGTGAG  
GATATTTGTCAGCAAATCCGAATGGCTCTACGGCGATTGCTGGAATTATGGCGGAAAGTTTCTGCGCGAAGGAACGCA  
AAAAATCGTCGGCAGTACCGCTCACTTACGGTCAATCCATTACCGACCCGTTCTGGGCTGGGAGGATACCGAACGCC  
TGGTCGAAAAACTCGCCTCTCGGGTAGATACCCGCTTCTGAATGCGTGCCATTCTGACGGAATGGGCATTTCTGCGCA  
ACTTGTGCTTCTCAACAAATTAAGTCTGCTGCTGCTGAGCCATAATATTGATAATAAGAATCATTGTTATATCAATTA  
TTATTAATTTTTATGCGTTATACGGATAGCAGAAAACCTCACGCTGAAACGGATGCCAATCACAAGACCGCTTCCCGCA  
GCCTATTCCGGGAATTTCCAGCCAGACACTGTTAGTCCGGATGGCAAATGATTATCGATCATGACGGGCAAGAATATC  
TGCTCCGTAATAACTCAGGCTGGCAAGCTGCTGTTGACCAAGTAGCCTTAACTCGAGCAGCTGACTTCCAGCCGTTTACC  
CCAGTCAGGTGGACGACTGACATAGTCATCATCTCTGCTGCTGAAAGGATTTGCAACGCCTCATGCAGGCGGTGCAATT  
CCGTCATATCACCCTTTTCTGCCGTTCAATCGCCGTTGCGCAACCGATTGCGCAATACCAGAGCGGGGTTAACGCTT  
TGATCAGTTGCTGACGCTCACTATCGCTAACCTCGTCTTGTGCAAACGCCCCGATAACGGGCAAACCGTCACTCAA  
TGCCGACGATCAATAAATCATCACGTAGCGGTGACGCCGCGCTGTGCTGCTCGGTGACTCAGCATGCGGAATGTGC  
GGGTATAATCGCTGCGCTCTCGGCCATCAGACTGAATAATTCATTAGTAGCGGTTATCCTCTTTTTGCTCCGTCATG  
AAGCCAGTTTCTGCCGATCCGTTCTCATAATGCGTCAACAAAACCTGCTGATAGCTGTCCAGGGCCTATTAGGGC  
ATCTACGGCAACAATGGCGACAATGTCTGCGCCAGACGCTGTAATTCACAACGCGACGGCAGGTTGATTATCAAAGC  
TGTAACGCCCTTATGATCCGAGTATTACAAATAAAAACCGGGTTCGTAATCATCAAGAAAACCAAACGGCCCGTAATCA  
AGCGTCAGCCAGCAGCGACATGTTGCTGGTATTATCAGCCATGAGCAAAGCCGACCGTCTGCCATTGGGCAATTA  
CGACGCGGTACGTGCGACAACATCGCTAAACAGAGACGGTATTTGCTCATCATCTGCAAGATGTACCAAGTAAAG  
GAATAGCAAAGTCAGTAACCTGACGAACCTTTTCCGACTCGCGGCGGTAGTAAAAATGTTGAAATGACCAAAGCGCAGA  
TGACTTGGTGCCACGATCAGCATCGCGCTGGCTCCGCCGTTTCCCGATACACTGGCGAATCGCTGGTGACGATACT  
TAACGCGCGGGTCTCGGAATGCCAGATAATGCATCGCCTCACTGGCGAGACTTTCTCGTATCGTGAACGTAACCCG  
CCCGTCCATCACCCATTGCGGAATAAGGCGTCAGGCCAGCACCTTTCAGATGCCAGTCCATTGTAGTGCCATCAGCAAGC  
AGTTGTTCCGGAGTAAATGCCGCGCCATCACCCAGTTGGCCCGCCAGACGCCGAAGTATGACCACTGTAAACCTG  
CGCCAGTGGTACATACCAGGCAAGTAGGCTTCCGCCCGCCAGACACCTGCGCCATTTTTAAACAGCGACGATGGAATAC  
TCAGCGTGTAGCCAGTTCCGGTATTATGCCAAATCAGCCGGGCATTATTTAAAGGCGTAGGGGAAAGTGTGTATAGGTT  
TCTGGCAATTCATCGCGCCAGCGGTAACAAAAGACAGGGTCAATAGATCCTCTGTTTGTAGTGTAGACGGTACTCTC  
GTCTTAAACACCAGCAAACAGAAGGGTATCGCTGAACCAACGCTGTTATCTGATTTATGGGAACGGCAGGCCACAGGCA  
TCCCTGGAGAGCATGAAATCGAAGGGGGTAATCTGTGCCAATATTTCTGCCGATCAATGCCTCCCGCAATGATGCAAT  
TGCAACAAGGGGAAATTTGCGCCTGGATCGCACGAATAACCGTTGGAAGGAGCGGTGCGTGATTTGTTGCTGAATAAAA  
CTTTTATCCAGCATGACCGGGTAAAAGACCATAAAAACCGCTTTCATTGTGCTATTGCCTGCTCCCAAATTACCTAA  
CACAAGGGGATACACTTGCAGATAAGGATAAAAAGACCGGATTATCTTTCTTATTGAGATGCGGGTAATTCTCATTAA  
TCAAAGTTCAATAAACGGATATTTTAAATAGTTGCGCTGCGTAATATCCCTCTCAATAAATGTAGCCACTTGTGGC  
GTTAAATTAAGCCAGGCAAAGAGTTTATGTTGAATAAAAAATGTTGGCATGATTTTAGTAATTCAACTGCTCTGAAAA  
TAATTGCCAATGTTGCTCTCGGTAAGTTGCGCTATAACCCGACTCGTCGGGATACGAACCGTACCATCTTCACTGGAGA



AATGGGTAATTAACCAACGCCGACAAGGACTTGCTGGTTGTCTCTTATCGGCAGGAAATAGCAATCAGAATGATAAAGA  
TTCTCCAAAAAATCTTCATGGTAACCGTCCCTCTCGAAGGATGTTTTTCAGTATCCGGCTAAAAGGGATGAGGCCATAA  
GACATAACAATTACAGAAGGAGTAACCTTCATTTGTTCCATGTTAACCACCTTTTCAGGGGTCCTTTTTTATAGATTATCC  
TGATTATAAACGAATAATCCATTTACGGAATTTTTGTCTGCAAAATACTACTGTATTAGGAGTAAATGGACGGCGATGT  
ATCATCGCCGTCATTTTTGACATACTAGATTCTGCTCGCCTGCCAGAAATTTTTCTGCCAATAGACATTATCAAGTGA  
GGAACGCATCACTCCCTTGCTGGTAGAGGCGTGGATAAATTGGTTGTTGGTATCGTAAATACCTACATGCAAACATTTT  
GTCCGGACCCGTTTTGAAAAAGACCAGGTCACCTGGCAGCAACTCGTCTTTATCAATTTGCGTGCCAATAGAGGCTTGT  
TGTTTGGTTTACGGGGCAGCTGCAAATCGAAACGATCGCGCATCGTCAACAACCAAAATCCCGAACAGTCCACACCCGG  
CCGCGTCATGCCACCATAACGATACGGCGTGCCATGCCAGCTTTGTAGCTGGTTCGTTCAAACCCGGCAATAACGGTAATCG  
AATCAGAAAGTCTGGCATTGGCGGGTGTCTTATGGTGGCTACACCCGGCCAGAAGCAGTGTGTGATCAAAATAAGG  
CAGAAACGCATTCCGTACGGTTCCTCTGTTTTTATCTTGACATAATTTAGCGTGTAAATACCCGATTTTCAAGATAC  
TAATGAAATCAGATGGTCAAAATCAGCATTCTGTGACCTTCGATATCCAGACGGCGAAAATTCATCCCATAGGCCTGCGC  
CAGATTTGGCGGCGTGAGCACCTTCCCTGCGTCCACTGGCCAGCATTTCACCTTTAGCAACCACGCCGATGCG  
CATGACGCAATGTGTGGTTGAGATCGTACTGCTCATACAATCGCCAGTCTTGTGACACAGCGCGCTCAGAATTTTG  
TCTAACGCACCTTTGTTGCGCAACATCAAGACTGTTTCATCGGTCATCAAGAAGCAGCAATGGCCCTGCGGGATTGGCTTG  
TGGTGTGATTTGCAACACCACCGCAGCAAGACGTACCGTTCGCAATTCACCGCCGAAAGTTGATTGGTGTACGTCCGA  
GTTTGTGTCATCAAGAGCCAGCGCCCTGCGACATCATTCAAGTAGTTCCGGTACGCGTTTTATCGTGTGATGACGTGTCAGG  
TAGTGCCAGACCCGCGTTGCAAACGGCGGCTGTGCTGTTGTGAAAGATAGGCGCGATGCAGCGCAGTTTTGTTGCGGA  
CCATGCTTCCAGTGGTTGCCCGCAACTGAATGCTTCCCTTACCCTGGTTCATTCCGGCCATTCCGCGCCAGTAAGGTAC  
TCTTACC CGCGCCATTCCGGCCACCAGGTGCAGGATCTCCCGAGCCGAACCTCGCCAGAAAGCGGCCCCAGGCGGGTA  
GATTCCGCAACATCTTGAACGTCATCACAATAGACATTATTTTCCAAACGCCAGTTAATGCTTTCATCACAATGGGA  
TCTTCCGGCGTCATATCCGGGGAAAAACGCTGGATGACTTTTCCGTCCCTGCCAACCAGGAATTTTTCAAATTCATAA  
AATATCATCCGGGTACAGCGGTGCACGGCTTTGCTGACCATACGGGCATAGAATCCGCTCTTCCGGCGCGACTGCGG  
TCGGCGCTGCGCAATCAATTTTTGATACAGCGGATGGCGTCTTCCGCAATTAACCTCAATCTTACTGAACATCGGGAAC  
GTCACCCCCATGTGGTGGTACAGTAAGTTTTAATCTTTCATCGCTGCCCGGTTCTTGTCCAGAACTGGTTGCACGG  
GAATCCAGCACCAATAAACCTCGATCGACCCAGGCTTCTGAATATTCTCCAACCTGCTCATATTGCGGCGTTAAGCCAC  
ACTTTGAGGCGACATTGACAATCAACAGCACATTACCGGCGAATCTCTCAGCGTGGTCACTTACCCTGATATCTTTC  
ACTACGGTCTGAGAATGGAATCTTGCATCGTTTCTCTGGGTGGTGCAGTAAAAATCTTAGCTTTAATCATAGACCG  
TCTTTTTGCGGCTAACGTCCTGCTTTTAAACAATAACAGATAAACACCGGCGCACCTAACGTTGCGGTGACCACGCCAAT  
AGGCAGCTCTGCGGCAGCTAATGCCAGGCGCGCTACAATATCGGCCAGCAGCAATGCGCTCGCCCTGCCAGCGCGCAGC  
CGGGAAGTAATACGCGATGATCGGTTAAACACACAACCGGAGAATATGGGGGATCACCAGACCAATAAAGCCGATAGCA  
CCCGCCAGCGCCACACTGACGCCAACCATCCAGCCGGTCTGCCACCAGCACATTGCGCCAGAACCACAGGGGTAAACC  
CAGTTGCCCGCGCCGAGATCTCGCAAGTGCTAACATATTCATCGGCTGGACTGACAACAGATCCACAACAACACGGGGA  
TCAATGCCAGCATCAGCCAGCTTTGCCCGCAGTCTACGCCGCAAAACCGCCCATCATCCAGTACATCAGCTGACGCAAA  
TCAACTGAGGTGAAAAGTAGATAGCCACGTCATTAGTGGCTACAGATAATCCCTAATGCAACGCCAGCCAGCAATAA  
CCGACTGGTCAAAGATGACGACGGGCGAAACGTAAGAGTATTAAGTGATGATAAGCGCGCCAGCAATCGCACACAGCC  
CTAGCGCCAGTTGGGGAGTTGCCCTTGCCTTGCCTAAGCAATACCGCGGCGATAAGCCCCACGCTGCGCGTTAGAGACGCCA  
AGTAGTCCAGTCTGCCAGAGGATTTCAAACAACGCCTGCATTACAGCGCCGATATAGCCAGCGCCGACCAACCAG  
CAATACAGCCAGCGTACGTGGCAGGCGAATTTGCCAGACGAACAGTTCGCCACGAGGAGTAAACAGTCACTGGCGAGA  
TCCATTGTTACCAGCGCAAAAGCTTAAGAGAAGCGCCAGCAGCATCAAAACTGACAGGCATAATAACCGCAATATTT  
TGTCTGCTGTTGTTGGCGGGCAAGTGTACGATGGTATCCGTTCTGCTGAAGTGTGATGGCGTTGATTTTTACGGTGACTCT  
TCGACAGTGAAAAGAAAAAGGCGCAGAGCGGCTTTTTAGTTAGATCAGATTACTCGTCTTTGGGCGAAGCGTTTTCG  
ACCCGCTTTTTAACTTCTGCCCGGTCTGAAGGTACCCACGCGCGTGTGTAATGGGAATATCCTCGCCGTTTTCCG  
GTTACGTCCCGGGCGTTGATTCTTATCACGCAGATCGAAGTTACCAAAACCAGAGATTTACCTGTTCCGCGTTTTCCA  
GAGCGCGACGGATCTCTTCAAACAGTTCAACCAGTTCTTTGGCATCCCGCTTGCTAAGCCCAAGCTTATCAAACAGA  
TATTCTGACATTTAGCTTTTGAAGCGCATAGGTTCAATCCCTCAATGATGCCTGGAATCGCTCTTTAATGCCTCTA  
CACATTTGGCGACGGTAGCGGCAATCTCTTCTTTCGAGTGTACGGCTGGTATCTTGCAGGATCAGGCTTATGGCGAGG  
CTCTTATACCCCTCCGCAACACCCTTACCAGGTCACAGTCAAATAAGTTTACGCCAATACCTGATTTACGCCAATTT  
CTTACATTCGATAAAAATATCCGCTGCGGGAACGTTTTCTGCGACCACCACCGGATGTCACGACGGTTCGCGGGAAGC  
GAGAAATCTCGCGCGCTGAGGACCACGCGGTCTGCGAGCTTGTCCACTCCAGTTTGAACACCAGAGTGCACCGGTTA  
AGATCCAGTTTACGTTCCAGTTCAGGATGAACAACCCCAACAAAACCAATACGTTACCTTTAGATAAATCGCTGCGGA  
TTGCCCCGATGCAAGTCCGATTGCTTCTGACGGAACCTCAACCTCATTAGTTTACCGGTGAGGTCGAGAACGGATT  
CAAGATCGCTTTCAAATCATAGAAATCAACGGTCTTTTTGCCAGGTTCCAGTGTCTTCTGTAACGGTTACCGCAATC  
ACACCGGTAACATCAGATCCTGACGAATGCCAACGGTGCCTGAGTATCTGGTACGAAACCGAGACCGTTTTGAAAAAT  
GCGCACACGGTTCTGCTGACGGTCTGTTGTACACCACGTTGCCAGCAGGCCAGTCCACAGAGAAAGACGCATTGCTG  
ACATTTCAACAGAGATCGGGCTTGGCAGCAGTAAGGCTTCAACGCCTGGATGGATCATCTGCTGCACTTTCCGGATCAACG

AAGCTGTAGGTGATCACTTCTGATAGCCTTTGTCGTTGAGCAGCGTTTTACGCGCTTGAGCGACAGGTGAGTTCACG  
GTGAGTACCCATAATCAGGCTTGCCTGTACCGGCTCATCCGGGATGTTGTTGTAGCCGTAACACGCGGACTTCTTCAA  
CCAGATCTTCTCAATCTCCATATCGAAACGCCAGCTCGGCGCAACTGCCTGCCATTCTGCTTTGCTTCGGTCACTTCG  
CAGCCGAGACGACGCAGAATGTCAGTTACCTGCTCATCCGCAATATGATGGCCGATCAGGCGATCCAGTTTGCTACGACG  
TAGAGTGATGGTTGCACGCTTCGGCAGCGTTGCTTCGTTGGTGATATCAATTACCGGGCCAGCCTCACCACCGCAGATGT  
CGATCAGCAGACGGTGCACGTTCCATCGCTTTGTGCTGCAGTGCCGGATCAACGCCACGCTCATAACGGTGAGACGCA  
TCGGTATGCAGGCCATGACGACGAGCAGACCGGTGATAGACAGCGGGCTAAAGAACGCGCATTCCAGCAGCAGTTTTG  
TGTTTCGTCATTACGCCAGAGTGTTCGCCACCGAAGATGCCGCCATCGCCAGCGCCTTGTGTGGTCGGCGATGACCA  
GAGTGTGACGATTGAGTTCGCTTCAGTACCGTCGAGCAGCACCAGCGTTTCGCCCTCTTTCGCCATCCGCAACCACAATG  
CCGCTTCAATGCGATCTTATCGAAAGCGTGCATCGGCTGGCCAGTTCGAGCAGCACATAGTTGGTGACGTCAACAAC  
TGATCGATAGAACGGATCCCGCAACGACGCAGTTTTTCTTTCATCCACAGCGAGTTGGCGCTTAACTGTTAATGCCTT  
TTACCACACGGCAAGATAACCGCGGCAGGCTTCGGCGCTTCGACTGTAATCGGCAGCGTGTGTCGATGGTCGCACCA  
ACCGAACGATTTCCGGTTGAACAGCGGCAGCTGGTTCAGCAGGCAACGTACGCGCAACACCAATGATGCCTAAGCA  
GTCGGCAGCGTTTGGCGTCACGCTGATTCGATGGTGTGTCATCAAGTTTCAGGTATTCAGGATATCGGTGCCAATCG  
GCCATCCGACGAGTCGATAATGCCGCTGTGATCGTACAGAAATGCCAGTTCAGAGAAGGAGCACAGCATCCCTTCA  
GACGGTTCCGCCACGAGTTTCGCCGCTTAAATTTGAAATCACCGCGAGAACAGCACAATGGTTCGCTACCGCTACAG  
CAGGCCCTGACGGCAGTTTGGCGCACCGCAGACGATGTCCAGCAGCGATCGCCGCGGACATTCACTTTTGTACACGCA  
GTTTGTGACGCTTCGGATGTGCGCACACTCAACCCTTACCAACGACCACGCGGTGGAAGCTGCCGGCAACCGTTC  
ACACCGTCAACTTCCAGGCCGCCATAGTGATTTGATTTGCCAGCGCATCGCTATCAATCGCCGGGTTACCCATTGCGG  
TAACCACAGTTCAGTGAATTTATAATCTATTCTGCCTATTTAAACTGTTTGAAGAACGCAGATCGTTTTGAAGAA  
TGAACGCAGGTGCGTGACGCCGTAACGCAACATAGTCAGACGCTCCATCCCCATCCCGAAGGCGAAACAGAGTAACTT  
CCGGGTCGATGCCAACGTTACGCAACAGTTCGGATGCACCATCCCGCAGCCAGCACTTCCAGCCATTTACCGTTTTTA  
CCCATGACGTCCACTTCTGAGAAGGTTGCGTAAACGGGAAGTAGGAAGGACGGAAGCGAATCTGCAATCTTCTCAA  
GAAGTTACGCAGGAAGTCGTGACGCGTGCCTTTAGGTTGGTAAAGCTGATGTTGGTATCAACAATCAGACCTTCCATCT  
GATGGAACATCGCGTGTGAGTCTGGTCGTAGTCGTTACGATAAACACGGCCAGGCGCGATGATACGAATCGGTGGCTGC  
TGGGCTTTTCATGGTGCAGTCTGTACGCCAGAGGTCGGGTACGACGAGGCGGGTAGTGTCAAACAGAAAGTGTCTGT  
GTCAGCGCGCGCCGGGTGGTGACCAGGAATGTTAGAGCATCGAAGTTATGATAATCGTCTTCGATTTCCGGCCCGGTTG  
CCACGGTAAAGCAAGCTCACCGAAGAACTTTGATACGGTTCGATGGTACGGGTAACCGGATGCAGACCGCGTTTTCA  
ATGCGACGACCTGGCAGAGAGACATCAATCGTTTCCGCCGCGCAGACGCGCATTAGTGCAGCGCTTCCAGTTCCGCTT  
ACGCGCATTACGCGCCTGCTGAACCTGCTCTTTCGCTTCGTTGATAACCGCACAGCTGCCGGACGCTTCTTGGCGGCA  
GCTCACGCAGGGTCGTCATCTGAAGGGTTAAGTGCCCTTTTTACCCAAATATTCGACGCGCACATTATCTAACGCGGCA  
ACATCTGACGCTGGCTAATGGCCGCTTCGCACTGCAACAGTTCGCGAGATGTGACATGGTTTTCTCATTGTGTC  
AGTGGTGACACTGGTTGCTTGGACTTAGAGCCTATCCCATCAGGCTATTTTACTTGGCATTGTTGGTCCCGGGCTGTGTC  
GAAATCTCACGTACTTAAATACGCTCCGGTTTCTCCGCGTGGCCGTGTCAGTCTGGCTGCGACAATTACACCTGATG  
AGACAGGCTTTTTATTTTTCAAACGCGCATACAAAAAAGCCTCCACTGGGAGGCTTTCAGGCGCTGTTTTCCGTTTCT  
CTTCTACGCGCTAGCCTCCTGGATTAGGTCGTAAGTAAAAAAGAACGCGGAAATAGCAGCATTATTGCTTGCCTT  
ACTTTTGGTACTCTTCAAAGACCTTATTGAAAAGGCTACGGCGATAAAAGTCAATGTTTTGATGGGTTGAAACGAA  
AAGAGGGAGACTAGCTCCCTCTTCAACTGGCTTATGCCAGAGCTGCTTTCGCTTTTTCAACCAGAGCGGTGAACGCTAC  
TTTGTGCAATACTGCGATATCAGCCAGGATCTTACGGTCGATTTCAACAGAGGCTTTTTTTCAGGCCATTGATGAATTCG  
TGTAAGAAATACCGTTCTGACGTGCTGCGTTGATACGCGCAATCCACAGTTGACGGAACGACTGACGTTACGTTGACGA  
CGGTACCGTAAGCATACTGACCAGCTTTGATAACAGCCTGGAAGGCAACGCGGTATACGCGAGAACCGCACCGTAGTA  
GCCTTTAGCTTGTTCAAAATTTTCTTGTGACGTGCAGTGAATAACACCAGTTTTACGCGAGCCATATGTGCTCTCC  
TGATATCTATTTCTAATTAAGGTTAAAAACGTTAACGGCTTATGCGTACGGCAGGCACGCGATTACCAGGCCAGATC  
GCCTTTGAAAACCATGGCTTTCGACGACGAGTGACGTTTACGTTTGGTGCCTTTTTTGGTTCAGAATGTGACGCAGGTTAG  
CGTGCTTGTGCTTAAACACCTTTACCGGTTTTTTGAAAGCGCTTAGCAGCACCGGTACGGTCTTAATTTTTGGCATT  
TTAATAACTTCCACTTCGATTGTTAATAAACGAAACAAAGGCGAACAAGCCTGTGAAGCCCGAAGGCTCCACAGACAG  
TGCTACTTGAAGGCTTACTGTTTCTTCTTAGGAGCGAGCACCATGATCATCTGGCGCCTTCGATCTTCGTTGGGAAGG  
ATTGACCACTGCCAGTTCGCAATCGTCTTTCACGCGATTAAGCACTTCCATACCGATTTGCTGGTGCATCTCA  
CGACCGGAAACGCAGCGTATTTTGGCTTATCACCTCTTCGAGAAAGCGAATCAGGTCGGGAGTTTTACCTGATA  
GTCGCCTTCATCTGTACCAGGACGGAATTAATTTCTTAACTGGATAACTTTTTGCTTTTTCTTCTGTTCTTTAGAAG  
ACTTGCTTTTTCATAGAGGAATTTGCCGTAATCCATTATACGACAAACCGGCGCTCGGCTTAGGGCTGATCTGACT  
AAGTCTACTCCGCTTCTCTGCTTCTCCAGAGCTTCTCTCAGACTCACAATACCAAGCTGCTCGCCTCCAGACCTGT  
TAAGCGAATCTCTGGGCGGAATTTCCGCTTATGATACGGTTAGGGCGCGCGTTTTGAACTCGTTTTCCGCTTAAATAC  
CTTATTCCTCAATTGTTAAGACTGCGGCTGCGAATCTCTTGTGACGTTCTCGATCACTTCATTTACGTCCATGCTT  
CCAGGTCTTTACCACGGCGGGTGCGAACGGCAACTTTGCCTGATTCACCTCTTATCACCAAGACAGCATATATGG  
GACGCGACGCAAGTGTGCTCGCGATTTAAAGCAATCTTCTCATTCTCAAGTCTGCTTAAACGAATGCCCGCAT

TTGATAGTTTTTGCCTCAATTCGTTAACGTATTCAGACTGTGAATCGGTAATATTCATGATAACAACCTGAACCGGCGCA  
AGCCAGGTCGGGAAGAAACCAGCGAACTTTCGGTCAGGATACCGATGAAACGTTCCATCGACCCAGAATTGCGCGGTG  
AATCATTACCGGTACTTTACGTTTCATTGTCTTCGCCTACATAAGAAGCGCTCAGACGAGACGGCAAAGAGAAGTCCAGCT  
GACTGTACCGCACTGCCATGCACGATCGAGGCAGTCATACAGGGTAAATTCATTTTTCGGACCGTAGAAAGCGCCTTCA  
CCAGTTGATATTCAAACGGGATGTTGTTTTCTCCAGCGCAACCGCCAGGTCCGCCTCAGCACGATCCACATTTCTGC  
GCTGCCAATACGTTTTTTCAGGACGAGTGGAGAGTTTGACGACGATCTTCTCGAAGCCAAAAGTGTGTACATATCATAGA  
CTAAACGGATACATCCGTTAACTTCATCGCGAATTTGTTCTTCAGTACAGAAGATATGCGCGTCATCCTGGGTAAATCCA  
CGCACGCGCATCAGGCCATGCAGCGAACTGACGGCTCGTTACGGTGGCAGCTACCAAACCTCGGCCATACGCAGCGGCAG  
ATCGCGATAAGACTTCAGCCCTGGTTGAAAATTTGTACGTGACCCGGGCAGTTCATCGGCTTAATGCAGTATTCACGGT  
TCTCAGAAGATGTGGTGAACATTGCATCTTTGTAGTTGTCCAGTGACCGGTTTTTCCACAGGACACGGTCCATCATG  
AACGGACCTTTAACTTCTGATACTGGTACTCTTTCAGTTTAGAACGAACAAACACTTCCAGTTACGGAAGATGGTCCA  
GCCGTCGTTGTCCAGAATACCATACCCGGCGCTTCTTCTGCATATGGTACAGGTCGAGCTGTTTACCATTACCGT  
GGTCGCGTTTCGCGGCTTCTCCAGGCCTGCAGGTAAGCGTTAAGTGCTTTTTTGTCTGCCACGCCGTACCGTAAATA  
CGTTGCAACATTTTGTGTTGCTGTGCCACGCCAGTAAGCCCTGCCGTTTTTATTAGTTTGAATGATGGCAGAAACG  
CATGTTCCGGTACGTGCGGACCGGCCACATATCGACATATTTTCATGGAAGTACAGACCTGGCTTGCATCATGGCGGA  
TGTTTTCTCAAGAATGGAGACTTTGTAGCTCTCCACGTTGGCGAAAGTTTACGCGCTTCGTGCCAGCTGACTTTCT  
TTCTTAATGAGCTCGTAGTTTTTCTCAGCAAGCTCATGCATCCGCTTCTCGAGTGCTTCGACATCTTCTGGGTTAACGT  
GCGGTCAAGATCAACGCTGTAATAAAAACCGTTGTCAATAACCGGCCGATTGCCATTTTGGTATGCGGCCAAAAGTTGTT  
TAATCGCGTGCCTAACAGGTGCGCACAGGAGTGACGAATGATCTCCAGACCTTCTTCGTCTTTGGCGGTAATGATCGAC  
AGTTGTGCGTCGTTTTCAATCAGATCGCAAGCATCAACCAGTTCGCCATTAACGCGCCCTGCGATACAGGCTTTCGCCAG  
ACCTGGACCAATGTCCAGCGCAACATCCATGGGGCTTACAGCGTGATCGTAATGGCGTTGGCTGCCATCAGGAAGAGTTA  
TAACAGGCATTTTATATCTTATTTGAGTGGTACCCACACGAAAGATCACATACAAAGAAAAATTTGTTTATTAACAG  
TTCATTGCGAAACCATCTAGCCAACAATGCTAAATTTGGTTCGCAATCAGGTACACAAATGAAAGACATTAACCTCTCAC  
CTTCCACCCGTTGAGCGATGTTAACTAAAAAAGGAGATTGACCTTTCGTTTACATTGATTGATTGCGAATT  
CGTTTGTAGTGAGTACACCAGCAAAACGTTAAAGAACAATGATAACATCACGGTGCCTGAAAGGTTTACTGCGAGC  
GGATTTACAGCAGCATAAATGAATCCAGCAAAGTTCGTTGCGTGATTTGGCGGTAGTATTTAAACGCTCATGAGATTA  
ATGACGAAGTGGTCAATACAATGATAAAAGTGACACAATTTTATAACAATTTTTCTGTCACATTTCTGTTCTGGCGAT  
AATAATTAATCATCATCCTCAAACCTCCAGATATATAAAGGCGAAGCAGATTATGAGTCAAACGATATCATTATCAGA  
ACTCATTATAAGTCTCCTCATAGATTGCACATCGATAGCGACATACCAACACCTTCATCAGAGCCTATTAATCAATTTGC  
GCGCCAGCTCATCACCTACTTGATACCTCTGACTTAAGTTTCGATGCTGTCATACTGTGTTACTCAGGAATTTACCGCAA  
ACTGTGCAAAAATATCAGAAAATGTTATTCCACTGCCCTTTTTACCATTAACCTTTCGCACTTCCACATCCATACAGAA  
AATATACTCATTACATTACACTATAAAAAAGAAATCATTTCCTTATTACTGGAAACCACGCCTATTAAGCTAACCATTT  
GCGAAGCATACTGGATTATATTGAACAGGAACAGTTAACTGCTGAAGATCGTAACCATTGTATGAAACTGTCAAAAAA  
TCCATAGAGAAAAAACTATACACCAACAGTAAATCTCAATGGTAGTGATGTTTTTGAATCTCCTTCTGACGCTAT  
TTTTTGTGCGCATCTGTCAATACGCCCTTGATTCAATTGAGAAATGAAAAAGGCAAAGTCAACCTGATTAACATT  
ACTCCTCCGTTGAATCCATACAGCAGCATGTCCCTTAGTCCGGGACGCGGAGTTCAGAGCATTACTTCGCCATCCTCCT  
GCAGGGAGTCGCTTATCGCGAGTAAGGATTTTGGCTTCGCTTAGATATTTCTTTTGTGCAATGATGGCAAACAATGT  
CAGTCATATGTCCGCGATTTTATATATAGACAATCATACTTTGTAGTAAAGGCTACGAATAAAGCAGTCAAGTATGGAC  
AATTAATTAATGTTGTGTCGTTTACGACCCGAACGATACCAACGTTGCCGTGAGAGACACCCACAGGACAGCAGGGGC  
TTTTCTTTCGTTGATAAGTTTCATCAGTTCAGTCCGATGCTCAGACCTGGGCTGATAGATATGTTCCGAACTGTGCAAT  
TGCTATTCTGCCCTATTACCTGTGGGAGTTCCAGGGCTATTTTCCGCGGATTTGCATCAGGAATGCCATTTGCCCTA  
TACATCCATCGCAATGTTGTTAATAATGGCTACAGGCCAGTCTCAACAGCTTATTACATTTCAAACAGTTGCCATA  
CTCCCTGAAAAAGAAATCATTGAAATAATAACTGCGCAGAATAGCGTTGGTACACCTGCTTTATTTTTGGCTATGATGAA  
CGGACATACTGACAACGTGAAAATTTTATGCAAGAAATTCAGTCACTGGTAGATAATCACATCATTATGAAAGATAATC  
TGGTTAAATTAAGTCAAACCTAAAAGTGTAAACGAAACACCTGGACTTTATATCTCCATGTTGTATGGATTGATGAAATA  
ATCGATATCTTCTGAATGCATTAACCACTCCAATAGCACAAGAGCTTTTAAACAAAAAACTGGTGTAGTATTTTAGC  
CATGAAAATACATGATGGTGGAGCCAGGATTATACGCCGCAATGAAAAATAATCACCTTTTGTGTGCACAGGTTCTCT  
CTAAAATTAATGGCATCGCTTTTAAATACAAGTTGAGCAAAGCTAACATCATGGATTTATTTAAAGGAGTACAGCACAG  
GGAACCCCTGCATTATACATCGCCATGAGCAAGGTAATGAAGACGTCGTGTTATCTTATATATCGACGCTGGGTGCTTT  
TGCAAAAAAACATTTTATTAGTCAACATCAGTTATTTACTATTGGCCGCTAAAAATCATGACAACATGTCAGCTGTT  
ATATAGCCATTATCATAAGCATTATAAACTGTAGAAACATATTATGCTGCTATTAATGCAATCAGCCAAAGCCTGAGT  
TTTGTGCTGATGAAATAAAGACGATTTTATAACCAGCTATTTACGATATATATCGATACATAATTTTATTTTTTTCATA  
AAACGACAGAAACAGTGACCATGTGCACAACGCCACCCGACGGCTGTAATAACAAAAAATCCCTTGATGCCTGTCCTTTT  
GTTACTACTCCGTTATCACGCAAGAGATATGCAGGACACTGGTATGCCGACTAAACGCTTTGATAAAAAAACTGGAAG  
ATGGTGGTGGTACTGTCGCAATCTGTGGCGCTATGTTGTTGCTACGTTGGGCGCAATGATTTGGGGCTGAGCAGTGAC  
AAACGAAGACAGCCAGACCCGATAACCGGTCCGGCAGATAATTTTACATGCTGTAGCCAGCGATAAGGTTGTCCGACG

GTCGGTATGTTCCGGTGCAGACTCTGGAGGTTCCAGAGTTCATGTGACGTTGTAAGCCACCTTCAGTCCAAAATGTTTCAT  
TAATAGCAACATTTAATGCGCTTTTCGGAGTTCAGCGTTGTGTCTCCGCGCCAAAGACCGAAAACCCCTGCGTAAATTTA  
GCGTTGTGAGTCAACTGCCATGCATAAGCCCCGGAGGCATAGCCAGCGGCTGGGTTTCACTGGCATTGTGCGGTATATTT  
GTCGTAACGCACACCTGGACCGAATTCAAAGCGGAACTGTGTACCGGGCCATTCAAAAACGACGACCATAACCCGCGG  
TCAACACATCGCGCTCTCGATAGCCGTTATAACGGTCTGTGAGCCAGCTTGCCAGCAAAATAAATAGTCATAATCAGTT  
AAATTAACGCGTACGCCCCGCCGCGCATATTTTTCTGAAGAAGCTCATCATTAGAAGAAGTATTACTGGCGTTCCC  
CCACAGCGACCAGGCAGTGGTGTGTCATACCAGGTCATGGTGGTGTGAGCCGTAAGTGAGGAGCTTTTCGTATTGCGCTG  
ATTGTGCAAGATATCCTGCGTTTCAGATTACCTTCGAAAGGTTTTTTAGCGCTGGCAGGATCATCCATGACAGTAAAAACG  
GAATCATCGGCAGCTGCATTGAGTGCACAAACATGCCCCCGCCAAACATAACGATGGCAGGAACTGTCTTCAAAGCTT  
CATTTATCAAGAGTCCGTACAACAAAAAAGAGACCATCGCGTCCCGGAACTTTCTTAAGGATCAAAGATTAGCGTCC  
CTGGAAAGGTAACGAATTATAAAAAGCGCGAATAAAGTCAATGATTCTTATTTTCAATTTTTGAATAAGCATGTGGC  
GAAAAACAGATTTTTATTTATATATTTATCTGCAAAATTTAAATAAAGCTCCAATAAATCATATTGTTAATTTCTTCA  
CTTTCCGCTGATTGCGTCCAGACTGAAATCAGCCTATAGGAGGAAATGATGGTACGTATCTATACGTTGACACTTGGC  
CCTCTCTCGATAGCGCAACAATTACCCCGCAAATTTATCCGAAAGGAAACTGCGCTGTACCGCACCGGTTTGAACCC  
GGGGGCGCGCATCAACCTCGCCGCGCCATTGCCATCTTGGAGGCAGTGCACAGCGATTTCCCGCGGGTGGCGC  
GACCGCGAACACCTGGTTTCACTGTTGGCGGATGAAAATGTCCCGTCTACTGTAGAAGCCAAAGACTGGACCCGCG  
AGAATTTACAGTACATGTGGAAGCAAGCGGTGAGCAGTATCGTTTTGTTATGCCAGGCGCGCATTAATAAGAGATGAG  
TTTTCGCAGCTTGAAGAGCAAGTTCTGGAATTAACCGGGGCCATCTGGTGCATAAGCGGAAGCTGCCGCGAGGTGT  
GAAGCTGGAATAAATTAACCAACTGATTTCCGCTGCGCAAAAACAAGGGATCCGCTGCATCGTCGACAGTTCTGGCGAAG  
CGTTAAGTGCAGCACTGGCAATTGTAACATCGAGTTGGTTAAGCCTAACCAAAAAGAACTCAGTGCCTGGTGAATCGC  
GAACTACCCAGCGGACGATGTCCGCAAGCGCGCAGGAAATCGTTAATAGCGGCAAGGCCAAACGGGTTGTGCTTTC  
CCTGGGTCCACAAGGAGCGTGGGTGTTGATAGTAAAAGTGTATTGAGTGGTGCACCACCGGTGAAAAGCCAGAGTA  
CCGTTGGCGTGGTGACAGCATGGTCCGCGCATGACTGAACTGGCAGAAAATGCCTCTTGAAGAGATGGTTCGT  
TTTGGCGTAGTGGGGAGTGCAGCCACTCAATCAGGGAACAGTCTGTGCTCCATGACGATACGCAAAAATTTA  
CGTTACCTTTCCGCTAACAAAAACATTCCCCAGCATTGGGGAAATCATCACCACCTGTCGGCAACGCTTTTCCG  
ACTATGCTCAAAGTCTGTGATAACAAAGGGTGAATATGGCCAGTGGCGATCTTGTCCGTTATGTCATAACCGTCAT  
GTTGCATGAGGATACATTGACTGAAATTAACGAGTTGAATAATTACCTGACTCGCGACGGTTTTTGTCTACTATGACGG  
ATGATGAGGAAATATCCATGAGCTGGAACTAACACTTTTGGACTTATCAGTACCCAAAGTGAAGAAGAAATAGAGAA  
CTGTTTTCCGGCTTACCCAAAGTGAACCGGCAAGATCCTGAAATCACCATCACGACCTGGGAGGAATGGAATAGCAA  
CAGAAAATAAATGGTTTTTGGGCAATAATCAGTCTGGTGTGCGTTAGCTCGTTTTTACACCGCATTCTTGGCTAA  
CCTTATGATCTGGCAGACAACATGGGAGAGACATCATGTGGCAGGCAATCAGTCGTCTTTTGGAGCGAGCAGTTAGGTGAA  
GGCGAAATCGAACTGCGTAAATGAACTGCCTGGCGGAGAAGTCCATGCCGATGGCATTGCGCTATGCAGGACATGATTT  
TTTTGTCAAATGTGATGAAAGGAACTGCTTCCCGTTTTACCGCCAAGCCGACCAACTGGAGTTACTGTGCGGTAGTA  
AAACCGTACCGTGCCTAAGGTTTGGGAGTGGCGCTGACCGTACTACAGTTTTCTGGTGTGATGATTTCTCCACCT  
CGTCCGCTGGATGCGCATAGCGCATTTATTCTTGGTCAAGAAATGCGCGTTTACATCAATGGAGCGACCAACCACAATT  
TGGCCTTGAATTCGATAACGCGCTCTCCAACTCCACAGCCAAACCTGGCAACGTCGCTGGTCAACGTTTTTGTG  
AACACGGATTGGCTGGCAGTTGGAATGGCTGCAGAAAAGGGATCGTTTTCCGCAATATCGACGCCATCGTCGAGCAT  
ATTGAGCAGCTGCGCCTCACATCAACCGCAGCCTTCTGTGACGGGATTTATGGTCCGGCAACTGTGCACTGGG  
TCCGATGGCCGTACATTTTCGACCCGGCTGCTACTGGGGTACCAGAGTGCAGCTGGCAGTGTACCCTGCGATA  
CTGAACAGCCGCCAAAATCTATGACGGCTATCAGTCAATGATACCCGCTACCTGCCGATTTCTTGAACGTCAACCCGTT  
TACCAACTCTACACGCTGTTAAATCGTCAAGGTTATTTGGCGTCAAGCATTGGTTATTGCTCAGCAGTCAATGGATAG  
ATTATTAGCAGCATGATATGGGTTGAGGATAATGGCCGCTCCGTGCGGCTTTTTGATTAATAAACCAGCAGAGAAAA  
GAACACATAACCTGCAGCAATACAAATAACCGGCAGGATATACAGTGAAGAAAATGCAGGAAAATAGTATGGTGGGAA  
CAACAATACGGGACTCAATTTGTTACGCGTTAGCCCTCTTCCCTTTGGCTTTTTCCAGAATGAGTTGATCTTCAACA  
CCTTCCCGCAAGAAGCGCGCTGGCGACTCATCCGGGCACCGAATCCTGCAACGCCAGTCCGACAAAAATCAGGATGAA  
AATCACCAGAACATAACGTTACGCCACCATTAATAATGGGCGTGGGGAGTTATACCAGAATAGATTCAAAAAGGCG  
TATTCGCTGCATCATATCGATCATGACATGAGTAAAGTGCAGCATGACCGCATTAAATGCCTTCTTGTCTTCTGCGG  
GTATTCATAAATTTAGCAAAAGAAATCAATGTAGAGATCAATGCAGGTATAAAAATCACCCAAACCAAAATCCTTTCAA  
AACAGCAATGCGTCCAGCTTGTGATACGTATGAGTTCTCTTGTGATTAAGACGCGTCTTTCACTTAGTTTACCTGTAG  
ATATCTGTTTTCGCCATTCTTTAAAGGCGATATGATAGGCGTTAATCATAAGCACGGCTTAATACCTTACACATAATG  
CTCTAAAGGAGAGGTTGTAATGTCAACCCGCGTCAGATTCTGCTGCAATTTTTGATATGGATGGATTACTTATCGACT  
CAGAACCTTTATGGGATCGAGCCGAACTGGATGTGATGGCAAGCCTGGGGTGGATATCTCCGCTCGTAACGAGCTGCCG  
GACACCTTAGGTTTACGCATCGATATGGTGGTGCATTTTTGGTACGCCCGCAACCGTGGAAATGGGCCAAGCCGTCAGGA  
AGTAGTAGAACGGGTTATTGCCGTGCCATTTCACTGGTTGAAGAGACAGTCCATTATTACCAGGCGTGGCGAAGCCG  
TTGCGTTATGCAAGAACAAGGTTATTGGTGGGACTGGCCTCCGCGTCAACCTACATATGCTGAAAAAGTGTGACC  
ATGTTTACTTACGCGACAGTTTCGATGCCCTCGCTCGGCCAAAAACTGCCTTACAGCAAGCCGATCCGCAAGTATA

TCTCGACTGCGCAGCAAACTGGGCGTTGACCTCTGACCTGCGTAGCGCTGGAAGATTCGGTAAATGGCATGATCGCCT  
CTAAAGCAGCCCGCATGCGTTCATCGTCGTTCTGCGCCAGAAGCGCAAAATGATCCACGTTTTGTATTAGCAGACGTC  
AACTTTTCATCGCTGACAGAAGTACCAGCAAAAGACCTTCTCGGTTAATGACCAGGGGAGTATCTCGCTGCCCTGGT  
TCTTTATCTGAAATTGCATTCAACTGACGGATTAATCGTCAATTAAGAGAAAAGAGTTACACCGTACCACCTTCCGTGCA  
CTGTATAAAAAATCCTATACTGTACGTATCGACAGTTTGTGAGTTTTATCATGACGGCGGAAGGTCACCTTCTTTTTCT  
ATTGCTTGTGCGGTATTTGCCAAAAATGCCGAGCTGACGCCGTGCTGGCACAGGGTACTGGTGGCATATTGTCCCTC  
CGCAATCCTGACGTGTTTGTACCAGCATCGATCACCCAAAGTCGTTTCTTGGGAGCGATTAAATGGATATCAAAAC  
CGATCGCCCGCGCTTTTGGGCATCGTGGTTTTACCCACAGTCTGCTGGCGGTATTTGCGCTGCTGGCAACCTTTTACCTT  
AAGGTTCCGGAAGGCTGGTTCATTCCGGCTGATGCGCTACAAGGAATGGTGTGGGTTATTTGAGCCACATACTTGGCGA  
TATGCTGACACCCGCCGGTGTCCCTGCTCTGGCCATGCCGCTGGGTTTTCCGCTTGCCTATCCTGGTTCCCAAAAGG  
GCAACCAACTGGAACGTTTTATCTGCATGGCATTATTTGTCTGGTGGTATGGATGCCCATTCATTACCCGAGAACAGC  
GCTGTTCTGTTGGTTCATCGCAATGATCAATACCTTGAGATCCAGTTTTCATCGGCTTATTAAGCATCAGTTGAATACTA  
AAAAGGCAAAAATCACCTTTCTGGAATAAGCAATTCATTTGAATATAAGAGCCAGCTCACAGTTCTGTTAATCTTGGC  
CAACTATGACTGCTACGAGTATAGAAAATAAAGATCAGGAGAACGGGGATGAACCTTCCATTAATTGCGAACATC  
GTGGTGTTCGTTGACTGCTGTTTGGCTGGCTCAGACCCGCCATAAACAGTGGAGTCTGGCGAAAAAAGTCTGGTGGG  
TCTGTGATGGGTGGTTTTTGGCCTGACCTGATACCTTTATGGTTCTGACAGCCAGTACTTAAAGATTCTGTAC  
AGTGGTTTAAACATCGTTGGTAAACGGCTATGTTCAACTGCTGCAAAATGATCGTTATGCCGTTAGTCTTCCGCTCTATTCTG  
AGCGCGTTGCCGCTGCTGATAACGCATCTCAGTTAGGCAAAATCAGTTTTCTGACCATCGGTACGCTTTTGTACCAC  
GCTGATTGCGCGCTGGTGGTGTGCTGGTACCAACTGTTTGGTTTACGGCTGAAGGTCTGGTTCAGGGTGGTGCAG  
AACTGCAGTCTGAACGCCATTGAAAGTAACTATGTTGGTAAAGTCTCTGATCTGAGCGTCCGAGCTGGTCTTGTCC  
TTTATCCGAAAAACCGTTTGGCGATCTTACCAGGCAATCCGACGTCATTAATCAGCGTGGTAAATTTTGGCGATT  
CCTCGGCGTAGCTGCATTGAACTGCTGAAGGATGATGCGCCGAAAGGTGAACGCGTCTTAGCCGCTATCGATAACCCTAC  
AAAGCTGGGTGATGAACTGGTTCGCTGGTGCAGTTGACCCCTTACGGCGTTCTGGCTAATGACCAAGTGGTT  
GCAGTTCTAACTTGAAGACATCAAACTGGGAAGTTTCTGTTGCGCTCTACCTCGGTCTGCTGATTATGTTTGC  
AGTGCATGGCATTCTGCTGGCATTAAATGGCGTGGTCCGCTGAAGTACTTCCGTAAGGTATGGCCTGTGCTGACGTTG  
CCTTACCAGCGTTCCAGTCTGCTGCTATCCACTGAATGTGGAAGCACAAACGCGTCTGTTGGGCTTCTGAATCC  
ATCGCCAGTTTCCGCGCTCTTCCGTTGCAACCATTGGTCAAGCGGCTGCGCCGTTTGTATCCGGCAATGCTGGCGGT  
GATGGTTGCGCTACGGTTGGCATTAAACCGCTGGACCGATGTGGATTGCGACGCTGGTGGTATTGTTACCGTTAGTT  
CCGAGGCGTTGCCGGTGTGGTGGTGGTCAACTTTCGCGCAGTATTGACTGCTGCGATGGGCTGCCAGTAACC  
CTGGTGGCGCTGTTAATCTCCGTTGAACCGCTTATCGACATGGGCGGTACGGCGTTAAACGTTAGTGGCTCGATGACAGC  
TGGCAGCTGACCAGCCAGTGGTGAAGCAAACCGATAAAGCCATTCTGGATAGCGAAGACGACGCCAACTGGCACACC  
ATTAATCTTATGCTGGCAACGGTCCGTTTTGTATAGGGGCGGTTGCCTTACTTTTTAAATGTTCCATCGCGGCGATGCA  
TACTGACTCATATTTAAACAGATCGTCAGCGAAAAAATGTCCAATTATCAATACATTCTGGCTCAATGAATGTGCC  
GTAGCGAGAAGCTTAAACCTCATACCCGAGACGTTTTCTAAGTGAATATCTGGAATACTCATAATATCTTCAAGCACA  
CCACTTCCATTCCCGGAAGATTTAGTGGATTAAGAAGAGATTGATATTAAGCATTGATATTATCGAAGGAACTTTAG  
GAGACTCTCATTTTTTGAATCGCAGCAAAATGCTCCGACAGGATGTATATAATTTTGTTCATAGTATATAGTCCTTA  
AATAGTGAATAACCAACCTGTTTTTATACTGATCAAATTTGGTCATTTTTCTGGGCGAAATACAGAAGTACATCCATT  
CCAATAAAATCTTTATTTTACCTCTTATCCGAATTTCACTACCATAAAGATTATTAATTTACTCTATATTTAACATT  
GTCTGCAGATATGTATCAAACTAAGTGTGGCGCTCTGGCTTGGAGCATCATAGTTAATGTTAGACATATAGGCCAA  
TCATATAATTAAGTTTATTCTGCTATTTATCGCATCGACGTCACATTTGACCCGTTGATATAAAGAAAGTGGTCTGCTA  
GTAGACTGACGCTTTTCTTAAAGAGTCAAGAGCCAGGCTTTTAAATATTTAAATCACCATAAATTAATCTGTTAAGTT  
TGTAGAAAACATCTCCGCTCATATTGTTAACAAAATTATTATCTCATTTAAATCTAAGTCAATTTACAATATAAGTTTA  
AGAGCGACGCCACAGGATGAACTATCAAAAATAGCTCATCATGATTAGCAAACTTAAACCTTTTAAATAAATAAACAA  
TTAAAGAAAAAGATCACTTATTTATAGCAATAGATCGTCAAAGGACGCTTTTTGTTACAGGTGGTTTGAATGAATGTAG  
CAACGAAATACAGAATTTAGGTGATGTAACCTCCGCGCAAAACCGGGAGGTATGTAATCCTTACTCAGTCACTTCCCTT  
CCTGGCGGATCTGATTTGCCAACGTTGGGAGATTGAGGACAGTAAACGCCGGTGGAGCGAGAAATGACTCTCCCATC  
AGTACAAACGCAACATATTTGCCACGAGCATCCAGACATCACGAAACGAATCCATCTTTATCGCATGTTCTGGCGGCGC  
GGTTTCCGTGCGTGGGACATAGCTAATAATCTGGCGTTTTGCTGGCGGAGCGGTTTTCTTACTGCTTCACTAAC  
GCATATTAATAAATCAGAAAACTGTAGTTAGCCGATTTAGCCCTGTACGTCGCTTTCGCTGATTTTATAACACCG  
TTTCCAGAATAGTCTCCGAAGCGGATCTGGCTGGTGGTCTATAGTTAGAGAGTTTTTTGACCAAAACAGCGGCCCTTTC  
AGTAATAAATTAAGGAGACGAGTTCAATGTCGAACATAACGAAAAGAACCCACATCAGCACCAGTACCACACTACACGAT  
TCCAGCGAAGCGAAACCGGGATGGACTACTGGCACCTGAGGACGGCTCTCATCGTCCAGCGGTGAACCAACACCGCC  
AGGTGCACAACCTACCGCCAGGGAGCTGAAAGCCCTGATACGCGTAACGAAAACTTAAATCTCTGGAAGACGTAC  
GCAAGGACAGTGAATAATGCGCTGACCACTAATCAGGGCGTGGCATCGCCGACGATCAAACTCACTGCGTGGCGGT  
AGCCGTGGTCCAACGCTGCTGGAAGATTTTATTCTGCGGAGAAAAATCACCCACTTTGACCATGAGCGCATTCCGGAACG  
TATTGTTATGACGCGGATCAGCCGCTCACGGTATTTTCCAGCCATATAAAAGCTTAAAGCGATATTACCAAAAGCGATT

TCCTCTCAGATCCGAACAAAATCACCCAGTATTTGTACGTTTCTCTACCGTTCAGGGTGGTCTGGCTCTGCTGATACC  
GTGCGTGATATCCGTGGCTTTGCCACCAAGTTCTATACCGAAGAGGGTATTTTTGACCTCGTTGGCAATAACACGCCAAT  
CTTCTTTATCCAGGATGCGCATAAATTCCCCGATTTTGTTCATGCGGTAAAACCAGAACCCTGACTGGGCAATTCACAAG  
GGCAAAGTGCCACGATACTTTCTGGGATTATGTTTCTCTGCAACCTGAAACTCTGCACAACGTGATGTGGGCGATGTCG  
GATCGCGGCATCCCCCGAGTTACCGCACCATGGAAGGCTTCGGTATTCACACCTTCGCTGATTAATGCCGAAGGGAA  
GGCAACGTTTTGTACGTTTCCACTGAAACCCTGGCAGGTAAGCCTCACTCGTTTGGGATGAAGCACAAAACTCACCG  
GACGTGACCCGGACTTCCACCGCCGCGAGTTGTGGGAAAGCCATTGAAGCAGGCGATTTCCGGAATACGAACTGGGCTC  
CAGTTGATTCTGAAGAAGATGAATTCAAGTTCGACTTCGATCTTCTCGATCCAACCAAATTAATCCCGAAGAAGTGGT  
GCCCCGTTACAGCGTGTGCGCAAAAATGGTGTCTCAATCGCAACCCGGATAACTTCTTTGCTGAAAAACGAACAGGCGGCTTTCC  
ATCCTGGGCATATCGTGCCGGGACTGGACTTCACCAACGATCCGCTGTTGCAGGGACGTTTGTCTCCTATACCGATAACA  
CAAAATCAGTCGCTTGGTGGGCCGAATTTCCATGAGATTCCGATTAACCGTCCGACCTGCCCTTACCATAATTTCCAGCG  
TGACGGCATGCATCGCATGGGGATCGACACTAACCCGGCGAATTACGAACCGAACTCGATTAACGATAACTGGCCGCGCG  
AAACACCGCCGGGCGCAACCGCGCGGTTTTGAATCATACCAGGAGCGCGTGAAGGCAATAAAGTTCCGAGCGCAGC  
CCATCGTTTGGCGAATATTATCCATCCGCGTCTGTTCTGGCTAAGTCAGACGCCATTTGAGCAGCGCATATTGTGCGA  
TGGTTTTAGTTTTGAGTTAAGCAAAGCTGTTCTGCTGATATTCGTCGAGCGGTTGTTGACCAGCTGGCGCATATTGATC  
TCACTCTGGCCAGGCGGTGCGCAAAAATCTCGGTATCGAATGACTGACGACCAGCTGAATATCACCCCACTTCGGAC  
GTCAACGGTCTGAAAAAGGATCCATCCTTAAGTTTTGTACGCCATTCTGACGGTGATGTGAAAGGTGCGGTGGTAGCGAT  
TTTACTTAATGATGAAGTGAGATCGGCAGACCTTCTGGCCATTCTCAAGGCGCTGAAGGCCAAAGCGTTCATGCCAAAC  
TGCTCTACTCCCGAATGGGTGAAGTACTGCGGATGACGGTACGGTGTGCTATAGCCGCTACCTTTGCCGGTGCACCT  
TCGCTGACGGTCGATGCGGTATTGTCCCTTGGCGCAATATCGCGGATATCGCTGACAACGGCGATGCCAACTACTACCT  
GATGGAAGCCTACAAACACCTTAAACCGATTGCGCTGGCGGTGACGCGCGCAAGTTTAAAGCAACAATCAAGATCGCTG  
ACCAGGGTGAAGAAGGGATTGTGGAAGCTGACAGCGCTGACGGTAGTTTTATGGATGAACTGCTAACGCTGATGGCAGCA  
CACCGCGTGTGGTACGCATTCTAAGATTGACAAAATTCCTGCCTGATGGGAGGCGGCGCAATTGCGCCGCTCAAATG  
ATTTACATAGTGCCTTTGTTTATGCCGGATGCGCGTGAACGCCTTATCCGGCTACAAAATGTGCAAATTAATATA  
TTGCAGGAAACACGTAGGCCTGATAAGCGAAGCGCATCAGGCAGTTTTGCGTTTGTGAGCAGTCTCAAGCGGCGCAGTTA  
CGCCGCTTTGTAGGAATTAATCGCCGGATGCAAGTTCACGCCGATCTGGCAAACATCCTCACTTACACATCCCATA  
ACTCCCAACCGATAACCACGCTGAGCGATAGCACCTTCAACGACGCTGATGTCAACACATCCAGCTCCGTTAAGCGTG  
GGAAACAGTAAGCACTCTGACGGATAGTATTATCGATAAACCGCCGATGACACATCACCTCCAGCGAACGATCACCCCGA  
TGGCCTGCGTCATCCAGCACTTGCAGGAACAGCGACTCACTGATCTCTTACCCTAGAATGCACTGCTGAATCCCTGGGT  
AGTGCGCAGTTGACCGGCAAAATCAAACGCCATCTGACGATCCGCCCCGAACGCAATGCCCTGCTCTGCCGCAAACTGG  
CAACAATCGGGAAAATCTGCGGGAACATATGCACATGATGATGGCTATCAAGATGCGTAGGTTTGCCTCAAATAGCTCA  
ATGAAACGCAAACTACTGACTGACAAGCTCCTGAGTAATTTCTCCAGCGTAAAGCATCTTCTTCTGCCAACTGCCAGAT  
CCATTTTCCAGCACACCATCGCGGTTAACCCCGCATAGCTGTGAGTGGCTTACCCATAGTAAGGACAAAAGTGCATCC  
CTATGGCCAGACTCGTTTATCAGACTCAACTGCACCGCATGGTCAATAGCCTGCCATTACCAGCGCCGTCGTGAC  
GTGACAATCCCATTGCGACAGGCTCGATAATGCCGTAGTTCTGACCTTTGCTTAAAGCCAAAATCATCGGCATTAACAAT  
CAGTAAGCGTTCATAATCAGCCTCGGTTAATGTGCTTTTTAAGCTCTGCGATGCAAGTTCGCAAGCTTAAAGTTGAGCC  
TCTCGTGCGCCAGAATCATCTCGCGTCCAGCAGCTCAGCATCGCATCGGAATGCACCAACGGAATAAGTTTAGCGCC  
AGTAACACATCGTTAAATTTCCGCTAAGTGCAGGCTTACTGGCAGCAATCTCGAAGCCTTAAAGTTGAGTGAATCAGCCC  
CATTACTTTATCATGAAATGCGTAATGCGCGGATGCGCGTCCGATCGCCATCGCCCGCAGCTTACAGGTCATTTCTACTG  
CCCAGTCTGCCGGAATATTATCAATCTGCCATGATGCGGGATTAACGTAATGTTCTGCTTGTGCTTGTAGATA  
GCGTTGACTCACTTCGCATGCTGCATCAGAGTAATAAGCCCCACCGCGCTGTTCCAGTTCTTTCCGCTTAACTTTAGCTC  
AGGATTTTTATACAGCTCAAAAAGTTGTTTCTGACTTTCTGACTACCTGCGCTCGTGCGCCGCTTTGTAGTATTCGC  
CCATTTCAATAGCCAGCATCTCTTCTGCTTGAAGTAATACAGCAGATAAGAACATGGCAGCAGATTCAACGAACGAATT  
AAGCCCTCACTAAATGGCAGATCGAAAATATTTTTTACAGAGGACGCTTTTAACTGCCCTGACGCCACACCATCAAGCAA  
TTCGGCAAAGCGGACTTGGCATTATCAGCACATCCTTAATGAACACCATATGGTTGAGGCCGAACAAATCGATAGATA  
AATCATCGCTGTCTTTCAGCATCAGAACATCGCGAATAAACATCTTCATGCCGATCGGAATATTACACACGCCGATAAAG  
CGTTTAAATCCGGTATGACGATAAACGGCTTCAGTGACATTCCCGCGGGTATGTAAGTTAATCACCCATGCATTCGG  
ACAAAGTTCTTCGACATCTTTACGATGTCAAAAATCACCGAATGGTACGCGACCTTTAAACAAACCGCCGCGCCGT  
TGGTTTCTGACCAAGATAACCATGACTTAATGGAATACGTTTCATCCAGTTCACGCGCCGTAATTGGCCAAACGCGCAGT  
TGGGTAGTAACGAAATCAGCATCTTTCAATGCTTCCGCGGATCCAGCGTTTTATAAAGCTTCATCGGGACGCCAGCGTT  
ATCAATCATCCGTTGGCAGAGATCGAAAATAATATCCAGTTTTCGTTTACCACCTTCGACATCCACCAGCCATAATTCCG  
TGACCGCAATTCGTGATAACGCTTAATAAATCCTCCAGTAACTCCGGGTATAGCTGCTCCCGCCACCAATAGTGACG  
ACTTTTAAATTTCTGGCTCATAATTTCTCCCTTCCAGTACAGAATACTGATATCTGGCATATCTGCCCTCCCGCCGACATAAAT  
AATCCAGCAACAGGACAGATATGTGAATTGTGAGGATAACGACTTACTGATTAATTCAGTCAATTTCTTACGATAGCT  
CTTAGGCGTAAAGGACGTTAATTTCTTAAACGTTTTAATAACAACTCGGGCTACTATAACCGGCTCAAACGCAATAT  
CCGTCACTGAATAGTTGGTCATTTCCAGTTGTTTTTGGCAAATTAATACGGATTTCAATAAATCTGCATTGGCGTT

TTGCCATAATATCGTTGAGTCGCTCGCGTCAAATATTCCTGTGATTTGGCTGACAACGCCACCATATTCTCCAGCGCCGA  
TTCCTAACTGCTCTTTATCATGCATCTTTCTACCGTACTTTTCAGCCACTGCGGTACATCATCAATCACCTGTTCTT  
CGCGGTAATGACGTAAACGGTTAATGACATAAAAAAGTAACCATCTCAACAACTCTTCCAGCCCTGTTTCGCGGAAATTC  
AATGAAGAAATCACTGTTTCCACATAGGTGAGAAAAGCGTTATTGGTCCGGTATACCTGCGAAGCGACAAAGCAATAAGG  
CAACAATGGCAGGTAATGCTGCTCAAAAAAGCGTTTACTGATCCCAACGTTCAATATGCGCGTGGCACAAAACCTATAAAA  
AACTTTGATGGTGCGAACCTAACGGAATAAAAACAAATCGCCCCGTTCCAGTAACACGCGCTTACCGTTAATCTCCTGG  
AAATAACGCCCGGTTAATACCAGAGTAAATTCATAATAGTCGTGCTGATGCAGTCCGCTGATACTCTCAGTTTTGTTATA  
GATAAACACATGGAAGTTTTTGCATTAAACAACCTGCTGTTCTCGGGCAGTGGCAATTTCCGGCGCGTTAATCACTGGCT  
GCATCATCGACTCCTTATGCCTTCAGTTTTTTCATGAAGCTCAATTAATTCAGTAATCAGTTCACGCGCAAGCATGGACGT  
CATTAAATGATCCTGAGCGTGGACCAGCACCAGACTCACTTTCATCTTACCTTCCGCCGCATCGCCTTCAATCAGTTTTCG  
TCTGTACCAGATGCGCTTCAATGCCATCCGTGACTGATCCATCATGGCTTTTGTGCGGCAAAATCGCCCTGCTTC  
GCCTGTTTTCAGTGGCAGTACGCCAGGCTGCGCGCTTGTCCGGAGTTGATGATCAGCCCCATACCACCTTCTCCAGCTC  
TTCAGCTTCCGTTTTCGATCGGGAATGTTATCGAGATCCATCATAACATCGTTCCTCTCTTTTCTTACCAGGACGATTAC  
CCGTACCGGCATCGATTAATAATTTTCAGGGCGTTAGCGATATCTTCTCGCTCTCTTCTTATCAATCGCATTGTTGCTT  
TGTTAGCCACCAACAAGGGCAGATAAATTAACGTTGCGATGCCAAGGTTGAAGAGTGCACCAGCAATCGCGGACG  
CTACCGTTGGTGTAAAGAAGGCTCCAGACCGTTGGCATGGTCCACGGTGAATATTGGTCAACGGAGGAATAATGCC  
CATGTAGTACGCTGCGAGGTTGATTGCCGCCAGAATCGGTTGTACCAGTACAACGGGATAAACATCACCAGGTTTCATGA  
TAATTTGGCAGACCAACAGAAATCGGTTGTTAATCTGGAAGATGCCGGACGGCAGCGCCAGTTTTTGCACCTGACGATAA  
TCAGCACGGCGAGAGGCGATAAAGATAGCCAGGATCAGGCCTAAAGTGCACCACTGCCCCAAAGGAAAATAAAGGAGTC  
CAGCATCGGCTTGGCCAGATATGGAAGTCTTACCAGGCTGCCAGCGCGCTTCGACGGAACCATATTGCTGATAGGTCG  
CGATATTTTCCAGTGGCCACGGCGTCATAATGCCGTTGTCCAGTGCAGTGCAGCGCCAGCGCCATGAATACCGAAGAAC  
CAGAGCAGTGGAAACAAGATCACATAGGCCAGCCACCAGCTACCCAACGATGCCAGTGGGGTTGAGATGGTATCCAT  
AATGATCTGATGGAAGTTGGTGGCCAGGATTCAACGCCAGGCAATAATCCCATCACGGAAAGAATAATAAAGCCGG  
GAATTAATGCCGAGAAGGAACGCGATACTGAAGCAGTACGCTGTCCGGCAGTTAATGACCAATTGCGGCGGACAATA  
AAGGTAACATTTCTGCCACCACAGGCCAATAATAATCCGGAGATGATATTCGCCCCACCTAACAGTTTGCACCAAC  
CGCATAGGCCCTCACCGACTATATGGGGTACGGTGCATAAATGCTGCAACGGATAACAACCCAGCCGCCAGCGCATCGA  
CTTTACGCTCTTCTGCCAGCGCCATGCCAATAAAGAACGGTGCATTAAAGACATTATTCCTAATGTTCCGTTATATACG  
TTGCCGCCAATACCTTTTCAGACCATTAAGTGTTCATGTTGAGGCGTGCAGGCGAATACCTAAGGAATAAAAAACGA  
CCCTCCCCAAAGCTTAGAAAAACGTTGTTAATTAACAACATGGCCCCGCAAGGTTAACGGCATTAAAGCGAATAA  
AGCCATTTTTGATTGCATTAACGTGTGGCTGCTTTCTATTTAACTGCAAAAGGGAGGAGTACCTTTTTCAAGCGATGCA  
ATAACATTAATCATAGAAAAATACCCTTAAAAACCGCAATTTAAATATTGCGGTATTGATTATGAAATAACTCTTTGAC  
GGAAAAATTTAAAAATAAATTTGCTGCGGCTTTTTTAAATCGCTGCAACCGCAGCCTTAAGCACGCCTAAACCATCGA  
CTTTGCCATAAAGCAGCGAGTCAATTACTTCAACCGTTTTGTTGGGTAACAAACGCTGGATTTCCGGCAACATATAAGCA  
ATCTGCGGCCCTAATAACACGACATCGGCATTCTGACCTTTTTACCAGCCAGTGTTCGGGAAATGCTTCAATAATGAC  
CGGAATTCATATTTTTCTGCTGTGCGCGCATTTTTGATACCAGTAAAGAGGTAGACATGCCCGCAGAACAAAACAGAT  
AAATGTGTTTTTTTTCCATAAAACTGCCCTCATCGACGATTATCTGTGAGCCAGACTCCGCAAGCCTTAACCTGCTTC  
CATGCTCTGGGTAACCTTGCAGAACCAACATGACTTTTTTTGTGGTGAAGGAGTATACGGTATAGACCTGAGCAATAGT  
ATTTCTTTGACCTTATAAATGTTTCTCCTTGACCTGTGGTTATGACCCTTTCACATTTCCGGCAAATAATTCGCGAAG  
ATAATTAAGAACTCAGGCCAAAAAACCGCGCAATGGCCGTTTTCCGTTGTTACTCAAGCTTTCCAGACGAATTGATTA  
CTTCGACCGCTGTGGATCAGTGTCTATTACGACAGGTTGATAACCGGAGTTGATGACATGTCCGGTATCATCTAACG  
CGACAAAGTAGTTTTCTGTTTTACCATCAGTTGACCCAGGATGTAGGTCTGGCAAGTACCAGGAGCATGGATCATGCTC  
ACTTCAGACGAAGTTTTACCAGCAATTTGTGCAACCTGCGCCCGCTCATGCCTTTTTTGACGTCTTTTACCACAGGCTG  
TACAAACTGGTCTTTGGTACGATCATAAGCCGTACAACCCGCCAGCATGGTTAATACCAGGCTGCACTCAGAATTCCTG  
CCATATTCTTGTTCATATCCGTCCTCTGTTTATCAGCGTGTAGATAAGCCTGGAATACATTGGGCGCTTTTTTCAAGC  
CCGTGAACGAAACGGCTCCGCTTTCAGAGGATTCCTGTATGACGTTTTTAAACCACCTTACAGCCGCTGTGCGTTGCTGTT  
TCAGTAGCAACGGTTAGCTTTAAGGAAGTTTTGCTTTTTCTGTCTGGAGGGTTCAATGACATTGCAACAACAAATAAT  
AAAGGCGCTGGGCGCAAAACCGCAGATTAATGCTGAAGAGGAAATTCGTCGTAGTGTGATTTTTCTGAAAAGCTACCTGC  
AACTTATCCGTTTCAATAAATCACTGGTGTGCTGGGATCAGCGCGGTGAGGACTCCACGCTTCCGGAAAGCTGTGCCAG  
ATGGCGATTAATGAGCTGCGCTGAAACCGGCAACGAATCACTGCAATTTATTGCCGTACGCTGCCCTATGGTGTCA  
GGCCGACGAACAAGATTGCCAGGATGCCATTGCCTTTATTCAACCGGATCGCGTATTAACCGTTAATATCAAGGGCGCGG  
TATTGGCCAGCAACAGGCTTGCAGGAGCAGGCTTGAAGTGAAGGATTTTGTCCGTGGCAATGAAAAAGCGCGTGAG  
CGGATGAAAGCAATATAGCATTGCGGGTATGACCAGCGGTGTGCTGGTGGGCACCGATCATGCAGCAGAAGCCATTAC  
CGGATTCTTACTAAATATGGTACGGCGGTACGGACATTAATCCGCTGTATCGTCTCAACAAACGTCAGGGTAAACAGT  
TACTGGCGGCTTAGCTTGGCCGAAACCTTTATAAGAAAGCGCAACGGCCGATCTGGAAGATGATCGCCCTTCTCTG  
CCAGATGAAGTGGCACTCGGCTGACCTATGACAATATCGACGACTATCTGGAAGGGAAAAACGTACCTCAACAGGTCCG  
CAGAACAATAGAGAAGTGTATCTGAAAAACGAACATAAACGCCGTCCGCCAATTACCGTTTTTCGATGATTTCTGAAAA

AGTAATAATTTGCACATATTGGATTGTGCGAAAAAGAGTAATTTGTTACGCCGGATGCGGCGTGAACGCCTTATTCGAC  
CTATAAAACTATGCAAAATCAATACATTGCAGGAGTGAATAGGCCTGACAGGCGTAGCACGTGACAGCGTGAACCTTT  
GTCATCGACCCGCTCTTTTTAATCGCTTCCCCTGTTACTGATAGATAACCAGCATTGCGAGTCAACAGTGGTA  
CGCGTTTTAACTTCTCCGCGCTCGAATTTGAAGCTGCGGCAATTTATGAATATCCCGAACATTTACGTTATTCTTAA  
TGACTTACCCACCCGACCAGGGGTGTATCTGTTTATGGTGAAGTGACACCATGCCGCTCTATATCGGCAAAAGCGTTA  
ACATCCGACGCCGCTCTTTCTATTACGTACCCCGGATGAAGCCGCCATGCTACGGCAATCCCGACGGATCAGCTGG  
ATATGTACCCGCGGTGAAATCGGCGCTGTCTCTTGAAGCGGATTAATCAAAGAACAACAGCCGCTGTTAATAAACG  
GTTGCGCCGCAATCGCCAGCTCTGTGCCCTGCAATTAATGAAAAGCGCGTGTGATGTGGTGTATGCCAAAGAGGTGGATT  
TTTACGAGCCCCAACCTGTTTGGCCTGTTGCAATAGGCGCGCAGCTTTGCAAGCATTGCAGACCATCGCTGATGAA  
CAAAAATTTGTTATGGCCTGCTGGACTGGAACGTTAAGTCGCGGTGCTGCATGTTTTCGTTACAGCGTAAAACGTTG  
CGCCGAGCATGCTGCGTAAAGAGAGCCATGAGGAACATGCGCTACGCTTGCGCCAGTCTCTGGAGCGTTTGGGGTGG  
TGTGTTGGCCTTGCAAGGGGGCGTGGCCTGAAAGAACAGCACCCGAAATGACTCAATATCATATTATCAAACCTGG  
CTGTGGCTGGGGCGGTTAATTCGCTGGAAGAAGCGACAACGTTAATTCGGACCCCGCGGGTTTGTACAGCAGGTTA  
TAAAATCTTTGTAAGCCGCTGCTTCCGGTAACTATGAAATTAAGTGAATTCGCGCAATGACCAGCGAGCCAGTT  
GATTTCACTGAACAACAGTTTACCTTGGCTTGTAAAAGCCGAGGTGTGCCATCGAACAGCACGCCCTGGT  
CGGTAGTGAGCAATTTATCGCCAGTTGCCACGCCGTTAATCACAAACACCACCCCGCCGCTGAGCCAAAGGTAGTA  
AACGTACGTTGCGCAATTCGACTTTGCTTACAGACATCCAGGCGTGTATGATGTTGAAATCCATCGACATCTGCC  
TGCCGTCAGTTTCGTTTTACCACCTGGTCCGCTGCAAAGGCAAAAGGCTGGAACGTTTTAAGGTATGGTTAAAGCGGT  
CTGCGCTTCAAGGAGCATCTCGCCGCTTCCAGCAACGTCACTATCCTTCCATGCCGGGAAACAAAGAAAACCTCCCA  
TTCGCCGCGATGGATGCAATGCTGGCACGCCAGTAAAAATCACGTTTTGCCGTTGGAAACGTGCAATTTTCGCGCTTC  
ACCCGACGATTTGCCACAGATTCACCGACATTTACGCATATCAAAGTATCCATACTCGCTCCCGGCCGTTCTTTT  
CATTGTTATCGTTCAGGTAACCGTGGATGGTTATCGGCAACTCGGGTATTTACGTTAGTGGTGTATCAGGCTTTTTTAC  
AACTGTTTGAAGAGAAAAGAAAACCCGCGATCCTGTCCACCGCATTACTGCAAGGTAGTGGACAAGACCCGCGGCTT  
AAGTTTTTGGCTGAAAGATTATTCAGCAGTTGCAGGATTTTACCTTTGCCGCTGGACGTTCTGTGACAGCCTTCTCA  
AAATTAGCATTAAATTGCTTTTTCTGTTCCGGCGTCAGGATGTTGAAATTTGTTCTGGGTTTCCATGTGCCCAGCAT  
GTTAGCTTTCGCTGTTCTCCATTTTTGCGATCTGCGCTTACGTTTTACTTTATCGAAGGTATCGCTGGCAATGATGT  
CATGCATTGCGCGGCTTCTCCAGCGCGGACGTTTATCTGGTACGCTGGCCTTTCATGATTTGCGGATCTGCTGT  
TTCTGCGCGTGGTCAAGTTGAGGTTTGAACATCATGCTCTGATGCGGACCGAATTGCCTTTGTGGTGCATCATCGG  
CTTCGCGTCAGCCGGTGTGCGGTAGTGGTGTCTGCGGCATGGGCCAGGTTAGCCGCGCAAGAGCCAGGGTAGAGGCAA  
CAACAGTGCAGTTAATTTACGCATATTTCTATATCCTTCTTTAGTTATTTTACGGCTTCTTAAGTAGCGTGCCGT  
GTTGACGAGATTAACCTTACTGACTTTAGCGTCAATTAATCAGAGCAACGGTAAAAAATGAAAGTGAAAAAACACTTT  
TGCGCAATTTAGGAGAAAAAAGAAAATTTGATGGAGAGTGTAGAGAGAATATTACAACACGATGATTTTGCAGAGATT  
ATGAAGAACTATACCGGATGACTGGTGATAAATAAAGCAAATAACCAGGATTAATCTGTATTAATTTATAAGAAAGCAAC  
TTAATACCCGAGAAATGATTTCTGCGGGTAAAGTATTAGCTATTTTTTTCGAGCATTAAATCCCGCGGTAATCCCAACGCT  
ACCAACGGATTAGGGAATAACACATACTCTACATCATGGGTTACGGTAAAACGTTTCTCTCCGCTCTGCCAGCAATGT  
TCCTTTCTCAAACGGCATAAAATTCAGCGTGTCACTTGCATATGCATTTGAAAGGACGGCGAGTGGCGAGTAATTTGCG  
AAACCACCCGATAACGGAGCGGCGGTGTTCTCACGATACCGACTCTCACCAGATAGCAGCGCAGCAATTTGCGTGGCA  
GTTACTGCAAACTGGCGAAGATCGTTTTGCCAAAGGGCAACGTTTGCAGTTCCAGCGTACAGGCCAGCGGCCAAA  
ATGCTGCGCGTGAATGGTAAACGTACCACAGTTTCTGATGAAACACCAGCGCTCCAGCCCCGCGCACCCAGCC  
ACGTCAGAAAATTTCTGCTCCAGGGAATGTCGCTTCCGGTAAACACCGAATGCGGATGCAAGGAGCCACGAATTTGCG  
GTATGTAGATCAAGGTGCCAGCGCACAGATTTTGCCTGGTCAAAAAATCTTCCAGGCACTGTTCCAGTTTCGCGCGC  
CCGACAGTTTTCTCCGTTTTAGCAAATAGTGCACACCGCCAAACATTCGATTCATATCGCTATGGCAATAACGTT  
TCCCTTGTTCAGCGCAGGAGGATTCCCGAGGATCACAGCAACCGCAACGTAACGGATCTCGCCGTGAGATATCGCG  
CCAAGCAACCGCTCCAGCATCTCCACAGGTGCCGTCTATTACCGTGTATTCCCGCTGAAATCACAGTGCGCCTTGGCG  
TGGCGTTAATGGCGTCAGTTCCAGCACACCATCGCCAGCCAGCGCAACGCCGTTGATTTCTCGCTCGGTGATAA  
CCGGTTTTTACCCTTAAGGTGAGCAAGAAAATTTATCCATTGCCCTTCCCTCGCGTGGAAACGGATAAACCGAAC  
GAGATTGAGTAATTTGCTCAATACATCCAGTGTCTCCCGCTTCCGCGCAGCAATTTGCGGGTGGCCAGATCGGCAGCAG  
TAAGGCGATCGCGGTAGTAACGATCCACCGAGTCATTGAGCGCATTAAACAGCGTATCGTTTATCATCACCGCGGATTC  
ACCGCCCGGCTTCTTCTGTCAATACCCGCAACCGCAGGACGCGCGGCGCCGCTTCCGCTGCTTTTACG  
TAAATCAAAGACTTTTAGTTCGCTAATCGGGTGTGACGGCAAGGAGTTTATTGAGATAACCCATACTCCGGCGTGT  
CCCGACTCTGAGGACGACCAACATCATGGAACCATCATCGCGCTCAGCAGTTGGCTGTTAAACAGATAGGTAGAC  
ACCGTATCAGACACGGAACCTGAGTTGCCGGAATTTCTATCGCCATAAAACCTTACCCGCGCACGCAGGTTTGGCAG  
TAACTGTGACTGGCGAGCGAACGCTGTTGGTGGCAAAACAGCACCTGGCGGTTACTACGCGCAATCACGTCATTATGAA  
AAACGCCCTGTGATAACGTCCGGTTTTGCTGGGCGAAAATCACTGTTGGGGATTACCTGATTACGCTTGGCCACC  
GCCTCGCTGGCTTCGCGAGTCTGTGCGCGCGGATAACGGGAAGCCGGGTATCATTGCCTTCTTCCGCCGTAGACAAA  
AAGTTGCATACCCGGTTCACCGTAATGACCGCGGAGACGATTGTGGTTTTGCCGCCCCCTATCACCGAGCAACGCTACCT



GTGGCAACGCCGAATGGACGCTAAATTTCTCTTCGTCGTTAAAAATCGTTTTAACAGCGATTAGTGACGGGCGCTTCC  
AGCGAACGGTAAATTTATTGTTTCAGGTTGGCAACGGTGGATGCACTTTGCCATCCAGCGTATCGGCAGATGGCGCGAT  
CGTTGCCGATTGGCTACCCACATTGGCGAAGCGGAACTGACGCTGGAAAGCCAGTGGGTGCCTGGCGTCAACTTTTT  
CCAGTACCTGCTCATCGCTACCACTGAATCCCACTGACGCGACCCGGAATAAACGGACGCTCGTGGCGGGGATCACG  
GCCTGGGGGAATCCCGCATCGGCAAGGGCTTTCATTTTCAGTAAGCCCTGCTTCGCCGCCAGTTCGCGGGTTAGACACCTG  
AAAAAGGTGACGGGTAGAGGCTTACCTACCAACGACAGGCCCGGTAATGATGCGTCAGCCCTACCAGCCCGTCAAAAT  
TGACTTCCCAGGCGTTCATCGCACCCCTCATCGAAAAATCCAGCCCGGGTTAAGCGTGGCGGGCAATGTTAACGAGT  
CCGACTCCAGGCTCGCCATCGGCCATGCGCAGTAATCTGCGGCATACCAGGCGTGGGGCGATGGTTACCAGGAAACCA  
ATGCCGCCGAATGGCGGGTACTGGCAGCACCGGTAAGCGTTTTGTTCCAGTTAAACAATCCCCGCCGCGCTCCAGCAA  
CAGTTGATCGAACTTTTCCCGCTCGGGGAAACCAGACCGCAAGAGAGTCCGAAGCGAGTGTATTCCGCATTGAATCG  
CTTCATCGAAAGTATCATAACGCCAGACGCGCAATAACGGTCCGAACACCTTTCATCTGGTACGCCAGCAACGCCTGTC  
ATTTCAATGATCCCCGGCGTACGCAACGATGTCCCTGCTTGAATAAGCGCGGCGCAAGCAGGGTTCGTCGCCCATCGC  
TTCCAGTTGCTGCCATGAGTAACCACTGCTGTGCGGCTGTTGAGAAATCAGCCCGCAATAAACGGTTCGCGTTGCT  
CATCCCAGTTGCCCGGCTAATCGCTGGCTGACGGCAACCAGACGAGCAAGAAACGCATCGCCCTGCGCCCCGCTTTTC  
AGCAATAAACGGCGGGCAGGTGACGCTTACCGGCTGTGACAAACGCCGACTGAATGGTCAGATGGACAGCCGCTGTC  
GATATCCGCCACCTCATCGATAATTAGCGGATTATTACCGCCCATCAAGGGCGAGAATTTTCTCCGGCTGACCGGAGA  
GCTGGCGATGCAACTGGTAGCCTGTATTGGCGCTACCGGTAACAGCAAACCGTCGAGATCCTCCAGCGACTCAGCGCC  
TGACCCGTTTTACGCCCGCCTGCACAGGTTACGACGCTGGCGGCAAGCCAGCCTGCTGCCATAAACGCATTACCGC  
TTCGCCACTCCACGGTGTAGTTGCTGGGTTAAAGATAATGGTGTACTGCGCAGCAATGCCGGAACGATATGTCGGT  
TCGGCAAATGACCAGGAAATTATACGGCCAAACACCGCCAGCACGCCGTGGGGCGATGTCGAGGCTCGCCGCGCCG  
TCCGGCATTCTACTACGCTGCTCGCCGTACGAACGTGATACGCCTTAATTGATATCGCGATTTTATTGATCATCGCCGT  
CACTTCGGTTGCCGTTCCAGCGCGGTTACCGTTTTCTGGAATAATCGCGGTTAATTCGGCTTTATTGCTTTCCA  
GCAGTGGGCAAAGCGTTGACAACGGCATGACGTTAGCAAAATGAAAGCCGCGCCAGCGCGAAACGCCGACGGGCT  
GCCGACAAGCCTGCTGACCTGAGCGGCATCGGCATATTGCCTTGCCATAACACCTCGCCGATACCGGATTACGCTT  
CACACGGATGCGCCCTGGCCGTTATCCAGTACCCTAATCCATAAAGTCATGCTGTTTTCTCTGCGCACAGGCG  
CACCAGACGAACGGATCCCCGGCGTGGCATTGAGGGCATCCAGTTGTGCGGCGGTTAAATCAAACGCTCGGTTGCCG  
GATCGGTACGACACGACCGCGAAATGGTGATAATTTTTCATTGGCGACAGGCGAGGCTGGGAAATCGCCCTGCGCA  
GGCTGCCCTTCTGCCACTCCACCAGCGACTTTTACGGATGGCGCGCACCGGTCGATGTCACTCAAGCGTCCGGCC  
ACCGTCAAAGATGTGATATAGTTACGGTAGCGAAAACCTTTTCTCCAGCACCGCGCGGGCAGGCGCGTTTTGCGGAT  
GTACCTGACCGATGACGCTCTGGGCTTCTGGGATAAAAAGTGGGTATAGATCGGATGTTTCGGCATCAGTTCTGCAATA  
AATGCCTTTTGGCCGGTGGCGCAGAGAAAATCGGCGCGGCTAAAATCCATCGAAAAGAAGCGTTTACCAGGCTTTGCCA  
GAACGGTGAATAGCCGTGTTGTCGAATCACCCCGCGCATTTACGCAACCACTTTGTCATTAAACTTGTGCGGAAAAGCCG  
CCATAAACATAAAGCGCGATTTGACAGCAAATAGCCGTTGCCCTCTTTGCGCCAGTCCGGGTCGAGAAACAGCGTGCAC  
AGCTCGCTGCTGCCGGTGTGATCGTTACTGAGAAACAGCGTCGGCAATGCGTTATAGACATTACGCTCTTTGAGGCGTG  
AACCAACGTGCCGACGCGATAGTTGTACCAGGGATCGTTACGCCAACCGCCACCTCAATGGCACAATCCCCGCCACGG  
TGCTGTCTCGCTATCTCCAGCACGAACACATAGCCCTGCTCACTTTTGGGAGTTCCGCTTGCAGGTTTTGATTGCC  
CTTTGATACGCGCGAAAGCGTGGCTTATTGGCGGAAAGCGACGTGAGCCCGCCGCCGTTTTGCTGGCAAGCTGCAT  
CAGCGCCGAGACATCTGATCGCTCAACGGGACGGATGACCATCATGATGAACCTCGGCTAACAAAGTGTTCGCAAGCAGC  
TGCAAAGCGATCCAGTCCGGTCTGTCACCTCTTCTGCTGACATTGAGCGCAGGCGCAAACGCACCAGTTGCCACCCG  
CAATCAGTACCATCAGCCTGCTTTCGCCGCTTCTGAGAGATGTTTTGCTTGGCCGTAATCGGCAATTGATGATGAT  
CAGCCAATCAGCAAACCTAAGCCGCAACTTCACTGAACAAACCATAGCGGTGATTAATAGTATTAAGACGCTCAACAAA  
CCAGTCTGAGCCTGTTAACGCCATTAAGCATCTCTGGTGTGTTGATGAGCTCCAGCACTTTGCCTGCCACCGCCGAGG  
CCAGCGGATTACGCCATAGGTGGTGCCATGAGTGCCAACGGTATCACGCGGGCGCACTTTCGGTTGCCAAACAGCA  
CCGACCGGAAACCGCCGCCAGCGCTTTGGCGGTAGTTAACAGATCAGGCGTACGCGGTAGTGCATATAGGCATACAG  
TTCCCCGGTGGCGCCGACCGGTTTTGACTTTCATAAAAATCAACAGCGCATTGTGGCGTTACACAATTCAGCGAGC  
CTTGAAAAACCGGTTGCTGGCTGGCACCACACCGCCTTCCCCCTGGATGGGTTGACAATCACCGCACAGGTAGAGTCG  
TCAATCAGCGCGTGGCAGAGTTAATATCGTTATATGAGCATGACGAATATCCGCCGGCAGTGGCGCAAAATCCTGTGA  
ATAGGCTGGCTGCCACCCGACTGACAGTAAACAGCGTGGCACCATGAAACGCATTTTTGAAACGCCAGATGCCGCTCT  
TATGGCTGCCGTAGCGGTGAGCGAATTTACGCGCAGTTTTAGCGCGCTTCGTTGGCTTCGACCGGAGTTACAA  
AAGAAGACCGATCGGCAACGTGGCGTCGATCAATTTTTTCCAGTGCAGTACCGGCTCGTTGGTGAACCGTTGCC  
GGTATGCCAGAACTTACTCGCTGTTCTGTTGAGCGTTCACGCGTTCGGATGCGCATGGCCAGCGGTTACCCGCAA  
TGCCACCCGCGAAGTCGATATACTCTTCCCCTGCTGATCCACAAGCGCGAACCTTCGCCACGTACCGGTATAAAGGGT  
GCCGGAGCGTAAACAGGTATCATCCATTCATCAAAGTTTTACGCGTAATTGGCTGAGACATAGCGACCTTACAGTAAA  
TAATTCGTTATTTATATGTTAATAAAGTAATGTTTGGCGTGAATAATGATGTTGAGGGTTCGTGCCAGCCAGTGATA  
AAAGTGATAAACGGCGGAGGCTAACTGGAAATCAAGGAGTTATAACCAAACCATATGCATTTAAAGTGATATAAAGTG  
AATACGTTTGGATGTGGGTGAATAAAAAGAATAAAAAACGCAATGTTATGCAGAAGTAAATATAATCTGGAATTGTG

ATCATTGACGAAATTTACTGAAATTAAGTGGCCATTCTGACGCAGCGCGCACAAAAGCGGGCATTTTTTGCGCCATCG  
TTGACATCATTAAACAACCATCGATCAAATCACTTAAACAACAGGCGGTAAGCAACGCGAAATTTCTGCTACCATCCACGCAC  
TCTTTATCTGAATAAATGGCAGCGACTATGAAATTTGTCTCTTTTAAATCAACGGCCTGCGCGCCAGACCTCACCAGCT  
TGAAGCCATCGTGCAAAAGCACCAACCGGATGTGATTGGCCTGCAGGAGACAAAAGTTCATGACGATATGTTCCGCTCG  
AAGAGGTGGCGAAGCTCGGCTACAACGTGTTTTATCACGGGCAGAAAAGGCCATTATGGCGTGGCGCTGCTGACCAAAGAG  
ACGCCGATTGGCGTGCCTGCGGCTTTCCCGGTGACGACGAAGAGGCGCAGCGCGGATTATTATGGCGGAAATCCCCTC  
ACTGCTGGGTAATGTCACCGTGATCAACGGTTACTTCCCGCAGGGTGAAAGCCGCGACCATCCGATAAAATTTCCCGCAA  
AAGCGCAGTTTTATCAGAATCTGCAAACTACCTGGAACCGAACTCAAACGTGATAATCCGGTACTGATTATGGGCGAT  
ATGAATATCAGCCCTACAGATCTGGATATCGGCATTGGCGAAGAAAACCGTAAGCGCTGGCTGCGTACCGGTAATGCTC  
TTTCTGCGGGAAGAGCGCGAATGGATGGACAGGCTGATGAGCTGGGGTGGTTCGATACCTTCCGCCATGCGAATCCGC  
AAACAGCAGATCGTTTCTCATGTTTTGATTACCGCTCAAAGGTTTTGACGATAACCGTGGTCTGCGCATCGACCTGCTG  
CTCGCCAGCAACCGCTGGCAGAATGTTCGTAGAAACCGGCATCGACTATGAAATCCGCAGCATGGAAAAACCGTCCGA  
TCACGCCCCGCTGGGCGACCTTCCGCCGCTAATTTAGCAGCTCTCTGGCTCAAACGGTGGTGGGAGAAATTAACCTTG  
AGAAAAATCAACAACTGTCAGTAATGATTTGTTGCCTGCCGCTTTGTTATACCGTCTCTGCGTTTTAGTTGTCTGA  
CCACTTCTCTATTATCAAGTTTGATATAGGAACTCCACGATGAACGCTGAGCGTAAATTTCTTTTGGCTGCTTATTT  
TTGCCCTGGTCAATTTACGCTATCCACGCTTTCCGTTTTGTTTTGATCTGCTCACCGATTTACCCCACTTACAGACCTATC  
CGCCAGAGCGAATTTTTCGGCTATAGCCTCTATATTCTGTTATTCATCATTGCCACCCTTTGCTGTTACCAGGAAGCAT  
ACTGGTGATCGCGGAGGAATAGTTTTGGCCCGCTCTTAGGGACACTACTCTCATTAAATTGCCGCCACGCTGGCCTCCT  
CGTGCTCATTCTGCTGGCGCGCTGGCTGGGACGTGATTTACTGCTGAAATACGTTGGCCATAGCAATACCTTCCAGGCC  
ATTGAAAAAGGCATTGCGGTAACGGTATTGATTTTCTATTCTGACCCGCTTAATCCCGTTGTTTCTTACAATATTCA  
AAATTACGCTTACGGATTAACCACAATCGCCTTCTGGCCTTATACCCTTATTTCCGCACTCACGACCCTACCCGGTATTG  
TTATTTATACCGTGATGGCAAGCGATCTCGCAATGAAGGCATTACGCTGCGCTTTATTTTACAACCTGCTCTGGCGGGC  
CTGGCGCTGTTTATTCTGCTCCAGCTCGCAAACTCTACGCCGACACAAACATGTGGATCTGCTGCTCGCGCCGAG  
CCCCTTACTACCCAAAAATGAAGGATAGAACGATGTTGCAACATTATTCAGTGTGATGGAAAAAGGACTGGCTGCA  
CTCTGTTTACTGGCTGTTGCTGGGCTTAGCGGCTGCATCAACAAGAGAATGCGGCGGCAAAAGTGAATACGACGGACT  
TTCGAACAGCCAACCGCTGCGTGTGATGCCAATAACCATAACCGTAACCATGCTGGTGCAATTAATGGTCTTTCTCA  
CCGACGACACTCGTCACGGTATTGTGTTAAAGATGGCTCCAACGGACATAAATCGCTGTTTATGGGTTATGCGACCCCG  
AAAGCATTATTAAGGCCCTGAAAGAGGCAGGTGGTACGCCGGGCGAAAACATGACGATGGATAATAAAGAAACGACTCA  
TGTACAGGCAGCAAACTGGATATTTCCGTCAACTGGCAAGGGGCGGCAAAAGCGTATTCTTCGATGAAGTGATTGTTG  
ACAGTAATGGCAAGAACTGGACATGCGCTTTGGCGGTAATTTAACGGCAGCAGAAAGAGAAGAAAACGGGTTGCCTGGT  
TGCTGGATAGCTGCCCGGTGCGCATCGTCAGCAATGCAACATACACTTATGGTGCAGTTGAAAAACGTGGTGAAGTTAA  
ATTCAAAGGCAATGCCTCAGTTCTCCCGGCGGATAACACGCTGGCAACGGTTACCTTTAAAATCGCCGAATAAAGCCAGG  
ATAAAGGATGATGATGATGCAATCGCGAAAAATCTGGTACTACCGTATAACCCTCATCATCCTGTTGTTGCTATGCTGC  
TGGCATGGGCGCTGCTTCCCGGCGTCCATGAGTTTTCAATCGCAGCGTTGCGGCGTTTCCCGCGTGGACCAACAGGGT  
ATAGAACGCTTATTACGCTTACGGCGCACTGGCGGCGAGTTGCTCTGTTCTTGTGATGATTTTGCAGGCCATTGCTGC  
ACCGCTACCTGCGTTTTGATCACCTTGCCAATGCGTGTGTTTTGGCGGTTCTGGGCGGCTTGTGCTGTGGACCA  
GTTGATGGCCGGCGCGGCTGTGCTTTTTATCGCCAGAGTGATGGGCGCGAAGTGGTGGAAAAATTAACCGGCAAA  
ACCGTGTGACAGTATGGACGGCTTTTTCACTCGTACGGCAACACACCATTCTGGTCTGTGCGTTATTGCCTTTTGT  
CCCTTTCGATCCAATCAGTATGCTGCCGTTTTGACTTCAATACGTTTTTCGCTGTTTTTTATCGCCACCGGGCTTGGT  
AGTTACCGCAACTATTGTTTTATTCTGGGCGGCGAGCATGTTAACAGGCGGTACTTTCTGGTTTTGTACCGGACTGTT  
ATTCTGTTTGCCTGACCGTGGTATTTTTATGGCGAAGAAAATATGGCTTGAACGCCAGAAAGGAATGCCTGATGGGT  
TTACCGCGCTTAGCAAAATTCCTTTAATTTTACGTCCACAGGCGTGGCTGCATCGTCGCCATTACGGCGAGGTGCTAAG  
CCCCATTGCTGGTGGGGCGGATCCCGTTTATCTTTTATCTGGTGTGATGTTTGTGGCTGGTGGAGCGCAAACGCT  
CACCGCTCGATCCGGTAGTACGATCGCTTGTGACGCGCGCATTTGCGCAAATGTGCTGTGAGTTTTGTGTTGATATC  
ACCAGTATGAAAGTGCAGGAGCGCACCGGCGAGCAGGATAAACTGCTGGCAGTGGCTGACTGGCGCAAAGCCCGCTCTT  
TAGCGATGAAGAACGGCTGGCGCTGGAGTACGCCGAAGCCGCAAGCGTAACGCCGCAACGGTTCGATGATGCCCTGCGTA  
CCCGACTGGCTGCGCATTTTACGCTCAGGCGCTCACCGAACTGACGGCATTGATCGGCTGCAAAATCTGTCAGCCCCG  
TTAATTCTGCCATGGACATTTCCGCTCAGGGGCTGTGCCGATTCTGAAAAACGTTCTTAAGGAGAGATGATGCGCCA  
TTGTGGGTGGTGTGGGATTGTTATCGCTGTTTTCTGGAACACATGCCAGTACTGGCAAGAAATTAATAATGAGG  
CCAAAGGGCAAACCGTCTGGTTAACGCTGGGGCGGCGATACCGCAATTAACCGTATCTCGACTGGTGGAGCGGCGAG  
ATGAAAACCCATTACGCTATAAACCTGAAGATTGCTCGTGGCGGATGCCGAGACGCGGTAAGCGCATTACAGCCGA  
AGCCGAGCCGACGTAACCGGGCGGCTCGGTGGATCTGCTCTGGTGAACGGCGAAAACCTCCGCACCTTAAAGAGG  
CCATTTATTACAAACGGGCTGGGCGGAGACTCTGCCAACTGGCGCTATGTGACACACAGCTGCCGGTGGGGAAGAT  
TTTTCTGTGCCGACACAAGTGTGGAATCGCCCTGGGGCGGCGCAAACTGACGTTTTATCGCCCGCCGCGATGTTACGCC  
ACAGCCACCACAAACCGCGCAAGCCTTACTGGAGTTTGCTAAAGCCAATCCCGGCGACGGTTACCTATCCGCGCCACCGG  
ACTTTACCGGCACGGCGTTTCTGAACAGTTGCTGATTATGCTGACGCCGATCCCGCGCATTAAGAAGCGCGGAC

GATGCGACTTTCGCCGTGCTACTGCTCCCTTGTGGCAATATCTTGATGTGCTGCATCCGTATTTGTGGCGGAAGGAAA  
GGATTTCCCGCCTTACCCGCGCGGATGGATGCTCTGCTGAAAGCCGGCACATTGCGCCTGCTGCTGACCTTTAACCCCG  
CGCATGCGCAGCAAAAAATGCCAGCGCGGATTTGCCTGCAAGCAGTTACAGTTTTGGCTTTCGCGAGGGGATGATTGGC  
AACGTGCATTTTCGTCACCATTCCTGCCAACGCGAATGCCAGTGTGCGGGCGAAGGTAGTTGCCAATTTCTGCTCTCACC  
CGATGCGCAACTGCGTAAAGCAGATCCCGCTGTCTGGGGCGATCCTTCTGTTCTCGATCCGCAAAAACTGCCTGACGGGC  
AGCGCGAATCATTGCAATCAAGAATGCCGAGGATCTGCCGCCGTTACTGGCTGAACCGCACGAGGTTGGGTAAATGCG  
CTGGAACAAGAATGGCTACACCGTTACGGTACGCATTAATCTTTTTGCTGTGGGCGATGGTGGCGGTGATTTATGCACCG  
CTGATCCCGGCGAGCTCTCACGCTGATATCGCCTGCTTGTGCTTACACACTGGCAGGCGTTATTTGCCGATCCACAGTT  
ACCGCAGGCATTACTGGCAACGCTGGTGTGACAACCATCGCGGCGGTGGGGCATTGTTGATTGCCCTGCTGGTGATTG  
TGGCGCTGTGGCCTGGGCCGAAATGGCAGCGTATGTGCGCCGCTGCGCGTGGCTGCTCGCCATTCCCATGTGGCTTTT  
GCCACCAGCGCCTTCTGCTCTTTGCTGACGGAGGGTCTTTTACTACTATTTCCCGTATTTACTCCGCAATGGACCG  
ATTTGGCATCGGTCTGGGCTCACCTTGCAGTAAAGAAAGCGCATTTCTGCTGTGGATCTTAGCAGCAGTATTGAGCG  
AAAAATGGCTGTTGCAGCAGGTCAATTGCTGGATTGCTGGCTACAGCCGCTGGCAATGCCTGAACTGGCTGCTGTTG  
CCCTCCGTGCGCCTGCGCTGGCAATGGCGATGCTGGCGATTGTTGCTGGTGTGCTGTCGGTGTGGTATGGCAATTAT  
TCTCGGGCCAGTAAATCCCGCAGCTGGCGGTAATTAGCTGGCAGTGGTTAACCCAGGGCGACATTGACCAACAACAA  
AAGCGCGCTTGGCAGCCTGCTGTTGATGCTGTTACTGCGCCCTACGTTTTGCTGAGCTATCTGCTATGCGCAGCTGG  
CGCGCACTATTTCCCGCTAGATGGCGTTGCAAGCCTGCCACGCTTTATTGCCGGCAATACGCTGGCGATTTTTTT  
ACCTTAACCGGTGTGCTGTGTGGTTCTGCTGGCGATCCTCGCGGATCAGTCGACGATCAATAGTGAAGCGCTCATCA  
ACAGCCTGACAATGGGGCTGGTGGCGACATTCATCGCTTGTCTCTGTTACTGCTGTGGCTGGAATGGGGGCCACAGCGT  
CGCCAGTTGTGGCTATGGTTGCCATTTTATTACCTGCTCTGCCACTGGTGGCGGGCCAGTACACGCTGGCGCTATGGCT  
GAAACTGGATGGAAGCTGGACGGCGGTGGTCTGGGGCATCTGCTGTGGGTGATGCCGTGGATGCTGTTTATCTGCAAC  
CCGCTGGCAGCGCATTGATTCACGGTAAATTTGATTGCGCAAACTGGGCTGGTGGCGGGCCAAAATCTTCTTTTAC  
GTGAAATGCCACTCATGTTGCGCCCTGTGCTGATTGCCTCGCGGTGGGATTTGAGTGGTATTGCGCAGTATATGCC  
AACGCTGTGGCTGGGCGGGGGCTTTTCCGACGCTCACCCTGAGGCGGTGGCATTAAAGCAGCGGGCAGCAACGGTA  
TTCTCGCCGCCAGGCTTTATGGCACTGCTATTACCGTTATTTTGGCCTGACCGCTTAGTCGCAAAATGGGTA  
GGTTATGTCAGACAAGGACTCCGCTAATGCTCTGCGTGA AAAATGTTTTCGCTACGTTTACCAGAAAGCCGCTTGTGACA  
AACGTTAACTTACGGTGGATAAAGGTGACATTGTCACGTTAATGGGGCGTCTGGCTGTGAAAATCCACTCTGTTTTT  
ATGGATGATTGGTGCCTGGCCGAACAGTTTTCTGTACAGGTGAGCTATGGCTCAATGAGCAACGGATTGACATCCTAC  
CCACCGCACAGCGTCAGATTGGCATTCTTTTCCAGGATGCACTGTTATTTGACCAGTTCAGTGTGCGGCAAAAATTTACTG  
CTGGCGCTACCGGCGACACTTAAAGGGAATGCCGACGTAATGCCGTGAATGATGCACTTGAGCGTTCAGGCCTTGAGGG  
AGCTTTCCATCAGGATCCTGCCACTTTGTCTGGCGGTGAGCGAGCGCGGTTGCTCTACTACGCGCCCTTCTCGCCAAC  
CAAAAGCGTACTCCTGGATGAGCCATTAGCCGCTTGTATGTGGCTCTGCGCGATAATTTTCCGCAAGTGGGTGTTGAGC  
GAAGTTCGCGCCCTGGCGATCCCGCTGTTTACGGTAACGCACGATCTCCAGGATGTTTCTGCTGATAGTTCTGTTCTGGA  
TATGGCGCAGTGGTCAGAAAATTAACA AAACTGCGATAACGCAAAGTTTTTCTCAATGCGTCAGTTCAGAAATGGCGCAC  
TCAAAACTACAATGTCGGGATTTTTCGATGAAACGTGTTTCTCAATGACCGCGCTGGCAATGGCTTTAGGGCTGGCTTGC  
GCTTCTTGTGGGCGCTGAACTGGCGAAGCCTTTACTACTGACCGCTTCAACA AAAATGGCAAAGCGATAGATACT  
TCGCCCCAGCGCTTTTATAACGGCTGGCCACAACCTTAAATGGCCCTTCTGGTCACTGAACTTGGCGCTTAAACCTCT  
CTGCCAGCTGGCTTGA AAAATGAGCACCGAACAGTCAACGCGTGGATCAAGCAACATAACCTGAAAACCGATGCTCCG  
GTGGCGTGTACGGTAATGACAAAGATGTCGACCGCTCAAAACGCGACTGCAAAAAGCAGTTTAAACGCATATCTCCAT  
CCTGAGTACCGCTAAGCGAACCTTCCCGTCTGCAAAAACCTGGCAGTTTTGAGCAGCTGGTTTATCCGCAATGCTGCG  
ACGACTGCAACAAGGTAAGAGGTTACGGCGAAAACCTGCGGTTACTGAAAAGTCAATTGAAAGCGCCTGGGGCGCTCCT  
AAGCTTTACCTTATCAGCCATATTTCCCGCGCTGACTACATCGATACCAACGAAGTGGAAAGTGAACCGCTGTGGAACAA  
AGTTTCTGATGAACA ACTAAAAGCGATGCTGGCAAAAACACGGCATTGCGCATGACACCACGGTCATTCTGTATGGGCGTG  
ACGTATACGCTGCAGCGCTGTGGCGCAGATTATGCTTTATGCTGGCGTAAAAGATGTGCGCCTGCTGGATGGCGGCTGG  
CAAACTGGTCCGACGCGGGACTGCTGTTGAGCGCGGAACGCCACCGAAAAGTAAAAGCGGAACCGGATTTCCGCGTGAA  
GATCCCGGCACAACCGCAGTTGATGCTCGATATGGAACAGGCCGCTGGACTGCTGCATCGCCAGGATGCATCGCTGGTGA  
GCATTCGTTCTGTGGCCAGAAATTTATCGGTACGACACGCGTTACAGCTATATTAACCAAAAAGGTGAAATAGCCGGCGCA  
CGTTGGGGACACGCTGGTAGCGACTCGACGCATATGGAAGATTTTATAACCCGGATGGCACCATGCGCAGCGCCGATGA  
TATTACCGCTATGTGAAAAGCGTGAATATCAAACAGAGCAGCAAGTTTCTACTGCGGCACCGGCTGGCGCGCGT  
CCGAAAACCTTTATGTACGCACGCGCCATGGGTTGGAAGAATGTTTCCGTGTATGACGGCGGCTGGTACGAATGGAGCAGC  
GATCCAAAAAATCCGGTAGCAACCGGTGAACGCGGCCCGGACAGTAGCAATAACATTGCAATTTACTGACGCTGGAGCGA  
CTCAGCGTCAGATACCCACTCCACACCCGCGTAAAGTGTGCTATCCAGCACAAACGACCCGAAGATCCACGCAAAACACG  
CAAACTATGACAGGAATAAATATCCAGCACAAACAGTAAGATGTTTTCTGTGCCCTTCGGTTAATCCCCCAGATAGTAA  
AACGACTTATGTGCATAACCGGGGTTATCAATCTGATGTTTTGCTGCCAGTGCAGCAAAGGCGAGAAAACCTGCTGCCCGT  
GCCGATAAACGCAAAACAACAGCCGCTGCCAGCGCATTTTCTCCGGTGCAGCAAGAATAAAGCCAAACGGCACCA  
GCGCGTAAAAGAGAAAATCGAGAGAAATATCAAGAAAGCCGCCGCTCGGTAAGCTCTCTGCGCCGCGCAGCGCACCC

TCCAGACCATCAAGCAGCCTGTTCAACAAAATGACGACTAGCGCCGCCAGATACCAGCCCAGCGCCAGAAACGGCAGAGC  
CAGCAGCCGATGGCAAATCCACTAATGTTAAACCATCTGGCGTAATGCCCGTTTATCAAGAACCCGCACGCACTGAT  
GCAACAACGGTTTAAATCCGGGGATGAAGATGGCGGTCTAGCACAGGCACTCCTTAAATATAAAGCCTTTCTGATTGAGCA  
ACAGTGC GGATATTATGGCATTTCGCTTATCTGCCCGTGTGAATTTATGAAAATGATTGAAGTTGTTGCCGCCATCA  
TTGAACGTGATGGCAAATTTTACTCGCGCAACGCCCGCCAGAGCGATCAGCGGGATTATGGGAGTTTGCCGGTGGT  
AAAGTCGAGCCGGATGAAAGTCAGCGGCAGGCGCTGGTGC GTGAGTTACGCGAAGA AACTGGGCATCGAAGCAACTGTGGG  
TGAATATGTTGCCAGCCATCAGCGAGAAGTTTCGGGGCGGATTATCCATCTTATGCCTGGCACGTACCCGACTTCCACG  
GGACGTTACAGGCACATGAACATCAGGCGCTGGTCTGGTGCTCACCTGAAGAGGCGCTGCAATATCCGCTGGCCCCTGCT  
GACATTCATTATTAGAGGCGTTTATGGCTTTACGCGCCGCCAGACCAGCGGATTAGTGCTAAGGGTTTTGTCATCACGC  
TGGCATTGCAGCAGTATTCCTTCGGCTTAAATTACCGCCCCTT CAGAATAATTTTGATCCTGATAAACGCAGCACTGAGT  
ACAGGGCTGCGCTGACTGCCCGCTGAACTGAACACTTCTGGCGGTACGTTTACCTCCACGTCCGGACGATAATGCGGGT  
TAGCCAGTGAATTAATGAAAATGCTAATACTACGGCGAACAATGCTCGACTCACAGGGA AACTCCTTAACTGTTATTGCT  
CTGCTACTGATAACGGTAGCCGGTGGCAAACCTTACGCTGAGTTATCGCATTGGTTATGAGTACTCTCGTTAT  
TAATTTGCTTTCCTGGGTCATTTTTTTCTTGCTTACCGTACACTTCTTGATGGTATAGTCGAAA AACTGCAAAGCACATG  
ACATAACAACATAAGCACAACTGATTAATATATAAGGGTTTTATATCTATGGATCAGACATATTCTTGAGTCACTC  
CTAACCATGTCCAAAAGCGGACCCGAATCAAACCGAGTTCGCGCAAGCCGTTCTGTAAGTAATGACCACACTCTGGCC  
TTTTCTTGAACAAAATCCAAAATATCGCCAGATGCTACTGGAGCGTCTGTTGAACCGGAGCGCGTATCCAGTTTC  
GCGTGGTATGGTTGATGATCGCAACCAGATACAGGTCAACCGTGCATGGCGTGTGCAGTTCAGCTCTGCCATCGGCCCG  
TACAAAAGGCGGTATGCGCTTCCATCCGT CAGTTAACCTTTCCATTCTCAAATCCTCGGCTTTGAACAAA CTTCAA AAA  
TGCCCTGACTACTCTGCCGATGGGCGGTGGTAAAGCGGCAGCGATTTTCGATCCGAAAGGAAAAAGCGAAGGTGAAGTGA  
TGCGTTTTTGCAGGCGCTGATGACTGAACTGTATCGCCACTGGGCGGGATACCGACGTTCCGGCAGGTGATATCGGG  
GTTGGTGGTGTGAAGTCGGCTTATGGCGGGGATGATGAAAAGCTCTCCAACAATACCGCTGCGTCTTACCGGTAA  
GGCCTTTTCAATTTGGCGCAGTCTTATTCGCCC GGAAGCTACCGCTACGGTCTGGTTATTTACAGAAGCAATGCTAA  
AACGCCACGGTATGGGTTTTGAAGGGATGCGCGTTCCGTTTCTGGCTCCGGCAACGTGCGCCAGTACGCTATCGAAAA  
GCGATGGAATTTGGTGTCTGTGATCACTGCGTCAGACTCCAGCGCACTGTAGTTGATGAAAGCGGATTCAGGAAAGA  
GAAACTGGCACGTCTTATCGAAATCAAAGCCAGCCGATGGTCGAGTGGCAGATTACGCCAAAGAATTTGGTCTGGTCT  
ATCTCGAAGGCCAACAGCCGTGGTCTTACCGGTTGATATCGCCCTGCCTTGCGCCACCCAGAATGAACTGGATGTTGAC  
GCCGCGCATCAGCTTATCGCTAATGGCGTTAAAGCCGTGCGCGAAGGGGCAAATATGCCGACCACCATCGAAGCGACTGA  
ACTGTTCCAGCAGGCAGGCTACTATTTGCACCGGGTAAAGCGGCTAATGCTGGTGGCGTCCGTACATCGGGCCTGAAAA  
TGGCACA AAACGCTGCGCGCTGGGCTGGAAGCCGAGAAAGTTGACGCACGTTTGCATCACATCATGCTGGATATCCAC  
CATGCCTGTGTTGAGCATGGTGGTGAAGGTGAGCAAACCAACTACGTGCAGGGCGCGAACATTGCCGTTTTGTGAAGGT  
TGCCGATGCGATGCTGGCGCAGGGTGTGATTTAAGTTGTAATGCCTGATGGCGCTACGCTTATCAGGCCTACAAATGGG  
CACAATTCATTGCAGTTACGCTCTAATGTAGGCCGGGAAGCGCAGCGCCCCCGCAAATTT CAGGCGTTTATGAGTAT  
TTAACGGATGATGCTCCCCACGGAACATTTCTTATGGGCCAACGGCATTCTTACTGTAGTGCTCCAAAAACTGCTTGT  
GTAACGATAACACGCTTCAAGTT CAGCATCCGTTAACTTTCTGCGATAGCAGCAGATATGCCAGTAAAGAAATCCCATT  
GACTATTTTTT GATAATCTTCTCGCTTTCGAACTCTGCGCTTTTCGAGAAGCAAGCATTATATAATGCCAGGCC  
AGTTCTTCAATTGCTCCGTTTTGAAAAGCTGTGCTTGATATCGAGATCATCCATGATAATTCGCGCCCATATTAG  
CTTCGCGGAGGATTTACCGAGCTATGATTAGCGCAATCAGAGATATAGTCTGAGGGAAAAACAGCAAATTTATTCAACA  
AGGCATAACCTGCTCTGGGCTTCTCCATGTTTGCTTAAAGTATTGGCTCCATGGTCCGAGAAAGAAAATGCTCC  
ATTAAGGCACAATAACTTTGCTATCTCGATACCCATTGACTCTTAAAGACTCGCTCTTTTACTTATGATATCGAT  
CGAGTCAAAAAGGAAGCACATGATATTGGAAGGTATCTTTCAGGTTTCAGGCTTTCGCGGCCAGA AACTCCAGCGTTTCAG  
ACCATTGCTTATGATAGAATCGATAAGGTGCGATCAATTGTAGCGCTGTA ACTTCTCGATACTGAGCGGCTCAATACCT  
TTAGCCTGATAATAATGCAGTTGTTCTTTTTTCTTAAACCGGCCCGAACAAATAAGCCCCATCATAATTAATAGATA  
AAGAAAAGAGCATCCCGGTAATCAGGCCTCTTTCATTCAAACCGTTGGATGTTATCGCTGCGAACACAAAACATTACAG  
CGACAACACATGTTAAATAAAAACCCCACTTACAAAGCAGCATGGCCTTATTTTCTTAAATCATCCGTTCAA AATTA  
TTAAATATTTCCAGCCATTAAGAATACTTCTCGCTCCAGGATGGTTTTGTAATAAACTTTTTTTCATCACATTCCC  
TGTTATTACATACTTTAGAGGCGATAATTTTATCCATGCAAAAAAATATCCAACGAATTTTCTTGATCCGCTGGATATT  
TCAGAATATGACTCGAATAGCACGAAAGATTCACCTCGCTTACGCTATCGCCCCGCTTCGACTTCATCTGCTGGCGGACT  
TTTTTTCGCACTACGTTTACGCGGTGCAGCCTTTTTCTTATCAGCACTGCCACCACTGCCCGAGCCACAATGCCGCGAA  
ACTGCCGCACCGCGTACGTTTGGCTTGATCAATAAGCTGATATAGCGTCCCACCAGCGGCTGCATAAAGTCTGATAG  
CGACTGCTTTTCGCTGATTTGCGTCAGCACCGATTCCCAGTGC GCGGT CATGTCCGGTTCGCTGCCATCTCCGGCAG  
CGAATGGAATAGCGCTTTTCCGGCGTGGTGGAGTGGATATAGCGCCTTTTTTGGTCAGGAAACCACGCTTGAACAACA  
GTTCAATAATCCCGGCACGCGTTGCCCTGTCCCGAGACCATCGGTGCGACGGAGGATCTTTTTCAGATCTTTATCCTGC  
ACAAAGCGCGGATCCCGGTGATCGCCGAAAGCAGTGTGATCGGTA AAATGGCGCGGCGCTGGGTTTTGCCGCTCTAC  
CACTTCACCTTTTTACACAGCAACTCATCGCTTTTCGCCACCACAGGCACTGGCGTGCCGTGCTTTTTCTTCATCGCGCT  
CTTTGCTGCCTAACAGCGTGCGCCAGCCTGCTTCAGCAAGAAAACGCGCTTTAGCGCAAAATTTGCTTTGGCAATGTCC

AGTTCGATAACACACTTGC GGAACACCCGCATCCGGGCAGAATTGCATCAGATACTGACGGGCAATCAGGTTATAGACCTT  
CGCTTCGTTTCCGTGAGTTGATCGCAGAACTCCGTGCGGTGCGAATGATGGCGTGGTGGCATCGACCTTTTTGTCAT  
CCCAACAGCGGTTGCGTATATCTGGATCTACCACTGGCTGCGGCAACAGATCCGGTGCATGAACACTGATGGCATTTCAT  
ACCGCGTGGCGTCCGGCAAAATGTTCTTCTGGCAAATAGCACAATCAGAACCGGATAAGTGATTAGCTTGTGCGTTTT  
GTACAGTTTCTGGCAGATATCAAGCACGTTCTGCGCACTCAGACCAAACGTTTTGCCGTTCAATCTGCAACGCTGAAA  
GCGAAAAAGGCAGCGGCGGATTCTGATTCCCGTTTATCGTTATAGCTGGTGACAATAGCCGGTTGACCACTAATGCGG  
TTAACACATGCTCCGCCAGTGACGATGTAACAAGCGCCCTTCTTCATCCTGGTACGGTTACACGCTTCGCTCGGTTG  
CCAGATAGCGGTAACCCGCTCATCGGCAGGTGTCACGATATGTGCTTTGACTTCAAAGAAGCTTTTCGCCACGAAGTTTT  
CAATCTCTTATCGCGGCGCACCACAGCCAAAGCAGGGCGTCTGCACGCGTCCCACGAAAAGTACGCCCTGATAACCG  
GCATTGCGACCGAGAATGGTATACGCACGGGTCAATTGATGCCGTACAGCCAGTGGCACGCGCTCGCGCCAGCGCAGA  
AACGCACAGCGGTACAACTCACTGTTGGAACGAAGACGGTCGATCGCCGCTCAACCGCTCGGGTTCAGGTCGTTA  
TCAAGCAACGCTGTACCTGCTGGCGTTTTCCGGTGCCAGTTGCAGATAGTCCAGCACTTCATCCACCAGCAATTGCCCT  
TCACGATCCGGTCCCGCGGTGAACGATTTGCTGGCTTCATGCAGGAACCGTTTGCATGACGTTAAGTTGTTTGGTAC  
GGAGGTGCGGGTGTAAATGCCACTTTCCGGGACAATCGGCAAATCCGCAAGATTCCAGCGGCATAGCGGCTGTCGT  
AGCGCTCTGGCTGCGCTGCTCAAGCAGGTGACCGATACACCAGTCCACCCTGACCAATTACCGCACTGATAAAGCCA  
TCGCCTTTCCGGTGGGTTGGCAGGACATCAGCAATGGCGCGCCAGACTCGGTTTTTCGGCAATAAACACCGCAT  
TGAATTAACGAATCTCAACATGGCACGACCGCCGCGCTGGCACAGTTCGCAATTGCCGTCAGTTCAATGCCAAAC  
TCGGCGGCTGTAGCTTTGACCTCATTTTCTGCTCCGGCATGACCGCCAGCAGCAAACCGCCAGAAGTTTGGGATCACA  
CAGCAGATCGCGCACTTCACGCGGATTTACCCATCAGATGACCGTAGCTGGCAAAGTTACGTTGAGTCCGCCAGGTA  
CTGCGCCAACTTAATGTACTCTTCAACACCGGGGAGTTTCCGGATCGCTTCATAGTCGACGCGTGCCTGCACACCAGCC  
CCCTGACACATTTGCTCAAGTGGCCAGCAGACCAAAGCCCGTAACGTCGGTTCATCGCTTTTACGCTTCGATGTTGGC  
AAAGGACGCGCCTGCGATGTTTCATCCGGCACATCACTTCCGTGCGCAGTCCCTGATGTTCTGGTTTCAACAGTATTTTT  
TCTCAGCCGTGGTAAGAACCGCATCCCAGCGTTTTGTCAGGAACAGTTTGCATCCGGCTTGTGCGGTTACTGTTTTT  
TTCACCCGCTCGGTGCTGATCCCCGTTACCGCCAGACCAAATCGGCTCCGGCGCATCGATGGAGTGACCGCCAGC  
CAGCGCAATACCCGCTGACGACATGCATAGCGTCCACCTTCGGTCACTTCGCGGGCAATTTCTGGGGAAAGTTGTAA  
TCGGCCAGCCGAGGATCGCAATCGCCATAATCGGTTTCCCCCATCGGAAGATATCGCTGATGGCGTTAGTCCGCCA  
ATCGGCCAAAATCGAAAGATTATCAACGATCGGCATAAAGAAGTCGGTGGTACTGATAACGCTGGTGCATTGCCAG  
ATCGTACACCGCCGCATCGTCCGGGTTTATTACCAACAAGCAAATTCGGATCAACAACTTCGCTGCTCACTATGCA  
GGATGGTTTCAAACACTTTTGGGGAAATTTACAGCCGCAACCAGCTCCGTGGCTGTATTGGGTCAAACGAATCGAGTTC  
TCGCTCATGGACATCTCCTGTCAATGCAATCCGGGTATGGTAACCCTCATTCCGTGAAGTGATAAGTGAGAGTGTCTGAA  
TTCTGCGCTTTGCTCACAAATCCAGACAGTTTCCGGACAATTATCAGAAATAAGTTACAAACGGCGTCCGGTCCGGGAC  
GTTAATCGACGTAGATGCTTTCAGCTGCGGCGTACCAGGTAGAGAAAACCGACAATTTTATCCTGCTCACGGCAACCGA  
ATGCTTTCACGCACTACCGGACTTTTCAAGTAAATGCGCCACTGCGCCAGATGCGCCAAACCCCTGGGCAACTGCTGCCATT  
TGATCGCCATGACCGCGCATCCGGCAGACATTTCTGTTCCAGCGCGGGACTTTATGATTCTCTTCGATTTCCGCCAC  
CACCGTGTATGAGCGGTGCGCGGAACGGCGCATTACGGGCTTTGTCGATAGCTTTGTCATCACTACCGGCAGCAATCG  
CCCCCTGTTCCAGTACGGCGCTGAAACGCTCGCGCCCTTCCCTTCAATCACAAAAAATGCCACGGTTGCATGGACTTA  
TGGTCCGGCGCACGCATACCCGACGCAGGATGTTTTGCAAGTGTTCACCCGTTGGCGCGGTTTACGCCAAGCGGGAGGC  
GCTACGGCGATTGATCAATAGTTTCAGTGCATCCATTTGATTAACCTCCTGTCGTGATATTTATCACAAAATTAACACGA  
GAGTGGATTTTGTACAGCACAGTCCGCAATTCCTGCTGACAAGTACCGGTTGGGTATTACGATAACCACATCTATTGC  
GCCTGTGACAGGTGTGACCTTAAGTTGGGAGAATACATGCAACCCTTTGGCGATTTATTGCCGATTTTTAAATGGAC  
GTGGCGTCTGCTGAAATTCGTCCGTGAAATGGTACTTAACTGTTCTTTATTTTCTCGTACTGGTTGGTGGGGATTT  
GGATGCAGGTGAGTGGTGGTATTGAAAAGAAACGGCCAGTCTGGCGCACTGCTGCTGGACATTTCTGGTGTGATCGTC  
GATAAACCCGACAGTTCTCAGCGGTTTATGAAATTAAGCCGCACTGCTTGGTGCAGTTCCGATCGTCTGCAGGAAAA  
CTCACTGTTTATATCGTCAACACTATTCGCCAGGCGAAGGACGACCGCAATATCACCGGTATTGTGATGGATCTGAAAA  
ACTTCGAGGCGGCGACCAACCGTCTATGCAGTACATCGGCAAAGCTCTGAAAGAGTTTCTGACAGCGGGAAACCGGTT  
TATGCCGTTGGCGAGAATAACAGCCAGGGCAATATTATCTCGCCAGTTTCGCCAATAAAATTTGGCTGTCTCCGCAAGG  
CGTGGTTGATCTGCACGGCTTTGCCACCAACGGTCTGACTACAAATCGTTGCTGGATAAGCTGAAAGTTTCCACCCATG  
TGTTCCGCGTGGGTACGTATAAATCTGCCGTTGAACGTTTATTCGTGATGATATGTCACCGGCAGCCCCGGAAGCTGAC  
AGCCGCTGGATTGGTGGCTGTGGCAAACACTATCTGAATACTGTTGCCGCTAACCGGCAGATCCCTGCTGAGCAGGTATT  
CCCTGGCGCGAAGGTTGCTTGGGGTTTAAACCAAACCGGTGGCGATACCGCAAATATGCACTGGAAAAAAGCTGG  
TCGATGCACTGGCATCGAGTGGGAAATCGAAAAAGCACTGACCAAAGAATTCGGCTGGAGTAAGACTGATAAAAAATTAT  
CGCGCCATCAGTTATTACGATTACGATTGAAAACGCCGCGAGATACCGGTGACAGCATCGGTGTCGTTTTGCTAATGG  
CGCAATTATGGATGGCGAGGAACTCAGGGGAATGTTGGCGGTGATACCACTGCGGCACAAATCCGCGACGCTCGCCTTG  
ACCCGAAAGTGAAGCGATTGCTCCTGCGTGTAAATAGCCAGGCGGCGAGCGTTACCGCGTCTGAAGTGATTTCGCGCTGAA  
CTGGCAGCAGCCCGGCGAGCGGTAAGCCTGTGGTTGTATCGATGGGCGGCATGGCGGCATCTGGTGGTTACTGGATTT  
CACGCCAGCTAATTACATTGTGGTAACCCAGCACCTGACCGGTTCTATCGGTATCTTCGGCGTATCACCAACGCTAG

AAAATAGTCTGGATTCGATTGGTGTTCATACTGATGGTGTCTCAACTTCACCGCTGGCGGATGTTTCTATCACCAGGGCA  
CTGCCGCCGGAAGCGCAGCTGATGATGCAGTTAAGCATTGAGAATGGCTATAAACGCTTTATCAGCTGGTTGCTGATGC  
GCGTCATTCGACGCCGGAGCAGATTGATAAAATTGCCAGGGCCACGTCTGGACCGGTGAGGATGCAAAAAGTAACGGGC  
TGGTCGATAGTCTCGGGGATTTGATGATGCGGTGCCAAAGCAGCAGAGCTGGCAAAAGTAAAACAGTGGCATCTGGAA  
TATTACGTTGATGAACCGACCTTCTTCGACAAAAGTATGGACAACATGTCTGGTTCTGTCCGGGCAATGTTGCCAGATGC  
GTTCCAGGCCATGTTACCTGCACCGCTGGCCTCGGTAGCCTCTACCGTTAAAAGTGAAAGTGACAAGCTGGCCGCGTTTA  
ATGACCCACAAAACCGTTATGCGTTTTGCCTGACCTGCGCCAACATGCGTTAAGTCTTGTACTGAGTGGCCGACAGATCG  
TCGGCCACATTATTTTTACGTCGACGAATCCTCTCCCGCTGTTTCGCCCCATATTTCTTATCCGCATAGTATCAGGT  
GCGTCCCCCTGCCTCACGTATATACTTTTGCTCTTTCGATATCATTCAATATCATGCAAAAAGAAATCAATTTAC  
GTTGCTACACGGGCGGGACCATCGGGATGCAGCGTTCGAGCAGGGTTATATACCGGTGTCAGGTCACTACAACGCCA  
ACTGGCGCTGATGCCGGAATTCATCGCCCGGAGATGCCAGATTTACCATTCAATATACGCCGCTGATGGATTCTT  
CAGATATGACGCCGGAAGACTGGCAGCATATTGCTGAAGATATTAAGCGCACTATGACGACTATGATGGTTTTGTCATT  
CTGCACGGCACCGACAGATGGCGTATACCGCTCTGCGCTGTCGTTTCATGCTCGAGAATCTCGGTAACCGGTCAATTG  
GACAGGGTACAAAATCCCGCTGGCTGAGTTACGCTCTGACGGACAAATTAATCTGCTGAATGCGTTGTACGTTGCGCGA  
ATTATCCGATCAACGAAGTAAACGCTCTTTTTCAATAACCGATTGATCGCGGCAACCGCACTACCAAAGCCATGCCGAT  
GGTTTTGATGCGTTTTGCCTCTCAAACCTTCTCCGTTACTGGAAGCAGGTATCCATATTCGTGTTTTGAATACGCCACC  
CGCCCCGACGTTGAAGGGGAATTAATCGTTTCATCCAATCACCCACAACCAATTGGCGTAGTGACGATTTATCCAGGGA  
TTTTCTGCTGACGTCGTGCGCAATTTTTCTGCGCAACCGGTGAAAGCATTGATTCGCGCTCTATGGCGTGGGTAATGCG  
CCACAAAACAAAGCCTTCTGCAGGAATTACAAGAAGCCAGCGATCGCGGATTGTGGTGGTCAACCTGACACAATGTAT  
GTCCGGTAAAGTGAACATGGGTGGTTATGCCACCGTAAACGCCCTCGCCATGCCGGCGTAATTGGCGGTGACAGATATGA  
CTGTAGAAGCCACGTAACCAAAGTGCATTACCTGCTTAGCCAGGAACTGGATACTGAAACCATTGCAAGGCCATGAGC  
CAAAACCTGCGCGGCAACTGACGCCGGATGATTAAGGAGACTGTAATGCCCTCGCGCCCTGTTACTGGTCGATTTAC  
AAAATGATTTCTGTGCTGGTGGCGGCTCGCCGTGCCGGAAGGTGACAGTACGGTGGATGTCGCTAACCGCTGATTGAC  
TGGTGCCAGTCGCGCGGTGAAGCGTTATCGCCAGTCAGGACTGGCACCCGGCGAATCACGGCAGTTTTGCCAGTCAGCA  
CGGTGTAGAGCCTTATACGCCAGGCCAACTCGACGGTTTCCACAAAACCTTCTGCCAGATCACTGTGTGAGAACAGTG  
AAGGCGCAATTAACATCCGTTACTGCACAAAAGCGATCGCAGCGGTGTTCCATAAAGGCGAAAATCCTTTAGTTGAC  
AGTTACAGTGCCTTTTTGATAACGGCCGTGCGCAGAAAACCTCTCTCGATGACTGGTTACGCGATCATGAAATCGATGA  
ATTGATCGTTATGGGCTGGCTACTGACTATTGCGTGAAGTTTACCGTGTGGACGCGTTACAGTTAGGTTATAAGGTAA  
ACGTGATTACCGATGTTTGTGCGTGGCGTGAATATCCAGCCCAGGACAGTGGCGACGCGTTTATGGAGATGTCAGCAGCT  
GGGCAACGCTATATACGCTGGCAGACTGGGAAGAGACACAGGGTAATTTTACGCTGGCCTACAATTTCTGACTGGCAT  
TGTAGGCCAAATAAAAACACGTCACTGGCACATCTGGCAATTGATGCCATCAACGAAAGATTTAATTCACCTCAGAAATCT  
CTTCCAACGACACCTTCCGCGTTTCGATGCCAAAATGGAGAGAACCAGCGCACAGAGCAATAACATAACACCAAGTACC  
ATAAACACCGTGATCGACCCATAATGTGTTAATAATGCCGCAACGCCATAGGGCGTGAAGACTGCGACGATCCGTCCGAC  
GGCATTAAACGAAACCCGAACCGCGCAGGCGTAAATGCGTTGGCCAAAGCTCCGGGATATAAACCGCCGACGCGAAGCAA  
CATAATGTATAAAAAGAAGATCATCACCAGTCCATAGATTAAAATCGCCACTCTGTAGTCTGAATTGAATAGATATAG  
CCTAACACGGCAATAATAAAGTAAGGTGGAGCCAAATAACCGACGAGGAAAATGATCAATAATTAATGCCGCAATAAA  
TATTCCTACCGGAGCGCAATCATAATAACAGCGGTCAATTAATGATTTATCGACATCAATGCCGGAGTTAACAAATA  
TGGTCGGTATCCATACGGTATGGTATAAAGCGAAATGTTCAATGCAATTAACAGTAATCGCGACTAATGTACGTCGT  
AACATTTACCTTTAAACAGGAGCCAGAAAGTACCTTGATTACTTTAACCTTGCTGTTGCTCTGATACGAAGTAAGCGG  
GGTAAACGAATACTCTTCTCTTTCAATTTGCTGCTCTACTTACGAAAGTTGGCATTCTGCACCTGCGATTTGCCCTT  
TCCCTGCCAGCCATCGTGGCGACTCGATAAAGTATTTACCTGAGAGAAAACAGGCTAACAGTATGCCAATACCACCCAGC  
AGAAAACATTATTCGCAACTAAAAAAGCGATAACCACCGCTATCGCCGACAGACAGCATGGGCGACCAAGTTACCAAC  
AAATGAGAGCCGCGCGGACCATTTTCCACGACCGTTCGCGGGGATAAACTCCGTAAATGAGGCATAGCCAACCATAATCA  
GCGCCCCATTCTGTTCCCATCAGGAAGCGAAAGAAGATGAGCCAGTACATATCAGGGACAAAAGCGGCCCTGTTGCA  
GCAATACCGACGATGAGAAGATTTATGCGAAACGCCCTGCGCCGCCAAAGTAGTCACCAATAAACCCACCAGTAAGTGA  
GCCGATGAAATAACCAAACATTAATGCCGAGGTAAGGCGGCATTGAGGAAATTTATGACCATCCATTGCTTACCAGCT  
TTGCTAAGACGACATTACCGGAGTAACCAAAAACCTGTTAATAACAGACTAAAGCTTATAATACCAAATATACGATAA  
TGAAACCGGCCAAAGGCAAGCGGTCCAGTCTTGCGCCAATTTGATCATATTGTTCCATTAGGTGCTCGGATTTGCTAA  
AAAGGTAGCAATTCGCGCAAATTCATTGCGCATCTTTATCATATTTTATTTCAAGGCGCAGGAACAAATAATATTGA  
CAACGTGTGCTTAAATTACCACACCAGCTGGATATTATTGCTTTGCAAAATGCTATCCACTCTGCACCCGGTGATTTAT  
CAGTTATTATGTAATTAATGACTAAAATCAGCTAACTGGACAAAAGCTTTGCGATCAAACCTTAGAGTGATCAACCAAT  
AACGCAACTTCTGTCGCTGACGGATCATTGTCTTTTTGATTTACGCTTCCGCTTCAATTAGAGTCCAGCGCGCCGCTGTT  
AATATCAAGACCTTTACAACCTATTACCATGATATCGACATGATAGCGCCTGATGATCTTTTAGTAATTTCTTCTTGA  
GTGAAAGTGTATTTTTGTTAGTTCCCAACCGTTGAAACGACTTTAATTTCTGACTGAGCCAGAACATGAATCGCTTCC  
GCCGAGTTGGTTAGCAACGTGAGGCCACTACGGTCTGTAACAATTTGAGCAATTCATTACGGTACTACTGGAATCGGC  
TGCCATGGTGGTTTTATTGTCGATAAAGGTAGTGCCTTGCCTGCAATAAGCTGCTTCTTTCATAAAACGATGAAGCGC

GCTTATAAAAAATGGATATTCTCCGTCAACATCGCTGTATTTAAAACAGCACCACCATAGGTTCTGGTCAAAAAGCCTTCA  
TCTTCCAGCTTCTCAAGATCGCGGCAATGGTTTCTCGGTTACCTGAAAAATCCCACTCAAATTTGAGACTGTCACCTT  
TTTATCGTTGGCAACCATTTGCTTAATTGCCTGAATCCTGTCTTTTGCCGCCACGATTACACCCTGTATCTTTTTACAT  
CACATTAGCGGATTATCGCATAACCGATGTTTACTTTCAAATAACCTGTTTGAATCACAGATTTTCATCACAGTTTTC  
ACAGAAACAGAGGTGAATCGTGTTGAGTATTTAACGCTCCAGGGCTCTGCCATTTCCCTCATCAATGTTGCGTCTGCAT  
CCGATAAGTTGATATTAGTCCGCGACATTTTCGCGTACCTGTTCCGGTGCAGTAGCCCCACTAAGAATGGAGATTA  
TCACTCTGTTTTAATATCCACGCCAGTGCCAGAGTGGGAATTGTGCACTGATAACGAGCACAAAGTGGCTGCCACTGTT  
AAGCATATCAATCACTTTAGCATGTTTTACGCTGGAACAGACTTTATTTGCCCGAGCGCCGCCGGAACGTAATCAC  
GAGTGATGGTCCGGTCAACAATCCCTGCTTAGCGGGGAATAAACCTGAACCACAATGCCATTATCACGACATAGTGGC  
AGCAGTTCGTTTTCCATTGCCCGTGCAGGATACTGATTTCCGCTGAATAATATCCAGTTCACCATATTGCAGATACTC  
GCGGATATGGTCAGCATCGACGTTAGCAGCGCTATAGCGGAATTTCCCTTCAGACTTTAACTCATTAAAGCACTGCGA  
CAGTTTCAGCGATCGCGTAAAAAATGGCGCACCGACTGCCAGTGGTGCATGTAGATATCGATGTAATCAATACCCAGA  
CGTTGCAAGCTCGCTGCTACCTCTTCGCGGATAGATTCCGGGAAAGTTTTTATACAACCTGCCGATCGCAACTTTGTT  
GAATAAACTTCCTTTTCGTTCCAGACAATGCCGATTTGGTTTCTACTACAACCTGTTACGCGGCAGTTTTTTAACG  
CCTGACCGACGATAAATCACTATTGCCAAAGTTATATCCTGGCGCAGTATCAATCAGATTAATGCCACAACGATGGCT  
TCAAGAATCGTATCAATACATATTTGCCGATCGGATCGCCATTCATGCAGGACCGCCCAATGGCCCATGTCCCAA  
CCCATTTCGCGAAAGCGTAATATCCGTTGTGCCTAAAGGTATCTTTTTCATTTGCCCTTATTATCCTTCGTATTCTCCA  
GCAATTGTTGACCGACTTTCTGTTTTTACGCCGGTGGTGGCACCGACGCTTAGAACCAGATAGCCGCGGTTGCATTG  
GCAAAGCGTGCACATTACGCGAGATTTTTGCCTTAAACAGTGCCGCAATAAACCTGAAGCAAAGTTATCGCCGCGCC  
AATGGTGTGATGGCGTTATTCTGCGACCGCCGCGACCTTCATCGTCATGTCACCACGCTTGATAAAGCAGCCGTCTT  
TACCCGTTTTAATCACCCGTTTTTACGCCGACGCAAGAAAGCAGTCAGCAATTTATCCAGTGTCTCTTTCCGGTG  
AGTAATTTGCCTCGGCAAAATTAGGAAACAGATAATCGACATAACTCAATGCTTCGAAATATCATCCAGCGTTTCATT  
CAACCGCGTTTATCATATCGGCACAGATAATCATCTGCCGGCTTTAGCTTGCCTGAAAAATTTCTGTTAGCGCTTAC  
CATCCAATAGTGGACTGTTGAAATACTGGCCAGTATAATAATTCGCCTGAGAAAACCGCGCAAAATCAACATCGTCA  
ATATTCAATTTCCACAGACTGCCATTACGGTTTGTGACAAACGTCGCTCGCCATCCTCCGTCACCAGTCCAACGTTAAT  
AGAGGTATCTATGCTGACGCTCTGCTTACGGCTTTGAATATCAATATTCTCTTTGCGGCAATGGTCGAGAATAAATTGCC  
CTGCGGCATCTTTACCAATACGACTCATTAAATGCTGTGCGATGGCCAGACGAGAAATAATTGTTGCTTCATTTATTGCA  
TCACCCCGGTGGTCAATTGCGATTCTTCAAGAGGATAAGAATCCACATCAAAGATATTTTACTGACCGGTTGCAATGG  
AATATCAACAATAGCGGCACCTATACAATAACGTGAGATTATCCATATCATTATTCCGCTTTGCCATCAGAACCGAAC  
AGTTAATTTTTTCCAATGCCGTTCTTTTACAGCTTACGTAATGCTGATTTTTCGCGATACCCAACGAAATTGCAGTTT  
TTCTTTCACTGCAACCATTGCGGCCTGACAGAGCTCCGTATGAATGTTGATTTTTCGCGATACCCAACGAAATTGCAGTTT  
TAATGTCGGCATCACTGATCCCGATGCACCGTGCAAAACAGCGGAACAGAAACGGCATCGCGTACGCGTTTGACGACC  
TCAAAGTTCAATTGTGGCTGTGACGTATAAACCCCATGCTGGTTGCCGATGGCGACAGCCAATGAATCACAGCCCGTACG  
TTCAACAAATTCAGCCGCTGGTCAGGATCGGTATAGTGATAGCCGCCAGCGCTTCTCATAAACGTTTCATTACCGA  
CATGCCCTAATTCGCTTACCAGGATACCCAGCGGATGGAAGAAATCGACAGCCTCTTTGGTTAAACGAAATTTTTCT  
TCGAAATCAAACGCGGAAGCATCACGCATTAATGAATTCATACCATGAGTCCAGGCGTTATGAATAATCTCCATACTCCG  
ACCATGATCCCAATGAGTTATTACCGCACCGTTGCTTTTTGTGCCATTGATACCATCATGTGAGAGAAATCTCAAATG  
AGGTGTTACCGACAAAACCTGTACCAAAAGAAATAAACCAGGGATTTTCGCTTCTTCGGTGCCTGATAACGCCCATC  
AACATTTCTGATTCCATACGTTAAAAATGGGCAATGCATAATGTTTATTTGTGGCATCGTTTTCCCAATATCTGATATC  
TGGGAGCATTTCTGTTCCCGTATTAATTAATCGCTAATTTAATAACGCCTTTAATAATGTGCGGTTGTTGTTAAAC  
TGACTCTTCAAATGCCTGTTGTACATCCGATAATCGTAAATATGCGTCAACATCGATTTACATCGAATCGCCCTGAAG  
AAATAGCTTCAATCGTACCGGATAACGATTGGCATAGCGGAATACCGTCTGGATAGTACTTCGCGATTGATTTGAGG  
AAATTGATTGCCGAATCGCCGGGTACGTACCAACAATCATAATTTTACCGCCGCGCATTACCAGATAAGGTGCCTGTTT  
AACGGTGACCGCAGAACCCTGTTTCGAAAACAATATCTGCGCCATGTCTTCGGTAAATTGCTGACAGCGTGCAATAG  
TGTCTTCTTTTGCCTGTTAATAACCACTGTGCGACCAAGCTGTTCCGCCATTGCCAGCGTTTTTCCAGCACATCAACG  
ACGGCAATTTCCGTTGCTCCAGGCATTTGCACGCTTGCAACGTCATCAAACCAATACAACCTGCTCCAGAAATAATTAT  
CTTCTTACCCGTTTAAACATCTGCCAGCATCGCGGCATGCATCCCGACTGCGGCAGGCTCCACCAGCGCCCTTCCATCG  
TGTCCATATTGTCGGGAGTTTGTAAAGTAAAGCTCTCCGGATGACACAGATAGTGCCTAATGCGCCGCGGTAGTTGGGT  
TGTGTCGCATAAAATCAACGTCGGGAGATGTTATATTTGCCCTCCAGACAGTAACGACAGTGACCGCAAGGAACGCC  
AGGTTGATATTTACCCGATCCCGGTTTAAATTTGCGCACGCGCTTCCACAGCCACAACCGTCCCGGCGCATTTCAT  
GACCCAGGCAATTTCTGATTTGGGTCTTAGGCGGAATAAACGGGCTGATTCAAAACCATGTACATCTGAACCACAA  
ATACCGACATATTCTACTTAAATCAAACCTTCATCTCTTTAGGCACTGGTATTTCTGCTGAAATAATTTTCATTGTGCC  
CGCACCTGCAATATTGTTTTGAATTTTTCATTTTGAATCCACCCTGATTTATTATTGGCTACTGCATCAATACTAAA  
CTTTCAACGGAGACCTTTGGTTTCGATTTCAATGTTGGCGATAGCAATTGCGACAATAATTGAAACCGCCCCAGAAAG  
AATAAAGACTCCCGTAACGCCATAACTACTGAGCAGCACTGCAACGGCATAAGGTGCGGCAATACCACTGATTCGCCCTA  
CCGATTCGCCAGACCGGAGCCACGGAGTTTGGCCTGTGCGCCAGATTTACGGGACATACACTGCCGAGGCATAGCAA

ACGTACATATAGACGAAAGTAATCAGGAAGAAACCAATCAACGTTATGAGCAACATACTGGTTTGCAGTGAATAGATATA  
TCCGAGCACCGAATCAGGATTAATAGCCCACACCATTGTTTTACGCGGAATTTTATCCATCACCAGCATGGCAATAA  
AAATACCAAATGGCGGCCAAACATACTCATGGTATTTAAACAATCGAGTCTTTAAATTAATCCCCTGGGTCATGAAT  
ATTGTTGGCAACCAGTTAATTAAGTGTACTGCACAACGTTTCATGGCAATCAGCACACAAGAGCCTAATATCACGCGTTT  
CAGTAATACTCCTGTCAAGGCTGAATACGGCACCCTTGTGGCGCTTACCCTCATCAGCAATAACCACAGGCGGCA  
AAGGTTTACCCGTCTGGCGTATGACGCCTTCTTATACTCCGCATGACTTTCTCGGCTTCTGATACCGTCCGCGCGAT  
TCCAGCCAGCGCGGGATTAGGAAAGTAGCGCCAGGCCAGCGCCGTAGCGATAAGCGACAATATTGCAGGGATAAGCAG  
TTGTACCCGCCAGTTCCTACTCTGACTAATCAGCGCGTGTAGTCCCATCGCTATCAATGAACAGAGCGGATATGACCAGT  
TGCCAATAAAGGAAACCCGACTTGACCACGTTCCACGATTTCTACCGGGCATATATTCCGGTAAACCAGCAAACAGCGTA  
ACCAGTAAAGTCCCAGCCCACTCCCATCACAACCGGCAGGCAATAAGGAAATCCATATTCGGTGAGAAAGCACCAGC  
AACCATCGAGGCAATATGAATGGCCTCATAGAGGATGAACGCATTTCTGCGACCGGTTTTGTCCCAATGATGCCGCCA  
CCAGCGCACCAGAAACATTCCGGCGGTCTGATTGCTGAGAAATGTGGCTGTGGTGAATTATCTGTCCAGCCCAACGCT  
TTCAGCTGCGCAGGATCAAGCCACCAACGGCATTACTCCAGCAGACAAGCAAGCCAAACGCGACGATGGCAAACATTGA  
TGAATGCCAGCGCAATCCGGTAAGCGATCCAGCCGTGACCACAATGCGGTTTTGTTATCTGTTCCATGCGATAACGTT  
CCTTCAGGAGAGTGGTTATTCATCAAAGTCGAAGTCATGATGACTTTGATTGCGGTTTTATCGACCATCGCATCAAAC  
CTTCGCGCCATTGCGACAGCCGATACGATGCGTATCGGTTTGACTTTGATAGCGCCGCTGGCTAATAGCTGATA  
GCGTTACGCCATGAGGTGGAGTCATAGGCCATATGCCAATGATGCTTTTGTCCAGGCGGTAATGTCATTAATCGAGAA  
ATCAAGAGGTTTGAAGCCCAATTCACCGCGTACCCTTCCCGGTCGCGGCGAGCATTTCGATGGCTTGTTCAGTGCGA  
TATTGGCACCAGGAGCATTCAATCACCAGTCCCAGATTGCTTTGCCACAAATTTGCTGGCAGCGGCCACCACATCTTCG  
GTAGAACCATTACTACTGCCGTGCGACCCAGTCTTTTGAACCGGGAAGCGGACCGCCACATCTTCTTGCAGACCAAC  
GACGACGATATTTACCGCCCCATAATTCGCGCCATTTGTACGGAGAACAGCCCGAGTGGGCCAGTGCCGATGACGACCA  
CATCCTGACCAGGAAGGAATTTGATTGCTGCGCGATGGATTTGTAGGCATTACAGATAGGGTCAAGTACGGCTGCGTCC  
TCATAATCAACACCATCAGGGATTTCCACAACGCATGACGATGAATTTTGAAGATTTCCAGGAACCAGACAATATTT  
GGAAAAACCACCGCCCCAGTATTATTCAGACCAAGGTTTACTTTTTCTGTACAACACAGAAAATCACCTTGTTCAC  
AGGCCGACAAACACCGCAAACGTGACCCTGTTATCCGATACGACGCGTTGCCCACTTTCCAGTCTTTGACTTTTTCA  
CCAACTGCGCAATACAACCTGCGAATCATGGCCGCGGATAGAGTTAAACTCATCAGAACCCTATCGACATTGTAGTG  
CTTCATGTCTGCGCCGAGATTGCCGCGCTTTAATTTCAATCACTACATCTTCCGGGCCACACATGGGTTGTGGGACAT  
CAATCATCTTGTAGCCGCAAAAGGCCCTGCCAAACCGAGCCAGTCTTTTATTGCGTCTCTCTGTGTTTGTGTTTGTGCT  
TAGATGGCCATCATACTTACCCACATGATTTTTGAGGTCAACATTAATCTGTAAAACACAGATAATGATCTGCGTTTTA  
CAACTCAGATCACAATTACGCAGAAAATGGCTGGGTCTGTTACAGGTTGATGGAAGCGGGGCGCAAAAAGAGCAAATTC  
GAGAGGGATTACCGGCCAAATAGGCTCGAGACTTAAGTTCAGGAGAAGTCATTAGGTGTGAACGGGACGGCAAGAGATC  
GGACTGGGACTTAGCCAGGTGATGGCGAGATAATTGAGATGAGTCGTGGGGTCAATGTTGGCTATCCCCTTCATAGCCGA  
GGCAAAAAGGGGATGAACCACTTACTTAAACATGGCAATAGGCTTTGCTGAGATACAAAATCTTCTTTAACTGCTGTT  
TGCTCTTATGACCATCTGACCATTTGTGTCAATTTGCATATGCTGTGCTTCGATATTATGGCGGGCTTGCCACAGCATC  
ACCAGTTGCAGGCAGTCTCTTTTTGTTCTCGTCAACGCAACGCCATCAGGCCATTTCCCAGTTCAACGGCGGTGCA  
CAAACGCTGGTATACCTCAGGCATCATGCTGTTGATAATGTATCAAGATTCATAATTTTTCCGCTCTGTGGAATAAGT  
TGCTGAATCGTTTTTCAACCGTTGATTTCTCGCCGTTTTGCCATCGGTAAGCGTAAGAGGCAGAGTTAACACAAT  
AACGTTCCCGGTTGGCTGCGGCCGTCGGGGAAGACATGCCCCAGATGGGCATCACAGTTACCGCAACGAATTTCTATG  
CGCTGATTCATGTGACAAGTCTTTGATATAACGAATGGATTTCTCACTACCGTTCTGTAAGAACTGGGCCAGCCAT  
GCCGGAATCATACTTGGTTTGGGAATGAAACAGCGGGGCATCGCAGATCAAACAGTGATATACGCCCTCACGCTTGTAT  
GCAGTAAACGACCCGTAATGGCGGCTCTGTCCCATGATTCTGCGTCACGTAACAACTGCATCTCGGACAAATTTTTTTC  
AGTTCTTCTGCGGAAGGTTTATTAGCCATTTGCTCACATCTACTTTAATCGTGCTCACATTACGTGACTGATTCTAACA  
AAACATTAACCAACTGGCAAAATTTTGTCTAAACTTGATCTCGACGAAATGGCTGCACCTAAATCGTGATGAAAATC  
ACATTTTTATCGTAATTGCCCTTAAATTTGGGGCGCCGACCCCATGTGGTCTCAAGCCAAAGGAAGAGTGAGGCGAG  
TCAGTGCAGTAATGCTTAGGCACAGGATTGATTTGTCGCAATGATTGACACGATTCCGCTTACGCTGCGTAAGGTTTTT  
GTAATTTTACAGGCAACCTTTTATTACTAACAATAGCTGGTGAATATATGACTATCAAAGTAGGTATCAACGGTTTT  
GGCCGATCGGTGCGATTGTTTTCCGTGCTGCTCAGAAACGTTCTGACATCGAGATCGTTGCAATCAACGACCTGTTAGA  
CGCTGATTACATGGCATAACATGCTGAAATATGACTCCACTCACGGCGTTTTGACGGTACCCTTGAAGTGAAGACGGTC  
ATCTGATCGTTAACGGTAAAAAATCCGTGTTACCCTGAACGTGATCCGGTAACCTGAAATGGGACGAAGTTGGTGT  
GACGTTGCTGCTGAAGCAACTGGTCTGTTCTGACTGACGAACTGCTCGTAAACACATCACCGCTGGTGCAGAAAGT  
GGTTATGACTGGTCCGTCTAAAGACAACACTCCGATGTTCTGTTAAAGCGCTAACTTCGACAAATATGCTGGCCAGGACA  
TCGTTTTCAACGCTTCTGCACCACCAACTGCCTGGCTCCGCTGGCTAAAGTTATCAACGATAACTTCGGCATCATCGAA  
GGTCTGATGACCACCGTTACGCTACTACCGCTACTCAGAAAACGTTGATGGCCCGTCTCACAAGACTGGCGCGCGG  
CCGCGCGCTTCCAGAACATCATCCCGTCTTACCCTGCTGCTAAAGCTGTAGGTAAGTACTGCCAGAACTGAATG  
GCAAACTGACTGGTATGGCGTTCCGCGTTCCGACCCGAACGTATCTGTAGTTGACCTGACCGTTCTGCTGGAAAAGCT  
GCAACTTACGAGCAGATCAAAGCTGCCGTTAAAGCTGCTGCTGAAGGCGAAATGAAAGCGGTTCTGGGCTACACCGAAGA



TGACGTAGTATCTACCGATTTCAACGGCGAAGTTTGCACCTCCGTGTTTCGATGCTAAAGCTGGTATCGTCTGAACGACA  
ACTTCGTGAAACTGGTATCCTGGTACGACAACGAAACCGGTTACTCCAACAAAGTTCTGGACCTGATCGCTCACATCTCC  
AAATAAGTTGAGATGACACTGTGATCTAAAAAGAGCGACTTCGGTCGCTCTTTTTTTTACCTGATAAAATGAAGTTAAAG  
GACTGCGTCATGATTAAGAAAATTTTTGCCCTTCCGGTCATCGAACAAATCTCCCTGTCTCTCCCGTCGTAACCTGGA  
TGAACCTGGACCTCATTGTGTCGATCATCCCCAGGTAAAAGCCTCTTTTGATTACAGGGCGCACACCTTCTCTCGTGGGA  
AACCTGCGGGTGAAGAAGAAGTTCTGTGGTTGAGCAACAACACACCGTTCAAAAATGGCGTCGCTATTCCGGTGGCGTA  
CCGGTTTGTGGCCGTGGTTTGGTCCGGCGGCACAACAAGGTCTGCCTGCGCACGGTTTTGCCCAGAACCTGCCGTGGAC  
GCTGAAATCACATCATGAAGATGCTGATGGCGTAGCGCTGACTTTTGAATTGACGCAAAGCGAAGAGACGAAAAATTTCT  
GGCCGACGACTTTACGCTGTTAGCGCATTTCGCGTGGGTAAAACCTTGAAAATCGATCTTGAATCACATGGCGAATTT  
GAAACCACCTCTGCCCTGCATACCTACTTTAACGTGGGTGATATCGCTAAGGTAAGCGTCAGTGGGCTGGGCGATCGCTT  
CATTGATAAAGTGAATGACGCGAAAAGAAAATGACTGACCGATGGTATTAGACCTTCCCTGACCGTACCGATCGCGTGT  
ATCTGAATCCACAAGATTGACGCGTGAATGATGAAGCGCTGAATCGTATTATCGCCGTAGGCCACCAGCATCATCTG  
AACGTTGTGGCTGGAACCCGGGACCGGCGCTTTCAATTAGCATGGGCGATATGCCGGATGATGGCTACAAAACATTTGT  
TTGTGTAGAAACGGCTTACGCTTCAGAAACGAAAAAGTGACCAAGAGAAAACCTGCACATCTGGCGCAATCCATTCCGG  
TTGCGAAACGTTAATTTACGTTAATGTTGTGTGCCGGTGAATGCATCCGGCACACAACATCACACCATATCCAGCGCA  
GTTTTCTTTTTGGTGGCGATATGCCTTATCCAGCATAGCTAATTCGCTGAAGAAAGTTGACCTCAAGCACAGCCGC  
ATTTTGTGGACATGGGCAATCGTGGCGCTTTTGGAAATCGCCATCACACCCTGATGACTGATCACCCAGCCACAACAATA  
CTTGTGCCGCGTATATTGTGAGCATGTGCAATTTGTTGACTACCGCTTTTTTAAACAGTCCATTGCGCAACCGCCCG  
GCCTGGGCTAACGGACTGTAAGCCATCACCGCATCTGCTGTTGCTGGCACCAGGGGAGTAGATCGTACTCAATTCCTCG  
TGAACCGAGATGGTAAAGCACCTGATTAGTGGCACACTGATTTCCCCCGGCGAGCTGCCAGAGTTCCTGCATATCAGCAT  
AATCAAGGTTAGAAACGCCCGAGCGGCGGATTTTTCCCTGGGCGATCAATTTTTCCATCGCTGCGACAGTCTTTAAAA  
GCGAAACTGCCAGACCAGTGAATAAGTAAAGATCGAGATAATCAGTATTGAGACGGCGTAAACTGGCTTCGCATGCATT  
TATCGTTTTTGGCCGAGCATTCCACGGATAGACTTTAGAGACGAGAAAGACCTTCTCTCGCAGACCGGTTAATGCTT  
CCCCAACACCTTTTGGCACCGCCATCGGCATACATTTGGCGGTATCAATGAGGGTTAAACCGAGTCAATGCCCGCG  
CGTAGTGCAGCAACTTCTGTTTTGCGCTGACTGGCATCTTCGCCATATACCATGTTCCCTGCCCTACGGCTGGCAGTGA  
GACATCGCCACTAAATTTGAATCATTTTTTGTTCATTGTTTCTCCAGGTATTGCACCACCGTAATGCAAAAACAGGGCG  
TGACGCCCTGTTTTATGCACAAAATGCCCTGGAAGATGCATTATCAGAATTTGTAGGTGATCCCGGTAGAAATCAGGC  
CAGTCCAGGATTTATCCACCATCGGGCTGTCAGTAACTTCATCAGACAGACGGGTGAGCGTGCAGTACCCTAAACACTC  
CAGTCGCGGAGGAAGTTGTAGCTGGCGCTCAGCTCCAGGTAAGGGCTCCAGCTGTCGTTCCGGTTATAGCCACGAGACC  
GCTGCGAGCGGACTCTTTGCGCGATACGCCATAATAGTATTGTTCTGGTTTTCGCTGTTCCACTGCACACCAATACCCG  
GAGTCACGGTCAGGCCACCGTTGGTGTAAACGATACAACCAGGCCATATCCAGACGATGCCGTTGCTGTTATCCAGGGTA  
TCGCCAGCCAGGGTGTACGCGAGTAACCGTACTGGGTAAAGTGAAGTAAAGCAGACCAGCCATCATGGTGCTCTTACG  
GTCATCCAGGTGACGCATTTGGTGTGCGCACTGCTTTTTCGTTTTGAAGTAAAGCGGCGACCAGTAAGCGGTAATTGAAA  
GTTTATCCGTTGCGTCATTTCCACAGGTAGTAACCACCACCTAAGCCACGGAACCAGAAGTTATCGCCTTCATAGTTGATT  
ACCGGTAAGGTAACATCGGTATCGTAATCTTTATATGGGTGTTCAACGACACCTACGCTGCGCCAGGGAAAATTT  
ACCTTCAGCGTGCCTACGCTGCAGACGTTGCGATAAGCACTCCAAGTCCAGAAAGTTTGGTGGTCAATTAATC  
ATTCCTTAAACAAATGTTTAGCGGGGACAAAAGTTTACCGTCAATACATCGAAACCAACCTTTTTACGTTTTTCAATTT  
TTAAAGTAACTGTTAATTTTTCTGACGCGGATGACACCGCGCTTACAGCCAAATGAATTTAGCGTTACTGGCGAGCCTG  
GTCTTTACATTAATTAATGCAAAAATTTATGGATGAGTTGTTGATATGCCATTGAAATTAAGAAAGCCGTGACGGCAAGTTT  
TCCATTTGCCATCAGCTTAATTTTTGAAGGTGATACCCGGGACGTTGTTCTCATCGTAAATAAATGGCATGAGAT  
TGCTGTGTTTTAGCAAGAGACGTCGTTACGTTTACCTCTTCCGGGAGCCTCTACTATTATGAAACGGCTCTTAACCTG  
TGCTAAAAAACGAAAGGACGGCATAACCATGAATATATTCGATCACTATCGCCAGCGATATGAAGCTGCCAAGGACGAAGA  
GTTCACTGCAGGAGTTTTCTTACCCTTGTGCGCAAGATCGCAGTGCTTATGCCAACGCGGCTGAGCGGCTATTGATGG  
CTATCGGTGAGCCTGTCATGGTGCATACAGCCAGGAACCCAGACTTTTCTGACTCTTTTTCTAACCGGCTATTGCACGT  
TATCCGGCGTTTTGAAGAGTTTTACGGCATGGAAGACGCGATTGAACAGATTGTCTTATCTGAAACACGCGGCTCAGGG  
GCTGGAAGAGAAGAAACAAATCCTGTATCTGCTGGGCGCTGTGGGTGGGGTAAATCATCGCTTGTGAGCGACTGAAAT  
CATTAAATGCAGCTCGTACCGATTTATGTATTGAGCGGAAACGGTGAAGCTAGCCCGGTCACGATCATCCGTTCTGTCTT  
TTCAATCCGAGGAAGATGCGCAGATTCTGAAAAAGAGTATGGCATTCTCGCGGTTATCTCGGCACCATCATGTCGCC  
GTGGGCGGCAAAACGCTGCATGAATTTGGTGGCGATACCTAAGTTCCGGGTAGTGAAGGTCTGGCCGTCATTTCTGC  
AACAAATGCTATCGCCAAAACGGAACCCGGCGATGAGAACAACCAGGACATCTCCGCGCTGGTTGGGAAAGTCGATATT  
CGTAAACTCGAACACTACGCGCAGAATGACCCGGACGCTACGGCTATTCCGGTGCCTGTGCCGCGCAATCAGGGGAT  
CATGGAATTCGTTGAGATGTTTAAAGCACCGATTAAGTGTGCTGCATCCCTTGTAAACCGCCACTCAGGAAGTAACTACA  
ACGGGACGGAAGGTATCTCCGCCCTGCGGTTCAACGGGATTATTCTCGCACACTCGAACGAGTCCGAATGGGTCACTTT  
CGTAATAACAAAAACAACGAAGCCTTCTCGATCGTTTTACATCGTGAAGGTGCCGATTGCTTGGCATTTCGAAGA  
GATCAAAATCTACGAGAAATGCTTAATCACAGTGAATTGACTCACGCCCATGCGCCCTGGCACGCTCGAAACACTGT  
CACGTTTTTCCATTCTTTGCGCCTGAAAGAGCCAGAAAACCTCCAGCATTATTCAAAGATGCGGGTTTTATGATGGCGAA

AGTCTGAAAGACACCGATCCCAAAGCCAAGTCGTATCAGGAATATCGTGACTACGCCGGTGTGATGAAGGGATGAACGG  
TCTGTGCGACGCGTTTTGCGTTAAAGATCCTCTCCCGCTGTTCAACTTCGATCATGTAGAAGTGGCAGCAAACCCGGTCC  
ATCTGTTCTACGTCCTGGAACAGCAGATTGAGCGCGAGCAGTTCCACAAGAGCAGGCAGAACGCTATCTGGAGTTCCTG  
AAAGGTTATCTGATCCCGAAATATGCCGAGTTTATCGGCAAAGAGATCCAGACGGCCTACCTTGAATCCTATTCCGAATA  
TGGGCAAACATTTTTGACCGTTATGTTACCTACGCGGATTTCTGGATTAGGATCAGGAGTATCGCGATCCGGATACCG  
GGCAGCTGTTTGACCGCGAGTCTTAAACGCCGAGCTGGAGAAAATCGAGAAAACCGCGGGGATCAGTAATCCAAAAGAT  
TTCCGCAACGAGATTGTTAACTTCGTAAGTGCAGCCAGAGCGAATAACAGCGGACGCAATCCGAACTGGACCAGCTATGA  
AAAAGTGGCAGCGTATCGAGAAGAAAATGTTCTCAATACCGAGGAGCTGTTGCCGTTATCTCGTTAAACGCCAAA  
CGTCAACCGACGAGCAGAAGAAACACGACGACTTTGTGACCGTATGATGAAAAAGGCTACACCCGTAACAGGTGCGT  
TACTGTGCGAATGGTATTTGCGCGTACGTAATCGTCTTAAACCCCTGGCCCGGTACACATGTTACCGGGCTACAAC  
GACAGCGAACCGTGGGCTGAGAAGCGGCAACACAGGCGTAGCATAACAGTTGGCAAATGTAGTACGGGGGCATATGACC  
TGGTTTTATTGACCGCGTCTGAACGGCAAAAACAAAAGCATGGTGAATCGCCAGCGTTTTTTACGCCGTTATAAAGCGCA  
AATTAACAGTCGATCTCCGAGGCCATTAATAAGCGTTCGGTACTGACGTGACAGCGGCGAATCCGTATCCATCCCA  
CGAAGATATTAGCGAACCGATGTTTCATCAGGGCGTGGCGGTCTGCGCCACCGCGTGCATCCGGGCAATGACCATTT  
GTCCAGAACGACCGAATTGAACGTCAGGGTGGCGGAGGTTCCGGCAGTGGTCAGGGCCAGGCCAGCCAGGATGG  
TGAAGTCAGGATGAATTTGCTTTTCAGATTTGAAAGATGAGTATCTTGATCTGCTCTTTGAAGATTTGGCCTTACCGA  
ATCTGAAACAAAACCAACAACCGCAGCTGACCGAATAAAAACGATCGGGCGGGTTATACCGCTAACGCGTTCGGCC  
AATATCAGCGTTGTGCGTTCATTGCGAACTCACTGGCGGACGACAGCCATGACGGCAGGCAAGCGCGGGAACCTCA  
TGCACTGGAAGAGAATTTGGCCATCATCAGCAACAGTGAACCTGCGCAACTGCTGGAAGAGGAACGTCTGCGCAAAGAAA  
TTGCAGAATTACGTGCCAAAATTGAACCGCTCCCTTTTATTGACACCTTCGATTTACGTTACAAGAACTACGAGAAGCGG  
CCCGATCCCTCCAGCCAGGCGATGATGTTTTGCTGATGGACGTTCCGGTTCAATGGATCAATCCACTAAAGATATGGC  
TAAGCGTTTTTATATTCTGCTGATCTGTTCTCAGCAGAACGTATAAGAAGTGGAAAGTGTATACATCCGCCATCATA  
CCAGGCGAAAGAAAGTGCATGAACATGAGTTTTTCTACTCGCAGGAAACAGGCGGACCATTTGTTCCAGCGCCTGAAA  
CTGATGGATGAGGTAGTGAAGAGCGTTATAACCCGGCACAGTGAATATTTACGCTGCACAAGCATCGGACGGCGATAA  
CTGGCCGATGACTCTCCGCTTCCATGAAATCCTGGCGAAAAAATTATTACCTGTTGTTGTTATTACAGCTATATCG  
AAATACCCGTCGTGCACATCAGACATTGGCGGAGAATATGAGCATCTGCAATCTACTTTGACAACCTTTCGATGCAG  
CACATCCGCGACCAGGATGATATTTATCCGGTTCCTGTAAGTGTTCATAAAACAAAATGCAACAGCTAAAGGCTAAAA  
CTATCAGCCAGTCAATTATCGCCTGGCTGATTTTTAGCTTACTGTAATATCTCATTTATTACATACATTAGCTTACAA  
TCGTTTTAAATATGACAGCATAACCTTTACATAATTTAGTTCCAGAAAACAATCATTCCGAAAAATGATTCAAGTCAACAC  
GTATTTCCATGGGGTTATCTTTAAATATTTTTATCGTTAACGAAAATTGATCCTGGTCAAAAATATATCTCTGCCA  
TCAATAAAATCCAGCACTCACATTGCTCTCCTTTTTATGGTTTCTATGGGTACACAAAATTTAAAAGCTCAAAGCTTTTT  
TATTTTCAGTTTATTGCTGACGTTAATTTTATTTGCACTACTACCTTATATAACGAAAACACAAATGTAAGCTCATCC  
CACAGATGAATTACCTGATGGTTGTTGTGGCTTTGTTTTCTTAAACGCCGTCATTTTTCTTTTCATGTTAATGAAATAT  
TTCATAACAAACAAATTTTACCAACTCATTTTAAAGCCTTGCATTTTTAAAGTGGCCTTATCTATTTAGTTGAAACCAT  
TGTAATTATCCATAAACCAATTAACGGCAGTACACTGATCCAGACAAAGTGAATGATGTTTCTATTTTCTATTTTTCC  
GCAACTCAGTTTTTATTTGTTAACTCGCTGGCGCTTTTTGTTATGAAAAGACAACATCCTTGACAACAATAAGAAA  
AAAACGGGAATCCTGTTGCTGGCGCTGATCCCTTTTTAGTTTTTCCCTTTCGGCACACAATCTGAGCAGTTATAACGC  
TGACTATCTTTGATGTGCTGATTACTGTCCGGACAACCATACTGCGACCTGGGGAATCAACTATACAAAAATATTGG  
TTTGTCTGTGGCATTTTTACTGTTCTTTATTATCATGCGCACAGATTAGCCAGCGAACTATGGCCGTTAATAGCATT  
TTATGTCTGGCATCGTATGCTGCAACTTACTTCTACTGACTTGGATGAGTATAATTATACTATCTGGTATATCAGTCG  
CGGATTGAAGTTTTCCAGTAAACTGTTTGTGCTTTTTCTGATTTATAACATTTTTTCAGGAGCTGCAACTCTCCAGCA  
AACTGGCAGTTCATGATGTGCTGACCAATATTTATAATCGCGCTACTTTTTCAACAGCGTAGAGTCATTATTGTGCGGA  
CCTGTTGTTAAGGACTTCTGTGTCATGCTGGTTGATTAATCAGTTCAAACGCATCAATGCCAATGGGGACATCGTGT  
GGGTGATAAAGTGTGTTTCAATTGTCGATATTATCCAGCAAAGCATCCGCCCGATGATTTTTAGCGCGACTGGAGG  
GTGAGGTGTTTGGCTTGTATTTACCGAACTCAATAGTGCCAGGCAAAAATCATTGCGGAACGTATGCGTAAAAATGTC  
GAACTCCTGACCGCTTTAGTAACAGATATGATGTTCTGAACAAATGACCATCAGTATTGGCACGGTTTTTTCAACGGG  
TGACACGCGTAATATCTCGTTGTCATGACGGAAGCAGATAAAGCCTTACGCGAAGCGAAAAGCGAGGGGGCAACAAAG  
TGATTATTCATCATATTTAAGTGCAAAAATATTAGAGCCATGCTTTTTGCGTGGCTTTTGCATACAATTTATTACTATT  
ACCCCTAAATTTCCCTCCAGCGGCGCAGAGATGAGTATAATTAGCGCCCTGTGCCAGGCGCAATCGAACTTTATC  
TGGTTTTCTGTTTCACTAACCGAAGGAGTGCCATTTATCATGAAATTGCACCATAGAATGCTCCGGCATTATATCGCCG  
CAAGTGTATTGTGCTGACATCTTCTTCTTATTTTTGAACTTGTGCGCAGCGACAGAGCAATGAGTGCCTATCTGCGC  
TATATCGTGAGAAAAGCAGACTCCTCCTTCTTATGATAAGTATCAGAATCAGAGTATTGCCGCGCATGTGATGCGCGC  
TCTCGTGTGAGCAGTCGGAAGTGTGCGCAGAACAGCGGCGCGCATCTGCGAGGCTTTTGAAGTCTGCCAATAACCCC  
ATGGCTTAAACCTGACTGCCATAAATACCCGGGCTTACGCGGCACACTACAAACCGCATCCACTGACTGCGACACAATT  
GTGGAAGCTGCAGCACTATTACCCGCTTTTATCAGGCAGTGAAGGCAACCGCCACCAGGATGATTACGGTTTCAAGTCT  
TGGGATGGCCGAAGAGAAAATTTCACTATTATCTCGATCTCAATGACCGCTATGTCTATTTTTATGAGCCGGTTAATGTTG

AATACTTTGCGATGAATAACTGGTCCTTCTGCAGTCAGGAAGTATTGGCATCGATCGCAAAGATATTGAAAAGGTATTT  
ACCGGGCGTACCGTATTGTCGAGCATTACCAGGATCAGCGTACTAAACAGAACGTGATGAGTTTGTGACGCCGGTATA  
TGTCGAGGGCAGCTAAAAGGGATTGTGCTGCTGGATTAACAAAAACAATCTGCGGAATATCTTTTATACTCATGACC  
GCCCTCTCCTCTGGCGTTTTCTCAATGTCACGCTAACCGATACCGATTCCGGGGCGCGACATTATCATCAACCAGAGCGAA  
GATAATCTGTTCCAGTATGTCAGTTACGTCCATGACTTACCGGGCGGCATTCTGTGCTCGTTATCCATTGATATTCTTTA  
CTTTATCACGTCTTCGTGAAAAAGCGTTCTGTTCTGGATTTTGACGGCGTTAATTTTGTGTAATATGGTGCGGATGCACT  
TCCGTTTATACCAAAATGTGTCGCGAGAAAAATATTAGTGATGCGATGACTGGACTGTATAATCGCAAATTTTAAACCCCT  
GAACTGGAGCAGCGGTTGCAGAAACTGGTGAATCCGGTCTTCGGTGATGTTTATTGCTATTGACATGGACAAGTTAAA  
GCAAATAAATGACACCCTCGGTATCAGGAGGGGGATTTAGCGATTACGTTATTAGCTCAGGCGATTAACAGTCGATT  
GTAAAAGTGATTATGCCATCCGACTCGGTGGCGATGAATCTGCATCATTCTGTGATTGACGCGCAAAATTGCAGCA  
CAACTGCCTGAACGTATCGAAAAACGTCTGCAACATATCGCGCCGAGAAAGAGATCGGCTTCTTCCGGTATTTACGC  
GATGAAAGAAAACGATACGTTACATGATGCGTATAAAGCTTCCGATGAGCGTTTATATGTCAATAAGCAGAACAAAAACA  
GCCGTTTATGATAACCTTCTGTGGTTGTTGCTTGAATCTCAGGAGCGTGAATGACTGAAATGGCTAAAGGAAGCGTG  
ACGCATCAGCGGTTAATCGCTTTATTATCACAGAAGGTGCTGACTTCCGCGTCTTACCCATGAAGCGGTAGGTAATG  
TGAAGCGGTGCAGAAATCTGTGGCACCCTTAGGCCAGGGTCTAAGGCACCTGGTATGTAAGTCAAAGCAATGGCG  
TAAATCAACATGTTCTGGCGATCCTCGCAGCCGATCAACAGGCGCATCTGAGCCAATCGCCAGCCATATAGGCGGATTA  
CGCGCTTCTGTTGGCCAGCCCGGCGAAAGTCGATGAACTCACAGGCTGTGTCTTCGGCGCGATCCCCCTTTCAGCTTCCA  
TCCAAAACCTCAAAGTGGTTCGCGACCCTCTACTCTTGAACGATTTGATGAAATCGCCTTCAATGCAGGCATGCTGGATA  
AATCCGTTATTTTAAAACCGCGGATTATTTGCGCATTGCGCAACCAGAAGTGGTCAATTTCCGCGCACTGCGTAACTA  
GCCGGTCCGTTGATAAGAAGAACGGACAAAACAGTACAACAGCAATGGCAAAAAACGATGACGTGATAATCAGTGTCT  
CGACAAACATTTGATCGTTCATAGCATGCCCCCGGAGATAGCTTTTTACGTTATTGTTAGCGTGCACAAATGGCAGT  
TTGATGACAGTTCGCTGATTTTTTATGCAAAAACGTAAGATTTTCTACTTCTTCTGCAGCAAGCGTAAAGTAAGC  
AGGCTTATTATTTTTGGCAAGGAAACCACGATGTTTGTGTCATTTGCTGATCCTGCTCGGTTAGCTGCGCTGGGCT  
TTATCAGTCATAACCACTGTGCGCTTCAATCTGGTGTAAATCATTGTCCGCGTACACCGTTAAGCACCTTTTTT  
CCGTGGATTGAAAAACAGGGGTAAGTATCGGGATAATCATTCTGACGATTGGCGTTATGGCCCCATCGCCAGCGGGAC  
GCTACCGCCCTCAACCTTGATTCACTCGTTTCTGAACTGGAATCACTGGTGGCGATTGCAGTAGGCGTATTGTCTCCT  
GGCTGGGTGGGCGCGCGTACGTTAATGGGCAGCCAGCCGCAACTGGTCCGCGGGCTGCTGGTAGGCACTGTTTTAGGC  
GTAGCGCTGTTTCGCGCGTACCGGTTGGGCCGCTTATTGCCCGGGCTGCTGGTTTCGCTGATTGTGGGAAACAGTAGTT  
AATCTCGCAATATATCGGCCTGGCGTTTCCCCAGGCTTTCTTAAACATAGTAATAAAGGCCGTTGTTGAATCATACCC  
CAGCGTATGAGCAACTTTCTGTACAGTATCGCCTTCACTAATCCCTGAAGCGCCATAATCAGCTGTAACCTGCTGACGCC  
ACTGGCGAAAACCTCAACCCCGTCTTTTTACTATCAGTCGGGCAAGATTGCGTTCACTCATCGAAAAAGCCAGCCCAT  
TGCCCCAATGCCCCCACTCGACAGGCCCTTTCGCCATCATCTCCACCATCGTGCGGATTTTAGGATGAGAAGAAACGGG  
CAGGTGCAGCTGTTGTTGGCTGCTGAGGGAGTTCATCAACAGGACCTGAATTAATCTGCGGGTCAATTGGCTCAGCAC  
GCTGAGTCGTCGCTGTTTGCAGGGTAAAATTAATTTCCGGCATAAGGGCGATATTTTCAATGTGCAACATGTTGTC  
GGCATTGTCACTGCGCTGGGTTTCGATAAACAGAAAACAGAGTTGAGCATTAGCTGTTACTTGATTGCTATGTTCCACCC  
GCCCGTATCCAAACCGCATATTGTGGCGCACCATCCACAAAGCATTTTCCACCGTACAGTAATTGCACCATGTAGCG  
CCAGTATCAGTGTCTTTGCGGTGCTGATGTACAGGACTGGTAACTCATCCGTTCCGGCGTGAATACAAAATGCGACC  
GCGGCTTATGGTGTGCGTGGGTTTATAGCCATTGAGATTCAACTGTGCATCATTGTTGTCGAACTTAGCGATAATTT  
TTCACCTTCAATAAGCGCAAAAACAGGATTGCTTACTCTGCTGGCATTCTGATGATTGCCACAACATTACGCGTCACT  
TTACCGGCGCAGCACCGTTACTGGATACGATTCTGTTCCGCTTACTCGCTGACGACAGCGCAAAACCGCTTATTGACCACC  
CTGCCATTATTGGCCTTTCGCTAATCTCACCTTGGCTGCCCGGTAGCGCGACGTTTTGGTATGGAACGTAGCCTGTT  
TGCCGCTTACTTTTTGATCTGTGCTGGTATCGCAATTCGCTCTCTCCCTTGCCTTACTTATTATTTGGCGGTACAGCGG  
TCATTGGCGGTGGGATTGCATTAGGCAATGTCTTACTGCCAGGATTAATTAACCGGATTTCCCTCATTCCGTCGCCAGA  
CTTACCGGCGCATATTCCCTGACAATGGGAGCTGCAGCGGCACTGGGATCGGCTATGGTCTGCCGCTGGCTTTGAACGG  
TTTTGGCTGGCAAGGCGGTTGCTCATGCTGATGTGTTTTCTCTGCTGGCTTTTTTTTTATGGCTGCCACAGTGGCGAA  
GTCAACAACATGCAATTTGAGTACCTCGCGCCTTACATACTCGGGTATCTGGCGTTCACCGCTTGCCTGGCAGGTC  
ACATTGTTTCTGGGATCAACTCACTGGTCTATTACGTGATTATTGGCTGGCTCCGGCGATCCTCATCAGTCACGGCTA  
TAGCGAAGCACAGGCGGGTCACTGCATGTTTTGCTGCAACTAGCCACAGCAGCACCCGGTTTGTGATCCACTTTTTCT  
TACATCATGTAAAGATCAGCGTGGTATTGCAGCGTTCGTTGCCCTGATGTGCGCAGTGGGCGGTTGGCTCTGCTTT  
ATGCCAGCGCACGCGATCACCTGGACTCTGTTTTCGTTTTGGTTCGGCGCAACAATGATACTGGGGTTGACGTTTCT  
TGGTCTGCGGGCTAGTTCTGCGCATCAGCGCGGCACTCTCGGGATGGCACAATCCGTCGGGTATTTGTTGGCAGCCT  
GTGGGCGCCGCTGATGGTAAAATACACGATGCTAACGGTAACTGGTCTGTACCATTATGGGTGTTGCCATACTTTCA  
CTACTGATGGCGATTTTTCGGACTTTGCGCCGGGAGAGACAAAGAAATTCGTAATATCCGGTGTATAGTGACGTAACAA  
ATCATGCGTAAAAGGAGAACAAACACGATGAATATTACGTGCAACCGCTTATGATCCGGCTGAACAGAGCGATGGTT  
ATCGCATACTGGTCGACCGCTCTGGCCGCGGATCAAAAAACCGATTTAGCCCTGATGAGTGGGATAAAGAAATC

ACGCCGTCAACGGAAGTGCACAAAGCCTTTCACGGCGAAGTCGTCGATTATGCAACCTTTCGCGAGCAATATCTTGCGAGA  
ACTGGCGCAACACGAGCAAGAAGGAAAGCGGCTGGCGGACATCGCAAAAAACAGCCGCTGACCCTGCTCTACTCAGCAA  
AAAAACCACGAGAACCATGCGCTGGTCTGGCCGACTGGCTACGTAGCTTGTGATTTTAGTACAGCATCCGGCGGTTA  
TTTTTACCAGCCGGATGGTACGCCGCCACAATGCCATTATCAATCGTTTACCAGCCCGTAATTTGCAATTGTTGC  
TGACCCCTTGGCTGTCTGCACTGGAATGAGCGTCCCGCCCTTCTGCTGGCAATAGACCGACGCCGGATTTGCCATACCA  
ATCTGCGGCGGTTTAGGTGCTTCTGGCTGAGAAGGGGTTGAACAACCAGCCAGGACCAGCAAGCAAGGCAGAAACAACT  
GATAATTTTCAATTTATTGATCTCACATATTTATCCAAGATTAGAGTATCGCGGTATCGTTTTGTTTTGCAGCACTATTTT  
TATTACATTTCAAAACATATTACGTCTTGTTCATCTTGTGATGATGTTTTATCATGCCTGCAAAGATTAATAA  
TCAGCATTTACCCGCCGATCCTGGAGTTGTTCCGTGTGAGTATCGCCCCGCTCTCGCAATCCCTTGCCAAAG  
AACAGTCACTGAAAGTCTGGTCCGACAGCTTCTGGAGATGCTGAAATGGTCACTGATATGGAATCAACCTACCTGACC  
AAAGTGGATGTGGAAGCGCGCTGCAGCATATTATGTTTGGCCGTAACAGCCAGAAAATGTACATCCCGGAGAATTTTAC  
CGTCTCGTGGGATTACTGTTATGCAAACGCGCCATTGATGAAAATGCTTTTTACGCGATGAAGTCCCCGACCGTTGGG  
GTGACTGTATTGCGGCACGCAATCTTGGCATCACCACATTTCTGAGCAGCCAACTTACCTACCGGATGGATCATTCTAT  
GGCAGCCTTTCGCGCCAGCAGTGAAGCGCCAGTGGAGTGAACGCGGGAACAGGTTTTACAGTTATTCCGCGGAT  
GATTGCACAATATTTCAAAAAGAGGCACTGGTTGAACAGTGCAGCAAGCCAAATGCTGCGCTGATTGCCAATCGTATA  
CCGATCGTTAACCGGGTACCGAATCGCGGGGCGATTTTTGAAAATCTGACGACTGTTTTCCCTCGCCAGGCATCTT  
AACATAAGATAATGATCGCGTTTTATCGATCTGGATAACTTCAAATTAATCAATGATCGTTTTGGTCATAATAGTGGCGA  
TCTGTTTTCTATTAGGTTGGCGAGCGCCTTAATACGCTCCAGCAAAAATGGCGAAGTTATTGGTCTGCTCGGCGGTGATG  
AGTTTTTAGTTGTTTCACTAAACAACGAGAATGCGGATATTTCTGCTGCGGAGAACGATTACAGCAGCAAAACGTTGGA  
GAATATCACTTAGGTGATGTTGATTTGATTATCCCGGTGCCAGTCTTGGCATAGTAGAAGTCGATCCTGAAACAACCGA  
TGAGACAGTGCCTGCATGCTGCCGATATTGCGATGATCAGGAGAAAAACAAACAGAAAAACCTTTTGTGCGCG  
ATCCAGCGCTACATCTGAGGCGTATTCACATCTTTTATTGGTATAACATGCGAATCGGTATTATTTTTCCGTTG  
TAATCTTATTACAGCGTCTGATTTTTAGCATGGTTTTTATTGGCGGCTATGCTGCCCGGGAGCATAAAGATGAAAA  
AAACAACGATTATTATGATGGTGTGGCGATTATTGCTGACTCGGCACTGAGTGGGATGGTGAACGTCACCTCTAA  
AAAATAGCAAAGGCTGCCTGTGTGAGCCTTTGTGCAATTAAGCGTTAACTTTAATCTTCTGTAGATAAATAGCACG  
ACAATCGACCAATAACGGCAACCACGAAGCTGCCAAAATTGAAGCCATCGACTTTACCAAAGCCAAACAGCGTGTGAT  
CCATCCGCGACTACGGCACCAGTATCCCAGCAGGATAGTCATAAAGAATCCACTCCATCTTTACCTGGCATGATCC  
ACTTCGCCAGAATACCGCAATAAGCCAAAAATAATCCATGACAGAATGCCATTGTTTCCCTCACTTATCTGTTTTGCA  
TTAGCGGGTATGTCGCTGATAAAAAGCATAGCAACAATCGGGAGGGCAAGATTTGTGACGAGCATCACGGAGGTTTTT  
TTGCGATGGCGCAGAAATTCGCCATCAACGATCAGTGATAATTACCAACCACAAACATCATGTTCTGTTTTCCGTGTCAT  
AAGAACGTACGGTATTACCCAGATCTTTTATCACTTACGCCCACTTCTGGCACCAGCAAAGTCATCGGCGTCTCTGTT  
TCATAATCGACAGAAACGCCATTGCTGTTATTGGTACGGTACGGTATACGTTGCTTTGCCCATGATTCATTTCCCGTT  
ATGAATGACTTTCCGTTGTTGCGCACCTTCCATCAGGACTTACAGGAGCCACGAAGAAGTCAATGTTGAAATAAGTATCGT  
CAGTCATGGCTTCAATGTTGTCACCTTTTCTGGAGGGAACACCGCAAACTGCCCGCTTCGATAAGGATCACCTGATCA  
GGCTCTGCACTGTGTTATCAGCGTAGCCGAGATATTTGACCGCCCATGCATAACGGAAGGCGTGGTAAACCCCGG  
GCGGTTCTTTATCAAGATGACGTTGCAATATTCGGCAGGTGCAGTTTGTATTCCAGAAAGGCGTTGAGCGCGTAT  
GAATATAATCTGTGGGATTTGAAGCATCTTTTCCCTCCTTGGTGAATGCGCTGAAAACGGTTTATCCAGCCGTTT  
AGGTACGCTGATAATTTGATTTTAAATACCATTTATTGGTACTTTTTAGCACCATATCAGCGAAGAATCAGGGAGG  
ATTATAGATGGGAAGCCCGCAGCAACCGGGCTGAAAGCATCAGGATTGAGCGTGCAGTCCAGTCCGCGAGCAAAACCCAG  
AACATCAAACCAATCAGTGAAGTTGCCAATTTAGCCAGTTCTTTTTGGTACGATGTAATGCGTGCAGAAAAGCAGCAGA  
TATAATCAGGAAGCTCAAATAGCAGAAACTCACCAGTTCCAGCGTCCGCCAGAAATAAGAATGAAATTTCCGATGTTG  
GGCATTAAACATCGATAAACTGTACGAAAAACGACACATAGAACAAAATGGCTTTCGGATTAGTACGGCTCAAAATTAAC  
GCGCGTTTAAAAATAGCACCGTATTGGGGCTCATCGGATTTGGCCTCGCTATTTTTACCCTTACGGGTGCGGTAAGAAT  
TTTACTCCCCAGATAGAGCAATAAAACGCACCAAGATAACGTACAATGTTGAATAATATCGGGGTGGTCTTAATTAATG  
TCGCCACTCCAGCCATGCCAGAAACATCAATACCGCATCGCCAATAAATACACCGCAGGCCGCAAGATAACCGCTTTC  
ATACCGCTACTGACGCTATTTTTGAGTACAAACAGGATTTTGGCCCTGGCACCACACAATAAAAATGGCCCAACCAG  
ATAGGTCCAGTAATTCAGAACCCCGTATTGAGCGAACACATTAACCTCTTTAATTATCTTTGATCATGCGCGATTAAG  
GTGAATATGCTAACCAATCTGTAGCGGCTTAGAAAGGAGAAAAATCAGGTTTTAACCTGATATCAACCCGATAATTGAATC  
ATTAATCAGGCATGCTCCAGTGAATAATTCGGGTAGTGTCTGGCAAAATACTGGCGTAAAAATTTACCGTTATCCGCAC  
TTTCGCTGACGTGCCAGCCTTGAACATAAACGGCCAGACGTTGCTGGTGGTAAATATTCGGGTAGCACTTGCACATA  
AATGACCACTGGCAATGTTTTGCTAACATCCCACCAGGAACGCAGAGCAATCCCTGCCATCGAGACACCACTGATGG  
ACAATTTCTCCATGATTAGACGACAGTGGCCGGTACTTTAATCGCATGGGGCCTTCTTTATTGCGTAATTGCCAGAC  
ACCAAAGGATGATCGCGCTTTAATGACCAGGCAGGCAATGCAGAAAGATCGGTTAAATGTTTCCGGCGCCATGTT  
GCGCAATAAATTTCCGGCGACGCGCAGAGAATACGGTAATTGGTCCGAGTTTGGGGCGATTAAATAGGGGCGATGTCA  
TCGCCAATGCGAATATCGAGATCGACACCTTATTGACCAATCGACCAGTCCGCTTCCACATCAAACGTAATTCAG  
TTGCGGATACGCCCTTCGCCAGCGTAATAACGCCGAGCCACCACCTGTCGTCACAAAACAAAGCTGCTGATAATACGCA

GCATCCCCTGCGGCACCTGACGCACGTCAGAAAGTTCGTCCATCATCTGACCGACATCCTGCAAAATCCGCTGCGCCCAT  
TCATAAATCCGCTCTCCTTCTCGGTAATGGTGACGCGGGGGTGGTGCGGTGTAACAACACCACGTTTAGCGTTTGCTC  
CAGCAAGGCGATGCGCTTGTGACGAACGCCGGTGAACGCCAGTTCCTCCGCCACGGCGGCAAAACCAGCCCGGCGAG  
CCACCAGCATAAAGACGCGCAAATCATTACAGCAGCGTAAATTATTCATGATTGTTTATGTTTCACCAGTTACGGG  
GATTAATTCCTTTTCAGTCAATTATAGGATGGTGTGTTGCAATTTTGATGGTCAGGAAGTGAGAACCCAATGATGAAA  
ACGATGCGTATTGCTGCGATCCCGGGAGACGGGATTGGCAAAGAAGTCTTCCTGAAGGGATTGCGGTGTTACAGGCTGC  
CGCTGAGCGCTGGGGCTTCGCTTGAGTTTTGAGCAAATGGAGTGGGCGAGCTGCGAGTATTACAGCCATCACGGTAAAA  
TGATGCCGGACGACTGGCATGAGCAACTAGCCGTTTCGACGCCATCTATTTTGGTGCCGTGCGCTGGCCGGATACCGTT  
CCGGACCATATTTGTTGTTGGGGTTGCTGCTGAAATTTGCTGCTGAATTCGACCAGTACGTCAACCTGCGCCCGGTTCCG  
TCTCTTCTGCGCTTCCCTGCCCCTGGCGGAAAAACAGCCTGGCGACATCGATTTTTACGTGGTCAGGAAAAACCCG  
AAGGCGAATATTCCTCGCTCGCGGTAGAGTGAATGAAGGTACAGAGCATGAAGTGTGTCATTACAGGAATCGGTATTTACC  
CGCGTGGTGTGATCGCATTTTTGCGTTATGCCTTCGAACTTGGCGAAAGCCGTCCACGTAAGACACTAACTTCTGCCAC  
TAAATCGAACGGTTTAGCCATCAGCATGCCGACTGGGATGAGCGAGTGAAGCAATGGCCGAGAATTACCCGGAGATCC  
GCTGGGACAAGCAGCATATTTGATATTTCTGCGCGCTTTTGTGATGCAGCCGGAACGATTGATGTGGTGGTGGCGTCC  
AATTTGTTGGCGATCTTTCCGATCTTGGCCCGCTGCACCCGACCATTGGCATTGCCCATCCGCAACCTGAA  
TCCGGAACGCACTTTCCCGTCTTTCGAGCCTGTCCAGCTTCCGCGCCGATATCTACGGGAAAAATTTGCTAAC  
CTATCGCCACGATTTGGCCGGGGCAATGATGCTCGATTTTCTCGCAATGGCGATGAGCGTTTCCAGCAAGCGCATAAC  
GGTATTCTGGCAGCAATTGAAGAAGTGATTGCTCACGGGCCGAAAAACACTGATATGAAAGGCAATGCCACCACGCCACA  
GGTTGCCGACGCGATTTGCAAAATTTTTCGTTAAGGTCAAACCAGTTTATTTGAACCGCGTCACTGACGCGGTTTTT  
TTATTCGTTCTTTCAGTAAATAACCTGCGTCATTTACCTTTTTATTGTTTCCGTTTTCGTGTTTTATGGCTTTCCGATT  
CTTAATTGTTAATTTATGTAACATGCAATTTTGTACGCGTACGTTAGGTTCCGCCGTACAGGTATTGGTTTTGCTGG  
CAATGGGACTGGTGATTTATTTAGCCACCAGTAAATACGGCAATATTCGCTTGGCGAAGGAAAAACCGGAATACAGCACG  
CTCTCCTGGCTGTTTATGTTTATTTGTCGGTTTTAGGTTCTTCTACGCTTTATTGGGGGTTGCTGAATGGCCTATTA  
TTATCAAACACTGGATTAATATCGCACCGGTTCAACAGGCACTCGAATTTAGCGTTCCTACTCTTTCTCCACT  
GGGGCATCAGCGCTGGGCAACTTATACGCTGGCCTCATTATCATGGCTTACTTTTTCATGTGCGGAAAAACAAAGT  
CTGAGCCTTTCCGGCATTATTGCTGCTATTACCGCGTTCGCCGCAAGGCCATGGGAAAACTGGTCGATTTGATGTT  
CCTGATCGCCACTGTCGGCGCACTGACCATTTCCCTGTTGTTACCAGCAACCTTTACCGTGGGCTTTCCGCGCTGA  
CCGTTTTACCCGATAACTTACCGTGCAGGCATTTGTGATCCTGCTTTCGGCGGCATTTTTTGCCTAAGCTCGTGATT  
GGTATCAACAACGGTTTGAACGCTGAGCAAAATGTTGGTGGGGCGGTTCTGCTGCCATTACTGGTGTGATTGT  
CGGCCAACCGAATTTATACCAACAGCATCATCAATGCCATCGGCTGACCACGCAAAACTTCTGCAATGAGCTTAT  
TCACCGATCCGCTTGGCGATGGTTCATTTACCCGCAACTGGACCGTTTTCTACTGGCTGTGGTGGATCTCATACCCCCCT  
GGCGTAGCAATGTTTGTACCCCGGTTTTCCCGCGTTCGTAAGATTAAGAAGTTATCTGGGGACTGATCCTCGGCAGCAC  
CGTCGGTGTGGTCTTCTTTGGCGTAATGAAAGCTATGCCATTATCAGTATTATCAATGGCGTAATCAACGTCCAC  
AGGTGCTGAAACACTGGGCGGCGAAACAGCTGTACAGCAAGTTCGATGTGTTGCCAGCCGGTAAATTGTTCTCGCC  
GCATACCTGGGCGTGATGATTATTTTCTTGCCTCGCATATGGATGCAGTGGCTACACCATGGCGGCGACCAGTACGG  
TAATCTCCAGGAAGGTGACGATCCTGACCGTGGGCTGCGTCTTTTCTGGTGGTGGTGTACTCTGATCCCGCTTTCCA  
TCTTGTACCCTGCTTTCGCTGGAACGATGAAACCACCGTGTGCTCACAGCCCTTCCCTTCTCGTCATTTTACTG  
GTAAAGTCCGCGGTTTTATTGCTGGCTGAAACAGGATTACGCCGACATTCGGCTCATCAAGTTGAACATTATCTCC  
GCAGACCCGTTGAAGCCTGGAAAAACGCCAGTCTCCTCGGGAACCGTATTCAAAGGCGACAATGAGCGCCAT  
CATCCTAACGATAAAGGTATCCCTATGAGCAATCTGAGCCCTGACTTTGACTACCCGAAAAATTTTGGCTAACCCGCA  
AGAGGCGTGGACCATTCTGCCGTTTTTATACCGATCAGAACCGTTTTGAACACGAAAAAGAGAACGTTCTCGCCAAAA  
GCTGGATTTGCGTCTCACAGCAGGCAACTGGCGAATGCCAATGATTATGTGACGCGTGAGATCATTGGCGAAAGCATC  
GTGCTGGTACGCGCTGTGATAAGTTTTGCGCGGTTCTATAACGTGTGTCGCCACCGTGGTTCATCAGTTGTTGAGCGG  
TGAAGGAAAAAGCAAAAATGTGATTACCTGCCCGTATCACGCATGGGCATTCAAACCTGATGGCAACCTGGCCCATGCAC  
GTAACCTGCGAAAACTGCGCAATTTGATAGCGAAAAAGCGCAACTGGTTCGGTGGTCTGGAAGAATATGCCGATT  
GTCTTATCAACATGGACCCCAACGCCACCAGCGTAGAAGATCAATTACCCGGCTGGCGCGAAAGTGTGGAAGCCTG  
CCCGAAGTCCACGATCTGAACTGGCGGCCGCTTACCACCCGACGCTGCCAAGTGAAGAATGTCGATAACT  
ATCTCGAGTGTACTACTGTGGTCCGGCGCATCCAGTTTTCTCCGACTCCGTACAGTTGATCGTTACTGGCACACCATG  
CACGGTAACCTGGACGCTGCAATACGGTTTCGCCAACCGTCCGAACAGTCGTTAAATTTGAAGAGGGTACGGATGCGGC  
ATCCACGGTTTTCTGGCTGTGGCGTGCAGGATGCTGAACGTCACCCGATCAAAGGGATGATGACGGTCATTTATGAAT  
TCCCGTGGATTCTGAACTACCCTGCAAACTACGATATTTACTTACCAATGAAGAGTTAACCGACGAGCAAAAATCG  
CTGATTGAGTGGTATCGCGATGTGTTCCGTCCGGAAGATTTACGCTGGTTGAAAGCGTACAGAAAGGGCTGAAATCGCG  
TGGCTATCGTGGTCAGGGGCGCATCATGCCGACAGTAGCGGTAGTGGCATTTCGGAACATGGTATCGCCCATTTCCATA  
ATCTGCTGGCGAGGTGTTTAAAGACTAATGACATCGCGCGCGTATTTTCCGCGCTGGGCTGATTTTTGATGGAGTAC  
AGCAATGTCAGACTATCAAATGTTTGAAGTACAGGTGAGCCAGTTGAAACCCCTTACCGAACAGGTGAAACGCTTACGC  
TGGTGGCAACCGATGGCAACCACTTACCTGCGTTTACCGGAGGAAGTACGTCATTGTGACAGATGAGCGATGGTGATAAC

CAGTACAGCAATGCGTATTCACTACTGAGTTCGCCGCATGACACCTCTTGTTATCAGATTGCCGTTCCGGCTGGAGGAAAA  
CTCGCGCGGGCGTTCCCGCTTTTTGCATCAGCAGGTAAGAGTGGCGGATCGGTTAACGATTTCAACGCCTAATAACCTGT  
TTGCGCTAATTCCTCAGCCAGAAAGCATCTGTTTATCGCGGGCGGTATTGGTATCACCCCTTCTGTGCGACATGGCA  
GAGCTGCAACACAGCGACGTGACTGGCAGCTACCTACTGCTCGCGAAATCCAGAAAGTTGCGCATTTCGTGATGAGCT  
AGTCCAGCATCCGAGGCTGAGAAAGTCCATTTGCATCATTATCAACCGGAACACGACTGGAATTAGCGCGATTATTGG  
CGGATATCGAACCTGGCACACACGTTTATACCTGTGCCCGAGGCGCTAATTGAAGCGGTAAGAAGTGAAGCTGCGCGT  
CTGGACATCGCCCGGATACGCTGCACTTTGAGCAATTTGCTATCGAAGACAAAACCGCGGATGCATTTACCTGGTGTCT  
TGCCCGTTCGGAAAAAGAGTTTGTGGTCCGGAAGAGATGACTATTTGAGGTTATTGAAAAATAAAAGCCGCGAAAAG  
TGGAATGTTTTATGTCGTGAAGGGGTATGCGGAACCTGCGAAACAGCAATACTGGAAGGTGAAGCTGACCATCGGGATCAA  
TATTTTAGCGATGAAGAGCGTGCCAGCCAGCAAAGTATGTTGATCTGTTGTTGCGGTGCGAAGGGTAAACGCCTGGTGT  
GGATTTGTAGTTTCCGAAGCCGGATGTGGCGCTGAGCGCGCCAGTCCGGCTTCGGAAGATTTACTGCGGATATTCCT  
GCAATAAATGTGTAATGCTTCCGCCATCAGCTCACCAGCCAGCCGGAATCAGCTCCGGCAAATGTTCTGCGGTTTC  
AGTTTCCAGTGCCAGTTCAGCAGTTGGTTGATTTGCCGACGCGATGCCAGCAATTCGGCGCTGATCTTATGCGTTTCGCT  
CACGTGAGTAATCAGCGAATTAATCGCTTTAAACGCTTTACGATAACCCGGCATGTCCATCAGGTTAAGCATCGGCTGCG  
GTAAGCATCTTCGGCAATGTCTGCGCTTTTTCCACCAGCTAGCAGCGTTTTACCGTGAAGCGGATTTCCGCTACCG  
GATAAACCCAGGCTGTCCAGTTCCGCTAAACTTCCCGCATATAACGCGCTACCGACCACAAATGCTCTTACGCGACGAC  
AAAGTTACCGCCAGATCGCGCTCTCGCGCTTTCGCGAGTCCGAGTCCGCTAACAGTTGCAGACAGGCCAGTTGGCGTG  
TGCGTAATTGCCAGGCAATGGTGATATCACGCCAGGCATCTTCCGGCGCAACGACTTCTGACGACGCAATTTGCATCAGG  
CGGCATTATCCAGCGCCGAGGTAGCCAGCGGAGGCTCCGTTTCTACCATAAGCTTGGCGGTGATCGGTAACAGATA  
CCAGACATCCGCCGCTGCGTATTCACACTGACGTTCCGGTACGCGGTCTGGCCAGCCAGTCCGGTGCAGGATCACTCTTGT  
CCAGCGTAACGCCGAATACTCTTCCACCATGGAAGCGAAACCCATGACATCGGGCGTCCGAGAAGGCAGCAAGGATT  
TGCGTGTCAATCAAGGGTGTGGTAATTCGCCAAAGACATTGAGGAACACTTCCAGATCTTCACTGCCTGCATGGAGAAA  
TTTTGTGATGGACGGATCGCGCAGGATCGCTTTAGCGGTGACCAGTCCGGTATCCCGAGTGGATCGATTAGCGCCAGAT  
GCTCGCCATCGAAAAGTTGAATCAACCCAGCTGCGGGTAATAAGTGCGCGTACGAACAAATTCAGTATCCAGGGCTATC  
GCCGGAAGGCACGGACGGCTTACACAAAGAAGCCAGCGCATCGTCCGTGTAATCATTTGGTAATTCAAATGTTTTT  
TCTTTAGTGGCGTCAAAAAAACGCCGATTAACCGCGTCTGACGACTGACTTAACGCTCAGGCTTTATTGTCCACTT  
TGCCGCGCGTTCGTGACGTAATTCCTGTCGCAAAATTTTTCCGACGTTAGATTTCCGTAACCTCATCACGAACTCCACC  
AGCTTCGGTACTTTGTATCCCGTGAGCTGACGGCGGCAAAAGTACCAGTACTCTTCCGTAAGCGATGGATCTTTTTT  
CACTACGAAGATTTTACCCTTACCAGTGGAGCCGGAAGGTACGCCAACAGCCGCGACTTCTGTACGCCAGGATGCT  
GCATGACGACATCTTCAATCTCGTTGGGATAGACGTTAAAACCGAAACCAGAAATCATGTCTTTTTTACGATCGACAATG  
CGCAGGAATCCTTCTTATCCATTACCAGGATGTGCGCGGTGTGTAACCAGCCATTTTTGATGATTTATCGGTAGCATC  
GGGACGCTGCCAGTAACCCAGCATCACCTGCGGTCTTTGACACAAAGCTCACCCGTTGACTTGGTGGTACTTCATTAT  
CATCATCATCCACGATTTGGCTTCCGTGACGGCACCCGCAACCGATGCTACCACTATGATAATCAATATCATATGGG  
TTAACGCTGACCAGCGGCGCACACTCGGTAAGGCCATAGCCTTCCAGCAGATACTGTCCGGTCAAGTTTACCCAACGCTC  
TGCCACCATTGCTGCACTGGCATCCACCGCTGCGGAAAGATGACAGTGGAGAAATCCAGCTGCTGGAATCTTTAT  
TGTTACGCAACGCATTGAACAAGGTGTTAACGCCGTGATAGCGGTAACCGGATATTTGCTAACTCTTTTACCAACCT  
GGAATATCGCGCGGTTAGTGATAAGCAGGTTCTGCCACCCAGTTGATAAACAGCAGGCAATTAATGGTCAAGGCAAA  
AATGTGATACAGCGGCGAGCGCGTACCACCAGCTCTTTGCCCGATGCAACAGCGGACCATAGGTGCGGTTAACCTGTT  
CCAGGTTCCGAGCATATTGCGGTGAGTACGATCGCGCTTTCCGCCACAGTGGTGGCGGCTATTGAGAAAA  
GCTAAATCTCCGGCAGGTTCCGGTTGACGTAATGCTATGCTCCGTAAGCCTTATGCGAGTCCGCTACGAAATGAAATGGC  
ATCTGGCAGATGGTATTTCCGGCACAAACGCTTGTATGATTTAACAAACGAAATGACTACCGTGCCTTTTCCCGTAGATA  
GCTGATCGCCATACGGGTGAGAAATACGTGCTGAACGGCGGTTTTATCAACCACTTTTTCCAGTGTGTGAGCAAGTTA  
GACACGATAACAATCGCCGATGCGCCGTATCGTTAAGCTGATGCTCAAGCTCACGCGGGTATACAACGGGTTAACGTT  
TACGACGATCATCCCGCACGCAAAATGCCAAACAGCGCCACCGGATATTGCAATAAATAGGCATCATCAACGCAACGC  
GATCGCTTTTCTCAGCCCCAACCTTGTGCAATAAGCGGCAACGCGGACTGCGTCTTCCAGCTTGGGAAGGTC  
ATTACCTCCCCATATTCACAAACGCAGGTTGATCGGCGTAGCGCGGACCGACTGCTCAAACATATCTACCAGAGATTG  
ATAACGGTCAGGGTTGATCTCCGTGGAACGTCCGCGGGATAACGGTTAAGCCAAACCTTCTTCAATTTACCTCTAA  
AATGCGTGTTCGTGTCATCGCAACCCCAATGATATACATGCCGTTAACATAATTAATCATCATACCAGCTTGATA  
ATTACCAACGAAAAGGTTGCGAAGCGCGTCACTATTTATTTTTATCTTACCCTAAGAATGCAGAAACAGCGGACCAGC  
CGCTGTTTCTTTTTCTTTAAAAACAAGCAATTTACAGTTACAAGTGTGTTGACTCTCGCGGGCCGGGATTATACCAGC  
CCATCCGCCGTAGCCATAGGGCCAGCCAGCCGACCCATAAAACCATGGATCAATCGGCTGAGGCGGCATAATCACCTGC  
TGGGTTAAATGCCAACGTTTGAACCCGTTACTTGCATCACCATAAATTTATAGGGCGTATTGCCGATTTTCCGCTAAC  
CGCACCAGTATTGGCCGACTACCGTAACAGTTGTCACGGAATCCACCGGTCAGAAAACCGTTACATCGGCAT  
AAATGCGACCGCGAGAAGTTCTCCAGCGTCCGTTGCTCCGCTGTCAGCGGTACGGTAGCAATTTCCAGGCGAGTT  
TTCCCTTGTGGTTTTGTACCGCAACCACTTTGCCACAAAGCGTGCCTCCTGACCAACGTACAGCTGCGGCGCACTCAT  
CACCCGAACATAATCTGTTGCGGCGTGGGACTGCTGCCTTAATGGCGTCCGGCACAGTGACACAACCGCTCAGCATT

GC GCAAACGTACCTGCCAGTATGCCTTTGATAACATTCCTTTTGAACCGCCATGGTGCGACTCCTTTTTTCTCAGGGCAT  
ACTCTTAAGATTCATTCTTTGCCCGGAAGTTTCTTCCATGCGACGTTGTTACGTAATAAACCGGTTCCGCATGTTCCAC  
CGCCACCGTTTTACCCTCAGCAAACATCTGACACGCAATCGGCAGCATATCTTCAGCAGCAGGCAGTAACACTTCGCCAT  
CGCGAAAACAGCCCGCTCTTTTACCGAGATCCGGCCAAGCTTGCCAGCCCGTCCCTACCGTCACCCATTTCGCCGAA  
AGCTGTTGCATTTCGTTTCATGGACGATTTCCGGGTTTGTAGTACGGCTTCGGTTTTCTTACCGTGCCAGATACCGTTTTCATC  
ACGCTGATATTCGGCCAGTAACTTCGCCCATTCGCGCTCAATGGCTGCCAGCACGCGGTTTGCGCCTTTTTGCGCC  
ACGCCCCCTTGCGCCATCGTCATTAGCTGGAGACGCCAATCATCGGTAATTCGCGCCAAGCGCCAGCCCTTGC CGCATG  
CCAATACCAATGCGCACGCCAGTAAAGCTACCGGGCCGCGCCGTAAGCCAGAGCGTTAATATCAGTCAGGGAAGTTCC  
GCTGGTGGTCAAGGATATCTGCACCATCGGTAAGATTGTTGAGTATGTTACAGAGGGCAAAGCTCAAAATGAGCGTTGA  
CAGTACCGTCTTCCACAGGGGACAGAGCAGGCCTCTGTCCGGTATCGATAGCCAGAATTCGCATGGGCTTTCGTGCT  
TAGATCAATAAAAAGGCGCGCATACACCATACTCCGTAACAAATTACCTGGAGGATGGTATCGCAAGGAAACGAACCGC  
ACGGGCAATGTACGGGTGCGTGGCGCGGGCGGAGACTGGCGAGAAACGTCCGCGCGTAAGGACGCATCACCAGCCGAT  
TGTCAAAATCACCAGCACGCCAGATCGTCCGGCTCGGAATCAGTCCCTACCCCTGTTTGGAGTAATGACGGCA  
TCTGGTAGTTGCACTTCATCGAACGGTCCGACCAGCGCAAACGACAATCTTCATGCGCGCTTTTAAACAGTGGATCATC  
CGCGAGGTAACAGGCAATTTGTCGATAATTACCAATGACAATGTATCGCCACGCAGTCCACCCCTTCCAGAACTGC  
TGTTGGCCACAAGAAGCGCATTACCGGCGCTGACAAATGCTGCAACAGTTGCCCTTTGCTGGTTTTCCCTGCAACAAT  
ACAGGAAGCGTCATGGTAGCGCGAACTGCTCGCCAGATCGCGCATCATGGCTGCGAGGTACAAAGCATAAAAACAACG  
ACCGTTGTTAGCTTCGATGATCGGTGCGCAGCATTGCCGCTAACTGGCGAGCAGAACCTGGCTGGTTGGTTTGC GGCAGAT  
TGCGCAGCACACAGAGTAACGCCTGGCGGCTGTAATCAAATGGGTGGGCAACAGCAACGACTCGGCCTGTTGATGCCA  
AGCCGCGAGGTGAAATGATGCGATCGTCGTTACCAGCAGCGTTGCTGAGGTGAAGATCCAGCTACCGGTTTTTGC GC  
CATTAACTCTTTGAATTTATCCGCCACGCTGAGCGGCTGAGAGCCAGAGTAAATGGCGGAAGTGCATTTCGTACCAGT  
AGCTGTAGCCCGGCTGATTGATCTCTTTAGCCGCTTACGCCGTGTGCGATACAACGTGGCGCGCTCAAATGCCGCATCC  
AGCAAGGCGGAACGCCCCAGTGACAGTTTCCGACGTACATAACAAAGTTCCAGGGTGTATCGAGCAGTAAAAATGCCCG  
CTGAATTTGGGATTAGCTAACAGCTCACGCAGTTACCGGATAACCTGGCTACCGAGTTGAGACGAAAATCCTGCG  
CACTCTGGGCAAGACGATCAGCGCACTTTTGAATGCTGGGTGCTTTTAAATTCGGTGGGTAGGCGATGGTATGTCT  
TTTGCCAGGTGAGCAGTTGTGACTGGAGAGTACTGACCAAATACTGGTGGCAATGTCCGGTAGTGGTGGGCTT  
GTCGAAGATCATGACGTCCGCTTCCGGGATCAGTTCGCAAATCCACTCTCTTAAACCACCATATCCGCCAGAAAGAGAT  
GATGGTTTACCACCACATCGGCGTCCATCGTTTTTACGTGCTTTGACCACAAAGCAATCTTTATACATCGGGCAG  
TCGCTGCCAAGACAGTTGTGTTGGTGTGGTGACCAGCGCCAGCCTGTGAATCTTCCGCCACGCTGACGCAGGTGCT  
GATATCACCATCGACTGTTTGATTAGACCAGGAGCGCAGCAGGATCACATCGCTTAAGATTTGTACCGGCAGATCGCCCC  
CCGCCAGCGCTGCTGTTGAGACGTTGAGGCAGAGGTAGTTTGTAGCGCCCTTTCAGCAGCGCCACGTTGCCCGTATAT  
TTCAATGCCTTTGAGACTGTTGGCAAATCGCGGCTGTAGAGCTGATCCTGCAACGCTTTTGTAGCCGGTTCGAGATAATGAC  
TTTTTTTTCGCCCGCAGCGCAGGAGCCAGGTAAGCGTAGTTTTTGGCCGTACCGGTTCTGCTTCCACCACCAGCGGCT  
GGCCTTTTTCTATCGCCTGGGTGACGGCTACCGCCATCTGTGCTGTGGTTCTCGCGGCTTAAAGCCTGGTATCGTTTT  
GCCAGCTGACCGTCTGGTGCAAATCGTCCGTACACTACCCCTGTTGATTTGAACAGGGATTATGTGAGGATGAGGGC  
GCTTTCGCCAGTTGAAGTGGTGACGGCGACCTCACATTGTGGCAGTCTTTCAGCAGCAAATGGAAGTATAATGAGGAC  
AAAATGATGACTATCGTTGATCGATGCTGAAGCCGCTGGTCTGATGTAGTAATCCACAACAACACGCTCTACTACAC  
TGGTGTACCGGAAAACCTCGACGCCGATGCCTTTGAGCAAACCGCAACACGCTGGCACAGATTGACGCCGTGCTGGAAA  
AACAGGGCAGCAATAAATCGAGCATTCTGGATGCCACCATTTTCTGGCCGATAAAAACGACTTCGCGGCATGAATAAA  
GCGTGGGATGCTTGGGTTGTGCGGGTGCATGCCGCTGCGCTGCACGGTACAAGCGGGTTGATGAACCCGAAGTATAA  
AGTTGAAATTAAGATTGTGCTGCGGTGTAAGCTTTATCGAAGCAAATAAGTCAGACGATAATTTATCGATAAATACTGG  
TCGGTTTTACATAAATCGACCAGAGAATAAGATATTACTGTTGATGCTTCTGCTAATTCATTATTTATATTTATAATTT  
AATTTTATCTATAAAAATACTATATAAATAAACATAAACATGCCGTTGTGTTCCGCTTTGATTAGCAACTCTGGTTTT  
CTTTCTTAGCTGAAACAATCTGGTTATAGCGTGCGGACTGACCGTTAAATTTCTCCATCTTACTGGATAACACACCATGAG  
CTGCTACCTTTAAAACACCTGAATGTCAACAGGTTAACTCGTGCCATATCGTTATAATCCCTTTGATATTAGATGCAAAT  
TAAGGTCATATATAGCCTTATCGATAACATGGTTAATTTAAGGATAAGAATATGCCTGCTGTAATAGATAAAGCCCTGG  
ATTTTATTGGTGCATGGATGTATCAGCGCAACACCAAGTTCGATGAATGAAAGCACGGCGAAGGGAATCTTTAAATAT  
TTAAAAGAAGTGGGAGTACCCGCGAGTCCGCTGATATTACGGCGCAGCTGACCAGGAAGGCTGGAACCTGGGTTTAC  
GGAAAAATGGTTGGATGGGCAAAAAAATGGAGACAGGTGAACGTTCTGTGATTAATAAATCTGAATACTTTTCAACAT  
ATATGAGGAAGAACTAAAAGCACTGGTCTGAGTTAAATTTATATCAGCATAAATGGGTGAGGACGCTTTTAAATCACATA  
TAAAAGCGTCTTTTTCTACAATCAAATGATCATCGGCTTCTATAACGAAATCGATACGGATTAGTGTGTTACTCGTC  
TTCATCCTCAAACCGCGCCACGATTGCTCGCCGAGTGGTTGGCACGCAGCTCTTCTGCCACCAGCGGATTGCTGGC  
CGCTGCTCATCCCTTGTCCATCAGTTCTGGATCCGCTGACAGCTTTTTGCTGCTGTTTATGGGTGAGTGAAGGTA  
CCTGCAAACATTTGTTAACTCCTGCTAAATTTGTTGGCGTAATTTTTCATGCTACCCGGCACATAGCCAGTAGAGTCAGG  
ACTGATGAAGACGTTATCTCCCGCTGTGATTACTTTACTCTGGCGTCAGGACGCGGCTGAATTTTATTTCTCCCGCTTAA  
GCCACCTGCCGTGGGCGATGCTTTTACTCCGCTATGCCGATCATCCGTATAGCCGCTTTGATATTGTGGTCCGCGAG

CCGATTTGACTTTAACCCTTTTCGGTAAAGAAACCGTTGTTAGTGAAAGCGAAAAACGCACAACGACCACTGATGACCC  
GCTACAGGTGCTCCAGCAGTGCTGGATCGCGCAGACATTCGCCAACGCATAACGAAGATTTGCCATTTAGGGCGGCG  
CACTGGGGTTGTTTGGCTACGATCTGGGCCGCCGTTTTGAGTCACTGCCAGAAATTGCGGAACAAGATATCGTTCTGCCG  
GATATGGCAGTGGGTATCTACGATTGGGCGCTCATTGTCGACCACCAGCGTCATACAGTTTCTTTGCTGAGTCATAATGA  
TGTCATGCCCGTTCGGCCCTGGCTGGAAGCCAGCAATTCTCGCCGAGGAAGATTTACGCTCACTTCGGACTGGCAAT  
CCAATATGACCCGCGAGCAGTACGGCGAAAAATTTCCGACAGTACAGGAATATCTGCACAGCGGTGATTGCTATCAGGTG  
AATCTCGCCCAACGTTTTTATGCGACCTATTCTGGCGATGAATGGCAGGCATTCTTCAGCTTAATCAGGCCAACCGCGC  
GCCATTTAGCGCTTTTTTACGCTTTGAACAGGGTGAATTTAAGCCTTTCCGACAGCGGTTTATTCTTTGTGATAATA  
GTGAAATCCAGACCCGCCGATTAAGGCACGCTACCACGCCTGCCCGATCCTCAGGAAGATAGCAAACAAGCAGTAAAA  
CTGGCGAAGTACAGCAAAGATCGTGCCGAAAATCTGATGATTGTCGATTTAATGCGTAATGATATCGGTCGTGTTGCCGT  
AGCAGGTTCCGTAAGTACAGAGCTGTTGTTGGTGAACCCCTCCCTGCCGTGCATCATCTGGTCAGCACCATAACGG  
CGCAACTACCAGAACAGTTACAGCCAGCGATCTGCTGCGCGCAGCTTTTCTGGTGGTCAATAACCGGGGCTCCGAAA  
GTACGGGCTATGGAATTTACGACGAAGTGAACCCGACGACGCAATGCCTGGTGCAGCAGATTGGCTATTTGAGCTT  
TTGCGGCAACATGGATACAGTATTACTATCCGCACGCTGACTGCCATTAACGGACAAAATTTCTGCTGCGGGCGGTG  
GAATTTGCGCGATGCCAGGAAGAAGCGGAATATCAGGAAACCTTTGATAAAGTTAATCGTATCCTGAAGCAACTGGAG  
AAGTAAGAGCTGGAATACCTAGCCTGACGCTTATGATTTTTTATCGCGCTTTCAACTTTTTCGCGCCGCAAATTAACCG  
GGAAACCCTAAATCATCGTACAGGCTGCTGTTAATCCCATCGTCCGTCGACCGCAACCGGGGTTGTTGCTGACTCAGC  
GTTTCGATTCATCTGCGTAAACACGCTGGACAAGTGGCATTCCCTGGAGGTGCAGTCGATGACACGCGACGCATCAGCTATC  
GCCGCCGCGCTGCGCGAAGCTGAAGAAGAGGTGCGTATACCGCCTCCGCCGTTGAAGTTATCGGCGTGTGCGCCCGT  
CGATAGCGTCACTGGCTACCAGGTAACCCAGTGGTGGCATTATCCCGCCGATCTGCCGTATCGCGCCAGTGAAGATG  
AAGTCTCGCGGTGTTTGAATGCCGCTCGCCAGGCATTACATCTGGTCTGTTATCACCTTTAGATATCTACCGCCGT  
GGTGATTCACATCGGGTATGGCTGTCCTGGTACGAACAGTATTTTGTATGGGAATGACCGCAGGCATAATTCGTGAGCT  
GGCGCTGCAAATTTGGTGTGAACCCCTGACTATACTTATCTTTACATCTACAAAACACTACTTGAGACAATCATCGCAATA  
TTAGTTAAATCGCGTTTTTATTAGTTAATTCATGTGAATAGTTAAGCCAGTCGCGCGTTCCCTCTTACACTATGCG  
CTGTTATTAGTTCGTTACTGGAAGTCCAGTACCTTGTGAGGATATTATCGTATTAGTCTATTGACATGTTAAGGT  
GGGATTGGTCCCTCATCTCCATACCGTAGGGCTATGAAGGCAGGTAACAGTTTCGTGATGATCTGGTCGAAAAAG  
GCTTACTGGATAGCGTACTCGCGTGGCGTGGTACTGTTGTTACTGTCGCTGACGGGTAAGGGCCACCACCCGAT  
ATCGCCATTATTATGGGTCTTCAGGTAACGAACCTGCCACCGTGGATATCGACAGTATCCCGGTTTTATTGCGGACGT  
AGAAGAGCGCGAACGTCGTGCTGGCACAGGGACGCATGAAGTGGATTTCCCGCGGACAAACGGGATGCGTTTTCATA  
ACGGCAACCTGCCGCTGCATGAAAACGGTATGCAAATCCACGCCTATAACGGCGATGAAGTCGTCTACAGCAAACTTAT  
TATTCATCGCGCGCGTTTTATCGTTCGATGAAGAACAATTTGGTCAGGATGCTGCCAACGAAGTAAGCGTGCCGTATCC  
GTTCAAATCTGCCACCGAAGTCTCGCGTACTGTAATGAAACCGCTATTTCGCTGTCTGGTCTCGCTATCGAGAACGAAC  
TGGCGCTGCACAGCAAGAAAGAGATCGACGAGTATTTCCGCGATGTCGGCAAACCATGCAGGCATGTATCGATCGCGGG  
ATGAACACCGAAGGTGACTGCCAGGCCGCTGCGCGTGCACGTCGTGCGTCTGCCCTGCGCCGGATGCTGGTTTTCCAG  
CGATAAACTGTCTAACGATCCGATGAATGTCATTGACTGGGTAACATGTTTGGCTGGCAGTTAACGAAGAAAACGCCG  
CCGGTGGTGTGTTAAGTGCGCCAACCAACGGTGCCTGCGGTATCGTTCCGGCAGTGTGGCTTACTATGACCACTTT  
ATTGAATCGGTGAGCCGGACATCTATACCGTTACTTTATGGCAGCGGGCGGATTGGTGCATTGTAAAAATGAACGC  
CTCTATTTCCGGTGGGAAGTTGGTTGCCAGGGCGAAGTGGTGTTCCTGTTCAATGGCTGCTGCGGGTCTTGAGAAC  
TGCTGGGCGGTAGCCCGAACAGGTTTGGTGGCGGGGAAATGGCATGGAACACAACCTTGTTTTAACCTGCGACCCG  
GTTGACGGCAGGTTGAGTGCCTGATTGAGCGTAAATGCCATTGCTCTGTGAAGGCGATTAACGCCGCGCGGATGGC  
TCTGCGCCGACCAAGTGCACCGCGCTCTCGCTGGATAAAGGTCATCGAAACGATGTACGAAACCGGTAAGGACATGAACG  
CCAAATACCGGAAACCTCACGCGGTGGTCTGGCAATCAAAGTCCAGTGTGACTAATACTTCTTACTCGCCCATCTGCAA  
CGGATGGGCGAATTTATACCGCTTTCTCGTCTGCTGTAATATCCCACTACACTTCCACTGTTGCGTCAGGCGTTTTGT  
CGCCATACGCTTACAGGGTGGCCCGCATGCAAAAAGCACAACGGATCATTAAAACCTATCGTCGTAATCGAATGATTGTT  
TGTACGATTTGCGCACTCGTTACGCTCGCTTCGACCCTGAGCGTGCATTTATTTACAGCGTAACCTAAATCAACAACG  
GGTAGTACAATTCGCAATCAGCTGTAGAGGAATTAGATAAAGTACTGCTTCCCTACAGGCAGGTAGCGAAGTCTTGC  
TTCCGCTGATTGGTCTGCCCTGCTCTGTCGCCCATTTGCCATTACGTAACAGGCGGCAAACTCCAACTGTGCGATCC  
ATTGGCCTGGTGAAGACGGCACACTTTATTGCTCCAGATTTTTGGTTATCGCAATGTGCCCGTCTGGACATTCTGGC  
TGAACCTTCTGCACCGCAACCACTTTTACGCTGACGATCGACCGTGCCTGATTAAGGCAGTCCGGTTTTGATTCAAT  
GGACGCTGCAGCGGGCAGTAGCAATGCTGGGGTATGGAGATGATTAACATCGACTTACTGACGGCAATGCTGCTTGAG  
CCACAACCTGCCGAAATCAGTAGCGCCAGCCTGACGGTGGACAACGGCATTGCTCTATGGTAATGGGCTGGTAGATTC  
CCTTCCGCAACCTGAAGACAATGAAAACCTATCAGGTTTCTTCGCAACGCTTTCTTTTACCATTAACGTTAATGGTCCGG  
GGGTACGGCGCTGGCATGGCACTATCTCCAACACAATTACCGTGGCGGTGCTGCTAAGTTTACTGGTGGGCTACATC  
GCCTGGCTGGGACCGCTTACCGAATGAGCTTTTCCCGGAAATCAATCTGGGCTGGCGCAACATGAGTTTCAATTTGTT  
CTGTACGCTTTGCTTAATGCGCGCAGCCAGCAATGTATTGGTGTAGAGATTTTGTGCGCTGGAACAATCCGCGTCAGG  
GCTGGATTTACCGGATGTGTTTATTCTATCGCGAAGAACATCATTTAATTTGTCGACTGACCCGCTATGTGATGGCA



GAAACCATTTCGTAGCGCCATGTTTTCCCGATGAGTAGTCAGTTTCATGTTGGCATTAAACGTGCACCCAGCCATTTTCG  
CCGTGGTGTGCTGATAAAAGATCTCAATCAGTACTGGTTTAGCGCTCACCCGATTCAGCAACTGATCCTCGAAATCACCG  
AACGCGATGCCTTACTGGATGTTGATTATCGGATTGCCGCGAGCTGCATCGTAAAAACGTCAAAGTGGCGATTGATGAC  
TTCGGCACCGCAACAGCTGTTTTCCCTGGCTTGAACATTACGTCTGACGTGCTGAAAATTGATAAGTCAATTTACCGC  
AGCTATAGGTTCTGACCGGTTAACTCGACGGTGACCGATATCATCATCGCGCTGGGGCAAAGACTGAATATTGAAGTGG  
TGGCGGAGGGCGTGAAACGCAAGAACAGGCGAAGTATTTGCGCCGTCATGGCGTGCATATTTTGAAGGGTATTTGTAC  
GCACAGCCGATGCCGCTACGTGATTTTTCCAAATGGCTGGCGGGCAGCAACCGCCGCCCGCCGGCATAATGGACATAT  
CACGCCATTATGCCGTTACGTTAACGTTACTCATCTTCATCGTGCAGCGGTTGCTCTTTAAACAATGCGAACAGATCA  
ACACGATAATCATTGGCTTCAATGATGGTGATATGCAGTGGCCCTACATCAATCACATCGCCACACGGGGAATGTGACC  
ATTTGCCGAGATCACGAGGCCGCGACCGTCCGATATCATCGTCATCGGCAAGGTGCTCAACATCAAGCGCCTGCTGCA  
AGGCATGCAAATCTGTACCGCTTTTACCAGCCAGCCGTACCATCAGTAATGATTTCCGGCGTTTCGTACGCGTCCGGG  
AATTCACCCGCAATGGCTTCCAGCACATCCAGCGCGTGACCAGACCTGTACCACACCAAACCTGTTGGTCACGATAAC  
AAAGCTCCCGCAGCAGCAGCAGCAGCCCAACAGTTGATCGGATCGAGGGTTTCCGGGACGATAATCGCCGGAGACG  
CCGAAGCAATCGCCGCACATCAACGCCCTCTCCAGCGCCACCAGCAGTTCTTTAGCACGTACAATACCGATGATTTCA  
TCCAGTTCACCGGACATCCGGGAACAGACTGTCCGGTGAAGAGAGCAGTTGCTCGCGGATTTTCATCGACCCCGAGAT  
AGCGTCAACCCAGCTTATTTACCGCGCGCGTGCATGATCCCGCAGAGAACCGCAGCCAGCGTCAGTACGCGGTTAA  
TCATGTAACGTTCTTCTCCGCAAATGCACCTTCCGGGATCGGCATCGGCATCGGGTTATCGGCATCGTCTGAACATTG  
GCCTGACGTTTTCCCGCCATCAAACGCAGGATGGCATCGGCAGTACGCGCTCGCAGCGGCAAAGTCTGACTGGTGGCAAT  
AAAGTTGCGACGCGCAATCTGGTTAAACACTTCGATGATGATCGAGAAGCCAATCGCGGCATACAGGTAACCTTTCCGAA  
TGTGAAACCGAAACCTTCTGCCACCAGACTCAGACCAATCATTAAACAGGAAGCTCAGACAGAGCACCACCACCGTGGGG  
TGCTGGTTAACGAATCGCGTCAGCGGTTTGGATGCCAGCAACATAACCGCCATCGCAATCACTACCGCCGCATCATCAC  
CGGCAGATGGTTAACCATCCCTACTGCAGTAATTACCGCATCCAACGAGAAGACGGCGTCAAGGATGACAATCTGTGTGA  
CGACCACCCAGAACTGGCGTAGCCTTACCCTGGCCGAATCATGATCGCGGTTTTCCAGCCGTTTCATGACGTTCCGTT  
GTTGCTTTGAACAGCAAGAATATCCCCCGAACAACATAATCAGTCCGCTCCGGAGAAGGAGAAATCCATGACGGTAAA  
TAGCGGTTTGGTCAGCGTGACCATCCATGAAATCAGCGACAGCAGCCAGACGCATAATCAGCGCCAGTGATAACCCCA  
GCAAACGCGCTTATCGCGTTGTTTTGGCGGCAGTTTGTGAGCAAGAATGGCGATGAAGACCAGGTTATCGATACCCAGC  
ACAATTTGAGAAACAACAAGCGTGAGTAGCCCCGCCAAATGAGGGTCCATTAAGAATTCATGACAAGCTCCTGCTT  
AAGGAATAGCTATTCGACGCCAGAAATAATGCAGGCGTAACGACAAAATGCAAACGAAAGGTGCGGCATAGAGTGCCAGA  
AAGGCAGGCGTTAAAAGGCTGATGCTGAAATGACGTCCGGTACGATCCATACTGCGGGCTACTGCCCTATACTCCATGG  
TTGTTAAACGGGAGTTAAACATATCAGAGACGCCTCTGATTTGGCAAAGATTTACCTTCTTTGCAAACGAATGTGACAA  
GGATATTTTACCTTTCGAAATTTCTGCTAATCGAAAGTTAAATACGGATCTTCATCACATAAAAATAATTTTTTCGATAT  
CTAAAATAAATCGCGAAACGAGGGGTTTTTGGTTGTAGCCCTTATCTGAATCGATTGATTGTTGAGCAGCAGATTCAAAA  
ATACATCTGGCACGTTGAGGTGTTAACGATAATAAAGGAGGTAGCAAGTGACCATGCTATTGTTATAGGCACACATGGT  
TGGGCTGCAGAGCAGTTGCTTAAAACGGCAGAAATGCTGTTAGGCGAGCAGGAAAACGTGCGCTGGATCGATTTCTGTTCC  
AGGTGAAAATGCCGAAACGTGATTGAAAAGTACAACGCTCAGTTGGCAAACCTCGACACCACTAAAGGCGTGCTGTTTC  
TCGTTGATACATGGGGAGGCAGCCGTTCAATGCTGCCAGCCGATTTGTCGTCGACAAAGAGCATTATGAAGTCATTGCA  
GGCGTTAACATTCCAATGCTCGTGAAACGTTAATGGCCGTCATGATGACCCAAGCTTTGATGAACTGGTGGCACTGGC  
AGTAGAAACAGGCCGTGAAGGCGTGAAGCACTGAAAGCCAAACCGTTGAAAAAGCCGCGCCAGCACCCTGCGCCAG  
CACAAAAGCGGCTCAAATCCGGCAAACCAATGGGGCAAACGACTACATGGTTATTGGCTTGGCGTATCGACAGC  
CGTCTGATTACCGTCAGTCCGACCCGCTGGACCAAAGAAACCAATGTCTCCCGTATTATTGTTGTTAGTGTGATGAACT  
GGTGCAGGATACCGTTCTGAAGACACTGCTCACCCAGGTTGCACCTCCGGGCGTAACAGCACACGTAGTTGATGTTGCCA  
AAATGATTCGCGTCTACAACAACCCGAAATATGCTGGCGAACGCGTAATGCTGTTATTTACCAACCAACAGATGTAGAG  
CGTCTCGTTGAAGGCGGCGTGAAAATCACCTCTGTTAACGTCGGTGGTATGGCATTCCGTCAGGGTAAAACCCAGGTGAA  
TAACGCGGTTTTCGGTTGATGAAAAAGATATCGAGGCGTTCAAGAACTGAATGCAGCGCGGATTGAGCTGGAAGTCCGTA  
AGGTTTTCCACCGATCCGAAACTGAAAATGATGGATCTGATCAGCAAAATCGATAAGTAACGTATTGTTGATTATCACT  
CAGTTTTCACACTAAGTCTTACGTAAACAGGAGAAGTACAATGGAGATTACCACTCTTCAAATTGTGCTGGTATTTATC  
GTAGCCTGTATCGCAGGTATGGGATCAATCCTCGATGAATTTAGTTTACCCTGCGCTAATCGCGTGTACCCTGGTGGG  
TATCGTTCTTGGGGATATGAAAACCGGTATTATTATCGGTGGTACGCTGAAATGATCGCGCTGGGCTGGATGAACATCG  
GTGCTGCAGTTGCGCCTGACGCCGCTCTGGCTTCTATCTTCTACCATTCTGGTTATCGCAGGTATCAGAGCATTGGT  
GCAGGTATCGCACTGGCAATCCCTCTGGCCGCTGCGGGCCAGGTAAGTACCATCATCGTTCTGACTATTACCGTTGCTTT  
CCAGCACGCTGCGGATAAGGCTGCTGATAACGGCAACTGACAGCAGTTTCTGGATCCACGTTTCTTCTGTTCCCTGC  
AAGCAATGCGTGTGGCTATTCGGCCGTCATCGTTGCGCTGTCTGTTGGTACCAGCGAAGTACAGAACATGCTGAATGCG  
ATTCCGGAAGTGGTACCAATGGTCTGAATATCGCCGGTGGCATGATCGTGGTGGTTGTTATGCGATGGTTATCAACAT  
GATGCGTGCTGCTACCTGATGCCGTTCTTACCTCGGCTTCTGAACCGCAGCATTACCAACTTTAACCTGGTTGCTC  
TGGGTGTGATTGGTACTGTTATGGCAGTCTCTACATCCAACCTTAGCCCGAAATACAACCGCGTAGCCGGTGCAGCTGCT  
CAGGCAGCTGGTAAACAGATCTCGATAACGAACTGGACTAACAGGTGAGCGAAATGGTTGATACAACTCAAACCTACCAC

CGAGAAAACTCACTCAAAGTGATATTCGTGGCGTCTTCTGCGTTCTAACCTCTCCAGGGTTCATGGAACCTCGAAC  
GTATGCAGGCACTGGGTTTCTGCTTCTATGGTACCGCAATTCGTGCGCTTACCCTGAGAACACGAAGCTCGTAA  
CAAGCTATTCGCCGTACCTGGAGTCTTTAACACCCAGCCGTTCTGGCTGCGCCGATTCTCGGCGTAACCTGGCGCT  
GGAAGAACAGCGTGCTAATGGCGCAGAGATCGACGACGGTGTATCAACGGTATCAAAGTCGGTTTGATGGGGCCACTGG  
CTGGTGTAGGGACCCGATCTTCTGGGGAACCGTACGTCCGGTATTTGCAGCACTGGGTGCCGGTATCGCGATGAGCGGC  
AGCCTGTTAGGTCCGCTGCTGTTCTTATCCTGTTAACTGGTGCCTGCGCAACCCGTTACTACGGCGTAGCGTATGG  
TACTCCAAAGGTATCGATATCGTTAAAGATATGGGTGGTGGCTTCTGCAAAAACGACGGAAGGGGCGTCTATCCTCG  
GCCTGTTTGTATGGGGCATTGGTTAAAGTGGACACATGTCAACATCCCGCTGGTTGTCTCTCGCATTACTGACCAG  
ACGGGCAAAGAACACGTTACTACTGTCCAGACTATTCTGGACCAGTTAATGCCAGGCCTGGTACCCTGCTGCTGACCTT  
TGCTTGTATGTGGCTACTGCGCAAAAAGTTAACCCGCTGTGGATCATCGTTGGCTTCTTCTGTCATCGGTATCGCTGGTT  
ACGCTTGGCGCTGCTGGGACTGTAAGACTGTTGTACACTACCGGGGCTTTTGGCCCCGTTTTTTATCTGGAGGATTA  
ATGACAATCACGGACCTGGTACTGATTCTTTTATCGCCGCACTCCTGGCCTTCCGATCTACGATCAGTTCATCATGCC  
CCGCCGTAACGGCCACCTGCTGGCAATTCCTTGTCCGGCGTGGTGCATCGATAGCGTTATCTTCTGCGGATTGA  
TTGTCATTCTATCTATAACAACGTACGAATCATGGTGCCTAATAACGACATGGTTATTAAGCGCACTGGCTCTGATG  
GGTTTTATATATTCTGGATCCGCGTCCGAAGATCATCTTTAAACAAAAGTTTTTTCTTCCCAATGTCTGGATTGA  
ATATAGCCGAATCAAAGCATGAACCTGTCCGAAGATGGCGTGGTGGTATGCAATTAGAACAGCGTGGCTGTTAATCC  
GCGTTGCAAAATATCGACGATCTGAAAAAATTTATAAGCTTCTGTTTTCAACTCAATAAGTTATGAATTTAGCCAAAGCT  
ATGTTTAGTGTATTTTAAATACAGACATAGCTTAGGCTATATTACCTCTTCCCTATTTTGTATTTATTTTAAACGTTT  
CATTGATATATAAATCCAAATGAAAATCGTTATCAATAAAGCAATGAAATAATATATTCCAACAGTTGTTTTATATTCTC  
AAAATATGTTAAGTTGCGCCCTCATTGGGGAGTAGCCGATTTCCAGATTCGGAAATGTACGTGTCAACATACTCGTT  
GCAAAACGTGGCAGTACGGACTGAATACTTTCAGTCAGGCGAGACCATATGCACATCAATCGCTATGCCTGCATGAACG  
CGAAAACCATCACGGCTTGTGTTTATGTATGCATGTTTGTGGGGCGATGATGTGTTTTATGGATACCCCGGTCAGGA  
CATTGTATGAATATCACTGCTACTGTTCTTCTGCGTTTGGTATGTCGATGGATGCATTTGCTGCATCAATCGGTAAG  
GTGCCACCCTCATAAACCGAAATTTCTGAAGCATTGCGAACCGGCTTATTTTTGGTCCCGTGAACCCCTGACGCCG  
CTGATCGGCTGGGAATGGGATGTTAGCCAGCCGTTTGTCTTGAATGGAACCACTGGATTGCGTTTTGTCTGCTGAT  
ATCCTCGGCGGCGAATGATTATTGAGGGTTTTCTGGCGCAGATGATGAAGATGAAGAGCCGCGCCGTCGACACGGTT  
TCTGGCTACTGTAACCACCGGATTGCCACCAGCCTGGATGCCATGGCTGTGGGTGTTGGTCTTCTTCTGACGGTC  
AACATTATCGGACCCGATTGGCCATTGGTTGTGCAACCTTGATTATGTCAACATTAGGGATGATGGTTGGTTCGCTTAT  
CGGCTCAATTTGGGAAAAAGCGGAAATTCGCGGGGCTGGTGTGATCGGCATCGGCGTCCAGATCCTCTGGACGC  
ACTTCCACGGTTAATAAGAACGCTGCCAGAGGTGAATATTAAGTCCGTCTGGCAGTCAACACTTCTTTTGTGCCAGT  
GTTTGGCAGACTTCTGGCTTGCACGCCAGGCAACGGCGTCATCTGCAATAATGCGACGGCTTCATCACCCGGAAGACG  
CATCGGATAACACAACCTCCGCACTCTGCTGTAATGTAAAACCTTCCAGTTGTTCTGCATGAGGTGCATGAAGATGACTT  
CATTGTAATCAGCCCTCAGCTCCATCAAATGTCGCGGTCCGGCGTGGCAGTAATGACCCAGCCGCCGGGCTTCACT  
ACTCGTGCTAATCTTCTGCTTACACGGCGCGTAAATACGTATTATGGCGTCCATACTGGTATCGGAAAACGGCAAACG  
GTGGCTGGAAGCGACAAAAAGTGACCTGCGGATAGCGTTTCCCGCCGCTTTTATCGCTACCTCGAAACATCCAGAC  
CAAACGTGGTATTTCCGGCAACGCATCGGCAATGCGTGTGTGAATACCTTACCACAGCCAATATCCAGCACCGCC  
GTGGCCTTATCATCAAGCCGTTCCCTCAGTTGGGCGACAATTGCATCACGCAGCGGCTGATAATGTCCGGCATCTAAGAA  
TGCGCGGCGTCTTGCATCATTTCCGCGCTGTGCGCCGGATCACGAGACCGTTTATGCTGAACGGGACAGATTGACAT  
ACCCTTCTTCCGATATCAAATGATGTCGCTGGGACAGATAGCTGTTTTTTTACGCGAAAAGAGGCTGATGGCAA  
AGTGACAGGAAAAAGACATGACAACCTCCGGCAGGATACTAAAGCCGCAAGTGAACCGGAATCACGGCGGGGCAAT  
ATCCGAACGCCAGGAGCAAGATAAAGCATAGTAAAAAGCCTCGCATTTCAGCAGGCTTTATAGCGAGATTGAAGCGTAT  
TCACACTTCAGATCAGTGGATTGATCAGATAGCTTTACGTTAACAGCTGCCGGACCTTTCTGGCCGCTCTGAATTTG  
AACTCAACGTTCTGACCTTCAGCCAGAGTTTTGAAGCCATTACCCTGGATAGCGGAGAAGGTACGAACACATCTTTGCT  
GCCATCAGCCGGAGTAATGAAGCCAAAACCTTTAGACTCGTTGAACCACTTAACCTGACCTTTAATCTTTGCCATTTGAA  
AAATTCCTTAGATTGTTTTCTCGCCCGCAGGCATAACATAGATAAAACTGACACATTACTGCATGAGGCACCAATATAA  
GGCTCGGCAGAGAAGCGGTATTCAACGTCAACGTGTTTACTCAGGACTTCTTTACTGAAAATGCCACACATAAACAGAAC  
TGTACCTCGTTTAAACCGAAATCTGTTATCACATACAACGTTAATTATGGCAAGCCATTTTTAAACATGTCTCGATCAGA  
CGCACAAATCTCGATACGCTTCCACTTTTTTGCACACTTATGCAACGGAATACGCGCCGATATATCATTGTGCTTAAAC  
CTTGCCAGTTCAGGCAGATACTTAAACTGGCGTATTTTCTAACATAGTTCAATAAGTTCAGTTGTTCCAGGCCAGTGGGA  
GAAGTTATTACATAGTGCCTGCAATATCACATTTTTTGTATGCAATGAATAAAAAGTTATATCACTTTTTCTCATAAAA  
CAGTCAGTTAACGGCTATTAATACCCTAAAGAGAAGTCAATCCCAAAGGGATTGTAATTTAAAATAAGAAAAATTGA  
TGAATGAGCAAAAAAATCAAGAGAGAAACGTTTCTGTAATAAATAATACCACGTTAATCACAAATCCGATGTAACATC  
CTAATAAATTAATGGGGTAAATATCTTTTTCTGATATCCCGTTAGCAAATAAATAATATGATAATTATTTGAAGTCAGA  
CCAGAGTTTTAATTTGAAGCAGTTGCACCATGACAGTGCCTAATACAGGATGAATTGAGTAACCTTCAACGACGGGGT  
TACTCAAGATTGAGGAAGGATTATCGTTCCGGCAGCAGCAATAATATCTTCTGCTTCAACCGATTTTTGACTCTCAAC  
GGTCTTTTTATCTGCTTCTCTGGTTCGTTTCTTGCACAAAACGACGTAACAGTGCATTTTGACGTTTTTGTGATCCA

GCAAAGCCTCAAGCAGTTCAATCTGTTTCGTTAGTCCGTGAACTGGCAGGATTGATAAAAAACCACAAGATGAGCCCGATA  
AGAAGAACCACCACCGATAACAACAAAGACGCAATGTTATCACGCTGAATTTACAACCTCGTTCATTTACCACCTCT  
GAGTAGAGGCGCTATTCTACCACTGCTGGAGAGGAAGAAAATCTAGTGCTGAAAAAATGATATCACCACGGGATAAACTG  
GTTAATGGCACAATTCGCTGAAAAATTGTACATCCTGATCGCACATCATGTTGAATACCTGCGCCCAAAGCAGCAAGC  
AAGCCAACACCACGACAACCAGAACGACCATCGAACTTTTTACTCCAATCTCCGTTTCACTTACCTTATGTCATTTAA  
ACTAGCATGCGTTAGTTAAACAGCGCCTAACTATGTCGATATTCGTGCTTTTTTCGGAATGAGTCGCTTGCTTCAGCGCAT  
ATTGCCGCTACGATTAAGCGAACATAAAAAAGAGAAGAGGTTGTAATGCGATTATCATTGCGACAGTTATGCTGATAGCA  
CTGGTATGGATAGGATTACTCAGCGGATATGGCGTTTTGATTGGAAGCAAAGAGAATGCCGAGGATTAGGTTTGCA  
ATGTACCTATCTGACTGCCAGAGGCACCAGCACGGTACAATACTTGACACTAAAAGTGGTTTTTTGGGGATAACAGATT  
GCCCCTGTTACGCAAAAGCAATATCGTGGTCGATAATGGTTAAGGGCAATAAATAACCAGATTCTCACTCCTGAGTAA  
ATACTCTTATAGCAAGCGGTTTTAATAAAGCCACCTTCACTTTATTTTTCTCATGCTAAATAAAGAACCTGTCTGTT  
TGATATCCGACAGGTTCTACTCTCATCAGAACGGATAGTCGTGATAACCCATTTGGGAGAAAATTTGCGCGCTGCGG  
TATGCAACATTGCGACATATTCCTGTAACGCTCTTCAGAGAAACGCAACGTCGGAAGGAGATGCTCAAACCGCAATG  
ACCACGCCAAAGCGATCAAATACCGGTACCGCAATGCATCGCAGCCCTTCTCTGCTCTTATTATCTCGCCATAACC  
CTGCTCGCGCACCTGGTCCAGAACGGTAATAACGCTTCTGTACTGGTGATGGTCCGCTCGGTACTGCTTTATACTCCA  
CGCCCTCAAGAATTTGCTTCACTTCTGCGGATCGGCCATGCCAGCAGTACCTTACCAATCGCGGTGCTGACAGCGGA  
TTACGACGCCAATCCGTGAATACATGCGCAAATTTGACATAGAGTCAATTTTTGGAATGTAACAATACTGCTCTTCGTC  
CAGTGCGCCGAGGTGGATAGTTTTCTTTGGTCAGGCGGGAGAGCTCACGCATCTGGATATCTGCGCTACGAATTAATCGA  
CGTTTTGTAACGCGGAGCGCCAGTTCAAACAATTCAGGGTCAGGGAATATTTCTCCGACTCCCCTTCTGCGCCACA  
TAACCTAAGTTTTTATGGTCTGTAAAAAGCGATAAACGGTGTTTTTGACATCATGACGCGCTGCGACAGCTCGGTTAT  
CCCTATTTGCGCTCTTACCCAGCGCTGCAAATGCCAAAACTTTTAGCACGGAAGATACAGAATCAGGCTGTTTTAT  
CCAGATCTGCGTTAGCCATTTATCACCTCATTGCGAGTGTATTAATAAATCAGAACTGTTTTTATTATAATTTGCGAC  
CAGGGTGGTCGAATCCATCTTTGCCGTTAGTTACAATTCTGCGACATCCACCGTGAATATCAGTGCTAGAATCATA  
CCCTGTTGATTATCACCAAAGATATAAAATTCCTATGCCAAAAGTTCAGGCCGACGGCCTGCCATTGCCCCAGCGATA  
GGTGGGATTAACCATTGTGATTGGTATTTGATGGCGTCTTACGGCGCAATCGCCAACGTCGCCCTGCCAACAAT  
CGCCACGGACCTCATGCCACGCCAGCCAGTTCATCTGGGTAGTGAACGCCTATCAAATCGCCATTGTCATCTCCCTGC  
TCTCGTTTTGTTTTCTGGCGATATGTTGGCTATCGACGATTTATAAATGCGGTCTGGTCTTTTTCTGTTGCTTCA  
CTGTTCTGCGCCCTTTCTGATTGCTGCAAATGCTCACCTTGGCGGTGTCATAAAGTTTTGGCGGTGACGCTTGAT  
GAGCGTTAATACCGCACTTATCCGCTGATCTATCCACAACGTTTTCTGGGTAGAGGGATGGGCATAAATCGTTTTATTG  
TTGCCGTCTTCTGCTGCCGGGCCGACAATGCTGCGAATCCTCTCCATCGCATCCTGGAAATGGTTATTTTTAATC  
AACGTACCGTTAGGTATTATCGCCCTGCTTCTGGCGATGCGTTTTCTGCCACCAATGGTTCTGCGCCAGTAAACCCCG  
TTTCGACCTGCCAGCGCGGTGATGAACGCGTTAACCTTGGCGCTGCTTACTGCGTTGAGTGGTTTTGCTCAGGGG  
AATCGCTGACGTTAATGCTGCGGAACGGTGGTAATGGTTGTTGTTGGTATTTTCTTATTGCGCGCAGCTTCTCTT  
CCCGTACCGCTGCTACCGGTGGATTTACTGCGTATCCCGCTGTTTTCACTTTCTATTTGCACATCTGTTTGCTTTTTCTG  
CGCAAAATGCTGGCAATGGTTTTCCCTGCCCTTTTACTGCAAACCGTCTCGGGCGTAGTGAAGTCGAAACAGGTTTAC  
TTCTGACACCGTGGCCGTTAGCAACGATGGTGGTCCGCTGGCAGGCTATTTGATTGAACGCGTACATGCAGGATTG  
CTGGGGCTTTAGGGTTGTTATCATGGCTGCGGGCTTTTTTCCCTGGTTCTGCTGCCGCGTACCTGCGGATATCAA  
TATTATCTGGCCGATGATCTTATGTGGTCTGGATTTGGCTTATTCAGTCACCAATAACCACACCATTATTACCTCCG  
CGCTCGCAACGCTAGCGGTGGAGCCAGTGGCATGTTAGGAACGGCTCGTCTACTGGGTGAGAGTAGCGGCGCGGCGCTG  
GTGGCGCTGATGCTAAATCAGTTTGGAGATAATGTTACACACGCTCGCTGATGGCTGCGGCTATTCTGGCAGTGATTGC  
TGCCTGTGTCAGTGGTTTTACGTATCACTCAGCCAGGATCCAGGGCATAAAAAAAGCGCGTGCATCAGGACGCGCTTTTAA  
GTATTTACTTCAATATTACTTCAAGTATTCACCCGTACGAGAGCTTCAATTCGTTTATCCAGCGCGGGTGGGTCATGAA  
CAACTCACTGAGCGATTTGACTTACCCTAATGCAGAGAGCCATCATGCTGTTGCTTCTGCGGTTATAGCTGGTTTT  
TCAGGCGCTGACGCGCGCAATCATTTTTCTGCGACCAACAGTTTTTCCGAACCGGCATCAGCATGGAATTCAGATGA  
CGGAGAACCACATGGTGATAATGCTCGCCAGAATACCAAACACCAGTTCAGAACCGTTGCAACCGCAAAGTAGATCAG  
CGGTTGCGGTTGCTCTCTTACCTTATCAGATTTCCGCCATAAAAACCGCGGCAAGCTGCGCCAGAATACGGGAAA  
TAAAGATAACGAAGGTGTTACCACGCCCTGAATCAGCGTCATGGTGACCATATCACCATTGGCGATGTGGCTGATTTG  
TGAGCAATTACCGCTCGGTTTATCCGGCTCATGTTCTGACGAAACCGGTGCTGACAGCAACCAGAGAGGCATCACG  
GCGCGACCGGTTGCAAAGCGTTGATGTCGGCGCATGGTAGATAGCCACTTGGCGATAGCGATCCCCGCTGACGAG  
CCTGGGTTGCTACAGTATTGACCAGCCAACGTTCCCTTCTGTTACGCGGTTGCTCGATCACTTCCCCGCCAACAGATCGT  
AATGCCATCCATTTGACATCAGAAGCGAAACGAAGGAACCACAAAACCGAACAGCAAGGCCATGATCATAGCCCCG  
AACGCTGCTGACTGTATCCCTGTCAGGCTCAGTACCAGCCGAAACGACCATTACGGCCAGGTTGTTAGCAGGAAGA  
GCGCGATTGCGATCATAATTTCTTTTTACCTCAGTTTAAACAAAACGCAATATGCGATACCCACATCGTATGGGTTACGC  
GACTATTTTCAAGTCTGGATAGTGCCTAAGTACCAGAAAGACACAACCTTTACATTTTGTAGCATCTGATTTACGGCATC  
TTGTGCTGTTAAAAAATCAGGCACAATTTCTTGTGCTGATTGATTAATTTGACGGGAGCGGGTGTTCGCGGGTCT  
GGTTTTTCAAGCTTCGCCAGATCGAGTGCATATTCACCGTCTCATCCAGATAAGGATCCGGCTCCTGGTAATCTTTCC

GTAGATCATCCAGTTTCTTCAACTCCGGTTTACCTTCGCGTTTAAAGCGTTCGTTCAAACGCGCCAGACGCGTCGCATCA  
TCTTCATTATTCTCTTTCTCACGCACAGCGTAATTCAGAGAAACGATATTGCGCTTGCCTTCATAGCGTTGAAGCGCGC  
GATATCCTTCATGATGTTCTGGAACCTCAGGATCTTTCGCGATACGCGCATTATGTTCTTCAGCAGCTCCGGTTCAAAGG  
CCGTTAAATCTCCTGATTTACATAAGTCGCGGCATCAATGCTATCCACGCGCAGCGGTTATCTTGAATTTCTACCC  
GTTTCCGTTTCTTATTACCCGTCGGCATGATGATGCTGCGGTTACGCCTTACGTTGCGTACTGCCGCGTTAACGG  
ATAGAATTTCTGGATCGTGTACTGCACAGAACCAGCGCTGGCCATTAGGACGTAACATCTGATCGTAAATACGGTTCA  
ATGAACGGTATTGCTGAACGGTGCCTTACCAAACGTCGGTTACCCACAACCAGCGCACGACCGTAATCCTGCATTGCC  
GGGCAAAGATTTCTGAAGCCGAAGCACTGAAGCGGTCAACCAGCACCAGCGGGCCTTATAGAAAACCTGTCCGTC  
GGTATCGCTATCTTACGAACCTTGCCGTTGTTATCGCGGACCTGAACAATGGGACCCGCGAGGAATAACAGACCGGAGA  
GCGATACGGCTCAGTTAACGCCCCACCGCATTGCTACGCAGGTCGATGATGACGCTGCTGACATTCTGTTTTCCAGT  
TTCTGCAGTTGCACTTTGACATCGTCTGCAAAACCCACATAGAAGCCCGAATATCCAGCACGCCGACTTTCTTTTACC  
GACGGTCTTACCAGCATTTTAAACCGCGCGTCTTCGAGACGAATACGTTACGGGTCAACGTTACAGTACGGGTCTTGG  
TCCCTTACCAGCAGGTAATAATTTCCAGACGAATTTACTGCCCTTCGGCCCTTAAATTAAGGCAACCACATCATCAAGA  
CGCCAGCAATCAGTCAACCATCGGCTTGCCTGTTGACCAACCCGACAATTTTGTACCAACGCTGATAGCTTTACT  
CTTCGCTGCCGGACCACCTGCCACCATCGAATTGATAACGGTGTAGTCATCATCCATTTGCAGCACTGCCAATCCTT  
CCAGCGACAAACTCATTTTCACTGTTGAACTGTTGCGTATTACCGGGGAAAGATAGTTGGTATGCGGGTCAATTTACGC  
GCAAACGCCGTCATTGCCAGCGAGAAAACATCTTCGCTGTTGGTTTGCGCCAGACGACGAATGGCAAATTTGTAGCGCG  
AGTCAGGGTTTACGAATTTCTTATCCGTTTTTCTGTCAGCTTACGGCTTAACTCGTCAATTTGACTTTACTGTCCC  
ACAGCGGTTCAACTCAGCCTCGTTTTTTCGGCCAGGGCGCTTGTGCGGTCAAGTTATAAGTGTGCTTCCGGTGAAA  
TCCATCGGCTTTTCCAGTACCGACAAAGCGTACTGGTAACGCTCAAACGCGCTTTTGCGCCAGATTGTAGAGATCGTA  
GAAAACGTCGAGTTTGCCTGAACGCAGTTCATCGCTAACTCGGTTTTCTTTTTCGGAACTGTTCAACATCGTTGCCA  
GCAGCAGTGTGGCTGTAATCGAGCAGATTGAGTACGGTCAAAGATTTTGGCCGAAAATGCCTGATCGAGGTGCAAC  
TGGCGATAATGAGAACGGGTGAAGCGCGACGTTACGCGCTCACTTACCGTCGCATGCTGCGTCTTCTTTAATACCGG  
AATTTGATCAGCAGCGTATATCTTACAGCGAAGTCTGGCCTGCTATTGCAAGCAGGCCAGCTAACCGGTAAGCC  
TAAAAACATGTTTATGCTTGGCCCGGCTCCGTTTCAAGAACCCAGGTGTTCTGCGCGACAATCAAAGACATACCCGA  
ATTAGCTGGACGCGGACCGCTTTTGGTGATTTTAATACGGTGGCATCCATCGCGTTTTGACCCGCTTTCACCTTCA  
GGCTTGTCCGACAGTCAAGCTGAAATGTCAGAAACCGGGGTGTGCTGTTCTTTCGCGAGGTGCTTTTACTGTTTTTGGC  
GCTTCTCTACCGGTTTTTGCACAGGTTTACGTTACGCGCTTCTTTCGCGGCTGGCGTAGTCGGACGTGGCTTGGC  
TTCGCGGCGCGTGCCTTCTTTCTACAGCAGTTGCGGCAGCTTCGCGTTTTTTCGCTTGTGCTTACGACGCTGTG  
CCTGAACACGCGCTTTCGCTTCTTCAAGCTGCTTGCAGCATGCTCTACATGTTGCTCGTCCAGCTCACCGCATGGGTTG  
CCGTCAAGATCGACACGCTTGCGCCGGTTTAAACCCGTAAGATAACGCCAGCTCGAAGTGTAGAGACGTAAGCGGA  
TCGCAATTTGCTTTTTGCTCAGGTTCAATTTCCCAGCAACACGATCGACCAAATCCTGAAAAATACCGATTTTCAGCGGAC  
GCGCTTACCTTCCGCACTGAAACAGTGGGAAAACGTTTCGGCCAGAAACGCGATTACTTCTTTACTGCTATTCACTTA  
GGTTGATTTTCCATGAAATTTCTGATTACAACGGACGTAGCCAAACAGCGCAGGCATGAACAGGCGTATTATAATGAC  
GCTATCAGTAAATGCTACGTTATCCGTTGATTATCTGCGACGCTCGAAAGAAATTTTTGTAATCCGTCGTTGCAAGCA  
CTTTTTCAAGCTGTGCCACAAGCTGACGTAAGCCTTGTCTGCTCTGTGTAAGCGACCGAAGACGGTACTATCGATG  
TCGAGAACACCAATAATCTGATTTTTACCACCAGCGGAGAAACAATTTGAAATTTACTCGCCGCATCACAGGCAATATG  
CCCGTCAAACACATGAACATCCTCGATACGCTGCATTTGATTGCGGGCAACCGCAGTGGCCACACGCCGCGCCGACGG  
GTATCCGGACACAGGCAATTTTGCCTGAAATGGTCCGAGTACCACTGATGCTCTCAAGCAAATAAAAACTGCCAG  
TTTATGTGAGTACGCTCATATAACAACGCCTGTTGTTGCGAAGCGTTGCCAGAAAACGTTTTCTCCCGCATCAG  
CGCGTTAAAGTCGCGATTTAAATCCGCGTAAAATTTGTTTTGTTTATTATATAAATCACTTGGTTGCTTACCTGGATCT  
GCCAGCTATTAATAAGCATTAAATGCGTTAATGCTCAAGATCATTCCCATCATGGGTTAAGATTAATGTTAATTCTT  
ATTACATTTGGCACGTCATGGCTTTAACACACCACAAATTACGCCGACAAAAAAGATAACAGTGAGGGCAATCGGCGAG  
GAACTGCCGCTGGTGATTACCAACGTTGCCGCAATGTGACATGCTGTTTAGCCTGCCGAGATAAATCTCATCAAAG  
TGCTATTGTCCGCGCTGTCAGGCAAAAATTCGTGACGGGCGGACTGGTCGCTAACGCGCTGGCGCAATGGCCTTCA  
CCATGCTGTTGCTTATGCCGTTTGCCTGGGGCAACCGCTGTTGCATATCTGGCTGTTAGGCATTGCTATTGACGCAAC  
GTTATGCAAGGCATCTGGCAAATGACCAAACAGGGCGATGCGATAACGGGGTGCATGGTCTTTTTCTGCGTTATTGGTGC  
CCCGCTATTCTGGTACCTCCATAGCTTATTTATGGTTTGGTAACCGACTGGGAATGAATTTACGTCGGTACTGCTGA  
TGCTTGAGCGACTTAAAGAGTGGGTAATGCTCGATATCTACCTGGTGGCATTGGCGTTGCTTATAAAGGTACAGGAT  
TATGCCATATCCAGGCTGGTGTGGCTTGTCTTTTTGCGGTTGGTGATTTTAAACGACGGTACGTTGTCACATCT  
TAATGTCGAAGAACTGTGGGAGCGATTTTATCCGACGCGCCCGCTACGCGTAGGGACGAGAACTTCGTGTCTGTCTTG  
GGTGCCATTTTACCGCTATCCAGATCAGCGTGGTCTGCTGCCGCTTGCATATCCCGCTACGCTGCGTCCGCTCAT  
AGTCTGAAAAATGCTGGGCGGCGCTTATAGCTCAATCGTTTTATTGTTACCTGCCAACCTGTTGCCTATTTCTATCAT  
TTATCTGAACGGAGGACGGCAGGAAGATACAATTTTCCGGAATATGTGCTGGCAAGTAGCAACATTGCGGTTGCA  
GAATCGTGTATCGCCAGTATTCTGGTACCGTTTACTAAAGTATGCTGTCATGTTCACTTTACTGTTGAGCATTCAATTT  
AAATGCCAGCAAGGTTTACGCACACGCTTCTGTTACTGCGGATGGTGACCTGGATTGGTCTGCTGCTGCTGACCT

GTTTGT CATATCTTTAACCATGTCGCTGATTAATCGCGATCAGATCCTCGCTTTTACTATGGGACCGGCTGCGTTTTATT  
TCGGCGCAGCGGTAATTTTACTATTCTTGTGTGGAATGGCTGGACAGCCGTTACTTTGGGATGCACATGAGTCAGGA  
AACGCCCGCTTCGACGACTGAAGCGCAGATTAATAAATAAACGCCGTATCTCACCTTTCTGGCTGCTGCCGTTTCATCGCGC  
TAATGATTGCCAGTTGGCTGATTTGGGACAGTTATCAGGACCGGGTAATACCGTCACCATCGACTTTATGTCGGCGGAT  
GGTATTGTTCCAGGCCGTACGCCTGTTGTTATCAGGGCGTTGAAGTCGGAACAGTGCAGGATATCAGCCTCAGCGACGA  
TCTTCGTAAGATTGAAGTCAAGTCAAGTCCGATATGAAAGATGCGCTGCGCGAAGAGACTCAGTTCTGGCTGG  
TGACGCCAAAAGCATCGTTGGCAGGTGTCTCCGGCTGGACGCCCTCGTCGGTGGGAATATATCGGCATGATGCCGGT  
AAAGGTAAGAGCAGGATCACTTTGTGCGACTCGATACCAACCGAAATATCGGCTGGACAATGGCGATCTGATGATCCA  
CCTGCAAGCCCCGATCTCGGTTGCTGAAACAGCGGTTCAATTGTTCTATTTCCGCAAGATCCCGGTGGGAAAAGTCTACG  
ACTATGCCATCAATCCCAACAAGCAAGCGTGGTATTGATGTCCTGATCGAGCGGCGTTTTACCGATCTGGTGAAAAAA  
GGTAGCCGTTTCTGGAACGTTTCCGGCGTTGATGCCAACGTCAGTATCAGTGGCGCGAAGGTGAAACTGGAAAGCCTGGC  
GGCACTGGTTAACGGTGCATTGCCTTCGATTACCAGAAGAGTCGAAACCTGCCGAGGCGGAAGATACCTTTGGTCTGT  
ATGAAGATCTGGCCACAGCAGCGTGGCGTAATAAATAAACTGGAATGCCGAGTGGGGCCGATTAACCGCCGACTCG  
ACGCCGTTAATGTATCAGGGGCTGGAAGTCGGACAGCTGACTAACTGGATTTAAATCCTGGTGGTAAAGTACAGGGGA  
AATGACCGTTATCTCCAGCGCTGTTACCCTGCTTCGTAATAACCCGCATCGAATTACGCAACCCGAAATATCCCTTA  
GCGATGCTAATCTCAGCGCCTGCTGACCGGCAAAACCTTCAGCTGGTGCCCGCGATGGCGAGCCACGAAAGAGTTT  
GTTGTTGTGCCAGGCGAAAAAGCACTGCTGCATGAACTGATGTTCTGACGCTGACCCTGACCGCGCCGAAAGTTACGG  
TATTGATGCGGGTCAGCCGCTCATTCTTCACGGCGTCAGGTAGGCCAGGTTATCGATCGTAAACTACCAGCAAAGGCG  
TCACCTTTACCGTCGCCATCGAGCCTCAGCATCGCGAACTGGTAAAAGGCGATAGCAAATTTGTCGTCACAGCCGTGTC  
GATGTGAAGGTGGGGCTGGATGGCGTTGAGTTTCTCGGTGCCAGCGCCTCAGAATGGATCAATGGCGGGATACGTTTCT  
GCCGGGCGATAAAGGTGAGATGAAAGCCAGCTATCCACTGTATGCCAATTTGAAAAAGCGCTGGAGAACAGCCTTAGCG  
ATTTACCCACCACAACCGTGAGTTGAGTGCAGAGACGCTGCCGGATGTGCAGGCAGGATCGGTAGTGTGTACCGTAAA  
TTTGAAGTTGGTGAAGTATTACCGTGCCTCCGCGAGCTAACCGTTTTGATATCGATCTGCATATTAAGCCGGAGTATCG  
CAACCTTCTGACCAGCAATAGCGTGTCTGGGCGAAGGCGGGCGAAAGTTACGCTGAATGGTAGTGGTCTGACCGTAC  
AGGCATCCCCGCTCTCCAGAGCATTAAAGGGAGCCATTAGCTTCGACAACCTCAGCGGTGCCAGCGCCAGTCAGCGTAAA  
GGCGATAAGCGTATTCTGTATGCTTCCGAAACAGCGCCCGTGCGGTTGGCGGGCAGATTACGCTTACGCTTTTCGATGC  
CGAAAACTGGCGGTCCGGATGCCAATTCGCTATCTCGGTATTGATATCGGGCAATCCAGACGCTGGATCTGATTACCG  
CAGCAATGAAGTACAGGCAAAGGCGGTACTTTACCGGAATATGTCAGACCTTTGCTCGCGGTGGTACGCGCTTCTCA  
GTGGTCACACCCAAATTTCCGCGAGCTGGCGTTGAGCATCTTGATACTATCCTCCAGCCGATATCAACGTCGAACCAGG  
CCGGGCAATCCTCGCCGACTTTGAATTACAAGAGGCCACCATTACTGATTTCGCGTTACCTGGATGGCTTAAGCATT  
TTGTTGAAGCGCCGGAAGCCGGTTCGTTAGGCATCGGTACGCCTGTGCTGTTCCGTGGTCTGGAAGTCGGTACGTTACA  
GGAATGACGCTGGGGACATTGTGAGATCGCGTATGATTGCGATGCGCATCAGTAAACGCTATCAACACCTGGTGCGTAA  
CAATTCGTTCTTCTGTTGGCATCGGTTACAGTCTGGACTTTGGTCTGACGGGCGGCGTAGTGAAAACCGGCACCTTTA  
ACCAGTTTATCCGTGGCGGCATCGCCTTCGCCACGCCTCCGGTACGCCACTGGCACCGAAAGCCAGGAAGGCAAACAC  
TTCCTGTTGCAGGAAAGTGAACCGAAAGAGTGGCGTGAATGGGAACTGCGCTTCCCAAATAATGCCACTGCTCCGGCG  
TGCTGCGCCGGAGCGTTTATGCTAACTGCGCGCTGTTTTTTGCCAGTGGTACATGCTCGTGGCCAAACACACCGTT  
TATTTCCGGACGCTTTCTGACACAAATGCGCGAAGCGATGCCTTCGACGCTCTCATTGATGATTTTCTGCGCGCTG  
TCAGCGCCCGTTGCGCCGACGATTCGCTTAATACGCTGAAAATCTCCGTTGCTGATTTCTGCAATTAACCGCTCCTT  
GGTAGTACCGCGAGCATTAAAGTGGCCTGTTTTATATTCAGGAAGCCAGTTCAATGTTGCTGTTGCCGCTTTGTTG  
TGACGGTAATGCACCACAGCGGGTATGGATGTCGCTGCCGCGCCTGGCTCCAAAACGACGCAAATTTCCGCGCGGATGA  
ATAACGAAGGGCAATCCTTGCAATGAGTTTTCCGCCAGTCGGTAAAAGTGTACATGCCAATATCAGCCGCTGTGGT  
ATCAGTAATGTTGCGCTCACACATTTTGTGAGCGCGTGTGGTGCAGGAGTCCAGAAATGTTGATGCCATTTTGTCT  
GGACGCTCCCTGCTCTGGCGAAGGCGTGGTGCGTAAAGATCCCGATGCGCTAAAAAAGTGGTACCAGAAAGCAATCAGG  
AAATCGCAGCTACACAACGGGAGCTTATCGACAGCGCCTTTCATGCATTACGTCCTGGTGGTACGCTGGTTTACTCGACC  
TGTACCTTAAACCAGGAAGAAAACGAAGCCGTTTGCCTGTGGCTGAAAGAGACTTACCCGACGCAGTAGAGTTTTTACC  
ACTTGGCGATCTTTCCCTGGTGCAAACAAGCGCTGACCGAAGAAGGCTTTTTGATGTTTTCCACAAATTTACGACT  
GCGAAGGCTTCTCGTTGCTGCTGCGTAAAACCTCAGGCGATTCGCGCTTACCCGCCCCAAATACAAAGTCGGTAAT  
TTCCGTTCCAGCCGGTGAAGATCGCGAAGCTGGACAAATTCGTAGGCGGCTACAGGTGTTGGCTTAAACTGGGATGA  
AACTGCGCCTCTGGCAGCGTGACAAAGAACTGTGGTTGTTCCCGTGGGCATTGAAGCCCTGATCGGTAAAGTCCGAT  
TTTCTCGTTGGGATTAACCTTCCGAGACGCACAACAAGGTTATCGCTGGCAGCATGAAGCGGTTATTGCTCTTGCC  
TCACCCGATAATATGAATGCATTGAGCTGACCCGAGGAAGCGGAGGAGTGGTATCGCGGGCGCGATGTTTACCCGCA  
AGCCGCGCCAGTGGCGGATGATGATTGGTTACTTTCCAGCATCAACCGATTGGTTTAGCCAAACGGATTGGTTCCGGAT  
TGAAAAACAGCTATCCGCGTGAAGTGGTGCAGGATGGGAAACTTTTTACCGGTAACGCCTGACAGCGCACAAAAAAGCG  
CACTTTTTGACTGGCACATTGCGCTGCCTCAACTAGGCTGAAAAATGGTGCATCGGACTGGTCTGATCCACAATCGGCAG  
CTAAATGGAGAGCACGAAGTGAAGAACAGTGTGCGCATAGGCGCTTTTGAATCGACGACGGCGAATTACAGGTGAAT

CGCCAGGTGATCGAACGTTAACCATTCCCTTGAAATCTGACCCCGATTTATGTATGCAACTGGATGCCTGGGATGCTGAA  
ACCAGTATCCCTGCCCTGCTAAATGGCGAACACTCTGTCTTTACCGTACCCGTTACGATCAACAATCTGATGCCTGGAT  
TATGCGTCTTGCTGATCCAAAAAGAACCGTCCGGATGGCGGGTATTTTGTCTGGTTATCCCCCGTTGTAATAATCTC  
TCCTAACTTAACGGTACGGCACCACACTTCGGGGATGAAATGTTCCGCGCTGGTACTTTTTGTTTGTACCTGGATGGCG  
GTTGTGAAGATATTGTTGTGGATGTCTACAACACGGAACAGCAGTGTCTTTATTCTATGAGCGATCAACGGATCCGCCAG  
GGCGGTTGTTTTCCGATTGAGGATTTTATAGATGGTTTCTGGCGACTGCACAGGAGTACGGTGAATTTTAAATTATTGCA  
ATTGCACAAGAGTCAGTTCGCCCCAAAGACAGCACCGGTATCAATATAATGCAGGTTGCCAATATCCACGCGATGTGC  
AACGGTGTATGACCAAACGAAATGATCAGCACCTGTAATCCCTGCCCTTTTGGCGTTACCTAATCGCGAGCGGCT  
CCACAAGACCTGATGAAATCAACGTCTTTTGGCATTATAAATCATCTGGATAATCGGCATGAGCAATAACATGTCT  
TGCCGGTGGACTGTGTACTTCAAGAATAAAGGGCAATGCTGACATTTTTCCAGCGCCGTTTTCGCTTGTCTGTGTA  
TTATCTGCCAGCGAATAAACAGTCCGCCCATTCATCAACCACAAAGACATCTGCTGGGATGCCAGCGCATCCATCGC  
CATCTGTTTATGATTGCCTTTACCGCACAAACCAATGTTGTTCCAGTAACTGCAGACAACGTAACCTTTGCGGCCAC  
GATCGATAACGTCTCCACTGAGATAAGTAAATCTGCCACGGATCAAAACGACAATGCCATAATTTGCGGCCAACTGC  
TCAAGACAACCGTGTATATGCCAGAAAGCCAGATATGTCGCCATTGATGACCCGCAATTCTGATAAACGGCGCAGG  
CTGTTTTCATCAATATTTTCTCCCGCTAAAGATCACATAATCTTAAACAAGAATGTTAAAAACGCTGGACTCAGACAG  
TAGAGTGTGTATTATGGTTGACTATAAAGTCAGCGAAGGAAATGCTTCTGGCTTTTAAACAGATAAAAAGAGACCGAACAC  
GATTCTGTATTCCGGTCCAGGGAAATGGCTCTTGGGAGAGAGCCGTGCGCTAAAAGTTGGCATTAAATGCAGGCTTAGTTG  
CCTTGCCCTTTAAGAATAGATGACGACGCCAGGTTTTCCAGTTTTGCGTGCAAAATGGTCAATAAAAAGCGTGGTGGTCA  
CAGCTGAAATGTTAAAAACGCCGTTCTGGTGAAGAAGTGGAGCGGTTTTTTTATTGAAATCAAAGGCTATTTTAG  
GTAATTAACAGAGTTTTTTCAGCTCGTTCTATAAACGGTGCCAGACTCATTTTTTTCGCCGGGATTGTTAGGATCATCAATC  
TGAATCACCGAAATGGGTTGGGCTTGGTCTTCCACTGGCAACTTCTTTTGTGCGATATCGTTAAAGGATACTGCAC  
GAGGGTACTCGGATTAATAACATACAAAGCATTACCCGGTCCGCAAGTCAGCATCACCTCTTCGCGATTAACGCCCAT  
TGTCTTTACCCACTTCAAACGACTGACGGTAATCACCTGCGGTGAGCCAGCGCCGCTGCAGAACTGGTGAAGTAAACA  
AACGCCAGAATACTTTTTTTCATCATTTTGTAAATCCATCAAAAAGGTTGAGAGTCGCAAGCAGGCTGATGATCACCAG  
CACTACCGCACCTATCGCCATTGAGTTTGTAGTATCCACACAAACAGGGTCCCGCACGATCTTCATCCTGCCTCATGC  
GCGGTACAAGAACATAACGATTAGCCAGCGCAATGACCACCATAATCATCACCAGGATGGCTTTGAGCAATAAGAGTTGG  
CCCAGTAAGTCGTAAGCGTGGGGGAAATCCGGTAATCAACAATGCATTAAGCACGCCGCTTGCAGTACGCCGATCAC  
CGCAAAATGCCCGCACAGGAAAAACGCATCAGCGCTGAATAGCCTGGTGTGCCAACCGCCTTTGATGAGTTGCATAC  
ACCAGAGCACCGGCGAGTAATCCCAACACAGCCCGCACAAATCAGGTGAATCGCGTATTAGTCTGATGGATTTT  
GCTGTTACCCCTTTCATTCAGCGTCGATGCCCACTCCCGCCAGCAGAATAAATTGCGCGGTAGTGAGCATAAACAGCAA  
ACGTGGCATATTCCGCGGTTGCATAAGGGCGACGATCAACGTTACGAGGGCGAGAACAATTTGCCATAACCAGATGCCAC  
CAAATGCGTTTGCAAAACAGCCTGCCAATGTTTGGCGAAAATACATCTGTCCATCCCGTCCCATCAACCCGCCCTGA  
ACGGCGAGCATTGCAAGTGGCACTGATCAAATCCAGACGGCAGCGTGTCTGTTGTAACGCAGAAAAACGCTTCCGCGCAA  
GCGACGAATCGTCAAGGGGGCCAGCCAGGCACCGTACATTGCGAAGCCAAAAACAGCATCAGCGAGGTGAAATGGATAA  
ATCGCAGCGGATCCAGGTAACGCCAGCATGATTTATTTACGCTAAAGGTGATGTTGCTTTTGTGTTTATGCCGCTCC  
ACCGAAACAACATGCCAGTCAACGGTGTAGGTTCCGGGTTTACGCAATCGCCAGTGAACAATCAGTTGCTTTTGGT  
CTGCTCATTTGCTTCCCGGTAATGTTTTAATAATTTTGGTTTTTGGCCCCGTGATTTTTGCACCACTGAATCCTGTT  
CAACACCTTCCGAGAAGTTAAAGTATTGCTGCGGTGCAGTGTCACTTGCAGCTTTGCCGAGGATACTGATGCGTT  
AAATGCGCATGTGCCAGACGGAAGGTGCACCAACGAAGTGGTCAAGATTGCCAGCGCTAGCGAAGGGAGCGTGCAGT  
TGAAGCCATATTATCTATCTTTTTGTAATAACTTTTTACAGAGCATAACCTTGTCTAATGTCTGAGTCGAGCATCAT  
CAATTCGGCTTGCATCTGGCTCACTCTTAGTAACTTTTGCCCGCAATGATGAGGAGATTAAGAATGCTGAAGAATC  
TGGCTAAACTGGATCAAACAGAAATGGATAAAGTGAATGTCGATTTGGCGGGCGCCGGGTGGCATTAAAGAACGCTAC  
AATATGCCGTTGATCGCTGAAGCGTTGAACGTGAACAGCCTGAACATTTGCGCAGCTGGTTTTCGCGAGCGGCTTATTGC  
CCACCGTTTGGCTTCCGTTCAATCTGTACGTTTACCTTACGAGCCAAACTTAAATAAAACTTATACAGAGTTACACTTT  
CTTACATAACGCCCTGCTAAATTATGAGTATTTTCTAAACCGCACTCATAATTTGCAGTCAATTTGAAAAGGAAGTCATTA  
TGTGCTTCCGAAAGTTGCAGCAGCGCAATGAGCCTCGTAAACCTCACTCACCGAACAGGTAGCTCATCATCTGGAG  
TTTGTGAGGGCCGCCAGGCAACAATGTCAGCTGTTAGTTTTTCCATCGCTTTCTTTACTGGGGTGTGATTATCCGCG  
ACGTGCCCTTCTGCCACCCGATCTCACTGTTAGACCCGCTTTGTTATGCCGCAACGACCTGGCGAATGACCATCA  
TTGCCGGCCTTCCGTTGAATATAACGATCGCTTTATCGTGAATTTGCGGTGTTGCGACCGTGGCGAAAAACGCTGGG  
ATCTACCATCAGAGTCATGGTGCATGTCTGGGCCGCTGTTCCAGAACCATCACGGTGGTGCATGAACAACCGCAAGGTAT  
GGATATGGACCCGACCTGTTCACTGTTTACTACAGGGCAATGCTGGGAGAACCAGCTGCTGGCGTCCGCCGCTCGCT  
TACAATTTTTTTCACATCAGTACTCGATTGCCGTGCTGATGGCAATGCCCGTGGTAACAGTGCATATGGGATGAATAT  
GGTCTCTCATCGTTCCGCGGATCGTGGTTCAATTTGTTAGTGGTCAAGCTTTCATCACAGGGTGGCAAGGCGATAT  
CATTCCATTACGCTAGGCTTTTTTCCGCCCTGGAGCATGCCATGTTGCGCATTATCGATACAGAAACCTGCGGTTTTGAGGG  
AGGGATCGTTGAGATTGCCTCTGTTGATGTCATTGACGGAAAAATCGTCAACCCATGAGCCACCTGGTCCGCCCGATC  
GTCTATTAGTCCACAAGCGATGGCGATTTCATCGCATCACCGAAGCCATGGTCCCGATAAACCGTGGATTGAAGATGTG

ATCCCACTATTACGGTAGTGAATGGTATGTCGCGCATAACGCCAGCTTTGACCGCCGCTACTGCCTGAGATGCCCCG  
TGAGTGGATTTGCACTATGAACTGGCCCGTCTTTGTGGCCTGGGATCAAGTACAGCAATATGGCGTTATATAAACAC  
GCAAGTCAATGTACAGACGCCCGGGCTGCATCATACCCGCGCTTGTATGACTGTTATATCACCGCCGCTTGCCT  
ATCGATATTATGAACACCTCCGGCTGGACGGCAGAACAGATGGCCGATATCACCGGACGTCGGTCGTTGATGACGACCTT  
CACCTTTGGCAAATACCGTGGAAGCGGTTTTCCGACGTTGCCGAACCGGATCCGGGCTATCTGCGCTGTTATTTAATA  
ACCTGGACAGCATGAGCCGGAGCTGCGTTTAACTGAAACATTATCTGAAAATACTTAGTCCGACGGCGTAGCGGGT  
AATGTTCCCTGCGCCAGCGCAGCCAGAAAAGCATATTCATCGCTACGCCTTCGTACGATTTAAAGCGACCAGATTTACC  
GCCATGGCCTGAGTCCATGTCGGTACAGAGCAATAAAAGATGGTCATCGGTTTTAGCTCGCGCAATTTAGCGACCCATT  
TTGCCGTTCCAATATTGCACCTGAGAATCGTGCAAACCGGTCGTTACCAGTAAATGCGGATAAGCCTGTGCGGTGACG  
TTGTCATACGGCTGTAGCTTTTTCATGACTCGTAATATTGCGGATCCTGCGGGTTACCCACTCTTCAAACCTACCAGT  
GGTAAGAGGAATTGATTCATCAAGCATCGTTGTTACAACATCAACAAACGGTACCTGGCGGATAACGCCGTGAATAATT  
CCGGGCTTGATTAATTGCAACGCCCATCAACATGCCCCCGCACTCCCGCCATCGCATAACAAAGCGAAGGAGAGCCA  
TAGCCAGTTTTAACAATGCATCGCAGGCATCAAGATAATCATTAAACGTATTTTTCTTCTCAGAAAATTTCCGTCTTC  
GTACCATTGTGCCCCAGCTCACCACCGCCGGAACATGGACAATGGCGTAGACAAAGCCACGATCTAACAACTCAAGC  
GGCTAAAACGAAATCGGCATCAATACTTGCGCCGTAAGAACCATAGCCATACACCAGCAACGGGTTGTCTTTGGCA  
AAATGTTTGGCATGGTAGCAACGAAACCGGAACCTGACGCCATCACGGGCACTATCCACAGGTGTTCACTGCGGTA  
ATTCGCGCATAAAAACAGGAACTTCCGTTTTGTTTTAATACAGCAGCTCACCAGTATCCATATCCAGTTCAAACAAAG  
TGCTGGTGTAGTCATGGAAGAATAACCATACGCAATCGCGCGTTTTAGGTTCTGGATTGTAGGCAATCCAGGTACAC  
TAGGCCGATCATCAAAGGCAATACCAATGACTTCCCGGTTCTGCGGTTAATTTGGCGAAAACCTGGTTAACCCGCGCTG  
ACGCTCTTCAACCACCAGCCAGTCGGTAAACAGCGTAAACCTTCCAGCATGATGTTTTGCGGTGGCGGAATTAACCTT  
CCCCTGTTGCTCATCACGCATACGGGTACGGTATAAGCCAAAGTTTTTGGCGTGGCGGTTGGAACGCAGATAAAAACGA  
TGCTGGTAGTGATCAAGGCTGTATTCTGTGATCTTTGCGGCGCGCAGAAAACAAACGGCTCGGCATCGGCCATTTCCGC  
GTCCAGCAGGCCAACTTCACTGGTGGTGGCGCTGGCCAAATGAATGACTACATAGTGCTTCGAGGTGTTTTATGCAGGC  
TGACGTAATAGGTATCGTCTTTTTCTTCTGATAGTCACTTTATCTTGCATGCTGGCGTACCAGTGGCGTGACGCCAGACC  
TGATAAGGCAGCAGCTCACCAGGATGCTTGCGAACATAGTAGAAAATCCAGGAGTCATTTGCCAGACAAAGCTGGGTT  
AACGTTATCCAGCAGTCCGGGTACCAGTTACCAGTTCCAGATTACGAAAACGAATGCCGACTGGCGTGGGAAAGAA  
AATCTTCTGCCAGCGCCATAATGGTGTATCGGGCGTAATCGCCATTCGCCCATCGAATAAACTCACTATGAGCTGCG  
CGCTTATTGGCATCGAGCAATGTTTCCACTCATCCACTTCTACTGAATGCCGATTGACGCTGGTAGATAGCATATTC  
ACAGCCTGGTTCATAAATATGCCGATAGCGGTAGCCATTTTTGATGTAGGGCGCAGAACTTCTCGTTGCGGAATGCGGT  
CGATGATTTCTTTAAGATGCGATCCTGCAAGGCTTGTGTGAGGCCATCACCCGATGACCCTAACTATTTCTTGTTC  
AGGTAGTCCAGGACTTCTGGCTGAGAACGCGTATCGTCCCAGCCAGTAGTAATTATCGATGCGCGTATCGCCATGAAG  
CGTCATGGCGTGGGAATGCGGGCGGCTTTTGGTAGCATGTTATTGTTCTTTCTGGTTGAAACATCTTATAAGGGTGGCA  
AACTCACCGGGGATGCAAGCGAAACAGGGGAGTCATTGCTTAGATGATGACAGGTAATGGCGCGGATATCGAATGTTAT  
GCAGACAGAGAAAATCAGCCTGTTCAAATGGCTGTGCGATTCTGGATAGCCGAAATAGTCAACTCAGGCTATCCAGAG  
AGCGGAATTATCCGCCAAAGTGCGTTTTTGTGTTGAGATCGCGTTCAATGCCGTACGAAACATCCTGGGGGATTTTC  
AGCGCGTACCCAGTGCAATCAGGTAAGTGCCTCCATAAAAATGGTCAATATCAATAGCCGCGCAACTCAGGAAATAGAT  
TTCCAGCGCTCTTCTTCAATGCGGACCCCGGTAGCCAGGCGTTGTGGATCCAGCGGTTGTTCGATTGCCTGCTCAATGA  
GTACAGCCCCGTCTTCCAGCGCGGCTCCACGCAATTGCTGGTACGATTGCCGACGTTCTTTGGCATCAATATGACCA  
TCACTTTTAGCGGCAAAGACCAGCGAAGGATCAAACTGCTACGCTCATCCAGCGGCTACTTTGCGCGCCAACTG  
CGTTTCGCTGATGCGCGCGCGAATTTTATCTTTGATTTTATCCACAGCACCGTACCCGCTACCCGCTCCGCGCCCAA  
CCAGTAACCGGTTGGTGCCATATTTCTGAAGAAGTTTACGTGCTGATTTATTTGCGGACCAGCAGCCAGCCAGTCCGCCT  
AATGCGCCTGGCACTAACAGTTTGACCAATCCCTGATCCGACAGCAGGAGGTAGAAGAACTGCTTTGCCAAGCAGGGA  
TTGCAGTTGATTTAACAGTTAGCCATATTTGCTCCTCAATAACCATTTTTAGTGCCTGTAGCATAGCGGATGAGGATGT  
CAGAAAATGTATATCGAGACAAAAGATGCGCAAATAAGCGGGCGGTAGGCCGTTATTCAAAGAAATTCGCGCCAGGTAA  
GGTATTTACTGTATATCAGGTGATAAGGGTATTTTAGGTGAAAGTAGTTTGTGTTTTGAGTGGCATTGTTTGTGCTGA  
TTGCCGATGCGACGCTGTTGCGTCTTCTCAGGCCTACGATTGTTGGTGCCTTCTGGGGCGGACAAGGCACTCGCGCCGA  
TCCGCCAACAGTCAATCGAATTATCAGAAGCCATTAACGCCGCTGATATTCCGCCATTCGCTTTGCAGTCCACGCTGA  
CCTGGTAATGAATATCGGCACTTTTACCACGCACGGTTAGCGGTACTGACCATTTATCATCTTTACCCTGAATGTCCTGC  
AACTGACCCAAGCCACGGGATCGGCTGACCGACAATTTTTGATCATCTGCCAACGCGCCACGCGATTTTGTGATA  
ATCAGTTTTACGCTCGCGCAATTCGCGCAGCATCCAGATCTTCACTTTGGAAAGTGACCGACTTGCTGGTTTTCAT  
TATTGGCAGCGAAAACGATGCGCAGGAGAAACCAACAACAGCCCTAAAACGCCCTTTTTTTTTCATGTTTTTCTCC  
ATAGACAATGATTCAGGAGAAAGCATGGTACAAATTTGTCAGGAGCGCAAGTTGCTTCAGGCCGCGTGTGAGGCATCTC  
CTTTCCGATTCAGCACCAGCAGCCTGTGGGACGTAATTTGCCGTTTTTCAAGATGGTGTGCTCAGCACATCTTTTTGTT  
CTGCCAGCCATAGCGAAAGGCTTACGTTGCTCGTCTTCCATTTGCACTGGAGAATTTGTGAGCCAGGTGTCAAGCAGA  
TCCGCCGATCAAGCATTTTGTGATAAGCATCGGCTTCTTTTTGCTGGTAAACGCATTTTCTTTCGCCCTCACGAAT  
GACTACGATTTAACTTCAACCGCATTTGCAGCCTCATAATAACTGTGATTTTATACAGTATATTTCTTTTTCGGTTG

AGAAATCAACATCAGCAATAAAGACACACGCAAACGTTTTCGTTTATACTGCGCGCGGAATTAATCAGGGGATATTCGTT  
ATGACGTTATTAGGCACTGCGCTGCGTCCGGCAGCAACTCGCGTGATGTTATTAGGCTCCGGTGAAGGTAAGAAAGT  
GGCAATCGAGTGTAGCGCTCTCGCGTAGAGGTGATTGCCGTCGATCGTATGCCGACGCACCAGCCATGCATGTCGCGC  
ATCGCTCCCATGTCATTAATATGCTTGATGGTGATGCATTACGCCGTGTGGTTGAAGTGGAAAAACCACATTATATCGTG  
CCGAGATCGAAGCTATTGCCACCAGATATGCTGATCCAACCTGAAAGAGGAAGGACTGAATGTTGTCCCTCGCTCGCGC  
AACGAAATTAACGATGAATCGCGAGGGTATCCGTCGCCCTGGCGGCAGAAGAGCTGCAGCTGCCCACTTCCACTTATCGTT  
TTGCCGATAGCGAAAGCCTTTCCGCGAGGCGGTGCTGACATTGGCTATCCCTGCATTGTAACCCGGTGTGAGCTCT  
TCCGGCAAGGGGAGACGTTTATTGTTGTCAGAGCAACTTGCTCAGGCATGGAAGTACGCTCAGCAAGGCGGTGCGCGC  
CGGAGCGGGCCCGTAATTGTTGAAGCGTCTGTTAAGTTTGACTTCGAAATTACCCTGCTAACCGTCAGCGCGGTGGATG  
GCGTCCATTTCTGTGCACCAGTAGGTGATCGCCAGGAAGATGGCGACTACCCTGAATCCTGGCAACCACAGCAAATGAGC  
CCGTTGCCCTTGAACGTGCGCAGGAGATTGCCCGTAAAGTGGTGGTGGCACTGGGCGGTTATGGGTTGTTGGTGTGCA  
GCTATTTGCTGTGGTGTAGGTTGATTTTTCAGTGAGGTCTCCCCCTGTCACATGATACCCGGGATGGTGACGTTAATTT  
CTCAAGATCTCAGAGTTTGCCTGTCATGTACGTGCTTCTCGGACTTCCGGTTGGCGGGATCCGTCAGTATGGTCCCT  
GCAGCTTCTGCCGTTATTCTGCCACAACCTGACAGTCAAGTGTACAGTTCGATAATGTGCAGAAATGCCCTAGGCGCAGA  
TTTGAGATTGTTTATTGTTGAAGCCGAAATTTGATGGCAGCCCTGCTCGGGGGTGGCACTGGCTACTGCAGAGAGTG  
TTGTTGACGCCATTGAACGCGGAGCAGCGCCGGCAGAGTAAAGTACAGGGTTAAACCCGGCAAAAAAACGCTACA  
AAAAATGCCGATCCTCGATCGGGCATTTTGACTTTTACAGCTTAGCGCTTCTACAGCTTACGCGCCAGCTTAGTAATG  
CGGTGTAATCGCCGCTTCCAGCGCATCTGCCGGAACCAGCCAGGAACCACCGATGCACAGCACGCTTTTTCAGCGCCAG  
GTAGTACGCTAGTTAGCCGGAGAAATACCACCCGTCGGGCAGAAACGGACCTGGGAGAACGGACCCGCGATCGCTGCA  
GGCTTTTACGCGCCGTTAGCTTACGCGGGAAGAATTTGAACTCTTTCAAACCGTAGTCCATACCCAGCATCAGTTTCG  
GAAACAGTGTGATCCCGGAAATCAGAGGAATAGTCCCTTGGTAGCAGCTTTCAGCAGCGGCTCGGTGACACCCGGGCT  
AATTGCGAATGTGCACCCGCTTTCAGTGACTTCTGCCAGTGTGTGGATTACGACCCGTACCGGCACCCACAATCGCTT  
CAGGCACTTCTTTGGCGATAGCACGGATAGCGTCAACTGCACACTCGGTACGCAGAGTCACTTCCAGAACCGGCACCCCA  
CCAGCAACCAACGCTTTTGCATCGGCACCGCGTGTCCAGTTTTTTTACCACGATAACCCGGTACAACCCGGCCGGTGGT  
CAGGATTGATTCTGCACTGTTTTTCCAGTTTTTTCATCAGAGTTTTCTCTCGCTGATTACAAATTTGTCGCTTAAAAAG  
TGATACAGGTTGCGCCCTGTTCCGCGCACCGGACAGTTTTTACGCAAGGCGCTGAATAATTCAGTCTGTTCCACGCGT  
GACGCGCTCAGGTCAGGAATGTGCGGTTCCGCGAGCAGCGATTCCGCTTCTGCTACCAGCAGCGTCACTTCCGCTGTCTG  
TCCATTCACACGAATGATGTCCCCGTGCGCACTTTTCCAGCAGCCCGCCATCGTAGGCTTCTGGTGTACGTGGATAG  
CTGACGGCACTTTACCTGAAGCGCCGGAGAGTCTCCTATCGGTAACGCAATTTTGAACACCCGGTCCAATAATACA  
CCAAGTGGCGGATGAGTTTATGTAATCTGGCATTCCGTTCCGTTTTGGCCCCGATGACGGACAACAACGACACAATC  
GCGGTCCAGCAAAACCGCTTCAAAGGCCGGCATAACGTGCTGGCTTTCAAAAAACAACCGCTGGCGCTTCAATCACCT  
GGTTCTCAACCCGCGACGGCAGAGGTTTTTATAACCCGCGCCAGGTTACCGCTTAACTTTTGTCCCACCATGATGA  
GAGAAAGGTTGTTGGAAGGAGGATCACATTGCTGTGAGTGATTTTTCCGCCCTTCCCGCCAGTCCAGTTTACCAT  
ATTCAGCCATGGTTCAAAGGTATAACGAGACAGACCAAAACCTGCCACCGTATTGACATCTTCATGCAGCAGGCTGCTT  
TGAGCAGTTACGCAACGAAACCGGTACGCCACCTGCCGCTGGAAGTGGTTAATATCGGCCGGACCGGTTGCGGTAGAGA  
CGTCCATCAGCGGTACAACATCAGAAAGGTGAGAGAGTCACTCCAGTTAATCTGAATACCCGGCCGCGCGCCATCGC  
CACCAGGTGCATGGTGTGGTTAGTGGAACCCGGTCCGACAGTGAACGATACCGTTCAACCACTTTCTCATCGA  
TCATCTTACCGATCGGCATCCATTATTACCATTACCGGTGATGCTGTAACCTGACGCGCAGCTGCGGCGGTCAAAGCA  
TCGCGCAGCGGAGAATCCGATGAACAAAAGAAGAGCTGGCAACTGCATCCCATAAACTCCACCACCTCTGGTTGGT  
GTTGGCAGTACCGTAGAAAGTACATGTTCCCGCGCATGGTAAGACGCGGCTTCTGACTCCAGTAAAGCCATGCGGTTCCA  
CTTTACCTTCCGCATAAAGCTGGCGAATACGCACTTTTTTTATTGGCAACCCGCTTGCATCGGTCCAGACGGCACA  
AACACCCGAGGCAAATGACCAAAACGACAGGGCTGCCATCGTCAGACCCGGGACAATCTTGTGCGCACACCCGAGGAACAG  
AGCACCATCAAACATGTTATGGGACAGCCCCACCGCCGACAGATCGCTATCACTTCCGCGCTTAGCAGCGACAATTCCA  
TTCCATCTGCCCTGGGTGACACCATCACACATCGCCGGAACACCCGCGAACCTGACCAACCCGATTCGCTTATGC  
AGGGCTTTACGAATGATTTCTGGATAGTGTTCATAAGGCTGGTGCAGGAGAGCATGTCGTTATAGGAGGTGATGATGGC  
GATATTGTTACGCAACATGCTTTTCAAAGAGGCTTTGTCTTGGCTGGCAGGAGGCAAAACCGTGTGCCAGGTTACCGC  
ATGCCAACTGCGAACGATGAACGGTGAAGTTTTCGCTGTTCTATCCGGGCGAGATAAGCAGAGCGAGTCTCGCGGAA  
CGTTCAATGATTCGATTTGTTACGCGTAACAATTGTTGATTATAAAGGCTCCTGAAATGAGTTGTGAGAGCAGGATGA  
TTCACAACCGTTTTATTAGAGGATTTACTGAAACGCTGTAACCGGAGCTCATAGGCAAAAACGTTTTCAGTCAG  
TGTAATAAAAAAGCCTCGTGGGTGAATCCGACAGGCGCTGAAAGTGTAAAAATTGTTCTACAATCTGCGCAAGATCAT  
GTTACCGGTAAAAATAACCATAAAGGATAAAGCGAGATTAATCAAACTCATTCCAGGAACGACCATCACGGGTAATCAT  
CGCCACCGAGGCAACGGGTCAGGTTCCGGCCTGATACGGTTTCCGCGCATCATTGTCATCGCCACGCTCAGTAA  
TGGAGTCTACCAATTCAGGCTTCTTCACTTCTGCGCAGTACAAACAGTCCCTGAATACCACGCATGGTTCCAGC  
AGCAACGTTTATAGGCATCCGCCAGATGCGTGTGATTAAGGTTTTCTGAATAGCTCAGATCCAGCTTGGTGATTTGAG  
GTTATGTTGTTGGTCAAGGCCAGGAATTTATTAGTACCTGGATATCCACGCCTTCATCAGGTTGCAGACGGATAGTCA  
GTTTATTCTGCGGAGATCTGCCACGATTTTAAACAGATTAGTTTCAAGTTGTTTTGAAATAGACCACGACTTCAGAA



CATTTGGTCGGCAGACGTTTACCAGTACGCAGGTAGAATGGCACACCGGCCAGCGCCAGTTATCAATGTCGACGCGGAT  
CGCCACGAAAGTTTCTGTATTGCTGCTCTTGTTCGCGCCTCTTCTTCCAGATATCCCGGCACTTTTTTGCCTGGGCGA  
AGCCCGCAGTATATTGCCCGGTACGGTTTTTTCGCGTACGTTGGAGCGGTGATGCGGCGCAGAGACTTCAGTACTTTC  
ACTTTTTCATCGCGGATGCTGTCTGCGCTCAGGTACAGCGGCGAGACATCGCAATCATGCAAAGAATTTGCAGCAGGTG  
GTTCTGGATCATGTGCGCATCTGACCGCTTATCAAATAGCCCCAGCGCCCTTCGATCCCCACTTCTTCTGCCACGG  
TAATCTCAACATGATCAATGGTGCGATTGTCACAGTTATTCACAAACAGGGAGTTAGCAAAAACGCAGCGCCAACAGGTT  
AGCACCGTTTTCTTACCAAGATAGTGGTCGATACGGTAAACCTGGCACTCCTCGAAGTATTCGCCAACCTGATCATTGAT  
TTCTGCGAGGTGCGCAGCGACGTCCCCAGCGTTTTCTCATGACTACGCGTCCGGTTTTAGCATTAGTTTTGCCTCGC  
CAAGCCCTTTGCAAATTCGCCAAAAGTCTGGGCGGCATGGCAAAGTAGTTAATGGTGATACGATTTTTTGTATCCAGC  
ATCGCGCCGAGACGGCTGAATGCAGCAGTGTATTGACATCGAGATTACAAAAATCCAGACGTGCACTCAGGGTGTCCCA  
TAAACCTTCATCAATGGTTTTCTTTCATGAAAGTTTTGAGCGCCTCGCGGACAACTTTGGTATATGCCGCTTATCCAGT  
CAGCAGCCCTACGCCGATAATCCGGGTGTCGGGTTGAGCTGACCGCTTTTTCCAGTTGATACAGGGAAGGCAGCAAT  
TTACGACGCGCAAGGTGCGCTTTCGCGCCGAAAATGACCAGGTACAGGCCTGGGCTGTTTGCATTACGCCATGTCATT  
CTCCTTAAGTTAACTAACCCGGTACTTAAGCCAGGTATACTTGAATTTTTCTTACGGTGCAGTGTACTGCTTTTACGAG  
CTTGCGAAAACGTAAACGCTTATCCACCCGTGCGATTACGGGAAAAGCGCGCAAAGTGCAGGCAAAAATGATAAAAAAT  
CATCGTTTTCCATTGGGTAAAAATCTGACACTGATCATGTTATGAAAAAAAATAACAATTTTTTATCTGCTTTTGTAT  
TAACACGGCACACAGGCGTAATATCTGACAAAACCTGATTTTCGATTTCTTTCAGTGCGGAAATCGTCATTACCCGTGAGT  
CTTTTTACATCATGAATATGCTGAAAAAATCCAGTCTCAGCTGGAACATTTGAGCAAATCAGAGCGCAAAGTTGCCGAG  
GTCATTCTGGCTTCGCCGATAACCGCATCCATTGAGTATTGCTGCTATGGCACTGGAAGCAATGTTAGCGAACCAGC  
GGTGAATCGTTTTCTGTCGACGATGGACACGCGCGTTTTCTGATTTTAACTTCATCTGGCACAGAGTCTGGCGAATG  
GCACTCCCTATGTTAATCGCAATGTCAATGAAGATGACAGCGTTGAATCATAACAGGGAAAAATATTTGAGTCCGCAATG  
GCAACGCTTGATCATGTCCGTCATTCACTGGATAAATCTGCCATCAACCGCGCCGTCGACTTGCTCACTCAGGCAAAAA  
AATCGCCTTTTTCGGATTAGGCTCTTCAGCCGCGTTGCCACGATGCGATGAATAAGTCTTTTGTATTTAATGTTCCGG  
TGGTGTACTCCGATGATATCGTGTGCAACGCATGAGTTGATGAATTGTAGCAGCGGAGACGTGGTGGTGTGATTTCT  
CACACTGGAAGAACAAAAATCTGGTCGAGCTGGCGCAGCTGGCACGCGAAAACGACGCCATGGTGATTGCCCTCACCTC  
TGCGGGTACCCGCTCGCCGGGAAGCAACGCTGGCAATTACCCTGACGTACCGGAAGATACTGACATTTATATGCCCA  
TGGTTTTCTGACTTGACAGCTGACCGTGATAGATGTCTGGCGACAGGATTTACTTTGCGACGCGGTGCAAAATTCAGA  
GATAACTTGAAGCGGGTCAAAGAAGCGCTGAAGGAATCGCTTTTTGATAAGCAGTTACTTAATTTAAGTGACGATCGCTA  
AAAACGACTGTCACTGTCTTAATCTTATACGACATCCGAATGAGATTAATTTATCGCCATCGCGGCGTTATTTTCATTCCG  
ATTTTCATGTTCAAGCAACACCTGGTTGTTTCAGTCAACGGAGTATTACATGTCCAGAAGGCTTCGAGAACAAAAATCGT  
TACCACGTTAGGCCAGCAACAGATCGCGATAATAATCTTGAAAAAGTTATCGCGGCGGGTGCCAACGTTGTACGTATGA  
ACTTTTTCTACGGCTCGCTGAAGATCACAAAATGCGCGCGGATAAAGTTCTGTGAGATTGCCGAAAACCTGGGGCGTCAT  
GTGGCTATTCTGGGTGACCTCCAGGGGCCAAAATCCGTGATCCACCTTAAAGAAGGCAAAGTTTTCTCAATATTGG  
GGATAAATCTGCTCGACGCCAACCTGGGTAAAGTTGAAGGCGACAAAGAAAAAGTGGTATCGACTACAAAGGCCTGC  
CTGCTGACGTCGTGCCTGGTGACATCTGCTGCTGGACGATGGTCGCGTCCAGTTAAAAGTACTGGAAGTTCAGGGCATG  
AAAGTGTTCACCGAAGTACCGTGGTGGTCCCCTCCAACAATAAAGGTATCAACAACTTGGCGGCGTTTTGTCCGGC  
TGAAGCGCTGACCGAAAAGACAAAGCAGACATTAAGACTGCGGCGTTGATTGGCGTAGATTACCTGGCTGTCTCTTCC  
CACGCTGTGGCGAAGATCTGAATATGCCCGTCCCTGGCACGCGATGCAGGATGTGATGCGAAAATTTGGCAAGGTT  
GAACGTGCGGAAGCCGTTTTGAGCCAGGATGCAATGGATGACATCATCTCGCTCTGACGTGGTAATGGTTGCACGTGG  
CGACCTGGTGTGAAATTTGGCGACCCGGAATGGTCGGCATTAGAAAAGCGTTGATCCGCTGTCGCGTCAGCTAAACC  
GAGCGGTAATCACGGGACCCAGATGATGGAGTCAATGATTACTAACCCGATGCCGACCGTGCAGAAAGTCAATGGACGTA  
GCAAACGCCGTTCTGGATGGTACTGACGCTGTGATGCTGTCTGCAGAAAATGCCGCTGGGAGTATCCGTGAGAAACCGT  
TGACGATGCGCGCGTTTTGCCTGGGTGCGGAAAAAATCCGAGCATCAACGTTTTCTAAACACCGTCTGGACGTTCACT  
TCGACAATGTGGAAGAAGCTATTGCCATGTCAGCAATGTACGACGTAACCACCTGAAAGGCGTTACGGCGATCATACC  
ATGACCGAATCGGGTGTACCGCGCTGATGACCTCCCGTATCAGCTCTGGTCTGCCAATTTTCCGATGTCGCGCCATGA  
ACGTACGCTGAACCTGACTGCTCTCTATCGTGGCGTTACGCCGTTGCACTTTGATAGCGCTAATGACGGCGTAGCAGCTG  
CCAGCGAAGCGGTTAATCTGCTGCGGATAAAGGTTACTTGATGCTGGTACCTGGTATTGTCACCCAGGGCGACGTG  
ATGAGTACCGTGGGTTCTACTAATACCACGCGTATTTTAAACGGTAGAGTAAGTACGTTGCCGGATGCGGCGAAAACGCCA  
CATCCGGCCTACAGTTCAATGATAGTTCAACAGATTTCAATATTTCTGAAGCAAATTTGAACTTATCATCAGGCGAAGGC  
CTCTCTCGCAGAGGCTTTTTTATTTGATGGGATAAAGATCTTTCGCTTATACGGCTGGATTTCCGCCGTTTTGCGAG  
TTTTCAGCAATTTTATGATCCAGGTGATTGTTCTGGTTCGCGGACCAACAAAAATCTCGACTTCTTATTTCATCCGCCG  
GCAATCGTATGATCATCCGCTCTAACAGATCATCCATCGGTGGGCGCACCTGAATCGTCAGACGATGCGTCTTGCATC  
ATAAATCGAAACAGCGGTACAACGCGCGCACGGCACACTTTCATCAAACGACCAATCGCGGGCAACGTCGCTTTATAGG  
TGGCAAAGAAATCCACAAATTCGCTGTGCTCTGGGCCATGATCCTGATCGGGTAAATAATATCCCAAGTACCCCTGACGT  
ACCGACTGGATGAATGGTTAATACCGTCATTTCTGCGATGACAGCAGCCGCAAAAGCGACGACCGCTGTTCCAGAC  
ATAATCAAAAACCGGTTGCCCTGATTATGGAACATCGCTGCCATTTTCTGCCCTTTCGAGGCCATCAGCATGGCAGGAA

TATCGACGGCCCAACCGTGCGGCACCAGAAAGATAACTTTCTCGTTATTACGCCGCATCTCTTCGATGATCTCCAGCCCT  
TGCCAGTCAACGCGCGGTGAATTTTCTCCGGCCCGTATTGCCAACTCAGCCATCATTGCCATCGCTTGGCGCGGT  
GGCAAACATCTCATCAACAATCGTTTCGCGTTCAGTTCCTACTACGTTCTGGAAAGCAGAGCGACAGATTGATTAACGCAC  
GACGGCGTGAGCTTTTTCCAGTCTGCCGCAAAACGTCCAGCCGTGCCAGAATGGGATCACGGAACCTTTGGCGGGT  
AAAGCGATACCCGCCATCGTCTACGCCAGCCATGCTCCCCAGTAGCGCGGTGGCGAAAAGGATTTATCAAACCTCAGG  
AATGATTCGCTATTATTTTTTTTCGTTTCCATGCTTTTCCAGTTTCGGATAAAGGCAAAAATCAATCTGGTGATAGTGA  
GCGGCGCAACTTGCCCCGACCAAATAAAAAAGCCGGTACTGACTGCGTACCAGGCTGCGAATGGATGTTAATTAATCAA  
ACCGTAGCTGCGGCACAATCTTTGGCTGCGCCAGGAATTCGCGACGATCGGAGCCGGTCCAGCCCTTCGGTACGCGGC  
AGTTTTGCGCTCAGCGGGTTTACGGCTGCTGGTTTATCCATACTTCATAGTGCAGATCGGCCCCGGTTGAACGTCCGGT  
ATTACCGGAAAGCGGATACGGTGCACGTTTACCTTCTGTCCCGTTTACCAGAATCTTGCGCAAGTGCATATAAC  
GCGTGGTGTAGCTGCGACCATGACGAATAGCCACATAAATACCTGCTGCGCCACTGCGTTTGGCAACCACCACTTACC  
TCACCCACTGAAAGCACTGGCGTACCCTGCGGATGGCGAAATCAACACCTCTGTGTGGTGAACGCGACCGGTACC  
ATTAGTACGACGCGGGTAAAATTAGACGAGATACGGAATGTTTCCGCGTGGGAATCGCAAGAATCCTTTCGCCAGAC  
CAGTACCGTTACGATCGTAGAATTTGCCATCTTCAGCGGGATAGCGTAATAATCTTTACCTTCTGAACGCAACGTACG  
CCCAGCAGTGGCTTTGCTACGTTTACCATCAAGCATTTCTCGAGACATTAACACCGAAATTCATCGCCTTTTTTCAG  
TTTTGCGAAATCCATTTGCCACTGTCATGGCTTTAATCACTGCGTCACTTCGGCGCTGGTTAAACCGGCTTTCTGGCG  
TGGCAACAAAGCTTCCCGGACGGTACCTTTAGCAGATTGTTAACCCACTCTCCTTGCTGCATTTTCGCTGGTCATTTTA  
AAACCGTTAGCGGAGTACGGTTCATAGTTTCGGTTTTCAGCAGACACTTCCAGGTGAGGCGCTGCAGTTTCGCCGTC  
CGCGTTAATGTCAGGAGAGTTGTTGACCGATTTTTCAGGTTACGCAATTTTGTTCGGCCGAGCCAGTTGGGTGATAT  
CACCCATATCAATACCATACTGATTGAGAATGCTGCTTAGCGTATCGCCAGTGGAAACAACATATTATGCACGCCCCGCT  
TCACCGGCGATTTTGTATCCAGTTGCTCCTGGGAATGGCTTATCTTCTGTGCAGCTTATCAATCGGCTCACTGGC  
TTCAGGTAAGAGCGAACGAATTTGTTCTGTTCCAGCTCAATGGTTTTGACAATTGGCGTGGCATCACGGTGATAAAT  
AAGGCCGCCAGACAGCGACGGCCAGAGTAAGAACGGTGGCGACCCCAACATAACGCGGTGGTGGTGGTAAATTATTA  
AACGCCAGGGGACAGAGCGGGCTATCTGTTGCACGTAATCACTTCTCATTAAATCTCCTTTCAGGCAGCTGCATACTG  
GTTGGCTAATTGACTCAGGAATTTGAATAGCTTGTTCACCGTTTATGATTTCCGCCCCAGGGATCCAACGTTCCCA  
TACGAACGGATGTCCTCGTGCAGCTCTCAACGACCGCTGGCCTGAACTGTGGCTCAGCAAAAACGCAGGTTGCTTTT  
TGCTCAACCAACTGTGTTCTTATTTTCATGTAACCGTGCAGCGCCAGGTTGAATCTCAGGGTTAACGGTAAAATGACCAAG  
CGGTGTCAGTCAAACCTGTTTTTCAAATAGCCGTAAGCATCGTAAAAACGAAATAACCTTTCCTTTCAGCGGCGCGA  
GCTCGTTACCAACCTGCGTTTCGGTTGAGGCTAATTGTGCTCAAATCCTCAGGTTGGCGTCAAGTTTGGCTCGACTT  
TGCGGCATAAGTTCCACTAATTTTCCATGGATTGCAACCGCTGTAGCCCGCGCTATCTCTGGGAAAAGCCAAAGATGCAT  
GTTGAAATCGCCGTGATGGTGTATCTTCGTCATTTTTTCCGCGTGGTCTGTGATCATCATCAGCCGTAATACTTTTCA  
TCAGTAGCGGTTTTCATCTTCAAGCTGCGCAATCGTTACCTGCTTCGCTCCTGGTAATTTGCTTACCAGTTTTTGCATA  
AACGCTTCCATCTCCGGGCAACCCAAACGACTAAGTCCGCGTCTGTAAGCGTTTTACATCCGATGGGCGCAGTGAATA  
ATCATGTTCTGAAGCGCGTTCAGGAAGTAAAACCTCTGTTTCTGTTACCCCATCAGCAATGGCAGAAGCGATGAACCCAA  
CGGGTTAAGCGAAGCGACAACGGCGGCATCTGCGGCTGTGTTGACCTCCCAGAGAGCGGCGGATAATGCTGCGAAA  
AGAAGCGTTTTTTTATGTAACATAATGCGACCAATAATCGTAATGAATATGAGAAGTGTGATATTATAACATTTTCATGAC  
TACTGCAAGACTAAAATTAACATGACAAGTCTGGTTCCCTGGAAAATGTCTCGGTTTCTTTTGGCAACGCCGCGTCT  
CTCTGATGTGCTGCTGGAACTTAAACCTGGAAAAATTTGACTTACTTGGCCAAATGGCGCAGGTAAGTCGACACTGG  
TACGGGTAGTGTCTCGGCTGGTAACACCCGATGAAGGGTTATCAAGCGCAACGAAAACCTGCGCATCGGCTATGTACC  
CAGAAGCTGTATCTGACACCACGTTGCCACTGACCCTAAACCGTTTTTTTACGCTTACGCCCTGGTACACATAAAGAAGA  
TATTTTGCCTGACTGAAACGTGTCCAGCCGGGACCTGATTAACGCACCGATGCAAAAAGCTCTCTGGTGGCGAAAACGC  
AGCGTGTACTATTAGCGGAGCATTGTTAAATCGCCGCAATTTAGTGTGATGAACCCACTCAAGCGGTGGATGTA  
AATGGCCAGGTGGCGTTATATGACCTTATTGACCAACTGCGTCTGAACTGGATTGTGGCGTTTTAATGGTTTCTCACGA  
TCTGCATCTGGTGTGCGAAAAACCGATGAAGTGTGCTGCTGAATCACCACATTTGTTGTTCCGGCACACCGGAAGTTG  
TTTTCCCTGCATCCGGAGTTTATTTCAATGTTTGGTCTCGTGGTGTGAACTGGTATCTATCGCCATCATATAAC  
CATCGTCACGATTTACAGGGACGAATGTTTTGCGTCCGGGAAATGATCGCTCATGATTGAATTTATTTCCCGGTTGG  
TTAGCCGGATCATGCTCGCTGTGCCGCGGTCCGCTGGTTTCTGTTAGTCTGGCGTGTATGCTTATTTCCGGTGA  
TACGCTGGCTCATGCCTACTTGGCGTGCCTTTGGTTTGTGCTGGACGTGAATCCATTCTATCGCGGTGATTGCCG  
TTACGCTGCTGCTGGCGGGCTGTTGATGGTGGAGAAGCGTCCACAGCTGGCGATCGACAGTTATTAGGGATTATG  
GCGCACAGTGCCTGTGCTGGCCTGGTGGTCTGAGTCTGATGCTAATATTCGTGTTGATTTGATGGCTTACCTGTT  
CGGTGATTTGCTGGCAGTGACGCCAGAAGATCTCATCTATTGCGATTGGCGTGGTTCATCGTGGTGGCTATTTTGTCT  
GGCAATGGCGCAATTTGCTGTCAATGACGATAAGCCGGATCTGGCGTTTGTGATGGTGTGAAATTACAGCGAGTGAAA  
TTGTTGTTGATGCTGGTACGGCATTGACGATTGGTGTAGCGATGAAATTTGTCGGTGGTGGATTATTACTTCGTTGCT  
GATTATTCCTGCTGCTACTGCGCTGCTTTGCCCGCACGCCGGAACAGATGGCTGGTGTGCTGTTTTGTTGGGGATGG  
TGGCAGTACTGGCGTTTTAACCTTTTCCGCGTTTTACGATACGCCGCGGGTCCGTCGGTGGTGTATGTGCGGCACTG  
TTATTTATTCTCAGTATGATGAAAAAGCAGGCCAGCTAATCTATCGTGAACACATTTGTCCGATGCGGCGGAGCGCCT

TATCCGACCTACGGTTCGGTATCTCTGGTAGTCCTGGTAAGACGCGAACAGCGTCGCATCAGGCATATTGCCAGTGCCGG  
ATGCGGCGCGAGCGACCAATCCGACTTACGGCATTCTGGCGGCTTATGCCAAAGTGATTCCACGCCCGCGTCGTCGCC  
ATACGCCACGCGGTGTACGCTGCAAAAAGCCTTGTGAATCAAATAAGGTTCCAGCACATCTCAATGGTTTCACGTTT  
TTGCCAATGGCTGCCGCCAGGTTATCCAGACCTACAGGTCCACCAAAGAATTATCGATTACCGCCAGCAACAATTTGC  
GGTCCATATAATCGAAACCTTCAGCATCGACATTCAACATATCCAGCGCCTGAGCAGCGATATCTGCCGAGATGGTGCCA  
TCGTGCTTCACTTCGGCGAAATCACGCACTCGACGCGAGCAGCGGTTGGCAATGCGCGGCGTACCGCGAGCGCGACGAGC  
AACTTCAGCGCGCGTCACTCATCTCAAGCCCCATAAAGCGTGCCTGCGACTGACGATATATTGCAGATCCGGCA  
CCTGATAAACTCCAGACGTTGCAACAACCAAACGGTGCAGCAACGGTGATGTCAGCGAACCTGCGCGCGTGGTTGCA  
CCAATCAGGGTAAACGGCGGCAAAATCAATTTTAAATGGAGCGTCCCGCGGACCTTACCAATCATGATATCCAGTTGGTA  
GTCTTCCATTGCCGGGTACAGCACTTCTTCAACAACGGCGATAGACGGTGGATCTCATCAATAAACAGCACGTCATGCG  
GTTCAAGGTTAGTGAGCATCGCAGCCAAATCGCCCGCTTTTCCAGCACCGGACCAGAAGTCGTGCGTAAATTAACGCC  
ATTTCAATGGCGACAATGTTGGCAAGCGTAGTTTTACCAACCCCGAGGACCAAAATCAACAAATGATCGAGGGCATC  
GCCGCGCAGTTTCTGCTTGTGATGAAAATCTCCATCTGTGAACGAACTGCGGCTGACCAACATACTCTCCAGTAATT  
TGGGGCGAATGGCGCGATGCTACATCTCCGGCAAAGTGGTACCGGCAGAAATCAGACGGTCTGCTTCAATCATCCTT  
TACCTCATAACCGCGCGTAGGGCTTCGCGAATTAAGTTTTACTGCTGGCGTCAGGGCGAGCGATTTTGTCTCACCATG  
CGCTTGTCTTGTGGTTTATAGCCAGCGCCACCAAGCGCGGCAACCGCTTCTTGTTCAGCATCGTCCGTCGCCGGGCT  
GGCAGGAGACGTGAGTACCAGTCCGGCGCTGGCGTAAAGAGATCGCCATGCAAACCTTTAAATCGGTCTTTCATTTCAA  
CAATCAAGCGTTCGGCGGTTTTTTTTGCAATACCCGCGAGTTTACCAGTGCCCCACTTCTTACGCTCAACGGCATT  
ACGAACTGCTGCGCTGACATTCCGGAGAGGATCGCCAGCGCAACTTCGGGCGGACGCCGTTGGTTTTGATCAACTCTT  
GAACAATGTGCGCTCTTGTATTGTTAAAACCGTACAGCAGTTGCGCGTCTTACGCACCACAAAGTGGGTGAAAACGA  
TCGCTTCTGACCCGCTTCCAGGAGTTCATAAAAACAGGTATCGGCATATGCACTTATAGCCTACGCCGCCACTTCA  
ATTAACACCAGCGGGGTTGTTTTCAATGATGATGCTCTGAGTCTGCCTATCACATGACGCTCCTGCGTAATGAATCA  
AAGATAATGCTGTATGATAAAAAAATGCTGGATAGATATCCAGCGAAGGATGAAGAAAATTCGCGAGGTCTCGATGAA  
CTGAAAAATGGCAGATAATTTATTCTACAGTTATATTGGAAGCAAATATTTAATATTACATATTCAGTGAAGAAA  
TGCGTAATAAAAAATACATTGCGCCTCTGAAAAATAAATTTTTATGCTATTACGTATATTTGTATCTATTTCAATG  
GAATGACAACGTGAATATTAATTACCCTGCTGAATATGAAATTGGAGATATCGTCTTACATGTATAGGTGCTGCCTTAT  
TTGGTCAAATATCAGCTGCATCAAATTGCTGGAGTAATCACGTGGGATCATTATCGGTCAACGGTGAAGACTTCCCTG  
GTTGCGAAAAGCCGGTTCCCTTTCAACCATCACCCAGCTATCTCGTTTTATTAACGTTCTGCTAATCAACGCTATGC  
TATAAAGCGATTAGACGCTGGGCTGACAGAACGACAAAAACAACGAATTGTTGAACAGGTTCCCTCCCGCTACGCAAAC  
TTTACCACACCGGTTTTAAATACGAATCTTCGCGCCAGTTCTGTTCAAAATTTGTTTTGATATTTATAAAGAAGCGCTA  
TGATTTCCGGTGGGTGAAATAGAGACGTTTGGAGAATTGTTAAATAGCAATCCGAATGCAAAAACACTCACTTTCTGAAATT  
CTGGTCTCTGGGTTCTATTTCCGTGGGAGCGTAAAACCGTACGCCAGCCAGTTTGTGGCATCATCCGGGTTTGGTGTGA  
TTCATGCGGAGGGAGTGGAAACGCCTCAGCCGGAACGACCGAGGCGGTATAACTTAACGCAGTCGCCCTCTCGCCAGGT  
TCAGCCGCGATTGCTCATCTGCATCGCATTCTGACTAACGTGGCAGTGGGTGATAGCAATCGCCAGCGCATCGCGGCA  
TCCGCTGTGGATTAGCGGGCAGTTTCCAGCAAGGTGCGGACCATATGCTGCACCTGGCTTTTTTGGCACTGCCAATACC  
TACCACCGTTTGTCTTACCTGACGTGCCGCGTATTCAAATACTGGCAACTCTGATTACCCGCCGCAACATCGCCACGC  
CGCGCGCTGGCCAGTTTCCAGGGCTGAGTCAGCGTTCTTTGCCATAAAGACTTGTTCATGGCGAAATAATCAGGCTGG  
AACTGGGTGATGATTTCCGTACGCCCCATAGATGAGTTTCCAGCAGACGGTAAATCATCCACTTTGGTGGCGATGCA  
TCCGCTACCCAGGTAGGACAGTTGCCTACCTACCTGGCGGATGACGCCGTAGCCGGTACGCGCGAACCAGGATCAATGC  
CGAGAATAATAGCCATACGCGCTCCCGTTTTGCTGTTTAGCAGGCTCATCAGAGAGTCTGCGACCTCATCAGAGAT  
TTCACCGTTATGGTAAACTTCTGCACGTGCTCGCAATCTTCCAGCATATCGATCAGACGCATCAGTTTCCGGTGGGTTTT  
CTGCATCCATATCAGCTTTGGTAGACGGGATCATGAAACTTCCGCGCTGTCTGCTTTAGACCTGCCGCTTCCAGAGCG  
TCGCGCACTTTACCCATTTCTCCATGCAAGTGTAGACATCAATCGCGCCGTATCATAGGTCACAACGCTTTCAGCACC  
TGCTTCCAGTGTCTTCCATGATGGTGTCTTATCGCCTTTCTCGAAGGAGATCACGCCTTTTTTGTGAAACAGATAGG  
CAACGGAACCATCAGTACCGAGGTTACCGCCACATTTGCTAAATGCATGACGCACTTACGCAACGGTACGGTTGCGGTTG  
TCAGACAGACATTCAATCATGATTGCCGTGCCGCCAGGACCGTAACTTCGTAGATGATGGTTTCCATGTTTGCATCATC  
ATCACCGCCCACACCAGTGAATTTGCGCGGTTCCAGTGTGTCAGGGTTCATGTTGTTAGACAGTGTCTTATCCACCGCCG  
CACGACAGCGGGTTAGCGTCCGGATCGCCACCGCCAGCTTAGCCGCGGTTACCAGCTCACGAATGATTTTGTAGGAG  
ATTTTACCAGCTTAGCATCTGCGCAGCTTACGATGTCTGGTGTGGCCATTTACTATGACCTGCCATAAAAAATATC  
TCCAGATAGCCCTGCCTGTTCCAGGCGGTTAATTACAAACTGTTCAATCGCTGCCGTTGCTCCAGGACTTAGTGAGC  
GCCGCCGACGAGGCGCATCAAGCCACTTGTAAAGCCAGATGTTCAAGTAAACGATCTGCCGCTCGTGGGAAGCGCAAG  
ACAGAACCATGATTCCGTATTACGCGTACGCCCCGCGCATAGCGATGACGTAATGTGAAAAAATTTCAAACCTTACCG  
TGGCTGACAGTCAATTAAGGTCAGTTGTTCCAGCGACAACATCAATGGTACCTCTTCTTACTTCCGCGCATGGCAGCT  
TGGGGCGCGGTTTTACCCTCTTCCAGCTGCCGTTACCGACTGCCAGAAATCGGGATCGTACGCCGCTGCAACATCAG  
CACCCGTTTGTATCTTGTGCGTAGATGACCACTAAGATGAAACGGGACGCTTATACACTTTATCTTACGCTGCCTC  
TTCGTTGACTGCCTTCGCTCATCCATTACATAGTTATCTATGCTCATGGGAGTTCACTCAGTTGCCGCTCGATGCAA

CGCGAATGATTCGTGTATTTGAGTCATATCAGTTATTCTCAGCCTTCTTACAACTGAATGCTCAGCTCAGCCAGTGC  
AGTCGGGTTAGCAAAGCTCGGTGCTTCAGTCATCAGACACGCTGCCGCCGTTTTCGGGAAGGCGATAACGTCACGGA  
TATTGTCGGTGCCGGTCAGCAGCATGGTCAGACGGTCAAGACCGAATGCCAGACCTGCGTGCGGGGAGTACCGTATTTT  
AGAGCGTCGAGCAGGAAGCCGAATTTCTCGCGCTGTTCTTCTGTTGATACCCAGAATACCAAACACCGTCTGCTGCAT  
ATCACCATTATGGATACGTAAGTGAACCCGCCCCTTCGTAACCATTGATGACCATATCGTAAGCGTTGCCACCCGCAT  
TTTCCGGTGCAGCTTTAGTTCTGCAGCCGTCATATCTTTCGGTGAGGTGAACGGATGGTGCATTGCCGTCAGGCCGCCT  
TCACCGTCGCTTCAAACATCGGGAAGTCGATAACCCACAGCGGTGCCCATTTGCTTTCGTCGGTCAGACCAAGGTCTTT  
ACCCACTTTTAGGCGCAGTGCACCCATCGCGTCGGCAACAATTTTCTTGTTCGGCACCGAAGAAAATCATATCGCCAT  
CTTGCAGCGGAGTACGATCCAGGATGCTTCGATGATTTCTGCATTAAGGAACCTTCGCTACCGGGCTGTTGATACCTTCC  
AGACCTTTCGCGGCTTCTTAACCTTTCGATGTAAGCCAGACCTTTCGCGCCGTCAGATTTTAAACGAAGTTACCGTATTCGTC  
GATCTGCTTACGGGTCAGCGATGCGCCGCCGGAACGCGCAGACCGCTACGCGACCTTTCGGATCGTTCCGCGGACCTG  
CAAATACAGCAAACCTCAACAGATTTACAGCAGATCAGCAACGTCAGTCAGTCCATCGGGTTACGCAGATCCGGTTTATCA  
GAACCATAACGGCGTTCTGCTTCCGCAAAGGTCAATACCGGAAATCGCCAGATCCACACCCTTCACTTCCAGCCACAG  
ATGACGCACCAGCGCTTCCATCACTTACGCACCTTTCGCGCGCGGTTCATGAAAGAAGTTTCCACATCGATCTGAGTAAAT  
CAGGCTGACGGTCAGCACGAGGTCTTCGTCACGGAAGCATTAAACGATCTGATAGTAACGGTCAAACCCGACATCATC  
AGCAGCTGTTTGAACAACCTCGGGGATTGCGGCAGTGCCTAGAATTTACCTTTCGTCACACGAGAAGGCCAGGTAGTC  
ACGCGCGCCTTCCGGCGTGGCTTTCGTCAGCATCGGAGTTTCGATGTCGAGGAAGCCGTTGTCATCCATAAAACGGCGCA  
CCAGGCTGGTGATTTTAGCGCGGGTTTTAGGCGCTGAGCCATTTCCGGACGACGCGAGGTCGAGGTAGCGGTATTTTCA  
CGCGCTTTCGGTGTTGACGTGGTTAGAGTCAAGCGGCAGAACATCTGCGCGGTTGATGATAGTCAGCGAGGACGCCAG  
CACTTCGATTTTCGCGGTCGCCATATCGCGGTTAATATTTTTTCGTCACGCGCACGTACGGTGCCCGTACCTGAATGC  
AGAACTCATTACGCGATTCAGAGGCCAGCTTTAACGCGTCCGACGATCCGGATCGAAAAATACCTGCACGATACCTTCG  
CGGTGCGCATATCGATGAAGATCAGGCTACCAAGATCAGCAGCAGGTTGACCAACCACACAGAGTCACTGCTGCC  
CACGTGGGACAAACGGAGCTGTCCACAATATTCTGTACGATGAGATATCCCTTAACTTAGCTGCCGGCGGATGCCCT  
GCTGCGCAGGTGACCAAGTCGAGCGTTAGCTGTATGTACAACCTGAATGAAAAAGGCGGCTATTATACTGAAATTTCT  
GCCGACCGTAAGAGCCTGGCCGCGTGGAACGCCCTGTTACCCTTTATATCGGGCTGAAATCAGACTCTACGCCAG  
TTTGCTATAAAGGTGTTGCCGAACCTATAAAAAATTAACAAAATTTGTCGTTCCGCCATCGGCTAATCGCATTAAAGGTG  
GAGGCACGATTTTGTTCAGGAGTCAATATGCTTGAACCTAATGCTAAAACCACTGCGCTGGTGGTATCGATTTAC  
AAGAAGGCATCTTACCTTTGCCGGTGGTCCACATACTGCCGATGAGGTAGTTAATCGCGCCGGGAAGCTGGCGGGGAAA  
TTTCGCGCCAGCGGTACGCCGTGTTCTGGTGCGGTTGGTGGTCTGCCGATTACGCTGAAGCATTAAAAACAGCCGCT  
CGATGCGCCCTCACCGGCTAAAGTGTTGCCGAAAATTTGGTGGCAACATCCTGCTGCATTAGGTGCAACCGACAGCGATA  
TCGAAATCATCAAACGTCATAGGGTGGCTTTTACGGTACGGATCTGGAGTTGCAATTACGCCCGGAGGTATCGATACA  
ATAGTGTTATGTGGGATCTCGACCAATATCGGTGTTGAATCCACCGCCCGCAATGCCTGGGAACCTGGCTTAACTGCT  
GATTGCCGAAGACGCCTGTAGTGCCGCCAGCGCCGAGCAGCAATAACAGTATCAACCATATCTACCCGCGCATCGCCC  
GTGTGCGTAGCGTGGAAGAGATCCTCAACGCGTTATGATTTACATCGGTCTACCGCAATGGTCGCATCTAAATGGGTGC  
GGTTGGGATCACCAGCCTTGAAGAGTATGCCGCCACTTTAACTGCGTGGAGGGCAACACCACGCTTACGCCCTGCC  
AAACCCGAGTTGCTGCGCTGGCGTGAGCAGACCACAGATGACTTCCGCTTCTGTTTTAAGTTTCCGGCGACCATTT  
GCATCAGGCAGCATTACGGCATTGCGATGATTTAGTACTGAATTTTGAACCGCATGTACCCTGGCTCCGCGCATTG  
GGCAATACTGGCTGCAACTGCCTGCCACATTCGGCCACGGGAGCTGCTGCGCTTTGGCATTCTCGATTCTCTTCT  
TTACATCAGCGCGGCTTAATCGGGTATTTAGACAGCGCCCGGTTTCATGCAGCAGTCCACACAGTGAAGCTATTC  
CGCAGCTCAACGAAAAAACCTAAAGTTCCGGTACATGCTGTACTGACGGCGACAAATCCGCTGATCCGTTTTATCGGT  
AGTGATGATATGACGCAAAACCGGAATTATTTAGGTCTGGTTACAAAAATAGCGCAGTGGCATCAGACCACTACGCC  
TTATCTTTTTTACATACGCCAGACATTGCCAGGCACCGGAACCTGGTACATACCCTGTGGGAAGACTTACGTAAAACGC  
TTCCAGAGATCGGAGCAGTTCGGCTATTCCACAGCAATCTTCTTTTTCTGAATTTGCCACCTATCATAGACAGGTGCC  
ATCGGCCATTTTAAAGGGAGTTTGTATGGTAAGCGCGCTGTACGCCGTTTTAAGTGGTGTATTATTAAGATTCTCTT  
TTGATGTCGTTGCGCTGCGAATGCAGTACCGGTTGCCATGCGGACGGCGTTTTAGCGAACTGCAAAGCGCTATTTCG  
ATTCATGGTAACGCGGTGGAATATATCCCATCGCGATTGTGCTGATGCTGTTTATGAAATGAATGGCGCAGAAACCTG  
GATGGTGCATATTTGCGGCATGTTTTGCTTGTGCTGCTGATGCTGATTACGGTTTTATCACCCTGTTCCGCT  
GGCGACGTTCCGGCATGAGCGCCACCTGGTGTGCGTGTGCTGATGGTGTGCGAATCTTGGTATATGCCCTGGGAG  
TTGGTTTTCTCCCTGCGTTAGCGCACAAACGCCACTTTCTTTTTCCGGATTTTTACGTTATGCTCACCGCGACACGC  
TATTTTCTGCCCTATCGCCAGACTGGCGACTGGACCTTTGATGAACGGGTAGCTGAAGTCTTCCGGATATGATCCAG  
CGTCCGTAACCGGCTATCCAATATTTCCATGATTGGTATGTTAGCCGAGCGCTTCTTCAACCTGGTACGCAGGT  
TTACGATCTGGTTGTTCTCTGGGCGCGCGACGCTCTCGGTGCGTCGCAACATTCATCATGATAATTGCAAATTTG  
CCATCGACAACCTCCCGGCATGATTGAACGCTGCCGTCGTCATATTGACGCCATAAAGCCCTACGCCAGTAGACGTC  
ATTGAAGGTGATATTCGCGATATCGCCATTGAAAACGCATCGATGGTGGTGGTGAATTTTACCCTGCAATTCCTGGAACC  
TTCCGAGCGCCAGGCGTTACTGGATAAAAATTTATCAAGGGCTGAACCCCGCGCGCGCTGGTCTTTCGGAAAAATTA

GTTTCGAAGATGCCAAAGTTGGTGAAGTGTGTTCAACATGCACCAGACTTTAAACGTGCCAACGGTTACAGCGAACTG  
GAGATCAGCCAGAAGCGCAGCATGCTGAAAAACGTGATGCTGACCGATTCCGTGAAACCCATAAAGCACGCCTGCATAA  
CGCCGGTTTTGAGCATAGTGAGCTGTGGTTCCAGTGTCTTAACTTTGGTTCACTGGTGGCATTAAAAGCAGAGGACGCTG  
CATGATCGACTTTGGTAACTTTTATTCTCTGATTGCCAAAAATCATCTTTCACACTGGCTCGAAACGCTGCCCGCGAGA  
TTGCTAACTGGCAGCGCAGCAGCAGCAGCGGGTTGTTTAAAGCAGTGGTCAAATGCGGTGGAGTTTCTACCTGAAATTTAAA  
CCGTATCGTCTTGATTTATTGCATAGCGTTACGGCAGAAAAGCGAAGGCCACTGAGCGCAGGGCAAATTTAAACGCATTGA  
AACGCTGATGCGCAACCTGATGCCGTGGCGCAAAGGCCGTTCTCACTGATGGCGTCAACATCGATACCGAATGGCGTT  
CCGACTGAAAATGGGATCGTGTCTGCCCCATCTTCTGATTTAACCGGACGCACCATTCTGGATGTCGGCTGCGGCAGC  
GGTTATCACATGTGGCGCATGATTGGCGCAGGCGCGCACCTCGCGGTGGGGATCGACCCTACGCAACTGTTTCTGTGCCA  
GTTTGAAGCGGTGCGTAAACTACTGGTAATGATCAGCGCGCGCATTTGTTACCGTTAGGTATTGAACAACCTCCGGCAC  
TGAAGCCTTTGATACCGTCTTTTCGATGGGCGTGTTCACATCGCCGTTACCGCTGGAGCATCTATGGCAGTTGAAA  
GATCAACTGGTCAATGAAGTGAAGTGGTGTGAAACGCTGGTATTGATGGTGTGAGAACACGGTGTGTACCAGG  
CGATCGTTACGCGCAAATGCGTAATGTCTATTTTCATCCCTCCGCGCTGGCGTGAAAAACTGGCTGAAGAAGTGTGGTT  
TTGTAGATATCCGATTGCGGATGTGAGCGTTACCACCACAGAAGCAGCGACGCACCGAATGGATGGTTACCGAATCG  
CTGGCCGATTTCTCGACCCACATGATCCGGTAAAACGGTGAAGGTTATCCGGCACCTAAACGCGCGGTGCTGATTGC  
CGCAAGCCGTAAAGTCTGGTATTACTGCCGGATGCGCGTGAACGCCTTATCCGGCTACAAAACCTGCTAATTTCAA  
TATATTGACGGGACTATGTAGGCTGATAAGCATAGCGCATCAGCGAGCTTTACGTTTGCATAACCTCAGCGCCGTTTC  
CGGGCGCTATTACGCTTACGCTGAACAGCTGGCTGATCAAACGCCGTTAACTTCGGTGCATTGCCCGTATATTTTTC  
GATATACCAACCGCTGAGTTACGGCACAGGCATTTGCCAGCTGCGAGCTGGGGATATCCGCCGTTAACACGTTCCGCAC  
TGCCGTTTTTACACAAGCCATTTCCAGATCTGGCCATGCACCTTCATGCACGCATACCACGCCTTTTTTATCCCGTCA  
GTCACCACCGCGCTGTCAAATCTGACCAGTTTGTTCAGACACGCACCAGATCGCCATTGCAATACCAAAGCGTGC  
AGCATCTTCGGTGTGAATAGTGATTGGTTCAGATCGGCGATCGCATATTTTTTACGCAGTTCGCATAGTTAAGCTGAC  
TGTGTAACCGTGTGCCGGATGTGCGGTGAGAAGCTGTAAGTCTTCTGTCGGCGGTACCTTTCCATTTCATCAGGAGCC  
AGCCAGTTGGGTGTGCCGGCAATCCTTATAGCCAAATTTTTCAAACGTTTTTGAATAGATTTCAATTTTCCGCTTGG  
CGTACCAGCGCATTTTTACCGGATCGGCGGAAATCACCATAACGAACGACTGTTCTGTTCTTCTGCTGTGGCGCA  
TTTTGATCAGTTTATTTTTGCTGCCAGAAGGCATTAACATTGGCATAAGTACGCGTTGCGCACGGGCACCTTTCTGAGCG  
GCATCATAGAAAAATTTACGCCACGCCATTTTCATCTTACCTTCGGTATAGATCTTTTTCCGCCAGGTTTGTAGTAATC  
CGCAAGATCGGCAAACACGTCAAATCGTTACGCGCTTCAAATGCGGAGCAACAGCCTGCTTCATCGGCACAATATGCT  
GGTTGCTGTAATCACCAGTATCGTCAAGTATTGCGCTCAAACGATGTGGTGTGCGTAATACGATATCTGCGTGTGTTG  
GCTGCTGCGGTCCAGTAGCATTAGAAAACGACGATCATCTCCGTTTTCTGCCATGCTTTAATCAGACGATTAGTATCCTG  
GTGATGGGTAAAGTTACCGCCACCCGCCACAGATCATTTTATGATTTCCGATACGTTTGTCTTTACCGTTATGCTGAT  
ATTTGCCGCCAGGATTTCCAGCGCATCGACGATACGGGCAACAGGAATCGCCGTCATTCCGCCATCATCAGCGGCCTCG  
CTGGCATGTCCGGCAATCGCCGAGACATTTCCGGCAGCAGCCGCCAACACGCGTCCGGTTGCCACCGTTGGAGTAATG  
ATAAGAGAAACCAAACCGCCGCCCGGTGATCAATCTGCCCTAACATCGCCGCCAGCGTACCAGCATCCAGTGTCTTCT  
GTTACCATATTGCTGGCGTGAATCCCCAGCCTGCCATCAGCATTGTGCGATTGCCGCCATCAGTTCAGCGAGTTTG  
ACTATCTGCGTTCGGTACGCCAGTAATTTCCGCCGCCAGACCGCGCTTCCGGCGTATTATCGCTTTACCTGTGAC  
ATACTCTTCAAACGCGGATACCCGGTAGTGTATTTTTCAAGGAACACTTTATCGTGTGTTGCTTGTGTCATCAGGGTAT  
GCGCAATCCCTAACATCAGTGCCACGTCGGTGCCTAATTCGGCGCATCCAGGTGGCATTATCGTCAAAGAATTCGATG  
GTTTCGGAGCGGATAGGATCAATGGCAATCACTGGTTTGCAGATTTTTTTCAGCTGATGGAAGTATTTCCAGCCCTTGC  
ATCGGTACTGCTCCAGGCAATTTTTAAGTATTGAGCGGTTTCACTTTCCACAGCACCAACCTGGCTTTTTCCAGAA  
TCAGCGCCAGGAGGTCTGCTGTTTATACACCTCTACAGAACCAGCACATGCGGCATGATCACCTGTGCTGCCCGGTT  
GAATAATCGCCGCTATGCCCGGAATAACCGCCGCCAGGTTATATAACGTTGAGTAAGTTTTCGCTTTATGCAACAC  
GCCAGAAGAGCGCCAGCCGTAAGATCCGGCAAATGGCCGATGGTCCGTTAGCTTTACGAATACGATCATGTTGCTCAT  
GAATCAGTTTTAATGCCTGTTCCAGCTCACCTGTACATAGGTATCTTCGCCACGACCTTTCCGCCGTTGCAAGTGAATTA  
TCGAGATAGCTTTTTCTCACCATCGGATGCTGAATACGCGCGTGGTGTGTACCTGATCCGCCGCCGTTAGACTGTAAGGA  
ATTCCGATGTTTTTCCGCCAGCGCCTGTTGAAGAAACAATCTTCCGCTCCTTCACTTCTACGTTTCATCGCTCCCCAAC  
GTCCCGCGGTGAGGATTTTACCGCCCTTCTTCTGCCATGCGGGGAGCGGTGCTGCCGATGTCACCACCAGCGCTCCA  
GCGGCAATACCCTGTGTTTAAATAAATCACGTCTTGTAAATGTCATAACTTCTCCCTGATCAACGAGGATCACTGTTT  
CTCGGTAATATCTTTGGCGTGTACTGGAATACCGCTTAAATGTCCAGTTCGTTTTCGCTCATGCTGGTTCGTGCC  
CCATTCCTTTGGCAATGGACGGCCACGCATTGACGGTGAATGGTGGCGGCAATAGGGGCATGACAACCAGCGCAATAG  
GTATCGTCAAGTTTTTTCAGCGTATTGCCATAGCGGTTTACGGTCCGTAATGCGGGATCGGTAAGCGCACCTGTAAAGA  
CGCTGACGCCATTGATTGCCGATTCTGTCAGCCTGCCATTTCCCGTTTTACAGTGAAGCGCCTTGATACCTTCTTCACTTA  
ATGTGGCTAGCGCCAGCCGTTGACCTGCCGCCAGGTAGAGCGTGTTCCTACTGCCCTGCATTTGATAACCTGCAACAGA  
ACGATCGGCTGTTTCCACTGGCATCAACGACGGTGAAGTACGGTTCAGGATTCACGGTAGCCAGCTCGCCTATGTGAGA  
AGTTTTGAAAGGATAAATATGTGCGCCATTAGTAACTGAAGTAGCGGCTGACTTTCCAGCTCATGCGCCGCGTTGTCAT  
CCATTTTTATTCTGCGGAAAATGGCAATGCCTTATGACAATCGATACAGGTTTCGCTGTCTTTTGTCTTTGTTA

TGCATTTTCTGCGCAGATTCACTTTGCGAGGCAATATCCATGGCATCAAAGAATGGCAACTACGGCACGTTGCAGAGTC  
AGTGGCTTTTAAATCTTTCCATACTGTTTCGGCCATTTCTGGCGATGAGCTTCGAACTTATCGTCACTGTCTATTTTGC  
CGCTAACAAATTCATGATAAATATCTTTAGATGCCTTAAATTTAGCAAATAAATAATCCATCCCTGACTTTGGAATATGG  
CAATCGGCACATTCGCGACGTATCCCTTTCTGGTTCGAAAAGTGGACAGTTCCTGATATTCCTCAAAGGTTTACTCAT  
CGAGTGGCAGGAAAGGCAAATGCTGTATCCGACGTTTTATGTAAGACTTTTTGCGCCAGCAATAACCCGCCGCCACCAA  
CCACAACCGCTATCAGCAAAAAAATAACCCAATGCGTTTTTCCCTCGCATAGATTCTCTAATTAATTAATTAATTAATTA  
CGAAATCATTGTATAATTAATATAACAACGAATTAACCGCTTGCATAATTAGGCACAACACTGCCTGAAACAATCGATAA  
AGAATATGATTATTACAATGTAATCATTAAATTGCTAAGGAATAACCCAGTTGCTATTTAGAAATATATTTTATCAGTTT  
TAGTAATTTAAATCCATAATTAATGTGAATATATACAATATTTTTCAGCACAACGCTATGCGCACTGTCAACCCGCTCAAC  
AGATCACGGTTATCGTTCGTTTTTATACTGTTTCAGGGATAAAAAAGGCCCTGTTGAAATTGCAGGGGCTGGTACGA  
GCAAGCATCATATTGGGCGACATGATGCAACGGTAAAAATCATTGGCCTGATGGCGTTCAATGATTCCTTTTCAATTCAG  
CAACCGCCGCCCGTCTACGATATAACGCGAATACTCGTCCGCGTGTTCATCTGATGACATGGACAATCCTTGATTACGA  
TAACGCATCGGTGAGGCTTCCACGCTCCCGCGGAGCTATGGACTCCAGCACTCCGGCATCGAGGAAGTGGTGCAGGTT  
TTCTGCACGGACTCCTGCTCCGGCCATAATGATTGGAGCATCACGATGGGCAATAAGTTCCATAATTTTTGATAAACCTT  
GCGATGCGTCTGATTTTTGCCCTGATGTCAGTACCCGGCAATGCCAATTCGCAAGATTATTGAGTGTATATAAAGGG  
TTAGCGCACATATCGAAGGCGGATGAAAAGTCACTGCCAGCGGACCGGAGCAGCATTATTTTTCCATTCTGTTGGCAT  
ATCGCAATTCCTGCAACATCGAGAACGCCGTCACCACTCCAGGAAAACCTAATTCGCGGACCGTGCAGCATCCTCAA  
GAATGGCGGAAAACCTCACCGTCTGTAGCAAAAATCACCACCGGTTGGGCAATTATCGGATGCACAGGGATCGTCAAC  
CGTGGCGCACGGATTTAGTACACCCAACGACGGCTTAAAGCCCCCTTTTTGGGGCTGCGCATAATCAACTCTGTC  
TGCGCGTTTTGCTGCGCGTTAGTGCACATTCCATGCTGTAACAGCAAATTTCCAGTAATGCCATTTTTACTCCTTAAT  
TACGCCGACTGCTCGTGGCAACGATCTCTCAATGGACCACGGATGAACTTAATAGTTGTTTTGCCATCGGTGACCGC  
CAGCGTGGATTCCGTAATCGTCTGCTCACCTTTTGGGCAACTGGTTTTCACTGAGATCCCGGTAGGCTGAGTCTT  
CATCAGAAAGCAATGCCAGCGCACGGCATTGAGGTTTTGATCACCCGGCAGAACGATTTCAATATGTTCCCACT  
TCGTGTGGTAACGTTTTTCCCGGGCCAGGTAGTCCACAATAGAAAAGTCCAGTGCAGAACCTGTACCGGTTTCAAT  
CAATTTAAACAGACAAATCGGTCTGCCATTGATCATATTTTCTGACAAAAGCTGCCACACTGTTCAAACCCGCGACGCC  
AGCGTTCAGCAGTGGCGTTTTGATGGCAACGAAAGAAATGTGATCGGCAGTACGGGAGTATATTCAACCCAGACGG  
CGGAAAAGTTCATCTAATGCGTGGATAAATCGCGGTAATCCGATGCAATATCTCGAGCTCGTGCATAGATTGCCAGTT  
CGCCATAATCACTCTTCTGCTTTTCAAGAAAGCTTAAATTTACCCTGTTGCCCTGTGCCAACCAACCGCTGATTTACGC  
CGTTCTGATGCAATAGTAAAACGGCAATACGCCACGCGCACGTTGCTGACGAAAACAGCATTGAGTATACTCCCG  
CCCTAATTTCTTAACTGGTGGCGGCAATTTTTGCTCGTTTATCAATGTAAGTATTCCGGTGAATATTCAGGCTCTT  
TCTCAGAAAAGTCCGTCAGGCCATGATTGCGGCAGGCGCGCTGCGGATTGCGAACCGCAGGTTCTGTCAGTCAGCAAAA  
GTTCACTTCGCGGACTATCAGGCTAACGGCATGATGGCAGTTGCTAAAAAAGTGGGATGGCACCGCGACAATAGCAGA  
GCAGGTGCTGACTCATCTGGATCTTAACGGTATCGCCAGCAAAGTTGAGATCGCCGGTCCAGGCTTTATCAACATTTTCC  
TTGATCCGGCATTCTGGCTGAACATGTTTCAGCAGGCGCTGGCGTCCGATCGTCTCGGTGTTGCTACGCCAGAAAAACAG  
ACCATTGTGGTTGACTACTCTGCGCAAACGTGGCGAAAGAGATGCATGTGGTCACTGCGCTTACCATTATTGGTGA  
CGCAGCAGTGGTACTCTGGAGTTCCTCGGTCAAAAGTATTGCGCGAAACCAGTCCGGGACTGGGGCACTCAGTTCCG  
GTATGCTGATTGCATGGCTGAAAAGCAGCAGCAGGAAAACGCCGGTAAAATGGAGCTGGCTGACCTTGAAGTTTTCTAC  
CGGATGCGAAAAAGCATTACGATGAAGATGAAGAGTTCGCCGAGCGCGCACGTAACACTACGTGGTAAAAGTCAAAGCGG  
TGACGAATATTTCCGCGAGATGTGGCGAAACTGGTGCATACCATGACGCGAACCAGATCACCTGATGCTGCTCA  
ACGTGACGCTGACCCGTGATGACGTGATGGGCGAAAGCCTTACAACCCGATGCTGCGAGGAATTTGGCGGATCTCAA  
GCCAAAAGTCTGGCAGTAGAAAAGCAGGAGGGCGAACCTGATTTCTTATGAGTTTTAAAAACAAGGAAGCGCAACCGAT  
GGCGTGTATTCAGAAGAAAGATGGCGGTATCTCTACACCACCTGATATCGCTGTGCGAAATATCGTTATGAAA  
CACTGCATGCCGATCGCGTCTGTATTACATCGACTCCCGTACGATCAACACCTGATGCAGGCATGGGCGATCGTCCGT  
AAAGCAGGCTATGTACCGGAATCCGTACCGCTGGAACACCACATGTTTCGGCATGATGCTGGGTAAAGACGGCAAACCGTT  
CAAAACCCGCGCGGGTGGTACAGTGAACCTGGCCGATCTGCTGGATGAAGCCCTGGAACGTGCACGCCGCTGTTGGCAG  
AAAAGAACCCGGATATGCCAGCCGACGAGCTGGAAAAAGTGGCTAACCGGTTGGTATTGGTGCAGGTAATATGCGGAT  
CTCTCAAAAACCGCACCCGACTACATCTTCTGACTGGGACAACATGCTGGCGTTTGGGGTAATACCGCGCCATACAT  
GCAGTATGCATACCGCGTGTATTGCTCGTGTCCGTAAGCAGAAATTGACGAAGAGCAACTGGCTGCAGCTCCGGTTA  
TCATCCGTGAAGATCGTGAAGCGCAACTGGCAGCTCGCTGCTGAGTTTGAAGAAACCTCACCGTGGTTGCCCGTAA  
GGCAGCGCATGTAATGTGTGCTTACCTGTACGATCTGGCCGGTCTGTTCTTGGCTTCTACGAGCACTGCCCGATCCT  
CAGCGCAGAAAACGAAGAAGTGCGTAACAGCCGTCTAAAAGTGGCACAACACTGACGGCGAAGACGCTGAAGCTGGGTCTGG  
ATACGCTGGGTATTGAGACTGTAGAGCGTATGTAATCGATTTTTCTGAGAGTGAAGCCTGATCAGGGTTAGCCGATCAG  
GCTTTTTTATTGCCATCTAATGTAATCTGAAAATGGACATGCCATTTGTTTTCTCACTGTTGGATAAGAGCCAGAAGCG  
TAATATCCGGCCCCAGGGAACGATAACGGTTGAATTTAAGGAATACCGCAGTGTAAATTTCTTGTATTAACATTAGG  
CATTATCTTGGCAGGCTTACGAGAAGATACGGTTATAGTAAACGACCATGACATTTACGCCATCAAAGATTGTTGGC  
AAAAAATTCAGATGATGATACTGACGTTAACGTGATCAAATCATGCCTGCGACAAGAATACAATCTCGTGCATGCGCAA

TTAAATAAAGCCTATGGTGAAGCTTATCGTTATATAGAACAAGTGCCACGCACAGGTGTAACCAACCTGATACCGAACA  
ACTTAACCTGCTTAAAAATCACAGCGAGCCTGGCTGGATTTTAGGGACAAAGAATGTGAATTAATCCTTTCAAATGAGG  
ACGTTTCAGGATTTAAGTGACCTTATTCTGAATCAGAATGGCTCTCATGTATGATCATAACAGACCAATACGCGAACTCGC  
CAGTTGCAGCTATACCGTAACTCTGAAGATTTTATCCAAGCCCTTTGACAAGAGGATAATTCACATCTTTTTGGCATGT  
TTTGTGCAAGCTATTCCGTATAAATAATTGCAACAAGACATCGAGCCTTTTTCACTGAGTTATTAACATACTCGCGAG  
CGCGTAATTTTTTGTCTTCAGCGATAATTCACAATCACTTCATTACGTTGTACCTTTAGCGGTGGAATTAACCGCCCA  
CCGCTGGCACTTCCAGATAAATCGCAACCGTTCTGCTGCCGTATACCGGAAAAGGCCACGGTGGTTCCGCTCTGCC  
CTCTAATTCGACACAACGAGATTGCGAACACAAGCGAACCCGAGTCTGAAGGTGTGGGGCGATAAGCTGATAACGCC  
ACGCTACCAGCGTCATCAATCCTGAAGCAGGTTGTGCGGTAGAAAAGAGGGCGCAGACGACATCGACTCACCAGCATGATTT  
AGCGTAATTCCTACTACTTGGCTGCCACATCCCCCGGGCGGTTGCACCAGCAGCGGAAAACAATAATATTGCTAA  
TAAGTTCTCATTATTTGCCGCAATTGTGCGGTCATGCGGATATGTCGGTATCAGACAGTTCCAGATTGACAGGAC  
CACTAATCGCGCAAGCTGCGGCGCAGGAAGCGAGACAATAATGGTCGCAGCGGTGGTTACCAACAATACTGGCGGCG  
CACCCAGCATCTCTGACGGGATAGCGCTTCTGAGTTTGCAGGTAACGATCCGCCAGCCCTGGCTCCAGTCTCCC  
CCGCCCTGCAGCGCTGTAGTAACAAACGTTCCAGCGGTGTATCGAGGCCAATAACATGGACTTCATCTTTGCCAGGAAA  
CCTACTGTGGTAATCGCGCTCCCAACGCCACGCGCAGCAGCGGTTAATTATCATGTGGATCGCTTTGGATGGCGCAT  
TTCCGCCAGCTTTGAGAAATGGTGGCATATCGCAATCGGTACTTTTTTCATCGAGGAGATTTGACGACTTTTATGC  
AGTGTGGTGAGCGTGACGACGCCAGGAACGAGATCTCCGTCAGCTTTGGCATCTCTGGGCGACGCGATCAACAGCTG  
TTGCGCTCTGACGACCAACAGCTCTGCGCATGCTGGCTAATGAGGTGGTTAAGATGCGTTGCTACCACCGTGGTGG  
CCTCAACCACTGTGTACCCCTGAATCTGCGCCTGTTCTTTAGCGCACTTTCAATCCAGATAGCATTAGGCCAAATGCC  
GGATCGACGGTCGCTCACCAGGTAACGTCCCGGCGAGGTTCCAGGTTAATCGCCAGCCAGCGCCCGGATAAGCATC  
ACCACTGCCAATCTCCACGCTTTTCATCAAAATGCGATAGCGGGCAGGTTGCAGATCCATATTGTGCGGAATGTGCACCA  
CTGGCGGCAGAAATCCCATCTCTGGGCAAAATTTCTTGGGATACTGCGTATACGGCCAAACAATCACCATCTGTCTGG  
AAATCGACCATCGGGATCAGTCGATAACCACTTCCATTCCAGAGAATCTTCCAGTTGTACATCGTTCCACGTCGCTTC  
GACAACGGTATTATTCTCTGCCATTTTACCGGTTTGGGTTGCGCAGGCGCTTTTTGTTGCGCTCCGCGTATCCACCAGG  
CCAGCCGAGCAATCCGGCAGTGAACAGCAAAAATACCAGGTTCCGCACTTCCAGGCACCAGGCCGAGTAAACCGAGCAG  
GCGGCGCTTAAACAACATAACGCTTGGGTTACTGAAAAGCTGATTACCATCTGCTGCCAACATCCTGATCGGTGCTGAC  
ACGCGTAACGATGACCCCCGCGGGTAGAAATCACCAGCGCCGAAATTTGTGCCACCAGACCGTCCGCAATGGTCAATA  
GCGTATAACTTTCCGCCGCTGTCCCATGCTCATGCCATGTTGCAGCACGCCAGCACCAGCAACCCGCGCAATGTTAATG  
ACCATGATGAGGATCCCGCGATGGCATCGCCGCAACAACTTACTTGCCTGTCATTGAGCCGTAACCAATCGGCTTC  
CTGAGTCACTTCGGAGCGCGTTTTTTCGCTCATCTTACCAATCAATCCGGCGTTAAGGTGCGGCGTCAATCGCCATCT  
GTTACCCGGCATAACATCGAGAACAAGCGCGCACCCACTTCTGCGATACGCCCGGCACCTTTGGAATGACCATAAAG  
TTGATGATCACGAGAATGACAAACACCACGATACCGATAGCGAAATTTGCCACCAACGAGGAAGTGACCAGCCTTCGAC  
CACCTTCCCTGCCCGCCGCGCGGATGCCCTTCCATTAATGATACGGGTTGAAGCCACGTTAAGTGCCAGACGCA  
ACAGCGTGGTAAACAACAGAATGGTCGGAACGCAGCAAACTCAAGCGTGCCTGGGTAACATCGCCACCAGCAACACC  
ATGATCGACAAGGCAATATTGAAGGTAACAACAGGTCGAGTATGAATGCGGGCAGTGGCAGCACCATCATCGACAAGAT  
CAACAGGATCAAAATCGGTCCGGCAAGGATCTGCCATTGTGTCGATTTAGGTTTGGGGCAGGCGCAGCATCGCGGCA  
GATTACTCATGGTTCGGTTTCTCGTTAATAAAATCCAGGGCTTCCGGCACCGGAAGATGAGTAGGTTGTACAGGGCGCTG  
TCCACCAGCCAGACGCCAGCGTTTTCAGTTGCCAGACCAGGCCAGCACTTCCGCCACCAGCGGCGTACAGTTGACCCGGGA  
TTTGTGACCAATCTCCGCATGTGATACAGCGCTCGCCAGCGGCGGCTTCAAGCGTCGGGACGTTATTTTTCAGCG  
CCAATTTACGAATGCGAGCGCAGCCAGCCCTGCACTTTAGCGACCACTTTCGGTGCCTCATTTTGTCTTCGTCATA  
CTGCAACGCTACCGAATAGTGGGTCCGGTTATTGACAATGACATCCGCTTTCGGCACATCGGCCATCATCCGACCGCGTG  
CAGCAGCTCGTGCATCTGACGGATCCGCCCTTAAACATGAGGGTCACTTTCGCTTTGTTGAACTCATCAGCAATATCC  
TGCCGTGACATACGCAGCTTTTTAGGTGGTGAATATTTGAAAAAGAGCGTCAAAATCCCACCATTGGAATGACACCAAG  
CACCACCAGCAGTGCATAGCCCTACCAATCCATCGCATTACCATGGCGGTAATCGGAGACTCGGCCATCAAGCGCA  
TCATCTGCGGCCAGTGATGCCAGAGAAAAACCCGTCACGCTGCCAACAGGATGGTTTTCAAATTTGCTTTAAGCAAC  
TCCGCGCCAGTCTGAGCCGAGAACATCCGTTAATGCCGGTAGCGGTTGAGTTTGGAAAATTCGGCTGCAAGGATTT  
GCCGCTAAATACCAGCCCTCCAGCATGACCGGAGAAATGAGCGCCACCAGCACCAGCCGCTAATCAGCGGCAGCAGCG  
CCAGCATGGCTTCTGATCAGCAGAATAATCTGCCGAGGATCAGATTCCGGTTCATTGATAATACTGTGATCAAAATGC  
AGCCAGCGGAGAGCATGCCGACAATCGACGGGCCAGCGACACCCGCAACCCAGATAACACTAACGCCACCAGCAA  
AATCAGCAGTGAAGTCAGTTACGGGAACGCGGATTTGCCCTTCTCCCGCTTTTTCTAGTCGGTGAAGTGTGGGGG  
CTTCTGTTTTGTCGTCGCTCTGTCAGACAGTCGCAATCCTGAAAGAGTATTAAGCGTGAATGATGCCAGAGCGCAA  
AGCGTTCAATGGTTTGAAGGGGCAAAACAGGCGGATTTAGGGCTTTTGTGCCACACATCAAGCATAGTGTGCGTT  
TGTGCGATGCGCGCTCATCGCTTATCAGACCGCTGATATGACGTGGTCAGCCACATCAGGCAATACAATCAAAATC  
CAAGACTATCAACAAATCGTCCACCTGATCCTGACTGGCTACCACACCGGCTTTGCTGGTATCGACCTGAGGTCCATTA  
AGCAAATCTGGTTTTACGTTTTGGACGCGACTCTGTTCCGGGATGTTTTCCAACAGCACCATCAGCAACTGGCGTTC  
GATCTCTGAATGACATCCATCATCCGCTTAATGACCTGCCCGGTGAGATCCTGAAAATCCTGCGCATCATGATTTCCA

GCAGTTGCGGTTAGTAAAGCTGGTATGCGCGGGTACATCTGCCAGAAATTGTCGTGTATCTGTTACCAGTTCACGGGCG  
TCGGAAGGTCAATCGGATCGGCAAACAGTCAATCCCAACGTTGGGTTAACGCTTTTGTGATTTCTCCATTTGATCCGT  
ATGCGGTTGTGACGCCTCAACTGTTACAGCAGCCGCTCCGACGCTGGGCGGTATCTGCACAACATAGTACAAACGAT  
CGCGGCATCGGGGATGGCTTCCGCCGCTTCGGCAATGGCCTGATCCAGCCCAAGTCCCGCAAACACTGTCGCGCAGCATA  
CGGTCAGGCTGCCGATGCGCGCAATGATATCGCCAGCTGAATGCTCGTCAGCAGGTTTGATTGATGGTTGCATCATAGT  
CGCATCCTACATGCCAGTTTCTCAAAGATTTTGTGAGTTTTCTCCAGCGTCGCGGCGGTAAATGGCTTACCACA  
TAGCCACTGGCCCCGCTTGCGCCGACGAATGATGTTCTTTCTTCGCTTCTGCAGTACCATTAACACTGGCAATGC  
CGACATCGCGCATCCGCACGAATTGTTTACGAATTCAGGCCATCCATATTGGGATGTTCCAGTCGGAGATAACAA  
ATCCATAACCGCTGCCTGCAACTTATTGAGAGCGTCGACGCCATCTCCGCTTCTCAACATTATTGAATCCCAGCTCT  
TTCAGCAGTTACGCACTATGCGTCGCATGGTGGAAAAGTCAACCAACAAAAATTAAGTTCTTTATCCGCCATTT  
CACTCCTGATTTAAATACGTATCGCTGTCCGGCACTAATTTTTGCAACATTTGCTGGCTTACCTGGTAAGATCGAC  
CACTTCGACAGACACCACCATATTGATGGCTCGCGCGCATGCCGAACACCACGCAACTGCTTCGTTTTGCGCAAGG  
TCCATGCCCCGCTGACGCATCGCAACATTCCCGCCGCGCGCTGTTGCCATACGGTCAGGATCACCCAAACCGCA  
TTACGCCCGCTGTTTGGCGACAGAATGGAACAACACATCTACCGAAGGCCGATGACGGTTAACGCCGGCCATCGT  
AATTTTGAATTTGGTAATTTGCCCACTACGCGACACTCCATATGCCGATCGCCGGCAATATAGGCATGCCCGGCA  
AGACAGTTTCCGCTTTCGGCTTTTAAACCCGATCTGGCAAAGCTTAAAGTCTGTGCGCAAAGAGCGGGTGA  
CCGGCGGCATATGCTGGTAAATTAACAGTGCAGCGCTGGAAAGCGCAACGTTGCAGTACGTGACGAATTCCTCAGT  
TCCACCGTTGAAGCAACATCGCAATCAGTTTTTCAAGACTCAACAACGGCCCCGCTTACGCGTTGTCGGTGCCGACA  
ATGGCTTATGTGCTGCAAGGCTCGCTTTGCTGCCGTACGCACCTTTTACGAATCATTTCGTTATACGCCAGCATACT  
TCGGAATACCCAGTTGCGGTTTGGTACAAAATCTATCGCCCCAGCTCCAGCGCGCGCAGCGTACTTCTGACCTTT  
GCCGGTCAGGGAAGAAACCATCACAACGGGCATTGGACGAAACGCATTAATTTTTGAGGAAATCCAGTCCGTCATCC  
GCGGCATTTCAACATCCAGCGTCAGCACATCGGGATTGAATTTCTTAATCAAGTACGCGCGACCAGCGGATCAGGCGG  
GTCGCCACCATTTCCATGTCGATGCTGTTGATGATTTCTGTCATGATCTGGCGCATCAGTGCCGAATCATCGACAGA  
TAACACCCTGATTTTGTCTATGTTAATCCTTACTTAGCGCATAACCGTCTGACCACGCAGCGTGAAGCGGCGCTCAAG  
GTGGCTAAAGTTTTCAGAGTGACCCGAAACAGCAATCCGTCGGGTTTAAAGGAGCGGAACAAAGCGGCGCAAATCTCCT  
GCTGGGTAGTTTTCAGAGTGACCCGAAACAGCAATCCGTCGGGTTTAAAGGAGCGGAACAAAGCGGCGCAAATCTCCT  
GCCAGTAGATTCAGCGGGGCAAATCAACATAGTTCGCCAGCTCCTGACGCACGCTACCAGCCCTTCATGCGGCCCCGT  
CCCTCGCATGAAATACCGTTGCAGTTGCTGCGGCGTCAAGGTTTCAACTCTTCATGGCGATAGATACCGCTTCTGGCTT  
TTCCAGCACTTCGGTGTGATATCACTGGCAAACACTTTCCAGGTCGCGGCGCGGTGCCAATGTGTACGCCAGCGTC  
ATCGCAATGCTGTACGGCTCTTCGCCGCTCGAAGCCGCGCGCTCCATACGCGATACTCGCCAGAACGGCGACGTGCGTG  
ATCCGCGAGCAGAGGAAATGATGTGCTCACGAAAAATGCCGTGAGTTCTGGTACGCGAATTGATAAACGCCTGCC  
ACTACCGCTGTGCTGATTAGATTCAGCAAGTTACAGATAATGACCGAAATCCGTCAGTCCAGCGAACGCAAACGACGA  
ACCAGTCGGTTGTAACCATGTCGCGTTTATGGTCAGCCAGAACGATCCCGGCTCGTTGATAGATCAATTGACTTATCCG  
CCGAAAATGCGCGTCGGAAGCGCCAGGCGCTCGGTATCTGTAACAATAAAGACGTTTCCCACAGGGCAGAGATGAAG  
TCATAGCGCTTCTCAATCACTTACGATACCACTGGCGCAATTTGTAAGTGCACCGACTCATGTCGTCATCTTATGT  
TCTTCAAGGTAATAACCGCCACACGCGACGAAAGATGGTCCGCTGATTGCCAGTTGTTCCGTTGCCACCGCGCTT  
TTCTACCAGCGAGGCGTTTCTGCTGAGTCACCTGATCCATCTGGCTGACAGCCTGTGCAACCTGCTCAATCCCCGCTGTT  
GTTCTTCCAGCGCAGAGGCAATTTCTCCATAATGTCGTTACGCGGGTACCAGAACTGACAATATCGATCATGGTCGCG  
GCGGCGTTATTACCAAGTTTCAACCTGCTGGACACGATTACTGACTCTTCGATCAGCCCTTTGATCTTTTTGCTGC  
CTGCGCGTACGGCTGGCAAGATTGCGCACTTCACTGCCACTACCGCAAACACGCCCCCTGCTCCGCGCGCATGCGC  
CTTCCACTGCCGATTACAGGCGCAGAATTTGGTCTGGAAAGCAATTCGTCGATAACGCTGATAATGTCCCAATTTTT  
TGCGAGCTGGTGGCGATCTCCTGCATGGTGTGAGTCACTGACTGACCTGAACACCGCCGCTGCGCGTTGTCGCGGC  
ATTTTTGCCAGTTCCGACGCTGCTGTCGCTTATCGCGTTTTGCCCTACCGTGGCGGTTAATTGCTCCATACTGGCGG  
CGTTTTGTCCAGCGATGCCGCTGCTGTTTGGTACGACTTGAGAGATCGTTATTGCTGCGACAATCTCCGCGATACCA  
ATGTGCATCTCCTGGCTTCCCTACGCACATCACTTACCGTCCACGCAAAGCCTGCTGCATGGTCTTACAGACTGGCAA  
AATGGCGGTGATCTCATTACGACCATATACCGCAATCGGACGCGCAGATTACCCGAGCAATGCTGTCAAATGGCTAC  
CGATAATGGCCAGTGGTTGAACAATCATCTTGCCTGCCACACAGCGCACTGCTGATGTAGATCGCCGCAACAATAATC  
ATGCTGATAAACACAGTGGCAAATCTGATAGTTACGCTGGCTTTCGCGCACTGGCGGCTTCCAGCACATGGTTGATCTC  
CAGCTGCCAGGCTCAAAGTTAACGTCAAACGCATTCTGTGATCCCTGCACCGCGCAGTGAAGAAATCCGAAAGTTGAT  
TACTTTCAAGCCAGTGCCTGATGTTGAGATCGTTGCCAGCGGCAAACTTTTCTCCGCTCTTTTTGCAATCCC  
CTGACGTGCTCGTTGCCGAGTCACTGCCATAAACTTTTAAACAGCGTGGTGGATTGCGTCAGACTGGCGCGCGCGT  
CGTCATCAACGTTTTAATGTCATCCGCCGATAGCTAAGTGCCGTGAGAGTCCCGCTTGTTCAGCGCGGTTACTGGCCT  
GTAACATTACCGCCGAGTTTGCCTAATGCCGACGTTGCTGATTGCTCTGCTCGACCTGATTACAGTCTGTGCAAATCG  
TCGGAATGCCAAAAGACATGCCGTTACTGCCAATCTGCAAGATCCCGCAGAGAATCAAATTAACAAACAGCGTGGT  
CGAAATCGAATACGATTAACATCAACGCTCCCATCAGCGGCAATGACCGGTTAGTAAATACTCGTCAAATGTTT  
CCAGTTTGGATCTTGTTCAGCAATTCGACGTCGTGGCTGAGCCGGTGGTGTCACTGGCAGGACGGGATGGTGTTC



GGTTTATTGGTGAGTGGGCTGGCTGCCAGACGGAACGCGGAACTGCTTGCCTTAAACGACTCGCTGTTCTTCCAGCGC  
AGCGGGCGGCGCAGCTGATTCTGCACCAGCGATGCGTTCTGTTGCGTGACGCGATCCATTTCCGAAACCGCAATGCGA  
CTTGATCGATGCCACGGCTCTGTTTCATCCGATGCCGATGCAATCTCGCCATAATGTCAGTCACGCGAGTGACAGCATTG  
ACGATATTGTTCAATTGTTTCCCCGGCGCTTTGACCCAGCACCGAACCAGGATCAACGCGTGAGACGGAGTCTTCAATGAG  
GGCTTTGATCTCTTTTGGCGCTGGGCGCTGCGACTGGCAAGATTACGCACTTCACCCGCCACCACGGCAAAACACGGC  
CCTGTTACCCGACGCGCGGCTTCAACCGCGGATTACAGCGGAGGATATTAGTCTGGAAGCAATACCGTGCATAACG  
CTGATAATGTCGGCAATTTTCTTGAACCTATCGGCGATCTCATGCATCGTTTTACTACGCCATCCACCCTTTGCCGCC  
GTGCTGGGCGGTGTCGGAGGCACTTTGCGCCAGTTGCGAGGCTGGCGGGCGTTATCGGCGTTTTGCTTCACTGTGCGGG  
TGAGCTGCTCCATGCTGGCGGCACTTTCTTCCAGCGCGGATGCGTGTGTTGAGTACGGGAGGAAAGATCGGTGTTGCC  
GCCGAATTTACGGGTACCGGCATAGATGGCATCTGAACCTTCCGCGGACATGAGTGACGGTGTGAGTCAAGAGCGTTG  
CATATGTGAAACGCTCTGCGCCAGGTCGCCATTTCACTGCGCCCGTCAATGGTCAGGGTATTGCGCAGTTACCACCGG  
CGATTTGCGCAATGTGAGCAATAATTTTGGCAGCGGAGTAAGCAACATACGGCGAATGCCGTACCACGCCACCAGCAGA  
ATCAATACCACCACGCGGATAACCGCAGTTGCCACTGGGCAATCGGTAATCATCTGCGTTGTGAGTGACGATATC  
GCGATACAGTTTTTCACTGCTGAGGGGCTACTGAGCAACGCTTCCGCCATTGCATTTTGCATTCCTGGGTTGGCTGAG  
CGAAATAAGCTCCAGTATTGCCATAATCTAGATAATCAATCAGTTCAGTTAACGCTGTGTAATAGTTTTATATTTTTCA  
TCAATATTACGACTGGTAGCGACCAATTTCAAGTAACGGTGCATGCTTTTGAATTTTTTATAATGCGTGCCTGCCGCG  
CAATGTTTTCTGGCGCTATCGAGCAATTTCAACTTTGGCGTTACTTTGTTGATTGGAGGAATCCATCATCATCCGTACCG  
CTGAACGACTCAGTTAATGCGCGTTTTGAGCATTAAATCCAGGTTGACGTGAGTCCGCTGCTGTTCCCGTAATTGA  
TTGGAACCACAAAGCTCTTCTGGCTATGGTGAAGGGAAGAAAAACAGACTGCCGAAATAAGCTGTAAACAGTGCAGAA  
TACCCCGAGCACCATTACCAACAGCGTACTACGCGGATACGGTTAATCATAAGGCACCTTCTGAAAACAAGTTGATCT  
CGTTATCGCAAGGAGGGGGGAAACTTTATTGCTGATGCCACCCGCGGAAATTGAAATAAAAAACCGATGCGCAGAT  
CATCGGTTTCAATTTGAGGAAATCGGGAGAATTACGCCACTTCTGACGCCGCGTATCTAACAGCGCCATCTCTTC  
GCTGTTGAGCAGTTTTTTCGATGTTCCAGCAATCAACATCCGGTCCGCGGAGTCCAGTCCAGTCCAGTCCAGTCCAGT  
AAAGCGTACGGCAAATTCGGTGCCGGACGAATTTGCTCCGCCGTAATGAAAGCACGTCTGAGACGCCGTCAACCACG  
ATGCCGACCACCGCTGTCCGAGATTACGAGCATAACTACCGTGTGTCGTTATAGTCCACATCCACCTGGCTGAACTT  
AATTCGTAAGTCAACAATCGGCACAATAACGCCGCGCAGATTCGTGACGCCCTTGTATAACGCTGGCGTGTTCGCAATCC  
GTGTTACCTGATCGTAGCCACGGATCTCTGCATTTAGGATATCAATACCGTACTCTTCATCACCAGGGTAAATACC  
AGAAATTCCTGGCCTGACGGCTCGCTGGCCAGCTTTGTTACATTCGTATACCGGTGATATTGTTACCTTTTTACTCATT  
CAGCGCGCGGTGTTCCGCATACGTTGTTGCGGTTTTATCGCCTGCAAGGCGGAGACATCAACAATCAGTGCCACGCTGCC  
GTCCGAAGAATGGTCCGAGCAGAAATGCCGGGACTTTGCGATAGTTACTTTCAAGGTTTTTAACCACAACCTGGTGT  
GACCAATTAATTGATCCACCAGCAAGGCGTAGCGGGACCGCCACTTTGTAAGATCACCACAATTCCTGGGTGGCTTCG  
GTTTTCCGCGCCCGCAGCTTGAACACTTTCCACAGTTCGACGATGGGCGAGATATTCACCCGCACTTCCAGCACCCTC  
GCCCGCGGCGAGTGGATGGAGATCGGCTTACGGGGTTGAGTATTCCATAACAGCATTACAGCGGAGAAATGAAAAT  
CATCCGCAACGCGTACGGACATGCCGTGAGGATGGCCAGCGTACGCGGAGTAAATGCGGATCGTAGTGCCAGTACCC  
TGCTTGCAGTGGATTTGACATGACCGCCATCTTCTGGATATTACGTTAACGACGTCCATGCCGACGCCGCGCCGGA  
GACGTCCGTGACCTGCTCTGCCGTGGAGAAGCCAGGTGCAAAATCAGCATCGGACTTCTGCTGCTCATGTTTTGCG  
TGACAGTCAAACCTTGGAGGCGCTTTTGGCAGAAATCGCTCACGGTTTAGCCCCGCCCATCGTGGTCACTTCAATG  
CAAATGTTGCCCGCTGATGTTCCGAGACAGAAATTAATTTCCGACGCTGTTTTACCTGCGGCGAGCCGTTTTTCTGG  
GTTCAAGTAACTGCCACAGCGTCACTTACCTGCTTCCGAGTTTTCCCGCAGATCACGCAACCGGGGATAG  
CGACTAAAAACATATTCATCGGCATCATGCGAATCGACATCACTGATTCTGCAAAATCACGGGCTTACGTTGTAACG  
CCCCATGCTGTTATCAAATCACCATGATTAACCGGTCCAGTTCGCTGGAACGCTGGGCAAGCATGGACTGGGTGATAA  
CCAGCTCGCCGACGAGGTTAATTAATTGATCAACCTTTTCTACCGCTACACGGATGCTGGTGGATTATTGCTGCGCGT  
GTTTTTCCGCTCCACGCGCCGTTGGCGCTTGTGCGCTGCCAGTTAAGCACTGGTGGGGTGGATATTTTTGGCGA  
GACTTCTACTGTTCAAAGGTAATCTGATCGGCTTCAATCACAAAACAGAGTACCGCTGTGATGTCATCTTCCGCGATGT  
CGCCCGTAATATTGCCGAGAGCGAATCCGCCCTTTACCACGTGAGTTAACGTTGTCAGATGTCCAGTTCTTCTTCC  
AGCAGTGCAGTTCACCGGCTTCCGCGGAAAGGATAATTCGTCGCGGCGACTGACTGCGACTCTGCTCATCTTCCGG  
TTCACTTTTGGCAACCACACTTAATCGGGTCACTGCGGATGGCGTTTCCGCTTTCGCTTCAATGCCAGTTGACGCAAGG  
CCTGGCAGATAAATCGAAGCTGGCGCATCCGGCTTTCGACTGTTTATAAGCGTCGAGCTGTTCTTGATGATGATGTC  
TTCGTTTCAAAAACAGATTGATAATGTCGGTGTGAGTTGCATCTCACCTGCTGGCTTTCATCGAGCAGGTTTTCCAT  
CAGATGCGTGGTTTCTGCAAAACGCTGAAGCAAAAGTTCTGCCCTCTTTGATCGAGTGGGCGAGCCGAAAGATGG  
CATTCAATTGTTGCGCATCTGGCGCTTCCGGCTGCAAAACAGCAATGCTGCTCCATGTCAGCCAACAGTTCGTCGGCT  
TCATCAAAAATGCTGATAAAAATCGCTTATATCCATGCTCACCTGCTGCTCCGTTCCGCTGATGGCATTGTGGGAA  
CACTGACCTGTGGTGAACCTCAGGTTTTTCCAGGGCGTTACTGGCTCATTCTGGCTTTCGGCGTTTTCATGCAAAATG  
GCCTGTTCCGCTTGTGTTGTTGAGTACCAGCAGGCTGATGCGACGGTTGACGGCATCATCAGGTCGCGATCGCTTAAGCG  
CATCGTTGCCGCCATGCCGACGACGTAACACTTTGCCGCTATCCAACCTCCGACCATCAGTTCGCGGCGGGATGCAT

TGGCCCGATCGGCAGAAAGCTCCAGTTGCTATATCCTTTCTCACCGCTGGCGTAGGGGAAATCATCGGTATGACCTGAA  
AGGCTAATACGGTTGGGAATACCGTTTCAGTACAGGCACAATGGCGCGCAGAATGTCGCGCATATAGGGTTCGACATCGGC  
ACTGCCGGTTCTAAACATCGGGCGATTCTGGCTATCGATGATCTGAATACGTAGACCTTCTGGACCAGATCGATTTTGA  
GATGGGGACGTAACGCCCGAGTTTCGGATCGGACTCTATCAACTGGTTCGAGATCACCCCGCAATTTCCGCAATCGACTT  
TGCTCCATGCGTTTTTTCAGCTCTTCGATGTTTCGGCTGCTTATCACTTCCCCCTGGCTTTGGGTGTAATCATCACCACC  
GCCGGGAATTGGGCTTTCACTATTAGAAATGCGATCGCCGCCCGTAACCGCAGTCGCCAGTGGAGTCCGGAAGTACTCCG  
CAATCTGAATCAGCTCTTTTGGGCTGGAGATGGAGATCAGCCACATCACCAGAAAAAGGCCATCATCGCAGTCATAAAG  
TCGGCATAAGCAATCTCCACGATCCATGTGCTGCCCGTGGCTTTTGGCTTTCGCTCGTTTGACGACAATAATCGGATG  
CGTTGATTCTTCATGCTTCTCGGTTGTCGCTGTTGTTGCGGATTTTTACCAGCACGCACATGCTCTTCCAGTTCAAT  
AAACGACGGACGTTTCGCTGGAATAGAGCGTTTTGCGACCAAATCAACGGCGATAGGCGGTGCGTAACCGTTTCAGATTAG  
AAAGCAGAGTACTTTGACGCACTGCATCATTTTGTGTTTTCGGCGTTTTCTGACGTAACACAGTCGTAATGGGGAA  
ATAAATCCGTAAGCCAATAAAATGCCGAGGAAAGTCCCAACATCGCATGTGCGATAAGCGCACCCAGCTCGGCGCAGG  
ACGATCGGCTGAACCTAACGCGTGAACGACCCCCATTACAGCCGCAACAATACCAAACGCCGAAGTGAAGTCCCGACCA  
GCGCCAGACTGTTCCGCGGACTTCTGCCTCGTTTTGTCGCTCAATCTTTCATCCATCAGAGCTTCGATTTTGAAG  
GTGTTTCATGTGACCGCTGATAATCAGGCGCAGATAATCAGCATGATAAATCAAGCATGACGCTATCCGCGAGGATGCGTGG  
GTAGCTGGCGAAGATCTGCTCTCACGGGATTTTTCAATATCACGTTCCAGCGAAAACATCCCCATCTGCCGCGATTTTCG  
CCATCAACCGATAAAGCAGAGCCAGCAGATCCATATACATTGCTTTGGTGTATTTGGAGCGACGAAACAGCAACGGCAGC  
GCCTTCAGCGTGCCTTAAATCGCTTTCGATTATTGCCGACGATAAACGACCCAATCCCTGCACCGGCAATAATCACCAG  
TTCAGCGGTTGATAGAGTCTCCAAGGCTTCCACCGTTCATCAATAACCGCCGAAAACGTACCGAGAACAACCAGGT  
AACCTAATAAGATAAGCAGCAGCATCATCTTCCACTGTTGACCATGACAGGATGTTGAGTGTGAGGCGTTAACGCGCGA  
TTGGGGCAAAAAAGCAGCGGTACGTCGTTACCGTGTGGAATGTTGCGCCTCACCGTATCAGTTAAACAGCCTGTAC  
TCTCTGTTTCATCCAGCAGTTGTGGGATAATATCGGCAGGATTCTGGGAAAGTTTACGCTTTTTTACTGCCGGGATGGCG  
GTTGACATAAGCTGCAGGCAAAGCTGCCAACAGGCTGGTGAGCGTGGGTAATAAAATTGCCGCCGAGCAGTTGCAGCTG  
GAAAGTTGCAGTAATCCACTTTCAACAAACCGCACCAATGTCCAGGCACGGGTTAATGCCAGCAGTGGTCTTCTTCTGC  
TTGTGGGCACTGTTCAAGGTATAAACGGTAGGCTTTGATCACCGCATCGACGCCATTACACAAACCGTTTTTCAGTAAAA  
ACTGCCATGCATTACAGAACATCGAAGCATGAACGTTTTGTTCCAGGTATAAACAGTCCGTTGAGAATGGCAGCATG  
CCTTTCGGCGGTGGGCTTCCGCGCAGTCTTTATAAAGTTTTATCAGGCGTCCGCGACTTAACTGTGTTTCGCTTTCAG  
CATCTGCAAACGAGCGCCAGGGTATCAATTCCATTGCCAGTGAATATCCCGCGCTTCTGAACAATGCTTTTTTTCAC  
TCATGATCAGGCCCTTTCTTGCAGCGCTTCTCAGGCTGATTAACATCATTAGCAAGCGTGTGAGAGCATGATGC  
CGGTATGAATTTGCTGGAGATCGTCAACGCGGAATCTTGCCTCAACTGAGTAATCGTCTGGTGGCTGTCAAACCGGAAG  
TGACAAACCAGTTGATTGTTTTCTGCCAGCTTAAACATTTGCGGAAGAGTCAAGTGCAGTCCGCTAACGTTGTCGCCATTTCTC  
ATTTATGCCGAGACGAAACATAGCGGACGCTTTGTCTGAACAATCAAACGCTGTGCAAGTAGTAAATATGACAAGTTGA  
TGTCAATAATGTGTTTCAGCAACTCGGAGGTATGCATTATCCCAACCCAGAATAACCAACTTTATTTTTATGCGGTTTCA  
CCGACCCCGTGTATGTCGCCGGGAAGCCCCGGTAAAAAATAATTAGCATTAGAAATAGTTGCGATAAGTGCATAAAGCAG  
AACCACCTTTTTGGTTTAAATATGTCCTTACAAATAGAAATGGTCTTTACACTTATCTAAGATTTTTCTAAATCGACGC  
AACTGTACTCGTCACTACACGCACATACAACGGAGGGGGCTGCGATTTTCAATAATGCGTGTGAGATCACACAAAAC  
ACTCAATTAACATAAATGGGTAATGACTCCAATTATTGATAGTGTTTTATGTTGAGATAATGCCCGATGACTTTG  
TCATGCAGCTCACCGATTTTGAAGACGACAGCGACTTCCGTCACAGCGTCCAGGTGCTGCCTCAGATTCAGGTTATG  
CCGCTCAATTGCTGCGTATATCGTTGCTGATTACGTGCAGTTCCTTTCAGGCGGGATTACACAGCGGCCAGCCAT  
CCGTATCCATCACCACGTCAAAGGTTGACAGCGCTATAAGACGCCCCAGCGTCCGATAGTGCCTCACCCGAT  
ACGTGCGCAACAAACCGTCTTCCGAGACTGTACACGCGTAAAACAGCCAGCGCTGGCGGATTTAGCCCCGACATAGCC  
CCACTGTTGCTCATTTCGCGCAGACGATGACGTACTGCCCGCTGTATGCGCGAGGTTACCGACTGCGGCTGAGTT  
TTTTAAGTGACGTAATAATCGTGTGAGGCAACGCCATAATGCGGGCTGTTGCCCGCATCAAACGCCATTCATGGCCA  
TATCAATGATTTTCTGGTGCGTACCGGTTGAGAAGCGGTGAAGTGAAGTGCAGTTGCCATGTTTTACGGCAGTGAGAG  
CAGAGATAGCGCTGATGTCGGCGGTGCTTTTGGCCTTACGCACCACCCCGTCAAGTGTGAAACAGGAGGACAGCTGAT  
AGAAACAGAAGCCACTGGAGCACCTCAAAAACACCATCACACTAAATCAGTAAGTTGGCAGCATCACCCATAAATGTA  
TAAGTCATACTTTTGTGGTGTATTTCAATCTGTTAAAAAGTTTTTTCGCTACGCTAGCAAGCAAAAAATGAAACAGGA  
ATAATCGAAATGGGATGTTGCGCACAGTCAAATAACTCACCGTAAATAATCATCTGCTATAAATAATCACTTTTCATGCA  
ATACCAGATAAGCTATTTTTAAACAGACACTTACCGCACAAACAACTAATTAATAACAAGAAAGGCAACAATCACTTA  
ATGTTAATGAAATGTTTTACATATATTAACCACTTGTTTAATGCGGAGAATCAGTACACTATTTTCTTATAATTACATTT  
GAAATTATATGATCACCGGAGTGATTGATTAATTATCTTTACTAATAATCAGACTAATATTTACCTGTTTGACCGAGTT  
GGGATTGCGTCTTTCTCCATTAGGAGTAAAGCTTTAATGTCACCTGAAGTTCACAGAATAAGGAACAGGTTATGAGCTA  
TAGCAATATCTTGTGCTGTTGCGGTTACACCGGAAAGTCAAGCAACTGCTGGCAAAGCGGTATCTATGCCAGGCCAG  
TAAAGGGACACATCAGTTTAAATTACTCTCGTTCGACCCGAAATGTACAATCAATTAGCTGCGCCGATGCTTGAAGAT  
TTACGCAGCGTGTGATGATGAAGAAACGAAAGCTTTCTTGATAAGTTAATCAGGATGCGGGTATCCCGTTGACAAGAC  
GTTTATTGCCTACGGTGAAGTAAAGCAACATATTCTGGAAGTATGTCACAAGCATATTTTCGATTTGGTATTGCGGTA

ATCACAAATCACAGTTTCTTTTCGCGAGCATCCTGCTCGGCGAAAAGAGTTATTGCCTCAAGTGAGGTGATGTGCTGTTA  
GTTCCACTTACGGGAGATTAACCGCTCCTACGCAAGCTTTGAAAAGGTAGCAACTTTATCGCGCTGCTGGCTTTCCGCGC  
TTCGCGGAACATCTGCTTAAAGTTCGCTAATGAAGCACTCCTGCCAGTGGTTAATATCGTTTTTACGATAACGTCCAGC  
ATTTCTGCATGACGGGAAATACGTTCCGCCAGCGACATAGTCAATGCACGATCCAGCGCAGCTGCAACTTCGTCCAGGATC  
GTAGGGGTTAACAAATTAACGCCGACGTTAACTCGTTTTGCCGCTCCCGCAAATTGCGAAAGAACAAGAACGCCCGGATTGG  
CTGGGTCTGAGCAGCAACATACTCTTTTGTACCAGGTTTATCCCGTCACGCAAGTGGCGTCACTAAGCCACGTCAGAG  
TAGCGGAATATTTTATCAGTAATTTACGGTCAAATGCTGATTCAAATAATAAAGCGGCGTCCAGCCTAATTGCCCGTA  
TTTACCATAATTCTGTCAGCTTCTTTTTCGAGCTGATGACGAATATCTGATAGGCTTGCACATACCACGCGACGTTG  
GTGCAATCTGGGTATAACGAATTTTACCATGATGCTGCGGATATTTTTCCAGCAACGCTTCATAGGCGAGAAAACGCTCT  
GGCAAACCTTTGGAATAATCCAGCCGTTCCGACAGAAAAGATAATTTGTACGTTTTTCAAGTTCCGCTTTAAGTTGCGCCAG  
TTTTGGCGGCAAGTGGCCCGGAGCCTGTTGGCTATTTCTTTCGTTTCAATGCCGATCGGGTAGACTTCTGTTTGAATG  
CTTTGCCCCAGGCTGATGGCTTTTTCGCTACGTGCTGACGCGGGTCAGGTTAGAAAGACAATCCAGGAACGCCAGA  
CGATCGTTTTCTGCTGAAAACCCAGCAAATCATAATCACAAAGCTGTTCAAGCAAGGTGCATATGTCGGCAGCGCGTT  
GAAGATTTCCGGTGTGCGGAAAGGAATATGCAGAAAAGAAACCAATGCGATTATCTACTCCCGTTTGGTAATTCATGCG  
CAAATGGCAACAGGTGATAATCGTGGATCCAGATAATGTCATCTTTGCAACAGCGGCAGTAATTTATCTGCCAGCAAC  
GCATTTACGCTGAGTAGCCGTCAGGACGAGCAGTCAAATTGACCCAGATCGAGCGGATAATGAAAAGCGGGCCAGAG  
AACGGCATTGGAGAATTGGTTGTAGTATTCGTCAGGTCTGTTCCGCTGAGGTTAAAAGAGGCCACGTAATGTTACCTT  
TTTTACCTTTTTTTCGCGGCTGATCCTCATTCCTGTTTTACCACTCCAGCCAAACCACAGTCCGCTGCGGCTTTCAGT  
GCCCCAGTATGCCAACGGCAAGGCCACCGCACTGGCGGCTGCTGCTGTTGGTGAATCCGGTTAGATACTACGAC  
TAAACGACTCATAGTCATCACTCCTGTTATTTCTTTTTTGTGTAATGCCGTTGGTTATCATTTCAAGCCAGCTCCAG  
ACATCCGGCACACCCGCCAGTCGCCATGATGCTGAGTTGACCTGTGCCAATTTTTACTGACATTCCGCCAGTCCGTT  
AACGACTGCGAAGCCAGATTGTCGTTAAATCAGCCCAGAAATACGGGCGTTCCGCCGATAAAGGGAGCTTCTGCA  
TAAAAGCTGCAATTGCTCACCTTACTGGTACCTCTCGTTTTGATCTCGACAACACACTTCCCTGCTGTAACGCCATT  
TGTGGCCAGATCTGAGTAATACGTTGCGTAATGTCATTAATGCGTCTTCATGCTGCGGAGCTGACGATAATGCAGCGC  
AAAAGCCATCCCTTTCGCTCCAGCTCCGCGCCGGGATACTGAGCGATGACTGTATGCAAGTGCACGTAATATCACGCG  
CAATCGCATCCGGCAGATGAACGATATGTGTTTTACCATTGATGTACGGCGCTCCGCCCATGCACGCCGCTAACGGG  
AAGCGATAAGTTTTGCCAGTGCCTAAGCTCCACCATTGAGCGCCTGATATCAATGCCAATGCACCATCACTTGGCGT  
TGCCAGTAGCTGATGCTTGCAGAAATTTGTCAGGACGACGACCTGATCGGGATGCGGTTTGATTTCCGCCAGCGTTC  
CATCAAGATCAAAAACCCAGGCATATTTCCGCGGATAGTTCAGGGTTTTCCGTTAACGGTTCGTACCCCGTTCTCCTCC  
TTCTTTTTTTATTGTTGCGCAGAACCGCTTACAGACATGTAAGTATAGACAGTGTGACGGGGTTCGCCATTTGC  
AACGAAGAACAGCCAACCGTTATGGCGTTTGGCTATGGTGGAAAAAACGCTAAATTGTTGCAGAAAAAGCATCAGACA  
GTGCGTTTTTCGTTTTTGTGTAACGGTCAAGATCACCAGTCCAGCAGGATTAAGCCGGAACCACGTAAGTGCAGGAA  
AGGAGAAATATTAAGCAGTTTTCATGGCGTTTTCCACGGTGCCTAAAATTAAGATACCCGCCACCATATGAGATTTTT  
CGATGCCACCTTTCAGAGAAACGCCACCTAAAACGCAAGGCGAGATAACAATCAGCTCATAACCAATCGACGTCATTGGC  
TGCCACTGGTTCATCGTAAGCCAGAATAATTCCGGCTATCGCTGATACCAGGCTGAGAGAAACAAGATAATAATTT  
GGTGCAGAAACCGGTACACCCGCCAGACGCGGCCCTTTTCGTTCCCGCAATCGCCAGGGTGTACGACCAAAGTGG  
TTTTATTGAGCAGCAAACCAAGATAATCAGACACGCGACGGTGGCCAGATTGGCGCAGGACACCAACCAGTTGGCG  
TAACCAAGGGCAAAGAAGCTTTTTCATCTTGATACCGACCGCTTACCCTGTTAAATGATGTACGCCAGACCTCGAACAT  
CTGCATCGTTGCCAATGCTGATCAGAGCATTATTTTTTCAGTTTGGCGATAACAAGCCATTGACAGGCCACAGAGAA  
CGCCAGCAACAACCCCGCTGCCACGCCAATCCACAGGCTTTCAGTCAAGTTAATAACCACCGCCGTTGACACCCGCA  
CAGGCAATTACGGAGGCGACAGAAAGTCAAAGTCAACCGGAAGCAGGAGGAGAAACAACATGCCACAAGCCACCATCCCGA  
CATGGAAATTGCCAGGCCAACCTTTTATTAATGAAGGTGGCAAAATTTGGGACAAAAATGGCACAGGCGATAAAGA  
GCACCGCAAACACCACAGCATGCCGTAAGTATGCCAGATACGCCGAAGCTGAATGACGACTTAGGTGCGCCAGACCCC  
GATGTAGAAACAGAACATCATACTCTCCTTACTCAGGCAACAGCCTGGCTGACTTTAGGCATCGAAGGCTCAGTGGC  
TGACGCTCATCTGCTGCTGTAACAATTCACCGCGATTTTACCTTCCCGCATCACCACAATCCGGTCCGCAACGCC  
GAGGACTTCAGGTAAGTGCCTGGAGGCAAACAGCACCGCCACGCCCTGCGCCGCGCAGGCATAAATTACGTTATATATTT  
CGTGCTTAGCGCAACATCAATGCCGCGCTAGGTTTATCCAGCAAAATGACCTTCTCCTCCGATAACCGCGGCCC  
AGAATGGCTTTTTTGTGATTTCCGCTGAGAGATTCATGATCAGTTGCTCCGCGCCCGGCTTTTGTGTTGAGCGAACG  
AATGTGGTATCGGCATTGTTTTCTTCCAACCGTTGTGATTACACAACCGCCGAGCACATGTTTACGTTGGCACTGA  
TGTTGATATTGTCGGAACGGAGTGCACGGGAATAATGCCTTCCGCTTTGCGATCTTCCGGGACAGGCATCATGCCGTGG  
GCAATGGCGTGGCTCGTTTACGAATATCGATCGGTGTTGGTGCATATAAACCTGACCGGCGGTGATTTGGCTCCCGCC  
AAACATGCCTTTTATTAATTCGCTACGCCCCGCCCCTACCAGACCAAACAGCCCAACAATTTACCAGTCCGAACCGCCA  
GACTTATTGGCGTACGACGCTGGTGTTCACAGCATCAAGACGTAGGCGCTCCTCGCCATAACTACGCGTTGCCAG  
CCGTAGATATGCCAATGTGCGGCCCGACCATCGCTGCAACAGCGGCTCGTGGTCAACCTGCTGCATATCGGTAAGGT  
TTTGACATAACGTCCATCTTTAAAGACAGTAATGGCATCGCTGAGGGCAAATATTTCTTCCATACGGTGAAGAAACGTATA  
AGATTACCCGCCCTTTTTTCGAGTTCACGAATAACCGGAAAAGATTGTCGATTTACGGGCAGAGAGGGAGCTGTT

GGCTCATCAAAGGCGATAATTTTGGCGTTACGCGCCAGCGCTTTGGCGATTTCAACCATCTGCCACTGACCAATGGAGAG  
ATATTTTCAGCGCGGTGTCCGGGTCAATATCCATACCAAGATGTTTAAAGTTGTAACCCGCTCATAATTCAGCAATGAGC  
GATTCACAATGCCGCTTTATGCGGCAGCTGGCCGAGATAGATGTTTCCGCGACGGTCATTTCCGGCAGAGATGCAGT  
TCCTGGTAAATAATCGCCAGCCCGCGTTAAGTGCTGCGGTCTGTCTGGAAAAGGACATTTCTGCCCATTAATCACTAC  
AGAACCCGTGTTGGCGCATAGTTGCCGCTGAGGATTTTTAAGAGAGTTGATTTTCTGCGCCATTTTACCCATCAACG  
CATGAACCTGACCCGCATAGCAGTCAAACTAATATCCGTGACGGCTTAACGCCGGAAACGTTTTACCAGTGCAGGCA  
AATGAGAGATACGGGGTAGACTGTTGCATAACGTCTCCGTGAATCACTGGTCGTTACACCCCCCTCTGCATCATGCAGAG  
GGGAATTTTTCCGGCAAATTACTTACCCTAAACCTTTTTTCTCCAGTTCTTCTTAAAGTTGTCACGCGTGATCAGTA  
CCACGTGCGTAACTTCGGTAAATTTTGGCGGTTCAACGTCTTTTGTACCCAGTTGTAAGCATTTCGCTGGATTTATAG  
CCATGTACGTCCGGGCTTGGCAGCAGGAAACCGTAGAAGCCGGTTGCCTGTGCTTTAGACAGTTTCGCTCACCGCATCCAC  
ACCGTTAATGCCAATGCCGATGATATCGGCCGCTTTAAAGCCCTGACCTTCCGTGCGCGTACGCCGCCAGCACGGTGC  
TGTGCTTACACCGAGATCAGCCAATGTTTAACTTCCGGATGTTGAACCAGCATTGAGTTGGCAGCGTCAAATGCCCC  
GGGATGTGTTAGATTTGGTAGGTACCTGATAAATTTGTTTTCCGGGAATCCGGCCGCTTTCAGCGCATCCATAGATCC  
CGTAGTACGGCGCGGGTATCCAGTTCGTTGGCGGTAATCGCCATCACCGCGCTTTCTTTGACATCCAGCCACGTT  
TCTGCATCTTTATACAGTTCCTGGCCCTGACGTTCCGCAATTTAGTCCGCCATCATACCAGCGGAACGGTATCC  
ATTGGCTTACCTTTGGCGTTAACAACTGGTCATCCACGGCAATGACTTTCATATCGTAGCCAGCGCTTTCGCGACGAT  
GGCAGAGCCGAGTTTGGGGTCCGGAGTACAAATAACGAAACCTTTTGGCGCCACTGGCAGCCAGGCTGTGCATCGCTTCA  
ATGTTTTTTCGCCATCCGGCACGGCAATCTTAATAACCTCAAACCTAAATCCTTCCGGCTTTATCGGCAAACCTCCAT  
TCGGTCTGGAACCACGGCTCTTCCGGTGTCTTACCAGAAAACCGAGCTTCCAGTTCTCCGCCATAGCGGATTGTGACAT  
AACGGCTGCCAGACCAATGGCTGCCAGGGCTTTAGTAAATTTGTGCATGGTTCTCTCCAGCTTTAGTGTGTTTTGTGTA  
GGGCAAACGAATGACATTCGTTAAATTAATCGGAAAACAAAGCATTACCTTTTAACTAAAAGATAAGTACTGTGTTG  
ACATAGTTTTAGCGAGAAATTAATTCATAGGAGAGCAATATCACATCGCAGAATTACAGTGAGAACGTGCATAAATT  
TAGCGGAAAAGACATAAGGAAAGCCAATTTGTCAGACAAATTTGCGAATGCACAGCAGATTAATCCATAAGATTAGCC  
TGGAATCCTTGTGCTTTGGTACCCATGCGGGATGTCTTCTTTTAAACCAGTCAATAGGCCGATTACCTGGCGTTGA  
GTTTTTGAATGGTGAATAACCGCAACTCAAAGATGTGAAAATGCACGTCATTCATTTCTGCATTAATTATCACTGTG  
CTCATTAAATTAACAGAACACGTATAATGAGAGCCATCTCGAAAAATGAAAAACGTTTTATAAAATCATCACTTCATCA  
TGAATTCAAATTCATTGATTAATATCAACAAGATACAAAAGCACTATCATTAAAATTCATTGCAAGTTACATTGATTTCA  
TCAATGAAATGAAAAATATAAACTTGATGATTTAAGCATTCTTATACCCGTTCCAGACGTTATTCTTATTTTCAGAT  
CATCGTCAGAATTGACTCCACGATCACATTTCCGACCGGCAGAAAGGAATTATCTGCAAACAGTAATTATGGTGTGTTG  
ATTTATCTTGACCTCTCACTTCTGGATATAAGGATATTAGGTATGGCAACCGCTGGAATGCTTCTCAAACCTCAACTCT  
CAAATGAACCGCGAGTTTTACGCATCCAATCTCTACCTTACCTGAGTAACTGGTGTCTGAAACAGAGTCTGAACGGCAC  
CGCCACTTTCTTTCGCGCCAGGCACAGAGTAATGTGACCCAAATGATGCGCATGTTTAACTTTATGAAGAGTGTGCGCG  
CTACCCCATCGTTAAAGCCATTGATGTTCCCGGTGAAAAACTGAACTCTCTGGAAGAAGTGTCCAAAAACGATGGAA  
GAATACGAGCAACGTTCTAGTACGTTGGCACAGTTAGCCGATGAAGCGAAAGAACTGAATGATGATTCAACCGTCAATTT  
CCTGCGCATCTGAAAAAGAACAGCAGCATGATGGTCTGTTGCTGCAAACCTTCTGATGAAGTGCAGTGCAGAAAC  
TTGCGGGTATGTGCCCTGTGACAGCCGACCAACATGTTCTGAATGTCGTGTACACCAGCTGCATTGATCATCATCGGC  
CTAATGCATTGCGCCGATGAAGTTTTGAGAAACCGCTGCCTCATCTGTTTGAAGCAGCGTTTTTTTTAATGGGATTAC  
CCTGTGGGGTAACTTTGAGTTCAATAAGCGCGATGGCTTTTTGGATTGCCCGCATGGTACCAGGCTGCGCGCGGGGA  
TGTTAGTAAAGTCGATATCTTCCAGTACTGGACATTTTTTCCAGAACTTCAACGGGCGGATTACATCGAGAATC  
CAGAATTTGTTGATAACCACTGGCAAGCAACACATCAGAAACCAATTCCTGATCGGCATTGAGCGGCTGGGACATCG  
TAAACTCTGATAGCATTGTTGAAAGCCGTTATAGTAGCGACTTACATCTTCCAGCGATAGTACATCCACCGTCAACG  
ACACAAAAAACCTGCCGGAGCAGTTTTTTGTTATCGGAACATATTGCCTGGCGGTACGTTTTGAACGCTTGTGAATA  
GTTATTGAACATACTTTTTCAGGATTTTGGCGAGTTTTCATCGCGGCACTCCGACCATTGTTATACAGGTGTTATTGTCTT  
TGCGCTTATAATATGACAACCATCACAAAAATCAATCTTTATGTGATACAAATCACATAAATACCCCTTAAATGTTATAA  
AAATGATAATCAAAAAACAGCCCCCTATTTCTGACACCTACAGATGGCAAGAAATAGCGCCTGCCAGGCGTCTTTCCG  
GCCATTGTGCGCAGCACTGTAACGCGTAAATAGTGTCTTCTTACTCTTCTGGCTGGACCATGAGACTTCTGATTCTGA  
CTCTTTTCTTAATAACGCTGGCGGGGTGACGGTACTCGCAAGCCATGTGAGCGAAGTTGACGCGGCAACAGGTATT  
GTACGGTTAGTTTATGACCAGGCTTTTTTGCAGCATGCCATACCGATCGTTATGTCAGTCCGGGATCGCCGATCGCGC  
ATGCCAGCAGGAAGGCTATACCCACGCGTCCCCTTTGGTCCAGCAGTAGGCAACTGTAGCCTTTTTGCGGGTCTTAT  
GTTTGAATACGAATTCATTTGTCATATCAGTGCCATCATTCCGCTTCCCTGTCTTTCTCTAAATATTTAATCAGCG  
AGGGGATCTTCTGCTGATTAAGAAATAGCGGTAATGCGTTTTATTCCATTCGTATTTTTAATAATTGAAGTTTATATTT  
TACCTTTTGAATAATAAAAAATAACAAATTAATGAGCAGCAACAAATAAACCTTTGTGGAGCACTATCATGCT  
GAAACCAGAAATGATTGAAAAACTTAATGAGCAGATGAACCTGGAAGTACTTCTCACTGCTTTATCAGCAAATGAGCG  
CCTGGTGCAGCTATCATACCTTCAAGGTGCTGCCGCTTCTGCGCCGTCACGCCAGGAAGAGATGACGCATATGACG  
CGTCTGTTTATTACCTGACTGATACCGCAATTTACCAGGATTAATACCGTTGAATCTCCGTTTGTGAAATTTCTC  
ACTTGATGAATTATTCCAGGAAACCTATAAACACGAACAATTAATCACCCAGAAAATTAACGAACTGGCTCATGCTGCAA

TGACCAATCAGGACTACCCAACATTTAATTTCTGCAATGGTATGTTTCTGAGCAGCATGAAGAAGAGAACTGTTCAA  
TCGATTATTGATAAATTAAGCCTGGCAGGCAAAGCGGCGAAGGTCTGTATTTATCGACAAAGAACTCTACCCCTGA  
CACAAAACTAATGCTCTCCGGCGGAGGTTTACTGCCGCCGTTCAAATCAGTGACGGCAAATCTTACTCTGATCGGT  
CGAAAAACCGTCTTTGAAAGGTATAAATTTGCCCTTTGCTGCCAGAAACGCTACCAGCTCTCCCGTGTATCCCTTCTG  
CCGAGCAGGTGTGAAAACGTGCCTGTTACCAAAAACGCGCTTTAATCGCAGCTTCCAGACTGGCATGCGTATATTGCTCG  
CCTGATTCAATCATATATTTAACACTTCATGACCGTGAATAGAGTCCATCGTCCCTCCTCAAAAAAGCCTAGCGTAGC  
GATTGCCGCTTATGAAGACTTTGCGCCAGCGCAGGACTGAATGCTTTTTATTGTACATTTATTTACACCATATGTAAC  
GTCGGTTTGACGAAGCAGCCGTTATGCCTAACCTGCGCCGAGATATCACTCATAAAGATCGTCAGGACAGAAGAAAGC  
GTGAAAAACAGAACCTGGGAAGTGTTTTTATCGTGGCGGGAACCACAATTGGCGCAGGCATGCTGGCAATGCCGCTGGC  
TGCGGCCGGTGTGGTTTTAGCGTTACGTTAATCTTGTGATTGGGCTTTGGCGTTGATGTGCTACACGGCGCTATTAC  
TGCTGGAGGTGACCAGCATGTTCCGGCAGATACCGGTCTGGGCACGCTGGCAAAACGCTATCTGGGACGCTACGGTCAA  
TGGCTGACGGGCTTCAATGATGTTCTAATGTATGCTCTGACTGCGGCATACATCAGCGGTGCCGGTGAATTGTTGGC  
CTCCAGCATCAGCGACTGGCAGGATTTCTATGTCGGCAACCGTGGCGTGTGTTGTTCACTTTTGTGCCGGTGGCG  
TGGTTTGTGTCGGAACCTCACTGGTCGATTTATTTAACCGTTTTCTGTTGAGCAGCAAGATTATTTTTCTGGTGGTAATG  
CTGGTACTACTGCTGCCGATTTACAAAAGTGAATCTTTAACCTGCCGTTGCAACAGGGGCTGGCTGTCTGCAAT  
CCCGGTGATTTTTACGTCGTTTTGTTTTACGGTAGCGTGCCGATATTTTTCTGGCAGGTGGCGACGCTTGGCAGCATT  
TACGCTGGGTGTTATAATCGGTAGTGCATCCCCCTGGTGGCATATATTTTTCTGGCAGGTGGCGACGCTTGGCAGCATT  
GATTCAACAACCTTTATGGGATTGCTGGCTAATCATGCTGGATTAACCGGGCTGTTACAGGCGTTACGCGAAATGGTGGC  
CTCTCCGCATGTTGAGCTGGCAGTGCATTTATTTGCTGATTTAGCCCTGCCACGTCATTTCTCGGCGTTGCGTTAGGCT  
TATTTGATTATCTGGCTGATTTATTTACGCGTTCAAATACCGTTGGTGGACGTTGCAAACCTGGTGAATTACGTTTCTG  
CCGCCGTTGGCGTTTGCCTGTTTTATCCACGAGGATTTGTGATGGCGTGGTTACGCGGTGTGGCGTGGCGGTACT  
GGCATTGATTACCTTCGCTGTTGACCTGGCAAAGCAGAAAGCACAATCCTCAGGCGGGTACCAGGTCAAAGGTGGTC  
GTCCGGCGCTGGTGGTGGTGTCTCTGTGGTATTGCTGTGATTGGCGTGAATTTTTGATTGCGGCAGGTTGTTACCA  
GAAGTGGGGTATCAGATAGCCTCAAATTCCTTATTGGGTGCCAGAAATTAACGCTGACACCAATTTGCCCTCTAATGC  
AGGACGACTGCTAAATTTCTTACCACTACCGCACGGCAAGGATCGTTACGCCCCGTTTTCTTCTGCTTTGATCGG  
TTGCTGAACAGCTTTTTCTGCGGATGCGCCATCCAGTACGCATGTAGTCAAGCGCCGCGCAGTGAATGGCATCTACGC  
TCTCTTCAAACGCTTCTGGCGACATCTTTCTACCCGCTCGAAGTTTTCTCAGTACCGTGCAGCGCAATCGCTCCAGC  
GCTGGTTTTAACGAATCGGGCAACGTTGACCAGTCAGAAAGTCCACGCCCCGCATATAGCCAAAGCACCCTCCTCAAC  
AATCGTCAGCTCGCTGCCATCAACTTCTCGCAAGCCGAATAACGGCTCAAACGCTCCGGGAATTCGTTACAGACGCTCTG  
CGGTATCGCCATATGTTGAAAAGCCAGATTCATAAAGCGCGTATCTCTTTCTGACGCCAGCGCGGCACATAGTCA  
GCCCCACCCACACGGAACAGCCACTGTTCCGGTTCAATCTTTGCGGAGAACTCAACACCCGCGTCAATAAACCGTC  
CAGCTCCGCCACATCAAGGATGGCGTGGTCAAGTGTATTTGGTCAAGATATCGTCCAGCCATTCAAACCTCACTTTGCT  
TTAACGGTCCCGTTTTATACGCTTTTCTTGTGGATCTCAACTCGCCAGCACCTATCTTACATGCCGGTCCGTATCAGA  
GATACTTTTTGAGTGGCTTTGCTGGTGAATAAAATTAAGGAGGGTGAACGACAAGTTGCAGGCACAAAAAACCC  
GAAGGTGGTTTACGACACTGCTTATTGCTTTGATTTTATTCTTATCTTTCCATGGTACCAGGAGCGGGACTTGAACC  
GCACAGCGCAACGCCGAGGATTTAAATCCCTTGTGTACCGATTCCACCATCCGGGCTCGGAAGAAAGTGGAGGC  
GCGTTCGGAGTGAACCGGACTAGACGGATTTGAATCCGCTACATAACCGCTTTGTTAACGCGCAAATCTTACAGC  
CTTTACGCCAGACATCCGCTTACGCGCATGCTTTTAAACTGGAGCGGAAACGAGACTCGAACTCGGACCCCGACT  
TGGCAAGGTCTGCTCTACCAACTGAGTATTCCCGCATTCATCAAGCAATCAGTTAATCACTTGAATTTTACCACCTTTGA  
TGGTATCAGTCCGCGCTGATGCGTTCGATTACTTACCTGGCGCATGAGTCAACGATATTTTTACCACCTTTTGA  
TCGTTTTGCTGAAAATTACGCCGAAACGATCACTGATCAAGCAAATCTGCACGCGCAGCGCTCAAATATTGCAACATTGAC  
CACAGAGTCACTACCGCAGCCACAAAGAAAAGTGAATACCGGCTACTCAACCCAAATGTTGCGACGCCACAGCAGCCA  
TGCCAACGCCACCATCTGGGAGTGGTTTTCACTTTCCCAATCCAGGAGACGGCCACGCTACTGCGTTTTACCCAACCTCCG  
CCATCCATTGCGTAGCGCAGAAATAAATTTACGGGCGATCATCGTTGCCGCCGTAATGTCACCCACCAGCTGTGA  
TAATGCTCGGTTACCAGCACCATGGCGATAGCCACGAGAACTTTATCTGCCACAGGGTCAAGGAAAGCACCAAACCGGGT  
ACTCTGGTTCCAGCGCGTCCAGAAAACCATCGAACAGTCACTACCGCCGCGCAGCAGAAAATGAGCGCGGCGGCAA  
ACGGCGACCAGGTGACAGGCAGATAAAAGACCAATACAAAGAATGGGATAAGGATGACACGGAACAGTGAAGCAACGTA  
GGGATATTAATTTGATAATGACGGGTAATCTGTTGTGAGTAAAGATTACCCTATGTTGCTACAGAGACATCAATGT  
TTCAACGACCAGAAGATCTTTCTGCCAGACTTGCAGAAATACCGGCACTTTTGAATTTCTCGACGCTGGCGTTACG  
TAAACCTTGAACCCGATATATTTCAACAACATTTGCCGACTTTTGGCCGACGCTTCAATGGTTTTCCAGGGAAC  
TGGTATTTTTGACCTTCCCGTTTTTACGGTCCCGCAATCGCGTATCATGTGATTATCGCGAATATGCTGGATA  
ACATGACGCGCGGGTGAATCTGGCGGCAACTAAATCCCTCACCTCCGGCTCAAAGAACAGCGTTTCCAGTCCAGCCTT  
ACGATCTGCTCTTTGGCAACGCAAGTAGCAGCGGATGATTTTTATCCATGAGACATCCAGTTCGGCGAAGACATTTT  
TCGCTGCGCAAGCTGGCCTTTGCCCGCTCGATAAGGATCACATCCGGGATCTTACTGTCGTAATGGCTTTACCATAA  
CGCCGACGCGACCTGATTATCGCCGATAATCATCGCCCGCGTGTGCTGTAATGTTATAGCGCCGATACTCCGC  
ACGACGCGGGCGTTAGCATCAAACACCACAGGAAGCGACGTTTTGTTGCCCATGGTATGGCTGATGTCAAAGCACT

CCATCCGCTTCACTTCCGGCAATTTCAACACGCTGGCAAGCGGGTCACTCGCTGGTGAACGGTAGATTGCTGCGAAAGT  
TTGCTGGTTAAGGCCGTCGCCGATTGGTGCAGCGAGTTTCAGATAACCGCCCTATCGCCGCGAGGTTTGGTTTGAAC  
ATTAATCTTGGCTCCCGCAGTTCTGAAAGGGAATCGCGAGCAGCGTTTTATCGCTAAGATTAATAATCGAGCAGGATCT  
CACCCGGTAAGGTGCGCATCTGGCTGCCTGTAAATAGAAGTGGCTACGAAGTTTTCTACCACCTCGCTCAGTTCCGTA  
CCGCCAGGCACTTTCCGGAAATAGCTGCGGCTGCCGAGCACTTTCGCTGACGAATGAACAATACGTGGACACAAGCCAT  
GCCCCATCGAACGCCACCAATAACGTCGAGGTCGTCGCCGATTGGAAACGAATTGTTTTTGGTACGCGTCGCA  
CCGCTGAATTTGGTCGCGAATACGTGCAGTCTTCAAACCTCAGATTCTGGCTGGCAGTTTCCATACGACTAATGAGT  
TGCGTAAGCACCTGATCATCTTTGCCAGACAAAACAGGCGCACATACTCGACCTGCTGAGCGTATTCTTCTACTCAC  
CAGTCTTCAACGCACGGTCCAGACAGCGCCCTATCTGGATTGCAGACACGGACGCGAGCGATTGCGATAAACACTAT  
TTTCGCACTGGCGAATGGGAAAATCTTTGAGTAGCGCCAGTGTTCACGTACGGCATAGCCATTCCGGAAACGGGCCG  
AAATATTCACCTTTGGCATGCTTCCACCACGATGCATCGCCAGACGCGGGTGGGTATCACCCTCAGGAAGATAAAAGG  
ATATGATTTATCATCGCTAGCAAAACGTTGTAACGCGGCTGATAGAGTTTGTAGTGTGTTCCAGCAACAGCGCTT  
CGTTTTCTGTGAGTAACCGTTACATCAATTTGCTGGATCTGGGCGACCAGCGCTTCGGTTTTGCGCGAAGCGAGGTTG  
CTACGAAAATAGCTGAAAGCCGTTTTTTCAGGTCTTTCGCTTTCGCCGACATAGATAACCGTACCACCAGCATCGTACAT  
GCGATAAACCGCTGGCTGGTTACGGTTTTTAAAAACGCTTTTTCGCTCAAACCTGATCACTCACTGATTGATAATGT  
CTCCGATTACACAGACCATTGGCGAATTGCCAGGTGAGTCACTCAACATCGCCATGAATGTTTAGTTTACTGAACATAC  
GATAGCGGTAGCTGTTCCCGTTTTTCGACTGAGATTGAGCTGTTCTGAGATCTCATTGACCTTTCGGCCCTTGGTGATC  
ATCAGCATAATCTGCAATTCAGCTTCCAGACAAAAGTGGCAATGGGCTTTCTGTTTTTCTGGTTCGATCTGGCTAACGC  
CATTGTTGAGCGATGTCAGAAGCAATGTAACGCTGCCCTGAATAGACAGAACGAATCGCACTCACGACTTCTGCGGAG  
CCGCGCCTTTGCTGAGGTAGCCCGCAGCACCGGCCTGCATGACTTTCGCTGGTAAAGGGTTTTCTGTATGGACGGTAAGC  
ATGATGATTTTACATCAGCTGTGGAACGCGGATTTTACGCGTCGCTCAAGACCGCCAATGCCCGCATACTCATGTC  
CATTAGCACCGTCAACGGCATTGTCCGGCACCACTTAAACGGCTTTCACCAGCAGTGCCTCACCAGCAGCTTTTA  
TACCCTTTATCTTCCAGAATGCGTCGATCCCTGCGCGACCAGTTCTGGTTCATCAACAAGTAGAACGTTGATCAAA  
GGAATATCTCCAGAAATAGGATAACGCTACTGATAGTTAGTCATTCTGATATTTAGCGTTTTTATTGCAACTTTGAAAC  
GTTAAAAATGGTGGGTATTGATTTTTCTCTGTTTTGTCAATTCGATTGTCACAGTTATGGTCACGCCCGTCACCAA  
CGGCTTACCGGATCGTTTTACAGTAAGCCCTACGATGAAATGTGACAAAAATTGACTTTTTCAGCAAAAATGAAAATCA  
GCCCCTGAATATGTAACATTAATTAACCGAACAATACGGGCAAAAACATTATGATAAAAATATTTATTGGTCATTA  
TATTAACGATTTTATAGCACTGCCGATATCACGCTCAAAAAACAACCACTGCTATTTTTAGCAAAGCTTATGGTATACT  
CCGCCGCTTAAACATTTTTACCGCAATTTTTATTGCAACATGACGAGGAAAATAAATGAGTACGCCTGATTTTTCTAC  
TGCCGAGAATAATCAAGAATCGCAAAATGAAGTCTCCTGCCTGAAAGCGATGCTGACGCTGATGCTGCAGGCGATGGGAC  
AAGCTGACGCGGGCCGCTGATGTTAAAGATGAAAAACAGCTTGCCTGATCGAAGACGAAACCCAGGCTGCAGTATTT  
TCCAAAACGGTTAAGCAATTAACAAGCCTACCGTCAAGTAATATAAAACCGGCTGATAGCGTGCCTTTCAGCCGGTTTT  
TGATCTGGCACGAGGACAGAAAAGAGATCAAAATTAAGCCAGTAGCGGCCGTAACAGGCAACCTGGGTCTTATTTGG  
TGATTAATTTTTTCTGCATGTTTTCTGGTGGAAATTGACCGTATTCTCAGAGATTGACAAAATCATCGCTATCTCTG  
CTGATGTTTTCCCTTCCGCCGTCACCTCAGAAATTTCTTTTTCGCGCTTCTGAAATTCATCTCTGGCGTCATCACTATT  
TCATCATTTAAACGCATCAGAGCCATCAGACTTTCGCGCACCAGTAACTGCATTTTTAATTGCAGTTCATCACTAAGAA  
GGGATTTTCGCGCGCTGCAACGGGAAAAGGACAAAAAGCCAGCGCCGTTTGGCAGCATTAAATACTGAGTGACAC  
CGCGGCTAAACCATGTGCGCGCGCGGCTTCCATAACGGCTGTGCTTCTGCTGAATAAGTCATCATTCCACATTAATGG  
CCCTGACTAAAGTTTTAGGTTTTCAGCACCAGTCAATTCGAGAAAGTTTTTTCGCTGATAATAACTAACCCACGCCCT  
AGGTAATTGGTGTAAAAAGCCACTTTAGGTCGAGTGAATGGTACCAGGTTGGCGACACATAACGAATAATGTAATCGTACT  
CCAGCTGTGAGCCTGAAGCTCAATTTTATGGTAGACCTTCTTCTGCGGTCTCCATCCTCTGAAAACGCAACAGCATCGTG  
CGACGCCAGCTGAAAAAATCCTTATCCTGCATAGTAAACCGCAACGCCCTGAGAGTGAGTATCATTTATAATGATAATT  
CAAATATCACATAAATAAGATTTATATAATTTATATTATTCAGGCAATGAATTACTTTTGAAGCCATCGCATTCTC  
TTATGTTAATGAGTTATGCTGATTTGTTAAGCAGTTTTATCAGGCTTGAATGGCGTCCAGCCCCGACAGGTGAATC  
GTCGGGGCTGATTTTTTCTTATTATTGCAGCAGAACTTCTCGAGGAACTGGCGGGTGGCAGGCTGCTCGGGGTCGGCAA  
ATAACGTTTTTGGGCCCTGCTCGACTATCCGCCCTGGTCCATAAAGATCGCCCGTCCGCAACATCCCGGCAAAAG  
CTCATTTCTGTCGTCACAATCACCATCGTGCCTTTTCTGCGCCAGCTGACGGATGGTGTTCAGGACTTCAACCACAG  
CTCTGGATCCAGCGCTGACGTTGGCTCGTCAAACAAAATCACCTCAGGACGATTGCCAGCGCAGCGCAATCGCAACAC  
GCTGCTGTTGACCGCCAGACAAACGACGTGGATAGTGGTTTTCTTACCTGCCAGCCAACTTTTCCAGCAGCTCGCGA  
GCGCGCGCCGTGGCTCTTCTTTCGGTTCACCTTTGACGATCACCGGCCCTTCAATAATGTTCTCCAGCACCCTACGATG  
CGAAAACAAATTAAGTTTCTGGAAGACAAACCCGACGTGCTGACGCAACTGGCGAATCAGAGATTTTTGCTGACTTAATG  
AACGTGCAGTATCAATAGTATATCGCAACGGTATCGTTCCCGCTTCCGGTGTTCAGCAGATTTATGCTGCGTAGC  
AACGTGGTTTTGCCGGAACCACTCGGACCGATAATTGCCACCCTTCCGCGGCTTACCTCAAGGTCGATACCGTGACG  
CACCGTCTGACCGTGAATTTTTTACCAGGTTCTTAACTTCAATGGCACTATTTTGGTTCTCTCCTGGCGATTAAG  
TTGATCTCAAATGTTTCTGCAACGTCGATAACACAGTGCCTATGATCCAGTAGATGAGCGAAGCCGCCAGATACATGG  
TGAACACCTCCAGCTACGCGAGGTAATCAACTGCGCTGACGGAACAGCTCCGGCACCTGGATTGTCGCGGCCAGCGAC

GTATCTTTTACCAGGCTAATAAAGCTGTTTCGACAGCGGGCAACGCCACACGCGCCGCTGTGGCAAATCGCGGACG  
CATGGTCTGCCACGGCGTCATACTACTGGCTGCCGCTTCCCCTGACCTTTATCAATAGAAGAAATGGCGGCGCGCA  
GCGTTTCGGCAGCATAGGCGCAGTGTCAACGACAGACCAATCATTGCTGACGGAATGGGATCTAATTCGATACCAAAC  
TGCGGCAGGCCGTAATAGATCATAAACAGTTGTGCGATGAGCGGCGTACCACGAAAAATAGAGATATAAAAACGCGCCAG  
CCAGCGCACGGCCAGATTGGCGACAGACGCATCAGCGCGAGAATAAACCCGAGCAGTAAGCCAAAAACATGCCGCGGA  
TACTGAGTTGCAGCGTATACCCAGCCCCCTTTCAGCAGGAACGGCAAGGAATCAATAACCAGTTGTATACTTTCTTGCATG  
AGCGTTTCCGGAGCTAAACGTGGGGATGATAGGCGAACAGCGCAGGCGCACCAGCCGGTATGAATAAACAGAAATCGGCCCT  
TCATCTTTGAAGCGTTTCTGACTGATACCGTCAATCAGCCCCGCCATCGCTTTTCCGGTATACACAGGATCAAGCAGAAAT  
GCCTTCAGCCGCGCCAGCAATTTCACTGCTTCCATGCCTTCTGCTGTTCCGACGCGCTAGCCAGGTGCAAAAATAGTCAT  
CCCAGAGTAAAATTTCCGCTGATGCGGTGAGTCCAGTTCTTTGCAATCGCTGTTGTAGTTAACCACTTTCGGCAAT  
TGATCGGCAACGGAACGCGACAGCGTACGCCAATCAGTTGCTTTCAGGCATCAGGTGTTCCAGCCCAACAGCCAGTCC  
GGCGTGAGTTCCGGCACTGCCGATGCGACTACCACGATGAAATATTAACCGCCCCCTCACACTGTTGCGCGATTTCCA  
GCGACTCTCCACATAACCTAGCGCGCAAGAGCATTAGAACCGCCAACCGAATGACATACGGGCGAAAGCCTTGTGCT  
TCGACTCGCGTCGCCAGCTTTCAGTTGGGCATTGGGATCGGTGAGTGCCTGCGCAATAGGATTTCCAGCAGCCACGCGAT  
GCAGACCGAGTTTGGCAGCGACTGCCGAGTCTGCCGCACATGGTTAGACTGGATCGCCCCGCGAGTAATCAGCGTATCG  
GCACCTTCACGCGAGCAGCATCTGCCGCGAGAAATTCAGCTTACGTAATTTATTGCCGCCATTGCCATGGGGGTGACGTC  
ATCCCGTTTGTGAAAATTTCCCGTCTAGATAATCAGAAAAGCGCGCAGATATTCGAGCGCGGTTGGCGCGCCGATAA  
ACTCCAGCCGTGAAAACGGGTTAAATTTAGCAGTGGCATAACAGCCTCCGATGTGTGTTGTTGTGATTTTCTTATTATG  
CACGCTGAAAACGCGTAAATAAAAAAGGCGCTAGTGAAGCGCCCTTTTTTGTATTATGCTGATTATTTGGTCACATCA  
GCACCAAACCATTTTTCGGAAAGGGCTTGAGAGTGCATCTTTTTGCATTTCCGCAATTGCATCATTCACTGCTTTTCCAG  
CAGGTCTCTATTTCTTTACGCGAGCGCCAGCCAGACTCCTGACGGGAGAATGCTTCCCGGTTACTGCCAGCGTATCGT  
TGGTTTTTCCACAGATCCAGCGCCGCGCAGACGATCAACGAGGATCGCATCGATACGCCCTACGCGCAGATCCTGATAT  
TTGGTCCGGTATCATCATAGGTACGCACATCGACGCCCTGAACATTCTGCCGAGCCACTTTCATAGTTGGTGGCCAG  
ACCGACCCCACTTTTTTGCCTTTAGATCATCGGTGTTTTAATGGTGCCTTCTTACCTTTTTTACCAGCGCCTGAA  
TACCAGAAATGGTGTACGGGTTGAGAAATCGTATTTTTTCTGCGCTCATCAGAAATGGTACCTGATTAATCACCACA  
TCAATACGTTTAGAGTCCAGCGACGCCAGCATAACCGTCCCATTGGTTCGGTTTTAGTGACGCCTCAACGCCAAGATGTTT  
TGCCAGCTGTTGGGCAAATTCACCTTCAAACCGGTTAATTTGCCGTCATCTCCCTGAAAACCTGAACGGCGGATAAGTTC  
CTTCCAGCCCTACCAGCAGCGTGGCGGCTCTTTAACTTTATTAAGCAGACCTTCATCTGAAAACCTTTAACGCTCATG  
CCCGCAACCAGCGCCACGGCCATCACACCCATCAATGCCTGACGTCCAGATGTGCTAATTTTCATATTCACCCCGAATGT  
TGTATGTCTGTTTGCAGTGTAGAGCCATTGTTTGTAAACAAAAACAACCTCCGCTACATCTTATTCTTATTTAATATA  
TATCAGAAGAAGGCGAGGCTGGAGGATTTCTGCACAAGTCTGGTACAGGTTTGGCGCTGATAGTGTGATACTTCCGTAAC  
GCGATGCGGTAATTTGTTGGTGTGGTGGTGGGCGAGCCACGGGGCGAGGATTTTCATCAAGGAAAACCGTCTGCAGCTGATC  
GAGGGAAATATTTTGTCTGTAGATGATTTCCCAAACGGCGCAAACGAACGACATATTCACGCAACCGTACCTGGGCTCA  
TTTTCAGTTTGTCAAAAAGAAATGCTTAAAGCCGATAATATCGAAAAATCACTCTGCGTTTTGCAATGTAATCACC  
CAAAATCGGCACAATGCCGCCATGATTTTTGTTCCGTTTCCAGCCATTTTCATCAAGCAGCGTGTCCAGGCGGAAAT  
CTCGATTTTATCACTATTTTCCGTCGCGAACAAGGTAATGCGATCGAGTAATTTACGGCAATGCGCGCAATGGGTCT  
GGCTGTGTTTAAAGTCTTAAAGATAGCGGCTTAAATGGCGTCTTTTTCAGGTGCTGCACCATCATTAAAGAACTCCTGGTAG  
TCAAAGTTAAAGTGGCGCATTTACTGACGTTATAACTTACCAGTTTATGCGTAACCGTTTAAATAGCCTGGCTGGTAA  
CTGACTGACCCGCGATTTCCCGACCTCCAGCAGCGCCAACTCTTTGAGATTCAGCTCTTCTGGTAAATAGAGGGTTA  
ATACCAGTTTTTTCGCGCTCCGGCAACGTTTCGATGGCTTCCATCACCCGCTGGCGCAGATTAAGTGTCCAGTATGTTGT  
AGCGGGTTTTCTCGCTGATGATCATCAGTAACAGTTCGATGCTATCGCCGCTGCTTTCGCGCCACTCATCGTAGGAGAA  
GAGCTGGCTGTTATTGGTGTGAGCAACATTTGGCGATAATCGGCAATATCGATCCCTAAACGTTCCGCTACCTCAGTTT  
CCGTGGCGTTGCGGCAAGTTCTGCTCCAGTTGCCCTATTGCCTGTGCCACTTCACGCGGTTGCGTGCACGCTGCGC  
GGCACCAGTCACGGCTGCGAAGTTATCCAGCATAGCGCCACGGATACGCTGCACTGCGTAAAGTTGTAATGCCGTTCC  
TTGTAGGGCGTCATAGCGTTCGACGGCATTAAAGTAACCAATGCCGCCGCTGTAGCAGATCGTCAAGTTCCACGCTCG  
CGGGCAGTCGAACCTGCAGGCGCAATGCTTCTGACGCACCAGCGGGACATAACGCTGCCACAGCGAGTGTATCCATT  
ACACCTTCAGCGGTATAGAGTGAATTCACGATAAACAGCCCTGCGTTATATGAGTTATCGGCATGATTATCCGTTTCTGC  
AGGGTTTTTAAATCGGACGATTAGTGGGTGAAATGAGGGTTATTTGGGGTTACAGGTAATTCAGGCAGAAAAAAC  
CCGCGGTGGCGGGAAGCACGTTGCTGACAAATTCGCTTTATGTTGCCGATGCGGCGTAAACGCCTTATCCGGCCTA  
CAAAAATGTGCAAATTAATAAATTGCAATTAACCTGTAGGCCGTGATAAGCGCAGCGCATCAGGCAATTTGGCGTTGCC  
GTCAGTCTCAGTTAATCAGTTTACAACGATTAACCTGCAGCAGAGACAGAACCTGCTGCGGTACCTGGTTAGCTTTTGC  
CAACACGGAGTTACCGCCCTGCTGGATGATCTGCGCTTTCGACATATTGGACACTTCGGTGCATAGTCCGCGTCTGAA  
TACGGGACTGCGCTTCAGACAGGTTGGTAGTGGTGTGTTTCAGGTTGGTAACCGCGGAATCCAGACGGTTTTGCACCGCA  
CCGAGGGAAGAACGGAATTTGTCTACAGATGCGATAGCATCGTCCAGCGCTTTCAGCGGATCCGTGGTTTTACCATTTC  
AACAGCAGTCAGAGCCTCACACCAGCAGTCAAACCTGTTTGCAGATTACCGCCATTTAAATCGGCAGAATCGTATGTTT

TACCATCAATATCGACCACTTCTGTTTTGCCATCATCTCCGCCAGTTTGACCGCGTTGGAGAAGTGGCGGCACCGGAA  
GAGTCAGTATAGGTAATAGTTTTAACAGAAACAGCACCAGTAGTTTCATTACATCCGCAGCGTAAAGATTGCCATTTGT  
ATCTTTAAGCGCATATGTATCGGTATCATTACCCTTGAATCCTGCAGTTTTACTAAGCTAACAGCACCAGGTTGGCAG  
TTGCGGAACCTGCAGTATTATCAATCTGAACAGGTGTACCGCCTGAAGTGATAGTTGTAGCTTTAGTAGTATTTGCATCA  
GTTACAGTTGCATTTGCCGTTGCTCCAGTCGCCATTGTCACTGTACCATCATTAGCAACTGTTACTGCGTAAACTTCCC  
ATCGTTATCACCACCGGTGATTTTTCGCATAGTAATCATTACCATTATCAGTATAAACACCCTCAATTGAAGCTGGGTTAG  
TTCCGCCAGTATCAGTGGCTGCTTCCGTAGAAAAGGTAATCCAGTAAGTTTAAATATTGTTTGTGGTGTAGCACAAAA  
GCAGTACTGGAGCACTAGTGGTAACTGTATCGTTATTTTTAACGCTAAAACCATCAAGGCCAAGAGTTTTAGCATCAAT  
CTGCTTCAGATCGATAGTGTAGTCTGTTATCATTGCGCCAACCTGGATTTTCATGGAGCCATTTTTTGCAGCACGT  
TCACGCCGTTGAACTGGTCTGACCAGATACCGGTCAATTTTCATCCAGACGGGATTTAATTTGCTCCTGGATAGAAGAC  
AGATCAGACTCAGAGTTAGTACCGGTAGTGGCCTGTACCGTCAGTTCACGCACACGCTGTAAGTTGTTGTTGATTTCCGA  
CAGCGCCCTTCGGTGGTCTGCGCAACGGAGATACCGTCGTTGGCGTTACGGGCCGCTGAGTCAGGCCTTAATGTTAG  
AGGTGAAACGGTTAGCAATCGCCTGACCCGCTGCGTCATCCTTCGCGCTGTTAATACGCAAGCCAGAAGACAGACGCTCG  
ATAGAACTCGACAGCGCAGACTGGTCTTGTGATATTATTTGAGTGATCAGCGAGAGGCTGTTGGTATTAATGACTTG  
TGCCATGATTCGTTATCTATATTGCAAGTCGTTGATTACGTATTGGGTTTCCACCCGTCGCTCAATCGCCGTCACCC  
TGTTATCGTCTGTCGTAACCAACCTTTAGAATTTTTTCAAAAACAGCCATTTTTTTGTTAGTCGCCGAAATACTCTTTT  
CTCTGCCCTTATTCCCGCTATTAATAAAAAACAATTAACGTAACCTTTGCGCAATTCAGACCGATAACCCCGGTATTG  
TTTTACGTGTGAAAAGATAAAAAGAAATCGCATGGCAAGTATTTTCATCGCTGGGAGTCGGGTGAGTCTGGATTTAAGTT  
CCATCCTTGATAGCCTCACCGCCGCGCAAAAAGCGACGCTAACCCCATTTCAATCAGCAATCGTCGTTTACCCTAAA  
CTTAGCGCCTACGGTACGCTGAAAAGCGCGCTGACGACTTTCCAGACCGCAATACTGCATTGTCTAAAGCCGATCTTTT  
TTCCGCCACCAGCACCACCAGCAGCACCACCGGTTAGTCCACCCTGCGGGTAAACGCCATCGCCGGGAAATACACCA  
TCAGCGTACCCATCTGGCGCAGGCGCAAACCTGACCACGCGCACCACCAGAGACGATACGAAAACGGCGATCGCCACC  
AGCGACAGTAACTACCATTTCAACAAGGCGCGCAAAAGATCCGATTACCATTGATATCAGCGCGGCTAACTCATCGTT  
AAGCGGGATCCGTGATGCCATCAACAACGCAAAAGCAGGCGTAAGCGCAAGCATCATTAACTGGGTAACGGTGAATATC  
GTCTGTCAGTCACATCAATGACACCGCCTTGATAATGCGATGACACTCTCGGTGAGCGGTGATGATGCGCTACAAAGT  
TTTATGGGCTATGACGCCAGTGCCAGCAGCAACGGTATGGAGTCTCGGTTGCCGCCAGAAATGCGCAGCTGACAGTCAA  
CAACGTCGCCATCGAGAACAGCAGCAACACCATCAGCGACGCGCTGAAAACATCACCTGAACTGAACGATGTCACCA  
CGGGCAACCAGACGCTAACCATCACTCAGGACACCTCAAAGCGCAAACGGCGATTAAGACTGGGTGAATGCCTACAAC  
TCGTAATAGATACCTTCAGCAGCCTGACCAAATACCCGCCGTAGATGCGGGAGCTGATAGCCAGAGTTCTAGCAATGG  
TGCACTGCTCGGCGACTCCACGCTGCGGACGATTGAGACGAGTTGAAATCGATGCTGAGTAAATACCGTCAGTTCTTCCA  
GCTATAAACGTTGGCGCAGATTGGTATCACGACCGATCCAGCGATGGCAAACCTGGAAGTGGATGCCGACAAACTCAC  
GCTGCACTGAAAAAGATGCCAGCGGCGTAGGTGCATTGATTGTTGGCGATGGTAAAAAACCGGCATCACGACCACCAT  
CGGCAGCAACCTGACCAGTTGGCTTTGACAACGGGCAATTAATAAGCCGCTACCGATGGCGTTAGTAAGACCCTGAATA  
AATTAATAAAGACTACAACGCCGCCAGCGATCGCATTGATGCGCAGGTGCTCGCTACAAGAACAATTTACCCAAGT  
GACGTTTTAATGACCTCGTTAAACAGCACCAGCAGCTACTTAACGCGCAGTTGAAAACAACAGTAATTTCAAGTAAGC  
AATATTCATCGGGAGACAGTGTACGCGGCAAAAGGCACCCAGGCTATGCACAAATTTGGCGTGAAGCGCCGTA  
TGAGCGCCAGCCAGCAGCAGCTGGTACCATGCTATTTGATGGAGTGTGAGCGCACTGGTTAGAGCGAGCCTGTTTATG  
CAGGACAACAATCAGCAAGGCAAAGGCTCTCTTTGCAAAAGCGATCAACATCATTGAGAACGGACTCGGGGTGAGTCT  
TGATGAAGAGAGCAAAGACGAACTAACCAAAACTGATTGCTCTTTATAGCTATATGGTCAGGCGCTTGTGCAAGCCA  
ATTTACGCAACGATGTCTCCGAGTCGAAGAAGTGAAGCATTAATGCGCAATATTGCCGATGCCTGAAAAGAGTCTTTA  
CTCTCCCTTTCTTTGATTCAGGACCCAGTCTGATGAACCATGCACCCGATTTATATTTCCCTGGCAACAACCTCGTGA  
AAAAGCCAGCTCATGTTACGCTGGCAACGGAAGAACAATGGGACGAACTATCGCCAGCGAAATGGCGTATGTGAATGC  
GGTGCAGGAGATTGCACATTTGACTGAAGAGTTGACCCGTCACCACGATGCAGGAGCAGCTCCGCCGATGCTGCGCC  
TGATTCTCGACAACGAAAGCAAGGTAAAGCAGTTATTACAGATTCGGATGGATGAACTGGCGAAAAGTGGTGGTCA  
TCGGTGCAAAAATCGGTGTTAAGTGCCTATGGCGATCAGGGCGGCTTTGTGCTGGCTCCGAGGATAACCTCTTTTGAAT  
CTGAATGAGTCGATGGCTCGCGAATAATCCGATTACGGCTACGCTTCTAATGTTCCCTTGAATGGAGTCGAAGAATGCG  
TAATCCCACGCTGTTACAATGTTTTACTGGTATTACCCGGAAGCGGTAAGCTCTGGCCTGAACTGGCCGAGCGCGCCG  
ACGGTTTTAATGATATTGGTATCAATATGGTCTGGTTGCCGCCGCTATAAAGGCGCATCGGGCGGATTCGGTCCGC  
TACGACTCCTATGATTTATTTGATTTAGGCGAGTTGATCAGAAAGCGAGCATCCCTACTAAATATGGCGATAAAGCACA  
ACTGCTGGCCGCCATTGATGCTCTGAAACGTAATGACATTGCGGTGCTGTTGGATGTTGGTAGTCAACCACAAAATGGGCG  
CGGATGAAAAGAAGCTATTCGCGTGCAGCGTGAATGCTGATGACCGTACGCAATTTGACGAAGAAATCATTGAGTGT  
GAAGGCTGGACGCGTTACACCTTCCCGCCGTCGCCGGCAATACTCGCAGTTTATCTGGGATTTCAAATGTTTTAGCGG  
TATCGACCATATCGAAAACCTGACGAAGATGGCATTTTTAAAATTTGTTAACGACTACCCGCGAAGGCTGGAACGATC  
AGTTGATGATGAATTAGGTAATTTGATTATCTGATGGGCGAGAATATCGATTTTCGCAATCATGCCGTGACGGAAGAG  
ATTAATACTGGGCGCGCTGGGTGATGGAACAAACGCAATGCGACGGTTTTGCTTGTGATGCGGTCAAACATATTCCAGC  
CTGGTTTTATAAAGAGTGGATCGAACCGTACAGGAAGTTGCGCCAAAGCCGCTGTTTATTGTGGCGAGTACTGGTCCG



ATGAAGTTGATAAGCTGCAAACGTATATTGATCAGGTGGAAGGCAAAACCATGCTGTTTATGCGCCGCTGCAGATGAAA  
TTCCATGAAGCATCGCGCATGGGGCGGACTACGACATGACGCAGATTTTACGGGTACATTAGTGGAAGCCGATCCTTT  
CCACGCCGTGACGCTCGTTGCCAATCACGACACCCAAACCGTTGCAAGCCCTCGAAGCGCCGTCGAACCGTGGTTAAAC  
CGCTGGCGTATGCCTTAATTTTGTTCGGGAAAATGCGTTCCCTCGGTATTCTATCCGGACCTCTACGGTGCACATTAC  
GAAGATGTCGGTGGTGACGGGCAAACCTATCCGATAGATATGCCAATAATCGAACAGCTTGATGAGTTAATTCTCGCCCCG  
TCAGCGTTTCGCCACGGTGTACAGACGTTATTTTTGACCATCCGAACTGCATTGCCTTTAGCCGAGTGGCACCCGACG  
AATTTCCCGGTGCGTGGTGGTCATGTGGAACGGGGATGATGGCGAAAAAACCATTATCTGGGAGAGAATTACGGCAAT  
AAAACTGGCGTGATTTCTGGGGAACCGGCAAGAGAGAGTAGTGACCGACGAAAAACGGCGAAGCAACCTTCTTTTGCAA  
CGGCGGCAGCGTCAGCGTGTGGGTTATCGAAGAGGTGATTTAAATTCATCCCGGGCGGCAAGCCGGGGAGATTTCAATAC  
GGCAGTGGCGTCGGTAACGGCGCTTTATCCAGCGCGGGCACACTCTGCTGTGGGCGATCCACACGCTCCATCGTCAT  
ACCATCGTACTCAATGGTGTACCCTCACGCTCAACCTCGTACAGCTCACGTTTTACGGTAACGTTAGTGAGATCATCAG  
ACATCAATGTCAACTACCCGGCACGGCAATCACCCGCTGCCACTGACGGCAATCCAGGGTATCGCCCTCTTAGTGACA  
ATCAGGCTGCCTATCGCTCCGGGCTGACCAGCGCACGTTGCGGCCCTTTGGTGTGCCAGTAGCCCGCAGCCAGTCCGG  
CGCGGGGGTTTTACGACATTGTTATAGTTTTGACTTCGGCACAGCCCGCCAGCAACAAGAGCGCGCTGCAATTGCGA  
GTTTTTTCATCATTGCTCTGCATGAGAAGAAAAGAGATTGTGGCATTAAAGCCCTGATGTCGCCAGCCTTCAAGGTT  
CAGAGAGAAAATTTGATCTAACTATTATTTTTGTGAATTTACCCTGAAAATAAATTTGCATGGTGTATGATTCGCGACT  
CTTGTTTTCAAACCTTCTGAGTTCAGAGGCTACATTCATGTCATGGCAGCAATTCAAACACGCCTGGTTGATTAATTTCTG  
GGCCCCATCCCTGCGGTATCGCGGGGGTATTCTCTACTTACTATTTTGGCATTACTGGCACCTTTTGGGCTGTCA  
CGGGTGAATTTACCCTTGGGGCGGCCAGCTCCTGCAACTGTTGGCGTCCATGCTGAAGAGTGGGGTACTTTAAAATTT  
ATCCATCTGGAAGGATCGCCATTAACCCGCATCGACGGGATGATGATCCTCGGTATGTTTGGCGGCTGCTTTGCCGAGC  
GCTGTGGGCCAAACATGTCAAACCTGCGAATGCCGCGCAGCCGATCCGCATTATGCAGGCCATCATTGGCGGCATTATCG  
CCGGTTTTGGCGCGCTCTGGCAATGGGCTGTAACCTGGCGCGTCTTTACCCTGTTCTCAGTTCCTCGCTGCATGCC  
TGTTCTTTGCCATCGCCACTGCCATTGGTTCATGGTTTGGCGCGCTTTACCCTGCTGCCATCTTCCGATTCCCGT  
GAAAATGCAGAAAATTTCTGCCGCTCACCGCTGACGCAAAAACCGGATCAGGCGCGCGCTGTTTTCTCGTCTGGGATGC  
TGGTCTTTTTCGCATGCTGGGCTGGGCGCTGCTCACAGCGATGAACCAACCCAAACTGGGGCTGGCAATGCTGTTTGGC  
GTCGGCTTTGGTTACTGATTGAACGTGCGCAAATCTGTTTACTTACGCGTTCGCGATATGTGGATCACCGGACGTAC  
CCATATGGCGAAAACCAATCATTATCGGTATGGCGGTGAGTCCATCGGGATCTTACGTTACGTACAGTTAGCGGTTGAAC  
CCAAAATCATGTGGCGGGACCAAACCGGTAATTGGTGGTTTACTGTTTGGTTTTGGCATGCTGCTGGCTGGCGGCTGC  
GAAACCGGCTGGATGTACC CGCGGTAGAAGGCCAGGTGCACTACTGGTGGTGGTCTGGGCAATGTGATCGGCTCAAC  
GATTCTGGCGTATTACTGGGATGATTTGCTCCGGCGCTGGCCACCGACTGGGACAAAATCAAACCTGCTGAAAACCTTTG  
GTCCGATGGGTGGCTGCTGGTGACATATTTGCTGTTGTTGCTGCGCTGATGTTGATTATCGGCTGGGAAAAACGCTTC  
TTCCGCGTGCAGCCAGACTGCTAAGGAGATCGCATGAAAAATATCGTTCCTGATTACCGCCTTGATATGGTGGGT  
GAACCTGCCCTTATCCGGCAGTCGAACCTTGAGCGATGCCGAGTTAAAAAAGGGGAAATCCTGGAAGTGGTGAG  
CGACTGTCCGAGTCGATCAATAATTTCACTGGATGCGCGTAATCACGGCTATACGGTGTGGATATTCAGCAAGACG  
GGCCGACCATTCGTTATTTAATTCAGAAGTAATCCCTCATTCCCGCTGTGACCCACAGCGGGAACATCGTTACCTTTGTA  
TCACATAGATTTTACC CGCCCCACTCCTATTCTTTTACGATGATCTCAGGAGTTTTCTATGTGTGGACGCTTTGCCCA  
ATCCCAAACCGGTGAAGATTACCTTGCCTTCTCGCGGAAGATATTGAACCGGATATTCCCTATGATCCCGAACCCATTG  
GCAGATAACAACGTGCGCGGGGAACCAAAGTCTACTGCTCAGTGAACGTGATGAACACCTTCATCTGGATCCGGTTTTTC  
TGGGGATATGCTCCCGATGGTGGGATAAACCGCCGCTGATTAACGCCCGTAGAAAACCTGCGCAACCGTGTGATGTT  
TAAACCGCTGTGGCAACATGGTGGGCAATCTGTTTTGCCGATGGTGGTTTTGAGTGGAAAAAAGAAGGCGACAAAAAAC  
AGCCTTTTTTATCTATCTGCTGATGGACAACCTATTTTTATGGCCGCGATAGGTAGCACACCACTTTGAGCGTGGTGAC  
GAAGCCGAAGGATTTTTGATCGTCACTGCTGCGGCAGATCAAGGTCTGGTAGATATTATGACCGCCGCCACTGGTACT  
GTCGCCAGAAGCTGCGCGGGAATGGATGCGGCAAGAGATTAGCGGTAAGAAGCCTCAGAAAATCGCGGCCAGTGGCTGTG  
TTCCAGCAAACCGATTCTCCTGGCACCCGGTATCGCGCGCGTGGTAATGTTAAAAACCAGGGCGCGGAGTTAATTCAA  
CCTGTTTGATAAGCCTGGAGATTATTGATCAACAATACTGCGTCATAAGAAATCTCTATTAGACAAAGATTTCAATACCT  
GTTGGCATTATGCAAAAATAACACCAATACGGAATCGTCATGTTACGATTAACAGATGATCTCACCCATCCAGCAGT  
GCAAGCATTAGTGGCTTACCATATTTCCGGCATGCTGCAGCAGTCTCCCCGAAAGCAGTCATGCTTTAGATGTGCAAA  
AATTACGTAACCCGACAGTGACATTCTGGTCAATGGGAAAGGCAACAACCTCGCAGGAATTGGTGGCTGAAGTTGCTG  
GATGATAAACACGGCGAGCTGAAATCAATGCGTACC CGCCAAATTTTACGTCGTGGTGTGCCAGTCTGATTTTACG  
CCACATTTTGCAGGTGCCAGGACAGATGCCTTCATCGCTGAGCTTAGAAAACGGGTACACAGGCTGGATTTACGGCCT  
GCCATCAACTTTATTTGAAGCATGGTTTCGCTGATTGCGAACCCTTTGCTGATTATCGACTTGATCCACACAGTCTGATTT  
TTATCATTGACGCTATGCGAAAATAATGAATTGCCATGAGCCAGACGACGACATTCTTGATTGACGCTGCTGCGCCTT  
TATTTATCACAGCAGGAACCGCTTGTCCATAGACCCCCCTTCCACATGCGCCACAAGAAACCTCTATTCCAGTGACAC  
AATTGCGCCTAATTAATTACATTTAATATTTAATTATGAGTTCCTCACCATCTATTACATACTTTTTAAACCATATCGGAA  
TATTTATCATAATCAGCGGGATTCTGAACAATATATTTTTCGCTGCGATCTTTTATAGCAAATCCCTGTCAAAGTCCATGA  
TATAAAAATGTCTCTTCAAAGAATTACATTTTAAAAAGTAATTTCTTTATTGCTATATATCGCAGAGACAACTCAAT

ATCACACTCCATACGTGCTTCTCCAGATGATTTGGGAAGTATTGAATTTCTTTTATCTTATTATCGCCACAATTAACA  
GCTTAGTAGTCTCAGGCATTGCTGGTATTTACCATATTTTATTGCGATAAATAGAAATTGTCATAGCCTTTGACGGAGAT  
GAGTCAACACGCGATATCAGATTATTATCTACGGAGACCTGGGAATTCATCGGATACTTTGGAAATACCATATAATT  
ATTGAAATCGAGCTCTAATTTCTTTGCAGAATTTGGGAATTTGATTGTGGCAAGGCCATTATGACGAAGATAAAGCACCT  
CAATCCAGGATGGAAGAGGTGGCAAAGACCCCAAGTGAAGATCTGTTAAGTCAAGTTTACTATTGTGGAGTTCAACACAT  
TTAAACAATCTCACCAATGTATATCCACATTTTTTTTTGAAGTCATTGATGCGCCTTCTTTTACTGAATTAGCCCAGTC  
GCTGAAACCTTTGCAAAGTCTGGAATCTGTAATTTTCGTAAGTTGTCTAGAACTCTGCAATATTAGTCGATATAAACT  
CTAATTTATGCCGAATGGGTGGGTTACCAGTTCCCTGATTTTTCTATCATGATAAAAACCTATCTTATTATAAATCGAGA  
AATCTTGAAACCAGAGACTATAATCACCCATTGAAATATTCTGAGTGAATAAATTAATTTCTGACAGCATATTAAT  
AATTTGCTGTCTCACTAATTGGTGTAACTTACCATTTCCAAGCAACTGACTAACTCATTGATAATTCATTTATGAT  
TGATCATCAGATACTAATCATGTTGTTTTATCGTAGATTGAGTATTAGATGTGACTTTATTTAATTGAACCGGCTGAG  
TTTTAACGAAAGATCATTAATGAAACATTTACTCTCTGTTAATAAATTATATTGCCAGGGCGCATTCTAAAACA  
CAATAAAATTACACTATCAAAAATCGCTCATATCCATCGCCGGAATATGAATAAAAACATCAACAAAGATTAAATTA  
CCAGAGTTACTGTTGCGTCTGTGGTCGTAACAACATCCGACGTTGATGTGTCAAATGAGACGCTCTGATGTTGAGG  
GGTTATCGCTATACGGATCGTGGATGGCAGAAAACGTTCCAGGATCAGGTATCCATTTTAAACCAGAAATGAGTGAGT  
TTGCCCCATCCATGCCCCACGGTGAGATCGGATGTAATTAACAACAGGTTACAAAACCTACACTGCTCATCAC  
TTCTGATACGCCGCCACAGCTTATTACGCACCTGAATCCCCATTTGCATAGAACTGAGGCTTTTTGCATATCGGTCA  
TCACATCGTTTAAACGCCACGCCGGTTACCAGAGATGAATTTTTCTGCCTGCGTGCGGGCAGCTGTTGTGTACTACTA  
ATGCGATCGAGCGCGGCTGACGCTGCCCGCAAACTAATGGTCGGTTGCGGCAGTGATTCTGCGCACGCGCACTCAT  
CGCCGTAGCCTGTAACTGGCTGATAACCCCTTCAATCCCCTGTATCGCTGACATTCTCGTCTCCCGATAATTTCTGGTA  
GCAAAGCCTACCAGTAAGTCAATAAGACAAAGGCGTAAATAGCAACAAAAAACGGGTTTATTGGCGGATAGAAAAAAA  
CGAAAGCACAATAATGGGAGCGTCAATTTTTGAGTTTGTGACCCGGGAGTGAGTCTTGTCCACTTTGCCAATAACG  
CCGTCCATAATCAGCCACGAGGTGCGGATGAATGCGACTGCAGCCAGACAAAATCTCTTGTGAGTGGCTAATCGCCTGC  
GTGCGAATCCGAAATCCATTGATTGTTGCCGTTCCGCGCAGTGCGGTATGTCGCACTGATCTGTGGGCGAAA  
GCCCCGACTACCGCACATTATTGAGCAATCTTCCGATCAGGATGGTGGCGCAATTGTCAGCCAACGACGCAATGAA  
TATTCTTACCCTTCCAGCAAGCCAGCGCGCTATTGAAGTTCGGCAGATAAAGTTCACGAACTGCGTCTGCGCCTGG  
CACAAACAGGTTTCCAAAAGGCGCGCGGTCGGTTTCGAACTGCTTGTATCAGGAAAAGTTTGGTATCAGCCAGTTCAGC  
GAACAGGTGAATTATCAGCGGGCGCTGGAAGGCGAGCTTTCTCGTACCATCGAACTATCGGCCCGGTAAGGGGGCGCG  
CGTACATCTGGCAATGCCGAAACCGTCTTTATTCTCGTCCGTGAACAAAAATCCCCTTCTGCATCGGTGACGGTAAATCTGT  
TACCCGGCCGCGCACTCGATGAAGGGCAAATTAGCGCCATTGTGCATCTGGTTCCAGCGCCGTTGCTGGTCTGCCGCCG  
GGAAACGTCACGCTGGTGGATCAGGGCGGACATCTGTTAACCCAGTCCAATACCAGCGGGCGCGATCTTAATGACGCTCA  
GTTGAAATATGCCAGCGATGTCGAAGGCCGATTACAGCGCGTATTGAAGCGATCTGTGCGCTATTGTTGGTAACGGTA  
ATATTCACGCCAGGTTACGGCGCAGCTGGACTTCGCCAGTAAAGAACAAACGGAAGAACAGTATCGCCCTAACGGTGAT  
GAATCTCATGCGGCGCTTCTGTTACGCCAGCTTAATGAGAGCGAGCAAAGCGGTTCCGGTTATCCGGGCGCGTACCGGG  
GGCGTTGTGCAATCAACCGGCACCTGCGAATAACGCCCAATCAGCACGCTCCGGCAAATCAAAAATAACCGCCAGCAGC  
AGGCGAGCACCACAGCAATAGTGGCCCGTAGCACACAGCGGAATGAAACCAGTAACTACGAAGTCGATCGCACCATT  
CGTCATACAAAATGAACGTGGGCGATGTGCAACGTCTGTGAGTCGCGGTGTTGGTGAATTACAAAACCTTGCAGATGG  
CAAACGTTGCTCTCAGCAACGAACAGATGAAGCAAATGAAAGTCTGACCCGCGAGGCGATGGGCTTTTCTGAAAAAC  
CAAGCGTTTATCGATCAGTTACTTGTGCTGCCGCTGTTGTTGCTGTTGTTGCTGTTGTTGCTGTTGTTGCTGTTGTTG  
GGTACGTCCGAGCTAACACGTCGCGCTGAGGCGATGAAAGCTGTACAGCAACAGGCGCAGGCCCGCGAGGAAAGTGGAAAG  
ATGCGGTGGAAGTCCGCCTGAGCAAAGACGAACAACATAACAACGGCGCGCTAACCAACGCTTGGGGGAGAAAGTCATG  
AGCCAGCGTATCCGTGAAATGTCTGATAACGATCCGCGCGTGGTGGCGCTGGTATTCCGCCAGTGATAAATAACGATCA  
TGAGTAACCTGACAGGCACCATAAAAGCGTATCTGCTGATGACCATTGGCGAAGACCGGGCGGCAGAGGTGTTCAAG  
CACCTCTCCAGCGTGAAGTACAAACCCTGAGCGCTGCAATGGCGAACGTCACGCAGATCTCAACAAGCAGCTAACCGA  
TGTGCTGGCGGAGTTTGGCAAGAAGCTGAACAGTTTCCGCGACTGAATATCAACGCCAACGATTATCTGCGCTCGGTAT  
TGGTCAAAGCTCTGGGTGAAGAAGCTGCCGCCAGCTGCTGGAAGATATTCTCGAACTCGCGATAACCGCCAGCGGTATT  
GAAACGCTCAACTTTATGGAGCCACAGAGCGCCGCCGATCTGATTGCGATGAGCATCCGCAAATTATCGCCACCATTCT  
GGTGCATCTGAAGCGGCCAACGCCGATATTCTGGCGTTGTTGATGACGCTGCGCCACGACGTGATGTTGCGTA  
TCGCCACCTTTGGCGCGTGACGCCAGCCGCGTGGCGGAGCTGACCGAAGTACTGAATGGCTTGTGCGACGGTCAGAAT  
CTCAAGCGCAGCAAAATGGCGGGCTGAGAACGGCAGCCGAAATTAACAACCTGATGAAAACCTCAGCAGGAAGAAGCCGT  
TATTACCGCGTGCCTGAATTCGACGGCGAGCTGGCGCAGAAAATCATCGACGAGATGTTCTGTTGAGAAATCTGGTGG  
ATGTCGACGATCGCAGCATTGAGCGTCTGTTGAGGAAAGTGGATTCCGAATCGTGTGATCGCGCTGAAAGGAGCCGAG  
CAGCCACTGCGCGAGAAATTTGCGCAATATGTCGAGCGTCCGCCGATATTCTGCGCGACGATCTCGCAACCGTGG  
TCCGGTGCCTGTGCGCAGGTGAAAACGAACAGAAAGCGATTCTGCTGATTGTGCGCCGCTTCCGAAACTGGCGAGA  
TGTAATTGGCAGCGCGAGGATACCTATGTCTGATAATCTGCCGTGAAAACCTGGACGCGCGACGATCTGCGCCACC

ACAGGCAGAGTTTGTGCCATAGTCGAGCCGGAAGAAACCATCATTGAAGAGGCTGAACCCAGCCTTGAGCAGCAACTGG  
CGCAACTGCAATGCAGGCCATGAGCAAGGTTATCAGGCGGGTATTGCCGAAGGTCGCCAGCAAGGTCATAAGCAGGGC  
TATCAGGAAGGACTGGCCAGGGGCTGGAGCAAGGTCTGGCAGAGGCCAAGTCTCAACAAGGCCAATTCATGCCCGGAT  
GCAGCAACTGGTCAGCGAATTTCAAACCTACCCTTGATGCACCTGATAGTGTGATAGCGTCGCGCCTGATGCAGATGGCGC  
TGGAGGCGGCACGTCAAGTCATCGGTAGACGCCAAGGCTGGATAACTCGGCACTGATCAAACAGATCCAACAGTTGTTG  
CAGCAAGAACCCTTATTCAGCGGTAACCACAGCTGCGCGTGCACCCGGATGATCTGCAACGTGTGGATGATATGCTCGG  
CGTACCTTAAGTTTGCATGGCTGGCGCTTGGCGGGCGATCCCACCCTCCATCCTGGCGGCTGTAAAGTCTCCGCCGATG  
AAGGCGATCTCGACGCCAGTGTGCCACTCGCTGGCAAGAACTCTGCCGTCTGGCAGCACCAGGAGTGGTGTAAATGACCA  
CGCGCTGACTCGCTGGCTAACCACGCTGGATAACTTTGAAGCCAAAATGGCGCAGTTGCCTGCGGTACGTCGCTACGGG  
CGATTAACCCGCGCTACCGGGCTGGTGTGGAAGCCACCGATTACAATTGCCGCTCGGCGCAACCTGTGTATTGAGCG  
CCAGAACGGCAGCGAAACGCACGAAGTAGAAAGCGAAGTCTGGCTTTAACGGTCAACGGCTGTTTTAATGCCGCTGG  
AGGAAGTCAAAGGTGTCTGCCCGCGCGCTGTTTATGCCAAAAACATTTCCGAGAAAGGCTGCAAAGCGGCAAGCAG  
TTGCCGCTCGTCCGGCTTATTAGTTCGCTTCTGGACGGCAGCGGTAACCCGCTCGATGGCTGCCCTCCCCGATAC  
GACGAAACCCTGGCTGATTACCCGCCATTTAACCCGTTGCAACGTACACCGATTGAACATGTGCTGGACACCGGC  
TGCGCCAATCAATGCCCTGCTTACCCTGGGCGTGGCAGCGTATGGGCTGTTTCCGGGTCCGGCTTGGTAAAAGT  
GTGCTGTGGGATGATGGCACGTTACCCCGCGCATGTATTGTCTGGGTTTGTATTGGTGAACGTGGCGCGAAGT  
AAAAGATTTTATTGAGAATCCTCGGTGCCGAAGGCGTGCACGCTCAGTGGTGATTGCCGCTCCGGCGGATGTTTCTC  
CGTCTCGCAATGCAGGTTGCCGCTATGCCACGCGCATTGCCGAAGATTTTCCGATCGTGGTCAGCATGTGTTGCTG  
ATTATGACTCCCTACCCGCTACGCGATGGCCAGCGTAAATTGCGCTGGCGATTGGCGAACCCCGGCCACCAAAGG  
TTATCCACCGTCGGTGTGTTGCCAAATTACCGGCACTGGTCGAGCGTCCGGAATGGCATTAGCGGGCGGCTCGATTA  
CCGCGTTTTATACCGTGTCTACTGAAGCGATGACCAGCAGGATCCGATTGCCGACTCCGCGCGGGCGATCCTCGACGGT  
CACATTGTGTGTCTCGCCGACTGGCGGAAGCCGGGCACTATCCGGCTATCGATATTGAAGCGTCGATCAGCCGCGCAAT  
GACGGCGTTGATCAGTGAGCAACATTACGCGGAGTGCACCTTCAAACAGCTGTTGTGAGTTCAGCGTAACCGCG  
ATCTGGTTAGCGTCGGCGGTATGCCAAAGCGAGCGATCCGATGCTCGATAAAGCCATCGCCCTGTGGCCGAGCTGGAG  
GGCTATTTGCAACAAGGCATTTTTGAACGCGCGGACTGGGAAGCGTCTTCCAGGGGCTGGAGCGTATTTCCGACAGT  
GTCATAACCCAGGAGATAACGGCAGATGGCAGAACATGGTGCCTGGCGACCCTGAAAGATCTGGCAGAAAAAGAGGTAG  
AGGATGCCGCGCGCTGCTGGGTGAAATCGTCCGGATGTCAGCAGGCGGAAGAACAGCTCAAATGCTGATTGATTAT  
CAGAATGAATATCGCAATAACCTCAACAGCGATATAGTGCCTGGGATAACCAGCAACCGCTGGATCAACTATCAGCAGTT  
TATCCAGACGTCGAAAAAGCCATTACTCAGCATCGCCAGCAACTTAATCAGTGACGCGAGAAAGTTGACATTGCCCTGA  
ACAGTTGGCGAGAAAAAAACAACGTTTGCAGGCCTGGCAGACACTGCAGGAACGGCAATCCACGCGGCGACTGCTTGA  
GAAAACCGCTCGATCAGAAAAAGATGGATGAGTTCGCCAGCGCGCCGCCATGAGGAAACCTGAATGATTGCTTAGCG  
CCCTTGATTACCGCCGAGCTTGACACCACCATTTGCTGGCGGCAAAGCCAGCGATGCTGCACAAGATTTTCTCGCGTT  
GTTGAGCGAAGCATTAGCAGGCGAGACAACTACCGACAAAGCGGCCCCCAGTTGCTGGTGGCAACAGATAAGCCCACGA  
CAAAGGCGAGCCGCTGATCAGCGATATTGTTTCCGACGCGCAACAAGCTAATTTACTGATCCCTGTGGATGAAACCCG  
CCTGTCATCAACGACGAACAATCCACATCAACACCGTTAACCCCGCTCAGACGATGGCGTTGGCTGCGGTGGCTGACAA  
AAATACGACAAAAAGACGAAAAAGCGGATGATCTGAATGAAGACGTACCAGCAAGCCTGAGCGCCCTTTTTGCGATGTTGC  
CGGTTTTGACAATACGCCCAAAGTACTGATGCGCCGTCAACCGTGTACCAGCAGAGAAACCAACGCTCTTCAAAAA  
CTGACTTCTGAGCAACTCACAACAGCACAGCCTGATGACGCCCCGGCACACCAGCTCAGCCATTAACACCGCTGGTAGC  
AGAAGCCAGAGTAAAGCGGAAGTCATCAGCACACCTTACCAGTACCAGCTGCCCGCAGCCGCTAATCACTCCACACC  
AGACACAGCCACTGCCACCGTCCGCCACTGTTTTGAGTGCACCGCTGGGTTCTCACGAATGGCAACAATCATAAAGC  
CAGCATATTTGCTGTTACCCCGCAGGGGCAACAAAGTGCAGATTTGCGTCTGCACCCGAGGATTTAGGTGAAGTGCA  
AATCTCCCTCAAAGTGGATGATAACCAGCGCAAATCCAGATGGTTTACCAGCATCAGATGTACGCGCCGCCCTGGAAG  
CAGCGCTGCCGTAAGTGCACGAGCTGGCCGAAAGTGGCATTAGTTAGGGCAAAGCAACATCAGTGGCGAAAGCTTT  
AGTGGTCAGCAGCAGGCGCTTCCAGCAACAGCAAAGCCACGACAGCAAACCATGAACCTCTGGCGGGGGAAGACGA  
CGATACGCTTCCGGTTCCGCTCTTTACAAGGGCGTGAACAGGCAACAGCGGCGTTGATTTTTCGCTAACGTCAGA  
GGTAGCACCGTAATCCGCTCTTTCCCGCTTTGTTGCGCTCAAGACGAGGATAATTAGCCGATAAGCAGTAGCGACA  
CAGGAAGACCGCAACACATGACTGATTACGCGATAAGCAAGAAAGCAAGCGATCGCTTTGGATCCCATTCTGGTATT  
ATTACCCTCGCGCCTGTGCCAGCGCAGGTTACAGTACTGGCATTGCGATCAGGTTGCCGCTGACGACAAAGCGCAGCA  
ACGCGTCGTGCCCTACCGGCTTCTACGCGCTGGATACTTACGGTCAATTTGGGCGATGCGGATCGCGTACTTTATA  
TCGGCATAACCCTGCGCTGAAAGATGAAGTACCCGCTCGCGGCTGAGTGAATTTGCCGAAGTCCGTAGTCGCTTG  
CTGTTACTGTTTTGCGTCAAGATGCTGCCGTAAGTGGCGACAGAAAGGCAAGAAAAACCTGATTGCCGAGATTAAC  
CACACTTCCACCCGCTTGTGCGGGCAACCGAAACAGGATGTACCAGCGTGTGTATACCCTTTTATTCTGCGAT  
AACGACATGGGCGATAGTATTCTTTCTCAAGCTGAAATTGATGCGCTGTTGAATGGTGACAGCGAAGTCAAAGACGAACC  
GACAGCCAGTGTAGCGGCGAAAGTGACATTCGTCCTACGATCCGAATACCAACGACGGGTTGTGGCGGAACGTTTGC  
AGGCGCTGGAATCATTAAATGAGCGCTTTGCCCGCATTTCGATGGGGCTGTTCAACCTGCTGCGTGTAGCCCGGAT  
ATAACCGTCGGGGCCATCCGCATTACCGCTACCATGAATTTGCCCGCAACCTGCCGTCGCCACCACTGAACCTTAT

CCATCTGAAACCGCTGCGCGGCACTGGGCTGGTGGTGTCTCACCGAGTCTGGTGTATCGCCGTGGATAACCTGTTG  
GCGCGATGGACGCTTCCCACCAAAGTGAAGGTCGCGAGTTTACCATACCGAACAGCGCGTCATCAACCGCATGTTG  
AAACTGGCGCTTGAAGGCTATAGCGACGCTGGAAGCGGATTAATCCGCTGGAAGTTGAGTACGTGCGTTGCGAAATGCA  
GGTAAAATTTACCAATATCACCACTCGCCGAACGACATTGTGGTTAACACGCCGTTCCATGTGGAGATTGGCAACCTGA  
CCGGCGAATTTAATATCTGCCTGCCATTACAGCATGATCGAGCCGCTACGGGAATTTGTTGGTTAACCCGCGCTGGAAAA  
TCGGCTAATGAAGATCAGAACTGGCGGATAACCTGGTGCGCCAGGTGCAGCATTACAGCTGGAGCTGGTGCCTCAACTT  
TGCCGATATCTCGCTACGCCGTGCGCAGATTTTAAACTGAACCCCGCGACGTCCTGCCGATAGAAAAACCGATCGCA  
TCATCGCCCATGTTGACGGCGTCCCGTGTGACCAGTCAGTATGGCACCCTCAACGGTCAGTATGCGTTACGGATAGAA  
CATTGATTAACCCGATTTTAAATTCTCTGAACGAGGAACAGCCAAATGAGTGACATGAATAATCCGGCCGATGACAAC  
AACGGCGCAATGGACGATCTGTGGGCTGAAGCGTTGAGCGAACAAAAATCAACCAGCAGCAAAAGCGCTGCCGAGACGGT  
GTTCCAGCAATTTGGCGTGGTGTGATGTCAGCGGAACGTTGAGGATATCGACCTGATTATGGATATCCGGTCAAGCTGA  
CCGTCGAGCTGGCCGTACGCGGATGACCATCAAAGAGCTGTTGCGTCTGACGCAAGGGTCCGTCGTGGCGCTGGACGGT  
CTGGCGGGCAACCACTGGATATTCTGATCAACGGTTATTTAATCGCCAGGGCGAAGTGGTGGTCTGTTGCCGATAAATA  
TGCGTGGGATCACCGATCATTACTCCGTCGAGCGAATGCCCGCTGAGCCGTTAGTGATGAATAACCAACGCTAC  
TGTGCAATCTCCGCGCCGTTTCTGCTGCACCCTGCTGCAGGTGAGCGGGCACTCATGCCATTATGGCCTGATCC  
TCGCTGCTGCCTGGTAAACCGTTGGGATTTGCCCTAAACGCACTGGCGTTAACGGTCTGAAAAATAGCGCCAGT  
GCTTCACTGGCGCGCGTGAAGGGTTGTGGTGGTGTGATGTGAAGATGCACGCGTGGTGTGCTGGCGTTACCGCAGGTCA  
AATCAATCTGCTGCATAAATTTCCCCTTCTGCACCAACGGAAGAGATACCGCAGACCGATTTTACGTCGGTCATGAAAA  
ATTTGCTTAAGCGTAGCGGGAGATCCTGATGCGTGTATTATTGTCTGCGCACCTGTCTTCTCTGGCTGATTACGCCCC  
TCGCCTTCGCGCAACTGCCGGTATCACCAAGCCAGCCGCTGCCTGGCGGTGGACAAAGCTGGTCGCTCCCGGTGACAGC  
CTGGTGTTTACCTCGTTGACGTTTATCCGGAATTTTACTGATGATGACCAGTTTACCCGCATCATCATTGTTTT  
TGGTTTATTGCGTAACGCGCTGGGAACACCCTCCGCGCCACCTAACAGGTATTGCTGGGGCTGGCACTGTTTTTACCT  
TTTTTATTATGTCACCGGTGATCGACAAAATTTATGTAGATGCGTACCAGCCATTACGGAAGAGAAAATATCAATGCAG  
GAGGCGCTGAAAAAGGGGCGCAGCCGCTGCGTGAGTTTATGCTGCGTCAGACCCGTGAGGCAATTTAGGGTTGTTTGC  
CAGACTGGCGAATACCGCCGTTGACAGGACCTGAAGCCGTGCCGATGCGCATTTTCTCCCGCCTACGTGACCAGCG  
AGTTGAAAACCGCATTTTACAGATAGGCTTACGATTTTATCCCTTTTTTATTATCGACCTGGTGATAGCCAGCGTGTG  
ATGGCATTGGGGATGATGATGGTCCCCAGCCACCATTGCTCTGCCCTTAACTGATGCTGTTTGTACTGGTGGATGG  
CTGGCAATTGCTGGTTCGCTGGCGCAGAGCTTTACAGCTAGAGAGGCAAAATGACACCTGAATCGGTTCATGATGA  
TGGGGACTGAAGCGATGAAAGTTCGCGTGGCACTGGCTGCCCGCTATTGTTGGTAGCGTTGGTCACGGCCCTTATCATC  
AGTATTTTGCAGGCCGCCACGCAGATTAACGAAATGACGCTGTGTTTATTCCGAAAATCATCGCCGATTTATCGCCAT  
TATTATTGCCGGACCGTGGATGCTCAATCTGTTGCTGGATTACGTCCGCACCTTGTCTACTAACCTGCCGTATATCATCG  
GGTAGCCGACTATGTTGCAAGTGACAAGCAAAATGGTATCCTGGTTAAACCTGTACTTCTGGCCGTTACTGCGCGT  
GCTGGCGCTGATCTCCACCGCGCCGATTTGAGCGAACGCAGCGTACCGAAACGGGTAAAATGGGTCTGGCAATGATGA  
TCAGTTTCGCCATTGCCCATCATTACCTGCCAACGATGTTCTGTTTTTCTGTTCTTTGCTCTGTGGCTGGCCGTGCAG  
CAGATCCTGATCGGCATTGCGCTTGGTTTTACCATGCAATTTGCCTTTGCCGCTGTGCGAACCCGCTGGCGAAATATCGG  
TCTGCAATGGGGCTGTCAATTTGCGACGTTTGTGATCCGGCCAGCCATCTTAATATGCCCGTTTTAGCGCGTATCATGG  
ATATGCTGGCGTTACTGCTGTTCTGACATTTAACGGTCATTTATGGTTGATTTCACTGCTGGTCGATACCTTTACACC  
CTGCCGATTGGTGGCGAACCGTTGAACAGCAATGCGTTTCTGGCACTCACAAAGCAGGGAGTTTATTCTTTAACGG  
GCTGATGCTGGCGTTACCCTCATTACTGCTGCTGACTGACTGTGGCATCTTTAATGGCGGCATTAATGCCCTTAAT  
AATTAATCAATTTTTGTTATTGGATTTCCATTAATCTGACTGTGGCATCTTTAATGGCGGCATTAATGCCCTTAAT  
GCACCTTTTTGCGAACATTTTATTAGTGAATTTTTAATTTGCTGGCTGATATTATTAGTGAATGGCATTAAATATAATT  
CCGTAACGTTTATCATGTTATCCTAAGGATTATCCGAAAAATAATACCTACGAACATCTTCCAGGATACTCCTGCAGCGA  
AATATTTGTTTTAAGCTCACTCACATATCGCAACATTTACTTTACTTTAAGACAATTCAGGCAAAATTATACAACACTTT  
ACGGGATAGTAAGTCCGCTGAAAAATCGCGAGAGTGGCGCATTAGGTGACCCATGTTGTTCCGTTTACTGATGATGAAA  
TATTACAGTAAGGGGAATTATCGTTACGCATTGAGTGAGGGTATGCCATGTCAACGATTATTATGGATTTATGTAGTTAC  
ACCCGACTAGTTTAAACCGGTATCTGTTGAGTAGAGGGGTTAAAAAAGAGAAATCAACGACATTGAAACCGTTGATGA  
CCTTGCCATAGCTTGATTACAGCGCCCTTCACTGGTGTATTATTAATGAGGACTGTTTCATCCACGATGCTTCTAACA  
GTCAGCGTATCAAGCTCATCATTAAATCAACATCCCAATACGTTATTTATCGTTTTTATGGCAATTGCAATGTTCAATTT  
GATGAATATCTATTGGTCAGAAAAATTTATTGATCAGTTCTAAATCGATTAACCGGAATCTCTCGACGATATCCTTGG  
CGATATTCTGAAAAAAGAGACAACGATAACCTCGTTTTTAAATATGCCGACGTTATCATTGAGCCGAACCGAATCGAGTA  
TGTTGCGAATGTGGATGGCAGGTGAGGGAACCATTAATCTCTGACCAATGAATATCAAAGCCAAGACCGTTTCATCG  
CATAAAGGTAATATAACGTAAGATCAAACGCATAATAAACAGGTTATCTACCATGTGCTCCGACTGACGGATAATGT  
GACTAATGGTATTTTTGTCAACATGCGCTAACACATTCTGACTGGTGGTTTTCCACCAGTCAAGGCTGAATAAGATTACTC  
TGTTTTCTCCACAAAGATACCGTCTGATGCCCTGCTTCATTAAGAAGCAGATGCCGAGCGGGTAGTCTTCCAGCGAAA  
CCAGGTACATTGTGCTTCACTAAACTCTCAACTGCCAGTACCACGCCAGGACGACGCGGACCGCCATCCGTTTTGACT  
GTTACCCGATCATTACCTTCATCGTTTTCTCCTGTGGCTTTGTGCCAGTGTAGAACAATTTCTGTTTTCTGGCAGCGC

CAGGCGCGCGAGTGCTGATTTTCTCGACGGTCTATACTTAAGAGATGCCAGGCGGACTTAACGACTGGCGGCAACAAC  
AGAGTAACGGTTGCGAGGAAAGATGATGAAAACCGCAAAGAGTACAGCGATACCGCAAACGTGAGGTACAGCGTCGATG  
TCGATGCCCTGCTGGCGGCATCAATGAAATTAGCGAAAGCGAAGTTCATCGCAGCCAGAACGATTCTGAACACGTTAGC  
GTGATGGACGTGAATATCATAATGCGCTGAATTGGCGGATGCCTTGAAGTGGATATTCATGACTTCAGCGTCTCTGA  
AGTGAATCGTTGAATGCACAATAAAAAAATCCCGACCTGAGGGGGTGGGATGAAACTTGCTTAAGCAAGAAGCATTAA  
AAAAATTGTTACACCAGGAAATCTGATGTGTTTATCCGCAATTTTTTTTCTGCTGACAAGAAAATATTCGCCA  
TATGAATGATTAACGCTACTTATGAATAGAAATGTGACGCACGTACCCCTTGGTGGCTCTGGCGTCAGCGGGATCGCTC  
CCGAAAAATCATCTTTGATAATTTGTGCGGTTTTGAGAATCATCCTGGTAAGAGGAGTACTGCGCGACTATGTTTTCAA  
TTCAACAACCACTACTGGTTTTAGCGATCTTGATGGCACCCTGCTGGACAGTCATAGTTATGACTGGCAACCGGCAGCC  
CCCTGGCTCACCCGTTTACGCGAAGCAAATGTTCCCGTCATTCTCTGTAGCAGTAAAACATCAGCGGAAATGCTGTACTT  
GCAAAAAACGTTGGGGCTACAAGGTTTACCGCTGATTGCCGAAAATGGCGCAGTGATCCAGCTTGCTGAGCAATGGCAGG  
AGATAGACGGTTTTCCACGCATCATCTCAGGTATTAGCCATGGCGAAATCAGCCTGGTTTTAAATACGCTACGCGAGAAA  
GAACATTTAAATTACGACTTTTGATGATGTGACGATGCAACCATCGCCGAATGGACGGGATTAAGCCGTAGCCAGCG  
GGCGTACGCGAGCTTTCATGAGGCGTCGTAACGCTAATCTGGCGGACAGTGACGAGCGTATGGCACAATTTACCGCTC  
GTCTGCAACTGGATTACGCTGACCTATCAACAATTTGACGAAACGCGCCCAACCACTTGGCTGGGGATGGGCCAAA  
CGATGCGCCCTTACTGGAGGTAATGGATTACGCGGTGATTGTGAAAGGGCTAAATCGTGAAGGGGTGCATCTGCATGATG  
AGGATCCGGCCCGCTGCTGGCGAACGCAGCGTGAAGGACCGGAAGGATGGCGTGAAGGGCTGGACCATTTTTTTCTCCGCC  
CGTTAAGCGTTATCGCTCGGAATACCCGATTACGCCAGCCTGTTAGCGAGATAAAGCCGACGGTCCGGCCAGTGACTG  
GAGTTGTTCAAATCATAATCACCGTTTTCTCGCTGCTGTTACCCCGAGCGAGGCACTGATGCGTATCGTCTGACTCT  
TGCGCATCAACATCTTTTTTCAATTAATTTAGTGAATACGTTCTGCGACCTCCGCGAGCTCCGTCAGACTCGCGCCT  
GGCAGAATCACACAAAACCTCACCACCGACCCCGCCGGCAACGCTCCTGCGCACGCAAGGAACTGCTAATTAATCCGGC  
AGCATGAGAAAGAACACGGTCGCGCCTGATGACCAAAGCGGTCAATTCGTTTAAAATGGTCAAGATCGACCTGAA  
TGACAGAAAAAGGATGTTGGTGCCTGACACAATTTAGCGAGCGGACGGGCTTTTTGAAACAGTGCGCCACGGTTATAT  
AAACGCGTTAAGGTGTCGTGCCACGCTGCCACTGCAACGAGCTTTCGAGAACATACATGTTGCTAACCATCCGGCGAAT  
CACATACCAGGAGATGAGTAACATGGTGGTAAAGAGCGCCACAGCAGGGTAAATGCAATGCTGATACTGCCGAAATCGC  
CGCGCACGCTTCGTTAACGTATGGACACGCACACCGCTCGAAATGGTCCAGACGTTCCAGCTAACATAGCGA  
CTGTCCATACGAATGCCGCCCGCTGTCATGTTCCATTGCTGCGCCAGCAAGGCCAGTTCACGAGGATCAAAAATATT  
CCCTGTTGGATGGTCAGGATTTGGAAGAGGTCAAAAATCTCAGCTTACTGTCATAGAGCTGATACTCACCATCGAGGTTTT  
TATCGATGGCGTTTTCTAAAATTGCTGCATAGTACGCACGGAAATACTCATCCCAGCACGCCATACCAGTAGTTATTA  
CTGTCTACCGAACACTGACGGTAACCTGCGGTTAGTATTGCTGGCGTGTCCGGTTGCGAAGTGAACCAGCGTACCGC  
GCGGTGACGATTTTCTGTTGTGAATGGCCAATAAACCAGGGTTGGGTGACATAGCCGTAATAACGCGTTGGAACATTGC  
GCGTAAACAAGGTGCGTGCCTGGAACGTAAAATCCGGCACGCGAGACATACATCGCCTGTTCAACCATCGACGAGGAG  
TTGTGCGTAGTGCAGCAAGTAACCACTTCCAGTGCAGCGTAATTTCAATGTCGAGGCTTTCAATTTTCGCGAGACAG  
GAGATTTCCCTCGCTGACTAATGCATCCGACACACCATTAAGTGGCAGAGTGCCTGCTCGGTTGAGTTGATTTTCCAGG  
CGTGCTCGTGCAGTGTGTTGAACTCGGTTACAGCATCACGAGAGAGGTGAAATCCAGTGGCGCTACGAGAGCTTCG  
CGCATGCCATTACGTA AAAAGATCAGTTTGTGACGTTATACTGCAAATGCTTATCGAGCGGTTGGCAACGTTTTCCAG  
ATGATTACGCTGGCTGGAGATATAGGCATCTTCCAGCACCACCTTACGCCAGGTGAGCAAGGTGAAAAAAGCAATA  
CCACGATAAAGCAGAGATTAACGACATGACCAGGCCCCAGCGGCGTGCAGTTTTTTCAACCAGCTCGTTTTTCCATT  
TTGTCTCGTGTGACCTGACGACTCCCAACTGCTTTTTATGATTCTGGCATAACCTGGCGATAGCGTACCGCAAA  
ACAGCGATAATTTTATAATGGTGGCATGATAAAGACCGCACTATCATTTCATTGACGGCATTAGCACACCGCCGATGTG  
ATCCGGCCTGATGTTAATGATACCCTTTCACACTTCTTCCGAGAACGACTCCCTCCCGGAACAAGTCCGGTTTTAT  
GAAAAGCTTCCGCTTGACCCGTAACCGTCATACCAACGACACTCAACCATACCGCTGGAGTATCCAGTGACAATCATC  
CGCGGGCCGCCCTTTTAAACCGTAACCTCCTCACTAACATAAAGCTCATACTCGCTCCTTTTTTTCAGTGAAACTTGT  
TCACCTTAGTTGAAGATGGCGAATTTTGCATAATAGCCAGTGCAGGATTAATGTGCTGACCGCGCATTTTCTCTACGG  
CTTTCACTCCCAGCACCGATGCCGCCGATGATAAATCCAAGAATCAGATTTAAAACAGTCGGTAATATCATCGCCACT  
ACTGCACTTTGCTGCCCGCGGAAATGTTCAATGGCGTATGCAGCGGCGCAATTCATGTACCACAATCCCACCGCGAC  
GAGGAACATCGCCAGCGTCCGACAATCGATAACGTTTTATCAGCCAGGGCGGATAATCAATAACCTTTACCTAATG  
CCTGCATCAGCGCGTGGATTTTTCCGCCAGCAATACCCAGGTATCAATCTAACGATAACCCCTACCAGACCGTAG  
ACGCCACGGTCACTACCAGCGGATGCCTGAAAGCACCAGCACCTGATTAAGCAACGGCGCTTCGGCCACAATCCCAG  
CGTATGGCGACGATTTCCGAGACAATATAAATCGGTACGAATCGCCCTTTTATTTTGTCTTTTTCAAACCTTACGCG  
GATCCTGCGCCCGAGCTTCTCCAGACGCTGCTGGCTCTGCGCCGGATCTTCTTTATGTTTACGCGCCTCCAGCATATGC  
AGCACTTTCTACTCTTCAAAGCAGAGAAACGCGCCACCAATCATCAACAGAGGCGTAATCGCCACGGGATAAACGC  
ACTGATGATCAGCGCCAGCGCACCAGAACTTTTAAATCAGCGATCTTTTCGCCACGCCCCAGACCACGGGAAGTT  
CCCGGTTGGCCCGCACGCTGAAACTTGTGCGCATGAGCGATAAGTCATCCCTAATACCCGGCGGTTTTCTCGCC  
GCCAGTTGCCATCACGGAGATATGTCAGTAGTGTGGGATATCATCGAGCAACGTAGTAAACTACTCCCGGCCAA

AAGCATTCCCTCTCATTTTTATTGTTGAAGGGTGAAGTATGAAGCAAAAACGGCAGCTCTGATACTTGCTTCACAGGTCAACATTTTTTAAACAATCAAGTGAATTATATCTCTCGCCAGCAGAATGATTTTACGTTTACTATGAACCACCTTTTTATTTCCACCGTGAGGGATTATGCGTTTTCCGCCAGTTGTTACCGTTTTTGGCGCGCTGTTTGCCTGTATATCATTTGGGGCTCAACCTATTTTGTATTGGATTGGCGTGGAAAGCTGGCCTCCGTTAATGATGGCGGGCTTCGATTCCTGGCAGCCGTATTTTTATTGCTGGCATTGTTGCTACTGCGCGGACACAAACTCCCCCGCTACGTCCGCTGCTCAATGCCGCGCTGATTGGCCTGTTATTGCTGGCTGTGCGTAATGGCATGGTGACGGTGGCCGAACATCAAATGTTCCCTCCGGCATCGCCGCCGTAGTGGTGAACCGTGCCCTCTTACCTGTGCTCAGCCGCTGTTTGGCATTAAAACGCGCAAACCTGGAATGGGTGGTATTGCCATTGGGCTTGCCGGAATCATCATGCTCAATAGCGGTGGAATTTAAGCGGCAATCCGTGGGGCGCGATTCTGATTTAATCGGCTCGATTAGCTGGGCTTTGGCTCAGTTATGGCTCGCGCATTACCTTACCTGTAGGGATGATGGCGGGTGCGATTGAGATGCTGGCGGCAGGCGTGGTGAATGATCGCGTCGATGATTGGGGTAAAACTGACGGCGCTCCCTTCCCTTTCAGGCTTCTTGGCGTGGCTATCTGGCGCTGTTGGTTGATTATCGCCATCAACGCTTATATGATTTAATCGTAATGTCAGTCCGGCTCTCGCCACCAGCTACGCTTACGTTAACCGGTGGTGGCGTCTTGGTGGTACGGGACTGGGTGGAGAAACTGTGAAGATTGAATGGCTGGCGCTCGCGTAATTGTTCTTGGCGGTGGTACTGGTACGTTGGGAAAAATCTCTTCCCGCAAACCCGATAGTTGCGCCAGTTATTCAGGACGCATCAAGCGAGTAAATGAATCCCTGCGTGTCCGATGTCGCGCTGGCATTGCGCGCAGATCCACTTCCAGACGCTCGGTAAGCGCTTCCATCCGTGAGTTCTCGCGCCACTGTAACGCGACTCCAGACAATCAATACGCGCAGCGAGTTCTGCAAGCGACTGATATCGCGGCGATCGCGCTCAACATTTTTACCTATCTTCTCCAGCCAGAACTCGGTTTCGAGTCGAGGCACTTTAAACAGATAGCAGTGATGATGCCAGAA GCAGCCATGGGTAAATATCACGCAGCGATATTATCAACGACAAAATCCGGACGTCCGGGCAGACTGGGCTCCTGAACGC GAAATGCCAGGCCCTGCCGGTTAACAGACTGGCGAGGCGCTTCTATCGCGTATCACGCGTGGCAATCGCGCGCATA TTTTTGCTGCGAGTGGCCTTATCGTGAACGTGCGCCATGTTGTGCTTGTGCTGACGCAACGCCACCGCTGTTGATTT TTGGCTCAAGCAGTTTTGCCACCGCGGCAAAGACCGGCAGCACCAGGTTACCGAACTGGCGATAGGCTGAGTGTCC GAAACCGGAATACGGAATTCGCTTCTCCGGCGCTTCAAACCCATTAAGCGCGCGCATTCCCGAGGCTTAAACCGACG TGACGATGTTGCTGATTACGGGATCGTCAAAGTCTTCTACCCGTGGCCATATCCAGCCGCGATCGATTAATTTT CCGCGCCATCTTTGTAATAACGCGCAGACAGCGTACGCGTGGCGTGGGATTGTTGGGATAAACCATTCCATAACCG AAGCGTTACCGCGCGCCTGATGTTTTTTCGCATATCGATAGAGTACTTCCACAGCACCGGCGTCCAGGATATTTTCG CCTCGACCATCGGTTCAAACAGCTGCGCCAGCGTCACTCGCTGCGCAGGAAACATTGCTGATATCACGCAGGGTAAAT CGGCTTTCAGATTGATCGCGACGAAAACCCACCAGCAGATGCGTTCACGGTGTGCGCGAGAAAATGTTTGGCGTCA TGATTTTTCGGATCGTGTGCCCCATTATCTTCTGCATCAGCCACGTCATAGCCAGTTCGTCAGCGTGTGCATGATGAT GCGGAACGTTTTACCCTGGTGTGACTTTTCAGTTTTTTCAGTTTTTCGAGTTTTTCGAGCACAACATCGCCGGACGACGCGCTGCA TAATGCGTACCACATCAAAAAACAGCGTGCCCTGGGTATCGCAGGCAAAACCGTGGCGCCGCGGAGCGAGTTCTTTTT C GATACGCCAGCCAGCGAAAATGGCTGACAAGGAAACCGGCCAGTAAAACATCGTGTTGAGGAATGTGTTGACGAATATG TTCCGCGCGCCCTCATCACTCACGCCTTCTTATGGCTGAGGGTGTGTCGCGGATATCTTCATTAATGATGCGTCCG CCGGATCGCAATAATGGTTGGCTTTATAAGTGGTACCGCATGTTTGTCCATTGCTGGTAAACACGCACTGTCCGCCA ATCGATTCAAACCGCGACGGATGCCGCAATTCGGCGAATAGATCGATAAAGCGAAACGCATAATGCGGATGATGTGC CGGTGGTTGGTAATAACGTTTGCAGATGGGCGAACTCTTCTCACTTAAACGGTGCCATGCCGAGTCACTTCCGACGC CACGTTTTAAATTTGCCGCGCTCCAGTATTCTCACCTACCCATTAAGCTGCGCCACCAACGTTTTAACATCATAAAT TGCAGCAGTTTCTCCAGCATTGCTGTGCGGCATTCGGGTGTGATGAATCGGTTACTGATATATTTTCTGCATAGA TTTACCGGCCATCTGAGATGGCCGACAGGTTAACATAATTACAGCCATTTAGGGCCACGCGCTCAGCCAGCGGATGAAA ACGCATCTATCACCTTGATCGACACCTTCACTTCCCCCGCCAGTTTGGCACTGAGCTTCCGATAAACTCGACTAAA AAATGCGCGTGTGCTGCGCCAGCTGCTTGCCTTTCGCGTTTGCATGTTTGGGTTGCGGTTAGCTTACGCAACTTAGTGGAA ATGATCCAGCGCTAGCGTTTTATCATCAAGCGGGCGATGCTGTGCGAACGGATCTTACCATCAAACAGCGCCACGCCCA ATGCCCCGAAACGGCAAACACGCGCGCCAGGCCAATCGCCCCAGGGCTTCCAGCCGATCCGCATCCTGGACAATTTTA GCTTCCGTTGTTAAGGGGGCGATTTGCGCGCTGAAACTGTGAGCGGCAATGGCATGACAAAACGGCCTCGATTTTCTCCGC CGGAAATTGCTCGAACTCTCACGAGCAGGCGACGCTCTTCTGCGCCAGGATTGAAGAACGCTGCCTTTGCGGAT GATTTTTCGCCAGGCTCACAATATCGTGAATAACAGGCGGTTAAAATCACCAGCATAATCGACATCGTCACTGCGGCC AGCTTCTGTGCGTAGCCAGACGCGGCGAAAATGACACACGTCATGGGCCGCGTCTGGTGTGATGATGGTTTTTCAA CCAGTTTTCGAACTGTGCTGCCAGTGTGTAAGTCCATACGCGCTCCGTTGCCAAAGAGTCGCCACCTTAGCAGTTTTT ATTCATAGCGTCTGCTACGTGCGGGACGAGGTGGGTGTACCAGGCAATGCTGCCTAACAATGCCCGACGAGCCATA AATAAAAAATCCGACAGTGGCCCTAACCACTTTCCCGGGTAGAGCTAAATCGCTTCAAATCCCGACGCGGGGCATC GGAATCCGGCTCATCACCAGATGTAACGCGCCATTGCCAGACGAAATAGCCACACCATGTATAGAAAGCCACAAG CCAGTTTCCCGCAGGGCTGCGAGAGAGTCTCTCTTCCATCTTGTGCAACCGTATTCCATTTTGAGATAACCCGAAAA TTCAGACTTAGTACTATTATGTGATAAAAAGTCAATTTTTCCACATTGGATGAGCCAGTCAAGACTCAATCATTTTTTGA ACAAATAGATAAATTTTGGCAACGGCAGTGAATACAGGAAAAATCGTTTTGAGCGATTTTATTTATCTTTGATATCGGC TTTATTAATTCATTTAATCAATATATTAGCACTGATTACAATTATACCTTTTTATTATTCTGTGTCATGATGCTTCCGTT ATTAGCCTTTTATCGTCTGTTTATATTTTTTGGGCCGGCATGATGCCGGCTTTTTTTTTATGCCTTCATTAATGTGCGCC TGATCACACCAGCCGTTTGGCGCAACAATCATTGATACCCCTATGTTTCCGCTCAACTATAACATATTGATATACATT

TATAATTTTCATGAATATTTATATTTAGAATTCATAATTATGAATTATATTAAGATTAGAAACATTTTGATATCTTT  
TAAATACATTTGTTACATGTAATCCTTAAAATAAAATGAACCTCATAGAATAGTATCCAAATGTGCTTTTTTTGGATAA  
CGGCACTTATTGATATATTCATGAAGATTATAATCACAGGGAATACATAATGAAAAGAAAAGTTCTGGCAATGCTGGTC  
CCGGCCTTATTAGTTGCTGGCGCAGCAAATGCGGCTGAAGTCTATAATAAAGATGGTAATAAACTGGATTTGTACGGAAA  
AGTAGTGGGTCTGCACTACTTCTCTGATGATTCTGGCAGCGATGGCGACATGTCATATGCCGTATCGGTTTCAAAGGTG  
AAACTCAGATCGCTGATCAATTCAGTGTATGGTCAGTGGGAATTTAACATTGGCGCAAACGGTCTGAAAAGCGACAAG  
GGTAATACCGCAACGCGTCTGGCATTTCAGGTTTAGGCTTTGGTCAGAATGGTACTTTGACTATGGTCGTAACACTCGG  
TGTCGTATATGACGTAGAAGCATGGACCGATATGCTGCCAGAATTTGGTGGCGATACCTATGCTGGCGTGACAACCTCA  
TGAACGGTCTGTAAATGGTGTGCAACCTACCGTAAACAATGGCTTCTTTGGTTAGGTCGATGGCTTGAACCTTTGCTTTG  
CAATATCAGGGTAATAATGAAAAGTGGTGGACCTTCGGGCAGGAAGGTTCCGGTAGTGGTGGTGGCCTAGCCTTTCCAA  
AGAAAATGGTGATGGTTTCGGTATGTCAACATCCTACGACTTCGACTTCGGTTAAAGTCTGGGTGCTGCATATCAAACCTC  
TGATCGTTCAGATCGTCAAGTTGGAGTTGGTTTAAATGATCGTAACCATAGCAACAGAAATGCTGGTGGTGAACCCGCTG  
AAGCATGGACTGTTGGTGCAAAAATATGATGCTAATAATGTGATTTAGCAGCTATGTACGCTGAAACTCGCAATATGACC  
CCATATGGTGGTGGCGAGTTTGATAATGGTGAATCAAGATCAGCCATCGCTAACAAAACCCAAAACCTTTGAAGTTGTTGC  
TCAGTATCAGTTCGACTTTGGCCTGCGCCCTCCATCGTTCACCTGCAATCTAAAGGTAAGGATTTAGCGGTTGGGCTC  
ATGACGGCAACGGCGACCCAGTTACACCAATAAAGATCTGGTTAAATACGTTGATATTGGTGGCAGCTACTACTCTCAAC  
AAAAACATGTCCACCTATGTTGATTACAAAATCAACCTGCTGGACAACGACGATGACTTCTACGAAGCAACGGCATCGC  
TACCAGTATATCGTTGCTGTGGGCTTAGTCTACCAGTTCTAATCAGTCAACTCGCTGCGCGTGTACTGTAAAACCTGA  
ACACTAGCCTGAGTTCGTCCCTCATCGAACTCAGGCTTTTTTATTGGCATTTCATCTCCATCTGCGGCACACGCAATTGC  
CGAAGCATATCGATACAGCACCTTACCCTGCCCTCCTGGCACAATAACATCAACCAGCTACTCTCAAGCTAACACCCA  
AATGCATTTCTTTATGAATTAATCCGTAACAAACACGCTTCCCATATAGAAATATTTGCAAAAATAGTGCATGAAATAAG  
CTTTTTCTCTACCAATCCGGGATATAAATATTCATCAGCACCACAATATTCACAGCACTAAATCTCTCCCCGCCACCCC  
GTACCTCTGATAATGGTCTAAAATCATTGAAGCCACTTGCAGCAGCTTGTCAATAAGGAAAATTTGGCGTGAATAATA  
TTCAACACCAGTGAGCATCATCATTACATACTTACAGCCGCCGACTACCGCTTTCGATATATTGACTCAATTTCCAGC  
CTGGTAAAAATAGCGACCAGCTCAGTCGAAAATATAGTGACTACCCTAACTAAGCAACAATAAGGAATACACTATGACT  
GTTCAAACAAGTAAAAATCCGAGGTCGATATTGCTGAAGATAATGCATTCTCCCTTCAGAAATTCGTTAGCCAATA  
TACCAGTCTGTCTCTGATCTTGATGGCTGGACTATCCAAAACCTTATCGCGTAAACATAAAAATCTGGTGTATCGCCG  
CGGACGAACGTTATTTGCCGACCGATAACGGAAAACGTTCTCGACCGGTAACCATCCGATTGAAACGTTGCTGCCGTTG  
TATCATCTCCATGCTGCAGTTCGAATTCGAAGTGGCGACCATTTCCGGTCTGATGACCAAGTTTGAATACTGGGCTAT  
GCCGCACAAAGATGAAAAGTAATGCCATTCTTTGAGCAGCATAAATCGTTGTTCCGCAATCCGAAGAACTCGCGGATG  
TTGTTGCCAGCCTCAACGCTGATAGCGAATATGCAGCAATCTTTGTTCTGGTGGTGCATGGCGCACTTATTGGTTTACCT  
GAAAAGCCAGGACGTGGCTGCCGCTTTACAGTGGGCAATCAAAAATGACCGTTTTGTTATCTCCCTTTGCCACGGCCCGC  
GGCTTTCTGGCGCTTCGCCACGGCGATAAACCCTGAATGGTTATTCATTTGCGCATTCCCAGACGCCGAGACAAC  
AAACGCCAGAGATTGGCTATATGCCGGTTCATCTCACCTGGTACTTCGGCGAAGAACTGAAGAAAATGGGCATGAATATC  
ATTAATGACGACATCACCGGGCAGTACATAAGGACCGTAACTTCTCACCGGCAGAGTCTTTTGCAGCGAATGCGTT  
GGGTAAACTGGCGGCAGGAAATGCTGGCAGCTTACGCGGTTAATCCCTGTTACGTTTGAATGTAAGCGCATAATCAA  
TCGCGGCCCGGTTAGTACTCAGGACGTGGCTGCGTTTTTACGGTTAATTTATGGCGTACTGAAGCCCTATGTTAATTT  
CTTTGCGGTAAACGTAATCCGGAACACATTATGCTTATTGAGATAGTGATACGTAGCACTTCCCCATGCAATTCGGCAAT  
CGTTTTGACTAAAGAAAGGCTAGTCCCTGACCTACGGAATGACGCAATTATCTCCCCGCAAAATCTACGGAAGAGTT  
TTTACGGCTCATTAATTTTCGTTCCAGGGCTGGCGATCAATATAAGATAGCTGTTGGTATCAAGAAAATGGTTATA  
TGAATACGCGATTTTTCTGGCGAATATCTAATGGCATTAAACAATAAGATTGATAACATTCTGTTGTAGTAAAATTTTATC  
CGCAAAGATTTGCTGATTGCACTCGACCTTAAAGCAAATCTTTTCTGCTGAAAAGGATTCAAGATAGTCCAACAAT  
TTTCGACTTCTTATTGAGAGAAAAGCGAGTCCAGTTTACCAAAAACATTGTTTTTATCTGCCCTGGCAAGAAAACAGTATG  
TTCTCTGTTAACCGCGAAATATTTTCCAGCTCTTCAATGTTTCCGGCAATTGTTTTTATGATTTACGCGATACTTCTGGT  
TTGACTGAGCGTAACCTGATTCTGACCCAGTAATGCATTAATTGGCGTTCTAAGTTCATGAGCGAGATCGTCAGCAAAC  
GACTTAGACGCTCAAAATCTTTGACTAAAGCATGATGCATTTTATCAACGCCTGCCAAGAGGTTTTAGTCTCTCGGT  
AATGCGCTAACCTCAACAGGCTCTCGGCTATCGTTATAATTCAGCGCTTCCGTTACACCACTCAACTTTTTGATCTCTCG  
TAATCCCGTTCTGATTAACAGCGGACTTAATACTGAGCAAAGTACAATGGCGACAATGCAATTTATAATGCTATTAATTT  
TATACTGTTCAAGCATGTTATGCTGGCTGAAGCCAATTTAGCCACAGTAACCGTTAATGATGGCGAACTTCATCAATA  
TTAATTCGTAAGCATCTATCTCTGTATCATTAAATAATGCTTCTGTAATGCCAGCTGCGCTGATTGTCTACTAGCAGG  
TATGTTATTTAACATGCCATCACTGACATTTGTCCGGTAAACAATTTTATTGATGCTATCACCATGAATAATCAAGATAT  
CCTGACTAACATCCATCATCCGGTTAAAGTACACAGGTAACGTATCTGGATTTACCCCATCAATTAACAACCTGCTTATC  
TGGCTGTCCGGTTAATGAGTGTGATCATCGCGCAATTTCAACTCACTTGCAGGCCATTATAGAGAGTCCAGACAAT  
TCCGGCGCCAGCAACAGACAGTAGCAATATAAAAAGCAAGGTTAAACGGACGTTATAGATAGTCTTTTATTATTTTTT  
TACCCTACGAATGAATAGCCCATCCCCGATTGTGGCAATTAGCTTTTCCAGGAAAAGGATCATCAACTTTTTGCGCGGA  
GCCTGCAATGGCGACGTCACCGTATTGGTATCACTATCAAAGTTGATTTCCCAAATTTCACTCGCAATAACCGTCTG

GGTATAATTTGCCAGCTCTGGAGGCCAGTAGCCAAAGTAACTGAAACTCCTTGCGCGTCAGTGAATACTGATATTGTC  
CCTGCTCACACTATGACTAACAGAGTCCATTCTTAAGCCGCTGATTTCTAATGTTGAATTCAAAGCGTGATGTTGCCTTA  
ATTGTGCCGAACCCCTTGCCAGCAACTCAGAAAATGAAAAAGGTTTTACCAGATAATCATTGCCCCACTGTCCAGCCCT  
CTGACTCTGTATCGACAGAATCCCTTGACAGTAAGGCAAATAACAGGGGTTTTGCTTTGCTGTTCTTAACGTTTTGAAGAT  
CTGCCAGCCATCCATAACCCGGAAGCATAATATCCAGAAATGATCAATGCATAATCATCTTCAGCGCAAGATAAAGCCCAT  
CTCTGCCATCAGAAAACGGCATCGATGACATAACCCGCTTCGAAAAGCCCCTGCGTTACCCATTCTGGGTCTTTGATTA  
TCTTCAATAAGTAGAATCTTATGAAAATAATATGCCATAAATCATATGTTATAGAAAACAGCCTGGTTCATTACAAAATT  
GTAATGCTGCTGAAGGTTACCCTGGACGCTTTTTGCTATCCTCAAAACTCATTACATGACAAGGATATAAACATGTT  
AAAGCGTATTTAGTACTCTCGGTAGCAACGGCAGCATTTCATTACCTTCTTGGTTAATGCCGCACAACAAAACATTC  
TTAGCGTGACATTTTGAACCAGCAACAGGAAAACCCGCTGCTGACGTGACAGTCACTCTTGAAAAGAAGGCGGATAAC  
GGCTGGTTACAACCTAATACCGCAAAACAGATAAGGATGGACGAATTAAGGCACTGTGGCCCGAGCAAACTGCAACTAC  
GGCGATTACCGTGTCTGATTTAAAACCGGGACTATTTCAAGAAAACAAAATCTTGAAAGTTTCTTCCCTGAGATCCCCG  
TTGAATTTATATAAAGTGAACGAGCATTATCATGTGCTTTATTACTTAGCCAATATGGGTATTCAACCTATCGT  
GGCAGTTAATGCATAAATATGAAAAGCAGATCTCTGCTACTGTTAGGGAGGACACTCCCTGACAGATTAACAGTAAAC  
GCTCTTGCTGGCTAACGACAAAAAAGTGTATGGCTTATGAAAAAGAATCAATTTTTAAAAGAATCAGATGTTACGGCCG  
AGTCGGTATTTTATGAAGCGTCGGCAGGTGTTAAAAGCACTGGGCATCAGTGCAACTGCACTTTCTTTCCTCAGCT  
GCCGATGCCGATCTGCTTAGCTGGTTTTAAAGGGAACGATCGCCCGCCCGCCCGCGGAAAAGCGCTGGAGTTCAGCAA  
GCCTGCCGCTGGCAAAATAACCTGCCACTGACGCCAGCAGATAAAGTTCCGGTTATAATAACTTCTATGAATTCGGGC  
TGGATAAAGCCGATCCCGCCGCTAATGCTGGTAGCCTGAAAACCGATCCATGGACACTGAAAATCAGCGCGAAGTGGCA  
AAACCATTGACCCTCGATCATGATGACTTAACCCGTCGCTTCCCGCTGGAAGAGCGTATTTATCGATGCGCTGCGTGGGA  
AGCGTGGTTCGATGGTGGTCCGTGGATTGGTTTTCCGCTGCACAAATTGCTGGCGCTTGCCGAACCTACCAGCAATGCGA  
AGTATGTGCTTTGAAACAATTTATGCACCGGAACAGATGCCAGGCCAGCAGGACCGCTTATCGGCGGTGGGCTGAAA  
TATCCTTATGTGAAGGATTGCGTCTCGACGAAGCAATGCATCCGCTCACACTGATGACCGTAGGTGTTTATGGCAAGGC  
GTTACCGCCACAAAATGGCGCGCCGGTGCAGTATTGTGCCGTGAAAATATGGCTTTAAGGGATTAATCGATAGTCA  
GTATTAAGCTGACCCGCGAGCGTCCGCCAACCCCTGGAATCTGGCAGCGCCTGACGAATACGGTTTTACGCCAACGTT  
AATCCGATGTTGATCACCCGCGCTGGTACAGGCTACCGAACGATTTATTGGTTCAGGCGGCATCCTCGATGTACAGCG  
CCAGCCAACGCTACTGTTAATGGTTACGCCGCCAGGTGGCATCGCTGTATCGTGGCCTGGATTTGCGGGAGAATTTCT  
AAATGCGTCTGACAGCAAAACAGGTGACATGGCTGAAAGTTTGCCTGCATCTTGCCGGATTGTTGCCGTTTCTCTGGCTG  
GTCTGGGCGATCAATCACGTTGGACTGGGTGCCGATCCGGTGAAGATATTCAGCATTACTGGTGGCAGTGCAGTAA  
ATTTTTGCTGGCGACCTTGTAAATCACCCCTCTGGCAGCTACGCAAAACAGCCGTTATTGATACGCACTCGCCGCTGT  
TAGGATTATGGTGCTTTGCCTGGGCGACACTGCATTTAACAAGTTACGCATTGCTGGAGCTGGGCGTGAATAATCTGGCG  
TTATTAGGTAAGGAGTTAATTACCCGGCCTATTTAACGTTAGGTATTATCAGCTGGGTAATTTTGTGCTTTAGCGTT  
CACTTCAACCCAGGCGATGCAGCGAAAACCTGGCAAGCACTGGCAACAGTTGCATAATTTGCTCTATCTTGTGCGGATTC  
TGGCCCAATACATTATCTGTTGTCGGTGAAGATTATTTACCAGCAGCCGCTCATCTACGCTGGGCTGGCTGACTGCTT  
TTAGCCTTACGGTATAAGAAGTTGCGTTCCCTTTTTAACCGTTACGCAAGCAGGTTACAACAAATTTCTGTATAACT  
TCATATTGCCGACAAAGTACGCGTTATCCCTGCCGATGTGGCGGAGCGCCCTATCCGGCATAACAGATCGCATCAGG  
TTATGTTTCGTTTGTATCAACCTCAAATCACAAAATAATTTATTTTATTTCAATAAGATAGATAAGTAGAACTGAGAA  
AGCCATGCTCTGTTTTCTAAGAGTTGTTGATTTTTGCTATATGTTACAATAAACATTACACATCATATACATTAACCT  
TGGAGGAAACTGTTTTGGGATTCGTTTACAAACTGGCTGTGCTTTAGGTGTCTTTATTGTTAGCGTCTCTGCTTTT  
TCGCATGGTCACTCAACGGCAAACCCCTTAACAGAGGTGCAACAAAAGCTGCTAATGGTGTTTTTGATGATGCCAA  
TGTACAAAACCGAACGCTCAGTGACTGGGATGGAGTCTGGCAATCCGTTTTATCCTTTACTGCAAAAGTGGCAAACCTGACC  
CCGCTTTTCAGAAAGCGGATGCAGATAAAAATAAAACATTTGCTGAAATTAAAGATTATTATCACAAAGGTTATGCA  
ACAGATATCGAGATGATTGGCATTGAGGACGGCATTGTTGAATCCATAGAAAATAATGAAACAACATCGTAAATATGA  
TTACGATGGATACAAAATACTCACCTATAAATCAGGCAAGAAAGGCGTTGTTACTTATTGAAATGTAAGATCCTGAAA  
GCAAAGCCCTAAATATATACAATTTAGCGATCATATAATTGCACCACGAAAATCATCTATTTTACATTTTTATGGGT  
AATGATTCACAGCAATCTTTAATAAGAAATGAAAACCTGGCCAACGATTATCCATATCAGTTGAGTAGCGAAGAAGT  
GGTGCAGGAAATGATGTCTCATTGAGTATTCTCATGATAACGCCTCGATGCCGCTTTAGTAAGTTATCATAACTGCCACT  
GGTCCATCCACAAACGCCACTGAACGCAAGCTAGCTACAGACAGCTCATCACTATGACGTGTCTGTATATAAAGCT  
AACCCGATTGAGTTAACCAATAACGGATTCCATACACAATACGGCCAACAGAGAAAGATACCTGTGCTCACGCCATTGC  
TTATATTGGCTGGTTACAATATGCACTATCAATTTTTAAATAACAAATTTAAAACACATCTGTATAAGGAATTTTT  
AAGTTTCGTGGATAGCTTGACTGTGAAAATCACAGGAGCTACAAAATGAACCGATTCTCAAAAACCTCAATTTATTTA  
CATTGGATAACGCTGCTTTTCGTTGCAATAACCTATGCCGCGATGGAACCTCCGTGGCTGGTTTCTAAAGGTAGTAGTAC  
TTATCTGCTGATGCGAGAAACACATTACAATGCGGGTATATTCGTTTGGGTGTTAATGTTTTACGCCTGATTATAAAC  
ACCGTTATAGTGATCCTTCTATTGTGCCACCGCCACCTGCCTGGCAAATGAAAGCGGCTTCGCTAATGCACATCATGCTT  
TATATAACCTTCTTGCCTTCTCTGCTGGGATTGCTTTGATGGCTTACAGTGGAAAATCGTGGAGTTTCTTGGTTTT  
CAATGTGCTCTCCCTTTGTTACCCCAACAGCGAAATTAAGCACTGATAAAAAATATTACGAAACCTGGGCAAAATATAG



GCTACTTTTTAATCGCAGCTCACGCTGGCGCAGCACTCTTTCATCACTACATTAGAAAAGATAATACTCTGTTACGAATG  
ATGCCTCGCCGCAAATAAGTCGATCCCCTTACAAGGAAATGTGAACCATGGACATCAACGCGTCATAAATGTTTACGCAA  
GTGCACAATGCACCCTTCCACTATCAACAAGGAGGAGCAGAACTGTGTAATCGTACAATGGTAAGACTTATCAAAAA  
TACAGGTAAATTTTGGTATTTAAACCTTTTTTACTTGTAGTATGATACAAAGCCTTTCAAAAAAGCTGCGAAATCAAC  
AACTCTTGGAAATTATGGACTTTGTCCGCGCGCTTAACTGACGCGCGCTTCTTTTTTACTCAATTATTGAACCTT  
TCTCTACGCAACTTCAGTCCCACCACCAACTTTGCGGCAGTTTCATAGGATGAATGTCTAAAAGAATAATGGTGAGCGA  
TAAGAAAACGACTGAATAACTGCACATTTTCGCTCGAAAGCTTCTGTGATCCATAGCGAATCAAGTGCTGAATGTCA  
CAGTATCGAACAGAAAACAGTGACGATCTAACCTTCAAGAATATTCTACGATTGTTCTGTTTAGGAAAAGCAAGGCGGG  
AAGTCGGGAGATAAGTCATTGATAAAGTGGCGGAGAGAGGGGATTTGAACCCCGGTAGAGTTGCCCTACTCCGTTTT  
TCGAGACCGGTCCGTTACGCGCTCCGGCATCTCCGTTGATGGTGGCCATGATGCCAGGAAATTTGGCATTTTAAC  
AGTCCCTGTCCGTGCAATTTTGTCAAGTGACGAGTTTTCGAGCAAAACGATGATTAAGTGCCCTGGAAAGTACAAGAA  
TCAGCACATCAAACCTGCCCTCCCTGGCAGGAAGCACTATCGATCCCCCTTTAACGTGTCTGACGGAACAGGAACAAAG  
CAAATTAGTCACTCTTCCGAAACGTTTTTACAGCAAAAGCGGCTTGTCTTTACAGGGCTTTGAACTGGATTATTAA  
GAAGTCGCCGATAGCACTTCTATTTTGCCTACCCGTTCTGGAGTTAGGACTGGAATGGCTGGATGGTTTTTCATGAAGTC  
TTAATTTATCCTGCGCATTGTGGTCGATGATGAATGGGAAGACGATATCGGTCTGGTGCATAACCAACGATTGTTCA  
GTCAGGTGACGAGTGGCAGCAAGGGCTATCGTTTTGAACTGGTGGATATACAAGATTCTTTTGTGCTTCTGTTTTA  
ACCTGATTATTCATGAAGTCGCTCATAAGCTGGACACCCGTAACGCGGATCGCGCCAGCGGAGTTCCCTTTATTCCGTTG  
CGTGAGGTTGTGGCTGGGAACACGATCTTCATGCTGCAATGAACAACATTAGGAAGAAATCGAATTGTTGGCGAGAA  
TGCGGCGAGCATTGATGCTTATGACGCCAGCATCTGCTGAATGTTTTGCCGTAATTTCTGAATATTTCTTTAGCGCCC  
CAGAATTTTTGCTCCTCGTTTTCCCTTATTGTGGCAACGTTTCTGCCAATTTTATCAACAAGATCCTTTCAGAGACTG  
CATCACGCTAATGATACAGACTCGTTTTCGCGCAGCAATGTTTCAATTAACAACCTTTCAGATTAATTAACCAATTGA  
AATGACTTATGAAATTTAGTGTGACAGACAAGGTACCGCTAAGTAATATTCGCCCCGTTACACGATTCCTCTGTAGTT  
CAGTCGGTAGAACGGCGGACTGTTAATCCGATGTCAGTGGTTCGAGTCCAGTCAGAGGAGCCAAATTTAAAAATTCGC  
TTTTTTAGCGCAATGTCAGTACCTTAGTTGAACATTGTTTTTAAACGGATAGCGGTTTTTAAACATCTAAGCGCCCTC  
GACCTTTATGGTTGAGGGCTTTTTGCTATGAACGCCATCACCATTTCCCTCGATTATAAAAATTGAGTTATTAGTAG  
TCTCCCTCTTGAACCTCACACCCAAAACCTGCCTAACGAAAAGTTATTAATTTCAATCATATTGCTATCAGTATTTACA  
TTTTTTCGCTGTGCTAGAAAAGGGCGCATTATGTTAGCTCGTTACGGAAGGTAAGCATGGCTACGAAGAAGAGAAGTGG  
AGAAGAAATAAATGACCGACAATATTATGCGGGATGGGAATTAACCTACGCCGTTAACTGCGGGTATCTGTCTGATAA  
CTCAACTTGCCTTCCCTATGGCTGCGGCAGCACAAGGTGTGGTAAACGCCGCAACCCAAACAACCAAGTTCTCGACAAAT  
GCCATTGCAAATGCCAATACGGTGCCTACACCTTGGAGCGTTGGAATCGGCCAAAGCGTTGCCGAACGTTTTCGGTAT  
TTCGGTGGCTGAGTTACGCAAACTCAACCAGTTTCTGACGTTTGTCTGAGGTTTTGATAATGTCCGCCAGGGTATGAAC  
TGGATGTCCCGGCACAAGTTAGTGAATAAATAAACCCTCCGCGCCGGGTAATAGCAGTGACAACCTCGAGCAACAGATA  
GCCAGTACTTCACAGCAATCGGGTCTGCTCGCCGAAGATATGAACAGCGAGCAAGCGGCAAAATAGGCGCGTGGATG  
GGCTCTTCTCAGGCTTCAGGCGCAATGACAGACTGGTTAAGCCGCTTCCGTACCGCAAGAATCACGCTGGGCGTGGATG  
AAGATTTTAGCCTGAAGAACTCCAGTTTCGATTTTCTCATCCGTGGTATGAACCGCTGATAATCTTTTTTTCAGTCAG  
CATACTCTCCATCGTACTGACGAGCGTACGAGATTAACAACGGCTTAGGTTGGCGTCATTTCACTCCACATGGATGTC  
GGCATCAACTCTTTTTTCGACCACGATCTTAGCCGTTACCACTCCCGCGCCGGCATTGGCGCGGAGTACTGGCGCGACT  
ATCTAAAATTAAGCAGTAACGGCTATTTGCGACTGACCAACTGGCGCAGCGCACCTGAACTGGACAACGATTATGAAGCA  
CGCCCGCAATGGCTGGATGTACGCGCAGAAAGTGGCTACCCGCTGGCCGACCTTGGCGGTAACCTGGTCTATGA  
ACAGTATTATGGCGATGAAGTGGCCCTGTTTCGATAAAGACGATCGGCAAAAGTAATCCTCATGCCATAACCGCTGGACTTA  
ACTATACCCCTTCCCGCTGATGACCTTCAGCGCGGAGCAACGCCAGGGTAAACAGGGCGAAAATGACACCCGTTTTGCC  
GTCGATTTTACCTGGCAACCTGGCAGCGCAATGCAGAAAACAGCTTACCCGAATGAAGTCGCTGCACGGCGTAGCCTTGC  
AGGCAGCCGTTATGATCTGGTGGATCGCAACAACAATATCGTTCTGGAATATCGCAAAAAAGAACTGGTTTCGCTGACCC  
TGACAGACCCCGTACAGGGGAGTACAGGAGAAGTGAATCACTGGTTTTGTCGCTACAAACCAAAATATGCCCTGAAAGGC  
TATAACGTCGAAGCCACCGCACTGGAAGCTGCCGGTGGCAAAGTGGTACAACGGGTAAGATATTCTGGTTACCCTGCC  
GGCTTACCGGTTACCAAGTACGCCAGAAACCGATAACACCTGGCCGATTGAAGTACCGCCGAAGATGTCAAAGGCAATT  
TGTGCAATCGTGAACAGAGCATGGTGGTCTTACGGCACCTACGTAAGCCAGAAAGATTCCTCGGTATCGTTAAGTACC  
CAACATTTGAACGCGGATTCCTTCAACCGCCACACTGACTTTTATTGCGCATGATGCAGCAGGTAATCCTGTTGTCGG  
GCTGGTCTCTGACGCGTACGAAGGTGTTACGGACATCACCCTTCTGACTGAAAGATAATGGTGACGGAAGCTATA  
CCCAGATCCTGACCACAGGAGCGATGCTGGCACGTCAGCTGATGCCACAGCTGAATGGTGGTGGATGCGGCTAAAGCC  
CCCGCGTGGTGAATATCATTTCTGTTTCTGTCATCCGAACTCACTCGTCAATTAAGATTGATAAGGACCGTTATCTCTC  
CGCAATCCTATCGAGGTGACGGTAGAACTGAGAGATGAAAATGACAAAACCTGTTAAGGAACAAAACAGCAACTGAATA  
ACGAGTCAGCATCGACAACGTGAAACAGGAGTCACTACAGACTGGAAAGAAACCGCAGATGGCGTCTATAAGGCGACC  
TATACCGCCTATACAAAGGCAAGTGGACTTACTGCGAAGCTATTAATGCAAAAACCTGGAATGAAGATTGATAACCGCTGG  
ATTTATCATCGACGCAACCCGCAAGTACGCGAAAATTCGACATTTATCTGCCAGCAATAATGGTGTGCTCGCAATGAGA  
ATGCAGCAACACCGTCTCGGTCAATGTCGCTGATGAAGGAAGCAACCAATCAATGATCATACCGTACGTTTTGCGGTA

TTAAGCGGATCGGCAACTTCCTTCAACAATCAAAACACCGCAAAAACGGATGTTAATGGTCTGGCGACTTTTGATCTGAA  
AAGTAGTAAGCAGGAAGACAACACGGTTGAAGTCACCTTGAAAATGGCGTAAACAAACGTTAATCGTCAGTTTTGTCTG  
GCGACTCGAGTACTGCGCAGTTGATCTGCAGAAGTCGAAAAATGAAGTGGTCTGACGGCAATGACAGCGTCACAATG  
ACCGCGACCGTCCGGGATGCAAAAGGCAACCTGCTCAATGACGTCATGGTCACTTTCAATGTTAATTCAGCAGAGGCGAA  
ACTGAGCCAAACCGAAGTGAATAGCCACGACGGGATCGCCACAGCTACGCTGACCAGTTTAAAAATGGTGATTATAGGG  
TTACGGCCTCTGTGAGCTCTGGTTCCAGGCTAATCAACAGGTGAATTTTATCGGTGATCAAAGTACTGCTGCCCTGACC  
CTCAGTGTGCCTTCAGGTGATATCACCGTCACCAACACAGCTCCGCAATATATGACTGCAACCTTGCAGGATAAAAAATGG  
CAACCCACTAAAAAGATAAAGAAATCACCTTCTGTGCCAAACGACGTCGCAAGTAAGTTCTCGATTAGCAACGGAGGAA  
AAGGCATGACGGATAGTAACGGGGTTGCAATCGCCTCCCTGACCGGCACGTTAGCGGGCACGCATATGATCATGGCTCGT  
CTGGCTAACAGCAATGTCAGCGATGCACAGCCAATGACGTTTGTGGCGGATAAAGACAGAGCGGTTGTCGTTTTGCAAAC  
ATCGAAAGCGGAAATCATTGGGAATGGCGTGGATGAGACAACCTGACAGCAACAGTGAAGATCCGTCGAATCATCCGG  
TGCGGGGATAACGGTAACTTCACCATGCCACAGGACGTTGCGGCAAACTTACCCTTAAAAATAACGGTATTGCCATC  
ACTCAGGCCAATGGGGAAGCGCATGTCACGCTGAAAGGTAAAAAGCGGGCACGCATACGGTTACCGCAACGCTGGGTAA  
TAACAATACCAGTGATTCGACGCCGTAACATTTGTGGCGGACAAAGCCTCGGCTCAGGTTGTCCTGCAGATATCAAAG  
ATGAGATCACAGGTAATGGCGTCGATAGCGCAACGCTAACTGCAACGGTTAAAGATCAGTTCGACAATGAGGTGAATAAT  
CTTCGGTAACATTCAGCTCAGCCTTTCAGGACTCACCTGACCCGGGAGTAAGTAATACCAACGAGTTCGGCATCGC  
GCAGGCCACTCTCGCAGGCTTGCCTTTGGTGAGAAGACGGTTACTGCATCACTGGCTAATAATGGTGCCAGCGACAACA  
AAACTGTGATTTTATTGGCGACACAGCGGCGGCAAAAATTATCGAGTTGGCGCCTGTCCAGACAGCATAATCGCCGGT  
ACCCCGCAGAACAGCTCCGGCAGCGTCATCACCGCCACAGTCGTTGATAATAATGGCTTCCGGTGAAAGGTGTGACTGT  
GAACTTCACAGCAACGCAGCGACAGCCGAAATGACGAACGGCGGTCAAGCCGTGACGAACGAACAGGGTAAAGGCTACCG  
TCACTTATACCAATACCCGCTCCTCGATAGAATCAGGAGCGAGACCGGATACCGTTGAGGCCAGTCTGAAAAATGGTAGC  
TCCACGCTTAGCACATCAATTAATGTCAACGCTGATGCGTCTACGGCACATCTCACCTGTACAGGCACTTTTTGATAC  
AGTCTCCGAGCGGAGACAACAGTCTGTATATTGAGGTGAAGGATAATTACGGCAACGGTGTCCCCAGCAGGAGGTAA  
CCCTCAGCGTTTACCAAGTGAAGGCGTGACCCCGTAATAACGCTATATATACTACCAACCAGCAGCGCAATTTTTAC  
GCAAGCTTACCGCTACAAAAGCGGGGTTTATCAATTGACGGCAACCTCGAAAATGGCGATTGATGCAACAAACAGT  
GACCTATGTGCCGAACGTCGCGAATGCTGAAATCACGCTGGCAGCCTCGAAGGATCCGGTATTGCCGACAATAACGATC  
TCACGACACTAACAGCAACAGTCGCTGATACAGAGGGCAATGCGATAGCCAACACTGAGGTAACATTTACTCTGCCGGAA  
GATGTGAAGGCGAATTCACGCTGAGCGATGGCGGTAAAGTGATTACTGATGCTGAAGGCAAAGCGAAAGTCACGCTGAA  
AGGTACAAAAGCAGGCGCTCATACTGTTACAGCATCGATGACTGGCGGTAAGAGTGAGCAGTTGGTGGTGAATTTATTG  
CGGATACGCTCACTGCGCAGGTTAATCTTAACGTTACCGAGGACAATTTTATCGCTAATAACGTCGGGATGACCAGGCTG  
CAGGCAACAGTGACTGATGGAACGGCAACCCGTTAGCCAATGAGGCGGTGACATTACGCTACCGGCAGATGTGAGCGC  
AAGCTTACTCTCGGACAAGGCGGTTCCGCCATTACTGATATCAACGGCAAGGCTGAAGTTACTGAGCGGTACAAAAT  
CCGGCACCTACCCGTGACAGTTAGCGTGAACAATTATGGTGTGAGTATACGAAACAGGTGACTTTGATTGCCGATGCT  
GGTACCGCAAAACTAGCCTCCTAACCTCTGTATACTCATTGTCGTCAGCACGACCGAGGGCGCAACCATGACGGCAA  
CGTCACTGACGCTAACGGCAACCCGGTAGAAGGCATAAAAGTTAATTTCCGCGGAACCTCCGTACGCTAAGCAGCACA  
GCGTTGAAACGGATGATCGGGGTTTCTGTAATTTGTGACAAGCACCGAGGTCGGACTGAAAACAGTTTACGCCTCT  
CTGGCAGATAAACCTACTGAAGTCATCTCGGATTACTGAATGCCAGTGCAGATGTTAATTCTGCGACGATTACAGTCT  
GGAGATACCGGAAGGTGAGTAAATGGTCGACAAGACGTAGCAGTTAAAGCTCACGTTAACGACCAGTTTGGCAACCCGG  
TTGCGCATCAACCCGTGACATTCAGTGCAGAGCCATCCTCGCAATGATCATCAGCCAGAATACGGTCTCTACTAATACG  
CAGGGTGTAGCCGAGGTACCATGACGCCGAAAGAAACGGTTCTGATATGGTGAAGCATCCCTGCCGAATGGAGCCTC  
ACTTGAGAAAACAACCTGGAGGCTATTGATGAAAAACTGACACTACGGCGTCCAGTCCGCTTATCGGTGTCTATGCCCTA  
CAGGCGTACTCTGACGGCAACGCTAACCTCTGCAATGGCACTCCAGTGGAGGGTCAGGTATCAACTTTAGCGTAACG  
CCAGAAGGGGCGACGTTAAGTGGCGGAAAAGTGAGAACTAACTCTCAGGTGAGGCTCCAGTCTTTTTGACCAGCAATAA  
AGTCGGTACATATACGGTACTGCATCTTCCATAACGGCGTAACAATACAGACACAGACAACCGTAAAAGTCACTGGCA  
ACTCAAGCACCGCCATGTTGCTAGCTTATCGCTGATCCATCGACTATCGCCGCCACCAACTGATTTAAGTACCTTA  
AAGGCAACGGTTGAGGATGGCAGTGGTAACTGATCGAAGGTCTCACTGTGACTTTCGCTTAAAAAGCGGCTCTGCCAC  
ATTAACGTCATTAACAGCGGTGACCGATCAAAACGGAAATCGCGACAACAAGCGTGAAGGAGCGATGACAGGTAGCGTCA  
CGGTAAGCGCAGTCACGACCGCTGGTGAATGCAACAGTAGATATAACGCTGGTGGCTGGCCCGCAGACACCTCGCAG  
TCCGTCTTAAAGAGCAATCGGTATCACTGAAAGGGGACTATACCGATAGTGTGAATTACGCTTTGTTCTGCAGGATAT  
ATCAGGCAATCCGATCAAAGTTTCTGAAGGGATGGAATTTGTGCAATCAGGTAACGTCCTATATAAAAAATTAGCG  
CAATTGATTACAGTCTAAATATCAACGGTGATTACAAAGCCACTGTTACAGGAGGCGGAGAGGGTATCGCAACGCTGATC  
CCTGTATTGAATGGTGTTCATCAAGCTGGTCTGAGTACCACAATACAATTCCTCGCGCAGAAGACAAAATAATGAGCGG  
TACAGTATCAGTCAATGGTACTGACCTACCGACAACACTACCTTCCGCGAGGGGTTACCGGGGCGTATTATCAGTTGA  
ATAATGACAACCTTTGCCCAAGGAAAACGGCGGCTGATTATGAGTTTTCAAGCTCTGCCTCCTGGGTCGATGTTGATGCT  
ACCGGTAAGTGACATTTAAAAATGTCCGAGCAATTCGGAAGGATTACGGCGACGCCAAAATCAGGAGGCCCTAGCTA  
TGTATACGAAATCCGTGTGAAGAGTTGGTGGGTGAACGCCGGCGAGGCTTTCATGATATACAGCCTTGTGAAAATTTT

GCAGCAGCAATGGCTACACGCTCCCCAGAGCAAACCTATTTAAACCACTGTAGTTCCTGGAGGCATCGGGTCACTGTACAGT  
GAATGGGGAGATATGGGGCATTACACGACTGACGCTGGTTTTCAATCAAATATGTATTGGTCATCTAGTCCCAGCAAACCTC  
AAGCGAACAAACGCTAGTTCCTGGCAACAGGTGATCAAAGCGATTTTAAAAAGCTTGGGTTTGCTTATGCGACATGTT  
ATAAAAACCTGTGATTTTCCGTTATAATTTCTTAAAGAGTGTTCATTCCGGGCACTCTTTTTTACATTCCCTCTACAGA  
ACTAGCCCTTCTCTCACAGAAAATGAATAAATAAAAATGCGGCACCGCCAGAATCGCGTTCGATGTGACTATGATCATT  
TCGGTGAGTACTGCTTTGATCTAAAGGCTGGTTTTCTGTGATGATTGACCAGCCTCAGAGTATTGATGACACCACCGTTC  
ATAACAGATCGGCATTACTATGCATAAGTACTGTCTCATATTCTCGCCAAAACACTTTTTAATGCCTTTGCGAATTCATC  
CAGACTTATATTGTCAATTTTTGCCCCAACGACGACTGACTCCGAGACATCGGCCATTGCGGGCCATCGCGTTTTGTAAT  
CAGCATAAATTGCAACAACAGGGGTATTATAGGCACCTGCCATATGTAATATTGAGGTGTCAGGAGTTATTGCGATATAA  
GCATCTTTTATGATTGCTGCTGAACGTTTAAATCGAGGGTGGTAAGGATAAACGGTAGACATTATTATAACAATCCACTAA  
TGCCCTGGCTTTATCTTACCTTTGGGTCCATGAACGATCACTATTGGTATATCTGTTTCACTTTAAATTTTTGCTATTA  
GATTTTCTGCAATCGATAATGAAAATGTACGTTCTGCGAGCTACCTTCTAAATTGAACGCAATGTAAGATCCTAACGAT  
CGATTTCTCGGCACCTCATCGAGTACATCTCACTTAGTGGAATTATATATTGGCTGACTGCTGAAAAACCCG  
CTCACGCATCATAAATGCCATGTATAGGTACGGGAGCCCGAGTTTCTGATCCATACTGGACGCGTTCTTGACAAAA  
GGGAGAAGCAATTCATGGTTATACCAACAACCTGAAAATTCGTTTTTGTCTTCAACTGACTGATAAATAACATCGTTTT  
AGTTCTTTTTTACGCATCCCTCAATGCAAAGATCCGGCGTACCGTATTGCTGTGTTATGTTCTTTGCTAAATCTTTTTAT  
TTCTTTTAAATGTTGCGTGATCCTGCATAGTCATTGTGACTAATGTTAATTTAGTCTGTTCAAGTTTAAAGCGCATTAAAGA  
CTTCTAAATTAATTGTCGACGTTACAATTAAGAGATGCTTAATTTTATGCAATTCAAGCGCCCGAATAACAGGAAAGATG  
GCCATAGCATCGCAATCTGATCGGGAATATGGATGACAACAAAGTCTGTTTTTTCAATATTGAAATTATAAGCTTTATA  
ATCGTAGTAACTAAATGCAATACGCTCTCAACAATGATGCTAAAAACATACCTAACCTCGCCTCCCTACTGGTTATAATGC  
AATGCAGTCTATCAGACTCATCAGGGTGCATTTTGTGCATATGCGGACTTTTTATGTTTATATCTCTAACCTGTGGGT  
CTCTGCTTAATCCTTAAACAACACCAGCAACTCTGCGCTTTCATCTTCCATCGAATTTTTTATGTTGCCGTAATCAGC  
CATAAAATCATTGTCAGATGCGCTCTGTCGAGGTAGTCTCATAAGGTTGTTTTATAGATCGACGGCAATGTGAGTTACCT  
TTTCATACTAATTATAAAAAAGACAGTACAAACAGGATCATTATGGACTCCACGCTCATCTCCACTCGTCCCGATGAAGG  
GACGCTTTCGTTAAGTTCGCGCCGACGAGCTGCGTTAGGCAGTTCGCTGGTCCGTCGTCGACTGGTATGATTTTTTAC  
TCTATGGCATCACCGCCGACTGGTGTAAATCGCGAGTTTTTCCGCAAGTAAGCCCGGCGATGGGAACGCTCGCCGCA  
TTTGCTACCTTTGGCGTCGATTTCTTTCCGTCGCTCGGCGGTGCATTTTCGGTCACTTTGGCGACCAGCTGGGACG  
TAAGCGCATGTTAATGCTGACCGTCTGGATGATGGGCATCGCGACAGCCTTGATTGGTATTCTTCTTATTCTCGACCA  
TTGGGTGGTGGGCACCTATTTTGTGTTGACTGCGTGCCATTACGGGATTTGCAAGTCCGGCGGAATGGGGAGGCGCG  
GCGTTGCTTTCCGTTGAAAGTGCACCGAAAAATAAAAAAGCCTTTTACAGTAGCGGTGACAAAGTTGGCTACGGTGTAGG  
TTTACTGCTTTCAACCGACTGGTTTCATTGATCAGTATGATGACGACTGACGAAACAGTTTTTAAAGTGGGGCTGGCGCA  
TTCCTTTCTGTTTAGCATCGTACTGGTACTGGGAGCATTGTGGGTGCGCAATGGCATGGAGGAGTCCGCGGAATTTGAA  
CAACAGCAACATTATCAAGTCCGCGGAAAAACGCATCCCGTTATCGAAGCGCTGTTACGACATCCCGGTGCTTTCT  
GAAGATTATTGCGCTACGACTGTGCGAATTGCTGACGATGATACGTTACTGCCTTGCCTTAAATTATTCAACCCAGA  
ATATGGGGCTACCGCGCAACTTTTCTTAAATTTGTTTGTGGTAGGTGGATTAAGCTGCCTGACAATTCCTGTTTT  
GCCTGGCTTCCGATCGTTTTGGTCCCGTAGGGTTATATCACAGGTACGTTAATCGGAACGTTGAGCGCATTTCTTT  
CTTTATGGCGCTTGAAGCACAATCTATTTCTGGATAGTTTTCTTCTCATAATGCTGGCAACATTGCGCATGACATGG  
TGGTGTGTGCAACAACCGATGTTTACCGAAATGTTTGGTGCAGTTATCGCTATAGTGGCGCTGGAGTCGTTATCAG  
GTTGCCAGTGTGGTGGCGGTGGATTTACACCTTTTATTGCCGCTGCACTCATCACTTACTTTGCCGGAACTGGCATG  
CGTCGCCATTTATTTGCTGGCTGGATGCCTGATTTCCGCAATGACCGCTTTGTTGATGAAAGACAGTCAACGCGCTGAT  
AGCCTGGCGAAGATCATCCGATCTTCCGCTTACACTTTTTGTTTACATTTCTGTGACATACTATCGGATGTGCGGTAATT  
GTATGGAACAGGAGACACACATGAATAATAAGGGCTCCGGTCTGACCCAGCTCAGGCACTGGATAAACTCGACGCGCTG  
TATGAGCAATCTGTAGTCGATTACGCAACGCCATTGGCAACTATATTACAAGTGGCGAATTACCTGATGAAAACGCCCC  
CAACAAGGTCTTTTTGTCTATCCATCACTGACCGTAACCTGGGACGGTAGCACAACCAATCCCCCAAACGCGCGCAT  
TTGGTGCCTTACCACGCGAGGCTACACCACGATTACTCGCCCTACTCTTTTCTGTTGATCTTAAATGAACAA  
CTTACGTTGCTGTATCAGGATTATGGTGCATATCTCAGTGAACCTCGCAGCATGAAATCCCTTATCCTTATGTCAT  
CGATGGCTCTGAATTGACACTTGATCGCTCAATGAGCGCTGGGTTAACTCGCTACTTCCGACAACAGAAGTGGCGCAA  
TTGGCGATGAAACTGCAGACGGCATTATCATCCAATGAATTCTCCCGCTATCGATTTTGTGCGCGCCGCTCGAT  
TTTTCCCTCGCACGGTTCGCCATTATACGGTACGCCAGTTGAACATTTTCCAGCGTTCTGTTTACCAACTACAC  
ACGTTATGTGGATGAATTCGTTGTTGGGATGCAGCCAGATCCTCGATCCTGATAGTCCCTACATTGCCCTTCTTGTG  
CTGGCGGAACTGGATCACCGCGAAACCGAAGCGCAGAAGAAGCCATTTCCGACCTTGCATGGAAAAACATCAGATG  
CCAGCATGGCATTAAATTACCGCGATGGTCAGGGTATTACTCTGGTGAATATTGGCGTGGGACCGTCAAATGCTAAAC  
CATCTGCGATCATCTGGCAGTGTACGCCGGATGTCTGGTTGATGATTGGTCACTGTGGCGGATTACGTGAAAGTCAGG  
CCATTGGCGATTATGACTTGCACACGCTTATTTACCGGATGACCACGTTCTTGATGCGGTTCTGCCGCCGATATTCCT  
ATTCCGAGCATTGCTGAAGTGAACGTCGCTTTATGACGCCACCAAGCTGGTGGAGCGGACGGCCGGTGGGAAAGTCAA  
ACAGCGGCTACGACTGTTACTGTGGTAAACACAGATGACAGGAACTGGGAATTACGTTACTCAGCTTCTGACTTCGTT

TTAACTTAAGCCGGGCCGTAGCAATTGATATGGAAAGTGAACCATTGCCGCGCAAGGATATCGTTTCCGCGTGCCATAC  
GGGACACTACTGTGTGTTTCAGATAAACCGTTGCATGGCGAGATTAACCTCCCGGCCAGGCTAACCGTTTTTATGAAGG  
CGTATTTCCGAACATCTGCAAATTGGCATTCCGGCGATCGATTTGCTGCGCGCAGAAGGGACCGACTGCATTCGCGTA  
AATTACGAACCTTAATGAGCCGCCGTTCCGATAAATAAGTTCTGAACCTTCTATCAGAAAATAGATGTGAAGGAGTAAGT  
AAGACACCTGGCAAATAGCCTGCAATAATCGTGGGCTGTTTGCTTCCCTGGGCGGATACGAGTTTTATTATCGTCTTAAT  
GATTTCCACATATTAAGCAAGTATGCTTTCAAAAACAATTATAAAAAATCCCGCCAACAATATAAGTTTTTATAAAA  
TTAAATATAAGATTATGGCTTTAGAATATTTTTATTCTAATAGACGAGATTTTCTGTTATGATATAATATGCTGAAT  
TAACACATGTTAACGATTTACCAGTAATGTAATAAATTTTCGAGGAGATCATTCCAGTGGGACGTAATGGGCCAATAT  
TGTTGCTAAAAAACGGCTAAAGACGGTGAACGCTAAAATTTATGCAAAATTCGGTGTAGAAAATCTATGCTGCTGCTA  
AACAAAGGTGAACCCGATCCAGAATTAACACATCTTTAAAATTCGTTATTGAACGTGCAAAGCAGGCACAAGTTCCAAAG  
CACGTTATTGATAAAGCAATTGATAAAGCAAAGGCCGGGAGATGAAACGTTCTGTCAGGGACGTTATGAAGGCTTTGG  
TCCTAATGGCTCAATGATTATCGCCGAGACATTGACTTCAAATGTTAACCGTACGATTGCTAACGTTCCGACAATTTCA  
ATAAAAAAGGCCGCAATATCGGAGCGGAGGTTCTGTCAGCTATATGTTTGACAATACGGGTGTGATTGTATTTAAAGGG  
ACAGACCCTGACCATATTTTGAATTTTACTTGAAGCTGAAGTTGATGTTCTGATGTGACTGAAGAAGAAGGTAACAT  
TGTTATTTATACTGAACCTACTGACCTCATAAAGGAATCGCGGCTCTAAAAGCAGCTGGAATCACTGATTTCTCAACAA  
CAGAATTAGAAAATGATTGCTCAATCTGAAGTTGAGCTTTCCCGAAGATTTAGAAAATCTTTGAAGGGCTTTGTTGATGCC  
CTTGAAGATGACGACGATGTACAAAAGTTTATCATAACGTCGCAAACTCTAATTATCTTTTAAAGAAAATCTGCTTTTA  
CGGCAGATTTCTTAACTCATATAATTCTTATAAAAAATATAATATTCAACTCGTCATATTGATTATACCCCCCGTTC  
CCAGAGAAATAATATTTATTAATAATCCAGTTCTTCTTTTTCTGATTACAGAAGGCAAAGTGGCAATTACGCATAGTTTC  
CCGATAAAGACCGGATAGCGACATCCCGCATAAGGCATTTTTCTTTATCTTTGTACGGTACTTTCATGGAACAGAGTTT  
TTGACCTTGCGAATCGTGATGTCTGTTGGGGAGGACAATTTGCTCACTGAAGCGTGAGACTCGATTAAGCGCACGAAAC  
ACAGAAATCAAAAAACCCGGTCACTTTTTTACAAGTAACCGGTAATAATAATTTTTTATTTTAACTGTTTTGAGACT  
CATAGAGATGTCTCAAACTAAAATTTGGCTCCTCTGACTGGACTCGAACCGTACATACGGATTAACAGTCCGCCGTT  
CTACCGACTGAACTACAGAGGAATCGTGAGAACGAGCGAATATTAGCGATGCCACCCACAATGTCAAAGCCTGTTTTT  
TAAATTTGAAATCGTTTGTGAAATAATCTGCATTTTGTGTTTTATTCCGACACAACCTGGCTTTTTTTCACACTTTTGGC  
GCTCGGGTTCGAGGATTTCCATAGCCAACGTCCAGTAACCATTCCCGAGTAAAACAGCACGGCCCGCACAGCCAGTCCG  
GCAAACATTCCATCCAGACACCAACCACACCCAGCCAAGCATGATTTCCAGCACATAACCGACTACAACCCGACAACC  
CCACATGCTCAACATCGAAACCCACATGGCGTAACGGGCATCACGAGCACCTTAAATCCAGCGGGTAGCACCCATGAGG  
CGACCAAATAGGCATAAATAAGCATTAGCCAAATCAGAATACAACGACATGTTTAACTGTGGATCCTGGGTGTAA  
AACGATGCCATAACCCCGCAAAGGGAGCCGTTAGCCAGGCGATGGCCGTTAATCCAAGAGTGGAAAGCCAGAACACATG  
CCGCAACTGAATCTCTGCTTGCCTATCTGCCCTACCCCAACCTTCGGCCTGTAATGATCGTAGAAGCAGAGCCGAGCG  
CACTTCCGGTAAAGTTGATAAGAGCCGCAATTGAAAACGCGATAAAAATTTCCGGCAATAACTGTTCCCATCCCGGCA  
ACGAACATTTGGGTTAATAACCGACCACTGGTAAATAACACTGATTGCACTCGCGGGAATACCAATCCCATGACTTC  
CCAGATAATGCTAAAATTCAGCGGTTTAAAATAGCTCTTAAACGAAATCCTTAGCGCAGGATTAACCAATCGCCAGCA  
CCCACAAAATTGCAACTGCGCAATATAACGAGAAATGGTTAAACCCAGCCCTGCCCGACAAATCCCAGTCCCGGCCAG  
GAGAAAAGGCCGTAATCAATATGCCGCTAATAATAATATTAAGAATATTAGGCTACCGTTAATCAATAGCGGTATTTT  
CGTATTCCTGCAACCAAGTGCCTGCTACCAATAAGAGTGATGGCAGCTGCTGGATAACTGAGTACCGTCACTCCA  
GATAAGTCAACGCCAGTGTAACTTCTGCTGGCATCACCCGCGACGAAATCAATAATTTGTTGCCCCAAATGATGA  
ATAAGCGTTGCCAACAGTACGGCAAACAACGTATGATCAACGACTGCCGCTCGCCACCCTCGCTCGTCTGCTGATC  
CCGTTACCGAGACTAAATGCCACAACGACAGTAGTACCAAGATCGATAGCAGCAAAAAAGCCATAATGACCATTTGA  
AGTGTCCGCAATCCACGCCGCCATCGCATTTTTCCAGCCAGCTGACCAGAAAAGTGTGCAACCCCATCAAC  
AGGACACAGGCAATTCATGAAGATAGGAACGAAAGCGGGTTATCTCGCGCAGAACAACACTTTGTAGCTCTTGGC  
TTTAGCGTGCCAGCGAGTCCGTGAACAACCTGGCGTAAAGCAGAGGAGATATTCAAAGCCGACCTAATTGCAGAAAGT  
GAAACCACATTTCAAATAATGAGGGAGAATCAGCAAAGCTGCAAAGATTTTCGCAACAAATTTGCTGCAATGCAACAA  
ACTGTTGATAGAAACGGCAAACAGTTGGGAATTTAAAAATCGGGTTTGACAAAAGATTTTTCGCCGTTAAGATGTGCT  
CAACAACGATTCCTCTGTAGTTCAGTCGGTAGAACGGCGGACTGTTAATCCGTATGTCAGTGGTTCGAGTCCAGTCAGAG  
GAGCCAAATTCCTGAAAAGCCGCTTTTATAGCGGATTTTGTATATCTGATAATCAATTTCTCTTCACTGCTTTCC  
ATCACCTGCCGTTGATATCTCAACTGACAGTCTGCATTACAAAGTTCCAGAAAAGCGCCAGACATAGTTACGCTGAAG  
TTGCTCTCGTTCAGTCCCAACCAGACAGTATTAGCATCAAAAAGATGCCGCTATCCAGGCGGATTAATTTCTCTTCT  
CTTGTTCGCCACTGGATTGCTCGGCAACTAATCCGATCCCAAGCCAAAGAGCAACATAGGTTTTAATGACATCAGAATCC  
TGCGCACTTAATAAATATCTGCCAGCAAACCTTTGCGGGCAAATGCGTCATCAATACGTGAGCGCCCCGTAATCCCCTG  
TCGTAAGTGATTAACGGCACTTCGCTATTGATTCAGCGTCAATGGTGAATTTGCGTCAAGGGATGATCGTGTGGAA  
CAAGCAAATATGGTGCCAAACGAAACCAGGGAAGGCGACGAGCTGCGGGTCACTACTCAAACGCTCGCTGGCGATACCA  
ATATCAGCTTCCGCAATTTGCAACAATGTCGCAATTTCTGTGGCGTCCCTGGATTAGCTCGAGCCGAACCTCCGGGAA  
AAGTTCCGCAAAAAGCTTTAATGACCTCTGGCAAGCTATAACGTGCCTGAGTATGCGTCTGTTGCAATAGTGAGAACGCCAG  
ACGTATCGTTGGTAAACAGGCTGCAAGCCGACGAACATTACTGGCTTCACTCAGAATACGTTCTGCAATGACCAGTAAT

GCTTTGCCGGTT CAGTCATGCCAGCAGTCGTTACCTCGTCGAACAAATATTTGATGCCAAGTTCATCCTCCAGTTC  
CCGAATATGACGGCTGACGCTGACTGTGAGGTA AAAAGCATATTCGCAACCTCTGTCAGGTTGTAATCCTGACGTGCAG  
CCTCGCGGATTATCTTTAGTTGTTGAAAATTCACGGTAAACTCCGGGCAGTT CAGATTTCCCGTTATTGTTAAAGTCTAA  
TGCCCGGCATAACAAATAATAAAAACCCGCATCTTATTCATCCCGATATAACACTTAGCTACCAATTGCCACTGCCTT  
TTTTCCATCACTGGAGA ACTAATCACTGACATTAACAACTCTTCACTGCCTGTGCCTGTGGCGATAAGTTCCGCTCGGC  
GGTAAATTTAATGACAAAGAGAGACTCATGGAAGGAGTGGTAATGCGTGACATCCACCCATTTACTGCGCCACATAACG  
AACGCGCGGCCGATTCCGGTAATACTGCAACGCCATGCGCTGGCAATCGCTGCGGTAAGCGTGGCAATAGACTCAATT  
TCACCAATAACTTTTGCCGTGAGTCGCGTAGGGAAAAAGCCTCATCAACACGAAGTCTAATAGCACTGTAATCACTGGG  
GAGAAAGAGGTTCAATTTGCGCAATAGCATTACATCAACGCTTTGCCCGGGCAATCTTGAGTTCTACCAGAAAAAGAT  
CTTCTTTCAGCAAAGCCTGACTGGATACACCAGCCACAGGGGAATGCTCATAAATCACCGCCATATCGAGTTGGTGATTT  
ATCAATTTTTCGTTAAGCACTGCACCACTATTTTCATGAAGATAGATAACGATCTCCGAAATTCAGCGCAACCCGCTG  
TAATAAGGGCATGGTGATGGATGACGCAGCGGTTCTGGTGCAAAGCCAATCGAGACTTGGCCGATAATGCCTGACCAA  
CGTTATGCACCGCCAGTTGGGCTGTTCACTGACGTA AAAATGGCCGCGCATGGGTATAGAGAATTTTCCGGCGTCT  
GTTGGTGTAACGCCCCGCTTGTACGGATCAAAGTTGTTGATTAACCTCACCTCCAGTGTGGCAACCTGCTGGCTGAG  
CGCTGGTTGCGATATGCAACTTTCAGCAGCTGGTCAGGCTACCAATATCTACAATTTTACGAAGTATTTTCAGG  
GTGGAAGTTCATGTTGCCCTCCGTTTTAAGAATGCGCCCAAGTACCGCCATTACTTACAACCAAGATGCAAGATGCTT  
GCCAGTTTTATTTGGTGTGATGTACAAGTAACCAACTGTCAAATAAGAGATTATGATAGATTTCGTCATTTGCTCCTT  
TAATCAGCTGTGCGGTTCCCTGCCCTATAAAAAGGAGGGTATGCACCACGATGGTTCATTACCCAATAAGATTGAAAGCT  
CACCACTTTGTTGAAATGACAGCAAACAAAAAATGCATTTACCCTTTGACATCACCATGCACTGCCATTAATA  
TGCGCCCCGTTACACGATTCTCTGTAGTTCAGTCGGTAGAACGGCGGACTGTTAATCCGTATGTCAGTGGTTCGAGTC  
CAGTCAGAGGAGCAAATTCAAAAAGCCTGCTTCTAGCAGGCTTTTTGCTTCTAATTACCAACGCTCTTAAACATC  
TGTCTTGAACCAGA ACTAATTTGCACAGGCATTCCCGATCGACGTTGCAACGCAGCATTGCGCGATTTACATCAACTC  
TTGCCGTTGATAACGCCCGCAAAGATGGGTTACCGCAATGGCACTTTTCGGTCAGACTCATATTCTGCAGATTGC  
GCGACAATGGCTCATGAACTTCAGCCAGTTCGAGCCATCTGGTTCAGTGGTGATTTTACTGGCTGGTCGATAATTTGC  
ACACGCGTCCCAACAGGAACATTATCAAACAGATATTTGATATCGTCATTGCGCAGACGAATACAGCCCTGACTTACCCG  
GAGCCCAATACAAAATTTGGCATTGGTACCATGGATGGCATAAACCTGCCAATAAATCGCGTACAGCCCATGGGAT  
TATCGGGGCCGAGGAACAAATGCGGGCAAACCTCTCCCTCGTTTCGCATATTCGCGCCGAGTGTTCGCGCTTGGCGTC  
CAGTTTGGAGTCTCTGTTTACGTTCAACGGTAGTCACCCAGTACGCGGGTTTCTCGCCAGCCTGGCCGATACCAAT  
AGGAAAGACTTCCACAGTACTACTGTCTGGTGGTAGTAATAAAGACGCATCTCAGCGACGTTAACAACATCCCTTAC  
GAACAGTGTGCGGCAAATCAGTTGCTGCGGAATGGTGAGTTGCGAGCCAGACTTCGGCAAAAAACATCAGCGCCCGG  
TTCGCTTCCAGCATGTTACTTAACCTTGCCCGTATTGTGCGGCAAAAGTCTCCAGCGGCTGGGTATTGTGATCAGGAAC  
AGTTACAGTAAACGACTGCCCACTAAACGGCTACCCTCTGGAGGTAATGGATAAGTTACCGCCAGGCTAGTATGGCTGG  
CAAAAAGCAGAGCAAATGAGCAAAGAATATTTACACGACGCATCATGTCCCTTTCCTATGTGCGGAAAGCTATCCGTTAA  
GTATAGCTTTTATCAGACTTTTTGTTTTAACTGTTCAAATCAGAAGTCGATTTCCCGGTAGAACAATATTACTGGCAG  
CAAGTTCGCCCATGTTGTTGATATCGCACAGGCAGCTTCGATGATGGGCATCGCCAGAGCTGCGCCACTCCCTCACCT  
AAACGCATCTCCATATTGAGATAAGGCTCCAGCCCCAAATGCGAGAGCGCTATACGCGCGCCTTTTTCTGCCGACAGGTG  
AGAAGGAATGAGATACGGTTTATCGCAGGAGACATCTGGCAGGCTGCGAGCGCAGCAGCATAAGAAAGAAATCCATCCA  
GCAACACGGGTAACCGCAGGAAGCAGCACCTAACATCACTCCAGCTATTCGACCAAAATCAAATCCACCCTTTTGGC  
AGGACATCAACACCATCTGAGGATTTGGTTGATTAACGTAATCGCCGACGACAACATCAATTTTATTAGCCAGTTT  
ATCTGTGCGGAGGTTTTGCGCAATCCCAACCACTTCTCAGGATCCCGCCAGTGATTGTGCTGACTATTGCTGTGCTGCGG  
GTGTGCTGTTTTGCCATCCCAAGTTCACCTACACCAACAGCGTGACACCGTTTTTTTGGCAGTCTCTGCGTATAACATATG  
ACGTCCAAAAGCAACTTTTTCAGCCTGACGGGACTCATTGCCGGAGCTGAAGCAATATTGCCGCTACCTCGTGCGACACG  
CATGTTGATAAGCCCGGGATAGGCTCAGCAGTATCAATACCAACATCAATTACGTGGACGTTAGCGCCCGCTTGTCTG  
CCAGCACACACACGCGGTTGTTCCACGGGTCATATTTTACGCTGTATGGCTGTCATTTTGGAGAAATAGCGACC  
CCTTCTCCAGACGCGGTGATCGGCACACATAACCAGTACCGCTTTTTTGGCCACATGCGGTATGCCATTCAACCCCGG  
CATTCTGCCAGTTGATGGCAAGCACCTCCAGCTTTCCAGGCTACCAACAGGTTTGGTAACCCGTCAATATGCCGTT  
GTGCACGCGACATAGCGGTAGAATCGATGGCTGGGATCGTATTAGTAAATCGGCAAGTATTTGCATCTCACGCTCTTTT  
ATAGCAGTGCCAGCAGGAAGACCAGTTACCAAGCTCTATGGCTGCTCCAGCGTATCGCCGTTTGGCCGCCAGCGTA  
CGTTTGAAGCTGACCGAGGATGAAAATCGCCACCATCGTACCACCATAGCAGCCACACCATGCATACCCGGCAATAA  
TACGGCAGCAAAAATAGCGGCTAAGCCGAGTGTGACGAGGTTTTGTCGCCATCAATTTTGGCAATGAACACATTGCCAA  
GCCCTTCTCCCGCAGATAACGATGACGATACATCAATAATGCGGAGTCCCGGCTGACCGCACATGCTGCCGCCAGC  
GATGCAAGGATCGATTGCCACGCAGAGCCAACCTCGCTTAACACCAGAATCTTGGCAGTACCACAAAAATCAATGCCAG  
ACCGCCGTGGTGCCTAAACGGCTATCACGATGATTTCCAACATGCGATCGCGGCTACGTGCAGAAAAATACGCCATCAC  
AGGTATCAGCGAGGCCGTCCAGATGGAATCCCCCGTTCATCAGCACCAGCACAAGTACGCTAAACAGTGGCCAGTGGT  
GCGCCACACCATGCCTGCAGCACCATGAAGACCAGCCGCTAATCGCGCAAGCAATAATCCAATCAAAGGAAAAGTAAT  
AATACCGGAGAAATGCTCGAAATCCAGTCCCTGGGACCAGCGACGCGGTACAGGCAGACGCGTAATAAATGAGAGCA

TCGCCAAAATAATTTACTCATTTGATTTTTACTCCAATACCCGAAACCACCAGCCATACTTCATTTGCCGAGCGGCCA  
ACTGCTGATTTACCCGCCCGCAATATCACGAAAATGTCGTGCCAGACGACTCTCCGGCACAATCCCCATTCCCCTTCCG  
TTAGTCACTAATAACAACCTTTGCGGGCAACGTTGGCAGGCAGCAATCAACGACTGAATCTCAGCATTAAATCGCCTGTT  
CATCGCCTGATAATCCCATTATCAGGGTCTTTATCGCCGCCATAATCAAACAACAGATTAGTCACCATTGTGGTAACGC  
ATTCAAGCAACACAACCTCATTGCGGTTAATGTCTGCATGAATTAATTCATCAAGATGTTGCCAGCGCTCCACTGTGCC  
CAGTGCTCCGGGCGGCTTGCCGATGATGTTCTATCCGTGCAGCCATCTCATCAAGGATTTGCGAGGTAGCGATATA  
CAGAACCTGTGAAGAGTCCCAATAAGCGCTCTGCGTGGCGACTCTCCCGCTCCGTGCGCCCCCGTCACCAAAATCA  
TCATACCGACTCCTGATTCAAATGTATGATGGTATTCAATGAACAGAACAATGGATCCCCACCGTTGCTGACCGCAAAA  
CATTTACGCGATTAATACTGCGCGTAATAATTAATAAATCCAGCATTCTCAATCCATTACGAAATAAGATGGCATTACG  
GAATAGCCAGACTTTCTCGTGTTAACGTCCGACAAAATGCGTCATTGACAGCGGTTTCTGTGGATTGACACATTTTATT  
AGATAATGAATTAATGCTACTGCCGGAACAACAGCAAACGGGCATTGTGTTCTGAAATCCAGGCTATTGATTCAACGTC  
AGCGACAGATCTGCGCTGTAAGAAGAACTGTAAGAACAACGTAATAGAATTATCCGGAATGGTGGCGACTATGCACTAGGG  
AAGGTGCGAATAAGTGGGAAATTTCTTCTCGGCTGACTCAGTCATTTTCAATTTCTCATGTTGAGCCGATTTTTTCTCC  
GTAATGCCTGAATCAGCCTATTTAGACCGTTTCTTCGCCATTAAGGCGTTATCCCCAGTTTTTGTAGTGAATCTCTCC  
CACTGACGTATCATTTGGTCCGCCGAAACAGGTTGCCAGCGTAATAACATCGCCAGTTGGTTATCGTTTTTTCAGCAA  
CCCCTTGTATCTGGCTTTCACGAAGCCGAACTGTCGCTTGATGATGCCGAAATGGGTGCTCCACTTGGCCGGATGCTGG  
CTTTCATGTATTGATGTTGATGGCCGTTTTGTTCTTGGCTGGATGCTGTTTCAAGGTTTACCTTGGCCGGGCGCTCG  
GCGATCAGCCAGTCCACATCCACTCGGCCAGCTCCTCGCGCTGTGGCGCCCCTTGGTAGCCGGCATCGGCTGAGACAAA  
TTGCTCCTCTCCATGACGAGATTACCCAGCTGATTGAGGTGATGCTCGTTGGCCGCGGTGGTACTAGGCTGTGGGTCA  
GGCCGCTCTTGGCATCGACACCAATGTGGGCCTTATGCCAAAGTCCACTGATTGCTTTTCTTGGTCTGATGCATCTCC  
GGATCGCGTTGCTGCTCTTTGTTCTTGGTCGAGCTGGGTGCTCAATGATGGTGGCATCGACCAAGGTGCCTTGAGTCAT  
CATGACGCTGCTTCCGCCAGCCAGCGATTGATGGTCTTGAACAATTGGCGGGCAGTTGATGCTGCTCCAGCAGGTGGC  
GGAAATTCATGATGGTGGTGGGTCCGGCAAGGCGCTATCCAGGGATAACCGGGCAAACAGACGCATGGAGGCGATTTCCG  
TACAGAGCATCTTCCATCGCCCATCGCTCAGGTTGTACCAATGCTGCATGCAGTGAATGCGTAGCATGGTTTCCAGCGG  
ATAAGGTGCGCCGCCATTACCAGCCTTGGGTAAAACGGCTCGATGACTTCCACCATGTTTTGCCATGGCAGAATCTGCT  
CCATGCGGGACAAGAAAATCTTTTTCTGGTCTGACGGCGTTACTGCTGAATCACTGTCGGCGAAGGTAAGTTGATGA  
CTCATGATGAACCCTGTTCCATGGCTCCAGATGACAAAATGATCTCATATCAGGGACTTGTTCGCACCTTCCCTAGAAC  
ACCACAATTTGCTCTCTCGGTAAGGCACTGTCACAGCATTCAACAGAATGTGACTTGCCAGATTTATTAGCGCCACCAG  
ATGTTTAAACGGGTAACCAGACCCAGTCGGGGATATATTCCATCTTCTCGCTGACATCATCAAGAATAAAAAGGTTTAT  
CACACTCAGAGCAACGTTCTTCCAGCAGCGGGATAATTCTTCAACATTTAGAAGATGTGTTATTAAGGCATACAAACTG  
GACGATTGATTTTTCTTTTGGTGGTTGACCTAAGGTAGCAGTTTATCCTGATGCGCTGAGATTTCTGTAATATCTACGT  
CAACATTTCTCTCGAATAGAAAATGCAGCCCCGGAAGTATTACATTTTTTAAACAAAACGTTGTTAGCGTGCCATTTT  
CAGAAGCTCTCAAGAAAGCGAATTTCTTCTCAAATTTCTGCATTTCTCAGACACAGTTTCTACTCCATGGTAATGGCCC  
AAATACGAAGTTGCTCAGGATCATTAGTGGTGTGAGAAGTTAAATAACCATGCGGAGTACCCTCGTCATCACGTATTT  
ATATATCATGAAGCTATTGTTGTGTTTGTACATCAGTAGATATATTCTGATATACTCCTTTTGTAGACATAACCTTTC  
ACCTGCTTGCAAAGCTTCTGTGTTCTGACATTGCCAAATTTGTTGCAATTTCTGATCCAGCCTTCTTTCAGTCATAGCTT  
GGCCGCGATAAAGACTCACTGATCTGACCCTGATTCCTTTCGAGACTTTATAGACCAATTAATAATGCAGTTTCTGCAGG  
TCAACGTCTGACCATCATTGTATCACTCTGGCCATTAGAGTAACCTTCTGCATTATCCTTTTGTAAAAAGTTTATATT  
AGTATCAGCAATTAACCGGACCTGATACTGATATGAGTCTTACCAGCATATACGGTCAATTTTCAGCAATTAATTAATTA  
CCACGCCAAAGTATTTGTATCACAATGATGGTACCCTTCTTTCAGACACCATTTTTTCAACTCCGTTTTTCCAGCGACC  
ACTCTTATGTCAAGAGTGGGTCCTGGATACAACAGAGACCCGACTGACACGAGTCAGAGGAAACGACGGATATGTTCA  
GTCGTAATAATCTATCAAAAAACATGATTAAGGTCAAAAATGTTTGATATTTACAATTTATGAAGATGACAATAATTAT  
AGATATATGAGAACATAAATGAAAATAATTATCATTACAGTAATCATTTGTACTTTGTATTAATGAGGGATGAAATGTTA  
TATAATATACCTTGTGCAATTTATATCCTTTCCACTCTGTATTATGCATTTCTGGGATAGTTTCTACTGCAACCGCAAC  
TTCTTCAGAAAACAAAATCAGCAACGAAGAGCGCTCGTGTGACCACGAATCGTTTCGGCAAGCAACCTTTGGGAAAGCC  
CGGCGACTATACAGGTTATTGACCAACAAACATTGCAGAACTCCACCAATGCCTCCATAGCCGATAATTTGCAGGACATC  
CCCGGAGTAGAGATAACAGACAACCTTGGCAGGCCGTAACAAATCCGCATTCGTGGCTGGATTTGCCCTATATTTT  
CAGACATCTGTTATCACTTAACCCATTACAAGCCCGCTGCCGAGATATTCCCGTGGCGAGCGATAACCCAGCGCACTAT  
GCGGATGCCATTCGTTATAATGCTCGAACGCCTCTGCAAGGTTCTTGTGCCGTTAACCCTGCTGGTTTGGGCATGATA  
CTGATGATGACGCTTTATCGTTTTTACGAAGCTCTCTGCTATTCCGTTACTCTCCGGACTCCGCACCGCCGTGTTCTT  
CGGTTCAAGTCCAAACATCCGGGCGAACTGGCGTGTTCATTAGCCCGGTAGCATGAACCATTATCCGTGAGCCACTCCA  
CTGGAGACGACGGAAGATCGTTGCCGAAGCGGCTCCACCGCTCCAGCATGACGTCCTGTACTGTTTCACTGTTGAAG  
CCGCCGGTAGTGACCGCCAGTGACGTGCTCAGATCACAGCAGTCCAGCGGAACGTGACACGAGTCTCTCTCCGTT  
ATCACAGCAGAACTGAACCCGTGAGAGCACCATCGCTGATTGCTTTCTTTCAGGGCACTCTGCCTGTATGTGCCGTT  
TCGATGGCGGTACAGCAGTTTTCTGCTCAAGCAACAGCGCATTCTGGCGCATGATCCGGTAAACACGTTTGGCATTGATC  
CGAGGCATACCATCAAGTTCTGCTGTCTGGAAGCAGCGCCATACCCGACGATAACCATACGTTGGCAGCTCTCCGAT

AACATGGTGTATACGGAGAAGCACATCCGTATCATCAGTGTGACGACTGCGGCGGCCATCCATCCAGTCATCGGTTCTGTC  
TGAGAATGACGTGCAACTGCGCACGCGACACCCGGAGACAACGGCTGACTAAGCTTACTCCCCATCCCCGGCAATAAGG  
GCGCGTGCCTATCCACTTTTTTCCCGTCCATATCAACGGCTTCTTTGAGGAGTTCATTTTCCATCGTTTTCTTGCCG  
AGCAGGCGCTGGAGTTCTTTAATCTGCTTCATGGCGCAGCAAGTTCAGAGGCAGGAACAACCTGTTCTCCGGCGGCGAC  
AGCAGTAAGACTTCTTCCCTGGTATTGCTTACGCCAGAGAAATAACTGGCTGGCTGCTACACCATGTTGCCGGGCAACGA  
GGGAGACCGTCATCCCCGTTCAAAGCTCTGCTGAACAATTGCGATCTTTTCCCTGTGTGGTACGCCGTCTGCGTTTTCTC  
GGCCTAAGACATCAATCATCTGTTCTCCAATGACTAGTCTAAAACTAGTATTAAGACTATCACTTATTTAAGTGATAT  
TGTTTGTCTGGAGATTACGGGGGCCAGTCTAGTGGCGAAGCATCCTCCCGTGTTTAATTCTCATTGATGGTCAGGAGGT  
AACTTATCAGCGCGCCGGAGATAATTATGGTGTGGGACTGTTGATAGATGAGTCTGCGCTGGAGCGTGTGGAGGTAGTGA  
AAGGTCCATATTCGTAAGTGTACGGTTCACAGGCAATTGGCGGTATTGTTAACTTCATCACAAAAGGGTGAATCTCCG  
GACTCCCTATATCACTTAAATTGATACAACTTTTTAGAGTAGTCAATTAGTGAACAGATAATTGATAACTCAGAACCAGTA  
AAATGCAAAAGACGCACCACGCTGGAAAAATCGTGTCTATTACAGCAGAGTTTTGATCGAGAATGGTGGCCAGCCACTTA  
TTGCTCTCGGTAAGCGGGTACCGTGACATTCTGCCTGAACTTGACCTGGTACTGTGGCTGATTAAGCCGATGACCGTG  
CCCTGTCTGTGGATGAGTATTTCTGGCGACACATGCTGCAGTCCGGACATCAGCAGGTGCTGTTGTGGTGACGCGAGCC  
GACAAAACGGAGCCCTGCCATGAATGGGATATGGCCGTATTACGCTTCTCCTGCACAGGCACAGAATATTCGCGAAAA  
AACGGAGGCGGTATTCGCTGTTCGGGCCGTACATCCGTTTGGCCGTATCGGCCCGCAGCCGCTGGGAACCTGGATA  
CGCTGGTCAGTGCCTCATGACAGCGCTTCCCGACCATGCCGAGTCCCTGATGACCCGACTGCAGGACGAGCTGCCG  
ACGGAATCTGTCCGCTCAGGCCGTGAACAGTTTACCGGTGCGGTGGACCGGATATTTGACACGGCGGAGAGCGTCTG  
TATTGCCTCTGTTGCACGCACGGTCTGCGTGCCGTCGCTGACACGGTGGTCTCTGTTGCCGTGCGGTATGGAACCTGGA  
TTTTCTTGAACCTGCTGTGACTGATGCCCTCCCTGACTCTGAGTCTGCTCACAAAAGCACTGTTTTCTGTTACTGTCTC  
TCTTGTCCGTGCAATAGCTCAATAATAGAATAAAACGATCAATATCTATTTTATCGATCGTTTATATCGATCGATAAGCT  
AATAATAACCTTTGTGAGTAACATGCACAGATACGTACAGAAAGACATTACGGGAACAACAGAACCACAATTAGAAACT  
CCCACAGCCGGACTCCGGCACTGTAACCCTTACCTGCCGATCCACGTTTGTGGTACCGGCTTTTTTATTACCCT  
CAATCTAAGGAAAAGCTGATGAAACGACATCTGAATACCTGCTACAGGCTGGTATGGAATCACATGACGGGCGCTTTCGT  
GGTTGCCTCCGAACTGGCCCGCACGGGTAACGTGGCGGTGTGGCGTTGACTGTCTCTTGGCGAGTCACGTCAC  
TCCCGGTGCTGGCTGCTGACATCGTTGTGACCCGGGAGAAACCGTGAACGGCGGAACACTGGCAAATCATGACAACCAG  
ATTGCTTTCGTAACGCAACGGAATGACCATCAGTACCGGGCTGGAGTATGGGCCGGATAACGAGGCCAATACCGGGCG  
GCAATGGGTACAGGATGGCGGAACAGCAACAAAACGACTGTCACCAAGTGGTGGTCTTACAGAGAGTGAACCCCGGTGGAA  
GTGTCTCAGACACGGTTATCAGTGCCGGAGGCGGACAGAGCCTTACGGGACGGGCTGTGAACACCACGCTGAATGGTGGC  
GAACAGTGGATGCATGAGGGGGCGATAGCCACAGGAACCGTCATTAATGATAAGGGCTGGCAGGTCGTAAGCCCGGTAC  
AGTGGCAACGGATACCGTTGTAATACCGGGGCGGAAGGGGACCGGATGCAGAAAACGGTGAACCGGGCAGTTTGTTC  
GCGGGGATGCCGTACGCACAACCATCAATAAAAACGGTCCGAGATTGTGAGAGCTGAAGGAACGGCAAATACCACTGTG  
GTTTATGCCGGCGGCGACAGACTGTACATGGTCACGCACTGGATACCAGCTGAATGGGGGATACCAGTATGTGCACAA  
CGGCGGTACAGCGTCTGACACTGTTGTGAACAGTGCAGGCTGGCAGATTGTCAAAAACGGGGGTGTGGCCGGGAATACCA  
CCGTTAATCAGAAGGGCAGACTGCAGTGGACGCCGGTGGTACAGCCACGAATGTCACCCTGAAGCAGGGCGGCGCACTG  
GTTACCAGTACGGCTGCAACCGTTACCGGCATAAACCGCTGGGAGCATTCTCTGTTGTGGAGGGTAAAGCTGATAATGT  
CGTACTGGAAAATGGCGGACGCCTGGATGTGCTGACCGGACACACAGCCACTAATACCCGCTGGATGATGGCGGAACGC  
TGGATGTCCGCAACGGTGGCACCGCCACCAGTATCCATGGGAAATGGCGGTGACTGCTGGCCGATTCCGGTGGCCGT  
GTCAGTGGTACCCGGAGCGACGGAAGGCATTAGTATCGGAGGCGGTACGGCGGATGCCCTGATGTGGAAAAGGCAG  
TTCATTACGCTGAACCCGGTGATACGGCCACGGATACCAGGTAATGGCGGACTGTTACCCGCGAGGGCGGCACAC  
TGGCGGGCACACCACGCTGAATAACGGCGCCATACTTACCCTTTCCGGGAAGACGGTGAACAACGATACCCTGACCATC  
CGTGAAGGCGATGCACTCTGCAGGGAGGCTCTCTACCGGTAACGGCAGCGTGGAAAAATCAGGAAGTGGCACACTCAC  
TGTCAGCAACACCACACTCACCCAGAAAGCCGTCAACCTGAATGAAGGCACGCTGACGCTGAACGACAGTACCGTACCA  
CGGATGTCATTGCTCAGCGCGGTACAGCCCTGAAGTGAACCGGACGACTGTGCTGAACGGTGCCATTGACCCACGAAT  
GTCACTCTCGCTCCGGTGCACCTGGAATATCCCCGATAACGCCAGGTGCAGTCCGTGGTGGATGACCTCAGCCATGC  
CGGACAGATTCACTTCCACTCCACCCGCACAGGGAAGTTCTGACCGCAACCCTGAAAGTGAACAACTGAACGGACAGA  
ATGGCACCATCAGCCTGCGTGTACGCCGGATATGGCACAGAACAATGCTGACAGACTGGTCAATTGACGGCGGCGAGGGCA  
ACCGGAAAACCATCCTGAACCTGGTGAACGCCGGCAACAGTGCCTGGGGCTGGCGACCAGCGGTAAGGGTATTAGGT  
GGTGAAGCCATTAACGGTGCACACGAGGAAGGGCCTTTGTCCAGGGGAACAGGCTGCAGGCGGTGCCTTTAACT  
ACTCCCTCAACCGGGACAGTGTGAGAGCTGGTATCTGCGCAGTGAATGCTTATCGTGCAGAAGTCCCTCTGTATGCC  
TCCATGCTGACACAGGCAATGGACTATGACCGGATTGTGGCAGGCTCCCGCAGCCATCAGACCGGTGTAATGGTGA  
CAACAGCGTCCGTCTCAGCATTAGGGCGGTCTCTCGGTACGATAACAATGGCGGTATTGCCCGTGGGGCCACGCCGG  
AAAGCAGCGGAGCTATGGATTCTGCTGCTGGAGGTTGACCTGATGAGAACAGAGGTTGCCGGTATGTCTGTGACCGG  
GGGTATATGGTGTGCTGCTGCCATTCTCCGTTGATGTTAAGGATGATGACGGTCCCGTGGCGCACGGTCCGGGATGA  
TGCCGGCAGCTGGGCGGATACCTGAATCTGGTACACAGTCTCCGGCCTGTGGGCTGACATTGTGGCACAGGGAACCC  
GCCACAGCATGAAAGCGTATCGGACAATAACGACTTCCGCGCCCGGGCTGGGGCTGGCTGGGCTCACTGGAAACCGT

CTGCCCTTCAGTATCACTGACAACCTGATGCTGGAGCCACAACCTGCAGTATACCTGGCAGGGACTTTCCCTGGATGACGG  
TAAGGACAACGCCGTTATGTGAAGTTCGGGCATGGCAGTGCACAACATGTGCGTGCCGGTTCCGTCTGGGCAGCCACA  
ACGATATGACCTTTGGCGAAGGCACCTCATCCCGTCCCCCTGCGTGACAGTGCAAAACACAGTGTGAGTGAATTACCG  
GTGAACTGGTGGGTACAGCCTTCTGTTATCCGCACCTTCAGCTCCCGGGGAGATATGCGTGTGGGGACTTCCACTGCAGG  
CAGCGGGATGACGTTCTCTCCCTCACAGAATGGCACATCACTGGACCTGCAGGCCGGACTGGAAGCCCGTGTCCGGGAAA  
ATATCACCCCTGGGCGTTAGGCCGTTATGCCACAGCGTCAGCGGCAGCAGCGCTGAAGGTATAACGGTCAAGGCCACA  
CTGAATGTGACCTTCTGACAGAACCATCGCCTCTCTGTGGTCCCGGTTCATCATGACCGGGACCCGGACCGGCGCAACGGA  
TCTTCAACGCCACATTGCGTGGCATTAAACAATAACATGATATTATCACGGAGTGACTATGTTACAGATAGTCGGCGCGC  
TGATCCTGCTGATCGCAGGATTTGCCATTCTTCGCCTTTTGTTAGAGCATTAAATCAGCACGGCTTCTGCGCTGGCAGGG  
CTCATATTGCTGTGTCTGTTTCGGCCCGCCTTACTGGCTGGCTATATCACCGAACGCATAACCCGGTTGTTCCATATTCG  
CTGGCTGGCAGGCGTATTTCTGACGATTGCCGGAATGATCATCAGCTTCATGTGGGGACTTGATGGTAAACATATCGCGC  
TGGAGGCTCACACCTTTGACTCTGTGAAATTTATTTGACCACCGCTCTCGCCGGTGGTCTGCTGGCTGTTCCCTGCAG  
ATCAAAAACATTACAGCAGAACGGGATCACACCAGAAGATATCAGCAAGGAAATTAACGGGTATTACTGCTGTTTTTATAC  
TGCCTTTTTCTTATGGCGTGTCTGCATGCGCACCATGATCGCGTTACAGTACGATATTTACCCTACTGATGTGGT  
GGGGCGGGTGTGTACTGGCTGGCTGATTAGTACGCTGCTATGGGCGGCCAGCCAGATCCAGGCGTGAAAAACTG  
ACCTGTGCCATAGCCAGCACTGGAAGAACAACCGTGTCTCAACAGTAAATCGTGGCTGACCAGTTTGCAAAACGATTA  
CAGCCTTCTGACTCACTGACGGAGCGCATCTGGCTGACGCTCATTCTCAACGGATTTCCCGGGGAGAGCTGAGGGAAT  
TTGAACTGGCAGACGAAACTGTTACTGAACAATGCCTGGTATGAAAGAAACATGGCAGGGTTTAAACGAACAGTTGAAA  
GAGAACCTGTCACTCACACCTGATGAACTGAAAACGCTCTCCGGAACCGCCTGAATTTATCACCGGAAGCGAATGACGA  
TTTTCTCGATCGTTGCTGGACGGCGGTGACTGGTATCCCTTTTTCAGAAAGTTCGCCGTTTTGTATCATTCCATCACGTGG  
ATGAGTTCGTATCTGTGCCTCCTGCGGGCTGACAGAAGTACATCATGCCCGGAAAATCATAAGCCGGATCCGGAATGG  
TACTGCTCCTCTTTGTCGCGAAACAGAAACACTGTGTCAGGAAATTTATGAACGCCCTTACAACAGCTTTATTTCCGA  
TGCAACGGCGAATGGTCTGATTCTCATGAAACTGCCGGAACCTGGAGTACAAATGAGAAAATGTTTGTCCGGAGGGC  
AGGGACATGGGTTTCCGCTGAACGGGAAACCATATTGTGACAGAGTCCGTCTGAAAAACGCACGGATCCTCGGTGAT  
AATAATGCCAGAAATGGAGCAGACAGACTGGTACGCGGAACAGAAATCCAGACGAAATATTGTTCAACTGCAGCCCGTAG  
CGTCGGTGGCGATTGACGGACAAAACGGACAGTATCGTTACATGGGAAATAATGGCCCCATGCAACTGGAAGTCCCC  
GTGATCAGTATGCCGGCGCTGTTGAAACCATGAGGAATAAGATCCGCGAAGGTAAGTAGAGGAGAGATGACGCCCGCGC  
AGCGCAGCCTCATTCAACGGGCCCTGAAAACCTGGACCGCATCTTCATGAACCCGGCGTGGCCTTACCTCCACCCGT  
GCAGCACGGGAATGGCTGATTCTGAACATGGCGGGACTGGAGCGTGAAGAATTCGGGTGCTGATCTGAACAACAGAA  
TCAGCTGATTGCCGGTGAACCCCTCTCACCGGCACCATCAACCGCACGGAAGTCCATCCCGGGAAGTGATTAACCGC  
CCCTGTACCACAATGCCGCTGCCGTGGTACTGGCACACAATCACCCGTCCGGTGAAGTACACCCAGTAAGGCAGACCGG  
CTTATCACCGAACGTCTGGTACAGGCACTGGGCCTGGTGGATATCCGGGTGCCGGACCATCTGATAGTCGGTGGCAACCA  
GGTTTTCTCCTTTGCCGAACATGGTCTGCTTTAACCCCTTACAACCACATCACACCTGTTTTCACTTTTATCTTCTGTCT  
TCAGAGGTATCCATTATGAAAATTATCACCCGTGGTGAAGCCATGCGTATTACCAACAACATCCGACATCCCGTCTTT  
TTCCGTTCTGTACCGGTAATACCGCTGGCACGGCAGTGTGAAGCGTATACCGGTCTGGAAGTGCAGGATATCCCGGT  
GTGCTGGCCGTGTTTGTGAACGCCGTAAGGACAGTTTTGGTCCGTATGTCCGGCTGATGAGCGTCACCTGAACTGAGT  
GGGAATTCTGATGAGCAGAAATATCGCCACTACCGGACCATTTAGCCGATTTTCTGTAAGGATTTTATCGTGTGAGC  
ACACTCCCCGGGACAACACTTCCGACGACAATCACGACCGCCCTGGTGGGGCTGCCCTGCACCGTGCACCCCTGTT  
CGGGGACGTCTGGTGCAGGAGGGTAACCGTTGCATTACCTTCCGACCGCCGGTATCAGAGGCGTTCAGCGATG  
CAGATGCGTACCACCTGGACCGGCTTTCCGCTGCTGATGAAACAACCTGAACTCATGCTCACCAGCGGTGAACTGAAT  
CCCCGCCATCAGCATACCGTACGCTGTATGCAAAAAGGGCTGACCTGCAAAAGCCGATACCTCAGCAGTTGTGATTACGT  
TTATCTGGCTGTTTATCCGACGCCGAAATGAAAAATTAACCTCTCAGAATAGCCTTCTGCTACGGCCTGGTGTTCAC  
CACGCCACTTTTCCATTTTTATATCTGCATATCAGGAAAATCTTCAGTATGAAAACATTACCTGTATTACCCGGGCAGGC  
GGCCAGTTCTCGCCGCTCTCCTGTTGAAATCTGGCAGATACTGCTGTCCCGACTGCTGGACCAGCACTATGGCCTCACAC  
TGAATGACACACCTTTTGGCGATGAACGTGTGATTGAGCAGCATATTGAGGCAGGCATTTCACTGTGTGATGCGGTGAAC  
TTTCTCGTGGAAAAATACGCGCTGGTGCCTACCGACAGCCGGGATTAGCGCCTGTACCCGCTCTCAGTTAATAAACAG  
CATCGATATCCTCCGGGCTCGCAGGGCGACCGGCCTGATGACCCGCGACAATTACAGAACGGTAAATAACATTACCCTGG  
GTAAGTATCCGGAGGCGAAATGATGACACTGGAAGCCGACAGCGTTAACGTACAGGCGCTGGATATGGGGCACATTGTCG  
TTGACATTGATGGTGTAAATCACTGAACTGATTAATAAGGCCGCTGAAAACGGTATTCACTCCGCGTGGTGGATGAC  
CGTACTCTACCGAAACACCGCAACTTATGCCAGCCCTCACCAGTTGCTGTAAGACAATGCAGTGATACAGGGTATAGT  
GCCATTAACACAGAAACAGCACTGTTGCTCTGATTAAGCAGGCAAGAGAAGATGTCCTTACCCTGCGCATCTGCAGC  
TTCTGCACCAGAACCGGTGAATCTCACTCAACAGGCTTCAATTTCTCTGACGCCAGCCTGAATACAGCTGGCGTTTTAT  
TTATAAACAGAAAGGAAAACCGATAATAATGGAATGGACGCCCGACCATGAAGCAACGGTAGGATATTACTGATAAAC  
TTCCAGTGGAGGTGCGTTATGGCCGTTTTAACGATTAGCATTGACCTGACAAAAAATGAATTTCAAATCCACGGTCTGGG  
TAGGAACAGAAAAATCTAAGCTCAGAAAAACGGATTAAGTAAGCGTCAACGGAGCACCGTATTGACGCTTATTTATTGGT  
GAGAACTACGTTCCATGGCAGGAGTTCGTC AACACGGTTGGAGGGCCATTCCGGCAGTATGCTCAGAATATGGCGCAGAT



ACGCTTCCGGATCGATACCGTTTACAGACGGCAGGTGCCTGCTTTTCTGGCAACAAGCAGGAATCTCAGCGCTGAAGCAGGA  
ATTAGAGGTAAAAACGCCCTACCGGGCCATGAATCACCCGGTCATTGGAGTAGTAACCAAAGCAGATTTAGCCAGCATGG  
AACAAATATCTTTGGTGAAGTTGGTTACGGGAAGCTGGAGCGCACAACTGTTAGTAACAGTGCAGTTAATAACAAT  
GGAGTTACAGAACTTTTTGCCTTGTGCATACAGAAGAAGGCTGTTGTTAATTTGATTGGTTCTCGGATGAGAATGATG  
ACGGTGATACACAGATAAGAATCAATGAGCAATGAGGGTTGCCGGCAACCCTCATTGAATAAAAACGGGAATTACTTCGC  
TTCGCCGTTTTTCATTTGCCCCATAGCTTTTACAGCTTTTGGAGATATCGCGGCTTCTTTGGAGAGCTCGGCATTTTTGA  
TGATGTAATCGTCAACGCGATCTTCATAGTACCTTTTCATGCTGGCGATGATGCCCTGGATTGCTTCAACGCTCATCCCC  
GGCTTGATGTAATCGCTCAGGTTGTCCAGCAGCAGGACGCGCTTCTGTTGTACGCGATCTTTTTCTCAACGCTCCTGAAT  
TTCACGTTGCAGTTTGTCTTACGACGGAACAGACGAACAATTCAGTACGTCCTGGAATGAAGGCTTGGTAGTTTCCA  
TTTTTATACCCCTGATAATGTGAGAGTCGGATTGTTAAGCAACCGCTATTCGTTAGGGCCAACATTACTCATAGCTGC  
CGCAGATGACAATGCTTTTATCCCTTTTACTATCATAACCCTTATCCTTGTGAAATCGAAGCAGCAGCAAGATGATTCT  
GAAGTTCAGGAATTTTTCGCAAGGCCCGCAAATCAGATTCGATAGCAACTCAAGCTGATGCGCCGTTTCCATGTTCA  
GCCACATAACCATAGATTGGTGTTCACAACCTCAGGTCATGGTGGTTATTGAGCAACTGACGCAGCTCTCCACA  
GCATCGTTCAATTTTTCCGATTGGCAAAAACCGGCTGCGGTTACCTTCGTACAGCGCATGAAACAAGGCTCAGCAGTAT  
TTGCTGCATCATGTGCTGGGTATCACGAAGTTTTTGCAGCTTCAATAACACGAAATGGCTGGGCGCGTGGCCAGTATG  
CATTGATTTGCACTCCAGCATACAAACCAGATTGCGGTTAATGGTCTGGATACCTTCATATATCGATTTTGAATACGG  
GTTTTCTTGTGGCGGGCGCAATCAGTCCACGATTTTTCACGGCATCGGTACAGGAGTTTTGTAGATGGCTTTCCAGACG  
TGGGCGTTCGAGTAAGTTCCGGTGAAGATGAGATTGATAGACCCGATTATACTCGGTACAGACTTTTCCGAGTTGAATGC  
GCCAGTGGATGAACGCCCGTTGTGGCCAGATACCGTAAACAACATTGCCAGTAAAGAGCCGAGGATCACATCGCCGCTT  
CGCCATAACGCCGTATCAATTTACCTGTCCGGGAACCCACAACAATTGCCAGCGTCACCCCAATCAATAAACCTTGATA  
CGTTTTCTTGGCCAGCGCCAGCAACCGCAAAGGAACATGGCCGCGCGCACCACTAACATCAGCGGTAACGAGATTA  
ACTCCAGTTGCAGAGCGATAAGACCTAAAATCGAACCAACACCGTACCGCCAATACGCTCAAAGGCGCGAGGGACAACG  
TTACCCAGAACGAGATTGGCCCATATACCACCATGGTGACCAGCGCCAGGTGCTTCCGGGATAGTAAACAGGCG  
GATAATGAGAAAAGTGAAGCAGGAATGCCAGCGGACCCGAGTACCATGCACAATGCGGTAATGGCGGTATACCCGATTT  
CAAAACGGGCTAATGACTTATCGGCACGCACGAGAACTCCGTAATGAGATTAAGGCGCTCATAACTCATCTGTCGGC  
CAGAAGGCGCGCTCTGAATATCCGACGGACAAACCGGAACAGTGAATTTCCGGCAGGAGCGAAAAAATTGAAAGG  
CGCATCTTACTCTTTTCCGTTTCAAAAAAAGAGTGGTATCGCGTTAACACACCGCCCTGAGATGAATTAGTGATGTTT  
TGGCTGCACCGCAACATACATTTTCGATATCCAGTACCATCTTCCGCGCCATTGTTCAAATAAACCTCGAAGCAGGGCT  
TTGGTAACATTTTCATAAGCACTGCTCTGCAAGAGACTATTAAGAAGTATACAGGGTTTAGCAAATCATCACCGACT  
ACACGAGTACCGCCACCGCATACTGACCACCTGTAATTTCTGTGAGAATGACGCCCTCACTGTTTTCCGGAAAGCGTAA  
GTAACCCGGCACCGTCACGACGGTGTGCGAGCGTAATTTTCCGGCGGTGTTTCATCTGGATTGTCGTAATAGACAGCAA  
CCCACTCCTTCCGCACAATATTTTGTATCTACCCACATCATCAACTGCTCAAAGCCTTTCTTTACCGTCTGTTCCAC  
GGGCAACGAGATGGAACCTGCAACGGTACGTTTCTTCTGCTTAATCTCGTAGTTTATGACGCCTCCATTGATACT  
GTTTTATATACAGTATAGTTGCAAAATTAACCACAAGGAATGAGTGTGATTATGCGAGCAGACTCGCACTCCTGCC  
AGTCTGCTGCAAAAAGAAAGTCAAGGCTTATGGTGGAAATAATCACTCAGGCGAGAAAACATGCTGCCTTCCCGACAGA  
TTCCAGGGTAACGAGCGCCAGTGGCCACCTGTTTATCACGGTCGTAAGTTCAATTTCCCTACCCGCTGATGGGCGC  
TAATTTGGCGCGGTGAGTTCTTACCATCAAGGGTATATTTGGCTTGTATGTGAATTTCCGCTTTCCGTTAGCACCATC  
CAGAACTCTTGTCCGTTCCAGGTCGATATTTCTTATCGCCATACCAGATGCGTTCGTTCCGACCTTTTTCCACG  
GTGCAAAATTTGCACCGTAGTAAAGTTTTGTTGCCCCCAACGCACTAATTTTCTGCTTCTCCTCACGACCTTTTGCAC  
TGTACGCCCCATTACCATTGCAATGAGACGACGCTGCCATCTACAGCCGAAGCAATGAGATTAACCCGGCAGCAGAA  
GTATGACCCGTTTTTCAGGCCGTCAACATTCATGGTTTTATCCCAACAACCCGTTACGGTTTTGCTGGGTGATACCGTT  
CCAGGTGAGACTTTTTCTACTGTACATATGATAAACTCGGGCTCGCCGTGGATGATAGCAGAGAAAGCACAGCTAAAT  
CATAAGCCGAGCTATGCTGGCCAGGTGCATCCAGACCATGCACTGTTTCAAATGCGTATCCTTGAGATGCACTTCTCG  
GCATAGTTGTTTCATCATTCAACAACCTGCCGTTGCCACCGGAATATAGTCAGCCAGAGCAACACAAGCGTCATTTCC  
GGAATCCACAATTAACCACGGCTTAAATCACGTACCGATACGCGATCGCCCTTTTCAAAAACATCAGTGAAGAACCGA  
CAAAACCGGATTATCTTTCGCCACGCATCGCGCCCCACGGTGACAATATCGTCTGGCGTAATGCGATGACTATCGATA  
GCGCGATCCACGACATAACCCGTCATCAGCTTTGTGAGGCTGGCGGGATTGCGCTGTTGATGCTCATTACCCGCGGTGAG  
GATCTGACCGGTGGTGAATCCATCAATACCAGGACCCGGCATGAATCTCTGGAGGCTGAGGTGAAAAAGGAATGTTTT  
CCGCGCAAAACAGACGATAAGTTAAAAACGAACAAGAAGCAGCAATAATAAGACGGCGTTTTCAACAGCAAAACCCTCA  
GGAGTTTCAAATAGCTGTTCTTTTACGGAATACTTATGAACCTGGTGAATAAAGTGAAGAAAATGTGACTACCCTC  
TCATTTTTATCTGACATGATCTGTTGCCACTCGCTGCCAAATTTGGCGCTAAAGCTGATTAGCACGGTATATTTGATA  
CTCTGGCAGACAGCAGAAATAACGGATTAACCTAATGATGAATGACGGTAAGCAACAATCTACCTTTTTGTTTACGAT  
TACGAAACCTTTGGCAGCACCCCGCTTAGATCGCCCTGCACAGTTTCGACGCCATTTCGACCCGATAGCGAATTCATGT  
CATCGGCGAACCCGAAGTCTTTTACTGCAAGCCCGTGTGACTATTTACCCAGCCAGGAGCCGATTAATTAACCGGTA  
TTACCCCGCAGGAAGCAGGGCGAAAGGAGAAAACGAAGCCGCGTTTGGCGCCGATTCACTCGCTTTTTACCGTACCG  
AAGACCTGTATTCTGGGCTACAACAATGTGCGTTTGCAGCAGCAAGTCAACGCAACATTTTTTATCGTAATTTCTACGA

TCCTTACGCCTGGAGCTGGCAGCATGATAACTCGCGCTGGGATTTACTGGATGTTATGCGTGCCTGTTATGCCCTGCGCC  
CGGAAGGAATAAACTGGCCTGAAAATGATGACGGTCTACCGAGCTTTCGCTTGAGCATTTAACCAAAGCGAATGGTATT  
GAACATAGCAACGCCACGATGCGATGGCTGATGTGTACGCCACTATTGCGATGGCAAAGCTGGTAAAAACGCGTCAGCC  
ACGCTGTTTTGATTATCTTTTACCCATCGTAATAAACACAAACTGATGGCGTTGATTGATTTCCGAGATGAAACCCC  
TGGTGCACGTTTTCCGGAATGTTTGGAGCATGGCGCGCAATACCACTGGGTGGCACCGCTGGCGTGGCATCCTGAAAAAT  
CGCAATGCCGTAATTATGGTGGATTTGGCAGGAGACATTTCCGCCATTACTGGAAGCTGGATAGCGACACATTGCGCGAGCG  
TTTATATACCGCAAAAACCGATCTTGGCGATAACGCCCGCGTTCCGGTTAAGCTGGTGCATATCAATAAATGTCGGTGC  
TGGCCCAGGCGAATACGCTACGCCCGGAAGATGCCGACCGACTGGGAATTAATCGTCAGCATTGCCTCGATAACCTGAAA  
ATTCTGCGTAAAAATCCGCAAGTGGCGAAAAAGTGGTGGCGATATTCCGGAAGCCGAACCGTTTACGCCTTACAGATAA  
CGTGGATGCACAGCTTTATAACGGCTTTTTAGTGACGCAGATCGTGCAGCAATGAAAATTGTGCTGGAAACCGAGCCGC  
GTAATTTACCGGCACTGGATATCACTTTTGTGATAAACGGATTGAAAAGCTGTTGTTCAATTATCGGGCAGCAACTTC  
CCGGGACGCTGGATTATGCCGAGCAGCAACGCTGGCTGGAGCACCGTCGCCAGGTCTTACGCCAGAGTTTTTGCAGGG  
TTATGCTGATGAATTGCAGATGCTGGTACAACAATATGCCGATGACAAAGAGAAAAGTGGCGCTGTTAAAAGCACTTTGGC  
AGTACGCGGAAGAGATTGCTAATTTGAAGCCTCCGCCGCTGGTACGGCGGAGGACAATGTTGAGTCAGGCTTTTTGAAC  
GGTGTGCTCCACGCTGCATCGCAATCTGCTGATAATCGGTGATGGCATGTCCTTCTTCTGCCGCCACTGTGGATTG  
CTTCAGTTGCTGGGTGCAATCAAACCTCAATCACTAATCATCGCCGCTGACCATTTCTGCCAGAGCTGTTTTGCTTCT  
ATGAGTGGAAACGGACAGACCTGCGTACCACATCCAGCTTTTTAATCACCATCTTTACACCTTACTTAATTTGCCGAG  
CAGTTGCCAGTCGCGCTTACGCTGCGGTGCAACATACACAAGCCAGGACGCGAGTCCAGACTCCGAGAATCATAAATACA  
AGGCCAATCCAGCCCTGCCAGGTCATCATTGCAGTCATAACCAGTCCATTACCGATAGAGCAACCACCTGCAATACTGGC  
ACCGAAGCCCATCAGTACACCACCTAACCCGCTACGTAATGTTGTTTGTGCATCAGCTGCGCGAACGCGGAACTCACGGC  
TCGCTTTGGCTGCAATAAATGACCCACGAAGATCCCTAACACCAGGAAAACGCCCCAGTTAATGTATTTTCACTGTCACCC  
GCGACCAGAAATGAGAATATTGGCCGTTGGGGAAGTGATTCTAACCCAAACATGCGTCCGGTGTCTCACTCAGGGG  
CCAGGCTAAAAGCGCAATCAAACCGATGAGTACAGCTGTGACAAAGGATGCCAGCGTTTTTCAAACAGAATATGAGCGA  
TCCCGTTCGGCGCGGCGTAAAGTTCGCGACTTTGAGTTTTGGCTTCTTCAACTCTTTCATCACCACCCAGAGCGTTATC  
ACCAGAAAACGGCAACCAACGGCCACACAGACAAATAAAAGTCTCAGCAATAGAGTTATGTTCACTACTGTAGTGTG  
CAAGTTTTGATTTAAACCACTGGCATGTGGAGAACGCATCACCAGCTCATCACCATAAAGTAAAAGCGCGATCCAAC  
TGCCGATCAATCCCTCACCAGCGGATACCAGGTCCCGGTGGCACATCCACCAGCAGAACCAATCCAGCCGAAGATA  
TACCACCTATAACAGTACCAAGCCACGGGAACGCCCGGCTTCTGAAGTCAGTAGGCCCGCTGAATTAACGCAAAAAC  
CCCACGCTTTGTACCGAAATTGCAATCAGCAAGGCTAAAACATGCGATTATTTTTACGATATACATATCGCGAAAAAC  
CACCTGTACAGGCAAAAACGCCACGCTGCATGACAAATCCAGCAGAGCACCAAAATTAGCCCGCTTAATATCATTGAA  
AACATAAATTAATTAACCAGATGAATGTTAATGAGGAAATTTTATCATGACTGGTGGAAATGCAGACCAATAACCAATTTCT  
CTAAATTAGAACAAATGGTTATTAATGAGGAGTTCGATACAAAAGAATAAAAAACCGGAGCCAAATGTTTCACTCGACTC  
CGTTTTATTATTAGAAAAGATGATTATGCTACGTCTTCGACTGCGGAACCGGATTACGGAAGCTCTTGGTGACGCAAGC  
CAGGTAAATCAGACCGATAGCAGCCAGATCAGACCCAGAACCATTGAGCTTTCTTCCAGGTTAACCCACAGCGCACCAA  
CGGTCAGCGCACACATCGGCAGGAACAGATACTGGAAGTGATCTTTACGCGCTTGTGTACGCTTCTCACGGATCCAG  
AACTGCGAGATGACCGACAGGTTAACGAAAGTGAACGCCACCAGCGCACCAAGTTAATCAGCGCCGTTGCCATTACCAG  
GTCGAAGTTGATTGCCAGCAGGGCAATCGCGCAACCAGGATGATGTTTATCGCCGGAGTACGCCATTTCCGGGTGTACAT  
AACCGAAGAAGCTTTTCGGGAATACGCCGTACGACCCATTACGTACATCAGACGCGCTACGCCTGCATGCGCCGCCATA  
CCGGACGCCAGTACGGTAATGGTGGAGAAGATCAGCGCGCAACTGGAACGCTTTTACCCGCAACGTACAGCATGATTTT  
AGGCTGTGACGCATCCGGATCTTTAAAGCGAGAGATATCCGGGAAGTACAGCTGCAGGAAGTAAAGTTGCAAGATGAAGA  
TCATGCCGCCGATCAGCGCGGTGAGGAAAATCGCACGCGGATCACGCGCTTCGCATCTTTGGTTTTCTCCGACAGGTTG  
CTGATGCCGTCAAAGCCGGTAAAGGAGAAGCACAGGATTGCGCCCCGTAATCATCGGGATAACATGCGCATCGCCAGA  
CCAGAATGGACGAGTGCTCGCCAGCGTACCAGCGCTTACCTTCAAATACGCCATAAACAACCATGCCAGAAATCACCG  
CGATCAGCACTACCTGCAACACGACGATTACAGTGTGAAGTTGCTACGGATTTTACAGACTACGCAGGTTAAAGGCGGTC  
ATAAAGGCCACCAGCGCCACCACAAACATCCACGATGGGATGGAAGGCCACCAGAGCTTCAAATAGATTTTTGCGCAGTAG  
AATGTTGATCATCGCGCGAACAGATAGTCGAGCAGAGAAGACCAACCCACCATAAAGCCGACAGTCGGGCTAATGGATT  
TCTGGGCGTAAGTGTATGCAGAGCCAGCAGAAGGATAGCGGCAACCAGCTTCCCGTAGCTCAGAGCCGTAACAGGATC  
GCAATCAATGCGAACGCATAGGCTGTCCGCACATGACCATCCGTGAGGCCTGAAACGATACAAAAGTATCAAACAGCGT  
CATCGCTGCATATAGGCAAGACCCATCATTACAACCGAACTAACGTAAGCGTTTTACGCAATTCACGCGAGAGGTGT  
TTGGAGTAACGTTATGCGACATGGTCATTCTCTTTACGGTGATAACCGTCGCGTAAGCAAAAATTGCCCATTTTTTT  
GGATTCCTCAGCGACAACAACTGTCGATTTTTAGTAAATATCTATCCGGTACGAAGCCCGGCTCTTGGTATGAATGATT  
GGTTTGAAGCAAAAATAAACCGACGCTGATGAAACGTCGGTTTTTGTGATTTTTTACAGCGCGCATTGTGCCTAAAT  
GGGGGGGAAATGACAAGAGAATGAGAGGCTTGTGAGAATAATTTTTCTTTAAATGGCTGATTTTCCGTATCAGATTTT  
CATAAACACCGCGATCGCACTATTTGCTAAAATTTTATCCCGCCACCAGCCACTGGCAAGTCTGCGGTCTGTTGTTT  
CAGCCAATCCAGACGGGTTCAAAGAGAGTTTGGGCGACCACTTTCTTCTCGATTAACGCGCCACTATCGAGAAAACGTTG  
CGCCAGATAACGGGGTAAATAGCCGACCGGAGCCGCTAATTTGCACTCCAGTTTGGTTTTAAATCGAAAACGGTAA

TGGCTTCTTGTCGTCGAGAAGTTGTGATGCCGTAGAAGCGCCTGCCTGCGCAGTATCCCCACCACAATCGCCGATAT  
CGCTTAATAATACGACGATTTAACGGCTCTTCTCCAGGGCTAACGGATGATGAGGCGCGACCCAAAGACTTGTTCCAG  
ATCGCCCAACCGTGAAAAACAACTCACTGGAAGATGGTGGCTCATGCATCGCGCCAACAATAATATCCGCTCGCCCT  
GAGTCAGGGCATCCCATGAACCACCGAGTACGCCATTGATAAACTTCAGGCGCGTCACGCTATGATGTTGATAAAAAGCT  
TCAATGAGTGGCGCAAGCAGAGAAAAAGGAAACGTGTCGTCCACGCCAATCACCAGCTCGTTTTCCAGCCTTCATGCAG  
TTTGATCGCCTGCTTTTCCAGTTCCCGCACGGTATGCGAAGTTCCTCCGCCCTTTCTCTAATAACATTTTTCCGGTGCGGG  
TGAATTTAGCGCGGTGTCCGCTACGATCAAGCAATTGAATATTAAGGTGCTTTCCAGCTTGTAACGGTGAACACTCAGA  
GCGGACGGCGTCTGTAGAGTTTGCCGACGCGCCGCAAACCTGCTTCTTTTTCTAAGGCATCGAGGATCATCAACAC  
ATCCAGCAGTGGTTTCATACACGCCCCCTTGAGTGCATGCGGCGTCTGCTGGCGTGATCGTTTACTCCAGCGGCATTA  
CCAGCGGATCGGGATACTGGTATTCAAATCCAGTTCATTACAAATCCGACTGCCATCAATAATCTTACCTTTGCCGCTG  
TCCAGACTATTTCTGAACTGCGGAGGTTCCAGCCCCAGTAAACGGGCCATCTGCGGATAGAAAAATTACGCGCAGGGTG  
AGCTGGCGCACATATATTAGATGTGTCGCTTTAGGTGCTGTAACAACAGAGTGATAGCGCAAATAACATCTTCTA  
AATGGACTAAATTAACACCATGTTCCCATCAGGCGGTTTTTCCGGCAAAGAAGCGTCCGGGATGACGTCGCGTCCG  
ACCAGGCCGCAAGACGAGAATATCGACCGAAGTACCGGGTAAATTTGTCAGCCAGTCTTCGAGTCTTCTAATACTCG  
TCCACTGTTGGTTACTGGATTACGCGGGTGGTTTTCCACCGTCCCTTGGCGTCCGCATAGACAGATGTTGAGCTGG  
TAAAAATAATCGGGGAATACGATGGGCCAGCGCGTATCCACTAACTTTGTACCGCTTGTAAATAGAATCATCGCCG  
GGCCGCTACGACGTGCCGGAAGCGTAATGACCAGCCATCGGCATCCATCAGGCATCCAGATCGTCAGAATCGAAAC  
TAGCTCAGGCTCCATGCGAAGCAGATAGCTATCAATGCCACTATTCCGGCCGCTTCGACACCATCTTGTGTGGTTTTAC  
TCCCGTGACTTGCCAGCCTCGCGTGAAAGTGACATCGCCAGCGGCATGCCTAACCCCTAACCCGACAATTGCGACC  
TTTTTCATCCGTTATCTCTGATACACCTTAGATCTATAAGGCTACGCTAGCGTATCAAACTGACAATTCATTCTATGA  
ATGAATCTGTTCAATAATGATAACGACATGCTGCAATGAGCAGTGAATCGTCGGTAACCGGTATACCAGACGGTGCTCC  
TCTGTAATGCGTGGGACCAGAACTGACAAATTATGTTTACGGGTTCTGGCTTCCCTTACCTTCAAATGGCGTCT  
GCGGGTATCTTTGATAAGTTCATTGATCTTTTTAACAAATCGCTTATCTGTTTCTGCCAGTACAGATAATCGTCCCATG  
ATCCTCAGACCAGATTAGTTTCACTCAATGATGTCCTTTCCGTTCTTTGCTGATTTCCAGGCTATCGATTGAGTCCA  
TCAATCTCCGGCGTTAGCGGGGAGCGCAGTAGATAAGCCGCTCTTCCAGCGAGTTGTATTCTTCGAGTGACATCAGA  
ACACAAGCCTCTCATTCTGACGAGTAATAAGGATCGGGCATGATCTTCAACGGCTTTCATATTGTTGCCGACAATT  
CTGACGCGCTTCGCTGTAGTAATTGTACGATGTCATCTCTCTTTGTACAGTTCATTGTACAATGATGAGCGTTAA  
TTAACTATTTATTAATTAGTTTGTAGATCAAGGTATTGTCAGTGAGACGAAAATCCAGGCTTCGCTATTTTTGGTGCCAT  
CAGCTAAGAGGACAGTCCCTTAGCCCCCTCTTCCCGCTCATTCAATAACAAATCCATTGCCATAAAATATATAAAA  
AAAGCCCTTGCTTTCAACGTGAAAGTGGTTAGGTTAAAAGACATCAGTTGAATAAACATTACAGAGACTTTTATGAC  
ACGCGTTCAATTTAAACACCACCATCATCACCATCATCCTGACTAGTCTTTCAGGCGATGTGTGCTGGAAGACATTGAGA  
TCTTCCAGTGGTGATGAACGCATGAGAAAGCCCCGGAAGATCACCTTCCGGGGGCTTTTTTATTGCGCGGTTGATAAC  
GGTTCAGACAGGTTTAAAGAGGAATAACAAAATGACAGACAACACTCGTTTACGCATAGCTATGCAGAAATCCGGCCGTT  
TAAGTGATGACTCACGGAATTGCTGGCGCGTGTGGCATTAAAATTAATCTTACACCCAGCGCCTGATCGCGATGGCA  
GAAAACATGCCGATTGATTTCTGCGCGTGCCTGACGACGACATTCCCGGTCTGGTAATGGATGGCGTGGTAGACCTTGG  
GATTATCGCGGAAAACGTGCTGGAAGAAGAGCTGCTTAAACCGCCGCGCCAGGGTGAAGATCCACGCTACTTTACCCTGC  
GTCGCTGGATTTCCGGCGCTGTGCTTTCCGCTGGCAACGCCGTTGATGAAGCCTGGGACGGTCCGCTCTCTTAAAC  
GGTAAACGATCGCCACCTTATCTCACCTGCTCAAGCGTTATCTCGACCAGAAAGGCATCTTTTTAAATCTGCTT  
ACTGAACGGTCTGTTGAAGTCGCCCCGCTGCCGACTGGCGGATGCGATTGCGATCTGGTTTCCACCGGTGCCACGC  
TGGAAGCTAACGGCTGCGCGAAGTCAAGTTATCTATCGCTGAAAGCCTGCCTGATTCAACGCGATGGCGAAATGGAA  
GAATCCAAACAGCAACTGATCGACAAACTGCTGACCCGATTCAGGGTGTGATCCAGGCGCGCAATCAAATAACATCAT  
GATGACGACCGACCGAACGCTCTGGATGAAGTCATCGCCCTGCTGCCAGGTGCCGAACGCCCAACTATTCTGCCGCTGG  
CGGGTGACCAACAGCGCTAGCGATGCACATGGTACGACGAGAAACCTGTTCTGGGAAACCATGAAAAACTGAAAGCG  
CTGGGTGCCAGTTCAATTCTGGTCTGCCGATTGAGAAGATGATGGAGTGATCGCCATGAGCTTTAACACAATCATTGAC  
TGGAATAGCTGTACTGCGGAGCAACAACGCCAGCTGTTAATGCGCCGCGGATTTCGCTCTGAAAGCATTACCCGCAC  
TGTTAACGATATTCTCGATAACGTGAAAGCACGCGGCGATGAGGCCCTGCGGGAATACAGCGCAAGTTTGATAAAACCA  
CGTTACCAGCTGAAGGTGCTGACAGGAGATCGCCGCGCCAGCGAACGCTGAGCGACGAGCTAAAACAGGCGATG  
GCGGTGGCAGTAAAGAATATTGAAACCTTCCACTGCGCAAAAACCTGCCGCGGTAGATGTAGAAACGACGCGAGGCGT  
GCGTTGCCAGCAGTACGCGTCCGGTAGCTTCACTGGGTTGTATATTCTGGCGCTCCGCCCCGCTTCTCAACGG  
TATTAATGCTGGCGACTCCGGCGAGTATTGCGGGCTGAAAAAGTGGTGTGCTCACCGCCGCGATTGCCGATGAG  
ATCCTTTATGCGGCGCAGTGTGCGGTGTGACGAGCTGTTAACGTGCGCGCGCACAGGCCATTGCCGACTGGCGTT  
TGGTACGGAATCTGTGCCAAAAGTGGACAAAATCTCGGGCCGGTAACGCCTTGTACCGAAGCGAAACGTCAGGTGA  
GCCAGCGTCTGGACGGTGGCGCGATCGATATGCCCGCAGGCCCGTGGAAAGTGTGGTATTGCTGACAGCGGCGTACG  
CCGATTTCTGGCTTCTGATTTGCTCTCAGGCTGAAACGCGCCGACTCACAGGTGATTTTACTGACGCCCCGCTGC  
TGATATGGCGCGTTCGCTTCCGAGGCGCTGAACGCCAATGGCAGAACTGCCGCGTGGCGAAACCGCCCGCAGGCAC  
TGAACGCCAGCCGCTGATCGTACTAAAGATTTAGCGCAGTGGTGGAGATCTCAACCAGTACGGCCCGGAGCACCTG

ATCATTAGACCCGCAACGCCCGTGAACGGTGCATAGCATACCAGCGCCGGTTCGGTATTTCTTGGTACTGGTCACC  
GGAATCGGCAGGTGATTACGCCCTCCGGCACCACACCGTTCTACCGACTTACGGTTACACCGCCACCTGTTCCAGCCTCG  
GGCTGGCAGATTTCCAGAAGCGCATGACCGTACAGGAACTGTGCGAAAGAGGGGTCTCCGCGCTGGCTTCAACCATAGAA  
ACACTGGCCGCCGCCGAGCGCTGACCGCCACAAAAATGCCGTTACTTTGCGTGTTAACGCCCTTAAGGAGCAAGCATG  
AGCACCGTGACTATTACCGATTTAGCGCGTGAAAACGTCCGCAACCTGACGCCGTATCAGTCGGCGCGTCTGGGGCGG  
TAACGGCGATGTCTGGTGAACGCCAAGCAATACCCCACTGCCGTGGAGTTTCACTTACTCAGCAAACGCTCAACCGCT  
ACCCGGAATGCCAGCCGAAAGCGGTGATTGAAAATTACGCGCAATATGCAGGCGTAAAACCCGGAGCAGGTGCTGGTCAGC  
CGTGGCGCGGACGAAGGTATTGAACTGCTGATTGCGCTTTTTGCGAACCCGGTAAAGACGCCATCCTCTACTGCCCGCC  
AACGTACGGCATGTACAGCGTCAGCGCCGAAACGATTGGCGTCGAGTGCCGCACAGTGCCGACGCTGGACAACTGGCAAC  
TGGACTTACAGGGCATTTCGACAAGCTGGACGGCGTAAAAGTGGTTTATGTTTGCAGCCCCAATAACCCGACCGGGCAA  
CTGATCAATCCGAGGATTTTCGACCCTGCTGGAGTTAACCCGCGTAAGCGGATTGTGGTTGCCGATGAAGCCTATAT  
CGAGTTTTGCCCGCAGGCATCGCTGGCTGGCTGGCTGGCGAATATCCGCACCTGGCTATTTTACGCACACTGTGAAAAG  
CTTTTGTCTGGCGGGGCTTCTGTTGCGGATTTACGCTGGCAACGAAGAAGTCATCAACCTGCTGATGAAAGTGATCGCC  
CCCTACCCGCTCTCGACGCCGGTGGCGACATTGCGGCCAGGCCTTAAGCCACAGGGAATCGTCGCCATGCGCGAACG  
GGTAGCGAAATATTGCGAAGCGCAATACCTGATTGCCGCACTGAAAGAGATCCCCTGCGTAGAGCAGGTTTTCGACT  
CTGAAACCAACTACTATTCTGGCGCGCTTAAAGCCTCCAGTGCCTGTTTAAATCTTTGTGGGATCAGGCAATTATCTTA  
CGTGATCAGAATAAACAACCCCTTTAAAGCGGCTGCTGCAATTACCGTCCGAAACCCGTGAAGAAAGCCAGCGCTCAT  
TGACGCCTTACGTGCGGAGCAAGTTTGTGAGTCAAGATATCTTTTTATCGATCGCGATGGAACCTGATTAGCGAACCC  
GCCGAGTGATTTTCAAGTGGACCGTTTTGATAAACTCGCCTTTGAACCGGGCGTGATCCCGGAACTGCTGAAGCTGAAA  
AAGCGGGCTACAAGCTGGTGTGATGATCACTAATCAGGATGGTCTTGGAACACAAAGTTTCCACAGCGGATTTTCGATGGC  
CCGCACAACCTGATGATGCAGATCTTACCTCGCAAGGCGTACAGTTTGTGAAAGTGTGATTTTCCGCACCTGCCCGC  
CGATGAGTGCAGTCCGTAAGCCGAAAGTAAAAGTGGTGAACGTTATCTGGCTGAGCAAGCGATGGATCGCGCTAACAA  
GTTATGTGATTGGCGATCGCGGACCGACATTCACTGGCGGAAAACATGGGCATTACTGGTTTACGCTACGACCGCGAA  
ACCCTGAAGTGGCAATGATTGGCGAGCAACTCACCAGACGTGACCGTTACGCTACGTAAGTGCCTAATACCAAAGAGAC  
GCAGATTGACGTTCAAGTGTGGCTGGATCGTAAGTGGCAGCAAGATTAACACCGCGTGGCTTCTTTGATCATATGC  
TGGATCAGATCGTACCCACGGCGTTTCCGCATGAAATCAACGTCAAAGGCGACCTCTATATCGACGATCACCACACC  
GTCGAAGATACCGCCTGGCGCTGGCGAAGCGCTAAAATCGCCCTCGGAGACAAACCGCGTATTTGCCGCTTTGGTTT  
TGTGCTACCGATGGACGAATGCCTTCCCCGCTGCGCGCTGGATATCTCTGGTCCCGCACCTGGAATATAAAGCCGAGT  
TTACCTACCAGCGCTGGGCGATCTCAGCACCGAAATGATCGAGCACTTCTCCGTTCCGCTCTCATACACCATGGGCGTG  
ACGCTACACCTGAAAACCAAAGTAAAACGATCATCACCGTGTAGAGAGTCTGTTCAAAGCCTTTGGTCCGACCCCTGCG  
CCAGGCCATCCGCGTGAAGGCGATACCTGCCCTCGTCAAAGGAGTGCTGTAATGAACGTGGTGTATCTTGATACCGG  
CTGCGCCAACCTGAACTCGGTGAAGTCTGCCATTGCGCGTACCGTTATGAACCAAAGTACAGCCGTGACCCGGACGTCG  
TGTGCTGGCCGATAAAGTGTTTTACCCGGCGTTGGCACTGCGCAAGCGGCGATGGATCAGGTACGTGAGCGCGAGCTG  
TTTGATCTCATCAAAGCCTGTACCCAACCGGTGCTGGGCATCTGCTTAGGGATGCAACTGCTGGGCGGCGCAGCGAAGA  
GAGCAACGGCGTCGACTTGTGGGCATCATCGACGAAGACGTGCCGAAAATGACCGACTTTGGTCTGCCACTGCCACATA  
TGGGCTGGAACCGGTTTACCCGAGGCAAGCGCCTGTTTACGGGATTGAAGACGGCGGCTACTTTTACTTTGTT  
CACAGTACGCAATGCCGGTCAATCCGTGGACCATCGCCAGTGAATTACGGCGAACCGTTCACCGCGGCGGTACAAAA  
AGATAACTTACGGCGTGCAGTTCCACCCGGAGCGTTCTGGTCCGCTGGTGTAAAGTGGTGAAAAACCTTCTGGAGA  
TGTGATGATTATCCGGCATTAGATTTAATCGACGGCACTGTGGTGCCTCCATCAGGGCGATTACGGCAAACAGCGCG  
ATTACGGTAAACGACCGCTGCCGATTCAGGATTACGCCGCGCAGGGTCCGAAAGTGTGCACCTGGTGGATCTGACC  
GGGCAAAAAGATCCCGCTAAACGTCAAATCCCGCTGATTAAAAACCCCTGGTCCGCGGGCTTAAACGTTCCGGTGCAGGTTGG  
CGCGCGCTGCGTAGCGAAGAAAGATGTGGCGCGTACTGGAAGCGGCGTTGCGCGCGTAGTGGTCCGCTCCACCGCGG  
TGAAATCACAAGATATGGTGAAGGCTGGTTTGAACGCTTCCGTTGCCGATGCCTTAGTGCTGGCGCTGGATGTCCGTATT  
GACGAGCAAGGCAACAAGCAGGTGGCAGTCAGCGGCTGGCAAGAGAACTCGGGCGTTTCACTGGAACAACTGGTGGAAAC  
CTATCTGCCCGTCCGCTGAAACATGTGCTGTGTACCGATATCTCGCGGACGGCACGCTGGCAGGCTTAACGCTCTTT  
TATATGAAGAAGTGTGCGCCAGATATCCGAGGTGGCATTTCAGTCTCCGGCGGTATTGGCGACATTGATGATGTGGCG  
GCCCTGCGTGGCACTGGTGTGCGCGGCGTAATAGTTGGTGGGCATTACTGGAAGGTAATTCACCGTGAAGGAGGCCAT  
CGCATGCTGGCAAAACGCATAATCCCATGCTCGACGTTCTGATGGTCAGGTGGTGAAGGCGTACAGTTTCGCAACCA  
TGAAATCATTGGCGATATCGTCCGCTGGCAAAACGCTACGCTGAAGAAGGCGCTGACGAACTGGTGTCTACGATATCA  
CCGCTTCCAGCGATGGCCGTGGTAGATAAAAAGCTGGGTATCTCGCGTGGCGAAGTGTGACATTCCGTTTTGTGTG  
GCGGGTGGGATTAAGTCTCTGGAAGATGCCGCGAAAATTTCTTCTTTGGCGCGGATAAAAATTTCCATCAACTCTCCTGC  
GCTGGCAGACCAACATTAATTACTCGCTGGCCGATCGCTTTGGCGTGCAGTGTATTGTGGTCCGATTGATACCTGGT  
ACGACGCCGAAACCGGTAATATCATGTGAATCAATATACCGCGATGAAAGCCGACCCCGCTCACTCAATGGGAAACG  
CTCGACTGGGTACAGGAAGTGA AAAACGCGGTGCCGGAGAAATCGTCTCAATATGATGAATCAGGACGGCGTGGCTAA  
CGTTACGACCTCGAACAACGTA AAAAAGTGGTGAAGTTGCCACGTCCCGCTGATTGCCTCCGGTGGCGCGGGCACCA  
TGGAACACTTCTCGAAGCCTTCCGCGATGCCGACGTTGACGGCGCGCTGGCAGCTTCCGATTCCACAAACAAATAATC

AATATTGGTGAATTA AAAAGCGTACCTGGCAACACAGGGCGTGGAGATCAGGATATGTTAACAGAACAAACAGTCGCGAA  
CTGGACTGGGAAAAACCGACGGACTTATGCCGGTGATTGTGCAACACGCGGTATCCGGCGAAGTGCTAATGCTGGGCTA  
TATGAACCCGGAAGCCTTAGACAAAACCTCGAAAGCGGCAAAGTACCTTCTTCTCGCGACTAAACAGCGACTGTGGA  
CCAAAGCGAAACGTCGGGCAATTTCTCAACGTAGTGAGTATTGCCCCGACTGCGACAACGACAGTTACTGGTGCTG  
GCGAATCCCATCGGCCGACTTGCACAAAGGCACAGCAGTTGCTTCGGCGACACCGCTACCAGTGGCTGTTCTGTGA  
TCAACTGGAACAACTGCTCGCCGAGCGCAAATCTGCCGATCCGGAACCTCCTACACCGCCAAACTGTATGCCAGCGGCA  
CCAAACGCATTGCGCAGAAAAGTGGGTGAAGAAGCGGTGAAACCGCGCTGGCAGCAACGGTACATGACCGCTTTGAGCTG  
ACCAACGAGGCGTCTGATTTGATGTATCACCTGCTGGTGTGTTGCAGGATCAGGGGCTGGATTTAACGACGGTAATTGA  
GAACCTGCGTAAACGGCATCAGTGAGTTGCGGGTAAGCGGATGCGATATTGTTGCCGATCCGGCAAAAAACGGGCAA  
GGTGTACACCACCTGCCCTTTTTCTTAAAAACGAAAAGATTACTTCGCGTTGTAATTGCGTAGAGCATTACGCCCCAGC  
ACAATCCCCGCGCAACCATGCCACCCAGCAGCACCGCCAGAATCAAGGTAATTGCCTTTTTCGGGCTATCACGACGAAT  
AGTAACATCGGTTTCATCACATAACGGTAAGCATGAATATCAAGATCATCAACTTTTAAGCTTTGATATCCAGCAGGT  
TTTGACGAGTCTGATAGTAGTTTGGCGAGAACCAACGGACGGTGCCTCATGCTTAATCATCGACTCCAGCGCTTCG  
CTCCCCAAAAGGAACAACGTATCTTGTGTGATATCTCGCCAGTCTGTTGAATCTGCGGTTTTGTACCTGCGCCTGATT  
CGCATCTGCAACGCTTCTGAATCTGACGGATACGCAGATCTTCTGCTCTGCGGACTACTTCTGCGTTTTCTTAAAG  
AGTCTGCAAGTTTTCCGTCCCAGAGCAATGTTGTCTTTGAGATCCTTTTTCTAGCTCTTGATTCACTTTATCGTCAACT  
TGCTGAATGTATTGGGCCAACTTCATTTGTGCGCCCTTCGAGTTTGCCCAACATAAGAAAAGTCAATGGTAATTGCTG  
GTTCTTAAACAGAAGGTTTCGATGGTAAGTTTTTCTGTTCTTCTGATTATCCAGCGTTTTCTGCTAATGCAGAGAAGGCG  
AACTGAAGCGACCAATTAACGTCTCCTGCAAATCCGATACTTTGGTGCAGCCTGACCATAGATAACATTCATGGCATTG  
TTATAGCCAGCAATTTGCCCCAGTCGGGCTGAGTGATAATTGCTGTTGACGTCCTTTCTCCTTCGCTACTGCCAAATA  
TCCAATAGCCAGGGCAATAGCCACAATGACGGAAATGATGATTGCATCTTGCCAGCCACAACCTGACTAGTAAATCAA  
TCAAATCAATCTGTTCCGGGTCATGGTTTTGCCAGAAACATTATTTTTCTACTCTCATCATTACCCTAACTGACGGA  
AATTTCCAAGTCCGCATAGTTTAGCGATAATCCTCGTGAATGCTATAGGATAAGTGATAAAAATAATGAATTGTTGTGA  
AGTAACAAAAGACAATCAGGGCGTAAATAGCCCTGATAACAAGATGTTAGTCGCTGCCAAGAGATCGCGGGTGTATACC  
TTATCTGCCACATCCTTAAGCTCTTCTGCCATTCCGTTAGAGATAATGACGTCGGCTTGTGTTTGAAGGTGGCGAGATC  
ACGTTCCAGGGCAGAGTTGAAGAATGAGTCTTCTTTCATCACTGGCTCGTAGATGATCACTTCAACACCTTTCGCTTGA  
TACGTTTTATAATCCCCTGAATAGAAGACGCACGGAAGTTATCTGAACCGCTTTCATAATCAGACGATAAATACCCACC  
ACTTGCGGCTTGCCTGACAAAATGGCATCGGCAATAAAATCTTACGCGTGGGTTAGCATCGACAATTGCCGAGATCAG  
GTTATTCGGCAGACTGGTAGTTCGCCAGTAACCTGTTGGTATCTTTCGGCAGACAATAACCACCATAACCAAACGACG  
GATTGTTGTAATGGTTGCCAATACGTGGGTCGAGACAAACGCCTTCGATTATTTGACGGGAATTCAGACCTAAACTTTCT  
GCATAGCTATCCAGTTGCTTAAAGTACGCCACGCGCATCGCCAGGTAGGTGTTTGA AAAAAGTTTAAATCGCTTCTGCTC  
AGTGGAGTCGGTAAACAGCATCGGGATATTTTGCTAATCGCGCTTCTCTGTAACAGAGCAGCGAAACGTTCTGCGCGTT  
CTGAACGCTCACCGATGACAATACGTGAAGGATGGAGATTATCGTAAAGGGCTTACCCTCACGGAGAAATTCGGGGGAG  
AATATAATATTTTTCAGTGCATATTTCTTATGCATCGCTGCGGTA AAAACCAACGGGAACCGTTGATTTGATGACCATAAC  
CGCATAAGGATTTATCTCAACTACGCTTTAATTACTGATTCTACACTGGATGTATTGAAATAATTAGTTTTAGGATCAT  
AGTCGGTTGGAGTGGCGATGATGACATAATCAGCATCCCGTAGGCTTCATTTTTATCTAATGTGGCATTAAAGTGATT  
TTATCTGATTGCAAAAACGCTGAATTTCTTATCAACAATAGGAGATATCCGATCATTGAGCATAGCAACGCGTGACGG  
TAAAATATCTAATGCCACAACCTCATGATTTTGTGCGATTAGAAGCCGTTTGACAAGCCTACATAGCCAGTACCGGAAA  
TGGTGATTTTCATTTCTGCTCTCAGAATTAACCTAACTGTGAATCATGATGTTTTTAGCATCCTGATAAGAGCTAAAAG  
TTTTAACGTCACGTTGTGATGGTCAACGCAAGAAAACAATTCAGATTTTCTTTATAAGAAATAGCTGATATTTATTA  
AGTTAATATTAAGCAGTGAATTTAGTCTATAAGATATTTGGCAAAAAAAGCCGGTGAATATAACCGCGGCCTCAAT  
TTTTATTGTTGGTTAAATCAGATTAATCCAGCATTCCGTTAGGAAACACCTTCTTTATCAATACGCTTATAAGTATGCG  
CACCAAAAATAGTCACGCTGTGCCTGGATCAGGTTTCGAGGAGACAACAGCAGCACGGTAGCTGTGTAATAGGCAACCGCT  
GCGGAGAAGTTCGGAACCGGAATACCGTTCTGTACTGCATAAGCAACGACATCACGCGCGCTGCTGGTAGTCATCGGC  
AATTTGCTTGAAGTACGGAGCCAGCAACAGGTTAGCGATCTGTGGATTTTCGGCATAAGCATCGGTGATTTTCTGCAGGA  
ACTGCGCACGGATGATGACGCCAGCACGGAAAATCTTCGCGATTTCCGCGTAGTTCAGATCCAGTTGTA CTCTTCAGAC  
GCAGCACGAGCTGAGAGAAGCCCTGGGCGTAAGAAACGATTTTGCCAGATACAGCGCACGCAACTTTTTCGATGAA  
CTCAGCCTTGTGCTGCTGGCTGTGCTTGGGACCAGAGAGA ACTTTAGATGCGGCAACACGCTGATCTTTCAGAGAAG  
AGATATAACGTGCAACACAGACTCGGTAATCAGCGACAGCGTTTCGCCGAGATCCAGCGCGCTGCTGGCTGGTCCATTTA  
CCGGTACCTTTGTTAGCCGTTTCATCCAGGATCACATCAACCAGTGTAGTTACCCTTTCATCTTTTTTGGTGAAGATATC  
TTTTGGTGATGTCGATCAGGTA ACTGCTCAGTTACCCTTATTCCACTCGGTAAGGCTGCGCCAGTTCTTCTGTTGGTGA  
GGTTCAGGCCACCTTTAAGCAGAGAATAGGCTTTCAGCAATCAGCTGCATATCGCCGATTCAATACCGTTGTGAACCATC  
TTCACATAGTGACCTGCGCCATCGGCACCAATATAGGTAACGCATGGTTCACCGTCTTCAGCTACGGCGCGGATTTTGGT  
CAGGATCGGTGCTACCAATTCATAGGCTTCTTTCTGCCACCAGGCATAATAGAAGGACCTTTCAGCGCCCCCTCTTAC  
CGCCAGAAACACCGGTACCGATGAAGTTAAAGCCCTCTGCTGAAAGCTCACGATTACGACGAATAGTGTCTTGAAGAAG  
GTGTTACCACCATCAATGATGATGCTCCTTTATCGAGATATGTTTTGAGGGAATCAATAGCAGCATCCGTGCTGCACC

TGCTTTACCATTAACAGGATGCGACGAGGCGTTTCCAGAGATTCGACAACTCTTTCACCGTATAGTAAGGAACAGTT  
TCTTGCCTGGATTTTCGGCAATCACTTCTCCGCTTCTCACGGGAACGGTTGAAAATAGAGACGGTATAACCACGGCTT  
TCGATGTTGAGCGCAAGGTTGCGTCCCATCACTGCCATACCGACTACGCCGATCTGTTGCTTGACATTACATACTCCTG  
TCAGGTGTGATCACCGCGCTGAATGCTCGCGCCTGGAATGTTCCGAAATAAGTATACAAAGTACTTATTAAGTATAAA  
TAGCTTATCCATGCTTATATGCTTACGGCTTTATATTACGGGTGAAAACTGATGAAATTCGATCAAAGTTGCGATTTGA  
TAAAATACGTTTTCTGGCTAAATATCTAAAAGTACTTTTTAAGTGCCATCTGAAGGCTTTTGAAAAAACTTCGATTGT  
CATGATGAGCATAATGTATCGCATGAAAAGCGGGAACATAATGAAGTCTGACACCAGCCAGGCTAAGCCTCAAGCACAGG  
TCAATATCTTCACAGTACATAAAGTAACCTTGATCGAAGCCATTTACACGCACAAAATCTGAAAAACGTACCAGCATAAA  
TGATCCTGCGCACCAATCAACAACCGTATCAGAATAGATACTTCTTTAGGAATTTTTGTTTTATTAAGGAAGGTGCGAA  
TAAGCGGGAAATTTCTCGGCTGACTCAGTCATTTCACTTCTCATGTTTGAGCCGATTTTTCTCCCGTAAATGCCT  
TGAATCAGCCTATTTAGACCGTTTCTTCGCCATTTAAGGCGTTATCCCAGTTTTAGTGAGATCTCTCCCACTGACGTA  
TCATTTGGTCCGCGGAAACAGGTTGGCCAGCGTGAATAACATCGCCAGTTGGTTATCGTTTTTACGCAACCCCTTGAT  
CTGGCTTTCACGAAGCCGAACTGTGCTTGTATGATGCGAAATGGTGCTCCACCCTGGCCCGGATGCTGGCTTTCATGTA  
TTCGATGTTGATGGCCGTTTTGTTCTTGCCTGGATGCTGTTTCAAGGTTCTTACCTTGGCCGGGCGCTCGGCATCAGCC  
AGTCCACATCCACCTCGGCCAGCTCCTCGCGCTGTGGCGCCCTTGGTAGCCGGCATCGGCTGAGACAAATGCTCCTCT  
CCATGCAGCAGATTACCCAGCTGATTGAGGTCATGCTCGTTGGCCGGTGGTGACCAGGCTGTGGGTGAGGCCACTCTT  
GGCATCGACACCAATGTGGGCTTTCATGCCAAAGTGCCACTGATTGCCTTTCTTGGTCTGATGCATCTCCGGATCGCGTT  
GCTGCTCTTTGTTCTTGGTGCAGCTGGGTGCCTCAATGATGGTGGCATCGACCAAGGTGCCTTGAGTCATCATGACGCCT  
GCTTCGGCCAGCCAGCGATTGATGGTCTTGAACAATTGGCGGGCCAGTTGATGCTGCTCCAGCAGGTGGCGGAAATTCAT  
GATGGTGGTGGTCCGGCAAGGCGCTATCCAGGGATAACCGGGCAAACAGACGCATGGAGGCGATTTCTGTACAGAGCAT  
CTTCCATCGCGCCATCGCTCAGGTTGTACCAATGCTGCATGCAGTGAATGCGTAGCATGGTTTCCAGCGGATAAGGTGCG  
CGGCCATTACCAGCCTTGGGGTAAAACGGCTCGATGACTTCCACCATGTTTTGCCATGGCAGAATCTGCTCCATGCGGGA  
CAAGAAAATCTTTTTCTGGTCTGACGGCGTACTGCTGAATCACTGTGCGCGAAGGTAAGTTGATGACTCATGATGA  
ACCCTGTTCTATGGCTCCAGATGACAAACATGATCTCATATCAGGACTTGTTCGCACCTCCTTAATCCCTAACATAAA  
TGACACAATAAAAATCAGAAAGCACAGGAAATTTTCTACGGAATAATCATGTAAGATTTTCGTTTATCTCGGAACAGGC  
ATAATGTAATAAAGCATAACGCTTACTTTCGACATATTTAATATATGTGAGCAATCATCATGCTTTCATGATGATATCG  
GGATTCAAAAACAAAATGTAATCATCATCTCGGGTCTATATTTTTCTTTACATACGCCACCGAATATTATTATTATG  
ACCAAAGCCGTATACACCTCCTAATAATAGTCCAGGCTGCATAATGCTGGCATATTTGTTTCAATAATAGAGAGTCTT  
TGTTGTCGCGTACGATAATCTGTAGTGCTCATCGTCAAGATTAAGATTTTCGAGTAATTTTTGATGTAGTCTTCATGT  
CCGTGGGAAACGATTATTATATATACCATTTCAATGTTCTTCAAGTAAATAAAATTAAGTTCATCAAACCCAACTAATA  
CATTTTTATTACGATAAATGAAATTTGCATCAGAGATATCTTTTTGAGGTTACCTTTTTGAAGTCAATAATAAGTTTA  
ACTAACATGTCATCGTTATTAGAATCAAAAAAGCTTTCTTTTATAACTACCAAGAGTTTCTCTAGTAAATGGGAAATC  
TGATGCTAATACCCACTTACCTCGCTCTTTAGCTTCAGACAACGGCAATCCCATGTTTCTAACCTAGAGGGAAAAACAA  
CTATATCTGAAATATTATAACAATGATCGATTTTTCTTTATCCAAGTACCCGAGGAAATGAACATTATCCAGTCTTCT  
GCAAGACTGATAATATATTTGCATACGATTTTCTGTACCACTGATAGTAAGCAGAAATTAATATTGGATTGTTCTTT  
CAATTTCTTGTGCTACTAATAAAGCTCGAATTTTTAAATACTCGTGAACAGCAGGGTAAATATTGTCAACTCAG  
AAGGTTATTTAAATTTGAGAATCATCATCAGTAAGTTGGCTTTTATCAGATAATTTAATTTCTGGCCGACTGACAATG  
ATGTTATTTATAGAATATTTCTTGATAAATTTTTCTTTCATCCAGAATTGTTGAACAAACACTGCAGTATTTTTTTAAT  
GTTTATTTTATATACAGCCGATAGCATTTTAAATAAGAAAAAGCTAGGCTCCATAAGAATTTACGGAATAAAATTC  
CTTATAAAAAGGTGCAGGTTATGACAATACACATATCTTTTTTATGACGACATTGGCCGTAATATCATGCAGACAA  
ATCCAATGCTAGCATTACGCTCTTTTGAAGTTTTTTTACAAACTACATATTCAAAGTGCAAACGTTTTTAGCCACGACCC  
TTTAACTCAGGAACTCAATGAATTTAACCCATGGATAACTTTCTTTTAACTCTTTAGCAGAATGGACTAATGCGATAA  
AACTGACATTTTCTTTATTATTAGTTGCTGCCAAAAATTTTTTCAAATGGTAAATGGACCGCCAGTGGTAAAATTTGACC  
GCAGAAACAACGACTATGCTTTTTCCATAAATTTGGTCTCATGATTGATTTCTTTATGATTTTTGCTGGTACTCCCGCA  
ATGACAGTATTTTCCGGAATAGAACCTTAACAACAGAATTGGCGCCGACTACGACTCCATTACCAATAATTGTTCCAGG  
CAAAACCGTACATTCTACCCAACCAACCCTCTGGCCAATTACAACAGCTGAAGATTCCAACGTGCGCATGTCTGGAG  
GTATATTTGGCGAACTCATTGGATCAGAGTGCTTAAAGGAACCGTGAATGATCGGTAATAAATACTTTACTTGAATA  
AGCGTATCCCGACCTATCGTAACGCTCTCAATTGAGGCGATATGAACATAGTCGTTAACTTGCACATTATCGAAAAAAA  
AATCAGCCACGTCAAATGCATCCAGCCTGAGACCGACTCCACTTGTGAAATTTTACCAAAATTAATGCTACCATCAT  
TGCGAATATAGCAGGAAATCGAATAATTCTACAGTTCCGGTAAAATACACGAGTCAATAAGACATCTTAACAAGCCGA  
ATAAAACCACAGAGACCATATCGTTTAGCGAGTTTTAAGATCATCGATCACCTCTTCAAGAACATCCCTGAAGTAACTT  
CTGTTGCAATTTTCTGAGAAATAATTTTTGTATTCTACTAATTTGCTTATAAGTTTCTATTGTCATGGAGTCAACAATC  
TCTTGCATTTCTTTGATTGATCCCACTGCATATCCTATTCTATTATCTACAATGAAATCCGCAAGGGCGGCTTTATCCCA  
TATAAATACTGGAAGTCCATTGAAAGATAAAGAGATGCTTATGAGGGTATTAAGTCTTAAATAGTCGCCAAAGGCAC  
CACTACAGGTTTCGACAGAATCTCCATCCAAATGAGTCCAAATGTCATGCCTGGGAGGTTAATCTTTTCCGGAGATTGA  
GCATCAAACCTTCAAGATATTTAGGATTATCTTTATTTTTCATAGTTGACACCAAGAGAGTAAAATCGCATCCTTCAGT

ATATATGAAAGAACATTTATGCCTAGAAAAGTTGCCAGCATATATGACCCCTCGTTGCTTATCCGTAACATCTCGATGCT  
CCACATCAGATGAGACGAGTAATCAAATATTTTTATGCTTTGATTTTATCCTGAGACATATATTTACTAAGGTACTTT  
GTCATTTGTGGATTGTGACTTATGACCATATCACAGGTAGCAAGCCGCACAGAATCACTACCCCTCCTCCTCTTAATTC  
ATCAATATCATGAATCAGAGGTACTATTCTAAATTTTGAAGGGCGGTGAAAGAATGACAATATATGCCAAATGGTTTTGG  
CCATCGGGAAATTGAAAATTAACATCTTTATTTTCAAGACCGCAGAGAAATGTAATAAGCTTAACAGAACTAATAATT  
CTCTGGACTACTCCACCCATAGAGGAATGTTAACAACAGAAATGTTTTCATAATCTGAAGCAATGTCCAGTGCATCTTT  
TCTTGCTTTAAATCCAGCATCGCGTCTAGAGAAATTTAAATCATTCAAAAAATACATTTTCACTTTATTTTCTGGGCCTT  
AAGAAATTGAGAGAATACTATGATACAAAAGATTATTTGTATCCAATGCTAATATTAGTCATGAAGCTTTCATGATAAA  
AAATGAAAGAAAAGGTATAAATAAAATATGAATAAAATATTTTACAGATATGTAATTTGAGACAATCTCCATAAAACA  
CCTGAAATACAGCCATGAATAACCATCATCAAATAGCTTAGCTCCGCGGAAATATAAACATAATCCGAAAAAGCAGTATA  
AACATTTGTTGGCAAACCCACACAAATTTTATGCAACGCATAGAGACTCCACCTGTTAATAGCCCCATCAGCC  
TTTCAAAAACCAAAGACATGAGAACTGGCAGAGTTAGATACTTGTGAAAATAAACTCCTGAAACCGGATTATAGGG  
CTGACCAAATACATGGATAGATAATATGCCATCCCCCAGGCAGTCCACGTA AAAAGAGCATATACAAGGAGAATAGAAC  
ACCTACAGCTGAATAAGATAAACATAATGTTTTACTCTATTAACACCTACGATGAATGCATAAGAGATGATAACCATAA  
AGACAATTTGCTTACCAGTATTCAGTATAATTGCAAAGATGAATACAATAAAAAACAAGTAAATGTTTTACTTACC  
TTTTGATTAGTAAATTTTTAGACCAAATAAATAAAGCAAAGTAAATGAAATGATTGGCTGCATGTATGAGAAAAT  
TCTTGATGTGCTTCAACATCAGCATCTCTTATCAAATTCATATAGCTAAGTAAGCTAGTCCCGAACTGGTAGTTACTTA  
ACCTCATGCATATATATATCATCGAAAAAGAAATAACTAACAAGCCTACATTATGCACTTTCTTCGATGGTATGCTATAA  
ATAGCATTATTGACTTTTCTGATATTTAGATCTAATACACTTTCCGTCAATAAACATGACAGGGTAAATGTCAAACATT  
GCAAAGTAGAAAAATCAACGTAGCGTCATTTAACTGAAAAGCATATATCTGACGTTATTTTATATCCCAATAAGACCA  
GTGCGAAGATGATATTAACGCATACGGCTGGATAAAATATATCCTTCTTAAGATATAAACAGATAAATGTGTAATGAGA  
AAGACACTAATTACAAGATAGATCATTAAATCCGTACTCATTATTTTTTCACTTGATAAAGAGCGGCAGATCACTTGA  
TGATATCATAATATTTACTCGCCAAACGCCGCCAAATATAACCTTGTCTTCTCTGCTAGCTAATCTCTATATTT  
CTTAAAAAGCTCCATGTTTTTATTATCATTAACTGGATAGTAGGGTTCGTCGCCAACTTTCCACTCTAATGGATATCTT  
TTGTAACAACCGTATGCTTTGTCTCAACATAGTCAAATGTTTATGCTCAATTATTCTGGTATATGGTACATTAGCATCA  
GTGAAAATTTACTGCATTCCCTTGGAAAGTTTGGAAATTCATGGCGTTCCTGCTCAAATTTTAAAGAGCGATATCTAA  
CGCTCAAACCTATAGTCGAAGTACTGATCAATGGGTCCAGTGTAGATGATTCTATGGGCTTACTCGTAGAGAATCTT  
TGCTTTTCAAAAATCAATGCCTAATTTTACGTCCACACCTTCAAGCATTTTTTCAATAAGCTTAGTGTAGCCTCCCACC  
GGAATACCTTGATAGCGATCGGAAAAAATATTGTTATCAAACGTAATCTCACTGGGATTCGCTTAATAAATAATGCAGG  
CAATTTCTTTGCACTTCTTCCCACTGCTTCTCCGTATAACCTTTATCAATGCTTGGTATAAGTCTCCCAACTAATG  
AAATCGCTGCTCCTCAAATTTTTCAGGTACCTTGTACCATACTTTTTTTTCTGAGCATTAAATGATATTTTGGCTTCT  
TGAGGATCTTAACTCCCAACATTTGGTGGAAAGTATTCATATTA AAAAGGAAGTTGAATAATTTGTCTTTATAAATCGC  
CAGTGGAGAATTAGTAAAACGATTAATTTCTACTAAATCATTAAACGTAATCCCATATATATTTATCATTGGTATGAAAA  
TATGTGCACCATATTTATGAATCTGGATACCCTCACAGTCTCTGTGTACGCATTTCCACCGATATGATTTCTTTTCTCA  
ATCACTAAAATTTTTTGTAGCTTTTTTAACTCATTGCAAAAACGGCACCAAAACAACCAAGAACCAATGATATA  
ATCGTACATAAAAATCCTCAGCAAACAGTAATTTATTTTCTACGAACATCAGCATGAGTGACGTAAC TAAGCACTCT  
GTTGCAAGCAATGTTATTGCTGCACCAATCTCTTAAAAAGAGTTGTTAGCGGAAAAATCAACAACAACCTCAACAAC  
CGCAGCGATTAATCTTACTGAATCTTTCTTATAATTTATGGGTGAGCATAACTTGAATGCCATAGACATTACTTAATG  
AAATAAGAAAAGGAGGAGGATATAAATCATTAGCACAATCACTGCATTATCATATCCCGCCCTATACTTATTTTTACT  
AGTATAGATGCACCAAGAGCAGAATTAATGAAAAAGCACCACCAATCAAACCTCAAGCAGTCAATGATTTTTTAATTA  
AATCACACCTTCAACAGTAAAGAACAGCGTACTTTGATATTTCTGGGTATATTGCTTGGGTGATAGGATTTAATAGCC  
CTTGAAGCGCTTTCTTATAGTATTGGCCGATTAATAATCCCTACGGACGTTGGTCCAGATATAAATCCAGGATAATA  
ACTATTTCCCGTAGAATATAAACTAATAGCAGATGTGAAAATAAAAAACATGAAAACCGTCTGCTAAAGATCGACGCACATT  
ATGTAATGATAGCGTAACTTTACCAATCCAACCTTCATGAACAACGATAGCTAGTGCAATAATTCAGCAACCAGATTTG  
CACTTGACTGAATAAAACCGGCAATTGCTATATCTGACTTTGTGTTCAAAAAATAAATGTTAGAGGGATAATAGCCAAG  
CGGGATAAAATACTACTTAAAGTACGCCATTTTCATTTTTCTTTTCCCTGAAACAGCCAGATAGGGTAGATTAATTTCC  
GACTAATGCAGGAACAACGACCATATAAATACGGCATGCTTGTATATTCAGGAACAAGCAAGGTCATCGACGTTAAGA  
AAATCAATGTAATGACGATAAAGAACTATTTTTGAAAATATCACCGCCAAAAAATAGACGTTACTTTATCTTTACTATCT  
GCTGCTTTGGCAACTCTGAGTTGCTGTGAGATTGAAACCATATTAACAACATTATCATATATAGCATAGTCGCTTG  
GCAAAAACCGAATATACCGAAATTTTTCAGGACCAAGTGTCTTACAAGATATGAAATGTAAGCAATGGTAAAAGATAAT  
TGCTACCTTGAACGACAGCCAGATATAAACGTTTCTTAAAGATAATTTATTCGATTCATGCAATTAATTTAATC  
TGATAAGCTCATCTAACGTAAGAGCCTTTCATCTTTTGGCGAAAGGATTAACCCTGATGTTTGGGGCAATCAATTGCA  
ATGCGTTTCATCTTCAACATATTCCACAATCGTTTTCAGGATGATAATAGTTTGTAGTTTTATATTGAAATTCAGCGAT  
ATCAGACAGAACCAAAAAGCCATGAGCAAACCTTTTTGGTATCCACAACCTGCTGCTTATTATCAGCTGAAAGCAGAACAC  
CAACCCATTTACCAAAGGATACCGAATTTGGGTGCAATTAACAGCAACATCAAAAACCTGCTCCATGAGTGCAGCGTACA  
AGTTTATCTTGTGCTACTCGCCGCTTGAAGTGAAGGCCTCTGAGTACATTTTTTGTGAACTGAGTGAATGCTTGT

AACAAAGCTGACCGGATAGCCTAGAATATGTTCAAATGCTGATTGATTAAGCTCTCATAAAAGAAACCTCTATCATCAC  
CAAATACTCTTGCTCCAGAATTAGCACATCTTCAATTTGAGTTCTAATCACATTCATTAATTTGAATCCTTCGTCATTT  
TATAAAGATACTGCCATAATTATTCTTTATTAGTGGTACAGCTAATTTTCTACTTGCTCAACATCAATAAAACCTTTA  
CGAAATGCAATCTCTTCAGGACAGGAAACCTTCAATCCCTGGCGCTCTTCAATTGTCGCAATAAAATTACTTGCTTCTAT  
CAGACTCTGATGAGTCCCGGTGTCCAGCCACGCGTAGCCACGCCCCATCATCGCGACAGACAGACGTCCCTGCTCAAGAT  
AAATACGGTAAATATCTGTAATTTCTAACTCACCACGTGCAGACGGCTTCAAGTTTTTCCGCATCTGAACCACGTCGTTA  
TCATAAAAGTACAGACCTGTAACGGCGTAATTACTCTTTGGTTCTAACGGTTTTTCTCCAGACTGATTGCCGTACCGTT  
TTTATCAAACCTCAACGACACCATAGCGTTCTGGATCATTAACGTGATAGGCAAAATACCGTTGCACCACCTTCTTTGTTAA  
CAGCGGCTCCATTAGCTTCGGCAGATCGTGACCGTAAAAGATATTATACCAAGAACCAAAGCAATCATCACCACCA  
ATAAACTCTTCACCGATGATAAATGCCTGCAGGCGCATCTGGGCTAGGTTGCACTTTGACTGAAGATTACAGCCCCA  
CTGGCTACCGTACCCAGCAATTGTTGAAAACGAGGAGTATCTGAGGTGACTGATAATCAAAAATACGCGAATACCCG  
CCAACATCAGTGTAGAGACGGGTAATAGATCATCGTTTTATCATAAATAGGTAATAGCTGTTTACTGACAGCCATAGTC  
ACAGGATAAAGACGTGTACCAGAACCACCGCTAAAATAATACCTTTACGCATTTTCATTTATCATTCTTTTAATTCA  
TCTTGCTCCACCATCACGAACAAGATGCAAAAACCTATTAATTTGCTGTAGTCGTAATAAATTCATTGAGCATTGTTTCA  
CGCAACCTGCCAGTCAGGCAAGACAAGCGAAAAGTCTGCTGAAATTTTTCTGTATTAAGCGGAGATTATGTGGACGA  
CGAGCTGGTGTAGGATAGGCTGTTGTTGGTACTCGTGGTGTGACTTTGAGTGAAGGGGAATGCCTGCTTTGCGCGCTC  
TTCAAAAACAGCGCAGCATAATCGTACCAGTTGTTGGTACCACCTGGCTACCAATGGTACAAGCCTGCGACATCCGGTT  
TATTCAGTGCAGACGAATGGCATGTGCTGTACAATCAGCCAGCAGTTTACGCACCTGTTGGCGCACAAAACCTGATCGTTA  
ATAACCCTAATCTTTCAGCTCTTTTCCGACAGCTAACATCGTTTTGGCGAAGTTATTTCTTTTTCTGATAGACCCA  
GCTGGTCCGAAAATAAGATGCTTCGCGCAATATCCTGTAACGTTTTTCTCCGGTAACTTGGTTTACCCTAAACAT  
TTAGTGGTGCGGTTCATCCGTCTCCAGCCATGGCATATCGCCATTTCCAGGGAAAGCAGTAATCAGTCGAGTAATGGATA  
ACCCAGGCTCAAACCTTCTTTGCTGCTTTCGCAATCGCTTCGACACTTGTTCGTTAATTAATTGTGCAAACTCCGGTTC  
TGATTCTGCTTGTACTGCGGTGTGAGCGGCTGCATTGACAATAATATCCGGCCGAATGCTTCTTACGGTTTACAGTA  
CACCTTCAGGATTACTAAAATCACCAGCAATAATCAGTAGAGTGAACATCAAAGCAATCAAATACCCAAAGGTGCCAGA  
GCACGCTGTAGTCCCAACCTACCTGCCCTGTTTTGCCAAAAGGAGGATATTACTTGGCGCCCTCATAGTTCTGT  
TCAATCCACGATTGATAGGCACCACTTTTACATTATCAACCCATTTTGTATTGGACAGGTACCATTCCACCGTTTTACG  
AATCCCGCTCTCAAACGTTTCTGTGGTTTTCCATCCAATGCGCGACCAATCTTCTCAGCATCAATAGCATAGCGGCGAT  
CGTGTCCCGGACGATCAGCAACATAAGTGATTTGCTCAGATAAGATTTCTTTTCGGTACAATCTCATCCAGCAAATCA  
CAATAGTGAGCACTACATCGATGTTTTCTTTTCTGTTGTGCCACCAATGTTATAAGTTTACCCGCTTACCTTCGGT  
TACGACGGTATATAACGCACGCGCATGATCTTCAACATAACAACAGTCGCGGATCTGATCTCCTTTGCCATAAATAGGTA  
ATGCCTTACCTCCAGTGCAATTAAGAATAACAGTGGAAATAAGCTTTTCCGGGAAATGATAAAGGACCATAGTTGTTGAG  
CAATTAGTCACAATTTGTCGGTAAACCATATGTACGTTTCCACGCGCGGACTAAATGATCGCTGGATGCTTTGGATGCGGA  
ATAAGGGCTGCTTGGCGGTAAGCTGTGCTCAGTAAATAAGGGTAATTTCTCTGTATTATTTACTTCACTGATGAG  
GCAAATCACCATAGACTTCTGTCAGTAGAATAATGATGAAAACGGAAGCTATTTTCTTGTGCTATCAAGAGCAGACCAG  
TAATTGCGAGCGGCTTCCAAAAGGACATAAGTACCAACAATATTGGTTTCAATAAATGCCGAGGGCCTGTAATTGAACG  
GTCAACATGGCTTTCAGCAGCCAGGTGCATCACTGCATCCGGTGTGCTGAGCAAAAATCCGTGCCATTGCAGGTGCAT  
CGAAAATATCCGATGTTCAAAAACATAGCGTTCAGAATCAGAACATCAGCAAGTGATTCCCGGTTTCCGGCGTACGTT  
AATTTATCGACATTAACAACACTATCTGCGTATTATTTATAATGTGACGAACACAGCTGAACCAATAAATCCTGCGCC  
ACCAGTAACAAGTATTTTCACTTAATTTATTTCCATATTACTTCAGAGCATGCTGTGAAATAAGCGGCTCAGTTTTGATT  
AATAGAGGTATAATGCACGCTACCCGCCCTGGCTTACAGTACCAGACATGCATGCATGCATGCATGCATGCATGCATGC  
GTTACCCACTGCGCTAAACCCGAAAAATTCAAACGCTAATTGCTTACCAATCCGCTCTGGAAAACAAGGAAAATCCTGG  
AAAACTTTGAATAAAAACCTACTGCTAACTCGTTGTTATTCTGATGGTTTATATAAAAACAAGGCAAGGATTGCAAC  
AAATTACTTTTCTGCGAATTTTACTGCGGTTATAATTTTCTTATCAACCGTTACATCCGGTTCAGATTTTTCATTATTG  
CTTAACAGCTTCTCAATACCTTTTACGGAACCTTCGCCCTTCTTTACAGTTGCGTAGGCCATACTTCAAAAACGCTGCAT  
ATAGCCATTTTTTTTGGCGCAGTCGTAACGTGCGCGGTCATCAGCATTGCATCAACGGATTGTTTTTTCGCCAGCTCGG  
CAATAGCATCAGTCAGCTGAATACGTCCCATGCACCAGGCTGAGTACGTTCCAGTTCGGCCAAAATATCGGCAGAAAGC  
ACATAGCGACTACGGCCATGATGTCTGAGTCCAGCGTCTGCGGCTGATCCGGTTTTTTCGATAAAATCAACAATGCGGCT  
GACTTTACCTCAGGTCCAGCGGCTCTTATGCTGGATGACGGAGTATTAGAGAGGTCACCCGGCATACTGTTTTGCCA  
GCACCTGGCTGCGGCCGTTTTGTTGAAACGTGCAATCATGGCAGCAAGGTTGAACGTAGCGGGTGGCGCTGGCATCG  
TCGATCACAACGTCTGGCAGTACCACGACAAATGGTGTGCCAATGGCAGGTCGCGCACAAAAATGGAGTGGCCTAA  
ACCTAAAGGTTGCCCTGACGCACGTTTATAATGGTACGCCCCGGCGACAGATGGACTGTACTTCCGCCAGCAGTTGAC  
GCTTACGCGCTGCTCAAGGAGTGATTCTAACTATAAGAGGTGTGAAAGTGGTTTTGACCGGCTTCTTGACGCGTGA  
GTTACCAGGAGGATTTCTTTGATCCCTGACGCCAATCTCGTCAACAATGACTGAATCATTGGCTTGTGACGATTGG  
TAGCATCTTTGGGTATCGCTTAGTGGCAGGCAACATATGCATCCCGAGACCGCTACAGGAATAACTGCTTTTAAAT  
TCGTCATTATTTTCATCCACCTGTAATGGTGGTGAATTATAGCTTGTTCGATTTTTTTCGCCAGCATCAATACCCCTG  
AATTGATTACTGAATTAATTGTGATGTACGCCGCTTCTGTTGGATTGCAGTAGCATTGTTCTAAGTATGACTCCATT



TTCCAGGAATGGTCGAAATCTACTCCCTCAGTCCGGCAATCTAAAGTTAATCTTCTCCACATTAACAATATGGTGAT  
TAATCCTGTGCATATCGACGGAGCTTTGTCTTTTTATTACCAGCATGAACATTTGCAAGAGACAGCAGTGTCTTTT  
TTCGCCATAAAAAACACCACGAACGTCTTTGCGCATGTCAAAGTTCAATGCTCAATGCGGGTCCAAGTGGAGTTCTGCAT  
CACATTGATATTTGCGATAAAAAAATGTTGCGGTTTGTGTGTAAGTCCAGCGACGCACGTTTCATCTCAATGTTAGTTA  
GCGCCACAAAGGAAACAGCATTCCCGGCGGAGATTTGAATGCCGCGCAATTTATAAGCAAGATGAGTATTATCCAGTTGA  
ATATCATTACCCCGAAATTTTGGGTATCGAGAGATATTTGCCTTAATTACCCCATAGCCGATTAACATCCCGGCGCT  
ATTAATCATTTCAATATTATCAATCAGGAAATTGTCACAACCGTAAATAGCGACTGTGCGGTTATCAATGCCCGCTTTCT  
TACTGAAATCCGGCGTGATATTGCGGGCTTTGATATTACGAATAACAAAATGTTTACCATTTTCAACATGTATCAACTGC  
CGACAATCCGATCCCGTGATATTGCCACGACAAAGTTTTTACTGCTGCTTCCGGGTAGTTGTTATCATAAGTGC  
TCCCAGGAGCTATGCCGATGCCAGTTGATTTTGCCTGGTACAGTTGATGCGCTCGATGACATGGTCAGATATCA  
AAATATCACGGTCGTTAATTGCCACGTTCCATTCAATGGCGTGCCTTGAAGTCGCTGAACCTACAATTGGTGATGTTG  
GCACCGATAATCTGGTTATGAAATCCCTGGCGTAAGATGGCGTAATTAGCGTGGCTAACGGTCAGGTTATCGATGATCAG  
GTTGCGCATGACCCGTTTGTGTTTGGCGCGATATAAATCTGCGTACCAGGCGCAAGCCGCTCATAGTCAGCCCTTTGA  
TGGTGACGTGAGAACCACGACATCCAGGGTGATGTTATGCATACTGCCCATCCTCCCTGTACCTGGCTGCCGTC  
TGTAAGCAAAATGCCCTTCCGCTTCCGCGCAAGCTTCAAAGAATGTAAACGTTTTACCGGGAGGGGATAAAGATGCC  
GGTGTGATATTGTCAAAAACCAATCCCGCAGGCACGACGACTGTTTGCCTTCGCTGAAGCTTGTGTTAAATGAGGCGA  
TCCAGTCGTGGGTTGTAGTCGTTAATGTTAACGCTTTGTGCGGCGGGAAGCGCGGGCGAAAGGGGTATGGAGGAAG  
GCAAGCGCCGAGCTTCCGCTCAGGAACGTGCGTCCGGAGAGTTTTTAAATGGCATGCGTTCCTCTATAAAGCCTGCA  
GCAAGCTGGCGAGTTCTCGATTGATCACCTGCTGGTAAAATCGTGTCAACTTTTTCGCGCGCGCTTTGACGACCGGA  
GCCAATTGTCGGTGTCAGTTGGCTAAACGCCCGCAGTGTGCGCCAGTGCAGGAGCATCGTTCTCAGGCACCAGCCA  
GCCGGATTTGTCAGCCTCCACAGTTCGGTATTCCACTATGCAGAGTAGAAACCACCGGAATACCGACCCCATCGCTT  
CCATTAGCGCCACCGAATACCTCCATATCACCATCCGCACCTGTAACCGATGGCAACAGGAAGACATCCGCGTCGTCG  
AGCATCGCTTCACTTATGGCTCGGTTAAAGCCCGCATCTCCACCACATCTCCAGTTGATATTGTTGATGAGGGT  
GCGCAGGCGCTTTCCACGGGCAATGCCGAGGATGCGATAGCGAAATGCCACGCCCTGCTTTCACTGACGGCAGG  
CTTCGATGCCACATGCAGGCTTTTTTCTCGGTTAAGCGTGCAGCGAAATAATCTCCAGCGGCTTCCGGGCGCTTTC  
ACGGGACGGGGCTAAAGCGGTATCATCTACGCCATGCGCGATACGGCGATTTTTTCCCTCGGGCAGCCATTTTTTG  
CAGCCTTCCGGCCACAGATCGTTATCGGTAACATCAGGTGCCACGGCGAAACAGTTGCTGATATCCGGAGTGAGT  
GGTTGAGCACTTCCGACTGGAGATATCAATACCGTGAAGATAGTGGCAATTTTGCAGCGAATGACACCGAGTTCCGGG  
AGTTTTGCTGCGGTTACCCCGCGGGACCAAATGAGCGATGAACACATCGGCAGCGAAACGTTGTTGCGACTGGCCGCA  
AATGGCAGACAAAATCAGTTCCGCGACTCGGCACCATAGCGTTTGGAGTTGAGCGCTGCCAGGATTTTTTACGATGAA  
TGCCGCGCAAGGTCTGGCTGGCTCGGTGGCGCAGTTTCCGCACCTTTGCCCGTAGGTTGCTCCTGTAACAGCGGGTCTG  
GCAGCAAGGTTGATTTCTGTCATGCCGCGTGGGTGTTTTGTGTGTCGCCTTTTTGCGCGCGAGAATCTCTACCTCAA  
TCCCATATCAATAACCGGTAATTTGGTTAAGGACGAAGTTTTCTGACGACAGCGGAATTTGAGTAAAAAGAGCCGA  
CCTTCATTTCACTCCCGATGCGCTCAAGCACAGACTGCACCATCTGCATTCTGTCTGACGCTCAGACTGACGGCTT  
CACTAAGTCGCGCATTACGCGCCGGAAGTGGCCTAAGGTATCCGCAACCATCGCTTGCAGGCTGCCGCTAATAAATGA  
CGGATATCAATTGCCATCTCCGGTAGTCCAGCTGCTGCATAATCCCGGCGGATTTATGTTGAGTGTGATGGCAATTGC  
CGGAGTGGCAAAATTCATCGAGATAATGGCAGAGTGCAGGCGGTACCAGCGTGAGTTCACAGGCCCCAGAATTTTGC  
CCATTTCCAGATCGTTGAGTTCATCCATCACTACGTGTAACGGGAGGATCGCTGATGTGCTGGCGCAGGTTGAGCGCC  
ACCATGCGGTGCTTTGTTATAGCTGTCAATGCCCGTACAGGTGAGAGCGCAATCACCTGATACCTTCATCGAGAAT  
GCGATTGACACCCCGCAAAGGCTTTTTATACGCTTTGTTGAGTGGTGGCAGAGCTTTGTCAAACGGTGCCAGTTCCG  
GCAGGGTAATGGCCACCGTTTTCTGTTGTGCGGCAACGTCAGCCAGTGTGAACGGCATAGCTGGCGGTGAAGTCTTCT  
GTGTGGTGATCGACCAGCCACGCGGTATCGACGCCATGTTCCACTTTTGCGGTGGTGATATTGCTGCGTTTCATCAGATC  
AAAGCTGACCGATTCCGCGCAGGATCAGCGCTCGCAGTGACCAAAAACGTAGTTCGCCAGTTGGTTAAATTGCTCATCCT  
GGAACGGGCCAACACTGTGACCAATCATAAACAGCGCTTTTTCGCCATAAACGTGCAAAGTGATGTTCAAAGTGGCGC  
ACGCCATAGAGATCGACAAAAACGATCCGCCAGCTGGATAATGGCGTCGTAACCTGACAGCAGGCGCACGAAGTCCGGT  
GAATCCCTGGGCGATGGCGATATTGCGCAGCTTCCAGTGTGGTGACGCGTGAGAGCAATACCTGATGCTGGTAGCGGC  
GACGGAGGACTTTTTTAACGCGCCGACAACGCCCGCCGCGCTGTTGTGTTGTTTCATTTGACAGAACAGCGGATCGCCC  
ATTACGGGCGGTTGAGCAGCCAGGAAGAACTGACCGGATAGCGGCTCATCACATCCACTTCCGGCGTGGATTGAGAAT  
GTTGATGGCATCAAGTAAGCCGCGCAGGATGGCGCTGTCGCCAGATTGCCGCAAGTGTGGTTGCCAGAATAAGTAATT  
TCATTTTTCTCATAAATTTGATGCCAGGTGAGGTCGCTTTGTTTTGTTGTTGCCGCTTTTTGCCTGATGCGACGCT  
GACGCGTCTTATCAGGCCTACAAGACCCGAGCACAGAACCGTAGGACGGATAAGGCGTTCACGCCGATCCGGCATTAG  
TGCTGATGCGACGCTGACGCGTCTTATCAGGCCTACAGTCCCAGCACAGAACCGTAGGACGGATAAGGCGTTTTACG  
CCGATCCGGCAACCGTTGTGGAACCGAAAACAGCAACTCACCCGCGCCGTAAGGATTTTTCATTTTTGCTGCGAC  
AAAAGTACGCTTCACTTCCACCACCGGATGGCGCGACAGCAATCATACCACAAACGCCAGCACCCCGTGGCT  
ATTTGACCGCCAGCAGCATCCCAGCGCAGTTGCCCTTTGAGCAATGCCAGCGCATAACTGACCCACAGCGTCCG  
CAGCGAGAGATAAAACGGCAGCCATAAATCAGGATGACTGGCGATAACTGGAACCAAGAACCAGTTTAAATCATCACGA

AGTAACTCAGAATGGTGTGATAATTTGCACCAGCAGGAAGCCAAGCGTGACGCCGATCGCGCCGCCATCTGCCACCT  
ATAACAATCGCCGAATAAACAGAAATGTTTTGAATACGTTGAATTTAAAGCTGATATCGACCCGCGCTTTCGCCATCAG  
CAGCGAACCAATCGGGTTACCTACGGAGCGCAGCAGACCCACCACACACAGCAATTGCAGCACCAGGAATAATGCTGTCC  
ACTTCTACCAAAGACCAGCGGTACAAAGTTATTCGACACCACCATTAGCCCGAGCAGCGCCGAAAGTTGATAATCCCC  
ACTACCGACAGCAGCTTGTAGAAGTTAACACGCAGCTTTTCGGTATCGTCCTGAATTTTGGCGAATGCCGAAACAACAC  
GCGGGTGATGATTGGGTTACGTTTCATCGGTGGCACAAACGCCACGTTGTACGCCAGGTTGTATCCCCCTGCCACGCCCG  
CGCCGAGAATACGCGCCAGCACGAGCGTTGAAAGTTGGTATTGAGATAGTTGATGATGCTGTCCGCCGTAGCCAGGCA  
CCAAAGCGTAAGTTCCGTTGCCACCGACGCCAGCGAGAAATGCAGACCCGGGGGATAAATTTTGCGGCCAAAGTAGCCAAA  
CAGCAGCGTTCTACCGCACTATTGACCAGATAACCGAGGATCGCGGTATCGCCAGCGGCCAGAAATGGGCGCTAACCA  
CCGTACAAGTGAAGCCCGCCAGCACCGCGCTGGTTTCGATCATGCCGATTTTGTGAACTCCAGCTCTTTTTGCATCAAC  
GCGCGAACTGTTGCCGTGGGGGATTACCACAAACGCCAGCGATAATGTTTTAATCAACGGTGCCAGGTCCGGGTATT  
CAGCAGTCGCCGATGAGATCACTCAACAAAACACCGCCACGCACACCAGATCCCAGCCCGACGTTAGCCAGTACA  
ACGTGGTGAGTTCAAGGTGACTGATTTCTTTTCGCTGAATAATCGAGTTAGCGATAACGAAGTCAAGAAAGCGTATCTGCC  
AGCGCGATAATCACCAGCGACCGTAAGCAGGCCGAACTGGTGGTTGTCGATAATCCGCGCCAGCACGGTATCTGCAC  
CAGCCCGAGCCGATGATGATCACCCTGGCAATCGCCGACCATTCCGCGCCGTGATGGTTTTTTCAGCTAAGCTCAT  
CAATATGCCGCTTTGTTAACGAAACCTTTGAACACCGTCAGGAAAACGATTTTGATATCGAACCCAGACGCTCCATTCCGG  
GATGTAICTCAAGGTGCAACTCGACCGTTTTTCCATTTTCTCCAGCGTGTGGTTTTTCCGCGCCAGCCGTTAATCTGCG  
CCAGCCGGTAATGCCGTTTTACCTTATGGCGCAGCATGTAGCCTTCAATGAGCTGTGATACTGTTCTGTTATGCGCT  
ACTGCGTGCGGACGTGGACCACAATCGACATCCCCCGGTGAGCACATTGATAAACTGCGGCAATTCATCCAGCGAGGT  
ACGGCGCAGAAAGTTCCCACTTTGGTGACGCGCGGATCGTTCTGCGTCGCCTGGGTACCACTTTGTGTTTCTCCATCA  
CTTTTATGGAACGGAATTCACACTTTGATCGGCTTGCCATCCATGCCGTAGCGAGTCTGGCGGAAAATAACCGGCCCT  
GGTGAAGTGAAGTTACCGCCAGCGCAATACAGCACAGCACCGGGGAGATCAGCAGCAGAATAAGCGTCCAGCACAAAT  
GTCTTCCGACGTTTGGAGCGGTTAACCCCGAAAAGCGCGTGTGTAAGCGGCACCACCGGTACGCCGTTTCTCT  
CTTCGAGGCGTGAATGGAGAATGTTGAAGGTAAGACGTCGGGGATCAGCAGCACCGAACAGGTGGTGTCCGCCAGTTGA  
TGGACAGTTTTTCTACTCGCGCGCCGTGCACATTTGCATCGCGATATAGACGTTATGAATCTTCCCGCTTTTCGCGTC  
CTCGACCAGCTGTTGAGGTTACCCGCCAGTCGTTAGAAACGCCCGCCGTTTCCGGTGTGGTAAACGCCACCACCTT  
CAAACCCTAACACGGCTGGTTACGGAAGCTCTCCATCAGCATTGCCCCGGCGCTAAATCCCCGCCACCAGCGACCATG  
CGTTGTTATAGCCATGATTACGCAGCCAGCCGCCCAATGCGAATACACGAACGGCAAACCACAGTCCGATGCTGGT  
CAGCGCATACCAGCCAGCCAGATTTTCAAGTTCGTTGCGAAATCATTGTTGAACGCCACCAGTCCGGCGCTGAAAATCA  
CGCTAAGGTCCAGTTTTGTAGCAACAGGGCAAATCTGTGCTGCCGAACACCGCGCCATGAGCGATAAAAAATCGGTG  
ATGCCGCCAGCATCTGGAACACCACCAGCGTAATCAGCGCCACCAACAGGTGCATGTAGAGGAATGACAGTCCGCTGAC  
TTCGCAAACCAGCCATAGTCCGGCAAACATGATGGTATCTGAAAAGCGTTGCACCATAGAGATTAACGATGCAATGG  
TTTTCGCTCGCTCGCGCTTTTTTAGATTTGTCATCGTTGTTCTGTTATTAGCCCTTACCCGAGTGGGGTAAGGGAAG  
ATCCGACATTAAGTTCAGCAACGTCAGCAGAGTTCGCGTTCGCGCTTCCATCAGCGGCACATCACCAGCGGATTCCAC  
ATCAGGGCACCACCGTTCCGTTATGGAGGTGCGCAGGTTAAAGCGCCAGTCCGCAAAGGTGATGCTGATGCCATCGG  
TGCGATCCACCAGCGCCTACGGCTAAAATGCTGTTCCACGCGGTTAATCGCTCAACGGGTTGCCAGTTTGTGTG  
TTGATCTACCGCTTCCCGAAAACGCCGCCATCCGGTCCGCTACCAGTTCGCCAGCGTTTTATCTTTCAGGCACACCAG  
TTCGGGACCAGCAGCCAGGGATCATGCCGCTGTCGAGTAAGCGAAATCACGGAAGTAAAGTGGTGGGCGCTCATTTCG  
GCGCAGTACCACATCAACGGTGTTCAGGAGAGACGTGGATCTTCCGCGCGGGTTTTTTCGAGGAA  
TGCTTCTGCCAACAGGCCGACAATGTAGTCCCTCAATAAACTGCCCTTTTTTCGTCAAACAGGAAACAGCGGTCAAAAT  
CGCCATCAAAAGCAATGCCCATATCCGCGCCGTGTTGATGACCGCATTGCGGGTGTGCTCGCGCATTCCGGCAGTAGT  
GGTTTAGGAATACCGTTGGGAAAATTGCCGTCCGGCGTGTGTTGCACTTTGATTAATCCACGGGCGCGCCGAGGGCTTT  
AAAGCGGGCTTCAATGGCGTCCACCACCGGACCCGCTGCGCGCTTCCCGAGTTGATCACCAGCTTGGCGCGGTGAGGT  
TTTTGACATTTGATATAACCGAACAGGTGATCAACGTAAGCGTCACGCAGGTTGATTTGCTGATAGCGACCAGGTTGGTT  
TCATCGACGGGAGGAAAGTCCGTTGCTTCCAGCCAGACGCTGGACGTCGCGCAGTCCGGTATCTCCGCTGATCGGGCAGC  
CCCCCTCGGAACCAGCTTCCATGCCGTTAATCCATCGGATTATGGCTGGCGGTAACCTTCAATGCCGCCATCCACGCCGA  
GATGGAACGTGGCGAAATAGATCTTCCGGTCCCGGACATAACCAATCCAGCACGTCAACGCCCGCATCTGTAAACCT  
TTCGCCAGCGCAGTTTTAAGTTTTGCTGGTGAGGCGGACATCACCCTAACACAATGGTTTTTGGTTTTGAGAAATTC  
GCCATAGGCGCAGCAATGCCAGGCGATATCTTATTAGTTCCTGCGCTAATTTCCCGCAATATCATAGGCTTTAA  
AGCAGGTTAATTTTTTTCATATCGTTACCCTTTTTTCCAGCAATAGTTGCCCTGACCGAAGCGGCAATTTTTATTTTTGTC  
GTTATTTACACCGCGTTTTGCACTTATTGCCTGATGCGACGTTTACACCCGTCGTTAGCGATCCGCGAAACGCACCACA  
TCATCTCTTTCGAGATAAGAGCCGGAGCGCACTTCAATTAATCGAGCGGAATTTTCCCGGGTTTTTCCAGGCAATGCGT  
CGCCCCAGCGGAATATAAATGGACTCGTTTTACCAAGCAGTTTGATATCACCATCAATGGTGACTTTTTGCCGTTCCCG  
CGACAACCACCAGTGTTCGCGCGGTGATGGTGCATCTGTACCGACAAGCCCTCGCCCGTTTTACGGTGTGCGTTTTC  
ACCTGGTAGCGGTGCGCCGCGTGATAGAGTCAATTTGCCCCACGGACGATACACTTCGCGATGCACCCGATGCTCATG

CGCACCATCGGCTTTGATCTGCTCGACCACTTTTTTACATCCTGTACCGGTTACGGTCGGCAATCAGCACCGCATCTT  
TGGTCTGCACCACTACCAGATCTTTCACCCCGACGGTGGTGACCAGGCCAGATTACGCATACACATAGCTGTTTTTCAGTT  
TTGTGATTAATCACATCGCCGTGGCAAACGTTGCCCTCGGCGGTGTGGGCGCTGATCTCCATAATGAAGACCAGGAGCC  
AACATCGCTCCAGCCCGCATCCATCGGCACCACAACAGCATCTGCCGTACGTTCCATGACC CGGTAATCCACCGACTCTT  
CCGGGCAGGCGAGAAACGCTTCTTCATCCACGCAATAAAATTGAGATCCGGATCGACGGCGCTCATCGCTTTTTACAG  
GCATCGAGGATATCCGGGCGATATTTTTTTCAGTTCTTCGAGATAGCGTCCGGCGCGGAACAGGAACATACCGCTGTTCCA  
GTAATATTCGCGCTTGCCACATAGGCCCTGAGCGGTTTCCAGATTCGGTTTTTCGACAACTGCGCCACTTCAAAGGCCA  
CCATATCCTGCTACCCGCGACACTTACC GCGACGAATATAGCCATAACCGGTTTCTGGTAGATCCGGCAATGCCG  
AAGGTCACCAGCTTGCCGCTTCGGCATATGGCATGGCATTACGCACGGCGGCACGGAACGCGTCTTCATCGGCAATCAC  
ATGATCCGCGCCAATACCAGCATTACGGGTGCGTCTCCGGGTATGACGTTTTGCGCCAGCGCCGAGCGCAATGG  
CAGGTGCCGTGTTTTGCCCTGCCGTTTCGAGAATAATGTTCTCGGTAAGTTTGTTCAGTTGACGCAGCTGTTCCGCGACA  
ATAAAGCGGTGCTGCTCATTGCAAATCACACCGGGCTTTCGACTCCACGCGTTTCAGCGGCAGATGGTGGTTTTGCAG  
CATGGTGAGATCGCTTTCAGGCATAAAAACTGCTTGGGATAAAGTACGCGGAAAGCGCCATAAGCGGCTACCGGAGC  
CACCTGCCATCACAACGGATAGAGTTTCGACTGCGCCATAATTATCCCGAATATCATTTATAAATTGACGTAACAGT  
TCTCTTTATCGAGCGTTCGGCATATTCAGTGCCACCGTGTGTTGTTTTGGGCAGCAGGAGCGCTGACGGATCCCG  
GCCACGAGCGCTCGACGATTCCGGTTCAACGCAAACCGCAATGCCGAAAGTTTTCGAAAGTGCCTGCCAGTTCTGT  
GTAGGCTTCAGCAGTAATACCGCGTTACCGCTACTGCCAGAATATTGGTCAGTTTTGACGGCAATACGGCATCTGCCG  
CGCCGCTTTTTGACCACCAGATGGCAATCGCCATCTTCAGCAGTGCGGGTAAAGCGTCATACGATTGACGCGGAAAA  
AATTGCATGTTGCGCAGTCCACGCTGCTGCGCATTTTTTCCAGCCGCGCTTTCGCCGCGCTTTCGCCGCAATGGCAAA  
AATCAGCGGTTTCATCGCGCAGACGATCGGCAGCTTCAATAACGTTTTCCAGCCCTGCTTTTACCAATATTGCCGGAGT  
AAAGAATGATTTTTTTGTTATCCGGCAGGTCAAGCTGGTACGAAGGCATCAACATCGGCATCTGCAACATGCTGAAAA  
CGGGCAATTTCCGACCAGTTGGGAAGAAGATGACGTTTTCCGCCGCCACGCTTTTTTCGATGGCTTTATTCATCATCGA  
ACGCGAAATCGTGAGACGTTATCGACGTTATGCAGTCCGCTACGTTTCGAACGCGGTTGCCAGCTGTGCCACTTTGCCGC  
CTTTGCCTTTTCCGGCAAGGCCAGCCCCAGCATGGCGTCCACTTCGTAATCCTGAATATGCAGCAGGTTACGCGCACCA  
GAGAGTTTCCGACAGCGGCATTCCCGCGCGCAAAAACGCGTTGGCACCACGCCAATAATGCGATCCGGCTTCCAGCG  
ACGTTGCGCCATCAGCGGAAAGAACTGCTGACGGCAAACTGCCAGATGCAACAGGCGTTTCAGGGTGTCCGGCTGTT  
TTGGCACATACAGCGGCAGCGCCACACCGTGGCGGCCCTCTTCTCGTTTGTAGCGCCAGCGGAATAGTTCTCGCCC  
ACCTGCCATTGCGGGTAGTAAGGCGGTGCGGTAATGACCCGCACCTCATGACCTTGTGCCGCCAGCCATTCCACCATCTC  
GCCGGTGTATTTGCCGATGCCGGTAACTCCGGCGAGTAGTTAATGCCGTAGACCAGTATTTTCATAATCCGGGTACTCC  
GGTACGCTTCTCAGCGAGAAAAATAGGCGCGGCTGTTAGCATGAACATTATCACTGGCGAGCAGCGCTCCGACGTCAGCC  
AGCGGTAATCGTCATGCTCATCCGGCAGTAACAGCTCTTCTTCCGATACTCTGAAGCGAAAAACCGAGCACCATAG  
TGAGTGGTGAATCCGTGCCAGAGAAGTTATCGTCATAAAAGTGTGCCAGACACCGTAAACTGGCCTGCTGTTATCCG  
CAAACGAGCCCGAGTTCCGCCATCGTCAGCCGCTCAAATGCGGCTTCCAGCGTTTTCTGCTTTCTGCACGCGCCCTCCCG  
GCACAAACCAGTAACCTGCGCCGGGCGGTTGGTCTTTTTGCAAAGCAGAACTCGCCGCGACTGTTCTCGACAATAAAG  
TCGAGAGAGACAAGCGGAGTGGAGCGCACTACCGTGGCAAAGTCTTCTGACGTAAAAACATCATTACCCCCGAAAGCGG  
TCTTGATTCTCAAGGAACCACTGGTAAGTGTGGCAAGCCCCGCTTCCAGTGAGATTTCTGATACCAGCAAGCTGATG  
CAGGCGGTCACATCCAGCAGTTTGC GCGCGTGCATCCGGTTTGTGGCATCAAAAACCACCGGCCCTTGTAAACCA  
CCACTTTGGCGATGGTTTTGCCAGCTCGCGGATAGTGCAGTCAACGCCGTGCCGACGTTAATGTGCACAACATCGGC  
TGGGTGTTCTCAGCCAGACTTCATGCGCCAGCTCCATGACATGAATGCTCGCCGCCCATATCATCGACGTCAGAAAA  
TTCGCGCATCGGTGTACCGTGCCTTACCACACCGTCCGGCGATTCTGTGCCGTGCCCTCGTGGAGCGACGCGACA  
ATGCTGGGATCAGATGCAATTACTCGGGTGGAAAGTTGTCTGTGGCCCCGTACAGGTTGGTGGCATGACTGAGCGGTAA  
TCGCGTCCGTAAGCGGTTGATGATTGCGACAGTTTGTATCCCGCGGATTTTGGCAATAGCATAAAGGCTCGTTAGTCGG  
CTCCAGCGTGCCTGCAACAACCTCGCTTCTGCCATCGGCTGTTTTGCCAGTTTCCGGTAGATGCAGGACGATCCGAGAA  
ACAGCAGTTTTGTTACGTCGTTCTGATGCGCGGCGTGAATGATGTTGCTCTCAATCATCATGTTCTGGTAGATGAAATCC  
GCCGGATAGGTGTTGTTGGCAACAATGCCGCCACTTTCGCCGCCGAGATAGACCTGGTCAATACGTTTCGCTGGCAAA  
GAAATCATGCACGGCGGGCTGTCCAGCAGGTTACGCTCGTCGGGTGCGTAATACCAGTTCCACATCACCGCGCTGTT  
CGAGCTGCCGCTGATGGCGGAACCGACCATCCCGCATGACCAGCAATAAAAACTCGTTGTTTACTCATGCTTATGACT  
CCAGCGGATCGCCACGTCGTAGCCGTGAGATTTACGAGAGAGTGTTTTTTTCGCCGCTTCGAGGTATTAGCCACCATT  
TCAGACACCATCTCTGAGGGTGATTTCCGGTTTTCCAGCCAGTTTTTTCGTCGCTTGGTGGGTGCGCGAGCAGCGT  
TTCAACTTCAGCCGGACGGAAGTAACGCGGGTCAACAGCGATAATCACATCACCGGTTTAAAGCCCGCGCGTTCATGCC  
CGGTGACGGAAACCAATGCCCTTCTTCAACGCCCGTGCCTTCAAAGCGCAGTTTGTATGCCAGCTGTGCTGCCGCC  
ATTTCCACGAACTGACGCACGGAGTACTGAACGCCGCTGCGATAACGAAATCTTCCGGCTGTTCTGCTGCAGCATCAT  
CCACTGCATTTTTACGTAGTCTTTGGCGTGGCCCCAGTCACGCAGGGAATCCATATTGCCGAGGTACAGGACGACTCCA  
GCCCTGGGCGATGTTGGCGATTGCGCGGGTGAATTTGCGGGTAAAGGTTTTCCGCCGCGCGCGGGGATTCATGGTTG  
AAGAGAATTCGTTACAGGCGTACATGCCGTAGGATTCACGGTAGTTAACGGTGTATCCAGTAGGCGTACAGTTTGGCGAC  
CGCATACGAGATCGCGGTAGAACGCGGTGGTCTCTTTCGCGGAATTTCTGCACCAGACCATAACAGTTTCAGAGGTGG

AAGCTGATAGAAACGAGTTTTCTTTCCAGACCGAGGAAGCGGATCGCCTCCAGCAGGCGCAGCGTACCCATCGCGTCG  
ACGTCAGCGGTATATTCTGGTGACTCAAAGAGACCACAACGTGGCTCATTGCGCCAGGTTGTACACTTCATCCGGCTG  
TACTTCACGCAAAATGCGCGTCAGGTTAGAGGTACTACTCAGGTGCCATAATGCAGATGGAATTTGGGTTGCAGGTGT  
GCGGATCCTGATAAATGTGATCCACGCGCTCGGTGTTGAATGACGATGCGCGACGCTTAATACCATGCACCTCGTAACCT  
TTTTCCAGCAGAAACTCTGCCAGGTAAGAACCGTCTTGTCCGGTTACACCGGTGATGAGAGCGACTTTTGACATGTATTA  
TTCTCTGTATTTTTGAATTTATTCAGTTTCAACGCGTTTCGCGTATCACCCTCGCGGATTCGGGATTCGGCAAAACCACATTT  
GCCGGAAGCGATTTAAAAACTGCTTCGTGCACCCACGACGGTCCGCTCGCCGATTGTGACGCTGGGGCAACAAAGAC  
ATCGGTTGCCAGCCAGCATTCTCGCCAAACACAATAGGCGTGGCGTTAATGGTGAAATGTTGACTTGCATGGTCGTGGC  
TACCGGTGCATAAATAACTTTTTGCGATATCACCGAATGTGCGCAATGGTTATTTACCCGAGGGTATATAAATTGACG  
TCATCGCCGACCCACGCGTAATCACCTAAGGTTAATTTCCACGGATAGGTAATTTTACTGACGGACGAATAACTACGTT  
TTTTCTATTTTTGCTCCGAATAAACGTAATAAAAAAGCCCGCAGCGATACAATACTTGTGGCGACCGGCAAAATTTG  
TTGCCTGTACTGCCACCATAATTGACTTTAATAGCGTTGCCGCCCCGAACCCTTTCCGGCAGGAGAAACCGCTTAA  
TCTTGCAATGGTTTTCTTATATTCAGACTTTGTTATAAAGCTTTTCGCTTTGAGGTAGTACGTTGGCGTAAATGCCA  
GGATAAATCAGCCAAAAGCCAGGCACATGTAATATTTGTCGTTGGACTTTTTTCGCGTCAGCACACAATCCATATTAT  
TGGTGGTAGATACCCACCATGGAAAATTCAGACACCAGGCCATTGAGTTTTTTAATGCATAACCGGCTTTATACATT  
TTGGTCCAGCGCGTAGTCGGAAGAACTTTATTTCCAGGTATAACGCCATTTTTTCAAGCCGGATACAGGGAAAAA  
TATCGCCTGATGACTGGCGGGCAGGCTGTGATAAATATACCAGCCCGGTTTGGCGCTACGTTTAAATTTATGCCCGTCGC  
CAAATCCAGCAGCGCATCGCCGTGATCATCAGTTATCTTTTTGCATTTTTAACTTACGGACAAAATTTGCGGCATTC  
TGATGAAAAATATCGCCGAATTGAGAAACAACGCGAACTTGCTTGTGCCATCGCAATGCCTTTGTTTCATGGCGTCGTA  
GATACCGTTATCTGGCTCGTGACAAAGCGTAGGTTAAAGATACCATTGAGATTTTCCAGATACTCACGGGTGCCGTCGT  
TGGAACCGCCATCGACAACAATCCATTCGAAGCTGATATCTTCCACTGCGCCAGATGCGCCAGCGAGGCATGTGTTTTG  
ACTATCCCTTCGAGGTTACGAAACGCGACAGTGATTATGCTAAGCAACATGTTCTTATTCTTACCTCGTAATATTTAACG  
CTTTTCGAAAATAAACGGACAGACGATTAAAAATGCATATTCGGGCTAAATATCGAACCGGTAAAAAACAGCGATACC  
GGAGTAAAAAGATATAATTGCACGCGAAAATTCGGTTATCACAAAAGCGTTGATCATCATTTTTTACTTTTCCCAT  
GTACCACAGTGATAAAAAACCCGGAACCAGGAAAAATAAATAATCAGCAGATACAAACCATTGCTATGGTTTTTCCGA  
CATCCGACCGTTAAATATTCGAATGATGCGACATATTCATAAAGTGAGCCAAATCTGACTACACCGTCAATATGGGTC  
AAAGAATAACCGACCATCACAGCGGACCAGCAATACGATAATATGATGACGATCCTTCCGTACCTAAATCGCCAGACG  
GGTGAAATATAAGGAAACGCGATTACCACACCAACCAGGAATACAGCCAGAGAAATCAATGCTAACGGTAACTTTTTCT  
TAATCGCCTTTTATTAGATATTGAAATGCCACTCCAGCAAATAAAACAGGATAAAGGTATAACCCCTGAAAACGAT  
CCGGATAATATTATCCCTGCGAGAATCATAGCATCTGTTTTAGGGTTTTGATACCAAATGTTTGTGCTGAGCCAAAT  
TGAGATTAATGCCAGAGCGAAAAATGCCGGTTCGAAATAAAGTGCTGTCGTGCGCTTGGCGCCGAATTTAATGAAATCA  
GCACATAGCTGTTGCTGTAATCAGATATTTGAAATCGACTCCATAATACTGCTGCCACCGGTGAGGATAATTTGTGCC  
ATCTCCACCGCCGCGCAGCGCCACCACCAGCCGACCAGATAAAAGAAACGTAATATCTTGCATGGTTGTGTGGCGA  
AATTGTTTTAAACGAATACTCCACACCATGCCAATAATGATCACAATATAGACAAACAGCATAGTTGAAGTGACGTATT  
TACTGGCATCCAGCGACTGACCAAACAGATAGTTAAACGCGTGAGTCCCGCGCAATCCCTAAGGCAATCATCAATTTT  
TTAACGCTGATGCGTTCTAAAAACAGCAGTAACAAGACAGGTAAAAAAGTGACGATGGTGTGAGGAAACTTTCGCAA  
CTGGCGGATTTGACGTTAACAGCAGATAAATCAGCGCAGCAACAGGTAGCTACAGATTCTGATAGAAGTTGACATAC  
TCCTCCAGCATCTGTTGCTCACTGTAGGCGCGCGGCTGCGTTGGCTGAACCTCAGCCAGCGTGGTACCAAATATCGCCTG  
CGGATTTCCGGTTTGCTTAACTGCACCAGTTGCAGCACCTTCTTCTGCTGACGGTTTTACCGCCGGATTTTTGAACA  
CTTCCGCGCGCATGCTATGGGTGCAATCACCGCACGCCAATCGATAGCGCTCACACAAAATCAGCGGGTGTGTTA  
TCGACGCGAGAACTGAATACCAGCGCATCCATCTGATTGAGCGCGCTCATCAGCTTACGTTTTGTCGGTTTTCAAAGCCGTG  
ATTAACCAGTTGCCAGCGGTGAACCGCGAGAATTTACCAAAGGTATGAGTTCAATTTTGTGCGCCAGCGCCATCATCT  
CGCGTACCAGTTGCTGGTTAGTTTTGCCGTCGTAACGAGATCATGCGCCACCACCAGGATTTTCCGGTTGCCCTGGGTT  
TCGCGCACCGGAGGCAAGTCCGCCAGAATCGCTCAGTTGCCATATCAATGCCATTATTGATAATCCGGCAACGCCCTGG  
ACCGTACAGGCTATTGAAAGCGTCAGCCACATGCTGGCTGGGGGAAATAAAGTACAGCCAGCGCCAGCATCTCACGGA  
ATAACTGGCGTTTCCCGCCACCAGTTGGTGTGCGGATCAATCTTACCAGCGGATAGTTATTTAAGGTGCGGCATTTT  
TGGCAGCCTGTTTTCCAGCTTCGCAACCGTCGTTAAAGGCGCAGCGTCCGGTAACTCCAGTGGTGTGACGCGTCCA  
GACCAGAGTGACGTCGCTTATGTTTTTCACTTTTTCGAAAAGCGCACCCAGCTCTTAAAGATTTAGCCAGTAGCTGT  
GCAGCATGAAAATGCAGGACCACCGGACCCGCTGTGCGAGTAATGGTGCATATAACTCATTGAAATGCCAAACAGA  
TCGCGATTAACAGACGAAACAGAGCAATATTCGCCATCGCGGTATCCGCGCGTATGTTTGTGACCTGCGGATAGTT  
CTGATGGCTGACGCTCTTTTCCGCTTTCGCGTAACCGTAGACAAAATGTGACGCCAGCCCTGTTGACGCGCACGCT  
GGTGGAGATCTAACGCCACCTGCTGCCCGCTTCCGCCAGTGCACATTAATTTGAAAAATTCATTTAATTACCT  
TACTCGCGTTTTTTCTCCACCACCAGCGGTTGTCCGGGACAGAGTCGAGCACCCAGCTGCCCGCGCCACGGTGACG  
TTGTTACCAAGCGTGATATACCAAGAATAATGACGTTGGCACCGAGTTCGACGCCGTTGCCAATGTGTGGACATGCCAT  
GTTATCGGCACCACGATTGCCGATAGTGACGCCGTGGCGAATGGTAAAAATCATCCCGCTACCACGTTTTTATTGATCA  
CGACGGCGTAACCGTGATGGATAGTAAAGCGCGGCCAATGGTCGCGCAGCCTGGATTTCAACCGAAAAAGCATTCG

GTGATAATGCGATACAGCACCAGCAGCGGGGCCGCCACAGATTGTTGAGGACGTTCTTTTTGCGCCACACCGAACAAAA  
ATGAGCAACACGATAGGCAAGAACCATGCAGCACGGCGTAAACTCCAGCTGTTGGCGCGCAGATCTCCAGCATCTTTA  
GCGCCCCGAATACCATCAGCCAGACGTTTGCCGTTACGCACCGACAGCAGCGTCAGCAAAGTGCGCCAGGTCATACGTT  
TATTGCGGATCTGGTAGAGGGTAAACAGCTGATATTTTTGCTGGCGCGGTCGAATTTGTCTTTGTGCTTCCGGTAAAA  
TGGAAGTACCCGGAGAATTTTTCGGTGACGAGGTGATCTGCATTTACCGTGATTGATATGCAGGATCTGCGTCGCCCT  
TTCTACTTTCCACGGTTCGCCGTACTCCACCACCATCCGCAGGAAGATGTCGTAATCCTGTGCCGCTTTAGTTCGGTAT  
CGAACAAACACTCTTTGAAACGCCATGCCAGGTAAAGACCTGGTTGCCAATGATATTGCGTTTGTAGAACAGGCGGCGT  
GAATACGGCGATTTGGGATACAGCGGCAAGCTTGCCGGTTGGGAATAGACTTCGCCCTGGCAAACGTAGTCGTTAGCGTA  
CAAAAAGGCGTGTGTGACCAGTTGCTGTTATGGGCGAGGAAGACGCTCAGACGGTTGGGTGTCCATTGTCATCGTCAT  
CAATCCCGTGATATATCCCTTGCGCCAGCATAATCGCCTGGTTACGTACCAGCGCACGCCCCGCTGTTAATGTGCTTG  
TGAATGTAAGTGATACGCGGATCGTTGAGGGCGGTGACGACTGTTGAGTTGTTCCAGGAGGTGGAGCAATCATCCAC  
GATGATCATCTCCAGTTGCTGTAGTCTGGCGCAAACCGATTTTATTGCCGAATCGCCAGTTGTTGGCGGTTCCAGG  
TCGGCATATAGATTGAGATCAGCGGATTGTTTTTATAGGTTGTTCTCCCGCTTATGAGCTGGTTTGTTCGCCGATG  
GGCGTGAACGCCTTATCCGGCTACGGGGCGGTGCGAATGCAGGCGTCGTTATTTGCATCCGACTTATATTCGTATTG  
TAATAGCCATAATCCTGATACGCGCTGGCGGGCGAAGATGGAGTTCAGAATCACCCCTTACCAGGAATACCGTTT  
CTCAAAGCGGCTCAGACTGTTTTCCACTTCTTTCAATGTGTTGACCGCATAACGCGCCACCATTAACTGGTTCCGACAT  
GACGACCAACAATTGCCGATCGGTCCTGCCAGAATCGGCGGGCTATCAATCAACACCAGGTCATAGTTTTTACTCGCC  
CAGTTACCCAGTTCGGCAAAGCGTTGCTCATCAACAGTTCAGAAGGATTTGGCGGCACCTGACCGCGGGGATCAGGTC  
AAATTTGGCAATAGAGGTGGTTTAGCAGCGGTAGTAATATCGCCCTGACCAATCAGAATTTCCGACAGGCCATTAACGT  
TATTAGTGCCCAACAGCTCGTGGGTGTAGCCTTTGCGCATATCGCAGTCGATCAACAACACGCGTTTATTGGTCTGGCTG  
ATCACCGCGCCAGGTTGGCGCAGACAAAGTTTTTACCAATTGACGGGTAACCCCGGTATCATCAACACATTGTTCTG  
TGCTGCATCATCGGAAGTGCAAAGTGGTACGCAACTACGGATGGCTTCAATCGCCAGATCGGTTGGATTCCCACCG  
CCAGTAGCTGGCTGTTTTATAGCGTTAATCCCTTTGATGGTTTTGACGCTATCAGCGCTTTCTGCCATTCCGACAGC  
GGGATGCTGGCATAGACGCTAATACCGTGTCTTCCAGTACTTGGCGGCTTTCAATGCCCGGATTAACAACGAGCGCAG  
CAGCACACCCACGATAGAAAGCATCAGGCCAAGGATAATCGCGCCGAGGATAATCAGCCCTTTCTCGGTTTCAGCACGC  
CAGGCTGAGTGATTGCCGGTCAACAATGCGCACATCGCCGACGGTCTGGCTCGGTGATTTTCAGCTCCTGCTCTTTA  
TTCAGCAGTTGCATATAGACCTGCTGACCAGACTCGACATCGCGGGTCAGACGGACAATCTCCTGCTGGGTTTTCGGCAT  
CGCCGTTACCGGACCGTTAAGTTTTGGCTTTTTCGTTCCAGCGCCTGACGTTTCTCCAGCAGCGTGCGGTACGCCGGT  
GAACTTTGGTGTACAGCTTGAGATTTCCGCCTCTTAAAGGTGAGTTTCGTTCAACTGCGCATCGATGTTACCATCGAA  
TCGAGCACCGCTTTGCTTCCAGCGGCAGATCAACAGAATCTTATCCTGACGGAAGGCATTACGTTTGTTCGGCAAC  
ATCCAAGCGGTACTGACTTCCGGTAACTGTTGCGCGAGGAAGGCGAGGCTTTTCGACGCTTCCGCCGATTTGCGCTCAA  
TATTTTGTCTGATAGTTACGGGCGATGCTGTTAAGAATGTCGCGGATCTGTTACGATCTTACCAGGATAAGTCAGG  
CTCAAAACGCCAGCGTCTTTGCCGTTCTCCGTTACCGTCAGGCTGTTTTGCAAGTTGGTTGATCATCCCAGCGTGGAGTA  
TTTGGTGACGGTAAACTCACTGCCCGGCTGGCGTGAATGGCTTCAACCATCAGCGTGACGCCCTTTTTTTTCAGCATCT  
GGCCCGCTTCCCCCGGGCGCTAAAGCCCGCTCGCTGCTCAGGGTGTAGTTTTTGTGTTCCAGCACATTAAGCGTAAAC  
ACCTGATCCGCCATCTCTTTCGGGCGGTTAAAGGTGGTCACTTACCAGTCTCGTTCTGACGTCCCATCAGGCGATCCCA  
GCCCCACCGAAAATCGGGAACGTGTTTTGCTCACTGCAATATCGAGGTGAGATCGTCCACCGTTTTACCAAGCACA  
GACCGGAACGAATCAACTGGATCTCGGCGTCCGATGCAAGCGGTTTGTGGTAATGCCGAACCAATGCTCTGACTAAC  
GAATTCGCGTGTGTTGCTGATTTGTACCAGTCCGTCGGCACTATAAATCGGCGTGGCGAAGAAGGTGAAACACGGC  
ACAGAGGGCGAATACGGTGGTATGCCAATCACCCAGCGCGCTTCAATGACGGTGCCGACCAGGCGCAATATCGA  
TTTTCACTGCCCCGTTACCGGAGCGGCATGTTGTTTTACTTTTTCTGTATTCTTATACCTGCTCTGCGTTCAATGCCT  
GCGCCACTGGCGGCAGACCGTTCAAGTAAATGTGTACACCGCTGCAAACGTTTTCCCGGCTTTTTCGATACGGATCGGG  
ATTTACATTCGTTATCCCAGTGACCAACAGCATCACTTTGCCGCGCATCTCCGGTGCCATCTCGCATAAGCGTTCGAT  
ATGGCGCTTTTCCATGGTCAAATCAGGTCGTAGTTGCGACACAGACGGCGGCTGATTTGACGGGCACAGTGACCTTCCA  
GAGACAGTTGATGTTCTGCGGCGACGCTGATAGCGGTAGGATCAGCGCCCTTACCAGCAGCGCGGAGTCCAGCGGAC  
TCCACTTTCAGCTCCGGGTGATAACGTTGCAAGTTCAGTAAGCGTTCGCCGCTCGGGGAACGGCAAATATTGCCGACACAGACA  
TAAGATGTTGTTAAACATGACGATTACCAGTTATGAATGTCGCTGGCTGATCCGTCATGTAACGGACACCGCTAATAGT  
TGGCAGCAACTGATTGATCAGACGGTTCCAGCGGAAACCGGGCGGTGGTACATACACCACGTATAAGGTTGCAGGC  
GGAATTCGTGCGCATCACCAGCGACGTGGCATCGACATATCCAGCTGGTAGATTTGGCAATCTTGCCGTTACGCCCC  
CCCTCGCTTTCAGCGGACGAATGACAAAGATGCCGCTGGCGTGGAGGTGGTATGTCGATGCCTTCAGCATTGCCAG  
GGCTTCAGTCAGGTCATGCCGCTAAAGTCCATTTTCAGGGTGCTCTGTTTTCTCACTTACCATCACAAATACTTTCA  
GATCATCATTACGTGGCACGTAGAGAATATCGCCGGGTAAAGCAGGCGATTCTGGTTGAGGTCGCCGTTTTGCATCAGC  
GCCTGCAAAGAAATGCGCTTTCACGACCATTGTGTGTTAGCACACGTTGCGCCAGTCAGCGGTGTCGGTCAGGCCACC  
TGCGGGCTTGTGGCGTCGAGAATAGTCAGTGGCACGTTGGTGATCGCTGTTGACCGGATTTATTACCTGACCGGAGA  
TATAGGCCTTTTGTGAGCGGAAGGCGGCGATTAACGTCACCTGCGGGTCAGCGATGTACGTGCTAAGCGCCCCGTA  
ATATCACTGCGGATTTACGCGAGCGTTTTCCCGACTACGTGGACCTTGCCGATATACGGGTAACATAGTGCCGTCAGG

CTGTACCCAGTTGCCGGTGTGCTGGAGCTGCGGTACTGACCGGCTGGCGTGGTGAGTTCCGGGTGATCCAGACGGTGA  
CATTAAAGAACGTCCCCGGCCGACGCGATACTGGTAATTCGCGATCTCACTTCCAGCGTCATATTGGGGCGCGCTACA  
TTCGGGCGTGGGCGTAATTGGTCAATCAGGCGCGGGGTGAGCGGATAAACATTACCATTTTGTGAGATCGAAATCAGC  
GTCCTGCTGTTTGGATGACGCTTTTGCCTATCGTCGACATATTGCTGCCCCGGAAGTACTGTGCAACCGCTTATCAAGGTTA  
CTGACACCAATAATGGCATCAATTTCAATTTGGATTCATCATTGTTATTTATCACTTTGGCAGAGTAATTATCTGTG  
CACTATTAATAGCAATGTGCCATGCACATTTACCTTGCAATTAATTGAATAAAAAATTAAGTGGCATCAGTCTAAAAA  
AATTGATTTATCCGAGGCTATTGACAGAATAATTGACACTGGTCTTTAGGCATCCAGACACGCTACCGCCCTGGCT  
TTTTAGCTACCAATACTGATTTAGTTAATTTTTACACCCTCTCAGCATGCAGTCGTTGATGAGAAAAGGTTATTAC  
GGAAATTAACTCCGAATATAAGGTGACATTATGGTAATTGAATATTGGCTTTCCAATAATGCAGGAGGAAGTGTACAG  
CTAACGGAATAGCAGGCAAGATAACAATTCGGAATTTGGCTATTTTTAAGAATTATATTAAGTGTCAATCAATATGTTTT  
TTAGGAGTTTTCTTAGGTTGACAATATTAATATAGTGTCTCCACATGCGATATTTCTAAATAATGTTTTATTATTACC  
ACTTTTAATTCAGGGATAATGTGAGGTTATTACCCTCAAATAATAGAGATAAATAGTGTGCAACATTGCATTTTTGCC  
CCGATTTATCCATGATCGAATTTGTGACATTTGTATACAACGAATAGGTTTTGACTTACTATGGAATGGATTGCCGATC  
CGTCTATCTGGGCCGGGTTAATCAGGCTGATTGTGATCGAATGGTCTCGGCATTGATAACCTGGTCTTTATGCCATC  
CTGCCGAAAAACTACCGCGAAGCAGCGTGACCGCGACGGTTACCGGGTCTGCTGGCAATGTTAATGCGCCTGTT  
ACTGCTGGCGTCAATCTCCTGGCTGGTACCCTGACTCAACCGTGTTCAGTTCGCTCCGCTGTTTACCTTTAGCGCCCGC  
ACTTAATCATGCTGTTTGGTGGTTTTCTCCTGTTGTTCAAAGCCAGATGGAGCTGAACGAACGGCTGGAAGGGAAAGAC  
AGCAATAATCCACACAACGCAAGGTGCGAAGTTCTGGGGCTGGTGACGCAATTGTGGTACTGGACGCCATTTTTCTC  
ACTCGACTCAGTGATTACCGCCGTCGGGATGGTCGACCATTTACTGGTCATGATGGCCGCGTGGTTATCGCTATCAGCC  
TGATGTTGATGGCCAGCAAGCCGTTAACGCAATTTGTTAACAGTCACCCGACGATCGTTATTCTCTGTTAAGCTTCTCTG  
TTGATGATTGGCTTAGCTGGTGGCAGAAGTTTTGGCTTCTGTCATTCCGAAAGGCTACCTGTACGCTGCCATTGTTTT  
CTCGGTGATGATCAGGGCGTCAATCAGTTGGCTATCTTTAACGGCGACGTTTTCTTCCGTAACCAGACGCTGCGCC  
AGCGGACTACCGAAGCGGTAATGCGCCTGCTTAGCGGGCAAAAAGAGATGCGGAAGTGGACGCCGAAACCGCTCCATG  
CTGGTGGATCATGTAACCAGCAGATCTTAATCCGAGGAACGGCGGATGATTGAGCGGGTACTTAATCTTAACCAGCG  
TACCCTCAGCAGCATTATGACGTCGCGCCACGATATTGAGCATATCGATCTCAACGCGCCGGAAGAAGAAATCCGCCAGT  
TGCTGGAGCGAAATCAGCATACGCGGCTGGTGGTTACCAGCGGTGATGACGCGAAGATTTGCTCGGTGTTGTTACGTT  
ATCGACCTGCTACAACAGTCTCTGCGCGCGAACCCTCAACCTGCGGGTGTGATTGCCAGCCGCTGGTGTTCGCCGA  
AACCTTGCCGTTGTTACCTGCCCTGGAGCAGTTCGTAATGCCCGCACGCATTTGCTTTTGTGGTGGATGAGTTGGCT  
CGGTGGAAGGATTTGACATTAAGTACGTCACCTGAAACCATTCCCGGTAACCTACCGAAGGAGTGGAAAGAGATCGAC  
GCCCCCATGATATTCAGAAGAATGCGGACGGTTCCTGGACGGCGAATGGTCATATGCCGCTGGAGGATCTGGTGCAATA  
TGTGCCGCTGCCGCTGGATGAAAAACGTGAATATCACACCATTGCCGGGCTGTTGATGGAGTATTTGCAGCGTATTTCAA  
AACCTGGCGAAGAAGTTCAGGTGGGGGATTTTGTCTAAAACGTTGCAAGGTAGAAAGCCATCGCGTGCAGAAGGTGCAG  
ATTATACCGCTGCGTAAGGATGGCGAGATGGAGTACGAGGTGTGATGGTATCGGTCAATTTACCCAATAGCCGAAAGGAA  
TAAGATGAGGGAACCGCGCCATCGCGATTTACCGCCGGGAGCCCGGTTGCCAGGGTGGTGGAGATTGAGCCACCCTGG  
CACGTTACCGGCTTGAGCGTTCCATAGTAGCGAGGAACATCAAGTGAACGGAACAGCCTTCGATCTTACATATTAGAA  
TATAATGATGCCGCCACGAACGCTGATGCGACGCTTACGCGCTTATCAGGCCTACAGGACTGGTACCTGGTAACCT  
ACATCTTCCAGCAACTTCTTACATCTTTGCCATTACGGGAATCTTTATCCGCTCGGCCAGTATTGAGGCGACGT  
TTCGCTTGTCTGTAGATGTTTGGCAGTAACTGATCCACTTGCAGGCTGTAATTGAGTTGCTGCCAGTTGCCATAAAC  
CCGACGGTACTGGCGTTTCTTTGAGAAATCAATCAGTTTGGCTTTCCCGTCCAGCCACCCAGCCGAATATCAA  
ACTGGGTGTCGAGGTTGATCTGCCAGATTCAACTGCCTTCCCTGTGAGCCAGCACAGGCGATTGACCTTGCATG  
TCGTTTAACTGACGACGCCATCTTCAACGTCAAATCGGTGGTAAAGCGGTCAAGCCCGTACGTTATCAAAGTTTTT  
AGCGGCTTACATCACCGCATTACGCTCTACCGTGTGTAATCATCTGCTGGAAGTTCATCCCTTCCATGCGCGTGT  
CGGTCAATTCGACATGTGCCTGTCTTGGCAGTTGTGGCGAATGCGTCGGCATCTATGTCAGCACCGGAGAAATCACCA  
GCCAGTGACATTTTTCCGGTCAACGAAATCGGATAGTTAAACGCTTTCAGAATGGTACCAATCTCAACGTTTTCCAGCCG  
TGGCTGGAAGTTATCCGCGGATTTATTGATGTCGCGTCCAGCGTCCCGGCGAGTGAACCTGTCCACCCTTAAGTTTGC  
CCTGCAGTTGAGTAATTTCCAGCAAACCCGACTTGTGGTCAATTTGCGTGGCAACATCTGTAAAATTCATTCCGCGCCAG  
CGCACGTTACTGGCTGCAACAAAATATCAGCCGTAAGCCTTGCAGTCCCTGATAGGCCGTTTATCAATACGCGAAGA  
AATGACCGGGCGGGCAACGTTGATTGGCTCTGCCCTGCTGCGCGGACCGTTTTACCATTGCGGTTTTATTAAGCG  
GGATGAGGTTGCAAGATTCAGTTGCGGGAATTGCAGCCTCAGCTGCCATTCCGGTTTCTCTGTCAGCGTAACCTGTGCT  
TGCCCGTTAGCGTACTATCATTGGCGGTCAAATAATTTGGTAAATGAAAGGCGTTTATGTGACTCCTGCCACTGGGC  
CTGAAAACCTCCCTGCCCTGAATACCTGTTTTGGTAAATCGGCACCCTGCAACTGCCAGTTAATTTGTTCAATAGCCG  
CCGTTAAATCATGCGGATAATCAGAAGCATCTACCGTACCCTAAGGGATATCGTGAGATCGCGCTGATCGCGATTAACC  
CGCCCGGAGAACTCAAATGAACCACGATGTTGGGGATCTTGTCCATTTGACAGCGAATATTGCGGATTGTCACCTGCTC  
GTCACTTTCATGCTGGAACACCAGCAGCTGTCCGCCACCTTAAAGTGGATATATCAAACGACCATCCGCGATCGTCTG  
ACAGATCCGGCAAGGATTTGTCGCGCGGTGCAACCGGAGCGTCTTCACTGCGCACCGCTTCCGCTGCGGCGTCAGTTGG  
ATCACTGCCCTTTTAGCATCACCTGCTTAAAGCTCAGTTGATGACTCAGTAGTGGTAAAGCGCCACGTCAGACGCAT

GTTGTCGGCGGAACCAGTGGCTGGCTTGCGCCCTGGGCGGTGAGAGACATTCGCCCGGAGAGGATACTAAGCTGCGGCC  
AGACGTGCCAACGCAGTGGCCCGTGCAGCTGCAATTGATAACCGCTACGTGCAGCAACTTGCTTGACCATATAGTCGGG  
AAATCATTTCGGATTACCAGCAACTAACGCAGATAACCCGGCCACCAGCACGACCAGGAGTATCATCAGCGTCGTCAG  
AAATCGTCTCATGGTATCTCAATGGGCTGAATTAGTCTTTATCGATTGCGCTGGCTACCGCGCCCTGCTGGTTGCGAT  
ATTTTCGCATCTTCACGGCGTTTGAAGTTCGCACCGCCGGGCCGAAAGCGGCTCAAAGCTCAGCGCACCAATTAACATG  
CCCGGACGCAGCGCCAGCGGAGCTTACCGGAGTTGTAGAACTCCAGCAATGCAACCAGACCAGCCCGGATCGATGCG  
GTGCGCGGTGACGTGCACCATCAGCCCCAGCGCGCAGTGGGAACGCCCGTCCAGCCAGCCACCAGATCGGCTGGCA  
GCGTCACCGACTCCAGCGTCACCGCCAGCGCCAGCTCTCTGGGTGAAGATAGAACGCCTCGCCCTCGTCGAGAACGATC  
TCATCGCTCATCAGCGGTCAAGCGCGGCGCTCACTTCATCTTTGGGACCGCTCAGATCGATAAACGCTGCCGTGTGACC  
ACGGAAGGTACGAAATTTATTGCCAGGCGTACATCCACCGTCGCGCCGTTAATACGCTCCACTGGCGGACGTGGGTTGA  
TCGACAAACGGCTTCATCAAGCCAGGCTCAATATCTCGGTACACAGACGCATGGCATTCTCTTTTCGCGCATCAC  
TCCCTTAACGCCAATTACGTCAAGGGCATACTAGGTTACTGAACGGTACACAATTTATCAAGCTTATCAAAGAACT  
GACTATTTTCGCTTTCATATATCGATCGCGATGCGGTTTTTCCCGCCGCGCGGCACGATAATGTCCGCATATTGTTA  
GAAGGCTCAATGAATTGCAGGAACATCGGGCGCACGTTTTTTGATATTGCGCCATCACTGAATCCATTGAACGCCACG  
CTCGTTAACGTACGCTTGATGCGGCGCATCAGGCAGATATCCAGCGGGTATCAACGAAAAATGGAGAAGTTAAGTTGCT  
CAGCAAACCGGCATCCGTAGCAACAAAATGCCTTCGAGAATGATGACCTTCTTCGGCTCAACCGTACCGTCTTCTTC  
ATACCGGTATGTTCAACATAGCTGTAACCGGCAGTCAATTGCCGAGCCGCTTTCACGCTTGTAAATGCTCAAGCAG  
CAGACTGTGATCCATCGCGCTGGGATGGTCGTAGTTGGTCTTAACGCGTTCTTCCATCGACAGATGGCTTTGATCTTTGT  
AATAGCAGTCTTCGGAATTACGCCGATGTGTTATCACCAGCTTGTCTACGCAATTCAGGATAAAGGGTACTGGCAATA  
AGACTCTTGCCGGAAGCCGATGCGCCAGCGATAACGATAATGACGCACTGATGAGACTGATCAGTCATATATTTAGCGAC  
CTGATTAACCTGGATGTTAGGAAGGGGCGACGAAGCGCAAACGCGGAATTATAGGGATTTTATCCGCTGATACCAG  
TCGAATAGCGTTGCCGCGCTCAGAGTTAATTGTTGACAAAGAATTCGGGGGCAAATTACGTTGATCAGTTTTATGT  
AAGGTAAAAATGTTAAACGCAGTTGCGCAAATTATCCGCTTACGTCATTTATGAGCAATTCGCATATAAAATGTAA  
AACTTTTGTACTAGCATAAACACAGAAACGAATACTGGCGACCAGGCTTTCGGATAAAGCGGTAATGAGCAAACAATCA  
CAGCATGTATTAATTGCCCTGCCCCACCGCTGCTCACCTGGTCAGTTTAGGTTTAGTCTCGTTTATCTTTACCCTTTT  
CTCGCTTGGCTTTCGAGTTTGGCACCAACTCGCCCACTGTGGTTCGGACGTCCATCATGATGGTGGCGTTTTATC  
GCCATGCCGGGCGCATGTGGCCGGGAATTGCGCTGAGCTGTTGCTGGGAAATATCGCCGCATCCATCTGCTTTTTTCC  
ACCAGCTCGTGAACATGACCTGGACGACCATCAATATTGTTGAAGCCGTGGTGGGGCAGTCTGCTACGTAATTTGCT  
GCCGTGGTATAACCCCTTGCAAATCTGGCTGACTGGCTGCGTCTGGCACTCGGCAGCGCCATTGTTCCGCCCTGTTGG  
GGGTGTTCTGTTGTCCTGCTGACGCCCGGAGACGATCTCTCAGGGCATTGTTGATATGGGTAAGTGTGAGAAATCCATC  
GGCGCTCTGGCACTGGTGCCGCTGGGATTGTTATTTAAACCACACTATCTGCTGCGCCATCGCAACCCACGGTTGCTTTT  
TGAGTCGCTGCTCACGTTAGCCATCACACTGACGTTAAGCTGGCTTTCGATGCTGTATCTGCCGTGGCCTTTTACTTTCA  
TTATTGTGCTGTTGATGTGGAGCGCGTGCCTGCTGCCACGAATGGAAGCCTTTTTGATCTTCTTACCACGGTGATGATG  
GTGTCGCTGATGATGGCCGCGGATCCCTCCCTGCTTGTACGCCGCGTACGTACCTGATGAGCCATATGCCGTGGCTACC  
GTTTTTGTGATCCTGCTGCCCGCAAACATCATGACCATGGTGTGATGCCTTTCGTGCGGAACGCAAACACATTTCCG  
AAAGCGAAACCACTTTCGGAACGCGATGGAATATCCGCTATCGGTATGGCGTTAGTGGGACCGAGGGACAATGGCTG  
CAAACCAACAAAGCGCTCTGCCAGTTTCTCGGTACAGTCAGGAAGAGCTGCGCGGACTCACCTTTCAGCAACTGACCTG  
GCCGGAGGATCTCAATAAAGATCTCCAACAGGTTGAAAAGCTGATAAGCGGTGAAATAAACACCTATTCAATGAAAAAC  
GCTACTACAACCGCAATGGCGATGTTGTCTGGGCGTTGCTTCCGCTCTCACTGGTGCGCCACACGGATGGCACGCCGCTC  
TATTTTATCGCTCAGATTGAAGACATTAACGAGCTAAAACGCACCGAAGGTAATCAGCAACTGATGGAGCGCATCAC  
TCTGGCTAACGAAGCGGGCGGATTGGCATCTGGGAGTGGGAGTTGAAGCCGAATATTTTTAGCTGGGATAAGCGGATGT  
TCGAGCTGTATGAAATTCCTCCACATATCAAACCGAACTGGCAGGTGTGGTACGAGTGCCTGCTGCCGGAAGATCGCCAG  
CATGCCGAAAAAGTGATTGCTGATTGTTGCAATCACGCTCGCCCTTTAAACTGGAATTTGCGATTACCGTAAAAGACGG  
TATTCGCCATATCCGCGCCCTCGCAAACCGGGTACTGAATAAAGAAGGCGAAGTCAACGCTCTCCTCGGCATCAATATGG  
ATATGACCGAAGTGAACAGCTTAACGAGGCTTGTTCAGGAAAAAGAGCGCTGACATTACGCTTATTCCATCGGT  
GAAGCCGTGGTCTGATTGATATGGCGATGAAAATTACCTTTATGAATCCAGTGGCGGAGAAGATGAGCGGCTGGACGCA  
GGAAGAAGCGTTAGGTGTTCCGCTCCTGACGGTGTTCATATTACTTTTGGCGACAACGGACCATTAATGGAGAACATTT  
ACAGTGCCGACACCTCACGTTCCGCGATCGAGCAAGATGTGGTGTGCACTGTGCGAGCGGCGGAGTTACGACGTGCAT  
TACAGTATTACCGTAAAGTACTCTGGACGGCAGCAATATTGGTTCGGTCTGGTGATTACGACGTTACCGAATCACG  
CAAATGCTGCGCCAGCTGAGTACAGCGCCTCCCATGATGCACTGACGCATCTCGCAACCGCGCCAGTTTTGAGAAAC  
AACTGCGTATCTGCTGCAAACGGTAAACAGTACACATCAGCGACATGCCCTGGTGTATCGATCTTGATCGCTTTAAA  
GCGGTGAATGACAGCGCCGGCATGCGGCGGGTACGCTTTGCTGCGGAACTGGCGTCGTTAATGCTGAGTATGCTGCG  
TTCCAGCGACGTGCTGGCGGACTCGGTGGGATGAATTTGGTCTGCTGCTACCAGACTGTAATGTTGAAAGCGCGGTT  
TTATCGCTACACGATTATCAGTGGCGTAATGACTATCACTTTATATGGGAAGGCCGTGTGCATCGGGTAGGTGCCAGT  
GCCGGGATTACCTTATTGATGACAACAATCATCAGCGCGCAGAAGTGTGTCGAGGCTGATATCGCCTGTTATGCCTC  
CAAAAATGGTGGCCGGGCGGGTACGAGTTCAGAACCGCAGCAAGCTGCCGCACATAGCGAACGGCGGCGATGTGCG

TTGATGAACAGTGGCGGATGATTAAGAGAATCAGTTGATGATGCTCGCCACGGTGTGCTTCCGCCACGGATCCCGGAA  
GCGCGTAATTTGTGGCTGATTTCACTTAAGCTCTGGAGTTGCGAAGGCGAGATTATTGATGAACAAACATTTTCGTCGTAG  
CTTCAGCGATCCGGCGCTTAGCCATGCTCTTGACCGCCGGGTATTCCACGAATTTTTCCAGCAGGCCGAAAAGCGGTTG  
CCAGTAAAGGCATAAGCATCTCCCTCCCCCTTTCCGTTGCCGGTTGAGTAGGCCACGCTGGTGAATGATCTGCTTGAG  
CAGCTGGAAAATAGCCCTCTACCACCAGGTTATTACATCTGATTATTCCGGCTGAAGCGATTTTAGATCACGCAGAAA  
CGTGCAAAAATGCGGCTGGCGGGATGTCGGATAGTGCTCAGCCAGGTGGGCGCGATCTGCAAACTTCAACTCGCTGA  
AAGCGAATATGGCAGATTACCTGCTACTTGATGGTGAGTTATGCGCAACGTGCAGGGTAATTTGATGGATGAGATGCTG  
ATTACGATTATTACAGGGGCAGCTCAGCGACTCGGGATGAAAACCATCGCCGGGCCAGTCGTTTTACCCTTAGTGATGGA  
TACGCTTTCTGGCATCGGCGTGATCTGATTTATGGTGAGGTGATTGCCGATGCCAACCGCTGGATTTGCTGGTGAATA  
GTAGTTATTTTCGCGATTAAGTGGGCTGCTTCCCCATCGCTGATGCGACGCTAACGCGTCTTATCATGCTACAAATC  
GCTCATTCCCCAGGCCGATAAGGGCTCGCACCAGCATCGGGCAGCAACGTCATGCTTCGCTGGTTGCCAGCCTCCCG  
TATACCAGATATGCAACAGCGCATAAGAACGCCAGGGCTTCCAGCGCTCGGCATAACGGCGGATTTGCGCCGGTGTCT  
CCCGGAAATCGCTGTTAATCAGATAATCATCCGGCAGGAAAACATCTTTCGCTGCCAGCCAGCAAAGCAAATAATT  
CGCCGTCCAGCGCCGATACCCGAAAAGTTGACAGCTTTTCATCGCTGCCACATCGCCGGTATTGTCTGGTGAATA  
AGGTGCCCTCAGCGCCGATTTGCCAGATGAATCAGCGCTCTGCCGTTTCAACGGCATAACCTAACGCTTTAATGCC  
TGGGGTCTGCTGCCAGCCGCTGAGCGCTCGGGAAGCAGATATACTCCGAAAATCATCCAGCCGTTCCGCCATAAAG  
CTGTGCCACTCTGGCGGTCAATTTTGGCGCCATCGCCACGCTACCAGTTGGCTAAAATCGCCCGCACGCCCTGCTCAA  
AAGCATCAACACAGCCGGTAAACGCAATCCGGGCCGCGCGCCTAACCTGCCAACGCACCGTTAACAAATTTGTGGG  
TTACATTGCAGATCAAACAGGCGGCTCATTTTCGCCAGACTCTGCGCAACAGGTTCTAAACCTGCACTTAAATTTAT  
GTGCAGAGTATGGCGGGCTATATCCGGAATAGCAGTCACCACGCCGCGATATTCGCCACCGCCAGACTACGGGCATAAT  
AACTGTCCGCGACCGTTTCCACACTGCTCACCACGCGGGCGGAGAAAATCCCAACATCCACGACCAGTCATACGGCGGC  
TGCCAGTTCAGGGTATACATCGCATCTCCTTATTATCCGCTTTCAGCATAAACGTTATTCCAGACGCTGCGCTTTGCTTT  
CATATTCGGTTGTGCGGACGGCAACATTTGCTAAAGTCAGCCCTTCTTCCAGGCGATGGGGATTATTTGCTGTTTA  
TTGGTTTTGATTACGGTACAGCAAATGTTTCAAGTGGCGGTGATGCGTGACGGTAAACCGCATTTGCTAAAATGGAAAAC  
GACAGCAGCTGCTGCCTTCAATGCTTTGCGCGCAACGCGTGAAGCGGTAAGCGAATGGCTGTACCGCCATCATGATGT  
TCCGGCAGACGAGTGAACCGCAGGCGCTGTTACGTGGGCGATTGTTATAACCGCGAAGAAGATATCGATGTTACGG  
CGAAAAGCGTGAGTTCCGTTCTTCTACTGGCACAGTACATTGATGATCCAGAAGAAGTGTGGTTGTGAAATCACC  
AAATCGTTCCTCGGTGCCAGCGGTTAAAACCGCAGCAGGTAGCGCTGTTTGGAGATCTGGTCTGCGCAATGATGTTGCA  
CATTCGCCAGCAGGCGCAGGCACAGCTGCCAGAAGCATTACTCAGGCGGTGATTGGTTCGTCGGATCAACTTCCAGGGC  
TGGGCGGTGATTGAAGCAAACACCAGGCGCAAGGGATTCTGGAACGCGCGGCGAAGCGTGGCCGATTACAGGGACGTGGTA  
TTCCAGTACGAGCCGGTTCGCGGCTGGGCTGGATTACGAAGCCACCTTGCAGGAAGAAAACGGGTGCTGGTGGTGGAT  
CGGCGGTGGTACGACTGACTGTTTATTGCTGCTGATGGGGCCGAGTGGCGTTTCGCTCTCGATCGTGAAGCCAGCCTGC  
TGGGTACAGTGGTTGCCGTTTGGCGGTAACGATCTGGATATCGCGCTGGCGTTTAAAACCTGATGCCACTGCTGGGT  
ATGGGTGGCGAAAACGAAAAGGCATCGCCCTGCCGATCCTGCCGTGGTGAATGCGGTTGCCATCAACGACGTACTGC  
GCAGAGTGAATTTACAGTAGTGCCAACGGTCTGCTTAAAGTACTGTTACGCGATGCCCGGAACCGGAAAAGTGG  
CCCTGTTACAGAAAGTCTGGCGTACGCGTTTAAAGTATCGCTGGTGGTACGCGAGAAGAGTGCAAAATGCTCTTCA  
AGCGTAGCGGAAAACCGCGCTCACTGCCGTTTATCAGCAATGAAGTGGTACGCTGATTAGCCAGCGAGGGCTGAAAAG  
CGCCCTCAGCCAGCCACTGACGCGGATTCTGGAACAGGTGCAACTGGCCCTGGATAACGCCAGGAAAACCGGACGTTA  
TCTACCTGACCGCGGTAGCGCCGTTCTCGCTGATTAAAAAAGCGCTGGCAGAACAGTTGCCGGCATTCCGATTGCA  
GGCGGCGATGACTTTGGTCCGTCACCGCCGGGTGGCACGCTGGGCGGAAGTGGTGTTCGTTAATTGAAAATAGGCTC  
AGCAGCGGCTTAAATCTGCCTGCGCCTGAGCCAGTTTTTCTGCTGCTGCTGACGTAAACGGTTCCATCAACGGCATGGTCCGT  
GCTGGAGCATGAAGGCGGAATCGCTGCAACTCTGTGCGCCGACTGTCAACGCCGATTCCAGCCGATGTGTTTTGGCGGT  
CATTTTCGCCATTACCGTTGTCTGTCTGCTGGCGTTATCGCTTCACTCGGCCTGAACACAAAACGGCGTTCACAGCTCG  
CTTTCAGTCGATAACCGCTGGGTGAGATGGTCCGCAAAACCTTCACTTGTCTAACGCCACGACGGGTAACATCTGCG  
GCTGTTTCAATAACAAAAGACCGTAACGCCGTTTTACGCGCAGGGCAACGCCGGGAATAGAGGCAACATCAATAAAAA  
TCCCTCCAGAAACTTCTGCTTCTGCCGTTCCCTTGCAGTGTATGAAGTGTGCCAGAGCGGTTTCTTCTTCCGGTA  
ACCCGAGAATTTCTGCTTCAATTTTTTCGAGCATCGTCCGTTTGGCGATAAAACCTTCCAGGCCGCTACCTGCTGGATC  
TGCGGACTAAATGGTCATAGTCCATTTTCGACGATTAATGCCTCACGGGTTGCTGAACTTCTGCTTTGTACGCTTT  
GCTTGTGACTGCCAATAATCCAGATAGCCGCCAGCACAGGAACAAAATAATAACCGGTTCTGCCTGAAGGCCGC  
AAAGCAGCAGCGATAATGCTGACAGTGCATCTCAAGCAGAATGATGATTCGCGCCGTAACAGGCCTAAAGGAAGCGGC  
CTGCCAGTCGGTTGAAATGATCGGGTAAAGGAGTTCGAAATGCTGGCGGTGCTACTGACGCCATCACCATCGCCAGAC  
TTTCGCCAGCACAAAATCCCGCCGGTGAATGACCTCTTCCGCCAGATCAATAAAATAGATAACACCTTGATTATCCA  
GCGCACACCAGGGCAGTCAGTCAAATGAGCGGGTAAACATGCATTGCTGAAACGATACATTTCTTTAACTGTTGGCGT  
AGAGAGTCCAGTGGCGTACCCACGCTTTAGCCGTCCGACGCCGGTTGCCACGCCACTTTCCGTTGAATGCTGCTGAAA  
CATGGCTTCAACATCACTCGGTAACATCGATAGCGGAATAGATCGTGGCGGGGTTTTAAACCACGTCGCTGATTATCTG  
ACCGTAGGCATAACGAAAATGGGTAATATCCGTCTCCAGCGCATTACCCGCATCAGAGATAAGCGGCACACCAGAATAA



GGATGCCGCCACCAAACAAGACGTGAAAAATTAGCAACGCAAGGCCAAAATTATCGTGATTTCTGTGCGTTCAAACC  
GACAAATGATGGCAAGGTTTGTAGCTCTGGCGGCGTAAAATGCGACACGCCACTTCGCATAAATGCAGTGTGCCATTGG  
CGTTAATTTGAAAGGAGTGCCTATCAATCAGTACCCTTTGCTGTGCGACCTACCATAAACTGTTCTGGTTTACGTCA  
CCCACGACGTGCCCGTGTCTGTGAACCGTAGCAAAAGATGAAGCAATATTGCGCGCAACATAGAGTAGAAAAATCCCACGC  
ACAAATGAGGGTAACTCTGGCGACGATGTGCCGGGCTATAGATCATATGAATCGGTTCTTTACCAGAACTTTTGGCATCA  
TAAAACCGATAACTTTTCCGCCTCGTCCACCGTGAAGCGTTGCTGCGGCCAGGCGACATAATTCAACAACCTGCGCGTCA  
GCTGTGCGAGCCATAAAGGCAAGTTTGTCTGTTTTAAGGCGGGTGGCGGCGTGTGATAAATCTTGGCGACGCTATCGAC  
AACTCCTCGATATCATAAACCGCGCCTTACCACCTTTGCCAGTTCACGGCCAAGAGTGGTCAATTCACCTGTGCGATG  
TAAATACTTTTATATTTGTTTTTATAATATTTCCGCGGTAGTTATATTATTTCAATGAATAATAACAACCTAACCTTA  
AAATTTTCTATATGGGAAAAACCCACTCAAGAATAAAAAATGATAATGCAATTTTATCAGGATACAATTCATTTCCGGC  
CTGATAATGATTAACCTCCACAGGTTTTTGTAACTTTGACTACAAAGGGATTCTGGAGAAAAATGAAAAAGATATTAC  
TTATGTTGAGTCTGCTATTTTTACTACCGGGGCTTGTAGTGAAGTTTCCGATACGTTAGTGACGGGAGTTATGATAAA  
CAAGCGATGTCTGACGCGATTAAACATGCGCGGAAAGAAACCGATAAATTCATCGAGGTTATGAATAAAAAAGATGCCGA  
TACTTTGCGAGTCAAAGCCCGATAACCGATCACGGAAGAACCAGCATTCTGGCTTACGGATGTCACTTATTCTAACG  
GCATGTTTTATTGGCGTAATCAGCAATGACCCTGGTATTGTTACAACGTAGAATATGGCCAGGAGTGGAAAAATCAAGAAA  
GAAGATATTTACAGATGGATGATACGCGCGGGGATAAAAATTTACGGCGGTTATACCATTGATCCTTTATTGGTCACCTA  
TCCAAAAGAAGAAGCCGACGAGCTAAGAGCAAAATTAGTTTCGTAATCAGCCGTTATATTTATTGTTTAACTGGCGGTT  
GAATTGTTGTCTTCAACCGCATGAGAAACTCACTCTGCCACAGCGCCAGTGCCAACGTTTTATCATCATCCGTACGCT  
CGTTTACCGCCGGGCTGGACAAAACTGCTTTAACAATTCAGGTAATAAATCGAGTTGTTCTGCGTTGTGCGCCAGT  
CCATTGAAAAACGGGTAAGAAAGGCACATGAGGAGAATTATCCAGCATATTTAACGCCAGTCTGCTGGATACCATCCGT  
AAATGCTGCACTTTGTGCGCACGCCAGTGTGTTGAAAGTTTCCAGTCTGGAAACGGCATCTTCTGCGGTAATGAAGT  
GCGTCATGTTGGCATATTCACCGCCATCGGCGTGAGAGGCAATTGCAGACCGTGACCCAAATCTACCACCACGCCGCCA  
TCGCCAATCTGCATAATCAAGGTGCCGTAGGCGATGAAATCAGTCCAGAAATGTGCAGGCAAAATCGCGAACCGCTAA  
TTCTTTGGCTTCCGCTCGGCAAAAAGTCTTGTACGAATGGTCACTACCATATTTGTGGCGAGGACATCATTAAAGCCCCA  
ATCCCCGCCCTGCATTTTTGCGACATATAAGCCATCGTTCATTGACGGCGAGCATCGCGCCTTCCGCCACCTGCGAG  
ACACTGCCTGCCCATCAGCGACAAATACCGACAATAATGGCTGCTGGTCAATTAACCAGGCAATCTGCATCTGGCAGGC  
ATCTGACAAGGCAAGTCCGCGCTGATGTGCGACGTTCCAACGGTTGATGCATAGACCAGACGCCAGCTCACACTGACGT  
CCAGCCTTTTGGCGCTTCCAGCACAACTTCCGTTCCCGGCGTGGAGCGGAAACCGAACGCAGCGAACTGGATAACCAGC  
TAAACAGTTACCGGAATTGTAACTTTCAGAGGCAAAAGGCTGACGAACGTAATTTGTGCCAGCGTCTTCATATCCGCC  
CCCTGAACACCGATGAAAAAGAAAGCAAACTTTTTATCTTCTTCCCCCGAAACACTTTGTTGGCTGCAGCTGCCACTC  
ATCGGTTGGTGCAACATCGGTAATCAGGAAAATCCACGGGCGATAATACGAAATACCATTTGCACGATACTCACGTTTTCC  
GCTCCTTACCATATCCAGGGCTTTGGTAATGGCCGCACCCATTGGTGTATCGCCCTGGGCAACAGGATGGGCGGAAAA  
AAATTAGCGGCGCTGGTAAAGGGTTGTTCCACATGCACCGGGCGAACGTCACAATGCCGAGTTCCACTCTTTTTAAAGC  
CAGCGGATCAGCAAGCAGTTCATCACGAAAGGTAACCAATCCGGCGTTAAGTTCATTAATAGGTCTACCCTTCATAGAAC  
CAGAAACATCCAGCAGCAAAATGCAGGGGCAACGTGTTCCGGTTACTGGCAAAATCGCTGGTGGCAACAGTGATTTGT  
TCGCTCATAAGAAATCCTTCTTAGAGAAATATCGAGGTCCGGTATCATACCGACTGCAATAATGAAATAAGAGCAAACG  
AAGAACTTTCAGAATTAGCCCGGGCGCGAGAAAATTTGCTATTCGCCTCGCAAGAACGGAGAGCCGTGATTGACA  
CTAAGGGCGGAGTGACATAATTTCAGGAGTGAGGGTTAGGGAGAGGTTTCCCCCTCCCCCTGGTGTCTTAGTAAGCCTG  
GAAGCTAATCACTAAGAGTATCACCAGTATGATGACGTGCTTCATCATAACCTTTCTTATTAAGGCCCTCTTCTCCG  
GGAGAGGCTTTCCGTTTTACGCGTCCCGCTGAAATCATCGGCTTACCTCCTTTCCGCTGAATGCAGTATCGCTAACG  
CGTGAATAAAATAGTTTTCTGTGATTATTGCGTAACGACTCGCAAGAATAATTTGCTGGCAGGATCGCAGACTACAAA  
GCCTGCGGATTGACAATCTTATCGTGAAGGCATACTTTCAGGAGTGAGGGTAGAGCGGGGTTTTCCCCCGCCTGGTAGTC  
TTAGTAAGCGGGGAAGCTTATGACTAAGAGCACCACGATGATGAGTAGTTCATCATGACCCTTTCTTATTTATGGCCC  
CTTCTCGGGAGGGGCTTTCCGTTTTACGCGTCCCGCTGAAATCGTGGCTTACCTCCTTTCCGCAATGCAAGCAGTCTAT  
CGCTAACGCGTAGATAAAATAGTTTCTGTGTTATTACTGGATGCGTGCTCGCAAAATGTGCCCGTCAATCAGACGATTCC  
AGACAGTGTTCATAATTCCTCCATTTTTCTCCCTATTGGCTGGCTACACTAGTATCATTCCGCAAAACGTTTCAGGAA  
GAGAACTCTTAACGATGAAAGGTAGTTATAAATCCCGTTGGGTAATCGTAATCGTGGTGGTTATCGCCGCCATCGCCGC  
ATTCTGTTTCTGGCAAGGCCGAATGACTCCCGAGTGACGCCCCAGGGGCGACGAAACAAGCGCAGCAATCGCCAGCGG  
GTGGTGCAGTGGTATGCGTTCCGGCCATTAGCCCCGTTTACGGCGGCGACCCTGAGAACAGGCAAGTCCGCGTTAC  
CTCACCGGGCTTGGCACCATTACCGCCGTAATACCGTTACGGTGCAGCCCGTGGACGGCCAACCTGATAGCGTTACA  
TTTCCAGGAAGGCCAGCAGTCAAAGCAGGCGATTTACTGGCAGAAATGACCCAGCCAGTTCAAAGTTCATTAGCAC  
AAGCCCAGGGCCAACCTGGCAAAAGATAAAGCCACGCTTCCAACGCCCGCGTACCTGGCGGCTTATCAACAACCTGGCA  
AAAAACCAATCTCGTTTCCGCCAGGAGCTGGATGCCAACAGGCGCTGGTCAAGTGAACCCAGGCAACCTTAAGGCTGA  
TGAAGCAAGCGTTGCCAGCGCGAGCTGCAACTCGACTGGAGCCGGATTACCGCACCAGTCCGATGGTGCAGTTGGTCTCA  
AGCAGGTTGATGTTGTAACCAAACTCCAGTGGTGTATACCACGGGATCGTGGTGTATACCCAGACGCATCCTATCGAT  
TTAGTCTTTACCCTGCCGAAAGCGATATCGCTACCCTAGTGCAGGCGCAGAAAGCCGAAACCGCTGGTGGTAGAAGC

CTGGGATCGCACCAACTCGAAGAAATTAAGTGAAGGCAGCTGTTAAGTCTAGATAACCAATCGATGCCACTACCGGTA  
CGATTAAGTGAAGCAGCTTTAATAATCAGGATGATGCGCTGTTTCCAATCAGTTTGTTAACGCGCGCATGTTAGTC  
GACACCGAACAAAACGCCGTAGTGATCCCAACAGCCGCCCTGCAAATGGGCAATGAAGGCCATTTTGTCTGGGTGCTGAA  
TAGCGAAAACAAGGTGAGCAACATCTGGTGACGCCGGCATTACAGGACAGTCAGAAAGTGGTGATCCGTGCAGGTATTT  
CTGCGGGCGATCGCGTGGTGACAGACGGCATTGATCGCCTGACCGAAGGGGGCAAAGTGGAAAGTGGTGGAAAGCCAGAGC  
GCCACTACTCCGGAAGAGAAAGCCACCAGCCGCAATACGCGAAAAAAGGAGCAGCTCCTGATGCAGGTGTTACCCCCG  
AGCAGCACAGGCGGCCCTCGCGCCTGTTATTATGCGTCTGTGGCCACCAGCTGCTGATGGTGGCGATCTTACTCGC  
CGGGATTATCGGTTATCGCGCCTGCCGTTTCCGGCCTGCCGGAAGTGGACTATCCGACCATTACAGGTGGTCACGCTCT  
ACCCAGGTGCCAGCCGGATGTCATGACCTCTGCCGTTACCGCGCCGCTAGAACGCCAGTTCGGGCAGATGTCTGGCCTG  
AAACAGATGTCGTGCAAAGTTCGGGCGGTGCGTCAGTTATCACTTTGCAGTTCCAGCTAACATTACCGCTCGATGTCGC  
CGAGCAGGAAGTGCAGGCCGCGATTAACGCTGCGACCAACTTGTTCGCGAGCGATCTGCCTAACCCGCGGTTTACAGCA  
AAGTGAACCCGGCAGATCCGCCGATCATGACGCTCGCCGTACCTCAACCCGATGCCGATGACGCAAGTGGAAAGATATG  
GTGAAACCCGCTCGCGCAGAAAATCTGCAGATTTCCGGCCTCGGCCGTACCAGCGAAACCGTGCACCCGCTTACCGGC  
TGTTCGCGTCAAATTAACGCTCAGGCATTGCCGCCCTCGCCGTGACGAGCGAAACCGTGCACCCGCTTACCGGC  
CTAACGTTAATCGGCAAAAGTAGCCTCGACGGCCTTCCCGTGCAGTACGCTTTCCGCGAACGACAGATGCAATCC  
GCCGAAGAGTATCGCCAGTAAATCATCGCCTACCAGAACGGCGCCCAATTCGTCTGGGCGATGTCGCAACTGTAGAGCA  
AGGTGCAGAAAACAGCTGGCTCGGGCGGTGGGCGAAACAAAGAACAGGCCATTGTGATGAATGTTACAGCGCCAGCCCGTG  
CTAACATTATCTCACCGCGCAGCATTTCGGCAGATGCTGCCACAGCTCACTGAGAGTCTGCCGAAATCGGTGAAGGTG  
ACAGTGCTTTCCGATCGCACCAATATCCGCGCATCCGTGATGATACTCAGTTTGAATTGATGATGGCTATCGCGCT  
GGTAGTCATGATTATCTACCTGTTTTTGCGAATATTCCGGCGACCATCATTCCCGGTGTTGCTGTACCCTGTCGTTAA  
TCGGCACTTTCCGGTATGGTGTCTCGATTTTTCAATCAATAACCTGACACTGATGGCGTTAACTATCGCCACCGGA  
TTCGTGGTTCGATGACCCATCGTGGTATCGAAAACATTTCCCGTATATCGAAAAAGGCGAAAAACCGTTGGCGCGGC  
GCTCAAGGGCGCAGGTGAAATCGGCTTACCATTATCTCGCTGACCTTCTACTGATTGCGGTGTTGATCCACTGCTGT  
TTATGGGCGATATCGTGGGCGACTGTTCCGCAATTTGCTATTACCTGGCGTAGCGATTTTATCTCAGCGGTGGTG  
TCGCTGACCCTGACCCGATGATGTGCGCGGGATGCTCAGCCAGGAGTCGTTGCGTAAACAGAACCGCTTCTCCCGTGC  
CTCGAAAAAATGTTTCGACAGGATAATCGCCGCTATGGTCTGGACTGGCGAAAGTGTGAATCATCCGTGGCTGACCT  
TAAGCGTGGCACTCAGCACGCTGCTGCTTAGCGTGTGCTGTGGGTGTTTATTCCGAAAGTTCCTCCCGGTACAGGAC  
AATGGCATTATTCAGGGCACTTTGAGGCACCGCAATCCAGCTCCTTTGCCAATATGGCCAGCGACAACGCCAGGTGCG  
GGACGTGATTTTCAGGATCCGGCAGTCAAAGCCTGACCTCATTGTTGGCGTTGATGGCTAACCCGTCGCTGAACA  
GTGCACGTTTACAATCAACCTCAAACCGTTGGATGAACGTGATGATCGGGTGAAAAAGTCAATCGCCGCTGCAAACG  
GCGGTAGATAAAGTCCGGGCGTGCATCTTCTGCAACCAACGCAAGGATCTGACTATTGATACTCAGGTCAGCCGCAC  
CCAGTACCAGTTTACCTGACGGCCACGTCACTGGATGCGCTCAGTACCTGGGTGCCACAGTTGATGGAAAACTCCAGC  
AACTGCCACAGCTTTCTGATGCTCCAGCGACTGGCAGGACAAAGGGCTGGTGGCGTATGTCAATGTTGATCGCGACAGC  
GCCAGCCGTCTGGGATCAGCATGGCGGATGTCGATAACGCCCTGTACAACGCTTTGGTACGCGGTGATTTCCACTAT  
TTACTCAGGCCAACAGTATCGCGTGGTGTGGAGCACAACACCGAAAAATACCCAGGCCCTCGCGGCGCTGGATACCA  
TTCGCTGACCAGCAGCGGCGGCGTGGTGGCGTAAGCTCAATTGCCAAAATTGAGCAGCGTTTTGCGCCGCTCTCC  
ATCAACCATCTGGATCAGTTCCCGTAACGACCATCTCCTTAACTGCGCGGATAACTATTCGCTGGGCGATGCGGTGCA  
GGCGATTATGGACCCGAAAAGACGCTGAATCTGCCGTGGATATCACCACGAGTTCAGGGCAGCACCTCGCCTTCC  
AGTCCGCGCTGGGCGACTGTCTGGCTGATTGTCGCGCGGCTGGTGGCGATGATATCGTCTCGGCATTCTGTACGAG  
AGCTTTATACCACCGTACCACTTCTCGACGCTACCCACCGGAGGTTGGCGCACTGCTGGCGTTCGATTGCTGG  
TAGCGAACTGGATGTGATTGCGATTATCGGCATTATTTGCTGATCGGTATCGTGAAGAAGAACGCCATCATGATGATCG  
ACTTCGCGCTGGCTGCTGAGCGGAGCAAGGCATGTCGCCGCGGAGGCAATCTACCAGGCTTGTCTGTTGCGTTTTCTG  
CCGATCCTGATGACCACTCTGGCGCTGCTTGGCGCGTGGCGCTGATGTTGAGTACCGGGGTCCGGCGGAACTGCG  
TCGTCCGTTAGGTATCGGCATGGTCCGGCTGCTGATTGTCAGCCAGGTGCTGACGCTGTTTACCACGCGGTGATTTATT  
TGCTGTTGACCCGCTGGCATTGTGGACAAAAGCCGCTTTGCCCGTCATGAAGAGGAGGCGTAAGTGAAGTTTTTTGCC  
CTCTTCAATTAACGCCCGGTGGCGACGATTTTACTGTCGGTTGCCATTACCCTGTGCGGCATACTGGGCTCCGATGCT  
GCCGGTCCGCCGCTGCCGAGGTGATTTTTCCGGTATTATCGTCAGCGCCTCGCTGCCCGGTGCGTCACCAGAAACAA  
TGGCGTCTTCCGTTGCCACGCCGCTGGAGCGCTCACTTGGGCGCATTGCCGGAGTCAGTGAATGACCTCCAGCAGTTCCG  
CTCGGCAGCACGCTATTATTTGAGTTTGATTTGACCGGGATATCAACGGCGCAGCGCTGATGTGACGGCGGCGAT  
CAACGCTGCACAAAGTTTGTGCCAGTGGGATGCCAGCCGCCGACCTATCGAAAGCGAACCCGTCGGATGCGCCAA  
TTATGATCCTCAGCTGACGCTCGGATACTTATTGCGAGGTGAACTGTACGATTTGCTCAGCGAGCTGGCTCCGACG  
ATTTGCAAATCGACGGTGTGGTGTGATGTCGATGTCGGAGGAGCTCACTGCCCGCGTACGCGTCCGGTGAATCCGCA  
GGCGCTGTTTAAATCAGGGCGTGTGCTGGACGACGTACGACCCGCGTACGCAATGCCAACGTGCGTAAACCGCAGGGCG  
CGCTGGAAGATGGCACTACCCGCTGGCAGATCCAGACCAATGATGAGCTAAAAACCGCCGCTGAATATACGCCGTTGATT  
ATCACTACAACAACGGCGCGCGGTTGCTGTTGGCGGATGTTGGCGACGGTACCGACTCAGTGCAGGATGTGCGCAACGC  
CGGGATGACCAACGCCAAACCGGCTATTTTACTGATGATCCGAAACTGCCGGAAGCAATATTATCCAGACGGTTGACA

GCATCCGGGAAAATTACCGGAGTTGCAGGAAACCATTCCGGCGGCGATTGATCTGCAAATTGCCAGGATCGTCCCC  
ACCATTCGCGCCTCGCTGGAAGAAGTCGAGCAAACGCTGATTATCTCGGTGGCCTGGTATTCTGGTGGTGTTTTTATT  
CCTGCGCTCGGGTCGCGCCACTATTATCCCGCCGTTTCGGTGCCGGTTTCGCTGATTGGTACGTTTTCGGCGGATGTACC  
TGTGCGGATTACAGTCTCAATAACCTTTCTGTTAATGGCGCTCACCATCGCTACTGTTTCGTTGGTGGATGACGCCATCGTG  
GTGCTGGAACATTGCACGTCATCTGGAAGCGGAATGAAACCGTTGCAAGCCGCACTGCAAGGTAAGTTCGCGAAGTCGG  
TTTTACGGTGTCTGCATGAGTCTGTCACTGGTGGCGGTGTTCTGCGCTGCTGTTGATGGGCGGATTGCCGGCCGAC  
TGTTACGCAATTTGCCGTGACGCTTTCTGTGCGCATTGGTATATCGTTGCTGGTTTCTCTGACATTAACGCCAATGATG  
TGTGGCTGGATGCTGAAAGCCAGCAAGCCGCGGAGCAAAGCGACTGCGTGGTTTTGGTCGCATGTTGGTAGCCCTGCA  
ACAAGGCTACGGCAAGTCACTAAAATGGGTGCTCAATCATACCCGCTCGGTGGGCGTGGTGTGCTTGGCACCATTGCGC  
TGAATATCTGGCTGTATATCTGCATCCCGAAAACCTTCTCCCGGAGCAGGACTGGCGTGTGATGGGCGGGATTACAG  
GCGGATCAGAGTATTTCTGTTTCAGGCGATGCGCGGTAAGTTGCAGGATTTTCATGAAAATTACCGTGACGATCCGGCAGT  
GGATAATGTACCGGCTTACAGGCGGTTGCGGAGTGAACAGCGGGATGATGTTATCACCTCAAGCCACGCGACGAAC  
GCAGCGAAACGGCGAGCAAATTATCGACCGTCTGCGCGTAAAACCTGGCGAAAGAACGGGGGCGAATCTGTTCTGATG  
GCGGTACAGGATATTCGCTTGGTGGGCGTCAGTCGAACGCCAGTACCAGTACACGTTGTTATCCGACGACCTGGCGGC  
ACTGCGAGAATGGGAGCCGAAAATCCGCAAAAACCTGGCGACCTGGCGAATCGCGGACGTGAACCTCGATCAGCAG  
ATAACGGCGCGAGATGAATCTGGTTACGACCCGCGACACCATGGCACGGCTGGGAATCGAGTACAAGCCGCCAACAGT  
CTGTTAAATAACGCCTTCGCTCAGCGGCAAATCTCGACCATTTACCAGCCGATGAACCAGTATAAAGTGGTGTGGAAGT  
GGATCCGCGCTATACCCAGGACATCAGTGCCTGGAATAAATGTTCTGTTATCAATAACGAAGCAAAGCGATCCCGCTGT  
CGTATTTCTGCTAAATGGCAACCGCGAATGCCCCACTATCGGTGAATCATCAGGGATTATCGGCGGCCTCGACATTTCTG  
TTAACCTGCCGACCGAAAATCGCTCTCGGACGCCAGTGGCGGATCGATCGCGCAATGACCCAGCTTGGTGTGCCTTC  
GACGGTGGCGGCGAGTTTTGCCGCGACGGCGCAGGTGTTCCAGGAGACGATGAACTCGCAGGTGATCCTGATTATCGCCG  
CCATCGCCACGGTGTATATCGTGTGGTATCCTTTACGAGAGTACGTACATCCGCTGACGATTCTCTCCACCCTGCC  
TCGGCGGGCGTTGGAGCGCTGTTGGCGCTGGAGCTGTTCAATGCCCGTTACGCTAATCGCCCTGATAGGGATCATGCT  
ATTAATCGGCATCGTGAAGAAAACGCCATTATGATGGTGCATTTTCGCGTTGAAGCCACGGCACGGTAACCTGACGC  
CGCAGGAAGCTATTTCCAGGCCTGTCTGCTGCGTTTTCCGCCGATTATGATGACTACCCTGGCGGCGCTGTTTGGTGC  
CTGCCGCTGGTATTGTCGGGCGGCGACGGCTCGGAGCTGCGGCAACCCCTGGGATCACCATTGTCGGCGGACTGGTAAT  
GAGCCAGCTCCTTACGCTGTATACCACGCCGGTGGTGTATCTTTTTTCGACCGTCTGCGGCTGCGTTTTTCGCGTAAAC  
CTAAACAAACGGTAACCGAGTAAATGACAGATCTTCCCGACAGCACCCGTTGGCAATTGTGGATTGTGGCTTTCCGGCTTC  
TTTTATGCACTGCTGGACACCACCATCGTAAACACCGCCCTTCCCTCAATGGCGCAAAGCCTCGGGGAAAGTCCGTTGCA  
TATGCACATGGTCATTGTCTTATGTGCTGACCGTGGCGGTGATGCTGCCCGCCAGCGGCTGGCTGGCGGACAAAGTCG  
GCGTGGCAATATTTCTTACCGCCATCGTGTGTTACTCTCGGTTCACTGTTTTGCGCGCTTTCCGGCACGCTGAAC  
GAACTGTTGCTGGCACGCGCTTACAGGGCGTTGGCGGCGGATGATGGTGCCGGTCCGGCAGATTGACGGTGTGAAAAT  
CGTACCGCGCGAGCAATATATGGCGGCGATGACCTTTGTCACGTTACCCGGTCAAGTCCGCTCGCTCGGTCGGCGC  
TCGGCGGTCTGCTGGTGGAGTACGCATCGTGGCACTGGATCTTTTTGATCAACATTCGGTGGGATTATCGGTGCGATC  
GCCACATTGCTGTTAATGCCGAACTACCCATGCAGACGCGGCGCTTTGATCTCTCCGATTTTTATTGCTGGCGGTTGG  
CATGGCGGTATTAACCTGGCGCTGGACGGCAGTAAAGGTACAGGTTTATCGCCGCTGACGATTGACGGCCTGGTCCGAG  
TTGGCGTGGTGGCACTGGTCTTTATCTGCTGCACGCCAGAAATAACAACCGTCCCTGTTCAAGTCTGAAACTGTTCCGT  
ACTCGTACCTTTTCGCTGGGCTGGCGGGGAGCTTTGCCGGACGATTGGCAGTGGCATGTTGCCCTTTATGACACCGGT  
TTTCTGCAAATTTGGCCTCGTTTTCTGCGGTTTCATGCCGGACTGATGATGATCCCGATGGTGTGGTGGCAGCATGGGAA  
TGAAGCGAATTTGGTACAGTGGTGAATCGTTTTGGTTATCGTGGGACTGTTAGCGACACGCTGGCTGCTGCGCTG  
GTCACCTGTTGTTTTACTACCCGCTGCTGGGCTGGTACTACGTTTTGCGGTTTCGCTGTTTTTACAAGGGATGGT  
CAACTCGACGCGTTTTCTCTCCATGAACACCCTGACGCTGAAAGATCTCCCGACAATCTGGCGAGCAGCGGCAACAGCC  
TGCTGTGATGATTATGCAATTGTGATGAGTATCGCGCTCACTATCGCCGGGCTGTTGCTGGGACTTTTTGGTTACAG  
CATGTACGCTCGACAGCGGACACACAAACCGTCTTTATGTACACCTGGCTTAGCATGGCGTTGATCATCGCCCTTCC  
GGCGTTCTTTGCCAGAGTGCCGAACGATACGCATCAAATGTAGCTATTTCCGGCGGAAAAGGAGCGCGCAATGAA  
GTTCTGGCGACCCGGTATTACCGGCAAACCTGTTTCTGGCGATTTTCCGACCTGCATTGTCTTGTGATCAGTATGCACT  
GGGCGGTGCGTATCAGTTTTGAGCGTGGCTTTATTGATTACATCAAGCATGGTAATGAACAGCGATTACAACCTGTTAAGT  
GATGCGCTTGGCGAGCAGTATGCGCAGCATGGCAACTGGCGCTTCTGCGCAACAATGATCGCTTTGCTTTTTCAGATCCT  
GCGTTCATTTGAACACGATAATTGGAAGATAAACCAGCCCGGATGACCCAGCACGGTGGCGTACCAGTTCTGGG  
TGGTTGATCAAAAACAACAAAGTGTGTTGGTCCGCGAGCGCCGATTCCACCTGACGGTACACGGCGACCCATTCTGGT  
AACGGTGGGAAGTTGGCGGGTATCGCTCCCGGTTGAGCGGTTAACCGCAATACTGATATCAATTTGATAAACA  
ACAGCGGCAAACAGCTGGTTGATTGTCGCCCTGGCAACGTTACTCGCGGCACTTGGCACTTTTCTGCTGGCGCGCGGTT  
TACTGGCACCGGTAACAGACTTGTGATGGCACGCAAACTGGCGGCGGGGATTTCACTACCCGCGTAAACGCCACC  
AGTGAAGATGAACTGGGCAAACCTGGCGAAAGACTTCAACAGCTTCCAGCACACTGGAGAAAAACAGCAAATGCGGCG  
CGATTTTATGGCCGATATTTCTCACGAACTGCGTACGCCATTAGCGGTGCTGCGCGGTGAACTGGAAGCCATTACAGGATG  
CGGTGCGTAAATTCACGCGGAGACGGTGGCGTCTTACAGGCGGAGGTCGGTACACTGACCAAACCTGGTTGACGATCTC

CATCAGTTGTCGATGTCTGATGAAGGCGCTCTCGCCTATCAAAAAGCACCGGTAGATTTGATCCCCTGCTGGAAGTGGC  
GGGCGGCGCATTTCGCGAACGATTCCGAGTCGTGGCTGAAACTGCAATTTTCCCTGCCAGACAGTATTACCGTATTTG  
GCGATCGCGACCGTTTAAATGCGATTATCAATAACTTACTGAAAAACAGCCTGCGCTACACTGACAGCGCGGCAGCCTG  
CAATCTCTGCCGGGCGAGCGGACAAAACGGTGCCTGACCTTTGCCGACAGTGCGCCAGGTGTCAGTGACGATCAGCT  
ACAAAAATTGTTTGAACGTTTTTATCGCACCGAAGTTFCCCGAACCGTGCCAGCGGCGGTTCCGGGGCTGGGGCTGGCGA  
TTTGCTGAACATTGTTGAAGCACATAATGGTCGCATTATTGCTGCCATTTCGCTTTTGGCGGGTAAGCATTACAGTA  
GAGTTACCGCTGGAACGGGATTTACAGAGAGAAGTATGACCGAGTTACCAATCGACGAAAACACACCGCGTATTTTGATC  
GTGGAAGATGAACCGAAGCTGGGGCAGTTGCTCATTGATTATCTGCGTGTGCGAGCTATGCGCCGACGCTTATCAGCCA  
CGGCGATCAGTACTGCCGTATGTGCGCCAGACACCACCGGATCTGATCCTGTTAGATCTGATGCTCCCTGGCACCGATG  
GCCTGACGCTGTGCCGGAAATTCTGCTGTTTTCTGACATTCCGATCGTGATGGTGACGGCAAAAATCGAAGAGATCGAT  
CGCTGCTGGGGCTGGAGATTGGCGCAGATGATTATATCTGTAAGCCGTACAGCCCACGGGAAGTGGTAGCGCGCTCAA  
AACATTTTGCGCCGTTGCAAAACCGCAGCGCAGATTGCAGCAACAGGATGCTGAAAGCCCCTTGATTATCGACGAAGGTC  
GTTTTCAGGCTTCATGGCGCGGTAAAATGCTTGACCTGACGCCTGCGGAATTCGTCTGCTGAAAACGCTCTCTCACGAA  
CCAGGAAAAGTGTCTCCCGCAGCAATTGCTCAATCATCTTTATGACGACTACCGCGTAGTAACCGACCGCACCATCGA  
CAGCCACATTA AAAACCTGCGCCGAAGCTGGAATCTCTGACGCCGAACAGTCATTTATCCGCGCCGTTATGGCGTCTG  
GTTACCGCTGGGAAGCCGACGCTGCCGATCGTTTTAGTTTTAGCGACATTATTTTGTAGCCGGAGATGGCGTTCAGAC  
CAGATCCGGCAACATTATCCACGCATGGTCAGCAAACCTGACATTATCTCTCGCCCTGGCAGGCATCAGAAAATCGCTC  
ATACTTTAATCGGTAAACAGCACCTTTAGATGCTGTTTTGATACACAATTTCAATCAAGGAGTCATTATGGCTGGTTGG  
TTTGAACCTCAGTAAGAGCAGTGATAATCAGTTCCGGTTTGCTAAAAGCGGGCAATGGTGAGACTATCTCACCAGCGA  
GCTTTATACCTCAAAAACCTCTGCGGAAAAGGGCATCGCGTGGTGCGTAGCAACAGCCCGCAAGAAGAAGCCTATGAGA  
AAAAACCGCAAGTAACGGCAAATTTCTATTTCAATCTGAAAGCCGCTAATCATCAAATTATCGGCTCCAGCCAGATGTAC  
GCCACCGCGCAATCTCGTGAACCGGAATTGCCTCCGTTAAAGCCAATGGCACAAGCCAGACGGTGAAGACAATACGTA  
ATTACGATGCCGGGCGTGGTTGTTGGCGTCCGGCGCTTTACCAGAGCCCCCACAGCGCTACAATGCCCGCCCTTAAAG  
TGGGGGCACTCCCCTAACCGCTTCATCAGGTGAAGCGGATCTGACCTGTATCAGAACGAGAGAATTATGTTTAAACCGG  
AACTCCTTTCCCGGCGGGAACGCTGAAAAATATGCGTTACGCTTTCGCTTATGGCGCAGATGCTGTTTATGCGGGCCAG  
CCGCGTTATTCCTGCGTGTGCGCAACAACGAATTAACCCACGAAAATCTTCAGCTCGGCATCAATGAAGCCACGCGCT  
GGGAAAAAAGTTTTATGTCGTGGTCAACATTGCACCGCACAACGCCAAGCTGAAAACCTTTATCCGTGACCTGAAACCGG  
TGGTGGAAATGGGGCCGGATGCGCTGATTATGTCCGATCCAGGGCTGATTATGCTGGTGCGTGAGCACTTCCTGAAATG  
CCGATCCACCTTTCCGGTGCAGGCTAACCCGCTGAACTGGGCGACGGTGAAATTCGGCAGCAAATGGGCCTGACCCGCGT  
GATCCTCTCTCGCGAGCTGTGCTGGAAGAGATTGAAGAGATCCGCAATCAGGTGCCGGATATGGAGATCGAGATCTTCG  
TTCACGGCGCGCTGTGCATGGCCTACTCCGGTGCCTGCCTGCTCTGGCTATATCAACAAGCGCGACCCGAAACAGGGC  
ACCTGCACCAACGCTGCCGCTGGGAGTACAACGTCCAGGAAGGGAAAGAAGATGATGTTGGCAACATCGTACACAAGTA  
CGAGCCGATTCGGGTGCAAAATGTTGAGCCGACGCTGGGTATCGGCGCACCACCGCAAAAGTGTATGATCGAAGAGG  
CCCAGCGTCCGGGCGAGTATATGACCGGCTTTGAAGATGAGCACGGCACTTACATCATGAACTCGAAAGATCTGCGCGCC  
ATCGCCCATGTAGAACGCTGACCAAAATGGGCGTGCATTGCTGAAAATCGAAGGTGCTACCAAATCTTTCTACTATTG  
TGACGCACCCGACAGGTTTACCGCAAAGCTATCGATGACGCCGCTGCGGAAAAACCGTTCGATACCAGCCTGCTGGAAA  
CTCTGGAAGTCTGGCGCATCGTGGCTATACCGAAGTTTTCTGCGTGTCTACTCAGCAGATTATCAGAACTACGAA  
TACGTTATTAGTTTTCTGACCGCCAGCAGTTTTGTTGGTGAGTTTACCGGTGAGCGCAAGGGGACCTCGCGCGGTAGC  
GGTAAAAATAAATTTCCGTTGGCGACAGCCTTGAGCTGATGACGCCGCAAGGCAACATTAATTTTACCTTTGAGCACA  
TGGAAAAACGCAAGGCGAAGCTATGCCGATAGCACAGGCGATGGTTATACTGTGTGGTCCCCTCCCGCAGGATCTT  
GAGCTCAATTAACGCGCTGCTGATGCGTAATTTCTCCGGGAAACCGCGTAATCCCCACGGTAAGTGATTAATTTGAT  
TATTTTTCCGGATGAAAAATTTAGAAAACCGATCACATACAGTGCATTTATTAAGGTTATCATCCGTTTCGCTGAAA  
AACATAACCCATAAAATGCTAGCTGTACCAGGAACACCTCCTTAGCCTGTGTAATCTCCCTTACACGGGCTTATTTTTT  
ACGCGTAATACAATGAAATAAAAGGATTTATTTCTGGTCACGTCCACACATTGACCACATCGACAAAAAAGCCCTCGAC  
TGAGGGGCTTCCTGTTTCTAATTACATCCACATAATTTGCTGCCCTGACGGCAACGGGTGCGGCTTACGACGTGGACTT  
CTCCCGCTTACAAATGTATCGCTGTACCAGTCTATAAGTGTGAACTGGCGCTGCAATTCACGTTCTGACACTGGTGA  
TAACGCTCTTTTGTGCTGTCAGTGATATAGCGGCTGTACGCGCATGTGCGGCATGCTGGCATAAAGGACAATGAAACAT  
CGCGAGCACCTTCCGGTTTTGTTGATGGTGCCATTTAGTTAATTTACCCTTACAAAACAAACAGATAAAAATAAAAAC  
ATCACTCATTATCTTCTGTTTCTGACCCACATCAGAAAAGCCTGACCTCAAGCTCTAATGACGTCGTGAAGCCGCTATTA  
TTCAGAAAATGTGCACCTTAGTGATTGTCCAGTCTGCTCGTCTATGACGCGCTTAAAGCCAGACACTTTGACCGGTGT  
TTCCGTGTAATATCTGCCGACCGGTAGCCAGGCTGATGGAGAAGCTGCTACACGGGCTTATTTTTTTATGCATAAGC  
CCTATCTCTGGTAACCGTCTCCATTGACCACATCGATAGAATCCTCCTCATAGCACGATGCCTTTCACCTTATCGGCAT  
CGTGCTCCACAGGTTCCGGCTACGCACAGCCAGAACGCGCATATTTGACGCTTACAAAAAATATTCTCACTCTCCACA  
TTTGAATGTGACAGGAGCGACACCATGTAATCCTACACCTTGTCTTCAGCTCAACTATTTGCAATTTTTTGCCTGAG  
TAACACAGAAATGAGTTGCATCATTTTTTACTATATTTTCTGCACCAGATATTCTACCCCTGGCTAAAGAAGCTTCGGCT  
TCGGTGTAGTATTGGTTATCGAGTTTACGCTGAATATTACTTTTTATGCAAGACCAAATTTACCGATACTTGTCTCATC

ATTATGCACAGCACAACCAGACATAATAAAAATACTAATTAATGATATAGCAGCTATCTTTTTCATCTCACCTTCCCCCA  
TTAAATACCAACGACTCTCTAGTGTTAAATATAATAATGGCATGATTATTATAATTGAATAGGATTATAATAAATGT  
TCTGTACAACATTTCTACATAAGTAGGAATTACGGACATTGAGGCCCTTCAGGGTAACTCCATGGGGGCTTTAATATAT  
TATATTGAAGATGCCACTGTTTAGTTGAATATTAGGTATATGCTCTTTTTGAAATTTATCGGTGGCAGCCGTTAGTATT  
CGCTGTCCCCATTGCAAGCTCCTGGTGGTAACCCTGAACTCCTCATACTTGAAGTACTTTTTATCCTCCGACTTTCAT  
CCTGTTCTGACTCCACCTTTTGTCTCTACACTATCTACAGACCAATCATAAAGGCACATACGATCATGGCAGAA  
TTTCCCAGCTTACTGATTCTTAATGGCAAAAGTACTGACAATCTACCCTTGCAGCAAGCAATTATGCTGTTGCGTGA  
GGAAGGAATGACGATCCATGTGCGGGTCACTGGGAGAAAGGCGATGCCGCACGATATGTAGAGGAGGCCGGAAGTTG  
GCGTCGCAACGGTGATTGCCGGTGGTGGCGATGGCACCATTAATGAAGTTTCTACGGCGTTGATTGAGTGTAGGGGGAT  
GACATACCCGCGCTGGGAATTTGCCATTAGGAACCGCAATGATTTTACCACAGTGTAGGGATTCTGAGGCACTGGA  
TAAGGCGCTGAACTGGCAATTGCCGGTACGCCATTGCGATAGATATGGCGCAGGTCAACAAACAACTGTTTTATTA  
ATATGGCGACAGGCGGATTTGGGACCGTATTACCAGAAACGCCGAAAAATTAAGCCGCGCTGGGTAGCGTCTCT  
TACATCATTGATGCTTAATGCGTATGGATACTCTGCAACCGACCGTTGTGAAATCCGCGGTGAAAATTTCACTGGCA  
AGGTGACGCCCTGGTATTGGTATTGGTAACGGGCGTACGGCCGTTGCGGTGAGCAATTGTGCCAACCGGTTAATTA  
ACGATGGCTTGTGCAACTGCGCATTTTACCGGCGTAAACTTCCGGCTCTCGTATCAACCTTAAAACTGACGAA  
GATAACCCGAATATTATCGAAGGCGCTTCGTGTTGTTGATTTAGGCACACACGATCACCTTTAATCTTGATGG  
CGAACCGTTGAGTGGCAAAATTTTCATATTGAAACTTCCGGCAGCGTTGCGTTGTCGATTACCACAGATTGTCCAC  
TGTTGCGTTAATCAAATTTCTCTCTTGAACCAGGAGAATCCGTAATGCCGGATGCGGTGTAACACCTTATCCGGCA  
TACAGAACAATACTACACCGTAATTAATTTTACCAGCGTCTTCTGCAATGCCAGTTTATCCACCTCTGACACAGCATCAT  
CGGTAATAATAATGTCAATTTTTCGATTGGTAGTACCTGATTAACCGCGACGGTAAATTTTCGATGAATCGAGAACG  
GCAATCACTTTATTAGCGGCTGTGACCATCGACCGCTAATAGAATAACCTTCATTAAGGTCGTAATACCATTAACCGC  
ATCAATACCATCAGCACCAGCAACATTAATCGGCATTAATATCCTGTAATGAACGCTCGGCAATGGAACCATGCATCG  
AGCGCGTTTTATGGCGACCGTCCACCACAGACGACAGAGTAATGTCTTTATTTTCGAAAGGGCAACGCTGCCGGG  
AGACTGTTGGTAATCACCGTATATTTTGGCGTCAATCCTTCGGCGATAAGCATTGCTGACTTCCGCTGTCGAG  
AATAACGGTCTGATCTTACCAGCAATAGTGGACACGCGGCTAAGTGAGTAACTCTCAGTCAGAGGTGACTCACATGAC  
AAAAACAGTATCAACCAGTAAAAAACCCTGTAACAGCATTGCCTGAATTTTCGAGTGAAGCCCTGAAGCTTGTGAAC  
GCATCGGTGTTACTGCCGACCGCTGAACTCAGCTGATGAATCAAACTCTACAACCTGGCGCAGTAAACAGCAAAAT  
CAGCAGACGCTTCTGAACGTGAACTGGAGATGTCTACCGAGATTGCACGTCTCAAACGCCAGCTGGCAGAACGGGATGA  
AGAGCTGGCTATCCTCCAAAAGGCCGACATACTTCGCGAAGCCCTGAAATGAAGTATGTCTTTATTGAAAAACATCA  
GGCTGAGTTACAGCATCAAAGCAATGTGCCGCGTCTCCGGTGGCCCGCAGCGGCTGGTATACGTGGTGTGAGCGGGGA  
CAAGGATAAGCACGCGTCAGCAGTTCGCCAACACTGCGACAGCGTTGTCCTCGCGGCTTTTACCAGGTCAAAACAGCGT  
TACGGTGGCCACGCTGACGGATGAACTGCGTGTCTCAGGGTTACCCCTTAAACGTAACCAACCGTGGCGGCAAGCCTGCG  
CCGTGAGGACTGAGGGCAAAGGCTCCCGAAGTTGAGCCGGTTCAGCTACCGCGCACACGGCCTGCCTGTGTGAGAAA  
ATCTGTTGGAGCAGGATTTTACGCCAGTGGCCGAACAGAGTGGGCAGGAGACATCACGTAATACGATGAA  
GGCTGGCTGTATCTGGCAGTGGTCACTGTGGTACGTGCCGTTATTGGTGGTCAATGTGCCACGCATGACGGC  
GCAACTGGCTGCGATGCCCTGCAGATGGCGTGTGGCGGCTAAGAGGCCCGGAAAGTTATCGTTCACACGGACCGTG  
GAGGCCAGTACTGTTGAGCAGATTACAGGCGCAACTGAAGCGGCATAATCTGCGTGGAAAGTATGAGCGCAAAAGGTTGC  
TGCTACGATAATGCCTGCGTGGAAAGCTTTTTCATTCGCTGAAAGTGGAAATGATCCATGGAGAACAATTTATCAGCCG  
GGAAATAATGCGGCAACGGTGTTTAATATATCGAATGTGATTAACAATCGGTGGCGGCGCAGTTGGTGTGGCGGCC  
TCAGTCCGGAACAATTTGAAAACAAGAACCTCGTTAGGCTGTGTCCATATTACGTGGGTAGGATCAGTATCCCTTCG  
TGGATCATTTTACTGCCGCTGCGTATTCTGTTTTTTGGCGCGCTGGCGAGCTGAAATCGCTCTTTAAACCCGACTTC  
CTGGGTCTCGTTTACTATTACCAGACATTATTTTCGCCGACCGCCATGAAAGCGCGTAACCACGCTTTTTTGTTCGA  
GAAAGCGCAAATCGGCACGGATTGTGCTTCCGAGGCGACAAATACTCCCGCCAGATCCTGAACAAGCACGGTTCCTGT  
TCATTCATAATTGGATGATCTTATCCTTCGCTCGAATGAATTCATCGTCAATTAACCATATTCAATTGTGGCTAGTGT  
AAACGAAGGGGGACCATTTGGTGAATGATCTGTTTTGCAACAATACCGGGCCAGCATCACGCTGGCCCGGTTTACGGGAA  
TGAGCAACACTTTGCCGGCATAGCATTACGAGCGATGTCACGCACCGCCTGGGCGAAGCTTTCAAAGCTTCCACGGTGA  
GCGATTAATGGCTCCAGGCTTAACTTACGTTCTGTGACCAACCGCTCGCCGTTTCCACTCTGCCCGGCAAGGGCT  
GGAGTAGTTTCACTCAACTGCCGATAACCGTACGCTTTTACGCAATATTTTCCAAACGTTGCCGATGTTAAATGCAGAT  
CCTGATGCAACGTGCCACCAGCGCCAGTTGGGCATGAGGACCGCAATCTCTACCGCCAGTTCGACAGTTTGGGTACG  
CCAGCCGTCTCGAGGATAAGCTGATTAAGCGCAGTTCGCGTAAACGCTCTGCATTTGCGGCGCGCTCATTTCGCTACT  
GTTAAATGTTGTCATCGCACCGAAAGATTTTGCAGTGCCAGTTTTTCTGAACTAATGTGATCGCCGTACACTCTTTG  
CTCCAGCGCGACAGCGCACTGAATGGCCAGCAGGCCAATGGTCCGGCACCAATAATAAATACGTTTTTATTCTACAA  
CCTTGCCTAAATGAAAAGCATGCAGACCAACGGTAATCGGCTCAATAAAAGCCCATCCTCAATAGGCATATCCGTGGG  
TAGAGCAAAGACATTTTTTTCGTTAACGACAATATATTCAGCAAAATCCACCATCACGCCGAGCAATAAAAATCATATT  
TTGGCGACTGGGAATAAAACCTTTTACAGACTCTGGCAAGTAAACAGGGTAATAACGGCACACAGGCAACCGCATCG  
CCAGGGTGAATCATCAACACCGGATCCACCGCATCAATATAGCCGCTAAATTCATGGCCTAACGTTATTGGATAATA

ATGTGCACCATTTTTAAATATCCTGGGTAATCGGAACCACATAAGCCCGAGCTGGCAATTTTTACCCGCACCTCATCCT  
GATGTTTAATTTAGGAATGACGCTTTCTGCAACGCGCACGATACCATCAGTATCATTACCACTGATTTATAAAAACT  
CCTGATTGTTAAGGGGGATAACCTCCCCCTCAGGTAATAATTCTGCGAGAACGACTTTCTTTGTTAATAAAGCCA  
CGCGCTCTACGCCAGGTCATGAAAATACCGGTGAGTAAATTGCACCGATAAATGAAACCGGGAATTTTTGCGGGGA  
GAAAACCTGAATCAGTAACAGGTAATGGGAGAACCGCCCTGATCCATTGAAGCCACCATACCCCGGCTTTAACGCC  
CAGCATTAGCCGCCAGTTGGGTGTGCAAACCAATAGTTGCGTCGCGATCCACAGGGTGATGCTCATAATGATGACCCC  
GAGATTAAGGTGCGGAACAGATTTCCACGATGCACGGCGACCGCCATCGCCACGAAGAAGCCGATGGTGGCAAGATCGCC  
AAACGGCAGCCTGATTACCCGGCACACAAACAGCAATTAATAATGGTGAGTGGGATAAAAACTCAGGCTTGCCGATACCA  
CCCCGCCGATGTCCAGCAGCAACGCCGGATCAAGGCCAATCAGGAACTCTGACCGCCGAATTCGCTGTAAACGAC  
TACGAGCCTGCTTAGCGATGGGCGTTAAACCATCCATGATGGGTTAATCACCCTGGCATTAGCAGCATCACTGCCGCC  
GTTTTTACCGCCAGCTGCAATACACCTTTGACATCGTAACCCGCGAGGATGCCGATAATCAGCCCCATCACAAAACCCAC  
GGTGACAGGCTCGCAAATGGACCAAATTTGCGTGAATATCGTCGGCGCTAAATTTAATTCGGTTAACGCTGGGATTT  
TCTCGATGATAGCATCGACCAGCACCGCAATCGGCCCATATACGCCGACGTACCGTGCGGAATAGCAATACCTCCAGC  
TCAAAGAAATTTGGGTATCGCGGGCAAACAGTCGCCGAGCTTATAAACAAACGCCGCGTGAATTACCACACCTGCCAT  
CCCTATCATCCATGAACCGGTTGCCAGATGCAGCAACGCCGCGTGAAGTGCATATGCCAGATATCCAGATCAACAT  
TTACACCCGCGTCATACGGGTGAGTAAACATCGCCAGTTAACAGAAATCGCAATCGGAATCGCCACCGCAATTTGCG  
GACGCCCAGGTCATTGGTGAAGAGCCCGCCAGCCAACATCGACCACATGCAGATTCAGGTCGAAATTTCCGCCATCGC  
TTTCGCCGCGGGCAATGGAATCCAGCATTAAAGCCAATCACAAAGCCAATGCCAAAGCCAATCCCGATATGCAGAC  
CCGCTTTAAAGCAATCGCTGCCTTATGCCTAATTTTTAGAAAAATAATGATGACAATCGGCAGCATCACCGTAGGG  
CCGAGGTCGAGAATAAACGCATGACTTCTGAAAACATAGGTCACCCCTGTAAGATAGTCAGAATTTTATTTGTAATGC  
TTCGATACCGATACCAGAAATAAAGGCATGCCGTGAACAAACGGAATATCGCCAAAACACTACGATCCACTTTGGCAGTGG  
TGATATCAAATGCACACCATCCATATAGGTTTCTATTTTATTAACCCGACACTGGATTAATCAACAGGAATATTATGA  
TTCTGACACAACCTTTAATTTCTCCGCCCATCGTAGAGGTCGCAACCGCGCTCCGCAAGCGACAATAATCTTGCG  
TTTCATAAATAGTCTTTTTATTGTTACAGAGGGATTTATTCGTCTGAATCTAAAACATACTTTGTGAAGTATTCTTTA  
ACTGGGTTTCAGGAAGAGTGATTAGTGTCTCGACGATATCGGGCTGTTGTAACCTGCCAAATAAACAGCGTAAAAGTTT  
AATTGCTGCTCGGATTTTCCACAATCAACGCAATAACCAACGATACCGCCACGTCGTTATCATCATCCGCTTGTGAAA  
ATGAACTTTATTTGTTGGCCTTAACAGATAAATGGTGACGACTTAGCATGAATCGCTCACAAATGCGGTATTGCAATAG  
CGTGCTGCTCAAGCATTATCCCGGTAGGGAATTCGCTTCTGCGCAATTAATGCTGTGGCCAGGTATCATGAACCACA  
CCTTTGGCGAGCATCTCATTACCGATATGGGTTAAACTTCGCTACGATCGACAAAAGAAATTCGCTACGAACAAACAG  
GTTAGTCATATACCGTCTTATTCCGCACAGCCGTAGCGATAGGCGCGCAAAACATCATAAATTTTATCCATAATCAGCT  
GATGCGGTATTGCTGATAATTTCCCGGACTGAATGCGTTCAAATTTGTTGGGAAGATACTGACTAATCATGCCCAGTGGG  
ATGTCCACGCTTCAAGATTCACCATCATCGTTTCGACGCTATTTTAAATCCGACTATGCGGCCAGTAATAACGAATACG  
ATCCGACAGGCTGAACGAATATCCAGTAATGAATCGTTAAACCCGTACGATAATATTTTTCCAGTATTGCGGTTGCT  
CGAGCATCACTTCTTCAATTACCGCCAGGCAACCGCTGCGATTTTCAGGGGCGATAAGTTCCTGCTCAATTTGTGCCAGT  
GCAAATATCGCCTCGCGTAAAGCAAAGGTTAATGCGGGACCGACTTTCAATATTGCAAAGTGATCGCGGACTAATCCCA  
ATAAGCCGTCGGGTCTGTAATCGGTAGAATGTGCTTATAAACCATTCGGGTGTTTTCTATCCATTGCGCCAGCGGCT  
GCGCTTCTGCGGCTGATAATGGATAAATTTGCTGTGATCAAATTCACACCCGGCTGCACCAGATGGCAATCACACGT  
GTTAACGCCTGTGACCCACGGGCAATAAAGGCTTTTATGCGTACGTAAGTATTGGCGGCATCTTCAACATGGGT  
GATGTGACTGACTGAATGCGCTGGCTCACCGCCGGAACCGAACTTCGGTGCCAAATGACATAGTCAGTTGCTCAC  
GCTGGCAATCTGTCGCCACTTTCCGACGAAAGCAAAGCACAGCAGCTCGTTCCGCAACCGTTTTCTGGTGTCAACGGT  
ATGGGATCCCCGCGCAGGACATTGACGCATCAAGATGAATTTACTGAAGCCGGCACGAACATATTCCTTTACCAGCTC  
GACGGATTTTTCCATCGCCGATCCGATTTTTCTGCTGCCAGAGTTTGGCCCGAGATGATCGCCGCCGAGAATAATGC  
GTTCCGCTGCAAACCAACTTTATCGGCAATCGTAAAAACAAATTCGCGAAAGTCTGCCGGTGTCAATCCGGTATAACCG  
CCAAATTGATTGACCTGTTTACGTTGCTTCAATCAGCACTTTGCGCGTGTGTTGCGATCAAATGCCAGCGCCGCTTC  
GATAACCAACGGATGGGCGAACAGACTGAACATATGCCGATATGTTACCAGCTTTATGCCGGGCAATTAACGTTTTCA  
TGTTTTTCTTGTAAATGGCAGGTGCGTTATGCCCTGCCCTCGCAGCCACAATCGGCAATCACTTTGCTCACCACATC  
GCGCATTGCGGATTTAGCCGACTGCAAATAATCCCGGGGATCGGTGCGTTACAGGGTGTGCGGTGAGTAAATTTTAAACG  
CCTGCGAGAAGGCATTTTTAGCTCCGTTGCAACGTTGATTTGATATCCCCAGTTTGTGGTTTGTGAAATCCTTA  
GTCGATAACCCGACGCGCCATGCAGCACCAGCGGTAAGTTACCCACTGGCGAATGTTCTCCAGTCTAGAAAAATCAAG  
CGCCGGTGCCTGGCATAACATCCATGAGCCGTGCCGATGGCGACCGCCAGGGAATCAATTCGGTTGCCTCGGCAAT  
CACGCGCTGAGCGGGTGGTGTACAACGCATCGGCTTATTGACTTGACATCATCTTCTGGCCGCAAGTTGCCCC  
AGCTCCGCTCGACGCTGACATCAAAGCGATGGCAAAAATCCACCACCTTTTACCCGTAATATTTTGCGCAAAAGG  
CAAATGCGAGGCGTCAATCATGACTGAGCGCACGCCAGAACGAACCTTCTGAGCGATATCGTCAAATTTCTGTGTGATGGT  
CGAGATGAATTCAGTGGATGGTGTATTTGCTTCCGATCGCGCTGACCAGCGCAACAGATTTTCTGTACCAGCATGA  
GTAATGTGCCAGGCTTCCGGCGATGATGACCGGGCATGCAGGTTGGCAGCGGTTTCTACCACCACTTGATCGTTT  
GAGATTGTAATATTGAATGCCGGAACCGCATAACCGCCGCGCTGTGCGTTGTTGAGCATCTGCTTTGTCGATACCAGT

ACATTTTCATATCCTGTCGTTTGTTCGATTTCAAATAAATGAAATTATTTGTTTTAAATATCGAGATAACGATCA  
CAAAAACGACAATATGAAAATTATTCGAGGAGTAAAAGGCAAAAAACGGCCTCCCGATAGGAAGCCGTAGCAAAGTGC  
GCGTGTTCATGCGCGATGCGGTGTAACATACGTGGCAGTGCATGTAGGCATGATAAGACGCTTCAGCGTCGCATCA  
GGCATAGGTTGCCGGATGCAGCGTAAACGCCATTATCCGTCCTACGGGGTGGTGTTCGTATAAGGCGTATCAGGCGAT  
AGTAATTTTGTATCGAGATAAACGTCCTGCACGGCGTTAATCAGTTTCACGCCGTAGCCATCGATTTCTGAACGCTT  
TACGTCCAAGAATCAGCCCCATTCCGCTGCGCGTTTGTGATAACCGCAGTACGCACTGCATCGCTGAGGTCAGTTTCA  
CCGCCCCGAGCACCGCCGGAGTTTATCAACCCAGCCGACCCATATAGCAGTTAGTAACTGATAACGCACCAGATCAAT  
CGGGTTTTCGCTGGTCAATTTGCTGTAACACGATCGTCGGTGAACCGTAATTAATTGCTTTATAGCCGCCGTTATTTT  
CCGCCATTTTTTGTTCAGGATATCTGCACCGATGGTTGCCGCCAGATGGTTTGCCTGACCGGTACAGTCCGGCGAAACA  
TGGAATCAACGCCATCTTTCTAAAGGCGGAGTTACGCAATAGGCCACAGCACTGTACCATAACCGACTCGTGCGC  
ACGTTCAAAGCCGAGAAATTTCTTCAATCTGGCGACGTGACTCTTCGAGCCAAAATAGATAGTCGCACCAACCGCAA  
CCGCGCCCATGTTGAACGCTGCTCCACGCTGGCATAACGCGGTGATCGTAGGTATTCCGGTAACTTAGCGTCTCGTTG  
TGATTAAGTTTACGAGGAATGGAATGCGATGCGCATAACGCCCGATACCGACGCCAGCACGCCGTAAGTTGACGCCAC  
ACAGTTACAGCCGCTTCGATCGCCAGTTCAACAATGTTTTCGGGTCAAAGTAGAGCGGGTTAGCAGCAAATGAAGCTC  
CGCAGAGTGCTCAACGCCCTGGTCAACCGCAGAATAGAAAGATATCCTGTGCCAGCCAGACGCCCGGTGTTGTACAAC  
GTCTGATATTACGTAACACCGCTGGCGGGCGATTATTGTCAATCATTACCGGTCTACGTAGTCATGTCCGGGAGATA  
AAGCTGGTCAGAAGGAATTGTCATAACCGGTGCTGTAAGGTTGTCGGCGTCTTTGCCAAGCAACTGCCAATATCTG  
TCATTAATGCTCCCGTAAATTCCGATTGGATATCGGCTATGGATTGCTCTGCCCGCCTTTTGGGGCAATCATAATC  
CTGGTCTTACGGGCGAGTTTTCCATCTTTGGATGTTTTTACGCGTTTTCTGTTGGCTCGATTATCAGAAAAAATG  
TTAGCGCGTCAAGTTTTACCGCCAAAGGTATTTAAAGGTATTATTAAGTGGTATTGTCATCGCTACCTTACATTACC  
TGTCATGAAGGAATTAAGATGAAAACAACAGCAAAGCTGTCGTTATGATGTTTTGTTGAATGGTTTATCTGGGGCGC  
TGGTTTGTCCATTGTGGTTGTGGTTAAGTAAAAGCGGTTTTAGTGCCGGAGAAATTGGCTGGTGTATCGCTGTACCGC  
CATTGCGCGATCCTGTCCGAATTTGTTGGCTCCATCACTGACCGTTTTTCTCGCGCAAAAAGTGTGGCGGTAT  
TGATGTTGCGAGGCGGCTGCTGATGATTTGCTGCGCAACAGACCACTTTTCCGGGTTCTCCCGTACTGCTGGCC  
TACTCGTAACCTATATGCCGACATTGCGCTGACTAACAGCATCGTTTTGCCAAGTGGCGGATGTTGAGCGTGATTT  
CCCGCGATTCTGTCGATGGCACTATCGGCTGGATTGCTCCGGTCTGGCATGTGGTTTTCTGCCGAAATACTGGGGT  
ATGCCGATATCTACCGACTAACATCCCGCTGCTGATTACCGCCGAAGTTCTGCTCTGCTGGTGTGTTTGCCTTTT  
CTGCCGACACGCCACCAAAAAGCACCAGCAAAATGGATTAAGTTCATGCTGGCCTGGATGCGCTGATCCTGCTGCG  
CGATAAAAATTCCTCGTCTTTTTCTTCTGTTTATTCTGTTTGGATGCCACTAGCGTTCTATTACATCTTTGCCAAG  
GTTATCTGACCGAAGTTGGCATGAAAACGCCACCGGCTGGATGACGCTCGGCCAGTTCTCTGAAATCTTTTATGCTG  
GCATTGCCGTTTTTACTAAACGCTTTGGTATCAAAAAGGTATTATTGCTTGGTCTGGTACCCTGCGATCCGCTATGG  
CTTCTTTATTTACGGTAGTGCAGGATGAATATTTACCTACCGTTACTGTTCTCGGATTTTTGCTTACGGCGTAAGTT  
ACGATTTTTACTACGTTACCGCTTACATCTATGTCGATAAAAAGCCCCGTGCATATGCGTACCGCTGCGCAGGGGCTG  
ATCACGCTCTGCTGCCAGGGCTTCCGCGAGTTGCTCGGCTATCGTCTGGCGGTGTGATGATGAAAAGATGTTGCTTA  
TCAGGAACCGGTAACCGACTGACTTTCAACTGGTCCGGGATGTGGACTTTCCGGCGGTGATGATTGCCATTATCGCCG  
TGCTGTTATGATTTTTTTCCGCGAATCCGACAACGAAATTACGGCTATCAAGTTCGATGATCGCGATATTGCGTTGACA  
CAAGGGGAAGTTAAATGAAAACAGAACGATTCTCGGTGCTCTTATGGGACAGCGTTAGGGGATGCGATGGGGATGCC  
TCCGAGCTTTGGCCACGCAGCCGCTTAAAGCACACTTTGGCTGGATTGACCGTTTTCTTCTGGACCAAAAGGAGAATAA  
CGCGGCTGTTATTTAAACCGCGCCGATTACCGACGATACCTCGATGGCGCTGTGCTGGCGGATGCTTACTGGAAC  
GTGAAGGCAAGATCGATCCGGATCTGATTGGCGTAATATTCTGACTGGGCGCTGCGTTTTGACGCTTTAACAAAAAC  
GTACTAGGTCGACCTCGAAGATTGCGCTTAAACGCCATTCCGACGGTAAACCCGTTGCTGAACTGAAAACAACAGCGCT  
GACCAACGGCGCAGCGATGCGGCTCTCGCCATTAGTTGTTTCTCCGGCGGTGATGTTGATTCTTTATTGATGATG  
TAGCGCTGGGCTCCAGCCCGACCCATAAATCCGATCTGGCGGTTGACGGCGGGTAGTCATCGCATGGGCGATTTCTCGT  
GCCATTGACGGAGAAAGCTGGTCAGCGATTGTTGATTCCCTGCCTTCAATTGCGCGACATGCACAGCAAAAACGCATCAC  
TACGTTTACGCGCTCACTGGCGGCGGGCTGGAGATTGCGCTGAAAATTGTGCGCAATGCCGACGGCACCGAATCCGCCA  
GCGAACAGCTTTACCAGTCTGTTGGCGCAGTACCAGCACTATTGAGTCCGTTCCGTGCGCCATTGCGCTGGTTGAACTG  
GCACAAACCGACCCGAATCGCTGCGCCGCTCTGTGCGCTAACCTTGGCGGCGACACAGACACCATCGGTGCTATGGCGAC  
GGCAATTTGGCGCGGTTGATGGCGTTAACGCTATCGATCCTGCGTTAAAGGCGGAACTGGATGCGGTAATCAGCTTG  
ATTTCAACCGCTATGCCACAGCGCTGGCGAAATATCGTCAACAACGGGAGGCGGTATGAGCGCGCTCGATTACACACGC  
TGCTGCCTGAATTAACACGCGTCAGTCGGTGTGTCGTCGGCGCGGGTATTGACGTGATCGCCGACGCTTATGCC  
CTCCCTGGCGTGGGTGCGATATCGAACTGAAACAGCAGAGCGTTAACGTTGGCGGCTGCGCACTGAATATTGCCGTGGC  
GTTAAAGCGCCTCGGCATCGAAGCGGGTAATGCCTTCCGCTCGGTCAGGGCGTGTGGGCGGAGATGATTGCAACCGGA  
TGGCAAAAGAGGGCTTAATCAGCTGATCGATAACGCCGAAGGTATAACCGCTGGTGTCTGGCGCTGGTTGAGCCGGAT  
GGCGAACGCATTTTTATGTCATTACGCGGTGTTGAAAATCAGTGGAAATCGCCAGTGGCTGGCGGATTAACCGTTGCGCC  
TGGCAGCCTGCTATTTTTCCGGTTATCAACTGGCCTCGCCCTGCGCGAATTGTTAGTGGAAATGGCTGGAAGAGCTGC  
AAGACGTGACGCCGTTTATCGATTTTGGCCACGATTGGCGATATCCCGATGCATTACTGGCGCGGATCATGGCCTGT

CGACCTTTAGTGTGCTCAATCGTCAAGAGGCTGAGATTGCCGCCAACGTTTTGCTTTATCCGCAGAGATAACAACACT  
TGCAAGCAATGGCAGGAGAAATTTGCCGCGCGTTGATCGTTCGTCTCGATAAAGAAGGGCGCATGGTATTTAGCAACG  
ACGTTCTGGTGCATTCCGGCATTTCACGCAAGTTGTCGACACCATTGGGGCGGGCGACAGTCATGCCGGTGGCGTA  
CTTGCCGGGCTGGCCTCTGGTCTGCCACTGGCGGATGCCGTAATCTGGGCAATGCAGTGGCGTCTGGGTTGTGCGGCA  
TCGGGGCGGTGATTGTGCGCCAACGCGCGAGGAAGTACTCTCGCACAAAAACGTATAGATCGCTGCGACAGTGGCTA  
ATGCTGTACTCAATAGGCCGTTGCTGTTGGTCAAGCGCCACTTGCTTGATCACCAGCACCGGTATTTTGTATCTAAGT  
AATATGTGACTGAAACTCGGCATCCGGCATCCGGGCGCTAACGCGGGAACGCGTACGTTGTGGGTAATGTGCTGGCTGC  
GGAAATAGTCATAAAGTAAATCCCGATGGCATCAACATCATGAATTAATGCGCCGGAACCCACGATTCCTCAATCGAT  
ACCGTTCTTCATCGACATAGCAATACGCTTAAGCAAAAAGACATCACTTCTGCTTCGACCCGCCAGCTGCTGCGCGAC  
TTCTTCGGGACATTTACGACACGCTTGTAAACCATAGCGTATCGGGCTTTTTCCCGCGCAATACCACCTGCTGAGAAA  
AACCTCGCGCTTCTTCAACGAGTATTCGAAGATGTTGTTGATCTGCGTGCCGTAACCGCGCGAACGCGTACCACACC  
TCTTCTCCAGCGCTGCATCGCTTGGCACCCTAATGCGCGAAACGCGGTTAACTGACTTAAATCACGCTACCCGGG  
CAAAATATTGCCATGCTCCAGCACCCCGCTGCGCACGGCATTTTTTACCGTTTCGGCAAACCTAATAAAAGCGGCGTGT  
TATCCGCGCTAAAATACGCTCGTTAGTTGGGCAATCAGCTGGGTATGCGCTGTTCCATTTGCTTTTTCTGCCGGG  
GAGTCTGGTGGGAGTATACACTGCTTCTTATTTAAGCGTTTTCTTAATCCCATCAACGAATGCCTGCAACTCTCCAC  
CGTGCCATTAATACATTAATAATCCACCGACCTTATGATGCCATCTACCTGTCCACGGTCGGAATGCTGCCAGAAGCGCC  
AGGCCATTCCGTCATTGTCCGGACGACGTTGATAGTAGTGAGCCACCCACCAGGATATTCATTGAAATAGCCCGCCAGA  
TTGGTGTGATAAAAAACGGCTCTGAGTAAATAATCGGCTTTTTCCCGTACTTTTTTCGACCATTTTTAGCCACTGACT  
TACCCGCTTGGTAATTTCTTTGCGGATAATTTCCCGTCTTCTACGTCCAGCACGGCAGGAAATCGCCTTGTGAGA  
AATCCACCGTTTGCAGAAATAATCTCGCTGAAGTGAAGCGGATACCGACGGGGAGAAATAATGATACGCCCCACGCGC  
AGGCCATTTTCGCGGCTTAGTTGCCAGTTACGCGAAAAATAGGGTCCACCAGCTTTTCGCTTCCGTCGCTTAATAAA  
AGCAAATGTAAGCGGATACATTGTGCGCATTTTTTGCCACCGCTGCCAGTCGATCCGCTCTGCCAGCGCGAAACAT  
CTATTCCGTAATGGTGAAGTGGCAGGAATGCGAATAGCGAAAGATTTAACCGGGCGATAACCGTAGAAGTGGATGTAG  
TCTGTAATCTGAAGTGTGCGAATAGAAAAATTCACCGTCTGACGCGGATAAATTGCAACGATGGAAATAGCCCAAG  
AGCGCATAATAGAGAGGTGAGTTTTTTTCGACTGGAATTTCTAGCTGCATTGGTTTCATCCCTGAATGCAGTGCCAAA  
GGCTGACAATAACCAAAGCAGCTATAGTACGGTGTACCACCAGGCGTGAAGTGGTGAACCGGACCAATACCGTGACC  
AACTTCCAGCGTGTCCGCTGGGCTAACGCCGATGAAAGCCAGCTTTTTGCCTCTGTACGGTGTGAGCCAGTTTGTAT  
GGCGCGGGCGTAGTGCAGCAACGCCGACAGAGGTGACAACCGTCCGCTGGGTGTTTTGGTCATAATGCGCGGTGCG  
GTAACCGTTGTTACCCCTCGCGGGTAAACAGCCAGTCCGGGCTTTGCTCATATCCAGATGACCACCTTCATTAGCAC  
TGCGCCACAGCCATCGCCAACAGCGATCGCCCTTGTTCAGCATTTCCTGTTGCGTGGCGCGTGTGGCGCGTGCAGCA  
AGGCGGCGAGCTTCGGGCAAGTTTGGCGTTATTAATGAAACCTGTGGCAATAATCGACTGCGCAGCGTAGCAACCGCGAA  
GGTGAAGCAGCGGGTGCCTGTTTTGCCAGCATAACGGTGTGAGTACCAGTTTTGGATCTGATAACGTTGCAACCG  
TTCTGCCACCGCTTCAACAATATCGGTTTCCGCCAGCATACCGATTTTGTGGTATCGATTGCGACATCGCTGAACCCG  
AATCGAGCTGGGCGGCGAAAAATCAGGCTCAATGCGATACCCGACTGTACGCCACGGGTATTTGCGCCACCAGTGCA  
GTAATAACTGAGCAACCATAAGCGCAAGTGGCGAGAAGGTTTTAAGATCGGCTGAATCCCCGACCCACCAGTCCGATC  
AGTACCGGCAATCGTACAGCGTTAATCGTTTTCATGCCTGCACCTCCTGCGTCAATTGCCAGAGCGCATCAAGGAAATG  
TGGAACAAAATGCCTGGCCCTCGCTTCTGGCGACTGCGCGTTCCTCGGCTGTTTCATCCAGTGACAGGCGAGTGGCA  
CATTTTCCAGCGTATCGCTGGTAACGCACAGCAGGACGACAAACCGCGATAATGCACAGCCAGTTCTACCACCTTG  
GTCATTAACGGATCACACCGTGAATACCAATGATACGATGTCCATCGGTAACATAATCCATCTCGCCAGTGACCACGAC  
GATTGCGCCAGTTTTCCGTCGACGTTTGTGCGAGGGTATCGGTTAGCTGCGGCGTCAAGTGGTATCCACTCCCCGTC  
CGCCATTAGCAATGCCAGCTAATGCCATGATTTCCGAAGCATTACCACGTATCGCTGCCGGTTTTAAAGATAAAAAGTTCA  
TGACAAAATGGCGGCGATAATCGAGCGACCCACCCTACTGGATCAAGCGTCCAGGGTGTGAGAGCTTTTTGCTTG  
CTCAACGGCAGCACGCATCGCTGAGCGCGTGGCTGCGTCAAGTGTGCAACGTTAATCAACAAGGCACTGGCGATAGCCG  
CAAAGTACTGGCCTCTTGGTTTTGATAAACCATCGCTGGCGATGCACCGAGCGCCAGCAAGGATTGGCGGTAAAGGTT  
TGCAACCATCATTGGTATGAGTGCACAAGAGGGGAATGTTGGTGAAGGTAACGCGTGCAGATTGCGCTGA  
ACCCAGCAGTGCAGTTCATAGTTTGTCTGCTGCCATAACGTGAAGAAGCAATGACCTGGTGGTCCGTGACTTCCCTACG  
CTGGCATTATCCAGATCAGGTGATACGGTATTTCTCAGCCTTACGCGAGAAGGGCACCCCGAGTCGTTTGGTTGCGATG  
ATAAATCGCAGAGGAGGATGGTAATGTCCAGCGCACGCTTGAAGCAGGAAAAACGGCAGTTTTACAATCGCTTAAT  
AAATTTTGTATATGAATCCAGCACCTTCAGAACGACATCCAGATCTTCTCAGTTTTAGCTCATCCCCCTGGTGAA  
CGATGTGTTCCGTGAGTACCTTTAATCACTTCCCGCATCAGACGTTTACCAGCGCCAGGATAGCAGCAATCTGTTGT  
AAAATGACAGCGATTCTGCGGCTGCTCGAGCATTCTTGGAGCGCCACGCTGGCCCTGAATCTTACTGGCACGCGC  
TTTCACTTCTGTTTATCACGGATTGTATGAGACATGGCAACACCTGGTTAACAAGAATATGAAAAATCATAGCACTATT  
AATCTACTGGGGGTAGTATCAGGACTGGGGGGGAGTAGAATCAGATTGCCGAATTAATACTAAGAATTATTATCATGA  
CCGAATTTACAACCTTCTTTCAGCAAGGAAACGCTGGTTCTTATCCCCAGCGCCATCTTACTTGGTGGCTTCATGGC  
CTGGAACAGGGCACTCAAAAACGATGATGGCGGCTTTATCATCGCCATCAAAGGCACCATTAAACAAGCGGTGATGCT  
CGGACTGGCAGCAACTATTTGCATACCCGAGTGGTCTGGTTAATTGCCTTTGGCGGGATGGTGTATCAGCAAGCGCTTA



CTGCTCAATCAGCAGAACCCTGGCTCCAGCTGATTTCCGCAGTGATCATTATTAGCACCGGTTCTGGATGTTCTGGCGT  
ACCTGGCGCGGCAACGCAACTGGCTGGAGAATATGCACGGGCATGATTATGAGCATCATCATCACGATCACGAACATCA  
CCACGACCATGGACATCATACCATCACGAACATGGCGAGTATCAGGATGCCATGCACGAGCCCATGCCAATGACATTA  
AACGACGCTTTGATGGTAGAGAGGTCACCAACTGGCAAATTTTGTATTTGGCTTAACCGGTGGCCTTATCCCCTGCCCG  
GCAGCAATTACCGTGCTGTTGATATGCATTCAGTTGAAAGCCCTGACACTGGGCGCAACACTGGTCGTCAGTTTCAGCAT  
TGGCCTGGCGTTAACGCTTGTACCGTAGGCGTTGGCGCAGCAATCAGCGTTAGCAGGTCGCAAAACGCTGGAGCGGAT  
TTAACTCTCGCTAAACGCGCCCCCTATTTTTCCAGTCTGTTGATTGGCTTAGTCGGTGTATATGGGCGTACATGGC  
TTCATGGGCATAATGCGATAACTCAATCCTTTAGGCTTGCATGTTATCTTCAGCCAGGATGATTCTTAAATCAGCTATT  
TCCGCTGACTCTGCTCGCTAAGGATGCTTTTAGGGCATCCTTTCATTTACACTTTTTACGAAATCATGGGATCACTAA  
CAAAATATCGCTTGTGAGTTATATTGTATGGCAGGAAAGATATGCGACTGATATTACAGATCCCCAAAGTGGAGAGTTTA  
TGACCATTAATAAATAAGATGTTGCTGGGTGCGCTTTTGTGTTACCAGTGGCGCTGGGCCGACCAGCCACCGCGGGT  
TCGACCAATACCTCGGAATTTCTAAGTATGAGTTAAGTAGTTTCATTGCTGACTTTAAGCATTTCAAACCAGGGGACAC  
CGACTGGACTATATGGGTGGCGCGTACGTGTTGATCAGCGACACCGGAAATGCGAGACACCTTGTATTTTTATTATTAGCCAC  
TTGCTCGTCTGCTTTGTTATTAGTCGATTTTACGTTGATTAATGCGGTTGCCCTCCAGTGGCCAGATTAACTTTGTTT  
GTATCGTAGACGTAGTAACTGGCTGTTATCGGAATTGAAACCGTTGTATCTGTAAGTTTTGACTTCGCCGCAACTCCTT  
TAAATTTGATATCCTTTACTGCTGTTAGTGATATTTAAAAGTGTGACTGGCGAACCATTACTTTCAAGAATAAATCCTA  
CGCCATTATCTCCGCACCTTTCAGTATTGTGTTGCTGTTGGTTAAACAAGTCAGAACTTGATAAATACACCTGCATTTT  
CGTGATGTTTGATTTTGTGACCTAATAAATTTTTACAACGCAGAATAATATCCCCTTGTACTATTTATTGTTGCTTT  
GTTACCTGTGGCTGGTAATTGTGAAACGGGAATACTGTCTAAAGTAAATTAATAAATCGTCCGGTTTGCAGGTTGTGTTA  
TCGGGTTGTATGACAATGTCAGATTAAGGAATAGACACCTGCATTTTGTGCAATGCATTTCTGTAGCTATTTACACAT  
GCATCCCATGACTTGCACCTAATAAACACAGTAGAAATTGACTGCGGCCTCCCGCTGTCGATGATGAAGCACTGGA  
TAATGTCGCAACACCATTAATCATCACTGAACCGCCGCCCCCGCAGAAACATTCACTTTTGCATTACTGGCCGAGGTG  
TCACCGTAACTGAATAACCACTGGTAAACTGGTCTGATTATTTGACAACGTGATGTTGTTTTATTGGTCCATTAAAA  
TGTAATTTAATTTTATGGTATCGTTATAAAGTCCAACAATAATATCCGACGGGCTCATAGGGGTGATAGTATTTGACT  
TACGCATGACGAATCATAAATATGCTCATATGTCGCCATTTGTGTTGAGTAAGTGCAAAATCCCCCTGAACAACCA  
AGTTGTGCTGAACAGATAACTCACTATAACATGCCGCATAGCTCACAGGCATAACCATCATCATTAAATAAATAGCATT  
ATGCGAATTTCCATAGAACCACCTGACTATTACTGGCAAATATAATTTCTACTTTCATCAATCTTTTACCGAAGGTGAT  
TGTGCATGAAAGTCTTGTGCTTATCAATTGCCACATTAACCGATGGCGGTACTTTCATTGGTGCGAATAAATAACTGAC  
TTCCCTGGCCGACAACGCCAATATTATGACCATGGATATCATTGACTTCATAACCAACGTTAATGATTGCCCATCTGCT  
CTTAACGCTTTTATAAACCATGGCTTGCCTGATCGGTATCAAAATTAACCAGTACAACCGCGCCGCGATAAGGGGCGGC  
AATTTTCCGGTTGCCACGTAATTCTGCTTCGCTATCGCTTTCGCGACATCCAGCATCAGGTGATTTTCCCGATAAGGTG  
TCATTCCGTCGTATATCACCCTCCATTACGGTTTGTGTCGATATTTTGGCCATTGACATAAGCATCTTTAATTCCT  
GGCGATTATCACAGCAACGTTTCGGAAAGACGGTTCGCCAGATTAACGCCACCCGACCAGGCGACAATGCCCTGGA  
AACACTGGCTCCAGCCTGTCGATAAGTACTGACTGACTATAACTGCCATTCATGTCGCAACCGGCGGTTCCAGGTCA  
AATTCGCCCCAGCTGTCGTTTCAATTCCTGATGTTGATGACTCAGGTTGACACCATAATTGAACTGATCCCGACTCCCT  
ACTGTTCTGATAATCCCGTATTATTTGAGGCAAACCCCTGATCATCAAACGTGTTGAGTTAGACATATATATTTGCCG  
ACGAGGCGTCGAAACGTACTCACCCCAATCAAAGGGAATCGATAAAAAATTTAAACGTTTCTCTTCATGATGATTCT  
CGTCATAAGCTGGCTTGCAGGAGGATAGCTTATCCGTGCGAGGTTGTTGGAATAACTCAACTGATAAATCCTTACTA  
CTGCCGCTACGCCCCAGTAATCTCGCCATAAAGTACTTAATGACACAGACCCCAACCTTCTGGCAATGACTGGCTCAT  
ATTGGCGGAAAAGCTATTTTTGCGGCCAAAATCGTTCTGGTAATAATCGGCAATGTCATAGACATCGTTTTCATCACGGC  
GATAAATATCTTTATTGTTTGCCTAACGTTGATCGTTAAATGTCCGGTAATCACGCGACGAATAACGCCAGGCGCCGAGA  
CCAAAACGCGTCGACGTTTGGCTCACAAATTTGTTGTAGGCAATTTGATAACTTTGCCCGTCAAACACATCGCCGTTGTC  
TTGTTTACTATGCGACTTAGTGGCATCGACGAAATGGCACCATGCGTGTATTCCAGCCAGCCCCAAAGTAAACGCGT  
AATAAATATTCGCGACCATCGAGCCACCATACAGCGTCAATAAATTATTAACCCATACTGATAACCCGCTGGACAAAA  
TCACTTTGTTTGTGCTGCCCCCTCAATATGGCTACGACCCGCGCTAAATCATATTTGACACGCGGGTTGCAGCATATT  
TGGCACCCTGCATAAGGCACCAGATAGGTGTTACCAGCGCTCCGCTCTTTCAGCTGACATCAAGATCTGCTCCAC  
CACCGGCAACTGCAATCTGTAATCGGAACGGCCAGGAGAACCTCTTTCGATAAACCAAAAACCATCTGTTCA  
ATAGTTACCAGCGGTTACTCTGAGCAATCCCCTGCACCCGTGGCGTAAAAATTTGTTTTCGAGTTAGGCAACATCTGCAT  
ATCAGGAAACAACCGCACACCTCTGAAGCGAACAGAATCAAAAATATCGCTTGTGTACATATCACCACGCGAAGCG  
TGCCGAGAAGTTGGGCAATCCACGTTCCAGATACAGGATTTGCTTTTCCACACCCCTGGATTGTTATTTGTTTACTG  
AACTGGCATCAGAATGCAGTTGCCACCCAGTAAATTAACCCGCTGTTAAACGTACATATGACTCTTGTATTACC  
CGACGCTTTATAGTCGCTGTAATACTGACTCAGATAAATAAGAGGTATAAAACGCATTAATACCCCGCTCCAGTTTTCCG  
GTGGAACATAGCCACTTTCCAGTCTTCCACCCAGGCTGCGGGACACTGAAATCGAGACGAAAAACCCCGATATCCAG  
GTATAGCTCCACCTGAACAAGTTGCTCAAATGTTAAACATTGCTTACCCTGGCGAAGTTATCGCTATTAATGCCTAA

CCGCTTGATAACTTCTCTTGATAAACATGTTTCTTGCGGGTGTCTTTAACAATAATCTCATATTTCCCGGCCATTGCT  
TATTGACATAAATATCGATGCATACTGCCCCGGTAAGGGTGTATTATCATCAAGACGAATATTTGCAACCTGCTGGTCT  
TTCATTCCACCTATCATAAAATGGGTATCAAAGTTTCTTTCAGCTGCATAAGCTTCAATGCCGAGCAATAACGCTACGAT  
TGCTGATGCAAGTGGGGTCACTTCTCAACATAGGCAGCTCCTGCAATTAATTTTTGTCACATAATAGTTGCCATGGTCAT  
CGATAATGGTCAGATGCCAGTTATTTGCATTATTACTTTTACATTAACTCTGACTTTCTAAGGGGGCAATCATAATA  
GTTTTATAATTGACTTTGACATTATTAGCTTTGACATCCGAAATCGTCAACCAATTAGCTGAGTCATTTTTTATCACCAA  
ACCATTGCCACTGCGATTTACCAGCAATTTTTAAATGTCGCTTATTTACCGGAGCAATACCCGCTGGCCGGTAAAACA  
ACTTAATTCTGTTTTGCATCGAACTTCAGTGCATTCTTACCTTCTTGGCTGGACTATTTGGTGGAAATATCCAGAACA  
TTCAGATAAAAAATGCTTTCTTTATTAGTGGGCAGTTTATTCCGCATAATTTTGATTTTTACTTGGCTGCCGGAAATTTGC  
CCCTATTTTTGCCACTGGTGGCGTAAACATGAAAGGAACCTGAATTTTTCTGGTGGTAATGACGTATCGCCATCATCAA  
TCCACGCTGCAGCAGCGAAGAACGGTTCCCTGGTTCATCACTGCACCATCACTTCTTTATTTTCTGCCGGTAAATA  
ATGCGCGTCCCGTAGATAACAATTCGGCATGTGCAGGAAGGACCATAGAAAAATGAGTAAAGATAAATAATCCTTTCAT  
TTAATGCCTCTAAATTAAGAGCCGCATGGGATAGCGCCATGTTTATTACCTGGAGAAACTTACAATTTTATTTAT  
TAATCCTGCGCCACACGCATAACCAGAGAAGATAACACATCACCTGATTGACTGAGTTATCTGTCAGTTTCAGGTATTT  
TGCTTTAAACGGAATAGCATTTGACCTCCGCTGTTTTATAACTCTCAATGTTAAAAGGTGCAGAAACATCCAGGACAT  
CGTGTTATACCTAAATAGAGATAGTAACCCAGGTATCGTTGTCTACTGGCTATCGCCTTATCGTTACCCTTATTTTTA  
TCGTTGGTAATCAACGAGAGTTTTACACCAGCAACTCTTTTCGGGACGTAATTTTTAACATGCTGCTGTTTACCCGAC  
TGATCATCATAGGTAGAATATTTAGCTTTACCTTCAAAGACACTGGTTGGTACAGTCGGCATATTAATACTTACTGAAT  
CACCACCCGCTTCAATTTACACGGAGATTCTGCAATATTTCCCTTAAATAGTTAATGTTCCGGTATCAACGTCTGCAGCA  
AATACTCCAGCGCTCATAAAAAAGAAGAAAAGACAGCGGCAGCAATAATTGAACGTTTCATAATATGTTCTTAAATAAA  
ATTTATTTTTGGTTGTTAAGAGTCTGTATCTCTTGGAAACAAATTTCTCACATCAAAAAAGTTGCCGCAATGTAACACA  
TTGTTTTATTGATTTAAACAAATTAACCATTGCAATATAAATACAAAAATATTTAAGAGTATTAATACTTTTATCGCAT  
CTATCAATTAATGTAGATTTATGTAATGGTATTGTTGATATCAATAAAAAAGCCGAAATCATTTATATAAATGATTTG  
GCTTTCTAAATGCAATTAATAATCAGGTTGCCAAATTAATCGTAGCGATTTAACACGATTGACGTTTGTATCGCTACCT  
GCAACAACCACTTCTGTCGTTACACCTTTGACGGCGAAGAAAACAGATGACGGGTGTCAACATTATACGTTAACTGACC  
ACAATGCTGTTGAGGTTGACCATTAACCATAGCCATACTGCATGTTGGGGACTGATCCTGCCATTAATCGTAATGTGG  
CAGTCTCTGAAGAGAATGCCGGAGAAGCCAATCCATAGGCAAGAAAATAATCCTGACAGCAATACTTATTTCATTGAA  
CGTTATCCCTGTAGTAAAGTTATGCCTGGATAGAATGAGTGCATAACAACTATAGCTGTACATCCACTACACAGCCAC  
GAAGGATGATAATGAAGCATTGCTGTATGATCAATCGACTTTGTAGAGTTTCGGACGAAGTCCGCAGAAATATTCGAG  
TATTAATAAGTTCATTAATGCGGCAAAAATAACACCCGCATCAATGTAACATCTCTGCGGTGTATGAAGAATAAC  
CAGAATGGTTAATAGGCGTTAGACCGCGCGAAGGAAATCTCGCCTGGAATGACTTCACCTGCCAGTAGAGCTGAGCTG  
CAACGCGGTACGCCAGCTGGCGGTAGATAGCGGTAAATTCGCTCTCCGGACGGCTGATAACCGTTGGCGTACCTTTATCG  
AGATCCTCACGTAAGGAGATGTGTAACGGCATCTGCCCCAGCAGCTGTGTATGGTATTTTTAGCCAGTTTCTCTGCACC  
ACCGGTACCGAAAATCGGTTTATGGTACACAGTTACTGCAATATGCACACTCATGTTCTCGACAATACCGAGCACC  
GAACCTCGACTTTCTCGAACATCAATGCTTTTTTTCGCATCGATCAGCGCGATGTCTCGGGGGTGGTACCACGACT  
GCACCGTTACTGGAATGTTTTGCGCCAGCGTCAATTGAATGTACCAGGTGCTGGCGGCATATCAAGCACCAGATAGT  
GAGATCCGGCCACAAGTTTCTGCAACATCTGCATTAACGCCTTGTCTGCCATCGGTCCACGCCACACCATCGCATTG  
CGTCAGTGACCAGATAACCAATTGAATTGGTTGCCAGGCCATGAGACATAATCGGTGCCATATGGGTACCCTCGGGCGAA  
GTTGGACGCTGATTTTTCTGCGCCCAACATTGTTGGATTGATGGCCGTAGATATCGGCGTCCAGAATCCGACTTTCCG  
CCCTTCTGCCCGCAGCGCAGTGCAGGTTTACCAGGTTTACCAGGATTTACCCAGCGCCTTTACCAGGAACTCACCCGGA  
TAATGTTCTTACACCGTTAATTTCCCGGCTGATTTCCACGCGTTTCAGAGTGGCTATGTTATGCGACAGTTTCCAGTCG  
ATAGCTTTCCGCCCCGGTGTGCGCAGCAGTTCGGCGCTACATTGCTTTTTAACTCTTTCGAACGCGCTATGCCAGACAAA  
CGGCATAACAGTTCCACATGCAACGTGTCTCCATCCAGGCGACATGGTGCACGCTTTACGCGTGGTGGGTTATGCT  
TCAGGGTTGGGTGCTGAAAATTTGGCCAGTGTCCCGGCGACATTGCGCGCAAGGCTTCTGGTATTGTCCTGGGATTGT  
TCGTTTCATCCCGACTCCTTTTTGTATAGATAAACCATCAGCTGATAGTTTACCTGAAGAATATAGAGAAGTACTTACTT  
AACATTTTCCATTTGGTACTATCTAACCCTTTTCACTATTAAGAAGTAATGCCTACTATGACTCAAGTCGCGAAGAAA  
ATTCTGGTGACGTGCGCACTGCCGTACGTAACGGCTCAATCCACCTCGCCATATGCTGGAGCACATCCAGGCTGATGT  
CTGGGTCGGTACCAGCGAATGCGCGGCCACGAGGTCACTTCTGCGCCGACGATGCCACGGTACACCGATCATGC  
TGAAAGCTCAGCAGTTGGTATCACCCGGAGCAGATGATTGGCGAAATGAGTCAGGAGCATCAGACTGATTTGCGAGGC  
TTTAACATCAGCTATGACAACTATCACTCGACGCACAGCGAAGAGAACCGCCAGTTGTCAGAACTTATCTACTCTGCCT  
GAAAAGAAACGGTTTTATTAACAAACCGCACCATCTCTCAGCTGTACGATCCGGAAAAAGGCATGTTCTGCGGACCGTT  
TTGTGAAAGGCACCTGCCGAAATGTAATCCCCGGATCAATACGGCGATAACTGCGAAGTCTGCGGGCGCACCTACAGC  
CCGACTGAACTGATCGAGCCGAAATCGGTGGTTTTCTGGCGCTACCGCGGTAATCGGTGATTCTGAACACTTCTTCTTGA  
TCTGCCCTTTTACGCGAAATGTTGCAGGCATGGACCCGAGCGGTGCGTTGCAAGGAGCAGGTGGCAATAAAATGCAGG  
AGTGGTTTGAATCTGGCCTGCAACAGTGGGATATCTCCCGCAGCGCCCTTACTTCGGTTTTGAAATTCGAAACGCGCCG  
GGCAATATTTCTACGTCTGGCTGGACGCACCGATTGGCTACATGGGTTCTTTCAAGAATCTGTGCGACAAGCGCGCGCA

CAGCGTAAGCTTCGATGAATACTGGAAGAAAGACTCCACCGCCGAGCTGTACCACTTCATCGGTAAGATATTGTTTACT  
TCCACAGCCTGTTCTGGCCTGCCATGTGGAAGGCAGCAACTCCGCAAGCCGTCCAACCTGTTTGTTCATGGCTATGTG  
ACGGTGAACGGCGCAAAGATGTCCAAGTCTCGCGGCACCTTTATTAAGCCAGCACCTGGTGAATCATTTTTGACGCAGA  
CAGCCTGCGTTACTACTACACTGCGAAACTCTCTTCGCGCATTGATGATATCGATCTCAACCTGGAAGATTTTCGTTACG  
GTGTGAATGCCGATATCGTTAACAAAGTGGTTAACCTGGCCTCCCGTAATGCGGGCTTTATCAACAAGCGTTTTGACGGC  
GTGCTGGCAAGCGAACTGGCTGACCCGCACTGTACAAAACCTTCACTGATGCCGCTGAAGTGATTGGTGAAGCGTGGGA  
AAGCCGTGAATTTGGTAAAGCCGTGCGCGAAATCATGGCGCTGGCTGATCTGGCTAACCGCTATGTCGATGAACAGGCTC  
CGTGGGTGGTGGCGAAACAGGAAGGCCGCGATGCCGACCTGCAGGCAATTTGCTCAATGGGCATCAACCTGTTCCGCGTG  
CTGATGACTTACCTGAAGCCGTAAGTCCGAAACTGACCGAGCGTGCAGAAGCATTCTCAATACGGAACGACCTGGGA  
TGGTATCCAGCAACCGCTGCTGGGCCACAAAGTGAATCCGTTCAAGGCGCTGTATAACCGCATCGATAGAGGCAGGTTG  
AAGCACTGGTGAAGCCTCTAAGAAGAAGTAAAGCCGCTGCCGCGCCGTAAGTGGCCGCTGGCAGATGATCCGATT  
CAGGAAACCATCACCTTTGACGACTTCGCTAAAGTTGACCTGCGCGTGGCGCTGATTGAAAACGCAGAGTTTGTGAAGG  
TTCTGACAACTGCTGCGCTGACGCTGGATCTCGCGGTGAAAAACGCAATGTCTTCCGGTATTCGTTCTGCTTACC  
CGGATCCGAGGCACTGATTGGTCTGACACCATTATGGTGGCTAACCTGGCACCACGTAATAATGCGCTTCGGTATCTC  
GAAGGCATGGTATGGTCCGCTGGCGGGAAGATATTTCTGCTAAGCCCGGATGCCGGTCTAAACCGGGTCA  
TCAGGTGAAATAATCCCCCTCAAGGCGCTGCATGCAGCGCCTTTCTTTATAAATCCTAAAGTTGTTTTCTTGCGA  
TTTTGTCTCTCTAACCAGCATAAATACTGGTAGCATCTGCATTCAACTGGATAAAAATTACAGGGATGCAAGTGAAGAC  
ACTTTATCTATCAGGACGAAAAATCACATAAATTCAGGGCAGTTGAGCAACAGGGAAACGAGTTGCATATCAGTTGGGGA  
AAAGTTGGCACAAAGGGCAAAGCCAGATAAAAAGTTTTTTCAGATGCTGCGGCAGCGGCAAAGCGGAGCTTAAGCTGAT  
TGCGGAGAAGGTGAAGAAGGGGTATGTGGAGCAAGCGAAGGATAATTCTTTGCAACCTTCCCAAACGGAACGGGCTCTC  
TCAAGGTAGCGGACTTATCCACCATTATTCAGGAACAACCTCTTTCTGAGCAGAAACCGGTGCGCCTGACAAAAATACA  
GATGCTGTTTTACCGTGGCTGGCGAAAGATATTGCTGTCGTTTTTCCGCCGAAGTTGTACACACCACGTTAAGTCATCG  
CCGCTTTCCCGGAGTTCTGTTAGCAAGCAGACAAATGCCCAATTACGTCGCTTAGCCTGTAGTGTGTCGCAACGGG  
ATAATAAACAGCCACATTTGACTTCAGCGCCTGTTCTTTAGAATGGCAAACACCGTCCGCCAGGCGATCAGTCAGATC  
GACGGCCTGAAAAACAACACAGTTACCATCACCAGTAATGGCTGTAACCGCACTTGAATGAAATGCACAAGATATAA  
AGTGGCTGAGGATGTTATGGATCAGATCGTCCAGGAAGCGGTCTGGAATATGCTACTGATGTAATAACACCTTCAAC  
AGATTGATATTGAATGGGATTATGCGAATAATGTCATTATTATTCTGCCGTCTGGCATTGCACCTAGCTACTTGGAGCAA  
TATTCCAGATTTGAATGACGCTACGTAACATTTATCACTGACGGAAGAGTCTCTCTGGCAAAAATGTGCACAAAACT  
TATTGCCGAATTCACATATTCCAGAATGGCGGCAACCATTAATTGCTTTGTTATTACCCGAAAAACAGAAATTGCAC  
ATGAAATTGCCAGCGTCTACTGGGGCAAAAAAATACCCTCGTTGAGTGGTTAAAAATAGTGGCGACTGATGAGCAC  
ATTCTTGCCTCATTAGAAAAATATCACGAACCATATGCCATTTTTGATGATTACTATTGTGGTGGCATATGGTCAGCCAC  
CGTATTACAGGAGCAAGGTGTTGACGCCCTGCCCGATTTGCTCCCTATGCCGCAAGTACTGCGCCGATGTGTTGC  
GTCATATCAATCATCCGTTGCACTGACTGCTTATACGTGTAGCCGGGCAAACTAAACGCTGTCACGATCGGATGACG  
AAAGCCATTGCTGCGTCCACATGCAGCAATGGCGGCACTGACGGAACCTTCTGGGCAAAAAGAGAGAACAGTTGGCG  
CATTATGCTAATGACAATGCTTATCTCACAACCAGCACTGGCAGAACAGGTCATTCCCTGGCTCTCGACACCCGAGTTG  
CCGACTGAAATCATGCCAGCAACACTGACACAGCCCTCAAACCATGCCAGCGCCGATCTACTGCCAGCCGATGATGTC  
TCCCCTCCCTGGCTTTGAAAAAGAAAAATCGCCGATTCGGTCTGGATTAGGCCATTAGGCATTAGCCAACTG  
TTATCTGACAGAAGAAATCAGTAATCACTTTTGGCGAAATATATCTGGTATTCAAACACATCACGGTTAGCCATGAAG  
AAAGTACTACCAACCTGTTGGCAAGGATGGGTTTTCAACGACGGATCGCTGGTACATATATTAAGCTCCCGAAGCGGTA  
GTTGAGGCATGGCTAAATGAAGATTCAACCTTACTAAGTGAATTTAAGGTGTTTCATTACCTACCGGGCATTATTG  
GCAGTTGGGATTTTGAACAACATTGCCGCTGGAGAAAGCAGTAAAAGCATGGAATGCCCTTACCCTATCTCCACATACCG  
ATACCGAATACTCCATGTTACATTTTGGACTCAAAGGGTTACCTGGGTTAGTAAACTCACTTGCACGCTATCCACAAGAA  
GCCTTGCCATCACGAATTACTTCGACGAGTGGCTGCTGCTGCCGTCGCCGTCCTTCAACAACTGAAAACGCT  
ACGCGAAAACGCCGCTAGCTGGCTGTTGAAATACCCGGAACATGCCCTTACCGGCTGCTGCTGCGGCGCTCGGCAAAG  
CCGGTGAAGCAGGATAACGCCCGCGCTGCCTGCGTATGCTTACCGAAAACGGTCATCAGCATTACTGCAAGAAATC  
GCCGACGTTATAACCAGCCGGAAGTAACCGATGCGGTGAACGCTCTGCTTGCCTCGATCCCTTAGATAATCACCCGAC  
AAAAATCCCCACTCTCCGGCTTTTATCAGCCATCGCTCTGGACGCGCCGGTATTAAGCAAATGCCAATCACTGC  
CAGATAGCGCCCTCTCCACCTCGGTGAAATGCTCCGCTTCCCTCAGGAAGAGGCTCTGTATCCGGGATTATTGCAGGTG  
AAAGACGTCTGTTCCGCGACTCACTGGCGGGATTTGCCTGGGATCTGTTTACCGCTGGCAGACCGCTGGCGCGCCGTC  
GAAAAGAGATTGGGCGTTCACTGCGTTAGGCGTTCTCGGTAACGATGACACCCGCCGAAACTGACGCCATTAATACGCG  
CCTGGCCTGGTGAATCCAGCATAAACGCGCCACCGTTGGGTTGGATATTCTCGCTGCTATCGGTAGTGATATCGCCCTT  
ATGCAGTTAACGGCATGCCAGAAACTGAAATCAAAGCATTACAGGAGCGGGCAAAGAAAAAATGCCGACATTGC  
CGAGAGCCGCAACTCACGTGGCGGAGCTTGAAGATCGGGTTAGCACCGGATCTCGGTCTGGATGATAACGGTTCCGCTG  
CTGCTGGATTTTGGCCACGGCAGTTACCGTCAGCTTTGATGAAACCTTAAAACCGTTTGTGCGTGATGTTTCCGGCAG  
CCGCTGAAAGACCTGCCAAACCGAACAAAAGCGATGATGAAACGCGGGCGAACGATGCGGTTAACCGCTACAAATTC  
TGAAAAAGATGCGCGTACCATCGCCGCCAGCAGGTAGCAAGGCTGGAATCCGCCATGTGCTGCGCCCGCTGTGTC

CTGAAAACTCCAGCTCTTCTGTTGAGCATCCGCTGGTTCGTCACCTTAACCCGCCGTCTGATTTGGGGCGTTTATAG  
CGCCGAAAACAGCTACTGGCTTCTTTCGCGTAGCAGAAGATAACAGCTCCAGCACCGCTGACGATGATCTTTTACCC  
TGCCGGAAGGCATATCTCTATCGGCACTCCTCACGTTCTGGAATATCACCAACGGATGCTGCCGCTTTGGTCAGCTT  
TTTGCCGACTACGAACTGCTACCACCGTTCCGCCAGCTCGACCGTAACAGCTACGCCCTGACAGAAGCCGAGCGCAATGC  
CAGTGAAGTACCCGCTGGGCGAGCAGAAAAATGCCGAGTGGTCCGGTTCATGGGGCTGGCAATAAAGGCTGGATAAAGG  
GCGAACCACAGGATGGAGGCTGGATCGGATGGATGATCAAACCTTTGGGTCGCTGGTTCGTTAATCATGGAATCGATGAA  
GGCTTTGCGGTAGGCATGTCGCCAGCCGAACTCAGCGCTGAGCAGCTCTTAAGCAAGCTGTGGCTATGGGAAGGCAAAGC  
AGAAAGATATGGCTGGGGGAGTAATTCAACACAGGAAGCGAGTTCTCCGTAATCGATGCCATCACCGCCAGCGAGCTAA  
TTAACGATATTGAAGCCCTGTTTGAATAAGGAAAGAGCATGGACAAGGAATTACCGTGGCTGGCGGATAACGCCAACTG  
GAACTGAAATATAAAAAGGCAAAACGCCGCTCAGTCATCGTCGCTGGCCGGGCGAACCAGTGTCCGTTATCACTGGAAG  
TCTCATCCAGACATTGGGTGATGAATTGCTACAAAAAGCTGAGAAGAAAAAATATTGTCTGGCGTTATGAGAATTTTT  
CACTGGAGTGGCAGTCCGCCATCACGCAGGCCATCACTTGATCGGCGAACACAAACCTCAATCCCGGCCCGGACAATG  
GCGGCGTAGCCTGTATCGCGCAAAATGACAGCCAACAGTTGCTCGACGAAATCGTCCAACAAGAGGGGCTGGAATATGC  
GACTGAGGTGGTATTGCACGCCAGTTTATTGCGCGGTGTTATGAGAGTGATCCTCTGGTAGTGACATTGACAGTATGC  
ACGAGGATTATGGCTATGGTTATCGCTCAGAAACCTATAACGAATTCGATCTCCGACTGCGTAAGCATCTCTCTCGCA  
GAGAAAAGCTGCTGGCAGCTTGGCGCCGACAACTATTGCCGCACTACCAGGAATAACAAAGTTCCGCCCTTTTTAT  
TGCCTGATCCTCCCGAAAAACAGAAATAGCCAATGAGTTGGTAGGCCTTGAATGCCCGGAACTCATTTTTATTCTA  
AGGAGTGGTTAAAAGTTGTTGCTAATGACCCACAGCGGTGAGAAAACTCGAACACTACTGGAGCCAGGATATATTTAGC  
GATCGAGAAGCCAGCTACATGTCGCATGAAAACCACTTCGGCTACGCGCCCTGCGCCGCTTTTTGCGGAAACAAGGACT  
GGCAGCCATTCGCGCCTCGCGATGTATGCCATAAAGAAGATTGCGGCAGTCTGCTGGTACAAATTAACCATCCGCAAG  
TCATCCGCACCTTGCTACTGGTGGCTGATAAAAAACAACCCAGCCTGCAACGTGTAGCTAAATACCATAAAAACTTCCCC  
CATGCGACGCTCGCCGACTGGCAGAAGTGTGGCTTAAACAGAACCACCAGCCGCTGGTTATCCAATCATCGAAGA  
CAAAAAGCTGCCTGCACAGCAAAAAGCACGCGATGAATACTGGCGTACGCTGTTACAAACGCTGATGGCATCGCAGCCAC  
AACTGGCAGCAGAAGTATGCCGTGGTAAAGTACTCAACCCAGTCAGTGTGAAGAGTTATTTATCGGCACCGCCAAA  
CCGTTATTGATGGCACCAGATAACAGCAATCTGCCAGAAATCCTCGTTTACCACCGTGGCGTAGTAAGAAAAAATGAC  
AGCTCCACGCTTGTATTTGGCACCCTGAAATTAACCTCGCAAGTTTACTGGCAACCAGGCGAACAAGAGAGGCTTGGCG  
CCACTGAGCCTGCCGTTATTTAGCACGGAATCTTTCGCAACGCATGGAACAAAAAAGTGACAGAGTTGATTACAG  
GAACTGGGTTTTGGGGATGATGTATGGCTGTTTCTGAATTATATACTCCCGGAAAACCTGGATGCTGCACGAATTCCT  
CTTTGTTAGTGGCATTACTACCAGGGCGGGTTGAAGAGATCTGAATGGCTGGAACCTCCCGGAAGCAATTAGCAG  
AACAGGCGCTCCGAGCGGTACATAGAGCGTTAATTAACATATGGGAAAATGACAACACTACTCACATTATCGTCCGGAA  
AAGAGTGTCTGGAACCTGTATTTATTGGCACAGTTGCCGCTGAGATGGCTTTGACCTTCTGGCTGCGTATCAATGAGAA  
AAAGCATCTGTTGCGGGTGGAGACTATTTTCTCAGTATCCTCGGATTGGATGCGCTACCAGGTCTGCTGTTGGCTTTTT  
CACATCGTCCAAAAGAACATTTCCGTTAATTTTAAATTTGGCGCAACAGAACTGGCGCTGCCTGTTGCCACGCTGG  
CGACGTTTTCGCGGCGCAGCGTATCTGGCTCGCCAGTGGATTTTACAATGGCCGGAACATACGGCTAGTGCACTTATCCC  
TCTTGTCTTTACAAACCCAGCGATAATAGCGAAGCCGATTACTTGCCTGCGTTTACTGTACGAACAGGGACATGGCG  
AATTGCTACAAACCGTGGCAACCGCTGGCAGCGTACAGATGTATGGTCTGCCCTGGAGCAGTTGCTTAAACAGGGTCCA  
ATGGACATTTACCGGCACGATTCCAAAAGCCCTGATTTCTGGCATCCGCAATGTGGTCCAGGCCGCGCTTATCAC  
TAATAATCAACTGTTACCAATGACGCTCTGAAATATCGGGCAAAATGCTGCGCTTTACCAGGGGGGACGTTTTTATA  
GCGGGCTGGAACAACGAAAACGTTCTGCCAGCCACAAACGCTGGCAGCTTTTGCCTGGGATCTCTTCACTGCGTGCCA  
CAAGCTGGTCCCCCGCAAAAAGCAAACTGGGCAATTTCTGGCTTAAAGTCTCTTTGGTGACGAAAGCACGCGCAGGGATCT  
GACGACACAGATCCTCGCTGGCCACAAGAAGCAAATCTGCCCGTGTCTGACGCGCCTGAACATCCTTACCCTGATGA  
ATAATGATATGGCGTATACAGCTGCATCATATATCGCAACGGGCTAAATCCCGCCCTTACGTGATAACGCGGGGAA  
TTTCTTACGTTGGTGCAGAAAAATCGCGGGCTAAGCCAGGAAGAGCTAGCGGACAGATTAGTCCCAACCTGGGCTTGA  
TGATCCGAGGCGTTGAGTTTTGATTTTGGTCCCGGCGAGTTTACCGTTCGCTTCGATGAAAATCTCAACCCGGTTATCT  
TTGATCAGCAAAACGTTCCGCAAAAAGCGTTCCCGTTTTGCGCGCGATGACGATCAACTGAAAGCGCCGAGGCACTG  
GCCCGACTAAAAGGGCTAAAAAAGATGCTACTCAGGTGAGCAAAAACCTGCTCCCGCTTGAACCGCCCTACGTAC  
CACCCGACGCTGGTGCCTGGCAGATTTTCACTCTGTTTGTAAATCATCCCTTACCCGCTGGTTACCAGCGATTAA  
TATGGGGGTTTTATCCGGCAATGAACCGGTTGTTTACTCAAAGCCTTTCGTGTGGCCGAGAGGGGGAGTTCTGCAAT  
GCGCAAGATGAGCAATGACCTGCTGCGGACGCTGATTGGCATTGCCACCGTTAGAAATGACAGCAGAAATGCG  
CAGTGAATTTGCACAGCTTTTTGCGGATTACGAAATATGCCGCTTTTCCGAGTTGTCGCGCCGACGGTGTCTCA  
CACCTGACGAGTCAACAGTAACAGCCTGACTCGCTGGGAAGGTAATCCGCTACCGTTGGCAACTTATGGGAATGCGA  
TACAAAGGCTGGGAGTCAAGCTATGAGGACGATTTGTCTATAACCTGGGTGAGTACCGGCTGGTCTTAAAGTTTTACC  
CGTTTTTAACTACTACAATGTTGATAGCAAAGCGCTAATGAGCTTCCGTTCTTTCGAGTGTACCGTGAATAAATCCG  
TCACTTTTGGCGAACTTGATGTGTTTGAATTTGAGTGAGGCGTTAAGCGCACCTGACGTCATTTTCCATTAACACAGCG  
GGCAGTGTGCAACTGCCGTTATCAACACGACTTACCAGCGGGAAAGCGATGATCGTCAAAAAGAGCTGGTTGCTAT  
TTACGATTATGAGTCCCTGTACTGAAGATCCGTTTTCTTACAGCTTGGATCCATAAATGCTCTGAATTTTACAG

GTTCCGTCTATCGACTGGAGCGATTCCGGCTACGTCCAACATTTTCATCAACGTGATCGAGAAGATGCTGACCCGCTAATA  
AATGATGCGTTGATTTATATAAGAGATGAGTGTATTGATGAGCGGAAATTACGAGGTGAATCACCTGAACTGTAATAGC  
AATTTTTAATCGTGAACACAGAATATATCAACCAAGAAATAGAATAATATACTCTAAATAATTCAAATTTGGTCCGATC  
CGCGCAACGTCCAATGGCCTGGATTATAAATCTCATTATCTTAATTGCAACGGGGTCCAGCCGTGGTTATAATTCGTT  
CGTTGGAACACGATGTTGCACAGGCTGTGGTGTAGCCTGAAAATAGTAAATAAAAAGAACCTGCCTCACCAGCAGGTTT  
TTTTATTTACTGTGATCTGCTTTCCAGATATTTTTCGCTCAAACAATAATGCGCCAAACATTTATTGCGCGTAAAATAT  
CGTTATTTTATTAAATACATTTTCCAGGGATGAATATATGTCACCCGAGAATAATCATCTGCAGCGTCCGCCTGCTGCTGTG  
TTATACGCCGATGAACTGGCAAAATTAACAAACAAATGATAACGCACCTTGCCCGCCCGGTTGGCAGTTAAGTTTGCCTGC  
GGCCCGTCTTTTATCCTTGGCGACGAAGCGCAAAATATCAGCCGTAAGTGGTGAATTAGCCCTCCGCTGTCGAACGTA  
TGTTAGTCACTCTTGTACCCGGCCGGTTTTGATGTTGGTGGGGAAACCGGGTACCAGCAAAATCTCTTTCTGAATTA  
CTGGCAACCGCTATTAGCGCGATGCCGGTTAACCATCCAGGGCGGGGCATCTACCACCGAAGATCAAATCAAGTATGG  
CTGGAACACGCCCTGCTTATCAATCATGGTCCGTCAACGGAAGCGCTGGTCCCTGCCCGCTTTATCAGGAATGCGCG  
ACGGCAAAATCGTCCGTTTGAAGAGATAACCGGTACACCGCTGGAAGTGCAGGACTGTCTGTTAGGTATGCTTTCTGAC  
AGGTGATGACGGGGCGGAACCTCACTGGTGAAGCCAGTCACTATGCGCGAGAAGGCTTAAATATTATTGCCACTGC  
CAATACCCGCGATCGCGGCTCAATGAAATGAGTGTGCGCTAAAGCGTTCGATTGAAACGGTTTTTCCGATTA  
TGGATTTCCGCCAGGAGTTGAACTGGTCCGAGTCTTCCGGCGTTTTGCTGGCCATAGCGGTATTCCGCATAAAGTG  
CCTGACGCGTACTGGAATTAAGTGGTCCGACCTTCCGCGATCTGCGTGCCAACGGCGAAAAGAAAACGTCATGGATAC  
ACTGACAGCGATTATGTCCACCGCTGAAGCCGTGAACGTGGCCATGCTGTGGCGTCCGCGCCTGGTTTTAGCGAATC  
GCGCGGGGAGCCTGCCGACCTGGTGAATGATTGCCGGAACCATCGTCAAAGATAACGAAGAAGATCGCGCGCTGTG  
CGCCGTTACTTCAACAGCGTGTGCCACACATAAAGAAGCTCACTGGCAGGCTTATTATCAAGCCCGCCACCGCTGCC  
GTGAGGAAAGATGCATGAGCGAGCCGTTAATTGTGGCATCCGGCATCATAGTCCGGCCTGCGCCCGGCTGGTGAATCG  
TTAATCGAAAGCCAGCGCCACGATACGTGTTGATTGAAGCCCGGCTGATTTAATGACCGGGTAGACGAACTGTTTTT  
AGCCACCAGCTTCCGGTAGCTATTTACAGTTATTGCCAGTATCAGGACGGTGCAGCCCCGGGCTGGTGCCTGGACGC  
CATTTGCTGAATTTTCCGGAGTGGCAGGCGCTACAAGCCGACGTGCGATTAGGCACAAACTTACTCATCGATTTG  
CCTTGTGGGCGCAGAGTGAAGAAGAGGACGATTCCGCTGATACGAAGATGAAAGCCAGGCCTTACTGTGCGTGCCAC  
CCGATGGATAACAGCGATACCCTGTGGGATCACTTGTTCGAAGATGAAAGCCAGCAAACCTGCATTACCCTCTGCGCTGG  
CGCACTATTTGCCAACTGCGGGGCGACGCTCCGGCGATGCGCTCAATCGTCAGCGCAAGCCTTTATGGCCGCTGG  
ATTGGATGGGCGATGCAGAAAATAATGGCGACGTGTTAGTTGTCTGCGGTGGCTGGCACGCTCCGGCACTGGCAAAGAT  
GTGGCGCAATGCCCTCAGAAAATTAACAAGCCAGAATTGCCCTGCTGGCAGATGCCGTTACAGGTTGTTATCTCACAC  
CCTACAGTGAAAAGCGCCTTGATGTGCTGGCAGGATACCTTTAGGAATGCCTGCCCGGTATGGCAAACCTGGTGTGG  
CAGTGGGGCTTGAGAAGCCGGTGAACAACCTGTAACAACTATCCTTACCCGTTTGCGCCAGCACAAATGGCCGCTTC  
TACCAGGATATGGCTGCCGCTCATCTGCATGCGATGGCGTGGCACAGTTGCGCGGTATACACTACCCTTACGCACTG  
ACTGGCTGGATGCCATAGCAGGCTCGTGATTAAGAAGCCCTGAACGCGCCGTTGCCGTGGAGTATCGCGGCTTATT  
CATCCCGATACCGATCCGATTCTGTAACGTTGATAGACATTAAGCGGGTACGCGATTGGTAAACTTGCCCTTCTAC  
GCCACAACCGCCTCTGCCAAAAGATGTCACCTGCGAACTGGAACGTACCAGCAATCTCCCTTCCGGCGGAGCTTACCTTAA  
ATCGCTTACCCCGATGGGCTGGCGCAAAGTCAAGTGTACATCGGCTGGCAATACTGGAGATCCCTGGGATTGTACGC  
CAGCAGGGAAGTACACTGACACTTGCAGGCAACGGTGAAGAACGCTGGAATAAACCAGCCGCTTAGCCAGCATGCGGC  
ATTGATTGAGCCGCTGTTTTGGTGGCACACTCCAGGAAGCCGACGCAATAAATTAGAAGCCGATATGCTGGACGCGG  
CGGAATCGGCAGTATACCACATGTTAGCCAGGCGGCTTAGCGGGTCTGGCGTCTTCACTCAACAATTAAGTGGAG  
CAACTCACATTAATATGCCCAAGAAATCAATTTGCCGAAATGGGCGAGGCTGGAAGTCTTTATGCTTATGCTTATGGC  
GCTGGATGAAATTAGCGGTATGCAAGGCGCGAGATATTACAACGACGTTATGCGCGACTATCGATCGCACGCTGTGGC  
TGTGTGAATCTAACGGCAGACCGGATGAAAAGGAGTTTACGCTCACCTGCATAGCTGGCAAGCGCTTTGCCATATTCTG  
CGGATCTACATAGCGGCTTAATTTACCCGGCTTCTCTTTCTGCGGCGGTAGCCTTACTGGAGCGACGCACTCAGGC  
AATTCATGCCCGGCGCTGGATCGCGGCGGCTCTTGGCGCACTAATGCGTCTGGAACATCCAACGCCAGTGCCGAAG  
CGGCGTGACGATGCTGGCGCAGTTATCCCGGCACAATCTGGTGAAGCGCTGCACGGTTTCTGGCGCTGGCCCGCAT  
CAACTGGCCTGTCAGCCGGCATTATCGCCGTTTTAGCAGTCAATTAATCAACTGAGTGAAGCCGATTTTATTAACGC  
CCTGCCGATTTACGCGCGGCGATGGCCTGGCTACCACCACGAGAACCGGGACGCTGGCGCATCAGGTGCTTGAACATT  
ATCAACTGGCGCAACTTCCCGTTTTCCGGCTGCAATGCCGTTGATTGTCACACAGGCCATTGCACATCATCAACAA  
CTCGAACAGCAGGCACTGGCATCGCTGCAAACTGGGGAGTTTTCCATGCTGAACTGAACGATCTTCTGACCACCCGTG  
AGCTACAACGCTGGCGATTAATTTGGCGAAGCGGAGAAACGACGCTTTGTGGGCTGGATGACAACGCCCGGAGATA  
GACCACGCGTGGAGTGGCTGATGGGCGGATCCTGAACGGCTCAGCGTGGTGAACGTTCCGGTGGATTAGGTGGCTC  
AAATCTCACCACCCCTGAGTGGATCAACAGTATTACACGCTGTTTCCGCGAGGCTGATTGAGCGGCTGAAAAGCGATG  
CCGTGCTGCGCTACGGCATTGAAGATGTGGTACGAATCTCGACGTGCTGGAACGATGACGCTTCTGAAAGCCTGCTA  
CGGCTGTTTTGCACACCAAACATCTGATGAACCCGAAAGTACTGGCTGCCCGCCCGGATAGTGTGCCAGGTTGTTGA  
AGAAATTAAGGCTCGACTGGCAAGGAAGTTCTGACAGGCTTTTTCTGGTGTCCGCGATCGCCGTGCCGTTCAATTTATC  
CACTGGCGCAAACTTTGATTTCAAAGTACTCTGCGCGCAACCTGCAACACTGGCACCCGCAACACGGCAAGTTGTAT

ATCGAATCCCCCGCTTTAACAGCCGCATTAACGCCAAAGCGAACAAATGGCAACTGGTCTTACTGGTTGATCAAAGCGG  
ATCGATGGTGCATTCCGGTGATCCACTCTCGGGTATGGCGCCTGTTTGTGGCAGTTACCCGGCATTCTGACCCATCTGG  
TGGCGTTTGACACAAGCGTCGTTGATCTCACGGCAGACGTTGCCGATCCGGTAGAGTTAATGAAAGTACAGTTGGGC  
GGCGGGACCAATATCGCCAGTGCCGTGGAGTATGGTCGGCACTTATTGAACAACCAGCGAAAAGCGTCATTATCCTCGT  
GAGCGATTTTTACGAAGGGGTTTCATCATCATTACTGACGCATCAGGTGAAAAAGTGTGTCCAGAGCGGCATCAAAGTGC  
TGGGACTGGCAGCGCTCGATAGCACCGCAACACCTTGTATGACCGCGATACGGCCAGGGCGTGGTTAATGTGGCGCA  
CAATAGCCGCCATGACGCCGGGCGAGCTGGCATCATGGCTTGGGAGAATCTTCAGTCATGAATCACTACGTCCGGAA  
TTATTAGAAGTACACCGCAGGCCCTGACGGCGTTAAGCAATGCCGGTTTTGTTAAGCGCAGTCTTAAGGAACTGAAAA  
TGGAACGTCCCGGAGATCAGCCATGAGAACGACGCTTAAATGCCACCTTCAGTGACGGTGTCCGTACCCAGCTGGCGA  
ACGGCCAGGCACTGAAAGAGGCTCAGTGCAGTTGCGGGGCCAACGGTATGTGCCGTATCGCGTGATGCTGGTGAAGT  
TATCAACGACTTTGTGCCCACTCAGTCTACGGAAAAAGAAGAAGTGGGATCCGGCAATCTGGCTGGAAAGAACTGGC  
TACCCTTCCCGATGCTACCCGAAAACGCGCACAGGCCTGGTCGCTAAAGGCATCACCATTGAGTTGTTCTGTGCGCCGG  
GTGAAATCCCTCTGCCCCTTACCGATGAGCGATGTGCGTTTTATTCCCGCAGCAGTATCGTTTTCGCCCGTTGTGAT  
TGATTGAAGGCACACTTTGCGAACATGCTGACTGGCGGTACAGGCCTTCGTGAGGCCAAAGCGCAGCAAGCAGAATT  
TAACCATTTAATCTGGCAGATGCGCAGCGAACACGTCACATCATCTGACGATCCGTTTGCCAGCGAAGAAGCAACGCGT  
GTCGTCAATATGTTTCAGCAATTAAGCCAGACATTATGGCTTGGCGCATCAGCCAGCCGCTCATCCATTACGAGGCAGCA  
TTCAACCGCGCATTGCAAGCGGCAGAGACCTGCAACTGGCGCTGGGTGAGTGAATCGCTACGGCAACTGCGCGCCAGCGT  
TGATGCCTTCCACGCCCGCGCCAGCCACTATAATGCCGGAGAATGCTTACATCAGCTTGGCGCATTAACAGTGCATTAA  
ATTGCGCACAAGAGATGGCCCGCGCGACAGTATTGGTGAAGTTCCTCTGTGCCGTGGCGCACGGTCTGGTCTGGC  
ATTGCCGAGAAGCAAAGCTTGATCATCTGCGGCTGGTGTCTTTAGGTATGCGTTGCTGGCAGGATATTGAGCATTATGG  
TTTACGCATCTGGTTTACCAGTCCCGACACCGGCAGTATTTTGCACCTTTCGCGCAGTTGGCCGGAAGTGAACAGGAAA  
ACTCACCGGCAGCTACGCGTCGGCTGTTAGTTTTAGGCTGGCGCACTGGCGGGCGGGCAAATTGTTTCACAAGCAGCA  
AAACGCAGTCCGATGGCGAGCTGCTGTTAGCTACCCGCAACCGCTTAAAGCAGCGTTGTGCCGCTGTCGCTGATGCCTG  
GCAAATGTTGAGCGCGCCGTTACGCCAGCCGGGCTTGTGGCTTTCGGGAATATTTACGCCAGCGTCCCCCGCTGCA  
TACGGCCTCTAATCAGGTGATAACTTATTTATCTGCCGGTCGCTGAGTGTATTTGCTCGGTTGGGACAGCAGCCGC  
CAGACGCTGGATGCGCAGGTATTAGCGCGGAAGGGGAAGATAATGTGCTGACGTTATCATTACCAGCCTCAGCCAGCGC  
ACCTTATGCCGTTGAACGCATGGCGGCGCTTTTGAACAAACAGACGACCCCGTGTGTCTGGTTTTCTGGCTTTGTCAGTT  
TTGTTGAAGGGCAATTGACTGGAACACGGGTGATGATGACAAAACCCGTCCTGGGCGCTGGACGCAGAAACTACG  
CCTGTGGCACCCTACCTTCTGCCAGCGTTTTGCTGTGCCGCTACTGCTCATCAGTTGCTGATACGCTGCCAGGCGTT  
ACTTATTCACTGCTCCATAACGGCTGGCGCTATCAGGAACAGAGTGCTATTGGTCAGGCATAGTTGCTGGCGAATGACC  
TCACCGCGTGGGTTTTATCGGCTGGCACATGTGTTGGGACAATTTGTAATACAGAAAGCGAGGCACGGGTAGAAGCA  
ATGAATAACGGTGTGTTTGTCTTTCGCAACAATTAATCCCATGCTTCAGCAACAAGGATGAAATAGTGCTTTTTACTAAGA  
GTTCTACTCCAGTTCCGGACTGCTCACGCCACGGTATTAGGCATATCCTATATAGCCCCTGGTGAGAGTACCAGTTCCCT  
TGATTAATAAAATGGAGTTTTACATGAAGGCTTTCAATAAGCTGTTTTCCCTCGTTGTTGCATCTGTTCTGGTTTTCTC  
TCTTGCTGGCTGCGGTGACAAAAGAAGTCAAGAAATTCAGCGCAATCTGAACGGCACTGAAATGGCATTACCTATG  
TCTACAAAGGTGACAAGTGCTTAAGCAATCTTCTGAAACCAAATTCATTTGCCTCCATTGGTGCAACCACCAAAGAA  
GATGCTGCCAAGACACTTGAGCCGTTAAGCGCAAATACAAAAACATCGCGGTGTTGAAGAAAAATTAACCTATACCGA  
TACCTACGCGCAGGAAAACGTGACTATCGATATGAAAAAGTGGATTTAAAGCCCTGCAGGTATTTTCAAGAAATCAACG  
TTTCTGCTGAAGATGCCAAAAAAGGTATCACTATGGCGCAAATGGAAGTGGTATGAAAGCCGCTGGTTTTAAAGAAGTG  
AAATAATCGGTTGGCGTCATGCTCTAAACATGACCGCCAATTTTTAGCCTTTTTTACATGCTGGCGCGCTGCCAGTC  
CACGCAGAAAATAACGTAAAAAATTGATGCCGCATTCGCGGAAGTTTTTATGATCCGGTGGCGCATCATCGCTGTAATT  
TCCGGCATCGAAACGCGAACTGCTGTTCCGGTGAGGATAGCCAGAATGTCATCGGTTTTTACGCGAAAACGCGATGCGTAA  
TTTTTTACGACGATGTTGTTAATGCGACGTTCCGGCTCCAGTGCCGGAGCAGACTCATCCTTGGCGGTTTTTTCAT  
AAATCAGGCCATTGAGGAATGACGACAAAACAATGTCCGGACAACGCTGAAAACCTCTTCGTTCTTTACGTAGCCAG  
ACGGCGATCTGTTCCGGGTGGCTTCGACATTACCCAGCGCCAGAATACGCACCAGGTATTATTATTGGCTTTCAAAT  
GTAGCGCAGCTGCGCAGAAATCGTTACTTAGCATGAGGCCTTCAGGTGTTGATGAGGCAAAAAGCCATTTTAGCAGTC  
TTTTACAGGCCAATCGCCTCTTTAAGCTTTTACGATAACGGCGGCTGACCGGCACGGTTAAGCCATTACGCAAAATCAA  
CTCGGCTGGCGTTATCTTCCAGACGAATCTCTGTAATGCGCGAGGTTAACCAGATACTGACGATGGCAGCGCAGTA  
GTGGTGTACGACTTTCCAGGTACGTAATGCAATTCGTAAGCCCTCTTTCCCTTCGTGGCTGGTAACGTAGACACCG  
CTCATCCGACTGCTGACAAATGCCACATCTTTCATTTGACGCAATAAATCCGACTATGCCCCGTACAAGGGATAAATTT  
CAGCGCCTGTTGATTTTTCCGGTAACAGCGAAACATCCTGCTTGTGCGCTCCTGACGCAATCGCGCCAGCGTTTTCTCCA  
GTCGCGCTTCAATTTGGCTTCAGCAGATAATCAAAGGCATGTTCTTCAAAGGCTTTAATTGCGTATTCGTCAAACGCA  
GTGAGAAAAACAATATACGGGCGATGTTCCGGGTCAAGCATCCCCACCATTTCCAGACCCTGATGCGCGCATCTGGAT  
ATCGAGAAAACAGCACATCCGGGCGAGTTTATGACCGCGCCGATCCCTTCCAGCGGTTTTGAACTCTCCAACGATTT  
CAATATCGCTCTGCTCCTGCAAAAATACACGAGGTTCTCCCGTCTAACGGTTCATCATCGACAATTAAGACTTTAATC  
ATGCCTCGTCCCTCATGGTAGTCGTAACGTTATTCGGGTGTAACATCAGGCTCACAGGCGACGCTTATTCATAGTCA

TCGCCAAACCGTTACGTAACGCTTATCCACCAGATTATCCCCAGCCACTGGCATTGGTTACCGGTTGATACAAACC  
GGCATTGTCTTCGATCTCCAGCATCAAATGTTGCCCTCACGTGGGCGCTGATTGCCACTCGCCTGTATCCAGCAGTT  
GTGATGTCCTATGTTAATGGCGTTTTCCACTATCGGTTGAGGGTAAACCGGGCAATTGCTGCTGGGATAATTCTTGC  
GGAATAGCAATGTTGACCTGCAACCGGACTGGAAGCGCGCTTTTCAATTTGCAGATAAGCATTACATGTTCAATTC  
GTCGGCGAGAGTAACAACTCCGAAGCGCTTTAAGTTTTGCGGAAAAAAGTGAAAGATACTGCACCAGCTGGCTGG  
CCTGTTGCTGTCGCGGGGATCACCGCTTAAATGGTGTAAAGCGCATTAAACAAAAAATGGGGATTACCTGGGCGTGA  
AGCAGTTTGTCTGACTGGGTGAGCATCGTTTTTGGCGCTCATATTGCCCGCAAGGATCTGCGCCGAAAGCAATTG  
CGCAATCCCCTCACCAACGTGCGGTTGATTGAAGTGAATAAACGGTTTTTGGCTTCATACATTTGATGGTGCCCATCA  
CCCGCTGATTTTACCACGCAACGGAATTACCAGCGTCGACCCAGTTTGCATTGCGGATGCAAAGAGCAACGGTAAGGT  
ACTTCGTTGCCATCAGCGTAGACCACTTACCAGTTTTCAATCGTTTTAAAGTAAAGTTGAAGAAATCGGTTTGGCGGG  
TAAATGGTGGTCGTCACCAATTCGGTAAAGGCCAGCAATTTCTCTCGATCGGTAATCGCGACTGCACCAATATCCAGTT  
CCTGATACAGCACCTGAGCCACTTTTATGCTGTTCACTTCTGTTAAACCCCTGGCGCAAAATGCCTTCCGTCGAGGCTGCC  
ACTTTCAGCGCAGTGGCAGAAAAAGCCGAAGTGTATTTTTCAAACATCGCGCTTTATCGAGCAATATACGCATAAACAG  
CGCCGCGCCGACGGTATTGGTGACCATCATTGGCGCAGCAATATTACTACCAGACGCACCCGATCTTTCATAAGGTGCGG  
CGATCGCAAGGATGATCAGCATTGACCATTTGACCATTTGACGACGAACGTGACGGCACCGGGTAAAGCAATTTA  
TCAGTGCGCCGCGGGATCAGGATGCTGTGTACCAGGCCACCGAGTAATCTTCAACGATGGTTCGAGATCATGCAACT  
TAACGCGGTATGCCCCCATCGAATATCGATGTAAGCCGCGGTGACGCCAACAGCCACCGACGACCGGACCGCGGA  
GTAAGCCGCCATTACCGCGCTATCGCACGGGTATTGGCAATAGAATCGTCAATGTGCAACCCAAACCAGGTGCCCATG  
ATGCAGAAGATGGAAGACGATGTAGCAGAGAAATTTATGCGGACGACGAACCGTGACCTGCATTAACGGTATGAATAA  
TGCGTTTTACTCATTAAACCATGCAATGACTAAAAAACGCACATCTGCTGAAGCAGCAGCAACACCAGATTAATAATCGT  
ACATACCCGCAAAACCACTTCCCTTTAAACCGCTAACATACATTGCTGCGTTTTAATTTCTTTGAACTTTGCAGAA  
AAATGAGAATTCGTGAGTACGATCACTAAAATCGCTGGCAAAAATAAAATCACCTATAGATGCACAAAAACGGGCA  
AAACTACCTGGTTGCAAACTGCGTCTAAAGTTAAACCGGGACCTCGCGAGCAAGGGTGAAGCAGTGGCGCTTTACACA  
ATTGGTGAAGTGGCGTTGCTTTGTGATATTAATCCTGTACGTTACGCGGTGGCAGAGGGTTACGGATTGCTGAAACC  
GCAACGGACAGACGGCGGTATCGGCTGTTCAACGATGCCGATATTGACCGGATCCGCGAGATCAAACGCTGGATCGACA  
ACGGCGTGCAGGTGAGCAAAAGTTAAAATGCTGCTCAGTAATGAAAATGTTGATGTGAGAACGGCTGGCGGATCAGCAA  
GAAACATTACTGACTTACCTGCAAAGCGCAATCTACATAGCCTGCGAACGTGGATCAAAGAGCGGGTCAAGATTACCC  
CGCCAGACACTCACACACATCTGTTTATTCTCTGCGCCGACGGCTTCAAGTCCAAACACCGACTCTCCAGGCGCTGC  
TGCGGATCCTGACGGCGTACTGATCAACTACATCGCCATTTGTCTGGCTTCGCGACGTAAAAACAGGGTAAAGATGCG  
CTGGTGGTTGGCTGGAATATTCAAGGATACCACCCGTCTGTGGCTGGAGGGTGGATTGCCAGTCAACAAGGATGGCGCAT  
TGATGTCCTCGCCACTCGTCAACTCACTACGCCCTGAACTATTGAAAGGCGGTACATTGCTGGTGTGGTGGCGGTGAAA  
ATCGAACCTCCGCCAACAGCAGCAACTACCCAGTTGGCAAGAACAAGGCCATGATATTTCCACTCGGCATTTAATGA  
TTCGTTAAACAATGCGCTTACTGTACAATCCTTTGTTAACATAAGGAGTGCATTATGCGCATAGCTAAAAATGGGGTGC  
ATCGCCCTGTTCTGTTTATGGCGTTAGGCGGAATGGTGGCGTCATGCTCGCAGGTTATACCTTTATTTTGGCTGCTGG  
CTAAGCGCCTGACCAGCCTTTCAAACAGGCGGTCTGCGATGATCGCCGCAAGTGCACCCAGTAAACGCCCCCTGGATCAC  
ATACGCGGTATTAATCCGTAAGCCCGATGATGATGGGCGTACCAGCGTGTGGCCCCCTACCGTTGAGGCGATCGTCG  
CCGTACCAATGTTGATAATCACCGAAGTTCGCACGCCCGCAGAATCACCGGAGCCGCCAGCGGTAGCTCGACCTTACGC  
ACTCGCTGACCACGACTCATTCCATACCTTTGCAACTTCTGTACGCTGGCATCAATCGCTCCAGCCCGCAAGTGT  
CGCTGCAGGACGGGCAGCACACCGTAAAGGATCAAGGCGATAATCGTGGTTGCAGACCAAAGCCGATCACCGGAACGG  
CGATCGCCAGCACTGCGACGGCGGAAAAAGTCTGTCAAACGGCGGCAATAGTTTCCACAGTGGGCGAAATTCGGGCCCC  
CACGGGCGAGTGACAGCAATTCGGCACCAAGTGGCAATGATCACCGCAAAACAACTCGAAATTCACCCAGCCAGAAATG  
AGCCAGTGCCAGAGCTGCAAACTTTCTGCTGATAAACGGTCTGTGGCAGTTGTGGGAACAAGGCAGCAAAACAGCGGCT  
GGCTGTAAGGCAGCCAGAAAATCAGCGCCACAAACAGAGCAATGAGCCAGAACAGCGGATCGCGCAACATCTTCATACGC  
TTACGCCTCCACCAGCAGATCTGAAAATGCAGCGTGGCGAAGGCTGGCCCTGCATGTTACCACCGGCAGCACCTCGC  
ATCCCCGCGCAACAAACAGAGAGAGCGCATCGCGTAGCGTCATCTCTTCCAGTGCCTCACCATCTGCTGTTCTTCG  
CGACGCAGTAATCCGCCACACTACGTAACGAAAGCAGGCGCACACCCAGTTCACTACGTCCAAAAAAGTGGCGGACAAA  
ATCATTGCGCGGACGAGTACGATCGTCAGCGGATTGCCCTGCTGCACTACTTACCCTGATCCATCAATACCAGATGTT  
CTGCCAGCCGTAGCGCTCATCAATATCATGAGTGACCAGCACAATGGTACGCCCCAGCAAACGGTGAATGCGCGTCATC  
TCTTGTGCAACGCGCCGCGGTTACCGGTTCCAGTGCGCCAAAAGGTTTATCCATTAGTAAGACTTGGCGATCGGCAGC  
CAGTGCACGCGCCACTCCACACGTTGCTGCTGACCACCGGAAAGCTGATGCGGATAACGCTCAGCAAATTTGACTCCA  
GCCCCAGTAGCCATTAATTCGTCGATACGATCGTCAATCCGCGCCGCGACATTTTTGTAATTGCGGCAGGGTAGCG  
ATGTTTTGCGCCACGCTCCAGTGGGGGAACAGGCCAATAGATTGAATGGCATAGCCATCCGCGGGCGCAACTCCAGTAC  
TGGCAGCGAGGCAATTTCTTCTCCGCAAAAGCGGATCTCTCCGCTGTCATGCTCCACCAGGCGGTTAATCATTTTACGG  
TGTTGGATTTGCGGAGCCAGATGTGCAATCAGCACCGAAAACTCCCTTCTGAAAATTGAGATTGAGATCGTTAACG  
GCTTTTTGTGCGCCGAACAGTTTGTGACATGGCTAAATCAATCATTACGTTTCACTTACAGAGTGGGATAAGCAAT  
CGAACAGCGGCTCGGTAAGCACCGCCAGAACAATTACCGGGATCACCCAGCAACACTAAATCAATGGCGCTGCTTAGC

AGCCCCTGAAAAACCAGCGCACAAAACCGCCTGCGCCGATTAACGCCGAATCACCGCCATACCTACAGTTTGACCAT  
CACCACCCGCGAGGCTGCGCAGAAATACCGGTAACGCCAGCGGTAACCTGAACATGCAGGAAACGCTGCGCCCCGCTCATCC  
CCATCGCTCTGGCGCTTCCAGCACATCGCGGGGATCTGGTTCAAACCGACTACCACGCCGCGCACCAGCGGCAGCAAG  
GCATAGAGCACCAGCGCAATCAGTGCGGGTGTCATTCCGGTCTCTGCTATGCCGAGCGTCCCAGCCACGAAAGGCCGT  
AACAGCGCGGCAAGCGGCCAATCAACAGGCCAAAGAGCGCCACCAGGACCGGTCTGAATCACATTGAGCAGAGAAA  
AAATTGCCCCCTGCCGAGCAGTGGAAAAGTAGCACCAGATGCCAACGGCACACCAATCACTAACGCAGGCAGCACC  
CCAAACAGCAACGTCAGATGTTGTGCCAGCGCTGTCAAACACATCCTGACGGTTGGCGTATTCTTTCATTAGTGAGAG  
ATCGTTAAGCGTGCCGAGTACAGCAACCACAGCGGAATAATGGCAATCTGCATATGCAACAACCAGCGCCACAGCGGAT  
GCGTGAGATTGCGCGGATGGCATCGCTACAGGCCAGCAATGCCAGCGCCGAGCCAGCCAGAAACCACTGCCGAGGCTG  
GTACGCGCCAGCGCACTGCCATTTTGGCCAGTTGGGTGCGCCCTTCCAGCTCCCACACCAGCAATACGAAGACGAA  
TTGCGCCAGAATGAGTGCACAAATGCTGCCTTTTTACCGGAATAAAACAGGCCGTGAGCCAGGCGCAACCAACGCCCA  
CCAGCATCCAGATCGTTTGGGCCACAGCTGCCAGAGATGACGCCCTCACCCGAACTAACGATTAGCGCGTAACCTG  
ATAAACGGCAGCGCCGCTGCGATTGCCGTGAGCAACAGCAGCAGCGCCAGAACAGGATTAATACGGAAATAAGTACGGG  
AAATTACTTCGTCACCCCTTTTTGTTTCAGGTAGTCGGCAGCCACTTTTTTGGCATCCAGTCTTCCACAGCAATGCTC  
CATTACGTTGCTGCAATGTTTTGCATCGAGGCTGGCGAAGACTGGCTGTAGCCACTGTGCCATTTGCGGTAACCTC  
AACCCGACTCACGCACCCTGGTGCAGCGCGTAGATAGTTGCACACCTTGGCGATCGCTTAAGGTTGACGCCCCAG  
CGCCGCTACCGGGCCGTCAGTGCCTAAGCCATTGCAGCATTAAACGCCAGAGGTTTGTGGCGAGCGGCTTGTATCGTCA  
CCGCCGTGTCGCCACCAGCCAGTGACAGCAACTGATCCTGACCAGCTTAAAGCCATAGGCTTTTTCAAACGCGGGTAA  
GCATCGGCGGTTGATAAACTCTGCCGAGGCTGCCAGTTGAAGGTGCCGCCCTTTCAGATAACGACTCAGGTGCGC  
AAGCGAAGTGAGTTTATTTTTCTGCCACATCCTGACGCACGGCGATAGTCCAGGTGTTATTTGAGGCGCGGGCGTCA  
GCCAGATTAACCTGTTGTCTCCGAATCGAGCTTTTTGACTTTCTGTAACCTTGTGCGGTTTTTCCACGCTGCATCG  
TTTTCATCTTAAAGAAGAAAGCGCCATTGCCGGTATATTCCGGATAGATATCCAGTTCACCGGAAGTAATCGCCCCG  
CACCACAGGAGTGTTCGAGTTGCACCTTATTACCGTGGTACGCCGTGGCTTTCCAGCACCTGCAAAATGATATTGC  
CGAGTAGCGCACCTTCGGTATCGATTTTTGAACCGACTTAAACGGGGGAAGCCGCTGTAGCGGCAGGCTCACGGTGC  
AACATAACCAGTGAACCTGCCAGAGCTTAAAGAGTGGCATGATGCTTTCCTATTCTTTACTGTTGTTTTAGCGAAT  
TAAGAGAAAAGCATAGTTGATAATGGCGGGTAGCTTGGAGCGGAAGGATTCAGTTGCAGAATCAGATAAAATACTTAAG  
GGCATATTCGGTCCGGGCTTCTGCCGATGCGGCGGAGCGCCTTATCCGGCTACAAAGGGCGCAAACGTCGCGCCC  
TACTAAAGCATTACAGCAACTCAAACCTGCCTTTTAAACGCGTGCAGGATCAGTGCCGATAAAGACATTGAACCTGCC  
AGGCTCGGCGTCATATTTTATCTGTTGATTCCAGAATTCAGCGCCTCAATATCGATCGGGAAGCTGACAGTCTGAGTT  
CGCCCGTTTTAGGGTATTTTTCTCAAAGCCTTTCAGTGTTCACAGGGCGACTCATGGAAGCCGTCACATCCTGCAAG  
TACATCTGACTACCGTGGCACCCTCGCGCTTACCGGTGTTGTCACCTGCAGGCTGGCAGTCACTTTGCCGTACGCTT  
CATGGTTCGGCGCAGAAAGTTTACATCAGAGACGGTAAAGTGGTGTAGCTCAGCCATAGCCGAACGGATACAACGCC  
CGTTAGCTTACAAAATAACGCGAAGTGATTTGTTGCGGCTTGTGCGCATTACGGGCGACCGGTATTCAGATGGCTG  
TAGTACACCGGATCTGCCCAGCAGAACCGGGAAGGACATTGGCAGCTTGGCGGACGGGTTGTAATCGCCAAACAATAC  
ATCGGCAATTGCATTACCGCCTTCACTCCCGCAAACAGGTTTCCAGAATCGCATCAGCCTGCTGATCTTCTTTACCA  
GGCCAGCGGACGCCCCTCATCAGCACCAGCACCAGCGGTTTACCGGTGGCTTTCAGCGCCGCAATCAAGTACGTTGG  
CTTTGCGGAATAGTGATATCGTCCGGCTGGAGGCTTCGTGCGCCATCCCCTGTGCTTACCGACTACAGCCACCACC  
ATCAGATTGTTTCCCGTCTGCACCGCTTCAATCATCTCTTGGCGGAACGCGGATCGACTTTGACCGCTTCTTCA  
ACTGATTGAGAAATCGATAATGCCTTTGCTACTGGTAAACGTTTCCGCCCTTTGGCATAACAGCACTTTACCGTTT  
ACCGCATTTTAAATCCGGTCACTACGGTACGGATTGATCGGCAACACCGGCTGCGGACCGCTGCCATCAGTCAAG  
TTTACTGTCCGCCAGTGGCCAAACACCGCAATGGTGGCCGATTTTTTTCAGCGGTAACGTTTTCGAGACGGTTTTT  
ACGCAACCAAGCTTTCGCGCGCCACTTACCGGCTTCTTACGGTGCAGGCGGCTTTCGGCATTGGTATCCACCGGGT  
CAGACTCTTTCGGCCCCAAATGGCTGTATGGGTGTTAAACAACCCCATATCATATTTAACGTTAGTACATGGCGG  
GAGCATC  
GTCCAGCTCTGCCATCGTCACTTTGCCGATTTAATCAACCCAGGCGAGATACTTCAGTAGTACTCGTGCCTCATGCTCA  
TGTTGATTCCGGATTTACGCGCCACGCGCACCAGCATCTCCGGTCTGCCGCCGTGCCATGTTAATCAGCTCTTTGATT  
GCACCGTATCGGAAACGGTATGCCTTTAAAGCCCCACTGGTGCAGCAGAACATCTTTCAGCAGCCAGGAATCGGAGG  
GGCTGGCGTGGCTTTCAGCGAGTTCAGCGCCACCATCACCGCGCCGCTGCTGCGTCCAGCCCCGCTTTGTACGGG  
GCA  
TATAATCATTAACAGGGCTGCGGACTCATATCGACGGTGTGACTCTTACCGCTTCTACCGCGCCGATGCGGCA  
AAGTGTGAGCTGGTATCACCAGTAGCGATCTCCGGGCTTTTACCCTGCATCGCTTCCACCATGGTTTTACCCAT  
TGTTGAGGTGAGATCGTATCTTCCGCAAAACCTTCCGAAGCACGTCCCAGCGGGATCGCGGAGACATCGACCATCG  
GTGCCAGGTATATTAGGCCATCATCTGCCGCTTATAAGCAGAGACACGTCCGACCGTTTTACTGCATCGAGGTTA  
AAAGACGAGGCCAGCCGAGCTAATCGGGAACACCGTGCCTGACCGTGCAGCACGTCTGAAGCAAAGAAAAGAGGAAT  
TTTACGGCGGCTAATTCATCACCTGATCCTGCATGGCGGGATATCTGACGGGTTACGGTGTGAAAATCGCCCCAA  
CCTGACCGTTTTGATCATCTCGCGGATCGCCTTTCGGGTTATCCGGGCCAGCGTATTAAGCGCAGCTGACCAATT  
TTCTCATCAACTGTCATTTTCTAAGCAGTTCGGTGCAGAACGCATCCCAGCGTTCGGGCGTTAATGGATGGTTGCCGAA  
TAAATCATCCGCCAGTGTGGTGCAGGGCCAGACTCACCGGATTCCTACTGAACATAGCCATTTTATATGGATTTTT



TTCCTTTGTTGCCGACGTGGCAGCGAAAATGGTGCAAAAACCGTAGTTTGCCATAAGCATGATGGAGAGAGAAAAAGAA  
TGCTCAGTTTTATTGTCTGAATTTTCAAATATTCACTCGCTGAATTGTTATACAAGGCGCTATTCTAGTTTGTGATATTT  
TTTCGCCACCACAAGGAGTGAAAAATGTCTTCCATGACAACAACCTGATAATAAAGCCTTTTTGAATGAACTTGCTCGTCT  
GGTGGGTTCTTACACCTGCTCACCGATCCCGCAAAAACGGCCCGCTATCGCAAGGGCTTCCGTTCTGGTCAGGGCGACG  
CGCTGGCTGTGTTTTCCCTGGCTCACTACTAGAATTGTGGCGGGTGTCTGAAAGCCTGCGTCACCGCCGACAAAATTATT  
CTGATGCAGGCCGCAATACAGGCCTGACCGAAGGATCGACGCCAAAACGGTAACGATTATGATCGCGATGCTGTTATCAT  
CAGCACCTGCGTCTCGACAAGCTGCACGTTCTTGGCAAGGGCGAACAGGTGCTGGCCTATCCGGGACCCACGCTCTATT  
CGCTGGA AAAAGCCCTCAAACCGCTGGGACGCGAACCCGCACTCAGTGATTGGATCATCGTGTATAGGCGCATCGGTATC  
GGCGGTATTTGTAACAACTCCGGCGGCTCGCTGGTGCAACGTGGCCCGGCGTATACCGAAATGTCGTTATTCGCGCGTAT  
AAATGAAGACGGCAAACCTGACGCTGGTGAACCATCTGGGATTGATCTGGGCGAAACGCCGGAGCAGATCCTTAGCAAGC  
TGGATGATGATCGATCAAAGATGACGATGTGCGTCACGATGGTCGTACGCCACGATTATGACTATGTCCACCGCGTT  
CGTGATATTGAAGCCGACACGCCCGCACGTTATAACGCCGATCCTGATCGGTTATTTGAATCTTCTGGTTGCGCCGGAA  
GCTGGCGGTCTTTCAGTACGCTTGTACCTTCGAAGCGGAAAAAATCAGCAGGTGTTTTATATCGGCACCAACCAGC  
CGAAGTGTACCGAAAATCCGCCGTCATATTCTGGTAACCTCGAAAATCTGCCGTTGCCGGGAATATATGCACCGG  
GATATCTACGATATTGCGGAAAAATACGGCAAAGACCTTCTGATGATTGATAAGTTAGGCACCGACAAGATGCCGTT  
CTTCTTTAATCTCAAGGGACGCAACCGATGCGATGCTGGAGAAAGTGAATTTCCGTCGCAATTTTACTGACCGTGGCA  
TGCAAAAATTCGGTACCTGTTCCCGAGCATTACCGCCGCGCATGAAAAACTGGCGCGATAAATACGAGCATCATCTG  
CTGTTAAAAATGGCGGGCATGGCGTGGCGGAAGCCAAATCGTGGCTGTTGGATTATTTCAAACAGGCCGAAGGCGATTT  
CTTTGTCTGTACGCCGAGGAAAGCAGCAAAGCGTTTTTACACCGTTTTCGCGCTGCGGGCGCAGCAATTCGTTATCAGG  
CGGTGCATTCCGATGAAGTCGAAGACATTCTGGCGTTGGATATCGCTCTGCGGCGTAACGACACCGAGTGGTATGAGCAT  
TTACCGCCGAGATCGACAGCCAGCTGGTGACAAGCTCTATTACGGCATTATGTTGCTATGTCTTCCATCAGGATTA  
CATAGTAAAAAAGGCGTGGATGTGCATGCGTTAAAAGAACAGATGCTGGAACGTACAGCAGCGCGGCGCGCAGTACC  
CTGCCGAGCATAACGTGGTCATTTGTATAAAGCACCGGAGACGTTGCGAGAAGTTCTATCGCGAGAACGATCCGACCAAC  
AGCATGAATCCGGGATCGGTA AAACAGTAAACGGAAAAACTGGCAGGAAGTGGAGTAAAAATTACGGATGGCAGAGTA  
TCGCCATCCGAATCACTTAATCGTTCTGTGCCGTGCCCCGCCCGCCATTGGGCGGCTTTTTGTTTTTTATAGCT  
CAACGCTGCTGCCGACAGGCATCACTTACC GGTTTCAATCCAGGTACGCAGCGGCTGGCATCGGCAAAATGGGTAT  
ATTTGCCAAACCGTCCATCACTACCAGCGCCACCGTTTTATTATTGATAACCGTACGCATCACCAGACAATGGCCCGC  
GCATTGGTAAAGCGGTTTTGGTTAACTGAATATCCAGTTATCGCGATACACCAGATGATTAGTATTGCGGAACGGCAG  
CGTATACGTCGGATTAGAGAAGGTTGCCATATCTTCCCGGTAGTACTTAACTGCCGATCAACGGATATTGTTTGCTGG  
CAATGAGCAGTTTGTTAAGTCACGGGCAAGTGAACGTTATGCACCGACAATCCGGTAGGTTCAACAAAGCGCGTGTG  
TTCATTCCGAGCGATTTGCTTTTCGATTCAATTGCCTTAATAAAGGCTTTGTAACCACCGGATAATGGTGCGAAGGCT  
TGCCGCGCGCGGTTTTCTGAAGACATCAGCGCCAGCAACAGCATATCTTACGGCTGATTTGCTATTAGTACGTCACGC  
GCGAATAGACCCCTTTCATCTCCGGCGTCTGGCTGATATCCACTTTTAGTTTTTATCCAGCGGAGTCTGCATCCAGC  
ACAACCATCGCGGTCAATTTGCTGATAGACGCAATCGGACGCACAGATCCGGGTGGTTCGAATAGATCACTTTGTT  
GGTATTAGATCAACAATCATCGCGCTACCGGAGGCAATTTCCGGTTGTGAAGCGGTGGTAGCGGCTGCCGTTTTCGCAA  
CGGCTGCGGTGCAAAAGGCACAGCCAGCATCAGGGCCAGGCTAAATAAAGAAACTCGAAATTTCCGCATGATGAGCATT  
CAGATAGTGGTTCACGCGCACGGGTTGCGCACCCCGGAGTAAGGATTTACTGAGGCTAGCGAGCCATCATAACGAGCA  
AAAAGTGCATCGTCAAAGGAGAATCGTGAGGAAATGCTGCATTGCTGACATTTACGCCAGCAATGCAACGTCAAAGAAC  
TTTCTAGAACAACGATAACCGTAGCCCATAGTATAACGGTTAGGGCGAGCAGCACTCCAGTACCAGCACGCCAATCG  
CCAGCGTCAAACTAGAAAGCTAAGGCCCTTCTCTTTGTTGATTTAGGAAAGCTCGGAATACCAAGGTAAGCAGGTAG  
CCGGTGTAAAAACAGCGCCACCGTGCCGACCGCACACAACAGACCAAGTGGATAAAGCGCCACCAGACCGCTTAAAAA  
CAGCGGAGTTGCAACGTAGCCCGGAAGACCATGCAGTGCGCAAGTGACGGACGCTGCGGATAATTACGGCCATCCACC  
AGATGACCCGCCCCATCACC GCGACCCAGCCAGCATAACGCCGTA AAAACAAGACAGCCAGCGCCAGTCCGGTAAACCAG  
GATAACTTCAGGATAGTGCCATCGCAAAAATTCAGCCAATCTGTGTAGTGCCAATGAAGGCGCAAATCACC GGAATCGC  
CGCCATCAGCAAAACGTGGTGGGTGTAATGGTGAGAAATCGTTTTCGTTTTCGCGATTAATCACCTGCATTTACGATCGG  
GATGGGAAAACAGTCCCGAGACATGGCTCATAACGCCCCCTTGTGTGAGTTCATGAACCTGACAGTTCAAGTATAAGTC  
AGCTTGTGATTATTTTTTGTTCGCCATGTAATTTTCACTGTCTGATGAACGTCCTTTTTTACGCGTGAATGATTCACAGG  
GTGTATGCTTACTGGCAACCAAAGGGAGACAGACTGGCCTATGGATCTCAATACTTATCTACAATATGGTTATGCCG  
CGCTGGTATCGGTAGCCTGGCGGAAGGTGAAACCGTACTTTGCTGGGAGGCGTTGCGGCGCATCAGGGGCTATTAAG  
TTCCCGCTGGTGGTACTTTCTGTGGCGTTGGCGGCATGATTGGCGACCAGGTGCTCTATCTGTGCGGGCGGCGTTTTGG  
CGCAAGCTGTTACGCCGTTTCTGAAACATCAGGATAAAATTTAGCGGGCGCAGAACTTATCCAACGCCATCCGTATC  
TGTTTGTATTGGTACGCGCTTTATGTATGGCTTTCGGGTGATTGGCCCAGCGTATTGGTGCCAGCCAGCTGCCGCCG  
AAAACTTTTCCCGCTGAATATTCTCGCGCATTTGCCTGGGCGTTGATTTTTACC ACTATTGGTTACGCTGGTGGTCA  
GGTGATTGCGCGTGGTTGCAAACTCGACCGATTTGAAGCACTGGGTCTGGTTGATTCTGGTCTGTTCTGGTGG  
TGGGCGTGGCTGGTGGTGA AACGACCGGGAAGAAAAAGCCGGATCATCAGGCGTAAAACCATGCCCCTGGATAAGGC  
GTTCCGCGCCATCCGACATCCGGAGTACCATGCCTGATACGACGCTTGTGCGTCTTTTATGCCGACCAAAAATATTACC

CAATGAAATATCCACGCACCTACTGCGCTATTCTGGGTTGAACTGTGGATTGCCAACATAAAGCCGCCATCCACTATC  
AACGACTGCCCCGGTGGTGAATTTGCGCCCTCCGAACAAAGCCACACCAGGCTGGCAATCTCATGCGTTGCGCCAAA  
ACGCCGAAGGAATCGAAGGCTCCGCGTCGGGCTTACGTGCGTGTATCCATGCCATTATTGGCGTGGCGATCGCCC  
CAGCGCGACTGCGTTACCAAATCTTATGCTGACCAGCTCCAGCGCCATCGCTTTGGTTAACCCACCGAGCGCATGT  
TTAGCGGCTGTGTAGGCGCTGGCATCCGCGAGCGGCTATGTTATGTACCGACGTAATGTTGATGATGCGACCGCCCTG  
CCCTTGTTCACCATCTGACGAGCCGCAATTTGCGAGCATAAGAATGCACCATCGACATCAACGGTAAAAATCTTGCGCC  
ACTCATAAAAGCCATATCAAGAAACGGCGCTTTGGTCATTGCACCCGCATTATTCACCAGCACATCAATGCGCCCCAGC  
CGTTGAATGAGTTTCTCCAGCGCCAGTGCCCTTCTGGTAGATTGCCGAGATCCAGCTGCACGATCTCCGCACGTACGCC  
GTGGCTAACTACCTCACGCGCGGTATCTTTGCCCCCTTCTCATCTGAGTGCCAGGTAATACCAATATCAAAACCCTGCT  
GCGCCAGTAATAACGCGCACTCTTTGCCGATCCCCGAATCGGAGGCGGTAATAATCGAACCTGTGCCATCGAGTTCTCC  
ACTTAACGCTGAATAAACGTTAAGTATAGAAGGCGCATATCATCAGCGTTTGTACCCCCGCCAACGCACCACTGAGTT  
GAATGGAGGCATCCAGCCACTGCCCTTGAATAACAGGCCATTGGCCGCTCACGCAGCGGGGATTCTGGCTTCGCTG  
ACGCGGGAACCAGCAATGATGCCCGGTTAAAGCGCGCTGCGCAAGACCTACCACACGCAAGGCATCGCGCTCAATTTG  
CGCTGATGCTGGTTTTTCTCCGCCAGTGTCTGAACCTGACTGGCTGCCCGCCACGTCATTACCGCTTCAACCACCG  
CTTTGTTGAGCTGGCGATAGACAAGTTGCTTTCCGCTTTTGCATATCGAGATTGGCGTTAAGACGACCACTATCGAAA  
ATGGGTAGCGTAGGCCTGCCGTAACGCCATTTGCTGCGCGGAATGACGGAACAGATCGCTTAAAGTGAACGCATCTG  
TTGCAGGAAGGCCATCAGGTTGATGTACAGATAAAAATGCCGCTTTTGCCGCATCAATGGTGCTTAGCGATGACTCAACGT  
ACCAGTGCGCCGCTGCAAATCTGCCCGCGGGCCAGTAAGGAGTACCCAGTTCATCAGGAAGCTGGCTTGCCACTTTC  
GGCAACGCGACCGGTTAAGCTTCAATGACTTTGTCTGGTATTTGTAAGTGGCTTAACCGTGCCTCAATAATTTTCAT  
TTCCCCGCGACATCGTTGAGCTGCTGCCGGTTTTGCTGGCATTAAATCGGTTTCCACACCTTCAACTGAAGAAGTAA  
TCCCGTTCTGATATAGCTGGCGATCGGTCGCGATAATGGTGTCTGCTTTTTTCTATTTGCTGCAAGACCGTGTAAAC  
GCCGCTGGTTTTGCCACTCCAGTACAGGCGGGTACGCTGCCAGCCAGCAATTGGCGGTTTTGCTCGGTTCCGCCGC  
CCGTGCTTAAACCGTACCCAGGCGGGCAGTAACCTCCGCCGATTCTTTCCCGAGATATCGAGATGCCAGCCCGCGTTA  
AGCCAAAAGTACCGTTGGTGTACCACGGCGGGTCTACCTGCGCGCGGATCGTTCAGAGCAAACGGCCCCATTAAGCCT  
TCTGCCGACATTTTTTCCGCTCCATATCCGCCAAAAGTCGATCTGCGGACCATCCTGAGTGGCAACTGCCTTCGCTG  
GGCTTCAGCTAGCTGAATGCGCTGTTCCAGCCACTGCATATCCGGTGCCTTCTGAGTGCATTGTTAATTAAGGAAGTGA  
GTTGATTATCGTGATACTCCAGCCACCATTGGCTGTCTGGCAACCAATTTTCCAGCGCGTGGGTAATGCGGTGTCAACTT  
GTGACGCGGGCTTTGCTGGCTTAACGCCTGGCGGTTTTATGCATAGGCGCACACCCGGCCAGCATCAGTAACAGCGGA  
AAACAGGCGATGGCTGGATAAAAAGGAATCACGATTCATGGGGGAATAATCAGGTAAGAAAAGGTGCGCGGAGATTACCGT  
GTGTTGCGATATATTTTTAGTTTTCGCGTGGCAATACATCAGTGGCAATAAAACGCATATCCAGAAAAATATACTAA  
GTGAATGATATCTCCGATTTATCTTAATCGTTTATGGATAACGGCAAAGGGCTTCGTTTTTCTATACTTATTACAGCA  
CTCACAATAAAGGAACGCCAATGAAAATTATACTCTGGGCTGTATTGATTATTTTCTGATTGGGCTACTGGTGGTGAC  
TGCGGATTTAAGATGATATTTTAAAATTAATTAATGTCATCAGGTCGAAAATAACGAGAATATTTAGTCTCTCATCC  
TGTTGCGCTCTGTATGTGCATTGCTTCATATAATCACTGGCGCAAGGAGCGCGCAGGGGGCGGCAATCGCCGCCGCC  
CCCTGCACCCCGGGCTCTGGGAACAAAATCGCCGCTGCGCGGTGCCCTCGGCTTATCCCTTACGGCTACCGGGTCCGG  
CGCGAGGTAACATCCCTGTAACCGCGCCCTCAGCCACATCCATGTGGGCTGCCCGGCCCTCAGGGAACGCCTCGGCA  
ATTTTGACGCCACCAAACCGTGGCGCTATTGATAAAGAGCTAACACATTGTCAAAAAACATCACTATGGTTTTTTA  
GAGTTTCTCGATATCAATTGCTGAATAGCCCTTGAATATCAGGGGAATTATTCAACACCCGAACATGCTGAAATAATT  
CCGTTGCTTATCGTATTTTACGCAAATAACTCAACCACTGTTAATCCGCGCAACGTGATATAAACCCGGTATCGCCC  
TGCTTTTCCAGACGGGTATATTTTTGACGCAAAGCAACCACTCCGGCCACCGCATTCGCGTTTCTGTTATATTTTACCAC  
CCGGCTCAGGTTGGGAATATTGAGCGCCCCGCGACCAATCATCACTGCGTGCAGCCGCTGATCGCCATGCATTGTTGCG  
CGCTCTGCCAGTCCCAGATTTACCGTTGGCAATACCGGAATATTCAGCCGCTGGCGAATATCGCCAATCGCCTGCCAG  
TCAATATGCTCCGCGCGTAACCTGCTCTTTCGTCGCCCATGCACCACCAGCTCCGTAGCGCCAGCCTGTTGAACCGC  
ATCGGCGATTTCAAATTTCTTCTACCCTGTCCCAGCCAGACGCACTTTACGCTGACGGGCAAATGCGCCGGTACAG  
CTTACGCATCGTTTTGCACCCTGGTAGATGAGTTCAGGATCTTTGAGTAACGTGCCCCGCGCGCTACCGTTAACC  
GTTTTGACGGGCGAGCCGAATTGAGATCCAGCCCCAGGAACCTAACTCCACCGCACGGGCGGCTTCTCTGCCAGCCA  
TTGTGGAACTGACCTAACAACTGCACGCGCACCAGCGTACCAGATGGTGTCCGGCTGGCGTTTTGTAGCTCAGGGCAA  
TGCGATGAAAGACTTTTACCAGCAGGTTGATCCACCACGCGGACAACTCGGTGATGCACAGATCGTAGTCGTTAACC  
TCGGTCAGCAATTCACGCACCAGAGAGTCAAGCACTCCCTCCATCGGTGCCAGTAACACACGCATATCATACCCGCAA  
AAAATGAGGCGCTATGTTAGCGCTATGGTCAGCGGATTAAGGTCTGCAAAGAGGGATTGCTGCAAACGCAATCCCTC  
TCTATGCTTATGATGATGCTGAGTTGCTGCGCATTGCGTAATGCCGGGAGCGAAAAATAAGCGCTGATTTCTTAATG  
TGATCGGTAGCACGTTTTACGAATTAATTGATGATGAATCCATCTCATCTGGGGTGTGATTATGAGTAAGACACTGAA  
CATTATCTGGCAATTTTACGCGCTTTCGTCCTGATTTATGCCTGCCTGATGCAGGCATTTTCATTGCTTCCCTGCTAC  
CGGTAACCAATTCGGGCGAGCATCATCGGGATGCTGATCCTGTTTGTCTGCTGGCCTTGCAAATTTCTCCGGCAAATGG  
GTCAATCCGGGGTGTACTGATTCGCTATATGGCGCTATTGTTTGTGCCGATTGGCGTAGGCGTATGCAATATTT  
TGATTTGCTCCGCGCACAGTTTGGCCCGTAGTGGTTTCTGTGCAGTACGCTGGTGGTTTTTCTGGTGGTGAAGT

GGAGTTCGCAACTGGTACACGGTGAACGTAAAGTCGTAGGTCAGAAAGGATCAGAAGAATGATGGCGAATATCTGGTGGT  
CATTACCGCTGACATTGATTGTCTTTTTGCCGCCCCAAACTGGCGGCACGGTATAAGTTTCCCTTGCTTAACCCGTTG  
CTGGTAGCAATGGTGGTATCATTCTTTTTAATGCTGACTGGCATCTTACGACAGCTACTTTAAAGGTAGCGAAGT  
GCTAAACGATCTGCTGCAACCGGCGGTCTGCGCTGGCCTATCCTTTATATGAGCAGCTACACCAGATCCGCGCGCGCT  
GGAAATCGATCATCACCATCTGTTTTATCGGCAGCGTGGTTGCGATGGTGACGGGGACTTCCGTGGCATTGTTGATGGGC  
GCTTACCAGGAAATCGCCGCGTCAATCCTGCCGAAATCAGTACCACGCCTATTGCAATGGCGGTTGGCGGCAGTATTGG  
CGGTATTCCGGAATCAGCGCAGTTTGGTGGTATTTGCTGGCATCCTCGGCGCGGTATTTGGCCATACATTGCTTAATG  
CGATGCGTATTCTGACCAAAGCTGCGCGCGGTCTGGCAATGGGGACTGCCTCGCACGCCCTCGGTACGGCGCGCTGCGCC  
GAGCTGGATTATCAGGAAGTGCATTTAGTTCGCTAGCGCTGGTGTATGCGGGATAATTACTTCCGTGATCGCACCGTT  
CCTTTTCCGATTATTCTGGCAGTAATGGGCTAAAAATTTGCGATGCGTGGCGCATTTTTGATGTATGTTTACGCGTTGC  
ATAATTAATGAGATTGAGATCACATATAAAGCCACAACGGGTTGTAACCTGTTATCCATTACATGATTATGAGGCAAC  
GCCATGCATCCACGTTTTCAAACCGCTTTGCCAACTTGGGATAAATTGCAATCTGCACTGGAACCTATTCTGGCAGA  
CAAGTACTTCCCCGCTTTGTTGACCGGGAGCAAGTCTCATCGCTGAAGAGCGCAACGGGGCTGGACGAAGACGCGCTGG  
CATTGCACTACTTCCGCTGGCGCGCGCTGTGCGCTACGCCATTGTCGAATTTAATGTTGGCGCAATTGCGCGCGGT  
GTGAGCGGAACCTGGTATTGCGTGAGTGGTGA AAAAGCGCTTGCAGCATACCGTTAACTACACGCTTGTGGTCACTGCC  
CGCATCAGCCACGCTGGTGGTGGTGA AAAAGCGCTTGCAGCATACCGTTAACTACACGCTTGTGGTCACTGCC  
GTAGTTTTATGAATGAACGAACAGCGGTCTGGATCTGCGTATTATCTGCGGGCCGCGAGGCACACGCGCTGCGTGAC  
TATCTGCCAGATGCCCTTGGGCCGAAAGATCTGGAGATTA AACCGCTGCTGATGGACGAACAGGATCACGGCTATGCGCT  
GACGGGTGATGCGCTTCTCAGGCAGCGATTGCGGGGCAAACCGTTGCGACATGCCTTACAGTAAGTCGCCAAGCGGTG  
TCGCGCTGGAATGTAAGACGGTCTGATTTTTAGTGGCAGCTACGCTGAAAACGCCGATTCAACCCGACTCTGCCACCG  
TTGCAGGGAGCGTTAATTCTGTTGAATCTCAAGGGTATGATTACCCGGATATCCAGCGCGCGGTTCTGGCAGAAAAAGC  
CGATGCGCGTGTGATTGAGTGGGATGCCACCTCCGCAACGCTGAAAGCTCTCGGCTGTCACAGTATCGACCGAGTGCTTC  
TCGCTTAAGCCTGGTCCGGATGCGGCGTGAACGCCTTGTCGGCTTGCAGCCCTCTCCTGGTGTGAAATTTCCGGCA  
AACAGTTTCCGCTTCTTGCGCAAAACCAGCGGGTAAAGTAGCCTGATGAAATTTTCTTAGATCGAGTCTCCTGCATG  
TTAAAGCGGTGTTCTCAGCCTGTTAGTCTGATCGGCTTGTGCTGTTGACTGTGCTCGGCTCGATCGTGGATGAG  
CTGGA AAACCGCGCTTATATCTACGACGAATTGCAGGATCTCCCTACCGCCAGGTCGGTGGTGTGCTCGGAACAGCAA  
AATATTATCGTACTGGCGTAATTAATCAGTATTATCGTACCGCATTCAAGGAGCGATTAATGCCTATAACAGCGGTAAG  
GTAAATTATCTATTACTGAGCGGCGATAACGCATTGCAAAGTTATAATGAGCCGATGACCATGCGCAAAGATTTAATCGC  
TGCTGGTGTGACCCATCAGATATTGTTCTCGATTACGCAAGGCTTTCGTACGCTGGATTCCATCGTGGTACACGCAAAG  
TTTTCGATACTAATGATTTTATTATTATCACCAACGTTTTCCACTGTGAGCGAGCATTATTTATTGCGCTGCATATGGGG  
ATTGAGCTCAGTGTTATGCCGTACCGTACCGAAAGATATGCTGTGAGTACGTTTTCGTGAATTTGCCGCCGTTTCGG  
TGCGCTGGCTGACCTTTATATTTTTAAACGTGAACCGCGTTTTTATAGGGCCGCTGGTCCCTATTCCGGCTATGCACCAGG  
TACCGGAAGATGCGCAGGGGTATCCCGCCGTACACCCGAACAGTTACTTGAATTACAAAAGAAAACAAGGAAAGTAGTTA  
TGGATGTACAGCAGTTTTTTGTCGTTGCCGTTTTTTTCTTATCCCGATTTTTGTTTCCGCGAAGCATGGAAAGGCTGG  
CGCGCAGGCGCGATTGATAAACGGGTTAAAAATGCACCGGAACCGGTGTATGTCTGGCGAGCAAAAAATCCCGACTCTT  
TTTTCGCTTATATGGTGGCATATATCGGCTTCCGAATTTTATCTATCGGCATGATTGTTTATCTTATTTTTCTATGTTAAT  
ATTTCCCTCTCCAGTTAATTATTGAGAATAATTACTTACCTGATAAGCTGCGGATATCATTCCCTAACCGCAGCT  
ATTTGTGAATCTTTTACAGTTTAAATCCCCCGCACGCTTAGCCTTAATATCAGTACATTATTTACTAAACGCTCG  
CCTTAATTACCTATAGCATTAAAGGAAGATCACATCGCCGAACAAAATTATCTGGATGAACCTACTCCGGCTTTTACGCT  
TTACTGGCGATTAAGAAGCCTCTCGCTGTTTATTATGTCACGACGCTCCCTGTAGTCAAGGCTTGGCCGACAGACCGA  
TCCGGGGAATTTTATTGCTCAATCTACTTTTCTAATTTTTAAAGCGCTGCCGAGACAATTCGCGAAAATAATGCCCTCG  
GTGCCGTTTTGTGCCAGAGTGTGCCGACGGAGAAATATGCCAAAGCGGTTGTACCCGTGCCGGTGTGATGCTCCATT  
GATATCGGCCGCTTACAGCGTTTTGTTACTGATTTTGAACAACAACCGGAATGGAAATTTATCAGCCCGGTTACTAAAAC  
GCTCGGCAAAGTCGCGATTATTGGCGCAGGTCCTGCCGGATTGCAGGCCAGTGTGACACTGACAAAACAGGGTTATGACG  
TCACGATTTATGAGAAAGAAGCGCACCCCGGTGGTGGTGGTGAACGGTATTCGCAATTCGGTTACCGCAATCAGTG  
CTGGATGCAGAGATCGCCCGTATTGAAAAATGGCGTGACCATTAAGTGAACAACGAAGTCGGTAACACTCACCT  
TGAGCAGCTGAAAGCAGAAAACCGCGGTAAGTGGTACCCTGGGTTATCAAGCGGTTCCGGGCTACCGCTGTTTGGC  
ATAGTGACGTTGAGATTGCCGCTGACTTCTTGAACGTGCACGACAGGCGCAAGGCGATATCAGCATTCCACAAAGCGCA  
TTAATTATCGGCGCGGTGATGTCGCGATGGACGTAGCCAGCACGCTGAAAGTTCTCGGCTGTGAGGCGGTAACCTGCGT  
AGCGCGTGAAGAGTTAGATGAGTTTCCGGCAAGCGAAAAAGAGTTTACCAGCGCCGGGAGCTGGGCGTTTCGATCATCG  
ATGATTACGCCAGTAGCCGTGGAAGCAATAAAGTACGTTTAAAGCATGTACGGTTATCGGGCGAACTGACGATGGCG  
GCAGATAAAATTTATCTCGCCGTGGTACGATGCCAGACTAGATGCCTTTGCGGAGTTAGAGCCGACGCTAACACCAT  
CAAAACACAAAATTACCAGACCCGCGACCCGCAAGTCTTTGCTGCTGGCGATATTGTTGAGGGTGACAAAACCGTGGTCT  
ATGCCGTGAAAACCGGAAAGAAAGCCGCGAGGCGATTATCACTATTTAGAGGGAGCTTGTCTCATGTTAACGAAAGATC  
TTTCGATTACTTTTTGCGCGTGAAGTTTCCAACCGTTCTGCCTCTTCTTTCGCGGTTAGGCAACTGCTATGAGATG  
TGTGCCAAAGCCTACGACACAGGTTGGGGCGGTGTGGTGTAAAAACGATCGGCTTTTTATCGCAACGAAGTCTCGCC

CGGTTTTGATCATCTGGTAAAAGAAGATACCGGTTTTATCGGCTTCAAAAATATGGAGCAGATTGCTGAACATCCGTTGG  
AAGAGAATCTGGCCGCCCTCGCTCGGCTGAAGGAAGATTACCCGGACAAAGTATTGATCGCTTCGATCATGGGGAAAAAT  
GAGCAGCAATGGGAGGAGCTGGCGCGCTGGTGAAGAAGCTGGCGCGGATATGATCGAGTGAACCTTCTCTGTCCGCA  
AATGACTTCTCATGCGATGGGTAGCGATGTCGGGCAAAGCCCGAGCTGGTAGAAAAATATTGTCCGGCAGTGAAACGGG  
GTTCCACGCTGCCAATGCTGGCGAAGATGACGCCAATATCGGTGATATGTGCGAAGTGGCGCTGGCGGCGAAGCGCGGC  
GGCGCAGATGGCATTGCGGCGATTAACACCGTTAAATCCATCACCAATATCGATCTTAATCAGAAAATCGGTATGCCGAT  
CGTTAACGGAAAATCGAGTATTTCCGGATATTCCGGTAAAGCGGTAAAACCGATCGCCCTGCGCTTATTTCAGCAAATGC  
GCACCCATCCAGAAGTGGCGGATTTCCCAATCAGCGGTATCGGCGGATTGAAACCTGGGAGGATGCGGCTGAGTTTTTA  
TTGCTCGGCGCAGCAACGTTACAGGTGACCACCGGCATCATGCAGTACGGGTATCGGATAGTGAAGATATGGCAAGCGG  
GTTGTCGATTATCTCGCGATCAGGGATTTGATTCGCTGCAGGAGATGGTAGGTCTGGCGAATAACAATATTGTCCCGG  
CGGAAGATTTAGACCGCAGTTATATTGTCTATCCCCGATCAATCTTGATAAATGTGTTGGCTGTGGACGCTGTTATATT  
TCCTGTTACGACGGCGGTACCAGGCGATGGAATGGAGCGAGAAAACCCGCACACCGCATTGTAATACCGAGAAATGTGT  
GGTTGTCTGCTTTGTGGTACGCTGCCCGGTGGTTGATTGAGCTCGGGGAAGTGAAGTTAAGAAAAGCGAGAAAAG  
AACACCCGGTAACGTTGAAAACAGAGACGCATCCGGCATTGGTTCTGTGCGCGGATGCGGCTTGAACGCTTATCC  
GGCTACAAAACCATACAAATCAGTATGTTGAGTATTGATAGCCGGATAAAAACGCGCAGCTTGCATCCGGCATTTG  
GCTCTGTTGCCGATGCGGCGTGAACGCTTATCCGGCTACAAAACACACAGATCATGATGTTATGTGCGTTTTATGA  
CCGAATGCGGACACATTACATCATTTCTTACGCGGTATTTTCAAGTGAATCCAGCGCTACGCGAAGATAATAATCGCC  
CCTTTGATGATGTAAGTACTGCGGATGTTTACGCGGATATACGTCAGGCCATAGTTGATGACGGTAAAAATAATTACCCC  
GGTCACCACGCAATCACCGTCCCCACACCGCGCTGAACGATACACCGCTACCACGCACGCCGCGATAGCATCCAGCT  
CATACATAAAGCCGAGGTTGTTGGTGGCAGAGCCGATACGTCGGCTTCTAACATCCCGCAAAGGCATAGAACACGCCA  
GACAACGCGTAGATCATCAGCAGGTTACGGCCGACGTTGACACCAGATACTTTTGGCGTTCGGGTTACCGCAATGGC  
AAAAATGTTCTTACCGAAGCGGTTTTGTTCCACAACACCCAGACGAACGCCACCGCAATCAACGCGTAGAAGGTGATGT  
AAGAGAGACGGAACTCCCAGCGCGACAAGCCCTGAGCAAAGGTAGAGAAGCCACTGTCAAACAGAAATTGGCGAC  
GCCCCGACAAAGTCGTAATAGAGCGAGTTGATGCCATAGACGATGATCATCGTCCGAGCGTGGTAATGAACGGCGTCAC  
GTTGAGATAAGCGATAATCAGACCGTTGATCAAACCGATCACCGACCAATGGCACAGACAATCAGAATAACCGAGCGCAA  
TCGGCATCGTCGCCATTTCCGGGAACACTTTGTTGGCGTTATCCATGGACTGCAATAATGTGCGAGCCACCACTGCCGCC  
AGCCCTACCTGACGACCAGCAGAAAGATCGGTCCCCGGGTGACAATTAACCTGCCACACCGAGCGCGATAATAATACG  
CACCGATGACTGGGTGAGAAATTAAGTTCAACAGACTTAAAAATGTTGGGTCTGGAAAATAATAATCGCCAGCA  
AACTAAAAGAACGACGTAATAACCGCCCTTTTACAGTAAGTAAAGAAAACCTTTTCTTATTTAACGCACTCATGGGAAGC  
CCCTAATCTTAAAGGTGCAAAGACGCAAGACGCAAGATTTTCGTTTTGCGTTGTTGTTTTGTATCGACAATTCGGAAAC  
GAGACCATTGCTCATGACCAGAATACGGTCTGTTATCCCTAACAACTCAGGCATTTTACAGAGGAGATAATAATAATCCCT  
TGCTTTCTTCGCGAGTTCCGCAATTAAGTATAAATTTCAAACCTTCGCCCCGACATCAATACCGCGCGTCGGTTATCG  
AGCATTAAATTTCTGGTTGCGTTAGTAGCCAGCGACCAATAATCACCTTTTGTGATTACCACCGGAGAGCGAACCAAT  
TTGCGTCCGATGACCCGGGTTTTTACCCGCATCGAATCAATCACCCACTGGGTATCGCTTTTTCATCCGCGAGTTATCCA  
GTAAACCACTTTATTTTGTAGTTGCGAATATTGGAATTAACGAGTTAAACCAATATCCAGATAGGCATAAATCCC  
GTTGAGCGGCGCTCCTCAGTTACCAGTGCAAATCCATGGTTTTATGGCTTCTGTTGGCATTATGGTTATTGATCTGTTTGGC  
GTGCAACGTTATGGTGCCAGCCGATTTCTCGGAATACCAATAACGCTCTCAACAATATCGGTACGTTTTCGCCCCACCA  
GACCGGCAATACCGAGGATCTCCCCTTATGCAGATCAAACGAGACATCGCGAATCGACGGCTGGCGCAGTGACGTCAGG  
TTACGTACCTCGAGGATGACTTCGCCCCGTTGTTTTCTTGTGAGGAAACGCTGGTTAAGAGAACGCCAACCATCAT  
GGCGATGATCTTGTCCATCGTCACTGCGCAGCGTTCCGTTGGCGATCCACTGACCGTCCGCGCAATACGGTAACTCAT  
CACATAACTGGAAGATTTCTTCCATTTTATGCGAGATATAAACAATACCGCAGCCGCGCTTTTTAATTTACGAATAATA  
GTGAACAGATGATTGACCTTTTTTTCGTTAACGAAGAAGTCGGTTCATCCATAATCACAATTTTTCGCGTTATAGGAAAA  
CGTTTTGGCGATTTTCGATCATCTGCATTTGCGAAACGGATAATGTGCCGACGCGCGCACGCGGATCGATATCAATATCCA  
GTTGCTCAAAAATCGTTTTGGTTTCGCGGTACATTTTGTCTGATCGACAAACATGCCTTTGGTGGGATATCGCCCCAGC  
CACATGTTATCCATACCGAACGTTGTAATACCAGTTTAACTCTGGTGTACCATCGAAATACCATTTTCCAGGGCTTC  
TTTTGCAGAATGGAATCGATCTCTTTACCCTGGAATAAAATGGTGCCGGAGTCTTTTTGATAAATACCAACAGGCATT  
TTAATAATGTCGATTTTCTGCACCGTTTTCCCCATTAATGCATGGATAGAATGTGGCCGACTTTTAAATTAACGTTA  
TCAAGTGCCTTAACACCAGGAAAGGACTTGTGATACCGCTCATTTCCAACAAGTATCCCCGGAGGACGGAGTCGTTGA  
GCTGACCATATAATTTTACCTTGTGGCCATAAATAAGGGCGCAGTAATAGACTGCGCCCAATCAGTCTTATTTCTTGC  
TGAATTCAGCCAGTTGCTTTATCTACGCCAACATAAGGTACGCGGACCCTTTGTTGTCGATTTTCCAGTTGGTGCCA  
TCAGCCGACCTTTACCATCGCCAGTTTTTCGCCAGATCAAAGTTCGCTTTCGCTGGTTGTTAGCATCGTTCAGTAC  
GGTGCCCGCAGTGCACCGATTTACCAGCGCCAGCGCTTTCGGCAGCGCATCGACGCCAACACCGGAATGCTGGACT  
TGTTGTGTGCTTTCAGCGCTTCAACCGCGCCATTGCCATCGATCGTTGTTGGCGATAACCACTTCGATTTTGTGGCG  
TTCGGGCCAGACAGCCAGGCGTCCATCTTATCTTTCGCTGAGCGGTGTCCACATTGCGGTATCTAACTGTAACGTTC  
AGTTTTGATGCCTTATCGTTCAATCTTTAATCACGTAAGTGGTACGTGCTTCTGCATCCGGATGGCCCGGTTACCTT  
TCAGCAGTACGAACTGAATCTGACCGTCTTTGTTGAGATCCCAACCTGATTCCCGCCAGTGTTTAGCAATCAAATCG

CCTTGAATAATGCCGGACTCTTTGGAGTCAGTGCCAACGTAGTAGGCTTTGTCGTAGCTATCCAGCGCCTTACGAGACGG  
TTCTTTGTTGAAGAAAACACCGGCACGTTTTGCCACGCGCTTCTCAATCACCGTACCCGACGCTGCCGGTCAACCA  
GGTTGATTGCCAGTGCCTTACCCCTTTCGCCAGCAATACGTCGATCTGATCGTTCTGCTTGGACTGGTCATTCTGAGAA  
TCATTCATCAGCAGCTGAACATCTGGCGCGGCTTTCGCATCTTGCTCAATAGCCTTGCACACTACAGACATAAAGTTATC  
GTCGTACTTATAGATTGTTACACCAATGCGAGTATCAGCAGCGTGTGACGCGGCACCGAATAACATGCTGGCCATCACAG  
CAGACAGGGTTAACACCTTCTTATTATGGTATCTCCGGTTTTTCTTATGCAGGGTAGTGCTTGAGATAAATGCTCGGCG  
GGCAGTAGAGTTAATGAAGTGTACTGAACGCCGAAGCTCACTTTTTAAAATTCGTTCTTCCATGCCGGTAACGCTCC  
AGAAAACGGCTTAAATTGTTGTTATGACGCTGTACCTCGGCAAAAGTGATTATTCAGTGTACATACGGGTTACAACGT  
TAAAACGGTGAATCATAGCTATCACATTGTTAAGATACTGTGAAATCACTCACAGATTGAAAAGCGGTTACATCGCCTGA  
TTTGTGAGTTAGTGATCGCCGCCGATTCTGGCGTGTGCGACAGAATGGCGACGCACTAACGTCGGCATAAAAACAGTG  
GCTGGCAGGAGATCAATATTGCTGTCGCCCTGCAAGGCCAGTTCGGTGGCTAATTTCCGATTGAAGCAATGGGAT  
AACGCACGGTCGTTAATTGCGGGTCGGTGAACGGCGATGGGAATATCATCGAAACCGATGATTGAGAGATGTAACGGA  
ATCGCAATGCCATTATCTTTAATGCTGTCAGTGCACCAGCGCCATATTGTCGTTATAAGCAAATACAGCGGTAAGTTG  
TAGATTGCGCCACAGCAGTCAACCATCGCCGCTCACCGCCCGCATGTCCGGCGTACCAGCGCAATCCAGCTTTCCG  
GCCGAATAATCTCTGCTTTTCAACGCACTCATCCAGCCTGCTTACGTCATGGCGTCATCTTCAATGCCGTGGTGGAA  
GAAAATAACCAATACGTTGATGACCGTTATTAGCAACATGCGCGTCGCCATTCGGGACCGCTGAGATTATCCAGGCA  
AACGCAACGATGGGCGTACCCCGCACACGCGGTTGATTAACACCATAACGGGAATGTTATCCATAAATGCGCCAGTT  
CATCGTCACTCAATGCTTTTGGAGTGAACAATCAACGCATTACAACGCTGGCGAATTAACACCTCAATGGCGTGACGCTCT  
TTTTCCGCTTCATGATAGCTATTGCCGATTAGCACGTATTTCTGATGCTGCTGAGCGACCAGATCCACCGCTTTTACCAG  
CGCGCCGAAAACGCATCAGAAACGTCCATCACCACCAGCCTAAGGTGTCGCTAACCTGAGTTGCCAGCGCCTGGGCAT  
TGCGCTTTGGCCGATAATCCAGCTCACTACGGCTTTCATTACTGCTTACGCGTGTGGCACTGACCAGCGTGTGTTA  
TTGAGCACCCGGAAACCGTTGCCACAGAGACGCCAGCCTGACGCGCTACATCACGAATGGTATCATATTCAGTACCTG  
TTATGAGATTGAGTAAATGACTGCTTGTGGCGCTATTTTGTGAGCACTGAATACAGGACTTCGTAATCGAGTACACA  
GCAATGAAACGGTTACAGCCGTTTTGTTAACGAATGTATCCAGATCGTTATCTTGTATGTTTTAGATATTGCCGGTCCG  
GCAGCACGAAAGTTAACTGACGCCAGAGCCATTCCACCGCCCTGGCGGAAGTAACGCAGCCAGATAACAGAGAAGAG  
GATATTCGCCAGCCATACCGGAATAACAAACGCCAGCAGCTCCAGCGGTCAAATGCATAAAACAAACGAGGTGGTAAA  
AAAGCGTGGTACAATCAGCGTTTGAATAGATAGTTGGTCAGCGCCATCCGTCGACGCAGCGGATCGCAAGCACCAGC  
TTAAAGCGGCTCAATTGCGGCCAGAAGCCATAAAACAGCGACGCATAGCCAATCGCCTGAAACGGCGCACTCAGTCCCG  
CGCATTGTAAGTAAGAAGGCACACCAGCGATACGCCAGTCCAGCTGCCATTGCAAGGGCGATGGCAGGAAGGTTAATGG  
TCACCCCAATGCCACCAGCACAAACAGTACGACGATAGTGACGTAAGCTGAACTGCCCTTTCAGCCAGCCGCTGGCC  
ATCAGCGCCGCACCAATGAGCATCATCCCTGCCAGTTGCCAGCCATACTGTGCGCCAGTGCCAGTAAACTGTTGCCAAC  
ACCATCGGCACGATTACTGATCGCTTCAACGCCCGCGTGAAGCTTCCAGTATTTTTATACAAAATAGCCGATGCATCCG  
GGTCCAGGCGCGGCTGGTCTGGCTGTGCGAAATCAGCCCAATAACAGCAAACGCCAAGCCCAACAGATAAAGCATG  
ACGCTGTATTAACAGGCTTTTTACCAGTGGCGCATCGCGCACCAGCCGCCAGCAGATTAAGCCACCAGCCCGTAAGC  
CAGCAAATATCGCCGTCCAGAACATAAACCGTGAATAAAGCCAAACAAGACTAACAGCGTTAACCGCGACTGGATCC  
AGCGTCTGCCACGGGCGAGCAACATTTGAGGCCCGCACAAACAGTAGCGCAAAAAGCGTGAGGAATTTACCTGGCCG  
ATGAGATCAAGAAATGCCAAGTCCATGCATCCCGCGCGTAATAGCACCGTACCAGGCGGGATTGAGATAAGCCGCTT  
TGGTAGCCAAAGGCGCTGATGTTAATAGCAGGATCCCAGAATGGCGACGCCGGAACAAAATCGAGCGTGACGTTG  
GCTCCATGGTCTCTGCTTTAATCAGTTGTGATGACGCACAGCGCGCAGAACTCGTGGCGGTATTCTGACTGGATTT  
GAACAATCCACCAAGAGAGTGTGTTGCTGTCGTCAGTGGTGCATCGCGGATGCCACGCTTCCAGCAGTAAATGACCCG  
CGTCGATCGAGACAGCCAGTTATTGGTCCCAGCAGCGTTTGTAGCGCAATAAGAATTTGCTGCGTCAGACGTTCTGTC  
ACCTGCGGACGCTGGCAAAGAACTGCACAATGCGGTTAATTTTTGACAGACCGATCACCGAATCTTTCGGGATATAGGC  
CACCGTCGCTTGGCATCGATGGTAACAAAATGGTGTTCACAGGTGCTGGTCAGAGTGATATCGCGCACGGTGACCATTT  
CATCGACCTTCATTTTGTTTCAATGAGGGTGATTTTCCGGAAATGGCGTAATCCAGACCGGAGAAAATTTTCATCGACA  
TACATTTTAGCGATGCGATGCGGCTTTCATCAAACGTGTCATCAGCCAGGTCGAGATTACGAGCTGCATGATTTCCGGT  
CATATGACCAGCAATAAGGCTTTTGGCGGTTTCTTATCCATTTTCATGCACGGGCGGGCGCAGCGGTGTTCCAGTCTC  
GCGCAACTAACGCTTCATGAACCAGGGCCGCTTCTTACTGAGTGATGGCATTATGATTTCTCTGCAGGTGTGACGCC  
TCCGCCCTGCTGGGGGCAAAGTTAATAAGCTGATTTACAGCCTGATTTTGTGCGTGAGGCGGGCGCACATAATCCAGTA  
TTCACAGCGATAATTATTGTAATTGCCGCTGCTTTTCATCAGCAGATGTTAAAACATCGTTATGCAAATACGGAAGTGA  
AGTTACTCACAGCATTGAATAAACGGTATGATGAAGAAATTGCAAACAACAACAAGGAGCCACGCATGGAATGCT  
CGAAGAGCACCGCTGTTTTGAGGCTGGCAGCAACGCTGGCGACGACTCCAGTACCTTAACTGCCGATGACGTTCA  
GTATCTTCTCCCTCCACCTCGTGATCACAACCGCCACAGTGTGACTGGCTTTCGGATTAACCTGCAATGACGAG  
AACTTACCACCAAGGCGGTGCCAGCGGGTAGCGCGGAAGTGGGATTGACTGGTGTGCCAGACACCAGCCCGCG  
CGCGAAAAGGTTGCCAACGACGATGGCTACGATTTAGGCCAGGGCGCAGGCTTTTATCTTAATGCCACGCAACCGCGT  
GGGCGACGATTACCGGATGATGATTATCTGCGGATGAATTACCGCGCTGGTTCAGTCGCAATTTAATGTCAGCGAC  
CGCTGCGCCATTAGCGGTCACTCAATGGGTGGTCACGGTGCCTGATTATGGCGCTGAAAATCCGGGTAATACACCAG

CGTTTCGGCCTTTGCGCCAATTGTGAATCCGTGCAGCGTCCCGTGGGAATCAAAGCGTTTAGCAGCTATTTAGGTGAGG  
ACAAAAATGCATGGCTGGAATGGGACAGTTGCGCACTGATGTATGCCAGTAACGCGCAGGATGCGATCCCAGCCTTATC  
GATCAGGGCGATAATGATCAGTTTCTTGCCGACCAGTTGCAACCTGCGGTACTGGCAGAAGCCGCGGCCAGAAAGCGTG  
GCCGATGACGCTGCGTATTCAGCCGGGATATGATCACAGTTACTACTTCATCGCCTCTTTTATAGAGGATCACCTGCGCT  
TCCATGCGCAGTATTTACTGAAGTGAAAGTCCGCCCGTTTCGCCGGGCATCTTCTCATCAGAAGCGATAATCCACTGCCA  
TAAAGTAACGACGCTCCGTCTTCGTTATAGCTGTAGTCGTCACGACTGAGATCCTTGTGCGCCAAAGTTCAGCACGCTGCG  
CGCAGTTTGACGTCTTTAGTCACCTGCCAGGCCGCGCCGGTATTCAGATGGTATAACCGCCCGGTGTTTTAGCCGTGCG  
GCTGTGCGGCGGTTTTCTGCCGGTATAGTGCCAGAAACATAGAATGACCAGTCTTCAGCGCCAGCGGTTTTCCAGTCCA  
GCGTACCGTTAGCAGTATGGAACGGCAGATCGGATAGCGGTTTTTTTTGCGGTTGCTGACATCACGACCATCGTTGTAG  
GTGTAGTTGATCGACAGTTTCCATTATCGTTGAACGGAAATTTTCAGTTCGGTTTTCCACGCCCTGAATACGAGCTTTGTT  
AACGTTGTAGTAGCTAAATACCGGTATGCGCCGTCGGTTAGCGCCGCTCATAAACCAACAAAGTTTTGGTAGCCCGGTG  
CAGCGTTGACGTCAGACGTACGGCTGATGCTGATACGATCTTTCACATCGTTACGGAAAACGGTAACGCTGGATTCAACC  
CCTTCAGCCAGCCTTCTCACCCATGTAGTAAAGCCCAGCTCCCACTTTTCGCTGGTTTTCTGGTTTCAGATCCGGGT  
ACCCACAATCTTACATGCGCCACGGCAGGAATTGCTCGTCCAGTCAGGGCTAAGTTGCAACAGAGAAGGTGCTTTAAATG  
CCGTGCCCCAGCCCCCTTACCCTTACGGTGTGCGTGCAGCGGTTATAAACAGGTAGGCACGCGGACTCCAGTGTCCACC  
TAGTTTTCGTGAATCGTCCATACGCACGCCGGTCTGACGCGCCAGCGGCTCGAAGATCCGCCATTTCATCTCCACAAACAG  
CGGTAAGTGGCTGGCAGACGTTTTGGAGCTGGTTCCCGGGTTCAGGTTACCGCATCGCTAAGTTTTGCTGTGACGCCATT  
CACCGCAACCGTGAGAACTGATTAATCGCCGTCAGCGCAACGTGATTTGCGCTGACCGTATTGCTTTGGAAGTT  
ATCGGGCTGCTGTTGCCAGGTTTTTTGTTCTCGACTTTCTCACCGTAGTATTTTCAGTTCGCTGGTGCCGTAATCCCAACG  
CCCATTATGGCTGACGGAGTAGTTCTGGCGTTCCAGCGGTTTTTTGTTCCAGCGAGTCGGAATCACGATCTGACGGTCTGA  
AACCGTATCCGGCAGTAAATCGTGATTTTGATTGGTGTCCAGGCAAATTCGACATTGCCGTGCGGGTGGAGAATCCT  
TCAATACGCGGCTTTCTCCGGTATCGGTGGTGTGAGTTTTGCGGGTTCATCTTTTCAGTTTTGCCAGGCTGCCGTA  
AGTTTTATTCCAGCACACCATCAATTAATGGTCCACTGGTAAAGAACTGACCATTATAGGTGTCACCGCATCGCGAT  
GTTCTGAATGGTGGTATCGACGGTAACGGTACCCGACATTTCTGACCGATTTTTTTGGTGTGATATTACTACCCG  
CCGAGCGCATCGAACCGTACAGCGACGACATCGGGCCACGGACACTTCAATACGTTTCGATGGAATCGACCGGGATCCA  
GTTCAGATCGAAATCATTGTGGCGGAAGACGGCATTGCGGGAGTTCACGCGTTTACCGTCGACGAGAATCAGGGTATAGC  
TGCTGTCCAGACCACGAATACTAACGCCCTTACGGTATCCCTTCGTTTCGTCAGTTGTACGCCAGGCACTTCTTTGAGG  
ACATCCTTCAGATTCTGTACCGTTTTTCGCTGCAGGCTTCTCGGTAATGACGCTGATACTGGCAGGTGCATCTTTAAG  
ATTTTGTCCAGGAAGATGCAAGTACCAACCATCGTTTCGCCATCATCATCGACCGTAACACAGGCCATGCACAAGAAA  
TAGCGGACAAACACAGCCCGACCCGTACGAAAGGGTTCAACCTAAACATTCCATATCTCCATGAGGTAACACGAAAATA  
AAATGGGTTATCGCTCACATCTTCTCACGTCCCCTTGCGTACGGCAGCATCGCGGTGGACTTATTTTTTATGCAGGTGA  
TCATCCCAGAAAGCCGGAACAGCCTCTGATTTGTACGCTTTTTTTGATTGCGGCGTAACGATAATGCAAACGATAACAAT  
TATCAATCCAAATGTTAAATTTTATATCCGCATGATTTGTACGGGAAATGGAATGAAAAAGCCCTCTCGGTTGAGAGGG  
CTTAGCAAGGAAGGGAGGAACTTATTTCTTATCGTTCTGCGGAACTTCATTTTCGCTGTAGCGTACGAAGTGAGTTCTT  
TTAATCAGCTTGTAGCCGAACCAATAATCAGGAACAGCGGATACCAATATACGTTGCCGTACGCCGCCCCAGTCAAT  
AGTATCTTTAGGAACGCTTCGTAGTTCTGGCCAAAGTGATAATCAGACACAGAATGAATGCGAAGATCGGCCACGTG  
GGAAGAAACCTGAACGGTACGGCAGATCGTTAATGTGTCGTCCTGCAATACGTAACCGCGACGGAAGCGATAGTGGCTA  
ATGGCAATCCCAGCCAGGCAGATAAAACCCGTCATCCCGAGGTGTTACGACGACAGGTATACCGTCTGGTTGCCAAA  
CATGGAGGTGAGGAAGCACAGACCGGCAATCACCCTCGTGCATACAGCGCATTACGCGGCACGCCACCACGCGACAGTT  
TAGCGAAAATGCGCGGCGCTTTACCGTCACACGCGAGGGTGTACAGCATAAGAGTACGAGTACAGCAGTACATACCGGATACC  
GCTGACAGCACCGCCGTGAGAATAACTGCGTTTCATCACCAGCCGCGCAGAGAGCAGACCCGCGTGTGGAACACCCAGGT  
GAACGGAATAACGCTGATGTCTTTAACATCGTTACGACGAGGCTCGGATCGGTGTACGGAATAATCAGGCTGATAATCA  
GGATCGGAACACATAGAACAACAGGATTCGCCAGAACACCTGACGTACCGCGCGTGAATGTTTTTCGCCGGATCTTCG  
GACTCGCCTGCAGCAATACCGATCAGCTCGGTTCCCTGAAAGAGAAGCCGACAATCATAGCTACGCCGATCATCGCCGC  
AAAACCACAGCAAACGGCGCTTCGCCGATTGTCCAGTTGCTCCAGCCGCGAGGCTGCGCGCTTTGAAGATACCGATAA  
TCATCAGCACGCCAACGATGATAAAGACAATAACTGTCGTGACTTTGATCAGTGAGAACCAGTATTCCGTTCCACAAAG  
CCACGAACTGAGATGTAGTTCAGCAGGAAGATAACGCCAGGAACAACGCACTCCAGATCCAGCCCGGTGTATCCGGGAA  
CCACCAGCTCATGACCAGCTGAGCTGCAACCAGGTCAACGGCGATAGTACCCGCCAGTTGTACCAGTAGTTCCAGCCCA  
GCGCGAAGCCAAAGCCTTCTTCAACATAGTTCTGACCGTAAGTGGCAAACGAACCGGAAACCGGCATATATGACCCAGT  
TCACCGAGACTGGTCATCAGGAAGTAAACCATCAGGCAATCAGCATATACGAGAGCAATGCCCGCCCGGACCTGCCTG  
AGAAATCGTTGCGCCAGAGGCAACAAAAGACCTGTACCGATGGAACCGCAATGGCAATCATCGTCAGGTGACGCGCCT  
TTAATTCACGGCGTAAGCCCGCGCTTCTGTGGTTTTAGTTTTCGAAACCATACAAAATGCTATCCATCTTAAAAATGA  
GGCGGATTGTAGCAGACGATTGGCAATCCTTCCGGCAGAAATACACGGTTATAAGACACCTTCATGATCGCCAGGGAT  
TATAAGTAAAGCAGCAATCTCTTTTCTGGCAATGATGCTGAAGGCGCTGCGTACGAAATCGACACAGCACCAGCAT  
GTTCTTGTACGCAACTTAACGCGGCACATTTGCGGGATCGCAATAGTCCAGAAAGCGCGTAGCGGTTGGAAAGGTGT  
TTTTGCCGATGATGTATACGCCACAACGTACGCATCAGGCGCGCAGAGGGACCGCAACTTCACTAATGTGCTGCCTG

CAATTGATCTTCAATCACACGTGCGACAGGCAACTAATTCCCAACCCATGACGCACCGCATGTTTGATTGCCTCGGAGT  
TACCTAATTCATCGCCATCTCAAACCTCGGTAAATGTGACAGCAACAGATAATCGACAATCTCCCGCGTGCCGGAACCG  
CGTTCACGCAGGATCCACGGCGCAGCGCCAGCTGTTCTAAGGTGACCGGACCACGGGCCAACGGCGAAGTCGGCGCGGC  
GAAAACCACAGCTCGTCTTCCAGCCACGGTTCAGAAATGATTTCAAGTGCTGTGGCACGGTCTTCAATAAAGCCAATAT  
CAACCGGAAATCCAGCACCGCTTGCATCACGTCTGGCTATTCCCAACGCTAAGTTCAATCGGCAACTGCGGATAATCA  
TGGCGATAACGGGCGATAACTGCAGGCAGAATGTAGTTACCGATGGTACTACTGGCATAGATACGAATCGCGCCGTTGTC  
TTCGCGAAACAGTTGTTTCGATTTCAACCCGCTGTTCAAGCAATGCCAACGCACGCGGATAGAGCAGCCGCCCCGTTTCAT  
TAACAACCAGTCTTTTCCACGCGATCAAACAGTTGCACGCCAAGCTGCCCTTCCAGGTCGGTCAAGGTCGCGTCACT  
GCTGATTGCGACAACGCCAGCATCACCGACGCTGGGTGGTTGATCCACTTTTCAATACTTCTGCAAAAACTTCCAAGT  
CCGGAGGGTGATGTGCATAGTCGTTACCCTTATAAAGATTAATTATAAATATATAATCAATTTTATTTTTAAACCAGT  
TAGTCGTAACCTTATGCCGGTTAAAGGAGAGGGTATGACGAATATCACCTTACAGAAACAACATCGTACACTGTGGCA  
TTTTATTCCGGGGTAGCCCTGAGTGCAGTTATCACGGGGTCCGCTGTGGGGTGGTTCCATTCCCGCGGTTGCGGGTG  
CCGGGTTTAGTGCCCTCACCTCGCAATCTTGTGGGGATGGTTTTAGGCAACACCATCTATCCGCACATCTGAAAAAGC  
TGTGACGGTGTGTGCTTTGCCAAGCAATATTTATTACGTCTGGGTATCATTCTTTATGGCTTCCGTCTGACGTTCTC  
GCAAATGCCGATGTCGGTATCAGTGGGATCATCTTACGTGTGACGCTGTCCAGTACCTTCTGTGGCTTGTCTCC  
TGGGGCAGAAAGTGTGGTCTGGATAAGCACACCAGCTGGTTGATCGGTGCCGGTAGCAGTATCTGTGGTCTGCGCG  
GTAAGTGGCAGTGTAGCCGTTAGTGAAGCGGAAGCCAGTAAAGTAAACCGTGGCTGTTGCAACCGTTGTTATCTTCCGGAC  
CGTCGCGATTTTCTCTACCCGCGGATATATCCGCTGATGTCTCAATGGTTTAGTCCGAAACTTTCCGTTATCTACATTG  
GTTCTACTGTGACGAAGTGGCGCAGGTGGTGGCGCAGGTATGCCATCAGCCCGGATGCGGAAAACGCAGCAGTTATT  
TCCAAAATGCTGCGCGTATGATGCTGGCTCCGTTCCCTCATCTGCTGGCGCGCGTGTAAACAGCTGTCTGGGGCGAA  
CAGCGGCGAGAAAAGCAAAATCACTATTCGTTGGTTGCCATCTTGTTCATCGTAGTTGCCATCTTAACTCGTTCCACC  
TGTTACCGCAGAGCGTGGTGAACATGTGGTAACGCTGGATACCTTCTGCTGGCAATGGCGATGGCGGCGCTGGGTCTG  
ACCCTCACGTGACGCGCTGAAAAAGCTGGGGCGAAACCTCTGCTGATGGCACTGGTACTGTTGCTGGCTGATTGT  
TGGTGGTGGTGCATTAATATGTGATTCAAAGCGTATCGCATAAACCACTACATCTTGTCTCTGTTAACCCGCTATCA  
TTACCGTTTTCTCCAGCGGTTTAAACAGGAGTCTCGCATGAAATACATTGGAGCGCACGTTAGTGCTGCTGGCGGTCT  
GGCAAATGCCGAATTCGCGCCGCGAAATCGACGCAACCGGTTTGCCTTGTACCAAAAACCAACGTCAGTGGCGTG  
CCGACCGCTCACGACGCAACCATCGATGAATCAAAGCCGCTGTGAAAAATCACTACACATCGCGCAAATTTCTT  
CCCCACGACGTTATCTGATTAACCTCGGACATCCGGTCACTGAAGCTCTGGAAAAATCGCGCGATGCCTTTATAGATGA  
AATGACGCGTTCGGAACAGTGGGGCTTTCTTTGCTCAACTCCACCCTGGCAGCCATCTGATGCAGATTTAGAAAGAGG  
ATTGCTTGGCGGATTGCGGAATCCATCAACATTCGCTGGATAAACTCAAGGTGTGACAGCGGTGATAGAAAACACC  
GCCGGTCAGGGCAGTAACCTAGGGTTAAATTCGAACATCTCGCGGCGATTATCGACGGCGTGAAGATAAATCCCGCGT  
CGGCGTCTGCATTGATACCTGCCATGCTTTCGCTGCCGGGATGATTTGCGTACTCCAGCCGAATGCGAGAAAACATTCCG  
CGGATTTTCCCGTACTGTCCGCTTAAAGTATCTGCGCGGGATGCACCTAACGATGCGAAAAGCACCTTTGGCAGCCGC  
GTTGACCGCCATCATAGCCTCGGTGAAGGCAATATCGGTGATGATGCGTTCGCTGGATCATGCAGGACGACCGTTTCGA  
CGGATTCGCTGATCCTCGAAACCATCAACCCGGATATCTGGGCAGAAGAGATCGCCTGGCTGAAAGCGCAACAACTG  
AAAAAGCGGTAGCCTGAAGTGAATAACCGGAAAAGGAGATCCTTGCAATTTTACGGCGTAAACCGCTGATTGACGAGA  
ACGAAATTCGGACATGCTGCAATCAGCCGTTCCGCGGTTGCGGCGCATATTATGGATTAATGCGCAAAGGCCGGATT  
AAAGGCAAAGTTACATTCACCGAGCAGGAATACTGCGTAGTGGTGGGACAATCAATATGGATATTCGCGGGATGGC  
GGATATCCGTTACCCGCAATCGGCTTCTATCCCGTACAATTTGCTGCTCAGCGGGCGGCTGGGACGCAACATCGCCC  
ACAATCTGGCGCTGTTAGCCGTTGACGTCATTTGCTTTTCAAGTATTGGCGATGACTTTTATGGCGAAATGCTCTGGAA  
GAAACGCGCCGTTGCCGGCGTGAATGTCTCCGGTCTCGTTGCTTTGTCATGGTCAAAGCACATCGACGATCTGGCAATTGC  
CAATCGAGACGATCAAACCGTGTGGCGATTAACGATACCATCTGCTGGAACAGTTGACACCGCAACTACTGAACGGGT  
CGCGGATTTACTTCGTCATGCGGGCGTGGTACTGGCTGATTGCAACCTGACAGCCGAGGGCGTGAATGGGTCTTTACC  
CTCGCTGATGAAATCCCGGTGTTTGTGATACCGTTTCCAGAAATCAAAGCGGGCAAAATCAAACACTGGCTGGCGCATAT  
TCACACCCTGAAACCACTTTACCGGAGCTGAAATTTTATGGGGACAGGCGATCACCAGCGATGCTGACCGTAATACCG  
CAGTGAATGCATTGCATCAGCAAGGTGTTGAGCAACTGTTTGTATTTGCCGATGAGTCAGTTTATTGACGCGAAAAG  
GATGGAGAACAATTTTGTGACCGCGCCAGCGCATACGACAGTAGACAGTTTTGGTGTGACGATGGTTTTATGGCGGG  
CCTGGTATATAGCTTTCTGAAAGGATACAGTTTCCGCGACAGCGCCGTTTTGCGGTAGCTGCGCGGCAATTTCCGCG  
CCAGCGGAGCTTAAACAACCTACCCTGTCTCCGATAACGCGCTTTCATTAGTGCCAAATGGTGAACAATGTTGCCGG  
ATGCGACGCTTAAACGCTTATCCGGCTACAAATCAGGCAATTTGAGCAAGTAAATGTAGGCTGATAAGCTTGGCGA  
TCAGGCAATGACACTCAAGTAAACCAATAAAGAACCAGGCAATGGTGCACATCAAGTTGAAAGCGTCCGCGCCG  
CAGCGCCCGTAAACCAAGCTGGGCGATTTCCGGCGCAGGTGTGGCGCAACCGAGAAAACGCCCCACCACCACCCCGA  
TAGAACCAAAGTTAGCGAAACCGCACACCGGAAGGAAATAATCGCCACAGTTTATGATCGAGAGTCCAGCGCTTTC  
AGATAGGGTGAGAAATTGAGATAAGCGACAAATTCATTTATTGCCAGTTTCTGTCCAATCAAACCTCCCGGCAAGATTCCG  
ATCACTCCAGTCCACACCATCACCCACGCCAGTGGAGCCAGCAGGTAACCTAAAATGGACTCCAGCGAGGCATGTTCAA  
AACCAAACCAGCCACCAACGCGCGGATAATACCGTAAATCAACGCAATTTGCAACAATGCCATCACCACTGTTGCC

ACACCTGCGGCGATTTTCAGCCCGGTCATTGCCCTGTGCGAGCGGCTTCAATAATGCTTTTTGGCGGTGTTTCGGTGAA  
AGAGAGGTTATTAAGGAAACCTGCGAAGATTCCGTTGCCGGCTTAACAGGCGGGCAAACAAGATCCC GCCAGGGATCG  
CCATTAATGATGCCGCCAGCAGATATCCACAGGCACGCCAGTGC GGCGTAACCAATCATTGTCGAACCAGCAATCGAG  
GCCATGCCACTACAAATCGCTGTAAATAATTCATTGCGATT CAGACGATCGATAAAGGGTTTGACGATTGCCGGAATTC  
GTTTTGCCCGAGGAAAATGGTGGTGACCGCGACGAATGACTCGATCTTGCTGATATTTAATGCTTCTGGAAGATACCGC  
CGAGAATTCGAATTAATCCCATCACACCGATGTAGTAGAGAATACTCACCAGCGCGGTGACGAAGATAATTGCCGGT  
AACACCCTGAAACCAAAGATAAATCCTGCACCATCAATAAGGTATCCATTTTCGGTCCGACCAGAGAACC GAAGATAAA  
TGCGCTACCCGCGTGCCTGTACGCCATCACTTTATG CACGCCAAAAGCGACTTTTTAGCGACCCAACGCCCTGGCGGTA  
ACCAAAGCATAATGCCGCCAATCACGACCTGTAACACTAACGCCGCGCCAACGGTACGCAGGCTGATCTTCTTGT  
ACTGACAGTAAAAACGCAATCGTCAGCAATACCACCTTCCAGAACACTTCTCATGACATCCATAGTGATTATCTCTTC  
ATGTCATATTGGGCGACGGCTTTCTGCCATCAGAAATAGCCAGGCTGCATCTTGCGATACCGGCCCGGCTTGTATCA  
ACACTTAATGGGTTTTGATGTAGCCGCGCAGCCTCTTGACTAATCCCAGAACAGTCTGTATCAATAGTGATGCCG  
ACTTTGGTATTGGCGGGCTTCCAAGAACGCCAGCTCGTCGAGACGGTACGCCATAGCAAAGGCCACTGTTGACGTC  
CACTTCGACGTACATCTCTGGGTTTTAATGCCATCAGGGTTAATCAGATAACCGATGCAGGTGGCGTGCACCGGGC  
CGCCAGCAAGCCGTAGTTTTGAACGCTGCTTTTGAGAGTGAAGTTCATGATGTCGCTGAACAGCTCCTCCGCGGGCCG  
CCTGCCCTTTCCATCCGAGCAATCACGTCGGGGTGC AAAACGGTCTGGTTGGTGAGATCGAGGCCCATCACTACTAATGG  
AACGCCGAGGTGAACACTACGCTGCGGCTTCCGGTTCGGCAAAGATGTTGAACTCGGCAGATGGCGTGAAGTTGCCCTG  
TACCGTAAGCGCCGCCATTAGCACAATTTACGGATTTTGGG CAGGATCGCGGGTTGCATACGCATTGCCACCGCGATA  
TTTGAAAGCGGACCAACCGGCACCAGAGTGATATCGCCATCGCTTGCATCAGGGTATCAATGATATATTTACC CGCATG  
AGTGCTTTCTGCCTGGCGGGTCAGCGGCTCGAATACCGGGCCATCCAGTCCGGTTTACCCTGAATATTTACGGCAACGA  
TTTGTTGACGCATAATGGGCTGCGGCATCCCGCATAAAACCGAACATTAATCTCCAGTTTCTGGCAAACATT CAGGCCA  
TTAATTAATGTTTTATCAAGCGTCTGATTACCCGCTACAATAGTGATGCCTAATAAATCTATTGCCGGATGTTTCGCCGC  
CATCATTATAGCAATAGCATCATCATGACCCGGATCACAATCCAGAATAATTTTTCTCTTTTCCATTGTTTATTTCTCT  
GTTTCCAGTTGCGTTATTTTTCTACAGCAAAGAAAATTCGACCGGGCCGATGATTGAATCTTAACAACAGCGTACGTAT  
GCTAAATATGAGAAATCTCATAGCGGATAAACATCGT GAAAGAAATCCACAATAATGATCTTAAGCAGCAATTGATGAGT  
GAATCCGCGTTAAGGATTGCTTTTTAACGGATGTTTCAGCCGATACGCGGCTGTTTCATTTTTTAGCGCGTGACTACAT  
TGTGCAGGAAGGGCAACAGCCGCTCTGGCTGTTTTAC TCGACGCGAGGCCGCGCCAGGCTTACGCCACGCTAGCTAATG  
GTGCGGTGTCGCTGATCGATTTCTTTGCCGCCCTGTTT ATTGGCGAGATTGAGTTAATCGATAAAGACCATGAACCG  
CGTGCGGTGCAGGCTATTGAAGAGTGTGGTGCTTGCCTCCCTATGAAACATTACCGTCCGCTGTTATTAACGACAC  
GCTATTTTTACGAAAATCTGCGTCACCTAAGTCATAAAAAT TATCGTAATATTGTTCTTTAACTCAGAATCAATCAT  
TTCCGTTAGTGAATCGCCTGGCAGCATTTATATTACTCTCGCAGGAAGGTGATCTTTATCACGAAAAGCATA CGCAAGCG  
GCAGAGTATTTAGGCGTTTCTTATCGACATCTTTTATATGTTCTCGCGCAGTTCATTACGACGGTTTATTAATTA AAAAG  
CAAGAAAGGGTATCTCATTAAAAACAGAAAGCAGTTGT CAGGACTGGCGCTGGAGATGGACCCGGAGAATAAATTTCCG  
GGATGATGCAGTAAAAATATTTTCAATAGCGCGATTGCCGGATGCAACGCTTAATACGTTTTATCCGGTCTACAAATCG  
AGCATTACGCCAGACCAATAAAGAACCCGGCAATAGTGC ACTCATCAGGTTGAAAGCGTTGCTGCTGCCAGCGCCCGT  
AAACCAAGCTGGGCGATTTCCGGCGCGCTTTTGGCGAAATAGCCGAAAATGCGCCAACGACAACACCGATAGAACCAA  
GTTAGCAAACCAAAAGCGCAAAGGAGATAATCGCAATG GTTTTCACTTCCAGCGTGCCGCCGTTTGCAGGTATGGGG  
AGAAACTCAGTAAAGCGACGAATTCGTTAATCGCCAGT TTTCTGCCAATCAGGCTACCCGCAAGATTGGCATCACTCCAG  
TCCACACCCATGATCCACGCCAGCGGTCCAGCACATA GCCAAAAATACTTTCCAGAGAGGCATTGGCGAAAACCAAACCA  
GCCGCCAATTCGCGGATAATGCCGTTGATCAGCGCAATAAATGCGACAAAACGCCATTACCACCGTCCGCACACACGCGG  
CGATTTTTTAGCCCGGTATCGCACCCGCTCGCCCGCTTCGATAAAGCTTTTTGGCGGGCTTTCGCTGAACGACAGATTT  
TCAAATGTGACCTGCGAAGGCTCGTTGCCGGGCTAAGA ATACGTGCAAACAAAATCCCGCCAGGGATCGCCATCAGCGA  
TGCCGCTAACAGGTAGTCAATTGGTACGCCATTCCGGCATAACCAATCATCATCGAACCGCAATGGACGCCATCCCGC  
TACAAATTGCGGTAACAACCTGTTGCGATTATGCGGATCGATAAACGGTTAACGATCGCCGGGATCTCATTTTGCCCG  
AGGAAAATAGTAGTAACCGCAACAAAAGATTCGATTTT GCTGATGTTGAGGGCTTTCTGGAAAATGCTGCCAAGGATGCG  
AATCAGCAGCCCATCACGCCAATGTAGTACAGCAGACTG ATGAGCGCAGTAACGAAAATAATCGCCGGAAGTACGCGAA  
AGGCGAAGATAAAAACCCGCACCGTCAAACAGGACATCC ATTTTCGGCCAAACCAGCGAACCAAAAATGAAGGCGCTACCG  
GCATCACTGTAAGACATCACTTTATGAACGCCTAATGCCGCTGTTCTACTGCCATTTTCCCGGTGGGAAGTAGAGCAT  
GATGCCACCAATAGCATTGTCAGCAGCAGTGGGCTCCA ACCGTGCGCAAACGATGCTCTTTTTATTCACTGACAACA  
GAAATGCTATTGCCAGTAACACCACCTCCCAACAACACTTCTATTATATCCATAATGATTTTCCCTTCATGCCGGTAA  
ACCCGGCGTCAGCGCCAGTTTTGGTATGCTTGATGAGTACGGGCGACGGCTTTCTGCCCGTCAGAAATTAACCCGCGAG  
ACGCTGATATCTTTGGCAATTCGCTCGCCAGAATGGCGT TTTGAAACACCAGCTGGATGTTGGATTTACGGCTGTCAC  
CGCCGGTCAGTTCAGCAACGCGGCCAGGAAATGGCGTACTTTCTTTACCAATGACTCCCTGAGCTTCAGCTTCAGCT  
ACCGCTGATCGATCGCCGATTGATAGTGTGTTCCGGCATAGCAA ACTGTTCCGGGATCGGGTTCGCTACCACGAGGCC  
ACCGTTACAGCCGCTTTGCCATTTACACCACCTTGCACGGGCAATTTGCTGGCGCTGTCGAGACGAATGCTGACGTCAA  
ACGGGCTGGTGCAGCAAAAACGAGGCAGCGCTTAGTCTGATAGCCAATTAACGGCACACCGAAGGTTTCTAAATAC



TCAGTGGTTAATCCTAAATCGAGAATAGATTTGCCCCGGCACAAACAACGGTGACATTAGTATTTGCCAGTTCTTGCAA  
ATCGGCAGAAATATCGAAGGTATGTTCCGCCCGCGATGCACACCACCAATTCGCCGGTGGCAAATACTTTAATCCGG  
CAAGCGCCGCAATAATCATCGTTGAAGCCACAGTGGTTGCGCCATTTTTCCGGCGGCAACAACAAAAGGTAATCGCGA  
CGACTAACTTTGGTCACGTTATGCCCTTACGACCCAGTAATTCATTTCTTTGCTTAACCCCACTTTCATCACGCC  
GCCAATAATGGCGATCGTGGCAGGTACAGCGCCCTGTTTACGAATAGTTTCTTCAACTTCAATTGCGGTCTGGGCAATTT  
GTGGGAACGGCATCCCGTGAGAAATAATGGTCGATTCCAGCGCCACAACCGTTTTTTGTTTTTAAAGCGTCTGCACT  
TCCGGGGAAATTTGTAATAATTCAGGGGAAATTTTTAATTAGACATTCTGCGTTCTCCACTAACGATATAACGTTGGCA  
ATCGATAAATCGGGGTTATTGGTGTATTCACAGGAGAGCGCCATTGACGAACATCCCTGTGCGAAACGAACAGATTCCGC  
AAACGGCATTCCGTCTACCCAACACGAAGCAAGTCCCGCCATCATGGCATCGCCCGCTCCGGTAACATTAATAACATTGG  
TTTTGATCGGCGCAGACCAGCCACTTTACCGCTGATATCGCTGTAATAACGCCGTGCGCCCATGCTCAATACCAGT  
CGGTTACAGCCATGTTGATGGAACCAGGCAGCAACTTTGCCACATCTTACGCGCTGACAGCGCAATCCCACTCAGGGT  
TTCCGCTTCAAGGCGTTTTGGCTTGAGAGTGTGGATCTGATTTAGACGGTTCGCGCACTTTGACACATTTCCATGCCGAA  
CCGGATCGACAAATACGGGTACGTTGGCGGCATTATCCAGAATCCATGCCAGTGCCTCTTCACTGATATTACAGTCCGCG  
ACAATGACCTTTGCCCTTGAATAAATTCACCGTGTGCGAGATATTAGTGTAAATAGCGTTGCTAATAATTCATGTC  
ATTTATAGCAACAGCACTTTCACCGGTATTATCGAGTAAATGATAAATAACTCGACGTATTTTCCCGGCACAATCAGGC  
ATTTATCGACATAAACCGCAGATTGATTGGTTTTGCGTTAGCAGCGATTGACCATAAAAACTACTGCCTACGGCGCTCAGT  
AGCCAGGCTTTGTTACCCAGCAACGCCAGGTTTTGTCGAATATTGCGCCCTACTCCACCAGCGTAAATTTTATTTTACC  
TGGATTTGAATCCGCATAATTTAATGATTCATGTGAATATCCGGCGACATCAATATTGCGCGAACCTATAAATTACGACAT  
AATCCTTTTTCGCGCATAGCACGTCCTCTGGTAAAAAATTACCAACCTGTCAATCCACAAGAATATAGATACTGCAAAGA  
CGTTTTAAACATGTGTTTCAATTTAAACATGTGCTCATAGTATGCATGTTTTACGTAAAGTAAATTACCGCCAGAGAGGC  
AAAATGGGCGATTTGAGCAGGCTCACAAAATGCGATTAATGCCTGAATTACAAAAGCGAGGAATTTGTGACGGGATGC  
ACAGAACAGAACATAAAAAAGGGCAGAAAATAATCGCCCTTGGAGAAATAACCTGAGTGTGATGAACGTTTGAAGT  
TTCTACTGAAAGATAAAACCATTTAAATTCATAAAATTACATTCACAAACCGGTCACTTCTTTGCGCTCATCAAATGTT  
ACAGGACAGGAAATTTCTGCCCTGTAACACACCTTTTATTACGCTGCTTTGCTACTGCGTCCACTTCCGGACGTTTTCAG  
GAAGGCATAGGCCAAACCCGCCACCAGCGTACCGGCAATAATTGCTACCAGGTAACCCAATACCGGCGTAATAGCGCCAG  
GGATCAGCAGAACAAACAGACCACCGTGGCGGCCATCAGTTTGCACCAATGCCATTGAGATTGCGCCAGTACGCGCC  
CCACCCACGATACAGCACGGCAGCACACGCATCGGATCACGAGCAGCAAACGGAATTGCACCTTCCGAAATGAAGCACAG  
TCCAATACCAGAGCGGCTTTGCCACCTTCTGCTGCGCTTTGTCGAATTTGCGACGCGCCACCATTGTTGCCAGACCCA  
TTGCCAGCGGTGGCACCATACTGCCGCCATAATCGCCGCCATCGGGCCATAGGTTTGAAGTACTCAGCAGACCCACACCG  
AATGCGTACGCTGCTTTGTTTACCGGACCGCCATGTCAGTACACATCATGCCACCGAGGATCGCCCCAGCAGAACC  
ATTCGACGTCCTCATGGTCTGCAGCCAGTGAAGTACGACCTTCGAGAATGCCAGCAACTGGTTTACCGATCAGGTAGATCA  
TCGCCAGACCGACCACCAGACTGGAATTAGCGGAATGATCAGGATCGGTTTACGCGCCTCCATACTCTGTGGCAGTTTC  
AATTGCGTACTGATTAATTCGCAATGTAACCAGCCAGGAAGCCGCAATAATACCACCAATGAAGCCAGAACCAGGTCGCT  
GACCGCCAGCATAACCGCAATCAGACCCGGAGTGAAGCCCGGACGATCGGCAATGGAAAAGGCAATATAACCTGCCAGTA  
CCGGCACCATCAGCGCAAAGGCTGAACCACCACCAATCTGCATCAGCGCCGACGCAACGTACCCGGCTCTTTAAACGCT  
TCGATACAAAAGCAAAGAAAGCGCGATACACAGACCACCTGCAACGACCATCGGCAGCATGAAGAAACGCCCGTACAG  
CAAGTGACGGTATGCGCCTGCACTCTCTTTCTTACTTTTCAAGTGGTTCGCGTTTGAAGTTCGCGCGGTTTTCATACGGCG  
TTGCTTTCAGCAACCGCTTTATCCAGTTCCTGCGCGTTTTCTTACGCGCCAGACCGGTAGAGGTACGATACATCGGTTTA  
CCAGCAAATTTCCGAGATCCATTCGATATCTGCCCCACAATACCAGATCCGCTGCTGCGACTTCTTCCGGAGTGAT  
TGCAATACCCGCGCAACAGAACACGGGTTTTCAACTTACCCACGACCGTTTTTTTCGCTTTCGTTTCAATGGCTT  
CAGCCGCCATAAAGGTGTGTGCTACGCCAGTCCGGCAAGCAGTACCCGCAACTACGCGTTTTCGGACCGCTGGCGGCAACT  
GGTGTGTCGACGACCGGCGCAGTGAAGTTTTGCGATGGCCTTTGGCTTACTCAGGAACAGCTCAGGGTGCAGCAAC  
TGCCCGGAAATATCGCCAGCCAGACATTTTTACCGTTTACGCGCGCTGTCGTTTCGGGATGGAATCACCGAGAACAATCG  
CCATTTTACGCGTCTGTTCCGATTGTCGATGATTTCCAGTTTTGCTTTTTCGCGCCGCCGCGCCAGCAGGGTCTTCGCCATA  
TAGGCGCGTGCCTGACCGAGATTAGCGTCAATAATCAGCAGCGTTTTTATTATGCTCTCTGCTGTCAGTTAAAAGGTT  
GTAAGTCGACGCGGCCATCATTGCGGCCAATGCGGACGATCGGTAATACCCACATTGCTTTGACTTACCGCCAGGGCT  
GCAACAGCTGTCGCCAGACGAGTGTGTGTTCACTGGATTACGCATCAGCAAGCCATAAATCAGGCCACCAACCATAGA  
ATCCCTGCGCAACGGTGTACGACATCGACTGACGGTGGTTTGGCGATCCATTGCGCGGAGGCATTAACCCAAAGCG  
CGCTTTCGGCACCCAGTGAATAACAACATGCGCGATGCCCTTGTACGTAGCGCATGTGACGCTTCAATCACATCTTTC  
ATTTACGGCAGTTTACGGCTGCCAGATTTCCAGTTCGCGGGGTTAGGTTTACCAGCCACGGTGGCGCTTTCAAACC  
TGCTACTAACGCTTACGGCTACTATCAAAGATAATGCAAGGACACTGACTACGAGGCGAGTCAATCCAGTCCGTGAACG  
CTTCCGGGCTGACGCTGACGGTAAGCTTCCGCTGACACAGACCATATCGAACTGACCGAGCCAGCTCAGAGAATCAGTC  
ACAAAGCGTTCAGTCCGGGGGGTACTTCAAACCCGAGAAGTTGAAGTCCGTCACCTTCCCGCTTTTTTCCGTCAG  
CTTAACGTTAATTCGGGTGCGCCCTGTACAACCTGAAACCGTTGGCAATGCCAGCTCGCTGAACAGTTGCTGAAAAC  
CATCCTGATTGCTTTACCCAGGAAGCCGCAACGGTACATCAATTCAGGTTCTTTAATACTTTGGCCACGTTGATG  
CCTTACCCGCGCATGACAGCCGGTGGTTTTACCCAGGTTCACTTTCGCGCGTTCAATTTCCGGGCAAGAAACAAG

GTCATAAGCCGGATTAAGGGTGATAGTAGCAACACGTCTGCTCATTATGCGCCCTCCCAAGACCAGCAGCGATAGCGTC  
GCCGATTGCTTTCAGCGCCTGTTGAGCATCTGCACCCTGGGCGGTAAAGCGTAGGCGATGACCTTTCTAACGCCAAGTG  
CCACAACCTTTCATCAGACTACGTCCGTTTCCCGTTTCCCGGTACCATCAAGGTTTGTACGGTAATATCACTGTTAAAT  
TGTTAATGGTATTGACCAGCATGGTACCTGGACGAGCATGCAGGCCGTGTTCAATTGCGCACCACAACTCCGCGCTTAA  
CAGTCTCGTCCGTCGGCGCATCATCGCTGGTCAGCAGCGCCAGCAACGTTGCCGATCCGCTTTCAGCAAGCGGTGAGCTT  
TATTGTCGAGCAATAAATCAGCGAGACGCTTAAGAACCAGCGATGGGCTGATCGTCAATTCATCGCCACACTCACCAGCATG  
GCTGCCGTTTCCGCGTCCACATCAAAGCATTGTCGCGACGGCTTACCGCAATCGCGCTACGCAGATTGCCTTCCGCGCT  
ATCGCTCAGCCAGATAACCTGTCCGAGATTGAGCGGTTGTTCAATTGATGGCTTGGTGACGAAAGTGGCGTCAACTGCC  
CCGCTCTTTCAGACGCGCAGCGTTGAGCGCTGAAGAGTCAGCAGATCGCTGGCGACGATATCCAGTGTGAGCATTTCG  
TTGTCGAGCTTCACTGCTACTGCTTTTCCGCCATCAGTAATGCGCGAAGTCTTCTGCTGTTGTTGCTGACTTCAG  
TTGTTGAGCAACGGAATCATCGCTCAGTACGTGGGTGAGTGGCGTAGCAGGCCAGATGTTCCAGGCTGGCAGCAA  
TACCGATTGCCACGTACGCTACCTGACCGTACCCAGGTGACGCCTTCCGGAACTGAAATACCTGAACGCCGTTTTT  
AGCACCTGATCGCGGGTGTGGTAGTCCGTGTGGAATAGCAATACCATTGCCGAGGAACGTTGAGGTTTGTGTTCCG  
CGCCAGCATGCCATTGACCTAGCCTTCTGCTACATTACCGCCTGCACCAGCGCCGAGCGACCTGGCGAATCGCCTCT  
CTTGTCTCCGCTTTTCCGCCGATGGATGTCCTGTACGGATAACTGGAACATAGTTCTCTCTCTTGTGCTGAATTGAA  
ACGATTGACCTCATGAGAAAAAAGCGCAACCTGCTTAGGTTAAAGACAAGATCGCGCTGAAACGTTTCAAGAAA  
GCATAATACTTCTGTTTCCAGCACGCAAGGAAAGCCGTAAGGTTATGAGCAAAAGTTTGTGCTGCACAATTTTTTCC  
ATTTTTCTAATTGCTGATGGGAAAATCCGTTATCAGCAATTTCAATTCAGCAGCGTCAGCAGCAATCAGCAACAGTGA  
AATGGCATTGTTGACTATTCGTGGCGCTTTGATTTGCTGTCTGTTATTTTTCTGACAAGCAGCGTAACTCCGCGTCTT  
CCTCTTCCAGTGATCGACCAGCATGCATAACTCCCCGAGTCTCCAGCGCAAATCGTTTACCTGACCTCGACGCGCT  
TTTTAATCGTTGCTTTTCTACCGGTATTGCGGGCGCTCTGCAAACCCGACACTCAGTATTTTTCTTACCGATGAAGTA  
CATGCCCGTCCGGCGATGGTGGGATTCTTCTTACCAGCGCGCTGTCATTGGGATTCTGGTAAGTCAAGTCTTCCGCGG  
GCGCTCTGATAAGCGCGGATCGCAAATCGCTGATTGCTTTTGTGCTGTTAGGCGTGGCTGCACCCTTTTTG  
CCTGGAATCGCAACTACTTTGTTTTGCTATTGTTGGCGTCTTCTTAGCAGCTTTGGCTCGACCGCTAACCCGCAAATG  
TTTCCCTTGGCCGTGAACATGCCGACAAAACCGGACGTGAGGCGGTGATGTTGAGCTTTTTTTACGCGCTCAGGTTT  
ACTGGCATGGGTATTGGCCACCGCTGGCTTATGCCTTAGCGATGGGTTTACGCTTTACGTAATGTATCTGAGCGCAG  
CGGTAGCGTTTATTGTTTGGGTGTGATGGTGTGGTGTTTTTACCGTGCATGCGAAAAGAGCTTCCGCTGGCGACCGGC  
ACGATCGAAGCGCCGCGCCGTAACCGTCCGATACGCTGCTGCTGTTTGTCAATTTGTACATTGATGTGGGGCTCGAACAG  
CCTGTACATCATCAACATGCCGCTATTTATTATCAACGAACTGCATCTTCCGAGAAACTGGCCGGTGTGATGATGGGGA  
CCGCCCGCGGGTGGAAATCCCGACGATGTTGATTGCCGATATTTCCGCAAACGCTGGGTAAGCGTTTCTAATGCCG  
GTTGCTGCCGTGGGTGGCGTCTGTTTTACGCAGGAATGCTGATGGCGCATTACCTGTCAATCTGTTGGGCTTGCAGCT  
GCTAAATGCTATTTTTATTGGCATTCTGGGCGGCATCGGGATGCTCTATTTTACGATCTGATGCCCGGTGAGGCGGGT  
CAGCCACCAGCTCTATACCAACACTTCCGCGTGGGCTGGATCATCGCAGGATCAGTGGCGGGCATCGTCGCCGAGATC  
TGGAATTATCAGCTGTGTTCTGGTTTGCATGGTGTGATTATCGCCACTCTGTTTGTACTGCGGATTAAGATGT  
TTAAGGCGCGTCAAGATTTCCAGATCGATAAGCCAGGTGATGGCTGCTGACGCGAGTTACCGCACATTTGAGCGCTGG  
CTTGAAGCCTGCACAGACTTTCGGTCCGAGTGGCGAGGTGAAATTTTACAGCGTTGCTGTTCAAGCTGAATGCAG  
GGCGTATTGGCGGGTTCGCATCTGGCATAACGGGAATAGGGCTGAAATTTAAGGGGAGTGAACACGCCCGCAACC  
CGGACGGCATTCCATACGTTGTTCTCTAAGGTTAACCCCGGATTGATGAGCGCGCACAGTACCACCTTTTTTGCACCA  
GCAAAAGTGCGAATACCATTGCCCCGAAAGCCCGTCCGAGTACTTTGTCGCGATATTTTGTGACTTTTTCGACTACAGG  
AATTTTTCGATGCCAAGAGCGAACGAAATTAAGAAAGTATGTTACTGAATTAACAACGGCAAATGCTGTTGTTAAGGA  
TATTGATATTGATCGCCACTGCCCGGGTCCCGTACGCTGTACAAAATGCGTTTTTCTGATGTCCGTACCGGGCTGA  
AAGTAGAAGAGCGTTTCAAAGGTGATGATATCGTTGACACCGTACGCTGACCCGCGGTTACGTTGACTTCTCTATGTC  
GATGGCAACGAATATGCTTTATGGATAAAGAAGACTATACCCGCTATACCTTACCAAAGATCAGATTGAAGAAGAGTT  
GCTGTTTATGCCAGAGGGCGGCATGCCGGACATGCAGGTGCTGACCTGGGACGGTCAACTGCTGGCGCTTGGAGTCCGCG  
AGACCGTTGATCTGAAATCGTTGAAACCGCACCAGGCATCAAAGGGCATCTGCCAGCGCCGTAACAAACCGGCGACA  
TTGAGCACTGGTCTGGTATTGAGTACCAGAATACTTAAAGCCCGGGCGAAAAAATTCGTATCCATATCGAAGAACGCCG  
TTATATGGGCGTGTGACTAACTTACGCGCATGCAGAAAAGGGATAGCTCAGGCTGTCCCTTTTTTAAATTTATTATAC  
CAATCTTCTATTTTGGCTTCTGAACACCTTACGCCCTCAATTTTCACTCGTTGATTGATCGCCCTCACACTTCTATCGC  
ATTAACAATCCAGACCAATTTCAATTGCTGTATATAACTTTACTGTGTTGTTAATTAATCGTTACTAAGACGTGAC  
TCCTATGAATAAATCGCTCCGTTACGCTCCCGCATCATGTACACGCTCCACGCTATGATCGCCAGCAGTTGCAATCAC  
GTATCGTTCAATTTGGCTTTGGAGCCTTTACCGCGCTCATCAGCGTACTGACCGATCGTGTGCTGAATGCCAGGGC  
GGCGACTGGGGATCTGTGAAATCAGCTTGTTCAGCGGTGATCAACTGATGAGCCAGCTCCGCGCACAGAACCATTTATA  
TACCGTGTGGAGAAAGGTCCGGACGGCAATCAGGTGATAATTGTCGGTGCCGTTACGAATGCCCTAATGCAAAACTGG  
ATTCTTAGCGGCAATTTGAGAAATTTTGGAGCCACAGGTGGCAATTTTCCCTGACGATTACGAAAAAGGCTAT  
TGATTGACCCGGCCACCGTGCACCTGCACACAGTAATCCGCGGATTATTCACGATCTACAAACCCCTGAAGAACCTCA  
CTCCGACCGGGTATTCTCGTCAAGCACTGAAACGCCCGTGGAGCGGGCTTACACCGTTTACCGTGTCTCTCGC

ACAATATCCCGACAATGGTCATGTGGTGAAAAACGCGGTGCTGGGAATGGCAGAAAAACGTTCCGCCAGAACTCGCCGGG  
TGGATAAAAGAGCACGTGAGTTTTCCGGGAACCATGGTCGACCGCATTGTTCCGGCTGCAACCGACGAATCACTGGTGG  
AATCAGCCAGCATCTGGGGTGAATGATCCCTGCGCGATTAGCTGCGAACCGTTTATCCAGTGGGTGGTGAAGATAACT  
TCGTCGCTGGGCGTCTGCCTGGGAAGTCGAGGTGTACAAATGGTGAATGATGTCCTGCCATGGGAAGAGATGAAACTG  
CGATGCTTAATGGCAGCCACTCTTTTCTCGCTTATCTGGTTACCTCTCAGGATTCGCCATATCAGTATTGCATGCA  
GGATCGCGCATTTCCGCATGCCGCCAGAACATTAATGCTGGATGAGCAAGCGCCGACACTGCAAATTAAGATGTCGATT  
TAACACAATATGCGGATAAGTTAATTGCACGTTTTGCTAATCCGGCGCTGAAACATAAGACCTGGCAAATCGCGATGGAT  
GGCAGCCAGAAATTACCGCAACGCATGCTGGCAGGTATTGCATACATCAGGGGCGGAAACGGACTGGTCTGTTGCTGGC  
ATTAGGCGTTGCGAGGCTGGATGCGTTACGTCAGCGCGTGGATGATGCCGAAATGCCATTGATGTTCCGCGATCCGCTTA  
GCGATAAAATTCGCGAATTGTTGCGGGCAGCAGCAGTGAACAACCGTAACCGCCCTGCTTTCCCTGCTGAAATTTT  
GGTATGATCTGCCAGATAACCCGCATTTTGTGAGCCATCGAACAAGCCTGGCAACAAATCGTACAATTCGGCGCACA  
TCAGGCGCTATTAACACCCCTAAAATTTAACGATTTCTGCGGTTAAAGCGGATGAAGTCACTTCGTCGCTCTCCCC  
TTCTTTTTCTGCCTTTTTAGCCAGGATTAACGCTCAGTTAACTTACCAGAGTATTGCGGAGCGTTGTGACCAGGACC  
AACCTCATCACCGTTTTCTCGGCAGCGGAAACACGTCGATTCTTATCTGTTAGCCATAAAGATCCCAACGAAAA  
ATGGGCGTACTGGTTAATGAATTTGGGAAGTCGGAATTGATGGTCTTTGCTCGCGATAGCGGCGCATTGCTGAAAA  
AGATCCCGCGGCTGCATGTGCTGCGTTAATGGTTTACCATGCAGGTAGGTTGAATACCTTACTGCTGAGGAAAA  
CCAGACCGCTTGTGATAGAGCCGACCGGCTGGGCATCCGAAACAGATCCTCGATCTGTTAACCGCACAGTCTATGA  
ACCGTGATAGATCTGCGGCCACCTTGTGCATTCTCGATCCGCGCTTGTGCTGGACGAAAAAGCGCCAGCAATGAAA  
ACTTCCGTGACCAGCTGGCTGCCGAGACATCATTGTCGCAATAAATCCGACCGTACGACGCCGAAAGTGAGCAAGCG  
CTACAGCGTTGGTGGCAGCAAAATGGTGGCGATCGACAATTAATTCACAGTGAGCATGGGAAAGTTGACGGTCATCTTCT  
GGATTTGCCGCGTCGCAATTTAGCCGAGTTGCCCGCAGCGCCGCGCATTCTCATCAGCATGTCGTGAAAAAAGGGTTAG  
CAGCGTTAAGCCTGCCAGAGCATCAACGCTGGCGTCGAGTCTGAACAGCGGGCAAGGATATCAGGCCTGCGGCTGGATA  
TTCGACGCTGATACGGTATTGACACCATTTGGCATTCTGGAATGGGCGGACTTGCACCGGTGAACCGCTCAAAGCGT  
GCTGCGTATCCCGAAGGGTGGTGCGAATCAACCGTCAGGGCGATGACCTGCACATTGAAACGAAAACGTTGCGCCAC  
CGGACAGCCGATTGAGCTGATTTCCAGCAGCGAAGCTGACTGGAATGCCTTGCAGAGCGCGCTGTTGAAGCTTCGTTA  
GCGACTACCGCGTAAGGTTGCTGCGTTTTTTCAGTAAGATAATTAGAGAAAAATGATTAATAAATTTGCCGAAATAGTG  
TTGTTGAATATTGTCGGCCTCGCGCTGTTCTTTCTGGTATATCCCGTTAATCATGGATTCTGTTGCGGATTGATGC  
GGATATTTTTTATTTCTTAATCAGAACTGGTCGAAAGTAAGGCCTTTTTGTGGCTGGTTGCATTGACCAACAATCGCG  
CCTTCGACGGTTGTTCACTGCTGGCGATGGGTATGTTGATGCTGAGTTTCTGGCTGAAAGAAAACGCCCTGGCAGACGA  
CGTATCGTGATTATTGGTCTGGTCATGCTATTAAGTGCAGTGGTATTAACCAGCTGGGTACGGCATTAAATTCCTGAAA  
ACGGGCCAGCCAAACATTGACTTTTACCGATATTAACCGCGTCAGCGAACTGCTCTCTGTTCCACGAAAGATGCCTCAC  
GAGATAGCTTTCCCGCGATCACGGCATGATGCTGCTTATTTTTTCCGCAATTCATGTGGCGTTATTTCCGCAAGTTGCA  
GGCCTTATCGCCCTTATTATTTTTGTGGTTTTTGCATTTCCAGAGTAATGATTGGCGCACACTGGTTTACTGACATCAT  
TGTGCGTTTCGATGACCGTGATATTGATCGGTTTGCCTGGGTGTTGCTGACGCCATTAAGTGCATTAATCACCTTTT  
TTGACAAATCACTACCAGGAAAAACAACATTTCCAAAACAATAACTCACAGTAATTAACATCATCAGGGTATTTTT  
ATAGTGAGGATAATCCTGATGATGCGCACCGTCTTTCATCTATCGAACGAAAAATCATTCTAAGTAAATGAATGGA  
TTGCATGCGTTTCACTCAATTGACTTTAATTGACCAACCCCGCTTATTAATTTCTGTATCACTTTTTCTATAAAAA  
TCATGTAACCGCTCGCCAAGACCGCACCAATCGGTAATCTCGAACTCGTTTTGCTCGGCGGTAGATTATCCTCACA  
GCATATAATTTTGTGCGTTAGTCCACAGATTTGGCCTAAGGAATGTTTCAACATGCCAGGTAATTAAGTCTCGTGTG  
CTTGGCATTTTTTATAACGATATTTGCTGTTAAGGACTTCAAGGAAAAACAACAACATGGTCAAATCAACCGATTT  
TGAGATATATCTTGCAGCGGATTCCCGGATTGAGTGCAGTGGGTTCTGCTTTCTGCATGTAGTGAAAATAACCCGAAAG  
AATATGCATCCTGAGACACGTGCGAGTGGGTAGTGAACATCATCACTGCAAGCTTCTCAGGATGAATTTGAAAACCTGGT  
TCGTAATGTCGACGTAATAATCGCAATTATGGATCAGTATGCTGACTGGAAGGCGTACGTTATCGTCTGGGCGGCAGCA  
CTAAAAAAGGTATCGATTGTTCTGGTTTCTGACAGCGTACATTCCGTGAGCAATTTGGCTTAGAACTTCCGCGTTGACT  
TACGAAACAGCAGGAAATGGGTAATCTGTTTCCCGCAGTAATTTGCGTACGGGTGATTTAGTTCTGTTCCGTGCCGTTT  
AACGGGACGCCATGTCGGTATTTATATCGGCAACAATCAGTTTGTCCATGCTTCCACCAGCAGTGGTGTATTATTTCCA  
GCATGAATGAACCGTACTGGAAGAAGCGTTACAACGAAGCAGCGCGGTTCTCAGCCGAGCTAATAACCGTTTGGATG  
CAATCCCTTGGCTATCCTGACGAGTTAACTGAAAGCACTGCTTAGGCAGTGTCTTTTTGTTTTTATTTCATCAGAGAAAA  
GATGTTTCCGCGTCTTATCAGGCTATAGTCCGGTATTGTTATCTTTTAAATGTTGTCGTAATTTAGGAAATTAACG  
GAATCATGTTACATACGCGTCCCAATTTTGGACGTAAGCTCCTGTTACCTGCATTGTTGACGGCGTAATGATTGCGATA  
CTGGTGAGTTGCTTTCAGTTTTAGTGGCCTGGCATAAGCACGAAGTCAAATACGACACACTGATTACCGACGTAAAA  
GTATCTCGATACCTATTTTCCGACCTGAAATCCACTACTGACCGGCTCCAGCCGCTGACCTTAGATACCTGCCAGCAAG  
CTAACCCCGAACTGACCGCCGCGCAGCGTTAGCATGAATGTCCGAACGTTTGTGCTGGTGAAGATAAAAAACATTC  
TGTTTCATCTGCGACCGGTGAGATGGACATTCCACTCAATGAATGATTCCGGCGCTCGACATTAATAAAAAACGTCGATAT  
GGCGATCTTACCCGCGCAGCGGATGGTGGCAACAAACCCGCAATCGTCATCTGGTATCGCAACCTTTGCTGAAAAATA  
GCGGCGTCTTTGCCGCTCTGAATCTAACCTGACGCCTTACTCTTTTATAGTTCACGGCAGGAAGATTACGATGGCGTC

GCCTCATTATTGGCAACTACTGCGCTATCTACCTTTTCTTACGTTTGTATGAACGTTAACGAATTAACCGACATGCCAGT  
CCGTGAAACTAAAATTGCGGGCATTCTCTGACCGTTCGGCTTTATGCAGATGACTGGACATGGAACGATGTGTGGTACG  
CATTTTTACTGGCGGCATGAGTGGAAGTGTCTGTTGGCCTGCTCTGCTATTACCTGATGAGCGTACGTATGCGCCCCGGC  
AGAGAAATCATGACCGCCATCAAGCGCGAAACAATTTTACGTGGCGTATCAACCGGTGGTGGATACACAAGCTTTGCGAGT  
AACGGGCTGGAAGTACTGCTACGCTGCGGGCATCTGTCTGCGGGAGAAATCCCCGGATGCCTTCATTAACCTTTGCCG  
AATCGCAAAAGATGATTGTGCCGCTGACTCAGCACCTGTTTGAAGTAAATTGCCCGCGATGCCCGAGAATTAGAAAAAGT  
CTGCCGGTAGGCGTCAAATTTGGTATTAACATTGCGCCGACCATCTGCACAGCGAAAGCTTTAAAGCAGATATCCAGAA  
ACTGCTCACTTCCCTGCCCGCACACCATTTCCAGATTGTGCTGGAATTAACCGAGCGCGATATGTTGAAAGAGCAAGAAG  
CCACACAACCTTTCGCTGGCTGACTCGGTGCGGTAGAAATTTGCTATTGATGACTTCGGCACCGGGCACAGCGCGCTT  
ATCTATCTTGAGCGTTTTACGCTCGATTATCTGAAAATTGACCGTGGATTTATCAACGCCATCGGTACGGAACGATCAC  
TTCCCCGTACTTGACGCGGTGCTGACGCTGGCGAAACGCCTCAATATGCTGACGGTGTGTAAGGGTGCAAACGCCGG  
AACAGGCGCGATGGCTAAGCGAACGCGCGTAAATTTATGCAAGGCTACTGGATTAGCCGCCGTTACCCTGGACGAT  
TTTGTTCGCTGGCTAAAGAAACCGTATACGCCGAGTGGTAAGGTGTGCTTACGTCCCTTATTATTATAGTGAAGCAT  
GCCGGATTGCGGCTAATGATGAGTAAAGGAAATCCGTTGCAGATGATTGTGCGCATACTGCTGCTTTATCGCTGT  
TCACCTTTGGTGCAGGCGCAGGCTATCAAGGAAAGCTATGCCTTTGCCGTGCTGGGCGAACCCGGTACGCGTTAAT  
TTCAACCTTTTATTGATTATGTGAACCCCGCGCCAAAAGTGGCGCAGATAACGTTGTCAGCCCTCGGCACCTTCGATAA  
TTTCAACCGCTATGCACTGCGCGCAACCCGGGCGCACGCCAGCAGCTGTACGACACGCTATTTACGACTTCCGATG  
ACGAACCAGGCGATTATTACCCGCTGATTGCTGAAAGCGCACGCTATGCTGACGATTATTCCTGGGTGGAGTGCCTATT  
AATCCGCGCGCCGTTTTTATGATGGTTCGCCATTACTGCCCGCGATGTAGAGTTTACTTTTCAAAAATTTATGACCGA  
AGGCGTGCCGCAATTTCTGCTGGTCTACAAAGGCACCACCGTCAAAGCCATTGCACCGTTAACCGTGCAGCATTGAGTTAG  
CTAAACCCGGCAAAGAAGATATGCTGAGTCTGTTTTGCTGCGGTATTTCCAGAAAAGTACTGGAAGGATCACAACCTT  
AGCGACCCGCTCGCCACGCCTCCGCTTCCAGTGGTCCGTACCGCGTTACGTCCTGAAAATGGGGCAAATATTGTCTA  
TTCCCGTGTGAAAGATTACTGGGCGCAAACCTACCAGTAAACCGTGGACGCTGGAATTTGCACACCATTCGCTACGATT  
ATTACCTCGATGATAATGTCGCTTTGAAGCGTTTTAAAGCAGGTGCCTTTGATTTGCGTATGAAAACGACGCCAAAAAC  
TGGGCCACGCTTATACCGTAAAAATTTGATAAAAAATACATCATCAAAGATGAGCAAAGAACGAATCAGCCCAGGA  
TACGCGTTGGTGGCGTTAATATCCAACGTCGGTATTACGCGATCGCCGGTCCGGGAAGCTATCACTCTCGCTTTG  
ACTTTGAATGGATGAACAAGCGTTGTTTTACAATGCCTGGAGTGCACGAACAGTTATTTTCAGAATACCGAATACGCG  
GCCAGAAATTACCCGACCGCGGAGCTGGTGTCTTGGCACCAATGAAAAAAGATCTACCGTCAGAAGTCTTCACACA  
AATCTACCAGCCCGGATCCAAAGGCGATGGCTACGATCGTGAACCTGTTAAAAGCCGACAACTTCTCAACGAAG  
CGGCTGGGTGCTGAAGGTGAGCAACCGTAAATGCCACAACGGGTGAGCCACTCAGCTTTGAATTATTGCTTCCCGCA  
AGCAGCAATAGTCAGTGGTATTGCCGTTCCAGCACAGCCTGCAACGGCTGGGTATCAACATGGACATTCGCAAGGTGGA  
TAACTCGCAAATCACTAACCAGCATGCGCAGTGCAGCTATGACATGATGCCGCGCGTATGGCGGGCGATGCCGTGGCCCA  
GTTCCGATTTACAGATTTCTGGTCTATCGGAATATATCAATTCACCTATAATGCCCCGGCGTGAAAGCCCGGTTATC  
GACTCGCTGATCAACCAATTTATTGCCGCGCAGGGAAATAAAGAAAAATTTACTGCCGTTGGGGCAGCACTGGATCGCGT  
ATTAACGTGGAATTTATACATGCTGCCAATGTGGTACATGGCGGAAGACCGTCTCGCTGGTGGGATAAATTTCTCCAGC  
CGGCCGTGCGCCCATCTATAGCCTCGGTATCGATACTGGTGGTATGACGTCAATAAAGCGGCCAACTGCCGTCCGCC  
AGCAAACAGGGAGAGTAGATGGGCGCTTACCTGATTCCGCTGTTGCTGGTATCCCAACATTATGGGCGATTATCAC  
CATCAACTTTTTCATCGTCAAATTTGCGCTGGCGGTCCGGTGCAGCAGCCATCGCCGCCATTGAGTTTGGTAATGCCG  
GAGTATTACCCGGCGCAGGCGGTGAAGGTGTTGTCGAGCAGCATCGCAAACGGGTGTCGGCAATATACGCGACAGTAAT  
TACCGTGGCGGACGCGGATTAGATCCAGAAGTATCGCTGAGTCACTCATCGCTACGGTTTTGATAAGCCGATCCACGA  
ACGTTACTTCAAATGCTCTGGGACTACATCCGCTTTGATTTTGGCGATAGCCTGTTTCGACGCGCTCGGTGCTGACGC  
TGATTAAGACAGTCTGCCGTTTTCCATCACCTCGGATTGTGGAGCACGCTGATTATCTATCTGGTGTGATTCCGTTA  
GGCATTGCAAGCTGTTTATAATGGGAGCCGCTTTGACGCTGGAGTAGCGCATTATATCATCATCGGCTACGCCATTCC  
GGCCTTTTTGTTTGCATCTGCTGATTGTCTTCTTCCGCGGGCGCAGCTATTTGACCTGTTCCCTCTACGCGGCCTGG  
TTTCCGCTAACTTTGATTGCTGCGTGGTATCAGAAAATCACCGATTATCTGTGGCATATCACGCTGCCGGTGTGGCG  
ACAGTGATTGGTGGCTTTGCGGCGCTGACCATGCTGACAAAAACTCATTCTTGTGATGAAGTGCGCAAGCAATACGTGGT  
GACCGCGCTGCGAAAGGGTAAAGTAAAAAAATATTCTTGGAAACATGTGTTCCGCAACGCCATGCTGCTGGTGATTG  
CCGGTTTTCCGGCGACGTTTATCAGCATGTTTTTACCAGGCTCGTCTGATTGAGGTGATTTTTACTCAATGGTCTG  
GGCTTACTGGGCTACGAAGCAGCGTCTCGCGGATTATCCTGTAATGTTTGGTACCTTGATATTTTACCCTGATTGG  
CCTGCTGCTGAATATTGTCAGTGATATCAGCTATACGCTGTTGATCCGCGTATTGATTTTGGGGACGTTAATGTCGCG  
ACTCAGCCCCGTCATCAGGCCGTTGGGCGGTTTTGCTCATAACCGTCCGCGCTACTGGTCTGTTATGGATTTTCTCG  
TCTTGTGTTGTTGAGTTTGTGTTCTGAACTTATCGCCAACGATAAACCGTTGCTGGTGCCTATGACCGCAGTTGGTAT  
TTCCGTTATTGAAAAACTACAGCGAAAGCGATTTTGGCGGCCGCTGGCAAGTCAGGCTGATTATCAGGACCCGTTGGCT  
GAAACAACGGCTGGAATAACGGCTGGTACTGTGGGACCGATTTCGCTTTGGTGTACCAAGTATCAACTTTGCTACCA  
ATAAGCCCTTCCCTTCTCCACCCTCCCGGCAAACTGGCTGGGAACGGATGCCAACGGCGCGATGTGCTGGCACGCTT  
CTCTATGGCACGCGGATCTCGGTTCTGTTGGCCTGATGCTGACTCTCTGTTCCAGCGTATGGGCGTGTGGCGGGGG

GCTACAAGGCTATTACGGCGGTAAAGTCGATCTCTGGGGACAACGCTTTATTGAAGTATGGTCGGGGATGCCGACGCTGT  
TTTTGATTATTTACTTTCCAGCGTCGTACAGCCTAACTTCTGGTGGCTGCTGGCAATTACTGTCTTGTGGTGGATG  
AGTCTGGTCGGCGTGGTGGCGGGGAGTTTTTACGTACTCGTAATTCGACTACATTCGTGCGGCACAGGCGTTGGCGT  
CAGCGATCGCAGTATCATCTGCGTCATATGTTGCCTAATGCCATGGTCGCGACCCTCACCTTTTTACCGTTATTTTAT  
GTAGTTCGATAAACCACCCTGACCTCGCTCGATTTCTCGGCTTCCGTCTACCGCTCGGTTACCGTCACTCGGTGAACGT  
CTGTTACAAGGAAAAATAACCTTCAGGCCCCGTGGCTTGGGATCACCGCCTTCTTGTGCGTGGCGATATTATTGTCTTT  
GCTGATCTTTATTGGTGAAGCCGTCGCGACGCATTTGATCCTAATAAGGCGGTGTAGCATGACGCAAACCTGTTAGCG  
ATTGAAAATTTGTCGGTGGGTTTTCGCCATCAGCAAACCGTACGTACAGTAGTCAATGATGTTTCACTACAGATTGAGGC  
TGCGAAACGCTGGCGTGGTGGGTGAGTCAGGTTCAAGCAAAGCGTTACCGCGCTGTCAATTTTACGCTGCTCCCTT  
CCCCGCCGTTGAATATCTCTCCGGCGATATTGTTTTATGGCGAATCGCTGCTTACGCCAGCGATCAAACGTTGCGC  
GGTGTACGCGTAATAAGATCGCCATGATTTTTCAGGAACCGATGGTGTGTTAAATCCATTGCATACCTTGAAAAACA  
GCTTTATGAAGTCTTTCACTCCACCGGGATGCGTCGGGAAGCGGCTCGTGGCGAAATCTTAACTGCCTTGATCGCG  
TTGGTATCCGCCAGGCGGAAAAAGGTCGACAGATTATCCGCATCAGCTCTCCGGCGGCGAACGGCAGCGGGTGTGATT  
GCGATGGCGCTGTTAACGCGACCGGAATTATTAATTGCCGATGAACCGACCACCGACTGGACGTCTCTGTCCAGGGCGA  
GATTTTACAGTGTTCGCGAACTGCAAGGCGAGTGAATATGGGCATGCTGTTTATTACTATAACCTCAGCATTGTCA  
GAAAACTGGCCACCAGCGTGGCGGTAATGCAAAACGCTGCTGTGTGAGCAAAATTACCGCGCTACGCTATTTGCATCA  
CCCACTCATCCTTACACACAAAAGCTACTCAACAGTGAACCGTACGGCGATCCAGTCCGTTGCCAGAACCTGCCTCAAC  
GTTGCTGGATGTTGAACAGCTTCAGGTTGCCTTCCCAATTCGCAAAGGGATTTGAAGCGCATTGTGGATCATAATGTGG  
TGGTAAAAACATCAGTTTTACGCTACGAGCGGGTAAAACTGGGTTTGTGGGCGAGTCCGGTTCGGGAAAAAGTACG  
ACGGGACTGGCGCTGCTGCGACTGATTAATTCTCAGGGCAGCATCATCTTTGACGGTACGCCACTGCAAAATTTAAATCG  
CCGCCAGCTGTTACCTATTCGTCATCGCATTAGGTTGTTTACAGGATCCAACTCCTCGCTCAACCCAGACTCAACG  
TTTTGCAGATTATTGAGGAAGGCTTACGGGTTACCAGCCGACGCTTTCTGCCGACAACGCGAACAACAAGTATAGCC  
GTGATGCATGAAGTGGGATTAGATCCTGAAACACGCCACCGTTATCCGGCGGAGTCTCTGGTGGTACGCGACAACGTAT  
TGCGATTGCCAGGCATTAATTCTTAAGCCCTCGCTGATCATACTTGTGAAACGACATCATCTCGACAAAACGGTAC  
AGGCGCAAATATTGACGCTATTGAAATCATTGCAACAAAAGCATCAACTGGCCTATTTGTTTATCAGCCACGATTTGCAC  
GTTGTCCGCGCTTATGTCATCAGGTTATCATACTGCGACAAGGGGAAGTAGTGAACAAGGACCGTGCAGCGCGGTGTT  
TGCCACACCGCAGCAGGAGTATACGCGTACGCTACTGGCGTTGAGCTGACGCTTAAAAAGGATTGTAGTTTAAAAAGGT  
TCGGCAATTGCCACACCAAAATTTTTCAATCGGCATGTTGAGCAAACTCGCTCGGCGATTTACAAACAGGACCGGCTC  
ACCTTCACACTCCAGCACCGAATGGAATTCGATGTCGCTTAAACGCTGGCTTAGTTTATACATCACCGACCATGCAT  
TATCACCATCCGGGTAAGCAATTTAAGCGCCACCAGGCTGTTGTACCCGACGGTCCATTTTGGCGAATCGGTTCAACC  
TTCGAACCTGCGAAACAGCAGACCAGCGATAGTTCTGCGGCAGTCGATGGACGATTGAGAGTTGTAATGAAGTCACTTA  
TTTTCCCGGAAGCACATTCATTTCAAAATTTGTTTACATCAATTTTAAACATCATCAACAATCCGCTTTTATACAGAT  
CGTAAAGATTGATGCCTCGCTGCGTGGCCTCTATGGCTCTGATTTAAGTAATATCTGCGGGCGTGGTACGTTTGGCGG  
GCTATATGTACCCGTTTCTGCGATCTAACTCAACCTTTTTAACTACAATGATGTGACTTTTTACATAAATTGATTTTACA  
TAAAATAAACATATATCGGGGAATGATAGATTTGTGGTTGACATGCATCAACAAGGAAGCCTTTTAGCTTCTCGTTG  
TGCAATAGATCACCGTTTTTTCGGCCGACTGGCGTACAGACAGAAGAGAATGGAGCTGGTTGCGCAGAATGCAATTGACC  
AAATCATCGCCATGCAGAGTTAAAGTGCAGAGAGAAAGCAATGCGCAACAATGCCCCATGCCAAAACGGAAGGTT  
CCTGCCAGCGAAGATGCCGTTCCCGCCATATGGGAAAATCATCAAGAATGACCGCCATCGCATTGGATGACACCATCGA  
CACGAGCCCAAAACGCCCAACGCCAACACCAGCGACCAAAATCCAGCCCCAGCAGCGCACTGATGACCATCCAGC  
CTGCCATAATAAATTGTATCCACAACCCCGAGCGGAACATATTTAACGCAATGCGGCGGACGAAGCGGCTGTTAAAG  
ATGGTCATCACGAACAGAAAAACAATGTTTAGCGCAAAGTAATAACCAAGTTTTTCCGGCGGACGTGGTTAATTTCAAT  
ATAAACAAACGGTCCGGCGCTTAAAGATGAGAACATCCCGCAAAGCTGAAACCACTGGCAAGCATGTAGCTCAGGACAC  
GTTTATGGCGGAACAGCGCCGCAAAGTTACCAATAGTGGTACGAATGTGAAATGGCTGACGACGCTCCGTTGGTAAGGTT  
TCTTTAATCAGGAAGAAAATCATTGCCGAAGCCAGAATCGCCGCTAATGCCAGGATCCAGAAGATGTAATGCCAGCTCAG  
CCACACCAGCACCCAGCCGCAACTATCGGTGCCATCAGCGGTGCAATGGTTGTACCAGCATGACAAACGACATCATCC  
GCGAGAATCTTCTTTCGGGTAATATCGCGCATCAGGGCGTTAATGACCACGCTGGCCGAGCCGAGCCAGCCCGTGG  
AAGAAACGCATACAATCAGCTGATCGATGGTGTGGTCCAAACGCACACGCCACCAGCGGCGGCGCAAACACCAGCGTACC  
GCCGAGCACCCAGGCTTACGCCGAAAGTGTCTGCCATCGCCCGTAGATTAAGTCCCAACGCAAAGCCAGAATAT  
AAGTACTGAGGTCATCTGCGTACTGCCCGCGGTACGCCAACTGCGCTGAAATACCGGTAGCGGGGAGATACATA  
TCAATCGACAGCGCATCAACATGGCCAGCAGGCCAAGGATAAAAAACAATAGCAAACGACGAATGCTGTGCGGTGGTAC  
AACGGGCTCCTGAAAGTCATTGAAAAGTTAGACGACGCTGGCAATTTCTTCTCAGTTAACGGACGATATTCACCGGGG  
CTAAATCAGCATCCAGCGTAATACCGCAATACGTTACAGATGCAGCTCAACCAGTGGTTACCCAGCGGCGGAACATG  
CGTTTACCTGATGATAACGCCCTTCCGCTGATGGTCAGACGAACCTGCGTTGGGTAATCACTTCCAGCACCGCAGGCTT  
AGTGAGATCTTTTCTGTTATGCAGCTGCACGCTTTAGCAAATGCTCTGCCGTATCGTCAGCTACAGGTGATTCCAGTG  
TCACCAGATAGGTTCTTCGCAATGATGGCGCGGAGAAGTAATGCGGTGCGACCACTGACCATCATCAGTCATCAGCAC  
AGACCGGTGGTATCAATATCAACCGCCCCGCCGATGCAGTTTTCCACGCTACCGGTTTCAAGAAAATAGAGCACCGT

TGGGTGATCAGGGTCGTCCGTGGAGCAAACATAGCCCTGAGGCTTATTGAGCATGAAGTAACGTGGACCCTGTTGCTGCG  
CCAGCGGGTTGCCATCGTAAGCGACATCATGTTCCAGGAAGCAGTTTGAACGCTGCATTACGGACGATTTCCGCATCGACG  
GTGACACGATTGCCGCGGATTTACGCCCCGCAATAGCACGGCTAACGCCGAGTTGCTGTGCGATAAATTTATCAAGTCG  
CATGTGTGTGATTTTGCCTGTA AAAACGGAGGTCGGGCATTGACCCGAAAATCTGAACTGTTGTCTGCCAGTATAGCGG  
TCTAATAACATCCCTCAAGGGAAAAAGATCCATGGCATACTATTAGCAGAATAATCTACCTACGCGAGACCATGATTTTT  
ACACTTCGCCCATATCAGCAAGAAGCCGTGGATGCCACGCTCAACCATTTTCGTGTCATAAAAACCCCTGCCGTTATCGT  
GCTGCCACCGGCGCAGGTA AAAAGCCTGGTGATAGCGGAACTGGCACGGCTGGCTCGTGGTCGCGTGCTGGTGCTGGCAC  
ACGTTAAAGAACTGGTGGCGCAAACCATGCAAAGTATCAGGCGCTGGGGCTGGAAGCCGATATTTTTGCCGCGGGGCTA  
AAGCGCAAAGAGAGCCACGGTAAAGTGGTATTTGGCAGCGTGCAGTCTGTGCCCGTAATCTTGATGCCTTTAGGGTGA  
ATTTTCGCTGTTGATTGTCGATGAATGTCACCGTATTGGTGACGATGAAGAGAGCCAGTATCAGCAAATCCTCACTACC  
TGACAAAAGTGAATCCCCACTTACGCCTGCTGGGGCTGACTGCCACGCCTTTTCGATTGGGCAAAGGCTGGATCTACCAG  
TTTCATTATCAGGCATGGTACGCGCGGATGAGAAAAGCCCTTTCCGTGACTGCATTTATGAGCTGCCGCTGCGTTATAT  
GATTA AACACGGCTATCTGACGCGCCAGAACGACTGGATATGCCAGTAGTGAATACGATTTAGCCGCTTGACGGCAC  
AGAGTAACGGGCTGTTGAGCGAAGCCGATCTCAACCGTGAGCTGAAAAACAACAACGATTACCCCGCACATCATCAGC  
CAGATTATGGAGTTTGCTGCAACGCGCAAAGGGTGATGATTTTTGCCGCGACGGTTGAACACGCAAAGAGATTGTTGGG  
ATTACTGCCTGCCGAAGATGACGACTGATTACTGGCGACACCCCGGCTGAGCGCGATGTGTTAATGAAAATTTTA  
AAGCCCAGCGTTTTTCGCTATCTGGTCAACGTCGCGTACTGACCACCGGATTTGACGCCCCGACGTCGATCTTATCGCC  
ATTCTGCGCCCTACGAATCAGTGAGTCTTTACCAACAAATTGTCGGGCGCGTCTGCGTCTCGCTCCGGCAAGACTGA  
TTGCTTAATTCTTGATTATGCGGGTAATCCTCACGATCTTACGCGCCGGAAGTTGGTACACCAAAGGCAAAGTGACA  
ACGTTCCGGTACAGGTTTTCTGCCCTGCCTGCGTTTTGCAACACCTTTTGGGGGAAAACGACCGCCGACGGGACATTG  
ATTGAACACTTTGGTCGTCGCTGTCAGGGATGGTTTGAAGATGACGACGGTCATCGGAACAATGTGACTTCCGTTCCG  
TTTTAAAATTGCCGCAATGTAACGCGGAAAACGATATTGCCGCCGCGCTGCCGCAATGTGACACCGTACTGGTTG  
ATCCGGACGATATGTTAAAAGCGGCGCTACGACTGAAAGACGCGCTGGTATTACGCTGTAGCGGCATGCTTTGCAACAT  
GGGACGACGAGAAAAGGCGAATGGTTGAAAATCACCTATTACGATGAAGACGGCGGGATGTGAGTGAGCGTTTTCCGTCT  
GCAAACACCTGCCAGCGTACCGCCTTCGAGCAGCTTTTTATCCGCCGCATACGCGCACACCGGGCATCCCGCTGCGCT  
GGATCACCGCCCGGATATCCTCGCCAGCAAGCCTTATTGCGACACCCGGATTTTGTGCTGCGCCGATGAAAGGCCAG  
TACTGGCAGGTGCGTGAAAAAGTGTTCGATTACGAAGTCTGTTTTGCTGCTGGCGCAGCAATTACGCGGTTAATGGTAGTT  
TTGATTGATGATAAGGCGATTGAGTATAGAATCTCGCCGCTTTGCATACGCAAAGCAGATCACTTACCTGTTGCTGG  
GTCGCTGTAGCAGGATTAATTTAAGAGAGAAAAGAAATGTTTACTATCAACGAGAAGTACGTAAGAGCAGGGTAAGGG  
TGCAGCGCCGCGCTGCGTCCGCTAACAAAGTCCCGCAATCATCTACGGTGGCAAAGAAGCGCCGCTGGCTATCGAGC  
TGGATCACGACAAAGTATGAACATGCAAGCTAAAGCTGAATTCTACAGCGAAGTTCTGACCATCGTTGTTGACGGTAAA  
GAAATCAAAGTTAAAGCTCAGGACGTACAGCGTCACCCGTACAAACCGAAGCTGCAGCACATCGACTTCGTTCCGCGTTA  
ATTGCTGAATAAGTTGTA AAAAACCCCGCTCCGCGGGGTTTTTTGTATCTGCAGATTAGCCTGATTACGGTATTGCTA  
TTTTTTGCAGGCCAGATAAGGCGTTCACGCCGATCTGGCATTGAGAACACAAAACCGATTAATTGCCGCAGACGTCGG  
GCGCTGCAATTGGTCGCGCAAATTCGCGCGCGTGCCTTTAATGGTCAAGGTATCGGTTGCTGGATCCCAGAAGATGCGTT  
CACCTAACAGCATCGATCAAAGTTAATAGTCAAGCCACCGCCGCTACCGGCAAACCTCGTCAACTGACGCAGTGTGCTA  
CGGTCTGCCGGAAAGCTCTCTCCAGTTCGTAGCCTTTTTAGCCGCAAACCTCGTGAAGTCACTTCGTTACGCCTGC  
CAGCTCTTTGACAGCGATTTCAGTTCGATCTCTTCGCTGCCTGCAGCTGCTCATTACAGTAGCTATAAACCTGCTGGC  
GCACGTTCTGTCGCTCTGCTTTATCCAGTTGTGCTTCGGCAGTGAAATCATCAACCGCTTGCAACAGCCACGGTTTTGC  
GCTTTCCGCTTTAACCCCTTCGCTGGCCCGAGGAAATCCATAAAGAAATCCGCCACTTTGCGCCCTACTCGCCCTTCAG  
GAAAGTGAGATAGCGGGTGGACTCTGGATTGGTTTTCCATTCCGTTAAATCGATACGCGCAACAATATCCGCATGATTGA  
TATCAAGATAATGGGTTGGGTTGATGTGAGATTTTTGTTAACGCGCATACTGCTCAGGTTGCTCAGAAGTCCACCAGC  
AAATACTCCACCGCCAGATAGCGATAGTGGCAAACAGCACGAATCCACCGTCAGCAAAGGATATTTGCTAATTCGTC  
ACGACGGCGCGGTTGCCGCGCGCTAAATGCCAGGAAGTCTCTTCGCCCTGACGCTGTAAGCGCAGCGTCTGCGCCA  
GTTCACTCTCTTCGTA AACAGCCGTAAGCTTTATTTTTGGCGCTATAGACCCGATGCAGTTCTGCCACCATCTCAACG  
ACGGTTTCTGTCGTTCCAGCAATGAATCGCGCAACACCAGCTCAAGGTTCTGCTCATCACGCTTGATAAGCTGGTGAC  
AGCAATCTGGTTGATATCCAGACTCATGATAAACTCTCTTTAAGACCGGGCGTATTCAACCACCGCCGGTTAAGCGAC  
GCAATAAAAGATGGCGGTCATTTTACAGAAGGCAGCGTAACGAGAATGATTTAACGCATAAAAAAGCAGAAAAAAAACCG  
TTGCTACGGTAATATGTTGCCCTTTCATCAACTAAGTATTTGATTTATGCCACAAATTTCCGCTACAGTGATGAACA  
GGTTGAACAATTGCTCGCAGAGCTGCTCAACGACTGAAAAACATAAGGCTCCGACCGACCTTTCCCTGATGGTGTTAG  
GCAACATGGTCACTAACCTTATCAACACCAGCATTGCCCGGCCAACGCCAGGCAATTGCCAACTCTTTTCCCGCGCC  
TTACAGTCTCTATCAACGAAGACAAAGCGCACTAAGGAAAACAGATAACAGGTTATGGTAACTCATCGTCAGCGCTACC  
GTAAAAAGTCTCCAGATGGTCAGTTGGGGCACTGGTTGCACTGTTCAATATTCTGCTTTGCTCGCTATTGGCAGC  
CGTTACCTGTTTATCGCCGACTGGCCGACACGCTTGTGGTGCATTTATCTACGTAAGCATTATCGGCCATTTACG  
CTTCTGGTGTTCGCCACCTACTTGTGATCCTCTTCCCGCTGACCTTTATCGTCGGCTCCAGAGGCTGATGAGGTTTT  
TGCCGTCATTTGGCAACGGCGGAATGACGCTATTACTGATCGATAGCGAAGTCTTACTCGTTTCCATCTCCATCTT

AATCCCATCGTCTGGCAACTGGTTATCAACCCAGACGAAAATGAGATGGCGCGGACTGGCAGCTGATGTTTCATCAGCGT  
GCCGGTATTTTATTGCTTGAACCTGGTGTTCGACGTGGAGCTGGCAAAGCTGCGCAGCCTGACGCGTCGTCGACGCT  
TCGCGCGCCCGCTGGCCGATTCTTATTTATCGCCTTTATCGCCTCGCATGTGGTGTATATCTGGGCCGATGCCAATTC  
TATCGCCCGATCACCATGCAGCGCGCTAACCTGCCGCTTTCTGACCCGATGACGGCGGACGTTTTCTTGAGAAGCATGG  
TCTGCTTGATGCGCAGGAGTATCAACGCCGCTTATTGAGCAAGTAATCCAGACGCCGTTTTCCGTTCACTATCCGTTAA  
GCGAACTGCGCTATCGCGATATGGGCACCCGGGCAGAATGTGCTGTTGATTACTGTCGATGGCCTGAACTACTCACGCTTC  
GAGAAGCAGATGCCTGCGCTGGCAGGTTTTGCTGAGCAAAATATTTGTTTACGCGCCATATGAGCTCCGGCAACACTAC  
AGACAACGGCATCTTTGGCCTGTTCTATGGCATCTCGCCGAGCTATATGGACGGCATTCTGTCGACCCGTACGCCTGCGG  
CATTAACTACTGCGCTTAATCAGCAAGGCTATCAGCTGGGGTATTCTCATCAGATGGCTTACCAGCCCGCTGTATCGC  
CAGGCATTGTTGTGAGATTTCTCGATGCCGAGCGTACGCACCCAAATCCGACGAGCAGACCGCCACGCAGTGGATCAACTG  
GCTGGGACGCTACGCACAAGAAGATAACCGCTGGTTCGTTGTTTCTTCAATGGTACTAACATTGACGACAGCAATC  
AGCAGGCATTTGCACGAAATATAGCCGGGCGGCAGGCAATGTCGATGACCAGATCAACCCGCTGCTCAATGCACTGCGT  
GATTCTGGCAAACCTGGACAATACGGTGGTATTACTGCGCGTGGGGTATCCACTGAGCGAAGAGGAAGAAACCTT  
TGACTGGTCCCACGGTCTATGACGAGCTGATGCAACGCCTGTACATGTACGACACCTGCCAGCAATATTCGCAAGT  
CAGGATTTGTTCAACCTCAACGCCGCTATTACTGGTTACCGCAGCGGATAACGATAACGCTGGCAATTACCACCCCGAA  
AAAGACGCTGGTACTGAACAATAACGGTAAATACCGCACTTACAACCTTACGTGGTGAAAGAGTGAAAGATGAAAAACAC  
AGTTAAGTTTTGTTATTGCAAGTGTGACAGACGAGAAGCGTTTTATCGTAACCTGATTAATTATAAATCAGTTAGCGAAA  
TATCTTACTTGAATCGGTGTGAAAACGGTAGTATTAGCAGCCACGAGTCGGCACGTAGCCGAGCCTGGTAGCGACCCG  
TCATGGGGTGTGCGGGTTCGAGGTTCAAATCCTCTCGTGCCGACAAAAATCCCAAGAAAAAACCAACCTTACGGTTG  
GTTTTTTTATATCTGCAATTAATTCGATAAAACAGACCGTGACACATCACAGCCTGTTTATTTTCTGTTATCAGAAGTCC  
AGACCACACCCGCTGAGTATTCACGGCGATTCTACCCTGCGCATTGCCATAGCTGACAAATGACCGTTAAC  
GTCGGGGTAAACGATGACCTTATACCAGCCTGATAAACGCCACTGGTTCAGCCACATCATTATTAATTTGCCATCGTC  
ATTAACCTTACCTGGTTAGAATCGGCGTATTCTGACGCACGGCCGTTTTAGCCAGGGTTCAGCGTCGTACCGTTTT  
GCAGGTCCATGTGATAGCTTACCGCCGTTCCCGCTCAGCGCGTAATATCCGGTATTTCCACATCCGCGCGCATGCCG  
TTTGATAACGTGTAGTCTGACCATCTGTGGTAAAGCCGGTAAAGCCAGATAGGGTCTAACACTCCACAATCCGTCAAC  
CCAACGGAACCCGCTCTCAACATGAGCACCCGCGCCGTTACTATTGTAATCGCCAAACGCTGTTGCCCCATTACTCATCT  
TGCCATGGATGGTGTGGCAAAACGGTCAACTTTACCACCCCATCAACATAGGCACCGTTCTGATGCTCCCAACCGGCA  
TAAGCCCCAGGGTATAGCTATCGATATTACCTTTCGCGCCGCGATCAAAACCAATATCAGAATGAGAGTAACCAAAGAT  
CAAGCCGCAATTGTAAGTCTTTCACGGGAGAAACGGCTATCGATAACGAGCGTCAGGCCCGTCAATGTTTGCTCAA  
AACCAGTCCCGCATCAGTGGTCACGTTGTTGCGGGTGTAAATGCCGAACCTCACATCGCCGATCGTAACTAACGCCT  
TTTACGCTACCAAGACGCTCACGCACGGTGTCCAGTTCTGCATCAATACCAGCGGTTGTGCGGCCGCAATTCAGCAC  
ATCAGTGGTTGAAGGGTAAATTTGCGCGGATTCTCTGCCAGACTCCAGCTATGGTTGCCATTATCCAGCAAGGTATATT  
CATACGTACCGATATCAACAACGCCTCCGGCATTGCCAACGTAATGCAGCATCACCGCCGCCGTTGTTACCAGTGA  
AGGCTATCTCTGCTGCCGGCTGGCACCGGTGTCCGTACGAATATTTGAAATCACCTGTTGCCTGACCGGTGACGTT  
GAGCTGATCGTCTGATGATTAGCCATATCGGTACGCATATAAAAATTTGCCGTTTCCGACAGGGTATTGGTGGTCAACG  
TAATGAAATTTCCGCACTTCCCGTCACTGATGAACGAGTCACTGGCTCATCCATCATAATCACATTTGCGTCAGACATC  
GCAAGGTTGGTAAGTTGAGGAGGGTGTGGTTCGTCGTAGTGATATCGGCAATGATGGTCCATACGCTATTTTCGAG  
CGAAACGTCGCTTTGCTGGTATCCACGGCACCATCGTTCATAAAGAAGCGCCCTCAGAAACCACTACCTTACCACCA  
ACATTTGCGGGTGATAAATTTATTTGCGGCTTCATGACCTCAAGAATGCCATCATTCCCTCTGACTGAAACGTTAAACCT  
GTGCCAGCCCAGACGTTAGCGCGCCATTGTTGATAACCATATTTTCAGAGATGGCTTTTGAGGAATACGTGATACTCC  
ATTCTGATATGATCGACCGAGATCATATACCGATTGCTGCACTTTCTGACCCAGTATCCTTTCCAGCGATTGCATAG  
TGGCATGCTTATCAAGGATAGTATCAATGGCCTGCGTGTCTCCATAAACAATGAGCCCGGAACCATCATCCAGTTCAATA  
TTTTTTGACACACCATCTTTTATACTAAATTTGGCCTTACTGTTTGGACCACTCACTTCCAGCGCATTGTTGAGACAAT  
TAATTTTCCGCTGCTTTTTTATCAACGCCAGTTACAGTCCCGCCATCCATAACCTCCAGTAAGCCGCCACTATCTACAG  
TGGTATTATAAGCGAAGTCAATTTCTCAACTCGCAAACCTCCGCGTTTTTCCAACAACATATTATTAGCAATACCATT  
TTGATATCGAACTGACCGAGACGGTTTTGTTCCGAATACCTCCATGGCCCGCGTGGTTGTTTAAATAGCACCGCTGCTTT  
CTGATCTACCGCAAATGCAAATCCCCCTCTTAACTCCAGTAGTCTCCCTTTTCGATAGCGCAAAGACGGCCCCC  
CATCTTTTTCAACGATTAAGCGCCCGCTTAAATCGTGGTATCATTGCTGCGCCATAAACCTGTAGCACACCATTATTG  
AGCGTAGTCTGGTTTCCCGCGCCACCCATTTGAACAATTTGATAACCGTCATTTAATACTGAGTATTCTGCGGCGCCATT  
CATTTCATGTACTGATACCCTCCGTTAATTTAGTATTACTTACACCAAATTTCTTTTATGCTGTTCTCCGCCAG  
GATTGATTTTCTGATTATTGGCGGTCCATAAACACGCTGGATATCTTTTTCCAGGACAACACCATCAACTGTCTACCA  
TACTCAACAGTTGATGCCAATGCTATGGGTGAATATAAGGAAGGTGCGAATAAGCGGGGAAATTTCTTCTCGGCTGACTCA  
GTCAATTCATTTCTCATGTTTGGCCGATTTTTCTCCCGTAAATGCTTGAATCAGCCTATTTAGACCGTTTTCTCCG  
CATTTAAGGCGTTATCCCGAGTTTTAGTGAGATCTCTCCACTGACGTATCATTTGGTCCGCCCCGAAACAGGTTGGCCA  
CGGTGAATAACATCGCCAGTTGGTTATCGTTTTTACGCAACCCCTTGATCTGGCTTTCAGGAAGCCGAACCTGTCGCTT

ATGATGCGAAATGGGTGCTCCACCCTGGCCCGGATGCTGGCTTTCATGTATTGATGTTGATGGCCGTTTTGTTCTTGGC  
TGGATGCTGTTTTCAAGGTTCTTACCTTGCCGGGGCGCTCGGCGATCAGCCAGTCCACATCCACCCTCGGCCAGCTCCTCGC  
GCTGTGGCGCCCTTGGTAGCCGGCATCGGCTGAGACAAAATTGCTCCTCCTCATGCAGCAGATTACCCAGCTGATTGAGG  
TCATGCTCGTTGGCCCGGTTGGTGACCAGGCTGTGGGTGAGGCCACTCTTGGCATCGACACCAATGTGGGCCCTTCATGCC  
AAAGTGCCACTGATTGCCTTTCTTGGTCTGATGCATCTCCGGATCGCGTTGCTGCTCTTTGTTCTTGGTCGAGCTGGGTG  
CCTCAATGATGGTGGCATCGACCAAGGTGCCTTGAGTCATCATGACGCCTGCTTCGGCCAGCCAGCGATTGATGGTCTTG  
AACAAATGGCGGGCCAGTTGATGCTGCTCCAGCAGGTGGCGGAAATTCATGATGGTGGTGGGTCGGCAAGGCGCTATC  
CAGGGATAACCGGGCAAACAGACGCATGGAGGCGATTCGTACAGAGCATCTCCATCGCGCCATCGCTCAGGTTGTACC  
AATGCTGCATGCAGTGAATGCGTAGCATGGTTTTCCAGCGGATAAGGTGCGCGGCCATTACCAGCCTTGGGGTAAAACGGC  
TCGATGACTTCCACCATGTTTTGCCATGGCAGAATCTGCTCCATGCGGGACAAGAAAATCTTTTTCTGGTCTGACGGCG  
CTTACTGCTGAATTCAGTGTGCGCGAAGTAAGTTGATGACTCATGATGAACCTGTTCTATGGTCCAGATGACAAACA  
TGATCTCATATCAGGGACTTGTTCGCACCTTCCATAACGCTGTAGCCACCAGAACAGATATTGCGGAACGACAAAGAGAA  
ACAGAACCAGATTGATGCATTGAGCTTTCATCCTATGAAATTAATTGCTGTTAAAAGCATTGGGTACAGAAAATACCCAT  
AGCTCCATAACCGGAGTCAGTTTTTAAAACTGTTTAAAGAAATGCACAAGTATTGTGATTGATTTTTTGTGTTTTT  
TTGATGAGAAGCTGATGCAAAATCCGCTTTATAATGAAATGATGCCAAAGCGAACGACAAGGTTGAGTTTTCACTA  
CATGTCCATACAAAAATGGGTAACATTCACGCGCTGGTAGCGTTACCAACGCTACGCTCAAACATAATGATTTCTAAT  
AAAACTCAGGAGACTACTATGCTGAAGCAACACCTTTTTCAGGTGATGATTGTGGATGATCATCCACTTATGCGACGCG  
GTGTTCTGTCAGTTACTGGAGCTTATCCTGGCTCTGAAGTGGTCGCCGAAGCGGGCGACGGCGGAGCGCTATCGATCTG  
GCGAATAGACTGGATATCGACGTGATCTTGTGGATCTCAATATGAAAGGTATGAGTGGCCTGGATACTCTCAATGCCTT  
GCGCAGGGATGGCGTTACCGCGCAAATTATTATCCTGACCGTATCCGATGCCTCCAGCGATGCTTTGCGCTGATAGACG  
CAGGCGCAGACGGTTATCTGTTGAAAGACAGCGACCCGGAAGTATTGCTGGAAGCGATTCTGCGGAGCGAAAGGCAGC  
AAAGTCTTTAGCGAACGCGTCAATCAGTACTTACGTGAACGTGAAATGTTTGGCGCGGAAGAAGATCCCTTCAGCGTGCT  
GACGGAGCGGAGCTGGATGTTCTGCACGAGCTGGCACAGGGGCTGTCAAATAAACAGATTGCCTCGGTGTTGAATATTT  
CCGAGCAGACAGTAAAAGTACATATTCGCAATCTGCTGCGTAACTCAATGTCCGCTCACGCGTGGCGGCCACCATTCTG  
TTCCTGCAACAACGCGGGGACAATAAAAATAGCCCGATGGATTTATCATCGGGCTGAGATTTATGACAAACGAAAAT  
GCCTGATGCGTACGCTTATCAGGCCTACGTGGATCGATCAATTTATTGAATTTACACAATTTGTAGGCCGGATAAGGC  
GTTACGCGCATCCGGCATAAACTAAGCGCACTTTGTCAACAGTCTAGCCCGATGGCATCACCATCGGGCCTCTTTTTA  
TTTACTCTCTGCGGCGACAAATGTTGCATCGCCTGCGGATACTACGTTCAATCACCGCACGGCGAGTATCGTTGGCAG  
GTAAGAGTTTTCAACATCATCTCCACGCGCAACGGCTTCGCCAAATCGCTGCTGCTCAAAGGCATTAACCGCATACATG  
CTTAGCACACGGATATTGCTATGGTCCGTTCTACCAGCTGACGTAGCAGTTACCAGCCGAGGCGGTTGTCGTTGGGATC  
AGATGAACGAGTCAACGCTTCCAGCGTATCCCAGTGCAGCATCACTGTTTTTTCGGATCGAGGCGATACGCAGTGGCGTATG  
CATCGGTGGCGATACTGGCGTTACCCAGCGCCATGCCAACGCGGCCAACATAATCCAGCCTTCTATATCTCCCGGATTT  
TTTTGCAGTTGAGTACGCATCCCAGCGCAAGACGCGACATCTCTTCTTCTGTTGAGCGGATCGGCTTTCGGATCCAGCGC  
CCTGTCCAGCAACGCGGAGCCTGTGCCGTGGCCTGCTGCCAGATTTTACCTGCTGATAATTGCCAGTCTGGTAGTAGC  
TGACGCCAGCCACAATTAACGCCACCACAATACCCGGCAGATAAACAAACATATCCGGCAGCCTTACCTTCCGGCAGCCTT  
TGTTCAGGAAACGCTTCCGGCACCACGCTACCCGACGCGGAGCGGGCGTATATGACCCAACCGCCAATGCCAATAGC  
CACTACTGGCAGCACCCACAGCAGCACGGTACGCGCGTTAACGGCGGATCGTAAGTGACGAAGTTGCCGTAACGCGCCA  
CCATATAATCGACAATCTTTTTTACTTTTTACCTTCTGTCATGATTCATACACTTTCTGACGCAGGTCGGTGGCAATC  
ATCGAGTTGGAATCGGCAATGCTGTTGTTCTGGCATTTTCGGGACGCGCAGTTCCTCAGTGAGCTGACGGAACTGTTGTT  
CTGTGCTTCATCTTAACTGCAACACATCGATGGTGCAGCGCTGAGCCGGAGATCATCAGCATCAGCAGCCCAATA  
AAAACTCATTGTGCGGCTCCTTACTGTATTTCTCCACAGCGGCTTGTCTCTTCTTCCAGACGCGAGGATTGAGAT  
CGCCCGCATGGCGATAGCGAATGATGCGGTTGCCGTCAATAAGAAACGTTTCTGGCGGCCATAGACACCAGATCCAGC  
CCTAACATGCCATCGCCATCAAACAGGCTTAGCGCGTAAGGATTGCCAGCTCTTTCAGCCAGCTGATTGCCTTCTGGCG  
ATCGTCTTTATAGTTCATGCCGACCACGCGGATGCCCTGCGCAGAAAGCTGATTGAGATATTGATGTTCCGCACGGCAGG  
TCGGACACCAGGTCGCCAGACGTTAAGCAGTACTGTTTTGCCCTGAGTCAGCACATCCGCTGATAAACTGCCCGGA  
TTGTCCAGTGATTGAGACGAAACTTCGGCACAGGCTTCCAATGAGCGCCGATTCCAGATTGGTCGGATCATCCCCTC  
GGCATTACGCGCCAGCTGCCACAGCAGCGCCGCGGCAATGCCAGGAAGATAATCAACGGAATTAACAATACTTTGCGCT  
TCATACGGCTCCGGCGAGTTTTTTCGGGACTCACGCGTTACGATAGCGAGGATCAAACAGACACAGCAGTCCGCCCCA  
ACGCCATCATCAGCCCGCCGCCAAATCCAGCGAACAAATGTTTTGATGAAAGACGCACGGCCACGCGCGTTTTCC  
AGCTCTTACCAGAGGCGCGTACAGGTCACGCGTATGCCGCGTCAATTGCCGCTTCGGTTCATCATGACCCGGCAGT  
GTTGTAATAACGTTTTTCCGCATACAGCACCGTTTTCCGGCTTGCATCGCGGTTACGCCGATAGTCCGCACACCGCCAC  
GCCAGTTCGGGCCAGTCACTCTTTGACATCACGGAAGGTGAAGCGATATTCATGAATATCGACGCTATCGCCGGACTTC  
ATGCGCACATCAGCTCAACGCTATAGTTCTGGCTAAAGGCAATGCCAAATTTGCTACTGCCAGCCAAAGGTGAGCCGC  
CACCATCCCCAAATAACTGAAGGTGGTTTTCTGCGCGGTGAAATACGTAGCGCAGCTTCGCAATTTGCCAGCACCGCAA  
TCCAGCAGGCCATTGCCAGGCCGAGCACCGTTCATCGCCACAATTTGCTTTCGAACAGCCACGGCAACAGCAGCGACAGC  
ACCAGCGTAGAGATGAAGGCGATAATCAATAAATTCGGGATCTTACGCGGGCGATCCCGCCCCAGCGCACAGAGGACC



GACACCAAGCAGTAGCGCAAACGGCACCATCAGCCAGGTAACATGGTGTGAAGAACGGTTCGCAATCGAAATACTGC  
CCAGTCCCAGTTGCTTATGCACCAACGGCAGCAGCGTCCCCAGCAACACCACCAGCATCGCAGCGACCAGCAAACATTG  
TTCGCTAACAGCAAAGATCCCAGCAGCAGCGCATTGTTTACGCGTGAGCGAACTTTGTGTCCACGCGCGCAAACAG  
CAGCAGCGAACCGCAATCACCAGCACCATAAAGGCGAGGATAAACATACCGCGCGCCGGATCAGACGAAACGCGTGT  
CCGATACCAGCAGCCGGAACGCACGAGGAAAGTCCCAACAGACACAACGAGAAGGCACTGATTGCCAGCAGTAATGTC  
CAGCTTTGAAGCTGGCGCTTGTTCAGTGACCGCCAGTGAGTGCATCAGCGCAGTCCCACCAGCCACGGCATAAACGA  
GGCGTTTTCTACCGGATCCCAGAACCACCAGCCACCCAGCCGAGTTCGTAATAGGCCATGCGGAACCGAGCACGATGC  
CGAGCGTCAGGAAGATCCACGCTGCCAGCGTCCACGGACGAGTAAACGCGCATAAGTGCTGTCCAGACGCCCGCTCAGC  
AAAGAAGCAATGGCAAAGCAAACGCCACCGAGAAACCCACGTACCCCATATAAAGCAGAGGCGGATGGAAGATCAGCCC  
CGGATCCTGCAATAGCGGGTTAAGATCGCGACCTTCAATCGGGAAGTTGGCAACGTGCGAGAGAACGGTTAGAGGTAA  
AGAGAATGAACAGCAAAAAGCCGACACTGACCATCCCCATTATCGCCAGTACACGGGCCACAATATCCAGCGGAATACGC  
TGAATAAAAATCGCCACCGCAAAGGTCAGCCGCTCATCAGCAGACCCACAGCAGTAGCGAGCCTTCATGCGCGCCCCA  
GGTAGCCGCCACGCGATACCACCCGGAAGCTGGGTATTGGAGTTGCTGGCAACATAGGTGACGGTGAAGTCGTTGACCA  
CGAAAGCATTGACCAGCACCAGAAATGCCAGCCAGCAGACATAAACAGCAGCAGGCAAACAAGCGGGAAGACGCCATC  
ATGCGCGCATTCGCGCGCCACGCCCATAGCGGATACACGGACAGCAGCAGCGCAATTCCAGCGCCAGCACAGCAG  
TCCGTTACCAATTTCTGGCATCATGATGCTGGTCTTATAAACACTCGCCGGCGACGGTGGTTAGCTTCCATCGCTTT  
CTCAACTTCTGGCGCGTATAGTTTTATCGTGTTCGCCAGCACTTCTTTCGCGAGGATATGATTGCCTTTTTCCAGTT  
CGCCTGCACCACAACGCCCTGCCCTTACGGAACAGATCCGGCAAAATGCCTTCGTAAGAGACATCCACTGAGCCTTCA  
GCATCGTAAATGGTGAAGTCACTTTACGCAATTGGGATCGCGTGCACACTACCCGGCATCACCATCCCGCAAACGCG  
CAGACGCTGACCGACTTCCGGCATTGCTGAGTTTACGCTTGGCGTAGAGAATTTCCCCGGCGTATAAAAAGAGATCGA  
TATTCGAGCGCAGCGCATATAGCACCAGACGATAGTCAGCGCCAGCCCTGCCAACACGGCACAGGCAATCCACAAGCGG  
TTTTTACGGCGAATATTCATGCAGCCTCTGCTGTTGCGCAGCACGTAACGCGCCTCAGCGCGCCGCTGTTGCGCCACG  
CCACGCAGAATTGCGCGATGTTGCATCACCAGTGCACGACCAAAACACCAGCGGAATAACGGTCATCACCACCGCCAG  
CCAGACAAAAAAGGCGTAACCGCCATTGCGAAAAATTCATTCCAGGAAGCAAATGCAGGGGTCAATTTACGGCCTTTTT  
CAGTATCAGTTCCTCACCACGGACGGCTTTTTCCATCAGCAAAATCAAATTACGCATCCGCATCAGCGTCAGCGTGG  
CAGACAGGAGCAGGAAGCAAAAATCGACCAGCGCAGCGGCAACGCATCGCCGGATCGATACTTTGCTGCATCCGCGTT  
GATCCCTGATGAGGGTGTCCACCCTCCACGGAGTAATGAATAATCGGCAGATTACCACGCCAATCAGCACCAGGAT  
ACCTGCCGACGGCCCGCAGACGGCGTGTGCAAGCGGTGCCACAGGGCAATCACACCCACATACAAAAACAGCAGCA  
CCAGTTCAGAAGTCAGACGTGCATCCCATACCCACCAGGTGCCCCACATCGGTTTTCCCATCGAGAGCCGGTAACCAGG  
GCAATAAAGGTAAACACGGCACCAATGGGGCCATCGCCGCCACCGCCAGGTTGGCCATTTTCATCTGCCAGACAAGGCC  
AATAAACGCTGCCACTGCCATTGATGCATAAATGCCATCGACCAGATCGCCGACGGCACATGCAGGTAGATAATGCGGT  
AGCTATTTCCCTGCTGATAATCAGCCGGAGCAAAGCCGAATCCCCAGATCCAGCCGACGGTAAGCACGACCACACTGGCA  
ATTGCCAGCCACGGTATAAACACAGCCACAGATTTGATACAGCCGTGGTGGGATCGCCAGTTGATGCAGTGTTCACAT  
AGTTTCGATACCAGACTCGAAACAAAATCAGTAATCCAGCGTTATTGAATGCTGATTTCGTAACGCTGCCGCCGTGCAAA  
AGGACTTAATGTCGCGGTGCTGCCAGCAACGCGCTAAAATTGCCAGATACCCGTCAACGGGCAAATGCATAGAAGCCG  
CGTCCATCGCGCGGTGGCAAAGATGAGTAATGGGATAGTCAGCGGTAACACCAGTATGCTGAGCAGCACACCACCGCGC  
TTAAGTCCCCTGTCAGCGCCACGCCCCGTGCACCGAGAAAGCCAAGCGTAGGCGTTCCAGCAGCAGCGTCAGCGCCAT  
CACTTGCAGCCATAAACATCCATTTCCAGTAGCATTGCTACCAGTGGCGAAAGGATGAGTAACGGCAGACCGGTTACCA  
TCCAGTGGCCATCACCTTCCAGCACAACGGCGGCAAGGGTAACGGCAACAACATCAATTGTTCAAGACTGCCGCTCC  
TGCAAATCGTCAGGAACAGTCTGTTCCAGCGCCAGCAAGGATGAAAGCAGCGCAGCAACCCAGATAAATCCCGGTGCAAT  
ACGCGCCAGCAGTTGCGGCTCCGACCAGTACTGAGCGGAAAAAGGGTAATTACAATCAGGAAGAACCACAGCGGGTTGG  
CGATTTCCGCGCTATGGCGAAACGCTACACGCGCTCAAGACGAAAAATGCGCCAGAACATCATGCGGCCCTCGTTGCG  
TCAGTGAATGCGGCGAATTTACTTTAGCAACGTTGAGCGGCTGGTGGGTAGTCAGAATCACAATCCCCCTGCTCC  
GTATGCTGCGCCATACGCTGGGTGAGACGATCGACACCGTTAACGTCATCGCGGTAAGGCTCGTCGAGGATCCATAA  
CGTGGCACGGGTGAGCCACAGACGCGCTAAAGCGACGCGGCTGTTGTTGCCGGCCGAGAGCTGATTTACAGGAATATCTT  
CGAATCCGGCAAGCCCGGCTGCGCCAGGGCTTCCAGACATTGTCGGTATCGCCATCGCGATGATAAAGTGCAGATTT  
TCTAACGCGTCAGCCGGTTTTGATCCCCGCTGATGGCCTATCCATAACAGTTTTGATGGTAGCTGTCGCGTACCTG  
ATGCAAGGGTGCCTTGCAGAGAACCTCGCTGCGTCAGGGCGAGACAACCCGTCAGCAAACGGAGAAGCGTTGTCT  
TCCCCGCGCGTTGCTACCGGTGATTTGATCCACTCTCTGCGTTCAGCGTAAATGACAAGCCACTAAATAAGGTTTCGT  
TCATCCCGCTCACAAGTAACTCTCTGGCTTCAAGCATAACCCACGAATAACCTGTTAAAAACCTGGCTCGACTTCAG  
CATATCGGGCAGCTTGTGCGCTATCCCTTATGGCAATCAATACAGGTTTGGCCATCTTTCACCGCTGGTCATGCATCT  
TCGCGCAACCGATTTCTGGCGGTTGTATCCATATACTCGAAGTTGTGACAGTTACGGCACTCCTGCGAGTTATTGTCC  
TTCATGCGCCGCACTATTCTGTGCCATCGTCAGACGATGAGCTTCAAATTTCTGCGCGTGTCAATAACGCCAAAAAT  
TTTACCATACGCTCTTTACTTGTGTTGAGCTTGCATCATCTTCGGCACAACCTCGTGGGAACGTGACAATCCGGAC  
AGGTGCGACGGACCGCTACGGTGTGTAGTGCACGGAATCCATGTAATCCTGATACACCGTGTGCGCATTTCTGGG  
CAGCTAATGCAGAATCTTCGGTATTGGCTTTTTCCATCCCGGTGTTAAAGCCACCCAGAAGACGATGCCGCCAACAAA

ACCGATCAACAGCAGCGTCCCCAGCGCCAGACGGCTGGGGTACGCCACCATTTCCACAGGCGCTTAATCAGACCAGGCT  
TACGGTCAGAAATTTCCATAATAACCTCTTATTTCCCGTAACCTTTTGATGGGGTAAAGGTATTCCCCACGATTGGCGCG  
GTATCGGCCTGCGGTACGTGACATTGCAGACAGAAAATAACGACGCGGAGCCACTTCCGCGCCCACTTTGCCGTGCTGTC  
CATAAAGTGAGTAGGACTGATACGCGGCGGCCAGTGGTGCATAGCTTTTCGACACCGTGGCACTGCAAGCAGCGATTGG  
TATTGGTCGTTACCTGATAACCTTCAACGCTATGCGGGATCATTGGCGGCTGATTACATAGTTTCAGCGGCATCCGATCC  
TGCTCTTTTGGCATCCGAATGGCCCTTCTGTGTCCCGGATACTTCCGCGCACTGGCTAAAATCGACGCCATTAGCCGC  
CCAAACCGCGCGCTTACCACCAGGGCCAGCATCGCCGTCCATTGACACAGCGCTTTCTTACGGTCATGGCTTTTCATGA  
TTTCGCTCCCGAACTCCATCGTGTAGTTATTGTAATACATCCTCAGAACAGACATCCACGCGAGCACCAGCAGCAGTGC  
AATCGCGGCTGGTGACCTGCACCGGGCTTTGTTTCATCCAGCACCAGGGGACGTAGCACATGCGGTTCCGGGCAAACATGA  
AAACAATCCATACAGCGGTTACATTTCTGCCGATCGGTGGCCGCAACGGTAATCACACCTTTGCTACCCAGCAGCCATA  
CAGCGCGCCAACCGGACAAATGTGCCCGCACCAGCCGTGTTCAACGACCAGTAGATCAAATAAAAACAGCGCGAGAATAA  
GCAGCGCGCCGCTGCCGAAGCCATTACCAGGCTACGCCCATCAGAGAAACGGGGTTGATCCATTCCAAATGAGCGTG  
CCAGTTAAGGCTGATCCACCAGAATGACCACCAACAGCACGTAGCGAATGTGGCGAGGGATCGTCGAGACTGATTGAG  
GTCAAAGCGCTGCGTAACCAGTTCGCTAAGTCGGTAATCGGGTTCAGCGGGCAGACCCAGCTGAAAATAATCGCTTTC  
CCGCCAGGGCTAGAGCACGTTGATAATCACCAGCCGTTCAACGCCACCGTGGCAGGCAGATGACCACCTGGCAAGACTT  
TGCAGCGTCATCAGCGGATCGGTGACGGAACGGTGTGGAATAACAGGCTACTGCTGTAGTTGCCGTGCAAGTCCACAC  
ACCAAACCATGGACCGCTCAAAAACATCCCAGCAGGAAGAAGTACAAAAGGCGACGTAACACCAGCCACGGTGACTGC  
GCCACCAGCCTTTTTTCTCCAGCGCTCGCGCCCGGCTCACGTTTACGATTTGCCATTGTTCCCTCCAGCCAGCCGAA  
GCGGTAATGGTGACCTAACTCCCTTTCCGCGAGTGACAGCGGTAACACCTTGATTGCCGTTGTTCCAGCACGATACTT  
TTTCGCACTTACCGAACCGGTACAGCGCTGCTGTGAACCGTGGCAGAAAGCGGGCGTGTACCGGTACGCGTGTG  
CGCTCCAGCTCCAGGGTGTGGCTCATCAATTTTCCGGCATTCCGCGATAACAAACATCGCAGCGCAGCCCTGAAAGTT  
GAGACAGTTTTCTGGTCCACCAGTACCGCCAGCCCATCCGCGCGTGTGATCGATTCAATCTCACGATCCAGCGCAC  
CGCTTGGGCACACTTTGGCGCACGGAATGTCCTCACACATTTCCGAAAGGAATATCCCGTGCACAAAATATGGCGTCCC  
GCCGACAGACCAGAGGCCAGCGTCCGAGTTTTAAGGTGTGTAAGGGCAAGCCTGAACACACTGACCCGCAACGCACACA  
GGCACTGGCAAAGGCGTTCTCGTTTATGGCTCCGGGCGGGCGCAACCGCACGCCAGATGCGCGTGGGTTTGTGTTGTA  
ACCCAGCGCCACACCCACGGCAGCCAGCCGCTGCTGTGCGAACGACATCGCGCAGAAAGCGGGCGGACCATTTTTGA  
GGTTTCGCTGACCGGGACATAATGGCTTACACCTTCTCCAGTTTACCGCGCACTTCTTGAAGTCCGTCTTTTCGAGAG  
CGGATCGGTGCGATCCAGCGTCAGTTTGTAAACCAACTGTGCGGCGTGAAGAACGGCATGTACACCAGGCCCTGTGGCG  
GACGGTTACGACCGCGGTTTCAACAATCGAGATCACTTCCGACGGCGAGAAACCACTTTCACTTTGTGCCACCGGCG  
AGATCGCGGCTTTTCGATCCAGCGGGTGAATAAACAGGACCGCTTCCGGGAAGGCGCGGTGCACTTCTGGTACACGGCG  
AGTCATACTGCCGGTGTGCCAGTGCTCCAGAACCGTCCGGTAGAGAGCCACAGGTGTACTTCTTATCCGGTGCTTCCG  
CCGCCGTTTGAATGGCAGTGCGAAGATCACCGCTTGGCATCCGGTTTACCCTAGAACCTTATAGCCTTCCGCCGCTTTC  
ACGTACGGGTGTTACCTTCCGTGTAACGCCACTGCGTTTTCTTACCCTTACCACCGGCCAGCGCAGACCAGCGCGCTTT  
GTGGTAGTCATCGAACGGTGCCAGATCGTGACCGTGACCGCGACCAACCATGCGTACTCTTGAACAGCCCTTTTTGCA  
GATAGAAGCCAGCTCGCGGGATTTCATCGTTGAGTGTGATCTTCCGCCAGTTCGGATACCGGGAATTTGCTCACTTCCGGT  
GTGGCATAACAGCACTTGTACAGCGTTTTGCCACGCGTTCGGTTTTCTTCCGCGCAGATCTTCCGGCCATACTTCTT  
AGTTTTGAAGCGGCGGGAGAAGTGGACTAACTGCCAGAGATCCGATTTGCTTCCGCCGCTGTACCTGTTGACGCC  
AGAAGTGTGACGGGTTCCGGCTTACCCTAAGCGCCCTTTCTTACCACATTGCGGTGCGCAGGATCAAGTCCGGC  
GCCAGCGCACTGACTGTCGGATACGGATCGGAGACGATGTAAGTTGCGCGGATCGCGCCAGCCGATACGCTTCTT  
ATTGATGTTCCGCGCCGCTGATGTTGTTGGTACACATGGAAGTAAACATTGAGTTTCCGCTTTTCCAGCGCAGCGT  
CTTGTGCCACCGCGTGCAGACCGATTTTCCGCCGAATGGTGCCGCTCGGGATATTCCACTTCTTCTCGAGATACACGG  
TGTTTTCTGTTGGTACCACCATGTCCGCGAGGACAGCGGTGAGCAAAGGTGCCCACTTACCGCGCAGTACCACACGCAGA  
AGGTTGCCCGGTGAGGAGAACGACCGCAACCCGGCTGGGAAATTTTCCGGTCCAGAGGTGAGGTTGTAGACCAGGT  
TGTTAGCCACACGCCACGAGTATGCTGGTTGAAGCCATCGTCCAGTAGGAGATGACTTTCTTGTTCGGATCGGCATAC  
AGCTGCGCCAGTTGTTCTAACTGGTCTTTCGGCAGCGCGGTATTTCCGCGAGTTTTTCCAGCGTATACTCGGCAACGAA  
GGCTTTGTAATCTTCAAAGCTCATCGGTTCCGAGGCGTCAAGCCGGATTCTTCCGCTGCTTTTTCCAGCGGATGGGTCG  
GACGTAACCGTAGCCGATGTCGTCGCCCTTTGCGCAGGTTAAGTGTGCTGAAGAAGTCTGATTTATCGCATTG  
TTTTGAATGATATAGTTGGCGATGTAGTTCAGGATCACAGGTGAGATTGCGGCGTAAAGATGATGCCGTTATCCGCCAG  
CTCGAAGCTACGATGCTGGTAGGTAGAAAGCACCGCCAGGTGACGTTCTGGTTAGAGAGACGCGGTTAGTGATGCGCG  
ACCAGAGGATCGGGTGCATTTCCGCCATGTTTGGCGCCACAGCACAAACCGCTGAGCCTGCTCGATGTCGTATAGCAG  
CCCATCGGCTCATCCATAACAAAGGTACGCATAAAGCCAACTACTGCCGACGCATACAGTGACGCGCGTTCGGGTGAT  
GTTGTTGCAACGGAAGCCCGCTTTAAACAGCTTGGACGCGGCATAACCTTCCAGATAGTCCACTGACCAGAACCGAACA  
TACCGATCGATTTCCGGCCCTTTTTCTTTCAGGGCGTTTTGAATTTCTTCCATCACATCGAAGGCCTGATCCAGGTG  
ATTGGGGTAAATTCGCTTCTTTGTCATATTTACCGTTTTTATACGCGAGCAGCGGCTGCGTCAAACGGTCTTTACCGTA  
CATGATTTTGGCAGGAAATAGCCCTTAAATGAGTTTCCAGGACCGGTTAACCAGTTCGCTCCGGGTGCGCCCTGACAGGCCA  
CCACACGTCCTGCTGCGTTCCGACCAGAACGCCGCAACAGTACCAGAAACGGCAGCGGCTTTATCCCATTTGATG

GCTTCCTGCTGACCAACAACGGCGCGGGCAACGCCGGCAGCTGAGACCGGCAGCCGCCGAGCGGCCGCAACGGCGTT  
AGCTTTTCATAAAGCTACGACGACTGAGTTTCATGGTGTTCCTCACCTTGCTTCTCCTGCTGGTGATAAACCAGCGACAC  
CGCCAGCACGCCCTCTACGTTGCGTACTGACTCAATGGTTTGGATCAGCGTTTCGCTGTCTTCTGCTTCCACCACCACAA  
TCAACTGACCGCTCGGGCGTGCCTGACAGCAACTTACAGCCGGAAAGGCGTTCAGTTGGGTGCTGATGTCTGAAATT  
CGTTCGCTTTTGGCCTGCACGACCAGGCTGCAAACCTTGCAGTTAGTGTGCATGGAGATACTCCGCGATTATGGCTGATA  
CCGGACAGCTGGCTGCACATGCTCCACATCCGTTGCAAAGTTGGCTATTAAGTTGCGGCTGGTAGATCCCGGAGAGCGTC  
GGGCGAAAGATAATTGCCATTGGCTCACAGCTATCTGACAGCGCGGCATTCAACTGACTGATACGCCAGGCACGCGTC  
CCCGATGGTGAAGTCAAATCCAGGCCCTGGTGTGGCGCGGAGAAAATAGCGATTCCGGGCAAGCCTGCGCGCAGGCGT  
AACAGAAGCTGCACTCGTTATTTTTGAAATTAACGCTCGGATAGCCGCCCGCGCGTTCGAGAATGTTGTTTTACAAA  
GCATTAATACAGGCGTGCAGCGGGTGAATGGGTGAGAAAATGAGATTCATCACCGGACCAGGGCGGACGGATACCGTT  
ACTGGCTTTGCGCCAGCGACCAGTGAATGATGCCCCGACGGGATGCATCAATCTTACATTGACCTTCCATCATTAAACGG  
CTCTGAAAATTGAGAGCGACAAATAAACCGCATAATTAATAAGCATTTTTTATAGCCGCTAAGATATTAAGGATGTGT  
CAAAGATGCATACCCGATCGGGTAAAACCTGTAGCAGGATCAAAGAGTGGCGGGAAGCGTGGCAAAAACGGGCTTTT  
GCTCACATTTCAAATGGTTATAATATATTTATATAGCGATTGATTACCAGAGATATTTCTGCTGGTTGCTCTCTCAT  
TAGAATTTAACACTAAAAGAGCAGGTAATAATGTCTGAATGTTCTTTAAGTTATTCATAAAGCAAATTAATAATCTGAT  
GAATATGTTAACCTTTCAGCGACATCATCGGTGAAAACCTATAAATGAAGAAGGAAAGCAAAAAAATGAAGACCATTCTAC  
CTGCAGTATTGTTTCCGCTTTTCGCTACCACTTCCGCTGGGCGCAGAAAGCCTCCAGCCACTGAAAAAATCGCGCCT  
TATCCACAAGCTGAAAAAGGGATGAAGCGTCAGGTGATTAGTTAACCCGCAAGAAGATGAATCTACCTGAAAGTAGA  
ACTGTTAATCGGTGACAGCTGGAAGTCGATTGCAATTTGCATCGTCTCGGCGGGAAGCTGAAAAACAAAACGCTGGAAG  
GCTGGGGCTATGATTATTATGCTTTTGATAAAGTCAGTTCCCGGTTTTCAACGATGATGGCCTGCCGGATGGCAAGAAA  
GAGAAGAAATTTGTCACCGCGTATCTGGCGATGCTGGAATGCTGCGTTACAACAGCAAGTGCAGTCTGGTGTATAC  
GCCAGACAATGTAGATGTGAAGTACCGCGTCTGGAAGGCGGAAGAGAAAATTGACAACGCGGTAGTTCGCTAAACTGCCG  
TGAAGTGGCGACCCCGTAGGTGACACAAGGCGGTACGCGCATCCGACATCCAACGCCGAGCCGGTTGCTGATGCG  
ACGCTGGCGCTTTATCAGGCCTACACCGCTGTGAAGTGGCGCACCCCGTAGGTGACACAAGGCGGTACGCGCATCC  
GACATCCAACGCCGAGCCGGTTCCCTGATGCGACGCTGGCGCTTTATCAGGCCTACACCGCTGTGAAGTGTCCACC  
CCGTAGGTGCGATAAGGCGGTTACGCCGATCCGACATCTAACGCCAAGCCGGTTGCCTGATGCGACGCTGGCGGTCT  
TATCAGGCCTACACCGCTGTGAAGTGTCCACCCCGTAGGTTGGATAAGGCGGTTACGCCGATCCAACATCTAACGCCGAGCCGGTTGCTG  
ATGCGACGCTGGCGGTCTTATCAGCATAACGCCACATCCGGCATAACCATGCCGGATGTGGCGTATCATTACAACGCAATA  
TCCGCCACTTCTTTTTGAACGGGTTGCGGTTTTCAACTGCGGTTTTCGGCGTACTATCTGCTGCCTGCGGCTTGTCTAGTT  
CAACCCAGCACTTCCGCTGGTGTACTGCAACTCGCGTTCTGTTGCCGCTACATCACCGTTCAGCTTGCCTCCATAAGACG  
GAACGATCGCTTTCAACGTAGCCTGCCATTGCGGGTGGAAACACGATCGCCAAATACTTTTTCCAGCAGATTCAACATA  
ATCGGCGCGCGGTTGACGCCCTGGCGATGCCCCAGGAGCGCGGCAATGGTTCCTTGTGGTCACTGACGACTTCAGT  
ACCCAGACGAGTACGCCACCTTTCTCGGCATCAGCCTTGATAATCTGCACGCGCTGCCCGCTTCCACAAAACGCCAGT  
CCTTTTTTTGCGCTGCGGATAGTACTCTTTCAACGCTTCAAACGATCCTCTTCACTCAACATCACCTGACTCACCAGA  
TATTTACCAGATCGAAATATCCAGCCGACGTGCATCATCGGCATCACGTTAGAGGTGGTGGTGAACCTATTAGATC  
CCACAATGAACCGTTTTTGGGAATTTGGTTGAGAAGTGGCAAATGGCCAAAACAGCACTACGCGTTTACCGTCCAGAA  
CGCGGTATCGATATGCGAAACCGACATCGGTGGTGGCCCAACGGATGCTTTACCGTAAACCTTCCGCAATGGTGATTA  
ACCAGTCCGGGTTTTCCGAAACAAGGAAGTGTCCGCCACCGGAAACCGGCGTAGTCTTTCGCTTCCGGAATCCCGGA  
TTCTGTAAACGCTTTCAGCCCGCACCGCCGCGGATAAAGACAAATTTGGCACGAATGTTCTGTGCAGTGCCATTTT  
TCAGATCGGCAACGGTAACGGTCCAGGTGTTATCGTATTACGCTTTAGGGCGCGGACTTCCGCTGCTGAGTTGACGCGAG  
AAGTTAGATTTCTTCTGCAAGGAAGCAATTAAGTGGCGGTGATCTCGCCGTAGTTCACATCGGTACCAATTTCCGTACG  
CGTGGCTGCCACTTTCTGTTGCGGATCGCGCCCTTCCATCACTAACGGTGGCCACTCTTTGATCTGCGCGTATCTTACG  
AGTAACGCATACCGGAAACAGCGAGCTTTGTTGCAACGCGCGTAACGGGCGCGCAGGAAATTGACGTTATCTCGCCC  
CAGACAAAGCTCATATGCGGAACGGTATTGATAAATGAACGCGGAGTACGCAGCAGCGCGCTCAACCTGGTGGCCCCA  
GAACTGGCGGGAAATCTGAAATGCTTCGTTAATGGCGACTGCTTTTTCAATACTGATGCTGCCATCGCGTTTTGCGGGG  
TGATGTTAGTCCATCAGTGCAGAATGCCGGTCCGGCGTTATCCAGCCGTTGAACTCTCTGCGCGACACCCTCC  
AGGCGCTCCACCATGGTATCGACATTAGGCTCCAGCTCGCGTAAATAGTCCCAACGTGGCGCTCATAATGCCGCC  
GCCAATCAACAGTACATCAGTTTCTGCTCCTCGGACGTTTTCGTTTTGCCGCATCGAAACGGCATTAAAGCCCCACGG  
CCATCGAGAAGAGCATGGCAGTCACTTTTTTCTTGTAAATGCCTTACTTTTAGTGCCTTATTGCAGGTGAGATTTG  
CGGGCATCAACGGTAACACTTAAGTAACAACATTTAAATAATGTTTATAAATTATATTCTAATTTTAGAAAATTATAA  
TTTTGTTGATTAATTATAGGGTTATTAGAAATGAAGGGATTTTTAGCATATTGACCTGACGCGCAGCAGTCCGCCAGGTCA  
GCGTGTAAATATTATGCCGTCGGGCAACGGCATCACGCGAAGCGGCATCGCGCTTCCGCCGTCAGCTCGCTAAGTTG  
CCCATGCGCATTTCCAGCAGGCGGTGGCGTGGATAAAGTAATGATCATGACTGATAGCGAAAATAGTTTTACCCA

TCTCCTGCATCAGCGGCAGCAACACCTGATAAAACTCAGACGGAAGTGTGGATCCTGATCCGCCGCCATTTCATCCAGC  
AGGATAATATCGCTTCTTCTGCCAGCGCCAGCAACAGCGCCACGCTTTTTCTGCCCTTTTGATAACTTCAGGTTAAC  
AATACGCCCGTTGCTTAACTCAAGCTTATGAGCCATTTTCAGCTGCCAGCCACTTCTCAACCAGTTGCGGGTTAGCGG  
GTTTACCCTCCGGCCCCAGCAGTTGATCAAACAGCCAGACATCGGTAACACTGCCGAAAACAGTTTGCAGATAATCTCC  
GGTTGTTCCGGCTGACAGTGTTCATCCAGCAAGATTTCCGCCCTTTGTGGCTGATACAAGCCCGTCAACAACATCCG  
CAGCGTCGATTTTCCGCTACCGTTGCCGCAATCAGAAAACAGCAGCTCGCCACGTTTATGTTGAGATTAATCGGACCAA  
CGAAAACGCGTTATCCTGATAAGCAAACGTCACGTTACGCAGCTCCAGCGTTTGCAGTTGGGAAAACGCTCGGGGCGC  
GGAACTCTGCTTTGAAAGCGCGAGCGCAATTTGTTAGCTTGTAAACGCCACCTCGCCGTCAGCAGCGTCGGCAA  
TGCGCAACCGCCGAAAGCAGCGGCGTACGCAGGAATAAAGCGTCAACGAATAGGTCGCGCAACGTTGGTATCAGCCC  
AACCGAGGCTGTTCCGATCCAGAACCAGGCGGATTGCGCCAGCATCATGATGTTGACCAGTTCACGGCACTAAGA  
TGAAGGTGTCTGCGCAATAATATGGTGGGATACTCTTGCATCAGGAATGAGAGTTGTTAAACATACTCGGC  
GCTTCCCGTTCCAGAGTCAGCTCTTTCGCCCTTCAAGTACAGTTTAAAAATCCGTGTACAGCTTGTCTCGGTTTCC  
GCAGGTCGCCATATGTTGTACACCCGCGCCACCAGCACAAAACCGCCAGATGGTGTATCCAGATAGCCGTT  
ACCAGCAACATTTTCCCGCAGCATCCAGATACGCCGCTAACCGATAGTGAGAATGATCCCTGCACCAGTTCGG  
CAGACGCACAAAAGCAATGGTATGATTTGCGCACATCGTGGTTAACCCCGCAGCAACGAGGCGTACCAGTTGTTCAA  
TGCGCTCGACGTGAGTATCCAGAATCCGCTTGATAAAATTCAGTACGCAGTCGTTAAACGAAGTATGCCAAAAGTGGTG  
AGCGCCAGTTGCGATCCGAGAGTACTGCCATCAACAGCAGCAATAATCCAGAAAACCTCGGCAACACAGCAGACTGGT  
ATCCGCCGTTTTCGATAAGGCGCTGATTGATAAAAGCAATTAAGCCAATGCCTAATGCCGACTGGCGAGGCTTAGCGCCA  
TCACACTGATAAATGGCCAGCGATACTGCCGCCAGACAAGTACAAGAAGTTCATGCAGAAAACCCGGACAATGAATTAC  
AGCCCGCAGTTTAAACATCTTCCGCGCAGCAGCAATAATAATTCTTATTTTTTACCTGCCTGACGGAATGT  
CAGGTTGTAGCGGCGAGTCGATGGTGTAGTGGATGAAACCCCGCTTCAACGGTTGAATACCGTGATAAAACAGCCGCGATT  
CACCGCCCCATACCACCACATCGCCATGTTCCAACAACAAACGTTTGGCGGATCATTTGTTTCCAGCCGCCAAATTA  
AAAATCGCGGTAAGCCAGAGAAACAGAAACAATTGGCGCGCAGATCCGGTTCGTCTTATCCTGATGCAGCGACAG  
TTTCCGCCAGGAGCGTAGCGTTGATAAGACAAGCATCTGGTGGAAATCTGGATAGCCCGCGCGTAGCCGCACGTT  
GACATAAATTATGAAAACCTGTGGCATGGCGGGCCACGTTTATTTGTTTGGGATCAATGGGCGAATAGAGATAACCT  
TGCCGATGGTGTCCAGCCAGATGCCACAGTTGGTTCATCGCCACCGACATGGTATATCCCGGGGGTACCATCTG  
GCGAAACGGCGACTGGCTGGCAACGTCAATTAATATCGCGGATCAGTTGCTCCGAGCGTAAAAGCAAAACGCCGTA  
TTACCGCACCAGCCGAGTGGCTCTTCCACGTTTACGATCGGCAACAGATCCAACATTACCTCTCCTCATTTTTCAG  
CTTCCGCGGCGCAGCAGTTGCGCTTACCGCAGACGCCCCAGCGGTAACCGGAAAGTGTGCCATCACCACGGACCACCGA  
TGACAGGATTTATGATAGCCAGCTTGTGGCGGCACAGGCGTGGAACCGGCCGTACCCTTTCGTTTCCGATGGC  
GTTAGCCAGTTGCTGATAACTGACGGTTTACCAGCAAGGATCGTGGCAGTGCCTGCCAGACTTGTGCTGAAAAGCAG  
TGCCGCAATGTCCAGCGGTAACGTCAGCGGCGTATCGCGTTGATTGAGGCTGGCGATCACTTACGCACATGTTGCTGA  
AACATCAGATCGGCAGGCGGTTGTCGGCAGCGGAAACATCTGCTGCAACTCGCTGATTAGTGTGCGCTCATCATCGCC  
CAGCAATATCGCGCAATCCCCGCTCGCTTCTGCCACCAGGCAACGACCCAGCTCACAATCAGCCAGCGGTAACGCA  
CCGCCAGATTTTCCGACCGTGACGGAATGTTTAGCCGTCATGCCAGCGTTTTCGTCAGCTTTGCGATAGTAACTGCTG  
CTGTCGGGGAATCCGGCGTTAAGAATAGACGTCGTACGCTCTCCCTTTCGCCAGCGATTCCGCGAAACGGCGAGCGG  
CCAGGCTGTTGCCAGGCTTAGGCGTCATTCCGGTAGTCGCTTAAACAACCGATGTAGATGAAATGGACTCATGCCA  
CCTGGTCCGCTAAGGCTTCCAGCGTTACAGGCGTTTCTGTTCCAGCAGTCGACACGCGTGGTGATTTTATCCAACCGA  
TGTTGCTGGGCAATTGGCTTTTTCTGGTGACAACGTTTGCAGGGCGAAAGCCAGCGGCGAGTGCCTCGTGGCATTTGC  
GTAGAAGGAGACGTTTTTCCGCAAGCATGTCTGGCGCGCAAGACAGATTGCCAGCGTTGATCGTCAAGTTAAGCATGTGGCTTTT  
AAACGAATTCGCCGTCGGCATTCCGGTCCGGGCTAAGACAGATTGCCAGCGTTGATCGTCAAGTTAAGCATGTGGCTTTT  
TTCATAATCAGCTCCCTGGTTAAGGATAGCCTTTAGGCTGCCCGTACCATCAGCAAAAACCAACAATCTTGGCCTTT  
AATTTTTTTCGCTGACAAGGAAGCTTTTAAACTGTGGTGACATCCAGGTTTTAAAGCTATCGCCTTCTTGGTGATCATA  
TAAACCGCCAGCCCTTCCGGCGAACAACCTCTTATGCTTCTCCGGCCGAGTACCATCAAGCCAGTATCCAGGCATC  
GGCTTCCAGCGCCGTCGGAGCAATCACCCTCACGGATACCAGATTGTGTTGATGGGACGCCCGGTTTGGGATCGATAA  
CATGGGAAAGACGTTTCCGCTCCAGTTCGTAATAGTTACGGTAGCTGCCAGAGGTGCTAATCCCATGACCCTTATATCC  
ACCACAGCCTGAACCGGTTTTCTTTATCGGTTGGTTTTTGAATCGTACCCGCCACGGCAGGCTTACCCTTATACC  
ACGGCTGTTACAGCGCGCCGCCACCAGACACAGATAGCGGAAATCCCTTCTGCTCCATCAAGCGTGCCAAATGATCGG  
CCGATAGCCTTCCGCGACGGTGGAGAGATCGACATATAAATCCGGCAGGCTTTTTTGCAGATATTGCTGATGCGACTGA  
TTGATGACCGTCAGGTGCTGTAAGCCGTTTTGGCTTTCATCGCATCGATCTGTTCTGGCTCGGAATTTGAACCGGCTG  
TTGTTCCGGGCAAAGCCCCACAGATTCACCAGCGGCCGACGGTTATATCCATCGCGCCATCGGTCTTCCGCGCAATGC  
GCAGCGAGGTGGTACGATATCGGCCATCGCTTCACTTACCAGCCACGGCGATAAACTTTCGAGTCTGTTAAAGCGCATC  
AGCGCGAATCTTTTTATAGGTCGAAAGCAGCTGATCGTCCGGCTCCAGTTGGGTCTGAATCTTTCTTTAAGTTCCGC  
GCTGCGTTTTGGCGTCAATGCCCGGATGCTGGCACGCCAGAAGGTACCCATAGTTTTGCCTTCAAGAACGGTAACTTACG  
TAGCGTGGGTTTTGGCGGTTGTGGTTTTGATCGCAACCAACAAGAAGAGCGCGCAGCCAGCAGTCCACGCGGGTA  
AAGCTTATTTCCATACGTGATTATCCTCATGCGAACGGTGCAGAGTACACCAAAAACCTGAGTTTGTACGCTGAAAA

AATGAAAAAGGGCCCGCAGGCCCTTTGTTTCGATATCAATCGAGATTAGAACTGGTAAACCAGACCCAGAGCTACGATGT  
TATCAGTGTTGATGCCAGCGTCACGAGTGAAGTGGTTGTCGTCCAGCAGGTTGATTTTGTAGTCAACGTAGTGACATG  
TTTTTGTGAAAGTAGTAGGTAGCACCACATCAACATATTTTCAGGATATCTTCGTTCGTCTAGCCACGACCAGGTTTTT  
ACCTTTAGACTGCAGGTAAGCCAGGGACGGACGCAGACCGAAGTCGAAGTGGTACTGAGCAACAGCTTCCGAAGTTCTGTG  
CTTTGTTCCGCAACCCAGGGAACCTACGCGAGTTGCGTTGTAGGTTCTGGGTGACTGAGCAGCCAGGTAGATGTTGTTA  
GCCTGATATTTCAGACCACAGTGTAGGTTTCAGCAGGTCGCGGTTACCGATGTAAGCAGCGGTGTTCTGAGCATCAGT  
ACGTTTGGAGCTGGAGATCGCACACCAGATACCGAAACCTTCGTAATCATAAGTGATAGAACCGCCAGCCGCGCTCGCGT  
TTTGACGCACTGCGTCACGACCGTTGTTAGTTACGCCACTAGTAAAGCCTTCACCAGATGGGTTGCCGTTTTTACCCTGG  
TACTGAACAGCAAAGTTCAGGCCGTCAACCAGACCGAAGAAGTCAAGTGGTACGGTAGGTCGCGAAGCCGTTACCACGCTG  
CTGCATGAAGTTGTCAGAACCGTAGGTGTACCACCGAATTCGGCAGTACGTCGGTCCAGGAAGTTACGTACATAAACA  
CGCCGATGTTACGACCGTAGTTCGAAAGAACCACATCCTGGAATTCAGACCTGCGAATGCCACACGGGTCCAGGAGTTG  
TTTTCGTTTTAGCAGCTGTTGCCCTGGATCTGATATCCCACTGGCCGTAAACGGTTCAGTGGTCACTGAGTAACTGAGTT  
ACCTTTGAAGCAAGACGATGTAGGTTGTCGCCATCTACATCTTTGTTGTCAGAGAAATAGTGCAGGCCGTCTACTT  
TACCGTACAGATCAATTTGTTGCCGTCTTTGTTGTAACCTCTCAGCAGCGTTTGGTGCCTGCTACCAGCAGAGCTGG  
ACCAGAGGACAGTACTTAACCTTTCATGTTAATTAAACCTCTGTATATGCTTTATTTGCTTTTTTATGCCACTGCAT  
ACTGATTAACCTCATTAACTCAGTCGGCAAGTCCATTCCTCCCAAAAATGCAGAAATAATCCAACACGAATATGATACTAA  
AACTTTTAAAGATGTTTTATTTCGCTATAGATGTTCAAAATGTAAATGCAAGGGAACTTTTTAAAGATTATTGCGGAAT  
GGCGAAATAAGCACCTAACATCAAGCAATAATAATTCAAGTTAAAATCAATAACTTATTCTTAAGTATTTGACAGCACT  
GAATGTCAAAAACAAACCTCACTCGCAACTAGAATAACTCCCGTATCATCATTAACCTTATTTATTACCGTCATTCAT  
TTCTGAATGTCTGTTTACCCTATTTCAACCAGGATGCTCGCATTCCGTTTTTTTTACCCTCTTTACACACTTTTTCTT  
ATTCTGTGCTACCACAGAAAACTATAACGTTGTTAACTATTTCAAAATAATTAACATCCGCATAATTTCCAGCAATC  
TTTTGTTATTTGCAATTTTGTGTTGGCTTTTTGTAGGTTATTTGTACAGCAAAAATGGCGCTTGTACATCTATTTCCC  
CCAATGCAGGATGATAAATACACGGGAGAAAGAGAATCATCAATCAGGTAAGAGTCTGGAATTTACACTGTACCCCT  
TATACTGCCCTATCACTTCGCGAAGTTTTAACAGGTCAAAAACGAATGCGTACGAAAGAGACAACGGCCACGACCCGC  
TTTTCACTCCTACCGGGAGCATTACCCTTCTTTTTACTGTTGATCATTGTGTTACTGGTGACGATGGGTGAATGGT  
ACAAAGCGCCTTAAACGCTGGCTGAAAGATAAAAGTTACCAGATTGTGACATTACCCATGCTATCCAAAAGCGCGCTCG  
ATAACTGGCGTTACGTGACCTGGCAGATCTACGACAACATTGCCGCGACGACCTCCCTCTCCGGCGAAGGTTTACAA  
GAGACGCGCCTGAAACAGGATGCTACTATCTGGAGAAACACGCGCAAAAACGGAAGCGTTAATCTTGGCTCTCACGA  
CAACTCAACGCTTGTAGATGACTCAGCGGATGTCCACTTATCTGGATACATTGTGGGCGCAGAAAATGTACCGTGGTCA  
TGATTAACCTGAATGGTCAGGATAACAGTCTGGTGCTGATCTCAACCCTACCCCTTAAAGATCTCACCTCCGGATTTAAA  
GAATCGACCGTCAGCGACATTTGTTGATTACGCTGTCAGAGATGTTGCAACAGGCCAACGCCCTCGATGAACGCGAAAAG  
CTTTTCAACATGCGCCGCTGGCCTGGCAGAACGGTCACTTATACATTGCGTACTACCTTTAACAGCCAGGACATC  
TGGCAACGGTTCGTTGGCTTTTGTACTGCCGATTAATGATTTGATCCCACCGGGTATGCCGCTGGACAGTTTCCGCTTGAG  
CCAGACGCGACGGCAACGGGAAACAATGATAATGAGAAAGAGGGACGGATAGCGTCACTTAAACAGTACGAA  
GATTGAAATCTCCTCGGCACTCAACTTACCGATATGCGCCTGGTCTGGCAGGTTTCTTATGGCACCTTATTGCTGGATA  
CGTTGCAAAAACATTTCTGCTGCACTGCTGCTGAAACATCGGTTTGTGGCGCTGGCGTTATTGGCTATACCACATTCGCG  
CATTCTCCAGCCGAGTACAGAAAACGTCCCAGCACGGCGGTCATAAACGAATTGCGCATTTTTACGGGCAATCAATGA  
AGAGATAGTCTCACTGCTGCCGCTCGGCTGCTGGTTCAGGATCAGGAAATCGAACCCGACTGTACATAAGTAACAAAATTG  
CCGATCATTGCTGCGCATTGAACTGCAAAAACATCACCACATGGCGGAACAGCATCAGGGGATTATTACGGGACG  
ATCAATAACAGAGCTGTATGAGATCCGATGTTCCGAGCCAGGTCGCGCGCGCACAAAATTTTATTGCTGCGATCA  
GGATCGCGAAGTGTGGTAAACAAGAAAACCAAGCAGGCGCAGCGTCTGTATGAGAAAAACAGCAGGGGCGGATGATCT  
TTATGAAAAACATTGGCGATGCGCTGAAAGAACCCGACAGTCCCTGGCGGAGAGCGCGGCTAAAACCAACGCCCGGAA  
AGCAAAACAACTGGCGAATCAGGCGAGATGTGCTGGTGCAGGCTGGTTGATGAAATACAGTTAGCGAACATGCTTGGGATGA  
TAGCTGGAAAAGTGGAGCGGTGCTGTTCTCCGTCAGGATTTAATTGATGAAGTTGTGCTTCAGTGTTCCCTGCCATCA  
AGCGTAAAGGTCTGCAACTGCTGATTAACAATCATCTGAAAGCACAGATATGCGCCGCGGCGATCGCGATGCCTTACGA  
CGTATTTTGTCTACTGATGCAATATGCCGTGACCTCAACGCAATTGGGAAAAATCACCTTGAGGTTGATCAGGATGA  
GTCCTCCGAAGACCGCTGACGTTCCGCATTCTGGACACGGGAGAAGGCGTAAGTATTGAAATGGATAATTTGCACT  
TCCCGTTTTATCAACCAGACCCAAAACGATCGCTATGGCAAGGCGGACCCGCTGGCATTCTGGCTGAGCGATCAACTGGCA  
CGTAAACTGGGCGGTCATTTAAACATCAAAACGCGGATGGGCTTGTACACGCTACTCTGTGCATATCAAAATGCTCGC  
AGCTGACCCGGAAGTTGAAAGAGGAAGAAGAGCGTTTACTGGATGATGCTGCGTAATGGTGGATGTTACTTCGGCAGAAA  
TTCGGAATATTGCTACTCGCAGTTAGAAAATTTGGGTGCAACCTGTATCACACCCGATGAAAGATTAATTAGTCAAGAT  
TATGATATCTTTTTAACGGATAATCCGTCTAATCTTACTGCCTCTGGCTTGCTTTTAAAGCGATGATGAGTCTGGCGTACG  
GGAAATTTGGGCGTGGTCAATTGTCGTCAACTTCAATATGAGCAACGCTATGCAAGGAAGCGGTCTTACAATTAATTGAG  
TGCAACTGGCGCAGGAAGAGGTGACAGAATCGCCTCTGGGCGGAGATGAAAATGCGCAACTCCATGCCAGCGGCTATTAT  
GCGCTCTTTGTAGACACAGTACCAGGATGATGTTAAGAGGCTGATACTGAAGCAGCAACCAAGTACTTTGCTGCGTTAGC  
CCAAACGGCTCATCGTCTTAAAGGCGTATTTGCCATGCTAAATCTGGTACCCGCAAGCAGTTATGTAAACGCTGGAAC

ATCTGATTCGTGAGAAGGATGTTCCAGGAATAGAAAAATACATCAGCGACATTGACAGTTATGTCAAGAGCTTGCTGTAG  
CAAGGTAGCCTATTACATGAACAATATGAACGTAATTATTGCCGATGACCATCCGATAGTCTTGTTCGGTATTTCGAAAT  
CACTTGAGCAAATGAGTGGGTGAATGTTGTCGGCGAATTTGAAGACTCTACAGCACTGATCAACAACCTGCCGAACTG  
GATGCGCATGTGTTGATTACCGATCTCTCCATGCCTGGCGATAAGTACGGCGATGGCATTACCTTAATCAAGTACATCAA  
GCCCATTTCCCAAGCCTGTGATCATTGTTCTGACTATGAACAACAACCCGGCGATTCTTAGTGCGGTATTGGATCTGG  
ATATCGAAGGGATCGTGCTGAAACAAGGTGCACCGACCGATCTGCCGAAAGCTCTCGCCGCTGCAGAAAGGGAAGAAA  
TTTACCCCGGAAAGCGTTTTCTCGCCTGTTGGAAAAATCAGTGCTGGTGGTTACGGTGACAAGCGTCTCTCGCCAAAAGA  
GAGTGAAGTTCGCGCCTGTTTTCGCGAAGGCTTCTGGTGACCGAGATCGCTAAAAAGCTGAACCGCAGTATTAACCA  
TCAGTAGCCAGAAGAAATCTGCGATGATGAAGCTGGGTGTCGAGAACGATATCGCCCTGCTGAATTATCTCTCTTACGTG  
ACCTAAGTCCGGCAGATAAAGACTAATCACCTGTAGGCCAGATAAGACGCGTTAGTGTCTTATCTGGCATTTCGACCGA  
TTGCCGGATGCCGCGTAAACGCCTTATCCGGCCTACGATTCCCATTATTTCAACAAATTACATTAAGTAGGCCAGATAA  
GACGCGTCAGCGTCGCATCTGGCATTGCACTGAATGCCGGATGCCGCGTAAACGCCTTATCCGTCCTACGAATCCCGCG  
ATTTCTGACCCTCTCGGCATATAACGTCAGCGTCTGTTTTATCACATCCAGCGTTACCGGCTTCGACAGGCAGCTGTCC  
ATACCGACTCCAGACCCGCTGCTTCTTTAGCCAAACGCATTAGCAGTTACTCCGATTACCGGCAACGTCAGTCCCAA  
CTGACGAATCGCTTGCCTCAAGCGGTAAACCATCCATTTGGCAGTGTTCGACTGCTAAGCAGCATATCAATATGATTCT  
TGCTAAGTACATTAAGCGCATCGACGCCATCATTCCGGTTTTACATTGATAGCCCAACGATCCCAACTGATCTGCCAGC  
AAACGCGGTTAATCGGATGATCATCCAGCAGCAGAAATCATATCGTCATTATCGCTGACCGCTTTGTCGGTTGACCG  
CAGAGCGTTAGCAGGATCGTCGCTCTCCATCTCGATCAAATAAATACGCGCCAACAATGCCGGTAGCTCATGCGGAGCAG  
CCACACTGTGTACCCACTCCCCTGGCGTTTTCTCCAGCGGAATACCAATATGGCGACGACAGAAGGTCACTACCGCTCTG  
CCCTGCCATTTTTACTCACTACCTCGTCAGTGATCAACACATCTTCGGGAGTCGGTTCCTGCCCTTCGTATGTTGTAAC  
GACGATGCCGCTGCGCTGCAAACTGGTTTTCCAGGAACTGACAGAGCGACGCATTGCGGACCGCCAGCCAGCAGCGTTTAC  
CACTCAACCCTTCACGCTTTTTTCTGCGGTTACTGAGCGCGTACAACGGAATACGCACGGTAACTGGCTGCCATT  
CCCGGTTCTGAATCTACCGAGATATCGCCGTCATCATGCTGATCAGTTTTTCAAAATCGCCAGACCCAGACCGGTTCC  
CTGAAATTACGCTGTACGCCGTTCCGACTGGAAGAAGGGTCAAACAAGCGCACCACTTCTTTCGCCGGTATCCCCA  
CGCCGGTATCGCAACACGGATAGAGAGATAATCGCCATCCGCGCAACATGCAAAACTATACAGCCGGTATCGGTGAAT  
TTTATGGCGTTACTCAACAGTTGGAGATGACCTGCTGTAACGCATCGGGTCCGCTTTAAGGCCACTGGCACATCCGG  
TTCAATAAAGCAGTACAAGCCTAACTGCTTGCCTACCAGCGGTAATAAGTTGGCGGTGATGTGGTTCATCACTTAC  
GCGGTGAAAACCTCACGCGTTCGATCTTCAACTGTTCCGATTCAATCTTCGAGAAATCGAGAATATCGTGATAATTTTC  
AACAAACAGGCTGGAAGAGTTGTTTATTGCCGTCACCAAGCCGATCGACGCCTTTCCGGTAACTCTTTGGTTTGCAACAGATC  
CAGGTTACCGATAATGCCATACAGCGCGGTTCCGAGCTCATGACTGACGGTGGCAAGGAACATCGATTTTGACTGGCTCG  
CCTGTTCCGCTGCTTGTGCCATCTCCTGCAACGACTCTTCCATCTTCACGCGGGAAGAAACATCCACCAGCACAAAATG  
GCCACGTTTTTATTACGATAGCGCGAATGGACGAAGCTGATTTGCAGATTGGTATTGTTGCTGGTCAGGACATCAACAAA  
ATTGACCTGCTGCCACAGATAATTTGCGTCAGTCGTTGGCGTCCTCATGCGTAAGCATATTGAGATAGGTATGCGCCA  
GTTGCTTACTTAAAATATTGACGCCATCAGCGGTACGCAAAATGCAGATACCCACTGGCGCGGAGGCGACAATCTTGCGA  
TTGAACTGCTCATGTTCTCCAGTCGACGGGCGTCGTTTTCCGCCGGAATGAAAATACGTCGCTCGTACATCCGTGCGAG  
AGTAAACAATGCAGCTCCGGCAAGCACATTAGCAAAATGCGTTAAGGATCAACATGCGAATGCGTTCAGCACCTTAT  
CAACCGCACCGAATACAGATGCTTAGCGATGAGGGTGGCAGATTTTTCTCAGCACCAGCTCCCGAACCTTCCGTA  
TAGCCAAACCAGGAGCGTTCCTGCATCCAGCGAGGATCGCCCTTAATTTTACTTTCTGGTCCGGTAAGCGAAATCAGGGT  
ATGACATTTTTCATCAAGAATGGTAACCCCATCGGCAACGTACCCGTAAGAAAAAGTTTCCATCCGGATGGTCTGCT  
CGACACCCAAAAGCGCTGCAACCGGTTCCGAGATAAATGCGTCAACGCGTAAAAATACCCGACCGCAGGCGCGGGA  
CCTTCGCTGATCCAGTAGAGGTTACTGCCGCTATCATCTTGTGGTGCATTTTCGATATTTATTGATGCGTTCATGCAAAAGC  
TTTTCAACGCGGTATCGCTTCCACTGGCATATCACGACAGCCGAAATTGGCCATGCAGAGTTATCGCTGCCGATTAATA  
ATACCCGGTTTAGATCGTAAGCCGAGAAAAATTATCGCGCCAGTAGCGCATAAACCACGCCAATGACTCCAGAGAACCCT  
CGCCAGGTGTTACTATTGCGGAACAATCGGAGTCGGCAACAGCGGTTCAAACGCAGGCACATCCGCTGCGTTTTCTCG  
TCCACGCGGGGAAAGCACACCGTTTTCTGCCGATAAGCGATTTTCGGCGATGTAATTCAGCTCTTTCATCACATCAGAGG  
TGCGTTGAATAAAGCGCTGAGCCTGATCGGAACTCAGATTAATTCCTGACGAATTTCCGATTCTCGCTGATGTAACGCA  
TTAACGATGTAACAAAACGGATGAAAAAGCAATCAACAGCCAGAGCACTAACGCCAATGCTCTGAACATGTAGCGCGAGGC  
TTTCAGGGTTGACGAAAAGAAGCAAGGTATTTCAAAGGGCGAAGCTCCGCTCAGGTGACCGATGGAGTGTGGTTAAG  
GTAGCGGTAACGCGTGTACCGCAATGTTCTCTCTCTGGAATATGATACACCGCCGAGAAATCATCACCTAACCT  
CTGATAATCGTCATATACCGGACAAGACTAGTGGATTTAGCATGCATTATATGAAGTGGATTTATCCACGCGCTTACG  
CAATCAAATGATCCTGATGGCAATCCTGATGGTCATTTGCCAACGCTTACTATTGGTTATATCGTAGAAACGGAAGGAC  
GTTACAGCAGTCTTATCTGAAAAAGAGAAAAAATTTCTGCCGTTGTCACCTGCTTAATCAGGCACTAGGCGATCGCTAT  
GATCTCTACATCGACTTACCACGTGAGGAGCGTATCCGCGCATTAAATGCAGAACTTGCCCCATTACCGAAAATATCAC  
TCACGCCTTCCCTGGCATCGGTGCTGGTTATTACAACAAAATGCTGGATGCGATAATCACCTACGCGCCTTACGCGCTAT  
ATCAGAATAATGTCGGCGTTACCATGGCCGAGATCACCTGGTCGCGAAGTATGCGTACAAATACCCCTTTAGTTTTAT  
TCAGGCAGGCAGGTGCGCGCGGATATTTGAATTCAATGCTCCCCATTGAGCGTAATGGTGAATCCTCGGCTATATCTG

GGCCAATGAATTAACCGAAGATATTCGCCGCCAGGCTGGAAAATGGATGTGAGGATTATCATTGTGCTACCGCTGGTT  
TGCTGATAAGCCTGCTGTTGATTGTCCTTTCTCCCGTGCCTGAGCGCCAATATTGATATCATCACCGATGGCCTCTCG  
ACTCTGGCACAAAATATTCCACTCGATTACCACAATTGCCCGTGAAATGGGGCAAATCAGTCAGAGTGTTAATAACCT  
CGCCAGGCACTGCGTGAACCGCGGACACTTAACGATCTGATTATTGAAAACGCTGCCGATGGCGTCATTGCCATTGACC  
GCCAGGGTGATGTAACCACCATGAACCAGCAGCAGAAGTTTACTGCTGCTATCAACGCCATGAACCTGGTAGGGCAGCCT  
TACTCCATGTTGTTGACAATACTCAGTTCTACAGTCCAGTACTGGATACGCTGGAACATGGCACCGAACATGTGGCGCT  
GGAGATCAGTTTTCCAGGTCGTGACCGCACCATTGAACTCAGTGTCACTACCAGTCGTATTATAACACGCACGGTGAAA  
TGATAGGTGCTTTGGTGATTTTCTCTGATTTAACTGCCCGAAAGAAACCCAGCGCCGATGGCGCAAGCAGAACGCCCTC  
GCCACACTGGGTGAGCTGATGGCTGGCGTCGCGCATGAAGTACGTAATCCGTTAACGGCTATTCTGGTTATGTACAGAT  
CTTGGCCAAACAAACAGTGACCCAATACATCAGGAATATCTGTCCGTAAGTACTCAAAGAAATCGATTCAATTAACAAAG  
TTATTAGCAATTGCTCGAATTTTACGTCACGCCACAGTCAATGGCAACAAGTCAGCCTCAATGCATTGGTTGAAGAA  
ACTCTGGTACTGGTACAACCGCGCGGTACAAGCGGGTCGACTTCATAAGCGAACTGGATAATGAATTAAGCCCGAT  
TAACGCCGATCGTGAACCTGCTCAAACAGTACTACTGAATATCTGATCAATGCCGTCCAGGCTATCAGCGCACGAGGGA  
AAATTCGATTCAAACCTGGCAATACAGCGACTCACAAACAGGCCATTTGATAGAGGACAACGGCTGTGGCATTGATCTC  
TCGCTGCAAAAAAAGATCTTCGATCCCTTTTACCACCAAAGCCTCAGGAACCGGGCTTGGTCTGGCGTTAAGTCAACG  
CATCATTAATGCCCATCAGGTGATATTCGCGTCCGAGTTTGGCGGGTACGGCGCAACCTTACGCTTATTTTACCGA  
TCAACCCGAGGGAAATCAGACTGTATGACTGCTATTAATCGCATCCTTATTGTGGATGATGAAGATAATGTTCCCGTA  
TGCTGAGCACCGCTTTTGCCTACAAGGATTGAAACACATTGTGCGAACAACGGACGCACAGCATTACACCTGTTTGGC  
GATATTCACCTGATGTGGTGTGATGGATATCCGATGCCAGAGATGGACGGCATCAAGGCACTAAAGGAGATGGCGAG  
CCATGAGACCCGGACACCCGTTATTCTGATGACGGCTATGCGGAAGTGAAACCGCGTCGAAGCGCTACGCTGCGGAG  
CCTTCGACTATGTTATTAACCGTTTGTCTCGATGAGTTGAATTAATCGTTCAGCGCGCTTACAACCTCAGTCAATG  
AAAAAGAGATCCGTCATCTGCACCAGGCACTGAGCACCAGCTGGCAATGGGGGCACATTCTACCAACAGCCGGCGAT  
GATGGACATCTGAAAGACACCGCCAAAATTGCCCTTCTCAGCCAGCGTCTTGATTAGCGGTGAAAGCGGCACCGGGA  
AAGAGTTGATTGCCAGAGCGATTCACTACAATTCGCGGGGGCAAAGGGCCGTTTCAATTAAGTCAACTGCGCGGGCTG  
CCGAATCGTTGCTCGAAAGTGAACCTGTTGGTTCATGAAAAGGTGCATTTACTGGTGCACAAACCTTGCCTCAGGGATT  
ATTTGAACGAGCAACGAAGTACTCTGCTCCTCGACGAAATGGCGAAATGCCGTGGTACTACAAGCCAAATTAAC  
GCATTCTACAGGAACGGGAATTTGAACGATTGGCGCCATCAGACCATAAAAAGTTGATATCCGCATCATTGCTGCCACC  
AACCGCGACTTGCAGGCAATGGTAAAAGAAGGCACCTTCCGTGAAGATCTCTTTTATCGCCTTAACGTTATTCATTTAAT  
ACTGCCGCCTCTGCGGATCGCCGGGAAGATATTTCCCTGTTAGCTAATCACTTTTTGCAAAAATTAGTAGTGAGAATC  
AGCGGATATTATCGACATCGATCCGATGGCAATGTCACTGCTTACCGCCTGGTTCATGGCCGGGAAATATTCGAGAGCTT  
TCCAACGTTATTGAACGCGCGCTGCTGATGAATCAGGCCGATCATTTTTTCTGAGGATCTTCCGCCACAGATTCTGCA  
GCCAGTCTGTAATGCTGGCGAGGTAATAACAGCCCTGTGCGTGAGCGTAATTTAAAAGAGGAAATTAACCGCGTCGAAA  
AACGCATCATTATGGAAGTCTGGAACAACAAGAAGGAAACCGAACCCGCACTGCTTTAATGCTGGGCATCAGTCGCCGT  
GCATTGATGTATAAATCCAGGAATACGGTATCGATCCGGCGGATGTATAACACCAAACTTGCTATGCAGAAATTTGCA  
CAGTGGCAATTTTCTGCATAGCCGCTCATTCTCCTATAAATCCCATCCAATTTATCCCTTCATATCAATTAGTTAA  
ATAACTAAATCCAATAATCTCATTCTGGCACTCCCTTGTATTGCTGACTGTACCCACAACGGTGTATGCAAGAGGGA  
TAAAAAATGAAAACAAAATTGATGACATTACAAGACGCCACCGGCTTCTTTCGTGACGGCATGACCATCATGGTGGCGG  
ATTTATGGGATTGGCACTCCATCCCGCTGGTTGAAGCATTACTGGAATCTGGTGTTCGCGACCTGACATTGATAGCCA  
ATGATACCGCTTTGTTGATACCGGCATCGTCCGCTCATCGTCAATGGTCGAGTCCGCAAAGTGATTGCTTCACATATC  
GGCACAACCCGGAACAGTCCGGCGCATGATATCTGGTGAGATGGACGTCGTTCTGGTGGCGCAAGGTACGCTAATCGA  
GCAAATTCGCTGTGGTGGAGCTGGACTGGTGTCTTCTCACCCCAACGGGTGTCGGCACCGTCTGAGAGGAAGGCAAAAC  
AGACACTGACACTCGACGGTAAAACCTGGCTGCTCGAACGCCACTGCGCGCGACCTGGCGCTAATTGCGCTCATCGT  
TGCGACACACTTGGCAACCTGACCTATCAACTTAGCGCCGCAACTTTAACCCCTGATAGCCCTTGGCGCTGATATCAC  
GCTGGTAGAGCCAGATGAACTGGTTCGAAACCGCGGAGCTGCAACCTGACCATATTGTCACCCCTGGTGGCGTTATCGACC  
ACATCATCGTTTACAGGAGAGCAAATAATGGATGCGAAACAACGATTGCGCGCCGTGGCGCAAGAGCTTCTGATG  
GTGACATCGTTAACTTAGGGATCGGTTTACCACAATGGTCGCCAATTTTACCAGGAGGTTTATCATACTCTGCAA  
TCGGAAAACGGCTTCTCGGTTTAGGCCCGGTACGACAGCGCATCCAGATCTGGTGAACGCTGGCGGGCAACCGTGGCG  
TGTTTTACCCGGTGCAGCCATGTTGATAGCGCCATGCTTTGCGCTAATCCGTGGCGGTGATATTGATGCTGCGTGC  
TCGGCGGTTTGAAGTAGACGAAGAAGCAAACCTCGCAACTGGTGTAGTGCCTGGGAAAATGGTGGCCGGTATGGTGGC  
GCGATGGATCTGGTGACCGGTGCGCAAAGTATCATCGCCATGGAACATTGCGCAAAGATGGTTACGAAAAATTTT  
GCGCGCTGCACCATGCCACTCACTGCGCAACATGCGGTGCATATGCTGGTACTGAACTGGCTGCTTTTCTGTTTTATTG  
ACGGCAAATGTGGCTCACGAAATGGCGACGGGTGTGATTTAGCCACCGTGGTGGCCAAAACAGAAGCTCGGTTTGA  
GTGCCCGCATCTGAATACGCAACGGGTGATTTATGATTGGTGCATATCGCGTTTTATGACGCGTTTTGTCAGCCGG  
TGGCTTCCCGATCCACTGATCTTTGCCATGTTGCTGACATTGCTAACATTCTGATCGCGTTTTGGTTAACACCACAAAC  
GCCGATCAGCATGGTGAATAATGGGGTGACGGTTTCTGGAACCTGCTGGCGTTTTGGTATGCAGATGGCGCTTATCATCG  
TTACCGGTCATGCCCTTGCAGCTCTGCTCCGGTAAAAGTTGCTGCGTACTGCCGCTCCGCCGAAAGACGCCCGTA

CAGGGCGTCATGCTGGTCACTTTCTTCGGTTCAGTCGCTTGTGTCATCAACTGGGGATTTGGTTTGGTTGTCGGCGCAAT  
GTTTGCCCGTGAAGTCGCCCCGGCGAGTCCCCGGTTCGATTATCCGTTGCTCATTGCCTGCGCCTACATTGGTTTTCTCA  
CCTGGGGTGGCGGCTTCTCTGGATCAATGCCTCTGTTGGCTGCAACACCGGGCAACCCGGTTGAGCATATCGCCGGGCTG  
ATCCCGGTGGCGGATACTCTGTTCAAGTGGTTTTAACATTTTCATCACTGTGGCGTTGATTGTGGTGATGCCATTTATCAC  
CCGATGATGATGCCAAAACCGTCTGACGTGGTGAATATCGATCCAAAACACTCATGGAAGAGGCTGATTTTCAAAGC  
AGCTACCGAAAGATGCCCCACCATCCGAGCGACTGGAAGAAAGCCGACTTCTGACGTTGATCATCGGCGCACTCGGTATC  
GTTACCTTGCATGACTTTCAGCGAACATGGCTTCAACATCACCATCAATACCGTCAACCTGATGTTTATGATTGCGGG  
TCTGCTGCTACATAAAACGCCAATGGCTTATATGCGTGCTATCAGCGCGCAGCACGCAGTACTGCCGGTATTCTGGTGC  
AATTCCTTCTACGCTGGGATCCAACGATGATGGAGCATTCCGGTCTGGGCGGACTCATTACCGAATTCCTCATCAAT  
GTTGCGAACAAAGACACCTTCCCGTAATGACCTTTTTAGTTCTGCACTGATTAACCTCGCCGTTCCGTTCTGGCGGGC  
TCACTGGGTTATTAGGGACCTTTCGTGATACCCGACGCCAGGCGCTGGGCGTGTATCTCGGTAATCGGTAATGGCGA  
TCGCTACGGCGAGCAATGGATGAACATGGCACAACATTCTGGGCGCTGCCAGCACTGGCAATCGCCGGACTCGGTGC  
CGGACATCATGGGCTACTGCATCACTGCCCTGCTTCTCCGGTGCATTTTCGTATTGGTTTAAACGCTGTTCTGACG  
GCACCCCTACAAAAGAAAGAAATATAAAATGAAAAATTTGTGTCATCGTCAGTGGGTACGTAATTAAGCCGCCATTGAACGTCAGAAATCGAT  
TCACAACACGTTGATGAAGTGATTATGGGTAACGTGTTACAAGCCGGGCTGGGGCAAAATCCGGCGCTCAGGCATGTT  
AAAAAGCGGGCTGGCAGAAACGGTGTGCGGATTACCGTCAATAAAGTATGTGGTTCCGGTCTTAAAGTGTGGCGCTTG  
CCGCCAGGCCATTACGGCAGGTACGGCGCAGAGCATTGTGGCGGGGGTATGGAAAATATGAGTTTAGCCCCCTACTTA  
CTCGATGCAAAAGCACGCTCTGTTATCGTCTTGGAGACGGACAGGTTTATGACGTAATCCTGCGCGATGGCCTGATGTG  
CGCCACCCATGGTTATCATATGGGGATTACCGCCGAAAACGTGGCTAAAGAGTACGGAATTACCCGTGAAATGCAGGATG  
AACTGGCGCTACATTCACAGCGTAAAGCGGCAGCCGCAATTGAGTCCGGTCTTTTACAGCCGAAATCGTCCCGTAAAT  
GTTGCTACTCGAAAGAAAACCTTCTCTCAGTCAAGACGAATCCCGAAAGCAATTCAACGGCTGAAGCGTTAGGTGC  
ATTGCGCCCGCTTCGATAAAGCAGGAACAGTACCCTGGGAAACGCGTCTGGTATTAACGACGGTGTGCCGCTCTGG  
TGATTATGGAAGAATCTGCGGCGCTGGCAGCAGGCTTACCCCTGGCTCGCATTAAAAGTTATGCCAGCGGTGGCGTG  
CCCCCGCATTGATGGGTATGGGGCCAGTACCTGCCACGCAAAAAGCGTTACAACCTGGCGGGCTGCAACTGGCGGATAT  
TGATCTCATTGAGGCTAATGAAGCATTGCTGCACAGTTCCTTGGCGTTGGGAAAACCTGGGCTTTGATTCTGAGAAAG  
TGAATGTCAACGGCGGGCCATCGCGCTCGGCATCCTATCGGTGCCAGTGGTCTCGTATTCTGGTCACACTATTACAT  
GCCATGCAGGCACGCGATAAAACGCTGGGGCTGGCAACACTGTGATTGGCGGCGGTACGGGAATTGCGATGGTGATTGA  
ACGGTTGAATTAATCAATAAAAACACCCGATAGCGAAAGTTATCGGGTGTTCCTTGAACATCGACGGCGAAGGTAACCC  
CATTAAACACAGTCAAAACTTTTTACACAGCTCAGCTCGCCAGCATTACGCATCGGTACAATAAATGTTTCTGTTTTCT  
CATTGACCGATCCTTCATCGGTGATCAGCGTCAGTTGGGCGGTGGTTAATTCGGTTTCGCTGCGCCCACCATAGTAGTTG  
ATATACACCTGATAGCGCCCGTGAATTGGCGCGGGCATGGCGAAAATCTCGGGTCCGTACCCCGCTCGTGACATCCATATC  
CAGTGCACCACTGTTTTTACGACCGGTGTACCCTACCAGGCGTGTTCGCCATCGGGCGTAACAACGTGAAGGTCGAGGT  
CGGTATTGTCCGATCCACAGAGAACAGCCGTAACGTGCACGAATCGTTCCTGTACCCGGCGTTGAGTAAAACCTGC  
ATTTTTTGTGCGCTTGGCCATCCGGGCTGATGACCTGCACGCTGTTGCTGCCCTCAGTGAATAATAAGGGCGTGCAA  
TGAACCATCGGATTCAATCTCTGCGGCATACTGGCACCCTGACCACAGCCGGCCCTGCTGAACTTACCCGCGCAG  
CATAATCTTTATTTTGGCGGGATCTGCGCTGAGATATTTTGTATCTGCCATGTTGACGGACGACCCGGGTAATTG  
ATCGATTGTAAAAACTGGCATCTTCGCCCTCTGCCGATGCCAGCCTGAGAGCGGTGCATCAATCTCGACTTCTGCAC  
ACCTTCACTGTGAGCGACAGCGGAAAGCGCCACCAGTAACAACGGAAGAAAAATCTTTCGCATAGCATTAGTCCATTAAT  
AATTGTCCGGTACGCTTTCGATATAGTTCTCATCAAGCCCGTGGGATAACCATCAAAGGCCAGGTGCAGATACTCATG  
GGTTAAATCCAGCCGATCTGAAGCGTAAAGAAGTTACGAATAAACAGCCGTTTCTGCTGCCGATCGGTATAGGGGAAAC  
CTGAGACTAAACGGCAAACCGCAAACAGTCTGGTTGTTGTACCCCGTCTCAGCTTGAATATACGCCGCCACTGCGGC  
ATTTTTTTCGCCAGCCAGGCTTTTCGTTTGGGTAATAACTGGCAGGTTGAGCGTGGCGCTCCCGAGCGGCTAAGACTGTT  
GTCGGGATAAGCAAACGCGAGTATCTGATCGTAACGCTCTCCCTGCCCGCCTGGGCGGTGGCTTGGCGCCAGGAAAGTG  
TCCCTTCCGTAGCGGACTGCCATGATAATGAACCGGATCGCTGCATAGATGAGATCCTGCGTCCAGGCGGTATCGTT  
CGCGCCCCCGTGGTCTGGCGAAGCAGAAACACGCTGCGTGGCGCTGCTGTCGGGGATGGTCAGGCAATCGCCTTCCCG  
ATTGGCGTTTTGCTGTA AAAAGTGC GAATCGCCACGGTATGGCTTTTCGCTGCCCTCAGGGGGCGTACTTTTTCGCTCGC  
GATCCAGA ACTCTGGCAACGTA CTCTTACGATCGAGATGCGACTGCAATTTCA GTTTGGCCTTTTCGCTCAGTAAGGTC  
GTCTCACCGTGGCTGACAAACGTAATGTGGTTACCATTAGTAAACGTACACGATAGCGCCATTAAGTACGCCGGGATT  
TACTGCCGTCGACTCTTTTCCGCTGTGATTTTCTCAGCGGATAGCGGGCAAACAGCTCCACCTCTACACATTGCCAC  
TGGAACCTGCGTCGGCACTGGCAAACCCGATTAAGCACCGTGCATAACGGTTAGTACCGTTTTGCTGGTGCCACTG  
CCAGTAACCCACAGCGGTGATCCATCGGTTAACCAGCCAGCAAACACCCCTGACGGATTTCTGTTTATCATCGGCAAA  
CCAGCTCCAGTTTTTACCCGTACCCGACTACCGAGCATGGATGGACACCGATTTTTCGCTCGTCCAGCACCATCCA  
GTAAGACTTCTGAGCTTTGTTTTGCGCGGGTAACGTGCGTAATGAATCAAGCAGGATTTAACCGTTACCGAGTTTTCT  
GGCTTACGCGTAGTCAGAGACGCTAACACGCGAGGTGCTGACGCTGTTGCCAGTATTGCCCCACACATCTGCGCAAAT  
ATGCAACCGCTGCGGCGCAAAATAGAGCCACAGGAACGTACCAGCGCGGTATCGCGGTTATGCTCTCCCAGCCTGAC



ACAATAAACCTCTTCCGGGGAGTTTCCGCGACTGGTAGGGCTGCTCCGGTTGATGGGTATCCTCCAGCCAGGCGTAA  
ACATACAGTTTCCACAACTCCCTAACGGCGTGGTAGCGAGTACAGTAATGCTGAGACTTTGGTCACGCTGATGACGA  
CAGCTGATACAGTTGATCGTGCTGCGCACC GCGCAGCACCAGTTGTAACGGCGTCTCTCCGCAAGTGTGGCAGAGTAA  
CCAACGCCAATAGCCAGACGATTCTGCGCCAGTTCACTTATTTCACTGCATCCCGGTCCATTCACTCCCTGCCGAACA  
CTTTGCTGCGCAGGTGCATAGGAACGCACATAACGAGCAGGAGGAGAACGAATTGCCCTTTTTGCGAGAAGCGCAGCAA  
ATGGCGGAAAGTGACCGTCCCGTCAGTTCTTTACCCGGCACCATATAGGCCAGTTCGCCATTTTCAATTCGCGCTTTTT  
CCAGCAATTGCCCTGCTGTTTTGCGCGGTTGGGTTTATTGACCGAAATGCCCATGTTGTGCGCTCAACGTCGGCTCCC  
GGTGGCAGCGGTACTTCCACCTGACCGTAGCGCAGAACTGCATCTGCTCGTGGTAAGCGTGATTTTCATCGAGATACAG  
CGCATCGCTGTCAATCTCATTGCTGGTCACCGGTTGCGAATAAAGCTCATCTCTTCCACCAGGGATAAGCCGATACA  
ACTGGCGTTAACGGTCACCGGAATGTTACTTTGTTGAGCCATTTTTGCCGGCTCAGTCAGCGGACCTGCACATTTTGC  
GGCGATAATTCGTACCAAAAGAGAGAATGTCCGGCAGCCCTGACCAACCAACGCCAGTCTTCCGCCCCCTCAGTTAA  
CTTATGTTTAGCCATGCGCCCGCAGGCGCAGGCAAACTGGAGGCATTGTCGCCATATATTTGCCAGCCAGTTCA  
TGCCAGCGCGCTCAATAGTGGATTGCTCAGCGGTCAAACCACTAAAATAGCGCCGCTGGGTAGCGTCGCCACCG  
CTATTAAGCAGCAACCGTGTGCGCCAGCGGCTGATTGCTGTTGCCGCTTATCCACGCATATTGCTGAACCTGTGG  
CATCACCGTGGACTTCAACTGCGCTTTTTTCAGCAACGTCATGGTTAAGACGTTTGCACCCGATCTGCCAGTGGAGACT  
CCGGTGATCGAGGATCAGGCTATCATTGATATCGCGGTGCTTCTCAGAGAAATCTTCACTTTTAGTTCCGCGCCGG  
GCGATAGCTTTCATCAACCCCTTTCAACACGTTTTGACCGGAAATTCATCTCTGCGCCATGCCAGCACCAGCGCCCG  
ATGCAATAACGGCATGTTATCTGCCTGCTCCGCGTAGCTGTCGAGCATATGCTGCCAGTATCCGGTTGTTGCGTTACGC  
CGATCGCTGGCTGGCTGCCAGTCGCGTACCATGCCATGCCGTAAGGAAGCGTCACCATTGCCATCTCACCCAC  
CAGGTAAGCGCGCTCCGGGCCCGCCAGTTGCATCAGCCGACAGCGTTATCCTGAATCATCTGACGAATGTCGTTAGC  
GGCGCACTTTGATGATCGGCAAGCGAACGCCAGGCGAGACTGAGCGGGATCAGACGGCTACCGGTGTTGATTACGCCAC  
CCCAGGTTTCATGACTAACGCATCAAGATTGTTGCGGAAATCTCTGCGCGTTTCACTACTTTGTAGCCGGATATTG  
CTCGCTGCTCGGCAACATCAGCGGTTATCGCCACCACCGAGCATGACATTTTTCTGCTGTTCAACGGCCAGCTGTT  
ATCCACAAAAGACAGTTTTGTGCTAATGCTGCTGCTGACTGCCATTTTGTGAGTTCTGACTTAACAAGCCAGATT  
GCTGAATATTCTGCTCAGCGAAATATAATTCGCCCTTTGTGACGCTCAGCGTCTGGCGCATCTCAGCGCTGCAAT  
TTAGTACCAGCGCCACCGTTCGTTATCCTGCTGACTGAAGATAAAGCTCTGCCGCGGTTTGTGCGCCACGCGATA  
CACCGTTGGCATACTCCACTTCATGTAGAGATTTTTTCCGAACGCAGATAAGCACGCCCTGCCCGACCGCCGTCGC  
CGTTCATCCCACGCGGGTATACGCCAGCGGTTAACGAATCAGGCATCAGGAACGTGAAATACGCTTTGCCTTGTTA  
TCGGTTGTGAGTGACGGCATCCATGCCGCGGATCCACCTCTTACGCGGTGGACGTTCAAGCATTTTTACTCGCCGCTC  
GCTGCGGTTAGTTGCGCCAGGCGCAACCGGCTCGCTGGAGAGCGCTGGTCTGAGTGATAAACGACAGACTGGAGCTGG  
TACGCACATTGTTACGCCACGCGGATAGAAAAATTTGCCGATATTCGGCGGATTTCTGGTTGCAGCGGTTAGATCATT  
TCATCGACCACGCTACCGTTAGCTGCGCAGAAACAGGTTTACCTTTACGCGACGAGGTTAATTGACATTGACCAGTTC  
ACCAGGCTGGTAATGGGTTTTGTCGTTTTACCCGGATATCCAGCTGGGGAACGGCAACTTTGATCCCGGCGTTCTGAA  
AACTGACTGACCGTTACGGGTATACAGCACGAAAAAGTGATGTTAGGCGCAAAGGAATTGCTCACTGGAACCCGGGCT  
TCATACTGGGTATCGTTAAACGTTGTAGCGTTAGCCAGTTTCCGGATGCGAAAGCAGCGACTGCTGTTCCACGCGATC  
GCGTTCCAGCGTCAATAATGCTTCAATTTGGCTCCGAAAGGTAATCAGCATCTTCCGCGTTTTGCGCTGGCTGGTACA  
GCGTTTTATCCGCCAGATATCACCCTACCAGTATGCGCCGCTGCTGCCCTTACCCTGACGGCATGACTTAACCCAGCG  
AGAATTAAGCGCTTTTTATCGCGTAATGTCAGATTGATTTGCCAGGTTTAGCGAAATTGACGGTAAAGGATTTGCCGCC  
TGACGGTAGCTCTCCGCTATGGCTCGTCCGCTTTCGAGACGCAACCATTCATACGTAACAGGAACCTGTTTTGAAGATT  
CCAGCGCGGCATAACGGAACACAACCGACTCGCCCTATTACTGATTGTCGGCAGTACTTAATGAGTAATGCGCCAGA  
CCGCGTTCAATGAGGATCTTTTTGGTGGTGACGCGATACCCGCGCTCACTGGCGGAGACGGTTAACAAATAGCG  
GCTCGGTTTTATCGCGCGGGGAGATTTAACGCCACATGACCGCTGGCGTCCGACACCGTTTTGCTGCTTCCAGCGACA  
CGGGGAAACGTCGCGCATAACGCAATCGTTACCGACCATGATAATTGCTGAGCGCGAACTTAACGACGCGGGCA  
TTTTTTACCGGCTCGCCATCCGGGTAGAGCAGTTGACGTTTGGCGCTGACCGCTTCCGAGTTTTGAACTCTTTTTTGGC  
GAGAGCTAAACCAATCTCGAAATGTGGCTTGTAGTTTGCACGCGAAACTGCTGCTATAGACCTGATTGCGGTAAG  
CAAGACGTAACCTATAACCTCCGGCTACGGCATTCTTGGCAGCGGAACTTCCCTGCCCGCATTGCGCGCATCCAGC  
GTGACATTGACGGTTTGAACAGACTGCCGTTGGCTCCAGCACCGAAAGCTTCCGCGGGGCGCTGACGATGGGGGATGA  
ATGCAACGGATCGTGAACCTCGCGCCGATCACTTTAACATCGACACGATCGCTGCGGATATAGCGGGCGATCGGTAA  
AAATATAAAGCGGGTGTGATGATTTGCTTTCTGTAAGAAGTTCTCGGAGACAAAACGCCGCTTCCAGCATCCTTA  
CCCAGAATGTATGAACGTTCTGGCGATATATGTTGTAACGCAAGGTACCGCTGTCATCGGTACACCCGCGGTCATCAC  
GCCAAGACCGTCACTCCACAAGATCTCTGAGCCGGGCTTCCGTTACCCCTGTTTTTACCCGCGTCCACACCAGAAGCT  
CTTTGCTGACTTTGCTAAGCGCCACGGTATCGGAAACAAACACCACCGTCTGCGCCGATACCCACCAACCATCGCC  
TCGACGAGGTACAGTCCCGCTCTTGTGGCCGAGAGGAATATAAATGTTACCCGGCTGCGCGGAGATGAAATTGCTGGA  
TGCGCTTCCAGTTTTACCCCTTGTGCGGCTCGAACGGTTTAGCCTGCCATAGTGGATAACGGAAGTTCACCAGGG  
GATATTTTTTACGCGGGGAAACTGGTTGTTCTGTACATAACGGGAAAGTTTAAATGGCATTGCCGAGCTGTAATTCG  
GTAACGCCTGAGTACATTCTGCCGTGACTGAGAAGAAAGTACGCTGCATCACGCGCGAGATTTGCCGTACCAGTT

ATCCACAGCCAGGTTAGCGTATTGTTACAGCCGTCGCCAGATATTGCGGTTGCACCACAATGCGATGCAGGTTTTCT  
GCTGGCGCAAAAATGCCATCGGGTCAGGAATACGATACAGGCGAACGTCACGCCGCGTACTCTTCCATCTGATAGCGC  
CGATAATCACGCCCCGGCGTTCAGTCGCACTTTCGCTCTTACTGCTGCTAAAAGTCTGTCAGCAAGCAAAAAGAA  
TGTTCCCCCGCAGGCGGGCATAGTTGCTGGAAGGAAGCAATCATCAGCATTAGCAAGCCCTGTTCCACAAGAGACA  
GGGACAAGCAGCTGCTATCGCGCCAGAAAATTTAAACGATAAATGCCAATGAAATTGGGATTGGAATCGTTGGGTATCC  
ATCGGGTGTCTTCCATGTCATAAGTTGTTGCGACTGACTGCGCGCATTCCGTTGTCAGTTTTCTGTTGGCGCTTCCGGTG  
TGGTAGATGACGTAACGCCCCATCCAGACCATTAAGTGTGGGCATCGCCCTGATCGAAAAAATCATATCGCCAGGCAG  
CGCTGTTTTATGTCCTGGCCAATAAACTGGCTGTTGACTGAATCAAATTAATCGCGGTCACATAGGGGCCGTTTTCC  
CGTTCCTGATTCCAGTTTTGCGCCAGTTGACGCTGTTAGGTGTTAGCGTCATCTTGGCGGCAAATACTGGCTAGAT  
AAACCGTTACTTTTTAGCCATTTACTGTCGTGAACCTTTCAGCGTCTGTTCCGCCGCAAATCGCACCAGGCCCGCACAATC  
CTGCTGATACCAGCGTGGACTTGGCCCCGCGGAGCTGTTCTTGTGCAATGCGTACAAACAGGCGCGAAACAGCCCCG  
ATTGTTGACATTAGCATTTCGCTATGGGCAACAACAACAGCCAGCAAAATCAGCGCCAGCAGCCCGTGCCTCATA  
GCGGCTGCCAGTTATGGTAGCCACTGCCAGGCGGACCGGGTTCATCTGGCCAGCTTCATGACATAACGCGGTTGT  
TGAGATAAAGCGTCCAGTTCGGCATTAAATAAAGTTTGTGCGGCTTATAAAAAACCGTTCGAGATTCCTGCGCAGCT  
GGTCAACGTTTTGTTACGCGCAGGTTTTGCTATTCTTGTGGATTGATATAGAGCGGAACGATGCCATAGTTGGTATTA  
CATCCACATTGCCGGGCGGTTTTTTCAGTGTTCGAGCGGTTATTAACAGCGTGTATCGAGGGAGAAAAGCAGC  
GTTTTGTTTTGCATCGCCAGCGACACAGGAAAAAATAATCCGACATTAATTGATCGGGTTCGCCCGCTGCGCTTTCGG  
ATACTGGCCGATCGGAACTCACTTTCGCGACGCCAGATTTGCGCTTCGCCCTGCTGAGTCTGGCTTACCGGCAAAACAC  
CTTCTGGCGCTTGTCTTTCGTGCGCACCAATATTTTGCCTAAACAGTTTCCCTGGCAATTGCGCCTGTTCCGCGAGTCCA  
TCAAAGTACCGCAAAACAGCGGGTTTTGCAATTTTGTGCTTTCATACCAGCACAGCCCCGCGGACCGTCTAACGCCCC  
ATTCAGCTTGTGTTTTCTGGCTGATGTGCGAAAGCATCTTTCGGCAATACCGTGTGAATACGGCACCCGCACACAGA  
AGCTGGCTCCGGCAGGCATACTGTTCCATACCAGGCGTAAAATCGAACTGGCATCTACGCTGGCGGATTCATCATTTAAC  
GCCACAAAAGTGTCCAGCCGCTGTTACCATTTTCGAAGCGTACGCCAGCAAAAGAGGATTAACCGCTGGTAGCCAAA  
CCCCAGCCACCTGGCGCTGACTACGATGCGCTGGCGTACTGGCGTTTTTTTCGGCAGTACGCTTTCAGGCCAAAGCTG  
CTTGCCAGCGTTTTTTGCCGCTCAACAAATCACCTGCGATCGCCGTGGCTTCGGTATCCTGCTGATCATCTTTAAACAAC  
ATATCCGTGCTGGAACACCCAGCATCTTGTCTGATAAGTGCAGCAACATCAGGGCGTTATTGCCGTTATAGCGCAACTG  
ATAAACAGGAACAGTTTCACTATTTATCTTGATGCTACTGATTTCCGTTTTGCTTAACTGGCTGTCGCTGGTAGCGGCAA  
ACAACAATGGCTCCAGCAGTTTGTCTAAACCACTGCGCTGGATCAGCACCATATAATGTGAAAGATGGCCTTGTATTCG  
TGCCACAGCGTGCCTGCGCGGGCTGATCTAAGAGTGACGAAAAGAGCTTATCTTTCAGCGTGAGATCGTTCATAGAC  
AATACGACGAATGCTGCCTCAATGCCAGACGATCGGCATGATTCTGATAATAGAAAACGAAATCTTCGCTCAGAACAT  
CGTGGAGAAACGGAATGGTGAAGAGATCTTTGGGAAGCTGGCTCAGAGAGTCTGTCGAGAAAGAGGTCCGGCTCATTG  
AGATCGATTTGCGAGTTGTTGTGCACCACCAGCGGCGACAACGTTTTTTCTGGCCACTGCCAGCATATTGCAACGCCCA  
GACGCCAGCGGAAAGCAGTGCTATTGCGCAAAACCTACAAGACCATAGAACCGCCAGCCTTTCGCTTTTTTTTACCAC  
TCATTGCCACATTCCTTGTGATAGCCAGCATTTTTTACGGGCACAGCCAACTTTACCGTGCCTAATACGACAAAAG  
CCCAGACTTTGCGCCTGGACTTTTCAATTCAAACAAGGGAGATAGCTCCCTTTTGGCATGAAGAAGTAAATATTCTT  
CTTCTGGCTGTCGTCAACGTTCCACTTCCGGAGCGATTTATCGTCCCCTTCCGCGGCACTGCCGTCGATGGTATCCAGA  
TCTTCTCGTCAACCGGTTACGCAACAGTTGACAGCCACTACGTTTTTTCATCTTCCGAGTACGGATGAGGATCACGCC  
CTGGGTGTTACGGCCACGATGCTGATTTCCGAAACGCGAGTACGTACCAGCGTACCGGCATCGGTGATCATCATGATCT  
GGTCGAGTATCTACCTGACCGCGCAACAACAACTAACCGTTACGTTCCGTTAACCTTGTGAGAGATAACCCCTTTCGTC  
GCACGCGACTTGGTTGGTATTCCGCCACTGCGGTACGTTTACCCTAACCGTTTTGCGTTGCGGTGAGGATTGCGCCATC  
GCCACGAGGCACGATCAGAGAGACGACTTTATCGCTTACCTAAGCGAATACCGCAACACCCGGTGGTGTTCGACCCCA  
TCGCACGAGCAGAAGACTCTTAAAGCGCACCACTTTACCTTACGCGGAGAACAGCATTACTTCTGCTTTCGCCGCTGGTC  
AGGTCAACGCCGATCAGCTCATCGCCGTCACCAGTTTGTGACGCACTTTACCGGCGGTACGCAGACGGTTGAACTCGGT  
GAGGACAGTTTTCTTACGGTACCCTAGCGGTGCGCATGAAGACTTTACGCTTCTTCAAACCTCGGTCACTGGCAGGA  
TCGCAGTGATACGTTCTGCTGCTCCAGCGGCGAGGTTGACGATCGGACGACCGCGCGCCACGAGTGGCTTCCGGC  
AACTGATAAATTTTATCGAATAGACGCGACCGGCTGGAGAAGCACAGAATATGGTCGTGAGTGTTCGCCACCAGCAG  
TCGGTGCATAAAGTCTTCTTCTTAAACGTCGCGCAGATTTACCTTTCGCCACGACGCTGCGCTTCTGATTAGAAA  
GCGGCTGATACTTAACTAGCCCTGGTGAAGAGCGTCACGACCACATCTTCTGGGTGATCAGATCTTCCAGGTTGATG  
TCTGCGCTGTTGGCGGTGATTTAGTACGAGCTTTGTACCGAAGTGTTCACGAACAGCTCCAGCTTTCACGGATCAC  
TTCCATCAGACGATCGGCGTACCAAGAATACGCAACAGTTCCGCGATCTGATCCAGCAGCTTTTGTATTCTGTCGAGCA  
GTTTTCTGTCCTAAGACCGGTGAGTTTCTGCAACGCGATCCAGAATCGCTGAGCTTGTGTTGGTCAGGTAGTAC  
AGACCATCACGACGCCAACTCTGGCTCCAGCCATTCCGGACGCGCAGCATGTCGCCAGCAGTTCGAGCATCGCGGC  
AACGTTGCCAGCTGCCACGATTAGCAACCAGCGAGTTTTCTGCTTCTGACGCGTCCGGCATGACGGATCAGTTTCA  
TGATCGGGTGCATGTTCCGACGCGCCAGGCTAATGCTTCAAGGATATGAGCACGATCGCGAGCTTACGCGATTGAAA  
ATAGTACGACGGGTACCACTTTCAGCGGGTACGAAACAAACGCCGCGATGATGCTTTCAGGTTTATGATCTTTCGGCTG  
ACCATGGTGAATGCCACCATGTTGATACCGAAAGAAACCTGCAACTGGGTCTGGGAGTAGAGGTTGTTGAGCAACTT

CACCGACCGCATCGGTTTTCACTTCAATCAGGATGCGCATACCGTCTTTGTCAGACTCGTCACGCAGCGCGCTGATGCCT  
TCCACGCGTTTTCTTTTACCAGTTCCGCAATCTTCTCGATCAGCGCGCTTTGTTTACCTGATACGGAATTTTCGTGGAC  
GATAATGGTTTACAGACCGTTTTGGCGTCAACTTCACTTCTGCGCGAGCGCGGATATACACCTTGCCGCGACCGGTAC  
GGTAAGCTTCTCAATACCGCGACGACCGTTAATGATTGCGCGCTCGGGAAGTCCGGCCCCGGGATGTGTTCCATCAGC  
CCTTCAATGCTGATGTTTTCATCATCAATATACGCCAGACAACCGTTGATGACTTCCGTCAGGTTGTGCGCGCGGATGTT  
GGTTGCCATACCTACGGCGATACCGGAAGAACCCTTACCAGCAGGTTAGGAATTTTGGTTGGCATGACGTTCCGGAATTT  
TTTTCCGTGCCGTCATAGTTATCAACGAAATCGACCGTCTCTTTTTCGAGATCGGCCATCAGTTCATGGGCAATTTTCGCC  
AGACGGATTTCCGTATAACGCATTGCCGCCGAGAGTGCCTGATAGAACCGAAGTTACCTGACCGTCTACCAGCAT  
ATAACGCAGCGAGAATGGCTGCGCCATGCGGACGATCGTGTATAGACCGCCGAGTACCATGGGGATGGTATTTACCGA  
TTACGTCACCAACGACACGGGAGATTTTTATAGGCTTTGTTCCAGTCAATGCTAGTACGTTTCATGGCGTAAAGTACG  
CGACGGTGTACCGGCTTACGGCCATCTCGGACATCTGGCAGCGCACGGCCAACAATGACCGACATCGCATAATCCAGATA  
GGAGCTCTTACGCTCTTCTCAATGTTGACCGGTGTAATTTCTCTCGAAGTGCCTCATCTAACCGCTATCCCTCTACT  
GTATCCCGATTCAAAGTGCAGAAATTAAACACAGCCGCGCAGTTTGGAGTAAACCTATACGCTTTATTCACATCCAAT  
GCCTGATATACTCGTTTGTCTTGCATTAACGAGTGAAGTGAAGTGAAGTGAAGTGAAGTGAAGTGAAGTGAAGTGAAGT  
TAGACCAAGAAGAGATCGCTAAATTTGAAGCCGTCGCTCCCGTGGTGGGATCTGGAAGGTGAGTTCAAACCGCTGCAC  
CGCATTAACCGCTGCGTGGGCTATTTGCCGAGCGTGTGGCGGTTTTATTGGCAAAAAGGTGCTCGATGTCGGTTG  
TGGCGGCGGATTTCTGGCCGAGAGTATGGCGCGCAAGGCGCAGCGGTGACCGTCTGGATATGGGCTTTGAGCCATTGC  
AGGTGGCAAACTGCACGCACTGGAAGCGGCATTACGTTGGATTACGTGCAGGAAACCGTGAAGAGCACGCGGCAAAA  
CATGCCGGGAGTATGATGTGGTGACCTGCATGGAGATGCTGGAGCACGTCCCCGATCCGCGAGTACGTTGTCAGAGCCTG  
TGCGCAACTGGTGAACACGCGCGGATGCTTTTTCTGACACTTAACCGCAACGGCAAGTACGCTGATGGCGGTGG  
TTGGTGGGAATATATTTTGCATGGTGCCCAAAGGCACGCATGATGTGAAGAAGTTTATTAACCGGCGAGAATTGCTG  
GGCTGGGTGGATCAGACCAGTTTAAAGAGCGGCATATCACTGGCTGCATTACAACCCGATCACTAATACTTTAACT  
CGGCCCCGGGTGGATGTGAATAATGCTGCACACGAGAATAAGTGAAGTGGTGGTGGTGGTGGTGGTGGTGGTGGTGGT  
CGACGTTGCCGCTTATCAGGCCATAAATGCTCCCCGTAGCCGGATAAGGCGTTTACGCCGCATCCGGCAACCGT  
GCCGACTAGACAGTATTACATTTACCCTCATCGACAAAACCGTCCGCTGGGCAAAATCATCACTCCCTTTCTGC  
CACGCCACGCTGCCGCGCAGGGACACTCGCTGACTGATTTGCCGCTGACTCCACTTTTTATTTACCCCGTTGCTTAC  
CGCATCGTCACTGATAGTGTGCCATCCTTTCAATTTCCGTCGAATGGGGATCGTGATAATAATTAGATCTAATGTTG  
GTATGACATGAACAGCGGTACGCCATTCGCTGTGTAACCCAGCCGCTCTGAATATCATCACCTGCGATTGTGACACG  
CGGCGACGGTTAGCGGGGTAAAATCATCTGCTGCACGCCCTGATAAATCACCTGCGCTGCGGTTCAATCACCACACC  
ACGCCCCGGTAACCACTGATACCCCGCTCCAGCGAGGCGATAATCCCCGACGAGTGGTAATGATCTGTGCCATCTTCTT  
GTTCCGAAACATCATTGCTAAACACGCGTATTGCAGCCAGCTATCCAGCCAGGCCCTTGCTTCTGATTACCGTGTGTA  
AACAGCTTGTATGTCAGCCCAACGGCATAAACCGTGGTTCTGGTTATCGGCGGAGTTCCGGTCATATTCGAGCGGCTGC  
GCCCTGGTTATCGCTGTAGCCCAACAATCCCAAGCATCCACTCGCCATCCGTGCCCCAGCGCCCGTAAACAGATCGC  
CGTAAGTTGCACCGTAGAAGTGTCTTTCATGTTGAGCCAGTTGCCCGCTGTGTGTAATGATAATCTCCGCCGATAACA  
CGTAAATTCAGCGTCTGACCATCGCCACTGCGTGTGCGTGCCTCCATCATAAACGCGCTGATTTGCCGCCGAGGTT  
ATTAAGATAACCGCAACTTTGGCATTCAACACCGGCTGGTAAGCAGGCGTAGGTTCCGGTGGGTTGGATCAGGAT  
CCGGCGTGGATCAGGATCGGGAGTGGGTCTGGATCAGGTGGGATGGCGGCTTACTTCTTGCATCGCAGATACCAG  
TCGTTGTTATCTTCCACAGCGTGTAGTCATACGCTCCCATATTGACGTAGCCGCTGCCTGCCAGACTGAACTGCGCATT  
GTTTTGAAACTGCGTGGGATCAGTGCAGAAATCAACCACTTTAATGCCTGTCGATGTCGGTCAACCAATCCCTGTAATGG  
AGTTAACACACAGTGTGTTGCCAGCAGTATTACCGTTTATCAACCAATTGATCGCTTACCAGTATCGCCGCTTTAAT  
TCGCTATCGAGCAGTAGCGTACCGCCCGGTATAATCACCGTTTACCGTACGCTATCGCCAGCGACGCCATTTTGCAG  
GCTAACCGCACCGGACGATTGGTGCAGATTGCCATTAACCGTACGTTGGAAGATAAGTACGCTGTGAGTTTCAAGGT  
TGGTATTAAGCTCACCTGTCAACGTCACACCATCGGTGGCATTACCAGCGTCCCATCGCCGTTAAATAGTGAGGCATTA  
AGGGCGACGGAAGTATCCTGCCCGTACGGCGCAAAACCGTACCATCGCTGATGTCGATAGTCCGCTGGAAATAGCATC  
AATTGACTGAATATCCTGATCCGCGCCAGTAACGAACGTTGCCCATCACCACCCACAGTACGGAAGCATAAGGAAGGA  
TATCAGCAACATCACCTTTCAGGGTGCCTTCTTGCACAGTACCGCCGACTGCGTTGTACCCTGGCGGTGAGTCCAGT  
GTACCAGCCCCGTTTTAGTCAATGTGCTACCCTCATCTGATGTCGCCGCTGCTGTCAGCCATCAGTGCGCCCACTG  
CGTGTCTACCCCGCATCAACTGCCACTTACCCTGCGCGCATTTCATATCACGTCGCTGGCCTGCCGCATCTGAAC  
GCGTGTCAACGTCGGAGTAATCTCCATCAGCTTTCTTGTGCTTATCGGTAAGATAACCTGGCGGTTATAGTGGGTA  
TCTCAAGCTGCGAGTTGCTGCTCACCATCAGCGTACCGGAGGCGATTTGTGTTGTGCCAAATAACTATTATTGTTTGC  
CAGACTTACCTGCCGCTGCTGCTGCATCGACCACCAGTACGCGCATCTTCCGCTGCGCCGCGATATGCAAAATTTGCGC  
CACCTGCAAGATCTACCACATCCTGACTGCCGATAACCGTTCCGCTGCTGCCACTGACTTCAAGGCCATCGTTGATGAT  
GTGCCGCTCTGCCAGGTGGAGAAATCAGAGAGATCGAGCACACCGCGTTTAAACACGATCGACTGCGGATCGTCTGGAG  
AGCGGTAAGATCTGCCGCTGCGCTTCCAGCGAAAGCACCGCACCATCATCAACGACTATATCGCCGGTTAGCGCCATCG  
ACTGCGCCCCGTCAGCACGTAGCTGCGTTTTGCGCAATGGTGAAGTACCGAGCACCTTCGATGATGCCAGCAAACTG  
CCCTGATTAACAGTAACGTTGCCACCAGCATCGATATTTAAAGTGCCATTCTGAAAGCCCGTCAATGCGTGCACAAAAGT

TTGTTGGGTCGAGCCAACGTTTAGCTCAGCCTGATTCTGATACTGATCAATACTCCCTATCGTCAGACCCTAGCAGTCTT  
GCGGATCGTCCTGGCAATGCGTATCGCCGACATTCATCAGGGAGTTGCTGCGGCCAGGGTAACTTCACCGTTTTCAATC  
TGATCTCACCAGTAAAGTCATTGTTATCTGCATTAAGTACCAGATCGCCGGAACCTGTTTTGGTGATTAACCCGGTACC  
AGCAATAGAGTCAACAGCTCCGTCATTCTGTATTGCCAATAACCAGCGTTTTTCCGTCGGCAATATCAAAGGTAACCTT  
CACTTAAGCCGAGATACATAAAGCCACCCGCGCAGAGGAAGGACCATCTCCATAGCCTGCTGCGCTATTGTTCTCATCG  
ACTAACACGCCTCCGTTCTGGCTGTAGCTGTCATCAACAGAAATCAATAAGATAGGGAGCCGTCACGCTATTGGTATA  
TATCGCCCCGCATAACCTTCGGCAGTGTTATTTGTAAAGGCAGTGTTATTTACTATCGTATAACCTGAAGGATGCTTGC  
TGTCGCTATTATTATCGGTAACATCGATTGCCCCGCATCGCCATCACTGTAACCTGTTGATGTATATGCCTGGTTGTTA  
TCAAAAATAACATCACTTAAATAAACGTCATTATTAATGGTATAAATTGCGCCACCTTTGCCATCATTAGCGATGTTATT  
GCGAAACATGGCGTTAGTGACACGTAATCGACGGCACCAGTATCGTTAGTACCAGAAGAATAGATTGCGCCACCATAGC  
CGCTGCGACGTTACCGGAAAAAATAACATCAGTAAGATTGAGCGTTGAGTTTTCTTTAGCAAATATGGCCCCGCGTTA  
TTATATTCTCTGTAACGGTATTGGCAAACAGAGTCATTCCAGTTTCATTTCTGGTAATAGTAAAAATCCGCTCC  
TTGTTGAAAAATACGGCCCCACCGCTGGCGTTATTGGTCATATCCGAAAAACCAGCCATTGCCATCAGCGATACTCC  
AGTCTGCGTAATGCCTGAAAGGCTTTGCCTGCTGGCCTGACAACTCGCTTTGACATCATATCCCTGGCATGAATCAGTG  
ACCGCCGACACCGTTAGCAGAGAAAAGAGATGCAATCATTGACGGGAGTAAAGATAAAATACTCCTTGGCTAGAAAAGAT  
AATCCGCAATATAATCTAACCATTTTTCTATAAGACGGCGTATTTAATCGCATTATACGATATGGAATATCTTTCTTT  
TGTAAATTGTTCAACCCGGTCAATGGCTATTTTGTATTATTTGATGAATAATATCAGTGGCTCATAATTCAAGTTAAT  
AACCTTCAGGGATATCAGTTATATTTAACTAAATTAAGTCAATGAATAATTTTCTTATAATAAAGGTAATTAACAAA  
ATGGCTTAGCATTAAACAATAACCGAATAGAAAACAACCTTTGCCATCAACAATCTCTTACATTGCTTATATATTGA  
CCACAACCTGATACATCAGATTATGTGATGACTCGTGCTTAGATCAATTTTTGCAATCATTAGCAAAAAGATTAATAAGCC  
ATCTATATCAATTTATCTAACCTATTATGCCGTTCAAGAAATCGCCGAACAGTTATTTTTAACAAATTTTTCTTCCCA  
TTGACTTTCCCGACACCTTGCTGACCTAAGGTGCGCGAAAGCCACTTTTTCTTCTGAGTTATCCACAAAGTTATGC  
ACTTGCAAGAGGGTCATTTTCACTATCTTGAGTGAATCCCAAACATACCCCTATATATAGTGTCTAAGCAGCTTC  
CCGACTACAGGTAGTCTGCATGAAACTATTGCGGAAAGAATCCAAAACAGGTACGACATACATGAATCAGAATCTGC  
TGGTGACAAAGCGGACGGTAGCACAGAGCGCATCAATCTCGACAAAATCCATCGCTTCTGGATTGGCGGCAGAAAGGA  
CTGCATAACGTTTCGATTTCCAGGTGAGCTGCGCTCCACATTCAGTTTTATGACGGTATCAAGACCTCTGACATCCA  
CGAAACCATTATCAAGGCTGCCGACAGCTGATCTCCCGTGATGCGCCGGATTATCAGTATCTCGCCGCGCGCTGGCGA  
TCTTCCACCTGCGTAAAAAGCCTACGGCCAGTTTGAAGCCGCTGCGCTGTACGACCACGTGGTGAATAAGTGGTGGAGATG  
GGCAATACGATAATCATCTGCTGGAAGACTACACGGAAGAAGAGTTCAAGCAGATGGACACCTTTATCGATCAGACCG  
TGATATGACCTTCTTATGCTGCCGTTAAGCAGCTGGAAGGCAATATCTGGTACAGAACCAGCTGACCGGCGAAATCT  
ATGAGAGCGCCAGTTCTTTATATTCTAGTTGCCGCGTGCTTGTCTCGAACTACCCGCTGAAACGCGCTGCAATAT  
GTGAAGCGTTTTTACGACGCGGTTCCACATTTAAATTTGCTGCCGACGCAATCATGTCCGGCGTGCGTACCCCGAC  
TCGTCAGTTACGCTCCTGCGTACTGATCGAGTGCGGTGACAGCCTGGATTCCATCAACGCCACCTCCAGCGGATTGTTA  
AATACGTTTCCAGCGTGCCGGGATCGGCATCAACGCCGGGCGTATTCGTGCGCTGGGTAGCCGATTGCGGGTGGTGA  
GCGTTCCATACCGGCTGCATTCCGTTCTACAAACATTTCCAGACAGCGGTGAAATCCTGCTCTCAGGGCGGTGTGCGCGG  
CGGTGCGGCAACGCTGTTTACCCGATGTGGCATCTGGAAGTGAAAGCCTGCTGGTGTGAAAAACAACCGTGGTGTGG  
AAGGCAACCGCGTGCGTCATATGGACTACGGGGTACAAATCAACAACTGATGTATACCCGCTGCTGAAAGGTGAAGAT  
ATCACCTGTTACGCCGTCGACGTACCGGGGCTGACGACGCTTCTTCGCCGATCAGGAAGAGTTTGAACGTCTGTA  
TACCAAATATGAGAAAGACGACAGCATCCGCAAGCAGCGTGTGAAAGCCGTTGAGCTGTTCTGCTGATGATGCAGGAAC  
GTGCGTCTACCGGTCGTATCTATATTAGAACGTTGACCACTGCAATACCCATAGCCCGTTTGATCCGGCCATCGCCCA  
GTGCGTCAGTCTAACCTGTGCCTGGAGATAGCCCTGCCGACAAAACCGCTGAACGACGTCAACGACGAGAACGGTGAAT  
CGCGCTGTGTACGCTGTCTGCTTTCAACCTGGGCGCAATTAATAACCTGGATGAACTGGAAGAGCTGGCAATTCTGGCGG  
TTCGTGCACTTGACGCGCTGCTGGATTATCAGGATTACCCGATCCCGGCCGCAACCTGGAGCGATGGGTGCTGCTACG  
CTGGGTATTGGTGTGATCAACTTCGTTACTACCTGGCGAAGCACGGTAAACGCTACTCCGACGGCAGCGCAACAACCT  
GACGCATAAAACCTTCGAAGCCATTAGTATTACCTGCTGAAAGCCTCTAATGAGCTGGCGAAAGAGCAAGGCGCGTGCC  
CGTGGTTTAAAGAAACCTTACCGGAAAGGGATCTGCCGATCGATACCTATAAGAAAGATCTGGATACCATCGCTAAT  
GAGCCGCTGCATTACGACTGGGAAGCTCTGCGTGAGTCAATCAAAACGCACGGTCTGCGTAACTCCACGCTTTCTGCTCT  
GATGCCGTCGAGACTTCTTCGAGATCTTAACGCCACTAACGGTATTGAACCGCGCGCGGTTACGTCAGCATCAAAG  
CGTCGAAAGACGGTATTTTGCAGGTTGGTCCGGACTACGAGCAGCTGCACGACGCTATGAGCTGCTGTGGGAAATG  
CCGGTAACGATGTTTATCTGCAACTGGTGGGTATCATGCAGAAATTTATCGATCAGTCGATCTCTGCCAACCAACTA  
CGATCCGTCACGCTTCCCGTCAAGAAAAGTGCCGATGCAGCAGTTGCTGAAAGACCTGCTCACCCTACAAATTCGGGG  
TCAAAACACTGTATTATCAGAACACCCGTCGCGGCTGAAGACGCACAAGACGATCTGGTCCGCTCAATCCAGGACGAT  
GGCTGCGAAAGCGGCGCATGTAAGATCTGATATTGAGATGCCGATGCGGGCTAAACGCTTATCCGGCTACGGCTCGG  
TTTGTAGCCCTGATAAGACGCGCAGCGTGCATCAGGCTCCGGGTGCCGGATCGACGCTGAACGCTTATCCGGCCTAC  
GGCTCGGATTTGTAGGCCTGATAAGACGCGCAGCGTGCATCAGGCACAGGATGCGGGCTAAAATGCCTTATCCGGCAT  
TAAACTCCCAACAGGACACACTCATGGCATATACCCTTTTACAGACGAAAAATGATCAGCTCAAAGAACCAGTGTTC

TTTGGTCAGCCGGTCAACGTGGCTCGCTACGATCAGCAAAAATATGACATCTTCGAAAAGCTGATCGAAAAGCAGCTCTC  
TTTCTTCTGGCGTCCGGAAGAAGTTGACGTCTCCCGCAGCCGATAGATTACCAGGCGCTGCCGGAGCACGAAAAACACA  
TCTTTATCAGCAACCTGAAATATCAGACGCTGCTGGATTCCATTACAGGGTCGTAGCCCGAACGTGGCGCTATTGCCGCTT  
ATTTCTATTCCGGAACCTGAAACCTGGGTCGAAACCTGGGCGTTCTCAGAAACGATTTCATCCCGTTCCTATACTCATAT  
CATTCTGTAATATCGTTAACGATCCGTCTGTTGTGTTGACGATATCGTCACCAACGAGCAGATCCAGAAAACGTGCGGAAG  
GGATCTCCAGCTATTACGATGAGCTGATCGAAATGACCAGCTACTGGCATCTGCTGGGCGAAGGTACCCACACCGTTAAC  
GGTAAAACCTGTGACCGTTAGCCTGCGCGAGCTGAAGAAAAAAGTGTATCTCTGCCTGATGAGCGTTAACGCGCTGGAAGC  
GATTCGTTTCTACGTCAGCTTTGCTTGTCTTCGATTTGCAGAACCGAATTGATGGAAGGCAACGCCAAAATTATTC  
GCCTGATTGCCGCGACGAAGCCCTGCACCTGACCGGCACCCAGCATATGCTGAATCTGCTGCGCAGCGCGCGGACGAT  
CCTGAGATGGCGGAAATTGCCGAAGAGTGAAGCAGGAGTGTATGACCTGTTTGTTCAGGCGCTCAACAGGAGAAAAGA  
CTGGGCGGATTATCTGTTCCGCGACGGTTCGATGATTGGTCTGAATAAAGACATTCTCTGCCAGTACGTTGAATACATCA  
CCAATATCCGTATGCAGGCGAGTCCGTTGGATCTGCCGTTCCAGACGCGCTCCAACCCGATCCCGTGGATCAACACTTGG  
CTGGTGTCTGATAACGTGCAGGTTGCTCCGCGGAGTGAAGTCAAGTTCAGTTCAGTTCCTATCTGGTGGGCGAGATTGACTCGGAAGT  
GGACACCGACGATTTGAGTAACTTCCAGCTCTGATGGCCCGGTTACCCTGCGCATCACTGGCACACAATGCTGTGCCA  
GGATCTGTCGCGACCGCTGTTGCAGGTCAAGTTGACTGGATTGCCGAACCGTTAGCCTTTATTTCAGCCGGGGGAAATTT  
TTGCCCTGTTGTTGCCGGGCAAAAGGCGATATTGAAATCGAGATGTGAATTGTTGTAGTGCCAGATACAACGCTTATGC  
GTCTTATCTGGCCTACAACGATTACATGGCGTAGTAATACGCTTTCACCTGCTCCAGTCCGCTTTGGGGATTGGTCCCA  
GATATTTTTCCAGCTGGCGGAAGTCATGATTAATCGCTTATCGCGACGCAAGCGGCGACGACTTTTTCTCCAGGTCAAGA  
AAACCAGCTTCTGCATTACCTTCTGTTTTACATAGATATGGCGAACATAACAACAGCCATGCTGACGATTAATGCTATG  
CATTTTTCTAAACGCCAGCGCCACTGCTTCAACATGGCTTCCGCTACTTCTGTCAGAATAAGGCGATACTGCATGCTGGG  
CATAACAGTCAGCAATGCTGATGAACCCCGCCATATCTTCACTCAGCAGCAACGCTCGCCATTACCCTCAATTTTTACC  
GCTTACCAAAAAACGATCTTCCGCGACGATGACACCGGCCGTTCCAGTTCCTTAATTACCGCAACCTCACGGACAATCGT  
TGGTCCGGCCGAACGGATAACGTACGGAATGAAACAGATGATGCGTCATGCGCTTACATACAGCTTTTTGCCGTTGCGCT  
CGACGATTGCACCCCGCTCATAACATTACGGCGATAGTTAGGCTCTTCAACCCAGTCCGCTCTGTTGCCACCCAGTGA  
TTAAATTGCTGCTACTTTGCTGAAACTGCCATACCTATCGCCTGTCAATTTTTATTAACGACAATGACTATAGGTGGTTA  
CCTGAGGAAAATCTTAATGAAACGTGCTGATTAATGAATTTCTTTGCCACTACTAGCTTACACCCGCTTTTACCCTTC  
ATTTGCAGCGCATAGATTCCACCAGCCACTACCATAATAGTGGCCCGCAGCAGATAAAAATGTGAATTTAATCAGGCGGAT  
ACAGCGATGAATTTTATTCGACAGGGATTAGGCATCGCCTTACAACCAGAGTTAACGCTGAAAAGCATTGCAAGGTGAATT  
GTGTTCCGTTCCCTCTCGAACCAACTTTCTATCGACAGATTTGCTTGGCTAAAGAAAAGCCGGTAGAAGGCGATCCAC  
TGTTTTTACTACAAATGTGCATGGAACAATTAGTGGCGATTGGAATAATTTGATATGAGACAGGATGGCGCATGAACGCC  
ATCCTGCAGTAACATACTTTTATTAAGAAATTTTACTGCCTTATCAGGGAATCAGTAAACAGCCATTTACACCCGC  
TTTGTTATACAGAGCATCATATAACTGATTACATCAGGAGTGTATTACAGGCGATTTATCTGACCGCACGGTATAAGGAT  
GCACTACCAGTTTATTCTGCTGAGCATCTTGACCATGCCAGTGAAGTTGATATTACCCGGCTGCGATGTCTCCTCAATC  
AACATATGGTAATCCGGACCAATACCATCTGCATATCCGCCACCTGTTTATGGCACCCGGCTTAAACATCCAGTCGTA  
GTTGTAATTAACCCAGCTTCCATCCGGCTGTTTCTGCTGCGTTTCACTCCAGTCGGTATAGGCAATCAGCTGTAACAGAT  
TGAGCTCCATGCCATTTGGGTTCCAGCTCATTCTTAATACGCTTCACTCATCAGCATCAAAAACATTGCAAAATAACT  
TTATCGTCTTACCAGGTGAACCATATTTCTTCCAGCACTTCCAGCGTTTTTCCGCAATATCCTTCCCTTCTGATGATG  
GAACCACGGCGCTTTGATTTCTGGATAAATACCGATATTTTCCGGTAGAGTGATTTAACCCCTGAACAAATTTCAACT  
CTTCTTCAAAGGTGTGCACCCGGAAGTCGGACTTACCATTGGGAAACGCCCGGATAAGTCTGCATTTTTTACCCTTT  
TCAATATCGAAACCTTCCGGTAAATTTCAACGACTTAAATTTTCCAGCGTGAATCTATCGCGTAGTAACGACCGCTTTT  
GCGCGCCGATCCGGGAAACGATCGGCAACATCAGTAACACGATCGAGGTAATGGTCATGCAGAAACAACAGATTGTCGT  
CTTTGGTCATACCAAAATCTGTTCCAGATAATCCGCTCCCTGCGCATAACGCTTCTTTTGGTGGCAGCGTATGCTCC  
GGCAAAATCCACTGGCACCGCGATGGCGGATGACTATTTTTTCTGTTGCTGTCCGCGCCATTGCACTGCTTCCCATGAC  
TATAGTGCTCATCATGATCGCCATGCTAAGGTTTTTCCAGCGTCAATTTTATGCCATTAGCTCCGTTGCGTTCTTGCAGT  
AATTGTTTATGGCGACGTTTTTCCGCAATCATCACAACAATCAACAAGATAACCGCCAGAATGCTGCCGCAATCATTAC  
CATAAAGCCGCCATCCAGCCGAAGAAGTCCACGGTGTAGCCAACAATCGCGCTCGCCGCCACCGAACCCAGGTAAC  
CAACAGCCCGGTAAGCCCGCTGCCGTACCTGCCGTTTTTTCCGGTCCAGTTCAGCGCATGCAGACCGATCAGCATC  
ACAGGACCGTAGATCAGGAAGCCGATAACAATCATAACAATCATATCGACGGTTGGGTTACCTGCCGGGTTTATCCAGTA  
AACGATAGTCGCGATGGTACCAGTGTATAAAGAAAAACCGGTTGCCACCGGTTGCCACGGAAGACTTTATCCGACA  
TCCAGCCGCACAGCAGAGTCCCGGAATACCTGCATATTCATAAAGGAAGTAGGCCAGGAGATTTATCTAGCGCGAAA  
TGCTTAACCTCTTTCAGATAAGTCCGGTACCAGTCCAGGATGCCGTAACGCAGCAGATAAACGAACACGTTGGCGATGGC  
GATATACCACAGCAGTTTGTTCGGCAGTACGTAAGATTTGCTTCCGCGTCCAGTCTCTGTTCCGCTTTTTCTGT  
TATAGTCTCCGATAATCAATTTTTGACTCTTTCATCGCGCGCAAGCCACAGGATTGCGGGTATCGCGCATCATCGCA  
AAGGCGAATAATGCCACCAGAATGGCGCAGAAAGCAGGATATAGAGCGCCGATGCCAGTCAATTGAACCAGGCCATCCC  
CAGCAGGAACAGCAGCGCGGAATACCACCACCGACTTGTGCGCACAGTTCACACTGACACAATGCCGCCACGTTCTT

TCTGCGACCACAGTGCACCATAGTACGACCACACGGCGCCACCCCATCCCCTGGAACCAACCGCAGAGGAACAACAGT  
ACAAACATCACGCAATGCTCGACGTGCCCATGGCACAAAGCCATAAAACAACATCACTGCCGCCGAGAAATCAAACC  
TGCGGGCAGGAAAACGCGCGGATTCGAGCGATCCGATACCGAACCATGATGAATTTGAAAAATCCATAAGCAATCGAGA  
TCCCCGAAAGGGCAAAACCTAAATCACCGGTGAGAATCCCTGCTCAACCAGATAAGGCATAGCAAGCGCAAAGTCTTA  
CGAACCAAAATAGTAAGCCGCATAGCCAAAGAATATCCCAGGAAAATTTGCCAGCGCAATCGACGATAAGTCGGATCGAT  
CTCCGCGGCAGGTAAGCGCGCTTTGTGTGGCGCTGTTAAAAAATACTCAACATTGATAGCCTCCGTGGCCCGTGGTCTT  
ATTTATGATTAACAGCCTGATTCAGTGAGAGAACCTGCCGTTTCTTGAGTTGCCGCGATGTTAAGAAAACATTCAAAAT  
TAAATGTGAATTGCCGCACACATTATTAATAAGATTTACAAAATGTTCAAAATGACGCATGAAATCACGTTTCACTTTC  
GAATTATGAGCGAATATGCGCGAAATCAAACAATTCATGTTTTACTATGGTAAATGGTAAAAAACGAACCTCAGAGGG  
ATAACAATGAAAACCTCGGACTCGCAATCAAGTGACGTGATTATCATTGGCGGCGGCGCAACGGGAGCCGGGATTGCCCG  
CGACTGTGCCCTGCGCGGCTGCGCGTGATTTTGGTTGAGCGCCACGACATCGCAACCGGTGCCACCGGGCGTAACCACG  
GCCTGCTGCACAGCGGTGCGCGCTATGCGGTAACCGATGCGGAATCGGCCCGCAATGCATTAGTGAAAACAGATCCTG  
AAACGCATTGCACGTCACTGCGTTGAACCAACCAACGGCCTGTTTATCACCTGCCGGAAGATGACCTCTCCTTCCAGCG  
CACTTTTATTCGCGCCTGCCAAGAAGCAGGGATCAGCGCAGAAGCTATAGACCCGAGCAAGCGCGCATTATCGAACCTG  
CCGTTAAACCGCACTGATTGGCGCGGTGAAAGTTCCGGATGGCACCGTTGATCCATTTGCTGTGACCGCAGCAAACATG  
CTGGATGCCAAAGAACACGCTGCCGTTATCCTTACCCTCATGAAGTACGGGCTGATTCGTGAAGGCGGACGGTGTG  
CGTGTTCGTGTACGTAACCATCTCACGGCGAAACTCAGGCCCTTCATGCACCTGTCGTGGTTAATGCCGCTGGGATCT  
GGGGCAACACATTGCCGAATATGCCGATCTGCGCATTGCGATGTTCCCGGCGAAAGGATCGTGTGATCATGGATCAC  
CGCATTAAACAGCATGTGATCAACCGCTGCCGTAACCTTCCGACGCCGATATTCTGGTGCCTGGCGATACCATTTGCT  
GATTGGTACCACCTCTTTACGTATTGATTACAACGAGATTGACGATAATCGAGTGACGGCAGAAGAGGTTGATATTCTGC  
TGCGTGAAGGGGAAAAACTGGCCCCGTGATGGCGAAAACGCGCATTTCGGGGCTATTCTGGCGTGCGCCGCTGGTT  
GCCAGCGATGACGACCCGAGCGGACGTAACGTCAGCCGTGGCCTGCTGCTGCTGACCATGCTGAACGCGATGGTCTGGA  
CGGATTTATCACCATCACCGGTGGCAAACCTGATGACCTATCGGCTGATGGCTGAATGGGCTACCGACGCGGTATGCCGCA  
AACTGGGCAACACGCGCCCTGTACGACTGCCGATCTGGCACTGCCTGGTTCACAAGAACCCGCTGAAGTTACCTTGCCT  
AAAGTCATCTCCCTGCTGCCCGCTGCGCGGTTCTGCGGTTTATCGTCATGGCGATCGCACGCTGCCTGGCTGAGCGA  
AGGCCGTGTCACCGTAGCCTGGTATGTGAGTGCAGGCGGTAACCTGCGGGTGAAGTGCAGTACCGGGTAGAAAATTTAA  
ACGTTAATAGCCTGCTGGATTTACGCCGTGATCCCGTGTGGGGATGGGCACCTGCCAGGGCGAACTCTGCGCCTGCCG  
GCTGCCGGACTGCTGCAACGTTTTAACGTCACGACGTCGCGCAATCTATCGAGCAACTTCCACCTTCTTAACGAACG  
CTGGAAAGGCGTGCAACCATCGCCTGGGGAGATGACTGCGCGAAAAGCAATTTACCCGCTGGGTTTATCAGGGATTGT  
GTGGTCTGGAGAAGGAGCAGAAAGATGCGCTTTGATACTGTCATTATGGGCGGCGGCTCGCCGATTACTCTGTGGCCT  
GCAACTGCAAAAAACGCGCTGCGCTGTGCCATTGTCACTCGTGGTCAAAGCGCACTGCATTTCTCATCCGGATCGCTGG  
ATTTGCTGAGCCATCTGCCAGATGGTCAACCGGTGACAGACATTCACAGTGGACTGGAATCTTTGCGTACGACAGGACCA  
GCCATCCTTACTCCCTTCTCGAGCCACAACGCGTGCTCGATCTCGTTCGCCAGGCGCAGGCATTAATCGCTGAAAGCGG  
TGCGCAATTGCAGGGCAGCGTAGAACTTGCTCACAGCGGGTTACGCCGCTCGCACTCTGCGCTCTACCTGGCTAAGTT  
CGCCAGAAGTCCCGTCTGGCCGCTGCCCGCAAGAAAATATGTGATGAGTGGGAATTAGCGGCTGATGGATTTTACGGCG  
CACCTTGGCGCAGCTTCGTTGCGTGAACCTGCGCCTTCCGTTGAAACCGCAGAAAATAGAGCTGCCGGAACGGATGTGCT  
GCGCAATAACGCCACCGAATTTGCGCGGTGAATATCGCCGTTTCTTATAATGAAGAAAACCTGGCCGCTGTTACTTG  
ATGCGCTTATCTGTGCGCAATACCTGCGAAATGATCCTGATGCCCGCTGCTTCGGTCTGGCCGATGACAAAACCTGG  
CGTTGGTTGAATGAAAACCTACCTTGTCACTGATGCTTTTGCACCGCTGCCGCTTCCGTGCTGGCATTCTGCTGCA  
AAACAGTTACAGCGCAATTTGTGCGCCAGGGTGGCGTGGATGCCGGGCGATGAAGTAAAAAAGTGACCTGTAATA  
ATGGCGTAGTGAACGAAATCTGGACCCGCAATCACGCCGATATCCGCTACGTCCACGTTTTCGCGGTTCTCGCCAGCGC  
AGTTTTCTTAGTGGCGGACTGGTAGCGGAACGTAACGGCATTGAGAGCCGATTCTCGGCCTTGATGTGTACAAACCGC  
CACGCGGGGTGAATGGTATAAGGGAGATTTTTTGGCCGCAACCGTGGCAGCAGTTCCGGTGAACCACTGATGAGACGC  
TACGCCCGTACAGGCGAGGCAAAACCTGAAAACCTGTTGCCATCGGTTCCGGTGTGGGCGGATTTGATCCCATCGCC  
CAGGGATGCGGCGGCGGTGTTTGTGCCGTGAGTCTTACATGCCGCTCAACAGATTGCCAACGCGCAGGAGGCAACA  
ATGAATGACACCAGCTTCGAAAACCTGATTAAGTGCACCGTCTGCACCACCGCTGCCCGGTGAGCCGGGTGAATCCCGG  
TTATCCAGGGCAAAAACAAGCCGGGCCGATGGCGAGCGTCTGCGTTTGAAGATGGCGCACTGTATGACGAGGCGCTGA  
AATATTGCATCAACTGCAACGTTGTGAAGTGCCTGCCGTCGGATGTGAAGATTGGCGATATTACAGCGCGCGCGG  
GCGAAAATATGACACCACGCGCCGTCGCTGCGTAATTTTGTGTTGAGTCATACCGACCTGATGGGTAGCGTTTCCACGCC  
GTTGCGACCAATCGTCAACACCGCTACCTCGCTGAAACCGGTGCGGCAGCTGCTTGTGCGCGGTTAAAAATCGATCATC  
GCCGACGCTACCGAAATACTCCTTCGCGCAGTTCCGTCGCTGGTATCGCAGCGTGGCGGCTCAGCAAGCACAATATAAA  
GACCAGGTCGCTTTCTTTCACGGCTGCTTCGTTAACTACAACCATCCGACGTTAGGTAAGATTTAATTAAGTGCTCAA  
CGCAATGGGTACCGGTGTACAACCTGCTCAGCAAAGAAAATGCTGCGGCGTACCCTAATCGCAACCGCTTTACCGATA  
AAGCACGCAACAGGCAATTAACGAATGTAGAGTCGATCCGCGAAGCTGTGGGAGTAAAAGGATTCCGGTGATTGCCACC  
TCCTCAACCTGTACATTTGCCCTGCGCGCAGTAACCCGGAAGTGTGAATGTGCAACAACAGGCTTGGCGGATCATAT  
CGAACTGGCAACCCGCTGGCTGTGGCGCAAGCTGGACGAAGGCAAAACGTTACCGCTGAAACCGCTGCCGCTGAAAGTGG

TTTATCACACTCCGTGCCATATGGAAAAATGGGCTGGACGCTCTACACCCTGGAGCTGTTGCGTAACATCCCGGGCTT  
GAGTTAACGGTGTGGATTCCAGTGTGCGGTATTGCGGGTACTTACGGTTTCAAAAAAGAGAACTACCCACCTCACA  
AGCCATCGGGCACCAGTGTCCGCCAGATAGAAGAAAGCGGGCAGATCTGGTGGTACCAGTGCAGAACTGTAAAT  
GGCAGATTGAGATGTCCACAAGTCTTCGCTGCGAACATCCGATTACGCTACTGCCCAGGCGCTGGCTTAAACTCCTTC  
TGATGCCCGGTAAAGCATGTGGTTACCGGGCATTTCGCGTACAGATTCCGTGCCAATGTATGCGTTGCAACGCAGTGA  
AAATTCCTCTGAAAACGTCTCGAAAGGCTGAAACTGGCAGATGTCAAAGGCTGGGATAACCCTAATGTGCGTATCA  
TAAATATCAGTGTACGGACAACCATGACCGAATCAACAACCTCCTCCCGCATGATGCGGTATTTAAACCTTTATGTT  
ACACCCGAAACCGCACGGGATTTCTCGAAATACATTTACCAGAACCTGCGCAAGCTTTGCAACCTGCAACCTTACG  
CCTGGAACCCACTAGTTTTATTGAAAAAGTTTACGCGCTTACTACTCGGATGTTTTGTGGTCCGTGGAAACCAGCGACG  
GTGACGGCTATATCTACTGCGTGATTGAACATCAAAGCTCTGCAGAAAAGAAATATGGCTTTTCGGCTAATGCGCTATGCC  
ACTGCCGCCATGCAGCGTACCAGGACAAAGGCTATGACAGAGTCCGCTGGTGGTCCGTTGCTGTTTTATCATGGCGA  
AACCTCGCCTTACCCGACTCACTCAACTGGCTGGATGAGTTTGACGATCCGCAACTTGCCCGCAGTTGTACCCGAAG  
CTTTCTGTTGGTGGATACACCATCGTACCTGACGATGAGATCATGCAACATCGGCGTATAGCTCTGCTGGAATGATT  
CAAAAGCATATTCGCGACCAGGATTAATCGGCATGGTGCAGAGATCACCACGCTTTTGGTTAGAGGCTTACTAATGA  
CAGCCAGCTACAAACACTGTTAATTATCTGCTGCAATGCGGCATACCTCCCGTTTCACCCGTTTTATTGAGGAGATTG  
CCGAAGTTCCACTACAAAAGGAGAGATTAATGACTATTGCTGAACGGCTACGGCAGGAAGGGCATCAAATGGCTGG  
CAGGAAGGTATGCATGAACAAGCCATTAATAATTGCTTTGCGCATGCTGGAGCAGGGCTTTGAACGTGAGATTGTGCTGGC  
GACAACCAACTCACTGATGCTGATATTCGAACTGTCATTAAGGAGAGATTAATGACTATTGCTGAACGGCTGCGGC  
AGGAAGGACATCAAATGGCTGGCAGGAAGGTAATTAGAAGTTTGCATGAACAAGCCATTAATAATTGCTTTGCGCATG  
CTGGAACAGGGCTTTGATCGTGACCAGGTGCTCGCGGCCACCCAGCTAAGCGAAGCCGATCTGGCAGCGAATAACCTA  
ATTAACACAGGCCACAGCCGATCCCATGGCCTTTGATATCAATAACTACCTTTTATGCGTGGCCATTTTTGCTGA  
TTTAAACATCGCCAGTGTGATCCAGGGCATCGCTGTAGAGCATCGTGTCAACGCCAACAGCGACAAAGTTCGCTCCCC  
ACGCCAGGCATTGCTGCGCCATATCAGGAGCCACAGCCAGAAAACAGCCGCTTTACCCGACGACGGATCCGCCGAATA  
CTGGTTTCAATAATTGCTGCACTTCCGGGTGCCCGGCTTATCCGGTAGCCCAACGACGCAGAAAGATCCGCAGGTCC  
AATAAACACGCCATCAATCCCTTCGACGTCGAGGATTTGCTCCAGGTTATCCAGTGCCTTTTACTTTCCACCTGCACCA  
ACAGACAAAGCGAATCGTTAACTTGCGCCATGTAATTCATGCGTCCCAGCGCGCAGCCGTGCCACACTGGCCCCG  
ACACCACGCTACCGTAGGGAGGATAGCGCGTGGCAGACACCACCTGACGTGCCTGTTCCGGCAGTATCGACCATCGGGAT  
CAGTAGAGTTTGCAGCCAAATCCAGGACTTGTAAATCAGCGTTTACTGCCTTCCACCGACGGATCACGGTTGGC  
TGGCATAGGGGCTACCGCTGTAGCTGATGATAAAGATCCTGAATGGTGTGGCGCGTGTCCCGTCAATCAGCAAC  
CAGTCATAACCAGAAGTGGCGGCAATTTCTGCCATATAGGCAGTCGTTGAGCTTAACCACAGACCAATTTGCACTTCGCC  
CTTGCGTAAACGTTCTTTAAAGGGATTGCTTAATAATGCGTTCATCGTTCCTTAACCTATTTAATGATGTGCCACGTC  
GGTCTGCGCAACAGTGCATTACACGCAGAGTGAAAATAATCAGCGAACCGATGACCGCCACCGCTGCCAGCGTCAGTA  
ATCCCGCCGATCGCTGGCAATAACGTTTCTGCTTTCACGCGCAGGATCGGGGCAATAAACCCGCCACTGCACCAAC  
AGTTTTACAAAACCAATTCGCGAGCCAGCGCGTACCAGAAAGCAGTTGTGTGCGCATCGTCCAGAACCTGGCTGCAC  
GGCAATAAACCCGATAGCTGCAACACACAGCGCTACGATCGCCATTACTGGAGAAAGCAGCCCGACAGACCAATACCAA  
TGCCCGCCGAGTAATGTCAGCGCTGCGACATTACGCCGTTCCCGGTTTTATCGGAATAGCGCGGAATAAGCCAGGTC  
CCAAACAAGCCGCAACCCACGGAATGGCGGTGACCACCGACGCTGTAAGCCCACTTTTGTCCAGCAATGCCGCAAC  
CTGGGTGCGCAGGAAGAAAATTAATCCGTAACCCGCCACCTGAATGGTCAAGTAGATAATCGCTAGTTGCCAGACTCGGC  
CATTACGACGCATCGCTCAGCCGAGAAGTCACTTTCTGTTGTTCTTCACTTGCCAGTTGATTGATAAGCAACGTTTTT  
TCTTGTTTACTCAGAAAACGTGCCTGCCGTTGTCATCAAGCCAAAAGAATGTGAATACCCAGCACCGCATGCCAA  
CAATCTTCAATCACAACATCCAGAACCAGCCGGATGCCCATAAATCCATGCATCTCCAACAGCGCCCGGAAAGCG  
GTGATCCAGTGTAAACGCCAGCGGTGCGCCATATAGAACAGCCCATAAATGCTGGCGGATTACGCTGCGGAAACCAT  
TGCGAGGTGAGATAAATCATACCAGGGAAAAATCCGGCCTCCGCAGCACGAAGCAGAGTGGGAACTATCAGAAATTTGCG  
TTCAGTATCGGCCATGCCATGGCTGCCGAAAGAAATCCACAGCAGTGTGTCGTACCAATCCAGGTTCTGGCCCCCA  
GTTTGGCATCAAAGATTCGCCGGAACCCAGAAACGCATATACCACAAAGAAAATGCCTGCTCCAGCGCATAAGCT  
TCATTACTCAACCCGGTATCAATCTGGTAGGTCTGTTTGGCAAAACCGATATTCGAACGGTCGAGAAACGCCAGCATA  
CAGCGCAACATAAACGGAATTAACGCACACGTTTTTTCTTACCACGGCGTCAAGCAAAGCGGTGCTCATAAAAAGCT  
CCTTAGAATATGTGGCGTTACCGTTGTACAGCAACGCCGGAGTGATTAGTGGCTGTAGGGGCTTTCAAATTCAGT  
CACGATTGAGTTCGACGCCAAAACCGGTTTTATCAAGCACTGATTTATGAATACGACATTACCAGAACCGGCTCATTG  
AGCAGAATCGGGTCAAATGCGGACGCATCGTTGAACAATCCGGGCTGGTGCATCAGGAATTCGCTGAATGGCGTATTGGT  
GAAGGTGATCACCGCATGGTGAAGATAACAGACGAACCGTGGCGCACACCAGTTGCCCTGGATTTGGCGATTGCGG  
CAATTTCCACAGCGTGGTTAAACCACCGCACAGCAACATCCGGCTGCATAATGTCGATACCGGTTTTCTGAAAGCGTA  
CGAAAAGATTGAGTGTGCCGTGGTGTACCGCTGGTACCATCATTCCGACTGGCGCGTTCGCTTTAGTTTCGCGATA  
ACTTTCATACTGCTGTGGCGGACGGCACTCTTCGATCCATTTAGGTTATAGGGCGCGCAAGCGTGGGCCAGTTTGGTGC  
CATAGTTACGTCCTGACTCATCCAGCAGTGCAGCATTAAACAGAAATCCTCACCGCATTTTTACGCATATCCGCGACC  
ATAGCGGCATCTTTGCGGATCCCGCATCGCCATCATGTGCCCCCAGTGCCTGCGCATTTTGCCACCGATAAAGCCCAT

CTCTTTTGCCAGATCCGGACGCGCACCTGTGGCGTAGAACTGAATCTCATCACGAACAGCGCCGCCTAAAAGTTTATAAA  
CCGGAAGCCCACCACCTTTGCCGAACAGATCCCACAGAGCCAGATCGACACAAGAAATCGTATTCATCACCAGGCCACCA  
GAGCCGGAGTAATACAGGGTGGCACTGAGCATTGATCGTGGATCAGTTTGATATCACTGACACATTTACCCTCAATGAA  
ACGGTTAAGATGTTTTTCGACAATAAAACAGCCATTTACCCGGCTGTCGAAACGGCGAATCCGGTCTGGCCGTTTTCTG  
CTTCGACTTCAACAACCAACGTGCCAAGAACGTTAATGCCAATGACTGGCGTGACTGCTCGTAATCGCGGTATTTACTC  
ATCGGGGTGGCAATATGATCGTCTATCCAGTGATTGCCCCCTGGTCTGTGATAATCACCGCCGCCAGCGCCTTTTTCTGC  
TGTCGCACCGCCAGTAAACCAGGCGCGAACCTGTTAATTTTTGGTAGGGTCATGATGTTCTCCATTGTTATGAGGCTTG  
TAAGTCAAAGGGACTTTTCCATCCCAACAGACGTGAAATATCCCTGGCGCAGGCAATGGCCTTGCCCGCCAGATAATCAC  
GGTATTCCTCATTGATTTGTAAGCGGGTACCACCAGGATCGCAGCGGTAAGTCTGTTATTGGCGTTAAACACCGGC  
GCAGCGACACAACGGACATCGGCGTAATCTTCGCCGTTGTCATAGCTCCAGCCCTGACGGCGAATACGCGCCAGTTCTC  
GTGAAGTTGCTGTGGATGAGTAATCGTTGTTGGTGTGCGCTGCTCCAGACCAGCCCTTCGATAATACTTTGCTGTACCG  
CTGCAGGTTGCCAGGCAAGCAGGCATTTACCTATTCGGAGCGATAAAGCGTAAGGCTTTTCTTCATGGGAACGCACG  
CTGATAGTGGCTGATGACTCCACTTTCAAATGTAATAAGCGTCCGTTATCAATAATCCCAGGTGACATAACAGCCC  
GGTGGTATCCATCAGTTGCTCAAACGCGTCCGAGCAGTTCCCGGAGATCCATCTTGCTTAACGCATGACCGGAAAGCT  
CCACCAGCTGGTCCACAACAAAAATTTCTGGTATCAAGGTAAGAAAAAGCTGACGCTGAGTTCATTAAGCAGC  
AAATAGGCCGTGTTTTAGGGATTCCCAATGTGTCAATGATCGTCGACACTACAGGGGCAATGCGGGCAATCAAAT  
GAGAATATCAATAGCCCGTGTGAGGGCGGAACTTTGCTTGATTCCAACATACTGGACTCCAGTCTTAGATACTGGAATC  
AGTCTCGTTGCTCAGGGGGAGTAAATTTGTAAGCGCATCAAATCCCCTCCTCGTCCAGCAGACTGGAGAAATTACGCA  
CAAATTTGTAATCAGCGCACGGATTTTTTTCTTATTGAGTACAACAGGTTGGACAAATTTTCCCGGAGGGGGAATGTGCC  
GGTGCAGTAAACCGGCACAGAGTGGCGGAATCAGACAGATAAGGTCATGGACTCAACAACCTCAATCCAGCCATGCTCAC  
TGCGGATATCTGGCCGTTAAACCAACGGCGCAGCATATTCAGTGCCATCATTGCGCACACTTCTGACGGATAGCCAGG  
CTGTAGCGCTAGTGCTGAAACGCACACGCAGAGCGAAAGTCCGCTGTCGGCTGGTAGCGCAAAGTTGAGATGCTCGTT  
CTCGAAACCGGAAACAGCCAGTGCCAGCCCGCAAATGGTTGGCCGCGCTTCTGTAATCCAGTGCGCAGTTTGGCCCA  
GGTTTTCTCCTGTGAAGGAACCACTTACACGCCAGCAATGGAGCCTGCGCGAGAAAGTTGCAAAGCCAATAAACCA  
CCGGTGAATTGCTCGCTCAACGTGAGGCTGAACTGGCGTTTTGCAATTCGCGACTGATCTGCGCGGGCAGTCTTCAGT  
GCCTTCGAAAATCAGCTCTGTCCGGCAACAGTAAACATCCAGCCACAGTTTTTCCATCGCTGTTGCTCGTTGCCG  
GTCCGGTGAGTTTCAGTTGATGATAGGCATTGAGGAGCGATAGCCATTGTTACGCCCGGCGCAGTTGTAGAGTGTCC  
AGGCTTTGTGCCAGATCGTTTTCCGAACGACAAAAGTAGTCAAACGCAGACAAACCGCGGCTGCGGTAAGAAAAACG  
CTCGCGCAGGCGCGGAGGATTTCTGCTCGACCATCACCTTAAATTTCTGACGTTACGCCGGAGTAAAGAACATCAGGC  
AACGATTAAGTGTGACGGCAAAACACAGGCGGTGCCTACCGGTTATTGATAAATTCAGCACTGGCAGGCGAGTCCGCT  
TGTTTACGGTTGCTCGGTGCCATTACTCGTCCACGTTCTGTGAAATAGCGTTCCATCTTTGAGCCAGGCTTCATGCAG  
CACCAGGCCTTCACTTTTGTGTCGACGCGGAGTGCCTTAAATCATCGCTGGTCCGTCAGCCCGCCGTTAACGCA  
TCAGCACATCGGCGTGTGACTACGTTCCGGAAGAAATGGTACTAAGTCATCAAGGTTATCCCCACCCTATTGCGGCGA  
GATAATGGCAACCCCTGATGAAAGAAAAAATCGGCCAGCCAGGCGAGGTTAGTGTCAACGATTTGCCCGTGAACACTTC  
ATCCCCGGTGGATAACATTTCACTTTTAAATGTTATCTCTGCTTTTGTATCGAATCACTATAACGCAAAGGGAGA  
TAAGGCGTAGTAAGAACTGAATGGCGCGACAGAATGCCGCGCGGAAGGGATCAGAACTGGCGTTAACCCCAACATAC  
GGGCGTACGCCAGGCGTTGTGCGGTTACCGTCTTACCCGACAGATTAGGTAGCGATAACCCGCCTCAATACTGAC  
TGGACGCATAATGGTGTAAACGCGCGCCAGCATTGCTTCTTATAACTTTGAATACCGCTGGAGAGCGAATCCGGAGAGT  
AGTAATACTGCCAAACAACGGAAGCTGTGCAATTTTCCACTGCAAACCACTCCTACCGCTGCGGCATAACCTTCA  
TCGCCGAATTCGGGTTGGTGTAAACGCCTTTTCCGCCAACGCTGCCATTAACGGCCCGAGAGGCGAGTTCAACCCAG  
CCCCACGCCAGCGACATCACCGTCTGCTGTTATGTGTCCAGTTACCGCTTAAACGCCAGGCGCGTTCGTTTCAGTCCCAA  
AACCGACACCAATATTGGTGTATTCTTACCCGCTGACCGCTGATGCTCATTGCATTGACCGATGCAGAAACCAACAGC  
ATTCCGGCCAGACCTGCTAGCGCAATTTTTTTCATTATCCCCTTCCACAAGCAATTAATCAAATTTCCCAAAGCTGCG  
GGATTGACTGCCTGGCACAGAGGATTCAATGAGCGAAAAAAGGATCTAGTCACTTATTGTAACATAACTTCTTAAA  
TAATTAATGCCGAAAAAATAAACACACTTTATCGATACACAAAAAATAATAAAGTACAGTTATCATCGAAAAGAG  
ATTACTGTCACCTTACATATTTGTGAGTTACCGTATTCTCATGGTTTTCTTTTATTTATAAGGAATATCCCTGTGCGAC  
AACGGACTATTGTATGCCCTTTGATTCAAATGATGGTGCTTATTGCTGTGTAATGGCCGACGATCGCGCGTTTTT  
CCCGGTCATGGGCGATTTCCGGTGGCGGCTGGAGCTGGCGAACGAATTGAAGAGGCACTACGCCCGGAAATTCGCGA  
AGAACTGGGAGAACAGCTGTTTTGACAGAAATCACGCGTGGACCTTCAGCGATGATATTCGACCAAGACGTATGCAG  
ATGGTGCAGGAAGAGATTTATGATTTACCTGATTTTTGACTGCGTTTTCTGCCAACCGAGAAGTGAAAAATAACGAA  
GAGTTTCAGGACTACGCGTGGTAAAACCTGAAGATCTGGTGCATTATGATTTGAATGTGCGCACCCGAAAAACGTTACG  
TTTAAAAGGCTTCTGTAAACATGATGACAGCCATTACTGGCTGTGAGATTGAAAAATTTAGTGGTTAACGAATTTCCCAT  
CCAGATAAACTTTGCCTTTTCCACATGCATGACTAAACCATCCAGATAATCAGGTTTAAATGTGCGCTCAGCCTTATCT  
TTAGCAATATATGTCAGGCAATGATTATGGGTGAAAAATAACGATTTTTTATCAGGCGCTTTGCTTTGTAAGTCTTAAAT  
TGCACTATAAATCTCATTACCGCACTGAAGAAGTCTTTATCTACCGTCAATTTTTTACCCGCTGAAAACCAAGTAGCCG  
ACTGAATGGTCCGGACGGTATTACTGGAATAAAGATCGAAATCAGGGATATCAGCACTAAAAGCGTTGCCAGTTACCGG



GCATCCTGGGTACCTTTAACCGTAATACCTGTTTTATCTGACAAGCATTGATTGGTTGAACGGTCGCAACGTTCAAGCATG  
ACGAAACAAAACGACAACCGGGTGTCTGTGCCAGTCTGGCCAGTGTTCATTTGTCGATACGTGGCAAACATTGCTAC  
TCCAGGCGGCATGAGTACCCAGTCCGGCAATTGCAGCGAGCGCCAGTAAAATGATGATATATTTTTTTGACTTCAACGAA  
GAGCGGCAAAAAGCTAACACGTAACCTCCACCTATAGACAAGCGCAACCAGACAATTACCGTGAAATTGAGCTACATTTT  
TGCGGATAATTCGAGTTGGTGTAAATATTAATAATCCTACGATGTCCGCAAAATGCCTCAAAATTTTCCAAATGCAAAG  
CCTAAATAAGAAAAATATAAAAAATTTCAATATTTACGTCTAATATTAGTTTCTTAAGTTAAGTTAATATTCTATCCTT  
AAAAATTCGCTCCAAATGGCAAAATATACACAACACTCTTTATAGCAAATATAAGTGGACAGGTATTCAATGGCGGAAGG  
AAAAGCAATGTCAGAATTTTTGCTTTTTTCGCGACCAGCAATGGGCGTGGAGGAACTCGCTGCAGTTAAAGAGGTTCTCG  
AATCCGTTGGATCACAACCGGTCCGAAGAATCAGGCGCTTGAGCAAGCTTTTTGCCAGTTGACGGGAAATCAGCATGCC  
ATCGCGGTGAGTTGAGCCACCGCGGAATGCATATCACGCTAATGGCGTTGAAAATTGGCAAGGGCGATGAAGTGATTAC  
GCCTTCCCTGACCTGGGTTTCAACCCTCAATATGATTTCTTGTGGGTGCAACGCCGTAATGGTGGATGTCGACCGCG  
ATACGCTGATGGTCACGCTGAAGCTATCGAGTCAGCATTACGCCACGCACTAAAGCCATCATTCCGGTGATTATGCC  
GGTGGCCAGCAGATATTGACGCCATTCGCGCATTGGCGAACGTTACGGCATCGCAGTTATCGAAGATGCTGCCATGC  
CGTCGGTACGTATTACAAAGGGCGACATATTGGCGCAAAAGGTACCCTATTTTTTTCATTTTCATGCCATTAATAATTA  
CCTGTGTGAAGTGGCCTGATTGTAAGTGAATAAGAAACCTTCCCGCCAGCTACGGATGCTGAAATTTACGGTCTG  
GGTGTGATGCTATGACAGACAACCTGGGCGCTGCACCGAGCTGAAGTCTTAACACCGGGCTATAAGTACAATCT  
GACCGATATTAACGCCGCGATTGCCCTGACACAGTTAGTCAAATTAAGAGCACCTCAACACCGTCCGCGGAAATTGCC  
AGCAATATCAGCAAGCACTGGCAGCTCTCCCTTTAGCCATTAAGCCTTCCCGCTGGCCGACGTTACAGCCTGGCAT  
CTGTTTATTATTCGTGTCGATGAACAACGTTGTGGTATCAGTCGCGATGCGTTGATGGAAGCGTTAAAGAAAGAGGCAT  
TGGTACCGGTTACATTTCCGCGCCGCTCACACAAAAATATTATCGCGAGGTTTTCCACGCTGTGTTTACCGAATA  
CCGAATGGAATAGCAACGCATCTGTTCTTTGCCGTGTTCCCGGATATGACTACCGCGATGCCGACCATGTCATCACA  
GCCCTTACGCAACTCGCAGGACAATAAGCCATGTTTGAATCCACCCTGTTAAGAAAGTCTCGGTGGTTATTTCCGTTA  
TAACGAGCAGGAAAGCTTACCGGAATTAATCAGGCGCACCCACAGCCTGTGAATCGTTGGGAAAGAGTATGAGATCC  
TGCTGATTGATGACGGCAGTAGCGATAATTCGCGCATATGCTGGTGAAGCCTACAAGCGGAGAACAGCCATATTGTG  
TCTATTTTGTAAACCGCAATTACGGGCAACATTACAGGATTATGGCGGATTGAGTACGTTACTGGGACTTAATTAT  
TACCCTTGATGCCGATCTCCAGAATCCGCAGAAGAAATCCCCGCTGGTGGCAAAGCCGATGAAGGTTACGACGTGG  
TAGGGACTGTACGCCAGAACCGCCAGGACAGCTGGTTTCGTAACCGCTTCAAGATGATTAACCGGTTATTACAGCGC  
ACCACTGGCAAAGCGATGGGTGATTACGGTTGTATGCTGCGCCCTATCGCCGTCATATTGTCGATGCGATGTTGACTG  
CCATGAACGCAGCACCTTTATCCCGATTCTGGCGAATATCTTCGCCCGCGTCCATTGAAATTCAGTACATCATGCCG  
AGCGTGAGTTTGGTGAATCCAAATACAGTTTTATGCGCCTGATTAATTTGATGTACGACCTGGTGACCTGCCCTACCACA  
ACGCCGCTACGTATGCTGAGTCTGCTCGGCAGCATTATTGCGATTGGAGGTTTTAGCATTGCGGTGCTGTGGTATTT  
ACGCTGACCTTCGGACCACAATGGGCGGCAGAAGGCGTCTTTATGCTATTTGCCGTGCTGTTTACTTTTATTGGCGCTC  
AGTTTATCGGCATGGGATTAATCGGTGAATATATCGGCAGGATCTACCCGATGTCGCGCGCCGCCCGCTATTTTGT  
CAGCAAGTTATCCGTCATCCAGCAAGGAAAATGAATAATGAAAACCGTTCGTTTTTGCCTACCACGATATGGGATGCC  
GGTATTGAAGCCCTGCTGGTGCCTGACGAAATAGCGCCATTTTACCATACTGATAATCCCGTGAAAAGCCCTT  
TTATGGTTCGGTGGCTCGTCTGGCGCGGAAAGAGGCAATCCGGTTTATGCGCCGATAACGTTAATCATCCGCTGTGGG  
TGGAACGCATTGCCAACTGTGCCAGATGTGATTTCTTTTTATTATCGCCATCTTATTTACGACGAAATTTTGCAG  
CTCGCTCCCGCAGGTGCATTTAATCTGCATGGTTCGCTGTTACCAAATATCGTGGTCCGCGCCGCTGAACTGGGTGCT  
GGTCAACGGTGAACGGAACTGGCGTTACATTGCACCGAATGGTGAACGTCGCGATGCCGGGCGCATTGTGGCGCAAC  
TGCGCATTGCCATTGCGCCAGACGATATCGCTATTACGCTGCATATAAATTTGTCATGCCGCGCCAGCTACTGGAA  
CAGACATTACCCGCCATTAACACCGTAATATTCTGAAAATCGCCAGCGCAAAACGAAGCCACCTGTTTTGGTTCGAG  
AACGCCGATGACAGTTTCCCTGAATGGCATAAACCGGCATCCGTAAGTGCACAACATGGTACGTGCCGTTGCCGATCCGT  
GGCCGGGTGCCTTACGCTATGTTGGCAATCAGAAATCACCGTCTGGTCTGCGCGTGTTCATCCTCATGCCAGCAAAGCA  
CAGCCGGGAGCGTGATTTCTGTTGCGCCACTGCTGATTGCTGTGGCGATGGCGCGCTGGAATCGTACCAGGACAGGC  
GGGCGACGGCATTACTATGACGGGCTCGCAATTAGCGCAGACGCTGGGCTGGTGAAGGTTACGCTTGAATAGCCAGC  
CTGCTGCACCGCCGACGCCGTACCCGGTACTCATCCTCGGGTGAATGGCTTTATTGGCAACCATCTGACAGAACGC  
CTGCTGCGCAAGATCATTATGAAGTTTACGGTCTGGATATTGGCAGCGATGCGATAAGCCGTTTTCTGAATCATCCGCA  
TTTTACTTTGTTGAAGGCGATATCAGTATTCATCCGAATGGATTGAGTATCATGTCAAAAAATGTGATGTCGCTTGC  
CGCTGGTGGCGATAGCCACGCCGATTGAATATACCCGCAACCCGCTGCGCGTATTTGAACTGATTTTGAAGAGAATCTG  
CGCATTATCCGCTACTGCGTGAAGTACCGTAAGCGAATCATCTCCCGTCAACTTCAGAAGTTTATGGGATGTGTAGCGA  
TAAATACTTCGATGAGGACCATTCTAATTTAATCGTCCGCCGGTGAATAAACACGCTGGATTTATTCGGTATCAAAC  
AATTAATGATCGGGTATCTGGCCATGGCGAAAAAGAGGGTTTACAGTTACCCCTCTCCGCCGTTTAACTGGATG  
GGACCACGACTGGATAACCTAATGCAGCGCAATTGGCAGCTCCCGCGCTATTACGCAACTCATTCTAATCTGGTAGA  
AGGTTACCGATTAAGCTGATTGATGGCGGAAAACAAAAACGCTGTTTTACTGATATTCCGATGGTATCGAGGCGTTAT  
ACCGCATTATCGAAAATGCGGGAAATCGCTGCGACGGTGAATTTAACAATTGGCAATCCTGAGAACGAAGCGAGCATT  
GAGGAACTGGGCGAGATGCTGCTGGCGAGCTTCAAAAAACATCCGCTGCGCCATCATTCCACCGTTTTGCGGGCTTTCC

CGTTGTCGAAAGTAGCAGCTACTACGGCAAAGGATATCAGGACGTAGAGCATCGTAAACCGAGCATCCGCAATGCCACC  
GCTGCTGGACTGGGAGCCGAAAATTGATATGCAGGAAACCATCGACGAAACGCTGGATTTCTTCTGCGCACCGTTGAT  
CTTACGGATAAACCATCATGACCAAAGTAGGCTTACGCATTGATGTCGATACCTTTCTGTTGACCCGTTGAAGGCGTGCCG  
CGTCTGCTGGAATCTTGAGTAAGCATAATATTCAGGCCAGCATTTTTTTTCAGCGTCCGGCCGGACAATATGGGCCGCCA  
TCTCTGGCGACTGGTGAAGCCACAGTTTTTGTGGAAGATGCTGCGCTCAAACGCGGCATCGCTTTATGGCTGGGATATTT  
TACTGGCAGGTACGGCCTGGCCAGGTAAGAGATTGGTTCATGCCAATGCCGATATCATTCTGTAAGCGGCTAAACATCAC  
GAAGTCGGCCTGCACGCCTGGGATCACCATGCCTGGCAAGCCCGTAGCGGTAACCTGGGATCGGCAAACAATGATCGACGA  
TATTGCACGCGGTCTTGCCTCTGGAAGAGATTATCGGTCAACCGGTAACCTGTTCTGCGCTGCGGGCTGGCGTGCCG  
ACCAGAAGGTGATCGAAGCAAAGAAGCGTTCATTTGCGCTACAACAGCGATTGTCGTGGGGCCATGCCGTTCCGTCCA  
TTGCTCGAATCAGGAAACCTGGCACTGCGCAAATTCGGTGACCTTACCCACTGGGATGAAGTGATTGGTTCGGGATGT  
GAAAGCAGAAGATTTAACGGTTGGTACTCAACCGCATCTGCGAGATAAAGGCACGCGGTTTATACCATTATGCAG  
AAGTTGAAGGCTGCGCTTATCAGCATAATTTGTGGATCTCTCAAACGCGCAGCTCAGGAAGGCGTGACATTTGCCCT  
TTAAGCGAACTGTTATCAGAGACGTTGCCGCTCGGACAAGTTGTCGCGGAAATATTGCCGGACGTGAAGGCTGGCTGGG  
TTGCCAACAAATGCGGGTAGTCGCTGATGAAATCGGTACGTTACCTTATCGGCCTCTTCTGCGTTTATTGCTGTATTA  
CCTGTTACCGCATCAGCAGCCTCTGCTCTGGCAACCGGTAACCGGCTTATGCGGAAATCAGTCGAGAAATGCTGGCAT  
CCGGCAGACTGGATTGTGCCCATCTGTTAGGGCTACGTTATTTGAAAAACCCATTGCCGGATACTGGATTAACAGCATT  
GGCAATGGCTATTTGGCGCAATAACTTTGGTGTGCGGGCAGGCGTTATCTTTGCGACCCTGTTAACTGCCGCGCTGGT  
GACCTGGTTTTACTCTGCGCTTATGGCGGATAAACGCTGCGCTACTCGCCACAGTAATTTATCTCTATTGTTTATTG  
TCTATGCCATCGGCACCTTATGCCGTGCTCGATCCGTTTATTGCATTCTGGCTGGTGGCGGGAATGTGCAGCTTCTGGCTG  
GCAATGCAGGCACAGACGTGAAAGGCAAAGCGCAGGATTTTTACTGCTGGGAATCACCTGCGGCATGGGGGTGATGAC  
CAAAGGTTTTCTGCCCTTGGCGTCCGTTATTAAGCGTGTGCCATGGGTAGCGACGCAAAAACGCTGGAAAGATCTCT  
TTATTTACGGCTGGCTGGCGGTTATCAGTTGCGTACTGACGGTCTCCCTTGGGGACTGGCGATAGCGCAGCGGGAGCCT  
AACTTCTGGCACTATTTTTCTGGGTTGAGCATAATCAACGCTTTCGACTGGATGATGCCAACATAGAGCTCCGTTCTG  
GTACTACGTGCCGGTTCATCATTGCCGGTAGCCTGCCGTGGCTGGGATTACTCCCGGTGCACTGTACACAGGCTGAAAA  
ACCGCAAGCATTCCGCAACCGTCTATTTGTTGAGCTGGACGATAATGCCGCTGCTGTTTTCTCCGTCGCTAAAGGTAAA  
TTGCCACCTATATTCTTCTGCTTTGCATCTCTGCAATGCTGATGGCGCATTACGCTTTGCTGGCAGCAAAAAATAA  
TCCTCTGGCGTGGGATTAATGGCTGGATTAACATCGTTTTGGCGTCACTGGCATTATTGCCACATTTGTGGTCTCCC  
CGTGGGGACCAATGAACACGCCGGTGTGGCAAACCTTCGAGAGCTATAAAGTCTTTTGTGCTGGTGGATTTTTTCGCTA  
TGGGCAATTTTTCGGCTGGTACACCTTAACAAACGTCGAAAAGACCTGGCCTTTTGGCGGCTTTGCCCGCTGGGGCTGGC  
GTTGCTGGTAGGATTTCAATTCCTGACAGAGTTATGGAAGGAAAACATCCGCAATTTTTTGTGAGATGACACAAGAAT  
CACTTCAGCCAAGCCGCTATATTCTTACTGATAGCGTCCGGTGTGCCGAGGTCTGGCATGGAGCCTGCAACGCGATGAC  
ATCATCATGTATCGCCAGACAGGTGAGTTGAAATACGGCCTTAATTATCCGGATGCGAAAGGGAGATTTGTCAGCGGTGA  
TGAGTTCGAAACTGGCTTAATCAACATCGTCAGGAGGGGATTACTCTCGTGCTTTGCGTTGACCGCGATGAAGATA  
TCAACAGTCTCGCATTCCGCCCGCAGATGCCATCGATCGTCAGGAGCGTCTGGTGCTGATTAGTATCGTCCCAAATGA  
TCTGGTAACATTAGTCTTTGCCAGCTTGCTTAGCGTTGCCGGCAGTTGTGTGAGAAACAGGCAACCTGCTTTGTGGCG  
ATAAAACAAACGGCGCAAACATATCGTGCTGTGGCTGGGACTGGCGCTGGCTTGTCTTGGTCTTGCATGGTGTCTGGCT  
GCTGGTCTTGCAGAACGTACCGGTAGGCATTGCTTACCCGATGTTAAGTCTGAATTTTGTCTGGGTGACGCTGGCTGCAG  
TAAACTGTGGCAGCAACCGGTATCGCCGCTCACTGGTGTGGGTGGCGTTTATTGGCGCATTGTGATCCTCGGG  
AGTACGGTGAATGGGCTGATGTGGGATTATTACGCGTCAATTATTGCCTAGTTGCGCAATTAAGCCTGGGTTTTGCG  
GCGAGTCACTGCCCGCATGACGCATTATGGGATTTTATCGCGGCTCTGTTAGCTTTTGGCCTGGATGCCCGGATACT  
GTTACTCGGGCTGCTGGGTTATCTGCTTTCCGTTTTTGTGGTATAAAAACGCTTCATAAACTTGCCTAAGCAAAGCCT  
ATGCTTGGCTCAGTATGAGTTATGTGCTGGTATGGATTGCTTCAATGGTACTTCCCGGCTGGGAAGGGACTTTTTCGCTG  
AAAGCACTACTGGGAGTAGCCTGTATTATGAGCGGGTTGATGCTGATTTTCTGCCACGACAAAAACAACGTTACTGAGT  
TTTTCCCTGCCACTTTACTGCTGCCGTTCCCACTCATCGGGGCTATAACTGCTTGGCGAGAGGACTTTACCGTATGCAGCT  
TTTACGATTAATAACAATAAAGCGCATTCTGCAAAGGCGAGAGTAAATCCCCACTTTACGGCGAAGTCACTCTTCACT  
TCGGCGATCATTTTTATCGCGCCGCCAGCATCGCAGAGCATAAGTACATGTCTGTTATCTTGTATTGTCAGCAGCAGTTT  
TTTGACCAGCCATTCCATTGCATTATCTGTTTGTAAAGATTTTACATCAATTTACAGATTAACAGATAAACTCTTTA  
TCAACGGCAATGGAATGGCAGAAATGAGAAGTGAACGAGGGGTAATTATTGCTGACGTTGCACCCACTTTTTAGCGC  
CTGACGTGAAATTTAATACCGCGTTTTTCACTCCGGCGCAGAGTTAGCCAGCGCACCGGTTGTTGAAAACGGGCCA  
GCTTATCTTTACCCATTCACTAAGATCAACGCTCTCGTGGTCACTCCATCACCGCCACCGGTCGATGACCAAACCTCC  
TTGTCCGCAACGGGGACGATAAACACCTGCAAACCGCAGGATGTGCAGCAATTACGCGCTGACTTCTCCGGCTGAAT  
ACCTCTCCGCCACTGAAGAATAGATTGTCTAAACGTCGACAATGGTCAGCTTGCATTATGCATCTCACCGCGATCGC  
GCGTAGCGTACCAGCCTTCTGTCATTAACAGTGAACCAAGTGGCCGTTACGCCAGTAACCTTCTGCCATACTGGCAGCC  
CGCAGCCACACTTCATTATTAACGATTTTCACTTCCCGACCCGGCAGCGGCAACCAACGCTGTCAGGGCCGTGGCTTC  
TTTCGACACACCGTGGAGGCAAACCTCGGTGAGACCATAGCCGCAAAAAGCAACGAATCCCCTGCTCGCGCGCTGTTCCG  
TCAACTCGACCGGATAGCCGCGCCGAAGTAACCCGCTTTCAGGGAAACGGAACACTACGGTTAACCAGCAAACGCCAG

AGTTGTGTTGGCACCAGTGAAGCGTGAGTACAGCCTGCCAGCATTGCTCCAATGGCTGTTTATCACGTACCGTATCCG  
CGCACCAGCGTATAAACCAGCGCCACATAATTCCCTGACCGGAGACGTGAAACAGCGGTAAGAGAGCAACCAATCATCGT  
GATCGCCAAACGGAATCAGCGATAACACACCTTGCGCACTGGCAAGATGGGCTGATAAGTATGGACAGCGGCTTTCCGC  
AAACCGGTAGAACCCGAGGTCAACGTATTGAGCACAGACCGCTGGGCTGCCACGTAGCGGCATGTGCGCTTCAACCAG  
CTGAATGTGCAGCGACGTTAATGCCGAAACGTGTTTTCCCATCCGGCACCAGAGCAAATTCAGCGCTCAGATTGGGCA  
GCAATCTTCAAGCAACGGTTGCGGCAGCTGAGGGTTCACGGGCAACACCCGCGCCCGCATTGCAGTAACGCCAGCCAG  
GCGAGCAGCGTTTGGCGGTATTCCACGCCCGCAACATCACGCCGCTGCCCTCAACCACCCCTGCACCGCAAATCCGGA  
GGTAATTCATCGACGCGAGCACAAGCTCGCGCCAGTTGAGTTGCTCGTCATTAAGACGTAAGGCGATGGTTTTCTCCC  
GCACTTGCCGCCAGTGACGCCACGGCCAGTCAGAGAAGATCATAACAACCGCTCCAGTGCATCAACTCCACGACAGGCA  
GCGTGCTACCCGGCCAGCGACGTACCTGCTGCGCTGCATCAGATCCAGCGTGTCCAGCCCTGGAATGGTGTCCGGCGTT  
AACCAGGCGGCAATCCGCGCCAGTTGCGTTAAGCCTAAGCTCGATTCAATGGAAGAACTGATCACCGCGTCAGCCCCAG  
CGCGTGCGCCGCTGTACCTGCTCGCTACTTTTTCCAGACTGCCCGTGAGCGTGGGTTTGATAACTACCGCGCGCACGC  
CCTCTTCAGCCACAAAGGCAAAATCCGGCTCGCGCAGGCTTTCATCCAGGCAATGGCAATGCCGTTTTACGGGCAAA  
GCTCGGAATCATCGCGGTTTTGCACGGCTCTTCGAGAAACGCGATGCGGTGCGGATAATCCGGGTTAACGTATTTGGC  
AAACTGACCACTTTACCGGTGTCCAGGCGCGATTTGCGTCAAGACGCAAATGCAGATCCGGAATTGCCCTCCAGAA  
GATTCACCATGCGCGTCCGCGCACCGCTTCGTACAATCCACTTTGACCTTCGCCACTTTCTCGCTGCGCATATCTGCA  
AGTTTGAGGATCAGATCGTCCGGATCGCCATTACACAGCGGTGCCGACGGTAGTTGGCTGCTTGGCGCAACGTATCTGT  
CAGTTCTGCCAATGCACAGCTTACGCCAAAGGCCACGGAAGGCATCTGCGGTAGCTCGCAATCGCCTGCCAGCCAGTTAT  
TTACCCAGGCAAGCAGCACACTTTGCGCTCTTCCAGGTTTCTGACTGAAGCCCGCAGTGGGAGATCTCCCCCAC  
CCTTCGCGCTCGCCTTACGCGAGGCAAACATACAGCCCGTCCGCGGTTTTTAACCGCTGTGCGCAGAACACCCCGC  
GTCCATGGGGATCTGCCAGCGGTATACCTGCGCGCTACGCATTACGGATTCCGTTTTGAATTTGCTGAAGTCAGGCTGACG  
TTTTGTTGAAGGCGTTGCGACCTTCTGACCTTCTCCGTATGTAGAACAGCATGGTGGCGTTGCCCGCAGCTCCT  
GCAGCCCCGCTGCCGTACAGTCGCGGTTCAGTGACGTTTTAGGCGAGCGCAGCCATCGGGCTGTTTTGCAGCATT  
TCGCGGCACCAACGGACGGTTTTTTTTCCAGATCCGCCAGCGGTACCACGGTGTTCACAAGGCCATATCCAGCGCCTG  
TTTTGCGTCTACTGACGGCACAGGAACCAGATTTACGCGCTTTTTCTGCCGACGATGCGAGCCATGTAGGAAGCGC  
CCCAGCGCCGTGAAGGAACCGACTTTCGGGCCAGTCTGACCGAAGATGGCATTATCTGCCGCGATAGTCAGGTGCGAC  
ATCATGTGCAAGCGTGACCGCCGCGATGGAGTAGCCAGCCACCATCGCGACAACCGTTTTCGGACAGTACGGATCTG  
ACGCTGGAAGTCCAGCACATTCAGGTGATGTACGCCGAATCATCTTTATAGCCGCGTAATCACCACGCACTTTCTGGT  
CACCACCGGAGCAGAACGCTTTATCGCCTGCACCAGTCAGAATGATCACGCCGATGTTGTCGTCATAACCGCGCATCTGCC  
AGCGCTGGATCATCTTTTTACCGTACAGAGACGGAAGGCATTGCGCACCTGCGGACGATTAATGGTGATTTTTGCGAT  
ACCGTCCGTTGGATTTTTATAACGAATGCTCTGAAACCTTCGGAGCAGTCTGCCATTCAACCGGTGCGTAAAGCATTG  
CTTCATCAGGATAAATCATAATTGTGCTCTTTAGTCAGAAACGCAAGATCTGCGCCAGACTTGCATTACGCCAGCGGGAT  
TTTTCCGATGCGCGTTATGTCCGGCGGAGGAATGACATGGCAGTCCGCGAGCCAGTTCCGCGCCAGGGCGCGGAATTTG  
CTGTACGTTACACATAAATAATAAAACGCAAATGTGCGGGCGCTAAGGTTAGCACGTAATCAGGCTGGACGGCGAG  
AGAAGTCCCTCCAGCATGGCGGCAAGCGTTGCGCCATTATTGTTGCTGCGCAGCGCCACCAGCTCCCGCGGTTGATCGT  
CATTGAGTGAGCAAAAACAGGCTGTTGATACCAGTCGGCAAATACCGCGTTAACGGTCTGTGAGAAAACGCTGCACC  
CATTGGCGATCGGAACGCTGACGTTCCGCAGTTGTTACGATTTTTGCAGCCCCGATGCCCGCTTCGACAATAACCC  
ACAAAGCCCCGCCAGCCCCGGCAAGCCGCATCATCGCCACCCGTCACCAAGCGAGTACCCACCAGCCAGAAGTCAA  
GGATGTTGTAATAACCAAGTTTTACGAGTAAGTCCGTGACATCATCAAATCCATCGACGCTAATCGCCGCCGAACCA  
CCGTGACCTGGGAGATCAACATAACCGTGAAGTCTGGCAAACGCTCGCCACTTCTGCCATTCTGGCAATCGCC  
GGAAAAACCGTCAAAAACACCAAGCCAGGTAACCTGGTTTTCCGTGTTTTGCTGCGCGTGCAGGATCATAAATGGCT  
TACCTGCGCCAGAAGTTGCTGGAGCGTTTGGCACCATCGGTGTGTTAACCACCATTTCAATCACCGTGGTGGTTGGCG  
TGCGCCAGGCGTCCGCAAATGCCGTTTTCAAGTTCTGCCAGTTTTGCGGACGATGATATTTAGCTCGAACATCGCGCG  
GCGTGCTCAAAATGGACGTTTTGCGGCATCAGATAGAAACGCTCACGCTCGCTTTGCGGCGTTGGCAACAGCGAGAAAAT  
TTGCCCGCGTTGTTGTTACCACAATTAATACCAGCGGCGCAGAAACCTGACGCAATAACGCCAGCGGTTGAGATCGT  
AAAGTGGGAGAGATCGCCACAATCGCCAGCGTGGTTTTGCCGTTGCCCGTGAACGCCGGCGGGTTCGAAAGCAGC  
CCGTGATACCGCTGGCCCCACGGTTGCTGTACCCGGTAACCTGCCGGAAGTTGCGAAAGCGCATCAATCAGACGTAC  
CACCAGGCTGTTACCAACAAACAATTGCCCTGTTACGGCAGATAGTCGAGATGCGATGCGCCAGTTGCGCTTCGCCAA  
ACGCATCACGGCGGGCAATAACCGCTGCATTGCCTGTTCCGCCAGGCGCGGGATTTCAACGCACCAGGGCTGGCGTTTT  
TCTGCCGATGACGCTCCAGCCAGTCGGCAATATTGGCAATTAAGCGACGTCCGCGATGGTGTGCCGGATCAAGTCGCC  
TTCAATGTCATCAACAATCAGTACTTCTGGTTACAGCTTGCCTGCCATTGCAGGAGCGTTTTCCCGTCAGGCTGC  
TTCCAGTTGACCCACAATTTGCGCTGCTGCAGCTCGCTGGTGCCTTTGGCATTGCCTAACCAAGATCGGCACACGGC  
AGCGGCTGCCCGGTTTTGTGACAGCACATCGCAATCAGCGCCAGCAAGAGTTTGGCGCCACAGGGCAACTTTTTGCC  
CTCTTCGCACTCATGCGCCGGCAACCAACCGCCGCTTTTTGTGCCAGAGAACCAGTCGCGCTGTTTTTCACTTT  
CCAGACGAGGCGCTTACGCGAGCCAGGTTTTGTCGCTGCCACCAGTACCCAGACGCTGTTGCCAGCTAAGCCCGGTA  
TCGTCCATTTCCGCATACAGCGGTTACGAAACGGGCGATTGATATGGACTCCCCCGCATGAAGCGTACCAGAGCGGTG

GTCGATGGTAGAAACCAGCCAACGTGCGGGGATATCCTGGGTCGGGCGGGCAATGAAATACTGTGCGTGGGGTGAGAGG  
CGAACATTCGGGCTGGCGAATTGCTGATTCGCGCCGAGTCAATTAGCTCCGGCGGGCGATCGGCGGTTAAGAGAATC  
AGTTTTTCTCCGGTTAACCCGGCTTCAATCAGTGCCGGATAGAGATTTGCCACCGCCGTGCCGGAGGTCACAATCACCGC  
CACCGGCTGCTTGCTGACTTTCGCCAGCCCCAGCGCCAGATGCCCAACCCACGCTCATCGAAATGGGTGTGGTGAATGA  
ATGCGGAATTCCTCGCCGCCGCTAACGTTAACGGTGTAGAACGCCAGCCTGGGCGGATACAGATGTGTCTGACGCCGTGA  
CGGTTAATGCTTCCAGAATGACCGCCGCCAGCGTCGGTTAAATGCGCTTACTGACATGAGTTTGTCCGGTATCAATAT  
TGCGGTAAGTATAAGGAGCTACAAAAATAGATTATTGATATGAATCGGTAATGATGCGACTCATTACTATTCCATTTGT  
AATAAAGTACGCAGCCCTGCCGCTTTGTTGTCGATTTCTGCCACTCTTGCTCGGGGTCGGAACCACGGACAATGCCCGC  
GCCAGCATATAATCGCACGACATTGCCGTAATTTTTGCTGAGCGCAGGGAAACGCAGAATTCGCTTTGTTGTAATGAGA  
GATAGCCCCGAGAACCGGCTACCATTCTCGGGTGAACGGTTCGTGACGGGCGATAAACTGTCGCGCCAGATCGCGCGGT  
AAGCCAGCAACTGCTGCCGTTGGCTGCAACTGATGTAACAGATCACATCATCCGCTTTGTTGAGTGAAGTCCAGATACA  
GCGGCGAAGATGCTGCACTTTACGCAGACGCAGTACCTGCGGCGTAAAACATCCAGCGTCTGGGTATCGGCCTGTAATC  
GTTGACAGATATCTTCCACCACCAGCATGTTCTCGCGCTGGTTTTATCATCCGCCATCAGCCACTCTCCTAACTGCTGC  
GCCTGCTTATCATCAGGATTATTTGCTACTGTTCCCGCAGCGCTTCAAGGCAATGTAATAAATGGTAGCAATTGAGTTGAG  
CCGTTCCGGTGAAGAGCAAGAAAAGCATTTTCGCCATCAAAGGCCATGTAATAAATGGTAGCAATTGAGTTGAGTTGAG  
GACTGGCAGCCATCATCGCCGCCGCTTGACCGGACTTGCGAAATGCAGGTGAGTTGCCGAGCGAGCACCCTTTGTCG  
AGCTCACCTTCGGCGATGGTTTTGTTGCCAGTTGCAATTAATTGGTCCAGCCGTTTTGTCGGCCAGTGTGTTCTCG  
CGTGGTGGTTAAATGTAACCCAGGCAAGGGCTTGATACTACCAGTGTGGCGATAAATTCTTTTGCCTGAATCGCATCGT  
GCTGAAGGGAGCTTTCGCTGAATAGCGTCAGCCGCAGCGTGGCTTACCGCCACAGCGTCCGCTTCCAGGCGGGGTAAA  
AGTAAATTGCCCTGCGACGGGTCAAAGCATTACGCCCCAAATGCGTAAGTCCGGGCTTCCGGGTGCTGGCGAAGAAA  
ACGTTGTGCTGGTCCAACGACGTAACCGGTAATCGCGCCAGGACGACAGCTTCTTATCACCATTACGTTGTTGCC  
AGTAGAATTGCGGGTATGTTTGTGACTGGCCAGCCAGCTCAAGGCATCAAAGCGTCTTTGAGAGGGAAAGGAATATCG  
ATAACCCGAATGCCGGGTGTCGCCGAATCTCTTGCACAAATGGCGCAGTAGATTTTCCAGCGCCGTAGTAAGTATTG  
CACGCGGACCTCTCCCTGTTAAAAGCCTCACATTATACGGGGTACTACAAAAAAATGCAGTACCCCGGTGATGGGAGGT  
TTAAACGGCGTCCAGCAACAGTCTAGTACCAGCCAACGGCCGCCACACCAATTCCTTGCAGGGTTTTTCTGTTG  
ACGTAGTCATCAGCACGATAAACTGCCTGCTTCCGCCGATAGTAATAACTGTCTGAAGCCTGGCTAACCCGTTTTTTCAC  
ATCATCCAGCGCTTTTTCTGCACGCGCTTTCAGCTCAACATATTTCTGATCGGCGGGATCGCCAGAGGAGCGGAGCACCT  
CTTCCAGTGTTCCTACTAAGCAGCGTCAGTCTGTCATCGATACGTGTATCACCAAATGATTAGACATTCTCGTTCTCCAT  
TTGCGTAAAACCTGCTACTAACTATAGACAAGGGTGTGATTAGCCTGAATTACCTCGCGTGCATCCCAATGTGTGG  
GATACCATCTTTCATAGACCTCCGTACAGGGATAAAACCGAAACTCTGGTGAAGTTTTGCAGATGGCCTGCGCCC  
CGAGGTAACAGGCTTATCAGGCCAGTGATGCGTACATGTTTCGAGTGTTTTACTCATCAGCTGCTGCCCACTTTTTCG  
CCACGCAACGCTTCACTGACAATCACCCGACCTATAACGACCGGCTCAAGATCATCATCCTTTTTCAGAACTCTCGCATA  
CGCCACCAGTTCATATTTTTCAACCGAGAATATGGCGATTATCCCCGTCAAATCATCACCATCGATATCCTGATAAG  
GGCAATTCTGCTCGACAACAAACACCGCGCAACGCAGTTGTAATAAGGCATAAAGCTGGGAAACCGATAATTGAGAGTGA  
TGAGATCTTGCCATTCAATCATAATGCTCTCCTTTTAGATGTATGCCTTATACTAGCCGGAATATTTTTGAAACGTGA  
TGAATCATGGAATTAATTTTTTAGTACTTACGCGGTGTGCAACCCGCACGCGCAATGTACGGCAATATTGCTTA  
ACCTGCAACATCCGACCCAGAGCGGACTTTGGTTGTTTACTGCGGTGAAGGCACCCAGCATCAGTACTGCATACCGCC  
TTAAACCTGGAAAACGGACAAGATTTTTATCAGTCACTTATGGCGATCATTTTTTGGTTTACCCGGCTTGTGTG  
CAGTCTTTATGTCAGGCATTATCCAACCTTAACGATTTATGGTCCGCAAGGTATCCGTGAATTTGTGAAACCCGCG  
TGCGGATTAGCGGCTCATGACCGATTATCCGCTGGAAATTTGCGAAATTTGGCGCTGGCGAAATTCGATGATAGCCCTG  
CGCAAAGTAAACCGCTTATCCGCTGGAACACCCACTGGAATGTTATGGCTATCGTATTGAAGAACATGATAAACCCGGTGC  
ATTAATGCCAGGCATTAAGAGTGTGGCGTGGCCCTGGCCACTGTTTTCAGGAATTAAGAGCGGGCAAAACAATCA  
CGCTGGAAGATGGAAGGCAGATTAACGGCGCAGATTAAGTGTCTCAGTGCAGGTAAGCGCTCGTATTTTTCGGC  
GATACCGGCCCTGCGATGCCGCACTTGACTGGCTAAAGGTGTCGATGTCATGGTGCACGAAGCGACGCTGGATATAAC  
CATGGAAGCCAAAGCCAATAGTCGCGGCCATAGCTTACACGCCAGGCTGCGACACTAGCCCGTGAGGCTGGAGTGGCA  
AGCTAATCATTACCCACGTCAGCTCGCGCTATGATGACAAAGGTTGTCAGCACCTGTTACGTGAATGCAGGTCAATTTT  
CCGGCGACTGAACTGGCGAATGATTTACCGTGTAAACGTTAACTCTGCTTATTATTAACAGGGCGAAACTTGGC  
CTGTTATCGCAACCCGCGCTACATATATCCACCCACACAGGCATATTGAGCGATTTTTGATATTTATTCATCTCCTTACG  
CACTATATTAGAGCAATAAGTTGCCCTTTTATCTTATTGATTGACACAACCTTTGCAACTAAAAGGAGCCCATGATGGT  
TACAGTTGTCAGCAATTTGTCATTAATCTCAAACGCAACTCAGTCAAGATTTGCGAAAAATTTACTGTGACCGAGG  
AATTAAGTCACTTTTAAAAAAACAGCGTTATCCGGAGATGAAGAAAGCATTGAGTTACTGCATAATATTGCGTTAGGT  
TATGATAAATTTGGGAAAGAAAGCTGAAGATATTCTTACCATATTGTTAGAACCCCAACAAATGAGACCCATCGATTAT  
CCGACTTATCAAAAATGCTTGTAAAATATATAATCTGGCACATATCGCAACCAACTCCCCCTCAAATCACATGATT  
CAGATGATCTCCTGTTCAAAAAACTATTCTCCCTTCGAAATTAATGACAATTATCGGTGATGAAATTCCTTTATATCT  
GAAAAACAGTCGCTTTCAAAGGTGCTTTAAATGATGAGAATAATGAACTGAGTGTGTAACAACTTCTGGGATAAAAA  
TCGTCAAATTAACACAGATGAAATAGCTTCTATCTTCCAGAGATCGCCGCTAATGCAAAAAATACTCAAGTCAATTATC

CTACTGGTCTCTACGTCCCCTACTCCACCAGAACTCACCTGGAAGACGCTCTCAATGAAAATATTAAGAGCGATCCATCA  
TGGCCGAATGAAGTCCAGTTATCCCCATAAATACTGGCGGACACTGGATATTAGTTTCGTACAGAAAAATAGTAAATAA  
AAAAATAATAAACTACAAATAAAATGCGTCATATCAACTCATTGCGTGCCTAGGCTATGATAAAGAAAATTCACCTTA  
AGCGTGTCAATAGTTTTAATTCTGAACTCATGGGAGAAATGTGGAATAATAATATAAAAGTTTCATTTAAATGAACCA  
GAGATAATATTTTTACATGCCGATCTTCAGCAATACTTAAGCCAAAGTTGCGGTGCATTTGTGTGCATGGCAGCCAGGA  
AGTGATTGAACAAAGGAAAGCAATTCTGACAGCGCCCCATACGTTATTAATAAAACCATGCTGACAGATTTAAAAAAT  
ATTACAGCAGAAGAGCAGTACGAAATTGATTTTCAACATCGACTGGCAAACAGAAATTGTTATTTAGATAAATATGGCGAT  
GCAAATATCAATCATTATTATAGAACTTAGAAATAAAACACTCACAAACCAAAAAATAGAGCATCCGGCAAAAGAGTGAG  
TTAACATCATTGTTAATTAATTCGACCAGTCAGCAATATGCTGACTGGTGCACATAGTTTGCTAAACAGTCATCACTG  
ACTGATGTCAGTCACACCATCCGCCAGTTCAATCAGGCGAATAAATTCGCCCTGTAACCTGTGGATCTTCCCCTTTG  
CCTGCTGAGCCACTGTTTGATCTGCTGCCAGGAGGTATTGTTGAGTATTGAGAACCCGCTAACTTTTGCCCATATGCA  
GCTACTGCTGCCGAAAACGCATATCTTCAGAGGGCGGTTTATTGTTGGCCCCAGCGGAATTCAACTAACTGACTTTC  
TTTTCCCTGCGGGTATTTCCAGCGAATTTTAAACAGGCCAGTTCTTTGTTTTGTCCGATTTGCTAATTTGTTATCCG  
GGCATAGCGTAACTTATCAATTGATGCTTTTTGCCGTTGAGGTTAATTCGAATAACAACGTTATATGTTTGCCTGCG  
CCTATATCCCCTGCATCAACGTTGTCGTTATTAATAAATGTTCCACCCGAAGTTGGCGCTTTTCATAACCAACTGACGCTA  
TTCCGTTACCCACGCGGGTTAAACTCAATTTGCGTTTTGACATCTTTTGTACGGTAATCAACATCTGCCGCAATTCAC  
TATTCAATACTTTCTGCGCTTCAGAGAGGGTATCAATGTAGCTGTAGTTGCCGTTACCAACATCGGCAATTCGCACCATC  
ATTGCTCTGTTGTAATTGCTATTCCCCACGCCAAACGTCGACAGAGTAACACCAGACTCCCGCTGTTTTTTGACCATTGA  
TTCAATCGATTTTGGATCGTCAATGCCAACGTTAAAGTCACCGTCAGTGGCTAATAAAATGCGATTGATGCCGCCCTTAA  
TAAACCCCTTCGTCGCTGCTGATAAGCCAGTTCCAGCCCGCACCGCATTGGTACTGCCTTCGGCATCCAGCGAATCA  
ATTGCGGCATTAATTTCCGCCTTATGACTCCCGGAGATAGAAGGCAATGCAATACGGGAGTCGCCAGCGTAGGTACGAT  
GGCAATGTTATCTGCTCACGAAGTTCTTTGACCAATAATTTCAACGAAGACTGGATAAGTGGCAAACGTTTCATCAGAAA  
TCATTGAACAGAAAGTGTGATAAGAAAGACCAGATTAGAAGCTGGTAACTCTTCACTTTTGCATCTTTCGCCAGGATA  
TCAACTTTCCAGCAATGTTGCTGTTTATTCCATGGTGCAGGTGCCAATTCGTAGCGCATAGCGAAAGGTATTGGCTTAGA  
GGCCGGAATAGATTGTTTGTCTTTGATATCCAATCAGACGGGAAATAATTGACTATCTCTCCACCCGCACAGCGTCTG  
GCGGAGGTAACAGCCCTTGATTGAGGAAACGCCTTACATTGCGATAACTGCCAGTGTCAACGTCAAGACTAAACGTGCC  
AACGGATTTTGCCTACCTGCTTAACCGATTATCATCGAACTGCTGGTAGCGAGCGGTTCTGGATTTGCGATATGTGT  
AGCTTTTGTGTTAGCCGCTCTTCAAATGTTGGCGTTCCTGCAATCGCCCTGTAAAGCCTGTTTGTCTGAATATTGTT  
GCACTTCTTGTGGGCAAGGCTTTCCGCGCGGGCGGCTTTGCTCAGCCTCTTTTATTGCAGCTTGCTGCGCGGCAAGC  
ACTTGCTGCTCTGTTGGGAGTACTGGGTTGTTGTTGCTGACTTTCTTATTCTCAGGTTGCGGCCACATCCTGACAAAAAT  
CAAATACTCATAAGCAACATGATTATATTTTTATTTCGCATATAAAAATCCTTTTAAATAAACTCAGGCACCAGACATAA  
AATAACTCTTTGATAATCCTGCTAATCTTAATAAAATACAATATCGAAACCCATAGCAAATAATGATTCAACAACGCA  
ACCCATTAATAATTTGCATATGAAAAAATAATCTTTGCTTTTATTATATTATTGTTGTTTTACTCCCTATGATTATTT  
TTTACCAACCCCTGGGTCAATGCATTACCGTCAACGCCCCGACAGCAAGTCTGAGCAATTAGAAAAACAGTTTCGTTAT  
CTTACACAACTGTGCATCCACGTAGTGGCAGCAATATTGATAATCTGAATAGGTCCGAGAAATATAAAAAGAGGTCTT  
TGTAGTAGCGGTGCCAGAGTTACCTCGCAGGACGTCCTTACGGGTGGCCCTACAAAAACATTGTTGCTGATTATG  
GTCCTGCCGATGGACCGTATTATTGTTGCGCATTATGACTCTGCCAGCAGTTATGAAAACGATCAATTGACCTAT  
ACGCCGGGCGCGGATGATAACGCCAGCGGTGTGGCAGGATTACTCGAACTGGCACGTTTGTACATCAGCAAGTACCGAA  
AACAGGCGTGCAGTGGTGCCTATGCGTCGGAAGAACCGCCCTTCTTTGTTAGCGGATGAAATGGGGAGCGCGGTGACCT  
CAGCTTTCGTTGAGCCTCAGTGAATAATGATGACTGGAGTATTGGCTATTACGACTCTGCGCTGGAAGCCAG  
AATTACCCTTACCCGGCAATGTCCTGGCTTTATCCCGATCGGGGAGACTTTATTGCCGTGGTCCGAGAAATACAGGATAT  
CAACGCCGTTGCTCAGGTAAGAGCGGCATTGTTGTCATCTCAGGATTTATCTGTTTATTCTATGAATACCCAGGGTTTA  
TTCCCGGATTGATTTCTGACCACCTGAATTATTGGCAACACGATATTCCCGCCATAATGATTACTGACACCGCTTTT  
TATCGTAATAAACAATACCCTTGGCCGGTATACCGCAGACAGATTGAATTATCAGAAAAATGGCTCAGGTAGTGGATGG  
TGTTATAACTTTGTTATACAACAGTAAATAATAAAATTTCTCGAGGCGGGTCCAGAAAAAGCGACATGCACATTTTATT  
TTCCCTCATCTGTTTTAAGATGCGAAACATGAAATTCACCGAGGAAAAATAAATGGGAATGATTGGCTATTTTGCAGAA  
ATTGACTCAGAAAAGATTAACCAACTGCTTGTGACTACTGAAAACTTTGATGGATAATATACATGACACGCTTTTCAGG  
ATTACGCCGACTGGATATTGATAAACGCTGGGATTTTTTACACTTTGGGCTGACAGGCACCTCTGCTTTTATCCCGCA  
AGAATGATCCGCTGAGTCGTGCCGTGTTGTTGAACACAGCCTCGAAGATGGCATAGATGGCTTCTTGGATTGACCTGG  
AATCAGGAGTTAGCCGCGACAATCGACCGACTGGAATCACTGGATCGAAATGAACTGCGTAAACAGTTTTCCATTAAGCG  
ACTCAATGAAATGGAGATTTATCCGGGAGTGACTTTTTCAAGAAGGTTAGAGGGGCAACTCTTGCCTCGATCATGCTTG  
ATATGAAAAAGCTGATTAGCGCGTATCGACGTATGCTGCGACAAGGGAATCATGCGCTGACGGTTATTGTTGGGTGATAT  
AGCTTGATGCCTGGGGGAGAAAGACCCATTAGTTAAGATTTACGCCAGGATCATCTTAAAAAATCTTTAACCATGGTCC  
GGTTTTTATCCCTTGATAAATAACTAAATGCTTGTAGTGCATTGTTAAATGCAATACCGTATATTCGGTATGT  
AACAGCGATATCCTCTGTGCTGGCAACGATCTGTATGCTTGTGATAAACCGAATTGAACCTGTCATTACCAGGTAGATA  
AAAAGCCTGTTCAATTTTGGGATTATTTTTATAACTCGTGTCTGTTATGGCGACAGGAAAAACATCAATATTGCTCTT

CACAAATTGCAGTAATATAGAATCAACCTCTCTTGCAAGTTGGTCACAATGTATTATAAGCATTTTGAATATGTCATCCT  
CTGTAATCTCGTGA AAAATTTTCGGCCTTGTCTTTTAGCTCATCATATCGGATTCTTGCAGTAACCATTTTTTGGGCGAGT  
TCTAATAACCCCAAAGCTTGAATTGCTGGTGAGTATGATCACTTTCAAAAAATATCCACACTCCATTCTTTCCCAACC  
AACATATTCATGCCATTCATAAACCAGCATAAATGTTTGTA AAACTGGCGGTAATAATTGGATATCTGCAAAAACCAAACC  
AAAACCTTACGCTTGAGATCCCACTCATATTCAATCGCCAATGCTATATTGTTAAGGCATCTCCGGCATCTTATTTTTA  
CGAAAATCAATTCGGTCAGTGATAGCGTTGTTCAATACGCCGAAGAGCTTCTGCAATATCATAGTTTGTAGCCAA  
CAAAACATTCTCTGCTTCTGATGAGTGACGCTGCTTTTGCCGTCAATATATTGATTTGGTCAATATGAAACAACCTTGA  
TGCTTTCATCAACATCACCGCCAGTCTCTAACAACGCTGGCAACCTGGATACCGACAGGTACGTTCTTCCGAAGT  
TTACGAATTTCACTTAACCATTCATGTCAAACCCCTTAAATATTTATGATATTAATAAACAACGCTGCGATAACGA  
CCCGGCTGACTGAATATCTCAGTTTTCTGCTTAACATTGTTATGATGCTCTTGAAACTAATAATACGTATGGAA  
TTGTCACTATTTATCTGCTAATGAATCAACAATGTCATTGTTGATGAATATATTATTCAGGGAATAATTATGACA  
CTTTAGAACGCATTACCAACTTGTTAATATCAATGGTGATGTTAATAATCCTGATACTCCTCGTCCATTGTTATCTCT  
TGAGGATTTTTTATTGACAATAATATCCATGGTTCAATATGTTGCAATGTGATTCCAGAACAATCTCCGCAAGCTATCT  
ATCACCATTTTCTGAAAATACGTGAGCGTAACAATGTTAGTGATGTTTTGGTAGAAATTACGATGTTCCGATGACCCAGC  
TGCCCTTTAGTGAAAATGTTTGTAGTTATCACCCTGCTTACCAGAAGAAGTTCCAGAGCTGGTTGTAGAAGAAATTC  
CCCTGATGAGTCTGGGAAGGATGGTCAGAAGTACGGAGCATGGATGGGTTGAAGTCCCTGTGGGTATGCATCCGGTTA  
CTTGTGGTGGGATTA AAAACATTTATATAAACAGATAAGCGGATGTTTACATAAATTTTTATGTGAAGGAACATGATGAA  
ACTTATTCCTCGCAGTAGTATTTTACCTGGCATTGATGGAATTTGCCGGGGCCTTTTCTCCGAACGGATTTACCG  
TACTTACAGATGCAGCATATGGTAACGGAGACTGTTTCGGTTTGTACTGGCCTATTGGTCAGGAGCATAAACTACCTATA  
GTGTGCAAAACGTACCATGACGAATGGCGAATCGTACTGCTTTTCCAGCATTAAAGAAGTTCGAAGAATGGCTGGAAGT  
GAATGATGATGATCCCATGAAAATGGCATCAGCATCGAAGATCAAGACTTTGCAGCAAATCTTCCGTGTTGCTCGGA  
AATGCTTTTCAACGGGAAGGCTTGTGACGCACTGCCACTGTTACAGCGAGCAACAGAACAATTGCTGAAGTCAGCGAA  
TATTGGTTAGCACTGGCAATCCAGTATCGCCGATGTA AAAAACAGAAAGCTGCAGCACAGGCTGCGCTTAATGCTTATCT  
TGCAATTGGGCAATTTGGTGTCTGACAATAAAGTCAATTTGCTGTACAGGCCGAGATGTTCCGAATTTCCAGG  
ATGATCCTGTGATTCAAGTGCATTAAGAACAAGGATTAGATCTTAGCTTTGGAGGAACAAGGAAAATAAATACCCC  
TTGATGCAGATGTGTGTTGATACTTATTTTGGCAGAGAAAACCGCTTCCAGGCATTAACCTGTTACATAAATTATGCCTG  
GATAATGTCCAGTGAAACGACTGCATTTAGGAACGCTATGATTTAATATCGATGAATGGCGGGCAAAAATTCAGGCAGT  
TATGTTTAGAGTATTTTGGCGATAGTCTGACACAGTCACTTAACGCTCTGCGTCTATCTACTATCCCTTCTTTTTCAGA  
AAAACCGCCGAGCATGTCCGGGCTTTCTGACTTACAAAGTAACAGATTACATCAGCGGCTTGC AAAACGCACAATGCT  
AATCAGCGGTTGTGGCCATACACCAGCACCAGTACC AACAGTGCAGAGATCAGCACAACGATACCGCCCGCGCTGTACT  
GCCAGTTTGTGGTGCATCGCGACCCGGTTGTTCCGGGGCGTGAAGATACAGGCTCACCGCCACGCGCAGGTAGTAGTAG  
AGGCCGATTGCCGAACCGACAACACGGCACCCACCAGCCACCACAAGTGTGCTTGGACACCGACCGCCAGCACGTAGAA  
CTTACCATAAAGCCAGCGTCATCGGGATACCGGCCAGAGACAGCATCATCACCCTCATCACTGCCGCGAGGATCGGAC  
GATGCCAGAACAGACCGCGTAAAGAGAACAGGGAATCAGCATCCGGGCCACGATACGGGCTGGACATCAGGCTGACCACG  
CCGAACCGCCGAGGCTGCTGAACAGATAAACCAGGCAAAACCCCTACCGCTTCCATCGACATCTCGCCGGTTTGCAG  
CGCAATCAGCGCTACCAGCAGATAGCCGAGGTGAGAGATAGATGAGTAACCGAGCAGACGTTTGTATTTGGTCTGGCTCA  
GCGCCATCAGGTTACCGAAGATGATGGAGGCAAAGGCGATAATCGCCAGCACACGCGAATCGCTTCTGCTGTACCCACC  
GGTGGCTAGAGGAACAGACGCATCACCAACCGAAGATAGCGATTTTGTCTGCGCTCGCCAGGAAAGTGGAAACCGGCG  
AGGCGGCCCTTGTATACGTCTGGCGTCCACAGGTGAAACGGCACAGAGAGAGTTTGAAGCCGAGGCCAACAATCATCA  
GGCCGAAACCTGCCAGCAACAGCGGCTGTTGAGCATACCGTCCCAAGGTTTTTACC AACCGCAACAACGACAGGTCG  
CCAGACTGCGCATACACCAGCGCATACCAAACAGCAGGAAAGAAGACGCTGCGGCAGAAAGGATGGTGTATTTGATACT  
GGCTTCCAGTGAACGTTTTCTGGCGAAAGCGTAACCGACCAGGCCAAACAGCGGCAAGAGATCAGTTCGATACCGAGGA  
ACAGAGACGCCAGATGGTTGGCATTGCCAGCAGGATCCCGCCAGCGCGCAATTAACACCAACAGGTAGAACTCATCC  
TTGTTGTGCTTATAGCCTTCAAGCCACGGGTAGGCGAAAGTACAGGTGGCGAGGCTCGCCAACAATACCAGCCCGGTGTA  
AAGCATGGCGAAACCATCAACGCGCATCAGCGGCGTAACTCCATAGCGCCCGCTGGCCAACAACAGAGCGAAACCA  
GCGCCGCGTTAAGCCCAATAACCGAGAGCGTAGCGTTGAGGAAATGATTGCGTCCGACGCAATGGAGAGCATCACAACC  
ACCACCGTCAAGCCGACGATCAGCAACGGTAGCAGTGCATCAGTTTTTGTGGAGTTATTGTCATGGCGATTTACGGCCT  
TGTAGTAGTAACGGAATTAACAACCACTGCTGGATATTGCCAATCGCGGAGTGCAGGATCCAGAATCGGCTGCGGAT  
AGAAGCCAGCAGTACCAGCAGCACCACCAGCAACAGGATCATAAACAGCTCACGCAGCGACATCCCTGGCAGTTCTGG  
CTGGCAATCTGGCTTTTCTGCTTTACCGAAGTAAGCGCGATGTAACATCGCCAGCGAATAAACAGATGCAAAGACCAGCCC  
AAAGGTAGAGATAACGGTAATCACCGTACAACCTGGAAGCTGCCGAACAGAATCATAAATTCGCCGACGAAGTTACCGG  
TGCCAGGCATCCAAAGCGTTGCCACCGCAAAGAACAGCGACAGTCTGGCAGCCATTTTCTTGTCTCCACAGACCGCCC  
ATCATGCGCATGTCCGGGTATGGATACGTTTATAAAGCTGACCACAAAGAATAAACAGACCCGCCCGCCGACAAACCGTG  
CGCAATCATCTGGATTACCGCGCCCTGGTAGGCCAACTGGCTGCCGGTGTAGATAGCAATCAGCACGAAGCCCATGTGGG  
AAACCGAGGTGTAGGCGATCAGACGTTTGTATCGTCTGGGCGAAGGCCATCCACGCACCGTAGAAGATGCCGATAACA  
CCAGCCACATAGCAATTTGGCGGAACTCTGCCAGCGGTTCCGGAAACAGCGGAGGAGAAACGCAGCAAAACCGTAAGC

GGCAGTTTTAGCAAGATCCCCGCGAGGTCAACGGAACCGGCGGTGCGAGCCTGGGAGTGCATCCGGCAGCCAGCCAT  
GCAGCGGAACCACCGGCATTTTACTGCGAAGGCGATGAAGAAGCCAGCATTAAACAGGTATCCACACCACTGGACATT  
GGCGTATTCAGCAGCTCTTCATAGTTGAAGGTCCAGACGCCGGTGCATTGTAGTGAACAAAAACCAGCGCCAGGATGGC  
AATCAACATCACCAGGCCACTCGCCTGGGTGTAATGAAGAACTTGGTTGCCGCCGTGATACGCGTTTTACCAGTCAGAGG  
CTTTATGCCCCACAGTGCATCAGGAAGTACATCGGCACCAGCATATTTCCAGAAGAAGAAGAACAGGAACATGTCG  
ATGGCAAGGAACACGCCGATAACGCCGCCAGGATCCACATCAGGTTGAGGTGGAAAGCCCTGATATTTTTGCATCTC  
TTTCCACGAACATAGTACCGCCAGCACACCGAGCAGACCGGTGAGCAGACCATCAGCAGCGACAGCCCGTCAATGGCGA  
GATGAATAGAGATACAAAACGCGGGATCCACGGCATGTGCAATTCAGACTGCCACTGCGGAATTCGGCGGATTGCGTC  
AGTGAATAACCGCCTGCAACACAGTTGAGCGACAGCGCCAGCGTCAATCCCATGGTGTACAGCGCATCCAGCGTGG  
CACCTTGACGCCAAAGCGTTGCGTCTGCCAGCACAGGAAGCCGCAATAAAGGGAATTAATATTAGCCAGGGTAGTAACA  
TGCGCATCTTTATTCCTGTAAAAGTCCCGTCAGGACCGGATTTCAACGAATTCACGACAGAAAATCTCTTCGGAC  
TGGGGTAGTGTGGATGCACCGGAAGCGGCTTATCCGACCTACGTTCTTATATGCCAGGGGCAATCCACAATCCT  
TAACTCAACGCAGTACCATCAACAGTGCCAGCACCGACCGCACCGATGCTCATGGATGCCACATACCAGCGCAGATAG  
CCGTTCTCACTTAACAGCAGACCTTACCTGCAAAGCGGAAAGGACAGCCGGGATGTTTCATCATTGAGTTCAGCGGATC  
GCGTTTCAGCAACCCAGCAATACCCAGGAACGGCTTACGCAACACTTTGCATACAGCCAGTCAAATCCCCAGGCGTGT  
ACCCTCAGGTGCCAGCAGCGCCCGCGCACTGTTGGCGATGGAGGTACCAGAGTACGTTTACCAGCCACAGCCAG  
GCTGCCAGCAGAAATGCCACCACCGCAGCACCGCCAGAGGTAATTTCCAGGGTCAACATGCTGCCGTGCGCCAGTTCGGT  
CGTTTGCAGGAAGCACGCCCTGCAGCGCGGTACAATCAGTGCGCCAACGAAGGTGGAAAGGATCAGCAGCACAATCAGCG  
GCAGGCTGTGAGTTACCCCTTTCACGGCGTGAGCGTGAATTTGTTCTTTCCGTGGAAGACGATGAAAATCATAACGGAAG  
GTGTAGAGCGAGGTCATAAACGCACCGACCGAGACCTGCCACCATCAGATTGATATGACCATTGCCATCGCACCCGCGAG  
GATCTCATCTTACTGAAGAAGCCCGCAGTGACCAGCGGTAGTGCAGCAGTGTGCGCGCCACCAGGAAGCAGAGAT  
AAACCAGCGGAATAGATTTACGAGACCGCCCATCTTGAAGATGTTCTGTTCTGTGATGGCAGGCCAGAATGACGGAACCG  
GATGCCAGGAACAGCAGCGCTTAAAGAACCGTGGGTATCAAGTGGAATCGCCGCATCCCATGCCTGCACGCCAAG  
CGCAGGAACATGTAGCCAATCTGGCTCATGGTAGAGTAAGCGAGAACACGTTTGTGTCGGTCTGTACCAGCGCGGCAA  
AACCGGCCAGCAGCGTAACCGCCCCGACAATACCACAGATGCAGAACTCCGGCGTATCAGGAACAGGCGCTGG  
GTACGGCGATCAGGTAGACACCGCGGTTACCATGGTTGCGCGTGGATCAGCGCGGAGACAGGCGTGGGCCCGCCAT  
CGGTGCGCAAGCCATGTCTGCAACGGCAACTGCGCAGATTTACCGACCGCACCGCCAGCAGCATCAGCGTCGCCACA  
TCAGCATGTTATTGCCGTACGAAAGTGCCTGGTGCCAGTTCACCATTTCCGCGAAGTTCAGGGTGCCAGTTGCGTTG  
TAAAGAATGAACAGTGCGAAAGCGAGGAACACGTACCCACACGGGTACGACGAACGCTTTCATTGCCGCTGCGCCATT  
CTTCGGATCGGTGAATAGAACCCGATCAGCAGATAGGAGCACAGGCCACGCCCTCCAGCCGAGGTACATCAGCAGCA  
GGTTGTGCGCAAGCACCAGAACCACCATGCTGGCGATGAACAGGTTGGTGAAGCGAAGAAGCGAGAGTAGCCCTCTTCA  
CCGCGCATATACCAGGAGCGTACATGTGAATAAGGAAACCCACACCACTGACCACCGAGAGCATGGTACGCGACAGGCC  
GTCCAGCACCAGGTTAAACCGATGTTAAAGTGCCTACCGACATCCACGTCCACAGCGGCTGGCTGTATGTCTGCTCGC  
CGTTAGCGAAGAAATCAACGCCGATAAAGGCGGTTACCAGCGCGCCAGGCCACAGAGCTACGCCGACGATCGCCGAG  
ACGTTTTAGACCAGCGCCACGGGAGAAATGCCAGCAGGACGAAGCCAATCAATGGCAAAATAATGGTTAAGGCAAGCAT  
GTTTCATCCGCGCATCTCACTTACTGAATCGATGTTCAAGTTCGGCAGCAGCGTGAAGTTGCAGCAGCAGCGCAAGGCC  
GATACTCGTCTGCGCGCGGAGGCTGATGGCAGAAATGTACATCACTGACCGTCCGTTGCCCCAGTAGCTTCCGG  
CGACCACGAAGGCCAGCGCGGAGGCGTAAATCATGATTTCCAGACCAATCAACATAAACAGCAGATTGCGACGGATAACC  
AGACCGTTAAGCCAAGAACAATAAGATTGCCGCGAGGATCAGTCCATGTTGTAAGGGGATCATGCGTGCTCCTCCGTT  
TTTTTTTTCGCGTGTCTTTACGATTGCTCAGCACTTACCAGCAGCTTCCAGCAGCTTCCAGCAGCGTGAAGTTGCAAC  
CAGACCTGCGAGCAGCAGCATAGAAGCCAGTTCACCGCCAGTACGTAAGGCCGAACAGCGTAATACCCACTGCTTTAG  
CACTGATTGGCGTACCGTGCATACCCTGATCGTTAACACCGAGGATGGCGTAAACAATCACCACAGCATGATGGCCGAC  
AAAATTGCCGGACCAATCCACACCTGCGGTTTACGCCACTGGCGTTCCTGTTGATTTCTGAACCGCCAGGTTGAGCAT  
CATCACCACGAACACGAACAGCACCATAATGGCACCCGCGTAGACGATAATTTCCAGCGCACCGGCGAAGTAAGCGCCCA  
GTGAGAAGAACACCCCGAAATCGCCAGCAGGAAATAATCAGGTACAGCAGTGCGTGTACCGGATTGGTATGGGTGATC  
ACTCGAAGGTGCAAGTATGGCTATCAGGCCACAGATATAAAAAGCGAACTCCATTGCCCTCTCCTTACGGTAACAGG  
CTCTTGACGTCGATAGGCTTGGCTTCTGCTTCCGCTTATCTTTGCCGTGATTGCCATACCTGCCATCCGGTA  
GAAGTTATATCCGGTATTTGCCCGACCGGAGATCAGCAGATCCTTTTCTCGTAAACCAGATCCTGGCGCTTGATT  
CCCCATTTGAAATCCGGGTTAACTGAATCGCCGTGGTGGACAGGCTTCTTCGCACAGACCACAGAAAATGCAGCGT  
GAGAAGTTGATGCGGAAAAATCCGGTACCAGCGACCGTCTTTGGTTTCTGCTTTTTGCAGCGAGATACAGCCGACCGG  
GCAGGCTACCGCGCAGAGGTTACAGGCTACGCAACGCTTTCGCCGTCCGGTCCGGGTCAGAACGATACGACCAGAT  
AACGGGGCGGAGATAGACCGGCTCTCCGGTACATTCGCGTTCGCGTTTGGCGAACCGTGCAGGCCGATCATCCAG  
ATACTACGAACCTGGGTGCCGAAACCTACTAACAATCTTTTAAAGTTCATGGTCTTATTGCCCTTATTGCGCTGCCAG  
AGAATGACAGCCGCGTTACCAGCAAGTTGATCAGCGTCAGCGGACGGCAGATTTTCCAGCCGAAGGACATTACCTGGTC  
ATAACGCGGACCGGTAACGACGCACGAATCAAAATGAACATCATATAAAGAAGCGGTTTTAGCGCGAACAGATGA  
ATGGCGGTAACAACGGGCTTGCAGCCACCGAAGAAGCAGCGTACCATCAATGCAGAGATGGTCAATCCCGATGTAC

TCACCCACGAAGAACAGACCGAACTTCATACCGGAATATTCAATGTGGTAACCATCCGCCAGTTCCTGCTCGGCTTCCGG  
CTGGTCAAACGGGTGACGGTGACATACCGCCACGCCGCGATGGCAAAGGTAATAAAACCAAAGAATTGCGGGATAACGT  
TCCACACATGCGCCTGGCTGTTGACGATGTCGGTCATGTTGAATGAACCGGCTGCGCCACCACGCCCATCAAGGAAAGC  
CCGAGGAACACTTCGTAGCTCAGGGTCTGCGCAGAAGCACGCATGCGACCCAGCAACGAGTATTTGTTGTTACTTGACCA  
GCCCCAAACAGCACC CGTAAACCGCCAGACCTGCCATCATCAGGAAGAACAAAATCCCGATGTTGAGTTCGGCAACCA  
CCCAACCCGGACTGACTGGCACAATCGCAAAGGCCAGCAGCAGCGAGGTAAGGCAATCATCGGTGCCAGGGTAAAGATG  
ACGCGATCCGAGAATTTGCGGATCCAGTCTTCTTAAAGAACATTTTGATCATGTCCGCAACCAGCTGGAGCGAACCGCC  
CCAGCCAACACGGTTAGTCCGTAACGGTTCTGGAACAGACCCAGCAGGGCAGCTTCGCCAAAGCTCATGAATGCCCGC  
AGGTGACAACCACCAGCAGGATCACCACCGCTTTGAGGATGGTCAGCAGGATCTCAATCAGTTCGGTGATATCCAATC  
ATTGTTGTGCCTCCTTGAGATCCTCAAGATGCGCGCCAGCCAGCACCCGGAGCAATGCCGGACATACCCATCGGCAAGCCC  
ACCTGCCCTGCCGTACGTCCTTCGCGCATTTCAACCGGCAGCGTGACCGTGTGCCATCGTAACTAAAGGAGACGCGTGT  
ACCTGCGTTCACACCAACTTCGCGGCATCCGCTGGGTTGAGTTTGTATGTACGGCTGCGGCATACGGCTCTGGAAGACCG  
GAGCAGCTGTGACAATTCATCGCTGCCAAACAGGTGGTAATACGGCGGATACGCCATTTCCCGTCTGCGGCTGGAAG  
CGTGCCGGTACGCTGGTGAAGTAATCCAGACCATTTTCGCTGGTTTCAAACAGACGCACGCCCGGATGCCAAAGCGCG  
TTTCCCGCCACTTCGCTGGAATTTGTTCCACGCTGCGGGGAGTTCCAGCCGGCCAGGCAAACGGCACTTGC  
AACGGTGCAGCTCGGCTGTTGTTACCTTCCATCGAGAAGGTGAACATGGTGTCAATATCCTGCGGCTGACGCGGCTCA  
TGAACGCTGATATTGGCGCGCATGGCGGTACGACCGCTGTAACGGTGCGGTTACGGGCCAGTTTCTGCCACGAATACG  
GAATGTCGCATCCGGCGCAGCATCTTTGATACCTGCCAGTTCGGGATTTTCCGCAACAGCGTCAATCACATGGTCGA  
GCTGCGTCCAGTCCACTTCACGGCTCAGCAGGGTGTGTGCGAGGAGTGAACCAGCGCCAGCTTTCAGCATGACAGTT  
TTGCTGTGTAATAAGCAGGATCGTAAACCTGGAAGAAACGTTGGGCGCGGCTTTCGTTGTTGATCACCGTACCGTCGCT  
TTCAGCAAAGCTGGCAGCAGAAAGTACCAGATGGCGTTTTCCATAATCGCTGTGCGTTGATGATCAACCACCATCACCA  
GCGGTGCTTTAGCCAGCGCAGCATTACGCGGATAGCAGAAGCGTGACGATGCAGATCGTTTTCCAACACCACCACCGCG  
TCGGCGCTCCGGTTCCAGTTCGTTAACGTTCTTCAAGCGAACCCGCCACCATAATGCCAGCCCCATGCTGTTGAC  
GGAACGGGCAATCATGGTGATACCGACGTCAGCGCCGACCTTTCAGGGCTTTCGCGACGTTAGCCGCCGCTGAATCA  
CCTCTAAGCTACCGCGTTCGTCGCGGAGATAATCAACGGTTTTCTCGCACCTGCCAGTGCCTGCACGATGACGTCGATT  
TTGCTTTCAGCTCAGGTTGATACCGTCAACCGCTGGTGCAGAGTTATCCAGCGCATGGGCGATGGCAAACCTAAACG  
CGCTGATCTTCAACCGGTGCGCGGTAAGTCCACGCCGCGATATCATCCAGACGGGTGCATCAACGTTGGTAACAAACA  
GCGGATGCTTCGCACGTTGACCGATGTTGAGGATTGCCGAATCTGCCAGTCAGCCACTTTCGTGCTGCCGCCATTTCCG  
CGGCTTTACCTTTCACAGCCTGACGCACTGCCAGCGCAGCGCGCGCGGCTGCGGTAACGTTTCGCCACGACCCAG  
TACCGCATCGTAAGATTGATTTCCGCGCAGAGCCGGAGTATAAATGCCGCTTTCACGCAGCACTTTCAGCGCCAGTTGCA  
GACGTTCTGCTCACCGTAGCGATACCGGTGTAGAAGTTTTCTTCGCCACCAGTTTCACGCAGCGCAAAGTTGCTTTCC  
ACGCTGGCACGCGGAGAACAATACCGATCACTTCTTCGACTGACGCGAATATCTGCCGCGCCCTGCATTGCCTGTTCC  
GGCGTTGAGGGTAATGAAATCATCGCCACGACGCTGTACTGGCTGACGCGGACGATCCTTCAGGTTGACGTAACCGTAAC  
CGAAACGACCACGGTCGAGAGGAAGTAGTGGTTTACCCTACCGTTGTAACGGTTTTTCGATACGACGAGTTCCCGGTA  
CGTTACCGGGGCTGATGTTACAGCCGATGGAACATTGCTGGCAGATGCTCGGCGCAAACCTGCATATCCCATTTACGGTT  
GTAACGCTCGGAGTGCCTTTGTCGGTAAATACGCCGGTGGGCAAATTTTCGACCAGGTTACCGGAAAATTCGCTTTCCA  
GCGTGCCGCTTTCGGGCGACCGAAGTAGACGTTGTCGTGCGCACCGTAAACGCCAGATCTGTACCGTCAGCGTAATCT  
TTGTAGTAACGCACACAGCGGTAGCAGCGGATGCAGCGGTTTTCATTCGTGAGAGATGAATGGCCCCAAATCCTGATTACG  
GTGGGTACGTTTGGTGAACGGTAGCGACGGAAGGTGTCCGGTCATCACAGTCATATCCTGAAGATGGCAGTTACCGC  
CCTCTTACATACCGGACAGTGTGCGGGTGGTTGTCATCAACCACTGACCCAGCTTTCACGGAACGTTTTCGCTTCT  
TCGTCGTCATGGAATAAAGGTGCCATCGGAAGCCGGTGTATACAGGACATCACCAGGGCACCACGCGTGTCTTCGCG  
GTTTTGGTATTGCTTACCGCACACTGGCGCAAGCACCGACTTCCAGCGCGGATGCCAGCAAAGTAAGGAATAT  
CAAGGCCAGAGACAGACAAGCTTCCAGCAGGTTGTCGCTCCGTTGACCTCGTATTCTTTGCCGCTACATGAATTGTA  
GCCATTAGCATGCTTCCAGTTTTCTCAGTCAGAGACTGAGCGTTAATCGAAATTCGGTTACCAGCGCTCTTTCAGCAGGT  
TCGGCTGAATCCCATTAATCAAATGGGTATTGCTGAACGGCTGTTTGATTCCCGCCTCAAATTTCTTCGCGGAAATATTTG  
ATGGCGCTCTGAACGGCTCACTGCACCAGGTGCGTGGGCACAGAAAGTTTTACCGGGCCTAAGAATCGACACAGTTG  
CTCAAGTGTTCGATATCGCCGGCTGACCTTACCACGCTCCAGCGCACGCAGAAATTTTCAGCTCCACGGCAGACCGT  
CGCGGCACGGCTACACCAGCCGAGGACTCACGGGCAAAAACCTTTCAGGTTACGCACCAGCGACACCATGTTGATC  
TCATGGTCAACCGCATCGCAGCGCCGTACCAGACGGCTGCCCGCTTACCAGTACTTTCGAATTCATCGGCAGATC  
AAGTGGCTTCGGTCAGGAAGTCAGTCCCGCGCCGCTGGCTGCCAGGCTTAAATTTTCAGACCATCACGCATACCAC  
CGCGTAATCTTCGAGGATCTCGCTGCGGTGGTCCGAACGGCAGTTCACACAGTCCCGGATTTTTACCCGACCGGAG  
AAGCCCATCAGCTTGGTCCAGCATCTTACTTTTTGAGATGTTCTGATACCACTCCACGCGTTAGCGAGGATCGCCGG  
AACGTTACACAGGGTTTCGACGTTGTTGACACAGGTCGGTTTACCCCATGCGCCGGAGGTTGCCGGGAAGGGTGGCTTCG  
AGCGTGGGTTAGCACGACGCTCTTCCAGGGAGTTGATTAACGCTGTTTCTTCCCGCAGATGTAGCGCCCTGCCCGGTA  
TGACGAACAGTTCGAAATCGAAACCTGTTCCATAATGTTTTGCCAAGCAGACCCGCTTCCGGTGGCTTCGGCAATGGC  
ACGGCGCAGATTAAGTCCGCTTCGATATATTGCCACGCAGGAAGATGTAGCCACGGTAAGCTTTCAGCGCAAACCGCG



AGATGAGCATACTTCCACCAGCAGGTGCGGCAGTTGCTCCATCAACAGGCGGTCTTTATAGGTGCCCGCTCCATTTCA  
TCGGCATTACACAGCAGGTAACGGATGTTTCATGGATTCTGCTTTTCGGCATCAGGCTCCATTTAGGCCAGTCGAGAAGCC  
CGCGCCGCCGCCCTTTTACAGACCAGCGTCTTTTACCTGATTAACGATTTTCGTCGGAGACAGCCCGGTACAGCGCTTAC  
GCGCGCTTCTGTAACCGTTTTTCTGCGGTATTCTGTCAGCCACTGGCTGTTTGTATCGCGCAGACGCCAGGTCAGC  
GGATGCGTTTTCGGGAGTACGGATAATGTTTTTATTATACCGCTCCAGCAGTTCAGGGATCGCTTCCGGGGTCAGATGC  
GCGTGAGTGTCTCATCGATCATCATGTTTGGCCCTTTATCACAGTTCACCAGGCAGCAAGTTGGCAGCAGCGTAAAGCG  
GCCATCAAATGTCGTTTGCCTGGTTTGTGTTGAGTTCAGCTTTTCTCGAGCGCCGCTGAATACCCTGATAACCGTTGATAT  
GACAGACCAGCTGTCACAATAACGGATCACATGGCGACCAACCGGCTGGCGGAAGATCTGACTGTAGAACGTTGCCACA  
CCTTCGACGTCGCTTGGCGGAATACCCAGCACATCGGCGATCGCGTGATCGCACCATCCGGCACCCAGCCACGCTGCTT  
CTGAACGATTTTACAGCGCTTCAATGGACGCCGACGCGGGTCTTCGTAAGTGGTGCATCTCGTGCTCGATCGCTTACGCT  
CTGCCGACTCAGCTCAAAGCCTCGGTTTGTGGTTGTTGATTCTCGTGCATAAATTAGCGGTCCACATCTGACATAACAA  
AATCGATACTGCCAGATAAAACATCAGGTCAGACACCAGGCTGCCGCGGATCGCCGCCGAATTTGTGCAAAATGCGCA  
AAGCTCGGGGTACGAACACGGGTGCGGTAACCTATGGTGTGCGTGTGCGTGGTCAAGTAACTGTTGATCCCTTTGGT  
CGCTCAATCATCTGAAAGATTATTGGCAGGCATCACCGGACCCACGACACTTGCAGGAAGTGGGTGATCAGGGTTT  
CGATATGTTGACGCGTCTTTTCCGGCGGCGTGGTCAAGCGGTGATCCGCTTTGAACGGGCTTCCGGCATGTTG  
TTGAGGCACTGCTCAAGAATGCGCAGACTCTGGCGAGCTCTTCCACTTTAAGCATTACCGGGGTGTAGCAGTCAGAAAC  
GCCACCACCCACGGGATTTCAAAGTCAAGTTTTATAGCCAGAATAAGGACGCGCTTACGCACGTCAAGTTCGATCC  
CGGTAGCACGCAGGCCCGGCCAGTGGTCCCCACTCCAGCGCTCTTTCGCGCCATAGGCGGCAACGCCCTGGGAACGA  
CCTTTCAGAATGGTGTGTTTGCAGCGCGCTTCTCGTAAGACGCCAGACGTTTTCGGCATCCAGTCGAGGAACTCACGCAG  
CAGGCGATCCAGCCGCGCGGCGAGGTCGTGCGCTACGCCCAATACGGAACCACGCGGGTGCATACGGAACCCAGTGA  
TTGCTTCCACCAGATCGTAAATTTTCTGACGATCGGTAAAGGCGAAGAACACTGGCGTATTGCGCCGACGCTCTGAATA  
AAGGTCGAGATATACAGCAGGTGACTGTTGATGCGGAACAGTTCGGAGAGCATAACGCGAATGACGTTAACGCGATCCGG  
CACGGTGTCCCGCCAGTTTCTTACCGCCAGCACGTAAGGCATTTCTGTTAACGACGCGCCGAGGTTTCGATACGGT  
CAGTATACGGAATGTAGCTGTCCAGGACTGGCGTTCGCCATTTTCTCCGACACCGGTGGTGGTAACCGATGTCTGGT  
ACGCAGTCGACAACTCTTCCGCATCGAGTTGCAAAACGATACGGAAGCCCGTGCGCCGACGGGTGGTTCGGACCGAG  
GTTGAGGAACATGAAGTCTCGTTTTCGGTGCCGCGCTTATCCCCACTCTTCCGGTTTGAAGGTCAAGGCTTCCATCT  
CCAGATCTGTTTGGCTTGGTTCAGCTCAAACGGCGAGAATTCGTTAGCGCGCGCCGGATAATCTTACGCAGCGGGTGA  
CCTTTCCAGGTTTGGCGCATCATGATGCGTGCAGGTTCCGGTGACCGTCAAAAGTAATGCCAAACAGATCCAGGTTTC  
ACGCTCATACCAGTTAGCGTTCCGGGAACAGTTTGGTGAAGGTGCGTACGTGCAGGTCGTTTTCTGCCAGCGCCACCTTCA  
GCATGATGTCGCGTTACGATCGATAGAAATCAGATGGTAGAAAACGGAAAAATCCGCGGCAGGTAACCTTTCGCGGTGT  
GTGCGCAGACGTTCTGTCATGCCGTGTAAGTCAAACAGCATGACGTAAGGTTTTCGGCAGTTTCTTTAAGAAATCGCCAAC  
TTCCAGTAATTGTTACGCTTATCCACACAACGGGAACCCCGGTGCGAGTGCCTGAACAGTAAAGGCATCCGGCCCAA  
AACGGTTGCGCAGTTCGCAATCACCGGATCATCAAGATGATCGCGGGTCTGCCAGGCGGGTCTTGGCGGGTAAAGTCG  
GTCATATTGTTACCAATTGCAAATGGTCCGTGGTACTGTCCGCGCAGTAAGCTTCGCGAAATAGATTTAGGAATAAGCG  
AAGAAAAATCCCTTTGCCGACAGGCGCAAATTAATCTCGTCAGGTGTACGCAGGTTAGTTACGGCAATGCGTTCACCGC  
GCTTGCCTTCCGCTCTGATTGCATATTGGCGGATAAACGCCCTGATCGCCAAACCCAGGAGAGCGGACGACGTTCT  
TTGCCGATAGATTCTGCAACAGCATCAGTGCCTGCATGTACGTTTACGACGCGCGGCGGACGCCGGATATACACATC  
AACCGGATGAATTTATCGACGCCCTGCACAACGGAATAAATATCGTACATAACCACAGAGTTGGCACAGGCACCCATTG  
AGATAACCCATTTTGGTTCCAGCATCTGGTACACAGACGCTGAATAACCGGTGCCATTTTGGTAAAGCAGGTTCTGCA  
ACCACCATCAGGTGACGCTGACGCGGCGAAGCAGCAATACTTGCGCCAAAACGCGCCAGTCATGCACCGCGGTA  
CGAAGTCAACATCTCAACGTAACAGCAGGAAAGACCGAAGTTATACGGCCAAATTTGAGTTTTTACGACCCCAAGTAA  
TGTCATTGAGCTTGCCTATAAACACGTTTTTGTAACTTCTTGTCCAGAGGTCGTTACGATCTCCTGCTTTTGCAGG  
GGGTAACGGTCTTCTACCCTGGGATCTATGCGGGTGAAGCGTATAATCCATCTTAATGCCTCGCGTTAGCGTTGACG  
ATTAGCGATACTGTTCTGTTTCCGGTTTACAGCTCGCGGCGTGAACGCGCGGGCGTCCAGTCCAGCGCGCAATACGCA  
CCAGATAAACAGACCTGCCAGTAACACAAAAATAAAATGACGCTTCCACAAAGCCTACCAGCGCTTTCGCGGATA  
GAGGTTGACCATGCGAACAGATACAGCGCTTCAACGTCGAAGATAACGAAGAACATGGCCACCAGATAAAACTTGGCGGA  
CAGGCGTAAGCGGCGGAGCCGACCGAGTCGATACCGGATTCAAACGGCACGTTTTTTCGACCTCGCGCTGCGGACCCG  
CTAAAAACCAACCGCTACCAGCATCAGGCAACACAGGCAATGGCAACGATAAAGAAAGATAGCGAATGCCAGTATGA  
GCGATGACTTCAAGTGGATGTTGACATACTATTGCTTACTCATAAAAGTAGCGCCAGATTAAGTCTTACGGCAGA  
TGGACGCCACATCGATTATGGGGAGGAATAAAAAAACCTTACAATCACTGTAGAAATTTCTTTATACAGTAATTGAT  
GTGGTTTTTTACTCCTTTCTATAACCTTTTGTCAACTTTAACAAAAGTTTCTTACATTAGTTTACATAATATCAACACC  
ATTAGCATTTAATGCCCTTTCACCCAGATCCTTGACGACTCCAGGATAATTAGATGTTGTTGAATCGTGTCCGTTGTGA  
AGCAATGGAAAAAATACGGTCTATTTTACAGGAATTTGTGTGATTCTCCCCCAAAAGAGAGATTTTTCTTGATCT  
GTGACACGTTTTTGTATTCCATAACAAAACGACGCAACAAATTTACGATTTTTTTAACATCATTGTAGCAGGTGATTT  
TTTTCAGGCGATTATTTGTGCGTTCGGGACGTGAATCTCTGGTGGTTGAAAAATGAACAGTTTTTGTACGTTCTGCACTAT  
GCGATGAAGGATTTTTACTAAAAAAAAGCCGCTGGGGTTTAAACACCCCCAGCGGCTCGTTTTTTTACACTATTGTCTCA

GGAATTATCTATCGTCCGTCGATTACTCGATATCCCTTTCAATCAACAATGAATCATCCCCTCCGGAGCAGACATTGGG  
CTGTATTGCCACGGATTATGGTAGCTCTCCATCGCCTGATAGATCACCTGGGCCAGCTCATTATTACTGGACGGATCATA  
GCACAGCAAATATTCCGGTATCAGGTAGCGGGGTAAGCCATCTACTCCACTCAGCACACGCAGGTCCGGGCTCATCATCT  
CAACCGGCCTTGCCGTACGCCAAGACCGGCTTTCACTGCCGCACGAACGGCCGGAAGCGTCGAGGCGACATAAGCCAGT  
CGCCATGGAATATCTGCTTTATTAAGCGTCGCCAGCACCATATCCGGAACGGGCTAGGATCATCCAGCAATAACAAGAGG  
GATCGGCTCGCCTTTTTGCAATATGTATTCCGCTGCCAGTACCAGTGTGTTGGCGAGGTACGCAGGTTCAATGCCTTAA  
ACGCTGAAGGACGATGGGTGGTTACCATCAAATCCACTTCTGGGATTCCAGCATTCTGCCATATAGGCATTACGTTTA  
ACGCGGACATCCAGCGCTAATTTCCGATAAAACCGAACTCACGCGATTTAACAGGAAAGGTAAGATCGTATCGGCAGATTC  
ATCTGAAGCACCGATAGTTAATACGCCCTGAAGATTACTGAACATTAATGATGAGCAGGCCATCATTAAAAACGCAGGA  
TTTTCTGGCGTAACCAAGAAGTTGAATGCCATGTTAGTTAACAGTTTGTGCGACCGTGACGAGCGAACAGTTCTTTC  
CCAACGAGTTGTTCCAGACGCTGCATTTGCTGACTTACGGCGACTGAGTACGACACACAGCGGACGCTCGGCAGCAAA  
AGTGTTCAGATCGGCAACAGCAACAATGTTCTCAGCAGATCGAGGTCGAGGTTAATTATCGGACGATTTGCACTTATCA  
TATATTACTACTTACTGGCGCTCATACTGAGCTGGTTAATGCTGTGCACACACAACAAGCAATTCATTTGTAATGTG  
CCTCCCTGGCAGTTTCATCCGGAACCCGACGAAAGTAAAAATGCATATGAGTTGCACTAAAAAAGCGACTCACATTTCT  
CCGTTATAATGCCTGAAGTAGATCACAGAATATATCTTCAGGGATCGCATATCTATTAAGTTACTCACTCTTTTCTATTT  
ATGACATGCGCGTGTGTTGTATAAATGTAATGTAGTCTTGTCCACTCTGTCAGCATCGCTGGTCATACGCGAACCA  
CGTACCAACAGCAATGGTGAGGCGGCATCAAGAGCAGGGATCCGTCATTTATCCGAGCATTTTACCCAAAAACCTTTTA  
TTTATAAGGGTCATTGCGAATTATCTGATGCAAAGTTATGTTATGTTAGGCAAAGTAATCTTCTATTATTAATAAGCACA  
TCAAAAACCTTTTTGAATATTAATAATAATTAATTAGCATCATCCTCATTATTAATCCGCTTAAACAATAGTTTCACAC  
CTTGCCCCATTGCGACACCTCGGAAATCATCACGCAGTTAACTCTCCGTAATGAGGAAATATCATCATCGCGTTTCAT  
TAGTGAATTCTTAAATGAGGCATTTTACACAATTATCTTACAGATAAAAAAACGACTTACAATTAAGAATCAGAACA  
ATCACTATATAACATTGCATGTAAGCATATACACCTCATTATTTGTATTATTAAGTTATTAACAGCACAATCGAGC  
CTTCCCTCTGGCAAAATCTTATTCTGCAGACCTTCAAAACACCGTCTGGGGAGTACATTGTTCTAAGCTGACTTCCA  
CGCAGGGAGTGGCGATAACAGCAAAAAAGTCAAGATTCATGTCCTCCATTGAAAAATCCAGCAAATAGAGAATGTCT  
GTTATGACATCCGTGGTCCGGTCTGAAAGAAGCAAAACGCTGGAAGAAGAAGGTAACAAGGTAAGTAACTGAACATC  
GGCAACCCAGCCCGTTCGTTTTGACGCGCCAGATGAAATCCTCGTTGACGTGATACGCAACCTGCCTACCGCTCAAGG  
GTATTGCGATTCAAAGGTCTTACTCCGCGCTAAAGCCATCATGCAGCACTACCAGGCTCGTGGCATGCGTGATGTTA  
CCGTGGAAGATATTTACATCGGCAATGGTGTATCGGAGCTTATCGTTTCAGGCAATGCAGGCATTGCTGAACAGCGGGGAC  
GAAATGTTGGTTCCTGCACCAGATTACCCACTCTGGACCGCGCGTTTTGCTTTCCAGCGGTAAGCGGTGCATTATCT  
TTGCGATGAATCCTCTGACTGGTTCGCGACCTCGATGATATTCGCGCTAAAATTACGCCTCGTACGCGTGGGATCGTTA  
TTATCAACCCAAATAACCCAAACCGGCGGGTATATTTCAAAGAGCTTTAATGGAGATTGTGGAGATTGCACGTCAGCAT  
AATCTCATTATCTTCGCCGATGAAATTTATGACAAAATCTCTACGACGACGCTGAGCATCAATTGCGCCGCTGGC  
ACCTGACCTGTGACCATTACCTTTAACGGACTGTCGAAAACGTACCGCGTTGACAGGCTTCCGTCAGGGGTGGATGGTGT  
TGAACGGGCCGAAAAACACGCCAAAGGCTACATCGAAGGTCTGGAATGCTGGCTTCAATGCGCCTGTGTGCTAACGTT  
CCTGCGCAACACGCCATTAGACCGCGCTAGGTGGTTATCAGAGCATCAGTGAATTTATTACCCCTGGCGGTGCTTTTA  
TGAGCAGCGTAACCGCGGTGGAACTGATCAACGATATTCGGGCGTTTTCTGCGTGAACCTCGTGGTGCCTGTATA  
TGTTCCGAAAATCGACGCCAACGCTTAAACATTCACGACGATCAGAAAATGGTGTGGATTTCCTGTTGCAGGAAAA  
GTTCTGTTGGTGAAGGGACGGCATTCAACTGGCCGTGGCCGGATCACTTCCGATTGTACGCTACCGCGTGTGATGA  
TATCAGAGTCTTTGAGCAAGTTCGCGGTTTTCTTTCTGGTTATCATCAGTGAATCTTAAATTCAGTCCGGAGAT  
TGCATCCGGCAGCGTTATCCCGCACAAATGACCTGATGATGCATCATAAGGTCACTATGAAACAGAGCCATTTTTT  
TTGCCATCTCTCCCGCTGAAACTCATTAAACCGTGGCCGCTCATGCGCAACGTGCGGACGGAAAAATGTGTCGAAAC  
AGTTTGCAGGTAGCGATGGTCGCCATGCGCTGGCAGCTATCAAAAATCGAAAATTTGGCGGTAATGTCAACGCCGAACG  
TATCGTTTTACTGGCGATGTACCAGATGCCTCAGAAGTGTCCACCGCGATCTCCCTACTCCGGTAAAATACTTCAATT  
CGAAAATCGCTCAGGAGTACAAGGCTATTGAAAAATCGCTCAGCAAAAACCTGGTGCATATGGTTCGGAAGAGCTGCGG  
GATATCTTTGCGCGTTAATTGACGAGCATGCATATAGCGATGAAGAAAAATCGCTGGTGAACAGGCAGATGCACTGTG  
TGATATCTGAAATGTCTGGAAGAACTCGCGCCGGAATAATGAATTTGCTGGCAAAAACGCGACTGGAAGCGACGC  
TTGAAGCGCTGCGAGCCAGGAGATGGACTACTTATGAAATATTTGTTCCAGCTTCCATCTTTGCTCGATGAGATT  
AGCCAGGATTCACCGCTGAAGCAGCCGAGTCTGCGTGCATCAGGCAATAAGCGCCGATGCGACATCAGGCTCTTGT  
CAAAACGGAACAGCATCGGATCATCACACAAAACCGCCATCAGATAATGGTGAACGGTACCCCAACTTCACAAA  
GTCACTGAAGCTGAATTTCCGGACTAAAACAGTGTGTTAACAGGTGAAGAAACCGGTGCATAAAGGCGGCGGATG  
CTGCCATCGCCACGACCATCGCAATGGATAAGGGACACCCCATCGTTTTGCGAGCAGCCAGCGCAATCGGAGCCATC  
AACACCGCCGTCGCGTATTAGAGATAAATAGCCCAATAACCGCCGACAAGCAAAACAAAACCCAGCATCATATGTGG  
CCGTAACCCGCAATGTCCATCAGCCCTTTCACCGCCAGCGGACACCTCCGTTTTCTGTAATGCCACAGCAAACG  
GCATCATCCAAACGATCAAAATAATGCTCGGCCAGTGAATGGATTTATAGGCGCTTTCAGCATCTATACAGCGGAATTT  
CCATCAGCAGGACGGATGATAGCGGCAACAGGATTAGGAATTTATCTGTGAGCATTAAACGCCACCATTAGCACCAG  
ACAGAAAATGGCATGGGGTGCCTGGCTGTGCGCGGGTGTGCTTCACTCACCTCTCCGGTAAGTTACAGCGCTACGAAGT

CGCGGCCCTGTTTGGCCAGCATACCGATCAGTTTCCAGTTACCCACAACCAGGATGATATCGCCCAGCAGCAGAGGCTCA  
TCCGCCAGCGAACCTTCCAGCGCCACGCCATTGCGCTTTAGCCCCACCACATTCAGTCCGTAGCGGGTACGAAAACCAAT  
TTCGCGCACCGATTTACCAATCAGTTCTGACTCAGGAATTAATGAAATCTCTGCCATGCCACATCAAGGGCCTGGTCAG  
AAAAATACTCGCCGCGCAGTACCATCGGCTCCAGCAATTGCTACTACAAAATTGCCGGAGATCGACATCAGCCGCGAGAC  
ATATCAATAAGCAAAACGTACGCGCGGAAATTCAGAAAACCCATTAAACGTTACGATAACGCGACGAAAACGCCGCCA  
GCGTTCAACACCGATGACGTTAGCGCCATAACGCTCACGTAATTTGAGATCATCCAGCCGTTGACCAATCATTGGCGATC  
CGGGGCGAATAGCCAGACGTCGCGCACGCCCGGTACGTCGATTTACGCGATAAGATCGCGAAAGGTTGACGCGTCCAG  
CCTTCGCGCTGCGGGGTCTGGGTATCCCTTTACGATGAAACGCATCACTAACATATACAAAATACCCAGCACCAGCAC  
GACCAGGCCAATAGGTGTTACGCTAAAGAACTGAAGCCGTGATAGCCTTACCGCAGCAATTCAGTGTGACTACCAGGT  
TCGGCGGCGTCGCCACCAGCGTCATCATGCCGCTAATCAGCCCGGCAAACTTAACGGCATCATCAGACGTGACGGCGAC  
GTTTGCATACGCATGGCAACGCTTAACACCACGGGAATAAAGATAGCGACAACGCCGGTTGAACTCATAAACGCGCCAAG  
CCCCGCGACGGTCAGCATCAACAAAACCAACATTTTATTTACTATTGCCCGCACTTTGACCAGCCATGTTCCCATTA  
CGGTGGCAACACCGGTACGGACCAACCATCGCCAATAATAACAAGCGGCAATCAGGACAACGTTAGGATCAGAAAAG  
CCGAAAATACTTCTGGGACTGTGAGCCTTCCGCTTAATGCAACCGGACAATAACAACAAAAGCGACCATCCATACG  
CACTCTGCCCGTGCAAAACAAGACGATGGCAACGGCAGTAATGAAAGAACCCTCAATTCACCGTTACAAGTTATC  
CTTGTAAATGAGGGGATGACTTGTCTGCCATAAAAAAGCCCGACGAGACGGGGCTAAATCATGATCAGGTGTTTC  
ACTGAATAATAACATCGCCATTTGGCTGTTTGGTACAGTAATTTGCTCCAGACTGTGGAGACCAAATCGACCTCATT  
AGGCGCGGGTATCTGCCGAGCGTTAACCGCAATGACATGACAACCCGCCCGCCAGGCCAGAAAAGCACGCCAGCGGGAGC  
ATCTTCCACCACACACTCCTGCGGCGCAAGCCCCAGCAGCTGCGCGCTAACAGATACGCATCAGGTTCTGTTTTTC  
CGCGTTCACTCGCTCAGCGGTTACAAACACCTCTGGTGCGGGAAGCCAGCTATTTTATGGCGCGCTCGCGCTACCGGC  
ATGGAGCCAGAAGTACAATGGCCACGGAATACCTGCTTTATTCAAATGACTGAGTAAGGCGATTGCCCGGGAAGCGC  
GGTAATACCTTCGTTTTCCGTGGCCTCGATGTGCTCAGACGCGTAAACTCGGCGGCAATATCAGCCTCGGATTTGCCCG  
CCATAAAATGGCGCAGAGAGGTGATCGCTGTTTACCGTGAATGAAAGCCAGCACCTCTTCCGGCGCTAACCCATGACGT  
CTGGCCAGTTGCTCCACGCCGTTTACCAGCAGGCAAGGAAATCCACCAGCGTTCATCAAGATCAAACAGAAAACCTTT  
GCACCGCACGCGGGCCTCCTCAGGCATTGATAATTTGATTAATTTGTTGGCGCTCAAATGGTACTGACGCGGGCAGGCA  
TGCCACACATTAAGCATGCGCTGATATTTTTCCACATTGGCGTCTGGGCGTAAAACCGTGAGTTCCGGCGTCAAATG  
GGTATAGCGCCCTTCCACATTAACCATAAAGCGGACATAACCGAGGTAACGTGCTTCAGTGGCGGCGTCAAAGCCGAGGA  
AGGTGACACGACGTTTCATCGATGGATTGCTGGTCTGCAAATTAGACCAGGAAACATGCAACGCATGATACATCTCCATA  
ATGTCGATGATAGTGCAGGAGGTTTCTTCTTTCAGTCTGCCAACTCGCGATCCAATTCACGCATCTGTAATCCGTAACC  
ACGCTCAATAAATGTTTGCAGGCGACGTTAACGTTACGATTTGCCGGATCGAGCATAGTCATCATCTTGTACTGATTAG  
ACAAAATAAGACGTTGCGGCTTGGTCAATTTCCATTGTTGACTCCTGTATCACTCTACTACGGTGAAAAAAAAGAAGGCTG  
AGTATGCCTTCTTTATATGCGTAATCAGGGGTCAATTACAAATCATCAAGGAAAGTTTTATCCAGTTGTTTGAAGGCGC  
GCTTAAGCGTGTGAGTAATGCCTGGTAATCAGGCTTGCTTCAACGGGTGCCAACACCTGTCCAGACTCCTGCAATTA  
CCGCGAACTTCATAAAACAGTTAAGGATTGAGGGGGTAAATGGCGTGACAGAACGTTGCCAGCCACCACAATCCCTG  
CATGGGTAACTTAAGGCGAACAGGGCAGTGGCAACTGCCGGCCAAAGCTGACCGCCAGGCAATCTGCCAGCAGAGAG  
TAAATACGGCGATCGGCGGCATAAAACGGATCGCATAACGCGTCACTTGATAACGCGATTTTCGACAAAGACCGGGGCA  
AGGCGTTTTTCCAGCGGCCACGTCTTTGAGTAATGCTGTCCCCGGCGAAACAAGCTAAAAAATTAACAGAACGATTATC  
CGGCGTTGACATGCTTCACTCAACTTACATATAAAGATTCAAAAATTTGTGCAAATTCACAACTCAGCGGGACAACGT  
TCAAAAACATTTTGTCTTCCATACCCACTATCAGGTATCCTTTAGCAGCCTGAAGGCCTAAGTAGTACATATTCATTGAGT  
CGTCAAATTCATACATTATGCCATTGGCTGAAAAATTCGCAAAATGGCATAGACTCAAGATATTTCTCCATCATGCA  
AAAAAAATTTGCAGTGATGTTAATCATAAATGTCGGTGTATCATGCGCTACGCTCTATGGCTCCCTGACGTTTTT  
TTAGCCACGTATCAATTATAGGTACTTCCATGTGAGTAAGTTAGTACTGGTTCTGAACTGCGGTAGTTCTTCACTGAAA  
TTTGCCATCATCGATGACGTAATGGTGAAGAGTACCTTTCTGGTTTAGCCGAATGTTTCCACCTGCCCGAAGCACGTAT  
CAATGAAAAATGACGCGCAATAAACAGGAAGCGGCTTTAGGTGACGGCGCGCTCACAGCGAAGCGCTCAACTTTATCG  
TTAATACTATTCTGGCACAACAAACAGAACTGTCTGCGCAGCTGACTGCTATCGGTACCGTATCGTACACGGCGGCGAA  
AAGTATACCAGCTCCGTAGTGATCGATGAGTCTGTTATTACGGGTATCAAAGATGACGCTTCTTTGACCGCTGCACAA  
CCCCGCTCACCTGATCGGTATCGAAGAAGCTCTGAAATCTTTCCACAGCTGAAAGACAAAAACGTTGCTGTATTTGACA  
CCGCGTTCCACCAGACTATGCCGGAAGAGTCTTACCTTACGCCCTGCCTTACAACCTGTACAAAGAGCACGGCATCCGT  
CGTTACGGCGCGCACGGCACCAGCCACTTCTATGTAACCCAGGAAGCGGCAAAAATGCTGAACAAACCGGTAGAAGAACT  
GAACATCATCACCTGCCACCTGGGCAACGGTGGTTCGTTTCTGCTATCCGCAACGGTAAATGCGTTGACACCTCTATGG  
GCCTGACCCCGCTGGAAGGTCTGGTCATGGGTACCCGTTCTGGTGATATCGATCCGGCGATCATCTTCCACCTGCACGAC  
ACCTGGGCATGAGCGTTGACGCAATCAACAACTGCTGACCAAAGAGTCTGGCCTGCTGGGTCTGACCGAAGTGACCAG  
CGACTGCCGCTATGTTGAAGACAACACTACGCGACGAAAGAAGACGGGAAGCGCGCAATGGACGTTTACTGCCACCGCCTGG  
CGAAATACATCGGTGCTACACTGCGCTGATGGATGGTCTGGACGCTGTTGTATTCACTGGTGGTATCGGTGAAAAAT  
GCCGCAATGGTTCGTGAACTGTCTCTGGGCAAACTGGGCGTGGGCTTTGAAGTTGATCATGAACGCAACCTGGCTGC  
ACGTTTTCGGCAATCTGGTTTCATCAACAAAGAAGTACCCGCTCTGCGGTGGTTATCCCAACCAACGAAGAAGTGGTTA

TCGCGCAAGACGCGAGCCGCTGACTGCCTGATTTACACCGCCAGCTCAGCTGGCGGTGCTGTTTTGTAACCCGCCAAA  
TCGGCGGTAACGAAAGAGGATAAACCGTGTCCCGTATTATTATGCTGATCCCTACCGGAACCAGCGTCGGTCTGACCAGC  
GTCAGCCTTGGCGTGATCCGTGCAATGGAACGCAAAGCGTTCGTCTGAGCGTTTTCAAACCTATCGCTCAGCCGCGTAC  
CGGTGGCGATGCGCCGATCAGACTACGACTATCGTGCGTGCGAACTCTTCCACCACGACGGCCGCTGAACCGCTGAAAA  
TGAGCTACGTTGAAGGTCTGCTTTCCAGCAATCAGAAAAGATGTGCTGATGGAAGAGATCGTCGCAAACCTACCACGCTAAC  
ACCAAAGACGCTGAAGTCGTTCTGGTTGAAGGTCTGGTCCCGACAGTAAGCACCAGTTTGCCAGTCTCTGAACTACGA  
AATCGCTAAAAACGCTGAATGCGGAAATCGTCTTCGTTATGCTCAGGGCACTGACACCCCGGAACAGCTGAAAGAGCGTA  
TCGAACTGACCCGCAACAGCTTCGGCGGTGCCAAAAACCAACATCACCGCGTTATCGTTAAACAACTGAACGCACCG  
GTTGATGAACAGGGTCGTACTCGCCCGGATCTGTCCGAGATTTTCGACGACTCTTCAAAGCTAAAGTAAACAATGTTGA  
TCCGGCGAAGCTGCAAGAATCCAGCCCGCTGCCGGTTCGGCGCTGTGCCGTGGAGCTTTGACCTGATCGCGACTCGTG  
CGATCGATATGGCTCGCCACCTGAATGCGACCATCATCAACGAAGGCGACATCAATACTCGCCGCTTAAATCCGCTACT  
TTCTGCGCACGAGCATTCCGCACATGCTGGAGCACTTCCGTGCCGGTCTCTGCTGGTGACTTCCGCAGACCGTCTGA  
CGTGCTGGTGGCCGCTTGCCTGGCAGCCATGAACGGCGTAGAAATCGGTGCCCTGCTGCTGACTGGCGGTTACGAAATGG  
ACGCGCGCATTCTAAACTGTGCGAACGTGCTTTCGCTACCGGCTGCCGGTATTTATGGTGAACACCAACACCTGGCAG  
ACCTCTGAGCCTCGAGGCTTCAACTGGAAGTCCGGTTGACGATCACGAACGTATCGAGAAAAGTTCAGGAATACGT  
TGCTAACTACATCAACGCTGACTGGATCGAATCTGACTGCCACTTCTGAGCGCAGCCGTCGTCTGCTCCGCTGCGT  
TCCGTTATCAGCTGACTGAACTTGCAGCGCAAAGCGGGCAAACGTATCGTACTGCCGGAAGGTGACGAACCCGCTACCGTT  
AAAGCAGCCGCTATCTGTGCTGAACGTGGTATCGCAACTTGCCTACTGCTGGTAATCCGGCAGAGATCAACCGTGTTC  
AGCGTCTCAGGGTGTAGAATGGGTGCAGGGATTGAAATCGTTGATCCAGAAGTGGTTCGCGAAAAGCTATGTTGGTCTC  
TGGTCAACTGCGTAAGAACAAGGCATGACCGAAACCGTTGCCCGCAACAGCTGGAAGACAACGTGGTCTCGGTACG  
CTGATGCTGGAACAGGATGAAGTTGATGGTCTGGTTCCGGTGTGTTACACTACCGCAAACACCATCCGTCGCCCGCT  
GCAGCTGATCAAACTGCACCGGGCAGCTCCCTGGTATCTTCCGTGTTCTTCATGCTGCTGCCGGAACAGGTTTACGTTT  
ACGGTACTGTGCGATCAACCCGGATCCGACCGTGAACAGCTGGCAGAAATCGCGATTAGTCCGCTGATTCCGCTGCG  
GCCTCCGTATCGAACCGCGCTTGTATGCTCTCCTACTCCACCGTACTTCTGGTGCAGGTAGCGACGTAGAAAAAGT  
TCGCGAAGCAACTCGTCTGGCGCAGGAAAAACGTCCTGACCTGATGATGACGGTCCGCTGCAGTACGACGCTGCGGTAA  
TGGCTGACGTTGCGAAATCAAAGCGCCGAACTCTCCGTTGACAGTTCGCGCTACCGTGTTCATCTTCCCGGATCTGAAC  
ACCGGTAACACCACCTACAAAGCGGTACAGCGTTCGCCGACCTGATCTCCATCGGGCCGATGCTGCAGGGTATGCGCAA  
GCCGGTTAACGACCTGTCCCGTGGCGCACTGGTTGACGATATCGTCTACACCATCGCGCTGACTGCGATTAGTCTGCAC  
AGCAGCAGTAATCTCGTATCATCCGAGCTTTGCGCTGCGGATATCTGAACCGGAAATAACTACTATTTCCGGTTTTTT  
ATTCCTTAATTTGCATTAATCCTTTCTGATTATCTTGCTTAACTGCGCTGCATCAATGAATTGCGCCATCCCACTTTGC  
ATACTTACCACCTTTGTTTTGTCAAGGGAATATTTGCGCTATGTCCGCAATCACTGAATCCAAACCAACAAGAAGATGGG  
CAATGCCCGATACGTTGGTGATTATCTTTTTGTTGCTATTTAAACCAGCCTTGCCACCTGGGTAGTTCGGTGGGGATG  
TTTGACAGTCAGGAAGTGCAGTATCAGGTTGATGGTCAAACAAAAACACGCAAAGTCGTAGATCCACACTCATTTCCGAT  
TCTGACTAACGAAGCAGGCGAACCTGAGTATCACCGGTACAGCTGTTACAGACGGGCGATGAACGCCCGGGCCTGATGA  
ACTTCCCGTTTGAAGGATTAACCTCAGGATCGAAATACGGGACAGCCGTTGGCATCATCATGTTTATGCTGGTGAATGGC  
GGCGGTTTGGCATTGTGATGCGTACAGGAACCATGATAACGGTATCCTGGCGTTATTCGCCATACCCGCGGGAATGA  
AATTCCTTTATTCCTGCGCTGTTTATCTGTTTTCACTTGGCGGCGCGGATTTGGTATGGGAGAAGAGGCCGTCGCC  
TTGCCATTATCATCGCACCGTAATGGTCCGGTGGGCTATGACAGTATTACCACCGTCTGGTGAACCTATATTGCCACG  
CAAATCGGTTTTGCCAGTTCGTGGATGAACCCGTTTTGTGTGGTCTGCTCAGGGGATTGCCGGCTCCGGTGTCTTTC  
TGGCTCCGGGTTGCGCATCTGGTGTGGTTATCGCCACTCTGATTGGCCTGATCTTTACCATGGTGTACGCCCTACAG  
TGAAAAAGAATCCTCTTCTGTACGCGTGCATGAGTCCGACCGTCTTTTCGTGAAAAGCAGGCTGATGTTGAACAACGT  
CCGTTTACCTTTGGTGAAGTGGTATTGATTGCTCTGACCGCCGTAATGGTCTGGGTGATTTGGGGCGTGATCGTTAA  
TGCCTGGTTTTATTCCAGAAATTGCCAGCCAGTCTTACCATGGGTCTGGTATTGGCATCATCGCGGTTGTTTTCCGCC  
TTAACGGCATGACGGTAAATACCATGGCTTATCCTTTACCGAAGGGGCGCAATGATGATCGCCCTGCCCTGCTGGTG  
GGTTTCGCAAAGGGATTTTGTGCTGGTCCGTAATGGTGAAGCGGGTATGCCAGCGTGTAAATACCATCCTCAACAG  
CATTGCCAATGCCATTAGCGGTCTGGACAACCGGTCGCGGCTGGTTTATGTTGCTCTTCCAGGCGGTATTTAATTTCT  
TCGTGACGTCGGTCTGGTCAGGCGGCTTAAACATGCCGTTACTGGCACCGCTTGGCGATCTGGTCCGTGTTAACCGT  
CAGGTTACCGTCTGGCGTCCAGTTTGGTATGGCTTCACTCACATCATTTACCAACCTCAGCGTCGTTAATGGCAAC  
GCTCGGTGTGTGACGGTGGACTTCCGTAACCTGGTGAAGGTGGCGCGACCTACTTGGACTGCTGTTTATTATGTCCA  
GCGTCGTAGTATCGCGCTCAGTTGATGGGCTACCACTAAAAATGTTAAGAGCCGAATTGCGGCTCTTTTTTATTCT  
GCCGTTTCACTCTACGGTTCATTTTTGGCATTGCGCTTATCCACAACGCTAGCGCTTTCAGCGAGTCTGGAGTGAA  
CTCATCGCAGCGTGCAGTATTTCTCCGGCGTCAGCCAGCAAACCTCACTGACTTCATCTTCTGTAGTGCGAAGGGAC  
CGTGAGAGACGAGCTGAACAATGCGCCCGACACGGCAATTTTTATCTTCAAATAGAAGTCCCGTGTCTGGCAAAG  
GGGACACCGGCAATGCCAACTCTTCTCCGCTTCCGACGCGCGGATTCCAGCAGTTGCTCATCGCCCTGGACTACACC  
GCCTGCGGTGCGATTAACATGCCGGTAAAAAGTCTTTGTCTCGGTACGACGCTGGACCAGAATTTTGCCCATGCCAT  
CATGACGACGATGTAAGTTGCACGATGACGCGACACTGTGCCCGCATTTGTTCCCGGCTGGCTGTGCAATGACTTCG

TTCTCTTCATTGACAATATCCACCCATTCACTACTGCCAAACGACGCTGTTCCATTATCAGGAAACCTTCTTTTTCTGG  
CGCTCTTACGGCGCATTGTTGAGTTGTGGGTAAATTACGGATTAATCGCGACCTGCGCAATGATACTTTGATCATTGAGTG  
CGATTACACTAAGTACGTCAATTATCCAGCATGCCATAACTCGCCGATTACCGCCTTTCCGGAATACTCACCGAGCCGGG  
TTGAAGTGGAAAATCTCCCCCGCTGTTCTGCCACTGGCAGATGGGTATGACCGTACACCAGCACATCGTTCTGGTTTAA  
AGCAGGCAGATTTTCCGGGCCAAAAAGATGACCATGCGTCAAAAAACAGACGTTGTTTTCCAGTAATACCTGTTGCCACG  
GGCGGTTATCGGGAAATGCAGCAGCATTGATCCACTTCGCTGTGCGAGTTGCCGCGCACAGCGATAACCTTATGTGCC  
ACTTCATTAAGCCGTTACAGCGACTTTGGCTGGCGCTAAACCTCCGGTAAAGCATTACGCGGGCCGTGATTCAACACGTC  
GCCAAGGATCACCAGCCACTGGGCACCCTTTGGGCAAAACACTCCAGAACACGTTCCGTGCGCGGTAACGACCCATGAA  
TGTCGATGCAAAACATCAGTTTCATCACTCACTCCTCGTCGAAAAACGTAAGCTATGATACTGGATTCTGTGTTGCTA  
TCAGCCAGATTGCTTCGCCGAAAGTGAATAAAACGCTGGACAGACGCTCGCTGCCACTGGAATGTTGCATAATCCACCA  
GGCCTTCTGGCACCTCATCGCCATGTAGTACCAGCGGTTAATCATTAGCGCCAGATCAGTATCAGCAATGCACCATTCA  
CCAAATAAATTCGGCTGACCAGTACTAACAAATGTTCTGCCATCGCGAACAGTTTCTCTGCACTGGCTTTTCCCTCGGC  
CGTTAGTGGCGCTTTTTTCGCCCCGAAAGACAACATCCGTGCGACGCTCTTCGCGGATGGGCATCAGATCGCTGCGCA  
GCCAGGCCTGAATCTGTCTGCACGCGCACGATTTTCTAAATCAAGCGGATAAATACGTTCCAGGTCGGTGGCGCAAT  
CGATCTCCAGATACTCCGCAATGGCAGAAGATTCACTCAACTCAAATCATCGATTGTAATAACGGCACACGGCGGT  
CTGACCGTAACCTTGGCAGCTCGGCTGCAAATGTTCACTGCTGCGAGGTCGATGGTCTTGATATGAAACGACAGGCCCTT  
TTTTCTGCAACGCCACCCAGCGGATAACACATAAGGGGAGAAAAAGTGGGCATCTGACCAAAGCGTGATAGCGGGTTA  
CTCATTATGCTCTCGCAATAAAGGGGGCTGGCTATCAAATAAGAGCCTTTTTGTCAGTGTACGTAACATACTCA  
CGTAAGTCGCCGCTTTCTATACTTGTGGTGTTCAGATGATTAACAACCGGAGCTGCAATGATCGATCTCTATTTCCG  
CCCGACACCCAAATGGTCACAAAATTACGCTGTTTCTCGAAGAAGCAGAGCTGGATTATCGCTTGATTAAGGTAGACCTGG  
GGAAAGCGGTCAGTTTCGTCCGGAATTTTTGCGCATTTGCCCCAACAAATTCGGCAATTGTTGATCATTCTCCT  
GCCGATGGCGGCAACCGCTAAGCCTCTTGTAGTCTGGTGCCATTTTGTGTATCTGGCTGAGAAAACAGGACTCTTTTT  
GAGTCATGAAACGCGTGAGCGCGCCACATTACAGTGGTTATTCTGGCAGGTAGCGGACTGGGGCCGATGCTTGGGC  
AAAATCATCATTTAATCACGCAGCCCCCAAACCTTCTTACGCTATTGAACGTTATCAGGTTGAAACTCAGCGCTT  
TACCATGACTGAACAAGCGGCTGAAAACTCGCCCTGGCTGGGAGGCGAGAACTACAGCATTGCGGATATTGCTGCTG  
GCCGTGGGTTAATGCCTGGACTCGCCAGCAATTGACCTAGCAATGTATCCGGCAGTCAAGAACTGGCATGAGCGGATCC  
GTTCCGCGCCCTGCCACCGGCGAGGCACTGCTAAAAGCAAACTCGGTGATGAGCGTTCGGATAGTTAACAGAAAACAGGTT  
CTCGTGATATTATTCATCCTAAGTAAAACAACGGAGAACCTGCAATGGCACAACCTGCCGCTATTATTCGATAAAGAAC  
CTTCGTTTGCCTACGTTTATCGGAATTAAGGAAGAAGAAATTAACAACCGTCAGGATATTGTTATCAATGTGACGATCCA  
CTACCCCGCGATAAAGCGCGCACTAGCGAAGATATCAACGATGCGCTGAATTATCGCACCGTAACGAAAAACATTATTC  
AGCATGTAGAGAATAACCGTTTCTCTTGTGGAAAAATTAACCTCAGGATGTGCTCGATATCGCACGTGAACATCACTGG  
GTGACGATGTGTAAGTGGAGATCGATAAACTGCACGCGCTGCGTACGCCGATTCCGGTATCCATGACCTAAGCTGGCA  
GCGTTAATCGCCATATCGGGAGGCTGCATGAACATAGTGATCACCAGGAGGACAGGATTAATTGGTCGCCATTTGATCC  
GCGTTTGTGGAGCTGGCCATCAAATTACGGTAGTGACGCGTAACCCGAGAAAGCCAGTTCCGTTCTCGGCCCTCGGG  
TGACACTATGGCAAGGGCTTCCGATCAAAGCAACCTCAACGGCGTTGATGCGGTAATCAACTGGCCGGAGAACCATT  
GCTGATAAACGCTGGACTCACGAGCAAAAAGAGCGTCTCGCCAAAGCCGCTGGAATATCACGCAAAAACCTGGTCGATT  
GATTAATGCCAGCGACACGCCACCGTCGGTACTCATTTCCGGCTCGGCAACGGGCTATTATGGTGACTTAGGTGAAGTGG  
TGTTACCGAAGAGGAACCGCCGATAACGAATTTACCATAAACTCTGCGCTCGCTGGGAAGAAATTCCTGCCGGCG  
CAAAGTGACAAAACGCGAGTGTGCTGCTGCGTACCAGGTGATGCTGGCACCAGGATGGCGGTTATTCTCGGTAATGCT  
GCCGCCGTTTCTGTTGGCTGGGCGGGCCGATTGGCTCGGTCGGCAGTATCTGGCTGGATTCAATGATGATATGG  
TCAACGGTATTTCTGGCTGCTGGATAACGAGCTGCGCGGGCCATTTAATATGGTTTTCCGCCCTACCCGGTACGCAATGAA  
CAATTTGCCATGCGCTCGTGCATGCGCTGCATCGCCCGCCATTTTTCGCGCTCCCGCGACCGCCATTGACTGTTAAT  
GGGCGAATCTTCAGTACTGGTATTAGGTGGACAACGCGCTGCCTAAACGGCTGGAAGAAGCGGGTTTTGCGTTTCTGCT  
GGTACGATTTAGAAGAGGCGCTGGCGGATGTCGTTCTGCTGATGTGGTTTACAGCAAACATCCGCCAGTTAACTCCCGGTG  
TTACAGGATTAGTGGCTTTGCGCGATAAGATCGTCTGGTGAAAGTCCGGTACCATCATACTAACTCTGTCTAAACC  
TCTATCCAGCATCTCCTGAGCAATACGACGGCTTCTTCGTGTTTGCCTGCATTGCGCCTTCTTACGTAATCTGTGAG  
CAATGGTCATCAGTTTCTCTTTTCTGTGGTGGCGTTCCGCTATCTACCAATAAATGCACGAAAACGCTGGGCATCC  
CCTGTTTGAATACGTAATTAACAGGGCTTTTAGTGTCTGTGATAGTGTCCCTGTAAGTACGAGCGAAACAATTTG  
GTCGACTAATCCCAACAGATCGCGCTGACGAATATGTTTCTGAATTAACCTCAACAGCGCCATTTGCGGTGTTGCATAA  
TCTCGTCATCCGGCACCAGGTAATATCCACCAACGAAAAGCCGATGAATATATTTTTCGGGCTATAGCAGGCTCGGCA  
AATTCATCAAGCCAGCAGAGTGAATAAGGATAAGGACTTCTGCAACCATGATAAAACAGCATCGGGAGCACCAATGGAAG  
CTCTTTATAGCCGCATCAAGATGGTTTTGCATTGCCCAATGGAATAACGCATCATGCGAAAAGCCATTAATCTTCCG  
GCTTACTTTGGTGTCTATCACTACATAAATAAACCCTCCCTCTGCGTTTTACAGACCACAAGAGGTCGGAATAA  
TATTGCCGAGGTTCTCATCAATAAAACTGTTTGGTTCAGTTTAAAGCGTCTGTTAAATCACACAGTTTGGCAGCGGGCC  
GGGAAGATGAATATCAATAAAATCCCGCGCGGTGTCTGGATGGCGTAAAAAAGATTTAAATACCGCATCATGCGCGGTGG  
AAGTTGCGATATTGTCATGGCGTTCCGTCAACCCTCAAATTAAGATGACGCGACAATAACCACGATTAACACCCAATG

CAGCAGGCAGTTTTATCTTTGGACAGCGAATTCAGAAGTATTTTTAGCGGACTGTAACTTTTACATTTACAGCGGAAGCT  
GACTCGAAATCCCCATGAAAATACTCCGGCAGCGTTAGCCACCGGAGAGGAAATTTTACAGCGATCCCTTAAGGAAC  
CGTTGCAGACGAGGGCTTTGCGGGTTGCCAATAACTGCTCCGGCGCCCTCTTCTTCTATTTTCCCCTGATGGAGGAA  
AATGACATGAGTAGAAACATGGCGAGCAAAGCCATTTCTGTGAGTCACTACCACCATGGTTTTCCCCTCTTCTGCCAGTT  
GCTGCATAATACGCAACACTTCGCCTACCAGTTCAGGATCGAGCGCCGAGGTAGGTTTCATCAAACAGTAAAACTCCGGT  
TCCATCGCCAGCGCCCGCGCATAGAAACACGCTGTTGCTGACCGCCGAAAGATGCACCGGATATTTCCCCTGCGCACG  
TTCGCTATCCCGACTTTTGCCAGATACTTCACCGCCCGCTCGCGCGCTTCTGCTTGTGCTCAGGCCAACACCTGAATCG  
GCGTTCCATGACGTTTTCCAGCACCGTCATATGGCTCCAGAGATTGAAGTGTGGAATACCATCGTCAGGCGTGTGCGC  
AGTAAGCGCAGTTGATTTTTATCGCGACTTTGAGTTGACCGTCTTTGTGCGGCACCAGATTGATCGTCTGGCCATTGAC  
CACGATCGACCCTTCACTCGGTTTTTCGAGGAAGTTAATGCAGCGCAGAAAGTACTTTTTCCCGATCCCAGCATCCGA  
TGATGCTTATTACATCTCCGGCATTGCTTGCAGTGATACCCCTTTCAGCACTTCATGTTCCGCGTAGCGTTTGTGCAA  
TCGATAACGTTAATTTATCTCGGACATCGTATTCAGTGCCTTGAAGAAGTTCACATGCTGCAACCAGCGTTTTT  
CCGCTCTGCGAAAGAGGCTGATCAGGACATAAGAGATGATTAATAGAGCACCAGCGCAATGCCGAAGCGGTAAAAGT  
TGATACGTGGCGGCTTAATATCGCGGCTATTTTCAGCAGATCCGGCACCGTGGCAGTAAATGCCAACGCAGTAGAGT  
CAGCATCAGGATCACTTCTGTATGCGCGTAACGCAATACGCAGCGCAGAAAGGCAAAAATAATGCAGCGATACATTT  
TAAAAGTCGAGAAGCCATAGGCTCTGGCGGCTTCAATTTCCCATGCGGAACCGAACCAGGATTGCCCCAGCAAAAATCTCG  
GTAGTGTAAGCGCAGGTGTTAAGCGTCAGCGCCAGCACGGTACAGTTTCAGGCCACTGCGGAAGAAAGCGTTAAGGAATTC  
GGTCCCTTAACAATCTCAAGCGTGTACATGCCGGAATAGAACCAGCAACTGAAATACAGCGGCTACCCGCAAAAA  
TATAGGTAATAACCAGATTGAAACTGGATGTATTTACTGGAGACACGACCAATCGCCAGAAACAGCGCCAGGACT  
CCGCTATCACTACCGACAAAATAAGCAGCCACAGAGTGATCGCCACACCAGTAAAGCGATAACCGTCGGTCCACAGCAG  
CGTTTTCCAGTATTCATGTAAGATTTGATCACAGGTGAGCCCTTTCACACCCACGGAGTAGCGGCGTCAAGGAACAG  
CAGCACACCATTGAAACAGTGGTAAAACAGGTAATCACGCCACAGACGATGGCGAAATAGAAGGTTCCAGGTAC  
TTTTGCCTGCCAGTTGGGTGGCTTTGACCACATCTCCAGGCCGAGTAACGAAACAGTGGGTAGATTTGAGGATCAC  
TGCCAGTTGTTGCCAATGCCTGGCAGGGCGTAACGCATCATCGACGAAACATGATCCGCCGAAACACTTCCCACGAGT  
AAAACCGAACGCCGTCGCCCTCTATATGTCCTTTCGGCACTGCCATAAAAGCACCACGGAACGTTTCGGTAAAATAAG  
CACCGTAGATAAAAACCGAGAGTGATAATACCAGCGACCATCGGATCGATATCAATCTGCCCGACGCCCATCGCTCCGTC  
ACCGTGTAGCGCAATCTGCAAAACCGTAGAAAATCAGCAGCATCAACACTAAGTCCGGCACGCCACGAATCAGCGTGGT  
GTACCTTCGAAAATCAGCCCCGAAAGCCGATTTTGCAGAGCTTACCGCCAGCGCCAATTAACCGATGATTACAGCGA  
GCACTACAGAGCTGATAGCCAGCTCCAGCGTGACGAGCGCACCCGTAAAATAACACCTGAAAACCCATACAACATGCTG  
CCTGTCTGTGCTGTGTTGAATTACCGCTCTTGTCTCCCTCCGGTACCAGGAGGAGCGGGCTTTCTTTCACCGAT  
GGCGATTAGCCACCATAAACATCAAAATCGAAGTACTTTTTCGCTAATTTCTCGTAAGTACCGTCAGCGCGCATTTCGGC  
AAAGGCTTTGTTGAGTGTTCGCGCAGTTCGTTATCTTTCACGAGGCCATGCCGGTCCCTACGCCAAACAGTTTTT  
CATCTTTAACAGACGGGCCACCGAATTTGTAATCTTTACCGACAGGTTGTTTGAGGAAACCTTCGCTGGCAGCGACCTCA  
TCCTGGAACGCGGCATCAATACGTCCGGCAGTCAAGTCAAGTAAATGTTGCTCCTGCCCTGATACGAGACGATTTCAAT  
GCCTTTTGGTGCCCAATGTTTATTACCGAACGTCTCCTGGGTGGTGCCTGCAATACGCCTACCCGTTTGCCTTTCAGCG  
ACTCGACTGTCCGCTGAATGTCAGAAATTTTCGCCACCACCAACGAGAATCGGCAGCGTACAGTTTGTCCGTTGAAGGCT  
ATTTCTTGTGACGTTTTTCCGTAATGGAAGCGATGACATGATGGCGTCAATCTTCTCGTTTTAAGGACGGGATTA  
CGCATCCAGCGGATTTTCGACAAACGTACATTGCGTATTGATGCGTTTGCATAATTCCTTTCAGATCGATATCGAAGC  
CAACCAGTTCCGCTTGTGAATTTTTGATTCAAATGGCGCATAGTTCGGTCCGTTACCGATCGGATGTTTTGCGGAATC  
GCAGCAAACCGCGAGTTGCGCTGGAGAAGGCCAGAACCAGAGAGCGATAGCACCAGTTTTTTTATAATGTCTCAAC  
TGACAGTCTTTTTATAGGAATATTTACAGGTTTTGTTACACTTATCGTGCCATAAAAATTGACCATCAAGGCAAAAATATCC  
CGCCCCGTTAGACGTATTATTTTTATTAAAAATGCTTAAGTATGCATTTCAATGCACCACGATAGTGCAACAAACCTGG  
CGTGCAACATGATGATCATTCCATCAGGTACAGCTTCCAGCGACGTATCAGTACCAGTAGACATTAAGTGCAAAATACT  
TTTTCGCCATCTTGTGCTAGGTGCCGCTGACGCAGCTCGCCAAGCGCCTTATTGAAGGACGCGTCAGTTCAGCATCA  
TCTTTACGTAGCCCTACCCGGTGCCATACCGAAGTATTTTTTGTCTTTACTGATGAGCCAGCAAAGGCGAAATCTTT  
ACCAGCAGGTTGCTTGAAGAAATCCTTCGCTGGCAGCAACTTCTTGTAAACGCAGCATCCAGACGCTCTGCAGCCAGAT  
CGGAATAGACCAAATCCTGGTTGGCATAGGCCACCACATCCACGCTTTACTACGCCAGGTCTCGTTAGCGTAAGCTTCC  
TGGGTTGATCCCTGCAGCACACCAACATGTTTACCTTTAGTGAATCCAGCGTTGGCTGAATCGGTGAACCTTTGGCCG  
AATCAAACGAGAATCTCGCGGTACAGCTTGTGCGAGAAGGCAATCTCCTGCTGACGTTTATCGGTAATGGAAGCGACG  
AAATAATAGCGTCGATTTTTTTCGCTTTCAGTGAAGGATCAGCGGTCAAAGTCACTGGCAACCCAGGTACATTTACC  
TGATCCGTTTGCACATCTGTTACCGAGATCGATATCAAAGCCAAACAAAATCACCTTTAGCATCTTTGATGAGAACGG  
TGCGTAGGTGGTATCGGTTCCGATACGTACCGTCTCCGGTAGCGCCGATAGCTGGAAGCCGCTGTGGAGAGACCGACTA  
ACAAAGACAGAGCGAGAATCGACTTCTCATACATAACCCCTCAAGTGAATAATGGCTTTTTTATGTTGTGATTGTGTTGT  
GTGTTTGCAGGCTCTTTCATGAGGTTTATGCCATCTTACGACAAACAGTAACATTCAACGTTAAATATGTTAATAAGA  
CGTTGCATTATTGTCCTGAAGTTGAAGATAGCAGGTATAGCGGTTGAATCGCAGCGTTTCGATTGAATGGCAGAAACAAA  
ATGTCGAGGATTTGATCGCGGTTGCAAAAATGCCCTGAAACAGGGCAACAGCGGAGTTATGCGCCCTGCCAGCGGCAAA

GAGATCTTCAGGAAGGGTTATCGCAAACCTGGTCAAGAACACGATTAACCGTCTGATTTATCACATCATCAAGGGATTGCG  
GGCGATGATAAAACGCCGGAACGGGAGGCATAATCACCGCACCATTCTGCCGCTGAGTCATTAACGCAGATGGCCT  
AAGTGCAATGGTGTTCACGCACGCAGAGCACCAACGGGCGACGCTCTTCAGCACCACATCTGCCGCACGGGTGAGTAA  
GCCATCAGTATAGCTATGGACAATGCCGGAAGGGTTTTGATTGAACAGGGTAAAATCACCATCCCCAGCGTCTGGAAAAG  
AACCGGAAGAGATGCTGGCGCAATATCGCGCGCATCGTGCGTACATCGGCTAATGCCTGCACTTCGCGCAGAGAAAAA  
TCCGTTTTGAGGGATAAGTCTGGCGCGTGCCTGGCTCATCACCAGATGCGTTTTGATATCTGTGACATCGCGCAGAAC  
CTGTAATAAGCGCACGCCATAAATCGCGCCGCTGGCACCCTGATGCCTACAATGAGTCGTTTCATAAATAGTTGCCCTG  
TCAGACTTGCAGGCAGACTTTGAGGATTTGCGCGGAGTTGCAAGTCAGGGTGCCAGACCGGCACCCTCAGCGAAGGCA  
TCATCCTTCGTTATGCATTTGAGATTTTCACTTCGTTTGCAGTTGACTGCTTTGGCGTCATCATTACGTAACGTAT  
CGAGGAAATCGAGGTAGCCCTGATCAACATCTTTGGTGACGTAGACGCCGTTGAACACCGAGCATTCAAACCTGCTGGATA  
TCCGGATTTTCAGCGCAACGGCGTCGATCAGATCGTTAGATCCTGGAAAATCAACCCGTCAGCACCATGATCTGGCG  
AATTTTCATCAACTTCGCGACCGTGAGCGATCAGTTCGTTGGCGCTCGGCATATCAATACCATAAACGTTCCGGGAAGCGAA  
TTTCCGGTGGCGCAGAAGCGAGGTACACTTTCTCGCTCCGGCTCGCGTCCATCTCGATAATCTGCTCAGAAGTGGTG  
CCACGGACGATGGAGTCGTCGACCAGCAGGACGTTTTATCGCGAACTCGGCGCGTTGGCATTAGTTACGGCGCAC  
GGACTTACGACGCAGTCTGGCCCGCATGATAAAGTTCGCGCAACATAGCGGTTTTTAAACGAAGCCCTGGCGGATCAG  
GTTTTCCAGAATACGAGCAATTTCCAGCGCATATCACACGAGTTTCTGGGATCGGGATCACCATCGATATCCAGTA  
TCTTCCATTTCGCGGCAATTTTCTCGCCAGTTTCTGTGCCATATTCACACGCGCGCTGTAACGGAATTTTGTGAT  
AAACGAGTCCGGGCGGCAAGTATACTCAACAGGCACGATTGCTGACCGGATTGTCAGCACATTGACGGGTAA  
ACAACCTGCCCTTCTTCAGTGATGTAATCGCTTCGCCCCGCGCAGCTCACGCAGGAAATCAAAGCCAGCGTATCGAGC  
GCTACGCTTTTCGGAAGCGACCATATATTTCTGTACGTTTCTGTCAATATCACGTTTTCCAGTACCAGCGGACGAATCCC  
GTTTGGATCGCGAAAGCAACCATAACCGTGGCCGATAATCATCGCACACAGGCATACGCGCCGCGGATTAAGCGGTTTG  
TGGCAGCAATGGCAGCGAAAATATTGTCGGCTTCCAGCGGAGTGGCGGAAGTTGTCAGCTCGCTGGCGAAGATATTA  
AGCAGAATTTCCGAGTCGGAAGTGGTGTGATGTGGCGGCTTTTTCTCAAACAGTTTTTACGCAACTCGTGAGCGTT  
GGTCAGATTGCCGTTGTGGCAAGCGTAATGCCATACGGGAGTAAACGTAACCGCTGCGCTTACAGAGCGCTGGAGC  
TGCCAGCCGTTGGGTAACGCACATGACCAATGCCATATTGCCCTGCAAACGCTGCATATGGCGAGCTTCAAATACATCG  
CTCACCAGCCGTTTCGTTTACGCAAACGGAAGCAGTTATTGGCATCTATGGTATGATGCCGGCGGCATCTGACCCTG  
ATGCTGAAGCACCGTTAAGGCATCATAAATCGACTGGTTAACCAGCATAACACCGCGGATACCGACAATACCGCACATAC  
GTCTTTTTCTCGTTAAGCCACATCTCAGAGCACTTACGCTCTGGGCAAGAACTTACGAGCTTTGAGATAATCAAAA  
AAACATCTGATGATAAACTGAATTGCGGGATCAGCTGTGATTTGCTCCAGTCTTCGCTTTTCGACACCCCGGTAAAGGA  
GTCGAGAAAGAAGAGAATGGCAGCAACATCAACACACCGCGCAACCGCAACAGACGCCAGCACCCGATCGGTGC  
CTGACAACCCGTTTTCTCCACCAACTGGCCTATCAGGAAGTTACGATAGCACCAACGATCAGGGTAGCGATAAACAGT  
ACCGCGATGGCAATCCCATTTCGAACCACTTCGTTCAAAGCCGTAACCCAGACTGACAGGTAAGTGTAGTAATGACT  
GGCAACAAAGAAAGCACAACCCCATGTACCAGCGATAACGCTTACGAACAAAGCCGCGGATCAGGTAACAGAGAGG  
AAAAAGCAATCACCGGATTATGGCGTAATCAATCCAGACCATATGTGTCCACGATTTTACGCCCTGTATCTGTTCCG  
GGGCGCATTCTAACAGAAAAAGAAAAGTTTTGCGTAGGGATTTCTTCCCGCGCATCAATAAAAATGGCGCTGAAAAAT  
ATTCAACGCCATCGACTTTTTATGCCTTTGCGGCATCGGGCAATGCGTGTGGATGCGGCGTAAACGCCCTTATCCGACCT  
ACGGTCTACCCCTGCGTAGGCCTGATAAGACGCGCCAGCGTCGATCAGGCAAGACCGTATTAATTCGGCGTATAGCCC  
ATTACCAGCCACTTAAGCCAGAAAGTTGCTTCACTCACCCAGCGAACCTTTCAGCTTATCTTTCGAGGCATCCGGCCC  
AACGAAATACGGGTAATTTTACCCTGCACTGGCGTGGATGGCGACGTATAAACCCGATAACCGGCACCCGCGAGCTTAC  
CGACAATCTCATTCACTTTATCGGCAATTTTTCAGCGCACCCAGTTGCACAACATAGGCTTTACCCGCTCGGTGACGTTTT  
TCTTCCACGACCGGCTTCGTTTCTGGCTTCGGCGCAGGTGGTGTTC AACCTTTGGTTTTAGCGGCTCCACCGTTTTCCG  
CTTCGTTGGGCGACCGGTGCAAGTTCCGGTTCAAACCTCGGTGTTATTGGCTGCAATAGTGGCCGGATCGAGCGACGGTG  
CTGCGGCATCACCTGCCCGCACCTTCTCCGCTGCGCCTTCGCGGGCTGCGTGGTAACGCTGGGTGGCGGCTGGCATC  
ATATCAGGCTCATCAGATCGCCGCTTTCGGCACCAGCGGGATAGCCGCAACTCATCTGATAATGTTTTTCTGCC  
GTCCAGCAGCCCTGGAAGTACAATCACCCCAGCGCCACCAGCACGATCGTGCCACTAACCGATTCTGAACTTACTTG  
CCACCGCTTCTCTCGCGTCAATCACTTCCATGACATGTGCGACCGTGTGAAAGAACCACACACCAGCACGGTGTCTTC  
CGTTTTAGCGTCCGCATTGCGGCATCCCATGCCTGCGCAACGCTATCAAATGATTTGCCGTTACCCAAATGCTCAAGCA  
GTTGTTCTGCCGTGGCACCCGCGGCCCTTCCAGTGGCGACAATACCAGTCATCAACCACGCTTTTCAACCAGGCCAGA  
GTTCCGGCAATATCTTTATCATGTAGCATAACCGATAACCGCCAGCAGCGCCCGTTTTTTCGGTAGCGCTTTCATACGCC  
GGTGAGATATCCGCCGATGTGGATTATGCGCGACATCAAAAATAACGCGTGGCGACTCGCTCACAATCTGAAAACGTC  
CCGGCAAAATGCGCTGGCAATCCCGTGCGAATGGCATTTCCTACTGACTTCCAGCCCGCTGGCACGCAGTCCGCCAGC  
GCTGTTGCGGCATTTCGTTGCGGGACAAGCGGAACGGCAGATTTTCCAGCGTCCGCTGAGCATCGCTAAACGCCAGTC  
ATGATCGGTGACGGAATAGTTCCACTCAACGCCCGCAGTTGTAACAGTGCACCTTTTTCTGCGCCACATCAGCAATGG  
TAGAAGGCATTTCCGGCTACCCGACAATTTGCCGTTTTTTCGCTGCGGAAGATGCCTGCTTTCTCGCGACCAATACTTTCG  
CGATCTGGACCAGCCAGTCGGTATGATCCAGCGCAATACTGGTTACTACCGCGACATCGGCGTGCACAATATTGGTTGC  
GTCCAGACGACCCGCGCCAGCCCTACTTCCAGAATCACACGTCAGTTGTGCCTGCTTGAACAGCCACAACGCCGACAGCG

TACCGTACTCGAAATAGGTCAGGGAAATATCACCGCTGCCGATTCAATCTCCGAAAAGAGGCGGTGTGGGCCGATTCC  
GGCAATTCCTGGCCCTGCACACGTACGCGCTCGGTATAACGCACCAGATGAGGCCAACTGTAGACGCCACTTTGTACCC  
TGCCGCCATCAGAATCGACTCCAGCGTACGGCAGGTGGTGCCTTTGCCATTCTACCCGCAACGGTAAACACAAATGGCG  
CTGGTTTCAGGACGCCAAGACGCGCCGACCAGGCTCACGCGCTCAAGGCCGAGATCGATAGTTTTACTGTGCAGGTTT  
TCCAGATAAGAAAGCCACGAAGCCAGAGGCGACGCGCTTGAGGAGTGCCTTGATAATCATGGTATCCGCTGATTCTGTT  
ACGGTGAGAATAGCAAAGGGCAGAGCCAGTGGCCCTGCCCTTATCAGTTATCAGGCCTCAGGTTCTGATCCGGTACCCG  
GGGTACCCTACGCCTTACGCGCGCTTACAGGATTCCGCGCTGGCAGATTCACTCACTTCCGCAAGATGCTCGCCAGT  
TTCAGGCGCATTTCGGACGACGGACGATCATGTGATCGCGCTTCTCGATCAGGAATCACTGCGCTGGAATCCAGG  
CGGAGTTTTTCGCAACGGTCTGTTTCGATAACACGCGGACCGGCAAAGCCGATTAACGCTTTCGTTTACGCGATGTTGA  
GATCGCCAGCATGGCGAACTTGCAGAAACACCGCCATCGTCGGGTGGTTCAGCACGGAGATGTACGGCAAGCCGCGC  
TCCTGCATTTTTGCCAGTCCGCGAGAGTTTTGCCATCTGCATCAGCGACATCAGTGTCTCTGCATACGTGCGCCACC  
AGAGGGGAGAAGCAGATCAGCGGGCAGTTATCTCCAGCGCTGCTCAACGGCACGCACGAAACGTGCACCCACAACAG  
ACCCATTGAACCGCCATAAAGGGCGAACTCGAATGCCGACGACAAACCGGATTCCATACAGAGTGCCTTTCATCACC  
ACCAGCGCATTTTTCGCCGGTTTTCTTCTGCGCAGATGCCAGACGGTCTTATACTTCTTGAGTACGAAACTTCAG  
CACATCTTTCGGTCAAGTCCGATACCAGCTCCACAAGGCTTCTTATCTAACAGGCTATGCAGGCGATTACGCGCTG  
TCATACGCATGTGATGGTACACTTCCGACAGACTCAAGATTACGTTTCAGTTCAGTTCAGCGCGGTATAAAACCTGACCGCAG  
CTATCACACTTAGTCCACACCCCTTACGAATGCTCGCCTTCCGGGTGGGAGTAATGTTGCTTTTAATTCGTTCAATCCA  
GCTCATTAGGGACCTTCTGTCTGAACCTGGTTTCGATGCCAGTTTTATCTTTGGGACGCATAATGCCATTTTTGCCCC  
AACAGACCATGAATGTTGCACATTAACATAACAGCCGAACTTTGGATAAAAAAGTGGTCAACCGCGGAGTACTT  
TTATTTTTGGCGCGCTGCCGACGCGTTTTGTGACGGATTATTCGATGACGCCCGCAAATAGAAACCACAATAATC  
CCGACGATCAGCAGCTTAAGGTTATCTGAACCATCGGGATTGTACCGAAGAAATAGCCTGCGTAGGTAAGGAGCAGTAC  
CCACAACAGTGCAGGATCAGTTATAAGCGGCGAAATGACGGTACGACATGTGGCCATTCGCAACAAACGGGGCGA  
ACGTTCTGACGATCGGCACAAAACGGGCGAGAATAATCGTTTTGCCGATGTTTCTATAAAACTGATGGGTTTTGTCG  
AGATAACTGCGACGAAAATTTTGAATTTGGGATTACTGAACAATTTTACCAGAACACCGCCGATAGTGAATTGAC  
CGGTCACCCACAATCGCGGATCAGCATCAGCACCATCATATGGACGTTGAGATCGTTGGTTTTCCAGTATGCCA  
ACGCTCCGGCAACAAACAGCAATGAATCACCCGGTAAAAACGGGTTACCACCAGACCGGTTTACAGAACAAAATTAAG  
AACAAAATGGCATAAACCAGACGCCGACTCCGCGACGACTTCCAGATGCAGTCAATGTGCAGGATAAAATCGAT  
GAGGAAATAAATCAGTCCATATTTGCCTATGCCTGTACTCGTATCTTTCAGGCTGTAACACTGTTGGCTACAGCCTG  
AAATGTTCCGAGCATTATCTCGTTAGTCCGCCAGAAATAGCGGGCCATTGGCGGTTTTGGAAGATCATACCGGTCAGG  
GTAATCCACCGCAGCAGATACAGCCCTTCCGCTTTTGGCGTTGTCGCCAGCGTTCTGTCCTTTCGCCCGCAACT  
CTGCTATCCAGCTCTCCGGCTGGTTGTGGGCACCGACTTCCATCAGGCTGCCGACAATATTCCTGACCATATGATGTACA  
AAAGCATTTCGTTAATATCTACCACCACATAAGGACCGTGACGCGTGACATTAATATGCATAACGTTGCGCCACGGGGT  
TCGGGACTGGCACTGCACCGCACGGAACGAGGTGAAATCATTCTCGCCAGCAAGCATTGCGCAGCCGATGCATCCGTT  
CAGCGTCCAGCGGTTTCGTAATAATGGGTTACCCCTTACTCAGTACCGCCGGGCGCAGCCGATGATTGTAGATGATGTAG  
CGATAACGGCGAGCCGTGGCGCTAAATCGGGCATGAAATCATCAGGTACAGTTTTAACCAACGCACAGCGATGTCACC  
AGGTAATTCGATTTACGCCAAGGTCCAGCGCGCTTTTGGCAGCGCGGTTGTTTCGAAATGCACAACCTGCCCGG  
TACCGTGTACCCTGCGTACGTACGCCGGCGCAGAAGACGGTATGGGTTTCGTTCCGACCTGGGAGAGCGCTTTTCC  
AGCTTCTCTGCACACTGCGGACTTCTGTTCTGCCGTTGCCAGCGTAATACTTACTGCCGTCGACTCAATGCCAGCGC  
AATTTTATAAACTGGCGGTTGTTGCTGGTCCGACATTAGTACAGATACTCCTGCACAGTTTCTCGGCGATTTTTACTGC  
CATCAGCGCCCGCAAAGCGAAGCTTATCGGCCACCGCAGAACTGGACTTGGCTCCGGCATAACCGATGCATTACGCA  
CGCAGCCAACAGAAAGATGCGGCTACCCGAAGCATACCTACCTGAGTTGGGAATTCGTTCTCTTTCAGAGAGCACAATA  
TCTTCGCTTGAACAAACGCATACGCGCTTCTTCTGCTGCCAGTGGACGCAGAGCTTCAAAGTTGACCATCTGGGCATG  
ACCGTAGAATACCGGTGCCTGGACGACGCTAGCCGAAATCATCAGCCCTTCTGCTGCAGGATTTTGCCTACTTCGTCAA  
CGATACGAGCTTCTTACGCACGCTACCTTCTGCTATCCGGCAGTAACGGCAGCATGTTGAACGCCAGCTGACGCCGAAG  
AAATCTTCTCGTCAATCGGAATGCCGTTGAGCAATTTGCACTCTGCCCGCTAACGCATCGACCGTTTTTTGCCCTG  
GGCGGAGGCTGAAATCAGGCTGGTAACGCTGATACGTGATAAACCGCCCTGATCGATTAACGGTTTTCAGTCCGCCAGCA  
GCTGGCTGGTACAGTGTCTGGTACGGCAGTACATTCCGGTTCCGGTAATCTGTCAGTACAAACGGGTTTACTTCCGGC  
ACCACCAGCGGTACGTGGGTTTCGAGAGCAAACAATCCACTGCTGTCGATCACCAGGCAACCTGAGTTGGTCCGTTCTT  
AACCCAGGCAGCGGTAGCTTCTTTCGCTGCGACAAAATGCCAGCTGCGCCTGCGTCCAGTCAATTCAGCGGCATCCT  
GCACGGTATTGTCTTACCACCAAAGCGCAGTTGTTGCTGCGCTTTCGTTACGTGCCAGTGCATAAATTTCCCAACC  
GGAACTGACGTTACGCCAGCGTTTAAAGCAGGGCTTCCGCCACAGCGCCAGTTGCGCCAGGACGGCAATGTTCCAGCC  
TTCAGACATGGTGGTTTACTCCAGAAATAGCAAAGTCCCTGCCAATGTTACAGCAGAGAGCATGAAGAAGAGATTAACG  
TGCCGGATGATGAACGGCGTTAAAACCGAGTTTACACAGCAATGATGCCGACTGGCGTATCACAAATTACATACAGAG  
ATGACCATTACGGCGCTCAAGATAGTTTTTGGCAGTTTTATCGAACTACCCGGTATCCCGGCGACTTTACGCAGCGGT  
GCGTCATCGCGGCGACATCATACCAAATGCACAGCCTTTTTCAGCGTCCGTTGATCGAGCGGGCCATGCAGCGTAAT  
GCGACCAAACCTCTGGCGCAGGCAAGTATGATCCAGCGCAACGTGCTGTTTCATGCCAATAAACTTGCTATAAGCTTCAA



ACACTTGCGTAGTACCGGTGCTTTACCTTCCAGGGTATAGCCTGCGATATGCGACGTGCCGATATCCACTTTTTTTCAGC  
AGCTCGACGTTGAGTTCCGGTTCGCTTCCAGACATCCAGCACTACGCTTAACTTCTGGCCTTCATTACGGCAGGTCAG  
CAACGCAGTATTATCGACGACTGCGCCACGGCAGGCGTAAATCAGAATCGCTCCGGGCTTCAGGCTACGGATCAGTTTTT  
CATCCGCCAGATGTAGCGTTTTGTACGGACCATCTTAAAGAGTGGCGTATGGAAAGTCAGAATATCCGCGCGCTGGACT  
AACTCATCCAGCGAGCGAAATCACCTCATCCCCACGGTCCGGCGGAGGCGGATCGCAAAGTAAGGTTTTAATCCCTAA  
CGTTCCAGTCGCGCCTGCAATCGACGTCCAACGTTACCAACGCCACGATCCCCACCGTACGGTCGTACAGTAAAATC  
CATCGCGTTCCGCAAGCATCAGCAGGGAGGAGAAAACATATCCACCACCGCAATCGCATTACAGCCAGGTGCAGCGGAA  
AAACCAATTCCCGCTGCTTCAACCATGCTTTCATCGACATGGTCGGTCCCGCAGTGGCAGTGCCAACAAATTTAATGGG  
TTTTCTGCCAGCAAAGATTCACTTCTGTGACCGAACGCACCATCAGCGCATCCGCTCTGCCAGTTGAGCGACGG  
GGATTGGACGCCCAGGAAACCGCGTCACTCACCCAAACGGCTAAATAAGTCGCGGGCATAAGGCATATTTTCATCAACA  
AGGATTTTACGTTTGTGTACCTGTATGAGACGAGAGTTAACGGACAAGTGTCCATAATCTCGCGGCCAGGCATACT  
TGCGAAGATTTAGGTATAAGGATACGTAATGATACAACCTATTTCCGGCCCTCCTCTGGCAACCACAGGTGAGGGA  
GATAATCTGCCGTCTGGCACGGGCAATCAGCCTTATCCAGTCAGCAACGTACTTCGCTGGAAAGCTTAATGACGAAAGT  
GACCTCACTGACGCAACAGCAAAGAGCAGAATGTGGCGGGTATCAGGCACGATATTGGTCTGTCGGGAGATTACCCGC  
TGCTTTCGCGTCACTTCCCTGCCGTGAGCATAATCGGCGCAACGTCTGCTGGCCGCGCAAAAAGCCATTCTGCCCGC  
CAGGTTTTAGCGCAATTAGGGGAGTATTTACGTCTGGGAATAATCGTCAGGCGGTACGGATTATATCCGTATACTT  
TGTCAGACGCGCTGAATCAGCTCTACCGGAGCAATTA AAAACCATTCTCACCTGTTGCAGGAAGGGAAGATGGTTA  
TTCCGCAACCACAGCAGCGGAGGCGACCGACCTTTTATTACCGCGGAGCACAATGCGCTAAAACAGCTGGTGACC  
AACTTGGCGCGGCAACGGGGAAACCCAGCAAACAGATCTGGCAATCGATGCTGGAACCTTTCCGGGGTAAAAGATGGCGA  
GTTAATTCAGCGAAACTGTTAACTCTGGTACCTGGCTACAGGCGCGTCAGACGCTAAGCCAGCAAATACGCCGA  
CGCTGGAATCACTACAGATGACGCTAAAACAACCTTTAGATGCCAGTGAACGGCGGCTTATCGGCATATATCCAGCAA  
AAATATGGTCTTTCTGCGCAATCATCGCTTTCTTCTGCCAGGCCGAGGATATTCTTAATCAGCTTTATCAACGGCGGGT  
TAAAGGGATTGATCCGCGTGTATGCAACCGCTGCTTAATCCTTTTCCACCGATGATGGACACGTTGCAAAAATAGGCAA  
CGCGTCCCGCGCTGTGGATACTGTTAGTCGCGATTATCCTGATGCTGGTCTGGCTGGTTGTTAACCCCGACGAAATGAC  
AGTATCGTGACAATAATACCAGCACCGCAGAGATCGCCCGGCAAGAAATACCGAAGAGTAACCAAACGTGGTCGCCAG  
CATTCCCGCCAGCGGCCCGGAGACGCCAGGGCGATATCCTGAAACGCGGCGTAACCGCCAGTGGGTGCCGGAACCT  
GTGAGGGGACGCGTTAACCACCTCCACGCCAGCGCAGGAAAGATAAGCGAACATCCGGCTCCGGTTAACGCCGCGCCC  
GCTAATGCGACCCATGCACCTGGGGCTTCCAGAGCAGCAACAAGCCACCGTTTCTACAAGCAGAGAGACAATCGCCAC  
TTTCAGCGCCGCAAAACGGTCCGGCATCCAGCAAACATGACCGCATCACGACAAATGCGCCGCAAAACGCGGTAAGAG  
TAAAGCCCGCCATCGCCATCCTTTGCTGGCAAAGTAGAGCAAACGAAAGTCCCGATAACAGCAAACCAACGCCTTGT  
AGTGCCAGACCTAACCTGGTTTCCAGATAAGCCCGACAACGCTCCACAGCGATGGACGTTCTCCCGCCAGGGCCGGTAC  
TTTGCGCACTGTGCCGTTACAGGCCACGCCAGTACGGGTAATACCATTGTGGTGATCGCCAGTGCAGGCAAAACCGTAAT  
GGCTATGAATCAACAGGCCAAGCGGAGCACCAACAGCGAGGGCACCGTAAATCGCCATTCCGTTCCATGACATCACTTTG  
CCAGAGTGTTTTGGCCCTACGATGCCTAGTCCCCAGGTGAGAGCGCTGTGAGTAACTGGCTTTACCAAAGCCAAGAAAT  
CAAACGCCCCGACGACCAACAGAGCAAATTTGAACGGTGGGAGACAGGCAAAATCGCCGCCAGCAGCAACCGCCGCGCAG  
CCAGACCACAAGCTAACATTCCTGAAGCGCCGAACGTTTTGCACCATATTGATCGCCAGTGCAGCGCGGTAACACGC  
GTCAGCACCGTAGCCAGAACTGAATCCCGACGGCAATGCCGACCATGGTATTGCCATAGCCAGTTTATGATGAACAAA  
CAGCGGGATAACCGGCAACGGCAACCTACGGTTCATGAGGTGAGAAAAACCGCAAAAGCGATGCGGAAGAGCGAAAAAT  
TGGCAGAAGATCGTGTTCGTTTGGCTTACAGCATGATGATTACTCCAGAATGCAGCGCAAGGCGAGGAGATCCCC  
GTCTCATCTCTGTGTTTACGGTTACGGTGCCTGGCAGGATTAACCGGTACGCTTTTTCAGAAGGAAATCGACAAAAG  
CGGGAAGTTTTGCTGAACTGGCGCGGATTGTCAATGATGTGAAAAAGGGAACCATCAGGTTCCCTTTTGGCTTAGTGCC  
GGAGGCCGATTGGCGCGTAACGTGCGATGCGACGCTGGCGCGTCTACTCCGACCTACTGCGAATTAATCTTTAGCTTG  
CGCATTACCAGCGTGGCGTTGGTGCCGCCGAAGCCGAAGCTGTTAGACATAACGGTGGTCACTTCCGATCGGTCTGTTT  
GGTCACGATGTTACAGCCCGCAGCCTGCTCGTCCAGCTCTTCAATGTTGATGCTCGGGGCGATAAAGCCGTGTTCCAGCA  
TCAGCAGAGAGTAGATAGCTTCTGTACGCCAGCAGCGCCAGAGAGTGACCGGTGATGGCTTTGGTTGCAGAAATCGCC  
GGGCTCTTATCGCCGAACACTTACGGATAGCTGCCAGCTCTTTCAGCTCGCCAACCGGAGTGAAGTACCGTGGGAGTT  
CAGGTAATCGATTGGGGTATCAACGCCATGCATCGCCATCTTTCATGCAGCGTACTGCGCTTCCGACAGCGGAGCAACCA  
TGCTGCACCATCAGAGGTTGCGCCGTAGCCAACGATTTTACGATAGATGTGAGCACACGCGCCAGCGCGTGTCCAGC  
TCTTCAACCACTACCATAACCGCCGCCAGCGATAACGAAACCGTCACGGTGAGCGTCTGTAAGTACGGGAGGCTTTTTT  
CGGGGTGTCGTTGATTTTAGTAGACAGCGCACCCATTGCGTCAATTCGCAAGCATTTCAGCACAGCTTTCGCCCGC  
CGCCAGCAAACACGATGTCTGTTTGGCCAGTTGGATCTGCTCTACTGCGTTACCGATACAGTGTGCGGAAGTGCACAC  
GCGGAGCTGATGGAGTAGTTAACGCCATGAATTTTAAACGGGGTGGCGAGGCAGGCAAAACGCCGATGCCATCGCTTT  
GGTGACCACATACGGGCCAACCGCTTTCAGGCCGCGGGCCGCGCATTGCGTACGCGCCAACACCTGAAACCGGGG  
AGCCGCGCCGGAACCTGCAATCAGGCCAACCGCGGGTTATTCTGGTAAGCTTCCGGAGAGAGGCCCGCATCAGCGATT  
GCCTGCTCCATAGAAAGGAATGCATAAATGGATGCGTCTGCTATAAAGCGCACAACTTTGCGGTCAATGAGGCCAGTGGT  
ATCCAGTTTTACGTTGCCCGACGTTGCTACGCATGCCGGAATCCTTACGCTCCTGAGAGAAAGTATCCCTGAACGTC

CTTCACGCAGAGATGCCAGGACTTCCTGCTGTTATTACCGATGCTGAAACAATGCCAGGCCAGTAATCACTGCACGT  
TTCATTCAATACCTCTGTAAGTCGCACATAGAGTAAGTTTCGAATGCACAATAGCGTACACTTGTACGCCGAACAAGTCC  
GATCAGCCATTTAATAGAGAAATTTGCGCAGCCTTACACACATCGCTAAGATCGAGCCACCCTGTAAGACGAGTAACT  
TAGTGAAACACTACTCCATAACAACCTGCCAACCTCGAATTTAATGCTGAGGGTACACCTGTTTCCCGAGATTTTGACGA  
TGCTATTTTTTCCAACGATAACGGGCTGGAAGAGACGCGTTATGTTTTCTGGGAGGCAACCAATTAGAGGTACGCTTTC  
CTGAGCATCCACATCCTCTGTTTGTGGTAGCAGAGAGCGGCTTCGGCACCGGATTAACCTTCTGACGCTATGGCAGGCA  
TTTGATCAGTTTCGCGAAGCGCATCCGCAAGCGCAATTACAACGCTTACATTTTATTAGTTTTGAGAAATTTCCCTCAC  
CCGTGCGGATTTAGCCTTAGCGCATCAACTGGCCGGAAGTGGCTCCGTGGGCAGAACAACTTACGGCGCAGTGGCCAA  
TGCCCTTGCCCGTTGCCATCGTTTATTGCTCGATGAAGGCCGCGTGACGCTGGATTTATGGTTTTGGCGATTAACGAA  
CTGACCAGCCAACTGGACGATTGCTAAATCAAAAAGTAGATGCCTGGTTTTCTGGACGGCTTTGCGCCAGCGAAAACCC  
GGATATGTGGACGCAAAATCTGTTAACGCCATGGCAAGGTTGGCGCGTCCGGGCGGCACGCTGGCGACATTTACGCTG  
CCGTTTTGTCCGCCGCGTTTTGCAGGACGCCGATTACGATGCAAAAACGTAAGGGCTTTGGGCGAAACGGGAAATG  
CTTTGCGGGGTGATGGAACAGACATTACCGCTCCCTGCTCCGCGCGTGGTTAACCGCACGGGCAGCAGCAAACGGGA  
AGCGGCGATTATCGGCGGTGATTGCCAGCGCGTTGTTGTCGCTGGCGCTATTACGGCGCGGCTGGCAGGTAACGCTTT  
ATTGCGCGGATGAGGCCCGCACTGGGTGCTTCCGGCAATCGCCAGGGGGCGCTGTATCCGTTATTAAGCAAACACGAT  
GAGGCGCTAAACCGTTTTTCTCTAATGCGTTTTACTTTTTGCTCGTGGTTTTACGACCAATTACCCGTTAAATTTGATCA  
TGACTGGTGGCGGCTCACGAGTTAGGCTGGGATGAGAAAAGCCAGCATAAAATCGCACAGATGTTGTAATGGATTTAC  
CCGCAAACTGGCTGTAGCCGTTGAGGCAAATGCGGTTGAACAAATTACGGGCGTTGCGACAAATTGCAGCGCATTACT  
TATCCGCAAGGTGGTTGGCTGTGCCAGCAGAAGTACCCGTAATGTGCTGGAAGTGGCGCAACAGCAGGGTTTTGAGAT  
TTATTATCAATATCAGTTACAGAATTTATCCCGTAAGGATGACTGTTGGTTGTTGAATTTTGCAGGAGATCAGCAAGCAA  
CACACAGCGTAGTGGTACTGGCGAACGGGCATCAAATCAGCCGATTACGCCAAACGTCGACTCTCCCGGTGATTCCGTT  
GCCGGGCGAGTACCCATATTCGACAACGCCGGAATTGGCAGAGCTGAAGCAGGTGCTGTGCTATGACGGTTATCTCAC  
GCCACAAAATCCGGCGAATCAACATCATTGTATTGGTGCCAGTTATCATCGCGGCGAGCAAGATACGGCGTACAGTGAGG  
ACGATCAGCAGCAGAATCGCCAGCGGTTGATTGATTGTTTCCCGCAGGCACAGTGGGCAAAAGAGGTTGATGTCAGTGAT  
AAAGAGGCGCGCTGCGGTGTGCGTTGTGCCACCCCGCATCATCTGCAATGGTAGGCAATGTTCCCGATTATGAGGCAAC  
ACTCGTGGAATATGCGTCGTTGGCGGAGCAGAAAGTAGAGCGGTAAGCGCGCGGTTTTTACGATCTCTTTATGTTTG  
CGGCTTTAGGTTCTCGCGGTTTGTGTTCTGCCCCGCTGTGTGCCAGATTCTGGCGGCGCAGATGAGCGACGAACCGATT  
CCGATGGATGCCAGTACGCTGGCGGCTTAAACCCGAATCGGTTATGGGTGCGGAAATTGTTGAAGGGTAAAGCGGTTAA  
GGCGGGGTAATCTGCTCTCGCAGTGTTCGCCGATGCGGCGTGAACGCCCTTATCCGACCTACGTGTGACGTGTAGGCCCTG  
ATAAGACGCGATAAAGCGTCGCATCAGGCATGCTGCTCCAGACGCCCAACTTACTGCTGTGACGCCTGCTGAAACAGGTT  
TTCCACATATCGGTACACAGCGCCTGGTCACGCGGCGACAATCACCAGCACCAATGGCTTTTTCCAGACTCTGGCTAA  
CGGTCGATGCACCGCCTGAGCGGAGTGGTCATCACCCTTTCCAGTTCTGCGATGGCTAATGTCAGGTGGCCACGCAAA  
TACCCTGGCAAACTCATCATCACTGGCATGGTCAACCATACCGTCGATTAATGCCAGAATGCGTGATTCAAACCTC  
CGGATCATCTTCTTCTCATTGTAACAGTGGCGCTGGCTTCAAGTGGCGCTTCCGGCCACGGAACTGTTCCGCCG  
TAAGTTCCGGCGTGTGATAAATTTGTAGTGCTTAAATGAAGCGTGCCGGACGTTCCGGAATGCCATTTGTCAGATAA  
TCCATCACCTGCGCATGACTCGCCGTTGAAACACCACAGATCCGGTTCGAAATCCCTTCCAGATTGTCGCAACTGAC  
GTTAAACGGATATCCCGCCGCACACAGAACAACAGTGCAGCGCTGCGGCTTCACTTCAACATCTTCAAACCTGGCTTT  
GCGTTTGGGCATCGCGTCCGTCGCGGCAATACCAGTAGCCGAAATCAACCAGTCAAGCGCGCTTCCCGGCAATACAC  
CAGTGCGAAATCTCATGAATTGCGCTGGCATAAAAGCCATGAGCAAGACGATTCCGTTATACGGTACTTCCGCATCAGC  
AGGAAGATAGATCGGTTGCTGCTGCTTAAATCAGACGGGTTAAATCATCGGCAAAGCAGTATTAATAAATTTCAA  
TCAACTGCTCGTAGTGGTGTGTAAGTTTCAATAGTTTCAATCCCAACAGTGGAGGATCTCCTGTCCGTGGCTGTGTA  
GTAATTTGGCACTCATCACCGCCGAGACGATAACAATCATCGGGCGGATCAGCTTTTGTCTTTGCTCAACACCAGTGT  
GAACCCATGCGCGCGCAGGAACTGCCCCACCAGCATGACAAAGCCGTCGCCAAATCACTTTGCCGCGGAGAATAAA  
CAGCAGTAAACCGCGATGTTTACGTTGCGTTGAGTAATTTGGCGTGAGCCGTGGCTTTGGCGAGGTTAAATCCGCACA  
GCGTAACGAAGGCCAGCGGTAACGACCCGGCAGCCGGCCAAAGAATCCATCATAAAAACCGACGCAGCCACCGGCT  
ATTAACGCGAAGGTAACCGTACATCCGGCGTGGCGGCTTCTTACCTAGCTTTGGCATCAGCAAGAAATAGAGGCC  
GATACAAATTACCAGAATGGGCAAAATCTGCCGTAAGACATCAGCCTGAACGATTGACACCAGCAGTGCGCCGCTCATTG  
AGCCGACAAAGTTCATGGCGATTTGAGTTTCTGATCGTTAACTAACCCTTTGCGGCAATAAAGTAGATAGTAGCG  
GAAATAGAGCCGCGCAGGCTTGCAGTTTATTGGTTGCCAGCGCATTAGCGGGAGACATCCCCGCTGCCATCAATGCCGG  
AATGGTGAGTAACCCACCACCAGGCAATCGAGTCGATAAATCCCGCAGCATGGCGACAAAAAAGAGAACTCCAGCA  
ACAGCGGGAAACATAAACAGGCTATTAACGTTTTCCATTAGATCAGTGCTCATCCAGTAGCGCTGGCAGGAAGGCG  
GCAACGGAGGCGGTGCTTCTTCTCAGGCTTTGTTGTTCCCGTTTTGGAGGTTCAAACAGCTTTGCAGTTCTGCCCCG  
CAACCATCGCCTGATGGCGTAAAGGTTGATCTTCACTCCAGACTATCGGCAGGGCAACGTAATCGTACATGCATATG  
CGCGGATGCTGGAACAGGGTGCACCTTTGCGCAACAGTCCGATCGGTGCCCGCATCAAGGCAAAGTTGTTGTTTAA  
TCGCCGATTAACAAAATGCGCGTGACGCTTTTGTCTGGGCGGCGAGTTTATCAAGCTGAAAATTTCTGGCTTCCAC  
AGCGTGAGACAACGTGTTTACCGTCCGGGAAACTAAGTCCAGTGCTTGGCGGCGCAAGAGCTGCGCGGAGGTCCAGCG

AGTTTTCGGCAGTTGCAGAAAGATATCGACATCCAGTCCGGTCTGGTGGCTGGCATGACCGCCGTTGAAACGCCACCAG  
CGGGCATCCCCATATCGCCAATCAGCACCGTACCCATGCCAGATTGCTCACCTGGCTACTCAGACGCTGGATAAACATC  
ACCAGATCCGGGTGACCGAAATAGCGACGCTGATCGGTACGCATGACCTGATAATGTTCCGACTGTATCGGCAGCGTGT  
AGCGCCGACAATACAGCCATTAGAAAACTGCCTATCGATTGTGCGCTACCCGCGCACAGGTTGGGTTATTTTTGCCACG  
GCGTCGCTGCCAGGCTGGCGCTACTGGCAAGCAGAGCCAGCAGCGCAATCGCGTTTTATTCATTTTTTACCAGCGTGG  
ATATCAGTCTTACATCGGCATTTTGGCGCCGTTGCCGTAACAGGTGATCCATTAACAGATCGCCAGCATCGCTTCTGC  
GATCGGCACTGCGCGGATCCCGACACAGGGATCGTGACGGCCTTTGGTGATCATCTCAACTTCTTCGCCAAAGCGGTTAA  
TGGTACGACCCGGCACGGTAATGCTGGAGGTGCGTTTACGCGCCATATGGGCAATGATTTGCTGCCGCTGCTGATACCG  
CCGAGAATGCCGCCCGCATGGTTGCTCTGGAAACCGTCTTTGGTGATTTATCGCGGTTCTGGCTGCCGCGCAGCGCCAC  
CACGTCAAAGCCGTCGCCAATTTCCACGCCTTTACCGCGTTGATGCTCATCAGCGCATGGGCGATGTGACGATCCAGGC  
GGTCAAAGACCCGGCTCGCCAAGTCCGGCAGGAACGCCACTGGCAACAACGGTGACTTTAGCGCCGATGGAGTCCGCCTCT  
TTTTTCAGCGCACGCATCAACTCGTCTAACCGCTCGATTTTGTGGGGTCCGGGCAAAAAACGGATTTTGTCTGACCTG  
CGACCAGTCTTTGATATCCAGCGGAATGTCGCCATCTGGGTGAGCAGCCACGGATTTCAATACCAATTTCTCGCGCA  
GATATTTTTTGGCAATAGCTCCTGCCCCACGCGCATGGCGGTTTCCGCGGCGAAGAACGTCCACCGCCGCGATAATCG  
CGCAGACGTAATTTTTGCTAGGTGTAATCGGCATGGCTGGACGGAAACGTCCTTAATCGCACTGTAATCCTGAGA  
GCGCTGGTCAGTGTTCGATCAACAAGCCAATGCTGGTCCGGTAGTAACGCCCTTCAAAAAACCCGGAGAGAATTTTGA  
CCTGATCCGGCTCGCGGCGCTGGGTGGTATAGCGCATGTCCAGGGCGACGACGGTCGAGGTCATGTTGACAGTCCGCT  
TCCGTCAGCGGAATGCTGGCGGAACACCATCGACGATGCAGCCGAGCGCCAGCCGTCGATTCGCCGAAGGTGGTTAC  
GCGAAAGAGTTGTCCAATTTGTTTCCAGCCATCACGGCTCCGTTATTGTTGTGTTTGCCTGTTTACTTAATCTTTATAA  
ATCGCGAAATGTTCTCGTCCGGAATAAGCTGCTCTTTGGTGAGCATAAACACACCATCGCCGCCGTTATCAAATCCAG  
CCAGGTGAACGGAACATCCGGATATTGTTCCATAAGATGTACCATGCTGTTGCCGACTTCACAAATCAACACGCCATCAT  
CAGCAAGGTAATCTGCCGCTTACCGAGAATGCGACGCGTCAGTTTACGGCCGTCAGTGCCAGATGCCAGGCCAGTTCC  
GGCTCGTGGCGGTTATCGTTTGGCAGGTCCGACATATCTCCGCATCGACATACGGCGGGTATGACAAATCAGGTCGTA  
CTGCACTTTCCGCAAGTCCGGAACAGATCGGAACGAATCGGAATGACGTTGTGGATCAGACCGTGTCTTCGATGTTCT  
GTTCAGCAACCCGACGCGCTGGAGAGATATCCACCAGTCTGACTTTCGATCCGGGAAGGCATAAGCACAGGCAATG  
GCGATGCAGCCGCTACCAGTACACATATCTAAAATATGCTGCGGTTGCTTGTGATAAGTCCGGCAAATTTATTGTTGAT  
CAGTTCACCAATCGCGAGCGCGGCACCAGCACGCGTTCATCGACGTAATAATCATGGCCGAGAACCACGCTTTGTTGG  
TCAGGTAAGCCACCGGAATCGGTTTATTGACGCGCGGATCACGCGTTCAACAATACGGTGTTTTTCGTGGAGGTCAGA  
CGCGCGGTGCGCATATCTCCGGAATATCCAGCGCAGGTAGAGCGAAGGCAACACCAGCTGTACGGCTTCATCCACCG  
GTTATCGGTACCGTGACCGTACCAGATATTTGCCGCGCTGAAGCGGCTCACCGACCAGCGCAACATGTCTGAATGGTTT  
GCAGCTCATTTACTGCTTCAACGAAAATTTATCCACGTATTCCTCCAGGGCATGATCGCAATAATTTCCGCGGCTA  
GTTTGCCATGAAGATGACGATAAATCAGCATTACGCGCGGTGAGTGAGGAAAAATACGTTTAAAACGATCGATTGCGCT  
ACGAGTCCGGTAAACTGTAGGAAAATTAGAAATAGAGACAGATAAATGAAAAAGAAAACAACACTTAGCGAGGAGGACCA  
GGCTCTGTTTCCGCAAGTGTGGCGGGGACTCGCAAGATTAAGCAGGACACGATTGTCCACCAGCCGACGCTAAAAAA  
TCAGCGAAGTCCGGTGAACGCTTGTCCAGGAGCAGGCTGATGCCAGCCATTATTTCTCCGATGAGTTTACCGGTTA  
TTAAATACCGAAGGTCCGGTGAATATGTTCCGCCGATGTCAGCATTGTTGAGGCGAAGAACTGCCCGTGGCGATTA  
TTCGCCGAGTTGTTTTGGATTTACACGGTCTGACGACGCTGCAGGCCAAGCAGGAACCTGGGGCGTTGATTGCCGCT  
GCCGCGTGAACATGTGTTTTGCGCTGCGTGATGCATGGGACGGGAAGCATATTTTGAAGCAACAACACCGCTGTGG  
CTGGCACAACATCCGATGTGATGCCCTTTCATCAGGCACAAAAGAGTATGGCGGTGATGCGGCGTTGTTGGTGTGAT  
TGAAGTCAAGAGTGGTCCCGGAGTTGCCCTGAGGAGTTGAGCGGTTGCCCGAGGTACGGGTAATGGCAGGGGCG  
AATGCCCTGCTGGTGTATCTAAGGGTACAACCTCATTGATGTACTGGAACCGCAAGTAGAATCGATTGGTGGTCA  
TACTGCTGGTATCAACACGCACGACCATATCGTGAATGTTTGTCCGTTATAGGGTGTGATTTGGCGTGACCGAGACT  
TCCGCTTGTACATCCCGACGCGGTAAGTTATCATCTGTGCAACCCAGCGGCAGTAACCACCTGTTTCATTATCTG  
CGTACTGTGCGACAACCTCCCATCTTTCATCAAATACGTTGAAAGCGTTTTCTCAACCACCCGCCGCTGACTGCAGGG  
TGAGCAGTTTTGACTTACTGACATAATTCTATTCCATGAAACGTCATAAGGTTGAACAGAAACGGATGGACAAATCGTG  
TCGTGACTATCAGGCCCTGATACGTCACGCCCCCTGGAGAGGCTTCAGAGTCAATCATAATAACCAACCATGGACAAGA  
AAAGTAAGATTCAATCTCTGCAGAGACAATAACCTCAAATGTATAATAACCCGAGTTCCACCAGACGGTAATCCAGGAC  
AATTGCTTTGTTGATATTTGATGGTAGCCAATCAGCTTAACCGAAGGGGAGGAGGAGGACCACTCCAGCTCACATTT  
TGCAATATTTCCAGTCATGAGCCATTGACTACTTTTATATTACCAACGTACTGCGGATGGCATCATTATTTTTAA  
ATTAAGTGCATATTTACGGAATCACCGTTGTAACCGTAGTAAACGTCAACGCTATGCCCGCAGCCATAGCTTCTG  
TAGTAGCAATAAGCATGACCAGAGCGAACAACCATCGTAGTATTTTCAATTTAAATATACTCAAATGTCGAGTTAAAGA  
GGCGGTAATTCACCGATCGTCACATCACGGCCGTTTTGCGCTGTAGCCAGGCTCTGAAATGATATCGTTATTGCCAT  
TGTTTAGCGCAAAGGTGCCCCATTTGTATTGTTGATGGCAACCTGCATTCCGTCGGTTTTTTCCATGCCAATCCCCT  
CCCTGAGCGGTTGATGACGTATCCAGTCCAGAAAACCGGGTTTGTGCTGTCTTACCCCGTGAGCGTGACTTTTAC  
GTTGATCCCGCCGCGCTTTGCAATCTTTCAGCTTAAAGACTACGGGTACACGAGCGGACTGGCCTGCAACGTTCAAAT  
CCTGACGACTGACCGTGGGAAAGCGCACCTCTGCCAGATATTGGCCATCCACCACCAGCGCACAGGATTTACTTAATAAA

TTACCGGAGAAATGCAGATTATTATCTGCCGGAATAACGTGCTACTCATTGCCAATATCAGCCCCGCTAACAGGACGTA  
ACCACCGGACTGAATCATTGATTTATTATTGATAATCCACCCGTAATGTTGCGTAAGCCGAAAAATTCGTATCGCTTAA  
CACAGCATCACTCGCTTTTACCGGTACGGCTCCAGCTTCGGCTTTTGCGTAAAATCAGTGGCGTTGATAGCAAGCGGAG  
TATTGAGTTTAAAACGCTGACCATCGTGTGAAGCTCGATACAAAACCGGGTACATCAGTTTCAATTGCTGCATCATT  
AAACTGGTTTTGTGTACCAGTCCAGGTGAGGGTCATCTCCAATCTGGATGACGGGTCGTGAGTCAACAAGTGAGTTCATA  
TGGCACCTCTTACGACCATAGTTGCCGTTGATGTCGTCGATAATGAGATCGCGAAATTCGACTTCAATGGTTTTACCAC  
CGCTGATGCTACAGGTTGGCGGTGACAATAATGTCCCGTGAAGGTGATGTCTTCATCAGCAGCATGAGCTATGGCGCTA  
CTGACACAAAGCAGGGTTAAGAAAGTCTTCTCATTGATAGTCCACCACCATGGTCAAACCTGGCGTTAAACTCGCCCGCA  
GCAAGTTGGCCCCGCTTGCCTTACAGGTACAGCCTTCAACTGTGGCTGGTTATTGATATTAATGGCGTCCAGCTATT  
TTCACCGACGGCAAACAATGAGTTATCGGCGCTATTTCTATCCGAATGCCAGCCCGGTGATATTGGTACTGAGTACCG  
TTTCGCCGTTAATCGTTGAGGTATTGCCCTTAAGTTGCATCCGCAAGTCGTTAGCAAGACTGTTTGTGCAGTTCAACGTG  
TATTTGCGATCTTGCCGATAATTGGTGCCATCAACGTTATCAGCAATCATATTGCCGAACCTACCTGGCTGCCCTTGAT  
TGAACAGGGTGGCGGAGCATCGACCAACGCGCAGAATTAATCCACGGGTTACTACCAGCCATAGCAGATAAACTAC  
AGACTGCATACCAGCAGCCCTGCGCCACTACAACTTTTACTCATAACTCCCCCGTCATCAGCCTTTGCGGCTCT  
GCTCTTCACCTGCCAGCTGTTGCCATTGCACCTGGAAGAACAGCGGCATCCGTGCGCAAAGTCGTTGACGTAAGTC  
AGCACCGGTACGCTATCCATTTTACATTACGCGGTACCGTGGTTTTCGGCTCAATGACCAGAGGCGAGAACCCTGCAGC  
TGGATTACCGTTTTTCTGCGCACTGGCGTTGCTGATAATCACGTAGTACGGCGTTGGGTTATTGACGGTAAATGCCTGAC  
CGCTGCGGGTGAAGCTCACCTTGTGCTGCCACGGACTTTTTCACTGACCTTTTCCAGCGCCTTTGGTGCAGAACAAAC  
TTGATACGCGTTTGCAGCGGATTTGCAGGGTATTGGGTTGTTGATTTTGGCGGGATCTCGCGCACGTTAAAGTAGAA  
CATGCTTTACGATCGGCTGGCAATTTGTTGATATCCGGCATTCCCTGACTTTTACCTGCCCGTTTATCATTGAATCGA  
TGCGTTGCACTGGCGGCAGCACAGTTAACGGCGAGGTGATCTTGTACCCTTTTATCTTCAATCCAGCTTTGAGCCAGA  
TAAGGGAGTTTCGGATCGTTATTACGACGCTCACGCTGATTGATTTGTGCTTTTATTAATATCAAACGGGTACGATC  
TGGCGTTACAGACGCCAGGGCAGACAACTGGTAGCGCTAAGCAGTAACGCCAGGTCATAGCACCAATTTGGCAGAGC  
AAAGTAAATCAGACATGGATCATTCTTAATCACGTTATTGGTTAGCTGAAACAGAAACAGGGGGATCGTGGGTGTCAC  
CTGTTGCGTCTGCTCCTGAATGACAGGCTTTATGTCATCAGGAACAACCGGCGCAGCTTGCCTTTATGCTGGCATGGCA  
GTAACAAGCCGTTAAACAGATCGGCAGGACGGGTCGGCAGGTTGATATCGCAATGCGCAACACCCTCCAGAACACA  
CTCATATGTTCCGAGGTTTACCCCAGCCAGATAGACTACCCTCATCATGACAAGGCCACTGTCTGCTCGTTATC  
ATTTTTACTTCTGCGCAAACGGTGGATGGCTGCCATCTTGTAAACGCAGCACCGCCATCGCTTTTTGACCACTGATGA  
CGCAAATTTGCGGTAGCAATGGCTCCTTCAGTTAGCGTGGCTTGCACCACCGACTGGGTTGCTTCCGCGTTTTCCGGC  
AATTTGTTGAGGTCGATATACGCTGATTGCGATAAATGTTAACGTGAGAAACGACGGCTTTACCAAACATATTGGT  
ATAAACAGCAGCCCCGTTACCTTCCACCGGAACATCGGCAACGCCATCGGCATCAATCAGCAGGCGTGTCCCGCCATAT  
TCTGGGTACGGTGAAGTGCAGCCGCGTGGGTAGTAAGCGTTGCGCCGCCCTGTAACGACAAGCCCGCAGAGGTGATTGC  
CCTTCATGGTAGTTGCACTGAGGTCAACCTGCGCCAGCGAACCATCATGGCTGATGAGCCATCAACGCTGGTGTGTTT  
GTCACTGGTCCGATGTTCAACTGATAGTGAAGTGCAGTGCATCGACACGGCTAAAATAACCGACTGGCTGCTGTCCGTCC  
CACTGCCATAGTTGCCGTTATAGCTAACGGTACTGTTGTCGCCCCACGGCATACTGAGCGAAATCTACATGCCCTTATCC  
GCCCCGTTGTCATACTCGTAGCGGTAGCCAGTCAAGGAAACGCTCATATTACGAATGCTGCCATATTGAAATAGTGGGA  
GAGCATGATGTTGAGTTTGTCTGCTCCTCACGATCCAGTAGGTATGGCGGGTATAGTTGAGATAAACCAGAAACCCCG  
CATCGCGGAAGTTCTGGTTAAGTGGCGGTGTACATCTTTTGTGCTTGGCCGTTACGGACATTTGCTGTCAGTGGCA  
TCCAGATACTCGCTATGGTCATAAAGTCTCTTCCGAGAAGCGATATCCAGCGAAAGTGACGCGGCTGTTGAGCTGGTC  
AAAGTCTTTGGAATAACTCACACGGAAGGAGTTACCGTCCAGCGAACCTTTGCCATAAAGCGGTGCTTTTATCCAGTTTGG  
TATGCGAATGAGTAACATCAAACGCGACCGCCGAAAGGTAGACAAATCGCGACCGACGCCAGCCGCGCAGACTGATAG  
TTTTTCATACCCAGCGCACCCCATATAACGACCAGCGTTAGCGATGCCCCAGGAGGCTTACGACCCAGAGAAAAATCC  
CCCCGACATGGTGGCCCCACTCTTGGGACGTCCTCATGATCTTATAGCGAACCTGGCTGGGCGAGTGAGGTATG  
GCATCGAGGCGGTGCTGATGTCATATCTTGCACCTGGCCGTTCTGTTCTTCAATGCGAATATGCAACGTACCGGAGACG  
GAATCACCAGATCCTGAATACGAAACGGTCCAGCCGGAACCTGCGTTTCGTAATCACACGCCCCATCTGGCTGACGGT  
CACTTTTGTGTTGTTGTTGCCACGCCGAAATGTCTGGCGGTAGCCGCGCAGATTGGGAGGCAACATTTGATCGTCAG  
TGCTGACACTGCCACCAACATAATTAACCGTCAAAAATATCGGAATTGAGGTAATCTTCCGCCAGCGCCAGTTTGGCT  
TTAATGACGGTAACGCCCGCAGGCATAATAGCGACTCCACTCCATTTTTTTTTGTGTGCATCGCCGCCAAATTCATC  
GTCATCATTAATGCGCGTATGTTGATAGTTGGTCTGCCAGTCAGCGCGCATACGCCATGGCCCCAGGTTAACCCCGA  
CCGTCGCCGTTGCCGCTGATCTGTTACTGTCATCGCCGCCATTTTCTTCTGTCGTTTGGCGAGTGATGCTGTAGTCC  
GCAATGATCCCGGAGATGCCATCATCCAACGAGAAGTGGATCCAGTCGGGCCAGGTATATTGAGGTAAGCCTGCGG  
TAGTGAAATGACTAATGCGGACTGGCTTAAATCAGCCTAATTTCCAGCCTTCCAGTTGACCGGGCTTACAGGCATTTAC  
CATCGTGGCTCCATTGAGATTTTTCCGACGCTCTTCTTTAAACCAAACCTGCGCCACCAGTTCGGGTGTCAGACAAGCA  
TAGCTTTTGTAAACGTCATCTTACCAGCATACCAGTAAATATCGTACTCTTCCGCAATGGCTGTTTATTAGTTGAAC  
CTGTAATTTGATTTTCCGGGCTCAACATACCCCTGGCTGAAAAACGCTTTCAGATCAATTTTTGTGTGCGCTTTAATT  
CCAGAAAACGGGAATCAAACCTGAATGTCGCTTTCAGCCAGACTGCTATAACTCCCTGACATTGCCAGCGCAATGCAC

CACGGAAGAATCCGTAATCGAAAAAGAGAATGGTCAGGCATACACGTTTTTATCCGTTTTTATTCTTGTTCCGGTCAAAAT  
CCATTTAAATACCCCATAGCAGTGTGCTATGGGGGTATGCCTTACAGGTAAGTAATCTGGAAGGTGGTATTTGCTTCGA  
AATTACCCAGATCTGGCGCATCAGCTGCGCCGACCAGCCAGGCTTTAAAGTTCAGAGTCTGCTTCGCTTTGCCTTTATTA  
GTGGCAGTATCTTTCACGATTTTCTGGTCAATACCCATGCCGTTTTGTAAGAGGTACCCAGAGAGTCCCGATCGCCAG  
GCTAACATTGTTAAATGCCGCACCGGTATCGGTATTGAAAATGGTGAATAATTGCCGCTATTTGCAGAAGAAACGGTAC  
CAGTAAAGGTAGTGGTCATTGTTTTCTGAGTATCAAATACGCAATCTTGAGGCGAATCTGGAAATTTTTCGGCGTGGTG  
GTGCCGTTATTTTTCAGTTTTTCGGCACCCGATATCACCCATATCAACTTCCAGTTTGTGATCGTCCGGAACGATAGAACA  
CACTGAGTCTTCAATGGTGGCGTAAAAACGTGCAGTACCGTTGTACCCGCAGCGATTGTTGCCGTAGAGGTGAACGGC  
CCATCACCATTTGCCGAGCAATAGCTGTTTTAACAACTTACTCATTATTTGTCCTTAAACTATAAATAATTAATAATA  
AACATTGCAATACATTGATTGAGTCAATAGCCAATGTTTATACCCAGCCATTGAATACGGCATGCGATCCAAAAAACAG  
GTCGTAAAAAATGATTTCGTTGGTGTGGGGTCAATAGTGATGTTTTCACTCCCCTGATTCAATTTAATTTACTAATGA  
GTAAATGTAGATTTAATTAATATATTGATAGGGGAAAGATTATCTTAAGGATCTTCTAAAAAACACGAAATATATATT  
AGAAAAACAGGAAGCATATCAACAATGAATGCCAATAGCTTAAAAAACAAACAATGAACATATAATGCGATTGGCATT  
ACCCGCTTTTTCGATATAATATAAACTATAGCCAGAATTAATCAAGTTTCAATTACGTCCTGCCTGATTATTCA  
ACTCTATTTTCTCATTATCTGTATTAATAAATGATAATGAGTGTCAAACAGACATTATTCATTTCAACATGTAACCTTG  
GGCAAAATCAAGATACGGCAGAGAATACTTTCCGAATGAAAGTTAAAGGTGTTTTATTTATAGATGGGGAGAGTCTTC  
GATAGTAGTGAGGTTGACAGATATCCGCTGCCTGATGAGCAATTATGCCAATGAATCTACCTCATTGGGCATAATTTGG  
AACTCATCAGATAGCTTTTTGCCATCTTCAAGTACAGGGCTCATCTGCCAGTTGAATGTGCCGTTTTCCGCTTTCATCAA  
GCGTTACGCTGGCAATGGCCGAGGTGGTAAACATAGCGCGGTTTTCGCCCGACATAACTCGGCAACCAGATACCCGACT  
AACGGTAAGTGAGAGATCACCGTACCGAAGCAACACCTTTCATTGGTCAACGCTGCAAATAGGCACTGACCAGACCAAC  
ATCGCCGAGGGCGTTAACTCCGGCAGAACTTCTGCACTGGAAGGAGGTTCAAGCAATCCCTACTTCTTCCAGTGT  
GCTCGGCTCGCAGGAACGGGCTCACCAGAACGCGTTGATTCCACTTTTTGACCTTTCAGCCAGTTCGCCATCAGGCGA  
GATTCGTCACAACATTAGTGGTCAAGGACGAACGGAATCACTGGCGGCATCGAGGGCTGCGTCGCCGTGACGCATGAT  
AAAACTTGCATATTGCACCGCTTTTGTAAACCAGATTGCCCCGTTTTCTTTCATCTGAAACCAGAGAAAGAAAACGGTG  
GCCGGCATTGTGCTTATCCATTACCGAATGAAACGCTGTTTTTACCTCAATGGCGTAAGTATAGTCAATATGCGTTT  
ACATTTTGACCAACACTCCGCCATTACCGAATGAAACGCTGTTTTTACCTCAATGGCGTAAGTATAGTCAATATGCGTTT  
TCCAAAACTTTCCACGCGCGCCCATCTCGACCAACGCTCGCAAGGGGTAACCGGAAACATACTGCGTGGAAGT  
CGTTGCATTATTGCAACCACTTCGCCCGCGGAGAGAATCGATATAGCGGAACGGTCCACCGAGAAATGGCGGAAACC  
AATGCCAAATACCGCGCCAATATCCCCGTACGCACGCTACGGTAACCTGCTCATCAACACAACGACTGCTTCATTCA  
GCATCAACATCACACACCGTTCAGCAACCTCGCGGTGCGGAGATTGCCCCCTGCCCTTGTGTGCCAATCAGCGGGTAAATG  
GCGGGATCGACCTGTTTTTGTCTTACGCCCTTCTGACCATAAAGATAGAAACCCCGGCCATTTTTCTGCTTTGCG  
ATCGTCTTCAAAATTGAAGAAACAACATTTGACGGCGCGTAAAACGTTTCCATAAGCGGCTTCCAGTACAGGAATAA  
TTTTAGTCCCGGTGTCGATTCTACCTCATCAAAAAGTTGGATTGGGCTACCGGAAAACCAATTTCACTAGCGCGGCA  
TCAATGTGCTTACCCGTTACCTTGGTCAACATGCGGATAGCTTCATTAATGTAAGGCGCTAAGATGCGATTGACGTA  
AAAACCGGCTTTGTCACGCACGACAATTGGCGTTTTACCCTGTTTTTCCGAGTTTTACTGTGGTAGCGATGGTTTGGC  
CCGATGTCCCCGATGAGGAATAATCTCCACCAGCGGCATTTTTTCCACCGACTGAAGAAATGACGGCCGATAACTTGC  
TCAGGTGCGGTGGCGTGAGCGGCGATACCAATCGGTAAAGATGACGTTTGAAGCAAAGATGGTATGAGCGGCGCA  
ATTTTGTCAACTTCCGCCACCATCTGTTGTTTCAATTCGAGATTTTCAAACACCGCTTCAATAATCAGATCGCGATGGG  
CAAAGCCGATAGTCCGTGTTCCGGAGATTAATGCCAGTGTGTTGTCACGTTTCGCTGGCTTTGAGATGACGACGGCA  
ACTTTCCCTCAGCTGATCCCACTGACTTCAGCGCATGATTTATGCCCTGCGGGTTGATATCTTTAATTTCTGACCGG  
AATCCCCGCTTTACAAGCAGTGACATAAGCAATACCGCCGCCATCAAGCCACCACCTAAAAATCCCCACGCTGTTAATG  
GCGCAGGCGGCGCATCACTGCCGGATCTTTCTACGTTCCGACTGGCAAAAAAGATACTACGCAGCGCCTGCGATTGT  
GGCGTCATCGCAGTTCCGCAAAACGCCGAGCTTGGCGTCATAACCGCTGCTGGTGCCCTGCGCTAATCCCGTTTCAAC  
AACCTCCAGGATGCGTTCTGTCGCCGATAAATTGCCTTGAGTTTTGTGTTCTGTTTTCTTGCCGACCATTTGAACAGCA  
GCGCAGCAGCTAACGGCCCCGCCAGAATACGCTCGGTACAGGTAGAGGGCGGGAGATGGGCGCTCCTTCTTGGCAGC  
TCAACAGCGGCTTCCAGCAGAATGGAGTGCAGCAACGTCATCCACCAGCCCCAGCTTTAATGCCTGTTTCCGCCGAAG  
TTGTTTTCCGGTGAGGATCATCTAATGCTGTGCTGACGCTATCAGACGCGGTAACGCTGGGTGCCGCTGAACCGG  
GTAACAATCCAAGTTGTACTTCAGGCAAACCGAGCACCGTTTTAGGATCGTCAGTACAACCGCAGCGTGGCAGCCAGC  
GCCAACTCCAGCCACCACCAGGCAAGCGCATGAATAGCCGCGATAACCTGAATGGGCAAAGCATGAATCTCCGCCAT  
CAACTGTTGGCCCTGCCGCGCAGAGCTTCCGCTTCTTGCGCCGTTTTGCAGTTGCCGATCATGTTGATGCTGCGCCAG  
CAATGAAGTTGTCGGTTTTAGCGGAGACAAACACCACGCTCGCAACTCTTTGTTTTACGGAGTTGCTTAATAATGGCG  
CGACCTGCGAGGCAAACCTCCGCTTTCAGGGTATTCATTTTCCACCGGTACGTCGATGGTATAACGGCAATGTTGTC  
CAGACGAACATTAAGGGTAAACGCTGATGTCATTTCCATTATTCGCCCTCCAGAACCATTGCCGCGCCAAGCCACCGG  
AGCACAGGCGGTAACATAACCAATCCACCGCCGCGACGGCGAAGTTCATGCAATGTCTGGTAATCATCCGCGCGCCGG  
TCGCCGGAAGGGATGCCGTAAGCAATCGAACCGCAAGCACGTTAAATTTGCTATCGTCCACTTCCGAGTGGCATGT  
GCACGCCCCAGTGCTTACGAGCAAACGTTCACTACCCAGCAACTGAATATTCGCCAGCGTCTGAGCTGCAAAGGCTT

GTGCATATCGATCAATGTCAGATCGCTCATCGTCAAACGGCACGCTCCAGCGCCAGCGGTGTTGACCAGGCTGGACCGA  
GCAACATGTCCTGCCAGACATCAATCGCAGTAAATGCGTAGCTGCGCAGATACCCAGCGGCACCAGCCCTAATTCTTTC  
GCCCCGGATTAGTTCATCAGGATCACCGCTGCCCGCCATCGGTAGCGGGCTACTGTTTGCCGCCGTTACCAGTTCCGTG  
TTTGCATCAAACGCCGGGCGAGCTTTGCGTAATCGCAAGCGAGGAATTACCGCAATATTGTTGCTTCCGACAAGCG  
GTTGTTTATAAGGAGGGATAAAGGCAGTCATCACCTCTTCTTTGAGTTTTCCGTCTGACCATGCTGAGCGGCACGCTGA  
TGCGAACGGTGCCTAATGCATCTTGCTGTTCTCGGGTGTAGCCGTAGGTTTTCGCCATTTGCTCTGCGGTGTGCCCCAT  
CCGCAAGCCGGTAGAATATTCTGCTACCCGAGGTGGTACGGGCATTAAGTCCGCGCAAACGCAGGCGAGAGAAGAGTTTCA  
GTCGCTGGCTCATGGTACGAGCTTTGTTGACATCAACCAGCACGCGCGCCAGTTTTTTACTGACGCCAATTGGCAATACC  
GAAGAGGAATCTGCCCCACCGCAATCCCCGCTCGAATAGTTCGCCCATCAGGCTTTCTGCGACGTTTGCAACTGCCTG  
GAACTGGTAGCGCAAGCGCGGCTGACGCTGTAAGCATCGGTATGTACATTCATTCCCCTACCGAGAACAATTTACGCG  
CAATGTTGGGGCTTCAGGCATTTGTACGACCTGACCAAAGACCAGTTGTTCAATCACTTCGGCGGGGATCTCGCTGCGT  
GCCAGCAGTTCCCTACCACCATCTTCCCTAAATCAACCGCGGAATGCCATGAAAAGCCGTCGCCTGACGGGCAAAAGG  
CGTACGTAACCGCTAACATGGCGATACGATCGCCCTGGCGGTAACCAGCGGTAAAACCTGACCCATAAACTCCCT  
GTAAAAAATAAATAAAGTGGTCTGACCTGATCATAGTCTTAACCATTTTTTACATTTAGCCAAGTGGAGAAAAGGGAA  
AGTGGGAGCTATGACACAGAGAAAAGAAAAGAAAAGAAAAGAAAAGAAAAGAAAAGAAAAGAAAAGAAAAGAAAAG  
CGAGAGGAATTAACGCAGACCAGTGGAAAATCAGCATTTTTCAGTTTCGAGGAAAAGTAAAATCGATATCCAGGCGCA  
CACCGTCAGACTCTTCAGTAAAAGTCCGGGTGATTTTGAAGGTTTTCAGATTCCACGCTACGGGCTTTTTTTCAGTCAGCGCC  
GCCAGCTTTGCTCTGCTTCTGCGCGTTTTGCAAACACGCGGCTGTAAGACGCGGTGCAGTCGGAGTTGCCATAATGGT  
GCCAACATCCATACAGCAGCAAACCGGGTTTTATCAGCACTACATTTACTCATCGTTGATTTCTCTGTATGTGCACC  
AAGGTGCCAGATAAACGTTGTGGATATTTTACGCTTCCGAAAAGTGTGCTCCAGTTGTTAATTCTGCAAAATCGGATAA  
GTGACCGAAATCACACTTAAAAATGATCTAAAACAAAATTCACCCGAATCCATGAGTGCGCCACCTCAAATTTTGGCAG  
CTGGATCGCGTTTCTTAGATCATATTTGAAAAAGATAGAAACATACTTGCAACATTCCAGCTGGTCCGACCTATACTCT  
CGCCACTGGTCTGATTTCTAAGATGTACCTCAGACCCTACACTTCGCGCTCCTGTTACAGCACGTAACATAGTTTGATA  
AAAAATAATCATTGAGGTTATGGTCATGAGCCAGAAAACCTGTTTACAAAGTCTGCTCTCGCAGTCGCAGTGGCACTTA  
TCTCCACCCAGGCTGGTCCGACGGCTTTTCAGTTAAACGAATTTTCTTCTGCTGGCCTGGGCCGGGCTTATTAGGGGAA  
GGCGCAATTGCCGATGATGCAGGTAACGTAGCCGTAACCCCGCATTGATTACTATGTTTGACCGCCGACATTTTCTGC  
GGGTGCGGTTTATATTGACCGGATGTAATATCAGCGGAACGTCTCCATCTGGTCGTAGCCTGAAAGCCGATAACATCG  
CGCTACGGCATGGGTTCCGAACATGCACTTTGTTGACCGATTAAACGACCAATTTGGTTGGGGCGCTTCTATTACCTCT  
AACTATGGTCTGGCTACAGAGTTTAAACGATACTTATGACAGCGGCTCTGTCCGGGGTACAACCGACCTTGAAACCATGAA  
CTGAACCTAAGCGGTGCGTATCGCTTAAATAATGCATGGAGCTTTGGTCTTGGTTTCAACGCCGTCTACGCTCGCGGCA  
AAATTGAACGTTTTCGAGGCGATCTGGGGCAGTTGGTTGCTGGCCAAATTAATGCAATCTCCTGCTGGCCAAACTCAGCAA  
GGGCAAGCATTGGCAGCTACCGCAACGGTATTGACAGTAATACCAAAATCGCTCATCTGAACGGTAACCAAGTGGGGCTT  
TGCTGGAACGCCGGAATCTGTATGAACTGGATAAAAATAACCGCTATGCACTGACCTACCGTTCTGAAGTAAAATTG  
ACTTCAAAGGTAACACAGCAGCGATCTTAATCGTGCCTTAAATAACTACGGTTTGCAATTCCTACCGCGACAGGTGGC  
GCAACGCAATCGGTTATCTGACGCTGAACCTGCCTGAAATGTGGGAAGTGTGAGGTTATAACCGTGTGATCCACAGTG  
GGCGATTCACTATAGCCTGGCTTACACCAGCTGGAGTCAAGTCCAGCAGCTGAAAGCGACCTCAACCAAGTGGCGACACGC  
TGTTCCAGAAACATGAAGGCTTAAAGATGCTTACCAGCATCGCTTGGGTACCACTTATTACTACGATGATAACTGGACC  
TTCCGTACCGGTATCGCTTTGATGACAGCCAGTTCCTGCACAGAATCGTTTATCTCCATTCCGGACCAGGACCGTTT  
CTGGTGAGTGCAGGTACGACTTACGCATTTAATAAAGATGCTTTCAGTGCAGGTTGGTGTCTTATATGACCGGTGAGA  
GCGTGAATAAAGCAAGGCCATAACAGTTCGAGTCTGAAGTAAAGCCTGGCTGTTCCGTTACTAATTTAACTACGCG  
TTCTGATAACCGGTTCCGCTGGATAAAGTCACTGCATAGCAGGTGACTTTAACTCCCCACTTCCCGAAAGTGTGTC  
CTCATTGCTTACCTCCTGAGTTTTGCAAACAGCCTGTTGGCAGCTTGCCCTTCAAATCAATAAGCGGTATCCACAGACA  
AACCTGAAGGGAAAGGCATATTTTTCAGGCGTTCTGCTCGTCTTCTCAAAGAGTTTACTTTTCTGCATTTCCAGGATACT  
CCCCCCCCCTGGCTATTGTGCGCTCATACACTCAAATTAAGATAGGTTCTAAATAAATGAGCGTTTTTGTAGTCTAT  
TTCATTAGGTAATATATATTTGTAACAAATCAATCAAATGGAATAAATCATGCTACCATCTATTTCAATCAACAATAC  
CAGCGCAGCTTACCCAGAATCCATCAATGAAAATAACAATGATGAAGTAAATGGATTAGTACAAGAGTTCAAAAACCTTT  
TTAATGGTAAGGAAGGAATAAGCACCTGTATTAACATCTACTTGAGCTTATAAAAAACGCCATACGAGTAAACGACGAT  
CCTTATAGATTTAATATTAATAATTTCTCAGTTACTTATATTGATATTGACTCCAATGATACAGACCATATTACTATTGG  
TATCGACAACCAAGAACCAATAGAATTACCTGCGAACTATAAAGACAAAGAACTCGTCCGTAATCATTAAATGACAACA  
TAGTTGAGAAGACTCATGATATCAATAACAAGGAAATGATCTTACGCGCATTAAGAAAATATATGATGGAGATCCTGGT  
TTTATCTTCGATAAGATATCACACAACTCAGACATACGGTAACGGAATTTGATGAGAGCGGGAAAAGCGAACCAACGGA  
CTTATTTACCTGGTACGGTAAAGATAAAAAAGGCGACTCTCTCGCTATTGTAATTAATAAAAAACGGAATGATTACT  
TATCTCTCGGTTACTACGATCAGGACGACTACCACATTCAAAGAGGAATTCGATTAATGGTGATAGTCTCACCCAATAT  
TGTAGTAAAACGCCAGGAGTGCTTACGCGTGGTTTGAAGCAGTAAAGCTATCATGGCAGAAATCATTGCAACTGGTTC  
CGATCATCAGGTTGTAACGAGCTCAACGGGGAAAGACTGAGAGAACCAAACGACGTTTTTAAACGTTATGGTCGAGCAA  
TAAGATATGATTTTCAAGTGGACGATGCAAAAATATAAATGCGACCATCTAAAAGAAATAGTTTCTACTTTAGTCGGTAA

AAAATTAACGTTGCCATTCTCAAAAAATATATAAGCATTTTAAGGATCTCGAAGGTAAAATTGAAGAAAGGCTTCAAAA  
TCGCCAGGCTGAATATCAAAATGAAATTAATCAACCATCTGCGCCAGGTGTTAATTTTATGATGATTTTAAAAATTATTTTT  
CCAGTTTTTTGATTTTTCAACAGCTGAATATCGGAAATAGTCAGTGACGAACATCAGTATTTTTACATAATTACGTCTAG  
GTCATTGTCGGTTTTATCTCCTTTTACTTGTGGTAATTGAGGGATAACAACAAAAAGGTGAGTTTTGCGACTCACCTTTT  
TTATTTGTTTCTTATTAGAAATCAATATCTTTAAATCATCTGAATCGCTTGTGCGTTCCGATTTTCTCGCGTTTGG  
TTCGCCGCCATTAGCGATGAAATCATGACGCTGGAAGTACGCTTCGCGCACCATATAAAGGATCGGACGACTGACGCA  
GCAGACCATCGGAATCCAGCAGCTGAGCGCGGGTTTCGATCCCTTCAAGCGTCCATTTACCCACAGACATCGGCCAGGTC  
AGCCAGGAAAGAACCGGGTAAAAACCATCCGCCATATCACCACCGTCATCACGCAGCGTGAAGCTACCGTAGAACGGTAA  
CTGAACGTAAGGCCATAACCCACGCCATAATGACCAAGCGTACTACCGAAGCGGTGAGGTTTCACTCCGTTGCGATTTG  
GGTTCGCCATCCCTGCAACATCAATAAAACCGCCATCCCAAAATGGTGTTCAGGAAAAAGCGGGTAAAGTGGACCATC  
CCCTGATAAGGGTGCCTTCAAGAAGTAGTTAACCATCACCGCAGGTTCTTCAAGGTTGCCAGTAAAGTTGCTCAAACC  
GTTACGCGCCGGTTGCGGAACATAATCACGCCAGGCACAGCGACCGGTGCAACAATATACGGGTCTAATACATTGAAGT  
TGAAGTTGTACATGGTGGGTTGAACCTTCAACGGGTGAGAACGCCCTTGTGATCTGTACCGGAACGACACACCC  
ACCAGAAGCTAGTTCAGAGCAAGCGCCGACAGCGAAGCTTCATAAATGTCCCTGTTTTTTATGGCTTATGCAG  
TTTGCCATCCATGACGGAACGATACCGTATCCGCCTGTTTGGTGTGGCGATTGTAACAGCAGTCAACTGATGTTCCG  
ACGCCCTGATTTGCTGATTTGATCATAGCTGGTAATCGCCGCCCTGTAGGCTACTTGATTCTATAGAAAACAGAAAAAG  
CAAACGCGACCTTTTCTACATTTTTCAGAGTAACTCCCGTCAGTTGCGAGCAAAAAAGCCGCTACGCTTTAGCTATACGTG  
CTAATTCAGAGAAGAGACCATGGACAACGCAAAAATTGATCAACACAGCGACGAAATTGAAGTTGAGAGCGAAGAAAA  
GAGCGCGCAAAAAATAGAAATAGATGAAGACCGACTCCCTCCCGGGCGATGGCAATTCATGAGCATATCCGCCAGGA  
TGGTGAAAAAGAGCTGGAACGCGACGCAATGGCGCTACTGTGGTCAGCCATTGCGGCGGGTCTGTGATGGGCGCTTCGT  
TACTGGCAAAAGGATATTTCAAGTGAACGGAAGGTGTGCCGGCAGCTTCTTGTGGAATCTCGTTTATACCTTT  
GGTTTTATTATCGTCATTATGGCCCGCCAGCAATTTTACCAGAAATACCGTACTGCGGTACTACCCGTCATGCAAAA  
ACCGACAATGAGCAACGTCGGCTTACTTATACGGTTATGGGGCGTGTGCTGCTGGTAATATTCTCGGGACAGGTATTG  
CGGCGTGGCATTGAAATATATGCCTATCTTCAATGAAGAACTCGCATGCAATTTGTCAAATCGGCATGGATGTGATG  
AAGAACACCCCGAGGATGTTTCCCAACGCGATCATTTCCGGTGGCTGATCGCCACTATGGTTTGGATGTTTCTGC  
AGCGGGTGGCGAAAGATTGGTGTATTATATTGATGACCTGGCTTATTGCCCTGGGTGACACCACCCATATCGTGGTCCG  
GTTCTGTTGAAATCCTCTATCTGGTGTAAACGGTACGCTGCACTGGAGCGATTTTATCTGGCCCTTCGCACTACCTACT  
TTAGCGGGGAACATCTGCGCGGCACCTTTATCTTCCGTTAATGAGTCATGCACAGATTCGTAACGACATGAGCAATAA  
GCGTAAAGCAGAAAGCAGCCAAAAAGCAGAACGTGGGAAAACATTAAGAAAAATTATAAAAAACCCGGCATAAATGGCGA  
GGTTTTAAGCAATCGAGCGGCGAGCTACTTACCCCGCACTCCATTAGCGGGTATACTCATGCCGATTGTCTCTTAGTT  
AAATGGATATAACGAGCCCTCCTAAGGGCTAATTGCAAGTTCGATTCTGACAGGGGACACCATTTATCAGTTTCGCTCCC  
ATCCGTACCAGTCCGCAAAATCCCCTGAATATCAAGCATTCCGTAGATTTACAGTTTCGTCATGGTTTCGTTTACAGATCGTT  
GACAGCCGCACTCCATGACGGGTAAAAAGTGGATAAAATAATTTTACCCACCGGATTTTTACCCATGCTCACCGTTAAGC  
AGATTGAAGCAGCAAAGCCGAAAGAAAAACCATACCGCCTTCTCGATGGTAATGGCCTGTACCTTTATGTCCCTGTGTCA  
GGGAAAAAGGTATGGCAGCTTCGCTACAAGATTGACGGTAAGGAGAAAAATCCTGACCGTCGGAAAAATACCGCTTATGAC  
TTTGAGGAGGCAAGGGATAAAGCATGGACTGCGAGGAAAGACATCTCGTTGGCATCGATCCTGTAAAGGCGAAAAAGG  
CTTCGTCTAACAAATTCCTTTAGTGCATTTACAAGGAATGGTACGAGCACAAGAAGCAAGTATGGTCAGTAGGGTAT  
GCAACTGACTGGAAGTAATCCGACGTTTGAAGATCGCGGTGCAATGGAACGAGCCAACAAGCAGCAGAAAGTGGCGG  
AGTTTTCCGTTACGCTATTGTCACCGGAAAGGGCTAAATATAACCCGGCACCTGACCTTGTGACGCCATGAAGGGATAC  
CGCAAGAAGAATTCCTGTTTCTTCTGACAGACGATCCCGCATTTCAACAAGCACTGGCAACATTTTCAAGGAAGTAT  
CGTATCGCTCATTGCGACCAAAGTTTTACGCTACACAGCCCTAAGAACGAAAGAGCTTCGTTCCATGCTATGGAAGAAGC  
TCGATTTTGAATAAGGATTATCACCATCGACGCCAGTGTGATGAAAGGACGCAAAATTATGTTGTTTCTATGTCAGAC  
CAGGTAGTTGAACTTCTCACTACGCTAAGCTCCATCACAAACAGTCTCAGAGTTTGTTTTTGCCGGCGCAACGATAA  
GAAGAAGCCAATCTGCGAGAACCGGTAAGTGTGATCAACAATAATCGGCTATGAGGGTCTGGAAAGCGGTACGGAT  
TCAGGCATGAATTCAGCAGGATTATGAACGAGCAGCAATGGCCTGCTGACGCTATTGAAGTGAACGACATGCAAAAC  
GGCGGATCTGTGCGTGGGATTTACAACCATGCTCAGTATCTCGATAAACGCAGAGAAATGATGCAATGGTGGGCGGACTG  
GCTTGATGAGAAGGTGGAGTGAAGCAGCTTAAACAATATCGAATAGCACAAGTCTTGAATCCAGTGAAGGCTTTGTG  
TGTATAAGTTTTGCTCATCAACCACAGCAAGTATCGATCGATTAAGACTTGGATGATAGACTTCATTCCTTTGATTATT  
AGCTGATAGAAGAAATGTTAAAGCTATTTGCAAAGTACACCTCTATTGGTGTGCTGAACACCCTTATACACTGGGTGGTT  
TTTGGTGTGTTGATCTATGTCGCGCATACAAACCAAGCTCTTGAACACTTCGACAGGTTTCGTTGTGGCTGTGAGCTTTAG  
CTTCTTCGCAATGCAAAATTCACATTCAGGCATCGACTACAACGATGCGCTACATGCTATATGTTGGGTTTATGGGGA  
CACTGAGTGCTACTGTTGGATGGGCTGCTGATAGATGCGCACTTCCCCGATGATAACTCTTGTACCTTCTCCGCCATC  
AGCCTGGTGTGCGGTTTCTGCTATTCAAAGTTCATTGTCTTTAGGGATGCGAAATGAAGATATCTTGTAGTTCCTGTG  
TTCAATGAAGAAGAAGCGATACCAATTTTTATAAAACGGTACGTGAATTCGAAGAATTGAAGTCATATGAAGTGGAAAT  
CGTTTTTATAAATGACGGCAGCAAAGACGCTACGGAGTCAATCATTAAATGCTCTGGCTGTTTTCAGATCCTTAGTTGTT

CGCTGTCATTTACACGCAACTTTGGTAAAGAACCAGCATTGTTTGCAGGGTTAGACCATGCAACCGGGGATGCGATAATC  
CCAATTGATGTTGACCTGCAAGACCCGATTGAGGTTATTCCTCATCTTATTGAAAAATGGCAAGCAGGTGCTGATATGGT  
TCTTGCTAAAAGATCTGACCCTCAACTGATGGACGCCTGAAGCGAAAAACGGCTGAGTGGTCTATAAGCTCCACAATA  
AAATAAGCAATCTAAAATTGAAGAGAATGTTGGTATTTGAGGCTGATGAGCCGTGATGTTGTCGAAAAATTTAACTT  
ATGCCAGAACGAAACCTTTTCATGAAAGGTATTCTGAGCTGGGTAGGAGGAAAGACAGATATTGTTGAATACGTGCGAGC  
GGAAAGAATTGCTGGAGATACAAAATTTAATGGATGGAACCTTTGGAATTTAGCACTTGAGGGTATTACAAGCTTTTCCA  
CATTCCCTCTTCGCATCTGGACATACATAGGGTTAGTGGTAGCCAGTGTAGCATTATTTATGGGGCGTGGATGATTTTA  
GATACTATCATATTTGAAAATGCTGTTAGGGGATATCCTTCACTACTGTTTCAATACTGTTTTAGGTGGAATTCAGAT  
GATTGGAATAGGAGTATTAGGTGAATATATTGGACGCACATACATTGAAACCAAAAAACGCCCGAAATACATCATCAAGA  
GAGTCAAAAAATGAATAAAGCAATAAAAGTATCATTGTATATATCTTTTGTGTTGATTATTTGCGCCTTATCTAAAAACA  
TAATGATGTTAAATACATCTGATTTGGAAGAGCCATTAAGCCATTAATTGAAGACATACCAGCATTACATATGACTTA  
CCTTTATTGTATAAATTGAAAGGTCAATTGATTCAATTGATAGCTATGAGTATATAAGTTCATATAGTTATATTTTGT  
TACATACGTCCTGTTTATTAGCATTCTTACTGAATATCTTGATGCTAGGGTGTATCGTTATTTCTAAAAGTAATATATA  
TTTATTCATTATATGCGATATTTACTTCATATATAAAAAACAGAAAGGTATGAACTTTATTTACATTCTTTATTTTGT  
TTCTTATGTGTTCTTTCATCAACACTGTCAATGTTTGCATCATTCTATCAAGAGCAAATAGTTATAAATTTTCTTCCATT  
TTTGGTGTATTCATTAACATGCAAAAAACAATAAATCTATGCTTTTGTCTATTTTTTTCGTTGCTAATAATATCTACTGCTA  
AAAAATCAATTTATATTAACCCCACTAATAGTGTATTCAATTATATTTTTTTTTGATAGACAAAACTAATTATTAATCT  
GTAATATGCGTGGTGTGCTTGTGCTCAATATTTGCAATATCTTATTCAAAAGGTGTTGTTGAATTAATAAGTACCA  
TGCAACATACTTCGGTAGTTATCTTTATATGAAAAACAACGGGTATAAAATGCCATCGTATGTTGATGATAAGTGTGTTG  
GGTTAGATGCCTGGGGTAATAAATTCGACATATCATTGGCGCAACCCCAACAGAAAGTTGGAACGGAATGTTTGAATCT  
CATAAAGATGAAACGTTTTGCAATGCACTCTTTTTATTGGTTAGCAAACCAAGCACCATCTTCAAACTTCCATTTGATGA  
TGGTGTGATGTCTCAGTATAAAGAAAATTATTTCCATGTATATAAAAAACTACACGTAATATATGGAGAATCAAACATAC  
TAACGACTATTACTAACATAAAAGACAATATATTTAAAAACATTAGATTTATATCATTGTTATTTTTTTATTGCTTCT  
ATTTTTATTAGAAATAATAAAATAAAGGCATCTTTATTTGTAGTATCTTTTTTGAATATCTCAATTTTATGTGTCATT  
TTTCGGGAAGGATATAGAGATTTAAGCAAGCATTATTTGGAATGTATTTTTCGTTGACCTTTGCTTATACATAACAG  
TCGTTTTTTTTAATTTATAAAATAAATCAAAGAAATCAAGACAATAGCGATGTAAGCACTAAGTTAAATGCGCGCCAA  
TCATGGCGCGACAAGCTATAATACCAACCTAATTTCTCCTCCTTAGAGTACTATATCTCCTGATAGAATTGCGGTA  
TTGACTATCAAATGCCCTGATTCTGTTGTTTATTGTAATATCTCCTCTATCTGCAGACGATAACTTAAATGCATCATTGCC  
CACAACAAACCCCTCCAGAACCAAGTGTGATATTATCATCAACAGTGATAGATACATATACTAACTGATTATCGTTAT  
AAGTGATTCCTGTCTTATACTTAACATAAAGACTTCCACTTTGATTCTCGATAGACACATAACATCCAGGGGTTATGTTT  
GTATGCGTCCCGGACTATCGCCCATTAACGCCATACGATAAATGGGATGGTGAAGAAATGGGTGACGGATACCGAGGCA  
CAGCATAGCGTCGAGTAGATGCAGCAGAAGCACAGCGCCAGTCTGATTGATACTGCAATGGCTTCCATTAGTCTGAT  
TCAACTGAAATTACAGGCTGGGCGAAGCTGATGCAGGCAGAGACCTCCCGACTTAACACTGTGCTGGATTACATTGACG  
CGGTGACGGCAACAGATACCAGCACCGCGCGGATGTATCTGGCCTGAACTGCCGGAGGAGTAGGCCATTCAATATCTG  
GCGCACTGGAAGTATCGACCAGTCCAGTGCCTCAGATAATCCAGCCACAATTTATTTGCGCCAGTTCCTCACCTTT  
AGACGACCAATAGCCGCTTACCAGCCATTGTTTACTGTTTATATAATCGTTGGCCTGATTAATCAATTGCTGCTTTTT  
CAGTTCCGCTGCAGCAATCTGTTCTCATGTGTTGGTGGTGAATTTGAGCCATGCAGGAAAACCATTTTCTCCAGCGA  
TACGGATTTTTCTTTGCGCGGTAATCCGAAAACCTCAATATACACTTGTCTATCAACTTCAACAGCATCATCTGGCCAT  
GAGCCAGCTTGCCTGTAATCCTCTTTTATCTCAAGGGATAGAAAAGAGTTTGTAGTGCAGGAAATATATGTAATTTT  
TCACTCCATAAAGTTAAAAGAAATTAACCCCTAATGCGAAAAATGAAGCACCGATAACGGGTACGCTGCTCTGAAAT  
AAATTTACCGGGTCTGTTTATAAACCAGCACAAGCTATATAGCCAACATTTGCACTGCCGGGAGTGAATCCTGAGTCG  
CAAATACCCGAGACATCTATTGAAATGCAATCGGAAAATAGGTTACTGTGCTGAGACGTCAGCGGAACATCAATT  
GGCCCCATTGAATAATTAACCGGATGGCAATTTTTGATATCCAGGAACTGAAGCAGAAAGCATAAAACTACCCATATC  
AGGTATCTGATTGCCCCCTGTCCTACATTTCTTTTAGCCGCTTCTCCAAACCAAGGTTTTGAGAGCCTTTTGCACCG  
TGCCGTCGAATTTGATATCGCCAAACGGATTCTTGGGCTTAACAGCAGCGCACGAAGCGGGTAAGCAGCTGGTCATGC  
CGCCCTTCTCCAGGCTGGCACCAGGCTCCACAACGCTGCAAGCTCCTCCTGCAACATGTCAAAGTAGTCATCATC  
CAGATCGGTGGCAGGCTGCGGCTGTTGGGTTACCACGGGTACGGGGATTACAAAGGCAGCACCTTTAAGCTCCGCA  
AGACGTTCTGACCAGTATGCGCCAGCGGTTGCTTCCGAGTGAATACGCGGCACATTTGGCGTTATCACCATCAGT  
AAACAGATCCAGAACAACGGGCCAAACAGGGTGTAAATCCCAGAAAATGTTGTCCGGCGTGCACACTGATCGCCCA  
CTTCTTTCAGTTCATGGGCTGGTTTGTCCGAGCTCCACCAGCGCTGGCAATATTTTACTCATTAAAGCCCCACGT  
AATTCCTGAGAGATACCACTTTTACCTGATGCAGCCGCTTACTGCTTTTTCGTAAACACCGTTTACGACGCGCCAGA  
AAATTGTTTCTGTTCTGGCTGGGAGTGGCTTTACGGAATGCCCATCCACACCGTTGAGCAGCAGCGGATAAGCCCC  
GGACTCCAGTCTTCCGCTGGCGGGTACGGCACAATAACCCCGGGTCTTGTAGTCCGACATAGAAATTTGCGCACAG  
GTCTGTTTTACGAACTGGTTGTGGTTCCGGATCCTGCGCTCTCTCAGTCAGGCGCGGAAATGTCTGTGTATCTCCT  
TCACAACGGTGAAGCACAGCCACTCTGACGTAATTGCTTGTGACTGCAGAACGCGCTGCCGTGAGTAACTGCAAA  
AGCATCCGCAATGTCTCCGGAAGTACAGCCGGATGGGCTTCAATGAATTTCTGAACGTCATTCAAAGACTCATGTCTA



CCCCCTGAATCCTGCCGGGATCTGGCTGTAGTCCACATTGTCGTAACCTGGCTTTGAAGTACGGGTCTTCGCGTTTTCTG  
TGACGTGCTGACGGACGGCGATAAGCGCAGGGAAAGCTCATCCATTTTTCCCGCAGCTTCGACGGGTGAGCACGTTA  
CGCACCAGAACGGATCGCGGCTGACCGGCTGTACATCTCGCAGATTTGTTGTGAGTACGACCATCTGCACACACAT  
CAGGCGAATTTGTTTTGCCAGGCTGTCCAGTTCGGTCTTTGGGACGAACCCTCGCCGTCACATTCGGCGGCTGTCT  
CGTACAGGGCGATGATTTTTTCCAGAGCCACTGTGCGCAGGTCAAATCATCTGCGTTCGCCACTGGCGCTTTTTAGGG  
CTGAATACAACCCGATCAGGATGGCGAGTTAAAAATCCTGTTTATCCGCTGCGTGTCCGGTTGCGAAGCGTCCGGACG  
AGAAGGTTTTTATCTGACGGATCATGTTTTGATTTACTGACGGATCCCCGCCAGATTCTGACGGGTGAAAACCCGATT  
TTTTGCCAGATTTGACGCATCAAATTTGACGGGTGAGATTTGATGCGTCAGATTTGACGGGTGAGAGTCTGACAGT  
TGAGAAAATGCCGCTGCCTGAAGCTTCGCAACGTTAAGCTGATAAACATTGACGCATTGCGGTTATGATGAGGAGCAGC  
AAAATGGCTAGCGAACGCAGTACTGATGTGACGGCATTATCGGGGAGCTGGACGGCGGCTATTTGAAACAAAATCGG  
CGCAGTTCTCAGTGAAGTCGCTCCGGTGTGATGAACACGAAAACCAAAGGTAAGGTCTCACTCAACCTGAAAATCGAAC  
CATTTGATGAGAACCCTGAAAATCAAAACAAACTCTCATATGTTCCGCCGACTAACCTGGGAAAATTTCCGAAGAA  
GACACCACCGAAAACCGCATGTATGTCAATCGCGGTGGTGCCTGACTATTCTGAGGAAGACCAGGGACAATTACTGAC  
TCTTGCCGGTGAAGCTGACGAAAACCTCCGCGCAGCAGGTCAATTAATATCATTCTTAATTAACATAATTTATCTCATC  
ACTGAATATCTTAATATAGTGAGGACTTATTATGTCTCAGAACTTAGACGCAACCGCAATTAATCAAATCCATGCCCTTA  
TTTTCTGCTCAGGGTGTTAATGAAATTACAGTAAGATTGGTGCCGATGCTGTGGCATTGCCTGAGAATTCGCGATTCA  
GATCTGAAAAAATTTAATTTAAATCGCTTCCGTTTTCCGTGGTGCCGTTTTCCACTGCCAGCATCGATGACTTTACCCGTTA  
TTCTAAAGATCTTGAGATGAAGGCACCCGCTGCTTATCGATGCTGATAATATGCGTGCCGTCAGTGTGCTTAACCTGG  
GACTATTGATGAACCAGGTGACGAGATAACACCGCCACTCTCAAATGAAAAAGACAGCACCGTTCTCTGCCCTGTTG  
TCTGTTAACGGCGAGCGTAACTCCAGAAATCACTGGCAGAATGGATTGAAGACTGGGCGGACTACCTTTGTTGGGCTTTGA  
TGCTAATGGTGACGCCATTCAGGCAACAAAAGCGGCTGCGGCAATCCGTAATAACAGATTGAAGCAAACAGACCGCTG  
ATTTTGAAGATAATGACTTCAGCGGCAACGCTCCCTGATGGAATCTGTGCAAGCGAAGACCAAAGACATTATGCCAGTG  
GCATTTGAATTTAAATGCGTTCCGTTTGAAGGTCTGAAAGAAGCTCCGTTTAAATTACGCCTCAGCATTACTGCGCA  
TCGCTCTGACTGTTTCTGCGCATTATTCAGCTGGAAGCGGTGCAGGAAGATATGGCTAACGAATTTCTGATCTGCTTG  
TTGAGAAAATCAAAGACAGCAAAGTAGAAACCTTTATTGGTACTTTCACCGCTGATTTTACTGCAAATGCCCTGC  
GGGGCATTATGAAACGTAATTAACCAATAATCACCGGATGGTGAAGGCTTCTTTTACCCAAACCTCAGCGGGTGC  
AGCGCATATACGTGGAGAACAAAATGTCAATTTAAAACTTTTTCCGGGAAGCATTTTTATTATGACAAGATAAATAAA  
GACGACATCGTGATTAACGATATCGCGGTTTTCCCTTCAAATATCTGCCGTTTTGCCGGTCATTTTTCTCACTTCTACAG  
TGTCGCCCAACATGCGGTGCTTTGACGCCAGCTGGTGCCGAGGAATTTGCTTTGAAGCATTAAATGCATGATGCAACAG  
AAGCGTATTGCCAGGACATCCCCGACCACTGAAACGCCTTCTTCTGACTATAAACCGGATGGAAGAAAAATAGATGCA  
GTAATCCGTGAGAAAATACGGGTTACCTCCTGTTATGAGCACGCCAGTGAATATGCCGATCTCATTATGTGCGCAACCGA  
ACGCCGTGATCTCGGGCTTGATGATGGCTCTTTCTGGCCTGACTGGAAGGCATCCCGGCAACAGAGATGTTCAACGTGA  
TTCCACTGGCACCGGGTCATGCCTACGGGATGTTTTATGGAACGTTTTAACGATTTATCGGAGTTACGCAAATGCGCATGA  
ATGTTTTCGAAATGGAAGGTTTTCTCGCGGAAATGTGTACCGCAGATCTGAAAGTGAACGAAACAAATGCTGAGTAC  
CTGGTACGTAATTCGACGCGCTTGAAGCTAAATGTGCGGCACTGGAAAACAAAATAATACCAGTGTGAGTCACTGCC  
ACCAGCAAATGAAAGTGTCTGTTATTTGATGCTAACGGAGAAGGCTGGCTGATTGGCTGGCGTTCTCTGTTACACCT  
GGGGACAAAAGAAACCGGAGAATGGCAGTGGACATTTAGGTTGGGACCTTAAAACGTCATATCACTCACTGGGCA  
GTAATGCCAAAAGCACCGGAGGCTGGAGCATAATGACCACATTTACCAATAAAGAACTGATTAAGAAAATCAAAGAACGA  
ATCAGCAGCTAGAGGTTGAGACGATATTGAGCGCGTCTTATGAAATCGCACTCGTATCTCTGGAAGTAGAGCCAGA  
TGAACGCGAAGCCTATGAATTTATGAAAAGCGTTTTCCGTTACTTAGTAGATCGTGGAGAGCAAAAAACGGCGGATA  
ACGAATACATGGCATGGGATATGACTCTCGGTTGGATCATCTGGCAGCAACGAGCTGGTATCCATTTTTCAACAATGTCA  
CAACAAGAGGTGAAAATAATAGAGCCATACAGCCTCACACTCGATGAGGCTGTGAGTTTCTAAAAATATCCTGATCTACC  
ATCGCCGTCATAGAGCGTATTTTTATTACCTGATTTGACAGTTGATTCCCTATTTCGGAGATAGCACTCATGCAACACGA  
ACTACAGCCTGATCACTGGTTGATTTGAAATTCATCATGGCTGATACTGGCTTTGGTAAAACCTTATCTATGACCGGA  
TTAAGTCAGGCGACTGCCAAAAGCCAAAGTTATCCACGGGCGAGCAAGATGGTTATATCGTGACCATTGTGAATCAA  
AATAAGCTCTTAAGCCGCGCAATGGGTAATAAGCGGGTAAAATATTTCTCACATCTAAAAAACACCATTCCAATCAAT  
CCCCTGCTGCTTCAAGTAGATGTCTGCAGGGGACACCATCCTTGTGTTTATCCCTAAAACCACATAAAAAACCGTAAATTA  
AATTCGAACTAGCAGGCCGAATAAGGCACACCAGGAACTCGTGGTTTTATTCTTATGAAGTGGTTTTTACCTGTTCTCT  
TAGCCAGATAATAACGCTTCAATTTTTGGCCACTGCCTGCCCGTAATGTGGTGTGTAATAATGCTGATGGCATTTC  
CCGTCATATGCCAAACGGCGGACGAGCTCACCACTGGCAAGCCTTTTTGTACCAGGCTTTTTCTCCATCGCCACC  
CCAATATGATTCATCGCGCAATAACAGCTAAATCAGAACGATCAAAGCCAATCCAGAAGATGTCGGCAAATTAACCGC  
ATAATGTTGCGCCAACTATGCCATTCATCCGTAACCGAGTCTGTGCTCCATGCCTGTCTGTGATGGAGCAACGTACAGT  
GACACAGGTTAATTACCGTGTGGTTAAAGCATGTCTTTGAGCGTATTCCGGGCTACATACTGGCAGGATTTCTTCATCC  
ATCAGAAAAGTATGAGTGTGCTGCGTACGGCGCATCATCAAAGTAGATCGCCAAATCGATTCCGGCACGTTGAGATT  
GACGTTGTCTTACCAGTGAACGCGTGAAGCAATAGACGGATACCGGCGTGTAAAGTCACTAATGCGGGCACCAACC  
AGCATTGGGCGATAGAGGGCCGGGAATACAGAGTTAACGTTCCCGATAACTCCTGATTTTTGATATCAAGAAATTCCTGG

TTCAGGGTATCCAGCGACGATTTTAGCGCCCAATAAACACGTTTTCCCTCGTGCGTTAATTCCACTTTGCGATGGGAACG  
AACAAACAACCTGAATGCCCAATTTCTTCTCCAGCTGATTGATACGGTGACTTACCGCACTGGGGCTCAGCGACAATTCCT  
CTGCCGCCAGGGCGAAGGACTGATGCCTGGCAGCCACTTCAAAGTATGCATTTTTGATAATTGCCAGCCGTTAAGCAGC  
CGATTTCTATTTTACGAAGGGTTCCATAATCACCTCATTTTTGCTTAAGTGTAAAAAATAGCGGCAAAATTTACG  
TATGAGATGAGCTAAAGTGAACCATATCTCAATTCACCTTCATTTTTAGATGTAAATCACTCCATTGATGCAATTTACCT  
CATGTGAAAGGCAAAATTTATCGTTTTGTCAGCCTGCGTTGTTTTTTGTCCAATATCATCAGGTTAATCACAGGGGAAGG  
TGAGATATGCACTCTCAAATCTGGGTTGTGAGCAGCTGCTTATCAGCATCGTGTTAATTGTAAGTACTGACCATCGTGAAGTT  
CAAATTCACCCGTTTCTGGCGCTGTTGCTGGCCAGCTTCTCGTGGGAACGATGATGGGCATGGGGCCACTGGATATGG  
TAAATGCTATTGAAAGTGAATTTGGCGGAACGCTGGGGTCTCGCAGCGGTTATCGGCCTTGGCAGTACTGGGAAAA  
ATGATGGAAGTATCCGGGGCCGAGAAAGAAATTGGTCTGACACTTCAACGCTGCCGCTGGCTTTCAGTTGATGTCATTAT  
GGTGTGGTTGGCCTGATTTGTGGCATCACGCTGTTTGTGAAGTGGGCGTCGTGCTATTGATTCCTCTGGCTTTTTCAA  
TTGCCAAAAAACCAATACCTCATTATTAAGCTTGGCATTCCGCTATGTACCGCATTGATGGCAGTGCCTGCGTGGTT  
CCTCCACATCCGGCTGCTTATATGTTGCAATAAGCTGGGCGCAGATATCGGTTCCGTTGATCGTCTACGGTTTGTGGT  
TGGGCTGATGGCATCACTGATCGGTGGCCACTTTTTCTTAAATTTCTGGGTCAACGACTGCCCTTTAAACCTGTACCCA  
CAGAGTTGCGAGATCTCAAAGTTGCGGATGAAAAAACACTACCGTCATTAGCGCAACGTTATTCACCATACTGCTACCC  
ATTGCGCTGATGTTGGTTAAAACGATTGCCGAATTGAATATGGCGCTGAGAGTGGTTGTATATCTTGGTTGAGTTTTAT  
TGGCAACCCTATCACTGCCATGTTTATCGCCGTGTTTGTGCGCTATTATGTGTTGGGTATACGCCAGCATATGAGCATGG  
GGACGATGCTCACACATACGAAAAATGGCTTCTATTGCTAATATTTGCTGATTATCGGGGCCGAGGCGCATT  
AACGCCATTTTAAAAAGCAGCAGTCTCGCTGATACGCTGGCAGTTATTCTCTCCAATATGCATATGACCCGATTCTTCT  
GGCCTGTTAGTGGCTCTTATTCTGCATGCGGCAGTGGGCTCCGCTACCGTGGCAATGATGGGGGCAACGGCAATTGTTG  
CACCCATGCTGCCGCTGATCCCGACATCAGCCCGAAATTATTGCGATTGCTATCGGTTCAAGTGAATTTGGCTGCACT  
ATCGTTACGGACTCGTTTTCTGGCTAGTGAAGCAATATTGCGGCTACGCTCAATGAAACATTTAAATACTATACGAC  
AGCGACATTTATCGTTTCACTGCTGCTGCTGGCGGGCACATTCCTGCTGCTATTATCATCTAAGCGCAAAGAGACGTAC  
TATGAAAACGCTAAAATGAACTCGCTCATCGCCAGTATCCGTTGGTAAAGGATCTGGTTGCTCTTAAAGAAACCACCT  
GGTTAATCCTGGCAGCCTCATTGGCTGAAGTTTACCTTATGTTGGCCTGACCGAACAGGATGTTCAAGACGCCCAT  
GCGCGCTTATCCGTTTTGCACCCTATCTGGCAAAGCATTCTCTGAAACTGCTGCCACTGGGGGATTATTGAATCAGA  
ACTGTTGCCATTCCAGCTATGCAAAAACGGCTGAAAAAGAATATCAGCAACCGATCAGCGGCAACTGTTACTGAAAA  
AAGATAGCCATTTGCCATTTCCGGCTCCATAAAAGCAGCGGGGATTATGAAGTCTGGCACACGCAGAAAAACTG  
GCTCTGGAAGCGGGTGTGCTGACGCTTATGATGACTACAGCAAAGTCTTCTCCGGAGTTTAAACAGTTCTTTAGCCA  
ATACAGCATTGCTGTGGGCTCAACCGAAATCTGGGTTATCAATCGGCATTATGAGCGCCCGCATTGGCTTTAAGGTGA  
CAGTTCATATGCTGCTGATGCCCGGGCATGAAAAAAGCGAAACTGCGCAGCCATGGCGTTACGGTCTGGAATATGAG  
CAAGATTATGGTGTGCGCTCGAGGAAGGACGTAAGCAGCGCAGTCTGACCCGAACTGTTTCTTTATTGATGACGAAAA  
TTCCCGCAGTTGTTCTTTGGGATTCCGTCGCTGGCCAGCGTCTTAAAGCGCAATTTGCCAGCAAGGCCGATATGCTCG  
ATGCTGATAACCTCTGTTTGTCTATCTGCCGTGTGGTGTGGCGGTGGTCTGGTGGCGTCGCATTGGGCTTAAACTG  
GCGTTTGGCGATCATGTTCACTGCTTTTTTGGCAACCAACGCACTCCCCTTGTATGTTGTTAGGCGTCCATACAGGATT  
ACACGATCAGATTTCTGTTCAAGATATTGGTATCGACAACCTTACCGCAGCGGATGGCCTTGAGTTGGTGGCGCATCAG  
GCTTTGTGGGCGGGCAATGGAGCGTCTGCTGGATGGCTTCTATACCCTTAGCGATCAAACCATGTATGACATGCTTGGC  
TGGCTGGCGCAGGAAGAAGTATTGCTTGAACCTTGGCAGTGGCGGGTATGGCCGGACCTCAGCGCTGTGTGCATC  
GAATGGTGGCGAAGAAGATGAATCAATATCTGGCAAAGCGGTTAATAACGTTTCAACGAGCATGCAATCCGATTT  
CCCTGGGTGAGCGATGCTGCCGATGGCGCAGACTTAAAGATCCCCGCTTACCCTGATAACCCCTCTTTTATCATCA  
CCCAACGCCTTTCGCTGTAACGGCGGTTTTCGAAACCAAACCAAACCGTAAGTAAGATAAAAGCAATAGCCGCCATAC  
GGAAAACTCATTTGAGAAATAGAAAGTGAAGTCTGGGTTATTTCAATTTAATTTTCAATTAAGAACTCTGAAAGCGAA  
CCATAATTTTATCCATAATTTGTGACGATGAATTAACACGGGGTTAAATTGATCGATGGTTGCTGTCAACTGACTATG  
GTGTAACGATTGCGCTGCTCCACAGCGTATTGTCAACGACGTACCAACTGATCCTGACAAGGTACGAAAAAATTAC  
TCATACTCGAGGCATTGGCAAATTTATATCTGGCAAGCCTGAAAACGAAATCGTTGTTAAGGGTAAAAAGAAACAGGCA  
ACGGCGAATCCCTGAAAAACTGCGGCAAAATGATGCCTGTAATAATCAATCGTTGGCATAAATGTCACAGAACGCCAGTA  
ATAGCAAACCGCATAATCAAAAACTAAATGTCACTAACACCGCATGTCTATTTTGTGCCATAACGCTCTATCAAAG  
GTGAAATTAATAGTGGCATGATGCCGATGGGCGCATAAGCAAGTCCGGCCATATCGCATTATACCCCATGTTTCTGG  
AGTAACTGCGGCATAAGGACGATCGCTCCAGAGTAAAAATAACGCGCATGTGATACTACAATACCAATGGTGAAGTT  
ACGGGACTTAAACAACTGAGATCAAGAATCGGGTCTCTGAGGTGACTCCCAAATGACTAAAGAGATCAGAGAAATAA  
CTGATACTACTGTTAATATTATTGACTCGAGTTGAACCAATCCAGATCGCGCCCTTTATCAAGCATAATTTGCAAG  
CCACCAACACCGAGCACTAACAGGGTCACTCCTGGTAGATTATTTTACCGGTGAAGTCTCAGTTTCTTCTCTTTAAG  
TAAGGTTAAGCATAATGTACAGGACGATAATCCCATAGGGACATTGATTAATAATATCCAACCCAGCTAAAGTTATCAC  
AAATATAACCGCCAATATCGGCCACATATCGGAGCGATAATCACGGTCATTGACCATAATGCCAGAGCAAATGTTCTT  
TTTTCTGGCGGATAATTCCTTAATAATAAATCTGTGACAGTGAATTAACGGCCCCGCCATTAACCCCTGAACGACTCT

AAAAATATCAGCACATCAAGATTGGTCGATAGGCTACACATTAATGAAGACAGCGAAAAAAGTGACTGAAAGTAAAA  
ATAATCTTAATTCGCCTATTCTTTGTGCCAACCTGCCAGTAACAGGGATCGCAATGGCATTGCTACACCAAACGAGGTG  
ATAACCCAGGTGCCTTCGTCTGTTGATGCTCCCAGAAAAGCCAGATATTGTCGGTATTGCGACGTTAGAAAATAGTGAATC  
CAACATTTGCATAAATGTCGCTAATGACAATGCAATAGTGACGCACCATAACGTCCCACCGTTAATGGTGCCGGAGTTG  
ATTTAGTGATTGCCATTAAGTTGTCCATTATGCGAAAATAATGTTGCTAATTTCTTTTTCTATCGGACTGGTATCGATAA  
CTAAAGCCTTACTGGTATAAGCCGGCATGGAGGTCACGGTTGAAGCCAGCTCAGGCATCTCGGCAATGTCTTCGTTCTC  
GTATCAATAGTTGCTGTCATCGATAAACCAATACGCAAGGGGTGTTCCATGAGTTCTTTGGATCAAGAGAACTTCAAC  
CGGTACACGCTGAACGATTTTGATCCAGTTCCCTGTGCGATTTTGTGAGGTAATAAGGAGAACGCATTGCCGGTCCCA  
TATTGATCCCTGTCAACCCGACCATGAAACACAACATTTTACCATAAAGATCGTGATAATATTGACCGATTGACCAATC  
CGTACATCCGTGAGTTGTGTTTCTTAAAGTTGGCATTAAACCCACATTTGACGTGCCGGTACGACAGCCATTAACGATTG  
TCCGGGGCTCACTGTTTCGCGACCTGAACACTTCTCTGGCAATATAGCCGGTAACCGGACTCTAATATCCGTACGTT  
TAAGCGCAACCAGGCTTCTTATGTTGCATCCGCGCTTCAACGACTTGTGGCTGACGGTTAATGGTGTGTTTACTACT  
AAAGCTTTATTCGCTTTATAAGCCTGGATAGCGGCATTCAATGCCGCTTGTACTTATTAACGTATCTTTGGTATGCTC  
CAGCGTTTCTTTGAAATAACCCCTGCTTCGCTAACGGCACTGACGGTTAATCTTAAAGATTGTTGATACTGAA  
TACGTGCTGAAGCGACTTCGGCACTGTATTGTTTATCTGTAAAGTATAGTTTATTCGTTTCCGCAACAATATTTGCCAGA  
TTATTTTTAGCTTTATTGAGTGCATAGTGGCATCAGTTTTATCCAGTGAAACTAAAATGTCACCTTGTGCAACGTAGTT  
CGTATCTTTATGATTAACGACAGTGACACTACCTGAGACTTGTGCAGAAATTGGATCTGCATTCCCCGTGACATAGGCGT  
CATCTGTAATAATCATGTCTTCTAATTCATTGACCAATAGGCATAGGCACCTGAAAACGCAATAAATAAAACTACCGCC  
AATAAAGAAAAGTATTTTCTTCTGTTAGAATGTTTTTATTTGAATTAATCTGTTCCACTATTATCTCTCATTCTCATA  
GATGAAATTTATGAATGAATGAAAAGAGCATTCTTCTCATATCAAACACAGTGATGTGTTGCACATTATCCCAGGA  
ACGTTGGAGGCCTAATTTAATGAGGTGCAAAAAAACAACAGAGGACTAAACCGTGGCTTTTGAATACAATTTCTACG  
CCTGTAGGATTAGTAAGAAGACTTATAGTGCCAACCTGAAACTATAAATCATCGGTACAATCCCTGATTTTATTGTTGAC  
ATTTCAATTTATGCCGACTATTTATATGGTATACTTGTGCAATTATCTTAAAGGAAGCTCAGATTTTCTTATTTTTATTGA  
GAAAATGAGATGACGCCTTATGTCTGTACTACAGGGAGAAGGAGATGCTTATTGCAAAGGGAATAATCTATGAAC  
GCAATAATTATTGATGACCATCCTCTGCTATCGCAGCAATTCGTAATTTATTGATCAAAAACGATATTGAAATCTTAGC  
AGAGTTGACTGAAGCGGAAGTGCCGTTAGCGGGTGAACACTTAAGCCTGATATCGTCATCATTGATGTCGATATCC  
CCGAGTTAACGGTATCCAGGTGTTAGAAAACGCTGAGGAAGCGCAATATAGCGGAATTATTATTATCGTCTCCGCTAAA  
AATGACCATTTTTACGGGAAACATTGTGCTGATGCTGGCGTAATGGTTTTCGTGAGTAAAAAAGAAGGCATGAACAATAT  
CATTGCGGCTATTGAAGCTGCAAAAAATGGCTACTGCTATTTCCCTTCTCTCAACCGTTTGTGGAAGTTAACGT  
CCGACCAGCAAAAACCTGACTCCTTATCGAAAACAAGAAATTAGTGTGATGCGGTATATTCTTGATGGCAAGGATAATAAT  
GACATTGCTGAAAAATGTTTCATCAGCAACAAAACCTGTCAGCACTTATAAAAGTCGCCTGATGGAAAAATTAGAATGTAA  
ATCACTGATGGATCTTTACACATTCGCACAACGTAACAAAATCGGCTAACCCATGAAGTTTTTACCCTATATTTTTCTT  
CTCTGTTGTGGTCTTTGGTGCAGCATAAGTTTTCGCAGACGAAGATTACATCGAATATCGTGGCATCAGTAGTAACAACCG  
TGTCACTTGATCCACTACGTCTGAGCAACAAGGAATTACGTTGGTTAGCGAGCAAAAAAATCTTGTGATTGCAGTAC  
ATAAGTCCCAAACGGCTACGTTGTTGCATACCGATTTCGAGCAACGGGTTTCGTGGTATTAATGCTGATTATTTAAATCTT  
TTAAAAGAGCGTTAAATATCAAATTAACACTCCGGGAATACGCAGATCATCAAAAAGCAATGGACGCGCTTGCAGAAGG  
TGAAGTCGATATAGTGTTATCACATTTAGTTACTTCCGCGCTCTTAATAATGACATTGCTGCAACCAACCATTGATAA  
TTACCTTTCCGGCGCTGGTAACCACCTTACGACTCAATGCGACCGCTTACCTCACAAAACAGTAAATATTGCTCGG  
GTAGCAAATTAACCCCGAGCAGGTAATTCATTAATCATTTCAAAAGCAACAATTATCTCTTTACAAATTTATATCA  
GGCATTAGCATCCGCTCAGCTGGGCAACAATGATTACTTTATTGGTAGTAACATCATTACCAGCAGTATGATTTCCGCT  
ATTTCACTCACTCCTTAAATGTAGTGAATATTATAAATCAGCGCTCAATATAATTTTTTCTTGACCAGAAAAGAATCT  
GTCATTCTTAATGAAGTACTCAATAGATTTGTTGATGCTTTAACAATGAAGTTCGCTATGAAGTATCACAAAATTGGCT  
TGATACAGGAAACCTGGCCTTTCTGAACAAACCATTAGAACTCACTGAACATGAAAAACAGTGGAATTAAGCAGCATCCCA  
ATTTAAAGGTGCTGGAAAATCCTTACTCGCCCCCTATTCTATGACGGATGAAAATGGCTCGGTTCCGGGCGTTATGGGG  
GACATTTCTAATATTATTACCTTGAAACAGGTTTTAAATTTTTCTCCGATCACCGTTTACACAATATCCATGCTGGAAC  
ACAGCTTAGCCCCGAGGATGGGATATAATACCTGGCGCTATTTATAGTGAAGATCGAGAAAATAATGTTTTATTTGCTG  
AAGCCTTCATAAACCGCTTACGTTTTTGTGATGCAAAAAGCGCTGACAGTGAACAAACATTAAAAAAGGAATGAAA  
GTTGCCATTCCATATTATTAGAGCTGCATTGCAATTAAGAGATGTATCCGGAGGTTGAATGGATACAGGTCGATAA  
TGCCAGCGCTGATTTACAAAGTTAAGGAAGGTGAACCTGATGCTCTGGTCGACACAGCTAAATTCGCGTTACATGA  
TCGATCATTACTATCCTAATGAACTTTATCATTTTCTTATTCTGGCGTTCCGAATGCATCGCTTTCTGTTCTGCTTTTCT  
CGCGGAGAACCAGAACTTAAGGATATTATAAATAAGCACTGAATGCAATTCGCCAAGCGAAGTTCTGCGCCTGACGGA  
AAAATGGATTAATAATGCCAATGTGACCATTGACACATGGGACCTATATAGCGAGCAATTTTATATTGTTACGACATTAT  
CCGTTTTATTAGTTGGCAGTAGCCTTTTATGGGGATTCTACCTGTTACGCTCAGTTTCGTCGTCGTAAGTCAATCAGGGT  
GATTTAGAAAACCAATATCATTCCGAAAAGCACTCTCGGATTCCTTACCGAATCCAACCTTATGTTGAAACTGGCAAGG  
TAATGTCATTAGTCATAATAGTGCTTTTGAACATTTTACTGCGGATTACTACAAAATGCAATGTTACCATTAGAAA  
ACAGTGACTCACCTTTAAAGATGTTTTTCTAATGCGCATGAAGTCACAGCAGAAAACGAAAGAAAATCGAACAATATAC

ACACAGGTATTTGAAATTGATAATGGCATCGAGAAAAGATGCATTAATCACTGGCATAACATTATGCAATCTTCTGCAAG  
TGACAAATGCAGTATATATTTGTGGTTGGCAAGATATTACTGAAACCGGTGATCTAATTAATGCACTCGAGGTAGAAAAA  
ATAAAGCGATAAAGGCTACCGTAGCAAAAAGTCAGTTTCTGGCAACGATGAGTCACGAAATAAGAACCACAAATAGCTCT  
ATTATGGGCTTCTGGAACCTCTGTCCGGTTCTGGTCTTAGCAAGGAGCAACGGGTGGAGGCGATTTCACTTGCCTACGC  
CACCGGACAATCACTCCTCGCTTAATTGGTGAAATCCTTGATGTGACAAAATTGAATCGGGTAACTATCAACTTCAAC  
ACAATGGGTGATATCCCTACTTTAGTCCAGAACACTTGTCACTCTTTCGGTGCATTGCTGCAAGCAAATCGATCGCA  
TTAAGTTGCAGCAGTACGTTTCTGAACATTACCTGGTTAAGATCGACCCTCAGGCGTTTAAAGCAGGTCTTATCAAATTT  
ACTGAGTAATGCTCTCAAATTTACCACCGAGGGGCGAGTAAAAATTACGACCTCCCTGGGTACATTGATGACAACCACG  
CTGTTATCAAATGACGATTATGGATTCTGGAAGTGGATTATCGCAGGAAGAACAACAACAACTGTTTAAACGCTACAGC  
CAACAAGTGCAGGTCGTGAGCAACAGGTTCTGGTTTAGGCTTAATGATCTGCAAAGAATTAATTAATAATATGCAGGG  
CGATTTGTCTTAGAAAGTCATCCAGGCATAGGAACAACATTTACGATCACAATCCCGGTAGAAATAGCCAGCAAGTGG  
CGACTGTGAGGCAAAAGCAGAAACAACCCATCACACTACCTGAAAAGTTGAGCATTAATCGCGGATGATCATCCGACC  
AACAGGCTATTACTCAAACGCCAGCTAAATCTATTAGGATATGATGTTGATGAAGCCACTGATGGTGTGCAAGCGCTACA  
CAAAGTCAGTATGCAACATTATGATCTGCTTATTACTGACGTTAATATGCCGAATATGGATGGTTTTGAGTTGACTCGCA  
AACTCCGTGAGCAAAATTTCTTACCATCTGGGGCTTACGCAACGCACAGGCTAACGAACGTGAAAAAGGGTTA  
AGTTGCGGCATGAACCTTATGTTTCAAACCGTTGACCCTGGATGTAAGTACTGAAAAACATTTAAGTCAGTTACACCAAGT  
TGCGCATATTGCACCTCAGTATCGCCACCTTGATATCGAAGCCCTGAAAAATAATACGGCGAACGATCTACAACCTGATGC  
AGGAGATTCTCATGACTTCCAGCATGAAACGCATAAAGATCTACCCGCTGCGTTTCAAGCACTAGAAGCTGGCGATAAC  
AGAACTTCCATCAGTGTATTCATCGCATCCACGGTGCAGGTAACATCCTGAATTTGCAAAAGTTGATTAATATTAGCCA  
TCAGTTAGAAATAACACCTGTTTCCAGATGACAGTAAGCCTGAAATTTCTCAGTTGCTGAACTCTGAAAAAGAACATTG  
CAGAGCTGGACCAGGAGATTGCTGTTTTCTGTCAGAAAAATGACTAAATAGCGGCTCCACAATGTTCAAATGTGGGAGC  
TATTTACCAGCACATCTTACATTTATGATGAGAATCCTGGCAATTTGTTCCCATGCTGGTGCAGCGTTGCCGCTCCC  
GGCATAACATGCGGGTCCGCGCAGCCGCTGATTTTTATCGGATTACCCGGCATCATTATCCCCCGGCTTCAATCAACAT  
ATTTCTGCGCTGAGTTTGTGGCAATTTAATGGCCTCAGCCACACTTAATAACGGCGGACGGGTACACCAACTTCATGTA  
TTCTGGCTAACAAACTCAGTGCCTGCGTTTTAACGTCCGCTCAATATATTGTTAAGAATAGCCTGGTTTTGTACG  
CGTAAAATATTGCTGCTAAATCGGGGATCATAACCAGTTCGTAAGCTCCAGTGCCTGGCATAACGCAGAAAAAGCTT  
GTCATTACCACAACAAATCGTAATCGGCTTATCCTGAGTATTGAAAACATCAAAGGTGCCATGTAGGGATGGCGATTT  
CCAGACGTTGTGGTACTTCCAGTTCGATATATGCCATCAGACCATGCTCCAGAAAACCTCAGCGTGGCATCAAACATC  
GCTATATCGACATGCGCCCTCTCTGGCTTTTTCGCGGCATAAAGTGCCTCACTATTCCGCTGAATAAATAGACACC  
GCCGCATAGATCCGCAAGAGATGTACCACGCGCACTGGCGGAGCATCAGGATATCCTGTTTCCATCATTATCCCGCTCA  
TTGCCTGAATGATGGTATCGTAGGCAGGAGCATTTTTAGCGGACCGGTATGTCCGAAACCTGACGATGAAGCATATATG  
AGGCGCGGGTTGATTTCTTGAAGCGTTTCCCATGAAAACCCAGTTTTTCCATTGTACCTGGGCGAAAATTTCTCAGCTAA  
TACATCAGCTTGTGTTGAGCATATTTATAAATACTTTTATCGTGATCATTCTTTAAATCAAGAACCACACTCTCTTTGC  
CATGATTAATAAACTGTAATAGAGTACTGTCCATCCACATAGGGACCAATGTGCGGGTATCATCACCATGACCCGGC  
GGCTCAACTTAAATACCCTTGCGCCATATTACAAAGAGTTGAGTTCGAAAGGTCCATTAAGGACATGTGTCATATC  
GATAACTAATAAGCCTTCAAACGGCCCTTTGCTTTCATTTTGTCTTTGCTTATGCCTGAAAAAGCCGAAGGTGAA  
AAGACACTTCGGCATTATGTAATAAATAACATGATTAATTAAGAACAGTGCCTGACATAAATCCACAAGGGAGC  
CGTGACGACAAAAGCCAGTACGCTCACAGCCAATGACGCTGTACCAGTACGGGTGTAGACATTAACCCGGCTGGCAATAA  
TGATTCGGGAGAAATGCCGGCGGTAATGCGCCTGCCAGTACCATCATCTGCAGATGTTGCTGTTCAAATGACATGCCATA  
CCAAACGAGAAGCAGTCCAGTGGCATCAGAATCAGTTCAGGAAGGTGTTATAAGCAATTTCCGCACTGAACTCGAATTT  
ATGTGACGCCAGAGTCAACCCCGCAGCGAATAACCGCTACCCCTGAGTTAGCCTTCGCAATCAGATTAAGGTTGGGTTCC  
ATGCTGCCGGAATTTTTACCCCAACCAACACCAGGATCGTTGCCAGAACAGGTGCCATACTACTGGCTCCTTTGCCGCA  
GAAATTAATGCGCTCAGATTACTATTCTTCTTACCATCCGCTCCTGAAGAAGGATTGAGCAATAACAGACCAATAGGAAT  
AGTAATTGCGTTAAACAATAATAGAAATAATTGCTACCATAAACCTGTTGATACGGAATCACCATAAATAGGATCGAGAA  
CTGCAAAACCCAGGAATCCAATGGTAGGTGAACCTGCAATTAATGCACATACAGCTGCTTCTGCATGGGTACGTTTAAAA  
AATTTGTAGCAACCGAACAGGAGAAAAAGAAACATCCGACAATAACCAAGTATACAAGGGTACAGCAGTGTCCGC  
AAAAATCATTTCCCTGTTTGCAGGTAATAGATACAAATAGAGCCGAGGAAGCGGTAGTTAATACCAGTTTATTTAA  
ATGCCCGAGCTTGTCTTCTGAAAATGTTTCTGCTGCGCTAAAATAACCCAACAGCATGATTACGATAATAGGCAAT  
AAATCGCAATAAAAAATGTTAGCATAATAGTATTTCCGATAAGGGTCCCTCACCATCGCATAATGAGTTGGCAAGAGG  
AGACGATGTCAGTATTTAATACCAGCGACTTGTGTTGGGTTAAGTTTGGTAATATGGCCACTTTCAGTTCCTGCTGCAG  
GGTCGATGACCACATTAATAATGGTCCGTTTGCAGGACTGAATACCGGTGGTAAAGCATGACGAAGTTCATCTGCTGCTG  
GTGACGTTATAGCCAACGCCACGAAACGCATCCATTAATTTGTCATACCTTGCATGGTGAACAGATCCGTTGGTGATGG  
TGCACCAGCGCACTGAGATCAACACCGTCTCCTGTAGATGCCGCCATTATTAATAAACGATCGTACCAGGAGGT  
TATATCGACAAATCGTTTCAATTTCCATCCCACTGAAACCAAAAAGCACTATCACCTTCAATGGCGACAACCCGGAGAACCA  
GAAGTCACGCTAGCACCGATGGCATAGCCATACCGATGCCATGACACCCAGGTACCACAATCCAGACGACGACGCTGG  
TTTATACATATCAATAATATTTCTGTCATTATCCAGGGTATTTGCACCTTCACTAAATAAATAATCTGTTCTCGC

GCAATACGTCGCGCACAGCACTTAATGCATTAAGTAATTTAATGGTTGAGTATCTGTACTTAATTTTTATGCATTTTT  
TGTGCATTTTTGCTGCTTGTGGATATTTAAAATATCGCGCCATACCAGTGGAGTCGTAATGTGTTTTGTTTCAGTTCTGC  
CAGCATACCTTGCACTGGATGCAATATCACCACGACTGGCACAGCAATGGGGCGGTTGCTGTCAATTTCTGCGGTT  
CAATATCCAGTTGAATAAACTGTGTATCTGCCGCCATCCTTTTTACCGTGTGCAATAACCAATTCAGTCGTGCACCA  
ACAAGCATGACAACGTCAGCATTGCCAGGGCAAACGAACGCGCAGCTGCCGAGAAAAGTGGATGCGTATCTTCAAGGAT  
CCTTTTCGCCATAGACATTTGGCAGGAATGGAATCTGAGCACTTTCAATAAATTCACGAAGCTGTTTCATCAGCTTGTGAAT  
ACGCCGCGCTTTGCCAAGGATAATTAATGGCCGTTGACTTTTTGCTAAAAGCGAAATTGCGCTAGTGACTGACTTCGGG  
CATGGCAATAATGCTGGCGACGGATTTTCAACTTTAACAATCGTGGTTAACGCTTCGTCTTTTTCCATCGTCGCGGCCAG  
GACATTTGCTGGCAAATCAAGATAAACTCCGCCAGGGCGACCCGATACAGAGACCCGGATAGCGCGTGCCAAATGCAATGC  
CAAGATCCTGCGGCTGATTAACGCGAAATGCTGCTTTGGCATAACGGTTTTGCCGCATTCATTTGGTCCAGCTCTTCATAA  
TCACCTTGCTGAGGTCGACGATCGCGCGGTGCTGGAGCCGTAATCATGATCATCGGAAAACATTTACCGTTGCGTT  
GGCAATGCGGTCAAACATTGAGGAATCCTGGCGCAGAACTGTGAGGAGATCCCGGTTTTGGGTAAGAAAACCGC  
TTGCCGAGCGCATAGCCTGCCGACTGCTCATGACGAAAACCAATAAACGAATGCCTTCCGCTGGGCATGGCGTGCC  
ATATCCGTCACAGGAATACCTACAACACCATAAATAGTGTCAATATTATTCTGTTTTAATGCTTCAACGATGATATGCAT  
ACCATCTGTCAATTTGAAGTTGATCTGACATGATTAATAACCTCGAAATTTTTATAAATTGGGAGCCAGAAGCCCGGTTA  
ATATCAGATGGCGTGGTTTTGCTTCATTGACGCAATTTTCATCGTGCCTATAACCCAGTCTCCTGCAATACAGCAGCGGTAT  
GTTACCTAATAGCGGCGAGCTTTAATATCCGGCGTAAAGGCGAGAAATTTTATTGGACAACCAACGGTCAGATATTTT  
CCACGCAACGGTTGTTCCACTTCAACAACACTGCCACTTTGGCGCAAAGAGGGATCAAGTGAATTTCTTTCATACTTAA  
AACCGGTGCACAAGGAATATCAAACAGTCAAATAGGCCACCGCTTCATGTTTATCAATAGTGACAGTGTATTTTTCGA  
TTTCAGCAAAAATATCGAAAATATGTGGCTGTCGTGCATGGGCTGACTGTATGCCGATCGGTAATCCATTCTGGTTTG  
CCGATGGCTTTACAGGTGTTTTCCAGTTTTGCTCCTGAATAGTGAATAAATATAGGCGTTAGGATCGGTTTTCCAGCC  
TTTACATTTAGGATCCAGCCAGGCTGACCGCCACCACCTGCATTACCACCGCGGGAACTGCATCACCAAATGTACCAT  
TCGGATACTGCGGTTATTCTCCAGATAACCCAATTTATCGAGACGCTGCTGGTACGTAATTTACGCGGCAAAGGTTT  
AATACGGCATCCTGCATTGACATGGTACTGTTGCCACGCCCCGTTTTTTCGCGATGCAGCAAAGCAGCAAGTAAACC  
GATCAGCAAATGCATTCCGGTGTGCTGTACCCACGCTGCAGCGTTACCAGCGGCGGACCATCCAAAAACCCGTAG  
TGGATGCCGCGCCACCCGCTGCCTGAGCAACGTTTTATAGGCTTTTACATTCACATAAGGCGAACACTCATAAACCCT  
TTGATCGAACAAAATCAGACGTGGATTGATTTCTGAATATGCTCCAGGTGAAGCCCATGTGATCAATGGCCCTGG  
ATGAAAGTTCTCGACTAAGATATCAGCTTCGCGGATCAGCTTTTCCATTACCTCTTTCGCTTCCGCTGTTTTGGTATTTA  
ACTCAATAGAACGTTTGTACTGTTAAGCATGGTGAAGTAAAGCGCATCGATATCAGGAATATCTCGCAGCTGGTGACGC  
GTTACGTACCAACCGCGGACGTTCAATTTAATAACGTGAGCGCAAACCCAGGCCAGCATTGAGTACAAGATGGGCC  
AGATTGCACACCGGTGAATCGAGAATTTAATTCCTTGAAGTGGAGTTGACATAGCAATACCTATTAGTTAATTAATA  
TGTGTTAATTTAGCGTTTATTTAAGGCGTAATATCTTCTATAAATAACCCGCAAAAATATCGTCGTAGCTGCACTCGATAT  
TTTTAAAATCCTGTATCAAGTGTGAAAATCATTTCATCGCCACTTCCAATTCCTTTCTGCATGGTAAGTAGTGAGGACG  
AAAAGAAGAATATGATAAATATTGATTCGTGGTAATCAGAGAGAGTCGCGACATTTGTGATGTTATTCTTACAACGTAA  
GAAGCGCCGGTATTTACAAGCAAGGGTATGATTACGCTTTTTAAAGCGTACCATAAAACATAACATAATAAATGATTTG  
TGATGACACGGGATTTGCGGTTACTTTGAGGAATATAAAATGCGAGTTTATAGCACCGGAGCGCAAAATAATTTA  
TGACCACAACCTGTGCTATTGTGGTCATAAAAAATGTCGGCTGGAGGGAGTTAAATCCTTACCTCAATATACTGCCTG  
TCAGCATTAGTTCACAAACAGTGCTTCGCTATCGACGATGATTCATCTTCCGCACTTTTAAGCGCCAGGTTTGCCTCGT  
AGTATTGCTTTTTATCAAGCAGTTTTCGCGCATCAGCAAGTACCTTACGAGTCTGTTAAGTGGCATCAGATATTGGTTT  
TCCATTACGCCAACACCGGCCAGGCGAAGCTCTTCCATTGCGCCTTTTTATCCCTTTCCGCAATTTTTTATTGGCAAT  
TTTTATCGCGCTTCTTTTTCGGGAGTTGCTACATAAATCTCAGAAATTCGACAGATGCATTAATGACAATATATTGGT  
CATCATTGAGATTGGTCTTTTTACCTGGCTTAGCGAATTTGCCATTCGGTACTGTCATCTGACAGCAAAGCGGAAGCT  
TCATTGGTCAGTTCTTTTGCCTTTTCTGGATCGCCATGAAACAGAGCCAGGCGCGCTACCTGCACGTCACGCATCGCATA  
TAAACCTTGTTCAGAGATACGCTCTGCTGCCGCTGCCGTTTTCTGGGTTTGTGAACTTGTGAGTTTGTGTTGTGCCG  
CTACCGGAGCATTATCAGCAGCCATACAGTTGAAGATGCCAGAATTGCTGTGACCATCGTGGCCATAATTAACGTTTT  
ATACTTACCTCATTCTTTAACAGTTTTAGAAAACGCGCCATCATATTGGGTGAGCATGAAATGAGAAATCAGAGAGCAA  
CGGTCATTTTGAAGGGTTATCTTACAGTTGTAGTTATTATCGCAAGAAGTATTTTGTCTTACAATTGTAGGAATATGC  
TTCCTGTGCGCAGAGAACTATTCTTATATACCACAAAGAGATGTCATTTATTATATCGATGTAATACTGATTAATTAAT  
GTAAATACAGCCATAACATCGTAGGTTCTCAGTGAACATTTTTCAGGATAACTTTCTATGAAAGTAACTTAATACTTTT  
CAGCTTATTTTTATTGGTCTCTATTATGGCATGCAATGTTTTTGCATTTTCCATTTCCGGTGGTGAAGTGAAGGAGCT  
ATAAAGAGACTGAAAAACATCAGCGATGACGACCACACTCTACAAAACCTCAGCCATCACAGGCGATTTTGTAAAG  
ATGAGAGAAGATGCGCCACCATTAACCTCACAGAAGAAATGCCGCCCTTTTCCGACAAAGGCGAATTATCTTATTCA  
TCCTGTGCGATAGCGTCTTTCACATGGCAGGTGAACAATCATGTCTGATGCTGATGTAACACCTGCCAAATGAGCCAT  
CCTGACCCACTACCGCTGCCATACCCACCATAAAGCGAATCATCAAGCCACAAGCCGGGCAAGAAACATAAATATCC  
CCGTCACTAGTTTATTACCGCCAGTTAACCATGTTGAAGTAATAAATGAGTGCAGCGAGGATCACCATGCCGAAGAAA  
GAAGAGACCGCGATACCACGTTTACCTGACCGATGTAGCCGTTACGCGACAATACACAGGGCGAGAAACATCCA

TAAATTAATCATAGCTCAACCTCCTGCCGCGCTAAAAACCTGTAACCTCAGTCACTTTAATAGTAAGACAATCCTTAAC  
CTCTGGCAATTTTTGCTAAGCATCAATGAAAACAGCATGTTAAATGCAAGACTGTTGTGTACGGAAAAATATTTACTTTG  
CACGATTAATAATCAGTAGCTGAAAGCAGTCAGCGAGTGATAAAGTACAGATACCGCATTGCTCCTCGTGGTTATGT  
CCTGACTAGTCTTTACACTCTTTACAGGAACCATTGTCGTACATGATGGCCCAACCAATTGAGTGTACCGCTGTGACAT  
GGAATCTTCTGCGATAACAATTCGTATCTACAGAAGGTAACATGTTTCCACAATGCAAATTTTCCCGCAGTTTTCTA  
CATCCTCGCTACTGGCTCACATGGTTTGGGCTTGGTGTACTCTGGCTTTGGGTACAGCTTCCTTATCCTGTTCTCTGCTT  
TCTCGGCACGGTATTGGCGCAATGGCGCGACCATTCTGAAACGTCGTGAATCTATCGCCCGTAAAAACCTGGAACCTT  
GTTTCCCGCAGCATTCTGCGGAAGAACCGCGAGAAGATGATTGCCGAAAACCTTTCGTTCACTCGGCATGGCGCTGGTAGAA  
ACCGGCATGGCATGGTTCTGGCCCAGAGTCGCGTACGTAAATGGTTTGATGTTGAAGGGTTGGATAACCTTAAACGCGC  
ACAAATGCAAATCGCGCGTAATGGTTGTCGGCGTCCATTTTATGTCGCTGGAACGGCGCGCGTGTGGACTGT  
GCCAACCAATGATGGCTACCTATCGTCCACATAATAATCAGCTGATGGAATGGGTGCAGACCCGTGGCGCATGCGCTCT  
AACAAAGCGATGATCGGCAGAAATAATCTGCGCGCATTGTCGGTGCAGTGAAGAAAGGTGAAGCGGTATGGTTGCTCC  
CGATCAGGATTATGGTCGTAAGGCAGCTCCTTCGCGCGTTCCTTGGGTGAAAATGTCGCCACAACCAATGGCACCT  
ATGTTCTCTCCGCTCTCTGCGCGCAGCCATGTTGACCGTAACGATGGTAAGAAAAGCGGATTACAGCGGATATCGTTT  
TTCATCACCCAGAGATGGAAGGCTACCCGACAGATGAAAATCAAGCCGCTGCCTATATGAACAAGATTTCGAGAAAAG  
GATCATGCGCGCACCGAGCAGTACCTCTGGATCCACGTCGCTTAAAAACGCGCCCGGTGGGAGAATCGTCGTTGTACA  
TTTAAACAACTGCTCTTACTCTTTCCCTCCTCAAATCGGCCATAATAACCTCATGGTTTTTATGGCTTTTTCTTAAGGT  
TTTTCTTCTGCTGAATATCTAATTATTACCGTCAGAAATTAACCTGTCGCCGATATGAGACACTTGAAGTTACTAAAA  
GTAAATAAGAAAATGCCTCTGTCTGTTTTCAGTTTTAGGCGTACATTAGCGCCGCTCTCGAGCAGTTTAGCTCAGAATC  
TGGGGTGATGCCACGGTAAAATACAGGGCTTTTAAAGTGCCTTTCGCCGTTGCAACTACTGTATCAGGTGTAATGAA  
GTCATTCAGGCGTAACAGTAATTACGCGGAGAGATGTAAGTGAATATTTCTTTATGGGCATTTCTTTTATGGTCATCG  
TTTGGGCGGTACTTTTTGCCCTGATGATCTAAAAGCAAACCTGTGCAATGAAAAACAGGAGCCATCAGGCTCCTGTTGCA  
TTTCTGACGACGGTGTATTTCCGCGTTTTCTGTAATGTTTGTGCTGCGCGGTAGTAAACCGTCGGCACGGAACATC  
GCTTTAATCCCTCTGATGGCCTGACGAATACGGTCGCGTTTTCAATCAGTGCAAAGCGAACATGCGTATCACCATAGTC  
GCCAAAGCCAATCCCGCGGAGACACAAACCTTCGTTCTGTTAAGGAGCTTCTTGGCAAATTCAGCGATCCCATGGCCG  
CATATGTTCCGGGATTTTCGCCAGACATACATCGAAGCCTTCGGCATTTCACCATCCAGCCCGCTTCATGACGCCCT  
TTAACCAATACATCACGGCGCGTTTTGACTGTTCCGCAATGTCGCGCACGCACTGTTGATCGCCCTCCAGCGCCGCAAT  
CGCCGCCACCTGCAACGGCGTAAAGGTGCCGTAATCGTGATAGCTTTTAAATACGAGCCAGGGCGCTGACCAGCGTTTTGT  
TGCCAACCATAAAGCCGATACGCCAGCCCGCCATGTTGTAGCTTTTCGACAGCGTAAAGAAGTTCGACTGCCACATCGCGT  
GCACCCGGTACCTGCATAATTGACGGCGCTTTCCAGCCATCGTAGACGATATCGGCATAGGCCAGGTCATGGACCACAG  
CACATCGTAGCGTTTTCGCCAGCGCCACTACTTTTTCGAAGAAGTCCAGTTCCACGCATTGCGCGGTTGGGTTTTGACGGGA  
AGCCGAGGATCATCATCTTCGGTTTTCGGATAACTTTACGAATGGCTCGCTCCAGTTTCGTTGAAGAAATCGACACCTTCC  
ACCAGCGGCACTGAGCGTACCTGCGCCCCGGCAATCACCGCGCCATAAATATGGATCGGGTAACTTGATTCCGGCACCAG  
CACCGTGTACCATGATCCAGCGTCGCCAGCATCAGATGCGCCAGGCCCTCTTTCGAACCAATAGTGACGATGGCTTCTG  
ATTCCGGTTCGATTTCAACGTCTGATGATCCTGATACCAGCGGGAAATGGCGCGACGTAACCGCGGAATGCCGCGTAA  
GTGGAGTAACCATGCGTGTCCGGGCGTGGGCCACAGTACATAATTTTTCGACGATATGCGGCGGAGTCGCACCGTCCGG  
GTTACCCATGCTGAAATCGATAATATCTTCGCCGCGCCGACGCGCAGCCATTTTCAGTTGAGCGGTGATGTTAAAAACGT  
AGGGCGGAGACGATCAATGCGCGTAAAGCGACGTTGAGGGCGAGTGTGAGCCATAATTTCTCAGATTAACTTAGCGC  
CCGACCGTCCGAGCGACGCTGCCACGATGGTGGCTGTTTTGAAAATAGCCTGATTAATTTCTGTCTGTCAGCGTTTTA  
GAACATTTTAAATGACGTTAAATGAGGAACTCTGTTTTAAAAACAGGAAATTTATCTGCGCTAACCAAGAAAATACCA  
CTCATTTTTATTAACATAATAATTTCAATAAATTTACTAACCAGAAGTGCATTATCAAGAGATGCATTGCTAATAACCCAT  
TTATCTATCAATCCCTTTTTAAAATTGGTTTTTCTCAAAAACGGCCTGCTGGTCATCAGCCTTCAGTTTACCTATCA  
TAGAGGTTTTAATCCTTATTCAGAGTACCCCGTGCACGAAATATCAACATGCTGCTGGCGGCTTCGATCGGGCAGCGTT  
AATGCTTATCTGCCTGTTCTTTCTCATCCGATCCGCTGTTTCGCGAACTGTTGCACAAGTCGGCGCACTCCCCAAAAG  
AATTGCTCGCCGTTACCGCCATTTTCTCGCTGTTTCGCCCTGTTGACGACCTGGTCCGGCGTTCCTGATAGAGGCTCGCTG  
GTGAACGTACGATTTATCGCGGTGATGTCGGCGGGATTCTGTTTGGCCGTTGGGTAGGCATCATTACCGCGGTGATTGC  
GGGTATTACCGGTATTTAATTGATATCGGCGCGTACGCGCATCCCTGCTTTATCACCAGCATTCTGGCGGTTGTA  
TATCGGGCTGGATCAACCTGAAAATCCCCAAAGCACAGCGTGGCGCGTGGTATTCTCGGCGCATGTTGTGTGAGACG  
TTGACCATGATTCTGGTAATTGTCTGGGCACCAACTACCGGTTGGGATCGATATCGTCTCTAAAATCGGCATTCCAAT  
GATCCTCGGTAGCGTCTGTATCGGCTTTATTGTCTTCTGGTCAAAGCGTTGAGGGCGAAAAAGAGGCCAGCGCCGCGC  
GGCAGGCCAAGCTGGCGTGGATATCGCCAACAAAACGCTACCGCTGTTTCGCCATGTCAATAGCGAGTCATTACGCAAG  
GTCTGCGAAATATTCGCGATGACATTCACGCCGATGCGGTGGCGATTACTAATACCGATCATGTGCTGGCCTATGTTGG  
CGTGGGTGAACATAACTATCAGAATGGCGATGACTTCATTAGCCGACTACCCGTCAGGCGATGAATTACGGAAAAATCA  
TCATTAAAAACAAATGATGAAGCCACCGCACACCAGAGATTCATTCCATGCTGGTGTATCCATTGTTGGGAGAAAGGGGT  
GTGACCGGAACGCTGAAAATTTACTACTGCCACGCGCATCAGATCACCTCGTCAATTACAGGAAATGGCGGTGCGTGTGTC  
GCAAATCATCTCCACGCAACTGGAGGTTTACGCGCCGAGCAGCTACGTGAAATGGCAAATAAGGCAGAGCTTCGCGCC

TGCAAAGCAAATTAATCCCATTTTCTGTTAACGCTCTGAACGCTATTTTCATCGTCAATCCGTCTGAATCCGGATACC  
GCTCGCCAGTTGATCTTTAATCTGTGCGCTTATCTGCGCTATAACATTGAATTAAGAGACGATGAGCAAATCGATATCAA  
AAAAGAGCTGTATCAAATTAAGACTATATTGCCATTGAGCAGGCCCGCTTTGGTGACAAGCTGACGGTTATCTATGATA  
TTGATGAAGAGGTGAATTGCTGCATTCCACGCTGCTGATCCAGCCGTTGGTGGAGAACGCCATTGTCCACGGTATTACG  
CCTTGCAAAGTAAAGGCGTTGTCACCATCAGCGTTGACAGAGTGGGAAATCGGGTACGCATTGCGGTGCGAGATACCGG  
GCACGGCATCGATCAAAGGTGATTGAGCGGGTGAAGCGAATGAAATGCCGGCAATAAAATTGGCCTGCTGAATGTCC  
ATCATCGCGTGAAGTTATTGTATGGCGAGGGGCTGCATATCCGCCGCTGGAGCCGGGACGGAAATTGCGTTTTACATT  
CCTAACCAACGCACCCAGTCGCTCACAGGCTACGTTATTGCTTTGAGCCGGAGTGATATTGTGAAAGTCATCATTGTT  
GAAGACGAATCCTGGCACAACAGGAACTGAGCTGGCTAATTAAGAGCACAGCCAGATGGAGATTGTGGCACCTTTGA  
CGACGGTCTGGACGTGTTGAAGTTTTGACGATAACCGCGTCGACGCCATTTTCTGGATATCAATATCCGTCGCTGG  
ATGGCGTGTGCTGGCGCAAACATCAGCCAGTTCGCCATAAACCGTTTATTGTGTTTCATCACCAGCGTGAAGAACAT  
GCGGTAGAAGCGTTTGAAGTGGAGGCGTTGACTACATTCTCAAACCGTATCAGGAGTCACGTATTACCGGGATGCTGCA  
AAAATGGAAGCGCCTGGCAACAACAGCAGACCAGCAGTACGCTGCCGCGACGGTAACGCGTGAGAATGACACCATTA  
ATCTGGTGAAGATGAGCGAATAATCGTCAGCCAAATTAACGATATCTATTACGCCGAAGCGCACGAGAAAATGACCTTT  
GTCTATACGCGGCGTGAATCTACGTAATGCCGATGAACATTACCGAATTTTGCAGCAAATGCCCGCTGCATTTTTT  
CCGCTGCCATCGCTAATTTGTGTCAATCTGAACAAAATACCGGAAATCGAACCGTGGTTAATAAACACCTACATTCTGC  
GACTGAAAGATCTGGATTTTGAAGTGGCGGTCAGCCGACGAAAGTGAAAGAATTTCCGAGTTAATGCATCTTTAATCG  
GAACTTTTCATGAAAGCACAGGCTTGCCCGCGATCAACAATTTTCCGCGATCTGTTACAGCGCCTGGTGTCTTAACCC  
GCAACTACTGGGGCGCTGTGGTTTGGCAGCCAGCTGCCTCGTTGCCGGTGGGCAGTTTATGTATTGATTTTCCCCGTC  
TGGATATCGTGTGCGCGCGAATACGGCAATCTGTGGAAGCAAAGCAGCAACGTTTGGTGAAGGAGAATGCTGTTT  
ATTCCGGCGCGCGGCTAATTTACCGGTCAACAACAAACCGGTGATGCTGTTAAGCCTGGTGTTCGCTCCGACCTGGCT  
TGGGTTATCGTTTTACGATAGCCGACACCGTGTGTTGTCATCTGCTGCCAGATCCAGCTTCCAGCCTGCAACGCG  
GTGAAGGTGAAGCGATGTTACCGCCCTACCCATCTTAGCCGTTGCCGCTGGAGCAAATATCATTACAGCGCTGGTG  
TTAAGTTTGTGCATCTTTCGCGTAGCGTGGTGAATATGCCGCCGGCAATTCGAGCCGCGGGCGATTTTCTCTATCA  
CAGCATTGTAACTGGGTTACAGATAATTATGCCAGCCGCTCACCCGCGAGAGCGTGGCGCAGTTTTTAATATCACGC  
CCAATCATCTGCAAACTGTTTGTCTCAGCATGGAACGATGCGTTTTATCGAGTATGTGCGTTGGGTGCGAATGGCGAAG  
GCGAGGATGATTTTGCAGAAATATCATCTGTCAATCATGAAGTGGCACAGCGTTGCGGTTTTCCGGATAGCGACTATTT  
TTGTCGCGTTTTCCGGCGTCAAGTTTGGTCTGACGCCGGAGAGTACAGCGCCGTTTTCCAGGCTAACGTGAGAAGTTA  
ATTCTGTTTCCAGCAGCGTACAGATACTTTGTGCATCTTGCAGCGCAAACAACGACTGGCGGAAGTTTTTATTACCCAGT  
TTACGCGCCAGCTGCGAGAAGACTTTACATGATTCATCCCTTGTAGCACCCAGCGTCAGCATGATCACCAGTTCGAC  
TTCGCCATTTCTGACTGCCAGCAATCGGTTTCCGACGCCGGCAATGCTGATACTGGAATGACGGATCCACTGAGATT  
TGGTGTGCGGGATCGCTACGCCAAAACCAACGCCGGTGGTAACAATCTCTTCCCGCTGCCAGACATCTTCTTCCAGCTCA  
AACGGATGTTCAAGTGCAGCCGTTAACGCCGAGGTTGCCGACAGGAACTGGATCGCCTGCTCTTATTGTAAAATCCTG  
ATCAACAAGATATTCTCCAGCGCCAGCAGTGGGCGAACGTTCTTCCGGCGTAAAGGCGGTGAGTAACGCTTCAATTT  
CCTGCGCACTGCGGCATTCATGCCTGACGCGCCAGTTCGGACACGCCTCGTATCCAGTTGACGAAGCTGGCTTTTC  
ACCGCCGGAATACGCGGGTACTCATACTCAGCTCATCCAGGCCAGCCAAAGCAGTAGCGGCAGATAACGGCTTTACC  
GCCAGTTCACCGCAAATGCCTACCCATTTGCCCGCTGATGCGCAGTGGTAACTATTTGCTGCAACATGCGCAGGAACG  
ATGGCGTAATCGGTTATATAGCGGCGATACGCGCGGTTATTACGATCAGCCGATACAGATACTGGGTGATATCGTTG  
GAGCCGATACTGAAGAAATGACCTCATCGAGAATGGTGCATGATGTAGCACACCGGAACTTCCACCATGATCCC  
AAGCGTAATCGTCTGATGACGACGCCATCGCGCTTAAGCTCAACGATCGCTTTTTGGATCTCGCTTTTACCCATA  
AGATCTGATCAGGCTGTGAACCATCGGGATCATCAACTGGCGTTTCCGAAACTGGCGGCGCAAATGGCCCGCAGT  
TGAGTGCAGAACAGGCCAGCAAATTCGGGTAAATACGTACCGCGCGATAGCCGAGGAACGGGTTCTCTTCTGGGGAAT  
ATTACAGATAAGGAATGCTTTTATCGCCGCCGATGTCCATCGTGGGAAGATAATCGGCTTGTGCGCCGCCAGTAGCA  
CCTGCTGGTAGCTTCAAATGCTCCTGCTCGTCCGCGCGCTGTGCGATCCATATAGAGCATTTCGGTACGGAACAGC  
CCGACACCTTCCGCGCGGTTGGCAAACGCGCCTGGCGCTTCCAGAGCGGTGCCGATATTCCGCCAATATCAATACGCTT  
GTTATCACGGGAATAGGCCAGCTGCGCGGCAGCCTGCGCTGTTGTTTTGGCGTTTATCCGCCAGCGTCTGCGCGACCT  
GATAATAACCGCTCACCGGCTCATTGGGTTAATCGCCAGCACGCCGACTGGGCGTCAAGCACTGCAGTTTCCCGGCA  
TAACGGGCAATCGATCCAGCGGAAGCCACTCAGTACCGGGATCGCGAGGCAGGGCCAGAATCAGTGTATGCGAGGT  
GCGCCCGTTTTTCTCAGAATCATGCCGCAAGTTTTCAAATCAAGGCTCAAAAATGGCTTGGGGTTAAATCTTACG  
CCACCAGAATGGTCGGTTTTTCAAGCACAGCTTGTGCGCGGCTTCAAGTCCGGCCAGGTGATATGACGCAACTGTTCG  
CTGATATCGCGAATGTGCTAACACGTTGCGCGAGATAATCGCTGGCAGAGGCAGAAAGTTTGGCGCAAACCTGCTCCAT  
ATTGCTGATGATCGCCGCCCCAGCCCTGATGCTGTTCTGTCATCAGGCGACGGATATTGCCTGCAAATTCATCATCCT  
GAATCAGCGCAAATGGGCGCTGAGGATAGTTTTGCTTTCGCCGTACGCTCACGCAATTGCTGGTTCAGTTGCTCGGCA  
AGCGTTGCCAGCTGTGCTCCAGCCGGTGAATCTTGGCAGTGGCGGGGATTGCCCGATAACTGTGAGGCTGTGCGT  
TTGTAACAGGGTACGCGTACCCACGCCGACCGCTTCCAGCACATTGCCGTACAGTAAATCCGGGTTAAGGCGGCTTA  
ATGAACGCGGACGCGATGCGCCGTCAGTTCTGCTGCGTAGGCTGAACGCTGTGCTGTGATAAAGCGCACCTGGATG

TACTCTTCCAGCACGGCCGCGCTGCTCTTCATCGCTGCCGCTAATGTTTCAGGCTGCAACTGTCATTAATAGGGTGCC  
GGTGCCAATCAGCGCCAGCGAGCTTTTCGCATCTGCCTTTGCGTTCTGGCGATGGTTAATAAAAAGTGATTTTCGCTTTGCC  
ACTGGCTGCACTGTTCTTTAAGTTCCACGCCGGACGAGCATGTAGACCGTTAGGCAAAGGACAGAGAAAATTGAATCGTT  
AACATAACCGTCCGGGTTAATCAGGAGATCATCTGAAATCCGTAGTTGAACAACCGTCTCACGCGTAAGACGTTGAAT  
AAGGGCAGATAAAAAGTTGCTGCATCTGCAAAAATGTCGCGGCAATCGGCAATCGATGCGGCGCAATGTCCATGGCGGGTGT  
CTGGCCCATACCACTGTGGGCACGCCGGTGCCGGTTAAGTGACCCGCCCGCCGTCCTGTCGCGCTTGTGAACATA  
TCTGCCTGCAACGGCACGCCAATTTCTGCCGCCAGGTTTCGACCCAGGCGGTAAGTTTTGGCGGCGCAATCAGCGACTT  
GTCGCTTAACACCAGCATCGGCCGTTACCAATCTGGCGATGGTTAGCCGCGCCATAATCAAAGTTTTTCGCCAGCAGG  
CGGTATCAAGCACAATGGCGACGTCCGGCGACACCCGCGGGTGGCAGTTTCCCGCCGCGTAATCCCACCTCTTCGCTG  
GAACTTGGCACCAGCCACTTCCGCAGGTAGTTCCGGCTCGTGACGTTCCGCGAGTAACGTCACCAGCAGATAGCAACC  
GAGGCGGTATCAAAGGCTTTCCCATCACTCGCTGGTGAGGGAGAACCTGAAAAGTGGTATCAAACGTGACGCGATCGC  
CGGACGAATCCCGCTGCATCACTCGTCATAGGAGCGCGACCAATGTCACGCGCATGGCGCTGACGTCATTTCCC  
TGCCGGTCCCGTCAAGCAGGCTGGAATTTGCACTCTTCACGGGTGGTATGCGCACCCGCTGACGCTGGCGGGCAGC  
CATGCGTACGTTGCCAACCCGAGCACATCAATGCCCTTCGCGGGAGATGCTGCGCACCAATAAATCCCCTTCGTTCA  
TATGTTGCAGGCGATCCGCTTCTCCAGCAGGATCGCCGACTTCCTGTTCCGAGGAGGCGATCGCATCTGCCTCGCT  
CAACGCTTTAATAGCGATAAATCCATTATGCTCTCCCGTAGCAACACTGTTTTCGGCATGGCGTAGAGCACTTCTGC  
GCCTTCCGGGTAACAGCACAACATCTTCGATGCGCACGCCCTTGCCTGGCAAATAAATCCCGGCTCCACGGTCA  
GTAACATGCCTGGCTGTAGCGTCTGGTGTCCCGGGTAAAAACGCGGATCTTCATGAACTTCAATGCCGATAGCGTGA  
CCGGTGTATGACCGAATAGTCGCCATAACCTGCTTCTGTAATGACCCGCGCGCGGCATCGTCAACCTGCTGGCAGCG  
CACGCCGGGGCAATCGCGGAGATTGCTGCGAGCTGTGCTGCAGGACAATTTGATAGACGTTAAACAGCAGGTGAGATT  
CGGCGTCCACCTTCGCCATTACCAGCAAGGTGCGCGTCATATCAGAGCAGTAGCCCTGATACAGCGCACCGAAATCG  
AGAGTGACAACTCGCCGCTGCAACAATCTTGTGCTGGCTTTGCCGTGCGGACGCGCCACGCCAGCCTGGCGAC  
AATGGTGTCAAAGAGGCTTTTCTGCGCCTGCTGGCGATAAACCACTCCAGTTCCAGCGGTATCTCGCGCTCGCTCA  
TCCCGCCTGAATAAAGCGGCAATATGCTCTGCACCGGATCAGCAATCCACAGGCGAGGCGGATTTTCTCCACCTCC  
TCTGGGTTTTGATTTGCCGAGCACATCCGGCGTGGCGTAACCAGTTTCGATTGAGTTAGACTGCCAGCGGTGCGC  
GGTTCCCAACTCACCTGCTGGCCCTCAAACCGAGCGTTTGAACCTGTTTCATCGGCAATGATTTGATTGACGATAGTGG  
TAAGCGTGTCTGTCGCTCAAGCAAATGCAGCTGGTAGCCTTGGCGACGGGTTCCACCTCAACGTAATAGCGCAATCC  
ACCAGAATGTGCGCACTTTCACGGTAATCACCACATAACCTGATCCGGTGGAGATCCCAGATGCGGCTGTTTGTCTG  
CCGTGAGGAGAGAAGCACTGCATCCAGTTGTTGCGCCTAAGCCAGTCCGCGACGGAAGCGAGTAATGTCATCTGGATTT  
TCCTTTACAGGCTATCGATTAACAATTTGCCTTTACGGAACATCATCAGACGCAGGAACACCACCATCAGCGCAGTTA  
TGACTGCCCCAGCGGATCCCCGCCATATAGACGCCAGGTTAGTGACCAGCGGCATGCCAGATAGCGGACTCCGGG  
AACCATTGCACTGCGCCAGCCAGACAGCGGGGTTGAGCCGACAATAGCGCCGACCATATACGACGGAATGGCGGTGAT  
GGGGCTTCCAGCGCAAACGGAATCGCACCTCACTGATCCCCATAAACGCCAGGAACATGGCGGTCTTACCCTGCGGAT  
AAAGTTGAGCGTTGAACAGGCGTTTCCGGTTAAACGACGGTCGATAATGGTCGCCAGCCCCAGACCAATCGGCGGAATA  
ACGATAGCGATAGAACGAGCGGTGACCGTAATACGTGGTCAAGTAAAGTGAAGGCAACAAAACCTGCGGCTTTGTT  
GATCGGGCCACCAAGTTCGATTGCTGTGCGCGCGGATCCCCATTGCGTACATCAGCGCGCCCTTCTCACCTGCGGCAG  
TCAGCACAGTACGGATACCGCGTTGATCCAGCCACAAAGGGGTGATGACGTAGTACATCGCCAGCATGACAAAAATG  
CGGAAAGAATCGGGAGCAAAAATGTGGTTTTGAACGCTAACAGGAAATCCGGTAACTGGATTTTCTGGTTTCATCCACT  
CACAAGGTAACCCGCAACGATAGAAAATAACAGCGACCAATGAAGGTGACGCGCACCGGGAAGGTCGCCATTTGCA  
TAGTGCTGGGATCGAAGTTGAGCAGTTGCGTGGTGGGTAGACATCAACCCGCGGATAAAAACCGGGGAACCGCAGT  
TTGCCACCGATAGAGTTCGCCACAAAAGCAGCAAACATCGGAATGGCAAACAAAACAACGCGCCGCGAAGGACTGCGA  
CAGCCAGGCAAATTTAAGTAAGGAGAGGTGAAAACCGGAGAATTTCCCGCTATTAAGAGCATCCATGATGCCGATCTCAG  
CAGGAATTTAAGCCAGCTATAAGCAATCAGCTGGTGAAGGCGAGGATCACACCGCCATAATTAAGTTCGGCACCATG  
CGTGAATCCCTGACATCACATGCTGCGGGAGTTACCCCGAAGCTGGTTTTAGAGGCTGCGGATTCTTAAGTCCCGC  
TGCCGACCGGATGCGCCAGGCACAACGGTTGCACTGCGTTTTTAATGGCCATAACAATTATCCCTGTCGAATATTACT  
GTTGTTGAGAGCAATCATCTCTCGATTTCTTTGATGATGCCCGCAGCGTTTTTAATTGCGTCTGCAAAGTGATTTCA  
TAAACGTGCGGTGATTCGAAACGTTCTTATCTTCCGGGTAACGTCACGGAGTGATGATGATGGTTCGCTTCGGCGAT  
ATCCTGCGCCGTGAGGCGATTCTGGATACCGTCCCGCCCTGGGTTTCAATTTTCACTTATAACCGGCTTCTACCGCCG  
CTTCTTCCAGCGCTGAGCGCCATAAAGGTGTGAGCCAGGCCATCGGGCAGGCACATAAGGCAATCAGTTTCTTACTC  
ATCGTTAATCCTCGTTGATGATGAGTGTGACGAGTGAATTAAGCACTGCAAAAACAATCGCCGTTACCAGACAAATAA  
TGATTTACTGGAGAATTAATCCCGTGTACGGAAGTGTGACGAGGTCGACCTTGTGAGGGGACACAAAGAAAAATTGA  
ATAAAGTGTATGATTTAAAAGATTATCGGGAGAGTTACCTCCCGATATAAAGGAAGGATTTACAGAATGTGACCTAAGG  
TCTGGCGTAAATGTGACCCGGAACCGAGAAGGCCGATTGTCATGGACGATGAGATACACCGGAATATCATGGACATAT  
TCTTTAAAGCGCCCTTATCTTCAAATGCGGCACGGAACCGGAGGCTTTGAAGAACTCAAGGAAGCGCGGCACGATACC  
GCCCCAATAAACACGCCGCAATGTCCGAGATTGAGCGCCAGATTGCCGCCAAAACGCGCCATAATGACGCAAAACA



CGGACAATGCGCGGGGCAATCGGTGCAGCTGTCAGCCAGCGCGGTTCCGGTAATATCTTTTGGCTTGAGATTTTCTGGC  
AGGCGGTTGTCAGCTTTTCACAATTGCGCGATACAAATTCACCAGCCAGGGCCAGAAAGCACGCGCTCCGCCGAAACATG  
ACCAATTTCCGACGCAATATTTGAGGATAATGGCTCTTCTTACTATTTCGCGCAAAAATCAACGTGACCGCCTTCGC  
CTGGCAAGCTTACCCAACGCTTATCGACATGGACCAGATGCGCAACCCCAAGCCCCGTTCCGGCACCGTAAACCGCAATA  
GGCTTACCTTCGACCGGTTCTGCGCCACCAAATGAATCAGATGCTCTTTTTTTCAGCATCGGGATCGCCATCGATACAGC  
GGTAAAATCGTTAATAATTTCCAGATGGCTAAAACCGAGATTCTTTTTTATTTCGGAATTGAGAACGCCAGGTATGGT  
TGTCATCGCCACCCAGTACCCGTAATTGGGCAAGCGATGGCAATACAGCCGCTTTTACCTCGACCTTATGTTCTTCA  
AGATAAACGCGAATGACCGCTTCGAGGCTGGGGTAATCAAGCCCTGAATAGGTCTTAGCCTGCGAGATTTACCAGTGGC  
AATATCACACAGAGCAAGACGTGCGTTGGTGCCGCCACATCACCAGCTAATGCATACTTTGTATTCTTCAACTGCTCC  
GCTAAAGTCAAAATAATTTCTTCTCACTGTAAATACCTGGGGGCATAACAACAACGCGGAAAGGCAGGCTCCCTGTA  
AATATCGATCTGGGTACACAATTACTTTATCGTTTTCAGCACAATTGCAGCGATGCTTTTTTGAAGCTGGGCAACTA  
AGTATCTGACCCCGCATAAGGAATAGAATGCTCCATCCGCGAGCCAGAACCATGTTGTTATTATCGCTCCCGCCGCTG  
GCAATTGGGATTGCGTCCAGTCTTATTCTGATTGTGGTGATGAAAATCGCTCGGTATTACAGAATTTGCTCTGGCAACG  
ACTGCGGGAACTCTGGGATAGCCCAGGATTACCCTCTGGATCATCGGTGATTAACGCTAACGGGTATTGCGGTGG  
GGTTGGTTATCCGTTTCAGCCAGGTCATGCCGACCAGACCCCGCTGTGAACCGCTGATCGGCGCACCGGTTCCGCC  
TCTGCGCTACCTGGACTTATCGTAGCATTATTCTCGTCTTGTGCGGCGCTCAGCCTGGGCGGAACATCCGATCAT  
GACCGTCAATATCGCCCTTCGCGTTGCCATTGGCGCTCGTCTGTTACCGCGCGTCAACCGAATGGAGTGGACTATTTT  
CCTCTGCCGGAACCATCGCGCACTGTTTGGCACTCTGTTGCGCGCGGCTGATATTTTCGCAAACTTAAATGGCAGT  
AGTGAAGTTCGCTATGGGATCGTCTCTTTGCGCCGTTAATGGCGGCAGCAGCTGGTGCACCTACTACCGGATTATTTT  
CCATCCTCATTTTTACTGCCATTGCTCATTACGGACAGATGGAATGACCGATATTCTCAGCGGTGCAATTGTCGCGG  
CGATTGCCATCGCAGCAGGGATGGTCGCCGATGGTGCTTACCACGGTTGCACGCGATGATGCATCAAATGAAAAATCCG  
GTGCTCGTGGTATTGGCGGATTTATTCTCGGTATTCTGGGGTTATTGGTGGACCAGTTTCGCTGTTTAAAGGGCT  
GGATGAGATGCAGCAGATGGTGCAATCAGGCTTTCAGCACCAGCGATTACTTTTTGCTGGCGGTAATTAACCTTGGCG  
CCCTGGTCTGTGCGCCAGTGGCTTTCGCGGTGGGCGAATCTCCCGCAGTGTGTCGGCGTGGCATTAGGGTTG  
ATGCTGCATGAGCAGTTCGCCCGTACCAGCGCAATAACCGTTTCTTGCCTATTCTCGGCATCGTGTGGTGGTAAAC  
ACGCGATGGCTGGTAAAGTCTTTTTATGGCGCAGTCTGTGTACCAATACCACATTGCTACCCTGCTCTGTATCGTCA  
TGCTTCGGCATGGCTGTTATTAGCAGTAAGCCGATGATGATGGTCAATCGTCCGAAGCAACAGCCACCCACGATAAC  
GTTTAGCAAAAAATGCTCTCTTTATGATTTAAGAGTTATGGCGATGATACGGGGCTTTACCTCCCGTAATATTGCGTT  
AACAGGCCGCTGACGGCTTCGAGCGTGAAGGAGAATAACAATGTTAGGTCACCTGTTTCTGGCGGCCGCCCTGATGGCAT  
TTACCCCGCTTCAGCAAAACGAGGTGAAATCACCTACTGCCATCAATCAAATTAACAATTTGGCGATCGCGATCATTAC  
GGTAATTAAGGGACGGTGGTCACTGGCGGACCGTACTACTGGCATCGCAATTATGAGTGGCGCAAAAACCGTTGGT  
GCGTCATGATAATGGTACCACCGTGGCTGGGATAAGCGTAAAGCGTATGAGCGTGGCTATCGTGAAGGCTGGCGCGATC  
GTGACGATCATCGCGAAAAGGCGGGGTCATGGGCACCGCCATTAACCGCTCCGCCAATGGAGCAATGCTGATGC  
GACGCTAGTGGCTTATCAGGCCTACAAACCGCTCTTAAACCGTAGGGCGGATAAGGCGTTTACGCCGATCCGCCA  
ATAGTGCCAGATGCGACGCTCATTCAACTACAATCCAGCGCCGTCACCAACAACAGATATTACGCGCCACGACCA  
GCACCACAATCACCCAGCTGTCTGTTTTACGCGTTTGTGTTACCAGATCGCCATCAACTGCTGTACTGGTGA  
ATCAGCAGTGGAAACAGCGCCAGAGCGATAACAAACTAACAGTACCTGACTCATAACCAGAATCCGTGTCGGATCTAA  
TCCCATCAGAATGACAATAAATGACGGCAACATGGTACTGTACGACGCCACCCACAGCGGGATATGAAAGCGAATGAAG  
CCTGCATCACCACTGCCCGCCAGTGTCCCACCACCGTTGAAGACAGCCCCGAGCAACAGGCTTAATCCAAAGACC  
GTTGCCGCGCGTGGCTTAAACAGCGTTGCAGCGTCAGATAAGCCTCATCAAGATCGGCAACACAGTATGACCGGAAAA  
GTGGAACGCCGCCGAGCTGTAGCCATCATCGCCAGATTGACAAAACCGGCAATAGTCATGGCGATAGCCACATCCCAT  
TGGTGGCGGAATAACGTTGTTGACGCAACCGCCATGTAATGCTGAGTGAAGGAGGAGTGCAAAATAATACATGCGGC  
ATAATCGTCGCCCTAACACGCTGCTGCCAGGAAGACCGCTCCGAAGTAGGTAACCTGGGATCACCATTCTTTTACC  
CAGCTGCGCCAGGTTAGGCTGGGAGAAAAATCAACTCGACAATGTAAGCGCGGCAACAACAACAGTAACCCGCCAATCA  
CTTTCTCCAGCGGTTTTTGGCCGCGACGTTGCGCATTAAATCAGGAAAGTCCGATCCCGTCCAGCCGCGCCCTGC  
AACAAACGAAACACCAAGAATGAGTTTTAAACCGATCGCCGACCAATAAATTCGCCAGGTCGGTTGCCATCGCAATA  
TTCTGCCTGAACCAATAGAACCACACTACGGGACGCGGATAGTATCGCAATCTGCTCCGCCAGATTTTTACCGGTGG  
CAATCCCTAGTTTGGCAGAGAGGATCTGAATCAGCATCGCCATCAGGTTGGCCCAAACGACAACCCACAGTAGCTGATAG  
CCGAAGCTAGCACCCGCTGAATATTGGTCGAAAGTTACCGGATCGATATAACCAATCGCCGCAATGAACGAGGTCC  
CATTAAATGCGAGCCTCATCTTGGCGCCGCCGTCCTGCTACTCTCAACGCGATAGTTCGTATCTTGTGCTCTAAA  
ACATAGCCTTTGCTATGTTTATGCTATGCCAAACGAGAATGATTATCAAATCATTTAAATGGATTGTGGTGAATTTCTC  
TGATAGACCAGGATTATGACTACGAAAAGATTGATGACTTGAATGTTATGGTTATGTTTAAATGTTAGCACATTTACATA  
CTTTAGCTTCCATACACAACATAGCAGAAATGATGACAGATCACTATTTTTGAAGCCTGTCACAGGACGTCATTATAG  
TGTGTGTCAGATCTGTTTTCTTAAACCATGTTACATAGAATGTGCACGAAATTTAACCTGCCTCATATTTGGAGCAAA  
TATGGACCGCTCCTTATTTTGTACTGGCACTTGGCGTTGTTGCGATTCTCGCACTGCTGGTAAAGCAGCGACCGCAAAA  
AAATTCGATCCGTTATGTTATTCAACTGCTTGTATCGAAGTGTACTGGCGTGGTCTTCTGAACTCCGACGTTGGT

TTAGGCTTCGTGAAAGGCTTCTCCGAAATGTTCGAAAACTGCTCGGATTTGCCAACGAAGGGACTAACTTCGTCTTTGG  
TAGCATGAATGATCAAGGCTGGCATTCTTCTTCTGAAAGTGTGTGCCCAATCGTCTTTATCTCTGCACTGATCGGTA  
TTCTCCAGCACATTTCGCGTGTGGCGGTGATCATCCGCGCAATTGGTTTCTGCTCTCCAAAGTCAACGGCATGGGCAA  
CTGGAATCCTTTAACGCCGTGAGTCCCTGATTCTGGGTGAGTCTGAAAACCTTTATTGCCTATAAAGATATCCTCGGCAA  
AATCTCCCGTAATCGTATGTACACCATGGCTGCCACGGCAATGTCACCGTGTGATGTCCATCGTTGGTGCATACATGA  
CCATGCTGGAACCGAAATACGTCGTTGCTGCGCTGGTACTGAACATGTTGAGCACCCTTATCGTGCTGTGCTGATCAAT  
CCTTACCGTGTGATGCCAGTGAAGAAAAATCCAGATGTCCAACCTGCACGAAGGTGAGAGCTTCTTCGAAATGCTGGG  
TGAATACATTCTGGCAGGTTCAAAGTTGCCATTATCGTTGCCGCGATGCTGATTGGCTTTATCGCCCTGATCGCCGCGC  
TGAACGCACTGTTTCCACCGTTACTGGCTGGTTTGGCTACAGCATCTCCTTCCAGGGCATCCTGGGCTACATCTTCTAT  
CCGATTGCATGGGTGATGGGTGTTCTTCCAGTGAAGCACTGCAAGTGGGCACTATCATGGCGACCAAATGGTTTCCAA  
CGAGTTCGTTGCGATGATGGATCTGCAGAAAATTGCTTCCAGCTCTCTCCGCGTGTGAAGGCATCATCTCTGTGTTCC  
TGGTTTCTTCCGTAACCTTCTTCAATCGGGATTATCGCAGGTGAGTTAAGGCCTGAATGAAGAGCAAGGTAACGTG  
GTTTCTCGTTCGGTCTGAAGCTGGTTACGGCTCTACCCTGGTGTGCTGTCTGCGTCAATCGCAGCACTGGTGT  
GTAAGACCATACATAAAAAAGCCGGGATAATCCCATAAAGCGTAACCTAAGGGTTGGTATTACGCCTGATATGATT  
TAACGTGCCGATGAATTACTCTACGATAACTGGTCAGCAATTCGGCCATATTGGTAAGCCGAAGAATGGATCTT  
CGCACGTAATGCCGGGCTTAACCCGCGCGCAAAATTCGTGATGCTGCAACTCTGCTACGCTCGGGCTGGCTTAC  
GGCCCCGGGGGATGTCATTACGTGAAGTCACTGCATGGGCTCAGCTCCATGACGTTGCAACATTATCTGACGTGGCTCT  
CCTGAAGCGGCTGCGGAATGCCCGGACTGGTTTGGCATACTTGGCCACAAACACTTGCTGTACGCGCCGAGTTACGG  
GTTGTACAAGCGAAAGAGATTGCGTCTTGTGATGGAACAGCAATCAGTGCGCCCGGGGCGGCAGCGCTGAATGGCGA  
CTACATATGGGATATGATCCTCATACTGTGAGTTCAGTATTTGAGCTAACCGACAGCAGAGACGCTGAACGGCTGGA  
CCGATTTGCGCAAACGGCAGACGAGATACGATTGTGACCGGGGATTGGTTGCGTCCCGAATGTATCCGCTCACTTG  
CTTTGGAGAAGCTGATTATATCGTCCGGTTCAGTGGCGAGGATTGCGCTGGTTAACTGCAGAAGGAATGCGCTTTGAC  
ATGATGGGTTTTCTGCGCGGCTGGATTGCGGTAAGAACGGTGAACCACTGTAATGATAGGCAATTCAGGTAATAAAAA  
AGCCGGAGCTCCCTTCCGGCAGTCTCATTGCCGTATCACTTCTCCGAAAAAGCATTAAATCAGTAAAACCCGACTGC  
TCAGCGAGAATCGTGAAGGACGAGTAGTTCAGCGGAAACGCTGGAAGCAGCGGCCATGTGCTATTGCTAACATCA  
TTACCGGAAGATGAATATTCAGCAGAGCAAGTGGCTGATTGTTACCGTCTGCGATGGCAAATGAACTGGCTTTAAGCG  
GCTCAAAAGTTTGTGACCTGGATGCTTTCGCTGCAAAGGAACCTGAACTGCGAAAGCGTGATATTTGCTAATCTAC  
TCGCCGATTTTTAATTGACGACATAATCCAGCCATCGCTGGATTTCCCCCAGAAGTGGCCGATCCGAAAAGAAGAAC  
TAACTCGTTGGGAGAATAACAAAATGGTCATCTGGAGTTACAGGTGGCCATTCGTGGGACAGTATCCCTGACAGCCT  
ACAAAACGCAATGAAGAACCGCAGGCATCGCTTAAACGAGGCACCGAGGCGTGCATTCTCAGATGGTTCAACCCCTTA  
AGTTAGCGCTTATGGGATAATTCCTCGTTTTTTTACGCTGTTAATCAGCTAATGGCTGCGGGCGACCAATCAAATACC  
CTTGAGATATTGACCCCGAGCTTATGCAATAGCGCTGCTGCTGTTGCGTCTCGACAACTCCGCGACCACACTCAAT  
GACTTCGTTTTCCGAGATCGGTAATTGATCTACAATCATCGCATCCAGCGTGTTCGTGACAATATCTTTCACAAAGAC  
GCCATCAATTTGATGATATCAGCCTGCAACGCTTAAACCGTTCGTAGTTGGCATATCCGGTGCCAAAGTCATCAATCG  
CAATCCGAAACCAAATTTAGCAGCTGCTCGATGTTGTACATGCTGCTTCTGCGTTAGAAAACGCCTGCTCCTCGGTG  
ATCTCAAGAATGACCGCTCGGGGAGATGTGATAACGCTTAAACAGACGAATAATCCGCCGCAATATCTTTTGCAG  
CAGCGTGAGCGGCATTAATGACTGAAAAGCGCGTCTTTTTTGTGCAAGGGTGTGTTGCCAGCCACTTCAACAAGG  
ATTCCAGCACTTGCAATCAAACGCGCGCTAAGTTAAACTGAGCAATAAGGGGAGAACTTATCCGGGTGATAATG  
CCGCCGTATATTCAGTCCGCGGAGGATCTCATCAACCTTACCCTCTTTGTTGCAATTGGCTGGGCGTAGAGCAG  
CAAATACCCTGATCTAACGCCGTGCGAATGGTATTAGCAATAGCACCTGTTTAGTGGTGTGCCCCGAAACCATCTCCT  
CTCTGTATCCAGCGCCAGCATGATGATGTGCGCAGGATTGCTCCGCCAGCCAGCTTAACTGCCCAAACAGGGTTGC  
AGGGTTTTCTGATTTCCATCAAACGCCCCAGGCAGCACCATAGCCATATCCAGCCGATTGTTCCAGTGAATTTG  
CCGACTATTAGGATGTTAACCATATGCTGGAGTGCCTTCCGTTTTCCGGCCGCTCAGCACTAACAGCAGTTCACTAC  
CCGGCAATTGATACAACTTTTCTGTTTCTGATCAACGGCAGCAGCTACGGCAAATTGAGCGGATACAGTGAACGCGC  
ATCATTAAGCCGTAATGACGACTCATAAACTCAAGATTATCAATGCGCAGGCAGCAAAAACCTTGGCCGCTCTTGCTC  
CGGCGTGTGTTCAACGCACGAAAGTTGGGTAGGAGCGTTAACGGATCTGTGAGCGCTGCAATGCCAGCGGCGATTA  
GCCATTCACTGCGATGATAAATGCGCACCATATAGAGCAGGCAACGCTAAAGGAAATCAGCACCGCAAGAATAAATGCC  
AGCGAATATTCGGTTTTCCACCCCTTCAAAGTTCTGTTGTAATTCAGAAGGCAAAGCGTTGAAACAGCCAGGTGAG  
ATTTAAAACGGATAGCGAAGCTTACCAGCCCCGAGGTAAAGATGATGAAGAAAACGGGTACCAGGTAACCGCAATAA  
AGTCGTTTTATAAGGTGTGCAACAAGAGTAGCAGCAGCTTAAACGCTGCCAGCCAGCTTAAAGGTAATGCGCGTTT  
TCTTTGCCAACGACGGAGCGATATCCCTGCGCCACAATATCTGCGCAAAGTGGGACTTACAATCATGCGAGTGAGATA  
GTAGAAAAGCATGTTGTAATCAGCACAGCGGTGAAAAGGCTTAGCAATCAACGACCGTAAAATGGCATCCGCATCGC  
CGAAAAGGTGGATATCTTTAGCGGAAATCAAAGAAGCTCCCCACAAGATACATGCTGCATTTGATGCCGATCGGCGTC  
ACCAAACCAAGCCAGAACAGACGTTGCCAGACATATCGGCTGGTCAATCCATAACGCCAACCGCTCCCCAGCTGCCAGCG  
TAATATTGCGCAGGCACACAACAGCAAACTGCTGGTACCGAGCATGACCGCAGTCTGTAAAAAGAGAGATGAAAGT  
TCCACAGATTGGTGCAAACATCCGCATAAAAACGGGAACGACACCAGCGCCAGCAAAGATAAACAAGATTGACAGCATT

ACGCACAGTGGCATCCACGCCAGAAAGATATAACTGGAATGGATAATGGCAAGTGGCGAAATAAAACGGGATAGCTGAAT  
AAGTACCACGGTGAGCGTAAACGCTAGTGTGAATATCTTGATATTTTTATCAGGTTATGCTCCACAAACATGAGTACAC  
TACTCTCACTGATCGGGGTTTTAGGACACAAAATAAAGTTTTATTCGCATCGCGAAGCAAACAGGGGGCCAGCCTGTT  
GCCGATTTTTATCCAATGATGCTTTACCAGGCGGACTAACCCGGACGTAGACTGTATTACAAAAGCGGCAAAAAGCA  
GAGACAAAAAACCCCGCTTTGAGCGAGGGTTGAAAATTTGGTGGAGCTAAGCGGGATCGAACCGCTGACCTCTTGAT  
GCCATGCAAGCGCTCTCCAGCTGAGCTATAGCCCCACGATGCGTTTACGTACCAAGTTTGCTGGGTGCAAAAATTTGGT  
GAGCTAAGCGGGATCGAACCGCTGACCTCTTGATGCCATGCAAGCGCTCTCCAGCTGAGCTATAGCCCCGTACAGTAA  
AGCTTGTCGAGTTGACGGGCGGCATCATATGAATCCGCCCCAATGTGTCAACGGCAAATTGCAACGTGTAGTTCAATC  
GCTGAAAAATCAGGCAAATGAACAATTTGGAAAACCGCTCGCATTAGTAGTTATTATGTCACGGTTTCTGTAAAGT  
GGTGTATAAAATGAACTACTAATAGACCCACATACATTAGGGAATTGTTATGTTCAAGGAGAGGATGACACCAGATGA  
ACTTGCCAGACTGACCGCTATAGCCGCCAGACCATTAATAAATGGGTACGCAAGGAAGGCTGGACAACGTACCAAAC  
CTGGCGTCCAGGGTGGCAAAGCCCGACTGGTTCAGTCAATGAACAGGTTCTGTAATATATTCGCAATGCTGAACGTCCA  
GAAGGTGAGGAGAAGCGCTGCCCTTCTGGTGTGCGCCGCTTGAAGTATTGCTGGTGAACACTGGCGAAAGAGATGAC  
GCCAGTTGAACAAAAACAGTTTACATCCTTCTGCTTCTGCGGGAAGGATTATCGGATTGTTACAACGCTTAGGGATTCCGC  
ATAGCAAATAATGAAAAGATTACGCAATAAAATGACCAACCGAAGAACTGGTGAATGCCCTCGGTGTGGCTAAACAAAG  
TGTTAACCGTTGGATCAGAGAAAAAGGCTGGAAAACGGAAAAATTTCCCGGCGTGAAGGGCGTCTGTCAGACTTATTC  
TGTCGATACGCAAGTTTGCAGTTTTATTGAGAACACGCCAGCCTTCCATAACACCAATGTTGATGGAAGCTGAAGAG  
AGAATTGCTGAATACGCTCTGAGACGCGCCCCGGCGTATCGACAAATCATCAACGCGATAGATAATATGACAGACAT  
TGAGCAGGAAAAAGTCGCGCAATTTTTGTCACGTGAAGGAATTCGCAATTTCTCGCCGCTCTGATATTGACGAATCAG  
CATAAATAAAAAACGGCAGGATATTATCTCTGCGGTTTATCTTTTTACACGCTAATTACTGCTGATTTTTCGCGTTCAGC  
AATAAAATCCAGCGCTTTGTTGATACGCTCGATACTGCGGGTCTTACCAATTGCGTGAACGGTAACATCCAGTGCTGGAG  
ACTGCCCGCACCGGTTACGGGACACGACGCGGCATACCAACTTTACCCATACCCACTTCCAGCTCATCCGCGTCCGC  
TGAATAGCGTGATGAACGTTTTAGCGGTCAGTCAATCGCGCCAGTTTGTACGAACCACTTCCAGCGGCTGACG  
CGCTACCGACGAGATGTTTTTTCGCGGCTGCGCATCGAACTCAGCAAATCTTCTGAGAAATAACGGCAGCTCTGTG  
CCATCTCTTTCAGCGTCTTGACGCTTCCGCGAGCTTCCAGATCAGCCAGCTGCGGGCCGTTACGGGTATCGATA  
TTTTCTGCTCAATGTGCCACTGTAAGTAGTAGCAACATACTCCGGCGGACGCGTTAATGTAGTGATGGTTCAGCCA  
CAGCAGCTTTCGGTGTGAACGCACTGCGAGATTTGCTGACGGCATTCAAAGTGAAGTATTGATCATCTTTCACGAG  
TGAAGATTTCTGATCGCCGTGGGACCGCCAGACGACCGATAGTTGAGCAGTGCTTCTGGCAAATAACCGTCATCA  
CGATACTGCATTACGCTGACTGCCCGTACGTTTTGACAGTTTTTACCGTATCGCCATTGATCATAGAAACGTGCCG  
GTAAACCGGCACCGCGCTTTCAGGGCCTAAGAATGTTGATCTGGCGTGGCGTGTGTTGATATGGTCTTCGCCACGGA  
TAACGTGGGTGATTTCCATATCCAGTCATCGACAACCACACAGAAGTTATAGGTTGGGAACCATCGGTACGGCGGATA  
ATAAGATCGTCCAGTTCTGTTGCTGAACTCGATCGGACCGGATCTGATCGTCAAAAACAACAGAACCTTCTGCGG  
GTTAGCAAAACGTACAACACACGGTTCATCATCAGCATGATGCTCATGGCTGTGGCGGACGACCGTCAACCGGGCT  
TCTCACTTTTCGCATTTGCTCTTTCGCGCAGCGCTTCCAGGCGCTTTTAGAGCAATAGCATTATAAGCAGTGCCCTCT  
TCCAGCATCTGATCGATCACCGGTTGTAGCGATCAAAACGTTTGGTCTGGTAGTACGGACCTTATCCCACTCCAGGCT  
CAGCCAGTTATGCCATCCATAATGGCTTCGATAGCTTCCGGCGTGAACGCTCAAGATCGGTGCTTCAATACGCAGCA  
CGAACTCACCGCGTGGTACGTGCAAAAAGCCAGGAGTAAAGAGCAGTACGCGCGCCGCAACGTCAGATAGCCTGTT  
GGCTTGGCGGAAGCGAGTTTTGATTTTATGAAATGGCCTTACGTTTAAAGATGCCGACAACCGGCAAAATCTGGA  
AAAATTAAGTGGCGATATTCTACTCCCCTGATTCTCAATGTAGTTTGGGTTTCTACCTTACGCAATTTGTTT  
TCGTTGACAAATTCGCAACACGGTCTGTTTTGCGATCATCTGCTTAAATTTACGACGAACGAACAATTTCTTTAGAAA  
ATGCGTTGACTATTTTGAACCTCCCTATAATGCGACTCCACACAGCGGGGTGATTAGCTCAGCTGGGAGAGCACCTC  
CCTTACAAGGAGGGGTGCGCGTTGATCCCGTATCACCCACCAACTACTTTATGTAGTCTCCGCGTGTAGCAAGAA  
ATTGAGAAGTGGGTGATTAGCTCAGCTGGGAGAGCACCTCCCTTACAAGGAGGGGTGCGCGGTTGATCCCGTATCAC  
CCACCCTTTCTGCCAGCTAAATTTCTGTAAAAATGTGAAGTACCGAAGTGGGTGATTAGCTCAGCTGGGAGAGCAC  
TCCCTTACAAGGAGGGGTGCGCGTTGATCCCGTATCACCCACCACTTCCGGTCTGTTAGCTCAGTTGGTAGAGCAGT  
TGACTTTTAAATCAATTGGTGCAGGTTGAACTCTGCACGACCCACCAATGTA AAAAAGCGCCCTAAAGGCGCTTTTTTA  
CTATCTGCGATACTCAAAGATTCGAACCTGCAGCAGTTTTGAGTTGAGCGCAGCGAAACAACGGAGCCGCTCGCGGAC  
GGCCGAAGGGGAGCGAAGCGAGTATCTGCACGACCCACCAATGTA AAAAAGCGCCCTAAAGGCGCTTTTTTGTAT  
CTGCGATTTGCGAAATTCCTGATGCGCTTCACTTAGCAGACTACTTTCCGGCAATTCCTGTCTCCTCACCTACTGTG  
TCAATGCGCAACAGCTTAAACATCGCGGGGCTCACCTGCTGTGTTTATAAACAATATATAAATCTGCAGGGATGCGC  
TGTTTGAGCGGACGGAATGACACCTGGCCAGTTCAATTTGTGCGTAGCTGTCCGCTATCAATGTGATACCAATGCCAT  
ACTGACCATAGCGAGTACCGTTTTCGGGTTCAATTAACCTCGCAATAACAACCGGTGAAAATCCCACTGCTGGCAAAC  
GCTGCAAAAAATCCAGTCAAGTGAACGGGCGGATTTGTAACAAAATACTGTCACGTAGCGCTTCCAGCGGGACGGT  
GAAAATGATGAGAGATGATGCTTTCAGGCATCGCCACCAGAAACCGGATTCATGCAACCGTAAGCTGGTAAAACAGT  
CGGTGGTTCTGTGCCATTCGCCAGATCCCGCATCAAGTTTCGCGGCTTCCAGCAAGGCCATTTGATCGCGGGCATCT  
TTTCGCAAAAAGAAGCTCAACGTTAGGATTTCCCTGAGGAATCGCCGATAACCGGGCGCATCCGTCACATTGCC

GTTCCCACTACGCCGAGTTCAATCCGCCCTGCTTCTCCCCGACCTATTTGTTCAATCCGAGCCAATACATTATTAGCATT  
CACCAGCAATCGACGCGATTCTTCCATCAAGATTTTCCCCGCGTGTGTCAGTACGACGCTGCGCGAATGGCGAATAAAAA  
GCTGCGTGCCGAGTTGATTTTCCAGCTCTTTAATATGAATGCTGAGCGGAGGCTGAGACATATTTAAACGCGCTGCTGCG  
CGGCCAAAATGCAACTCTCCGCTACGGCAAGAAAAAATACGGAGCAACTTAAGATCTGTTCTGTATACGCGTTCCATAAT  
TAAGTGCTCCATATAATAAATACATCGTATTAATTAATCATGGCATAAAGTATTTACCACCAGATATCCGACATACATA  
AACACAATGGATAATATACCCGGTAATACATTTGGTACAGGAATAGGCAAGCGCACGATTGTAACAAAAGCACCAATACC  
AAAACCAACGCCGGAAGAAAAATAAATATCTTTCACTAATTAACCTTTATCATAAAAAGCAGCTCTGAAGAGCAGAGCCGC  
GAATCCTTTTAAATGAGTCACCGCTCGATGCTTTATCTTTTACGGGTCATGATTATATTTAAACCCAAAGAAAAATATCAC  
TGCGAGAAAAAGAGCATATCCTGCAACACCAGCCAGATAGTTTGCCAGTCTTTTACGCCATCCACCAGAAAAGTAATCTA  
CTGCCATGCCACTCAGAATCGAGCCAACCCATGCGCCGACACCATTTACCATGGTCATAAAGAGCCCTGCGCGCTGGCA  
CGAATGCTGGAATCAACTTCTGTTGACAAATACCGAACCAGAAATATTGAAGAAATCGAATGCACAGCCATAAACAAT  
CATCGACAGCAGCAGCAAAAATAATCCGGTTGTTGACGGATCGCCATAGGCGAAGAAGCCAAAAGCGCAGCGTCCAGGCCA  
CCATACTCATCAGCATGACGGTTTTAATGCCAAATCGTTTTAAAAAGAATGGGATAGTCAGTATAAAGCCCACTTCTGCC  
ATCTGTGAAACTGACAGTAAAATGGAGGGATATTTACCACAAAATGTGTCAGCAAACTCCGGGTTACGGGCGAAATCATG  
TAGGAACGGATTACCAAAAACGTTGGTAATTTGCAGTACCCGACCCAGCATCATGGCAAAGAGGAAAAAGATGGCCATGC  
GTGGATTTTTAAACAGCACGAAGGCATCCAGACCAGCTTGTGCAAGCGATGTGGTCGTTTTTTTCTCCGCAACCCGGA  
ATCTTCGGCAAAGTCAGCGCATAAGCCGACAGCAGCAATGACGCACCCGACGCGATATACAGCTGCAGACTACTCAATTC  
CAGATGCAGCAGGCTTACTGCCACATCGCGACAATGAACCCACCGTACCAAAAAACGCGAATGGGCGGGAAAGCGGTCA  
CCGGGTCAAGCCCTGCTGGGCAAGACAGGAATAAGAGACGCTGTTGATAACGCAATAGTCGGCATAAACGCCATCGCA  
TTGACTAACATCACCCAAAACATCATATCCGGATCAGTTACGGATGCCGCATAAAAAAGTACGCCCGCACACACCAGGTG  
ACACAGCATGTATGCAGTCTGCGCGCAGCCATTTGTCTGCGATGATCCCCATTATACCAGGCATAAATCGCGGCGA  
TCCCTTTGAACTGTAACCATGCCAACATTAGCGCCGGTGAATGAAGAGTATTAATCATGTAAGAGCCGAGGGTAACC  
AGCCAGCTCCCCAGATAAAAATATTGCAAAAAGGACATTACCTTTAAGCGCATCGCGATGCTCATAATCGTTTTCTGTG  
GCATCATTTGGCTCACCCGCGAGGCCGTTTTCTATTGTTTTTCTCAGGCAATTTTGCAGAAAAGCCACAAAATAAGGTT  
GATGAAGTTCTGCTTAGAGAGCTCCGACGCGCCAGCGTTTGCAGATGTGACAATTTACATCGTTAAACCTTCCGCCA  
TATTGGTAATCGCAGAGACCGAACGACTTTAAGGTGCAATGGCGAGCTGAAATAACCTCAGGCACCACAGACATACCA  
ACAACATCCCCACCAATAATTTGCATCATGCGAATTTCCGCCGAGTCTCGAAATTCGGCCCCGGATACGAGACGAACAC  
GCCCTCCGTACAGAGGAAACCTCTTCTTCCGCCACTTTTTGTAACAGTGCAGCGGATTCCGCATCGTAGGCATTTGCCA  
GTGAGAAGAAGCGCTCTCCAAAACGATCATCGTTAAGACCCACCATCGGCGTACCGGGCATGGTGTGATGATCTTTC  
AATGCGACCAGGCTGCTGCCCCACTTCCGGACGCGAGCGAGCCTGCCGCATTTGGTGCAGAACAGTAGCTCGCAGCCCAG  
CAGCTTAAAGGTACGAATTCGCTCAGTCATAATGGTCATTCCACGACCTTCGTAGAAATGTCCGCGACCTTTCATACATA  
CCACCGGTACGCCCTGGAGATGGCCCAGCACTAACTCCCCGCATGACCATGTACCGTACTTACCGGGAAGCCCGGCAGC  
TTTTCGTAGGAAATTGCGACAGCGTTCTCAATCTGATCGGCCAGCGCGCCGAGCCCGGAACCTAAAATAAAGGCCACTCG  
TGCGGTGAATCAGGTTTATAAGTCTTGATAATATCTATGCAAAACAGCGGGTTATGAGAAAATTGAACCTGAGACATAC  
ATATCCTTTTTCTGTAGGTTGGAATCTAACGCCTTTTTATAGCGAGGTTGTCCCGGCTCTTACCAATACACTTTTCTCAC  
GCATTCAATAGCGATTGATATCGATGGATTTATATCTTTTCTTATTAATCCACGGTAAAAACTGTATTGGCGATTA  
ATTCCTTTGCATTAACAATATGTGTTTTAGCAAAACACTTTTAAAGCAATCTACTAATAACGATCGGCATAGGGAAAT  
TATGCTATGAAAAACATCTTTAACTCTGACACTTTCCTCTATATTAGCGATACCTGTTGATCTCATGAGAATTTAA  
AGCGGTTTTGAGATATCGCGTGCATTATCTGGACTGGACCAGCCGGACTACCGAAAAATCGTCGACCAAATCACACA  
AAGATGATTTTTGGTTATCTTGAATTTGAAGTTGGCGTAACCTTGTAGTTGGGAGAAAATGTACGGGTTCTCGACTGGGAA  
AACTTCTATAACGGTCCGCAATAAACCAGGTAGCGAGCAGCGTTATACCTTTAAAAATACCAACCGTATTTACCTGGG  
TGACACCGGATTTAATCTCTACTTGCATGCGTATGGCACCTACGTTTCTGCGAATCGCGTGAATTTCCAGCAGATATGT  
TCCTGTACGGTATCGGCTACAATTTACCCGCGAGCGGTTGGTGGTTCAAACCGTTCTTTGCTAAGCGTTATACAGATCAA  
ACCTATTACACTGGCGACAACGGCTATGTGCGCCGGTGGGTTGCAGGTTACAACCTTTATGCTGGGCGAGGAAATTCAC  
TCTTACCAACTGGAACGAGTACGAGTTTGACCGTGACGCTACCTATGCAGCGGGTAATGGCGGTAAAGAAGGGCTGAATG  
GCGCAGTTGCACTGTGGTGAATGCAACATCACACATTACTACGGGGATTAGTATCGATATGCGGATGACAAAATGGGC  
GAAGATTTTTACCAGGATGCGATAATCTACTCCATCAAATTTAACTTCTGATTGATTACTGCCGGGGCTCCCGGCAGTAT  
GAATTCCTCTATATCTGATAACAACGGATCCCTTCCCGCCAGCCATTAGCGCATTGCCCTGGTCTCGTACCACGTCCC  
ATAAAGCTTACGCGCGGTGAAAGTGAACGGTTCTTCTGCGCACAGCATCAACTGGCGTTCAACAACCGGCGTAATG  
CGCTTACCACAGTGGGCTACCTTACGGCAATGGTAGCGCCAGTGGGGAAGAATACTGATGCCGATGCTGCGGCTAC  
CATCGGGAACAGCGTCCCGGATGTCCAATCTCCTGCAACAATATTCGCTGAATACCATTGCGCGCCAGCGCTGCGTCAA  
TCAGCGGTGCGCTGCTGACGCGTAATCTGCAACCAATTTGCTCCCTGAATGCCTGCCAGGGTACATAATCTTCC  
ACGCCAAAAGCGCTATCGCGATGGCAAAGCAGAAAGAAAGGCTCGGAAAGAATCGCTTACATTGACAGATCGCCACTGG  
GCCTGGATCGATGACGATGCCAAAATCGACATCTCCCTGGCGAATACTTTCCATTACCCACTGCTGCGGACGATCGTGCA  
GGACAAAATGAATATCTGGATAGCGGCGATGGCTTTAGCAATGCATTGCGGAATAAGATGCGCGGAAATGGTCTGGCTG  
GCAGCGACCCGAACTTTCCGCTCAGTTGTTGCCCATACGCCGGTATCGCGCAACGTGCTGTTTCACTCAGCAG

TCGCTCAAGACGCAAAGCCAGCTGCTGCCCTGCATCTGTAAGCACCCTTACGCGTGGTTCTGTCCAGCAGGCGAACAC  
CAGTATGATTTTCCAGTTCCCTTACACTGTGACTACTGCCGACTGGCTCAGGCCGATACGCTCTCCTGCACGACTAAAA  
CTTTTCTCCTGCGCTACTGTGACGAAAACCTTTAATTGTTTTAAAGAATAATTATCTGTTTTCTTCATGAATGGATGCA  
ATAAATCAATTTTATTTCTCAAACCTGGAAGAAGCACAATAGAACCATCGATCATCTGGAGTCTTTATGAAACTTTTTCGT  
ATCCTCGATCCTTTACCTTAACCCTGATCACGGTGGTGGTGGCTGGCCTCTTTCTTTCCGGCCAGAGGGCATTTCGTCCC  
CTTCTTTGAAAATCTGACCACCGCAGCTATTGCCCTGCTGTTCTTTATGCACGGCGCGAAGTTGTCGCGTGAGGCGATTA  
TTGCTGGCGGTGGTCACTGGCGACTGCATTTGTGGGTAATGTGCAGCACCTTCGTGCTGTTCCGATTCTGGGTGACTG  
TTTGCTGGTGGAAACCGGTAAATGTGACCCGATGCTCTACTCCGGTTTTCTACTTGTGCATTCTCCCGGTACCGT  
GCAGTCTGCAATCGCCTTACGTCAATGGCGGGCGTAACGTGCGGGCAGCGGTTTTGTTCTGCGTCGGATCCAGCCTGC  
TGGGGATTTTCTTTACCAATTGCTGGTGGTCTGGTGAATGTTACGGTGCAGGGGGCAGCCTTGAGCAGGTCGGT  
AAAATTATGCTGCAACTGCTGCTGCCGTTGTGTTGGGGCATCTTTCCGGCCGTGGATTGGTGAAGTGGTGCAGC  
TAAAAAATGGATTGCGAAAACCTGACCAGACGTCCATTCTGTTGGTGGTTTATACAGCGTTCAGCGAAGCCGTGTTAATG  
GTATCTGGCATAAAGTTGGCTGGGGATCATTGCTGTTTATCGTGGTGGTGCAGTGCCTTCTTGCTATCGTGATTGTA  
GTTAACGTCTTTATGCGACGCCGACTGAGCTTCAATAAGGCAGATGAAATTAATATCGTCTTTTGTGGTTCGAAAAAGAG  
TCTGGCAAATGGCATCCCGATGGCAAACATTCTGTTCCACATCGGTGATCGGTATGATGGTGTGCCCTGATGATTT  
TCCATCAGATCCAATTGATGGTCTGTGCGGTGCTGGCGCGTGCATACAAACGCCAGACCGAACAGTTACAGCGCGAGCAG  
GAAAGCAGCGCGATAAAGCTTAAAGCGGACGCTTACGGGGTGGACCAAGTTGCGTCAGCCCTCGGTTTTAATCAGCAG  
CGTGATTTGCATTAGCTCACCGAGCTTCCCTGCCGGGAACTCATCTTTGCGGGCAAACCACAGCAGATACTCCTCCGGCA  
GGTCGATTAAGCGACGCCCTTTGTATTTGCCAAACGGCATTATCGTATTGGCTATTTCAATCAGCTGCTCTTTTTCCATC  
TCAGCTACCCAGCAAACGCAGCATTTCGGCTTCTGTCGATGACTTCAATGCCAGTTCTGCGCCTTCGCCAGTTTAGATC  
CTGCAGCTTACCCGCTATCACCAGATCGGTTTTCTTGACACGCTGCCCGGACTTTGCGGCCAGTTCCGACCAGTTCGA  
GCTTTAGCGTCATCACGCGACATCTGGCTTAAGCTGCCGTAAGCACCACGGTTTTACCAGCAAACGGGCTGCAATCTC  
TTCCGCGTTGATAACGATCGGGCAGGCCAGTGAACACCTTCCGCCAACAGCTCGTGATGACATTGCGGTTGCTTTCTT  
CGGCAAAGAAGTTGTGAACGTGGGATGCAACGACAATGCCAACATCAGGCACCTTTTGCAGCTCTTCAATCGAAGCGGCT  
TCCAGCGCTTCCAGCGTCCGAAATATGCCGCCAGACCTGCTGCGGTGGCCTCGCCGACTTACGGATGCCAAGTGCATA  
GAGGAAGCGAGCAAAGGTGGTTTTCTTTCGCTTTTTCCAGCGGTTAACACGTTTTGTGCCGATTTTGGCCCATACGCT  
CCAGTCCGGTCAGTTTGCCTGCGGTGAGTTGAACAGATCTGCCGGAGTATGGACATATTTCTTTTCAACCAGCTGATCG  
ATGATTTTGTGCCCCATTCCGTCAACATCCATCGCACGGCGGAAACAAAGTGTTCAGCGACTCTTTACGCTGCGCACC  
GCAAATCAGGCCACCGGTACAGCGGGCAACCGCTTACCTTCCACACGCTCAACGTGAGAACCACATACCCGACAATGCG  
TCGGGAATACAACCTCACGGGTATCTTCCGGGCGTTAGAAAGCACGACGTTAACACCTGCGGGATCAGGTCGCCAGCG  
CGGCGAATCACCACTTTATCGCAATGCGTAAACCAAGACGTTGATTTTATCCGATTGTGTAAGGTTGCGTTACTCAC  
CAGCACGCCTGCAACATGGACAGGTTCCAGACGCGCAACAGGCGTAATCGCGCCAGTACGCCAACCTGAAACTCGACGT  
CACGCACAAAGGTGATCTGCTCCTGCGCCGGGAATTTAAACGCTACCGCCAGCGCGGGGCACGCGGACAAAGCCAAGC  
TGCTCCTGCTGTGCCAGTGAGTTGACCTTAATCACCACGCCGTCGATATCAAAGCCAGCGTCGGGCGGTCTTCTCCAC  
TTTGTGATAGAAGCCAGCACTTCTTCCGCCGATTCAAAGCGTTACCCGATCGCTGACCGGCAACCCCACTTTTTAA  
ATTGAGTAACAGGCCAAGATGAGTATCCGGCAGCTCGCCACCTTCCAGAACACCAACGCCATAGCAGAAAAAGTGAAGC  
GGTCGTTTCGCTGTAATACGCGGATCAAGCTGACGCAAGTGAACAGCTGCCGATTACGTGGGTTAGCAAACACTTTCC  
GCCCCTGCGTCGCGCATCTTCTGTTAATCTTTTGAACCCCGCTGCGGCAGGAACACTTACCACGCACTTCCAGACGCG  
CCGGGATATTCTCCTGTCAGCTTACGCGGAATGGCGGAATAGTACGCACATTAGACGTGATATCTTCCCGGTGGTG  
CCATCGCCACGGGTGCGGCACTGACTAAAACGCCATTTTATACAGAATACTGACGGCAAGACCACTCCAGCTTACGCTC  
ACAGCACAGGTGACTTTCTGTTGTTTTTCAGACGGTCTGCACACGTTTTGTTGAAAGCAAGAAAGCTTTCTTATCAA  
AAACGTTATCCAGTGACAGCATTGGTACTTTCATGGCGTATCTGGCTGAAAGCCGCCAGCGGCGCAGCGCTACACGTTGA  
GTAGGCGAATCAGGCGTAATCAGTTCTGGATGTTTGGTTCAGCTCGCGCAGTTTCGCGCATCAGCCTGTGATTCAGC  
GTCGGGAATTTCCGGCGCATCCATCACATGATAAAGATATTATGATGGCGAAGCGTCTGTTCCGAGTTCTGTCAGTTGTT  
GTTGATTCAGGCGTTGGCGTCTTTGACTTCCGGGATGATGTCCTGGTACTCGCGCAATTTCTGCGGAGTCATCAGCGC  
GCTGATCGTCAAGCACGACCCGCCACTTATCGGCAATATGCTGCGCAGATTGCAGCATCAGCTTGAAGTTCTGCAGC  
TCGTCACCGTAAGACGGTACCTGCATAAAGATAGTACACCCGGAGTAGTAAATCCTTCATTTAGGATCAAAGGTTCC  
CGTTTTACCATATTCGCCAGGCTGAATAACGCCGGGCGCTGCCATCCGGGTAAGATGACGATGGTAAATATTCATAT  
CGCAAATAAGACCCGCTTGTGTAATGCTGTTAAGAAGCAGTTACCGTTTAGCTCGCTACCGTGATGCGCCGCGACG  
TTCATGATAATCACCCTTCTTTGCGCTTGGTTTTATCCATACTGGAGCAGTTCCGCTACAGGCTCAGGCTGTGGTGC  
CGCTACGGGTTCTGCAGGCTGAAAGCCTGTTGTGCCGGTGGCGTGTGAATGCACAGGCTGCGGCGTGGCGGACCT  
GTGGCGAAACTGGCTGCTGCAACGGCTGTTACGGCTGCGGCTGATAGGCAGGCTGCTGCACCGGCTGCGTGGATGCGGA  
GCATGTTGCGGCGGTACCTGCGCTTACGGCGGCTGCTGGACCGGTTGACGCGGCTGCGCAGACGCATAAGGCGGTTGGTA  
CTGGTGTGCGGCGACGAGCAGCCTCATGCTCCTGAGCGTTAGCCGGGGCATGATTCACGCGGTGAACACGAACCT  
ACCAACGCCCTCATCATCTTGCATCTCTGTCATAAGAATCGTCGTCACGTTTTGACTTCATTCGTTTTAATGGCCGA

TCGCGAACATAGAAGATCGTTCTTTACGGCTGGTCCAGAAACCATGTACCAGTAAAGCGATTATGGCGATCGGCCAAC  
AATGATTAATATCAGACGCAAACTCCTGCATCATTATATTCTCTGTTGTTCTAACACCTTGCCACCACGGCAAACATTTAC  
TACTAAGAGTATTTGCCGATTACCTCAAGTGCAAGTGCATTAATACTTTACAGCACAAAGATAGATGAAATCGTGCT  
TTTTGCTGTTTTTTCGAACATATCCTAACTGTCCATTGCGCAATTACCCGGTAAAATACGCAGAATTTTCTGGGATTGG  
TCAAAGGAGCTCATCCTGATTATGGTTTCATCATTACATCTGCCCCACGCAGCGGTTTTACTATTTTTCGCAAGGCT  
GGAAGCTCGTCTCGAACCTGGGATTGCGGCTTTCTGTTATTTTACCCTGCTGCTGGTCAATATTTTGTGATGGGGGGCGCA  
TTCTGGTGGCTCTTTACACAGCTCGATGTCTGGATCCCGACTCTCATGAGTTACGTTCCGGACTGGCTACAATGGCTGAG  
TTATCTGTTGTGGCCTCTGGCTGTCATCTCTGTGCTGTTAGTGTTGGCTATTTCTTCTCCACGATTGCTAACTGGATTG  
CCGCTCCGTTTAAACGTTTTATTGGCTGAACAACCTGGAAGCAGGATTGACTGGCGCTACACCGCCAGATACCGGGATTTTC  
GGTATCATGAAAGATGTGCCGCAATCATGAAACCGCAATGGCAAAAATTTGCTGGTATCTGCCGCGCGCAATTGTATT  
ACTAATCTTTACTTCATCCTGGTATTGGGCAAACCGTCCGCGCGGTAAGTGTGGTCTGTTAGCGCCTGGATGTTAG  
CCATCCAGTATTGCGATTACCCCTTCGATAACCACAAAAGTCCGTTTAAAGAGATGCGCACCGCCTGCGCACACGCAAA  
ATCACCAATATGCAGTTTGGTGCTTTAACAGCCTGTTACGATGATCCCGCTGCTTAATCTGTTTCATCATGCCCGTTGC  
CGTTTGTGGCGCAGCGCGATGTGGGTGATTGCTATCGCGATAAACACGCGATGTGGCGGTAACAATCTACCGGTTATT  
TTGTAACCCGTTGTGTGAAACAGGGTGGCTTATGCCGCCCTTATTCATCTTGCATGCTAATTTCCCTTCTGTAT  
ATAGATATGCTAAATCCTTACTTCCGCATATTCTCTGAGCGGGTATGCTACCTGTTGTATCCCAATTTTACAGTTAAG  
GACAGGCCATGAGTAAGATTTTTGAAGATAAAGTCCGCTGACTATCCGTCACACGCGGCTGGTTCGCTGAATCGCATCGGT  
AACGGACGCATTCTGGCGAAGGTGGAATCTCGTAACCCAGCTTCAGCGTTAAGTGCCGTATCGGTGCCAACATGATTTG  
GGATGCCGAAAAGCGCGGCTGCTGAAACCAGGCGTTGAACTGGTTGAAACCGACCGGTAATACCGGGATTGCACTGG  
CCTATGTAGCTGCCGCTCGCGGTTACAACTCACCTGACCATGCCAGAAACCATGAGTATTGAACGCGCGCAAGCTGCTG  
AAAGCGTTAGGTGCAAACCTGGTGCTGACGGAAGGTGCTAAAGGCATGAAAGGCGCAATCCAAAAAGCAGAAGAAATTTGT  
CGCCAGCAATCCAGAGAAATACCTGCTGCTGCAACAATTCAGCAATCCGGCAAACCTGAAATTCAGGAAAAGACCACCG  
GTCCGAGATATGGGAAGATACCGACGGTCAGGTTGATGATTTATTGCTGGCGTTGGACTGGCGGTACGCTGACTGGC  
GTCAGCCGCTACATTAAGGCACCAAGGCAAGACCATCTTATCTGTGCGCGTTGAGCCAACCGATTCTCCAGTTAT  
CGCCAGGCGCTGGCAGGTGAAGAGATTAACCTGGCCGCATAAAAATTCAGGGTATTGGCGCTGGTTTTATCCCGGCTA  
ACCTCGATCTCAAGCTGGTCGATAAAGTCATTGGCATACCAATGAAGAAGCGATTTCTACCGCGGCTGCTGATGGAA  
GAAGAAGGTATTCTTGCAGTATCTCTTCTGGAGCAGCTGTTGCCGCGGCGTTGAAACTACAAGAAGATGAAAGCTTTAC  
CAACAAGAATATTGTGGTATTCTACCATCATCGGGTGAGCGTTATTTAAGCACCGCATTGTTTGGCGATCTCTTCACTG  
AGAAAAGATTGCAACAGTAATGCCAGCTTGTAAAAATGCGTAAAAAAGCACCTTTTTAGGTGCTTTTTTGTGGCCTGCT  
TCAAATTTCCGCCCTCCTGGCATTGATTCAGCCTGTCCGAACTGGTATTTAACAGACTAATTTTTGATGCGCGAAA  
TTAATCGTTACAGGAAAAGCCAAAGCTGAATCGATTTTATGATTTGGTTCAATCTTCTTTAGCGGCATAATGTTAAT  
GACGTACGAAACGTCAGCGGTCAACACCCGCCAGCAATGGACTGTATTGCGCTCTTCTGCGCTCGCGTCTGTTAAAACT  
GGCGTAACAATACAGGCTAAAGTCGAACCGCCAGGCTAGACTTTAGTTCACAACACTAAACCTATAAGTTGGGAAAT  
ACAATGTTCCAGCAAGAAGTTACCATTACCGCTCCGAACGGTCTGCACACCCGCCCTGCTGCCAGTTTGTAAAAGAAGC  
TAAGGGCTTCACTTCTGAAATTAAGTGTGACTTCCAACGGCAAAGCGCCAGCGCAAAGCCTGTTTAACTGCAGACTC  
TGGGCTGACTCAAGGTACCGTTGTGACTATCTCCGAGAAGGCGAAGACGAGCAGAAAGCGGTTGAACATCTGGTTAAA  
CTGATGGCGGAACTCGAGTAATTTCCCGGTTCTTTAAAAATCAGTCACAAGTAAGGTAGGGTTATGATTTCAAGCATT  
TTAGCATCCCCGGTATCGTTTTCGGTAAGCTCTGCTTCTGAAAGAAGACGAAATTTGATTGACCGGAAAAAATTTT  
TGCCGACCAGTTGATCAGGAAGTTGAACGTTTTCTGAGCGGTGTCGCAAGGCATCAGCCAGCTGAAACGATCAAAA  
CGAAAGCTGGTGAACGTTCCGTTGAAGAAAAAGAACCCATCTTTGAAGGGCATATTATGCTGCTCGAAGATGAGGAGCTG  
GAGCAGGAAATCATAGCCCTGATTAAGATAAAGACATGACAGCTGACGCGCTGCTCATGAAGTTATCGAAGGTGAGGC  
TTCTGCCCTGGAAAGCTGGATGATGAATACCTGAAAGAAGCTGCGGCTGACGTACGTGATATCGGTAAGCGCCTGCTGC  
GCAACATCCTGGGCTGAAGATTATCGACCTGAGCGCCATTAGGATGAAGTATTCTGGTTGCCGCTGACCTGACGCCG  
TCCGAAACCGCACAGCTGAACCTGAAGAAGGTGCTGGGTTTATCACCGACGCGGGTGGCCGTAATTTCCACACCTCTAT  
CATGGCGGTTCTCTGGAACCTGCTATCGTGGGTACCGGTAGCGTCACCTCTCAGGTGAAAAATGACGACTATCTGA  
TTCTGGATGCCGTAATAATCAGGTTTACGTCAATCCAACCAACGAAGTTATTGATAAAATGCGCGCTGTTCAAGGACAA  
GTGGCTTCTGAAAAAGCAGAGCTTGTAACTGAAAGATCTGCCAGCTATTACGCTGGACGGTACCAGGTAGAAGTATG  
CGTAACATTTGGTACGGTTCGTGACGTTGAAGGTGCAGAGCGTAACGGCGCTGAAGGCGTTGGTCTGTATCGTACTGAGT  
TCCTGTTTCATGACCGCGACGCACTGCCACTGAAGAAGAAGCTTTGCTGCTTACAAAGCAGTGGCTGAAGCGTGTGGC  
TCGCAAGCGGTTATCGTTCTGATGACATCGGCGCGACAAGAGCTGCCATACATGAACTTTCCGAAAGAAGAGAA  
CCCGTTCTCGCTGGCGGCTATCCGTATCGCGATGGATCGTAGAGAGATCCTGCGGATCAGCTCCGCGCTATCCTGC  
GTGCTCGGTTTTCGGTAATTTGCGCATTATGTTCCCGATGATCATCTCTGTTGAAGAAGTGCCTGCACTGCGCAAAGAG  
ATCGAAATCTACAAACAGGAACTGCGCGACGAAGGTAAAGCGTTTACGAGTCAATGAAATCGGCGTAATGGTGGAAAC  
ACCGGCTGCCGCAACAATTCGACGTCATTTAGCCAAAGAAGTTGATTTCTTTAGTATCGGCACCAATGATTTAACCGAGT  
ACACTCTGGCAGTTGACCGTGGTAATGATATGATTTACACCTTTACCAGCCAATGTCACCGTCCGCTGCTGAACTTGATC  
AAGCAAGTTATTGATGCTTCTCATGCTGAAGGCAAAATGGACTGGCATGTGTGGTGGAGCTTGTGGCGATGAACGTGCTAC

ACTTCTGTTGCTGGGGATGGGTCTGGACGAATTCTCTATGAGCGCCATTTCTATCCCGCGCATTAAAGAAGATTATCCGTA  
ACACGAAC TTCGAAGATGCGAAGGTGTTAGCAGAGCAGGCTCTTGCTCAACCGACAACGGACGAGTTAATGACGCTGGTT  
AACAAAGTTCATTGAAGAAAAACAATCTGCTAATCCACGAGATGCGGCCAATTTACTGCTTAGGAGAAGATCATGGGTT  
TGTTGATAAACTGAAATCTCTGGTTCCGACGACAAGAAGGATACCGGAACTATTGAGATCATTGCTCCGCTCTCTGGC  
GAGATCGTCAATATCGAAGACGTGCCGGATGTGTTTTTGGGAAAAAATCGTTGGTGATGGTATTGCTATCAAACCAAC  
GGGTAACAAAATGGTCGCGCCAGTAGACGGCACCATTGGTAAAATCTTTGAAACCAACCACGCATTCTCTATCGAATCTG  
ATAGCGGCGTTGAACTGTTCTGCTCCACTTCGGTATCGACACCGTTGAACTGAAAGGCGAAGGCTTCAAGCGTATTGCTGAA  
GAAGGTCAGCGCGTGAAGTTGGCGATACTGTCATTGAATTTGATCTGCCGCTGCTGGAAGAGAAAAGCCAAGTCTACCCCT  
GACTCCGGTGTATCTCCAACATGGACGAAATCAAAGAATGATCAAATGTCGGTAGCGTAACCGTGGGTGAAACCC  
CGTTATCCGCATCAAGAAGTAATTCTTGCCGAGTGAAAAATGGCGCCATCGGCGCCATTTTTTATGCTTCCGCCAG  
CGGCGGCAAAATCAATTCATCGCTCTCATGCTGCTGGGTGTAGCGCATCACTCCAGTACGCGCAACCCCGCTCGGTGCA  
CTGCATCGGTAAACGCCTTCCCTTTCAGCAAGCCACTGATGAGCTGAGCACAAAAACAGTCCGCGAGTCCCTTTCAGGTG  
TTTTTACCCTGAATGGGAAATGACATTCACGCTGTCGGCAGTGACCACCACAACCTGCATCTCTGATTTTTCTTCAAT  
ACCGGAGGCGTGGTAACCACCACCCATTTAATGTGTCTGAAAGCAGACTTTTTGGCGAGCAATGGCACTGTGAGAT  
CGCGGCAATTTTACCAGTTCAGGATTTCAACTCAAAGATTTGGGGTAATCCCTGCGCCAGCGGCAGTAAATATTGT  
CGATACGCTTCGGGAAGGTCAAGTTTGACATAAATCCGCTATCAATCGCCAATCACCGGATCGACCATGATCAATAG  
GTGAGGATGGTCTTTGCGTAGCGCAGTACGCCACTCGGCAAGGATTTTTGATTTGCGATGCCGTTCCCATATAGCCCGTGG  
TTACAGCACGAAGTTGGCGCAGCGCATCACGCTCCTGAAGCGCACGCAATAGCCGCTAAACCATTCGTCGGAATCGCA  
CCACCGTAGAAAGTGCATAATGCGGCGTATTGCTCAGCAATACCGTCGGCACGGCAAAGACATTAGGCCGTTCTGTTT  
GATAGCAGGCACGGCAATGCTGTTGCCACGCTGCCGTAACCCACTGCGACTGCACGCGGACGATATCCGCCTGCAGTG  
CCCTACTCTTATCGTTAAACAACAACAACTACTCATTTAATTTTTCTCCTTGCCGATGATCCTCATCGTAATCCAACC  
GAACTTTACTGATTCTGGCAGTCAAATCGCTATCACAAAACAAGGATAAGGTAATTCAATGAAGAAAATCATTGTG  
TGGTCACTACTACTAATGACACTCCCGTTTACGCGAAGTTAACTGCCATGAAGAAGCCCGCATCAACGCCATGCTG  
GAGGGATTAGCACAGAAAAGGATTTGATATTTGTGCGCAACGGTGATGAACATACCTGCTATGAAGCGGTTTCTCATCT  
GCGTCTGAAGCTCGCAATACCCGTAACCGCATTGACACTGCCGAGCAGTTTATTGATAAGGTTGCTTCTGCTCATCGA  
TTACTGGGAAGCCGTATATTGTGAAGATCCCGGTAAGAGCGATGAGAACGCACAGCCTTTTTTACATGCGTTAATTGCG  
CAGACGGATAAAAACGGTGCCTGCGGAAGGAAATTAATCCGCTTTGGGAAGGCATTTACAGGAGGTAACATGAAAAACGC  
TTTTATTTATCACGATGAAAAATCGAATAAATTTTGGTGATAGATTACGAAGGGGATAGTTTAGCTGTCAACTATGGCAA  
GGTAGGTAGTATTGGTAAATTCAGACAAAAGAGTTGATAATGAAGAACAGTGTCTGAAAGAAGCCAGTAAATGATTG  
CCGCAAAAATGAAGAAAGGCTATCAAGAAGATCCAAAGTTAACTTCATGGATCGCTACTATTTTTGATGATGAAGAAAT  
GGTTACATGTTAAAACGTCACACCCAACTTCCAGTGCCATTTTACTGATCCACTTTATATGTTGCTGGGATGAAGA  
ATCTCCTTTTGGCAGCGATGAAGGTGCTGATGCTCTAAACGTTCTTGAAAATAGCCTCCGTAAGAGCCGGATCTGGACT  
GTGCTGATTTCCCTCAAATGTTAATTGAACTATGTGGGTATGAAATACATCGCTATGGACAGTATTCTTGAGAGGAT  
GTTCTGCGCAATTAAGTTCGATGAAATGAGCACTATCCAGAGCAATATGATTACCTACGCAACTGCATTCCGTCAGAT  
TAAAGTCATGGGTAAAATCTCCATAAATTTAAAAGATGGGACTCAATGCACTAGCGCGTCATCAGCTTACCGCAAAA  
TTCTTCAATGGGTGACGGTCAAGACTCACCAATATTTCAAAAAATGATTGATGACCTTACGGCGTTTCTCACGAAAAT  
TAAATACTGCATTTGTGCGCAGCAACAACCTGTTAAAAAGTGCCTTTGTTTATGCCGGATGCGGCGTAAACGCCTTATC  
CGGCTACAAAATCGTGTAATCAATATATTGCAGAACTTTGAGGCTGATAAGCGTAGCGCATCAGGCAGTTTTGCG  
GTTTGTATCAGTCTCCGATGCTATTAATCTTAAATCCCGCCCGCTGGCTAAAATGCTCTTCCCACACCCTGGTCC  
GAAAGGTAGCGATCGCCAGATGATCGCCACCACCCGCGTCAGGTTAGCTTTTTGCCACCCGAGTGTCC  
GGCAACCGCGCGGAGCTGACGCCACAGAATATTCTTCCCGCACCAGTTCGCGCATGGTGTTCGCGCATGCTG  
GCTGATGAATATCCAGCACCTCATCCACCAGAGAAGCGTTGAAAATCCCGGCAGATATTCCGTAGGCCAGCGGCAATG  
CCGGGAATGCTGCTGCCCTCTCCGGTTGCAAGCGGACAATGGTACCAGTTTGGATTGTTGCGCATAAAGCGTGAGAC  
GCCGGTGATAGTCCGCTGCTCCCATGCTGGAGACAAAATGAGTGATGCGCCCGCGGTTTGGTCCGAGATTTCCGGCC  
CAGTGGTGGTGAATGCGCATAAGGGTTATCGGGATTATTGAACTGATCGAGCAGCTTTCCTTCCGACGATTCCGCATC  
TCCAGCGCCAGATCGCGCGCACCTTCCATGCCCTGCTTTGGTGACAAGAATCAGTTCGCGACCATAAGCACGCATCGC  
CGCACGGCGTTCTGGCTCATGTTGTCGGGCATCAGCAATTTATGCGATAGCCTTTCAGCGCGGCAATCATTGCCAGCG  
CAATGCCGGTGTACCCTGGTGGCTTCGATTAAGACATACCCCGTTTAAATTTCCCGCGCTTTTCCGCTCGACGATC  
ATCGAAAGTCCGCGACGATCTTACCAGAACCTGCCGGTTATTGCCTTCCAGTTTTAACCACTTCACTGCCGTTATC  
CGCCCCATTCGCTGCACTTACCAGAGGCGTATTGCCTATTGTTTCTAATGTACTCAGCATCTCTATCCATACGT  
GGTGTGCTGATGCGACGCTTGGCGCTTATCAGGCTACAGGTTACAACTTGCATTAATAAAGCCGGATCGCGG  
GAAGCGCTCCGGGCGTTAAACATTCCTAACCTATCAGGCGCTTTGTGCGAGAGCAAGTTCCTCATCGCGGGTTTCGA  
TAGCTCGTCCGTTATACAGCCGCGATGTTGAGACCAACGAATAAACGCTCGCCACGCTGCGGGGATCGTCCGCA  
TGATCACGACCGTCAGCGGTTCTGTTGTACCACCCAGCGGCTGACCACTAATTGGGTGATGACCTTCCGGGCTGGC  
TTCCAGTACCTGTACCGGACGCGGAATCGAGGCTGGTACGGCGCTGATATCCACTTCCAAGGGCGCAGGAAGAGAT  
CCACCGCCCCGTGATACGAGGTGTGTAGCCAGCGGCCAGCGATGCGCGCAACATGAACTGCCCGCCGCAATGTTT

CCCTGCAGGCGGTTCACTTCGCCATAAATTCGAGCACAAAACGGGTCGCCGGTTCGCGCCATACTGATCCGGCGCGTCA  
AGCCTGTTCAATATTGCCCTGGCTCATCACTACACGATCAGTACTTCGGTCGTTCTTCTGATCGTGGGTCACAA  
AAACGCTGGTGAATTTTAGTTCCTTTCATGGAGTTGACGAGCCAGCGACGAGCTCTTTACGCACTGCGCATCCAGCGC  
CCAAACGGTTCATCAAGCAGCAGAATTTGCGGTTCCACAGCCAGCGCGCCAGCGCCACGCGCTGTTTCTGGCCGCC  
GGAAAGCTGCGCCGGATAACGATCCGCCAGATGGGCAAGCTGGACCATTTCCAGCAATTTTGTCACTTTCGCTTTGATGG  
CTGCGGCAATTCGGGCGCTCGCGACGCGGAGCACCCTCAGGCCAAAAGCGATATTGTGAACACCGTCAATATGGCGAAC  
AGCGCGTAATGCTGGAACACGAAACCGACTTTACGATCACGTGCGTGCAGGCGGCTCACGTGGTGGCGTGAAGCGAAT  
ATGCCCCTGGTTTATGCTCCAGCCCGGCGATAATGCGCAGCAGCGTGGTTTTCCCGAACCGGACGGCCCCAGCAACG  
CGACCATCTGACCTGAAGGAATATCCAGTGAGATATCGTTCAGCACCTGGGTGCGACCAACGACTTCTTAATATTGGCA  
ATCTCAATGCTCATGATGTTCTCCTGCTGTGCGGTTTTCTGATTCTCCAGGCGCCACTGCAACATACTTTTTAAAA  
ACAGGGTGATAATCGCCATCAGCGTTAACAGCGCCGAGCGGTAAGGAGCCGACGGTGTGTAGTCTGCTCCAGCAAT  
TCAATCTGTAACGGCAGCGACAGGGTTTCGCCGGAATCGAGCCGAAACCACCGACCCGCGCAAACCTCGCAATTGC  
GCGGGCGTTGGTCAACACCACGCCATAAAGCAGCGCCAGCGGATGTTGCGTAATGTGACGCGACGGAACATCTGCCAGC  
CGACGCGCCAAGCAAATCGCCGCTTCGTCTTCTGGCTGCCCTGGCTTAACATCACCGGCACCGTTCGCGCACCACA  
AACGGCACCTGACGAAGATGGTGACCAGCACCATTCCCGCCAGGAGAACAATTTGCAGGTTATGCTCGTCCGAGCCA  
ACCGCCGAGCGGCGTTAGAGCCGTAGAACAGCAAATACACCAGACCCGCAACCACCGGCGATACGGAAACGGAATGT  
CCAGTAGCGTCAGCAGTAACTGGCGTCCAGGGAAGTTAAAGCGCGTACCAGCCAGGCGAGCAATGCCGAACACCAGG  
TTTACCGGTACGGCAATCAGCGGATCATCACCCTCAGCCAGATGGCGTGCAGCATGTCCGGATCGGCCAGATTCTGTAA  
AACCGGCATCAGCCCCTTGTGAATGCCTGCACGAAGATGTAATCATCGGCACCAGCAGGATGAACGCCGAAACCAGCA  
TCCCGATGCCAATCAGAAACCATTTGCCCCAGTTAATCGGGCGCGTGCATAACGCTTCAATTGGGTAACCTCCGCCATT  
AATGACCTACCACAGCGCCGACAAAGCGACTTTGCAGAGTGTAAATTGAGAACAGCAGCAGAGATGCCGCGAGGATC  
ACCGAAGCAATCGCGCTCGTCCGGGTAATCAAATCCTGTAAGCGCACAAAAATCATCAGCGACGTCACCTCCGTCTT  
CCACGCGATATTTCCGGCGATAAAAATCACCAGCCAAATTCACCAAGACTACGGGTAACGACAGCGCCACGCCGCCA  
CCAGCGCCGAGAAAGCTCCGGCAGCACCCTTTGCAGAACTCTGCCAGCGGTTGCACCAAGCGTTTTCCGCCGCTTCT  
TCATATTCGGGCTAACTTTCAGCACCAGGCTGCACGGTACGCACCACAAACGGAATGCTGGTAAAGGCCATAGCCAC  
CGCAATCCCAGCCATGTATAGGTGACTTTGATATCAAATTCGCCAGCCATTACCGTAAAAACCGTTTACGGAAAAGA  
GCGAGGCCAGCGTTAAACCGCGCAGCGCTGGCAGCGCAAAGGTAATCCATCAGCGCATCAAGCAGCGTGCAGCCCT  
GGGAAGCGATAGCGGTTAGGATCCACGCCATCAGCAGACCGAAAACGCGTAAAAATCGATGCCACAAACGCCGACAG  
CAGCGTTACTTTGTAGGCCGCGACCACCTGCGGGTTGGTGATCACCTCCAGTACTGCGCCAGCTCATCTGGGCCAGTT  
GCATCACCAGCGCGAGAGCGGAGCAGCAAAATCAGGCACACAAACAGCAGACTGGTGCCGAGGCTTAAGGTAAAGCCC  
GGCAGCAGCGTCTGGAGGAGACAGCAAAATCAGTTACGCCCGCCGCTAACAGCTTGTCTAACTCGCCGCCGCTGGTG  
AAGTGGGTTTTCATCACTTCCGGCCAGGAGCCAAATTTGTCTTCCACGCGGAACAGCTCGGTCTGCGGGAATTTGTCTT  
CAGTTTGTCCATCACCTCCGGGTTATTCACGCGGTAGTAATAGTCGGTGATGATGGTTTGCCTGCGGGCTATAGAGCC  
AGTTCAGATAGGCTTTGGCGGCTTTTTCCGTACCCTGGCCTGCACGTTTTTATCAACCCACGCCACCGGGAATTCGCC  
AGAATGTTGGTTTTCGGAATCACCCTCAAAGCCCTGCGCTTCACTGTTTACGGATGTTGTTCACTTCCGATTCGAA  
GCTAATCAGCAGATCGCCAGGCGCGCTCGGCAAAAGTGGTGGTGCAGCCACGACCGCCAGTATCGAACACTTCAACGT  
TTTTCAGGAATGGGTATAAACTGTTGCGTTTTGCCTTTGTACCACCGTCAGCTTTATCCGCTGCGCCCATGCCGCC  
AGATAGGTATAACGCGGTTACCCGAGTTTTCGGGTTCGGGAAAATCAGCTTACGTGAGGCGCACCAGGTGTTTCA  
ATCGTGGATATTCTTCGGTTACCTTACGCACAGGAAGCCATGGTGGAGTGAACGGCGAGCTATTATTCGGCAGGC  
GCGACTGCCAGTCCGGCGGATCAGTTGCCCTTATCGTGCAGGATTTGTACGTGCGTACCTGGTTATAAGTGACAACG  
TCGGCTTTTAAAGCCCTGAAAATCGCCAGCGCTGTTTTGATGACCCGGCATGAGATTGTTTTATCGTCAGTTTTGCGCC  
GCCGTTATCTTTGCCATTGTTGCTCAAACGGCGGATTACGGGCGGCAAACAGCTCGCGGGAGACGTCATAAGAAGTGT  
TCAGCAGTTCGGTGTACATGGCCCGCAGCAGCAGAGAAGCGACCAGCGCAGTGAGTTCTTTTTCAGTAAGTTA  
ACGGCCATTGCGCACCTTATAAATTAATGACTTTCTAATAGCCATCATATTTATAACGGACGTGAAAGGAGTAACGGT  
TTTATATACCCTTTGGTATTTGGAAGTTGAAAAGGGAATAAGAAGTTGTTTCAACAGGCGTAATTGTTGCAGTCAGTTT  
GGACACGAACAGCGCGGAGAAACCGGAGCGTACACATAGTACGTGAGGATTTTCGAGCACTGCCCGGGCCAAAATGACAA  
ATAAAATAGCCTGGTGAACCTTAGTTCAAGACGAAATCCTCCCCACAAATGCAGGGAGGAAACAGAGGTGAATCAGATACC  
GACGCTAACCGTCTCCGGCAGTGTGCTGCCGCCATCAATCACATTCTGTGTACCAGTTAAATAGCTGGATTCATCCGATG  
CGAGGAAGGCCCGAGTTCCGGCAGTTCCAGCGGATCGGCGAGGCGACGCATCGGGATTGCTTTCGCCATTCAGTCAGC  
ACCGACTCTGGATCTTCGGGTTGACTGGCGGGAATGCTTTCGCCATTGGTGTGCGCACGATCCCGGGCAAATGGC  
GTTAACCGGAATACCAGACTGCGCGTACTCCACCAGCAGGATTTTGTGAGGCAACAATCGCCGCTTTCGTTAAGGCGT  
ACGCCGTTTTGCCAGGATCGCCACCATATCACCAGTACTGAAGACATCATCAATGCGACCATCTTTCGCCGGCAATC  
ATCTCCGGCAGCACCCTTCTGTGACGTTCCATACGCCCTTAAATATTGATGTCAATATGGAATCGCGATCGTCATCGCT  
CATATCGAGGAAACTGCCAGACGACAAACGCTGCGTTATTACCAGGATATCAATGCGCCCTTCTTTTTCTTCCGCC  
GTTTGTAGCTGCGGCTACCGACGCGGGTACGCACATCGGCGACAACCGCGTACAGCGATGACCACGACCACACAGT  
TCGTCCGCCAGCTTTTCGATCTCAGGGGAGATCCAGCAAGATTAGGTTTCGCCCATGACGTGCAAAAGTTCTGGCAAT



TCCTTCGCCAATTCCTGCAATGCGCCCGTAATCAGTGCTGTCTTGCCCGTGAGTTTACCCATTTAATGCTCTCCTTGT  
TAATACAGAGCGTTACACTCCATTCCCTCTGAAAATACAGGATAAAACAAAATATTGCTGCGGATCAGCTACTAATTACAG  
GAAAATCTCAATCCAGTCGCTGCTTTATGCATCATTTAGGCGTGTGTTAGCTACTGCTGCGCTGAATCATTTTCAAT  
GACTCCACATCATTGAGTTGCACAAGGCCAACAAACAGTAAATCGGTAACAGAAATTTGCGCCGTGCGGGTAGACATCGA  
CGAGCTACGCCATTCGGTTTCTCCGAAACGGTATCGAGGGTGAATGCGCCAGCCGCCGAGCGGAGAGTCAGTCAGAG  
AAGTAATGGCAATCACCGTTGCCCCCTGCTTTCGTGCGCTTCTGCGCACAAGACAATCTCTTTTTACTGCCGCTGTAA  
GAGATAGCGATTTGTACATCGCCTTTTTCAACGCCTGAGAAACGGTGGCTTGTACGTGCGTGTGCGGCTTCGAGGCCAC  
GCGATAGCCAATTTTCATCAGTTTGAACGACAGATCGCGCCCCACCAGCGCCGATCCGCCAGGCCGTTATCTGGATAA  
ACGGTGCTTTACTGATGACCTCAATGATTTTTGACGCGCGCGTAATCGAGCAACGCGCAGGTTTGTCCAGCGCCAGC  
TCTTTTTCGCGATTAGTTTGCAGCGATCACTTCCAGCGAATCATCACTGGTAATCGAATGTGAGGTGACGTGCCGT  
GGCATTGTTTTCTCCGGCTGGCACTGTATTGCGCTATTAACGCCATACGCAATTCAGTAAATCCTTGCAGCGCCGAGTT  
TTTGGGCAAATTTCACTATGCTCGACTGGCTAATGCCGAGCTGTTTCCGCATCTGCCGTGAAGAAACGGATTGCAGCTCA  
CTCAGTTGGCCTGCAGAAAGTCAGCGATTTTTGCTCGTTTTCGGTGAATTCCTCCCGCATTGCTTATTTTCGTGAGT  
GTACAACATCTCCACTCTCTGGCTGGCAGCATAAATCCGCTTAAGTTCTTATGACGCTTTCACACTCTGCGAGTG  
TAGACTCAATGATTCCTTAAAGCTGTCAATTCGGGATATGATTCATACATCTGCAATTAATTTGATCGTAAATAGTA  
AGGTCACCACGATGCAATTTGAAAAGATGATTACTGAAGCTGAAACCCGCTCGGCTGAAATGACCGGTATCGAC  
GCTGAAAATGTCCGGATTATCAACGATGAAGATAAAACCGTACCCTTCCGCTTGGAGCGGCTACTGCCGGATATCGCCG  
CGCGATCGATGTTATCCACGCCAGGTAAGCGGCGCGGGCGTCTGATTTACCTCGGTGCGGGAACATCCGGTCTGTG  
GGGATTCTGGATGCCAGCGAATGTCCGCCACCTACGGCGTGAACCCGGGTCTGGTGGTTGGTTTATTGCTGGCGGCGA  
ATATGCCATTACGACGCGGTGGAAGCGCGGAAGATAGCCGGGAAGCGGTGTTAATGATCTGAAAAATATTAATTTAA  
CGGCACAGGATGTGGTGGTTGGCATTGCTGCCAGCGGTGCGACGCCGATGTGATTGCCGGACTGGAATACGACGCCAG  
CTCGGTGCCGACAGTGGGAATTTCTGTAATCCGGGGAGCGCCGTTTCAACCACCGCTGAGTTGCCATTACCCGAT  
TGTAGGTGCCGAAGTTGTTACCGTCTTCCGCGATGAAAGCAGGTACAGCGCAGAACTGGTCTCAATATGCTTTCCA  
CCGGGTGATGATTAATCCGGCAAAGTGTTCGGCAACCTGATGGTCGATGTGGTCCGACCAACGAAAACTGCATGTG  
CGACAGGTCAATATTGTTAAAAACGCCACCGGATGTAGCGCAGAGCAAGCGGAAGCGGCTTAATTGCTTGCAGCGCAA  
CTGTA AACCGCCATTGTGATGGTGTGAAAAATCTCGATGCCGAGAAGCTAAAAACGCCTGGATCAACAGCGGGCT  
TTATTCGTGAGTTTTAGACAAGGAATAACCCATGGCAAAGAGATCAGCAGTGAATCTGAACACCATTCTTACCCGT  
GTCGGCGGACCGGAAATATCGCCAGTTGTGGTAACTGTATGACGCGCTGCGTCTGGGTGTACATGACAGTTCACTGGT  
TGATCCCAATATCAAAACGCTGGAAGGCGTGAAGGGCGTCATTTTGACCAGCGACCAGGTGCAAGTCTTTTTGGGCGCTG  
GTAAAGCGCATCGTGCCGAAAAGCGATGAGCGAGCTGCTGGGAGAAGCACCGGTACAGGATGCCGAGAAATCGCCGCC  
CAGAACAACGTCAAGTAAAAGCAAACAACCTCCGGCGTGAACAATTTCTCGCAAATTCGCCACCATCTTACGCC  
GCTGATCCCGGTTTTATTGCCGCGGTCTGCTGCTGGGGATAGCGACGTTAATTGCCACGGTGTGACGTTCCGGCAG  
ATGCTCAGGGAACACTACCCGATGCGTGAATTTTGAAGGTGTTAGCAAAGGTTTGTTCATTTCTTGGTGATTCTG  
GTGGGTATAACGCCGCCAGGCATTTGGCGGCACGGGCGTAAATGGCGCAATTATCGCCGCGCTCTTTTTGCTCGGTTA  
TAACCCCGCAGCGACCACCGTTACTACCGCGTTTTACGATTTCTTGGTCTGCCATCGATCCGCGCGGCAATATTA  
TCGGCGTGTGATTGCCGCTGGGCTGCGCCCGCATTGAAGGCATGGTGCGCCGCTTTATGCCGGACGATCTCGACATG  
CTGCTGACCTCGTTAATCACCTGTGATCACCGCTACGCTTGCCTACCTGATCATTATGCCGCTGGGTGGCTGGTTATT  
CGAAGGTATGTCATGGCTGTTTATGCACCTGAACAGTAATCCGTTCCGTTGTGCGGTTTTAGCCGGGCTTCTGATCG  
CCGTTGTTTGGCGTATCAGGGCTTATTCTGTTTACCTCGCTTAAATGGACAGCCAGGATTCAACAGCTTATTT  
CCCATCTTTCAATGGCAGGCGGGCCAGTGGGCGGGCGTGGCACTCTACTGGCGGGCGCAACCCGACAGTGGCGCT  
ACGCAGTCAGGTACGCGGGCGATTATCCCGCCCTGCTGGGCGTTGGTGAACCGCTGATTTACGGTGTACCCCTGCC  
GCATGAAGCGTTTTGTTACCGCTGTTTAGGCGGCGGGCGGGCGTTTTGTTATCGCCCTGATAGCCTGGTGGGTCTG  
CCGATGGGCTTAAACAGCGCTTTGGGCGTCTGGTCTGGTAGCGCTGCCGCTGATGACTTCCGCACAAGGCATCTTCC  
GGCCATGGCGGTTTTATGCTGGCGGATTTCTGGTGGCATGGTTTTGCGGGTTTTATTTTACCACGCTCTTTGGCTGCCGTA  
ACGTCAATCTGGACTGATATCATGAAACGGACAATGCTCTATCTTCTCTGCTGGCTGTTAGTTGTAGCGTCAGCGCCG  
AAAATACCCTGTTCTGACAGAAAGCTCGCCAGAGAAAGCAGGGTTTAAACGTGAAACGGCTTAAACAGATGGATCGTGGA  
TTAGCCAGCAAGTTGATGTCGGTTATCCAGCGTAAACCTGCTGATCATTAAAGATAATCAGATTGTGTATCGAAAGCC  
TGGGGAGCGGCGAAAAAGTACGATGGCAGCGTGTGATGGAACAGCTGTCAAAGCCACCACGGGACGCTGTATGACCT  
GGCTCAAACACAAAATGTACGCCACGAACTTCCGCTGAAAAGCTGATGAGCGAAGGCAAACCTGCATCTGACGATC  
GGATTGCGAAATATATCCGGGTTTTGCCGATAGTCAAATGACACCATTAAGGCAAAAACACCCTGCGGATTTCTGAC  
CTGCTGCATCACAGCGGCGTTTTCCGCGAGATCCGCAATACCCGAATAAAGCGGTGCGGGCGGCTTATATCCAGGA  
TAAAGGCCAGACGCTGGAGATGATCAAGCGCACGCCCTGGAATATCAGCCCGCAGCAAACATATCTACAGCGATGTCG  
ATTATATGCTGCTTGGATTTATCGTCGAGTCGGTTACCGGTGAGCCGCTTACCCTGATGTTGAAGAGTCGATTTATCGC  
CCGCTCGCCCTGACACATACGGTATTTAACCCGCTGCTGAAAGGCTTTAAACCGCAACAAATTTGCCGCCACGGAATGAA  
CGGCAATACCCGCGATGGCGTATCCATTTCCGAAATATCCGACCTCCACTCTCTGGGTGAGGTGACGATGAAAAAG  
CCTTTTATTCGATGGGCGCGTTTTCCGGGCACGAGTTTTGTTTTCAATACCGCGATATTGCGGTGTTAATGAAACG

ATGCTGAACGGCGGGGGCTATGGTGTATGTCAGCTGTTCAATGCGGAAACGGTGAAGATGTTACCACCAGCTCTAAGGA  
AGATGCCACTTTTGGCCTCGGCTGGCGGTGAATGGTAATGCCACCATGACGCCGACGTTTGGCACGCTGGCAAGCCCCG  
AAACCTACGGTCACTGGCTGGACCGGAACGGTGACCGTTATCGATCCGGTGAATCATATGACGATTGTGATGTTAAGC  
AACAGCCACATTCGCCGGTTGCCGATCCGCAAAAGAATCCCAATATGTTGCAAAGCGGTGAGTTGCCGATTGCAACTTA  
TGTTTGGGTAGTTGATCAGGTGTATGCGGCGTTAAAGCAGAAGTAATAAAAAGGCCAGTCAGTAATGTTACTGGCTGGTC  
TGAGAGTGCTGACAAACGCAAACTGCCTGATGCGCTACGCTTATCAGGCCTACGTGGAGCCCAATATATTGAATTAG  
CACGATTTCTGAGGCCGATAAGGCGTTCACGCCGATCCGGCGTGTACAACGCGCACTTGGTCAACAATCTGAGGCCAG  
TCAGTAATGTTACTGCCTGGCCTTTAATCAATGAATCAGAAACGTTACAGCGCCATCAACTTGTCCAGCGACGGTGCGA  
ATAATAGCCGCCGGTTACCGGTTTGGTGAACGCAACATCGCATCACGTTACCATCGGTATCGCCAAACATGCTCAGC  
AGTTGCTGCTCAATGTTATGACAGCGCGCAGTAGGCCGAGAAGTACAGACCGTGAGTGCCACTGGCAGTGCCGTACGG  
CAGGCTCTGGCGAAACATCTTCAGCCCTTTGCCATCTTCTTCAGATCAACGCGGGTGAGGTGAGAGGTTTCCGGACGTT  
CGTCGCCGTCGATCTCTTCGTTGGCCTCTTTGGTGCGCCGATCACCATCTCTGATCGTGAACGCTCATCCGGTTGAGC  
TGCTTCAGGTTGTGTTCCCAACGCTGGACAAACACATAGCTGCCGCCGATCCAGCGCTCTTGATAACCGCCACTTC  
GCGACGCGTCTCTCACCCGCCGGTTTTCCGTACCGTCAACAAGCCGCTCAGGTCACGCTCTTCAACCAACGGAAGC  
CGTGGATCTCTCTTCACTTCAATGCAGTCACCAAAGGCTTCCATCGCCCTGGGCGACAGAGAAGTTTACGTGCTGA  
CGCAGAGAAAGAATGTGGATCAACACATCGAATGGTTCGCGCGCAAGGCCTTTACCGTAGCCCGGAAATCTTTCAG  
CTCTTCTGCCCAACGCCCGGCTCAGAGCGCGCCAGGTGTTGTTACCAAAGGCAACCACCGCACCAAGATGCGCGTCCG  
GGATTTGCTTCAAAGTTGCCAGTTTTGTCGGCAAATGTTTTACTGGCCGACGCGAGGGCGTCAACTTCCCCTTTCACG  
TTGGCTTCGATCCAAATCGCCGCGCGCAATGTTCTGGCAAATGCCACTCTGAACCTGAGACATTGTTCTCTGAAAA  
TAATAATGCCACGCAATCCGTGGCATTGTTGAGCGCTATTTTACGTGTTTTTTCGCGGCGCGGTTTGTTCAGACGCAA  
TTAACGCCGCCAGATAATTTACTGACTTTCAGTTTTTTCAGGGTATCGTCCGAAGGCATTAACCTTCAGGACCACGCC  
ATTTCCCGCTGAACTGGTAGCTAATATGTTGACTGCCTTCGGCTTACATTCGACGGCAGATTATCATCACCATCAGCT  
TTTTGGCAATTGCCAAATGCTTTGCTGTAAGGTGCTAAACGGTGTACCGATTTTAAACCGGTGTCAGCAGGAATATC  
GCTATCCAGCAGCTCAATGCGACTGATCGTGCCTTATCGCCGTTAATCACCATCGCCACGTTGTGCGCTTTCATCACTT  
CAAAAAAGCGCACCACGTTGCCGTTCCGCGTTTTTATTCCGCTGCGCAGGCGATAATCGCCATCAAGCGCATCGGCAATG  
GCTTGTCTTGACAGTGGTGTGGACGCCGTTAATTCACCACGCCCTGCTCGCTCACTTTGGTGGACGACCCAAACCAGTT  
CCACGGGTTAGCGGCAGACCAGTTAACTGACGACATCGTGAACAGCCGGTCAGCATCAATGGCATAGCGCATAACATTA  
AACGCGAGGATTTTATGTCACCTTCTTTGGTTATCAATAACGTTGCTTGGAGTGCAAATTCACCAAAAAGTGCCGTTAT  
TCTTTTACTTCATAAAAACAAGCGCTAAACGTCGATTGGTCCAGCAGCCAGATTAACGCCACAATATCCGCCACTACCAG  
CGCCAGACCGATACCGCTAACGGATTACCGTTTCAGCCACAGCCAGGTTGCCAGCAAAGTAAAAACACCTGCGCCAACA  
GCAACAGAAAATAGAGTACACGCCAGGTGCGAGGAAACGTAGCCCGCCGACCGCTCAACAAAAACGCCAGCACCGCCGGA  
ATGCCAGGAATCAGCCCCAGCCAGAAATTATCGTGATCGGGATAAAACAGATTTAGCAGCGCAGTACCCTGCTCGCGCGA  
CGCACCGGCAATGACAAACAGCACCCAGGTTTCGCGCCTGAAGCAATAGCACAAAGCCAGAAGAGCAAGGGTAAACGCAGGC  
GACCGTGCGCATCATAATGGACAGGATGAAACTCAGTACTCTTCAATCAAACGCTTACCCAGACTCAGCAGCTC  
GGCGTTCATATCCAGCGTTTCATACATTCGAGCACCATGTCGTTATCTTCCGGCACATTGATCTGAATTTTGGGGC  
AGCCACGAGCAATCAGCTTTTTCTCAGCCGATTAAGCAACGCATTGGCAATCCACGCCACGAAACTCTGGATGCACG  
CCAAGATAATAAGCAGACCCGCGATGCCCGTCATAACCGCCATCACCCTCCGACCACGTCACCGTTTACCTCAGCGAC  
CAAAAACAACTGACGTCATGGTTCATCTTACGCTCGATGTCCATTTCCGGATCGTTCCACGGACGCAAGTTCGCAAC  
GTTCCCAAAGGGTATGACCTCTTCGAAATCTTCTGGCGAAATACGCGTATCTCCATGGTATTCTGTTACCTTTTTGCGG  
GTTAAAAGGCTGATTAGCGGTGAACGGTCAATTAAGCAATATCTGACGAAATCGGTTGAAAAAGTGGCATAATGGGG  
AGTTGTCAACTATTGAAATGAAAAAGTAAAAAATTCTCAACAGCAAACCGTCGTAACGGATTACGCGATACGATATAACA  
TCTGAACTTTTATTATAAACAACCTCAGGCCGATGAGCACTTTTAAACCACTAAAAACACTCACTTCGCGCGCCAGGTGC  
TGAAAGCCGTTTGGCTGCCCTGACGTTGTCAGGAATGTCGCAAGCCATCGCCAAAGACGAACTTTTAAAAACAGCAAC  
GGACACAGCAAGCCGAAAGCAAAAAATCTGGCGGCAACGTGTCGTTGTTCTCGATCCAGGTCACGGCGGAATTGATAC  
CGGAGCGATCGGACGCAACGGTTCGAAAGAAAAACATGTGGTGTGGCGATTGCTAAAAACGTCGTTCCATTTTGGCTA  
ATCATGGGATTGATGCGCGTTTAAACGCGTTCTGGCGATACGTTTATCCACTTTACGATCGCGTTGAAATCGCCATAAA  
CATGGCGCAGATCTGTTTATGTCAATTCATGCCGATGGCTTACCAACCCGAAAGCTGCCGGTGTCTCGGTATTTGCCCT  
CTTAACCGTGGGGCAAGTAGCGCAATGGCGAAATACCTGTCTGAACGCGAAAACCGCGCCGATGAAGTTGCCGGTAAAA  
AGGCGACTGACAAGGATCACCTATTGCAACAAGTGTGTTGATCTGGTCAAACAGATACCATTAATAAATAGTCTGACG  
CTCGGCTCGCATATTCTGAAGAAGATTAAGCCGGTGCATAAATGCACAGCCGCAACACCGAACAAGCGGCAATTTGGGT  
GTTGAAATCACCGTCGGTTCCTTCGGTGTGGTGGAAACCTCGTTTATCACCACCCGGAAGAAGAACGGCTGTTAGGCA  
CGCGCGGCTTCGTCAGAAAATCGCCACAGCGATTGCTGAAGGCGTGTGATCAGTTATTTCACTGGTTCGACAACCAGAAA  
GCACATTGAAAAAGCGATAAGTTATGAAACCCGACGCACACCAGTTAAACAGTTTCTGCTCAACCTTCAGGATACGAT  
TTGTCAGCAGCTGACCGCGTGCATGGCGCAGAATTTGTCGAAGATAGTTGGCAGCGCAAGCTGGCGGCGCGGGCGTA  
GTCGGGTGTTGCGTAATGGTGGTGTTCGAAACAGGCGAGGCGTCACTTTTTCGATGTCCACGGTGAGGCGATGCTGCT  
TCCGCCACCGCTCATCGCCCGAACTTCCGGGCGCAGTTTCAGGCGATGGCGGTTTCACTGGTAGTGCATCCGATAA

CCCGTATGTTCCACCAGCCACGCGAATGTGCGGTTTTTATTGCCGAAAAACGGGTGCCGATCCCGTCTGGTGGTTT  
GCGGTGGCTTCGACTTAACCCATTCTATGGTTTTGAAGAAGATGCTATTCACTGGCATCGCACCGCCCGTGACCTGTGC  
CTGCCATTTGGCGAAGACGTTTATCCCGTTACAAAAAGTGGTGCACGAATACTTCTACCTCAAACATCGAACGAACA  
GCGCGGTATTGGCGGGCTGTTCTTTGATGACCTGAACACGCCAGATTTGACCGCTGTTTTGCCTTTATGCAGGCGGTAG  
GCAAAGGCTACACCGACGCTTATTTACCAATTGTCGAGCGACGAAAGCGATGGCTACGGCGAGCGCGAGCGCAATTC  
CAGTTATATCGTCGCGGTGTTATGTGAGTTCAATCTGGTCTGGGATCGCGGCACGCTGTTTGGCCTGCAAACCTGGCGG  
GCGCACCGAGTCTATCCTGATGTCAATGCCGCCACTGGTACGCTGGGAATATGATTATCAGCCAAAAGATGGCAGCCAG  
AAGCGGCGTTAAGTGAGTTTATTAAGTCAAGGATTGGGTGTAACCTCCCTACCCCCACTCCCGCATCCGCTGATGCAGC  
GTCAGTGACGGCTTCTCGGAAAAACAGTCTGCTGGTAATCCGTGGCAAATTGCCCCAGATGCCAGAATCCCCACTGCATGGC  
GGCGTCTTTTACCGTCATACTTTGCGACCACGGACTTATCAGTTCGCGGCGTACGGCGTTCAGGCGAATGCGTTTACGCC  
ACGCGTTCGGGCAATGCCTAAAATAGCGTGAACGCGTTTTGTAGCGTGGCGGGCTGACATGCAGTTGATTACACAAA  
TCCAGCACCGTACCGGTTCCGACATGTTTTCCAGCACATATTCACGGGCGCGGAAAGCAATCGACGGTAACCTCTGATG  
ACTGATGCTTCCGCCGTACCAATTGGTTGCGCTTCTCCAGCATGGCCCCATCGCATTAGCAAATATCCCCAGCA  
CTTTTCGCATGCAGGCTGATGGAGATTTCCGGATTCTCGCAAAACGTCCGACGCGCTGTTGGACAAAGCCCCACAGC  
GCGGCTTTATGCTGCTCTTACCTCCAGCGCCGACTGGTTACGCAACATATGTAATACCCGATCCGGTTATGCAAAAA  
GTTAGCTGCGGCTGATGCATCTTCAGAAAGCACCGCCAGGATCGTGTAAATCATCCGCGTGTCTGCTGCTCAAAAT  
CAGTGCCACCAGGGCGGGTGGCGATTTCCGCGCTTCCAGACATTGCGAACCATAAATCCCTGCTCACCAGCGCTCGCC  
GGAATGCCAAACAGAACGAGTTCCGCGCAGACCAGGCACGACTGACGCGAGCGCCAGACCGGTGATTACGAAAAACCTG  
AATATCATCGAGTAGAATTTCCGTAATTCACCATGAAACTTGCCCGGATGCAGCTGATCGTAAATCTGCTGCCAGGCGG  
TAATCGTTAAAGCATGTTTATAGACATCCGTTGTCTGCTGTTGATGAACATTATCCACTTCGACCTTCGGCGTGAGCTTC  
AGTTTTTGGGTAAGGTTTATGATAAAGATGGTGCAAATTGGCTGTACGGGCTTTTTTATGATGTTAATGCCGGTGT  
TGTAGGACACCCGGCACCTCCGACAGGTTAATGGGCTTGAGACGATAACGACTACTGCGTTTACGTAACGTCGCGGACG  
AAAAGAGCTGTTGAGCGCATTTCTGGCTTTTTCCAGCGGCCAGCAAAGTGGGCGCCACTTCTCTGCCGTATTCCC  
TGACGTAAGTGTAAACAGCGCAACAACCTCGTCAGCAGATTCCGCGACGATAACTGGCGCGTGGGTTCCCTTACGGG  
TTGCTTCCGCTGGCGTTAAAGCCAGTAACCAGCCACTGGGTGTCATCGTCTGGCCGACCGATCTCCTTCCGCGTGTGA  
CACGCCCCGTACGCATCGCGGCAGCACAACTGCGTCCAGCGCCGACGACACGCGCCAGATCGCTTCCACCACCAGC  
GTTAAGCGACAGGGTCAAGCACTTCTGACTGAGCAGACGAACGTTAGCTGCTTTGAGCATGGCATCCGCTGCATCTAT  
CGCGGCGACCATGCCGTCCACTTCCAGCAATCCAGTGCAATTGATCATCGGCAACCTCCGTTACGCACGCTGGATTGGAT  
TACGCGCGATTTCCAGCACTGCATCGGTAAGGCGTTACAGGCTGCTTTACACGCTGCCTGGCTACCGGTTAAAAATGCT  
GCCGAGTAGTTGGTTTTAGACGGTGGCGGGACATAGGTCGCCAGCTGTACGTCGGCAGACTTCAGGGCTGCATCAATGCC  
ATAGGTCGCTTCCAGCGGGTGGCCACAGATACGCCATCGGATCGCAAGCGTGATCCCGCGGTTGATGAGAGATAAG  
AACCGGTACGCGAAACTACATGTGCCAGGAATGCCGTATCTTGCGCGTCAATTAGCCACTGGAAAGCTGCGCCATTTTCA  
ATATGCGCAATCATCGCATCCAGACCTGCACGCACTTCCGCGGGTTTTGGCCACCAAGCATAATCAGCACTTCCCGGC  
AGTCCGTGACGGGCGTGTGACGCGCCGCATATAGCGAGCGCCATACACCACTTCCACCATCGCTGCTTGGTGCCTT  
CATCAGCGCAATGTAGGTGACGTCATCGGAGTCCGAGAAATCAGACCGAGGTACGAATATGCGGCGGCAATTTAGT  
TCACGCGCAAAATCGCGTTAACGGAGGCAATCACCAGCATAGCGGTGACAGACGGTGAATCAAATCTAAAGCTGGCAT  
GATGCTCCTTATCGGGTATGTTGATGCCGGATGCTTTCTGCTCCAGCATACTTTCCGCAAAATCCACAATGACGGCTG  
CGGCTTCAACCGCGGGTCCGCCCTGGTGAATGTTAGAGATACAGGTGCGATCGGCTCAACGGTGGTCCGACATCGC  
GGCAGTAAACGGCGTACGAGGAGAGGCTTTCTGACTGACCAACCCCGAGCTTCCGCCACCAGCAGGATCACTACTTT  
CGCGCCGAGGATCTCAGCATCTGATCTTCAATCTCACGCGACCAACGAACAAGAATGGTGTACCGACTTTACGCC  
CGGCTGTTTTAGGCCCCCATCAGCGGTGGCAGGATCTTCTGATGTTACGCGTGTGATCGCATCAGTTGACAGGCCATCA  
GAAATAACGACCTGTACGTCGGATTGGCAACACACTGCGCTTTAGCGCTTCAACAGCTTCTGCACACAGGCGGGCGCC  
CATATCCGGGCGAGTCAGGTAGAGATTTTTGTGCTAATTTAGAGCGTACTTCCAGCAAGCCCTGCGCTTTACCCACT  
CTTCCGGCACTTCTTTCAGTACGGTATCTTTCGAACGAGAGTGATCGGCCAGGAAACGAGCAGCGCCTGCGTACGTGGA  
CGCGGACCGGCACGACCGGTACAAACGCGGGCCACGGTGTGCGGCGAGTTCTGTTAATACGCTGCGCGATGCGGATT  
TTCAACACCAATCCACGCTTTTGTTCAGCGGAACCTAAATCCAGCGCACAGCTTTCCGAGGTACCGGTGCCGACAGT  
TGGTGGTGGCGCACTTTGCTTCTGACGGCGGGGGCCGCTTGTCCATTGACGCCATCACGCTGCGTACAATTTCTTCA  
ATCTGTTTTTATCCATGATATGTTATCTCCGCTCATCAGAAGAAGTACGAGGATCGCCCGCCGTTTGGTACGGCGA  
CCGTTTGCATAATGCCATGCTTCCAGCCAGCGTTCAAACCTCCGGTACGGGCGCAGGTTGAGTAACGACGACAGT  
GGCGGTATCGTGAATGCGGTGGTCTGGTAGTTGAGCATGATGTCATACCCAGCGGCATCCCATGATGATGTTGACG  
CTGCGGTGGCAGCAGGATCATCAGGTTTTGTTGAGGTTCTGGTACGCGTACGCGTGGTGGTATAACAGCAGTACAG  
CCATAGAGATGCCGCTCAGCTTGCCATAAAGTGATCTTCTAAGCCAGCACGGATAATCTGGCGGTGCTGTAGAGATA  
CTCCGGCCCAATAAAGCCGACCGGTGTTGACGATAAAGGATCGTAATGACGCGCCAGCCGTTAGTTACGTGCTTCCA  
TCGTTACCTGGTCTGCGCCGAAGTTAGCGCCAGCGGATAGCGCAGAGCTTGTCCGGTTTTGAAAGTAGAGCAGTTTTCC  
CCGGCGATACGGTTGAACCTCCGCGCCACTGCGCGCTTCTGTCGAGCATCGCCAGCTCCACGCCAAACTCTTTCAGCCC  
TTTTCTGCTGCCACAGATACTCTGAAAAATCAGCCCGCCGGTGGCCACGACGGATCGCTTCCGATCTGGGTGGTACGCT



AGCTGAATAGTTTGAACATTCACCATTTGGAGATGACAAACAATGAGCCTGATCCGCACTGAAACCAGAGACACAAAA  
GCGCAGCTGACCCACTGCACGACCTGCGTAGCAAGCGTTTTCTGAGTGGGGCAGGATGAAATCAGGCGTTTTAATCTG  
ATAGACGCGCTTCTTGTAGTTTGTCTACACAGACACATCCAGCCCCGTTTCGGTATCGGCATGACCTTCGATTACACGGAGTG  
CTGGGAAATTTGGTGTTCGTGACGACTGCCTGGTAATGACACGCGTTAAGCCGGTGCATCCAGAATATGCGAAGCACTGGA  
ACATGAAAGGCGTCATGAATGACAAAACCCGCTTCCACGCCGACAAGTGGGTAGGGTACAGCAAGGTGCTTGCTGGGTG  
AGCTTATCGCACAAAGACACCTTACGGGTGCGAAACGGTTTTCAATACTTCAAACGATGTACGACATGGAACGGCAAAT  
CAACGCAAACCTGCCGTTGGCGGCCTTCCCAACGTTGACACAGAGCGAACTGGCAAACCTGTTCCAACCGGATGACTTTT  
CTGAGGATAGCCATGCCAACGATCCGAAGTTGGTTGGTGATGATTACGTCCCCCAGGCACCGGAGCAAATCAACTGAATT  
TTCGGACAAACGCGCGCGTAGCCGACGTCAGCGGCAAGACTGGCGGTCATTTCCCCGCTCTACGCGAAAAATCCCTCAC  
AACTACCCTGCAAATTTCCAGATTTACGTACACGCGCCAAAAATAAAGGCCAGGCAGTTAGCAACCTACCCGGGCCT  
TTCTCAATCCCCGCTGACATTATATCACCCATCTTCCGTTTTAGGTGGGAGACTGATGGCCGCCGACGTTGCACAA  
TTGATTAATTTCTGAACATCAATCAACTCCCACAAAGCCAACAAGATGGGAGGTGAATTTGTGATGACATCGCTT  
TTCCCTTCAGGCATTTTGTAAATCAATCAACGAAAGGCAGTTCCCAACAACAAAAATAAAGATGGGAGGTAAAAATG  
AAACGGTGGGAAGTGGCTTACTGGTGATGGTAATGTTGGTTTGTCTGATTGAACTGTGAAGGAGGACCCATGAACTT  
TTAATCGCAATCACTGATGGTGCTGACTGGTGTGCTTTCAGATGTTGGTGATTACAGGCTGAACGGGGAGGATAA  
CGCAAGAATTGAATCAGTCGTTACTGATAACTGTGAAAAACAGCCGATTGGTAGGCGGTGACAGGCTTCCGAGGGTTG  
AGATCGAATATATAGCGACATTGTGCAAGCCGGTGGCTTTGGTATTATTTACGACAGATTTGACGATATAGCGGCAATC  
CCTCTTAAGGTGACGTTGAAAAAGGTATTGAAAGAGAATAGCGATGAAAAGATTAACCTATTGAACAAGATGGGGGATCT  
GGCTGGTGTATCGTTGCAGAGCAGTATTTAGGCATGAGTTTTGAGTAAGGAGGCAATCATGAAAGTGTAGGTAATATT  
TTATGGTGGGCTTTTGTGGTTTTCATGGCTTACGCCACTTTGATTAAGCCGGACAACTGATCCAGCTGTTGTGAAC  
TGAAGAGCCTTTGCTATGGAGCTTGCACATATGGCGAACAGGTGAAGGGGGGAAAAATCATGAATGCCGCAAAAAATAA  
TGGGTGCGGACTACGATGGAAACATGTAAGAAGACAGGTTGCCATGTCTGTTTCCCGCCGGGTTTGTGCTGATAAC  
ATCCTGGTAAATACCATTTAGCAATGAACTGAGTTCAAATTAAGCGGCAGCGGTGAGAGAATGCCCAACGTAGC  
AGAAAAACACGGCTTTGTTTTGGTAGGTAGAGTATTTGAAAAACGTAATTGATTGCGAATAGCAACAATAACAACCAA  
TACACCCGGCCCTCGCCGGGTTTTTGTGATCTGCGTCAATATCCCTCCGTTACGCTTACCCTCCACCAATACGCGT  
GTTAACCTCCCAATGGATTCTATGAGATGGGAGATAAAAAATCATGAGTTACGAAATCAAAATTTGCGACATCCTCAAAGG  
CGCTGCGATGGAAGGACAATAAAGGGCGCTCAACGTGGGGCCAAATGCGAGGAGATCGCAAACGAGTTAACTCGCCGGG  
GAGTAAAAACAACAAGGGAGAGGTTATTAAGGGCGGCTTAGCCATTGGCTGGAAGGTAGACGGGAGCCAAATTTT  
GACTCTGGCTGAACTGTGCGACATGTTCCGGCTTATGCCCCTGATGCCGATGCGTGGCGGTAATGGATTTCGAGTTCA  
CCCGAAGACCGTGGAGAAATGGAATTACGCGAGGCTGTAGCTGAACGAGATGCTATTATCGACGACCTGAAGGCCCGTA  
TCGCTGAGCTTGAGGCGGCACTAGCAAATAAACAAGTCCCAGCAGAAGCGGAAGAGATGGGAGGTGAAAAAGTGAAGAA  
GTGGCAGCAGAGCAAGCGCCCAACGATGAAAAAGAGATGGGAGCTAAGGAGTGGGTTAACC CGAACCCGAAAAAATACAG  
CGTCCGATGTTGTGTCAGGTAAGTGGCTGCAATGGGCGGCAATACCTGGGCAACAACGAGGTTACAGCAGAAGATCA  
CTGTGTTGGATAACGACGGCAACCGGAAGCCAATCAGTAACCGCGCTTTTATCGACTGATTGAGCAGGCCAAAGGGAGA  
GGATTGATTAGCGTTGACAGGAAATCAAACACAAGAAAGACGAAACCGGCAACAGATCGGCAAAGGCAAGAAAGGTGA  
CAAGCTGATAACTTTGCTTCCAACTGGATTGATAAGCTGGGAGACGAATAAACCGCCTTCAACCCATCTCATCAATC  
AACGCCCCGGCCGCTGCCGGGTTTTGCTATGCACCACAATTACCCCAACCGGATACACAGCCGGATACAATTCACCA  
GCACCCAGCCACCCAGCGCCACCGCTGGCGAATACCGCATTGAGGAAGGAAATGCGAGTGATTTACCGTACCGGCACA  
ACCGATCCGCAAAAAGAGCGGTACCAATGTCGATATAGTCCCCGCGCGGACAATCACTTCGTCATGACTGCCAACGG  
GAGTTGTTGAGCTGTGGGCGAACCAATGCCCAGAGCTTTACCAAAGTCTGCCCGCCACCACAGCGGGGATCGCG  
GATTCGGAAAAACGCGCAGCAAATCGACCAACCGTGTGATGACCGTCAGTACC GCGGCTAACGCACAGGCAAGGCG  
GGAAGCGCCAGCAGTACGCGTCAGTTTTGGGATCAAGATCCAGCTGAATCAGCGCCTGTTGCCAGGCCCCACAGATC  
CGTTTCATCAATCGGGATCGCCACCGGCAAATGCGCAGCGGAGTTGTACGCCCTCAAGCCAGATTGTGCTGCCAGAGA  
GCGAAAGGGTATGCGCGCCCGCCAATCACCGTGGCGCGCAGGTTTTCGCGCGGAAACTGTACGTTTCTCACGAGG  
CGCGGATGGTCATGCAGCGCAGTTGCCAGCAGCGGGCAATATCGGCAAAACAGAACGGGTCGGCGGGCTGGTGGCGATA  
ACATTCGCCACGCGCCAGAAAGCGTAATGATTTCCGGCGTAACACCTGCGGGCAGCAAACCGGTTTGCATCAATGCCT  
GCGCGAGCGGTGAGAGCGTTCGTCATCACTTCGACAATCAGTTCTGCCATCCGCGGGTACCTGCACCAGCTGCGCG  
CCGGTCAGCGAACGGGCGTGGTGCCTGCACCGAAGCACTCATCCACAATCATCTGCCCGGTTTATGAGCGTAAACCAC  
GCGCCGTTGGTGTGCGTTTCCAGCAGGCGACCACCGAGCTTGGGAGGCGAGTCCGCTGATTTTTCCGGCATCGAAC  
GGGCGTAGTTCGCGGTGCCACCGCGATGTCGATATCAGTACCCGACACAGCCGTTGTTGAGAAAGGGTTTGTGCCCCG  
GCTCCGTGACCGCGATCACGGATTGAGGTGCGGCCCGGCGTGGCAACGACAAAATCGCCAGCGACTGAGAGAGCGC  
CATACCCGCCGGCGAGCATTGCGGGTTTTCGCGTTTTACCGGTGATGATGATGGCACCAGAATCAACGCTTTCCGGCT  
CAATACCCGACGATGATTTGCTCGAGTATTAAGTTTTAGTTCCGCTTCTTTAAACCGCCCTGTTTATCGACAGGG  
GTAAAGAACACCGGACTTTGCCAGTAATTTGCGTTTAAATGAATTCGTAGCGCGGCACCTGCCACACCGCCGACGGTT  
AACCAGCTCCAGCCGGGAGAAAAATCACCTGGGTGGTGGTGGTGGCGATATCGATACCGAGCTCAATAGCTGGCGAGTGT  
TCACGATTGTGCTCCGCTTTCGTTTTAGTGCGGTTCGCTTCTTTTGGCACCAGCATCATCGCCACGCCAATCGCCG

TTACGCCGCCGATCAACTTGCCGACAATCATCGGGAAGATCATGGCGTTCATGTTGGCAGCGGCGAAGCCTAAGTGGTCG  
CCCAGGGCGAAAGCAGCGGAAACGGCGAAGGCGCAGTTGATGACTTTGCCGCGGGTATCCATCTGCTTCATCATGCCGAA  
CATCGGGATGTTGTTGGCAAGCGTTGCCACCATGCCGCTGCCGCGATGTTGTTTATATTCACTACTTTACCGACGCTCA  
TCAGCGGTTTTTCAAACCGAGTCAGCAGCAGCACCATCGGATACGCCCTAACAGAACGCAGGAGATAGAACCAGATA  
ACTTCAATGGCGCGCATCACCTCACCGGTTTTATCGCCAGGGGCCATAAAGATAGGATCCAGACCGGGGATCAGTCCCA  
GCCAAGCAGGAATTTCACTACCGCAGCGGCAAGACCGAGGGTATCAATGCAACGAGGAATTTGGCGAAGATCTGGAAGC  
CGTTGATCATTTTTTCCGGGATGAATTCAGCCCCAGCGCCACCAGAATCGCAACAATGATCACCGGGATCATGTTATC  
AGGATCAGGGCGAAAGTGAATTCACCGGCTGGCCGTTGATCTGCACACCGGAGTACATAGCAACCAGACCACCAGCGAT  
ACAACCAATCGGAATGGTACAATGCCCGCCAGCACGCCGAGCGCCAGATAACGACGGTCAGAAGGTTTCGATAATGCCGA  
GCGCCACCGGAATGGAAAACACAATCGTTGGCCCCATCATCGACCCGAGAATTAACCCAGAGTATAGCCACGCGGCTACG  
TCGCCGCCCGCAGCTCTTTGGCGAGGAAGAAGCCGCCATATCGCACGCCAGCAGTGTTCGGCGAACATCGATGGGTT  
AGCGCCGAGCATTTCTGTAACCGGAATAATTACCGGCCGAGAACGTGAGCCAGTACCGGTGCCAGCGCGGTTCATACCGA  
CCATCGCCAGGCCAGTGCGCCATTGCCATAAAGCCTTCTCGAACTGACCGCCTGATCCTTCGATACTTTTACCGAAC  
TTACCGAGGAACGAGCAGAACCGCCGAACCTGCGACAGGATCTGTCTACGGCAGCTATCAGCATAAAGAACATCATGAT  
GTACATGATGATTTCTGTTAATTCATCGCCTTTACTCCCTGTTAGTTGTTATTTATTGGCGGATGCGGCGTAAACCGCT  
TATCCGCCCTACATGTGCAATCCCGTAGGCTGGATAAGACCGCGCAAGCGTGCATCCGGCAATTCACCGCCACTGG  
CGATGCGGCGTGAACGCCTTATCCGCCCTACATGTGCAATCCCGTAGGCTGGATAAGATGCGGCAAGCGTGCATCCGG  
CATTATTGCGCCGCTGCGTACAGGCCGACAATCTGCTCCAGGCTGGCGGTACGCGGGTACTGCGCAGACAAATATCTT  
CCAGCGCGGCTGCGCCCATGCGCCGTAATGCGCAGATGTGCGACCAACATCGCCAGTCTTTACCAATCCCACTTCC  
GCAATCAGCTCACTTACCGGTTAATAGCGTCACGATCGTCGGATTTTTTAGTTCGCGAGTCCCGACCAATCTGACTAAA  
GCGTTACAGACAAACCATCCGGTTAAATTCATCACCGTTGGCAGCAACATGGCGTTTCGCGAGACCGTGCAGGAATATGCA  
GCGCCGCGCCCGGCTGATGCGCCATCGCGTGGCACAACCAAGACCCGCACTGGAAAACGCCATTCCCGCCATACATGAA  
GCCAGCAACATGCTCTCGCGCGCGGAAGGTCGTGACCGTAGCCACCGCTTTCGCGAGCGATTTGCCAATCATCGCAAT  
GGCACCAATCGCCAGACTGTCGTAACCGGTGTAGCGTTCAGGGCGCTGTATGCTTCAATGGCATGGGTTAACGCATCAA  
TGCCGGTATCGCCGTGACATGCGACGGCACACCTCGGTCAATGCGGCGTCGAGGATCGCCACATCCGGCATCAGCGAG  
GCATGGGCTAACACCTGCTTGCGCCGCTCACCGCTCGATAATCACCGTTACATTGGTGGTTTCAGAGCCGGTTCCGGC  
GGTAGTTGGAATGGCAATCAGCGGCAAGCGCGGTTGAGAACCGTGGTTTCTGACATCTCTGCCAGCGTGTATCCGGGT  
TCGTACCAGCAACGTCACGGCTTTCGCCGATCCAGCACCGAGCCGCCAAACGCGATCACCCCATCACAGCCTGAC  
TCACGCAACTGCGCCACGGCTGCACACACGTCGGTAATGCACGGTTCGCCACCGGACATGGCCAGAGCGTTCATGGCGAT  
ACTTTTAACGGTACAGGCTACGCGTCAGCCCGCGGTCATCCCTGCCTGATGCAAAAAGCTGTCTGCCATCACGAACAGAT  
GTTTCAGCCCACCGGTTTGCCTTGTCTCCGCAACTGCTCACCGAGCCCGACCGCAAAGCGTACCCGGTGAACGCTA  
AATGTTTTTACCCGTTGAGATTACGGGTATCGAACGCCTGAAAGAGCGCGTCTGCAATTCATTTTGCATATAGCCCCCT  
CCGCTTCTCTCGCCACTACTGGCGATCGCCAGCGGGGTATAAACAACACTGTGCTGCGGTAATGCACCTGTAACGCC  
GGGAATGTTTGCAAAACAGTTCGCCACGCCCGGTTGCATACAAGAGCCGCCAGCCATAAATCAGTAATGCCCTG  
CCCTTCAATATGCCGGGCGACAATGTCCGCCATTTTTCTGACACCGGTTTACCCGAGGCCAAATCTCTTACCGTGAC  
CGCGTTGACTGCTCCGCTCTTCCAGCGAAATACGGCGATTTCCGGCGAGAGTCAGAGAGATGTGATGCCGCGGTG  
GCTTCATCCGCCGAGTACGTACCTTGCCTTTTTTACGATGGCAATGCCGGTAGTGCCGCCGCGATATCCACTACCC  
GGCGTTGTCCAGTTGACGAGATCCGCAACTGCGGTTGGCTATCCAGCACATGGCTCACTTCCAGTCCGGCAGATTCCA  
GCACGTTGATGAAATACGCGGGTCCGTACCTGGAGGAAATGAAGTGCGCCGATGGCTAAAACGACGACCGAATTGCTGC  
TCGAGCGTGTGAGATGCCGACGAACAATGGTGCAGCGCGCAAGAAATCCAGACGATGCCGTGCGGAACACATCGGC  
CCAGTCCGAGGCATACCGCACTGGCTGACCGTCCGCGTGCACAACCATCGACACACATCGCAGGTGCCAGATCCACCC  
CCAGCCACAGCGGAGATTCCGTGCGGCGGGCGTCTGGTTACACAGCGTTGCCGCCGTTTGCAGACGTGGGGTGAGCCAT  
TGTTCTGCTGCGCCATCTGTTACTCCTTAAACAATGCGAAAACGCATCGACTAATACACAGCGACGACGAGCGGACAAACG  
TACGCGCGCTGGTTACCCCTTACCGGTTGGCGTGGTATGGTATGGTGGTCCAGCCTTCCCGCCAGCCCCAGCCCCG  
GCAATGCACGGTCCGTTCTTAAAGAAATGCTGGTATCAATAGCATTGCCATCTGGTTATGTTTTCGATGTTGCGCGA  
GTGCATTGCCGCCGTGTGGTGGCAACCGCCTTCCAGTTTACCGCTAGCGCAATGGCATCCGCCACGTTGGCGACGCGCA  
CGACGGGCAACACCGGCATCATCAGTTCAGTCACGGCAACCGGATGTTCTGCGGTGGTTTTCCACAAACAGCAGGCGCGTT  
TCTTGGGAACTTTAAGGCCGATTGCCCGCGGATTTTGCCTGCGTGCAGCAACCCAGTCACGGCTGACGGTGCCTTT  
TCCGCGCTCGTCGATTTTTTACGCAACACCGGTTGACGTGCTGCGCTGTTCTGCGGTGAGTTTACCGCGTGTGCTGGC  
CTTCCATCAGACGCATCAGTTCATCGGCTACGCTATCAACAACAATCAGTACCTTTTCTGCGGACAAATGATGTTGTTA  
TCGAAAGAAGCGCTTTGACGATGGACTGAGCGGCACGGCGAGGTCGGCGGTTTTCATCCACCACTACCGCGGGTTGCC  
AGCGCTGCGGCAATCAGACGTTTATTGGTGTGTTTACGCGCCGCTTCTACTACCGCTTCCGCCCGGTTACCACCAGCA  
GGCCGATACCCGGAACCTTGAACAAGCGTTGCGCGGTTTCGATATCCGGATTTGCCACAGTAACAGTAAGTTTTCCGGC  
CCACTGCGGCAACAATCGCCTGGTTGAGCAGCGTAATCGCCCGTGGGAGACTTTTTTCCGCCCGGATGCGGGGCAAA  
AATGACGCTGTTGCCCGGCAATCAGGCTGATGGCGTTGTTAATTACGGTTGCCCGCGGTTAGTGGAAAGGCGTACCCG  
AAGCCACCACGCCCCAGGTTGCGTTTTCAATTAGGGTCAGGCCGTTGTCGCCAGTCAGCACTTGCAGAGAGGCACTCA

ACGCCTGGTGTGCCGCGCCTGAGCGACGTTTTTTGCAAATTTATCTTCAACGCGCCCCATGCCGGTTTACTGACGGC  
AAGTTCCGCTAAATCTCTGGCGTGTTTTTGCCTGCTTACGAATGGCAGCAATGGCTAACTGGCGCATTGCCACGCTTT  
TTAACCTTGTGGGCGACTTTGGCTGCCGAACGGCGTCATCCAGGGACGCGAAAACGCCATCTCATGAACGGCGGCG  
GACGGCGTGTACTGCTTTGCAATTTTACGAGTACCCTTTACCACCTGTTCAATATCCTGTTGATTATGATGTTCTG  
CCTTATTTGTGAAAATTACCTGACCGCCAGACACCACCTCATCGACAATGCCAATCACGCACAGATCGACCGGTGACGT  
TTCGCTTTTATGCGCCTGGCGGGCGGAACTGCCACTCACCAGTAACACCCACTCCCCGGTTCCCGCGCAATATTGTGGA  
TGCGCAGCGCGCATTGCCCGTCAGGATTACCTTGTGGATCAATCATTTCCACCATCAGCAATTTGTCATGCGCCAGTCCG  
TGATGGCGTACGGTACAAACAATTTGTCCAGTGACGACTGCCAGTTTCATACCCGCTCCGTGGCGTATTTAGGTA  
GCTCCCCCTACCTCCGAGAAAGGTAATAAAGGAGAGAGCGTGACGCCGAATCGACGTCACACAGGGTGATTAC  
AGTTTGTGCTATCGCTTTAGGCGGATCGGGAAGACTTCTCCAGGTGCGGTGCGGACGCGGGATAACGTGTACAGA  
TACCAGCTCGCGGATACGCTGTGCCGTGCGGCACCTGCATCGGTGCGGCTTTACAGGCTGCAACATCACCACGAACCA  
TGGCAGTACACAGGCCCGCCCAATCTGCTTAACACCAACCAGCTTGACGCGCGCAGCTTTACCATCGCGTCAGAAGCC  
TCAATCAGTGAACACAGGCCCGGGTTTGCATCATTCTAATGCTTCCATTGTCTTTCTCTTTATCAGGGTCCAGAAC  
GGGACCGTTTCAACCAAGTGTGTTGTAACCTGCTTTCGCGGTTCACTTCTGTCTGACGCGGCACAGCTGCCACAGCGC  
CAGCTCGATAATTTCTGACGCTACAACACGAGAGAGATCGTCAATCGGCGCGCAAGTCTTGTATCAGTGGCCCGA  
CGGCACGATATCCGCGAGTGTGCGGATTTTGTGCAATTTGTAACCAATATTTCCGGTTCAGCGACGGAAAAACCATCACATTG  
GCCTTGCCCTGTAGCGGGCTGGCAGGCGTTTTTGCGCCGCACTTCCGGCAGGAAGGCGCGTCAAACCTGTAACCTGCC  
ATCCACCACAGCTTTGGTGCAGCTCACGGACGATTTCTGTGCGCTGCTGGACGTTAGCAACACAGGGGTGACGGGGC  
TACCATTGCTGAAAAACGACAGCATGCCACGCGCGCTTCTCCGGTGATGGCGCGCCAGGTTTCCGCACTGGCAAGC  
GCGATATCCGCGAGTGCAGCGCGCTGGCTGTGGCACCACGCTGCAATCGGCAAGGCCAACGCCGGGCGCTGTACTG  
TGGAACATCAGGAAAATGGAAGAGAGCGTTTTACAGCCTGGCTGCAAGCCGATAATGCGTAATCCGGCAGCAGCACAT  
TTGCCGTGGAAGAGAGGTTGCCCGGATACAGACATCCGCTTTACCGGCGTGACCATTGTGCGGCAACATCAGAGGG  
TCGGTAAGTTTTTCCAGCGCATCCGGCGGCTTTTTTGCGCCGCGGGCCAGCCAGCGATGAGCAAATCTTCCCGCAT  
TGCGAGGTTGCCATGCGGATCAATCACCTGTAGCCCGTCCATGCCACGCGCTGACTGAGCGCAAACGACGAAGTTCAA  
ACGATTGGCGACCAGAATGGCGGTTGCCAGACCTGTTGATGTAATAATTGCGCGCTTTACGACACGTTGGTCTAAC  
GCATCCGAAAAACCACTCTGGCGGGCGCTCGAACGCCAGTTCACGACAACGTTCAATAATCATTGCGTTTCCCCAGT  
CGTTGTTGGATCTGCTTACCCTAGCGGCTGCTTCTGTTACGCTCAGGATCATCATCAGTAGACCGTGTCTGAAAGGCG  
GTTACAGCGCTGCAAAATGTCCGGGCGTAATACTTCAAAGCTGCGGGTGATAAAGACCTGCCCGCTACGGTTTCCGTTT  
CCCGCACTTTGGTGCAGTAGCAGATTGAGCAACGCAGCATCGCGCCGTGGCTGGCTTCCGGCACAGATGATCGTGGTGC  
AGATAGCGCAGCGGCTGATGAGAAAGCGGATGAGATCTTCGTGAGAAAGCCGACAATCGCTGGCAGCCAGCGGTT  
CCCCAGCGCATCGGCGCGCATAATGTTGCCAAGACGCGAACCGGATATCCGCCAGCCACGGCTGCCACGGTTCCGCCAGTT  
CAATTTGACGCCACACTGCCAGCGCAATGGTGTGTCGAGAACCAGCGCGAAAACCCAGACGCGGATCGCTTTTGGCGACC  
ATTTTTCCGCGGACAGGTGAGTACGCTATCCGGCTTTTTTGCACCGGCTGGCGACACAGTTTCGACGACGCTGCGG  
ATGTTATCGTACTGGTCAGCCATGAACGGGCTGCGGCTGTGCTGTTTATCGTCAACAAACAGGCGGCCCTGCTCGT  
CAATAAACTTGTGCGCAGATGGCGGCTTTCCAGCAACTCCGGGCGAGGGGCTCAGGCGACTGTCCGAGGGAGATGG  
ATCTTGCCTTTCGCTGAGCGTATGGTTCGCTCTTAGCCATGCTTCGGTGTGAAATCTTTCATAGGGATTGCCAGTTA  
GCCGGCCAGGCGACATACAGGAATTTACGCTGGATGTCGTACCAAAATCGATGCTGGAGCCTTTCCGGATAAACATCAC  
GTCGCTGCTTTGGCGATCATGTTTTGGCCTTCTGGCGAACATGCAGCTCCCTTCCAGCACCATGTCGATTTTCGTCGT  
AGTTCAGGGTCCAGGGAAGAAATGCTTCTCCACTGCATAAAACCGGCGCCATGCTGCTGCCGTGCTTCCGGTACA  
AGATCAGTCAAGCCACGCAATGCGGCTGCGCCGCGAAACGACCAAACTGACGCTACTGCCATCAATCACTTTGAT  
GCCGCTTTGCCGCTACCGATTTGAAGCTCGGCTGCATTGCGCCCTGCTCCAGCGACTTTTTTCTTCACTTTTTT  
CCATCAGCTGTGCGACAGGCTTTCCGTAACCTGCGCTTCCGGCAGCTGGGCAATGATGGTTTCCGCGGATGCGCTGGCTT  
TCGGTTTTGTCGGCTGGCACGCTGGCGGGCACGACGCCGTTACCGGATCGATTATCACATTCCGTGATGGTAAAACC  
CAGTAGATCCGCCACTTACGGGCTTCCGGGTAATAATGCTGGCGCGCAGAACCACGACATTGCTGTTCCGCGCGCG  
CGTGTGCTTACGAATATCATTGCTGTGATGAGTTTTTACCTGCTTCTCCTGTTTGGTGGAGAGATGCCAGATAATC  
CACCAGTTGCTGCAGCTTTGCGGGTCTGGCTGTTTAGCTCGAACATCGGCTTTCGAAACCCGCTCAAGCAATAACT  
TTCGCGTTGCGGCGACGTCAGCATCTGGCATGTCGTTTTACTGATGACGGCGATTTGCCGTTTGTGACGCCAATATCC  
AGCAACCCGGCAGGCAACCGACTTTCCGGGTCATTTGCCCATGGACATAGATCAGCATGTCTACATCTGTAGCGTGGT  
AATTAAGGCGTGATACCAGCGGGGATGGTAAAATATCACCCGGCGTATCAATATCGCCCTATCATTAAATCCACGG  
CCTGTGTTTTTCTGGCGAGGATATAATCCCTGCAACGCATTAATAACGTTGTTTTTCTGCCCGACGCTACCCACA  
AACGCAATTCGTTTTCATGAATGCCTCGTATTAACTTTTGGTCATTTCAAAAGCGTATAATTTAATAAGCGACTAAACC  
GCTGACGGTTTGTGATAACGCTTCTTACTGCGCCACCGAGCCATAAATACCAATGCACCGCTGAATCGGTGAGAA  
AACCGATATGCACATCAGCGCTTTCAGCGCTAAATCACCGCGATCATCGCCGTTTCCGGGGAGTTAGCGTCATAATG  
CCAATTCGCCCGCATCCGGAACGCCGATTTTCTTCCAGGTTCTCACCAGGATGCGCGATGAGATGCGCCAGTGTGAC  
CTGTTTCCGGGCGACAAATCCTGAATGATGCGTCTTTATCCATGAGTCGCCGCTGTGAAAACTTTCTGTGATCGTG  
ACAATTTTTCTCAGAGTAAATAACAAAATTCGGCAAGCGGTTTTAAAAGGTGAGGTAGATCACTAAGAATGGAGAGATA

TTCGCTGTGGTGCATAAACTTTTCATATGCAACGCATGAATATAAATAAAATAATATCGAGATATTATATAGACTGCTTTT  
TTTTATTATTCGAAACTCAGTAATAAGCTTTACTAATATATTGCAGCTAAACTGCTTACCCTGAATATTCAGGGTAAGC  
GTGAGAGTTAAAAAAATTACAGCGGTTGGGTTTGCCTTCTACCACGGCCAGCGCCACCATGTTGACGATACGACGCAC  
CGATGCGATCGCGGTTAACACGTGAACCGGTTTCGCCACACCCATCAGCACCGGGCCGACAGTACACCTCCGAGCTGG  
AAACACGCAGTAAGTTGTAACATAATGCGGGCAGCTTCCATGTTCCGCATCACCAGAATATTGGCGGAACCTTTCAAAGAG  
CTGTCCGGCATAACGGTCTTGCATCGCTTCCACCAGCGCTGCATCGCCGTGCATTTACCATCAATCATCAGTTCTGG  
TGCACGTTCCCTGACCAGTTCAGCGCCTGACGCATTTTGTCTGACGACGGGAGTCCAGAAACCAAAGTTGGAGTGGC  
ACAACAAAGCAACGCGCGCTCAATACCAAACGACGGACAGTTTCTGCCGCCATCAAGGTGATCTCCGCCAGCTCTTCT  
GCATCCGGTTCATCATTAAACATATGTATCGGCAATAAAGGTGTTACCACTCGGCAGCAGCAGCGGTTTATGGCACCTGC  
GGTGTGAACGCCATCGCGATAACCAAAGACATTTTTACCACGCTAAAATGTTTCATGATAATCACCCACCGTACCGCAA  
TCATTGCATCGGCTTCCCCACGCTGAACCATGATCGCGCCGATCACTGTCCGGTTACTGATCAGCGCCCGCTGCGCCTGT  
TCCTGAGTGACCGCGACGCTTATGATCTGGAAGTATTCGGTCCAGTACTCTTAAAGCGCGGATCGGATTCTGTTATT  
GACGATCTCAAATCAACGCCGCTTGTGATCTGCAAGCCAGTTTCTGAATGCGCATTTGATCAGGTTCCGACGACCGA  
TAAGGATCGGTTTCCGAGTCCAGCGTTACCAGTTCCTGAGTGGCATGCAGAACGCGCGCTTCTCCCTTCCGGCAGA  
ACAACGCGCTTCCGCGCTTTCGAGCCTGGGAGAAAATCGGCTTATAAACAGGTTGGTTTTGTAACGAACACTCAGTCAG  
CTTGTGATGTAGACGTCGAAATCAGCAATCGGACGAGTCCGCCACCGCCACTCCATCGCGCTTTAGCGACCGCAGGAG  
CGATCTTAACGATCAAGCGCGGATCAAACGGTTTTGGAATGATGTATTCCGGACCAAAGCTCAGATCCTGATCGCCATAC  
GCTGAAGCCACCCTTCCGCTCTGTTCCGCATGGCGAGTTCGCAATCGCACGTACCGCCGCCAGTTTCTCTCTTCTGTT  
GATGGCGGTTGCGCAACGTCCAGCGCGCCACGGAAGTGAACGGGAAGCACAGGACGTTGTTACCTGGTTCGGATAGT  
CAGAACGACCGGTGCAAATGATGGCATCCGGACGCACTTCTTCCGCCAGCGCGCGCAGAATTTCCGGTCCGGGTTCCGC  
AGCGCCAGGATCATTGGCGCAGGACCTTTTCTTACCATTTCTGGTCCAGCACTTTCGGGCGGAACAGCCAGGAA  
AATATCCGCGCTTCAATCACATCATCGAGGTTAGCTTTCGGTCCATCCACCACCGCATATGCGGCTTTGGTTTCCGCCA  
TGTTTGGCTCAGGCCCTGATAGATAACGCTTTTGAATCGCAAACCAGATGTTATGTTTTGACAGCCAGCGCTACC  
AGCAGGTTACATACAGGCGATTGCTGCGGCACCCGCGCCGAAACCACCATCCGCAGTCCGAGATGTTTTTCTCCACCAC  
GCGCAAGCCGTTGAGGATGGCGCAGTGTGATAATTGCCGTGCCGTGCTGATCGTCTGGAATACCGGAATATTCATCC  
GCTCGCGCAGTTTCTGTTCAATATAGAAACATTTCTGGCGCTTAAATGCTTTCGAGGTTGATGCGCGCAAGGTTGGTTCCG  
AGCGCGGCGACAACCTTCAATAAATTTGTCGGGTGAGTTCGTCACCTTCAATGTCAAATACATCAATCCCGCGCAATTT  
CTTAAACAGAACGCCCTTGCCTTCCATCACCAGTTTGCCTGCCAGCGCGCAATGTTGCCTAACCCAGCACCAGCGCTAC  
CGTTAGAGATCACCGCCACCAGGTTACCTCGGGCGGTATATTTGTAGGCTTTTAAACGGGCTTTTTCGATTTCAAGACAA  
GGTCCGGAACGCCTGGTGTAGTGGCCAGCGCCAGATCGCGCTGTGTTGCCAGAGGCTTGGTTGGAGAAACCTGGATTTT  
CCCTGGAACGGAAATTCATGGAATCAAGTGCATTTGTTTTAACTGGTCCATCCATTTGGTTGTTCTTTCACGTAACG  
TTCACAAATAAAGTGTGTGGCAACAGCCCTGCCACAACGTGGCGCACATTATTACCCTGCCGGAGTCTACAGACTTT  
GAGCAAGTCCAACTCTCACCATTAATAATGTTTTGGTAATAATCCTATAACACTGATGTTACCTGCTTAATCCAGCA  
ATACCATGCCTGTCTGCTATGCTTTTTGATGCGTTTAGCGAAATTTCTCAGAAGTGTGAATTAACGCACTCATCTAACA  
CTTTACTTTTTCAAGGAGTATTTCTATGAACGAGTTAGACGGCATCAAACAGTTCACCAGTGTGTTGCGGACAGCGGGC  
ATATTGAGTCCATTCCGCTTATCATCCCGAGTGCACCCACCAATCCTTCGCTGTTACTCAAAGCTGCCGATTATCA  
CAATATGAGCATTAAATAGACGATGCTATCGCTGGGGTAAAAAAATGGCAAGACCCAGGAACAACAGTGGTTCGAGC  
GTGTGACAACTGGCGGTCAATTTCCGTGCTGAAATCCTCAAATCGTACCCGGTCCGCTGTAACAGAAGTTGATGCAC  
GCCTCTTTTTGATAAAGAAAAGAGTATTGAGAAGCGCGCCATCTGGTGGACTTGTATCAGCAACAAGCGTTGAGAAA  
TCACGCATTCGATCAAGTGGCTTCGACCTGGGAAGGAATTCGCCGCGCAGAAGAGTGGAAAAAGAAGTTAATACG  
CAACCTGACGCTGCTGTTTTCTTTTGCACAGGCACGGCCTGTGCGGAAGCAGGCGTTTTCTGATTTCCGCGTTTTGTCG  
GGCGTATTTATGACTGTTATCAGGCACGCAAGCCGATGGACCCGATGTGGTGGGAAGAGATCCGGGCGTTAAATCGGTG  
CGCAATATCTACGACTACTATAAGCAACCACTATGAAACCATTGTGATGGGCGCGAGCTTCCGTGCGACCGAACAAAT  
CCTCGCTTAAACCGGCTGCGATCGACTGACTATCGCACCGAATTTACTGAAGGAGTGCAGGAAAAAGTTTCGCCAGTGG  
TACGTAATTAATCCACCTTCTCAGACGTTCCACGCCAGCTCCCATGAGCGAAGCGGAGTTCCGTTGGGAGCAAT  
CAGGATGCGATGGCGGTAGAAAACTGTCTGAAGGCATTGCTGTTTCCGCGTTGATCAACGCAAACTGGAAGATCTTCT  
TGCCGCCAAACTATAAACAGCCACGGAGTGTATATGTTCCGAAAGACCTTGCCAATGCGATTCCGCGCACTCAGTATG  
GATGCGGTACAAAAAGCCAACTCTGGTCATCCCGCGCGCCGATGGGATGGCTGATATTGCCGAAGTGTGTGGAACGA  
TTTTCTTAAACATAACCCTACCGACCAACCTGGTATGATCGCGACCGCTTTATTCTTCCAAACGGTACGCGTGCATGC  
TGCTCTACAGTTTGTACATCTGACCGGTTACGACCTGCCGCTGGAAGAAGTGAAGAAGTCCGTCAGTTGCATTGAAA  
ACCCAGGCCACCCGAGATTGGCTATACGCCAGCGTTGAAACCACCCAGCGCCGCTTGGACAAGGTTTGGCGAACGC  
CGTCCGGCTGGCGATAGCAGAGCGTACACTGGCGGCGCAGTTAAACCAGCCAGACCATGAGATCGTGCATCACTTCACT  
ATGTGTTTATGGGCGACGGTCCCTGATGGAAGGATTTCCACGAAGTCTGTTCCGCTGGCAGGCACGCTGGGACTGGC  
AAGCTGATTGGTTTTTACGATCACAACGTTATTTCCATCGACGGTGAACAGAAAGGCTGGTTTACCAGCATAACGGCAA  
ACGTTTTGAAGCTTACTGGCATGTGATCCATGAAATCGACGGTACGATCCGAGCGGTTGAAGGAAGCGATCCTTG  
AAGCGCAAAGCGTGAAGATAAGCCGTCGCTGATTATCTGCCGTACGGTATTGGCTTGGTTCCGCAATAAAGCAGGT



AAGGAAGAGGGCGACGGCGCACCACTGGGGGAAGAAGAAGTGGCGCTGGCACGGCAAAAAC TGGGCTGGCACCATCCGCC  
ATTTGAGATCCCTAAAGAGATTTATCACGCCTGGGATGCCCGTAAAAAGGCGAAAAAGCGCAGCAGAGCTGGAATGAGA  
AGTTTGCCGCCTATAAAAAGGCTCATCCGCAACTGGCAGAAGAGTTTACCCGACGGATGAGCGGTGGTTTACCGAAGGAC  
TGGGAGAAAACGACTCAGAAATATATCAATGAGTTACAGGCAAATCCGGCGAAAATCGCTACCCGTAAGGCTTCGAAAA  
TACGCTTAACGCTTACGGGCGGATGCTGCCTGAGTTGCTCGGGGTTTCGGCGGATCTGGCTCCAGCAACCTGACCATCT  
GGAAAGTTTCTGTTTCGCTGAAGGAAGATCCAGCGGGCAACTACATTCACTACGGGGTGCCTGAATTTGGCATGACCGCT  
ATCGCCAACGGCATCGCGCACCCAGCGGCTTTGTGCCGTATACCCGACGTTCTCTGATGTTTGTGAATACGCCCGTAA  
CGCCGCGGGATGGCGGCACTGATGAAAGCGCGGAGATTATGGTTTATACCCAGACTCAATTGGCCTGGGCGAAGATG  
GTCCGACGCACCAGGCTGTTGAGCAACTGGCCAGCTGCGCTTAACGCCAAATTCAGCACCTGGCGACCGTGGCATCAG  
GTGGAAGCGGCGGTGGGCTGGAAGCTGGCGGTTGAGCGCCACAACGGACCGGCACTGATCCTCTCAAGGCAGAATCT  
GGCCAGGTGGAACGTACGCCGGATCAGGTTAAAGAGATTGCTCGTGGCGGTTATGTGCTGAAAGACAGCGGCGGTAAGC  
CAGATATTATTCTGATTGCCACCGGTTAGAGATGGAATACCTGCAAGCGGAGAGAAATAGCAGGAGAAGGTCCG  
AATGTACGCGTAGTTTCCCTGCCCTCGACCGATATTTGACGCCAGGATGAGGAATATCGGGAGTCGGTGTTCCTTC  
TAACGTTGCGGCTCGCGTGGCGGTGGAAGCAGGATTGCCGATTACTGGTACAAGTATGTTGGTCTGAAAGGGGCAATTG  
TCGGGATGACGGTTACGGGGAATCTGCTCCGGCGGATAAGCTGTTCCCGTTCTTTGGCTTACC GCCGAGAATATTGTG  
GCAAAAAGCGCATAAGGTGCTGGGAGTGAAGGTGCCGTGATGGTATTGCCGGATGCTGATTGCCGGATCGGACGCTGACG  
CGTCTTATCCGGCCTACAGGCTTATCCGGCCTACATGTCCCGCATTTTGTTAACGGGTGATCCACAACGTGGGCCA  
GGCGTCTGGCCATGCCAGTTATCGCAGGTGGGTTCTGCGGCGTAACGCACCAGGCGAAAACGCTGACCGTCAAAGCGCC  
AGCGCGCTGAATGCCACAATCGCTTAATCCGCGCCCTTTGCTAAGGTACCAGTTACAGCGATTTCTCATCAAATGTT  
GCGTTCATCAGTTCAGTTCATTCTGCTCCTGACCGTTGTTGAACGGCAAACGCAACCGAACC GGCGCGAAGCTAGTGG  
CTTTTTACGCGACACAATCCATGCCAAATCAATGGTGTATAGGCCCTGCCTCACAGCTAATCATCATCAGCGCTTTAT  
CATCAGTCAGCGCAGTGACATTCACCTCACGACGCAATGGATCAAGCGAGCAGCGCAGACCATTATCCGCCAGTTTCCA  
TAATCCAGCAAATCGTTGCGTTCCTCGAGTGAGAGTGGCGTGGCGTGGGTTAACCACCGGACCTCTTTCAGCGCAGG  
CGCGGGCGGTACGCTGAGCGGCGGTTCTGCCCTTTCTTGATCCACGCGGTTTACTGCCAACGCGCTTTTGTGAGCAT  
CAATAAACAACAACGCTGCTTTAAGCCACTCAGAGAAATGGTCTGATGCCATCGCGTAAGGTGATTGCCTTCCCTTCC  
TGAATCATCTGCAAAAACGCGGTGATGGTTGCCGTATCATCGGTTACTAATAACCATGGTGAATCCGCCACTTGTACC  
ACTTAACGCCAACGGCTCGCATCTAACAGCAGCCGTGGCGCTATCTCCCTTCTGACGCCTCCGGCGACTTCAATCCGC  
CGCGCTCAATACGTAAAACGGCATCGGTATGCGCCCGGCGCTGCGGCTCAGGTCATACCAGTCCATTATGATCGCCC  
GTATTACGCGCCACGCAGAAATTTGGTTATTACAGGTGACCTGCCAGTCGAAAACGCCCGTTGCGCTGGTGGCGCCA  
CACC AAAGACGTGCGCAACAAGCGAAAAAAGAGAAAGGAAAATGCGATAGCGCATGGACGGTACGACCCCAAGATTC  
AAACAAACAGCACAAGTCGTATCTTGGTGGCAGGTAGCGCGGCTCAATCGGATTTGTGGATTGAGCCAATAATAAAC  
AACGAAATATTATTGTTATTTTTAGTCCATTAATGTGACGTTTGCAAATAGTTAAGCAATAACACCGTCTTACCGTCA  
CGTATCTCGCCGGTTTTGATCATCTCCAGCGCTGGCTGAACGGCAGCTCGAGCACTTCAATATCTTTCATCTTCCGACCC  
GCCACCGCGGTTAGCGCGCTGATTGTCACTGTATTCGGCGATAAAAAAGTGGATTAGCTCAGTCACACCGCTGGCGACA  
TATACAGTTCAAATAATTTGCGCACTTCAACCACTTATAGCCGCTCTTCAATCGCTTCTTTGCGAATACACACTTCC  
GGTTCGTGTTATCCAGCAGCCCGGCGCAGCTTCAATCAGCTGCCCGCTTTCATTGCCATTAACCCAGGTAGCGACACG  
GAACTGACGAATCAGAACCACGGTCTTTTTCTTCTGTTGTACAGGAGGATCGTCGCACCATTTGCCGCGATCGTACACTT  
CACGTTTATGGCGGATAACTTCGCCGTCTTTGCGGTGAGATCGTAAGTAATGTTGTGCAGGTGAAATAGTTATCGGAG  
AGAATTTTGTCTTTAATGAGGGTATTGTTGCGTCATACCGACTCCACAGCGCAAATGAACAATTATCTTACGCTGTG  
AAGTCGGGTTTGTCTGCGCAGGCTATCAGTGAGATTTGACTGATTTTACCCAGCCAGTCAATAATCCCTGTGCCGCA  
TGACGTCCTTCTGCCATTGCGGTAACCAACAGATCCGCAACCGCACGGCGTCAACCAACAGCGAAGATTTTCGGATTGGT  
GGTCTGTAACGGTACTGGCTTTCCACATCCGCGATGATGCGGCCCATTTGTCTACCGTTACACCGTGCGACTCCAGCC  
ACGGCATCCCGTGC GGATTGAAGCCAAACGCCATAATCACCGCTGCGCTGGCATGACAAAATCACTGCCTTCCACCGGC  
ACTGGACGCCGACGCCCTGGGCATCCGGCTCTCCAAGACGCTGCGCAGGAAACGAATCCCGCAGACGTGACCTTGTTC  
ATTAGCTCAAGCGCCACCGGCTGGACGTTAAATTCGAAGTTGGCCCTCTTTCGCGGGGCTTCTTCACTTCTTTCTTCG  
AGCCTGGCATGTTAGCTTATCACGACGATAAGCGCAGGTGACGTTACTCGCGCGTGGCGCAGTGCGGTACGCACACAG  
TCCATCGCGGTGTCGCGCCGCCAGTACCACGACGTTAAGTCCGGCGGATTGATAAACGGCTCTTCCGGTAGCTCTTC  
GAGCCCATCACCTGTTTAGTGTGGCAATGAGGAACGGCAGCGCTATAAACGCCCGGCGCATCTTATTGGGTA AAC  
CCGCTTTCATGGAACGGTAAGTGCCTACGCCAACGAAGACCGCGTCTATTGTTCCAAAAGCGAATCAAAGAGACATCT  
TTACCCACTTCACAATTGAGTTCGAAGTGAATCCCCATCGCGTGAAGATTTCCGACGGCGTGCCAGCAGGGATTTATC  
CAGTTTGAAGAAGGAATGCCGAAAGTGAAGAACCCAGGATTTCTGGATGGCGATCGTACACCGTCAACCCACGCCAT  
TGCGGGT CAGAACATCCGCACAGGCCAGCCCTGCCGACCTGCACCGATAATCGCCACCCGCTTGTCCACTTTGGTGACA  
TGGCTTAAGTCAGGACGCCAACCTTTCGCCAACGCTGATCTGAAATGTAGCGTTCAATGTTGCCGATAGTTACCGCGCC  
GTGCTCATCGGAAATAGTACAGGCACCTTACACAAAACGGTCTTGC GGACAAAACGCGTCCGGTAATTTCCGGCAGGGTGT  
TGGTCTGGTGAGAAAGCTCGACGGCGGCTCGATGTTTCCGGCTTACCAGTTC AATCCACTGCGGTATATGGTTATGC  
AGCGGGCAGGTCCATTACAAAACGCTGTGCTCGCCGCACTAAGGCAGCGCAGGCTTCCCGTTGTGCTGGTGGCGCG

AAATGGCAGATAAATTTTCATCAAACCGGTTTTGCGCGCTTCAATCGCCAGTTTATCCGGCTCGCCACGCGGGCGTTG  
CCTGCATTTGTTGACTTTACTCATTACCGGCATTTCTTGGCCCGGTTACTGGCATGCCACGGTTGATGTTCTTGACGC  
GCGGTGCGCAAGCGGCGGGATTTCCGCATGCCGAGAGTGCACGTGAGTACCAGTTGCAGCGCGTCCGCCGGCAATT  
CTCAACACAGGCAGGACCGTTTTGCGCCCCGCACAAAGTGCATTTATGCGCCGTGGCTTTTACTTTTCTGCCGCGA  
CGGTGTGACGACGATTTGCATCGTACCAAAGGACAGGCCACCACGCAGGATTTACAGCCAATACACTTTTGTGATTG  
ACCTGAATGCTGTCATCAACGTGGCTGATTGCGCCATTAGGGCAGCTACGGGCGCAGGGCGCATCTTCACAATGGTGACA  
GGTCACTGACTACGTTGCTGTTGATGTTGATAACCGTAATTCGGGGATGAAAATGGTGTGGCTCAGGACATGTTGCT  
CATCATTGTGAGCCATGACACAGGCGATTTACAAGCATGACAACCCAGACATTGCTGACTGTTGGCCATAATAAACGGA  
TTCATAACGACCTTCTTTTTGTTTGTAAAACTTATTCTTTATATGAGTGTGTTATTACCCGACTTACAGGGGAATC  
GGCAATGTTTATGTGCCAGAATAAGTAACTATTTCCGTATAAATGTGGCAGATCAAATAATCCCATCACTGACTAAAT  
TGCGTTTACGCGAAGTGAACATTAATGATTTTTTGTGGAGAAGACGCGTGTGATTGTTAAACGACCCGTTCTCGCCAGT  
CTGGCCCGGCTTTTTTACATTGTGCTGCTGTCGATTCTTCCACGGGTATCGCTCTGCTAACTCTGGCGAGCAGTTT  
GCGCGACGCTGAGGCTATCAATATTGCCGGATCGCTGCGTATGCAGAGTTACCGCTGGGTACGACTTGCAAAGTGGCA  
GTCCACAACCTCAATGCACATCGCCAGTATTTTACGAGGCATGCATTACCCGGTATTAACCAACCTCAACGTCTGGTAT  
GTGCCAGAAGCAGTAAAACTCGTATGCGCATGTAATGCCAAGTGGCTGGAGATGAATAATCGGCTCAGCAAGGCGGA  
TTTTCCCGTGGTATCAGGCCAATTAATAATTATGTTAATCAGATAGACCTGTTGCTACTGGCTTTACAGCACTACGCTG  
AACGCAAAATGCTGCTGGTGGTGGCGATTTCCCTGGCTGGCGGCATCGGTATTTTACGCTGGTCTTTTTTACTTTGCGC  
CGCATACGCCATCAGGTGGTTGCCCGCTGAATCAGCTGGTTACCGCCAGTCAGCGTATTGAACACGGGCAGTTCGACTC  
GCCGCCGCTGGATACCACTGCCGAATGAGCTTGGTCTGCTTGCAAAACTTTAACCAGATGTCGAGCGAGCTGCATA  
AATTGTACCGTTCGCTGGAAGCGTCAGTAGAAGAAAAGACCCGCGATCTCCACGAGGCCAAGCGTCTGAGGTTGTTG  
TATCAGTGTTCGAGGCGTGAACACTAGCCAGATTGATGTGCATTGTTCCGCCATATTTTGCAGATTGTTGCGGACAA  
TGAAGCGGCTGAATATCTGGAGTAAATGTGGTGAAGTGGCGGATTAGCGAAGGGCAACCAAACCCGGAATTGCCGA  
TGCAGATTTTACCGGTGACAATGCAAGAGACGGTTTACGGCGAAGTGCAGTGGCAAATAGTCAGTTTTCATCATCAGAA  
CCGCTGCTTAAACAGCGTTTCTGTCGATGCTGGGACCGGTTTGTACTTTAATCAGGCGCAGAAGCATTTCAGCAATTAT  
GTTGATGGAAGAACGTGCGACCATCGCCCGGAATTGCACGACTCGTGGCTCAGGTACTTCTTACTTACGTATCCAGT  
TGACGTTACTGAAGCGTTCGATACCGGAAGATAACGCCACCGCACAAAGTATCATGGCCGATTTTTCCAGGCGTTGAAT  
GATGCTTATCGGCAGTTACGCGAGCTGTTGACTACTTCCGCCTGACGCTGCAGCAGGCGGATCTCCCTCCGCATTGAG  
GGAAATGCTGGATACGTTACAAAATCAAACAGCGCAAACCTGACCTCGACTGCCGTCTGCCAACCTGGCACTGGATG  
CGCAAATGCAGGTGCATTTGTTGCAAATATTCCGCAAGCGGTGCTGAATGCGATGAAGCAGGCCAACCGCAGCGAAATC  
GCCGTGAGTTGCGTACCGCGCCGACGGCAATCACACGGTTTATATCCGTGATAACGGGATTGGTATCGGTGAACCGAA  
AGAACCAGAAGGTCATTATGGTCTGAATATCATGCGCGAACCGCGGAAACGGCTAGGTGGGACGCTGACTTTTTTCAAC  
CTTCCGGCGGCGGACGTTAGTGAGTATTAGCTTTCGCTCTGCGGAGGGTGAGGAAAGTCAAGTAAATGTAATGCCTCCTA  
CTGACCAAAGAATACTTGCCTTAAGGTTTCAAGTATAAAAGGGCATGATAATTTACATTAACCTTTTTTTTCTCCAGAT  
TGCTCGTACCTTGGCGTACAGTGAAGCAAGTCAAGCCTACAACGATACGCAGAAACACGAGGTCCTCTTTAATGGCG  
AATTTCTTTATTGATCGCCCATTTTTGCTGGGTGCTGGCAATCCTGTTGTGCTGACAGGTACCCTGGCGATTTTTTC  
ATTGCCCGTTGAACAATACCCCGATCTCGCGCCACCGAATGTGCGAGTGACCGTAACTATCCCGGCGCATCGGCCAGA  
CGCTGGAACACCGTGACCCAGGTTATCGAGCAAAATATGACCGCCTCGATAATCTCATGTATATGTCATCTCAGAGC  
AGTGGCACCGGTCAGGCATCTGTCACTTTAAGTTTTAAAGCAGGACCGATCCGGACGAAGCCGTGCAGCAAGTACAAAA  
CCAGCTGCAATCAGCCATGCGAAAGTTACCGCAGGCGGTGCAAATCAGGGCGTGACGGTGCCTAAAACCGCGGATACCA  
ACATTTCTGACCATTTGCCTCTGCTCTACCGATGGTTCGATGGATAAACAGGATATTGCTGATTATGTTGCCAGTAATATT  
CAGGACCCGTTAAGCCCGTGAATGGCGTCCGGGATATCGATGCCTATGGTTCGCAATATCCATGCTGATCTGGCTGGA  
CCCGGCGAACTCAACAGTTTCCAGATGACGGCTAAAGATGCTACTGATGCCATTGAGTCACAGAACCGCGAGATTGCGG  
TTGGGCAACTTGGTGGTACACCTTCCGTGATAAGCAGGCGCTCAACGCCACCTAACGCCACGTCAGTCTGCAAACA  
CCAGAACAGTTCGCGATATCACCTTGGGGTCAATCAGGACGGCTCAGAGGTAAGGCTGGGCGATGTCGCCACCGTCCGA  
AATGGGGGCGGAGAAATACGATTATCTTAGCCGTTCAATGGTAAGCCAGCCTCCGGGCTGGGGGTAACCTGGCTCCG  
GCGTAACGAAATGGCGACAGCGGAGCTGGTGTCAATCGTCTCGACGAGCTGGCGCAGTATTTCCCGCATGGACTGGAA  
TACAAGGTGGCGTATGAAACCACCTCGTTTGTAAAGCCTCCATTGAAGACGTGGTGAACGCTGCTGGAAGCTATCGC  
TCTGGTTTTCTCGTTATGTATCTGTTCTGCAAACTTCCGCGCCACGCTGATACCCACTATCGCCGTGCCGGTGGTGT  
TGATGGGAACCTTCTCCGACTTTACGCCTTCCGTTACAGCGTCAACACCTTAACCATGTTCCGCGATGGTGTGCGGATC  
GGTCTGCTGGTGGATGACGCCATCGTGGTGGTGGAAAACGTGCAACGTATTATGAGTGAGGAAGGACTCACTCCTCGCGA  
AGCCACACGTAATCGATGGGCGAGATCCAGGGGCGACTGGTCCGGATTGCGATGGTCTTTCCGGCGGATTTGTACCAA  
TGCCCTTCTCCGCGGACACCGGTGCCATCTATCGCCAGTTCCTATTACCATTGTTGCGGCGATGGTGTGTCAGTA  
CTGGTAGCGATGATCCTCACTCCGGCTCTGTGTGCCACACTTAAAGCCACTGAAAAAAGGTGAGCATCATGGGCAAAA  
AGGCTTTTTGCTGGTTTAAACAGATGTTTAAACCGCAACGCCAAGCCTACGAAAAAGGGGTGGCGAAAATTTCCACC  
GTAGCCTGCGCTGGATTGTGATTTATGCTGCTGCTTGGCGGCATGGTGTTCCTGTTCTGCGTTTTGCCGACGTCGTT  
TTACCGCTGGAAGACCGTGGCATGTTTACTACCTCGGTACAGTTGCCAGCGGTTCAACGCAACAACAGACCCTGAAAGT

CGTTGAGCAAATCGAGAAATACTACTTACCCATGAAAAAGACAACATCATGTCCGGTGTGGCCACCGTTGGTTCTGGCC  
CTGGGGGTAACGGGCAAACGTGGCGCAATGTTTATCCGCTGAAAGACTGGAGCGAACGCGACAGTAAGACCGGCACC  
TCGTTTGCCATTATCGAGCGTGCAACGAAGCGTTTAAACAAATTAAGAAGCTCGCGTTATCGCCAGCAGCCCGCCAGC  
AATTAGCGGTCTTGGTAGTTCTGCAGGTTTTGATATGGAGTTGCAGGACCACGCTGGAGCGGGTCACGATGCGCTGATGG  
CAGCACGTAATCAGTTGCTGGCGCTGGCGGGGAAAAACCCGGAGCTAACCCGTGTGCGCCATAACGGCCTCGACGACAGT  
CCGAGTTGCAGATTGATATCGACCAGCGTAAAGCTCAGGCGCTGGGCGTTGCTATCGACGATATTAACGACACACTGCA  
AACCGCCTGGGGTTTCGAGCTATGTGAATGACTTTATGGATCGCGGTGCGGTGAAGAAAGTCTATGTGCAGGCAGCTGCGC  
CGTATCGCATGCTGCCAGATGACATCAATCTCTGGTATGTCCGAAATAAAGATGGCGGCATGGTGCCTTCTCTGCTTTC  
GCGACCTCACGCTGGGAAACAGGCTCGCCGCGTCTGGAACGCTATAACGTTATTCTGCGGTTGAGATTGTTGGGGAAGC  
CGCACCGGGGGTCACTACCGGTACGGCGATGGATATTATGGAATCGTTAGTGAAGCAGCTGCCAAACGGCTTTGGTCTGG  
AGTGAGCGCGATGTCGATCAGGAGCGGCTTCCGGCGCGCAGGCTCCGGCGCTGTACGCCATTTCTTGTCTGGTGGTA  
TTCTGTGTCTGGCTGCGTTGTATGAAAGCTGGTCGGTGCCGTTCTCGGTAATGCTGGTGTGCGCGTGGGGTAATCGG  
CGCGCTGTGGCAACCTGGATGCGCGGGCTGAAAAACGACGTTTACTTCCAGGTGGGCTGTTAACGGTCATTGGTTTAT  
CGCGAAAAACGCCATCTGATCGTCGAGTTTGTAAACGAGATGAACAAAAAGGCCACGACCTGTTTGAAGCGACGCTC  
CACGCTGCCGTGAGCGTTTACGCCGATTTCTGATGACCTCGTGGCATTATCTTCCGGCTATTGCCAATGGCAACCCAG  
CACGGTGGCGTTCCGGTTCAGCATGCGGTGGTACTGGCGTAATGGGCGGGATGATTTCCGGCACTATTCTGGCTA  
TTTACTTCTGCGCGTGTCTTTGTGCTGGTGCGCCCGCTTCCGCTGAAGCCGCGCCCGAATAAGCAATAAAAAAG  
GCGACATGCCAATGTGTGCGCTTTTTCACTTCCGATTAAGAACCTGCTCAGCGGGTTCTTGTGTTTGTACTTTGTCT  
CAGGAATTACTTACGAAGCATAACTTCGATAAAGTCTTCCAGTTCACGTTCAATCATAACACCTCTCTTA  
TAATTATGGGTATTCTACGGAACAATATACCGTGGTGAAGCTAATTTACTCGATTGCTGCGATGACTACCTCCGGGGGA  
CAATCTTATGTAATACTATGGTCTGCGGTGATGATTTGTATGTGATACACAGCAACATTTGAGATATTCATACGGC  
ATCTAATACTGATTTAATCTGGTTAAAATACAGACAGATAACAAGATGAATATTCTAATGTTTACGTTAAAAATGTTT  
AATATTATTAATAGTTGTAATTTGAATACTTCGATAATGTTATATTTCTGATAATCATTTGCAGGCAAAATGTTTT  
ACCCTTAAATGAGTATTTATCTCATAAATCGAAAAAGGATTCATTATGGTTACACTTTACGGTATCAAAAATTGTGACA  
CCATTA AAAAGGCTCGCCGTTGGCTGGAAGCCAATAACATCGACTATCGTTTTCATGATTACCGCGTCGATGGGCTGGAC  
AGCGAATTATTGAACGATTTATCAACGAATTAGGTGGGAAGCGTTACTCAACACCCGTTGTAACCTGGCGTAACT  
GGACGAAACCACCGCAATAAAATCACCGATGCGGCCTCTGCGCGGCATTAATGACTGAAATGCCTGCAATTATCAAAC  
GTCCATTGCTCTGCGTGCCCGTAAGCCTATGCTGCTGGGTTTCACTGATTCCAGTTATCAGCAATTTTTCCATGAGGTG  
TAGTCTATGTCGTGCCCGTTATTGAGCTGACACAACAGTTATTCGCCCGCTTCCCTGAGTCTGATGATGCAGGATG  
CCAGGCTTTGTTGATTGAACGTTTGCAGGCGATCGTTTTACCCTGGAACGCATGGACTTTGCCGATACGCAGAATTTTT  
GGCATGGCGTGGGCAAGGTGAAACGTTAGCCTTTGCCGGCATAACCGACGTGGTGCCGCTGGCGACGCCGATCGTTGG  
ATCAATCCCCGTTTGAACCCACCATTCGTGACGGCATGTTATTCGGGCGCGGTGCGGCAGATATGAAAGGCTCGTGGC  
GGCGATGGTGGTGGCGGCAACGTTTTGTGCAACAACATCCCAACCATACGGGGGCACTGGCATTCTGATCACCTCTG  
ATGAAGAAGCCAGTGCCACAACGGTACGGTAAAAGTCTGCGAAGCGTTAATGGCACGTAATGAGCGTCTCGATTACTGC  
CTGGTTGGCGAACCGTCGAGTATCGAAGTGGTAGGTGATGTGGTGA AAAATGGTGTGCGGATCATTAACTGCAACCT  
TACCATTATGGCGTTACGGGCGATGTTGCCATCCACATCTGGTGAACAATCCGGTACATCGCGCAGCACCTTTCTTA  
ATGAATTAGTGGCTATTGAGTGGGATCAGGGCAATGAATCTTCCCGGCGACCAGTATGCAGATTGCAATATTGAGCG  
GGAACGGGCGAGTAACAACGTTATTCGGGTGAACGTTTGTGAGTTAACTTCCGCTTACGACCGAAGTACTGATGA  
GATGATCAAAGCGCAGTCTTCCCTGCTTGA AAAACATCAACTGCGCTATACGGTGGATTGGTGGCTTCCGGGCGC  
CATTTTTGACCGCGCGGTAACTGGTGGATGCGGTGCTTAAACGCGGTTGAGCACTATAATGAAATTAACCGCAGCTA  
CTGACCACAGGCGGAACGTCGACGGGCTTTATTGCCCGCATGGGGGCGCAGGTGGTGAACCTCGGGCGGTCAATGC  
CACTATTATAAAAATTAATGAATGTGTGAACGCTGCCGACCTGCAGCTACTTGGCCGATGTATCAACGTATCATGGAAC  
AGCTCGTCGCTGATGAGTGGTTCTGCAAGAGGAAATAAGCATGGACTGGCTGGCTAAATATTGGTGGATTCTGGTGATT  
GTCTTTTTGGTAGGCTCTGCTGAACGTGATTAAGATCTCAAGCGCGTGCACCATAAGAAATTTCTCGCCAACAAGCC  
GGAGCTTCCCCGATCGTGATTTCAACGATAAGTGGGACGATGACGACGACTGGCCGAAAAAGGATCAACCGAAGAAGT  
AAGCTGAGTGTCAACCGTAGGCGGATAAGGCGTTAACGCCGATCCGGCAATGGTGAACGATGCCTGATGCGACGCTC  
ACGCGTCTTATCAGGCCAGGTAATCTGTCTTTTACATCATTTCAATCACATCATCATCGCCAGGCTTACCGCCACTTAGC  
GCTTCGTGAAATAATGTTTCGGAATGGTATAACGCAAGTATCCAGGGCAAATTCATACTGCGATTGTCGATCGCATG  
GCCTAAATCTCCAGATATCCAGCGTACGTCACCACCGGCACTGATTAACGTTCTGCGCGCAACCGCATGCGCCA  
GATCGATAACCGATCTTACCGCCATGAATCAGGTGAATTGTCGTGGCTGTAGACGAGTTTCCGGCAGGCTCGCATAG  
CGTCCGTTAAAAGCAATGACGCGTGAAGCAAGGCCCGTTCCGGCTTAAATGCTCTCCAGCACATAATCGCGCTTGAGA  
GAAACCGATGAGCGCGTGGCGTTAGCCCTACTCCGCTCTGTTTCTGCCAGTAGCGCACCGTTTCAATAAACGTCGGCA  
TGATCGCATCCACACGCGCTGGCGATTATCTTCCGTAATACCCTGCACCGAAAAACCACTGACGCCCGCGGATTACCG  
CTCGGCTCCGCGCCACCGACACTCACCCAGCGCATCAGGAAACAGCGGTGCAAAACAGTTGCCATTTCCCCATTGC  
CACCGGTTATCCCCGACACCGTGGAAAAAGCAGTAACAACGTTGCGCAGGTTTATCCGGGCTTTGAACAACAAAATGGT  
CATGTTTCATGGCGAACTCCTTAACCTGATGTCATTAATTTTACGCCGCTGACTACAATGACCATGAGATAAAAATGAAG

GAGTCAGTGAATAATTGCCATTGCGTTATGCGATCGCGCAGACGCTCAGTGC AACATCATTAAAGTGC GAACAGCGCCT  
GCGCGGCCTCTTCCCGCTGACGGACCAGTAACATCTTGC GGCCTGAAAGTTTAAAGTGTGGTACATAACTGCGCATCACTG  
GCGTTTTTCTGTA AACGCCACGCAGCGCCGGAATGCCAGTTCACTGGTTTGTAAACAGACGCAATAAGCAACCTAACGA  
CGTTAATAGCGGACGATGAGCGAAAGCAAACCGGCCAGTTCAAGCCAGTCGTCGT CAGAAAGGACGGCATCGTTTAGTG  
GATCAACAGGAAGCGTTTCGCCATTCCACTGCGCGAGAGCTTGC GCATCGCGACGTTAAACGGTAATGCTCACGTTACGCC  
AGCTGTTTACCCGCATCACTCATCGGTAACAGCGCCATCGCCGTATAGCAACCGCTGCTGGCTTCCCGATGATTACCCAT  
CCGCACCAGCACAAAACCGCAGCGTTGCCAGAAACGCCATAACTCCCCGGTGTAAACAAAACCTCACCGAAAGATAGTCGA  
GGTCTTGCGTATATTGCAAAGCACCAGCAATAAGTTGCCGCCCTGTGCCTTCCCGCTGACGAGCCGGATGAACTGCTATC  
CGGCTGACCCGCCGTCCACGCAATGTGCGCGCCAGTGGATTGTTGCCGTGCGCCGCCAGCGACTGGGCCACCAGATTACC  
CCGCGGGGACGAAAACCTGCCATACCGCCTGACTGAGTTGTTGAGATAATCCACCCTCATCCACCAGCCACAGCGCCC  
CGGCAATCTCGTTTTCGCCAGCCGCTGTAAAAATGTTGCCCTGGTGCATCCATCATCCGGCGTAAATCCAGCGGGCAA  
GTCCGATAGTGCACAGACAAGAGCTGATAAACCTTAAACGGCGTTTCTGGATCGCTTGGCATAACGTCTGTTCAA  
TGCGGAAATGACAATATTGCCTTGTTGTTGATGGGTGAAGTTTTATCGTCAAAAACAGTGCCTCGCTGACCATTTTT  
CCAGCGGGCATCCCTGCGCCAGCGGATCGGCTGTTGCAGTTCAAACCGGTAAATGCGGAAAGCGAGCGAAAATTC  
AGCAAAAACACCGTCCCGTGCCTTCGTAGCCCTGCACCGTAGTGGTTAACAAACGTTTCGAGGAAAACGCCGATACCAGTTG  
ATGCAAAACATGGCGCAGGTATGGCTGCGGCTTATCGACCACCAGCCAGTCGGCTTGTCTCATCGCTGGTAAACAAGGCAT  
CCGGCGCAATAAAGCGAAACTTCTCGCCCGCAAATTTGTCAGTACATCCGTTGACGCTTTTTCGCGGGCGGGTGACAATC  
GCTCTGCCCGCAATACGAGAAATGAGTTGCCCTGCCAACGCCACTTACCGCGCCACGCGCAGCCGTTACCGCTGCCAC  
GCCCCGCGCATGGTCAATTAGCTGCTTTAAGAGTTGCTGTTGTTCTGGTTGTTGGTGCGCCAGTCGCGGGGTACCAGTCAG  
TACGGGGAGTAAAATGCGCCAACGAGAATGGCTGGTTTTGCCGCCAGAGGATAGCCTCGTTATCCGCCGTAAGTACGCGT  
TTGAGATGCTGGACAAAATGCGGCGTCGCAATAGGGTCAGGGCAATCACTCCAGCGCAGCGAGTCGGCATCAGGTTGGTT  
TTCCCACTTCTCCATACAGGGAGTAACAAAACAGCCAGCTTCCCGCTTCAACGTTCCGCTAAGTGC GGCAAAGGCAG  
CGGCATCAAAGCCGTGGCGGGCGTGAATACCGCATGCCGGAACCTGCGCCCAAGTAAAGTTTGTAGTGCCGAGGGAGAA  
CAGTGGTTTTCAGCATCTGGCCGCGGCAAATCCACAGCCAGTCGCCAGGTAAGGCATCACGCAACTTAAGAGTATGCTC  
AAAACACCAACCTCTTCCCGCTCAACACCAGCAAGCGGGGATCCCTTACGTTTCATTTGCGCTGTTAATGTGTGAA  
GCGCAGTCAGTTCAGCCATCCCTGCCCGGAAGTAAATGCTTTTACCAAAGTATTGCATTGTGCCGGATCGCCGCTGT  
CGAAACCAGTTTTAAACCAGCTGTAGCGTTGCTGAGAAGTGCCATGAGTGAACCTGTCTGGTACTACTCGCCCTGACTT  
TGCTGTTGTAACGGTCATCGCCGATGGCTGCGCCGCTTACGCGCCTTCCAGATCGCCGGTTTTCCAGAACGCCTTG  
CTGCTGCATACTATGCCCCAGACACCGCAAACAGTTCGGCCTGGAGTTCCATACGCACAGATAAGCGGTTTACTTCCG  
CCTGCGTGC GTTTTGTTGAGTTGACGAACTTTCGGCTCGATGCCTAACAGTTTCTGCACATGATGACC GACTTCATGG  
GCGATAACGTACCCCTGGGCAAATCGCCATCCGCGCCAAGTTTGTCTTTCATGTCATCATAGAAGGAGAGATCGATATA  
AACCGTGCCATCCGCCGGGCAATAGAACGGCCCCATTATGACTGGCCCCGCCCGCAGCCGGTACGCGTCATTCCACGGT  
ACATGACCAGCTTCGTTGCTGATAGGCTTACCATCTTCTCGAACTGTTGTCCCGAGGTGCTTCCGTGGTTGCCAGA  
ATCACCGAGGTGAATTTGCGGCTTCTTCAATTTGGGCTAATTGACCGCGTTGATTGTTGTTGGGAAACCGGCTGCC  
GGTCATCAACCCGTTAAATCAACACCATAGTAGCTGCAACCAGCAGACTATCAGTAAATCAGCCCCGCTTTACCGC  
TTGGCAGGGCAAACCGGGACCGCCATAGATGGACCACCAGAGCTGTTGCGCCTGTCTTCAACATTGCTACTTTACGT  
CGCCCTTCCAACGCATAGATACCTCAACAATATATTCAATATAGAAATGATCGTAGGTGGTT CAGAGGAAGATTACCAC  
AGGAAAGCGGGATGAAATGGCGGAGGAATGAGCGTTCAATGCATATATTCCGAGAGCGGTTGTCTTGGCTGCCAGCTGC  
ACGGCAAGATGATGAACAGAAAAATCAGTCCAGCTGACACCCAGGCGGGCGGACGGCTTCATAGGCTTCGATCAGGC  
CACCGAGGCTCTGGCGGAAACGGTCTTTGTCCATTTTCCAGCTTTCTTTGTCACAGCGGCTACCCTCCGGGAG  
AACTCATACCCAGTACCCTTTCGCCCTTTGTACAGACCAAATTCAGCTTGAAGTCGACCAGAAATCAGACCAGCATCATC  
GAACAGTTTTTTCAGCACGTCGTTTCGCTTTGTAGGTCAGCTCTTTCATACGCGCCAGGTTCTCTTTGCTACCCAGCCAA  
AGTTTTCGCAGTAAGATTGTTGACCATCGGATCGTGCATGGCGTCGTTTTTTCAGGAACAGATCGAACAGCGGGGTTT  
AGCTCAATACCTTCTTTCGATTCCAAGACGTTTACCAGAGAGCCAGCAGCACGGTTACGCACGACACACTCAACCGGCAC  
CATATCCAGCTTTTTACCAGACATTCGGTATCGGAGAGCAGACGCTCCATTTGAGTCGGGATACCCGCTTACGCCAGTT  
TGCTCATAATGAAGTAGTTGAACCTGTTGTTTACCATACCTTTGCGATCAAACCTGCTCAATGCGCGGCCATCCCCTGCT  
GACGTATCATTGCGGAATTCGAGCACCAACAGGTCCGGTTTTCCGTGCTGTATACGGTTTTCGCTTTACCACGATACAA  
CTCAGCTTGTCTTTGCATCTTATCACTCCTGGGTGTAATTAACGTTTTAAAATCTTTTGTGTCTGGTGTGCCGGATG  
TTTTGTGGATGCGGCGTGAACGCCTTATCCGAACCTACGTCGACAAACAAATTTCTGCGCAATTACCGTAAAATCGCG  
TTTTCTGCAGACGCACGTTTTGCGTATCATATCAGAAAAAAGGCCGGATGATTCCAGCCCTGATTTTTACTTGCTA  
AACGCAGCCTGGAAGACAGTACCAGCGCTGTTCTGACTCTGAGTCAGAGTATGACCTTTCGGATCGATGAACTGTAG  
GCTGCTGCGGTTATCTAAATCGCCAACCTGCAGTTTATAGTACC GGATGCCAGGCCTGGATCGCTCGCGCCAGTTCTCT  
GCCAGTCGCTGT CAGACAGCGGCTTATAAGTTACGGCCATGTTGCCCTGCGAACGGGTGCTGTGCGTCACTTTCATGCC  
ACTTTTTCCAGCGCGCTGGCAGACGTTGCCAAACCACATTGAACGGCCCGCTACGACCAGCATTGGTAAACCGGTGTC  
ATCAGCTGCACTTTGTAGTCCATAGTGGTGAGGCACGATTTTGC GCGAGGTTTCGCGGCTCAGTGGCAGATTTATCCA  
GACCGGGCAAATAACGTTTCATCATCTCCGTGCTGTAAACGCTGCATGGAAGCCGCTGTGCAACCGGTTTCCCGCCTGT

TCCAGTTTCAGCAGTTTAAACGTAACCGCTGCTGATAAACCTGCGGCTTAACAGAGATTTGATAACGACCAGGATACTG  
CTCGTCTTCGTCAGACGGTCCATTGTACCCAATCGGTGGTCAGTGTCTGACCAGCATCATCACGTTGGGTGATGGTGT  
AGTTTTTCGCTCGCAGCACGCTAACCACTGCGGCCACAGAGTATTGCCACGACATTTTCCACCAGCAATGAAGCGGTA  
TCGCCCCGTAACCTGGGTACGCGGCCAGAAACAGTGCCAGCGGCTGGGCTGGTGGACGAATGTCCAGCGCCTTACCGAC  
AGCACCCTACCGTTGGTACCGGGATTGCATAATACCGGAGGTCACCGGCAAAATCATTCCAGCCGGGCATGAAGCT  
CCGCAAGCGGTGCCGCTTCCAGGTAGGCTTCATCACCCTGACCTGACGCTTATAGCGTGAGTCAGAACTACAGGCAGCG  
AGTAATAAAACAAGCGAAACACCCGCAACCTTTGCCAGGCGGACTTTTGAACAGAGTAAGCCATCAAATCTCCCTAAAC  
TTTACAGCAAACCGGCATGCTTAAGCGCCGCTCTGACCGTCTCACGACCCTGTCCGGTATTGGTGTCTATTGGCAGGCGC  
AGCGTATCGGTGCCACAAGACCCAGTTCCTTACATGCCATTTACCGGGATTGGATTGGGTTTCGACAAATAGTTTGT  
GTGTAATGGCATCAGACGCTGATTAATAACGCGTGCCTCGGCAAAATGCCCTTCTGCTGCCAGTTTGCACATCTGGGCCA  
TATCACGCGCTGCGACGTTAGCCGTAACGGAATAACCCATGACCGCCAATTGCATGAAGTCCAGCGCGCTCGCATCA  
TCGCGGCTCAGCAGAAACAAATCATCTGAAACCAGCTTTTGTCTGGTTTACACGCGTTAAGTTCCTGTTGCCTCTTT  
GATTCCGATAATTTTTTACTTTTCGCGAGACGGCCACCCTTCCGGGAGCAGATCGCAGCCAGTACGGGACGGCACAT  
TATACAGAATTTGCGGCAGTCAAGTATGCTCAGCGATGGCTTTGAAATGCTGATACAAACCTTCTTGCACGCGACGATTG  
TAGTAAGGGGTTACCGTCAGGCAGCCGACGATACCCTGTCTTGAAGCGCTGCGTCAGGCTAATGGCTTCCGCAAGTAC  
GTTAGCGCCGTTCCCGGCAATTACCGGAATGCGCCCATCAGCCAGATCCAGCGTATTATCACACATCAGCATGTTCTGT  
CATGATTTAAGGTAGCGACTCGCCAGTGGTCCAAACAGAAACGATCGCCGAAGTACCGCTGGCGACATGATAATCAATC  
AGTTTTTTCAAGCTAGCCGACAGACATTACCTTTTTCATCCATCGGAGTAACAATCGCGACAATACTTCCCGTGAACAT  
GGGCCATCCTCTGTGCAACAAGTGTCTCAATGGTACGTTTGGTATGGCATTAAAAGCAAGCAGACAGAACCCTTCTGAT  
TGTTGTATGCATGTTTTTTTATGCTTTCCTTAAGAACAACCTACCCCTTAAAGGAATAACCAGTTTGACACTGTCATCG  
CAACATTATCTGGTGATCACTGCGTTGGGTGCCGATCGCCCTGGAATTGTGAACACCATCACCCGTCATGTCAGTAGTTG  
CGGCTGTAATATTGAAGACAGTGCCTGGCGATGCTGGGAGAAGAGTTACGTTTATTATGCTGCTTCCGGTTCATGGA  
ATGCCATTACTCTGATTGAATCAACGTTACCGTTGAAAGGTGCCGAACCTGGATCTTTAATCGTGATGAAGCGCACGACG  
GCGCGTCCGCGTCCGCAATGCCAGCATCTGTCTGGGTTCAAGTCGATGTGGCAGACTCCCGCATTTAATTGAACGCTT  
CACAGCACTTTTCGACGCGCATCATATGAACATTGCGGAGCTGGTGTGCGCACGCAACCTGCTGAAAATGAACGGGCTG  
CGCAGTTGCATATTAGATAACCGCCACAGCCCCGATCTGCGGACGCAAGCAATATTGAGCAAGCGTTCAAAGCCCTA  
TGACAGAACTCAATGCACAAGGCAGTATTAACGTCGCAATTATCCCAACATGATGAACAGGATGGAGTTAAGTAATG  
AATCCACTGAAAGCCGGTATATCGCACGAAATTTAGCTTCCCGGATCAAGACGGAGAACAAGTTAATTTGACCGACTT  
CCAGGGACAGCGTGTCTGTTTTATTTCTACCCGAAAGCCATGACCCCCGGCTGTACCGTACAGGCCTGCGGCTTACCGG  
ATAACATGGATGAGTTGAAAAAAGCGGGCGTTGATGTGCTGGGTATCAGCACCGATAAACCCGAAAAACTCTCCGTTTT  
GCGGAAAAAGAGCTGCTTAACTTTACGCTCCTGTCTGATGAGGACCACCAGGTGTGCGAACAATTCGGCGTCTGGGGTGA  
AAAGTCTTTCATGGGCAAAACCTACGATGGCATTATCGCATCAGCTTCTGATTGACGCTGATGGCAAAATCGAACATG  
TCTTTGACGATTTCAAACACAGCAATCACACGACGTTGTGCTGAACTGGCTGAAAGAACACGCTGATTACTTTGCTCC  
ATTCCGTGCTGGCTGCGCTTGCAGCCAGCATACTCACTTCTCGTGATCAAGATCACATTTCTGCTTCCCTGCGACAC  
GGGTGTCGAATCCATTTTTTGTGAACGTTAATGACCATCATTTTTGTACCGTTTCAAGTAAACATAACTTAT  
TGAATATATTGAGTTAATCAGAATGGCATCCTTTATGCAATATGAAATGCAATGTTTTCATATCATTTTCAAGGAGCCGAC  
ATGAACCGCTTTGTGGTGGCCGAACCACTGTGGTGTACAGGATGTAATACCTGTCTCGTGCCTGTTCCGACGTCATAA  
AACGCAAGGTTTACAGCAACACCCGCGCTGGCCCTGGCGAAGACGTCAACAATCACTGCCCTGTGCTGTGTCATCACT  
GTGAGGAAGCCCTTGCCTGCAGGCTGCCCGGTCAATGCCATCTCAGAGGGATGATGCATCAACTCAACGAAAGC  
CTCTGTATTGGCTGCAAGCTTTCGCGGCTGGTCTGCCAATTTGGCGCAATCAGCGCTTTCAGGAAGCCGTCGGTGAATGC  
CCATGCGCAATATGTTTTTCAGGCTGAAGGCTCACTCAAAGACGCGGAAGAAAACGCGCAACACAACATGCTTTGCTGC  
GCTGGGAACCTGGTGTCCAGACCGTGCAGGTTGAAATGCGACCTGTGTGATTTCTTGCCAGAAGGTCCGGCCTGCGTTCCG  
GCTTGGCCGAATCAGGCGTTACGGCTGATCACCGGTGATAGCCTGCAACGTCAGATGAAAGAAAAACAGCGCCTTGGCCG  
AAGCTGTTTTGCCAATGGCGGGGAGGATCCCTTTCCCTCACTCAGGAGCAACGCTAATGGATGCCCTGCAATTTAATAC  
CTGGTGCCTGATTCTCTATCTGTTGCTAGTCTGGCTTCTGCTTTTTTACTCGGTCTGGACAGACTGGCTATTAAGCTTT  
CCGGCATCACATCGCTGGTGGGCGGCGTATTGGCATCATCAGCGGAATTACGCAATTACATGCTGGTGAACCTTTAGTC  
GCCGTTTTTGGCCCCCTTTTGAATTTGCCGATTTAACCTGCGAATGGATAGCCTCTCGGCATTTATGGTGTGGTTAT  
CTCCTTGTGGTGGTGGTTTGTCTCTATTATTGACTTATATGCGCAATACGAGGGCAAAGGCGCGGCGGCGATGG  
GCTTCTTTATGAATTTTTATCGCATCGATGGTTGCCCTGCTGGTGTGACAAACGCTTTTTGGTTCATCGTGTGTTT  
GAAATGATGTCGCTGTCTTCTGGTTTCTGGTATTGCCAGGCAGGATAAACGTCGATCAACGCTGGCATGCTCTACTT  
TTTTATCGCCACGCCGGATCGGTGCTGATAATGATCGCTTCTGCTGATGGGGCGCGAAAGCGGCAGCCTCGATTTTG  
CCAGTTTCCGACGCTTTCATTTCTCCGGGCTGGCGTCCGGGCTGTTCTGCTGGCCTTTTTCGGTTTTGGCGCGAAA  
GCCGGGATGATGCCGTTGCACAGCTGGTGGCGCGCTCACCTGCCGACCATCGCACGCTTCCGGCTTGTGCTGG  
CGTAATGGTCAAATAGGATTTTTCGGCATCCTGAAAGTAGCGATGGATCTGCTGGCGCAAACGGGTTTTGCCTCTGTGGT  
GGGGCATTCTGGTGTGGGATCGGCGCAATCTCCGCGCTCCTGGGCGTGTATATGCGCTGGCGGAACAGGATATCAA  
CGCTGCTGGCCTGGAGTACCGTCGAAACGTCGGCATTATTTTCTGGCAGTCCGGTGGCGATGGTGGTCTGTCACT

GCACGACCCGCTGCTCACCGTGGTTGGACTGCTCGGCGCACTGTTTCATCTGCTCAACCATGCGCTGTTCAAAGGGCTGC  
TATTTCTCGGCGCGGGAGCGATTATTTTCGCGTTTGCATACCCACGACATGGAAAAAATGGGGGCACTAGCGAAACGGATG  
CCGTGGACAGCCGAGCATGCTGATTGGTTGCCTCGCATATCAGCCATTCCTCCGCTGAATGGTTTTATCAGCGAATG  
GTACACCTGGCAGTGCCTGTTCTACTAAGTCGTGTGGAAGCCGTAGCGCTACAACCTTGGGGTCTATTGCTATGGTAA  
TGCTGGCAGTCACTGGTGGGCTGGCAGTAATGTGCTTCGTAAAAATGTACGGTATTACTTTCTGTGGTGCGCCGCGCAGT  
ACACACGCTGAAGAGGCACAGGAAGTGCCAAATACGATGATCGTCGCCATGCTACTGCTCGCGGCACTCTGCGTATTAAT  
TGCCTTAGTGCCAGTTGGCTGGCACCAGGATAATGCATATTGCCCATGCGTTTACCAATACCCCTCCCGCCACTGTG  
CCAGCGAATAGCACTTGTACCCGGCAGTTCATACACAGGTACCCCCCTACTGTTGCTGTTACTACTGGCGATG  
CCTTTGCTGCCTGGCCTTACTGGCTGTGGTGTCTTCCGCGCCGCGCAGCGTTTCGTGCGACAGGAGATGCTGGGCATG  
CGGTACGGCTGGGAAAATGCGATGGCCCCGTACGGCAATGGCGTGATGCGCCGCTGCGTGTGGTCTTTTCTGCGCTAT  
TTCGTCTACGACAACAGCTGACCCCTACGCTGAGGCTAAATAAAGGCTTTCGCGCAGTACCCGCCAGGGCTCAGAGCACA  
GAACCTTCTGGGATGAGCGGGTATCCGCCCATCGTGAGCGCCACCCAACGGCTGGCCAAAAGAAATACAGCATCTGCA  
AAGCGGCGACTTTCGTCTCTATTGCCTGATGTGGTGCGCCACTGGTTGTGCTGCTAATCGCTATTGCCGTCTAAGGAA  
ATCACCATGAGACAAACTTTTGGCAGGATATCTGGTCATTTTTGCGTTAGCACAGGCCGTATTCTGCTGATGCTAAC  
CCACTTTTTACGGGATTTCCCGCAGATACGCGCGCTATGCCTCCCGCCGCGGGGATCTGGCAGGATTATC  
GGATATCCACAACTGTTTTAAACGCCAGGAAGTTGCGCCGACATCTTCAGGTCTGATGTTCCGCCTGATGCCGTGGGTA  
TTAATCAGCAGCATGCTGGTGTGGCGATGGCCTTACCCTGTTTATTACCGTTTCCCTTTTTGCGGGCGCGCGCATCT  
GATCACCTTATCTATCTTCTTGCCTGTTTCGTTTTTTCTTGTCTTTCCGGGCTGGATACCGGAAGTCCGTTTGGCG  
GAGTCCGTTGCCAGTGCAGGTTGACGCTCGCATTCTGGTCAACCAATGCTTATTCTCTACTGCTGGTATTGGCGCTG  
ATAGCAGGTTCCACGCATATCGAGATGATCAGCAATACGCTGGCGATGGGCTGGAACTCGCCGCTAACCACCGTACTGGC  
GTTACTGGCCTGTGGTTTTGCTGCTTATTGAGATGGGAAAAATCCCTTTGATGTTGCTGAAGCAGAACAGGAATTAC  
AGGAAGGCCCGCTGACCGAATATCCGGTGCCGGGCTGGCGCTAGCGAAATGGGGGCTGGGGCTGAAACAGGTCGTGATG  
GCATCACTGTTTGGCCCTGTTTCTGCCCTTTGGCGCGCGCAAGAACTTTCTCTGCTGCTGCTGACTTCACTTGT  
CGTTACGCTGCTCAAGGTTTTGCTGATTTTTGACTGGCTCAATCGCAGAAAACAGCTGGCAGCGGGCGTTTTTTAC  
TCATTACCATGTGACCTGGCTTGGCTCAGCCTTGTGCGCTTGCATGGGCTTCTGGTTAACCGGTCTGTAAGGAGCA  
CTGACGGAATATGAAAATCTTGTCTGACGACGTTATTGCTGCCTTTATCGGCGCACTGGTCGTTTCTGTTTTCGCCAC  
AACGTCGGGCCCGCAATGGGGGTTTTGTTCCGCCGCTGACCACGCTGTGCATGTTGCTACTGATCTCCGCTTTTTAT  
CAGGCCGATAAAGTTGCCGTACGTTGACGTTGGTCAACGTGGGGATGTGGCGTTGTTTGGCCTGGTCAATTGATCGCGT  
GAGTACGCTGATTCTGTTTGTGGTGGTGTTCCTCGTTTGTGGTCAAGTCTACTCCACGGGTTATCTGACGGATAAAA  
ATCGCGAACACCCGCATAACGGCAGCAATCGTTATTACGCATTTTTACTGGTGTATCGGCGCATGGCGGGACTGGTA  
CTCTCCTCGACGCTGCTCGGTCAAGTGTGTTTTTAAATTACAGGCGGCTGCTCCTGGGCGTTGATCAGTTATTACCA  
GAGCGATAAAGCGCAGCGTTGACACTAAAAGCGTTACTTATCACTCATATCGGCTCGTTGGGGTTGATCTTGGCCCG  
CCACGCTGTTTTTGCAGACCGGAACGTTTGCCTTAGCGCGATGAGCGAGTTACACGGCGACGACGTTATCTGTTTTAT  
GGCGCATCTGTTTGGCGCGTGGGGAAATCGGCCAGCTACCGATGCAAGCGTGGTACCGGACGCAATGGAAGCGCC  
AACACCGATCAGCGCCTATCTCCACGCCGCATCGATGGTGAAGTGGGCGTTTACATTTTTGCCCGCGCTATTATCGACG  
GCGGCAATATCCCGCATGTGATTGGCGCGTTGGCATGGTCACTGGTCAACCTTTATGGCTTTCTGATGAT  
TTGCCACAGCAGGATATGAAGCGGTTGCTAGCCTGGTCGACCATCACTCAACTGGCTGGATGTTCTTGGCTTGTGCT  
CTCATCTTGGCTCGCGGCTGGCGCTGGAGGCGAGCATCGCTACATCGTCAACCACGCGTTGCTAAAAGCCTGTTTT  
TCCTTGTAGCAGGTGCGTGAAGTACAGCTGCGGACGCGCTTGTGGCGCTGCGTGGCGTATTGCACACCTGCCG  
TTGCCAGGCGTGGGTTTTGCTGCGGAGCGCTGGCGATTACCGCGTTCGCGCTTCAACGGCTTCTTCAAGTAAATCCC  
GCTGTTTTGCTGCCGTTTTGCGTTGTAGTGGAGTACTGGATCCTGCTGCCCGCATGATTCTTCTGATGATTGAATCGG  
TCGCCAGTTTTGCGCTGGTTTTATTGCTGGTTTTGGTGCCTTGTGCTGGCAAACCGAGCGAGGCCGTCGCCGATGCCGCA  
CCGCTGCCAGGATCAATGCGCTGGTGTGATTGACTGATTGTGATGTCGCTGATTTCCAGCGTAATCGCCGCGACCTG  
GTTGCGATAAGGAGATGATGAATGACCGGTTCTATGATCGTAAATAATCTGGCGGGACTGATGATGCTGACATCGCTGTT  
TGTGATTAGCGTCAAAGCTATCGCTGTGATGCGGATTTTACGCTGCCAGTCACTGGTGTGGTGTCTATTTTCGCCA  
CTCTCTGCTGCTGTTCCGCCGAGAGCAACTGCTGATCTGGTCCGCCAGCGCTTTATCACAAAGTGTGCTGGTACCG  
TTAATCATGACTTACGCTGCACGAAATATTTCCAGAACATCCCGGAAAAAGCGTTATTCCGGTCCGGCAATGATGGCACT  
GCTCGCGGCTTAATTGCTGCTTTGCGCATTTGCTGTTAGCCCGTGAAGTACCGATGGTACCGGGCTGAAACCGG  
CGCTGGCGGTAGCGTTAGTCAATTTCTGCTTGGCTGCTGTGATTTGTCAGCCAGCGCAATATCTGCGGCAATTTTT  
GGTACTGCTGATGAAAACGGCTCCCATCTGGTGTGGCGCTTCTGCTGGCGAGCACCGGAAGTGGTGAATAAGG  
TATCGTACCGACGCCATCTTCCCGTCAATTGTGATGGTGTACTGGCAAGAAAAATATGGCGTACCCACGGCAGCTGG  
ACGTGAACAACTTGAACCGCTGAAGGATAATGAGATGAGTTATTCTGTGATGTTGCTTTACTCCTGCTCAGCCGCT  
GCTTTTTTCTGCTGCTGTTTTGCTGCCGAAACGGAGACTTTCTGCGACTCGCAGGTGACCGTATTACATAGCTTAG  
GGATCACACTGCTGCTGATTCTGGCACTCTGGGTGGTCCAAACTGCCGCTGATGCAAGGAAAAATATCGCTGCGGGACTG  
TGGCTTCAATTGATGGTCTGGCGGTTTTGTTCCCTGCCATTCTGGTGTGATTGGCTTTCTACCGGTATTTACTCGAT  
TGCTACATGCGTCATGAAGTGGCACACGGCGAGCTTACCCTTACGCTGTGCGATTACTACGGTTTTCTCATCTGT

TTTTGTTACCATGCTGCTGGTTGTTACCAGCAATAACCTGATTGTGATGTGGGCGGGATCGAAGCCACCACCTTAAGC  
TCGGCGTTTCTGGTAGGCATTTACGGTCAGCGTTCATCGCTGGAAGCTGCATGGAAGTACATCATTATTTGACTGTTGG  
TGTCGCTTTTGGTCTGTTCCGTACCGTGTGGTATACGCCAACGCCGCCAGCGTTATGCCGCAGGCAGAAATGGCGATAT  
TCTGGAGCGAGTTCTTAAGCAATCGTCTTGTGTTGACCCAACATTAATGCTGTTGGCCTTTGTGTTTTGCTAATTGGC  
TTTGGTACCAAAACCGGGCTATTTCCCATGCACGCCCTGGCTGCCGGATGCTCACAGTGAAGCGCCGAGTCCGGTCAGCGC  
CCTGCTCTCCGCCGTATTGCTGAACCTGCGCGCTGTTGGTGTGATTTCGCTATTACATCATTATTTGCCAAGCCATCGGCA  
GCGATTTCCCAACCGGTTGTTGCTCATCTTCGGCATGTTGTGCGTTGCCGTGGCGGCATTTTTATTCTGGTACAGCGG  
GACATTAAGCGTCTGCTGGCGTACTCCAGCGTGGAGAACATGGGGCTGGTCGCGGTGGAGCTAGGCATTGGCGGGCCGCT  
GGGAATTTTTGCCGCGTGTGCACATCTAAACCACAGTCTGGCAAAAACGCTGCTGTTCTGCGGTTCCGGCAATGTAC  
TGCTCAAGTACGGCACGCGCGATCTCAACGTCGTCTGTGGATGCTCAAAATCATGCCATTTACCGCCGTGCTGTTGGC  
GGCGGTGCGCTGGCGTGGCAGGGATGCCGCCCTTCAACATTTTTCTTAGCGAATTTATGACCATTACCGCCGACTGGC  
ACGTAATCACCTGCTGATTATCGTCTGCTGTTATTGCTGTTAACGCTGGTGTGGCGGGCCTGGTACGGATGGCTGCGC  
GGGTGTTAATGGCGAAACCGCCGAGGCCGTTAACCGGGGTGATCTGGCTGGTTGACCACCTGCCAATGGTGATTCTG  
CTGGTCATGCTGGCGATGGGAACGCATATCCACAACCTGTCATCAGGATCCTGGCGGGCGCTTCCACTATAGTCTC  
CTCAGGGACGCACGATCTGCCTGCACAACGTAGCAGCTGGCATGATTTTTTGCCTTCAGGCACCGCATCTGTTCCGGAGA  
AACACAGTGAACGTTAATTCATCGTCAAATCGTGGCGAAGCGATTCTCGCCGCCCTGAAAACGCAGTTCCTCCGGCGGT  
GCTGGATGAAGAGCGACAAACCGCTGAACAGGTACCAATTACGGTGAAAATCAATCTGCTGCCTGACGTTGTACAGTATC  
TTTATTATCAACATGATGGCTGGCTTCCGGTCTGTTTGGCAACGACGAGCGGACACTTAACGGTCATTACGCGGTTTTAT  
TATGCCCTTTCAATGGAAGGGGCCGAAAATGCTGGATTGTGGTGAAGGCGCTGGTCGATGCCGACAGTCGGGAGTTTTCC  
GTCAGTCACACCGCGCTCCCTGCCGCGGTCTGGGGCGAGCGAGAAATTCGCGATATGTACGGGCTGATTCCGGTTGGCC  
TGCCGGATCAGCGTCGCTGGTGTGCCGATGACTGGCCGGAAGATATGCATCCGCTGCGCAAAGATGCGATGGATTAT  
CGACTGCGCCCTGAACCGACGACTGATTCCGAAACGTATCCGTTTATCAATGAGGGCAACAGCGATGCGCGGGTATCCC  
TGTCGGCCCGTGCATATCACCTCCGATGAACCGGGTCACTTCCGCTTGTGTTGGATGGCGAGCAAATTGTCGATGCTG  
ATTACCGCTGTTTTATGTCATCGCGCATGGAGAACTGGCAGAAACGCGGATGGGCTACAACGAAGTACCTTCTTA  
TCGGACCGGTGTGTGGATTTGCGGTTTTGCCACAGTGTGGCCTATACCAATTCGGTTGAAAATGCACTGGGGATTGA  
GGTGCCGCAACGAGCACATACTATTGCTCGATTCTGCTGGAAGTGAACGGCTACACAGTCAATTTGCTTAACCTTGGCC  
TCTCCTGCCATTTGTTGGTTTTGATACCGCTTTATGCAATTTTTCCGCGTGGGAAAAGTCGATGACGATGGCGGAA  
TTGCTGATCGGGTCGCGTAAAACCTACGGTCTGAATCTGATTGGTGGTGTTCGCCGCGATATTCTCAAAGAGCAACGCTC  
GCAAACGCTGAAACTGGTGCAGGATGCGCGCCGAGTGTGGAGCTGGTAGAGATGCTGCTTACCGCGAATATGG  
AACAAACGCACTCAGGGCATTGGCATTCTGACCCGACAAATCGCCCGTGAATTTGCGCTTTGATCACCCCTACGCCGACTAC  
GGCAATATTCAAAAACACTGTTTACCTTACCGGCGGCGATGTTTTCTCCCGCGTGTGGTCCGTGCAAGAGACGTT  
TGATTGCTGGCAATGCTGGAATTTGCCCTCGACAACATGCCGATACCCACTGCTGACCGAAGGCTTTAGCTATAAAC  
CTCACGATTCGCGCTGGGCTTTGTTGAAGCGCCACGCGGTGAAGACGTGCACTGGAGCATGCTCGGTGATAACCAAAAA  
TTGTTCCGCTGGCGTGGCTGCCGCCACCTACGCCAACTGGCCGGTGTGCGTTACATGCTGCGCGGCAATACCGTTT  
TGACGCACCGCTGATTATCGGTAGCCTTATCCCTGCTACTCCTGTACCGACCGTGTGACGCTGGTAGATGTGCGCAAGC  
GCCAGTCAAAAACCGTCCGTATAAAGAGATCGAACGCTACGGCATTGATCGTAACCGTTCGCCGCTGAAGTAAGGACAG  
AAGATGCTGAAGTTACTGAAAATATTATGCGCGCCGGAACCGCAGCGTGAATATCCCTTCGCGCCACTGGAGGTCAG  
CCCTGGCTTTGCGGAAAACCGGACCTGATGCCAGCAATGTATTGCTGCGGTGCTGCGCCTGTGCTTGTCCGGCAA  
ATGCGCTGACTATCCAGACCGACGACCAGCAAAATCGCGCACCTGGCAGCTCTATCTGGGGCGTTGATTTACTGCGGA  
CGTTGTGAAGAAGTGTCCCGACAGCCATCCAGCTTACCAATAACTTTGAACTGACCGTACCAATAAAGCCGATCT  
CTATACCCGCGGACGTTCCATCTACAACGTTGCAGCCGTTGCGAACGCCGTTTGCCTTTCGCGCAAAAACCATCGCACTGG  
CTGCTGAATTTAGTACAGCAACAAAATGCGCCACAAAACCGCGAAATGTTGTGGGCGCAAGCGAGCGTGTGCCGGAA  
TGCAAAACACGCGGACGCTGATCAACGACGATACAGATGACTGCTGGTGGCTAAGGAGCAGCTATGAGTCCAGTGCTT  
ACACAACATGTCAGCCAGCCATCACGCTGGACGAGCAACGCAAAAGATGAAGCGGCATTTGCTACAGGATATCCGTCG  
CTCGGCTTACGTTTATCGGTCGATTGCCGGGCTGCAACGCCTGTGAAATCGAAATTTTTGCTGCCATTACACCAGTAT  
TCGACGCAGAAGCTTTTGGCATTAAAGTTGTTTATCACCGCGTCACGCCGATATTTGTTATTTACTGGCGCAGTCACC  
CGGGCGATGCGTATGCTGCACTTCGGGCGTATGAGTCTGCCCGGATCATAAAATTTGTTTCTACGGCGCGTGGCG  
TGTCGGCGGGGATTTTTCCAGCATCTACAGCGTCTGGGGCGTAGCGACACCATTGCCCCATTGATGTTTGGATCC  
CCGGCTGCCCGCAACACCGGCCGCCACCATTACGGTTTTCCGCGTGGCGCTCGGTTTGTGCAACAGAAGATTACGCT  
GTGGATTATCGCGATCCACCGGGTACTATGCAACCGTTGTGGCCGAGATCCCGCCATCACAGCGTATCGCCATTGA  
GCGAGAAGCGCGGGCTGGCGGGCTATCGTCAGGGGCGAGAAATTTGCGATCGGCTCCTGCGCCATTTAAGCGACGATC  
CTACAGGAAATCGGGTAAACACTGGTTGCGCGATGCCGACGATCCAGTCTCAATAGTATCGTTACGCAACTCTTTCGC  
GTAATCGCCTTCCGCTGCCACTGACGGAATACGAAGATTGGCTTGCCTGCGTGAAGAGGAGCAAGCCCGACGTAAGAT  
GCTGGGGGTGATGACTTTTGGTGGATTGTTATTGACGCCAGCCACCGCCCTGTTGACCCGGGCAATTCGCGCCACTGG

CGGATGACGCGACGTCTGTGTGGCAGGCGGTAGCATTCAATTCATTCATCTGTTGGATGAAATTGTGCAGGAACCGGCC  
ATCTATCTGATGGCCAGAAAAATTGCGTGAGAAGGATTTCTCATTAAATAAGGACTGTTGATGGCTATGTCAGACGAGGCC  
ATGTTTGGCCGCCACAAGGAATAACAATTGAAGCGGTAACCGGAATGCTCGCGGAGCGGTTAGCACAGAAACACGGCAA  
GGCGTCTTTATTACGCGCCTTCATCCCGCTGCCGCCCGTTAGCCCGGTACAACCTATTGAACTGCATGTTCTCAAAA  
GCAACTTCTATTACCGCTACCATGATGATGGCAGCGATGTGACGGCAACAACAGAGTATCAGGGCGAGATGGTCGATTAT  
TCGCGTCACGCCGCTCTTCTCGGCAGTAGTGAATGGCGGAGCTACGCTTTATTCGCACCCACGGCAGTCGTTTTACTTC  
CCAGGATTGCACACTGTTAACTGGCTGGCGCGGATAATCACCCCGTTCGCAATCATGGCTCAATGATGAAGAACAGC  
AGGTGGCGCTGCGTTTGTGGAGAAAGATCGCGATCATCATCGGGTACTGGTTGATATTACTAATGCAGTGTCTCACAT  
CTTGATCTCGACGATCTGATCGCTGACGTGCTCGTGAGATCCATCATTTTTTCGGTCTGGCTCAGTCAGTATGGTACT  
GGGCGATCATCGAAAACGAGAAGTTCAGCCTGTGGTGCAGCGATCTTTCTGCCTCACATTGTGCGTGTCTGCCACGCT  
GTATGCCTGGCGAAAGTGTATTGCTGACACAAACGCTACAAACCCGACAACCGACCTTGACGCACCGTGCAGATGATCTG  
TTTCTCTGGCAACGCGACCCGTTATTACTCTTACTTGCATCTAACGGCTGCGAATCTGCGCTCCTTATACCGCTTACCTT  
TGGAACCATACACCGGGTGCATTGTTGCTGGCGCATACCTCTTCCACTCTCTTTAGTGAGGAAAACCTGCCAGCTACTAC  
AACACATAGCCGATCGCATCGCTATTGCCGTTGGCAATGCCGATCGCTGGCGTAGCATGACCGATTTGCAGGAAAGTTG  
CAGCAAGAAAACCCAGCTTAGCGAGCAGCTCTTTCGAATCTGGGCATCGGTGACATTCTATCAAAGCCAGGCAAT  
GGAAGACTGCTCCAGCAGTAGATATTGTGGCGAAGAGCGACAGTACGGTGTGATTGTTGGTGAAACCGGAACCTGGCA  
AAGAGGTGATCGCCAGAGCGATCCATCAACTTAGCCCGCGACGCGACAAGCCGCTGGTCAAATCAACTGCGCTGCCATC  
CCCGCCAGTCTTCTGAAAGTGAGTTATTCGGTTCATGACAAAGGGCGTTTTACTGGTGCATTAAATCCCATCGTGGTGC  
TTTTGAAATTGCCGATGGCGGCACGTTGTTTCTCGATGAAATTGGCGATCTGCCGTTAGAACTTCAGCCTAAACTGCTGC  
GCGTATTGCAGGAGCGGGAGATTGAGCGTCTCGCGGGAGTAGAACGATCCCGGTGAATGTCAGAGTCATTGCCGCCACC  
AACCGTGATTTGTGGCAAATGGTTGAAGATCGCCAGTTTGCAGCGATCTCTTTATCGCTGAATGTCTTCCACTGGA  
ATTGCCGCGCTACGCGACCGTCCGGAAGATATCCCTCTTTAGCAAAACATTTACGCAAAAAATGGCGCGCCATATGA  
ATCGCGCAATTGACGCCATCCGACCGAGGCACTACGCCAGTTGATGTCGTGGGATTGGCCGGCAACGTGCGCGAGCTG  
GAAAACGTGATTGAGCGGGCGTACTGTTGACTCGTGGTAACAGTCTGAATTTACATCTAAATGTCCGACAAAGCCGTTT  
ACTGCCGACGCTAAATGAAGATTGAGCGCTTCGAGTTCATGGCGAGTACTGCACCCGACGACGCCAGAGAATGACG  
AAGAAGAACGTGACGCGATTGTTGAGTATTGCGAGAAACCAATGGCATTGTTGCCGGCCCCGTGGCGCAGCGACGCGA  
TTAGGGATGAAGCGCACCGCTGCTGTACGAATGACGCGGCTGGGATCTCGGTTCCGCGAGGTGTTGTAATCTGCTTT  
TGCAGGAGTATGCATGAGAAACAACTCTTTTCGACTTGAGTTCAGCGCCAGAAAAGCGGCAATCGTGAACGGATTG  
CCGCCATAAAATTGCCCGAGTAAAGTTCGGTCTTTTTAATGGCGATGTCCGCTGGCGTGTATGGCGATCGGATTT  
ACTTTTTACCTTTCCGTTATCGCCGATGCCCGTCTTACAGGCAATTAACCCATCTGGTGGCGCGCTTTGCTTTACACT  
CGGCTTTATTTGCTGGCGGTTTGGCGCACCGCCTGTTACCTCGTGGTAATGACGGTGTGGCAAAAAGTGGGGCG  
TTATTAGTTGGCGAACTTGGCTGATTAACGCACTTCTGGTGGCCTGCGGTAATCTGGCAGGTATTGCCTGTTTTCAGTTG  
TTAATCTGTTTTCCGGGCTGGTGATGAGTGAACCGCGATGTGGGGAGTCCGGTTTTACTGCGCCGAGGGCAAAAT  
GCATCATACATTTACTGAATCTGTCAGCCTCGGCATTATGTGCAATCTGATGGTTTGCCTGGCGCTGTGGATGAGTTATT  
GCGGGCGTTGTTATGCGACAAAATCGTCGCCATGATTTTGCCATCACCTGTTTGTCCGAGTGGCTTTGAGCACTGT  
ATCGCAATTTGTTTGTGATTCCGTTCCGATTGCCATTGCCATTTGCCCTCCCCCTTCCGAGTGGCGCACAG  
TAGCGCAGACAATTTCCGGCACTGACGGTCAAGCATTATTAACCGCAATCTGCTCCCGGTGATGCTGGGTAATATTA  
TCGGCGGTGCGGTGCTGGTGAAGTATGTGTTATCGGGCTATTTATTAACGTGAGAAACCTGAAAAATCAGCCCGGCGAAA  
CAGTTGCTGCGGTGAAGATTATTCTTGCAGATTGCCCATCGGGCCAGGCATGAATCACGGCTTTGATCAGCGTGC  
AACGGAATGGCGAAGAATACGCCCCAGAATCCCAAAACACCGGAAGTACCACCGATAAAAATCAACAGCGGATG  
CAGGTTAACCGCTTCCGAGAACAACACCGGCACTAACAGGTTGCCGTCCAGCGCTGAATAATCAGATACACCGCGAAGC  
AGCTCCAGAATTCAGTACCTGCGCCAAACTGGAATAGCGCCACGCAACACCGGAATGGTACCACAAATGCGCAATG  
TACGGAATAAGAACCGAGAAGCCGACCGACTGCCAGCAGCAGCAATAGTTGAGCCGAAAGAGCAAGAACCCAGCCA  
GGTGGCGATCCCCACCACGATCATCTCCAGCACTTTGCCGCGATATAGTTGGTATTGTTGATTATCTCCTTCCACA  
CCTGTCTGCCAGCCACGGTTACGCGGCAGCACCCGGCGAACGGGCTTCCAGCATCTGCTCTTTGCTTTTCCAGCAGGAAG  
AAGACCATCAATGGCACCAGCACCAGATAGACGGCTATGGTCCAGCAAACCGACCGAGCGAGGCGAGGGAAATTTTACCAC  
CGAATCGCCATGGTCCAGCATCCGACTGCGCATATTTTCCGCTTGCATCAATAATGCCCGCTCCATTAACCGCGGAT  
AGCGGCGCGCAACGTGGCGGCAAAGTCAAGAAAGCTTATTGAGCATCCCGGCATATCGCGGATTAAGTAGATGCCCTGT  
TGCCAGGCGATAGGCACTACCGAACGCCATCAGTAGCAATATACCGAGAAAACCAACATAAATCGACGTGCCCCA  
GCGGCGGGAGCAGCAATAGATTGACAGCAGCGGTTGGCCATTCAGCAAATAGGCCAGCACAATAGCCACCAGCAACG  
GAGCAAGCAGGCCACTAAAGAAAAAGATAATGCCAAATCCGGCACTAAAATAACAGCAAGGCAATCGTTCCGGGTCG  
CTAAAACGGCGCGGATACCATTGCATCAACATTTGAGCATAAAGACCTTCCCTGAACCTCAAGAGCGGGATTGCGATCC  
GCAATTGTATGAAATGTCAAAAAAAGACTTCGCTTTTTATGACGGATTGAGGAACTGAAAAGTCATTTGAGTGGGCT  
AATCTTCCGCTTACACTCAAAGGCGGCGGGTGGGAACGATATTTACAGTATCGGTCAAATGACTATCTCCAGAAATA  
CAGGATAGAGGTTATGTTAGGCGAGTTGAAAAAAACCTGTTGCAACCCTCATTGCTGCTATGACCATTGGTCAGGTAG  
CCCCGGCGTTTCCGACAGCGCAGACACCTTCCCGATATGGAACTCCGAGGAAGCACGCTTTCATTGGTCAGGAA



ATGCAGATGGGCGACTATTATGTCCGCCAGCTACGCGGCAGCGCGCGTTAATTAATGACCCGCTGTTAACGCAATATAT  
TAATTCGCTGGGGATGCGTCTGGTTTCGCATGCCAATTCGGTTAAGACACCGTTTCATTTTTTTCTGATCAACAACGACG  
AAATTAACGCCTTTGCTTTCTTTGGCGCAACGTGGTCTGCACTCTGCCCTGTTCCGTTATTCGATAACGAAAGTCAA  
CTGGCTTCAGTTATGGCGCACGAAATCTCCACGTACCCAACGTCACTGGCGCGAGCGATGGAAGATCAGCAGCGCAG  
CGCGCCGCTGACCTGGTTCGGCGCTTAGGTTCTATTTTACTGGCGATGGCCAGTCCGCAGGCGGGGATGGCGGCGCTGA  
CCGTACACTGGCGGAACGCGTCAGGGGATGATCAGTTTACCCAGCAAAATGAACAGGAAGCGGACCGCATTGGTATT  
CAGGTGCTGCAACGCTCGGGATTGATCCGCAGGCGATGCCAACCTTCTCGAAAAATTAATCTGATCAGGCGCGTACTC  
CTCGCGCCCGCGGAAATTTTATTGACTACCCGTTGCCGAAAGTCGTCTGGCAGATGCCCGCAACCGTGCTAATCAGA  
TGCGCCCGATGGTGGTGCAGTCTGCGGAAGATTTCTATCTGGCGAAAGCGCGCACACTGGGGATGTATAATTCGGACGT  
AACCAGCTCACCAGTGATTTGCTGGATGAATGGCGAAAGGAAACGTTCTGTCAGCAACGAGCAGCACAATATGGTCTGTC  
TTTACAGGCGATGGAAGCCAATAAATACGACGAGGCGCGTAAACGCTGCAACCGTTACTGGCGGAGAACCTGGCAACG  
CATGGTATCTGATCTGGTACTGATATCGATCTTGGGCAAAACAAGCCAATGAGGCGATCAATCGTCTGAAAAATGCC  
CGGATTTACGACCAATCCGGTGTTCAGCTCAACCTGGCGAACGCTTATTTGCAAGGCGGTCAACCACAAGAAGCGGC  
CAATATTCTGAATCGCTACACCTTTAATAAAGATGACAGCAACGCGTGGGATTTGCTGGCACAGGCGGAAGCCGCG  
TAAATAACCGCGATCAGGAGCTGGCTGCCGAGCAGAAGGTTATGCGCTCGCCGACGACTCGATCAGGCCATTTCTGCTG  
TTGAGTAGCGCAGTTGCGAGGTGAAATTAGGCAGCTGCAACAAGCGCGTTACGATGCGCGCATCGACCACTTGGCCCA  
GCTGCAGGAACGCTTTAAGCCTTATACCAAGATGTAATTCGATTAAAGGAAGAACAATGACCAACAGGTAATAAATCTA  
CCATAACCCACGCTGTTCAAAGAGCCGGGAAACGCTGAACCTGCTGAAAGAAAAACGGCGTGGAGCCAGAAGTGGTGCTCT  
ACCTTGAGACACCCGCCGATGCGGCAACGCTGCGGATTTGCTGAAAATACTGGGGATGAATAGCAGCCCGTGAATTGATG  
CGCCAGAAAGAGGATCTTTATAAAGAAGTGAACCTGGCTGACAGTTCGTTAGCGAAGAGGCGCTGATTCAGGCAATGGT  
GGATAATCCGAAGCTGATGGAGCGCCGATTGTGGTGCGAATGGCAAAGCGCGGATTGGTCTCCACCGGAGCAGGTAC  
TGAAATCGTGGGTTAAGATGTGCTCCATCGCTAGTTGAAGCACATTGCCGGATGCGACGCTTCCACGCTTATCCGGC  
CTACGAATACTATGGATTAACCTTCGCTAGTTCGGATAAGGCGTTGCGCGCCGATCCGACAATAAACACCTTATCTACAA  
CTTCAGAAATTTCTTTCACAAACGGAATGGTCACTTACGTTGCGCGGTAATCGACGCACGATCCAACGATCCAACGTC  
TAAATAGCGTGCATTTCTGTCGAGCCGCTTCCAGCAAGAAACGCCCCACATCTTCCGGCAGTTCAAACACGCAAA  
CGCGCGGTAACGTAGCGCTGCAACTTATCTTCATCAGAAAGTGGCTGCAATTTGTAGATCTGCCCCAGTCGAGTCG  
CGACGCGAGATCCGGTAATCCAGATTCAACTGCCGCGGTGGACGATCGCCGTTGATCAACAACCGTGTGTTTGGCCGAT  
CCAGAATTCGATTGTAGAGATCGAAAATCGCCATCTCCACAACCTCATCGCCTGCAATACACTCAATGTTGTCGATACAG  
ACCAGCGACAATGCTCCATACCGTGCAGCACTCCGGAACAAACAGGTGCGTTTATCCAGCGGGACATAGCCACCGC  
ATCGCCACGCTGCGACAATTCGCGCAAGCCGCGTGCAGCAGATGGCTGCGCCCCGCGCTTCCGCTGCCAGAGATAGA  
TGTAACCGCTATGTTCTGACGCAGCAGCTTTTGCAGCGCGGCCAGTAAAGAGGAGTTATCCCCCGGCCAGAAACTTGCA  
AAGGTTTCTGTCGTCAGGAAGATAAAGTGGCAAAGAGAGCTGTGCCGGTGTGTTTCAAGATACCTCAACCAGGATTTACA  
AAATCGCGAGAAGTTTACCACAGAATCCCATGATGTTTGAACCGGCAGCAACACTGCCGGTCCGGTACATTATTTGCTCT  
GTTATATCCGCGTCTTCTGCGTCCAGCACCACTTCTCAGGGCGCAGCACTGATCAGTTTGAAGATCAAACCTAAGCC  
GATACCGAGATGGTCCGACGCGCCATACCTTTAACTCCGCCGCGCCGATGTTTACCTTCCGCCACTGACGCGGATGA  
TCAAAATCACGGAAGTCAAGATCAGGTTCTGTGCTTTGTTGTAATCACTTTTCGATTGATCAAAACACGAATACCGGAA  
GCACCGATGACACCATAAAGCAGCAGCGAAACGCGCCCATCACCGCAATGGGATCATCTGGATAGCGGCAGCCAGTTT  
ACCGACGCAGGAAAGCAGGATAGCGAAAATCGCCGCCCGCCGATAACCCAGTACTGTAACACGGGTGATCGCCATCA  
CGCAATGTTTTCTCCGTAAGTAGTATTTGGCGTAGAGCAAAGAAGCCGGAATCACGGTCGACAAGCCATTAGCAAA  
ATCGAACGGTCAGACCTGGATCGCGCAGCAGATCTTTTTGACGATATTAGCCGTTACTACCAGTGCCCTACGTGTTT  
GGCAATAACCACTAACCGCCGCTGGCAGAATAGTCAAGATGGCAAACCACTCGAAGCGCGGCGTATAGAGGGTTGGCAGCG  
CAAACAGTGAGCATTAAATAATCGCGTGGTATCGACAATCCATTGCGAAAGAGAGCGGTACCCACCAGCAGCCCA  
ATTAATCGGGATAATTGCCAGGAAACCACGAAACAGCAGGAACCTAAAACCGTGACCGCCAGGGTGGTAATAGAGAT  
GATGATGGTTTTGGAGTCTGGCGTTTGCCTTACGCCGGGAGTAAACCCGCCATACCGGCAGCTACGCCCGCCAGCTCCA  
GACCGATGACGGCAACGATTGCGCCATTGCCGAGGTGGAACAGCAGCTCCAGCCAGCCGGTCCCCGCTTTCTTACG  
ATAAAGAAACAGGCAGAACAGCAGCGCCGACATAATAAAGCCGCCAGCGCGACTTCATACCCTAACGGCAACAGTAA  
CAATACCGGTGAAATAAAGCAAAGCTGGAACCAAGATAAGCCGGAATTTTCCCTTTACAGATGAAGAGATACAGCAGCG  
TTCAATACCGTTAAATAACAGTACAGTCGCGGGTTAATATGAAATAAGACGGGCACCAGGACGGTTGCACCAACATG  
GCGAACAAATGTTGCAAACTAAGCGGGATTGTCTGTAAGTGGCGTCTTTCACTCACCCGATAGCACGGCGGTCAT  
AGTATTATCTCTGATTATGTGTTATAGGCGCTTACTCAAAAAAAGCCGACTCTTAAAGTCGGCTTAAATTATTTTT  
ATTTCTTATTTCTGACCAAAGATTTTGTACCGGCATCGCGAGCCGGAATAATGTATCCGTGCTCGTTCAGTCCCTG  
ATCAATCGATCGGTATACAGTTGACGCTCGGGTGCCTTTTTCCAGCGCAGCGATACCTTCTGGCGCAGCTACCAGCA  
CCAGAATTTGATGCTGCTGACGCCGCTTTTTTACGAGGTCGATGGTCCGATAACGGAACCACCGTTGCCAGCATT  
GGGTCAACGATCAGCGCCATACGCTCATCGATGTTAGAAACAGTTTCTGGAAGTACGGTACCGGCTCCAGCGTTTCTT  
ATTACGGTACATACCGACAACGCTGATGCGCGCGCTCGGAACGTTTTCCAGCACACCGTCCATCATACCAAGACCCGCAC  
GAGAATTTGGCACAACGTAATTTTCTTACCTTTGATCTGGTCTGATTTTACCGGGCGGTTCCAGCCTTCGATAGTTACT

TTTTCCGTTTTCGAGGTCGGCGGTGCTTCGTAAGTCAGCAGGCTACCCACTTCGGAAGCGAGTTCGCGAAAAGCGCTTGGT  
GCTGATATCTTGCTCACGCATCAGTCCCAGCTTGTGTTTGACGAGTGGGTGTTGACTTCCACGATCTTCATACTCTTTC  
TCCTTTGAGGGGCAGCCACAAAAAATCGACGGATTATACCTCCTTTCTTCAAGGCGGCAATATTCTTTTCGTTGACTT  
TAGTCAAATGATAACGGTTTGAGATAAAGTTATTTTATATTCAGATGGTTATGAAAGAAGATTATTCCATCCGAAAAC  
AACCTTTACCTGGCACAAGTCTTCTTTCGCGCGCGCCTGGGAAAAAGACGTGCAAAAAGTTTGTGTAAGCAGTCTCG  
CAAACGTTTGCTTCCCTGTTAGAATTGCGCCGAATTTTATTTTTCTACCGCAAGTAACGCGTGGGGACCCAAGCAGTGA  
CCGATAAAACCTCTCTTAGCTACAAAGATGCCGGTGTGATATTGACGCGGTAATGCTCTGGTTGGAAGAATCAAAGC  
GTAGTGAAGAAAACGCGTCGTCGGAAGTGATGGCGGTCTGGCGGCTTCGGTGCCTGTGTGCATTGCCGCAAAAATA  
TCGTGAACCCGTGCTGGTTTCTGGCACTGACGGCGTAGGTACCAAGTGCCTGGCAATGGACTTAAAACGTCACGACA  
CCATTGGTATTGATCTGGTCGCCATGTGCGTAAATGACCTGGTGGTGCAAGTGCAGAGCCGCTGTTTTCTCGACTAT  
TACGCAACCGAAAACCTGGATGTTGATACCGCTTACGCGGTGATCAGCGCATTGCGGAAGTTGTCTGCAATCAGGCTG  
TTCCTGGTGGTGGCGAAACGGCAGAAATGCCGGGATGTATCAGGTGAGGATTACGATGTCGCGGGTTTCTGCGTTG  
GCGTGGTAGAAAAATCAGAAATCATCGACGGCTCTAAAGTCAAGTGCAGCGGTTGTGATCCGCAAAACCCGAACTTGTGG  
CCACTCGAACGGCTATTCGCTGGTGCAGAAATCTTGAAGTCAAGCGGTTGTGATCCGCAAAACCCGAACTTGTGG  
TAAGCCATTAGCCGATCATCTGCTGGCACCACCCGATTTACGTGAAGTCAAGTGCCTGGAGTTGATTGAAAAGGTCGATG  
TGCATGCCATTGCGCACCTGACCGGGCGGCTTCTGGGAAAACATTCCGCGCTATTGCCAGATAAATCAGGCAAGTGA  
ATTGATGAATCTTCTGGCAGTGGCCGGAAGTGTCAACTGGCTGCAAAACGCGAGGTAACGTTGAGCACCATGAAATGTA  
TCGCACCTTCAACTGCGGCTCGGGATGATTATTGCCTGCTGCTCCGGAAGTGGAACAAAGCCCTCGCCCTGCTCAATG  
CCAACGGTGAACCGCGTGGAAAATCGGTATCATCAAAGCCTCTGATTCCGAACAACGCGTGGTTATCGAATAATGAATA  
TTGTGGTGTATTTCGGCAACGGAAGTAATTTACAGGCAATTTGACGCTGTAAAACCAACAAAATTAAGGCACC  
GTACGGCAGTTTTAGCAATAAGGCCGACGCTTCCGCTTGAACGCGCCCGCAGGCGGTATTGCAACGCATACGCT  
CATCGCCAGCGCTTTGACAGTCTGAAGCCTATGACCGGGAGTTGATTGATGAAATCGACATGTACGCACCCGATGTGG  
TCGTGCTGGTGGTTTTATGCGCATTCTAGCCCGGCTTGTCTCCACTATGCCGGCGTTTGTGAAACATTACCCT  
TCTCTGCTGCCGAAATATCCCGATTACACCCATCGTCAGGCGCTGGAAAATGGCGATGAAGAGCACGGTACATCGGT  
GCATTTCTGACCCGATGAACTGGACGGTGGCCCGTATTTTACAGGCGAAAGTCCCGTATTTGCTGGTATTGCGAAG  
ATGACATCACGCCCGCGTGAACCCAGGAACACGCCATTTACTGCTGGTATTAGCTGGTTTCCGATGGTCTGCTG  
AAAATGCACGAAAACGCCGCTGGCTGGATGGTCAAGTCTGCCCGCAGGGTACGCTGCCGACGAGTAATACCCCG  
TAATTAAGCGCCAGCTCTGCCGCTGGCTTTTTCAATCACCTGTAATCGCAAGCTCCAGCAGTTTTTTCCCCCTTT  
TCTGGCATAGTTGGACATCTGCCAATATTGCTCGCCATAATATCCAGGCAAGTGTCCCGTGAATAAAACGGAGTAAAGTG  
GTAATGGGTGAGGAAAAGCTATACATCGAAAAGAGCTCAGTTGGTTATCGTTCAATGAACCGCTGCTTCAAGGAGCGG  
GGACAAATCTAACCCGCTGATTGAAAGGATGCGTTTCTGGGATCTATTCCAATAACCTTATGAGTTCTATAAAGTCC  
GCTTCGCTGAACTGAAGCGACGCATCATTATTAGCGAAGAACAAGGCTCCAACCTCTATTCCCGCATTACTGGGCAAA  
ATTAGTCCCAGGCTGAAAGCCGATCAGGAATTCGACGGCCTTACAACGAGCTATTGCTGGAGATGGCGCGCAACCA  
GATCTTCTGATTAATGAACGCCAGCTCTCCGTCATCAACAAAACCTGGCTGCGTCATTATTTAAGCAGTATCTGCGTC  
AGCATTACGCCGATTTAATCAATCCTGACACTGACTTAGTGCAGTTCCTGAAAGATGATTACACCTATCTGGCGGTG  
GAAATATCCGTGGCGATACCATCCGTACGCGCTGCTGGAGATCCCATCAGATAAAGTGGCGGCTTTGTGAATTTACC  
GCCAGAAGCGCCGCTGACGCAAGCCGATGATTCTTGGATAACATTCTGCGTACTGCCTGATGATATTTCAAAG  
GCTTCTTTGATTATGACGCGCTGAATGCCTATTCAATGAAGATGACCCGCGATGCCGAATACGATTTAGTGCATGAGATG  
GAAGCCAGCTGATGGAGTTGATGTCTCCAGTCTCAAGCAGCGTTAACTGCTGAGCCGGTGCCTTTGTTTATCAGCG  
CGATATCCCAATGCGTGGTTGAAGTGTACGCGAAAAACTGACTATTTCCCGCTACGATCCATCGTCCCGCGGCTC  
GTTATCATAATTTTAAAGACTTTTAAATTTCCCAATGTCCGCAAGCCAATCTGGTGAACAAACCACTGCCGCGTTTA  
CGCCATATTTGGTTTGATAAAGCCAGTTCGCAATGGTTTTGATGCCATTGCGAAGCGGATGTGTTGCTCTATTATCC  
TTATCACACCTTTGAGCATGTGCTGGAAGTCTGCTGCTCAGGCTTCTGTTGACCCGAGCGTACTGGCGATTAATAAACA  
TTTACCAGTGGCGAAAGATTACGCATCATCGACTCGATGATCCACGCCGACATAACGGTAAGAAAGTACCAGTGGT  
GTTGAGTTACAGGCGGTTTTCGACGAAGAAGCAACATTACTGGCGAAGCGCCTGACCGAAGCAGGCGTGCACGTTAT  
CTTCTGCGCGGGGCTGAAAATTCACGCCAACTGTTCTGATTTACGTAAGAAAACGGTGAAGTGGTGCCTTATG  
CACACATCGGGACCGGAACTTTAACGAAAAACCGCGCTTTTATACTGACTATTGTTGCTGACCGCCGATGCGCGC  
ATCACCAACGAAGTACGGCGGTATTTAACTTTATTGAAAACCCATACCGTCCGGTGCATTTGATTATTTAATGGTATC  
GCCGAAAACCTCCCGCCCTATTGTATGAAATGGTGGACCGGAGATGCCAAGCGCAGCAAGGGCTGCCAGTGGTA  
TCACCTGAAGCTAATAACCTTGTGATAAAGGCTGGTTGATCGTCTGTATGCGGCTCCAGCTCCGGCTACCGGTT  
AATCTGCTGGTTCGCGGAATGTGTTGCTGATCCCAATCTGGAAGGCAATTAGCGACAACATTCGTGCCATCAGTATTG  
TGACCGTTACCTGAACATGACCGGTTTATATTTTAAAATGGCGGATAAAAAGGTTACCTTTCTCCGCGGACT  
GGATGACGCGCAATATTGATTATCGTATTGAAGTGGCGACCCGCTGCTCGATCCGCGCTGAAGCAGCGGTACTGGAC  
ATCATCGACATATTGTTAGCGATACGGTCAAAGCAGTATATCGATAAAGAACTCAGTAATCGCTACGTTCCCGCGG  
CAATCGCCGAAAGTACGGCGCAGTTGGCGATTTATGACTACATCAAATCACTCGAACAACCTGAATAACCTATGCCA  
ATACAGATAAATCCCTCGTCCGAGGAGTTGCTGCGGTGATCTTGGTTCAAACAGTTTTACATGGTCATAGCCCC

TGTGGTAGATGGTCCATGCAGATTATTGGCCGCTGAAACAGCGGGTGCATCTGGCGGACGGCCTGGGGCCAGATAATA  
TGTTGAGTGAAGAGGCAATGACGCGCGTTAAACTGTCTGTCGCTGTTTGCCGAACGGCTACAAGGGTTTTCTCCTGCC  
AGCTCTGTATAGTTGGTACCCATACGCTGCGTCAGCGCTGAACGCCACTGACTTTCTGAAACGCGCGAAAAGGTCAT  
TCCCTACCCGATTGAAATATTTCCGGTAATGAAGAAGCCCGTCTGATTTTTATGGGCGTGAACATACCCAACCGGAAA  
AAGGTGCGAAACTGGTTATTGATATTGGCGGCGATCTACGAACTGGTGATTGGTGAAAAATTCGAACCTATTCTCGTT  
GAAAGCCGCCGGATGGGTTGTGTCAGCTTTGCCAGCTTTATTTCTGGCGGGTGCATCAATAAAGAGAATTTTCAGCG  
CGCTCGCATGGCGGACGACAAAACTGGAACTTTAACCTGGCAATCCGTATTCAGGGCTGGAACGTTGCAATGGGCG  
CTTCCGGTACCATAAAAGCCGCCCATGAAGTGTTAATGGAAATGGGCGAGAAAGACGGGATAATTACCCCGAACGTCGTG  
GAAAACTGGTAAAAGAAGTTTTACGTACCCTAATTTGCGATCGCTGAGTTTACCGGGTCTTTCCGAAGAGCGGAAAAAC  
AGTCTTCGTTCCGGGACTGGCGATTTTATGCGGTGTGTTTGTGCTTTAGCCATCCGTGAACGTCGCCTTTCTGACGGGG  
CGTTACGCGAAGGCGTACTGTATGAAATGGAAGGACGTTTCCGTCATCAGGATGTGCGTAGTCGACCCGCCAGCAGCCTC  
GCCAACAGTATCACATCGACAGCGAACAGGCCCGACGGGTGCTGGATACCACTATGCAATGTACGAACAGTGGCGGGA  
ACAGCAACCGAAGCTGGCGCATCCGAACTGGAGGCGCTACTGCGATGGGCCCATGCTGCATGAGGTGGGTTGAATA  
TCAACCACAGCGTTTGCATCGCCACTCCGCTTATTTCTGCAAAACAGTGACTTGGCGGGTTTAAATCAGGAACAGCAG  
CTGATGATGGCGACACTGGTGCCTATCACCGTAAAGCGATTAAGCTCGACGATCTACCCGCTTTACCTGTTTAAAGAA  
GAAACAGTTCCCTGCCACTGATACAGCTATTGCGCCTTGGCGTATTACTCAACAATCAACGTCAGGCAACCCACACCCG  
CAACATTGACGCTGATTACTGATGACAGTCACTGGACACTGCGTTTTCCCGCATGACTGGTTTTAGTCAGAATGCGCTGGTA  
CTGCTTGATCTGGAAAAGGAGCAAGAATACTGGAAAGCGTGGCTGGCTGGCGGTTGAAAATTGAAGAAGAAAGTACACC  
AGAAATCGCCGCTTAATACTTTGCGGGCCGACGAGAATGTGCGCCCGCATTATTCAGGCACTTTGCGGAATGGGTTGCA  
TTTCATTACGCGTATCAATTAACGGCTGCGGCTTACCAATAAGATAAACCTGCATATAATCGATCCCAAAGAGAGCACC  
GCCTCGGGATCTCTCGTTTTCAACGTACTCTGCCACTACCAGCATTTTCTTCATTGCGCCAGGTGGCAAATCGATGC  
CACTATCTGATAATCCAGACTATTTGACACAATATTGCGGATAAACTGCCGTCAATTTAAGCAGATCGGCATTACAT  
TTTTAAGCCGCGCATAGCTGGCGTAGCCGGTCCGAAATCATCAATCGCAATCTGGCAGCCTAATTCCTGAAGATGCTGC  
AAGGTGATTTGCGCCTGCTTAACATTGGTCAGAGCATTACTTTCCGGTACTTCAAAAATAAGTTGCCACGCTTCAATCTG  
ATATTTAGCCAGCAACTGACTGACTTCAACAGGAAAACGAGCCTGACATACCCAGGTTGGAGACAGATTAATAGCAAAAC  
GGTGAGCGGCATCTTCGCTCTGTTTTACGCCATAAATTCGACGCTATGCTCAATGACCCACATGTCGATACTCGACGAT  
AAACCAAATTCGTGCGGACCGGCAAGAAGCTATCGGGGCTGATCAGTTCATCATTCTCACCTTTTCATGCGCAGAAGAAT  
TTCATGGTAAACATCACCCAGCATAACCGTAATCGGCTGGGCCATCAGGAAAAAATGGTTGTGTTCCAGCGCCTGCTGTA  
GTCGATTATCATCGCGACTTTATCTTTCAATTCGCGTTGCAAAATACATTGCCCGCGACGCTGCATATTTCCGGGGCG  
TTGGTCACGATGGAAAGTTCGGCGACCGTATTTAGCTCTCCAGCAGCAGGTAGATATGATTCACTGGCGAGCGCACATA  
GCAGTAACTGACGCCAATCTGCGGTTGCATCGGCATGCCATCCAAAAGAAACGAAATTGCTTGAGATGGCTATCCAGTG  
CGGTAATGCGCTCCTGGTGCATTCTGTATTGATCGCAGCGCAGATCGTTACCCGAAAGCTGATAAACATCTTACCC  
GGTTCCAGCAAGGGTGACAGCCAGTGAGAAAAGTTTTGCTTGATTGAATCCGACGATGATGCCATAGTTCTTAAACAG  
CATTTCCATGCCAGGGATGCGTAAATAACAAAGCGCAGACCAGGGGGCATCACGCAACGCGCGATTACGGGCGGAACAT  
TTGGCAGATGAACCACCGGTCCACATACGCAAGCCGCTGAATGCGTCTGACTACCGCTCTCTGACGGTTGCCAGTACA  
GCCATATAATTGACAATAAAGAGAATACCAGATAACTGGAGGAGTTATGGTCAGCTGCGTGGTATAGCCAGGATAAAT  
GGGAATGTAATTTTATAGCTGTGGATGCTGATCATCAACACGACCGCCAGAGCAGCGAAATCAGCTTATAACCATAGC  
GCATCGTCCCATCATCAGGGGACGAAATAATGACAAGGTATAATTGGTGCTAAAAATTTGCTTTTTTTCATTTAAC  
GGCATGCATAACAGCAAAATAAAGCACCTAATGCCAGTAGCCAGAGCGGCAACTCTTTTTTGGTGACTTTGGCATCAAC  
CTGCTGTTTTAATTCGAATAATAGCTACGTAATAAATGGATTTGCGACTACCCGAATGATGAAGTAGCACAGCGGGA  
CACCGATCAGATTACCCACAGTAAGGCCTGATAAATTGATTAAGTCCCGAGGTTAAAAGGCATGACACCGACAGATTT  
TCTCTGCTCGCCAGTAATCCTACAAATGCAGCAAACTGAAAAAGTATCAGAAACAGCGTTGCAGGAAACCAATCTGCCA  
GAATATACGCTGGGAAATTAACCGGTATCACCATGTGAAACGTTGTTACGCCGGGAGTAAAGACCCTGTAACCGCCCC  
AACAGAGAATGATAATGATAATAAAATAGCCGTTAATGATAGCGTTTCGTA AAAAACCAGCTCTGCATATTTGCGGACA  
AAAATCCCTAAGGCGATCCCTGGCAATGCCGCCAGCTGAAAAACATCATCATGCTGATCATCAGTGCCAGAGGCAGATA  
AAAGAGAAAAACCTCACCGGAAGAAATATGCGCGAAAGTATTAATGTGGGCGAAAAATGGGCAAGATTAAGAAGGCAGGA  
ACAGCGGAAGCCCCACCATTTATCACGTATTTTTATATAAGTTGCATTGATTTTATAGATGCTCAGCAGAATCCCCCA  
CATCCTGAAGGAGGTGATTGACAGGCATCCACCTGACTTGAATGATGATTATTCATCACTATAGAGAGCATTGAT  
TCTAAGTGTCATATGAAAGTACCAATTGATATATCAAACAAAATAACCTGATTAATGAATTATTACGTTTATCATGT  
TAATTCATCATTATTACATCATCATTGTAATAATTAATTAACCTCCATAACATTAATAATGATCCACTGACGCTTT  
TTTACATAACGAAGAATTGACCATTTTGTCTGTTGTCCTAATGTAAGTACCGTCCACAGCGTGGGACATACTTCAAG  
GAACCTTTTGTGAGTCAGGCAACAGTATGCGAAAAACGACCCGATTTAACAGTCGCATGACCCGTATCGTACTGCTCAT  
CAGCTTTATCTTCTTTGTCCTGTTTATCTACTGTCGCTGCTGGCAGCACCATCAGAGCAAAAAAGAAGCTC  
AGCAATCCACACTCTCCGTGCAATCACCGGTACAACGTTAGCGGTTACCTTCTCACTTTACAGAACATAACGGCACTT  
CGCTGTCGGATGCTTTTGTGTTTGGGATTATCAAAGCGGCGAGATATTCTTTCATCTTAAATTTTACGCTTTATCCTGA  
CTGATGTTTATCCTGTTTGGCTGCGAAATAAATAAAAATTAATATATATGTTGTAATGATATATTTTTATAAATTTTCT

CCTGCGTGAATTTTAATAAATTTAATCTATCCCTTTATACGCAATACATTTACTTTCTCTTTTGATGATCTTAAATGTC  
TTATTTTTCGTAATGTGTATAACAAGGAATAGTGATGAAATTTAAAAATGTCTTCTGCTGTGGCAATGTTAGCGTCAT  
TCACTCTGGCAGGATGCCAGTCAAATGCTGACGATCATGCTGCCGATGTTTATCAAACCGATCAACTGAATACCAAACAA  
GAACTAAAACCGTTAATATTTTCCATTCTTCCCGCAAAAGTTGCCGTAGACAACCTCCAAAATAAACGGAACGCACA  
AGCCTTCGGCGCGCTTATTGGCGCAGTCTGGCGGTGTTATCGGCCACAACGTCGGGTCTGGCAGCAATTCGGAACGA  
CGGCAGGTGCAGTTGGCGCGGAGCTGTAGGCGCGGACGCGGTTCTATGGTGAATGATAAAACCTTAGTGGAAGGTGTT  
TCTTTAACCTATAAGGAAGGCACCAAAGTGATACCTTACCCAGGTGGTAAAGAGTGCCAGTTTACGACAGGTTTAGC  
CGTTGTTATTACCACGACGTATAACGAAACGCGTATTACGCCAAATACCAAATGTCCTGAAAAGAGCTAATAATCAGGAG  
GAGTCATGAAGAAAGTTTTTCTTGGCCATCTTAGCCTCCTAAGCTATCCGGCTATCGCCTCATCATTGCAGGATCAA  
CTCTCTGCTGTCGAGAAGCGGAACAGCAAGGTAATAAAGAGCAAGGCAGCATGACGAATGGGTGCGGAGCGCAA  
CAGGGAAATCCAGCAAGAGAAGCAACGTCGCGCAATGCCAGGCCGCGCTAACAAAAGAGCGGCAACGGCAGCGGCAA  
ATAAGAAAGCTCGTCAGGATAAACTGGACGCCGAAGCCTCTGCGGACAAAAACGCGATCAAAGTTATGAAGATGAGCTA  
CGCAGCTTAGAGATTAGAAAACAAAACCTGGCGCTGGCGAAAGAAGCCCGCTAAGCGAGAAAACGAATTTATCGA  
TCAGGAAGTGAAGCACAAGCTGCGCAACCGATGTTGGTGAATCTGAAGCTGACGCCAACAGAAATATGACTGAAGGCG  
GTCCGATCTGATGAAAAGCTGGGCAAAGCAGAAGAGAACAATCGGACAGCTGGTTAATTAATCGATGTTAGTAACT  
TCAATCCTATAATTTCTGAAGATAAAAAACCTCTGTAGTAACAGAGGGTTTTGTTTCATTAGTGCAGGGTCAAATCA  
TTCCCACTCAATGGTAGCTGGCGGCTTGGCGCTGATGTCATACCCACGCGGAAATACCGTTCACTTATTGATAATGC  
GTTTGGAAACGCGACCGAGGAAATCGTACGGCAGATGCGCCAGTGTGCGGTATAAAGTCGATGGTTTTGACAGCACGC  
AGAGAGACAACCCAGTCATACTTACGACCATCGCCATTACGCCAACGGAACGTACCGGCAGGAACACAGTGAACGCTG  
GCTGACTTTGTCGTACAGTCCGCTTTACGAGTCTTCAATGAAGATGGCGTCAGCACGGCGCAGCAGTCCAGTACT  
CTTTCTTCACTTACCCAGAACACGAACGCCAAGGCCTGGTCCGGGAACGGGTGACGGTACAGCATGTCGTACGGCAGG  
CCAGCTCCAGACCAATCTTACGACTTCGTCTTTGAACAGCTCTTTCAGCGGTTCAACCAGGCCCATCTTCATCTCTTT  
CGGCAGGCCGCCACGTTGTGGTGAGATTTGATGACGTGTGCTTTACCGGTTGCAGACGCCGAGATTCGATAACGTGAG  
GGTAGATGGTCCCTGCGCCAGCCACTTACGCTCTCCAGTTTCAGCGCTTCTTCATCGAATACTTCAACGAAAACGCGA  
CCGATGATTTTACGTTTTGCTTCCGGATGTTTTCCGACGCCAGCGCTGACAGGAAGCGATCTTCTGCCGGTACGTGAAC  
AATGTTAAGACCAAAGTATCGCCAAACATATCCAGAACCTGCTCTGCTTCCGTTGAGGCGCAGCAGGCCGTTGTGACGA  
ATACGCAAGTCAGTTTTTACCGATAGCGGGTGCAGCAGCATTGCGGTTACGGAGGAATCCACACCACAGAGAGGCCG  
AGGATGACTTTATCGTCGCTACCTGCTCGCGGATGCGAGCTACAGCATCGTCGATAATTTTCTGCTGGCGTCCACAGGGC  
TTCACACTGGCAGATATCAGCACAACCGCTCCAGCATGCGCATACCCTGGCGGGTATGAGTCACTTCCGGGTGGAAC  
GTACGCCATAGAAGCGTTTTTCTTCTGTTAGCCATAATGGCAAACGGGCGAGCTTTCGGTCTGGCTACGGTATGAAGTCG  
GACGGAATAGCGGTAACCTTATCGCCGTGGCTCATCCAGACATCGAGCAGCGGTTTACCGTCTGCGGTACGCGCATCTT  
GATACCGCAACCCAGTGGCTGTGCTTTACGACTTCAACCTGCGCGTAGCCAAATTCACGTTCTGTTAGAGGCTTCAACGT  
GACCGCCCAACTGCATTGCCATGGTCTGCATGCCATAGCAAACGCCGAATACCGGTACGCTGCTTCAAAGACATACTGC  
GGCGCAGCGGACTGTTTTCTTCACTAGTACTTTCCGGGCCGCGGAAAGAATAATGCCGTTGGATTGAAGTCACGAAT  
TTGTGCTTCTGTACATCCACGCCACAGTTTCGAGTAAACACCCAGCTCACGCACGCGCGCAACCCAGTTGAGTGT  
ACTGAGAACCAGAGTCCAGAATGAGGATGCGATGCTTATGAATGTTTTCCGTCATTGACGCTTATTCCGAGGCAAGTGAA  
ACAGATAATATAAATCGCCGACATGAAGTCGGGCGAAGAGAATCAGGAGCCAGACGGTAGTTCCGGGACTCTTTAGTA  
ATGGTCACGTCGTGAACGTGGCTTTCTGAATGCCCGCACCCTGATACGTACAAAACCTCCGCTTTAGTACGAGTTCGTC  
GATAGTACCACAGCCGGTCAGACCCATACAGGAGCGCAGGCCGCCATCTGCTGGTGAATGATCTCTTTACGGCGACCTT  
TATAGGCTACGCGACCTTCGATACTTCCGGCACCGTTTGTCCGACGCTTATCGCTCTGGAATAACGGTCAGAGGAA  
CCTTTGGACATCGCGCCAGGGAACCCATACCACGGTAAGATTTGTAAGAACGGCCCTGGTAGAGTTTCGATTTTACCCGG  
AGATTTCTCAGTACCCGCCAGCATGGAACCTACCATACCACGCGTTGCGCCAGCGGCGATAGCTTTGGCGATGTCGCCGG  
AGAAGCGAATACCGCCATCAGCGATAACCGGAATACCGGTGCCTTCCAGGGCTTCTACTGCGTCAGCAACAGCGGTAATC  
TGCGGAACACCGACGCCAGTACGATACGAGTTGTACAGATAGAGCCAGGGCCAATGCCGACTTTAACCGCACTGCAACC  
AGCTTCTGCCAGAGCGCGTGCACCTGCAGCTGTTGCCAGTTCGCCCGGATAATTTGCAGATCCGGATATTTAGCACGGG  
TTTACGGATACGTTGCAGTACACCTTCTGAGTGACCGTGGGAGGAGTGCATCAGCAGAACGTCAACGCCTGCGGCAACC  
AGCGCGTCAACACGCTCTTCTGTTACCCGCACCTGCGCAACCGCTGCACCAACACGCAGACGGCCTTGTCTGCTTTTACA  
GGCGTTCCGTTTACGTTCCGCTTTCTGGAAGTCTTTCACGGTGATCATGCCGATCAGGTGGAATTCGTCATCAACCACCA  
GCGCTTTTTCAACGCGTTTTTCTGTCATTTTTGCCAGCACCTTACGGGCTTCACTTACGCACGGTGACCAGACGC  
TCTTTCGGCGTCATGTAACGCTAACCAGGCTGGTTCAGGTCGGTAACAAAACGCAGTACGACCGGTGATAATACCCAC  
CAGTTCGTTTTCTTCCGTAACGACCGGATAGCCCGAAAACCGTTACGCTCGGTGAGTCTTTCACTTCCGCGACGCTCG  
TGGTTGGCAGAACAGTCTGCGGATCAGTACCACACAGATTCGTGTTTTTTCACACGGCGAACTTCTTCTGCTGGCGT  
TCAATGGACATGTTTTTGTGGATAAAGCCGATACCGCTTCTGAGCCAGAGCAATAGCCAGGCGCGCTTCCGTTACGGT  
ATCCATTGCTGCGGAAAGCATAGGGATATTCAGACGAATAGTTTTCTGTCAGCTGGGTGCTGAGGTCAGCAGTATTCCGCA  
GAACGGTAGAGTGAGCAGGAACGAGGAGAAGCTCGTCAAACGTGAGAGCTTCTTTAGCGATACGTAGCATGGGCAATATC  
TCGACCAGAGTGGTTAATAAATATTGCCGCGCATTATACAGAGCGTAACCGATTGCATCTACCCCTTTTTGCAAAAAAT

GCTTGCTATCCCCGAAGGGCGGGTACTATCGACTGAATAACCTGCTGATTTAGAATTTGATCTCGCTCACATGTTACCT  
TCTCAATCCCCTGCAATTTTTACCCTTAGTCGCCTGAATCAAACGGTTCGTCTGCTGCTTGGAGCATGAGATGGGACAGT  
TTGGATCAGCGCGGAAATTTCTAATTTACGCAACAGCTTCCGGTCACTGGTACTTTACTCAAAGACGACACCGCCC  
AGGTACGCTGCGCGATGTTCCGCAACAGCAACCGCCGGGTGACCTTCCGCCACAGCATGGGCAACAAGTTTTAGTTCCG  
GCCAATATTAGCTCTACGAGCCGCGCGCGACTACCAGATAATCGTTGAGAGTATGCAGCCGGCCGGTGAAGGGCTGCT  
GCAACAGAAGTACGAACAGCTCAAAGCGAAGTTGCAGGCTGAAGGTTTGTTCGATCAGCAATCAAAAAACCACTTCCCT  
CCCCTGCGCATTGCGTTGGTGTGATCACCTCAAAAAACGGTGTGCGCTACATGATATTTTGCATGTGTTAAAACGTGCG  
GATCCTTCTCTGCCGGTGTGATCATCTACCTGCCGCCGTTACAGGGCGATGACGCGCCGGGGCAAATGTTCCGCGCATTGA  
ACTGGCGAATCAGCGCAATGAGTGCAGCTATTGATCGTGGGCGCGGGCGGGTTCGCTGGAAGATTTATGGAGTTTTA  
ACGACGAACCGGTAGCGCGGGCGATTTTTACCAGCCGATTCCGGTGTGTCAGCGCCGTCCGGCATGAGACGGATGTGACC  
ATTGCCGATTTTGTGCGCATCTGCGTGCGCCAACCGCTCTGCCCGCTGAAGTAGTGAGCCGTAATCAGCAAGAGTT  
ACTGCGCCAGGTGCAATCGACCCGTCACGGCTGGAGATGGCGATGGATTATATCTCGCCAACCGCACACGTGCTTTA  
CGAAATTCATCACCGATTACAGCAACAGCATCCGCAGCTCCGGTGGCAGCCAGCAAACCATGCTTGAGCGCTGCAA  
AAGCGAATGAGCTTTGCGCTGAAAACTAACTTAAGCGTACCGGGCAACAGCAGCAGCGGTTAACACAGCGGCTGAATCA  
GCAAAATCCACAGCCGAAGATTATCGCGCGCAAACCGCATTAGCAACTGGAATATCGTTTAGCAGAAACCCCTGCGCG  
CACAGCTTAGCGCCACCGGTGAACGTTTTCGGTAATGCAGTAACGCACCTCGAAGCCGTAAGCCACTGTCAACGCTGGCG  
CGTGGATACAGCGTTACTACTGCTACTGACGGCAATGTACTGAAAAAGTGAAGCAAGTTAAAGCGGGTGAATGCTAAC  
CACACGTCTGGAAGACGGCTGGATAGAAAGTGAAGTAAAAAACATCCAGCCAGTAAAAAAATCGCGTAAAAAGGTGCATT  
AAGCCAGCAGCAATCAACGCGTTTTTTCGATATCAAGCCATGCCGTGCTGACAGAAGTAATCTACTGCACCACAGGCT  
TTAACACCTGCAACGGTTGATGGCAGTCTGGACAAAGAGTTTTCAATTAATCCCCGAGGATCGGCAACGCGC  
ATGGCCGTTATCTGATCAAGCACATGCTGACATTGTGGACAATGCAGTTCCATATGAATTCCTCCGGTAGCCATTCCCT  
CTACATTCATAGAGGAATGGCAGATAAAATACTTACGGATAATTATTTATTTTTCTTGATGTGCTTCATCAGACGTTA  
CGTTTACGCATCTGGGTTGGCGTACGGGTATTACGTTATTTCGCATACGGGTTTTCCCTTCTTTGAACTGAATACGAAT  
CGGGCATCCCATTACGTCCAGCGATTTGCGGAAGTAGTTCATCAAGTAGCGCTGTAGGAATCAGGCAGGCTTTTACCT  
GATTACCGTGAATCACCACAATCGGCGGGTTATAACCACCGCGTGGGCATATTTAGCTTACACGACGACCGCGTACC  
AGCGCGGGTGGTGTGATCTTCAACAGCCATCGTCATGATGCGCGTCAGCATAGAGGTCCCACACGACGGGTGGAGCTGTC  
ATACGTTTACGTAATCAAACAAGTTACCAACACCACTGCCGTGCAAGGCAGAGATAAAGTGCACACGAGCAAAAT  
CGATAAAGCCAGACGGAAGTCCAGCGTTTTCTTTCACCTGCTCTTTCACCTCCTGACTCAGGCCATCCCCTTATTACC  
ACAATGACAAGTGAGCGCCACTATTGAGAATAAAGCCAGCAGCGAGAGATCCTGATCGGAAATACCTTCGCGCGCATC  
AATCACTAACATCACCACGTTGGCGTCTTCAATGGCCTGCAACGTTTTGATTACGGAGAATTTCTCTACAGCATCGGTGA  
TTTTGCCGCGTTTACGTACGCCAGCGGTGCAATGAGCACATACTCACGTCCATCGCGTTCATTGGGATGTAGATGCTG  
TCACGCGTCTGCCAGGCATGTGTAACAACAACGCGCTCTTACCAAGAATACGGTTAGTGAGTGTAGACTTACCTAC  
GTTCCGACGACCCACAATCGCCAGTTTGTGCGCAGACTTTGCGGGTCAAGTCGTCTTCTCTTCTTCCGCGTTCT  
CTTCCGTTCAAATTTGCCCCAGTATTACGCGTCTTCTGCGACTTCTTCTTGGCGTGGAGATCTTCCATCCACGGCAGC  
AGCATATGCTCCAGCAGACTTAATACGCCACGACCGTGAGACGCGGGCATCGGGTAGATTTACCTAAACCAAGCGAGTA  
GAAATCAACCACTGCCTGATCGGGATCCAGACCGTCAGTTTTGTTGCCACCAGGAAGTCCGGTTTTTACGGGAGCGCA  
GATGTTTGGCAATCGTTTATCTGCCGGCATCAGGCCCGCGCGCGCATCCACCATAAACAGTACGACGTCCGCTTCTCA  
ATCGCCAGCAGCGACTGTTCCGCCATGCGGGTTTTTACACCGTCTTGTGCCATCAATCCCGCGGTATCAATACAGAT  
AAACTCAGGCCTTCAATTTCCGCACGACCGTACTTACGGTACAGAGTACAGCCGGGAAATCCGCAACAGCGCATCTC  
GGGTGCGAGTTAGACGTTAAATAACGTGGATTTTCTACGTTAGGGCGCCGACAAGCGGACCAAGTACCATGTTT  
AAAGCCTCATTTTTATAAATCATCAGACAACGCACGCTATATTCGCGTCTGTTGTTAAAAACAGGAAAACGGCCCTGTCC  
AGGAGCCGTTTTCAAAGTGAACGACAGAGACGATTAACGTGTAATAGAGTACACGGTTCGCTTTTTGCCTGGATCAGCA  
GTTTGCCTGACGCGCAACCGGTTCACTGTGAAACCGGAATATCAACTTTTTGCTGGGCAACGAAACGACCATCTTCG  
ACGTTAATCCAGTGCAGATAACCTTACTGTACCGACCAACAGGTTGCCATTATACAGCACCGGAGAAGTACAGAGCG  
ATGCAGCAGATCGTTTTGTGTCACAGCGTAACGCCCATCAATGGTCAACGCCATCACCGGTCATTTTGTGACGACCA  
GATAGATGCGATTGCCGTCGACGATGAAATCATTACCGAACCCAGTTGCGTTTTCCACATAATCTGACCACTGCGCAGA  
TCAAGCGCGTCAGGTTACCATTATAGGCCAGCGGAAAAACAACGCCGTTAACAAACGACGGGAGTCTGTCAACATCGCT  
CAGACGGTCAATTTCCGTAGAACCGGTGCGCTGGGAAATACGCTGCTGCCAAATCATCTGGCCCTGTTCCATCAGCACTG  
CGCTGACGCGACCATATCGCCCCACGACGGCCGACCAAAAGCGTTGTCGGCGCAGACTCGCCACGAAAGAGAGC  
GAAGGCATATCAGGTTAACTGTCCATTTGACAGCGCGTCAGCTTCGTTACGCGCTTGTAACTGACCGTTACTGGTGTG  
GATTAACACCAGACCGTGTGACCAACGGGCGGAAAGTGTTCACCCGCGACTTTAGTTTGCATGCCACAGTACCAT  
CGCTGGTATTCAGCGGTAAACCTGCGCTTTTTCGTGCCAATGTAGACATGCCACCAGACAGGTCACACCGCCAGAA  
AGTAATGCAGGCTCTTTAGAGAACCAGCATCTTCTCGGCCAGGCTGACAGACCAGATTTCTTTGCCATCATCCGATT  
CAGCGCTTTTACTAAACAGCGCGGTCCGCTGCATAGACAACGTTGTCCGCCAGTGCCGGATGAAGATTGGAATAGAAGT  
TGCCAATGCCGCTACCAACGGAAGTGCTCCACGCGGTGGTCCGGCTAAACTGGTTTTCAACGGTTGGCAATGGGACATC  
TTTACCACATCTTCTCGCTGTTAAACAGCGAACAGCCGTTAAAGGGTAAACGGAAGCAGTCTGGCAGCAGTAATTT

ACGCAATTGCATCGGGTCCCTCTCAGATGGACAAATTATTAATTTTCATCTGCATCATTTGCTCAGTGCCGGAGTAACA  
TCGCTTTTTCACGCCTGCTTCCCATGCACTACGCGCACCTTGCTTATCACCTTTGCTCAGCAATGCTTCACCACGCAGGTC  
GGCAACAATGGCAGCCCACCCTTACCTTTGATGGTATCAAGGGTTTTAGCGCGGCATCAGCCTGCTTGAGCTGTACCT  
GAACGCGAGCAAGACGCAGATTTATCACGGCTTTGAGATTTTCATCGCTCGTGTCTGCCAGCCCCTGTTGTAACCTGGGCG  
GCAGCTTTCTCTAGTTTCATTTTTGTCAACAAATTGCTGCGCAAGTTCCAAAGAAGCCAGCGCACCATAAGTATTTTTATT  
TTCAGCAGCAAATTTTTCCGCCGCCGGGATGCTATCCGGTTTTGCCTTCGCTCACTGCGGTAACCCGATTTTGATAGGCAA  
GAGAAGCGGAGCGTGCAGAAATCAACCTGATGGCTGTTCCAGTAGCGCCAGCCAATCAGTGCCCAACGCCAAAATCACC  
CCAACAGCCAGTGCTTTGCCATTTTTCAGCAAAAAGCGTTAACCCTTCTACCTGGTCGTTTTGTTTCTCGTAAATTTT  
CACGCTGTCTTCTCCTTCCCTTAACCCAGTAACGTGCGCAAATGCGCGGCTACGCTATCCTGCGCAACTGCCGTTTGTCT  
ACCAGAGCGCAAATCCTTCACTACTGTGTGCCGTTAGCCACTTCAGACTCACCCAGCACCACAGCAACGCGGGCACCC  
ATTTATCAGCACGGGCAAATGTTTCTTAAAGTTGCCGCCGCCGTTGGTTGGTCATCAATTTACGCCCCGTAATTCATCA  
CGCAGACGCTCAGCTAATGCCATAGCCGAGATTGTGTATCAGCACCTGAAGCCACCAGGTATATATCGACAACAGGATC  
GGCTTTAAATCCGGATTAACGGCCTGTACTAACAATAAAGACGTTTCGAGGCCATAGCAAAACCGACAGCCGGTGTG  
CACGACCGCCAGTTGTTCCACAAGACCGTCATAACGACCGCCTGCACACACGGTGCCCTGGGAGCCGAGACTGTTAGTC  
ACCACTCGAAAACGGTACGGTTGTAGTAATCCAGACACGCACAGCAGCTGGTTTACGGTGAAGCGATCCCCGCGCT  
CTCCAGCAGTTTGCACAGACCGCAAATGCTCACGAGATTCCTCGTCCAGATAGTCACCTAATGCCGGAGCGTCGTTGA  
GAAGCGCCTGCACTTCCGGATTTTTGAATCCAGCACGCGCAGCGGGTTAGTGTACATGCGCGTTTTGCAGTCTTCGTC  
AGTTTTTCTTATGCTGCTCAAGGAATGCCACCAGCGCATCGCGTAATTGGCGCGTGCTTCCAGCAACCGATAGAGTT  
CAGCTCAAGAGTTACGTGCTCGGAAATACCCAGCGCGCCACCAGCGGGCAGTGAGCATAATCAGTTCAGCGTCGATAT  
CCGGACCTTGCAGACCGAAAATTCGACGCCAACTGATGGAAGTACGATAACGCCCTTTCTGCGGACGCTCGTGACGG  
AACATCGGCCCGATATACCACAGACGCTGTTCTGATTGTACAGAAGACCATGCTCGATGCCGGCGCGTACACAGCCCCG  
CGTCCCTTTCAGGGCGCAGAGTCAGGCTGTGCCATTGCGATCCTCAAAGGTGTACATCTTTTTCAACCACGTGCGTGA  
CTTACCAATCGCACGTTTGAATAGCGGGTCTGCTCTACAATCGGCAAGCGGATTTCACTGTAACCGTAGCTGCCGAGC  
ACGTTTTTTCAGTGTGCTTCAATGCGCTGCCAGATGCCGTTTTGCCAGGCAGTAATCGTTCATGCCGCGAATGGCTTG  
AATGTTTTTTCGACGTTTATTCTCTTCTGAATATAAAAATGAACCCTCAACGCTTCCCTCAATGTTTTCGGGAGCCATG  
CGGGTTCAATCATAACGGAAGCGAGGCGCTTCCCATCACGTTATTTTTTCAACCTGCTGAACGTCAATTTCGACGCG  
CTTCGTCAGCTGACTGGCTTTCGCACGAATGCGTGCTTCCAGCTGGTCGATCATATCGTGTGTGTCAGACGGTCTTTG  
CGCAGCCATCTTCATAGAGCCGCTTTTCTTGTGCCGCCGGTACGCGGAGTGTAGAAACCAGCGCCTCACCTGGGCC  
ATTCACCACGCAGCCGATAATCGAAACGTCCATCGGAGTGATGATATCTTCCAGCGGTTGCTCCAGCGGTTAACCGTAC  
CGATAACATCAAATTCCTGACGCGAACAGGTCCGGCAGGCGATGAAGTTGATCCCTCGCAACGGATACGCAGCGATTT  
AAAATATCGAAACCGACTTTGATCTTTCGACCGGATCGGCCGCCAGCGATACGCGCAGCGTGTGCCGATGCCTTCAGA  
CAGCAGCAGACCTAAACCAATGGCGGATTTTACTGCCCCGCTGCGCGCACACCACCGGCTTCGGTGATCCCCAGATGCAACG  
GCTGATCGATCTGTTTTGCCAGCAAACGATAAGACTCAACAGCGAGGAAGACGTGAGACGCTTTCAGCGTACTTTGAAC  
TGATCGAAGTTCAGGCGATCGAGATGATCAACATGACGCATGGCAGATTCAGCAACGCCTGCGGCGTGGTTGCCATA  
CTTTTCTTGCAGATCTTTTTCCAGCGATCCGGCGTTAACGCCAATACGGATCGGAATGTTTTATCGCGCGCACAGTCAA  
CCACCATGCGAATACGCTCTTATTACCGATATTGCCAGGGTTAATACGCAGACAATCGACGCCGATTCGCTACTTTT  
AGCGCAATGCGATAGTCAAGTGGATGTCAGCCACCAGCGGCACGTTAACCTGCTGTTTGTAGTGTGAAACGCTTCTG  
CGCGTCCATCGTCCGTACGGATACACGGACGATATCAGCGCAACCGGTTCCAGCGCCTTGATTTGATTGACCGTTGCTT  
CGACGTCTGTGTCGATGCGTATTGGTATGACTGTACGGCAGTGGGAGCACCATCGCAATCGGCACATTTCCCAACGTA  
ATACGTGTTGATTTTCTACGTTGAATTTGAGCCTGGTTATGCATGAAAAATCTCCCGCTTACCCGCTGTTACTGCGCC  
GGTGATTGTTCCGCAATGAGGGTCAGACGCGCAACCTGGTTAGTTCTGATAAAACGACTCAGATCGACAGGTTTTCCCTG  
ATACTGGATCTGTAAGTGGCTGGCGACCAATTTTTCAGTTTGTACGGTGCCTGGCCGGTTAAGTTCAAATTTACCGTCTT  
TACGCTGCATACCGCTAAACAATTTTTTACCAGTAGCATCAGTGACCTCCAGCCAGCAATCGGCAGTAAAGTTTATCACC  
AGCGCATTCCGATCAGCCACCAGCGTGGTACGCCAGCCTGATCGGTTGGCAACGGCGCAGCACCATCTGGCGTTGTTGC  
TGCCGTTGGTCCGGGGTCCGCGCGGTATCAACATTTGCTGCGAAGGCGAAACAACCGCATTCTGTTGCCGATCAACAG  
CTGGTGTGCGCAGTTACGGCAGGTGTTGCGTGTGGTTGCGGTAGTATCCACAGACGCTGGCGGCGTGGACGTTGTA  
GCCGGGTCTGTAGTTGTCGACGATTTAATGGAACACTCTGCCCTGCTCGCTATTACTGCTCAGTTCCGCCGAAGATTG  
ATCGCCATAGTGGTATCTTCTGCTGAGCTTTGCGGTCTTCCACCACCAGGCACCGCTCAGGCCGATAACCACAA  
ACAACACCAGCAAGTGAAGTTCATCAGCCAGCCGTCGCTTTTTTCCAGCCCTGGCAGCAGTTCTTCTTCTGGAATATGTACCAGACGCGC  
GCAACTTTTTCAGCCCCAAGTGGAGCCTGCTTTTCCAGCCCTGGCAGCAGTTCTTCTTCTGGAATATGTACCAGACGCGC  
ATAAGAGCGGATATATCCGCGCAGGAATGTTGAAGCAAGATCGCGGGTGCCTTATCTTCTCAATGTGCGGTACCGTGG  
AAACCTTTCAGGCAAAGTCTGCTCGGCAACGGCCTGCTGACTAAGTCTAGTTGTTGCGGAGCATTACGCAGGCGAGCGCCG  
GTAGTAAGTGTCTCATTTTGGTCTGCGTGGCTTACGATTTTTCGCTGCAGGTACGTTTAAATGAGAATTGAGATGCC  
GGTGAACCATCATGCTCACCCACACCGGAAACATCCGTTAAGTTAACCGTTATCATAAGTAAAGACCGTCTGTGTGC  
TCGTGACAAAGCCACATTCATAAGGCTAACTTACTGTTGCATCGTTACATACTGCCTTAAAGTCAAGCAAAAACGCACC  
GTTAATATTGACCAGACAATTGCAACTTAATACTTCAATAAAACATTACGCCACGGTACATAAAGTAACCGTGGCGT

AATGGCTATCAGACCGCTTAAATGTCGATGGCTTACCCTGCATCCGTTTACGCAGGGTACGTTTCGTACGGTCGATAAC  
ATCGCCCGCCAACTGACCACAGGCAGCATCGATATCATACCACGAGTTTTACGCACAATAGTGGTGAACCGTAGCTCA  
TCAGCACTTTTGAAGAACGGTCGATACGGCTGTTTCGAGCTGCGTCCATACGGCGCACCCGGGAACGGGTTCCACGGGATC  
AGTTTGATCTTACACGGCGTATCTTTACGAGTTCGCCAGTTGGTGC GCGTTCAGTGCCGTCGTTAACGTGGTCAAG  
CATCACGTATTCAATAGTACTCGGCCCTGATTGGCGTTGGATTTCTCCAGATAACGGCGCACCCGAGCAAGGAACGTTT  
CGATATTGACTTTTTGTTGATCGGCACAATTTCTGCACGAATTTCTGTCGTTCCGGCGGTGCAGGGAAATTTGCCAGTGCA  
ACGTCGATCATATCGCCAGTTTATCCAGCGCCGGAACACACCGGAAGTGGAAAGCGTGACGCGACGTTTAGACAGGCC  
AAAACCGAAATCATCAAGCATGATTTCCATCGCCGGAACGACGTTGTTACAGTTGAGCAGCGGCTCGCCCATGCCATCA  
TCACTACGTTAGTGATCGGACGCTGACCGGTGACTTTTGTGCGCCGACGATTTTCCGGCACGCCACACCTGGCCGATA  
ATTTCCGACACCCGACGTTGCGGTTAAAGCCCTGCTGGGCGGTGGAACAGAATTTACTCCAGCGCACACCCACCTG  
CGAAGAGACGCAGAGCGTGGCAGGTCGTTCCGGGATATACACCGTTTCGACGCGTGCATGCCAACGGCGATCGCC  
ATTAATGGTGCCGTGATGAACGCTGTTCTTCAACACTTCCGGTGC GCGGATTTCCGCCACCTCTTTCAGTTTGGC  
CGAACACTTTGTTGATGTCGGTATCTCATAAAGTTGTGCGAGCAATAGTGATACATCCACTTCATCACCTGATCGGC  
GCGGAAGGGTTTTTACCTAAATCTTTAAAAAACTCCGCATCTGCTGACGGTTGAGATCCAGCAGGTTGATTTTTCCAT  
CTTTCGTGGTGACGTTTTAGGTTGACTAATTGTTAGACATATGCTATTCCGGCTCGTTATTACACGTTATGGCCCC  
TGGAGGGTTGAAAAAGAAACGCCCGGTGAGCGGTGCTCGTCCGGGGCGCTGATTGTACAAATTTGGCGCACGGA  
TGCCACGTTTGCACGCGCATTTACGAAATTATTAACGGGTGCGCGGGCACACTTCGCCTTCGCCAAAGAAATAAGCGAT  
TTCGCGAGCGGAGATTGACGGAATCAGAACCCTGGTACCGTTTTCGGTACGGCTGTCAGCGTAATCAGCGCGCAGAG  
TACCAGCCAGTGCGTTTGGCGGATTGGTGC GCGCCAGCAGATCGCGGTGACGCTGAACGGCGTTTTACCTTCCAGCACG  
GAAACCAGCATCGGGCCAGAGGTCATGAATCAACCAGACCATCAAAGAACGGTTTTTCATCGTGTTACAGATAAAAGCC  
ACGTGCCTGTTCAACGGTCAGGTGCAGCATTTTGGTCCAACAATTTTGAACCTGACGTTCAAAGCGCGCAAAGATAT  
TACCAATGACGTTTTTGTACCGGTTCCGTTTGTGATGATGAAAAAGTACGTTCAATAGCCATTTTTACCTCTGTAAT  
TGTTCTGTTGTTGCTGTACAGCGTACGAGATGGCGCGGATTATAATGAGCAACAGGGCCGTTGACTATTGATGAAGT  
AACATTTTTTAAATAAAATGAGTTTTAGCAACAATCAGGGACAAAACAGACTATTGCATGACAAATTTACTGTCGCG  
ATTTGCCCCACGTATCCATCACCAGCAATTGATAACACCTTTATCCGTCAAATGCAGGGTCAGTTGCGCCCGCGTT  
AGTTAACGGTTCGCCATTCAGAAACCACAGCGTTCACCTGCCCTCCACTTGATTGCAACGGCAAAGTCGTTCCGCTG  
CGCCGGTAAACGTTAATAATCGCGCATCGCGAACCGCTGTCAGTGCAGCGGGAGCTGGGCATCGTGACCGTATGGC  
GGCAACTTGTGAGGCCGTTGTAAGCGCACAGCGGACGTTCTGATGCGGGCAGCCAGGTTCCAGCGGTAGCGGCCA  
GACATTTATCATTTCTTGTGCGCTTGGCGGCAATCAGCGGCAACACGTTTGCATTTTCATCCAGCCAGATGGGGAAAC  
GAATGCCATTAATGCCTTCTGCTCCGGCAGTAATAGAGTTGGCGGCTGACTCCGTCCAGCAGCCAGGTTGCCAGGGC  
CGGCAGAGTTACCGTACCTTCCGGCAAAGACTGTCCGCCGGCCAGCAGATAACGCCACGAGTGACTGAGTTCCGGCG  
CGGGTCTTCCGGCAGATTCGCACTGCGCGACAGTAAGATATTATTGACCTGATTCAACAATGGTACGGCACTGGCAAAGC  
CAAATGACCAACAACGGGCGTGCCGTCCGGTCTGCCAGTCCAGATCCCAATGACATAGCGAGCGTTAACCCCAATCGCC  
CAGGCGTCAGGATAGCCATAGCTGGTGCCGTTTTCCATGCCAGTGGGGCAGCGCGGCAAGGCACTATCCGGCAAGGG  
TTGCGTTCATCAGCCATAATCCGGCGAATGATCCACGCCGCCCGGACGACATTAAAGGCCGTTCAAGCAGCGGATCGT  
CAGGCTGTAAGCGCAATTTGCTGCTTCCGTGCGGAGCAAACGCGGTATACGCTGCCGCATATCTTCCAGTTTTGCA  
CCAGCGCCCGGAGAATGAGTGAAGATTCCGGCGACGACCGTTGGGCAAATATAACGGCAATCCAACATTGCGTAACCT  
TGCCGCAAACCGTTTTCGTCCATAGGTTCCAGCACCTGCACAGCAGGTAAGTTGAGCGAGCGCACAGCGCCTCGTCA  
TGCTGATCGGGCCATGAAAACCGCTATCAAAGTTACTGGTCGATAATCACCAGTGC GCGGGGACGCTTTCGAGCAGT  
GATGCCGGGTGATCAAGCTTCATCCAGCGCCAGACCATAAAACAAACGGTTGAGCAGTATCCTGGCAGTCGGATCGA  
ATTGACCATATCAACATGACCAAAGCGTGAATCATCGTTGAGATCAACCGATCCCAACCGCCGCAACACGATATCGG  
TATGATCAACCACGATCATCGCAGTAGCTGCGCGGTGGCAACCGCCCTTTCCAGTTTTGCGCCAGTTCTTCCAGACGT  
CGTTGAAGACCGGCATCCAACGTAGTAGTATTGTTGCTGTTTTGCTTTTACCAGCATCATGCGCGAAAACAGCGGTGC  
CAGTTGCGGCATTTGTCGGGGGGCCAGCCAGATGGGTTCTTCCCTGACTCTTTTACCTGCTCACGGACACACACCTT  
GCACGGCCATCCGTTGAGCACTTTATTACGCGCGGCTTGGCACGCTCCGGCCAACGATCCGGGCGAAGACGGCTGGGC  
GCTTGGCGAAAACCGCCAGCATTGCCGCTCGGAATAGCTTAAATTCGAGGCGATTTTCCGAGATAAGCCAACTTGC  
CGCACCGATCCCTGCAACGTACCGCCAAACGGAGCGCGTTAAGATAACAAGGTGAGAATTTACGCTTAGACAGATGCC  
ATTCAGTTGCAACGCGCGCAGAGCTGGCGAATTTTCCGCCAAATGTTTTGGGGTGAAGGATCAAGCAGACGAGCAACC  
TGATAGTGAGCGTGTGCCACCGAAATAACCCGTCCGAAGTGAATCTTCCATGCTGCGCGGCCACCGAGAATGG  
ATTCACCCCGGATGCTTCCAGAACCAGCGATCTTCATAATTGATCAGCGCTTCAAGGTAACGTGGAGAAAACATCTTCA  
TTGTTACCGGATAACGCCAGATGCCGTGACATCGCGAAGCGCCAGAGCGGCTACCATCCTGCGCCACGACCACTCGT  
GCGGGATTGACTTCATGACGCGGTAGAGGCCAGAGTTTATCTGCTCCACGCTGCAAGAAAAAGGAGAAAAGGGCGCGGC  
TGCCAACGTTATCCAGCAGCGCGTTTTGGTTAAACAAGCGAGGCATTTACGGTCTGACAATCAGCAGATCTTACGCCGCG  
CGTTCGCCCGCATTGGGGAACATAATTTGATTCCACCATCGGTTGCGGTACCTGATACGTTCCCGGGCTACCGCCCGC  
GCCAGATACACCAGCGTTACCGGTTGGTATTATCAACGGCAACCGCCGCCAAAGCGATCGTACGGAACCTCAATGTG  
CTAATGCTCGCTGCTGCATCTGTTTTCAGTAAGTTCTGACTTCGCCACCCTTTGCTCCAGGCTGGCGCTACCGTTCC

CCAGATTCTGGTTTTCCAGTTCAGACCCGAGGCAGCAGATCCACGACTAACGCATCCGGCAGGCTGTTACTGGCTTTT  
ACCTGCAACCACACCAGCACCAGATCGCCGCTACGTAACGAGTCCAGCGATTTGCTCTTACCATCAGTACCAAGAATATG  
ACGCTCGATTTGCAGCACATTGTTCCGCCGTTAAAGGTGCGGATTGCGGATAACCCTGGCATCCATACGCAACCATAACG  
GCTGATCGCCACTGTTGCTCACCTGCAAGGTGACAAGTTGATCGCTATTAGATTGCTGTTTTGCGCTTTCTCGCCTGTC  
AGCTGCTCAGCTGAGAAAGAGGTTTGGCCTGCCATTTACCGGTAAATCCTGAATCGTACGGGCAGCCAGGAACAACGC  
GTTACTTTCTGCGTCGATAGCCAGCGTTACCAAAACGCTGCTGCGAAAGTGTGTTACGCAAAGTGTACTGCTCATCGG  
GTAGCAGTTTTATTTCTCCAGCAAGGAGAGCATTAAACGCGTTGTCGCGCAGTGAACCTACCCTAATCACCAGCCATATC  
CGCTCATCACTATTACGCGCGTTTTCCAGCGCCAGCGCAATCGCTTCTTACCACGCGTCGCATCACCATGGTTTTTCCAG  
CGCAACGCCAAGTTGAGCAGCGGTAACCCAGAAAGCGGCATCTGCACGATGCTCCAGATTTACGCGAGCGCACCAGCG  
GAGCCTTTTGTGACGGGCCAACACCAGCGCAGCGTAAGACTGTACGGCAATTTACTGGCTTTGAGATTATCCGCGTAC  
GGGATCGACATCATGCCCGATCTTGTAAATAGCGCAGCAGACGCTATTACCCCGTTAATGGCGTCTGTCGGCAGCGT  
GTAACCCTGTTGCGCTGCGCGGACCAGGAAATCCATCAGTAAGCCGTCAGCCAGTACTCTTGTCCAGCTTTTTATCCC  
ACAGCGCAAAGCCGCGTTATCAGTTGCAATTTGCAGCAAACGGGAAATGCCGATATCGACCGATGCACGGCGTTTTCTCA  
TCACTGTGCGCTTTGATGCCAACGCTGCAGTTGGCTGCGTTGGTATAAAGTGACGGAAACAGGCGCTGGCGGTTTG  
CTCAAGACAGCGCTACGGATACGCTTTAACTCTTTGATATAACGTGCGATGTTACGCGGTGTTTTGCCGCTCAACA  
ATTGCCCTTCCAGCGTAACAGCGAGAGTTTTGCAATCCATCCGCGGAATCGCCATGTCTCACCAGGCTTAACGCC  
GTACCGTAATTAACCGTTTTGTGCCGGAACGCGGACGCGGATTTTCCACTGCTTATGCTGATCGGCAACGGTTTT  
ACCCGTAACGCTAACCCGCTAATGGTGGCTGAATTTCTCCATCGCCATAACCCGCAATGCTCGCACCAGGATAAACA  
GCGTAGTACGCACACCTGGCGTAATTAACGGCTGCGGGTGAATCGCTGACCAGTTCAAGCAAACACTGGCGGTGAGG  
GCAACGTTCACTTTTTGCGGTTTATCGGTAAGATTAGTGATATCCAGCGTCAGACGCGAGGTATCGCCACTCGCCATAAA  
GCGCGCATGTTCACTTACGCAATCACCAGGTCGCGCAACTATCACTTTACTTTGTTGCTACCGAAGTCACTGCGCTCC  
AGGCTTGGCCATGACGCGCAATCACCCTTAAATCGCAATCGGCAGTGAACCGAGCCTTGGCCTGTTGTTGAGC  
GTTACCGGCAGCGCTGCTGCACGACAATATTGACGTGATTGACCGCGGTTTACCACCAGTTTCACTCATCACCATC  
GCCACGAAACGAGAGCTGCCAGACGCCCTGACCTTCAATAACCTGACCGTAAATATCGTAAATGTCTGCGCCATAGC  
GTTTCTGACCAAAGAACGCTGCCACGGATCTGGCGTACGTAGTCAGTAATATTACGCACACCACTATCAACGGCAGAC  
ACCAGCACATTCACTGTTTAGGCTTCTGCCATTTTTAGTGCTGGCTTAAATTTTACGGTTAATGGTTGATTGGGACG  
CATTTTTGCTGGTGTTCAGCGCCAGATCGAGGCGACGGTTTTATCGCCAAGCGGCAGATGCAACACACCAACCCGCGC  
GTTTTGGCGTGGCGGAGCGAGATTTATCGCCAGGACGTACCACCAGCGTACTTAAATACAGATCATGACGATTCCAGGTT  
TTATCGACCGAATCGTCAGATCCAGCCCTTGGCCGGAACATCAATCTTGGCCACCACAGCGGCCCTTCACTGGACTC  
GACCATCGATAACCTTTACCCGCGTGGCGCGGCGATGCAACTTAATGGTGTGCCAGGGCGATAACTGGCTTTAT  
CCAGTTTACGCGTGACACGGTGGGTCGCACTGCGCCGCTACCGTCTGCTGTTGCTGCCAGCTATAGCCAGCCAGAAA  
CGAACACTACTGACCGCTTCACTGGCGCTTTGACTTCCAGACGATAAGCGCCCCACTTACCAGGAAACTGACCTTGGC  
GGTTTCTCGCTTTTCCAGATCCAGAGTTTGTTCATTTTTCGATCAGATCTTTTTGATCAAATGTGACTGCCAGCCTTCA  
CTTCTGACCAGTTCCAGTAGTAATCGCGGCGTTGCGGAATCAGGCGCACCTGCAAGCCCGACAGCGCTTTTTTACGCT  
TGCGCATCGCTATAAACGATGTCAAAGCGGCGTTACTGCCTTCAACAATGGGCTGTTTACCCTGCTGTGAGTACG  
ATAATCGTAAACCGATTTGAGGCGAACTGCGGACGGATCCCCGCAATGCATCGGCAGCCAGATAGCCTGCTCAGCGC  
GGCGGTACCAGGCGACCGCCGATTCCAGCAAATACCCTGAAAATAACCTGTAATGGGAATGCGTTTCTTCCAC  
TGGCTTTCTGTAGAACTTCCGCGCGCTTTATCATCCAGCGTCAACTGAATTCATCCAGCGTGGCGGAAAGATTTT  
GGCAGCTATATCGCGAATTCAAAACAGGTAAGGTGACACAGCTTACGCAGTGGGCGCAGGAAAGATTTGCCCTGCA  
AAGTATTACCATAGCAGGTGACCATACAGGTAGTACCCACCCAGGAGAAATTTCACTTCACTTTCCGCGTTAGCGGG  
GTTTTCTACCAGTCAAGTTCAGCGCCATGCGCTTGGCATAAAATCTTCCAGCTGGAAATCCACATCCGATACTGATT  
ATCGCCCGTGTAGCGCAATATGCCACATACCGGTTGCCGATTGCTATCGAGTGGCCAGGTAAGTGGTAGAGGCCAT  
TCTCCGGCTGACTAACGACGCTCCTGAGTACCTGCCATCGGGTTAATCACGTCTAATTTGATGGGTTGATTGGGCAAC  
GCTTTACCCTGTCATCAGCAGCAAACATTGAGGATTACCGTTTACCTGGCGATAAAGATCGCGTGGGCCAAACAT  
GAAAACTGTTTGTATAGCCTGGCGGCCAGCAATGTTAAATCTGCTAAGTCCAGCGCCGGAAGTTTTAAATCGAGTA  
GCGTTGTCTGACCGTCTTACGCGCAACAGTAATGCCGCTTTTTATCATTTTCCAGCTGCACATGCCCTGAGCGTCA  
CTGGTTGCTGAGTCAAGTCTGCCCTTTCTCATTTAATAAAGAGACTTCAATTCCTTGTGGGCGCGCGCTTTTCCAG  
ACTTTGGGTAAAGATATCCAGACGATTGTGATAACGGTGTGACTGAAACGCCGATATCACTTAAACGTAACAGCGTGGCG  
GATTACTGTAATCGTAACGTCCAGCCTGATTATCACAGCCAGATACACGCCCGCTGCTGAAGCGGTTTGTATCGCCC  
AGCGGCAGCAATAATTTTTACGGGTGTTACGCGCAGGATTGAGATCAAACCGTCCGGTGTAGACCAGATCCGCCATCTG  
CAGCAGTTTGTGACTGCCAGTTCCGACGGAATTCGGGTATCCATTGGCTAATGAATGCTGGCAGAGATTCTGGCT  
TAACGCGGAAGAAGTTAACATCGACATTATTAACGTTGAGCGCCATTACCGGCAGCCCTTCAACGACTTTGCCAGGCAGC  
AGCGAACACGCTGGCAAACCGACGCTGGGTTGGATGTCGCGGTTAGTTATAGTTTTTTCGTAATCTTTACTGAAGGT  
TGCGTTGTTGAGTGCTTTGACCTCCTTCCAATAGTAACGATCAATCACGTTTTCGTTTCCAGGTGGCGTAAACGTAAT  
CTTTAAGATTATCTGACAGCTCCAGGCACCATCCACTTTGCCGTTTTTTTTATCGACGACATGAATAACGCGTGAGAAA  
TCCTGATCCGGTTCGAGAGGGATGGAGAACGTCAGCACCAGCGTGGCTGCACCATCAAGTTGGACTTCAGAGAGATCCAG



CAATGTCAGCACCTTACCGGCACTCTGTTGGGCCAGTTTTGTCTCTCCGGCACGGAGAGTTTTGCTGAACTCGCGTTTT  
CTGAAGAGGCCGCTTTAGTAACTTCAGAAGGCGCATTTTTTACCAGCTGTTGGCGGTTATCGTTGTTGTCGCACCCT  
GCCAGCGCCAGCATTAGCATGCAGGCGCTACGCGTAACTTTTTCATTTTTCATCCCTGCCACAATGGCCCGTTAGCAAC  
GTCGAATAATTATTATGCGTGAGAATTTACGTTATGTAATTCAGTATCACGCCATACAATCCGAATTTTAGTGAGAATT  
GTGGCTCAGACAGCAAATCAGCCTTTTTGCTTGTGCGTTTTACTAAACATCCGACAATTTAGCCTAACCCCGGCAAA  
AATGGAGATGCCTATGTCCACGACATGTTTTGTAGGAGCCGACTGGCTCGCCGAACATATTGATGACCCGGAAATTCAGA  
TTATCGATGCCCGCATGGCGTCGCCTGGACAGGAGGATCGTAACTGTTGCTCAGGAGTATCTGAATGGACATATCCCGGC  
GCAGTGTTTTTGATATCGAAGCGTTTTCTGATCACACTTCCCGCTTCCGCACATGCTGCCGCGCCCGAAACGTTCCG  
CGTGGCGATGCGTGAATTAGGCGTTAACCAGGATAAGCACCTGATTGCTATGACGAAGGTAATCTTTTCTAGCCCCAC  
GAGCATGGTGGATGCTGCGCACCTTTGGTGTAGAGAAAAGTGTGATTCTGGGGGTGGACTTGCAGGCTGGCAGCGCGAT  
GATCTGCTGTTAGAAGAAGTGCAGTAGAGCTGCCGGAAGGAGAGTTAACGCCGCTTTAATCCTGAAGCCGTGGTGA  
AGTAACCGATGATTATTGGCAAGCCATGAAAATACGGCGAAATTATTGATGCCCGCCCGCTGCACGTTTTAACGCAG  
AAGTTGATGAACCTCGCCAGGTTTACGTCGCGGACATATCCCGGAGCACTGAATGTTCCGTGGACGGAACCTGGTGGC  
GAAGGCGAACTAAAACGACCGATGAACTGGATGCGATATTTTTGGTGCAGCGCTCAGTACGACAAACCAATTATCGT  
CAGCTGCGGCTGTGGTAAACGGCAGCCGTGGTTTTGTAGCACTCGCAGCTGGATGTGCCAAACGTGAACTGTACG  
ACGGCGATGGAGTGAATGGGGCGCGGGCAGATTTACCGTTGAGCCAGTAAAATAAGTATTTTACAGGCAATAAAAA  
ACCGCCGAATTTGGCGTTTTTTTATTGCTAGTCTGTTTCGCGCCCTTCCAGCAGGTTGACTTGTGTTACATGAGCAACG  
CAGGTGCTTACAGCAAAAACAATACTACCAGTAACTCTTTTTGTCAAGCAAAAAGAGTAATTATTGTTTATTAGC  
GTATTATCGACACCGCCCTTTCGCGCTGTTCCGTAATAAAAATAACCTGGCTTATTAGTCCGAATTCAGACAAATATA  
ATAAATCCTGCTCAAAATTAATAATTCTAACCGTAAAAGATTAATACTTAAACATGTAATTCACTTTCTTTAAAAAC  
AAAAACCGCCAAAATCAGGCGTTTTTTGTTGCTGGTCCGGTTCGCGCCCTTCCAGCAGTTGATTACCGTAGTAAT  
GCAAGCGCTCTCAGCGGAGACAATACTCGCCAGTAACTCTTTTTGTCAAGCAAAAAGAGAGTATTATTGTTCTGTTA  
GTGATTATCCACTGCGCCCTTTCGCGCTCTCGCAAACGGCGCTGGCTTATAGAAAGGATGTTCCGTGGCCGTAAT  
GCAGGTGTTTACAGCGCTTGTATCGCGCAATATCGCCAGTGGTGTGCTGCTGATGCGGTCTTGCATGGACCGACA  
ATGAAGATACGGTCTTTTTGTATCGTACTTATTGTTTCTGGTGCCTGTTAACCGAGGTAATAATAACCGAGTCTCTC  
CGCGACAATTTACTGGTGGTTAAACAACCTTCAGAGCAGCAAGTAAAGCCGAATGCCGCCCTTTGGGCGCATATTTTAG  
ATTATCCGATTCTGTTTAAAGTACGCAAAAACCACCCAGCGACGTTTATAGAATGGCGCAATATGTTCCGTAATAAA  
GTGGCTAATCCTTTTTCCCTTTTTTCACTGACAAATATCGATTGGTTCATCGCCAGGTAATGATCGGTGCTACAC  
TTCCCGTGCCTGAATAATTTCTTCGATATCACCATCGGCTTCAATGCAATAAGTAAATTAGGCTGTGCCTCTTCGTT  
TCTTAATTGAACAAATAAAGCACGCTTACCAGGCTTAAATGGTTTTAAATAAGGTGGTGAATCAATCATTGTGC  
TGCGGCTCTGCGACTTCCGATAATATCAGCGATTACCGCCTTCCAGGATTTCTGGCTGCTCAGCGGATTTCCCTCTT  
CACCATCAACAACTGATTTACGCGGCATAAATCTTACCAGTTGGCAGTTTGGCATTAAAGGAAGAGCGTTCCGCA  
AGTGTATCTCAACAGCGTGCACGGGCATTACGACAAATGCCTGTTGCTTCAACCGCTGTTGAAGTGTCTTAA  
CGAGGTGAAAAAGGAATGACGCTGGTGGCTTCTTTTTCCAGTGTGTAATCAAGCGGCTATCTTCAACCACAG  
CCTCGCCCTGCGCCCGGTACCAGGCACCCAGACGGTGGATTCCAGTAGAGTACGGAAGGCGGGCGGTGCGCCGT  
TCAGTTGCTGCTTTTTCCAGCAGGTTCAAGTTCGTTTTGTTTCCGACATAAGAACCACAATTCATTCAAGTTCCG  
GGCGAAATGCCTGATGCGTACGCTTATCAGGCCTACAAGGATTCGCAATTTGTTGAATTTGCAGAATTTGTAGCCG  
GATAAGGCGTTACGCCGCATCCGGCATATTAGTTTACGCCGTTAACAGATTAGCTATCGTGCACACCAAGTCCCGTA  
GCGCCCGCAGACCACTGTTCAACCGGCTTTACGGTAAAGTCCGCGAGCAGTGCATATGCAGCCAGCCTTGTGATAGT  
CTCAACAAAGTGCACAGGAAGCCCGCGCTGCTCGCGCTGCCGGATACGCGCTTCCGGTATTGTTGAGTTCCG  
CAAAGTTAGACGGCAGTGGCTGCGGTGGAACCTCGCCAGCGGACGACGCCAGAACGGTTCGTTCTCCTGCGCGCACTC  
GCCAGCAAGCGACCGCCAGCGCATGTCAAAACCTGAACAGCGCGTGATAATCATTACCCAGCGCAGTTTTCCGCGCCC  
GGTGAAGGTGCGCCGATCAATGATCATTTCGTTTTCTGCGCACTGGCATCAATCAGACCATCGGCAAGCACCAGACGCC  
CTTCCGATCAGTGTTCATCACTTCAACTTTTTTACCAGTTGCGATAGGTGATGATATCGCCAGCTTGAACGCATTGCCG  
CTAATCAGGTTATCCGCACAGCAGAGGAACAGCTTACGCGCTTGTTCAGTCCGCGGTAATGGCAAATGCCAGCGCCC  
GGTAACCGTTGCCGCGCCCATGTCCGACTTTCATCGAGTCCATAAACGCAGTCTGTTTGTGCTGTAGCCGCGGAGT  
CAAAAGTGATACCTTACCTACCAGGCACGCTACTGGCGTCTTTTATCGCCAGTTGGTTGTAATCCAGCGCCAGC  
AATACCGGAGAAGCTTGAACCGCTCCGACTGTGTGACGCCCCATATAACCTTGTCTCACGAGATCTTCGCTTTGGT  
GATCCGATAAGTACACGATCGCCCGCAGTGTGCTGATCAGATCAACAGCACGCTGTGCCAGTTGCGATGGTCCCAAT  
CTTCTGCCGTTGCGTTGATGGTGTACGCACCCAGTGCATGATCAGGCGGTTATCCAGTTCCTGGCGCTGGGCATCG  
TCCAGATCCGCCACACCACTTACGCGTGCCTTTCGGGCTTTGTAACCTTGCAGAATGCCAGCAGCGATCCGCATC  
CCAGCCTTACCAGTAACTGAACATGCTTGTGCCAGACCGTCAATCTTGCAGCGCCGACGCTGGATCAGCCCCAGAT  
CGTCTGCCCGTTCAAATGACAGGTAATGCCGTATTATTAATGCTGTAAGTTGTTTTTCTCCCAGCGCGCTGGCA  
GGTTGGGTAGAGAGGTAATCTTCATCGTTCTGTCAATTTAGTTATCTTCTTTGTAAGGCGCCAGTTGGCAGCC  
CCAGGATTTTTCCGCTAAATGATTCGCTTTCAGGAAGGCGGCAAGTGAAGTGAAGCCCGAGGAGCATAGATAACTATGTG  
ACTGGGTGAACGAGCGCAGCAACGCATCTGCGCGTGAAGCATGACGCGAAATTTCCGCTCTGCCAGCAGCT

AACAAAATCGCTTCGAGGATTTTCTCGTTGGATGCCTGCGGGTCGTGTCGAAATCTTCCAGATCGCAAATCCACTGATG  
CATATCGGTGAATCGAACGTTTTTCGGATCAAGATCGGGATACGCATCGTACAGTGCTTCGCAATTTTCGCGGTATCGG  
TCCACTTAAGTCCATACTAACCTCTGTTAATGCTCACGCGCATGGTTGATAGTGAACGCGGGATTTGACTACTAAAT  
CTTCGTGCGTAACGCGCGCTGGCAGCTTAAACGGCTTTCCGGCTCCAGTCCCAGGCTTTGTCCAGCATGTCGTCTTCC  
TGCTCTGAGCTTTCGGCAGTGAGTCAAAACCTTACGAACGATGCAAGTGGCAGGTGGTGAAGCACAGGATTTTCA  
GGCGTGTCAATCTCGATACCGTTACGCGAGAGCTGCGTCGAGAATGGTTTACCCTATTAGCTTCCAGAACAGCGCCAT  
CAGGGCAGAGATCCTGATGAGGCAAATAACAATCTTTGGCATATTAACCTCGTCCACGGAATGGCCTTTCAGCGCACG  
ACGAACCGACTGGTCCATGCGGCGAGCGGCAAATCCTGGGTTTTGTTGTCTACGTTTTTAATCGCTTGTTCGATGGCGT  
CAACATCATCGCCCTGCGCCACTTCACTCAGGTGAGCGGCAGCATCGTCAATGACCTGACGTTCTGCGGCGCTTAACAGC  
GCGGCATCAGCAGCCAGCGCGCCGTGCAGACTTTCCAGCACACGCGCCGCTTCTACTTTTTGTTCTGCCAGCATTGGGC  
TTTTACGTCTGCTCGGCATAGCTCATTGAGTCTTTGATCATCGAAGCGATTTGCTATCGGTGAGACCGTAAGACGGTT  
TGACCTGAATAGACGCTCAACGCCGGTGGATTTCTCCATCGCCGTACGCTCAAAGACCGTCCGCATCGACCTGGAAC  
GTCACGCGAATATGCGCACCGCCAGCCGGTAGCGCCGGAATACCACGCGAGCGCAAACGCGCCAGTGAGCGGCAGTCCG  
CACCAGTTCGCGCTCACCCTGCATTACATGGATAGACATCGCCGTGACCATCTTTAAAGTGGTGAATCCTGAGCGC  
GGCCACCGGAATAGTGGTATTACGCGGAATCACTTCTCCACCAGGCCCATCGTTTTGAGGCCAGCGCAGTGGG  
ATCACATCAAGCAACAGCATTTCTGCTGTCTGGCTTGTACCACAGAATATCCGCTGAATCGCCGCGCAATAGCGAC  
GACTTTATCCGGTTCGATGGAAGTCAAGCGGTGGACGACCGAAAAATTCGCTACCCGTTACGCGACCGCGGCACGCGAG  
TAGAACCGCCACCATCACCCTTCCAGCACTTCTACAGCTTCTACACCCGCTCTTTCAGCGCGGACGACAAGCCAGT  
AAGTTCGTTTTACCAGTGGCGGATCAGTTCATTGAATTGTTACGCGTATTTCGCCCTGCCAGCCCGCAACGTTAAC  
GGTCACGGAGTCCGCATCGCTCAGCGGATTTGGCTGCAATGGCGGCATCCAGCAGTTCACGCTGAACGCGGTTATCGC  
TACGATCAGGAATGCCGCTGCTCGGAATGTAATCCGCCAGCAGATGGTGAATATCGCCGCGGAGCGCGGAATCA  
CCGCCGTTGCCAGCACTTCAAACACGCCGCACTTAAAGCGAGAATGGAATATCAAACGTCGCCACCGAGGTATA  
AACGGCGATCAGCCTTCTGACCGGAATCCAGCCGTAGCGCATAGCCGCGAGCGTGGTTCGTTAAGTAAAGCGCAGGA  
CGTGAAGGCCCGCAGACGCGCGCTTTGGTGCCTGACGCTGGGCATCGTCAAAGTACGCGGAACGGTGATAACT  
ACACCATCCAGCTCGCTGCCAGGGCTCAGTTCGCCGCGCCGAGTGTTCGAGGATGTCGCGAAGACGCGACCCGG  
GTTGAGCAGCCCGCGCGCTTCAATCATCGCGAGCCGTTTTGCTGGCTGGAATTGATAAGGCAGATCGGGATAGC  
GTTGCTGGATATCAGCCAGCGAGCGTCCATCAGCGTTTAAACAGAACTAATTGTTGGCGGTATCGAGCGCTGCATTA  
GTACGCGGTATCAACCCACCGAATGCCCTTGTGTTGATAGTGAACAACAGATGGCAGCAGGTGACGGCTTTCATGATC  
GGCTAACGTTTTCGGCTGACCGCTGCGCACTGTCGCCACCAGCGAGTTGGTTGTGCCAGGTCAATACCGCCGCCAGAC  
GACGCTGATGCGGCGCAGCACTCAAACAGGTTCACTAATTTGTAATAAGGCCATGTTTAGCTTCCAGAAATTAATAATC  
GAGCAGTTTTTCTCGAGTTGTTGCGCACTGCTTCGAGTTTATCGAAGAACGCGAGTTCACGACCGGTATCCGCCGCG  
CGTCCCACGTCTCGTTGTCTAACTGTTCAACCATCAACTGATGGCGGGTATCAAACATCTTTTTACACGTTTGATAAAG  
CTTTCAGCCGCGCTTATCTTTGCTGTTGATCTCGTCCAGCTTTCGCGCAGCTCCAAGTTCATCAGGAACGC  
GGTGTGCGGCACAGTATGCTGCTCGTGGCGAGATCAAAGCCGTGCAAAGAAAGCAAATATTCGCGCGCATTAAACGGAT  
GACGCGAGTTCGCCAGGCTGGTTAATGGTTGAGATTGCTGTACGGCGCGAGTTGTTCCGCTGGCTCCGCTGGCG  
AATTTATCAGGATGATACTGACGTTGTAGATCCTGAAAACGCGAGCTCAGCGCTGGGTATCGAGTTGATAGCGGCGAG  
CAAGCAAAGAGGGTGAAGTAACTCATAACATTTCTCAGGGCTGCGATCCGCCGCGATAACGGCGAATCAGGTAACAAA  
CCCACGCGCAGGCGACCGGTTGGGTTATCGGTATGCGCATCAAACGTTGGAAGCTTTCCGCCAACCACACTCATCTT  
TGACGTTCCGGTTGGTGAATTTAAACCCTTCTGTTGAGCCTTCTTTACGAAGTCCAGTGCCTACCGTCCAGAAATTC  
AGGCTCTTGCCATCGACCAGCACTTTCACGCTTTGCTTCAAACAGCATGCTTCCGGCGTGGTTCGTTCAACAAATTC  
CAGTACATAAGCCATAACCTGAACACCCGAGGTTTCTACGCCCAGACGCGAGCCAAACCCTTACCGCGTTAGCCAGAA  
AGGTATTTACTCGCGCTGCTGCACTGTGCTCAGTGAATCGACATAACCAAACCTCAACTCTTATTTTGTTCACGTTT  
GCTTTTATAGTCCGCAATGGCGGCTTTGATCGCGTCTTCTGCCAGAATAGAACAGTGAATTTTACCGGCGGCGAGTTCAA  
GTTCTTCAGCAATATCGGTGTTTTGATCGCCTGCGCTTCTGTCGAGAGACTTCCCTTTCACCCATTGCGTGACCAGGGAG  
CTGGAAGCGATAGCGAACCAGCGGTAAGTTTTAAACGCGCGTCTTCAATGATACCTTTCATCGTTGACTTTAATCTG  
CAACTTTCATCAGCTGCCACAGGCGGTGCCCCACCATGCCGCTGCCGACGTTCTCGTGTGTTGTCAAAGGAACCCA  
CGTTACGCGGATTCGTAATGGTCGATAACTTTTTGCTGTAAGCCATTATAAATTTCTCTGATTCCGATACCGATTAA  
TGATGAGCCATTGATGCTGTTGATGATCCACGCCCTGCTGTACATTTCCACAGCGGAGAAAGGTACGCGAGACGACC  
GATGGATTTACGAATAACTCGATGGTGTAGTCGATCTTCTTTCAGTAGTAAACGACCTAAAGAGAAACGGATAGAGC  
TATGTGCCAGCTGCTGTTACGCCCAGCGCGCAGCACGTAGGACGGTTCGAGGCTTGTGACGTACAGGCGGAACCT  
GAAGAACTGCGAGGTCTTTCAGCGCCATAATCAGGACTCACCTTCAACGTAGTTGAAGTACGTTGAGAATGTTCCG  
CGCACCGTGTCCAGGTACCGTTCAGGTAACCTTCTCGATATCTTTGATGCCGTTCCACAGACGGTACGCGAGCCGC  
GCAGACGTTCCATCTCGGTGCCATCTTCTTTTGGCATGCGATAGGCCTCGCCATTCCGACGATCTGGTGAACAGGC  
AGAGTGCAGCAACGCATACCGCGCTCGTGACCGCCCGGTGCAATTTGCGCTTCGATGCGTACGCGCGGTTTTACGACGTAC  
ATACAGCGCACCGATACTTTCCGGCCATAGATTTTGTGACCGGAGAAAGACATCAGGTCAACTTTCAACTGGCTCAGGT  
CGATAGGCAGTTTACCACGCTCTGGGTTGATCAACGTGATAGATAATGCCACGAGCAGGCGACATTTCCCGGATAGCC

CGGATATCCTGCACCACGCCGATTTTCGTTATTTACGTGCATGATGGACACGAGGATGGTGTCTGCACGCATCGCTGCTT  
AAGTTCCTTTCAGTGCATAATGCCGTTACGCTGCGGTGCCAGGTAGGTGACTTCAAACCTTCGCGCTCCAGCTGACGGC  
AGGTATCCAGTACCGCTTTGTGTTTCGTTTTGCTGGTGATGATGTGCTTGCCTTTTTCTGATAAAAAGTTGGCTGCACCT  
TTGATCGCCAGTTGTGAGATTCGTTGCACCAGAGTAAAGACGATTTACGCGGATCAGCGCCGACCAGATCGGCAAT  
CTGATTACGGCGATATCTACCGCTTCTTCAGCCTGCCAGCCGAAACGGTGAGAACGGGAGGCCGGTTACCAAAGTTT  
CGTCCATCGTCATAAACTGCATCATTTTTCTCGGCAACACGCGGTCCACCGCGTGGTTGCGGAGTAGTCGAGATAAATC  
GGTAATTTTCATTGCTCTATAAACTCCGTACATCACTCAATGCAAGGAATCAGGCTACCGGCTGGATGTACGACCGTGT  
ACGGAGTATTTAGCACTCCGGCCTGATTTCTGAATCTTTTTATTAAGCGCGTAACTTAACGTGCATCGCGCTTGTGTGC  
GGGTGCGTGGCGCTCGTAGTATGCTGACGACCAGACACATCCAGCACTTCTGGTTATTAACAGTTCGCTAAAGTA  
ATGTTGTTGAGAAAACCGGTGAGACGGTGCCTCAAATCACGCCACAGCGGTGGTTCAGGCATTTATCGCCGCCCTGGCA  
GCCGCTTTACCTGACAACGGGTGGCATCTACAGATTCGTAACGGCGTAATTACTTCGCAACGGCGATGCTGTGG  
CATCTTTGCCTAACAGATAACCACCGCTGTCCACGTACGCTGGAACACAGACCATTTTTACGCAGACGGGAAAACAGT  
TGTTCCAGATAAGAAAGGAAAATCCCTGACGTTTCGAAATATCAGCCAACGGTACCGGGCCGCTTCAGAGTTGAGCGC  
AACGTCAAGCATTGCGGTACGGCATAGCGCCCTTAGATGTGAGTCTCATGCTTACTTACCTCAAACCTGCCCCCTGC  
CCGGGTTTTTTATTGTAAGTGGGGTATTGCATAGCAGGTCAAGTCTGACATTCGAGTAAATTTGGTCAACTATT  
TACTTGACTGATTTAGTCGGGTATTTAACCTTCAGTGCCATTTTTATCGTGGCGTTTGTACCTGTTGCGGATCGCGC  
GTGAACGCCATATCCGCCCTGGGGTTCTGTACACTGTAGGCCTGATAAGACGCATTACCGCTCGCATCAGCAACCGCTG  
TCGGATGCGCGTGAACGCCTTATCCGACCTACGGTCTGTTCACTGTAGGCCTGATAAGACGCATTACGCGTGCATCA  
GGCAACGGCTGTCGGATGCGGCGTGAACGCCTTATCCGACCTACGGTCTGTTCACTGTAGGCCTGATAAGACGCATTAC  
GCGTGCATCAGGCAACGGCTGTTATTCGGCCTTGTACCTTTATTCTGCTGCTCAATAGAAGCCAGAATCCCGCGCAGG  
ATATTCAACTCCTGGCTTTCCGGGCGGCACGGGTAACAGACGGCGCAATTTATTCATCACCTGCCCGGATGGTTTTT  
ACGGATAAAACCGGTTGCCAGCAGCGTTTGTCCAGATGACCATAAAAACGCTCCAGATCATCGACCAGCGGATACGGCG  
TCTCTTCATGCTCGACCTGCTCGCGTTTTCTGAGTTGCCAGCCAGGCATGCGCACTTCATAGGCAATAACCTGAACC  
GCCATCGCCAGGTTACGCGAGCTGTATTCCGGGTTAGCCGCAATCGCGACATGATAATGGCATTCTGCAACTCTTCATT  
GGTCAAGCCGACGCGCTCGCGACCAACACCAGCGCCACCGGGTATTTGCCGTTTCAGCGACGCTTTTCAGGCCGATT  
CGCGGGTTCGAGCATCGGCATGGCAGCGTGGGGAACTGCGCTGGTCCCACCACCAGGCTACAACCGGCTAACGCT  
TCGTCGAGCGTATCGACGATGTGAGCATTACCAATCACATCGCTGCCCTGCTGCCAGGGCAATCGCTGGGAGTCGGG  
TTTACCAGTGGATTAACAGCCACAGATTGGTTAATCCCATTGTTTTCATGGCACGGGCAACAGAACCATATTGCCGG  
TGTGTGACGTCTCCACCAGCAATTCGAATATTTGCAGCATTGCTTTTCTCATCTAAAGATTATTCAGCATCTTAT  
CATAAAACGAAGACAGATGCCGATCTCGCTGCTATACTCTGCGCGTTTTCCCGTTCTTTAACATCCAGTGAGAGAGACC  
GATGCATCCGATGCTGAACATCGCCGTGCGCGCAGCGCGCAAGGCGGTAATTTAATTGCCAAAACCTATGAAACCCCGG  
ACGCTGTAGAAGCGAGCCAGAAAGGAGTAACGATTTCTGTGACCAACGTAGATAAAGCTGCCGAAGCGGTGATTATCGAC  
ACGATTCGTAATCTTACCACAGCACACCATCATCACCGAAGAAAGCGGTGAACCTGAAGGTAAGTACTGATCAGGATGTTCA  
ATGGGTTATCGATCCACTGGATGGCACTACCAACTTTATCAAACGCTGCGGCACTTCGCGGTATCTATCGCTGTTGTA  
TCAAAGGCCGACCGAAGTTGCTGTGGTATACGATCCTATGCGTAACGAACGTTTACCAGCCACTCGCGGTACGGGCGCA  
CAGCTGAACGGTACCGACTGCGCGGCAGCACCGCTCGGATCTCGACGGTACTATTCTGGCGACCGGCTCCCGTTCAA  
AGCAAAACAGTACGCCACTACCTACATCAACATCGTCGGCAAACTGTTCAACGAATGTGCAGACTTCCGTCGATCCGGTT  
CTGCGGCGTGGATCTGGCTTACGTGCTGCGGGTCTGTTGACGGTTTTCTTGAATCGGTCTGCGCCGTTGGGACTTC  
GCCGAGGCGAGCTGTGGTTCTGGAAGCGGCGGCATCGTCAGCGACTTACCAGTGGTCATAACTACATGCTGACCGG  
TAACTCGTTGCTGGTAACCCGCGCTGTTAAAGGCATGCTGGCAACATGCGTGACGAGTTAAGCGACTGCTGGAAGC  
GTTAATGACTCAGGCGGTGATATCACTACCCGCCCTCGCTTTTCAGGCGCTATTCCGAAATACTTCTCCTACTGCTTTA  
CTTTCTTCTGCTACTCTCCACCATCTTTCCCGATTAATGGATGATAAAGAAGTCGCAAGGAAAGTTATGGCACTGCC  
AGTGAACAAACCGGTTCCCAAATTTCTGTTTATTCTCTTTGTTGTTGCTTCTGCGTTTTATTAGTGCCGCGGTTGCCA  
TCAACTTCTTCTATTATCCCGACGATAAAATTTACGGTCCCGATCCCTGGTGGCGGAATCCGTCGAATTTACGGCTAAG  
GACGGTACTCGTCTGCAAGGCTGGTTTATCCCTTCTGACGGGCCCTGCTGACAACGCCATCGCAACCATCATTATGC  
TCACGGCAATGCCGAAATATGTCGCCCACTGGCCGCTGGTCACTTGGTTACCGAGCGTAATTTCAACGTTTTTATGT  
TTGATTATCGCGGTTTTGGTAAATCAAAGGCACGCGTCCCAGGCCGATTGCTGGACGATACGCAAAGTGCCATCAAT  
GTGGTGCATCGCAGTGTAAACCCACAACGCTGGTGTGTTTCGGGCGAGGATTGGCGGGGCGAATATTCTGGA  
TGTTATTGGTGGGGTATCGTGAAGGCATACGTGCGGTGATCCTCGACTCCACATTTGCCTTATGCAACCATCGCCA  
ACCAAATGATCCCGGAGTGGCTACTTACTTGTGAGAGTTACAGCGCGAAAATATATCGCCAGCGTCAGCCCGATC  
CCGCTTTTACTCATTACGGTAAAGCTGATCACGTTATCCCATGGCAGCACAGCGAAAAGTTGATAGCCTGGCAAAGA  
GCCAAAACGGTTGATCCTAATCCCGATGGCGAACACATTGATGCTTTTTCCGATCGTCACGGCGATGTTTATCGGCAAC  
AGATGGTGGACTTTATCCTTAGCGGTTGAATCCGAGAACTAACCCATGATCGCTAGCACGATAATCATTACAAAACC  
ACCTAAGACATGCTAATCCACTGGTCAAGACGTTAAGATGAGAAAAATTTGTTGACGCTTCCAACATTTCTGATGA  
TTAGCATTCCCTTCGCCATTTCTTGGAGCAACTTTAGCTATTCTTATCAATTTATGCTTATGGGAGATCTACAGATGATG  
CCTACGCTTGTCCACCATCTGCTTTTCGGCTCCCGAGCGCGTGCAGATCTTGTGACGCTTTTCAGCCGGGTT

GACCGCCACCATGGCAACCTTCAGCGAGCTTAATGGTGTGGATGATGATATTGCCAGTCTTGATATCAGCGAAACAGGAC  
GGGAGATCCTGCGCTATCATCAACTCACACTGACGACTGGTTATGACGGTAGCTACCGGGTTGAAGGTACAGTGCTTAAC  
CAACGTTTGTGTTTATTTACTGGCTACGACGTGGTTTCCGTCTGTGTCGTCATTTATTACCAGCCAATTCACCCCCGC  
CCTGAAGAGTGAAGTGAAGCGGCGCGGAATTGCGCGTAACTTTTACGACGATACCAATCTACAAGCGTTAGTGAATCTCT  
GCTCCCAGCGCTGCAAAAACGCTTTGAATCGCGCATATTCATTTCTGTGTCTGTATCTGCAATATTGTTTGCTGCA  
CACCACGCTGGAATTACGCCTCAGTTTAAATCCGCTCCAACGTGCTGGGCGGAATCCTGCCTTGAATTTAGGTAGCGCA  
GGAAATTGGACGCCACTGGCAGCGTGGGCGCTCCAGCCTGTACCACCTGATGAGCCACTGTTTATGGCACTACTTTTT  
CCATGTTGCGGGTCCCGATCCATTGCGGGATGCGCATCAGCGGGACAGACAATTGCGTCAGTCTATCAAACGTCTGGTA  
AACCATTTTCTGTGAGCTGGGAAATGTTCTGTTTTATGATGAACAGGGGTTATGTGATCAGCTTTATACCCACCTCGCCCA  
GGCGTTAAATCGCAGTTTGTGGCCATCGGTATTGATAATACCCTGCCGGAAGGTTCCGCCAGACTGTACCCACGCCTGG  
TGCGCACCACCGCGCGGCTGGCCGGATTTGAAAGTGAATACGGCGTCCATCTTTCTGATGAGGAAAGTGGTCTGGTC  
GCGGTGATTTTGGTGCCTGGCTAATGCAGGAAAACGATCTGCATGAAAAACAGATTATTTCTTACCGGGAATGATAG  
CGAGCGAGAAGCGCAGATTGAGCAGCAGTTACGCGAACTAACGTTACTGCCGCTCAACATTAAGCATATGTCGGTAAAGG  
CATTTTTGCAGACAGGCGCTCCGCGTGGCGGGCACTGATTATTGCGCTTATACCATGCCATTACCGCTTTTTACCAC  
CCGCTGATCTATACGGACCTGACGCTGACAACACATCAACAGGAGCAGATCCGCAAAATGCTGAATCAGCATGAGGGAA  
CAACTTTTCGGGCGCAAAAACATTGCCGGAAGCGCCACAGCGCCATTACCCAGAACACGCCGTGGCCAGATATTGATA  
AGGAAAACCGCGGAAAACGCTCATGATAGCGATACTGCCGCCATCGCGACGGCAGAGTAAACCGCCTGTAACCGGATGAC  
TTGCTACCCTGGCGAGCAGCAATATAACGCATGGCGGCCAGGTGGCAGACCCTGAAGGTGCCGAATGCAGAATTTGCA  
CCACTATCAACCACGGCAACGCCGTAGTTGCTCCCATAATGCCCCAGCGCACTACGCCGCAATCGCCGAGATCAACAGC  
ATATCGCGTGCCTACAACGGCGGAAAAGTTTACTCAGCGCAAAGATAATGACTTCCGCCACCACGCCAGCGACCA  
CAATACCCACCGCGGAGCGGAGTAGCCAGCTGCCTGCCAGTAAATGGCGTAAAACCGTAATAGGCCGATGTGCC  
CCTGCAATAAACAAACGCAGGCCAGAAAGCGCCAGTTCTGGGAACAGCGCAACCACGCAGACCAACCGGTGCTCTCC  
TGCTGGCGACTTGCCCTTGTGGCTGAATCGTCGGACGGATGAGAAAGCCGAGCAGCATGGATGCCACGCCAACGTCAA  
CAGCGCGAGGATACCCGATAATCAACATAGTGACCAGTTTGGCCGTCAGCGCCGAGCCAATGACAAACGCCACCGAGC  
CCCACAGTCGCACTTTGCCGTAATCAAGCGGAACTGCTTTTGCACGTATTCGCCAGTGCATCGGTCAACGGTACCAGT  
GGTGAGAAAAAGAGGTTAAAGCCAATCATCACCAGCATCAGCCACGCTACGTGCGCCCCCGCCAGAAGGCCACAGCAA  
GAGAAGTGTACGAGTGCAGCAGCGCGCAAGGCGGAAATCAGGCGGAAGGATCGCTGACGCGGGGCGGATGAGCAAAC  
TCCCGAGGAAACGGGCAACCAGACCTGCCCAATAACAGGCCGATGGTTTCTGGCGTTAAACCAATCCCTTAAAGCCAG  
ACGCTCCAGAAAGGTAGAAAAATGCCGTAATAAAAAAGTATGTAAATAGCCGAGCGCAACCAGCGCTGGATTGCAA  
AACCATGAGTCCCTCCCGTACGAGGGCGTTAGTCTGGGGTAAATCGAATGTTGGTGCAAGTTGAAAAATAGAATATTCG  
AGCCTGCTTCCCGATGTCTGTAACGCCAGTTCACAAGCACTAAAAAACTGAGATCCGCGACGCATGTTGCAAAAATAATG  
CGTAATTATGCCGTTACGCTTGCCAAACGTTCTGCACAATGGCGATGAAATCGCGTAATGCCGGCTTATCTCCCCTT  
CTTCCACGCCATCAGTAAAGCAATGGAAGGCACATTTCCGGCAATGGGACGAAAAACAACCTGTCCGGTATTAATAAT  
TCATATAACCGGGTATCAAAGTACGCCAGCCCATGCCACCAGATTGATGGTCAACAGAAATTCGTTGCCACCTGG  
ACGATATTTGGCTGGCTGTTTTCTTGGCAAACCACGCTTTAACGATCGCGCAAGCGAACCAGGAAATACACCGGATCGGT  
ACTGACGAAATCAGCCATCCAGTTGCGCGGGGATGATCTTTTTTATGTGCTAAAGGGTATCAACCGGTAACACAA  
CCACTAATGGTTCGTAAGGCTCCAGATAATCAATCTCCGGGTATAAACAGGATGGCGCATTAAAGCCGACGTCGAGT  
TCACCACGGCAATTTTTTCTCCTGTTGCGTGGTATTAACCTACCAGCTCAATCAAGGTGTCTGGCTGTCTGAGACG  
AAACATCGGTAATACTTTTGGCAGTAAATCACTTCCGCCGATGGCAGAAAGCAATGGTTAATTGTCTTCTTCCGAA  
CAATTTTCCGCGCCGTAATTTGGCATTTCGCTTGTTCGAGATTGCCAGCGCTCTGGAGAAAACATCTCCCCTCC  
GCCGTCAACGCGACTTTGCGCTTATCCCTCACCAGTAAACGGAACACCGACACAGTTTTTCAAGATCGCGGATCTGGCTGCT  
TAACGAAGGCTGTGAGGTATGAGTTTTTCCGCCGACGGTAAAGTTAGTGCTGCGCCACTGCGACGAAATAGCGTA  
AATGCCGTAGTTCCATCACCTTCCCCTTGTATCGAAAAACGCTCAGCTGGTAGAAATTAATTTTACATATTAGC  
AACCAACCAGCAACATCCTTATGGCACAAAAATAGAAGGCAATACATCTTATCTTTCAGGATTAATAATAATGACCACA  
CCCTCAGATTTGAACATTTACCAACTGATTGACACCCAAAATGGTCGGGTCCTCCGCTATTTATACCGACCCGGATAT  
TTACCAACTGGAGCTTGGCGTATTTTCCGGTCTGTTGCTGATTTTCTCGCCACGAAAGCCAGATCCCAAAACCCGGT  
ATTTCTTAAACACCTACATGGGAGAAGATGCGGTTGCTGATGCGTCAGAAAGACGGCAGCATCAAGGCGTTTCTCAAC  
CAATGCCGCCACCGGCCATGCGTGTGAGTTATGACGATTGCGGCAACTCGCGCTTTACTGCCCGTATCACGGCTG  
GTCTTATGGCATTAAACGGCAGTTGATCGATGTACCCTGGAACCTCGCGCTACCCACAAGGTTGTGTAATCCCACT  
GGGACTAAACGAAGTTCCTTGTGTGGAGAGTTATAAAGGGCTAATTTTTGGCAACTGGGATACCAGCGCACCGGGCTG  
CGTATTACCTGGGTGACATTGCTGATCTGGATGGCATGCTGGATCGTCGCAAGGCGCACCGAAATGTGCGCGG  
CGTACAAAAGTGGGTGATCAACTGTAAGTGGAAATCCCGGCAGAGCAGTTCGCCAGTGACCAGTATCATGCTCTGTTCA  
GCCATGCTTCCCGTTCAGGTATTAGGGGCGAAAGATGATGGCAGCGATAAGCGCCTCGGTGATGGACAAACCGCCCGC  
CCGTGTGGGAAACCGCAAAGATGCGCTGCAATTTGGTCAAGGACGGTACGGTAGCGTTTTCTTTACTGAAAAACC  
GGATGCTAATGTCTGGTGCATGGCGAGTTTCAAGCTATTACCGCGAAACCTATGCCGAAGCAGAAACAGTTTAGGTG  
AAGTTCGCGCCCTGCGCCTGGCGGGTCAACAATATTTTCCCACGCTTTCATGGCTAAACGGCACTGCCACACTCCGC

GTCTGGCATCCGCGGGCCCTGATCAAGTTGAAGTGTGGGCGTTCTGTATTACTGACAAAGCCGCTCCGATGAAGTTAA  
AGCCGCTTTTAAAAACAGCGCCACTCGTCTTTTGGTCTGCTGGTTTTCTCGAGCAGGATGACTCGGAGAACTGGTGTG  
AAATCCAGAAATTGCTTAAAGGCCACCGCGCCCGCAACAGCAAAGTGTGTCTGAAATGGGGCTTGGTCAGGAAAAGCGC  
CGGACGACGGCATTCTGGCATTACTAACTATATCTTTTCAGAAACTGCCGCTCGTGGAAATGTACCAACGCTGGGCCGA  
TCTTCTGAGTAGCGAAAGCTGGCAGGAAGTGTCTGATAAAAACCGCCGCTTACCAGCAGGAGGTGATGAAATGAGTGC  
AGTTTCACTAGAGTTACATCACCGCATTAGCCAGTTTCTTTTACGAAGCCAGCTTACTGGACGACTGGAAATTTCTGT  
ACTGGCTGGCGCAGCTCGACGAAGAGATTCTGTTACACCATGCGCACACAGTTAACGCGCAAAACGCGACCCGCCGAAA  
GGCGTCCAGCCACCGACAACCTGGATTTTTAATGACACCAAAGACCAGCTGGAGCGGGAATCGCCCGTCTGGAAACGGG  
CATGGCCTGGGCGAGAAGAGCCCGCTCACGCACCCGCTCACTTAATCAGCAACTGCCAGATAAGCGAAACCGACATCCCAA  
ACGTATTTGCTGTGCGGGTAAATTATCTGCTTTATCGGGCACAAAAGAGCGCGATGAAACATTCTATGTTGGAACGCGT  
TTCGACAAAGTTCGCCGTCTGGAAGATGACAACTGGCGCTTGTGGAACGGGATATCGTCTGGATCAAGCGGTAATCAC  
TTCCATAACCTGAGTGTACTGTTCTGATGAATCGAATTTATGCGTGTCCCGTTCGGGATGTCCGGAGGGTGAGGCTCT  
CCGGATCGATACTCGCCGTCATCGCCCTGTTCAACGTTGGCGGCGAGTTTTATGCCATTAACGATCGTTGCAGCCATG  
GTAATGCGTCAATGTGAGAAGGGTATCTGGAAGATGACGCCACGGTGGAGTGCCCGCTACACGCCGCCAGTTTTTGCCTG  
AAAACGGGAAAAGCGTTATGCCTGCCGCCACCGATCCGCTCACACTTATCCAGTACACGTTGAAGTGGTGACATTTT  
CATCGACTTACCGGAGGCGCAGCATGAGCGATCTGCATAACGAGTCCATTTTTATTACCAGCGCGGATCGGGATTAGG  
GCTGGCGCTGTTGAGCGATTTATCGAAGAAGGCGCGCAGGTTGCCACGCTGGAAGTGTGCGCGGCAAAAAGTCCGAGTC  
TGCGTCAGCGATTTGGCGAACATATTCTGGCGGTGGAAGGTAACGTGACCTGTTATGCCGATTATCAACGCGCGGTGAT  
CAGATCCTGACTCGTTCGGCAAGCTGGATTGTTTTATCGGCAATGCAGGCATCTGGGATCACAATGCCTCACTGGTTAA  
TACTCCCGCAGAGACGCTCGAAACCGCTTCCACGAGCTGTTAACGTCAATGTTCTCGGTTACTGCTGGGCGCAAAAAG  
CCTGCGCTCCGGCGTTAATCGCCAGTGAAGGCAGCATGATTTTCACTGTCAATGCCGCTGGTATCTGGCGGCGGT  
GGCCCGCTGTACACCGCCAGTAAACATGCCGCAACCGGACTTATTCGCAACTGGCTTATGAACTGGCACCGAAAGTGC  
GGTGAATGGCGTCCGCCGTGTGGTATGGCCAGCGACTGCGCGGCCACAGGCGCTCGGGCAAAAGTAAACCTCGATAA  
TGAGTCTCTGACGCCGAGAAAATTGCCCCATTTTACCCTGCAATTTTTCCGCAACCGCGGATTTTACGGGGCCG  
TATGTGATGTTGACATCGCGGCGCAATAATCGCGCATTAAAGCGGTGTGATGATCAACGCTGATGCGGGTTTACGATTCG  
CGCATTGCCACGTAGCGGCTGGGCTGGATCTTAAAGGAAGCAGATGAAAGAAAAACGATCATTATTGTCGGTGGCG  
GGCAAGCGGCGCAATGGCTGCGGCCCTGCTACGCCAGCAAGGGTTCACCGGTGAGCTGCATCTGTTTTCCGATGAGCGA  
CATTTCTTATGAACGACTCCACTCTGAAATCCATGTTGCTGGAAGATTCCCCGAGTTACAGCAGGTGTTACCCGC  
TAACTGGTGGCAGGAAAACAATGTTTATCTGATTCGGGTGTAACCATCAAAACGCTGGGTGCGGACACAGAGAGTTAG  
TGTTAACCAACGGCGAAAGCTGGCACTGGGATCAGTTTTTATAGCAACCGGCGCGGCGAGCTCGACCGCTGCCGTTGCTT  
GATGCACTGGGAGAACGCTGCTTACCCTACGCCATGCCGGTGTGCGCCAGACTGCGAGAAGTTCTGCAGCCCGAACG  
GTCAGTCGTGATTATCGGTGCCGGAACCTATTGGTCTGGAAGTGGCTGCCAGCGCCACGCAGCGCAGATGTAAGGTGACAG  
TGATTGAACTGGCGGCAACCGTCATGGGCCGTAATGCACCACCGCCCGTCAACGCTATCTTTTACAGCGCCACCAGCAG  
GCTGGTGTGCGCATTCTGCTCAATAATGCCATTGAACATGTGGTCGATGGTGAAAAAGTAGAACTGACGCTGCAAGTGG  
GGAAACGCTTACGGCTGATGTGGTATTACGGTATTGGTATCAGCGCAACGAGCAACTGGCTCGCGAGGCCAACCTTG  
ATACTGCCAATGGCATTGTCATTGATGAGGCTTCCCGCACCTGCGATCCCGGATCTTTGCCGGTGGCGATGTGGCAATC  
ACTGCTTTGATAATGGTGCCTACACCGCTGCGAAAGCTGGGAAAACGCCAATAACCAGGCGCAAATGCCGCTGCCGC  
AATGTTAGGGTACCCTACCGCTACTGCCCGCCCGTGGTTCTGGAGCGATCAGTACAGTGATAACTTACAGTTTTATTG  
GCGATATGCTGGCGATGACTGGCTTTGCTGTGGCAACCGGAAACTCAGAAGGCGATTTGGTTAATCTGCAAAACGGC  
GTGCTTATCGTGGTGCAGCTGAATCAGGGCGTGAGATTCCGCCAATTCGCAATGGATCCAGAGCGGCAAAACGTT  
TGATGCGAAACTGCTGATAGATGAGAACATCGCGCTTAAATCACTGTAACCAGGATAATTAGCGAATATCTCAATGCCCTG  
GGCGTGGCGAGGTGCAAGAGTGTGATTACGTTTTAAATCACATTATCTTGCAAAAGGATTGGTTATGAACACACTACGT  
TATTTTGAATTTGGAGCTGCCCGCCCGTTTTGTTATTAATTGCCGATCGCCGTGGTCTTAATTTTATTATTTTTGG  
TTTTCCAAAATGATGGGCTTTGACGGTACGGTCCAATATATGGCCTCGTTGGGCGCGCAATGCCGATGCTGGCAGCGA  
TTATTGCGGTAGTTATGGAAGTGCCCGCCGCGATATTAATCGTGTGGCTTTTTTACCCTGCCGCTGGCGGTGCTGTTT  
ATTTTCTACACGCTGGGTACGGCGGTGATTGGTACCATTACTGGGATATGACCGCGATGCGGTTGGGCCAAAATATGAT  
TAATTTCTGGAAGAATGTCAGTATCGTGGCGGTTCTTGTATTGGCAATTACCAGGCGCGGGGCAATTTCTCTCGATC  
GGCGTTAGGAAAGATGCCGATGCGGCGTGAACGCCATTATCCGGCATTAAATAAATTACAGCCACTTACCCGCAACGAC  
ATCTCTGAAGTTGTTGATCCCTGGTGTAGCGCAATGAGATCACCCCTTCCGGGCGATGATGATCATCCGGCGCATG  
GCTCATCGTTCCAGACAGAAGAAATCAAACGCATATCTTTATCAAACGCAGGGTCGGAACAAAGATGAAATAACACG  
GTGAGGTGGCGTCGTTTCCATGATGATGGCATAACCTTCTGCGCTGCTCGATGCGGGCTGACCATTCCATCCGGCA  
AAACCATTGTTACCCACTGGCGCGGCAACGGCGCGGCTGGTAAAATCCAGTTCTGCGGTAGCTGCTCGAAAACCTC  
ACCCGCCAGCCACTGCTCCGCTCCAGCCAGTAACCGCTCGCCTGTGCTGAATCCGCGTTTGGCGGCAACGGAAAAT  
AAGGATGCCAGCCGTTACCAAATGGCAGCGTCTCTGCCCTTGATTGGTGACAGAGAGCGTACCCTGACGCTATCCGCC  
GTTAAATGAAACGCTGACTTACCCGATAGTGATAGACACCGCTGCGATGTTATACACCAGACAAAATATCATCGCT  
GTGCGAGACACATTGCCACTCGCCAGCCAGCATGCCGTTAGATAGTGGCATCCACTCAACATTCGGTTGACGTT

GATACTCACGCCCTGCCAGACAAAACGATTGCCGCTACCCGGTTTGCAAATGGCACCAGCGGAAAACATGAGGCATCG  
GTTGCCACACCGCTTTTTTTACCAGGACGTAAGAGCGGCGTCGTATCGCGCCAGAAGCCTTCGATTACGCCGCCCTGGTC  
AGAAACGTCCAGCTTTAGCGACCCGTGGGATAAGGTATAGATGGTCATCCGCTAACTCCTTAATCCGGGAAGTTAATCAC  
AACTTTCCCGCATTTGCCGCTGCCATCAGCGCATAGGCATCACCTGCCTGTTCCAGCGAGAAGCGATGGGTAATGGCGT  
TACGCGGCCACAGCTTCCAGTCCGTGATCATGGCGCATTTTTCCATATGGAACAGACTGGTCACCCAGGAGCCGATA  
ATCCGCCGTTGATGGTGCATCAGATCGGCGCTGACCTCGAATTCACCTTTCCGGTTTACCAATGTAACCACCCGCTCC  
CCAGTCAGCGGTGGATTGCACTGCCAGCAAGCGACCTGCGGCATTACCGGAACAATCGAGCGCAACATCCGCGCCACCGT  
GGGTGAGTTCGGCGATAATCTGCGGCAGACCTTCGGTGGTTGCTAAATAGCCGTGATCCATCACCCCTAACTGTTTTGCC  
ATCGCCAGACGTTCCGGCAGCATATCAACGCCGATGATCCGTTTTGCACCGGACCTTTCGCCAGCATCATCGCCATCAT  
GCCGACTGGCCCCAGACCGACCAGCACGTTATCACTGCCGAAAATTTCGCCGCGAAAATTCCTTCATACGCTGTAC  
CAACGCCGCAACTGATAAACGCACCATCTTCGTAGCTCAGCGCATCCGGCAGGAGGATCAGATCTTTTTCTTCGCCAGC  
AAGTATTCGGCATGACCGCCGTACGCTGCCAGCCGTAAGCCGTTTTCTTCGCCAGTACAAGAAATAGGAAAACCGCG  
ACGGCAGTTCGGGCAAAAACACAGCCAGAAATGTATACACCAGCACGCGTGCCTCTTTAAAATGGCGGCAGCCTT  
GCCCCATCGCCACAATCTGCCGACGCTTCATGACCGTTGATAAAGCCCTGGTATAACGGTTTATCGGGTCCCGCCGCT  
GTGGCAGGTTGATGATAGATATAGTGGACATCGTTCCGCAATCCCGGAGGATTTTATTGATCAGTACCTGGTT  
AATCCCCGGCTCGGCACCGCAACTTCCCGCAGATCGACGGTCGAATTTCTGGTAAATAAGCTGCCAGCATCGTTTTCA  
TAAATCCCTCATTAACAATACGATTAATTTTCATCCCTGCCGACCCCGCCAGGGGCGTTAAGGTTTAGCGTTTCGCTT  
TACTGCTTCGTTGGTCCAGCAAGATATTCGCCAGCACCGCCACCACGATGATGACGCCGCGTACCACCTGCTGAAAAAG  
GAGTTAATACCGAGCAGCACCAGACCGTTACCGATTAGCGTAATCACCAGCACACCAAGCAATGTACCGAACAGGGAACC  
GCGACCGCCGAAAGTGGCTACCGCCGACCGACCGCGGATGACGTCAAATCCAGACCGTTTGGCGCACCTGCGT  
TACCAGAACCAGGCGCGCCGCAACAAAATGCCGGTACCGCCGCTAATAATCCCGAAAGGGTAAAGATAAGAATGCGC  
ACCCGACGAACGTTGATGCCGCAACTGCGCCGCTAGCATTACCGCAACGGCAAAAACCGAGCGCCGAAGGCGGT  
TTTGGCGCTGATGAACACAAAACAGCGCAAAACAACATAATCATGATCAGCGGGATACCGGCACACCGAGAAATTGTCGC  
CCAGCCAGTCCAGCACCTCGTTTTCATCAATCGGCACTGGCAGTGCCTTCGCATAAACAGCCCCATTCCGCGCAGGGCG  
CTCCACAGCCCCAGTGTGGCAACGAACTTGGTACATTAACACGCGCGCAGCACCCCGCCAGCGTTCATCAGCGC  
GCCTAACAGCAACACCAGCAGGCACGCCACCGCCAGCGGAATTCAAATTGCAGCAAAAATGCCAGGCACACCGAGACAA  
AAGCCACCATCGCCCAACGCTGACATCAATTTACCGGAGATAATAATCAGCGTCATCGCCAGGCGGCAATCCCAATG  
GTGGCGGCATCGCGCAGCAGTTCATCTGGTTATCAATGAGATAAAGCCAGGCGGTTACGGGAGAAGACCAGATAAAG  
AATGGCAATACCACCAGCAACCGATCTCATTAAATGCGGACTGACAAATGTTTGAGCGAGACGCTCTTGCCCTGCG  
GCAATGGTAATGACGAAGCAGACATCTTCAGGTTCTCGGTAATAATTCATCAGTGACAGACAGAATGGCGGACATCAGC  
TCATCCACATTGACCGGAGCGTGAACTCCTGCGAGAACGTGCCGTGCTGTAATAACAGGATGCGGTACACACCAGCGG  
CAACTCCTCCACTTCACTGGAGATAAACACCACGCTTTTTCTTCGCGAGCCAGCTCACGGACAATACGGTAAATCTGCT  
GTTTGGCTTCGATATCGACGCCGCGGTTGGCTCGTGCAGCAACAAAATCTGGCTGGCAGCATAGACCAACGACCGATC  
ACCACTTTTGGCTGATTGCCACCAGAAAGCGTGGCGATGGGTGTTTCGCTACTGGCGGCTTGACCGTCATCCGCTGCAT  
CACCTTTCGGTCAGGCGGCGGATGGTGGACATTGAGCACACCGTTGGCGCTGATTTTTTCCGATTGGTTCAGCACTG  
TATTTTCGTC AACGCCAACAGGGAATGATCCCCGCTTTTTCGGGTTTTCTGGCGTATAGCCAATGCCGCGTTTCAGC  
ATGTCGCGTAATCGGGGCGGTGATTTTCTCGCCGTTGATAACAATTTCCGCTGTTTACTCTCCAGCCCAACAAT  
CGCTTCAGCAATTCAGTGCCTTGCCTCCAGCAGACCAATGCCGAGCACTTCGCCACGAGTACGTAATAAATGA  
TATCCTCCAGCTTGGGCTTATGGCGTAACGCACGGACTTCAGCAGCGCTGATCCACAATTTCTGAGGGGCTACCGGC  
GCAATATCAACGTGATCGGCCCCGAGCATCAGCGACACAATATGATGCGTGGAGGTGTTTTCGAGCATCATATCCCGC  
CACCTGACCATCGCGCATAACCGTGGCACAGGAGCAATGCGGCAATTTCTTCATCCGGTGGCTGACATAAATCACCG  
CCACGCCAGTCCGACATCTTTTTACCGCGCTGATCACAGTTCAACTTCCGCACTCGCAAGCAGCAACTGGTAGGTTCA  
TCAAGAATGACCACGCGGCTCGCCCTTCATCACCCGCGCAATTTCCACCAGCTGCTTTTGCGCCGGGCTTAGCGTTGA  
AACAAAGTTGTTGAGGACTAACGTCAACGCCAGCGCTGTAAGCAACGTTGGGCATCCTGCGCCATTTGCAGGTAATCAA  
TCATGCCGTTGCGGGGGGCACTGACCGAGGAGAGGTTTTCCGCCACTGTGACGCCCTTCCACCAGACTTAACTCCTGA  
TAAACCGCGCGCACCCCCAGTTCAGCGGCACGGCGAGTCAGCGTAGCTTCGTACCTTCCAGTCGCGTCTCGCAATCCA  
GATATCACCGTATCCGGGCGTTGCTGCCGTAAGCATTGAAATGAGAGTCGATTTGCCCGCGCGTTTTTACCTAACA  
GCGCACGAATTCGCTTTATTGAGCGTGAAGTTAACGTTATCCAGCGCAACGACGCGGGGATAACGCTTATTTCTGCC  
ACCACTTTTGTACCGGACTGCCTCTGTTGCCGTGAACATAGGGACCTCTGCGAATCAGCGATTAGGGCAGACCATCAA  
CGTGCCTTCCAGCCACTGTTTACCGTCTCCGTTTTGGTATAGAGATCGATAGGCACCTGAATCACTTTTTACCGTCCG  
GCTTGTATTGATAACCTCAATGTTTGCAGCAAAACAGCATTGCCATTTTCTTACCGGAAATATCCACTACCGCTTT  
CAGCACCTGATTGTTTTCCAGCTCCTGAGCAATTTCCGTTGTCATATCCGAACGAAAACAGCAATTTTTCCGGCCTGAT  
TTTGATTACGTACCGCTTTTACCGCGCGAGTGTGCACCGCCGATTTCCCAATAATGGCGTTGAGATCCGGCGTGGAG  
ATAATTAGTTTTTACCAACGGAATCGCTTATCTAAAACAGTCCCTTCTGATTAGCGACAATTTGCGCGCCGGGAAC  
GCGGGATTTTTAAAATCTTCAAATCCTTACGTGCGTGCACACAAAATCAAAGGCTTCGCAATTGATGACGGCAATTT  
TCGGCTGGTCAATTTTATTGGCAATAAATAATCAGCGGCAGCGTTACCCAGTTTTTACCAAATTCAGCGGATCGCCG

ACCAGATACGCCGAGACATATTTATCGACCCCTTTTGATTAATACAGGTGTTGTAGCAAATCACCGAATGCCCGCTT  
ACTGGCGGACGAACGGTACGGCTACTGCCATTTTCAGACACTGCCGATAAAATAATGGCATCGACATTACGCGCCACGA  
GGGTATCAACAAAGGTACTTTCTTTTCAAATATCACCTGGGCGTTAGTTTCTATTAAGTAACTGAACTTGTACTGAGGAATCT  
TTTGCCGCATCCTGAACGCCCTGACGCACTCCAGCGTAGTATCCCTGAGTATCAAGGTATATTGCGCCAATGGTCATTTT  
TTTTTCCGAGCCCTGGCAAATAGTGCGCTACCTAATAGCGTAGCCATTAATAATAGATTACGGGTTGTTCTCATTTTTG  
TAGGCATAGAGCCTCCTGTAGGGTTTTTATTAACAACGGCTTATTCTAATTATTTGTGATGAGCGGCAGCGCTGCCGC  
TCAAATATTACAGTAAATAGGGTTAGTGAACGCGGTTAAAAATAAAAGGCATCACGGTGGTGAATAATGCCGCTTTCCG  
CCAAGCCGATTAATCGCCGTCAATTCAGCGCGAGCAGACTCATATTGCGCAACCTCCCGAGTCCCGCGGACGCCAGCA  
TCGCCACCATCAGGCATTTTTCTTTATGCTGCTGTTGTAATCGCCATACAGCGACAACAAGTCAGGTTGCGAGACGGCA  
AAGAAATCCGCTTCGATACTGGTTTTCGCCATCTTTGCGCCACTGTTTCATTTCACTAAACAGTTGCTGTGCGGTTTG  
TTGTTGCGCCAGCAGTCGCGAGCCATCCCTTCCAGAAAGAGATAATCAACCGCTGATCGTTGTAATAACTGTGAATGT  
TAATAGTGCATCGCCGGTCCCGCCAGACGTAACAACGCGTCGCTTTCAGTTTCATCGCCCTGCGCGTTGGCGCATATC  
GCCTGCCAGAACAGATGCTGTTATCAGTTTCCCCGGTAAACGGCCTTCGTTAAATTCTCCGATAATGCAGCGCGGC  
ATGAAGCAGTTCGACGGCTGCTGCGGCTGTCTGGCATCAAGATGCTGCCAGGCGCGTAATAACTGGTTGAGGATAAAT  
GACTGGTACCTTCCCTTCCCGCTTCCACGGTGAATTTGCCGTGGCGAGAATGTCGCGCTTCCGCGCTTGTCTGCCTGA  
CCCGTGAGATGCCACAAATGAGCAGTTCTGCGGTATGTCGCGTTCGCGCTTTCAGCGCAATTTCCAGATTATTTCCAGACG  
CGCCAGTCGTTTCTCCGGTGTGGCTCCACTTAACTTATCCAGCAAATCCCGTTCGAAAAGCAGACGTGCATCCTGCGGCG  
CAAGCTGATAAGCATTATCAAGATAACGCGCGGCCAGCTCATAATCGTGTTGCTTATTCCACGCATGGATCGCTAACCCG  
CGCCAGCCGTCCGCAAATCCGCGGACATCTCTACGCAACGTTGCCAAAAGGCAATGGCTTTGTTGTAGTACGTTTGT  
GTAGTAGAAGCAAGTAGTAAATGGCGAGCAAACAGCACTCTTCAATACTCTCCAGCGCCGCACTTCTTCCAGCGTAT  
TCGGGAAACGGACAAACTGCGGGAAGACATCAATGGCTTTTGCAGCAGTTCGCCACGTTCCGGCTTTCGGCAGCAAGCTG  
GCTTGACAGTAAAGCGGCGAGCTGCGTGGCAGTCCAGTGCCTTCCAGCATCTGCGGCCAGGGTGGGCATTCCCAGTT  
AATCAGTTGCCGCGGTCATCAGGGCGTTAACGTCGCGTCCCTGACACAGACCGCCACTGCGCGAGAGCTGATTCCG  
TACGACCATCGAACAGTTCAGCCACCACAGAGTGGCGTTCCAGCGATAATCGCGCAGCAGTTTCTCGCGCTGCACACGC  
GCGTTGCTCCTGACGACCTTAAACACCAGCAGCAGATTATGCAGGCAAAGCACTTCTGATTGGTTGGGAGGCGCGAAG  
ACTTTGTTGGCAAAAATCCAGACCAGCGTCGAAGTTACCATTACGCGCCGCCAGTCTGCCAGGCCATAATAGCCACCGG  
CTTTGCTGTTGCCGCTCCAGACCGCACGCCAGAAATCCTCTTCCGCTTGTGATATTGTCCTGACGTTCTGAAGCACTG  
GCGCAATCAAATCGCCTGTCGCACTGCGGATTTTTGTTCCAGCGCATGTGCGCGTTTCCAGAGCCTGAGTGGCATAACGC  
CACCGCTTCCGGGAAATCTGCGCGTTATATTCCAGCATCGCCAGCGCCAGTTACAGCGATAATCCAGCGGGTCCAGCG  
CCACGCCGCGCAGGTAGTAATCGAACGGTGAACGGCTGGCGTGATGATATTGCTCCAGATGCTGACCGATAAACCAGGCT  
TCATCTGACTGGTAATGCTTGTGCTGCCAGTGGCGCTTTGGCGACGTCGCGTAACGGCAACGCTTCCGGCTGATGTT  
CTGATAACTCAGTACAATATTGCCGTCCGCATCGGAGAGCTCAATGGTCAGCCTTTCCAGGATTGATACCGTGCAACACGC  
CCTGGATGGCGGTGCGAGGCATCAGTCCACGGCATCATCAAGTAACGCGTTGCATTTACCAGTTTCCGGGATCGCCAGG  
CGGTATCCGTTCAACGGAGAGATGGCATAACAGCCCCACTCAATCCCCCGCTTACTACGCTGGAGTTTTATCACCGCATC  
GCGGGAGGCATTTTGCACCATGCCAAAGAATGATAAGGCAGGAAATACTGCTCAAACGCTTCTCTTGTAAAGCATCAA  
GCCAGGTAAAATCGGGCTGGTTATCGGCAAAAATACCGGTTCATCAGTTTCGATATACGGGCCGTTATTGTCGGTCAGACT  
TTATCCCACGCTGGCCAAATTCAGTGTCCCCAACTCCACTGTTTTTTACCTGGCGCAATATGGTGGTTGGCAACGTG  
CAGCAAACGCCATCTTCATCGTGACACCAGCGCCGACAAAATCGTACTGCGATTTTTCCGCCATATAGAGGTTGGAA  
CAGGCACATTTTTATAGCGAGAAATGTCCTCCAGCGGAGTAGTCCACTTTGTAGTAAGTCCGGTAGCCGATGCGGAAA  
GCCGAGACGGCCGTTTCCGCTGATCAAAACACCGGTTACATCCGGCGGAAAGACGCTGATGCCCCCTTCCCCCTT  
CACTGCCGGGTTGGCCACCACAAGAAATGACCGCGGCTGGCGTTCCCGTTATAGACGCGGCTGGCGATTTCCAGCGCCG  
CCCGGTGAGGCGCAGGGTGAACCTGTATCACCTGTAAACCATGCATCGGCTCCGTTTCCGCTACCCACACCGTCTGT  
GCACCGTCTTCATGGCTTCCGAGGGTGAATCAACGGGCATAAAGGTGGTGGGCGATGATGTTGCGGCCAGTTAAACTC  
AATCCCACCGGAAATCCACGGCCCCAGCAGCCCCACCAGCGCAGGTTTAAATGACTTCATTGTGATAAACAATAATCGCGCT  
GTTTCACTTTATCCCACGCGGATGCACCCGACCGCCAGTTCGGCAGGATCATCACTTTGATGTAGTCGTTTTCCAGC  
CACACCGCCTGCCAGGATTTCCAGGTTTTCTGCTCGCTCAGCGTATCGGTACGCGCTAGGGATAAACCGCGCCGGACGA  
TCCCTGATAAACCGGATTTTCCAGGAACATGGGATGTATATCCTGCGGCCGTTTTCATAGGTCCGGATCTCAACGCGCT  
CTTGCCACACTTTTACTGGAGTCATGGTGCCTCAATATTAACAAGACATACTGAATTAAGATTTGTGGCAGTGTATT  
GAACAATCTGGCAATGTTTTGCGGAATAATCACGCAATTAACATAACAAGTTTGTAGTGAAGATGAGAGCCTGCATTAAT  
AATCAACAGATTCGCCACCATAACAATGCGTGATTCTGGAACGCTGTACCAGCAAAGCGCCCAATAAATCAACGCT  
GGCCCGCTGGCGCAAATTTGATTCCGCGAGTCAGTAATTTTTGCAGGAACTGGAAAGCGAAAACGGGTGGTGAATA  
TTGACGATGAAAGCCAGACGCGGGCATAAGTAGCGGTACATGGCTGATTGCGCCGGAAGGTGACTGGACGCTGTGCCGT  
AACGTGACGCCACCAGTATTGAGTGTAGGTTGCTAATGCTTGTAAAGTCCGAAAGGTGAATTTGAGTATTTACAGAT  
TGATGCACCGACGCCGAGCGCTGCTGTCCGAAATCGAAAATGCTGGCATCGCCACCGTAAATTTGGCCGGACCAT  
CCATCAACCTGGCGTTGGCAATCCACGGTCAGGTTGATCCTGTGACCGGCGTGTGCGAAACCATGCCGCAAGCGCGTGG  
ACAACGCCGTTGGAGGTGAATATCTGCTGGAAGAGAAGCTCGGCATTCGGGTGATGGTGCATAATGACTGCGTGATGCT

GGCGCTGGCGGAGAAATGGCAAATAATTCGCAGGAACGGGATTTCTGCGTGATCAACGTTGATTACGGCATTGGCTCGT  
CGTTCGTGATTAACGAGCAAATTTATCGCGGCAGTTTGTATGGTAGCGGACAGATTGGTCACACCATCGTTAATCCGGAT  
GGCGTCGTCTGCGACTGTGGACGTTATGGCTGCCTGAAAACGTGCGCTCGTTAAGCGCATTAAAAAACAGGCGCGGGT  
ATGGCTAAAATCACAACCGTTAGTACTCAACTGATCCTGAAAACTGACTACAGCGCAGTTAATCGCTGCCTGGCAA  
GTGGAGAACCCTGGATCACCAGCTGGGTTGATCGCTCTGCCAATGCCATTGTTTGAGTCTGTATAACTTCTCAACATC  
CTCAATATTAATCAGATTTGGTTGTACGGTCGCAGTTGTGCCCTTGGTGAGAACTGGCTTAATACTATTATTCGCCAGAC  
AGGATTTAACCCTTCGACCAGCGACGAAGGACCGAGCGTGAAGCGACGCAAATTTGGCTTTGGGCAATTAAGCCGCGCAC  
AACAGGTGCTGGGAATTTGGCTATTTGTATGTTGAGGCGCAGTTACGACAGATTTGATGGCGCGATAACGTAGAAAGGCTT  
CCCGAAGGAAGCCTTGATGATCATAACGAAAAATTGCCTGATGCGCTACGCTTATCAGGCCACACGGAGATTGCAATA  
TATTGAATTTGCAAAGTTTTGTAGGCCGATAAGGCGTTACGCGCATCCGGCATGAACAACGAGCACATTGACAGCAA  
ATCACCGTTTTCGTTATGCGTAAACCGGGTAACGTGCGCAGATGTCGAGAACTTTACCTTTGATGCGCTCGATAACGGCT  
TCATCATTGATGCTGTCCAGCAGTCACACATCCAGCCAGCCAGTTCTTTTCGCTTCGGCTTCTTTAAAGCCGCGACGGGT  
AATCGCCGAGTACCTACACGAATACCGAGGTCAAAACGGGCTCTTCGGATCGTTCCGGTACGCTGTTTTGTTGACGG  
TGATGTTAGCACGGCCAGAGCGGCGTCTGCTTCTTACCGGTCAGGTTTTATCAACCAGATCAACCAGGAACAGGTGG  
TTATCAGTGCCCGGAAACCACTTTGTAGCCGCTCGAGAACACTTCTACCATCGCTTTAGCGTTTTAGCGACTG  
CTGCTGGTAAGTTTTGAACCTCAGGCTCCATCGCTTCTTTTCAGAGCAACCGCTTTACCAGGATTACGTGCATCAACGGAC  
CGCCCTGACCACAGGAAAAACGGCAGAGTTTCAAGTTTTGTACAGCTCTTCGCTACCACCTTTCCGAGGATCAGGCCG  
CCGCGCGACCCGCCAGGTTTTGTGAGTGGTGGTAGTAACAACGTGAGCATGAGGAACCGGTTCCGGTAGACGCCAGC  
AGCAACCAGGCCCCGAACGTGCGCCATATCAACGAACAGGTAAGCACCGATGCTGTGAGCGATTTACGCAATTTCCGCC  
AGTCCACCACGCCGAATATGCAGAGAAACACCGATAATCATTTTCGGCTTGTGTTCTTTGGCTGTTTTTCCAGATCG  
GCGTAGTCGATATGACCGGTAGCATCGATAACGTAAGGAACGATGTTGTACAGTTTACCGGAGAAGTTAACCGGAGAACC  
GTGAGTCAGGTGACCGCCATGCGCCAGTTTACATCCAGAACGGTATCACCTGGTTCCAGCAGCGCGGTGTAGACCGCAA  
AGTTAGCCTGGGAGCCGAGTGGCGCTGACGTTAGCGTAGTCAGCGCCGAACAGTTCTTTTCGACGATCGATCGCCAGT  
TGTTCAACGATATCAACATACTCGCAACCGCGTAGTAGCCTTTCGCGGATAACCTTCAGCATATTTGTTGGTCAGCTG  
AGAACCCTGCGCTGCATTACGCGCGGGCTGGTGTAGTTTTCGGAGGCGATCAGTTCGATGTGCTCTTCCTGACGTACTT  
TTTCTGCTCCATAGCCTGCCACAGTTCCGCATCATAATCGGCAATGTTCAATTCACGCTTAAACATCCGCATCTCCTGA  
CTCAGTAACAATAAAATTTTTGGCCTTATAGGCGGTCTGTTGGACAACGGCGAACAGTATAACCGAATCATTGTGCG  
ATAACAGGTCTTGACAAAGGAATTTACGCAAACGATTACCTTCAGGCTACGCAAGGCTTTGGAGAATAAAGAGCTTGCAA  
CCGGAACCGATTTCTTTTCAGGTTTGTGATGCAAATTTTTCACTTCATCACATTTCTTTCTGAAAAACACCAAAGAACCA  
TTTACATTGACAGGCTATTTTTATAAGATGCATTTGAGATACATCAATTAAGATGCAAAAAAAGGAAGACCATATGCTT  
GACGCTCAAACCATCGCTACAGTAAAAGCCACCATCCCTTTACTGGTGGAAACGGGCCCCAAAGTTAACCGCCATTTCTA  
CGACCGTATGTTTACTCATAACCCAGAATCAAAGAAATTTTTAACATGAGTAACCAGCGTAATGGCGATCAACGTGAAG  
CCCTGTTTAAACGCTATTGCCGCTACGCCAGTAATATTGAAAACCTGCCTGCGCTGCTGCCAGCGGTAGAAAAAATCGCG  
CAGAAGCACACCAGTTCAGATCAAACCGGAACAGTACAACATCGTCCGGTGAACACCTGTTGGCAACGCTGGACGAAAT  
GTTACGCCCCGGGAGGAAGTGTGGACGCGTGGGGTAAAGCCTATGGTGTACTGGCTAATGTATTTAATCGCGAGG  
CGGAAATCTATAACGAAAACGCCAGCAAAGCCGGTGGTGGGAAGGTAAGTACTCGCGATTTCCGCATTGTGGCTAAAACCCG  
CGCAGCGCGCTTATCACCAGCTTGAACCTGGAGCCGGTGCAGCGTGGCGCAGTGGCAGAATACCGTCCGGGGCAATATCT  
CGGCGTCTGGCTGAAGCCGGAAGTTTTCCACATCAGGAAATTCGTAGTACTCTTTGACTCGAAAACCGGATGGCAAAG  
GTGAAACTGGTCCGCTCCGGCAGTGATTTCTTTATGGCTGTCCGAGATGACACACCAGTGCAGTTAATCTCTGCGGTTG  
TGGTCAAACGCCAATGCTGGCAATGCTGACACGCTGGCAAAGCAGGCCACACAGCAAGTGAACGTTTCCATGCGG  
CAGAAAATGGCGATGTTACGCTTTGCGGATGAAGTTAAGGAACGTTGGGCGAGTCACTGCCGCGCTTTACCAGCGCACACC  
TGGTATCGTACGCCGAGCGAAGCCGATCGCGCTAAAGGTCAGTTTGTAGCGAAGGCTGATGGATTTGAGCAAACCTGGA  
AGGTGCGTTACAGCATCCGACAATGCAGTTCTATCTGCGGCCCGGTTGGCTTCATGCAGTTTACCAGCAAACAGTTAG  
TGGATCTGGGCGTGAAGCAGGAAAACATTATTACGAATGCTTTGGCCGCATAAGGTGCTGTAATTTGATGTTGCCGGA  
TGGAACATCCGGCAACCTTGACGCGGTTTAAATTGCCGCGTCTCCTCTTACCAGGATCGGAATGACCCGTC  
CACGTCAAAGCAGAAATTTTACCCTCACGATTTTGGCGTTTGCAGCGTGCAGTAATGGTATCGACACAGGTATCGA  
CAATGTCGTCGGTACGACAATCTCAATTTTCACTTTCGGCAGAAAATCCACCATATACTCCGCGCCGCGGTACAGCTCG  
GTATGGCCTTTCTGGCGACCAAAGCCTTCACTTCCGGTACCCTCATGCCGTAATACCGACTTCGGCCAGTCTTCCGCG  
GACATCGTCCAGCTTGAAGGTTTTATAATCGCATCAATCTTTTTCATGCTATTCCTTAAAAAGGTCGCTGTCTTTTGA  
TCTGCTAAACGTAACACATAACGCCAATTCATTCTTGAATCGTTTGCATCCAGCTCGTGTCCGGAAAGCAGTTTATAA  
AATCTGTCCGGTTGCGCCCGCCATTCTCGCCGCGTGGGTGACGTTGCCTTTGGTGATTTGCAGCAGCTTACGCAAATA  
GTTGAGTTCAAACGATTAGCTGCCTCAACAAAGGTTGGCAGCGCGTATTTTACCCTCCAGCGCTGCTCCACCAGCG  
CATCACTAATCACCAGGATGAGGTACGCGCCACGCACTGTTCAATCACGTTGACCAACTGGCGCACATTACCCGGCCAG  
CTCGCGGTCATCAGGCGTTTTCATCGCATCGGTAGAGAACGCGCGGACAAACGGTTTTATGTCGCTCTGCCGCTGGCGCAA  
CAGGTGATTTGCCAGTAGCGGAATGTCTTGTGCGCTCCGCCAGTGCCGGAATTTTACGGCTGACAACGTTGAGGCGGT



AATAGAGATCTTCGCGGAATTCCTCCGCGGCCATCGCTTTTGGCAGATCACGGTGAGTGGCAGAAATAATCCGCACATTG  
ATATCAATATCGCGGTTACTGCCAGCGGGCGCACTTTACGCTCCTGCAACACGCGCAGCAGTTTACCTGTAACGGCGC  
AGGCATATCGCAATTTTCATCGAGAAATAGCGTTCCGCCTTCCGCCCTGGAATAAACCTTCGCGATTGCTGACAGCGC  
CAGTAAACGCGCCACGCGCATGACCAAACAGCTCCGACTCCAGCAATTGCTCGGGCAATGCCCCACAGTTAATAGCAATA  
AATGGTTTTGCTGTTGCGCGGGCTGGCGTTGTGGATAGCCTGGGCGAAAATCTTTTTCCCGGTGCCGCTCTGACCGTTAAT  
CAAAACGCTGACGTCTGATTGCGCCACCAGCCGCGCTGTTCCAGCAAACGCAGCATCAGCGGGCTGCGGGTGACAATTG  
CCTCGCGCCAGCGTTTCATCGGTGGCTGGCGCGGATTGCTCCAGCGCATCGTCAATTGCCTGATATAGCGCGTCTTTGTGCG  
ACAGGCTTGGTGAGGAACTAAAAACGCCCTGCTGTGTTGAGCAACGGCATCGGGAATAGAACCATGCGCGGTAAGAAT  
AATTACCGGCAATTCGCGGCTGCACTTTCTGGATTTTCAGCAAACAGCTGCATACCGTCCATTTTCATCCATCCGAGGTGCG  
TGATGACTAAATCTACTTTTTGCGGATTAGTACCCGTAATCCTTCAGCGCCACTTTCCGCCGTGACCACACTGTAGCCT  
TCGCTGGTCAGGCGCAGGCAAGCAGTTTCAGCAATCCCGGATCGTCATCGACCAATAATAAATGCGCAGGTTTATGGCT  
CATCAGGAGTGACCTCATGGGTGGATGGCGGGGCTTTTACTCTCGTGCGCGTATCCGGCGAGAAATTTCCAGCCGGT  
TTGCGGGTCGAGAGCTGGCGTTCAATATCGGTGAGTTTTCCAGCTTGGGGTGGTGGAGTTCCAGTTGCTGCTGTAGAAC  
GTGATGTTGCTGGCGCAATGATCCAGCTCGTGTGCTGGACTGCTGGAGTTACTGTAACGTTGGCGCTTTCCGCCA  
GTTGTCAGTTGTCAGCGCTGACCATCGCGCCAGAGTTGATACAGTGGGCGAACCTGTGCCGGATCTCGGTACTTAACGCT  
TCAATACGCGCAGCCAGCTGGCGGGCTCATAACGGCTAATTTTTGGCGTCCGCGAGCAAATCCCTTGTTTAAAGGTATT  
TTGCCAGCTGCCGTGCTCATATTGGCGAGCTTGGTACGCGACTGCGCAGGCATTAACGATCAGCACAATCCATCGCCC  
GCAGCCAGTAAAGCGATTGGTTTTCGGTTGATTTACCTTGAGCGCCAGATGTCGCTACATTCAGTAGAAAAGATAGTCA  
GCCAGTTGATAAACCGGAATTTTTTTCTTCTGCTGGCGTATCAATGGCTGGCTTATTGTGATTCTGCACGCAACCAGCAA  
TGCCAGACATGGCAGCCCTGCCAGCCACAGCCGTCGGGGCAATAATCGTTGAAAAATGTGTCGCATATTCACCAGACTTA  
AAGCCTATCCAGTGGCGTAATTGTTGAGACAGTCTGGACATGGACAGCGCGGAGAAACCGGAGCGTACATATCGTAC  
GTGAAGATTTGAGCACTGCCCGGGCCGAAGTACAAATAAAATAGCCTGATAGGATAGGCTGTTAGCATTATTTCTGTG  
TTTTTGCAGCAGGTAATCAATGCGGAAACAAACGCTTTGCCGCTCTCGTCGACCAGATACAGTTCCCTTGCATACG  
GCGAATAAATCCCTGGCAATGCTTAATCCAGACCCTGCCCTTACCAGCCCTTTTCGCTGGTGGCTTCCCTGAAAAA  
AGGGTTCGAAGATCATGGCGGTTCTCTTGGGAAATGGGCGTGCCTGTATTGATGACATCAATATAAACCCGCGCACCA  
TGTAACCTGCTGCGAAGGCAATGTTACCGGATTACGCCCCGATGACCCGATTGGAGTAAAGATTATCCAGTACGCT  
CATCAGCAGCATTGGCTCCGCCAGGCAAGCTGTTGCTTTGAGATCGACGTCGGTATGCATCATTTTAGCCGCTGCGGGCA  
GGCTATGAGCAGAAACCACTGTCTCCACCAGCGGTGCTAACTCAACATTCTCCAGTTCCACCAGCACTGTCCGCTGTTTA  
CGTTGTAATCAAGCAGTTGTTGATCAGTTTTTGCAAATTGCGGCTGCTGCTATCAAGAATGCTCACCACCTCTTTTTG  
CTCTGGCGTAAGCGGCCCAACCTGGTCAGCCAGTAATCAGTGCCCTCGCGCATACTCGCCAGTGGCGTTTTTAATT  
CATGAGATAAATGTCTTAAAAATTGATGGCGTTGGGATTCCAGCCATGACAGGCGCTCACTTAACCAAGAATACGTTGC  
CCAACCGAGCGTAACTCGCTCGGTCCACTGAACGAGACGCTATTGCCAGAGAACGCCCTTCCCCAGACGGTTGATCAT  
GGCTCGATATTTTTACCAGCCCGATAATCATCCGCGTGAAGAGCAGTACCATTACCAGACTCACCAGAAATAGCACCA  
GCGATTGCCAACCAAAATATTGCCACGTTTGGCGATTTACGCTGAAGCTGCTGCCACGAGAGAACCACACTGTGCGC  
GTGGCTGTACCATTTGGTATTGGCACTGGCAAAGGCTTCAAGACGTGCGCGGGCGGCAGCATCGGGACCGCTGTTGTT  
ACACTGAAGTTGAGCCAGATTGTGAAATCCTGACGTAATGCCTGGTAGAGTTTATCGTCCGGCAGCAGCCTGCGTGGG  
CATCAGCATTTCGCTGTAACGCTTGGCTGGCTTTGATAAACCTTCGCCAGGTTGGTTCGTCAGCACGAATACTGA  
CGGTAACACTAGCTCCATCTCCAGCGCCGCTTGGTCATCGCTTACTGCGCCGGCATCAATAAGCGTAGTGCGGTTAAC  
CAGCGCCGCTGATCGCTAAGCGCATTACGGCTTTGCCAGGCTTGCATGCCAGCACCAACAGGGGCAGCAGAAATCAGCA  
AAAACTCCAGCATTACCAATTGTGCTAATGAGCGGGGAAAAACGGCCAGCGTTTCAAGGTGTTACTCTGTCGACAGCGG  
AATAGCCTGATGCTAACCGAGGGGAAGTTGAGATACAAACAAAGCCGGGAATTACCCGCTTTGTTATGGAATAAGGCGGT  
GCCTAACTCGACGTTTCCGCCGATGGTTGATATAGCTACGCTGATATCAGAAGTTGGACGGCAGGCACCTTGTGTGCGT  
CATTGATTTTTATGAGCAGTCCCGAAGGGGCTGACATAAGTCGGTGAATGAGCCACTGGTTACTATTATGAGTAAAC  
TGTGCCAATAAAGAAAATAGTTTGGTAACGTAATGATTATACGTTGCTTTGAGGGGTTTATGCTCCTCCGCTGTTTGA  
TGTAATCAGCCACTGTGTCGCTAAAAAGAGACAACCTAAGATAAATTTAGATAATATAAAATCAATGAGTTAAGT  
GTCGCCAGAAAGCGACACGGCAAACACCATTGTCGTGATTTACAGACAAAAAAGCTCCCGGAGTTGGGAGCTTATG  
ATAGTGGTTGGTCTTAATGCCGATCCGGGCTGCAAAACCAATGGGCTGACGACTTACCCCAACTGCTTACGCGCATTG  
CGGAAAATGCGCATCCATGGCCATCCTCGCCCAGTTTTCCGGATGCCAGGAGTTGCTGACAGTACGGAAAACACGTT  
CGGGTGGGCATCATAATGGTGACTCGACCACTTTCAGTCTGACTGCCGTAATACCGTTCGGTGAACCGTTCCGGTTAG  
CCGGTAGGTTTTCAGTGACTTTGCCGAAGTTATCGACATAGCGCAGTGCCACCAGCCCTTTGCTTTCCAGTGCCGCCAGA  
TGCGCCGATCAGCACTTCCAGCGCCCTTACCATGAGAGACAGCAATCGGCATTTGCGAGCCACCATCCCCTGCAA  
CAGCAGAGACGGCTTTGGGTTACTTCAACCAGGCTGAAACGCGCTTCAAAGCGATCGGAGGTATTGCGCAGAAAACGTTG  
GCCAACAATCACTACCTGGGATCAGTTACGCGAGTTAGACATCATCTGGCAACCGTTACATACCCCGAGCGCCAGCGTT  
TGCGGACGGTGAAGAAGTTGCAAACTCATCGCTACACGGTATTGAACAGGATTGACTTCGCCAACCTTACCAGGC  
ACCCAGCACATCACCGTAGGAGAAACCCGACGCGACCAGGGCGTGAAATCTTCCAGGCCCGTGGCTCCGGTACGCA  
GGTCACTCATATGACGTCGATAGCATCAAAGCCTGACGGTGGAAAGCTGCCGCCATTTCAACATGCGAGTTACGCCC

TGCTCACGCAGTACGGCAACTTTCCGACGTGCGCCAGTGGCAATATACGGTGCTGCCACATCTTCGTTGATATCGAACGA  
CAGTTTTACATTACAGCCCCGATCGGCGTCGTTAGATTTCCGCTGATGCTCCTGATCGGCACACTCCGGTTGTCACGCA  
GGCGCTGCATCTGCCAGGTAGTTTCTGCCACCAGACACGCAACGTGGTGGCGCTTTCCGCTGAATACAGTCTGCCCGTTG  
GCGTAATCACAAAACGGTACCGGAAACCGCTGCCCTACATAAATGGACACAATCAGCAAGCCCATGCTGTGCCAGTAC  
GACTCGACCGCTTACGGTACGCGGCACGAACCTGAATCACCACCCAGTTCCTCGTTAAACAACGCCGCCAGGCGAT  
CGTACCCAGAGTGGCGATATCCGCGTCAATGCCACAATGACCAGCAAAGGCCATTTCCGCCAGCGTTACCAGCAGGCGG  
CCATCAGAGCGGTGCTGATACGCCAGCAGCTTACGCTGTGCAACCAGCGCTGAATCGCGTCATAGAAGCCTTTAGTTG  
CGCGACATCGCGTACATCTGCCGTTTTGTCGCCAAGCTGACGATAAACCTGCGCCAGCGCGTTGCGCCAGCGCGTTAT  
TGCTTTGCCCAAATCAATCAGCAGCAGTGGCTTATCTTCGGTAGAAAGCTGCGGCGTGATGGTGTGACGTACATCTTCC  
ACGCGGGCAAATGCAGAAATCACCAGCGACAGCGGCGACGTATTTCCGCTCTTCGTTACCTTCTGCCAGCGGGTTTT  
CATCGACATGGAGTCTTTACCCACCGGATCGTCAGGCCAGCGCCGACAAAGCTCTTCGCCACGGCTTTAACGGCTT  
CATAAGGCCCGCATCTTACCAGGTTGGCTGCCGCCCATCCAGTTGGCGGAAAGTTGATGCGTTGATATCGCCA  
ATTTGTGTTGCGGCGATGTTGGTTAACGTTTACCAGCCGCGCAGCGGCGAGAGGCGGCGAAATCCAGCAGCGCAACCGG  
CGCAGCTCGCAATCGCCATCGCTTACCAGTAGTGTGCGAGGCTGGCGGTAGTGACCAGCGCAGTTAGCGACCGGCA  
CCTGCCACGGCCCAATCTGATCGCGCGTACCATGCCGTTACGCTGCGGTGCGCAATGGTACCAGGAAGGTTTTT  
TCCGCCACAGTGGCGAGTGCAGCACAGTTTTACCAGCTGCAATGGTGTGATCCCTTACGGGCCAGCGCTCGCTTT  
CGTTTTACGCTTTGTACATCGCGGTCATCTTCGCGTTTTTACCAGCAGGACGTCCAGCGGCAGATCGATCGGCTGAT  
TATCAAATGACGATCGTGCAGAGAAAGATGCAAGTTCTTCGGTCCGTTACCAATCACCAGCGTAGGGTGGCGCTCACGC  
TTACACAGTTCTCAAACAGCGTAATTGATCGGCAGCAACCGCCAGCAGTAGCGTTCCTGGGATTCGTTACACCAGAT  
TTCCAGCGGGCTCATGCCGGTTCTGTCGCTTAGAATCTCGCGAGTTCAAATTTACCAGCGCGCCCGCGCTCGCTACCA  
GTTCCGGCATGGCGTTAGAAAGACCGCCAGCGCAACGTCGTGGATAAACAGGATTGGGTTGGCATACCAAGCTGCCAG  
CAACGGTCGATCACTTCTGGCAGCGACGCTCCATCTCCGGTTGTCGCGCTGTACGGAAGCAAAGTCGAGGTGGCATC  
AGACTGACCAGACCCATAGAAGACGTCGACCACCGCAAGACCGATGTTCAATTGCCGGCCCGGAGAACGACCAGCT  
TCGCACCGACGTTGATCTCGCTTTTTGTACGTGATCGGCGCAATGTTGCCGATCCCGCCCGCAGCATGATCGGTTG  
TGATAACCGCGCAGCTCTTCGCGTTGTGGCTGTTCACTTTTTCTCATAAGTACGGAAGTAGCCGTTAGTGGCGGACG  
ACCAAATTCGTTGTTAAACGCCGCGCCCGCCAGCGGGCTTCGGTCATGATGTCCAGCGCGGTGACAATGCGCTCAGGCT  
TACCGAAATCTTCTCCACGGCTGTTCAAGCCAGGAATTCGAGGTTGAAACGGAGAAACCAACCAGACCCGCTTTC  
GGCTTTGCGCCGCGCCCGTGGCACCTTCATCGCGATTTACCAGCGGAACCGGTCCGCCGCCCCGGCCACGGAGAAAT  
CGCGCTCGGGTGGTTGTAGTTTTGACTTTCATCAGAATATGCGCGGTTCTGATGAAATCGTAGCGGCCGTTTTCTGT  
GGTACGAAAGTAGCGGCCACTTCAGAACCTTCCATTACGGCGCGTATCTTTATAAGCAGAGAGAACGTGATCTGGC  
GTGGTTTCGAAAGTATTTTTGATCATCTTGAACAGCGATTTCCGGTCTGTTACCATCGATAAACCAGTCCGGCTTAA  
AATTTGTGGCGGCGAGTGTCTCGGATTCGCTGGGCAACATATACAGTTGATGTCGTTCCGGTTACGACCAAGCTTTG  
TGAAGCATCTCGAGATAGTCAATTTTCATCTTCGCCAGAGCCAAGCAAGACGCAGGTTAGCGTCGATCAGCGCCTGA  
CGGCCCTGCCAGCAATCAACGCTGGTAACCGGAGTTCGTTGATGGTGGGCAACAACGCTCTGCATCATCTAAAGC  
AAAAAGACGTTTTCCATCATGCGGTGTCAGTTCAGCGGTAACCTGCTGCCATTGTTATTGTTAGCGTACCGGCTT  
CTATATAGTAAGCAACGCCGCGCTCAAGCGGTTTACCTGTTGAGCCGCAATATGGGCAATATCGGTGCTTTGAA  
GACCAGGGAGAGATGGTCCAGGACGCGGGTACCAGCAGGAGTTTGCCTTGGGGGCGTGGCTGGCAGTGGCGGGCC  
ATATTTAGCAGGCGTTCAAGTTGTGCGTGTCTCATCGTTAACGGCGCATTGAGGTGAGCAAAATGGACATACTCGG  
CGTAAATATTGTAACCGGAGCCTGGCAGCTGAAAACGTCGACGAGTTTGTGATTGGAATGCCGACAGTGCAGCG  
GAACCACGCAGAAATTTCCATCATAAGTCTCTGCTTCTAAGCTTTCGTTACCCAAAGGGGGGAAACGGGCGCTATTA  
TAAAGAACTGATGCGCTGACGAAACCGTTTTGCTGGAAATAAAATCACCATCGTGAATTAGCAACCGTCCCGCAATG  
GCTGTAATAAGTTGCCATCTGGCGAGTTTTACGAAAATGCCGCTCATTTATGAGTAAACCTTTCACTATTATTACGTT  
TTTTCAAGCTGGGACGCGCACGACACAGAGAATTAACATAATTGAAAAATTAAGATTAATTATCTGTTATCGGCATTC  
TGGCACTGCTGCTCGCGTCTCTGCGCATCCATTCCCTGGTTTGGTAAAGCCGACAACCGTATCGCCGCCATTCAA  
GCGCGGGGAGAGTTGCGTGTGAGCACCATTACTACTCCCTGACTTATAACGAAATCAACGGGAAACCTTTTGGCTGGA  
TTACGAACTGGCGAAACAGTTTGGCGATTACCTCGGCGTAAACTGAAAGTGACCGTGGCGCAGAAATCAGCCAGCTGT  
TTGACGACCTTGATAATGGTAACGCCGACCTGCTGGCGCAGGACTTGTCTATAACAGTGAGCGGGTAAAAAATTATCAG  
CCTGGCCCTACCTATTATCCGTGTCACAACAACGTTTTATAAAGTGGTCAAGTATCGCCACGTACGTTGGGCAACCT  
GACGGCGGAGCAACTACCAGTGCACCGGTCATGTTGGTTAACGATCTCCAGACCCTGAAAGAAACAAAATCCCGG  
AATTAAGCTGGAAGGTAGACGACAAAAAGGCTCTGCGGAATTAATGGAAGATGTCATCGAAGGAAACTCGATTACCC  
ATTGCTGATTCTGTCGCATCAGCCTGTTTACGCGGTTACCCGGAGCTCGCCGTAAGCGCTGATATCACCAGTGAACA  
ACGGTGACTTGGTTTAGCCGTTAGATGGCGATAATACCCTTCCGCCCGCTGCTGACTTCTTCAACGAAATGAATG  
AAGACGGTACGCTGGCAGCATTGAAGAGAAATACCTGGGGCATGGCGATGTTTTGATTACGTCGATACGCGCACATTT  
TTACGCGCGTGCATGCGTACTGCCGAGTTAAAGCCCTGTTTGGAAATACGCCGAAGAAATGACTGGCGTTTGTCT  
GGCCGCTATTGCTTATCAGGAATCGCACTGGGATGCACAGGCCACTTACCAGCGGGTGTGCGCGCATGATGATGTTAA  
CCAAAAATACCGCGCAAAGCCTCGGCATTACGGATCGTACCGATGCCGAACAGAGCATCAGCGGTGGCGTGGCTTATTTG

CAGGATATGATGAGTAAAGTGCCGAAAGTGTCCGGAGAACGAGCGGATCTGGTTTGCCTCGCTGCGTACAATATGGG  
CTATGCGCATATGCTGGATGCCCGCCCTGACGGCAAAAACCAAAGGAATCTGACAGTTGGGCTGACGTAAAACAGC  
GTCTGCCTTACTTAGCCAGAAACCTATTACAGCAAGCTGACTTACGGCTACGCTCGTGGACATGAAGCCTACGCTTAT  
GTCGAAAATATTCGTAAGTATCAGATTAGCCTGGTGGGTTATCTGCAAGAGAAAAGAGAAGCAGGCTACAGAAGCGGCGAT  
GCAACTGGCGCAGGATTATCCGGCGGTATCGCCTACGGAGTTGGGCAAAGAGAAATTTCTTTTTCTCTGTTTTCTTCC  
AGTCGTCATCAAACTATTTGACCCATTCTCCCTCTCTGCTGTTTTCCAGGAAAGGGAGTGAAGAGAAAACAAAATTAATCC  
GTCGAGGATTGCGCTTTTTCTGCGCTTAATTTCTGGCGGCGCATGCGAAAGAAGTCACTGAGCAACGCCGCGCACTC  
ATCCGCCAGTATCTTCCGTAATTTCCACTCGGTGATTCATACCCGGATGATGCAGCACATCCATTAAGATCCCAGCAG  
CGCCAGTTTTCGCGTCACGCGCACCAAGACCACGCGACCAATGCGACTGTGGATCATCGCTCCGGCACACATTACACAT  
GGTTCAAGCGTGACATAACCTGGCGTGCATCAGACGATAATTTTGATCACCAGACCACCTGCCGACGGGCCATGAT  
TTCTGCATGTGCGGTGGGATCATGGCGACCAATCGGGCGGTTCCAGCCTTCGCCGATTACCCGATTGTTATGCACTAATA  
CCGCGCCGACCGGCACTTCCCGCTCATCCAGGCACGTTTCGCCAGCGTCAGCGCGTGACGCATCCAGTATTCGTGGCTA  
AATTCGACTTCAGACAAAAGAAAACCTCCGGTTATAAAAGCGCGGCGCATTATACAGGACGCTATGCTTACTCTATTC  
CAGTTGTGGAGTTACCCGCGCGGGGTTACTCGCCAACGATGCTGACAGAAATAAAGCAGCGGATTGCTCTGATTACTGT  
CGCTAAGCTACTGTACAGCCGAGCGGAGTCCGATTTTGGCTCCAGTTGTGCGACCTTTTCATGTCCAGACAACGC  
ATCGTCAATACCAACACCACATAGCCACGCTGAATTTGGCTGGCGATAAGATTAACCCGCGCAGCCAGGGCGTATCGAA  
ATAAACCGCTTCAACCAGCGCTGCGGAGAGCCGTAATCAACCAGATATCAGCATCGAACTTAACAGGTAGGTGGTTA  
ATCGCTCTGAACCAGCGGAAAGCGGTAACATTGTGCGGAAACCAGCGCACGAAATCGGCCGTGCAACGTCTGTAAACGT  
GCTTCGCTGTGACCAAAAGTGACCCCCACAGAAGCAGACTCATCGGCCAGCGTGCCGACGACCTTTTTATCAATAACGC  
AATGGCTATAATCGTAACAACGCGCAGGACAAGTAACGCATTACGCGGTTGGCGACGTAGTAAATAGCGCAGAAAACCTGC  
CGAACATATCTGCTGATGCAATGTTCCATCTAAGTCAAAAACACCACACGACGCTCGTGAGTTGCCAAACATACTCC  
TCTGGACTGAAACATCTGATTAATTTTCTGCTACTACATAGCCTAACAGATAGATCATCACTTTTTCCGGCAACAATCGAC  
CGCATCATGGTAACCTGGAATTTTTAATTCATGGCAATTAGCGGCAATGGAATATAAAATTCCTCGCGTGTGTCTCATA  
TTGCCTGTTGTGCCACTATTTTCATCGCGAGGAAAGATATGAACGGCTTACTTCGATCCGTACGCGTTACCAGGGGCTT  
GCCAGAGTGATAAAAACTGGCGGATTATCTGCTGCTACAACCTGATACGGCGCGCCATTAAGCTCTCAGCAACTGGC  
CAACGAAGCCGGAGTCAGTCAGTCCAGCGTCGTGAAGTTCCGCGCAAAAACCTCGGCTATAAAGGTTTTCCGGCGCTTAAGT  
TGCGGTTGAGTGAAGCGTGCAAGCCAGCCGGAATCACCTCCGTGCCATTATAACCAAATCCGCGGTGATGATCCG  
TTACGGCTGGTCGGCGAAAAACTGATTAAGAAAATACTGCCGCTATGTACGCAACGCTAAACGTTAATAGTGAAGAGAA  
ACTGCATGAATGCGTAACAATGTTGCGCTCTGCGCGCGGATAATTTCTGACCGTATTGGCGCTTCGGGTCTGGTGGCGC  
AAAACTTTCCTGGAAGCTGATGAAGATTGGCTTCAATGCTGCCGAGTGGCGGATATGCATGCGCTACTCGCAACAGTA  
CAGGCGTCTCCCTGACGATCTGTTATTAGCCATTTCTACACCCGGTGACGACGCGAGTTAAACCTGGCGGCGAGATGA  
GATGCTGCGAGTGGGCGGAAAAGTGTGGCGATTACCGGCTTTACTCCGAATGCCCTGCAACAGCGTGCTTCTCATTGCC  
TGTATACCATTGCCGAAGAACAAGCGACAACAGTGCTTCAATCTCTGCTTGTACGCTCAGGGAATGTTAACGGATTTG  
CTGTTCAATTGCGCTGATTACGAGGATCTGGAACGGCACCAGAACGATTCGTATAGTGAAGCGCTGGTGAAAAACT  
GGTCTGAGTAAAGAAATGCGCGTATAATGCCCGCCCGGTTTGTGTTGTTTTGAGAGTTTCTTATGGCGTTGTTAATCACT  
AAAAATGCATCAATTGTGATATGTGTGAACCCGAATGCCGAATGAGGCGATTTCAATGGGAGATCATATCTACGAGAT  
TAACAGCGATAAGTGTACCGAATGCGTAGGGCACTACGAGACCAACCTGCCAGAAGGTGTGCCGATCCCAATACTA  
TTGTGAAAGATCCGGCGCATGTGAGACAGAAGAACAGTTGTGGGATAAATTTGTGCTGATGCACCACGCGGATAAAAT  
TAATATTCTACTCTGGAAGTAGAGTATTAATTATAGTACTGCGGAGCCTTAACGCCATTATTTATTTAATTTGATGACA  
TTAGCATAACTCATTCAAGTTAATTTATATAGTACTGCCAGACACTTATTTATAGTTATTAAGGTGCGTCCGACT  
GGTTCACCGGACGCACCTTAAGTACGTTTCTTTGTTTATAAGAACAAGGATCAGCTGTAACCAAGCAATGATGATTT  
TGATGACCCGTTAATCAGGTATCGGCAATCAGTCATTCTGTTTTCTTAAACAAGGAATGCAGCATTAGATTAGCCC  
TTACATCTCCCAAAAACCTGAACGTGCGAGTTATTGAGGGTGCATGCTGCACTCCACACCAGAGCTTTGACGACCACTC  
GTTTCAATGGGGGAATTTCTGTGGCATGGTGTAAAGCACAGCAAAATCTTCAATAACGAAGCCAATTTAATGTACTTACG  
AATTGGCGGTACGTTAATCTTCCATCAATATTGCTTTCTCGTAAAGGCTCGAGTTTTTATGCTAAAGATTGCAAGTT  
GCTTGTAAGATAAGTACTGATCCATAATCGCTGTTGTTGAGGGTGCATGCTGCACAAAATTAAGTTAAAAAGTAA  
AACCCCGTTCCTTACCAGTTCCGGGGTTTTACTTTTTAAAGAGAACGGTATTATTTTTAACTTTCAATAATTACCGTGG  
CACAAAGCATAGTCCGCTCATCTGCCAGGTTACATGCATTTTGAACGCCAGCTTTTCCGCCAGTTTTAATGCCTCG  
CCCATAGCCGTAGCCGTGGTTTCCGAGCTCATCATTGAATACTTCAAATTGATTAACGCCAGACCATTGCGGATCCC  
GGTGCCAAACGCTTTTGTGCGGCTTCTTTCACAGCAAAACGCTTCCGCAAAAACGCACCGGCTGGTGGTGCCTTTCC  
AGATAGCCCATTCGTTATCGCTTAATACGCGGCGTCCAGGCGATCACCGGATCGGGCGATCACCGCTTCGATGCGAGCG  
ATCTCCACAATATCCGTGCCTAAACCTAATATTGCCATTAGCCACGCGCTTCCAGCATCAGACGCTTCATTTCTGCCACC  
GCATCTTTTCAGTCCGGTCACTGCAGACCAATAATGGCATGACCGATATTCAGTTCATGCATCTCAGGGATGGCGGC  
AATGGCTTTACGTTGTGATAGGTGAGCCGTGTCGGCGTTAATTTTACAGCCGAGGCTTCCGGCAAAGGTGCGGCTT  
TGCGGATACGCGCCAGCTTTGCGCCTGTTCCGGCGTCAGTTTTGGCATCAGCATAGCAACCGGTGTTGATCTCGATAAAC  
GGTGCGCCAACCTCTGCCGAGCTTTGATCTGCTTTCATCGCGTCAATAAACAGAGAACTGAATCCCGCATCTCG

CAGACGTTTGCAGGCATCGCGCATTTTTGTCACGCTGCCCTGCGACATCCAGGCCGCTTCGGTTGTTACTTCTGACGCT  
TTCCGGTACCAGGCAGCAAAAATGTGGCTTCGTCTCAACGGCGATCGCCAGCATCTTCCGGTACCAGCCATCTCCAGA  
TTCATGCGGGTATCCAGCGTCTGACGCAGGATGCGCACGTGCGGGTCAAGTGTGACGGCGATCTTACGTAATGCAC  
GGTAAATGCCGTCCGCTCCCGCTGCTCGCAATAAACGCGGCCTGCACCGGATCCGGGTAAGCGGTACCAGCGCGTTGC  
GCAGCGTAGCGATATGGTCAATGTTGACGCCAAGTAATTCAGCCATGACAACTCCTCATTCATAATGTGTTTTCA  
CCGTTCCGTTAGGCATAAACTGCCGGAACAGTTCCTGCTCTTTAAAGGTTTACCAGCAAGATACGGCTTAAAGGCCATG  
CGGGTAAAGCGTTTCGCGGCGCGCAGTGTGTCTGCGTCAGGAAATCCCGTGCCTTTAACGCTTTTAACTGCCTTCCGGT  
GAACGTTTTATTGTGATAACGACGCTTGCATAAACCTTTTTCTTCCGATAAACGATACGTATGGTGTCTATCTACC  
GCTCGCCGCTACCAGCAATGGGTAATTTGACGCCATAACCAGATGCCGAGCAGTGCAGTTCAAAGCGGCGCAGC  
GCGGGTTCGCGTACCAGTACCCCTGCAAGAGACTGAATGCAGTGAAGTAAATCGAAAAAAGTTTCAAGAGAAGCGGT  
CTCGTATCCAGTACGCGGAGAGAAGTTCGTTGATGTACAGACCGCTGTAAGCGTGTACCGCTTAAATGGCAGCGCA  
GCGAGACGGTTCAGCACTGCGCAGCGTTTTGACTTCGCCACGCCGCAAAACGTAGCAAGAGAGGGGTAAAGGCTGT  
AATGCACCTTTCAGGGTAGAGCGTTTAGAGCGTGCCTTTGGCAACCAGACGACGCGCCCCGATTCCTCCGTGAAGC  
GTCCAGCATCAGGCTGGTTTCGCTCCACGGGCGACTATGCAGGCAAAATGCGCGCTGCCAGCCTTCCATCGGAGTTACT  
TTAAAGATCGTCAACGTAACCGAGACTGCGCAGTGCCTTTCGTCGCGCCAAACCGGATTCACTTTTACCACAGTT  
CAAGGTGAACAGCGCTTCGAACATTTCTGCATGTCTTTACGCGCTTCAATCCCGATGGTTTTGATCTTGCCCCCTTG  
TTGCCAATGACCATCTTCTTCTGCCCTTACGCTCAACGAGAATCAAACCGTTGATGTATAACCACCGCTTCGTTAGA  
GACGAAACGTTTCGATCTCCACGGTACGCGAGTACGCGAGTTCAGCGCCGAGGAAACGCATCAGTTTTTCGCGGATGATT  
CAGACGCCATAAAACGCTGTGAGCGATCGGTGATGAATCTTCCGGGAAGTGTAGAGTGCCTTCAAGTAGATGCTTACGC  
ACGATTGCCGCAATAGTGTCAACATTCAGCCCGTTTTGCGCAGAGATTGGCACGATATCGAGGAAGTTTATCTGGCTTG  
CAGGAACTGCAGGTGCGGCAGCAGATCGCTTTCTCCTGCAGTTGTCCACTTTGTTTACCAGCAGGATTACCAGCGCTT  
TGCTTTCGCGCAGTTTGTGAGCACCATTTCGTGTCGCGCTCCAGCGGTGCCTTCAACGACAAAAATCACCAGCTCA  
ACATCGCAATAGAGCTGCTCGCCGCTTTGTTTATCAGGCGGTTAATGGCGCTTTTTCTTCCATATGCAGGCCCGGTGT  
ATCGACGTAGATCGCTGATACGCGCTTCAGTATGGATCCCAACATGCGGTGACGAGTGTCTGCGCTTGGGGAAAG  
TGATGGAGATTTCTGCCCCAGCAGTTTGTCAACAATGTGGATTTGCCAACGTTCCGACGTCGACGATGGCAATAAAT  
CCGACGTAACCTTATCGATGCTCATTCCAGCTCCAGTTTTTTCAACGCCTGTTCCGCGGCAGCCTGCTCAGCCTTACGA  
CGCTTGAACCTGTGCCAACACCGGTTCACTCAGCGCGTACCTGGCAGTGGATAGTAAATTCCTGATCGTGCCTTC  
GCCAGTACCTGGACTACCAGATAAGTCGGCAGCGCAGATGGCGACCCTGCAAAATATTCTGCAAGCGCTTTTCGGAT  
CTTTTTGTTTATCGCTGGGCTAATTCGTCCAAACGAGTTTGATACCAGTTGAGGATTAATTTCTCGACGGTTGAATA  
TCACTGTGAGGAATACGCCACCAATTAATGCTTCGACGGTGTGCGCGAGAATTGACTCACGACGAAATCCACCGCTTTT  
AAGTTACCTGGCCCTAAACGTAAGCACTCGCTAACTCAAATTCGCGCGCCAGTTCCGCCAGCGTATTGCCACGGACCA  
GCGTGGCGCGCATCCGGCTCATATCGCTTCATCCACACGAGGGAACCGGTGATAAAGCGCATTGGCGATAACGTAGCTC  
AGAATAGAGTCGCTAAAAATTTCTAAACGCTCGTTATGTTTACTGCTGGCACTACGATGAGTTAATGCCTGCTGCAACAG  
TTCCTGATGATTAAGGTGTAGCCAGCTTCGTTGAAGCCGATTAATTACGATGGGGTTCATGCGATACCAATAAATAA  
ATGCGTCAACAATTCAGCACACGAAACAGACCTGATATACATGTTTCTGCTAACTGCTTTCGCTGCAGTTTACGTTTACC  
GTATATGGGGACCAACGCTGTTTCGTGTGCGGTGCAACCTGGAGGTGCAACCTTAACTTCGGGGGAATATTCTATAC  
ACAACGACGGGGATGTCTTAGCCACGGGAGATTTATCTATAAATAAATCACGTTGTGCCATAACGGCGACAACGTG  
AACGAAGATGGCTATTAATGGATGCCGCAATGCGACTTAAGCGCAGACCAGTCCGCCATTCCGCTTCTGCTTATCGAA  
GCTCATCCAGATAGCCGTTGCCGACCGACAGATTCGTTCCGGCACAAAGCCAGTAACGGCTGTCCGCGCTGTTGT  
CGCGTTGTCGCCCATATGAAGTATTGTCCCGGAGGAACAATCCAGTTGCCAGTTGTTGCCCTGGCTGTGGTAATG  
ATCCCCACCTGATCCTGCGCAATCGGCACTGTGAGAATGCGGTGCGTACATCACCCAGTGTCTTTACGCTCGGAAAG  
ACGAATCCATTTTCTTTGGTTTTGTTTTGCGCACTTCAAAGAATCCGCTGTTGCTTCCCACCATACGGCGTGAGA  
AGGTCTGAACGAAATCGCTCGGTTCCACGTTTGTAGTGGTACCGGCAGCGGTTTTACACGCTGGCCGGAACGTGAT  
CCCGGTTGAATCGTCAGCTTTTTGAGACCGGATCGTAAGTACTTTATCGCCCGGTAACCCACCGCGCTTGTATGTA  
ATCAAGCTTTGGATCTTCCGGATATTTAAAGACCAGATATCGCCGCTTCCGGATGACCGGTTTTGATCAGCGTTTTCT  
GGTAGATAGGATCTTAAATGCCATAAGCAAACTTCTTACCAGATAAAATCACCAATTAACAGAGTCCGCATCATCGAA  
CCTGACGGGATCTGGAACGGTTTATAAATAAACGAACGCAATAAATACGATAGCCAGTACCAGAAAAACAGAAGCACC  
GGTTTCCAGCCAGCCAGGCTTCCGGCGCAACCTTTTTCAACGTTGCTTTATCCAGTGTGAGTCCCGCAGCCGCTGCGCCG  
CTGCTGACGTTCCCGCGTTTTAGGTGCGAAAAAGAATTTATCCACGACCATAAAATGCCGTACCCAGTGTGGCAATC  
ACCAGAATCAGGGCAACATATTGCCATGCCAATCCTAAGGGTATTTTGTGCTTTGCCGACGTGCAGAATGGCGAG  
GAACGCTTCTGCGGCAGCTCGACGTTACCGATCTGCTTCATGCGTTTTTACCTTCTTTCTGCTTCTGCAGCAGCTTTT  
TCTTACGGCTGATATCGCCGCCATAACATTTAGCCAGTACGTTTTTACGCGCTGTTTACCGTGGATCGCGCAATGATG  
TGCGTACCAATCGCTGCCTGAATGGCGATATCAAACGCTGCGCGTGGGATCAGATCTTTCATCTTCTCCCAACTCGCG  
ACCGCGTTTTTGCGAATATCACGGTGGGTGATCAACGCCAGCGCATCAACACGTTTACCAGTTGATTAATACGTCTACAC  
GTACCATGTGCGGACGCTGGAGCGCTTGAAGTTGTAATCCAGAGACGCATAACCACGCGAGGTAGATTTCAAGCGATCG  
AAGAAGTCGAGCACCCTTCCGCCATCGGATCTCGTACGTCAGCGCCACCTGATTACCCTGGTAAACCATATTGGTCTG

CACGCCGCTTTTTCTACGCACAACGTAATAACGTTGCCGAGATATGCCTGCCGAGCAGCATGTGACTCTGCAATCG  
GCTCGCGCAGTTCGTAGATGTTATTTACCGCAGGCAGCTTGGATGGGCTGTCGACGTAGATAACTTCTCTTGACGTGGTT  
TCAACTTCATACTACTACGGTCCGGCGCAGTGGTGATCAGATCCAGATCGTATTCAGTTCAGACGTTCCCTGGATGATCTC  
CATGTGCAGCAGGCCGAGGAAGCCGACGCGAAACAAAGCCAGCGCTGGAGCTTCCGGCTCATAGAACAGTGAGG  
CATCGTTCAGGCTGAGTTTACCCAGCGGTCACGGAAGGCTTCATAGTCGTCGGAACCTACCGGGAACAGACCGCGTAT  
ACCTGCGGTTTGACTTCTTAAAGCCAGGCGAGCGCCTTTCTGCCGATTACGCGCCAGCGTTAAGGTATCGCCGACTGG  
AGCGCCGTGGATATCTTAAATCGCACATACGAGCCAGCCTACTTCGCCACATTTCAAGTTCAGTGCGGTCAACCTGTTTCG  
GCGTGAAGATGCCAGACGGTCCGGCTTATAGGTCTGCCCGTACTCATGACTTTCACCTTTGTGCGCCTTACGACGGGTG  
CCGTTTTTAATACGGATAAGTGAACAACGCCAGGTAGTTGTGGAACCATGAGTCGATAATTAGTGCCTGCAACGGGCC  
TTCCGGATCGCCTTCCGGCGGCGGAATGTCGCGCACCAGACGTTCCGAGAAGTCTGCACACCAACGCCGGTTTTCGCTG  
AACAGCGCACCCGCTCGGTGGCGTCGATGCCGACGATATCTTCAATTTCTTCCGCCACGCTTCAGGATCGGCTGCCGGC  
AGGTCAATCTTGTTCAGTACCGGCACAACCTTCGAGATCCATTTCCATGGCGGTGAGCAGTTTGCAGGGTTTGCCTTC  
TACGCCCTGCCGGCGTCGACCACCAGCAATGCACCTTCACAGGCAGCCAGCGAACGGGAACTTCATAGGAGAAGTCTA  
CGTGGCCCGGGTGTGATAAAGTTAAGCTGATAGTTCGCCGTACAGACGCTTTGAGTCCAGCGTCACGCTTTGCGCT  
TTGATGGTAATGCCACGCTCAGCTCAAGATCCATGGAATCGAGAACCTGCGCCTCCATTTACGGTCAGACAGGCCACC  
GCAGATCTGGATAAATACGGTCAGACAGCGTCGATTTACCGTGGTCAATGTGAGCTATGATCGAAAAGTTACGTATATTCT  
TCATAAAGTATGATTATTGTGCCCTTAAATGCCCGTTAACCAGGCTTTTAGAAGTCGCTGTTCTGAGCTTAAACGTCTGTAT  
TAATAGAAACGCCGATTCTACACTACAACATTGAGCGAGGAAATGTTCATACCGTATGGATTGTGGTATCTGAAAACG  
TCCTCGCATTTGTTATGCAAAATGCAACAAGCCAGTGAAATCACTGGCTCGCGTCTTCCGAAGATGTTTCAAATCGCAC  
AAGGCCAGGGCAATGCCACGCTTAAGATGATCGGTTGCCATTTGCCCGGGCAGCAAATACGCGAGTAGCCGCGCG  
CAATCAGGAACCCGCCAATACCACCGAGGATCGCACACATAATGCTGCGACGTCAGAAGCAAAGAGTAGCTGAAATAGC  
GAAGCGATAAGGAATAATCCACCAGCGGCGACATATAAACCAGTAATGCGGAGCTAAGCAGGCTGCCTTCGGCGATCCC  
CAATTCACTTTTTGCCTCCGACTAACGGCTCATCACAGGTTACGACAATGGTATGCGTGGTTTGGGGCAAGTTTAT  
TTAACACGCGGCTACCGCAACCGCGCGTGAAGCGCAGCTGCTGCATGAAGCTTTAACATCACAACCTGACCAGCGCCTGC  
CCGTTTTGCCAGGAGACGAGGTTAGCCACTCTTTGATCATTGCGCTGCCCGAACTTAATATTCTCGGCAATGCGTTT  
GCCGTTTGGCGGGCAGTTCACCGACAATGGTATTTCGGCGTTATCACGTACGCTTGTACTGACGGTCTGCGTCCGGT  
GCGCAACATCTGATCGGTGCTCGATGGCTGAGCGGTTAACGTTTACCAGAAAGCTGAATAATCCGTCGGAATAGAGAC  
GTGATTCGATAGGCATGTTGCCATCGTCCGTAGCGGACGTCGACTACTGGAACCTTCGCTAAAACCTGTGGCAACCAG  
GTTGGCGTCCAGCTGAATTTAGCTTTTACCTACAGGAACAGAAAGCAACGGCGGCAATTTGCCTTCGCCAGCGTCTG  
CATACTGCTGCTGATATCCTGATTGACGTAAAAGCAATCACGCGAAATTTGTTCCAGCGTTTACCATCGCGATCAAGGA  
GATCAACCCGCATCGGTAATTTGATTCCGTGTCATCCACACGATGTAGCTGTAGCGTGTACCATCTCGGGCAACCACG  
CGAATGACTTCGCAAGACGATCAGCAATACGCGTGCGCCGACGGAGATAAAGTCGTAGTAAGGAGAAAAGGCGTTTGA  
ATCGGTATAGATAAGCGATGGCAGAGAATCAACAATGTAATCGCCATTAAGCGTGAACGGTTCAAGTCCCGGTTCAAAT  
AGCTGATTTCAATGCCGCGTGTACCCTTCCGGCGCGGGCCATCCATTTGCAACAATTGTGCAAGAGGACGGTTATCG  
AGGCGTGCATGTCGATAACGAGAGACTCAACACCTGTTTATTGATGCTGATGAATGACAGCTCGTAATTCAGTGACTG  
ACTGGCCAGTTTCATCTGCTGTAATAACGCCCGGACGCGGAGTGGCCGAGGCGTTAGCAGAGAATAACAGGCTACCTG  
TCACTAATGACATGGCAACCAAAGTTGCTTCACTACTGCGATTGCGTTCCTAAAGTTTGAATTCCTGGCACCTGTACAG  
CGGCTTGTGGTTTGGCCCTGCTCAACTGAAGCTGTTACAGTGGAGTGGCGGTTGAGTTCGTAATCCTGCAACATT  
GCATTAATGCGACGACGCTGCTCCTGTACCTGCTGTTGACCATGTTTGGCGTTCGTTTCAAGGTAAGTCTCCAGGCT  
TACCGGCTGGCTTTACCCATCATCGGAGTGTATTAATACCGCGGTTTTCCGGCTGCTGGGACGTTTCAAGTTCAT  
TATAGTGTGACGCAACGATAACTGCAAGCGATACGCATCGCGCTACGCCATTTGGGTAAGCTGTGCCGCCACGGA  
CGTACTTTCTGCCAGAATGGCATTCTGCCATTGATGCGGGCAGGCTGGGCTTCCGGGATCAATGTGCGCGGTTGACG  
TACTGGCTCTTCTCAATGGCGCCATCACGCGTGAAGAGATATCGAAATGGAGCACCTCGGGAGTATCACCCCGCATTG  
AGTCACGGATTAAGTGATAGCTTTCCAGGTTTTCTGCATTTCTGGGTTATGAGCCAGTTCGTTAAGCAGCTCACTATCC  
AGCGTTTCCCATCCATTAAGCGGAAAGTTGTTCTTTCTGCATGCCAATACCCTTATCCAGTATCCCGCTATCGTCAA  
CGCTGATAAGCGGTTGAATTTGTTATCAATAGCTTCCCTCGCTCGGAAGATACGTGAACGCACCGTACCTACCGGACA  
ATCCATGATAGCGCTATCTTTCATAGCTCAGGCCATCCAGCTCCCGCAAGGTTATTGCCATGCGTAAATCTTCCGGGA  
GGGACTCAATAGTTTCGAAAACTATCTGTCTCAGTCTTCTGACAACATTAAGTCTCAGGTTTCGAAATTTCTTTCAAC  
GCGCGCCACTTTGAAAGTTTTCAGCTTCAATGGCATCCACATCACTGGAAGTGGACGACGCCCTGAGCAACCAGGTA  
ATTTTTGCTGATTTTACAGCAATCCGATACAGCCATGTATAAAAAGCGCTATCTCCCGGAACGAATCCAGCGCACGAT  
AGGCTTTAATAAAAAGCTTCTGTACCACATCGGGAACATACCCGACGGCACATAGCGGGAACAGACTCGCCACTTTA  
TGCTGATAGCGCACTACCAGTAAGTTAAAGGCTTTCTGATCTCCCTTCTGGACCGTTCACCAGGACCTGGTCCGTTAA  
CTGCTCGCTCATCCGAGGTAAGTCTCCCAAACCAATTTCCAGCGCTATCGAAACGCCACTCCATTAGCTGCAATTT  
GAGCAAGCAAAAGGTTAGAGTGTCTGTTTTGTAAAGTTCGGTAACGCATCTGTTTTTGTGTCATGCTGTAGACGGA  
TCATTATCTATCATTATAAGTCTACAGAATCTGAACATCGCATTATCTGTGTAGAAATGCCCATTTAACTGCCTGAAGAG  
TAACCAACGGCCTTTTTATTTACCACCTAATCTCCACCAGCCAGTAACTTCTTTTTCTCGCCGCCCTGCGTCAGC

GTGTTTAGCAACTGTAACAAATATTAATAAGCAGGTGTTTATCCGCACAACATGATGCTATGCTGACCAAAACCATGTTT  
AGTAAATTAACAAAGAAAAATGAATACTCTCCCTGAACATTCATGTGACGTGTTGATTATCGGTAGCGGCGCAGCCGGAC  
TTTACTGGCGCTACGCCTGGCTGACCAGCATCAGGTATCGTTCTAAGTAAAGGCCCGGTAACGGAAGTTCAACATTT  
TATGCCAGGGCGGTATTGCCGCCGTGTTTATGAAACTGACAGCATTGACTCGCATGTGGAAGACACATTGATTGCCGG  
GGCTGGTATTTGCGATCGCCATGCAGTTGAATTTGTCGCCAGCAATGCACGATCCTGTGTGAATGGCTAATCGACCAGG  
GGGTGTTGTTTATACCCACATTCAACCGAATGGCGAAGAAAGTTACCATCTGACCCGTGAAGGTGGACATAGTCACCGT  
CGTATTCTTATGCGCCGACGCCACCGGTAGAGAAAGTAGAAACCACGCTGGTGAAGCAAGCGCTGAACCATCCGAATAT  
TCGCGTGTGGAGCGCAGCAACGCGGTTGATCTGATTGTTTCTGACAAAATTGGCTGCCGGGCACGCGACGGGTTGTTG  
GCGCGTGGGTATGGAACCGTAATAAAGAAACGGTGGAAACCTGCCACGAAAAGCGGTGGTGTGGAACCGGCGGTGCG  
TCGAAGTTTTATCAGTACACCACCAATCCGGATATTTCTTCTGGCGATGGCATTGCTATGGCGTGGCGCGCAGGCTGCCG  
GGTTGCAATCTGAATTAATCAGTTCACCCCTACCGCGTATATCACCCACAGGCACGCAATTTCTGTAAACAGAAG  
CACTGCGCGCGAAGGCGCTTATCTCAAGCGCCGGATGGTACGCGTTTTATGCCGATTTTATGAGCGCGCGAAGCTG  
GCCCCGCGGATATTGTCGCCCGGCCATTGACCATGAAATGAAACGCTCGGCGCAGATTGTATGTTCTTGATATCAG  
CCATAAGCCCCGATTTTATTCGCCAGCATTTCCCGATGATTTATGAAAAGCTGCTCGGGCTGGGGATGATCTCACAC  
AAGAACCGTACCATTGCGCTGTGCACATTACCTGCGGTGTGTAATGGTTGATGATCATGGGCGTACGGGACGCTC  
GAGGCTTGTATGCCATTGGCGAGGTGAGTTATACCGCTTACACGCGCTAACCGCATGGCCTCGAATTCATTGCTGGA  
GTGTCTGGTCTATGGCTGGTCCGGCGGGAAGATATCACCAGACGTATGCCTTATGCCACGACATCAGTACGTTACCGC  
CGTGGGATGAAAGCCGCTTGAGAACCCTGACGAACGGGTAGTAATTCAGCATAACTGGCAGGAGCTACGCTCTGTTTATG  
TGGGATTACGTTGGCATTGTGCGCACAACGAAGCGCTGGAACGCGCCCTGCGGCGGATAACCATGCTCCAACAAGAAAT  
AGACGAATATTACGCCATTTCGCGTCTCAAATAATTTGCTGGAGCTGCGTAATCTGGTACAGGTTGCCGAGTTGATTG  
TTCGCTGTGAATGATGCGTAAAGAGAGTCGGGGTTGCATTTACGCTGGATTATCCGGAAGTCTCACCCATTCCGGT  
CCGTCGATCCTTTCCCCGGCAATCATTACATAAACAGATAAAAAGCCTGGGTGAGCGCGTATACGCTTCGGAATAGTT  
CTGGTCTGGCCACGAATGACTAAGCGATCGCTAAGCATTCTCCCGCTGCGGGGAGAATGCCAGCAGCACCAGTGGC  
GCAGTCGCGTTCGTTTTCCGCCACATCCGTCGCAACGTAATGCCAGCCATGCTAATGCCAGCTCCGTAACCA  
TTACCAATCTGCTCTGGCAGCACTACGCAGAAAAATCCCTCTCGGTAATGCACTCCGCCGCAGGTCAGCAACGATGG  
GTGATCAAGCGTAGTGGTATAGCGAGCCTGTTCCCGTTGAGGTGTCGAGCACTACTCCCTGCTGATAGTAAGGTGGT  
TACTGATGATTAATCGAAGCGTACTGTCTGCTGTGTGATCCACTGCTGAATATCCGCCGATGGACGTTAATCCGCTCT  
GCCACGGGACTGGTTGATTTTTCTGCGCTGCGCGGAGCTTCACTTTCCAGTTCAACTGCATCAATCATCACGCT  
GTATCGGTTGCTGCGCCAGCATAATGCCAGCAACCCGCTACCCGCGCCGATATCAAGGCAACGTTTTACCCAGCCA  
CCGTGCCCATGCGCCCAATAAAATACCATCCGTTCCCACTTTATCGCACAGCGATCGTGAGCAACAAAAAAGTGT  
AAAGTAAATCCATTACGACGAAGCAGGATGTAGACTGTGACATGAAAATAAACCTTGCAGGAAAAACGGCGATAGCAC  
CGGTGAGAACAATACCCGAGAAGCGATATCCATACAAACAGATGAAGATTGCAGCCGTAACGCTATAATCAGCGCCC  
ACACAGAGGTAGAATGACTGTAACGACTTTTTCCGAACTTGAAGTGCAGGAAAGCCTGCTGGAAGCCCTCCAGGATAA  
AGTTTTCACTCGCCGACCGCATTAGGCTGCCGCCATTCCGCTGCGCTCGATGGCCGTGATGACTCGGTTCTGCGC  
CGACAGGACCCGTAACCGCGCGGTATCTGCTGCCAGCGTTGCAGCACCTGCTCGATTTCCCGGTAAGAAATCCGCT  
CCGCCGCTATTTGATCCTCACCCAACTCGCGAGCTGGCGATGCAGGTGTCGATCATGCCCGGAACTGGCGAAACA  
TACGATCTGGATATCGCCACCATCACCGCGCGGTAGCCTATATGAACCACGCGGAAGTGTTCAGCGAAAAATCAGGACA  
TCGTGGTCCGACGACCGGACGCTGTGTCGAATACATAAAGAAGAGAATTCGATTGCCGCGCGGTTGAAACGCTGATC  
CTCGACGAAGCAGACCGTATGCTGGATATGGCTTCTGCTCAGGATATCGAACATATTGCTGGCGAAACCGCTGGCGTAA  
ACAGACCTGTCTTTTTGGCAACGCTGGAAGCGATGCGATTACGACTTTGCCGAGCTGCTGGAAGATCCGTTGG  
AAGTTTTCTGCCAATCCCTCCACCCGTGAGCGCAAAAAAATTCATCAGTGGTATTACCGCGCGGATGATCTTGAGCATAAA  
ACCGCTTGTGGTGCATCTGTTAAAACAGCCGGAAGCGACCCGCTCAATTGTGTTTGTGCGTAAGCGTGAAGCTGTGCA  
TGAGCTGGCAAACTGGCTGCGCGAAGCGGCATCAACAACGCTATCTCGAAGGTGAGATGGTACAGGGCAAGCGTAACG  
AAGCGATCAAGCGTTTGACCGAAGGTGCGTAAACGTAAGTGGTGCACCCGATGTTGCCGCGCGGATCGACATTCCT  
GACGTCAGCCACGCTTTAACTTCGATATGCCGCGCAGTGGCGATACTTATTTGACCGTATCGGACGTACCGCGCGCGC  
CGGTGTAAGGCACCGCAATTTGCTGGTGAAGCCATGACCATCTGCTGCTGGGTAAAGTAGGCGCTATATTGAAG  
AGCAATTAAGCTCGGTTATTGATGAGTTACGCCGAAAACCGGTGCGCCAAGCGAAAAGCAGACCGGCAAGCCATCG  
AAGAAAGTACTGGTAAACGTGCTGAGAAGAAAAAGCTAAAGAGAAAGAGAAGCCGCGGGTAAAAAACGCCATCGCGA  
CACCAAAAATATTGGTAAGCGCGTAAACCAAGCGGAACGGGCTGCCACCGCAACGACAGAAGAGTAATCTCAATGCC  
AGTTTTAAGCTGGTATTAAGTGTGGCAACGAAAACGCTGCTGATGCGCTACGCTTATCAGGCTACGTGGCTCAT  
GCAATATATTGAATTTGCACGATCTTGTAGGCGGATAAGGCGTTCACGCCGATCCGGCATGAATAAAGCGCACTTTGT  
CGACAAGTTAAATGCCGGTTTAAATCCCGACATATTTTTATCCAGCCACAAAACCTCTCTTCAACACACTGAATAAAAGT  
GTGCATCGCCGGGTAACCGCTTTTCCAGCATGATGTGCGCACATGGCCGTAATGGTCTGCGACTGTTGCCAAAAGGCA  
ATTCAATTAATTTCCGCACTCCAACCTTTTTGCCACCGCAAAGCGCGGTAGGTAGCTGACCCGATATTCGCCGCGACA  
CAACGCTTGTGCTTTGATACTTATAAGCTCAATGGTGTGTTTCCACCGTATCCGCCGCTGACGCGCGTGTCTCAA  
TATCTGCCGAAGACACATTGCGGTTGTTGATAATAAAGCTACAGGCGTTATGTCTTCCCGCTCAGTAAAAATCGACAT

CTGCAATTTGCGGTGAAGCCACCAGCACCAGTGATTGTTACCCAACTCTCGTCGATTAGAGCATCATCATTCCCTACA  
CGATAAAAGACGCCAACATCGGCCTCATCATTAGTAGCGCATCACGGATCACGTAACAGTTCAGCGACTGCAACGATAA  
ACGCACTTTTGGGGCGCGTTGCCGAAAACGCTGCAACACCTGCGGCATTGCGTAAGAGAGCAACGTTTCGCCGAAACAA  
CGCGTAGTTCCCCGTCCGGATCTGACTCCTTTTTGGCAGCCTCAGGAAGCGTATCCATCACTCGGGTAAGTTCATAAATG  
TGGGGCAGCACTTTTTTCCCTTCGCGGTAAGGCACATCCGTGCGCAATTTTTCTCAAATAACTGGACTGAAAACCTCTG  
CTCAAGCTGCTGAATATGAAAAGTCACCGTCGATTGTGTACAGCACAATTTTTGCGAAGCTCGAAAAAGGAACCTCTT  
CCACCACGTTTTAAGCGTAATAAAACGGCGCAGATCCATAACCCCAAACCTATCGAAAATATCGAATCTAGAATATAAA  
AACATTCATTTTTTAAATGTTCCGTGTCGGGACTGTCTACCAAAACAGAGGAGATAACAAGTGACACCCGACCTTTTA  
AGTGCTTTTTGGACTTACACCCTGATTACCGCTATGACGCCAGGACCGAACAATATTCTCGCCCTTAGCTCTGCTACGTC  
GCATGGATTTTCGTCAAAGTACCCGCGTGTGGCAGGGATGAGTCTGGGATTTTTGATTGTGATGTTACTGTGTGCGGGCA  
TTTCATTTTACTGGCAGTATTGACCCGGCAGCGGTACACCTTTTGGTTGGGCGGGGGCGGCATATATTGTCTGGCTG  
GCGTGAAAATCGCCACCAGCCAAACAAAGGAAGACGGACTTCAGGCAAAACCAATCAGCTTTTGGCCAGCTTTGCTTT  
GCAGTTTGTAACGTCAAATCATTGTACGGTGTACGGCACTGTCGACGTTTGTCTGCCGAAACACAGGCGTTAA  
GCTGGGTAGTTGGCGTCAGCGTTTTGCTGGCGATGATTGGGACGTTTGGCAATGTGTGCTGGGCGTGGCGGGGCATCTG  
TTTACGATTTGTTCCGCCAGTATGGTCGCCAGTTAAATATCGTCTTCCCTGTTGCTGGTCTATTGCGCGGTACGCT  
TTTTCTATTAACGAAAAAAGCGGAAGAGTCCGCCCTTTCCGCTTAGTAACCTGCTACTTAAGCCTTACAGGCTTTT  
AAAGGTACGAGCGATAACGTGCGGCTGCTGTTCCGGAGTCAGAGAGTTAAAGCGAACTGCATAACCGGATACACGGATGG  
TCAGCTGCGGATATTTTTCCGGATGCTTAACTGCATCTTCCAGAGTTTCCGACGCGAGAACGTTAACGTTTCAAGTGTGA  
CCACCTTCAACCGCAACTTCTGGTTTCACTTCTACTGGAACCTTACCGGATTTCAATGTCACCCAGTTTGTACTGCAAC  
CACTTCATCTTCTGCATAACCTGCTTTTGAACGATGCAACGCGCTTCCGCTTTTTCGCTGTCAGCAGCCAGAAAGAGT  
TCAGCAGATCGTCGTTAGCGGCTTTAGTAATCTGGATACTGTAATCATGTGATGCCTCCCGGCAAAATTTATTTGATTT  
GTTGAGCCTGTGCGGCCAATTGGTAAAACATTGTTGCTTGGTGTATATACTCCTCAAACACCCTTGAATCTTTGA  
TTTAAATCAATAAAAACACACATCAAGTATGGTCGCAATGGATTTTATTGTTTTACATCAACTTATGCGGGTGTGAAA  
TTTTACCAATTTACATTTTTTGCCTCGTTAAGTCTAAAAATGAGCATGATTTTGTCTGTAGAAAGAAGCAGTTAA  
GCTAGGCGGATTGAAGATTCGAGGAGAGCGAGATGGTAACGAATTAACCTGGCATGACGTGCTGGCTGAAGAGAAGCA  
GCAACCCTATTTCTTAATACCTTCAGACCGTCGCCAGCGAGCGGCAGTCCGGCGTCACTATCTACCCACCACAAAAAG  
ATGCTTTAACGCGTTCCGCTTACAGAGTTGGGTGACGTTAAAGTGGTATTCTCGGCCAGGATCCTTATCACGGACCG  
GGACAGGCGCATGGTCTGGCATTTCGTTCCGTCGTCGCCGATTGCCATTCTCCGTCATTATTGAATATGTATAAAGAGCT  
GGAAAATACTATTCGGGCTTACCCGCCCTAATCATGTTTATCTTGAAAGCTGGGCGCGTCAGGGCGTTCTGCTACTCA  
ATACTGTGTTGACGGTACGCGCAGGTACGGCGCATTCCACGCCAGCCTCGGCTGGGAAACCTTACCAGTAAAGTGATC  
AGCCTGATTAACCAGCATCGCGAAGGCGTGGTGTTTTTGTTGTGGGGATCGCATGCGCAAAAGAAAGGGGCGATTATAGA  
TAAGCAACGCCATCATGACTGAAAGCACCGCATCCGTCGCCGCTTTCCGGCGCATCGTGGATTCTTTGGCTGCAACCATT  
TTGTGCTGGCAATCAGTGGCTGGAACAACGTGGCGAGACGCCGATTGACTGGATGCCAGTATTACCGGCAGAGAGTGAG  
TAAATTTGCGGGGAAATGCCGGATGGCAGAGTGGCACCCGGCTGATTTATCAGGCTTTATTCTGACGCCACCATTACC  
AAGCAAAACGCCGTTGCGACAGAGATTTAGCCCCGGCAACGTTGCCCGTACCCTCAATCTTACGCGCAGATCGTTCCG  
GATCGCGTGGGCATCCGGTAACCTTTCATATCCTGACCCAGCACAGTACCATTTCGCTGGCAGACTAGTTTTGAAC  
AGCGTTTTACCTGCTCGTGAAGTGGTCACTACGGTGAACCTGCCTGACGGAATCATCCAGCACGTTAAACAATGTT  
GTCGCCAGTAATCGGCTGAACGTGCTGCGCCGCTTCTGCGGTACGGATAGCCGCCCGACTCCAGCAGTGGCCAT  
CCTGCACCAGACACCTTTCAGCCGAAGTGGCGCAGTCCGCATCATGCCACCAGGTTATGCGGGTAGATTGCTTT  
TCCAGTGCCAGAACGCAATCCTGCGCGCTGCTGGCTTACCCACTGCTGCACGTTGTACCGTTACGTTTTTGTATCAA  
GAAGCAAAACGCCCGTGTATGTTCCGTGCTGACGCTTTTGTCAATTCGCTTATCCACCACATGGTACGCTTTGCGGT  
TTGCTGCCATCCAGCGAAAGCTTCTTTAAAACGCGCGTTACTCTGGATAAACCAGGCGGAACAATCGCTTCCGGA  
CGGCTCTGAAAAGTGCTGACATGCATTTTCCGCTGAGACGCGGGTTTCTCCGACGCTGACGACGCAACACTTCCGG  
ATCAATAAAACTTTTACCCTGATGCCACCGTATCGGCTTTTCCGGCGTCTCATACCCGGCGCGGGGAAACCGTGC  
GCCACGGCGAATCTTCCACTTGGCGTACGGGGTACTCTGTTTGTATCGCGGGCGGGGCGACGGCCACCGTCAGCA  
CGAGATTTTCTGGACGCCCGCCCCCTTCCGGTACGCGGGTGTGGGTACGTTTATCAGAATCATCATCACTGCGGAC  
ATACATCACTTTGACCTTGGCGTTTTACCTTTTATTTATCGTTTATGCTTTTCTCCACCAGCGTGGCGAAGCGCGC  
AGATTACCCGAAGTCCGCGCGTTCGCCATGATTTCTGACCAAAGCTGCGACTATCATACCTATTGAATAAAACAGATT  
GTTGTCTGGAACAATGTCCCGATAATATGTAACATATTAGAACATAACGGCGTCTGTTGCCGATAAGTCTCCTTACTCA  
TCCCGAGGTTAGTTATGAATACCGTTTTGACCCATTGTGAGGCCATCAATCGCATTCCCGACGATCGGATCGAAGATGCG  
GCAAAATGCGGACGCTGCGGTACGACTTGTGTTGACGGAGAGGTGATTAATGCGACCGGTGAAACACTCGACAAATTGCT  
GAAGGATGATCTACCTGTGGTATCGACTTCTGGGACCGTGGTGGCGCCCTGCCGTAATTTGACCAATTTTTGAAG  
ATGTGCGCAAGAGCGTAGCGGTAAAGTGGCTTTGTGAAAGTGAATACCGAAGCTGAACGTGAATTGAGCAGTCCGTTT  
GGAATTCGTAGTATACCGAGCATGATTTTTCAAACCGTTCAGGTTGTGACATGCTTAATGGCGCAGTACCGAAAGC  
GCCGTTTCGATAGCTGGTGAACGAATCTTTAATCTTACCGGGCGCATCTTGTGCCCGTTTTCTCCTCTGCGACAAT  
GGCGTTTTTTCGACGCTCTTATGACCGAAAACGCTGTTCTCCAGTTACGCGCCGAGCGTATTGCGCGCGCAACACGTC

CTTTTCTTGCCCGGGTAATCGCGTTCGTCGCTGCCAACGCTGTCTTTTCCAGAGAAATTATGTCTCTGTTGACAATT  
ACCCAGCACAAAGCAAAAAGTCGTTCTGTTTGGCTGATGTTTCACACCGAGCCAATGAAGCCAGTAATACCGGGCGTCT  
CATTGCTGATATTTTGCCTGATACCGTTGCGTTTCAATGGTCGCGTACCGAACCTCGCAGGATTTGCTGGAGTTGGTGC  
AAAAACCGACTATCAGCCAATGGTGGTCTTTCCCGCTTCGATGCTGATGAGCAACGGGAAGTGATCTTCACACCACCT  
GCCGGTAAGCCACCGCTGTTTATCATGCTCGATGGTACCTGGCCGGAAAGCTCGCAAGATGTTTCGTAAAAAGTCCGTATCT  
GGATAATCTTCCCGTCATTTCCGTCGATCTTTCCCGGCTTTCTGCCTATCGCCTGCGTGAAGCCCAGGCTGAAGGCCAAT  
ATTGTAAGTCCGAGGTAGCCATCGCACTGTTAGATATGGCCGGCGATACCGGGCGGCGGCGAGGGTTAGGCGAGCATTTT  
ACCCGCTTTAAAAACGCTATCTGGCAGGAAAAACGCAACATCTGGGTAGCATCACAGCAGAACAGTTAGAAAAGCGTTTA  
AAATCATTCCGGTCACTTCTGCGGGAGACCGGTATGAGTCAGCGAGGACTGGAAGCACTACTGCGACCAAAATCGATAGCG  
GTAATTGGCGCGTCGATGAAACCAATCGCGCAGGTTACCTGATGATGCGTAACCTGCTGGCGGGAGGCTTTAACGGACC  
GGTACTCCCGGTGACGCCAGCCTGAAAGCGGTGTTGGGTGTGTTGGCCTGGCCGATATTGCCAGCTTGCCCTTTACAC  
CCGACCTTGCGGTTTTATGTACCAATGCCAGCCGTAATCTTGCTCTTCTGGAAGAGCTCGCGGAGAAAGGCTGTAAAACC  
TGCATTATCTTTCCGCCCGGCATCGCAACACGAAGATCTCCGCGCCTGCGCCCTGCGCCATAACATGCGCCTGCTTGG  
ACCAACAGTCTGGGTTTACTGGCTCCCTGGCAAGTCTGAATGCCAGCTTTTTCGCTGTGCCGATTAAGCCGCGGCAAGC  
TGGCGTTTTATTTCGAATCGGCTGCCGTCTCAACACCATCTCGACTGGGCGCAACAGCGTAAGATGGGCTTTTCTCTAC  
TTTTATTGCGCTCGGCGACAGCCTGGATATCGACGTTGATGAATTGACTTGGACTATCTGGCACGCGACAGTAAAAACAGCGC  
CATCCTGCTCTATCTCGAACAGTTAAGCGACGCGCAGCCTTTGTTTCGGCGGCCGTAGTGCCTCGCGTAATAAACCGA  
TTCTGGTGATTAAGAAGCGGACGTAGCCCGGCGGCACAGCGACTGCTCAACACGACGGCAGGAATGGACCCGGCATGGGAT  
GCGGCTATTACGCGTGCCGGTTTTGTTGCGGGTACAGGACACCCACGAGCTGTTTTCGGCGGTGAAACCCCTTAGCCATAT  
GCGCCCGCTACGTGGCGACCGGCTGATGATTATCAGCAACGGTGTGCGCCTGCCGCGCTGGCGCTGGATGCCTTATGGT  
CACGCAATGGCAAGCTGGCAACGCTAAGCGAAGAAACCTGCCAGAACTGCGCGATGCACTGCCAGAATATGTGGCAATA  
TCTAACCCGCTCGATCTACGCGATGACGCCAGCAGTGAAGCACTATATTAACGCTGGATATTCTGCTCCACAGCCAGGA  
TTTTGACGCGCTGATGGTTATTCATTGCGCCAGCGCCGCTGCTCCGCAACAGAAAGCGCGCAAGTATTAATTGAAGCGG  
TAAAGCATCATCCCGCAGCAAATATGTCTTTGCTGACGAAGTGGTGGCGGAGCACTCTCGAAGAGGCACGACGT  
TTATTACGCGAAGCCGGGCTGCCGACCTACCGTACCCCGGAAGGAACCATCACTGCTTTTTATGCATATGGTGGAGTACCG  
GCGTAATCAGAAGCAACTACGCGAAACGCCGGCTTCCCAGCAATCTGACTTCAATACCGCAGAAGCGCATCTTCTGT  
TGCAACAGGCGATTGCCGAAGGGGCTACGTCGCTCGATACCCATGAAGTTCAGCCCATCTGCAAGCGTATGGCATGAAC  
ACGCTCCCTACCTGGATTGCCAGCGATAGCACCGAAGCGGTGCATATTGCCGAACAGATTGGTTATCCGGTGGCGCTGAA  
ATTGCGTTGCGCGGATATCCACATAAATCGGAAGTTCAGGGCGTCATGCTTTACCTGCGTACAGCCAATGAAGTCCAGC  
AAGCGGCAACGCTATTTTCGATCGCGTAAAAATGGCCTGGCCACAGGCGCGGGTCCACGGCCTGTTGGTGCAAAGTATG  
GCTAACCGTGTGCGCTCAGGAGTTGCGGGTTGTGTTGAGCACGATCCGTTTTTCGGGCGGTTGATCATGCTGGGTGA  
AGGCGGTGTGGAGTGGCGTCTGAAGATCAAGCCGTCGTCGACTGCCGCGCTGAACATGAACCTGGCCCGCTATCTGG  
TTATTACGGGGATCAAAGTAAAAAGATTCTGCGCGCAGTGGCTACGCCATTGGATGTTGCAGGCTTGAGCCAGCTT  
CTGGTGCAGTTTTCAACTTGATTGTCGATTGCCGGAAATTCAGCGTCTGGATATTATCTTTGCTGGCTTCTGGCAG  
TGAATTTACCGCGCTGGATGTCAGCTGGATATCTGCCGTTTGAAGGCGATAACGAGAGTTCGGCTGGCAGTGGCCCTT  
ATCCGCATCAGCTGGAAGATGGGTAGAATTGAAAAACGGTGAACGCTGCTTGTTCGCCCCGATTTTCCAGAAAGATGAG  
CCACAATTCAGCAATTCATTTGCGAGTCACCAAGAAGATCTTTATTACCGCTACTTTAGCGAGATCAACGAATTTAC  
CCATGAAGATTTAGCCAACATGACACAGATCGACTACGATCGGGAAATGGCCTTTGTAGCGGTACGACGATTTGATCAA  
CGAAGAGATCCTCGCGTACGCGTCCGATTTCCGATCCTGATAACATCGATGCCGAATTTGCTGTATGGTTGCTCG  
GATCTCAAAGGGTTAGGCTTAGGTCGACGCTTAATGAAAAAGTTGATTACCTATACGCGAGATCACGGACTACAACGCTC  
GAATGGTATTACGATGCCAAACAATCGTGGCATGGTGGCGCTAGCCCGCAAGCTCGGGTTTAAACGTTGATATCCAGCTCG  
AAGAGGGGATCGTTGGGCTTACGCTAAATCTTGCCAGCGAGGAATCATGAGTAAGGTAAGTACTGGAAATGTTGACCACTT  
AATCGGGACTGGTGTATTATTGCCCCCTTATGTGCTCTGATTGCACAGAGGACCCTTCAATGAACAGAGAAGAAATGC  
ACTGTGATGTTGTCAAATTTAAGCGTAATAAACATCAACAACACCTTGCCCAACTACCCAAGATTTCTCAATCAGTTGA  
TGATGTCGATTTCTTTTACGCTCCCGCGACTTCCGGGAGACGCTGCTGGAAAAATAGCCAGCGGAAGCAGCGCATT  
GCATTGTCGCCCTGTATCTCGAACAGGATGACGGTGGCAAAGGCATTCTGAACGCGTTGTATGAGGCTAAAAGGCAGCGT  
CCGGAACCTGGATGTGCGGGTGTGGTGCAGTGGCATCGTGCACAACGTTGGACGATTGGCGCTGCGGCATCTAACACTAA  
CGCTGACTGGTACTGCCGATGGCGCAGGAAAAATCCGGGCGTAGATGTTCCGGTTTTATGGCGTTCCAATCAATACTCGT  
AAGCCCTTGGTGTCTGCACTTTAAAGGCTTTATCATCGACGATAGCGTACTTTATAGCGGTGCCAGCCTGAACGATGTT  
TACCTGCATCAGCAGATAAATATCGTACGACCGTTATCATCTGATCCGTAACCGTAAGATGTCAGACATTATGTTTGA  
ATGGGTTACACAGAATATTATGAATGGCCGCGGCTTAATCGTCTGGATGATGTTAATCGGCCAAAAAGCCGGAAATCA  
AGAACGATATTCGCTGTTCCGCCAGGAGCTGCGTATGCCGTTATCATTTCCAGGGCGATGCCGACAACGATCAGCTT  
TCTGTAACGCCCTAGTGGGCTGGGAAATCGAGTCTGTTGAACAAGACCATTTTCCATCTTATGCCTGTGCGGAGCA  
GAAACTAACCTCTGTACGCCATACTTCAACCTGCCAGCAATCTTGTGCGCAATATTATCCAGTTGCTGCGCGAAGGGA  
AAAAGGTGCAAAATATTGTTGGTGATAAAACCGCAATGACTTCTACATTCCGGAAGATGAACCTTTCAAGATAATTGGC  
GCATTGCCTTATCTATGAGATCAATCTGCGTCGTTTCTGAGCCGTTGCGAGTATTACGTAATACTGACCAGCTAGT



GGTTCGGTTATGGAAAGATGACGACAACCTATCACCTGAAAGGGATGTGGGTTGATGATAAGTGGATGTTGATCACCG  
GTAATAACCTGAACCCGCGCCTGGCGTCTGGATCTGGAAAACGCCATTTTATCCACGATCCGCAACTTGAGCTGGCG  
CCACAGCGAGAGAAAGAACTGGAGCTGATCCGCGAGCATACCACATCGTTAAGCACTATCGCGATCTGCAAAGTATTGC  
CGATTATCCGGTGAAGGTTCTGTAACCTATCCGCCGTTTGCGCCGTATCCGCATCGACCGATTAATTAGCCGCATCCTGT  
AATCACAACCCCGTCTGTACGGGGTTTGTTTTTGGAGGCCACGTTTTGCGTATTCTTTTTGTCTGTTGCTATTGTTA  
CTTTCTGGATGACGCATATGGCTAACGATAGCTGGAGCGGGCAGGATAAAGCTCAACACTTTATCGCCTCGGCGATGCT  
TTCCGCGCGGAAATGAATATCACAGCATCAGGGGATGAGCCGGGATCGCAGTGCCATGTTTGGATTGATGTTCTCTG  
TCAGTTTGGGGCGTCAAAGAGCTTTGGGATAGCCGCCCGAAGGGAGCGGCTGGAGCTGGAAGGATTTGGCCTGGGAT  
GTCGCGGTGCAAGCACC GGCTATACCGTCTGGCAACTGACCCGCTACTAAAGACGCATCCCTTCCCTTTGCGATGTAG  
CATCAAAGAAACAGAAACGCCACCACGGCCATCAAGGTCACATACCAGAAGAAGGCTGTTTCCATTCTATTGATTTCA  
GCGACAACGCTACGTACTCCGCCGAACCACCAATATAGCATTAGCGACCGCATATGACAGACCAACGCCTAATGCGCGA  
ACCTGTGCCGGAAACATCTCAGCCTTCAGTATCCACTGATTGATGTATAAAAACTCACTATCAGCAGGGCACACATCAC  
CAGACAAAAGCGGCATAAGGCGAGGAAACGTTTTGCAATGCTGAGAGAATAGGAACGGTAAAAATGGCTGCCAGCGAAC  
CGAAACATAACATTGAGGTACGGCGACCAATCTTATCCGACAGCGGCCAATGAGTGGTTGAATAAGCATGAATACAAAC  
AATGCGGCAGTCATAATGCCACTCGCCACGTTGGCATGCATTCCCGCAGTATTTACCAGATACTTCTGCATATAAGTAGT  
GAAGGTATAGAAAACAAAGGGAGCCCGCAGCGTAAAAACCGAGAACCATGATGAATGCACGGCGATTGCGCATAATCCTT  
TCAGAGATCCAGCTTCTTTAAAGCGCGGTTTTCTGTTGCGAAGTTTCATCTAACTGACGACGTAACCAACGCCACA  
ACAGCTAACACAGCTCCTAACGCGAAAGGAATACGCCATCCCCACTCTCTGAGTGCAGCGTCTTCCATGTTGTTGTAA  
AACCACGACAACCAGTAGGGCTAGCAGTTGTCCGCCGATCAACGTCACATACTGAAATGATGCGTAAAAACCTTTGCGCC  
CTTCAACGGCAACTTCACTCATATAGTGGCGTGGTCCATATTCTCCGCCAACAGATAATCCCTGAAATAAACGAGCG  
AGAAGCAATAATGCCGAGCCACGTACCTATAGTTTCATAACCTGGGAGGCAGGCGATAACCAGCGATCCGAAACACAT  
CATAACACCGGATAACAGCATCGATTTTTTGGCACCATGTTTATCGGCTATGCGGCCAAATAGCCAACCGCTATTGGGC  
GCATCAGGAATCCCGCAGCAAAAACACCTGCTGTTTGTAGTAGTTGAGTCGTCGTTCCCGGAAGGGAAGAAGATGTGG  
GCAAAGTAGAGTGAACAGAACGAGTAGACATAGAAATCGAACCCTCGACCAGATTACCTGAAGAGGCCCCCAATCGC  
CCAAATGCGGCGACGAGTACTACTTGTGAGTTGCTGTCTGCCGTTACAGTACTTTAGCCATGCCATTATGTCTCC  
TGCCGTAATCCGATGCTTTTTGTCGGTCTGTTTTGTTATTTTTTTGTAAGGAAATATTATACATTTGTTGCATATCAT  
TATGCAACCTAACCATGAATTTAGTTAGCAGGAAAATGGTTATTGAGGAGCTTAAGGATAAATTTCTGTAAGGAGGAC  
ACGTATGGAAGTGGGCAAGTTGGGGAAGCCGATCCGTTGCTGAATCTGGCATAATGTTGGGAGTATAAGACGCGCAGCGTC  
GCATCAGGCATTTTTTTCTGCGCAATGCAAAAAGGCCATCCGTAGGATGGCCTTTCCGATAATTTGATGCCTGGCAGT  
TCCCTACTCTCGCATGGGGAGACCCACACTACCATCGGCGCTACGGCGTTTTCACTTCTGAGTTCCGGCATGGGGTCAGGT  
GGGACCACCGCTACGGCCGCCAGGCAAATCTGTTTTATCAGACCCTTCTGCGTTCTGATTTAATCTGTATCAGGCT  
GAAAATCTTCTCATCCGCCAAAACAGCTTCGGCGTTGTAAGTTAAGCCTCACGGTTCATTAGTACC GGTTAGCTCAA  
CGCATCGCTGCGCTTACACACCCGGCCTATCAACGTCGTCGTTCAACGTTCCCTCAGGACCCTTAAGGGTCAGGGAG  
AACTCATCTCGGGCAAGTTTCGTGCTTAGATGCTTTCAGCACTATCTCTTCCGATTTAGCTACCGGGCAGTGCCATT  
GGCATGACAACCCGAACACCAGTGTGCTCAGGTCCTCCGTCCTCTGTAAGGAGCAGCCCCCTCAGTTCTCCAGCGC  
CCACGGCAGATAGGGACCGAAGTGTCTCAGGACGTTCTAAACCAGCTCGCGTACCCTTTAAATGGCGAACAGCCATA  
CCTTGGGACCTACTTCAGCCCCAGGATGTGATGAGCCGACATCGAGGTGCCAAACACCGCCGTCGATATGAACTCTTGGG  
CGGTATCAGCTGTTATCCCGGAGTACCTTTTATCCGTTGAGCGATGGCCCTTCCATTGAGAACCACCGGATCACTATG  
ACCTGTTTTGCACTGCTCGCGCCGTACGCTCGCAGTCAAGTGGCTTATGCCATTGCACTAACCTCTGATGTCCGA  
CCAGGATTAGCAACCTCTGCTCCTCCGTTACTTTTAGGAGGAGACCGCCCGTCAAACCTACCCACAGCACTGCT  
CCGCAACCCGATTACGGGTCAACGTTAGAACATCAAACATTAAGGGTGGTATTTCAAGGTCGGCTCCATGCAGACTGG  
CGTCCACACTTCAAAGCCTCCACCTATCCTACACATCAAGGCTCAATGTTCAAGTGTCAAGCTATAGTAAAGGTTACGG  
GGTCTTTCCGTTCTGCGCGGGTACACTGCATCTTACAGCGAGTTCAATTTCACTGAGTCTCGGGTGGAGACAGCCTGG  
CCATCATTACGCCATTCTGTCAGGTGCGAAGTACCCGACAAGGAATTTGCTACCTTAGGACCGTTATAGTTACGGCCG  
CCGTTTACCGGGGCTTCGATCAAGAGCTTCGTTGCGCTAACCCCATCAATTAACCTTCCGGCACCGGGCAGGCGTCACA  
CCGTATACGTCCTTCTGTTTGCACAGTGTGTGTTTTAATAAACAGTTGCAGCCAGCTGGTATCTTCGACTGATT  
TCAGCTCCATCCGCGAGGGACCTCACCTACATACAGCGTGCCTTCTCCGAAGTTACGGCACCATTTTGCTAGTTCTCT  
TCACCCGAGTTCTCTCAAGCGCTTGGTATTCTCTACTGACCACCTGTGTCGGTTTGGGGTACGATTTGATGTTACCTG  
ATGCTTAGAGGCTTTTCTGGAAGCAGGGCATTGTTGCTTACGACCGTAGTGCCTGTCATCACGCCTCAGCCTTGAT  
TTTCCGGATTTGCTGAAAACAGCCTACACGCTTAAACCGGACAACCGTCGCCCGGCAACATAGCCTTCTCCGTCC  
CCCCTTGCAGTAACACCAAGTACAGGAATTAACCTGTTTCCATCGACTACGCCTTTGCGCTCGCCTTAGGGGTCG  
ACTACCCTGCCCCGATTAACGTTGGACAGGAACCTTGGTCTTCCGGCGAGCGGGCTTTACCCGCTTTATCGTTACT  
TATGTCAGCATTTCGACTTCTGATACCTCCAGCATGCCTCACAGCACACCTTCGAGGCTTACAGAACGCTCCCCTACCC  
AACAAACGCATAAGCGTCGCTGCCGAGCTTCGGTGCATGGTTAGCCCCGTTACATCTTCCGCGCAGGGCGACTCGACCA  
GTGAGCTATTACGCTTCTTTAAATGATGGCTGCTTAAAGCCAACATCCTGGCTGCTGGGCCTTCCACATCGTTTTCC  
CACTTAACCATGACTTTGGGACCTTAGCTGGCGTCTGGGTTGTTTCCCTCTTACGACGGACGTTAGCACCCGCCGTG

GTCTCCCGTGATAACATTCTCCGGTATTCGCAGTTTGCATCGGGTTGGTAAGTCGGGATGACCCCTTGCCGAAACAGTG  
CTCTACCCCGGAGATGAATTCACGAGCGCTACCTAAATAGCTTTCGGGGAGAACCAGCTATCTCCCGTTTGATTGGC  
CTTTCACCCCGAGCCACAAGTCATCCGCTAATTTTTCAACATTAGTCGGTTCGGTCTCCAGTTAGTGTTACCCAACCTT  
CAACCTGCCCATGGCTAGATCACCGGTTTCGGGTCTATACCCTGCAACTTAACGCCAGTTAAGACTCGGTTTCCCTT  
GGCTCCCCTATTTCGGTTAACCTTGCTACAGAATATAAGTCGCTGACCCATTATACAAAAGGTACGCAGTACACGCCTAA  
GCGTGCTCCCACTGCTTGTACGTACACGGTTTCAGGTTCTTTTTACTCCCCTCGCCGGGTTCTTTTTCGCCTTCCCTC  
ACGGTACTGGTTCATATCGGTGAGTACAGGATTTAGCCTTGAGGATGGTCCCCCATATTACAGACAGGATACCAG  
TGTCGCCCTACTCATCGAGTACACAGCATGTGCATTTTTGTGTACGGGGTGTACCCTGTATCGCGCCTTCCAG  
ACGCTTCCACTAACACACACTGATTAGGCTCTGGGCTGCTCCCCGTTGCTCGCCGCTACTGGGGGAATCTCGGTTG  
ATTTCTTTCTCGGGTACTTAGATGTTTTCAGTTCCTCCCGTTGCGCTCATTAACTATGGATTAGTTAATGATAGTG  
TGTCGAAACACACTGGGTTTCCCATTTCGAAATCGCCGTTATAACGGTTCATATCACCTTACCGACGTTATCGCAGA  
TTAGCACGTCCTTTCATCGCTCTGACTGCCAGGGTACCACGTTAGCCTTAGTCGTTAACCTCACAAACCGAAGATG  
TTTCACTTCAGAGTTGCGAAAATTTGAGAGACTCACGAACAATTTTATTGTTAGTGTTCATTTTTAGCTTGATCCA  
GATTTTTAAAGAGCAAATATACAAACAAGACTTAACAGTCTGTTTTGAGATATTGAGGTGCGGACTTCACTCACAAA  
CCAGCAAGTGGCTCCCCTAGGGGATTCGAACCCCTGTACCCTGTTGAAAGGGCGGTGCTTGGGCTTAGACGAAGG  
GGACAGAAAATTTGCTTATACGCGTTGCGTGATTTTTCTGTAGGGTGTGAGCTTTTATTAAAGAAAGGCAACGGCTT  
ATTTCTTTCAGCTCACTCCCAACGCGTAAACGCTTGTATTCACTTTTTCATCAGACAATCTGTGTGAGCACTGCAAAG  
TACGCTTCTTAAAGTAAGGAGGTGATCCAACCGCAGGTTCCCCTACGTTACCTTGTACGACTTACCCCACTCATGA  
ATCACAAAGTGGTAAGCGCCTCCCGAAGGTTAAGTACTACTTCTTTGCAACCCACTCCCATGGTGTGACGGGCGGT  
GTGTACAAGGCCCGGAACGTATTACCGTGGCATTCTGATCCACGATTACTAGCGATTCCGACTTATGGAGTTCGAGTT  
GCAGACTCCAATCCGACTACGACGACTTTATGAGTTCGCTTCTCGCGAGGTCGCTTCTTTGTATGCGCCATT  
GTAGCACGTGTAGCCCTGGTCGTAAGGGCCATGATGACTTGACGTATCCCACTTCTCCAGTTTATCACTGGCAG  
TCTCCTTTGAGTTCCCGCCGACCGCTGGCAACAAAGGATAAGGGTTCGCTGTTGCGGGACTTAACCAACATTTCA  
CAACACGAGTACGACAGCATGCAGCACCTGTCTACGGTTCGGAAGGCACATTCTCATCTGAAAATTTCCGTGG  
ATGTCAAGACCAGTAAGGTTCTTCGCTGTCATCGAATTAACACATGCTCCACCGTGTGCGGGCCCCGTCATT  
CATTTGAGTTTAACTTTCGCGCGTACTCCCAGCGGTGACTTAAACGCTTAGCTCCGGAAGCCACGCCTCAAGGGC  
ACAACCTCAAAGTCGACATGTTTACGGCTGGACTACCAGGGTATCTAATCCTGTTTGTCCCCACGTTTCGCACCTG  
AGCGTCAGTCTTCGTCAGGGGCGCCTTCGCCACCGGATTCCTCCAGATCTCTACGCATTTACCGCTACACCTGGA  
ATTTACCCCTCTACGAGACTCAAGCTTGGCAGTATCAGATGAGTTCAGGTTGAGCCCGGGGATTTACATCTGA  
CTTAAACAAACCGCTGCGTGCCTTTACGCCAGTAATTCGATTAACGCTTGACCCTCCGTATTACCGCGGTGCTGG  
CACGGAGTTAGCCGGTCTTCTGCGGGTAACGTCAATGAGCAAAGGATTAACCTTACTCCCTTCTCCCGCTGAA  
AGTACTTTACAACCCGAAGGCTTCTTCATACACGCGGCATGGCTGCATCAGGCTTGCGCCATTGTGCAATATTTCCA  
CTGCTGCTCCCGTAGGAGTCTGGACCGTGTCTCAGTTCAGTGTGGCTGGTGCATCCTCTCAGACCAGTAGGGATCGTC  
GCCTTGGTGGCCGTTACCCACCAACAAGCTAATCCCATCTGGGCACATCCGATGGCAAGAGGCCCGAAGGTCCCCCTC  
TTTGGTCTTGCACATTATGCGGTATTAGTACCCTTCCAGTAGTTATCCCCCTCCATCAGGCAGCTTCCAGACATTA  
CTCACCCGTCGCCACTCGTCAGCGAAGCAGCAAGTGTCTTCTGTTACCGTTCGACTTGCATGTGTTAGGCTGCCGCC  
AGCGTTCATCTGAGCCATGATCAAATCTTCAATTTAAAAGTTTGTGCTCAAAGAATTAACCTTGTAAATGAATTACG  
TGTTCACTCTGAGACTTGGTATTCAATTTTTCTGCTTTCGACGTTAAGAATCCGATCTTCGAGTGCCACACAGATTG  
CTGATAAATGTTAAAGAGCAGTCCCGCTTCTGCTTTTCTCAGCGGCGCGGGTGTGCATAATACGCCTTCCCGTACAG  
AGTCAAGCATTTCTTTTCTGTTGAGATTCTCAGGAGAACCCCGCCGACCCGCGGCGGTGTTGCGGTTGTTTCC  
GTGTCAGTGGTGGCCATTATAGGGAGTTATTCGGCTGACAAGCGAAAAATATAAAAACCTTTATCGTTCCGCTCACTTT  
TCAGGCAAAACATCTTAAATATAGTCTTTTCCGCTAACTTATAGACAAAACGAGCCCCGAAGGGCTGTTTTATCATT  
TACTGGACGGCGACAATCCGGTCTTCACTAATCCAGGCAATCACTTTACCCGGAACCAATTCACCAGACAGTATTTG  
CTGTGCCAGCGGGTTTTCGATCTGCTGCTGAATTGCAGTTCAGAGGACGTGCACCATAGACCAGGATCGTAACCGTCT  
CGCTCAGCAGTTTTCAGCGCCTCGTCAGAAATGTGGATTTTATAACACGTTCTTCCAGACGTTTGTACAGACGTTTCAAC  
TGAATCTGCGCAATCGAGGCAATGTGCTTTCACCCAGCGGATGGAAGACCACACTTTCATCGATACGGTTAATGAATTC  
CGGACGGAAGTTATGGCTTACCACACCGAGCACCAGCTTTCATGTGCGCATAATCCAGTTCACCGAAGCGTTCTGAA  
TCAGATCGGAACCGAGGTTAGAGGTCATAATGACGACCGTATTACGGAAGTCGACCGTTCTCCCTTCCCGTCACTCAGA  
CGCCATCATCCAGTACCTGCAACAGAATGTTGAAGACATCCGGATGCGCTTTTCCACTTTCATCCAGCAGGATGACGGA  
ATACGGACGACGACCGCTTCCGTACGGTAGCCACCTTCTCATAACCGACATATCCCGAGGCGCACCAACCAAAAC  
GAGACACCGAGTGTTCCTCATAAACTCGACATATCGATACGGACCATCGCTCGTGCATCAAACATAAAGTTCGCC  
AGCGCTTACAAGCTCTGTTTTCCACACCGAGTTGGCCGAGGAACAGGAATGAACCAATCGGGCGATTTGGATCCGC  
CAGCCCCGACGGCTACGACGAATAGCGTTAGATACCGCATCAACCGCTTCTGTTCTGACCAATTACCGGATGGTGCAGTT  
CTTGCTCCATACGACAGTTTTTTCGCGCTCGCTTTCCATCATGCGAGAAACCGGAATCCCGTCCAACGCGCCAGCACT  
TCAGCAATTTTCGGCTCGGTCACTTTATTACGCAACAGACGATAGTTTTGCCTTCGAGCTGCGTTGCGGCTTCCAGTTG  
CTTTTCAGTTCCGGGATTTTCCGCTATTGACGTTTCAGACATCCGCGCCAGGTCACCCACAGCGGAGCTGTTCAATAG

CGATTTTCGCCTGTTCCAGTTCGCTTTAATGGTCTGCGTACCAGAAAGCGATGCCTTCTCTGCTTTCCACTCTTCTTCT  
AACTCGGAGTACTGACGTTCTTTGTCGCTCAGTTCTTCGTTGAGCATATCCAGACGTTTTTTACTGGCTTCATCAGACTC  
TTTCATTAACGCCTGTTGTTCCAGTTTGAGCTGGATGATACGACGATCGAGTCGGTCGAGTCTTCTGGTTTTGAGTCAA  
TCTGCATACGAATGCTGGATGCTGCTTCATCGATCAGTTCGATGGCTTTATCCGGCAGCTGACGGTCAGCAATGTAGCGA  
TGAGACAACGTCGCCGCTGCAACAATTGCCGGGTACGTAATTTGCACATGGTGGTGCAATTCGTAACGTTCTTTAGGCC  
ACGCAGAATCGCAATGGTATCTTCAACAGAAGGCTCGGCAACAAACACTTTCTGAAACGACGTTCCAGCGCAGCATCTT  
TTTCAATGACTGGCGATATTCGTCAAGCGTCGTGGCACCTACGCAGTGCAATTCACCACGCGCCAGCGCCGGTTTTCAGC  
ATGTTTCCGGCGTCCATTGCGCCATCGGCTTTACCCGCGCCGACCATGGTATGTAATTCGTGATAAATAGGATGACGTT  
GCCTTCTGTTTGGCAAGATCGTTAAGCACGCCTTTTAAACGTTCTTCAAACCTACCGCGATATTTCCGCCAGCCACCA  
GGCGGCCATATCCAGCGCCAGTACCCGGCGGCCTTTCAACCTTCCGGCACTTCGCCGTTGATAATACGCTGCGCCAGA  
CCTTCAACGATGGCAGTTTTACCGACGCCGGTTACCAATCAGTACCGGGTATTTTTAGTACGACGTTGCAGCACCTG  
AATGGTACGGCGAATTTCTTCATCACGACCAATCACCGGATCGAGTTGCCCTGTTCCGGCTCGTTCCGTAAGGTCGATGG  
TATATTTTTTCAAAGCCTGACGTTGGTCTTCAGCACCTTGATGTTACGCTTTCACCTCCACGATTTGTTCAATCGCT  
TGAGTAATGTTGGCGGTGGTCGCCCTGCTGCTTTCCAGGATGTCGGCCAGCTGCCGCGAGACTCAAGTCCGCCAGAAC  
GAACAGTTCTGACGAGATAAAGTTATCACCACTTTTTGCGCCAGCTTGTGCGAAAGATTAAGAACGCGCACCAGACTCT  
GTGATGGCTGGAGATCACCAACAGTCACTTCAACCTGCGGTAACGATTTAATGCCTGATTGATATCTGTGCGCAACTGG  
CCAGCATTTATGCCAGCGGATGTTAATAAAGGACTAACCGAACCCCTTCTGATTCAGCAGGGCGCTCATTAAATGAAG  
TGTTTCGATAAATTTGTTGTCGTGCCCGAGTGCAAGTGATTGGGCATCGGCAAGAGCAAGCTGGAATTTATTAGTAAGAC  
GATCCAGACGCATAACTCTCCATAACGGATCAAAGTTGCTACTGGAGATTAATGAGGTCATCCCTCAATTATTCAAG  
GTTATTGACCAGATTAATGTGAAAAGAAAATCACGCGTACCGGATCGTCTTGATTCTTTAGGTTATATCAGCCAAATGAA  
ACTTGCCATACGACCGGTGGTCTTGTGCGGACGATAAGAGAAGAAAGTCTCATTTCGATATGTACAACGGTCGCCGC  
CGAAAATTTGCTCAACACCCACGTTGCCAGACGCTGCCGGGCAAGCTGATAAATATCCGCCAGATACTTATCACCATGC  
TGAATGAAAGTGCACCTGCTTTAGCGTCTACTGCCATAAACGCCTCGGAACCTCCCCCCCCACTTCGAACGCGCGTGG  
ACCAATTGCCGCCCTAACCAGGCGAGAATATTTCCGGATTATCAGCAAACAGGAAACCGTCTCTCCAGCACGCCTG  
CGCACAGTCCACGCCAGCCAGCATGAGCGCGGCGACTTCCGTTCCCGCTCGATTGCAAAACAGCACAGGGAGGCAGTCG  
GCAGTCATCACTGCGCAACCGTCCGGGCGTATTGCTATAAGAGGCATCCGCCGTTTTGAGGCATAAGGTTCCGCCAGT  
GAGCTTAAGCACATCTTTGCCGTGACCTGCTCAAGCCAGACCGTTTTAGAAGGCAAATTCGCCGAGCAAAAAGTCGCT  
TGCGATTCTCCTCAACGTGATCCGGGTTATCGCCACAATGGGCACCGAGGTTGAGTGAGTCATACGGGGCAAGCTCACG  
CCGCCGATACGAGTGGAGCTACAGGCCGCAACACCTTTGGCTGCGGCCACTGCGGGACAATCAGCTTACTCATAACCAG  
TCCACTTCATCCTTATGTTCTTCAAATCGGCGCGCATCACCTCAATCAGCTCCACCATATCTTGGAATAGGCGCATG  
CCATTCCATTTGATGCCGGAGATCGGGTGATAAAGACGCAGCATGGTTGCATGTAGCGCCTGGCGGTCAAACCTTACGCA  
GCGTGAGATAAATGCTTCCGAAGCACCTTTGGCGGACGCGGACGGCCACCATAAACCGGATCGCCACCAGCGGATGA  
GTGATATGGGCCATATGCACGCGGATCTGGTGCGTACGTCCAGTTTCCAGACGCAACCGCAGACGCGTGTGCACACGGAA  
GTGTTCCATGATGCGATAGTGAGTCACCGCTGGTTTGGCCATCGGATGCACCGCCATATGGGTACGTTTGGTCCGGTGGC  
GACTGATTGGCTCGTCCACCGTGCACCTGCGGTATATGACCAATCGCCACCGCTTCACTACAGGTAATTTACCGC  
CGTTGCAAAGATTCGACTAAACGCGTCTGAGCCGGAACGGTTTTTGCACAACCATCAGGCCAGTGGTGTCTTTATCCAG  
ACGATGGACGATGCCCCACGCGGTACATCGGCAATGGGTGGATAGTAATGAAGCAACGCATTGAGTACCGTGCATCCG  
GGTTACCCGCGCCAGGATGTACCACAGGTCGCGCGGTTTTATTAATGATAAATGTCTTCATCTTCATAGACGATATCC  
AGCGGGATCCTGCGGTTCAAACGCGCTTCTTCAATCTCAGCGTTGATGGCAACCTGCTCGCCACCCAATACTTT  
TTCTTTGGCTTATCACAACCTTTGCCGTTAACCCAGCACTCGTGGTCGAGGATCCATTCTTTTATTCCGGAACGTGAAT  
AATCCGGGAACATTTCCGCCAAAGCCTGATCTAAGCGTTGACCGAGTTGGTTTTCCGGACACCGTTGACGTGAGCTGTACT  
CGTTGTGCCATATATACTGCTTCTTCTGTTTATCGTTGGGTTTTACGGCTTTGCCGTTTTAATAGTGTGCTATTGTAGC  
TGGTCTTAACCGGAGCAGGAACAGAGAATCTCCCGTATTACATTTTGGAGAAAGTCAAACGTCATGACGCGCATGAAA  
TATCTGGTGGCAGCCGCCACACTAAGCCTGTTTTGGCGGTTGCTCGGGTCAAAGGAAGAAGTACCTGATAATCCGCC  
AAATGAAATTTACGCGACTGCACAACAAAAGCTGCAGGACGGTAACTGGAGACAGGCAATAACGCAACTGGAAGCGTTAG  
ATAATCGCTATCCGTTTGGTCCGATTCGCAGCAGGTGCAGCTGGATCTCATCTACGCCTACTATAAAAACGCCGATTTG  
CCGTTAGCACAGGCTGCCATCGATCGTTTTATTGCTTAAACCGACCCATCCGAATATCGATTATGTCATGTACATGCG  
TGGCCTGACCAATATGGCGTGGATGACAGTGCCTGCAAGGGTCTTTGGCGTCGATCGTAGCGATCGCGATCCTCAAC  
ATGCACGAGTGCCTTAGTGACTTTTCAAACCTGGTGCAGGCTATCCGAACAGTCAGTACACCACCGATGCCACCAA  
CGTCTGGTATTCTGAAAGATCGTCTGGCGAAATATGAATACTCCGTGGCCGAGTACTATACAGAACGTGGCGCATGGGT  
TGCCGTCGTTAACCGGTAGAAGGCATGTTGCGGCACTACCCGGATACCCAGGCTACGCGTATGCGCTGCCGCTGATGG  
AAAATGCATACCGTCAGATCGAGATGAATGCGCAAGCTGAAAAAGTAGCGAAAATCATCGCCGAAACAGCAGCAATACA  
TAACAGAAACCTGAAACACAAAACGGCAGCCCTGAGCTGCCGTTTTTTTATTCTGTCAGTTGTGAAACTGAAGCGATTT  
AGTGCCTATCGATCTCATCAAATATGGCTCGCTTTGAGATATTCCTCAAGTAAAAAACATCTCTTCTCGGATTTCTCA  
CAAAAAAGATTCGTTGACAAAAAGTGACAAAATTATGAGATTTTCATCACACATTTTACATCAGGAACGGTATGCTGAA  
TTCACCAAGACGGGAAGACAAGAGGTAATAATTTATGACAATGAACATTACCAGCAAACAAATGGAATTACTCCGGCCAT

CCGCCAACATGTCGACACCGTCTCGCCAACTGGAAAAATGGCAAACACATCTGATTAATCCACATATCATTCTGTCCA  
AAGAGCCACAAGGTTTTGTTGCTGACGCCACAATCAATACACCTAACGGCGTTCTGGTTGCCAGTGGTAAACATGAAGAT  
ATGTACACCGCAATTAACGAATTGATCAACAAGCTGGAACGGCAGCTCAATAAACTGCAGCACAAGGCGAAGCAGCTCG  
TGCCGCAACATCGGTGAAAGACGCCAACTTCGTGCAAGAAGTTGAAGAAGAGTAGTCCTTTATATTGAGTGTATCGCCAA  
CGCGCTTCGGGCGCGTTTTTTGTTGACAGCGTGAAAAACAGTACGGGTACTGTACTAAAGTCACTTAAGGAAACAAACAT  
GAAACACATACCGTTTTTCTTCGATTCTTTTTACCTTCCCCTGAATGGGAGGCGTTTTCTCGTGTGAAACAGAATGCG  
AAGACGAACAATAAGGCCTCCCAAATCGGGGGCCTTTTTATTGATAACAAAAAGGCAACACTATGACATCGGAAAACC  
CGTTACTGGCGCTGCGAGAGAAAATCAGCGCGCTGGATGAAAAATTATTAGCGTTACTGGCAGAACGGCGCGAACTGGCC  
GTCGAGGTGGGAAAAGCCAACTGCTCTCGCATCGCCCGGTACGTGATATTGATCGTGAACGCGATTTGCTGGAAAGATT  
AATTACGCTCGGTAAAGCGCACCATCTGGACGCCATTACATTACTCGCCTGTTCCAGCTCATCATTGAAGATTCGGTAT  
TAACTCAGCAGCTTTGCTCCAACAACATCTCAATAAAATTAATCCGCACTCAGCAGCATCGTTTTCTCGGCCCAAA  
GGTCTTATTCCCATCTTGGCGCGCCAGTATGCTGCCCGTCACTTTGAGCAATTCATTGAAAGTGGCTGCGCCAAATT  
TGCCGATATTTTAAATCAGTGGAAACCGCCAGGCCACTATGCCGTGTAACCGATTGAAAAACAGCTCCGGTGCCA  
TAAACGACGTTTACGATCTGCTGCAACATAACCAGCTTGTGATTGTTGGCGAGATGACGTTAACTATCGACCATTGTTG  
TTGGTCTCCGGCACTACTGATTTATCCACCATCAATACGGTCTACAGCCATCCGAGCCATTCCAGCAATGCAGCAAATT  
CCTTAATCGTTATCCGCACTGGAAGATTGAATATACCGAAAGTACGTCTCGGCAATGGAAAAGGTTGCACAGGCAAAAT  
CACCGCATGTTGCTGCGTTGGGAAGCGAAGCTGGCGGCACTTTGTACGGTTTGACGGTACTGGAGCGTATTGAAGCAAAT  
CAGCGCAAAAACCTTACCAGATTGTTGTTGGCGGTAAAGCCATTAACGTGCTGATCAGGTTCCGGCGAAAACCAC  
GTTGTTAATGGCGACCGGGCAACAAGCCGGTGCCTGGTTGAAGCGTTGCTGTTACTGCGCAACCACAATCTGATTATGA  
CCCGTCTGGAATCAGCCCGATTACGCGTAATCCATGGGAAGAGATGTTCTATCTGGATATTCAGGCCAATCTTGAATCA  
GCGGAAATGCAAAAAGCATTGAAAGAGTTAGGGGAAATCACCCGTTCAATGAAGGTATTGGGCTGTTACCCAAGTGAGAA  
CGTAGTGCCTGTTGATCCAACCTGATGAAAAGGTGCCGGATGATGTAATCATCCGGCACTGGATTACTGGCGATTG  
TCATTGCTGACGCAATAACACGCGGCTTTCACTCTGAAAACGCTGTGCGTAATCGCCGAACAGTGTCCACCTTGGC  
GAAACTGTCAATAAACGCTGCTTATCGCCCTGCTCCAGCACTCAATCGCCTCGCCGAAACGCTTATAGTAACGTTTGA  
TTAACGCCAGATTACGCTCTGACGACATAATGATGTCGGCATAAAGTGGGATCCTGAGCAAACAGTCCCGGACCATC  
GCCAGCTCAAGCGGTAAATCGGCGAAGAGAGCGCCAGAAGTTGCTCAAGCTGAACATTTTCTTCTGCCAGTGCAGCCC  
GTAAGCAAAAGTAGCAAAGTGGCGCAGTGCCTGAATAAACGCCATATTCTGATCGTGTGCTGACGGCGTAATACGATGCA  
GCCGAGCGCCAGACCTGAATTTGCTCCAGAAACCATTGGTATGCTTCCGGTTTACGTCCATCACACCAGACCACAAC  
TGCTTTGCCAGCTACCGCTGTCCGACCGAACATCGGGTGTAGCCCCAGCACCGGACCATCATGCGCCACCAGCATGGC  
CTGTAATGGCCATTTTTACTGATGCCAGATCGACCAGAATACAATCTTTCGGTAAAGGCGGTAATTTGCCAATAACTT  
GCTCAGTAACGTGGATTGGCACACTAACAAATCACCATTCCGGCATCGGCAACAATATCAGCCGCTCGATCCCAGTCATGT  
TGCTCCAGAATCCGCACCTGATAACCCGAGAGGGTACAGCATCTTCTGAAACAGGCGTCCCATCTGACCGCCACCGCCGAC  
GATAACCACCGGACGAGTACGCGAACAAGTGTAAAAATCCTTTGCTGTTTTACTGGAGTAAGATTACCGCATCACCC  
GACGCAAAACATCCTCAATCAGATCTGGCGGTACACCCAGAGCTTCCGCCTCTGCACGACGCGAGGCCAACAATAGATGCC  
TCGCGCTCCGGAACATAAATAGGCAGTCCAAAGCGGTTTTACCTCGCCACTTCAGCAACCAGTTCAGACGCTTCGC  
TAATAAATTCAGCAGCGCTTATCGACTTCATCAATTTGATCGCGTAATGCGGTCAATTCAGCAACCATAATAAACCTCT  
TAAGCCACGCGAGCGTCACTGCCCCGTTGATCCTGATGAATTTACGCGAGCAAGGCATCGGTCAATTCAGCTAAT  
GCAGGCATCGTTACGGATACACCGTATTTCACTTACTGCGCGTTGCTCGGAAGACTGATTGCCCTCGTGATATTAC  
TTTCGATCATCAGACCAATAAATGAGCGATTGCCATCTTTGATTTAGCAACCACGGATTCTGCCACCGAGGCTGACGG  
CGATAATCTTTATTGGAATTACCGTGGTGAATCTACCATCAGAGACGGGCGCAGTCCCGCTGTTCCATCTCTTTTT  
ACATTTGCGCAACATCCGAGGGCTATAGTTCCGGCTTTACCACCGCGCAGGATCACATGGCCGTCGGATTCCCTGAG  
TTTTGAGCAACGCAACCTGCCCTGCTGTTAATGCCAACAACCGGTGCGGCTGGGCGGGCGCGCATAGCGTTAATT  
GCTGTTGCCAGACTGCCGTGGTGCCGTTTTTAAAACCAACCGGCATGGAAAGCCCGAGGCGCATTTACGGTGAGTTG  
CGATTCCGTTGTACGAGACCAATTGCTGACCAGCTAAACAGATCGCCAGGTATTGCGGGCTATTCCGATCTAACGCTT  
CCGTCGCCAGTGGCAGTCCCATATTCACCAGCTCAAGCAGCAATTTACGCGGATCTGCAGCCCGGCTTCTACATCAAAA  
GAGCCATCCATATGGGATCGTTAATTAACCCTTTCCAGCCGACAGTGGTACGGGGTTTTTCAAAATAGACGCGCATTAC  
CAGATAGAGGCTATCGCTGACCTCTGCGGCAAGGGTTTTAAATCGACGAGCATATTCAGAGCAGTTCGGATCATGAA  
TGGAACAAGGACCACATACTACCAGCAGACGAGGATCGCGCCCGGCGATAATATCTGAAATGCTTTTACGCGAGTCAGCA  
ATCTGGGCTTCTGTTGAGGCTCAATGAAAAAGCGCCTTCAGTTGTTCCGGAGTCATTAACCTGTTCTGCGGTAAT  
ATGTACGTTATTCAGCGCTTTTTGTCATGATGGCGATCCTGTTATGCTCGTTTGCATAGTTGATCCTCAGCGAGGA  
TGACGTAACGATAACACATAAAGTAAAGTTTTCAATCCATATTTCTGATATTTTATTTACACAGGCAATTTAGTCCGCG  
TTTCAACCCTTACCTCTGTATAGATAAATTTACTCCCTTTGAAAAAATCCGCTATGCTTTGAAAAAGGAGAAAGAAA  
TGATGAAAAAGTTTATCGCCCCCTTGTGGCTTACTGGTTAGCGGATGTCAGATTGATCCTTATACTACGCGCCAACC  
TTGACCAGCACCGACTGGTATGATGTCGGTATGGAAGATGCGATATCGGGCAGCGCCATAAAAAGATGACGATGCATTTAG  
CGATTCACAGGCGGATCGCGGTCTATACCTTAAAGGATATGCCGAAGGACAAAAGAAAACCTTCCAGACCGATTTACTT  
ATGCCCCGAGGACTTCCGGTAAAAGCTTCTGCCAGCTGCAACAATGTTGAAAATGCCAGCCAACCTGCATGAAGTATGG

CAAAAAGGGGCTGATGAAAATGCCAGCACAATACGATTAATTAATTAACCCACAAATAAATTAACATAAGATTTT  
ACTCATTGTGTTTTATTTCTCACATTGATGACGGTCGCATGAAAAATGATATTTTAAATGAGCATTCTGAAAAATATCG  
ATGCATTTTCGAGCGAAGATGGTGGGGATCCCTGAATGCGTTTTCTCACCGACTGTTCTTACTTCTGATTCTCCTGCTGA  
CGGGAGCACCATACTCGCTCAGGAGCCTTCTGACGTTGCGAAAAACGTGCGTATGATGGTTTCCGGTATTGTCAGTTAC  
ACCCGCTGGCCTGCGCTATCAGGGCCACCAAGTTATGTATCTTTTCATCTTACGTTTTAGTACCGCCCTACAAGAGAA  
TGCCGCGACATCTTTGCCTTATCTGCCTGTCATCATTACACTCAACAAGAGGCGATGATTCAGGCTGCAATGGTTTTT  
ATTTTGGCAACGAGTCACCGACATTCCAGATGGAATTAACCGAACAAATATCCGTCAAAGGCGTTATTATTAATTGCCGAA  
CAAAATACCGAGTGCAATTATTGGTAGCGCCTTTTGTCTGATCATCCACAATAATGACGTCAGATTTGCCGTAACCTGGA  
TGCCTTATCGCGTAGCGGTGAAAGGTCAACCCGGATGCTTAATGCTCGCACGGAAGAAAAATGATGGATAACGATAAT  
TCTCTTAATAAGCGCCCCACGTTTAAAAGAGCATTACGCAACATCAGTATGACCAGCATATTTACTATGATGCTGAT  
CTGGTTGCTGCTTTCCGTGACCTCGGTGCTGACCCTGAAACAGTACGCGCAAAAAACCTGGCACTGACAGCAGCAACAA  
TGACTTACAGTCTGGAAGCAGCTGTCGTTTTTCCGATGGCCCTGCAGCAACTGAAACACTGGCAGCGCTGGCCAGCAA  
GGCAATTTTCAACTGCAGAAGTACGTGATAAGCAGCAAAATATCTGGCATCTGGCATTACCCCGTAAGGATCCAGG  
CGATACTTTAGTAATTTATAAGCCACTGGCTCTCCCTGCCCCATCATTAGCCGATTCTGCACAATGGTGAACCA  
TTGGCGAAGTACGCTAACCGCTCGCGACAGTTCAATCAGCCATTTTATCTGGTTTTTTCGCTCGCCGACTGACCCGTTGT  
ATTTCTGCTGGCATCAGGCAATGCAATACCCTCACCGCAATTTTCCCGACGAGTTTCGGAAGAACGATCGCTGAGTTTACC  
CGATGTCGTACATGATGTGCGTTTCCAACCGCAATTTTCCCGACGAGTTTCGGAAGAACGATCGCTGAGTTTACC  
TCGCTCTCGACTTCAACAGTCTGCTGGATGAAATGGAAGAGTGGCAGCTTCTTTACAGGCTAAAAATGCGCAGCTTCTA  
CGTACCGCGCTACATGACCCATTAACCGGGCTGGCTAACCGCGCAGCGTTTTCTGAGCGGCATCAACACGTTGATGAACAA  
TTCCGATGCCCCGAAAAACGTGCGGCTTACTATTTCTTGATGGCGATAATTTCAAATACATCAATGATACCTGGGGTCTG  
CGACGGGCGATAGAGTCTTGATTGAAATCGAAAACGGTTAGCTGAATTTGGCGGGCTGCGACATAAAGCATAACCGCTG  
GGCGGGCATGAATTCGCTATGGTGTCTATGATGTACAGTCCGAACTGAAGTGCAGCAGATATGTTACGACTGACACA  
AATCTTTAATCTCCGTTTATCTTATAATGGCCATCAGACCACATGACATTAAGCATTGGTTACGCGATGACCATG  
AGCAGCCTCTGCGGAAAAATTACAAGAGCTTCCGATCACAATATGATCAGGCCAAACACCAGCGTCCGAAAAAGCTG  
GTGAGATAACAAGGATATATCGATATGATAAAGCACCTGGTAGCACCCCTGGTTTTTCCCTACTAATACTGACTGGCTG  
CCAGTCCCCTCAGGGAAAGTTTACTCCTGAGCAAGTCCCGCTATGCAATCTTATGGATTTACTGAATCCGCGGGCGACT  
GGTCTGCTGGGCTTATCAGATGCCATTCTGTTGCAAAAAATGACTACAAATTGCTCCCGAAAAGCCAGCAACAGATCCAA  
ACCATGGCAGCTAAATTGGCCTCGACAGGGCTAACACATGCCCGTATGGATGGACACACCGATAACTATGGTGAAGACAG  
TTACAACGAAGCTTATCATTGAAACGGGCGAATGTGCTGGCCGATGCATGGGCTATGGGTGGACAAATTCACGCAGCA  
ATCTCACACACAGGGTTTAGGAAAAAATATCCCATAGCCAGTAACAAGACCGCCAGGGCCGCGCCGAGAACCGCCGC  
GTCGCGAGTGGTGAATTAACCCCTTAAAAACACCAGCAACAGATAAAAAAGGGCCAGCCAATTGGCCAGCCCTTCTAAC  
AGGATGTGCTTAAGCGAAATCTTAGTTAAGACGCTCTTTGATACGAGCAGCCTTACCAGTACGCTCACGCGAGGTAGTAC  
AGTTTAGCTTACGAACAGCACCACGACGTTTGACAGAAATGCTGTCAACTACCGGAGAGTGAGTCTGGAAGACACGCTC  
AACGCTTCGCGGTTGGAATTTTACGAACAGTGAATGCAGAGTGCAGACCGCGGTTACGAATAGCGATAAACACGCCC  
CGAATGCCTGCAGACGTTTTTTGGAACCTTCAACAACCCATACTTTCACTTCCACGGTATCACCCGGACGGAAGGAAGT  
ACGTCCTGCTTATCTGCTTGTGTTCAAGTTGCTTAATAATGTTGCTCATAATTAATCTTATCCTGGGTAACCTGAT  
ATCTCGGGGCTTACGCCATCCCATCATGTTTATGTTGCTGTTGTGCGTGTTCGTTTTGAACTCCGCCAGCAACCTTGC  
TTGCTCTTCAGTACAGAGCCAGGTTTTCCAGAAGTTCAAGTCTTCTAAGCCAGGTACGGCCAGCGACTGTTTCAAACGCC  
AGCGACGTATCTGGCATGGTTGCCGACAGTAACACTGGCGGAACTTCCATCCCTTCAACACCTCAGCCGCGTATAG  
TGCGGGCAATCCAGCAATCTTCCAGAAAGGAATCTCCGTTCCGAGGCTTCAATGTCCCAGTACTCCCGGAATAAACCG  
GGAAACGGAGTCAATCAGCGTCATTGCTGGTAACCTACCACACTGAGAACGTAATCGCCGATTGACCATCTTCTCGTCAA  
TTTTCGTTTTGGATCACGCGCTCATCTATACCTTCTGAGCAGCCGACACCAGAATCAATTTTTGATTGTTGCCAGTTG  
CTGACGCCCCGCTTATCAAGCTTGCCTGCTGTTGACAGATAAATCACCTTTGCGCCTTACCCGCGCGGCTTTTTGC  
TGATGAATGGCGTCCCGAAGGGTTGCACCATTAACATCCCGGTCGCGCCGTAAGGACGATCGTCCACGGTAC  
GGTGCCGCTATGCGTGAAGTCGCGAGGACTCCAGCTCTGGATGCTCAGCAGGCCATTTTTAACTGCCCGCCAGTTACC  
CCGTAATCGGTAATTGCGCGGAACATTTAGGAAACAGGCTAATTATGCCAATCCACATAGCGCCGCTTTTTACCGTTA  
TCCGGTGGTTTTAAAACAGGATCCCAATCTACTTCGATTGAACGAGTAGTGAGATCGACTTTCTTGATAACCTGCCCAT  
CGAGGAACGGTACGAGACGTTCTTGGATACCAAACGCATCTTTCAGGTTTGCCTTAAATGACGAGAACGTCATTAGATCCG  
GTTTCCATCATATCGACGACTTTACCGAGATCGTAGCCTTCAAGTGGTACTACCTGGCAGCCATCAGGCTTTTCCAGTA  
GTAGTCCCCCTCTTCAAGCTGAGGCAGCTGCGATGAATCCACGACAATTTACAATTCGTCAGCAGGTTCCGCGCATCAC  
GATCGTCAACGCCCTTTCAGCTTATGATCATGTCCTGATTGTTGCTTCCAGCTTTCCAGCTGGACTTGTGCCACTGA  
CCCGCTTCTGGATAAACAGGGCTGATAGTCAAAAATGCTTTCGCGCTTTCGGTGGAAAGAAAACACTCTGAGCCACCC  
ACGAATACCGTAAAGACGAACCCATTTTTCCAAAACGATGGGATCAACAGGTGCTTGCAGCGTGGAGTTGTTGCTCATCA  
TGACCACCGTACAGATTAAGCTGCTTTGTTACTTCTTTGATCAGCGCAGCAACGCGATCAGAAATAGTTGCGCCCTGG  
CCAACCCAGTACGATGCGATCCAGATCCAGGCGAGTGCCTTCTTTTTGCTAGCGATTGGGTTGAAGAAACCAAC  
CGCTCGATGAAGCGACCGTTGCGTGCATTACGGCTGTCAGCGACAACAACCTGGTAGAACGGACGCTTTTTAGCGCCGT

GACGTGCTAAACGAATAGTTACCATAACATCCTCTTGTGTGAATAAAACAACCGGACCCCATCGAGGAACGGAGTCCGGT  
GTCATATTAAGCCGAAAATTTTACTCATTTTTGCGGGAATTGCAATCAACAGTTGCTAACTCTGCTGTAAGGCCG  
TCGGCGGTGCAGCCAGTTTGGTGCCGGAGTGCGCGCAGTACCAGGAGCGTACACGCAGTACGTGAGGATGACGAGCACAT  
CCCGGTGCCAAATGGCAAACAAGCCAGCCGATTAGCGACCAGGGAAGCCTGGGGGCATCATACCCTTCATGCTTCTCA  
TCATCTTCGCCATTCCGCCCTTCTTCATTTTTCTTCATCATGCGCTGCATGTCGTGCGAAGTGTTCAGAAGACGGTTAACG  
TCCTGCACCTGCATACCGCAACCGGCAGCAATACGGCGTTTACGCGAACCTTTGATGATTTCTGGCTTAGCGCGCTCTT  
CATCGTCATCGAGTTGATGATGGCTTCCATACGCACCAGCACTTTATCGTCCATCTGTGACTTGACGTTATCCGGGATCT  
GCCCCATGCCCCGCGAGCTTGCCCATCAGACTAGCCATGCCGCCATATTTTTCATCTGGCGCAGCTGCTCAAGAAAGTCG  
TTGAGATCGAAGCCGTCACCTTTTTTTCAGCTTGCTGGCTAATTTCTCTGCCTGCGCGCGGTCAACTTTGCTTTGCATATC  
TTCGATCAGCGACAGTACGTGCCCATGCCGAGAATACGCGACGCGATGCGGTCCGGATGGAACGGCTCCAGCGCCTCAG  
TTTTCTGCCAACACCGAGGAATTGATCGGTTTGCAGTGTGTGACGAATAGAGAGCGCCGACCCGCCGGGCATCG  
CCGTCCACTTTGGTCAACACTACGCCGTAAGCGGTAACGCTTATTGAATGCTTTTGGCGATTGGCCGCATCCTGACC  
GGTCATGGCGTCAACCACAAACAGGGTTTCAACCGGTTAATCGACGCATGGACTTGTTTGTCTCGTCCATCATCGCTT  
CGTCAACGTGCAGACGACCAGCGGTATCCACCAGCAGCAGTGTGAGAATTTAGTTTGGCTTCTTTTTCAGCGCCGCTTA  
ACGATATCTACCGCTTCTGACCAACATCAGAAGGGAAGAAATCAACGCCACCTGCTCTGCCAGCGTCTCAAGCTGTT  
GATTGCCGCCGGCGATAAACGTCGGCAGAAACCACAGCACTTTCTTCTTGTGCTTCTCGCGCAGGAATACCGGTT  
TACCAACGCTGGTTGTTTTACCGGCACCTTGCAGGCCCGCCATCAGTACGACCGCAGGGCGTTGCGCAGCCAGGTTACGG  
GTCTGGTTCTTTCGCCCATCGCCGCAACCGATTGTTTACGACTATTTTACGAACTCCTGCCCGCGCTCAGGCTCTT  
ATTAACCTCATGACCAACCGCTTCTCTTTTACGCGATTGATAAACTCACGCACTACCGGCAGAGCTACGTCGCCCTCCA  
GCAGCGCATGCGCACTTCCGCGCAGCGTATCTTTTACGTTGTCTTTCAGTGAAGCGTCCACGGCCACTGATTTGCGCAGC  
GTGCGGACAAACGATCGGTTAAATTATCAAACTTGTCTCTCGCTGGGGTGGAAACGGTTGGCCGCAATCGCGACACA  
TCATCAGTATTTTCCGCGAGTATAACATGAAGCGCTTTTGTGTTATGCAACGGTTGGAGCAGCGTTACCTGACGCTA  
TACTGCTTCTTCTTATTGCTCAAACTGTGACATCACTATGCCCGTTTTTGTCTGCTCGCGCTTGTGCGCTACTCC  
GTCAGTCTTGCCTGATTGTTCCCGTCTGCTGCAAAAAACGGCGCTGGCGGCGCATGGCTATTATTTCTGCGGTCAT  
TGCGCTGGTCTGCCACGCAATCGCTCTGGAAGCCCGCATCCTGCCGACGGTGATAGCGGACAAAACCTCAGCCTGCTGA  
ACGTTGGTTCATTGGTCAGTTTGTGATCTGTACGGTAATGACCATTGTGGCTTCTCGCAATCGTGGCTGGCTGCTGCTA  
CCCATTGTCTATGCCTTTGCGCTTATCAACCTGGCGCTGGCAACCTTCATGCCCAATGAATACATCACCCATCTGGAAGC  
TACGCTGGGATGCTGGTGCACATTGGCTTATCGCTCTTTTCTATGCCACGCTAATTATCGCCGCCCTGTACGCGCTGC  
AACTGGCGTGGATTGATTACCAACTGAAGAACAAGAAGCTGGCGTTTAAACCAGGAAATGCCGCCATTGATGAGTATCGAG  
CGTAAAATGTTCCACATCACGCAGATTGGCGTGGTGTGCTAACGCTCACGCTTTCGACTGGCCTGTTCTACATGCACAA  
CTTATTTAGCATGGAAAATATCGACAAGGCTGTGCTCTATCGTGGCGTGGTTTGTCTATATTGTGCTGCTGTGGGGAC  
ATTATCATGAAGGATGGCGTGGACGCCGCTCGTCTGGTTAACGTTTGGGGCGCGGTAATTCTGACACTGGCCTACTTC  
GGCAGCCGAATTGTCCAGCAGTTAATCAGCTAAACCAGAAAAGGAGTTTCCCTGGAACACATTTCTACTACTAGTTG  
ATCATTATTCTGATCATCATGGTGGTCATTTTTCAGCTATTTTTCCGGGTCCGAAACCGGAATGATGACCTCAACCGCTA  
TCGTCTGCGACATATGGCGAAACAGGGTAATCGCTCGGCCAAACGCGTCGAAAAATTGCTGCGTAAGCCAGACCGCCTGA  
TAAGCCTGGTGTAAATCGGCAATAACCTGGTCAATATTTTGCCTCCGCGCTCGGCACTATTGTTGGGATGCGTTTGTAC  
GGCGATGCGGGCGTGGCAATTGCGACTGGTGTGCTGACTTTTGTGCTACTGGTATTTGTGAGGATTGCCGAAAACCAT  
TGCCGCGCTGTACCCGAAAAAGTCGTTATCCGAGTAGTTTTTCTGCTGGCTCCGCTGCAATTTTGTGATGCGCGTGG  
TCTGGTTGCTGAATGCTATACCCGTATGCTGATGCCATGATGGGTATCAAAACCGATATCGTGGTTAGCGGCTCTTTG  
AGCAAGAAGAGTTGCGCACTATCGTGCACGAATCACGCTCACAAATTTCCGTCGCAATCAGGATATGCTGCTGTGCGT  
GCTCGATCTGGAAAAAATGACCGTTGATGACATCATGGTGCCGCGCAGTGAATTTATCGGTATTGATATCAACGATGACT  
GGAAATCGATTCTGCGCAACTCTCCCACTCACCTCACGGGCGCATCGTGTCTACCGTATTGCTGGACGACGCCATC  
AGTATGCTGCGAGTACGTGAAGCCTGGCGGTTGATGTCGGAGAAAAAAGAGTTCACCAAAGAAACCATGTGCGCGCCG  
GGACGAGATCTATTTTGTGCCGGAAGGTACGCCGCTCAGCACGCAGTTGGTAAAGTTTTCAGCGCAACAAAAGAAAGTCG  
GCCTGGTGTCAACGAGTATGGAGACATTAGGGGCTGGTACGTTTGAAGATATTCTGGAAGAGATTGTGCGGATTTT  
ACTACGTCGATGTCGCCAACACTTGCCGAAGAGGTACGCCGCAAAACGACGGTTCCGGTATTATCGATGGCACCGCCAA  
CGTGGCGGAAATCAACAAAGCCTTTAACTGGCATCTACCGGAAGATGATGCCCGCAGGTTAATGGCGTCATTCTTGAGG  
CACTGGAAGAGATCCCTGTGCGAGGACCCGCGTGCATTGGCGAGTACGATATCGATATTCTCGACGTACAGGACAAT  
ATGATTAAGCAGGTAAGTTTCTGTGAAACCGCTGCGGAGAGTGTGGCGGAGTAACGAAAACGGCCCGGCAATTCG  
CATGCAAGGCGTGAATTTTACGAAAGCAGAAATTAAGCTTTTGTCTTTCGCTACAGTAACCATCGCCGACGAATCGTA  
CGACCATTCAGCGTATAACCCTTCTGCATAATGCCAGTACGTTACCTGGCGCAACGTCATCAGATTCCACCATTGCGAT  
GGCCTGATGCACATTCCGGTCCAGTGGGACGTTAGTTTTCGGCGATCACTTCAACGCCAACTTACGCACAACATCCAGCA  
TCGACTTCAGCGTCAGCTCAATGCCTTCAACCATCGCAGACATATCCGGGTTAGCTTTATCAGCCACTTCCAGCGCACGA  
TCCAGGCTATCAATACCCGCGAGCAATTCGTTGATGAATTTCTCCAGCGCAATTTTGGGGCTTTTTCAATATCCAGTTC  
AGTACGACGACGAGGTTTTCCATTTCCGCTTTTACACGCAAAATGCCGTACGTTACGGGTCTGGGCTTACGCCAGCT  
GAGCTTCGAGATTGCAACTTTTTTTCATCGCGCGATCCACCTGCTCAGCAGAAGCTTCTGGCTCAACTGCCTCAATCTCT

TCGTGCTGATCCATGATAATTTCTCCGGGGCTTGCCCTCAGGCGTTTTCTGTTCTTTACTACTCATGAATTTCTCCGC  
GTTTTTTTCGCATTCATCTCGTAACCTTCGTTATTATGGGGATCAGTTTCAGGGTTTCAAGGGAAGCACTCACATTGTC  
ATCAATCTTCGCAACAAGGACCTCGGAAAAATGAATAATCATTCAAGTGTATTGGCATTGTGGGACACCACGGCACCC  
CACTGCACTGACAACACATGAAATGCTCTACCGCTGGCTGTGCACAAAAGGTTACGAGGTATCGTTGAGCAACAAATCG  
CTCACGAACTGCAACTGAAGAATGTGAAAACCTGGCAGCTCGCGGAGATTGGGCAACTAGCTGATCTCGCGGTAGTCGTT  
GGTGGCGACGGTAATATGCTGGGCGCGGCACGCACACTCGCCGTTACGATATTAAGTATTGGAATCAACCGTGGCAA  
CCTGGGTTTTCTGACTGACCTTGACCCCGATAACGCCAGCAACAGTTAGCCGATGTGCTGGAAGGCCACTACATCAGCG  
AGAAACGTTTTTTGCTGGAAGCGCAAGTCTGTCAGCAAGATTGCCAGAAACGCATCAGCACCGCGATAAATGAAGTGGTG  
CTTCATCCAGGCAAAGTGGCGCATATGATTGAGTTCGAAGTGTATATCGACGAGATCTTTGCGTTTTCTCAGCGATCTGA  
TGGACTAATATTTTCGACGCCAACAGGCTCCACCGCTATTCCCTCTCTGCAGGCGGTCTATTCTGACCCCTCTCTGG  
ATGCGATTACCTGGTGGCCATGTTCCCGCATACGTTGTCAGCACGACCCTGGTCATAAACAGCAGCAGCAGATCCGT  
CTGCGTTTTTCGCATCGCGTAACGACCTGGAATCAGTTGCGACAGCCAGATAGCACTGCCGATTGAGGAAGGTGAAGA  
TGTCTGATTGCTCGCTGTGATTACCATCTGAATCTGATTATCCGAAAGATTACAGTTATTTCAACACATTAAGCACCA  
AGCTCGGCTGGTCAAAAAAATTTCTAATTTTACGCCAGCCTCTTTACTGTATATAAAACCAGTTTATACTGTACACAA  
TAACAGTAATGGTTTTTCATACAGGAAAACGACTATGTTGGCACAACCTGACCATCAGCAACTTTGCTATCGTTCGTGAGC  
TTGAGATTGATTTTTCATAGCGGCATGACCCTAATAAAGTGGCGAGACCGCGCGGTAATCTATTGCAATAGATGCCCTC  
GGTCTTTGCTCGGTGGTCCGCTGAAGCCGACATGGTGCCTACCGCGCTGCTCGCGCTGACCTGTGCGCCGTTTTTC  
TCTGAAAGATACGCCAGCGCTCTGCGTGGCTGGAAGAAAACAGCTTGAAGACGGGCATGAATGTTTGCTTCGTGCGG  
TGATCAGCAGCGATGGTCTGCTCCGTTGTTTATCAACGGTACAGCTGTTCTCTGTGCACAACTGCGCGAACTGGGTGAG  
TTGCTGATTGAGATCCATGGTCAGCACGCTCATCAATTAAGTACCAAACTGAGCACCAAAAATTCCTGTTGATGGCTA  
TGCCAATGAAACCTCTCTACTGCAGGAAATGACCGCACGTTATCAGTTGTGGCATCAAAGCTGCCGTGACCTCGCGCATC  
ATCAACAGTTAAGTCAAGAACGCGCCGCCGTCGCGAACTGCTGCAATACCAATTAAGAACTTAACGAATTTAATCCG  
CAGCCCGAGAGTTTGAACAAATCGACGAAGAGTACAAACGCTGGCGAACAGCGGTCAATTGCTGACCACCAGCCAGAA  
TGCATTGGCATTAAATGGCCGACGGTGAAGACGCAAACTGCAAAGTCAAGTCAAGTCAAGTCAAGTCAAGTCAAGTCAAGT  
TGATTGGCATGGACAGCAAACCTGTCGGGCTACTTGATATGCTGGAAGAAGTACCATCCAGATTGCTGAAGCCAGCGAT  
GAACTGCGCCACTACTGCGATCGTCTGGATCTCGATCCAACCGACTATTTGAACTTGAACAGCGCATCTCAAAACAGAT  
TTCGCTGGCACGTAACATCAGCTCAGCCCTGAGGCATTGCCACAGTATTACCAGTCGCTACTGGAAGAACAGCAGCAAC  
TGGACGATCAGCCGACTACAAGAAACGCTTGGCTGGCGGTAAACGAAACATCATCAGCAGGCACTGGAATCGCGCGC  
GCATTACCAACAACGCCAGCAATATGCAGAAGAAGTTCACAGCTGATCACCAGCAGTATGCATGCGCTCTCAATGCC  
GCATGGGCAGTTTACGATCGATGTTAAATTTGACGAGCATCACCTGGGCGCTGACGGTGCCGATCGTATTGAGTTTCGGG  
TAACCACCAACCCAGGTCAGCCAATGCAGCCTATTGCCAAAGTGCATCCGGTGGTGAATTGTCCCGCATCGCACTGGCA  
ATCCAGGTCATCACGGCGGTAAAATGGAACCCCGGCACTGATTTTTGATGAAGTGGATGTAGGGATTAGCGGTCCAAC  
AGCGGCAGTTGTCGGCAAACCTGCTGCGTCAACTCGGCGAATCAACTCAGGTGATGTGTGTTACCCACCTGCCACAAGTCG  
CGGGATGTGGTCATCAACACTATTTTGTGAGCAAGAAACCGATGGTGGCATGACAGAAACGCATATGCAATCCCTGAAT  
AAAAAGCGCGGTTACAAGAGCTGGCGCGCTGCTTGGTGGCAGTGAAGTCAACGTAATACACTGGCGAATGCGAAAGA  
ACTGCTTGCAGCGTAACTTTTTCTGCTTACGGTCAAGTAAACAGCAAAACCGGTAAGACCGGAAAGCAAAGGT  
TTAAAGTGATGAAAGGTCTATTATCATCGGCATATTACAGATGAGCCACGTAAGTCAACTGCTCGGGCCGAAAAGGAATCAAT  
CACTATGCGCTGTAACAGCTGACTGCTGCAGCAGCAGTACTATTGATGTTGACCGCAGGTGTTCCACTCTGGAGCGAG  
TGGTTTACCCTGCTGACATCAACAGGGGAACATATGACCGCTAACGACGATCCAAAATACGTGTTGGCATGACGCCAA  
CAACAAGTTGCGTACGCAATGGGTACACCGCTGATGCTCCGATCCATTTGGTACGAATACCTGGTTCTATGCTTCCGCCA  
GCAACCAAGTTCATGAAGGTGTAACCTAGCAAAACGCTGACGCTGACCTTTAACAGTAGCGGTGTTGACCAATATTGATA  
ACAAACCTGCGCTGAGTGGTAACTAATAAAGGTTGCTCTCAAAGACGTTAAAAAGGTGCTCAATGAGCACCTTTTTT  
CTGTCTGTTATTTATTGCTGATTTTTCTGCTGTTGCCTGCGAAGCTCTTTGCGATCGGCAATGAGAGGGCGATAAATC  
TCCACCCGATCGCCATCATGCACACTATCGTTAGTTTTGCCGACGGCTGTAATGCCGACTTTGTTTTAGTTAAATC  
GATATCGGTACGCAATTCAGCAAGCCACTGGCGCAATAGCTTCTTCAACCGTCGCGCCCTCTGCAGCGTCACTCGCT  
GCAGGTAAGTCTCAGGTAGCGCATAAGCCACCTCAACGGCAATTTTACCTGGCACTGTAAACCTCTTTCGCACGAAC  
CGTAAAAGCCTGGACCATATTAGCCGCCAGCTCTTAAACACGCGACCAAGGCGAGTTCAATCAACTTATTGGTAAACT  
CAAAGTCGAGATGAAACTCGATACGACACGCCTCTGGCTCAGCGCGTAAACTTCCATCCACCAATCAATTTCTTGAAC  
GGCCATCCACCAGATTCATAAGAATACTTTGGTACTGGTCAACTGGTTGCGGGTAGTAAACGTTTTGCTGATCCAGC  
CTTAGAGACATCTACCGCCGAGTCATCTGCCAGGAGTGGACTCCAGAATCCGACTTCCGGTACAACCCGGCAAAAAC  
GAGGATAAGACTGAACGTCATCTACTAAGTATGATACATTTGCTCCGCGCTGTAGGGTACCAGTCCGGTCCGGCTAATCTGA  
GGCATAACAATTTCCATCAACAAAAATCAACAAATAATATCATTATCCTGCTGTAAAAAAAACGCTATCCCGCGCTG  
GGTAACATCGGGTTCATGCTAAGATAGAGCCTTGTCCCGCAGGATTGATATGGGGTGTTCGATTTAGATTACCGA  
TGATTACAGCAGCTTATGACGAAGAAAAAGCACATAAACCTGGTTCAGCGACCATCGCGCTTAAACAGCGCGCCGCTCA  
CGAATACTTTATCGAAGAAGAGTTCGAAGCGGGACTTGCCCTGCAAGGCTGGGAAGTAAATCCCTGCGCGCAGGAAAAAG  
CCAATATCAGCGACAGCTACGTCCTTCTGCTGACGGAGAGGCATTTCTGTTTGGCGCTAACATCACGCCAATGGCCGTG

GCCTCCACGCATGTGGTGTGCGATCCTACCCGTACCCGCAAGTTACTTCTCAACCAGCGGAACTGGACTCATTGTACGG  
TCGCGTCAATCGAGAAGGCTATACCGTAGTGGCGCTCTCCCTGTACTGGAAAAATGCCTGGTGCAAAGTGAAAATCGGCG  
TCGCCAAAGGTAAGAAACAGCACGATAAACGTTGAGATATCAAAGAGCGGAAATGGCAGGTGGATAAAGCACGTATCATG  
AAAAACGCCACCCTTAAACCTGCACTCCAATTATTGACCAGTTCCTCACCCGCGCTCCCTCTCCGGCGCGCGAATGAA  
CATCTTATTGGCTATCACATCCGACACAAATGTTGCCATCCATTGCTTAATCGAATAAAAAATCAGGCTACATGGGTGCT  
AAATCTTTAACGATAACGCCATTGAGGCTGGTCATGGCGCTCATAAATCTGGTATACTTACCTTTACACATTGGGGCTGA  
TTCTGGATTGACGGGATTTGCGAAACCAAGGTGCATGCCGAGGGGCGGTTGGCTCGTAAAAAGCCGCAAAAAATAGT  
CGAAACGACGAAAACACTAGCCTTTAGCAGCTTAATAACCTGCTTAGAGCCCTCTCTCCCTAGCCTCCGCTCTTAGGACGG  
GGATCAAGAGAGGTCAAACCAAAAGAGATCGCGTGGAAAGCCCTGCTGGGGTTGAAGCGTTAAACTTAAATCAGGCTAG  
TTTGTAGTGGCGTGTCCGTCCGCAGCTGGCAAGCGAATGTAAGACTGACTAAGCATGTAGTACCGAGGATGTAGGAAT  
TTCGGACGCGGGTTCAACTCCCGCCAGCTCCACCAAAATCTCCATCGGTGATTACCAGAGTCATCCGATGAAGTCTAA  
GAGCCCGCACGGCGAAGCCCTGCGGGCTTTTTGTGCCCTCAATTTGTCCCGGAAGTCCGAAGAGAATAATTAATC  
CGAACCTTTTAGGCCATTGATAGGCCAACGAAAAGCTCTATTGTTTACGTTGGGCTAACGCAGGGAGACTCCCAT  
GGCAAGAAAAACCAAGCCGTTAACTGATACGGAATCAAAGCCGCAAACTAAAGATGCCGATTACCAGCTTTATGACG  
GTGACGGGCTTACTCTGTTAATCAAGTCCAGTGGCAGTAAGCTTTGGCAATTCGTTACTATCGGCTTTGACCAAGCAG  
CGAACAAACAGAGCTTCGGTGCCTATCCTGCCGTCTCGCTTTCTGATGCACGTAAACTCAGAGCCGAATCTAAAGTTTT  
ATTGGCGAAAGACATTGATCCTCAGGAACATCAGAAAGAACAGGTGAGGAATTCCTAAGAGGCCAAAACCAATACCTTCT  
TGTTAGTTGCCGAGCGTTGGTGAATGTGAAGAAAACAGCGTAACAGAGGACTATGCCGACGATATCTGGCGCTCGCTT  
GAGAGAGATATTTTCCGGCAATCGGTGATATCAGTATCACTGAGATTAAGGCTCATACTCTGGTTAAAGCAGTTCAGCC  
GGTTCAGGCCAGAGGTGCATTAGAGACTGTTCCGCCCTTTGTGACGCTATTAACGAAGTCATGATTTATGCGCAGAACA  
CAGGCTGATTGATGCTGTTCTAGTGTAAATATCGGAAAAGCTTTCGAGAAACCGCAAAAGAAAAACATGCCAAGCATC  
CGGCCGGATCAACTTCCGCAGCTAATGCACACCATGCGTACGGCAAGTATCAGCATGTCCACAAGATGCCTGTTGATGTG  
GCAACTTCAACCATCACCCGCCCTGCCGAAGCTGCTGAGGCTCGATGGGATGAGATCGATTTCAATGCTAGCGAATGGA  
AAATTCCTGCAGCTCGAATGAAGATGAACCGGGACCATACGGTCCACTATCTGATGGGGCTTTGCTATTCTGAAATG  
ATGAAGCCTCTCAGTGGTGGCCGAGAATTTATCTTCTAGCCGATCAAGCCCAACCAACCAATGAATAGCCAAACAGT  
GAATGCAGCACTCAAGCGTGTGGCTTAGGAGGTGACTTGTTCACACGGCTTGCCTTATCGCCAGTACGGCACTCA  
ATGAGGAAGGATTTCCACCTGATGTCATTGAAGCAGCGCTTGTCTATGTAGACAAAATGAGGTGCGTCCGCTTATAAC  
CGCAGTGATTATCTTAGCAACGTGCTCCGATGATGCAATGGTGGCTGATCTCGTAAAAGCAGCAGATAGTGGTAGCAT  
CGTTTTAACTCAATTTAGCAAAATTCGCTTGTCCGATAAAAATTTTATCAGCCAGCTCTCTGGGCTGATATTTCTAAA  
AGATCGCACTAAATAGCTACGCGGAATAGTGCTCTACTTTTCGTTTAGCCCTTTCAGAGGTAAGACATTAGGGCAATTTCA  
CTGTATGACTGCGCAGTCATCGAGTCTGTGGGTGTTGCTCCTTTTGCAACGTATCACTTGTCAATAAATAGAAAAGTGA  
GATGTATTAGGCGCAGCTATTTAGTCTATATGGCAAGTAGAATTAATTTACTTCTTTTTTTTCTACGAACAGCGCTATCG  
AAAGCTTGTTTTACATCTTCATTTTTTAAAGACCATTGATTTAAAATAGTATCAACCAAGCATCTTGACTCATTGTTGC  
TACACGATATTTTTATTTTATTATTTATCTCAAACCTGACATTTGAATAAAATCCCATAGCGGTTGATAAGTTTAT  
TAACTGCTACAACCTTATTTTTCCACCATCATTCCGAACAGAGTCATTAATTAGCTCAACCAACTTCAGTTGAATGATA  
TGGTACACTCCGCTTTGCTTTTCCACCCTTCTTCTGCACTCCGCTGACTTCTGATAATTTTTTTTATTACAAC  
AGAGATGTTAAACCAAGTCATACCTATGCACTTATCAAATAACTCCGAGCCCGATGAAATGCTTTAAAGGCAACGTTTT  
CATTTTTCAGACATGATAGATTTTCCCCAGAAAAAGAGATTGAGCGCAACATAAGGTGTGCCTTGAATAATGTCATTAATG  
GAAAATGGCTCGATAACAAGAGGTA AAAACGTTTCC TTGGTAAGT TTTGAACTTAGATTTTCCAGACTTCTTGAGCTGG  
ATCATATAAATCAGTGTATTCTTCTTATCTCCAGTTGCCATTTCACTGTATGGTGCCTTGTTTCCCATGGTACATCGC  
AGGAATATAACCTCACACGAGTACCTATTTTCTCAGAGCTCCAGAATTGCTCTCGCATTCTGCCTAGCTCAATCCGTTAT  
TCCGGATGATCTTCTCTAGAACATCAGTATCCACCGCCATTGCGATTGCGACATGTGATAGGCGAGATCACGTCGTTT  
TCTACAAAATTTGTTTATAAAAATCATTAGAGAAATCATAAAAACCACCATAAATCAATGTATTAGAGGTTGTA AAAAATTG  
TATTTTTGGTACATGGGTTTTTTGCTTAAAGATACCCATTAATCTCTGCAACCAAAGTGAACCAATGAGAGGCAACA  
AGAATGAACAATCGATCGGCCGTTAGAATACTACGGTTACCAGCGGTTATCCAAAAACAGGTATGGCACGGGCCACCAT  
CTATGACTGGTTGAACCCAAATCACCACGATACGATGCCACCTTCCCAAAAAGCGAATGCTCGGCGTGAAATCTGTGCG  
GATGGATTGAGCCGAGATTGATGAGTGGTTATCACAACGCTGTA AACTTATTTGAGGGTGTACATGAATTCATACTCA  
ATTGCTGTCATCGGAGTGTAAACATCTGCTATTTCCGCCATTAATAGCGGAATAGCCATATTTGCTAAACAATTTCTTA  
ATTTAATTAATAAGAGGCATTGCATGTTCAATGGTCGCTTTCCCTGTAGATGCATTTCTAAAATATCAGGAATGC  
AATTTATGAAGTGAACAGCATAACGAGGCCCTCAAGGTTTATTGCTGCTTCTGCTCTTGGGGTAATTTCTCTTGCCT  
GTCAGAACCGGATTGATGTTTCCGATTGAATAATCTACGTGGCCCGGATCACTTTTCTAATGACTCTGGCTGAATCA  
GGTGAACGTAAGAGTACGGTTGATAAATGCTGATGAAGCCATTATATCAACTGGAAGAGGATTTATTTGAAAAATACAC  
CCACGATCTTACCGCATGGAGAAATGATGAAGCAATTTTTAATATTGAAAAAAAAGCACTGATGTCAAAACTTAAATCAG  
ATATTGACGTAACAAAGATCACTTGGCAACAAATGAAAGACTTAAAGA ACTACTTACGACAAAACCCGAAAGCTCCAGTG  
AGATTCAAATTTTTATTTAACGATGCCACACCTGCAGCTATTAAGCTCATCTCTGTGGGCACTGGCGATCAGTCGGCAT  
CATGTCTGATGAAGCTGGGATCATTTTTAATGGTTACACACTAACGAGCTGCCGTTTATCAATAAGATGTGGGATGTT



CAATATTTACGGTGGAAAGGAAAAACGAGCCGAGAAATTAATTAGAGATGCAAGAATAAACTGTGCGTGATGGTCCAG  
CCTAATGTTTTAAGGGTTATATCGACAGGAAAGGAGATATGGCAAAGGGGATTGGATTTTTGCACGGTGCCTCATGTG  
CCAGCCTGCTTCAACACAAGGTAACAGAAAAATTTCCAACCAATTTTTCAAATGAACATTTGCCGGTATTTACCAAC  
GTCTTATGGAAATTGTTAATGAGAGCATCATTAAAAATTAATGAAAATAATCGCATCTGCCTCCGATTCTCTGCAGAAGCA  
GAAAGACATTGGATCGAATTTACAACAGGTCGAGTCAGAAATGAGAATGATTGGCCTTCTTTATGATTTTTAAGGATTA  
TGCTTCAAAAATGGCGGAGAACATGGCGAGGCTTGCTGCCTTACTTCATTACTTCAGCGGTGATGGAGGCGATATATCTG  
TTACCGCAGTAAAAGCAGCAGTGGAGATAGTGGCTTGGTATATTGAAGAATACATCCGCTTGTCTCAAAAAAGAAGAG  
TTTTCTTTAGATGTTTCAAGCAGATGAGCTTTATTGTTGGATAAAAAGATTACTGCACGCAAAAATTTTCTTCTGCAT  
CAAGAAAAATATTATCTTACAATTTGGGCCAAAATAAATTTAGAAAATCGTGACAAGGCAAATGAATTAATTAGAATCTTAA  
TTTCACAAAACAAAATTTTATATCTTTCATGGGGTAAAAACAAAATAATAAACATAACTCATTGTGTTTTTTGATTTTAA  
TGACAATCTAAAAGGACTTAATTTAAGAGTAAAAACAACTCTAAACCCAGTTCGGATAAAAAGCTTGTCATCTTGATAGG  
TAATATATAGGTACATAGACACATCAGAACGATCACCTACTCCAATATCATTGGCCAGGATACTATATGACATACGATAG  
TGAATTCGGATCACATGTATCCCTATATCGGGATAGAATCAAACAGGTTATTGATGACTCCCTAAACGAACATCTTAACT  
CAATGATTCTACGTGTTGATCTGCATGACCCAATTGATACAGAAAATATGGATAACCCATTCTTTCAACCCAGGGTTGAC  
TCTGGTGTATATCTGCTTTACCAGTGCCTTAAAGCAAAAGCTTAAACATGATAAGCATATTAACCAATCAACGAAAGA  
CTGGCCTGATAGTCGACCTTCACTTTACGTTACGCATGGGTCAGAGAATATACCAAAAATAGAAAAGCGGCAATTACCATT  
TGATACTGTGTTTCAATCAGGATGCTTATTATCATTAGGTGATTACGACTTAAACCGTAAACAGTACGTACAATGATA  
ACGACAGCTTGGTACAGTGCCTTGGCATCCCTATAGATAGCTCGGGGAAGTTAGTTAATTACCCGCCAAATGGCAAATA  
CCTTCTCAATCGTAAAAGGGACAACCTTTGAGCAGACTTATAGCGATTTGATGAATAGGGTGGATTACATGACCAAAGTAA  
GGACTAAAATAGTCGGTGACGGAGACCCTAATTTCCGGCTGAGTCGCGGGTAATTTATTTTTTACAACAATGGCCTTTCT  
TATGGCTGGAAGGCTGATTTGTTTGTATTAAGATATCGGTAATCTTTTATGTTGGAAGCCGCTCTGGTAGACGAC  
CTAGCCTACCGAAGATGTGAGTTATTCAAAAATGTCGCTTTCCCGCTTCCGTAGACAAACGTACCTAAATCAATGTCGT  
CTAATACCGAGCGCGCCTGATAACATCTGATCAACGTACCAATCGATCTACTCCAATGTCCTGAGTATCCCGAAG  
ATACTGGCTCAACTCATCCACATCAGCCTCGTCGAAAATTCAGCAAGTCTACCAGTCGGTGAACGTCTGAATGGGAA  
TGCCAACTCTTCAAGGCATTGACACCTGGTGGTAGATGGAACTTTGAACGCCAATTTGACATGTGTGAATCGACT  
TTGCTGCGTATACCACGCTTACAGCGTGGTGTAACTACATCCTCCATCAAGCTGAGCACCTTAGGTAGGGTATAGCC  
GAAGGTATTGGTTATGAGCTTCAAATCATTGTTGAGGGCAATGGAAGAGTACGTTTCTCCCTTCAGAAATCCACTGTC  
GTGCATAATCGATCTGATTTTTAGATATCCGAATAACTTTGAGCACTTAAATAGCCGGCAAGTTTTGCGATCATGACA  
TCCGTAGGCTTAAACAGGGACCCATTGCGACTGAACGTATGGGAACCAAGTCTGGCAATGATCTTTGCAAGGTCTTGAG  
GAAGTTTGTGCGGGAGTCCAGTGAACACTAACGAGGAAAATTCGTTATCGTCCATCATCTCGAACATGCTTTGCAGCA  
TTTCGAAGTCTGACACGGAAGTACGAATGCTTCTTACAAGGTGATGGAACACCGTCTTTATGAAAACCTCATCA  
AAGCGATCCTGTGAAAACCTCGGACAAGTGGTCTGGTTGAACGCTGGCTAACAGGTTGATTGGGGTATCAATGCCCTGAAT  
ACCGAGCGGAATATCCACCTCTTGATTGAGATTGCTTCCGGGATTTCTCCAGGCAAAAGATTTTGGCGACGAAGTGA  
CGCCCATGCGCCCGGCGGACCTTTGATGTTCCCATGGGTGAATTTGTCAATGCTGCGAGTTCATCGCGGTTGTCGTAG  
ATCACAACGTTCTTAGCGATAGTGTGACTCCTTCAATGATCGTGGAGGTGCAGAGCAAAAAGCGCAGTTTTCCAGCATT  
GAATTTGGTCCGAGTGTATTGCTGCAGTGCCTCGGTAGCGGCCAAAATGCAAGCCAATACCGTTTTCAAGGGCGACTG  
TGTAATCCCAGTCGGCATCGAATCTTTCGCTGACCCAGTCGACATGGGGATTCTCAGTCGGAGTGCCATGCCAAGCCTG  
ATCAGCTCGCGGCCACCAGGCCGCAACAGTTGGTACTTGAATAAATGATCGTTGCGTCGACACATCGTGCAGCAT  
TTCCCCAGCGCTTTGAGCTTTGGCTTTGCTGCTATTGCTTTGATGCCGAACGCTTAAACATCTAGCGGACTGTATTGA  
AGTCGGTAGAAAACGAAAGTATGCGGATATCCAAGTTTTTCGAGACCCGGAATGCTGTTAACGAACGGTCCCGTCAAGTAA  
AACTGCCTGGAGACCTTAAAGCAGTTTGCTTAAACGCAATGTTGAGCTCGATGACTCGTTCTGTTGATGATCAATGTCCC  
GCTTTTTCAGTTGTCGGAACGCCAATTTGTAATAACTCGTCAATGACGAAGAGGTCAATGTGACGATGTGTCAGCTCGT  
TCACTCGCTCTGAGTTAACACATAAACAGCCTGATCGGAATGGCACACTTGGGAACTGTGGTGGATGATCTGATATCGG  
TCACCGAATCGCTCTTGCAGTCGGCGACGGGTTTCTGCGCAAGAGCCACGGTTGGAACAACCAGAACAAGCCGTTTCAA  
AGTTCCCATGCCGAGCAATGAATCGACGATTGCACTTTTCCCATGCTTGTAGGTGCACTCAGCACCACGTTTTGACCAG  
ACTTGAGCAGATCGAATATGTGGAACGCAATGAGTGGAAAACATAACCATCCGAGAATGGCGTCCGGTATAGCTCAAGC  
ACCCTCAGGTCATCCGGTGTGAGGCTGGTGAACCTTTTTGAGATACGGGAACAAACCTGATTTTTCTACCATATTTTT  
CAAAATTGTGGTGTGCTCGGAAAACCGCTCGCGCAATCGAGAGCTCGCACGATCAAGTCCCGTCCCAAGTCATACGAAA  
CAGGGTTAGACAACAGCTTGTAAACCGCAACAGATAATTGAACGATGAGAAGTCTCACCTGCAGGCTATGTTTCGCC  
TGTTTCATAGATCTCTGTCATACGACCTCTCTCACCTTCTCATCAACTAATTGGGTTAACCGCTCAAGACTCGGGGCTGGA  
TAAATGAATACGTGGATGCAAAGATTGCAAACGGGCAATCCTCGATGAGGTGACCCGCAATTTTTCGAACAGCACCGC  
TGTTTCTTCCAGGTCATCCTCGAACCCCGGCTTTCAGGCTCGTTAGTAGATTAGAGTCGTAGCCACGAACAGAA  
CAAACGTGAAACGATCGAGGTGAGCATGAAAGGTTGGCTGCCATCAAGAATTTCTGTCATGTCGTGGCGAAGCAGGTAG  
TTATCGTCTTAAATGTGAGGATTTTTTTCGCGCGGTATCGATGCAATCCGAATGTCCTCGTACAACCTGATCCCCTAT  
CTCCGGCAATCTGACGGCAATGTTAATATCAGTCACCAACTCGCTGAAGCCAATCCAAAGCTGATCACCTTCTGGATCGC  
GGCAACGATATGCACGTTTTCAAGAATTTTTTCGGCCCTGCTTTTTCCACGTATAGCATGCAAGGAATAGGCTGGCTT

TCGTGGTGCTGCCGGATCGTTGCGTGCAACAGCACTCGACCCAAAAATTCGCTGACGTCATGGAGCGATTTGAAGACGGA  
ATTCCTTTAGTCGTTCTCGCTTTTCAATGAATGTCAGTTTATGAATATCAGACATTTCTTTTGGTCGGAGAAAAACCTCAT  
CCAACCATTGACAGACGTTATCCGCGATGTGCTTGTAGCGGTATTTCTTAAGTGAGTACTGCTGATGTAGAACCTGGCCT  
TTACGCTTAGCGCAGACCGAAGCCATAGCGCTCTAAATGGCGTAAGGATGTGGGGTAAGTCCCGTTTGACGTAGATTTT  
GCGGCTGACCGAGATTGGTCATCTTCGACACGCTGCTTGAACCACTCAAGTAGGTCTGGTCGTAAGTAGGACTTGTAT  
CAGCACTGTGAATGCGTCGAGAATGCTCGCCCTTGGCGCTCACAGTATCAAGGATGCGGCACCAAATGTCTTCGGCGACG  
GTTTCGGAAGTGAAGTACCCCATGTAGATCTTGGGAGGCCAGCCGATGTTCTTGATCCCTAGAAGTTCAGTTCGCG  
CAGGGATGAAAACACTTCCCATGTAGCCGCATCGATCCAATCTGAAACGCTTATACCTGAGTCTGTTAAAAAATTGTCTG  
TGCGTTTGTGAGGTCATCGATGAGTTCCTGTGACCTGGCTTATCTAGTCGGGCGTTTGGGCTGATCGTCAAGTACTCA  
AGGGTTTTGTGACCTTTTCTCTGTGACGATGGAGTACCTACGTCCAAGGGACAGGTCAGACTCACACTGCATTGATTT  
GTGCAAAATGAAGTGCAGGGGATCGTCTTTTTATCAGCACCTTTGAATTCGAAACGATGCCAAATGTTCCAACGTG  
TTTTGCCGGTCTTTTTACCTGAACGAAGTCGATGTATCCATCAGATACAATGTCGATATCGTCTGTGACCTCGCAGCGC  
ACACTGCGGATAGTCTTGTACGAAGCATTGGGTGACATGGTAAGCGGCTACGCAGTCTGAAATAAGAAACCGTGCCT  
GGCGGCTACTCCGCTGAATCGTTCGACTCCATTTAGACATCCGTGACAATTTTGGCAAAATTAAGGAGATGTTATGACA  
CAGTCCAATCGATCACTCATCACCAGTGATCTAAATACTCACAGCCATTCGCGTCGAGGATCAAGCTTTTC  
AGGATCCACAAATATTGTAACCCTGACGTCTAATTTGGTTATATAACATACTGCCCCAACTAACGTAAGGTAGGCACAG  
CCTTAATCAAGTTTTTGGTTTTCAAATAGTTCAGAGCTGAGACCGCAACCGCACTATGGCACTATGGCACTATGGCACT  
ATGGCACTATGGCACTATGGCACCGCCAGCGATTGTAATCACACTTGATATTATAAAACACAGTTGCACGCATTATTTCC  
TGTTGGTAGGGTCATATCTCGATGCTCTTTGAGCAATGTCAACATCGCGTGTTCATGGCTTTCTATATTGTTGATGCCT  
TGCCCATCCGGACCCACTCCTTATAGCTCATCATGATGGCTTGTTTGGGCTCTCTGCTCGTTCTGTTTCGACGTAGAA  
TTTTTTCTGTCTGCTGGCAATAATTAAGTATCGAGTGTCTGCTTGGTGAGATCAGGAAGAGGTTACCGAAACGAT  
GGACATCATCCCCATTTTGTGACTGCCCCCGGTAGACGATCCTGCCCTATAGTTGGAGTGCCCCCTATTAGGTGG  
CTAAATTTAGCAAATCAATACACTCAGGGGGTATTATTGTAGAGTTTCCCATATGTTTCTATGGGATCCAGGAAATG  
ACAATCAGGAGTTACAAAACTTAAATCTGGTCAGGGCAAATATCGAGACTGAATCCAGACAATTCATTGAAAATAAAAA  
CTATTCAATCCAATCAATTGGTCTATGCCAGGGTCAAGGGCTGGGCTTCGGTCTGATTTACCAGACCAGGGGTTAACT  
TGGCAACTGTGGACATTTTTATAACGGGGACGGTTCGACTACAATTCATATCTCACTGGAGCCAATCGTTCTCTGGGC  
CAAGAGTTAGCGGATCATCTTTTTGAAACCATCAATCTGCTGAATTTGAGCAGGTAATATGGTACTGCAAGGATTTGT  
AGAGACAAGGTTCTACCTGACTTGGCTATCAGCAGATGAATCGCATATAGAGTTCAGAGAACACTCTCGTAACGCTC  
ATACCGTAGTGTGAAAATTTATTTCCACCAGCTATCAGGACGAATGACTGTGAGCCTGCATATCACAACAGGTAAGCTC  
CAGATTCAGGGCCGACCGCTGTCATGTTACAGAGTTTTACGTTTAACTTGGCAGCCCTGCTTGATTTACAGGGTTTGG  
GAAAGTGCTAATCCGCCAGGAGGATGGTAAAGCTAATATTGTTCAACAGGAGGTTGCCCGCACTTACTTGCAGACTGTAA  
TGCCGATGCTTACCCGCATCTCCACGTGACTGCCGAAAAATGCTCGTTTTCAGGGCTATGTGTTAAACTCGCCGCCCT  
GATTTGCTGACTACTGTATGTTACTTTATCCTGAACTACGCACCATTGAAGGTGTCTTAAAAAGTAAGATGAGTGGGTT  
AGGCATGCCAGTACAGCAGCCGGCAGGTTTTGGAACCTACTTTGATAAACCTGCTGCTCATTACATTTGAAACCGCAAT  
TTGCAGTACTCTTAGACCGGAACAGATTAACATCATCAGCACAGCCTATACTTTTTTAAATGTGGAACGTCATTCTCTG  
TTCCACATGAAAATGTGGTCGATGCCAGCCGATGATTTCTGATATGGCCCGTTGATGGGTAAGCCACTAGAGCGTG  
GGAAATAATCAAGGACTTATATATTGTTTGAATCACCGGAATTAACGTCAGGGGCTCTAAAAGCTGTCGTTATGGCG  
ACCGGCTTCGAGAACCCTTTGCTCCTCAGTTAATGAAATGAGACGAACTTTCTGCCCTACTGGGTAGTGAGACCACTGG  
TGAAATCCTTTTTGACCTTGTGCGCTAACGGTCCAGAGTGGAAACCGCTTCGTTACGCTGGAATGAAATATGGCCGA  
TCATGCTGGATACGGCCAAAATTTATTGATGAGCAGGACGTTCCGACACATATCTGAGCAAACCTGACTTTTACTTTACGT  
AATCATCCTGAGTACCTAGAACCTCTGTTTTGTCTCCGATGATGTACGCCAAGTCTGTCAATGGATTTTTGAAACTC  
TTCTTTCTAAACGAACAGTATAGAATTCGCCCTTTTTGGCATGATTAACCTTGCCAATATGATCAAATAGCATTAAACC  
CCCCCTCACAACGTCCTGCATAGGGAACAGTTTTCCCTGTGCACCCACGACTAAATTTCCCCCTTTAAACTTCTCA  
ATAATGTCACCAATTTTCTGAAAATCCTATGATGCCTTTCCCGTAAATGGTGTGTGAGTTCAGAAAGATTCTGCAATC  
TATGTGCATTGAAAAATCTTCAGATAGATATCATTCTCCTGAACAATCCGATGAACGGCAGAACCTCGCGGTTCTGCCG  
TTTTTGTTTTACTTTTTCAGAGGAGTGGTATGAAAAATTTGAAGTCTGCAGCCACTACAGAACTCCCTTTCCGGTCTA  
CCGCTATGGGTATCTGAACGTATATTGCAGCAGATAAATCAGTTAACCCACTACGAGCCAGTATCGGCATCATGGGTAA  
AACTGGGGCGGAAAGAGTAGCCTTTGCAATGCCCTGTTTCCCGGTGAAGTATCGCCGGTCAGCGATGTAGCGGCCTGTA  
CACGTGATCCTTTACGCTTTCGCTGCAGATTGGAGAACACTTTATGACCATCGTGGATCTGCCGGCGTGGCGGAAAGT  
GGCGTTCGCGATACCGAGTATGCTGCGCTGTACCGGAACAATTTCCCGGCTGCACCTGATTCTGTGGCTGATTAAGGC  
TGATGATCGGGCACTGGCGACTGATGAGCATTTTTACCCTGAGGTGATTGGCGAAGCATAACCGCATAAGATGCTGTTG  
TTATCAGCCAGTCAGACAAAGCTGAACCCACCAGCGGTGGAAATATCCTTTCCACAGAGCAGAAACAAAATATCAGCCGC  
AAAATCTGCCTGCTGCATGAGCTATTCAGCCCGTGCATCCGGTGTGTGCCGTGTCGGTTCGCTGCAGTGGGGACTAAG  
GGTATGGCAGAGCGGATGATTAAGTGTCTGCCGCTGAGGCCAGCAGCCCGGTAGTAGCGCTACTGCAACATCCCTTT  
GAACAACGGTAGCCCGGGAGCAGGCACGTGACGATTTCCGGTGAACCGTAGGTGCCATACTCGATACGGTAAACACCTTT  
CCCCATTATCCCGCCCGGTGCGGACCATTATTCAGGCCGTGCGTTCCTCGGTGGTGTGAGTGGCCCGCGCTGTCTGGGA

TTTCTTCTTGAGTGTTAATTCTGCCCTATTATTCTCCGAGCCTGTCGCAAGTGCGGCAGGGCTTTCTTTATTTGTT  
TTACCCATACTGAGGAGTCTGCTTATGACCCGTCTGGCTTCGCGCTTTGGCGTGCAAATCTTATTGCGCGTGACCGTCC  
GTTAACCCGTGAAGAGTTATTTGCGTGGTGCCAGCGTATTAGTGAGGATAAACACGAATCCCGCAGTGAACGCTACA  
CGTATATACCCACAATTTCCCTGCTGGACAGCCTGCAGCGGGAAGGCTTCCAGCCATTCTTTGCTGTGACAGACGGGTA  
CGTGACCCCGTCTGCTGTGAGCATACTAAGCATATGCTGCGCCTACGTCGGGAGGGGCAAATTAACCGGTAACAGGTTCC  
GGAAATTATCTGCTTAACCTCTCACGATGGCACCAGTTCGTACCAGATGCTGCCGGGCATGTTGAGGGCGGTGTGCCAGA  
ACGGTCTGGTCTGCGGCGAGTCTGTTGGCGAGGTGCCGCGGTGCCACACAAGGGGGATGTGGTGTGAGTCAAGTTATTGAGGG  
GCGTATGAAGTCTGGGGATTTTTGAGCGTGTGGAAGAAAAGAGGGATGCCATGCAGTCTGTTTACCGCCACCTGT  
GCAGCAGGCACTGGCAAAGCAGCGCTTACGTATCGCTTTGGTGAAGACCACAGCCGGTACTGAATCGCAGATACTCT  
CCCCACGCCGTGGCAGGATGAGAGCAATGACCTTTGGACCACCTATCAGCGGATTCAAGAAAACCTGATTAAGGGCGGA  
CTCAGTGGGCGTAATGCTAAAGGCGGACGAACCTACTACTCGTCCCGTGCCTGGCATTGACGGGGATGTGAAGCTAACCG  
TGCGCTGTGGGTGATGGCAGAAACTGCTCACGCAACTGCAGTAGACGTTTCATGTTGCCACGTTGTTAATATCGGACA  
CCACCTGTCCGCATCGCTATGTGCTGTGCTCAATCCCCGGTTATAGCTTTAAACCCCGTTACATCTGGCTTTTG  
CAGAAATAAAAAATAGTTTCTGCGTTGCTATACCCTGTCCGCCCCCTCTTAAAGTAATCACATCATTTTCAGTCACT  
TAACCTTCTGGAAATCTCATGACACAGGCAGAACCCGCCATGACCGGTGGCTGTGACTGTCAGGCTGTCACTGATACTCA  
GCCGTCTGGTGGGGTGAACGTTGAGCGTGCAGAACTGGCGGTGAGTTTGGCGTGTGAGTGCAGCAGCTGCGGCGT  
GATTTTCTGTAACGACTGATGATCTGGACCTGGAGTATCAGTCCGGATACTGCGGCTTACGCACTGCTGGCAGTGAGAT  
GCAGATGGTGCCGACGTGCTTATCTTTGCCACCGCAGCGGGTGGCGGGCTTTTTCCCGCCTTGACCGCGTCTGG  
TGAATGCACTGCTGATGTGCGATGAGTCTCCCTGCGTGATAGCACCAGCCAATCCGGTTCCTTCGCTTCAGGAGCATTG  
TCTTTCTGGAGACTGATTCAGGCCATTACCGGGCGAGCGGGTGCAGTGTGAGAGGGGCGACGCTGTGAGCGCCT  
AGCTCCCTGCCGTTACTCATCCACCAGCAGACCTGGTATCTGGTGGCTGAACACGAAGGGCATATCGCCGTATTCACAC  
TTGATGAAATCCATCTGATTGAGCCTTGCAGGAGACTTTTCGCCCAATGACAGTCTGTGTCGCCTGGTTGAAGACCCG  
GTCTTCATTAGGCCCTTACCCATTTTCGCTTTATCCAGCATTACTGCTTACGTTTGTCCGGCCGACAGCCACCGGA  
ATAGCGCAGCGTTGTTATCAACCCGGCAACATGGAGGAGCCAGTGCCGTTATTGCCATTATCGCCATTGTTATCATC  
GTCATCATTCTGAACAAAACCGGAGTGTCCGACAGCCTCACGGCCTGACACTTGAACCGTTGCCGCACTACTGACGGG  
AGGTGGTGCAGCCGGTGTGCCAGTGTGCGCTGACGCCGTTCTGCGGCTGCCGGTGGGTATTTTTGTGGGAATTTATG  
TCTTTGCCAAAGTGGTTCGTCTGATTTAGGGAAAAATAATGAAACGTAACAACTACCTCTGCTGGCGCTGGTTGCCA  
CCTCTCTGTTCTGAGCGCTGCGATGACAGGAGTGTGACCTCAAAGCTATCAGTAAATTAAGGACCTCACGCCCCG  
CGCTTCAGCGATGTGGTCAAGCGTCAAGATGATGTACGGAAGAATGGTACAGGTTGGCTTCTCATCCGGTCTCACCT  
GCAGGTCTTACGTACCCGTGAGTGCAGCGATGGTTGCGAGGGTGGCAGTTACTACTATCTGGTAGATATGGAGGAGAAAA  
CCGTCCAGCCGCTGATGAATGCGCTTTGTATTGCCGACAATATCAAACCTGGAATACCACGAAGTTACGGACCCGATACG  
AAAGAAAAATACTTGAATATTTCCATGACGGCAAACCTGATGGGACGGCTGTGATACCGTCAAACCTGATAACCGGGA  
ATAAAAAACAACGAGAAAGGAGACATAAATGAAAATACGTTCACTAAGCCGTTTGTACTGGCAAGTACAATGTTCCGCG  
CTTTACAGCCTCTGCGGTCCCGGACTCTGGCAACAGGGGTACGGTCAAGGGCAATGCGGAATACAGTGTGACGGATGCCA  
GCGGAAAGATGTTTACCATCAACTGCACGGGAAATCCGGACCAGAACGGTATTTACCAGCACTCGGTTTTCTGATCCTC  
GCCGGGATAAAACGGTCAAGTGCATGATGACAGTACCGGCATCACAGTGGTGTGAGCCATAAGCAATATGCCATTCC  
CTCAACCTTGGCTGGCGTAACGGAGATAATGCCTGGTTGAGTTCATCATGGATATCCGTAAGGCCCGGCGAGTTGACG  
TCTACGTCAATGACCAGAAAGTTGGATCGTTAACCTGATGTTCCGAATGCACAAAAGGCTCTGCCAACATTAGCGGAC  
TGCACTAACGACTGACGGCTGCGCCTTCCCTACCATAACAACCTGATTGCCCTCCGGCGGTGGGGGTTTTCTTTTTCTC  
CTTAATCTCCAGAGGTAGCCACGTAATTCGAACGATGAGCGCAGTGGTCACTTTTTTTTTCAGATATATTTATCTTTTT  
TGGCTGTAAGTCCGCTGTGAGCGCAGGCTGTGTTAAAACCTGATCACTTTTTTGGTCTAAGCGATGGTTTCATATGAT  
CAACCTTCTTGATAAACCCATGAGACGACTAACTTTTTTATTAAAATTAAGGATATGAATGAATACTGCGGATATC  
AACATGGCCAATCACATTCAAGGACAAGGCAGGCATCAGGTGACATTGCTCCCTGATGCACTCGATGATTTTGTCACTGA  
AGATATCTGAAATAAGTTAATCAGTTCATCACGGTCCGGTGGCATATCGAGATAATTAATTATTGTCGGTTCTGTTGCCG  
TTGTTATGAAGCATCTCCAGCGTGTGCGTGAGGTGCCACAGGCCGGTGTGATAGATGGTAATGTTGCTCATATCAGT  
ATCTAATTACAAAGTGCAGAGAGCCGCCAGCCAGCGCGCCAGAGTGACAAACAGCACCAGGACAGTGCATGACAATGC  
CGGTACGGAAGTAATATCCCAAGTATTGTCATATTTTTCTGGGCAAGCACATGCAGCCACAGCAGAGTTGCCAGACTG  
CCAATCGGGGTGATTTTCCGGCCTAAATCACAGCCAATCACATTGGCATAAATCATTGCCTTTTGCAGCAGCCAGTCCG  
CGTACTCCCGTCAATCGACAGCGCACCAATCAGCACCGTGGCATATTGTTCACTGATGAGAGAAATGCCGTCAAGA  
AGCCGGTGCCGAACGTGCTGCCATAACCCCTGTCTGCCAGCAGATTGAGCAGCCAGACAGGTAAGTCCGTGAACCT  
GCATTGCGCAGCCATAGACCACGATGTACATGCCAGTGAGAAAATAACGATCTGCCATGGCGCACCAGGAGGACTTT  
TCCGGTGTGATCGAATGACCTTTTTGCCACCACAAACAGCACTGCTGCGCCAGCGGCCGTATCGCACTGACAGGA  
TTCCCTGCGGCTCCAGAAAGAAGAAACCGACAAGCAGCAATAACAGGACAATCCAGCCCGCTGAAGGTTGCCAGATCC  
TTGATGCACTGGCAGGCGTCTCAGCAGCGAACTTAATACGTTGCCGGAATAACTCTGCCAAAGAAGAGATACAGCAT  
AATCAGCGTGGCCGCAATCGCTGCCGATCCACGGAGATCATAACGGAGGCGTACTGCGCAAAGCTCAGACCGAAGAAGT  
CCGCCGAGACGATATCACAGGTTAGAAACAATGAGCGGCAGGCTGGCCGTATCTGCAATAAATCTGCAGCCATGACA

AAGGCCAGTGTGTCGCCCTGGCTGAACCCAGTGGCATCAGCATCGCAATCACAATCGGGCAGGATCAGCGGGCCG  
TCATTGGCAAACAACGCATCAACAGCGGCACCGAGCAAGACTTCCAGGTGAACAGCGCTCTAGGTAGGAACTTTGTCGT  
TGATAGAGTCTTCAGCCATCAACACTGTATCGAGTAATGAAATTGGTTGCTAGAAAAGTCGATGATTTGTTGCGTATGATT  
AAAAATCAACCTTAAAGGCTTTATACATGGATTTGCTATGGCTTTTGATCAGAAAAGAGAAATTGTAAGAAAGATATTTA  
GCAAAAAAATTGACTTTACGATCTTGGCATTCTTCTATATTTCTCTATTTTTTTCTTTTGTAGTGGCGTTCTCTTT  
CAATATTTTACCGCTGCCTTCAAAAAGTAATTGTTATGAATGTCAATGAAACTTGATTACATAAAAACAATTTATTT  
TTCACTGGAACCCGCATGGTACCTCATATCTGCTGTTGCGATTTTATTGCATCTGTTTTTATACAGCATAGAATTAAG  
CTTATTTAACATTATTAGCTATTACATGGATTGACTAACAATAACAGATGTGGCGTTAATACACGCCTTAGACAATATA  
GCCATGAATAATATTTTGTAAATATACTATATAATCTTTTTGGGGCGATTTTATTGTCACCTGTTTATGTGTTTATCAA  
TTCCCTCCTTTTCCACCTAATAAGATAAAAACATATCCAATGATTTTATCGGCAATGATTCCATTAGTTCCGCAATAA  
TAATAGCCATACTCATAACCGCTGTTATATATTTATTGTTTGGCCGCGAGCGGTAGAGATTGAGATGGATATATCTGAA  
GGTTCAGACATCGCATATGTAGGTGTAAGATAATGAGGAATCATTTGGGTTTTAAATGATAAAAAACAGACACACC  
AACGTATCTGGATGTAATCAAAAATGGTAGTTTGATATATAATGATACACAGGGTTAAGTGGTGTGATATTTATTTG  
TCTCCGTTGTTATGCCCTTCCAGATTTACTTCGCAATGTACCGCTTGATGCTAAAAATCTTTTCTGAATGTAAAAAAG  
CTAGAAAATCACAGAAAATCCAATGATGGGTTTCATACAAGGTGAATCCGCTGATGTGATGCCTAAAGCAGCATCCAG  
GTTAAGTTTGAGCAAGCAAGATGATAAATTTATGTAGCCTCAAGTGTTACTGACTCTCAAATAAAAATTTAAATCAAACA  
ATGCACAATTGATGGTTGCTTTGCAATTTATGCCAATAACAACGAATGGTATTTTACATGATTATACATACGATATAATA  
ATAAATGATAAAAAATATAAAAATTGAAAATCATGTTGCACCTCTATCTAGGCTTGATAAAAAATAAGAAGTGAAGTGTGA  
ATACCAGCAAATATCGGATTTAAACAAATACGTATAACATTAATGCAAATTAACCGGTTTTTTACTTGTCTAAAAAC  
CAGATGATATTATTAATTACAACAATAGCCCTTCCGTACTACTCAAGACTGATTTTGCCTTATAAAAAACATACCAG  
AAGCTTGATAAAAATATATGATGACATAAGCAATGGAAAATTATCTTCACTGAGAGCAACAGGTATCTCCAGTTTAGTAT  
CAACGGGAAACATTTGTCGTTAAGGCCAGAATCGGAGATTATTATTTCTGAAGGGAGTTTGTATGGACTAGTTAATAAAA  
GCAAAAAAATCAAATATATGGCACAGCAGATCTTGTTTTTGTTGATAACAAGATAATGAACCTTCGTAAAAATACTTAT  
TTGCAATCTAAGCTAGAAATTTTTGGTCTTCTATTATGGATATATAAAGTATATATTTGGTTTAGGTCTGCTAGCAAT  
TTCTATAAAATTCATTCTTACTTTAAGAATGATGTGAATGAAAATTTATCTTGAACGCATTTGGCTCCAATTGG  
AGCCTTTTTATGACTATTTATAAAAATATCCTAAGTTAAGCCTGTTTTTAAAGCAGGCTTGAGCGTGAAGCGGACACTCA  
TACCTGCTTTAAAGTGGCGTTTTTGTGTTACCCATACCTATATTTTCTGTTGTTTAACTGCCAGAACTGAGCGGTTGAA  
AAGCCAGAAATATGCCGAGCCAGCGGCATGGAAGCGCCAGCAGCTGTTGAATGGAGTACTGTAGGCAAATGGTGCCGTAA  
CCGCTTTTCTGACTGAAAGTTCTGTCTATCCCATCCCTTCTCTGTATCTAACATTTAGTTGTGAATAGCTACTGTA  
TGCCCTACAAAATGAACCAATATTTTATAGGGGCTCTGGCACTCCAACCTCCGCTTTTGGCACAGAACGGCCTATCAG  
CAATATAAAGCATTAGATATATATCATTTCTACAAAACATACCCGATTAACGGCAGAATCTCAGGATTTCTGCCGCTTT  
TTATATTTTTTTCAGGGGAGTAGTAATGAGCAACTCTGAAGGTTGGTAGTCATTTTAGCAAACGCTTTCTGGTCTGCCGCA  
GTGGGCATCGGCTGATTGCGTAGCAGGGCCACTGGTATCTGCCGTATCACCGACATTAACATTGAAGACGACCAGGGCA  
TTCACGTCCGCTGATAGTTCGTGATGCCGAAGGTCGGATGGTTGGCGGGCATGGAACCTTTGAACCGGACCCGGTGAAG  
GTTTTAACCGTATATCCACAGGTCAGGCATCCGCACCGACACCTTCCCGCTGACTCCGAATCATTTACCAGCAACAT  
TTCACCTTCCCAAACGCGCTTTATTACCTCATACGCCAGCCATCGCCGCTGGCGTTTTTTATTACGGAGACATACCCAT  
GACAACACAGACAGTACGACCTCGTACCCGCTAACGGATCCGAATTTGAGTTGAGCGTAACGCAGGTACCCGATGAAC  
AGCATATCCGCTTCTGGCCGAGCACCTTTGGCACCATCCCGCAGTGGATAACGCTGGAACCGCGCATTTTCGCTGGATG  
GACCGCTTCTGTGATGAGTACTGCGGGGTATCTGGTCTTTTTACACGCTCAGCAATGGCGGAGCGTTTTATGGCTCTGTA  
TGCTGACGGTGACGATAAATGGCATTGCTCAACGGCATGAATGGCAATGGTGGGAAATGAGCGCGGAAGCCGCAAGTA  
TCGCTGTCTGCTGATTGAATATAGCCATCACGCCTGCCCTCACCGAATGCGATGCCATGACGGAGCACTATTACCCGCTG  
CGGGATTACGCTCTGAGCACCCCTGAATCCAGCGCCATTATGCGCATTATTGATTAAGGATACTCATGATGGAACAGTCA  
CTCATCCACAGACACCGGTACTTCCACTGACCGCACAAACGCACGGTAAAACGCGCCTTAAACGCTGCTTGACCGACACCT  
GCGCGAAACAGGCGTGGCATTACCTCCACTCAGGCTGCTCGTACTGGCTGAAGCTGAAAATGGCGGGGCTGGAGCGTG  
AAGAATTTATGATGCTGTATCTGAACCAGCAGAACCAGTTGATTGCCACGAAACCCTGTTTGGCGTTCTATTAGCAGT  
ACCGAGGTACATCCCGTGAGGTGGTCAAACGCGCCCTGTATTTCAATGCAGCAGCAGTGATACTGGCGCATAACCACCC  
CTCCGGCGACACTACTCCAGCCAGGAGATAAGACTATAACGCAGCGTCTGGTGCAGGCGCTTACGCTCGTTGATATCC  
GTGTCCCTGACCATCTGATTGTTGGTGGCAGGCAAATCTATTCGTTGCGAGAACACGGTCTGCTTTGAGGTATTACATGA  
GAATTTATCAGTAAACGCCGGCAATGACGATATACCGCCAGCATCTGAGTCCCGAATCTTCTGCTACTGCACGGAAAA  
TATCAGTGGCACGGTAGCGTCTGTATTACACCGGCAGGGATGTTCCGGATATCACAGGAGTCTGGCTGTGACGCCGA  
ACGCCGAGGACCGCAGCGGACCGTATGCTTACTGATGAGTATCACCTGAACTGACAATAAAGAGGTTATGAATGAGC  
AACACCACATGGGCCTGCAGCGAGATATCACGCCGCGCTGGGAGCACGTCTGGTGCAGGAGGGCAACCAGCTGACTA  
TCTGGCTGACCGGGCCAGTATCACCGGTAAGTTTAGTGACGCCGAATGTCCTAAGCTGGATGTGGTATTTCCACATTTA  
TCAGCCAGATAGAGTCTGATGCTGACCACTGGTGAATCCCGCCATGCCAATGCGTACCCTGTACCACAACGGT  
TTTACCTGCGAAGCCGATACTCTTGGTAGTTGCGGCTACGTATACATCGCTGTTTACCCCACTCAACGCTAACTAATTT  
ACGAGAGCAAGCATGAACACTCTACCTGCTACAATTTGCGAGGCGCGAAGCCCTGCTGTGCCAGTGGCTGTCTGGCA

AATGCTACTGACACGCCTGCTGGAACAACACTATGGCCTGACACTGAACGACACGCCGTTTCAGTGATGAAACTGTTATTA  
AGGAACATATCGATGCTGGTATCACTCTGGCCGATGCAGTCAATTTCTGGTGGAAAAGTACGAACTGGTACGTATCGAT  
CACAGAGGATTTTCGTGGCAACAACAGTCTCCATATATTTCCGTAGTAGATATTCTGCGAGCAAGGCGCTCTACCGGCTT  
GCTAAAAACTAATGTGAAATAAACGCTTAAATACAGAGCAGACTGAAGGAAAGCAAATGCTAATCTCATAGACGAAGAG  
ACTCCCCTGTAACCTCCCCTCCCCGAAAAAACCCTGACATTTTCTTTTAGGACCAACAATGGGACCAAAATGAAAATTG  
AACTGAAGATTACAATCAATTTAACAACAAGTTACACAACCAATTCAGACTCCGCCAGCCCAATCATGATTGGACGG  
TGTAAGGACAACCAACAACAAAAACAGGAAGTTAGAAGTCTCAGCAAAACACCGACCAGACGGTGAGGAGACATAAAAGGA  
TACGCAAAGGAGCCGCGGCTCTGGTAACATGAAAGCCACAGATGTGGGCTTTTTCTGTTGATGGTCAGAACGACCAGTT  
CACACCAGCTACCGGTTCCACGGGATTCCACACCGGCACTATGGCTATACCCCAACCAAGATGCCCGCTAACGTAC  
TGCTGAATGAGGCTTTAATACCTGCCTGGTATATCCACGTCTGCCCGACAAATAATTGACGAAATTACCGTCACTATTC  
ACTTTCACCCGGTTATCATCGACAAATCTTTGCGCACAGCCGCTTCAGCCACGGCTCAACTTCCATACCGTTCACCGAG  
ACGCATGTTGTAACCTCAGCGTTGCGCCAGTTACAGATATACTGCGGGTATCGACTGATTTGATTTTCATGCCATTGG  
ATAAATGATATTCGGGGTATCAGCGGTGAACCCGTTAACGATGCATACGGCGTCAGGTTCCAGTTACCATCGGTAAT  
CGCATCCCGGTTTCAATGTGACCGCCAGCCGTTGCTGTGGTAACTGCCATTGGCGGCTCCACCGCTCATTTTACC  
TGCTACGTTACTTTTAAAAACGGTTACGCTTCCAGACCCGTCAGATAGAAACCACTTTTCAATGTTCCAACTGGCATAGC  
CGCCAGAGAATAACTGCCACACTGCCATGTCCTCCGCGATCAAAACCGATATGTGAATGGGAATAGCCATAAAAGCG  
CCTAGCGTGGTAATTCCTTCAGGAATACATTACGGCTGTCGATCCCCACTGTATTCCGGTTCAGCGTCTGCTCAAACCC  
GGCACCCGATCGGTGGTGACATTATTACGGGTGTTATACGTCGCCCCCAGACATTATTGTTGTGTGGACTCGCTTCA  
TTATGTTCAACCGCTCGGAATACTGTTAGCTCAGCATCAAATACCAACGTAATGTTGCTGCCATATTGAGTACGGCT  
GCCGTAGAAGCGTAATGCGTTTCTCCGGAACGGGTGTCGGCGTTGGATCGGGAGTAGGGTCTGGTTTTGGATTTGGGT  
TGCTTTGGATCGGGTTTTGGGTCTGGCTTTGGATTTGGGATGGGGTCCGGGTTGGGTTTACATCATTGGTCAGGTTCC  
AGTTGCTGTTGCCGTCACTTTTCCAGACATACTCATAGGTCCCAAGATCAACGAAACCGCCGGTATTGCCAGCGTAAAC  
GAAGCATCCCCCTCCCCTGTTTTACCAGCGTCATCGCGTCGTCAGACTGTGGGCTGACGCCGGTATCCTGAACAAAGAT  
TTAAAAATTACCAGTGGCGTTGTTGTTGACGACCAGTTGATCGCCCCGGGAGCCTGCAACGTTGGTATGCAGGTAGAAAT  
TACCCTACCGAAAGTTTATTGGTTGTCAGCGTATTGTAGATACCGTTAGTTGTTGGCAGGCGCTGCTGTTTGTGCTGAC  
AAATAAACATACCGTCTGTTGAGTAGCAAATGTTTACTCTATATTGCGAGTTGCTGGTACCTGCACAGGAATTATTGCT  
GTTAAGCCAGACTGCCCGGCTGGCAGCCGTGAGTCCGGAAGCGTGGTATCGACGCCATTTCCAGAGTCAATGTCG  
CGCTATCGGTAATCCGGACCGCCCTTCGAGTTAACTGGCGTAACATTATCCCGTGGCGTATTAACGACAGGCTTCCT  
GTCGCGCCACTGACCGATGCATCCGCCAGCGTACCTGCGTAGACGATTGCCGTACCGCCAGCGACCTGGAGATCTTCTGC  
CCGGCCAGAGCTGAAACTCATCTTTGACCGCCAAAGGATATTGCCCCCAGAGTTAACCTTTGTGGCGGAGTCT  
GACCCAGGTTTTGCATTGCCCCACCCTTGCCAACCGTGAGTCCGCGAGCTTCGGTACCTGCTAATAACCAATAAATTACCG  
CCATTTTCCAGCAACATATTGGTCGCTAAATTGCCGGAAATGGAAGTACCGTACTGGTGGTACCGCTGATTTCAAT  
ACCGTTAGCCGTGCTCGTCTGGAGAGCGGCACCGCTGTTCTGGACGATATCTGTCGCTTTGCCATTATCGTTGACTGTCA  
GCGTACCGCCTTATTGATCTTTGTTTTATTGCCTCTCCGTTAGCTGAAACTGTTTGTATTCCGCGCTCGTTAATTGTT  
GTCTCATTCCGCCACACCCTCGACAATTTGTTACCGCCGGTGAGCGTCTGCTGCTGCGAGTGGCTTTTGTGTTGACGAT  
CTCCCGTCCGCCCATATTGACCTGTGTTTTGTCAGAAGAGGTGTCTGACTCCACGGTTAACACGCCGCCATTTGCCAGCA  
GGATATTGTTCCGCGCACCTGCTCGATGCTGAACGCGACGCCATCCGCGCGTGTCTGTGACCCGCGTCCGCTGGTG  
GTTGCAACCAAAGCGCCCTGGTACTCTGCTGTATCCCGTTGCGCTGCCTTCTCCGACATCGAGTGTCCGCGCTC  
ATTAAGCACCAGTTTTTTCAGCCAGGCCGCCCTATTAACACTACCTGTAACCCCAATTAATAATGGAACCTCCGCTGCC  
CGTTTTGCCATAATTTGTTAGGCGCAGACGATATCGGATTTGCTTACCATAATTCTGAACCGTTTTGCGTGCCA  
CCATTGATGTGTGTTTTCTGTTGACCCACCATCAACAATTTGTTACCACTTTCGATATTTGCTTCAGTTGGCTAAACC  
ATATACCGTTTCTTGCACCTTTGATATTTGCTTTATCAGAAGTGGCACTGGCATATATTGTTTGGGTGCCAGCACTAT  
TGAGTACAGTGCCAACATCTTTCCATAAACATCCATTTTGGCGTTGGCATTAAATAATCGTGTCAACTGCGCGGAACCA  
GTGACGACTGTTAATGAGCCAGCGTTTTCCAGCACTACATTTTGTGCTTCTGAATTCTGATGTAGAAAGCATCACCATA  
ACTGTTGGTTCCTTCGATAAGTGTTCGGAGGTCGTGGAAGCAATTAATGCGCCGCGGATTGTTGCTCAACATGCTTAG  
CCTCACCACCGTCTGAACCTCCAGAACGCCGCTATTATTAAGTCTGGTCTATCTGTTTTAGCCTCCTTCTGGACAATC  
AGCTTACCGCCAGTATCAATGGTAGTATTTTTCGCCGAGGTTTTAGCCACTACCGTCAGTTCGCCGGTATTTTCCAGCAC  
AACATAATTAGCCTCCCCTCCGTAATAGTGAAGTGAAGAGCTTGTGATCCTTCGATATCAGTCCCTGCACCCGTTG  
TGGAACATAAAGCACTGCCGCTCCTGGTTAACCCATGTGCAATACCGCCGATAGACAATCAGCGAGCCTCCGGCG  
CTAATATTGCTGCCAATTGCCGTACCATCTTTCTCAACAACCTGCCGGCTCCCGGAGGATATAATTGTTGTGTCAGCTTT  
CCCGCGCTTTTGTATTTTTGCGTTCCGCTGTTGATATTGGTGCCTGTGGCTATGCCATAATTATAATATTCTGTGTGC  
CACCATAATTATGGTATTTGTCGCGTTTCTGCAACATCCATAACCCCGCATTATCTATTCCGGTTCGATCAGCTTTA  
GCATTGGTTAAACTGACATTGTTCTTTATCTTTAATAATCGTCTTGTGTTGCCGAACCATATGCGTTTTATGCTAAATG  
ACCACCGTTTTCCAGCAACACATTGTCTGCCACGTATTGTGGATTGGAGAATGCACCTTCACTATTTCGACCGCTCACC  
TCGTACCGTTAGTGTTAGTTTTAAATTTGACCATCGTGTGGTAAACATTTGTTGCCGTACCAACCCCTAACATCAAGC  
ACGCCACCAGAATAAACTTCAATAACATCCGAGGTGCTGGTATTATCAACAATTTGCGTGCCACCAGAATAGATATGCGT

ATTTTTGCCGTTGACTTACTATTAGAGACTGAGTTCGGCCTTCAATCGTCGTGTCCAGCGCAGGGCTCTCATATACT  
TTTGCTCACCGCCATTTTTAATGGTTGTTGTTTCTACTGTGCTCTGTTCAACATACTGTCGACCACCATTATAGTTGTG  
TTCGTTGCCAGACTTCCTTGACTACGTCCTGAGAGCCAGACTTATTTATCGTTGTACCATCAGCATGCCCTTGAACTTT  
TACTATCTGGCTACCACCATCAATGAGTATTCCATTGCACTCCCTCCCTCTACGCGTGAAGCACCGCCCTTAATTGTCG  
TTCATTGCTGATACCCCTTTATAAAGTCTGATTGCCACTCTCGATTGTGCTACCTGTGAAATACCCCGTCATGA  
ATTGACTGTCTGCCACCGTTAATGGTTGATTATTAGCCTGCCCCACAAAATTGTTATGACTTCTATATCTTGATATCC  
ACCAGATTCAATAAGACTTCCATTAGATACCCCGCCATGAACATTCTGCTGGCCATGGTTGATAATATGAGTGTATTTG  
TTGTACCTCGTTCATCCACTTTTTGGTTGCCATCTACAGTCTCATCGTTTACCACACCAATAACATTAGTAGTGAAGGCA  
GCCATCCCGGGCGGGGCATATCAAGGCAGATATCAATAAGGAAAGTACTGAGCGGCGACAATAATAGGGACTGGTCTT  
GTTCAAAATTTATCCTCTGAAAAGTGAATACTGAGTAGCGTTTAAAGCGACCTTAGCTTTGCTGCAACATCAGCCACA  
GGCACCAGACCAGGGGATTATCCTGAAGAGACAGCGCAAGTGTATTGTGTTACCAGCTCATCAAAGACATCATGATGAA  
ATGATGATATCCGCATAAAGATGAGGCATTTTTAAACGCAGTGCCTGAAGTGTGGTTGGATAAAAAAGTCAATCCAT  
TCAGGAAATACGGGCGTATTCTTTTCTTCGACAATGAGGCCGTTGGCAAAAATAAATGATTTACATAATCGTTTCTGAT  
GAATATCTTCTGCTCACATAAAAAATCACACAATAACTTTGAGATCGCAGATTGTTTTACTTTTACAGCATTCTGCCCC  
ATTGTTGGCAAAATATAGATTTGGGCCAGAGCACGAAAGTTAATACCACGTTTCGCACAGCTCCTCAACAGCACGACAAGA  
TGCCACATACTGCGCCAGTTCGTTTACAGTTCAGTTTACAGACTAGCAGTGCCTTCCCTGCCGATGATGTCCTGACCAATTTT  
CAGTCCGGACCTCTGCCACGGTTTTACGTTGAAGTGGTAACCCTGAGCACGAGTTCTTACAGTCAGGCGTGGTGCACCG  
TAACGCTGTTATTGCTGGTAAAGATCAAAAACTTTTCAAGCAGCTAAGGAAAGTTGAACCAGACATTAGATGAAATATTT  
CAACCAATTACAGCACCATTAGTCACTGCCAGCCACCAAATAAATCAAGGGTTACATGAAAACGTAGCCCTTTTT  
CTTTGGTAGTGACACTAAAATGGATGTAGTGTGAAGAATAATCCCGTTTACTCAATCAATAATACATATTGTTTCAATCT  
ACGTTATTATCTTTGTAATAAATGGCATTATTAATCATTGAAAACGTCTTTTGAAGTGTGATACAACGGGACTAGTC  
ACAACAGGACTATTCTCAACGGGATCATCCTCAGAGGAATCATCAAAGTCATCCATAAAATAAATATCATCGAA  
TGGTGCCACGCCGATGAGTTTTATTTATTATTACGATCAGTCAATACTCCACTTAAACCGTTTTGCTCACAGGTT  
TTAATGATTTTTATTACTCTTGTGTAAGCAGGCGCATTAAAAATACACGGAGTATCAACATCAAACAATGACGTTCCC  
CAGTTCACATATTGAATATCATAGTACTGAAGTCTGTCCAGAAAAGAAGCACCCCTTAAATCCAATCCAGTAAAT  
ATATAAACCACCTCTTCTTTTGGAGAGTAATGTTAATTTGGCTATCTCCCGGACATCATGCCATTTTTGTATTTGA  
ATACCGTTTCAAGATGTTCTCCAGACAGCTTGAAGTTCAGGAAATAATTTGAAATCAAAGCCTATATTATTATGTGCAAC  
GTAGATGAACAAAAAATGAAAAAGCTTGCAGTGTGAATTATAGCTATCGATTTTATCTTGAAGGCTGAGCTCTTGGTAA  
AACTTATAGCAACACTATAAAAAATTAACAGAAGCTCTGAAGACCTTGTATTTTATCAATAATACCCCTTGAAC  
CATTCAAAACGCATCTTTTTTTCTTGAATATCTATGGGGTGTCTTTGACTCTGACAAAGATGAAATCTCATCTATT  
TTGTTTTCATATGAATTACGTGATTCCATACAGACATTTGGCGCGTTTCTAAAATAACACTACGCGTACTACTTGGCTT  
AAGTAAACCAACATGAAATCACTTTTTCTTATATTATCGAAAAGTTTCTATTCATTTCTTTTAGCGCATTCAAAAACT  
GATCGGCATTATTTTTATTCGATAATTTTTAGTTTTCAGAAAACACATTTTCATTGTTTTCCAGCTTTAGTTAATGAGA  
AGATTTTCCAGACCTGCTTAAACATATTACGTCAGGCTCACCAGAACTAACTAAGTATTATTAAAGTG  
TACGTTGAATACCTTTAAGTTATTTTACCAACTTCATATTTAATACGTTTTAATGTTCTCCAGCTCCCATAAATGACAA  
AGGCGTTGCCCTTCTGATATATACATTAGACATCATTTTTGTAAAGTTTCAAGAGCACCGGATACGTCCTGATGCA  
GCTTCTTACAAAATTAATTTAAAATACTATGAGCTAGTAGCTCCATGTGTTTGAAGATTTATTTTATTATAACTTCC  
ACTACCCAAAACGTGCGTAGCGTTAAATCCGTTGCTTTTACTAACTAACATTGTCTATTCTCAATTAATGTCTACATGG  
CTATTTTAAATGTTATTACTGTTTGTCACTATAAAAAACGCTCATTTGAGACAATTACTGACATTAAGTCTTCACTTG  
CTACGCATGGAACCTTTAATTAATAGCACAGGAATGTTAAATTAATAAACAAGGTTATTTGCTGTATGATAAAAA  
AAAACCGTTATAATTTATTAGTAAAACTGTTTTTCAAGTGTAGAAATTTATATCTCAATAGCGTTGGTTAATGAGCAT  
AGCCACGCTCCTGTAACGCTCACAAAACCTCATCTGCCCTGCGGCGGGTGTCTGGTCAAGTAGTAGATGTTTAAAGCGTGGC  
AGAGACATTTTATCCTTACTCTACGGCATTGTTCTACATACATTGGTTGTGGTACTCACCTATCATCAGTGAAGCAACAG  
AGAATAGTTCAAGTATTGAGTAATTAACCTGATTAATGAAGGGGTATAATAAATGATAACTCTGGCTTTATCGTTA  
ATTACTTAATCCACATGTAAGCAATTTGCCGCTTGGCATAGCAGGCATTTTTTCCAGGACTTTTGAATGAGTACTGA  
TGGATAAATACATTGAGTGGCGTCCACGTACCAAAACACCAGCCCTATTGAAACCACCCACCGACTTCTTCTTG  
AAATGGCGTTAGTCATGAAATATAGACCGCCATCGAGTACCCCTGTACCCTTAACTCTTCTGATACGTAATAATGAT  
TTGGTGGCCCTTGGTGGACTTGAACCAGCGACCAAGCGATTATGAGTGCCTGCTTAACCACTGAGCTAAAGGGCCTTG  
AGTGTGCAATAACAATACTTATAAACCACGCAATAAACATGATGATCATATGATGTAATAACAGATTTTATGCGTCC  
CATTACCTTGGGTCGTATTACACGCGACATAAAACCCGACACCGCCTCATTGCAAAAGTCGATACTCGCAGTCAACA  
AGCAATGTTAATAATTAGCACTATCTATAGTTATCATCGATTCAATGATACTTTGTAATGATTTTGTATCTAATAATAT  
AACTTTATTACATTAGCTGAAGAGTTTTCGCATATTATGATATCTGTTACTTTTCACTCCATAAAAAATAAATCTCGTAT  
AGCAATATATTCTTTCATAGATCTTATTCTGCTAATCATTAGTTTCGATGAGCGATTTTGGACAGTTGCCCTCTCCAGAC  
CACATCGATAAATAAATAAACAAGATTTAAGCATTATCTTTTCCATATAAATAATTGGATAAAAAGTAGGACATCTGTTTGC  
AATTACTTTCAACAATAAACAATTTTTATGTTTCCGTATACATCATATTACTCTACCATTAGAGGAACTTTATTATGT  
TTTCTATAAAACCAGGACCCAGAAATTTACCTATCGACAACCCACATTGTTATCATGAAACATTACTGACGGGGATCTA

AATTCAAATTAATACATTAGAATATCTAACTGTATAACAAATATTATTAATTCTTGTGGAGTTTACCCTCAAGGATT  
AAAAGACAGAGAAATTATCAACTTTTCACGCAGAAAAAGTTATTAATGATCTGTTAAAAAACGATTATAAAATTTCCC  
TTTCTCCAGATACAACCTTACCGAGAGTTGAATAAAGCAGCACAGCGTAGCATTACAGCGCCAGACAGGATAGGAGAAA  
AAAACATAGGTTTATCAACGAGATACAATGATTGAAAGAGGTGATAACAGCGGTGTTTATCAGTATGGTCGTGCTGAACA  
TTTCACCCACATTATATCTGACAAACCTTCCCAAAAAGATAAATATGTTGCATATGCTATTAACATTCCTGACTATGAGC  
TGGCAGCCGATGTATATAATATTAACGTGACGTACCTTCCGGACAGCAAGAAACATTTAAAAATTAATCAATCTAGAA  
CATCTACGGCAAACACTTGAACGTAATCTCTTACTGCTGTTGAGAAATCACAATGTGAAATCATCACCCCAAAAAACC  
TGGCGAAGCGATTCTTCATGCTTTTAAATGCCACCTACCAGCAGATCAGAGAAAAATATGTCTGAATTTGCACGTTGCCATT  
ATGGGTATATACAAATCCCTCCAGTGACAACCTTCCGCGCCGACGGACCAGAAACTCCCGAAGAAGAAAAGGGTTACTGG  
TTTCATGCTTATCAACCCGAAGATCTTTGTACCATCCATAATCCAATGGGAGATTTGCAGGATTTTATTGCATTGGTTAA  
AGATGCTAAAAATTTGGTATCGATATCATTCTGATTATACCTTTAACTTTATGGGAATTTGGGGTAGTGGTAAAAATG  
ACCTGGATTATCCCTCTGCTGATATACGAGCGAAGATCAGTAAAGATATAGAAGGTGGTATCCCTGGCTATTAGCAAGGT  
CAGGTTTTGATTCCATTCATTAAAGATCCAGTAAACAAAAGAACGTAACAAATCCATCCAGAAGATATACATCTCACTGC  
AAAAGACTTCGAAGCAAGTAAAGATAACATCTCTAAGGATGAATGGGAAAACCTCCATGCATTAAGAAAAGCGTTTAA  
ATGGAATGCCAAAAACAACCCAAAAGTGACCAGTTATTATGTTGCAAAATCAATACGTTCTGTAATGCGAAAATAT  
GGCGTACGAGTTTACGTTATGATGCGGCAAAACACTCAAACATGAACAAATAGAAAGATCAATAACCCACCGCTTAA  
AAATTATAATGAGCGTTACACAATACTAACTTATTTAACCCAAAATATCATAAAAAAGCCGTTATGAATTACATGGAAT  
ATCTGGTAACTTGTGAGTTGGATGAACAACAAATGTCATCACTGCTTTATGAAAGAGATGATTTAAGCGCCATTGATTTT  
TCATTGCTCATGAAAACGATAAAAAGCCTTTTCAATTTGGTGGAGATCTTCAAACCTTGCATCAAACCCGGTTCCACAAT  
CTCAAGTATCCCATCAGAAAAGACGGATATTGATTAACATTAACCACGATTTTCCTAACAATGGTAATCTTTTCAATGACT  
TTCTATTTAACCATCAACAAGATGAACAATTAGCAATGGCATATATAGCCGCTCTGCCGTTACAGCAGGCTTTAGTTTAC  
TGGGATGGCCAAGTATTAATCAACGACTGAAATTAATAATGATGGTCCACGCGTGTGGCGGTGAGGCGTAGCT  
TAATAAAGGTTGCTCTACCTATCAGCAGCTTACAATGAATCCACGATTATATAGATAAAGCAGGAATATGGAGCG  
CATTTGAGGGTGTATCTGCAACTAAAACGTTCTGGCCTTTAGTCGTGGGATTTCTGTGAACATTAATCACTCTCTCAT  
GATGGACTAGTTATAATAATAAAGGAAACGAAGAAGTTGAAGGTACCTGGCCTAACAAATGCAACCTGGAATATACAA  
AAACATGGGGAGTAAAGCGTTAACATTATTATTAATAATACCCGAAAATATCCCCCTGGTAAAGTATTTACGCTTA  
GAGGCGAACTCTAAATATCAATATTCCTGGGCGTAGCGCTCTTCTTTAGGGAAAACAGGAGAACCGCCAACTATCTC  
TATTTATAATTTAATGTTATATCTGCCCGATAAAAAGGGCAGATAATATGTTTACTAAGTTTACTAACGGTCATTTTGCAGT  
GAAGCCATTTACTGTTTTTATCGACCAGATAATCTGTTCTCTAATGTTAACTCCCCCTAACCTGTTGCTTTAGTTATTC  
ATTTCTGTCTCACTTGGCCTTAATACCTACGTTAAATGTTACTAATTTGTTGCTTTTATGATCACAATAAGAAAACAATA  
TGTCGCTTTTGTGCGCATTTTTCAGAAATGTAGATATTTTATGATTATGGCTACGAAATGAGCATCGCCATGTCACCCTA  
CATCTCATAAGAGGATCGCTTCTGATGAATGCACTGACCGCGTACAAAATAACGCTGTGCGATTACAGGCCAGGACTATAG  
CGGATTCACCTCACCCGTCGGCGCAATCCCGCGTCTGCTGGAACACCTTACCAGAACAGACGACCAACAGTTTC  
TTGAGCAGGTTGCCGAGTGGCCGTCAGGCGCTGGAGTACAATCGTTTCTGCGTTTTCGGGTAGCCAAAATTTCTTGAC  
GATCTATGTGCGAACCAGCTGCAACCTTGTGTTGAAGACGTTGCTAAACCGCGTGAAGGTGCGTTGTTGATCAATGC  
GGTGGTGTGCGATGATGTGAAGCAAGCGGATGAGATGGTGAAGCTGGCGACGGCGGTGGCGCATCTGATTGGCGTTCCA  
ATTTGATGCGATGAGCGGTGAGTATTACGCGGTTTTGTAGTAAAAATGTCGATAACTCAGACAGCTATCTGCGCCAG  
CCGACCCGCGTATGGAGCTACACAACGACGGCAGCTATGTCGAAGAGATAACCGATTACGTGCTGATGATAAATCGA  
CGAGCAAAACATGCAGGGCGAAATTCGCTGCTGCATCTCGATGACTGGGAACATCTCGACAATTTCCGCCACC  
CGCTGGCAGCTCGCCGATCGCCTTTGCCGCGCCGAGTAAAAACGTGAGCAAAAGATGTTTTTTCATCCGGTGTTCGAC  
GTGATCAACAGGGTCGCCGTTGATGCGCTATATCGACCAGTTCTGTCAGCCGAAAGACTTCGAAGAAGCGGTGGTT  
GAGCGAGCTTTCCGACGCCATTGAAACAGCAAAGGCAATCTTTCTGTGCCGTTCCCGTTGGCAAATTCCTGTTGATTA  
ACAACCTGTTCTGGCTGCACGGTGCAGCCGCTTTACTCCGACCCGGATCTGCGCGTGAACGATGCGCCAGCGTGGC  
TATTTGCTTACGCTCTAACCACTACCAGACGCATCAGTAAGCGCAAAGGAATGAGCGGATGTATGATTTTGTGATTA  
TTGGCGGGCATCATCGGCATGTCGACCGCCATGCAACTGATTGATGTCTATCCGACGCCCGATTGCGTTGCTGGAA  
AAAGAGTCCGCCCGCCTGTCAACGACGGGCCACAACAGCGCGTATCCATGCCGGGCTTATTACAGCCCGGCAG  
CCTGAAGGCGCAGTTTTGCTGGCGGAAACCGCGCCACCAAAGCCTTTTGGGATCAAACGGCATTGCTACGACAAC  
GCGGCAAGATGCTGGTTGCCAGTCCGATCTCGAAATGGAACGGATGCGCGCTTATGGGAACGCACAGCGGCAACGGT  
ATCGAGCGCAATGGCTAACGCCGACGAACTGCGCGAGCGCAACCGAATATCACCGGCTCGCGGCATTTTGTGCC  
GTCCAGCGCATTGTCAGTACCAGCGACGTGACGGCGGATGGCAAAAATCTCCAGTCCAGAGGCGGTGAAATATCT  
ATAACGCCGAAGTCAAGCGGCTTAATGAGCATAAAAACGGCGTGGTATACGTACCCGTCAGGGCGGCAATATGAAGCA  
TCAACGCTGATTAGCTGTTCCGGGCTGATGGCTGACCGGCTGGTAAAAATGCTCGGACTCGAACCGGGCTTTATCATCTG  
CCGTTCCGTGCGGAGTATTTCCGCTTGCGCCGAGCATAACCAGATTGTTAACCACTGATTTACCCATTCCCGACC  
CGCAATGCCGTTTTTGGCGTTTCTCAACCCGATGATCGACGGCAGCGTACCGTCCGGCCAAACCGGGTGTGGCT  
TTCAAACGCGAAGGCTATCGCAAGCGGACTTCTCATTTAGCGACACGCTGGAGATTTGGGCTGTCGGGGATTCCGCC  
GGTGTGCAAAACCATCTACGCTCAGGACTGGGCGAGATGAAAACTCGCTGTGCAAAAGCGGCTATCTGCGGCTGTGC

AAAAGTATTGTCCCCGGCTTTCGTTAAGCGATCTCCAGCCCTGGCCCCGCGGTGTGCGGGCGCAGGCGGTATCGCCGGAC  
GGCAAGCTGATTGACGATTTTCTGTTTGTACCACCCCGCGCACGATCCACACCTGCAATGCGCCCTCCCCGGCAGCGAC  
ATCAGCAATTCCTATTGGTGCATATTGTGAGCAAGGTACAAACGCTGTTGGCAAGCCAGAGTAACCCCGACGCACGC  
TGCGAGCGGCAGTAGTGTGGATGCCTTACACGCCGATTTAATCAATAACCTTTGAAAACAGGATGTAGCGATGAAACT  
TAACGACAGTAACTTATTCCGCCAGCAGGCGTTGATTAACGGGAATGGCTGGACGCCAACATGGTGAAGCCATCGACG  
TCACCAATCCGGCGAACGGCGACAAGCTGGGTAGCGTGCCGAAAATGGGCGCGGATGAAACCCGCGCCGCTATCGACGCC  
GCCAACCGCGCCTGCCCGCTGGCGCGCTCACCGCCAAAGAACGCGCCACCATTCTGCGCAACTGGTTCAATTTGAT  
GATGGAGCATCAGGACGATTTAGCGCGCTGATGACCCTCGAACAGGGTAAACCACTGGCCGAAGCGAAAGGCGAAATCA  
GCTACGCCGCTCCTTTATTGAGTGGTTTGCCGAAGAAGGCAAACGCATTTATGGCGACACCATTCTGGTCATCAGGCC  
GATAAACGCCTGATTGTTATCAAGCAGCCGATTGGCGTCACCGCGGCTATCACGCCGTGGAACCTCCCGCGCGGATGAT  
TACCCGCAAAGCCGGTCCGGCGCTGGCAGCAGGCTGCACCATGGTGTGAAGCCCGCAGTCAGACGCCGTTCTCTGCGC  
TGCGCTGGCGGAGCTGGCGATCCGCGCGGGCGTTCCGGCTGGGTATTTAACGTGGTCACCGGTTCCGGCGGCGCGGT  
GGTAACGAACCTGACCAGTAAACCGCTGGTGGCAGAACTGTCGTTTACCGGTTCCGACGAAATTGGCCGCCAGTTAATGGA  
ACAGTGCAGCAAGACATCAAGAAAGTTCGCTGGAGCTGGGCGTAAACGCGCGTTTATCGTCTTTGACGATGCCGACC  
TCGACAAAGCCGTGAAGCGCGCTGGCTCGAAATTCGCAACCCGCGGCAAACCTGCGTCTGCGCCAAACCGCTGTAT  
GTGACAGGACGGCGTGTATGACCGTTTTGCCGAAAATTCAGCAGCGTGAAGCAAACCTGCACATCGGCAGCGGGTGA  
TAACGGCGTACCATCGGGCGCTGATCGATGAAAAAGCGGTAGCAAAAGTGAAGAGCATATTGCCGATGCGCTGGAGA  
AAGCGCGCGGTGGTTTGGCGGTAAGCGCACGAACGCGCGGCAACTTCTCCAGCCGACCATTCTGGTGGACGTT  
CCGGCCAAACGCAAAGTGTGAAAAGAAGAGCGTTCCGGCCCCCTCGCCCCGCTGTTCCGCTTTAAGATGAAGCTGATGT  
GATTGCGCAAGCCAATGACACCGAGTTTGGCCTTGGCCCTATTTCTACGCCCGTGATTTAAGCCGCGTCTTCCGCGTGG  
GCGAAGCGCTGGAGTACGGCATCGTCGGCATCAATACCGGCATTTTCCAATGAAGTGGCCCCGTTCCGGCGCATCAAA  
GCCTCGGGTCTGGGTCGTGAAGTTTGAAGTATGGCATCGAAGATTACTTAGAAATCAAATATATGTGCATCGGTCTTTA  
ACTGGAGAATGCGAATGAACAGCAATAAAGAGTTAATGCAGCGCCGAGTCAGGCGATTCCCGTGGCGTTGGGCAAATT  
CACCCGATTTTCGCTGACCGCGCGGAAAACCTGCCGGTGTGGGACGTTGAAGGCCGTGAGTATCTTGATTTCCGGGGCGG  
GATTGCGGTGCTCAATACCGGGCACCTGCATCCGAAGTGGTGGCCGCGGTGAAGCGCAGTTGAAAAACTGTCGCACA  
CCTGCTTCCAGGTGCTGGCTTACGAGCCGATCTGGAGCTGTGCGAGATTATGAATCAGAAGGTGCCGGGCGATTTCCGC  
AAGAAAACGCTGCTGTTACGACCGGTTCCGAAGCGGTGAAAACGCGGTAAAAATCGCCCGCGCCGCCACCAAACGTAG  
CGCACCATCGCTTTTAGCGGCGCGTATCACGGGCGCACGATTACACGCTGGCGCTGACCGGCAAGGTGAATCCGTA  
CTGCGGGCATGGGGCTGATCGCGGGTATGTTTATCGCGCGCTTTATCCTTGGCCGCTGCACGGCATAAGCGAGGATGAC  
GCTATCGCCAGCATCCACCGGATCTTCAAAAATGATGCCGCGCCGGAAGATATCGCCGCCATCGTGATTGAGCCGGTTCA  
GGCGAAGGCGGTTTCTACGCCCTCGTCGCCAGCCTTTATGACGCTTTACGCGCTCTGTGTGACGAGCACGGGATCATGC  
TGATTGCCGATGAAGTGCAGAGCGGCGGGGCGTACCGGCACGCTGTTTGGCATGGAGCAGATGGGCGTTGCGCCGGAT  
CTTACCACCTTTGCGAAATCGATCGCGGGCGGCTTCCCGTGGCGGGCGTACCGGGCGCGCGGAAGTAATGGATGCCGT  
CGCTCCAGGCGGTCTGGGCGGCACCTATGCGGGTAAACCGATTGCCTGCGTGGCTGCGCTGGAAGTGTGAAGGTGTTT  
AGCAGGAAAATCTGCTGCAAAAAGCCAACGATCTGGGGCAGAAGTTGAAAGACGGATTGCTGGCGATAGCCGAAAACAC  
CCGGAGATCGGCGACGTACGCGGGCTGGGGCGATGATCGCCATTGAGCTGTTTGAAGACGGCGATCACAAACAGCCGGA  
CGCCAAACTCACCGCGAGATCGTGGCTCGCGCCCGGATAAAGGCTGATTCTTCTCTCTGCGGCCGTATTACAACG  
TGCTGCGCATCCTTGTACCGCTCACCATTGAAGACGCTCAGATCCGTGAGGCTGAGATCATCAGCCAGTGTGTTGAT  
GAGGCGAAGCAGTAGCGCCGCTCCTATGCCGAGGCGACGCTGCGCGCTTTGTCGGCCTACGGGGATCAGGTGCGGATA  
AGGCGTTTACCGCCATCGACAATCTGACGTGAACAGGAAGAAATCTATGTTGGCCGGTAAAGCGGAGCCGCTCTCC  
GGCAAAAAGAATCAATAACAATTATACCGGTGACCCGGCGCGGGAATGTGCGGGCGCTCTCCCAAGTGACACACTTTCG  
AGAGGATTCAGGATGGGGCAATCATCGCAACCACATGAGTTAGGCGGCGGGCTGAAGTCACGCCACGTACCATGTTGTC  
TATTGCCGGTGTATCGGGCAAGTCTGTTTGTGCGTTCCAGCGTCGCCATCGCCGAAGCGGGCCCGGGTATTACTGG  
CCTATCTGTTCCGCGGGCTACTGGTGGTTATGATTATGCGGATGTTGGCGAAATGGCGGTTGCCACGCCGATAACCGGT  
TCGTTTTCCACCTATGCCGATAAAGCCATTGGTTCGCTGGGCGGGCTATACCATCGGCTGGTTGTAAGTGGTGGTTTGGGT  
ACTGGTTATCCCGCTGGAAGCCAACATCGCCGCCATGATCCTGCACTCATGGTTCCAGGCATTCCCATCTGGTTATTTT  
CCCTCGTATTACCCTCGCCTTAACTGGCAGTAACCTATTAAGCGTTAAAAACTACGGCGAATTTGAGTCTGGCTGGCG  
CTGTGCAAAGTATCGCTATCCTGGCCTTATTTTCTTGGTGCAGTCGCAATTAGCGGTTTTTACCCGATGCCGAAGT  
GAGCGGGATCTCAAGATTGGGATAGCGCGGCTTATGCCAACGGTTTCGGTGCAGTATTAAGCGCGATGTTGATCA  
CCATGTTCTGTTTATGGGCGCAGAAATTGCACCATTTGCCGCCGGAATCCGACACGCCGAAAACATATTGCCGC  
GCCACCAACTCGTTATCTGGCGTATTTCTATCTTCTATTTATGTTCTATTTTTGTCGTCGTGGCATTAAATCCGTGGAA  
TATGCCCGACTAAAAGCCGTCGGTCTTATCGCTCGTACTGGAATTGCTCAATATTCCCATGCGAAATTAATCATGG  
ACTGCGTGATTAATTTCCGTAACCAGTTGCTGAACTCGGCGCTGATACCAGTCAAGGATGCTCTACTCCTTAAGT  
CGTCCGGTGTGCTCCCGGGTAATGGGTAATAACCGCAGTAAAACCCCGTACGTGGCGGTGTTACTCTCCACCCG  
CGCGCATTCTAACGGTGGTGGTGAACCTATTACGCGCTGCGAAGGTATTTAAATTTCTGATCGACAGCTCCGGCGCTA  
TCGCCCTGCTGGTTTATTAGTCATCGCCGTTTACAGTTGCGGATGCGCAAAATTCTGCGAGCAGAAGGAAGCGAAATT



CGCTTGC GAATGTGGCTTTATCCGTGGCTCACCTGGCTAGTCATCGGCTTTATTACCTTTGTGTTGGTAGTGATGCTATT  
CCGTCGGCGCAACAGTTAGAAGTGATCTCCACCGCTTATTAGCGATAGGGATTATCTGTACCGTGCCAATTATGGCTC  
GCTGAAAAAGCTGGTATTGTGGCAAAAAACACCCGTTATAATACGCGCTGATCATGATCAGGAGTCACACCATGACCA  
TTACGTCTCTGGATGGCTATCGCTGGCTGAAGAACGATATTATTCGCGGTAATTTTCAACCGGATGAAAAATTACGAATG  
AGTTTGCTGACATCGCGTTATGCACTTGGCGTTGGCGCTTACGGGAAGCTCTTTCGCAACTGGTGGCGGAACGGCTGGT  
CACGGTGGTGAATCAAAAAGGGTATCGGGTGGCGTCTATGTCAGAGCAGGAGCTGCTCGATATTTTCGACGCCCGCGCCA  
ATATGGAAGCGATGTTAGTGAGTCTGGCGATTGCCCGCGTGGCGATGAGTGGGAGGCAGACGTTCTCGAAAAGCGCAT  
CTGCTGAGTAAGCTTGAGGCCTGTGACGCCAGCGAGAAAAATGCTTGATGAGTGGGATCTGCGTCATCAGCGGTTTCATAC  
GGCAATTGTGGCGGGCTGTGGTTCTACTATTTGCTGCAAATGCGTGAACGGTTGTTTGATCTGGCGCGCGTTATCGAT  
TTATCTGGCTGCGGCAACGGTGCTTTCCGGTGGAAATGCTGGAGGATAAACACGATCAGCACCAGACCCTGACTGCGGCG  
GACTGCGCGGAGATACCGCGCGCCAGTGAGTTAATGCGCCAGCATTTACTGACGCCAATTCCTATTACAGCAGGC  
GATGGCTGGCAATTAACACTCTTCCGGAATACGCAACTTGGCCCGGATAAAATTTATCCGGGCTTTTAGCATCGGT  
TTATTCGCTTCAAGATTTTATTGTACAGATTAGCGTTACCGTAGACCTGTTTGAAATGGCACTCAGAGTGTGCCAGA  
CTTAACGGTATAAACTGGCTGGCAGTGGCTGGTGTGCCGTTTTACCTGATCATCGCACTGGCAATACCGGAAATAT  
TCCCACCGCAACAAGGATTTTCTCCTCGCTTACTGACTCAGGCGTACCAGTGACCGTCTGCTTTGGCGTCGGCAAT  
TGAATATTCATTTATCGGCATCCGGTATACCGTTTTGTTGAGATGCTCCTGCACCTTCTCGCTGATCGTCTTTTATC  
GTGCTGACCTGTAACCGCTCCAGAGTTTTCTCCGGCATCTTTCACAAAATTGAACAGACCCATAGCTACCTCATTG  
TTAACGAAACACTCAGAAAGTGTAGCAGAGGAACGCGCGCTTAACGCCCGGGGATGAGCACAGTTAATCGCGGG  
TTTGACCCAGAACGCGTGAATCAAACCGGGGATATACCAAGCAGTGTCAACAGAATATTAATAATGAACGCCCAACCG  
AACCTTTACCGAGCAGCACGCCGAGCGCGCAGAAATGATGGTGTGACGATTCTCCAGAAACCCATATGACTCCCTA  
TAAGAAAATTACTCATTGTTAAAAAGAGATTTTATCTCTAAGCGTAGTAATTTTAGCGGAGCCTGCCAGTTTCAGCTT  
ACGCTTTTACTCTCATTACGCTGCTGAGGCTGGTATATGTTGCATTTTGTAGTTAGAGTTTACTTAATTTAGAAAATAC  
TTAAATAAATATGACTGAACTCGCGCAATTACAGCCAGTGCCGAACAGGCAGCGGCTTATTGAAAGCAATGAGCCACC  
CTAAACGATTGCTGATTCTGTGCATGCTTAGCGTTCCCGGCACAGCGCGGAGAGCTGACGCGCATTACCGGACTG  
AGTGCTCTGCGACATCACAGCATCTCGCTCGTATGCGGGACGAAGGCTTATCGACAGCCAACGGGATGCCAACGCAT  
TCTATATTCATTAATAAATGAGGCGGTAATGCCATTATGCCACCCTGAAAAATGTCTATTGTCCGTAAGGAGTACTA  
TGGCTTTGACAACCATTTCCCGCATGATGCACAAGAATTAATCGCACGCGCGCAAGTTAATCGATATTCGTGATGCT  
GATGAATATCTTCGTGAACATATTCCTGAAGCAGATCTGGCTCCATTATCCGTGCTGGAACAGTCAGGTCTCCGGCTAA  
ATTACGTACAGAGCAAAATATATCCACTGCCAGGCAGGTAACGCCACCAGTAATAATGCCGATAAATTAGCAGCGATTG  
CCGCCCCCGCAGAAATCTTTTTACTCGAAGATGGGATTGATGGCTGGAAAAAGCAGGATTGCCAGTAGCGGTAAATAAA  
TCTCAACCTTGGCGTAAATGCGCCAGGTGCAGATCGCTGCGGGTGGTTAATATTAATCGCGGTTGACTGGGTTATAC  
CGTAAATAGCGGTTTCTTCTTATTAAGTGGCTTTGTTGGTGCCGGTTACTGTTTGAGGAATCAGCGGTTTTGTGGAA  
TGGAAGGTTGTTAGATAAGATGCCGTGGAACCAACGAGCTTGAGAAGCGACGCCGGACGCGCCCTAGCAGCGACATCCG  
GCCTCAGTAATTAGATCAGGAAATCGTCGAGAGATTTACCTTCTGCCAGCGCTGAGCAATTGGCTTCGGTGTACGGCCC  
TGACCGGTCCAGGTTTTAGTTTACCCTTAACATCGGTGAATTTATTTCCCGGACGCGGCTGGCGTTTTTTACCAGC  
GCGTGGTGCAGCAGCAGACTATTACCAATAACTTCCGGGTAATTCCGTGAGCTTTTATCAGCTCCAGCCAGGTGC  
TAATTTTTCTGGCGCTGTCAGTTACGCTGCTGCTGTTCTTCTTCCAGTCTTTCTTAGTGACAACCTGAAT  
TTTTCGAGCATTCTTCAAGAACGTCAATGGAGAATTCGCGAGCCATCGCACGGAGGTTGCAATGTTATTTAACTTTG  
TAACATTACGGACATAATAAAGAAAACCTTTAACGCCAAAACAAAAAAGTATTTCTGCGGTAGTGTAAAGCGATCACT  
TATTATTTCCAAAAATTAATCTATTTACAGTCTGCGCGAGATTATTTTACGCTGTTATTTTCTGAAACTCTCAGAA  
TAATTTCAAGATTATATATTAGCCATTTTGTATGAGTAATTTAGATTATTGGTGAACAGAGCGCGCTCTCTGCTCGCTAA  
TTCCGCAAGCCTGACAAAATCAAAGTGAATAAAAATGCAATATAACAGAATAAAAGAAAACATCCATCACTGGTGCTTTC  
TGCTGTTAATGTACATTGTCTGGCATAAAAAATGCTGAAAATGACCCAGCTACTACATACCCGAATTCTCTACGCTTAT  
AGCGTTACCTCACCCCAAATTTTATTAGTGATATTAAGGTAAGGCCATATCTAATTGATTTAATTAATAAATAAATCA  
TATCGGCATGTAAAAATCCACAATGTACAAAAACGAGCGTTACGGAATATTTTATCTACAAAAACTGACTAAATAAAA  
ATTTTTACTAATTGATTAGTCATAGCCAGCGATATACGCTATGCGAAAATGCAGATGGCAATGAGATCCACTGCTTCA  
TCTCATTAAACATCCATTACGCTTTTATTAAGGAGCATTAGCATGTTCTCACCGCAGTCACGCTTGCATGCAGTTG  
CAGATACGTTCCGCGATGGTTGTTTACTGTTCTGTGCGTGAACATGTGATTGAAGTTTTCTCTCCGGAATGAGCTTCGAA  
CAGTCTTTTTATTCCAGATTGGTAGCGATTCCGGTGAACATCTTAATTGCATGGCCATACGGTATGTACCGTGATCTGTT  
TATGCGCGCGCACGCAAGTTAGCCCGTGGGCTGGATAAAAAATCTGGCGGATATCCTGGCTTATGTGACGTTCCAGT  
CACCGGTGATGTGGCGATCTGTTAGTGGTGGGCGCAGACTGGCATCAGATTATGGCGGCGTCAAGTCAAACATCGTT  
GTTTCGATGTTGATGGGGCGGTTTATGGCTACTTCTCGATTATTGCCCGGACTGTTTAAAGTCAGCCGTTACCAGCA  
GGTAAAAGCCTGACTCTTCTTTCCGACTGGCATGCCAGTCGGTCTTTAACTGGCTTCGCAAAATAAACATTCAA  
TAACGTTCAAGCGCAACACGCAACTAAAGCCATGCCGGATACCGTAATGCTCGTGTGCTCGCTGCTAAATAGAGCGG  
AAATTGCTGTAATGATCGCAAGTTTTAATATCGGAAGCGGTTACGCCAGTGTGCAACTGCGTTCTTTAATGTTGGAT  
GAATTACCAGAGCGGTACGTCCATTCCGCTTCCGGATTAACATAGACATAATTTTCCCACGGCGTAACCATACGCT

TTCTGGGTTACCACATCGACAGTAAAACCGACTTTTTCAAGTACGCGGCCACCTCGTCTGGTCGTAATACATATTTGA  
TCCTCGTTATTATCAACCGGGCCTACCTTACCTGATTGCGCATTACAACGTTTCAGAAAAGTCCATAAAGCCGCGA  
TGAACCTCAGTTAAGAAAATATGGTCTACACTGAAAATTACATCGAATTCTAATGGGGGATCATATGTTTAAACCGACCG  
AACCGCAACGACGTTGATGATGGCGTGCAGGATATCCAGAATGATGTCAATCAATTAGCTGACAGCCTCGAATCTGTATT  
GAAGTCTGGGCGAGCGACGCCAAAGGGGAAAGCTGAAGCCGCACGAGTAAAGCTCAGGCATTGCTGAAAGAAAACAGGG  
CGCGAATGCATGGTCTACTCGCTCCAGCAAGCCGCGCGATGCCGTTGGCTGCGCGGATTCTTTTGTTCGTGAAAGA  
CCCTGGTGTAGCGTGGGTACAGCAGCTGCCGTAGGTATTTTTATCGGCGCACTGTTAAGCATGCGCAAATCGTAGTGCAA  
AAATGATAATAAATACGCGTCTTTGACCCCGAAGCCTGTCTTCGGGGTTCTTTTTGCCTGGTGAATCACAAAAATCCCC  
CTACCCCGTACGCTCATATCCAGGGTAATTTGACCACACTATTTGCTATATATTGTGTGGTTGAATCTTTTTTCAACTAC  
ATCTAGTATCTCTGTATCAACAGAGAGACAACCCGACGCGTATCATCGCGCCGTATCTTCATTTTAAACGGAAATACGAA  
TCATGCGCATTACTATTTACTCGTAAACGATTGCGTTTCAAGTCCACGCCAACCGGGGATGAAAACCGGGGCTTT  
GATTTTGAATGATTAATGTCGATCGCGTTCCTGAAGCGGCAGAAAGCTTGCCTGCTCAGGGCTTTCTGAGTTGCCGGT  
AGTGATTGCTGGCGATCTTAGCTGGTCTGGTTTCCGTCCGACATGATTAACCGTCTGCATCCAGCGCCACAGCGGCCA  
GTGCATGAGCCAGCTCGTCTACTTCTCCAGCAGCTCCGAAAACAGCAGCGTTTATCGAACGTTTAGTCTGCCCGGG  
TGCGCATCCCGCTCAATGAGCGGGAACGGATTGAGTACAGCAGCTTACATCCTGATCGTGCCTCTTACGGCGGGC  
GGTACGGTCCGCGGTGCCACGACAGTAATTGCTTTTTTAAACGACGAGCACAAACCGGGGCTTGTTCGCGGGCTTAT  
TGCTTCTGGTAAATCGCACTTTTGGTGAGCGGTATGGCCGCGCCGAGATGTGATTGCCCGAAATGCGCGGTGCCGTGGC  
TGTACCGTTTTGAACTCATGGGTACGCAAAGCGATATCGAAAACGTTCTGAAAAGGAGTAACCGAATTTTGGCAACGACAA  
CCGCAGAATGCCTGACGCGAGAAACGATGGATTACCACGCGTGAATGCGATGCTTAACTCTACGATAGCGCAGGTGCG  
ATTAGTTCGATAAAGACCGCCAGGCGTTGACGCCTTTATTGCGACGATGTGCGTCCGAACAGTGTGACCTTCAGTAG  
CCAGCAGCAGCGCTGAACTGGCTGGTCAACGAAGTTACTATGATGAAAGCGTTCTTAATCGCTACTCTCGCGACTTTG  
TCATTACGCTGTTTACCACGCACACACCAGCGTTTTGTTTTCCAGACATTCCTGGGGCATGGAAGTTTTACACCAGC  
TATACGTTGAAGACATTCGACGTAACGTTATCTGGAAGTTTTGCCGATCGAGTAACGATGGTGGCGTGCAGCTGGC  
ACAAGGCGATGAGACGCTGGCGTTGAACTGACCGATGAAATGCTGTCAGGACGCTTTCAGCCAGCCACGCCAACATTCC  
TCAACTGCGGTAAGCAGCAGCGCGGCAACTGGTTTCTGTTTTTGTGCGTATTGAAGACAATATGGAGTCGATTGGT  
CGGGCGGTAATTCGCACTGCAGCTGTCAAACCGCGCGGGCGGTAGCATTTTTGTGTCGAATCTGCGAGAAGCGGG  
CGCGCAATTAACGATTAAGAAATCAATCTTCTGGCGTAATTCGGTGATGAAAATGCTGGAAGACGCATTTTCTATG  
CCAACTGCGCGCTCGTCAAGGGGCTGGTGCAGTCTATTTACATGCTCATCATCCGATATTCTGCGTTTTTCTCGAC  
ACGAAACGGGAAAATGCCGACGAAAAATCCGCATTAACACTGTCGCTTGGCGTGGTATCCCGGATATCACTTTCCA  
TCTGGCAAAAGAGAATGCGCAGATGGCGCTGTTTTCGCCTTATGACGTAGAGCGAGTTTATGGCAAGCCGTTTGGCGATG  
TGCCATCAGCCAACACTATGACGAACTGGTTGCCGATGAACGCATTCGAAAAAATACCTCAACGCCGTGATTTCTC  
CAGCGACTGGCAGAAATCCAGTTTGGTCCGGTATCCCTACATCATGTATGAAGACACGGTAAACCGTGCTAACCTAT  
CGCCGGGCGCATAAATATGAGTAATCTCTGCTCAGAAATTTGACAGGTTAACAGCGCCTCAGAGTATGACGAGAATCTCG  
ACTATACCCGCACAGGCCATGATATTTCTGCAATTTAGGTTCTGTTGAATATTGCGCACACCATGGATTTCCCGGATTTT  
GCCCCACGGTAGAGACTGCCGTGCGCGTTAACGGCAGTATCAGATATGAGTCATATCCGACGCGTCCGCTCCATCGA  
AGCCGAAATGCCGCTCGCACGCCATCGGACTGGGCGAGTGAATTTACACGGCTATCTGGCGGAGAAGGCATCGCTT  
ATGGTTCGCCGGAAGCACTGGATTTACCAATCTCTATTTCTATGCCATCACCTGGCATGCACTGCGTACCTCGATGTTG  
CTGGCAGCGAACGCGGTGAAACCTTCGCCGGTTCAAACAGTCAAGCTATGCCAGTGGTGAATTTTTAGCCAATATCT  
GCAAGGGAATGGCAGCCGAAACGGCGAAAGTTGGCGAACTGTTTACCGTAGCGGTATTACGTTACCTACCCGTTGAGA  
TGTGGGCGCAGCTGCGCGACGACGTGTCGCTACGGCATATCAACAGAAATCTTACGGCGGTGCGCCAAACCGTTCT  
ATCTCTTATATCAACCATGCTACGTGAGTATTCTCCGATTGTGGCGAAAGTAGAGATACGCAAAAGGGGCAAAACAGG  
ACGCGTTTACTACCCTGCCCGTTTATGACTAACGAGAATCTGGCGCTGATCAGGACGCTTACGAAATTGGCGCAGAAA  
AGATCATCGACACCTACGCGGAAGCGACTCGCCATGTCGATCAGGGGCTGTCGCTGACGCTTTTTTCCCGGATACCGCC  
ACCACTCGCGATATCAACAAAGCGCAGATTTACGCCTGGCGCAAGGGTATCAAAACGCTCTATTACATCCGCTGCGTCA  
GATGGCGCTGGAAGGCACTGAAATTGAAGGCTGCGTCTCTGTGCACTTTAAGGAATATCTATGAAACTCTACGTATCA  
GCGCCATCAACTGGAACAAGATATCTGACGATAAAGATCTGGAGGTGGAATCGCCTGACCAGCAATTTCTGGCTACCA  
GAAAAGGTGCCGCTGTCGAACGATTTCTGCTGGCAGACATTAAGTGTGTAAGAACAACTGACGATGCGCGTTTTT  
TACTGGCCTGACGCTGCTCGACAGCTGCAAAATGTTATCGGCGCGCTTCTCTGATGCCCGATGCACTCACGCCTCATG  
AAGAAGCGGTATTATCGAATATCAGCTTTATGGAAGCGTTTATGCCGCTTACAGTTGATTTTCTCGACGCTATGC  
CAGACCAAAGATGTCGATGCCGCTACGCTGGAGTGAAGAAAACGACCGTTGACGCGAAAAGCTCAGATTATTCAGCA  
ACATTATCGCGGTGATGATCCGCTGAAAAAGAAAATCGCCAGTGTGTTTCTGAAATCTTTTTTGTCTATTCCGGTTTTCT  
GGCTGCCGATGATTTTTCCAGCCGCGGAAAGCTGACCAATACCGCGGACCTGATCCGTCTGATTATCCGCGATGAAGCA  
GTCCACGGTACTACATAGGCTATAAATATCAGAAAAACATGGAAGAGATATCTCTGGGACACGTGAAGAGTTGAAGAG  
TTTCGCTTTCGATTTGTTGCTGGAACCTACGACAAAGAGTTGCAATACCCGATGAGCTGTACGCCGAAACCCCGTGGG  
CTGACGATGTGAAAGCGTTTCTCTGTTACAACGCCAATAAGGCTTTGATGAATCTGGGCTACGAACCGTTATTTCCCGCA  
GAAATGGCGGAAGTGAATCCGGCAATCTCGCCGCGTTTTCCCGAATGCCGATGAAAATCACGATTTCTTTTCCGGTTC

AGGCTCCTCTTATGTGATGGGAAAGCGTTGAAACAGAAGATGAAGACTGGAATTTCTGAGGGTGTATTTTCAAAAA  
ATCACTACCCGCAGCAGGAAATAATTCCCGCAAATAGCTTTTTATCACGCAAATAATTTGGTGTACTACACTGATA  
CTCTGTTGATTATTCGCTGAAACCACAATATTCAGCGCTTTTTTCGCTATCTTTGACAAAAATATCAACTTTCTCGA  
TTTGCTCTCAGCCCTTATATCACGGGAAATTCGGCGATTTGCTGCGATCAATATTCATGCCACATTTGCCATCAGGGT  
TGCCTCAGATTCTCAGTATGTTAGGGTAGAAAAAGTGACTATTTCCATTGGGTAATATATCGACATAGACAAATAAAGG  
AATCTTTCTATTGCATGGCAATTAATTAGAAATTAATAAATCTTTATAAAATATTTGGCGAGCATCCACAGCGAGCGTTC  
AAATATATCGAACAGGACTTTCAAAGAAACAAATCTGGAAAAACTGGGCTATCGCTTGGCGTAAAAGACGCCAGTCT  
GGCATTGAAGAAGGCGAGATATTTGCATCATGGGATTATCCGGCTCGGGTAAATCCACAATGGTACGCCTTCTCAATC  
GCCTGATTGAACCCACCCGCGGCAAGTGTGATTGATGGTGTGGATATTGCCAAAATATCCGACGCCGAATCCGTGAG  
GTGCGCAGAAAAAGATTGCGATGGTCTTCCAGTCTTTGCCTTAATGCCGCATATGACCGTGTGGACAATACTGCGTT  
CGGTATGGAATTGGCCGGAATTAATGCCGAAGAACGCCGGAAAAAGCCCTTGATGCACTGCGTCAGGTCGGGCTGGAAA  
ATTATGCCACAGCTACCCGGATGAATCTCTGGCGGGATGCGTCAACGTGTGGGATTAGCCCGCGCTTAGCGATTAAT  
CCGGATATATTAAATGGACGAAGCCTTCTCGCGCTCGATCCATTAATTCGACCCGAGATGCAGGATGAGCTGGTAAA  
ATTACAGGCGAAACATCAGCGCACCATTGCTTTATTTCCACGATCTTGATGAAGCCATGCGTATTGGCGACCGAATTG  
CCATTATGCAAAATGGTGAAGTGGTACAGTCCGACACCCGGATGAAATTTCAATAATCCGGCGAATGATTATGCTCCGT  
ACCTTCTTCCGTGGCGTTGATATTAGTCAGGTATTCAGTGCAGAAAGATATTGCCCGCGACCCGAATGGCTTAATTCG  
TAAAACCCCTGGCTTCGGCCACGTTCCGCACTGAAATTATTGACAGGATGAAGATCGCAATATGGCTACGTTATCGAAC  
GCGTAATAAGTTTGTGCGCGCAGTCTCCATCGATTGCTTAAAACCCGCTTAAACGCGAGCAGCAAGGTCTTGATGCGGCG  
CTGATTGATGCGCGTTAGCAGTGCATGCACAAACGCTTCTAGCGAGTTGCTCTCTCATGTCGGACAGGCACCCTGTGC  
GGTGCCCGTGGTGCAGGAGGACCAACAGTATGTCGGCATATTTGAAAGGAATGCTGCTGCGCGCTTTAGATCGTGAGG  
GGTAAATAATGGCTGATCAAATAATCCGTGGGATACCACGCCAGCGGCGGACAGTGCAGCGCAATCCGACAGCGCTG  
GGGTACACCGAGCTGCACCGACTGACGGCGGTGGTGTGACTGGCTGACCAGTACGCTGCGCAAACGTCGAGCATT  
TTAATATTCTCGATCCGTTCCATAAAACGCTGATCCGCTCGACAGTTGGTCACTGAAGGATCGACTGGGTCGTTACC  
CATTTCCGTCCGCTTCCAGGGCGTGCAGGTTCCGGTTGATTATCTCAACGGTTCCAGCAATTGCTGCTGGGTAT  
GCCCCACCGGTGGCGATTATCGTTTTCGCTCTCATCGCTGGCAGATTTCCGGGGTGGAAATGGGTGTGGCGACGCTGG  
TTTCGCTGATTGCCATCGCGCAATCGGTGCCTGGTGCAGGCAATGGTACTGCGCGTGGTGTAAACCGCCCTGCTG  
TTCTGTATCGTCATCGGTTTCCGTTGGGGATATGGCTGGCGAGAAGTCCGCGAGCGGCGAAAATTTCTGCTCCACTGCT  
TGATGCCATGCAGACCACGCCAGCGTTTGTATCTGGTGCAATCGTCATGCTATTTGGTATCGGTAACGTGCCGGGCG  
TGGTGGTGACGATCATCTTTGCTCTGCCGCCGATTATCCGTCTGACCATTCTGGGGATTAACCAGGTTCCGGCGGATCTG  
ATTGAAGCCTCGCGCTATTCCGGTGCCAGCCCGCGCAGATGCTGTTCAAAGTTCAGTTACCGCTGGCGATGCCGACCAT  
TATGGCGGGGTTAACAGACGCTGATGCTGGCCCTTTCTATGGTGGTATCGCCTCGATGATTGCCGTGGCGGGTGG  
GTCAGATGGTACTTCGCGGTATCGGTCTGATATGGGGCTTCCACCGTTGGCGGCGTGGGATTGTGATCCTCGCC  
ATTATCCTCGATCGTCTGACGACGCGCTTGGGCGGACTCACGCAGTCCGGGCAACCGTCCGTGGTACACCACTGGCCC  
TGTTGGTCTGTGACCCGCCATTCAATAAGTAATCTGCACTTGCCCGGTGACGCCGGGCATTATCACCTGCCAAAAA  
AAGGAATAACAATGCGACATAGCGTACTTTTTGCGACAGCGTTTGCCACGCTTATCTCTACACAACTTTTGTGCCGAT  
CTGCCGGGCAAAGGCATTACTGTTAATCCAGTTCAGAGCACCATCACTGAAGAACTTCCAGACGCTGCTGGTCACTCG  
TGCGCTGGAGAAATTAGGTTATACCGTCAACAAACCAGCGAAGTAGATTACAACGTTGGCTACACCTCGCTTGTCCG  
GCGATGCAACCTTCCCGCGTGAATGGACGCCACTGCATGACAACATGTACGAAGCTCCGGTGGCGATAAGAAATTT  
TATCGTGAAGGGTATTTGTTAACGGCGCGCACAGGGTACCTGATCGATAAGAAAACCGCCGACGATACAAAATCAC  
CAACATCGCAACTGAAAGATCGAAGATCGCAAACTGTTGATACCAACGCGGACGGAAGCGGTTAAACCGTT  
GTAACCTGGCTGGGGCTGCGAAGGTGCGATCAACCACAGCTTCCCGCTATGAACCTGACCAACCCGTGACGCATAAT  
CAGGGGAACACGCGAGTATGAGGCGACACCATCAGTGCCTACAAAGAGGGCAAACCGGTGTTTTATTACACCTGGAC  
GCCGTACTGGGTGAGTAACGAACTGAAGCCGGGCAAAGATGTCGTCTGGTTGCAGGTGCCGTTCTCCGCACTGCCGGCG  
ATAAAAACGCCGATACAAACTGCCGAATGGTGCGAATTATGGCTTCCCGTGCAGCACCATGCATATCGTTGCCAACAAA  
GCCTGGGCGGAGAAAAACCCGGCAGCAGCAAATGTTTGCATTATGCAGTTGCCAGTGGCAGATATTAACGCCAGAA  
CGCCATTATGCATGACGGCAAAGCCTCAGAAGGCGATATTCAGGGACAGTTGATGGTTGGATCAAAGCCACCAGCAGC  
AGTTCGATGGCTGGGTGAATGAGGCGTGGCAGCGCAGAAGTAATTTTTATTCCGGCGGATAAGGCGTTTTTGCAGC  
CGCGTTCTGTGACAATGCCTGATGCGACGCTGGCGCTTATCATGCCTACAAACCACATCGCACATTTCAACAATC  
TATCTTTATCCCATATTCATCAACATCCGCTATTATTGATTTCCAGCTTAATCATCACCTGATGAACAAAAATAATGAC  
TAAACCTAATCATGAGCTTAGCCCGCGCTGATCGTGTGATGCTATCGCCACCGGTCTGGCGGTAGCCAGTAACTATT  
ACGCCAGCCATTGCTGACACCATCGCGGTAACCTTTCCCTTCCGCCAGTTCGGCAGGCTTTATTGTTACCGCCGCG  
CAGTTGGGCTATGCCGAGTCTACTGTTCTTGTCCCTCGGTGATATGTTGAACGCCCGCCCTGATTGTCTCGAT  
GACCTTACTGGCGGATGTTGATTACCGCAGCAGTCACTGCTGGCGATGATGATCCTCGGTACGGCATTAAACCGTTTT  
ATTTCACTGCTGGCACAAATTTCTGGTTCCGCTGGCAGCGACGCTGGCTTACCAGGATAAACCGCGCAAAGTGGTTGGCA  
CTATTATGAGCGGTCTGCTGTTGGGATCTTGTGGCACGACAGTTGCCGATTGCTGGCGAATCTCGCGGCTGGCGC  
ACCGTCTTTGGGTTGCTTCGGTGTAAATGGCACTGATGGCGTGGCATTATGGCGTGGTCTGCCACAAATGAAATCAGA

AACCCACCTCAACTACCCACAGTTGTTGGGTTCCGTTTTTCAGTATGTTTATCAGCGATAAAATTCTGCGTACCCGCGCGT  
TGCTGGGCTGCCTGACCTTTGCCAATTTAGCATTCTCTGGACCTCAATGGCCTTTTTGCTTGCCGCTCCACCTTTTAAAC  
TACAGCGATGGTGCATTGGTCTGTTTGGACTTGGGGAGCTGCCGGAGCGTTGGGCGCTCGTCCGGCGGGCGGTTTTGC  
CGATAAGGGGAAATCGCACCACACCACAACTTTTCGGTCTGCTGCTGCTATTACTTTTCATGGCTGGCGATCTGGTTTGGT  
ACACTTCCGTAAGTGGCGTTGATTATCGGAATCCTGGTCTGGATCTCACCGTGACGGCGTGTCATATCACTAACCAGACG  
GTAATTTATCGGATACATCCTGATGCGCGCAATCGCCTGACCCGACGGTTACATGACTAGCTACTTTATTGGCGGTGCCG  
CGTTTCGCTAATTTAGCCTCAGCCTGGCAACATGGCGGTTGGGCTGGCGTTTGTCTGGCTGGCGGACGATTGCCCTGG  
TTAACTTACTGGTCTGGTGGCGAGGTTTTTCATCGTCAGGAAGCCGCAAAATTAAGCAATCAGCAACCGTTTTCTGGGCTTT  
ACACTTATAAGGGTGTTAAGAAGCCCATCAGTCTGATAAGGTTAAGATATTCATTAGTCTATTTATAATATTAACAATC  
GTTAAGCGTACACTCTATGGAAAGCCCTACTCCACAGCCTGCTCCTGGTTCCGGCGACCTTCATGGAAGGATGCAAAGACA  
GTTTACCGATTGTTATTAGTTATATCCGGTGGCCTTTGCGTTCCGGTCTGAATGCGACCCGCTGGGATTCTCTCCTCTC  
GAAAGCGTTTTTTTCTCCTGCATCATTATGCAGGCGGAGCCAGTTCGTCATTACCGCGATGCTGGCAGCCGGGAGTAG  
TTTGTGGATTGCTGCACTGACCGTCATGGCAATGGATGTTCCCATGTGTTGTATGGCCCGTCACTGCGTAGCCGTATTA  
TTCAGCGTCTGCAAAAATCGAAAACCGCCCTGTGGCGTTCGGCTGACGGATGAGGTTTTTCCGCCCGCAACCGCAAAA  
CTGTTACGCAATAATCGCCGCTGGAGCGAGAAGTGGATGATCGGCATTGCCTCAGTTTCATGGTTCATCGTGGGATTTGG  
TACGGTAATAGGGGCACTTCGGGCGGCTTGTGCAAGGTTATCCCGCGTTGAAGTGCATTAGGTTTTATGTTTTC  
CGGCACTCTTTATGAGTTTTCTGCTCGCCTCTTCCAGCGCAAACTCTCTTTCGTTTACCGCAGCGTTAGTTGGTGCC  
CTTGCAAGCGTAACGCTATTTTCTATTCCTGCGCATTCTGGCAGGCAATTGTCTGTGGCTGCCTCACTGCGTTAATCCA  
GGCATTCTGGCAAGGAGCGCCCGATGAGCTATGAGGTTCTGCTGCTTGGGTTACTAGTTGGCGTGCGAATTATTGCTTC  
CGCTATTTGCGCTGCGCCTGCGTGTGGTAATGCCCGCCAAACCAACGTTGGCGCGTAGGTATTTGCTCGACACCAT  
TGGCATCGCCTCGATATGCGCTCTGCTGGTTGTCTTACCACAGCAAGTATGACGATACACGCGTTTCGTGCCCA  
CGCTGGTGGCTTCGCGTACTGGGTGCCAGTTTCTATAAAACACGAGCATTATCATCCCAACTGCTTAGTGGCGTG  
GCCTATGGGCTCGCCTGGAAAGTATGGCGATTATATAACCCACAAGAATCATTCTTCTAAAAAATACTTTACTTTAT  
TTGCTACTGCTGTTACTATATCGGCTGAAATTAATGAGGTATACCCAAATGGATAGTTCTGTTTACGCCATTGAACAAA  
TGCTAAAATTTGCGCCAGCCGCCACGAAGATTTTCTTATCAGGAGATCCTTCTGACTCGCTTTGCATGCACATGCAA  
AGCAAGCTGCTGGAGAACCACAATAAAATGCTGAAGGCTCAGGGGATTAACGAGACGTTGTTTATGGCGTTGATTACGCT  
GGAGTCTCAGGAAAACACAGTATTCAGCCTTCTGAATTAAGTTGTCTCTTGATCATCCCGTACCAACGCGACGCGTA  
TTGCCGATGAACTGGAAAAACGCGGTTGGATCGAACGTCGTGAAAGCGATAACGATCGCCGCTGCCTGCATCTGCAATTA  
ACGGAAAAAGTACAGGTTTTTTCGCGAGGTTTTACCACCGCAGCATAACTGCCTGCATCAACTCTGGTCCGCGCTCAG  
CACAAACAGAAAAAGATCAGCTCGAGCAATCACCCGCAAAATTGCTCTCCCGTCTCGACCAGATGGAACAAGACGGTGTGG  
TTCTCGAAGCGATGAGCTAACGCGTCTCTGCTCAAAAATCCAGATTTATAAAAAGAAAAATGACTGGCCAGCATCGCA  
ACATGCTGGCCTTTTTGGCAAGCAGGTCGGCTCAGCCGATGAGTTAAGAAGATCGTGGAGAACAATATGAGCGCAAATGC  
GGAGACTCAAACCCCGCAGCAACCGGTAAGAAGAGCGGCAACGTAAGCGTCTGCTCCTCCTTCTCACCTTGCTCTTTA  
TAATTATTGCCGTAGCGATAGGGATTTATTGGTTTTTGGTACTGCGTCACTTCGAAGAAACCGATGACGCATACGTGGCA  
GGGAATCAAATTCAAATTTGCTCAGGTGTCTGGCAGCGTGACGAAAGTCTGGGCCGATAACACCGATTTTGTAAAAGA  
AGGCGACGTGCTGGTCACTCTGACCCGACAGATGCTCGCCAGGCGTTTAAAAAGCCAAAACCTGCACTGGCTTCCAGCG  
TTCGCCAAACCCACAGCTGATGATTAACAGCAAGCAGTTGCAGGCAATATTGAGGTGCAGAAAATCGCCCTCGCGAAA  
GCACAAAGCGACTACAACCGCGTGTGCCGCTGGCAATGCCAACCTGATTGGTTCGGAAGAGCTGCAACACGCCCCGCA  
CGCCGTACCAAGTCCCAGCGCAACTGGACGTCCGATTCAACAATAACAATGCAATCAGGCGATGATTCTGGGGACTA  
AACTGGAAGATCAGCCAGCGTGAACAGGCTGCCACCGAAGTACGTAACCGCTGGCTGGCGCTGGAGCGTACTCGTATT  
ATCAGTCCGATGACCGGTTATGTCTCCCGCCGCGGTACAGCCTGGGGCGCAAAATTAGCCCAACGACGCGCTGATGGC  
GGTCTTCCAGCCACCAATATGTGGGTGGATGCCAACTTTAAAGAGACGAGATTGCCAATATGCGTATCGGTACGCGG  
TCACTATCACCGATATTTACGGCGATGATGTGAAATACACCGGTAAGTGGTTGGTCTGGATATGGGCACAGGTAGC  
GCGTTCTCACTGCTTCCAGCGCAAAATGCGACCGGTAAGTGGATCAAAGTCTTTCAGCGTCTGCTGTGCGTATCGAACT  
GGACCAGAAACAGCTGGAGCAATATCCGCTGCGTATCGGTTTGTCCAGCTGGTGGAGCGTCAATACCACTAACCGTGACG  
GTCAGGTAAGTGGCAATAAAGTACGTTCCACTCCGGTAGCGGTAAGCACCAGCGGTAAGTCAAGCCTGGCACCTGTCAAT  
AACTGATCGACGATATCGTAAAAGCTAACGCTGGTAATCCAGAGGTGCGTGTGATGCAACAGCAAAAACCGCTGGAAG  
GCGCGCAACTGGTCAATTATGACGATTGCGCTGTCACTGGCGACATTCATGCAGGTGCTGGACTCCACCATTGCTAACGTG  
GCGATCCCCACTATCGCCGGGAATCTGGGCTCATCGCTCAGCCAGGGAACGTGGGTAATCACTTCTTTCGGGGTGGCGAA  
TGCCATCTCGATCCCGCTTACCGGCTGGCTGGCAAAGCGGTCGGGGAAGTAAACTGTTCTTTGGTCCACCATCGCCT  
TTGCTATTGCGTCTGGGCGTGTGGTGTCTCCAGCAGCCTGAATATGCTGATCTTCTTCCGCGTATTACGGGGATTGTC  
GCCGGGCGGTTGATCCCGCTTTCGCAAGTCTATTGCTGAATAACTACCCGCAAGCAACGCTCGATCGCGCTGGCGTT  
GTGGTGCATGACGGTATTGTCGCGCCAAATTTGCGGCCGATCCTCGGCGGTTATATCAGCGATAATTACCACTGGGGCT  
GGATATTTTCATCAACGTCGCCGATTGGCGTGGCGGTTGGTGTGATGACACTGCAAACTCTGCGCGGACGTGAAACCCGC  
ACCGAACGCGCGGCGATTGATGCCGTGGGCTGGCACTGCTGGTTATTGGTATCGCGAGCCTGCAGATTATGCTCGACCG  
CGGTAAGAGCTGGACTGGTTTTTCATCACAGGAAATATCATCCTTACCGTGGTGGCGGTTGGTATCTGCTTCTGTA

TTGTCTGGGAGCTGACCGACGATAACCCGATAGTCGATCTGTCGTTGTTAAGTCGCGCACTTCACCATCGGCTGCTTG  
TGTATCAGCCTCGCGTATATGCTCTACTTCGGCGCTATTGTTCTGCTGCCGAGTTGTTGCAGGAGGTCTACGGTTACAC  
GGCGACCTGGGAGGTTTGGCTCTGCGCCGGTAGGATTATCCGGTGATCCTGTCGCCGATTATCGGCCGCTTCGCGC  
ATAAACTGGATATGCGGGCGCTGGTAACCTTCAGCTTTATTATGTATGCCGTCTGCTTCTACTGGCGTGCCTATACCTTT  
GAACCAGGTATGGATTTTGGCGCTGCGCCTGGCCGAGTTTATCCAGGGGTTTGCGGTGGCTGCTTCTTTATGCCGCT  
GACCACCATTACGCTGTCTGGTTTGCACCGGAACGACTGGCGGCGGCATCGAGCCTCTCTAACTTTACGCGAACGCTGG  
CGGGTCTATCGGCACGTCGATAACCACGACCATGTGGACCAACCGCGAGTCGATGCACCATGCGCAGTTGACTGAGTCG  
GTA AACCCGTTCAACCCGAATGCCAGGCGATGTACAGTCAACTGGAAGGGCTTGGGATGACGCAACAGCAGGCATCAGG  
CTGGATTGCCAGCAGATACCAATCAGGGGCTGATTATTTCCGCCAATGAGATCTTCTGGATGTCAGCCGGGATATTC  
TCGTCCTGCTGGGCTGGTGGTTTGTAAACCGCATTTCGGCGAGGTGGCGGCGAGGCGGTGCGCACTAAGTACAA  
CTAAGCCAGTTCATTTGAACTGGCTTTTTCAATTAATTGTGAAGATAGTTTACTGACTAGATGTGCAGTTCTGCAACT  
TCTCTTTCGGCAGTGCCAGTTCTTCGTTGCTGTTGATGCGTACGTACGTTCCAGAATGCTACGCGCAATATCCTGCGCT  
TCCTGCAACGAGTGCATCTGGTAAGTGCCACACTGGTAGACGTTACGTTCCGGGATCTGATTCTGATCCTGCACTTTCAG  
CAGTCTTCCATTGCCGCTTCCAGGCATCAGCAACACGCTGCTCATCTGGCGTACCAATCAGACTCATATAAAAACCGG  
TGCGGCAGCCATTGGCGAGATATCGATAATCTCTACACCATTACCGTTAAGATGGTTACGCATAAAAACAGCAAAACAGG  
TGCTCCAGGGTATGGATCCCTCTTCTGGCATCACTTCTTTGTTGGCACGCAAGCGCAGATCGAACACGGTGATTGC  
GTGCCATGCGGGGTGTTCAATTGTTTTCGCCACCCGAACTGCAGGCGCTTCCATCCGGGTATGATCGACTGTGAAGCTAT  
CTAACACGCGCATTTAGCCACCTCCGTAATTTTTTAAAAATTTTCTGAACTCTTCTTCCAGGCGAGTCTGAGTATA  
TGAAAGACGCGCATTTGTTATCATCATCCCTGAATTCAGAGATGAAATTTGGCCACTCACGAGTGGCCTTTTTCTTTTC  
TGTCAGGCGTGTTTTTCCAGCCACACCGCAAACGGTTCGGTATCAGCGGCTTCCATTTCTGCTGACGGCGTTTCAGACGC  
CTCGCGCTCGGCTACAAAATCCTCTTCGCGCAGAATTTCCAGCGGCTCTTACGCGAGCAGATTACGGTAGGCTTCTGCAA  
ATGCTTTGCTGTTCCGCCAATACCAGTATCAATCATAGACCTTAAGATACGGGCAGAGAAAGTCAGATCGGGATTATCG  
AAGCAGGCAACAGTTCATCACACACTTTCTGATACGCTTCGCCCGCTTAATACTATCCAGCGTTTTCGCGACGCGTTT  
CAGATCGCGGAACAGATCTTACCACCTGCGGTAACGGAACTGTGCGTTTTCGAGCCGATACCCAGCGTCAGACCCG  
GTTTGCACCTTCGAGGATACCCGGTCCAGTTAACGCGTGTACAGGCAAGTTCGCTACTGCTCATTTCGGTGCATCA  
GCCAGCGCACACCAGACCATAAACAGGTCGAGGAATCGCACCTGCTGTTTATCTACACCAATCGCGGAGAACGGGTTGAT  
GTCCAGCGAACGCACTTCAATATATTCAATGCCGCCACGTAACAGCGCATCAGAAGGCGACTCGCCGCTGCGGGTAACGC  
GTTTTGAGCAATCGGCGGTACAGTTGTTTTCAATCTGCAACACGTTGCTGTTGATTTGCAGCCTCTTACCGTCTTTC  
TCAATACCAATCTTCGCGTACTCTCCGATGGCGTTTTGATTGCCTGTTAAGGCCCGCTACGTACTCGTAAAGATCGTT  
GAAGGTAATACCAAGATTGCTTTGCGATTTATTGGTATAGCCGAGATCGCTCAAACGAAGAGAGGTGCGATACGGCAGGT  
AATACATACCGCACTCGGTTTTCTCAAACGCGCAGCGACGTTGGTTTTCTTGCAGGAAAGAAGAAACAAATCGCCGGAGAT  
GCACCAAACAGATAAGGAATGACCCAACCGAAACGATAGTAATTGCGGATAACGCGGAAATAGCCCGCAGAAATTTTCTC  
TTTGGCATCAGCGCCCGAGATATACCCGCACTTCGCTTGCAGAAATGCCATTGGCAAAGAGAAATTTAGTGCACGCGCG  
AAATGGTTTGCATCAGCGCGCGTAGCGATTTTTAGCCCTTACGATACAGCGTTTTAAAGCGTCCGGTGTAGAAAGTG  
CCGTA CTGTGCCAGTTCGATGTCCTGACCTTCTGCGATGTAGCATGGCATACTTAACGGCCACATCCGCTCATCGCCCAT  
ATTGCGCGCCGTATAACGATGCAGATCGGCATAAAGGTCAGCATATGTTCAATATCACCATCCACTGGTGAATGAATT  
CCAGCAATGCTTCGCAAAATCGGTAGTAATCCATTTGTGCGTCAGTGGGAACCTAATGCTTCAGGATGACCTGTTGTT  
GCCAGTGTGCCATCAGCATTAAACACGCAAAGTTTCGCGCTCCAGCCACGCTGTATCCCCTTAAACGCTGAGGATGTTT  
TTCCAGCCAGGCCAGCGCTGTGATACGTCCGGGATCAAATGACCTCCCGCTGTCAAATCGTTTTAATTAGCATAAC  
TGTAAATGGTGACCATATGTGCGAGCCTACAATTAGTGCCACCACATCATGCCCTGAACGGTGCCTGCAACTGCAACA  
TAGCGTAACGCTTTACCAAGGCACAAAAAAGATTACCGGTCCCACGAGATGCGCATCCATCCCCTAACAGACACAG  
TAAATCGCCAACCAGGGCATCCAGCTTAATAATAGCGTGACTGCACCATAGCGTTTTAGCCAGCCGGTAGCTTTCTCTT  
GCCAGCGCATGTTTTACGCAATGAAAGAAACGCCAAGGATAACGTTAGTTAACCTCCAAGGCTATTACCCATTGTT  
GCTGTTAAACTAAAACCCAGGGATGACTGATCCCGGAAAGCAACATTGCCACCAGCAGACTTCGGAGTTGCCGGGTAA  
TAGTGATAGCGCTGAGAAAATACTGGCAAACAACGAGAAAAGCGATAACGCTTCACTCACAGCAAGCGAATCCACGGC  
GTCCATGCCTGCTGCACGGGCCGCTGAATACCGAAATCGGCATCTTCAAAGACCACACACTGCGTCGGTTGCACGCCCA  
TACGCTGCGCGCACAAAAAATGTGCTGGCGCGGTTTTATGGTGTGTTGACGTGATCGGCAGCGACGACGGCGTAAAA  
TAATGGCGTAATCCAGGTGCGCCAGCAATGCCTCAGCGATGGCGCTTCACTCCCGTTCCTACAGCCATTGGGCGACG  
ACCATGCCAATTTTTACCACATCAACAAGAGGAAGCGTTTCGACGCTATCCAGCAGCATACTTCTTACTGCTTCTGTTT  
TTTACGCGCTAACGCATGCGGGTCGAGATCGGCCGATTGAGCTCAATAATTGCTGAGCAATACGCCAGGTGGGCGAT  
CCATTAAGCGCAATCATCGCTGAATATCGTACTGAAGACCGTAGTGCCCTAATACTTCGCGCCACGCTTACGGTGCCT  
AGGCTCCGATCCAGGATTGTCATCCATATCAAAAATTAACCTGCATAACGCTCGTACATGGTCTTCTCGCAAGTCG  
AAAAATATGACGCTACTTTAGCGTAATTGCTTGATTTGTGCGTATGGCGAAGGAGAAGAAAATTAGGAAATGGATAA  
AGGAGTATTTAGAAATGAGATATTTTTGAAGGAAATTTTTGGAGAAGATGGTGCATCCGGGAGGATGACTCACTGACG  
TTCGCCCTTCGGGCGGTTGCTGGCGCAACGTTATCCTTCTGGTGCCTGCGGTTAATACCGCTATCTTCTCGATACCTC  
ATTGCTGAAGTTACGAGAAATATGGTGCATCCGGGAGGATTCGAACCTCCGACCGCTCGGTTCTGAGCCGAGTACTCTA

TCCAGCTGAGCTACGGATGCATCGGGAAACTTATTCTACTGCTGATATTGATACCGCTACTAAAGCCATATCAATTAAG  
AGATGGTGCATCCGGGAGGATTACTCGCCTTGCGGCTCGCCCTTCGGGCCGTTGCTAAAGCAACGTTATCATCCCTAGTG  
CCTGCGGTTAATTCCGCTACCTCTTCGATACCTTATTGCTGAAGATTTTCGGAGAATATGGTGCATCCGGGAGGATTCTGA  
ACCTCCGACCGCTCGGTTCTGAGCCGAGTACTCTATCCAGCTGAGCTACGGATGCATCGGGAAATTTATTTTACTGCTGA  
TATTGATACCGCTACTAAAGCCATATCAAGTAAGAGATGGTGCATCCGGGAGGATTCTGAACCTCCGACCGCTCGGTTCTGT  
AGCCGAGTACTCTATCCAGCTGAGCTACGGATGCATCGGGAAACTTACTTTACTGCAGATTTTTTATACCGCTACTAAA  
GCCGTATCAAGTAAGAGATGGTGCATCCGGGAGGATTACTCGCCTTGCGGCTCGCCCTTCGGGCCGTTGCTAAAGCAACG  
TTATCCTCCCTGGTGCCTGCGGTTATTACCGCCACCTTCCATACCTTTCATCGCTGAAAGTACGTAGAATATGGTGCAT  
CCGGGAGGATTCTGAACCTCCGACCGCTCGGTTCTGAGCCGAGTACTCTATCCAGCTGAGCTACGGATGCAAAATGGCGGTG  
AGGCGGGGATTCTGAACCCCGGATGCAGCTTTTGACCGCATACTCCCTTAGCAGGGGAGCGCCTTCAGCCTCTCGGCCACC  
TCACCACACGCCTTACGAGTGCTTCGAAGAATTGTTTATCGCTCATCGTCGCTGCGTGGCGCACATATTACTTTCTG  
AGACTTATAAGTCAAACAATTTTTCTACACTTTTATCGTTTGCACACTTACGTTCAATTAGTCTGTAAAAACGTCAA  
AAGAGTGTTTTATCAACAGAAGAATGGAGGTCTGACAGATAGTAGTAATGCAAAAAAATGGAGACTTAAGTTGAATGAAC  
GGGAGTAAACGAAAAGACTATAGAGTGAAGGAGAAATTTGAGGGTGCCTCACCGATAAAGATGAGACGCGGAAAGA  
TTAGTAACTGGACTGCTGGGATTTTTCAGCCTGGATACGCTGGTAGATCTTTCACGGTGAACAGAAACTTCTTTCGGGG  
CAATTAACGCAATACGTACCTGGTTGCCCTTACCCTAAAAGTGTACGGTGCACCTCATCCCCAATCATGAGGGTCTCA  
CCAACTCGACGAGTCAGAATCAGCATTCTTTGCTCCTTGAAGATTAAAAGAGTCGGGTCTCTCTGTATCCCGCATTAT  
CCATCATATAACGCCAAAAAGTAAGCAATGACAAACACATTACATCTAAGCAGTCATGGCATTACATTCTGTTAAACCTA  
AGTTTAGCCGATATACACAACCTCAACCTGACTTTATCGTTGTCGATAGCGTTAATGCGAATGCCGTGAAGCGAGTCCAC  
GGCATTGCCTGACGCTTATATTATTGCAATTTTCGCGCTGACCCAGCCTTTCACACTGGCTAACGCTGCAGGTAAGGCCGC  
AGCATCCGTACCACCGGCTTGCGCCATGTCAGGACGTCACCACCCTTCCGCCACCTGCTGAGCGACCATAACCAATCA  
GTTCCCTGCTTTCACACGATCTGTGACGTCCTTAGATACGCTGCAATCAGAGAAACCTTACCTTCGACTACCGTTGCC  
AGCAGATAATTGTGACCCAGCTGATTTTTAAATCGTCAACCATGGTACGCAACATTTTCGGCTCAACACCGCTAAG  
CTCGCTAACCAACAGCTTAACACCATTAACATCAATTGCCTTACTGGAAAGATTTGCGCTCTCTGTGCGGCAGCTTGT  
CTTTAAGCTGTTGTAACCTTTTTCCAGCTGACGCGTACGTTCCAGTACTGAGCGCACTTTATCAGCCAGATTATTGCTA  
TCGCTTTTCAGCAGATGCGCGACTTTCGTTAAGCGATCGCTGTCTGCATGAACGGTGGCGATAGCACCTTCTCGGGTAC  
CGCTTCGATACGACGAACGCTGCAGCAGTACCCGATTCAGAGATGATGCGGAACAGACCAATATCACCAGTGGCGTGG  
CGTGAGTACCGCCACACAACCTCGGTAGAGAAATCGCCATGCTCAGCACGCGTACGCGCTCATCATACTTCTCGCCGAAC  
AGCGCCATCGACCTTTTCGCTTTTCGCGCTTCGAGATCCATGATGTTGGTTTCGATCGGCAAAATTCGACGAATCTGTGT  
GTTACCAGGTCTTCGACCGCACGAATCTTCTGTTTCATCGCTTCGTTGTGTGAGAAGTCGAAGCGCAGCACCTTGT  
CGTTAACAGTGAACCTTTCTGCGATACATGAGTACCCAGAACCTGGCGCAGCGCAGCGTGCATCAGGTGCGTTGCGGAG  
TGATTACAGACGAATACGGGCGCGACGAGCCTCATCAACATCAGCCTGCACCGGTCGCCACTTTTCAGAGAACCCTCGCAGC  
AAGTTTACCAGTGTGACCAATCGCCTGGCCGATTTCTGCGTATCTTCCACCGCAAAGGAGAAGTTAGCGCCTTTCAGTT  
CGCCTTATCGCCAACCTGACCGCCGATTCCGATAGAATGGCGTTTGATCCAGCAGCACCACAGCTTCTTGGCCTGCA  
TTGATGGCATCAACCGCTTACCATCAACAAACAGCGCAGTCACTTTGCCGTTTCCAGTTCAGATGGTGCATAGCCTTAA  
TTCAGATGACTGTCAACACGGATCATTGCGTTGTAATCGGCACCAAAGCCGCTGGCTTCGCGCGCGCAGCAGCGTGT  
CTTCCATTGCAGCTTCAAACACAGCTTCGTCAACTTTGATGTTGCGCTCACGACAAACATCAGCCGTGAGTCAACCGGG  
AAGCCATAGGTGTCGTACAGACGGAAAGCAGTTTACCATCCAGCGTATCACCAGAAAGTTTTCAGCTTTCATCCAG  
CAACGCCAGACCGCTCCAGAGTACGAGCAAACGCTCTTCTTTCAGTCTTTCAGCACCTGCTCAACCTGCGCCTGCTGGC  
GTTTCAGGTCTTACCCCGCAGAGCCCAACGTCGATCAGCGGACCAACAGTTTGTAGAAGAAGTTTTCTTTCGCGCGG  
AGCATATTACCGTGCAGCACTGCGCGACGAATGATACGACGAGTACATAACCACGGTTTTTCATTGGACGGCATTACGCC  
ATCCGCGATCAGGAACGCACAAGAACGAATGTGGTACGCGATTACGCGCAGCGATTTATTGCTCAGATCGGTTGCGCCAG  
TGACTTTTCGCTACCGCTGGATCAGCGTGCAGAACAGGTGATGTCATAGTTAGAGTTAACGTGTTGACGACCCGACGCA  
ATACGCTCCAGACCCATACCGGTATCTACAGACGGCTTCGGCAGCGGTTCCATCGTGCCATCGGCCTGGCGGTTGAACTG  
CATGAAGACGATGTTCCAGATCTCAATGTAGCGGTGCGGCTTCTTCCGGGCTTCCCGGAGGGCCCCCAAAATGTGGT  
CGCCGTGATCGTAGAAGATTTCCGTTGCACGGGCCGACGGACAGTGTACCCATCTGCCAGAAGTTGTCAGATGCGTAT  
GGCGCACCTTTGTTATCGCCGATGCGAATAATACGTTTCGCGCGGGATCCCTACTTCTTTTTCCAGATTTCTGAGGCTTC  
GTCGTGCTTTTCATAGACGGTAACCCACAGACGCTCTTTCGGCAGGGCAAACCATTTTTCTGCTGGTGCAGAGTTCATG  
CAAACCTGAATGGCATCGTGTGAAATAGTGCCTGAAGCTGAAGTTGCCAGCATTTTCGAAGAAGGTATGGTGACGCGCG  
GTGTAACCGACGTTTTCCAGGTCGTTGTGTTTACCACCGCACGCACGAGCGTTGGGAAGTGGTAGCGCGGGAATAATT  
ACGCTTGTGAGCCCAAGGAACACATCCTTGAACCTGTTTATCCCGGCTTGGTAAACAACAAGTTGGGTGTTATGGG  
GTACCAGGGAGCTGCTGGCAACTACCTGATGTCCTTACTATGAAAAAGTCGAGAAACGCTGACGGATCTCAGCGGTG  
CTTTGCTCATAAATTATCCTGAAATCAAGCTAACGAAATATCGCCACCAGCTCCAGCGTCTTAACCGCCGGGCTGGTA  
ACTGAAAAGTGGGAATAAGATAAGTTTTCTTACTGGAAGTAAAATACCGTATGCGTTTTCAGTCGGCAAAATTTCCGCAA  
ATCTCCTGGATATCTCCATCAGATAGCCACGATAGAGCAGAAAACGCTGGATCTTAACTTTTCTGAAAAGACAGTTGG  
CAAAGTTTCGCCATATTTTCGCGTGCCTGATCGCGGCCAGTGCACACAGTGCATGCACATTACGCATCGCTTTTT

CTGTGCTTCGCGGAAATACCTTTCTGATTAGTTCTGCGAATACGCGCAGGTCCATAACCTTTGCGGCTACGGCTG  
GCGATAAAGCGCGCAACAAATCGGCTGTATCGAGATAGCCATGTTATGGACCAGGCAATAACGCGCTCGTAATCTT  
TGCCGTAGCATCAATCTCTTCTGGCCATTTTTGCCATAATCGGTGCCGCGAGTTTACGTCGAGTTCTTGCTCACTGT  
GATCGCGCACCCGAGAATCGGTACCGCACGATCCAACAGGCGAGCATATGCCGGGCGACGGGATGTTGATTCTGTATG  
GCATATCCTTAACTTAAAAAGCAAAGGGCCGAGATGCGACCTTGTGTATCAAACAAGACGATTAATAAATCTTCG  
TTAGTTTCTGTACGCTTCGCTATCATCTACAGAGAAATCCGGCGTTGAGTTCGGGTTGCTCAGCAGCAACTCACGTAC  
TTCTTCTCGATCTTTTCGCGGTTTCCGGGTTATCTTTCAGCCAGGCGATCGATTTCGCTTTACCTGACCGATCTTCT  
CACCTTTGTAGCTGTACCACGCGCCTGCTTCTCGATCAGTTCTCTTTACGCCAGGTCAACCAGTTCGCGGTAGAAG  
TTGATACCTTCGCGGTAGAGGATCTGGAATTCAGCTGTTAAACGGGCGCAGGATTTTGTCTTACCACCTTTCACGCG  
GGTTTCGCTACCCACCAGTTTTTCGCCCTCTTTCACCGCGCCGATACGACGGATGTCGAGACGAACAGAGGCGTAGAATT  
TCAGCGGTTACCACCGGTAGTGGTTTCCGGGTTACCGAACATCACCAATTTTCATACGGATCTGGTTGATGAAGATC  
AGCAGCGTGTGGACTGCTTCAAGTTACCGCCAGTTACGCATCGCTGGCTCATCATACGTGCCGCAAGGCCATGTG  
AGAGTCGCCGATTTCCGCTTCGATTTCCGCTTTCGGCGTCAGTCCGCCACGGAGTCAACGACGATAACGTCTACTGCGC  
CAGAACGCGCCAGGGGTCACAGATTTCCAGTGCCTGCTCGCCGTTGTCGGCTGGGAGCACAGGTTGTCGATATCG  
ACGCCAGTTTACGTGCGTAGATTGGTCCAGCGCTGTTTCCAGTTCGATAAACGCACAGGTTTACCTTACGCTGCGC  
TGCGGCGATCAGTGCAGCGTCAGCGTGGTTTTACCAGGAAATCCGGTCCGTAGATTTTCGACGATACGGCCCATCGGCA  
GACCCACTGCCCAAGCGCGATATCCAGTGAAAGCGAACCCGGTAGAGATGGTTTCCACATCCATGGAACGGTCTTACCC  
AGGCGCATGATGGAGCCTTACCAAATGTTTCTCAATCTGGCCAGTGCTGCCGCAACGCTTTCTGTTGTTTTCTGTC  
GATAGCCATTTTTACTCCTGTCATGCCGGTAATACCGGATAGTCAATATGTTCTGTTGAAGCAATTATACTGTATGCTC  
ATACAGTATCAAGTGTGTTGAGAAATGTTGCCACAAGGTCGCAATGCATACGCAGTAGCCTGACGACGCACCCGATC  
ACGGTCCGCGTGAAGCATTCCCGCCGGTAATGCCCTTACCGCGGGCAGTGGCAAAGCAAACAGACGGTCCGACAG  
GCTTCTTCTACTGCCGCTCCGCCCCGGGATACCACTAATAGACACGGCATAATCAGCACGAGCCGCTTTCAGTGC  
CCTATGCCATTTCCACCACGACGGGTTCACTACCGCGCCATGCTGCGCCAGCGTCTTTCGCGTACGCCGATCATCTG  
CGTTTTGGCTTCGTTACTGTAGGTGACAAATCCGCGTTCAAACCAGGCGGAGTACCGGCAATATCGGTAATCACTTTCG  
CTACCCAACCACCGGTACAAGACTCGGCAGTTGTTACGGTTGCGCCACGGGCTTTCAGCGCCTGCCAACCTGTTCACTT  
AACTGCATCAGTTCAGTGCAGTATCAACCTCTGTGAGTCAAAAATTTATGCCGACAAGATAGCACTTTCGTCAGG  
AAGATGGTGTGGCGTTGCAATTTTACGAGGAGGATTCAGAAAAAGCTGATTAGCCAGAGGAAGCTCACGCCCCCTC  
TTGTAATAGTACTGTACTCGCGCCAGCGCCACGGCTTGTCTAACTGCCAGACCGCCATTGCGTAATGGGTGCTGTGG  
TTGTAACGGGTGATGGTGTAGAAGTTCGGCAGACCGTACCAGTACTGGTAGCCGGTGCCAACATCCAGACGCAGCAGGCT  
GGCTTGTGATGGTTGCCAGCGGCTGCTGTGGCGTTAAACCTGCGGCGCAAGCTGCGAAATGCTGTACTTAGTTTTGA  
AGCCATTTGGCAAGCCTGGAGCCTGACCGTTTGCATTACCGCGACTGATCGCTTTCACCCAGCCGTGCGCTTTGAAA  
TAGTTCCGCACGCTACCGATCGCATCAACCGGATCCACAGGTTGATATGCCGTCGCGCTGAAATCTACCGCATATTG  
TTTGAAGACGACGGCATAAACTGTCCGTAGCCATCGCCCCGCAAAGGAACCTTTCAGATTGAGCGGATCGTCTGCT  
CGTCGCGGCCATCAACAGGAAGGTTTCCAGTCCGAGAGAAATACTCCGCGCGGCGTGGTAGTTAAATGACAGCGTT  
GCCAGCGCATCGAGGATGCGAGTTTTCCCATCACGCGCCCCAGCGGTTTCAACGCCGATAATCCCGACGATAATTC  
CGGCGTACTCCATACACCTGCCACGCGGATTCAACGCATCTTCATACTGATTCCAGAAAACACACCGTTCTGCAGT  
TGTCGGCGTAATAAATTTTTGCGATAACGGAGCCATGCGCCGTTCCGACCTGATGGCGGTTTACCAGTGTGGTTGGT  
GCCTGGTTATCCATCAGCCGAGTACCGAATCCAGACGCTTCCGCTGGGAGAGAATTTCTGCAACTGCTGACGATCGAA  
ACCGTGTGTTTACCATTTTGTGATGAAGTGTGGGATTTCCGCTGGGAGAGAATTTCTGCAACTGCTGACGATCGAA  
TGTGCTGCGGCTCAAGCAGGAAGCGCCAGCGGCTTCCGGTTCGATCAGTCTCAGTAGGTTTTGCTTGTGCTA  
CAGGCGCAAGCAACAAAAAGGGGAAGCAATGTTACATAACGACGCTTGAACATGAGGGGTCCATTTAACAGATTCAA  
CCAGGGCAAGTATGGTAAAGCATCACGCCCCGACAAAGGAAGCGGTAGTACTGCCCGATACGGACTTTACATAACTCA  
ACTCATTCCCCTCGCTATCCTTTTATTCAAATTTCAAATTTAAATATTTATCTTTTATTTTGCATCAAATAACTT  
TTAAATCTTTCAATCTGATTAGATTAGTTTCCGCTTGGTAATAAAAAAATAAATCCTGAAGGAGAGAACAATGATAGAA  
ACCATTACTCATGGTGCAGAGTGGTTTATCGGGCTGTTCCAAAAGGGCGGAGAGGTGTTTACCAGGATGGTGACCGCAT  
TCTTCCGCTGTTGATTAGCTGCTGGTTATCATGAACGCACTGATTAATTTTATCGGTCAGCATCGTATTGAACGTTTTG  
CTCAACGTTGCGCGGTAACCTGTTTCCGTTACTACTGTTACCGTGCATTGGCACGTTTTGCTTTTGAATCCGATG  
ACCCTAAGCCTGGGTGCTTTATGCCGAAAAGTACAAACCCAGTACTACGCGGCGGCTCTTATAGCTGCCACTCAAT  
GAATGGCCTCTTCCCCATATCAACCTGGCGAAGTGTGTTTATCTTGGCATTGCCAGCGGTGACAACGCTGAACC  
TGCCACTTGGCCACTGGCGGTGAGTTATCTGCTGGTTGGTCTGGTACCAATTTCTTCCGCGGCTGGGTGACCGATCTG  
ACCACCGCATTTTTGAGAAAAAGATGGGCAATCAACTGAACAAAAAGTTCACCTGGCAGGAGCAACATCATGACGCAT  
ATTCGGATCGAAAAAGGAACGGGTGGCTGGGCGGCCGCTTGGCTGAAAGCCACGCCGGAAAAAAAATCGTCTATAT  
CACCGCGGTACCCGGCCTGCGATTGTTGACAACTGGCACAGCTTACTGGCTGGCAGGCTATTGACGGATTTAAGAAG  
GTGAACCCGCGGAGGCGAAATTTGGTGTGCGGTAATCGACTGTGGCGGCACATTACGCTGCGGCATCTATCCGAAACGA  
CGTATCCACCATTAATATCCACTCGACGGGCAAGTCCGGTCCGCTGGCGCAGTACATTGTGGAAGATATTTATGTCTC  
TGCGTAAAGAAAGAAACATCACTGTAGTAGGTGATGCGACACCACAACCCTTCCGTGGGCGTACTGACACCA

GTAAGAAAATCACCGAACAAAGCGATGGTTTACTGGCGAAGGTGGGAATGGGCATGGGGTCCACC GTTGCGGTGCTGTTT  
CAATCTGGTCGTGACACCATCGACACTGTATTA AAAACCACTTCTGCCGTTTATGGCATTCTCTCGGCGCTCATTGGCAT  
CATTATGGCTTCTGGCCTTGGTGACTGGATTGCCACGGTCTTGCTCCGCTGGCGAGCCATCCACTGGGTCTGGTCATGC  
TGCGCTCATCTGTTCTTCCACTGCTTTCACCTTCTCGGCCAGGCGCAGTTATCGCACAGGTTATCGGGCTATTG  
ATTGGCGTGACAGATTGGTCTCGGCAATATTCGCCCGCATCTGGCTTACCGGCACTGTTTGCCATCAACGCGCAGGCGGC  
CTGCGACTTATCCCGGTGCGTTTTGTGCTGGCGGAAGCCGTCAGGACACGGTTCGCGTGGTGTCCCTTCTGTACTGG  
TGAGCCGCTTTTTAACCGGCGCGCCGACTGTACTGATCGCCTGGTTTGTCTCCGTTTTATCTATCAATAGAGGCTGAAA  
CATGACCGTTATTTATCAGACCACCATCACCCGATCGGCGGAGTGCCATTGACGCCCTCAGTGACCAGATGCTCATCA  
CCTTTCGTGAAGGCGCGCCTGCGGACCTCGAAGAGTATTGCTTATTATTGCCACGGCGAGTTGAAAGGTGCACTCCAT  
CCCGTTTTGCAATTTTACTCGGGCAGCATCGTATCCGGTGACCCTGTTGGCAGCGTGGCGGAAGACAACCTTCGCGA  
ACTGGGTGATGTCACCCTGCGCTTCGATGGTTTAAACGAAGCGGAATTTCCGGGCACTGTCATGTGGCAGGCCCTGTCC  
CCGACGATATCGCGCCGGATCGGTTTTGAAGTTGAATCTGTTAAGGAGTAAAAATGAATCAGGTTGCCGTTGTCTATC  
GGTGGTGGGCAAACCTTAGCGCGTTCCTGTGCCACGGTCTGGCTGCCGAGGGGTATCGCGTCGCGGTTGTGATATTA  
GAGCGACAAAGCCGAAATGTGGCACAAGAAATTAACGCCGAATATGGTGAAGTATGGCGTACGGTTTTGGTGTGACG  
CCACTAGCGAGCAAAGCGTTCGGCGCTCTCTGTTGGGTAGATGAAATCTTTGGTGCCTGGATTTGTGCTACAGC  
CCCGAATAGCAAAGCAGCCTTATCAGCGACTTCCAGCTCGGCGATTTTGACCGTTTCGCTACAGGTGAATCTGGTGGG  
TTATTTCTGTGTGCGCGTGAATTTTCCGTTTTGATGATCCGCGACGGGATTCAGGGGCGATTATTCAGATCAACTCGA  
AATCCGCAAAGTGGGCGCAAACACAACCTCTGGCTACAGCGCAGCGAAATTTGGTGGCGTGGGCTGACTCAATCACTG  
GCGCTGGATCTGGCGGAGTACGGCATTACGGTGCATTCACTGATGCTCGGTAACCTGCTGAAATCGCCGATGTTCCAGTC  
ACTGTTGCCACAATACGCGACCAAGCTGGGTATCAAACCGGATCAAGTCGAGCAGTATTACATCGACAAAGTACCGCTCA  
AACGCGGCTGCGATTATCAAGATGTGTGAATATGTGCTGTTCTACGCCAGTCTAAGGCGTCTACTGACCCGGACAG  
TCGATCAATGTACCCGGCGTCAAGTGTGTTCTGATCAACAGCGGAGATCCATTAAGGATCTCCGTGAGACTATAGAAT  
GCCTGATGCGTACGCTCATCAGGCATACAGGACTTCCGCCACTACATTAAGGAAAAGTTATGGTATCCGCACTCATCAC  
CGTCGCCGTTATCGCCTGGTGTGCGCAACTGGCCTTAGCGGGTGGCAAATTTCTGTTTTAACCGTGCCTTCGACACAC  
TATGCCAGCAAGGGCGGTTGGCGTGGCCGTTCCAGCGGGCGTTTTAAACCGGGTCTGGTGGCCTCGCGCTGGAC  
GATCAGCAGCGCATCGTCGACACCTTGTATGAAAGGACTGACCGTCTTCGCCGACCGCAAATAATCCCGCAATTAC  
CGTATGCATCGGGTGATTTACAGCCCGATGTGATCTTCCCATGATCCACTATCACAGAATGCTCTATCATTGGCGC  
TTAAACTGAAACGTGGATAATTTCTGTGTAATGTTACTTGTTCGGAAGTTATCATTTTAAAACCTAAATCAGGTAATC  
ACGCCCATGAAACCTCGTACGGCTCAGGCCGCCATTCTGGAGTATCTGCAAAAGCAGGGTAAATGCTCGGTTGAAGAATT  
GGCGAATACTTTGACACCACAGGCACAACCACTTCGCAAAGATCTGGTCATTCTGGAACATGCCGGAACCGTCAATCGTA  
CTTATGGCGGAGTGGTGTGAATAAGAGGAATCCGATCCGCCTATCGATCATAAAAACACTCATCAACACCCACAAGAAA  
GAGCTGATTGCAGAAGCTGCCGTTAGTTTTATCCATGATGGCGATTGATCATTCTTGATGCTGGCAGTACCGTTTTGCA  
GATGGTTCCCTGCTCTCGCGCTTTAATAACATCACGGTATGACCAACAGCCTGCATATCGTCAATGCGCTATCCGAAC  
TGATAACGAACAACTATCCTGATGCCAGGCGGAACGTTTCGCAAAAAATCGGCCTCATTTCACGGGCAACTGGCAGAG  
AATGCCTTCGAGCATTTCACCTTCGATAAATTGTTTATGGGCACCGGATCGATCTCAATGCGGGGTAACCACCTT  
TAACGAGGTTTATACCGTCAAGGCAATGTGCAATGCCGCGCGGAAGTGATTTTGTGGCGGACTCATCAAAGTTTG  
GCCGTAAGCCCAACGTAGTTTGCAGTCTTGAAGCGTGCATAAGCTGATTACCAGCAGGATCGATCCGGCGTTT  
CGTCAGGCGTGAAGAGAAAAGGATCGATGTGATCATAACCGGAGAGAGCAATGAGTGAAGCACTACTGAACGCGGGAC  
GTCAGACCTTAATGCTGGAGTTGCAGGAAGCAAGCGTTTACCGGAACGTCTGGCGGATGATTTTGTTCGCGCCGCAAT  
ATCATCTGCACTGTGAAGGCAAAGTGGTGGTTTTCCGGAAATGGCAAATCGGGCCACATTGGTAAGAAAAATCGCCGCAAC  
GCTTGCCAGTACCGGCACTCCGGCTTTTTTTGTCCATCCGGCAGAAAGCGCTGCACGGCGATCTGGGGATGATCGAAAGCC  
GCGATGTGATGCTGTTTATCTTACTCCGGTGGCGGAAGGAACCTGGATCTGATTATTCCGCGTCTGGAAGATAAATCT  
ATCGCGCTGCTGGCGATGACCCGCAAACCGACGTCACCGCTGGGCTGGCGGCAAAGCGGTGCTGGATATCTCCGTAGA  
ACGCGAAGCCTGCCGATGCACCTTGCGCCGACCTCCAGCACCCTCAATACCCTGATGATGGGTGACGCGCTGGCGATGG  
CGGTGATGACGCGCGCGGATTTAATGAAGAAGTTTTGCCGCTCCACCCAGCCGGGCACTGGGCGCTCGTTGCTG  
AATAAAGTGCATCATCTGATGCGCCGTGACGATGCCATCCACAGGTGGCGTTAACCGCCAGCGTATGGATGCGATGCT  
GGAACCTCAGCCGACCGGTCTGGGGTGGTGGCGGTATGTGACGCTCAACAACAGGTACAAGGCGTCTTACCAGCGCG  
ATTTACGTCGCTGGCTGGTTGGCGGCGGCGCACTCACCACGCCAGTCAATGAAGCGATGACGGTCGGCGGACCACGTTG  
CAATCGCAAAGTCGCGCCATCGACGCCAAAGAGATCCTGATGAAGCGCAAATCACTGCCGACCGGTGGTGGATGAAAA  
CGGCAAACCTCAGCGGCAATAAACCTGCAGGATTTCTATCAGGCCGGGATTTAATCCTTCAATCCAGACGTTTTCG  
CCAGCCGATGACGTTGGCGACGTGGTTTTCCAGCATCCGCGCGCAGGCGCCAGTTGTGATGATTTTGTGCCAGTGCC  
TGACGAATAGTTTACGCTGGAACGCTTCTGTGCTTACGCGAGTTTTGCTTAAACAACGGGCACCGCCGCACTTCTGG  
CGTGGCAACGTCACCTCAGGAAAAGCAAATGTTGCGCTCAAGAATCACTTATCGCCGCTGCGGGTGGCTCTCGCCA  
GAACTACCGCCGATGAATAGCATGTTCCAGTTCGCGCACGTTTTCCCGAAAACCTGTAGTGTGACGTAATTTTCGCGCT  
CCGGCACTTAATACCACGCGGGAGAGCCCTGCCGCAAACGACACTGCTCGCAGAAATACCCCGCAGCAGAATGACATC  
ATCGCCCGCTCACGCGCGGCGCACCGAAAGTGGAAACACGCTCAGGCGATGAAACAAATCGGCGGGAATCGCCCTG



CCAGCACCTCTTCGCGTAAATCGCGGTTAGTCGCCGCCAGCACGCGCACATCGACCCGAAACAACGGTCATCGCCAACG  
CGCTGAATATCGCCATACTGCAACACCCTCAGCAGCTTGGCCTGCAATGCCAACGACAACCTCGCCGATCTCATCCAGAAA  
CAGCGTGCCGTTATCCGCCATTTCAAACCTCCCGCTGCGATTACTGATAGCGCCAGTAAACGCTCCTTTACATGCCCGA  
ACAACCTCACTTTCCGCCACACTTTCCGGCAGTGCAGCACAGTTGAGATAGACCAGCGGATTCACCGCCCGTGGCGAGGCT  
TCATGAATCGCTTTCCGCCACAGCTCCTTACCGGTTCCAGTCTCACCGCTGATCAGGACGTTGAGATCGGACGCCGCCAC  
AATCTCAATCTCTTTTTTTCAGTTGCGTCATGCCAGGGGACAAGCCAATCATCTGCGTCTGTTTCACCGCTTCAAACGGCG  
TGGCATCGCCTGGCAGCATATTCTGGCTTTCCAGTTGTTCAATCAGCAACGCATTGCTTAACGCTCCCGCCGCCAGCGCA  
GCAATCAGCCGTAGCTCTTCGTCGCTGAAAAATCGAACTGATCGGGCTGCATCCCGTCGAGCGTCAGTGCGCCGATCAG  
GTTTTGCCCGGCAAAATGGCAGACCAACGCAGGGCTGAACCTTCAGACTCTCCTGCCAGGAATCAAACCGTCATAGG  
GATCGGGCAATTGCTGTCTGCGGGAAAGCGACCACATCCCGCGCGGGCAATCGCTTCCAGCCGTGGATGCCCTTCC  
AGCGCAAAGCGTCTACCGAGTACATCCTTTGCCAGACCGTCGATGGCAAGCGGAATAAACTGCCGGAATCGTAACGTAG  
CAACGCAGACGCATCGACTCCAGCACCTGACGTAGCGTGGTATCAGGCGCTGAAAACGATCCTGGTGACCAATCCCAC  
GCTGCAATTCGATGGCGATATTCGCCAGCACATCAACGGAAAACTCATCTTTGCCCTACTGTCAATTTGACTATAGATA  
TTGTCATATCGACATTTGATTGATAGTCATTTTACTACTCATTAAATGGGCATAATTTTATTTATAGAGTAAAAACAAT  
CAGATAAAAACTGGCAGCAATCTGCAATTAGCAAGACATCTTTTGAACACGCTGAATAAATTGAGTTGCTATGTC  
TATTGTGGTAAAAATAACATTCATTGGGTTGGTCAACGTGACTGGGAAGTGCCTGATTTTACGGCAGGAATAAAAA  
CGCTGCGCGGACGAGCTACAATAGCTACCTCATCCCGCAAGAAAAAACGTCGTCGATCGACACCGTCGACCATAAATTC  
AGCCCGAATTTGTGCGAACCCTGCGTAATGAAATCGATCTGGCGGATATCGATTACATCGTGATTAACCATGCAGAAGA  
GGACCACGCTGGGGCGCTGACCGAACTGATGGCACAATTTCCCGATACGCCGATCTACTGTACAGCCAACGCTATCGACT  
CGATAAATGGTCATCACCATCATCCGGAGTGGAATTTAATGTGGTAAAACTGGCGACACGCTGGATATCGGCAACGGC  
AAACAGCTCATTTTTGTGCAAAACCAATGCTGCCTGCGCGACAGCATGATGACTTACCTGACAGGCGACGCGGTGCT  
GTTGAGTAACGATGCTTTCCGGTCAACACTACTGCGACGAGCATCTGTTCAACGATGAAGTGGATCAGACGGAGCTTTTCG  
AGCAGTGCCAGCGTACTACGCCAATATCCTGACGCCGTTCCAGCCGCTGGTAACACCGAAAATTACCGAGATCCTGGGC  
TTAACTTACCAGTCGATATGATAGCCACTTCCACGGCGTGGTATGGCGGATAACCCGACGCAAATTTGTCGAGCTGTA  
CCTGAAATGGGCGGCTGATTATCAGGAAGACAGAATCACCATTTCTACGACACCATGTGCAATAACACCCGATGATGG  
CTGACGCTATCGCCAGGGGATTGCGGAAACCGACCACGCGTGGCGGTGAAAATTTTCAACGTCGCCCAGGCGATAAA  
AACGAAATCCTGACTAATGTCTTCCGCTCAAAGGCGTGTGGTGGCAGCTTCCGACGATGAATAACGTCGATGATGCCGAA  
AATCGCCGGGCTGGTGGAGGAGATGACTGGTTTACGCTTCCGTAACAAACGCGCCAGTGCCTTTCGGCTCTCACGGCTGGA  
GCGCGGCTGCGGTGGATCGTCTTCCAGCGCCTGCAGGATGCGGGTTTCGAAATGTGCTTACGCTGAAAGCGAAATGG  
CGACCAGACCAGGACGCTCTGAAGTTATGCCGTGAACACGGTCCGGAAATCGCCCGTCAGTGGGCGCTCGCGCCGCTGCC  
GCAGAGCACGGTGAATACGGTAGTTAAAGAAGAAACCTCTGCCACCACGACGGCTGACCTCGGCCACGGATGCAGTGCA  
GCGTCTGCCAGTGGAATTTACGATCCGGCAAAAGGCGAGCCAATGCAGGACGTTGCGCCAGGAACGCCGTGGAGTGAAGTC  
CCGGATAACTTCTCTGCCCGAATGTCCCTCGGCAAAAGACGCTTTGAAGAACTGGCATCGGAGGCAAAATGAGTAAC  
GGCATTGTGATCATCGGTTCCGGCTTCCGCCGCCCAACTGGTGAATAATTCGCAACAGGACGCCACTATTCCATT  
AACCTGATTGCCCGCAGCATGGATGAGTACAACAAACCTGACCTCAGCCATGTTATCAGTCAGGGGCAACGTGCCG  
ATGACCTTACC CGCAGACGGCGGGTGAATTTGCCGAGCAGTTAATCTGCACCTGTTTCCACAAACCTGGGTGACGGAT  
ATCGATGCCGAAGCCGTCGTTGGTGAAGCCAGAATAATCAGTGGCAATACGACAAGCTAGTACTGGCAACCGGTGCCAG  
TGCTTTGTCCCGCTGTGCTGGCGTGAGTTAATGCTGACGTTAATAGTCAGCAAGAGTATCGCGCTGTGAAACGC  
AACTGCGGGATGCCCGACGCGTGTGATTGTTGGCGGTGGTTTATTGGTAGCAACTGGCGATGGATTTTTGTGCTGCA  
GGCAAAGCGGTACGCTAATCGACAACGCTGCCAGTATTCGCGTCTGTTAATGCCACCGGAAGTAAGCAGCCGCTGCA  
GCATCGGTTGACGGAGATGGGCGTTTCTGCTGTTGAAATCTCAGTTACAGGGGCTGGAAAAAACGGATTCTGGCATT  
AGGCAACGCTGGACCGCCAGCGCAATATCGAAGTGGATGCGGTAATTGCCGCCACCGGACTGCGCCCGAAACCGCCCTG  
GCACGACGCGCCGGGCTGACGATTAATCGCGGCTTTGCGTCGATAGTTATCTGCAAAACAGTAATACCGATATTTACGC  
GCTGGGCGATTGCGCGGAAATTAACGGTCAGGTATTGCCGTTCTCCAGCCGATTCAACTTAGCGCGATGGTGCTGGCAA  
AAAACTTCTCGGCAATAACACGCGCTGAAACTCCCGCGATGCTGGTGAATAAACAACGCCGGAATTACCGCTGCAT  
CTGGCAGGCGAAACCCAGCGTCAGGATTTACGCTGGCAATTAATACCGAACGCCAGGGAATGGTGGCGCGCGGCTTGA  
CGATGCTGACCAGCTTCCGCTTTTGGTTCAGTGAGGATCGGATGAAAGAGGCATTTGGATTGTTGAAAACATTGCCGA  
TGTAGTGGGCTACTGTGCTAAAATGTCGGATGCGACGCTGGCGCTTATCCGACCTACGGGACGCATGTGTAGGC  
CGGATAAGGCGTTTACGCCGATCCGGCAATGGTGTCAAATGCAACACGTTTTATCCGTTCTGGACTTACCCGCTAAC  
CAACGCGCCGACGAATAACCCCTGCCCGAGACAAACGCCATCACCCGCGGTAACCTGTGAAAGAGCAATGT  
GAAATCAGCGAGATAATGCCAGACGTGCACGACGCAACCGTTATGAATAACCCCGCGCTAAATACCAGCGTAGTGA  
TACCACGCATCGTGGCCTGCTCACGCATCAACGCGGCAAAACCTGCGCCAGCGCATCATGAAACGCCACGCGGCTTGA  
TTAACCGGTGCTGCCAGTTACGCACTGCTGCCAGAAAGTGGCGAGATCCAGTTGATTGTCCACCCGCGCATTGTAC  
CGGATGCGTACTCCGTGGCATGAGGCTGCGAGCGCTCCAGAGCAAGCCGTTTACCTTACATAACTTAACTGGGCTG  
GCGCACAGCCAGTGCAGCCGCACTGCATGAAAAACGCCACACGATGACGCCAGCGCGGCTTAATTCACGCTCA  
ATGGCCCGCGCAGCACGCTCCAGTTTGTGTTGCACACTTGTGTTTTCAGAGTAATTCTGCCACTCCGGCACAAGCG

CAGGCACTGCGCCAGCAGGTTTCGCCACGGCTGCTTCGCTGCCAAATCGCCACCCGGAAGCGCCACTGCAGGCAAGCCG  
CCAGGTGCTCACATTCGCGATAGTTACCCGCGAGGCACTCGCCGCCCAAAAGCGCGTTCTCCCCATACCGATAACCG  
TCGAGCGTCAAAGCAATGACATCACCGCCATCCAGCGGCCACTGATGCTCTGCCAGACACGCCGCTGCATGGGCATGATG  
ATGCAGTACCGTTTTCGCTCGGCAGATTCAATTCACGCGCCACTGGCTGGAGACATAGCCCGGATGCGCGTCATGCACAA  
CGTATTGCGGGTAAAATCGTAGATGTTTTGCATCAGGCGTAACGCTTCGCGCCACTGCATCTGGATGCCATCGTCACTT  
AAATCGCCAGATGCTGACTCAACACCGCTTGTTCACCGCGCACCAGGCAGAAGGTATTTTTCAGATCCGCGCCGAGACA  
CAGCACAGGCGGAACATTTTTAAAGCCCGGAGGCAAAGCCAGCGCATCCGGCACATACCCCGGAACGGCGCAGCATT  
CGCCGCTTTCGCGCACCACCGAATCATCCATCCGCTGCACGATGTCGCGGTTATGTATCAAGAATCCGTGCGCAATGCC  
TGCAAATCCGCCAGCGCCTGTTGTTGCTGATAGCTGGTGGTTTACCGCTCAGGTTGCCGGAGGTCATACCAGCGGGCA  
TTGCAGTTCCTGTAACAGCAAATGCTGGAGCGGTTTCGAGGCAACATTACCCGACTTCGTTAAGGTCAGGGGCGATAT  
CATCACAAAGCTCAGGAACGTATTTTTTATCCACCAGCACAATCGGCGCGCGGGCGTGGTAAGCAACTGGCGCGCAGCG  
TCTGGTAAACCGTCAGCCACTGGCAACATGACCGCCAGCGGTTTCGCGGGCGATGTTTGCAGCCCGAAGTGTGCCAC  
CGCGTACTGTTACGTGCATCGCAGGCAAGATGAAATCCGCCAATCCCTTGTGAGGCGACAATTTGCCATTTTTAACT  
GTGCGATAGCTGCCTGTAATGCCGCCTTGTTCGCGATGTTACCATGACTTACCCATTCAAGATGCGGGCCACATCC  
GGCAGGCCACCGCTGGCGTGGAGCGACGATCGAGCGGTCACGGTACTCTTGTACAGGCGGCACATAGCGGAAA  
CGCCGCATCAGGTAACGGCGGTGTAAGGCATCGCGCAATATGGTGAACCGGGCCGAGTGGGTACAGTTGA  
TAAACGATAACGATAACGCGTTCGCTGGGGTATTCATTTTCGCAAGGCAAGCAGGGCAAGTAGCGGCATCGGGAACA  
ATTTGCGTATTCATGGTGCCGCTGTGCTCTGGCGTATAGTGAATCGGTGGGCGAGTTGTGACCAGATAAACGGCTCAG  
CTCGACGCTATCAATACGCGCCAGCGCGGGCAGTGTGATACAATTGAACAAGAAACGTTTCCGGGCTTCCCGCAGCC  
GGACTTCTACGCCATCGCCGTCATTACAGACATCGCCGTGAAGATTTAATTGCTGTGCCAGCTGCCAGACAAACGGACGA  
AAACCGACGCCCTGACTTTGCCACGAATACGCAGTTGGACACCGCAAGATGTGTTTTTCCATTGAGTTATTCCCGCC  
ATCATGAATTGCGTAACCCGCCCTGCCGGACACGACAGCGTCGCATCCGGCAGTCACAGGTCGGGATACCGCCGCTCC  
GTATTCTACGAATATTTCCGGGAATTCCTTTGATGCCAGAACAGTTCTGTAAGATTTTTAGAACATCAGCGCCGTACGGC  
GGCGTTTTTTCGCGCTCAGTTGTTCAAGTTTATTACGATCGACACAAATCAGCGCATGAGTCGGGCAAGCCGCATACAC  
GCCGGGCGCTTTCACGATGGTTGCACAGGTCGATTTATTGGCTTCGGCTTGTGAGCCCGTACATTACAGCCCGCGCC  
GCTGTTGCGGATCACCGGACGTACCACACTTCCATCGACCATACGGGCAAGCCACAACGAGGTTTTGCAACCAATGC  
AACGTTCTGCATCACATGAACAAACCCTTATCACGGCTGATAGCACCATTCCGGCAGACGTTAGCGCACGGTGCATCT  
TCACACTGACGGCAAACGTGCGCCGTGGAATGTTACACCTTTAATGACATGGATACCGGTAACCAATACATTTACTCG  
CAGCGATGCACAGTCTGATTTTCTGATGAGAAACACGCACGCTACTTCACAGGTACGGCAACCAATACATTTACTCG  
CGTCAGCAATGATGAAACGGTTCATCAAATTCACAGCAATGACAGTTAATGCGCCGATACATTCACAAATCATGCCAGT  
TTTTAATTTACTGTTATTTAAGGAAATTAATTTCTGTAATGCAGGAAAAACGATGTCATCGACACTAGTGACGATGACAT  
GTGATGACAATGTTTATCGCGAAGGAGCAATGAGTGAGTCGCGCGGATCAGTTTTCCGCTGAAGTTTTTCGGCGGTGAG  
AAATCCCGCCATCGAGCATAAAAAATCAGCCGTCCAATAATTTCTGAATCATCTCAGTCACCGGAATTTTTACGCTGGA  
GAGCGCCGGAACGGTGTAGGGGCAATAGCGATATCATCGAATCCGATAACTGACACCTGCTCTGGCACCCTACGCCGC  
GCTCGTGTAAACGCTTTCATCGCACCTATCGCCATATCGTCGTTACTGGCAACTAACCGCTAAATTTAGCCCCACGTTCCG  
AGCAACATTTTACCCCTTCGCGCCGCTGGCAGGCGTCCATTTACCGTTAGCGATAAGTTTTTATTGAGCGCAATACC  
ATGCTGCGCCAGCGCGTCTTTATACCCGGCAAGACGTTCAATGCTGGTGGGGAAATCCATCGAGCCGTAAGGAAAGCAA  
TCTCCTGATGCCCCGGCTTATCAACTCTGCCACGGCGTAAAACGTTGGTCTGTTTATGATCGCACCAGACGCTATGGCTG  
CTGTTTTTGCAGGCGGCGATTAAGCACCATTATCGGCTGACTGTCGCGCTCAATGATGCATCGATCATCCACGCT  
TAAAAAACCGGGTAAATCATGATCGCGTCGACGCGAGATCCAGCAGATACTGAATCGCTGGCGCTCTTCTTCCGCG  
TGTGTTTTACCATCTGCCAATAGCAACTGCCGCCCTTCTCTTCCGCCATTTCGCGCGCATGAAAGAGTAATTCATAAAAA  
TAAATGCCGTGGTAAAGCGTGTGGTCACTACCAGCCCCAGCGTCTGAGTACTCTTCGCCGACAGATTGCGCGCCAGCAA  
GTTTGGACGGTAAACCGCTCTCTTACCCGCTGAAACACGCGATCTTTAGTCTCCTGGCTGACGTAGCCATTACCTGAAA  
GCACGCGGGAACGGTGCCTTTTGAACCCCGCGCGCTTCGCCACTTCAGCATCGTCGTCATATTTTTCATCCCTTTA  
CACGCAATCAACGCAGTGTACTGCACCGTTTTCGGATTGTCCTTGCACAATCGGCGGGAAAAATATTAGGTTACCGGTT  
TCACAAATATAAAAAATGAACAATTCCTCTCTTGTATTTAGTGACAATTCATGATTTTGTGAAACCGGTTTCTT  
AATTCGGTTTTCAGCATCGGCATTTTTCCGTCACGTCGACTGATAACAATACATCTACCCTACTGATAACAGGATAAAAT  
CCGATGGCCAAAAATATGCGGCGCTGGCAGCTCGGTGATAGCGGCACTGGGCGCGTTGATAACATCTCGGCGGTCAC  
GCACTGTATGACGCGTTGCGCTTTGTTATCAAAGATGATGACTTATCGACAGCCGACGTTAAAAACCATCCCGGCG  
TGCTCGGCGTGGTACGTAGTACAACAGTGTGAGGTGATTATCGGCAATACCGTTTACAAGCCTTTCAGGAAGTCGTC  
AGCCTGCTGCCGGGAGATATGACGCCCCACAGCCCGTGGGTAACCCAAACTCAGCTACGTCGATTGGTGGGGGAT  
CCTCGATGCGCTGATCGGCACCATGTACCGCTGATCCCGGCGATTATCGGCGGATCGATGGTCAAACGCTGGCAATGA  
TCCTCGAGATGAGCGGCGTCTGACAAAAGGATCGCCGACCTAACCATTTGAATGTGATTGGTGACGGTGTCTTCTTC  
TTCTGCGCGTGTGTTGCGGGCATCTGCCGCCATCAAATTTAAACCAATATGTCGCTGGCGATTGCCATCGCGGGTGT  
GCTGGTACATCCGAGTTTTATTGAACTGATGGCGAAAGCGGCCAGGGTGAACATGTGCAATTTGCCCTGATTCCGGTCA  
CCGCGGTGAAATACACTACACGGTATCCCGCGCTGGTGTGACTGGTGCATATATCGAACGCTGGGTGGAC

AGCATTACACCGGCGGTGACAAAAAATTCCTCAAACCAATGCTGATTGTGTTGATTGCCGCACCGCTGGCAATCCTGCT  
GATTGGCCCGATTGGTATCTGGATCGGTAGCGCCATTCGGCGCTGGTTTACACCATTTCATGGTTATCTGGGCTGGCTTT  
CAGTCGCCATTATGGGCGCGCTGTGGCCTCTGCTGGTAATGACCGGGATGCACCGCGTCTTACGCCAACCATCATTACG  
ACCATTGCCGAAACCGGCAAGAAGGGATGGTCATGCCGTGAGAGATCGGGCGTAACCTGTGCTGGGCGGTTTCATCACT  
GGCAGTGGCGTGGAAAACGAAAAACCCGGAATGCGTCAGACGGCGCTGGCTGCGGCGGCATCAGCCATTATGGCGGGGA  
TTTCCGAACCGGCGTTATATGGCGTGGCGATCCGCCTGAAACGTCGCTTATCGCCAGTCTTATCAGCGGTTTTATTTGC  
GGCGCGGTTGCCGGTATGGCGGGGCTTCCAGCCACTCAATGGCAGCGCCGGGGCTATTTACCAGCGTGCAGTCTTTCGA  
TCCGGCGAATCCAATGAGCATCGTCTGGGTGTTCCGGTATGGCGCTGGCGGTGGTGCTGTGTTTTATCCTCACACTGT  
TGCTCGGCTTTGAGGATATTCCTGTTGAGGAAGCGGCTGCCAGGCGCGAAAGTATCAGAGCGTACAACCGACCGTCGCC  
AAAGAAGTAAGTCTTAATTGAGGATGAAAATGTCAGTATTTCCAGAAAGTTTTTATGGGGCGGCGCGCTTCCGCCAAC  
CAGTCTGAAGTGCCTCCGTGAAGGTGACAAAGTCTGACCACTGTGATATGATCCACACGGCGAGCATCGAATGGC  
GGTAAACTGGGGCTGAAAAACGTTTTAGTTGCGAGATGACGAGTTTTATCCAGCCATGAGGCGACGGATTTTTATC  
ATCGTTATAAAGAAGATATCGCCCTGATGGCAGAGATGGGATTCAAGTTTTCCGTACCTCAATTGCCTGGAGCCGCTC  
TTTCCGAGGGCGATGAAATCACGCCAATCAGCAGGGCATTGCTTTTTATCGTTCTGTCTTTGAAGAGTGTAAAAAGTA  
CGGTATCGAACCGCTGGTACGTTGTCCACTTCGATGTGCCAGTGCATCGGTACCGAATATGGCTCCGCGTAACC  
GCAAGCTGGTGGAGTTTTTCAGCCGCTACGCCAGAACCTGCTTTGAAGCATTGATGGTCTGGTGAATAACTGGGTAACC  
TTCAATGAAATCAACATTATGTTGCATAGCCCGTTCTCCGGCGCGGGTCTGGTGTGTTGAAGAAGGTGAAAATCAGGATCA  
GGTGAATATCAGGCCGCGCATCACCAGTGGTTGCCAGTGCCTAGCCACCAAAATCGCCCATGAGGTTAACCCGCAAA  
ATCAGGTGGGCTGTATGCTGGCGGGCGTAACTTACCTTACAGTTGCAAGCCGGAAGATGTCTGGGCGGCGCTGGAG  
AAAGACCGGAAAAACCTGTTTTTATCGATGTGCAGGCGGGGACGATCAGGCTTACTCTGCCCGCTATTCCGCGA  
AAAAGGGTAAACCATCAACAAAGCACCAGGCGATGATGAAATCTGAAAAACACCGTCGATTTTGTCTTTTTCAGCTATT  
ACGCCTCGCGTGCCTCGGCGGAGATGAACGCCAACACAGCAGTGCGGCGAACGTGGTGAATCGTGCCTAATCCG  
TATCTACAGGTGAGCGACTGGGCTGGGAATTGATCCACTCGGTCTGCGTATCACCATGAATATGATGTACGATCGTTA  
TCAGAAGCCGCTGTTTCTGGTGAAAAACGGCCTGGGCGAAAAGATGAATTTGCTGCAATGGCGAGATTAACGACGACT  
ATCGCATCAGTACTTACCGAACATATCCGCGCAATGGGCGAAGCATTGCAGACGGCATTCCGCTGATGGGCTACACC  
ACATGGGGCTGTATTGATTTAGTTTCCGCTCTACGGGTGAAATGAGCAAACGCTACGGCTTTGTCTTTGTTGACCGTGA  
CGACGAGGCAACGGTACGCTGACGCGCACGCGTAAGAAATCATTCTGGTGGTATAAAAAAGTGATTGCCAGTAATGGGG  
AAGATTTAGAGTAGGTAACAGTGCAGGATGCGGGCGTGAACGCCTTATCCGGCTACATGTGCGACGAACCATGAAGGCC  
GATAAGCGCAGCGCATCGGCAATTTAGCATTTGGCATCAGAGCTGGTTCACCCCATCAAGAACATCCCTGTCTGATT  
CTAATGAAAAACTACTTCTTCCACCGCTAAGTGCAGGCGGCAATTTCCCTCCAGCCTTCCAGTTCGTTGATAAA  
CGTTTTCTACCGCATCTTAATCGGCTGGGTATCGGGTAGTAAAAGCCGACGATATCCGGCTGAATGCCGAGGAAAATC  
ACTTCGCCAATATCTTCTTCAACTGGTCGATAAGGTAATTAACGGCATGTTATGGGTAGTCATATAAACATCTCGGC  
GATATCATCCGGGTCGATGATGCGGATCTCGCCGGGTTTAGCCCATATCCGTGGCGTCGACAATCAGCAGTCTGTGCG  
GGCGCAGTTACCGATAGCGACGATGTCGTTTTCCGGTGCCTACCGCCGTCATCACCACCCAGTTACCTTTCCGGCGG  
GCGGCGACTTTTCCGCCAGCAGCGGACTGCGCCATCATCGCCATCATGCTATTGCCAACACAGAGTAAAACGTCAGT  
CACGAGTCTCCTCACCATCAAATAGATGGGTTTTCTGATGAATATCATGCAGCATACTTAACAGCATTGTACTCCAT  
TCCTGTCTGCGAAGTTTGCCTGCCGGGCTTATCGAATGCTTGGCCAGCATCGGCACATGGTTAATGTCGATGAC  
GATCTCACCATATTTCCGACGCTTCCATTTTCCGGCGGGCTTACTGCCTGCCTCCAGAGTGGCAATCCATGCCAGAT  
ATTCATCCCAGGGCAGGTGAGCGCCGCTTCCAGGCAATCGATAACCCCAAGTGGTGACCAATCGCCAGGCTGTAATAG  
ACCACCTGCTGCCTCGGCGGGCGTGGCATGTTCTCATCAATAAATTTACGGCTCAGTTGACTGAACACCACCTTTTC  
ACTCATCGGATACGCGCCTTTCAACAACATGATTAGATGGGTGACAATCTCGTTTCAGACGCGGATCGTTTTCCGCTTC  
CAGCCAGCGTGAACCTGTTCTTCCGCTGCCCCTAAGTGTGTAAGGTAATCATCGGCAATCTGACGACCGTAACGATAAC  
CCGCCAGGCGACGTGCTTCCGATCCACTTTACGCGCAGCGGCTGCACCATATCACCATGCAAGATCTCCGCGGTTGT  
TCATCCAGTTCACCCGGCCACGGGCGTGAATTTTCTGCTCCAGCAGGCGGAGCGCCATTGCAAAGCCGTACAGCGTGGC  
GGCAGGCGTTGGCGGGCAGCCAGGGATATAAACATCCACAGGGACAATTTTATCCGTACCGCCACACGCGAGTAGAGAT  
CGTGAAGATCCCGCACTGTTACCGCAGGCACCGTAGGAGATACAAATTTTCCGGTCCGGCGCGGACTGCCACGCACGC  
AGCGCAGGGGATCGATTGCACGGGTGACCGCGCCGTTAAACAGTAAAATATCCGCATGACGCGGTGAAGGAACGACTTT  
AATGCCGAAGCGTTCTGCATCAAACAGCGGCGAAAGCGTGGCGAAAATTTGATTTTCGAACCGTTGCAGCCGCGCAGT  
CCACGCGTAAACATAGGCAGAACGTTTATTTTTTTCAGTAACGACGCTTTCATGCTGGCGATGGATTATCCACCGTC  
ATGGGGACCGAATGCCGTTGGCGTACGGGGGCTAATAAATGCTCATCAGATGGCCTTTTCATATGGCGAGTCAGT  
TCAATACGGTTCGACGGCACCAGGCATTTCTGGCGTTACATTCGGGCAAGTCTCAAAGCTTTCGCGGTGGTTTTCCGC  
GCGGCTGTCCGCTTGTCTTAAGCAGCGCAATGGCGTAGTCGATCTTTTCTGGACGGCGAAAGGACGATTGCAGACGC  
GGCAGTTGCACAGCGCAAGCGGGACTGTTGCAGGAAGTCTTCTTCTTCCACACCGCCAGTTCGTACTTTCGCGACAGT  
TTGATCGCCGCGTCCGGCAGACTTCTTCGAGCGTCCACAGAAGATGCAAGTCCCAAGATTAACCTCCAGGCAAGCTC  
TCCTGTGGCGAGGTCAGTTTCAACCGTTAAGGCGTTTACGGGCGAGGATTGACGCGAGCCGCGCAGCCGATGCACTGCT  
GCGGTTCTGTCTGGCTTACCACGGAAGTTTTTATCAACCGCAATCGGCTCCAGCGGATAAGACGAGGTCGCCGTGCC

GTTTTGATGACTTTTTTGATAAAGGTTAAACATGGCGATTCTTATTTTCAGCGGCGAGTTTTTACGCTCAATGCTGTAACG  
CTCGAGTTCTTTGTACGGCACCACCTTTGCTCTTCTTACGCACATCGACCACGGTCATGCGGTGCGGTACAGGAGTAGC  
AAGGGTCGAGGCTACCGATAATCAGCGGCGCATCGGAAACGGTGTGCCGCGCAGCATGTAGCGCAGGGTCGGCCAGTTC  
GCGTAGGTCGCGGCACGGCAGCGCCAGCGGTACAGTCTCTGGTTGTGCGCGGTATGCTCCAGTGGATATCATCGCCGCG  
CGCGCTTCGCGCAAAGCCAGCGCAAAGCGGTGCGGAATGTAGGTAAAGCCTTCCACCATCAGTGGGCCACCCGGCAGGT  
TATCCAGACCGTAGTCGATCATGTTACAGCGCGGTATAGACTTCGTTGATACGCACTTTACAGACGGGAAATAACGTGCGAG  
CCCTGCTCGCTGTGGACTTCCATTGGCAGCAGGCCATAGCCGACAAAACGGGTGATCGGCGCGGGTATCACGGGCGTGACC  
GCTGGCACGGACCATCGGGCCGACGTTACTGAAGTCGCGAGCGATTTCCGGGTCCAGACGACCAATGCCGACAGTGGCGT  
GTTCCATGTTGCGAGTGTCTCAGCAGCACATCCACCAGCTCCTGCACTTACGACGCATCTGTTGTGCCAGCTGGCGGGTC  
TGATCATGTGCTTTTTCAGCAGATCGCGACGAATCCCGCCGATCAAGTTCAGGCCGTAGGTTTTACGCGCACCGGTAAG  
GATCTCTGCCATTTTTCATGGAGTTTTCACGCACGCGGAAGAACTGCATAAAGCCGGAGTCGAAGCCGGTAAAGTGACAGG  
CCAGGCCAAGTTGAGCAGATGCGAGTGAAGCGTTCTACCTCCAGCAGAATGGCGCGGATCATCTGCGCACGTTCTGGC  
ACCTGAATACCCATCGCTTTTTCCACCAGCTGGTGTAGGCGGTGCTGTGGGCAAAGCCGAGATCCCGCACACAGGTC  
AGAGAGGAAGTCACTTCGTTATAACCCATACGGTTTTCCGCCAGTTTTTCCATGCCGCGATGGACGTAGAACAGACGGT  
AGTCGGCGTGATAATGTTTTCCGCATCGACGAACAGACGGAAGTGGCCCGTTTCATCAGAAGTGACGTGACGCGGACCA  
ATCGGCACGAGTGTGTTTTCTTGTGCGCCAGTTCTGTGTAAGTTCGATAGGTTTCAGCATCGGTGGTGGTGGCGGACG  
CTGACGATAATCCATGCTGTCTTACGCGAGCGGATAAAGTTTCATCCGGCCAGTTCATCCGGCAGCACAGACGACGTTTAT  
CCGGCAGACCAACCGAATCAAACCGTACATATCGCGCACTTACGCTCGCCCCACACCGCCCGCGGAACGCGCGGCGTC  
ACGGACGGATATTCCGGTTTGTGGCGTCAACTTCGACGCGAACCCTAATCCAACACTTAGTGCCCTTCTCCATCGACAG  
CACGTAGTAAACGGCGTAATGACCACTTCAAGTTTGGCTTCGTCGTTACCAAACAGCACCGACAGCCAGCCACCCTGTTTGT  
AGTAAAGAACTCCACCCTTCCGGCAGGTAGTTACCTTTACGGTGACAGTCACTGATCTTTGGTCTGCCAGGCGTGG  
TCCAGCAGCAGCCCGGAAATGCCTCATTAGCGCGGCGAGATAATGTTGACCTAATTTTTTCTCAGACATGCTCAAAC  
CTCTTTAATCAGCGCCAGCAAGGAGACGAACGCTAAAAATGCAAAGCCAAACCCAGCCAGGTAATGCGCGGAGTAAT  
ATCAAGACGAGCAGCGGCCATGCTGTTTTGAAACAGCGGATAAACCAGGACGCCGACCCAGTTTTACGATGGCAATCA  
CCAGCGCCAGCAGCAGTCCACCGCGGTGAAGGTTCCATTTGCCCCACGGAATAAACACCCGACGAACATCTGCAAC  
ACCACCAGCTGTTTTCAGGCTGATACCCATTTTCATGACGCCAAAGCCGCTGCCGCTGTATTAGAGAGCGGGCTTCCCTG  
CAGCTCCTGCTCGGCTTCCGCCAGGTGAAACGGCAGTTTGGCCATTTGATAAAGGTGGCGAACGCACAGGCACAAAGCG  
CCAGTACCAGCGGGATGCTCTGGCTCAGCGGCCAGTGATAAACGGTGTCCGGTATGTTGCTGATGTTGGTGGAAACCGGCA  
ACCTGTGCGGCAACCCACAGACCAAGCAGCAGCATCGGTTTCAGCAGCACGCCAAGCATCGCTTACGGCTCGCGCCGAT  
AGCGGTAACGGGCTACCGGTATCCAGACCAGAAATGGCAAAGAAGAAACGCGCGATGGCAAAGAGATACAGTAAGGTGA  
TCAAATCACCCAGTTGCGGCAGCGGAGAACCGACGGTCAACCCGGCAGCGCAGTAGCGATAGTCAGCATGACGCCACC  
ATCACATACGGCGTCAGGCGGAACACCCAGCCGAGGCATCCGGGCCGACGCTCTGACGCCCCAGCAGTTTGATAATGTC  
GGGATACTCTGCAACACGCCCCGGCCGCGACGTTATGCAAGCGGGCGCGGCCACGCGGGTTATACCGGAGAGCAGCG  
GCGCAACGGCAAATAACACCAGCGCTGAATTAACGGATATAAAACACTCATTCTCAGGCTCCTCGTGAACAATAATCA  
CCACCAGTACCGCCAGTTCAACCAGCGCCATCCGGCGGAACAGCAACGCACTCCCTCGCACTGCCAGCCCGGACCCAGA  
GACACCGGATTAGCCATTTGCGTAGTTTTCAGCACCGGCGCAAACGCTGTTTACCGGCATGGCAAACCGTGAGCGGT  
AATCACCATTGATTTTTCGTGGTGTAAACCGCACACCCAGGCCGACCGCGGGAACCGCATGGCAAACGATCGCCTTTC  
AAATCGCCATAATGATGAATGGCAGCAGCGGCGAGCAATCAGCAGCAACGTGATCATCGGTTGAGAAACGGTGGTGTTA  
GCAGGCTCCAGCGCAGAGGTACAGCAGCAGAGAGCATCGGCACTAGCCACGGCGCAGCAACCCGCCAATTACGCGCA  
AATCGCCAGTGCCACTACGCTTACGCTCATCAGGACGCGGCACAGGTGGCGTTTTTCGGCTTTTGGTGGCGGGCGCG  
CGAGGAACGTGACGCATAGACTTTTCGCATACACATCACCGCCAGCGCACCGGTAATTGCCAGCCCCACAGCGAGCAGC  
GGCCCCAGCAGACGGGCAACAAACGCGCCACTATTGCTCAGTTTGAATAATGATTGATAGATAAACCATTCCCGGCAAA  
ACCATTAGCGGCGCAGCGCAGCCATTGCCATCAGCCGACTAACATGGCGATGGAGATAACCGGCATTTTCTTGCCAA  
TACCACCGAGTTTTTTCGATATCGCGATGACCGGTACGGAACAGACGCTCCCCGCCCGAGGAACAGTACGCTTTTGAAC  
AGGCTATGGTTAAGCAGATGGTACAGACCACCGACCAGGCCAAGAGCAATCAGCGCGGTTGTTGAGCGCGATAACCGT  
TACGCCAGCGCCAGCCAGCAGGATGATGCCGATTTTTCCAGGGTGTGGTAAGCCAGCAGGCGCTGGATGTTGTGCT  
CCACCAGCGCATAACAGACCACGACAAACGCGGTGATCATGCCGAGCAGCAGCGGATCCCCACCACAGCGGTGCA  
TTACCGCCAGCAGTACAGGGTTAAATGCCCAGCAGGCCAATTTTTCATGACTACCGTAGAAAACAACGCGGAGCTGG  
CGCAGAGGCGTTCGATGTGCTGCGGCACCCAGCCGTGACGCGGAATAATCCCGCCAGCAGGCCAAAGCCAATCACTC  
CGAGCAGCCAGATATCGAAACCGAGCGGCGAGCTGTTGCATACGCATATCCAGCAGGCGCAGATCCAGCGTGCCGTAACGC  
TGCCACAGCAGCCAGCAAGCAATCGCCAGCAGCAGAGTGCCAAGACGCCCGCAGCAAACCCAGTTCCTTCTTTGCT  
GTTGCTGGTGAAGAACACCGCGCACAGGGCCATGATTTTCGGCCATTACCACGAACATGCCGAGGTTGCTGGCAATGACGG  
CGCAGACGGCGCAGCCATCAACATATTGATCTGCAAGCCGTTGCACTTACCTGCGCGTGGCGATGCCAGTCAATGTTG  
TAGAGGCTGACAAAACAGACCGCACAGACCGAGCGTAATCAGCCAAATCGCGTTAAGCGGAGAGATTTGCACATCGTAGCT  
TACCAGCGACAGCGCACCGCTCACGCCAACCGCGCCAGTACAGTGAAGCCCGCGGCTGCCGATACAGACTACCAA  
CCGCGCCGCCAATTCCAGCTATCCAGCCACTTAACGCTTTTTGAAAAGAAAAGAGAAATGCCAGAACAGCGGCGGCGACA

AACCAGCCACGCCGCTATTGATCAGGAAATTGCGCTCATTTAGCCTCTCCACTTTGAGCCTGCTGAAACAAGGTGAGA  
TCGCCAAAGTCCGTGTTAAAGGTCAGCTCAGCTTACGTTTGGTACGCGGGCGATATCGGTGTTATCCACCAGATGCAG  
GGCTTTAGTCGGGCACATCCGCACGCAGGCCGGACCTTGTTCATCAAAGCTACAAAGGTCACATTTGACGGCGATCGCGC  
GAATACCTGGCACCCAGTCAAGCAATGTGCTGACACGCGCCGGAGCAGGCGGTGCCGGTGGCGCTTTTCGGGGTATTGGCG  
TTTGCCGGAATATCCAGCGGACGGCTGCCGAAAATTCAATTGCCCAAACGGGCAGGGCGATGCCGCACAGCTTGCAGCT  
TACGCACAGGCTTTCATTCAACTGCACGGCCCCATCGACGCGGGTGTATGGCGTTAACCGGGCAGACCACCGCGCAGGGTG  
CATCTTTCACAGTGGTGACAGAGCTGCGGCGCAGATTCTTTTTATTTCAGCATCACTCTCAGGCGCGGCATTGATTGCAGG  
CCGTGCTGGCGATGCGTCTCTGAACAGGCGGCCTCACAAAGTGTGGCAGCCGATACAGAGCGTGGAGTCAGCAATTACAAA  
ACGATTCACCAGGCATTCTCAGGTGATTGTCATTTTTGACGAAAACATGCCGATGAAATGTCATTTTCGACACTCATCG  
ACACGCCCATCCCAAACAGGCGTAACGCCTGCAAAAACGGGCAAAGCCTCAGCTCATGCTGCCGGGCTTTGTCCCTTAC  
CAGTTGGCTTAAATTCACCGGCACATTGTTTTCAATAGCGGTGTATAAGCTGTGTAACGCCAGCGATTTTTTCGAGAT  
AGTGTTCAGAACCTGTTCCGATCGCGGATGTTGACCTTCCATCAATCATGCCGTCATGCTCAGTTGCGCCTGCGCA  
ATCCGCTGTTTGTCTTCGCATCTTTGTTTCGACGTAATACTCGATGGTGTGGCTGTTAAAGCCATCCGCCAGGGTGAC  
GTAATGCGAAAATGTTCAAAAAGGACGAAACAGAGTCTTTGTCGGCGCGCAGCTCATGGCGTGTGACAGGCGCGCTT  
TCGATAACGTGATCCCTGAACAGCGAATTGCAGTAGATGTGCCACTGGTCTGTAGGCGACGATGCCGCTGTGCGATG  
TAATCGGCTTCTCGCTTATTTCCAAATAGTCATTGTGAGGTTACCCGTTAACAGAGATGCCAGCTTTAAGCATTTTT  
TGTGCCAATTTTTAATTTATTGTTATTAAGAGATTTTTAAGCTAAAGATGAATTTTCGTCGCGTGTGACGCTGTCATTT  
CGACATCATCGACATTATTCACCGCAGGGATAATCAACACTGGCACAATTATTGCTTGTAGCTGGCAATAGTTAATGGGA  
GGCGATATGCACGAAATAACCTCTGCCAACGGGCACTGGAATTGATCGAACAGCAGGCCGCAAAAACACGGCGCAAAACG  
CGTAACTGGGGTCTGGCTCAAAATTGGCGCATTTTCTTGTGTCGAAACAGCTCTTTCGCTTTTGTGTTTGTCTGTTT  
GCCGCGCAGCGTGGCGGAAGTTGTAACCTGCACCTCGAAGAACAAGAGGCCGAATGCTGGTGTGAAACATGCCAACAG  
TATGTGACGCTACTGACCCAGCGCTCCGCGCTGTCCACAGTGTATGGTACATGCTGCAGATTGTGGCAGACGACGG  
TTTACAGATTCGGCGGATAGAAATAGACCAGGAGTGAGCGATGTGTACAACATGCGGTTGCGGTGAAGGCAACCTGTATA  
TCGAGGGTGTGAACATAACCTCATTCCGCTTTCGTAGCGGCCATTTGCCCGGGCAGCAGCCGAAGATGAAAATC  
ACCGGCATTAAGCGCCTGAATTTACCCAGCCAGACTGAAGAAGGCGACCTGCATTACGGTGTGGCGAAGCGGGCAC  
TCACGCACCGGCATGAGCCAGCGTCCGATGCTGGAAGTGAATTTGACGTGCTGGACAAAAATAACCGTCTGGCTGAAC  
GCAACCGCGCGCGCTTTGCTGCCCGAAGCAACTGGTGTCAACCTGGTTTCCAGCCCTGGTTCGGTAAAACACCCTG  
CTGACGAAAACCTAATGCGCCTGAAAGACAGCGTCCGTGCGCAGTTATTGAAGGCGACCAGCAAACCGTGAACGATGC  
CGCAGCATTGCGCTACCGGCACACCAGCGATTAGGTGAACACCGGTAAGGCTGCCATCTTGACGCACAGATGATTG  
CCGACGCCGCACCGCGTCTGCCACTGGACGATAACGTTATTCTGTTTATCGAAAACGTTGGCAACCTCGTATGCCCGGCC  
AGCTTCGATCTCGGTGAAAAACACAAAGTGGCGGTGCTTCCGTTACCGAAGGTGAAGACAAACCACTGAAATATCCGCA  
TATGTTTGGCGCCGCTCGTGTATGCTCAACAAAGTTGACCTGTTGCCGTATCTCAACTTTGACGTTGAAAAGTGCA  
TCGCTGCGCCCGGAAGTCAATCCAGAAATTGAAATCATCTTATTTCCGCCACCAGCGCGAAGGGATGGACCAGTGG  
CTGAACTGGCTGGAGACACAGCGATGTGCATAGGCGTTCGCGCCAGATCCGCACCACTGACGGCAACCAGGCGAAAGTC  
GACGCTGCGGCATTACGCGGATGTGATTTAACGTTAGTCGGCAGCTGCGATGAAAACGGTCAGCCGCGCGTGGGCCA  
GTGGTACTGGTACACGTTGGCTTTCATGAGCGTAATTAATGAAGCCGAAGCAGCGGACACTCTCGACGCTTACAAA  
ACATGTTTACGTTGAGCCGGATGTGCGCGCGCTGTTGTATGGCGAGGAAAAATAATGCGTTTTGTTGATGAATATCGCG  
CGCCGGAACAGGTGATGCAGTTAATTGAGCATCTGCGGAACGTCTTCAATCTCTTACACCGCCGAACGCCCTCTG  
GTTTATCCAGGTCCGGGTGCCCGTGTGCGTACTGCCGATGGTGGTGAATCGACACTGCGTGGAGATTGCCAGCCATC  
CGAAGTCATCTTGTACCTTTGGCGACGCCATGCGCGTGGCGGGGAAACAGGGATCGCTGTTGCAAGGCAAAAGCACGC  
GGTGCCGATGTGCGCATGTTTACTCGCGATGGATGCGTTGAAACTGGCGCAGGAGAATCCAACCCGAAAAGTGGTGT  
CTTCGCTTAGGTTTTGAAACCACTATGCCGACCACCGCTATCACTCTGCAACAGGCGAAAGCGCGTGTATGTCAGAATT  
TTTACTTCTTCTGCCAGCACATTACGCTTATCCCGACGTTGCGCAGTTTGTGGAACAGCCGGATAACGGTATCGATGCG  
TTCCTGCGCCGGGTACGTCAGTATGGTTATCGGCACCGACGCTATAATTTTATCGCCAGCGATTTTCATCGTCCGCT  
GGTGGTTGCTGGATTGAAACCCCTTACTACTACAAGGCGTGGTGTGCTGGTGCAGCAGAAAATAGCGGCCACAGCA  
AGGTAGAGAATCAGTATCGTCAGTGGTACCGGATGCCGTAACCTGCTGGCGCAACAGGCGATTGCCGATGTGTTCTGT  
GTCAACGGCGACAGCGAATGGCGGGCTTAGGCGTATTGAATCTTCTGGCGTGCACCTGACGCGGATTATCAACGATT  
CGATGCCGAAGCACATTTCCGCCCGCACCGCAGGCTGCGATGACCCGCGCGCGCTTGTGGTGGGATTAACGG  
GCAAATGTAAGCCGATCAATGCCGCTGTTGGTAACACCTGTAATCTCAAACCGGCTTTGGTGGCTGATGGTTTCC  
TCCGAAGGAGCGTGCGCCGCTGGTATCAGTATCGTCAGCAGGAGTGAAGCGTGAATAATCCAACCTGCCACCGGT  
AGCGGCGGCCAGGCGATGCAGCAATTAATCAACAGCCTGTTTATGGAAGCCTTTGCCAACCGTGGCTGGCAGAGCAGGA  
AGATCAGGCAGCTTGTATCTGGCGCAGCTGGTAGCGGAAGGCGACCGTCTGGCGTTCTCCACCGACAGTTACGTTATTG  
ACCCGCTGTTCTTCCCTGGCGGTAATATCGGCAAGCTGGCGATTTGCGGCACAGCCAATGACGTTGCGGTGAGTGGCGCT  
ATTCCGCGCTATCTCTCTGTGGCTTTATCTCGAAGAAGGATTGCCGATGGAGACACTGAAAGCCGTAGTGACCAGCAT  
GGCAGAAAACCGCCCGCGCGGAGGCATTGCCATCGTACTGGCGATACTAAAGTGGTGCAGCGCGCGGCTAGATAAAC

TGTTTATCAACACCGCTGGCATGGGCGCAATTCCGGCGAATATTTACTGGGGCGCACAGACGCTAACCGCAGGCGATGTA  
TTGCTGGTGGTGGTACTCGGGCACCAGGGGCGACTATCCTTAACCTGCGTGAGCAGCTGGGGCTGGATGGCGAAT  
GGTCAGCGACTGCGCGGTGCTGACGCCGTTATTAGACGCTGCGTGACATTTCCGGCGTGAAAGCGCTGCGTGATGCCA  
CCCGTGGTGGTGTAAACCGCGTGGTTCATGAGTTGCGGGCAGCCTGCGGTTGTGGTATTGAACTTTGAGAAGCGGCACTG  
CCTGTTAAACCTGCCGTGCGTGGCGTTTGCGAATTGCTGGGACTGGACGCCCTGAACTTTGCCAACGAAGGCAAACCTAGT  
AATAGCTGTTGAACGCAACGCGCAGAGCAAGTGTGGCAGCGTTACATTTCCATCCACTGGGGAAAGACGCGGCGCTGA  
TTGGTGAAGTGGTGAACGTAAGGTGTTGCTTGGCGTGTATGGCGTGAACGAACCCCTGATTTACCACACGCC  
GAACCGCTTCCGCGTATATGCTAATAAAATTTCTAAATCTCCTATAGTTAGTCAATGACCTTTTGACCCGCTTTGCGGTGC  
TTTCTGGAAGAACAAAATGTCATATACACCGATGAGTGATCTCGGACAACAAGGGTGTTCGACATCACTCGGACACTA  
TTGCAGCAGCCGATCTGGCCTCGCTGTGTGAGGCTCTTTGCAACTGGTAAAGCGTTCGCGCTCGCCGACAACGCGGC  
TATTGTGTTGTGGCAAGCGCAGACTCAACGTGCGTCTTATTACGCGTGCCTGAAAAAGACACCCCATTAATATGAAG  
ACGAAACTGTTCTGGCACACGGTCCGGTACGCAGCATTGTCGCGCCCTGATACGCTGCATTGCAGTTACGAAGAATTT  
TGTGAAACCTGGCCGAGCTGGACGCAGTGGGCTATACCCAAAATTTGGTCACTATTGCCTGATGCCACTGGCGGCGGA  
AGGGCATATTTTTGGTGGCTGTGAATTTATCGTTATGACGATCGCCCTGGAGCGAAAAAGAGTTCAATCGTCTGCAAA  
CATTTACGCGATACTTTTCTGTCGTCACCGAACAAAATCCAGAGCCGCTCGTTAACAAATGTCGACTATGATTTGTTATGC  
CGGGAACGCGATACTTTCCGATCCTGGTCCCATACCAACGCGGTGCTTTCCCGCTGGATATGGACGAACCTGGTGCAG  
CGAAGTCGCCAAAGAAATCCATTAATTTGACATTTGACGATATCAGTATCGTCTTACGACGCCACCGTAAAAACAAC  
TCAACATCTACTCCACTACTATCTTGATAAACAGCATCCCGCCACGAACAGAGCGAAGTCGATGAAGCCGGAACCCCTC  
ACCGAACGCGTGTCAAAGTAAAGAGATGCTGCTGATCAATCTCCACGAGCGGGACGATTTAGCCCCCTATGAACGCAT  
GTTGTTGACACCTGGGGCAACCAGATTCAAACCTTGTGCTGTTACCGCTGATGTCTGGCGACACCATGCTGGGCGTGC  
TGAAACTGGCGCAATGCGAAGAGAAAGTGTACCACCTACCAATCTGAATTTACTGCGCCAGATTGCCGAACGTGTGGCA  
ATCGCTGTCGATAACGCCCTCGCTATCAGGAAATCCATGCTGAAAGAACGGCTGGTTGATGAAAACCTGCGCCTGAC  
CGAGCAGCTCAACAATGTTGATAGTGAATTTGGCGAGATTATTGGCCGAGCGAAGCCATGTACAGCGTGCTTAAACAAG  
TTGAAATGGTGGCGCAAAGTACAGTACCGTGTGATCCTCGGTGAAACTGGCACGGGTAAAGAGCTGATTGCCCGTGC  
ATCCATAATCTCAGTGGCGTAATAATCGCCGATGGTCAAAATGAACTGCGCGGGATGCCTGCCGATTGCTGGAAG  
CGATCTGTTTGGTGTGAGCGTGGGGCTTTACCGGTGCCAGCGCCAGCGTATCGGTGTTTTGAACTGGCGGATAAAA  
GCTCCCTGTTCTCGACGAAGTGGGCGATATGCCACTGGAGTTACAGCCGAAGTTGCTGCGTGTATTGCAGGAACAGGAG  
TTTGAACGTCTCGGCAGCAACAAAATCATTACAGACGGAGCTGCGTCTAATCGCCGCGACTAACCGCGATCTGAAAAAAT  
GGTCCCGGACCGTGAGTTCCGTAGCGATCTCTATTACCGCTGAACGTATTCCCGATTACCTGCCGCCACTACGCGAGC  
GTCCGGAAGATATTCCGCTGCTGGCGAAAGCCTTTACCTTCAAATTTGCCCGTGTCTGGGGCGCAATATCGACAGCATT  
CCTGCCGAGACGCTGCGCACCTTGGCAACATGGAGTGGCCGGGTAACGTACGCGAAGTGGAAAACGTCATTGAGCGCGC  
GGTATTGCTAACACGCGTAACGTGCTGACGCTGTCATTGCCAGATATTGTTTTACCGAACCTGAAACGCCGCTGCCG  
CAACGGTGTGCGCCTGGAGGGGCAAGATGAATATCAGTTGATTGTGCGCGTGTGAAAGAAACCAACGGCGTGGTTGCC  
GGGCTAAAGCGCTGCGCAACGTCTGGGGTGAACGCACGACCCTGCTGTCACGGATGAAGCGGCTGGGAATTGATAA  
ATCGGCATTGATTTAACTGCAAATTTGCCGGACAGATCTGCTGTCGGCATACTATTATGAGGTTTTTTGCGACGATAT  
TTTTCCGGCAGTTCTGGCACCGGACGCTTGTATCGATGAGATGACGCACGGTTAAGATCGGATGACGCCACAGCATTCT  
CGGCCGGCCCAACGCATAATCTGTTTCATCTTTCACGCTTTGACGGCTGGTAACAGTGCACCGGACACTGCTTACAGG  
CTGTTTTCTTTCGCCGAACACATTTATCCAGCCGCTTTTGGCGTAAACAAACAACGCCTCGTAATGCTCCGGCTCC  
GGACATGCTGCCTCCACCTATTAAGATGATTTTATATTACATCTTAATCTTAAAGGCACTATGACTCCAAAGAAGAAAG  
GGTTAGCCAACCGATACAATTTTTGCGTACTTGTCTTCAAGCATACGCAAAAGCTGCAAAACAGCATCTTTCCCGGAAC  
CAGCATCAAGAACTCGCCGTTGCTTCTTCCCTGAAATGATTAACCTCCGGTATCATGTGCGCCTTATGTGATTACAACG  
AAAAATAAAACCATCACACCCCATTTAATATCAGGGAAACCGACATAACCCCATGAGTGAATAGAAAATTTGACGCC  
ATACGCCATGATGACGAGTATCTCAGGCTGAAAGCCAGCATCCCGAGATCTGCTGTTTTACCGGATGGGTGATTTT  
TATGAACTGTTTTATGACGACGCAAAACGCGCTGCAACTGCTGGATATTTACTGACCAACGCGGTGCTTGGCGGG  
AGAGCCGATCCCGATGGCGGGGATTCCCTACCATGCGGTGAAAACCTATCTCGCAAACTGGTGAATCAGGGAGAGTCCG  
TTGCCATCTGCGAACAAATTTGGCGATCCGGGACCAGCAAAGTCCGGTTGAGCGCAAAGTTGTGCGTATCGTTACGCCA  
GGCACCATCAGCGATGAAGCCCTGTTGCAGGAGCGTCAAGACAACCTGCTGGCGGCTATCTGGCAGGACAGCAAAGTTT  
CGGCTACGCGACGCTGGATATCAGTTCCGGGCTTTTGCCTGAGCGAACCGGCTGACCGCAAACGATGGCGGCGAAC  
TGCAACGCACTAATCTGCGGAACTGCTGATGCAGAAGATTTTGTGAAATGTCGTTAATTGAAGGCCGCTCGGGCCCTG  
CGCCGTCGCCGCTGTGGGAGTTTGAATCGACACCGCGGCCAGCAGTTGAATCTGCAATTTGGGACCCGCGATCTGGT  
CGTTTTGGCGTCGAGAACGCGCCGCGGGACTTTGTGCTGCCGTTGTCTGTTGACGATGCGAAAGATACCCAACGTA  
CGACTCTGCCGATATTCTGTTCCATACCATGGAACGTGAGCAGGACAGCATATTATGGATGCCCGACGCGTCTGTAAT  
CTGGAATACCCAGAACCTGGCGGGTGTGCGGAAAATACGCTGGCTTCTGTGCTGACTGCACCGTACGCGCGATGGG  
CAGCCGATGCTGAAACGCTGGCTGCATATGCCAGTGCAGATACCCGCGTGTGCTTGGAGCGCCAGCAAACCTATTGGCG  
CATTGACGATTTACCGCCGGGCTACAGCCGTAAGTGCAGTGCAGGCTGGCGACCTGGAACGTATTCTGGCACGCTGGCT

TTACGAACTGCTCGCCACGCGATCTGGCCCGTATGCGCCACGCTTTCAGCAACTGCCGGAGCTGCGTGCGCAGTTAGA  
AACTGTCGATAGTGCACCGGTACAGGGCTACGTGAGAAGATGGCGAGTTTCCGAGCTGCGCGATCTGCTGGAGCGAG  
CAATCATCGACACACCGCCGGTGTGGTACGCGACGGTGGTGTATCGCATCGGGCTATAACGAAGAGCTGGATGAGTGG  
CGCGCTGGCTGACGGCGGACCGATTATCTGGAGCGTCTGGAAGTCCGCGAGCGTGAACGTACCGGCTGGACACGCT  
GAAAGTTGGCTTAAATGCGGTGCACGGCTACTACATTCAAATCAGCCGTGGGCAAAGCCATCTGGCACCCATCAACTACA  
TGCCTGCCAGACGCTGAAAAACGCCGAGCGCTACATCATTCCAGAGCTAAAAGAGTACGAAGATAAAGTTCTCACCTCA  
AAAGGCAAAGCACTGGCACTGGAAAAACAGCTTATGAAGAGCTGTTGACCTGCTGTTGCCGCATCTGGAAGCGTTGCA  
ACAGAGCGCGAGCGCGCTGGCGGAACCTGACGTGCTGGTTAACCTGGCGGAACGGGCTATAACCCTGAACTACACCTGCC  
CGACCTTATTGATAAACCGGGCATTGCGATTACCGAAGGTCGCCATCCGGTAGTTGAACAAGTACTGAATGAGCCATTT  
ATCGCCAACCCGCTGAATCTGTGCGCGCAGCGCCGCATGTTGATCATCACCGGTCCGAACATGGGCGGTAAGTACCTA  
TATGCGCCAGACCGCACTGATTGCGCTGATGGCCTACATCGGCAGCTATGTACCGGCACAAAAAGTCGAGATTGGACCTA  
TCGATCGCATCTTTACCCGCGTAGGCGCGGACAGTACCTGGCGTCCGGGCGCTCAACCTTTATGGTGGAGATGACTGAA  
ACCGCAATATTTTACATAACGCCACCGAATACAGTCTGGTGTAAATGGATGAGATCGGGCGTGAACGTCCACCTACGA  
TGGTCTGTGCTGGCGTGGCGTGGCGGAAAAATCTGGCGAATAAGATTAAGGCATTGACGTTATTTGCTACCCACTATT  
TCGAGCTGACCCAGTTACCGGAGAAAAATGGAAGGCTCGCTAACGTGCATCTCGATGCATGGAGCACGGCGACACCATT  
GCCCTTATGACAGCGTGCAGGATGGCGCGGAGCAAAAAGCTACGGCTGGCGGTTGCAGCTCTGGCAGCGTGCCTAAA  
AGAGGTTATTAAGCGCGCACGGCAAAGCTGCGTGAGCTGGAAGCATTTCGCCGAACGCCCGCTACGCAAGTGGATG  
GTACGCAAATGTCTTTGCTGTCAGTACCAGAAGAACTTCGCCTGCGGTGGAAGCTCTGAAAAATCTTGATCCGGATTCA  
CTCACCCCGCTCAGGCGCTGGAGTGGATTTATCGCTTGAAGAGCCTGGTGAATAACAATTTCCGATAGTCTTTTGCTA  
TCGGGAATATTAACGACAACCTGACGAATAAAAATAAAAAACCCCTGTATAATAGGAAAGCTTATTTTACAGGGTAAAACCA  
TGCCATCTACACGCTATCAAAAAATCAATGCCATCACTATCGCCATATATGGGTGCTTGGTGATATTCATGGTGAATAT  
CAGTTATTACAATCCCGTTACATCAACTCTCTTTTTTCCCAAATCGACTTACTTATTTCTGTGCGGATAAATTTGA  
TCGTGGACCGGAGAGTCTTGACGTCTGCGCTGCTAAACCAACCCTGGTTTACGTGCGTTAAAGGCAACCACGAAGCGA  
TGCGCTTGAGGCATTGAAACTGGCGATGGCAATATGTGGCTTGCAGCGGTGGTACTGGTTTTTCGATTTAAATGAT  
TCAGAGCAACAAGAGGCAATAGATCTGTTGCTGAAATCCATCACCTCCACATATTATTGAAATCACTAACGACAACAT  
AAAATATGCCATCGCACATGAGATTATCCGGGAGTGAATATCTTTTGGTAAAGAAATAGCGGAGAGCGAATTACTCT  
GGCCTGTTGATCGTGTGAGAAATCGCTTAATGGCGAGTTACAACAAATAAACGGCGCTGATTATTTTATATTTGGACAT  
ATGATGTTTGATAACATTCAGACGTTGCTAACAGATTTATATTGATACCGGATCGCCGAACAGCGGGCGGCTGTCATT  
TTATAAAATAAAGTAGTCTCATGCTTCTCTGTGAAGCATGAGTAACCCGGTGTATTGACAGCCATTATTCATTTTTCG  
CTACCAGCAAAGAGAGATCTGCTTACCAGCGCGGACTGGCACTCTCCGGCAAACCGTCTGTAATAATCTGATCA  
AACTCGCTTAATGGTAACGCCAGCCATGTCGCCACCTGACCATATTTCTGTCGCATCACAGACCAAAAACCTCGCTGGCGGCT  
GGCACTGGCAATCGCCGTTTACCCTGACTTTATCTTCCGCTGGCGTAGAAATCCCCGCACACTCCATGACGATGCAG  
AAATAAAAGCCTGATCAATCATCAGGCTGCGCAGCATGGTTCGAGCGGCTTCCCCGACACAGGAACGGTTTTTCCGACAC  
ACTGCACCGCCAGTGTGAATAATTGTGCAATTACTGTTGTCGAGCAAGTAGTCCGCAATAACGAAATCGTTTGTGACCAC  
AGTCAGTGACTCCATGTGAATCAGATGCTGTGCTATCGCTAACGTGGTGGTCCCGCATCCAGATAGATACAACTTCCCG  
GCTGAACAAGACTTCCGCCAGCTTCCAATAGCCGTTTTTGGTCAATGCGAGCGAGTTTTTACCTGATGAGAAGGT  
TCATGCGCCACGCGTCCCGGAGACTGGACGCTCCGGACACCAGCACAAACGGTCCCTGCTGCTCCAGTTTTTGTAAATC  
CCGACGAATGGTCATATGTGACACATTCATTCTGTCCGTTAGTTACAGCAATACTGACAATGCCTTTTTTACGCTACCATCT  
CAAGGATGATTTGGCGACGCTTACGGGTATCAACTTTTGTCTTCTTCTGCTGCTGACATTCTACGCTATTTGGCT  
CGGAAACGTGCGCGGCAACTAACGCTTAGTTACACATAAAAATAACACACAATGTTAATTTATGTGAATCAGATCACCAT  
ACCGTTATCTTCCAGCGCTTATATTCACAATATCAAACAAAATACACTTAAATTAACAAGGAGAGCAGATGAAAAACGGG  
ATCTGAGTTTTCATGTCGGTATCGTTGGCTTAGGGTCAATGGGAATGGGAGCAGCACTGTCATATGTCGCGCAGGTCTTT  
CTACCTGGGGCGCAGACCTGAACAGCAATGCCTGCGCTACGTTGAAAGAGGCAGGTGCTTGCGGGTTTTCTGATAACGCC  
GCGACGTTTTGCCGAAAAACTGGACGCACTGCTGGTGTGTTGTTCAATGCGGCCAGGTTAAACAGGTGCTGTTGGTGA  
AACAGGCGTTGCACAACATCTGAAACCCGGTACGGCAGTAATGGTTTCTTCCACTATCGCTAGTGCTGATGCGCAAGAAA  
TTGCTACCGCTCTGGCTGGATTGATCTGAAATGCTGGATGCGCCAGTTTCTGGTGGTGCAGTAAAAGCCGCTAACGGT  
GAAATGACTGTCATGGCCTCCGGTAGCGATATTGCCTTTGAACGACTGGCACCCGTGCTGGAAGCCGTTGCCGAAAAGT  
TTATCGCATAGGTGCAGAACCAGGACTAGGTTGACCGTAAAAATTATTACCAGTTGTTAGCGGGCGTACATATTGCTG  
CCGGAGCCGAAGCGATGGCACTTGCAGCCGTGCGGGGATCCCGCTGGATGTGATGATGACGTGCTGACCAATGCCGCC  
GGAAATTCCTGGATGTTGAAAACCGGATGCGTCATGTGGTGGATGGCGATTACACCCCGATTACGCCGTCGATATTTT  
TGTTAAGGATCTTGGTCTGGTTGCCGATACAGCCAAAGCCCTGCACTTCCCGTGCATTGGCCTCAACAGCATTGAATA  
TGTTACCAGCGCCAGTAACGCGGGTTACGGGAAAGAGACGATAGCGCAGTTATCAAGATTTTCTCTGGCATCACTCTA  
CCGGAGCGAAATCATGATCAAGATTGGCGTTATCGCCGATGATTTTACCGGCGGACGGATATCGCCAGTTTTCTGGTG  
GAAAACGGTCTACCAACGGTACAAATTAACGGTGTCCAACAGGTAAAATGCCGGAAGCAATCGACGCACTGGTGATCAG  
CCTGAAAACGCGCTCCTGTCCAGTGGTTGAAGCCACACAGCAATCGCTGGCGGCTCTGAGCTGGTTGCAACAGCAAGGTT  
GCAACAGATCTATTTCAAATACTGCTTACTTTGACAGTACGGCAAAGGTAATATTGGCCCGGTTACCGATGCCTTA

ATGGATGCTCTCGACACGCCGTTTACGGTCTTCTCTCCGGCCCTGCCGGTCAACGGACGTACGGTTTATCAGGGTATTT  
GTTCTGAATGAATCAACTGCTGGCCGAATCCGGGATGCGCCATCACCCGGTAAATCCCATGACCGACAGTATCTTCCCC  
GTCTGGTTGAAGCGCAATCCACAGGGCGCTGCGGGCTGTTTCGCGACATGTTTTCGAACAAGGTGTGGATGCCGTTCTGT  
CAAGAGCTGGCTCGCTTACAGCAAGAGGGCTACCGTACGCGGTGCTTGATGCGCTGACCGAACACCATCTGGAAATCA  
GGGAGAAGCCTTTCGCGATGCCCCACTGGTAACGGGCGGTTCTGGTCTGGCGATTGGCCTGGCCCGGAGTGGGCGCAA  
AAAAACGGTAACCAGGCTCGCAAAGCAGGGCGTCCGCTCGCTGGGCGCGGCGTAGTGCTCTCCGGTTCATGCTCTCAAATG  
ACCAACCGCCAGGTAGCACATTACCGTCAAATGACACCAGCCCGTGAAGTTGATGTGGCAGCTGCCTCTCAATTGAAAC  
TCTGGCCGCTTATGCACAGCAACTGGCAGAGTGGGTCTGGGCCAGGAAAGTGTACTTGCTCCACTGGTTTTTGGCACCCG  
CCAGCACTGACGCAATTGGCAGCAATCAACAGCAATACGGTGACAAAAAGCCAGTCAGGCAGTAGAAACACTGTTTTCT  
CAACTAGCGGCGCGGTTAGCAGCGGAAGGCGTGACACGCTTTATTGTGCGAGGCGGTGAGACCTCCGGCGTAGTCACACA  
GAGCCTGGGAATAAAAGGTTTTCATATTGGCCCAACATTTCCCCGGCGTCCCGTGGGTAACGCACTGGATAAGCCTGT  
CTCACTCGCCCTAAATCTGGCAACTTCGGTGATGACGCTTTTTTTTACAGAGCCAAAGAGAGTTTTTATCATGAGCGA  
TTTCGAAAAGTAGAGCAGTCTTTCGAGAGGAGATGACGCGGATTGCCAGTTCATTCTTTCAGCGCGGCTATGCAACCG  
GTTCCGGCTGGCAATCTGTGCTGCTTTTACCTGACGGGAATTTACTGGCGACACCAGCAGGTTTCATGCCTGGGCAATCT  
GATCCGCGAGCGCTTTCCAAAGTCCGCGGATGGCGAATGGTAAAGTGGTGACAAACCCTCGAAAGAGTGTCTTTTCA  
TCTGGCCTGTATCGCAACAATCCGCGCTGTAAAGCGGTGGTGCATTTGCACAGCACATGGTGCAGCGGCTTTCTGCC  
TGCAAGGGCTGGACAGCAGCAACGTTATTCGTCCTTACACCCATACGTGGTGTGCGGATGGGAAATGTCCCGCTGGTG  
CCTTATTACCGACCGGGCGATAAACGCATCGCACAGGATCTGGCGGAACTGGCAGCAGACAATCAGGCTTTTTTACTGGC  
AAATCATGGCCAGTGGTTTGCAGTAAAGCCTGCAAGAAGCCGCAACAATATGGAAGAGCTGGAGGAAACGGCAAAGC  
TGATTTTTATTCTCGGTGACCGCCGATCCGTTATCTGACCGCAGGTGAAATTGCGGAATTAAGGAGTTAATGCAATGCC  
TCGTTTTGCAGCTAATTTATCCATGATGTTCCACGAAGTGCCTTTTATTGAACGCTTCGCCGAGCGGAAAAGCCGGGT  
TCGATGCTGTGGAATTTCTGTTCCCTATAACTACTCCACCCTGCAAATCCAAAAGCAACTGGAGCAAACCATCTGACA  
CTGGCGCTGTTCAATACCGTCCCGGAGATTAATGCGGGGGAATGGGATTATCCGCCCTTCCCGACGTGAGCACGA  
AGCACACGCAGACATCGACCTGGCACTGGAATATGCATTGGCGCTCAATTGTGAACAAGTCCATGTGATGGCAGGCGTCG  
TGCCCGCTGGCGAAGATGCTGAACGGTACCGGGCAGTATTATCGATAATATCCGCTACGCTGCCGACCCTTTCGCCA  
CACGGCAAGCGAATATTAGTTGAAGCACTCAGCCCCGGGTTAAGCCTCATTATCTCTTCCAGCCAGTATCAGGCACT  
GGCTATTGTTGAAGAGGTTGCGCGAGATAACGTGTTTATTCAACTAGATACTTTTCATGCGCAAAAAGTAGATGGCAAC  
TGACGCATTTAATCCGCGACTACGCCGGAAATATGCGCACGTACAAATTGCCGGACTACCTGATCGACATGAACCGGAC  
GATGGAGAAATCAACTATCCGTGGCTGTTCCGCCTGTTGATGAGGTGGGATATCAGGGCTGGATCGGTTGTGAATATA  
ACCTCGTGGCCTACCGAAGAAGGGCTTGGCTGGTTTACGCTGGCGCTAATTCGTTAAATCCCTAATTACAACGTACC  
CATAATCCCCCATCTACGGATGGGGTAGGTTAACTATAACTTTTCAGACAGGGTTTTCCATGTCCACAATTACATTGTT  
ATGCATTGCGTTAGCTGGCGTAATCATGCTGTTGCTGCTGGTCAATCAAGGCAAAGGTACAACCATTGCTTGTCTCC  
TCGTCAGCCTGTTAGTCGCACTTGGCGCAGGTATACCGGCGGGCGAAGTGGGTAAGTGTGATCGCCGGATGGGCGGT  
GTGCTTGGTCCGTCCTACTATTATTGGTCTGGGCGCTATGCTGGGCGTATGATCGAACACTCTGGTGGTGCAGAGTC  
ACTGGCTAATTATTTAGTCGCAAGTTAGGTGACAAACGAATATCGCTGCGCTGACTCTGGCAGCGTCTTCTCGGTA  
TTCCCGTCTTCTTTGATGTCGGCTTTATTATTCTTGCGCAATCATTTACGGTTTTGCCAAGGTTGCCAAAATATCGCCA  
CTCAAAATTTGGCCTGCCTGTGCTGGGATCATGCTACTGTTACGTTGGCGGTACCGCCGATCCAGGCCCTGTGCGCGC  
AGCGGGTACTCCACGCAGACATCGGCTGGCTAACCATCATCGTATTGCGATTTCTATTCCCGTAGGGGTTGTTGGCT  
ACTTTGAGGAAAGCGGCAAAAATTAAGCGCAATATGCGATGTCAGTAGAAGTACTGGAACAGATGCAACTGGCTCCGGCC  
AGTGAGGAAGCGCGACAAAATTAAGCGATAAAAATTAACCCAGCGGCTGCGCTGGTCACTTCACCTGCTAATTGTTATTCC  
TATCGCGATTATCATGGCGGTTACGGTTTTCCGCAACTGATGCCGCTTCGATCCCTGCTTGGTACGCTACAGCTGA  
TCGGCTACCAATGGTAGCTCTAATGATTGCGCTGGTCTGGCATTCTGGTTATTGGCTTTACGTCGCGGCTGGAGCTTA  
CAACACACCAGCGACATTATGGGCTCAGCGCTTCTACTGCGCGGTAGTGATTTTGGTTACTGGTGTGGAGGGGTATT  
TGGCAAAGTGTGGTGAATCGGGCGTGGCAAAGCCCTTGCACAAATGCTACAAATGATTGACCTGCCTCTGTTACCAG  
CCGATTTATTATTTACTGGCGTGCCTGCATCGAGGGTACGCAACCGTAGCAATACTGACAACCGGCGGGTACTC  
TCAGAAGCGGTGATGGGATTGAATCCGATTGAGTGCATTGGTGGCAGCTGGCAGCCTGCTTTGGTGGGCTTGGTGCCTC  
ACATATTAATGACTCAGGGTTCTGGATTGTGACCAATATCTGGGTTGTCGGTAGCAGACGGTCTGAAAACCTGGACAG  
TGTTAACGACCATTCTCGTTTTACCGGATTCTTAATTACCTGGTGCCTATGGGCGGTAATTTGACCTTAATAAAAAGGT  
CCGATGGGCATCGACCTTTTATTGTGCACAGAAAAGGCCAGCCTCGCTTGGACTGGCCTTTCTGACAGATGCTTACTT  
ACTCGGGAACAGCGCTTCGATATTACGCCCTGCGTTTTGAGGATTTGCGCAAACGGCGCAGGCTTCAACCTGAATC  
TGGCGAACACGTTACGGGTGAGGCCAATTTACGACTACATCTTCCAGTGTGCGGCTTCGTACCCAGCAAACCGAA  
TCGACGTGCCAGCACTTACGCTGTTTGGCGTTGAGCTCGAACAGCCATTTGACGATGCTCTGCTTCATATCGTCATCTT  
GCGTGGTATCTCCGGACCGTCTCTTTTTTATCGGCCAGGATGTCCAGCAACGCTTTTTTCGGAATCACCCAGCGGG  
GTGTCTACCGAGGTAATGCGCTCGTTAAGACGAAGCATACGGCTGACGTCATCAACTGGCTTATCCAGTTGCTCTGCGAT  
CTCTCCGCACTTGGTTCATGGTCCAGCTTATGGGCAACTACGCTGCGGTTTCGAGGTAACGTTGAGCTCCTTTACGA  
TGTGAATCGGCAAACGAATAGTACGGGTTGGTTCATAATCGCCGTTCAATCGTCTGGCGAATCCACCAGGTTGCGTAT



GTTGAGAAGCGGAAACCACGTTCCGGGTCAAACCTTCTACCGCGGGATCAGCCCAGGTTGCCCTCTTCGATAAGGTC  
CAGCAACGCCAGACCACGATTGCCATAACGGCGGGCAATTTTTACCACCAGACGCAAGTTACTCTCGATCATCCGGCGGC  
GAGAGGCGACATCTCCACGAGTGCAGCGACGCGCAAATAAACTTCTTCTCGCCGTTAACAGTGGTGAATAACCAATC  
TCACCAAGGTAAGCTGAGTCGCGTCCAAACACACGCTGTGTGGCTCCCTGCGATAACAGTTCCTCTTCGCCAAATCGTT  
ATCACTGGGTTCTGTTCTACTAAGGCCTTTTCTGCAAAAACCTCAACTCCGTTCTCATCAAATTCGCGATCTTCATTTA  
AATCATGAACCTTCAGCGTATTCTGACTCATAAGGTGGCTCCTACCCGTGATCCCTTGACGGAACATTCAAGCAAAAGCC  
TGTTCCGCGGATTTATCGCTGCGGCAAATAACGCAGCGGGTTTACGGATTTCCCTTGTAACGAATTTCAAATGCAAG  
CGTGTGAACCTGGTCCGGTGTACCCATGGTCGCTATTTTTGCCCGCCTTAACTTCTTGTGTTCCCGGACCAGCAT  
TGTGTGCTTATGGGCGTAGGCACTCAGGTAATCATCATTATGTTTGATGATAATCAGATTACCGTAGCCGCGCAGCGCGT  
TACCAGCATAAAACAGCGGCCATCTGCGGTGCGGATAATTGCCTGTCTTTGCTGCCTGCGATATCAATCCCTTGTG  
CCCCCTCAGAAGCGCAAAGGTTTCGATCACTTGGCCTCAGTCGGCCAGCGCCAGGTGGAGATAGGCGTACTGGTTGA  
TGACTGCTGACAGTCGGCTCGGTTGTGCTTGTGTTGGTACCCTTACAGGCGCTGTGACCGTGGTCCGAGTTGGCTTGT  
TGTTCCGCAACATTTGTTAGCACTCTGTTACCCGAAGACTCAGAATACGTAATTGTGCGTTGCGACGCAACAGCAACG  
GTGGAATTTGTGCAAGTCTGATCACAACCTCTGCTGCTGCGTCCGCTGGGTAATGGCATTTCGCGCAGTGAATGG  
CGTACCGGAAGCATTACCCACCTGCAAGGTCTGACCAACGTTACGCGGTATGGTGCCTGAATATTGTTGCGCTGAGCAA  
GGTCACGGAATCGTTGCCAGTAATCCAGGCGATATAGAAAAGTGTGTCGCCTTTTTTACGGTATAGGTAAGTCCCGCTA  
TAACTGCCTTTTCGGAATGTTCCCATACTGACGGTTATAGACGATGCGTCCGTTTTTCATCTGTACCGGCTGCTGAGCTAC  
TGGTGCACCTGGCTGGATTTGCGGTTGTTGAGTAGCCTGAATTTGTGGCTGCTGCACCGGCTGAATTTGCGGTTGCTGCG  
CTGTAGACGTCGTCCTTTCGCGGCGGCGTAATCAACATACCAGAATTAGTATTTGACGGCGCATTGCCATTAACG  
GAGCTGACCGGTGCGGTTGATTTGAAGTGTGAGAACAGCCTGCCAGCCATAGCGAAACAGTGACAAAGCCGCAATGCG  
GCGAACGGTGAATTTGGGCTTCCGCGCTCATTATCCCCAGGAAAAATGGTTAATAACAGTGACATAATTACCGT  
GCAAGGCACCTACTGAACACTGAAAAGATGTTACGATACGCTGACCTGCGGCAAATAACAGGAAAAATCCAGGTA  
TTTCTCACGTTTTAAGCCAGCTCACCTTCACTAAAGGGACAAAGCGCACGGCTCCACGGTATCGATAATAAATTCGC  
CTCCCCGACGACGCCCTTCAAATACTGGTCTCTCCCTACGGTAAGACGAGAATCCGCTTCTGTCAGCTGC  
GTCATTAGCGCAGTTGGAATTTCCGGCGGTGCCGCCGAACAATGATAGCGTCAAACGGCGCACGTGCCTGCCAACCTG  
CCATCCATCGCATGACGGGTTGAAACATTATGTAATCAAGATTTTTAGGCGGCGACGTGCCTGCCACTGCAAGCCTT  
TAATCCGTTCAACCGAGCAAACATGCTGGACAAGATGCGCCAGGATTGCCGTTTGATATCCCGAACCGGTGCCAATTTCC  
AGCACCCGCGACTGCGGCGTCACTCGAGTAATTCGGTCACTCGGCCACCATATATGGCTGCGAAATTTGCTGCCCTG  
ACCTATCGGAAAGCGATATTGTCAGGCTTTTTGTTCAAACGTTTCATCAAAGAAATTTTACGCGGCGACGGCGGCAA  
GTGCATTACGACCTGCTCATCCTGAATACCTTGCAGCAGTAATTGATCCAGAAGTCTTGTACGCGTCTGCTTACCATT  
GCGTGCCAACCTCCACGCTGTTAACCAGTCTGAAACCACATCTTGCAGCTATGCGCAGTTAAATCCACATGACGCGGC  
GTGATGGAGACATAGCCCTCATCTACCGCAGCAAAATCGGTCCCCGGACCAGCATCACATTTACCGCCCCGGCGGCAAT  
CCAGTACAGCGTATTGCCGCGCGGATCTTGTGCGGGATCACCTGATCTGCCGGATGTCGTGTACCGCAGCGCGTACCGC  
GAATACCTTTGATTTGATCCAAGGGTAAATCCGGAACGTTAATATTAAGAATACGCCCGGTGCGCAGCGGCTCTTTACAC  
AGTGCAGCGCAAATTTGACAGGTTACCGCCGCGGACGTGTCGTAATGTTTATGCCCGTCAAGCGAGACGGCAAGCGCCGG  
AAAACTAAATGACGGCTTCCATCGCGGCGGCTACCGTACCGGAATAAATAACATCATCCCCAGATTCGGCCCGGCGT  
TAATTCGGACACAACAATGTCGGGCGCGGACGCATCAGAGCATTACGCCAAGATAGACGCAATCGGTGCGGGTTCCC  
ATTTGCACAGCAATATCACATTTTCAAAGGTAACGTGCGCAGGAGGATTCCAGTGTGAGAGAATTTGAAGCGCCGCT  
GCGGTTACGATCGGGGCGACCACTGAACGTGAGCAAACTACGCAAGGCTTTCGCGAGCTTTGTATACCGGGTGAT  
GTACCCCGTCACTACTCAGCAATATGCGCATAATCACCTGTTGTGTTGATAAGTTCCCTGACAACGCTGGTTGCAAAA  
ACTACCCGCGGAAAGCCAGAAACGGATCTCTACGGTGACGTATCCCAACCAATTCAGCTTAATTTGTTGCGGATACAGCA  
GCATCGCTCTGCGCGCGGCTTCAACTTTTTGCGCACCAAGTAAAGCTTGAATTCAGTTTTCTGCGGCGACAGCTGCTTGT  
TCGAATGCCAGCGCTTACGCTGAGTTCCCCATTGCCACTGCCTGGCAATGCGGCGGTTATCATCAACTCTTTATCGTT  
GACGCGACGCTGTAATTCGCCAGTCTTCTCGGTGGTTGCGACAAACCAGCTACCACGTCCGGCTAATTTAGCGCATCGC  
CGTCAACAACCTTGATTAACGCTGCTTTTTGAGGCGCTCAGCAACAATCTGATTAACAACGCACTGCGGGCTGCCGAC  
AACCAAAAACCTCGTTTATTGCGATCGCGCACCGGAGTATTGGTTTGCGCCAGCGCTGCGCCCCCTGCAAGTTGCTACC  
GCCAATCCCAAAACGTTGGGCACCGAAGTAGTTCGGTACACCTTTTACGCAAATATCGATCAGACGTTGTTCAACGTCAT  
CGCGATTGCTCACTTCGCGCAGAACCAGGTAAGGCGTTACCTTTCAGCGCGCTAAACGCAGCTTGCCTTGTGCCG  
GCATACTCCAGCACTGGCAGCCTTCCAGTTGAAAGGCGCTCAGATCGGGCATTTCCTTGCCTGGCACGCGAGCGCATAA  
CCACTGTTCCGTAACAGCATGTTTGTCTTTTTGCCAGCGAAGCTGACTTACGGGCATGAATTTTCAAGAAATTCGCCA  
GTGCATCCGCCACAAAACGGGATTGTCAGCGTTTTGAGGATTCTAACCAGAATATGCTCACCTTACCATCAGGCTCA  
AAGCCCAAATCTTCCACCACCAAAAGTCTTCCGGATTGGCTTTCAGCAGCCCGGTGCCTTGCCTTACCGTGGAGGTA  
AGTGAGATTATCAAACCTCAATCATTTTTGTTGCCTTAATGAGTAGCGCCACCGCTTACAGGCAATCCCTTCCCCACGTC  
GGTAAATCCCAGTTTTTCCGTAGTAGTGGCTTTCAGGTTAACATCATCCATATGGCAGCCGAGATCTTCGGAATAAACA  
CGCGCATTTGTGGAATGTGCGGCAACATCTTCCGGTGCCTGAGCGATGATAGTGACATCGACGTTGCCAAGGGTAAACCC  
TTCGCTGAATACGACGCCAGGCTTCCGTAGCAGCTCGCGCTATCGGCACCTTTAAATGCCGGATCGGTATCCGGAA

CAGCTTGCCGATATCCCCAGCGCCGCGCCGCAAGCAATGCATCGGTCAACGCATGGAGCGCCACGTCGCCATCAGAAT  
GCGCCAGCAATCCTTTTTCGTAAGGAATGCGTACGCCACCAATGATAATTGGGCCTTCACCGCCAAAGGCATGTACGTCA  
AAACCGTGTCAAATTCGATTATGTATTCTCCTGATGGATGGTTCGGGTGAGGTA AAACTCGCCAGTGCCAAATCTTCC  
GGCGCGTGACTTTAATGTTATCCGCACGGCCTTCGACCAACTGAGGATGGAATCCGCAATATTCCAGCGCCGAGGCTTC  
GTCGGTAATAGTCGCGCCTTCATTTAGAGCGCGCTCAGACAGTCATGTAACAGCTCACGAGGGAAAAATTCGCGCGTCA  
GCGCGTGCCATAAGCCGTTGCGATCAACGGTATGAGCAATGGCATTTCGCGGTTTCGGCACGTTTCATAGTATCGCGC  
ACTGGTGCGCGGAGGATCCCCCGTGGCGTGGTTTCGCTCAACGCCAACAATCGCGCGAGGTATCCTGATGCAAACA  
AGGACGAGCGCGTATGCACCAATACCCACTGCGCGTGCAGCGGCTTCAGACCTGCCAGCACGGAATCGGCACGCT  
CATCACCGCCATCTACAACGGTGATTTGCGGATGATTCGCCAGAGGAAGTTGTGCAAAAACGGCTATCGCCAGGACTTATG  
GCAATGACGACACGTTTCACCCGGGATGCGCCAGCAGCGCATGCACCGAGTGTCAAGAAATGGTTTGATTACCGATTGA  
GAGATATTGCTTAGGACATTCCGTTTGCATTGACGGCCAAATCCGGCCCGGAAACCAGCGCCAAACATCCAAATGAG  
TGTTGCCATGTTAATCCCGGGCTGATTTATCGATTGTTTTGCCCCGAGACTGTGCGCGCTTCGACGCGTCAGGCACC  
AGACGATAAAAAGTTTCGCCCGCCTGGTCATGCTGAGTTCATTACGCGCACGCTTCGAGCGCTCCTGGCCGCCATT  
GAGATCGTCAATTTCCGCAAAAAGTTGATCGTTTCGCGCTTAAAGTTTCGCGTTGTAGCTTGCTGTGCCGCCACATCAT  
CATTGACGCGGTATAGTCATGTATACCGTTCTTACCGAACACAGCGAATACTGTAGCCAGACCAGAATAGCCAGCAAC  
AGCAGCGTTAGTTTACCCATCCTGCCCTGAAAAACGGCATCATCCATCCGATCCGAAGACGACTACATCCTCT  
GTTGGGGATACCGCGACAACCGCGGCAATGTACCACATTTGTCCATTGTTACGTATACCCAGGGCGTGCAAGCATAAT  
CTCATTATTAGTTACGGTTTGAATTATGAACAGAGGAGACGGAAAGTACAAATTAGCCAGTAGCCACATAAACAGTGC  
GCCAAACATAATGCCTACTGTCACCAGGGTGA AAACAATACTGTAGCGTAGCTTTCGTCATCAATGAATGCAGCGCAA  
TCCCCACCACTACCGCGACGGGCATCAGCGCCAGAAAGAAAGGCCAGGTGTAGATAAAGAAGAACAGCGTGTAGAGCCA  
TAAATCAACATCGGCATCGCCAGCGCAAATAACCAGGAGATAAAACCGACCACGGCACCAGGCAGTGACCATGTGGTTTC  
TTCATCCTCAGTAAGGCTGTCGTTATTTGTTAGTGAATGTTATGGCTATTACGCATATTTGATCCTGTTACTTTGACGA  
ACCGGGCATGGAACCCGGTGGTGTCTCAGGATCTGATAATATCGTTCTGTCTCAACAGATCTAATAATTGCTGTACCAA  
ATTTGTTACTAATTGTTACCATTGAGATGAATTTTCGCCGATTACGGCGCTTCGTAACCGAATCTATTCGTAAGT  
TGCGCAGTTCACCGGCACGCGCTTCTTATATAAGCCTTTGGGATCGCGGGCTTCGCAATCGCCAGCGCGTATCGACA  
AACACTTCGATAAAGCGCCTTCTCCTACGCGTTCGGAACCATCTGGCGTTCGGCGCGGTGGCGAGATAAATGCGGT  
CAGCACCACAGTCCGGCTCAACCATCAAATTCGCCACTTCACCGACGCGACGGATATTCCTTTACGATCGGCATCGC  
TAAAACCGAGATCGCTGCATAATCCGTGGCGAACATTGTGCCATCCAGCAGATACGTAAGTGCAGCGGATTTATGTAAC  
GCCTCCTCCAGCGCCCCGCGACCGTTGATTTACCGGACCCGGAGAGGCCGTTAAACCACAGCACTACCCACGATGACC  
GTGGTGTAGCTCGCGTGTGTCACAGTACCAGGATGGCTATGCCAGACGACGTTTTTCGTCATGCAGCGCCATTATTTATC  
CCCCAGCAATCGCGCGCGCCAGTGGCGAAAGTGGCGACGAACCAGAGCATTCAATTCAGTTCGAATGCACTGAATT  
CAGATGGCGCAGCAGTTGCCTGGCTAAGTGGCTCGTGCACCATACCGGCACCCACGGTCACATTGCTCAGGCGATCGATA  
AAAATCAGCCACCCGTCACCGGATTTTGTGATAACGATCTAACACCAGCGGCTCGTCAAAAAGTGAATCCACGAGGCC  
GATCCCATTAGTGGCAGTTTTCACTTCACGCTGGGTAAGGTTATTAATATCAACCTGATAGCGAATGCCATCAACAC  
GCGCGCGCTCTTCTTACCGCAATTTGATGTCGTAACCTGTCCTGGAGAAAGCGGCTGTTCCGCCATCCATACCACA  
TCCACCGACGCGCTGTCACCGCGGTAACGCTTCGTCGCCAGCAGCAGATCGCCACGGCTGATGTCGATCTCATC  
CGTCAGCACCAGGGTATCGCTTCTCCGGCAAAGGCTTCTTCGCGATCACCATCAAAGTCACGATCCGCGCGACGTTTG  
ATTCACACCAGAGGGCAGCACTTTGACACGTTGCCGACTTCACCGCGACCGGATGCCAGCGTTCGGCGTAACCACGA  
AAATCGAGATTCGGGCGATTAACGTACTGCACCGGAAAGCGCATTGGCTGAGCATCCACCCTCGTGGATCTCCAGGT  
TTCCAGCACTTCGAGCAGTGTGCGACCGCTGTACCACGGCATACTTCACTTTGCGATGCCAGCTTGTGCGCTTCCAGTG  
CAGAGAGCGGCACAAAGCGGATATCCAGATTACCCGCGAGCTGCCCGCAAAGGTCAAATAATCTTCACGAATACGGGTG  
AACGTCTTCTCACTGTAATCCACCAGATCCATTTTGTGATCGCCACGACCAGATGTTTGATCCCCAACAGTGTGGAGAT  
AAAATGTCGACGACGGGTTGATCGAGCACGCTTTACGGGCATCGATCAGTAAGATCGCCAGTTCACATGTCGATGCGC  
CAGTCGCCATATTGCGGGTGTACTGCTGCTGCCCTGGGGTGTGCGCGATAATAAATTTACGCTTCTCGGTAGAGAAATAG  
CGGTAGGCCACGTCAATGGTGTGCTGCTGCGCTCAGCTTGCAGGCCGTCACCAGCAGAGCCAGATCCAGCTTTTC  
GCCCTGGGTGCGGTGACGCTTACTGTCGTTATGCAGCGATGAGAGCTGATCTTCGTAGATTTGGCGGGTATCGTGCAGCA  
GACGACCAATCAGAGTACTTTTCCGTCATCGACGCTACCACAGGTGAGAAAACGCAGCAGGCTTTTATGTTGTTGCGCA  
ATCATCCAGGCTTCGACGCCGCTTATTGGCGATTTGTTGTGCAAGTGGCGTTCATCTTAAAAATACCCCTGACGTT  
TTTTCAGCTCCATAGACCCGCTTGGTCGCGGTCATCACGCGCCCTGACGTTCACTGGTGGTGGAAACCAGCATCTCT  
TCGATGATTTCCGGCAGTGTGTTGTCATTTGACTCCACCGCACCGGTGAGCGCCAGCAGCCAGCGTACGGAAACGCAC  
CATCCGTTTTTAATCACTTCGCCCGTTGCAGGTCGATACGGTGTGCATCAATCATCATCAACATACCGTCGCGTTCCA  
GAACCGGACGTTCCGCGAGGAGATATAGCGGAACAATGTCGATATTTTCAGCCAGATGTATTGCCAGATATCCTGCTCG  
GTCCAGTTAGAGAGCGGGAAGACGCGGATGCTTTCGCTTTGTTAATTTGCCGTTGTAGTTGTGCCACAGCTCCGGGCG  
CTGATTTTTCGGATCCAGCGATGGAAGCGGTACGCGAAAGAGTAAATTCGCTTTTAGCGCGGGATTTCTTTCTGTCAC  
GGCGCGCACCCGAAAGCGGCATCAAACCGTATTTGTTGAGCGCTGTTTCAGGCTTCAGTTTTCATAAATATCGGTA  
GTTTTCGCGCTGCCGTGCACGAATGGATTAATCCCCATCGCCACGCTTCCGGGTTTTATGCACCAGCAGTTCGACGCG

GTAGGCTTTAGCAGTACGATCGCGAACTCATACATCTCGCGAATTTCCAGCCGGTATCGACATGCAGCAACGGGAAAG  
GCAGCGTACCTGGATAAAACGCCTTGGCGCCAGATGCAGCATGACGCTGGAATCTTTACCGATAGAGTAGAGCATACC  
GGATTTGAGAATCTGCCGCCACTCGCGAATAATGTGGATGCTTCCGCCTCCAGTTGCCGAGGTGAGTAAGTCGTAT  
TTGATCCATAACCGTTTCTTTGCAATACCGCTATTTTCTTCCATCAGATGTTTCGACTATAGGGAGCGTAAGAGAACGA  
ATGAAATTACCAATTAGAATGAGTAGTTCCTTAACGGAATAACGATTTGGCAAAGCTAATATCAAAAAGTGCTTAAGGCA  
CCGATTTCCGGCGTTTAGGAAAGATTTGAAATGTTTTAGCGCAGCGGCAGTTTCATACTATGGCGGTAAAAAATTTGC  
ATGGTATTTAAGGACTCACTATGTTTTCCGATTGGCCACCCTACCGCTGCCCTGGCGCTCGGCGTATGCTTTATTCTC  
CCCGTACACGCCTCGTCACTAAACCTGGCGATTTTGTAACTACTCAGGCACGACATATTGCTACTTTCTTTCCGGGACG  
CATGACCGAACTCCTGCAGAAATGTTATCTGCCGATTATATTCCGCAACAGTTTCAGCAAATGGGTTATCGCAGTGATA  
TTCGGACATTTAATAGTCGGTATATTTATACCGCCCGGATAATCGTAAGAGCTGGCATAACGTGACGGGAAGTACGGTG  
ATTGCCGCTCATGAAGGCAAAGCGCCGACGAGATCATATTATGGCGCATCTGGATACTACGCCCCGTGAGCGATGC  
TGACGCCGATGCCAATCTCGGGGGGTGACGTTACAAGGAATGGATGATAACGCCGAGGTTTAGGTGTCATGCTGGAAT  
TGGCAGAACGCCTGAAAAATACGCCTACCGAGTATGGTATTGATTTGTGGCGACCAGCGGGAAGAGGAAGGGAAATTA  
GGCGTGTGAAATTTACTCAAGCGGATGAGTGACACCAGAAAGAAAAATACGCTGCTGGTGATTAATCTCGATAACTTAAT  
TGTTGGCGATAAATGTATTTCAACAGCGGTGTA AAAACCCCTGAGGCAGTAAGGAAATTAACGCCGACAGGGCGCTGG  
CAATTTGCGCGCAGTACGGAAATAGCCGCAACGACCAATCCGGGTTTGAATAAAAAATTATCCGAAAGGCACTGGGTGTTGT  
AATGACGCAGAAATATTGCAAAAGCGGGCATTGCTGTACTTTCCGGTGAAGCGACTAAGTGAATCTTGGGAATAAGGA  
TGTTATCAGCAACGCGCAAAAACACCTGCCTTCCCGCGGGAAATAGCTGGCATGACGTAAGACTGGATAATCACCAAC  
ATATTGATAAGGCTCTTCTGGAAGAATAGAAGCTGCTGCCGTGACGTTATGCGGATAATGCTACCTCTGGTGAAGGAG  
TTGGCGAAGCGCTTGTATGGGTTTAAAATGGGAGCTGGGAGTTCTACCGCAGAGGCGGGGAACTCCAAGTGATATCC  
ATCATCGCATCCAGTGGCCCGGTTTATCCCGCTGATGCGGGGAACACCAGCGTCAGGCGTGAAATCTCACCGTCTGTG  
CCGGTTTATCCCTGCTGGCGGGGAACTCTCGGTTAGGCGTTGCAAACTGGCTACCGGGCGGTTTATCCCGCTAAC  
GCGGGAACTCGTAGTCCATCATTCCACCTATGTCTGAACTCCCGGTTTATCCCGCTGGCGGGGAACTCCCGGGGA  
TAATGTTTACGGTCATGCGCCCCCGGTTTATCCCGCTGGCGGGGAACTCTGGCGGGTTCCTTGCAGCCAGCTCC  
AGCAGCGGTTTATCCCGCTGGCGGGGAACTCAAGCTGGCTGGCAATCTCTTCCGGGTGAGTCCGGTTTATCCCGC  
TGCGCGGGGAACTCTAGTTTCCGTATCTCCGGATTATAAGCTGACGTTTATCCCGCTGGCGGGGAACTCGCAG  
GCGCGACGCGCAGGGTATGCGCGATTGCGGTTTATCCCGCTGGCGGGGAACTCGCGACCGCTCAGAAATTCAGA  
CCCGATCCAAACGGTTTATCCCGCTGGCGGGGAACTCTCAACATTATCAATTACAACCGACAGGGAGCCCGGTTTAT  
CCCGCTGGCGGGGAACTCAGCGTGTTCGGCATACCTTTGGCTTCGGCTGCGGTTTATCCCGCTGGCGGGGAAAC  
TCTGCGTGAGCGTATCGCCGCGCTGCGAAAGCGGTTTATCCCGCTGGCGGGGAACTCTCAAAAAGTATACATTT  
GTTCTTAAAGCATTTTTTCCATAAAAACAACCCACCAACCTTAATGTAACATTTCTTATTATTAAGATCAGCTAATT  
CTTTGTTTTCAAACAGGTAAAAAGACACCAACCTTAAACCATCCAAATCTACCGGGTACGCCTGTTTAAACCAAATGT  
CTGGAACCAATCCCGTTTCCGTATTCGTTGCCATGCCATCACTACATTGCCTTCTTCCGCCAGTCCAGCTATTTGTT  
CCCAGATCATTTACGAATTTTGGGATACATCACCTACATATACCCCTGCACGTACCTCCAACAACAGATGGCTAAT  
CTGCCTCGTAAGCGGGAGGTACATTTTCACTGACCACGACCAACATACTCATTTCAGTACTCCGATGGCTGCATCTC  
CCAGTGAACAGGAAGCGGAATGGCAACAGGCTGTGCATCTTCAGGTGGGGCCGGCGTTGATTTCTCCAGCGGAAGC  
ACGTCCTCTATAAGCGGAATCAATTTGGTAATGTTTTACTACTGCGAAAAATATCCCTGCACGCCAAACGGACTTCCCG  
GTCCGGCTCACCAGGTTACGACGCGTATCTCAAAGCTTTCCGTACAACAGTGTCAAATTAATGATGTCTGCAATAT  
CGTAAACAAAGAAAGAGGCTTTCTGTATGCACAAACCAATAGCTGGTGCATAACAGTGAAGTATCGCCGCTTCA  
GTTACGCCGTATAAACAGGAAGTTGACGCGCTAATGTTGATCGTATCGCCCTTTCCAGTCTTTCCGATCGTGA  
GCGACGTCATTCCATGTACGCCGATTGCTTCCGAGAAGTGGTAGGTTGCCCGCAGCGACTGCCTTCTATACCTC  
TGAGTTGCTCTACGGAGCGCCGGCAGGCGAGGTTCTCAAACCGAAGTTCAAACATTTTACGTACGACCTTCAGACGC  
AAATCTTATCCAGCAAGTTTTGCTGATAGAGCAGCTTATCTGAACGCGCACCTCCAGGCTGACCAGAAGCATAAAC  
ACGAACGCCCGCTTCCCCACCCATACCAACAATGTTCCAACCTTGCAGCCAGGCGTACAGCTGCATGCGAAACCCGTG  
TACCAGGTTCCAGCATGATGACGGCAACCGAGCCAACAGGAATATGAGTGCGGATCCCTGTCTTGTGATAAGTACAAC  
GCGCCATCTATTACATCGATCTGCCATATTGCAGAAAGATCATGGAGACGCGATCTTTGAGTGGAATGGGATTAAGGGG  
AAGCCAGGTCATTTTATTACACCTCAATCACAGTGGAGCCAAAGATAGCAAGCCACATCCCATCGATTTAGCTGGCCAA  
TACCTTGTGTACAAGATCTATTAACGCTGGCGCGTGTGATGGTGAGCACACCTTCAAAGCAAACCGTTTGGATCTTT  
CCACTTTTACCATCACCAGAAAAATACTGTGGCCGTTCCGATATGGGATGCACATCTTCAACGCGCGCCGATTGCCAA  
TTACGTTGCAACCACGCGATTTGTTCTGCTTCTTTTATTAACGGAACCCGACAGCGTTTAAATATTCCCTTACTGTCCA  
GGCGTTTTGATTGTCGAGAATAGTTTTGATCGGATTTGCCGAAAGCGAAAAATAGAGTGGAACACCAACCTGAAGTTGA  
AATCAACCTGTTAGTTTTAATGACTGTCGCAACGCGAGTTGAAACAGGCATTTGCGCTGACTGCAATAAAACATGACA  
GCCTTCTGGTGTGTTTCCGTTCTCAACATGAAAAAGAAAAATCACGAGCAGCATCCGGTCTGTTTGGAAATAAATGCCATA  
ATCCCTGGTGAAGTTGGTAAAGATCCCTGCTCCAGGCCCTGGCAATGATGACTTTACTGAGATACATCCATACCTCCTTT  
AATCACATACCATTCTCGGGAAGCAAATTTGTCGAGGCAAGGTGATCATCGGTTCTGCGCGCCGTAATTTTAAATGAT  
GCCCTGAACTGATTCCTACTATATATATCGCCGCAACGGGCTCATAATTAATAGCGCTTCTGAGGATCCGATGCC

TGACATGTCCCAAAAAAGCGGGTGTGTTAGTGGGCAACTTCTCCGCCAGGTAAGGTGTATACCGAGGCTTTAATAC  
TGCTTTTTCAAGTTCTGAGATAACCATCGTTGCATGGGGTGTAAACCAGAGAGCGACGGTAAAGGAGGCATCACATAAAT  
ATTCGCGCCATGTTTGAATCGTTTCATGACTTTTCAAACCACGGTAATCTTCTCGCGCTCCAAGGACTGTATGGTAATCA  
CGCAACCCCGTTACAGACACACGACGATCGTCAAGAATGAGTTTCATCGCAGCGCACTGCAAATTCACACTCTCTGATAA  
CGCCTGTAATGAAGAAGTATCATCACGTTGGATCCCAAGACAAGCCCCGAGTAGCCCTAATAACCCGCTTCGGGTCCGAA  
ATCTTCCGGTAGGTGCGCTTCTTCAAAGGTGCGCTGCCCCAGGCTTGCAATTGGCCAGCAAGCCGCAAGATCAAATAA  
GATCTCATGTTACGCCTCGCCATTATTACGAACCCAGGATTTAACTGTTCTAAAAGTAGGCATTTGTTAACTTGAGCA  
GTAATTGGGTCTACATCAGATAAGCTGAATTGCGCAGCAGCTCCGTTTCAGACCATATCCATTGGCAACGCGATCCCAATA  
TTGATTAACGCTGTATAGACGGTTGCAAAAAGCCATCTTTCGTTTAAACCGCTTTTCAAAGCATTGTCATAGAAA  
GTGGCATATCGGAGAAATTAACCATTACCATATCCGAGGGTTAAAAGCGGCATAAGTACGCTGTTTTGCTCCAGGGACC  
TCTGTTGCCAGCATATGAACAACATGGTTGCAATTTCCAGAGCTGCTCCCTGGAGGCACCACCTAAATTTTCTGAAG  
TTGAGCGAGTTAATGTTGGCATAACGATAAAAAACCCCGATGAAAATTCCTGAGTCCAGATGTGCAGAACCTTGTT  
CCTGTAATCATCTACAGCGGTGAACCACTCAATATCAGAATCAACCTGATGAGTAGTGATCGCATGCGCAATGGACATT  
GCACCATCAACTTTTCCAACTCAGTCATCATGCCGCTGGTTGCCATTCTTCCACTAAGCGCAATATCAACACCCCTGCTG  
TAAATTCACACGTATGGCGCAATATCTTCTTAAGAACTTTGAGCAGCTTTTTATCATCCAGATTATCAGCCTCTGCTT  
TTGCAACCTGCTCACGAACAGGCTATTTCTCCACAACCCAGGAGTAACCGCATCGGCAGAAATCTTTTCGGCTTCA  
TCAACTGATTTACCGGAGAGCAGCGCTAATGTCTTATCGATGATTTTTTGGTCAAACGTTTACCAAGTTTTTCCGAAG  
AACATCACGTAATTGTGCAAGATGAATGTTCTGAGACTGGATTACCAATATTTTGTGCGTAATAACCACTTTTACGCA  
TCGCACGTTTAAAGCTTTGACTTGAATTCCTACTGCTTTTTGCCGCCGAAAATAGCGTCTTTCTGCATGTTTCATATCG  
TCGCGGTTCCAGACATGAAGGCTGTGAGAGATCAGAACATGAATATTGATAAAGTTAGACATAGAAAGTTTTCTTACGC  
ATTTTTGTTTGGTCAATACAAAATCTTCCAGAAGTTGCTGGGCTTCGCGCTTTCCACCAGGTCAACATCCTGGCCA  
TTAATGGCCAGTCAAGTACGGGTTCCGCGTGAGTAAGTAATCGACGTAACCTGGACCATATCGGCTGTTCTGTCAGCCCGA  
ATTAATTGAAAGATACGGCGCTCGTTAATTTCTTCCACTATTGGCTAAAGCTCTTCCCAACGAGATACCTGTTGTTTGTCTC  
CGATTTTTGTCTGATGTCGGATGACATTCTTCTGCGCTCAGGCAAAACCCATGCGCAAAAGAGCCTGCTGGTGAC  
GTGGTTTTTCCCAACCAAAGGTTGCACCAGCCTATAAAACGCAGGGATATCGCGTAATTCATCAGGTTCTGAAACACGT  
CTAATTTGCGCATGATCCATTATCCAGTTGTTGCCAGGCTCGATATAAAGCATTGCATCAATTTTCATCAGCCATTTG  
ATGGCCCTCCTTGCAGTTTTAACTCCCGTAAATGTTTGTATAGCGTGGCGCGGCAAGCGTAATGTGCTTATTAATTTA  
GGATGATGTGCATAGGGAGTACAGATTGATTAATAGCATTTACACAATTGATGAAGTTTGTCTCGTAAATCAGCTAT  
TACCTCATCAGCTGGGAAAAATTAACATTTCGCCAGTACATCGGGAATTAATAATTCATCTGTGATAGAAATGCCTTT  
CTGCAGTCTCATGAACAGAGACTCCGGCCCTTTGAAGCTTTATTTTTAAACCCTTCTGCAAAGGTATATAACGCCTTG  
CGTAAGGCTGTTTTATATCCCAAACCAACAGTCACTATTTGTTTATCACATTGCCGTATTGTTGCCACCCTGATTA  
CATCAACACATCATGACGCCGTTCAAGAAATAGATGCTTGATTATTACGATATCCCCCATAATCAATTCAGAGGACTTT  
GCGGCGCAATATTTCTGAATTGATTCACAACCGCCGCCACGCGATTTCCATTTTCATTTTGAATAATCTTATCTACCACA  
ACTCGGCTGATTTGTGTCCATGATGGTGGGAGGTGGTGAAGCAAGAAATTTTTCTCAACCTCCCCTTTCTTGACTGT  
TACCAGACAAGGGGAATGCGGATGGGGCCATAGCCATTAAGTAAAGGTAATTTTTCTTAAAGAAAACCGGTATAAC  
GCAAATGCTTTCCTGTCCACAGCAAGAACATTTACCAATCCCAATGGGATCGCATAATTCATATGCGCTGTTGCCAG  
AATAGACCACGGACAAACCAATTGACGAAGCAGGTATAGACTCATTGGACTTGATAGGTTAATCCAGGTAGGTTGGTT  
TTCCGATGTGATTATTAGGAAATGTTTTGAAGACGAGGTAATGTGAGGACATTGAGTAACACCGTTGAACGAAGAT  
CGATCCCACGTACGAACGTTGTTACAGGTGTTCTCCACGTAACCGCTTTTAAACACCACCAAACCTGGTGCCTGA  
TTCGCTGGTTGAATAACGCAATCGCAGTGCATCCACCACATAATGCTTACCCTGCCCGTTGATTGACAAATGCACA  
ATTCGTCGCGCCGCTTACCCAGCCAACAGTTTTTCCATTGGAGTCACATCATTTGCTTTGACACCTTTGGTCTGCATAA  
AGGGATGTTCTGCGTGATTAAGGTAGAACATATCTATCCACGCGCGATGAGTTGTTGAAACTCATCTTCAAGTGAGCGGA  
TTCATTATGCGATGTCGAAATTCACGTCATCTTTGCCGGGGGATAATTTGCCCAATGCAAACAGCAGTGCTAAAGC  
GGCCAGTTCATATCGTCACGGGGCAAACCTAATCGCCACTGATCTCTACTGCAGTATAGCGATTGCAGATTTATGATTT  
GGACTTTCCCCCGTTTCGCGGGCGTACAGGGATCCAGTTATCAATAAGCAAATTCATTTGTTCTCCTTCATATGCTCCG  
ACATTTCTCCTGCATTTCTATACGTGCGCACACTTCCGTTATCGGTA AAAACAAAGAAAAAATACGGCGTAATTAATTC  
ATAATCACATTCAGTCAAAAAATATATTGTTTAAATACAATTAACCTATACATATATTAAGATGTGTTGAATTTGTT  
TAAAGACAATAATGCATGCATTTCAAATCTGCAAGTTATTGTTTTATTATTAAGAAACTTTTAGTTATAATAATTACC  
ATGAATTTTATTACATAAAATATTCACTGTGAATATAAAATCTCATACCGGGAATTAAGAAAGATGTACATTGTGC  
ACCTTCCCTACTTAAGTAGGATAAACCGTTATTGGTCTTATTATCGTCATTGATAACAATCATTCCCGAAGTTATTTGG  
GATTTGCAGGGATGACTCTGGTCATCCCTTCATCCCTGTATAGTAATAACAATACTGTTACCCTGCCAGACCCATCCA  
TCCAGATTCTGTTTCCCTTCCAGCCAAAGTAACCCATCTTCTACTACTTCAGAAAACTACGTTTCCAGGTGAAGGG  
TACATTGACGCGATTAAGTCAAGCGCCTCATACTGCTGTTTCATGACTTAGGTCTCTGATAGCCTGGCCATCGAGCAGTT  
GTTTACCTGAAGACGTTTGTACATAAGGCAATAATGCGAGGCTCATTTCCCATCCCTCGTTACCGCAAGAAATGTTTCA  
TCGTTATCCTGCAAGCTATATTCTTCCAGCCACTGCAGGACCTTGCAGGCTTGAACCTTTTTTTCACACTCGGCGCTTT  
CAATTTATCCATGCCATTGCCGACCCATTCTGGCTCATCCATTTCCGCATCATCGTAAATGCTATCCAGCCATTGCCGGT

AAGCATCAGGGAAAAATAAGGATGCTCCATTAAGCTCCTCAATATGTTGCTGCGTCCGCCACATGACTCTAACGTTGCTA  
TAAATATGCTCATGTGCGTCCGTAACCCCTGCCATCAGGCAGCAAAATGGTGGCAACAGGAATCTCAAACACAGCGGGACG  
ATATTTGCGATGATGGCGATGTAACCGGCCAATCGTTGGAAAAGCAAATCTGCAGGACAATGCTGAGTAATTAACCAAT  
CAAATCAACGTCGAGTGATTGTTCCACGACCTGGGTTGCGACAAGTATCCGTCCAACATTTGCTTCCCATTTTTGCGG  
AAATTGCTAATAACTCGATTCTTTTTACGACGATCGTTACAGCGTAAAGCGCGCATGAAACAAATCTATATCTACTTG  
CGTGTATTTAGCTCCTTTAGCCGTTGGTAGCATACTTGTGCAACGTCAACCAAATTGCAAATAAGACAGACCTGTGCAC  
CCGCGTTTGCCGCTGCGATCATTGCTCTAACATCGTAAGGTGAGGTAACATGTCAGCTAAACAAATAGGTTCTGGCTGA  
ATCGAAAAGCGGGGCGGAGTTGTTCTGGATGAGCTAGCAGATCAAACGTTGCGCACCATTACACCTCGCCAGTTAAT  
GAGTGGATATCGGGAGTTATTTCCACTGGATCTGTATGCAGACCATAAGTATCCAGAAGTTTCTGTTTTGTTTCATTG  
GTAGGGTTGCGGAAAAGAATAAACTCCCTCCCACATCAGCCTGAGCCTTGAAGTATGAGTGCCTCCAGCAAGCCGTTGATA  
TAGGTGTCGTAAGCATGAATTCATCAACAATTAACACTTCGACCAATCCCAAACACGGATAAAGCGGTGTTTAAAC  
TGGAATACCGATATCAACACCTGATCAATCGTGCAACGCGGATTTGCCAAGAAACACTTTCTTATTGCTTTGTGACA  
ACCACTGACAACACTGAACCCACGCTTCTTCCCTGTTGAGTAAATCGCGCGTGATTTTATTGATTGAAAGAGGTGG  
TTAAACCGTGAATTCATGAGCAAGAATAAGATTTGGGGATGAAAATAAGTGGCTCGCGCTCGCTTCCATTCTCGTAAG  
CATAGCATTGCGGTAGTTGTTGGGAGGGCAAAAATAACACTATCCGCAATTTGTTGATCAATAAGTTTCCAAGCAT  
AGGCCAGCGTGTTCGTTTTACCGGAGCCTGTAGTGCCTTATTACCGTCAGCCCGGAGCTACTGGAAGAGCATCA  
ACTAACACCTGTAATTGCTGGGTTGATAGCCATTGTCAGTAGTGCATGAACACCTTCATAACATCGCTTATTTGATAC  
AAGTCCACTCACTCCAATACCCGGCTCGCATCCTGTGTCGGTCTGGAATACGTTCTCAGAGCATTTATGTCGGAAG  
GCGCATCCTCATTAAACAGAAAGGTTATCGTTGTAGTCCAGGAGCCTAACAGTCAGCAAGCGAGCAAAAACCTGCTAAC  
AGTGATGAACAATCAGGTGGTATATCGTTTATAGATAACCCCGCTGGCGTTAAAAATAATGCTTCCAGTACAGATATCCA  
CTCCTCAGGAGCTGTTTATCTTGCAGCAGATAAGATGCCAGAGAAGCTGGCATTTCCAAACGCGACTTATCTTGATCCT  
GGGAATGTAATATAAAACCATGATGTCCTGTAACGGCCTTACCCATGGAACACAGGACTCATAAGGATGAGGAGCGGCA  
TCAAAAAAAGTAAAAAATCCCGAGAGATTGCTCTGAAAGTGAATCCTGGTTAAACCAATACAGACCGGCTGCACCATG  
ATTAATTTACGGCACATTTGTGTTGATGGACATTAAGTATGAGGTTGCAGGATTTAATTTAGCCAACTTTCTGCTG  
ATTTATATTGGAATCGTATATCAAATTTCCAATATCATGAAGAGCAATGAAAAATAACAGCCAGGCCTTACCCTCTGT  
TTTGATAGCATTTTATTTGCGCAAAAAGTATTTTGCAGTACGACTGATTGATCCACCAGCAATCTGCAACAGCAGCAAC  
ATCAAGGCAATGATAAATAACAGATGAATATCATTTCCTTTCGTCAGCTTTTGGAGATTTTCCCGTAATGGCATA  
TATATTTAAAAGTTCCATTAATAGCCTCCCTGTTTTTTTATGATTTATCGATGATATCAGCGGGCTATTTTTCGATGCTG  
CTCATAAATATCGAATTACAGTGATATACACATGCTTGCCTCCCTGCAAAGAAGAGACTAACATTGCAATTTGTTGGGT  
TCGAACGCTGGCCTCAGGTTGATAGAAATATCGCCTGGGGCTTTTGTCCATCTGGAACCTCGCAATGCTTAAACGCCAGA  
CAGCCTCAAGCACCCGAGCCATTCTATACCTGATAAATTTCCCGCGGCGTTACGTTTAAAATCAGGAATGCTGCTCG  
CAAATAAAAAACGCCCCATCATTCTGACAGAGGGCTTAAATTTGTCCGGCAATTTTACCCTTCGTGTAACCCACATT  
CCTTTTTAAGCCAAAGAACCGGTTTCTTTCGCCATGCCGGTTCCCATTTACGGGTTGATGGGTATCGCCACC  
GATAAATATCCTTCATCCATAATGGGTGATATTTAGGCCATGTTTTTGCAGGTAAGTAAATAGTTCCGGTATCCCA  
GTCGATAATCGGCAGCACTTTAAATACGCCACGCTGAATGCCAGCACCGGTAATTTGGCAGCACTGCCGGATTGTTTAC  
GGCGAGGCCAGCAACCCAGGTTTGCATTCAGTTCTTTCAGAGCCCGGTTTCATCGGTTGACTTTGTTGATGTCATTG  
TACTTTTCAATGCCTTCAACGCCCTGCTCCACAGTTTTCCGTAGCGTCTTCTGCCAGGCTGCGCTTTCGGTAGCACG  
GTACTTTTCAAGTTGAGCTTGAAGTTTGTCCGTTAACTCGTCAATAAAGCGGTAGGTTTCCGGGAACAAGTAAACCCGTAT  
CGGTGAGGATACCCGGAATTCGGGGCAATTTGATTCACAGATGCAGGCTCACCGCCCTGAATGCCAAAGCTGGAA  
GAAAGTACATATTCACCGGCAGATTACAGCGCCAGGCTACGCGCTTACGCTCCAGTTTTTCCAGTTTTCGGGTT  
AGTTTTCCGCCAGCCAGAATGCGATCTACCTTCGGCAGTTCTGTTACGGGCGTTTATGATCGAGTTTGGACATAGATTCT  
CACTGTTTGCCTTGCCTGATGCGACGCTCACGCTTCTATCAGGCTACAAGACCGGGCTGATGGTTAATCCACAAAT  
CACGCGCCGGATCGAGCACCGGGCGAATGATGCCCGCACGACCGTAAAGTCCCGAAGCCTTACCCGCTTTCGCGCTCT  
TTCGCCCAGCGCCTATCAGTTCATCAAGCGACGCCAGGATTTCCGGCTCGGTGATGTTTTCTTATACATCCGTGGGAT  
ACGTGTCCCAATGCGGTTGCCGCCAAGATGCAGGTTGAGCGACCCGGCGCTTACCACCAGGCCACTTCCGCCAGCA  
TCGCGGACCAACCGTTCGGGCAGCCTGTTACACGCATCAGATATGCTCATCGCTGACACCATGTTTCGCCATTA  
TTATCGATGTTGCGATAAAAGACGGCAGGAAACGCTCTGCTTCCGCCATCGCCAGCGGGCAAGTCGGGAATGACACGCA  
AGCCATCGAGTTTTACGCTGCGGCGTACGGCATTCTTAAACCCGCTCTCTTGGCGATCTTCTCGATCTTCTGCTTCT  
CGTTTTCCGGTACACCGGATGATCAGATTCTGGTTGCCGTAATGCGGAAATCGCTTTGTTGATCTTCCGATCTCC  
AGCAGGCGGTTTTACGCGGACGCGCCGATAATCAAGGATGCGACATTTTTCGATAAACAGCGTCAGGTGCCAGTTATC  
ATCAATGCCCTTAAACCCAGCAATACGATCGCTCGTCCGGTGAATCATATGGACGGATCGTTCAAATTTGATCCCCG  
CGCGACGCTCCACTTCCGCTTAAACGCTCAACCCCCACGCGCTCCAGCGTATTTGGTTTTGGCATTTTTACGATCG  
GTTCCGGTACCCAGTACGCTGAGTTGTCACGACGCTTCCGGCACCGCCAGCGTATGCTCCAGCGGAGATAGCCAAA  
CTCACTCGCGTGGCGGGCTAGGTTTTCTGTTGCCGTTTCGATGGAAGCCACCGCCACCAACAGGTTAAAGCCCA  
CCAGCTTCCGTTTTTCCGGGATCGCCACGAAGTTATGTCGTTGGCGTGAGATCGATATCGTTCTGTGGCGGGATCACT  
ACCGTGGTTTTGAATTTACGCGGCAGGTAGGCTGGCCGAGGATCGGTTCTTATCAGTAGTGGCGACTTTTTCTGCTG

GAGCCAGATCTCCGCATACGCGGGGTACGAGGCAACAGATGCTCAGAAATCTTCTTCGCCACTCGTACGTTCCGCGT  
GCAGCTGCGACTCGTAAGGGTTCGAGGTGCAGAGTACGTTACGGTTCATGTCGTTAGCTGTCGCCAGCGCATCAAGACCG  
ACCGAGTGCAGCATCTGGTGACCCGGTTTGACGTTCTTTTCAGAATGCCGTGGAACGAAACGTCTGGCGGTTGGTCAG  
GCCAATGCTGCCATAGATGGTGTTCACCGGCAAATTTGTCGATCGCTGCCACTGTTTAGTGGTAATCACCCACCCG  
GCAGACGACAGCGAAGCAGCATCGCGTGGCGCGGCTCCAGCTTCTGTTTCAGCACGTTCCGGCCGGATGTCGCGGTCATCC  
TGCTGATACATGCCGTGGAAGCGAATCAGCAGGAAGTTGTCGCCCTTAAAGCCGCCGGTACAGACCGTCTGTTAAATCTTC  
CGCAATGGTGCCGCGCAGGTAGTTGCTTTCATGCTTCATGCGCTCGGCGTCTGTCAGTTTTCTTCGACCACTAAAGGCC  
CTGGATGTTTTTCGCTCATTAGTAGACATCTCGCTGATAACGGCGCTCTACGCGCAGCTCACTTAAAAATTCATCCGCCG  
CTTCGGTGTCCATGCCACCAATTCGGAATCACTTCCAGAAGTGCTGCTCAACGTCTTTCGCCATGCGATTAGCGTGC  
CCGACAGACATAAATGTGGGCACCATCATTGATCCAGCGCCACAGCTCCGCGCCTGTTCCGCGCAGTTTGTCTGTACGTA  
AACTTTTTCTTTTTCGATCGCGCAGCAGGCAAGATCGATACGTGTCAGCACGCCATCTTTCGAGTAGCGTGCCTCCCA  
CCTGGTACAGGAAGTCTTCCGTAAGTGCAGGATTACCAAAGAAGCCAGTTTTTACCTGGCGCTTCGTCGGCGGCGCGT  
TGCTGCATAAAGCGCGGAACGGCGCAATACCGTGCCTGGGCCAATCATAATCACCGGGTTTCTGGATTGGCTGGCAG  
GCCGAAGTTATCGTTATGTTTCGATAAATACGGGACTTCGCCCTCTTCCACGCGGTGACGAGGAAGCTGGAGCCAC  
CACCGGCACGGCGCGGCTTCCACGTCGTAACGCACACACCAACGGTGACGTGTACTTCTCGACTTCCGCCTGC  
GAGGAGCGATGGAATACAGACGCGGCTCAGCGGGCGCAGCAGATTAATTAGCGCTTCGGCATCAAGCTGTGCCGGGA  
GAAACGCACCATGTCAACAATCGGCGTCTGCGCGGTAATGCTGTAACCTCGCTTTATCGCCACCAGCGGCAGCAGTG  
TTTCACTGCGGTAAGCGTGGCGTAATCTCAACAATGTTGGCGGTGTTGACGGTCAAGTTCGAAAGTCCACTGTAGCGCT  
TCGTTTCAGAGGCAACGTTTTGCCCTCGACGGTGACAGGTTTCATCGCTTTCAGCCACAGCAGTTTCGACAAGTTCTTTCAC  
CAGTGCCGGATCGTTCTGATACCAGACGCCAGCGGTCACCCGGCTGGTAACGCATGCCCGAGTCACTAAGTCAATTT  
CGATATGGCGAACGTCTTTTTCAGAGTTACGCCCGTAATTTTCTGGTTAACAGAGAGGCTAGCCACCAGCGGCGCTCT  
TTGCTGTACGGCTGGTGTGGATTTTACCTACCGGCCAGTAGCGACGGATTGCGAAGGTGCCGCGACAGGCGCACGCGA  
TTAAGCGCATCAACCACGCGGCGGCCACTCGCTGGCAGCAGCTGGTATTCAACATCGGCATCGACACGGTTCGAGCA  
GGCGTTCACCACCCAGTTCGCCAGCTTGTGTCGAAATCTTCCGGACTGGCAGAAAAATTCATAAGAGCTATCGCCG  
AGGCTAAACACGGCAAACCGGTGTTTTCCAGCTTTGGCGTTTTTGGAGAACAGGAAGTATGCAGCGCGACGGCTTC  
TTCCGGCGTTCCCTTCCCTTTCGCTTACGCTACTACGATGAGCAGTTTTTCGCTGGCGATTTGTTTGAATTTATAGT  
CGCCCGGTTACCAGCTTAACGTTTCAGTTTTGCTGCTAATAAATCATCACGTAATGCTTCAGCAACCCGGCGCGCATTG  
CCGTTTTGCGAGGCGGAGATAATAGTTATAACCGCATTTCTGCGGCTGGCGTGGCGTGCCTGCAAGCGCAGCAGGCTG  
CTGATTGAGTACGCCAGAAATAGCCAGAAACCCAGCAAGCTGGGTGGGAGTTAAATCGGTTCGTTGGCCGCTGAAGGC  
GTGCCAGTTGCTCCGGGTTCAACGGAAGCAACGCGAAGGTGGGACTGTGTCGTCATGCGTCTGTTATGTTCCAGTAAGC  
AAAGCTGTTTCTGCGCCCTGTCAGCGCCATAAAACAGAAAGAGAAAGGTAAGGTTAACGGGGCAAACGGTGTGGATTAAG  
ACGGGATAGCGATAACTAATAACCAATCGACTAACCTGTTTTAGCAATAGTCTTTAACAACAAAATAGATTAACCAACC  
TAATGAAAAACAAATGAATTTAGCCAATCATTAGATAAATCAGCGATTTTTCGCAACAAAGTTCGTTTTAGATAATGCGA  
AAAAACAGCCTTTCGGTACTCTACGGCGGTTTTATCGTCTGTAGAGAAATATGATGTCCACCAGTTATTTAAAGAT  
TTCACCTTCGAAGCCGCTCACCGCTTACCACAGTCCCGGAAGGGCATAAATGTGGTGCCTGCACGGGCATTCTTTAT  
GGTGGACTGGAAATTACCGGGGAAGTCGATCCGCATACGGGCTGGATTATCGATTTTCGCTGAACTAAAAGCGGCTTA  
AACCAACCTACGAGCGCCTCGATCACCATTATCTCAATGATATTCAGGTCTGAAAACCAACAGCAGGTTTTAGCA  
AAATGGATTTGGGATCAGTTAAACCCGTTGTGCCGCTGTTAAGTGCAGGATGGTAAAAGAAACCTGCACCGCAGGTTG  
TATCTATCGCGGCGAATGATAAGAGTGTGTCGGCGTCAATTTCCCTTAAGTAACGCTATGTTAGGGTGTGTTGTTTAC  
ATATCTGGGCGCATGACATGGAAGCAGCTGCGCATATTATTATTGGTGCCGTTATTGCAGGCACCGTTCGCGCTTAC  
GCTGCGCGGAGCGGTTTTATCCGTTTTGTTACTGGAACGCGCTGAAATCCCGGCAGCAAAAATCTTTCGGCGGGCGG  
TTATATAACCATGCACTCGCGGAACCTCCCGCAATTTTCATCTGACCGCGCTCTTGAACGACGCATCACTCACGAAAG  
CCTTTCCTGTTAACGCCGATGGCGTAACGACGTTTTCCAGCTTACAGCCCGCGGTTGAATCCTGGAGTGATTACGTG  
CACGATTTCGATCCGTGGCTGGTTGCCGAAGCCGAAAAAGAAGGTGTCGAATGCATCCCCGAGCGACGGTGGATGCACTG  
TATGAAGAAAACGGCAGAGTCTGTGGCGTTATTTGTGGTGACGATATTCTCCGCGCCGTTATGTGGTGTGGCAGAAGG  
TGCCAACAGCGTCTGGCTGAACGTCACGGGTTAGTGACTCGTCTGCTGGCGAAGCGATGGCGTTGGGGATCAAAGAAG  
TGCTGTCGCTGGAACATCCGCTATTGAAGAAGTTTTTCATCTGGAGAATAACGAAGGCGCAGCGTTGCTGTTTCAGCGGC  
AGGATCTGTGATGACTTACCAGCGCGCATTTCTTATACTAATCAACAACGCTCTCGTTAGGGATTGTTTCCCGCT  
CTCTCCCTTACGAAAGTCTGTTCCGGCAAGCGAGCTGCTGACTCGTTTTAAAGCGCATCCGGCAGTGCGCCGCTTA  
TCAAAAACACGGAATCACTGGAGTATGGTGGCATCTGGTCCAGAAGGTGGCTTGACAGTATGCCGTTGCAATACGCC  
GGTAACGGCTGGCTGCTGGTGGCGATGCGTTGCGCAGTTGCGTCAATACCGGAATTTCCGTGCGCGGCATGGATATGGC  
GCTGACTGGCGCGCAGGCGCGGCACAAACGCTGATAAGCGCCTGCCAGCACCGGAGCCGAAAATCTGTTTCCGCTTT  
ATCATACAACGTAGAGCGCAGCCTGCTGTTGGGATGTTCTACAGGTTATCAGCATGTTCCGGCGTTTTGCAACGCCCG  
GGATGGTACCCTGACGTGGCTGCGTTAATGCAGGATATTTCCCGGATTTATGGGATCAGGGTGATAAACCTGTTCCACC  
GCTGCGCCAGTTATTCTGGCATATTTACGTCGTCACGGCCTGTGGCATCTGGCGGGCGATGTTATCAGGAGTCTGCGAT  
GTCTGTAGCCCGTAATCTCTGGCGGTTGCTGATGCGCCGACATTGTTCCGGCTGACTCCGTTGAGCGCCAGACGGCAG

AACGGTTGATTAACGCCTGTCCGGCAGGTCTTTTTTCGCTCACACCGGAAGGTAACCTACGTATTGACTATCGCAGTTGC  
CTGGAGTGTGGCACTGCCGTTTGTGTGCGACGAATCAACACTACAACAGTGGCGCTATCCGCCTTCCGGATTCCGGCAT  
CACCTACCGCTTTGGATAAATAATAAGGATAATTTATGCCCTCTTACACCTGCTCCGCCAGAATCCGGTGATTGCTGCC  
GTTAAAGATAAATGCCAGCCTGCAACTGGCAATCGATTCTGAATGCCAATTTATTTCCGTGTTGTACGGCAATATCTGCAC  
CATCAGTAATATCGTTAAAAAGATTAAGAACGCCGGGAAATATGCTTTTATTATGTTGATTGCTGGAAGGCGCGTCAA  
ATAAAGAAGTCGTTATTAGTTTTTAAACTGGTGACCGAGGGCGACGGCATTATCAGTACCAAAGCCTCAATGTTGAAA  
GCGGCAAGAGCGGAAGGTTTTTCTGTATTCATCGCCTGTTTATTGTTGATTCAATTTCTGTTTCAACATTGATAAGCA  
AGTTGCGCAATCGAATCCGGATTGATTGAGATCCTGCCAGGCTGTATGCCCAAAGTGCTGGGCTGGGTGACAGAGAAAA  
TCCGCCAACCGCTGATTGCCGGTGGGCTGGTGTGCGATGAAGAAGATGCGCGTAATGCGATTAACGCGGGTGTGCTGGCG  
CTTTCCACCACGAATACCGGGTCTGGACGTTAGCGAAAAAATTACTTTGACGGGATAATCGTAACCAATTGAATTTGGT  
TTGATTTGTAGCCGACGCCACATCCGACATTCAGCGCTGTATGCGACGCTTACGCGCTTATCAGGCCTACAAGTCC  
CCAGGCCAGAACCGTAGGACAGGATCATCCGGCAACAGTATTGGCAATCTGCGTGAATGTTTGTACCAGTGCCTCCAG  
CACCCTTTCCAGTCAACACCGCAACATCTGCCTGTAAAAATACCGCAGCGCTGGCGTCATGATTAATCGCCACCA  
CAAACTTGTATTGCGTACGCCGCCATTAACGCTGCTGCGCCAGAAGCGCAACAACAATACACACCTCAGGTGCCAG  
AGATGTCGGAAATACCAATCACTTTTTCAGCATCAACGCCACCGTTCATCACTCGCGCCGACTGTAGCCCACTTCGGC  
TCCAGTTTTCTGCCAGCATAGCGATTTCTGTTATCTGCCTCTCCGCCCTGCCACCACCGCTCAGTCTGGCCT  
CAGCTAATGGGTGCGGGTAAACATTTTTTCAGATCCTGTGTCTAACAGCCAGTCCGGAAGCGCACCCGGACAATGTTT  
AGTTGTTGATTCCAGAGGGCAACGTGGCGTTTTTTCGCTGCTCCCGCTGACGCGCCAGGGAAAGGCATAGCGGGCGTTT  
TTCTGTTTGCAGCGTCGCCGTTAGCGCATTTCCCACTGGGATTTGCGCAGCTTACGTTGGAATATCTAACGAAGTCA  
CCTGGCAGATGCTTGACCATGTAAACGCCAGGCCAGCCGGTTCGACAGTTTCATCGCAAACGTTCCCGCGGAAAGAGA  
ACAACGTCCGAGGGCTTCCGCTGCCACTGTTCCACCAACGCATCCAGCACCTGTTCCGCCACTACAGGCTGAGGTTCAAT  
CTGCCAGTGCAGGTTACAACCGCTGAAATCCTGCGCCGAGCCAGCTTGTATTGCGGCATTCTCCTGATTTATTG  
TCACAATTGCGATATTATGGCTGCATCCTTTGGCGTAAATAGTCTGCCATAGCTTTTGGCTTTTCTGCTACCGTTT  
GCCATCAATCAGCGTGCCTCCGCGTCTGCTCTGCTCTTGGCAGTTGCAGACTGCATCGCTGGCATTTCGGCAGCA  
ACAGTTTTACGGATAATTTCTGTTTTCCCGCAGCCATTGCTGGCGCATTCCCGTACTGGCAAGGCCACTTCACCGCA  
CTGACGCACGGCAATCACCGCAGGCAAGCGAACCCGGCAACAACGCAACCCATGTTGAGTACGCTGTTGAGGGTGATAA  
ACAGCGCTGAGAGTGAACGCTCCACCTGGGTGAAGCAGGGCCAGCCAGCATTTCGCCAGCAAAAATGGCGTTTGC  
CCATTCTGCCCTTCGCTGTTTTGGCAGCCGTAATTATCAGATCCAGCGATTCTGATGCTGCCATTCCGCAATATGGCG  
AGCGACAAATTCGGCGCAAAGCGCAGATCTGCCCGCTTCCAGCAATACAGTTCCTCAAACCCAAGAGCCATGAGAT  
AGCGCAGCCAGTGCAATGCCGTTTCATCCCCATGCTCAACCGGTTAAAGACATCGGCGTACCGTTTTTCTCTGCGCC  
AACAGCAGCGCGGAGCGGCTGTTTCATCAGCACCGAGTAACTTCGAGTAGCGAAATATCCGGTCCGCTTTTACCCTG  
AGCCGCCGCTGCCACTTTTTTCCGCCAGCATTCCGGCATCCGTTTCGGCTTAAACGCTAACAGAATGTTTCATTGCA  
CCTCCTACATTTCCCGCGCCACCAGCGGGAGGGCTTTAGTTTCTGGTGCCATAGCCAGGTACAACAAAACCAACCAA  
CAACTGTGCCAGGAGCAATAAGGTGACTTGCATTTCCCACTGCGCCAGCACCCACGGCAGCAGGCCAGTACTTACCG  
CCGCGCAAGTCGACTCATGGCAGTGGCAAAACCGACGCCAGCGAGCGAATGTCAGTAGGAAAATTTCCCGAGGCAAA  
ATGCCACCAGATTACTGACTGCCGAAATGGTGGTGTGAAGAGAAACAAAAGCAGCAGCGTTAATGAACTGCCGGAAGG  
CAAAAGGCCATGACTACCAGCGTTGCCGCCAGCAGCAAAAACCTCCAGCAAAAATTTGCGATGTGCCAGCAGGTGCG  
TCAGAACTAATCCAGCAGCGGCCACAATTAACAACGCATTAAGCATCAGGCTGGCAGTCAGCGCATCTTCAGACCA  
ATAGTCTGGCGTAGTGTGGCAGCCAGGTATAAATCACAACCATGGGATTACGAGGCAGCAAGAAGACGCTGTTAAA  
CGCCGTGCGCCGCAAGTAAACGCGAAGAGAAACAAGTTTTGATGTTTATGGTTCGCGTTACCACTTCATCGCCAGTA  
AAACATGGGGACCAAAATAGCGATGCACGATAGCGTGAAGCTTCTGCAAAAACGCCCTGGCGCAGTAGCCAGCGTGGTAT  
TCTGGCGTTCCCGAGCGTAATAACGTAATCAACAACCGGGCAGAGCTGCCGATGCCAGTAGCCAGCGCCAGGCCTCCGG  
GTTTTCGGAAATAAAGTGATGTCCGGCAATACTTGCAGCACATAGCCTACGGTCCACACCACGCTGAATGCGCCAGCA  
AAATACCGGATGGCGGCGCGGGGAAATTCAGCCAGCAAGGTGTGACCTACTGAATAATCGCCTCCAGACCAATGCCA  
ATCAAAATGCGCAGTCCAATAAGATGCTCTGGCGTGGTGGCAAAAATTTGTA AAAACGAAGCAAGCGTAATCAGCAAAA  
GCTGAAGGTGAAGATTTTTTCCGACCAATATGGTCCGAGATCCACCAAGAACCAGGCTGCCAAGGAACAAAACCAAGGA  
GCGCCGAGCCGCGATCATTCCCGCCATAAACGGCGTCAGTTGCATGGCGGGCGTAAGCTGAATAATGGCGTAACCAATG  
ACGCCGAGAACATAACCGTCGGTCCAGTGTGCGCCGAAAGTGAAGCAGCAATGCGGCAGTAAAACGGTTAAGCGGTAA  
ATCATCCATTGCAACCGTGAAGTGTTCATCTTTACCCCTTATTGTCCGGTAATAAGAACGGCTTCTCGCTGAGAAGC  
CGAAAAGGCAACGCCCGTATCGCGAACGCTGCCTGACACATTTTTTCAATCGGATAGATAGTACCCGATTTCATA  
ATGCCATTAGGATCGAAGTCTTTTTTCCAGCCTTCCAGCAACGCCACGCGCTGCCGTGTTCCAGTTTGTCCAGTGAAC  
GCGATGTTTACCGATACCGTGGTGGTGCACCATCGAACCGCCAGGCGAATGGTTTCTTACAGATGATCTTGTGAGCG  
GATTGTGGTACTTGTGATTTCTCTCCGGCTTACAGTCAACGACGTTGTAATCGTAGACGAAGTACATGTTGGTGCCG  
TTCTGATAGCTATGAGAGGAATGACCGCCAGCATGGTGTATGCTGCGCGTGGGGAAGTCAAGTACGAATACGGTTAAT  
AACGCTTTCTGATGTTTCTGTTGATGCAGCTCCAGCAGCCGGTACTTCCGGTGGTAAAGCCCATGTTGCCGGTTTTGAGGA  
TCTGCACACGTTCCGCGAGCCACTTTATCCGGTCCCACTTTCAGTTGTTAAACCAGGTTTCGATCAGCTTGTGTCACG

CGCTGGCATTGCGGGTAGCGGGCAACGATTTCCGCAATCCCTTCGCCGTCACCTTCGCAATGCGAGGGTTACCTTCAGC  
CATAAAGATCAGCACGCATTTTCCGTCCGCAAAATGGGTGAAGTGTGGGTGCCATCTTCAGCGTCATACAAACGAGCGA  
TTGACGGACGATAACCCTCCACCATGATTTACGCGAGGATGTTGAAGCCGGTTTTTCATGTCTTCCAGGATATAGCCGTAG  
AAGAGGTTGTTTTCCGGGGTGAATTTAAAGATTTTCACTGTTACTTCAGTGATATAGCACAAATGCACCTTCGTTGCCGAT  
GATGATGTGACGAATGTCCGGGCCAGCCGCGCGGCTGGCACGTTTTTAATGCGTGTGACGGTGCCATACGCCAATACTG  
CTTCCAGACCAACGACCATATCTTCGATTGCGCCGTAGAGTGTGGAGAAGTCCCGGATACTTCGGGTTGCTACCAGGCCG  
CCCATCTGCGCCAGCGGCTTGTACTGCGGAGAATGCCCGTGGTGTAACTTTTTTCACGCAACGCGTTTTCCAGCACTTC  
CAGCGGAACACCACATTGCGCCGTGCGCTGCATATTCTCAATATCAATATTAATGATTTGATTCATGGCGGAGCCGTGCA  
GCACCACCGAGTTTTCTACAACAGTTTTCCAGCCACCTTCGGTGGCGGAAGCACCGGTACGCGGCACACCGTTAATTTTG  
TGCGCATTCAAAAATTCAGCACACGGGATACTTGTCTGTGGAACCGAGTTTTACGACCGCTGCCGGAATCGGCAAAGT  
ATAAATGCCATGAATATCCGGAAATTTACGAAAACGGTCAATACTGTTTTTCTTAATACTGTTTCATCGGTAATTACGC  
GATCTGCACCAACAATTTCTTTAGCTGGTCGACAATCGCTGCGCGAGATAAAGACATAGTAATTCCTTCCTGATAATAA  
AAATGGAATAATCATAAAGAGAAAACAGAAACCACCGTTATGGGTTAGCGCACTAAATAACCGCCATCAACCACTAA  
TAAATGCCCGTTGACATAATTCGATGCCGGACTTGCAGGAATACGGCTGCGCCATTAATCCTGAGTATCGCCCCAAC  
GGTTTGC CGAATATGATCAAGAACGCGCTGATTGGTTTTCTGGATTACTGCGTGTGCGCAGCGTAATATCTGTTGCATAA  
TAGCCAGGGGCGATACCATTACTGAATATTATATTGACCTAGTTTCATCACAATAAGCTTTGGTGAACCCGGCAAAGGC  
ATGTTTTAGTGGCAGAATATGCAGGTGACCATTGTCCACCTAAGTAAGAGAACAATGAACAGATATTAATAATTTTGCCGC  
TTTTCTGCGGGATCATAATTTTTGAGCTTCATAGCTTAACCTCGAATGCGGCGGTCAGGTTACATCAATCATCGGATCC  
CAGTCGGCACGACCGAAGTCCAGCACCTTATTAGCTTACAAATACCGGCATTGTTAACCAGAATATCAACTGTACCAGAA  
ACGCTCACAGCAAGCAGCGATAATCTTCTGCGGCGCGCTTCTGCGGTGATACCCACCTGCATGAAGTCCACCTCAACAC  
CCTGTTTTTCAATCATTTCTTTGTTTCGCGTTATCTTTGACGAACTAGGAATAAAGATATTTGCGCCAGCTTTGGCC  
AACGCCATGGCAAATGCCTGGCCTAAACCGCTATTTCCACCGGTAACAATTGCGGTTTTACCTTTAGGGAGAAAAAATC  
CATTGAGAACGCATTGAGAGATTGATTGACATAGTTAGCTCCAATTTCCGTAAGGCAAAAAAAAAAGAAAGGTAACCTCC  
CCCGCGAGAGGGAAGTTACCTTTCTATTATCTCTGGTAACTGGAGATAATTTTTAGCATAAAGGCATAACTGCTAATGT  
GATCGTAATCACAGTGTGATATTGATTGCAATAATTTTTAAAAAGCAGAAGCGTGATTACTCTCACACAACACCTCT  
GCTTTCCATGTTATTTATTATTCAATTAAGAGACCTGAGAAAAGTAATCCACCTGAAAGGGCGGCTTACTTTTTCTCT  
TTTTTTGTCTATTACAAATGGGAATACGATATGCAACACAACCTCATATCGCCGTTGGATAACCCTCGCGATAATTAGTT  
TTAGCGGCGCGTTAGTTTTGACCTGGCTTATTTACGTTATATTTATCAAATCCCATGGCGAAATTTATGGGATTCAGC  
AATACCGAGATAGGTTTAAATAGTAGTACCTTTGGTATTGCGGCCATTATTCTTTATGCCCCAGCGCGGTTATTGCCGA  
TAAATTTTACACCGCAAAATGATTACTTCCGCGATGATCATTACCGGATTACTGGGTCTGTTAATGGCAACGTATCCAC  
CGCTGTGGGTAATGCTCTGTATTAGATCGCCTTTGCGATAACGACGATTTAATGCTGTGGTTCGGTGTGATTAAGCT  
GCATCGTTGCTTGGCGATCATAGCGAGCAAGGAAAATATGGGCTGGATGGAAGGGCTGCGCGGCGTGGTGTAAATGTC  
GCTGGCGGTGTTTACCATGTGGGTCTTTTCTCGCTTTCGACCGGATGACAGCACAGCCTGAAAACGGTCATTATCATCT  
ATAGTGTGGTTACATCTTGTGGGATTCTGTGCTGGTTTTTTGTTAGCGATAACAACAACCTGCGCAGTGCCAATAAC  
GAAGAAAACAGTCATTCCAGCTTAGCGACATCTGGCCGTTTTGCGTATCAGCACACCTGGTATTGACGATGGTGAT  
TTTTGGCGTCTTACCATCTACGCCATTCTGAGTACTCCACCAACTATCTGACCAGAAATGATGGCATGTCGCTGGTGG  
CGGCGAGCTACATGGGATTGTGATCAACAAAATATCCGCGCGCTGTGCGGCCACTTGGCGGCATAATACCACCTAC  
AGCAAAGTAAATCCCCTACCGCGTGATCCAAATCCTTTCCGTAAGTACTGCGCTGCTGACGTTAACTGCCCTGCTCGTAC  
GAACTCTAACCGCAATCGTGCAGTGGGATTGGCTGATTTACTGCTGGGATTACCTGTTACGCTTACGCTCAGCGGGC  
TGTACTGGGCTGCCCTGGCGAAGCGAGAACCCTTACATTTATGGGCACCACGGTATGTTTGTTCGGTATTTGGGA  
TTCCTGCGGATGTCTTCGTTTACCAATTATCGGCCACTGGCAAGACACCCTGCCCGCTGAGAAGCCTACCGCAATAT  
GTGGCTGATGGGCATGGCGCGCTTGGCATGGTATTGCTTTTACCTTTTTGCTGTTCCAAAAAATTCGTAAGTGTGATA  
GCGCCCCGCAATGGCTAGCAGCAAGTAAGCCAGGAAAATACAGGAGAAAAATCATGTGAAAAAATACATCATAGGGA  
TTGATGGCGGAAGTACAGACACAAAAGTGGTGTGACGATCTGGAAGGTAACGTGGTTTGCAGGCAAGGCTTATTA  
CAGCCGATGCACACGCCAGATGCCGATACTGCAGAACATCCTGACGACGATTTATGGGCATCATTATGTTTTGCCGGTCA  
CGATTTGATGAGTCAGTTTCCGGGAATAAAGAAGATATTGTCGGTATTGGTCTGGGATCCATCCGTTGCTGCCGTGCGT  
TATTGAAAGCCGATGGCACGCTGCTGCGCGTTGATTAGCTGGCAGGATGCACGCGTTACACGCCCTTACGAACACACT  
AACCTGACGTGGCATATGTACCTCTTTTTCGGGTATCTGACGCATCGCTTAACCGCGAGTTTAAAGACAATATCGC  
CAACTATTTTGGTCAGTGGCCGGTGGATTATAAGAGCTGGCATGGAGCAAGATGCTGCGGTAATGGATAAGTTTAAATA  
TCCCCGTCATATGCTGTTGATGTGCAAATGCCTGGCACCGTCTCGGACATATCACACCACAAGCCGCACTGGCGACA  
CATTTCGCGCAGGACTGCCGGTTGTTGTACCACAGTGATAAACCGGTAGAAGCTCTGGGGGCCGATTACTGGATGA  
TGAAACGGCGTAATTTCTTGGCACCTACATCGCATTGATGATGAACGGCAAAGCACTGCCGAAAGATCCAGTAGCGT  
ACTGGCCGATTATGTCTTATTCCGCAACATTGCTGTATGAAGTTACGGTATTGCAAGGCATGTGGACGGTGAGC  
TGGCTGCGCGACATGCTAGCGGAGTGTAAATCAGGATGCCAGGGCGCAGGATCTTTCACCGGAAGATTTACTCAACAA  
AAAAGCTTCTTGTGTGCCGCCAGGCTGTAATGGTCTGATGACGGTGTGGACTGGCTGACCAATCCGTGGGAACCGTACA  
AACGCGGGATTATGATCGGCTTTGATTCCAGCATGGATTACGCATGGATATATCGTTGATACTGAAAGCGTGGCGCTG



ACGCTGAAGAACAATTACGACAATATGTGAATGAAATGAATCACTTTGCGAAGCATGTGATCATTACTGGCGGGGTT  
GAACAGCGATCTGTTTATGCAGATTTTTGCCGACGTGTCAACCTCCGGCACGACGTAACGCCATTAACGGTTGTGCAA  
GCCTGGGGCAGCGATTAATACAGCGGTAGGTCTGGGGCTATACCCGGATTACGCAACGGCTGTCGATAACATGGTTCGC  
GTGAAAGATATCTTTATACCGATTGAGAGCAATGCCAAACGCTACGACGCGATGAATAAAGGCATTTTCAAAGACCTAAC  
CAAACATACTGATGTGATCTGAAAAATCGTATGAAGTATGCATGGGGAATTGGGGAATGTGGATTGATCCAGAGCT  
GGTGAATGCGTAAGTGAGGAAGGCCGGGCGGGAACCTGCCGGCCTGAACATACCTGAATGGTTATCCCGCTGACCGG  
GGAAACATAAGTTCGACAACCTAAAAATGATAACAAGTCCGGTTTATCCCGCTGATGCAGGGAACATAATAAAAACTT  
TAACTAGTTCGGTTTATCCCTGTTTTACAAGGAATATTAACACTCGATGTCTTTAGAATAAAAGACAATACGAATC  
GCACTTTATCAATTTTCACTTAAAGTATGAAGTGGATATCTTTATTATAAGAACTATTATCAACAGCGTATAGAGGG  
GTTATGTAACCCTCATTAGCCTCAAAACAAAGCAAACTTCCAGATTTATTACTTAACCAATGAATAACAAGCTTAA  
AAAAATACTGTTATTCTAAAGAAAAATTAACAGGCATTAATTAATATTAATAAATAATAGATTAATAATTTCTTAAC  
GATTTAAGAATCATACAAATAACACTTTGATTAATTTAATTTTTGTATCGATAATTGTGAACCTCTCTGGCATGGAGA  
ACTATTTTGAACATGAGGTGTACGTGGATATGTTGCTTATTACAAGTACTGCTAATATAAAAACTTGAGAAAGAGATAA  
CGGTTATATGGTGGTTTATCCCGCTGGCGGGGAACTCGACAGAACGGCTCAGTAGTCTCGTGGCTCCGGTTA  
TCCCGCTGGCGGGGAACACCTGTTTTGCAAACTATGGACTATTGCTATTTCGGTTTATCCCGCTGGCGGGGAA  
CACGGCGCACGAATACAAAGCCGTGTATCTGCTCGTTTTATCCCGCTGGCGGGGAACTGGCTGCAACAGCA  
GCACCCATGACCACGTGGTTTATCCCGCTGGCGGGGAAACAGAAATGCTGGTGGAGCGTTAATGCCGCAAACACAGG  
TTTATCCCGCTGGCGGGGAAACACATTACGCCTTTTTGCGATTGCCCGTTTTTGGCGTTTTTATCCCGCTGGCGGG  
GGAACACTCTAAACATAACCTATTATTAATTAATGATTTTTAAGCCAGTCACAATCTACCACTTTATAGTATCACACA  
AACAAACATCCATTATGTTAAAGAGCACTTAATCCATTGATTAATAAAGGTAATATTTAAATAACTCTATACAACTA  
AAATCTACCAACTTTACCGCAATAATTTCACTCCAGCGAAAAATTAATGCCACAGAATTTGAGAGAATGCTAATGAT  
TAGCCCTGGATGGTAAATGGAGGATTTTTCAGAGGCGACAAACAATAAATGAGTAGAAGTCTTTACAGGTTCCACC  
CATTTATAACGCTTATAAATGTTAATCAGGCAATATTTAGATATTTATGTGTTTGCATCGACAAACGCCAATTACGGC  
AATGCAGGTTTCAATGCACAAACGTGTGGCATCATCTTTGGCTAATCGGCTGCAGTGAATGACTCGCGGTTTTATCAT  
CGGTCAGCGTTCAGTAGTTCATCCAGTGCTTCAATATCGCGTACGCGCCCACTGGATGCTTGATTCGTTGGCTCGC  
TCCAGTGCCTGTGACAACACTTCATAGCCGCCGCGCATGTTGAGCTTTGGCGATACGGTAACCCAGGTATTCGGTGTGCA  
GCGTACCTCATGAGTACCACTGGTTTCGATCTGGCAGCTAAAACGTTCTTTTCGAGCAGATCAGTCAAGTGGCAGCAA  
CATGAATGCAAGGCTCACCAACCGTAATCACCATGCGCGCGGTGTATCCCTGGCGACCAATGACAGCCAGCAAATCT  
TCACTGCTCGCAGCCCCCACTTATCACTCTCTTTGGTCTTCGCCAGAATGCTGAAAAGGGAGACTTCCCGATCCTCAAG  
CTTTCCAGGTGTGTTTGGTGTGCGACCCAGGCACAGCCAACCGGCATCCCTGTAACGAATAAAAAATGGCGGGAACGC  
CGGTAAGTAACCTCACCTTGAGGGTCTGGAACATCTCGTTAATCGGGTACTGCATAGCATTCTCTGTGAAGTGGATA  
ATTGTTAATTATTGCAGATCCTGCCACAACATCATGTCTTAAACATTCTGTTACAGGCAGGTTTAAAGAAAAATGCG  
AAACATATCGTTAATAATTAAGGGAGTAACGTATTATGTCAGAAGAAAATAAAGAAAATGGATTTAATCATGTCAAAC  
ATTACCAAAATTTATTTATTTTTCTGTATTAGTTTTAATGATAACGAATATAAAATACCGATGCCGCCGTCAATT  
TATTTATCCAGATTTAATGAGAAATTTATAATGCGCTATTTCACTAATGTTCACTTTGATGTTCTTTGTTGCAGC  
CCAACCAACTATTGTCCACAATTACAGCAACAAGTTACGGATCTTACGAGTAGCTTAACTCACAGAAAAGAAAGAAC  
TGACGCACAAGTTAGAATCTATTTCAATAATACCAAGTGAATTTGCCGATTAATTGTTCCACAACCAAGACGAG  
ACAATTGAACAATATGCTACAAGAGTTTTGACAATTGGCGTTTAGGAGATGCCAAACGTAATGATGGGATACTGATCGT  
TGTTGCCTGGTGGATCGCACTGTCCGCATCCAGTAGGTTATGGCTGGAAGAAAAGGTAACCGATGCTCTGGCTGGAG  
ATATCATCCGTAGCAACATGATACCCGCATTTAAACAACAATAAATAGCTAAGGGATTAGAGCTAGCTATAAACGCTTTG  
AATAACCAACTCACTTCAACAACCAATATCCGACTAATCTTCAGAAAGTGAATCAGCGTCTTCCAGTGATCATTATTA  
CTTTGCTATTTTTGGGTATTTGAGTGTGTTCTTCCCTTTCTGGTTTTTTCATCAAGGCAGTAATTTTTGTGCGCAT  
GTAAAAGTGGAGTCTGTATTTAGCAATCTATCTTTAGATTTATTCTGTTCTCCGATAAAAATTTTTCCATTGCTGTA  
TTTTCTTCTTTTTACTTTACCATATTTATGGTCTTTACCTGTTTATGTGTACTTCAGAAAAGAGCATCTGGTAGAAG  
TTATCATTACAGAACAGCGGTTCCGCTGGAGGCTCAGATAGCGCGGATTTAGCGGGGGGGCGGTTCTTGGAGGTG  
GCGGCGCATCCGGCCGCTGGTAACTCAACCATAAAAAATGCCAGCCGGAGGCTGGCATTTTTAAATCAGATAAAGTCA  
TCTTATGCCTGGCCTTTGATCTCTTACGACCGTTGACGGTCTTTTTCGCCAGAGCTTCTCGATACGAATCAGCTG  
GTTGATTTAGCAACACGGTCAAGCGCTCATAGAACCAGTTTTGATCTGGCTGCAGCAGTACCAACAGCCAGGTCA  
CGATGGTAGCGTCTTCAAGTTTCCGACAGCGTGGAGATAACTGCAGTGTAGCCAGCATCTTCCGCATCTTGATTGCA  
GCCAGATTTCCGGTCAAGAAACCGATCTGGTTGAATTTGATCAGGATGGAGTACGATACCTTTTTCGATACCTTCTT  
CAGGATCTTGGTGTGGTTACGAACAGGTCGTACCAACAGCTGGATTTTGTGCCAGAACTTTGGTCTGGTATGCGA  
AACCGTCCAGTCAATTCGTCAGACCGTCTTCGATAGAAACGATCGGGTACTGTTTGGTCAAGTCTTCCAGGAAGTGA  
GTGAATTTTCAAGAGGTGAACGCTTTGTTGCCTTCGCCAGCCAGAACGTATTTACCATCTTTGTAGAATTCAGAAGCTGC  
GCAGTCCATCGCAAAGTATGTTTGGCCAGTTCATAACCAGCAGCTTAAACAGCTTACAGCGATAACGCCAGAGCTT  
CAGCGTTGGAACCCAGGTTCCGGCGATAGCCACCTTCGTCACCAACAGCAGTGTTCATGCCTTTCGCTTTCAGAATTTT  
GCCAGGTGATGGAAAACCTCAGAACCCATGCGGATGGCTTCTTTCACAGTTTTTCCGCCAACCCGGCTGAATCATGAATC

CTGGATATCAACGTTGTTGTCAGCGTGCTACCACCGTTGATGATGTTTCATCATCGGAACCGGCATAGAGTATTTGCCCG  
GAGTACCGTTACGTTACGCGATGTGCTCGTACAGCGGCATACCTTACGAGCTGCAGCAGCTTTGGCGTTAGCCAGAGAT  
ACAGCCAGGATTGCGTTCCGCCGAATTTGGATTTGTTTTCGGTGCCGTCCAGGTCGATCATGATCTTGTCAATGCCAGC  
CTGATCTTTAGCATCTTTGCCAATCAGCGCTGAGCGATCGGGCCGTTTACCGCAGCAACAGCTTTGGTTACGCCTTTAC  
CCAGGAAACGGGATTTGTGCCATCGCGCAGTTCAGAGCTTCACGGGAACCAAGTAGAAGCACCTGACGGAGCAGCTGCC  
ATACCGACGAAACCACCTCCAGATGACTTCGGCTTCAACAGTCGGGTTACCACGGGAGTCGATGATTTACGACCGAT  
GATTTTTACGATTTTGACATTAGGTTTTCTCAAGTCACTAGTTAAACTGAACTCCAGACAAAACCGGTACCCAGG  
GTACGCGTTGCCGCTCTAATTTTTACTTACTTCGCTGACGTTTCTGGAACCTCGCTGGCGGCTTTACAAAAGCCTGCA  
AACAGCGGGTGACCATCAGTGGAGTAGAAGTAACTCCGGATGGAACCTGGCAAGCCACGAACCACGGGTGATTCGGAAC  
TTCGATGATCTCGACCAACTGATCATCCCCGGAACGGCCGCAACCGCGCAGACTGCATCTTCAATCTGTTTCAACAGCA  
TGTGTTGACTTCGTAACGGTGACGATGACGCTCAACAATTGTCGGCGCATTGTACAGCTGGCGAACCAGGCTATCGTCA  
ACCAACTGGCACTGCTGTGCCCGAGACGCATGGTACCGCCGAGATCGCTCTTCTCGCTACGAACTTCAACGTTGCCGTT  
TTCATCGCGCCACTCGGTAATCAGCGCCACAACCGGTACTTACAGTCTGGCACAATTCGTTAGAGTTGGCGTTCTCCA  
TGTTGGCAACATGGCGAGCGTAATCAATTAACGCCACTGCATACCCAGGCAAATGCCAGATAAGGAATATTGTTCTCA  
CGCGAAAACGGCGGTAAATCATGCCTTCTACGCCAGTACGCCGAAACCGCAGGTACGAGGATCGCTCCAGACC  
TTTAAGGATTTCAACGCCGCGTTTTCAACATCTTGGAATCGATCAGTTTGATGTTGACGCTGACACGATCTTTCAGCC  
CACCGTGTTCAGTGCTTCGATCACTGATTTATAAGCATCCGGCAGTTCAATGTAAGTTCGCGACCATAACCGATGGTACT  
TCACTTACCGGTTCCGTTCTTCAAGATAAACCCTGTTCCATTCCGACAGATTCGCTTCCGGCGAGTTTAAAGCTGAATCG  
TTTACAAATATAATCGTCCAGCCCCTGAGATTTCAACAGGCCCGGAATTTTATAGATGGAATCGACGCTTTTCAGAGAAA  
TAACCGTTTTTCCGGAACATTACAGAACAATGCAATCTTCCGACGTTTCTGTTCCGCGGAACAGCGCGATCTGAACGACAA  
ATCAGGATGTCAGGCTGGATACCGATGGAGAGCAGCTTTTTACAGAGTGTGAGTCGGTTTTGGTTTTGACTTCACCAGA  
CGCTGCCATGTACGGCACCAGCGTCAGGTGCATAAACAGAGTGTGCTCACGGCCAAATTTCAACAGCCATCTGGCGAATCG  
CTTCGAGGAACGGCAAGGATTCGATATCACCTACTGTACCGCGATTTCTACCAGTACTACGTCATGACCTTCGCCACCT  
TCCAGCACGCGCTCTTTGATTGCGTTAGTGATGTGCGGAATAACCTGCACGGTTGCGCCGAGGTAGTCACCGCGCGCTT  
TTACGCAGAACGTCAGAGTAGATACGACCCGTTGGAAGTTGTTGCGGCGGCTCATTTTTGGTACGAATGAAACGCTCGT  
AGTGCCCCAGGTCCAGGTGCGTTTTAGCGCGCTTTCAGTAACGAACACTTCCCGTGTGGATTGGGCTCATAGTACCT  
GGATCGACGTTGATGTACGGATCCAGTTTCATGATGGTCACATTGAGGCCACGGGCTTCAAGAATGGCTGCGAGGGAGGC  
TGCGGCAATGCCTTTACCCAGAGAGGATACGACCCCGCGGTACAAAAATATAGTTTCGTTGTCATGCTGAACCTGAGAA  
GTTAGGTTGAAAAGACGATGGAATAACCAAGACGGGAAAGCAGTATACCCGAACATGACCTGTGCCACAACTTTTCATTA  
TCCCTCCTCTTCGCCAGCGCACTATTGAAATCAGGAGTGAGAAAAATAGCCCTTTGGGGTAAATGTTTTTACGCAAATC  
AAGCGCTTGTCAATTAATAAATGACACAAATGGCGCTTGACCGCGTAATTCCTTAGAGATCAATTTCTGCCGTTTTAC  
CTGTTGCCAGACTTCTCCATTGTTTCGAGGTCAACACCTGTCATTTCCAGTCCACGCGCGCAACAATACGCTCCACTT  
CGCGAAAACGACGCTCGAATTTTTCGTTCCGTTTTGCAATGCGATTTCTGCTTTCGTCCCTAAATGGCGAGCCAGATTA  
ACCGTGGCAAACAGCAGGTCCCCATTTCTCCTCCAGTTTAGCTGGTCGACAAACAGCCTGCCGCGCTTCGTACATCAC  
CTCGTCGATCTCTTCGTAGACTTTATCGACTACCGGACCAAGCGTCGTCCAATCGAAGCCAACGTTGGCGCAACGTTTCT  
GGATTTTTTGGCAGCATTAAAGCCGGTAAACTACGAGGAATATCGTCCAGCGCCGAATGCTGCGCTTCTGCGCGCGC  
TCTTCGTTTTGATTTGCTCCCAACGGGCAAGCACTTCACTACTGTTTTCGGCAGAACTATCAGCAAAAACATGCGGATG  
GCGACGCTCAATTTATCGTAATAGCAGCGCAAATATCATTAAAGTCAAAGCGCCCTTCTCCTGAGCCATTTGCGCGT  
AAAACACCACCTGGAATAGCAGATCGCCAGTTCCAGCGGAAGATCGTCAAAATCTTACGGGCGATGCGGCTCCAGCATC  
TCGTAGGTTTTCTCAAGGTGTAAGGCCAATGGTGGCAAATGTCTGCTTTTATCCACGGGCGAGCCGTTTTCCGGATC  
GCGCAGGCGCTGCATAATAGTGAGCAAAACGGTTCGATTTGATTCATTGAATTGTCTGAAAATTTGCGGGTCTGTCAAGTGG  
AAACCTGTGACCAGAATAGAAGTGAGTTAGTAACACTACCCAATCAGTACGTTAATTTTTGGCTTTAATGAGTTGTAATTC  
CTCTGGGGCAACTGTTCTTTCTTCGTTGCTCCTCTTGCCCGCAGGCGATACTTTTTACCTGATCAGCTAACGCTACGC  
CATCACGTTCTGACCGGATAAAAACAACCTTGAACGGATATCCTTTTGATTGCGTTGTACAAGGAACACACAGACACATA  
CCTGTTTTGTTGTTGATGAAAGGACTCAGGACAACAGCTGGACGATGTCCAGCTTGTCTCGCTACCTTTTGTGCGGTC  
AAAATCAACCCAAATCAGATCGCCATATCGGGTACGATCGGCTTACCATTACCAGACTTCTTATCTTTCCGCTCTCC  
CCAGTCGATATTCTCGTGGAGGTTTTCCGGCGTGATGTCGTTGACCAGTTTCAGCAAGCGTAAATACGGGCTCTTTACGCA  
CTGGCTCAATAATTAATTTGCCATCCACCAGGTCAATCTTCACTTCATCATCAATATTCAGATTGAGCGCCTGCATTAAC  
GTAGCCGGGATCCGACCCGCGGTGAATTTCCCAACGCTTACGCTACTGTGGATCATAACCCTTCTCAAACCGCTA  
TCATATGTAGATACAGTATATATCAATCTACATTGTAGATACGAGCAAATTTCCGCCTAACCCCGTGAACCGACGCGC  
GTCGATAACATCCGGCACCTGGTTGAGTTTACCCAGCACGCGCCAGCACTTGCAGGTTGTAATCTCAATGGTCATGT  
CGATGGTCGCCAGTTGCTGTTGGTGTGCTACGGTGGCAACGCCAAGCACGTTACCTTCTCGTTGGCGAGAATGGTC  
GTGATATCACGTAACAACCCACTACGATCATTAGCTACCACGCGGACCACCAGCGAATATCCGGCGGAGTAGCTCTACC  
CCATACCGCGTCAACAATGCGTTCTGGGCGATGGGAGCGCAGTTCCGCCAGTTGTTCCGAATCGGCGCGGTGTAAGTAA  
TACCGCGCCCCCTGGGTAATGAAGCCGACAATCTCATCTCCAGGAATCGGCTGGCAGCAGCGCGGATGTGGTGCATCAGG  
TTGCCAACACCTTCGACTACCACGCGACCGTTATCTTTACTGCGTTTTGCGGCGGTAGCTTTTTGCTGAAGTTGCTT

CAGCGCGGCGCGTCTCTCGGCACTCGGCTTATTAATTGCGATTGCAGGAAGTTCACCATCTGATTGAGACGGA  
TATCCCCGCCACCAATCGCCGCCAGCAACTCGTCGACATCATTGAAGTTGTAACGCGGCAGCAGATGTTTTCTGCTTCT  
TTCAGGCTGATCCCAGATGTTCCAGCTCGTCGTAAGGATTTGCCGCCAGCCAGAATGTTTTGTACGGTCTGTTT  
ACGGAACCAGGCGTGAATTTTGAACGCCACGGCTGTTGTGACGTAACCGAGTTTGGGTTAACCAGTCACGGCTGG  
GGTTCGGCTGTTTCTGGGTGATAATTTCAATCTGGTCGCCATCTGCAGCTGGTAGGTGAACGGCACAATGCGCCCCCA  
ATTTTTGCCCCGATGCAGCGGTGTCCGACATCACTGTGGATGTGGTAAGCGAAGTCCAGCGCGTGTATCCCCGAGGCAA  
ATCAACGACATCACCTTTGCGCGTAAAGACGTACACCCGGTGTCAAAGACCTGACTACGTAATTCGTCGAGCATTTCGC  
CGAATCAGCCATCTCTTCTGCCACGCAATCAGTTTACGAGCCAGGCAATCCGGTCTTCATGTCCCGAACGTGCGCCG  
CCAGCAGCCGCGCCTCTTATATTTCCAGTGCGCAGCAACACCCAACTCTGCATCTTCATGCATCTGTTTGGTGCGGAT  
TTGGATCTCAACGGTTTTTCCACCCGGCCCCAGAACCACGGTATGAATAGACTGATAACCGTTTGGTTTCCGGTTAGCGA  
CGTAATCGTCAAACCTATCCGGCAGGTGGCGATAGTGAGTGTGCACTATCCCCAGTGCGGCATAGCAATCCTGTAACGC  
TCGGCGACAATACGTACCGCAGCACATCAACAGCTCATCAAGGCGAGGTTCTTTTTCTGCATTTTACGCCAGATGCT  
GTAGATGTGTTTCCGACGACCATACACTTCCGCTTAAACGCCTCAGCTTTCATCTCAGCGCGCAGATGACCAACGAACT  
CTTCGATGTAGTGTTCGCGGTGAGACGCCGTTTATGCAGCAGTTGGCAATTCGTTTGTATTGCGTTGGATGGAGGTAA  
CGAAGCAGTAATCTCCAGTTCCTTCCAGTTCAGTTCCGATTCCGAGACGGTTAGCCAGCGGTGCGTAGATGTTGGTACA  
CTCTTTTGGCCGAGTACACGTTTCTTCCGGCGCATCTTTTACTTCGCGCAGATGAGCAATACGCTCCGCCAGTTTGA  
TGACTACGCGAGGAAAATCATCGACCATCGCAATAACATCCGGCGAACGTTATCGACCTGTTGCGAGGAAAACAGAATCA  
GTGTGCGTCTTTCAGCTGGCGGATCGCCGCCATATCACGCACGCCGTGAATAAGGTTAACGACCGACTTACCGACGCT  
CTCACGCGACATCTTCGTCGACTACGTTGGCATCCGCCAGAGGAAAAGCAGCGCCGCCGCGAGCGTGTCAATGTCCA  
TACTTAATGTGAGAGGATCTCCACCATCTCAACACCACGCCACAATAACAGACTGGCATCCGGATGCCCTGCGTCTGT  
TGAGACAATACGCCAGGTTTCCGCTAAGCACTCACGACTTCTGGTGGTAATACCCAGACTTGCATCCATTTTTT  
CGGATCAAATCACCAGCCTTATTGATATGTGCACTTCTTACCACAACATCGTCTCTCTTTAGGGACCAGACCTGCC  
GAAATCGGCAAATCGCAACTATTTAACGCGGAGAAAAGTACCATCGATTCCAGATGTCCCGTGTGTGGGAACATATCCA  
GCATCGCCAGTCGCGCAATGGTATATCTGCTTTTAAACGCTTCTGATCCCGAGCCAGCGTTGCAGGTTACAGGAT  
ACATAAACTATACGAATAGTTCAGTTTTATAATTTGCTGCATAACACCTGCGGCACCTGCTCGCGCCGGTCCAGCAA  
CACTTTATCGAAGCCGTTTTTCCGCCACGGCTGCTTTGTGACATCTTCTTCAAGATTTTCTGATAAAACGTACATTCT  
GTAAGCCATTAAGACGCGCATTCTGCTGGCCTTTTTCCACCAGCGCCGGAACACCTTCTACACCGACCACACTGGCAGCT  
TGTGTCCCAATGGCAGTGTAAAGTTGCCATACCGCAGAACAGATCCAGTACGCGATCTTCAGGTTGCACATCCAGCCA  
TTCCAACGCGCGCTACCATTTTTTGGTTTACACCCGCAATTGACCTGAATAAAATCGCGCGGGCTAAAAGTTAAGCGCA  
ACCCGTTTGTAGTCATACAGGGCATCTACCAGAGACGGTTTTCAGTATCTCACTATCGGGGGCGAGATACAGATCCAGG  
CCTTCAGAATGCGAAAAGCGTTCCAGTTTTTCCGATCTGCCGAACCTTAGCGGTGCGGTATGGCGAAAATCATCAGCGT  
GCCGCTGGTTGCTGTACCAGTTCAACATGACCAAGATGGCGCATAGCTTGTAAAGTGCAGACATGCCCTGACTTTGG  
GCAGCAATGCTTCAAGTTGGGGCGCTAAAATGGGGCATTGTTTACGTCGACAAATGCACTGGAGCCCGCTTTGCGAAC  
CCCATCTGAAGTTGCTGTGTTTTCGGTAAGTAGTTCCAGACTTAAACGCGCGGACGGCGATAGCCCAGGGAACATCGGC  
GATCACTTCAGAGACATCGTGTTCATTAATCGGGCAGTGGCGCACTTTTGTTCGCTGTGTAATCCACGCTGGCGT  
GTTGTTGCTGACAGCCACCGCATACGCCAAAATGAGGACAGCGTGGCGTTTCCGCTTCCGGGCTATCGCTTAAACGGCGT  
ACGACTTTAGCGCGGCATACTGTTTTTATCTTCAGTAACAGTAACTTCCGCGTTTTCTGCGGCAATAATCCGGGGAT  
AAATAGCGTTTTGCCGTTATGTGCGCCACGCCCTGACAAAAGAGTTCGAGGTGTTGACTGAAACGGTTATGATCTGAC  
GCGTGTGTCGTCGTTTTGACAGAGTAGAATTTGCCATTGGCGAGACTTTTCAATTTAACAGTGTGACCTTAATTGT  
CCCATAACGGAACCTCATGACCAACTACAGCCTGCGCGCACGCATGATGATTCGATCCTGGCACCAGCGTCTTATTG  
GTTTATTGCTGAGTATCTTTTTGTCGTGCATCGTATAACGACTTGCAGCGTCAACTGGAAGATGCCGTTGCCAGCATT  
ATTGAGCCGTTGCAATTTCTACTGAATATGGCATGAGCCTGCAAAATCGCAATCTATCGGTGAGTTAATAAGCGTACT  
GCATCGTCGCCATTCCGATATTGTTGCGCGGATTTCCGTTTATGATGAAAATAACCGACTCTTTGTCACCTCCAATTTT  
ATCTTGATCCCTCATCAATGCAGCTCGGCAGCAACGTGCCGTTTCTCGCCAGCTCACTGTCACTCGTACGCGGATATT  
ATGATCCTCCGACGCGGATATTTCTGAGAGTTACTCCCCGACGAATCGCCAGTAGCGATGCCAAAATAGTCAAAA  
TATGTTGGGATATATTGCGTGGAGCTGGATCTTAAATCGGTTGCTTGCAGCAATATAAAGAGATCTTTATTTCCAGCG  
TGATGATGCTGTTTTGTATCGGATTGCGCTTATTTTTGGCTGGCGTTAATGCGCGATGTAACCGGTCCGATTGCAAC  
ATGGTGAATACCGTCGACCGCATCCGTCGCGGGCAACTCGACAGCCGGTGAAGGATTTATGCTCGCGAGCTGGATAT  
GCTGAAAACGGTATCAACTCGATGGCAATGTGCTGGCTGCTTATCACGAAGAGATGCAGACAATATCGACCAGGCGA  
CGTCCGATCTGCTGAAACGCTGGAGCAGATGGAATTCAGAAGTTGAGTTAGATCTGGGAAAAGCGCGCCAGGAA  
GCGGCGGTATTAATCCGAGTTTCTGGCAAATATGTACACGAGCTGCGTACACCACTGAATGGTGTATTGGCTTTAC  
CCGCTGACGCTGAAAACAGAAATAACACCAACGCAGCGGATCACCTGAATACGATTGAACGTTCCGCAATAATTTGC  
TGCAATTATTAATGATGTTCTCGACTTCTCGAACTGGAAGCAGGTAAGCTGATTCTGGAAGTATTCCATTTCCACTA  
CGCAGCAGCTGGATGAAGTCGTTACTGCTGGCACATTTCTTACGATAAAGGGTTAGAACTGACGCTCAATATTA  
AAGCGACGTGCCGTGATAACGTGATCGCGACCCGCTGCGATTACAGCAAATCATCACTAACCTGGTGGGGAAATGCAATTA  
AATTCACCGAAGTGGCAACATTGATTTCTGGTAGAAAACGTGCGCTGAGTAATACCAAAGTGCAGATTGAAGTGCAG

ATTCGGGATACCGCATTGGTATTCTGAACGCGATCAATCGCGCTTATTCCAGGCCTCCGACAGGCTGATGCCAGTAT  
TTCCCGCCGTCATGGTGGCACCAGGCTGGGGCTGGTATTACACAAAACTGGTTAATGAAATGGGCGGCATATTTCTG  
TCCATAGCCAGCCGAATCGCGGTTCACTTTCTGGTCCACATTAATCTCGATCTGAACCCGAACATTATTATCGAAGGG  
CCATCCACCCAGTGCCTCGCAGGTAAGCGCCTGGCCTATGTGCAACAACTCCGCAGCAGCGCAATGCACGCTGGATAT  
TTTAAGTAAAACGCCGCTGGAAGTGGTTATAGCCCAACGTTCTCCGCGCTGCCCTCCGCGCATTACGACATGATGTTGT  
TAGGCATCGCGGTGACCTTCCGCGAGCCGCTAACAAATGCAACATGAGCGATTAGCGAAAGCGGTATCGATGACCGATTC  
CTGATGCTGGCACTTCTTCCATGCACAAGTCAATGCTGAAAACTCAAGCAAGATGGTATCGGCGCGTGTCTGCTGAA  
ACCATTAACACCTACACGCTGTTGCCTGCCCTGACGGAATTTTGTATCACAACAAAACACGCTTTTGCCTGTAACCG  
ATGAAAAGTAAGCTGGCAATGACAGTCAATGGCGGTTGATGACAACCCCGCTAACCTGAACTTATCGGCGCATTGCTGAA  
GATATGGTGAACATGTGGAATTTGCGATAGCGGGCATCAGGCGGTTGAACGGGCGAAACAGATGCCGTTGATTTGAT  
CTTAATGGATATTCAATGCCGGACATGGATGGCATTGGGCTCGCAACTCATCCACCACTCCCGCATCAGCAACAAA  
CGCCGTTATCGCGTAACGGCGCATGCAATGGCCGGGCAAAAAGAGAAGCTGTTGGCGCAGGGATGAGCGATTATCTG  
GCGAAACCGATTGAAGAAGAGCGATTGCATAATTTGTTGTTGCGCTACAAGCTGGCAGCGGTATTTCTCTCGCGTGT  
GACGCCCCAAGTCAACGAAATTTGGTGAACCCGAATGCGACCTCGACTGGCAACTGGCACTACGCCAGGCAGCAGGAA  
AAACCGATTTAGCGCGCATGCTGCAAAATGTTACTCGATTTCTGCCTGAAGTTCGCAACAAAGTTGAGGAACAGCTG  
GTTGGAGAAAACCCGGAAGCCTGGTTGATTTGATTCATAAACTGCATGGCAGTTGCGGCTATAGCGGTGCCCGAT  
GAAGAATCTCTGCCAACTGATCGAACAACAGCTACGTAGCGGTAATAAGAAGAAAGATTGGAACCGGAGCTGCTGGAAC  
TGTTGACGAGATGGATAATGTCGCGCGCAAGCCAGCAAAATTTCTCGGTAATGGATGCTTGTGAGTAGCAATCGGC  
TTTTTATGACGCTGGTTTTCAGATTGGTGACAAAGTGCCTGTGTTTATGCCGGATGCGGCGTTAACGCCTTATCCGGCCTA  
CAAAACCAATTAATTAATGAATTAATAAATGATGTAGACCTGATACATAGCACAACAGGCTATTTTGCCTTAGCATC  
AGTCTCAAACCGGCTCCAGATAGAGCCGTTTGGTTTTCTGTCTTAACGCACCATGCACGGGCGCTTGTATCGAACGT  
CCAGCCAGGAATCAGATACTGCATTCCCATCGCATCGTACGCGCGCAAGCCCGTGTCTGATACAGCTCATGGCTT  
TCATCACTTGCATATCGATTTCTACACCCAGCCCCGTTTTTCTGGCACCTGTACCAGCCGCTTTGATCTCAAC  
GGTCTTTGGTCAGGCGCTGATTGCCTTCTGCCAAATCCAGTGCATCAATAGCAGTAATTTTACCCGGTGCAGCGC  
GGCAACATGGGTAACATCGCCAGGAAATATCGAAGTGGTTGTAGAGTGAACCCAGGTGAGGCAAAATTCATGGC  
ACATTTGCGCCACACGTACCGAACCTTGATTGTCAGAAATGCGGATCCGCCAGCGGGATATCAACGGATTGCAGGGAG  
AGCGTATGGCCATTTGCCGCCAGTGGTGGCGATCATATTGGTGCAGTGGTAGACCTGTCGCGGACGGAACCTGTC  
CATCACTTACGCCCCGAGAAACCTTGTCTCCGACACACGGATCTTCTGCATAAGCCAGCGAACCTTTACGGTATTTAC  
CGATTTAATCGCTTCGTTACGCGACCGACCGTTAGGATCGAGCGTAATACGCGCCTGCGGGAAGCGTTGCGCCAGT  
GCCACAATAGACTCGGCCTTCTTCCCGGCCAGTACACCGCCCTTCAAGTTTAAAATCGTTGAAGCCATATTTTTCATA  
TGCCGCTTCCGCCAGGCGCACCCGATCCGGCGTTCATCGCTTCTTATGACGCGAGGCGATACCAGTCCGATGAGTCAT  
CCGGCTGGCTTTGATACGGCAGCGGCTGGCTTTGCGATTACCGACGAAGAACAGATAACCGAGCATTTCGACTTCGCTA  
CGCTGTTGACCATCGCCAGCAGCGATGCCACGTTTACCCCGATGCTGCCCGCAGCAGATCCAGCATTGCCGCTTCTAT  
CCCGGTAACATACATGAATAGTGGTACGTAGGTCAAATGCTGCAAACCGCGCCACCAGCATCAGCATCGGCAAAAGTAT  
TACGCAACAGCGTCAAGACGTTTTTGTATTACCCAGCGTTTTACCTACCACAGCGGAATCGCATCTCCAGCGTTTTA  
CGGATTTTCTCGCGCCGGGAATTTCCCTACGCCAGTGTGACCAGAATTATCTTTGATAATCACAATATTACCGGTA  
GAACGGTGCCTGTCACCACTCAGATTCATCAGCATACTGTATGACCCGCCACCGGATAACCTGCATTTACAGTAACAA  
CAGGCGTGTAAATGAGAACTCATATTTATGTCCTTTTTCAGAATCAATGACGGCCGAAAACGGGACGTTTACGGTCAA  
AGTCCAGCCGGGATCAGTACTGCATCGGACCTCGTGTGACGCGCACCAGGCGAGCAGGTTTATAGGCTCATGT  
GCCTTTGTACCTGTTCCAGTCCAGTCCAGCCAGCCAGCGGCGCATCAGGAACGGCAATTTTTCCGTTTTTAATCTC  
CAGCGGATTTTGGGTGAGGCGACAATCGCCCTCTGCCAAATCCAGTGGGTATCGATAGCGGTAGGATTACCCGGTGGCG  
CCGCGCCACATGGGTAACATCGCCAGAGAGATATCGAAATGGTTATAGAATGGCAGCCCCAGGTGAGCCCCAGTGC  
TCGCAAAAGCTGCGCCACACGGACTGCACCGAAAGCGTCCAGAAGTGCAGGATCGGCAAGTGGAAATATCTACCGCATTGAG  
CATCACCGCATGACCCATTTGCGCGCAGTTGGTGGCGATCATGTTAGTGCAGCGGGCAAGCCGGTGCGCCGTCGAAAT  
CCGCCATCACTTACGTCGGAGAAGCCCTGTTCTGCGCCGATGGATCTTCCGCATAGGTAAGAATCATTACGCCCT  
TTGCATAAAGAAATGGCTTCATCAAGCAGCATGCACCGTTGGGATCAACGGTAATCCGCGCATCCGGGAAGCGTTTCTT  
CAATGCACGAACAGTGTGATTTCTGCTCGCCAGGTAACACGCCGCCCTTAAAGTTGAAATCTTTAAAGCCGTAGCGAT  
CCTGTGAGGCTTCCGCCAGCAGCACAACGGCTTCTGTTGTTGTTGTTGTTGTTGTTGTTGTTGTTGTTGTTGTTGTTGTTG  
CCCGCGTATTTTCCACATAAGGAAGATCGGTTTTGGTCCGATCACCAGATATAAAACAGATAACCGAGGACGGTAATAGC  
CTCGGTTGCTTGCCTGGCCCTAACAGTTCGAGACCGGAACATTCAGCGCTTACCTAGCAGGTCAAGCAAAGCGGCTT  
CCAGCGCCGACGGCGTTAACCGTAATCAAAGTCCAGGCACCTTACCAGGATATCAAATCGGCGGCTGATTA  
CCTTTATGACCTGCTGGACCACTTTATTCAGTCCGCAACTTCTGGCCAGAACCATCGGAATAGCATCGACAAGCGT  
CTGATAAATACATCTCCGCCCGGCGTTCACCAATGCCGGTATGCCCGGCTTATCGGTGAGTACCACAATATTGCGGG  
TGAAATATGCGTTATGTGCCCAACCAATTAAGCAACATGCTGTATGCCCGCCACCGGAATGACTTTTCATATCAGTA  
ATAACAGGACTGGATTGTGTCGCATCTTATTGCCCGCAACAGGTTTAACTCGATACGCTTATATCGCCACCAGCA  
CCAGGTAGCTCAGTACCGGATTAAGGCATGAACACCAACATAAATCAGCGCCCATTAACGAGCCAGTCTGCGCAACG

ATATAACCAATTGCGATTGGCGTGACGATGCCAGAAATGTTACCGAACATGTTGAACAGGCCACCGGAAAGACCGCTGAT  
CTCTTTTGGCGGGTATCTGCCATTACTGCCCAACCCAGCGCCCCGATGCCCTTACCGAAGAAGGCCAGCGCCATAAAGC  
CGATGATCATCCACTCAACGTTGACGTAGTTGCAGAACACCATCACCATCGACAGCAACATGCCATTACGATCGGTGTT  
TTACGCGCAATGTTTCAGCGATCCCCTGCGGGCGCATCAGCCAGTCGGAAATAATCCCACCCAGCACACCGCCGATAAAACC  
GCAAACCGCCGGAACGGAAGCCACAAAGCCCGCTTTTGAAGATCGACATCCCCTGCGCTGACCCAGATAAACCAGGAAAC  
AGGTAATAAAGAAAGTAAGTCAGGGCGTTGATACAGTACTGACCGATATAAACGCCGATCATCATCCGTGACCCTAGCAGC  
TGTTTGATCTGCCCCACTTCACGCTGAACGGCACTTTAACTTTGGTGTGTTTGTCTGATCCATATTGATCAGCGCACCACC  
CGCGGGATGTAATCCAGCTCTTTCTATTTACCCCGGATGTTGATTTGGCTCGTGGATGACTTTCAACCAGATAAAGC  
TGATGACAATCCCAGACCGCCATAAAGAAGAAGAGCTGTGACCAGCCACTTCATGCGTCAGCCAGCCATAATCGGC  
GCGAAGATCACCGTTGCGAAGTATTGAGCGGAGTAAAAATCGACACCGCGTTCCCTTTCTGCGCCGAAACCAGGC  
CGCAACAATGCGACTGTTGCCGGGAAAGATGGCGCTTCAGCAAGCCGACCAGGAAGCGCAGCGTAAACAGGGCAACGA  
TAATGCCGAATCCACTAAGATATCGACGAAGCCTTCAGCAAGTAAACATCGACCAGATAAAGATCGACCAGAAGTAG  
ACGCGTTTTGAACAAAACGGTCCAGCAACAGCCACCAGGGATCTGCCGATAACATAAGCCCATGAGAAAGCAGAGAA  
CACATAGCCCATTCCCACGGGATCAAGGCCGATATCTTTGGCCATTTCCGAACCGGCGATAGAGAGCGTAGCGGGTCCG  
CGTAGTTGAAGGATGTGACGATAAACAACATCACCATACTCCAGTAACGAGCATTGTGCGTTTTTCCACTGCTCGCA  
GCCTGACTTAAAGAACTCATTGTTGCACTCCTGAAAATTCGCGTTAGCCACGCTCACTCTGGACTGCGACATCGCCAGGA  
AATCAGAGGTGACGTAGGGTGTGTTTTTGGCGTTTTATAGGTCGTTCCGCGAATACGGCGCGTGTGTTATATCTGGCAATA  
GCAGTATAAAAAGCGCGCCATAGCGGCTCACCGTGAAACAACAACATTAATGCGTTCAATGAGGCCGATTTTTGGCAT  
TAGCCCTGGACGGTGAATCCACTTCACGGAAATGAAAAACAAGAACAAGAAAGGAAAGGTTAAAACGAAGAAATAAAGAA  
GAGTATGAAATGGATCGCTTACTCCAGGCAACCGCCAGTAAAAATCCGCGCTATGAAGCAGTTTTTACTGGCATTGTC  
TGAAAAGATTGATTGAGCACCCTAAAACGACATTTACCGCTCGCTGAACATATCAGGACAACAGCGTGCCCCACTGTT  
CGACCCACGGATTTGATTCCGTTTCCGGTTCCGGTTCTCACTGGCGTCAATCAACAGCATTTCGCCAACCCGCTGAGCG  
CTCTGTTCTGCAACAAGGCATCGAAGTGTGCGGCCATTGCAGAAATTCACATACTACTGTGCGCGAGCGCAATCAC  
GCCATAACGCAGATTCGGTGGAAAGCCAGACTATCTTTGATTCCCTGAAAGAGTGGCACAATGCTATCAGGAAGGTCCG  
CCTGCCCGGTGCGTGGACGTAACCACCAGAACATACTTATCTGATAGGGCAGCCAGTCGTTAATTCCAGGATCTTCAAT  
ACCGTTGCTTTGTGGCCCTGCGCGGTGAGAATCGCTTCCGCTTCTCGGCCACTAACAGTGAATTCCTGATCGGTGCC  
GACAAAAATACCAATTTCCGCCATACCGTTTTCTCCCTGGATTAGGAATTATCTCTCCATCTGACCCGATGGCGCACT  
GAACTCAACCCTTTCATTTTTCAGGAAGCAGACCGCGCCAGCCAAATTTGTATAACGCCTGCATCCAGGTGTCGTCCAGGC  
CCGCGTGAATAGTCAGCGGCTCGCCAGTAAAAGGATGCGTCAATGACAACACTGACTGGCATGTAGCATTAAACCGCTGGAGG  
CCAAAATGCTCAGCACCGCTGCGATTCTGGCGTAAATCGCCATGTTTGTATCGCCAATAATCGGATGACGCAAATGGGC  
AAGATGTGCGCGAAGCTGATGTTTGGCTCCGGTTTTCGGCTCCAGTTCACCAGGCCGTAGCGCGTGGTCCGGTAACGTC  
CGGTCGCTACCGGCATTTCTACGGTCGCCAGACCGCGATAATGCGTCACTGCTGGCTGCGGGCCTTTATCTTCCGGGCA  
AATTTATCAGCGATTTTGTCCAGTCTTCCACCAGTGGATAATCCAGCACCGCTTCTTCCATCAACCAGCCGCGCAAT  
CGCATGGTAACGTTTCTGGATTTGGTGTCTTCAAATGTTGTGCCAGCAGCCGTCGCGCTCGCTGGATAATCCCATCA  
ACAACACACCAGAAGTGGTCCGGTCCAGACGATGAGCAGTAAAAACATGCTGGCCTATCTGGTCACGCACGGTTTGCATG  
ACCACTACTTTCTCGTCGATCCAGCCAGTCCGGTGAACCAGCCAGCCGGAGGGTTATTTACCGCAACCAGCCATTC  
ATCTGATAGAGTATTTCCAGCATTAGCTCGCATATCCGCAAAAAGAGCATCCAGTTTTTCCAGCTCAGCCAGAATAAG  
CGCGGTTGCGGATGGTCCGTGCCAGCGCCATTTTATAATAGGGTGAACGGCAAAAAGCGCCCGTAACGGCTGTTTGT  
TATCTAACAATCGTGCATTGCGGGATCAGCACCCTGCAACCACTCCAGTGGTCCATGGTGTCCATAAAGAACGGT  
TGGTACTATTAATTTGATCGGGTTCATCGTTTTCCGCACTGCTGATGTTTACGCAGTAACGCTTCAAGCGCTG  
CAACTGGAGACGAACCGGTCATGAGTGGTCATAAAGCAACCTCAATAAAGAAAAACTGCCGGAAGGATAGCAGGAATAA  
AAAAAGGGAGCACTGTATTCACAGCGCTCCCGTTCTGTTTCCGAGCATTCCAGCTACTTTTTGTTGCTCCCTGCTCATCCT  
TGACAACTTTTCTCTGGCCTTGGCGCAATCGTTCATCCTGAACTATTGCTTCTGCTCACACCACCCCGATGTGATAC  
TTCATCCTGAAGTGTCCCTGGCCTTCTGACCCACCGAATCATCCTGACCGTTCTCATTCTCCATCCTGGAGGTGTCCT  
TTAACGCGTCTGCGTCATCCTCTTCCGTTTATCCAGAAGCCTTTCCCTGAAACACCATCCTGGTGTGCTCCTGCAGAAGT  
GTCATCATCCTGATGTTCACTTCGTTGCTGACTCCCTGTCGACGAAGATAGAATCGTCTTTTTCCGGAAGTCTTACAAG  
GCGCTTACAGACAATGCCTTAAAGAAAATTTTATATGAAAGTTAAGAATTAACAATCAACATTTTTGATTTTAAATGAAAA  
TAACGATTTCTATTTTTAAGTATTCGTTATTTTCTGGCGATCTCTACAGAGTCTGTAAGAGATCTCTACAACCAG  
ATGGGGTATTTGGATTACAGAAGAGGCTTAAAGTTGATTAAGGAATTCGCAAGATTTGAGGCTAAATGCGTCCGTTTACG  
TGTTCCAGCGTCTCTTTGCACACTTCACCGGAGAGATTACACACCAGATGACCTCTAATCTTCTTCCAGCGTCCGCA  
TAAATAGTGTGGCGGCAGTTTTAGCCTTTTCTGAGTACCAGATGACCAATCAGATTTTTCTGCACCCGACGGAAGTCG  
TCTTCACTCCAGTTTTGAGCAATGTGAGTTGATATCGCAAACCTGCGCGTGCATATCCCAGGCAAACTGAGTCGTATA  
AAAGGTATGAATTTGGGTTGATACAAATATCAAAAGCGGTTCAACCGGTTTACATTTTTGTTCCCGGTAACCGGCT  
GGGTTGCCAGTATACGGATCTTCCGTTAGTTGAAATAATGCACGGTGAAGGAACACCGTACAGTTTCTCACTTAAACGGC  
CAGTTTTATGCTCTTATGCCACGCATCGCAGTAGCGTGCAGTAAAAATCTTTAGGGCTGTGCGGTCAAAATCGTCCAC  
TAATTTCTCTTCACTTAAACCAGATACACTTGTGTTTTAGTTTATCTGGTTTATGACGGTGAACATGTCTTCTTATG

CAAACCATCAGGCACTTGC GGCCCTGACTCTTGAAAAATCAACCGATTACCGGGATACCTATGACGCCAGCCTACTGCAA  
GGCGTTCCACGCAGCCTGAATCGCGACCCGCTGGGTCTGAAAGCGGATAACCTGCCTTTTACGGTACGGATATCTGGAC  
GCTGTATGAACTTTCTGGCTGAATGCGAAAGGTTTGCCGAGGTGCTGTCCGGTCATGTTGAACTTGATTACACCAGCG  
TAAATCTGATTGAGTCAAGAGTTTTAAGCTCTATCTCAACAGTTTTAACAGACGCGTTTTAATAACTGGGATGAGGTG  
CGCCAGACGCTGGAGCGGACTTAAGCACTTGCCTCAGGGTAAGATTAGCGTGGCGTTATATCGTCTTGATGAACTGGA  
AGGCCAGCCGATAGGTCATTTTAATGGCACTTGATTGATGACCAGGATATCACTATCGATAACTATGAATTCACACTG  
ACTATCTGGAGAATGCCACCTGTGGTGAAAAAGTAGTGAAAGAGACGCTTGTCAGCCACCTGCTGAAATCAAAGTGCCTG  
ATCACCCATCAACCAGATTGGGGTTCGCTCAAATTCAGTATCGTGGACGCCAAATTGACAGAGAAAACTGCTGCGTTA  
CCTGGTCTCATTCCGTCATCACAACGAGTTCCACGAACAGTGCCTGGAACGCATCTTTAATGACCTGTTACGCTTCTGCC  
AGCCAGAAAAATTGAGCGTTTACGCAGTTATACCCGCTGCTGGCGGTCTGGACATTAACCCGTGGCGCAGTAATAGCGAT  
TTTGTCCCATCGACCACAAGACTGGTTCGGCAATAAATTTTTCTCAATTTTGGTGTGCTGGATTACCGCAGAAGGTTGTG  
AAAGGTCATCAGGCAGGGCTATTGTAATCAAAGGAATGACGATATTCGTCACATAAGGAGTTTTTCTTGATTACACATA  
TTAGCCCGCTGGCTCCATGGATATGTTGTCGAGCTGGAAGTGGATATGCTTAAACGCACCGCCAGCAGCGACCTCTAT  
CAACTGTTTCGCAACTGTTCACTTGCCGTAAGTCCGGTAGTTTGACCGATAACAGCAAAGAATTGCTGTCTCGTTT  
TGAAAAATTCGATATTAACGCTTTGCGCCGTGAACGCGGCTAAAGTGAACGATTAATCCCCGGAAGAGGCTTTTG  
TCGATGGGCGAATTATTCCGCTTTGCGAGCCAATTGTTCCGCGTCTCGCTGACATTCTCTCGTTTACGGGCAAATC  
CATAACACCGTTCGTTTTTCCCAACCTGAATCTCGACAACTCCGTCACATCACTAACCTGGTCTTTTCCATCTTGCGTAA  
CGCTCGCGCTGCATGTGGGTGAAGCGCAAATATGGTGGTCTGCTGGGGCGTCACTCAATTAACGAAAAACGAGTATT  
TGTATGCCCGTGCCTCGGAAACAGCTGGGCTGCGTGAGCTGAATATCTGCACCGGCTGTGGTCCGGGAGCGATGGAA  
GCGCCGATGAAAGGTGCTGCGGTGCGACACGCGCAGCAGCTTACAAAGACAGTCGTTTTATTGGTATGACAGAGCCGTC  
GATTATCGCCGCTGAACCGCTAACCCGCTGGTCAACGAATTGATCATGCCAGATATCGAAAAACGCTGGAAGCGT  
TTGTCCGATCGCTCACGGTATCATTATCTTCCCTGGCGGTGTTGGTACGGCAGAAGAGTTGCTCTATTTGCTGGGAATT  
TTAATGAACCCGGCAACAAAGATCAGGTTTTACCATTGATCCTACCGGCCGAAAGAGAGCGCCGACTACTTCCGCGT  
ACTGGACGAGTTTGTGTCGATACGCTGGGTGAAAACGCGCGCCGATTACCGCATCATCATTGATGACCGCTGAAG  
TCGCTCGTCAGATGAAAAATCGATGCCGCTGGTGAAGAAAAATCGCGTGATACAGGCGATGCCTACAGCTTAACTGG  
TCAATGCGCATTGCGCCAGATTTGCAATGCCGTTGAGCCGCTCACGAGAATATGGCTAATCTGAAGCTTACCCGGA  
TCAACCTGTTGAAGTGTGGCTGCCGACTGCGCCGTGCGTTCTCCGGTATTGTGGCGGTAACGTAAGAAGTCCGTA  
TTCGCGCCATTGAAGAGTTTGGTCTTACAAAATCAACGGCGATAAAGAGATTATGCGTCGATGGACGACCTGCTACAG  
GGTTTTGTTGCCAGCATCGTATGAAGTTGCCAGGCTCAGCCTACATCCCTGCTACGAAATCTGCACGTAATCTCCGCT  
CCCCGGTGAGTTTTGTTGCCGGTTTTCTCGTTTTTGGTCACTTACTCATCAACTCATTTCAATTTGTTATATGAATGTT  
TCTTACCACCTCACGCGACAAATATCATCACAGTTAATATGTCATACAATTTATGTTGCAACGCAAACGTTTTCCCTATT  
TTCATAAACCGTATTTTATCGCTATGAAAAAGAAATATCGCCATGATTAACAAAAGTATTGATTTTTTTCAGTTCAACC  
TACATATATTGCGCGCCCCGGAAGAAGTCAGATGTCGTTTAAATGGGCAAATATTGCCCTTAAATTTCTTTTTACTTTTTGA  
TTTACAGAGTAAAGCGTTGGGATAATCTATCTTCCAAGTAGATTATTGATTTGAGATCAAGATCACTGATAGATACATA  
ACTTGTGTGTATCTTTCCGCCCTCAAATTATTACGGCGGTAATGATTAAGCCATCGCCGATAGACAGATTTCAATTTTA  
CGGTACGGCACCTTCCGGGCTGAACTGGCTAAAAGCTGAATTTTGCATTCTCCAGGAGAAATAGATGGAACGACT  
CAAACAGCACGATTGCGTCAAGAGACTCTCGTAGTGCCTGGCGCAAGACAGACACCATGTGGATGCTGGGCTTTACGG  
CACGGCAATCGGCGGGGCTGCTGTTCTGCCAATCAACGCCGTTGTTGGCGGTATGATCCGCTGATCATCATGGCTA  
TCCTTGCCTCCGATGACGTTTTTTGCTCACCGGCTGACTCGTTCTGACTGTCTGGTAAAAACCCGGGCGAAGAC  
ATCACCGAGGTTGTAGAAGAACCTTTGGTATTGGCGAGGTAACCTGATTACCCTGCTACTTCTTCTGCTATCTACCC  
GATCCTGCTGGTTTTATAGCGTGGCAATACCAATACCGTTGAAAGCTTCATGTCTCACCAGCTGGGTATGACGCCACCGC  
CGCGTGCGATTCTGTGCTGATCCTGATCGTGGGTATGATGACCATCGTTTCGCTTCGGTGAGCAGATGATCGTTAAAGCG  
ATGAGTATTCTGGTATTCCGTTTTGTTGGCGTACTGATGCTGCTGGCTCTGTACCTGATCCCGCAGTGAACGGCGCTGC  
ACTGAAACGCTGTCTCTGGACTGCATCTGCAACCGGAAACGCTCTGTGGATGACCCTGTGGCTGGCAATTCCGTTAA  
TGGTGTCTCGTTCAACCACTCTCCGATCATCTCTTTTCCGCTTTCGGAAGCGTGAAGAGTACGGCGATATGGCAGAA  
CAGAAATGCTCGAAGATCTGGCATTGCGACACATCATGATGGTGTGACCGTAATGTTCTTCTGCTTACAGCTGTGACT  
GAGCCTGACTCCGGCAGACTGGCTGCGGCTAAAGAGCAGAACATCTCGATTCTGTCTTACCTGGCTAACCACTTTAACG  
CACCGTTATCGCGTGGATGGCTCCGATTATCGCGATTATCGCTATACCAAATCCTTCTCGGTCACTACCTGGGCGCA  
CGTGAAGGCTTCAACGGTATGGTATTAATCTCTGCTGGTAAAGTAAAGTCTATCGAAATCAACAAGTGAACCGTAT  
CACTGCGCTGTTGATGCTGGTAAACGACCTGGATTGTTGCCACCTGAACCCGAGCATCCTGGGTATGATTGAAACCTGG  
GCGGTCCAATCATCGCGATGATCCTGTTCTGATGCCGATGTACGCAATTCAGAAAGTACCGGCAATGCGTAAGTACAGC  
GGTACATCAGCAACGATTCGTTGCTGATGGGTCTGATTGCAATCTCCGCAATCTTACTCTCTGTTACAGTAAGT  
CCTTTCGCGCCGCTTTCCGGCGGCGCTTCTCCGTTTTAACCGGATGATTTTCTATGATTAGCGTATTCGATATTTTCA  
AAATCGGCATTGGCCCTTCCAGTTCTCATACCGTTGGACCAATGAAAGCGGGTAAACAATTTACCGACGATCTGATTGCC  
CGTAACTGCTTAAAGAGCTGACCCGCGTGGTGGTTGACGTGTACGGCTCGCTCTCTGACCGGTAAGGCCACCACAC  
TGATATCGCCATTATTATGGGCTGGCGGTAACCTGCCGATACCGTGGATATCGATTCCATCCCAGTTTTATTACAG

ATGTGAATACTCATGGTCGCCTGATGCTGGCAAACGGTCAGCATGAAGTGGAGTTCCTGGTGGATCAGTGCATGAACTT  
CACGCCGACAACCTTTCTCTGCATGAAAACGGTATGCGCATTACCGCGCTGGCGGGCGATAAAGTCGTTTACAGCCAGAC  
TTACTACTCTATTGGCGGTGGCTTTATCGTTGATGAAGAGCATTTTGGCCAGCAGGATAGCGCACCGGTTGAAGTTCCTT  
ATCCGTACAGTTCAGCAGCCGATCTGCAAAAACATTGTCAGGAAACCGGGCTGTCACTCTCTGGCCTGATGATGAAAAAC  
GAGCTGGCGCTGCACAGCAAAGAAGAGCTGGAACAGCACCTGGCGAACGTCTGGGAAGTCAATGCGCGGGCGTATTGAGCG  
CGGTATTTCCACCGAAGGCGTGTTCCTGGCAAACCTGCGCTTCCACGCCGTGCTGCGCACTACGCCGGATGCTGGTCA  
GCCAGGATAAAACCACCACTGACCCGATGGCGGTTGTTGACTGGATCAACATGTTTGCCTGGCAGTGAACGAAGAGAAC  
GCTGCTGGCGGTGCGGTGTTGACTGCGCCGACTAACGGTGCCTGCGGGATTATCCCGCAGTTCGGCGTACTACGACAA  
GTTTATCCGCGAAGTGAACGCTAACTCACTGGCTCGTTACCTGCTGGTAGCCAGCGCCATTGGTTCCTTTATAAGATGA  
ACGCGTCGATTTCTGGTGTGAAGTGGTTGCCAGGTTGAAGTGGCGTGGCGTGCCTAATGGCGGGCTGGTCTGGCA  
GAACTATTAGCGCAAGCCCGCGCAGGTGTGCATCGCGCGGAAATCGCCATGGAGCACAACTCGGTCTGACGTGTGA  
CCCGGTGCGCGACAGGTACAGGTGCCATGCATCGAGCGTAACGCCATTGCGGCAGTAAAAGCGGTGAACGCCGACGTA  
TGCGCTGCGCGTACCAGCGAGCCGCGCTCTGCCTCGATAAAGTTATCGAAACCATGTACGAAACAGGTAAAGATATG  
AACGCCAAGTACCAGCAACCTCTCGCGCGGCTGGCAATGAAGATCGTTGCCTGCGATTAATCGCTCTCAAAGGCTC  
CGTTTTGCGAGGCTCTTCCCGATTTTCATCCAGCCGATGCTTCCGGCATCGAATGTTACCTTATCCGCTGATCT  
TTAAGGGGGTTATCGTGGTGTTCATTTGCTTATTGTCGATGCATGAATCTTATTCTGCGATTACGCCGTTAGGGG  
TCGCCCTGTGTCGAAACCTGCCAGCATGCGCTCGATCAGCTCATTATGCACAGCCAGCCAACCCACGCGGTGCGCGTTTT  
TGATGATGAAAACCGCAGTAGCGGCTGGCGTCAACGCTTACCAGATTACAAAGCGGGTGCACCGCAATGCCGGAAG  
AGTTGCACGACGAGATGCCTGCATTACGCGCGCTTTGAGCAACGCGGCTCCCGTGGTCAACCAGCGGCAACGAA  
GCCGATGACTTAGCCGCCACGCTGGCGGTCAAAGTGACACAGGCCGGCATCAGGCAACGATTGTTTCGACAGATAAAGG  
CTACTGTCAGTACTTTACCGACATTACGTATTGTTGATTACTTCCAGAAACGTTGGCTGGATGCGCCATTTATCGATA  
AAGAATTTGGCGTTCAACCGCAGCAGTTGCCGATTACTGGGACTTGGCGGGATCAGCAGTCAAAGGTACCGGGTGT  
GCGGGAATCGGACAAAAGCGCCACGCAGTGTGGTGCAGTTTTCAGAGTCTGGAAGGGATATGAGAATCTGGATGC  
GGTTGCCGAAAAGTGGCGCAAAAATTAGAAACCCATAAAGAGATGGCGTTTCTGTGCCGATATTGCCCGTTACAAA  
CCGATTTGCATATCGACGGCAATTTACAGCAATTGCGGTTGGTACGGTAACGGCGAGCCGGATACGCCGAAACGTCGTA  
TCCGGCATTATACATCAGCGCATTACCAGCGGTATGGTAAAGCTCTACAATATCTCAAGCGTTGCTTACGCGGGT  
TGCCACCGGTACAAACATCATCCAGTCCGCTGCGCCAGTCCCGAATGTCTTCTTGCCTACACCAACATCACGAAA  
TGTGGCGGAATACCGACATCACGGTTGAGAGCAAACACCGCTTCAACAGCGGATTACGCGCTCTTCCAGGCTCATACC  
TTCCACTTTACGCCCATAACGCGCGGATATCGCGTACTTCTCACCAGTAAAGTCAGCGTTATAACGCATGACATGCG  
GTAACAGGATGGCGTTCCGCAACACCGTGTGGAGTGTATAAAACGCGCCAGTGGATGCGCCATACCATGACCAACCCCT  
AACCCAACATTCGAGAAGCCATACCCGCAACATACTGCCGAGCGCCATTTCTTCTCCGGCATCCTTATCACAGCAAC  
CGATCCTCGCAGCGCCCCAGCAATGATTTCAATCGCTTAAATGTGCAAGTGCATCGGTTAGCGCCACGCGCCACGGTAA  
TATACCCCTCAATAGCATGAGTGAGCGCATCGACACCCGTCGAGCTTTCAGCGCTGGAGGCATACCATCCATCATGTCA  
GCGTCAATAAACGCCACCTGCGGGATATCATGCGGATCAACGCAAACTTGGCGCGTTTCTTCTCGTCAAGTGCATCAC  
GTAGTTAATGGTCACTTCTGCCGAGTACCTGCTGTGGTAGGAATTGCCAGAATCGGTACACTGGGTTTATTGGTGGGG  
AAAGCCCTTCCAGGCTACGCACATCGGCAAACTCCGGTGTGCTGATAATGCCAATCGCTTACAAGTATCCTGTGGA  
GAACCACCACCAATAGCGATCAGGTAATCCGCGCCGCTATTCTGGAATACACCGAGCCCTTCTTTCGACGACGTAATTGT  
TGGGTTGGGCACTACGCCGTCGTAATCGCCATGCCAGCCCTGCAGCATCCATCTTATCGGTCACTTTCGCCACCACGC  
ACAGCACCCGACCAACCATGCCGTTTCGTTGAGAACTTCTGTTAGCCATCATCCTTCTCTTGTGCTTTACGAAA  
TTACTCTTCAATTCGTAACCCATAGGTTTTGAATTTCTCCAGCACTACGGCAATCTCTTATCGCTCAGCACTGGCACCG  
GGTCCGTAATCGCCAGGTCGTCAGGTAAGTTGCGCCAGCACTTCAACTCATGCGCCAGCCATAACGTTTTTCCAGA  
TTCACCTCACAAAGCGATAAGCCCATGATGTTGTAACAAAGTTGCCTTACGATTTTTGAGAGCCAGCGCAACATGTTGAGA  
AAGTTGCGGTGTTCAAAGTGCATAAAGGCGCGAAGGAATAGAATTACCGCCAGCCGCCAATCATGTAGTGAATAG  
CGGGGATCGATCGGTTAAGAATGAAACTGCCGTGCAATGAACGGCATGATTGTGAACAACCGGTTGGCATCCGGTCTG  
CTTTGATAGGCTGCCATATGAAACGCCATTGCTTGGAGGGAGCTTCTCTCCTCATGTTTACCCTTGCATCAATAAA  
GACAATATGCGACTCCGTGAGTTTTTTCATATGGAATGCCTGTAGGCGTAATCAGCATCCCATCCTGATAACGTACTGA  
CGTTCCCGCTGTCCCCTGGTTCAGTCCAGGCGGGTCATTTCCAGGCAAGTGTCAATAATCTGACGAGCAAGTTTATTT  
CGTTCATTAGCTACCTCTCTGATTCAAACAGGCAATAATGTTGTTCTTTCACACTATTGAATTAGCCGTTTAAAT  
TACCACCATCTTCTTCTGATTAACAAGAAAGAAATCACAAGCTTATATTTGTGACCTGGTCAACTAATCACAGTA  
AATAACTGCAAGTCTCTTTTTATAACCCATTAATAAATGACCGCTTAAAAATATTTATCAAACGGTCATTTTTCTA  
TTCCTCAAGCCCGAATGACCGTTTTGCGCACAAACAATTAATACGGTCACTGATTTGTGTTTTTATGATTTATTT  
CTGAAACGGGCATGAAATTTGATTATTAAGTGTGGTAGTCACATAAAGTACCTTCTAGCTAATAAGTGTGACCGCC  
GTCAATATTACAGAGCGTTTTTATTTGAAATGAATCCATGAGTTCATTTAGACAGGCAATATTCACTGATATGAAGC  
CGAACTCGCTGGTTTTGCACTTTTAAAAACATAACCGATTACGTGCTTAAGCTTCTGAACCTAAGAGGATGCTATGGGA  
AACACATCAATACAAACGAGGTTACCGTGCAGTGTAGATAAAGATGCAGGGCAAAGCAGAAGTTACATTTATTCATTCCG

GCTGCTGTGCTCACTGTTTTTCTTTGGGCGGTAGCCAATAACCTTAACGACATTTTATTACCTCAATTCAGCAGGCTT  
TTACGCTGACAAATTTCCAGGCTGGCCTGATCCAATCGGCCTTTTACTTTGGTTATTTTATTATCCCAATCCCTGCTGGG  
ATATTGATGAAAAAAGCTCAGTTATAAAGCAGGGATTATTACCGGGTTATTTTTATATGCCTTGGGTGCTGCATTATTCTG  
GCCCCGCGAGAAATAATGAACTACACCTTGTTTTAGTTGGCCTATTTATTATTGCAGCCGATTAGGTTGTCTGGAAA  
CTGCCGCAAACCTTTTGTACGGTATTAGGGCCGAAAGTAGTGGTCACTTCCGCTTAAATCTTGGCAGAAACATTTAAC  
TCGTTTTGGCGCAATTATCGCGGTTGTCTTTGGGCAAAGTCTTATTTTGTCTAACGTGCCACATCAATCGCAAGACGTTCT  
CGATAAAATGTCTCCAGAGCAATTGAGTGCGTATAAACACAGCCTGGTATTATCGGTACAGACACCTTATATGATCATCG  
TGCTATCGTGTACTGGTGCCTGTGATCATGTGACGAAATTTCCGCGATTGCAGAGTGATAATCACAGTGACGCC  
AAACAAGGATCGTTCTCCGCATCGTTTCTGCCTGGCGCTATTCGCCACTGGCGCTGGGCGGTATTAGCGCAATTCTG  
CTATGTCGGCGCACAAACGGCCTGCTGGAGCTATTTGATTGCTACGCTGTAGAAGAAATTCAGGTATGACTGCAGGCT  
TTGCCGTAACATTTAACCGGAACCATGGTGTGCTCTTTATTGGTCGTTTACCAGGACCTGGCTCATCAGTCGCTT  
GCACCACAAAAGTCTGGCCGCTACGATTAATCGCTATGGCACTGTGCCTGATCTCAGCCTTCGCTGGCGGTATGT  
GGGCTTAATAGCCCTGACTTTATGCAGCGCTTTATGTCGATTAGTACCAACAATCTTCTCGCTGGCATTAGAATC  
TCGGCCAGGACCAAATATGGTTCGTCCTTTCATCGTTATGACCATATTGGCGGCGGTATTGTCCTCCGGTATGGGT  
TTTGTCAAGTACGCGGCGCAACATCCCACTGCTGAACTGATCCCGCACTCTGCTTCCGCGGTATTTATCTTTGC  
CCGTTTCTCAAACGGCACTAACTGAACATATTTCCGAATAAAGTGAGGAATCTGTAATGAAAAAATCAGCTT  
ACCGAAAATTGTTATCCGCCGGTTATTGACGGTCTGCGATGGGTGTTCTGAGTGCCTTGAAGAACAACAATGAATA  
TGCGAAAGCTACGGCCGCACTGCTGACCGAGAACTGCGCCATGCTGCGGAGCTGCCGTGAGTGTGTCATTTCCGAT  
ACCTGTATCGCGGATGGTGAAGCCGCTGCTTGGCAAGAAAAATTCAGCAGTCAAGATGTAGGCCTCACCATACGGT  
AACGCTTGTGGTGCTATGGCAGTGAACCATCGACATGGATCCAACCCGCCGAAGGCCATTTGGGGCTTTAACGGCA  
CTGAACGCCCCGGCGCTGTTTACTGGCAGCGGCTCTGGCAGTCAACAGCCAGAAAGGCATCCAGCATTCTCCATTTAC  
GGTCATGACGTTCAAGATGCCGATGACACATCGATTCTGCCGATGTTGAAGAAAAACTGTCGCTTTGCCGCGCCGG  
TTTGGCCGTCGCCAGCATGAAAGGTAAGCTATCTGTCGCTGGCGGCTTTCGATGGGTATCGCCGTTCCATTGTTG  
ATCACAACTTCTTTGAATCTGGCTGGGAATGAAAGTCCAGGCGGTGGATATGACCGAACTGCGTCGCCGTATCGATCAG  
AAGATTTACGACGAAGCCGAATTTGAAATGGCACTGGCCTGGGCTGATAAAAACTTCCGCTATGGCGAAGATGAAAATA  
CAACAGTATCAACGTAATGCCGAGCAAAGCCGCGCAGTTCTGCGCGAAAGTTTACTGATGGCGATGTGTATCCGCGACA  
TGATGCAAGGCAACAGCAAATGGCCGATATTGGTGCCTGGAAGAACTCACTTGGCTACAACGCCATCGTGCAGGCTT  
CAGGGGCAACGTCCTGACCGATCAATATCCCAATGGTGCACCGCCGAAGGATCCTCAACAGTTCAATTTGACTGGAA  
TGCGGTGCGCGAACCTTTGTCGTGGCGACCGAAAACGACAGTCTTAACGGCTGGCAATGCTAATGGGTACCAGCTCA  
CCGGCACCGCTCAGGTATTTGCCGATGTGCGTACCTACTGGTACCAGAAGCAATTGAGCGTGAACGGGCAATAAAGT  
GATGGACTGGCAGAACACGGCATCATCCATTTGATCAACTCCGTTCTGCTGCGCTGGACGGTTCTGTAAACAACGGCA  
CAGCGAAGGTAACCCGACGATGAAGCCCACTGGGAAATCTCTCAGCAAGAGGCTGACGCTTGCTCGCCGCTACCGAAT  
GGTGGCCGGGATCCACGAATACTTCCGTGGCGGCGTTACTTCTCCGCTTCTTACCAGGCGGCGTCCCGTTACC  
ATGACTCGTGTCAACATCATCAAAGCCCTGGACCGGTACTGCAATCGCGAAGGCTGGAGCGTGAATTTGCCGAAGGA  
TGTGCATGACATCCTCAACAAACGCACCAACTCAACTGGCAACCACTGGTTTGACCGCGCCTCACCGGTAAAGGGC  
CGTTTACGGATGTGACTCGGTAATGGCGAATGGGGCGTAACCATGGGGTCTGACCATCGCCACGTTGGCGCAGAC  
TTTACTCTCGCTCCATGCTGCGTATCCCGTATGTATGCACAACGTTGAAGAGACCAAAAGTGTATCGTCTTCTGC  
CTGGGCTGCGCACGGCATGGATATTGAAGGCCAGGATTACCGCGCTTCCAGAACTACGGTCCGTTGTACAAGCGTTAAT  
ACATTAACCTGATGTGATGCCGGTGCCTCCGGTACCAGGCTGAAACAAGCAAGAGTGGTTAGCCGGATAAGCAATG  
TTATCCGGTATATTGACGAGCGATTATGAAACAAGAAGTTATCTGGTACTCGACTGCGCGCACCAATGTCAGGCG  
CATCGCGTTAATCGGCAGGGCAAATTTGTTGCCCGCCTCAACGCTAATGCCAGCGATATCGCGATGGAAAACAACA  
CCTGGCACCAAGTGGTCTTTAGACGCCATTTTGAACGCTTTGCTGATTGCTGTGCGCAAATCAATAGTGAAGTACTGAA  
TGCCACATCCGCGGTATCGCGTACCCACTTTGGTGTGGATGGCGCTCTGGTAGATAAGCAAGGCAATCTGCTCTATCC  
GATTATTAGCTGGAAATGTCCGCAACAGCAGCGGTTATGGACAATATTGAACGGTTAATCTCCGACAGCGGTTGACGG  
CTATTTCTGGCGTGGAGCCTTTAGTTTCAATACGTTATATAAGTTGGTGTGGTTGAAAGAAAATCATCCACAAGTCTG  
GAACGCGCGCACGCTGGCTCTTTATTTCTGTCGCTGATTAACCACCGTTTAAACGGCGAATTCACTACTGATATCACGAT  
GGCCGGAACAGCCAGATGCTGGATATCCAGCAACGCGATTTAGTCCGCAATTTTACAAGCCACCGGTATTCCACGCC  
GACTCTTCCCTCGTCTGGTGAAGCGGGTGAACAGATTGGTACGCTACAGAACAGCGCCGAGCAATGCTCGGCTTACC  
GTTGGCATAACCGGTGATTTCCGAGGTCAGGATACCAGTTCCGCCCTTTTGGCGCTGGTGTGAACAAAATGAACCCGT  
GCTCTTCCGGTACATGGGAAATTTAATGGTTCGACGCGCCAGGTTGATACTTCTGCTGTTAAGTCAAGTACCGCGGTT  
CCACCTGCGAACTGGATAGCCAGGCGGGTGTATAACCCAGGATGCAATGGCTGGCATCCGGCGTGTGGAATGGGTG  
AGAAAATGTTCTGGACGGTGAACACCCCTGGCAAATGTTGATTGAAGAAGCTCGTCTGATCGCGCCTGGCGCGGATGG  
CGTAAAAATGCAAGTGTGATTTATTGTCGTGTCAGAAGCCTGGCTGGCAAGGAGTGACGCTTAAATACCACGCGGGGCT  
TCTATCGCGCGCGCTGGAAAGGTTAACTGCGCAATTAACAGCGCAATCTACAGATGCTGGAAAAAATCGGGCACTTTAAG  
GCCTCTGAATTTATTGTTAGTGGTGGAGGAGTGCACAACATTTGGAATCAGATTAAGCCAATATGCTTGATTTCC  
GGTAAAAAGTTCTGACGACGCCGAACGACCGTGCAGGAGCTGCGCTGTTCCGGTTGGTATGGCGTAGGGGAATTTAACA



GCCCGGAAGAAGCCCGCGCACAGATTCATTATCAGTACCGTTATTTCTACCCGCAAACCTGAACCTGAATTTATAGAGGAA  
GTGTGAAATGCTGAAAACAATTTCCGCGTAAATTTCTCCCGAACTATTGAAAGTGCTGGCAGAGATGGGACATGGAGATG  
AAATTAATTTTTCCGATGCTCACTTTCCCGCCATTGATGGGACCGCAGGTGATCCGCGCTGATGGCCTGTTGGTGAGC  
GACTTGCTCCAGGCGATTATCCCGTATTTGAACTGGACAGTTATGCACCGCCGCTGGTGATGATGGCGCGGTTAGAAGG  
TGAACTCTCGATCCTGAAGTAGAACGACGTTACCGTAATGCGCTTTCACTACAAGCCCCGTGCTGACATCATCCGCA  
TCAATCGTTTTGCGTTTTATGAACGGGCGCAAAAAGCCTTTGCGATCGTTATACAGGGCAACGAGCGAAGTACGGGAAT  
ATTCTTTTAAAAAAGGGGTAAACCGTAATCTCATACCGGTACGCCGATGACGCGGGCGGTTATCGAATGATGGGGT  
GAAAAATAGAAAGCGGCACGCCAGCAAGCGATAGTCGACCTGCTGCTGAACCATACCAGCCTGACCACGGAAAGCTCTCT  
CTGAACAGCTAAAGGTGAGTAAAGAAACCATTGCTCGCGATCTCAATGAATTACAGACGCAGGGTAAAATTTGCGCAAT  
CATGGACGCGCTAAATATATCCACCGTCAAAATCAAGACAGTGGCGATCCCTTTACATCAGGCTGAAAAGCCATTATGC  
GCATAAAGCAGATATCGCGCGCAGGGCGCTCGCGTGGATTGAAGAAGGGATGGTGATAGCCTTAGACGCCAGTTCAACTT  
GCTGGTATCTGGCAGCCAGTTGCCTGACATCAACATTCAGGTCTTACCAATAGCCATCCGATTTGCCATGAACTCGGT  
AAACGCGAACGCATTCAACTGATCAGTTCGGCGGCACACTTGAGCGCAAATATGGCTGTTACGTCAATCCCTCGCTGAT  
TTCCCAACTTAAATCGCTGAAATCGATCTGTTATTTTTTTCTTGTGAAGGGATCGATAGCAGCGGCGACTGTGGGACT  
CCAATGCGATCAACGCTGATTACAAATCGATGCTATTAACCGTCCGCGCAATCGTTGTTATTGATTGATAAAAAGTAAA  
TTAATCGTTACGGGGAAGCCCGCATCGGCATCTGGATGAGGTAACGCACATTATTTCTGATGAGCGCCAGGTTGCAAC  
TTCTTTGGTAACAGCCTGACGGAAAGGTTAGCAGGCGGAGACGACGCCCGGCTTGCCTGTTATCGCTCGTCGCGACG  
ACCACCCACCGCAGCCAGATGCGGGGACGTGCACCGTCACTTCTTCCGATCGTGATACAACCTGCCGCGCCTGAATCT  
GAGCATTTATGCCATGTTTCAAGCTGTGCCTGAATATACGCCAGATTGTGTGACACTTCTTCTGAGCGTTTTTTTCATC  
GGCAGTTTGGGTTGAAAATGGTTTACGGCACCGCCATTAACCGCCACTGCGCCATCAATGCCGCAACTTTCCGCGG  
TTTTTCAACCATATCGCATACCATCCAGGAGATATTGCTGCGCGTGGACGGAATTTGAAACCGTCTTCCCGCAGCCACG  
TCACCTGTCCGGTATCCATCAGACTTTGCGCCATCGGGCGGTTGTCGACGGAATAAACCCACATGTTGCGCTTACCAGT  
TGGTAGGTCCAGCGCCAGGCAAGCGCTAAATCCACCGCCACATCCCGTTCGCCAGGCGTTTATCCCACTCATCCGC  
AGGAATAAACACATGAAATGCCTTCCAGTTTGGCGTGAACGACTCGGCGCATCTGCCGAAATTTAGGCGCGGAA  
TGCCCATATAGAACGGCGAATTATTGTTGCTGTATGAGTAACCGGTATAGCAGCAGCCTGGTGCAATAAAGAATACATGC  
ACAACCGGACGCTTCCGCGTTTTCATAGTTCCGCGACCCCGCATCGCGCAAGGCAGCGGTAGCGGAACAGTAAATTT  
ACGGCAGAATTTAGTAACCTTTGCTTTGTTGTTGATCGGCAACTTCAACACGCAGTTACCCGCCCTTCTCTACTACGC  
CCTGTAACATGCCACAATGGGGTAATACGATCTTCTGGCGGCAATGCTGCAGGAGTCCCCCACCACAAACCACTGG  
CGGGCAAAAATTAATGAACTGAACGGCAGCTCACGGATTAATTTATCGCCATCATCAGGTTGATAACATTCATAAATGAC  
ATAACCCGATTTCTTTTACCGCGGGCAAAACCGAAAATTTCCCGCTGGCCGGCTTTATCGGTAATTTCTGCGGCGCACT  
CTTTTTCAAGCCCGGACGGCACAGCAATACAACCTTATTGACTTACGCCCTTTCGCTTTAAACGGATAGCACCAAC  
TAACATTAACGCCAGCCCGCGAGGAAGCTCACGCCCAACCGGAGTGACAAACGCCACAAACGCAGATGGGACAGCG  
CCAGGCAATAAAGGCTGCCGCTGAACAACACCGTGCCTAACCGGAGGAAAACGCTACTCCAGTAAAACAGATACTGATG  
CGACGCTGCATTGCCACCGCCAGACCTAAGATCGCCAGCGTATGAAACGCGCTGGTATTGAGGCGCGTCTGGATCCAGCC  
CATCTCAACGGCCCCATGGTTTTACTTAAACATGCGCGCAAAAAGCGCCAGAGCCACAAAATGAAGCCGCTAATGG  
CGGGCAAAAATCAGCATAAAACGGCTGGTCATGGTCGTAACCTACGTAATTTGTTTATAACGAAAGCGGAATTTTTCT  
TGTTTACGAGCGGCTTTCCGCGAGGATCCATTGGCGAAAAGCGGCTATTTTACCAGTTCTGCTGACTGTGATGACAAAC  
CAGATAAAAAGCATTTTTACTGACCAGAACATCATTAAACGGGCAAAACAGAGCTCCGGCTCGATTTAGATTGCGCCA  
TCACGTTATTTGCCAGCGCACTCCCTGCCGTTGGATAGCCGCTGACGACCATGGCGCTATGGCTAAAAATTTGCCCT  
TGCTGAACGTTGATATGATTAACCCCAACTGTGGGTATATGTCTGCCAGTACGCGCGCAAGCATGTAATAACGCT  
ATGTTTAGCCAGATCTTCCGGTGTCTTCAAGGGTTTTTTCGCCAGTACGAGTACGCGGCAACACACCCGCAATAAATATT  
CGGCGTACAGTTTTTCCACCCGTAGCCCCGCGCAGTTGCCCGACCATAAAAATATCGCCACATCAACATCATCCGCCAGC  
TTATCTTCTGACGATCAACCGCCTGGATTGCAACGTCAATTTCCCGGATAAGCTGAATTAAGCTGGAAGTTCGCGGAAC  
CAACCAATGAATGGCGAACTGGGGAGTAAACTGACCGTCAACGCCCCCTTGGCGCTACGGGCTGGAGTTTACGCGTCG  
CTTCCGTTAATTGCGAAAATATCTTTGATATCGAGGAAATAGCTTTGCCCTTCTCGGTGAGCAGGAGTGAACGATTA  
CGGCGGCGGAACAGTTTTAGCCCCAAAAATCTCAAGAGACTTGATTTGATGACTTACTGCGGCTTGGGTACAAAAAG  
CTCTTCTGCTGCGCGAGTGAACCTTAAATGGCGTGTGCGGCATCAAAAACCTGTAAGGCATTTAGCGGTGGTAATCGTT  
TAGACATGGCTATTAACCTTGGTGTAAATGAATTAACAATTAGATCACACTATGTAACCTATTAGTTTTTTTAACTCT  
GAGCCATTATAAATTGCTGTTGAGCTTCTACCAGCAAATACCTATAGTGGCGCACTTCTGAGCCGGAACGAAAAGTT  
TTATCGGAATGCGTGTCTGGTGAACTTTTGGCTTACGGTTGTGATGTTGTGTTGTTGTTGCAATTTGGTCTGCGATT  
CAGACCATGGTAGCAAAGCTACCTTTTTTCACTTCTGTACATTTACCCTGTCTGTCCATAGTGATTAATGTAGCACCGC  
CTAATTTGGGTGCTTTTTTTTTACCTTGGCATCGCAATTAATGATCCAGTTCCAGCATCTTTTACGTCAGTACGGTTG  
ATCTGCTGTTTGTGGCATTAGCGCTTTATACGAAATCATACCGGTATCGTTATCAGTCTGTGGTTTCCGTCAGAGAC  
GATGGTACGTCGTCATTGGTGTGCATCACATAGTTGAAACCGGAACAGGGCGCTCAGGGCAAAAAGTACAGCATAACGGCAG  
AAATAATTGCGGCAGTCTTTTTTTCATCATCTTCTCTTAAAGCGATTAATAAATCTTAATAGTATTGATTAACAGGCTAAA  
ATTAACGCCTAACACTATTCAGCATATGTTACTTACGCGGCTTCCCGAGGATATCCAGATAATTCTGATGGTTAGCACTC

TCCTTGTATCAAAGTGAATTTTGGTGCACGATCGGTGCATCAAGCCGAGGAGTACCATGAACGTTTTTAATCCCGCGCAG  
TTTCGCGCCCAGTTTCCCGCACTACAGGATGCGGGCGTCTATCTCGACAGCGCCGCGACCCGCGCTTAAACCTGAAGCCGT  
GGTTGAAGCCACCAACAGTTTTACAGTCTGAGCGCCGAAACGTCCATCGCAGCCAGTTTCCCGAAGCCCAACGCCTGA  
CCGCGCGTTATGAAGCTGCACGAGAGAAAGTGGCGCAATTAATGAAATGCACCGGATGATAAAACTATCGTCTGGACGCGC  
GGCAACCACTGAATCCATCAACATGGTGGCACAATGCTATGCGCGTCCGCGTCTGCAACCGGGCGATGAGATTATTGTACG  
CGTGGCAGAACACCACGCCAACCTCGTCCCCTGGCTGATGGTGCGCCAACAACTGGAGCCAAAGTGGTGAATTTGCCGC  
TTAATGCGCAGCGACTGCCGGATGTCGATTTGTTGCCAGAACTGATTACTCCCCGTAGTCGGATTCTGGCGTTGGGTACG  
ATGTCGAACGTTACTGGCGGTTGCCGGATCTGGCGCGAGCGATTACCTTGTCTATTAGCCGGGATGGTGGTGGTGGT  
TGATGGTGTCTAGGGGGCAGTGCATTTCCCGCGGATGTTAGCAACTGGATATTGATTTCTATGCTTTTTCAGGTACACA  
AACTGTATGGCCCAGAGTATCGCGTGTCTGTATGGTAAATCAGAACTGCTGGAGGCGATGTCGCCCTGGCTGGGCGGC  
GGCAAAATGGTTCACGAAGTGAATTTTACCGGCTTACGACTCAATCTGCGCCGTGAAACTGGAAGCTGGAACGCCAAA  
TGTCGCTGGTGCATAGGATTAAGCGCGGCGCTGGAATGGCTGGCAGATTACGATATCAACCAGGCCGAAAGCTGGAGCC  
GTAGCTTAGCAACGCTGGCGAAGATGCGCTGGCGAAACGTCCCGGCTTTGTTTATTCCGCTGCCAGGATTCCAGCCTG  
CTGGCCTTTGATTTTGTGGCGTTCATCATAGCGATATGGTACGCTGCTGGCGGAGTACGGTATTGCCCTGCGGGCCGG  
GCAGCATTGGCTCAGCCGCTACTGGCAGAATTAGCGTAACCGGCACACTGCGCGCTCTTTTGCCCATATAATACAA  
AGAGTGATGTGGATGCGTGGTGAATGCCGTTGACCGCGCTGGAATTTGTTGGTGGATTAATGACAAACCCGCAATTCG  
CCGACATCCGTTTCGGCACAAACGTAACCGCAGAAACGTTACGCAATACCTTCGACCCGTTGACGCAATGGGAAGATAAA  
TATCGCCAGTTGATCATGCTGGGAAACAGCTTCCGGCATTGCCAGACGAGTTAAAAGCGCAGGCTAAAGAGATTGCCGG  
ATGCGAAAACCGCTCTGGCTGGGATATACAGTGGCTGAAAACGGCAAAATGCATTTCTTTGGCGACAGCGAAGGGCGCA  
TTGTGCGCGCCCTGCTGGCGGTGTTGTTGACTGCCGTTGAGGGGAAAACCGCCGCCGAGTTGCAGGCACAGTCAACACTG  
GCATTGTTTATGAGCTGGGATTACGTGCGCAGCTTAGCGCTCACGCAGCCAGGGTTAAATGCGTTAAGCGAGGCGAT  
TATCGCTGCGACGAAGCAGGTTTAAGCACAGAACCAGGGTGGATAAGACGTTCCGCTCTCATCCGACCTGATTGTTAAC  
CCTGACGCGCCGCTTTGCCATCATCTTCTTACGCGCATGAGAAACCGCAACAAACCCAAAGGTGGCGGTACCATCGTT  
GCCGCGCAAAATCAGATGCACAATCCATCCGCTTCCGCCCTTCTGCCGTTTTCATCGCACACACCGTACCCTGCTGA  
CTGCGGGTACACCAGCGCTCAGTAGAAAACACGCAATCCACGCCAGCTTACCTTTACTGTTTTTCACTACGCCAAAAT  
CGTTTTTCCAGCGCTCGCGCAACTTCCGCCCGCAGCGGCTCTGAATCGTTTTTCCGAGATCGGTAACCTGAATCTGCGTC  
GGATCAATCTGCCACCCGCGCCACCGGTTGTGACCACTGGGATTTTATTGCCGCGACAATAAGCAATCAGCGCCGCTTT  
GGCCGTACACTATCAATGGCATCAATCACGTACGAATAACCCACGCTCATATACTGCGCTACGTTATCCGGCGTCACGA  
AATCATCCACCACCGTTACACGGCACTCCGGGTTAATCTGGCGAATACGCTCCGCCATAACTTCCGCTTTTGCCAGCCCA  
ACGTTATCGCGCAGGGCATGAATTTGCCGATTGGTATTGGTACGCGCACACATCATCCATATCGATAAGCGTGATTGCGCC  
AATCCCCGTGCGCGCCAGCGCTTCCGCCGCCAGGAACCGACACCACCGATACCAACCACAAAATATGCGCGTCAGCAA  
ACAGTTGCAACGCTTTTTACCATAACAGCGCGCTGTGCCACAAAACGCTGACGCCATGCATCACTAATTACCACAGAC  
ATAGCACCTCAGAATTAAGGGGCGAGGTTATCCCTCACCTAAACGCATAAATGCCTGATGCGCTACGCTTATCAGGC  
CTACATAACTCCTGCAATATTTGGATTTGCATGATTTGTAGGCCGATAAGGCGTTACGCGCCATCCGGCATGAACAA  
CGCGCACTTAGTCAATAATCAGGATGTGAGGTTACCCTCACCTGTCATATCCGTAACAAACGGCATAACAGAAATACACA  
TCAGCCGCTAAAGACGTTACCTGCGCCGGGGCGGTTTTTACGACCCAGACACGTCATAGTGGTTGTACCAACCTGCGC  
GGTGTCCGGCTTCCGGCCGATCCCTTGATAGATATCGAAGTGTGGCCTTTGATTGCACCACCGACATCCAGCGCCACC  
ATCAGACGCAGTTCGACTGACCATTAATTTGCCGTTATTATCCAGCAACGGCACTTCTGCCAGCAAGGTAGTACCTGG  
CGGAATAATGGAACGATCAGAGGCAACTGACGCGGACCAACAGCGGCCACCGCACTTCCCTTTTACCAGCGAAAAC  
ATTGCGGTTTTAAAGAAGCAGAAAGACGGGTTCTGTTCCAGCAGCTCGCGAACCCTGGCTTCACTGTGTTTTGAGCCAAAG  
TGACGAATCGCCTGCATCGACATATCTTTTTTCACTTCGCCACGGTCGATCAGCACCTTACCAATGCTGCGATAGGC  
ATGACCGTTTTTCCCTGCATAGCTGAAAAAGTTAAGCGGACTGCCATCACCAAAGTCGATATACCACTACCCTGCACAT  
CCATAATGAAGTTATCCATCAGGGAGTACTGTAAGCGAGAATATATTTACTCAATGCCCCCGCTAGATCTCCGCA  
CGAGACGGCAGACGACCAGTTTTTGGCGGCATACGGTAAATAGGATACTGGAACCTGCCCTGGCGGGTATGGCGCGCTG  
AATTACCGCGTGTAATAACCGGTAACCTGCACGTTACCATAGTTGTGCGCACCTTCCATCTGCCAGGCATCAATGCCGA  
ACTGGCGCATATTGCGGGTATCACCCTGCGCGCAGCCACTTGTGACCGCGTTATAAACATTACTCTGGTTGCCATAC  
AGACGCGGTGACGAATTACGGATATGGTTAATTTGCTCGGCAAAATCACCGCGTTAATCGGCGCGCAACGGCATCTGG  
CTGGTTACCAGAGAGAAAGGCTGGGTAATTTCCCGTCTTTATATTGCTGTCCGCGATCGGTTGGTTTTGGAAGAGCAGG  
CGCAAGCATTGCCACAACCGTCCCATAAGAAGTACTTTACCAACGTCCTTTTATTGTTCTTCTTCCAGGTTAAAA  
ATAAGGCGCAACGAAGATAACAAACCGCGGTTAATGAAATGAGCAGCCTCTCCCTGACGCAAAATTTGCACAAAA  
ATAGGCTTTAGTATTTGTTTTTTGTTCAAATCATGCCAATCCGTGATCGGGTAAAAAAAAGGTTGCATGAAAACGCG  
AGCGGAGTATAGTGCATCCACGGACCGGGTGGAGCAGCCTGGTAGCTGTCGGGCTCATAACCCGAAGGTCGTGCG  
TTCAAATCCGGCCCCCGCAACCAATTAATTTGATGAAGTAAAGCAGTACGGTACGCGGGTGGAGCAGCCTGGTAGC  
TCGTGCGGCTCATAACCCGAAGGTCGTGTTCAAATCCGGCCCCCGCAACCAATCAAATTTGATGAAGTAAAAGCAGTA  
CGGTGACGCGGGTGGAGCAGCCTGGTAGCTCGTGGGCTCATAACCCGAAGGTCGTGTTCAAATCCGGCCCCCGCAA  
CAAATATTGAACACCCTAACGGGTGTTTTTTGTTTCTGGTCTCCATAAAAAAGCGCCATTAGCGCCTTTTTATCAT

CCCCTTCTCGCCAGCGTCGCCCCATCGGCAAAATACGCTTTAATCCCGCAAGAATAGACTCCGCAACTTCTGCTGGAA  
AGTCGCCGTTTTACGTTTACGCTCTTCTCAACGTTACTGATAAACGCCGTTTCGACCAGAATGGAGGAATATCTGGTG  
CCTTTAGTACGGCAAACCCGGCCTGTTCAACTTGATTTTTATGCAGCTTGTGATTTTACCAGCTTATTCAGTACCGCT  
TTACCAAATTCAGGCTGTGGCAATGGTCAGCGACTGTACCATATCGAACATGGTGTGGTCGACATAGCGGTCACCGCT  
TTTGCTCACGCCACCAATCAAGTCCGAGGCGTTCTGGGTTTGTGCCAGATATTTTGCCGAGTACTGGTTGCACCTTTGG  
TTGAGAGCGCAAACACAGAGGAACCGCTCGGCTGACGACTGGTAAAGGCGTCGGCATGGATAGAGACAAACAGGTCAGCA  
CGCTGTTTCTGGGCTTTTGTACTCGCGCACTTGCAATGGAATGAAGATGTCTTCATTGCGCGTCATGTACACCTTCATATT  
GCCCTCTTCTCGATCAGAGAGCGCAAACGGCGAGCTATTTGCAATACCACATCTTTTTCGCGCGTTTTGTATTTCCCA  
CCGACCCGGAGTCTTCGCCACCGTGGCCAGGGTCAAGCATAATGACAATCGGACGATCGCGCCCTGCTTTACCCGGTTGT  
GGACCACTTTCGCTGGCGGCACCTGCTTTTCGAGGTGCCTTTGTTGTAATCCTCCAGCAGCGCCAGCAGCGGGTCTGT  
CATATCCTGTGCATTGGCCGGATAGAGGTCCATCACCAGACGCTCTTAAACCCGGCGACCGGCGCAAGGCAAACAGCT  
GCGGTTTTACGTTTTGCTTAATTCAAAAACCATCCGTACGGTTTGGGGTCAAATTGCCGACGCGCGCCGACTTGATG  
AACGGTGTCTGCACGAATTTGTGCCGCATCCCCTTGAGTACCAGATTGAGTTCACCTCACGCGGGGTAGCTGGAC  
CAGGCAGACGCGCACCACGACCTGGCTGACCGCAGCCAGACTGACCTGACTTACGCTCAATAGCCACATGGCACCC  
GCGCCTTGCAGTAAACGACGCGGCTGATTGCAGTGTGGATCCTGACATGCCCTCTCCGAGCAAAAAGAAATCTAAGCTG  
TGTAACAAGTAAACGACTAATTTGACCGGAAACTTTAGCGAAAGACGCATAATCTGTCTAATAAACGGTAAACATTC  
TTTTTATATTCACGGCATTACTGATAAAAAAGTCGCTCTGCATAAAAATTTACACTTGACCCCTGCGAAAAAACAGAATA  
AAAAACACTAATTTGCAATAATCATGCAAAGAGGTGTGCCGTGGTAAAGGAACGTAACCCGAGTTGGTCGAGGGATT  
CGCCATTGCGTTCCTATATCAATACCCACCGGGAAAAACGTTTGTATCATGCTCGCGGGTGAAGCCATTGAGCATGA  
GAATTTCTCCAGTATCGTTAATGATATCGGGTGTGCACAGCCTCGGCATCCGTCTGGTGGTGGTCTATGGCGCAGTC  
CGCAGATCGACGCAAATCTGGCTGCGCATACCACGAACCGCTGTATCACAAGAATATACGTGTGACCGACGCCAAAACA  
CTGGAATGTTGAAGCAGGTCGCGGAACATTGCAACTGGATATTACTGCTCGCTGTCGATGAGTCTCAATAACACGCC  
GCTGCAGGGCGGCATATCAACGTCGTACGTGGCAATTTTATTATTGCCAGCCGCTGGCGTGCATGACGGCGTGGATT  
ACTGCCATAGCGGGCTATCCGGCGGATTGATGAAGACGCATCCATCGTCAACTGGACAGCGGTGCAATAGTGCTAATG  
GGCCGGTGTCTGTTTTCAGTCACTGGCAGAGCTTTAACTGACCTCGGAAGAGATTGCCACTCAACTGGCCATCAAAT  
GAAAGCTGAAAAGATGATTGGTTTTTGTCTTCCAGGGCGTCACTAATGACGACGGTATATTGTCTCCGAACTTTTCC  
CTAACGAAGCGCAAGCGCGGTAGAAGCCAGGAAGAGAAAGGCATTCAACTCCGGTACGGTGCCTTTTTGCGTGGC  
GCAGTGAAAGCCTGCCGACGGCGTGCCTGCTGATTTAATCAGTTATCAGGAAGATGGCGCGCTGTTGCAAGAGTT  
GTTCTCACGCGACGGTATCGGTACGCAGATTGTGATGAAAGCGCCGAGCAGATTCTGCGCGCAACAATCAACGATATTG  
GCGGTATTCTGGAGTTGATTGCGCCACTGGAGCAGCAAGGTATTCTGGTACGCCGTTCTCGCGAGCAGCTGGAGATGGAA  
ATCGACAAATTCACCATTTTACGCGCGATAACACGACTATTGCCTGCGCCGCTCTATCCGTTCCCGGAAGAGAAGAT  
TGGGGAAATGGCTGTGTGGCAGTTACCCGGATTACCGCAGTTCAAGGGGTGAAGTTCTGCTGGAACGCATTGCCG  
CTCAGGCGAAGCAGAGCGGCTTAAGCAAATGTTTTGTGCTGACCACGCGCAGTATTCACTGGTTCCAGGAACGTGGATT  
ACCCAGTGGATATTGATTTACTGCCGAGAGCAAAAAGCAGTTGTACAACCTACCAGCGTAAATCAAAGTGTGATGGC  
GGATTTAGGGTAAAGCATGAAAATCGTCGGATGCGACATGCGTAACTCGTACGTGCGATCCGGCAATTACGTTTATTC  
CCGTGAACTAAACAACGCCGACGACCTGCGCCGCTCAGTACGAGTGGCGATTGCCGCACTTAATATGCGCTCATCGG  
CATAACGCGACAGAGCGCGCAGCGCGGGTCAACCGGGTATAAACCAGCTCTCGCGTTACTACCGGGTGCCTGGCTC  
GGCAAAATCAACGCCCATGGTGAATCCGATCCCTGCGATTTATGTACCGTATCGCCACGTAAGTTCTGTCTGTGG  
CAAGCGACTCGTTGCACAGACTTAATATTGCGCTCGGCATGCAAAACGACGCGCGCTCCCTGCCGATCCGACGCG  
CAATACCGATATCGCCATTAACAACCAAGCGCGCTGTATTACGGGCAATCATCACCGGTGACCTTCGTACCAACGA  
GAGTGCAGATGACGATGAATTTTGGCTTCTGTTGCATAAACTGCTCAATTCGCTCATTAGTCCAGCCACGCCAAACGG  
CCTTCCCGCAGGGCGCACAAAAGCTGTTACTATTGAACGCCTGAATGATTAATCCGGCTCGGCACGCGCTTGCAGCA  
GATCCAGATAACGTCGTAACCCGCAAGAGCTTCTCAAGCATCGCAATATAATCTTCGCCGCTCTGTAAAAGCCGTTTT  
TCGATATCAGTAAAATCTGCTGAAAACGGTTTTACTGCCGTTTTATCACCACGGTTGATCGCCGAGCTAACTGACC  
AATGCCAGAATCGCTGCCGAAACGATAGCTTTTTTGCAGCAGGCAGAGACTGTCGCGCAAAGATGCCGCTTCTGTGCCGG  
TTCCTGCCGGAACGTGAGTCCCGTACGGCGCTTAGCTGCTGGCAGCTCGCGGTAAGCCCGGTTGGCATAAGCG  
CAGATATCGCCAGCACAGCCCAGCCTCAACCGAGCCAGTTGATCAGCATCGCCGAGAAAGATCACTCGCGCATGATC  
GGCAAGGCGTCGATCAGTCTGCATCATAGGCAGATCGATCATTGACGCTTCTACCACAGCACATCAAGATGCA  
GCGGGTACCAGCATGATGACGTAACGCTGGCTACCCGGTGCAGCGCCAGCAATCGGTGCAAAGTGTGGCATCTTCC  
GGAATGCGTTTTCTTTTGTATCGGTGACGGTAACTGTGCAAAGCCTTGCCGAGAGATTGGTTAAGCGCGGGCAGC  
TTTACCCGTTGGTGCAGCCAGACGGATACGGCAGGTTGCGCGTGCGCCATTTGAATTAACGCTGCCAGCAACTTCGCTA  
CGGTGGTCTTTTACCAGGTGCCAGGGCCGCCGAAATCACCGAGATCCGCCGCTCAGCGCCACTGCCGCGCAACTTTT  
TGCCAGTTAATTTTATCGCTTACTGAAAAAGTTTTGTCCAGGGTTTTGCGCCAGTAGAGCTTCAACCTCAATGGCATG  
ATTCACTTCGTTGAAAAGCGTGCCACTGTGCGCTGTTACACCACATGCGATTCAAATAAAGACGATCGCCACAGAGGA  
TCATCGCGTGGGTTCTCTCCCTGCTGACCGCTTGAGAAGCCAGCAAGCATTCTCCCAATTTTGTAGCTCACCGATT

TCACTGACACAGGTGCCAACAGCGGATGCGACGCCTCGTTATTTCCAGTCGTGAAAGCGGCAAACAACGTGTCCCTC  
TCCGGCATCATGACTTAACAGTGCCGCCGCGAGGGTGACGGCAGGATGTTTCATCTCCGCCACGGTCAGGGCAAATTGCA  
CATCCAGCGGGCGTAGCTGTTTGTGCTCCACAGCTTCCAGTAATTGCTTTTGCAATTTTATTACGCCCTCCTCAGGGTCA  
TACCGGCAAACATCTCATCCATCAGGGCAATCAACCCGGCGTTGGGTGCGGGTGTGTAAATCCCCTGTTGCGGATGTTCT  
TTATCAACGCCACGCAGGAACAGATAAATAACGCCGCCAAAGTGGTGCTCATAGTCGTAATCAGCAATGCGATGGCGCAG  
ATAACGATGCAGCGCCAGGGTATAAAGCTGATATTGAGATCATAGCGGTGTGCCTGCATTGCCGCTGCCATAGCCTGTT  
GGGTGTAAGCCGAACTGTCTTACCCEAACAGTTGGATTTATAGTCGAGCAGGTAATAACGCCCTTCTGTGGCGGAACACC  
AGGTCGATAAAGCCTTTTAAACATGCCAGTACCTGCATGAACTCCAGCGCGGGCAGCCTGCCGATAGCGGGTCAAACCTG  
GCGGATTAACGTATCAAGCTGACTGGCGATAAGCGGTTCACTAATCGGCAGATAAAAACCTCCATCTCCACCTGTTTATTGC  
GGCGGAAAGTTGACTCAGGCTTACGCCGGTTTTCATTGAGAGGTGCCTGGAGGACAGCCGTGATCCACTCGGTCAATACC  
GGTCCCCTGCGATTCAAAGCCGCCGAGTTCAGTTTTTCCCGCACCCAGTTCGGGTCAACCGGCTGGTAAAACCCAG  
GTCTTCAAACAACTGTGCAAGAAGCTCCCGGTGACGACCCGCGGAAACTGATGTGGTGTAAACGTCGGTCTTCAA  
CGACGCTGGCAACGCCTGCAGCATCGACATCCAGCCGAGGCATCAAATCTGGGCGATACCGTGACCACGCTGTTGCAA  
CCAGAGTAGCTGGTGACGCGCCAGTTATCGCCGGCAATCGTTGTAACGTCTTCGATTGAGCTCTGCTGTAGAAACATC  
ATTAACGTCAGGGTGGTATTACCAAGTTGTGCCGTTTGGCAGGCAATATCATCGCATAAACGTTCAATACAGG  
TGCGAAGCCCTGCCGATCTTGCAGTTCCCTTTTTGCGAGCAAACGCCCGAGCGCACTTTGGTGGACGTCGGTGCACCT  
TTTTTATCGCCACGACGCGCCAGCGGTGCAACGCCGAGACTGCAATGCCAAACCGAACGTGTCAGCGCCACGTAAG  
CAAACGCAGATCTTCCGCCAGCGTTCCGGCTCCGCGAGGTGACGCTTTCTGCGCAGCATTAAAGATCCAGAACTGCCT  
CAAACGAGTGGCGATCGTGATAAAAACGCCTGCTCCTGGACGCGGAAATGGTGATAAACCGCAGCCAGACCAATGGATAT  
TCCAGCCCTTTTCGATTTGTGGATCGTGACAATCTGCACCAGATGTTTATCACTTTTCGAGACGCATTTGTTGGCTGGAGGC  
ATTACTGTCTGGCTCGAGGATATGTTGCGATAACCAGCGTACCAGCGCATGTTCACTTTCCAGCTGCGTTCGGGCTTCTT  
GTAGCAGTTGCTGATATGCAAGATATCGGTAAGACGCCGCTCACCGCTGCCGTTGCCAGCAAGTTTTAGCAATGTTA  
CGCGCCGACATCAGCGCCCGCAGCATCGGCATAACGCCAGTTTGCGCCAGATTTGCCGATAACCATCGAACTCTTCGAC  
TACCACATCCCACGCATGTTCTGTCATTGTTGAGCGTTTCGATATCCAGCGGTTAGCCCATCATTGACGTTGCCAGCG  
CACTACGACGGGTGTTCTCACGTTCCGGCGTCATCACCGCTGCAACAACCAAAGCATTTCCTGCGCTTCCAGAGTTTCA  
AAAACACTGTCGCGGTTCCGAAAGGTAACGGAAGGGATTTCCAGCAACGTTAAGGCATCGCGCACCTGGGCGGCTCCTG  
GCGGCTGCGCACAGCACACTGATGTCCGAAGCAGCACCGGACGCGGTCGTGCGGTTTCATCAGCAACGCTTCGCCCC  
GCTGTCCGGCTTGATGCCAGTCGCGGATTTGCGCAGCATACTGCGCCATGGTACTTTGATAATCGCCAAACGCCGAG  
CTTTCGCTTCCATCAGCCACATTTTCATCGCAGGCTGTGTTTCACTTTAAATACAAAACGTAACGCCCTGATTTTTCC  
GGCTGATTTCACTGGAATAAACGGTATTTTCGCGAAACATGAACGCGTCATCAGTCTGGCTGAAAAGCTTATTCACGCTGT  
TCACCATTCTGGTGCAGAACGCCAGTTGGTGTCTAAAGTGTAGTGGGCGTGAACCTTCCGCTACGCGCCTTCATATAAGTG  
AAGATATCCGCACCCCGAATGCATATATGGCCTGCTTCGGGTGCGCAATTAGCAACAATGCGGTTTCCGGCTGATGGTG  
CCAGATACGGCGAAAAATTCGGTACTGCTGGGGTCCGGTATCTGAAATTCATCGATCATTGCCACCGGGAATCGCGTAC  
GGATCGCGCTGCCAACCTCACCGCTTTCGCTACGACGCGGGAATCGAGCCGACTTAACATGTATCAAACCCAAAT  
TCGCCACGGCGGCTTTTTACGCGCTACTGTTTCGGGATCTCAGCCAATGCGCGGGTGTACACCAGATCGCGGATCGA  
CAATGGTCTGCAAGCAGTTGATCGATCGCTCAAACAGTGGATGTCGCGGGGTTTTCCCCCGGCTTCGTGCGATCTT  
CTAAGAAACGCTGGGAGAATTTTTCCAGCGACTCCGGCAACTGATAACTGTTGTCTTCTTCTGCCCAGGCGCTGATC  
ACCACTGCGTCGCGCCACTGCTGTTTTACCGTATCAATACGCGCCACAATTTGCGCGTGACGGGAAGCAGCGTTTCAT  
CATCGGCGGGCGGCTTTGATAACCGGCGCTTCGCTTGCAGATAACGATTAATATCGCGCAGCAACCGCTGCGCCCT  
TTCCAGGTTTTCAAAGACACCTGGGCTATTTACGCGGCAGCGGGTAGCAGTGCGGACGCCAGAAATCGGCGCAGGCGCTG  
GTAGCGTAGCAGACTCATCTTCAATCAGCTGCTGCTCAAACAGCATGCCGATTCAAAGCATTAGGTTGAGCATGC  
GCTGGCAAAGCCGTGAATAGTAAAGACTGCCGCTTCATCCATCTGCCGTTCCGGCTAACAACAACCACTGCGCGGCTTGC  
GCTTTATCGTCGATCTCTTCCAGCAGCGCTTCGTACAGTGGATTGTCGGTGGTTTTACGCGACAGGCGATGCGCAACTC  
GTGGATATTGCTACGATACGACCGCGCAATTTCGCCGTGGCAGCCTCGGTAAGGTGACCACCAGCAGTTCTTCAACGG  
TCAGCGGGCGGGAAAGGCGGCGGAACCCCTAGTCCAAGTAACAGGCGCAAATAGAGCGCCGCAATCGTAAAGTTTTG  
CCTGTGCCGCGAGAGGCTTCAATCAGGCGCTCACCTGTAAGGGCAAGCGCAAAGGATCTAGTGTCTCGGCGACATCACT  
CATTCTTTTCACTCATCAGGGGATTGTTTGTGCAACGCGCTGACGTTCTCCCACTTTCCAGCCTTCCAGGGTGTACA  
TATTCGGCTTTCCGTTCTGGCTGCCGAAATCTGCGACAGAATAGCCATGCCTTGCGGCTCGACCACCGCTGATGGAA  
GAAATCAGCAAGTTTTTGCGGCGTCAGCAGTTTTATCTGGGCCAGATTTTATCAGCGAATCGAAGCGCATATTGCCGC  
GATCGAAATCTTACTTAACTTCGATGCTTCTTCCGCGAGCGTTTGGGTGCTGCAGCATCTGGGTAATTACCGCCTGC  
TGGATTTGCGCAAACCTCATCTGGCTTCATCGCTCGCAATTTTGCCTCTGCGGTTGGGAAAAACGCCTTGAACGCTCCCA  
CAAGAATGAAGCTGTTTATCATTGCTTTGCAAAGGAAGCCCATGCCCCACTGACGCCCCACGCTCATTGGAAACGCAA  
ACACGGCATAGCCCAATTGTTCTTCGGTACGCAACTGATTGTAGAACCACGGCTGTACGATCTGCCCAAACAGAGAGCTA  
TAGGCTGAGCTGGTGTATTTCATCGTAGCCAGTCGGTACAAATACCCTGCCAGTGCGGAGTCCGGTGTATTACCGGCTTT  
TTCAAAGATGACGGATTGTTTTTATCGACCACTACATCTTGTTCGACACCACTCTGAACCATCAGCGCCCAACTGTT

TTTGACATCGCGTGCCAGCGTTGTTGCCTGGGCCTCGGTCATGTTGCCGATAACCATAAACTCTGGTCGAGCCCCTGAT  
TTTAAGGCGTCGCGATAGGCCAGCACCTTTCAACGTAATGGAGGGCAAATTTTACGCCGTTTCATCTCGCGAGAAGTA  
CGGCACTTGCAGAGCATCTGCGCGGGCATAATCGCCTGCTCAAACGCTTTACCTTTTTCTCGGGAATCCATCATCTGGT  
TATACCAGGACTTCGCTGCTCAAGCTGATCTTCCGTAGCGGTATAGCTAAAGTACCCCTCGAGCAATGCCTGGAACAGC  
TGC GG CAGACGCTGGGTGTAACCATTAGCATTAACCATAAGGCCGTTGTTAGCGTTGGTGGAAAACTTATGCCACCAAC  
CGACGCTGGTTGCTTAACTGATCAAGCGCCAGCCCTGCGAGATAATCATTGAGCGCAAACATCACCTGATTGCGGGCCG  
TGTCATGGCTTTTCGATTACGCAAATCAGGCTGACATCAGCTTTGGGCTCGCTGGCAAATAACGGCTTGGCGCATAAC  
ACCACGCGCAGATTGACTCATCAACAATCAGCTCTGGATGGTCGATTTTCTTCTGACTTAATCAGCGAGAAATCATC  
AGGAATATAAGGGTTAAGCTCTGGCAAAGAGAGCGCAATGTGGCGGGCTTTTTTCTGCCAGTCGGCGAAAGTTTGTGCGC  
TGATTTTATCGACCTGATACGGCGCATCGACAAAGTAAAGCCGTTTTGTTGTGCGGCTCTTTTCGGGCTGATATACCAGATA  
CGCGCATTCTGCGGCGTCATCATCGCCAGACGTTCCCTTACTGCTTTAGCATCGTACCGATCGGCAATATTGACTGCATC  
CAGCGTATGCTCAACAGGAACCGCAATCATGGTATCTGCCAGCCATTCGACGTAATCCATATCACGGGTGATCGACGGAT  
AACGGAAGTCGATATCCAGCACATTCGCCAGTTCATCGAAGTATTGTTTATCAATGCCTTTTTCACGTAACAGATTGAGA  
TAGCTAAAAATTGCCGCCAACCTGATCGCGATTAGCCAGGCCCTTATCGGTTAAAGACGCAGAGATCGCTAATACGCC  
GCTGTTGCCGTTGACGATAGGATCGGAGTTGGCGTAAATGCCCTCAACTAATCCCTGCTTTTCAGCCAGTCAGAAAGTG  
TACCTGGGCTGCGATTGCCAATCAGATAGGTAATCAATTCATCGGTTTTACTACGGAACCTCGCTGAGTTGTTATCGATG  
CGAAACTCAACGCGCAACACTTTACGCGCGCAGCGCAGGGACGTAATGAATGATAATGCCCTTTTCGCGCTCGGTGACTAC  
CGGCACGGTGATTTTCGGTTTTTGTCTCTTTGTTTCGGCACGCGACCAAAGGTGTCCGCCGCCATTTTTGCCAACTCCG  
GCAGCGTTTTATTACTGTAATAACCGCCTTCATCAAATTTGGCGGAATAGTACTTCTCGTGAAATCTTTTCAGCGCCTGC  
TGCACCGGATTACCAGGTTTGTGCTTAAAGTTTCGAGGTTACCACCAGAAAACCTTTGAACCGGGGTGTCCGGGTTAAT  
GGTTTCTGCGTGACCTGTGCCATGCGCATCCCCTCACGCGTACGCGCATGGTTAATTACAGGTTACCCGATTACGCT  
CACGTTTCGGCATAATTTCTGTGCGAAAGGTTTCAGCAATAGCATCGCCAGGCGGTCTACCGCACCAGGCAAGGCGTCG  
TTCTCAACTTCAGATAGAAAGCCGTGCGATACGGCGCAGTGTGGCATTGTGACTACCGCCGTGCATTTTGGATATTC  
GGCCAGACTGTCAGCCTGCGGGTACTTTTTGACCCCATCAGACTCATATGTTCAAGGTAATGTGCCAGCCCTGGTACG  
CCTCGGGATCTTCAGCGACCAACGGGCACCACCAGCGCCGAGAGCGATTTAACTGCCTGCGGATCAGAAACCAGCAAG  
ACCACCATAACGTTATCCAGACGTATAGCCTGATACTGGCGGTTATCTTTATCACTTTTACGGATGGTTTCTGAATCGG  
CTGCCATCCCCTTTCTGCTGACTTAAGGGTGCCTAAAGGGCAACTAACAACAATAATGCTTTGAACCAGGTGCTGCGGG  
GCATTCACGGACCTCATAATCAACTTAAATTTTCTGTCCAGATTCAACACGTTAACGCAAATCATCTGCCAGAATTTAATC  
TTGTGCTGCAGAGTCAGCCTATGTTTATATAACCATCAGTCCGTGACTGGTGCATCATAAAGTAAGCGGATAGATTG  
CGCAATTTTATACAGCACTCATGACTGATTAAGCGAAACAGCGGTAACAGGAAACGTTGCGACTGTTCAACGATGGCC  
TCCATTGTCTCTGGTGTTAATTGCCGCCAGAGCCTTTGATACCAGATATCATCACCTTCGCCACGCACCATCATGTTGCC  
TTCGTAAGCCTGAAGGAATTTGTCAGGGCTTTTTGCAACGTGGAATCGTCATCCAGCATGGCATCGTTTTGCGCGTCAT  
AACAGGTTTTTAGCCACGCGCCGCCACTTTTCAGGTAACACCAGCAATGGCGCGGACATTCCTTACGATACCCCTCAATC  
AGTTGTGAGAGGTAATGCAAAGCCTGTTCCGGTGAAGCGCGGAAAAACGCCACTCGCCGTCTTTGCGTAGAAAAAGGCG  
ACTTTACCATACCACCGTGGCACAGTAGACAAGGTGTTCCAGCAAAGTTGCATTCCTGGGCCACTTAATAAAG  
AGGGACGCCAGCGAACAGGCATCCGGCTGCACCTGCGGCAACCAGCCAGTTATCTGCACACCGTTGCAGGCGAGATCA  
ATTTCCATACTCTGCCCCGCTGGCGACAGGCAATGACTCTGTGCGCAAGCTGCTGCATCTCTGGCACTGTGTTTCCCA  
GAAAATTTACCAAAGCGCCATACGGTAAATCCCTGCCGCTCGAAGCGGCGAACAAGCGTTCCGGATCATCTGCT  
CAACCAGTGCAATCAACTGCTGATTGATTTGATAACGGCTAAGTCTTCCAGAATAAATGGCTCGGTGTCGGGGATT  
TCGCTGTCTTCACTACGGAAGTTACCTGCAAACGCATCTGAAAAATGCCCGCAGGATGTGCCAGAATCGTTGTAG  
CGTTTTCCAGCGCACGGTTTTCCGGTAAGGTAACCGCACGCGGCTGAACAATAATCAGAATGTGCTTTACAGCCTGGCTGG  
CCGCAAGTAGCATTACAGCATAGCTTTGTGCTTGCCTGGCTGGTAGTTTTGTGGATCAAACGGCATCCGGGTATGG  
AGGCAAGTAAGATGCGCTTTTACCCTGCTCGCTTTCATCACAGTTGAGCGCTTCATCGCCCGTAGATAATGACTTTG  
CCCGATGTAGTCGATCAGTTCCTGCACCAGTACCGACGGGAAACGCTCACTGTTATCTGAATGGAACGACCGATATAGC  
TGATATAGAGTTTTGCTGCGCGGAAATTAACGCTTCAGGAACAGATAGCGGTCGTCATCGCGACGGCTACGGTCGCCA  
CGTTCCGGTTTCTGGCTCATCAGGTCAAAGCCCAATGGCGCAAGCTGACGTGGATAAACCGCGTCTGTTTCCAGCAG  
GCAAACCACTTTGAACGGAATTGAACGCATTGGCATCAGAGTACAATGTTAACCGGTCGGCGAGAAAACGCTGGCTGA  
TACGTTCTTGATCCAGACGCTGTGCCAGTTCATCACGAATAGTGACAGCGCACCGCGTCCGCTACTGCGCACCTAAA  
CCTTCGGCGATAATCGCCTGCCATTGTTGTTGATCAGCGTCATCGCCGCTTCGGTTTCCGCATCCGGCAGGAAGAAGC  
GTTGAGCATATCGCGACAAACGGCAACCACTTTCCAGCGGACGCTCCTGTGCCAGCCCGCAGCCAGATGTTTAGCT  
GCATTAGCAGTGAAGCCAGATGCCCCACAGTTCGCAATTAAGCCGCTCGATTATCATAAGGTAGAACCAGATTGCCAC  
TCGCCCTGCGCGCTCTCCATCGCGTAGCCAAACAACATACGCGTCAGGCCAAATCGCCAGGTGTGTTGTCCGGTGGCGGG  
GAGTTCCAGCTCGCGAACGTTGTCGTATCTATGCCCAACGAATGCCGGATTGTTGACCCACTGGCGTAAATAACGCA  
GCCCTTCTTCGGTGATGTCAAACCGCGCCGCCAGCACCGGCACATCCAGCAACGCCAGCACATCTCTGACACAAAACGA  
CTGTCAGGCGATGATAACAGGCTGATAAACGCTTCCAGTACCGGATGTGACTGCCGCGCACGACGGTCGGAAATGGCGTA  
AGGTAGGTAACGATCCGCGAGGTGCGCTACCAAACACAGCCTGAATAAACGGACTGTAGCTGTGATATCAGCCACCATCA

CGATGATGTCGCGGGAGTAAGTGTGGGTCTTCTCCAGCATGCCAGCAGGCATCGTGTAACCTTCAACTTCACGC  
TGCGGGCTATGGCAAACGTGAAGGTGATACTGCTATCCAGTGGATCAAGCGGGCGTTTGTATCGCTACGGGAAACTC  
TTCGATGTTACACCAGCAACGGCGCGGTTTTCCAGTTCAGAATGTCAGACTGAATGTTATGCAGCAGTTATCTGGCG  
TGACATCGACAAAGGCGTCCAGCTCCTGGCTGCTCTCCAGGTCAGAAAGGAGATAAATGTAGTCGCGCCCAAGCTTACCC  
CATGAAGCCAGCAGCGGGTTGCCGACATCCTGTTACCATCGCTGTTAAAGAGCTGCCCGGCAATTTTCGCTATCACGAAA  
TAGCGGCAATTCGCGATCTTCAAACCTGTGTCGACGCTGACGGGTGACAGTTTTGCCAGATAAAGCAGGATCTTAAATAT  
CGCCCAGTAATAACGGCAGGGGTTGGTAAACAGGAGATGGATTTCAATATGTTTACCAGCGCCTGTAGCGCCTGGAGA  
TAAACAGGCGGTAACGCGGAAATACCGCATATAAAGACGCGCAAGGTAACCCCGCGGGCAGGTCGTGCGGACTCCAG  
CGTTTCGATAAAGCGCTGATAGAGATTGGCGCGGTGCCAGCGGTTGCCCGAGTTGATGGGTATATTCCACCAGCGCCT  
TCCACAACGGGCTTCCAGGCCTGTGCTTCTCCAGCCCTTCAACCAAATGTCCTGTTTCCCACTGTGCCAGCCAGTCC  
GGACGATAGACCAGATACTGGTCAAACAGGTCGCCGCTTTTGGAGAAAGCTGGAAACAGTTTTCGCTTGTGCTATCGTC  
AGTCAGATAATGCCGCAACAGGTAAGTCTTCGCGCTCCAGCAATTGCGGCAGCAGAGTCATCAGTTTTCCAGCTCATGC  
TCTGTTTGTAAAGGCGCTCTTTGGGATTTCCGGTAACACCCGGACGAACATATCCAGATAAAGCTCGCTGGCAGC  
GGAAAATCAATGTTTCCGCAATACCAAACCTTTGCGACAGGGTCATTTGCAGCCACTGTGCCATAACCGTACTTTGAC  
CAGAATCATCTGTTTCCGAAAGGATCGTCCAGCCCTTCGCGTTGCAATAAACTCCATCAACGCTTCCAGCAGTCCCA  
GACGATTGGAATGGTAGACCTTAAACATAGCGGCTCCTGACTACTGACGATTCGGGCAATGACGGCGGGTCACTCGCCT  
TCTCTGCCCCGGGTGAAACTAGCGTAACGCTGATGCTGACACATCCCGCCTGCGATGTCTGCATTGCGTTGACCTGCCA  
GTTGGCAGGTGGCAAAATCGCGCGAGTTGCGTTTGTGTCAGCCATGCCGCGAGAGCTGTTGGTACTGTTTCTGCTGG  
CAAGACTGTTCAATGTTTCGCTGGAACCCGATAACGCAGTGACAATCATACCATCAACACCATCGCCAACATTACC  
TCCGGCAGGCTAAAGCCTTGTGATTCTCAGGGAAGCTGACATAACGCCCTCTTTTCCAGCGGACAAAATCGCTCCAG  
CCGCGTGGCGAAAAACAATGTTTCCATCAATGACTTCGCTGTTGCCACAACGAAACGCCTTCCATAACCGGCAATCAA  
TAAGGCTTCATTATCTGCCAGTAAACGCAAAACAACCTGGGCATCGGTTTCCAGCTACTGCGAGCACTGAACTGCTGGCT  
GCGTCTGCCAGCAGTGCATTTTTCCACGCCAGCGCCGACTGAACGATGGCTGGCGGCGCAATGACTGACTTTCCATG  
CTCACGCGAGAGGCAAACTGCGATCCTGTTGGCTATTCTTGAATAGCAAACCTACCAAAACCAGCAGCATCAGGAC  
CAGAGCCAGTGACGAAACACCTTTTCCGCGTTACAGGTTGAATCCTGTCACGCTATAGCTGGCATTACCACGGTTTG  
CGTTCCAGACTTACTGGCAGCACGCATATTAACCGTCAACACCCGGCAGAGAAGCCGCTGACATCCTGACGTACGACCTGAA  
AAGTGTGATAATGATGGCATCCGGATTAGTGACTTTATCCAGCCCTTACCTTACAGGATGTCGCACCGGTAGCGTT  
TCCAGCACATGCTCCTTCCAGACGAAATCCAATCTGGTCGGACTCTTTTACCAGTTCCGCGATCCAGATACCGTTACTGTT  
CGATCCCCTGACCAATGACACAGTACCCCTGTCGACAATTTCCAGCCCTTCCGCGGTACAGATGCCATGACAATAAC  
CCGCCCTTGGAGATGCTTCCGCGACGGTAAATACCCGCGAGCCAGATTTTATCTTCCAGCGCCAGTTCACGGGTGCTCGTT  
AACTTTACGCTGTAACGCAGGCAGAAAGCGTGCCGCCCCAGCAACAATACGCTACTGATCGCCATAGCAATCAACAC  
TTCCAGCAGAGAAAACTTCTCTTTTACAGGCATCCTTCTGTTTCTCCTTGTGACAAAGCCGGAGTCTTCCCACGG  
CGAAACCACCAGCCACTCGCCGTTGAGTTTTTGAAGCGAATATGCCCGGCCATGCGGTATTGCGCAGGCCAAAGA  
AAGCAAGCGAAGGTGTCAGTGCCTCATTTCGACTTCGGGCCAGCGTGGCACAAGACCAATGGTGAACCTGCCATGACAG  
GTATTGGCCCCAGCAGCGGAACTACAAGGCACCATAACGTCCCTCCCTGATAACGCTGATACTGTGGTCGCGGTTATG  
CCAGTTGGCATCTTACGTAAATAGAGCAAATAGTCCCGCCTGGCTGGCGGTTTCCATAGCCGTTGCGACTGCTGCC  
AGTATTGCCAGCCATAGAGTCCACTTGCCTTAGCATGACCAAAATCAGCATCGCGACCAGCGTTTCAATCAGCGTATAA  
CCACGTTGTGTTTTATGCCGGCAGTATGGAGCGAGGAGAAAAAAGACGAGGGCCAGTTTTCTATTTCTCGGCGCATCT  
TCCGGACTATTTACGCCGTTGACGAGCTTGCAAAATTTCCGGAAAGGCGTCTCGAAGAATTTAACGGAGGTTAAAAAAC  
CGACGCACACTGGCGTGGCTCTGGCAGGATGTTTCTGAATAGATAGCCACCAGCGCTTTAATGCCCAGGATGCGGATCG  
TAGCCTTCAATCTCAAAGTCTTCAAACGGTAGTCAAGATGGATTCCGGGTTTACGTTTGAATAATCAACTTCGGCAGCGG  
ACGCGGTTCCGCGCTTAATTGACAGATGAGTTTATCCATATGGTTGCTGTACAGATGCGTGTGCCACCAGGTTCCAGACAA  
AATCACCACTTCCAGATCGCACTGCTGCGCCATCATATGCACCAATAACGCGTAGCTGGCAATGTTGAACGGCAGGCCG  
AGGAAGACGTACAGGAGCGCTGATAAAGCTGGCAAGAGATTTGCCGTCTGCCACATAGAACTGGAAGAATGCATGGCA  
CGGTGCCAGCGCCATTTTATCCAGTTCGCTACGTTCCAGCTGAAACAATAATGCGGCGCAATCCGGGTGTTTTTCA  
GCTGGTTCAGTACCGTAGTGATCTGGTCAATATGACGACCATCTGGCGTTGGCCAGGCGGCCACTGTTTACCATACT  
GGCCGAGGTGCGGTTTTTATCGGCCATTCTGTCAGATGGTGACATTGTTTTCTGTGTAGATAAGCAATGTTAGTGTG  
GCCCTGCAGAAACCACAGCAGTTTATGGATGATGGAACGAGGTGGCAACGTTTAGTTGTCACCAGCGGGAATCCATCTT  
GCAGGTTAAACGCATCTGATGACCAAAATGGAAGCGTTCCGGTTCCGGTACGGTCTGTTTTTCTGTGTGCTTCTGCTG  
AGCACTTTTTGATCAGTTCTAAATACTGTTTCTGTTTCTCAGGAAACGTTGCTGTGGGCTGCGACGATATGCCCA  
GACCATCATGATCACACCCGCGACAATCATCGGGATGGAAGAATTTGCCCATGCTGATGACTGCACCAGGCACCGG  
TAAACTGCGCGTCCGGCTGGCGGAAAACTCAACAATGATGCGAAACGCGCCGTAACCAATCAGGAACAAACCTGAGACA  
GCTCCCATTGGGCGTGGTTTTACGAATATACAGGTTGAGGATAATAAAGCAGCACACCTTCCAGCAGCAGCTCGTAAAG  
CTGTGATGGGTGGCGCGGACACACCGTAAGTGTGAAAATGGATTGCCACTGCGGGTGGTTTTGACAGCAGAAAATAT  
CTTCTGTACGGGAGCCAGGGAACAGCATGGCAAACGGGAGTTCCGGTCAACGCGGCCCAATACCGTTAATAAAG  
TTGCCAGACGCCCGCACCAAGACCAACGGAATGAGTGGTGCGATAAAATCAGAGACCTGGAAGAAGGAACTTTAGT

ACGGCGGGCGAAGATAATCATCACCACGATAACGCCAATCAGGCCGCCGTGAAAGACATGCCGCCGTCCAGACACGGA  
ACAGATACAGCGGATCGGCCATAAACTGCGGGAAATGTAGAACAGAACATAACCAATACGTCCCCGAGGAAGACGCCG  
AGGAAGCCCGCATAGAGTAAGTTTTCAACTTCATTTTTGGTCCAGCCGCTGCCCGGACGATTGCCCGTCGTGTTGCCAG  
CCACATTGCAAAAATGAAACCCACCAGATACATCAGGCCGTACCAGTGAAGCGCCACGGGTCTATTGAGAAAATGACCG  
GATCAAACTCCGGAAAATGCAGATAGCTACTGGTCACTGTACCACAAGTTCTTGTTATTTTCGCTGAAAGAGAACAGCG  
ATTGAAATGCGCGCCGAGGTTTTAGGCGCTCCAAAGTGCGAATAATAGCACAAAGGGACCTGGCTGGTTGCCGGATAC  
CGTTAAAAGATATGTATATGATCCGCGCTATAACCTCCGCGAATCAGCCCGCCATGCCCGGACGCTCCATAAAGGCTG  
CAACTGATGGCGAATTCGGTCGCCAGTTGCGCTTCCAGACTACGCTGCGCAAGATTTTTCTGCTTCGGCATAATCAATG  
CGCCGACGAGGATTTTTGCCCGCGCTACAGAAGTCCGTTTATAGACAGATGGCGATACCCAAGCCCAATGAGGATTGC  
CACGCACATGGGATCGCCCGCCATTTACCAGCACAAACGGAGATCGATTCCATGATTTCCGCTTCCCGGGCGATCATCG  
CCAGAGCTCGTAACATTGCAGGATGAAGACTGTCATAAATGTTCCGACCCGGGTATTGTTGCGATCAACGGCCAGAATG  
TATTGAGTCAGATCGTTGGTCCAACAGAGATGAAATCGACCCGCTTTCGAGATGCGGCAGCATAAATACCATTGACGG  
CACTTCCAGCATGATGCCGATACGTGGTTTGGGAATTTGTAACCGATCATCTCCTCGACTTACGTCCGGCACGTTCAA  
TCAGGCGCGTGCTTTCATCAACTTCATCGAGGCTTGTACCATCGGCAACAGAATATTAGGTTGCCCGTAGCGGCATTA  
GCACGCAGCATCGCCGCACCTGGATCAAGAAGATCTCCGGTGTATCGAGCGTAATGCGAATCCCACGCCAACCCAGGCA  
TGGATTCTTTCGCTGATCGGCATGTAAGGCGACTGTTTATCTGCTCCGACATCCAGCGTACGCAAGGTGACGGTTTTAT  
CATTGAACATTTGCGAGCATCCCCTGATACTGCGCCACTGTTCTTCTTCCGACGGGAAACCACTTTGCGCATGAATGGG  
ATTTCAAGTGCATAAAGACCGATGCCATCAATACGGCTGCCAGTTTTTTCTTATGTTCCGGGCTTAAACCAGCATTGAG  
CATGACTTTTTATACGCTCACCGTTTTTAACTGCGCGGGTAAATTGACGTCATCTTCCGCCAGACGGCTAAGCTCAATCT  
CTTCACTAATTAGCCGCTGATATTCTTGCAGCAGTACCGGCTCCGGATCGACCAGCAATTCACCGCGATAGCCATCAACG  
ATCAGCGTCTACGATGCAGCACCGAAGGCTGAATATCCGCGCCCATCACGGTAGGGATCCCAGCGCACGTACCATGAT  
CGCAGCATGGGAGTTGGTGCGCCATCTGCACGACAACCCGACTAAGCGATCCTGGGCAGCTCAGCAAGCGTTGTCG  
CTGACAGTTTACTGCCACCAGAATGAAACGTTCCGGCCAGGCGTTCGGCCCTTGATTAGCGTCATCAAGATGAAACAGC  
AATCGCTGACCAGCGCACGTAATCGCCAGCCGCTCTTTGAGATAGTTATCACTTAGCGCGCAAACCTGTTCCGCAAA  
TTTTCAATGACCGTTTTTACCGCCACTCTGCCACCGAGCCTTATCAACCTCGGCAACAATTCGCGACGACGCCGGG  
TGTCGAAAGCAGGTGCGAGTAAAGATCGAAAATAGCCGCCGTTCTTTTTGTGACCCGGCGCAAAGCGTTTGCTGTAG  
CGCGAAACTCGTTTGCCGCTTCTTCCAGCGCCCGGTGAGTCGTTGCGGTTCCAGAGCCGGATCCAGCGTTGATGCCTG  
ATACACCTGTTCCATTAAGGTAACGTGGCATCCTGCCAGCCTTCGGCAATCGCCACACCAGGTGCTGCCGGTAATGCCG  
GGATTCGCGTCTGGCGATATTGCCAAACAAGGCAGTCAACTGCGACTGAGAAAGAATAGCTGCCATCTGGGTGGCAAGC  
GTCACCAGGAAGGATTCTTCACTTTGTCATACTGGCGCAACTCTCGTTGCTGTACCACCAGTACACCAAGCAACTGGCG  
ACGTTGAATAATTGGTACGCCTAAAACGCGCGGAAACGTTCTTCTTTACGGAGGGGATGATTTGAAGCTGGGGTGCT  
TTTTGCGCATCTGCAAGGTTTATCGGTTCCGCCAGCTGCCAACAGGCCGACGATCCCTTCATCAAACGCGAGCGTTACA  
GTGCGACCCGCTGGTTTTTTCAGCCCCGGTGCATCAGGTAGTAAACAACGTCGATCATGATCGGCCAGGTAGACCGA  
ACAGACCTCGGTATCCATCGCAAGACAGATGTGCGTAACCAGAATATTTAACGCCTCATTAGGCGTGGTGCCTGGCTA  
CCTTTTCGACTATTTGCGCGAGGCGAGTGAGCATAATTGGCGTACTTAACCTCTTTTACGTGATAAGCAGATGCGTTT  
TGTGGTTTTGGCGTATTTTCTGCGAGTACATCACCACACTCGGAACTCTTTCATTACCTACGGTAGACATCACGTTT  
AAATGACACCACCTGTCTGACCGGATACCAGTAACCTACCCATCGCCAGCCGTCAAACTCTGGTGTACTGCTGGTTTGA  
TATTGATTTGTCATCGCCGCTCACCAGCTGCAAGAGAAACCAATTTTTGTTTTGGCCGATACAAACCGGCTTCGTGCC  
CAACGCACCAACGTTTTCGTAATTTGAGCGCAACAGTTACGCGTTGAAGCAAGGATTGCAACGCTTTGCGGCTTAA  
TCCTACTTCTCAAACAATTCACGGTACATCGCCTGCTCTCGGATTCTCCGGGTTGATTCCGCTTCCGGAATTTGCC  
AGGAGTGCTGACCAAAATCGCCGGGCCACATTACCTGCCCTGGCGATTACAAATCACGATACCTACGTTTGGCGCGTAG  
CCATCGTCATCAATCACCAGGACTACCTCAAATAAAGCTTTATATACGAATGATTGTTTCACTACTCCAGGAAGACGGTAA  
ACCACTCTCTGCAGGCATTACACACTAATAACAATTGAATAACTCACAGTTATGTGCAGAGTTATAAACAGAGGAAGGG  
GTGGATAGCCGTTTTTATCACCTTTTCTGTGGATAGAGTTGTGAAGAACTACGGAATTACTACGGGAAAACCCGGAGCA  
TTCTGAATAAGCCGATATAGACATTTTAAAATATTCATTATCAGTCAATGCATTACATGTAATTTTAGTAATGAAAAAG  
AGTAATTCGTGACCCAGGTACACCTCTCATTTACGGGTTGGCGAAAGATCAACCAATGCCGTATTTATCCACAGAATGT  
GCCACTAAGTTAAGCACTGAACCACTAAAACTGGAGTTTTCGTCGCACGTCAAGGCTGTAATGGAACAGTAGTGGAGG  
TTTTTACAGTTATCCCAGCTTCTGTGGATAACATGGTGAAGATCCTGTTTATTTTTCAGTGACCAGATTTGAAAAACC  
CGTTGCGAGTTGCGCAACTCGATTACCAGCAACCTAAAAAGCAATATAAATCAGAGAATTGAACAACGCATGTGAAAA  
AGTTACTGCGAATATTCGGCACATAATTGCTGTTTGTTTTTAATCAAGGTATCATGACATGTCCAACCTCGCCAC  
TGCTCTCTCTCCGAAACTGAAGAACAGTTGTTAGCGCAAGCACAGCAACTTTCTGGTTATACATTTGGGAGAACTGGCG  
GCACTTGTCCGGCTGGTTACGCCAGAGAAATTTAAAACGCGATAAAGGCTGGATTGGCGTGTACTGGAGATCTGGCTAGG  
TGCCAGCGCAGGGAGTAAACCTGAGCAAGATTTGCTGCTCTGGCGTGGAACCTAAAACCTATCCCTGTGGATAGTCTTG  
GTCGTCCGCTGAAAAACAATTCGTTTGTGTTGCCCGTTAACGGCAATAGCGGGGTGACCTGGGAAACCAGCCACGTG  
CGCCACAAACTCAAACGCGTACTGTGGATACCGGTTGAAGCGAGCGCAGCATCCCCTGGCGCAGCGTCCGCTGGATC  
ACCGTTGCTGTGGAGCCCAATGAAGAGGAAGACCGGCAGCTACGCGAAGACTGGGAAGAATTAATGGATATGATTGTC

TCGGTCAGGTTGAGCGGATTACCGCTCGTCACGGGGAGTATTTACAGATACGACCGAAAGCAGCGAATGCGAAAGCGCTT  
ACCGAAGCCATTGGTGCCCGGGGCGAACGGATTCTGACGCTGCCACGCGGCTTTTATTTGAAGAAGAATTTACCAGTGC  
ACTACTGGCCCGTCATTTTCTGATCCAGTAGCCATCGCTTTGACCTGCCGCTTTCCGGGCATATAATTACCGCTTCATTT  
TTTTGGCAGGGCTTTTTAGATGTTATTTGCATGGATAACCGATCCTAACGCCTGGCTTGCCTCGGTACGCTGACGCTGC  
TGGAGATCGTTCCTGGGATCGACAATATTATTTTCTTTCTCTGGTGGTGGCAAAGCTTCCACAGCACAAACGTGCTCAT  
GCGCGCCGTCTGGGGTTGGCGGGAGCCATGGTTATGCGTCTGGCGCTGCTGGCATCAATCGCCTGGGTTACGCGCCTGAC  
AAATCCGCTTTTTACAATATTCAGTCAGGAAATTTCTGCCGTGATTTGATTCTGCTTCTGGGTGGCTTGTTCCTTATCT  
GGAAAGCCAGCAAGGAAATCCACGAATCCATTGAAGGTGAAGAAGAAGGGCTGAAAACACGCGTTTTATCATTCTCGGC  
GCTATCGTGCAGATTATGCTGCTGGATATTATCTTTAGCCTCGACTCGGTGATTACGGCTGTGGGTCTGTCAGATCACCT  
GTTTATTATGATGGCAGCCGTGGTATTGCCGTAGGCGTGATGATGTTCCGCCGCGCTCGATTGGTGATTTTGTGCAAC  
GCCATCCTTCGGTAAAAATGCTGGCGCTCTTTCTGATTCTGGTGGGCTTTACCCTGATTCTGGAAAGTTTCGACATC  
CACGTACCGAAAGTTACATCTACTTCGCGATGTTCTTCTATTGCGGTTGAAAGCCTCAACTTGATTTCGCAACAAAA  
GAATCCGCTCTGATACTCCGTACGCTCTCTGCGGGAGGGCGTACTACTCCTTTTACCCTCACAGTTTAAAGTTTTCT  
GCTTTCAAGATATAACGTGCGTTTTATAACAGACTATTATCATAGGTAGGCCAAATGAGGATAACCGGATGAAAAAT  
GGCAGTAATAATTTCTGCAGTCGGACTGGCGTTTGCTGTTCCGGGTGTTCCAGTGATTACGTCATGGCAGCCAAAGAT  
GGCGTATGATTTTTGACCGATGGAAAACCTGAAATTGATGATGATACCGGGCTGGTGAATTATCACGATCAGCAAGGTAA  
CGCGATGCAAATTAACCGTGATGATGTTTCGCAAATTAATTGAACGTTAACAATAAGGTGAGCATCCGGCTGGCCTTAAG  
ATTTTTCTTTCCCTTTCCCTTCCCTCTGCCATTTTTATATTCCTTATGTCGTGATTATAAAAAAGGAAACGGCTATGC  
AATATCACCGTATACCCACAGTTCGCTGGAAGTCAGCACGCTGGGGCTTGGCACGATGACGTTTGGTGAACAGAACAGC  
GAAGCCGACGCCACGCACAACCTCGACTATGCCGTGCTCAGGGCATTAACTTATCGACGTTGCCGAAATGTACCCAGT  
ACCTCCGCGCCCCGAAACGCAAGGGTTAACCGAAACCTACGTGCGCAACTGGCTGGCGAAACATGGCAGCCGCGAAAGT  
TAATTATCGCTCCAAAGTGAGCGGACCGTCGCGCAATAATGACAAGGGCATCCGCCGGATCAGGCGCTGGATCGGAAG  
AATATCCGCGAAGCGCTGCATGACAGCCTCAAGCGCTACAGACTGATTACCTCGATCTTTATCAGGTGCACTGGCCGCA  
GCGCCCGACCAACTGCTTCGGCAAACCTCGTTATAGCTGGACGGATTCTGCGCTGCGGTTTCGCTGCTGGATACGCTGG  
ACGCACTGGCAGAGTACCAACGCGCGGAAAAATTCGTTATATCGGCGTGTCGAACGAAACTGCATTTGGCGTAATGCGC  
TACCTGCATCTGGCGGACAAACACGATCTGCCGCTATTGTCACCATTAGAACCTTACAGTCTGTTAAACCGCAGTTT  
TGAAGTAGGTCTGGCAGAAGTCAGCCAGTATGAAGGGTGAACCTGCTGGCCTATTCGTGCCTGGGTTTCGGCACGCTGA  
CCGGGAAATATCTCAATGGTGCAAAACCCGCTGGCGCACGTAATACGCTCTTATAGTCGGTTCACCCGCTATAGCGGTGAG  
CAAACGCAAAAAGCCGTCGCGGGCTATGTTGATATCGCCAGACGTCATGGCCTGGACCCCTGCTCAGATGGCGCTCGCGTT  
TGACGCCGTCAACCGTTTGTGTCAGACTCTGCTGGGCGCAACCACGATGGATCAGCTGAAAATAACATCGAAAGTT  
TGCACTGGAGTTAAGCGAAGACGATTAAGTGAATTAAGCGGTGCATCAGGTTTATACTTATCCGGCACCAATAAGAT  
TAACGCCGTTAAAACCGCGTTAAATATTAATGACGGCGCTGCCAGATCCACAGCGCCGTTATTGCCAGCGCAACAGC  
GCACCGAAGCCAATGCCAATGGGCAGGACCGGGATGCCATCATTACCGCCAGCGAGTAAATGCCAGCATCAACAACAT  
GGCGCTGTTTTCGCAAGTTTTGTACTGCAATCGCATTCCCCGCCCCGACGCTTTTTTTACCCCGCTCTGTAGCAACG  
CATTGAGCGGAACGACAAAAAGCCCCCATCACGCCAATCAGCATCAACAAGGCATAGGCTGGCAGCAGCTCGTGTTC  
AGGGAAAAATCAGTACCACACGCCAATCAAAATCCCGGCTGGCATAACAGCGTGACACGGTTTCCAGCGTAACTAATT  
CGCTGCCGACCTGCGCAACCACGATACCAATCGTACCATCGGTTGAGATAGGTGGGCGTAGCGTTATCGGTAATGC  
CCAGCGCCACCGGTACCCACAGCACCAACAGGAAACGAGCGTGACACCCGCTCCCAGAATAAACTGGTGGCCACCAGC  
GAAAAACGCGTTTTACCATTGCGCCATAGCGAGGTGACAGGATTGAGGAAACTGCGGGTCATGTTGATGAGATTCAGGA  
CTGCCCCGGACGCGCCGCCAGTTTGGGAATGTAGATATTGGCAACGACCGACCCAGTGGCAGTGGCGCATGCGG  
CCAGGGCGACGAGGACATGCCAGTCAGCCAGCACACCCGGCTACGGAAACGAGCAAATCGCCGCTATGGTAGAAGCT  
TCCATTAACCGTTAGCTTTCACTAECTTACTACCCGTGGTTAATTCGCCGAGAATACCGTATTTCCGGGTGAATAGGC  
TGCAACCAACACCCACGAGCTATAGCCGAGAAACGGATTGATACCAAGCAGATACTGGCTGCGCCACGAGCTTCA  
GGCGTTGGCAAACATCATCACCCGGCTTTGGCGAAGCTATCCGCCACCTGCCGACAAACGGCGCAAAAAGAATGTAA  
GCACCTACAAACACCATTTGACAGGATGGGCTGGCTCCACTCCGGATAGAAGTGCCTTTAGTAACGCCAGAGTGGCAAA  
CAGTAGGGCATTATCGCCAAACGAGAGAAAACCTGCGCCACGATAACCGCTTTTATCCCTTCGACCACAACGAAGTGT  
TAGTGTGCACTGACTCACTCATCGTGTGTTCCGCTTCGTCTACCAGCTTTTCAACGTGACAAAGTCAGGTTTGGCGCT  
GCCAAGTAATGGCATCTGTTTCAGATAGCAATATCGCGCGGTACAGCAAGCTCCGGCACGCGTGTGCGGGCATACT  
GTTGCAACTTATCGCGCGTCAGTTCGTTATCTGTGGTGAAGAAGCACCAGTGCCTCGCTTTGCTGGCATCGCTTTAATC  
GCAGTGGCATGGAATTTATCTGGCGAAACACCAAGTCCAGTGTTCACCATTTCCAGCGACACCATTTCCGCTGCAAT  
TTTGGCAAAGCGTTTTGCGCGGCCCTGAATCTGCACAAAGCCCTGCTCGTCAAAACGCACAATATCGCCAGTGTCAACC  
AGCCGCGCTCCATTTCCGCCGAACATTTCTGGCGGTGGGCACCTCCAGTACACCTGGCTTCTCCACCCGAGATAGCCG  
TTCAATATGTTCCGCCCTTTCAGTTGACGGCGTCCGCCCTTTCGATACCAGGGACCGACAACAGGCGCGCATCCATTCC  
TGGTAGAATACGCCCTACCGTACCGGGTTTCGCCGCAATCGGTACGTTGATAGAAAACGACAGGCGCGCATTCGGTACGC  
CGTAGCCTTCAAGGATGCGCAGGCCAAATTTATCCTGCCAAAGCTGTTTGGTACTTTCTTGAATTTTTCTGCGCCTGCC  
ACCACATAGCGTAGACGATAGAAGTCATACGGGTTGGCGAAACGCGCGTAGTGACCGAGGAAAGTCGAGGTGCCGAACAA



CACGGTGCAACTGCGGTCATACACCAACTCCGGCACAATGCGGTAATGCAGCGGGCTTGGATAAAGGAACACTTCTGCAC  
CTGTAAGCAGTGGCGTAAACAGGCCTACCGTCAGCCAAAGGAGTGAAACAGCGGTAACGCCGACATAAAGCGATCGTTG  
GTGGTGAAGTCGCAATCGTTTTAATCTGCTCGACATTCGCCAGAATGCTTTTATGGCTATGGACGACGCTTTCCGGATG  
GCCTTCAGAACCAGGAGGTAAGGATCAGCGCCTTCTTCCGGCTGCTGTTAACTGTGCCAGACGCGGCATCAGCA  
AATGAGCGAAGATCCATACTTTGTCGGCAGTGGTGACATCTGCTTTAAATCTTCCAGATAGACCCAGCGCACCTGAGTA  
AGTTGCTCCGGCAGATGCCAGAGTTTGCCTTTATCGAGAACTGGCGGGAAGTGAAGATGGTTTTGATTTAGCCGCCGT  
AATAGCACTGGTCAGCCCTTTACCCCGCAGTGTAGTTTCATCATTGCGGGCATGCGGCGACGGGCGATGGCCCCAAAA  
TCACTGCCGCACTGATGCCTGCATTGGCAGCATTAAAGCCGATGCGTTTGCCTTCAACACTGTATTTTTCAAGGATGCGT  
CCAACAAACAGCGTTTTTCGTAAGCAATTTGCGATAGGAGTCTGGGGTAAAGTTGACGTCTTCGACACATTTCTTCCCGC  
TCCGAAGCGGTACATTGCACTCAGTAAAGATTCTGACAGCGTTTACGCGGGCGCACCGCCATTGCGCTTCCATCATT  
TTTGATGCAGCATTTCCGCCAGCATTTTGCAGCGGTACGGGCACGCGGCGCATCCGGCATCGCCACCTGCGTTGGTGGC  
AAAAATGCAGAGTAATTTGCGGGAACAAGCGACGTTTAAACCAGACCTTTAGCGCGCTGAAGTGCCTAAGTTCCGCCCC  
TTCAATACGCACAGGAATAACCGTTGCACCAGACTTCGCCGCGACAAAACCCGCGCCATCGTAGATTTTTCATCAGCGAGC  
CTGTCGTGGTATGCGTCCCTCAGGGAAAATCACCCTGGTGGCCCTGTTCCACCAGACGTACCAGATGTTAATAGCC  
ATAGTTGCGTGGGTGAGAGGAACAAGTCGATAAATGATTTAGCCAAACGCATATACCCTGTTGGCTTATTGAGGT  
GTAAACGGCAACACTGGAGCACAGGTAAGGTAAGGTAAGGTAAGGTAAGGTAAGGTAAGGTAAGGTAAGGTAAGGTAAGG  
TTAGAACGCGCTCGCCCTTCACTGCGTGGGTGTCACCCGTAACGCGAACGCGATACAAAACACGGCACAAATTTGAAAA  
AAGCTAAAAAGCATTCCAACCTCCCTTTGCTCTGATTAGTAAAAGCGAATGGAGGGAGATTACACGAGATAAAGAACGCG  
AGCGACAGTAAATTAGGTGCGAAAAAAACCTGCGCATCCGCGCAGGTTGGTGCAAGAGACAGGGTACGAAGAGCGTACC  
GAATAATCTCACCAATCAATACCTCTGGGATCTTGATTGTTGGTCTGCACGACGACTCTTCGCCAGCGAGAAAAACGAAAG  
GAATGAAGGGAATGCAACGAGGTGTGTAATTTGTCGGTTACTGTTACAGATTGATGACCGGCAAAAAAAACCTGCGCAT  
CTGCGCAGGCTGGTGAATTCATGTGCTCAACCCGAAGTTGACTTCACCTATCAATACCTCTGGGATCACCCTTTAGCA  
ACCTGAAGCCAAACGCCACCAGCGGTCAATCGAACAGCGTTTTCGCAAAGTGAACCAAGGTTTGAATCTCTTTTTTT  
GTCTTACTTATTTGCGTTTGGCTCACATTCACAGTAAAACACGCCACCCCTTGAACCAACGGGCGTTTTCCGTAACA  
CTGAAAGAATGTAAGCGTTTACCCTAAGGTAATTTTCATGGCGACCATAAAGGATGTAGCCGACTGGCAGGCGTTTCA  
GTCGCCACCGTTTCCCGCTCATTAAATTAATCACCAGCCAGCGAAGCTTCCCGCTGGCTGTGCATAGTGAATGGA  
GTCTCTTAGCTATCACCAGAACGCCAACGCCGCTGGCGCAGCAGACCTGAAACGCTGGTCTGGTCTGGTGGTGGT  
ATGTTTCCGATCCGTTTTTCCGTGCAATGGTGAAGCGGTGCAACAGGTGGCTTATCACACCGGTAATTTTTTATTGATT  
GGCAACGGTACCACAACGAACAAAAGAGCGTCAGGCCATTGAGCAACTGATCCGCCATCGCTGTGCTGCGTTGGTGGT  
CCATGCCAAAATGATCCCGATGCTGATTTAGCCTCATTAAATGAAACAAATGCCCGGTATGGTGTGATCAACCGTATCC  
TGCTGGCTTTGAAAACCGTTGATTGCTCTGGACGATCGTTACGGTGCCTGGCTGGCAACGCGTCATTTAATTCAGCAA  
GGTCATACCCGCAATTGGTTATCTGTGCTTAACCACTCTATTTCTGACGCCAAGATCGTCTGCAAGGGTATTACGATGC  
CCTTGCTGAAAGTGGTATTGCGGCCAATGACCGGCTGGTGACATTTGGCGAACAGACGAAAGCGGGCGAACAGGCAA  
TGACCGAGCTTTGGGACGAGGAAGAAATTTCACTGCGGTAGCCTGTTATAACGATTCAATGGCGGGGGTGGATGGG  
GTTCTCAATGATAATGGTATTGATGTACCGGGTGGATTTGTTAATTTGGCTTTGATGATGTGCTGGTGTACGCTATGT  
GCGTCCGCGCTGACCACCGTGCCTTACCAATCGTACGATGGCGACCCAGGCTGCCGAACCTGGCTTTGGCGCTGGCGG  
ATAATCGCCCTCTCCCGAAATCACTAATGCTTTAGTCCGACGCTGGTACGTCGTCATTCACTGTCGCTGCTGCTG  
GAGGCAAGTCATGCAACCAGCGACTAACCAGTAAAGCAATTCAGCGCCAGTAATTTTCGATGGTCTGGCGAG  
GGCAATCAACCGCGCTGACCATTATCAAACAGAACTTCTGGTAACAGCGGACGGCTATTGATGGTGGATGACATTGAT  
GCGCCATATCCCCTGTATCATGCACTACCAGATAACACCTGCTTCACTTCCGGCAAGGCGCGGTTTCAACATTTCC  
CCCTTCTGCTGGGTAAGACATCGCCGATTACATAACCGTCCGCGCAGCAGGTTTTCCACCGTTGGCGCGTGTTC  
GAGAACGACCATCAGCTGCCAGGGCACTGATATGGTGGTAACCTACCGTACATTGCCGGGCGCATCAGATCGTTGAACCCG  
GCATCAACCAGCACAAAGTGGCGGCTCCCATTTGTTGACGCTCCGACCTGAGTAATTAATACGCCAGACTGCGCTAC  
CAGGAAGCGACCCGGTTCAATTTCCAGTTTACAGGGTGGCCAAATGGCGGGCGATTTGCTCACGCGGGCATTCCACA  
GACCATAATAATGTTGCGTATCAACCGCTCTTACCCTGTTGATAAGGAACAGAAAGCCACCGCCGAGAAATAGCC  
TGTAATCCTGACCGAATTCGATGACCTGACGCACCATAGCACACACCTGTTCCAGATGGGCATAATCAACGCCAGA  
ACCAATGTGCATGTGAATGCCGACCGCTGCAGATGATGACGTTGATCACGTCAGTGGCGGGCAGATCGGTGTACC  
AGATACCGTGTGCTGTTTTCCGCCACCGGATTGGTTTTTTGGCTATGTCGTCGACCAACCCCGGATTAACGCGCAGC  
CATACCGATGCCCTGGCGAAACCTGGCCAGTTGGTGCAGCATATCAACAGAACCCGATTACCGGAATTTGCAATTC  
ACTGACGCTTCAAGCGTGCCTGATCGATAACATCTGCCGTAACAAACAAATATCATCGGGTGGCTTTGGGATTGTAAC  
CCGCGCAACGCAGCTTATTTGCGCTAACGAGACGGAATCCACTTTACGCGCTGCTCACGATTAAGCGCAAAATA  
TGAATATTGGAACAGGCTTTCTGTGCAAAGCGCACCATCAAACCTGTTTACGCGCTGCAATCTGCCGACGAATAATTTG  
CGATCGTAGACCCACACCGGGCAGCCAAATTCAGCGGGCAAACGACGAGATTTTCCGGCGTGAGATCGGTATCGGTGC  
TGAACAGTGAATGTGGCATAACAACTCCAGATAAGTGCTTTTTTATGATTACGCCACATCAAAAAAGAAATAAAAAATA  
TCGATTTATGTGAGTCTATGCAAAAATGATATGGATTACCGGATTGCGAGAGAGCGCTAATGGCCCGGTTAATTTACG  
TCATATTGAAATTTTTATGCGGTAATGACCGCCGGAAGCCTGACTGAGGCGGCACACCTGCTACACACCTCACAGCAA

CCGTCAGCCGCGAACTTGC GCGCTTTGAGAAGGTGATCGGGCTGAAATTGTTT GAGCGGTACGTGGGCGATTACATCCT  
ACCGTGCAAGGACTGCGTCTGTTTGAAGAAGTGCAACGATCCTGGTACGGACTGGATCGCATTGTCAGCGCCGAGAAA  
TCTGCGGAGTTTTGCCAGGAGAAGTGTCTATTGCCTGCCTGCCGGTCTTTTCGCAATCTTTTTACCGCAGCTCCTGC  
AACCTTTCTGGCAGCTTATCCCGATGTACGCTTAAATATCGTGCCCGAGGAATCACCGCTACTTGAAGAGTGGCTCTCG  
GCCAGCGTATGATTTAGGACTCACTGAAACGCTCCATACGCCTGCGGGAACAGAACGTACCGAATTACTCTCTTTAGA  
TGAAGTGTGTGTTACCTCCGGGTATCCGCTGGCGGTAAAAAGGTATTAACGCGGGATGATTTTCAGGGTGAGAACT  
ACATCAGCCTTTCCCGTACTGACAGCTATCGCCAGTTGCTGGATCAGCTATTTACTGAACATCAGGTTAAACGACGCATG  
ATCGTAGAAACCCACAGCGCCGCGTCACTGCGCAATGGTACGGGCGGGGTAGGTATTTCCGGTGGTTAACCCGCTCAC  
CGCACTAGATTATGCGGCAAGCGGTTTGTGGTGGCGGGTTCAGTATTGCGGTTCCGTTACCGTCAAGCTGATCCGCC  
CCCTGCACCGCCGTCATCAGCGCTGGTTCAGGCGTTTGTGGCATTACAAGCGGGTTACCGAACTGGTCACTTCT  
CTTGACGCTATTTTGTGTCAGCTACGACAGCATAAAAAGCGACAGCATCCTCGGCATGGATCGCCGCGGTATCAAACACA  
GGCAAAACTGCGCTCTTCTGGCACCAGTAAACCAATTTCTGTGACGCCAAAATGACGCCCTGTGCGCCCTGTTCTGC  
AAGGCGAGCAATCACTTGGCACAATAAGCGCGTACGCTTCCGTTAAATTGCCCCAGACAGTTCCTCAAAAATAATCT  
GATTAATTTTCCCGCTTATCCGCTTACGGAATAAGACAATTGATGGAAAATTGTTCCGTGAGCCGCCGCGATAAAAA  
TCCTGTTCCATGGTGAACGCGTACCCAGCAGCGCCACACGAGTCAATCCGGCCCGGTAATTGCACGTCGGTGGCACC  
CGCAATGTGAAGAAAGGACAGTGAACGCTGACTCAATGGCATCCGCCACTTTATGCATCGTATTGGTATGATAGCACAA  
TACCTTCTGCGCCCGCCGCTGTAAAGCAAGCGCCCTCAGCCAGAATGTCCCGGTTTTATCCATTCCCGCGACGC  
TGGCACTCTTCTATTTATGAAAATCGACGCTATGTAGCAGCACTTGGCGAGAGTGAAGCCACCAAGCCGCTGTTAAT  
GCCTTCATTTATCAAACGATAGTAAGGAATGGTGGATTCCAGCTCATTCTCCAGCAAACCAATTGTTTTATTCTCTC  
TCTCTGATGTGTGTACCGCAACAAGGCTGAATAAGGAACGAGACAAAACGCTCAACGGCCAAGTGCCCAATCTCTATT  
AACGAAAAAAGGGCCGATGTACAGCACATCCGGCCGTGAAATCAGACGCGGATATTTCTCAACTTCTCGCTGCCATC  
AGTTTGCCTCGATATGTTCCAGCGTGACATTTTTGGTTTCCGGAATGAGCCAGAAAGTAATGCCACAAACGCAATGTT  
CAGCGCAGTGTAGAGCCAGAACGTACCGCAGCGCCAAATGCTATCAAGCAGTGTGAGGAAGTGCAGCCGATAATCATAT  
TCGACACCCAGTTCGTGGTGGTGAACAGGTAATACCGAAATCGCGCATTTACAGGGCTGAATTTAGAGCACAGGATC  
CACACCACTGGCGGGCGCTCATCGCATAACCGGAATACACATCATCGTCATGCCAACAGAGAGCCAGGACAAGCCACT  
GGAAGCCGTACCGTTATCAAACGATCAGGCAATAGCCAGCAGAGTGCCTAACGCCATCAGCTGAAACCAATTT  
TCAGAGCCGTTTACGCCCTGCTTTATCTACCGTAAACACCGCAATAAAGGTGGCGAACATAAAGGTGAGCCCTACGACC  
AGAGTCGCAATCATCTGTTGTTCTGTGGTGTAAAGCCGCCATTTTGAAGTACGCGGCGGTAGTACATGATGATGTT  
CATACCGGTAACCTGCTGCATCGCCTGCAACAACATACCGAGAAACACAGCAGCAGCGGACGTTACGGTTGATCTTAAACA  
GTGCCAACCGCCCTGTTTTAACTTACGCTTTACGGAATTTCTGTTGAGTTCTTCTCGCGTTTTTCCGACGTATCGCGC  
AGCATACGCAATACTTCTCCGCTCAATATGACGCCCTTTTCCGCCAGCCAGCGGGGCTATTTGGCAGGAAGACTAC  
CAGAATAATCAGCAGAAGTCTGGTAAAGCAAGAACCCCAACATTGCGCGCCAGTTACCGCTATAACTGAACGCTGTAT  
CGGATAAAAACGCCAGCAGATGCCGAGTGTGACCATCAACTGGTACATACTGATCATCTTACCGCAACGTTTTCACTT  
GCCATTTAGAAAAGATACAGAGGAGCGGTGAAGACGCGATCCCGACAGCAATGCCAGCACCACAGAGCGGCGATTA  
CATCTCTACGCTGGTGCAAAAGCGGACCCTATAGAACCGAGTACAAACAGGATGGCCCCCGCCATCAGGCTGTATTTAC  
GCCCCAGGCGGAACGACAGCCAACCTAAACAGCGCACCAATGCTGCACCGAGCATCATGCTACTAACCACCCATTC  
TGCAACGACTGGTCAACAAAAGTGTGCGTAATGAACGGCAACGCTCCGGCGATTACGCCGATATCAAGACCAATAA  
CAATCCTGCGACCGCAGCAGTACCGAAAACAACATATTCATACGCCGCGTATCCCGCAAAGAAGTGGCGTTAAAGCAG  
ATTCCGTATTGATAGTAACCAATTTTTCTGCGCAGCAGAGATGAGCAGTAAAGTGAAGAAATACGTGAACAACTCAGCAG  
GTGTCAGGTCGGAACAGCATAAATATGATTAATTTGCTGCGCATGTGTTATGTGATGGATATTTCAATTTTCAAA  
TAAGTTGAATTTAGATTATTATTAACCACTAATTTTACAGCAGATAAAAATTCATAAAGTTTCAATTAATTGATAATTA  
ATATGGATTATTTATAACCATGATATGGATTATGATGATCTACAGGTATAAAAAACCCTGCCATGCGGCAGGGTCATAA  
AAGTAAGAAGAATGAATTAACGCGCCAGCCAACCGCCATCCACGGCAATGGTATAACCATTACATAATCTGAAGCGCTG  
GAGGCAAGGAACACTATCGGCCCATCAGGCTCACTCGGCAGTCCCAACGACCAGTGAATGCGGTGAGAAATTTCCGC  
GCTACGTTGTTCTGCCCCGAGTTGTTGAGTATTGTTGGTCCCATGTAACCCGGGGCTATCGCATTAAACATTAATGT  
TGTGTTTAGCCATTGTTCCGCATCAATCGCGTACACCCATCACGCCGCTTTTTGATGCGGTATAAGAAGGCACACGG  
ATCCCGCCTGGAAGGAGAGCATTGACGCGATATTGATAATCTTGCCGCCATTGCCTTGCAGGATAAAGTGTTCGCCCC  
TGCTGAGACATGAAGAATACGCTCTTGATATTGAGTTTATGACATCGTCCAGTCTTTTCTGCTGAACTCGAGAGCAT  
CTTCCGGCGAATCAATCCGGGTTATTACCAGGATATCAATATGACCAAACCTCCGCTACCGCGGATCCAGCAGTGT  
GGAATACCATCAATCTTTGCGAGATCGCGGTGAGGCTAAAAAACGACGCCCGAGCGTGTGACCTGCTCGATGGTTT  
AGTCGGTTCAACGATGTTAATGCCAACAATGTCACAGCCGCTTGCGCCAGCCCAACGCCATCCCCTGACCCAGTCCAG  
TATCACAACAGTGACGACCCAACTTACCTTCGAGAGAAAATGCACTTAAAAATCATAACAATACCTTATTCGTTTATG  
CCCAAACTAGCGAAATCTTTAACGGCCACATGGTCCATATCATCAAAGACCTGGTTTTACCGACCATGCCCCAGATA  
AAGGTATAAGCTTTGGTTCCGACACCGGAATGGATCGACCAGCTCGGGGAGATCACCGCTGCTGTTATGCATCACAAT  
ATGACGCGTTTTCTGCGGCTGCCCATCATGTGGAAAACGAGGCGTCAATCCATATTGAAATAGAAATAAACTTCCA  
TCCGGCGCTGTTGGGTGTGACACGGCATGGTGTCCACAAGTTACCCGGAGCCAGTCCGTGAGCCCATACTCAATGG

CAGGTTCCAGTACATCCGGGACAAAATATTTGTTAATCGTGGCAGGTTACTGGTGAGGTTATCGCCTAACGTGACTGG  
AGATACTTCGTCGGGTGTGACTTTTTTGGTGGGATACGTCGTATGCGGGTGCCAATTGTAATAAACTTCGCCGGAG  
TGCCGGTATCAATACTGGCAAAGACAACCTCTTTTGCACCTTTACCAACATACAGGGCGTCGCGGTGACCGATTTTCATAG  
CATTGGCCATCGACAGTAATCGTACCGGCACCGCCAATATTGATAACACCTAACTCGCGACGTTCAAGGAAATAGCTTAC  
GCCGAGTTGTTTACCAACTTCCCGCCAACGGAAACCGTTTTAGTTATCGGCATAATGCCGCCAACAAATAATTTCGGTCAA  
TGTGGCTGTAACCATGGTGTACTCATCGGGACAAAATACCTTTTCAACCAAAAATTCATTGCGCAGCCCTTGGGTATCC  
AGCGTTTTTGGTGGCAGTGTGGATGCTCTGTCTTACGTCCACATCAACCTCCGATAATCAGTGAAGCGTGAAAATAGA  
AAACGATAGTGAACACTGTTTTGTTTTCTATAAAGGGATGATATGCCATGGGCTAGGGTTTTCAATTAATAAATAA  
ACAATGTTTCATTTTTAAGTTAAGGATTAATAAAGTGCAGTGTGATCACGAATATGTATGAGAATGGAAAATGAGG  
GAGCCAGAAAATGTATGTCGACTTGGCAGCCATCATTATTCAACAGATTAATGACGGCAGATATTTATCGGTAAGGAGG  
AAATGCAGAGCTATTCGTCACGTTCAATGGTCAATGCCACACCCTGGCCCCGCGATACAAAAGCGTTGCCAGTCTTTG  
CGGGCATTACGTTTACCATTTTCATGAACCAGAGAAACCAGGATTCGGCAACCGGAAGCGCTATCGGGTACCGAGTGC  
GATCGCGCCACCATTGACATTGACCCGACGCTCATCCACTCAAGCATCTTGCCAACCGAAAGCGCTGTGCAGCAAACG  
CTTCATTAGCCTCGATAAGATCGACTTCAGCCAACCTGCCAGCCTACACGCTCCAGGCAACGGCGGGTTCGCATACCCGGC  
GCAATTTCCATCAATGCCGATCTACACCAACGCTGCCAAATGCCGAATGCCGGCCAGCAGCGGTAATCAACGCTCG  
TGCTTTGGCTTCGCTCATCATCATTACCGCAGCTGCCCATCGTTTTATGGATGATGCATTACCCGCTGTACAGAACCGA  
GACTATCAAATGAAGGATTTAAACGGGCTAAGCCTTCTGCGCTGCGCTCAGTGCCTGGCTGTTTCATCGGTATCAACAACC  
AACGCTCGCCGTTACTTTGGGTCAATTACCGGGACGATCTCATCTTAAATCGTCCGGCGTCAATCGCCGCTCGCGCTTT  
TTGTTGCGAGCTAAGTGCCTAAGCATCCTGCAACTGACGGCTGATGCCATATTCGCGAGCCAGATTTTCGGCGGTGACAC  
CAATATGATAATCATTGAAGGCATCCCAACCCATCATGCACAAGACTGTCAACCAACTGGCTATTGCCAAGCTGTGCA  
CCGGTGGCGTATCAGTCAGAACATGTGGTGGCGGGCTCATGTTTTCTGGCCACCGCGATGACAATATCAGCCTCGCC  
ACACTGTATCGCCTGAGTAGCCAGATGCAGTGTCTTAAAGCCCGGAACCGCAAACGTCTTAATAGTGATTGCAGAAACGC  
TATTAGGCAGACCACCTTAAATAGCCGATTGCTTGGCGATTCTGCCCTGCCCTGCAGTCAACACCTGACCAAGAATT  
ACTTCATCCACCGCATATGCAGGAACGCCGTACGTTCTATTAACGCTTTCACGACCAGACTACCAAGTTCACGGCGGA  
ATGACCCGCTAACGCACCACGAAAGCAGCCGATAGGTGTCCGTAACGCCCGACAATCACAACGTCTTTCATCACAACCT  
CGCACCAATTAACAGTGAATAGTAAATGATTGTTAATTACAGTTATCTTAATTGTTTTAAAAAAGTGATTTTTATCACA  
AAGGAAATATGCCTGAGCAGCAGTCAGAGACATAACTGGCACGTAAGGTTTGAACCACTAACCCACCAATAGAGGGGTA  
GATAGGGCGTAAATCTCCATACTTAACTGGTTTTATGGTAAATTGCCCTCCATTTTGTAAATTTGTAGATGATACGTT  
CAGATAATGTCTAATATTTGGTCTAAAGAAGAACTCTGTGGAGTTTCGCGCTCTACGGCAGACCGGTTGGTGCAGGCAC  
GCTCTTCTTCTATTAGTTAGGTTCCGGCAGGGGCTGTGGTCTGTTTTATTACTGCTCTGGTTCGCTGGCCTTAAACAT  
ATTGGCCACATAAAGCCTTGTGCCAGTTCATCTCTCATCAAAAACATCAGCAGGTGAAGGGATAACGGGCGCGGTAACA  
CACTACTATGGCAAGAAGATTGGTAATCTGATTACCACGCTGTACTTTCATCGCCTTTTTTGTGCTGCTGTTGATATATGC  
AGTGGCAATTACCAACTCACTTACGGAACAGCTGGCAAAGCATATGGTTATTGATCTTCGCATCCGATGTTGGTGAGTC  
TGGGTGTTGTATTAATCTGAATCTCATTCTTCTGATGGGACGTCATGCCACTATTCGGGTAATGGGATTTTTGGTATTC  
CCATTGATTGCCTATTTCTATTTCTTCCATTTACCTTGTGCGTAGTTGGCAACCTGATCTATTAACAACCCAGGTAGA  
GTTCAATCAGAATACCCTTACCAGATATGGATATCGATTCCCGTATGGTTTTCGCCTTAGCCATACGCCATTATTT  
CTACGTTTGCATAGACAGCAGTGAATAATGGCGAACACGCTATGGATAAATGCAAAAAAATTATGAAAGTCGCTTAT  
CTCATCATCTGCATAAGTGTACTGTTCTTTGTCTTGTAGCTGCCTGCTTCTATTCCACCTTCGATATTTGAAGCTGTAA  
AGAAGAAGGGGTCACCAATTTATCGGGCCTTCTATGCTGCCAACGCCAGCATGGTTGTCAATTTCCGGGATTATTG  
TCGCAGTAGTTGCGATGTCGAAATCATTCTGGTACGTACTTTGGCGTTATTGAAGGTGCCACAGAGGTCGTCAAAACA  
CACTACAGCAGGTTGGTGTAAAGAAAAGTCGTGCATTTAAACCGCGCACTATCAATTATGTTGGTATCGCTGATTACCTT  
CATTGTTTGTTCATTAACCCGAACGCGATTTTCGATGATTTACGCGATCAGCGGCCCGCTCATTGCCATGATACTTTTCA  
TCATGCCTACGCTGTCAACGTATCTCATCCCGCGCTTAAACCTGGCGTTCATCGGAAATCTGATTACGCTGATCGTG  
GGTATCCTGTGCGTATCGGTAATGTTCTTTAGCTAATATCAGTTGTGGATGGTTCAAAAATTGCTACAATTTGAACCATT  
CCATTTTTTATAATATTCATTTGTTATTATCCACCCTATCACTTCTCTCGTCATATCCTAGTATTATCAGTTAGTTAAA  
CACACAAAGAGATCTGAACATCTTAAATAAGACTATTTAAGATGCATAACTTAGATTGCAAGATATCTTCTGGTCATTC  
AAAAACAATTTGCGATATAGATATTCTTATACCATGAGATAGTTATCTGGACCCTCTCAACCATGCAAGATTAATCAG  
TGAAACATAATCATATTTGATAACGAGAAATGCATTTTTAAATGCCTTACTCAGAATTATAGCAAATACAGATTAATCGC  
AATTTTTCCCGCAAATTAACAAATCATGGTGTATTGACATCATCAATAACCAATGAAATTATGCAATTATATACGGAT  
AGGGAGTTCTTAACATGGGGCTTTGTAGTCGTTATAAAAAGTCTTACATGCAATAGTTGCTCAATGCATTGCCAAATAAT  
GCCAGAAGAGTACCCGCTTTCGAGTATTGCGCAAACCTCGTGTTTTTGTATGTGGCCGAAGAAAGTTTCATATTTAATC  
GTGGTGTGGTAGAAGGTATCTTAACAAAAAACCAATGCGAGATTAAGCGGATATATTTTTGTGATTTTTTCAGTAAGT  
TTTTTACGCTATTCTTAAAAAGACTGGATTGACTATCTTGCAAGTACTGACATGGGGATTGTTTTAGTCAGCGACCG  
CAATATGCAATCGTTAGCTAATTAAGTGGCGAAAACCAACTCAGCAATATCTGCTGTCATATATAATGATTGATGGTCTTG  
ATGTTGCCAATGAAAAGATCAGACAACCTATTTATTGGTCTGTTATTATCATTTACCGGAGGTAACACATTAACCTCAGATG  
GAATTCACCATAATGGGGTATATGTTTTCTGTTATAATCCATATCAGATTGCTGAAGTCTGGATATGGATATCCGTAG

CATCTACGCGTACAAGCAACGAATCGAAAAGAGAATGGGTGGTAAAAATAACGAATTATTTATTCGTTACATTCCGGTCC  
AACATTGATACTCAACGACCAGCCAGAATCATACTCTGTTTATACGGGCATTTATTGAAATGTCGGTATTTTATAAATAG  
GCCGTCCCCTCAAGAGTAAACACCATAGTATTTAAAACCATCACACGAAAAATTCAGAAGCATTACGAAATATGAATTTA  
CAACAATAGTGGCATAAATGTTAACCATGTTAATTTACGTAAAGTTTTACGTTGCAACATTAAGCCTCATTCAATCA  
TCATGATAAATATAAAATTAATATATATTTATGCCGTAAATACCAATATACTTAGCAAATATGTGATCTCCATTTGAT  
TGATTTAGTGGTTATTGACGTATGACTGGATTATTAACGATAATATCGAGTTCTGGCCTGAGCACCGAAAAATTAATATC  
GGTACATAACGCCGATCTAACGTCGTTCTGACAACGCCAGCCAGTCGATGTTTATCACTTCTACTTGAAGCTTTTCTCTG  
ATGTGGTTGCACAACAAGATTTTTTACCAGAGTCTGGGAAGAAGAAGGTATGCGTGTGCCTACTAACACGTTATATCAG  
AACATATCCATTATCAGACGCGGATTTTCGCGCTGTTGGTGATACTACCCACTCGCTAATTGCAACCGTGCCGAGAAGAGG  
ATTCAAGATCCATAATGACATTAACATACAAAATCATGTAATAAACTCGTCAACAGACGCACATACACACAATGCCCCAC  
CTGCCATAAAAGTTAATGCGGGATACAAAAGAGCATTGGTGGCGCAAAGAATTTCAATAACAAAATCCTCAAACATATA  
AAAAGTCATCTAATTATGTTGAGCGCATTGTGCATAGGCGCATTTCTGCATATTGGCTATGGAATAAATCAACCGAA  
GCCATTTTTCAAGGATTACAAGACTGTTGCGGAAATTAATGGCTGCCATTTTAAATGTAACAGAAGATACAATTGATGGT  
TGAAAGAGTTCGATAAATATAAAACACGGATACTGGATTGCGGGATTAAGTGTAAAAAACATCCGTGGTTATACTTCCCT  
CTTGCAAAATCCTCACCAGGATGATTGTTATGGCATGCAATAAAAACTATAACCAACATGAAGTGGCAAACTGTTAAG  
CCTGCTTACCGTGAGGTTAATCGTGATTGATTATAAAAAAACTTATTATTTTATTTAGTTTTTATCAGTGGGTTTTATT  
CTTTCACTGTCTATTCTTACACTGCAGAAAAATGATATATAACGAAACATGCACTGCAAATTTGGGTAATTTTTAATGA  
CCAGGGACGAGCAAATCTTACCATCGACTTTATGTATAACAAAAAAATAAAACAGGAAGTGTGCGTTGAGTGAACCT  
GGCAACAAGGTAACAGAGAAAGTAAATCAATACGGCGAAATTTGAATACACATGGATTGAAAATGACACAGCCCAT  
TTAATCAAGAAAGTTAATAAGTTTGAAGTATGGATCAAGTTGATGATGATAGACTTGCACAACTTATTCTGATTT  
TTATGCTTTCCAGAAAAAGTGAAGCTATAATACTAAAGCAAGGTAAGCATGCTTTTATTTGAGCATTGGTAACA  
GAGCAATAATGCATTGTCAAGGTAACATAAATAGATAACAAAAAGATGGAACCTCGTTAATCATAAAACAATAAAAT  
AAATATTCTCGCAGTATATGGCAGTCTAAAGCATCAAAGATTTGATCAACATCTTTCATTTAGACATCTCCTTGAATG  
TAAAATATCATGTATCAACAACATCTGGTGCAAATCCATGAGTCGAACTCGACATTCATCTTAGCTCGATTATTATCCT  
TCGTACAGTCGATGTAACAACATACAGAAAAGAGGATTATTAAGAACCAGTTTACTCAGTGAATCAATAGAGGAAAGGACTA  
ACGTTTCTTTAAAAGAATTGATTTTATCATCTGTTAACTAACTCATCATTGACAGATCGTGAGATATAACTGTTTTTA  
ACTTTACTCTTACGTTGACTTTATTGACAGAATTAACATTACATATCTTGAATTTAATGTCATGATGTTGTTTGGCT  
GAGAACATTCTCAGCATTAAAGGAATTTTTTAAACGGAATCCTTGGTTTTCTTTTTCGAGTCCGAATTTACAATATCATGCA  
TATAGACCATTTCATGAATCTGCGAAAAATCAATGTCCATTGTATACCTCACATTTTTACCCTGACTCGATGTTACTGTT  
CAATAATCACCTTCCATCAATACTAAAATTAATACCCCTAATGTGCCGATAACAAATATAGTCATTCTACGTAACGTCCTC  
CATAAGGTGATATTTGACATTATCAGAAGCTGCGAATTCGGATTTTGTCTAATCAAATGAGAGAAATGTAAAATGAAGC  
CACGAAATATTAATAATAGCCTACCCTGCAACCATTAGTTCTGATCAGGAGAACAATAAAGAAAAATGAAGAGAAA  
TCCGTTAATCCAGTAAAATCACAATGGGGTCTGGTTTAAATTATATTGAACAAGAATCTCTTGGAGGAAAAATCTAAC  
ACATGATTTGTCAATAAAGATAGCGGATATTTCTGAAGAGATAATTGAGCAAGCAATATTATCTGCTATGAGCATATATA  
AATTTTCGATAACAGATGATTTAATGAGTATGGCTGTAATGAACTCATAAACTGACCAAAATAGAGAATAATGTAGAC  
CTGAATAAATCACTACTATATGCACAGACGTTCTATCCCCCGCTCACCAGACATAATAAAGAAAAAAACAACGACA  
TTCTACCCTTCTAAAAATCCCCTTTTAAATTTTATTGAAAAATGGCAATTGATACTATGAATCCAGTGCATACACAT  
TAAGGCATTTATGTAATGTCGTAATTAAGATAACTAATAAGGTGAATATTAGTAAAACAACATGATGTTATTAGTTTG  
TAGTGAACAGTACTTTTACCAATAATGAAAAATATACCATAAGCAATGCAAGCTTAAAACTATAATTTAAAAAGATAA  
ATATAAAAAATCAATGAGTCAATCAATAATAATTTGGCATCACGAGACACATCACAGAGGAATATTATGAGCACAGAAA  
CAATTTGAAATATTCAATAATAGTGATGAATGGGCAATCAACTAAAAACACGCATTATCGAAAAGGAGAAAAATCTGGCATT  
CTACATGGTTTAACTCCTGATATCCTTGATAGAATATATGCATATGCATTGACTACCATGAAAAGGGTAAATATAACGGA  
CGCAGAAATTTATTATAAATTTCTGTGCATTTATGCGTTGCAAAATCATGAGTATCTAAAAGATTTTGCATCAGTATGTC  
AGCCAAAAAGAAATATCAACAAGCATATGACCTTTACAACTAAGTTACAATTACTTCCCGTATGATGACTATTCAGTT  
ATTTATCGTATGGGTCAATGTCAGATTGGGGCTAAAAATATCGATAACGCAATGCAATGTTTCTATCACATTATTAACAA  
TTGTGAGGATGATAGTGTAAAGAGTAAAGCGCAGGCATATATTGAACTCTTAAACGATAATTGAGAAGATAATGGCTAAG  
CATTACAATCATTGGTTAAATTTGCTGGTTATAGTGCAGTTAACACTATAACAGCACCTCTTATGTTTTCTTAAATC  
AGCATCTTAAACAGTTAAGAGCATACTATAAATCATTATTTTTCAATGCGTTAGAGAACAATCTACTTTATCAAATTTG  
AATAAGGCTATTTGAGTACATCACTGAATTCCTAAGATAAATAGTGAACACAACCATAGATATGTCAAATGTAATTT  
CCTGTAGCGTTAATGACACATAAATATGAATAGCCATAATTTCTATTGCTTAAAGCAGGATGCAAGAAACCAATTTTTCA  
TAGAGGTTAACTAATGGACTTAGAAAAATAAATCTCATATCATTCTTGGAGGATTAACGCTCACGGAAGATGGAATTC  
TACTCAAGGAAATGAGCAAGTTTATATCCACAGAAAGAGTTAGGTGATTAATAGTATTACTTGAATCCGCTGGTCAT  
GTTGACTGAAAGATATGATCATCGAATCAGTATGGAATAATATTATTGTTAGTGACGAGTCCCTGACAAGATGATCTA  
TTCTTTGCGCTGCATTTTTGAAAAATTTGGCTATGATCGTTGCATAGAAACAATCTACCGGAAAGGTTATCGTTTCAGCG  
GGCAGGTTTTCAAACATAAATTAATGAAGATAACTTCAGACTATTCCATAGCTATATCCCTTCACTACTTCATTG  
AATACACTGGATCCATTAATACTTAATCAGGAATTAGTGCAATCATTTCAAATAAAAAATCGATGGTCTCTATACCTA

TCCGATGGCTGCGACAAATTTTTGTAATGATCACATATCTCAAATTCATTCTTGAGCAGATTCAAGCCAGATTATTTTCG  
TTACAGGAAGAATAAACCCAGAATAATGCAGTGAACACTTTATACATTGAGTTGATCGACGCTAAAAACCTTTTCCTCATC  
GCCAGTAATCATCTCCCTGTTGATGAACTACATAATACATCACAATTTATTATAGATAATATCCTTCAAACGGTACATAA  
ACCAGAACGATCTGTAAGATTAGCTAAGCAGGACCAAGGATATAAGAATCATTATTTATCAGATGAAATGTTAGCCGGAA  
AGAAAGAACTTTACGACTTCACCCCTGAAAGCATTTACAGGGCCATGACTATATTTGATAGATTACAAAAATAAAAGTGAT  
ATACAGACGCTAAAAACAGAATGTTATTGCCTTCTAGCGGAATGCCATATGTCTTTGGCACTTCATGGAAAAAGTGAAC  
TGAACCTTGCTGCTCAAAAAGCATTAGAGCTTTTAGATTATGTATCAGACATAACCACTGTCGATGGAAAAATTTAGCTA  
TTATGGGACTGATAACTGGTCTGTCTGGACAAGCAAAGTATCTCATATCTTATTTGAACAGGCTAAGATACACTCAACT  
GATATAGCCTCTCTACTACTATAGGGCACTAGTCCACTTTCAATGAAAAATTTGAAGAGGCAAGGATTTGTATAGA  
CAATCACTACAACCTCGAACCCAGAAGACGAAAAGCAGTTGTGATAAAAGAATGTGTAGATATGTATGTGCCTAACCCGC  
TCAAAAACAACATTAACCTACTATAAAAGAACTGAGAGTGAAGCCATCGAGTTATAATTGACAACATTTTGAATTA  
AAGCAGCTGACGAGAATTTGATGCGATAAATTTTTATTGACGCAATTTTATTTTAGATGTATGCAACTGTTATTTA  
AACACAGAGATAAAAAATCTAAGATATTCACCTATTGCAAGATATTTAAATGCTCTAGAGTTAAAAGTATGATGTA  
AAGACCATTGGCCTGGACAATTA AAAAGGGAGCTTTATGACTAATCCAATCGGTATCAATAATTTATCTCAAAGTTCAA  
ATATAGCGAATGCAACGGGTGATGAAGTCGTATCATTAGATAAACACATCAACACCAGTGTACTGATACAGATCAAATA  
CAAGCATTTTAGTTTTCAACATGGATGGCGCTTTTCAAATGATATGTTTTCAGAAGATAATCCTATCTCACCTTACTA  
TAAAATTGAGTGGTAGACGATTGACCAATAAATCATAACGAGATACTTTTATAATAGTATCTCGTTCCTTTTCAATCAAT  
CCTCACACATGAAAAATATGCGCTCACCAAAAGTTAAATTTAACCATCTTCACGTTTTGTATATTTATTACAAAAAT  
GTCTTTGCGCCAGCAACTCTTGCTCTAATGAAGCAGGAACAATGTTCAGAATCGAACCAAATTTAATTAAGCTATCGCTC  
TTGTTGAAAGCAATCTAAAAAGGATAGCATAGGCAAGAACAGAGATAAGAATAACAATATAAAGAGTTTAGATTATTGG  
TTAATGCAGATAAACAGATGCATATTTCCCTGTTAAAAAACGTGGAATAATAAAGATGAACGAGATTTGTTAGATAA  
CCCTTGCTGAACATTAATAAGGAACCGAGATTTTATATAACCATTTTTTACGTTGTGGAGTAACGTGGCAATGCCTGG  
GGACTTATAATGCGGGTTTTGCAATGGATAACCAAAAAAGAGACAGCAATATGCCCAAAATATATATTGTATATACCA  
GGCTTAATGAACTAGACAATCGTAAGGCTTCAGCAAAATGAGCCTAAAGCCTCTTTTTTTTATATAGTCAAACACCCAT  
ACGTAAGCTGTTTTGATCAACTCGATACCACTGTGAACATCTAATTTCTTCATGATATTGAGTCTATGAGTTTCGACTG  
TTTTCTGCTTAACTGCAAGAAATTAGCGATTTCTTTGTTGTTTTACCATCAGCTATGAGTTGTAATTTTCTGACTCA  
CGATTTGTAAGTTGATTATCAGAGGAATACCTGGAAGATATTTTTTACAATCCATATGTACACTATCAAAAATAAGTGTA  
ACCATTACTAATCGAATCAATAGCACGATTTAGTTTCGCCGGGTGACTGGTTTTCCATACGCATCCTTTTCGCACCTGCTT  
CAAGCAATTTTATTGAATCAATATACGGCATCTTTGCTACAAATGTAATAATATGAGCATCTATCTTATGCGATTTAAC  
CATTTTACGAGTTCGGCCCCATCATTCCACCTGCAAAATCTCCTAAAATAAATATTTAGGCTGTAGATTTGTTACACTC  
CGTATAGCTTTCTTCAGATCTTTATAGCCCCAACACCTCATATAAATCAGGATAATGTCCGAGAAATCCAATTATCC  
CATCAATCATAAACGGCTGCTGATCTGAAACTACAATTTTAAATTTTCCCATATATTCATCCTGAGTGAAATGCTTTAA  
CGCATTCAATTTATAATCATCCCTTCCATTATTATTATAAGCAAAATCAAAGAATACATTGATGAAATAAATGAAATA  
TAATTA AAAATAAAATTTTTGCGTAAAAAAATACCACAGGCATTA AAAATCATGAGATGATTA AAAATATTACAATTAGA  
TTATATTCAAATCATTAACTTGAGCCAGGGAGCTATAAGTCCTCAGGGCTTGCCAAAACAGAATTATTCATATCCAAG  
AATGTGTTTCAAACATTTTTTCAACTAAATAATGTCGCTGTTGTTGCGAGATTCGTTAACCTTGTGAGGGGAGAAACAA  
TGATTATTAATTAATATTGCTCACAATTATCCACAATTCCTGCGGACTAAATTCAGCAATAAATTTGATCGGTA AAAA  
CACAAAACGCTTATCATGAAATGTAATATGGACATTCATATTGATTTGTGACAAAATATGACTCTACTTCAAGAG  
ACTTATCTTTGAAACTGGTAGGTATATGGAGATTTACAGGACCTGATATTGATGGTAATTTTGTACCCAACCTTTCAAAA  
ATTTTGATAAAAAACATCAACTCTTCTGAAGGTTTTAAACAATATACTCTTCAGATCGTTTTATCATGTTTATCTTTTT  
TCAAGTTCTGAGCATAGCAAGCTTATCAAGGGTATAAAAATTATCCATCTCATCAATAATGCCTTTTGTATAGCCATCATA  
ATAACCTTGAATAAATTTTTCTTCTCTTTTTCTCAATACTCGAATTTTTGCGGTGTTTCAAGAAGGATTTTTTCTT  
TAAGAGAACTATTTCTTCAATCCATCAGAAAATTTTTCTTTAATCACAACACCATTGCGAGGATTTTATCAAGCTC  
ATCTCTATTTTTTTTTCGCATAAAAATGTAATCTCTCTAAAAGTGTGATGCAAGTGGAACGGCGATTGTATGTGGTCAA  
AAAATCAGGAAATAATAAATTAATCGTTGCTGCATTGCCAATGGTTGTTGCCTTATATAGGGTAACAACGTTGAAAAA  
CCACATGTGATGATATTGTGATAGTTAGCGATGCCGGGTTGTATCGTGCCTTTTCAATTTATTTCCAGCGGTATAGCTGA  
TAAATAATCCCTTAGTACATCAGGAACCTTATAAAAAAACCCGCTTCTGCAAACCTTTCTCGATAAAAGTGACAACCAC  
TGAGTAAACAGATCAATGGAAGTAAATCCAATTGTTTATTGGATTTGCCCTATATTTCCAGACATCTGTTATCACTTA  
ACCCATTACAAGCCGCTGCCGAGATATCCCGTGGCAGCGATAACCCAGCGCACTATGCGGATGCCATTGTTATAA  
TGCTCGAACGCTCTGCAAGGTTCTTTGCTGCCGTTAACCCGCTGGTTTGGGCATGATACTGATGTAGTCACGCTTTAT  
CGTTTTACGAAGCTCTCTGCTATTCCGTTACTCTCCGACTCCGACCCGCTGTTCTTCGTTCAAGTCCAACATCC  
GGCGAACTGGCGTGTTCATTAGCCCGTAGCATGAACCATTATCCGTGAGCCACTCCACTGGAGACGACGGAAGATCG  
TTGCCGAAGCGCGTTCCACCGCTCCCAGCATGACGTCCTGTACTGTTTCACTGTTGAAGCCGCCGTTAGTGACCGCCCA  
GTGCAAGTGCCTCAGATCACAGCAGTCCAGCGCAACGTGACACGCACTCTCTCCGTTATCACAGCAGAACTCGAACCC  
CGTCAGAGCACCATCGCTGATTGCTTTCTTTACGGCCACTCTGCCTGTATGTGCCGTTTCGATGGCGGTACAGCAGGT  
TTTCGCTCAAGCAACAGCGCATTCTGGCGCATGATCCGGTAAACACGTTGGCATTGATCGCAGGCATACCATCAAGTTC

TGCCTGTCTGCGAAGCAGCGCCATAACCCGACGATAACCATACGTTGGCAGCTCTCCGATAACATGGTGTATACGGAGAA  
GCACATCCGTATCATCAGTGTGACGACTGCGGGCCATCCATCCAGTCATCGTTCTGCTGAGAATGACGTGCAACTGC  
GCACGCGACACCCGGAGACAACGGCTGACTAAGCTTACTCCCCATCCCCGGCAATAAGGGCGCGTGCCTATCCACTTT  
TTTGCCCGTCCATATTCAACGGCTTCTTTGAGGAGTTCATTTTCCATCGTTTTCTTGCCGAGCAGGCGCTGGAGTCTTT  
AATCTGCTTACATGGCGGAGCAAGTTCAGAGGCAGGAACAACCTGTTCTCCGGCGGCGACAGCAGTAAGACTTCTTCTC  
GGTATTGCTTACGCCAGAGAAATAACTGGCTGGCTGCTACACCATGTTGCCGGGAACGAGGGAGACCGTCATCCCCGGT  
TCAAAGCTCTGCTGAACAATTGCGATCTTTTCTGTGTGGTACGCCGTCTGCGTTTCTCCGGCCCTAAGACATCAATCAT  
CTGTTCTCCAATGACTAGTCTAAAACTAGTATTAAGACTATCATTATTTAAGTGATATTGGTTGTCTGGAGATTACAGG  
GGGCCAGTCTAAACTTGTCTTTTTCTTCTGGTGTATCTTTGAAAGATTTGTAGGATAAATAACATTAAGTAAAGCCGC  
ATCGGCTTCTCTGTAATGTTTATCTTTTTCCAGATAACCTGGGATTCTCCCCATAATCAAGCTGTAACGTTATCTTT  
CATAACCTTTATCTATGAGTGGTTCAACCTCGTTGTTGAAAGAGTTTTCATCCAGTTCATTGACTTTAGCTTCGCGTAGT  
AAATCAGAGACAAAACAGAGTCTTTCTCGAGAGTAGGTTTGACAAACGTTCCAGTCCAGAGGTACCAGTGCAACGGA  
AGATGTGTTTAAATCGGGCATCTTTCCCATGCTCAGGAATCTCCATAACATAGAAATTGGCTTTATCCAGATAAGCAA  
TCAGCAGCGCAACCGACTTAAATCGGTCACCTTTTTGCCAATCTCAGCGTTAATAGTACCAGTGTGTTGCTTGATA  
AGGAGATCAAGGTAAAGACATAAAGCATCATTTTGTATGTTTCCACAGCTGCGGCTTGCCTTCTTCTGCACATCTGC  
CATCACGGGGAGTTGCTGTCAAATCGGATATGCACAGCATTCTTTGACAGGGAATTCATCCAGTCGTTTTGGGTTGC  
TAATGACGTCCTGCATCCGCTTAAATCTGGTCGGGCGTAGACATATAATCCCACAGGGTGAAGCAACCTTTTTTGGCGCT  
ACACTATTTCCCTGATCTGATACTAATGCCATATAGCCCCATAAACTATCCCTCAACCAGACAGCATCATAGTGGGTTT  
TGCCGCTGTTTTGTCTCTCGAAAGTAGAAGCAAGAATAAACGTTCCCGAGGTTTCTCCGTCAACGTTAACTTTCTGT  
TGTTTTCTGTTAATGTTAGCAATCCTTGAATTTCTGTTTTGGTATAGTGGCTCTTTATTTCAATTTTGAATTTGGCTGAG  
TGAATCAGAAGACGATAATTAGGATACTTATCTGGATTAAACGATAAATAACTTTTATCTGTTGCTGCCCCCGTGAAT  
AAGAATGTTAAATACAGATTCCTCGTCACTTCTGCCCTGTGCGCTGGCATGTGCCGCACGAAAATATACCAGCGAGCA  
GAAGAGTTAATGCAGATTTCCCTTTCATAAAATATTCATCAATCGTTTGTAAAAGCGTAGATAACCACTTATTTAACA  
ACTTGAAAATAAGGTGTTTTACCTGGGTTGTTACAAAAGGATTGCATTGCGTAAACGCTTTTTATTTACAACAAAATGGG  
GAAGTATTACGGCGAAGATAAATTGGAGCGGGCGAAGGAATCGAACCTCGTATAGAGCTTGGGAAGCTCTCGTTCTAC  
CATTGAACTACGCCGCTTCGAGATGCGTAAGGCATTATAAACCTTACGCTCTCCTTAGCAAGTGCCACGCTGCTGACTG  
CTGATTAATTCGCCATCAGCATTTTGGCTTGTGCCCTGAGGCGCAAGTAACGTAGCGGATCAATTGCCGTTGCACGGT  
AACGAATCTGAAATGCAGGCGAACAGATGCCGCATCCGTGCTCCCATAAGTGGCGATTTTTTGGCCAGCTTCACGCTT  
TGCCATTATTTACCAGCATCGTGCTATTATGGGCGTAAGCCGTAATGTAATCTTCACTGTGTTAATCATGATGAGATT  
ACCGTAGCCACGCAGCTGGTTGCCACATAACCCACTTTCTGCACCCGCGGCGTAAATAGGTGTACCCCGTGGAGCTG  
AGATATCAATCCCTTTATTGCCGCCATCTGCTGTGGAATACGGCATGATAACTTTCCCTGTGCTTGGCCATAACCAACAA  
CGTTGCCCTACTGGCGGCCAGGATGATTTCCGTACCCTGATGACGGTGTAACCGATGCGGTTTTGGTCTGTGATTTGGC  
GGTTGATTTACGTGTAATACTGCTACTTTTTGCCCCACCCAGTTTTAGTTTTCTGACCAACTCAATGGTGAAGGGGGG  
AAATGCCGTTCACTCGCGCCAGTCTTTTTACGCTGGTTCCCGTGGTGCAGCAAAATACGATATAGCGTATCCCCCGTTT  
ACGGTGTAACCGAGCCGGAATACGTTCTGTATCGGATGATTTGCTACCCGAACAGCCCGCCAAAAGCAGTCAACCGA  
TAACAACATCAGGATACCAGAGATTTTTATTAGGCGTCCCGCACTCAAAATCTTCTCGCTTAAAAACAAGACGC  
CTTATCATAGCAGCCAGCTCTTGATACCAATCTCTTGTCTGAAAAACGTGGTAATAGAGAAAGAGTTAATTTCA  
TTTGCAAAGGAAAGTATCATCAGCAAAATATTGCTGTAGAGGTATCGAACTTCTGACTTTTTACCCTATTTCCCATC  
CTGATGCGTAATAATCCCAATTTATCATTGATTTTTATCGCCACTCATATTGATACGTATCACTGCCCTATTAGAGT  
CCTGTTTCTGATCATATCTGTGTTTTTAACTGATCACACTCCTACTCCCTAACGCTTATCGTCTTTCTGGCGT  
AAATCTTGCCTGCTTAGACTAAATCTTTGCCATAAGAACCAATGTTCAAATCGAGGGATTTCTATGGAAGCGCGGAA  
GCAACCGCTACGGGTGAATCATGCATGCGCGTGCATGCCATTGCTAAGGTACCAGGGCGGGCAGATATACTGACGATTA  
TGTTATGGCGGCATGTGTTATGCGAAATATGTACGTAGCCCTATCGCACATGGTTATGCCGTAAGTATTAATGATGAAC  
AAGCCAGAAGTTTGGCGGCGTACTGGCGATTTTTACTGGGAAGATGTGCCTGATATTCCATTGCTACAGCTGGGCAT  
GCCTGGACACTTGACGAAAACAAGCGGATACCGCCGATCGCGCACTGCTAACTCGCCATGTTGCTCATCATGGTGACGC  
CGTTGCCATCGTCTGGCCCGCATGAACTCACGGCAGAAAAGCGGCGCAATTGGTCAGCATTGAGTGGCAAGAATTAC  
CCGTTATCACCACGCCAGAAGCGGCGCTGGCAGAAGACGCTGCACCAATCCATAACGGTGGCAATTTACTGAAACAAAGC  
ACGATGTGACGGGTAATGTCCAACAACAATCGATGCCGCGACTACCAGGTACAGGGGCACTATCAGACCCCCGTTAT  
TCAAATTGTCACATGGAAGCGTAACATCGCTGGCGTGGATGGAGGATGACTCGGAATTACCATCGTTTCCAGCACCC  
AGATCCCGCACATTGTTCCGCGCTGGTTGGTACGGCGCTGGATATCCCTGGTGCATGCGTACGAGTCATCAAACATTT  
GTCGGTGGCGTTTTGGTAATAAACAGGATGTAAGTGAAGAGCAATGGCGGCTTCTGACCAGCAAGCTTGGCGGCAT  
TCCGGTGAAAGTTTTCCCTTAGCCGTAAGAGTGTTCCTCGCAACCCGTACCCGCCAGCTTTTACCATTGACGGGAAA  
TGGGCGTGAACCGCGACGGAACATTGAAAGGTTATAGTCTGGATGTTCTGTCTAACACCGGCGCTTATGCATCTCACGGG  
CACTCCATCGTTCTGCGGGGGGAATAAAGTGCCTTACCTTTATCCTGTTGTGCTACGCTTACAGTTCAAAGACCTG  
CTATAACCACTCCCCTCGGCTGGTGGATGCGTGGTTATGGCGGCCACAAGTCGATTTTGGCGTTGAGTCTATGCTTG  
ATGACGCCGCGACAGCTTAGGTATTGATCCTGTTGAAATTCGTTACGCAACGCCGCCGGAAGGAGATGCTAATCCG

CTCACGGGCAAACGTATTTACAGCGCAGGGTTGCCGGAGTGTCTTGAAAAAGCCGGAAAATCTTTGAATGGGAAAAACG  
CCGTGCAGAATGCCAGAACCAGCAAGGCAATTTGCGCCGCGGCGTTGGCGTCGCCTGTTTTAGCTACACCTTAACACCT  
GGCCTGTGCGCGTAGAAAATAGCAGGCGCGCCCTTCTGATGAATCAGGATGGAACCATCAACGTGCAAAGCGGCGGACG  
GAAATCGGTACAGGTGCCGACACCGTCTTCTCGAAATGGTGGCAGAAAACCGTGGGGTTCCGGTCAGCGACGTTCCGCT  
TATTTCAACTCAAGATACCGACGTTACGCCGTTTCGATCCCGGCGCATTTGCCTCACGCCAGAGCTATGTTGCCGCGCCTG  
CGCTGCGCAGTGCCGCACTATTATTAAGAGAAAAATCATCGCTCACGCCGAGTCATGCTACATCAGTCAGCGATGAAT  
CTGACCCTGATAAAAAGGCCATATCGTGTGGTTGAACGACCGGAAGACCGTTAATGTCGTTAAAAGATTTGGCGATGGA  
CGTTTTCTACCACCCTGAACGCGGCGGGCAGCTCTCTGCTGAAAGCTCCATCAAAAACCACTAACCACCGGCGTTT  
GCTGTACCTTTGTTGATCTGACGGTCGATATTGCGTGTGCAAAGTCACCATCAACCGCATCCTCAACGTTTCATGATTA  
GGGCATATTCTTAATCCACTGCTGGCAGAAGGTGAGTACACGGCGGAATGGGAATGGGCATTGGCTGGGCGCTATTTGA  
AGAGATGATCATCGATGCTAAAAGCGGCGTGGTCCGTAACCCCAATCTGCTGGATTACAAAATGCCGACCATGCCGATC  
TGCCACAACCTGAAAGCGGTTTCGTCGAAATCAATGAGCCGAATCCGCATACGGACATAAGTCACTGGGTGAGCCACCA  
ATAATTCCTGTTGCCGCTGCTATTTCGTAACGCGGTGAAGATGGTACCAGGTTGCAATCAATCACTGCCGCTGACGCC  
AAAACGGTTATATGAAGAGTTCATCTGGCAGGATTGATTTGAGGATAACATCATGTTTGATTTGCTTCTTACCATCGC  
GCAGCAACCTTGCCGATGCCATCAACCTGCTGGTGACAACCCGAGGCCAAACTGCTCGCCGGTGGCACTGACGTACT  
GATTCAGCTCCACCATCACAATGACCGTTATCGCCATATTGTTGATTTATAATCTGGCGAGCTGCGGGGAATTACGC  
TGCCGGAAGATGGCTCGCTACGTATCGGCTCTGCAACGACATTTACCCAGCTAATAAGAAGATCCTATAACTCAACGTCAT  
CTCCCGCGTTATGTGCTGCGGCCACGTCCATTGCTGGACCGCAGATCCGTAACGTGCTACCTACGGTGAAAATATTTG  
CAACGGTGCCACCAGCGCAGATTCTGCCACGCCAACGCTAATTTATGACGCGAAACTGGAGATCCACTCCCCGCGCGTG  
TTCGTTTTGTCGCCGATTAATGGTTTTACACCGGGCGGGCAAAGTGTCTTTGAGCATGACGAAATCCTCGTCGCCTTT  
CATTTTTCCGCCACAGCCGAAAGAACACGCGGGCAGCGCATTTTTAAATATGCCATGCGCGACGCAATGGATATTTCAAC  
GATTGGCTGCGCCGACATTGCCGACTGGATAACGGCAATTTACGCAATTACGCTGGCATTGGTGTGCGCGCCAA  
CGCCGATTCGTCGCAACATGCCGAACAGACTGCACAAAATGCGCCATTAACCTGCAAACGCTGGAAGCTATCAGCGAA  
TCTGTCTGCAAGATGTCGCCCCGCTTCTTCATGGCGGGCCAGTAAAGAGTTTCTGTCTGCATCTCATCCAGACGATGAC  
CAAAAAAGTGATTAGCGAAGCCGTGCGCCGCGGGGGGAAAAATTGCAATGAATCACAGCGAAACAATTACCATCGAATG  
CACCATTAACGGGATGCCTTTTCAGCTTACGCGCCAGCCAGGACGCCGCTCTCGGAATTACTCCGCGAACAAAGGACTGC  
TAAGTGTCAAACAAGGGTGTGCGTGGGTGAATGTGGTGCCTGTACGGTGTGGTGCAGCGCACAGCAATAGACAGTTGC  
TTATACCTTGGCCCTGGGTGAAGGAAAAGAGATCCGCACGCTGGAAGGTGAAGCGAAAGCGGAAAACCTTTCTCATGT  
TCAGCAGGCTTATGCGAAATCCGGCGCAGTGCAGTGCGGGTTTTGTACGCTGCGCTGATTATGGCTACCACGGCAATGC  
TGCCGAAACCACGCGAGAAGCCATTAACCATTACGGAATTCGTGCGGACTGGCGGAAAATCTTTGTCGCTGCACGGGG  
TATCAGATGATTGTAATACAGTTCGGATTGCGAGAAAACGAAGTAAAAGGATATCCGGCCTGAATTCAGGCCGGATT  
ACTGAGGTTATGTGTTAAACAACCTCATATTTCTTAATCTTGCATAGAGCGTAGCAATGCCGATGCCAGTTCATCAGCA  
ACTTGCTTCTTGTGTTATGACGTGAAAGCGCTCGCGGATCATTGCTTTCCATCTCCTCCAGCGCCGTGCCGCCGC  
ATCATCGAGTGACAGGTGCGCTCACTGACCTCTGTACATCACTTTGCTCCGTTGTGCCATTATTACGAGATTTGGCG  
GCAATAGCGTGCTGTGATAACTTCACCTGAAGGAACACGTTAACAGATATTCATCAAATGCTTAACCTCGCGCAGG  
TTTCCGGGCCAACGATGCTTACGCAATATTTGACGACATCGGGAGCAATGCCAGGATAAACCGATCCAGACGACGGGT  
ATGCAGATGTAAGAAAGTAATGCACCAATAGTTCAATATCTTCTGACGTTACGCGAGCGGTGGCAGAGTTATCGGGATAA  
CATTAAAGTCGTTAGAAGAGATCTTCCGCGAATTTACCTTCCGCAATGAACGGGCAAATTTCTGATTAGTTGAGAAATG  
ATGCGAATGTGCACTTGTATTGGGCTACTGGCACCAATCGGCAGAATTTACGTGCCTCAATAGCGCGCAGTAATTTAG  
CTGCAACATTAATGGCATATCACCTATTTATCGAGAAAACAGCTGCCCCGATTTCGCGCCTGAATCAACCTGTTTTAC  
CGTTGGCAGAAGCGCCAGTAAATGCACCTTTAACATAAACCGAACAGTTTCGCTCTCCAGAAGCTGCTCCGGAATCGCGCA  
CAGTTGATAGCAATAAAGGGTTTTATTCCGCTTCCGCTCAACTTATGGATTGACCGGGCGACGACTTCTTTACCCTGCC  
GCTTTACCAACCACCATAACGCTGGATGGGCTGGGTGCAATACGGCTAATGAGTGCCTTTAATTGCCGATAACACGGC  
ACTCGCAACCAATTGTTCAATATGCGGTTTCATCAGGTGCATTTGCTACAGAAAAACTGGTATGCGATTGGTGAAACGCC  
ATAAAAATAATTGTCGGCCCTGAATGTTATGCAATTGACCAATGATTAATCACTTTTATCGTCCCATGAAACAATATG  
CTGCATATGTCATGGGTAAAATTAATCTCAATGTTAATGGTCTGAAACGGATAGGTTTTCCAATAATATTATTTGCA  
CAACACCAAGTGTTTTTAAGGCAGTCTGATTAACAACTGAACCCGATTTTCATCATCTACAATAATACGCCCTGATCC  
ATATTATCGATCATGGTCGCAAAATTTTACTGATGTTATCTCTGGCCCTGATCCTCCAGAAGTTTCGAAACAAAAT  
GGTGATATATGGCGAACATAATCAGAAAATTCGCGTAAATTAATCACTGATATGCTCTTGTGCTCGTGGGTAAACGGCAA  
TCAAACCTATACCCCAACACAACGATCCTGAAAAATGACAGGCGTACCCAGAAATGCTTTTTCGCGCAATTTTCTTTA  
CTATCGCAACCTTCGAAAGGGATCGAAGCGAGACTGTGTCACAACTTTTTTCAGTTTTCGTTTTCCAGGACGTGGCGGAG  
CAGCGGTGAGTTGCCGCTCAACTGGCGACCAAGAACTTCCATACGCGCCCGTTCGGCAACGCGACACAAGTTTTTCAT  
CAACGATCTCAACCTCAAGCTGCAAAAACGCTGGCAAGCATTCTGGCAAAAACGCTGAATTGTCGGTTGAATTTGCATCAAT  
ACTGACTGCGTAGTAGCAAGCTCCATAGCTTTACCTTCCAGACTTACTTAAAAGTCGATCATTGAAGACGTTGATGGTTC  
ACAGATCATGATGATTAATCACTCAGGCGAAATGGCTTTGATAAAAAACATAAGATTTTTATCATTTTTCTAATGAAATTA  
GGAAGAGATATCACATTTCTATATCAATATGAGAATTACGGCGGTGAGTTTATCAAACGAAAGAGATAGCCTGCCCTT

TTATCTTATTTCTGATACTTAGCAGCAAATAAATAACGCGATAAAAAAGCCAAACGTTTTCTGATTTTTACAACAACCA  
GAAGCTGGCATCAATTTGTGATCAACCCACACATTATCCGTCAAATTAGTCTTTTGCAGCCGCGGGATAAATTCTGGCA  
CACTTATTGTTAGTCCCAGGTATAGCTGTGAAAACCAATCACTTTGGCAAGTCACAGTAAAATAAACCACTTTGCCGTG  
TCATTCCACTACCGGGACTTTATGATGAAAACCTGTTAATGAGCTGATTAAGGATATCAATTCGCTGACCTCTCACCTTCA  
CGAGAAAGATTTTTGTTAACGTGGGAACAGACGCCAGATGAAGTAAAACAAGTACTGGACGTTGCCGACGATTAAGG  
CACTGCGTGCTGAAAACATCTCAACCAAAGTCTTTAATAGTGGATTAGGTATTTCCGTATTCGCGACAACCTCCACCCGT  
ACCCGCTTCTCTTATGCTCCGCGCTTAACCTGCTGGCCTTGCAACAAGATCTCGACGAAGGCAAATCACAATCGC  
TCACGGCGAAACCGTGCGTGAACCCGCAATATGATCTCCTTCTGCGCCGACGCTATTGGTATTCCGCGACGATATGTATC  
TGGGCGCAGGCAACGCCTATATGCGTGAAGTTGGCGCTGCACTTATGACGGTTACAAGCAGGGTGTACTGCCACAGCGT  
CCGGCTTATGTAACCTGCAATGCGATATTGACCACCCGACTCAGTCAATGGCTGACCTCGCGTGGTTACGTGAACACTT  
TGTTCACTGGAAAACCTGAAAGGTAAAAAATCGCCATGACCTGGGCTACTCTCAAGTATGGCAAACCGCTCTCTG  
TACCACAAGGCATCATCGGTCTGATGACTCGCTTGGTATGGATGCACCCTGGCCATCCGGAAGGCTACGACCTGATC  
CCGGATGTGGTTGAAGTGGCGAAAAACAATGCTAAAGCCTCCGGTGGTAGCTCCGTGAGTACCAGCATGGAAGAAGC  
CTTCAAAGACGACATCGTTTATCCGAAGTATGGGCACCTTACAAGTATGGAAGAGCGTACTGAATTGCTGCGTG  
CGAAGCATCGAAAGCTTAAAAGCACTGGAACCAAGTGTCTGGCACAGAACCGCAACAAGCAAGACTGGCATTGACT  
GAAGAGATGATGAACTGACCCGTGATGGCGAAGCCGTACATGCACTGCCTGCCAGTATCAGCGCGGTATCCCTG  
TAAAGAAGGTGAAGTACTGAAAGCGTATTCGAAAAATACCGTATCGCTACCTACAAGAAGCCAGCTGGAAGCCTTATA  
TCATCGCCGCGATGATCCTGCTCCGTAATACGCCAAACAGGTGCACTGCTGAGCAACTGCTGAAAGAAGCGCAAGAA  
CGCGTGAATAACCCCTCGGGCGATCAGCTGGTCGGCCCTCTATTTCCAGAGGCCAAAAGGATAGGATATGTCGTTTT  
CTCATTGAAGATTGATATCGCCGATAACAAATTTTTCAACGGCGAAACATCACCGCTCTTTTCGAAAGCCAGGCCAAAC  
TGGCGCGCCAGTTCCACCAGAAAATAGCTGGTTATCGCCAAACACCGCTTTGTGCGCTGGACGATCTCGAAACCTTTTT  
GGTGTGAAGAAAATTCTCGTCAAAGACGAATCAAAACGATTGGTCTGAACGCCTTCAAATGCTTGGCGGTGCGTACGC  
CATCGCTCAATTATTGTGTGAAAAATATCATCTTGATATCGAAACGCTGTCTTTGAGCACCTGAAAAATGCCATCGGCG  
AAAAATGACTTTGCGGACCACCACCGACGGCAACCACGGCGCGGTGTGGCGTGGGCAGCACAGCAACTCGACAGAAT  
GCGGTGATTTACATGCCGAAAGTTCTGCTCAGGAACGCGTTGACGCCATTCTGAACCTCGGTGCCGAGTGCATCGTCAC  
GGATATGAACATGACGATACCGTTCCCTGACCATGCAACACGCGCAGCAGCAGCGCTGGGAAGTGGTACAGGACACGG  
CATGGGAAGTTACACAAAATCCCACTGGATCATGCAAGGCTACGCAACCTGGCAGATGAAGCCGTGAGCAAATG  
CGTGAATGGGCGTAACCCGACGCACGTTCTGCTGCAAGCCGGTGTGGAGCAATGGCCGGTGGTGTGCTGGGTTATCT  
GGTGCAGCTCTATAGCCCGAAAATCTGCACAGCATTATTGTTGAACCTGACAAAGCTGACTGTATTTATCGCTCCGGCG  
TCAAAGGCGACATCGTCAACGTTGGCGGTGATATGGCCACCATCATGGCAGGCCTGGCCTGTGGCGAACCTAACCCGCTG  
GGCTGGGAATCCTACGTAACCTGCGCCACCCAATTCATCTCCTGCCAGGACAGCGTTGCCGCAATTAGGTATGCGCGTGCT  
GGGTAATCCGTACGGCAACGACCCGCGCATCATCTCCGGTGAATCCGGCGCTGTGCGTTTGGGCGTTCTCGCAGCGGTT  
ATTATCACCCGCAACGTCAAAGCCTGATGAAAAACTGGCGCTGAACAAAGATGCCGTGGTGTGTTATCAGCACTGAA  
GGCGACACCGACGTGAAGCACTACCGGCAAGTTGTCTGGGAAGGCAACACGCTGTAGCACCTAATCACCTATTGGAA  
CTGCTCCCTGCAAAACGGGGAGTAAAAATCTGGAGAAAAATAATGGTAAGAATATTCCATTCAAACCTGATTCTTGAAA  
AAGCAAAAGATTACCAGCGGATATGACTCGCTTCTGCGGACATGTTTGTATTCCAGTGAAGCTGCGACGAGAAA  
CGCGTAGTACATCGTATTAAGAAGAGATGAAAAAGTCCGCTTCGATAAAGTTGAAATCGACCCGATGGCAACGTTCT  
CGTTATATCGGCCACGGCCCGCTCTGGTGGCAATGGACGCTCATATCGATACCGTGGCATTGGCAACATCAAAAAC  
GGGACTTCGATCCGTACGAAGGCATGAAAACCTGATGAACTGATTGGTGGTGGTGGTGGTGGTGGTGGTGGTGGTGGT  
GCCTCTATGGTTTTATGCCGTTAAAATCATTAAAGACCTCGGTGGAAGATGAATATACCTGCTGGTTACCGGTACGCT  
GCAGGAAGAAGACTGCGACGGTCTGTGCTGGCAGTACATTATTGAACAATCCGCGATTCCGCGGAATTTGTGGTCA  
CCGAACCAACCGACTGCCAGGTATACCGTGGTACGCGCGTGTGATAAGTTCGATTGATGTTTACGGGTGTTAGCTGC  
CACGGTTCTGCACCAGAACGCGGTGATAACGCCATTTTCAAATGGGTCCGATTCTTGGCGAATTACAAGAACTCTCCCA  
ACGTCTGGGTTATGACGAATCCTCGGCAAGGCACCTCACCGTTTCTGAAATCTTCTCACATCCCCAAGCCGTTGCG  
CTGTAGCAGACAGCTGCGCAGTTTCAATCGACCGTCTGCTGACCTGGGGCGAAACCTGGGAAGGCGCGCTGGACGAAATC  
CGCGCCCTGCCTGCAGTACAGAAAGCTAACGCGGTTGTTTCTATGTACAACCTACGACCGTCCGTCCTGGACTGGCCTGGT  
TTACCCAACCGAATGCTACTTCCCGACCTGGAAGTGAAGAAGATCACTTACCGTTAAAGCACTGGTGAATGCCTACG  
AAGGGCTGTTTGGCAAAGCGCGGTTGTTGATAAGTGGACCTTCAACTAACGGCGTATCTATCATGGGCGCTCACGGC  
ATTCCGGTGTGCGCTTTGGCCGGTAAAGAACCTGAAGCGCATGCACCTAACGAAAAACCTGGAATCTCACCTGGT  
GACCTGTGCCGCGATGTACGCTGCAATCCGTTAAGCTGGCTGGCAACAGAGTAATTACTTCACTTATTTCCCTCCGG  
TTCGCCGGAGGTTTTTGGAGTTTGTATGCGCGTATTGATCAAAAACGGCACTGTCGTTAACGCAGATGGACAAGCCAA  
ACAGGATTTGCTGATTGAAAGCGGGATTGTTCCGCAAGTTGGGCAACAATATTTCCGCGCAGCTCCCGTATGAAGAAATG  
ATGCCACTGGCTGTTACGTTTTCCCTGGCGGCGTGGATGTCCATACGCAATTTCAATATTGATGTCGGCATCGCGCGAGT  
TGTGATGATTTTTTACCGTACCCGCGCAGCTGCGTGTGGCGGTACAACAACCATTATTGACCATATGGGATTTGGCCC  
AAACGGCTGTGCGTTACGCCATCAACTGGAGTTTTATCGTGGTTATGCCGCCATAAAGCGGTTCATCGATTACAGCTTTC  
ACCGTGTGATCCAGCACATTAATCACGCAATCCTCGACGAAATCCCGATGATAGTCGAGGAAGGACTGAGCAGTTTTAAA



CTCTATTTAACCTATCAATACAACTCAACGATGACGAGGTTTTGCAGGCATTACGCCGCTTGCATGAATCCGGCGCGCT  
GACCACCGTGACCCGGAAAATGATGCGGCTATCGCCAGCAAGCGGGCGGAATTTATCGCCGACGGGTAAACCGCGCCGC  
GCTATCATGCCTTGAGTCGCCCTCTGGAATGCGAAGCGGAAGCCATCGCCGCATGATTAACCTGGCACAATTTGCCGGT  
AACGCCCGCTCTATATCGTGCACCTGTCTAACGGCTTAGGTCTGGATTATCTGCGTCTTGCCCGTGCGAATCACCAGCC  
AGTCTGGGTTGAAACCTGCCACAATATCTCCTGTTGGACGAACGCAGTTACGATACAGAAGATGGCATGAAGTTCAATC  
TTAGCCACCGCTGCGTAACGTACGCGAGCAGGACAACTGTGGTGTGGCATCAGCGATGGTGCATTGACGTGGTGGCA  
ACCGATCACTGCACCTTCTCGATGGCTCAACGCCTGCAAAATTTCTAAAGGCGATTTCAAGTCGCTGCCAAATGGCTTACC  
CGGTGTGAAAACCGCATGCAGTACTGTTTTCCAGTGGCGTGTGACGGGACTATAACACCGGAACGCTTTGTTGAAT  
TAACCAGCGCAATGCCCGCCAGGTTGTTTGGCCTGTGGCCGCAAAAAGGATTATTAGCGCCGGTTCCGACGGCGAGCTG  
GTGATTATCGACCCACGTGAGGCCAACAATTCAGCATCGCCATCTCCACGACAACGCCGACTACTCGCCATGGGAGGG  
TTTTACCTGTGAGGGCGGATTGTGAGAACCTTATCCCGTGGTGAACGATTTTCTGTGACGGCACCTTACAGGCAAAAG  
CCGGGCGAGGTCGTTCTCGCAGCACAACCGTTTGCCTCCCGTGCTCTAACACTGCCAGGGATCTATACAAATCA  
AGAATGATGAGTGAGGAAAAATGAGTAAGAAAATTTCTCGCCCTGGGCGGAATGCGCTGGGCGATGACCTGGCCGG  
CAATGAAAGCGGTAAAAATTAATCTCAGGCAATTGTTGATTAATTTCCAGGGACATGAAGTTATCGTCACTCTGG  
TAACGGCCCGCAGGTGGGCATGATTAACCAGGCCCTTGAAGCTGCCAAAACTGAAGCGCACTGCCAATGCTGCCGA  
TGCTGTCTGTGTTGATTAAAGCCAGGTTATATTGGTTACGATCTACAAAACGCTTTAAGAGAAGAAGCTTTTCTCG  
GGCATTAAATAAACCTGTAGCAACGCTGTTACTCAGGTGGAAGTCGACGCTAACGATCCGGCATTCTCAACCCGACCAA  
GCCGATCGGTTGTTCTTTACCGAGCAAGAAGCAGAGCAACTGACAAAACAGGGTTACACTCTGAAAGAAGATGCTGGT  
CGGGCTATCGCCGTGTTTGCCTCGCAAAAACCGTTGATATCATTGAAAAAGAAACGGTTAAAGCTCTGGTAGATGCA  
GGTCAGGTGGTGTACCCGTTGGCGTGGTGGTATCCCTGTTATTCGTGAAGGTAACCATCTGCGTGGTGCCAGCGCGGT  
TATCGATAAAGACTGGGCCAGCGCCGTTAGCAGAATGATTGATGCCGATATGCTGATCATTCTGACTGCGGTAGAAA  
AAGTGGCCATTAACTTGGTAAAGAGAATGAACAGTGGCTCGATCGCTGCTAAGTGTGCTGAACGCTTTATCGAA  
GAAGGTCAATTTGCGAAAGTTCTATGCTGCCTAAAGTGAAGCTGCCGCTCGTTGCTCGCTCTCGCGCAGGTGCTGA  
AGCTGATTACCGTATTGAGCAAAGCGAAAGAAGGATTGAAGGCAAAACAGGAACGGTGAATTTGTCAGTAATTTAAG  
GCCGGTGGTAATACCATCCGGCCAAAGATTGTCAAGTAAGTGCCTTTGTTGATGCCGGATGCGGCGCAGCGCCTTA  
TCCGTCTACAAAACATCGCAAATTAATAGATTGCAATGCATTGTAGGCTGATAAGCGTAGCGCATCAGGCAATTTG  
CGTTTTGCATCAGTCTCAGGCCGGTGGTAATACCATCCGGCCATTTTCATTTAAGCCACTTCCAGCACTTCTTTGT  
CGTTTTCACGCCCTGATGCATCAACATCATTAAAGCTCAAGTACGCCGCCCAATCGCCCGGGCTTTATCAGAAACGC  
TGGTGAAATACGCGGTTTACCACGAGGATCGATATACCAATTTTAAAACCAACCCTGCCAGGCCGTCGTTCAAC  
AAGCCACGCACCATCCCCGTCAACGGTCTTAAATTCATGCTACCAATCCAGGCAATCACATCGCCCTTTTACCAG  
ATCGCCTAATTCAGTTGGATCGATAATGCCTGCAGCAGGAGCACGGATCACCCGTCCGGTGGTATGCCCCATAATAT  
TGCCAGGAACACCGGTTCTCTCGCACAACAGAGTAAATCACCTGACCAGCCAGTGCAGGCTTTGTTCAAT  
ACCGCATGACAATCCTTCCCAGCAGTAAAGCCCGGCCAAGCGCGATTGTTACTGGTGCCATATCTGCCCAGGTTCCCAA  
ATTCTGTTTCCGAGAATAGCGTCCACCACGCAAAGCGGTTTCAAGTTCATCAAGCAATGAACAGGCGGGATCACCATCA  
CAGGAATGAATCCGCTTCGGTAAGTTTATCGCTTCCGAGAGCTGGTTGCCAGGCGAGCAGTGCACCTTCCAGCGTC  
ATTTCCCATCGAACACGGCCTGGGCAACGCCAGGTACAACGAATCACTGTGGTTTTTCCACTTCCAGCATGATCAC  
TTAAAACCCGCATGATACAGAGCTAGCGCCACACCACTGGCGATATCTCCCGCACCAGCAATCACCACAGCTGGTGT  
CGGAAGGATGAGAAGTTTATCATCAGCCCACCGCGCTTATTTTTCACCTGTAATATTTCTGCCAGCAGCTGATG  
GCGATCTCTCGGCGTTCGCGACCTATGTTGTAACCAACGGCGCATGTAACCGGCAATATGTTCTTCCAGCCAGCC  
TTTCTCAGCAATTGACGAGGAAAAGCTGAACCTTGCAGCACTTGCAGCAACCCCAACCATGCAATGGGCTGTTCAA  
TGAGTTTTGTCGAGGGCTTACGATCCTGATTATTCTGGCAATCAGGACAAAATTTATCAGGGCGAATATCCAGTGTCTC  
ACTGCCGACCAAACGACTCAGCATGGAGAAGCGTGTTGATGGTGGGAATAGTTTCAAGATTGAGGCTTTTCGCGATAAAT  
ATCAGCAACGGCAATATCAATCCTAATAGCGCCGACTCTGGGCTATCGCCGGTTGACATGCCCGCGCAATCAACA  
CCAGACGTGGACGCATACCATGGACGCTGATAAATACTGACATTGCACCTCCACAATCTGACCCGACAGCATCCGACCCG  
TTACGAGCCATACGTCCATGGAATAATCGCGCTTACGTTCTGCAATGCCTGAAGCGACTTTCATCACCTTCCGCTC  
AACCATTCCGCCACCAATTTGACCGACGATAGAACCATCGGCGCGCACTAACATTTGTGCAAGATGGCGGGGAGTCGAGC  
CTCGGCTATCAACAATTTGCGCCATAGCAAACGGACAATTTTGTCTTCCAGTTTTGACGCTCTGTGAAAAATTTTATA  
CCAACCTCAATGGATATCCTTTAGTAACCCGGAATACCCGGGCCGTAATTCACAAATCTGCGCGGATTGCAGGATGT  
TCTTGATATCGCCAGCCAGATTGCTCTACGTCGTTGTTGACGCGGTTGAAGGAGCTGCTTTGTGCAATCGCATT  
CTCACATTTGAGAAAAACGGTTAATGAACCAGACTCGCCGACAACCTTGGGTACGTTTTTAAACGCCCTGAGGGTGGC  
GAACCAGCGCAACGAGATCGCTCAGTTGCAAGGTTGATCAGGTGTTAACCCTGTAATATCAGCAAACCTGCGACAGCGA  
TGGACATTTTCTGTGCTCACTTTCCGCGCCAAAGTATGTCCTCCATCACAGCAATCACGAGCAACTGCTTTTGGGTAT  
GCAAGGTTCTGCTCATCAGCGCTTTTAAACGGCATTCCACGCGAGCCATCTGCTTCAATGAGAATTACGTCACACTCTG  
GTCGTTGCACCAAGTGCATCAATCGCTTCTGGCGTAAATCCCTGCACTTTTCCCTGGTTCCGCTTTCCAGCTGTGAAAACAA  
AATGAAATGGGGGATGTAAGAGACGCATGAGGAAGCATGGCGGGATCACGACAGAAAACCAGGGCCAGTGAGACGTTGG  
CATAAACATATGTGTCGTCGTGATTAACACACGCTCGCCGCTAGCCTGGAGCAGTTCTGCCAGCCAAAAAAGCAAGC

TGGTTTTCCCCCAGCACCAACAACAGAAATCACAGTGGGACGTTTCTGCGCACCTAAATCAATGACTAATGCCGATGGG  
TCAACTATACTTTTACAGAGTCTTTATGACCTCTCTGGGATAAATTAATCCCCAACTTAATCCATCAGGAAGTAACGCAAT  
TATCAGGCGTTATTAGCCCCATAAATAATGGAACCACTATGTCAGCCATCGACTGTATAATTACCGCTGCCGGATTATC  
ATCAAGAATGGGGCAATGAAAATGATGTTACCCTGGGAACAGGGAACAATTCTTGATACAAGTATCAAAAAATGCGTTGC  
AGTTTTGTAGCCGAATTATTTTAGTCACCGGCTATCGTGGTAATGAACTGCAGGAACGTTATGCGAACCCAGAGCAATATC  
ACTATTATTCACAACCAGATTATGCGCAGGGTTTACTAACATCCGTCAAGGCCGAGTACCCGAGTGCAAAACAGAACA  
TTGTTTTCTCACCCACGGTACATGCCAACCCCTCACCATCGATATTTTTAGAAAAATCTGGTCTGTTACGAAATGATGGCG  
CAATACTGCCACTCCATAATGGCATCCCCGGCCATCCGATTTTAGTGTCAAAACCATGCCTGATGCAGGCAATCCAACGA  
CCCAATGTCACCAATATGCGTCAGGCACTCCTTATGGGAGATCATTATCCGTGCAAAATAGAAAATGCAGAAAATAATTTT  
AGATATTGATACTCCGGACGACTTTATTACAGCGAAGGAAAGGTATACTGAAATTTAGAAAACGTAGTTAAACGATTGGC  
TTCAAAATTTAATCCTTCCGGCACTCATTATCATAATGATAAGGAATCACTGATTTTGAGAAAAGAGAAAAATTGATAA  
ATGGGCTGGCAATAATAATTTTACGAGTGATTTAATTTCTCATTTAGCACCTGTGAGTTCATTCACAAAAAGCCCTTAA  
GTTTCGAGCCGCTCACATTTTTTATATTTCCCGCAAACCTGGCAAGAGTGGTGCATTGTTGCTCTATCCCCCTAAA  
CCACCGATTCTCAACACCGGTCACTCAATGATATCTGTATAAGCTAAGGAGAGGGTTATGGGGGATATTATGCGTCCC  
ATTCGGTTGAGGAACTTTTGACGCGCATATTTGATGAATACCAACAACGCTCAATCTTTGGTATTTCCCGAGCAACA  
GTTTTACTCCTGTAAAAGGTAAAACCTGTTAGCGTCTTCGGTGAAACCTGTGCCACTCCCCTCGGCCCTGCGGCTGCCC  
CGCACACGAGCTCGCGCAAAATATTGCACTTCTGGCTGACTGGCGGACGCTTCATCGAACTAAAACCGTCCAAATTT  
CTTGACCGCTGGAGCTGAAAAGCCCTGTATCGATGCCGAAGACGAGTGCTTTAACCCGAATGGTCTACCGAGTTTAC  
CCTGCTTAAAGCTGGGATGAATACCTCAAAGCCTGGTTTGCCTGCACCTTCTGAAGCGATGTTCCAGCCTTCTGATT  
CCGGTAAATCGTTCATCTTTAATATGAGCGTCGTTACAACCTCGAAGGTATTAAGCAACCGCCGATGCAACAGTTCATC  
GACAATATGATGGACGCATCTGACCATCCGAAATTCGCTCAATATCGCGATACGCTGAATAAATTAATCCAGGATGACGC  
ATTTTTAGCTCGCCACGGATTGCAGGAAAAACGCGAAAGCTTGAAGCCTTACCCGCTCGCATCCCCACCAATGATGGTGC  
ATGGCGTACCCTCTCCACCATGCACGGCTGTCTCCGCATGAAATCGAAGCCATTTGCCGCTACATGCTGGAAGAAAAA  
GGGCTCAACACCTTTGTAAACTTAAACCCGACCTTACTGGGGTACGCGCTGTTCTGAGATCCTCGATGCTGCGGTTT  
CGTTACATAGCTTAAAAGAAGAGTCATTTGATCACGACCTCAAGCTGACGCAAGCACTGGAAATGCTGGAACGCCTGA  
TGGCACTGGCAAAAAGAAAAATCACTCGGCTTTGGCGTAAAACCTGACTAACACTCTCGGCACCATCAACAATAAAGGCGCA  
CTGCCTGGTGAAGAGATGTATATGTCAGGCCGTGCGCTGTTCCCGCTCTCCATCAATGTTGCAGCAGTCTCTCTCGCGC  
CTTTGACGGCAAACTGCCATTTCTTATTCCGGTGGTGCAGTCACTGACTATCCGCGATATTTTTGATACAGGTATTC  
GCCCTATTACTATGGCAACCGACTGTGAAACCTGGCGGCTATCTGCGCTTAAAGTGCCTGCATGCGCGAGCTGGAAGGC  
TCCGACGCCTGGGACTTGACCATGTTGACGTCGAACGACTGAACAGACTGGCAGCAGATGCGTTAACCATGGAATACAC  
CCAGAAACACTGGAAGCCAGAAGAGCGTATTGAAGTGGCAGAAGACTGCCGCTGACCGACTGCTACGTTGCCCCCTGTG  
TACTGCCTGCGCTATCAAGCAAGATATTCGGAATACATCCGTCTGCTTGGCGAACCCGCTATGCCGACGCGCTGGA  
CTCATCTACCAACGCAACGCTCTGCCCGCCATTACCGTTCATTTGCGATCACCAGTGCACATCAACTGTACCCGCCCT  
GGATTACGACAGTGCCTGAATATCCGCGAACTGAAAAAGTGCCTGGAAAAAGGTTGGGATGAATATAAGCAACGCT  
GGCACAACAGCCGTTCTGGTTCACGCCATCCGTTGCGTGATTGGTGCAGGTCGGCGGGTCTGGCAGCAGGTTAC  
TTCCTTGCCAGAGCGGCCATCCGTTACGCTGTTTGAACGCGAAGCAATGCGGGCGGCTGGTGAATAATCATTTCC  
TCAGTTCGCTATTCTGCAGAGTAAATCAGCACGATATCGATTTTGTGCCGCTCACGGCGTGAATTTGAGTATGGCT  
GCTCACCGATTAAACCATTGAGCAGTAAAAAATCAGGGCTTCCACTATGTTCTGATTGCCACCGGCACTGATAAAAAAT  
AGCGGTGTGAACTGGCGGGCGACAACCAAAATGTCGAAATCACTCCCCTTCTGCGTGAATAACAACAGGGTACAGC  
GCTCAAGCTGGGCAACATGTGGTCTGTCGGGGCGGTAACCCGCAATGGACTGCGCTCGTGCAGGCTTACCGGTTT  
CAGGCGTAGAAAAAGCAACGATCGTTTTACCGTCTTCACTACAAGAGATGCCCGCATGGCGCAAGAGTATGAAGAAGCG  
TTGCACGACGCGTAGAGTTCCGTTTTCTGAATAATCCGGAACGTTTTGATGCTGATGGCACCTTAACCTTGCGGTTAT  
GTCGCTTGGCGAACCGGATGAGAAAGTCTGCTGTCGTCGTTGAAACCAATGAAACAGTAACACTGCTTGATGACAGCC  
TGATCACCGCCATTGGTGAACAGCAGGATACTGAAGCCTGAATGCGATGGGCGTGCCGCTGGACAAAAACGGCTGGCCA  
GACGTCGACCAATATGGCGAAACTCGTCTGACTGACGCTTTTATGATCGCGACGTACAGCGCGGACCATCTCCATTGT  
CGCTGCTGTCGGAACCGCGCTCGGGCGACCGATGCCATCCTTAGTGGGAAAAATACCGTTCCACCAGAACGATAAAT  
ACTGGAACAACGTCAATCCAGCGAAATCTATCAACGTAAGGCGATATCTCTATCAGCTGGTGAACAGTACGATCGT  
GACGCGTTTGTGCGCCAGGAAGCCGCTGCTGCCTGAAATGTAACAGTTCGTTGACGCAAGTGTGTTGATGCTGCCCCAA  
CCGCGCAACGCTCATTGCGGTCCCAGGCTTCCAGAACCGTTCCAGACGCTGCACCTCGACGCTTACTGTAACGAAT  
GCGGCAACTGCGCTCAGTCTGTCCGTGGAACGGTAAACCGTACAAGACAAAAACACCGTCTTACGCTGGCGCAAGAC  
TTTGATAACAGCAGCAACCCAGGCTTCTTGTGGAAGATTGCCGGTACGAGTACGCTGAATAACCAAGCTGGGTGTT  
AAACATCGACAGCAAAGGTCAGTTTAAACAACGTACCACCGGAGCTGAACGATATGTGCCGATCATCAGCATGTCCACC  
AGCATCATATTATCTGCTGGGCCGCTGGAGGTGAATCATGTTGATTCTGAAGAATGCTACTGCGGTACAGCTACACC  
CGGCAAAAGTGCAAGGAGGCTGATATCGCCATCGAAAACGATGTGATTGTGCTATCGCGGATGCCCTGACGCAACGC  
TACCCCGACGCGAGTTCAAAGAGATGCATGGCCGATTGTGATGCCAGGATTGTCTGCTCGACAACCATTTTTACTC  
GGGGCTTCCCGCGGAATATGGAACATCGCCCCCTGCCGATTTCATCTCAACGCTGAAAAATCTCTGGTGGCGGC

TCGATCGCGCCCTTGATGAAGAGTCGCTCTATTACAGCGGACTGATTTGTTCCCTGGAAGCGATTAAGAGCGGATGTACA  
TCGGTTATCGATCACCATGCCTCTCCGGCGTATATCGGCGGGTGCCTCTCCACATTGCGCGACGCATTTTTAAAAGTTGG  
CCTGCGCGCGATGACCTGTTTTGAACTACTGACCGTAACAACGCATCAAAGAGTTGCAGGAAGGTGTAGAAGAAAACA  
TCGGTTTTCCCGGTTTTGATTGATGAGGCGAAGAAAGCGACAAGCGAGCCGATCTGGTGGAAGCACATATCGGTGCTCAC  
GCGCGTTTTACCGTGCCGGATGCGGGTCTGGAGATGCTGCGTGAAGCCGTGAAAGCCACAGGCCGTGGTTTTGCATATCA  
CGCTGCGGAAGACCTTTACGACGTTTTCTACAGTACCACCTGGTACGGCAAAGACCTGCTGGCAGACTGGCGCAATTGC  
ATCTCATCGACAGCAAAAGCTGGTCGCTCATGGGCTGTAATGTGCGAAAGATGACATCACCTACTCAATCAGCGCGAT  
GGTTTTCTGGTGATAACGCCGTTTAAACATGAACAACCATGTCGGCTACAACCATCACCTTAGCGACATCCGCAATCT  
GGCGTTGGGAACGACGGCATTGGTTCGGACATGTTTTGAAGAGATGAAATTTGCCTTCTTTAAACATCGCGATGCGGGT  
GTCCGCTGTGGCTGACAGTTTTGCCAAAGCCCTGACTAACGGTAACGAACTGATGAGCCGCAACTTTGGCGGAAATTT  
GGGTTCTGGAAGCCGGTACAAGCTGATTTAACCATTTGCGATTAACTCGCCGACGCCGCTGCTGGCAGACAATAT  
CGCCGGCATAATCGCTTTCCGGTATGGGCTCAGGCAGCGTTACAGCGTATGGTCAATGGTGTGATGGTCTATGAAGACC  
GTCAGTTTTAATTGATTGCGATTCCATTTATGCACAAGCCAGAAAAGCCGCTGCCAGTATGTGGCGTGGATGGATGCG  
CTGGCATAAATGACAGATGCCCTTTCCCGCAGGGAAGAGGTTAAATAAGGAAAGAAGATGATTGAACAATTTTTCAGC  
CCGACTCTGTGCAACAGCGCTGAACTGAAGCGCCGCTACCAGGATGAAGCCGCTGGTTCGCCGGGGCAGCAAAT  
CAATGCTACACCAACCCGTACCGATAAAAAGATTGCCATTTCTTACAGGATCTGGAAGTGGACTGGGTGACTGGGATA  
ACCGTGCACTGCGGATTGGCGCAATGTCTCGCTGACGCCACTGCGTGATGCGCGATTTATCTGACAGCGCTGCGTGAA  
GCCCTCGTTTTGTTTACTCACGCCATGTTCTGAATCAGTCGACCATTGGTGGTGAATCGCCGCCAGGAAGAGTC  
GGTGTGCTTCCCCTCTGTTGGCACTGGATGCTGAACTGGTTTTGGCAACGGCGAAACGCTGTCAATCGAGGACTACC  
TGGCCTGCCATGCGATCGCTGTAACCAGAAATTATCATTAAAGATCCGATCGCACCTGTGCGACCCGCAAAATTAGC  
CGTTCTCAGGCAGTTTAAACCGTCGTGACGGCAGCCGTTGCAATGACAGACCACGACGGTATGCGAATTGCGCTGGATGG  
CGTCCGAGTAAAGCACTGCGTCTGCATGATGTCGAAAAACAAAATCTGGAAGGCAATGCACTTGAACAGGCTGTCGCCA  
ACGCCATTTCCCGCAGGAAGATTTGGGGGCAGCGTGGCCTATAAAGCCTATATACGGGAGTTCTGGTAGCCGACCTG  
TATGCCGACTGCAACAGGCTGGGGAGGAAGCCGATGATCATCCACTTTACTTTAAATGGCGCGCTCAGGAGCTAAC  
GTTAATCCAGGCGAAACGTGCAAAAGCTGTTGTTAATGGAATGCACTCTGTACGCAACAGTATGATGGTTTTCCG  
GTTTCCCGTCTGACGCAATAATCTTAAACGGTAATATCGTTAACGCGTCTTCTGTTATTGCCGACAGTTAGAGAAGG  
CAGATATTCGTACCGCAGAACTCTGGGCAATGGAACGAGTTAAGTCTGGTTCAACAGGCAATGGTTGATGTTGGCGTG  
GTGCACTGTTTATAACGATCCAGCTGCACTGCTGATTATCACCGATCTTCTCGATCGCATCGCCGACCTACCCGCGA  
AGAGATCGACGACGCGTTTTCTGGTTGTTAGCCGCGATGCTGGCTGGCAGCAATACTATCAGGTCATTGAACTGGCGG  
TTGACGTAATAAATCCGAGGCCACCATGATATCGCTCCGACTTTCCGTGACGACCTAGAAGTCATTGGTAAGCAT  
TATCCTAAAATGATGCCGCGAAAATGGTGCAGGCGAAACCTGCTATGTTGAAGACCGCGTAACGGCTGACGCCTGCGT  
CATTAAAATGTTACGTAGCCACACGCTCACGCACTGATTACTCATCTGGATGTCAGCAAAGCTGAAGCCTTACCGGGCG  
TCGTTACGTTATTACTCACCTGAATGCCCCGATATCTACTATACCCCGGGTGGTCCAGAGCGCACCGGAACCGTACCCG  
CTTGACCGCGTATGTTCCGCAAGAAAATGCGTCACGTGCGGATCGTGTGCTGCGGTGCTGCGAGAAAGTGAAGAAAT  
TGCCTCGAAGCACTGAAGTCACTGACGCTGAATATGAAGTGCTTAAGCCGGTAATGTCGATCGACGAAGCAATGGCGG  
AAGATGCGCCTGTGTCGACGATGAACCGGTGGTGTATGTTGCTGGTGCAGGCAACTCTGGAAGACGATAACAGCCAT  
GCAGCCAGCGCGGAGCATATGATCATCAACTTCCCGATCGTTCTCGCCCTCGCAAAAATATCGCCGCCAGTATTA  
TGGTCAATTTGGCGATATGGACAAAGGCTTTGCCGATGCGGATGATCATTGAGCGAACCATAACTCAACGCAAGCGC  
AGCAGTCCCGACTGAAACACATATCTGCTTACTGATGGACGGCGATCGTCTGGTTATCCACGCCTCACCCAGGTA  
CCATGGCACTTACGCCAGGTCGCGCCCTCGTGGGCAATGAAACAGCATAAAGTTTATGTCATTAAAGAGCGAGTTGG  
CGCGGTTTTGGTTCAAACAGGACATCTGCTGGAAGAAAGTGTGCGCCTGGGCAACCTGCGTACCCGGGCGTCCGGTAC  
TGTTCCGCTACACCCGTGAAGAAGAGTTTTATTGCTAACACTCTGTCACGTGCGGAAAGTACCCTCAAACCTGGGAGCG  
AAAAAGATGGTCGCTGACGGCAGTGAAGATGGATTTCCGCGCAACACTGGCCCTTACGGCAACCACTCACTACCCGT  
ACCGTGTAACGGACCGGCGCTGTCGCTGCCGTTATATCCGTGCGATAACGTCGATTTCCAGGTCACCACCTACTACAGCA  
ACATTTGCCAAATGGTCTTATCAGGGTATGGCGCACCAGAAAGGTAACCTTCCGCTATCACCATGGCATTAGCGGAACTG  
GCTGAACAGTTACAGATCGACCAACTGGAATTAACGAACGTAACCGGTACACGAAGGGCAAGAGCTGAAAATTTCCGG  
TGCAATCGGTGAAGGTAAGCGCCGACCTCCGTTCCCTCCGCCGCACTGTGCACTGGAAGAGATCCTGCGTCAAGGT  
GCGAGATGATCAATGGTGTGTCACCGAAACCGCAAAATGGTACTGGCACATCGGTGCGGGCGTCCGATTATCATGCAG  
AAATCGGGTATCCGGATATCGATCAGGCTAACTGCATGATCAAACCTGGAATCGGACGGCACCTTTATCGTTTACTTGG  
CGGTGCGGATATTGGTACTGGTCTGGATACTGATGACGAACTGGCAGCAGAAGTGTGCACTGCCACCGCAGGACG  
TGATGTTATCTCCGGTATACCGATCATGCGTGGTTTGTAAAGGCGCATATGCCTCGTCCGGTACTTGTCTCCGGT  
AACGCGGCGGTTTTGGCAGCGGAAAATCTACGGGAGAAAATCTGTTCCACGGCGCGCAAATGTTGGGTGAGCCAGTGGC  
AGATGTTCACTGGCAACCGCGGGCGTGTGCGCGCAAGAAAGCGAAGTTAGTTTCCGGGATATTGCCATAAAGGGC  
AAACCGGCACCGGCTTTGGTCACTGGTGGGAACTGGCAGTTATATCACGCCTGATTTCCGCTTCCCGTATGGCGCAAAC  
TTCGCTGAAGTTGCCGTAACACGCGTACGGGTGAAATCCGCCTGGATAAATTTACGCCTTGTGGACTGCGGTACACC  
GGTCAATCCAGAGTTAGCGTTGGGACAAATCTACGGTGCCACCCTGCGTGCTATCGGCCACAGTATGAGCGAAGAGATCA

TTTATGACGCCGAAGGTACCCGTTAACGCGTGATTTACGCAGTTACGGCGCACCGAAAATTGGTGACATTCGCGTGAT  
TTCCGCGCTGTGCTGGTGCCGAGCGACGATAAAGTCGCCCCGTTCCGGGGCGAAATCGATCTCGGAAATCGGTGTAATGG  
CGCAGCTCCGCGCATTGCTACCGCAATTCACGATGCATGCGGCATCTGGTTACGCGAATGGCATTTCACACCGGAGAAAA  
TACTCACTGCGCTGGAAAAATATAAATAATAAATGGCCGCTTCGGCGGCCTGTTTCTCTGTTTGAACGATGACTAAATA  
GTGACTGCGAAAAATGAGATAAGCCGTTCTCAAGGCGTCCTGCGCCCCAAATTCGTGGGAATTTATTTTACTAATTCAGAT  
GATCAAATTTACTTTAAAAGGAGTGAAGGGATGTCTGATATAAACCATGCAGTTTCTGACCTTATATTTGAACTGGAGGA  
TCGCCCTCCCTTTCATCAGGCTCTCGTTGGTGCCATTACCCATCTGTTGGCAATTTTTCGTTCCGATGGTAACCCCCGCGT  
TAATCGTGGGTGCGGCCTTACAGCTTTCGCTGAAACAACTGCCTATCTTGTTCATGCGGATGATCGCCTCTGGTATT  
GGTACCTGGTTACAAGTAAACCGCTACGGCATCGTCGGTTCGCGCTACTCTCAATTCAGTCAGTCAATTTTTCATTTGT  
TACGGTCATGATTGCGCTGGGCAGCAGCATGAAAAGCGACGGTTTTACGAAGAGTTAATCATGTCGTCGCTTCTCGGCC  
TCTCCTTCGTTGGCGCATTCTGGTTGTCGGATCTTCAATTCATTTGTCCTATTTACGTCGGGTATTACGCCTACCGTC  
AGCGGTATTGGTACTGATGATCGGCTTAAGCCTGATTAAGTCGGCATTATCGATTTTGGTGGAGGATTTGCAGCCAA  
AAGCAGCGGTACGTTCCGCAATTCGAACATCTCGGCGTTGGTTTATTGGTTTTAATTGGTGGATCGGCTTAACTGCT  
GTCGAGTCCGTTGCTACGCATGGGAGGGATCGCCATTGGGCTATGTCGGCTATATCGCATCGTTATGCCTGGGCATG  
GTGATTTCCAGCAGTATCGCAATTTGCCGTTAATACCATCCCGCATCCGTTCAAATACGGCTTTAGTTTTAGCTTCCA  
TCAGTTCCTGGTGGTTGGCAGCATTTATCTGCTTAGCGTGCTGGAAGCAGTCGGCGATATCACCGCACGGCAATGGTTT  
CCCGCCGCCCATTCAGGGGGAAGAGTATCAGTCCCGCTGAAAGCGCGCTGCTGGCAGATGGTCTGGTTTCTGTTATC  
GCCTCCGCTGTGCGTTTATTACCATTAACCACGTTTTGCGCAAAATAATGGGGTTATTAGATGACTGGCGTCCGTTTACG  
TTATGTCGGGCGAACCATCGCGTAATGCTGGTTATCCTCGGCTATTTCCGATGATTGGCGGCTTCTTACGACCATTC  
CCTCGGCAGTTCTGGGAGCGCAATGACGTTGATGTTTTCCATGATTGCCATCGCAGGGATTTCGCATCATCATACCAAC  
GGTTTAAAGCGCCGTGAACACTTATTGTCGCCACTTCTTAGGTTTAGGGCTTGCGCTCCTACGATCCCGAAATTTT  
TAAAATATTGCCAGCCTCTATTTATGTATTAGTTGAAAACCTATTTGTGCTGGCGGGTAACTGCGATTTTATTAATA  
TTATCCTCCCTGGTGGCTACCGACAGGAAACGTTCTGCTGGTATTACCTCAGCGGAAGAGATGGATTAACAGTAAAGG  
AGTCAATGATGTCAGGAGAACACACGTTAAAAGCGGTACGAGGCAGTTTTATTGATGTCACCCGTACGATCGATAACCCG  
GAAGAGATTGCCTCTGCGCTGCGGTTTATTGAGGATGGTTTACTCATTAAACAGGGAAAAGTGAATGGTTTGGCGA  
ATGGGAAAACGAAAGCATCAAATTCCTGACACCATTGCGGTGCGCGACTATCGCGCAAACCTGATAGTACCGGGCTTTG  
TCGATACACATATCCATTATCCGCAAAGTAAAAGTGGTGGGGCCATGGTGAGCAATTGCTGGAGTGGTTGAATAAACAC  
ACCTTCCCTACTGAACGTCGTTATGAGGATTTAGAGTACGCCCGGAAATGTCGGCGTTTCTCATCAAGCAGCTTTTACG  
TAACGGAACCACCACGGCGTGGTGTGGCACTGTTATCCGCAATCTGTTGATGCGCTGTTTGAAGCCGCCAGTCATA  
TCAATATGCGTATGATTGCCGGTAAGGTGATGATGGACCACAACCGACCGGATTATCTGCTCGACACTGCCGAAAGCAGC  
TATCACAAAGCAAAGAACTGATCGAACGCTGGCACAAAATGGTCGCTGCTATATGCGATTACGCCACGCTTCGCCCC  
GACCTCATCTCCTGAACAGATGGCGATGGCGCAACGCTGAAAGAAGAATATCCGGATACGTGGGTACATACCCATCTCT  
GTGAAAACAAGATGAAATTGCCTGGGTGAAATCGCTTTATCCTGACCATGATGGTTATCTGGATGTTTACCATCAGTAC  
GGCTGACCGGTAAAAATGTGTCTTTGCTCACTGCGTCCATCTCGAAGAAAAGAGTGGGATCGTCTCAGCGAAACCAA  
ATCCAGCATTGCTTCTGTCCGACCTCCAACCTTACCTCGGCAGCGCTTATTCAACTTGAAAAAGCATGGCAGAAGA  
AAGTTAAAGTGGGCATGGGAACGGATATCGGTGCCGGAACCACTTTCAACATGCTGCAAACGCTGAACGAAGCCTACAAA  
GTATTGCAATTACAAGGCTATCGCCTCTCGGCATATGAAGCGTTTTACCTGGCCACGCTCGGCGGAGCGAAATCTCTGGG  
CCTTGACGATTTGATTGGCACTTTTTACCTGGCAAAGAGGCTGATTTCTGGTGATGGAACCCACCGCCACTCCGCTAC  
AGCAGCTGCGCTATGACAACTCTGTTTCTTAGTGACAAAATTGTTCTGATGATGACGTTGGCGGATGACCGTTCTGATC  
TACCGCACCTACGTTGATGGTCTGCTGGTACGAACGCAACTAATAAAAATTTAACATCCTCTGAGGACCATTAAT  
ATGTCTGGAGACATCTACAAAACACCGGACCGAACCAAGCCACAGGGCGCGCTGGATAATTTTAAAAATTACCGCTCG  
TGGCAGTACCGTTCTGTCAGGAAGTACTGGCTGGCTTAAACGACCTTCTGGCCATGGTTTATCCGTTATCGTCGTTCCGG  
GAATGCTGGGCAAAGCAGTTTTCTCCCGCAGCTGTGTTGTTGCCACCTGTCTGGTTCGGGGCTTCGGCTCGTTGCTG  
ATGGGATTATGGGCTAATTTGCCAATGGCGATTGGTTGCGCGATTTCTTGACGGCGTTTACCAGCATTAGTCTGGTACT  
CGGGCAACAAATTAGCGTTCCTGTGCGACTGGGCGCGGATTTCTGATGGGCGTCATCTTACCAGCATTTCGTAACCG  
GTGTGCGTACCTGGATCTTACGTAATTTGCCGATGGGTATCGCTCACGGTACAGGTATCGGTATCGGGCTGTTTCTGCTG  
CTGATTGCTGTAACGGTGTGGGTATGGTTATCAAAAACCCGATTGAAGGCTTGCCAGTGGCGCTCGGTGCGTTTACCTC  
CTTCCCGGTGATGATGAGCTTGTGGGGTGGCGGTCTTCCGCTGGAGAAGTGTGCGGTACCCGGCGGGATCTTGT  
TGGTGATTATTGCAATTTGATCATCGGCTTAATCTTTGACCCAGCGGTGAAATACCACGGTCTGGTGGCGATGCCAAGC  
CTGACTGGCGAAGATGGTAAAGTCTCTGATTTTACGCTCGATATTATGGGTGCACTCCAGCCAACTGTACTTCCGAGTGT  
ACTGGCATTGGTATGACCGCAGTGTTCGACGCTACTGGCACCATCCGTGCCGTGCGGGTCAGGCAGTTTGTGGATA  
AAGACAACCAGATCATCAACGGCGGCAAAGCCCTGACCAGTACTCAGTAAGTTCAATATTCTCCGGCTGGTGGGCGCA  
GCCCGGCGAGCGGTTATATCGAATCAGCGGCAGGAACCGCCCGGGGGTAAAACAGTTTAAACCGCAACCGTATGGG  
GGCGTTATTCTGTTAATTTCTGTTTTTATCACCGCTGTCATTTTTGATCCCTGGTTACGCCACTGCACCCGCTCTGATGT  
ACGTAGGTTTTGCTGATGTTAAGTAACGCTCTGAAGCTGGATTTCAATGATTTTATTGACGCTATGGCTGGCCTGGTGT  
GCCGTGTTATCGTTTACTGTTAATATCGTTACCGGATTATGCTGGGCTTTGTGACACTGGTCGATAGCCGCGTCTT

TGCACGCGAATGGCAAAGCTGAATATTGGTACGGTGATCATTACTGCCGCACTGGTCGCATTTTACGGGGTGGTTGGG  
CAATCTAATAGATTCTCCGCGCCTTTTCAGCGCGGAGATTTCTTTTCAGAGAGGATTCTCACCCTGGCAACAATACGCTGC  
TGGCGGACTCGCTGAGTTCTCTTTTCAGTAAGCAACTGCAGCGCCTGTGTTGGGCAAGATTC AACGCAGGCTGGCCCTC  
TTCCCGCTGTTACAGAGATCGCATTTACAATTTGTTGTGCGGTATCCCCGGCAACGACTGAATGGTGCATTCACAA  
ACGGGCACGCACTGACGCAACTCTGACAGCAATACAACGGGCAGAAATGGTCTGCACCACCTGCTCGCCATCGTCAGC  
GCCCCACGGGGCAAGCGCAACAAGGGGCGTTTTCACACTGATGGCACATCACGGCGCACTGATGTGTCCAGTCG  
CTGTACCTTACGCCGGGTAAAAAGACATCGGCATTCAACTCCTGTTCTGAAGGGTGAAGGACACACAGGCTACTTAC  
AAGTACGGCAGCAATACAGTCAGCCGGATTAACGATAATTAACGATTTTCATCACGATGCCTTCGATCAAAACAGAGTTA  
ACATATCGCGCGCCGCTGCCTTCTGCGGCCATTGCAGTGACAACCAGATCCGCGCCATGAACTGCATCACACCAGCA  
AAGACTTTTTTTCAGATGCGTCTGGGTAGGTAAATACCCGACGTCACCGGTTTGAATCAGGCCCCATTTATCGAGTTAAT  
TCCGCTGCCCTGCAACCACGGCATGGCATGCGCCTGAAAACCAAGGCCATAATCAGAATCAGCGGGCAATTCAAAC  
CTGAACCGCTACCGGACGAGGACGACGGCACCATCCGGCCCCGGTCACCCATGGCGGTACGAATCAGGCCACCGCA  
GTTAAACGCCCATCTTCGTCACAAGCGATATATTGCGGTTGAACATTGAACTGAACTCGACACCTTCTCGCGCGCATT  
AACCACTCTTTGCGCGAGCCGGCATACTGACTTATCACGACGATACGCGCAGGTACGCTGGCGGCAATTGAGGCGGA  
TGGAATCCGCAACAACATTGCTGATCGCCACCGCCAATACCAGACTCGCTTACCTTCCACGTCCTCGAGCGCA  
TACTTTTTCAGACTCCGGCAATCCCATGAGCTGGCGGATGGGCACTGAGGAAACGGTAGAGCCTGAATGACACCGGGCG  
ATCTTCATGCGCGAGATCTGCTCGCATATCCCGTAAGTCCCGCAGCCGATGAAAACTGCATCATATTCAGAAGTTAAAT  
CGTAAAGGTAATATCGCGGCCAATTTTCAGATTAAGTGAAGTTCGATTCCCATTGCGGTGAATATCTCTCGCGCTGG  
CTTAATACCGTTTTATCGAGTTTGAAGGAGGAATGCCAAAAGTCAGCATACCGCCAATTTCTGGATGGCGATCAAAGAC  
ATCGACCTGAACTCCTGCGCGCCGAGAAATATCAGCACACCCTAACCTGACAGGCCAGCGCAATCACCGCCACTTTTT  
CGCTACGGGAAACAATTTGCTGACATCGGGACGCCAGCCATCGCCAGCGCGTATCGGTGATGTAGCGTTCCAGATTA  
CCGATAGAGACTGCGCCGAGTGCATTTCAAAGTACATGCGCCTTCAAAGACGGTCTGTGGACATACCCTGCCGCA  
AATTTCTGGTAAGGAACTGGTCTGGTGGCAAAGTTCGCCGTTCAATAATCTTCTTCTGTACCAGACGGATGTAAT  
CCGGAATAGCGTTATGACGCGGCAATGCCAGTTGCAGTTAGCTTTTTCGGCACAATAAACACAGCGGTCACTCTATAA  
GTCGCTTGTGGATCCAGCCGCAATATTTTCGCAAAGTGGGTTTTCCGTTCACTCGCTGAAATTTATCTGCGCC  
TTACGCGAGTTAACGGGAGCAACGCTGCACTGCGAGATGGCTGAGCGTCTGATGACGCTTTCTGCTGCCGTTTTGC  
GCTGGCGGGCCACCTTTATCTGCTGCAACCCTTTATCGTCCATCAGTCGTAACGCTGTGTTGGGCAAACTCAATACAG  
GCTTGCCTGCCGAACTGCGCTGGTTACAAAGTTCGATTTTCTGCGCAATCGTATCGACCATCTCAACGACGCCAAAGGG  
GCAAAGCGATTGCGCATTTTTACAACCAATACATTTTTGCTCGTCCAGTTGTACGCTATCGGACTGGAAGTCAGAGCAT  
TAACCGGACAAGCCGTAACGCAAGGGGCATTGTTGCACTGATGGCAGGCCACCAGATTGCGAGCCTGGCCTTTCCCTACA  
ACGTGGATACGCGGTCGAAAGTCACTGTGACTCAGCGGCCAGTTTTCTTGATTTGTTGCCACCCGCACAGGCAATTTACA  
AGCATGACAGCCTATACATTCCGCGACTTTCAGCAGCAATAAATTAATTCATTTGCATCCCTTTCATTTAATGAGTTATGT  
CTTCTCAAATTTTCGCGATGCAATAAAGGGCATATATTAGGTAGCATGACCGTTTTAATTATAATTTTGGACTGAGTTC  
AAATTATTGCCCTCAATCTATGCGCTTTTCATTATTTCAACATTGCCGATCAAAGAGCGCTATCCAGATAAAAACGAT  
TAAATGCGAGAGTGCAGCATGCCAGAATGATTAATGAAATATCAATATGAGAAAATTACAGATAATTCATTGTGAGTT  
CTTCTCAATTTCTGTTGTTAACCACGATATGTGATTGCCTCCGCAATTCCTGTCTCTAACTCCCCTTCTCGCAAAA  
ACTGGCACTCCACGAGCATGTGTTTAGACAGTTTCAATAACGTAACGGTTGCTTTTTACTCTGGCGGGCAAAAGGAGAA  
ACACTGATGAGCGCCATAGATTTCCAACCTCCCTCATCTTCTGGCAAGACCGCCAACTGATGAGGTTGACCGCATATT  
ATCACCAGGAAAGCTGATCATACTCGGTCTGCAACCGTCTTGTATGATGACGAGGTGCAGTGCCTGTTCTCTTATGA  
TTGGTGACCGACTGGCCCTCAAAAAGAAGCTAATTCGATGCTCATTAGCTCGGATCTTTTTGCTGCGGGATCGTACA  
TTATTGCAATGTATCGGTATCGGCCGCTTTATGGGGATCCGCCTGCCGTTGATTATGTCGGTGCATTTGCTGCTGTAAC  
ACCAATGATAGCCATTGGGATGAACCCGATATCGGCTGCTGGGATATTTGGTGCCACTATCGCCGCGGGTTTTATCA  
CCACATTATTAGCGCACTTATCGGTGCTTGTGCTTTTATTCCCGCCACTGGTTACCGGTGTGTTTACTTCTATC  
GGGCTTAGCATCATTAGGTGGGTATTGACTGGGCCCGGAGGTAAGGGAATCCGCAATATGGTAATCCCGTTTATT  
AGGTATCTCCTTTCGCTTAAATTTTTATCTTGTCTACTACTCGCTATGCGAAAGGATTTATGTCCAACTGCGCGTAT  
TACTGGGATTGTATTTGGCTTTTACTTTCTGTTGATGATGAATGAAGTCAATTTATCCGGGTACATGATGCTTCATGG  
TTTGGCATTGTACCGCATGCTGTTTGGTATGCGGATTTTCGATCCCGTTTCATTCTGACCATGACTGCCGTGTTAAT  
CATCGTGTATTCAGATCAATGGGGATGTTCTGGCACTGGGTGAAATAGTCGGTCTGAAACTCTCTTCGCACGATATA  
TTCGCGGGCTGCGTGCATGGCGTAGGGACAATGATAGCGGCACGTTAACAGCTTCCCCACACGTCATTTTCTCAA  
AACGTTGGCCTGGTTAGCGTGACGCGCTTCATAGCCGCTGGGTGTGATTTCTTCGGGAATTATATTAATCCTGTTGG  
CATGGTGCCAAAATGGCGGTGCTGGTAGCCTCCATCCGCAATTTGTGCTGGCGGCGCTGGTCTAGTGATGTTGGCA  
TGGTACTGGCGACAGGATTGCAATCTGTGCGCTGTAACACACCACCAACGTTACAACCTCTATATTGTGGCGATC  
AGTCTCGGCGTTGGCATGACTCCGACGCTCTCTACGATTTCTTTCTAAGTTACCGGCGTACTGCAACCGCTGCTACA  
TAGCGGCATTATGCTCGCAACCTTAGCGCCGTTGTGCTGAACGCTTTCTTTAATGGCTATCAGCATCATGCTGACCTGG  
TGAAGGAATCCGTCCTGATAAAGATTTAAAGTCAAGGACGATGATGTTGCTTCTGATGCGCAAGCTGAAGAAAAT  
GAGCATGGAGAATAATGAATTTTTAATGCGCGTATATTAGTCTGTTGTTGCTTTTTACTCTCTATTCTGTCA

TTTCTGACTGTGTTGCAATGGCCATTGAAAGTCGTTCAAATATATGATGCTACTTTTTAAATGGTTTTTACCTGTCCG  
CATCCGCTCAAACGGGCGTGTGCGATAAACGCTCACTTGGTAAATCATTTCACTCTTCAATTATCTATAATGATGAGT  
GATCAGAATTACATGTGAGAAATTATGCAAACGGAAACAGTCATTTTATTGAATGCACAGGGAGTTCCCACGGGTACGCT  
GGAAAAGTATGCCGCACACACGGCAGACACCCGCTTACATCTCGCGTTTCCAGTTGGCTGTTAATGCCAAAGGACAAT  
TATTAGTTACCCGCGCAGTACTGAGCAAAAAAGCATGGCCTGGCGTGTGGACTAACTCGGTTTGTGGGCACCCACAAC  
GGAGAAAGCAACGAAGACGCAGTGATCCGCCGTTGCCGTTATGAGCTTGGCGTGGAAAATTACGCTCCTGAATCTATCTA  
TCCTGACTTTTCGCTACCCGCCACCAGTCCGAGTGGCATTGTGAAAAATGAAGTGTGTCCGGTATTTGCCGCACGCACCA  
CTAGTGCGTTACAGATCAATGATGATGAAGTGTGATTATCAATGGTGTGATTAGCAGATGATTACACGGTATTGAT  
GCCACGCCGTGGGCGTTCAGTCCGTGGATGGTGTGAGGCGACAATCGCGAAGCCAGAAAACGATTATCTGCATTTAC  
CCAGCTTAAATAAAAAAACCAGCATTGCGGGGTGTGAGCATAACGTAATGCTTATTTACCGGACGCATCGCCGG  
GAACAGAATAACGTGCGGATGGTATGGCTGTTGGTGAACAGCATTACCATACGGTCGATACCAATCCCAGACCTGCTG  
TCGGCGTAAGCCATGTTCCAGTGGGTGACGTAATCTTCATCGTAGAACATCGCTTCGTCGTCACCTGCCGCTTTCCGG  
GCAACCTGATCCAGGAAGCGTTCGCCTGATCTCCGCGTCATTACGCTCGCTAAAGCCGTTACCGATTTCACGACCAC  
AATGAAGAACTCAAAGCGTCTGTGATTTCCGGGTTAACGTGTTACGACGCCAGCGGAGAAAATCTCGCCGGATT  
CAGTAATGAAGTGGTCCGATGATGATGCTTCCGCACTTCTCGAAGATCTCGGTAACGATACGGCCAGACCCAC  
CTTTCTCAACGTGGATGCCAGATGATTACGCAATGCTTTCCGAGAGTGAAGTGTCCAGATCCGCCATTGTCGGTTTC  
CGGGCGATATTTCTTGATCGCTTACGCATGGTCAAGTTTTTCCGACGGTTTACCGAAGTCCAGCGTCACGTCGCGGTAGG  
TCACTTCCGCTTACCGAGAAATACCTGTGCCAGAGTACGGAACAGCGATTCCGGTACGCTCGATCAGATCTTTGTAATCT  
GCGTAAGCCATGTAGAGTCCATCATGGTGAACCTCGGGTATGACGTACGGAATACCTTCGTTACGGAAGTACGGTT  
GATTTTGAATACAGCTCGAAGCCACCAACCAGACGCTTGGGTACAGTTCCGGCGGATACGACAGTACATGTGCA  
GATCCAGCGCTTATGGTGGGTGATAAACGGACGCGCAGCGCACCCAGGGATCACCTGCATCATCGCGTTCAACT  
TCCATAAAGCCCGGTTCCCATGAACGGGAATACCAGAGAGGATCTGCGAGCGCACTTAAAGGTGTTGCGGGATTC  
ATCGTTGGAGATGAGATCGAGATAACGCTGACGATAGCGCTTCCGATCTGCAAGCCGTGAATTTATCCGGCAGCG  
GACGCAAGTCTTGGTACGAGACGCAACTCGGTGACGTGGATAGACAGTTCGCGGTTTTGTTTTGAACAGCTTACCT  
TTCGCGCCGAGGATGTGCGCGAGGTCCATTTTTGAACTGCTCGTTATAAACGCCCTCCGGGAGATCGTCACGGGCAAC  
GTACAGCTGAATGCGACCCCAACGCTCCTGCAGGTAACGAAAGACGCTTACCATAATACGACGGGTATCATGCGGC  
CAGCAACGGCGACTTCGATGTTCCAGCGTCCAGTTCTTCGTTCTTTGCCGTGCAATTCGCGTGAATTTGGTCCAGAG  
GTATGATCGCGACGGAAATCGTTCCGGAAAGCAATCCCTGCTCGCGAGGTTCCGACGTTCTCACGACGCGTTTTAG  
TTCAATTGTTAAGATCGACTACCGCGTCAGCGCCTGTGCGTGTGTTTCAGACATGTTGGTTCCTATAACCTGCTTCA  
AACTTGCTTCGATAAATTGATCCAGGCTGCCGTCCAGCACGGCCTGCGTGTTCGGGTTTTCTACCCCGTTCGCGAGATCT  
TTAATGCGGGAGTCAAGGACATAAGAACGAATCTGGCTGCCCCAGCCGATGTCCGATTGTTATCTTCCATCGCCTG  
TTTCTCGGCATTTTTCTTCTGCATCTCCAGTTCATAAAGCTTTCGTTTCATCTGCTTCATGGCCTGATCTTGTCTTGT  
GCTGGGAACGGTCTGTTTGGCACTGGGTCACGATCCCGGTCCGGATGTGGGTAAATACGCACCAGATTCCGGTACGGTTA  
ACGTGCTGACCCGCCCGCCGACGTCGATAAACGTCAATGCGCAGATCCGCCGGGTTGATTTTCGATATCAATATCATC  
ATCAACTTCGGATAAACAACCGGAGCTGAACGACGTGTGGCAGCACCCGCGGAGTCAAACGGGCTTTTACGCACCA  
GGCGGTGAACGCCGGTTTTGTACGCAGCCAGCCGTAAGCGTAATCGCCGGAGATTTGATCGTCACGGATTTAATACC  
GCCACTTACCTTCGACTCTTCGATGATTTAGTTTTGAAACCACGCGATTTCGCCAGCGCAGATAACATACGCTCAAG  
CATGCTCGCCAGTCTGTGCTTCCGTACCAGCCAGACCCGCTGAAATATCGAGGTAGCAGTCCGGGCTGTATATTCCG  
CAGAGAACAACCGCGGAATCAAGCTGCCAGTTTTTTTCCAGGGGCTCAGATTAGCAACGGCTTCGTTAAAGGTT  
TCTTCTGCTCAGCTTACAGCCAGTTCAGCAGACCAGAAACATCTTCCAGCCCTGTTTCATTGTTGGTCCAGGGTGTG  
GACAAACGGCTTTCAGGGAGGAACGCTTTACCAGCGCTGTGCGGTTCCGGTTCGTTCCAGACATCCGGCTGTTCCA  
GCTCGCGTTTTACTTCTCCAGACGCTTTTCTGGCGTGTAGTCAAAGATACCCCTAAGAACGTCCGAGCGTTCCGT  
GAGGTCTGAATGCGATTATTTACCGATTAATTTCAAACATGGTCTGATTTCTTTTATTGAGCTAGTCAAATGCGGTG  
ATAAGAGCGGGATTGTACCAATCCACGCTTTTTTATAGAGAAGTACGCTAAATTGGCCAGATATTGTCGATGATA  
ATTTGCAGGCTGCGGTTGCCGGAACCTGTTGATATCGAGCTTATAAGCCAGTTGCACTTCGCGACGCCGTTATCCGG  
CCAGAGGGCGGTATCGACATTAAGCAATACCATCCAGCAGTGGACCGCCGCCAGCGGTTCCGACCATCACCTCAAAT  
GACGTTCCGCCACCGCGTGTGACGAGACGGAATGACCGTCAAACAGCGGCTCCGGGAACATCTGCCCCACGGG  
CCAGCATCGCGCAGCAGTGCGCCACTTCCATGGTCAATTCGGCCGGGTTAACGGACCGTCTGATACCACTTCGCTT  
CAATAGCGAAGGTTCCAGCCACTCAGTAACCAGTTCCGCAACCCTGTTGAAAGAGTTTTGAATTTATCCTCTTCAGCG  
ACAAACCCGCCCATCGCATGACCGCAAACCTTACGATCATGCCAGGTTAGAGTGTGCTAATCGCTCCAGCGCATCA  
CGATATGAGCCCTGAAATGGAGCGACCGGAACCTTTCAGCGTACCGTCCCTGCTGGCGAAACCGCGATAACCGGACG  
GTAAAACGCTCTTTCGATGCGCAAGCCAGAATACCACAACGCCCTGATGCCATTCCGGGTTGATACATTGCCAGCCCCG  
CGGTTAGCGTGTACGGCTCGCTCCAGTTTCTCGACAGGGTACGGGCTTCAATTTGCATTCCTTGTTCGATCTCTTTT  
CGGTTCTGTTTATGCGCATCGAGTTTCATTGCCAGCACGCGCGCTTCCCGGATGTTGTGCGACAACAACAGCGCCACACC  
GACGGACATATCGTCCAGTCGTCGGCAGCATTGAGACGTGGCCCCAGCGAAAACCTAAATCGCTGGCGCGAGTTTTT  
GTGCATCACGGTTGCCACTTCAAGCAGCGCTTAAATCCCGGACGGCACTTCCGGCTCGGATGCGACTCATCCCCTCG

CAGGTCAGAATGCGATTATTAGCGTCCAGCGGCACGACGTCCGCCACTGTCCCAGCGCGACCAGATCCAGCAGTTCTGC  
CAGGTTAGGAATTGCGATGTTACGCTCATCAAACCAGCCCTGATCGCGCAAAAAGGTGCGCAGCGCCAGCATCAGATAAA  
ACGCCACACCCACGCCTGCCAGTGATTCGACGGGAAATTACAGTCGCGCAAGTTAGGGTTAATGATCGCTTCCGCTGCG  
GGTAATGTGTGCTGCGCTGGCAAATGGTGATCGGTAACAATAACCGGGATGCCAACGAGCGAGCGTGCTCAACCCCGCATG  
GGAGGAAATACCGTTATCCACCGTGACAAATTAAGTCGCGCCACGGGATGGGCTGATCGACCACTTCCGGGCTTAAGC  
CGTAACCGTCTTCGAAACGGTTTTGGTACCAGGTAGTCGATATTGCTGCAACCAAGCGAGCGCATCGCCAGCACGCTTAGA  
GCCGTGCTGGTCGCGCCGTGCGGCTGCAAATCACCGACCACAATAATCCGCGTTCCTTCGCGAAAAGCGTTGTAAGGAT  
CTCAACGGCCTTTTCGACGCCGCTCAGTTGCTGCCAGGGCAGCATACTTTAACTGCGTTCCAGTTCTTGGCGACTGC  
GTAATCCCGGCTGGCGTATAAACGGCGCAGCAAGGGAGGCAATTCAGCGGGCAAGTCTGCCGTTTCATCGACTTCACGG  
CGACGAAGTTGATCTGTTGTTTCACGCGAATTATTTACCCTGGTCATTTTTTGGTGTTCGTGAGGAAATCTTTTCATC  
TCTTTCCGCGGCTGGTAACCGGAACAAGTGTGCCATTGCTCAGCACAACCTGCCGAGTACCAGTAACGCCAAGCTGGAC  
GCCAAGTGCATAATGGTCGGAATATCCACGTCGCAACTGGCTGGTGCAGCGCTTTTACCTGCCATCACATCATCAAACG  
CTTTGTTTTATCTTCGACACCAGATAGCTTTTCACTTTCTTCTGTCATCGCTGTCAGCCCTGGCGCGGAAAGCA  
AGATAACGCACGGTGATCCCCAGCGGTTGAGTCTGCCATTTGCTCATGCAGTTTGTGGCAGTAACACAGGTAATATC  
AGTAAACCGGTGATGACGTGTTTTCTGCGGCTTTATAAACGATCATCTTTTTCAAGCGCATTCAACTGCTTTA  
ACAGCATCTTATTGGTGACATTGACCGGAGCCGTCACACTAACGTCATACATTGGCCCCTGAATGATGTTTTACCATCA  
TCGGTGATGTACAACACGCCGCTGTTAGTCAGAAGTCTTCATGCCAGCTACAGGCGGGCTGAATATCGCTGCTTTT  
GATGCCATTTTGGCTAACGTTTGTGATTGCGCGTTCATCAGCCTGAGCAAAGCCTGAAAACGCCGCTAACAAAGTAA  
ACAACATAAAACCTTTCTTCATAAATCTTCCGTTCTTTTCCAGACATCACGCCCGGGTGTGCTGTTGATGAAGTTGC  
CGCAGACGCTCGGTAGCGACATGCGTATAAATTTGCGTGGTGGAGAGATCGCTGTGGCCAGTAGCATCTGCACCACGGC  
TAAATCCGCACCATGATTTAATAAATGAGTGGCAAAGCGTGACGCAACACATGCGGTGACAGCTTTTCGCTGTCGATA  
CCGCCAGCACAGCATAATGTTAATACGGTGCCAGAAGGTCTGTCGCGTTCATCTGTCGCGACGCTGGCTGGGAAACAA  
ACGTCATTGACACACCATTCAGCAGCCACGGACGCCATGTTCCAGATAGGTTTCCAGCCAGTAAACCGCTCTTACC  
TAACGGCACAGACGCTCTTTGTTGCCCTTACCAATGACCCGTACCAGCCCTGACGCAGGCTGATATCACTCATTGTCA  
GTCCGACCAGTTCAGAGACACGAGCCGCTAGCATACAACACTCAAGCATGGCTTTATCGCGTAGCTCAGTGGCTGA  
TCGATTAATGGTGCTGTAATAACGTTGACCTGCGCTTCGCTAAATCTTTGGCAAACGCTGGGGCAATTTCCGGTGA  
AGCGAGATGCGCACTGGGATCGTCTTCACGAAACTTTTCGCGATAAAGATACTGGAACAATCGGCGCACTGCACTCAGCA  
AACGCGCTGAGCTGGTGGCTTTATACCCGCCCTCCAGCCGTTCTGCCAGTAATGCCTGCAAATCGTCACTTTGCGCCGTC  
GCCAGCGTCAACCCGCGGTGATGCAACCACTCCACCATCATTGACAGATCGCGACGGTAAGCGTTCAACGTATTTTCCAGC  
CAGATTTTTTTCCAGCCACAGAGCATCAAGAACTGCTCGATGCGTGCAGATCCTGTTCACTTGCGCCCTTATGGTC  
ACTATTTGATCCATTATGCCTTATTGTGCCGTGACTAAAGCGATTCTGATACACTAGCCGAAAAGCCACAGCAGAATC  
GAGAAGCTTACGTTATGAATATGGGTCTTTTTACGGTTCAGCACCTGTTACACCGAAATGGCGGCAGAAAAATCCGC  
GATATTATCGGCCAGAACTGGTGACCTTACATAACCTCAAGGACGACTCCCCGAAATTAATGGAGCAGTACGATGTGCT  
CATTCTGGGTATCCGACCTGGGATTTTGGTGAATCCAGGAAGACTGGGAAGCCGTCTGGGATCAGCTCGACGACCTGA  
ACCTGAAGGTAAAATGTTGCGCTGTATGGGCTTGGCGATCAACTGGGATACGGCGAGTGGTTCTCGATGCGCTCGGT  
ATGCTGCATGACAACTCTGACCAAAGCGTGAAGTTCGTCGGTACTGGCCAACGGAAGGATATGAATTTACCAGCCC  
GAAACCGGTGATTGCTGACGGGCAACTGTTGTTGGTCTGGCGTGGATGAAACTAACAGTATGACCTTAGCGACGAGC  
GTATTAGAGCTGGTGGAGCAAATCTCAACGAAATGGCAGAGCATTACGCTGATCTCACTGACGGCTTAGCGCATAT  
GCTTTGCGCTCATCTTTATCTTTGCTCTTTGTTGCAACAAAATCCGCCGTAATCCGCCATTGAGCTTCGTCATGC  
TGTCGGCTGCCAGCCATAAATGTTGCCGTTTACCCCATCAGAAGCAAGTAAACGACGATCATGCCGCTTAAATCAATCCAC  
GGTGCTTTGACGATGCTCACTCCTGCCCTTGCCAACGCAAAACGCGCTCCATCAACAAGCAATTTCCGCCCTGGCGAGC  
ATTAATACGCCGCTGGTGCGAACGCAATCAAACACCACAGCGAAAAGTAAACCATCCATAACGGGGTGAAGTGAAGT  
GCCAGGCATGAGTAAAATAACAGCGGCAACAGCCATGAATCAGCAAGGAAAGCCACTGTGCGCGCCAGGAGACGGC  
AAATCAGATTGCCACAGGACCACGTTCCCGGTTCCGTGCTGATGAGTCCGACCATCATTCCAGTTCTGCATCGGCCG  
GTTTACCCTGATTCATCAGCCAGTTAAACAGGTCCGGATGTCACATTCCAGCAGACGAATAAAGATGCGTTTTTTCGCA  
TCGCTTAAAGTGTGCTACTCATGTTGAAAAACGGCATGATTGAAATATCGAGTTGCGCATACCAGGCCGGCATGCCCA  
ATGAATGCGGGCTTTGTTGTTAATGTCCATCTTCTTCTGCTCACGAAAATCCAGTACCCGGCTATTGTAACGTGTTTT  
TCGCCTTCTTTACGGGAATATCAGTAAACACCATCGCGATCGCGAAATTAATCAACAATTCATGGCTTCATTTTT  
TTGGAAGTCGCTCGCAGAAAGCAGATCGCGTAGTAAAGCACTTGCATTGCTCATAGCTTTTTTACCATTAGTCAT  
TAATACGCCGTTAAGCAACTCAGGACTCTATTATGGCTTTTACACTTTTTCTCCCGTCAGCCTACGGCTTCTGCCCGT  
TTACCGCTGACGCTGATGACGCTTGTACTGGGCGCTTGCACCATTAAGTGCAGCGGACAGGAAAAATATATGCAGGG  
TCAGGTGACAGCAGATGTCAGCCAGATGGCAGAAGATCAGCACCTGCTGCCGCCATTGCGACGCCAAAGGTAAAATGT  
GGAGCAATTTACGCTGTTCCGCGACGGCGATGGCTTTGATGGATTGAACGGCGCAGCGTGGTGAACCGCAGCTGACT  
GAACTGAAAAAATATGCGGTATTCTCTAAAGTGACCATCGCGCCAGACGAGCGTGTGCTGCTTGGTGTGCGGTTTT  
TCAGGCGCGCGCCGCTGGCAAATCTTTTAGCGAACTGCCTTCGAAAGAAAAACAGGTAGTCAAAGAAGGCGCGACCA  
CTTTGCTATGGTTTTGAACACCCGGCAGAACGTTTCTGATCGTAACCGATGAAGCTACTGCTAATATGCTGACCGATAAA

CTGCGCGGTGAAGCGGAAGTGAACAATAGCCAACAGTGGCTGGCATTAAACATTGAAGCGGGTTCCCGGTGATTGATGC  
CGCCAACAGCGGGCAGTTTATCCCACAGCGGACCAATCTCCAGGCGCTGGGCGGTATCAGCTTTAAGAAAGGCTGTTATA  
CCGGACAAGAGATGGTGGCGGAGCAAATTCGGTGGTCCAATAAACGTGCGCTCTGGTTGCTGGCAGGTAGCGCCAGC  
CGACTGCCGGAAGCTGGTGAAGACTTAGAGCTGAAAATGGGCGAGAAGTGGCGTCGTACCGGTACGGTACTGGCTGCGGT  
AAAAGTGAAGATGGTCAAGTCTGGTACAGGTCGTATGAATAACGATATGGAACCGGATAGCATCTCCCGGTACGGG  
ACGATGCGAATACATTGCATATCGAGCCGCTGCCGTATTCGCTCGAAGAGTAAATCTCTTTATCGCATCAGGCATTTATC  
GCCTGATGCGACGCTGGCGCGTCTTATCATGCTGGGATTTGATGCCCTTATCACAACAGGGACGAGGCCCCGATAGTCCG  
ATAAGGCGTTACGCCGAATCCGGCAGTTGTGCTCCGATGCCTGATGCGACGCTGGCGCGTCTTATCAGGCCTACAAAGG  
CATACCCATTACGCCCTGCCAATATACAATAGATGCCAGAAAGTGGCACACACTACCGCCGAGCACGAAGCCGTGCCA  
GATGGCATGGTTGATGGAATGCGTTTGCAGACGTAGAAAATCACCCGAGCGAATAAACCACGCCGCTACCGCCAGTA  
AGGTAACGCTGCCCGCCGAGCTTAACTGCCATTTATAAATACCACCAGCGACAGCCAGCCATCGCCAGATAGGTC  
ACCAGAGATAAAAATTTTGAATCGGTGGCGGATGGTCAAGTTAAACAGAATACCAGCAATGCCAGGCTCCAGATAACAAT  
CATCAACCCGCGCTAACCAGGAATCCAGCCACCAGCAAAAACGGCGTGTAGGTTCCGGCAATCAACAGGTAATAG  
CGAATGGTCAAATTTCTCAGCCACATTTTTGCCCGTTGATGAGGAATGGCGTGATAGAGCGTGAAGCGAGGAACAGC  
AGGATCATACTGCCGCTAGAGGCTGATGCTGTTATCGCTGTGGCGCTGGCATTAAAGATCCACCGCTGAACCAGTAC  
CAACACCAGCCAACGATACAAACACCAACCCAAATGCCGTGACTGACGCTGTTGGCTATTTCTCTGCCAGTGAATATC  
CCTGCTTAATGAGGGCTTCTGAACCATAACTTACTCCGGAGAAACGTACACGCACATGTATACCTCTCCAGCGTAACTG  
AGAATAGTTCCAGTGAACACCTGTTAGCTAAAATAAATTCTGATTTGAGACTAATCTCCTAAAAATCATGAAATTAATG  
CGAAATTTCAACTAACAGGCGTGAGTTCAATTTAAAGACATTTAAATTAATCACATAAAAATTGTGTCTGACCGGGATAG  
ATGTCAGCAATGACTTTTTTTCAGTTCACTCAGGGTCAATTTTTCTGCTCTGCATGTTTTTTCAGTCAGCGTATCCAGCGT  
TACGGTTGAGGTTGCGGTGACTTCAATCGTGCAAAAATAACCGTCATCTTCAAAACGTCCGACACGAAGCACATCACCCG  
TTTTGAAGTGCATTAGACTCGTCGCGGATGGTGTGGTTTTACGCCAGCCAGAATGTCATCCTGAAACGTTGAAAA  
AAAGTGATGCTGTTGGCTGCATGGTACTATTTCTGTAAGAATTGACTCATCTGGAGCCTATGATAGTAAAAAACTCA  
CCTTACCGAAAGATTTCTTATGGGGCGGCGAGTTGCCGCTCATCAGGTCGAAGGCGGCTGGAACAAAGCGGAAAAGGG  
CCGAGCATTTGTGACGTTTACCGGTGGCGCACACGGCGTCCGCGCGAAATCACAAAGAAGTCTTCCAGGAAAATA  
CTATCAAACCATGAAGCCGTTGATTTTTATGGTCACTATAAGGAAGACATCAAGCTATTTGCCGAAATGGGCTTCAAAT  
GTTTTGCTACATCCATTGCCTGGACGCGCATTTTTTCAAAGGCGATGAAGCTCAGCCAAACGAAGAAGGCTGAAGTTC  
TACGATGATATGTTTCGATGAACTGCTGAAATACAACATCGAACCGGTGATCACCTCTCCACTTTGAAATGCCGCTGCA  
TCTGGTGCAGCAATACGGTAGCTGGACCAACCGTAAAGTGGTTGATTTCTTTGTACGTTTCCGCGAAGTGGTATTTGAAC  
GCTATAAGCACAAAGTCAAATACTGGATGACCTTCAACGAAATTAACAACCCAGCGTAACTGGCGTGCACCCTGTTCCGGT  
TACTGCTGCTCCGGCGTGGTGTATACCGAGCATGAAAACCCGGAAGAGACGATGTATCAGGTGCTGCATCACCGTTTTGT  
CGCCAGCGCCCTGGCGGTGAAAGTGGCGCTGCGATTAACCCGGAGATGAAAGTCCGGCTGTATGCTGGCGATGGTGCCTG  
TCTATCCTTACTCTGTAACCCGGACGATGTGATGTTGCTCAGGAGTGCATGCGCGAACGCTACGTCTTTACCGATGTG  
CAGCTACGCGGCTATTACCCGTCCTATGTGTTGAACGAGTGGGAGCGTCCGGATTTAACATCAAAAATGGAAGACGGCGA  
TCTGGATGTGCTGCGTGAAGGCACCTGCGATTATCTTGGTTTTGAGCTATTACATGACCAATGCAGTGAAGGCCGAAGGCG  
GCACCGCGATGCGATCTCTGGTTTTGAAGGCAGCGTACCAAAACCGTATGTTAAAGCATCTGACTGGGCTGGCAGATT  
GATCCAGTAGGTCTGCGTATGCATTTGCGAAGTGTATGAGCGTTATCAGAGCGCGTGTATTATTGTCGAAAACGGTTT  
TGCGCTTACGACAAAGTGAAGAAGATGGCAGCATCAACGACACTACCGATTGACTACCTGCGCGCCATATCGAAG  
AGATGAAAAAGCGGTGACTTACGATGGCGTGGATCTGATGGGTACACACCGTGGGCTGCATCGACTGCGTGTCTGTT  
ACCACCGGGCAGTACAGCAACGCTACGGCTTTATCTATGTAATAAACATGACGACGCTACTGGCGATATGTCGCGTTC  
ACGTAAGAAGGCTTTAACTGGTACAAAGAGGTTGTTGCCAGCAACGGCGAGAAGCTTTAAGTCGATGAAGTACCGGATG  
CAATACTTGTTCATCCGGTCCAGACAATTCCTGTTTTATTTCCCGCCGCAAAATCGATAAAAATTCCTGACGTA  
GAGGCTTTTACTTGTAGTCCAGACAATGGCCTGCGCGACCTCTTCTGCTGTCCACCACGCTGCATGGGGATGTTGCA  
CTTAACCGATCGACGCTCCAGGCTCGCCGCGCTGGCGTGCATTTCCGTTAAATAAACCTGGCCGACGCGATTA  
CGCGGATCCCTGCGCGGCGACTTCCAGCGATAGTCCGGTGGTTAACGTATCAATCGCCCTTTTCGATGCCGCGTAAATCA  
ACATATTCCCTGGCGAACCACCGTGAGGCCACCGAAGAGACATTGACGATAGCGCCGCACTGCCACCATTTTTAAG  
CGCCATGCGTTTTTACCGCTCGCGGAGCAGAGAAAATATCCCGTACGTTGGTGGAAAGTACTCGGTTGATTGCTGCTG  
CGGTAAGGTTTTCAACGGTGCCTGGGTAACAAGATCCCGCGTTATTGACCAGCGCTGTAGCGGTTTATCGTCTG  
TCGATTGCTGTAACATCGAACGACCTGGTTTTGCTGCTGATATCCGCTGGAGCACGAATGCTTTCACCGGCTTG  
CGTTATTAAGTTCATCACTTCTGCGCCGCTGGAGTTTTGCTGATAATTAACCGCCACCGTATAACCTTCTTGGCC  
ACAGTAATGCAGTTGCCCGCCGATGCCGCGACTGCCACCAGTACAAGTGTATAGCCATTTGTTTTCCGAGAAAAAT  
TAATTCGTTGACGTATCTTTGAGATTGCTAACAATGGCTCAATCTTCAATGTTGGCACGCTTTTCCCTCGCCCTT  
CAGGGAGAGGGCCGGGTGAGGGTAAATATTCGCGCAGTGGCGGCTGTTCCCTCACCTAACCTCTCCCAAAGG  
GCGAGGGGACTGTCTGAGCACTTTTGTACTTTGTACTGACTAAAAAGGCGCGAAGCGCTTTAGAAAAATAGTGAAT  
CAGTGAATTAAGTATTGCTAATCGGTACGACAGGAGCAACAGGTTACGGTCCGCTAAACATCATCCAGAGCTTTC  
ACTGTCGGCCAGTATTTGCTGCCACCTGCCGGAAATCCGCAACTTACGGCTGTACGGATGCGCCACTCGGCGAC



CAGTTCGCTCTGAATGTGCGGGCGGTTACCAGCGGGTTATCTTCCAGCGGCCAGACACCGGCTTTCACCTGGTCAATTT  
CTGCGCGGATAGCCAGCATCGCTCGATAAAGCGATCCAGTTCACCTTTGCTTTCAGATTAGTCGGTTCAACCATCAGC  
GTACCCGCCACCGGAACGACATCGTCGGCGCGTGGAAACCGTAGTCGATCAGCGCCTGGCAATATCCAGCTCGTGTAT  
GCCGGTTTCTTCTTTCAGCGGGCGAATATCGAGAATACATTCTGTCGCCACGCGACCGTTCGCGACCGGTATACAGCACCG  
GGAAGGCATCTCTGAGGCGGCTGGCAATATAGTTGGCGTTGAGGATTGCCACCTGGCTTGTCTTTTTCAGCCCTTCTGCG  
CCCATCATGCGGATGTACATCCAGCTGATTGGCAGGATAGAGGCGCTACCGAACGGTGCCGAGAAACCGCGCCCTGACG  
GGTTAACATGCCTTCGATTTGCACCACGCTATGACCCGGTACAAACGGTGCCAAATGCGCTTTCACGCGGATCGGTCCCA  
TACCCGGACCACCACCGCGTGCAGAAATGCAGAAAGTTTTATGTAGGTTAAGGTGTGAAACGTCCGCACCAATAAAGCCC  
GGCGAGGTGATGCCAACCTGGGCGTTCATGTTCCGCGCCATCAAGTAAACCTGACCGCCGAAGTATGCACGACTTCACA  
CACTTCACGGATCGTTTCTTATACACGCCGTGGGTAGAAGGATAAGTACCATGATACAGGAGAGGTTATCGCCCGCCT  
GTTCCGCTTTCGCGCGCAGATCAGTCAGATCGATGTTGCCGTTTTATCACACGCCACAACCACCACCTGCATTCTGCGC  
ATATGTGCAGAAGCGGGTTAGTTCGTGCGCAGAAGCCGGATCAGGCAGATATCGCGATGCCCTTCGTTGCGGCTTTC  
ATGATAATGACGAATCGCCAGCAGGCCGCTATTCGCCCTGTGCCAGAGTTCGGCTGCATACAAACGGCGTCGTAAC  
CGGTCAGTTTACCAGCCAGTCAGCCAGCTGCGCAATCATCTGCTGATAACCTTCGGCCTGCTCCGGCGGCAGAACGGG  
TGAGTTCGGCAAATTCGGCCAGGTGATTGGGATCATCTCGGCGCGGCGTTAGTTTCATGTTGCAGAACCCAGCGG  
GATCATCGCTGATTACGCGCAGATCTTACGCTCCAGCGAGTGCATATAGCGCATATTTCCGTTTTCGTGTGGTAGC  
GATTAACACCGGATGGGTGAGGATTTGTCGTCGCGCAGCATCGCAGGCTGGATAGAGCGGCTGTCGTGAGCCACGCTCT  
TTGTCCAGCGTGTGATGTCAGGCCGTGGTTATCGCCAGCAGCACGTTGAAAAGCTGCATTACGTTTTACGCGTGGT  
TGTTTTCATCAAGGTGATCCCAACCGGTTGAGAATATCGCTACGCGAGTTGATTTAGCCGCTTCGGCACGCGTCAGTA  
CGCCCGTTTTGTCGGCCACTTCCACACACAAGGTGTGAAATAGTGCATGGCGCAGTTTCAGACCTTTTTGTTGAGG  
CCCGCCGCGAGATATCGGTGAGCAGTGAATGCGTTAGCGATACGTTTCAGGCCAACCGGGCCGTGATAAACGGCATA  
CAGGCTGGCGATGTTGCCAGCAGTACCTGGGAAGTACAAATGTTGGAGTTCGCTTTCACGCGGATATGTTGCTCGC  
GAGTCTGCATCGCATGCGCAGCGGTTATTGCCAGTGCATCTTTCGATACACCGATAATACGGCCCGCATTGAGCGT  
TTGTATTATCTTTCGCGCAAAGAATGCCGCGTGTGGCCACCGTAGCCCATCGGCACGCCGAAGCGTTGCGCCGAACC  
AAAAACAATATCCGCGCCCTGTTTACCCGGCGCAGTAAACAGCACCAGCGCCATAATATCGGCGGCAACGCTGACCACAA  
TTTTGCGTGATTTAGTTGCTAATAAGCGCAGTGTAGTCGTAATTTACCCGTTAGTGCCTACCTGCTGTAACAGCAGC  
CCGAAGACGTCCTGATGGTCGAGCACTTTTTGCGCGTCATCGACAATCACTTCAAACCAAAGTTTTGCGCACGAGTACG  
GACCACATCCAGCGTTTGGCGATGCACATCGGAAGCCAGGAAGCGGTTGGCATTTCAGTTTGTGACGCGTTTTG  
CCATCGCCATTGCTTCGGCGCAGCGGTGGCCTCGTCCAGAAGAGAAGCAGAGGCCATATCCAGTCCAGTCAAATCCAGC  
GTTACCTGCTGGAAGTTGAGCAGTGCTTCAAGGCGGCCCTGGGAGACTTCAGTTGATACGGAGTGTACGCGGTATACCA  
GCCCCGATTTTCCAGCATGTTACGCGAGGATAACCGCGGTAGCTGCACGCGGTGTAACCCATGCCGATGTAAGACGTGA  
AGCGTTTATTGCGACTGGCAATAGCCTTGAGTTCTGCCAGTGCAGCGTATTCCGTTGCGCGGTGCGCCAACCTGCGGTGGT  
GTCGCAAGTTGAATATCTTTCGGCACAATCTGGCCGGTCAGCGGTTTAAACGATTGTGCACCAACGGCATTACAGATTC  
TTGCTGTTGCGCGCGTCCGGTCCGATATGGCGTTCAATAAAGCGCCGCTGTTTTCAAGTGGCTTAAACGTCTGTGTCA  
TGAGCGATGGTTCCTGAAACGTGCAGTGAATTGTGAACCTCTCTCCTTACGAAGAGAGTGAAGGTGAGGCATAAATTTTC  
CTCACCTGATCCTCTCCCGCAGAAGAGGAATAAAGCCGTTACTCGTCTTCTAACAATGCTTCGATGCGGTGCGATCCA  
GCAGTGATTCAGTTCGCTTTCATCGCTGGCTTTGATTTTAAAGTCCAGCCGCTGCATACGTTTCGCTGTTACCCAGT  
TCCGGGGAATCGCTCAGTGCCTGTTTACCGCCAGATTTACCCGTTACTGGCGCATAAATGTCTGACGCCGCTTTTAC  
ACAGTCTGAGCATGTTTCGTAATAACCAACGGTGAAGTGGCGCTCGGCTTCTTACGCGCAGCATTGTTGTTCTTCTGCTG  
TATTTTCAGTTCTGCTGTTGCTCATCAATCAATCTCAAAAAAGTAAATCACGCGACGGCTTTGCGGTTACGCACA  
AAAAACAGTTTTGTCACTTTAACCGCATTTTACGTTGCGAATTTGCACAATCGCCGTTTTGCGCAATACCTTCCGGCAC  
GCGCGCAGCGCAATGCTGTAACCCAGCGTGGGGAGAAAGTACCCTGGTGAATGCCTTCATGCTGTTGCCCTGCG  
CATCGGTAAGCGTACCGCAGTTCATTACGCGACGCGCTTTTTCGGTCATCACCAGACCAACAGTTTTTCTGTACCA  
TGCTCAGCTGCACCTCCAGGGCTTACGACCGATAAAGTACGATCTGCCGTTCCAGGCGATGGTCCAGCCATGTT  
GGCGGCTAAAGGAGAGATGGTTTCTGTCATCTCCTGACCATAAAGATTATGCCCGCTTCCAGACGCGAGCGTGCACGCG  
CGCCAAAGCCACATGGCTTAAACCCGCTTCCACCAGCGCAGCCAGAAATCGCCGCTTTTTATTGGGACGCGCAATT  
TCATAGCCCGCTTACCAGGTATAACAGTGGTGGCAATAAAGATCGCCCGCTGCACGCCAAAGAAGGTTTTATCCC  
TTCCACCGCTGACGCTGGCGTCATTAACAGTGTGGCAGCTTTTGCCTGCGCATTGGCCCTTGCACGGCAATCATGG  
AAAGGTATCACGAACGGTAATTTGATGCCGAAAGTTGAGCGTGTGGGTAATCCAGGAGAGGTCTTTTTGCGGGGTG  
GCGGAGTTAAACAGGCGGAAGAAATCTTCAAGTAAAGTAGTAGCAGTATGAGTGCATCTATCACACCGCAGAGGCATT  
CAACATCCCCGAGTAAAGGGCTTTGCCGTTTTGGTGAAGTTCGCCACATCGTTCCGCGCAGGATAACGCGAAACTCCC  
GGTGCAGGCTCCGCGAAGATCGACGATGGTCATATGTGACACATCAAACATTCGGGCATCGGTACGTACCGCATGATGT  
TCGTCGATTTGCGAACCGTAATGCAGCGGCATCATCAGCCGTGGAAATCCACCATGCGAGCGCCGAAAGCGTGTGTTG  
TTCGTACAAAGGAGTCTGTTGTCCATCTTGTCTCATTGAATAAGCGGGGCTGACAACTTTTTTCATGGTGAAATTATCA  
CCACGAAACCCAGCATCGGAGCCACTCCCGGTCCCCAACGCAATCGTTCTCTTTGCTGAACTTACCACCGAAACAGAC

TGTTAACCATAAAGGTTAAATGATCATCACATTAGCTTATGGTTAAAAAATGCAAAAATCGCGACAGAATAAAAAACCAA  
AAAATACACCAGTTTCTATACAAAGATGATGTGATGAGAAAAGTCAATTTGAATAAGACAATATTAAGAGCTAAAAAATG  
TCAAAAAACACTAAATCAAAAAATAATGGCATTAGAAAATATAATGCGAAAACGGAGGTGAAATTAAGTTTAAATG  
AGGAAAATCTCCCGGCGAAAAAACCGGGAGATGAAAGTGTGATGGGTATCAAATAAACAACAGAGGAGAAATTTTAAACG  
CAGCCATTAGGCAAAATCGTTAATCCATTGCCTGCGGATAAGTTGCGGCTTAACGCCAGGAAGCGTGTGCGCCAGTT  
TCAAACCAATATCACGCAGCAGTTTTTTTCGCGGATTGGTACCGGAAAACAGATCGCGGAATCCCTGCATACCAGCCAGC  
ATCAACGCCGACTGTGCTTGCAGCTACGCTCATAGCGACGCAGATAAATGACTGCCGATGTCTTCCCTGACGATG  
CAACCGTTTTCAGTTTCGGCAATCAGCTCTGAGCATCCATAAAGCCGAGATTTACCCCTGCCCGCCAGCGGGTGAATGG  
TATGTGCGGCTGCGCCACCAGCGCCAGCAGCGGTGCGAGGCAAACCTGGCGCGCATAACGCCCGTCAAGTGGAAACACCTGA  
CGCGGCTCTCAACCTTGCATAAGCCAGGCGATTATCAAAGCGATATTTAACGCGGATTAATTCGTTCACTTGC  
CTGCTGCATCCGCTGCGCTTCTCTGCGGACAGTGACCAGACAATCGAGCAAAGATGCGGATCGCTAAGCGGTAAAAAGG  
CCAGAATGCCTTCCGATGGAAAACCTGCCGCGCCACCAGCATCATGCGGTTCTCCGTGCGAATGGTGTGCTACCAGCGCG  
TGATGCTGATAATCCAGAAAAGTCAAGGAAATATCGGCTTTGTTGCGCAACCAGGAATAGCGCGTCCGCGCAATCAC  
CAGACGCGCGTTAACATGCTGCCATCTTTCAGCGTCAGGAAGTTTCATTTTCTCCAGCGGACCTGTGTAATTTCTG  
CGGGGCTAACAGAGTGATATCTGACGACTGATGCGCTTTGTTCCACAGCGGTAGTGAATCTGAAATTTTCAACGATA  
TGCCCAAGATGGCTATAGCCATGCTTTGATCGTCAAACGAAATGTGACCAAAGCTGTCTTTGTCCACACTTCCATACC  
GTGATAACAGCTGGCCCTACGAGAGAGAAATGTCCTGCCAGACGCCAAGACCGGTTGAGTAATTTTTCGCTGCGCGCATTGA  
TAGCCGAAACGCGCAGTTGTGGTGGTGCATTGCGCGCCAGAGGTTCTGTACGCGCTGCTCCAGTACGGCAACGCGTAAG  
CCGCTCCCCTGTAAGCCACAGGCAACCGCCAGCCCCACCATGCGCGCCCAACAATGGCTACATCAACACTTTGCATTGT  
TTATTCCTTAAACCGCCTTCAACGCGCCACCCAACCGAGGGTGCCTGCGCCAGCACATCGCGTCCGCGGGTGAATAAT  
TCCATCGTCATCAGCCGATGTTGCGCCGACAACCAGCGGTGCCAACGGTTGGCAAAAAGATGTACAAGGCTGTCCGT  
GACGCCAATGGTTGCTTGCAGTGCCTGTGCGACGCTGTGATAACGGCACAATACGCCGTAATCCCCATGTCTTCTC  
CGCGCTCTGCGCTGAGTCAGGGTTTCCGAAGACTCATCACATCTGCATACCGAGGTTAAACCTTCCCGGCAATC  
GGGTGCAGAGTTTGCAGCGATTGCCACCAGCACGGTACGATGGTAATAGATCTGGCGCGTGGGTTAACGCCAGCGG  
ATAAGCACTGCGTTTACCAGCGTGGGTAATTTTCCAAAGTCCGACGCAAAGGCCGACTGGAGTTCACGGCAAACTTCT  
CGTCACTCCACGACAACACTCTTTCGCGCGTTCCAGTGGATGACACCAGACCAGCGAACAGCGTCCGTGAGACATCGGC  
AACATCGCCAGCGGGCCATGTTGCGTAAAGCGTTCAAAGCGCGCCCTTTCATGCGCAACGGAAAGTAGCAACGTTGGCAAT  
CACGGCCAGTTGTTTCGTAAGGCTCCTGCTGCCAGTCAACGCCGACGCGGTGGCTAACGCTGAATGGGTGCCATCAGCTG  
CTACCAGCACGCGGCCCGTCAAGCTCTGCCACTCTCAGCGTCACTTCAACGTGACTCTGAGTACGGGCAACGTTAGCC  
ACGCGATCAGGGCAATGCAGCGTTACGCCAGGTGCTTACGCAGCAATGCAAAACAGCCGTTGCCCGACATTGTGCAATTC  
GACAACCTGTCCAGCGCGCCAGTTGGTAATCTTCTGCGGCGAGGGTGACAAATCCAGCGTGACCACGATCGCTGACAT  
GCACGGTGGTATGGCAGTTGCGCAATCCGCCAGAGATTGCCAGACGCCGATGCGCGCCAGTTGCTGACAGGTACCCGCC  
GCCAGCGTATCGCTCGTCCATCAAAGCCCGGATGAGCATGTGACTCTGGCGCAGTCCGTTCAATCAAATGTACCGGCAG  
CGCCCGTACTTAACCGGGAAATAGCCAGCGCCAGCGTCCGCGCCGCCATGCCGCCACCAGCAGTATTACGCTCATTG  
CTTCTCGCAGCAACCATCAACGCTTCGATTTCTTCCGGCTTTTTACCACGCTGGCGGTGAGGTTTTGTTACCGTTTT  
CGGTAATACAATGTCGCTTCAATACGAATGCCGATACCGGATATTGTTCTGGCACTTCTGCATCCGGCGCAATATAC  
AGCCCTGGCTACGGTCAGTACCATGCCCGTTCCAGAATGCGCGAGCGATCTGACCATAAACACCCACGTCATGGAC  
ATCCAGTCTAACAGTGGTAAGGCCATGCATAAAGAAAGGACGATGGCGTTCTGAGCGATCAGTTTCAACATCAC  
CTTTCAGGATGCCGAGTTTTACCAGGCCGTAACCATGATGCGCACCACTTACCAGTACTTCCAGAATGGAAGTTCCC  
GGACGATACAGGCGCAGGCTGGTTTCGAGAGACTCCAGCACAATGTCGTAGATTTTCAGCTGGGCTGGGTTGAATTTGCC  
GTTGACCGGGAAGGTGCGGTAATATCGCCAGCGTAACTTTGATTTACAACCCGCGTCAATCAACACCAGGTCCGCGT  
CGCGCATTTCACTCGTTTTCGGTGTAGTGAGAATGCAGCCGTTTTACCAGTCCGACAAATGGTGTATAGGACGGA  
TAGCGCGCACCGTGGCGGTTAAATTCGTGGTGAATTTGCTTCCAGATGGTACTCGAACATTTCCCGACGGCATTTTTC  
CATCGCCCGTGTATGTGCCATGGCGGTGATTTCTCCCGCGCGGGAGTACGGCAATCTTCTGCGGATTTGAACAGGC  
GCATTTTATGAACAACAGGACGCCAGTCGATCATCGTTGCCGGTGCAGTGGATTTTCCGCGAACCTTTACGAGTTTT  
TCCAGCGCACTGTTACGATTACATCAGCATATGCATATTGCCCTGGGCATGGTAAACCACATCCAGGCCGTTAAGTAG  
TTGATAAAGTTGCTGATTGATTTGCTGAATGCCAGTGCAGCGTCAACGCCAGTTTCTGCGCGGCATCCTGCCCTA  
AGCGACGGCCAAACAGATCTCCGCCGTCAGGTGCGGAACGCGGTTAAACAGAACGCTGTGGTTATGAGTGCATCGCTT  
TTAATCAGCACCAGCACCCTTCCGGTTCGTTAAAGCCGGTGAAGTACCAGAAGTCACTGTTCTGACGATAGGGGATTC  
GCTGTGCGGCTACGTGTTACTTCTGGTGCAGCAAAAATCAGCGCGGCTGCCGGTTGCATTTGCTCCACCAGGGCCT  
GACGGCGACGCTGAAACTCTTCCGGGATATCTCACTCATAAACTCTCCTTACGTTTTTTGTTTTTAGTGTAGAGTCGG  
TTTTTGTACTTCTGGCGGCTCGGTTGCGGATGAGTAAAGGTGCTGTGGCATAACAGCGCGGCAACACGAACGTATTGCA  
TGATCTCTTCAAGCGACATTTCAAGCTCTTCTGATCTTCTGCTTTCGTCGTAACCCAGTTGCGCAATGTTACGAGATCG  
TCGATAGCTTACCAGTTTTCCCGGTCACCTTATCCAGCTTCCGTTGCGTAACGCCAAGACCAAGCAGGAAGTGATTGAC  
CCAACCTGCCAATGCATCAGCCGATCGAAAACGCTGACATCATCGCCATCAGGCAGATAAAGCTGAAAAAGGAAGCCGT  
CATCCTGCAGGCATCGCTGGTGGCAGAGTGATTTTACGAGTGCCTGTGCCAGCTCATGACCGAAAGCCATGCCTTCG

TTCGTCAGGTCGTGAAGTAGCGGTAGCCATGAGCTGTCATCGTTACCGCCACATATCATCCCCTGATTAACCATGCAT  
CTCAGCTGGGGTCAGACCCGTCCTTGTGGTTGAGATACTGGTTCATTTTCGTTGTAACCAGGCATTTTCGTTCTGTATAG  
ACATAAGCATTTCGTCGTAAGGGAGGAATATTCATGATATGCTACCACTTTGGGCCCTGGTGGACCAGAAAAGGGCTTG  
TCTCTTCTCATCAGGGTAGCTATAGTGTGCCCCCTCGCAGACCATGGGTCTAAAGACGAAGGCAGCGCAGTCAATCAGC  
AGGAAGGTGGCATGTCTGCAACCCGTCGATATCCAAATTTTTGGCCGTTCACTGCGTGTGAACTGCCCGCTGACCAA  
AGGGATGCGTTGAATCAGGCAGCGGACGATCTGAACCAACGGTTGCAAGATCTGAAAGAACGCACTAGAGTCACAAATAC  
TGAACAGTTGGTCTTCATTGCCGATTGAATATCAGCTATGAGTTAGCGCAAGAAAAGCAAGACTCGTGACTACGCGG  
CAAGTATGGAACAGCGTATTCGGATGTGTCAGCAGACCATAGAACAAGCGTTACTTGAACAAGGTCGCATCACCGAAAA  
ACTAACCAAACTTTGAATGACACTTTTCGGTTTACTGTGGTAGAGTAACCGTGAAGACAAAATTTCTCTGAGATGTTCCG  
CAAGCGGGCCAGTCCCCTGAGCCGATATTTACATACCACAAGAATGTGGCGCTCCGCGGTTGGTGAGCATGCTCGGTCCGT  
CCGAGAAGCCTTAAACTGCGACGACACATTCACCTTGAACCAAGGGTTCAAGGGTTACAGCCTGCGCGGCATCTCGGA  
GATTCCTTCTTATCTGGCACCAGCCATGACGCAACACCAGAATCCCCTGACATTATCCCGACAAGAAATCCGCAAA  
ATGATTCGGCAACGTGTCGTGCGTTAACGCCGGAACAACAGCAGGAAATGGTCAACAAGCCGCTACCCGGATGATGAC  
TTATCCCCCGTGGTGGTACACATACGGTGCCTGATTCTCTCTTTTATGATGGCGAACTCGACACCCAGCCACTCATAG  
AACAACTGCGCGCCGGTAAGCGCTATATCTTCAAGTTTTGCATCCCTTTAGTGCCGGTAATTTGCTGTTCTGTAAT  
TACCATCCGAAAGCGAACTGGTATGAACAGTTGAAGATCCATGAGCCAAAATTTGGATGTGCGTGACGTGCTACCCCT  
TTCCCGATTAGACGTGCTGATCACACCGCTGGTGCCTTTGATGAGTACGGTACGCGCCTGGGAATGGGCGGTGTTTTT  
ATGATCGGACCTTACAAAACCTGGCAGCACTATAAAAACGCAACCGTGGGTTATGCGCATGATTGTCAGTTGGTGAAAAA  
CTCCCCGTTGAAGAGTGGGATATCCCTCTTCTGCGGTGGTTACACCGTCGAAAGTCTGGGAGTGGTAAGGGCGATACAC  
CCGCATCGCCCTGATTGACATCGTTGATTCTTTGACCTAATTTAGTGAGTAAGGGTAAGGGAGGATTGCTCCTCCCCTGA  
GACTGACTGTTAATAAGCGCTGAACTTATGAGTAACAGTACAATCAGTATGATGACAAGTCGCATCATAACCCCTTCTCC  
TTCAAGCCCTCGCTTGGTGGGCTTTACCGTTACAGCCCCATGCTGCCCTGCCATCGTAAATCCCATTAAATAAACA  
CAACGCATTGATCTGACTTTGATTTATTTCTGGAGCAGACTCGCAAAGTAGAATGCGCAACGCGGCAACGGTGTGGAGA  
AGGGATAAAAAACGGGCAAGTCAGTGACCTGCCGTTGATTTTACAGAGAAGGGGAATTAGTACAGCAGACGGGCGCGAA  
TGGTACCCGGAATAGCTTTCATTGCCTGCAGCGTTTTTGGCAACGCTTTCGTCGGCTTCAATATCAATAACACATAA  
CCCATCTGGGCGGAAGTTTGCAGATATTGCGCGGCATGTTGACGCCCTGCTCGGCGAAGTTTTGTTACAGCGCAGTTAG  
CACGCCCGGACGGTTTTCTGGATGTGCATCAGACGACGCCACCGTGCAGTGGCAGCGAGACTTCCGGGAAGTTCACCG  
CAGAGAGCGTTGAGCCATTGTCAGAATACTTATCAATTTACCCGCAACTTCCAGGCCGATATTCTCCTGCGCTTCTGTA  
GTCGAACCGCAATGTGTGGCGTCAGAAGGACGTTGTGCAATTCACACAGCGGAGAGGTAATGGATCGCTATTGGTCCG  
CGTTTCCGTCGGGAATACGTCGATTGCCGCCCCCGCAGATGTTTCTGCGCCAGCGCATCACACAGCGCCGGAATATCCA  
CCACAGTACCGCGCAAGCATTAAATCAGCAGCGAGCCGGCTTATTAGTGAATTTCTTTTCGCGCCATCATATTTTTG  
GTGGACGGATTCTCTGGTACATGCAGACTCACCACATCGCTCATATTCAGCAGGTCAGAAAAGATGCTGTACCTGAGTGGC  
GTTGCCAGCGGCAGTTTATTTTCAATATCATAAAAGTAAACATACATTCCCAGCGATTACGCCAGAATGCCAATTGGC  
TACCAATATGACCGTAGCCGATGATACCCAGCTTTTTGCCGCGGCTTCAAAGAACCCGCGCCAGTTTGTCCACACG  
CCACGGTGGCTTTAGCATTGGCTTCCGGCAGCGCCGCAATAGCAGCAGCAGTTCCGCAATCACCAGCTCCGCAACAGA  
GCGCGTATTTGAGAACGGTGCCTAAATACCGGGATCCGCGCTTTGCCGCGCATCCAGATCAACCTGGTTTGTCCGA  
TACAGAAACAGCCAATAGCGACAGTTTTTCTGCGCGTGTGATCACGTTTCACTCAGTACAGTGGGTACGGGATCGCAGGCCG  
ATGAAGTGGGCATCGCGGATGGATTCTTTAATTGTTTATCATCATCAGCGCGCTTTGTGAAATTCGATGTTGGTGAACC  
AGCTGCACGAAGGCTTTCCAGCGCTTTTGGTGCAGCCTTACCAGCAGAACTTAATCTTGTCTTTTCCAGCGATA  
CCTTTGCCATTTACCAATCTGTCTTTTGAATGTTGTGTGCGGATTTGCATCCGCTTTCAACATATCAAAAAATAAT  
ATTGCGGCAATATGAACGTTTTGCGTCCGATGTTGAGGAAATATACGCAAAGGTAATCTTGGATGAATATGCTGGTTT  
AGAGGATTTATTTAGAGCAATCGACAATTGCCTGGTAAAAGCGTGACACATGTACCAAATTTAATGAAGAGAATTTTTT  
TAACGGGGGAGTTCCCCGTCAGATCATTTACAATGGTTTTGACACCGTCAGGTGTGCCAATCAGCGCAACGTCGCGG  
CCACGGTTAGCAAACAAGCCAACAGTACCACGCCAGGAATCGCATTTATGGCGTTTTCCATCGCTATCGGGTCAAGGAT  
TTCCATGCCGTGGACGTCGAGGATCACGTTGCCATTATCGGTACCACGCCCTGACGGTATTCCGGACGACCGCCAGTT  
TCACCAGCTGACGCGCACTGCACTACGTGCCATCGGGATAACTTCTACTGGCAGCGGGAATTTACCCAGAATATCAACC  
TGCTTGAAGCGTCTGCAATACAGATAAATTTTTCTGCAACCGAAGCAATGATTTTTTACGGGTGAGCGCCGCGCCG  
GCCTTTGATCATTGTCATGTGGCGTTGATTTTCTGCGCCATCAACGTAGATGCCAAGGCTGTGACTTCGTTGAGAT  
CAAAAACGTGAATGCCGAGGCTTTTCAAGTTTTTCAAGTGAAGCATCTGAACTGGAACGGCCCTTCAATCTGGCTTTC  
ATTGTACCGAGCGGTCAATAAAGTGTGCGGCGGTGGAACCTGTACTACACCAACAATGGTCCGGGCTGAACATACTG  
AAGTCCCGCCATCCTACTGCTTTTTTCAATTCATCCTGCGTCATGATCGTTTGCCTGTGGTATGAAATTTACACGCA  
TTATATACAAAAAAGCGATTACAGACCCGTTGGCAAGCCGCGTGGTAACTCATCCATAAAAATATCGCGCAATGGCAGG  
CATCCCCTTTCGCCCCGAAATAAAGCATACAACGGTCTGGGTATGCCGCTCCACGGTGAACAGGGCGACCAAGTTAC  
CGTTCGCAAGCCCTGTTTACAGGCAAAATGAGGCAATAACGCCACGCCATTCAACACAACAGGGCGCGAACTCGCTGA  
GCGAAATGCATTAGCGCAAAATCCCTGATCTTTAAGCTGCGCTTTAACCACGGATACAAATGTTACCCGCGGACGGCTT  
CGGTATATGCAACCTGACACAAAATGTGTCATAGTGCAGGAAAAAGCATTTACCAGGAGCAGACAACAGCAATGAAACC

CCCGGACTACAGAACATTACAGGCACTGGATGCGGTGATACGTGAACGAGGATTTGAGCGCGGGCACAAAAGCTGTGCA  
TTACACAATCAGCCGTCTCACAGCGCATTAAAGCAACTGGAAAATATGTTCCGGCAGCCGCTGTTGGTGCGTACCGTACCG  
CCGCGCCCGACGGAACAAGGGCAAAAAGCTGCTGGCACTGCTGCGCCAGGTGGAGTTGCTGGAAGAAGAGTGGCTGGGCGA  
TGAACAAACCGGTTTCGACTCCGCTGCTGCTTTCTACTGGCGGTCAACGCCGACAGTCTGGCGACGTGGTTGCTTCCTGCAC  
TGGCTCCTGTGTTGGCTGATTTCGCCTATCCGCTCACTTGCAGGTAGAAGATGAAACCCGCACTCAGGAACGTCTGCC  
CGCGGGAAGTGGTGGCGCGGTGAGTATTCAACATCAGGCGCTGCCGAGTTGTCTTGTGATAAACTTGGTGGCTCGA  
CTATCTGTTGTCAGCTCAAAACCTTTGCCGAAAAATATTTCCCTAACGGCGTAACGCGTTCGGCATTACTGAAAGCGC  
CAGTGGTGGCTTTGACCATCTTGACGATATGCACCAGGCTTTTTGCGAAAACTTCGATCTGCCTCCAGGCAGCGTG  
CCCTGCCATATCGTTAATTTTTCAGAAGCGTTCGTACAACCTTGTCTGCCAGGGCACCACCTGCTGTATGATCCCGCACCT  
GCAAATCGAGAAAGAGCTGGCCAGCGGTGAAGTACTGACTTAACGCTGGGTATTTCAACGACGGATGCTCTACTGGC  
ACCGTTTTGCTCCTGAAAGCCGATGATGCGTAAAGTACTGATGCGTTACTCGATTATGGTCAAAAGTCTTCGTGAC  
GATTAATCCATCAATAATGCCTGATAGCACATATCAGGCGTTCCTCACTCTTTTTGTATTCTTGAATCACATCAC  
AAAATAGACAAATCTCAGGCGGCAAAAACGACGCTGAATGCATTTTTTTGCTGGCGACAAAACCCAGTAAAAAGCTC  
ACCGTAGGCGCAAATACCCTCATTTTGATTGCGTTTTACGGAGCAAATAATGTAACTGACAGGAGTGGCAACAGCTG  
CCAACAAGGAATTGAGCCGTCGGGAGAAAACTGTGACTCGCTGTTTCATCAAACCGGGAAGGGATGCCATCAAGCCG  
CTGTATACCGAAGCCGATCTCGATAATCTGGAGGTGACAGGTACCCTTCTGGTTTTGCCGCCCTACGTTGCTGGCCGCG  
TGCCACTATGTATACCGCCCAACCGTGGACCATCCGTGAGTATGCTGGTTTTTCAACAGCAAAAAGAGTCCAACGCTTTTT  
ATCGCCGTAACCTGGCCGCGGGCAAAAAGTCTTTCCGTTGCGTTTACCTTGCACCCACCGTGGCTACGACTCCGAT  
AACCCGCGCGTGGCGGGCAGCTCGGCAAAAGCGGGCTCGCTATCGACACCGTGAAGATATGAAAGTCTGTTGACCA  
GATCCCGCTGGATAAAATGTCGTTTTGATGACCATGAATGGCGCAGTGCTACCAGTACTGGCGTTTTATATCGTCGCCG  
CAGAAGAGCAAGGTGTTACACCTGATAAACTGACCGGCACCATTCAAAACGATATTCTCAAAGAGTACCTCTGCCGCAAC  
ACCTATATTTACCCACAAAACCGTCAATGCGCATTATCGCCGACATCATCGCTGGTGTCCGGCAACATGCCGCGATT  
TAATACCATCAGTATCAGCGTTACCACATGGGTGAAGCGGTGCCAACTGCGTGCAGCAGGTAGCATTACGCTCGCTG  
ATGGGATTGAGTACATCAAAGCAGCAATCTCGCCGACTGAAAATTGATGACTTCGCTCCTGCCTGCTGTTCTTCTC  
GGCATCGGCATGGATCTGTTATGAACGTCGCCATGTTGCGTGGCGCACGTTATTTATGGAGCGAAGCGGTGAGTGGATT  
TGCGCACAGGACCCGAAATCACTGGCGTGGTACCCTGCCAGACCTCAGGCTGGAGCCTGACTGAACAGGATCCGT  
ATAACAACGTTATCCGCACCACCATGAAGCGTGGCTGCGACGCTGGGCGGTACTCAGTCACTGCATACCAACGCCTTT  
GACGAAGCGCTTGGTTTTGCCTACCGATTTCTCAGCACGATTGCCCGCAACACCAGATCATCATCCAGGAAGAATCAGA  
ACTCTGCCGACCGTGCATCCACTGGCCGGATCCTATTACATTGAGTGGCTGACCGATCAAATCGTCAAACAAGCCAGAG  
CTATTATCCAACAGATCGACGAAGCCGGTGGCATGGCGAAAGCGATCGAAGCAGGTCTGCCAAAACGAATGATCGAAGAG  
GCCTCAGCGCGCAACAGTGCCTGATCGACCAGGGCAAGCGTGCATCGTTGGTGTCAACAAGTACAACTGGATCACGA  
AGACGAAACCGATGACTTGAGATCGACAACGTGATGGTGCCTAACGAGCAAATGCTTCGCTGGAACGCATTCCGCGCCA  
CCCGTATGATGCCGCGTAACCGCCGCTTGAACGCCCTGACTCACGCCGACAGCATAACGAAAACCTGCTGGCTGCC  
GCTGTTAATGCCGCTCGGTTCCGCGCCACCCTGGGTGAAATTTCCGATGCGCTGGAAGTGGCTTTGACCGTTATCTGGT  
GCCAAGCCAGTGTGTACCAGCGTGTTCGCGCAAAGCTATCATCAGTCTGAGAAATCGGCCTCCGAGTTCGATGCCATTG  
TTGCGCAAACGGAGCAGTTCCTTCCGACAATGGTGCCTGCGCCGCGCATTCTGATCGCTAAGATGGGCCAGGATGGACAC  
GATCGCGGCGCAAAAGTATCGCCAGCGCCTATCCGATCTCGTTTTGACGTAGATTTAAGCCCGATGTTCTCTACACC  
TGAAGAGATCGCCGCTGGCCGTAGAAAACGACGTTACGTAAGTGGGCGCATCCTCACTGGCTGCCGGTCAAAAACGC  
TGATCCCGAACTGGTGAAGCGCTGAAAAAATGGGACGCGAAGATATCTGCTGGTGGCGGGTGGCGCTATTCCGCCG  
CAGGATTACGCTTCTGCAAGAGCGCGGCTGGCGCGGATTTATGGTCCAGGTACACCTATGCTCGACAGTGTGGCGGA  
CGTACTGAATCTGATAAGCCAGCATCATGATTAATGAAGCCAGCTGGCAGAAAGTATTCCGCCGTTACGTGAGGGTGG  
CGTGCCACACTCGCCAGGCCATGACGCTGGTGGAAAGCCGTACCCGCGTATCAGGCACTAAGTACGAGCTGCTTGA  
TGCCATTATGCCGTAAGTGGTAACACCTGCGACTGGGCGTTACCAGGCACCCCGCGCGGGGAAAAGTACCTTTCTTG  
AGGCCTTTGGCATGTTGTTGATTGAGAGGGATTAAGGTGCGGTTATTGCGGTGATCCAGCAGCCCGGTCAGTGGC  
GGTAGCATTCTCGGGATAAAAACCGCATGAATGACCTGGCGGTGCCGAAGCGGGTTTTATTCCGCCGTACCATCTC  
CGGTCTATGCGCGGTGCCAGTCAAGCAGCGCGGAATTAATGCTGTTATGCGAAGCAGCGGGTTATGACGTAGTGATTG  
TCGAAAACGGTTGGCGTGGGCGAGTCGGAACAGAAGTGCCTGCATGGTGGACTGTTTTATCTGTTGCAAATGCGCGT  
GGCGCGATGATCTGAGGGCATTAAAAAGGGCTGATGGAAGTGGCTGATCTGATCGTTATCAACAAGACGATGGCGA  
TAACCATACCAATGTCGCCATTGCCCGCATATGTACGAGAGTCCCTGCATATTCTGCGACGTAAATACGACGAATGGC  
AGCCACGGTTCTGACTTGTAGCGCACTGAAAAACGTGGAATCGATGAGATCTGGCACGCCATCATCGACTTCAAACC  
GCGCTAACTGCCAGTGGTCTTTACAACAAGTGGCGCAACAACAATCGGTGGAATGGCTGCGTAAGCAGACCGAAGAAGA  
AGTACTGAATCACCTGTTCCGAATGAAGATTTGATCGCTATTACCGCCAGACGCTTTTAGCGGTCAAAAACAATACGC  
TCTACCGCGACCCGCTCGGCGAGCTCAGTGAATTTATCCAGACGCAATATTTTATTAAAGGAATTTTATGTCTTA  
TCAGTATGTTAACGTTGTAATCAACAAGTGGCGGTCAATGAGTTTAACTATGGCCGAAAACCTAATGCCTTAAGTA  
AAGTCTTTATTGATGATCTTATGAGGCGTTAAGCGATCTCAACCGCGCGAAATTCGCTGTATCATTTTTGCGCGCACCG  
AGTGGATCAAAGTCTTCTCCGAGGTACGATATTCACGAACTGCCGTCTGGCGGTGCGATCCGCTCTCTATGATGA

TCCATTGCGTCAAATCACCCGCATGATCCAAAAATCCCGAAACCGATCATTTGATGGTGAAGGTAGTGTGGGGTGGCGATTTGAAATGATCATGAGTTCCGATCTGATCATCGCCGCCAGTACCTCAACCTTCTCAATGACGCCTGTAACCTCGCGTCCCGTATAACCTGGTCGGCATTACAACCTGACCCGCGACGCGGGCTTCCACATTGTCAAAGAGCTGATTTTTACCGCTTCGCCAATCACCGCCAGCGCGCTGGCTGTGGCCTCAACCATGTTGTGGAAGTGAAGAAGTGAAGATTTCACCTTACAATGGCGCACCATCTCTGAGAAAGCGCCGTAGCCATTGCCGTTATCAAAGAAGAGCTGCGTGTACTGGCGAAGCACACACCATGAACTCCGATGAATTTGAACGTATTCAGGGGATGCGCCGCGGCTGATGACAGCGAAGATTAACAGGAAGGGATGAACGCTTCTCGAAAAACGTAAACCTAATTTGTTGGTCATTAATCCCTGCGAACGAAGGAGTAAATGAAACTCAGTGGACAAGGATGACCGCAATGAAGCGGCAGAAATTATCCAGCATAACGACATGGTGGCATTAGCGGCTTACCCGGCGGGTTCGCCGAAAGCCCTACCCACCGGATTGCCCGCAGAGCTAACGAACAGCATGAGGCCAAAAAGCCGATCAAATTCGCCTTCTGACGGGTGCGTCAATCAGCGCCGCCGCTGACGATGACTTTCTGACGCCGATGCTGTTCTGGCGTGGCCATATCAAACATCGTCCGGTTTACGTAAAAAGATCAATCAGGGCGCGGTGAGTTTCTGTTGACCTGCATTGAGCGAAGTGGCGCAAATGGTCAATTACGGTTTCTTCGGCGACATTGATGTTGCCGTATTGAAGCATCGGCACTGGCACGGATGGTCGAGTCTGGTTAACAGCGGGATCGGTAATGCGCCGACCTGGCTGCTGCGGGCGAAGAAAGTATCATTGAACTCAATCACGATCCGCGCGTTCAGAACTGGCGGATATTGTGATTCTGGCGGCCACCGCGGCGCAATAGCGTTCGATCTTCAATGCAATGGATCGCTCGGTACCCGCTATGTGCAAATCGATCCGAAAAAGATTGTCGCCGCTGTGGAAACCAACTTGGCCGACCGGTAATATGCTGGATAAGCAAATCCCATGTGCCAGCAGATTGCCGATAACGTGGTCAAGTTCTTATTGACAGAAATGGCGCATGGCGTATTCCGCCGAAATTTCTGCCGCTGCAAAGTGGCGTGGGCAATATCAATAATGCGTAATGGCGCTGTGGGGAAAAACCCGGTAATTCCTCCGTTTATGATGATTTCGGAAGTGTACAGGAATCGGTGGTCATTTACTGGAACCGGCAAAATCAGCGGGCCAGCGCTCCAGCCTGACAATCTCGCCGATTCCCTGCGCAAGATTTACGACAATATGGATTACTTTGCCAGCCGATTGTGTTGCGTCCGCAGGAGATTTCAATAACCCGAAATCATCCGTCGTCTGGGCGTCATCGCTCTGAACGTGCGCTGGAGTTTGATATTTACGGGCATGCCAACTCAACACACGTAGCCGGGTCGATCTGATGAACGGCATCGGCGGAGCGGTGATTTTGAACGCAACGCTATCTGTCGATCTTTATGGCCCCGTCGATTGCTAAAGAAGGCAAGATCTCAACCGTCGTGCCAATGTGCAGCCATGTTGATCACAGCGAACACAGCGTCAAAGTATCATCACCGAACAAAGGATCGCGATCTGCGCGTCTTTCCCGCTTCAACGCGCCGCACTATCATTGATAATTGTGCACATCTATGTATCGGGATTATCTGCATCGCTATCTGAAAAATGCGCTGGCGGACATTTACCACGATCTTAGCCACGCTTTCGACTTACACCGTAATTTAATTGCAACCGGCTCGATGCTGGTTAATGACTCGTCCCGTCAGCATCTCAGCAATATGCTGAAGCATCGTGGCGGTATAACGATGATTTCTGATTGAATAAAGATATTCCTGCATATACATCGCCCTGTGCGGTGCATCAAAATATTCAGCGTTGCCGATTACCAGTCGCCAGGCAAAATGCGGGATCACCGTCAGAAAATGTCCGCGCTCCACGGCGTGATTTTGGCCATAAACTGTAGGGACGATAAATAATGGTTGGATTGATCCACAAGTTCGCATATTCGCATCAATCATTGCTTCGAAGTTGGCCGGTTCTGAAAGCGCATTGTAGCCAGGGCAGCTCCTGAAGCAGCTCTTGCTCTTGTGCTCTTCATAACGGCGAGAAACGAGAAAGCCTAATCGCAGCGGTGGTAGTTCAGTGTTCAGTTTCCAGTTCTGAACTCGTGCAGATACATGCTGTGGGGAGATAAATAAATCTAACTGGCGGTCAAAAAGATTATCGATAACGCCATTTTCGCTGAACTCAACTGGCTGGGCGGTACGCCTTCACTTATCTCCGAGACTAATCAACTGATCGAAAAAATTGTCCGATAAGTATTATCTATGCCAATCACAAATTTCTCGTGAACGACGCCCTGAGTTATGGATTTTATTATCAATCGCAGAAAGCCGTTGATAAACCGGGAACAGTTTTTGTACAGTTCCTGTCCGGCTTATTGAGGCTGATATTATTATCTTTGCGGGTAAATAGCGTATAGCCAATTTGTTCTTCCAGCGGCAATGCTTTTACCAAATGGCGAAGCCGTCATATGGATTTTTTCTGCCGCCGGCAATATTATTGTTTGCCTAATAAAATGAAATTGCGCATTTTTTGAATAAAAAATGTCCATCCCCCTCCCCGCATCCTTGTCCGCTAACCGTTTTCAGTCAGCCTATCCTTGATGAAACCGCGAGCAAAGATAGGTGATTACGTCATGGTTTTACAGAAAATTACAGAAAAAGGAGCAATATCGGTTAAAGGCATTAGCCCCACGAATACGTCGGGCTACAAATATTATTGTGCTGCAGGTGTTTTAGCGGTTGTGATCCACAGTTCTAACTGGAAGACACATCGACCTGATCATCAAATGAATAGCGGCTGCTCGTAAGTTTCTGGGCGACACCGCGCGGCATCGGCTTTTATCATATCCGCACCATTGGGCTGGGCTGATAGTTGGAACATGGTAGCGCACGCTATATACGGCCAGTTTACGATGAAAGCCGTTCCGACGTTCTGCGCCTGATGAATCGGTTATCAATCGCTGCCTTACGCGCTTGTCTTTATAGGCATCCGGCTGCGCCACGCCAGCGACACAGAACGAATTTCTGTTAAGACCCGCCTTCAGCGCGCCATCCAGCAAGGAATTCAGTTTGTCTAACTGACGGAGCGTGACTTCCACCGTTCTCACAGCGCGGTAGCCTTTAAGGATACTTTTACCATCCTGATAATCATAATCTGGCTGGGTGCGTAAGTTTCGCTGAGCTGATATCTTTTTTTCGCGATCTGATTGAGTTCAAGGAAGGAAATGTATTGTGCGACGCGCTCATCTGCCTGTTTCTGGCAGTAGCGGCATCCTTCGCGGCCACGTTAACTTCAATCGCAAGAGTGGCAATGTCTGGCACCAGCATCCACGCTTCCGTTACCGGAGGTGACAATATGCGGTCCATCCGGCAATTCGTTAGCCTGCGCTGCCATCCCGCTAATACCCATTAATGCCGCCAGGGCGATAACTTTGAACTTACGTTAGTCTCTCGTGTTAATTGACTTGCCAAAATTCAGGACCTCTGGAGGCAAGCTTAGCGCTCTGTTTTATTTTTCCATCAGATAGCGCCTAACTGAACAAGGCTTGTGCATGAGCAATACCGTCTCTCGCAGCTGCAAGGCAATAAACACATAACACATCCACAACAGATTGATAATGCGCTGTGCTTTTGGCGTGCAGACGCGGTGCCAGCCAGGCTGCGAGAAGAGCCAGACCAAAGAACCACAGGAAAGAGGCGCTAATTGTCCCGAGTGCAAACAGCGTTTTGGTTCCACATCAAGTTGCCCGCAAGGCTGCCAGTACAACAAAGTATCCAGGTAACATGCGGATTACGCCAGGTCACTGCCAACATGGTGGCGATAATTTCCATCTGCCTTGCTTATGACTTCGGGCTGGCTAACTCAATATTAAGTCTGCTGTTTTAAAAGCGCCAAAACCATACCACAGCAAGGACTACGCCGCCAGGTGACCAGCGCCAGCAACCAGCGGACTGCATCAATAACGCGCTGCCACCAAAAATCCCGCGCAATCAGGACCAATCGCTGATAGCAAAAGTAAGGCAATCATAATGTGGTACTGACGACGTATGC

CCTGATTCATCACAAAAGCATTTTGTGGACCGAGCGGTAGGATCATAGCCGCCCAAGTGCAAGACCTTGAAAGTAATAA  
GAAAACACGTTGGATATTCCGAATTAAGTATCTGATGCAGAGACTATATCGCGGATTGTTATTAGCGGAAATTGATAAT  
ATTAATTGGCAATCAGAAAACTAATAAGAGAGAGGCCAGAGAGTATTATCTGGCCTCAGCGTTGATTACGCAGCTTTGT  
CTTCTTTACCCGCTTAAAGTTCACATCCATTTGCGGGTACGGGAAGCTGATACCGGCGGCATCAAATTCACGTTTAAATA  
CGTCCAGCACATCCAGTACACGTTTTGCGAGATCGCCGCTGTTGCTCCAGACGCGGACCAGAAATTAATCGACGATGC  
ACCAAGTTCGTTACAGGCGCACAGTCATTTGCGGATCTTTCAAATGCGATCTTCAGACTGGATAATATTGGTCAGGATCT  
GCTTAACCTGATCGATATCGGAATCATACGCCACGCCAATAATAAATTCGTTACGGGCAACTGGCTCGCGGGAGAAGTTA  
ATAATATTTCCGGCAATAATTTTACCCTTCGGAATAACGATAATTTTACCCTGTCAGTACGCATGGTGGTGGAGAAAAAT  
CTGCACACTCAGCACAGTACCGGCTACGCCGCCAGGTCAACATATTTCTCCGGCACGGAACGGGCGGAACATGACAAGTA  
ACACGCCAGCGGCCAGGTTAGACAGTGACCCCTGCAAAGCCAGACCAACAGCTAAGCCTGCGGCACCGAGTACAGCAATG  
ACTGACGCGGTTTGTACACCCACGCGTCCAGTGCAGCGATTAGCGTAAAGGCGATAATACCGTAACGGACTAATGCAGA  
AAGAAAATCAGCAACAGTGGCATCGATTTTACGGGAGATCATCAGGCGATTACCCGCTTGGAAATCATCCGCGCGATAA  
TCAAACCAACGATGATGATCGCGAGTGCCGCCACGATGTTTACTGCATAACTTAGCAGCAGCGCCTGGTTAGCTACCAGC  
CAGCTTCCCGCGCGTTTATGCTATCGACAACATTCAAATCTTCCATTCAATATTTCTTTTCAACTGACTCAAAATGGAG  
AAATACACTCCGCGCCTTATGACGGGCGTCTGACAAGGTAACAATAAAGCATAATTTTGCCAAATAGATCACAGAT  
TTCTCATCTGAATCACCTTGTCTTTGGCGAAAAAATCCCCGAGAGCGGGGCTCAGACAGATATCAATGTGCGCTTTGTC  
ATGCCGGATGCGGCGTGAACGCCCTTATCCGGCCTACAAAAACCTGCAAATTCATATATTGCAAGTACGTTGAGGCCCTG  
ATAAGCGTAGCGCATCAGGCAATTTTGTCTTTGGCGAAAAAAGACCCGAGAGCGGGCCTTGAGATAAGCAGAAAGGAA  
TATCTTACAGAACGTCGATCGCGTTCAGTTCCTGGAATGCTTTCTCCAGACGAGCGATCATCGAAGTCTGACCGGCACGC  
AGCCATACGCGCGGATCGTAGTATTTCTGTTCGGCTGATCTTCGCTTTCCGGTTACCCAGCTGACCCTGCAGATAAGC  
TTCGTTTCGCTTTGAGTAGTTCAGAACGCCTTCCAGGTTGCCATTGGGTATCGGTATCGATGTTCAATTTTTACTACGC  
CGTAGCTTACGGAGTCTTTGATTTCTGAGCAGTAGAACCGGAACACCCTGGAATACGAAGTTCAGGCTGTTGTGCGGC  
AGGTTGTGTTTCTTGAAACATATTTCTGAGAATCACGAGGATGGTCCGAGTACAGAACCGGTTACCCGCTTGTAAAC  
ACCGTGTACGTTACCGAAGGACGCTGCGATGGTGAACGCGGGCTGATTTTGTCTCAGTTCGGTGTATGCGTAATCAACGT  
CTTCCGGCTGGGTGTACAGTGCAGAAGCGTCCATGTGGCTGTTGTCCACGCCGCTTTCTTACCACCGGTGCAACCCAGT  
TCGATTTCCAGAGTCATGCCGATTTTGGACATGCGCTCCAGGTATTTAGAGCAGATTTTCGATGTTCTCTTGCAGAGATTC  
TTCAGACAGGTCGATCATGTGAGAAGAGAACAGCGGCTTACCGGTAGCTGCGAAGTGTTTTTACCCGCGTCCAACAGAC  
CGTCGATCCACGGCAGCAGTTTCTTCCGCGCAGTGGTCAAGTGTGCAGGATAACCGGAACACCATAATGTTACGCCATCTGG  
TGAACGTGATGCGCACAGAGATCGCGCCAGGATAGCAGCACCTGCGGAACGTCAGATTTACGCCTTTACCAGCGAT  
AAAGGAAGCACCCGTTGGAAGACTGAACGATAACCGGCGCTTTAACTTTAGCAGCGTTTCCAGTACGGCGTTGATGG  
AGTCAGTACCGACGCAGTTTACTGCTGGCAGTGCAGGTTGTTTTCTTTGCTACCTGGAAAACTTTCTGTACGTCATCA  
CCAGTGATTACGCCAGGTTTTACGAAATCAAAAATCTTAGACATGTCTTGTCTGTATCGTCGGGCCTTATACTCGTC  
ATACTTCAAGTTGCATGTGCTGCGTCTGCGTTCGCTCACCCAGTCACTTACTTATGTAAGCTCCTGGGGATTCACTCTC  
TTGTCGCTTCTGCAACTCGAATTAATTTAGAGTATGAAAAATTCGCTGCTCTAAAAGCGCGCTGAAACAAGGGCAGGTT  
TCCCTGCCCTGTGATTTTTTACTTCTTAGCGCGCTTTCGAGCATCGCTACTGCAGGCAGTACTTTACCTTCCACGAATT  
CGAGGAATGCGCCGCCAGTGGAGATGTAGGAGATTTTGTGAGCAATGCCGAACAGGTCGATTGCTGCCAGAGTGTGCG  
CCGCCGCCAGCGATGGAGAACGCTTCCGCTGTCTGCGATAGCGTTAGCCACGATTTCAAGTACCTTTGCGGAAGTTGCGGAA  
TTCGAACACGCCAACCCGACCGTTCCACAGAATGTTTTGCAATCTTTCAGGATTTACAGCCAGTTCCTGAGCGGAAGCAT  
CACCGATATCCAGGATCTGCTGTCAGCTTTACATCGTTAACAGATTTACAGGTTAGCCGTTGAGTTTACAGGATCTCG  
GTTGCTACCGGAACATCAGACGGAACCGGATGTTGAGGTCAGCAGACGTTTGTGCTTCAACAGGTCAGCTTTC  
GTACAGGGATTTTACCACATCGTGGCCTTGTGCCGCGATAAAGGTTTACGATACCACCACCAACATCAGCTGGTCAG  
CGATTTTACAGGGAGTCCAGAACCGTCAAGTTTGGTAGATACTTTAGAACCACCAACGATAGCCACCATCGGGCGAGCA  
GGTTCTTTCAAGTCTTTTACCAGCGCGTCCAGTTCAAGTGTCCAGCAGCGGGCCTGCGCACGCAACGTCAGCGAATTTACC  
GATACCGTGAGTAGAAGCCTGCGCGCGGTGAGCAGTACCGAATGCGTCCATTACGAACACGTCACACAGTGCAGCGTATT  
TTTTGGACAGGGTTTTGTCGCTTTTCTTCTCGCTTTGTTGAAGCGAACGTTTTCCAGAACAACAGTTACCTTACGCA  
ACGTCACCGCCGTCGAGGTAATCTTTAACAGACGAACCGGTTAGACAGTTTGTCTTTACAGGTAGTTAACAAACCGGCAG  
CAGAGAGAATTTCTGTTGACTCGCTTCCGTTAGGACGACCCAGGTGGGAAGTTACCATCACTTTTGCCTTGTTCAG  
GGCCAGTTTCGATGGTCCGCGAGAGAAGCACGGATACGCGCGTCTGTTTACTTTCCGCTTTTTACTGGTACGTTTCAG  
TCCGACGGATAAATACAGTTCAGCAAGATCCAGATCGGTCATCTTAATTACAGACATGGTGAATCCTCTCGTTGA  
TTCTAAAAGTTTTGACAGCCTGCTTGGCTTTACCTGAAAGCAACAGTAGCCATAGCTAACGTCGTGTCGAGCATTCCG  
TTAGCAAAGCCCATTGTTATCGCACAGACCAACGTTTTGATCAGGTGTGCCCACTGACCCGGGTTGGGTGCCATC  
GACAATGGCACTGTGCGGATCGTGGTAAAATCTACAGAGACCAACGGCAATTCGATAGTCAACTATACCATGAAATG  
CACCTTGTGCTGCTTTTTGACAGCAACAGGTTGACTTCAATGGCTTTTACAGGTTTCTTACCCTCACGCTTAAATCGATT  
GCCGTACATTTATGTTTGGCACACGTACCGCAATCGCTTCAAAGCGATCGTTAAATTCGGAAAAAATCGTGTGATACC  
GGCGGCCAGTTTGTATCGACCGGAATGATCGACTGGCTGGCTGCCCGGGTGCAGCGCAGGTCAGGATGGTATGCATCAA  
TAACCTGTTGATCGTGCATGGCGGAGTGAATTGTGGTCACAGTGCCGGACTCAATACCGTACGCATCATTAACAATTTG

ATGACGGGAATTATGCAATTCGTGGTACAGGAAGCGTTAGAAACGATGCGGTGTTCCGCACGAAGTTGATCCTGATTGAC  
GCCGTAAACAACGGTCGCGTCGAGATCGTTACTGCCAGGATGTGAAAAGAGCACTTTTTTGGCCCCGGCGCAATATGCG  
CTTCGCCATGCTCGCGGGAGCCATATACGCCGGTGCAGTCGAGGACTACATCAACGCCAAGTTCACGCCAGGGGAGCGAT  
TGCAGTGAACGTTTCATGCAATACGCGGATGGCGTCATCACCAACAAAAAGTTGATCGCGTTCCTGTGCTACTTCCCATGC  
AAAAACGGCCATGGCTGGTGTATATTTCAACAAATGCGCCATGCCCGCAGCATCCGCCAGTTCGTTGATTGCCACCACGG  
TAATTTCCGCCCGCGTCCGGATTATACAAAGCACGAACCACATTACGCCCGATGCGACCGAAGCCATTATCGCTACG  
CGTACGGTCATAGATCTCCTGCAAGGTTTTCCCTGAGCAAATTTGCCAGACAGAGTAATCCAGCAAATCGTCCGGGAAA  
CCTTACCTGTGCAAACTGCGACTGATTGGTTAATTGTGCAACATTTAATCGACTGAAACGCTTCAGCTAGGATAAGCGA  
AACGTGGAATAAAAAGGAATGTTTGTCCAGCCGAAGAAGACATTTATCTGACTCACATCACACTTTTATCCCCTTTTGTGG  
GAAGCTTTATTCAGGCTGGCGTAATAATAACCCTACAATAACTGGAATAAATTGTGAGCTTGTGAAGTGATACCGGCT  
TCTTCAGTCATCTCTACTATCAGATTGGCCTGACGGCTATTATCAGCACACGCTCGACATTGGGGCCATCGGTGCGGGC  
ATAAAATGCTTCGGTACTTGGCGGTTAATCCTCCCGCAATTTACGACTAATCAAGCGCTCCCGCAGAATTTGAGCAG  
GTGCATGAATAAAAATAGAAAAATCGCAGAAAGATGCCAATCCAGCCACTTTTCATCATCCAGTAACAACCAAGTTTCT  
TCGACGATGACGAGTGGTGGTAACTGCAACGCATCTTCAACAGGATCATGCTTTTGTGATCGTACTGCGGCCACGT  
ACAATCCCCTCCACGACCTGGCGCAGATTTTCCGTGAGTTTCGCAACGTCAAATGTCTGTTGCGCCTTTGAAGGGC  
GCAATTTGATGCGCATCCAGCAGCTATTGTAATGGTAAAACCATCCATCGGGAGCGTCTGAATAGCGGGCATTCCGGG  
TCTTGTTCGCGAGATATCCAGAAAGTGGTTAGGTTGATTTACCCGTCCCGCGGAGCGCAAAGAAAAACACCCT  
ACGCCGCTGCGGATTTACCGTCTGTAAGGCCCAACATGTGCAGCAACGGTTTATGTACATTTTCAATCTCTTCGTTCT  
GGTACTGTGCTGTATCTTCAGCCATTACCGTTAATTTCAATTTTACGGCGTTAATTCCTTTAAGGTGGTCGTTACTG  
CCAGCGTCAGCGCGTTTTGACCATTCCGCTAAAACGCGCCTCTGACCAGACGGAGAAATCAGCGAATTCATCGCTTTT  
AACGCGTCATAGAGCATCGCATTGCGGTTATGCTATTGACGTTGCTGATAAAATCCCAGGTCATGTCATCGGCAAATCC  
GGGCGTTTCATCTGTTGTTGAGTAATGCCAGAACTGGGAAAAATGCGTGATATCGGCGTACAACCATTTATCCATTT  
TCCCAACGCATAAATCAAACGAGTGCAACATCAATATCGTCAAGCGGGCCGTTTGGGCGAGTAACGGCTTACTGCA  
TATTCACGATCTCTTCATCGTTATCGACAAACAGCGACGGCAGAAACTGGCGTATCCCCTGGAGCAAATGGTATGCGC  
AGTTTTATAAATGAAAATAAATTGTCCTGTGCATCCAGTTGCTCAAGCACATCATCTTGTGAGCGTCGCCATTGGTC  
TTCCGATAGATCACCATCAATGCAAGGAGTCTATTATATTACGTTTGGTCCGCGCCGCCGATCAGTAATGTCTGCGTC  
CGCACCCCATTCGCCGTCTGTTGGATACCGTTCACCAGCTCACGCCCGTACGCCGCTAGCGCTAAAGAGGATATCGTT  
CCCCCTCACCAGTTCATCGAGCGAGTACACACGGTTAACGTCAACGCCCATTTGCCTTGCAACGCTTGCCTCCTGCTCTG  
CAATCTGCCGATTTTCCGTGTAATCCCCTTTAGCCTGGCAAAGTCAATCAGCTCGGCCTGCATATCCCCGCTAATGCT  
TTAACGGCACAGGCAGAAATCACGCTTCTGGCGCACCCCGATGGTGTACATCACATCGTAAGGATTATCCTGCCAGCA  
GGTCAGCACGCTGGCGGGCAGATCGCCATCCGGCAGGGCAAACCTTACGCCAGCTGTGTTGCTTCTCAATCGCGG  
CACTCAGGCGCGGTTTATCCAGCGTAACCATGCGCAGCTTATCCAGCGGTTTGCCTAACGCTTTCGCCACGTTGCGCAGG  
TTGTCCGTGAGAGCAAAGACAGATCAATCGCGCCCGCCAGCCGATTAACAACAGCTTTTTTATATACATATCGGG  
CGCATGTAACAGGCTATCTCGAGGGGGGAAAGCCATGACCGCCAGCGCATTGCTCTGCCCATCGCCACCATCCGCGTGC  
CTTCAATGGGATCAACCGGATATCGACTTCTGGCCATCGCCTTTGCCACCTCTTCGCCAATCCACAGCATCGGCGCA  
TGGTCAATTTCTCTTCGCCGATAACCACTCGTCCACGAAAAGCGACGTCGTTAATGCCTGGCGCATCGCGGTGACCGC  
CAGGCCATCAATTTATTTTTGTGCCCACATCCGGTTTGGCGCAGGCAACGCTGCCTGTTCCGTAACGCGAAATA  
ATGGCCACGCCAGGGACATCATTGCGCGGCTCCCCGATATCAACGCCAAATTTGCGCAGCAGATATTTCTGGCCTGTT  
CATTCCAGATGCCGTGCGTTTCTCAACGAGCCGCCAACTTTAAACAGCGGATCGGTTTTGCTTTTTTCGGGAAAA  
TCGGCAATGGCAGTGAGCGGCATGGTACGCGTTATAATGAGTTTTTTACCGCCAGGGATATCCGGCAGATTGAGCAC  
GGTTTTCTGGCACCGCATCCAGGCCACCGATATGGGTACCATAAACGACGGCTGTAACGCCCAGTGGCGCTAAAGGGCAA  
TCGCTCTTTTATGTCGTCGTTGAAACGCCAGATGTACCAGCAGCTGCGTGTGTTGTAATGGACGTTGTAGAAATTA  
AACGGCACTTTGAAGTTTTTATCCGTGCGCCCGCAAAGAAGTTCAGACAGCCATCTTCGCCAGTAATTCATCAGCCAT  
CTCAACGACAGCAGGACCGCCGATAAAACAAAAATGTCATCGAACCCGGCATCTCCTGTGAGCGCCCGCAGCATCTGGA  
CAGGATCGCTCATCCCTTTGGTATTACATACACCAGCTCAATGCCTTTACTGGCCGCGAGTTCACCGGCAGCAGCTTC  
TGTACTGCGCAGACGTTTGTGTCGATATCGACCACCACCACCGCGACGTTGTATGCCCGCCTAATGGCGTAATC  
GATAGCGCAAATGCCCATCGGACCTGCACACGCCAGCAGTGAATATTGCCCGCAGTTTTGACGCCATGCGATGCTCAT  
AAACATATTGCGTGGTGTGATAATTGGCATGATAAGCACCAATAATGAGCACATAGGCTCTGCCAGCGACGCCGAGCA  
AAATAAGAGCCGTGATACGTAATACGACGCCAAATTAATGGCGATTTCCGGAAATAATCATATAAGTGGCATTGCCGCC  
AAAATATTGTAAGTGTAGCTGTAGCCGCTGAATATCCGCTTGGTAACCCATCGCCGTTGCAATACAAAACGCTGGCCTTTTT  
TATATTTGCCAGTGAGATTTTTACCCACTTCGACAATAACCCCGCACATTCATGCCCGGTAATGACCGGATGATTTTCT  
AAATCGTGGGTACGCGTTTATGTTCACTACCGAGTAACGCGCTTTCAGGTCGATAAACAGACGCTGTGAGAAATTAC  
ACTCACCAGTAATTCATTATCGGTAATTTCTGGCAGTTCAAATACGCGCAGACGGACATCCCGCTTGCATAAATAGCAG  
CACTTTGGTTTTTCAATTTTACCTCTGTAATCAGTGTTTATGTTGCGCGTTAATTGATTAATAAAGTGTGAGTTTTG  
GATCGCAAATATAGTTATTAATCAATATCAGTGGTTTATCCGTACACGTTTACGCGCCCTTCCAGACTGGCATGAGTA  
ACGACGATATCCGCATCCGACGGCAGGCTTTTCTATGGCGTAATGTTTTACTTCAATTGCCAGCCCCGCTTTTTCCAGGGC

TTTACGGAAGGTGGTCGCGCCCATCGCACTGGAGCCATCCCCGCATCGAAACAAAGGCGATACGCTTAAACCCTGCTTA  
ACGAGAATGCACCCTCTTGTTCATCGCCTTAACCGCATTGGCTGACTGAGCAAACCTCATCTTCGCTCTCCGTTTCCACC  
GTTTTTCCATCTTCAGTATCAGCGAAGTAATAGCAAAGGACACCAGGGTACCTACCGTAACACCGGCAATTGTCGCCAG  
GAACGAGCCTTTCGGCGTCAGTGCCAGGTAAGCAAAGATAGACCCCGGACTTGGGCCAGCCACCAGACCACCGTCCAGTA  
AGTTAAACATCCAGGTGCCAGACATACGCCCGCAATCATGGCAATAATGGTCAGCGGCTTCATCAGCACATACGGGAAA  
TACAGTTCTGTGGATCCCACCGAGGAAGTGAATAATCATCGCCCCGGGCGCAGAACGTTTACTCATCCCTTACCAAACAA  
GGTAAACGCCAGCAGCAGCCCCAGGCCCGGACCTGGGTTAGAGGCCACCATAAAGAAGATGGATTTACCGTTAACCGAAG  
CCTGTTGCATTCCAGCGGATAATAGACGCCCTGATCGATCGCATTATTGAGGAAAAGCACTTTCGCCGTTTCATTGATG  
ACTGACAACAATGGCAGATAACCCGCATGTACCAGCGCCTCAATACACTCTTTGACGAAAGTATTGGCAATTAACACCGC  
CGGGCCGATAACTTCAAACCCAGCAGACAAAGGAGCATCCCCCGGATACCTAATGAGAAGTATTGATAACCATCTCAA  
AACCGGCAGGTATGCGTTTTTCCAGTGCCTTATCGACATATTTTATGACCAACCCACCGAGCGGCCCATGATCATTGAG  
CCAAGGAACATCGGGATCTCTGCGCAACGATCACACCAATAGTACCTATTCCGCCATGACCGCCCCGCGTTTACCGCC  
GACCAGATGACCACCTGTAGAACCAATCATCACGGCAATAAATAGGTAATCATCGGGCCGACAATTTTGGCGAAATGTT  
CGTTAGGCAGCAACCGGTGGGAATAAATAACGCAGTAATAAAACCCAGGCAATAAAAGCACCAATATTGGGGATGACC  
ATTGCAGTCAAAAAGCCCCAAAAGCCTGGACCTTTCACGAGCAGACTTGTTCATAAATATTATCTGTAGAGGAGA  
GAGTAATTATCCGCGGATAAATGTCCGCTAATGTTTTTCTGATGCTGTTAAGAGTTGTTTCGAGATTTTCTTCTT  
CGCACAGTAATTCACCTAACGCCTGAATAGCGCCAATGTGCGAATCGGCATCGGCAGCAGAGAGTCCGATGAGTAATTTA  
ATTGGTTCGTATTCCCCGAAAATAAACACCTTGTCAAGTAATGTCAAAGACATCCCGTTTTAAGCGCCCCACATTC  
CGGTCGCGCATGAGGCATTGCCACGCCTGGTGCAGAAATAAATAAGGGCCATTGTTAATGGTGGAATCTTTAATTGCCT  
GAATGTAATTCGCTGATATAGTTTTTATCCAGCAATGATACCATCGAGAAATCGATAGCTTCTGCCAATCTTTTGCT  
GAATGTATAACTGAGATTGATGATTCTGGAAAATAACTACTAAGCCGCATAAATTATCCTATTTTATTTTATAGGGTACC  
GTCGGCGGTAATAATAAATACTCGTGCAGTTAATGAAAGCAATTGAGCAGGAAACCGGTGTTTTGAAAACAGTGAA  
TTATTAATTTCTATATAACATTGAGTTATAGATATAACAACAAATGTCAATACGCATATCGTGATGCATATTACATAAT  
TGATATTTATTGCATATAAATATTTGTGATCTACAACAGCCTTATCTATTGCTTGTCCGCAAACGGACATATCAAGGTA  
ATAAAAAAGGTCGCCGAAGCGACCTTTTTACCCGAAATGCTAATTACAGCAGTCTTTTTGCTTTCGCAACAACGTTATCA  
ACAGTGAAGCCGAACCTTCAAACAGCAGCTCTGCCGAGCAGATTACCGAAGGTGGTCATACCGACGATAGCACCCTT  
CAGGCCAACATACTTGTACCAGTAGTCAGCAATACCCGCTTCTACAGCAACGCTGCAGTAACCGCTTTCGCGAGTACGG  
ATTCACGGTAAGCAGCATCTGCTTGTCAAATGCGTGGTAGACGGCATGGACACCACGCGCCTTTCACGCCTTCGGCA  
GTCAGTTTTTCTGATAGCAGCAACAGCCAGTTCAACTTCTGAACCGGTAGCGATGAAAATCAGTTCCGGCTGACCGGCGCA  
GTCTTTCAGCACATAACCACCGCGCGCATGTTTGCCAGTTGCTCTTCAGTTCTTCTGCTGCGCCAGGTTCTGACGGG  
AGAGGATCAGTGCAGTCCGGCCGCTCTGACGCTCAACACCGTATTTCCACGCGACCGCGGATTCAACCTGGTCAACGGA  
CGCCATGTAGACATGTTCCGGGTTACGCGCAGAGAAGCGACCTGCTCAACCGGCTGGTGAGTCCGGCCGCTTTCGCCAG  
ACCGATGGAGTCGTGGGTGTAACCATCACCTGACGCTGTTTCATCAGCGCAGCCATACGTACGGCGTTACGTGCGTATT  
CCACGAACATCAGGAAGTGGAGGTGTACGGCAGGAAGCCACCGTGCAGGGAGATACCGTTAGCAATCGCGGTACATCCG  
AACTCGGAACACCGTAGTGGATGTAGTTACCCGCAGCATCTTCGTTGATTGCTTTAGAACCAGACCACAGGGTCAGGTT  
AGACGGCGCCAGGTACAGCAGAACCAGCCGAGGAATCCGGCAACAGCGGACCGAACGCTTCGATAGCATTCTGAGACGCTT  
TACGGCTGGCGATTTTCGCCGATTAGCCTGCAGTTTAGCGATGAACTCTTTCGCTTTAGCGTCGAAGTCAGACGGCATT  
TCGCCTTTCATACGGCGGGTAAATTCAGCGGCTTCTGCGGATAAGCTTTCGCGTAAGCAGCGAATTTCTCGTTCATGC  
GGATTCTTTCGCTGGCTGCTTCTTTCGCATCCACTGAGCATAGATTTTCAGACGGGATTTGAAACGGCGCATATTTCC  
AGCCAGTTGTTTCGCGGGTCAGGGCAATTCAGCGTCGCCAGCGGCGACCGTGGGAGTCTGGGTACCGGCTTTGTTTC  
GGGAACCGAAACCGATGATGGTTTTGCACATCAGCAGGGAAGTTTTGTAGTCACTGCGCGCTTCTTCTACTGCGCG  
TTTGATAGATGCCGCTCATGACCGTGCATGTGCGCAATAACGTGCCAGCCGTAAGCTTCGAAACGCATTGCGGTGTCGT  
CGGTGAACCAGCCTTCAACGTGACCATCGATAGAAATACCGTTGTCATCGTAGAATGCAATCAGTTTACCAGCTTACGC  
GTACCCGCCAGAGACAACTTCTGTTGGAGATGCCTTCCATCATGCAGCCGTCGCCATGAAGGCGTAGGTGTAGTGGTC  
GACAATGTCGTGGCCCGACGGTTAAACTGCGCCGCCAGGTTTTTCTGCAATCGCCATACCGACTGCGTTGGCAATAC  
CCTGACCCAGCGGACCGGTGGTGGTTTTCCACACCAGCGGTGTAACCCACTTCCGGGTGACCCGGAGTTTTAGAGTGCAGC  
TGACGGAAGTTTTTCACTTCTTCATCGGCAGATCGTAACCGGTGAGGTGCAGCAGGCTGTAGATCAGCATGGAGCCGTG  
GCCGTTGGACAGCACGAAGCGGTACGGTCAGCCCAGGACGGATTCTGCGGTTGTGTTTCAGGAAATCACGCCACAGGA  
CTTCGGCAATGCAGCCATACCCATAGGGGACCCGGGTGACCGGATTTGGCTTCTGTACTGCGTCCATGCTCAGCGCA  
CGAATAGCATTGGCAAGCTCTTACGTGAGGACATTTTACTCCAGATCGGATGATGAAGGGCAGCCCTTAAACGACTTG  
ACGACAGCGCTTTTTGGGCTACGCCGAAAATTTGCCAACAATTTACCGCAAGCCGCGCTCATGTACATGGAACATCCT  
TTTGCCGCTTCAGAAATCTCTGGATCATGCTCGCATGTTGCGCAATCTACTCGCCGTCGCGCTTTCCTTATACT  
GAGACTGAGCGTCGATTCACCTGCAAACGGCGCATTTTTAGAATAATCTGACCTTGTGCGGAAGAGAAAACATGAAAAT  
TCGCGCCTTATTGGTAGCAATGAGCGTGGCAACGGTACTGACTGGTTGCCAGAAATGAGACTCCAACGGACTGCTCTCAT  
CAGGAGCGGAAGCTTTTTCAGGCTTACAGTTTGTGATGTCGCGAGGTGAAAACCCCTGAGCGATCAGGCATGTCAGGAGATG  
GACAGCAAGGCGACGATTGCCAGCCAAATAGCGAATACGCTAAACGCTGACAACATTGCCAATGCGCTAGGCAACAA



TATCAACGGTCAGCCGGTAAATTACAAAGTGTATATGGCGAAGGATGTGAACGCCTTTGCAATGGCTAACGGCTGTATCC  
GCGTCTATAGCGGGCTGATGGATATGATGACGGATAACGAAGTGAAGCGGTGATCGGTCACGAAATGGGGCACGTGGCG  
TTAGGCCATGTGAAAAAAGGAATGCAGGTGGCACTTGGTACAAATGCCGTGCGAGTAGCTGCGGCCTCTGCGGGCGGGAT  
TGTGCGAAGTTTATCTCAATCACAACCTGGTAATCTGGGCGAGAAATTAGTCAATTCGCAATTCCTCCAGCGCCAGGAAG  
CAGAAGCCGATGATTATTCTTACGATCTTCTGCGCCAACGCGGCATCAGCCCGCAGGTCTTGCCACCAGCTTTGAAAA  
CTGGCAAACTGGAAGAAGTGCCTAAAGCTCAATGTTTACGACCATCCTGCATCCGCCAACGCGCCAGCATATTCG  
CGATCGCATGAGCGCGATGGGATTAAGTAAAGCCTGGTGGTGTGCAACGTAGGTGAGATAAGGGCTTACCGCCGATCT  
GACATGAATGGCACATTTGTTACCTTGTGCGCATTGCCGGATGCGATGCTGGCGCATCTTATCCGGCCTACGGGTGCCGA  
ACGTAGGTGCGATAAGGCGTTACGCGCCGATCCGACATTAATGGCACGTTTTACCCGTGCGCATCGCATCTGGTGCTTAC  
TCGCCCTTTTTGCGCCCTGAATATACAGCATTTCCAGCGCCAGCGTTGCCGTGCCAGAGCAGTGATTTCCGACTGATC  
GTATGCCGGAGCCACTTCCACTACGTCCATCCCAACAATGTTGAGATCTTTCAGGCCGCGTACCAGTTTAAATAGCGCGAT  
CGGAGGTGAGCCGCAATCACTGGGTACCGGTGCCTGGTGC AAAAGCAGGATCCAGGCAGTCGATATCAAAGTCAGG  
TAAACCGGCATATCACCACAATCTGTTTCACTTGGGCGATAACGTATCCACGCTGCGATCGTTCACCTGGCAGGCGTC  
CAGCACGGTAAAGCCGTTGCTTTATCAAACCTGGTACGAATACCAATCTGCACGGAATGATTCGGGTGATCAGACCT  
CTTTCGGCGCGGTATAGAACAATAGTCCGTGGTCAAATTCACAACCGTTGCGATAGGTATCGGTGTGGCGTCAAAGTGT  
ACCAGGCCATTTTTGCGAAATGCTTTCGCATGAGCACGACGAGCGGAGCGTAACAAAGTGGTCACCACCGAAAGAGAG  
CATACGCTTACCGGCAGCCAGCAGCTTCTCGGCGTGCCTGACGCTTTTTCGCTCATCTCAGGGGCATCGCCAAAGGCAT  
ATACCAGATCGCCGAGTCCACGACGTTACAGACGCTCACGCATGTCGAAATTCACGGAAGCGGTTGTGTTCCAGGCC  
AGATTCGTCGAAACCTGACGGATCGCTGCCGGACCGTGGCGACCACCCGACGACCAGAAGTGGCCATATCGAACGGCAC  
GCCAGTAATCACCAGTCTGCATCGCTGCATACGGCTGGAAGTTCATCGGCAGGCGTAAAAAACAAAGGCATTGAAAA  
CCAGTGAGTTATCGTATTGATGACCTAAGGTGCTCATGGATGGACTCCTATTACAAAGTCGATATAAAAAAACCTTCCG  
CGTCGTTAGGCCGACGAGGAAGGGTTGGATTTGTCACAATAAATTGTGGCGGATTATCACCCTAAATTAAGCGGATTC  
AAGTAACACAGGACTTACTCATCTTCAAGATAAGTATAACCGTACAAACCTGCCTCGAATCTTCAAGGAACTGTTGTTG  
CAGTTCAGCATCAAGATCGGTTTTCTCACTTGTATCGCGAACTGGGTTAACAGCGTTTTTCGGATCGAGCTGTACATATT  
GCAGCATGTCCGCCACGGTATCGCCTTGTGACAGCTTACTTCTACGCTACCGTCAGGGAAGACGAACAGTCAACC  
GCTTCGGTATCACCGAACAGTTGTGCATGTTGCCGAGGATCTCCTGATATGCCGCCACCATAAAGAAACCGAGCATCGG  
CGGATTCCTGGATCGTACTCCGGCATTGGCATTGTGCGGAATACCGTCACCATCAATATAGTGGTGCATAGCACCGT  
CAGAGTCACAGTAATATCCAGCAGCACAGCGGACGTTCCGGCACTTGATCCAGCCCTTCCAGCGGCAGAACCGGGAAC  
AACTGGTGCATCCCCATGCGTCCGGCATCGACTGGAACAGCGAGAAGTTGACGTACATTTTGTCCGCCATACGTTCCCTG  
CAGCTCGTGCATAATCGGACGATGAGCACGGTTTTGCGGATCCAGCTGCTTTTGCATTCATGGCACATGCTCAAATAAA  
GCTGCTCAGCCATGCACGTTCTTGCAGGCTAAAGATGCCGGAAGAGTAGCCGATATGAATGTGTCGATCCATCTGA  
CTGTCGTGTAACCATTACCGCAGAGAACGGCGAGTTCCCGGTTGTCATCTCCTGCCAGGTTTCCACATGCTTTGCAG  
CGCGCGCGGCATCTTCTGAGGCGCGGTGGCACCGTGTATTTCGTTACGTTCCACGCCGATGATATTAGACACCAGCA  
CGGTGTGATGCGCAGTACCAGCACGCCGATTCCGTGATTACCGTCGGATGCGGCAGACCGTTTTTCTCACACGCATCG  
CCAATCGCCAGATAATGTTGTTGGGTATTCAATTGAGGCGTAGTTACCGAACAGTCGGACTGCGAACGAGTACCTTC  
ATAATCCACGCCAGACCGCCGCGGACGTCGAAGCACTGAATATTGACGCCAGCTTGTGCAGTTCACATAGAAACCGG  
CGGATTCACGAACGCCTGTGCGGATATCGCGAATATTCGCCATCTGCGAACCGAGGTGGAAGTGCAGTAGTTGCAGGCTG  
TCGAGACGCCCGGCTTACGCGAGGTTTCAACAGTTGAGTACCTGAGTCGACGCCAGGCCGAACCTTCGATTTTTCCCC  
GCCGGAGGACTGCCATTTACCCGAACCTGCGAAGCAGACGTGCACGCACGCCAGACGAGGAACGACATTCAGACGTT  
CTGCTTACCCAGCACAAATGGCGATTTCTGACATCTTCTCAATGACCAGATAGACCTTGTGCCCATCTTCTCGCCAATT  
AATGCCAGGCGATATATTGCGGGTCTTTATAACCGTTGACAGCATGACGCTACGGGTGATGCCAGCATGTGCCAGTAC  
TGCCATCAACTCGGCTTTGGAACCGGCTTCCAGACCCAGCGTTCCGCCGAATGAATCAGGGACTCAATCACGCGCGGT  
GCTGGTTAACTTTGATCGGATAAAACAAGGAAGTAATCGCCGTTATAGCCGTAGGATTCCTCGCACGTTTGAACGCGCGG  
TTAATGGAACGCAAACGGTGTGTCAGGATCTGTGGGAAACAGAACAGTGCAGGCAGACGCTGGCCCTGTGCTTACGAGT  
TTTCACTAACTGCGCGAGATCGACGCGAGCTTCCGGGACGTCGGGTCCGGGCACAGCTAATGTGGCCAGCTCGTTAA  
CGTCATAGTAGTTATTGCCCCACCAGGCAATATTGTAAGTACGCAGCATCTTGTGGCTTCTGGGAGCTCATTGCAACC  
TCCTGCATGGAGCGTAGTACACCGTGTTCGCCCGCTGACGAAGGCAAACCCATAGACATGTCGTCAGACATAGCGAACCT  
CAAATATTTTTATTAAGTGTAAAACAGTTAACGACTATCGCAGCTGGAATGCGATAACAACCCATAAGCACATGGATT  
TTCCAGCAGTGAATGCTGACGCTCCAACCTGCGCAACCGTTTTCTTTTTATAACATTATTAAGCACATAACCGAACGTAA  
GTGTGAAAGTTCGGCGAAACACGAGAAAACCTTTGTTTTTACAAGAGCGCCCTTGTTCAGTCTCAGTAACTGTAACCA  
GCTCTTGAATCCTGAGAAGCGCGAGATGGGTATAACATCGGCAGGTATGCAAAGCAGAGATGCAGAGTCCGGGGAACGA  
ATCTTACCAGAACGGTGAACAGGTTAAGCAGCAGACAACGGTTCAATATTCGTATCACCTCCACGGCCGCTGTAA  
GACGAACCCACAAGCCAAAACCTCTGATTTCAACCCGCTGGAAGTGGCAACACGAAAGAAAGTCTGTGTCTTTTTATTT  
AAGCCGCGCGCGCTTTTTATACCCACAATGGCAGAAAATTGCAAAAAGATAAATACGCAGAAATGCCGGCATTGTCAGGA  
AAAAATTTCCAGCCAGTTTTTAAACAGAATGAGACACGATTCAAAAAAAGTGGAAATAGGGTGAAGAATTGACCTAAAAAT  
AGCCATCCAGATGTTAATCCATCCATACCGATTAACACTCAGACTGCCAGTGTTTTTAACCTGCAGAGTCGTGGTAGGAT

CCGCTACCACAGAAAATCCACACAACAGTTTGGAGCTAACCAAATTCTCTTTAGGTGATATTAATATGGCAAAACACCTT  
TTTACGTCCGAGTCCGTCTCTGAAGGGCATCCTGACAAAATTGCTGACCAAATTTCTGATGCCGTTTTAGACGCGATCCT  
CGAACAGGATCCGAAAGCACGCGTTGCTTGCAGAACCTACGTAACAAACCGGCATGGTTTTAGTTGGCGGCGAAATCACCA  
CCAGCGCCTGGGTAGACATCGAAGAGATACCCGTAACACCGTTGCGGAAATTGGCTATGTGCATTCCGACATGGGCTTT  
GACGCTAACTCCTGTGCGGTTCTGAGCGCTATCGGCAAAACAGTCTCCTGACATCAACCAGGGCGTTGACCGTGCAGTCC  
GCTGGAACAGGGCGCGGGTGACCAGGGTCTGATGTTGGCTACGCAACTAATGAAACCGACGTGCTGATGCCAGCACCTA  
TCACCTATGCACACCGTCTGGTACAGCGTCAGGCTGAAGTGCCTAAAAACGGCACTCTGCCGTGGCTGCGCCCGGACGCG  
AAAAGCCAGGTGACTTTTTCAGTATGACGACGGCAAAATCGTTGGTATCGATGCTGTCTGTGCTTTTCCACTCAGCACTCTGA  
AGAGATCGACCAGAAATCGCTGCAAGAAGCGGTAATGGAAGAGATCATCAAGCAATTTCTGCCCGCTGAATGGTGACTT  
CTGCCACCAAATTTCTTATCAACCCGACCGGTGCTTTGCTTATCGGTGGCCCAATGGGTGACTGCGGTCTGACTGGTCTGT  
AAAATTATCGTTGATACCTACGGCGGCATGGCGCGTCACGGTGGCGGTGCATTCTCTGGTAAAGATCCATCAAAGTGGAA  
CCGTTCCGCGAGCTACGACGACGTTATGTGCGGAAAAACATCGTTGCTGCTGGCCTGGCCGATCGTTGTGAAATTCAGG  
TTTCTACGCAATCGGCGTGGCTGAACCGACCTCCATCATGGTAGAACTTTTGGTACTGAGAAAGTGCCTTCTGAACAA  
CTGACCCCTGCTGGTACGTGAGTTCTTTCGACCTGCGCCATACGGTCTGATTAGATGCTGGATCTGCTGCACCCGATCTGA  
CAAAGAAAACCGCAGCATAACGGTCACTTTGGTCTGGAACATTTCCCGTGGGAAAAACCGACAAGCGCAGCTGCTGCGCG  
ATGCTGCCGCTGAAGTAACTTTTTCACCTGCGTTCAAAGGCCAGCCTGCGCTGGCCTTTTTTCTTTGGATAGGCG  
TTCACGCCGATCCGGCAAAAAACCGCCGCAATAACATCATTCTTCTGATCACGTTTACCAGCAGATTATCATCA  
CAACTGAAACCGATTACCAACACAGACAAAGATTTGTAATATTTTTCATATTATTTCGTTTTTTCAGGTTTGT  
ACATTTCTTTTTCAGTAAAGTCTTAATTGCAGATAACAGCGTTAATCTATGATGATATACTCAATTATTTTTCATGCACT  
TAAATCATAACTAAGATAAATGTTAGTGAAGCGATTACACTGATGTGATTTGCTTTCACATCTTTTACGTCGTA  
CTATCTTAATTACAATAAAAAATAACCATATTGGAGGGCATCATGCCTGACGCTAAAAAACAGGGGCGGTCAAACAAGG  
CAATGACGTTTTTCTGCTGCTTCTTGGCGCTCTGGCGGGATTACTTTGGCTGGATATCGGTGTAATTGCTGGCGCA  
CTGCCGTTTATTGAGATGAATTCAGATTACTTCGCACACGCAAGAATGGGTGTAAGCTCCATGATGTTGCTGGCGC  
AGTGGTGGTGGGCGAGCGGTGGCTCTCTTAACTCGGGCGCAAAAAGAGCTGATGATCGGCGCAATTTTGTG  
TTGCCGTTTCTGCTGTTCTGCGGCTGCGCAACGTTGAAGTACTGATTCTTCCCGCTTCTACTGGGCTGGCGGTG  
GGTGGCCTTATACCGCACCGCTGTACCTCTGAAATTGCGCGGAAAAAATTCGTGGCAGTATGATCTCGATGTA  
TCAGTTGATGATCACTATCGGGATCCTCGGTGCTTATCTTCTGATACCGCCTCAGCTACACCGGTGCATGGCGCTGGA  
TGCTGGGTGTGATTATCATCCCGCAATTTTGTGCTGATTGGTGTCTTCTTCTGCCAGACAGCCACGTTGGTTGCC  
GCCAAACCGCCTTTTGTGATGCCGAACGCGTGTCTACGCCTGCGTGACACCAGCGCGGAAGCGAAACGCGAACTGGA  
TGAAATCCGTGAAAGTTTGCAGGTTAAACAGAGTGGCTGGGCGCTGTTTAAAGAGAACAGCAACTCCGCGCGCGGTGT  
TCCTTGGCGTACTGTTGCAGGTAATGCAGCAATTCACCGGGATGAACGTATCATGATTACGCGCCGAAATCTTCGAA  
CTGGCGGGTATACCAACTACCGAGCAATGTGGGGGACCGTGATTGTGGCCTGACCAACGTA  
CGCAATCGGCCTTGTGACCGCTGGGGACGTAACCAACGTAACCGTGGGCTTCTGGTATGGCTGCTGGCATGGGCG  
TACTCGGTACAATGATGCATATCGGTATTCACTCTCCGTGCGCGCAGTATTCGCCATCGCCATGCTGCTGATGTTTATT  
GTCGGTTTTGCCATGAGTCCGGTCCGCTGATTTGGTACTGTGCTCCGAAATTCAGCCGCTGAAAGGCCGATTTTGG  
CATCACCTGCTCCACTGCCACCAACTGGATTGCCAATGATCGTTGGCGCAACGTTCTGACCATGCTCAACACGCTGG  
GTAACGCCAACACCTTCTGGGTGATGCGGCTCTGAACGTA  
CTGTTTATCCTGCTGACATTGTGGCTGGTACCGGAAACC  
AAACAGTTTTCGTGAACATATTGAACGTAATCTGATGAAAGTCTGAAACTGCGCGAAATAGGCGCTACGATTAATC  
TCCCCAAGTCTCCTCCATCGCGGAGGAAGCCACCTTTGAGTCACTTTTTCTGCTCTATCCTCTCCGCTATGAAA  
ACATCCCGTCTCCCTATCGCCATCAAACAGGCGTTATGCTGCGCTGCGGAAAAACTCGCCAGGCCAACCTGAAGCT  
AGGCGTAACCTACCCGGAGCCAAAACCTCTTACACCCAGCGCGAACCTCCGCGGAACGCGCTGGCTGGAAAGCTATG  
AAATTCGCTCAATCCCGTTTTGCTGTTGAAAACAGTGAAGCTTTTATTGAAGAGTGGTACCGCACGAACTGGCACAT  
TTGCTGGTATGAAAACATTTGCGCCGCTAGCGCCACATGGCAAAGAGTGAAGTGGATGATGAAAACGTGCTGGGTGT  
TCCCGCCGCTGATCGCATCAGTTCGAACTGCAATCCGTGCGTGCACACCTTCCCTACCGCTGCAAGTGCCAGGAGC  
ATCAGTTACCGTACGCCGATAATCGCGTAGTTCGTGGCGAGGCGTCTATCGCTGTGTTCACTGCGGTGAACAGCTG  
GTTGCGAAATAACCATCTGAACTATCAGGAACCTTCTGATCTGGCTGATTGCATACAAAACAGCTTTCGCTACGTTGC  
TGGCTGTTTTAACACGGAGTAAGTATGATACCGTTATTTGCTATTGCTGCGGTGGTACTGAGCGCAGATTTTCCGGC  
CCGGCTTGGCGAAGGTATCAATAGTTTTTCTCAGCGAAAGCCGCGGCGTAAAAGTCCACGCTGACGCGCCGGTAC  
GTTTTATTGCGGATGAAAATTAACCTGGCAGGGCAAAAAGGCGTTGTTGATCTGCAATCGTGGCTATCAGGTGCGCA  
AAAATGAAAACCGCGCCAGCCGCTAGAGTGGGAACATGCTGTTCCCGCTGGCAGTTCGGTACCAGCGCCAGTGTGG  
CAGGACGGTGGACGTAACAACTGCGCTAAAGATCCGGTCTATCGAAGATGAAAGCGATATGCATAACCTGCAGCCGTC  
AGTGGTGGTGAATGGCGATCGCGCAACTTTATGTACAGCCAGTGAATGGCGGTGAAGGCCAGTACGGTCAATGCG  
CCATGAAGGTGATTTCAAAGAAAAGCTGCCGAACCACCGCGGTGCACGCGGTGCCATTGCGCGCACCTACTTCTAT  
ATGCGCGACCAATACAACCTGACACTCTCTGCCAGCAAACGCGCTGTTCAACGCATGGAACAAGATGTATCCGGTTAC  
CGACTGGGAGTGCAGCGGATGAACGCATCGCGAAGGTGCAGGGCAATCATAACCCGATGTGCAACGCGCTTGCAGG  
CGCGAAAGAGCTAACCTACACTAGCGGGATTCTTTTTGTTAACCCCTACCCACGCGTACAACCGGTGGGGAGACGACG

CGGATTTTTAACTATGCGTATCCCCGCATTTATCATCTGAACCACTGACCAGCCATTCTACATCGCGCTTTGCGAAG  
ATGCCGCCAACCATATCGGGCGCGTACTGCGCATGGGGCCGGGGCAGGCGTTGCAATTGTTTGACGGTAGCAACCAGGTC  
TTTGACGCCGAAATTACCAGCGCCAGCAAAAAAGCGTGGAAGTGAAGGTGCTGGAAGGCCAGATCGACGATCGCGAATC  
TCCGCTGCATATTCACCTCGGTGAGGTGATGTCGCGTGGTGA AAAAATGGAATTTACTATCCAGAAATCGATCGA ACTCG  
GTGTAAGCCTCATTACGCCACTTTTTCTGAGCGCTGCGGCGTTAACTGGATTAGTGAACGCTGAACAAGAAGCTTCAG  
CAGTGGCAGAAGATTGCAATTGCTGCCTGTGAGCAGTGTGGTCTGAACCGGGTGCCGGAATCCGTCCAGCGATGGATCT  
GGAAGCCTGGTGTGAGAGCAGGATGAAGGACTGAACTGAATCTTACCCGCGCGCCAGTAACAGCATCAATACGTTGC  
CGTTACCGGTTGAACGCGTCCGCTGTGATTGGCCGGAAGGCGGTTTATCGGCAGATGAAATTGCCATGACTGCCCGC  
TATCAATTTACTGATATCTGTTGGGACCTCGCGTTTTGCGTACAGAGACA ACTGCGCTCACCGCCATTACCGCGCTACA  
AGTACGATTTGGCGATTTGGGCTAACGGAGAAGAATAATGATCAAGCTCGGCATCGTGTGAGACCCCATCGAAACATCA  
ACATCAAGAAAGATTCCAGTTTTGCTATGTTGCTGGAAGCACAGCGTCTGTTACGA ACTTACTATATGGAGATGGGC  
GATCTGTATCTGATCAATGGTGAAGCCCGCGCCATACCCGCACGCTGAACGTGAAGCAGAACTACGAAGAGTGGTTTT  
GTTCTGCGTGAACAGGATCTGCCGCTGGCCGATCTCGATGTGATCCTGATGCGTAAAGACCCGCCGTTTGATACCGAGT  
TTATCTACGCGACCTATATTCTGGAACGTGCCGAAGAGAAAGGGACGCTGATCGTTAAACAAGCCGAGAGCTGCGCGAC  
TGTAAACGAGAAACTGTTTACCGCTGGTCTCTGACTTAAACGCGAAGAACGCTGGTTACGCGCAATAAAGCCGAGCTAAA  
AGCGTTCTGGGAGAAACACAGCGACATCATTCTTAAGCCGCTGGACGGTATGGGCGGCGCGTGCATTTTTCCGCGTAAAAG  
AAGGCGATCCAAACCTCGGCGTGATTGCCGAAACCTGACTGAGCATGGCACTCGCTACTGCATGGCGCAAAAATTACCTG  
CCAGCCATTAAGATGGCGACAAACGCGTGTGGTGGTGGATGGCGAGCCGTTACCGTACTGCCTGGCGGCTATTCCGCA  
GGGGGGCGAAACCCGTGGCAATCTGGCTGCCGTTGTCGCGTGAACCTCGTCCGCTGACGAAAAGTACTGGAAAATCG  
CCCGTCAGATCGGGCCGACGCTGAAAGAAAAAGGGCTGATTTTTGTTGGTCTGGATATCATCGGCGACCGTCTGACTGAA  
ATTAACGTCACCAGCCCAACCTGTATTCTGTGAGATTGAAGCAGAGTTTCCGGTGTGATCACCAGGAAATGTTAATGGATGC  
CATCGAAGCACGTTTACAGCAGCAGTAACCCACCTTAGCGAGAAGGATCTCGTTGAGACTCTGAGTGACAGCGCCCTTCT  
TTCCACGCATACTGGGCGCTGTTGCTTTTTGAACCAGGAAACAGAACCTCTGACAATGAATTTACAGCATCACTTTCTT  
ATTGCCATGCCTGCTCTCCAGGATCCGATTTCCGTCGTTCCGTTGCTACATTTGCGAACATAATACCAATGGTGAAT  
GGGGATCATCGTCAACAAGCCGCTGAAAAATCTCAAATTAAGGGATTCTGAAAAAGCTGAAGATCACGCCGAGCCGC  
GTGATGAATCAATCCGCTGTGATAAACCGTTATGCTCGGCGTCCGCTGGTGAAGATCGCGGGTTATTTTGCATACT  
CCGCCCTCAAATTTGCTTCCAGCATTGCAATTTAGACAACACGGTAATGACCACTTCCCGCATGTGTGAAAACGCT  
CGCACCGATAAAACAACCGTCTGACGATTTGGTGGCTCTGGGTTATGCCTCCTGGGAGAAAGTCAACTGGAACAAGAAA  
TTCTCGATAACGCGTGGCTAACGGCCCGGCAGATCTGAATATTCTGTTCAAACCGCCGATTGCCGACCGCTGGCGCGAG  
GGCGAAAACCTGATTGGTGTGGATATTCTACCATGCCTGGTGTGGCAGGACACGCCTGATGAGTGAACCTTACTCGCC  
TTCGACTTCGGCACAAAAGCATTGGCGTAGCGGTGGCCAACGCATTACCGGCACCGCTCGCCCTTTGCCTGCAATTA  
AGCACAGGACGGTACGCCGACTGGAACATTATCGAGCGTTTACTGAAAGAGTGGCAGCCGGACGAAATCATCGTCGGTT  
TGCCGCTGAATATGGACGGCACCGAGCAACATTGACTGCCAGAGCGGTAATTTGCCAACCGTATTATGGCCGTTT  
GGTGTGAAGTAAAGCTCCATGACGAGCGTCTTAGCACTGTGGAAGCCGTTCCGGTCTGTTTGAACAGGGCGGCTATCG  
GGCGCTCAACAAGGCAAAGTTGACTCTGCCTCTGCGGTTATTATTCTCGAAAGCTATTTGAGCAGGGATTAAGGGC  
ATTTAAACGCTGGCGGAGTGAATAATATCATCGCGTCTTATTGCCGGATGGCGGTGAACACCTTATCCAGCACACA  
TCTGGCAGCGGCTATAGGTCTGATAAGACGCGTTAGCGTGCATCAGACATTTATTGCCTTTGAGGCCCGATAAGCTTG  
CGCATCGGGCATGGCAACGTCAAAACGCCCTTCCCCACCCGGTGTGATAACTCTGTGAAACGTTATCATCCCCACC  
TGCTGCCGTTTTGAATAACATGCGGTAACCTGGTGGTTTTCCCTTCCGGAATCAAATTTCCACCGGGGTGTGTTAAT  
CAGCAATTCAAATAGCGCCACGCGCTTCTGTTTATCCACTTCCAGCTTTTGTGACAGCACTGCCCGTAAACTACTG  
CCAGTTGATTACGCACGGGTCTTTTTCTGCGCCGAAAATGAATCCACCAGTGCCTCAACTGCCTGCGCGGCACCACGC  
GTATGTAATGTTGCCAGCACAAATGCCGTTTTCTGCCGCCGTAGTCCAGACGGATTGTCTCGCTGTACGCAGCTC  
TCCGAGCAAAATCACATCAGGATCTTCCCGCAATGGGCGCCGCAATCCCGATGCGAACGTCATACAGTGCAAAACCAATTT  
CCCGCTGCTGGATCAAACATCGCTGGCTGGCATAGAGATTAACACAGGATCTTCCAGCGTCAGAATATGCGCATCGGCA  
TGTTGATTGAGATAGCAACCATCGCCGCCAGCGTGGTAGATTTGCCACTCCCGTCGCCCGCTCACAGAAATCAGGCC  
ATTCTCGCTCTTGAGTAATTCGGCAATACCGTTGGTGCGCCAAGCTGTTGAGCTGCGGGCAGTGCGAAGGTAACAGCC  
GTAACGCCAGGCAATGCCATGCCGTTGCGCAATGCGCTGCCACGCAATCGCTGGTTTTCCGCCAGCGACAGGCAAAA  
TCCAGTGACCATTCTCCAGCAATATTGCCGCTGATCGTATCCAGCCACTCCCGCAGTAGCTTTCGACGTCCGGCGT  
ATCAAACGGCGCAGCTTCCATTCTGCCGCAATGCGCCATCGTGGGGCCAGGCGTGCACAGGTGTAGATCCGAGACGT  
TATGCTTTACTAAGGGCCACAATTTCTCCATATTCATACTAAGATCCTCGAAAATGAACGATATTGCGCATAACCT  
GGCACAGGTCCGGGACAAAATCTCAGCGCTGCAACGCGTTGCGGCCGTTCTCAGAAGAAATTACGCTGCTTGCAGTCA  
GTA AAAACAAAACCTGCGAGCGCCATCGCAGAAGCCATTGATGCCGGGCAGCGTCAATTTGGTAAAACACTACGTTCAGGAA  
GGGTAGATAAAAATTCGCCACTTTAGGAACTGGGCGTAACAGGATTAGAATGGCATTATTTGGCCCGTTGCAGTCTAA  
TAAAAGCCGCTGGTGGCAGAGCATTTGACTGGTGTACATACCATCGACCGTTTGCATCGCTACCCGTCTCAACGACC  
AGCGCCCGCAGAACTTCCCTCTTAACGTTCTGATTCAAATTAACATTAGTGATGAAAACAGTAAGTCCGGGATTCAA  
CTGGCTGAACTGGACGAGCTGGCAGCTGCGGTGCTGAACTACCGCTTACGTCTGCGCGGGTTGATGGCAATCCCTGC

GCCTGAGTCAGAATATGTAAGGCAGTTTGAAGTTGCACGCCAAATGGCTGTAGCATTGCGGACTGAAAACGCGCTACC  
CGCATATCGACACGCTCTCTCTGGGAATGTCGGACGATATGGAAGCCGCCATTGCGGCAGGTAGCACGATGGTTCGTATC  
GGCACTGCAATTTTTGGTGCCTGATTACTCTAAAAATAAGGAATTAAGGAACGCCATGAATACGTTGACTTTCCTG  
CTTCAACGGTCATTGAGCTGTATACCATGGTGCTGTTATTACGCATCTGGATGCAAGTGGGCTCATTGTATTTTTACAA  
CCCCCTTCTCACAGTTTGTAGTGAAGGTAACGCAGCCAATTATCGGGCCACTGCGCCGCTTATTCCGGCAATGGGGCCAA  
TTGACAGCGCCTCGCTGCTGGTTGCCTATATTCTCAGTTTTATCAAAGCCATCGTGCTGTTTAAAGTGGTGACCTTCCCTG  
CCAATCATCTGGATTGCCGTTTACTGATTCTGCTGAAAACCATCGGCCCTGCTGATTTCTGGGCTCTGCTGGTGATGGC  
GATTATGAGCTGGGTAAGCCAGGGGCTAGCCCCGATTGAATACGTGCTGATTCAGCTGGCCGATCCGCTGCTGCGCCGA  
TTCGCCGCTGCTACCGCAATGGGTGGGATTGATTTCTCGCCGATGATCCTCGTTCTGCTGCTGTATGTCATCAATATG  
GGTGTGCGAGAAGTATTACAGGCAACCGGAAATATGCTGCTGCCAGGGCTGTGGATGGCGTTATGAATGCCGTAACAGTT  
AATGATGACGGTCTGGTTTTACGGCTCTATTCAGCCGAAAGCCAGCCGTGATTCTATTGTGCGTTTACATGGCGACGA  
AGTTAAAGTCGCCATTACCGCGCCCGGTTGACGGCCAGGCCAACAGTCATCTGGTGAAGTTTCTCGGTAAGCAATCC  
GGTTGCCAAAAGCCAGGTGGTATTGAAAAGGCGAACTTGCCGCCACAAACAAATTAATAATCCGCAACAA  
ATCCCGCCAGAAATCGCGCGTTAATTAATTAGGTATCCTATGAAAAAGTTGCTCGCAACCGGCAATGTCGGTAAAG  
TGCTGAGCTGGCTGCTGCTTAGCGACTTCGGTCTTGATATCGTGGCCAAACAGACCTCGGCGTTGATTCCGCTGAA  
GAAACCGCCTGACCTTTATCGAAAACGCGATTCTGAAAGCGCCATGCGGCAAAAGTACCGCTTACCAGCAATGTC  
CGACGACTCTGGTCTGGCGTAGATGTGCTTGGCGCGCGCCGGCATTACTCCGCGCTTATTCCGGTGAAGACCGGA  
CCGATCAAAAGAACTGCTGAAAACTGCTGAAAACAATGAAAGACGTACCGGACGACCAACGTGAGGCGCTTCCACTGC  
GTGCTGGTATATCTGCGTACGCGGAAGATCCACTCCGCTGGTATGCCACGGTAGCTGGCCGGGCGTGATTACTCGTGA  
ACCAGCGGGCACTGGTGGCTTTGGTTATGATCCAATCTTCTGACCTTCCGAAGGAAAACCGCCGCCAACTGACCC  
GCGAAGAAAAGAGCGCCATTTCCACCGTGGTACGGCTTAACTGCTGCTGGACGCTTACGTAATGGTTAAATTACC  
TCCGCTGAGTCTACATTCACATCCCGTGGTGCCTGAGAAATGCCGACTGCGATTTCAACTCTCACGCTTAAAG  
GAGAAGTCCCGCAGCAGATTATGTTACGATCTGCTTAACGATCTGGACAACGATGTGGCTTACGCTCAGGGCCGTGAA  
GTAAAGACAATCTTTATTGGCGGTGGTACGCCGAGCCTGCTTCCGGCCCGCGATGCAAACGCTGCTGGACGGCGTGC  
TGCGGTTTTGCCGCTGGCAGCGGATGCAGAAATTAATGGAAGCGAACCTGGCACGGTAGAAGCCGATCGTTTTGTCG  
ATTATCAGCGTCTGGTGTGAACCGCATCTCTATTGGTGTGACAGTTTTAGCGAAGAAAAGCTGAAACGACTTGGGCGT  
ATTCATGGCCCGAAGAAGCGAAACCGCGCGGCAAGCTGGCGAGCGTTTTAGGTTACGTAGCTTTAACCTTGATTTGAT  
GCATGGGCTGCCGATCAACTACTGGAAGAGGCGCTTGGCGATCTACGCCAGGCCATTGAATGAACTCCGCCGATCTTT  
CCTGGTATCAACTGACCATCGAACCAATACGCTGTTTGGTTCGGGACCACCGTGTGCTGCCGACGATGACGCGTTGTGG  
GATATATTCGAACAGGGGCATCAGTTATTAACCGCAGCGGTTATCAGCAATATGAAACTTCCGCTTACGCCAAACCCGG  
TTATCAGTGCCAGCAATCTCAACTACTGGCGTTTTGGTACTACATCGGTATTGGCTGCCGCGCACACGGCAAAGTGA  
CCTTCCCGGATGGGCGCATTCTGCGTACCACAAAACCGCTCATCCGCTGGTTTTATGCAAGGAAGGTATCTGAAAGC  
CAGCGTGATGTCGAAGCCACAGATAAGCCGTTTGGTTCTTTATGAATCGCTCCGCTGCTGGAGGCCGCGCCGCGGT  
GGAGTTTATTGCGTATACCGGGCTTTCGGAAGATGTGATTGCCCCACAGTTAGACGAGGCGATTGCCAGGGTTATCTCA  
CCGAATGTGCGGATTACTGGCAGATAACGGAACATGGGAAGCTGTTTTAAATTCGCTGCTGGAGCTTTTTCTGGCTGAG  
TAAACTTGTATTGCCGGATGCGGCGTGAACGCCTTATCCAGCCGACATGTGGCAGCGGTTGAGGTCTGATAAGACGGC  
AAGCGTCGCATCAGACGTTGATTGCCGGATGCGGGTCAACGCCGATCTGCTACAAATCGTGCATATATCAAATTA  
CTTAATCACCCATTGCGCCGAGTTGTTGCGTATCTTTTTCCAGCGTTTATTAGCTTGGTTGATATCGTCAATTTTCA  
TCAAAATCGCGACTTTTTTACTGTTTTATTCTGAACTTTTATCGTTAACGGATATTGCCCTTTTTCGAGCGTTACCCG  
TCATCTGCAATTTACGGTAAAGTTTTGATTGTCAGAAAAGTGTGCTGCCGTTGTTGTTGATATCGAAATCTGTTTT  
CTGCTGAATCGCACTTATAAACACTTCACTGTTTTATGACATGCCGCAATCGCCGTTGATAAACCTCTTTGTCAT  
ATTTAACCGCGAACGCTCGCTATCGTTCTGTTTATTAACCTATCACGCTGTTGGTGAATTTTTTAAAGGCGTCTTCG  
CGGTCATTTGCTTACCCTTTCATCTTTTCCCAATATGCATCCGCTGCTTCTGCGCCGCCACCATTTGCTTATCAAG  
CGTTTTCACTTCTTTTCCAGCGCAGGAATCGAGTCTTCTGGGTATTCAACGCAGATTCAAGCTGACTAAAGCGATAAT  
TGAAATCTTCCGCTATTCAGATCAGATATTTATTATTCGTTTTGATATCGTGCACCACCGCCACGATCGCTGGCTGCC  
GCCTGAAAAGAGTAAAAGTTCACCGACCAGCCAGACGCGGGGCTTCTTTACTGGTTAACATCGCCGAGAATTTTACCGG  
TTTATCTTTGCTCCAGGTCTGTTGAGCAGTTCTGTAATCTGCCAACTGACCGACCCAGGTATAGAGATCGTCACTGGAAG  
AGACATCGCTTCCGCTGACCAGGTGGCCTGATTACCCTTAGCATCAAGATTTTTTAAAGGTGATAGCATCAAGCTTGA  
ATGCCGTGATACTGTTTTGAATTGATCTTTAAGATATTTTCAAGTTGGCGGTTGCCATCTGCCAGGCAATACCAGT  
CATCAACATAAGCAGTGGCGTCCAACAATCCATTGCTTTTTTACCCGAAAAACCTCACGCGGAATAATTTATTCCGGTG  
ATTATCATTAGGTAATTAATTAATGGCAATGGACGTGAGTCTGAAGTAAAAAGCCCCGGCACGATACCGGGGCGAGGCG  
ATTAGTACTGATTGAAGATCTGCTGGATCTGCTGCGGATCTTTGGTTTTCGCTCAGAGCCAGTTGCAGCAGAACGCGCGCT  
TTTTGCGGGTTACGCTGCCAGAGGCGACGAAGCCGATTTTCGCATCATCCACTTCGGCATCTGAGTGGTAGCGCCCGT  
CGGTACGCGGGAAGAACGCAGACTGCAGTACCGGTTTTTCGCGGCGGTCGCCAGCGTGTGAAACACAGATTTATACAGGT  
TGCCGTTACCCACACCAGCGCTAACGATGCCATCATAGCCCGCATCTACCAGTGCTTTAGCCGGAAGATCGGATGCGTTA  
CGGTAGTTATAAAACAATGCCGACTTTCGGCAGTTTATTAGCTTAGAGACATCGAATGGCGTGTGCTGGTATGCTTACC

TGCCGGGTACGCTGGTAGTCAATCTTACCGTTGTGAATGTAACCCAGAGGACCGTAGTTAACAGACTTGAAGGTCGCTA  
CGTCGGTGGTGTGGTTTTGGTGACGTACGGCCATCAAGCACGGTGTATTACTACTACCAGCACGCCACGGTTGGCG  
GAGGCTTTATCAGCTGCGGTACTACCAGCTTATACAGGTTGAATGGACCGTCTGCGCTCATAGACGTGGACGGACGCAT  
TGCGCCGACCATCACCACCGTTTTGTGCGATTTACCGTCAAGTGCAGGGAAGTAAGCAGTTTCTTCATCGTGTGCGGTAC  
CGTGGGTAATGACGAAGCCGTGCGTCTTATCGCAGTCGGTGTTAATTTTTTTCGCCAGTGTGAGCCAGACATTATCGTTC  
ATGTCCTGGGAGCCGATATTCACTACCTGCTCGCCTTAAACGTTGCGAATGTCTTTTAGTTGCGGCACCCGATTAACCA  
ATTTTCTACGCCAACTTTACCCACTGTGTAGTTAGATTTGGTTGCGGAGTCACCACCACCGGCAATGGTCCCGCGGTTG  
CTAAAATGGTGATATTGGTAATGCCAATGCTGCACCACTAAAACCCATAACCAAGTGCAGGCAAGTGCCTCTTTTTGAAA  
AACTCCATTTTCTCCAGTTACGTGAACGCTACGCATTATCCCTTAGCTCTGTATGGGAAATTTGACGTTAAACAAT  
TTACAACGTGAATATATTTTGGAGATCTACAAAGTTAGAGGCAGGTAACAAAACGAAGAATTAACCGGCATAAAAAAGTA  
TTATGCCGCTTAAAATAGAGGATTATTTAAATCCCGACCAGGGCTTTGCGGCTATCTTCAGAGTCACAACGCGGCT  
ACAAACATCTTTGCCAACTGCTGGAAATCTTTTCTGCTTTTTTCCACTCGTTTTGGATTGAGGATTGCAGCCCCCA  
GGCTTCCAGCACATTCTGTAATGGTTACCGCCGCTTTTCCAGCACCGCTTTGCGGCCATTTTATTAATGCTGTCTGT  
AAAATCCACCATTGCCTGATTCACTAATTGCTGGCCTTCGGCGCGAACCTGATCAATGGCTTTATAGTGAACGCTCAG  
GCCATCGATCGCGTTTTCAATAATGCGGTTTATCTGCTTTTCCAGTGCATCAAGTTTGGTCAGACGGCTGCGCATTT  
TGCTGTTTTGCCCATCTCCTGAACGATAATTTTATCCAGAGCAATACGGGCTTTCTCGACGCGGCTTTTTCGCGCTTCA  
TCAATCCACGCGACGCTGCTGCGTAGTTCAAGCTGATAATCCTTCGCTGCTGCGCTGGGCGGCAATTCAGGGAATATTG  
CTTACCCTTATACATCAGTTGCGCTGCTGGCGTGATCACCAGATTGCCGTTTTTTCGCTTACCTGCACGGTTTTGCGGGC  
TGACAATCACATCGTACGCGGCGTGACGCTGACTGGTAGTCGCGGTGAGCGGTCATTGCCGTCCTGAAAGTGTGCGC  
GCCAGCAGCTTTTTCGCGATCATAGTCTTCCCTCAAGAAAAATCAGGCCAGCATTGCTGGCCCCAGATTGATAACAAA  
GTACGCGTTTTTCCATGCCGATGCGGCGTAAACACCTTATCCCGCTACTCGATCGTGCATCTTTCCAGGCTGATAAGC  
GTAGCGCATCAGGCGATTTTGCATTTGTCATCGCCGATGCTTTTCTAGTCCACCAACGTCGAAAAGTTGCTGGTG  
CGTACCTCATCAGTTTTCGCTCTTCCAGCCACTTACGCACAATCGCTGATGTTTTCGTTGCAATTTGCCGATTTCTG  
CATGCAGATCAGACCTTCCAGGCCAGATAACCGCTGCCGTCAGGCGGATTTGTTGCGTTCGATAACCTGTTAATAA  
AATCATCAACGGTTTTTATCAATCTGTTCTCCGATGTACCTTCCGGGAATCGCCATGCCACCGAAAATCCTAATTCCTGG  
AATTCGTGATGTGCAATTTTTTACGCGAGCAGCGGCTACGGTCTTTGCCATTATTTACCCTCTCGAACATTAAGTCC  
CATACTCCGTGACCAAGACGATGACCAGTTGTTCAAATTTCTGACCGGACGTCGATGCCGCGACGCGGTACGTAATCATT  
GCTCTCTGACAGTTTTTATAACCGTCAATAGAAGACATCACTTCAAGCATATGTTCCGCATAAGGTTCCAGTCGGTCG  
CCATATGGAATACGCCCCCAGCTGCAAGTTTGTCTTTTACCAGTTTCGGCAAACGGCACCTGAACGATACGCGTTTTATTA  
TGCGCGCTTTGTGCCACGGGTGAGGAAAAAGAGCTGACCATGCGCAATGAATGTGAGGAATCATTTTATGAGCAC  
TTCAACCGCATCGTGACACATCAGCGCAGGTTGCTTAAACCTTCTTATGCGCAGAAGCCAGGCACGCACCAACGCCCC  
GTGAATGCACTTCAATGCCGAGGAAGTCTGCTCAGGGCGATCTTTAGCCATTGCCACCAGCGACGCCCCCATGCCAAAA  
CCAATCTCAAGCGTACCGGCGCTTACGGCCAAAAAGCGCGGGGAAATCCAGCATATCTTCGCTGAACTCAACGCCCAT  
CACCGGCCAGTAGTTTTCCAGCGCATGTTCTGGCTTTGGTCAGTCGCCCCGGCGGCGCAGAAAACACTACGGATACGGC  
GCAGTGGGCGGCGTTTTTATCAAATTCGGTGAATGACGTCGTTTTTATAAAGGTTTAGTCGTTGTGAAAGTGTTC  
TGAAAACGGGCATTATCCAAAGTTAGTTGCCGGATGCAAGCATGATAAGGCCGTTGGCTGCGGAAAGTTCCGGTTTACACC  
CTGCCGTGCTGTGCTGCAATCTTCCCCCAACAACAGTGAATTCGGTGACCATGCAAGCGTCGCAATTTTACGCCCAGG  
TTCTGGACTGGTACGATAAATACGGGCGAAAACTTGCCTGGCAAATGACAAGACGCCCTACAAAGTATGGCTCTCA  
GAAGTGTGTTGCAACAACTCAGTTGCGACCGTTATCCCCTATTTTGAACGCTTTATGGCGCGCTTCCCGACGGTGC  
CGATCTCGCCAAATGCGCGCTGACGAAGTTCTCCACTTGTGGACCGGCTTGGCTATTACGCCCGCGCGCAATCTGC  
ATAAAGCGGCACAACAAGTGGCGACCTTACACGGCGTAAATTCGGGAAACCTTTGAGGAAGTTGACGACTGCCGGC  
GTCGGGCGTTCCACCGCAGCGCGATTCTCTCGTTTTCTGCGTAAAGCACTTTCCGATTCTGACGGTAACGTCAAACG  
CGTGTGCGCGCTGCTATGCTGTAAGCGGCTGGCTGGGAAAAAAGAGGTCGAGAATAAATTATGGAGTTTGGAGCGAGC  
AGGTGACGCCCCGCGTTGGCGTGGAACGGTTAATCAGGCGATGATGGATTTGGGTGCGATGATTTGTACGCGCTGAAA  
CCGAAATGTTGCTCTGTCCGCTACAAAACGGATGTATTGCCGCCCAACAATAGCTGGGCGCTTTATCCGGGCAAAAA  
ACCGAAACAGACGCTGCCGGAGCGCACCGGCTACTTTTTGCTATTACAGCACGAAGATGAAGTATTGCTGGCGCAGCGTC  
CGCCGAGCGGATTGTGGGCGGTTTTACTGTTTCCCGAGTTTCCGACGAAGAAAGTTTGGCGAGTGCTGGCGCAA  
CGGCAGATTGTGCCGATAACCTGACGCACTGACCAGTTTCCGCATACCTTACGCCATTTCACTTAGATATTGTGCC  
TATGTGGCTTCCCGTGTGCTATTACCGGCTGCATGGATGAAGCAATGCGCTCTGGTATAACTTAGCGCAACCGCCGT  
CAGTTGGCCTAGCGGCTCCCGTGGAGCGTTTGTACAGCAGTTACGCACTGGCGCGCGGTTTACGCGGTGAGTCGATAA  
AGAGGATGATTTATGAGCAGAACGATTTTTTGTACTTCTGCAACGTGAAGCAGAAGGTCAGGATTTTACGCTGTACCC  
CGCGAGCTGGGAAAACGCATCTATAACGAGATCTCAAAGAAGCCTGGGCGCAGTGGCAGCACAAGCAAACCATGCTGA  
TTAATGAAAAGAACTCAACATGATGAATGCCGAGACCGCAAGTCTTGGAGCAGGAGATGGTCAACTTCTGTTGAG  
GGTAAAGAGGTGCATATCGAGGGCTATACGCCGGAAGATAAAAAATAAAACAGTGCAGGAGCACGCCTCCGGCAACTTG  
CATAAAAAACAACACAACACGCACCCGGAATGATGAAAAAATATCTGCGCTGGCTTTGATTGCGCCGTTGCTCATCTCC  
GTTCGACGACCAAAAAAGCGGATACCTATAACGAAGCCTGGGTCAAAGATACCAACGGTTTTGATATTCTGATGGGGCA

ATTTGCCACAATATTGAGAACATCTGGGGCTTCAAAGAGGTGGTATCGCTGGTCCTAAGGACTACGTGAAATACACCG  
ATCAATATCAGACCCGACGCACATCAACTTCGATGACGGTACGATTACTATCGAAACCATCGCCGGGACAGAACCTGCC  
GCGCATTTGCGCCGGCAATTATCAAAACGTTATTGATGGGTGACGATCCGAGTTCGGTCGATCTCTATTCCGACGTTGA  
TGATATTACGATTTGAAAGAACCTTTCTTTACGGTCAGGTGGTGGACAACACCGGGCAGCCGATTGCTGGGAAGGTC  
GCGCAAGCAACTTCGCGGATTATCTGCTGAAAAACCGTCTGAAGAGCCGACGCAACGGGCTCGGTATCATCTACAGCGTC  
ACCATTAACATGGTGCCGAACCACCTTGATAAACGTGCGCACAAATATCTCGGCATGGTCCGCCAGGCGTCACGAAATA  
TGCGTTGATGAGTCGCTGATTCTGGCAATTATGCAGACCGAATCTTCTTTAACCCGATGCGGTGACGCGTTCGGATG  
CGCTGGGATTAATGCAGGTGGTACAACATACTGCCGGGAAAGATGTTCCGCTCGCAGGGGAAATCCGGCAGCCGAGC  
CGCAGTTTCTGTTTGTCTGCCAGCAATATTGATACCGGCACCGCGTATCTGGCGATGCTGAACAATGTTTATCTCGG  
CGGAATTGATAACCCAACATCGCGGCTTATGCCGTATACCGCCTATAACGGCGGCGCAGGCGAGCGTCTGCGAGTCT  
TTTGAATGATAAGATTGAGGCTGCCAATATTATTAACACCATGACGCCGGGCGATGTTTATCAGACGCTGACGACCCGC  
CATCCCTCTGCGGAATCTCGCGTATCTTTATAAAGTGAATACCGCGCAAAAACTACCGCCGCGGATAATTCCATTA  
ACCGCCCTGACGATGCTCAGGGGCAAAAATGTTATCCACATCACAATTTGTTTTGCAAATGGGAATGTTTGAATTA  
TTTGCCACAGTAACAAAAACAGTCCGCGAAGTTGATAGAATCCCATCATCTCGACGGTCAAATGCTTTTTTCAA  
CACTCATCCGCATCAGATGTGAGGAAATTAACATGAATCTTAAGCTGACGTGAAAATCCTCTTTTTCTGCAGTTCTG  
TCTGTGGGAAGTTGGCTGACGACCCCTCGGCTCCTATATGTTTTGTTACCCTGAAGTTTACGGTGCTTCTATTGGCGCAG  
TTTTATAGCTACTGGGTATCGCAGCGGTCTTTATGCCTGCGCTGCTGGGGATTGTGGCCGACAAATGGTTAAGTGCGAAA  
TGGGTATATGCCATTTGCCACACCATTTGGCGCTATCACGCTGTTTATGGCGGCACAGGTCACGACACCGGAAGCGATGTT  
CCTGTGATATTGATTAACCTGTTTGTATATGCCAACGCTTGGGTTAATCAACACCATCTTACTATCGCCTGCAAA  
ATGCCGGGATGGATATCGTTACTGACTTCCCGCAATCCGATCTGGGGCACCATCGGCTTTATCATGGCAATGTGGGTG  
GTGAGCCTGTCTGGCTTGAATTAAGCCACATGCAGCTGTATATTGGCGCAGCACTTCCGCCATTCTGGTTCTGTTTAC  
CCTGACTCTGCCGCATATCCGGTTGTAAACAGCAAGCGAATCAGAGCTGGACAACCCTGCTGGGCCTCGATGCATTCG  
CGCTGTTTAAAAACAAGCGTATGGCAATCTTCTTTATCTTCTCAATGCTGCTGGGCGGGAAGTGCAGATTACCAACATG  
TTCGGTAATACCTTCTGCACAGCTTCGACAAAGATCCGATGTTTGCAGCAGCTTTATTGTGCAGCATGCTCAATCAT  
CATGTGATTTGCAGATCTCTGAAACCCTGTTTCTTCTGACCATCCCGTCTTCTTAAGCCGCTACGGTATTAAGAAGC  
TAATGATGATCAGTATTGTGGCGTGGATCCTGCGTTTTGCGCTGTTTGTACGGCGACCCGACTCCGTTCCGGTACTGTA  
CTGCTGGTACTGTCGATGATCGTTTACGGTTGCGCATTGACTTCTCAACATCTCTGGTTCCGGTGTGTTGCGAAAAAGA  
AGTTAGCCCGCAATTCGCGCCAGTGACAAGGGATGTTCTGATGATGACTAACGGCTTCGGCTGTATCCTCGGGCGCA  
TCGTGAGCGGTAAAGTTGTTGAGATGTACACCAAAACGGCATTACCGACTGGCAGACCGTATGGTTGATTTTCGCTGGT  
TACTCCGTGGTCTGGCCTTCGCGTTCATGGCGATGTTCAAATATAAAACACGTTCTGTGTCGCCGACAGGCACACAGACGGT  
TAGCCACTAATTACGCAAAGAAAAACGGGTGCGCAGAAGGTGACCCGTTTTTTTTTATTCTTACTTCAACACATAACCGTA  
CAACCGTTTACGCCATCCGCATCGGTTTCGCTATAAACACCTTCGAGCTCCGGCGAAAATCCCGGCAACAAATTCACCC  
CTTCTTCCAGTGCAAGGAAATAACGTTGAACCGCCCCACCCAGACTTCCCCGGTACCACGCAAAGCACGCCAGGTGGA  
TAAGGCAACGCCCTTCTGCCGAATTCGCCCTTCGGCATCACGAATCCGCACCAACTCCACGTCACCGCGAATATAAGC  
GCTATGCGCATCCTGGGGTTCATCACCCTGACGGGAAACTCTGCTGGCGGAACATCGCTTTTTGTAGGTCTTTGACGT  
CGAAACTGACATACAGATCGTGATCTCTGACACAACCTGGCGCAGGGTGTAGTCGCGATAGCGCACCCGGATACTTGTA  
TAAACGCTCGGCAACACCTCAACCAGCGGCGAGTCACTCAATATGCTGTTCAAATTCGCCAGCATCGCCACCAGTTG  
TGCCAGCTTCTCGTGGCTTTCGCCCGGAGTTAATAAAAAACAGAATGGAGTTGAGATCGACTTCTCCGGCACAATCCGCT  
TCTCAGCAGATAGTGGCCAGAATCTGCGCGAACGCCAAAGCTGCTATATTCGCCGGTTTCGGCATCGATACCTGGT  
GTAGTGAGTAACAGCTTGCACGGATCAACAAAATCTGATCGCGGATATCCTTCAAAGCCGTGCCACTTCGCCCCCGG  
CTCAAAACTGAAAAACGGCGGTCTGCTGGCTAACACTGATGTCGGATAATCCTGCCACAATTTGCCATCAACAACGGGCG  
GGATAAACGGGCGGAACAGCTTACAGCGCGAAGAATAGCCTTGGCGCTTCAATCCCTATCTCAACACACTCAGCCAC  
AGCCGACGCCACTCTCCCTTCATGAATTTTGGCGTTAATCCAGTGCAGCAACAGCGGATAGAAAGGGCTGGTAGA  
AGCATGGAGCATAAAGGCGTTATTCAACCGCTTATGCGGGCAAAAACGCGCCTGTCCGCGGATATGGTTATCTTTTTTAT  
GGATCTGCGACGTCTGTGAGAATCCCGCTGCTGTTTGTGACCGACTGAGTCACAAAGATCCCGGATCGTTTTCTGTTA  
AGTTCTAACAGCAGCGGCGAGCTATCCGCCATCATCGGGATAAATTGTTCATAACCGACCCACGCGGAATCAAACAGAAT  
GTAATCACACAGATGCCAACGGTATCGATCACCTGACGGGCTTATAGACAGTGCCGTATAGGTTCCAGCTGAATAA  
TCGCCAGGCGATACGGGCGGCGAGGTCGGCTTTTTCTGGCGCAACGTCGCGAATTTGCTGGCGCAGATACTTTCATTA  
AAACAGTGCATCAATACGCCAATGAAACCAAACGGGTTGCGTGAAGCTTCCAGATAGACCGGCGTCCGCCCGCTG  
AATCAGCGCGCTGATGATTGCACTTATGGTTGTACGGTGAAGAGCACCAGATCGCCACGCTTAAACAGCGCATTCCG  
TCACCCTTTATTCGCTGCCGATGTGCCGTTTTCAGCACAAAATAGTTTTATCGGCATGAAAGACTTTGGCTGCGAATTC  
TGCGCATCTTTCGCCGATCCTTCATGAATAAGCAGATCGCCAAATTTTACGTCAGCGTTACACATATCGGCGCGAAAGAC  
GTTCTACCAAAGAAATCGTAAAAATGGCGTCCGGCAGGATGCTTTTTAAAAACGCACCATGTTGATGTCCAGGGCAAG  
CAAAGGTGCTGTTGCCATCTCAACGTAAGTGCCTGACGCTGCTATAAAACGGTGGCAGCAAATTTCTTTCATACTGACAG  
GCTGCGGATTCAGCTCCAGCCACTGCTGCTCGTTGCCGTTGATTACCGCCGTAACGCCCGCAGGTAATCAACAGCATG  
TTCGGAATACAAAAACCCGGTAGATGAAAAACGGTGCCTTAAAGCAACGCAAGAATGCCACTGCGACTATCCGACGCG

TAATGACGACTGCCGCGACGTCCGTAATAATCAGTATCTCCAACGCCACCACGCGACGATGAGAAGAAAGTCGGGATACC  
AGTTCACTACTGGCGCAATATTCATTGATTTTCATAAGCGCAAACCCGTTTCGGGGAAGTAAGAATACCGGACAAGGTGG  
AAAACCTGCCCATGAGATATGGGTCAAACCTGGTACCAGCTCCGACCGCCAGACATCAGTAAAAGCAGAAACGCTCTG  
ATTTACTGTTGCTCCTGCAGTGAGCGTGCCTAACCTCACCGCATGAGCAGTAACATAGAAAGGGAAACGTTTCGCGCGA  
AACGGCGATAAGCGAGAGAAATGTAAGGAGATGGCGTGCATCGGGCAAACCTCCGTACAGAGAGGAGAAAATTCGCGCAATC  
ATGGCACCTTTTCGCTAAAGCGTGCAAGCCAGGACTTTGCGAACAACAAGCCATCGACGGCACAAACGGTCATAATAAG  
AAAATCAAACAATACAGCTAACAGGAACTCTTGTGGTCATCGGCCCTTTATCAACGCTAGTGCACTTACTGGGTGGC  
GTTCTCGGCGCACTGCTCAGCCAACGCTTACCGAAACGTATCCGCGTCTCCATGACATCAATTTTTGGTCTGGCATCGCT  
GGGGATTGGTATTTACTGGTGGTGAATGTGCCAACCTTCCAGCGATGGTTTTAGCTACGCTACTTGGCGCTCTAATTG  
GCGAAATTTGTTGCTGGAGAAAGGTGTCAATACAGCAGTCGCCAAAGCACAAAATCTGTTTCGTCACCTCACGTAAGAAG  
CCAGCGCATGAATCTTTTATTAGAAATATGTCGCGATTATTGCTCTGTTTTGCGCCAGCGGCACCGGGATCTTCGGGGC  
GATGAACGAAGGGATGACCGCGCATCCGAGTATTTAATCGCAAAGTCATTTCTTGATTTCTTACGGCGATGATCTTCG  
CCTGCTCGTGGTATTGCGGTATCGGTGATTAGTATCCATTACTGATCATCCAGTTAACGCTGGCGTGGGCTGCCGCG  
CTGATTTTACCCTGACCACCCGTCGATGATGGCAGACTTCAGCGCCGTAGGCGGTTTTATTGCTGCTGGCAACCGGATT  
ACGCATCTGTGGCATTAAAATGTTCCCGTGGTCAACATGCTCCAGCACTCTTCTGGCAATGCCGCTTCCGCGCTTCCGCGCT  
GGACCGCTGTTTTGCTGACAATGCAATATCGCAAAGTGATAGATTGTGCAGTCTGCAGTAAATGAAGAA  
ATTTGATTGACGAGACGAGCGAATCAGTTTTAATCGCCCCGTTGCCCGGATAGCTCAGTCGGTAGAGCAGGGATTGA  
AAATCCCCGTGCTTGGTTGATTCCGAGTCCGGGACCCTAATTTCTTAAGAACCAGCCCAAGGCGGGTTTTTGGT  
TTTGATCTGACAATAACCTTACGAAAAAATAGCTTATAAAGTCTGGGGGAATTACTCTCGCCACGTTAACGAGAGT  
AATTTTATTGATTAATCTCCTGATACTTTACCCCGTCAAACCTCCAGCCGCTGCACATTCACCATCCAGGCTTCTC  
AGCAGCACTGACATCAATTTGTGTACCCGAGCGCATATTTTTCATCCAGTGCCTTAAACCATTTACGAGGTCATTA  
ACACCACAGTTCTATCCAGACCTGAATATTCTCCACGATCGGCTATCCGCTGATGACCACCGAGTGCAGGGAAGCA  
CTGTCACCTGATGACCCGCGATACCTGCGCAGGCGTTGTTGTGGCAGATTTTCGCGCTGCAATAATATCCGGCGGGCGTT  
CTCAGTCGGGTGTTTCATCGCCACCAGCTGCTGCAATATTGCTCCTGTTGCTCAATCCGTTGCTCAACGGCTGCCAGA  
TGAGGACGTAATATCCGACGCTAAACAGGAACACCACCGCTGCCAGTAACATGCCCTTTTCACGCGGAGAACGCCCCGCC  
AGGTGTTGTGCCAGCCAGTGTTCGCCACGGCTTAACTGGCGTTCACGCCATTGCTGAAAATAGTGAATAAATTTATCGCG  
TAACATGTTATTTCTCCGCAACGTTACGCCCGGAAACCGCATCACCTCTTTCTGTAACGCGTCTGTTGCACAACA  
TAATCGGTTGCCAGTACACTACGCAGTTTGTGAAACTGGCAAAGTTCGCGGCCGTAGCTGGAGGTGAAGTATCTGGCG  
TTTTTGATCAAAGGTA AACCCACGCATTTTCGATGTCGAAAGT GACGCTGATTCAGGGT GCTGGCTATCGCTGACAAC  
CGCGGAGCAGCCGGTATCGTCCGCTGTGGCGGATATTTTTAGCGCCATCGTCACCTGAGAGCGTAAATTCACAATC  
CGTTCTGCTCCGGGAACAACGTTAAGAACTGTTCTCCGCTGGGTGCGGCTTTGCGCCACCTGTTGCTGACGCTCCA  
TAACGTCACGCCCCGCTCCACTGCCAGCGCAACCAGAATCAGCAATATCGGCAGAATCATCACCCGCCAGCGGCCACT  
GTTTTCGGTAGCTGACGCGAGGCTGCCACGGCCCTGTCAGCAGTTCCCTTCCGGTTCGCCATAAGTGGTAAATGGCGGGC  
AGAGCTGTAACGGTCAGGCGTTACGCTGTCGCCAGCCATGCTGATAGCTTTTCCGGTGAATGCCGACTACGGTTAG  
CGAAAGCGGTAATCCTGCTCATTGAGCTGGGCGCGGAACATGACCGGAGCCAGCGCCAGCCCGGCGCTCCATCCCCGGC  
ATTCATCGATGCGGCAGATAACCCGTTGCGCATCGCAAGCCATAAACCCACAAGGAATGGACATCCAGTCCGGCGCGACG  
GTAGCGGGGTGATGCCGTTTTCTGCAACCACTGCCAATGTTGCGCATATGCTGTTGGTGAATCACTGCTACGGTTGC  
CAGTTGCTGGTCGATTTCAACGGGGCGAAATGCAGTTCATCGATATCCTGGTTCAGCTCTTCTTCCAGTAAGGCGGGCA  
GAATAGTCGGTAGCGCAGCGCATGGAATGTGCTGGCGCGCACCTTTCGCTAAAACCGTAAGTTGAATGGAATCCATTG  
AAGGTAATGCCGCATCAGAGCAATCATTGCTGCTGGATCAGTGAATCCTGCTGATTTAGCGCAATGGCGGATATCCGCT  
TCCTTGAACCGCTGGCATCGAACAGAGAACGATCTGCCCGGCTTCGCTGCATAACCGACAATCCCCCTCTTACGCAC  
AGGCGTAAGCTGGATATAGTTAAAAATTTCTGCGGATCTTTCGCCAGTGCCTGACGCACGGCAGCCGGATCTCAACTG  
GCACACTGACAGCAGGCTCAGCAACAGCTTGCTTTGCTTCTGCTACTGACGGCTTTTTGTTGGTACAGCAACAGTGGAA  
CGTTCCTCTTCTGCCAGACTCAGACGCTCTATTTTTCCCTGATAACGCAGCATCACATGGTCGCGGTTGATTTCTCAAT  
CACCGGTTGTGAGAGCCAAGCGTTTTACCCTGCAATAGACCTGCTGTTTACCGCCTTCTCAATAACCGCGCCGGGTC  
TGGCACAAAGGCGATCCCACGAGCACCATTAAGACGCGTTTCTGCCACAGGCACAGGTTCCGGGTTGTTTTACCTGC  
GCGGCGACAGGCTGATATTTGCCAAACAGTTTTGCTGGCTGATTAATTGCACGTCATTTTTATCGAACGTTTTTGCATC  
CACACGGCTCGGTTTATTACCGGTTGAGAAACCGCGTATATCCGCGAAAAGGAGATATAGCGCCAGAGTGAATGCG  
CCATTTTTGCAGAAATAATAAGCAGCATCAGCCAGAACATCCCGCGTCAATTTTTCGCAGATGCTCTTGTCTGTATTA  
AGAGATTGCTCTGGTTAAGAGTGTGACGAATTTTTGTCAGCCATTGAATGAGATAAATTCGTGCGTCACGAAAAACAAC  
CCGCGCAATTTATATCTACCCGACGTTATGCTTTGACTATTCCACAGGTGGTACGATCCAGTTTCCGCTGATACTGGTT  
ACCTGTACGTGATCATTAACTGTTATGCTGTAATTAATCCCTCAGTGATCATTAAATTTACCGTCCGGTCCAGCGACA  
TTTTGCTGTTGATAGCTGGTTAAAAGGCGTCAGGCGTCTGCGTGGTTTTGTGTACCCGCTTCGCTGATAATGGTCATTTTT  
ACCGTTGTGCCGCTACTTTGCGCCAGCACTAAGGTATATCCCGCAGATTTAATCGGCAGGTTTTGGCTGATATTTGCGC  
CTGTTTTTTCGCCAGTAACTGGCATTTCATTATGGCTGGCACAGCCACTTAATAATCCTGTAACGCTCAACAATAGCG  
ATATTAATACCCTCCCTGGCATTGTTTTATCGACATGGTAAATAATCTCTAAGGTTATTAATAAGAGTTAAAATGTAC

TTTGATAATGACGTGGTTATCATTAAACAATGCCTGTAGATAAAGTGTGCTATACCGCCAGACTTAAACACGGTCCA  
AAAGGCAGTGTGGTTGATCCTCTTTTTGTAATAACGCATATATCAGGCCGAGCATGAGGCGATTAAGCAACATTGGG  
CAGCGACAATGCCCCACCCAGCCACCTAACCGCGGAAAAAGTAATACATCGCCATGCCTAATGCTTTTACGCAGAA  
CTATTCCGGCTATCCAACGCAGAGAGTAAAAAGTGATAAATCCCACCAGGACGCCGGTGACTGCATCTTGTAGCGTGAGC  
GGACTCTGCTCGGCCATGCCGCAATCAGTCCTGTCCACAATACGCCCTGAGTAAAAACATCGGGCAGCCATTGGTGATC  
GAGGTGCGATGACACTCGCGCAATCAGCCAGGCGGATAATATCATCACCGCCAGCCCCATCCACTTTCTGGCCAGACCA  
GACTCGCCAGCAAAAAGCAAGTGCTGTCAATACTCCACCAGCGGATAACGCTTGCTGATTTTGCCTGACAGTCGCGG  
CAGCGCCCTTTGAGCATCAGCCAGGAGAACAGCGGAATATTGTACGATACCGGATGGTCTGCTGACAATGTGGGCAGTG  
CGAACCGGTAGCGCAAGGCTTATTTTTGACTGCGCACTCGACATTTACCCTGAAACTCCGCCATTTGTTGGCGCAGCA  
TGATTGGGTAACGCCAAATCACCACATTCAAAAAATGCCGATGATCAATCTCCGACGGTTGCCAGGACGGGCATCGCC  
GTGGGGTATTGCTGAAAAACATCAAAAAGCATGGTTAAAGGTTGTTTGTGTAACCTGCTGGATGCGGCGTAAAACGCC  
TATCCGTCCTACGGGTGCTGCCAGCGCAATAATCGCGGCTTCCCGTCTGTAGGCCGATAAGCAGGCGCATCGGGC  
AAATGTGTTAACCCGGTGCCTTATTTTCATGCCGGATGCGGCGCAGCGCCTTATCCGGCCTACGGGCTTACTCGGCAG  
ACATCTTATGCTCGGTAACCTGATTAATGGTTTTCCGGTCCCTGTCCGGTTTCCGGCAGATCGAGTGACGCGAGCGTGTG  
TAAGCCGACTGGCTCACACGCCCTCGAAGCTCATCTCGCTCGCCCCGGCAGCTGGTAAGCATTTCGGCCCCGGATTTCA  
TTTTTAAAGAACTCCGAAAGATCCGTCGGGCGACAGGAGGCACACAGCATCAGCGTGTCCGCTGCTTACCCTTGG  
ATTACAGCACAGTAATTCTTGCCGCCAACTTGTCTTGTGCTGACCTCATCGCCGCGTGCTTTACGATGCATCAACTGGAAC  
AGGTTCCAGCCTTTCATCCCTTACGCTCGCTGTAAAATCTGGCAGAGGAGTGCCATCTGGATAACATTTCTTGATATC  
AAAGTTTTTCTGCCCATTCTTCAGCTGTGCGTACATCAGCAGACGGTACCCTGCACCGCCGCGTGGCCATGCCTGGT  
TGTTGCTCTCCTCAGATATTCCGGTGCAGCGTAATATCGTCAGCGACAGGTTTTCATCTTCCGAGATAACGATCCTGC  
ATGTACAGCGCCAGCAGCTTGTAGCGACTTCAGTTGACCCGGTACAGTCAACGGCGTTTCTGCGGCGTTATGACCGAC  
TTCATGCCAGATCAGCCAGTCGTTGAGCGGCTCGTCGGCAGCGTGGTGTCTTCCGGCAGAAAGCTGCTGTTTATTACCG  
GATAACCCGAATGCGCATCACCAGTGGAGATCTGCACATCGTTGGTAAACGATGTTTGTGGCCCGGCAAGTTTTTATAG  
GTAAACATCCGGTGCTTACCCTTCCGCTATCAGCGCCGTAGAAGTCATTCATCGAGCTGGCAAAGGTATCCAGATCGTT  
AGCGAATTGCTCCAGTCCGCGAGTGAATTGCTGGCATTGAGTTCTTCTCCGGTGTGGTATAGACGAAAGCGTCTGATT  
CCAGCTCACCAGCGGAGCCGGTGGTTCAGATCGTTTTTCCATGCGCCGTCTTATAGAACGGTGTCTTTACCACGCCA  
GTAAAGGTGAAGCTGGCAGATTATTGGTAGAGCTATTGCCCTTGATATAAATCAGGCCACCGTAAGGCACCTTGAACCT  
CACCGTACCCTAGCGTCCAGAGAGTACGTTTTAGTCACTCTTGGCGGACGGTTCAGCGCAACTTCATGCTTCTCACGTC  
CGGTCAGGTCGTGAGCCAGCGCCACGGTGACGGTACAGGAACGTTCCGATTGACTTAATGGTGACCTCTTTCTGAGCC  
GGTGCCACAGGCCAGTTGACTGCATGTTACCTGCAAAACATTTGGTCCGATTGAGTACAGGCTGATGGTTTTAGTAAC  
GTTCTGTCCCTCTCCGATACTGCTCCCGGATACTTCTCGACATCAACTTTGATGTTTCCAGATCCCACCAGGAACGGCCCA  
GCATCAGGCGTGTGAGCGGTTTTTCCATATAGTTGAGCGGGTAGCTCGGGTTTCATGCCCCGCTTTGCTGCTACCGTCA  
CCGTAGATCATGTTGTTATCGACCAGCGATTTTTTCCAGATCTGCAGAACACTTGGTGCCGCTGCATAGGCGATCATTGGC  
GTAGCAGTTCAGGAACTCGGTGAACGTTTTAAAGCCAGCTCGTCATTTTTGCTTCTTATAACGATAGCTCGTATCGT  
TCCACAGCCAGACCGATGTTCTGGTACAGACGTTCCAGATCGACGCTGCTCAGACGCTCACCTTTGCGACCATTTGGT  
CGGAAGTAGAGCTCATGCTGATACAGACGCTGAATGTTGGTGCCTAAATCCGCGCCTGCACCATCGTTTTGCAAGTGC  
GGCGTTAAGGCTTAGTTGCTATACTGTGGAACATACATGCCACCAGTAACCGGAACCCCCGTGCCAGGACGATTTCCA  
GGCAGTTGACCTCATAGTATGATGATGCGGATAGTACACTTTTTAGCCCCGGGAACCGCGGAAAAATTTCTCCTTCCGA  
GCCTTCCAGAGAATCCTCTGTTTTATGATCGGCCTCATCAATAAAGGCATAACCGGTTTTCTGTTTGGCATACATCTTC  
CAGCCAGCTGGCAACTTCCAGCTTCCGTTTTGTATCAGGTTTTGTTTTCTACCTGATATTTCCACTTAACTTCCCTGCT  
TACTATCGATGGTGTACGGCAGCGCACCATCTACGGCAGGATAACGTTTCATAGACCCAAATGCCCGTTGCGCGCTGCTGA  
CGAACGCGGTTGCGATACCTTGGGATCGTTATTTACTACCGACTTGTTCAGTGCCATCGACAGACCTGCGGCATCCAA  
CAGACGCACAAAACAGACGCGCTCTCTCTTAAAGATTGCTCATCACGTTTTCCATGATCAGCACCGATCCACCTTTGT  
TCAGATAGGCGATCAGATCGGTACATCTGCTGAGTCAGCTTCCGTTTTGCTGGTATCTGCACGCAGCGGATTGCATAA  
GGATCGTTACCACCTGAGTCACATATCAAAGCCGTTAAGGATCAGCAGCGGCATTTCTGCGGATCGAGATCGCCATA  
GCTACTTAAATGCTCAACAGAGATGCCCGCAAAATCCGGATGGAAGTCAACGCAGCGCTGTTTCTGTAACCTGACCAT  
GACGTTTTAAAATAGACAGTATCCAGGTTGGTGCCTACGGTCATGCTGGCTTTCCGCTCCGGCTTCCATTTATCGTCGGAC  
AGATAGCGCAGCAGTCTCCATGAAGTTCTTTCATGTCATCGGGTCCGCTGTTGAGCGTACACTGCCCATCTTTATTAAC  
GCCCGGTTCCAGCTGTAACGTTCCGGCAACGCAAAATGCTGTTGTAGTGTGGTTACCGATAACCATCAGTTTGCCT  
CACCGACTTGGCCAGCGAAATAAACGGCAGGTTAAAGGTGGCGTATCGCGGTAACGTTTTCCGGCTCAACAAGAGAA  
GGCGCTTCCGTAATGTACGCCAGCTCGTTTTTATCCAGGCGGTTTTTCCGCCAAGGCCAGCCAGTAGTTTTTATCATT  
ACGCGCCATCAGAATCGGGAAGGCCGCTTGGAGATATCCACCAGCGCTGACCGCGCGCATTACCCTGCTGCCATAGA  
AGTTGGTGGAGTCATGGAATACATGGAACCTGCTGACAGATTTGTAGTTCGATCCACGCCCCACAGCTTGTGATAACG  
CCCTGAATCTGGCCGTATTAACATTGCGCGTCTGACGAGAACAGCGAGCCTGTTACAAACCATCGTTTTTCCGACA  
AATCGCGGATCGATCTTTGGCCTGACCCGATTTAAACTGCTCAATAAATTCGTTAGGCAGATTAACGACTTGCTCAC  
CTTCCCCAGCGTCGACCGTTGGATAACGAGAGATTGATAATCTCGTTGATCACGTTGGGATATTCCGCAAAAGACCTG



CGTACATCGTCCGGAACAACACGGGTATTATTTTGCCCGTCTGCGAATAGCGATGAATAAGCTGATCAATATTCGCCCC  
GCGAACTTCATCACCCAGTTCAGTCAGCGCAATGGTCGACTTATTGCCGCGCACTGAACCCAGTTCAAAGGTATCGATAC  
CAAAGGAGATGGTTTCGCCCCAGCTAAAGGAAAATTACCATTTTCCCCTGTCACGCCACGGCCTGAATTGGTGTAGTAG  
TTGACGCCAGCAACACCATATCCCTGGCTATCGACCAGTCGACCTTCAGAGAGAATGATTTTCAGTGGGTTGATACTGATA  
AAACTGTTCCGCGTTAGCCGACACGAAGGAAGCGTTTCAGATCCGTTTTGTTCCCGGCGTGGTGACGGGCACGACCGGTG  
AAGTATGAGTGGATGGCGCTTTATCGGTTCGACGATTGTTTTCCACCTCTTCATTGACCAGCTTTTTGAACTCTTCCGGT  
GCCAGATCGATTTGCTTATACAGCGAGTCGAAGCGTTTACTCTCGATCACCGAGGAGAACGTCAGACAAAACCTGTTCTGT  
ATTGCGCCGACAGCTGTTACTGGACGTTACCAGCGAAAACCGCATTGCTTTTTCTTGTATCGGAGCCCCGCACTTCTTGGC  
CGTCTCAAGGCTAAACGACACTTTTTCAACCGCACGAAGCTACGCGCAGCTTCTGACTGAGTGTGAAGGTGGCAATT  
GTCGTGTTACCCGCCACGCAAGTAACGTCCTCGCCAGGTTAAATGTAAGCCATCGCTGGATTACCATTACAGGTAGC  
ACCAGTTACCCGCTGGCTTCGCCCCAGGTCAGATAACCCGTTTTCTAGGAACAGGTTCTGGCTCCGGTTCTGGTGTG  
GTTGAGGATCAGGTATCGTTCTGGCGTAGGCTCTGGGTCGCGGTTGGCTCAGGCGTCGGCTCCGGGTTTGGTGTGGA  
TCAGTTTTCACTTCGGCAAAGACCCTGTTCCAGAATCTACAGGCGGCGTATCGGAGGAAGATCCGGAACCACCGCCATC  
ACAACCGGCTAACAGGGTTGCGCTCAAATAGCCGTAAGGCGATTTCTTATATTTAAATTTCTTATTCATTAATAACG  
CAAGTGACAAAAACATGTTAAAAAATTCGTAACGGGAGAAATAGTTTTATGCTTTATCTTCTAATAACTTCTCCAT  
CTTAAGAAAAACGACTCATTGATAGAAAAACAGGTGAAATTTATAAGAATAACCCCTATACGATGCTCTATCTGGCTATTT  
TTACGAAATTTCAACAAACAAAAAATTAACAACATTTCAACAACGTAACCTATATAAATTTGTTGGTAGTTTTAACGATTA  
GATTGCAAAAGCAACAGATTAGAACGGTGTGCTCATCAAGCGAACATAATTAATACAGACTTGTTTTGCGTGATAAAAA  
AATAGATGTTCTCAGCTCTTAATTTTAGCAGGTATCTGAACGCAAAACATTATTGCTGCATGGATAATAAAGCGAG  
AAATGATTTTCAATTAATAAGACAGAATAATGTAATGAAGCCGATGATATTAACGATCATCCGGCTTTATTGATTTAC  
GAGACTAACATCCCGTAAACACATACGCTGCAGCAGGTTGATAATGCCGATAACGCTGGCAAAAATCAGACTGTGCTT  
CACGGTGTAGCGGAACAGTTCAGATTCTCGGCCACCATGCCGTCGCGGCGCAGGCCACGGCGATAGATTGCGGGGAGA  
TCATCTTGCCAGTTACGCCGCCGCTGGTGTGCTGCCACCAGCAGGTTGTCAGAGACGTTGATTTGCTGCGCGTGGTC  
GATTGCACTGAACCAACAGGGCGTTAGAGGAGGTGCCGAGCCGTAAGGAATACGCCAGCCAGCCGAGAAACGGTGA  
GAAGAACGGGAACATCACGCTGTACCTGCCAGTACCAGCGCCAGCGTGGTGGACATGCCAGAATAGTTGGTGACGAAGG  
CGAACGCCAGCCATGCCAATCGACAGTATCGGCCACTTCAAGTAATTAGCGTTTCGGCAAAGACGCCAATACCTTTC  
TTGATCCCCACACCGAGGATGAAGATAGAGATAATCGCCGCAATAAAAATAGCGGTGCCGCCAGCCGAGAGGGGGTCGAA  
TTTAAACACCGCATCCATTGGCGTTGGTTGGGCGACAATGGGTGCCGTTTTCAACACTTGTGATGCAAATGAGGGATCT  
GGAAATTAATCACCAGTGAATAAACCGCCGCCCGGAGCAAATAACGCTTTAAACGGCTTCATGGTCCAGATGGTGACC  
AGCACCGTTAAGATTAAAAAACGGTGACCACGCTCGAATGATTTGCCCCAGACTATATTCTGAAGGCACGGGACCGCCAGA  
AGATGGCTTATTTACCACCATCGCACCTGCGGATTGTCCCATGCTGATTGCCGTTTTCGGTATTTTTCGGCCGCCAGACTT  
TAAGGAATAAAGCGAGTGAGACGATACTACCAGCGCCGAAGTAATACCGGCAGTTCGGACCAATATAGTTAGAGGTA  
AAGAAGTGAAGTACAGCGAAGCTTCCCCAGCAACCAGCGCCGCTGGCCACGCTCTTTTACCCTTTCCAGCCGTCAT  
CATTGCTACCAGCCAGAACGGCACAAGAACCAGCAGGAACGGTAACTGACGTCGCCCATTTGCGCAATGTGGAACGGAT  
CGATTTCCGTTACCTGACCGGCGACCAGAATCGGCACGCCAACCGCACCAACGCCACCGGCGCAGTATTGGCAATCAGA  
CACAGCCCCGCGGTATAACGTTTTGAAGCCAGGCCACCAGCAGCGCACCGGTAATCGCCACCGGCGCACCAAAGCC  
AGCCGCTCCTCCAGCAACGCCAAAGGAGAAACCAATCAGTAACACCTGCAAACGCTGATCGTCCGGTATGGAGATAA  
CCGAGCTGCGGATAATATCGAACTGCCGCTGGCAACGGTTAATTTATACAGGAACACCGCCGCGACAATAATCCACGCT  
ATTGGCCATAATCCATAAATAAAGCCATAGCCCCGAGCAGCAAATGCCATATCAATCGGCATTTTAAAGCGCAATATTG  
AATCAGGATAGATAAATAAGGGTTATTGCTCCAGCGACATGCTCTTTCAGACGTAATACCGCGAGTGAACGAAGA  
ATATTATCGGGATCAGGGGACCCAGAGCGGATAGCCCCAGTCTCCCATCGGCATATACATTTGGGTCCAGGTAACCAT  
TTGTTCACTCTTATTATCTTTATATGCTTATGATACTTAAGGTTGTAATAAGCAAAAGAGGACTGAACTGTAATAAT  
AGGCGTTATACTTTACAGCAACAGTACGCCGCTAACGCAATTGCTACCTCTGGCATAACAAGTATATCGGGTAAGGGTTT  
CTGTTCCGCACACGCAGACGCAGAGTATCGTTAAGATGTCCATATTGTTGTTTTAGGCCGCTAGTAATGCGCTACGGGT  
ATTTAATATTGTTAAACCCTGATAATCGCTCCGTTATTTCCGGGATAAATGTAATACCAGTACTACTATCATAGCCCCG  
ACAATAAAACTTGCCGGGGCTTTTTGACGCTATTAATGACTTTCTTTTTCGCGTAAACGCCAGGCGTGAATAACGGTT  
CGGTATAGCCGTTTGGCTGTTTACGCCGAGGAAGATTAATCGCTGGCAGCTTTAAAAGCACACGAGTTAGCGAAATTC  
CCCGCATCGGACGATAAGCCGGATGCCAGCGTTTTGCTGATCAACCACTTTCGCCATATTCTCCAGCGACGCTGCAC  
CTGTTCTTTGGTCAAGTATCCGTGACGTAACCGATTGGCGATGCTGGCTGGAGATACGCAGCGTTGCGCGGTCTTCCA  
TCAACGCCACATTGTGAATATCCGGCACTTTGAACAACCAATCCCTGCTCCACCCAGCGCACACGTAACCCAGAATC  
CCCTGCACGTTGTTATCCAGCTCTTGTGGATCTCTTGGCCGACAGTTAGCGTTTTTCAGCAACCGGAATAGTCAGCAG  
ATCGTCCAGCAGCGGTTCAAATTCAGCATTGAACTCGTCTGGGCAATGTTGGCTGTACGCTCTGTACGTTGGTTGGT  
GGTAGTGACGCGCATGGAGCGTAGCAGCGGTTGGTACGGAACCCAGGCTGTGTTTTGCCCGCACGAGTTGGTCCGCC  
TTCTGGCTGTACATGTCTGCCATCAGGTCGGCATTGCCACATGCCCTTACCAATTTGCGCTTTACCGCGCAGCCACA  
GAACAGACCGGAAAGCAGTTATTACGCTCGTAGGCTTTGATCCAAGCGTCGATTTTCATCTGATTTTTACGCGACATCG  
GGCAGCTTCCATCACCGAATGCATTTTCATCGCCGTCAGGTCGAGGAAACCGGATTGATGAACGCCACGCGGTTGCGC

GCCTGAGCGATACAGCTACGCAAGTTCAGCGAGGTCGACGTTCTTCATCCATAATGCCATTTTCAGGGTATTCCGGTGC  
CATAACCGAGCATTGTCTCAATGCGGGTAAACAGTTTGTGGCGAACGCCACTTCTGCGGACCGTGCATTTTCGGTTTCA  
CAATATAGACGCTGCCAGTGCAGGTTTTCTGCACTTTTAAATCATAGAGGGCAATCGCGCCAGTCATGACGCCATCA  
AGAATGCCTTCCGGGATTTTCATTGCCTTCGCTGTCCAAATCACAGGAATGGTATCAAATGACCCACGTTGCGGATAAA  
CAGCAGCGAGCGTCCGTGACAGAAATTTAGAGCCATCGCGCGCGGTGTAATGACGATCGTCATTAGTTTACGCACGA  
TTTGCCGACCGTTTTCTCCATTTTCTTTCGAGAGTCCCCTGCATCAGGCCACGAGTTGCGGTACAGCAGGATTTTA  
TCTTCCGCATCAACCGCCGCGACCGAATCTTCGAGTGCAGAAATGGTACTGATAGCAGCTTCGACGATAACATCGTTGAT  
GTGCGCCGATCGTCTTTGCCAATCCGCCATTGGCATCGATTTGCAGCTCAATATGACGGCCGTTATTTTTCAGCAAAA  
TGCAAGTCCGCGCAGCGGCATCGCCACGGTAACCGACAAACTGTGCTGGAGTACGTAACGTGGTTTCTTTACCATTTTC  
AACTGGATGCGTAATTGTTTATCAACCACCTTAAACGCCACCACATCCTGATAGCTGCCGTTTTCCAGCGGTAGAGATTC  
ATCGAGGAAACGCCGAACCCAGGCGATAACCTGCTACCGCGTTGCGGATCGTAGCCGCTGACCATCGCCCTTCTCGCG  
GGATGATGTCGCTGCCGTATAACGCATCGTACAGTACGCCCCAGCAGCGTTGCGCGGTTACAGCGGTAGCGGGCGTTC  
ATTGCCGGAACACCAGCTGCGGCCCCGCTGGCTGGTGATTTGCTGTCAATGCCCGTGGTTTCCACCGTCACGCGCTC  
CGTTGCGGCACCAGGTAGCCAGTTCACGCAGGAAAGATTTATAGGCCGTTTATCTTTTACCAGCCCCGATTGCTGC  
GATGCCACTCATCAAGCGCTGCCTGAATGCGATCGCTTCTGCCAGCAACTGACGATTTTCTGGTGCCAGATCATGAACG  
ATCTCATAAAATTGCGCCAGAACGCCGACGCTCCAGCCCTGTTCCCGGTAACAACTTCTCATCCACAAAACGTTTAAA  
ATTGGCGTCAATGCGTAAACGGCTCTGGGTTATGGTTTACTCATTGTTTATCTCTCGTTTTTCGCTTATTTTCGCAACA  
CCGCTGCTGCCGCTTTTCGCGACCTGCGCATCCTGTGCTCCGGTTAAACAGAAACGCCACGGCACCAATAATTTGCCCA  
TCCACAAACACCGGTACGCCGCTTCCAGCGACGTTAATAACGGCGCAGTCACGAACGCGGTACGTCGTTGTTACCAT  
CTTTCATAGCCCTTAGTTTACGACGCCCGCGCGGTACGCGCTTCTCCTGGGAGATATAAGCCGAATCGGCG  
CGCAATCGTCCATGCGACTTAAACGCCAGCAGATGACCGCGTATCGGCAACAGCAATGGAACAGACCAGTTATTTTTC  
TGCGCCTTCTCCTGACCTGCGGCAATAATTGCACTCGCATTGCTGGTAAGAATGACTTTAGTTTTATTGTTATT  
CCTTTTCAAGGCTTGTCTACAATTTCAATCCAGTACGCACAGAGGTACGACCGCGCTCGCCAGATGCGTCTGGCAA  
CCAATGTTGGCGGTGACGATCATTTCCGGTTGCCGTTTTCCAGCGCATTATTTTGTATCCCGCAGCTGGCGTCCAG  
ATCGGGATGCGTTAACGCATATGTTCCCGCTGAACCGCAGCACAGATGGCTGTGCGGAACGTCGTTAAGGTAATCCAA  
GACGAAGCAACACTTTTTCACTTCGCGGTTGAGCTTTGCGCATGTTGTAGGGTACACGGACAGTGAAGGCCAGCTTT  
TTATCGCCGCAATTGCCAGTTTTTCCAGCGGTTCTCGCGCAGAAGTTCGACTAAATCGACCGCCAGTTACTGACCTG  
ACGTGCTTTATCGGCATATAACGCATCGTTTTTTCAGCATCTGCCATACTCTTTGACAAACGCGCCGAGCCGCTGGCGG  
TTTGAAAATTGCCTCGGCACCTGCTCAATCGCGGCCACCAGGCATCAATATTATTGCGCGCCCGTGCACGCCCTTTC  
TCCTGCGCATTAAAGATGATAGTCCACCGCGCCACAACAGCCTGCTTCTGTTAGCTGGCATGACGCTGATCCCCAGACGATC  
CAGCACTCGCGCAGTTGCCGCGTTGGTGTGGGCGAAAGCGTAGGCTGGGCGCAGCCTTCCAACTAAAACCCGACGCT  
TATGGCGCAGCGGCGGACGCGGTTAGCTTTCACCGTTTACGAGGCAGTTTTGCTCTGACCTGTTCCGGTAAAAACGGT  
CGCAGCACCAGCCCTACCTGCGTCAGCGCACGGAAGACCGCGGACGCGGCACTACCTGGCGCAATCCTTCGCGCAGTAT  
TCGCTCCGGCAGTGGGCGTTTCACTTCTGCTCGACAATATCACGCCGATATCCAGCAAATTTGATAGCGCACACCAG  
AAGGACAGGTGGTTTCACAATTACGGCAAGTGAAGCAGCGATCGAGATGCTCCTGTGTTTTAAGCGTGACTTCGTTGCC  
TCCAGCACCTGTTAATCAGATAGATGCGCCCGCGCGGCGTCCAGTTCATCGCCAGAAGTGTAGGTTGGGCGAGT  
TGCGGTACAAAATCCGCAAGTGAACACAGCGCGCAGGATGCTGTGCGTTCAGCGCGCGCGGTTCTGCCGATCTCTT  
CAGTTAATTGGGTTTGCATAGCCTGCTCCTCAAAGTCCGCGTACATGCGACCGGGTTAAACACGCCGAAGGGTCCGAG  
TCGCATGACCCGAGCGTTGCGGCGATGCGATGGATTTGATTGCTCCTCGGTTGCGATTTACGCCAGTAAACGCCCG  
CCCCAGTCGATCAGTTGCTCGCCGGTAAATCCATCATCGGGCATCACTGGGTAATGAAATGCGCCATAAGGTACCTGG  
TAAACGAGAAGAACGGCAGTTGTTGTTACGCAATTGCTGCCAGAAGTACCGGCAACCTTTCGCCACCCAGCAGTTAC  
GCGTCTTTTTACCGATCCTTCGCCGCCCTCAAGGGGATCCACAACGCATTGTCGAAGTAACATAAGCCACTAATGGGT  
AATGGCTGGAGTTGCCACTCGGCGATTTCACTCATGGCTTCTTGCAGGCTGATTTCCCGACGACGCTCAGGGAGGCGCG  
CGGTGCGGTAACACTTTTATTGAGATTTAGTACGACGCAAGACAACCGTAGCTTCCGACCATTAACCGTGAGAGAT  
CGTATCCGGCAACGTTTTTTCATCACTTCGCCACCAAAACGCAGATGTTTTCCAGCGCGGTAATGATGCGCGTGCCGAGG  
ACAAAATCGCGGACCGAACCCTCCACGGGCGACGCGGCCCGCCAGCCCGCAGGCGACCATCCCGCCCCAGGTGGCTTC  
TTCACCATAATGCGGCGGCTCACAGGGGAGCATTGCCCCGCGCTTTCAGCGCGGTTCAATTGTCACCAGCGGCGTTC  
CGACACGCGCGGTTATCACCAGCTCGGTGCGGTGTAATTAACAATGCCGCGATGACAACGAACATCCAGCGTTTCCCCG  
GTGACAGGGGACCTAAAAGGCTTTGCTATTGCTGCCCTGAATCACCAGCGCGTTTTATCGTAATCGCTGATTAC  
CTGCTCCAGCAGCGCTGGTGTAAATCAGCTCGGTAGCATCAGAAACGCTCCAGTTAGGGAAAGGTAATGACCGTG  
ATGCACATGCATGGACCAAATTCAGCACAGCGGTGATGCGTGGGAATGTTTTTCCAGGGTTCAGCAAACCATCGGGT  
CAAACGCCGCTTTCAGCCGATGGAAGGTGTTGATTTATCGCTGTTGAACTGGGCGCACATTTGATTGTTTTTCTCGC  
CCGATGCCATGTTGCCACTGATGCTGCCGCAACTTAAACGCAGAGTTCGAGGATCTTCCCGCCAGCTTTCGCGCGG  
GGCAAATTCACCGGTTCTTGGCATCGAAAAGGATTAACGGGTGCATGTTGCCATCTCCGGCATGAAAGACGTTGGCAA  
CACGTAATCATATTGCTGCGATAAACGGCAATGCCTTCCAGTACGCCAGGACGGGCGACGCGGATGGTGCCATCC

ATGCAGTAGTAATCCGGGGAGATACGTCCTACCGCCGGGAACGCATTTTTGCGACCGGCCAGAAACGTACGCGCTCTGC  
TTCGTCTGTGCCAGACGGACGTCAGTCGCGCCCGCTTCAACAAGATGTCGTTAACCCGCTCGCAGTCTTCTGTACGT  
CAGACTCCACGCCGTCCAGCTCGCATAACAAAATCGCTTCGGCGTCGACGGGATAACCGGCATGAATAAAATCTTCCGCC  
GCGCGGATCGACAGGTTATCCATCATCTCAGCCCCCGGGGATAATGCCATTGGCGATGATGTCACCAACCGCAAGTCC  
GGCTTTTTCTACCGAGTCAAAGCTGGCTAACAGAACCCGCGCCACGGGCGGCTTCGGCAGCAGTTTTACCGTCACTTCGG  
TGGTCACGCCGAGCATACTTCCGATCCGGTGAACAGCGCCAGCAGGTCAAACCGAGTGAATCCAGCGCGTCCGATCCA  
AGCGTCAGTGCCTCGCCGTCAGCGTTTTGCACTTCAATTTTACGAGGTTATGTACGGTCAGACCATATTTACGGCAGTG  
GACGCCCGCGCATTTTTAGCCACATTGCCGCAATGGAACAGGCGATTTGTGAGGAAGGGTCCGGTGCCTAGTAGAGAT  
TATGCGGTGAACGGCCTGGGAGATCGCCAGGTTACGCACGCCTGGCTGCACGCGCGCGCGGCCACCAACGGGGTTAATG  
TCGAGGATCTCTTAAAGCGCGCCATCACCAACAACACCTTTTTCCAGCGGCAGCGGCCACCAGAAAAGCCCGGTGCC  
TGCAACACGGGTCACCACCGGTACACGCAGGCGATGGCAGACAGCCAGAATCGCTGTCACCTGTTCCATTTGCTTAGGCA  
GAACAACAGTAATGGACGCGTGCATACGCGCTCAACCCGTCACACTCGTAAGGAATGATCTCTCATCGGTATGCAGG  
ATCTCAAGTCCAGGGACATGCTCACGCAGTGCATCAGTACCGATGTGCGGTGACATCGGGTAAAGCGCCATCAAGACG  
CTCTTCGTACAAGATGCTCATGAGTAGGCTTCGCTTGTGTGTGTGTGGCAGCTGATTTTTGCGCGCTGCTTCTGTGA  
ACAGTTATTAAGCGGGCTTTTCGTTTTCGTCTATCTTTAGCTACCGGTCAGACCATTTTTTTCCAGCTCTGTGACCT  
TGTCTTGGTTAACTCAATGTTAAATGATGTAACATAATCACTACGTGATGTGCGTGTTCGAGTTAAGAACAGAAA  
AATTGGTCCTACTGTGCACGAGGTCCGGGAATGAAAGATGAACGTCGCCCTATTTGCGAAGTGGTTGCAGAGAGTATCG  
AACGGTTAATTATCGACGGCTACTGAAGGTCGGTCAGCCGCTTCCCTCGGAACGTCGACTGTGTGAAAAGCTCGGCTTC  
TCACGCTCCGCACTGCGTGAAGGGCTGACCGTGTGCGCGGGCGGGATTATTGAAACGGCGCAGGGTCCGATTCTCG  
TGTGCGACGGCTTAATCGGGTGCAGGACACCAGCCCGCTGATCCATCTGTTCACTACGACCGCGAACGCTGTACGATC  
TGCTCGACGTTGCGCATTACTGGAGGGCAATCGGCAAGGCTGGCGCAACGCTGGGAACGCAGGCTGATTTTTGTTGTG  
ATAACCCGCTGTTATGAAAAATGCTCGCGCCAGTGAGAACAACAAGAGATTTGCTGATCGAACATGCGCAGTTGGA  
TCACGCTTTCATCTCGCCATTTGTCAGGCTTCTACAATCAGGTGCTGGTGTTCAGCTGCAATCATTGACCGATCTGA  
TGTTAATTCAAGTGTTCGACGCTAAATAATCTCTACCATCGACCACAGCAAAAAAGCAGATCGATCGCCAGCATGCG  
CGGATCTACAACGCGGTGTTGACGCGGCTGCCGACGTCGCCAGCGCGCAGCAGCGATCATGTGCGGACCGTGAAAA  
GAATCTCCAGATATCGAGTGGAAAGCCACCATTTGATTCGCTCGCGGTGCCGCTGGAGATGAACCTGAGTTAGCTGG  
TATTAATCTGCTTTTCATAAATCGGTAACGCTTGTACGGCTCCGCCCCAATCGGTTCCAGCATGTTATTCATGCCTGT  
ATTGTTTTCGAGGATCCATGACATCTCAGCGCATGATCTTCCGGCGGGCAAACGGATCGCGTAAGGTTCAATCAATA  
ACAGCGCAATACCCGGGCGGATGCGGCTGAACTGATACTCGTCGCGCACGCCATCAGCGGTAATCGCGAGTTCCGACA  
CCGCTGACTTTCAAACGCCACAGCAATTTGCCAGCCGAAGGAAAAGAGCGATCCGTTAGATCGGCAATCGCCTCGTT  
GATGTTCCGCAAGCCGACAATAAACCGCGCAGGGTGCAGAATCAATCTCAGCGATATAGATCATATCGTCCGGCACAGAT  
ATTTAAGTTGATCGCCATGGTCGCAATTCATGTTCCGTAACCGGCACAAATCCCAGTTGTGCTGCCAGCCAGAGTTG  
AAAATCTCACGAGGATCTGCATCTTTCGGCAAACCGCTGACGATTGATGCAGCGAATGGTCACCTTTTTGCGCACCTG  
ATCCATCAGTTTTTTTAGCGCCGGAGAGAAAGTGAGATCGGTTGCTGCATCCACCACGCCAGTAAATCAATGCCTTTGT  
GATAACCCAGTTGTTCAATATGCGCGCATACCACGGTTTCCGCTGTGGCATCATCGCACAGGGTGGTGTGCAAACTT  
TCAATCAGTAATCCGTTTTCTGATTGATTTAGGCTGAAAGGACCGCTGATCTTACTTGACCTTTGACTTCAACCA  
CGTTCCGCTGCGCAAAACAACCGGGCAAAAACCTGCGGATCATCAATGGCGTCAATCATGCCGAAATGACCGGTATCTT  
TGCCGTAACGCTCGCGGTGCAAGGTATCTATTTGCGCGGTAATACGCCAACTATCTGCCCCGTTTTTTTTGCCACCCAC  
GCCTGCCAGATGATATGGTCCGTCGCCGATTTTTCGCAGACAAATGCTCGTTGCGTTCAATGAATAAAGGGGGTATCCA  
GTTTGGATCGTCGGGATAAAGTGTACGCGAAAAGGATAAAATGCCTTAAGGTCAATTTTTATTAAGGAAGGTGCAACAA  
GTCCCTGATATGAGATCATGTTTTGCATCTGGAGCCATAGAACAGGGTTATCATGAGTCATCAACTTACCTTCGCCGAC  
AGTGAATTCAGCAGTAAGCGCCGTCAGACCAGAAAAGAGATTTTTCTGTCCCGCATGGAGCAGATTCTGCCATGGAAAA  
CATGGTGAAGTCATCGAGCCGTTTTACCCAAAGGCTGGTAATGGCCGGCGACCTTATCCGCTGGAAACCATGCTACGCA  
TTCACTGCATGCAGCATTGGTACAACCTGAGCGATGGCGGATGGAAAGTGTCTGTACGAAATCGCCTCCATGCGTCTG  
TTTGCCCGTTATCCCTGGATAGCGCCTTGCCGGACCGCACCCATCATGAATTTCCGCCACCTGCTGGAGCAGCATCA  
ACTGGCCCGCAATTGTTCAAGACCATCAATCGCTGGCTGGCCGAAGCAGGCGTCATGATGACTCAAGGCACCTTGGTCTG  
ATGCCACCATCATTGAGGCACCCAGCTCGACCAAGAACAAGAGCAGCAACGCGATCCGGAGATGCATCAGACCAAGAAA  
GGCAATCAGTGGCACTTTGGCATGAAGGCCACATTGGTGTGATGCCAAGAGTGGCTGACCCACAGCTGGTCAACAC  
CGCGCCAACGAGCATGACCTCAATCAGCTGGGTAATCTGCTGCATGGAGAGGACAAATTTGCTCAGCCGATGCCGCT  
ACCAAGGGGCGCCACAGCGCAGGAGCTGGCCGAGGTGGATGTGGACTGGCTGATCGCCGAGCGCCCCGCAAGGTAAGA  
ACCTTAAAACAGCATCCACGCAAGAACAACCGCCATCAACATCGAATACATGAAAGCCAGCATCCGGGCCAGGGTGA  
GCACCCATTTGCATCATCAAGCGACGTTCCGGCTCGTGAAGCCAGATACAAGGGGTTGCTGAAAAACGATAACCAAC  
TGCCGATGTTATTCACGCTGGCCAACCTGTTCCGGCGGACCAAAATGATACGTCAGTGGGAGAGATCTACTAAAAACTG  
GGGATAACGCCTTAAATGGCGAAGAAACGGTCTAAATAGGCTGATTCAAGGCATTTACGGGAGAAAAAATCGGCTCAAC  
ATGAAGAAATGAAATGACTGAGTCAGCCGAGAAGAAATTTCCCGCTTATTGCGACCTTCCCTAAATCAGGTCATACGCTT  
CGAGATACTTAACGCCAAACACCAGCGAAATGAGCGGCTTCCCGACGATCAACACCGCGAGCGCCACCAGAATACCGATT

CCGCCCCAGTAAACCGGACTTCACACCTAACCAACCAGGTCTGGTGGTGC GCGGATCTAAACGCATCACCTCTGGGTA  
AAAACCTTTTACCAGCAAACCCGCTGGCGTTCGGCGCGCTCGAAGAATGTCATGGCGATTTTAAATAACCCGGCGGCAG  
CGGGTCTAACACGATCCCCACCAACTGTGCTGCACGAGTTACGCGCCGACCAGATGGAGTGGCAATGTTGGTTGAC  
CAGACAAAACCTCCACGCGCTTTAATGTATCGGGCAGACTCAAACAGATTCAATTTGAAGGCGTTATGGATATTTCCGGC  
GCGTAATTCGCGCGCGGAAACCACAGTACATGGTCCCGCAACCAGATTCGACACGTACCAGGCAATAACAAAACCCG  
CAAAACCAAAGTCAAATACCAGGCTACGACGCTCCCCGCTGCGCGCAGAAAAGGTTTCGTGCGCTGCTGTACAGCAATT  
AAATCGAAGCGATCTACCGCACGCAGAATGCCGCTGGCGTGGAGGAAGCCATTGAAGGAATGAGCGTGAATAGAGCGC  
TGCCAGCAAAAACCTTTGGTTCATCCAGACCTAATGAATGGGAAAGGAATGGCAGTAAGGCAATGCCACCGACAATCGCCA  
CCGCGCCGCTGACGATATCCAGCGAGAAGGAAAATGAGACGACATTGCGGAATTGCTGCGGATTATTGTTGGTTAATGCT  
GGTGTCCGTAAGTGAACCACAGTTGCCATGTCTGAACTTAATAAAATCGCTGATCGACTTGGCGTACGATTGCACAAT  
CACCAGTACGCCAAACATGGCGGGCGTCATCCCTTTACCGGCACACGAGAGCGCAACAGACCAGCAAGGCGCTCACGA  
CATTACTGGAGCTAACAGGCGCTATTGCGAATAATGGTGCAGAACGCGCCATCTGCAACCAATGTTTGATGTTAAAA  
CCCGCAATTCAGCCTGACCTTATCGTTGATAGTAAAAAGTATCCCGCCAGCCTTAAGTAAAACCTTCGGCGGTGAGAAAC  
GATGGCAACCAGAGAAAACCGCTTCTGTGCTGTTCCAGCAGCTTCGCTGTAGGGCGCTCTGGAATCAATCTAAGAATTT  
TTGTGCGTATAGCCAATCTTCACATGACACCGAATTTTGTCTGCAGCTCGCATAGTCATGGTCAGGCTTGCAGGAG  
ATGGCAGTCTCAATATCAATGCCAGGCAATAATTAATTCGGGCGATATTGCGCCATTTGTTGGTATAAACGCCGTTT  
GCGCTGCGCCAGAAAACATGCTGATTTTCCGGTTCGACGTTTCAGCGCAATCCCGGTCCATCATAATAAAAGCCGAAA  
TTTCAGCCTGCGGGAAGCGATCGCTGACCACCAGAACGCCACTTTGCGCCAGTTCGCTGAACCTTTCGTAGATTCCGCAAT  
CTTCGACGCGAGAAGCAGTACATAATCACCGCCGCCATAGCGCCGAGATTTGGTTTTTCATGCTTTGGTTTTTCGAGGA  
TTTGGCCGCGAGTTCGCGTTCAGCCAGACGCCAACCAACGGCAATCGTTTATTGTTGCGCGCTTCGCGCGGAGAGCA  
GCCCCAGATAGCGCGCTCGGTTTGCAGTGTGTTGCAGCGATTTACCAGGTCGGTGGTCAGTGTGGATTTACCAGT  
CCATCACACCCGACCACCGCAATCAGCCCCGGAATGTAGTTGGGCTGCGGCGCGGTTGACTATTAACAGTTTGGTTG  
TAGTGCATCCATTCGTTAAATCATCCCTATCCATTTTGGTATCAGGAAAGCGCGCGTGAATTGCGCGTAGTGACGCT  
TGCAGAATTTTCATCGGCGGGGTGTCGCCATCCAGTTCAAGGATCTTTGCGCCATTGAATGTCAGTTGCGGCGTAACGGC  
GATTTTTTCTGTAACGCTGCCAGTTGGTGGTCAGGTTTACGCGCAAACGCGGTTTGTTCATCAATGCCAAGACGAATCA  
ACAATACGGGCAAATAAGATGCCATCCATTGGTACAGCTTCAGCTCGCGCTGCCTTAACATTTTTATCCAACCGTTACCG  
CCCGTGGTTTTTCCAAATTCGCGGCCATCAAAGCGAAACCCCGGCACTTCAACTGCGGGTAGCGGTTCGGTATGAGCAG  
AAAGCCTTGCTGGCTTTTACACAACATTTTGCAGAACTTGTACGCCCGCCAGCAGGAAAGCAGATAGATAACCAGTGCAG  
TAATATTGCCAGGCGGTGTTGAGGGCTTTTCGTGCACATGTGCCGCTTTACTTCGAGATAACGCCCAAAAGGTGCGCCA  
ATAACAGGGAGCTGTGAATCCATTCCGCAATTCGCCCGGACGATTGCCCGAGATAAATGTGTTCTGTTGGCATTCTTGC  
TGCCAGTTCATTTACCAGGCTTCCGCTGAGGGTCGATTTACCTGAACCATCACATCCTACAATGGCAATAACACGCACTG  
GCGTGGAATTAATTATTGACATATTACGTTGATTACAGAAAACCCGGCAGTAAATAATGTATTGAATATTACGTGGTCC  
GTGCTCAGAATATCCGTTCAACCTTATTGTGACAATGGTTAATTTGACATTGACCTGAATTACGTTTTCATAAAAACAT  
ATTAACCAAATAAATAATTTTAAATGGATATTTAAATTAAGGATATATTATGCAGTCAATAACACCTCCATTAATTGCC  
GTTATTGGTAGCGATGGTTACGGCAAGTCAACGGTGTGTGAACATCTTATTACCGTTGTCGAAAAATATGGTGTGCCGA  
AAGAGTTCATTTAGGAAAACAGGCCGGAATGTCCGTCGTGCAGTGACAAAATTACCGTTGATGGGAAAATCCTTACATA  
AAACAATTGAACGAAATCAGGTGAAAACAGCAAAAAAATTGCCTGGACCAGTTCCGGCGCTGGTAATTACAGCGTTTGT  
GCCCCGCTTACTGCGCTTTCGTATATGCTTGCCTGTGCTGCTGCGGGTAAATTGTTCTAACCGACCGTTATCCTCA  
GGACCAAATTCCTGGCGTTACGATGGTACGGTGTCCCACCTAACGTTGAAGTGGTGGTTTTGTCTCATGGCTGGCAA  
GCCAGGAACGTAAGCGTTTCACTGGATGGCGAGCCATAAGCCTGATCTGGTCATCAAACCTCAATGTTGACCTTGAAGTT  
GCCTGTGCAGTAAACCCGACATAAACGGGAATCGCTGGCGAGGAAGATTGCCATAACGCCACAGTTAACCTTTGGTGG  
TGCACAACTGTTGATATCGATGCCAATCAGCCACTGGAACAGGTGTTGGTTGATGCAGAAAAAGCGATTACGGATTTTA  
TGACCGCGCTGGTTATCACTAGTCAAAAATGGAATGCCGATCGCCAGGACCGGGCATTTCAGGAAGGTTAAATCAA  
CTGCAATGCTATCCAGTACAGCCACCAGAAAAGAAAATTTGCCGCGGTAAGTAAATACCCAGCCATCAGGATGCTGG  
TTACCGTTTTACGCTGTAACCCACCGCGTCCACCACCATCGTCCCTGCAACTGCAGACGAGAGGACGTGTGTTGGGAG  
ACGGGCATCCCAATAAATGGCAAGACCGATAGACACTGCCGCGTCATTTGTGCCGCTGCTTGCGCATACGTCAT  
GCCGCGCTTACCAATCTTCTACCGATGGTCATCGTACACGACGCCAGCCAATCATGGTGCAATGCCGAGCGCCAGTG  
CTACCGCATGATGATCCACACCGGAGCGTACTCAATGGTCTTAAACATATCGCTGCGAAGTTTTTTCAGCAGGTTCTGG  
TCTTCTTACTGACGCTTGCAGTTTCGCTAGCTTCGCGGAGGTATCAGAGATGCACAGCATAATGCGGCGCAGCTGGCT  
GCGCTGACTCACGCTAACGGCTCGTAACTTTCCATATTGCTGGCAGCATCGTTTTAACGCGCGCAATAGCATCAAAGG  
TATTTGCCGATGACAGTAAACTCTGTTACTTGCCTGCCATCAGTCGATGCTGCAGGCAATGGAGGTTCCATCGCAATC  
AACTTCTGCGGAGTTCAGGATGCTGTTGCAGGTAGTGTTCGAAGTTGGTAACGGCATCGCGGTACGGGTAATTTTCATA  
GCCGGACGATTCATATTGACGACGAAGCCAGCAGGGGCAATCCCAACAGTACCAGCATTACCAGGCCGATCCCTTTTT  
GTCCGTCGTTCCGCGCGTGCAGAAAACGCCACGCCGCGCAGCGGAAACAATCAGCGCAATACGCGTCCAGAATGGCGGTTA  
CGTTTGCCTTTTTTCTTTTTGCGATCTTCCGGAATGCGGTGAATACGGTCACGCTTTTTCTCCCGCTCCAGTAGCGTCG  
CAGCAGGAATATCAGGCCTCCGCAATGACCAGGCCGACGATAGGGGAAACAATCAGCGAGGAGAAAATTTGGTCACTT

CACG CAGGTTAACGCATCCATCACCGATGAGCCGGTTAACAGCGCGTTGGTTAAACCGATGCCGATAATCGCACCAATC  
AAGTGTGCGAACTGGAGGCCGTTAAACCGAAGAACCAGTTCAGGTTCCAGATAATCGCCGCCAGCAGCATGGAAAA  
GACCATCGCCAGGCCGTTGGGTTGACCCATATTAGCAACAAATCGTTGGCAACATATGGACAATGGCATAAGGCAACGC  
TAAGTCCGCCAATAACACGCCAAAAAAGTTAAAAAATGCCGCCATCACACAGCAAGTTGTGGTTGCATGGCAGGTA  
TAAATAACGGCTGCCACCGCATTGCGCGTGTATGAAAACATTGATTGCTTCTGTAGAACAACACAAATGCCAGAGCAAG  
CAATAACAAAAGCCCTGTGTATATATCAAGGCCAACAAATAAATTTAGCATATATTAGATTACGCCATTTTGAATTTACG  
AACGGACGCATTATCAGTGACTTTAACGGCATGGGCAAAGTGAATATCATTTTTTAAACGATAAAAAGAGTGTATTCT  
TGTGTATCAGACAATAAGCATTCAATCAAAAACCTTTAGAAATAATCAAAAACACAGGATTCCACTGGTTAATATATTAC  
ATATGAAATGAATAAATATTGGAATATATAAATATTGAATTTTTGATTAATCCCCGACTGATTATTCTTCATAATCAG  
TACGGGTTGTACAACATGTATTACTTTTTACCACAATTAACGGTTCAATATCACTCTTTTTTGTATGACCAGTGAT  
TCATCACCGCGCAAACACGTCCACCGTAGTTGCCGCCAACGGTGAAGGTACATACCTGAATGATTTACCGTCCACTTT  
CGGCAACACCACAGTTGCTGATAGATTTTTCTGCTCGGCAATTTACCGTGGTTTTGTCCAGCACCTTTCATGAT  
GGCTGACGAGTGCATATTGCTGCCACAGCGACCGGCGATCGTTTCACTGCGTAACCTGTTTTACCAGTTCATCATT  
ACAGTGAATCGGTATCCAGCAGGTAACGATGGTGCGGAACAGCGACCAGAGGATCGGCAGAATCGCTTTGTTGCCGG  
GATCACCGTCCACAGCGCTCAAAGACCAGCACTCCGGGCGCAGCAATACGTCGATAAGACGCACCTTCGTTTTGCCGAT  
GACCGGTACGGATTGGCACCGCAGCAAACCTCACGGTCGTAACCTCACGAATCTGATCAAACGCGGTTTTCCACGCCAG  
GTTTTCCACACGAGTTAACAGTCCGCTTCCCATCAATCAGTTGCCCGCAGCATCCAGCCAGTTCATCCAATCC  
ACGCAAGATACGCGTTTTCAAAGCCGCTGTTGTCAGCGCTGCTCCATAAACTGCGCGTGATAGTTTTCTCGATATCTT  
TGTCTGCATGATATGGACAAACGACGTGCACGACTGTGTTCCAGGCACCAGCCAATTCGTTAATCAGCCCTTCGCC  
GGATTGAAGCCGTTGCTTTATAGCCCTGCTCCGCCAACGTTGAGGATCAAGCCGCTTCGGTATGACAGGAGGCGGA  
GTCGGCGTTGACTCGTAAACCTTCAGGCCACGCTCATCCATGCAGAAATCCATACGACCAGTGCATATGGTGACGGC  
GACGCTGCCAGGAGAGACGCAAACGTGGCCAGAGGATTTTCGGGATGTGAACAGCGCCAGCAGGTTGCATCTTTCAGC  
ACCTTGTGGTTGCGTGAAGATACATCAGGTGCAGCTGTTGGTGGCTTTAATTAGCTCCTGCTCGGCACCTTCGGTAAT  
GGTGTAGTAATGATAAGGATCCTGATTGATCACCTGACCGTTGGCTGCACATAGGCGTTTTGCAGCGGATCTTTTTCAT  
CCAGCCATTTACCGTCAAACCTGGCCTTTGTTTTCCAGGCGCGCTCCGCTGATTTTCAGCAGCTCGCTGCAATTTCCGGC  
TGCGGTAAGCTGTATTGATCATTCCGCTGATCATCCAGCCAGAATGGTGGTGCATCAAAGTGTCTTTCAGGGT  
ATAGCAGCCGTTTTCCAGCCACCATCTCCAGCTCGCGCTCCACTGTTGCCCTTCCGGCAACGGGAATGAATCACGTTCT  
GTTCCGCAATACGGACTTTGTTGCCATGCAATGGGTAATGATGGCGACATGGCCAGTGTCTTTAAATTCACCGCTTTA  
TCCAGATAAAGAGCGACCCGCGACCGCGCAGCGGCGAGCCGTTAGGAAATGCCTGCAATGGCAGGATGTTGTCATT  
AACCACTTCTCGCAGGAAGCGCAGCGAGAAAATCTCCACGCCATACCCACGTGAGTAAAGACCACACCGTAATTCAGAA  
AGAGAAAACGGCGAGCAAATTAACGCATTGCCACTTGTGGCCATATATTGTCGTCGATATAGCTACGGAAATACGGCG  
TCATCTTCTGATTCTGCGGATCGAGAGAACTGTAATCTGAAGAGTAGATTGCTACCCACCTGGGGCGTAGCCCAATAA  
TGTCGCAACGGGGCATCTGGCTGGTCTGTTCTTTGCTCATCACTTTACCTTTAAACAATACAACCTAAGCAGTTGGCGT  
AATTGTTGTCTGATTACCTGCTCAGCGACATTAACCGGACAGAGGTGAGCTAATCATAACCTCATCGCAGCGGCT  
GGCGCAAAGGTTAAAAAATTCATTTCTGTACAGCAAGTACCTGCTACACTGCTTCAACTACCCTCAGAAGGCAA  
CTCACTATGACAGACAATACTTATCAGCCCGGAAAGTCTGGACGTGGGATAAATCCGCTGGCGGCGGTTCCGCAATAT  
CAATCGCCCGTTTTCTGGTCCGACGCATGAAAAACGCTGCCGTTGGCAAACACCCATTGCAACTTTATTGCTGGGAA  
CGCCGAACGGTCAGAAAGTAACGATTATGCTTGAGGAGCTGCTGGCGCTGGGCGTACTGGTGACAGTACGACGCCTGG  
CTGATTCTGATTGGCGATGGCGATCAATCTCCAGCGGCTTTGTCGAAGTGAACCCAACTCGAAGATCCCGCGCTGCG  
CGATCATAAGCATAATCCGCCGATCCGCTGTTTGAATCTGGTTCGATCTGCTTTATCTGGCGGAGAAAATTTGGCTACT  
TCCTGCCGAGGATTTGGCAAAGCTACTGAAACGATGAACTGGCTGTTCTGTTTACAGGGCGCGCACCGTTCTCGGC  
GGTGGTTTTGTCATTTTTACCATTACGCACCGGTAAGATTGAGTACGCCATCAACCGCTTTACCATGGAAGCCAAACG  
TCTGCTCGACGTGCTGGATAAGCAACTGGCGCAGCATAAGTTTGTGCGGGCGATGAGTACACCATTGCGGATATGGCGA  
TTTGGCCGTTGTTGGCAACGTGGTGTAGGTGGTGTATGATGCCGCTGAGTTTCTTGATGCGGGCAGTTATAAGCAT  
GTACAACGCTGGGCGAAAGAAGTAGGCGAACGTCGGCGGTGAAACGTGGGCGTATTGTTAAACCGCACCAACGGACCGCT  
GAATGAGCAGTTGCATGAGCGCCATGACGCCAGTATTTCGAGACGAATACGGAAGATAAGCGTCAGGGGTAAGGGTTGG  
TGTTCTGTCGACGAAAGCCATCCAGGCCGATAAGGCGTTCAGCCGCATCCGGCAATCGTGACAATGCCTGATGCGACG  
CTGCCGCTTATCAGGCTACGAAAGTAATCATCACGCGTGGTAATGTCGTAATCCATTTGGCGCAGTGCCTAA  
TGTGGCTTTGGCTTCATCTTCTGTCGATGATGCTCATGGCAAATCCGACGTGTACCAGCACCCACTGGCCAGTAGATCGG  
CAGGGTTACCTTCACAAATCAGGGCGATATTACATCGCGCTTGATACCACATACTTCAACCTGCGCAAGCTGGTGAATA  
TCTTACCAGACAGCCAGCACCTGGCCTGGAACGCCAATACACATTATTAACCTCCGTTATTCAACTTCAATACTTTTAC  
GATCAGCGAATCGCCGATCGACACGCAACCGCTCGCGTGACAGAGCGGACACTGCGCATCGTGTGATGAATCTCCA  
CCACTGGCTGCAATCCAGCACCAAGCTGGGCGGTTTATAGACGATATGTAATCGCACCTTTCGCCACCGTTCCG  
TGGCAGACAATTTCAAACCTAAAACGGACGGCGCTCTCTCAACGAGGAGAGCGCCAAATTTCCAGCCACACGGCGGT  
GACGCGCTTAACATCGTGTCTCCGCTGCGGTTGGATAATTTCAACGGCGCTCTGGCAAAGAGACAACCTCATGCATTT  
TCGCCACTCTGCGACCAACAGCAGGGCGCGACGCCCTGCGTGTGGTACATCCGGATTCTGACTGGCAGCGAAAGGAT

CATTCGTGCGCAGTCATCCGTCAGGCGTTGGCCCTTCAATCGACATGCTGTGCGAAAGCGGCGACATCAGCGAACAGG  
AGAGATATTGCGAAACACCGTCCAGTTCCGCAACGGTAAAGGTCATAGTCCACACGCGGAGTTGCAGACCAATTTTTTCA  
CTCACTTTGCGCAGCGGCCAGAGTTGATCCGGGCCGGGAAGATAACTGCACTCAGCATCCACGGGGTGATCACACACCC  
CGTCCACTGACCTTGAACAGCGTAAATCAGAAACATACACCGCATTGAAGGATGCAGAAAAGAGAGATCGTGCATCG  
AACGCCGGCAATTTCTTCAAACGCTGCCTGTACTTGCGCCTTCGGGGAGGTCTGGAAACCTGCTATCTCTTCAGTCATG  
AATCGCCTCCCGTGGGATGGCTTCCACGCCAGATTACGCAGCGCAGCCAGAACCTGCTCAAGCGCAGGTTCAATCATTG  
CTTCAACCGTCCGGGTTAAGCCGATGTGTGGCTCCAGCGATTCCGGGATCACGCCGACCAGGGTCAGCTTTTTCGGAAAC  
TCGCCGGTGAAGCGCAGGGCCGACAAGACGTCGCCAGGCCAAGCTGATGCGGAGAGATTTTGTGGTAAACAACGCCGG  
AACTTTTTCATCCCGCAGGATCATCATCGTTCCCGCGCGTCTTTTTCGAGACAATGGCATCCGCAATAATCAAATGAT  
CGCGATTTGCCATGTCGCCAAGCAGCTCCATTCCCGCCGTGCCGCATCGAGGATCTCAACATAATCCGGCAGAATGTAT  
CGTTGCTCTAACGCTTCGACAATCCGCACACCGATGGCTTTCATCGGTGAGCAAAATATTGCCGACCCCTAAGACTAAAT  
ACGATTACAGAACCTTCACTGAAACCACTTCGTTGCCGTGAGCATCCACTACGTGTACCGCACAGGCCATGCACGGGTC  
AAAGGAGTGAATGGTACGCACCACTTCCAGCGGTTTATTCGGATCGGCAACCGGTGTACCCACCAGCGACTGCTCGTAA  
GACCGACGTCATCATTGAAGTTACGCGGACCAGAGTCCAGGTTGATGGAACAACCGCCTGGTAGTTGCTGATGATAC  
TCTTTAATAACCATCCAGTGAGAGAGCATACCGCGCGGCTTCGAGGAAGCCAACACCTTTGAATTCACCCGTTGCCGG  
AATGTTCCGGTTCACAAAGTGTTGATCGCCTTTCCGATATTGGTGATCAGTGCAGTGTATTGGTTTTGCAGGATAT  
CCTGCAATTCACAGCAGTGAACGGTACGACCAATAATACGGCCAGCGTGGAGTGCAGCTGTGCCACTTCCAGCGTGTG  
CCAGTCAGTTTCTGATAAATCGCAACGATTTCAATCAGTTTGTCTGGGTAGATTTCGCGACCTGCCGCCAGTTTACCAG  
CATATTAGCCAGTGGCCCACTTCTACCGTTTTGCCGTAGAAAGTCGGTGATTTACCCAGGAATATTTCCCGTCGTGAG  
ACCAACCATCATAAGCCGGAATGGTGGTGCCTTCCACGGTGCCTGCGGCGCTTCGTCTTTATACCAGGAGTGTTCGCG  
CTTTCTGAATGCCTTGTGATCAGGATTCATCGAATGAGAAGTGATCGGACGATACGAGGACAGATCCGCATTCTCAAT  
GTAGCCGCCGGGAACAGGAAGCTGCCGTTTTACTGTCGGTCCGGAATTCGGCACGCTCAGGTAGTTCACCGCACCTT  
TACCGCGTGTGAGCCATTCCGGGTAGAACCGGCAATAACTGCGGTATCAACCTTATAAACCTGCTCAACAAAGTCGCTC  
AGTTTGTGATGAAAGACTTGTGATACATCAGGCGTCAAGGTTGAGCACGCCAAACCGTCGAGGTTGATCGGGTTCGC  
GACACCACCTACCGCAGGTTCTGAATGTGCGGCTTTTACCGCCAGCAGCGCCACGACGCGTTAGCGTCACGCTGGC  
ACTCCAACGTTGAGGTTAGTGCCTACCGCAATCAGGTTCACTTCCGGCGCAGTTTTCATCGCCGGATGACCCAGTAG  
CCATTAGCGAAAATACCCAACCTGACCGCTGGCAACCAGATCTTGTGATCTTGTCTGAACCTTGGTGAACCTTCCGGACT  
GTTGAGGTTGCCAGGTCGAAACGCTTTTACGATTTCCGAGGCTTTGGTTGGGTGAGCTTGCAGTGCAGAAAGTGTGTTCA  
CCAGTCCAGCGCCGAAAGCTGATAGAAATGAACAATATGGTCATGCGTGGTGTGCGCAGCCAGAATGATGTTACGGATG  
TATTGCGGTTAACCGGAACGTCGATATTGAGCGCACTTTCTGCCGACGAACGGAAGACAGCGCGTGAGTGGTAGTACA  
TACGCCACAGATACGTTGCAACATCATCCATGCATGCGCGGATCGCGGTTTTTACGATCTCTTCCATGCCGCGCCACA  
TGGTACCGGAAGCCATGCTTTGAAACGACGCCATTTTCGATTTGCAATCGATGCGTAAATGCCCTCAATACGGGTT  
ACCGGATCAATAGTAATCTCTGGCTCATGCTTGTGCTGCCTCATGACGATTATGATCGTTTTGTTTTAAAGGAGGAAGT  
ATCGGCAGTAGACGAATGAGTACGATGTAAGCGCAATCTCAATAGCCACAAAACCAATAGAAATCAACAGTTCTTCCCA  
GGTCCGGAAGTAGGCGTAACCGCCGCCGGGTTGAATGCCACCAGCGAATAGGTGAGACGCCAGGTTGCACAACCTAACA  
GTGCGCTCAGTGTGACAGGAACAGCATGCGGGAATCATTACGCAGCTTCGCCACACGCAGAACGACCAGCGGGAAGAGC  
ATCAGCAGGACTTCAATCCAGAACATCACGGAGTAGAAGTCAACGGCAAACGCTAACGACAGCTTGTGCGGATAGATAAG  
CTCGCCAAAGCGCAGCAGATGAAAATCGCCAGCAACACTGATGGTGTGGTGTGAGCTTAAACAAACAGACTCTTTTTCAT  
CCGACCGTTGCCACGAGACCCGCTGCACCGCAACCTTCAAAGATGACAATCGAGAAGCCATGATGAACGCCGTC  
AGCAGCGAGAACAGCGGCAACATTTTCACTGCTGCCACAACCGATGCACCTTGTAGCCCGGAGATCATCAGCGACCC  
CATTGAAGACTGGTGCATGGTTCGGCAGCAGCGCACCGAGCGGATGATGAAGAACATCACCTTGTGTTAGTGCCTGTAGCG  
ACACCTTCCACCCAGAGCTTCAAACAGTGCAGGAGCAAACCTCCAGTGCATCACGCCGATATAGATGGTCATACAGACC  
GCCGTCTCGAACAGTACCGAGTTACGTTGAAGTGACCCGGAATGTAGAAGTACGGCAGGTTCCAGTAGCGACCCACGTC  
GATAGTGTGACAAAGCCACCCAGTGAAGTAAACAAACAGACTCGCAACAGCGCCGACGACCCAGCGGATGGTATTGCC  
CACGGTTAAAGACGTATACCGCCACGCCAGCGCCAGCGCCACAGGCAAAGCCGGTCCCAATCAGCAGGTCAAACGCG  
ATCCACACGCCCCACGGGAAGCCGCCGTTTCCAGGTCAGAGACAGAGCCAGACCAGAACACCAGACGTTTACAATCAGGAG  
CATACAGATGACGATTAACGGTCCAAAATCATGACCGTTTTACTGATGATTTTGGCGCCAGCGGTTGTGGATCATGAC  
TCATGATCGTCTCCTCCGTGATGGTGTGTTTTGGTGTGCGACGAACCAGCAGGTTAAGCCCGCAGCACAGCCAG  
TGGTAGCATCATGCTTTTACAGGGTGTGTTGAATTTTTCGGAACCGCACCGGTAGAAAGATCGTCCAGTTTCCGCA  
GGTCCAGATTTTATAAGGCACACCCGTCAGTACCAGAACCTGAGTACCGCCCTCTTTTCTCGCCGTACAGATGCGGA  
TAATATTTCCGACCGTATGACAGTAAGTGTGCCAGATTTTCCAGCTGACGCGGATAGTGGTATTGCTGCCAGGCTT  
CAGCGCCAGAGTTTTTTCGCTCCGCCATCAGCTTTCACGCGTACCAGAAATCACCGCGCCCGCGGGCACACTTCTA  
CGCAGCCAGGTAGACCGCTTTATCGAGACGTTCCACACCTTTCTGGTTGCACAGCTCGCACTTATGCAGCGCACAAAC  
GGTTTGTGATGCTACTTCCGACGTTGTACGGACAGGCGACCATGACGTAACGGCAGCCGGTGCACACATCTTTGTC  
GTAATGGACAATGCCGTTTTTCGGATCTTTTTTTCAGTGCAGAGACCGGGCACACAGAGACACAGTTCCGATCGACGAGT  
GCATACACTGTTTCTAATGTACGCGTAGCCGTTCTCTCTGGTCTTTGTTGACCCCTGTGCCGCTGGTCCACACCTGA

ATGATGTTATTGGTATACGGCGACAGTTTGTCTGTTTCGACCAGGTCTGTTCCCTTGCGGGTTACGTTACAGGAAATT  
GATATCCTGACTTTGGTGACGCAAGCCTGGCAGCCTACGCACAAGTCTGAGTCGTACAACATCCCCAGCGATCCCGGAA  
TTGGCGGGCGGTTTTTCAGCAGCCGATGACTGACAGACGGCAGCGCCCGTCAGCAATGCCCGCAGGAGGCTGCTTTA  
ATAAAATTACGTCTGTTACGGTTATTCTCCCCGTGAGTCAGCGTTATCTTTCTTTTGCTGACGACCCAGTTCACGCACC  
GCCATCACGCTGACACCGCAACCAACCAACACACCCGCGAGCAAACCAATAGCGCCTGCAGAGACGTTGCCGCCCTC  
TTTAGCGTTAACATCCGTTTCTGTGAACCGGAGTTTGATTTTCGACGTTGGCAAGCTGATGGATGCCTTTATGGAAGC  
CGATACCTTCTTCGTTACAGCCATAGCAAAGGTGACCAATCGCCACCGGCCACACACCCGCAACATCGCAGAATTGCAGC  
GTTGAGCAGTTGCCGTAAGTTTCTGGCCCTTACAGCCGAGGTGGTACAGGCACCAGCCTTCGCGGTGGCCTTCATCACC  
GAACTCTTTGGCAAACGACCAGCATCGAAGTGGGGGCGACGTTTCGACGTTCTGTAATCAGACGGCCATAGGCGAAGG  
TCGGACGGTTTTGTATCCAGTTTCGGCGGTTTCCGTAAGTATGATGTGCGCAACGGTCGCGAGGAAGTTGTGCGGG  
TTCGGCGGGCAGCCCGAATATTGATAACGGTTTTCCTGGCAGAACTTCTTGACGGCTGACTGCGCCAGTTGGGTTAAC  
TCCAGCTGCGGCAACACCGCCCCACGCAGAGCAGGAACCGATAGCGATAATGGCTGCTGCGCCTTCGCCGCTTTCGCGA  
TGTGATCCACAATCGGCTCACGGCAACCATGCAATAAATACCGTTATCTTTAATGGGATGGAACCATCCACCCTAAC  
ACATACTGCCCTTTGTACTTCTCGAGAGCGTTATGTTTGTCTCTTCGACCTGATGACCGAAGGCGGGGAAAGCCTTC  
GTGATACTCCAGAGAGATAGTCTCCAGTACGAGGTTTTCTACCCTGGATGCGTTGCACGAAGCAGAGATTCCGTACAAC  
CGTGCACCTCCTGCGCGCAATCCAGATAACTGGCGGACGCTGCGGGTATAGTAACCGATTTCGCCCATCTCTGCAGCGGCT  
TTGCTACTTAACCCCATGGTGGCGGCTAATGCTGCACAAAGCTTCATGAAATCACGACGGTTAATGCCGTGAGAATGGAT  
GAGGGTGTATCTCCAGTCAATTTATAGTTATTCCGTTGCGAAGACCTGGCATATATTTGCTCAATCGCAAATCAATA  
ATGCGATCGATGCGCCATTTACCACACATTTATTATGGTTATCGATATCATGATACTGCGGCGGGGCGCTAAAACGAAGG  
GAAGAAGCATTAGTGTAATTAATTAAGCAAGATAATACGTATGTTTATCAATTTTCGAGGCATAACCGGCCATAAAA  
AAGCGCAACGTAGAACAGGAATTTCTCACGAAAGAAATCCATTACCATCTCTTTATCCAGTCCATAGCGGCGCGTCAG  
AATACCGCTTCCAGGGCTAAGCTGGCGATCTCCGGTCTTTTCGTACATCCGGTGTGAGTAGCCTAATAACAAACCGC  
GTTTATAATCGGCACAGAATTTTGTACATTAACCGCACTGTCGGCATGCGTTGCTTTAATCCCGCCATTAAGCCTTA  
CCAAAATGGTTATTCATCGTTCACCTCATTGCTATATATTGTCATATATAGCGATATTTTAGCAAAGAACGACTTTTG  
CGCAGCTATTTTTTTCATGCTTGTAAAGACGTAATCCCGTAAGAGATAAACCTATCAGGAGAGATATTTATCGAACCAT  
TTCAGTGTCTTTGCCAGGCAAGATCGGCGGAGATTTGTACAAACGGGCGTGAATCATTATGGAATCCGTGATTAAC  
CCCCGATAGATATACGCCTCATAAACCTTATTATTGGCTTTCAACGCCGCTCGTAAGCAGGCCAGCCCTCGTTGATTC  
GGGTGTCCAGTTCGCGAAGTGGAGTAGTAAAGGCGCTCAATCTTCGCCACATCGGCAGTGGGTGCCTGACGACCATAA  
AACGGCACCGCGCAGGCCAGTTCCGATACGCGACAGCCGCCGCTTCGATACGCCACCGCCATAGCAAAATCCGGTAAT  
ACCCACTTTGCTGTCGCTTGCAGTACGTTGCATAACTCAATTGCGGCAAAGAAATCATTATCAGTTTGTGGATC  
AACCTGCTGTTGCAGCTCACGACCTTTATCATCATTCCCAGATAACCTCCAACGGAACCTAAGCCGTCAGGTGCCAGGG  
CGATATACCCCGCCTTCGCCACTCGCCGTGCCACATCTTCGATATACGGATTAGTCCACGATTCTCATGCACCACCACT  
ACGGCTGGCGTTTTGCGGCTCATCTTTGCGGGCTTACCAGATAACCCCGCACCTCGCCGTGACCATTTGGCGAAGGATA  
CGTATGACTCAGCAACAATTTCCGGTTCGGTAACTCTACCTGAGTCGCCAGCGCATAATTTGGCTTGAGCAAATCAA  
ACAACGCTAATGCCGTATCCCGCTACCGCACTTCGCCGCAAGTTGAGGAACTCACGTTTCGAGATTTCCCGTGAGC  
GTAATAGTCATAGTAATCCAGCAACTCTGTGGAAATCTTTGGCGGTTAACGCGGCATCGTTGCACTCCTCAGTTGGT  
GTTTTTTAAGCAAAGCATAAGCACGATTTTTGCCAGTTTTTCGTCACTCTGTGAGCCAGACTACGGGATACGCGCTG  
GCGAATCGCTAACTAGAAACATTGTTTCGAAATGAACGGTGGAAAGGAGAGGTATGGTCTGGTTAGCGAATCCCGAA  
CGTTACGGGCAGATGCAATACCGCTATTGCGGAAAAAGTGGTTACGCTGCCCGGTTATCGCTCGGTTATGGCACAA  
TTTCGGTACGTTAACGCGCTGGAATCACAGCTGCATCTGCTGTAAGCGTTTGATTTGGGCATTACGCACTTTGATT  
TAGCCAACAATTAACGGCCGCTCAGGAAGCGCAGAAGAGAACCTTTGGTGCCTGCTGCGGAGGATTTTTGCCCTTAT  
CGCGATGAAGTATTCTTACCAAGGCTGGCTACGATATGTGGCCCGCCCTTACGGCTTGCGGTTACGTAATA  
CCTGCTCGCCAGCCTCGACCAAAGCCTGAAGCGTATGGGGCTGAGTATGTCGATATCTTTTACTCTCATCGCTCGATG  
AAAATACGCCGATGGAAGAAACCGCCTGCGCTGGCTCATGCGGTACAAAGCGGTAAGGCGCTGATGTCGGGATCTCC  
TCTTACTCGCCAGAGCGGACGCAAAAATGGTCGAGTTGCTGCGGAGTGGAAAATTCGCTGTTAATTCATCAACCTTC  
GTACAATTTACTGAACCGCTGGGTGGATAAAAAGCGGCTGCTGGATACCCTGCAAAAATAACGGCGTGGGCTGATTGCCT  
TACTCCTCTGGCTCAGGGATTGCTGACCGGAAAATATCTCAACGGCATTCCGCAAGATTACGGATGCATCGTAAGGG  
AATAAAGTTCTGGTCTGACACCGAAAATGCTTACCAGCAACCTCAACAGCCTGCGCTTATTGAATGAAATGGCACA  
GCAGCGTGACAATCAATGGCGAAAATGGCGTTAAGCTGGTGTGAAAGATGATCGCGTGACGTCGGTATTGATTGGTG  
CCAGCCGCGGAGCAACTAGAGGAGAACGTGCAGGCGCTGAATAATCTGACATTTAGCACCAAGGAGCTGGCGCAGATT  
GATCAGCATATCGCGATGGCGAGCTGAATCTGTGGCAGGCGTCTCCGATAAATGACCTGTTAATAACGGGCGCGCGAA  
CCGCGCCGAATCAGATCAGTGATTATGACGAGTCACTGGTCAAGATAGCCCATCACAATGCAGAAAGCACAACCGTC  
AGATGGATAATGACGTACCACATCAGTTTGTATCCGGGACATTTTTTCGATCCATAAAGACGCGCAGTAAGTGAATGGA  
AGAAATTGCCAATCGACGCTGCTACTTTGTTTTTCAGCGACGTTGCGTCCATTTTCCCCAGCCAGTTACGTTCTCTT  
TGTCTCGGAGATATCCAGCTGTGAGACGAAATTTCTATAACCGGAAAACATCACCATCACAGCAAACCGCAACCGC  
GTCATATCCACCAGCGACAGCAACACGAGGATCAAATCTGATTCCGCCATCGAGAAGATATTCGGCAGTACGTGAATAAT

CTCCTGGAAGAACTTCAGCGCCAGGGCAACTAACGCCAGCGAAAGGCCAAAGTACACGGGGCAAGCAGCCAGCGAGAAG  
CATAATTGCATTTTCAAGAAAACGTTCCATACATTCTGTCTGTAGTTAAAACGGGCAACAGTATATCGCAATTGAGT  
AAACAGCACGCAACAGCAAATCAACATATACGTTAAACCTTTGTGCGATAATTCTGAGGTTTAGGGATCTTCTGGTTCC  
CTTATCAACGCATCGAGAAGCTCTACCCTTAAAGGACGTTGAACCTGAAGGGAGAAAAACGATGTCTCATTTAAAAGACC  
CGACCACGCAGTATTACACTGGTGAATATCCCAAACAGAAACAACCGACGCCAGGCATCCAGGCGAAGATTGACACCGGTA  
CCGGATTGCGGCGAGAAAACTATGTTGGTAGCGGTGCGCTGAAAGATCGTAAAGCACTGGTGACAGGGGGCGATTCCGG  
AATAGGTCGCGCTGCCGCCATCGCTTACGCGCGTGAAGGGGCTGACGTGGCGATCAGTTATCTTCCCGTGGAAAGAAG  
ACGCTCAGGATGTGAAAAAGATCATTGAAGAATGCGGACGCAAAGCCGTTCTGCTGCCAGGCGATTTAAGCGATGAGAAA  
TTTGCCCGTTGCTGGTTACGAAGCGCAAGGCGTTAGGCGGGCTGGATATTATGGCGCTGGTCGCCGGGAAACAGGT  
TGCCATTCGGATATTGACAGCCTCACCAGCGAACAGTTTCAAAGACCTTTGCCATTAACGTTTTGCGCTGTTCTGGC  
TAACCCAGGAAGCGATCCCCCTGCTACCAGAAAGGTGCAAGTATCATCACCATTCTGCAATCCAGGCATACCAGCCAAGT  
CCGATTTACTGGACTATGCGGCTACGAAGGCGGCGATTCTGAACTACAGCCGTGGCTTGGCAAAACAGGTGCGGGAGAA  
AGGTATTCGGGTGAATATTGTCGCGCCAGGCCGATCTGGACAGCACTGCAAATTTCCGGCGGACAAACGAGGATAAGA  
TCCCGCAGTTGGTGCAGAAACGCCGATGAAACGTGCGGGCAACCGCGGAACTGGCCCTGTATATGTTTATCTGGCA  
AGTCAGGAGTCGAGTACGTACCGCAGAAGTGACCGGCGTGTGCGGCGGCGAGCATTAGGTTAAAAAAATGCCCGTT  
GTGAAAAGCAACCGGGCATCATTGTGAATTCACCTTTACCTGATGTGGCGAAAACGCCTTATCCGCCTACAAACGATGA  
AGATTTCAACATGTTGCAATAGATTTTGTAGGCTGATAAGCGTAGCGCATCAGGCATTGAGCACCTAATGCCGGATGCGT  
CGTGAACGCCTTATCCGGCTACAAACGCACGAAGATTCAACATGTTGCAATAGATTTTGTAGGCTGATGAGCGTAGCG  
CATCAGGCAATTCTACTTTACTTTCGCTTTGGCGTTTCTTCCGCGACCAGACCTATCTTACGGTAACCCGCTGATGCAG  
CGTATCCATTACCTTCAACGTCTCGTAATCGACGGTTTTGTCCGCTCGGAAGAAGATGGTGGTGTCTTTCTTGCCTT  
CGGTTAACGCATTCAACGCCGTAATCATTGTTTATCGGTGACCGGATCGTTACCGATAAACATCGAGTTGTCTGCCTT  
ACCGACAGATAAACCGGTTTTTCCGGCGCGGCTGCGGCGTGTGGTAGAAGCAGGCAAGTTCACCTTACATCTACCCT  
CGTAACGGTGCCGCCACATAAAGATAATCAGCAGAACCAACATCAGTCGATAAACGGCGTCACGTTGATATCATGCA  
TTTCCCGTTATCGTCGAGTTTTTGTAAAGATGCATTGCCATCGGATATTCTTCCGCGTAATTTTTGTGCGACACGA  
ACCGGATGCGCAGCGGCGTGGCTTCCAGATCCAGTACGGCTTTCAGCAACAATACCTGCGCTGCAACATCACCCAG  
CATCGCTTTAAAGCCGCAATCTGGCTGCAAATACGTTATAGATAACGACCGCAGGAATCGCTGCCACGAGGCGGATTG  
CCGTTGCTAACAGAGCTTCTGCGATACCCGGCGCAACGACTGCCAGGTTAGTGGTCTGCGTTTGCAGGATACCAATAAAG  
CTGTTTCATGATGCCCCAGACCGTACCAAACAGACCAACGAACGGAGAAATCGCGCCGATGGTTGCCAGATAGCCGTTACC  
GCGCCCATTTGACGACCCACTGCGGCGACCCGACGCTCCAGACGGAAGCTGGTACGTTCTTAAATACCTTCGTTATCGT  
CGCTGCCTTCTGACAGTTCCAGCTCATTCTGCGCTTATTGAGCAATGCAGGCTTAAGCTTTTGTACCAAAATCAGCG  
GCGATATCGTTGGCCTGTTAAGGAACGCGCTTACGCCAGCAGTTGCTGCTCGCGCTTAAGGCGACGCTTCTGATTGAA  
GAACTCTACGCTTACTGAAGAAGATTGCCAGGTGACTACGGAGGCCAAAATAAGCCCAATCATCACGCACTTAACGA  
CAATATCGGCGTGTGATACATAACCCAGACGGAAGGTCGCTGTCATTAATTATTACCCACTGTGTATCTCCAGGAC  
GCAAGTCACAAAATCTGCGCATAATAATCAAAACGACGTGCAATTGATAGTCGTTCTCATTACTATTTGCATACTGCC  
GTACCTTTGCTTTCTTTTCTTTCGCTTACGCAAGTAAAAAGTACCAGCAGCGCATTGCGAAAATTTCTGCTTTATG  
CCAATCTTTCAGGATGCGCCCGGAATATTATGCTAGTTTAGACATCCAGACGTATAAAAACAGGAATCCCGACATGGC  
GGACAAAAGCTTGATACTCAACTGGTGAATGCAGGACGCAGCAAAAATACACTCTCGGCGCGGTAATAGCGTGATTC  
AGCGCGCTTCTGCTGGTCTTTGACAGTGTAGAAGCAAAAACACGCGACACGTAATCGCGCAATGGAGAGTTGTC  
TATGGACGGCGGGAACGTTAACCCATTTCTCTTACAACAAGCGATGTGTGAAGTGAAGGTGGCGGAGGCTGCGTCT  
ATTTCCCTGCGGGCGGCGGTTGCTAATTCATTCTTCTTATCGAACAGGGCGATCATGTGTTGATGACCAACA  
CCGCTATGAACCGAGTCAGGATTTCTGTAGCAAAATCCTCAGCAAACTGGGCGTAACGACATCATGGTTTTGATCCGCTG  
ATTGGTGCCGATATCGTTAAGCATCTGCAGCAAACTAAAATCGTGTTTCTGGAATCGCCAGGCTCCATCACCATGGA  
AGTCCACGACGTTCCGGCGATTGTTGCCCGCTACGCAAGTGTGGTGGCGGATGCCATCATTATGATCGACAACACCTGGG  
CAGCCGGTGTGCTGTTAAGGCGCTGGATTTTGGCATCGATGTTTCTATTCAAGCCGCCACCAAAATCTGGTTGGGCAT  
TCAGATGCGATGATTGGCACTGCCGTGTGCAATGCCGTTGCTGGGAGCAGCTACGGGAAAATGCCTATCTGATGGGCCA  
GATGGTCGATGCCGATACCCGCTATATAACCAGCCGTGGCCTGCGCACATTAGGTGTGCGTTTGCCTCAACATCATGAAA  
GCAGTCTGAAAGTGGCTGAATGGCTGGCAGAATCCGCAAGTTGCGCGAGTTAACCACCTGCTCTGCCTGGCAGTAAA  
GGTCACGAATTCTGAAACGAGACTTTACAGGCAGCAGCGGCTATTTTCTTTGTGCTTAAAGAAAAACTCAATAATGA  
AGAGCTGGCGAACTATCTGGATAAATTGATTTTATCAGCATGGCCTACTCGTGGGCGGGTATGAATCGTTGATCCTGG  
CAAATCAACGAAACATATCGCCGCTTCCGCCACAAGGCGAGATCGATTTTAGCGGGACCTTGATTGCTGCTCATATT  
GGTCTGGAAGATGTCGACGATCTGATTGCCGATCTGGACGCGGTTTTGCGCGAATTGTATAACATTGCCACTTTTGGAC  
AATTTTGCAGACATTTTATTGTGAAAAGTCTTAAATGTTGCGTCCGGGATCAAGGCGTCCCGGACGATTAGGAGTACA  
ATAGGCAGATAAAGGCTTAAACGCTGTTCCACAGGAAAGTCCATGGCTGTTATTCAAGATATCATCGCTGCGCTCTGGCA  
ACACGACTTTGCCGCGTGGCGGATCCTCATATTGTTAGCGTTGTTTACTTTGTATGTTTGCACGCTGTTTTTAGAAA  
ACGGCCTGCTGCCGCTCATTTTTGCCAGGCGACAGCTTGTGATACTGGCAGGCGCATTGATTGCCAGGGGGTTATG  
GATTTTCTGCCTACGATTGCGATTCTGACCGCCGACGAAGTCTGGGCTGCTGGCTAAGTTATATTAGGGGCGCTGTT



AGGGAATACAAAAACGGTAAAAGGCTGGCTGGCACAGCTTCTGTAAATATCACCAGCGGCCACCTGCATGTTTGACC  
GCCACGGTCTGCTGGCGCTGCTGGCTGGACGTTTTCTGCATTTGTCGTACGCTGCTGCCAACCATGGCGGAATTTCC  
GGTCTGCCAAACCGCCGCTTCCAGTTTTCAACTGGTTAAGTGGATTGCTGTGGGTGAGCGTGGTAACCAAGTTTTGGCTA  
TGCCTTAAGTATGATTCCGTTCTGTTAAACGCCATGAAGATCAGGTAATGACGTTCTGATGATCCTGCCAATTGCCTTGT  
TAACCGCTGGCTTGTAGGCACGCTGTTTGTGGTGATTAATAAAAAAATACTGTAACGCCTGACGATTTTCCCGTCCCG  
GTTGCTGTACCGGAACGTATTTAATCCCTGCATCGCCGCTTCTTGCCGCATCTTCCCGGCGTACACCGAAGT  
AACGTTTAACTCACGGCTAAATTGCGATGCGCTTTCATAGCCGACGCGCATCGCTGCTGCGCTGGCCTTCATGCCGTCA  
TGGATGATCATCATCCGCGCCTTATGCAGACGGTAATCTTCAAATACTGCAACGGCGAGGTAAGTGGTACAGACTTAA  
ATTATGGTGAACGCCGATACGCTCATGTTGGCTTCTGCCGCCAGTTGCTCGACGCTCAGGTTTTCGGTGATTTATTTCT  
CAATCCGTTTTCAGCACGGGCTAATCAGACTGAAGTGAAGTCTGGCGACTGACCAGCGCCAGTAACGGCCCGCAAGGT  
CCGGTCAGCACGTAGTACAGAAATTCGCGGATGATCTGTTTGGCGAGAATACGCGCATCCAGTGGTCCATCACGTC  
GAGTAACCGCTCCGCCGCGATAAAATCTTCTGATAACGTGGCGGAGTTAATCCCGTGGCTGCCATCGACGGCTGGA  
AATGCTCATCTTCCCAATGTCATCAACAGTTCCTGTAACGCAAAATATCGACATTGAGACGCAACCTGCCAGCGGC  
ACCTCTGACGTGGCATAGTTTTGCACTCAAACGGCAACGGCACCGTCAGCAGCAGGTATTCATTGGCATATAACGAAA  
CACGCGTTCATTGATATAACCGATTTTATGCCGGAAGAGAATTTATGATGCCAGGCTGATACATCACCGTGTACGTG  
CGAAAGGCGTCTCGCATACAACAAACGACATCGGGCAACAGTTCGCAAACTATTTTCTTTTTCAGTTTATTA  
ACTTTATCCGCCAGCAAGCGGCAAATCTTTCACGTTTCATATCCGTAATTTCTTAGGAATAATGCCGCAATTTGATTG  
TGCGCAATTTGTAGCATTTCTCCAGCACTCTGGAGAAATAGGCAAGACATTGGCAGAAATGAGCATTGAGAGCCAGGGC  
GCTGGCGATACAATGAAAAACATCAGGCAGATCGTCTCTGCCCTCATATTGGCCAGCAAGGGAGCAAGTAATGAAC  
AACTTTAATCTGCACACCCCAACCCGCTTCTGTTTGGTAAAGGCGCAATCGCTGGTTTACGCGAACAATTCCTCACGA  
TGCTCGCTATTGATTACCTACGGCGGCGCAGCGTGAACAAACCGCGTTCGATCAAGTTCTGGATGCCCTGAAAG  
GCATGGACGTGCTGGAATTTGGCGGTATTGAGCCAAACCGGCTTATGAAACGCTGATGAACGCCGTGAAACTGGTTCGC  
GAACAGAAAGTACTTCTGCTGGCGGTTGGCGCGGTTCTGTACTGGACGGCACCAATTTATCGCCGACGGCTAA  
CTATCCGAAAATATCGATCCGTGGCACATTCTGCAACGGCGGTAAGAGATTAAGAGCCATCCCGATGGGCTGTG  
TGCTGACGCTGCCAGCAACCGTTCAGAAATCCAACGAGCGCGGTGATCTCCCGTAAAACACAGGGCACAAGCAGGGC  
TTCCATTCTGCCATGTTACGCGGTATTTGCCGTGCTCGATCCGTTTATACCTACACCTGCCGCCGCTCAGGTGGC  
TAACGGCGTAGTGACGCTTTGTACACACCGTGAACAGTATGTTACCAACCGTGTGATGCCAAAATTCAGGACCGTT  
TCGAGAAGGCATTTTGTGACGCTAATCGAAGATGGTCCGAAAGCCCTGAAAGAGCCAGAAAACCTACGATGTGCGCGCC  
AACGTCATGTGGCGGGCAGTACAGGCGTGAACGGTTTATTGGCGCTGGCGTACCGCAGGACTGGGCAACGCATATGCT  
GGGCCACGAATGACTGCGATGCACGGTCTGGATCACGCGCAAACTGGCTATCGTCTGCTGCACTGTGGAATGAAA  
AACCGGATACCAAGCGCGCTAAGCTGCTGCAATATGCTGAACGCGTCTGGAACATCACTGAAGGTTCCGATGATGAGCGT  
ATTGACGCCGCGATTGCCGCAACCCGCAATTTCTTTGAGCAATTAGGCGTGCCGACCCACCTCCTCGACTACGGTCTGGA  
CGGACGCTCCATCCCGCTTTGCTGAAAAAAGTGAAGAGCAGCGCATGACCAACTGGGCGAAAATCATGACATTACGT  
TGGATGTCAGCCCGCTATATACGAAGCCCGCGCTAAGCTTTTTACGCCTCAAATTTCTGTTTTCGGGCATTTCGTCCA  
GACTTAAGTTCACAACACCTCACCGGAGCCTGCTCCGGTGAGTTCATATAAAGGAGGAACGTATGGCTAATCCAACCGTT  
ATTAAGCTACAGGATGGCAATGTATGCCCGAGCTGGGACTGGCGTCTGGCAAGCAAGTAATGAGGAAGTAATCACCGC  
CATTCAAAAAGCGTTAGAAGTGGGTTATCGCTGATTGATACCGCCGCGGCCTACAAGAACGAAGAAGGTGTCGGCAAAG  
CCCTGAAAAATGCCTCAGTCAACAGAGAAGAACTGTTTATCACCCTAAGCTGTGGAACGACGACCACAAGCGCCCCCG  
GAAGCCCTGCTGACAGCTGAAAAAAGTCCAGTGTATTATATCGACCTTACTTAATGCACTGGCCGTTCCCGCTAT  
CGACCATTTATGCAAGCATGGAAGGCATGATCGAATTTGCAAAAAGAGGATTAATCAAAAAGCATCGGCGTGTGCAACT  
TCCAGATCCATACCTGCAACGCCTGATTGATGAAACTGGCGTGACGCCTGTGATAAACCAGATCGAATTCATCCGCTG  
ATGCAACAACGCCAGCTACACGCTGGAACGCGACACACAAAATCCAGACCGAATCCTGGAGCCATTAGCGCAAGGAGG  
GAAAGGCGTTTTGATCAGAAAGTCATTCGCGATCTGGCAGATAAATACGGCAAAACCCCGCGCAGATTGTTATCCGCT  
GGCATCTGGATAGCGCCTGGTGGTATCCCGAAATCGGTACACCTTACGATTTGCCGAAAATTTGATGCTGGGAT  
TTCCGCTCTCGACAAAGACGAACTCGGCGAAATTTGCAAACTCGATCAGGGCAAGCGTCTCGGTCCCGATCCTGACCAGTT  
CGGCGGCTAACATGCAAATTTCCCGGTGGCGGTAATGTTCCGCTACCGGACTTTTTCAGAAATCATTTATCCCTCGCG  
TCCCGCCGTTGTTACTTCTTCTTGTTCAGGAATGCCAAATATAAGGACATCATCATGCAGAGCCGGAAGCTCTTAAAG  
AACAACTCATCTATATCCGGGATAAACGCAACGGAGAGGTGAAAAACAGATGAAAATAATACTTCTGTTTTTAGCAGCCC  
TGGAAGTTTTACCGTACACGCACAGCCCCCTCACAGACCGTAGAACAAACAGTCCGGCATATTTATCAGAACTATAAA  
TCAGATGCCACTGCCCTTATTTTGGTGAACCGGAGAGCGGGCGATAAATCTGCGCGTATTCAACAGGCGCTTACCCT  
GAACGACAATCTTACGCTGCCGGGCAATATTGGCTGGCTGGATTATGATCCGTTTGTGATTGTCAGGATTTTGGCGATC  
TGGTGTAGAAAGCGTTGCGATAACCCAACTGACGCCGATCATGCCGATGCCGTTGTGCGCTTTCGATCTTTAAAGAT  
GATAAAGAAAAGACCACGCAGACACTGAAAATGGTGGCGGAAAATGGTCTGTTGGGTCAATTGACGATATTGTCAGCAATCA  
TGGCAGCGTCTTACAAGCAGTTAATAGCGAGAATGAAAAACGCTGGCCGCTTTAGCTTCTGTTGCAAAAAGAACAGCCGG  
AAGCCTTTGTTGCCGAACTCTTTGAACATATTGCTGATTATAGCTGGCCGTGGACGTGGGTGGTTCCGACTCTTACCGC  
CAGGCGGTTAATGCCTTCTATAAAACACCTTCAAGACGGCAATAATCCCGATGAAGATATGCAATAGAACGGCAATT

TATTTACGACAATCCGATCTGTTTTGGCGAAGAGTCGCTATTTTCACGCGTTGATGAAATTCGAGTCCTGGAGAAAACCG  
CCGATTCGCCCCGATTTCATGTTTCGTTTTACGCTGACCAATGGCAACAACGAAGAGCAAGAACTGGTTTTACAGCGGCGC  
GAAGGCAAGTGGGAAATCGCTGATTTTTATCCGCCGAACAGCGGCAGCCTACTTAAGCAGATTGAGGCAAAAACCTGCCGC  
CAGATTAAGCAATGAGCTGAATTAATAACAATTAGCCGGAACAATAAATAAAAGGGAACACTATATGAAAACGATTTT  
CACCGTGGGAGCTGTTGTTCTGGCAACCTGCTTGCTCAGTGGCTGCGTCAATGAGCAAAAGTCAATCAGCTGGCGAGCA  
ATGTGCAAACATTAATGCCAAAATCGCCGGCTTGAGCAGGATATGAAAGCACTACGCCACAAATCTATGCTGCCAAA  
TCCGAAGCTAACAGAGCCAATACGCGTCTTGATGCTCAGGACTATTTTGATTGCCTGCGCTGCTTGCGTATGTACGCAGA  
ATGATAAAAAAATCCCGGTAGCGTGTGAGTTGCCGGGATATTTTTAACGTCCAACCGCCGCTTAGGCGGTTTCTC  
GCACCAGCATTACCCGACGAGATTGCGTAGACGACGCTTTTTTGGCGTAGCAGGCGTCTGACGCTGGGTGCCATCCG  
CGTATGTTTCGTAACGCCGGACGGGTATTGCGGTTCTGGCGACGAGCTTACGCATCTCTCAATGGTTGGCGCAGGCA  
CTAAGCAATCGCGACGGCTGCCAATCAGATGCTTTTTGCCATCGCTTCCAGCGCTGGCGGATTAACGGCCAGTTTGGC  
GGATCGTGGTAACGCAACAACGCTTTATGCAACGACGCTGTTTGTCCCTTCCGTACGAAGACGCTTTCGCTCTTATA  
ACCAATCTTCGCCAGCGGTTTTTCCCGGTGTAATACATGGTGGTTGAGTTCGCCAGCGGCGACGGATAGAAGTTCTGCA  
CCTGGTGCAGCGGAAGCGGTGCTTTTTCAGCCACAGCGCCAGATTACCATATCTTCATCACGCGTACCCGGGTGCGCG  
GAGATGAAATAGGGGATCAGATACTGCTTTACCTGCCTGTTTTGAGTAAGTATCGAACAGCTCTTTAAAGCGGTGATA  
GCTGCCATGCCGGCTTATCATCTTCGATAACGCCCTTCTCGGTATGTTCCGGGGCAATCTTCAGATAACCGCCGA  
CGTATGGGTGCCAGTTCTTTGATATAGCGCGGATCTTCTACGGCTATGTCATAACGCACACCAGAGGCAATCAGGATC  
TTTTAATGCCTTTCAGATCACGCGCACGGCGATAGAGTTGATCGTTGGTTCTGTTGCTGTTCCATGTGCGGACAAAT  
ATCCGGATAAACGCACGACAAAACGGCGACAAGTTTTGTTAGCGCGTGGCGATTTGCAGCGCAACATATACATGTTGGCAG  
TTGGCCACCAAGATCGGAAATCACGCCCGTAAACCTGGAACGGTGTGCGGGATCGCTTCGATCTCATTAAATGATCGAA  
TCTTCGGAACGGCTCTGAATAATGCGCCCTTCGTGCTCGGTGATAGAACAGAAAGAGCAGCCGCAAGCAGCCACGCAT  
AATGTTGACCGAAAAACGGATCATTTTCGTAAGCCGGAATACGGGCATTGCCATAGGCCGGATGTGGCACGCGCTTGTATG  
GCAGCGAAAAACGCTGTCCATCTCTTCGGTAGAAAGCGGAATAGCAGGCGGTTGATCCACACATAGCGGTGCGCGTGT  
TTTTGCATCAATGCGCGGCGACAGCCTGGGTTGGTTCTGTTGTCAGAAATACGCGAAGCATGGGCGTACAGCACTTTATC  
GCCCTTCACTTCTCGAAAGAAGGCAGCAACACGTAGGTTTTTCCACGGTTTCGGGCGCGGTGGCTGCACGGTTACGG  
CTTTGGCTTCTGTTTTTCCGGTGCACCGGTTTGTATCCGCGCACGGCAATCTTACCATAACGGATGCGGGATTGGG  
TCGATTTTTCCAGGGTATCAAGACGGGTGGAATCCACGCCGCTCCAGCCAGGACGCGCTCTTTCACGATAATCGCGGT  
ATTACGCACATCGCGGATTTACTAATTGGCTCGCCATCGCCAGACGATGCGCCACTTCCACCAGCGGACGCTCACCGT  
TACCAACATCAGCATGTCCGCTTTCGAATCCACCAGCACGGAACGGCGCACGGTATCGGACCAGTAATCATAATGCGCG  
GTACGGCGCAGACTAGCCTCAATACCGCCGAGGATCACCGGTACATCTTTCACGCCTCTTTACAACGCTGGGTATAAAC  
CAGTGTGGCGCGATCCGGGCGCTTACCCGCGACGTTATCCGGCGTGTAGGCATCGTCATGACGTAAACGGCGATCGGGCG  
TATAACGGTTGATCATCGAATCCATGTTGCCAGCAGTAACACCAAAAACAGATTTCGGTTTACCCAGACGCATAAAGTCG  
TCTTTGCTGCTCCAGTCCGGCTGGGCGATGATCCCGACGCGAAAGCCCTGCGCTTCCAGCATAACGACCGCAATCGCCAT  
CCCGAAGCTTGGGTGATCGACATACGCGTCCAGTAACAAAATGATGTGCGCAGTATCCAGCCAAGTTGATCCATCT  
CTTCAGGAGACATCGGCAAAAACGGTCCCGGTCCAAAACAGGCGGCCAGTACTGCGGCCAGGAGAACAGGTGCGGATCC  
GGTTGGATCAGGGAGATAGAGCTCATTTTGTTCAGAAATGATAAAAAATAATCAAAGGCCGGGATTATAAGCCGGA  
ACGAAAGAGAAATCGAAAGTATTCCATACTCGCCCTCCTCGGGCAGTATGAAGATTACGGTACCGGATTGACCAACAG  
TTGCCAATCGAGCCAGGTCCGCCATTTCCAGCCTGACTGTTGAAGTAGAACGGGAAGTGCGCCAGGAAGGCTGAC  
CGAAATAAACAAAGCAGCTCACTTGTCCGTCAACCCAAACGGTATCTTTCAGCCTCTGCTTCCGGGAACCGCATCGCG  
CCATTCACGTTACGGATTGGAACATTACGCCTTCAATATGAAACGCTTGGCGCTCGTCCGCGCTACCGTCCAGCTGTT  
CCACGTTCTTCTGCTGCGCGGTGACATCAATACGGTTGACGTCCACAGCTGTCCATTAATACCCGGGTATCACCCAGAC  
TGATATCGCGACTGCGAATTGGCGAACAGCCATGATTTTCAGTTGGCAGCAAGCGCATCGGAAGACTGTCTGTGACCAGC  
GGCAGAAGGCCGTTGGGCGCAGGTTAGCACCAGGTTAGAAACCAGAATACTGGATGGCTCAAAGAAGCCACGAATACG  
ATCAACAATGCTCGCCGCTTCGCCACAGGTGATCGACACTTATCGCCGTTGCTCATATCCACCAGAATCTCGCGGCGCT  
CGCCCGGTGCCAGCGAAAGTTGCTTACCAGTACAGGAGCAGGACGGAATCCCTGATCGCCAGAAATCACATGTAACGGG  
CGACCATCGTTCATCTGTAGTTGATAGCGACGAGAGTTCGACGCTTTCAGCAGTGCAGCGCACCCAGCCACGCGAGAC  
TTCAACGTACGGGCTTTGTACCCGTTAACAGCAGCGTATACCAACAAAGCCGCGCTTCCCGGTTGTTGTATTCTG  
GCGTACCAAAGTTATCCAGCCGTTTATCTGGATAATGACCGGAAAATCATCCACACCATAATGGTTGGGGATAGGCAGC  
GACTTGTGACTTTCATCTTCCACCAGCCACATTCGGCAAGGCCGTTATAGACCTGCTGAGCCGTGCGGTTGGGAGTATT  
GGCGTGATACCACAGAGTAGCTGCGTTCGGCGAATGGGCGTACGGGTGCCAGTCAGCGTTTGGCGACATCATCCGTG  
CCGACCGCCATCAGCGGGCTGGTACTGTAGCCGGCCACCCTATTGAGACATTTTCTGTCAGGCGGTTGCTGTAA  
ATAAGCTTAACATCGTCCCTTCCAGACCGGATAGTCGGCCCGGTAACGACCATTGATTTCCAGACCGACGCGCG  
TGTCCCTGGCGTAAATGACCAGTGCACGCTGTACAGTCATAACAGCGGTTGCCACGGGAGATTCAAGTAGCGGCG  
GAACGGGTAGCGGTTGCTGTTGCCGGCTGCGCTGGCCTTCCAGGGAAACAGCGCTGCACAAAGTGAATCCCCGATGCC  
TGAATGAACTGACGCCGACTGAGTGACATATTTGCTCCATGTAATACTGGCTAAAGTAATACCGTGCAGGAAAGTGTCC  
CCGCAAAAATACAGATTGCCGACTTAACTTTTTCCGGCGGCTTCGCTTCTGCGACTTCTTATCGAGCTCGGCGATTTT

TTGTTCCATTATCGAACGACAATGGGCAGCCAGCTCACGAACCTGATCTTTGCCATACTGACTGACGTCAATTGGCGGCA  
GCATTTTCGACAATCACCAGACCGTTGTGCAGTCGATTAAGATTAATCTTATTCGAAGTTGTAGAGACGCACACGGGAATA  
ATCGGGACGCCCGCCGAATTGCCCGGTGAAATGCTCCAGTCTTGAACGGTAGCAGGCCGCGACCACGGCTGCGGGTCC  
TTCCGGGAACATCCAGATGGAATACGGCGTTTTTTGAAGTGATTCACTACTTCGCAATGGTGCCGTGAGCTTTAGTGC  
GATTGTTTCTGTGCATCAATAAGTTGCCGGTTAACAGTACAACCTGCCCGAAGAAGGGGATCCACAGCAAGCTCTTTTTA  
CCTACCGTCACCGTCGGCGGTTGCACGATGTTGCATGCTGTACCATGTCATAGTTGTTCTGGTGTTAGCGATATAGAT  
AGCATTGCCGTAGCTTTACGCGTCTGTAGGTTTACGGCACTCACTTTACAGGCCAAACAGCGGCGCAAGACGGCCAAACA  
TATGCCCAAAGGTGGCCACATGTTTCCGGTTACGCGGGCTGAAAAGGCAGTAAATGGAGCCGAATACACAGACTAAGATG  
CTGTAATCACGGTAATAATAAGACGAAAGATATATAGCATAACACCCTCTGAAGGTCTGAGAGACTGGCATTGTACGTC  
ACCTGAAATCAGGTTAGGGCATTGTTAAAAGCCGCTCTCTGAAAAGCGTATTGTTAATCGCAACGCATGAATAAACAA  
GGTTTCAAGGGAATTTTTATCGTTTCCGGGGTTGAATACGCTGCCGGATGACGACTTAACGTTTTCATCCGGCGTCCCT  
GCAAGCGGGAGAAACAGCGCCCTCCCGGCATATTACTCTTCGCTATCACCCTGCTGGCACGGCGAGGAGAGTGCATC  
TCAACACGATCGATACGCTGCAACCGCGCATCAACGTACCAGCGGCTCCACGTTCCGACGTACTTTCTGTAACCTTTC  
CGGGCGCAGTTAATTTTTGCGTTTCCCAACATGAATGGTCAGCGTCTTTGCGGCGCAGAACGTACAATTGCGCCAGAC  
CATCTTCTCCACGCGCGCTTCTGCCGATGGAATGTTGATAATCTGTTGCCCTTGCCTTCGACAGCTGCCGATGATCA  
CTTACCGGGAACATCAACATACGGCTGCCTGAGTGAATTGCCAGCAGCATATCGGAAGCATCTTCAATCACACCGGGCG  
CATAACATGGGCATTTTTCCGGTAAGGTGATCAAAGCCTTACCTGCACGGTTACGCGCCACCAGATCGTTAAAGGTGCAGA  
CGAAACCGTAACCCGCATCGGAAGCCATCAGCAGTTTCTGATCGTCGCTTTCCATCAGCATATGGTCAACGGTCGCCCA  
GGCGGCAACGTTAATTTGCCGGTGAGCGGCTCGCCCTGACCACGCGCCGACGGCAGCGTAATCGGGTCAATGGCATAGCT  
ACGACCGGTGGAATCAACAAACTACCGGTTGTTGCTCTTACCTTTACCGCCGCTTTGAAGCTATCACCCGCTTTAT  
AATTCAGGCCCGCGCGTCGATATCATGGCCTTTAGCGCTGCGTACCAGCCCATCTGCGACAGCACAATGGTGACAGGT  
TCAGACGGCAGCATGTCGTCTGCTCATCGTTTCTGCTTCTTCGCGTTCCTGCAACGGCGAACGACGATCGTACCCTA  
GGCTTGCAGCTGCTGCTGAGTTCTTTCTTACGAGTTATTCTTTTACGCTCGGAAGCCAAAATGCCCTGCAACTGGT  
CGCGCTTTTTTCCAGTTCACTCTGCTCACCGCAATCTTCTCTTCCAGTTTGGCAAGATGACGCGATTTTCACTTCG  
AGGATCGTTCGCTGGTTCGTAAGGCCAAACCGCGACATCAGCGCCGGTTTCGGTTCATCTTCTTACGAATGAT  
CTCAATCACTTCGTCGATATTGAGAAACGCCACCAGCAAACCTTCGAGGATATGCAGGCGCTTGGAGACTTTCTCCAGAC  
GATAGTTCAGTCGGCGGCGACGGTATCGCGGCGAACACCAGCCATTCCGAGAGGATTTCCAGCAGTTTTTCCCGCC  
GGACGACCATCCAGACCGATCATATTAAGGTTAATACGATAGCTCTTTCCAGATCGGTGGTAGCGAAGAGGTGGTTCAT  
CACCTGATCCATATCCACGCGGTTGGAACGCGGCACAATCACCAGCGGGTCCGGTTCCTGTTGGTCAGATTCATCGCGCA  
GATCGTCAACCATCGGCAGCTTTTTGTTGCGCATTTGCGCAGCAATTTGCTCCAGTACGCGCGCACCTGAAACCTGATGC  
GGCAATGCGCTGATAACCACCGCGCCATCTTCTTCTTCCACACCGCGCGCATACGCACTGAACCACGTCCGTTCTCGTA  
GATTTTACGGATCTCGGCGCGGAAGTGATAATTTCCGCTTACGTCGGATAATCCGGCCCTGCACGATATCCAGCAGCT  
GATCGAGCGTGGTTTTCCGGTGGTCGATTAATGCGATTGCCGCTGAGCCACTTCACGCAGGTTATGCGGTGGAATATCG  
GTCGCCATGCCGACGGCAATACCGGTGGTGCCGTTAAGCAAATGTTTGGCAGACGGGCGAGGTAGCATTTTCCGGTCTCTG  
CAAAGTGCCGTGGAAGTTTGGCACCCAGTCAGCCGTCCTTCCCGAGCTCGCTCAATAGCAGCTCGGAATATTTGACA  
ACCGGATTCGGTGAACGCATTGCCGGAACGATTTCCGATCGTCCGGCGCGCCAGTCCCTGACCATCAACCAGC  
GGATAACGGTAAGAGAACGGTTGCGCCATCAGGACCATCGCTTATAACAGGCGCTATCGCCGTGCGGATGGTATTTACC  
CAGTACGTCACCGACGGTACGGGCGATTTTTAAATTTGGCGCTGGCATTACAGGCCAGTTCAGACATCGCATAACAAA  
TGCGGCGCTGAACAGGTTTACAGCATCAACAAACGGCAACGACGCGTCCATGATCAGCTACATGAGTAGTATTTAAG  
TAGCGTTTTTCCGTAATTCATGTAGCGCAAGGCGCTGTCATATCGCTCATTAAATCTGATTCTCAACTTATTCGCC  
AGCCTTCAAAGGGGCAATATTGCCGGAGATACTACATTATCTGCCGCGTCGAGTCACAGGAGATCAACGTGAATAGCGCC  
GCCGACGCTGCTCCGACGGCGATAAAGGCATCAATGTGCCCTGATATACTACTTTGCTGTAGACATAATCCTGGGGAT  
TATGACGCGGAAAACCGCAACGTAGGTTTAAAGCAGTTTGAATTAACGGCTGATAGTAGATAGGAATCAGCGGTGCCTGT  
TGTTGATGATCACTTCTGCCTGCTGATAACAACGCATTACGCTTTGTCGCATCAGTATGCTGCGTGGCTGGTTAGTAA  
GGCGTCATACTGCGCATTTTTCCAGTGACCGACGTTTTCTTACTATCGTTTTGAGCGTGTTCAGGAAGCTGGAAGCAT  
CATTGTACGTCGCATCCACGACTGCCGAGACAGCATGAAATCACCGGCTCGTCCGGCATCAAGATAGTTTTCCACTCC  
ATTGTGCGCAGCGTCACCTGTGACCCAGCCATTTTTTCCATTCCGGAAGACAACGCTATCGCGGTCTTTTTCATGCAGATC  
GTACTTGTGTAGAACAGCTCAAAGCGTAGCGGATGAGAGGCGTCGATCCCGCTGTTTTCAGCAAGGCTTTTGCATCG  
CGACGCGCTCACTCATTGGCTTTTGCAGTTCATCGAACGTCGTCGCGCTAAAGCCTTTTACCTCTGGCGGCTCAGCGTG  
GTTGCGGGCGTCTCAACCCAGTACCTTTTGCGAATAAGCTGTCGATCAACCGTAAGATATAGCGCCGACGCACTCG  
CACATCGTTAAATGGCGGTTTCTCAAGTTGAAGTTGAATATTCGCTGTTTCAGACGCGGAATAATTCGTAGCTCGCCAG  
GCAGTGATTTTTCAATGGCGGGAATTTGCTGCGCCGGAACCCAGGTGAGATCGACCTCTCCCGCGGATAGCGGTTATAG  
CCGGTGACCGAATTATCTAGCGCCAGATACTCAACCTGTTGCAATACTGTATGTTGCGCATCGCGGTACTTTGGATTTTT  
GCGTGACGTAATCTTTTCTGTTAACTACCCACTGATCAAAGCACAAGGCACCGTTGTAACCATGTTCTCTGGCTTACTCC  
AGCTATCGCCATGTTTAGCGATGACATGATGAGGAACCGGGAACAGCGTCGGCCAGGCGAGCATCGTCTGTAACCAAGGA  
ACCGGCTGCTCAAGCGTAACTCAAGAGTACGATCATCCGTCGCTTTGACACCCAGCGATGTAACATCTGCTTTACCCG

ACAATAGCTGCGCATTGTTAATGTGCGCCTGTGCCAGATAGCCAGCAAAGGGCTTGCCGTTTTCGGGTCAACCGCGC  
GCTGCCAGCCGAGGACAAAATCCTCTGCCGTCAGAGGCTGACCGTGGACCCTGCAAACCGCTACGCAGATGGAAAATA  
TAGCGCTTGCCGCGTCCAGTATCTCCAGCGTTCAGCCTGAGCGGGCTGCACCTGGCCTTACCCTCCATCCATACCAG  
ACCTTCAAACAGATCCAGACAATCTGCGCGGCAGTATTCTCTCCACCTTTTTCGGGTGAGCGTACCTGGGTCGCTAT  
GATTGTTGTAACGAAAGACTTGTGCGGGGCGAGCGGTGTGTTGGCGGGAACGTCAGCAGCGTAGAGAGGAGCCGCACTT  
ACCAGGCTGACCAGCCATAATAAATTTTCGCGTATACATGGTATTCCTTACCAGGAGAAATTATAAGCCCAACAATAACG  
CCTGTGGCATTGTTTCGCTCAAACCTTATCGCGAGTGATTTGGCTCACACTCCGGTAAAGAAAAAAGCGAGTTGCCCCCGCT  
TTTCCATTAATTAACGATTTCATTCAATAGTTCTGGATGCTTATCCAGAACACGTAAGTTTGATTGTGGAAGGATGA  
GGTTGGCATTGCCTTTTTCGTAACGCGAAAACGCAATTTACACCTCCCCAAAAATTTTCGCTTGCCTCTTTTTGGGTAAG  
AGAGAGCTTTTTTCGAACCTTCACTATAAATTCAGGTGCCACTGTTTCGGCATTACCGAAGCCCGAAATGCCTTTACTT  
GCGCCATGAAAGCATCTGACTCTTCTTATTATCATGATGCTCTCTTCGCAATGGACACAATAAAACCGTGGATACCTTTC  
AATACTGTTTTTCGTCCACGGAAGGTGTATGGAATATCTTTAATGCCAGAAACATTTCTCCCTGGTGGCAAACCGGACA  
TTTCATATTACTTCTCCTTAAACGAGACGATCAGTACGTATGAATACCGTAATTTAAGATAAACCTGGCCTGTAAACA  
AGCCTGGGTCTGTAACATCCTGCCAGATAGTATGATCAGAGTAGGTGGTATGCTTTTATAAAAGTCGCTCTCTGATAA  
TCCAATGATAACATTACACATACCATAAAAACCTAACTCATCTGCATTTAACAGGGCACTACGTTGTGTACGAA  
CTTCCCGGCATTGACAAGTTTTTTAACCTGACTCAAACGTTGATGTGGTGTGCGTTTTTTCATAACCCCGCCTCCCTG  
TTACTTTAGTTATAACCTAAAAGGTTAATTACAGCAATGAAAAAGCACCTAAAAGGTTAGTTAGATGTACGGAGATAGTG  
ACCACACAAAACGTTATCTTAAAGGAAAGTGATTGACCATATAAGAAAGTGCGCATTAGTAGCGCCAGTTTGAAGCAGG  
AATTTATAAGGGAAGCTGGAGTCAGGCATCACGCCAACGGCACATAAACATCCGTTTCCAGTCGCTGCTGTCCACCCCT  
TCGGCAAGATTGGTGTAGTGAAACAGAATCGGTGCTTACGCATTTTCTCGCCGCTTGCAGGCAGCCAGTGGCGAATGAT  
GCCCCATACCGTGTGTGAAATATCGTCCAGCTCGCCAACGTGGCGGGCCACGGCATAACGTCCACCGGTAAGTTACCCAT  
TGCTCACACCATAACGATTATCGGGAATCGGTTTCGTAACGCTGCCGAGATATCAAAGCGAAACGCTTCCGGTGGCGTG  
GTGGCAGGGTCGTCCAGGCAGCGCAAAGTCTGGCTTGGTTAACAGGAGAAAGCCCGTCTTTTACGCCACATGAT  
AAATTTGCCACGCTGTAGTTGAGCAATTCAGGGCTACAGCGGTGCGCAACATCGCCACAGGTATTGATGGGAAATCGA  
TAATGTTTACATCCAGTGTACGTTTTGCATTTTGCCTCCCTGCGAAATTTCCCGGGAACGCGTCCCGGGAGCGGTAA  
CAATTACGGATTTACTTTGCGGATCTGTTTGACGTCAATTTCAACAGAATTCAGTCTTTATCGACTTACCCCTGAATCT  
CAACCGTATCTTTCGGCGTACCGTACGCGCTTCCAGCGTTTGTGGTGCATATCAACATTGATAGTACCCTGGCATCT  
TTGAACACGTAGAGATCGTCAGAGATGCGTTCAACGATATTGCCGCGAGGGTTACCCAGGTGTCGTACGCAGGGATTT  
TGGCCTTTCTACAGTCGTTACGCTGCCGTTTCGGCCCTGGAATCTCCGGCCTGACTTTGCGTTGCCGATGGGCCAGAAA  
AACCGCCCTGCTGCTGCCATCACCGGTGCGCTGCACAGGGCCATTACTGCGATTACTGCTGCGAATTTTTTTCATGTTT  
ATTACTCCCTTAAATGTCTGTTTCCGAGCATTAAACAAGATAGTCCTTAAACAATCTTAAAGGGAAAAAATAAAATTTA  
GTGCTGTACAGAGCGGTTACAACACGGTTTACTGGCAGCAAATACGGTTATCGCAGGGATGAAAAAATGCGAATTTTAC  
TGATAGAAGATGACATGCTGATTGGCGACGGCATCAAACGGGCTTAGTAAAATGGGTTTTAGCGTCGACTGGTTTACA  
CAAGGTCGTAGGAAAAGAGGGCGCTTATAGCGCACCTTATGATGCGGTGATCCTGGATTTAACCTTACCAGGCATGGA  
TGGTCGCGATATTTTGGCGAATGGCGAGAAAAGGTGAGCGTGAAGCGGTAATGATCCTGACCGCGCGCATGCGCTGG  
CGAACGTGTAGAAGGGTTCGCTGTTGGAGCTGACGATTATCTGTGTAACCTTTTTCGTTGATAGAAGTCGCCGCCAGG  
CTGGAAGCTCTGATGCGCCGAACCAACGGCCAGGCCAGCAACGAGCTGCGCCACGGTAACGTATGCTCGACCCCGGCAA  
ACGTATCGCCACGCTGGCTGGCGAACCCTAACACTGAAACCAAAAAGAAATTTGCCCTGCTGGAATTTACTGATGCGTAACG  
CTGGTCGGTACTGTGCGCAAACCTGATTGAAGAGAACTGTATACCTGGACGAAGAGGTACCAGTAATGCCCTTTGAA  
GTGATGTGATCATCTGCGACGCAAACCTCGGTGATGTTTTATTCGTACCGTGCATGTTGTTGTTACACATTAGTTGA  
GAAATGAAATTTACCAACGCTTATGCTGCGCGTACGGCTGACGCTAATCTTTTTAATTCTGGCCTCGGTGACCTGGCT  
GCTTTCCAGCTTTGTCGCTGGAAACAACAACGGATAACGTGATGAATTTGTCGACACCAACTGATGCTGTTTGGCA  
AGCGGTTAAGTACGCTCGATCTCAACGAAATCAACGCGCGGATCGCATGGCACAGACGCCAAATAGATTAAAACACGGT  
CATGTTGATGACGATGCGCTGACCTTTGCCATCTTACCACGACGGCAGAATGGTCTTAAATGATGGCGATAACGGAGA  
AGATATTCCCTATAGCTATCAACGGGAAGTTTTGCTGACGGGCAACTGGTGGTGAAGACGATCCTTGGCGTTTTGTCT  
GGATGACCTCACCTGATGGCAAATATCGCATCGTTGTTGGCCAGGAATGGGAATACCGTGAAGACATGGCGCTGGCGATT  
GTTGCCGGCAATTGATCCCGTGGCTGGTCGCACTGCCGATTATGTTAATCATCATGATGGTACTACTGGGTCGTGAAC  
CGCGCCGCTGAACAACTGGCGCTGGCACTACGTATGCGTGACCTGACTCGGAAAAACCACTAAACGCGACTGGCGTAC  
CCAGCGAAGTGGCGCCACTGGTTGAGTCGCTAAATCAACTGTTCCGCCGACACATGCGATGATGGTTCTGTAACGACGC  
TTACTCTCCGACGAGCTCACGAACCTCGTAGCCCTTAAACGGCGCTGAAAGTCAAACCGAAGTTGCGCAGCTCTCTGA  
CGATGATCCGAGGCGCGGAAAAAAGCACTGCTCCAATTACATTCGGGATCGATCGCGCTACTCGTCTGGTTGATCAAC  
TGCTCACGCTATCGCGGCTGGACTCACTGGATAACCTTCAAGACGTCGCGGAGATCCCGCTTGAAGATCTCTGCAATCG  
TCGGTGATGGATATTTACCACACGGCGCAGCAGGCGAAAATTTGAGGTGCGACTGACACTCAATGCCACAGCATCAAACG  
CACCGGCAACCGCTATTGCTAAGTTTTGTTGGTGCAGAAATTTGCTGGATAACCGCGTGGCGTACAGTCCACAGGGCAGCG  
TGGTAGACGTCACGCTGAATGCTGATAATTTTCATCGTGAGGGATAACGGCCCGGTGTGACACCAGAGGCACTGGCGCGA  
ATTGGCAACGCTTATCGCCACCCGGACAAACCGCTACCGGACGCGGGCTTGGGCTATCGATTGTCCAGCAATCGC

CAAATTGCATGGCATGAATGTTGAATTTGGGAATGCGGAACAAGGTGGATTTGAGGCGAAGTAAGCTGGTAACTTCTCT  
GTCTATGAGAGCCGTTAAAAAGACTCTCATAGATTTTACTAATAGCAAAATATAAACCGTCCCAAAAAAGCCACCAACC  
ACAAACCAGACAAATACCGAGCGAGAATACATATACCCAAAACCTGAAACATTTCCCGCATAAAGAGTTTTCTTAAGATAA  
GAATAATAAGTGGCGTAAGAAGAAAAATGCTGCAATCATTGCTTGAATATACGATCTTCGCCTGAAACGGAAGGTATA  
CTGCAAATATTTCTCCGACTCAAGCATCCAGTCATACTTATTGAAAGCAAAAAAGAATCTATTAACCAATAAGTAAG  
CATTATATATAGCAATGCTTCAAATATTGTTTTAATTTTCTGCTTAAACATATACAGTACGCTCATAAAAAATCCATTTA  
TAATTATCAACATGACACGTTGATACTTTTCACTTTTACTTATTCAAAGCCATATTTTCAATCCCAAAAAAACCGAAC  
AAACGTGTAATATTCCGGTGCAGTAAGAATTATGAGGAATGGCTATCAGTATTGTCATTTTCAGAAAAATTTTATCC  
TGATCGGTGAGTCAGAGTAAGATCAGACTTTTGCTAAATTCGCAAAAGACTTTGCACATTTTGCTAATTTACCCGTACC  
GCTCTGTGACGTAATAGTCGGCAAACGCTCACCTTGAGGTTAAAAATGAGCAACATCCTGATTATCAACGGCGCGA  
AAAAATTCCGCCACTCCAATGGTCAACTGAACGACACCCTGACCGAAGTCGCGGATGGCACACTGCGCGACCTTGGGCAT  
GATGTCCGCATCGTTCGCGCCGACAGCGACTACGATGTCAAAGCGGAAGTACAAAACCTTCTCTGGGCTGATGTGGTGAT  
CTGGCAGATGCCAGGCTGGTGGATGGGCGCGCTGGACAGTAAAAAATACATTGATGATGATTACCCGAAGGTCAG  
GGACGCTGTATGCCAGCGATGGTGTACCCGCAAAGATCCGTGCAAAAAATACGTTCCGGCGGCCTGGTACAGGGCAAA  
AAATATATGCTTTTCTCTGACCTGGAACGACCAATGGAAGCCTTACCAGAAAAAGATCAGTTCTTCCACGGCGTTGGCGT  
TGACGGTGTGATCTGCCGTTCCATAAAGCAAACCAATTCCTCGGTATGGAACCGCTGCCGACATTTATCGCTAATGACG  
TGATAAAAAATGCTGATGTTCCCGCTATACTGAAGAAATATCGCAAGCATCTTGTGAAATTTTTGGTTAACTAGAGCTC  
AGGCTTTAGAAGGAGTTAACCATGCTTACCGTAATCGCAGAAATCCGTACTCTGCTCCTGGTCAACATCACCGTCAGGCGGT  
ATTGGATCAGTTTGCTAAAATCGTTCCAACCGTACTGAAAGAAGAAGGTTGCCACGGCTATGCGCCAATGGTGGATTGCG  
CAGCTGGCGTGAGTTCCAGTCTATGGCACCGGATTCTATCGTATGATTGAGCAGTGGGAAAGCATCGCGCATCTTGAA  
GCGCATCTGCAAAACCCGCACATGAAGGCGTATAGCGAAGCCGTAAGGTTGACGCTGCTGGAGATGAATATCCGATTTCT  
GCAGCCAGGGATTTAATCTGCCTTGTGGCCGGCCATCCTGACCGGGCAATGTTCTTCTTTAAACCTCAATCTCCG  
CCATGTCCGCTTTCTCTTGAACACAGTTGCGGCGATCTCCGAGCGTTTCTTCCGACGAGCATATCCATCATCGCGTCA  
GTACGCTGATCGTCTTATCATCGATAGTCAACTGCACCAGACGGCGAGTGTTCGGATCAAGCGTGGTTTCGCGCAATTG  
CATCGGTTTCAATTTCCCGCAGACCTTTAAACGCTGGACGTTCCGCTTGCCTTTCTTGCCTTTAATTGCTCAAGTACGC  
CCTCTTTCTCTTCTTCCGTCAGCGCGTAATAAACCTCTTTCCGAGATCAATACGGTAGAGCGGTGGCAGTGCAGGTAA  
ACGTGACCGTGTTCACCAACGCGCGGAAATGTTTTACGAACAAAGCGCAGAGCAGCGTGGCAATGTGCAGACCATCAGA  
GTCCGCATCCGCGAGGATACAGATTTTGCATAACGAAGCTGGCTCAGATCGTCTGTCAGGATCGATACCGATCGCTA  
CCGAAATATCGTGCACCTTCTGCGAAGCCAGCACTTCGTGCGAAGAGACTTCCAGGTGTTAAGGATCTTACCTTTAGT  
GGCATGATCGCCTGATATTCGCGATCGCGCGCTGCTTGGCAGATCCGCTGCGGAGTCACCTTCCACAAGGAACAGCTC  
GGTACGGTTAAGGTCTGCGCGGTACAATCAGCCAGTTTGCAGGCAACGCGGGCGCTGGTCAGCTTTTTACGCACCA  
CTTTTTTGGCCGACGCATACGGCGCTGGGCGCTGGAATCGCCATCTCCGCCAGCAGTTACGCCCTGAACGTTCTGG  
TTCAGCCACAGGATAAAGGCATCTTTCACCACGCCAGAAACGAATGCCGCGCATTGACGCGAAGAGAGACGCTCTTTCGT  
CTGCCCGGCAAACTGCGGATCCTGCATTTTTACTGACAGCACATAGGCGCAGCGATCCAGATATCTTCCGCCGACAGCT  
TTACACCGCGCGGAGAAATATTGCGGTATTACAGAATCACGCATCGCGTCCAACAGGCCCTGACGCAGACCATTAACA  
TGGGTACCGCCTGCATCGTTGGGATAAGGTTGACGTAGCTTTCCGGTACGAGTTACCCGCTTCCGGCAGCCACAGTAG  
CGCCAGTCCACAGCTTCAATCAGACCGTCTGATAGCACCAGCGTGTTCGGTATTGTTGATCTCATCTTAAAAAGTGATC  
TCAACGCCAGGGCACAATACCGCTTTGGCTTTGAGCATCGCTCAGGCGTAAACAGAAAAATCGCGGCTGTCAAAGAA  
GGTTTCATCCGGCCAGAAGTGCACACTGGTACCAGTATTGCGTTTACCAGCAAGTCCGCAACCTGTAATCTGCAACT  
TTTTCCGCAATTTTCAAAGGCGATGTTATAAACCTGACCATCGCGGCGCACGTTAACTTCTACGCGCTTCGACAGGGCGTTA  
ACCACCGAAATCCCGCAGCCATGACAGGCCGAGAGAACTGGTAATTTTTGTTAGAGAATTTACCGCCTGCATGACAGCG  
GCAAAGAATCAGTTCAACCGCCGTTACACCTCTTCCGGGTGAATATCCACCGCATCCCGCGCCATCGTCAATAACTT  
CTAACGACTGGTCAGCATGTAATAACGTTCCACGCGTTTTGCGTGACCCGCCAGTGCTTATCCACACTGTTATCAATG  
ACTTCTTGCCTAAATGTTAGGGCGAGTGGTATCGGTATACATCCCGGACGGCGGGAACCGGCTCAAGCCCGGTGAG  
TACCTCAATGGCATCAGCGTTATAAGTTTGCCTCATGGTTAAGTTAGTAATTCGAGTTGATCGTCAGAGATGGTGCAGA  
CCAAGAAAATCGACGATCGGGTTGAAATAATCTTGAAGCCCGTGAATGCGTGGTTGCCGCTTCTATGACAGTCTGGCG  
GCAGGAAGCGTAGTACGCCACCGCTGGCGTAATCCAGCACTTCACTCCCGTCTGTTGACGAGCCAGATCAAATCCG  
GCGCTTCCAGCGGTCAATCTGCATGACTTTAAGATCGTAAATATGGCGTACTTAGCACATATTGCTGCCGGTGTAG  
GGTCTCTGTTCTGACCGAGATAGTCCGTGAGCAGTTCAAACGGCGCACCGCCGGGTTTACCACACTGCGGGCAGCAT  
AAAAATTGTGACAACAGGTGGCGTAATATCCCCAGTGACGAACCGACAATACCCAGCGAATCACCGCATGTTCCA  
GGACAATGGATTCAGCAGCTCTGCCGCTCGGAAGGATACGGCGGCAACTGCGGAATGATCATCTCAACGTCAGGGTGA  
TGTTCCGCCAGCCAGTTTTTAAACAAGCTCGTTTTGACAGAGCGGGCGAGCTGTTGAAACCGTGAATAAAGAAGCGT  
AGACATCAGTAGCCTTGAAGCGGTATCAGGTTGGAACGTTGTCGCCAGCGGATGCACCTCGGTGGTCAGCGTGCC  
ATCAGCATGTAACCTGAGAGTACGCCAGCCGGCGCGATGGTATCCAGCGTAAAGTTGGAACAGTGGCGCTTAAACTGCA  
CACAGGTCAGCGGCTTCCAGCAGGGCGGACCATTCAGTCGAGATCCAGCTCCTGATGAATATGACCGCACAGCAAG

TATTTGACGTGCGGAACTTCGCCAGCACGGTATCCAGTTCGCCCGGTTACGCAGACTGTGTTGATCGAGCCAACTACA  
ACCCGCAGGTAGCGGATGATGATGCAGCAGCAGCAACGTATGGCGTTCGGCGCATCGCCAGTTTACGTTCCAGCCACT  
CAAGCTGAAACTCGCTCAGCTCACCGTGCAGCAGCCAAACACCTGGCTATCCAGCAACAGGATTTGCCATTGCTACCA  
ATAAACACCGCTTCGCCGGGAGATACCCGCATCTGTAACCGCTGTACATCGCGGGCTGGAAATCGTGGTTGCCCGG  
CAGCCAGACGCAGGGCGCACGAAAACCTTGCATGCCTTCAGCGAAATGCTGATAGGCCGCAGAGGATTGATCCTGCGCTA  
AATCACCTGTGCGGACAATCAGGTCGAATTCGTGCTGGTGTGGCCGAATCGCCTCCAGCACCCGCTGGTAACTCTCCAG  
GTGTTTACCCCTAACAGGGCTTCGTGCTTTTGTGCAACAGGTGAGTGTGCGTAATTTGTAATACTCTGACTCTGGCCTC  
ACCAGCCAGAGGAAGGGTTAACAGGCTTTCCAAATGGTGTCTTAGGTTTACGACGCTAATAAACCCGGAATCGCCATCG  
CTCCATGTGCTAAACAGTATCGCAACCAGTCCGCTAAAACTGATTAATTTGATGCTTTTCGTGCGGTTGATGCAACTTT  
TTATTAGGATAATCATACCGCGCTTTGAAGCGAAAAATCTGCTGGCTTGAACACACTTCAGCCACCATCGCGTCATGATA  
CAGACGCACCGTCATTGACGGAAGGCTCCAGTAAGTATGTCGCGGGCAGTCTGTTCTATTGTCACCAGGGTAGTGTATC  
GGGTCGATTCACAATCGTCAGCCGATATTGTGCGTTTGCACCTGATAGCTTACAGTTTCGCCGGTGCCTATTGCGC  
GGTAACAAACGGCGCAATTTGAAAAGTTCATCTCGCACAGGCGCATATTTAGGAAAGTCAGGTGTGTAACGCTTCAT  
TTATGCCACTCATTTTTAACGCTTGTGATGTCAGCTGCAGCATTGCAAAGCGATGACCGACGCTGCGTTGTGCGATT  
TCCCCTTCTACCCACTGGTATGCCTGTTCCCGCTTACCACATGAACGCGAATATCTTCGTTTTCATCGCCAGACCCG  
TGAATACCGTTCGCGTGTGGCGTCCACTTCGCCACCATAATTGACGAACGCTCACTGGTGCCCGGCTTGGCCAG  
GAAACTTAACACCGGTTTGTCCGTTTACTATCAGTCCCGCTTCAATCGTTCGCGACGGGCAACATCTTCCACAC  
TTTACCCTCTCAATCATCCCGCAACCATCTCCAGTAGCAAGGGTTTTGCTGGTGTGCTACGCGGCAATCCGAATC  
TGCTCAATCAGCACAACCTCATCACGCACTGGGTCAAAGGTTAGCAAGACTGCGGCGTGACCGCGCTCAAAAAATTTCCCG  
CCGCACCTCATGACTCATTGCCCCTTGAATAGACGATGACGAAATCTATAAAGATCTAATGAAAAAAGCCGCGATAAA  
GTGTTTCTCGTGAATAATTTCTACATCGTTTTTGCCAAATGTAACGGGCGAGTTGTCTGGCTTAAAGCATTGTTAATGTC  
CTGGCACTAATAGTGAATTAATGTGAATTTAGCGGACTTTGACTGCCGTTTGAAGCAGTGTGTTAATTTAGGAC  
ATTAACGCCCTATGGCAGTAACGCCAACCTTTGCGGTAGCGGCTTCTGCTAGAATCCGCAATAATTTTACAGTTT  
CGCGCTAAATACTGCTTACCACAAGGAATGCAAATGAAGAAATGCTCCCCATTCTTATCGGCTGAGCCTTTCTGGGT  
TCAGTTCGTTGAGCCAGGCCGAGAACCTGATGCAAGTTTATCAGCAAGCACGCCTTAGTAACCCGGAATTGCGTAAGTCT  
GCCGCCGATCGTGTGCTGCTTTGAAAAATTAATGAAGCGCGAGTCCATTACTGCCACAGCTAGGTTTAGGTGCAGA  
TTACACCTATAGCAACGGCTACCGCGACGCGAACGGCATCAACTTAACGCGACAGTGCCTTGCAGTTAACTCAAT  
CCATTTTTGATATGTCGAAATGGCGTGCCTTAAACGTCGAGGAAAAAGCAGCAGGGATTGAGGACGTCACGTATCAGACC  
GATCAGCAAACCTTGATCTCAACACCCGCGACCGTATTTCAACGTGTTGAATGCTATTGACGTTCTTCTATACACA  
GGCAGAAAAAGAGCGATCTACCGTCAATTAGATCAAACACCCAACGTTTTAACGTGGGCTGGTAGCGATCACCGACG  
TGCAAGACGCCCGCGCACAGTACGATACCGTGTGGCGAACGAAGTGACCGCACGTAATAACCTTGATAACGCGGTAGAG  
CAGCTGCGCCAGATCACCGTAACTACTATCCGGAACCTGGCTGCGCTGAATGTCGAAAACCTTAAAACCGACAAAACCA  
GCCGGTTAACGCGCTGCTGAAAGAAGCCGAAAAACGCAACCTGTGCTGTTACAGGCACGCTTGAAGCCAGGACCTGGCGC  
GCGAGCAAATTCGCCAGGCGCAGGATGGTCACTTACCGACTCTGGATTTAACGGCTTCTACCGGGATTTCTGACACCTCT  
TATAGCGGTTGAAAACCCGTGGTGGCGCTGGTACCAGTATGACGATAGCAATATGGGCCAGAACAAAGTTGGCCTGAG  
CTTCTGCTGCCGATTTATCAGGGCGGAATGGTTAACTCGCAGGTGAAACAGGCACAGTACAACCTTTGTCGGTGCCAGCG  
AGCAACTGAAAAGTGCCATCGTAGCGTGTGACAGCCGTGCGTTCCTCCTTCAACAACATTAATGCATCTATCAGTAGC  
ATTAACGCCTACAACAAGCCGTAGTTTCCGCTCAAAGCTCATTAGACGCGATGGAAGCGGGTACTCGGTGCGGTACGCG  
TACCATTGTTGATGTGTTGGATGCGACCACACGTTGTACAAGCCGCAAGCAAGAGCTGGCGAATGCGGCTATAACTACC  
TGATTAATCAGTGAATTAAGTCACTCTGGGTACGTTGAACGAGCAGGATCTGCTGGCACTGAACAATGCGCTGAGC  
AAACCGTTTTCCACTAATCCGAAAAACGTTGCACCGCAAAACCGGAAACAGAAATGCTATTGCTGATGGTTATGCGCCTGA  
TAGCCCGCACCAAGTCGTTAGCAAAACATCCGCACGCACTACCACAGTAACGGTCATAACCCCTTCCGTAACCTGATGAC  
GACGACGGGGCTTCGCCCGCTGTAACGTAAGGCAACGTAAGATACGGGTTATCTGCCGATTCTTCCCTTCTCGC  
TTCAATTTGACCCAGCATCCTCTATTCTGATGGGTATTTACCACTGGTCCCGGAAGACAAAAATGAAACGGACAAAATC  
CATACGCCACGCATCGTTCCGCAAAAACCTGGAGCGCACGCCATCTGACACCAGTCGCTCTCGCGGTTGCCACTGTTTTTA  
TGCTGGCTGGCTGTGAAAAGAGTGTGAAACAGTGTCTCTATCAAAAATGCTGACGACTGTTGAGCTGCAAAACCCAGGC  
AAAAGCGCGAATGTACCACCGCTACAACAATGCGCTGAAAGAAGCCGAACGTAAGTGGCGGAAATACGCCACCCGTGA  
AGACTGTGTTGCTGAATTTGGTGAAGTCAAGTGCAGCAGGCACCCAGGCTGGCATGGCACCAGAAAAACAGGCGC  
AGGCCAGCAATCCAGCGGAGTTTCTGGATGCCGCTGATGGCCGTTACATGATGGGGCTGCTGATGGGCGGCGGCGC  
GGATTTGCACAGCAGCCGCTGTTCTCTCGAAAAACCCAGCCAGTCCGGCTTACGGTAAATATACCGACGCGACGGGTAA  
AACTATGGCGCAGCCAGCCAGGCGCACCATGACCGTACCGAAGACGGCAATGGCACCAAAACCGGCGACCACTA  
CCGTTACCCGTGGCGTTTTTGGTGAATCTGTTGCCAAACAAAGCACTATGCAGCGTAGTGAACCCGGTACCTCTTCTCGT  
TCAATTTTACACCATGTACGGCGAGCCGACTGGTGTGAAGATGCTTACTACAAGTTGACCCTCGCCAGGTTGAAAA  
GCTGGAAGAAGTACCCGCGAACTGCACCAGATGTGCTGAAAGTGGTGGAAAAAGTATCGCCAGCGATGAGCTGATGA  
CAAATTCGCATTCAAACACACCTGGAGTTTTGTGCGCCAGTGTGCTGACGACCAAGCCATCGCTTTATTCGCT

CTTGATCTGGCGTGGGATGGCACTGGTGAACCTAACTTCTGGAAAATAACGCCGATACGCCAACGTCACTATACGAGGC  
GGCGTTCTTTAGTGGATCTGGCTGGAAGATCAGCTTAACGCCGTAACCTGCCGGAGGGCAGCGACCAGTTAACAGTC  
TGCAAGAAAACTGATCGATCGCTTGGTGGAGCTGCGTGAACAGTATGGCTTCCAGTTGCTGCATCTCACCTGCTGTCGC  
GACACGGTGGAAAGATCGCGGAACCATTCAGTATTTGCAAGACTGCGCAACGGAAGCTGAAATTTGCTACTGAGTTCCTCTA  
CATCGATGATATCGGGTTAGGTGAAAAAGGTCAGTTCACGGATTTACAGGATCAGGTAATTTCCAACCTGTTCAAACCTGT  
ATCCGTGGGAATTTATGTTGCGTGAGATGTTCTCAACCAAGCTGGAGGATGCAGGCGTACGCTGGCTGGAACCGGCGTGG  
AAGAGCATTATCTCCAACAAGGCACCTTACCGCTACTGTGGGAGATGTTCCCGAATCACCCGAACCTGCTGCCCGCTTA  
TTTTGCGGAAGATGATCATCCGCAATGGAAAAATATGTGGTTAAACCGATCTTCTCCCGTGAAGGCGCAACCTGTCGA  
TCATTGAGAACGGCAAAACCATGAAGCAGCGGAAGGTCGGTATGGCGAAGAAGGGATGATTGTTGAGCAATTCACCCG  
TTACCGAAATTCGGCGACAGCTATATGCTGATTGGTAGCTGGCTGGTGAACGATCAACCCGCCGGAATTTGGCATTCTGTA  
AGACCGTGCATTGATCACCCAGGATATGTCTCGTTTTATCCACATATTTTTGTTGAATAAGCCACGATACCCGATGGCA  
CTCGCCATCCGGTAATTTAGCCTATCTGCACCGACAGCATACTCAGGCTGCCATTTCTATACCCTCAACCGAATGG  
TAATTTGGCTCTGCCATCCACGCACCTAACACATAACAACGGCAAATAATGCTCTGGCGTTGGGTTGATAACGTG  
CCACCTTCATGGTCGAGGTAATTCACCAGAGGATGTTGTTCCACTGGCCCTTGCACGTCAGATTCGTTTCACATACT  
ATTAACCGACCTGCCACGGATACGGTGAACCTACCCGTGCCACTTCACTGTGCGCAGGTTATGCACCACGTTACCCG  
TGGCGACCAACATTATTCCTTCATCTCGCAGCGCTGCCAGTTTGGCCCCATTTGAAATGCCAGGCGGAGGTTTGCTA  
CTGTGATACTCAACTGCACCATCGGGATATCAGCGTCAAGGATACATCTTAATCAGCACGCCCCACGAGCCGTGGTCAAA  
GCCCCAGGCTTCTTTATCCAGCGTACCCGGGATCGGCGCTAACAGCTCAACCAGACGCTGTGCCAGCGCAGGCGAACCCG  
GAGCAGGATAATGCGTATCGTACAGCGCTGCGGGAAGCCACCAAGTCATGAATCGTGGGCGGCTCTCCATCGCGGTC  
ACTCCTGTTCCACGGTAAACAGTGAGCCGAAACCACCAATCGCTTGGGGCGTGGCAATGTCATCCCCAATTTCTG  
CCAGCTGCGGGTATAACAATTTATCTTCCAGCAGTTCATCGGACTACCGTGACCTAAAAACAATGCTGGCATACTGTTG  
AAGACATGATGATATCCTTAACTAAAGGTGTCATTTTGATATCTCACAATACGCTTGTTCGGCGGAGTAAGAACC  
TAACAATGATGATGATCATCAGTTATTTGACGATCTGCTGAAGGTGAAGATTTATAAGGAGTTGTCGATGTCAGTACC  
TCTATTCTGACCATACTGGCGGGGAGCCACGTTTATTGGCGGTTTCTCGGCGTTCTCGGGCAAAAACCTCGAAC  
GCTTACTGGCGTTTTGCTAGGTTTTGCGCGGGGATCATGTTGCTCATCTCATTAAATGAAATGCTTCTGCGCCTA  
GCAGCTGAAGGAATGTCGCTGTGTTGGTTATGGAATGTTTATCTCGGTCTGCTTGGCTATTTGGCCTGGACCGCAT  
GTTGCCACATGCTCATCCGAGGATTTAATGCAAAAATCGGTGCAGCCGTTGCCAAAATCGATCAAGCGCACAGCCATTC  
TGCTCACTCTCGGCATCAGTCTGCATAACTTCCCGAAGGGATTGCCACCTTTGTCACGGCGAGCAGCAACCTGGAGCTG  
GGATTTGGCATCGCACTGGCCGTGCGGTTGCACAATATCCCTGAAGGTCTGGCAGTGGCAGGCCCCGTTTATGCGGCAAC  
GGGTCTAAACGCACCGGATTTCTGTGGGCGGGGATTTCTGGACTAGCAGAAATTTCTTGGTGGTGTGCTGGCGTGGTTAA  
TCCTCGGTAGCATGATTTCCCCGGTGGTCATGGCGGCAATCATGGCGGCGTTGCAGGAATTATGGTGGCGCTCTCGGTT  
GATGAATTAATGCCGCTCGCCAAAGAGATTGACCCTAATAATAACCCAGCTATGGCGTACTATGTGGAATGTCAGTGAT  
GGGATTCAGTTAGTGTCTACAAACGGCGGGAATTTGGTTAAAAACAACATCAGAAGTTGTCAGCGCATGGACAACCTT  
CTGCCAGCTTACGAAAGCCTTATTCTACCTTTTGGCTGTCTTCTCTCGTACTGTTTAAAGTATTTGTTCCGCGCTT  
AAGCAGTGGTCTCTGTCTGGCGAAACGCCGACAATAACGTTTCAAATGCAGGAAATAACCCACCAACAGAGCAA  
TCAATACAATCCAGTACCAGGCGATAAACATCCTTTTACCCTAATATTTAAACAATACTAAACATTTAGCGTATAAATTT  
CACATATCCTTTTTCGGATATATTCATATGGTCGCATAATAACGGAACAATTAATGATTTGATCATAATGAAAAAGAA  
TGCTGATATTAATGAAATTTTCTCATAGAAAGAGAAGCGGAATTAACATCTGCATAGCAGGAAAAATAAAAACCGAA  
GCCTGTACAACCTTGGTTTTCTGATTAAGGCAGTAATTAAGCAGCGGTTTTAGCTGGCTTTACGCTCATGTGCCTGA  
CGGTATCCACAGGTCTCAATAGTCACGAGCGCCATATTGTGTTTATTGGCAAACCTCAATACACTCTGGTGCACGCGC  
CATCGTGCCATCGTCATTAGTCAGCTCACACAGTACACCAGCCGTTTTAAAGCCTGCCAGCGTCATCAGATCAATAGTTG  
CTTCAAGTATGACCGCCACGCGTCAGTACACCACCTGCTGAGCGGGAAGTGGGAAAAACGTGGCCAGGACGATTAGATCT  
GACGGTTTTGCGCCATCGGCAATCGCTGCGCGAACGGTCGTAATACGGTCAGCGGCAGAAACACCGGTAGTCACACCTT  
AGCTGCTTCAATGGTCACGGTAAAACCGGTGCCATAGGCGCTGGTGTATTTTTCTACCATATTGGCAGATCGAGTTGTT  
TACGGCGATCTTCAAGTATGCACAGGCAACAATACCGCTACCGTGGCGAATGGTCAGCGCCATCTGCTCAACAGTCATG  
GTTTCTGCCGGGAAGATCATATCACCTTCGTTTTACGGTCTTTCATCATCAAGCACCATTACACCGCTCCTTACGCGAG  
CGCAGCCAGTGCATTTTCAACACGTTGAAAGGCGTACAAAAGAGGAAAGTAGCGTCTGATTCATGGTAAAAAACCTC  
ACTAAAATTTAGTTACCAGAATCAGGGCAGTCTTAGGAGTGGCGGCATATAGCCAAAATAACGTGAGCGGGTCCATGCC  
CGACAGAATCGTTACTCTCTCCATCCGACTTAACCGTGGCCCCGGAATTACACCGGATCTGCTGTCCTTTGAGTTC  
GCACCCAAAGCGCTCGGGGCTTTCAACTGAGTTGATTTACCGCCGGTGGGGAATTTGCCCCGCCCTGAGAATAAGCGG  
ATCACTATAACGCTAATGATTAGCGGACGCAACGCATAGCTTACATAATTTGGTTTATGACTTACCCTTATCGCACT  
ACAATGGCACTCAACACCTATCAGTACAGGGAACCTACAATGATTGACCCGAAAAAAATTTAGCAAATCGCTCGCCAGGT  
TCACGAATCAATGCCTAAAGGAATCAGGGAGTTCCGGGAAGATGTGGAGAAAAAAATCCGCCAAACCTACAAGCGCAGC  
TGACGCGCCTCGACCTTGAAGCCGTGAAGAGTTCCAGCTCAAACGCAAGTCTGTTACGGACTCGTAAAAAACTGGCG  
CTGCTTGAACAAAGAATCAGCGAACTGGAAAATCGCAGTACTGAGATCAAAAAGCAGCCAGATCCAGAGACTCTCCCCC  
AACGCTGTAACATTCGTCCTTAAATGCACTGTAATTTATGAATTAATCCTCTAATTTATAGTGCTTTCTATTACCTTATC

CGGTAATCCCATTAGAAAACCATCACAAAATGAATGAGTACAATTGAAAGTATAATTGCAATGTATTTTTAAGTTTT  
ACTTAATCGATATTTAGATAAACTAATTTTATAAAAAACACAAAATAAAATATCATATTTCAATGATTAGTAGTCCTTAA  
ATAACAGTTACTAATCATTCTCTTTTCTACTTATCTTTATATAAAGGAATATTATGTCCGCTTTTAAAAAGTCACCTCTT  
GTTGCTGGCGTAGCAATGATTCTTTCCAATAACGTGTTTGTGATGAAGGTCACGGTATTGTTAAATTTAAAGGTGAAGT  
TATCTCTGCTCCATGTTCTATTAACCAGGTGACGAAGATTTAACTGTAAATCTGGGTGAAGTAGCAGATTACCGTACTGA  
AAAGCGATCAGAAATCTTTGGCTGAACCTTTCACTATTACCTGCAGGACTGCATGCTGAGTCAGGGTGGAACTACTTAT  
TCAAAAAGCGAAGGTTACTTTCACTACAGCAAATACCATGACGGGTGAGTCTGATCTTCTGAAAAATACCAAAGAACTGA  
AATCGGCGGGCCACTGGCGTTGGCGTACGTATTCTGGACAGCCAGAGCGGGCAAGTAAGTACTTTAGGTACTCCGGTAGTAA  
TTACGTTCAACAATACCAACAGCTATCAGGAAGTGAATTTCAAAGCTCGATGGAATCCCCAAGCAAAGATGCCACCCCG  
GGCAACGTTTACGCTCAGGCTGACTACAAGATTGCTTACGAGTAATCGCATTGGCCGGTTCGCCGGCCACATCATTAA  
ACGGATTAATGATAAGTGGATCAGATGTATAAAAAATTAATAAACCACAATAAGCGAATTGATTAATAATTTATTG  
TTCATTATCCGTTATTAGACTGGCCCCCTGAATCTCCAGACAACCAATATCACTTAAATAAGTGATAGTCTTAATACTAG  
TTTTTAGACTAGTCATTGGAGAACAGATGATTGATGCTTAGGGCCGGAGAAACGCAGACGGGTACCACACAGGAAAAAG  
ATCGCAATTTGAGCAGAGCTTTGAACCGGGGATGACGGTCTCCCTCGTTGCCCGCAACATGGTGTAGCAGCCAGCCA  
GTTATTTCTGCGGTAAGCAATACCAGGAAGGAAGTCTTACTGCTGTCGCCCGGAGAACAGGTTGTTCTGCTCTG  
AACTTGTGCGCCATGAAGCAGATTAAGAAGTCCAGCGCTGCTCGGCAAGAAAACGATGGAAAATGAATCCTCAAAA  
GAAGCCGTTGAATATGGACGGGCAAAAAAGTGGATAGCGCACGCCCTTATTGCCCGGGATGGGGAGTAAAGTCTAGTC  
AGCCGTTGCTCCGGGTGTCGCGTGCAGTTCACGCTATTCTCAGACGAACCGATGACTGGATGGATGGCCGCCGCGAG  
TCGTCACACTGATGATACGGATGTGCTTCTCCGTATACACCATGTTATCGGAGAGCTGCCAACGTATGGTTATCGTCGGG  
TATGGGCGCTGCTTCGCAGACAGGCAGAACTTGATGGTATGCCTGCGATCAATGCCAAACGTGTTTACCGGATCATGCGC  
CAGAATGCGCTGTTGCTTGAAGCAAACTGCTGTACCGCCATCGAAACGGGCACATACAGGCAGAGTGGCCGTGAAAGA  
AAGCAATCAGCGATGGTGTCTGACGGTTCGAGTTCGCTGTGATAACGGAGAGAGACTGCGTGTACGTTTCGCGCTGG  
ACTGCTGTGATCGTGAGGCACTGACTGGGCGGTCACTACCGCGGCTTCAACAGTGAAACAGTACAGGACGTATGCTG  
GGAGCGGTGAAACGCCGCTTCGGCAACGATCTCCGTCGTCTCCAGTGGAGTGGCTGACGGATAATGGTTCATGCTACCG  
GGTAATGAAACAGCCAGTTCGCCCGGATGTTGGGACTTGAACCGAAGAACACGGCGGTGCGGAGTCCGGAGAGTAACG  
GAATAGCAGAGAGCTTCGTGAAAACGATAAAGCGTACTACATCAGTATCATGCCAAACAGACGGGTTAACGGCAGCA  
AAGAACCTTGACAGAGCGTTCGAGCATTATAACGAATGGCATCCGCATAGTGCCTGGGTTATCGCTCGCCACGGGAATA  
TCTGCGGCAGCGGCTTGAATGGGTTAAGTGATAACAGATGTCTGAAAATATAGGGGCAAAATCCAGTTATCATCATTGG  
TTGTGCGTCAGCTTATGCCGTTGAATTCACAAAGATTTAATCGAAGCCGAAGATCGTGAAAACGTTAACCTTTCCCAAT  
TTGAAACTGATGGCAATTAACCGTCCGCAAAATATCTACTAAGCACTCTGATTAATAATAAGAGGACGCCAATCCACCTT  
GACCTCCAATGGGTATTAATTGATAACAAAACCTGCAGTTTGCCTGACACCAGAGCAATTAACATTATTAGGATTTACTGA  
TGAATTTATTGAAAAAAGTCAAGCAAACTGATCGATGGTTGTTACCTATCGAAAAAGAAAAACAAATTACAACCTTATC  
TCGATAAAGGGAAAAATGCAATTAATCCATATCTGCACCTCAGGCATGGTAAAATACAAAGATGCAAACTGGACGCTCCT  
GAACTTTGGAATCATGGTATTGCTGGGGCATTCTTACTACAATTTATATGCCTCTCATTATGCACCACATCAGGGCGA  
TAATTCGCAAAATATAAGTTCCTATGGGCAGGCTGGGGTAACTTTGGGGCCTGGCGCTGCGTACTGATTACCAGTACG  
ATCAGTCATTTAAATGGCAAAAGCCAGGCGACCAACCTGGATTTCCGCGTATTTATTTGTTTCGCCCAATCCCAGCA  
ATGAATGCAAACTAACTATAGGTCAATACGATACTGAATCCTCTATTTTCGACTCTTTCCATTTTCTGGCATTTCGTT  
GAAAAGCGATGAGAATATGTTACCGCCAGACCTACGTGGTTACGCACCGCAAATCACGGGTGTCGCACAAACGAATGCAA  
AGGTCACTGTCTACAGAACAACCGTATTATTTAAGAAAATGTTCTCCAGGCCATTTGCTATTACCAATTTATTC  
AATACATTACAGGGCAACTTGACGTCAAGGTTGAAGAAGAGGACGGACGCTTACGCAATGGCAAGTGCATCTAATAG  
TATTCCTTATCTGACGCGTAAAGGGCAGATTCGCTACACCACTGCTATGGGTAACCCGACCGGTTGGTGGTATTCT  
TACAACAACCTTCTTCTGGACTGGTGAATTCATGGGGTGGCTGAACAATGTATCCCTGTATGGTGGTTCAGTTTTA  
ACAAACCGTATTATCAATCTCTGGCTGCCGCGGTTGGTTTTAATCTTAACTCATTAGGTTTATTATCTTTTGTATGTCAC  
ACGATCTGATGCTCAGTTGCATAATCAGGATAAAGAAACGGGTTATAGTACCAGCGCTAACTATTCAAAACGTTTTGAAT  
CTACCGGTAGCCAGTCACTTTGCTGGTTACCGTTTCTGATAAAAACTTTGTGACAATGAATGAATATATCAATGAC  
ACTAACCATTACAGCAATTAATCAGAATGAAAAGAGAGTTATATTGTACGTTTAAACAGTATCTTGAATCATTAAAGTT  
AAATACATACGTAAGTTTGGCTCGTAATACTTACTGGGACGCCAGCAGTAATGTGAATTTTATTATCACTTAGCCGCG  
ATTTTGATATCGGGCCATTAAAAAACGTCTCCACTTCTTAACATTTAGCCGAATAAACTGGGAAGAAGACAACCGGAT  
CAACTGTACCTAAATATTTGATTCCCTGGGAACTAGTAGAACATTGAGCTATGGTATGCAACGAAATCAGGATAATGA  
GATTTGTCATACTGCTTCGTGGTATGACTCTTCCGATCGAAATAATTCCTGGAGCGTTTCTGCTTCAGGCGACAATGATG  
AATTCAAAGATATGAAAGCGTCACTACGCGCCAGTTATCAGCATAATACCGAGAACGGTGCAGTCTACCTCTCCGGTACA  
TCACAGCGAGACGTTATTTCTCTGAATGCCAGTTGGAATGGTTCATTACTGCGACTCGCCACGGTCCGCTTTCCA  
CGACTATAGCGGTAGTGGTACTCGGCTTTTATGATCGACGAGACGGCACTGAAGATATTCGTTGAACAATAAACCGG  
CGGTAACCTAATCGGTATGGCATCGGAGTTATCCATCAGTCAGCAGTTACATAACAACATCATTAAAGTGTGATAACCGGA  
AATCTGCCAGAAAATGTGGATATCGAAAACCTCGGTTATCACCACCACCTTAAACCGAGGGTGTATTGGCTACGCCAACT  
TGATAACCGCAAGGGCTACCAAATCATAGGGGTTATTCGCTGGCAGATGGTAGTCATCCACCACTGGGGATTAGCGTAA



AAGATGAAACCAGCCACAAAGAATTAGGACTGGTTGCTGATGGCGGCTTTGTATACCTCAACGGCATTGAGGATGATAAC  
AACTTGCTTTACGCTGGGTGACAAATCTTGTTTTATTCAACCACCAATAGCAGCAACTTAACCACCGAACGGCTAT  
TTTACCGTGTATTAGCCAAAATTAATTCAGGATGAACTAATGCCTACTTAAATACAAAGAATATCATTGCAGCAGGAG  
TATTACTCTCCTGTATGAGCAGCATTGCCTGGGGTCCATCATCCCGGATCGTACCCGATCATAATGAATGAGTCAGAT  
AAAGGCGAAGCATTAAACTTACTAATCAAAGTAAAAACCTGCCCTATCTGGCCAAACATGGATAGAAGATACGAAAGG  
CAATAAATCGCGTGACTTTATTGCTCACTGTTCTCCAATGGTGCCTTTAAATCCAGTGAGCAAATTCAAATAAGAATGA  
TAACTCAGGAAAAAATTGCTCAACTTCTAAAGACAGAAACGCTCTTCTATTTTAACTGCGGAGAAATACCGCCAAA  
ACAGATAAAAAAATGTGATGCAAGTCACTATGCAGCACGATTGAACTATTCTGGCGGCCAAAAGCCATTGAATTAGA  
AGACGATGGGGTAATGACTTACGAAAAAGTTGAAATCATTTCGTAGAAATGACGGTTCGATCCGCTTTAACAATAAGATGC  
CTTATCACGTTACGCTGGTTATATCGGAACAAATGGGGTAACGATGTTACCACAAACGCAAAGCTTAATGGTAACCCCT  
TTTAGCTATGCAAATACGCAAGTTAAAAATGTTCCGTCAACTTTTCAGGTGGTTATATCAATGACTTTGGTGGATTAAG  
TTTTTATGAAATAAATGCCCTGTAGTAAATAACATTTGTAATATTTCTGTAGCCAACCGAGATCAATAATATGCGCTAC  
TTGTTAATTGTTATTACTTTTTTATGGGTTTTAGTTCATTACCTGCATGGCAATGGACTGCTATGCTGAACATGAAGG  
TGAAATACCCTTGTATTGGTTACGTACCAAGAATCTATCCCCAGCGATGGTAAAAAAGGTGATAAAATCTGGCAAA  
GCAGTGAATATTTTATGAATGTTTTCTGTAATAATGCACTACCAGGCCATCTCCAGGAGAAGAATACCCATTCGATGG  
GCAATAATAATGATGTTGTTAGCATCAGTCAAGACTTTTATAAATCAAAACTTTATACTTTCCGGTGTAACTTATAATGG  
GGTTGATTATGATTCTACATCTCCACTACCTATTGCAGCACCTGTATGTATTGATATAAAGGGAGCCGGAACCTTCGGGA  
ATGGCTACAAAAAGCCGCGAGTCTGTAGTGGCGGCTCTGAACCGCAATTATCAGTAACTTTTCCAGTACGAGTGCAGCTA  
TATATTAAGCTAGCTAAAAATGCCAATAAAGTAAATAAAAAACTTGTATTACCTGACGAATATATAGCACTTGAATTTAA  
AGGTATGAGCGGAGCAGGTGCTATAGAAGTAGATAAAAAATCTGACCTTCAGGATTCGCGGATTAATAACATTTCATGTCC  
TTGACTGCTTTGTTAATGTTGATCTGGAACAGCTGATGGCGTTGTCGACTTTGGTAAAATAAATCCCGAACAAATAAA  
AATACCAGCGTGAGTGAGACGTTTAGCGTAGTCATGACCAAAGATCCGGGTGCGGCTGTACTGAGCAGTTAATATTTT  
AGGGAGTTTTTCTACTACGGATATTTTGTAGTATTAGCCATCTGGATATAGGTAATGGTCTGCTATTGAAGATATTT  
ATAACGATGGAACAGCAACGGAATTTAACCGTTCTACAATTTGCTCTTTTTTCATCGTCTAGTGCCTTCGGTCACC  
GCACCATTACGGGCAGAAGTGAAGTGCGAACCCGGCAGAAACGGTGTGAGGGACCGTTTAGTAAAGACGTAATCCTGAA  
AATCACCTATAACTAGTATCTAATACAAACACTAAAACGGCCATCAGGCCCTTATATCAGTCTAACTCCAGCTCT  
CTTGCTGCATCATCTGTTGACAATACCAGGCATAACGTGCGCAAAACAGGTTCTATGTTCTTCATCCATGTTACCAGT  
AACGGCCAGAATATCGACCCGGCGACCTTCTGCGTGCATTCTGGCAAAACTACGCGCCAGGAAATCGAAATATTTAAAG  
AATTAAGACTATGATCCATAAGCACATCTCCGGTATCGCATACCTTTAAGCCATATGCTTTTTCTGATTTGAGTAT  
TCCCAATCAGTGTAGTGCCTTTAAACATAACGTGCGTAAATATATTGTCGCCGATCACACTTTTTAGTAAAAATAAAA  
AACCATATTAAGACTTTCTCTCCAGAACTTCTCTAACCTGTGTTATTATTAACACAGATAAATGTAAGCAAGGAAAC  
TATTACAAAGTAAATATTGCGTCACTAAATGGACATTGGAGTGATATATGATTTTATTCGCCGACTATAACACCCCTTAT  
CTTTTCGCTATTTCTTTGACTGTTGATCGGCCTGTTAGAAATTTTTCGCTTATCTGCGGTACATGCTCTCCGGTGC  
TCTTGATGCACATCTTGACCATTATGATTCTATAACCACAGGTCAATTAGCCAGGCACCTCATTATCTCAATATTGGA  
GATTGCCAGCTCTCGTCTTCTGCTTACTGGCTGTTTTTTTTGGTCTTATTGGCATCCTGTTGCAGCATGCCTGCATC  
ATGGTCTGGCAATCACCCTGTCGAACCTGTTGCTGTTTCTGTGCTTACTGTTTACGATTATTGCGGTGCATTATAC  
CGTAAAATAGTTGCGCCCTGGATTCCACGCGACCATAGTTGAGTATTACAGAAGAAGAATATATTGGTAGCATGGCGT  
TAATTAACGGTCAAGCCACTTCAGGTAATCCCTGCGAAGGAAAACCTCACCAGTCAATTTGGCCAAATACATTATTTA  
CTACTGGAGCTGAAGAAGGAAAAATTTCACTAAAGGAGACAAAGTGTAAATATTTGCCACTTTCTGCAACGCGATA  
TTTGGCGGAAAAAATCCCTGGCCCCAAATATTGTAATTTATTAATCAAAAGGAAATTTAATAATGGATGATATTGTTAA  
TTCTGTGCCCTCCTGGATGTTTACCAGCAATTATTGCCGTATGCATTCTGTTTATTATTGGAATTTTTTCGCCAGGCTCT  
ATCGTGCCTTTCGGCAGAGCAAGCTTTTGTTCGACTGTTTTAGGTGGGCAAAAAGTGGTAAATGAGCGGTGGCGCAATC  
GTGATGCCGATCTTTATGAAATAATCCCATCAATATGAATACTCTGAAGCTGGAAGTCAGCCGCTCAACCATTGATAG  
CCTGATTACGAAAGATCGTATGCGCGTCGATGTAGTAGTGCCTTTCTTTGTGCGGGTAAAACCTTCAGTAGAAGGGATTG  
CCACCGCTGCCAGACGCTGGGGCAACGCACCCTGTGCGCTGAAGACTTACGTATGTTGGTTGAAGATAAATTTGTCGAT  
GCCCTCCGTGCAACAGCTGCGCAAATGACCATGCATGAGTTACAGGATACCCGCGAGAAGTTTGTGCAGGGGGTGCAAAA  
TACAGTGGCAGAAGACCTGTGAAAAACGGTCTGGAAGTGGAGAGCGTTTCACTTACCAACTTTAACCAGACCTCGAAAG  
AACATTTCAATCCGAACAATGCCTTTGACGCGAAGGTTTAAACAAACTGACTCAGGAAACAGAGCGCCGTCCGCGGAA  
CGTAACGAAGTTGAACAGGATGTAGAAGTTGCGGTGCGTGAAAAAAATCGCGATGCGCTATCGCGCAAGCTGGAGATTGA  
ACAGCAAGAAGCGTTTATGACGCTTGGAGCAGGAGCAGCGTTAAACCCGACTGCGCAACAGAATGCACGTATTGCGG  
CTTTTGAAGCTGAACGTCGTCGTGAAGCAGAGCAGACGAATTTCTGGCTGAACGACAGATTGAGGAAACAGAAATCGAC  
CGCAACAGGCCGTCGCTCAAGAAAGGTTGAAGCTGAACGTGAAGTTTCGATTAAGAGATCGAACAGCAGCAGGTCAC  
CGAAATCGTAACCAGACGAAATCGATCGCTATTGCCGCAAAATCGGAACAACAGTCCAGGCAGAAGCCGTGCTAATC  
TCGCACTTGCAGAAGCGGTAAGCGCCCAACAAAACGTGAAACCCTCGCCAGACTGCCGAAGCCGATCGTGCTAAACAA  
GTTGCCCTAATCGCTGCCGCGCAGGATGCAGAAACCAAAGCGGTTGAACTGACCGTGCAGGGCGAAAGCAGAAAAAGAAGC  
CGCAGAGATGCAGGCGGCGCTATCGTTGAGTTAGCCGAAGCTACACGTA AAAAGGGTCTGGCGGAAGCAGAAGCACAAC

GTGCGCTGAACGATGCTATCAACGTACTTTCTGATGAACAAACCAGCCTTAAATTCAAACTGGCCTTGTTCAGGCGCTG  
CCTGCGGTAATAGAGAAATCCGTTGAGCCGATGAAGTCAATCGACGGTATCAAGATTATTCAGGTCGATGGTCTGAATCG  
TGCGGGCGCTGCGGGTGATGCAAACACGGGTAATGTGGGGGGCGAAACCTGGCGGAACAAGCATTATCAGCCGCTCTCT  
CTTACCGCACACAGGCACCGCTGATTGACTCCTTGTCAATGAAATTTGGCGTTTCAGGCGGCTCACTGGCGGCATTGACT  
TCACCCTTAACCTCAACAACCTCCCGTCGAAGAAAAAGCAGAGTAAACCCTCTTCCAGGAATAATCCCTGGCCAAAAAGC  
CGGGGATTTTTATATCTGCGTTCCGCTAAAAAGTGCAAATGATCAGGTTGTTGCAGCATTGTTGCGTGACGGCTCGGGGA  
AGGCAAAACTGCATCAGAGAAAGCATTGCGTGGGGTCTGGCGCTCATCAACAATCGGGGAGTCAGCAGGGGGCTGAAACG  
GGAAAGCCCTCCCGAAGAAGGGGGCCTTACAGAAGGAAAGGGTTATGATGAAGCTCGTCATCATACTGATTGTGTTGTT  
ACTCGTAAGTTTCGCAGCTTATTAACAGCCAATCAGAGGGGGAGAAATCCTCCCTCACCTTGTTCTTTACTTTAGGT  
TGAAAAAAATCAGCGTCAAGAAGTTTCATTAACACATATCCCTGGCCAAAAAGCCGGGATTTTTATATCTGCGTT  
CCGCTAAAAGTGCAAATGCTCAGGACGTTGCGCGTTTTGCGTGACCGCTCGGGGAAGGCAAAATTCCTCTGGGAAAG  
CATTGCGCGGGTCCGGCGCTCATCAACAATCGGGGGCAGCAAGGGGCTGAAACGGGAAAGCCCTCCCGAAGAAGGGG  
CCTTGATAAGGAAAGGGTTATGATGAAGCTCGTCATCATACTGGTTGTGTTGTTACTGTTAAGTTTTCCGACTTACTAA  
CAACTCATCAGAGGGGGAGAAATCCTCCCTTACCTTGTTCTTTACTCTAGGTTGAAAAACAACAGCGTCAATAGGC  
CTGCCATGTACGAAGCGAGATCTGTGAACCGCTTCCGGTTAGCCTTTTTATCCTGTTGGATCTTCTTGATGATGTTGG  
TCGTCGAGCAACCGTCTTCAAAGTTGAGCACCAACACTTCGCCACCGTTGGCCAGACTTCTTTACTCCCGCAATCTCT  
TCTGGTTTTATAGTCGCCGCTTTACCAGCAGATCTGGCAAGATCCCGCGATCAAGCGCTCGCGCGTGTCTCTTCAA  
CGACACTACCCAGTCGACCGCTTCCAGTGCGCCAGCACAATCATACGCTGTTGAGTGGGTTTACCAGGGCGGGAATCCC  
CTTTCAGCCGTTTGGTGGAGGCATCGCTGTTGACGGCAACAATCAAGCGGTACCCAGCTTGCGGCATTGTCAGATAA  
GAGACGTGCCCGCGTGCAGGATGTCAAAGACACCGTTGGTATCACCACCTTTTACCACGTTTACGCGCTGCCGCTAC  
GGCAGCTTCACTTCTTCTCGGTATCACGCCAAAGCCTGTATCTGCAGTCCACGTACAGCATTTCAGCTCGATCG  
GCGAAACCGTGGAGGTTCCAGTTTGGCCAGCCACCGCCAGCCGCGCATTGGCAAAGAAGCAGGCTTCTTCCAGCGAA  
TTACCCGCTGCCAGGTTGCCGCCAGGACGCAATCACCGTGTGCCCGCACCGGTAACGTACATACACTTCTGCGCTG  
GGTTGGCATATGCAGCGGCTTTACCCGTTGCGAGCAGCATAACCTGTTGGAACGGGTCACTAACAGAGCCGAGA  
GTTGTAATCGGCAATCAGTTTATGCCGCGCTCAACAATCTCTTCTCGGTCTTACATTTACCGACAACAGCTTCAAAT  
TCCGAGAGATTCGGGTTAACAGCGTAGCGCCGCGTAGCGCTCAAATCGGTACCTTTTGGATCAATCAGCACCGGAAC  
ACCCGCTTACCGCCAGTTGGATCATCTGCTGTACGCTTGCAGCGCACCTTTGGCGTAGTCAGAAAGCACCAGCGCGC  
CAATCGAACTCAGCGCTGATTAATCCGCTCGTGCAGCGGCTGCGGATCAACACCTTCGAAACCTTCTCAAATCCAGA  
CGATCAGCTGTTGGTTGCCGGAAAGTACCCGTAATTTGGTAATGGTCGGATGCGTCGGTACAGAAACGAAGTCGATTT  
GACGTTGACGTCGGCCAGAGATTTACTCAGCGCGCGCTGCATCGTCAATGCCGTCACCCGACCAGGCGTGCATTAG  
CACCGAGAGAAGCGATATTCATCGCCAGTTAGCCGCGCCGCCGGACGTTCTTCGATGGTATTCACTTTAACACGGGC  
ACCCGCGCTTCCGGCGAGATACGACTGGTGGGGCCGTACCAGTAACGATCCAGCATCACATACCAACCACCATCACTCC  
TGACGTTCAAATCTGGCAGCGTTACTTTATTCTGTCTCCTGAGAGATTCAAATTTGCGCGGATAATACCATACT  
TCATTTCCACCAGCCACTTCTGCCAGCTTGCCCGCACAGTTCACGCTCTGCGGTGAAGCAATCCTCCGACACATGGC  
CCGGCAATTCGTAAATGCCAGATGATGAAGTTCATCGGAAGCGTAGTGAAGCACGGGTGAGCGCCATCGCTTCTGCT  
TCTTCATAATGTCGTTTTGCGCCAGTAGTTCAGAATACGCAGTGTGCTGACCAGCGGTTAACTTCGGTTTTTCATG  
AGCGTAGCGCAACACCAGATATTGGTAATAAATTCGATATCGGTAATCCCCCTTTCATCAGCTTTGATATCAAAGCGAT  
CGGATGTTTTATTGCCGAGATGAGCGCGCATTTTCTCGCGCATTTCCGCACTTCCGTTTTGAGAGTTTTACCTTACGC  
GGCAGCGTCAATCTCGCAGCGACTGCGTCAAAGTGCAGGTTGAGCTGCGGATCGCCGTACACTACACGCGCACGAC  
CAGCGCTGATGTTCCACGTCAGGCTCGTTTTCTGATAATCGGCAAATGCTTCTGCGGATGTACCAGCATCCCG  
CCGCCCCGACGGACGAGTCGAGCATCCACTTCATACAAAATGCCGGAAGAGGTACGCGTACTGAACAGATGCATAATG  
CGTTGCGCCAGACGAGATAAAACTGCCGCCGTCGATTTCCCGTCCACCGTAGTCATCGCATCCATTGGGCAATCATG  
GAGGAAGATAAGGTCAAGATCGGAACTGTAGCCTAACTCCAGCCGCCAGCTTGCCTGAGCCGACCACCAGCAAAACCAC  
GCCCTTTCGCTTCTGTTAGGTTGATTGCGCTTACCAGTACGGGCAACCATTTGAACCCACGCTGCTGAACGACGGCATCT  
ATCATGGCTTCCGCCAGCCAGGTTAAGTATCGCTCACTTTATCACCGGTAGCGTACCGGCGATATCCGCTGCGGCGAT  
GCGTAACAGCTGCGCCTGTTTGAAGTACGAGCGCCTCAAGCTGTTGCTCTTCTGTCATCTTCCGGCACGCGCAGCAAT  
ACTGGCGCAACTCATCGCGTAGGCATCGGTGCGCGTGGCTGGTAAAGGGTGTGTTGATCGAGCAATTCATCCAGCAAT  
AATGGATAACGCGCCAGCTGGCTGGCAATCATCGGCAGCGGACACAGAGAAATCAAATGTTTAAAGCGCCGCGGGGAA  
TTCAGTGAAGCAATTAATAAGTGGTGGGTAACAATCCCACCAGCAAGCGGTAATGCGCGACAGCGTAACGGCAG  
CGTCTTACGCGCACAGACATCACTTAGCAGATGCGGCATCAGATGGTGCAGCACCTGACGTCCTCGCGGCCGATGGTG  
CGTTATCCAGCTCTTTCGGGAAATCGGCAATCAGCGTTAGCACCTGTTTGGATCATCTCTGCTAAGATGCGCCAGCAC  
TGGCGTAGTGCATCTTCTGCAACGCATCTGCCACAGCTCACGCCACTGTTCCGACAGGACTCTTCTGAGTTTAC  
TTTCATCGTCCCAATCAATTCATTAACACCCCGCGCACATTTGGTTCATATGTCGGGTGAGCGCCCGGTGAGTTGCGGC  
CAGTCAGCAAAGTCCATCGCCACGCCAGCCGCGCACGATTAAGTTCATCAGAAGGAAGCGTCTGGGTTTTGTTGCTGTT  
AATGCTTTGACGACGTTTTTCCAGACGCCGAGGAACAGATACGCCACTCGCAATTTGTTGAGCATGTTTTCCAGAAAGCA  
GATGACGCTCGGCAATGGCGCTGAGCGTTGGCAGTAAAGAGCGCGATTGACGCGACGGTTCGCGTCCGCCGCAATGAGC

TGGAACACCTGAACGATAAATTC AATTCGCGAATGCCGCTGCGCCGAGTTTGATATTGTCGGTCAAACCACGTGACG  
CACTTCACGGGCAATCATCCCTTTCATGTTGCGCAGCGACTGAATCAGCTGAAATCGATGTAACGACGGAAAAACAACG  
GGCGCAGCATGCGACGAACTCGTTAGCATAGACGCCTTCGCTATCGCCATAATCCGCGCCTTGACCATCGCGTAACGC  
TCCCAGTGCGCCCTGCTCCTGGTAATAATCTTCCAACGCGGCAAAGCTCAGCACCAGCGGGCCACTTTTCGCCAAACGG  
ACGACGCCGATATCCACGCGATAGACGAAGCCATCCTGCGTTGGTTGATCCAGCACTTTAATCAGCCGCTGCCCATGC  
GGTAAAAAATGCGCGTTATCCAGTTCGCCGCTCCACCCTGCGTACAACCATGTTCCGGCCAGGCAAAAAATCAGATCG  
ATATCAGAGGAGAAATTCAGCTCCCCACCGCCAGCTTACCATGCTAAAATCAGCAGCGGTTGCGCTTCGCCCTGCGC  
ATTGACGCGGTTCCCACTCGCGGCAGCAGGCGTCATACAGCCAGTCACGCGCCGCAACAATCAGCGTCTCCGCCAGAT  
AGCTGAGCTGCTGCAATATGCTCTCTTTCAGTAACAGTGCAGCGTTTTCGCCCAGGCGATGCGCACCATAATGCGCCGC  
CGAATAGCCGAGCTCGCGCATTAAACCGGCTTCGCTACTCACATTACAGAGCGCCTCTGCAACCATGCCGCGTAATG  
CTGCCATTCGTCGGCCTGCGGCGGTTGGCTTTCAGTTCGCTCAGCCACTCTGGATGCGCAATCAGCTGCTCTGCACAA  
AATCACTAAAAGTAAGTACTGACTTCGCTGTGCGCTAAGTGATTCCTCGGCTAAAGGCTCTGGCAGCCGCTCAACAACG  
GTCTGCCAGTACTGCTGTAACGGTGAAGAGAGCGGCTTCATAAGCGATTTTATCCTTGCCTGATTAACGTTTTCCGCTG  
GCAACCAGAACGGTTCCTGATTGTTTGCCTCATTACGAAATGTTCAATTTGATGCGTTGCCCGTCCGAATAGCGTGA  
TGCAGCCCTGCCAGTTTCCAGCCAGGCTTGCAGCAGCAGGATCATAGTAACCCGCCAGCAACAGTATTGAGTCAAT  
ATCACGCGTCAAGCGTGGCAACTGGTCACGGTAGCGTACGCTAACGGCTGGCAGAAAACGCTTTTCAGTTCAGCGGCAT  
GGCGGAAAGATGGATATCGGCAAAGCTTTGAAGGAGTGCCTGATTTTGCCTGCGCTTTGGCATCTAAAAATGGCTGC  
CATGCTTTGCTTACCAACCATTCGGTCAACGCCAGCTTCGCCATTGCCGTTTCGGTAGAGTAGACCGCCGTCACGGCAGA  
CACCGCAGAAGCAATGGTCGCTCGCATTGAGTCAGCAGATCACGTAAGTGAGTGCTCGCTTTACGCGGCACAATACCAC  
CGAACAGCATCAGCGTATGACGGACCAGGCTAATGGCTGCCAGCACCTGTTCTTTCGCCGCATCGTTGCCGCGTACCCAC  
AGTTCTTATGATACTGCCATTGCGCTAACGCCAGCTCAGCGCCGCTTCAGCCCTGTTCCACATCGGCTTTTGGCCG  
AACATGCAAAATGGTGGTCGGTTTGATTTACGCGCCGGATTGCCCTGCGCCAGATGATAGCCACGCGCCGCTTTGCTCA  
GGCTGCCCTGGCGTAATCCGGTTTGCATACAGTTGGTTCGCCAGTTTTCAGCACCAGCGCGGTGTCGCCGCTAAGCAGT  
TCCAGTTCAGCTCACAGATAGTTTCAGCAAATTCACCGCTTTCACTTCCCCCTGGTCGAGGGCGATTTCAATTTGGCT  
ACCATCGACCCGCCACCAGCCATTTTTCGCGATAAAAATCGGTGCTGAACAGCGGCTGCACGCGGGAGGCGAGATCGGCCG  
GCAATTCGCCGTTTCGCCAGACTTCCGTCGGTAACGCGCAGGTCGAGCGTGGTTTCGCTCAACGCCACGTTATATTC  
GGCGCTGATGTAAGCCGCTGCTACTTTCCTGCAACTTTCATGGTCATCTCATAGCGACCGTTTTTCGCCACGAATACG  
TAAGCCCATATCGTGCCACGCAGCCAGTTATCCGGCGTTTCGTAGTAAATATTCAGCAACTGCACGGGGTCATGGTGCT  
CGCCGCCAGCGTATTGAGATGGTCACGCAACGCCTCAACGGCACTGTGATTAACAATAAACTTTAATTCGATTTCTGA  
GCCATGGCCTTTACTTATCGGTTATGTACATAAGTGACGATGAACGGCGAACTTAATGCGATCTTTTTTGTGAGTAGAT  
AGTATTTTGGCCAAATTCGCATGCAACGGGCAATTTGACGGGCGTAAAAGTTTGAAGCAGTGGCAAGACCTGACACAGA  
GGATTCCGATTGATGTGCAATGCTTTCGCTAGCGACTGATGCCACTACTATCGTTCCACTTTCCATGACAATAACGAC  
AGCCTGATGCCAAAATTACGCCTGATCGGATTACTTTACTCGCACTTAGCGCGACTGCCGCTCACACGCTGAAGAAAC  
GCGCTATGTTTCCGACGAACTGAATACCTGGGTCCGACGCGTCCGGGAGATCATTATCGCCTCGTGGGCACGGTTAACG  
CCGGCAGGAAGTGACCTTATTACAACTGACGCCAACCAATTATGCCAGGTGAAAGACAGCTCTGGCCGTACCGCC  
TGATCCCCTTGAACAACCTTAGCACTGAGCCAAGCCTGCGCTCCCGTGTGCCAGATCTGGAAAATCAGGTCAAAACCT  
GACCGATAAACTACCAATATCGATAACACCTGGAATCAGCGCACCGCAGAAATGCAGCAAAAAGTGGCGCAGAGCGACA  
GCGTGATCAACGGGTTAAAAGAAGAAAATCAGAACTGAAAAACGAGCTGATTGTCGCGCAGAAAAGGTCGATGCCGCC  
AGCGTACAGCTGGATGACAAACAGCGCACCATCATGCAATGGTTTATGTATGGCGGTGGCGTGTGGGGCTTGGCTT  
GCTGCTCGGTGTTACTGCCGACCTGATCCCAAGCCGAAACGCAAGATCGCTGGATGAACTAAATGCCTTCTTCG  
TTGCACTGCTTATTATTAGGAATTTGATTTTACGAAGGGATGATGGCGTGAAGATTTATCTGGTCGGTGGTGCTGTT  
CGGGATGCATTGTTAGGGCTACCGGTCAAAGACAGAGATTGGGTGGTGGTGGCAGTACGCCACAGGAGATGCTCGACGC  
GGGCTACCAGCAGGTAGGCCGCGATTTTCTGTGTTTCTGCATCCGCAAACGCATGAAGAGTATGCGCTGGCACGTACCG  
AACGGAAATCCGGTTCGGTTACACCGGTTTTACTTGTATGCCGACCGGATGTCACGCTGGAAGATGATCTTAAGCGT  
CGCGATCTGACCATTAATGCGCTGGCCAGGACGATAACGGCGAGATTATCGACCCGTACAACGGTCTGGCGATCTGCA  
AAATCGTCTGTTGCGCATGTTTCCCGCTTTTGGCGAAGATCCGTTACGCGTATTGCGCGTGGCGGTTTTGCTGCGC  
GTTATGCCACCTCGTTTTTCTGATTGCCGATGAACTCTGGCGTTGATGCGCGAGATGACCCATGCGGGTGAACGGAA  
CACCTGACGCTGAACGGGTATGAAAGAGACGAAAGCGCCTCACACCCGCAATCCACAGGTGTTCTTCCAGGTA  
GCGCGATTGCGGCGACTGCGGTTTTTATCCCGAAATGACGCACTGTTTGGCGTTCGGCCCTGCCAAGTGGCATC  
CGAAATCGATACGGGTATTACATCTAATGACGCTCTCAATGGCGCGATGCTGAGTCCGAGGTCGATGTCGTTTT  
GCAACTTTATGCCAGATCTCGGTAAGGGCTGACGCCGCGAAGCTCTGGCCGCGTCATCATGGTCATGGCCCGCGGG  
TGTTAAGTTAGTGAACAACATATGCCAGCGTCTGCGCGTGCCAAATGAAATTCGCGATTTAGCCAGACTGGTGGCTGAGT  
TTCAGATCTCATCCACCTTCCCAATGCTGAACCCAAAACCATCGTCAAATTAATTTGATTCATCGATGCTGGCGT  
AAACCGCAGCGTGTGCGCAACTGGCGCTGACGAGCGAGGCTGACGTGCGCGGCAAGACCGTTTTGAAATCAGCGGACTA  
CCCGCAAGGCCGCTGTTGCGCGAAGCCTGGGAAGTGGCGCAGTCAGTCCGACAAAAGCCGTCGTTGAAGCGGGATTA  
AAGGTGTGGAGATTGCGAGGAGCTGACCCGACGGCGGATTGCGCGGTAGCCAGCTGGAAGGAACAACGTTGCCAAAG

CCTGAATGAGTATTGGGCATTTTGCCGGATGCGGCGTAAACGCCTTATCCGGCTACATGTCAACGACAGTTGTAGGCCCTG  
ATAAGACGCGCAAGCGTCGCATCAGGCGTTGATTGCCGGATGCGGCGTGAACGCCTTATTCGCGCTACGCAATCGTTGAC  
AACGCCAAGCATCCGACACTATTCTCAATTAAGAAGACACGACATAACCCGACGCCACAATAAAGCGATAAATGGC  
GAACGGGATAAACGAAATGCGCTTAATCAATTGCAGGAAGTTTTAATCGCTATCAGCGCCACCACAAAAGCGGTGATAA  
ACCCAACGGCAAAACATCGGGATATCGCCGCTTGTACAGGAAGCCCCAGTTTTGTAGAGATCGAGCGCCGTTGCGCCCATC  
ATCATCGGCACCCGACGAGGAACGAAAACCTCGGAAGCAGCGTAACGGCTCACCCCATCAGCATCCCACCTGAAATGGT  
CGCCCCGGAACGGGAGAAACCCGGCCACAGCGCCAGACACTGGAACAGCCAATCATAAATGCCTGACGATAGGTCATAT  
CATCAAGACCCGGCGACGCGGCTCTTTCGGCTTACGGCATTGCGCGCAATCAGCAACAAACCGCAACGACCAGCGCA  
TACATCACATTTATCGGGTTAAACAATGACTTAATCGTGTCTGGAACAACAGCCCAATACCACCGCCGGAATCATCCC  
CAGCAAAATGTGGATCAGCGTTAAACGACCTTTGCTTTCACCTTCGTGCTGCAACGGGCGGCCAAAGTGGATGCCAATCA  
GGCAAAACAGACGCGCCAGAACATCACTACTACCGCCAGAATTGATCCTAACTGGATCACAACCTCAAAGGTTTTCGCC  
GTGTCGCCCTCAAACCCCAACAGTGACCGACAATAATCATATGGCCCGTGTGGATACCGGCAGAAATCTGTCAATCC  
TTCGACCACACCAATATTGCCGCTATCAGCAGCGAGTGCATATCGCTCATCAATAAACCCCTAAATTATTAATGTAC  
CGTTGTCCGAACACTGCTATGACCAGTTATAACCGTTTTGGTTAACAGCTGTAATAATTATTTCTTTTCAGAT  
TATTGCCACGCTCAATGATTACGCCAACATTCGCCGCCCGCCACTGCGCTTGCTGAGTTTGATACGACCCAC  
GGCGAGTTGAAGCGTGTAAACAGCCTCCGCCACTTTCAGCCACGCGTTCCACCAGCGCAAAACCGCCCTCGAC  
GTGGCTGACCACGTTTTCTGCAATGTACGCGTAACCTGAGGCAATCCGCCACATCATCACTTTTCGCCGTTTTACGGTTAT  
CCACGCCATTTGATATCGAACACTAATTCTGTTGATGGTCTGTTCCAGTCGTAAACACCAATAGTGGTGATTACC  
GAAAGTTGCTCTATAATACAATATCCATCACGTCCTGCTGTTTTGGCTAACCGGATACCACTTCCGGCGAAATGTG  
CGTATTATCCACAGATTCATCGTTGAACACGAATTTCAAACGGAACAGCTTATGAGTGAATCGCGCTGGAATGATC  
CTCATCGCGTACCTCTGCGGCTCCATTTCCAGTGCCATTCTGTTTTGCCGCTTGTGTGGGTGCCCGATCCGCAACCCAG  
CGGCTCCGGCAATCCAGGCGCAACCAATGTGTTACGTATCGGTGGCAAGGGAGCAGCCGTAGCAGTACTGATTTTCGACG  
TTCTGAAAGGAATGTTGCCCGTCTGGGGCGGTATGAATTAGGTGTCAGCCCTTCTGGCTAGGCTTAATTGCCATCGCC  
GCCTGTCTGGACACATCTGCCCGTTTTCTCGGATTTAAAGGAGGAAAAGGCGTTGCTACCCTTTTGGTGCCATCGC  
ACCCATTGGCTGGGATCTACCGGAGTAATGGCGGGAACCTGGTACTGACCGTGTATTGAGCGGATACTCGTCGCTGG  
GAGCGATTGTCAGTGCATGATTGCTCCGTTTTATGTCTGGTGGTTAAAGCCACAATTCACCTTCCCGTTTTCGATGCTC  
TCTTGCCTGATCTGCTGCTCATGACAACATCAACGTCTGTGGCGTCTCAGGAGACAAAATCTGGACGAAAT  
CAAAAGAAAGCGGAAAAGGATCCCGAGTGATTTCTGGTGGATCTACATGACCTGATAGCCTTCATCGGGCTTGCCAGC  
CGTTGCTGGCACCATGCCCGCAGAAATTCACGCGACACGTAATTTTCATGCTGCGATAGAGCGGCTCCCGGTAAACAGC  
CCAGATATTGGCGCTTTGTGCATACTCTGGCAATACTTGACCAGTTTGCACCTCTCCAGAAAACGGCAACACATCCCCT  
CGAACGACGACATAATCCCTTTGCCCTCCAGCGCCATTGACGACAATCTCGCCGCTATTGGAGGAAAGATGCCCGCTT  
ACCTTACCAGTTTTTTCTCCTGACCGTTCCCAACTCCCATATTCATGGGTGATATCGCGCTCTTTGGTACCAGACA  
GTCATGACGACTTAATCCTGTAGGGATTGTGGCTCGGGATATTTTTGCAGATACTCAGGTGCTGCGCATAATATTCTTT  
TATTTTTGTCAAAGATGCGCAATATAATAATCAGGAATTCGTCAATTAACGAATATCCAGATCAATATTATCCTGC  
ACTAAATCAATTTGCCGATCGAACAATCAAATGCACCTGTAACCTCAGGATAAATGCGCATCAGTTCGGTAATAGCTGG  
CGCAATATGGCTGCGCCAAAACAAAACCTGCAACCAATACGAATCATCCCTCCGGGCGGTTTTGATTTGCGTGACGT  
CATCGACAGTCGCTGATATTGGGTGAGGATTTCAACGCATGTTCTGAACAACGTTGGCCACTTTGAGTCAGCGCCACG  
CCGCGAGCGGAGCGGTTGAGCAGCGTTGTTGCCAGCGTATTTTCAAGGATTTGGATCCGCTTGGTGACAAATGCAGGCGT  
CTGCCAAAGCTGCGCGCTGCGGCGCTAAAACCTCCCGCTGTGAACGATTTCTACCAGTACCTGCAAGTCTTTGGCTAAAG  
GCCAGCTATTACGATCGTTAATTAATCCGAGTTGTGATAAGCGCAGTGTATTTCCGAAAACATTGCCATTTCCCTGCTCT  
GGCGCAATATTCACTTTATTTTCGCGTTGATTACGAACTGTAATTACATATTCACGGTGGCAAAAATATAAAACCA  
CATTTTTAGTGGTAGTTTTGTGGCGGTGAATTTTTCCAGACAAATCAAAAACCTGGAGTTGCCATGATGAGCGAAAGTAAT  
AAGCAACAGGCAGTGAATAAGTTGACAGAGATTGTCGCTAACTTTACCGCCATGATTTCTACCCGAATGCCTGATGACGT  
GGTGATAAATCAAAACAGCTAAAGGATGCCGAAACGTCGTCGATGGGAAAATTTATCTACCATACGATGTTGACAACA  
TGCAAAAAGCGATTGACCTGAATCGTCTGCTGTCAGGACACCGGGGAGATTATGTTCTTCGTTAAAGTCGGTTCCCGC  
TTCCACTGCTTGGCGAGCTGCAAAGCATACTCAAACAAGCCGTGGAAGAGGCAACCGTCAAAGCGCCACTACGTCACAA  
TGCGGTAGAAATTTTTGACGAAGTAAACACCGGCAAAAATACCGGTAGCGGCGTACCGTGGGTACCTGGGACATCATCC  
CCGACAATGACGATGCGGAAATCGAAGTTTACATGGCAGGCGGCGGCTGCACGCTACCTGGCCGCTCGAAAGTGTAAATG  
CCGTGAGAAGGCTACGAAGCGTGGTGAATTTGCTTTCGAAAATATCTCCACCCTCGCCGTAACCGCTGTCCACCGGT  
ACTGGTGGGCGTGGGCATGCCACCTCGTGGAAACCGCGCCGTAATCTCGCTAAAGCCATTTTGGCGCCGATTGGCA  
GCCGCCATCCCAATCAAAGCGGCGAGAACTGGAGTACGCTGGAAGAAGGACTCAACCGTCTGGGGATTGGTCCACAA  
GGGCTGACCGCAACAGTTCAGTGTGGGCGTACATATCGAATCTGCCGCCCGCATCCGTCAACCATCGCGGTTGCTGT  
CTCTACCGGCTGCTGGGCGCATGTCGCGGCACGCTGCTGTTTATGCCGATCTCACCTTTGAAAATCTGTCTCACACC  
GGAGCGGTTATGAAAAGATCCTGACAACCCCGATCAAAGCTGAAGATCTGCAAGATATTGCGCTCGGCGATGTGATCT  
ACCTGACCGGTACGCTGGTACCTGCCGCGACGTTTTGTCACCGCGTTTTGATCGAACTGAAACGTCCGATCCCTTACGAT  
CTCAACGGCAAAGCGATTTTCCACGCTGGCCCATCGTGCGCAAAAACGGCGACAAATGGGAGATGGTCTCCGTCGGCC

GACAACCAGTATGCGTATGGAAGTTTTGAACGTGAATTTATTGAGCAGACCGCGTGAAACTGGTGGTTGGCAAAGGTG  
GTATGGGGCCGCTGACCGAAGAAGGCTGCCAGAAATCAAGGCGCTACATGTGATTTCCCGCAGGCTGCGCGGTGCTG  
GCGGCAACCCAGGTGGAAGAGATTGAAGAAGTGACTGGACAGAGCTCGGAATGCCGGAGTCACTGTGGGTCTGCCGGT  
CAAAGAGTTCCGCCCCGCTGATTGTCTCTATTGATACCACGGCAACAACCTGATAGCCGAAAACAAAAGCTGTTCCGCG  
AACGCCGCGATCCCATCGTGAAGAGATCTGCGAGCACGTCCATTACATCAAATAACCCCTCCCGGAGAGGCTCACCCCTC  
TCCTTTTTCGCAGGCATAACACGATGAAACCTTCCACTGAATGGTGGCGATATCTTGCGCCGCTGGCGGTGATCGCCATT  
ATTGCTCTACTTCCGTTCCCGCAGGGCTGGAGAACCATACCTGGCTCTACTTTGCCGTTTTACTGGCGTGATCGTTGG  
ACTGATCCTCGAACCCGTGCCGGTGGCGTGGTGGCGATGGTGGGTATATCCATCATCGCCATACTCTCCCTGGCTGC  
TGTTACGCCGGAGCAGCTCGCTCAGCCAGGCTTAAATTCACTGCAAAATCCCTCTCGTGGGCCGTTTTCCGGTTTTCT  
AATTCGGTTATCTGGCTGATTTTCGCCGCTTATGTTTGGCACAGGCTATGAAAAACCGGGCTTGGACGCCGATTGC  
GCTGATTCTGGTGAAAAAGATGGGACATCGCACGCTGTTTCTCGGCTATGCGGTGATGTTCTCCGAGCTGATCCTCGCAC  
CTGTAACACCGTCCAACCTCGGCGGTGGTGGGGGATTATCTATCCATCATCCGTAACCTGCCACCGCTCTATCAATCA  
CAACCAAACGACAGCAGTTCGCGCAGCATTGGCTCGTACATCATGTGGATGGGATTGTTGCCGACTGCGTGACCAGCGC  
CATTTTCTTGACGGCGATGGCACAAACTTGTGTTAATTGGACTGATGAAAAGCGCATCTCACGCCACGCTGAGTTGGG  
GCGACTGGTTCCTCGGGATGTTGCCGCTCAGCATTTACTGGTTCTGCTGGTTCCTGGCTTACGTGGCTGTACCCG  
CCGGTACTGAAGTCTGGCGATCAGGTGCCGCTGGCGAGAGACGGAATGCAGGCAATGGGCCGCTGTTTCGCGTGA  
AAAAACGGATGCTGGGGCTGATGGTAGGCGCGCTGGTCTGTGGATTTTCGGCGGTGATTATATCGATGCCGCGATGGTGC  
GTTACAGCGTGGTGGCACTGATGCTGTTCTGCGCATTATCAGTTGGGACGACATTGTCAGTAATAAAGCGGCGTGAAC  
GTTTTCTTCTGGCTGGCCTCGCTTATCACCTCGCCACCGACTCAACAACACCGGTTTTATTAGCTGGTTTGGCAAAC  
GTTAGCAGGCAGCTTAAGCGTTATTCGCCAACGATGGTATGGTGGCGTTGATTGTGGTGTTTTACTACTGCGCTACT  
TTTTCGCCAGCGCCACGGGTATACCTCCGCTCTCGCACCGATGATGATTGCTGCTGCGCTGGCGATGCCGAAATCCCG  
CTGCCGGTGTCTGCCTGATGGTGGTGGCAATTGGTCTGGGGAGCATTCTACACCATACGCCACCGGCCCCAGTCC  
GATTTACTACGGCAGTGGTATCTGCCAACGGCGGATTACTGGCGACTGGGGCGATTTTTGGGCTGATTTCTCGTAT  
TGCTGGTATTACCGCTTACTGTGGATGCCGTTGGTGTGCTTAAAGTGGGACGGTCCCGAAATTGCTCTCCGGCAC  
CCAATAGTTTTACGACCGGTAACCTCCGCGAGCGGACGCGGACGACGTAACGCCGAGATCCGCCGTCGCGCTG  
CTTAAACCGCACCATTCGGCATAGGCGATCATCGCGCTTATCAGTACAAAATTCCGGACGCGCGTAGAACACTTCG  
CCGCGCGTTTTTTTCATCATTTAGCCAGCTTCCGCCGTAACGTACGGTTAGCACTCACGCCGCCCGCCATGACCAGTCG  
CTTAAAGCCGCTGATCCAGCGCCGCTTGCACTAATCATCAGCGTATCGACCACCGCATTTCAAAGCGCGGGCGGA  
TATCAGCACGCTGCTGGTCTCGGTGCCGTTGTACGAATGGTATTTGCCGGAAGGTTTTAGGCCGGAAGCTGAAA  
TCCAGCCCCGACGGTGGTTCATCGGACGCGGGAAGACAAAGCGCCCGCAGTACCCTGAGCCGCCATTTTCGACAGTAA  
CGCCCCGCCAGGATAATCCAGCCCCAGCAGCTTCGCGGTTTTATCAAACGCTTCCCGGGCGCATCATCGATAGACTCGC  
CGAGCAGCTCGTACTGACCAATGCCAGTCACGCTGATTAACCTGCGTATGACCGCCGAAACAAGCAGCGCAACAACGGA  
AATTCGGCGGGTTATCTTCCAGCATCGCGCTAACAGATGCCCTTCCATATGGTGTACAGGGATCGCCGGAACGTCCCA  
GGCAAACGCCAGAGAACGCCACGGTCCGCGCAACAGTAGCGCGCGACTAATCCAGGGCTGCGGTATAGGCCACAG  
CATCAATGTCTTTTCCGTTAAACAGACTCCTTATAGCGCGCTGGATCAACGGTACGGTTTTACGCACATGATCGCGG  
GAGGCCAGTTCAGGCACGACGCCCGTAGTCAGCGTGCAATTTACCTGACTATACAATTGGTTGGCTAACAAACCTTT  
TTCATCGTCTAAATGGCGATGCCGTTTTCATCGCAGGAAGTTTCAATACCCAGTACACGCATGACTTGTTTTACCTCGC  
TTTATTACCGCGCAGTGTAGGACCAATGCGGGTTGATGTAAAACCTTTGTTCCGCCCTGGAGAAAGCCTCGGTATACTCC  
TCACCCTTATAAAAAGTCCCTTTCAAAAAAGCCGCGGTGCTTTACAAAGCAGCAGCAATTGCAGTAAAAATCCGCACCAT  
TTTGAATAAGCTGGCGTTGATGCCAGCGCAACCAATTAATCAAAGGTGAGAGGCACATGCCGGTAATTAAGTACG  
TGAAAAACGAGCGTTTCGACGTAGCTCTGCGTCCCTTCAAGCGTTCCCTGCGAAAAAGCAGGTGTTCTGGCGAAGTTCTGC  
GTCGTGAGTTCTATGAAAAACCGACTACCGAACGTAAGCGCGCTAAAGCTTCTGCAGTGAAACGTCACGCGAAGAACTG  
GCTCGGAAAAACGACGCCGCACTCGTCTGACTAATTCCCGAGAGCGTTGCTCTCCGATCAGACCGAGTTGTAGTTGT  
AAGGCCGTGTTCCGAAAGGAATGCGCGGCTTATTTTCGTTTATGAATTGCTAAAAATCGGGGCTATGGCTGGACGAAT  
CCCACGCGTATTCATTAATGATCTGCTGGCACGCACTGACATCGTCTGATCTGATCGATGCCGTTGTAAGCTGAAAAAGC  
AGGGCAAGAATTTCCACGCGTGTGTCCATTCCACAACGAGAAAAACCCGCTCCTTACCCTAACGGTGAAGAACAGTTT  
TACCACTGCTTTGGATGTGGCGCGCACGGCAACGCGATCGACTTCTGATGAACTACGACAAGCTCGAGTTCGTGAAAC  
GGTCAAGAGCTGGCAGCAATGCACAATCTTGAAGTGCATTTGAAGCAGGCAGCGCCCCAGCCAGATCGAGCGCCATC  
AGAGGCAAACGCTTTATCAGTTGATGGACGGTCTGAATACGTTTTACCAACAATCTTTACAACAACCTGTTGCCACGTCT  
GCGCGCCAGTATCTGAAAAACCGGATTAAGCCACGAGGTTATCGTCTGCTTTGCGATTGTTTTGCGCCCCCGGCTG  
GGACAACGTCCTGAAGCGGTTTGGCGGCAATCCAGAAAATCGCCAGTCATTGATTGATGCGGGGATGTTGGTCACTAACG  
ATCAGGGACGCACTTACGATCGTTTCCCGGAGCGGGTATGTTCCCATTCGCGATAAACCGGGTCCGGTATTGGTTTT  
GGCGGGCGCTGCTGGGCAACGATACCCCAAATACCTGAACTCGCCGAAACAGACATTTTCCATAAAGCCCGCCAGCT  
TTACGGTCTTTATGAAGCGCAGCAGGATAACGCTGAACCAATCGTCTGCTTGTGGTCAAGGCTATATGGACGTGGTGG  
CGCTGGCGCAATACGGCATTAAATACGCCGTTGCGTCTGTTAGGTACGTCAACCACCGCCGATCACATACAACCTGTTGTC  
CGCGGACCAACAATGTCATTTGCTGTTATGACGGCGACCGTGCAGGCGCGATGCCGCTGGCGAGCGCTGGAACGGC

GCTGCCTTACATGACAGACGGCCGTCAGCTACGCTTTATGTTTTGCCTGATGGCGAAGACCCTGACACGCTAGTACGAA  
AAGAAGGTAAGAAGCGTTTGAAGCGCGATGGAGCAGGCGATGCCACTCTCCGATTTCTGTTTAAACAGTCTGATGCCG  
CAAGTTGATCTGAGTACCCCTGACGGGCGGCACGTTTGTAGTACGCTGGCACTACCATTGATATCGCAAGTGCCGGGCGA  
AACGCTGCGAATATATCTTCTGTCAGGAATTAGGCAACAAATTAGGCATACTTATGACAGCCAGTTGAACGATTAATGC  
AAAAGCGGACAGAGCGCGTTTTCTCGCCTGTTCCGAGCTAAAACGCACGACCATGCGTATACTTATAGGGTTGCTG  
GTGCAAAATCCAGAATTAGCGACGTTGGTCCCGCGCTTGAGAATCTGGATGAAAATAAGTCCCTGGACTTGGCTTATT  
CAGAGAACTGGTCAACACTTGTCTCTCCAGCCAGTCTGACCACCGGGCAACTTTTAGAGCACTATCGTGGTACAAATA  
ATGCTGCCACCCTTGA AAAACTGTCTGATGTGGGACGATATAGCAGATAAGAATATTGCTGAGCAAACTTACCCGACTCA  
CTCAACCATATGTTTGATTCGCTGCTTGAACGCGCCAGGAAGAGTTAATCGCTCGTGAGCGCACGCATGGTTTAAAGCAA  
CGAAGAACGCCTGGAGCTCTGGACATTAACAGGAGCTGGCGAAAAAGTGATTTAACGGCTTAAGTGCCGAAGAGCGAT  
CGGAAGCCCCGACAGCCGCACTGAGAGGCAGCGGCAAAATATAAGTACGCCCTCGTAATTATCGTTGGCGGTAAACA  
ACCGTTGGATTCAGCGTTAACGGCTGAAGGACATCGGGTCAATCGCCCAACACCAACCTCATGAAATAAGTGTGGATAC  
CGTCTTATGGAGCAAAACCCGAGTCACAGCTGAAACTTCTGTACCCGTTGTAAGGAGCAAGGCTATCTGACCTATGC  
CGAGTCAATGACCATCTGCCGAAGATATCGTCTGATTGATCAGATCGAAGACATCATCCAATGATCAACGCATGCG  
GCATTGAGTATGGAAGAAGCACCGGATGCCGATCTGATGCTGGCTGAAAAACCCGCGACGAAGATGCTGCCGAA  
GGCGCCGCGAGGTGCTTTCCAGCGTGAATCTGAAATCGGGCGCAGCTGACCCGGTACGCATGTACATGCGTGAAT  
GGGACCGTTGAACTGTTGACCCGCGAAGGCGAAATTGACATCGCTAAGCGTATTGAAGACGGGATCAACCAGGTTCAAT  
GCTCCGTTGCTGAATATCCGGAAGCGATCACCTATCTGCTGGAACAGTACGATCGTGTTGAAGCAGAAGAAGCGCTGTG  
TCCGATCTGATCACCGGCTTTGTTGACCCGAACGCAGAAGAAGATCTGGCACCTACCGCCACTCACGTCGGTTCTGAGCT  
TTCCAGGAAGATCTGGACGATGACGAAGATGAAGACGAAGAAGATGGCGATGACGACAGCGCGATGATGACAACAGCA  
TCGACCCGGAACCTGGCTCGGAAAAATTTGCGGAACACGCGCTCAGTACGTTGTAACGCGTGACACCATCAAAGCGAAA  
GGTCGACGTCACGCTACCGCTCAGGAAGAGATCCTGAAACTGTCTGAAGTATCAAACAGTTCCGCTGGTGCCGAAGCA  
GTTTGACTACCTGGTCAACAGCATGCGCGTCATGATGGACCGGTTCTGACGCAAGAAGCTCTGATCATGAAGCTCTGCG  
TTGAGCAGTGCAAAATGCCGAAGAAAACTTCAATTACCCTGTTTACCGCAACGAAACCAGCGATACCTGGTTCAACGCG  
GCAATTGCGATGAACAAGCCGTGGTCGAAAAACTGCACGATGTCTGGAAGAAGTGCATCGGCCCTGAAAAACTGCA  
GCAGATTGAAGAAGAAACCGCCTGACCATCGAGCAGGTTAAGATATCAACCGTCGTATGTCATCGGTGAAGCGAAAG  
CCCGCCGTGCGAAGAAAGAGATGGTTGAAGCGAACTTACGTCGTTATTTCTATCGCTAAGAAATACACCAACCGTGGC  
TTGACGTTCCCTGACCTGATTCAGGAAGCAACATCGGTCTGATGAAAGCGGTTGATAAATTCGAATACCGCCGTGGTTA  
CAAGTTCTCCACTACGCAACCTGGTGGATCCGTCAGGCGATCACCCGCTCTATCGCGGATCAGGCGCGACCATCCGTA  
TTCCGGTGATATGATTGAGACCATCAACAAGCTCAACCGTATTTCTCGCCAGATGCTGCAAGAGATGGGCCGTGAACCG  
ACGCCGGAAGAACTGGCTGAACGTATGCTGATGCCGGAAGACAAGATCCGCAAAGTGTGAAGATCGCCAAAGAGCCAAT  
CTCCATGGAACCGCGATCGGTGATGATGAAGATTCGCATCTGGGGGATTTATCGAGGATACCACCCTCGAGCTGCCGC  
TGGATTCTGCGACCACCGAAAGCCTGCGTGCGGCAACGCACGACGTGCTGGCTGGCCTGACCGCGCGTGAAGCAAAAGTT  
CTGCGTATGCGTTTCCGTATCGATATGAACACCGACTACACGCTGGAAGAAGTGGGTAACAGTTCGACGTTACCCGCGA  
ACGATCCGTCAGATCGAAGCGAAGGCGCTGCGCAAACTGCGTCACCCGAGCCGTTCTGAAGTGTGCGTAGCTTCTGG  
ACGATTAATCGGTAGGCCGATCAGGCGTTACGCCGACCCGGCACTAGGCCCTCTGCACAAAACGCCACCTTTTCCGGTGG  
CGTTTTTATCGCCACGCACTACCAGCGCTGGTCCAGCTCGGATACGCTTCAACAGTTTCTCCAGTGAACGCGAC  
TTAAACCGCTGGGATTTGGCAGCACCCAAATCTGCTCGAACCATGGTGAAGCGTTTGTTCCTCCACTGTGCACCCGCG  
TGGCTGAATCCCTGTTATGCTTGTGTTGCCAGAATCGCAACCGCTCGGCTGATAATCTTCAATTTTTTCAATCAG  
CTTACGCCCGCTGCGTGTAGCTCTGCTTTGAAACTTCAATGGCTTGCACCGTTGGACGCTACCAAGTTTGGTGACGC  
CACAACGATAATCCAGCAGATGCTGTGCCTCTGCGGCTTCAACTGACGGTCGGTAAACCCGCGCTGATATATCACCTTC  
CAGAAGCGATTTGCCGATGAGCAAAGGGAAAAACAGTCCCGCGGATGAAAGCCAGGGTTGATACCGCAAAACACGAC  
CCGTAACCCCTGGAGCCAAAAATATCCTCAACCATATTTACTCCTTTCTAACATCACCAGGAAAAAGTATAACGGATTGAAAA  
TACATTGTTTATAAAAACAGCAGGCGCGGTAATGGCTGGATTGCGACACGGAGTTACTTTATAATCCGCTACCATGGC  
CCCTTAGCTCAGTGGTTAGAGCAGGCGACTCATAATCGCTTGGTCGCTGTTCAAGTCCAGCAGGGGCCACCAGATATAG  
CAAAGGCTGACGAGAAATCGTCAGCCTTTTTCTTTTTATATACGTTACTTTGCGTGCCAGTAAGCCGCTGCACGTACC  
CGCTGTGGGTCACTGTTCCGCTTCAAAGCGGCGGCTTAAATTTCTAACGACTTTACCTTCGCCGTTATCCAGATGAA  
GTAATCATCGGCAGGGATTTGCATCTGCGCCAGACGCGCATCTACCCTGCTCATCATGTGCCAGCCATTGATATTA  
AACCATCAAGTGCGCGAGATAATCCTGACAGGCGTTATCCCGCACGCTAACAGCGCACTAACTTGGGTTTAAACGGCA  
AGTTTGCTCAACGTTTCCAGGCGGCGGCAATGCAGGCAATCCGATTATCGCAGACATACAGCTGATACGCGTAATC  
TTCCGGCACACCAGCGAACCGCGGACCTGCCACGTAAGTTTATCGCCCGTTGCGCTGCATCGCCAGCCGCTGG  
CGACCCACCGTCGTGAATAAAGAAATCAATCGCCAGTTCATGGCGTAGTTCGTATACAGCGGCGTATAGTACGCGAC  
GGTGGGCGTGGTCTTCCGCCAGACGATGCCCTTCCGTTACGTTGGCGGCACAAAGTGAAGGTCAGGTTGAGGAAA  
GAAGAGTTTGTGTGATCGTCAAAGCCACGCGATGTAAAACCGTCCAGCGCCTCGCCGCCAGGACAATGCGCTGAAAA  
CGGCGCTGATGCGCTCAACGCGTAACACAGTCAGTTACGGAAGCGCAGATCATTGCGAACGCGCTGCGGGTAGCGGGG  
GTGTTATTCATTGTTATCGCCTTCTGATGGTAATCAGATATATCTAAATAAACTCGAAATGATAATGATTGTTAATC

ATGATAAATGCAAGCGATTTGTAGAACTGATATGTCTATAGTCTGATAAGACGAACCGCTCTTCTCAGGCATCATTACT  
CAACGCCGGATGCGGCGTGAACGCCTTATCCGGCCTACGTGTGAGATGAGTCCACGTTTAAAAATCATTTTTACACTTGC  
AAGAACGCTCATATCAGATATAAATTAGATATATCTAATTAAGCAAAGGAGGCTGATATGAGCCATCATCACGAAGGGT  
GTTGTAACATGAAGGCCAGCCACGCCATGAGGGCTGCTGCAAAGGTGAGAAGTCAGAACACGAGCACTGCGGACACGGT  
CACCAGCATGAACACGGTCAATGCTGCGGTGGTCCGACGGTCCGCGGCGGGTCCGTCGGCAACGTTTCTTTGGTCACGG  
TGAATTACGTCTGGTGATTCTGGATATTCTCTCGCGCGATGACAGCCACGGTTACGAATTGATTAAAGCGATTGAGAATC  
TAACCCAGGGGAATTACACCCCAAGCCCGGGCGTCACTACCCAACGCTGGATTTTCTGCAGGAGCAGTCGCTGATTACC  
ATCCGCGAAGAGGAAGGAGGTAAGAAGCAGATTGCGCTGACCGAACAAGGCGCGCAGTGGCTGGAAGAAAACCGCGAACA  
GGTGAGATGATTGAAGAACGCATCAAAGCGGTTGCGTTGGCGCGGCGTCCGCGCAGAACCCGCAAATGAAGCGGGCGC  
TGATAATTTAAAGCGGTGCTGGATTACGCGTCAACCAGAGCGATATCAGTGATGCACAAAATAAAAAGATCATTGCG  
GTGATCGACCGCGCCGCTTTTGATATTACGCAACTGGATTAATCGCCGCATCCGCCAGTGGCGCGGTGCAATTGCCGGAT  
GCGACGCTTGACGCGCCTTATCCGGCTACACCCGCTACACACCCCGAGGCCGTGATAAGATGCGCCAGCATCGCATCAG  
GCATTGTGCTCAACCGCCGGATCCGGCATACCGATTAATGCAGTACCGTACCAGCGTCTTCCAGTCCGCTGGCGCGGTG  
TTTACCATCGCCGACACCTGCGCACTCTTCCACCAGCTCGGCATTTTTCTGGGTGATCAGGTTAAGTCATCCACTC  
CACGGTCAAGTGGAAAGCCATCGGCCTGTTCCAGCGTTGAATGGCTAATCTGGGCGATCACTGGTGACGTTTTTC  
ACCTGTGCCACAATATCTTCCATCGTCCGTCGGCGCGTGTACCTGCTGCGAACCAGTGGCACCCTTATCAGCATGGC  
ATCAATCAGCTTGGCAATATCGTTGGCAGCATTAGCGCTGCGGCTGGCTAAATGACGCACTTCCCCTGCCACCACTGCAA  
AACCTTTGCCCTGTTCCGCGCACGCGCCGCTTCCACCGCCGATTACAGGGCCAGAATATTGGTCTGAAACGCAATATCG  
TTAATCAGCGAAGTAATGGTGCCAATGCGCTGGTACTGTCCGGGATATCGTCCATTGTCTTGATCACCGTGGTCAATCGC  
CTCCCCACCCTGCACTGCCGATTACTGGCAGTGATTGACAGTTTATCGGCAGCCGACGCGGTGGCAGAGTTCTGTTTCA  
CCGACGCGCCATTTGGTTCATGGTCGCCACCGTTTCTGAACTTATCAACTGTCTGCTGGGTATGTTGTTTCACTTCA  
TCGGTGCTTTCCGACGCTCTCACTGCCATTTCTGACACTGGACACCTGGCTTGAGACATCGTTAATTAGCCAACGGCA  
CATCAGGCCAAGTTGCCCTACCGCACGTAATGTCAGCCCAGCTCATCGCTGCGATTAGATGCTCAACTACTTACGTT  
CTCCGGTCCGACCTTCACTGCCTGATGGCAACATTTTCTATCGGGCGCAATCTGCCATTCAAACAGGCGCTTGGC  
ACAATACCACTAACGCACAGAGGATACGTCACCACCGGGCAGCAACAACCAAAGCATGGCCGCCAGCAAGATAAAA  
CATCAGGGTCATCACTCCACGCGCCCGCAGCGAAGCGGTAATGAAGGCAGTTTACCAGCCAGCCTTTACGCACCACCA  
GGCTTTTATGAATACGCTTACTGGTACGTCGGCGTTCAACGCTTGTACAGCGCTCCACCGCCGCGATCTTTCATCC  
GTCGCCCCGGTACGAATCGACATATAGCCACTGATTTTTCCCTCGCGCACCATCGGTACCGCATTGGCCCGCACCCAATA  
ATGGTACCATTTTTGCGCGGATTTTTACGATGCCGCTCCAGGGCTCCCCTTTTTTTCAGGGTGAACCACATATCCGCAA  
ACGCCGCTTTTGGCATATCCGGGTGACGCACCATGTTGTGCGGCTGCCCTTGTAACTCTTGCAAGGTATAGCCGCTCAC  
TGCAAAAAGTGTATTAGCATGAGTGATATAGCTTTGAGATCGGTAGTGGACATCAGAGTGGTATCGTCCGCCAGCGG  
GGTATTTTGTGGGTGACATACGGATGAGAAGACATGTTGCGTCTGTGCAGGTTATATGGTTGTTAACTTCTTGTGAG  
AGTTTATGTCGGCCCCGCTGCGGTTATCTTTAACCGATTAATTTGATTTAGATCGCAATTTGCGATTTAAACACAAATCT  
AATTCCTTGATTTAAATACTTTCACTCTGTTACTATACGAAAACGTTAATTTATCTTGCCAAAAATCAGGCAATTATTG  
CCCTGAAAACGTGCAATTTGCGCAGCAATCATCAATCCATACCCGACAAAACCGTGCAAAAATAACAACAAATGTTAACA  
GATAGCATTAAATATTGCACAAATGATAACCGAATTTGTGTTTATCCCGATTTTTCGCGATCGCAGCCGGAGTGGCGCAAT  
CCCTGCAATACTTAAATCGGTATCATGTGATACGCGAGCCTCCGGAGCATATTTTGAACAGGTTACCTTCGAGCGCATCG  
GCTTTAGCGTGACGCGCCACGCCCCTGAATCTCATTGAGAAGCGAACGCTGGATCATGAGGAGATGAAAGCACTTAACCG  
AGAGGTGATTGAATACTTCAAAGAGCATGTCAATCCGGGTTTTTAGAGTATCGAAATCTGTTACCAGCCGGCGGGGATT  
ACGGAGCCGTAGAGTGGCAAGCGGGAAGTTAAATACGCTTGTGACACCCAGGGCCAGGAGTTTATCGACTGCCTGGGA  
GGTTTTGAAATTTTCAACGTGGGGCACGTAATCCAGTTGTGGTTTTCCGCGTACAGAATCAACTTGCAGAAACAACCGCT  
GCACAGCCAGGAGCTGCTCGATCCGTTACGGGCGATGTTGGCGAAAACCTTGTGCGCTAACGCCCGGTAAACTGAAAT  
ACAGCTTCTTGTGAATAGCGGCACCGAGTCCGTTGAAGCAGCGCTGAAGCTGGCGAAAGCTTACCAGTACCAGCGCGGC  
AAGTTTACTTTTATTGCCACCAGCGGCGGTTCCACGGTAAATCACTTGGCGCGCTGTCCGGCCACGGCGAAATCGACCTT  
CCGCAAAACCGTTTATGCCGTTACTGCCGGCTTCCGTCATGTGCCGTTTGGCAATATCGAAGCCATGCGCACGGCTCTTA  
ACGAGTGCAAAAAACCGGTGATGATGTGGCTGCGGTGATCCTCGAACCGATTACAGGGTGAAGGTGGCGTAATTTCTGCCG  
CCGCCGGGCTATCTACCCGCGTACGTAAGCTATGCGATGAGTTCGGCGCACTGATGATCCTCGATGAAGTACAAACGGG  
CATGGGGCGCACGGCAAGATGTTCCGCTGCGAGCATGAGAACGTACAGCCGGATATCCTCTGCCTTGCCAAAGCGCTCG  
GCGGCGCGTATGCCGATTGGCGGACCATCGCCACTGAAGAGGTGTTTTAGTTCTGTTGACAACCCATTCTGCAT  
ACCACCCTTTGGCGGCAACCCGCTGGCTGTGCGGCGGCTGGCGACCATCAATGTGTTGCTGGAGCAGAACTTACC  
GGCTCAGGCTGAGCAAAAAGCGATATGTTGCTGGACGGTTCCGTCAACTGGCGCGGGAATATCCCGATCTGGTACAGG  
AAGCGCGTGGTAAAGGGATGTTGATGGCGATTGAGTTTGTGATAACGAAATCGGCTATAACTTTGCCAGCGAGATGTT  
CGCCAGCGCTACTGGTGGCCGGAACGCTCAATAACGCCAAAACGATCCGCATTGAACCGCCACTGACACTGACCATTGA  
ACAGTGTGAACCTGGTATCAAAGCGGCGCGTAAGGCGCTGGCGGCCATGCGAGTAAAGTGTGGAAGAAGCGTAATATCAA  
TCGGATGGCGATACGACGTCGCCATCCGATCTTTTTATACGACGCGTACGCCCGCAGGCATCATCCGCTCCGGCGTTAAC  
AGCACGCTTTCACTGCCGTCATCGTTTCCGACACAACAGCATGCATTCCGACGTTTACCACGCATTTTCGCTTTTTG

CAGATTGCATAAGACCACCACCGTTTTCCCATCAGCTCTTCTCGCTGTAGTACGGCACCAGGCTGGTCACGGTTTGCA  
GCGTTTTTTGCCCCACATCAACCTGTACGATGTACAGCTTGTGCGGTTTTTCATGGCGTTTCACTTCCACAATCTTTCCG  
ACGCGCATTTCCAGACGTGCAAAATCAGCGTAAGCCACGGTTCCATTGCTTCTCCCTTAGGGTAAAATTTTACTAAAC  
TATAGCAAAAGTTTTTCTCAATCCTGTAGGCTAAAAATGGAGAATGCAGGCGTGATCACATTCGTGAGCCGCTGTGTTAC  
CGTTACAGCGTCAAAGAAACGCGCTTTATTTACTGAAAACAGGTGACCCGATAAGCACTTCCCTCTACAATGGGGGCGCAC  
ATCAGGGAAAGTAAAAAAGTAAACATGGCAACACTAAAAGACATCGCAATCGAAGCTGGCGTATCCCTGGCGACAGTAT  
CCAGGGTCTTAAATGACGATCCGACATTGAATGTGAAAGAAGAGACGAAACATCGCATTCTCGAGATCGCCGAAAAGCTG  
GAGTACAAGACCAGTAGTGCCCGTAAACTCCAGACAGGTGAGTCAACCAACACCATATTCTGGCTATCTACAGTACCA  
GCAGGAGCTGGAGATCAACGATCCTTACTATCTGGCGATCCGCCACGGCATTGAAACCCAGTGCGAAAAGCTGGGCATCG  
AGCTCACCAACTGTTATGAACACAGCGGCTTACCAGACATTA AAAACGTACCAGGATTTTTAATTGTCGGCAAACCCACG  
CCCGCCTGCGCGCCGCTGCCAGCGGTTGACCGACAATATCTGTTTTATCGACTTTCACGAACCCGGCAGCGGTTACGA  
TGCGGTGGATATCGATCTGGCAGCATCAGTAAAGAAATCATCGACTTCTATATCAACCAGGGCGTTAATCGTATTGGTT  
TTATTGGCGGTGAAGATGAGCCTGGCAAGGCGGATATTCGTGAGTGCCTTTGCGGAATATGGCCGACTGAAACAAGTG  
GTACGCGAAGAGGATATCTGGCGGGCGTTTTTCCAGTTCGTGCGGTTATGAACTGGCAAAACAAATGCTGGCGCGGGA  
AGACTATCCGAAGGCACTTTGTTGCTTCCGATTCCATTGCTATCGCGTACTGCGGGCAATTCATGAACGAGGCCTGA  
ACATCCCACAGGATATTTCGCTTATCAGCGTTAACGATATCCCCACCGCGCATTTACCTTTCCGCGCTTCCACCGTG  
CGCATCCATTCGAGATGATGGGAAGTCAAGGCGTTAACCTGGTGTATGAAAAAGCCGCGATGGTCCGCGCTGCCGCT  
GTTAGTCTTCTGTTCCAGCAAATTA AAACTGCGCGCACGACCCGTTAAATCCCCTTACACACTGTCCGGCAATCGTTTT  
TGCCGGACAGTGTGCCGTTTTATTTCTGTGATCCAGTTAAAGTAAATGCATTTACCTGCTACTTTTTAGTAAAAATTTTA  
CTAAACTCCCCAGCAATTACACAAACTACCATCACCATGAATGGTCCGATTTCTCTACCGGGAGGCCCTATGAATCG  
CTGGGAAAACATTAGCTCACCCACGAAAACCGACTTGGCGCGGTGCGTACTTTTTTTCATATGATTCTGTTGCGCAAG  
CGCGTACCTTTGCCGCGAAACCAGCAGCCTGTTTTGCCCTTAAGCGGTGAGTGAATTTCCACTTTTTTGACCATCCG  
CTGCAAGTACCAGAAGCCTTACCTCTGAGTTAATGGCTGACTGGGGCATATTACCGTCCCCGCCATGTGGCAATGGA  
AGGTCACGGCAAACGCAATATACCGACGAAGGTTTTCCGTTCCCATCGATGTGCCGTTGTCCCAGCGATAACCCAA  
CCGGTGCTATCAACGATTTTTACCCTCAGCGACGGCTGGCAGGGTAAACAGACGCTGATTAATTTGACGGCGTCGAA  
ACCTATTTGAAGTCTATGTTAACGGTCAGTATGTGGTTTTAGCAAGGGCAGTCGCTGACCGCAGAGTTTGACATCAG  
CGGATGGTAAAACCGGCGACAACCTGTTGTGTGCGCGTATGCAGTGGGCGGACTCTACCTACGTGGAAGACCAGG  
ATATGTGGTGGTCAGCGGGATCTCCGCGATGTTATCTGGTGGAAAACACCTAACGCATATTAACGATTTCACTGTG  
CGTACCGACTTTGACGAAGCCTATTGCGATGCCACGTTTTCTGGGAAGTGGTCTGAAAAATCTCGCCGCTCCCCTGT  
CGTCACGACGCTGGAATATACCCTGTTTGATGGCGAACCGGTGGTGCACAGCAGCGCCATTGATCATTTGGCAATTGAAA  
AACTGACCAGCGCCAGCTTTGCTTTTACTGTGCAACAGCCGACGCAATGGTACAGAGAATCCCCTTATCTTTACCATCTG  
GTCATGACGCTGAAAGACGCCAACGGCAACGTTCTGGAAGTGGTGCCACAACCGGTTGGCTTCCGTGATATCAAAGTGGC  
CGACGGTCTGTTCTGGATCAATAACCGTTATGTGATGCTGCACGGCTCAACCGTCACGACAACGATCATCGAAAGGCC  
GCGCGTTGGAATGGATCGCGTCGAGAAAAGATCTCCAGTTGATGAAGCAGCACAATATCAACTCCGTGCGTACCGCTCAC  
TACCCGAACGATCCGCGTTTTTACGAAGTGTGTGATATCTACGGCCTGTTTGTGATGGCGGAAACCGACGTCGAATCGCA  
CGGCTTTGCTAATGTGCGGATATTAGCCGATTACCGACGATCCGAGTGGGAAAAAGTCTACGTGAGCGCATTGTTT  
GCCATATCCACGCGCAGAAAAACCATCCGTCGATCATCTGGTCTGCTGGCAATGAATCCGGCTATGGCTGTAACATC  
CGCGGATGTACCATGCGGCGAAAGCGCTGGATGACACGCGACTGGTGCATTACGAAGAAGATCGCGATGCTGAAGTGGT  
CGATATTATTTCCACCATGTACACCCGCTGCCGCTGATGAATGAGTTTGGTGAATACCCGATCCGAAGCCGCGCATCA  
TCTGTGAATATGCTCATCGATGGGAAACGGACCGGGCGGCTGACGGAGTACCAGAACGCTTCTATAAGCAGCATTGC  
ATTCAGGGTCAATTATGTCTGGGAGTGGTCCGACCACGGGATCCAGGCACAGGACGACCACGGCAATGTCTGGTATAAATT  
CGCGCGGACTACGGCGACTATCCAACAATAA ACTTCTGTCTTGATGGTTTGATCTATTCGATCAGACCGCGGGAC  
CGGGCTGAAAGAGTACAAACAGGTTATCGCGCCGTTAAAAATCCACGCGCGGGATCTGACTCGCGCGAGTTGAAAGTC  
GAAAATAAACTGTGGTTTACCACGCTTGATGACTACACCCTGCACGACAGAGTGCAGCGCCGAAAGTGAACGCTCGCGAC  
GCAGCAGATTA AA ACTGCGCGACGTTGCGCGAACAGCGAAGCCCCCTTGAGATCAGCTGCCGACGCTGGACGCCCGCG  
AAGCGTTCTCAACATTACGGTGACCAAAGATTCCCGACCCGCTACAGCGAAGCCGGACACCCTATCGCCACTTATCAG  
TTCCCGCTGAAGGAAAACACCGCGCAGCCAGTGCCTTTGACCAAATAATGCGCGTCCGCTGACGCTGGAAGACGATCG  
TTTGAGCTGCACCGTTGCGGCTACA ACTTCCGATCACCTTCTCAAAAATGAGTGGCAAACCGACATCTGGCAGGTGA  
ATGGCGAATCGCTGCTGACTCGCGAGCAAAGATCAACTTCTTCAAGCCGATGATCGACAACCACAAGCAGGAGTACGAA  
GGGCTGTGGCAACCGAATCATTTGAGATCATGCAGGAACATCTGCGGACTTTGCCGTAGAACAGAGCGATGGTGAAGT  
GCTGATCATCAGCCGACAGTTATTGCCCGCCGGTGTGACTTCGGGATGCCTGCACCTACATCTGGCGCATCGCTG  
CCGATGGCCAGGTTAACGTGGCGTTTTCCGGCGAGGTTACGGGACTATCCGCACATCATTCCGTGCATCGGTTTACC  
ATGGGAATTAACGGCGAATACGATCAGGTGGCGTATTACGGTCTGGACCGGGGAAA ACTACGCCGACGCCAGCAGGC  
TAACATCATCGATATCTGGCGCAGCACCGTGCATGCCATGTTGAGA ACTATCCCTTCCCGAGAACAACGGTAACCGTC  
AGCATGTCCGCTGGACGGCACTGACTAACCGCCACGGTAAACGGTCTGCTGGTGGTTCCGACGCGCCAATTA ACTTACG  
GCCTGGCACTATACCCAGGAAAACATCCACGCTGCCAGCACTGTAACGAGCTGCAGCGCAGTGTGACATCACCTGAA



CCTCGATCACCAGCTGCTTGGCCTCGGCTCCAACCTCTGGGGCAGCGAGGTGCTGGACTCCTGGCGCTCTGGTTCCGTG  
ACTTCAGCTACGGCTTTACGTTGCTGCCGTTTCTGGCGGAGAAGCTACCGCGCAAAGCCTGGCGTCGATGAGTTCGGC  
GCAGGGTCTTTTCCACGAATTTGCACAGCGAGAATAAGCAATGAGGATCATCGATAACTTAGAACAGTTCGCCAGATT  
TACGCCCTTGCAAGAAGTGCAACGCTGCGTTGAAGCGATTGAAAATATCGACAACATTCAGCCTGGCGTCGCCACTC  
CATCGGTGACTCATTGACTTACCGCTGGAGACAGACTCCGCGACCGATGCGCTATTTACCGGCATCGACGCTATTTTG  
AAGTGCATTACTACCTGCAAGGGCAGCAAAAAATTGAATATGCGCCGAAAGAGACATTACAGGTAGTGAATATTATCGT  
GATGAAACTGACCGTGAATATTTAAAAGGCTGCGGAGAAAACCGTTGAGGTCCACGAAGGGCAAATCGTTATTTGCGATAT  
CCATGAAGCGTATCGTTTATCTGCAATAACGCGGTCAAAAAAGTGGTCTCAAAGTACCATCGAAGATGGTTATTTCC  
ATAACAAATAACAACCTACGGCGGCAAAAGGAGTTTGGCCACCAGCTACCCTACTCATTTTCGGAGATGTGTTATGCTG  
ATACCAAACGTAATAACAATCGGCAATTCGGCTTGCCTCGCTGACTTTTGGCCGCGTTTACAGCTTTAACAACTGTTATC  
AATAATAATATTGAGCTTGGACTGGCTCGGCACCGATGTTTTCTCGCGACGATTTTTTATTTTATTCCTTCTGTCT  
GATCATCGCAGATTTGTTTCGTTAAATAAAAACTCAGAAGCCGGTGTCTACGCGTGGGTA AAAAGTTGCTGGCGGGAC  
GTTGGGCATTTACTGCTATACCTACTGGTTCGTAACCTGTTCTTTTTACCTCACTGTTGCCGCGCTTATTGCT  
TATGCTTCGTATGCCTTCTCGGATACGAATATATTATGACGCCGGTTGCCACCACCATTATCAGTATGGTGTCTGTTCCG  
CTTCTCCACCTGGGTTTCCACCAACGGGGCGAAAAATGTTGGGGCAATTACCTCCGTCACCTCAACGCTGATGCTGCTG  
TAACGCTCTCTCATTTTTACTGGCAGGTACGGCGTGGTTGGCGCGTACAGCCTGCTGACGCCATCACCGTTGACGCG  
ATGATCCCGAACTTCAACTGGGCTTCTCGGCGTTACCACCTGGATCTTTATGGCCGAGGTGGCGCGGAGTCCGTCCG  
TGTGTACGTTAACGACGTCAAAGGCGGTTGAAATCGTTGTTAAAGTATCATCTCGCCGGGATTTTTATCGGCGTAC  
TGTATTCCGTCTCCTCGGTGCTGATTAACGTCTTCTGTCAGCAGCAAAGAGTTGAAATTTACCGGCGGATCGGTGACGGTA  
TTCCACGGCATGGCGGCGTATTTGGTCTACCGAAGCGTTGATGAATCGCTTGTGCGTCTGGTGTCTTTACCGCGAT  
GTTCCGTTCCCTGCTGATGTGGACCGCAACGCGGTGAAAATTTCTTCTCGAAATCCCGGAAGGCATCTTTGGAAGA  
AAACCGTGAACGAAACGCGGTTCCGGCGCGCAGCGTGGATCCAGTTCCTGATCGTCATCCCGCTGATGATT  
ATCCCGATGCTCGTTCCAATACCGTGCAGGATCTGATGAATACTATTATTAATATGACCGCCGACGCTCCATGCTTCC  
GCCGTTATTCATGCTGGCTTACCTGAATTTACGCGCAAATAGATCACCTGCCACGCGATTTCCGTATGGGCTCC  
GCCGACCGGTATTATCGTTGTTTCAATGCTGATTGCGATATTGCCGTAGGGTTTGTGCTTCGACATCCCGACTGGC  
GCGAATATTCTGACCATCATTTTTATAACGTGCGGCGTATTGTTATCTTCTTGGCTTTGCGTGGTGGAAATACAGTAA  
ATATATAAAGGATTAACGCTGAAGAGCGCCATATTGAAGCGACGCCAGCCAGCAATGTTGATTAAGCAGAATAATAAA  
AAATGAGCAGGCATTTTCCCTCTTCTGGATGAGGAGAGGGAAAATAGTTTCTGCCTTTATATTTTTATAATTACAACGA  
TAAAAGGCTGTACTTTTTCTTAGCTCATGGATTAACAATGAAATTAATCACTGCACCATGCAGAGCATTACTTGCTC  
TGCCGTTTTGCTACGCTTTTCTGCGGCAGGAGAAGACGCTCCGGCAGAACATGACGACACAAAAACACCCGCAATT  
ACCTCGACATCTTCTCTTCAATTCGTTTTTACGGCGAATTAGGGGTTGGTGGATATATGGATTTAGAGGGTGAGAATAA  
ACATAAATACAGCGACGGTACCTATATTGAAGGTGGCTGGAGATGAAGTACGGCTCCTGGTTCGGCCTGATTTACGGCG  
AAGGCTGGACCGTGCAGGCCGACCAGCAGCGCAATGCTGGTGGCAGACCATAGCTGGGGTGGTTTCGAGGGCGGAATT  
AACCGTTTCTATGGCGGTTATCGTACCAATGATGGCACCAGAAATCATGCTCAGTCTGCGTCAGGATTCCTCGCTGGATGA  
CCTGCAATGGTGGGGCGATTTACCCCGATCTGGGCTACGTCATTTCCAATACCCGCGACATTATGACTGCGCTGAAGG  
TACAGAACTTAAGCGGCACTTTGTTATAGCGTCACCGGACTCCTGCCGGACATCATGATGAAAGCAAAGCCTGGCTA  
CATTTTGGCAAATACGATCGCTATGACGACAAATACACCTATCCGGCAATGATGAACGGTTACATCCAGTATGACCTTGC  
CGAAGGCATCACCTGGATGAACGGTCTGAAATCACCGACGGCAGGACAGCTCTATCTCACGGGCTGCTAACTCCTA  
ACTTTGCCGCTCGCGCTGGCACCATACCGGACGCGCCGACCGCTGGACGTACCGGGAAGTAAAAGTGGATGATGGT  
AGCGCATGTATGAAGCGTTAAAGGGGTTTATCTCTCCACCGCTTACACCTACGCCAAACATCGCCCTGACCAGCTGA  
CGATGAAACCACTCTTTCATGCAGTTTGGTATCTGTTACGAATACGGCGGGGACGTTTCCGCCACGGCTTTTGATAGCC  
GCTTCTACATGAAAAATGCCCTCACGATCCCAGCGACCAATCTTCTGATGCAATATTTCTACTGGTAAATAAGGACTG  
TAATTTTATGAAAAATAAAAACTATTTTAAACGCCAGTAACTGCGCTCTGCTGATAAGTTTTTCCGCCATGCCGCTAACG  
CCGACAATTATAAAAACTGATTAACCGTACTGGCGCGCCGAGTACATGAAGGATTACGATTACGACGATCACCAGCGT  
TTAATCCGTTTTTTCGATCTCGGAGCCTGGCATGGTCTGTTGCCAGACGGCCCTAACACCATGGGCGGCTTTCCGGG  
CGTTGCGCTGCTGACGGAAGAGTACATCACTTTATGGCCAGCAATTTGACCCGCTGACCGTCTGGCAGGACGGCAAGA  
AAGTCGACTTTACGCTGGAGGCATACAGTATTCGGTGGCTGGTGCAAAAACTGACAGCAAAGATGTGCAAGTCGAA  
ATGACTCTGCGCTTCCGACGCCGCGCACGTCACTACTGAAACCAAATCACAGCAATAAACCGCTGGATCTGGTGTG  
GGACGGCGAAGTCTGAAAAACTGAAAGCGAAAGAAGGGAAACCGCTTTCCGATAAAAACCTGCTGGCGAATACCCTG  
ACTATCAGCGCAAATCAGCGCCACCCGTGATGGCTGAAAGTACCTTTGGCAAAGTGGCGCCACCTGGGATCTGCTG  
ACCTCCGGCGAATCGGAATATCAGGTGCATAAATCCCTGCCGGTGCAGACTGAAATCAACGGTAATCGCTTTACCAGTAA  
GGCGCATATCAACGGTTCGACCACGCTACACCACCTATTCCATCTGCTGACCGCTCAGGAAGTTAGCAAAGAGCAAA  
TGAGATCCCGGATATTCTGGCGCTCCGGCGTTTTATCTACCAGCTCGCAGCAACGCTGGGAAGAATACCTGAAGAAA  
GGGTTAACCAATCCGGATGCGACGCCGGAACAGACGCGCTCGCGGTGAAAGCGATCGAAACGCTCAACGGTAACCTGGCG  
CTCACCGGGCGGTGCGGTGAAATTTAACACCGTTACACCGTGGTACCGGGCGCTGGTTCTCCGGCAATCAGACCTGGC  
CGTGGGATACCTGGAAGCAGGCGTTTGCATGGCGCATTTCAATCCGGACATCGCCAAAGAGAATATCCGCGCGTCTT

TCCTGGCAGATCCAGCCTGGCGATAGCGTGCGTCCGACAGGATGTGGGCTTTGTCCCGACCTGATAGCGTGGAACCTTAG  
CCCCGAGCGTGGTGGCGATGGCGGCAACTGGAACGAACGTAATACCAAACCCAGCCTTGCCGCTGGTGGTGATGGAAG  
TGTATAACGTACCCAAGATAAAAACCTGGGTGGCAGAGATGTACCCGAAACTGGTGGCCTATCAGGACTGGTGGTTACGT  
AACCGCGATCACAAACGGCAACGGCGTGCCGGAATATGGCGGACCCGCGACAAAGCCACAACACTGAGAGCGGCGAGAT  
GCTGTTTACGTGAAAAAAGGCGATAAAGAAGAGACGCACTGCGGCTGAACAACACTACGCCCGCTGGTGGAGAAAGGCC  
AGTACGACAGTCTGGAATTCGGGCACAGGTTGCTGCATCGTGGGAATCGGGGCGTGATGATGCCGCCGCTTTTGGGTTT  
ATCGACAAAGAACAGTTGGATAAATATGTCGCTAATGGCGGAAACGTAGCGACTGGACGGTGAATTCGCCGAAAACCG  
CAGTCAGGACGGAAACGTTGCTGGGCTACTCGCTATTGCAGGAGTCGGTGGATCAGGCCAGCTATATGTACAGCGATAACC  
ATTATCTGGCGGAGATGGCAACCATCTCGGTAAGCCAGAAGAGGCCAAACGCTATCGCCAGTTGGCACAGCAGCTCGCG  
GACTACATCAACACCTGTATGTTGACCCGACTACCCAGTTCTACTATGACGTACGTATTGAAGATAAACCACTGGCGAA  
CGGCTGCGCGGCAACCCGATTGTTGAGCGCGGTAAGGGCCGGAAGGCTGGTCCGCGCTGTTAACGGTGGCGAACGC  
AGGCAATGCCGACGCGGTGGTGAAGTGATGCTCGATCTAAAGAGTTCAACACCTTTGTCCCGCTGGGAACGGCGGCG  
TTAACCAATCCGGCTTTTGGCGTGATATCTACTGGCGTGGCGCGTATGGTGGATCAGTTCTGGTTTGGTCTGAAAGG  
GATGGAGCGTTACGGTTATCGTGATGATGCCCTGAAGCTGGCGGATACGTTCTTCCGGCACGCCAAAGGTTAACCGCC  
ATGGACCAATTACGAAAAATAACAACCCGCTGACAGGCGCACAGCAAGGCGCACCAAAATTTCTCTGGAGTCCCGCGCAT  
TTGTATATGTTGATAACGATTTTTTCCGTAAGCAATAATTTGCAACTGCTGGCGGATGGCGGTAAACGCCTTATCCGC  
CCTACATGTGCAATCCTCTGGCCGGATAAAACCGCGCAAGCGTTGCATCCGGCAACTGCACCGCGCCACTGGCGGATGC  
GGCGTGAACGCCTTATCCGCCCTACATGTGTGTTCCCGTAGGTCGGATAAGACGCGACAAGCGTCGCATCCGGCATCTGC  
ACCGCGCCACTGGCGGATGGCGGTGGACGCCTTATCCGCCCTACATGTGCAATTCGTAACCTGGATAAAAACGCGACAA  
GCGTCGCATCCGGCGTTATCACCGGGCTATTCTTTTTGAATCCCATCACAACCCCGCACTCCCTTTTTCCTTTTCTC  
CGGCGACGGCTAAATTAGAACTCATCCGACCACATAACAATTATTTTACATACTGGACAATTTTATGAGTACCCGTCGC  
TGTTCCGCCGCTGGATTTAGGTTTTACCAGTTAAAAAACCGCGTGTGATGGGCTCAATGCACACCGGGCTGGAGGAA  
TACCCGGACGGTCCGAGCGGTGGCAGCGTTTTATGCCGAACCGCGCCGTCACGGCGTGGCGCTGATTGCAGCGGCGG  
CATTGCACCAGATTTAACAGGCGTTGGCATGGAAGTGGCGCAATGCTCAACGACGCCAGCCAGATCCCACACCATCGCA  
CCATTACCGAAGCGGTACATCAGGAAGGCGGCAAAATAGCCCTGCAAAATTTGCATACCGGGCGCTACAGCTACCAACCG  
CATCTGGTCCGCCGTCGCGATTGCAGGCCCCCATCAACCGTTTTCTGCCCCATGAGTTAAGCCATGAAGAGATCCTGCA  
ACTGATCGACAATTTCCGCCGCTGCGCGCAACTGGCGCGGAGGACAGGATACGACGGTGTAGAGGTGATGGTTCCGAAG  
GGTATTTGATCAACGAATTTCTGACGCTGCGCACCAATCAGCGTAGTGACCAGTGGGGCGGCGATTACCGCAACCGGATG  
CGATTTGCCGTAGAAGTAGTGCGTGGCGTGGCGCAACGCGTCCGCAACGACTTCATTATTATCTACCGACTGTGCGATGCT  
CGACCTGGTGAAGACGGCGGGACTTTTTGCCGAAACGGTAGAGCTGGCGCAGGCCATTGAAGCGGCGGGCGCACCATTA  
TCAACACCGGCATTGGCTGGCATGAAGCACGTAATCCGACCATTGCCACGCCGTCGCCGCGGGCGCATTTAGCTGGGT  
ACGCGCAAACCTGAAAGGCCACGTCTCGCTGCCGCTGGTAACCACCAACCGGATTAACGATCCGCGAGGTTGCCGACGAT  
TCTCTCGCGGGCGATGCCGATATGGTATCGATGGCGGACCGTTTTCTGCTGATGCGGAGCTGCTGTCAAAAGCGCAAT  
CGGGACGAGCCGATGAGATCAACACTTGTATTGGCTGCAATCAGGCTGTCTCGATCAATCTTGGTGGCAAAGTCACC  
TCGTGCCTGGTGAATCCTCGCGCTGCCACGAAACCAAAATGCCAATCCTTCCCGCGTGCAGAAAAAAATCTGGCGGT  
GGTGGTGGGACCTGCTGGGCTGGCGTTTTGCCATTAACGCGGCGGCGGCGTGGGCATCAGGTAACATTTGTTGACGCTC  
ATAGCGAGATTGGCGGGCAGTTAATATCGCAAACAGATCCCCGGCAAAGAGGAGTTTTACGAAACGCTGCGCTATTAC  
CGCCGATGATCGAAGTGACGGGCGTGACGCTAAAACCTCAATCACACCGTGACGGCGGATCAGTTACAGGCTTTGATGA  
AACGATCCTCGCCAGTGGATCGTGCCGCGCACTCCGCCATCAGCGGATCGATCATCGAAGGATTGAGTTATCTCG  
ATGTAATCGCGGACAAAGCGCCGTTGGCAACAAGTTGCCATCATCGTTGTGGCGGATTGGTTTTGATACGGGCTGATG  
TATTTAAGTCAGCCGGGCAATCCACCGCCAGAAATATCGCCGGTTCTGTAATGAATGGGGGATCGACAGTAGCCCTACA  
ACAGGCTGGTGGCTTAAGCCCGCAGGGAATCGAGATCCCCGTAGCCACGGCAGATTGTGATGCTCCAGCGCAAAGCCA  
GCAAACAGGACAGGGGTTAGGCAAACACCGGCTGGATCCATCGCACACCCTGCTCTCGCGGGGTGTAATAATGATC  
CCAGGCGTAAGTTATCAGAAGATTGACGATGACGGGCTGCATGTGGTGTATCAACGGCGAAACGCGAGGATTAGCAGTGG  
CAATGTGGTGTCTGCGCAGGGCAAGAGCCAAACCGCGGCTGGCGCAACCGCTGATTGATAGCGGAAAACGGTGCATT  
TAATTGGCGGCTGCGATGTGGCTATGGAGCTGGACGACGACGGCAATTGCCAGGGAACACGGCTGGCGCTGGAGATT  
TAAATCGTTATTTGAAGCGCCGGATGCAACGCATCCGGCACGTCGCTTAATCAATAAACAAGGCGGGAGAAATGCCGAA  
TCGCGTTGCCAATTTTTTAGCGTGTCCAGCGTTAATTTCTCTTCCCGCTCAAACCGCTGACACCATAGATTTACTGC  
CAATTTCCGGCAGATCGAAAGGGTTAAACCATATTGATCCATAAGGATACGAATCACGGCTATACCGCCAGGCATGGCT  
TGAGCCATGGCATTAAATTCGCAAAATCGGGCGCTGATTCTCCACGCGGTTATTTTGGCACACACCAGATCCAGCAA  
GGGTTTTTTCAGGATCGTTGAGCAGCAGATGATCTACCAGTTCAGCGCTGGTGTATTGTTCTCTGTTCTGAATACCCG  
CCAGAAAAGGTGCCACAGCAGTTAGCTTTTCTCTGCTTGAAGATGTCGGCAATCGCAATCATTTTTTCCCTTAGTAC  
GATGAACAGCGGTAAGAAATCGTATTCTTTATGCGTCATAACTTCACGTATGTAGCACTTTTGCATTCAAAGAGACC  
ATTGCTACAACACGTAATTCATTGCCCCCAACATTGAAAACATAATGCTTATCCAGATATTTGAAGTTATCCAGAGATGG  
GAATACTGCTTTAATGACTCAGGTTTTTTGAAATATCCCTTAGCAATCGTGTCCCGAGGCCACCAACTCCGTTTTAT  
GTTGCGGGTATTTTTCCGACGATCTTTCAATGCTTTTTGAGTTATCAGGTGCATTCTTATCACGTCCGTTGACAAATT

GGCAATATGATAACATCCGTTGCCAGATTGGCAACGGATGAATTTATCTGTGTGACGGAAGAATAAACGTAGAAAAACGC  
TAAACAAGAGAATGTAGACGATGGTGACAGGGATTTTTTTGTTTTATGGAAGCGCGATTCCAGAAGTGGGAGACATTGCC  
GGATGCGACGCTTCCCGCTTATCCGGCTGGAGTAACGTGCTGAACGTAGCCGGATAAGGCGTTTACGCCGATCC  
GGCAGGTAACCCCAATCTTACCGACGACGTCCAGCTTACCAGCTTTCAGTACCACAAATTTATTATTCGTCGCAATAG  
TGGTGCAGTTGCCGAAAATCTTTCAGTTTATGGAAGTAATCCAGGTGACGTTGGCAACGATATACAGCTCGCCGTTG  
ATTTTCAGGCAGCGCGGGCGTGGTGGAAACATCTCCAGGCGACGTTATCGGTGAGCGCATGTTGTTGGTAAACGGCGG  
GTTGAGAGCAGCATTAAAGCGAAAGGCTCCACGCCGAGAGCGGTTGTTGATCATAAACTCGCAGCGATCCAACG  
CCTCTGGCATGTTGGTTTCAACGTTCAAACGGCTGGAAGCAACCGCCATCGGCGATTATCGACAAACACCACTTTCGCC  
TGCGGGTTTTTATCAAGCAGCGTCAGACCAATAACGCCATTACCGCAACCGAGATCGACAATCTCCCCTTCGAGATTCTC  
TGGCAGATGTTGCATAAAGAAGCGCGCCGATATCAAGCCCGGTGCGGGAGAAGACATTCGCATGGTTGTGGATAGTCC  
AGTCAGTACCTTCCAGCTTCCAGCTAACGGTCTGCGGCGCATCGGCCAGCTGCGGTTTATTGAAAGTGAATTAATCAGG  
CGCGTTTTTCCATGCCAGCGTGGTGGTGGTGGCCGAGCACTTTTTCGAACAGTTCAGCGTGAAGTGTGAATGTC  
ACGGGCTTGGCACCGGCAATAATACGTGATCCGACGTGACCACTTTGCGCAGCGCACGAGTTGCTGTTCCAGCAATG  
CCAGTGTTCGCGACTTTGATCAGCACACACCCGGCTGTTGCGGGTAGTCGCGGTGCTGTCGAGAACTTACGCTC  
GACTCATCAATCCCGTTGAGGCGTAAATCTCGCGCTCGCCAGTTCAGTGTATGATGAGTCGCAATGCTGTACGGCTT  
ATGTTCCGCCAGTGCAGCTTAACGCAACAAAGGCATCATTAGGATCAACACCGGGCCGGATTCTGTGTGCTCCA  
ACTGTTGCAGCAAATATTCATCCCGCTTCCACGCCCTGTAGCGGGTAAACGTCATCCGTCGCCGAAAACGTTGTAGT  
GTCAGTGAACGAAAACCGTTGTCTAAGTGGCTCATCGGCCCTCTGAATGATAAAATTTGACATTGCCCTGAAAAGGG  
TGCGTGAGTATACCTTTTTCTTTTTCTGTTGGCGGTTATGAGCAATCTACTTATCTTCAGGGTATCCCGAGCAGCT  
ACTTTCCAGGTGCGAACACTGATTAACGAACAGCGTCTGGGCGATGTGCTGGCAAAACGCTATCCGGGAACACAGCACT  
ACGCCACCGATAAAGCCCTCTGGCAATATACTCAGGATCTGAAAATCAGTTTCTGCGTAATGCCCGCCGATCAATAAA  
GTGATGATGACAATAAGATCCATGTGCTAAAAACGCGCTCGGGTTACATACCCTGTTTCTGTTGTCAGGGCGGCAA  
GCTGAAAGCAAAGGTGGAGATCCGCGTCGCTACCGTGTTCGCAACGCGCCGGAACCGTTTTTGGCATGATCGTGGTGC  
ACGAGCTGGCGACCTGAAGGAGAAAGAGCATAACAAAGCTTTTACCAGTTGTGTTGTCATATGGAACCCAGTACCAC  
CAGCTTGAGTTCGACACCCGACTGTGGCTAACGAGTGTGCTTGGCAGAACAAAATCTGAAAATGATGTCAGGCGTT  
ATCTTTCTTTCTTTAGCGCTAAAATCGACCTCCCCCTTTCGTTAAGGATAACGACCATGCTGCGCGATTTGCCCGC  
CTTCTTCTCCGATTTTGTTTTTCTCGCCGACTCTAAAGATTGCCTGTTACTGTTACTTGTGGCAGGAGCGACCATCCT  
TATCGCGATCGCGTAATGGTCAACGCCAGCAAACAGCTGACCTGGAGCGATGTCAACGCCGTTCCGGCGGTAACGTGG  
GTTTATTGCTGGGGGCGAGGCCGGTAATCGCTACTTTACCCGAGTATTGATACCGCAGCAGCGTTGTACCACGCCGGA  
AAAGTGAATGGCTGCTGTTAAGTGGCGATAACGGACGTAAAAATACGATGAAGCATCAGGTATGCAGCAGGCTTTGAT  
CGTAAAGGCGTACCAGCAAAGTATCTTCTGCGACTATGCCGATTCTCAACGCTGGATTCCGGTAGTGCCTGCCAAAA  
AGGTTTTTGGTAAAACCATATCACCATTATCTCGCAAGAATTTACATAATCAACGCGCCATCTGGCTGGCAAAACAGTAC  
GGCATCGACGCTATCGGTTTTAACGCGCCAGACCTCAATATGAAGCACGGTTTTTATACTCAACTGCGGGAGAACTCGC  
TCGTGTCAGCGCCGTGATTGACGCCAAAATCCTCCATCGCCAGCCGAAATATCTCGGCCCTTCGGTATGATTGGCCGT  
TTAGTGAGCATGGCTGTCCGGCGCAGAAATAATGCGTATCTGCGCACGTGGAAGATGAAAAGGCGTGTACATTGACGA  
CAGAATCCCTTTATGGAGTATCCACGCGTTATGATACGTTTTCGCTGTGATTGGTACGAACTGGATCACTCGCCAGTTCGT  
CGAGGCCCCCATGAGAGCGGTAATAACAAGTTAACCGCGTATATTCGCGAGCCTTGAACAGGCCAGCACTTCGCCA  
ATGATTTTTCTGTGAGCATCTGTTTACCTCGTGGAAAGCGATGGCGGAAAGCGATGCCATTGACGCGGTGATATTGCC  
AGCCCGAATCCCTGCATTTTTCCAGACACAATTTTTCTTAGCCATAAAAATTAATGTGATTTGCGAGAAACCGCTGGC  
GTCGAATCTGGCGGAAGTGGATGCCGCCATTGCCTGTGCGCGGAAAATCAGGTGCTGTTTGGGCACTTAAAACCG  
CCTGCCTGCCGAACTTTTCAATTTGTTGCGCCAGGCGTGCCGAAAAGTTCGGCAAACCTGCGGAAAAGTCTTTTTCAACTATTGC  
CAGTATTCTCGCGTATCAACGTTACCTGGATGGTGAAGTCCCAACACCTTAAATCCGGCATTCTCTAACGGTTCAAT  
TATGGATATCGGTTTTTACTGTCTGGCGTGGCGGTGGCGTTATTTGGTGGAGCCGAAAAGCGTGCAGGCAACCGCCAGTT  
TGCTGGCAAGCGGCGTTGACGCCAGGGCGTGGTGGTATGATTACGGTATTTCAGCGTCACCTTGCAGCACTCAAAA  
GTCAGTGATTCTGTCTGGCGAGCGAGATTACGGGCGAAGCAGGATCGTGGTATTGAAAAACTGTCTGAATGCCAGAA  
AGTGTGCTTGTGCCGCGTGGCAGCCAAATGCAGGATCTACCCAGCCGAGCATATTAATACCATGCTCTACGAAGCAG  
AGCTGTTGCTACCTGGTGGATGAGCATCTGGTGGATCATCCAGGGCTGGCGGTGAGTGCATCACCGCCAAACTGCTG  
ACCGAGATCCGCCAGACTGGGGTATTTTTCCGGCAGATAGCGTAAAATATAATTGCCAAAGTAAAACAGTGTAAA  
AGGTATGTAACAGACATTGACTGGCTGAATGGTCTGTACACTTTGTTACTGCAAAGGGGAGTAACCTCATTGCCGGT  
CGATCGTCATTACGATGTGTAAAAAACACATCCGGTACCCGGCAACCCGAAAGGAATACGAGACGATTCCTTTTTT  
GTTGTAAGTGAACCTTTCGCGGAAGGCGAGGTCTATGCATAAAAAGCAGCGGCTGACGCTTCCGACGTTGGCGTTTTT  
TTATGTGAAGGAACTTCTATGAATACTGTGCGCACCGGTTGCTATGGGGCGATTTCGCTGTTGTTGTCGCCATTATGC  
TGGCTATCGACCTGTTGTTGAGGGGCGTGGGGGCATGCCATGACCATGAAACAGGCTGCGGCCGTTGCGGATCC  
ACAGGCACTGGCCTTCTCACAGGTTATCTGATTGAGAAAATCGCTGGCGGTGATAACGCTTTTGTCTGGCTGATGTTGT  
TCAGCTATTTCTGTTCCGGCGGCAATCAACGCCGCGTGGTGTATGGCGTGTCTGGGGCGATTGTTCTGCGTACC

ATCATGATCTTCACTGGCAGCTGGCTAATTTGCGAGTTCGACTGGATCCTGTATATCTTCGGTGCCTTCCTGCTGTTTAC  
CGGCGTGAAGATGGCGCTCGCCATGAAGATGAATCAGGCATTGGCGACAAGCCGCTGGTGCCTGGCTACGCGGTCATT  
TGCGCATGACCGACACCATCGACAACGAGCATTTCTTTGTGCGTAAGAATGGATTGCTGTACGCCACACCCTGATGCTG  
GACTGATTCTGGTGAATTGAGCGACGTGATTTTCGCCGTGGATAGCATTCCGGCTATCTTCGCCGTGACCACTGACCC  
GTTCAATTGTGCTGACCTCAAACCTGTTTGGCATCCTCGGCCTGCGTGGATGATTTTCCTGCTGGCGGGCGTAGCAGAGC  
GTTTCTCGATGCTCAAATATGGCCTGGCGGTGATTCTGGTGTATATCGGTATCAAGATGCTGATTGTCGACTTCTACCAT  
ATTCCAATCGCCGTCTCGCTGGGCGTGGTGTGGCATTCTGGTGTGACGTTTATTATCAACGCCTGGGTGAATTATCG  
GCATGATAAGCAGCGGGTGGATAATTTTAAATCTGCCTAAGCCGTGTACCCTGTCATTAACATGAGCACCCTTTTCTCC  
CTCTCCCTTCCAGGGAGAGGGTGGGGTGGGGTAAATTTTTCGCACCGATGCTGGCCTGTTCCCTCACCTAACCTCT  
CCCCAAACGGGGCAGGGGACTGACCGAGTCTTTTTTGTGTTGTCATCAGTCTGGAAGCCGCACGTTGGCTTTATTTT  
TATGTCAAAGAAATGAACCATTAAGTTTCAAATATGACCTCTTTAAATCCAGCATTTTTCGCTTCCCGAAGCTGT  
AACTTTCTTATACTCGACCTTGAACAACCTTTGTTACATCCTGAAAGATGCGTCGACAGAACGCACCAGGGATGTGCGA  
CAACAAATGAAAGGATCGAAAATGACTACGCAACGTTACCCGGGGCTATTCCGGCGTCTGGCTCATGGCAGCCTGGTA  
AAACAAATCTGGTGGCCTGTTCTGGGATTCTTCTGGCATGGATCTCAAACCCGCGGGCGAAGCTGTTGGTCTGTT  
AGTACTTTGTCGTCGGCGCACTGAAAGCCGTTGCCCTATCCTGGTGTGATGCTGGTGTGATGGCATCTATTGCTAAC  
ACCAGCAGCGGCAGAAAACCAATATCCGCCCTATTTTCTCTACTGGGCACCTTCTGCTGCTGGCCGCA  
GTAGTCTTCAGCTTTGCCTTCCCTTCTACCCTGCATTTATCCAGTAGCGGGTGTATTTTCGCCGCCGTCAGGCATTGT  
CGAAGTGTGCGCGGGTGGTAATGAGCATGTTTTCAACCCCATCGACGCGTGTGAAAGGTAACATACATCGGGATT  
TGGTGTGGGCGATCGGCCTCGCTTGCCTGCGTACGGTAACGAGACCACAAAACTGGTTAACGATATGTCGAAT  
GCCGTTACCTTATGTTGAAACTGGTCACTTTCGCTTCCGACCGATTGGTATTTTTGGGCTGGTTTCTTACCCTGGCAAC  
CACCGGTTTCTCCACTGTGGGGTACGCGCAACTGCTGGTCTGCTGGTTGGCTGTATGTTACTGGTGGCGCTGGTGG  
TTAACCCATTGCTGGTGTGGTGGAAAATTCGTCGTAACCCGTTCCGCTGGTGTGCTGTGCCTGCGCGAAAGCGGTGTG  
TATGCCTTCTTACCCGAGCTCTGCAGCAACATTCGGTGAATATGGCGTGTGTGAAAAGCTGAATCTGGATCGCGA  
TACCTATTCGTTTCTATTCGCTGGGAGCCACCATCAATATGGCGGGCAGCAATCACTATTACCGTGTGACGCTGG  
CTGCGGTTAATACGCTGGTATTCCGGTGCATCTGCCACGGCGTGTGTTGAGCGTGGTGGCTTCTGTGTGCCTGT  
GGCGCATCCGGCGTGGCGGGGGTCTCTGCTGCTGATCCACTGGCCTGTAATATGTTCCGTATTTGAAACGATATCGC  
CATGCAAGTGGTTCGCTGCGCTTTATCATCGCGTATTGCAAGACTCTTGCAAAACCGCGTGAACCTTCAACTGACG  
TGCTGTTCACTGCGGCAGCTTGCAGGCAGAAGACGATCGTCTGGCAAATAGCGCCCTGCGTAATTAATTGTTTAAACCC  
TTTCGCTACGCGGAAGGGTTTTCTCAACTTTAAACGGATCAATTCCTTTTCTGCATCCGCCAGAAACGAATGATA  
TTCAGGCCATTATAAGCAGAAAACCTACCTCAATCATCTGCGCCCTATCGACCCCGCCAGAAAGTTGTGAATCACCCA  
GCAACACGTTGAAAACACATTACGCAGCGCATGGTCAAGCCTTTACAGCAGAATAGCGCCAGGTAAGTACAATCGTGC  
CGATAACCGGCAATAGTTGACAGGATGATGAACTTCGCGAGGCCAATTCGCGCAGTCAAGCAATAAAAAATCGCCATT  
ACCCATAAGCTGCGCGTGGTAAGGTAATCAATGTACGAATGGCATTAAAGGATGGCACTGGCACCAGCGGGATAGGTGCC  
CAGAAGAAAAAATGTACGCCAATAACGGCGCTATAGACCGAAAGCTGCTTTTTGAAGCGACGTTCTGCACGATTGAAA  
ATGTTGTGATACCAATCAGAAAGGCGATGACACCCACGCCCTGGCCAGCCAATACGCGGTGATGATAAATCCTTAGCAG  
GTATGAAAAGCAAACGGCGCTTACATTATGAAACGCCGTTTTTATTAACAACTCATTTGACTTTATAGCGTTACGC  
CGTTTTGAAGATCGCCAGTTGCGGGAAGTCGTTACGCTGTTACAGTTTGTACCGTTGGCAAACCAACGATGGT  
TCGATAAATCTTCCAGCAACTGCGGCATCGTTTTACCGTGGATCAACTGACCCGCGTCAAAGTCGATCCAGTGTTTTT  
CTTCGCCCGAGTTCACTGTTGGTGGCATTTCACCGTGGCACAATCCACCATACGGCGTGCACGACCAGTACTGA  
ACAGCACCATATGGCAGCCCGCACCCGAGGCGTGGTCTGCTACGGCATGTTACCCGGCGCACTAACCAAGTTACG  
CCTGGCGTTTTTACAGCGCTCGCCGTAACGCAGCACGTCAACCACGACGCTGGAACCCGCTTTCTGGGTACAGCCAAGTGA  
TTTTGCTTCCAGCGTGGTATACCGCCGCTTTGTTCCCGCGATGGGTTTTCATAGATCGGCTGATCATGGGCAATAA  
AGTACTGTTTGAAGTCGTTGACCATGGTACAGTTTTTCAAACGTTGCTTCTGTCGCGCAATGGTCCATCAGCAACTGC  
TCTGCGCAAACATCTCCGGCACTTCCGTCAGTACGGTAGTACCGCCGTTAGCAATCACGTAGTCAAGAAAACGCCCCAG  
CATCGGGTTAGCAGTAATACCAGAAAGACCGTCAGAACCCGCACTCCAGACCAAACCTCAGTTCGCTGAGTTGCGCTG  
GCTCGGTTTTATCGTTGCGCATCACGTTATACAGCTGATGCAAATGCTCGATTCCGGCTTCGATCTCATCATCTGCTGT  
TGGCAGATCATGAAATGAACGCGTTCAGGATCGATATCGCCAGCGTTTACGGAATGCGGCAACCTGGTTGTTTTACA  
GCCAGACCAATCACCAGCACTGCGCTGCGTTCCGGTGGCGACCATGTTTTGCAGCATGGTGGGGTATTAATGTGAT  
CGTCGCCAGCTGTGAGCAGCCGTAGGTGGCTGAAGAGGAACACGCCGTGACCTTCGGCGTGTGGTCTCTTTC  
AGAAAACGGTCTGGATCTGCCGCGGATGCCGTTGACACAGCCACGGTTGGCAGGATCCACAGCTCATTACGCACCCC  
GACATCGCCGTTAGCGCGACGATAGATCTGCACTTACGATCTGCCGTTGCGCAGGCAGATCCTGAAAATCAGGTTGAT  
AGCGATACTGATCCAGATCGCTCAGATTCGTGCGCGTATTGTGGCGTGAACGTGAACACCTGCCGCAATATCCGCCAAT  
GCATAACCAATCGGCAGGCCATATTTGATGACATTGGCCCCTTTTGCGATATCCGTTAACGCAAATTTATGTCCACGAGC  
AACATCCTGGCGCAGCGTAACAGTCTGTTATCGACACTGACTTCTGTGCCTTCAGCCAAATCTGCTAAAAGCGACCGCGA  
CGTTATCCAGCGCATGGATCTTGATGATTGCATATCAACCCAGACCTTAGTTCAGTTCAATGGCGAAGTAGTCACGGC  
CATTGTTAAAGCAAATATTTTTACCATCTCGCCAGCAGGTTGATGTCGCGGGTGTTCGCCCGCTTCCACCCAGCGA

CCGATCATCTGGCACAGAATGCGGCGGAAGTATTCGTGACGGGTGTATGACAGGAAGCTACGGCTGTCAGTCAGCATAACC  
GACAAAGCGGCTCAGCAGACCGAGCTGCGCCAGTTGGGTCATCTGACGTTCCATACCGTCTTTCTGATCGTTAAACCACC  
AGCCGGAACCGAACTGCATTTTCCCGGCATACCTCGCCCTGGAAGTTACCGATCATGGTCCCAGCACTTCGTTATCG  
CGCGGGTTCAGGCAGTACAGAATGGTTTTCCGGCAGCAGTTTTCTCATTCTGCTTGTCTAGCAACTTAGACAGCTCTTC  
CGCCATCGGACGGTCTGTTGATGGAGTCAAAGCTACATCCGGCCCCAGCAGTTTGAAGTACGCAGGTTGTTATTACGCA  
GCGCGCAATGTGGTACTGTGTACCCAGCCGCGACGTGCATATTCGGCACCAAGGAACACCAGTACCCGAGTTTTGAAC  
TGCGCCACTTCGTGCTCGCTCAGGGTTTTCGCCAGCCAGACGGCGCCGAGAATGCTGTCCAGTTCCGCTTCGTTTCGCTTC  
AGCAAACATCACCACATCCAGCGCGTGGTCAGACACTTTACAGCCGTGAGCGGCGAAGTATCCAGACGTTTGGTCAGGG  
CAGTTTGCAGGTCAGCAAAGCGGCAATGTCCGATCGGAACTTCGCCATGTAGTCGTTAAAGGTCGCC  
TGTTTCGATGTTGAAGGCTTTGTCCGGACCCAGCTCGGCAGCACTTTGATGGTGAAGAGCCGTCTTTGGCGATCTCTGC  
GTGATGCTCCAGAGAATCGATCGGGTCATCGGTGGTCCGACCATTTTACGTTTCATCTGTCATGATGCCGCGCGCGG  
AGAAGTTATCTGCGCCAGCAGTTCGTTACATTCGTTCCAGATTTATCGGCAGTTGACGGAGAAAGCAATTTGCCAGTG  
ATACCAAACGGACGGCGCAGTTCGAGGTGCGTCCAGTGGTATAACGGGTTGCCGATAGTGTGCGGAACAGTCGCCGCCA  
GGCGTCAAATTTTTACGGTCAGACGCATCACCGGTACACAGACGCTCGGCCACACCGTTGGTACGCATAGCGCGCCATT  
TGTAGTGATCGCCTTTACGCAGATGCATACAGGTTTTTAAACGATAGTCTTCCGCAATCTGCTGCGGCGCAAATGG  
CAATGGTAATCGAAAATCGGCTGGTCTTTTGCGTAGTCGTGATACAGACGGCGGCAAATTCGGTATCTAACAGGAAATC  
TTCAAGTCATAAACCGAGTCATTTTCTGCTTCTCTCAACGAGTAGCTAGCTTCTTATGGTGCATGCTGACAAAGTTA  
TCACACCAATTTCCAGAGTCCGAAGATATTTCTGAGTGTAGTCAATAAACGTAGTTAAAAAAATTAAGTCTCAAAGTGG  
TAAATCTCGCTGCAGGCCGCGCCAGTACTGGCCTTGTGTCGTGAGGTAATGTCCCTACAAATATTCCCACATTTGTGAT  
GGCTCTCACCTTTTAAAGTTGTATGACAAGTTATCTTTCTGCCGTGCAAATCATAAGTCGACGGAATGCAAATGGCGA  
TTCATTCATTTGTTAGATGAATCGGGTAAACCGGTACGGAAGCCGAATTAGCACGAACTTTTCATGGCAACGTTCCGGGC  
GTGCCGTTTTTTTTCGGTTACCCGGTCGTAACACTTTCAGCCTTGGCGGGATGATGGCCGCGTTCCTGCGGAT  
ATAACAAAACGATGAGGTTTTACATGCGTAAAATTAAGGGTTACGTTGGTATATGATCGCACTGGTACGCTCGGCACC  
GTGCTTGGTTACCTGACGCGTAACACTGTGGCGCAGCTGCGCAACTCTGATGGAAGAGTAAACATCTCCACCCAACA  
GTATTCCTATATCATCGCAGCCTATTCTGCTGCTTACGGTCATGCAACCGGTAGCAGGTTATGACTGGATGTGCTGG  
GTACGAAAATCGGTTATGCAATGTTTGTGCTGTGGCCGTGTTCTGTGGTGAACCGCGCTGGCAGGTAGCTGGGGT  
GGCTGGCTGTTGCTCGTGGTGGGTGCGGTCGGTCCGCGGAAGCAGCGATGATCCCGCGGGTCTGAAAGCCAGCTCCGAATG  
GTTCCCGCGGAAAGAGCGTTCATCGCAGTAGGCTACTTTAACGTAGGTTCTTCGATTGGTGCATGATTGCGCCGCCGC  
TGGTGGTATGGCAATCGTAATGCACAGCTGGCAGATGGCATTATCATCTCCGGTGCATTGAGCTTTATCTGGCGGATG  
GCATGGCTGATTTTCTATAAACATCCGCGCGACCAGAAGCATCTGACCGATGAAGAACGCGACTATATTATTAATGGTCA  
GGAAGCCAGCACCAGGTGAGCACGGCGAAGAAAATGTCCGTTGGTCAGATCCTGCGTAACCGTCAGTTCTGGGGTATCG  
CGCTGCCGCGTTTTCTGGCAGAACCGGCTGGGGTACTTTAACGCGTGGATCCCGCTGTTTCATGTTAAAGTTTACGGC  
TTTAACTGAAAGAGATCGCGATGTTCCGCTGGATGCCGATGCTGTTTGTGACCTCGGTTGATCCTCGGTGGTTACCT  
GCCGCGCTGTTCCAGCGTTGGTTGGTGTGAACCTGATCGTTTTCCGTAAGATGGTGCATAACGCTGGGTGCAGTGTGA  
TGATTGGCCCGGGTATGATCGGCCTGTTACCAACCCGATGTGCGCAATTATGCTGCTGTGATCGGTGGTTTTGCCAC  
CAGGCACTGTGCGCGCTGATTACGCTCTTCCGATGTGTTGGTGCATAACGAAGTGGCAACGGCAAACGGTTTAAAC  
CGGATGTCCGCATGGCTGGCAAGTACGCTGTTGCGCTGGTTGTCGGTGCAGTGGCTGACCCATCGGCTTCAGCCCGC  
TGTTCCGAGTTCTGGCAGTGTTCGACCTGTTAGGTGCGCTGGTTATCTGGACCGTGTGAGAAACAAACGGCGATTGAG  
GTGGCGCAGGAAACACATAACGATCCCGCACCGCAACATTAACGTTTTCTGTAAGTTTTAGTTTTCCCTCAAAGCCGCT  
TCTCAGGCGGCTTTTTCACTGCGAGTAGAGTAAACTGCAAAAAGTGGTATAACAAATATAGTCTGCCGATATCTGC  
CTGGAGCGCATATGGAATCACTGAACACGCGTTTTGTATCAACAACTTGCCGCTGACCTGAAAGAGCGCATCGAACAG  
GGCTCTATCTGGTGGGTGATAAACTGCCTGCGAAGCCTTTATTGCCGATGAAAAGAACGTCAGCCGTACGGTAGTTCCG  
TGAAGCCATCATCATGCTGGAAGTTGAAGGCTATGTGGAAGTGCATAAAGGTTAGGTTATCATGTGGTTTCCAACCAGC  
CGCGCCATCAGCAGGCGGCTGACAATAATATGGAATTCGCAATTACGGTCCGTTTTGAGTTGCTTCAGGCTCGCCAGCTC  
ATCGAAAGTAATATTGCCGAATTCGCGGCAACTCAGGTAACGAAACAGGACATCATGAACTGATGGCCATTAGGAACA  
GGCGCGCGGGAACAATGCTCCGTGATTCCGAGTGGGATTTGCAGTTCACATTCAGGTCGCTCTGGCGACGCAACT  
CCGCCCTGGCGGCTATCGTGGAAAAATGTGGACCCAGCGTAGTCATAACCCGTAAGTGGAAAAACTGCACGAACACATT  
GATTCGCGTACCGTCGATAACTGGTGTGATGACCACGATCAAATCCTCAAGGCGCTGATTCGCAAGATCCTCATGCTGC  
TAAGCTGGCAATGTGGCAGCATCTGAAAAACCAAGATCATGTTATTTAACGAAACAGCGACTTCGAGTTCAATG  
CCGACCGCTATCTATTCCCGAAAACCGGTGGTGCATCTCGATACAGCCAGCGGCGAGTAAATGAAATTCCTGTCCG  
ACAGGCGCTGCAATGCGCTGTTTGTCTGCTCGGTAAGCGAAAAGTATAAAGTGTGAGCCTGTGTAATCCTCTCGCCAC  
CCTCCCCTGCATTCAGCAAAATCAGACTCCACGGACATGTAATTTTATAACGAAACAGTTCGACTTTTGTACAATTAG  
ATTCAATTTGAATTTATGTTTTGAATGCTTTCTTATCTACGATTTAACAGGGAATAGTTAGGCTGTGTTGATGATC  
AAACCCGAGAACATACAAAACAGCAATAACATTCGGGTAGTGCATCTTTTAAACAGCGTGGCGTTAACCGATTAC  
CAGGAATAATGAATGAACTTTTGAACCAATTGCTGCAAGCCCTGTGGGCGCAGGATTTTGAACCCCTGGCAATCCATC  
GATGATTGGCATGTTGATTTTTGTCTTGTGTTGTAATTTTGTCCCTGAAAACGGCTTGCTCCGGCGGCTTTTTACCGG

CGCAGTTTTACTGGTATTGGTCGGCGTGTGATTGCGAAAGGCGCGATGGGCTATCCGCAAACGATTCTGCTGCTGACC  
GTTGCCGCCAGCTCGGCTGCTGGGTGAGTATATTCAGGGGCGATGGCTGGGCAATACCCGCACCGTACAAAACCTGGCT  
ATCTCATTTACCCGCGCATTATCATCAACGCGCACACCATCTTTTTCATAAACACGGTTTATCGGCGCTGTTAATTGGTC  
GCTTTATTGCGTTTGTGAGAACACTGCTGCCGACGATTGCCGGTTATCAGGGCTGAATAACGCGCGCTTCAGTTTTTC  
AACTGGATGAGCGGTCTGCTGTGGGTATTGATCCTGACAACTCTGGGTTACATGCTCGGCAAAACGCCGGTATTTTTAAA  
GTACGAGGACCAGCTGATGTCATGCCTGATGCTGCTCCCGGTGGTGTGCTGGTGTGGCCCTGGCAGGTTCTCTGGTCCG  
TGTATGAAAAAGAAATATGAAATCGGGGTAAGGGATGCAAATACCTCGCATGTCGCTTCGCCAGCTAGCCTGGTCC  
GGCGCTGTTTTACTTCTGGTCGGCAGCTGTTGCTGGCCTGGTCCGCGGTTCCGCCAGCAAGAGTCTACGCTGGCGATTCCG  
TGCCGTTTCATCAAGGCACAACGATGCCAGACGGTTTTCAATCTGGCATCACCTTGACGCTCATGGCATTCTTTCAAAA  
GTATACCCCCAAAACGACTCTGTTAATTACATTTGACTCCAGCGACCAGAGCGCCGCCAAAAGCGGTCTCGAC  
AGAACATTGCCCATGGCTACATCATTGCGCAGCAGACAATAACAGTCAGGCTATGCAGTGGCTGACCCGGTTACGGGA  
TAACTCTCATCGCTTCGGATAACTTCTGTTATCCGAAACATATCACTCACTTTGGTGATTACCCGTAAGTGTCTATGA  
TTAATGAGGCGGTGGTTAACTACCGCTTCTGTTCTGTTGCTCTTGTGCTTATAGTCCGAATCACAATGGAAG  
GTTCAAGAATGAAATACCGCATCGCTTAGCTGTTTCTCTTTGCTCTTATGCTGCGGTAAGTATGCCACTACCTGTGT  
CAGGAAAAGGAGCAAAATATCCTTAAGGAGATCAGCTATGCCGAAAAACAAAAACCGAATCGTATTGACGGTCTGAA  
TAAAGCCCTGAGTGAAGTCCGGCCAACCTGTTGATAGCCAGTCCGTCGCGTCCGATCATCAGAAGAAAATCGCAAAGCAGA  
AAGATGAGGTGGCGAACGCCAGCAAGATTTAGCCAGGCGAAGCAAAAAGGCGATGCCGATAAGATTGCCAACCGCAA  
CGAAAACCTGGCAGAAGCGCAGGAAGAGCTGAAAAGCTGGAAGCGCGGACTACTAACTACAATAGTCACTACTTACTC  
ACCTGGAGAAAATATGTCGAAAGAACAACACTACGGAACATCTGCGTGTGAGTTGAAATCCCTTTCCGATACGCTGGAA  
GAGGTGCTTAGCTCATCTGGCGAGAAGTCAAGAAAGAGTTGAGTAAAGATTCTAGCAAAGCGGAGCAGGCACTGAAACA  
GAGCCGTTATCGCCTGGGTGAAACCGGTGATGCCATTGCCAAACAAACCCGTGTCGCGCGGCGCGTCCGATGAGTATG  
TGCGCGAAAATCCGTGGACGGGCGTGGGCATTGGCGCTGCAATCGGTGTAGTGTCTGGCGTTCTGCTGTCGCGTCTGTTAA  
TTATGGCGGACACTCATCACGCACAAGGGCCCGTAAAAGCGTTCTGGGCATCGGGCAGCGAATTGTTTCTATCATGGTT  
GAAATGGTAGAGACACGTCTGCGGCTGGCGGTGGTGGAGCTGGAAGAGGAAAAAGCGAATCTTTCACTTTTACTGAT  
GCTGGGCTGACGATGCTTTTCGCTGCATTTGGTCTTATGAGCCTGATGGTGTAAATTTGGGCGGTTGACCCGCAAT  
ATCGCCTGAATGCGATGATTGCCACCACCGTGGTGTGCTGCTACTGGCACTGATTGGCGGTATCTGGACGCTACGTA  
TCGCGTAAGTCTACGTTGCTGCGCCATACAGCCATGAGTTAGCAAACGATCGGCAGCTGCTCGAGGAGGAGTCCCGTGA  
GCAGTAAAGTGAACGTGAACGACGTAAGGCGCAACTGCTTAGCCAGATCCAGCAACAACGGCTGGATCTTTCCGCCAGT  
CGTCGTGAATGCTGGAGACAACAGGCGTTACGATCGTCGCTGGAATATGCTGCTAAGTCTGCGCTCCTGGGCGCTGGT  
TGGCAGTAGCGTGATGGCGATCTGGACGATTGCCATCCTAATATGCTGGTCCGCTGGGCCAGACGCGGTTTTGGCGTAT  
GGAGCGCTGGCGTCTGGTTAAAACGACCCTCAAGCAGCAACAGCTTCGCGGTTAACTCCCTCTGGCCGGAGCCATTCC  
GGCCTTATCCCTCAAATTTTTGAAGATTTTTGACAGTTTTCTTGTACAATCATATTACCACGTTTATGATTCTC  
TCCATCGACAGCAACGACGTAATACCGCGCCATTGCACAAAAAAACAATCAGCAGCCTGAGTGGCGCAGTGGAGAGTAT  
GATGAAAAAATTAGAAGATTTGGTGTACTGGTAGCGGCATTTAATGCCGATTCTGTTTATTACCGCTGGCTGGGGAA  
AAATTAAGTACGCGGTTACCAACAATATATGGAAGCAATGGGCGTCCCGGTTTTATGCTGCCACTGGTGATTCTG  
CTTGAGTTTGGTGGTGGTCTGGCAATCCTGTTCCGTTTCTGACTCGACCACAGCCCTGTTTACTGCGGGCTTTACGCT  
GCTGACGGCATTTTTTATTTACAGCAACTTTGCTGAAGGCGTCAACTCGCTGATGTTTATGAAAAACCTGACAATTTCTG  
GCGGATTCTGCTGCTGGCAATTACCGGTCCGGGCGGTATAGCATCGACCCCTGCTGAATAAAAAGTGGTAAGCACGC  
GCTATACTTAAACGATAAAAAACGAGGAGGAAGCTCTCGTTTTGCTATTGGAGGAGAGAAAAATGGTCAACTGATTGA  
CGGCGTCTGGCATGACACCTGGTACGATACCAAATCTACCGCGGTAAATTTCAACGTTGAGCTTCCGATTTCTGAACT  
GGCTCACTGCCGATGGCGTCTGGCCCACTGGCACAGGCGTTTTATCGCAGAGAAAGATCGTTATCATCTCTATGTT  
TCACTCGCCTGCCGTTGGGCGCACCGCAGCTGATCATGCGCAAACCTCAAAGGACTGGAACCGTTTTATTTCCGTTTCCGT  
AGTGAACCCGCTGATGCTGAAAAACGGTTGGACCTTTGATGACAGTTTTCCGGGAGCAACCGGAGACACGCTCTATCAA  
ATGAATTTCTGTATCAGCTTTATCTCCACGCCGATCCACACTACAGCGGACGAGTTACTGTTCCCGTGTGTTGGACAAA  
AAGAACCACACCATCGTCAGCAACGAATCAGCAGAAATCATCCGATGTTCAATACCGGTTTATGTCGCTGGGCGCGAA  
AGCGGGTGATTACTACCCTCAGCCCTGCAAACAAAATTGACGAACTTAAACGGCTGGATTTATGACACCGTTAACAACG  
GCGTGTATAAAGCTGTTTTGCCACCAGCCAGGAAGCTTACGACGAGGCGGTGGCGAAAGTGTGTTGAATCGCTGGCACGA  
CTGGAGCAGATTTTAGGCCAGCATCGTTACCTGACCGCAACAGCTAACCGAAGCCGATATTGCGCTGTGGACTACGCT  
GGTGGTTTTGATCCGGTGTATGTGACCACTTCAAGTGTGATAAGCACCGCATCAGCGATTACCTGAATCTGTACGGTT  
TTCTGCGGATATCTACCAGATGCCGGGATCGCCGAAACAGTCAATTTGATCATATCCGTAATCATTACTTCCGCGAC  
CATAAGACCATCAACCCTACGGGATTATTTCAATTTGGTCCGTGGCAGGATCTCGATGAACCGCATGGACGAGATGTTCCG  
CTTCGGTTAAAAAAGGCACCTTACGAGGTGCTCTGATAATTAGCTAAGTGCATGTTGTTTATGTCGGATGTGGCATGA  
ACGCCTTATCTGACATACAAAACATTGTACATTCAATAGATTGCATAACCCGCGCAGACCAGATAAGCGTAGCGCATCTG  
GCGATTTTGGCGTTGTCATCAGTCTTAGCGCGCCTTACGGCACTTTATTAATTCCTTGAACGAATATTTACTGCCATTT  
CATTACGCTATTCTTAATTTGCTGCTTAAAAACAAGTATTGAGCAAAATTGAGGCAAAAATGGACTGGTATCTGAA  
AGTACTAAAAAATTATGTCGGTTTTCCGGGTCGTGCGCGGCGCAAAGAGTACTGGATGTTTATTCTGGTCAACATCATCT

TTACGTTCTGCTGGGGCTGCTGGATAAAATGTTAGGCTGGCAACGCGCTGGTGGCGAAGGCATCCTGACGACAATCTAC  
GGTATTCTGGTGTTTTTACCGTGGTGGCGGTTTACGTTCCGCCGCTGCACGACACCGACCCTCGGCGTGGTGGGCACT  
GCTATTCTTAATCCCCTTATCGGCTGGCTTATTATCATCGTCTTAACTGCCAGGCGGGTACGCCAGGCGAAAACCGCT  
TTGGACCAGATCCAAAACCTGGAACCTTAAAACAAATCTGCTCGCCGGATGTCTGACTCATCCGGCTTTTATCATTATGTT  
GATGAATGAATAATTTACTAATGTTTATTTAAAATATTTCAATGTCGTTATATAAATTACCTATAAAAAATAACCATGTA  
TTTATCTTAAATATCAAAAACCTTTATAACATCCGAAAAAGAAAGATACGAATAGCATTACACAATACCCGGAATAGACT  
TTCGTCACCTTTAATTAAGGGATGTTTTATGCAGTGGTATTTGTCCTGATTAAAAAATTATGTTGGTTTCTCTGGTCCG  
CGCACGTCGTAAGAGTACTGGATGTTTACTCTGATTAACGCCATCGTCGGCGCTATTATCAATGTCATTCAATTGATTT  
TAGGTCTGGAGCTTCCATATCTGTCTATGCTTTATTTGCTGGCAACCTTCTTCCCGTCTTGGCCTTGTATCCGTCCG  
TTACACGATACCGACCCTCAGGTGCCTGGGCTTGGCTTTTTTGTCCGTTTATTGGCTGGCTCGTGTCTCTGGTTTT  
TTTCTGCACAGAAGGTACTTCTGGCAGCAATCGTTACGGAAACGATCCGAAGTTTGGTTCAAATTAATCTTAGAATTGGG  
GCGATATTTCCGCCCTTTTATTAACAATAATAATATTTTCCGTTAAAAAGTTTGGGAATTTCCCGCAGACACCAG  
GATTTCCGTTCCCCATACTGTACGACGCCAGGCCATAATAATATCGATCTCGCTGGTCGATTCCGGGTGACGACACG  
CAACCGCCCTCCGCAATATCTTTTCCGACCATAGGATACGGCATCGTCGCCACGCCAAGCCCCGCCAGTAATGCCTGAC  
GTTTATCTTCAATCGTCTACCGTTAAGCGCGGCTGTTTGTCCAGCAGCTGTACGGTCAACACCGGGGCTCACGAGCG  
GTATCCGCCAACGATTTCCACGATATTTACACGCGTCACTTACAGATAACGGTTCCGGCTCTGATGAATCGGGTATC  
AGGCGCGCAACGTAGACGTTTCAATTAACGTATAGAGCTTGCAGGTTGATCTCCGACGAGGAACGAAAATGCATATCCG  
GCGGATAACAATATCCGCCCGCCCTGCTCCAGCGTTCACGCCCCCGCCAGCACTTCTGTGATGATTGCCAGTTGG  
GTATTGGCTTTTGCGCCAGTTTGTGATTAACGGGAAAAAGGCAGGTGTGCGTACCAGCGCTTCCGTACAATGGTGAG  
ATGCGTTTCCCAACCGCGCGGAGAGCTTCCGCATCAGTAGTCAGTTTATCTGCGGCTTCCAGCAAACGCGCCCTCGCT  
CCAACAACATCCTCCCGACATTGGTGAATTTGGTACGATGGCCCGAGCGGTCAAACAGCACCATCCAGCTCTTCTTCC  
AGTTTTTGCATGGTGTAGCTAAGTGCAGGAAAGGCAGCGTCCAGCTCATCCGCCCGCGCCGAAAACGCCCCGGCGATC  
GATCGCATCCATAACCCGTAGTGTCCAGCGTTAATGCCCTTCTTTGGCCATTTGTTTCTCATTAGGAAATTTGAAC  
ATACCGGGCAGAATATCTGGCTAACAATGTAGCGTCCAGCCCTTACCATAAAAAGGAAGTAAAGAGAGGTCAAGAATTAT  
GATTACTACCCGAACTGCCAGGCGAGTGTGACAAGCAGACTACGGATGGTTGCAGGCCCGGTATACTTTTTCTTTGGAC  
ACTACTTGCACCCGAAATTTAGGCTATGCCTCCCTGCGTGTGCTTAAACAGGAAGTGTGGCCCCAGGTGCCGCTTT  
CAGCCGCAACCTATCCCAAAGTCGATATTTAAATGTGATTCTGGATGGAGAAGCAGAGTATCGCGATAGCGAAGGCAA  
TCATGTTCAGGCCAGCGCCGAGAGGGCTTGTGCTCTTACCAGCCGGGTGTAGCTATAGCGAACACAATCTCAGCA  
AAGACAAACCGTTAACCGCAATGCAGCTTTGGCTGGACGCTGCCCGCAGCGAGAGAATCCGCTGATTAAAAAGCTGGCG  
CTTAATATGGGCAAGCAGCAATTAATCGCTCGCCAGAGGGTGGCATGGGAAGCCTGCAATTACGCCAGCAAGTGTGGCT  
GCACCATATCGTGCTCGACAAAGGCGAAAAGTGCGAATTTCCAGTTGCATGGGCCACGCGCTATTTGCAATCGATTACG  
GGAAATTTTATGCGCTTACGCATCATGAAGAGAAAGCGGCGTACCTGCGGTGATGGGGCTTTATTCGTGACGAGGCT  
AACATTACGCTGGTTGCCGATTCCCACTGCGCGCTTGTGATAGATTTGCCTGTCTAGTTGTTTTACAGGGAGATGA  
TGATGAGTAAAAAATTGGCCAAAAGCGCCAGCCGGTGAAGCCGTGGTGGCGAAAAGAACCTGCTCGCACCGCAAAAAT  
TTTGGCTATGAAGAGATGTTGAGCGAGCTGGAAGCTATCGTCGCGGATGCTGAAACGCGTTTAGCCGAGGATGAAGCTAC  
CGCGTAAAGACAGGTTGCCGGATGCCGCGAAAACGCCTTATCCGGCTACAAAATCCAACAACATTAACGAATTAACAA  
CCCGTAGGCCGACAAGATGCGCCAGCATCGCATCCGGCAGATCCCAAAAACCTGGCGTTTATCTGGCCTTGTCCGCCA  
TAATCTCGATAATCTGCCGATCCGTTTGTGTCATCGAATGGCTTGCTAACGCACACAGGTTGGCAATCGACTGCTCAACA  
TCATGCGCCACAATCCCTTATTGCCGGTACGGCGGATCATCCAGCGCCATTAACACCGCTTTCCAGCGAGCCGAAGC  
ACTGGTCGAAACCTTATCGCGCAGCTGTTCCAGCGACCATCGAAAATCATGCCGCTGACATCGCCGCTACTACTGTGA  
TCGCCATCGAGATGGTTTATAAACGCCCATCCACCAGCCATGCCATCCCGCGCGGCCCCATTGCTGCGGTCTGTTGCG  
GCACACAGCGCAGACAAACGCGTAACGTTATGGATGTAAATTTGCGCTCAAATGCGAAAGCATCAGCGCACGCGCCAG  
CCGTTTATCATCCGCTCCGAAGTGTCTGCTACCACCACCACAGGCATTGTTGCGGTAATCCCTGGTTACCCGAGCCGG  
AGTTACTCATAGCCGGAAGCGTAGCGCCGCCATACGCGCATCGGATGCCGCGCTGGTACGAATCACAATGGATGAAGAG  
AGATCTTTCCGACGAAACCGCGCTCGCACTGTTTTTCCAGCGTCCGCGCAATATGCAGCCCCACTTACCCTCAAACC  
TTCCTGCGATAACGCACAATTTAGCTTCCGCGAATCGAGAATAAAGCGGATCGCCGCAAACGGGACTTCAATGACGAACT  
TCAGGATCTCAGCCAGCGTCTGTTGAAAGCACCGTACGCGGAGACTTGTCTCGCCTCTGCCACACACGCTGTGG  
GTAAACACCACACCATCGTGCCTCTCGATATGCACAATGTTGGTATGCCCGCCGACGATGGTACACACGCCCCACTTCTC  
ACCGTTCCAGACTTTGGCGGTGAGAAGAGGATTTTATCGCAAGTTCTGGATCTTAAACGGAGACTTTCCCGCCGCCA  
GCAGTGTCTTGGCATCGGAATTCCTGCGCTGTTGCTCTTTCAGCACTTCCAGCCCGGCTGGCATTCCACCTAAC  
GCCCCAGCGCCGCGCAATCGGCAGCCCCACCATTCCCGTCCGGGAACGGTACGCCCAGACCGTTCTTATCAGATT  
TGCGGAAACCCAGGCTTCTACACGTTCAACCGACCTTCCAGTTCTGCCGACGCAACCGCCCGCCAGCGCCAGTGA  
TCGTTTCACTATCCAGCGCCGTTTTACTTCTCTGAACGCGGAGGATGTAACGCTGCCATAACGGATTTAAAGTC  
GAATCAAACATATTAAAAACCTTAAAATTTTCAAGTAAATCAAGAAAATGCCAGGAACGGAGAAAACACACGCAACAAACC  
AGTGACGATAATCAGGTACAGAGACATCCCTTTGATTTGTGCAATGCTGGTACTTTGTAAACCAGCCACGCCGGATCA  
GGCACCTACCATGCCGAAAATCGGGCTACAGATAGAGGTGAAGCTCAACACCGGTGCGTTCACTGATGGCGCTCCAG

GCCAGCAAATGGCGAAAATCATGATGCCGCGCTGAACGAGATTTTCGTTAATCTTCTCGGCAGGCATCTTGCGACGCAG  
GATGTTTCATTACGATCCCTTGCCTTGCCTCGCGAAAGCCTAAATAGACGCCAAAGAATGCAGTCATGACAGCAAAGATAT  
TGAGAATGACGCTGACCACTTTACCCACGCTGCGCGTACCCTAATAAACTGTGCGGCAATCGCCAGCGCGGAAATA  
TTCTGCTCATAGGCTTTTACCGCTTGCATGTCCATCGCCAGCGTGAACGACACGGCGTAGAAAAAGACGGTGACAAA  
CAAATGCCAAACGCGATATTCATTGCCCGCAATGCTTTATGCCGCGCCACTTCAATTGATTTTTCCCGCGAGCGATAAG  
AGATCACCATCGGACTTAACGTCTGGATAAAACAGAATCGACGTCAGGGTAAACGGCAGCGTAATAATGGCGTTTTTACC  
AGCAGCCCCAGCGCGGTAGCGAACCGACGTTATACAGATGCCACATTTCCACCATCGACACGCCAGCGCCGCGACCCAC  
CAGCAGCTTGGTCAGCACCATGCCGTCGAAATTTGAATAACAATTTCTCGCCGCGTGAAGGATCGCCACCAGAATGC  
AAATCAGTACCAGACCATAAAAGGGACTGTCTGACAGCAACCTTCCGTCACGCCGAAGGTATGCAGGTAGGAAGCACTA  
TCGTTGGTGATGGCGGTGAATAGACGAACATCAAATCACCAGCATTACGAAATAGAGCGCACCTAACAGGATGCCCCA  
GTTTTTACCTAAATAACCGTAATGACGCTCGGGTAATCTTTACATTCTGGTGATTCTGCCAGCGTATTAATAAACAATC  
GCTGAAACAGATACATTTGCCGGTAACCAATCACCAGTGAAGAGCAAAAATACCCACAATCCCATCAAACCGACCTGCACC  
GGGAGAAAAACAATCCCCGCGCAATCGCCATCCCGATACTATAATCACCAGCCGGTGTGAGTACTGTGCAATTTGAT  
CGTTCTCGCCACTCGCTCACTCATTCCAGCAGACCCGCCGGGTGAAGCGTCTGCAATGACGCCTTTATTCGATG  
CAATTTCCATAATTTCTCGCTCAATATTTGTAGGGCTATTATTTTTTCCGAGCCGCATCAAGGCGATATGCGGCTA  
CGTTTTGACAGCGAGTTATTAGAATAAAGAAATGATACGCGGAGGTCAGAGAAAATCTTCAATCAAGACTTTGAAA  
TAACGGAGATGGATAAGAATTTTTCTACTAAATTAATCGCAGGAGAAATATTCTTCTATTTGCGGCAGATCACAAAAA  
AAGGTGCACATTTGTGCACCAAGGATGAAAGCTGACAGCAATGTCAGCCGAGACCACTTAATGGCCAGTCTCCGCG  
TGATGTTTTCGCGGTATTTATCGTTCATATCTTTGCCGGTTTATACATCGTCTCGATCACTTTATCGAGTGAAACACGCG  
GTGCCGAGGTGCGGCGCATCGCCATCCGCGCGGCTTACTGCTTTCACGGCATTAAATGGCATTACGTTCAATGCACGGG  
ATTTGTACCTGTCCGCAACCGGATCGCAGGTCAGCCCAAGGTTATGCTCCATCGGATTTCCGCCGATTGCATACCTG  
CGCCGACTGCCGCCAGTAGTTTCACTAACCTGCCGCCATTGAACAGGCCACGCCAATCTCCCCCTGACAGCCGA  
CTTCCGCGCCAGAGATGGAGGCTTCAATTTATACAGCGCCCAATAGCCCCCGCGCCAGAAAATAGCGGGCAATTGAC  
CGCTCGTTTACCGGACGACGAACTTATCGTAATAAGCCAGTACTGCCGAATAATGCCGCACGCACCGTTAGTCGGTGC  
CGTTACCACGCGCCGCCAGCTGCGTTTTCTTACTAACCGCCAGCGGTACATGTTGATCCAGTCGATGACATTCATCG  
GATCGTTAGAGATGTTATCGCTGGAACAGCTGACGACGCGGCTACGGCACGGCGCGGCACATTGAGCGGACCAGGC  
AGCAGCCTTCAGTGTTATCCACGTTCAATACCGTCATGCATCACTTCCAGATACGGGCAAAACCGCGTCAATTT  
CGTTTTGCTGCGCAGCGTAGCTCGTTGTGCATCATCAGACCAGATATAGACAGCCGTTGTAATCACACATTTTCAGCA  
GTTACCTGCTGAGTGGAAATCGTAAGGTACGGACGTTTCGACATCGTGCGACAGGCCGAAGTGTTCTTCTTCGACAATA  
AACCCGCGCCGACAGAGTAATAGTTTTACTTAATAGCTCTTCTGTCCTTCCAGGCAGTGATCCGCATTCGGTTCTC  
ATGGCGAGGCAACATTTCCGGATGGAAGATAATGTTCTTGTACAGGAAAATCAACAATATGCGCACCAGATGCCACTG  
GCAGCCGCCGCTGCGGTTACTAACTCTATAAATGCAAGGATCTCATCAATGACAACATCTGCGGACTGTTTCTGCC  
AGTCCCATGATGATGGCGACATCCGTGGCATGGCCTTTGCCGTCAGTGACAACGACCCGTACAGATCGACCACAATATG  
GCTCGTCGCGTTAATAAGCCGCTACTTTCCAGCCGATCAATAAACTTTTTCCGGCATTCAATGGCCCCACGGTATGCG  
AACTGGAGGGACCAATCCCAATTTGAAAATATCGAATGCACTAATCATATCCACACCTCGGATTGCCGTTTCAAGTGAAG  
TGAGCGGAACGACCTTACGACCGTCCCGCTCACGAGGCTTACGCACTACGTAAGTGGCATTCAATTTCCAGCTT  
ACATCTTTCGCAACGCGGACCTGCACACAGCTCCGGTGGATAGGTGCGCTGATGCTCATCGAAGAAGTGTATA  
GACTTCTGTTGATGGTGGCAAAATCATTAGATCGGTGATAAACACGGTATCTTGTGATATCGCCACGCTCAGCCCGG  
CAGCAACCAGATCGCTTTGACGTTTTGAGGCTTAAACGCGCTGATCTTGCACATCAGCCGGGATCTACCCGCTGT  
GGCAAAACCGGATTTGCCCGGAGGTGAAGACCATGCTGCCTAAATCAACGCCCTGAACATAAAGGCCGATTGCGCCTGG  
GGCAGTTGCGTTTTGATAATCTTTTTCATACATCTCCGGCGTCAGAGCGCTGGGTAAGGTACGTGAAATAACATCC  
TGTGCTGTTACGGGTGAGTGCCTGAAAGCGACGCGTAGCCAGAGACACGGATTGTCAGGTTAGGATATTTTTCCGG  
GTGCTCGATGGCATCCAGCAGATTTCCCGATTCTTACGTTGACGTTGAGGTGTTGACCGCCTTCGACATCCGCTTCTG  
GGTGGAAATACCCATCCAGCAGGCCGACAAGGTTGGTTTTACGTAAGTGGATCTTCTTTCGCCAGCGCCGAGGAACGATT  
GAGAAGGTGTACGAGATCCCATCTTTGGCGTAGGTGAACGGCAGTTTCGCCACCAGCTCAATGAGGCCACGGCACCTTT  
GCGGTACGACCATGCATCGGGTAGCGCCGGCGCAACGGTGTTCGGCGCGACGACCGTCCGGCGTATTACCGGTTT  
TCTGGCCGTACACCAGTTAGAAGTATAGTCAGAATCGACTGGTAGGGACGGCGTTGCGATAGGTTGGCAGCGCTTTA  
ATTTTCTTATAAAGCGTTCAACCAGGTCGAGGCAATGCTGTCTACGCGCTCGTCTGTTGCGGACTGCGGATATTC  
ACCGTCGATTTCAAAGTCCACCGCCAGGCCGTTTTCTGTCAGGATTGGTTTACGCGGGCATAATTTGATGGCAGACAGG  
AGTCCGTGCCACCGACAGGCCCGGATGCCGATGCCATAGTGCATAGACATCAGATCGTGCAGCGCATCAGCGAA  
GCTTCGTAGCTGTAATGCTGTCATGATGTAATGATATTACGCGCTGATGTAAGTGCACCGCCAGCCAGTCCATGAA  
GTGATCGAGGCTGTCATCACTTTGTCGTAATCCAGCAGTGCCTCAGCGGTGCTGTTTTCCGCCGACCTGAATCT  
TCAGCTTCTGTCACCCCGCGTTAATTGCGTAGAGCAGGTTTTCCCGAGTTAGCGCGTGACCAAAAGAAGTGCATT  
TGCTTACCAATCACCATTGGGCTGACGACGAGGCAATCGCGTAATCGTCTGCTGTTGAAGTCAAGTACGATCAGATCGTC  
ATTTTCTACTGCAAGGAAGAGGTGACGATCGACACCTGCGCGCATATTTTTGAAGGCAATCGGTAATTTCTCCGACC  
AAGAATGTCAGGTTAGGTTCCGGTCCCGGCCCATAGTGTGACGGGTGTGCAAAATAGCGGAAGGAGTTTTTGGTACC



AGCGTACGACCGTCCAGCCCCATCCCGCCGATCACTTCGGTCGCCAGATTGGGTGCGCGGAGAACAGCGAATCAAATTC  
CGGTGTACGCAGGAAGCGTACCATACGGATCTTCATGATGAAGTGATCGATCAGTTCCTGTGCCTGCTGCTCATTGAGTA  
CGCCAGCTTTAAAGTCGCGCTCAATGTAGATATCGAGGAACGATGCCGTGCGGCCAGCGACATCGCGCCGCCATTTTGC  
GATTTCACTGCCGCCAGATAAAGCGAAGTAGAGCCACTGCACCGCTTCTGCGCATTCTGCGCCGGGCGAGAGATATCAAA  
GCCATATTTCCGCCCATTTCTGAATCTGCAACAGCGCATGACGATGCTCTGCCAGCTCCTCACGCAGACGGATGGTGG  
CTTCCAGATCCTCGCCTTTTTCCAGACGAGACTGGAGATCGGCAAATTGCAGTTCGCGTTCACGTACCAGATAACTGATG  
CCATACAGCGCTACGCGGGATAGTCACCGATAATGCGCCACGGCCATAGCCATCTGGTAAACCGGTACGACGCCAGA  
TTTACGGCAGCGCAGCATATCCGGTGAGTAAACATCAAATACGCCCTGGTTATGGGTTTTACGCAGATCGGTAACAGAT  
ATTCAAATTCAGTGTCCATTTCTCGGCCATAGGCGTGAATGAACTTTAATCATATTAATGCCACCGAACGGGTGTAGC  
GCACGTTTCAACGGCGCATCCGTTTGCAGGCCAACAAATTTTTCCAGCGGCTGGTTAATATATCCCGCATCATGAGCGGT  
AATTGTGGTGGCAATATTGGTATCGAAATCAACCGCGCGTGGTTGCATTTTGCATACGGATGCCTTCCATTACTTTTT  
CCCACAATTCGGTGGCAGGCGTGCCTTCCGCGAGGAAAGATTATCGCCTTCATACGGTGTATAGTTATGTTGAATA  
AAATCGCGGACATTAATTTCTTTTTCCAGTCCGTACCTTTAAAGCCAAGCCATGCGTCGGCGTACAGCTTATCGCTGGT  
ATCAATATCTACCTTCATGAAAAATACTCTCTACAATACTTCAACTAAATATGCAAATTCGCGGGCGGTTAATT  
TGCCTAAATGAATGGCATCCAAAGCAATCATTTTTCTTCTGTTAGTCGGAATAACGGCACAAATGACACGCGCATTTCA  
CTGAAACAATTCGCTACCACAGGAGTTAGAGCGATTATTCACTTCTGTATCAATCTCTAAGCCTAATACAGCCAAATG  
TTCCATGACCAGACGACGAATTAAGCTTGAATTCTCTCCTATTCCGCCGGTGAATATAATTCATCCAGGCGACGTAATG  
AAGTGTGCTGCCGCAATATGACGGGCAATTCGGTGAACAAAGTTTTAATTGCCAGTTGCGCGGTTCTGTGACCTTCA  
TGCCAGGCTTTTTCCAGAACACGTAATCCGAAGAAAGACCGAAATACCTAATAATCCCGACTCTTTATTCACTACGCG  
TTCCAGGTCACCCAGGCTCTGGTTGGTTTGGCTGGCGACCCAGGACATCGCACCAAAGTCGACATCGCCACTGCGGGTAC  
CCATCATCAAGCCTTCCAGCGGCGTCACTCCATTGAGGTATCAACACTCTGACCGTTGCGAACCGCGCAGATTGACGCG  
CCATTGCCAAGATGCGCCACAACAGGCCGAGTCACTTCCGCCAGATTGAGCAGCAATGTGCGCGTGGGAAACATA  
GCGGTGCGACGTGCCGTGAAACCATAACGGCGTACACCTAATCTTATAATATTTCCAGCGCAGGCCGTATAAATAAG  
CTTCCGGAGCCATCGTCTGGTGAAACTGGTATCAAATACCGCCACTGAGTTACGCCGAAATAATTGCTGCGCCGAT  
TCAATACCCTAAATTTGGCGTAATTATGACGGGTGCCAGTGGAGAAACGCGACGGATATTCAATGACTTCATCGGT  
AATAATGGCGGACTCGGTAAAATACTGCCGCCGTGAGCGATGCGGTGGCAATTAAGGCCACACTGTCATTTAAATTC  
GTTTTTCCAGTTCAAATGCAATTGCCTTCAATGCACCTTCGTAGCTGTGGTGGAGCCAGCGGTGCTGGCTCTCCCCATTT  
ACGGATAAGAATGCATTTTCCGAGTTAATACCGTCGGCAATACCTGACATTAATACTTCACAGTCGCTGGCATCGAGCAC  
GGAAAATTAATCGAAGACGAACCACAGTTAATAACCAAACAACCGGAAATTCATTCATCTTTTTCTCATCTGAGTT  
ACGGATTAACAAGTTTTGTATACGATGTTCCAGGATGTTCCAGCAGCAATCACGGTAACAAACACGTTATCCAGACGACC  
ACGGTATTTCCGACAGACGGCGCTTTACGGATGGCATAACATCGGCAACAGGCACAGCAGGGATGCGATAATCGGTGCGC  
CCATGGCTTCAATCAGGTCAAGGATGTTCCGGTTGGCGTAGGCAACAACCCAGGTGGAGCCATGATGAAGATCATGCTG  
ATAGTGTTCAGTTTACCCAGCGACACTTTAGTTTTGTGCTTTATAACCAAATTCAGGACCAGGCCATTCCAGACCTTC  
CAGCGTTCCAGATAGTGACCGAAGAAAGATTTGAAGATAGCCACGAGTGGCATGATGGAAGCCGATATTCCAGTGTA  
TCGCGAACGTTGTTTTGGTACCGGTGATGGACGCAAGTGGTTAGCCAGATAAGAAAGCACTGGAATATTCTGCGCTTG  
GCTTCCGCCATGTTGGCCGAGACAGAGTAAACAGGCGCTAAAGGCAAAGAACATCACCCTGCAACCATCAGCATGCT  
GGCAGGAGAAATGATTTGGGAACATTTACGTTCCGTGAAGTCGCGACCGAAGTCTTCTCATACTCTTCCAGCTTAGAAA  
CCACGAAGGAAGACGATTGGCGAGAAGTTAAAGGAGAAAACCATGATGGAATCCCAGCCAGACAGTGTAGGATA  
CCGTGATGACCGTTAACGACAGCGAACCGAGGTCAACCTGGTCGATAACTGCAGAGTTCCAGTAAGGGATCAGCGACA  
AGAAATCAGCACAGGCTGGCGATAAACCGCCATACAGGTAGCTCATCACTTAAACCATCAGATCCTTACCAAACCAA  
TGACGAAAGCCATCAGCAGCAACAGGAACAGCGCCACAAGCGCGATTGAGCGGTGCAAAGCCGAGCTGTTTTCCAG  
AACGTCATAAAGTATTGGTAAATAGTAACGCCATAAATCCACAGCAGTGGGCAATCGCGAAGAGTACAGGAACGTGAT  
AACACGCGCCAGTTTTACCAAATGCTCTTCCACCGTTCCGTAATGTTGCCGGAAGGGTTAGAGCCAGAAAGACACA  
GACGCGCCAGCGCCCGTGGCAATAAAACGCGATGGGGTATGCCAATACCAACATCAGAAGAATCGGGATCAGTCCGCCA  
AACTGCGCGGATAGGGAAGAACAGCACCCCGCGCCGATTGCCGTACCAAACAAGCCTAACGTCCATGTGGTATCTGA  
TTTACGCCAGGACGATTGTTTTGTCTGGCTGGATACAATGCTATCTGAAGTACTCATATCCTATCCTCAACGAATTAATT  
AAGCGTCAACGAAACCGGTGATTTGAGAGACGCGAGAAAGATCGATATTGCCCGGAAATAATACTGACGGTTTTTCTG  
TTTTGAATATATTGGTCTAATTTACCGCTTAATAATGCAGCACATGCCAGAGCGCTGCGCTTCCGTGACGACTTTATT  
GCGCTGAATTAAGGCAATCATACTGTTTCTGATTTCTGCTTCCGTGACAGCAGCATGTCATCGACTAATTCACGAACGA  
TTTCTGAAGTTAAATTTCCCGGGCGGAGACATCACAACCATCCGCCAGGGTCCGGTAGTTCCGTGCGTGGTTATTTCT  
CCGGAGTGGAAAGAAGCCGCATGCCGTGAACGTTTTAGACTGTACCCAATAACACGAATGGTCCGGTTAATAGATTT  
AATTGCCACCGCAATACCAGCAATTAACCGCCACCACCAATTGGCACAATCACGTTATCGACATCATAGAGATCTTCCA  
TAATTTCCAGACCAATCGTTCCCTGGCCAGCAATCACTTTCCGATCATCGTAAGGTGGGATAAAAATACGCCCTTCCATT  
TCGACAATTTGCTCACTTTAGCGATAGTGTGTTGAAATTATACCATGCAGAACGACTTCTGCGGAGTAGTCGCACGT  
TGCCGCTACTTTGGATTTTGGCGCACCTTTGGCATCACCACTTTACCGTCGATACCCAGCATCGCGCAGGAGAGGGAAA  
CCCCCTGCGCATGGTTGCCCGCAGAACAGGCCACCACGCTTTGCGTTTTTCCGCATCGGTGAGTAACTTAATTTATTA

AATGCGCCACGAATTTTAAATGAACCCGTACGCTGCATATTTTCAAACCTCAGGAATATTTACCTTTGCAACGTTCACT  
AAAATAGTTGGAGCGAGGCATGCCTGTTTTATAAATTCGCCAGCCAGTCGTTGTTTCGCTTCAATAATGCATCAATAG  
CAACCGGCAGATCGTATGTAATATGCATTATAAAACCTCTTCGCCTGAATTAATATGTAGGTAACCGTAACCGACACCT  
GCAAGACAGACAGGTGGATTATTTATGTTTAAATAAAAAACAAATAACTAACCAACTTCTATTAATTGCCTTCGTCTACAC  
CCATTATAAGATGAATACTCTTTGGCTAATTCCACCAAAAACCGATGCTGCTTTTTTAATACGATAATTTTTCGACCATAC  
CGCGGCATATTGTGCCACAGGTAATGTTTCTTCAACCGGAATAGTAATAAATTGATTAGAACCAAAAAGGTGACGTCATAT  
CACAAGGAATTACAGTTAAGAAATCAGCATTGAGAACAAAGATTATAAATTGTACGACTGAGTCGGTTTTAACGATGTTT  
TCAATACTGATGCCATTTCTTTGTAACGTAGTAAGCAGTTCGCTGTAGTACCCCATATTAGTTTGTGGCAACACCCACTG  
TTCGTTCTTCAACGACTCCAGCGTGGTGGTGCCGGTGCATGTTCCGGGACTTACTGGCTACCAGCACAACTCGGACTCGA  
ACAGCGGCTCAACATGTAATCCTGAAGCTTCAATTTCTGACTTAACGTACCAATCGCAAAATCCAGTCGACCGTCGCGG  
ATTGCCGGTAAGAACGAAGACAGTTGCGCTTCATACATAGAAACCTGCGCTTTCGGGAACACCTCTTTGAACTTGTTGAT  
CATCCCTGACATAAAAGTAAACCAATCAATGAAGGAAAACCAATGAGACTTCACCACCGCCTCAGAAGACATACCGC  
TTATCTCATTAACCATATTTTTCATTTACGGGTAATGGATTCCGAACGGGAGAGTAACAATTGACCGGCAGGTGTTAAT  
GTTACACCGGTATTTTCCGACCACCTAATTCACACCAAAAATAATCTTCAATATCGTTAATGATTTTACTGACGGCCGG  
TTGAGTTAACCTAATTTTTCAGCCGAGCCGATAGAACCACCTCTAATGACTTCTGAAAGACTACCAGGTGCTGCG  
TTTTCGGAAGAAGAAATAGTCTCATAACGACCTACGTTAATTACCTCATTGACGGCATGAAGTGTATCAAAATGAAATGA  
ACAGGATATGTGCGACCACTCAAAATTAACCTTCAATACTTTCAGAGTATCGTTATTACAATTAATACCTTTAAATA  
TCAACAAGTTAAAGTATAAAAAATCAGCATAAACCCTGATTTTTGTCAAAAAAATGACGGGGATAACCATATTTTATGGC  
GATAACATCATTGTTATGTGGTTAATACAAAAAGGGCTGAGACCATATTTCAAGCAATTACCGGATAATTACCAGGC  
AAAATTTGAGTTAAATTTAATGAGCAAGTTCTCAAATTTTATTATAAATAAACCATTTTCAGTGATAAATAATGCGGCAT  
GTCACATTTTTTTCAGCTATTTGTTGGAGAACAACATTTATTTTATCAATATTTTAAATTTTGAATACATGTATTGAT  
CATCTGAAACAATTGATTAACGTCAACTTTTTCTTCTGACAGGACGTCAATTTGTGAATGCAATCGTTTTCCATAAAT  
TCTTCTCCCTCATAGGCGACGAATAGCATTGTGTTGAGGATCACAAAACGAATAATTGCTGATCGCCGCGATAAGGT  
CAGACAAAGACAACAAGGGAAATTTTACAGAGCTTTTGTGCGGCTAGGCCACAGAATGTTGCTTCTGTTTACTGTAACG  
CCGGTAAATGAGCGTTTTTGTAGTGCAGAAAGAACCTGCGAGGAAAATAAGCATCTATTATTGTTTGCATGATGAC  
AAGCGAGGCATCAATGAAAGCTTCCCAATTGCGCATATTTTACCCTTCAATCCCGCAATGCACGCAGTGGTTAACA  
ATCACAATAGAAATATTGATTATTGGACGGTAAAAAGAAAGTTTGCAGAAATGCTCCACCAATGACGTTAATAAAAT  
TACAGTATAAGTAATGAACTGCGGAGAGTATTATCTGCAATAACTGCATTGAATTTCTATCATGGCGATGTTCTTCTGT  
CATGATCCGAATCCAACCGAAAATATGAGTCCATTATTATAGATATTTCTACAGGAGAACATGATGATTATATCATA  
AAACATTAGATGTAGGCACTTTTGCACCTTTTGGTGAACAATGTACTTGCTCAGCCGTCATAAAAAAGAGCTGGAATGT  
ATTAAGGAGACGATTTCTAAGTATTGTGCAAAATTCACCCGAAAAGAACCATCTTAACCCCTTGTGCACTTTAATAA  
AACCAGCATTACTTCAGATTGTTGGCAAAATCTCTTTTTTACCAGGATCATTTAATAATGATTTTTATTGATTATTTA  
TAAAGGATAAAATAATGTTCCCTGTTTCATCAATTGGTAATGATATTAGTAGTGATTTAGTCCGTCGAAAAATGAATGAC  
CTTCTGAAAGCCCAACAGGAAATAACCTCGAAGCACTAGCACCAGGTATAGAAAACTAAAAACAGACCTCTATTGAAAT  
GGTCACTTTACTTAACACGTTACAACCTGGTGGAAAATGCATTACTGTTGATTTTCAAAAAGAATTAGCGTACTTAC  
AAAATGTAATCTTTATAATGTCTCGTCTCTTCTGCTGGATTTTTAGGTTAATACGCCAAATATTCAACGATCGGAC  
AATACTTGGAACCTACCATTAATGAACCGTTAAAAAACAGGAAATATCCACAGGTAATATCAATATTAATTGCCATT  
AAAAGATATTTACAATGAAATCAGGAGGTTAAACGTAATTTTTAGTTGTGGGACTGGAGATATCGTTGATCTATCCTCTC  
TGGACTTACGTAATGTGATTTAGATTATTGATTTACAGATAAACAATATGGCTAATACTATTTTAAATCTTTTTAAA  
TTGAATTAACAATTTTACTAATGCCAACATGTTTCAGGTTAATTTTGTAGTTCAACACAAAACGCCACAATCTCTCTG  
GGATTATTTACTAAAAATAACGCCTGTTTTAATAAGCATTAGCGATATGTATTCTGAAGAAAAAATCAAGTTTTGCGAAA  
GTTGTTTTAAATGAGCCTGGAGACATTACCGAAGAACAATTAATAAATATGAGATTTGCAATTAATAAATCTATACCAAGG  
GCAACTCTTACAGATAAATTAGAAAATGAATTAACAAAAGAAATATATAAAGCTCATCGAAAATCATCAATTGCTTGAA  
CAGAATTAATTAACAGAGATGAAAGAATTCTCATCAGAAAAAATATATGATTACATCGATATAATCATTGAAGATTATG  
AAAATACCAAAGAAAATGCTTATCTGGTCTGCCCCAAATTAATTATACTATGGATTTAAACATAGAAGACTCTAGCTCA  
GAAGAGTTACTTTAGATAATACCCTCGAAGAACGAAAATCTCCGGACAATGGCTTTGAGGTCGGGGAATATAACAC  
ATATGAAGCATATAACTCAGAGAAGCAATATTTTACCAGAGAGGACTATACGTATGATTACGACCTTTTTAAATGCAATAT  
AGACTTAATAACTTCTTACAAAGTCTATTATTAATACCGTAGATATTTATTCATCTTACCCTGTGCACCAAAAAGCAAAAA  
CTCACTGACCGGGTTTTGAAACTGATGGCAACCGCAAAAATGCCTGATGCGCTACGCTTATCAGGCCTACGCCATCTCTG  
CAATATATTGAATTTGCGTGCTTTTGTAGGCAGGATAAGGCGTTCACGCCGATCCGGCATGAATAAAGCGCACTCAACA  
ATCTGAAACCCGCGGAACGGTTTATTACGTACATCAGGTAACCTGACCGATAAGCCGCTTTCTTTTGGGTATAGTGTC  
GTGGACAGTCATTCATCTTTCTGCCCTCCAAAAGTAAAAACCCGCCGAAGCGGGTTTTTACGTAAAACAGGTGAAACTG  
ACCGATAAGCCGCTTTCTTTTGGGTATAGTGTGCTGGACAGTCATTCATCTTTCTGCCCTCCAAAAGCAAAAACCCGCC  
GAAGCGGGTTTTTACGTAAACCAGGTGAAACTGACCGATAAGCCGCTTTCTTTTGGGTATAGCGTCTGGACAGTCATTC  
ATCTTTCTGCCCTCCAAAAGCAAAAACCCGCCGAAGCGGGTTTTTACGTAAATCAGGTGAAACTGACCGATAAGCCGGG  
TTCTGTCTGGACAGTCATTCATCTAGGCCAGCAATCGCTCACTGGCTCAAGCAGCCTACCCGGGTTCACTACGGCCGT

ACCTTATGAACCCCTATTTGGCCTTGCTCCGGGTGGAGTTTACCGTGCCACGGACTGTTACCAGCCGCGCGGTGCGCTCT  
TACCGCACCCTTTACCCTTACCTGATCCCGCTTGC GCGGGCCATCGGCGGTTTGTCTCTGTTGCACTGGTCGTGGGTT  
TCCCCCCCAGGCGTTACCTGGCACCCTGCCCTATGGAGCCCGACTTTCTCCCTCCGCCGTCTCCCCGAAGAGGAC  
GACGACGAAGCGGCGACTGTCTGGTCAGTTTCGGCGCGCAGTATAGAGGGTTTGC GCGCCCTTGTACCCCGCGTTGCC  
ATTCCAATCGCCAGTGTGCGGGGATATTACGTGAAGCACGGCAGATATTGTACATAAGCCCCGCGGAATGCTTCGTCCAA  
CGTACCTATGCTGGTCAATACGCTGAAGACCGCATCAATGCCATGCTGATGTACAACGCCAACATCATCGGTCAGGCTAC  
CCGCAATGCCAATCACCGGTTTATGGTACTTCTTCGCCACGTTTGC GACACCAATCGGTACCTTCCCGTGAATACTCTGG  
CTGTCAATACGCCCTTACC CGGTGATCACCAGCGTACAATCGTGAATATGTTCTCCAGATTACAGCGCCGTAGTGACGAT  
TTCAATACCCTTTTTCAGTTCCGCACCAAGAAACGCCATTAGCGCCGCGCCCATACCACCCGAGCTCCTGCACCGGGGA  
CATCTTTACATCAACATGCAGCGCTTTTTAATGACCTCGGCATAGTGAGAGAGGTTATTGTCCAGCTCAACAATCATC  
GTTCACTGGCTCCCTTTTGTGGGCCAAAAGATGCGCGATGCGCCGTTATCGCCACCAGCGGATTGGTGACATCACAAGC  
GACGCGAATGACGCAATCTTTAAGCGCGGATCGAGGCCGAAATATCAATATCATTACAGAGTAAAGACTACCGCCGC  
CAAAACCAATTCATTGCCGTTGGCGTCGATAATTCGCCCCAGCGCCTGTACCATGCCTGC GCGCCCATCATTTGTA  
GCGCTGCCGCCAATGCCGATAATAATGTTGTGCGACCGCTCTCCAGCGCCTGCAGGATTAAC TCGCCTGTGCCGCGTA  
AGTGGTCACGAGTGGATCGCGTTTTTCCGAGGTACCAGCTCCAGCCACTGGCCGCCCATTTCAATAAACCGCGGTTT  
TGCCATCGCCGAGATCCCCAACCTGGCATTCACTTTCTCGCCACGCGCCCTGTAAACCAGCGGTGACGTTTCAGCCCC  
TGGGTGGCTGCAATCATCGCTTCCACCGTTCTTCGCCACCGTCCGCAACCGGAACAGAAACGTA CTGTGCATCAGGAAA  
AATTTCCCGAAATCCTTTTTCTATCGCCTGCGCAACCTCGCTGGCAGATAAACTTTCTTTATAAGAGTCTGGGGCGATTA  
CGATTTTCATACCTATGCCTGTTACCACATGACGCCGGAGGGGCTTTCTCTTATTCGGCCTGGATTCCAGGCCCGGATTG  
CAATACGCCATCCGGGCACGACGTCAATAACGAGTAACTTCGACTTTCCGAGTTTTTCGTAGTAGCAGCCAGGGCGCT  
ATGATCCGCCGTTCTAAACCATCTGCTCGCAGTGCCTGCATCATCTCCATAACCGCAGCTGTGAGCGGCAGTTGTGCGC  
CGACGCCGTGAGAAGTATCCAGCGCATTCCGACGATCCTTAATATGCAGATCAATACGGAAGCCCGGCTTGAAGTTGCGG  
TCCATCACCATCGCGCTTTGGCATCCAGCACGGTACTGCCCGCCAGTCCACC GCGAATTGCCTGATAAACAGGTCCGG  
GTTAACGCCCGCTTTAGTTGCCAGCGTTAACGCTTCTGACATCGCGCAATATTCAGCGCCACAATGACCTGATTTGCCA  
GTTTGGTGACGTTACCTGCACCGATTTCCCGGTATGACCACGGAACCCGCCATCGCTTTCATCAAATCATAGTATTTG  
TCGAAAATAGCCTTGTCCGCCCCACCATCACTGACAGCGTACCCTCGATGGCTTTCCGTTACCGCCGCTCACC GGAGC  
ATCCAGCATATCAATGCCTTTCGCTTTCAGCGCTTCCGCTGATTTACGGCTTGCAGCGGTGCGATAGA ACTCATATCGA  
TCAATACCGTACCTGGCTTCCGCGCTTCAATAATGCCATTCTACCCAGCGCCACCTCTTTCATAGAGGGGAGTTTGGC  
AGCATGGTTATGATGACGTGCGACTGTTACGCGATCGCTTTAGCCGTAGACGCTGTTTCTGCACCTGCAGCAATCACGTC  
AGCAATAGCTTCTGGTTACGGTCAGCAACCACCAGCGAGTAACTGCTTTTCAGAAGGTTTTACTCATTGGTTTACCCA  
TAATCCCAGGCCAATAAAACCAACTTTCATAGTCATATCAATCATCTCTCTTGTTCGGTGGTGGTTATTTTTTAAAGG  
TATCAGCCAGTTTCTGAGTGGCAGAGCGGAAGACGCCGAGATCGCTGCCGACAGCCACAACGTCGCGCCCCATTCCAGA  
TAACGACGCGCATCGGCTTCCAGCCGGCGGAGGATACCGCTGGGTTTCCGCTGCGCGCTGGCACGTTAAAAATGTGCTG  
AATTGCTTTTTGTACATCCGGGTGTGATGCATTGCCGAGATGGCTAATGCCGCGGCCAGATCGCTGGGGCCGACGAAGA  
TGCCGTCTACGCTTTCGGTAGCGGCAATGGCATCGACGTTATCTACGCCCTGCTGACTTTCTATCTGGACCAGAATAGTG  
ATGTTCTTGTTCGACTGAGCGAAATAATCCGCCAGGTGCCAACATATTGGCGCGGTGAGAAAACGGAGACGCCCGCAAT  
GCCTTCCGGTGGGTAACGGGTTGATGCCACCGCCAGCTCTGCTTCTCTTTTGTTCACAAAAGGAATCAGGAAGTTAT  
AGAAACCGATATCCAGAAGACGCTTAATAATTACCGGCTGTTGGTGGCACTCGCACTACTGGCGCGCTGGCGCTGCCT  
TTCAAGGCCATTAAC TCGGAATAAACGTGGAGATATCGTTTGGCGCATGTTCCGATCCAGCACCAGCCAGTCAAACCC  
AGCCAAACCAAGA ACTTCAGTGCTAATCGGGTTAGAGAGTGTACCAGCAACCAATTTGTACCTGTTTCGACAGCATG  
CGCTTTGAATTTATTTCGGGAAAACATCGTTATTTCATCGCTTATACCTTTGCTTATTTCTGCAATTCCATACGTTTAAATG  
TCGCCAACTACGAAGAGGTAGCAGACCATCGCCATCAGCGCTGAACATCCCACGAAAACAGTGCTGCATTGAAGGAGTG  
CAGTTCACTTACCAGGTAGCCAATCACCAGTGGAGTGACAATGGAGGCAACATTGCCAAAGACGTTAAAGACGCCGCCG  
AGAGGCCAACAATCTCTTTCGGCGCGGTGT CAGAAATCACCGGCCAGCCAGCGCACCAAAATCCTTTGCCAAAGAAAGCC  
AGCGCCATCAGCATGACCACCAGCGTGGTGTGTTGGTGTAGTTACATAAGATGATGGTGGAAAGCCAGCAACATTCCCAG  
CACAATCGGTAGCTTACGTGCCAGGGTCAGGGATAAACCGGTTTGTATCAGATAATCCGAGAAGACACCTCCCAGCACGC  
CGCCCGAAAACACACAGTGTGGAATCGAGGGCAGCAGCCACTTT CAGAATCGACATGCCTTTTTCTGCACCAGA  
TAAATCGGGAAC CAGGTGAGGAAGAACCAGGTGATGGTGTGATAAAATATTGTCCGAAAATACGCCAGCATCATGCG  
GTTAGAGAGCAATTGCTTGTATGTAATGCAGTTTGGTCCGCTTGTGCCGACTGCCCGGCTTTTTGTGGTCCATATCGA  
CCACCGGCCATTTTCAGAGATAAACTTCAGCTCTTCCGACACATACGTGGGTGATCTGTCCGGTTATGAATCAACTG  
ATCCACAGCGCGTCAGCACAAAACCAATCACCCCATAAACGGTAAAGACGTGCTCCAGCC CAGGGCAAAGTCAGCCA  
GCCAAGCAGCGCGGAAAAGAGCGCCAGCGAGAAATATTGCGCCGAGTTAAAGATGGCGGAGGCAGTACCACGTTCTTTCG  
TCGGGAAC CAGCGGCGACAATTCCGGCGTTTCGCCGGAATGATGGCGCTTCCGAGAAGCCGAGCATAAAGCGCATAAAG  
AACATGGAGATCCCTGCCAGGCCAGCGGGAACATATCAACAAAGCCTTGCAGGAAGGTGAATAGCGACCAGAAAAGAG  
GCTGTAGGTGTA AACTTTTTTCGAGCCAACTTATCAAGCAGCCAGCCCGCGGGGATTGTCATCAGCAAGTAGGCCACG  
CAAAAGCGGAGAAGATGTAACCCATCGAAACCGCACTTAACTGCAACTCTTTTGCCACTTCGGTACCAGCAATAGACAGC

GTTGCACGATCGGCGTAGTTAACGGCGGTAACAATAAAAAATAATCAGTAATATTAATAGCGGGTATGCACGCCTTTCTT  
TTTTTCGTCAACGGTGTCCAGAATCATTTTATTTACCTCGGGTACTTATGCTGATTTTTATTATTATGGGGAAGGTGTTA  
TTTATGAGTTTCATTTATGCCGTAACGACAATGAACTCGGGAATTAGTATAAGCAGCGGAGAATAATAATCATTGTGCA  
AATGCTAATTTAATTAATACTATTTAAATATTATTTGAGCATATGCACATAAGGTTGCGCGCTAAAGCACAGATTTGCG  
CTTTACCTTACCGGGCGGCACTGCAATCCTGAAATGATTGACATTGATCACATTTCTGCGTTTAAACTCCTGACATTC  
TATTTACCCAATGAAGTCAATTTATTTTAAATGAGACCAGGTCCTCATTTTAAATAACCCCTGGCTGGAGAATATTGCAC  
AATGGCCAACATCGAAATCAGACAAGAAACGCCAATGCGTTTTATATAAAAGTTCACGACACAGATAATGTGGCAATTA  
TTGTTAATGATAATGGCCTGAAAGCAGGAACGCGTTTTCCGGATGGGCTGGAATTAATTGAACATATTTCCCAAGGGGCAT  
AAAGTCGATTGCTGGACATTCGGCTAATGGTGAATTTATCGTTATGGCGAAGTGATTGGTTACGCCGTGCGTGCAT  
CCCACGCGGAAGCTGGATCGACGAATCAATGGTTGACTACCGGAAGCGCCGCTTACACACGCTGCCACTGGCAACCA  
AAGTCCCGAACCTTACCGCGCTGGAAGGATACACCTTTGAGGGCTATCGCAATGCCGATGGCAGCGTGGCACCACAA  
AACCTGCTCGGTATCACCACCAGCGTCCACTGTGTGGCAGGCGTGGTGGACTATGTAGTAAAAATCATTGAACGCGATCT  
GCTACCGAAATACCGAACGTCGATGGCGTGGTGGGCTGAATCATTTGTACGGTTGTGGCGTGGCGATTAACGCACCGG  
CGGCAAGTTGACCTATCCGTACCATTACAATATTTGCTGAATCCTAACTTTGGCGGCAAGTAATGGTATTGGCCTG  
GGTTGTGAAAAGTTGCAGCTGAGCGCTGCTGACTGGAACGGATGATGTGCAAGCTATTCAGTAGAAAAGCGCCAGCAT  
TGTCAAGTTTGCAGGATGAAAAGCATGTGCGTTTTTCACTCCATGGTTCGAGGATATTTTGCAGATCGCCGAACGCCATCTAC  
AAAAACTGAATCAACGGCAGCGAGAAAACCTGCCCGCTTCAGAACTGGTTCGTTGGTATGCAGTGCAGTGGCAGCGATGCG  
TTTTCTGGTGAACGGCAAACCCGGCGTTGGCTATGCGTCTGATCTACTGGTGCCTGCGCGCAACCGTGATGTTTTT  
AGAAGTAACGGAAAGTGCCTGACGCGATCCATCTGCTGACACCACGCGCAGTGAACGAAGAGGTGCGCAAACGGCTGCTGG  
AGGAGATGGAGTGGTACGATAACTATCTCAATATGGGAAAAACCGACCGCAGCGCAACCCCTTCGCGGGCAACAAGAAA  
GGCGGTCTGGCAAACGTGGTAGAGAAGGCACTCGGCTCCATTGCTAAATCGGGTAAAAGCGCAATTGTTGAAGTGTGTC  
GCCCGGTCAACGCCGACTAAACGCGGATTAATTTACGCCGACGCCAGCCAGCGATTTTGTCTGTGGCAGCAACAGG  
TGGCTTCGGGTATCACAGTCAAGTGTTCAGACCGGTGCTGGTACGCCGTACGGCCTGATGGCGGTACCCGTCATTA  
ATGGCAACCCGACCGAGCTGGCGAACCGCTGGTTTATTTAATGGATATTAATGCGGGCACCATCGCTACCGGCGAAGA  
AACTATTGAAGAGGTGGGCTGGAAGTTGTTCCACTTATTCTCGACGTGCCAGCGGGAAGAAGAAAACCTTCTCGGATC  
AATGGGGGCTGCATAACCAGCTGGCGGTGTTAACC CGCACCGGTGACCTGATTTCTTTTGAACGTCCCTCGAAAAC  
ATGGCCTTAGTGCCATGTTTTTATTGTTAAAGCCCCACGTCCATTAATAATGCATTTGCATTACCTTAGTTCAAGCTT  
ATAATTTGAGCAGAAAACAGGCTGTAAGGACAGTGAATCATGCCCGCTAATGCTCGCTCTCACGCTGACTGACCACT  
GAATCAAAGGTCACGATACGCGGACAAACAATATCCCCGCGCAGTGCCTGAGGCCTTAAACTGAAGCCAGGCCAGGA  
CAGCATTATTACGAAATCTGCTGGTGGGCAAGTATTTATGTGCCGACTGGGAGATGAACAGGAGGATCATACTATGA  
ATGCATTTTTGCGTTTTCTGGATGCAGATATCCAGAACAACCCGCAAAAACTCGTCCATTCAACATTCAACAAGGAAAG  
AACTTGTGCTGGCATGGACGTCAACATTGATGATGAGATTGGCGACGACGAATAATGGATTTTCCACAAGGGTTAAT  
GGTTGGGCGCTATATGCTCATCCCTGTTTTCAGGAAACCTACGACGCTTTAGTTGCCGAAGTCGAGACATTAAGGGAAA  
AGATCCTGAAAATTATCAGAGAAAAGCCGCCACAAAGTTATTGGCGGTAGTCCATAAAGTGATTGAGGAGCATATCACGG  
TCAATCCATCATCACCGGATTCCGTATGGCAAGTCGTTAGGCTCTGGGAAAAATAAAGACTGGTACGCGGTAAAATTT  
GGTGTGGTGTATCGTCTCTTTTCGTTATAGTAAAAAGAGAAAGTCACTATTCTGGGATGGATGAACGATGAAAA  
CACTCTGCGCACCTACGGTAAAAAACAGATGCCTATACCGTATTAGCAAAAATGTTAAAAAGAGGACATCCTCTGCCG  
ACTGGGAAACCTCACCCGAGAAAACAGAAACCCATTGATGGTGTTCACAATGCCCGCCGAACGCATTCTGTGTTGACC  
AGCGGGCATCCTTTCTCACTCCCGACAGAAATCACTTCAACCCAGCCTTTTCGAGTCTCCAGGCTATCCGAGGAA  
TGCTTTCATCAACAATGATCATGTGATCGATCGTTGAGTATCAATGATCTTATGTAACGGAACGATTGAACCTACTGGAA  
TCGGTGACCACGATGATCCGTTCCGCAACTTCGCACATCCGACGGTTTTAAACGAGCTTCATCTTATTATGTGTGCTGAC  
GCCGCGCTCCAGATCGATCGCATCTACACCAAGAAACAGCATATCGAAGTGGTAATTTTGCAGCGATTGCTCAGCCTGAT  
CGCCGTA AAAAGATTGCGACTGACGGCGCAAATGCCCGCGGTATCAGCAGCTCAACGCCTTCCGCTTCCAGCAACGCA  
TTAGCCACGTTTACCGTTGGTATCGCAATTACGTCAGTGTGCTTGGCATCAGACGAGCAATCTCAAAAGTGGTGGT  
CCCGAATCGAGGATAACCCGATGACCTGGCTGAATCAACTCAACGGCAGCTTTTCGCAACGCTGCGTTTTCATCGCGGTG  
TCAGTGGCTTTTATCTTCCACTGATGGCTGACTGACGGCGTGTGCTATCGCAGATCAACGCGCCACCATAGGCACGC  
ACAGCGATCCCTGCTTTTCCAGAAACGCCAGATCGTTGCGGATCGTACAGTAGATACGCCATACAATGCCGACAGATC  
GTTAACCTGCACACTCCCTTGTGTGCGCAGACGCTGAATGATCTGTTCTCGTCGCTCGCTGGTGGCAGTCACTCGTTCT  
CACCTGAAGCGTGGTATTACTCATAGTAAGTCTTTTCGTA AAACTTTGTTTTATTCTCACCATGACGAGTATCAACTGAAACAAAACGAAAGA  
TTAATATCGCAGTAATCTGAACTGGAGAGGAAAGTGAACATCTGACAGAAATGGTGGAGACAGCAAAAGCGGGCAAAAAC  
AAATGGAATTTATGCCGTTTGTCCGACATCCGCTGGTGGTGAAGCTGCAATCCGCTACGCCAGTGAACCAAAACGC  
CGTACTGATTGAAGCAACCTCAATCAGGTAGACCAGTTCGGCGGTTATACCGGAATGACGCCCGCCGATTTTTCGCGGC  
TTTGTGTCAGCTCGCCGACTCGTTGAATTTCCCGCAGGATGCGTTGATTCTGGTGGTACCATCTGGGGCAAACCG  
CTGGCAAACCTGCCGCGCTCAGGCAATGGCCAATGCCGATGATTTGATTA AAAAGCTACGTTGCGGCAGGATTA AAAA

AAATCCACCTTGATTGCAGCATGTCCTGTCAGGACGATCCGATTCCCTTAACTGATGACATCGTGGCTGAACGCGCCGCC  
CGTCTGGCGAAAGTGGCGGAAGAAACCTGCTTTGAACACTTTGGCGAAGCCGATCTGGAGTATGTCATTGGTACCGAAGT  
GCCGGTACCTGGCGGCGCATGAAACCTTAAGCGAGCTGGCGGTACCACGCCGATGCCGCCGCGCCACGCTGGAAG  
CCATCGTACGCCTTTGAAAAGCAAGTTTTGAATGCCATCTGGCCACGCATCATTGCCCTGGTGGTTCAACCCGGCGTC  
GAATTCGATCACACCAACGTTATTGATTATCAGCCCGCAAAGCGAGCGCCTTAAGCCAGATGGTCTGAAAACCTACGAAAC  
GCTGATTTTCGAAGCGCACTCTACCGATTATCAAACGCCGAATCGCTGCGCCAGCTGGTATTGACCACTTTGCCATTC  
TGAAAGTTGGCCAGCGCTGACCTTCGCCTGCGTGAAGCTCTGTTCTCTCTGGCGGCGATTGAAGAAGAACTGGTGCCA  
GCGAAAGCCTGTTCTGGTCTGCGTCAGGTGCTGGAAGACGTGATGCTCGACCGCCGGAATACTGGCAAAGCCTACCA  
CGGTGACGGCAACGCGCGTCTGTCGGCGGTGTTATAGCTACTCGGATCGCGTGCCTATTACTGGCCGGACAGCCAGA  
TTGATGACGCTTTGCTCATCTGGTACGTAATCTGGCGGATTACCAATTCGCTGCCGCTGATCAGCCAGTATCTGCCG  
CTGCAGTACGTGAAAGTTGCTCCGGCGAGCTGCAGCAACGCCACGGAACTCATTATCAACCATATTCAGGACATCCT  
GGCGAGTACCACACAGCCTGTGAAGGCAATAAGCAAAACAAGAGGAACACGCTATGCCAAATATTGTTTTAAGCCGG  
ATTGATGAACGCTTGATTCACGGTCAGTCCGGCTCAATGGTCCGATTTGCCGGGGCAAATCTGGTGTGGTAGCCAA  
CGATGAGGTTGCCGAAGTCCGGTACAACAAAACCTGATGAAATGGTACTGGCAGAAGGGATCGCCGTACGTTTCTGGA  
CGTGCAAAAAGTTATCGACAACATTCATCGCGCCGCGATCGACAGAAAATCTGCTGGTTGTA AAAACACCCGCCGAT  
TTCCTGACGCTGGTGAAGGTGGCGTTCCGGTGAATCGATTAACGTTGGCAATATGCACTACGCCAATGGCAAACAACA  
AATCGCAAACCGTTTTCTGTGGATGCGGGCGATATCGCAGCATTTAACGACCTGAAAACCGCTGGGGTGAATGCTTCG  
TTCAGGGCGTCCCGACAGAGCCTGCTGTGGACCTCTTAAATTACTTTGAGGGATTATCATGAAAATCAGCCTGTTGCA  
GGCATTGCGTTGGGCATTATCGCCTTATCGCTGGCTGGATATGTTTAAACGGCCTAACCCATATGCACCGCCCGGTGG  
TCCTCGGCCGTTGGTGGGCTGGTACTTGGCGATCTGCATACCGGAATTTTAAACGGCGGTACGCTGGAATGGTGG  
ATGGGGCTGGCCCGCTGGCGGGCGCACAGCCGCTAACGTGATTATCGGTACTATCGTCGGCACGGCGTTTGCATTAC  
TACTGGCGTGAACCCGATGTCGCAGTAGGTGTCGCGTACCTTTCGCTGTCGCAGTACAGATGGGGATTACCTTCTGT  
TCTCGGTGATGTCGGCGTGTCTCGCTGCGACCTGGCAACAAACCCGCGCCGATTTGATGCTGGTCCGACGGCCT  
GGTGCAATTGCTATAACGGGATGACAGGTTACATCACCGCAACCGGAATGGTTGGCGGGGATTAACGGACAAGCGCG  
CCTGGCTGAACTGATAGCCGATGGTCATCATGTGCATCCGGCGCAATGTCGCTGTGTTGTTGCTGTGCGAAAGAGAGA  
ATCGTACTGATCACCGACGCGATGCAGGCAGCTGGGATGCCGGATGGTGCCTATACGTTATGTTGGTGAAGAAGTGCAGAT  
GCACGGTGGCGTTGTCCGTACCGCGTCTGGTGGGCTGGCGGGCAGTACGCTGTCTGTTGATGCGGCAGTGCCAATATGG  
TCGAGTTGACGGGCGTAACGCTGCGGAAGCCATCCATATGGCGTGCCTGCATCCGGCGCAATGCTGGGTGTTGATGGT  
GTTCTGGGATCGTTAAACCGGGCAAACGCGCCAGCTCGTTGCGCTGGATAGCGGGCTACATGTGCAACAAATCTGGAT  
TCAGGGTCAATTAGCTTCGTTTTGATAGTTTGTCTCTTATTGGGCCCTTCACTTCCCCCGTAAGGCCTTTCTTTTTCTTT  
CGTTTTGATCTGTGCAGCGGTGTCGGATGCGACGCTAACCGCTTATCCGACCTACAGTTGGTGACCGCAAGGCCGGAT  
AAAGCGTTTGCGCCGATCCAGCAATCCCTTTTGTCTCTTATCTTTCTTTCAACGATCACAAATTCGTTTTATTTCT  
TTTTTCTCCATTGAACTTTAGTTTTCTTTCTATAGATTTTAAATCAACGAAAGACATCACCAAGTGAATGAAACGAA  
GGCAAGTGAAGCGACAACGCCCGACGTCAAGTTATCAGACTAAGGATTGAGTTATGCCAGAAAATTACACCCCTGCTG  
CCGCCGAACCGGTACATGGACTGAAGAAGAGATCCGCCATCAGCCTCGCGCATGGATCCGTTCACTACCAACATCGAC  
GCGCTACGTTCCGCGTCAATAACTTCTTGAACGGTACTGCGCAAAGAGAATCTGCGGATCATCTGACCGGAGCCGG  
AACGTCGGCATTATCGGTGACATCATCGCGCGTGGCTCGCCAGCCATACCGGTAAAAACTTCAAGCGCCGTACCGACCA  
CCGATCTGGTACCAATCCGATGGACTACCTGAACCCAGCTCATCCGCTGCTGTTGATCTCCTTCGGTCGATCCGGCAAC  
AGCCCGAAAGCGTCGACGCCGTGGAAGTGGCAAATCAATTTGTACCAGGAATGCTATCACCTGCCGATCACCTGCAACGA  
AGCGGGCGCTTTTACCAAAAACGCGATCAACAGCGATAACGCTGTTGCCCTGCTGATGCCCCGAGAAACGCAGTACGCG  
GTTTTGCGATGACCAGCAGCATTACCACCATGATGGCCAGCTGCCTCGCGGTTTTTCGACCTGAGACGATCAACAGCCAA  
ACCTTCCGCGAGCTGGCGGATCGTTGCCAGGCGATCCTGACCTACTGGCGATTTTCAGCGAAGGTGTGTTTGGTTACGC  
ACCGTGAAACGGATCGTTTATCTCGGTAGCGGTGGCTTACAGGGCGCAGCACGCGAGTCCGGCTGAAAGTGTGGAAC  
TGACGGCGGGTAAACTGGCGGCTTTTATGATTCTCCAACCGATTCCGTCATGGACCAAAATCGCTGGTTCGATGACGAA  
ACGCTGGTGGTGGTATTTGTCTCCAGCCACCCTTACACCCGTGATGATCTTGATCTGTGGTGAACCTCGCCGTGA  
CAACCAGGCAATGCGTGAATCGCCATCGCCGCGGAAAGCAGCGACATCGTCGCTGCCGTTCCACATATCATCTGCCAC  
CGTCACGTCACCTTATCGACGTTGAGCAGGCATTTTGTCTCTGATGTACGCCAGACGTTTGCATGATGCAGTCCGCTG  
CACATGGGCAATACGCCGATACCCATCAGCCAGTGGCACCGTTAACCGCGTGGTGAAGCGTAATCATTATCCGCTG  
GCAGGCATAAGAGGATCGCATTATGAGCATTATCTCCACTAAATATCTGTTACAGGACGCCAGGCCAATGGCTACGCGG  
TGCTGCTTTTAAACATTCATAACGCCGAGACGATCCAAGCGATCCTCGAAGTGTGCAGTGAATGCGATCGCCGGTATC  
CTCGCCGGAACGCCGGGACCTTTAAACACATCGCGCTGGAAGAGATCTACGCCCTGTGTAGCGCCTATTCCACAACCTA  
CAACATGCCACTGGCGTGCATCTCGACCACCACGAATCGCTGGATGATATTCGCCGTAAGTCCACGCAGGTGTGCGCA  
GTGCGATGATCGACGGCAGCCTTCCCGTTTTGCCGAGAACGTGAAGCTGGTGAATCGGTTGTTGACTTCTGCCACTCA  
CAAGATTGCAGCGTGAAGCAGAAGTGGCCCGCCTGGCGGTTGTTGAAGATGACATGAGCGTTGACGCCGAAAGTGCATT  
CCTGACCGATCCACAAGAAGCTAAACGCTTTGTGCAACTGACTGGCGTGCACAGCCTGGCGGTAGCGATTGGTACGGCGC  
ACGGCTTATACAGCAAAACGCCGAAGATTGATTTCCAGCGGTGGCGGAAATTCGTGAAGTGGTGGATGTTCTCTGGT

CTGCATGGTGCCAGCGATGTTCCGGATGAATTTGTCGGTGCCTACTATTGAACTTGGCGTCACAAAAGTGAACGTTGCCAC  
AGAATTAATAAGCCTTCGCTGGCGCGTTAAAGCCTGGTTTGGCGAAAATCCGCAGGGTAAATGATCCTCGTTATTATA  
TGCGCGTCGGAATGGATGCGATGAAAGAAGTTGTCAGAAATAAAATTAATGTCTGTGGTTCAGCGAATCGAATTCAGCA  
TAATCATTAGTTTTTATGATTTATCCCAATGTACTTCCCATTAAATATCGGGGAGTGCCTTAATGGAAAAGGAGATAAC  
TAAACCTTAATAAATACATCACTACAATATCGCAACAATAATATATTTAAAAAATTATATTATTCAACTTTATGGTGAG  
GATTACACAATGACCAGTCCAAATATTCTCTAACCCGATTGATAACCGTCTGGTTCACGGTCAGGTTGGCGTGACCTG  
GACATCCACCATCGGTGCAAATCTGCTGGTAGTCGTGGATGATGTTGTCGCTAACGATGATATTCAACAGAAATTAATGG  
GTATTACCGCGGAAACCTACGGCTTTGGCATTGTTTCTTACTATCGAAAAACCATTAAACGTCATCGGCAAAGCTGCA  
CCACATCAGAAGATCTTCTGATTTGCCGTACGCCACAAACGGTACGTAAATTTGGTAGAAGGTGGTATTGACCTGAAAGA  
TGTCACCGTCGGCAATATGCATTTCTCGGAAGGGAAAAAGCAAATCAGCAGTAAAGTTTATGTCGATGACCAGGATCTCA  
CGGACTTACGTTTTATTAACAACGTGGCGTGAATGTTTTATTACAGGACGTCCTGGCGATCAAAAAGAACAATCCCT  
GACTAAATCTAAAATCGCTTAATATTGGTTTGGGTAATAAAAATGCATGAAATAACCCTACTTCAGGGATTATCCCTG  
GCGGCGTTAGTTTTGTTCTGGGATTGATTTTTGGCTGGAAGCCTATTTTTATTCCGCCGATAATCGTTTGTACCT  
AACTGGCGCTATTCTCGGTGATTTACAGACTGGCTTAATTACCGGTGGTCTGACAGAGTTGGCTTTCCGCCGATTAACCC  
CTGCAGTGGTGTTCAGCCGCCAACCCGATTATGGCGGGTCTGATGACCACCGTCATTGCATGGTCTACGGCGTTGAT  
GCCAAAACAGCAATTTGGCTTGGCCTGCCGTTTAGTTGTTAATGCAGTACGTACTTCTGTTCTTCTATTCCGCTTCTC  
ATTATTTATGACCAAAGCCGATAAATGCGCGAAAGAGGCGGATACGGCAGCGTTTTCCCGCTTAACTGGACAACGATGC  
TCATCGTCGTTACAGCGTATGCGGTGATTGCTTTCCTCTGACTTACCTGGCACAGGGGGCGATGCAGGGCTGGTAAAA  
GCGATGCCCGCTGGCTGACCCACGGCTTTGAAGTGGCTGGCGTATTCTGCCTGCCGTTGGTTTTGGCTTGTCTGCG  
CGTAATGTTCAAAGCGCAATATATCCCTTACCTGATCGCGGTTTCTGTTTGTGTTGCTACATCCAGGTGAGCAACCTGT  
TGCCGTTGCCGTTACTGGCGCAGGCTTTGCGGTGATGAGTTTTCAATGCGAAATCCCGGCAGCAAGCGCAACCCGAG  
CCCGTTGCCAGTAAAAATGAAGAAGAGGACTACAGCAATGGGATCTGAAATCAGTAAAAAAGATATCACCCGCTGCGGCT  
TTCGTTCTGTCGCTGCTGCAAGCGAGCTTAACTACGAAAGGATGCAGGCGGGCGGTTTTACCTGGCGGATGTTGCCGATC  
CTGAAAAAGATTTATAAGGACGACAACCCGGCTTAAAGCGCGGATGAAAGATAACCTCGAATTTATTAATACCCACC  
GAATCTGGTCGGATTCTGATGGGGTTATTAATTTGATGGAAGAAAAAGGAGAAAAACCGGACACCATTAAAGGCCTCA  
AAGTGGCACTGTTTGGCCAAATCGCCGGATTGGCGATGCGATTTCTGGTTTACTTTGTTGCGGATTATGGCGGGAATT  
TGCTCATATTTGCCAGCCAGGAAACCTGCTGGGGCCGATTCTATTTTTCGCCGTTTACCTGCTTATCTTTTTCTGCG  
CGTCGGCTGGACCCACGTCGGTTATTCAGTCGGCGTGAAGGCGATCGATAAAGTGCAGAGAACTCGCAGATGATTGCC  
GTTCCGCAACCATCCTCGGATCACGTAATCGCGGGCTGATCGCTTCGATGTGCATATTAACGTGGTGACATCGTTT  
GCCATCGACAATACCCACAGCGTTGCGCTGCAGCAGGATTTCTCGATAAAGTCTTCCGAACATTTTACCGATGGCCTA  
CACCTGCTGATGATTACTTCTGCGGGTGAaaaaagCGCATCCGGTGTGTTAATCGGCGTGACTTTTTGTCTCTCTA  
TTGTTTGTCCGATTCCGCAATTTGTAATGGAACGAGGCACTGCGTCTGGTGGTGCCTCTTACTTAAGGAATTTTAT  
CCTGTGCAACCCTTCAGCAAGTTGAAAATATACGGCGTTAAGTGAACGTGCCAGCGAATATTTATTGGCCGTGATCCG  
TAGCAAACCGAATGCCGTGATTTGCCTGGCGACCGGAGCCACGCCATTACTGACGTATCATTATCTGGTAGAAAAATCC  
ACCAGCAGCAGTTGATGTCAGCCAGCTCACCTTCGTGAAGCTCGACGAATGGTGGATCTGCCATTAACGATGCCAGGC  
ACCTGCGAAATTTCTGCAACAGCATATCGTGCAGCCGCTGGGGCTACGTGAAGACCAGCTCATCAGCTTTCGCTCCGA  
AGAGATAAATGAGACAGAGTGGCAACGGTAAACGAACCTGATTGCGCGCAAAGGCGGTCTGGATTTATGCGTTCTCGGAT  
TGGGAAAAACGGTCATCTTGGGCTGAACGAACCGGAGAAAGCTGCAACCGCCTGCCATATCAGTCAACTTGATGCC  
AGAACACAGCAACATGAGATGTTAAAAACCGGGTGCCTGACTCGTGGGATCACCTTAGGCCTGAAGGATATTTCT  
CAATGCCCGCAAGTTTTTACTGGTACTGGCGAAGGAAAGCAGGATGCGACAGATCGTTTTCTCACGGCTAAAGCTCT  
CTACCGCTATCCCGGCTTCATTTTTATGGCTGCACAGTAACTTTATTTGTTTAAATTAACACCTAACAGATGAAAAATTT  
GCTCAAAATGTTTAAATTAACCTTATGTAACAGTACGCATTATATTAATAACATTTGACTGGGTTGAACATAACGCCGA  
TAGCAAAGGAGTTATGTTCAACAATTAATTTAGATATACATATAACTTGTCTATTAATAAATCACCTCGTATTCTG  
ACTCGCCCCCTGGCGCAGCAAAGTCAGGCATTTATACTCTTTTGAATACATAGAAAATTGATATCAATATAATGAAAATA  
TCAAATATTTGCATATAAATATAATCTTAAAGTTAGTCTATTTAATGTTCAATGAAATATTTCTGCCTGTATAATCTTT  
AAAGATGTTGAACATATATTACATTAATATGATTATGACTTGTACAAGGATAAGGTTATATATGAATAAAGTTACA  
AAAAAGCTATTGCGGGCTTACTTGCCTTTTTCGAGGTAATGCCGCTGCAACCGATGGTGAATAGTTTTTGTGGCGA  
GATTTTAAATCCGCTTGTGAAATCAATGACTCTGATAAGAAAATTGAAGTTGCTCTTGGTCACTATAATGCCGAACAGT  
TTCGTAATATTGGCGAGCGTAGCCAAAAATTCATTACTATTCCTTTAGTTAACTGCCAATGACTGGGTGGGAGCAC  
GATAACGGCAACGTTGAAGCGTCTTTCGCTCTATGGCTGGAACGCGAGATAATGGCACCGTCCCTAACTCCCTAATCT  
GGCAAAAGTAGCTCTTTTGTGTCATAGCGCAACAGGTGTGGTATCCGTATTGACGATGCGGAAAGCGGAAACATTA  
TGCCACTGAATGCTATGGGCAATGATAACACGGTTTATCAGATCCCGCGGAATCCAATGGTATTGCAATGTTGACCTC  
ATCGCTTACTACGTATCAACCGTAGTCCATCAGAAATCACCCAGGGGAAGCAGACGCTATCGTTAACGTAACGCTGGA  
TTACCGTTAATACGTTAGGCGTTATCTGACCTGTACAGATAACGCCCTTTTCTTCTCTTCTGTTGATCAGGTTGA  
AAAAAATATGTCAAACGGAACATTCGCGGTGATATTAACCTTGTGTAGCTTCTGTATTGGCCAGGCGCTTGCAGG  
AGGAATCGTTTTACAGCGAACGCGAGTATGATGCCAGCCGAAAGAGGCTGCGTTACCTGTGCAAAACAAAGGCC

CAGAAACGCCTTATTTACTGCAATCATGGGTAGATAATATAGATGGTAAAAGCCGTGCCCATTTATTATAACCCACCG  
CTATTTTCGTCCTTGAGGCTGGCGATGACTCATCACTGCGAATTATTAACAGCTGATAACCTGCCTGAAAATAAAGAGTC  
GCTGTTCTACATTAATGTTCTGTCGTCATTCCAGCAAAGAAAAAATCAGATGATGTTAATGCTAACGAGTTGACGCTGGTAT  
TTAAACACCGGATCAAAATGTTTTATCGCCCCGCACACCTGAAGGGACGGGTAACGATGCGTGGAAATCACTGGAATTT  
AAACGTAGTGACCATTCACTCAATATATAACCCAACCTGAATATTACGTCGTAATTTGCCGGACTGGCAGTCGATAAAAC  
CGATCTCACAAGCAAAATGAAATATATCGCGCCCGGAGAACATAAACAGTTACCACTTCTGCATCTGGCGGAAAGAACG  
TGAATGGGCTGCGATCAATGATTATGGCGGAGTTCCGGGACAGAACTCGTCCACTGCAATAAAAAATATAAAAAACAC  
AGGTCATCAGGGAATGCCACAACGACACCACCAGGGACATAAACGCACACCGAAACAGTTGGCGCTCATCATCAAACGTT  
GTTTGGCGATGGTGCTCACTGGCAGCGGCATGCTTTGACTACCGCTAACGCCGAAGAGTATTATTTGACCCCATTTATG  
CTGGAACCCACAAAAGTGGTATGCAAAACACCGATCTGTGCGTTTTTCAAAAAAATATGCACAACCTACCAGGAECTTA  
TCAGTTGATATCTGGCTGAATAAAAAGAAGTTTTACAGAAAAAAATTACATTTACCGCAATGCAGAGCAACTTCTGC  
AGCCACAGTTTACGGTAGAACAACTACGTGAGCTGGGTATTAAGTGGATGAAATCCCGCGCTGGCTGAAAAAGATGAC  
GATAGCGTGATCAACTCGCTTGAACAAATCATTCCCGGTACAGCTGCTGAATTTGATTTCAATCATCAGCAACTTAATTT  
GAGCATTCCCAAATTCGACTGTACCGTGATGCAAGAGTTACGTCTCCCTTCTCGTTGGGACGATGGTATACCAACGC  
TGTTTACCAACTCGTTTACAGGTTCTGATAACCGTTACCGCCAGGGCAATCGTAGCCAACGACAGTACCTGAATATG  
CAAAATGGTGCTAATTTTGGCCCTGGCGATTACGCAACTATCCACATGGACACGCAACGATCAGACATCAAGCTGGAA  
TACCATCAGTAGTTATTTACAACGTGATATCAAGGCGTTGAAGTCTCAGTTGCTTCTGGGAGAAAGCGCCACCAGCGGCA  
GTATTTTTTCCAGCTACACCTTTACTGGCGTGCAACTCGCTTCCGACGATAATATGTTGCCAAACAGCCAGCGCGGATTT  
GCCCCAACGGTACGCGGTATCGCAAACAGTAGTGCAATCGTACTATCAGGCAAAATGGTTATGTGATCTATCAAAGCAA  
CGTGTACGCGGGTGCCTTTGAAATTAACGATCTCTACCCCTCTTCCAACAGCGGCGATTTAGAAGTACGATTGAAGAAA  
GTGACGGTACACAACGTCGCTTTATCCAGCCTTATTCTTACCCATGATGCAGCGACCTGGGCATCTAAAGTATAGC  
GCGACCGCTGGACGCTATCGCGCTGATGCAAACAGTGATAGCAAGGAACCCGAATTTGCTGAAGCCACGGCAATATATGG  
TTTGAATAATACTTTTACGCTGATGGCGCCTGCTCGTTTGAAGATTATTATGCGCTGGGGATCGGTATCGCGGCA  
CACTTGGCGCACTGGGCGCTTGTGATGGATATCAACAGAGCTGACACCAATTCGATAACCAGCACTTTTTATGGC  
TATCAATGGCGTACGAGTACATCAAAGATATCCCGAAACCAACCAATATCGCTGTCAGTACTATCGCTATACCAA  
CGATGGCTATTTTAGTTTTAATGAAGCAATACCCGCAATTTGGACTATAACAGTCGCCAAAAAGTGAATTTCAATCA  
ACATCAGCCAGACAATATTTGATGGGGTAAGTCTGTATGCCTCCGGTTCGCAGCAAGACTATTGGGGCAATAACGATAAA  
AACAGGAATATCTCTGTTGGGGTTTCCGGCCAGCAATGGGGAGTTGGTTACAGCCTGAATTATCAATACAGCCGCTACAC  
TGATCAAAATAATGACCGCGCACTCTCTTTGAATCTCAGTATTCCGTTAGAAGCTGGTTACCGCGTAGCCGGGTTTCT  
ATCAGATGACCAGCCAGAAAGATCGCCCAACCAACATGAAATGCGTCTTGATGGCTCACTGCTGGATGATGGTCGCGCTG  
AGCTATAGCCTGGAACAAAGTCTGGATGACGATAACAACATAACAGTAGCCTGAACGCCAGTTACCGTTACCTTATGG  
CACCTTCAGTGCCGGATACAGCTACGTAATGACAGCAGCCAATACAATTACGGCGTTACCGGCGGCGTGGTTATCCATC  
CTCATGGCGTGACGCTCTCGCAATATCTGGGCAACGCTTTTGGCCTATCGATGCTAACGGAGCATCTGGCGTGAGGATA  
CAAACTATCCGGGATGTACCGATCCTTTTGGCTATGCAGTGGTTTCTTATCTCACAACCTATCAGGAAAACCGTCT  
CTCGGTAGATACTACGAGCTGCCGATAACGTCGATCTTGAACAAACAACAGTTTGTGGTGCCCAACAGAGGTGCAA  
TGGTAGCGGCGGTTTTCAACGCCAATATCGTTATCGCGTACTTGTACAGTCAGCGATCGCAACGGTAAACCGTTGCC  
TTTTGGCGCTTTGCCAGCAACGATGATACGGGGCAACAAAGTATCGTCGATGAGGGCGGCATACTATATCTCTGGGAT  
ATCGAGTAAATCACAAGCTGGACTGTACGCTGGGGAAATCAGGCAGATCAACAATGTCAGTTTGTTCAGTACACCGG  
ATTCAGAACCTACAACCTCTGATTACAAGGCACAGCGCAGTGCCATTAAGGATAAAAAAATGAAAAGAGCGCCTTTAT  
AACAGGCTTTTTGTTGATATCCACATCTGCGCTTATGCCTCCTCAGGAGGGTGTGGAGCCGACAGCACTAGCGGTGCGA  
CAAATTACAGCAGTGTGGTTGATGATGTTACGGTGAACAGACAGATAAACGTGACAGGACGGGAGTTTACCTCTGCAACG  
CTAAGTAGCACTAACTGGCAATACGCCTGTTCTGCTGCGGTAAGGCAGTTAACTTGTCTATATGGTCAGCCCGT  
ACTTACCACCACTGGACATCAGACAGGATATTACAACTCAATGACAGCCTGGATATTAACCAACATTACAGGCAAACG  
ACATTCCAGGACTCACAACCGACCAGTTGTCTCTGTTAACACCCGATTACACAGATAAAAAACAACACGGTATATTTCT  
GCTGCAACCCAAACGGGTGTTTCCAGGGTGATAGTCTCGTTATGGACCGTTAATATTGGTGCGAACACCACCTTTAC  
CCTGTATGTCACCAAGCCATTTCTCGGCTCGATGACCATTCCGAAACCGGATATTGCCGTCATTAAGGCGCGTGGGTCG  
ATGGAATGGGAAGCCCGTCTACAGGTGACTTCCATGATTTAGTCAAGTTATCGATTGAGGAAATCTCACCGCCCCACAG  
TCGTGCAAAATTAATCAGGGCGATGTTATTAAGGTTAATTTGGATTATCAATGGTCAGAAGTTTACCACCGCAATGC  
CATGCCAGACGGTTTTACTCCAGTAGACTTTGATATCACTTATGACTGTGGTGATACTTCAAAGATTAAAAACTCGTTGC  
AAATGCGCATCGACGGTACAACCTGGGAGTAGACCAGTACAACCTGGTCGCCAGGCGAAGAAGTTTACAGCAATGTGCC  
GATGTCGGTATTCGATTGAAAATCTCGCGCGGAGTTGCAAAATTTCTTTTTCAGAACGGTATCCTTCCCGTTGATCC  
TTCCGGGCATGGCACCGTCAATATGCGCGCTGGCCAGTTAATCTGGTGGTGGTGGAGCTGGAACAGGAAAATTTACAGG  
GCACAGCCACCATTACCGTCATCTGCGGTAAGAAGACGTTGCGTTTTGATTAACGCAACGCTTCCGCACTGTTACCC  
CTGCTGCTCCAGCGCATACTTATACAGCGCATTTTTCTTACGCGGTGAATTTCTGCGGCCAGCGCCCGCTTTTTTCA  
GCGGCGATTCTGCCTGTAGCAGCGCCAGCGTGCGCAGGGCATCGCGGGTAAGTCTTCTTCTGTGCTTTATGACCTTCG  
ACAATCAGCACCATTTCCGCTTTGCGACGGTTTTTCTTCTTTACCCACGCCAGCAGCTCGCAACGGGCGCGCCGTG

AATGGTTTCCAGGTTTTGGTCAGCTCACGCGCCAGAACCACGTAGCGGGATTGCGCTAATACCGCAACGATATCTTCCA  
GGCTATCTAACAGACGGTGGGTAGATTCAAAAAAATCAGCGTGC GCGGCTCCGCTTCAATGGCTTTTAGCGCATCACGG  
CGGCTTTTGTATTGGCAGGTA AAAAGCCTTCGTAACAGAAACGGTCAGAGGGTAAACCCGCTGCGCTTAACGCAGTGAT  
AGCAGCACACGCCCCGGTAGCGGCACCACGCGGATCCCCGTTACGCGCAGGTACGCACCAGATGGTAGCCAGGATCGT  
TAATTAGCGGCGTTCCGGCATCGGAAACCAGCGCAATGTTTTGCCCTCTTGACGTTCCGCCAGCAGCGTTTCAGCTTTT  
TGTTGTTGTTATGGTCGTGCAGCGCAAAACAACCGGCATTAATCCCAAAATGTTGCAGCAATAAACCGGTGTGACGAGT  
ATCCTCGGCGCAATCAGATCAACGGCCTGTAATACCTCTAACGCACGCTGGGTGATATCCGCCAGATTGCCGATTGGCG  
TCGGTACAATGTAAGCTGGCCCTGAGAATTATCCGCCGATTGGTGTGTTTCATTGTGTGCTCCGATTGCCGATTTAA  
TATTGAGCATTGCGTAAAAAATATCACTGGATACATTATGGTACCCTCAACATTTTCTCGTTTGAAGCCGCGCGTTG  
TCTGCTGTTGTTCTGGCAGCCCTGATTTTCCGCGTTGTGGCACCATACTCCCGATCAGTCCACTGCTTATATGCAGG  
GCACGGCGCAGGCTGATTCTGCCTTTTATCTTACGAGATGCAGCAAAGCTCTGATGATACCAGGATCAACTGGCAATTA  
CTCGCCATTCGTGCACTGGTAAAGAAGTAAAACCGGGCAGGCGGTTGAGTTGTTAACCAACTACCGCAAGAACTGAA  
CGATGCTCAGCGTCGCGAGAAAACACTGCTGGCGGTAGAGATTAACCTGGCGCAGAAAGATTTTGTGGCGCGCAAACT  
TGCTGGCGAAAATCACACCTGCCGATTTAGAACAAAACAGCAAGCGGTTACTGGCAGGCAAAAATCGATGCCAGCCAG  
GGGCTCCTTCCATTGATTTACTGCGCGGTTAATTGCTCAGGAACCGCTGCTTGGCGCGAAAAGAAAACAGCAAAATAT  
TGATGCCACCTGGCAGGCGCTCTCCTCATGACTCAGGAACAGGCGAATACGCTGGTGATCAACGCCGCAAAAATTTT  
TGCAAGGCTGGCTGGATCTGCAGCGCTGTGTTTTGATAACCGTAACGATCCCGACATGATGAAAGCCGGATCGCCGAC  
TGGCAGAAACGTTATCCGAACAATCCGGCGCGAAAATGCTGCCAACGAGTTGGTTAACGTA AAAAGCGTTTAAACCGC  
CTCGACCAACAAAATCGCCCTGCTGTTGCCACTGAATGGCAGGCAGCGGATTTTGGTGCCTACTTTCAGCAAGGCTTTG  
AAGCGCGCAAAAATATCGGCACTCAGCCAGTGGCAGCTCAGGTAGCTGCCGCACCTGCCGAGACGTAGCTGAACAACCT  
CAGCCGCAACCGTGATGGCGTTGCCAGCCCGGCACAAGCCTCGGTTAGCGATCTGACCGGTGAACAGCCTGCAGCCCA  
GCCGGTGCCTGTAAGCGCCCCGGCGACAAGCACCAGCGGTAAGCGCACCCGCAAAATCCATCCGAGAGCTGAAAATCT  
ACGATACCTCATCAACCACTTAGCCAGATCTTAAGCCAGGTTACGAGGATGGCGGAGTATTGTGGTCCGTTG  
CTGAAAATAACGTTGAAGAGTTGCTGAAGAGCAACACTCCGCTGAACGTAAGTGGCACTGAACAGCCGAGAAATATCGA  
AAATCGCGTCAATATTTGTTACTTCGCGCTTACCAGGAGACGAAGCGCGGATGCAGCGCGTCATATTCGTGACCAGG  
GTAAACAAGCGCCGCTGGTGTGATCCACGCGATTATTGGCGATCGCGTAGCCAATGCGTTTGGCAAGAGTGGCAG  
AACTGGGCGCGGCACCGTTCTGCAACAAAATTTGTTCCACAGCGAATTACGCGCGGTTTAAACGGCGTTCTGG  
TATTGCTTAAACGGGTAGCCGATTACTCTCAGAGCGACAACCGACTCCGGCATGACGACCAACAATCCAACGCTGCAAA  
CCACGCCAACCGATGACCAGTTCACCAATAATGGCGGTGCTGTGATGCGGTGTACATTGTGGCAACGCCGGGTGAAATC  
GCTTTTATCAAACCGATGATCGCCATGCGTAACGGTAGCCAGAGCGGTGCAACGCTGTACGCCAGCTCCCGCAGTGC  
AGGGACCGCTGGCCCGGATTTCCGACTGGAGATGGAAGGCTTGCAGTACAGCGAAAATCCCGATGCTGGCAGGCGGTAATC  
TACCGTTAATGCAGCAGGCACTCAGCGCGGTGAATAACGATTATTCACTGGCTCGCATGTATGCGATGGGCGTGCATGCC  
TGGTCGCTGGCAAATCATTTCTCAAAATGCGCCAGGTTACGGTTTTGAAATCAACGGTAATACCGGAAGCCTGACGGC  
TAACCCGGATTGCGTGATTAACAGGAATTATCATGGCTACAGTACCAACAAGGTCAGGTAGTCCCGTCAGTTAACCA  
CAACAGACCGCGATGCGTGGGAAGCACAAGCGGTCGCTGGCTGGAAGGCAAGGACTGCGGTTTATCGCCGTAACG  
TGAACGAGCGTGGCGGAGATCGATCTGATAATGCGTGAAGGCCGACCACCATTTTTGTGAGGTACGCTATCGCCG  
TCTGCGCTTATGGCGCGCGGCAGCCAGTGTGACCCGAGCAAAACAACAATTTTACAGACTGCCCGCTTGTGGCT  
CGCGGTCATAATGGGAGTTTTGATACTGTGGATTGCCGTTGATGTGGTAGCCTTACCAGGAAATGAGTTGAGTGG  
TTAAGGATGCCTTAATGACCACTATAATTAAGTTAAGGATTAGCGTGAAGAAAGAAATTAAGCTTGCTTCACTGA  
AAGCATTCAAATCAAATGCGCGGAGGCGCTTCCGATGCCATCTCCCGTGCAGCCATGACGCTGGTTGAGTCTC  
TGCTAATGGCAACAAAATCCTCTGTTGTGGTAATGGAACCTCCGCTGCCAATGCACAGCATTTTGTGCCAGCATGATC  
AACCGTTTTGAAACGAGCGGCCAGCTTACCTGCCATTGCACTAAATACTGATAATGTTGTCTTAAACGGCGATTGCCAA  
CGATCGCTTACATGATGAAGTGTATGCAAAACAGGTGCGGGCGCTGGGTGATGCGGGAGATGTATTGTTAGCCATTTCCA  
CCCGTGGCAACAGCCGATATTGTTAAAGCAGTTGAAGCCGCGTTACGCGTGTATGACCATTTGTTGACCTGACCGGC  
TATGACGGCGGCAACTTGCAGTTTTGTAGGGCCACAGGATGTGGAGATCCGCATTCCTTCGCATCGTAGTGTGCGCAT  
TCAGGAAATGCATATGCTGACGGTAAATTGCTGTGCGATCTGATCGATAACACGCTTTTCCCTCACCAGGATGATTAAG  
GAGAATACATGAAGGCATTATCGCAATCGCAGTCTTATTTCCGCGCTGCTGTTGCAAGTTGTGTTGCCGCTGCCGTA  
GTGGGTACCGTGTGTGGTACCAAAGCCGCAACTGACCCACGAGTGTGCGCACCCAGGTGGACGATGGTACCCTGGA  
AGTGCAGTGAACAGCGCATTGTGAAAGACGAACAGATTAAGAAAGAGCGCGCATTAAATGTAACGGCCTATCAGGGCA  
AAGTGTGCTGGTTGGGAGTACCAAATGCTGAACTTTCCGCTCGGCCAAACAGATTGCTATGGGCGTAGACGGTGCC  
AACGAAGTGTATAACGAGATTCGTGAGGCCAGCCGATTGGTCTGGGCGAAGCATCTAACGATACGTGGATCACCACAA  
AGTGCCTTCGAGCTCTAACAGCGACCTGGTGAATCGTCCAACGTGAAAGTGACCACCGAAAACGGTGAAGTGTCC  
TGATGGGGCTGGTGAACGTGAAGCGAAAGCGGCGGAGATATTGCCAGCCGGGTGAGCGGCGTGAAGCGGTA  
ACGGCGTTTACGTTTATTAATAGCAGCCCTTGAATGCCTGATGCGACGCTTGC CGCTTATCAGGCCATAACG  
TACAAACCGTAGGTGAGATAAGGCGTTTACGCCCATCCGACATGTTTTCCCTCAAATCAGAAACAACAGCGCCAGCCCGC  
CGACAATCACACCAGACTGCCACCATCGCCCTGTGAGCCATAAGGCTTTCCCGGGAACGCTTTCGCGAGCATAATC



AGTGACGGCAAACACTACTGCCGGGAGCGTCATCAACAAATGCCAGCGCCGGAGCGGTTCCCATACCTGCCAGCATCATCGT  
TTGTACAATCGGAATTTCTGCTGCCGTGGGAATGACAAACAAGCATCCTGCTACCGCCATCGCCACCACCACATCAGGC  
TGTTATCGACAGCACCATCGGCATGGGGGAATAACCAGACGCGAGCGGCACCCAACACCAGTACTGCAAGGATGTAACC  
GGGATCGTACTCCAGAAAAGCGTCCATAGCGCCCTGCCAGCGGCTAAAAAACCCGCCCTGTGCTTCCGGTATGTCAAT  
TTCGACCGGTGCTGCGTTTGCGGTGTTTCACGCACCCATTTTTGCACCAGCGTTCGAATCAGCAACACCATCACCAGCC  
CGGCCACCAGCAATCGCCGCAAAACCCAGCCGAGGACAAAGCCATAAACACCAGCGTCGCCGGGTTTAAACCCGGA  
TTGCCATCCAGAATGCCAGCGCACCCGCATCGACACCTGTTGGCGACGCATTCCCGCCGACCCGGAGCCGCACAGCA  
GGTACACATCATGCCCGCAACGAAAACAGCGTTCCAGCAGCGTTCGCCGAAAAGCGCGATTGCCAAGCGTACGCAACA  
ACCAGTCACGCGGGATCAGCACCTGAATCAACGAACCGAGGATCACCCCCAGCACCCGCCGTTTCCATACCCGAGGAAA  
TAGATCATCGCGTAATCCAACGCCCTGCCATGGGTTAGCATCCGCCTGCCAAGGATAGATTTACCGATACTGTGGGT  
TTCGGCAGCAGTAAACGCTTTGCCGTAGTAAGGTTCCATTTACATACCAGAGACCGGCAATGACAACGAGAAAGAAAA  
GCGCGGTTTTCCACCACTGAATGGGCGTTGCCGCTGAGATGAAGACTGACCAGTCATAGCATTCCCAGGAATAAGTTA  
TGATAATTGAGCGCGTGAATATTACGCTACTATCAATTCTTGGGAATAATTATTCAGCTCTTTGCGTAATTCTGAAGA  
GCTTAAAATCGTCACGCCTCATGCTCAGGCCGATCGACTCTGCCAGCATGACCCGCGCCACGTCTCTCGCATCAATGG  
ATTTCCAGTTACCTGGTAACAAACAGCGGCGCAAAAGCGTTTTGTTTCATCCGCTTTTGTACGATCGCCCGT  
AACATCGACGGCGAGCAATGGTCAATTTCCGGCCAGTTCTGGCGATTAATGCTTCTCCATCTCCCCTTTGACGCGGTT  
ATAGAAAACGCGGAGTGGGCATTGGCACCCATCGACTGACTACCAACATATGCTGCGCGCCAGTCGCGCCCGGTTA  
ATGCGGTATCCACTACCAGCGTGAATCGGCATGAATAAACGCCTCTTTGCTCCCCGTTCTCGCCGCGTGGTGCCGAGA  
CAACAAAACACAATGTGATGGGATCGGTGACCTGCCCAACGCGTCACTCAGTTGCGGATCATGGGATTAACACCCC  
GGGCATATCGCCCAACGGACGTGCGTCCGGCGCAGCAATGGCGTTAACTTTCCGTTTCGTTAATCAACATCCGAGCAGGT  
GACCGCCACCAGCCCCGTTGCGCTGTAATCAGTACCTGACTCATCTTCGCTCCTTACAGAATTGTCTGCCTTGCCT  
CCACGGCTCATGCACCAGGCTTAATAGACCATGAGGTAATTATCCCCGATTGTGGGAAATTCGCTCATCAATGCAACA  
ACGCGGAGGAAGCATGAGTAAGAAAATTGCCGTTTTAACTGATGAATTTGAGGATTGAGAATTTACTTACCCGCGAG  
ACGAGTTCGTAAGCCGGACGAAGTATTACCATGAAAACAAGCGGGTAAAACGGTAAAAGGCAAAAAGGAGAA  
GCCAGCGTACCATCGATAAATCCATCGATGAAGTACGCCTGCCGAGTTTGTATGCCCTGTGCTACCGGGCGCCATT  
ACCGGATTATCTGCGTGGGACAACCGTTTTGTACCTTTACCCGTGATTTTGTGAATAGTGGCAAACCGGTGTTTGCCA  
TCTGTCACGGCCCGAGTTGCTGATCAGCGCCGATGTGATTCCGGGGCGCAAACGACCGCAGTTAAACCGATCATTATT  
GATGTTAAAAATGCGGGCGCGGAATTTACGATCAGGAAGTCGTGGTTGATAAAGATCAGCTGTTACCAGCCGGACACC  
GGACGATCTGCCAGCGTTTAAACCGGAGCGGTTACGCCTGCTCGGTGCTGAGTCGCGTAGCCAAATCATTTTTTTACCA  
AAGCCCAGCGTGTGTCGGTGAATTTGATTTTCATCGAGCCGATTTCCACACCAGGGGCGACAGCATTCTGGCAACCGG  
AAAGCGACGATTGTACGCCTTGCGCGGAGGTGCGTTTTCTCACCTTCCAGCCTGCGGATCTCACCTTAAACTGCACAC  
CGGAATTAACGCTACCGTTTTCGGCTGACCGTTTACCGTTCCGGCAACCGCAGCCTGCGGCCACTCATCTGCGCGTGG  
CGCGTTTTTTCTCCGTCAAATGTAGAAGGCGACTTTCTGCGCATCAAAAAGATAAAAGGCATTAGCGCACCAGAGTTC  
CCCTTCTGCTGCACACCAAGTGACAACATGTTGTTTTGCCAGCAACGGCTGATGGCGATGAGTGTTCCATTGCTG  
TTCTTTTTATACTGTGGCCTGACCTTAACATGCGACGCAGACGATGACACCCTGGTTTTCTTACTTGATCCGTACCGC  
CGACAATAAGCTTTATACCGGATCACCACGGATGTGAAACGCCGCTATCAGCAGCACCAAAGCGGCAAAAGGGGCGAAA  
CACTGCGCGGAAAGGAGAACTAACGTTGGTGTTCGCGCCAGTGGGCGATCGTTGCTGGCGTTACGGGCGGAATAT  
CGCGTTAAGCAACTGACCAACGGCAAAAAGAGCGCTGGTAGCGGAAGGCGCAGGTTTTGCAGAGCTGTTAAGCAGTCT  
GCAAAACCCGGAGATTAAGGCGATTGAAATGCTGTGATACTCAACCAGCCGGTAACGCCATTGAGCGCTCATCCGC  
TAAACGATGTACCTGGAAGGCGCTTTGAGTGCCTGCGGCAACGCAGATCGTATGCCGCGCAGTTCAAAGCCGA  
AACGACTGTACAGCGCCGATCGCCAGCGTCAACACTGCGGCATAGCCGAACCTATTAAGCGAATCGAGTCTTCATAG  
ACCAGTTGGCGTGCCAGCCCTGTCCACGGTATTTTCATCAACCGCCAACGTTGCCATGCCGACCCATTGACGGTCTTC  
GCCCTGCACATCAACCGACTAAATGCCACATAGCCAATGACCTGACCTTCTGTCATCTGTGCCACCAGCCCAGCGTCA  
GAAAGCCATCTTACGCAGATCGTGAACCAGCTTCCGCTTCCGCATCACTTTGGAATGAGCGACGCAGCGGCATCAATA  
CCCGGCGCATCAATGGGAATTTCTACTCGAATTAGCATGGTTACCTACCGATGCTGTTTGGTTTACGGCGCGTTTTT  
ATCCCGCCTCAACAAAATCCGCCAGTTGCAGCAGCATCATGCGTAAGGCTTTCCGGATTTGCTCCAGTTCAATGGCGTC  
CATCAGTTTTTACATACAGCCCCAGCTCCGTATCGCCTTCAATCACCAGCCGACGCTGGAAGAAGAGCGTATCCGGAT  
CTTGTTTACGCGCGCAATCATCAGCAGATCGTGGCGTGGCACTAAAACCTCACATCAGCTTGGCGTTCTGGCTAACG  
ACCAGTTTGCATTACACCAGGTAACCATGTCAGGTCAATATCACGCACATGAATACTTAAACAGCGGCTTCAAG  
AAACTCCAGCTGCCATCATCAGCGCCTGGCGAATTGCCAGCTTAAAGACCTGCTCAAGAACCTGGCGTTTTAGCGCAA  
ATGGCGTCAGTTTTACCGGTACTCAACAGAGATGCCCCAAATGCACAATACGGGAACGAGTTTATCCAACACGAGT  
TTTACTCCCTGTTTCAACAATCATCTATTTTGCATATCAGAAAAATAACATAGCGGTATAAATCAACAATTCATATG  
AAATTGCTGCTACCACCAATACAATTTAACTGCCTTAAATCAAAAATTGTCGAGCAAGGTTAACTAAAATCCAGTTC  
GTTAAACATTTTTGCGTTTTGATAGCGCAACCTTACAGAAAAATTATGGAGCTGCTTCCCTGCCGAAATCTCCCGCGG  
CTTAAAGCGGCCATCGAAAACGGCGCAGATGCTGTTTATATCGGGCTAAAAGATGATACCAATGCCCGTCACTTCCCGG  
CTTAACTTTACCGAGAAAAAATTGCAGGAAGCGGTGAGTTTTGTCCATCAACATCGCCGCAACTTCACATCGCGATTA

ACACTTTTGGCATCCGGACGGTTACGCCGTTGGCAGCGGCCGTGGATATGGCGGCGCAGCTGGGTGCCGACGCGCTG  
ATCCTCGCCGACCTCGCCATGCTGGAGTACGCCGCCGAGCGTTATCCGCATATTGAGCGCCACGTATCGGTGACGGCTT  
GGCGACCAATGAAGAGGCGATTAACTTTTATCATCGCCATTTTACGTTGCTCGCGTGGTGTGCCGCGCGTGTTCGCA  
TTCATCAGGTGAAACAACCTGGCACGGGTACACCTGTACCACTGGAAGTCTTTGCTTTCCGGCAGCCTGTGCATTATGTCG  
GAAGGTCGTTGCTATCTGTGCTGATCTGACGGGTGAGTCGCCAACACCATAGGCGCGTGTTCCTCCGGCCCGTTTCGT  
GCGTGGCAACAAACGCCGAGGGCTGGAATCCCGCTGAACGAAGTGTGATCGACCGTTATCAGGACGGCGAAAACG  
CAGGTTATCCGACGCTATGTAAGGGCGTTATCTGGTGGACGGCGAGCGCTATCACGCGTGAAGAACCAACAGTCTC  
AATACCCTGGAAGTGTGCCGAGTAAATGGCGGCAATATTGCTTCGGTAAAATTGAAGGCCGACGCTAGCCCGG  
GTATGTCAGCCAGGTGGCGAAAAGTCTGGCGTCAGGCTATCGACCGTTGTAAGGCCGATCCGCAAACTTTGTACCGCAA  
GGCGTGGATGGAGACGCTCGGGTCGATGTCGAAGGCAGCAACCACTCTTGGCGCATATCACCGTAAATGGCAGTGA  
GAAAAGCAATGAAATATTCCTTAGGGCAGTGTGTGGTACTGGCAAAAGAGACGCTGGAAGAATTTTATCAGCAGGCC  
GCCACCAGCAGCGCCGACGTGATTTATCTTGGTGAAGCGGTATGCAGCAAGCGTCGGGCAACCAAGTTGGCAGTGGCT  
GGAGATGGCAAAATCGCTCGCCGGGAGTGGTAAGCAGATTGTCTCCACGCTGGCGTGGTGCAGGCATCATCTGAAC  
TGGGCGAACTGAAACGCTATGTTGAGAACGGTGAAGTTCTGATTGAAGCCAGCGATCTCGGCGTGGTGAATATGTGCGCT  
GAACGCAAACTGCCGTTGCTCGCCGGGCAGCGCTGAACTGTACAACGCGGTGACACTGAAAATATTGCTCAAAACGGG  
CATGTGCGTGGTGTATGCCAGTGGAGCTTTCCCGGACTGGTGGTGAATCTGCTTAATCAGTGGATGAGCTGGGCA  
TTCGTAACCAAGTTTGAAGTGGAAAGTCCGAGCTACGGTTCATCTGCCGCTGGCCTACTCCGCCCGCTGCTTTACCGCGCT  
TCGGAAGACCGCCGAAAGATGAGTGTGAAACCTGTGCATTAAGTATCCGAACGGGCGCAACGTGCTGTGCGAGGAAAA  
CCAACAAGTGTGTACTCAATGGCATTGAGCCATGAGCGGCTACGTTTACAACCTCGGTAAACGAGCTGGCATCCATGC  
AGGGCTGGTGTGATGTGGTCCGCTGTACCCGAGGCTACTGACACTTTCCGGATGCTCGACGCTTCCGCGCTAATGAA  
AATGGCGCTGCACCACTGCCGTTGACGGCGAACAGCGACTGTAACGGCTACTGGCGGGCTGGCAGGACTGGAGCTGCA  
AGCCTAAGTAAATAGCTCACTTTGTTAACTTTAACTACTCTTAAATGCAGTATTAAGATTAATCGGTAAACAAAGTG  
AGCTGTTATGACTGATAAAACATTGCGTTTTGCTACTCGATCTGGCCCCATTCCCGAAGGTTCTCAGCGCGAGAAG  
CATTCTCCCACTCTCTCGATCTCGCCGCTGGCTGAAAAGCGCGGCTATCATCGTACTGGCTGGCAGAACACCACAAT  
ATGACTGGCATTGCCAGTGTGCCACGTGGTATTGATCGGCTATCTGGCGGCAATACCACCAGCTGCATCTGGGGT  
TGGCGGCGTGTGTTGCCTAACCACTCACCGTTGGTATTGCAGAACAGTTCGGCAGCTTAATACACTCTATCCGGGGC  
GAATCGATTTGGGGCTGGTGTGCTCCGGGTAGTGACCAACGGACAATGATGGCGCTACGTGTCATATGAGCGGCGAT  
ATTGATAATTTCCCCCGCATGTGGCGGAGCTGGTGGACTGGTTTACGCCCCGATCCCAATCCGCATGTGCGCCCGGT  
ACCAGGCTATGGCGAGAAAAATCCCCGTGTGGTTGTTAGGCTCCAGCCTTTACAGCGCGCAACTGGCGGGCAGCTTGGT  
TGCCGTTTGGCTTCCCTCACACTTCCGCCGGATATGCTGTTCCAGGCGCTGCATCTTTATCGCAGCAACTTCAAACCG  
TCAGCACGGCTGGAAAACCATACCGCATGGTGTGCATCAATATTATCGCCGCCGACAGCAACCGCGACGCTGAATTTCT  
GTTTACCTCAATGCAGCAAGCCTTTGTGAAGCTGCGCCGTGGCGAAAACCGGGCAACTGCCGCCGCGATTCAAAATATGG  
ATCAGTTCTGGTACCCTGTGAGCAGTATGGCGTGCAGCAGGCGTGAATGTCGTTGGTAGGTGATAAAGCGAAAGTG  
CGTCATGGCTGCAGTCGATCCTGCGGAAAACCGACGCCGATGAGATTATGGTCAACGGGCAGATTTTCGACCACAGGC  
GGGCTGCATTCGTTGAGCTGGCGATGGATGTTAAGGAAGAGTTGTTGGGATAGTGTGCTTAAACGGCGGAAGCCTTAT  
CCGAGCTGGCAACGCTGTCTACATAGACCTGATAAGCGAAGCGCATCAGGCATTGTGTAGGCAGCAGAAATGTCGGATA  
AGGCACCGCTGATTACTGATACACCGGCGAGTAAATTAAGTCTGATAAAAATGCACCAGTGCCTTCCGACGCCAAACA  
CCAGAATCAGCGCAATCATCGGCTTCCACCCAGACGCGGAATTTCCGGCTGCCAAAGCGTTTACGCGATGCACGGGT  
AACAGCGCCCGAACAATTGCCGCCAGATGGTAGCGCTAAACCAAGCATAACCAATGGCGTACAGGAATCCGTTCCGGGAA  
CAACAGCCCCCAACAATGGCGGGCAAAGTCAAGTCAAGTCCGTTTTCAAGCGGCCACAGCCGAGTGTGCAAAACCAA  
ACAGATCTGCCAGATAGTCAAACAACCCAGCGTTACGCCGAGGAACGAACCTGCTACCGCAAAGTTTGAAGAACAGCACC  
AGCAGCAGATCCAGACTACGGCTGTTAGTACGCCGCTTAAACGCTGTACCAGCACATCAATATTACCGCCTTCTCTGC  
AATACCATAAACTCCGACGCGGGATGTTACCCATCGTCGCCAGCAACAGATGGTATACAGCGCCAGCGCCATCAGCG  
TACCGTACACCAGACATTTACGATGGTTTTCGATCTTTGCCGTAATACTTATCAGGCTTGGCACGTTACCGTGATAA  
CCAAACGATGCCAGACAGAACGGCAGGTCATCAACAGATACGGTGCATAAGACGATTGCTTTCCGGCGACGTTGAACAA  
TGTGCGAGGCTGCACATGCCCGAGCGGCTACCAAAGGTGAGGAAGAAGGTAATGACTTTCCGCCCGCAGCACAATCGCTG  
TCATGCGACTGACGGCTTGTAGTGTCAACCACACCACAAACGCTACCAGCAATGCAAAACCAAAACCCGCCCGCCGTGCC  
GGGACGTTTGTGACATCTCTGCAAGGTGTGATGCAGAAATCAACCACTGGCAGAAATATAGGCATAGGTGAGGATATA  
GAGCAGAAAGGCAATGAAATGCCGTTGACCACGTTCCAGCCTTTGCCAGCAATCTTTGGTGTGTTGCAAACTCG  
AACCGATTCTGTAATTCAGGTTAGCTTCCAGAATCATCAAGCCGGAATGCAGCATAACAAGCAGGTAAGATCAGCGCC  
GCCATTGACAGAAAAACACGCCCGGACATGACCACTGGCAGAGAAAACATCCCTGCGCAATAATGGTCCGCCGAT  
AATACCACGCCCAAGCAGCGACGGTACGTTTTGGTGGTGGTATTAGTGTGTCATGAGGGCTTCTCTCAGTGA AAAA  
TAGTGGCAGTCCGTTGTTATGCATTGACTGTACCAGTACACGAGTACAAAAGACAGAAAAAAGCCCCGATGGTAAAAA  
TCGGGGCTGTATATATTTTACAGATTGTGTTCCGCTGTTCCAGCGATGATTACGCATACCACCAGAACGACGACGACC  
GGTAGAATCATCACGACGGGAGCGCGCCTTACGACGTTCCGCCGTA AAACGACGACCATCACCACGGCCACCTTAC  
GGCCTTACCAGCTGAAGTACGACCGCTTACGACGTTCCGCCAGAAACACGACACCGCCACGACGCTACCGCCA

GTATGCGGCTGTGCATCGCCAGTAACTGCATGTTTCATCGGCTTGTGAGAATGCGAGTGC GCGTAAAGTGTTCAGCAC  
TTCACCCGGCATACTTTTCGGCAGTTCGATGGTGGAGTGAGAAGCAAACAGCTTGATGTTACCAATGTAACGGCTGCTGA  
TGTCGCCTTCGTTAGCAATCGACCAACGATATGACGAACTTCAACACCATCATCGCGGCCACTTCAATGCGGTACAGC  
TGATATCGCCAAACATCACGACGTTACGACGCGGACGATCTTACGGTCACCACGCGGGCCACGGTCGTTACGATCGCG  
CGGACCACGGTCATCACGGTCACGGAATTCACGTTTCGGACGCATCGGCGCATCTGGCGGTACGATCAGAGTACGTTAC  
CCTGTGCCATTTTCAGCAGTGCCGACGACAGAGTTTCGAGATCCAGCTCTTACCTTCAGCAGTCGGCTGAATTTTGCTC  
AGCAGTGC GCGGTATTGATCCAGATCGCTGCTTCCAGCTGCTGCTGACTTTAGCGGCGAATTTTCCAGACGCGGCTT  
GCCTAGCAGTTCGCGTTCGGCAGTTCCTACTCCGGAATAGTCAGCTTCATAGTACGTTCAATGTTGCGCAGCAGACGAC  
GCTCGCGGTTCTCAACGAACAGCAGCGCGCGCCAGCACGACCCGACGACCCGTACGACCGATACGGTGAACGTAAGAC  
TCAGAATCCATCGGGATATCGTAGTAACTACCAGGCTGATACGCTCAACGTCACGGCCACGGGCTGCAACGTCGGTGC  
AATCAGGATGTCCAGACGACCATCTTTCAGGCGTTCAGTGTCTGTTACGACGCGCCTGGTTCATGTACCCTTCAGCG  
CGGCGCTGTTGATGCCGTTACGCTCAAGAGCTTCAGCCACTTCAGAGTCGCGTTTTTGGTACGAACGAAGATAATCGCC  
GCATCAAAATCTTCGCTTCAGGAAACGTACCAGTGTCTGTTTTGCGCATACCCAGACAGTCCAGTAGCTCTGGCT  
GATGTCAGGACGGGTAGTCACGCTGGACTGAATGCGCACTTCTGCGGCTCTTATAAAGCGGCGGTAATGCGACGAA  
TCGCTTCCGGCATGGTTGACGAGAACAGAGCGGTCTGATGACCTTCCGGGATCTGCGCCATAATGGTTCAACGTCTTCG  
ATGAAGCCCATGCGCAGCATTTTCGTCAGCTTTCATCCAGAACCAGACCGCTCAGTTTAGAGAGGTCCAGAGTCCACGCTT  
CAGGTGGTCCAGCAGACGCGCCGAGTACCGACAACGATCTGCGGCCCTGACGCAAGGCGGTAATTGCACGTCATAAC  
GCTGGCCGCGGTACAGAGCAACCACATTTACGCCGCGCATGTGTTTAGAGAAATCCGTCATTGCTTCAGCAACCTGTACC  
GCCAGTTGCGGGTTCGGTGCAGCACCAGAATCTGTGGTGCTTTCAGCTCAGGATCAAGATTCTGCAACAGAGGTAAGA  
GAATGCTGCAGTTTTTTCGCTCCCCGCTGGGCCATACCCAGAACGTCGCGGCCATTACAGCAGATGTGGAATACACTCTG  
CCTGAATTGGAGATGGTTTTTCGTAACCCAGATCGTTAAGGGCTCAAGGATAGGAGCCTTCAGGCCAGATCTGCAAAA  
GTGGTTTGAATTCAGCCATGTAGTACGTGTGCCTCAAAATTAATGGCGCCAGTCTACATAACTCATCATGAAATTGAT  
CAGCAATTTTTCATTGAAAAGTGTGAACCGGCTCAAAGTAGGTGATTAACGAACAACAACGCCCTCACCCGTTAAGGTGA  
TGGAATCAAAAAAGATTACGGGCTGATGTGTACGTGAGTATTGCTGGTCCGATTCTGCCAGGTCATCTTGGTCTGCG  
CCAGGAGCGATAATTCCAACATGCGTATCGGTGCTCAACAAAGTTATGAACGTTGTTGGCAACCGCCAGTTTGAACAGT  
GCCGTGGCGCTGTCCAAATCCCCAGACTTAGGTAGTACTTACCTAAATAGAAGTTGGTTTACTGAGATGCTCAGCGAG  
CGAGGTGTTATCCGTTGCGTCCGCCTTGAGCCTTCCATTAACGTTTGTTCGCTAATGTTGCCAGGTAGAACTCGACAA  
TGTTCCATCCCCTGTTCTTATCCGATTTTTCGAAGTGTGTTTCAACACTTCTTTAGCCTGCTTCTCATCGAGCTTC  
TGCTCGGCGAGATAAAGCCACAGACTACGGAAAGGATCATTGGGATCGTCTTGATAAAACGCCAGCAGATCATCTTGCCG  
TAACTTGTACGACCGCCGTAATATAATGCGATCCCGCGATTCAAGTGC GCGT AGTTGTAAGTTGGATCAAGCTCAAGTA  
CAGAATCAACGCTTCATAGGCAGCATCAAAATGCTGCTGCGTTAAATATATGCCTAAGTAATTGAATACTTCAGGC  
ATATCCGGTCCGATTGCCAGCGCTTGGCAAAAATCGTTACGCGCTAATGCCCTCAGACCGAGACTATCATACAACACTCC  
GGCTCATATAAAAGCTGTGCGCGTTCGTCATCGGTTAAAGCCCGACTGGCAAGGATTTGTTCCATACGTGCCAGAATCA  
CTTCTGCTGTAAAGTGGTTGCAATGGTACCGCGAGGACTTCACTTTTACGCCAGGAAGTATTACTGCATCCTGCAAGC  
GTAAGTGTGTGCAACGAAACACCAGCGCAAAAAGGCTTCAATTTCCACTCCCGAAGACCACGGTTGAATGAACGTCC  
TGTTCCCGTTGCTAACAAAGGCGTCTGCCGCTTAAAAGCCCCCGCCGACGCGAGGGGCAAATGGCAACCTTACTCGC  
CCTGTTACGACGCGGAGCTTCCGGTGTGACGAGGTTGAGACTGCTCAGTCGCTTCTTAAATGCTCAGACGGATAACGG  
CCCTGGCGATCAACTTCAGAACTTTCACCGGACTTCTGACCCATCTGCAGGTAATCGGTCACTTTTCAACGCGTTT  
GTCAGCGATTAGAGATGTGGACCAGACCTTCTTACCGCCCGCATGGCAACAATGCGCCAAAGTCAACGATACGGG  
TCACTTTACCAGTGTAGACGCGGCCACTTCGATTTCTGCACTGATCTCTTCGATACGACGAATAGCATGTTTCGCTTTC  
TCGCCGTCCGTCGCTGCAATCTTACAGTACCGTCACTCTTCGATTTTCGATGGTGGTGCCAGTTTTCTTCGGTACAGACAG  
GATTACAGAACCGCTTACCGATAACATCTTGTATCTTGTCCGGTTGATCTTGATGGTATGGATACGCGGTGCGAATC  
CAGAGATATCGCCACGCGCGGCTTGCCTGTTCCATTACGCCAGGATATGCAGACGCGCACCTTTAGCCTGGTTC  
AGCGCAACCTGCATGATCTTGTGGTATACCTTCAATTTTATGATCCATCTGCAGTGCAGAGATACCGTTCGCGGGAACC  
TGCAACTTTGAAGTCCATATCGCCAGGTGATCTTTCGTCGCCAAAATGTCAGACAGTACAACGTAGTTGTCGCTTCTT  
TCACCAGACCCATTGCGATACCCGCAACGGCAGCTTTCGATCGGCACACCTGCGTCCATCAGCGCCAGAGACGCGCCGAC  
ACGGAAGCCATAGAAGAGGAACCGTTGGATTGATGATTTTCAGACACAACACGTACGGTGTACGGGAATTTGTCATATC  
CGCATGACTGCCAGCACGCGCGCTTCGCCAGACGACCGTGACCAATTTTCAGACGCTTCGGAGAACCAGCATGCCGG  
TTTCGCTACGGAGTACGGAGGGAAGTTGATGGAACAGGAAGTATCGGTACGTTGCCCATCAGTTCATCAAGAACC  
TGCGGTCACGACGAGTACCAGCGTTGCGGTAACCAGCGCTGCGTTTACCACGGGTGAACAGCGCAGAACCCTGAGT  
ACGCGGACGACGCCAGTACGCACATCCAGACCAGGATCATATCTTTTTCAGACCGTTCGATACGCGGTTGCGCTGCCA  
GTACGCGGCTACGAACAACGTTTTTTCGATCGCGTGCAGAATTTACCCAGTTCGTTTTTCGTTCCAGGGTTTCGCTTCA  
GCAAGCAGCGTCGCGATGGTTTCAGATTTGATGACATCAACCTGCGCATAACGCTCTTGTGTTGTCGGTATGCGGTAAGC  
ATCGCTCAGGCGAGCTTCAGCCAGTGCAGCAACGCGCGGTTTAGCGCTTCTTTACCGGCTCCGGCTGCCAGTCCCAAC  
GCGGTTTACCGGCTTCTTTCACCGATTGATGTTCTGAATAACAACCTGCTGTTGTTTCATGACCGAACACTACTGCG  
CCCAGCATCTGGTCTTCGCTCAGCAGTTGAGCTTCAACCATCAGTACAGCGGCTTCAAGTACCGGCAACAACAG

ATCCAGTTTGTCTCTTTTCAGCTCGTCTGAGTCGGGTTTCAGTACGTAAGCTACGCGGGCAGCAC  
CAATCGGGCCATTGAACGGAATACCAGACAGAGACAGCGCTGCGGAAGCACCAATCATCGCGACGATATCCGGGTTAACT  
TGCGGGTTAACAGAAACCACGGTGGCGATAACCTGAACTTCGTTGACGAAGCCTTCGGGAACAGCGGGCGAATCGGGCG  
GTCAATCAGACGCGGATCAGGGTTTTCCCTTCGCTTGGGCGGCCTTCACGACGGAAGAAGCTACCCGGGATACGACCAG  
CAGCGTAGGTACGCTCCTGATAGTTAACGGTCAGTGGGAAGAAGTCTGACCTGGTTTTGGCTTTTTCTGGCCAACAACG  
GTAACGAATACCCGCGGTGCATCCATGCTAACATAACAGCGGAGTAGCCTGACGAGCCATCATGCCGTTTTCCAGAGT  
CACGGTGTGTTGGCCGTAAGTTTACGAACGATCGGATTAAGCAATGTAATATCCTTTCTTTCTTAGACAGTACC  
TTACGGCACTGGTGTAAATACCCGATCTTCTGCGCATCCTCGCGACTAATGACAACCCTAACCCAGCTCTATGTGGGTAA  
AGCCTCTCATTAGCCGCGGAACCTCTGCAACGGAAGATCATTATAGCAACAATACATTAGTTTTCCAGTGAATTGCTGC  
CGTCAGCTTAAAAAAGGGCCACTCAGGCCCTTTCTGAACTCGCAAGAATTAGCGACGACAGCCAGGCGCTCGA  
TGAGCTGGGTAAACGTGTACGTCTTACGTTTCAGGTAGTCGAGCAGTTTACGACGCTGAGAAACCATGCGCAGCAGA  
CCACGACGGCTGTGGTGTCTTTTTGTGCTCTGCAAAAGTGGCCCTGCAGGTGGTTGATCTGTGCAGTCAGCAGTGCTAC  
CTGAACTTCGGTAGAACCGGTGTGTTTTGCGTACGACCAAACCTCAGAAACGATTTTAGCTGTTGCTTACGACTTAGAG  
ACATTTTAAAACCTCAAAGTATATAGAATGAAAGGACGCCGATCTCTAATTCAGCGATCCCAGTGTACGTTACGCAAAGT  
GTTAAACAATTTACGCGAGTAAAGCGGAGTATTCTACTGACGACCTGTTATCGAAGACGGTTAACATTACCGCG  
GGTATTAACCAACAGGCGACGAGGCGCAACGCGGCTTCATCGTCAATTTGCCCATAACCGATAAAATTTGCCGTTCTCA  
CCTTCCGTGACGCGAACCAGTCTTCCAGTGGCGCACAGATGTACGAACCGGTTACCATTTTTGAAGTAAACAGAAGA  
CGTTAACGGAAGATTACCACCGGATAGTCCGAAGCTGGACTGTCCATTGGCATCAGTAATGGATCAAGTAACTCCGCGG  
CTGGAATATCTGCTGTTACGTTGCTCAACAAGTTCACGAGGTGCTCCAGGGTACCATCCGTTCAACCGGATATTTA  
CTTACCGCCAGACGGCGCAGGTAATAACATGCGCGCCACAGCCGAGTTTTTACCAGGTCATCAATGATGGTGGGAT  
ATAAGTGCCTTTTGGAGTGAATTTCCAGTCCAGCTCATTGCCTTCATGGCGAATAAACAGCAATTCATAAACGGTAA  
TCGGACGCGTTCACGCGGAACCTCAATGCCCTGACGCGCATATTCGTACAGTTTTTGCCTGATATTTAGTGTGAA  
TACATCGAAGGATCTGTTGATATCGCCACGGAAGTATCCAGTCCGCTGCCAGCTGCTCTGCGCTAAAGGTTACCGG  
ACGTTCTTCAACGATCTGTCCGTGCGCATCAGAAGTATCGGTACGCTGTCCAAGACGCGCAATGACCCGATAGCGTTTGT  
CGGAGTCCAGCAGATACTGGAAAACCTCGTCTTCCCCGAGGCAAATCGGCAACATGCCGGTCCGACGCGGTCCAGC  
GCACCGGTATGCCCGCACGGTTGGCGTTATATACGTTTCACTTTTTGCAGCGCATCGTTGCTGGACATACCCTGAGG  
TTTATCCAGCAACAAAACGCCGTTAATGTGCGGACCGGACGACGAGGACGACTCATTAGTCTCCTTGTGCTGCTCCGG  
GTTAACACGACGTTCTTGTGATGTTTACCACGCTGGTACCAGGTTTACATGCGCATCCCTTCAACCCAGAGAGTTGT  
CGTAGAAGAAGTTCAGTTCCGGCAGGATACGCGAGGCGCATCGCTTCCCCAGCAGGCTGCGGATGAAACCAGAAGCTTCT  
TGCAACGCTTTGATGCCCGTTAACCGCGTCTTATCTTTGTGCTTGGGAACGTCACATATACTTTGGCATAACGCCAG  
GTCGCGAGACATTTGACACCCGAAACGGTGGTGCATCATGCCAGGCGAGGATCTTAAATTCACGCTGCAGGATGAGAG  
CGATCTCTTTTTGCATTTCTGCGCTACGCGCTGCGGGCGACCAATTTTCCGCATAATAAATTTCTCTGACAAAAAA  
GGGGCTGTTAGCCCTTTTTAAAATTAATTTAGGTGGAAGGGCTGTTACGTTGACCTGATAAGACGCGCCAGCGTCAC  
ATCAGGCAATCCATGCCGGATGCAGCGTAAACGCCTTATCCCGCATGGAACCTAAAACCTTAAAGCAATGGTACGTTGG  
ATCTCGATGATTTGAACTTTCGATCACATCGCCAGTGGGACGTCGTTGTAGTTCTTAAACCGGATACCACATCCAT  
ACCGTTACGGACTTTCGTTAACGTATCTTTGAAGCGGCGCAGGACTCCAGCTCGCCTTCGTAGATAACCACGTTGTCAC  
GCAGAACGCGGATCGGGTTGACGTTAACCACACCTTCGGTAAACATACAGCCTGCGATGGCACCAAAATTTCCGCGAT  
TGAACACGTCACGAACCTCCGCCAGACCGATAATCTGCTGTTTACGTTCCGGAGACAGCATAACCGCTCATCGCCGCTT  
CACTTCGTCAATCAGTTTATAGATGACGGAGTAGTAACGCAGATCCAGGCTTCCGCTTCAATCACTTTACGTGCAGAGG  
CATCAGCAGTACGTTAAAGCCAACAGGATGGCGTTGGACGCCAGGCGAGGTTGGCGTTCGGTTTCGGTGATACCACT  
ACGCCAGAACCAGTATCTTCACTTTAACTTTCGTAGACAGTTTTAGCAAGGAGTCCGAGATCGCTTCCGACAGAACC  
CTGTACGCTGCTTCCAGGACGATTTCACTTCTGTAACCTTCGCCTTCGGTATGTTGGCGAACATGTTCTCGAGTTTAG  
ATTTCTGCTGACGCGCCAGTTTAACTTCCGCGAATTTACCCTGACGATAGAGTGCAACTTCACGCGCTTTCTTCTGCTCA  
CGTACAACGGTAACTTATCACCCGACGCGGTACGCCGACAGGCGGAGGATTTCCACCGGAATGGACGGACCCGCTTC  
CAGCACTTCTGACCCAGTTCGTTACGCATCGCACGAACACGACCGTATTGAAAGCCACACAGAACGATATCGCCCTTGT  
GCAGAGTACCTTACGTACCAGAACGGTAGCAACCGGACACGACCTTTATCGAGGAAGGATTCGATAACCCGACCGCTC  
GCCATACCTTTACGTACCGCTTTCAGCTCCAGAACTTCGCGCTGCAGCAGGATAGCGTCCAGCAGTTCATCGATACCGGT  
ACCCGCTTTCGAGATACGTGTACGAACCTGGCTTTCACCGCCCCACTTCCGGCAGGATGCCGACTGGGAGAGTTTCGT  
TCTTAAACGCGATCCGGATCAGCTTCTGGTTTATCGATCTTGTACTGCAACCACACCGGTACCTGCGCCGCTTTCGCG  
TGCTGGATTGCTTCGATGGTCTGCGGCATCACACCGTGTGCGGACGAACAACAGGACTACGATGTCGCTTGCCTGCGC  
ACCACGAGCACGATTGAAGTAAACGCGCGTGGCCCGGGTGTCCAGGAAGGTGATCATGCCGTTTTAGTTTCAACGT  
GGTATGCACCAATGTGCTGGTAATGCCGCCGCTTCCGAGAGGCCACTTTCGTTGAACGAATGTAGTCCAGCAGAGAG  
GTTTTACCGTGGTCAACGTACCCATGATGGTCAACCGGCGCGCGGTTACGCCGACGACCCGTGTACGGTTCGCT  
CATTACCGCTTTCAGCTCGTTTTACGACGCGAGGATAACTTTATGGCCATCTCTTACGCAACAGCTGTGCGGTTTT  
CCTGATCGATAACCTGGTTGATGGTTGCCATTGCGCCAGTTTATCATCGCTTTGATGACCTGAGAGCCTTTAACCGCC  
ATCTTGTTCGCCAGTTCCCAACGGTATAGTTTCGCCGATCACAAACGTCACGGTTAACGGCTGAGCAGGCTTCTGGAA

GCCTTGCTGCAGCGAAGAACCTTTACGTTTTCCGCCTTTACCGCCACGTAAGTCTGCTGCGCGTGCTTCTTACGATCAGCTT  
TTGATTCAGCGTGTGGTTCCTTTCGGACGCGCTGCTTTCGCGTTACGACCACGGCCACGGCCGCTTCGACTTCA  
CGATCGCTTTCGCTTCTGCTGGCGAGCATGTTGAGAAGTAGTGACGTGATAATCGCTGGAATCTTCAGTCGGTCCGC  
GTTATCAGTCCATTTGTTTTCTTCGCCATACGACGTGCTTCTCAGCAACGCGACGTGCTTCTTCTCAGTTCACGAC  
GCGCTTCTTTCAGCTTTCAGCTTGAGCTCTGCAGCTTCTGCTCACGGCGGCTTTTTTACGCTGGGCGTTTTAGTC  
ATATCGTCTTGTGATTGCTCACTTTGCTTTTTCCGACGCTTACGTTTCGCTTGTTCAGCAGCTTACGCTTAGCTG  
TTCTGCGGCTCACGTTACGCTTTTTGTTGCGCCTCGCGTTAGCCGATTCTTCTGCTCACGACGGGCTTGTCTTCCG  
CTTACGCTGCGCTTGTCTTCCGCTGCAAGGCGTTACGCTTTCGCGATCGCGTTTACAAAAGGTGCGTTTTCTGCGG  
ACTTCGATTTGTACCGATTTGCTTTTTCCACCGGTACCAGGAATGTTAAGGGTGTGCGTGTTCACGTTGCAGCGTCAA  
TTTGTCCGGCCTGAATTTTTCTGATTACAGTGGTCAATCAAAGTCTGTTTCTTGTGCAGACACAGAGTGTGACGAG  
ACTTCCGGATACCTGCATCAGCAAATTGCTGTACAGGCGTCCACGAGGTCTGTGCTCTGCGGCCAGCGTTTTAATC  
GTTACATCTGTATGCTGTTCTTCTGCTACAGTTATTACGCTTGTACCGAACAGCAAATATTACGGGACGCCAT  
AATCAGTGTCCGGCTTTTTCTGCGGTCACCCCTTCGATATCAGCCAGATCATCAATGCCCTGTTCCGGCAGATCTTCCA  
GCGTACAAACGCCACGGCGGCCAGTTGAATGCCAAATCAGATCTACCCCTTCAAGGTTACAGCAGATCGTCAGCCGCT  
TTGTTATCACCGAGGTTTTCTTCTGGGCTGTGCAATGGTGGCAGTGCATTTTTAGCACGCTCGCGCAGTGCCTCAA  
GGTCCGCTCATCAAGGCTTCGATTTCAACAGTCTTTTATCGGCACATAGGCCAATTCTTCCAGCGTGCAGAAAGCTT  
CTTCTACCAGAACAGTCCGGAAGTCTTCTGTCGATGTGAGATATTTGGTGAAGGTGTCGATCGCTGCGTTCGCTTCCGCC  
TGATGCTTAGCTGCAGGTGTCACGCTCATCACGTTGAGTTCCCAACCGCTCAGCTGCGAAGCCAGACGCACGTTCTG  
ACCGTTACGGCAATCGCTGCGCCAGGTTACCGGCTTCAACGGCGATATCCATGGTGTGTTTATCTTATCCACCACGA  
TAGAAGCAACGCTGCGCGTGCATTGCGTTAATCACGAAGTGCAGCGGTTATCATCCCACAGGACGATATCGATACGC  
TCGCCACCCAGTTCAGTAGACCCGCTGAACACGCGCGCCACGCATACCTACGCAAGCACCTACCGGATCGATACGTTT  
ATCGTTGGTTTTACCGGATTTTTCGCACGAGAACCCGGATCGCGAGCCGCTGCTTTAATTTCAATCACTTCTTCCGCCA  
TTTTGCGCACTTCAATACGGAACAGTTCGATCAGCATTTCCGGCTTGAACGAGTGACGAACAGTTGCGCGCCACGCGCT  
TCCGGGCGAACGGAATAGAGCACGCCACGACGCGTCCAGGGCGGAAGTTTTACGCGGCAGCATATCTTCCGCGAG  
GATCACGGCTTACGCTTGTGCCAGATCCAGAGAGATGTTGTCGCGGTTACTTTTTTACCACGCGCGGTGATGATTT  
CACCTTCGTGTTACGGAAGTATCAACCACCATCGCAGTTCGCTTACGCACTTTCTGCAGGATAACCTGTTTTGCC  
GTCTGGGTAGTGATACGGTCAAAGGTAACAGACTCAATCTGATCTTCAACGTAATCGCCAGGTTACGGCTTTCATCTT  
ATAACGTGCGGCTTCAAGGGTGATTTCTTGGTCCGCTGGGTGACTTCAACAACCTAACAGCGACGAAAGTGTCAA  
AATCACCGCTTTTTCGATCGATCTGTACGCGGACGTGATCTTGTTCATATTTTTCTTTGTTGCTGTGCCAGCGCG  
CTTTCAATGCTTCGAAAATCTTCTCGCGAGGTAGCGCTTTTATTGGATACGGCTTCAACTACAGCCAAAATTTCTTT  
GTTATCGCGGCTTTTACCTCATCCAGACTATTAAGGTTGGGAAACAGGTTTCGCTTCTGGATATTACTCAGCGCGA  
ACACTTCATCTTTACCTTCGACGGAAGTGTGATCATTTACCGCTTACCGCTTTCGATAACGCCCTGCCATTTACGACGG  
TTTTGTACCGCATACGGAGAACCAGAGTCACTTCTTCCGACAAAACGGGCGTAGTGTTCAGCCGTGAACAGTGGGCG  
ATCGAGACCCGGTGAGGAGACTTCCAGGTTATAAGCAACGGTGTGGGATCTTCAACATCCAGCACAGCACTTACCTGGT  
GGCTCATATCAGCAATCATCAACATTGATGCCATCTTCACTATCAATATAGATGCGCAGTGTGGATGTGCGACCGCGA  
ATAAATTCGATGCCAACAGTTCAAAACCCAGGGCTCAACTGGCGCAGTAATCATCTCTGTTAATTTTTGCTCTAATGT  
GGACAAGCCACCCCAAGACATAAAAAAAGGGCTAAAGCCAGTATTCTGTAGTCAGATAACAAAAAACCAGGATAA  
ATCGGGCTTTATATAACTGAACCTATAACCGCAACTGCGGTCTGGAGCACTTCCAGAAGGATTTTTTCAATCCAC  
TACGAAGCCGAAGTCTTACAGTATATTTGAAAAAGACTCTAAGGGAAAGTGGTTGCGGGGCGGATTTGAACCGAC  
GATCTTCCGGTTATGAGCCGACGAGTACCAGGCTGCTCCACCCGCGCCTGAAACGTGGCAAATTTACTCTGTTTTGG  
GTAAAAAATGCAAATACTGCTGGGATTTGGTGTACCGAGACGGGACGTAAATCTGCAGGATTATAGTATCCAGCCCA  
CATTTTGTCAACGTTTATTGCTAATCATGTGAATGAATATCCAGTTCACCTTTTATTGTTGAATACTTTTGCCTTCTCT  
GCTCTCCCTTAAAGCGATTATTTTACAAAAACACACTAAACTCTTCTGCTCCGATAAAAAGATGATTAATGAAAAC  
CATTTATTTTGCATAAAAATTCAGTGAGAGCGGAAATCCAGGCTCATCATCAGTTAATTAAGCAGGGTGTATTTTATGA  
CGACGATTCTCAAGCATCTCCCGTAGGTCAACGATTGGTATCGCTTTTTCTGGCGGTCTGGACACCAGTGCCGCACTG  
CTGTGGATGCGACAAAAGGGAGCGGTTCTTATGCATATACTGCAAACCTGGGCGAGCCAGACGAAGAGGATTATGATGC  
GATCCCTCGTCTGCCATGGAATACGGCGCGGAGAACGCACGTCTGATCGACTGCCGAAACAACTGGTGGCCGAAGGTA  
TTGCCGCTATTAGTGTGGCGATTTTATAACACCACCGCGGCTGACCTATTTCAACACGACGCGCTGGGCGCGCC  
GTGACTGGTACCATGCTGGTGTGCTGCGATGAAAGAAGTGGCGTGAATATCTGGGTGACGGTAGCACCTACAAAGGAAA  
CGATATCGAACGTTTCTATCGTTATGGTCTGCTGACCAATGCTGAACTGCAGATTTACAAACCGTGGCTTGATACTGACT  
TTATTGATGAACTGGGCGCGCTCATGAGATGTCTGAATTTATGATTGCTGCGGTTTCGACTACAAAATGTCTGTGCAA  
AAAGCCTACTCCAGACTCCAACATGCTTGGTGAACGCATGAAGCGAAGGATCTGGAATACCTCAACTCCAGCGTCAA  
AATCGTCAACCGATTATGGGCGTGAATTTCTGGGATGAGAGCGTGAAGATCCCGGCAGAAAGTACAGTACGCTTTG  
AACAAAGGTCATCCGGTGGCGCTGAACGGTAAAACCTTTAGCGACGACGTAGAAATGATGCTGGAAGCTAACCGCATCGGC  
GGTGTGACGGCTGGGATGAGCGACAGATTGAAAACCGTATCATCGAAGCGAAAAGCCGTGGTATTTACGAAGCTCC  
GGGATGGCACTGCTGCACATTGCGTATGAACGCTGTTGACCGGATTACAAACGAAGACACCATTGAGCAGTATCACG

CGCATGGTCGTCAGTTGGGCCGTCTGCTGTACCAGGGCGTTGGTTTGACTCCCAGGCGCTGATGCTGCGTGACTCTCTG  
CAACGCTGGGTTGCCAGCCAGATCACTGGTGAAGTTACCCTGGAGCTGCGCCGTGGGAACGATTATTCAATCCTGAATAC  
CGTCTCAGAGAACCTGACCTACAAGCCAGAGCGTCTGACGATGGAAAAAGGCGACTCGGTGTTCTCGCCAGATGATCGTA  
TTGGTCAATTGACCATGCGTAACCTGGATACACTGATACCCGCGAGAACTTTTCGGTTATGCCAAAACCTGGCCTGCTT  
TCCTCTCTGCCGCTTACAGCGTGGCCGAGGTGGAGAACTTGGAAAAACAAAGGCCAGTAATTCGACATCAACCTGCCCT  
TCAGGGGTGGGTTACCTTGCTTATCCTCTGTAAACTCCTTTCTGAGCATCACATAATCGAAAAACATCATGGTTTGCATC  
CACAACCCGTGAGTCTCCTTTATAGTGTGCAATCACTTCTCAAGCGTTTGGCGCTGTTCCGGCTTTGTTACCCCATCC  
ACGCATTAATAAGGTAATTATTGTAAGCTGTGAAAAGATGTTGTTTTCCGTTGTGCGATCCACGCCATCCCAAGAACG  
GGGTATACCAGATAAACATCGGGACATGATAGCTGTGCTGGCTAGCCTCCCTGCCATGAAAATAGACGTTCTTCTT  
CGTAGGGTCACGTTCCAGGCCGTGGTGGCAAAATACATGACCGAGGCGCGCGATCTTTAATAATCAAAAACCTGAC  
CTAGCAAATATCTGTGAATGAATGGAGTTGTATAGCAGGCATCCTGATCGTCTGCGGTTGAAACACGGCGCTGGAT  
TGCGGATAGGCGCTACAAGCCGTTTATGGCTTCCATTTAAATGAAGAACAATCAGTTTCTTTGCTGCGTATTTTGTG  
TAATGCTTGCATAAATGCGGCAACAACAATTATCAAACTCTGACATAAACTGTTCCATGGCGCGCATGGCGATAC  
TGAATACTGCTGTACCATTCTGCCGAAAAGCGGATTGCGAGCTTAGCCAGAAAGTCTGAAATCCTGCTTGATTAGCCATA  
TTAATAATGTTGTCGGGGTAATTATGAATGTATGACTCAAAACAGAATCAGCAGTTAAAGAAAGGGAAACCGACAGCGC  
AGTGAAGGTGCGCCGCTTATTGCTTGATTAACAGTTTGTCTGTTTCTTTGCTTCAACTTGGCGGTGCTGAGAGC  
GTGTATATCCATACAAAGACATATTGTGACACGTACAGACTCCCCACAATCAACACGTAGGTATCAATACCTGTATCC  
CTGACTGATAATTGAAAATACGGCACCGTGTGTTGCAATTGAGAGTAATCTTTGATGCTCTTTCGCTGCTAAAGCAAATA  
GTTGAGATTGAAAACGGCGTATAGGTAGCAAATCGCGACGCTAGTATATATGGACTGAACGCTTTTTTATTTTTGTCAT  
CTTTATAAGCAAATTGACAAGCGGAAAATAAACTGCCGAAATGACAATCAGCAATAATATTCCTGTCACTTTTTTTGTC  
GGCAAGGAAACATCATATTTTATTACTGCCAAAAAAGAAGGATAAAAAAGCAAAGGCACATAGATAAGGGATATA  
CATCCCCAGCATTTTGAACAATCATCCGGATCACTCTGGAGCACACTAATCGCAAATCCATCATTGAAAGTTGTACCAA  
AGGTACACCATGAATAGAGGCTAATACTCATGTCTGCCGAGTCAGTAACACAAATGGTGGGCAACAAGCAGGCGAAGC  
GGAAGGGATGATACGTTTTACAACCAGGATGGTCAAGCAAGAACAGCAAGCGCTGAACCATATGCGCTCCGGAAGA  
AGCGACTAAGTTCGTAATACAAAAACAATAACACAAAGATACAACAACCAATGAGATTTAAAAGTTCTAGCAAATTTGT  
TGAATACTGTCATCCAGAAATCCAAGTTCACAACCAATATAAACAATTATCAACAATGTTAATTTTATATCAGACATGT  
TTTTCAACTCTGATCCATATCAGAACGAAACACTGTTAGTTTTTCTTTTTAAATGATGCGGCCATTGCGTCTCAGTAA  
TTAATAACATTATCAATGCGTCTCTAAACATTACGAGAACGTAGCCATCAGTCGTTATACTGACAGGAGCAGGATGGT  
TTATCGAGAAGTAAACATATCCGTATTGTTACCGGAACTGGAGTTGACACAATAAAGTGCCAAATTATGTCAGTAGAAGGG  
AAAAATTTATAACTAAGGCGTACCGGCACCATCGTTTCAAGGTACCAGCTACGAGTAAAGCAACTGGACGAGATACAGAT  
ACCTGACAACCATTCCTCAGACCAGGACCAAAACGAAAAAAGACGCTTTTCAGCGTCTCTTTTCTGGAATTTGGTACCGA  
GGACGGGACTTGAACCCGTAAGCCCTATTGGGCACTACCACCTCAAGGTAGCGTGTCTACCAATTCACCACCTCGGCAC  
GGATACTACTTTTTAGTTCCGGATATCGCTGGTGGCTTAGCCGGAGCAGCTGGCTGAGTTTGTTCGGTTTTCGCCGGT  
CACTCAGATTTTCCATTCGCTACCTTATTGGTTTTGTTGCTATTGATGTTACCCAGCACCAGACTGATGATGAAGAA  
AACGTTGCCAGCAGCGCCGTATGCGGGTATGAAGTTACCAGAACCACTTGAACCAAACAGCGTAGCGGAAGCGCCTGC  
TCCGAAGGAGGCTCCCATATCAGCGCTTTACCTTGTGAGCATGATCAGACCAACAAGGCAATTGCCACAATAAGGA  
AACTACTAAAAGAGCTTATACATAATCAACCTGTTCTTGGGAGTTGCCGCGTACCAATGCTTCAACCAATAAAGCG  
GGAGTTTTAATCTTTCCACTGAAGCGGGTGTGAATACTAACAAAGCGAATGACCTTCGCAAGGGCAATTTTATCGCA  
TTGATCAACTGCGGAAAAAAGCAGCAAAACCGATGTTGCTGAGAAAAAAGGCGACAATCGCCGCTTTTTAGCCAG  
TTATCTAACGCTTAAACGGCTTTTACTGCATCGGCGATGCGGTGTGCAAATTCAGTCACCTGCGCTTCTGCTTCCGCTT  
CCACCATCACGCGAATTAACGGTTCCGGTCCCGATTTACGAGCAACACGCGTCCACGGTTGCCAGCGCAGCTTCAACC  
TCTGCGGTACGGCTTAACTGACTCATGCTCAAGTGGATCGCCGTACCTGCGGTGTAACGTACGTTAACCAAGAACTG  
CGGGAACATTTTATGCGCGTGCAAAGGTCTGTCAGGCTCATATGGTTACGTGCCATCGCCGCCAGCACCTGCAAGCCAG  
CAACGATGCCGTACCGGTAGTAGTTTTATCCAGCAGGATCACATGACCGGAATTCTCTGCACCGATACGCCAGCCTTTC  
TCCTGCATTTTTTCCAGTACGTAGCGGTACCCACTTTCGCGCGCGCAAATGGAATTCCTAACTGTTTACGCGCCAGTTC  
AAGCCCATGTTGCTCATCAATGTACCCACAGCGCCACCACGAGCTGGCCCTGACGAAGACCTTACGCGCGATGATAT  
ACATGATCTGATCGCCATCGACTTTATTGCTTTCATGGTCAACCATAATCACGCGATCGCCATCGCCGTCGAAGGCAATA  
CCGAGATCCGCTTTTTCAGCCAGCACACGAGCCTGGAGCGCGCAACGTGGTAGCCCCACTTGGCATTGATGTTTAC  
ACCGTTTGGCTACAACCGATAGCGATAACGTTCCGCCCCAGTTCGCGCAGCACGTTGGCGCGATGTGATAAGTGCAC  
CGTTTGCAAAATCCACCACAATCTTCAAGTTCAGTGGAGCTAAGTTCGTTCCGGAAACGTGGCTTTGCAAACTCGATATAG  
CGACCCGCGCATCAACGATACGGCTGGCTTTACCCAGTTCGCGCAATCAACGAGCTGATCTCTTTTCCATTTCCGC  
TTCGATGGCTCTTACCCGATCCGGCAGTTTGGTCCGTGATAGAGAAGAAATTAATGCCATTATCGTAGAACGGGT  
TATGCGATGAGATATACAATTCGGCTCTGCGCGGAAGGTACGCGTCAGATAAGCCACGGCCGGTGGTGGCATCGGG  
CCAGTGAAGAGTGGCGAAAGGCCGCTGCGCCAGACCCGCTTCCAGTGTGACTCCAGCATATAGCCAGAAATACGGCT  
GTCTTTACCAATAATAATCTTACGGGAGCCGTGGCGCGCCAGCACTTTACCCGCGGCCAACCCAGCTTAAAGCACAATA  
CAGGTGTGATCGGCGCATCCCTACACGACCACGAATCCCATCGGTACCGAAATATTTACGATTACTCATAGCCTTGT

TTCCTTTGCAGACAGAGTGGCTTCCACCACCCGCATCGTTCTACGGTTTCTTTGACGTCATGAACACGAATGATGTGCG  
CGCCTTGCATTGCGGCAATGACCGCACAGGCCAGACTACCGCTCAGGCGCTCGGACGGCCCCACGTTACAGAGCTGCCA  
ATCATCGATTTTCGTGACATAACCCACCAACAGCGGCAGGTTGAAATGGTAAATTCAGCCAGGCGGCCAGTAATGAATA  
GTTATGGGAGAGATTTTTACCGAAACCGAATCCGGGTCGAGCAACAATTTCTTTTTGCGATACCCGCCTGCTCGCAAC  
GTGCTATTTGCTCAATAAAGTAGCGATTCACTTCTGCAAAGACATCGTCATACTTCGGAGCTTCTGCGATGGTTTTGGA  
TTTTCCCTGCATATGCATCAGACAAACCGGTAAACCGGTTTTCTGCAGCCGCTCCAGAGCGCCAGGTTTCGGAAGGGAGCG  
GATATCATTAATAATGTGAGCGCAACTTTCTGCTGACTCACGGATGACTTCTGGTTTGGATGTATCGACTGAGATCCAGA  
CTTCGAAGCGTTGAGCAATTGCCTCAACCACAGGAATAACACGTTGCAACTCTTCTCAACGCTAACTTCCGCCGCCCT  
GGGCGGTGGACTCGCCACCAACGTCAATGATCGTCGCGCCAGCGTTGATCATCAGATTGCGATGTTTACCAGCATCTAT  
CAGCGAGTTATGCGTGCCACCATCCGAAAAGGAATCAGGCGTGACGTTGAGGATCCCCATTACGTGAGGATGGTAAGGT  
CCAGTGAAGTACCCTGGGCAAAGAGTTTCATGATGTTATCCCTGGTATGAATTGATAAGAAAAACCCGGAGCACGCC  
CGGGTTTTCGGTACAAATACAGTCATCTGATGCGGAACTTACTTGTGCTAACTGCTCTGACATGGTGTACCCGGG  
TTCGGCGTACGCGGTTTCAACCCGACGAGGAGCCTTTGGACTACCATTGTCGCCAGAATTGTTAGAAGCGCCTGGTTC  
TTCCAGCCCGCTGGCGGACGTACATCGCGACGTGCCATCAGGTCATCAATCGCGGTGCGTCGATAGTTCATATTTCA  
TGAGAGCATCTTTCATCGCATGCAGAATATCCATATTGTCGGTCAGAAGCTGACGCGCACGATTATAGTTACGCTCAAT  
AGTGGTTTTCACTTCTGCTGATGATACGTGCAGTTTCATCGGACATATGTTTTCGTTTTCGCTACGCTACGGCCGAGGAA  
CACTTCACCTTCTTCTCCGCGTACAGCAGTGGACCAATTTCTCAGAGAAGCCCACTGAGTCACCATGTTACGTGCCA  
GGTTGGTCGCAACTTTAATATCGTTGGACGCACCGGTAGATACATGTTCCGGCCGTAGATGATCTTCTGCGCAGACGA  
CCACCGTACAGCGTAGAAATCTGGTTTTCCAGTTTTCTGACGGCTGGCGCTGATTGCGTCGCCCTCAGGCAAGAAGAAAGT  
CACACCCAGCGCACGACCGCGTGGGATAATCGTCACTTTGTGCACCGGATCGTGTTCGGCACCAGGCGACCGATAATCG  
CATGACCCGCTTCGTGGTAAAGCGTCGATTCTTCTGCGCTTCCGTATCACCATGGAGCGACGTTCCGCACCCATCATG  
ATTTTGTCTTTCGTTTTCTGAACTCAACCATCGACACAACGCGTTTTGTTGCCACGAGCAGCGAACAGTGCCGTTCTGTT  
CACCAGTTTCCGAGGTGACACCCGAGAAACCAGGAGTACCACGGCAATGATTGCCGCGTCGATATCGGGTGCCAAATG  
GTACGCGACGCATGTGAATTTAGGATCTGCTCACGACCGCAACATCTGGCAAGCCGACCACAACCTGACGGTCGAAA  
CGGCCAGGACGCAGCAGGGCCGGTTCGAGAACGTCGGACGGTATGTCGCGGCGATAACGATGATACCTTCGTTACCTTC  
GAAGCCATCCATCTCAACCAGCATCTGGTTCAGAGTCTGTTACGTTTCATCGTACCACCGCCAGACCAGCGCCACGCT  
GGCGCCTACGGCGTCGATTTTCATCGATAAAGATGATGCACGGTCCGCTTTCTTCGCTGTTGCAACATGTCACGAACA  
CGGGATGCACCCACCGACGAACATTTCTACGAAGTCAGAACCAGGATAGTAAAGAACGGAACTTTTGCTTCGCCTGC  
AATCGCTTTCGCCAGCAGCCTTTACCGGTACCCGGAGGACCGACCATCAAGACGCCTTTCGGGATCTTACCGCCGAGTT  
TCTGGAAGCGGCTCGGCTCGCGCAGATACTCAACCAGTTTCAGCAACTTCTTCTTTGCTTCGTCGAGCCCGCAACGTCA  
GCAAAGGTCGTTTTGATCTGATCTTCCGTGACATGCGCGCTTGTCTTACCAAACGACATGGCACCTTTGCCACCGCC  
GCCCTGCATTTGACGCATGAAGAAGATCCAGACCAACATCAGCAACAGCATCGGGAACCAGGAGATGAAGATAGAAGCCA  
GCAGGCTTGGTTCTTACGGCGGTTACCCGACAACCTTACGTTTCTGGTCAACAGGTTATCCAGTAATTTCCGATCCTGA  
ACCGGAATGTAAGTGGTATAACGGTACTATCTTCTGGTAACTTGTGATTTACGTCGCTGATACGCGCTTACGAAAC  
CTGGTCTTATTGACCTTGTAGGAAGGTAGAGTAATCCACCTTACGGCCATTAGACTCGCTGGGCCAAAAGCTCTGGA  
ATACTGACATCAGCACAACGGCAATGACCAGCCAGAGTATTAGTTTTTCCCATGTCACTCAAGGGATTAACCTCTTAT  
TACAACGTGTTAAAAACAGCGTCAGGATACTCTATATCCAGCATCTTCAAACCTTTCGCTGAAATCTCCCGGTTAGGG  
TTTACGCCCCGTCGCTACAATATACACTTCCCGCAACGTGCACGAGAAGAGTCCGGCTTACGAACTTTGACCTTCGTAA  
ACAGGGAGCGAATTTCCCTTAGATACTCATCGAAACCTTCCGCTGGAACACCTTCACTACAAAACCTGCCACCTGGCGCT  
AATACATCAGACACATTTCTAGCCTCAGTTCCACCAGATACATGGCACGGGGATATCCACCAGCGGTTCCGCTCAT  
GTTTGGTGCCATATCGGACATGACAACCTGGACTTTGCTGTCCGCAACGCGCTCCAGCAGTCTTTTCATCACCAGTTTCAT  
CACGAAAATCGCCTGAAGAAAAGTCCACACCAACGATAGGATCCATAGGTAAGATCGCAAGCGATGATGCGGCCCTTTG  
CCGCCAATTTGGGTGACCACATATTGTGACCAACCACCCGAGCAGCACCAGGTCGACAACCGTCATTTCCCGGTTTAAA  
GAGTTTGTCACTTTGCTGTATTTTCATCAAGTTTAAACCAGGCACGGGAACGTAACCCCTTTTTCTGTGCTGTTGAACAT  
ATTTATCGCTAAAGTGTTCCTGAAGCCAGCGGCTGGAGCTGGCAGAACGCTTCTTACCTGTCAATTAACCTTTCCATGGG  
GATAACTCATCGTAACCAATTGCGTAAATTTTTACGCGCTATTTGGTGATATATGGGAGATGGCGGTAGAATGACCCGT  
TTTCAATCCCAACGTAAGCAAAAAATACGATGAATCTGAGTACTAAACAACAGCACCTGAAAGGTCTGGCACATCCG  
CTCAAGCCAGTTGTTCTGCTTGGCAGTAATGGTTTTGACCGAAGGGGTGCTGGCCGAGATTGAACAAGCGTTAGAGCACCA  
TGAACCTCATCAAGGTGAAAATCGCCACCGAAGATCGCGAACTAAAACCTTGTGCTGGAAGCTATCGTGCAGCAACCG  
GCGCCTGTAATGTACAGGTCATCGGTAACCGCTGGTGTCTTATCGCCAACTAAAGAACGTAATAATCTCGTGCACGC  
TAAGATTATCCTAAAGTTACACACATTTGCTGTGTAACGAGGGGTTTTCCGACGGCAGGAGAGCAAAATGCCACGCTC  
TGTTCTGTTGATAAAGGCCGATAGCGGCCCTTTTTCTTTCTTACAATACATCAACATCTTGTGATTTGGTAATTTCTT  
ACAGGTATTCCACCTTAATTAATTAATTAATTAATTAATTAATTAATTAATTAATTAATTAATTAATTAATTAATTAATTA  
CCGATCAGGCCACGAGCAATAGGCGAGTTTACAGAAATCAGGTTTTGTTTAAAGTCAGCTTCGTCATCGCAACGATGCG  
ATAAGTCTGTTCTTCTGTCAGAATCCAGATTCAGCACCGTTACGGTAGCACCAAAAAATAACGCGCCATTGTTGGGCATTT  
TGGTGACATCAATCACCTGCGGCTTGCACAGCTTGGCTTCGATGTCTTAAACGGCCTTCGAGAAACCTGCTGTCA

CGAGCTGCGTGGTATTCCGGCGTTTTCTTTCAGGTCGCCATGCTCACGCGCTTCCGCGATAGCAGCAATGATTTCCAGGACG  
GCGCACAGATTTAGAAAATCCAGCTCTTCGCGTAATTTTTACGCGCCGCTAAGGTCATCGGAATAGCTTGCATTTGTT  
ATACCTCTTGAATATTCTGATAGGGCAAGTCTTACCACCCCGCTGTTCCGCTGCCCGCATAACTCCTTACCGGG  
ACCGAAGCAAAAAATACCAGCCGGGTACAAGTCCCAGGTCAGCTACAATTCACATTTTGATAGTCATTTTACCCTGA  
AGTTCCCGAAGGGTCATCGTTTACTTTATAGGGCGTTGCGCCGTAGTATGACGGCTCGATTCCAGGTTGTTAGCGCGAGA  
TTATGCGATTTTCCAGATTTATCATCGGATTGACCAGCTGTATAGCGTTCAGTGTTCAGGCCGCAATGTTGATGAGTAC  
ATTACTCAACTCCCCGCTGGTGCCAACCTTGCCCTGATGGTGCAAAAAGTCGGCGCGTCCGCCCCGCTATTGATTACCA  
CAGTCAGCAGATGGCGCTGCCTGCCAGTACCCAGAAAGTGATTACTGCGCTGGCGGGCTGATTCAACTCGGCCCGGATT  
TTCGTTTTACCACGACGCTTGAACCAAAAGGCAATGTGAAAACGGCGTACTTAAGGGTGAAGTGGCGCGGATTTGGT  
GCCGATCCGACGTTAAAACGTCAGGATATTGCAATATGGTCGCGACTTTGAAAAATCTGGCGTCAACCAATCGATGG  
CAATGTGTTGATAGATACCTCCATTTTCGCCAGCCACGATAAAGCCCCGGCTGGCCATGGAATGACATGACACAATGCT  
TTAGCGCTCCGCTGCCGCCCATAGTTGACCAGCACTGTTTCTCCGTCTCGCTCTACAGTGCCTCAAGCCCTGGTGAT  
ATGGCTTTTATACGCGTGGCATCTTATTACCCGTTACGATGTTACGCCAGGTACGCACCTCCCCGTGGTTCTGCCGA  
AGCGCAATACTGCGAAGTGGATGTGGTGCCAGGGCACTGAACCGCTTACGCTGACGGGATGCCTGCCACAACGTTCTG  
AGCCGCTCCCGTTGGCTTTGCCGTGCAAGATGGAGCCAGCTATGCCGGTGAATTTCTGAAAGATGAAACAGCGT  
GGTATCACCTGGAGCGGAACACTGCTGCCAGACTCAGTTAACGAACTGGAACGGTAGTTGCCAGTAAACAGTCGGC  
CCCCTGCACGATCTGCTTAAAGATTATGCTGAAAAAGTCGGACAACATGATCGCCGATACGTTTTCCGATGATAGGCC  
ATGCGCGCTTCAATGTGCCTGGAACATGGCGGGCGGGTCCGACGCCGTGCGTCAGATCCTGCCAGCAAGCCGGTGT  
GATATTGAAAACACCATTATTGCCGATGGTTCCAGGGCTTTCCGCGCATAACCTGATTGCCCGCCACCATGATGCAGGT  
GCTGCAATACATTGCCAACACGACAATGAACCTTAACTTTATCTCCATGCTGCCGCTGGCGGGCTATGACGGCTCTTTC  
AGTACCGTGCAGGTCTGCATCAGGCGGGCGTGGATGAAAAGTCTCAGCGAAAACCGGTTCTGTCAGGGGGTATATAAC  
CTGGCGGGATTCAATACCACAGCGAGCGGGCAACGAATGGCGTTTGTGCAATATCTTCTGGCTATGCAGTAGAACCTGC  
GGATCAGCGTAATCGCCGATTCCGTTAGTGCCTTTGAAAGCCGTTTGTATAAAGATATTTATCAGAACAATTAGTCAA  
AAAGAAACCCCGCACATGGCCGGGGCTCAGATTATTGACAAAGTGCCTTTGTTTATGCCGGATGCGCGTAAACGCC  
TTATCCGGCTACAAAATCGTGCAAAATCAACATATTGCAATTCTTGTAGGCCTGATAAGCGTAGCGCATCAGGCTGA  
TTTGGCGTTTATCATCAGTGATTAACGCTTGTAAATGAACTCAACGCCTTCTCGTCTGCTTCCGCTCCAGTCTCATCCC  
AGTCTTCATCATCTCTTACAGCAATCTTCAAGCTGCTGGCGATGATAATCATCCACATGAATTCGACTTTCTCTGGC  
TGTTTCGCTTCTTACGCCTGCACGACCGGGTTTTCAATGATAAAGGTCATCACATCCAGCAGAGATCTTTCACGCCAG  
TCCACTCGCCGAGAGATCAGATAATTTATCTTCCAGCCAGCGCTCAGCGATCGCTTTCGCTTCTCTTCCGGCTT  
CTACCTTATCCAGCAGATCGATCTTGTGAAACATAACCAACGCGTTTTCTGCGCCAGATCCTGGCTGTATTTTCCAGC  
TCGCTGATAATAATACGCGCGTTTTCAACCGGATCGGTGCCGTCAATCGGATCGATATCGATGAGGTGCAACAGGACGCG  
GCAACGTTCCAGGTGCTTCCAGGAAGCGAATGCCAGACCTGCGCCTTCCGCGAGCGCTTCAATCAGTCTTGAATATCGG  
CAACAACGAAGCTCTTTTCGTTGTCCATTCTGACCACCCAGACTTGGCACCAGAGTGGTAAACGGATAATCCGCCACT  
TTCGGTTTAGCCGCGGATACCGCACGAATAAAGGTCGATTTACCCGCGTTTGGCATCCCCAACATAACGACGTCAGCCAG  
CAGCATCAGCTCCAGCAGCAGCTCGCGCTTATCGCCCGCGTCCGCTTGGTTTTCTGCCGCGGTGACGGTTAACGGACG  
ATTTGAAACGGGTATTGCCAGACCGTGCAGCCGCCCTTAGCAACCAGCAGACGCTGACCGTGTGGTTCATATCGCCC  
ATGGTTTACCAGTACCCTGGTTCGATTACACGCGTACCTACCGGCACTTAAATCGTCACGCTTTTACCAGCGTTACCGGT  
ACAGTCGCGGCTTGCGCCATTCTGACCGCGCTCTGCACGGAAGATTTTTCAAACGATAATCGATAAGCGTGTTCAGGT  
TCTCGTCCGCTTCCATCCATACGTACCACCATCACCGCGTCCGCCATCCGGGCGCTTTCGGAATATACTTTTCG  
CGCGGAAGCTCAGCAACCAATACCGCCATCACCTGCAACGACGAAATCGATGCTTTCATCAACAAATTCATTTTTATT  
CTCCGTAATCATTCCGCTGCGCGGGGTTGCGATACCACCGTTGTATGCTTACGTAATCCGCCCCAAATACGATGACCAA  
TGCGGAATACATCGCGCCGCAACCACGACAAACGACCCAGATAAACCATAAAGGTTTAAACATCGGTCTGGCGAAGAAA  
TCGGGCCAGGCCAGTGATAAAAAGATCTGAAAAAACAGCGTAAACAGTGGGGTGGAGCGTATGATCGCGCTCACCTGGC  
TGCTGCCAGCGAGCCATCGCTTCCGCCAGGGCGCCATATCTACCAAGGATTCAGTCCGCAAAAAATTAACATGCGA  
GCTGCCAGTGGCTAAGCTGCGCTATCACTCCAGGCTTTGCCAGAGGGAAGAGCGCAATTGTACATAAAGTGTACAGTAAA  
AACAGGATCTGCGGTGAGGCCAGCCGACGCAATAAAACCTTTTGCACCAGCCATAACTCACCAAACCGTCCGCGACC  
GACCCCAAAGATAACTCCCCAGGTGTAATCGGTGAGCTTTGTAATATCTCGACCAGACTGGTGTAAAAAATACCA  
GGCCGCTCAGGAGCATCAATGCCCTACAACCTGAGTGTGCGCATTTTCTCTTTGAGGATAAATACGCTGGCAACCATC  
ATGCCAACTGGCGAGAGTTGCCAATCACCTGCGAAGCGGTGGACTCAGGTATTGCAAGGATGAGCTGAACAGGATGAA  
GTTCCCAAACAGCCCGGGTGCCTGCAACAAATCAACCAGCGTGGCTTACGAAACACGCGTAATGGCGGCAACC  
TCTTCTTACCAGCAAGAATGCCACCCAGGCCAATACTGCCATCAAGAAACGGTAAACACGATTGTCCGAGGTTCCATC  
ACCTCCAGCACCTGCTTATTGCGATTGGCAACGCCCCAGCAAATGCTGTGGTGGAGCGCAAAAGAATGCCAATGCC  
TGCTGTGCTTCATACCGTATTCCCTGCAAAGCGATTTGCGGATTAACGTCGCACCATGCGCATTTTTACCAGTTATC  
GAATGTAAAAAGCCCCGCAACGTTGCGGGGCTTTTATCCGTTACCGGGACGCGAAAAACTTATTACGCTTCGATGCTG  
ATAAATTTACGGTTTTTTCGGGCTTTAACTTCGAATTTCACTTACCCTGCTTTAGCAAACAGAGTGTGGTACGACC  
GCAACCTACGTTAGCGCCAGCGTGAATTTGGTACCACGTTGACGAAACGATGATGCTACCCGCCAGAACGGATTCCGCC



CGAAACGCTTAACGCCAGCGTTTTAGCTTCTGAATCGCGACCGTTACGTGTGGAGCCGCCAGCCTTTTTATGTGCCATT  
TGAAATCTCTCCTCAGGTCTTAGGCGCTGATGCCAGTAATTTTACATCAGTGAACCACTGACGATGGCCCTGCTGCTTA  
CGATAGTGTTTACGACGACGAACTTAACGATTTTAACTTTCTCGCCACGACCGTGAGCAACAACCTTACGCTTTGATTAC  
GCCGCCATCAACGAAAGGAACGCCGATTTTGACTTCTTACCGTTTGGCGATCATCAGCACTTCAGCGAACTCAACAGTTT  
CGCCAGTTGCGATGTCCAGCTTTTCCAGGCGAACGCTCTGACCTTCGCTTACTCGGTGTTGTTTACCACCACTTTGGAAA  
ACCGCGTACATATAAACTCCGCTTCCGCGCACACCTTTCAATGATTACAGAGTGCCTATAAAATATTCACAATAGGGCG  
CGAATATTACGCAAAACGACGCTTTGACAAGTGCTACAGTCAATACACGAAGAAAAAACACAACCTGTACGGTAAC  
GTTTATCTGTGCCATTTTTTACGATAAATCACCTATATTCTAACCATAAACCTAAGTTGCCTTTGTTTACAGTAAGG  
TAATCGGGGCGAAAAGCCCGCTTTTGGCGATGAATTTAGAAAAATCAATGAGTTAACCGCGCAAGATATGGCGGGTGT  
AATGCGGCAATCCTTGAGCAGCTTAATTCGACGTCCTCACTGATCAATCAGTTAGGCTATTACATCGTCAGCGGGCGGG  
TAAACGATTCGTCGATGATTGCTGACTGGCTGCACGAGCTTTGGCTATGAGGGAAATGCGCATGTCACCATTGCTG  
CCCTGATCGAGTTTATCCACACGGCGACTCTGCTACACGACGAGCTTTGGTGAATCAGATATGCGCAGGGGTAAGCT  
ACCGCAACGCCGATTTGGCAATGCCGCCAGCGTCTGGTAGGCGATTTTATTTATACCCGCGCTTTCCAGATGATGAC  
CAGCCTCGGTTGCTCAAAGTGTGGAAGTCAATGTCAGAAGCCGTAACGTCATCGCAGAAGGTGAAGTTCTGCAACTGA  
TGAACGTTAACGATCCGGACATCACTGAAGAAAATACATGCGCGTTATCTATAGCAAAACCGCGCTGTTTGGAGGT  
GCCGCGCAGTGTTCGGGATCTGGCTGGCTGTACGCCGAGGAGGAGAAAGGCTGCAGGATTATGGGCGCTATCTCGG  
CACTGCTTTCCAGTTGATCGACGATTTACTCGATTACAATGCCGATGGCGAACAGTTAGGTAAAAATGTGCGCGACGATC  
TGAACGAAGGTAAACCGACGCTGCCGCTGCTGCATGCGATGCATCATGGCACACCAGAACAGGCACAGATGATCCGTACC  
GCCATCGAACAGGGTAACGGTGCCTCTTCTGGAACCGGTTCTGGAAGCAATGAACGCTTGTGGATCTTGAATGGAC  
GCGTCAGCGTGCCGAGGAAGAAGCAGACAAAGCCATCGCAGCGTTACAGGTGCTCCCGACACCCCTTGGCGAGAAGCAC  
TCATCGGCTCGCGCACATCGCTGTTCAACGCGATCGTTAATCCCTCCCTCATCCCGCGCAGCGCGGGGATGGTTCC  
AGTAAGTTCATAAAAACACTTATTACGCTCTATAACACCTGAAAAATAGGGATGTGCATCTTTATATATTCTGAATATT  
CACACTCTTACAGGAACTTTTAGAGCAATAGGCCATCAGGAGTATAGTGTGCTCGACAGAAGAAGTGTCTGAATGA  
AAGCGACTAACCTAAGGAGTGAGGAAAAATGAAAGTAATTTTACTGACTGGCATCCGCTGACATCATTGCGGGTTTGC  
GCAAGAAGGGAACGTCATGGCGGCGAATCTCGCAGAATGGTTTGAAGTCTCAACGCTGGCGAATGCATTATCGCGC  
CCATGGCCGAAAGGAGAGATGATTATTGCGAAAGCCCTGGGAAGTACCCTGGGTTATCTGGCCATCACGCTACCATGA  
TCCGACAGCCATGAGTTTATCGACAGAACGAGTTGATGCGTAGCTACACTAAACCGAAAAATGAGTGGTCTGGCGGT  
AGCCCCGCAACGGGGTGCAGCTCTCAGACGATTATTCGCTTTCACACGCTCAATATTTGCACCTAAAGCGCGCAGT  
TTGTCTTCAATGCGTTCTGATGCCACGATCGATGTGATAAATACGATCAACCACGCTCGTCCCTCCGCAATACAGCCAGC  
CAGCACCAGGCTTGTGATGACGACGATCGGTTGCCATAACCTGTGCGCCAGAAAGTTTTCAACACCGTGACAAATAA  
CGGTATTGCTTTCGATTTCCGGCGTGGCGGCCATACGGCTCAGCTCTGGCACATGCATAAAGCGGTTTTCAAAGACCGTT  
TCGGTGATAAACCCGGTCCCTTCTGCCACCAGGTTCAACAGCGTGAACCTGGGCTGCATATCGGTGCGGAATGCCGGATG  
CGGCGCGGTACGTACGTTAACAGCCTTCCGACGTTTCCATGCATATCCAGGCTAATCCAGTCTTCCGCGACTTCGATGT  
CCGCTCCAGCGTCACGCAGTTTCCGACGACGGCGTCGAGAGTATCTGGCTGCGCGTTACGGCAGATAATTTTCCGCGCA  
GAAATCGCCGCCGCCACCAGGAAAGTACCAGTTTTCGATACGATCCGGCAGAACGCGATAGACACCGCCGCTAAACGTTT  
CACACCTTCGATGACGATACGATCGGTGCCCTGACCCTAATTTTCCGACCCAGCGTAATCAGGAAGTTCGCGGTATCGA  
CGATTTCCGGTTCACGCGCTGCGTTTTCAATAATCGTGGTGCCTTCCGCCAGGTTGCAGCACACATGATGGTCAACGTT  
GCGCAACGCTGACTTTATCCATCACGATATGTGCACCTTTCAAACGACCATCGACGGAAGCTTTAACGTAACCTTCTTC  
CAGTTTGTAGGTCGCGCTAATTTGTTGAGGCGAGAAATGTGTAGATCAACCGGACGCGCACCGGATCGTACAACCGCAG  
GTAGTAAAACCTGCCCCTGACCAAAGCGCGTACCAGCGGCCCCAGATAGAAGCACGCATGGTTTTAACCGA  
TCGTAAGGTGCGCAGAATACATTAACGTCGCGGGCATCAATATGCACAGAACCATTACGTTCTACTTTCCGACCCAGCTG  
GCTTAGCAGCTTCAATGATGATCGACGCTTTTCAATTTCCGGAGCTTCTGGATCTTACCAGGTTCTTCCGCCAGTAGT  
CGGCAAAAAGGATAGGCAGAGCAGATTTTTAGCGCGGAAATTTGACTTCCGCTGGAGCTTCTGTTGGCCCTGAACA  
CGAAATTTATCCATTTAGTTTGTCTCAGTTAACAATTCATATCCGCTACCGGCGAATCGCCCATAGCTCAAAGCCGTT  
CAGTTTGGATCGCGGCCACTCCGACGGGTATACGCTTTGATCGACACAGCATGAATGCGGTTATCCGCAATATATT  
CCATCAGCGGACCATAGACCGTCTGCTGTTTTTAAACCGACTCATGCCGTAACAACCTCACCCACGGCAATAACCTGA  
AAGTGGCTGCCATCGCCGAAACGTTGACTTCTGGAGGGAGAGCGTTTCAACACGCTCTGAATTTTATTATTTT  
CATGGGATCTTCAATCATCAGTTAATAAACAGCGAAACATCTTAGAGCAAAGTTGCGCTGGCATAAATAAGCAAAAAGC  
CTCGCTGATAAATCAGACAAGGCTCGACTTGCAGGCGAGTTTCCGCGACAGGCGGTTAACGCCATATCCGGCTGAAAA  
ATTTAACGAGGCAGAATCAGCAGGCAAATTATACAATTTCCGACGGGTATACACTTTGCTGTTTACCCCTGAAGCGT  
CACATTGTTGCCCTGCTTTTTCCGACGATCGATAAGATGGAGCAGCAGTCCAGTCCCCCGTATCCACGCGGGAGACAC  
GGCTAAGATCGATGACGTAATCCCTTACCCTTCTCACGATTTCCCAAAGCGGTAGCAAAACGTCCTGATCCAGC  
TCTCCGGATAACGCCAGCGTGCACCCGCTGCATCCAGCTCAGTACTCGCTCATTATTTTTTCTTCCAGAGTGATT  
TTCTGTTGAGAAATCGATTTTCAAGTTGCGCAGTACGCGCTGATACCTTTGGTACGCGAGCAGGTTCCCACTCGTTTTG  
TTTGGTGGTATCATACTGACGCTTACGCAATCATGTGTAAGCCTGCCAATTGCCCGTCTGGGAGTTTTTACGCCACT  
GGAAGTCCAGACGCCGCGGACGGCCATTCGGTCAATAATGGTAACGCGAATAGGCACAATGGTTTTATCGCCAGC

GGCTGTTCTGGCGCAATCTGATAGGTTTGACCGTGATACATCGCCAGCGCCTGACCCTGTAAGCCTGCTTCAGGTA CTACAG  
GAAAGCGGCAAAGTAGGCTTACGTTGAGCAGGGTGCACCTTGTAACTGGCCAGCACCAGCGCACCGGCGTATT  
TCACCTGTACGTATGGCAGCAGTTCCTGATCAACAATGGTACGCAGATAATCCGGGTTGGCCGAATTTGCGGTTGCTCA  
TTCTTCAGGCGATCGAACGTTTTCTGCGCCGCTCGTCCATCAGCTTATACGGATTGGTCTGGTCTGCCGCGTTGCCGC  
ACTCAGAGGTGCAATCACAGCAAAGCGACCATCATTAAACGTTTAAACATGCGTTCGGTCTCCTGAAATTTATTCGTTG  
TACCCACAGGTTCAAGTGGTTTATTATTACCTGGCGCAGCAGCTGGCGCATCGCCACTATTCTTATTGTCATCGCCTTTA  
CTACCGTAAAGGAACTGACCAATGAGATCTTCCAGCACCATCGCAGACTTAGTGTCTGAATTGTATCGCCATCCTTCAG  
GATAGCAGTCCCAGTTCGGGTTCTCAAACCGACGTTTAAATGCCAGATATTGTTCCCCAGCAGGCGGAAAGTACGAA  
TGCTCAGCGAACTGGTATCTGGAATGTGGTTATAACGTTGTTCAATTTCCAGCGTTACGCGCGGAGATAGGTTTTCGGG  
TCCAGCGTAATATCCGCCACCGACCCACAACAACGCCACCAATACTGACCGGAGAGCGCGCTTTTCAGGCCGCAATGTT  
ATCGAACGTCGCATAAAGCGTGTAGGTCGGTTCAGTACGTATGGACGTCACGTTCCGCCCTTCAGGCAAACAACAGCG  
CCGCCAGCAGTGTGTAATAAAAAGATACCCACCCAAATTTCAATTTTTTTTCGTTTGCATGAACTCAATTTCCAAACAT  
CAATGCGGTGAGCACAATAAAGCGTTCAGCCCCAGAACAGCCAGAGACGAGTGGACAACGGTGCAGTGGTTGCCGCGTAATCC  
CGCAGACGTCGGGATGGCGTGTAGCCGTTAAACAACGAAATCCACGTACCCTGATGGCGAACACCACGCTCTTAATC  
AGACAGTTGACAGATCCATACGCCAGTCGACGGCATTGTTGATTGCCGACCAGAAGAACCCTATCAATGCCTTTCCA  
ACTGACGCCGACAGAGATCCGCCCCAGATCCCCACGGCAGGAAATAACCGTCAACAGTGGTAATGAAATAACCCAG  
CCAGAAACGGGGAGAAATAACCCGACGCGAGCGGATCCACCGCCATCATCTCCATACTGGAGAGTTGCTCTGTAGCGCGC  
ATCAGGCCGATTTCTGCGGTTAGCGCCGAACCAGCAGCGCCGGAACAACAACGCGGCAACCACCGGCCAGTTCACG  
CAGTAGCGATAACGCCACCAGCATAACCCAGACTGGTTTCCGCACTATAAGTGGTTCAGAACCAGATAACCTTGCAGCCCCA  
ACACCATTCCGATGAACACGCCAGAAACCACAATAATCAGCATCGACAGGACGCCGACATTATAGAGCTGGCGCACCAGC  
AGCGGCGCATGTTTGCAGAAATTCGGTTCGCGACCAGCGCATTGAATAACATTAACCCGGCCCGCCGAACGTTCTCAG  
GGTTTTAATCCCTTATGTCCGAGCGACGCCAGCGCATTAAACAGCATGAGTGGCTTAACTCCCTGGTAAAAGATCAGCG  
TGATAATCGCCGGCAGGATAGCGGAACGGAACAGGCCCGTCACTATCCCGTCCAGAACTGACGTACGCGCGGATCAGG  
ATTGCTGCAACGCCTGGGACTGCCATGAGCGACAATTTTTTTGTCCGCCAGGATCCAGGCGTATCCGCAATACTTA  
ACACTTCCGGCACATCGTGAGAAACCACACACAAGTACGCCAGCGCGCTGTTGAGTCCAGAAATCAGCTTACCAGT  
ACGCCATGGTATGGGATCTTGCCTAACAAAAGGTTCAATCAACATGATGAGATCCGGCTCCAGCGCAATCGCACGCGC  
CAGCGCTGCACGCCGCGCCATCCACCGGAAAGTTCAGAAGGCATTAGTTAGCCGCTCCACGAGCCCCACGGCCTCCA  
GCTTCATCATACCCGTAATGCAACAATGGCGCGGAAAGTTGGGTATGTTCCGCGCAGTGGATAGGCGACGTTGTCAAAT  
ACGTTTCATATCAGTGAACAACGCCCGGACTGAAATAACATGCTCATCCGTTTCCGCACTGTATACAGGCGCGAACGAGA  
CATCGCCGGAATATTCTACCATCGAAAAGGATCTACCATGATCTGGTGCATTTGCCCGCAATCAGACGGAGTAGCG  
TCGTTTTACCGATGCCCGATGGCCCATGATCGCCGTGATCTCCCTCGCGCACGGTTCAGGGAAATATTATCGAAGATG  
CAGCGATTGCCACGCGTAAACTGACATCGCGCATATCGACTAAATTCGCCACAGACTGCTCCATAATTCACCTTCGTC  
TTGCGTTGATTTTCTAAGCATGGCGCTCAATTTAACCTTGAACCAACATATTTACAGAATATTACCCGCGGTGGTTAGC  
GAAAGCTGGCATTGTTTTACTTTTTAGCCGCATAAAGTCAAATTAAGCATCCGTTACGGCTTTCTGAAAATCTTCAGC  
GGACCGGCGAGTATACCTGAAGAAAGGACGTTAGATGCTTTTAGCTACGGCACTGTTAATTGTTGGTTTACTTTTGGTCG  
TTTACAGTCCGACCGCCTGGTTTTTCCGCGCTTATCTTTGCCGAACCTTGGCATCCCGCGCTGATCATCGGCATG  
ACGGTGGTCAATTTGGTACATCGTTACCAGAAGTCATCGTCTCGCTTCCGCGTCTCTGCACGAACAACGCGATTTAGC  
CGTTGGTACAGCCCTCGGCTCAAACATTATCAATATATTGCTGATCCTCGGTTCGGCTGCGCTGGTTCGCTCTTTTACC  
TCCATTCTGATGTTCTACGCCGTAATTACCTTAATGTTGTTGGTCAAGCGTGGTGGCGGTTCCGTACTCTATGACGGA  
CAACTTAGTCGACGAGTGGTATCTTTCTCTCTTTCTGGCTGTGCTATGGTCTGCTGTTTCAATGTTAAACTTGCACGCA  
GGCTGAACGTCAGGGGACTGACAGCCTGACCAGAGAGCAGCTTGCAGAGCTGCCGCGTACGCGCGGATTGCCGCTCGCGT  
TTTTATGGCTCGGCATTGCGCTTATCATCATGCCAGTGGCCACGCGGATGGTGGTTGATAACGCCACGGTCTGGCGAAT  
TACTTTGCCATCAGCGAGTTGACGATGGGTCTGACGGCAATTGCTATCGGAACCAGCCTGCCGGAACGGCAACCGCAAT  
AGCGGGGGTTCGCAAAGGTGAAAACGACATTGCTGTGCGAAATATCATTGGCGCAAACATTTTTAATATTGTCATCGTGT  
TGGGTTTACCCGCGTGATAACGCCAGGAGAGATTGATCCACTGGCGTACAGTCTGACTACAGCGTATGTTGCTGGTG  
AGCATTATTTTTGCGTTGCTGTGCTGGCGGCTCCCGCAACCGGGCGTGGTGTAGGGGATTATTAAGTGGCGGATT  
TATCGTATGGCTGGCGATGTTGTAAGTGGTTATCGCCAACTCGTTGAATAACTGGAACGCATTATGTCGCACGTAGAG  
TTACAACCGGTTTTGACTTTCAGCAAGCAGGTAAGAAGTCTGGCGATTGAACGTGAATGCCTGGCGGAGCTTGATCA  
ATACATCAATCAGAAATTCACGCTTGCCTGTGAAAAGATGTTCTGGTGAAGGAAAGTTGTCGTATGGGGATGGGAA  
AATCGGGGCATATTGGGCGAAAATGGCGCAACGTTTGCAGCACCGGTACACCTTCAATTTTTCTGCCATCCTGGTGAA  
GCCGCGCATGGTATTTAGCATGGTTACCCACAGGATGTTGGTATTGCTATCTCTAACTCTGGTGAATCCAGCGAAAT  
CACGGCCTTAATCCAGTGTAAAGCGTCTTACGTACCCTAATCTGCATACCCGCTGCCCGGAGAGCAGCATGGCGC  
GCCCGCAGATGTGCATCTGTGTGTTAAAGTAGCGAAAGAAGCTGTCCGTTAGGGCTGGCACCGACAGCAGCACCACC  
GCCACGCTGGTTATGGGCGATGCCCTCGCTGTGCGCTGTTAAAAGCACGCGGCTTTACTGCTGAAGATTTTGGCTCTC  
ACACCCAGGCGGCGCACTGGGTGTAACCTTCTGCTGCGCGTAAACGATATTATGCATACGGCGATGAGATCCCGCATG  
TTAAGAAAACGGCCAGTCTGCGTGACGCGTTGCTGGAAGTTACCCGCAAAAATCTTGGTATGACTGTCATTTGCGATGAC

AATATGATGATTGAAGGCATCTTTACCGACGGTGATTTACGCCGTGCTTCGATATGGGCGTGATGTTTCGTCAGTTAAG  
TATTGCCGATGTGATGACGCCGGGGGAATACGTGTGCGCCCTGGCATTCTGGCCGTTGAGGCACTGAACCTAATGCAGT  
CCC GCCATATCACCTCCGTGATGGTTGCCGATGGCGACCATTTACTCGGTGTGTTACATATGCATGATTTACTGCGTGCA  
GGCGTAGTGTAAGATTCAAGGATAAACAACAATGAGCAAAGCAGGTGCGTCTGCTTGCACCTGTTACGGCCCTGTCAGC  
GCCGACGTTATAGCAAAGCAGAGAACATTCGTCTGCTGATCCTCGATGTGATGGCGTACTGTGATGGCCTGATTTA  
TATGGGCAATAATGGCGAAGAGCTGAAAGCGTTCAATGTTCTGACGGTTATGGCATTCTGTTGCGCTCACCTCTGATA  
TTGAAGTCGCTATCATTACCGGGCGAAAGGCTAAACTGGTAGAAGATCGTTGTGCCACATTGGGGATCACTCACTTGTAT  
CAGGGGCGAGTCAAACAACTGATCGCCTTTAGCGATCTGCTGAAAAAAGTGGCGATTGCCCGGAAAATGTGGCTTATGT  
CGGCGATGATCTCATCGACTGGCCGTAATGAAAAAGTGGGTTAAGCGTCCGCTGGCCGATGCGCATCCACTGTTGA  
TCCC GCGCGCCGATTACGTGACGCGCATTGCTGGCGGTGCTGGCGCAGTGGCGGAAATTTGCGACTTATTACTCTGGCG  
CAGGGCAAACCTGGATGAAGCAAAGGGCAATCGATATGAGTAAAGCCAGACGTTGGGTTATCATTGTGCTATCACTGGCG  
GTTCTGGTGTGATCGGCATTAATATGGCCGAAAAAGACGATACCGCCAGGTGGTCTGCAACAACAATGATCCACCTA  
TAAAAGCGAGCATACGGACACGCTCGTCTATAACCCAGAAGGGGCACTAAGCTATCGATTGATTGCTCAACACGTTGAAT  
ATTATTCCGATCAGGCCGTTTCTGGTGTACGACGCGGTACTTACCACGTTTGATAAGGATAAAAATCCCGACATGGTCC  
GTAAAAGCAGATAAAGCCAAGCTGACCAATGACCGGATGCTCTATTTATATGGACACGTTGAAGTCAACGCATTGTGCC  
AGACTCTCAACTTCGCAGAAATCACGACGATAACCGCGAGATCAATCTGGTGACGACGAGGTTACCTCTGAAGACCTCG  
TCACGTTATACGGAACAACATTTAACTCCAGCGGTCTGAAAATGCGCGGCAACTTACGACGCAAGAACCGCGAGCTGATT  
GAAAAGTTAGAACATCCTATGAAATTCAAAAACAACAACTCAGCCTTAATCTTGTGCTTGCAGCTCACTTCTGGCCG  
CCAGCATTCCGGCATTGCGCTAACCGGAGACACTGATCAGCCGATCCACATTGAATCGGACCAGCAATCTCTTGATATG  
CAAGGCAACGTGGTTACCTTTACCGTAATGTCATCGTACCCAGGGCACCATCAAATTAATGCCGACAAAGTGGTCTG  
TACCCGTCGGGCGGCGAACAGGTAAAGAGTATTGACGGCTACGGTAAACCGCAACGTTCTACCAGATGCAGGACA  
ACGGTAAACCCGTTGAAGTACGCTTCCAGATGCACTACGAACTGGCAAAGATTTTGTGCTTCTGACGGTAATGCT  
TATCTGCAGCAGGTGATAGCAACATTAAGGGCGATAAGATCACTTACCTGGTGAAGAGCAGAAAATGCAGGCTTTCAG  
CGACAAAGGCAAGCGGTAACAACCGTTCTGGTCCGCTGCGAGCTGACGACAAAAACAACAAGGCCAGACCCCGGCAC  
AGAAGAAGGTAATTAATTCGTTATGGCAACATTAAGTCAAAAGAACCTTGAAGGCTTATAAAGGCCGTCGCGTGGTA  
GAAGACGTCAGCTGACCGTCAACTCCGGGAAATTTGCGGTCTGCTGGGGCAAACGGTCCGGTAAGACCACCACTTT  
CTACATGGTTGTAGGCATTGTGCCGCGGATGCGGGCAACATCATTATTGATGATGACGATATCAGTCTGCTGCCTCTGC  
ATGCACGCGCGCCGCGGTATCGGCTATCTGCCACAGGAAGCCTCCATTTCCGTCGCTCAGCGTTTACGATAACCTG  
ATGGCGGTACTGCAAATTCGTGACGACTTGTCTGCTGAAACAACGTGAAGACCGCGCAACGAGCTGATGGAAGAGTTTCA  
CATTGAGCACCTGCGTGACAGCATGGGGCAGTCACTCTCCGGGGTGAACGTGCCCGTGTAGAAAATGCCCGCGCACTGG  
CTGCGAATCCGAAATTTATTCTGCTGACGAACCGTTTCCGGGGTGGACCCGATCTCGGTTATCGACATTAACGCATC  
ATTGAGCACCTGCGGACAGCGCCTGGGCGTGCTGATCACTGACCACAACGTGCGTGAACACTGGCGGTTTGTGAACG  
CGTTATATCGTCAGTCAGGGGCATTTGATCGCCACGGCACGCTACAGAAATCTTACAAGACGAACACGTTAAGCGTG  
TATACCTTGGGGAAGACTTCAGACTCTGATAGGGTAGAAGTTTGCAGCTTTTAGCAGGAGAGTACGATTCTGAACATGA  
AGCAAGTTTGAACCTCAGGCTTAGCCAAACTGGCGATGACGCCACAGCTCCAACAGGCAATTCGTCTGTTGCAGTTG  
TCGACGCTGGAATTCAGCAGGAGCTACAGCAGGCGCTGGAGAGTAATCCGCTGCTTGAAGCAATCGACACTCATGAAGA  
AATCGACACCCGCGAAACGAAGACAGTGAACGCTGGACACCGCCGACGCGCTCGAACAAAAAGAGATGCCGGAAGAGC  
TGCCGCTCGATGCCAGTTGGACACCATTTACACCGCTGGTACACCATCCGGCACAGCGGTGACTACATTGACGACGAG  
CTGCCGCTACCAGGGCGAAACGACGACAGCTTGCAGGATTACCTGATGTGGCAGGTTGAGCTGACACCGTTTTCCGA  
CACTGACCCGCTATTGCTACCTCTATCGTGCATCCGTTGATGAAACCGTTATCTGACTGTCCCGTGAAGATATTC  
TCGAAAAGTATAGGCGATGAAGAGATCGACATCGACGAAGTTGAAGCCGTCCTTAAGCGGATCCAACGGTTTTGATCCGGTC  
GGTGTGGCGGCAAAAGATCTGCGTGACTGTCTGCTGATCCAACCTCTCCAATTCGATAAGACCACGCCGTGGCTGGAAGA  
GGCCAGACTGATCATTAGCGATCATCTCGATCTGTTAGCCAATCACGACTTCCGCACTTTAATGCGCGTCACGCGTCTGA  
AAGAAGATGTGCTGAAAGAAGCCGTAATCTGATCCAGTCTGCTGATCCGCGCCCCGGGAGTCTGATCCAGACTGGCGAA  
CCTGAGTATGTCATTCCAGATGTGCTGGTGCCTAAGCATAACGGTCACTGGACGGTAGAACTCAACAGTGACAGCATTCC  
GCGTCTGCAAATCAACCAGCACTACGCTCGATGTGCAATAACCGCGCAACGATGGTACAGCCAGTTTATCCGCGACA  
ATCTGCAGGATGCCAAATGGTTGATCAAGAGTCTGGAAGCCGTAACGATACGCTACTGCGCGTGAGTCTGATCGTT  
GAACAGCAGCAAGCCTTCTTTGAGCAAGGTGAAGAATATGAAACCGATGGTACTGGCCGATATCGCCAGGCTGTGCA  
AATGCATGAATCGACGATATCTGCGTGACCACGCAAAAATACCTGCATAGTCCAGAGGCATTTTTGAACTGAAGTATT  
TCTTTTCCAGTCAGTCAATACCGAGGGCGGGCGGAAGCTTCTCCACGGCGATTCTGCGCTGGTGAAGAAATTAATC  
GCGCGGAAAACCCAGCGAAACCGTTGAGCGACAGCAAGTTAACCTCTTTGCTGTCGGAACAAGGTATCATGGTGGCACG  
CCGCACTGTTGCGAAGTACCGAGAGTCTTTATCCATTCGCGCTCAAACAGCGTAAACAACCTCGTTTGACCAACCGAT  
AAGGAAGACACTATGACGCTCAACATTACCGGAAATAACGTCGAGATCACCGAGGCACTGCCGGAATTTGTTACAGCCAA  
ATTTGCCAAACTTGAGCAATATTTGACCGAATCAACCAGGTCTATGTTGTTCTGAAAAGTGGAGAAAGTACCCACACCT  
CAGATGCAACACTGCATGTAACCGGTGGTGAATTCATGCCAGCGCGGAAGGTGAGACATGTACGCTGCCATTGATGGC  
TTAATTGATAAGCTGGCACGCCAGTTGACCAAACATAAAGATAAACTGAAACAACACTAATTGTCCGGGCAATTAGCATG

TGCATGGCGGTCTGTTGTGCGGCACAACGGGCCATTTGTACGGTTAATGCTCCGAGCCTGTTCCACTGTTTGAGTGGGCA  
GGTTCCTTAGGTGAAATTATGACAAATAATGATACAACCTACAGCTTAGCAGTGTTCCTAACAGGGAATGTACGCGAAGC  
CGCGTCCACTGTCAGAGCAAAAAACGCGCCCTGGAAATCATCAGCGAGCTGGCGGCGAAACAACCTTAGCCTGCCGCCTCA  
GGTGGTTTTTGAAGCTATCCTGACGCGGAAAAAATGGGCAGTACCGGTATCGCAATGGTATTGCCATTCGCATGGCA  
AACTGGAAGAAGATACTCTGCGCGCCGTTGGCGTTTTCGTTACAGCTCGAAACGCCTATAGCTTTTCGATGCCATCGACAAC  
CAACCGGTGGACTTACTTTTTGCCCTGCTGGTGCCGCGAGACCAACTAAAACGCACCTGCATACTCTGTGCTGGTGGC  
GAAACGTCTGGCGGACAAAACCATCTGCCCGCTTTACGCGCAGCCAGAGCGATGAAGAGCTGTATCAAATCATTACGG  
ATACCGAAGTACTCCGGATGAAGCGTAGTTATTCGGTAATGTCTCTTTTAGACGTTGTGAGGAGAAACAGTACATGGTA  
CTGATGATCGTCAGCGGACGTTTCAAGTTCAGGTAATCTGTGCGCCTGCGTGCCTGGAAGATATGGGTTTTTACTGCGT  
GGATAACCTTCCCGTAGTGTGTTACCCGATCTGGCTCGAACCCTGGCCGATCGCGAGATTTCTGCCGCCGTGAGCATTG  
ATGTTTCGTAATATGCCGGAGTACCAGAAATATTCGAACAGGCGATGAGTAACCTGCCTGACGCTTTCTACCCGCAACTC  
CTGTTCTGGATGCCGACCGTAATACCTTAATTCGTCGTTACAGTGACACGCGCCGACTGCATCCGCTTTCAGCAAAAA  
CCTGTGCGTGGAAAGTGTATCGACAAAGAAAGCGATTTGCTGGAGCCTCTGCGTTCGCGAGCGGATCTGATTGTGATA  
CCTCAGAAATGTCGTTACGAGCTGGCTGAAATGCTGCGTACCCGCTGCTGGGTAACGTGAACGCGAACTGACCATG  
GTCTTTGAGTCTTTGGCTTCAAACACGGTATCCCTATCGATGCAGATTACGTTCTTTGACGTGCGCTTCTTCCGCAACC  
GCACCTGGGATCCGAAACTGCTCCAATGACAGGCTTTGATAAACCTGTCCGCCGCTTCTCGACGCCACACAGAAGTAC  
ACAAATTTATCTACCAGACGCGAAGCTATCTTGAGCTATGGTTACCTATGCTGAAACCAACAACCGTAGCTACTTGACG  
GTCCGCAATTGTTGTACCGCGGGAAGCACCGTTTGGTGTATATTGCAGAGCAACTGGCAGACTACTTCCGCTCGCGCGG  
TAAAAACGTCCAGTACGCCATCGTACGCTGAAAAACGTAACCATGACCGTCAAGCAAACCTGTTGAAATCACAAACAA  
GCTGGGCATGCATGCCCGCCTGCAATGAAGCTGTTGAATTAATGCAGGGTTTTGACGCTGAAGTGTCTTACGTAATG  
ACGAAGGCACCGAGGCTGAAGCCAACAGCGTTATTGCGCTGCTGATGTTGGATTCTGCCAAAGGACGGCAGATTGAAGTT  
GAAGCGACCGGTCACAGGAAGAGGAAGCACTGGCCGCGTTATCGCCCTCTTAATTCTGGTTTTGATGAAGATTAATC  
TTCATCACTTTGACATACAACTCCCTTCAAACCTCCCCGACAATAAGAAAATCACGTAAGTAAATCGTTCTCAATCAAC  
GTCATTTGTACATTTTGTGCGCTTTTCACTTTCAGAAGAACCTTAAGAAAACCTTAAGAGGCATTGTTTAGGTTTTGTT  
AAGTTAATCGACCATACTGGAGATCGTCAGAAAATATTTCCAGGAGATGGCATGATTGCTTATCTGAACAAAGTCCCCT  
GGGCACCGGAAGACATCGGAAATGTTATGCGCATCCGGAAGATGCCAACGCTGTATCAAGATTGTCTACCATCGTGGCG  
ATGGTGGCGATAAAGAGATCCGCCGTGAGTTAAAGTACTACGCGCATCTTGGTCCCGGTTAAAGACTGGAGTGAATA  
CCGCGCTATCACGGTACCGTTGAGACGGATTGCGGAACCGGTTATGTCTACGATGTGATTGCAGATTTTACGCGCAAGCC  
TTCCATTACGCTGACCGAATTTGCTGAACAATGCCGTTACGAAGAAGACATTGCACAACCTGCCAGCTACTGAAACAGC  
TGAAGCGTTATTTGCAGGATAACCGTATCGTGACGATGTGCTGAAGCCGAGAAATATCCTCTGTACCCGCATCAGTGAG  
TCAGAGGTTATCCCGTCTGCTGCGACAACATTGGTGAAGCACATTGATTCCACTGGCGACCTGGTCAAGTGGTGTG  
TCTGCGTAAGCAAGAGCGGTTATGAAACGATTTATCGCCCAACCGGCGCTGGCTATTGCCCTGCAGAAAGATCTGCAAC  
CTCGTGAGAGCAAAACGCTGGCCCTCACTTCGCGCGAAGCTTAATCCAGCTGGTGTGTTGCATAAACGGCTCACCGCCT  
AACTGATACATCTGCCGTAATAACACGCTGACGGCTACGCACGTAGCCCGATGGCGAGGAGACTTTGAAACGAAGTGG  
ATTAGGTAATACAGCTGCCAGTAATGCAGCTTCCGACCGGTAAGTTTGTGCTCGCGGTTTTGTGAAATAACGTTGTGCCG  
CAGCTTCGACGCCAAACACACCGTCCGCAAAATTCGGCGATATTCAGGTAACCGTCAAGGATACGCTTTTTGCTCCAGACC  
GTTTCTATCCCAGCGTTAATCCGGCTTCCAGCCCTTTTGAACCCAGCTACGCCATCCCATAAAAAGAGATTTTTGGC  
TGCTGTTGAGAAATCGTTGAAGCACCGCAATACGTTTTTATTGCGCTGTTGTGCGCCAGGGCTTTCTAATGGAAG  
CGACATCAAAGCCCAGTGTGCAAGAAATTTCTGATCTTCTGCGCAATCACCGCCAGTCCCATCCACGGCGAGATTTGA  
TCCATACTGACCCAGTCAAGTGTGCCACGTAACGAAAATGCCATGCAGCCAGGCGCTGACCTGTGCTGACCATTTA  
CGCTGAGAAGGGAAACAGGCGCAACGCTAAACAACGCGATGCCCGCCCCAGAAAACGGCGAGGACAACCATTAAACCGCA  
AAAGAAAACGGCGAACGAACTAAACACCGTTAAGCGGCTTTTACTCATTACAGCAGAACCAGCACGCGGAAAACAGCT  
TATCAATGCCGCTCGCCGTTCTGCAATGTTCTGCGCCAGCATATATGCTGGGGTGGTGACAATCTTATTGTCTTCATCA  
ACCACGATATCATCGACAGGACACGGCACATGCTCCGCGCCATCTCTCCAGCACTTCTGCGGTATCGATATCAGTACC  
GATGGTCAAACGACGCGGAAATCGAAAATTTTCCGCGAGCATCGCCGGGCAATACACATAAAACCAAGCGGTTTTCCGG  
CCTGATGCATCGTTGTGCCAGCGCTTAAATTCACGGTCAACGGTGCATTGCTACCAAGACTGGCAAAATTTGCTTAAA  
TTCTTCCGCGCGCAAAACCCCGGCAATCAACGCATCCAGTTCAGCGGCATCGCCCTGGGCCAGAGGACGGATTT  
ACCGCGGTTATTCTGCGGCTTCAATCAGCACATTGCGGTTTTCCGTCATCGCTTCCGAGTTAAATGGTTGATAACAT  
CAACCTGCTGTTATCCGGTCAAAGCAGACCGCTGCGCACCGCTGCGTAAATAGCTAACACGTC AACACCGCTTCA  
TGAATTTCAGAACCGTCATAGACGCCGATCCGCTCAGAATTACGCCAATTTTCTTATTGTGATCATCTTTGCAATT  
GACTGAAACACATTAATTTTTTAAATAAAAATGGTACGCATCACACATTTAACTGATTGATGAACAAATCATTTAAGTT  
TTGCTATCTTAACTGCGTGGCGCTGAAAAACAGTGTGTGCCCTTGAACCTATCATAATAATTTACGGCGCAGCCAAG  
ATTTCCCTGGTGTGGCGAGTATTCCGCGACCCCGTCTAGCCGGGTCATTTTTTAGTGGCTTTTCCACCCACGCTT  
TCAGCACTTACGTCGTGACGCCACTTCTTTTATCTCTTCAATCCATTACCGACGTTATCTTCCAGGCCGGAAGG  
TCAGGAGACTGAATTTGCTGACCCAGCTGTTGAGATGGCGTAACCCCACTGACCCCGCGCACCTTTAATTTTATGTCC  
TTCTCAACAATGCCTTTTTTATCCTGCGCGCTCAGATTGACTCCAGCAGCTGACATAGCCCGCATCATCTTCTCAA

ACACCGCTAACCCGTCGGTGATCAGCTTCGGTCCTACAAGTTCGAGATACTGTTCCAGCATGGGAATATCGAGCAATGCT  
TCTGATTTACTGTTCTCTTCTGTCGTCACCGTACTCTCTCATCATCCTGGGTATCCCAGAATTTCTTGATCATCGCGGT  
TAGCGCCGGAACAGAAAGCGGCTTACTCAGCACATCATCCATTCCAGCATTGAGTACTCTTGTGTTTGTTCAGCACGT  
TAGCGGTAAAGCCACCAGCGGGGTAATCCTCGCGCGGATAACGTTTTCGTCAGTTCACGAGAGATATCCAGCCCGGT  
ATATCTGGCAACTGAATATCCAGCAACACCAGGTCGTATTCGCCCGGTTAAACATCTCCAGCGCCGCTTGCCGGT  
GGCGACATCAACGCTGTTACCTAATTTTTCCAGCACAGAACCGCGCAACAATCACGTTTCAAGTCAATGTCTTCCACCAGCA  
GCACATTACAGCGCCGTAAGGCGATATCGTCTTTCATCAAACGCATCATCGACCTCTTCTGCTACCGACGGTGGTGGATC  
GTCAACGTAAGGTTGAACCTTTGCCCTGTTGCTGGTAACCGTAATATCGCCGCCATATTTTTCGCCAGACGACGAGA  
AACGGCCAGACCAATACCGGTGCCGGTGGCAGGTTTACCGCATGACTGTCTTTCACCTGGTAATACATGGCGAAAATTT  
TATCCAGCTCATCCTGCGGAATGCCGATACCAGAGTCTTCCACTTCAAATGCAGCATATCGCCTTATCGTAGCGCACG  
CGCACGGTAACCTGGCCTTGTGGGTGAATTTGACGGGTTACTGATGAGGTTCCACAGGATCTGCCGTAACCGCGTCCC  
GTCGGTAATGACCTGATGCGGTAATGGCAGCGTCCAGGTTAAAGCGCAATCCTTTTTGTTGCGCCTGCAATGCGG  
AGAGATTTCCAGATCGGCAAGGAAGTGGTGAATCAACCGTTGATTATCAAGCTGGACCTTGCGCCGTTCCATCTTA  
TCCATGTCGATAATATCGTTAAAGATATCCCCAGCGTGACGGCCGAAACATGGATGGTCTTGAGATATTTTTCTGCTC  
GGCGGTGAGTTCGGTACAGCAGAATGCGGCTCAGACCGACATACCGTTTACGCGGTACGCAATTCGTGACTGATGG  
TGGAGATAAACGTCGTTTTGTCGCGGTCGCCCGTTCAAGCGCATCTGATACCGCTTACGCTCGGTAATGTCGCGACCA  
AAGCCCATCAAACCGTGACGTTTTACCCACGCGGTCGTAGTACGGCACTTTACGATTTCAAAGCAGGCTTTGCGCCCGTC  
CGGTAATCCAGCCACTGTTTCATAGGTCAGTGACACATTATGACGGAACTTTTTTCATCGGTTTTCAATGACTTTTTGCGG  
CGCTTCCGGTGAGTAAACATCAGCAGGTTTACGGTGAACAGTTGTTTTCGCTTTTTCCGGTCAGCAGCTCCATCGCG  
CGGTTACAGCCGGAACCTTTTATCTTCTGTTACGATAAAAAACCAGGTCGGGTGAAGCATCAAGGAAGGAACGTAAGAA  
TGAGGATTGCTGCTCGAGCTGAATTTGTGCTCTTTCGCGCTCTTTGATTTCAATTTTTCAGTTGGCCGAAGGTTTCTGCA  
GTTCTGCTTCCGTTTTTTCAGAACGGCAATTTCTGATTTAGCTGGGCAATATTATCTTTTAACTGAACGTTGAGGCTC  
AAATCGCGCTCGGCATCTCCTCCAGTTTTTGCACCAGCGTGACAGAGCTTGTGCTGACTCTCCAGTTGCTCGACGAC  
CACCGATAGAAAGTAGACCGCCACGGCGTAATCAGCAAACCAAGAAGATAGAACGAATAACATCAATGCTTTTCGACCT  
GACCATGCAGCACCATTGTTACCGCATTTGTACCACAATGGCAAGAACGACGAGGGCCAGCGCCAGCAACATTGAGAAG  
CGCACAGACCTAACTTCATCATCAGGTCAACATAACTGCGCCAGCAGACGAATTTGCTTCATTAGGGAATTCCTTCA  
CGACAACCTGCCCAATAATACCAATTCTGACAGTTACGTTATAAATTGTGTGAGAAATGCGGAATTCCTCAACGAC  
CTACTCCGTTGGAGGTAGCCACGGACGTCCAGCGCGATCCCTGTACGCCATGTTTCATTAGATAGCGATCCAGCTCGA  
CCATTTCCGTCATCGATTTTCGACCCACAGCGAGCAAGCAGGTCGCGGCGACGGGCGCTGGCGGAAATGCGGTGGT  
ATCACTTCCGTTGGCGTATGGCGAATCAATTTCTCCGGCAGTGAGCGTGAATCCTCCAGTTCAATACCGTTCAAACGCC  
CGTTCCAGGCTTTCCGCAATAATGCTGCCTTTACAATATGCAGCGGATGCAGCTTTATGCCGTCACGCCGGTTTCAA  
CCTCAGCTCCAGGCTTTGCAACATTCAGCCTGCCCTTCCGACGGCAGGCGCAATTAAGTGGGAACACACCTTCAGC  
CCGCGTGACGTGCCAGCTGGGTTGTACGCTGATAACAGGCAAAATCATGGCCGCGTTGATGCGATGCAGTGTGTTGTC  
GTGGGCGGTTGTAGCCAGCTCCAGCCACACTTCGTAACCTGGTCTTATATTGCAAAGCAGATCCAGCACCGCAT  
CCGGCAGCAGTCCGGGCGGTTACCCACACAAACCGACAATATTGGCCTGGCTACCGCCTGCTGATACATAGAACGC  
AGCACCTGAATTCGCAAGGTGCTGGTATACGCTGAAAGTAGGCCAGATAGCGTTTAGCGCGTTAACTAAATTCGC  
CTGGTGCAGGTTGCTCGCAATGGAACGATGCTGCTGCGCTTCATCGGCAACGAGGCAACATTACAGAATGTGCAGC  
CACCAGCCGATGGTACCGTCACGGTTAGGGCAGCTAAAACCGCGTGCAGCGTCAGCTTATGCACCTTTGCCCCATAA  
CGACGGGTGAGATCACCACAAACATATTGACTAATTTCTGTAACATGCATAATCTGATAGACCAGCGCTTGAAGGAGG  
CAAAGCTGCCATTTTTAGCTCAATTCGGCGATGACCTGGATCAATCGTCCCGCCTGCTTTTATCAACTGCATAATCAA  
TCAAATACCGAAATTTTCATGCATAATCACATAAACTCACTTTTGCTTATCTTGTGTCAGATTTTTTTATCTCCTGATGG  
ATTTTAGGCAAAAACAGTAGCATGAAACGTCATTACCAATTAAGGCAAGTATAAAATGCTGGTTTTGTCGTCAGTTCAAGG  
CAGGATAAGGGTTAACACACCTTTATGACAGTCAGGAATTGACTGTTTCTTAACTGACTTCCCTTTTAGCCTTAAAGATA  
AAATCCATTTTAAATTTAGTCATTTAATAAAGAATTTGCGCTAAAGCACATTTCTGTACCAATAAGCTTGCATTTGAC  
CTGTATCAGCTTTCCGATAAGTTGGAATCCGCTGGAAGCTTTCTGGATGAGCAGCTGCTCATATTTATGCAGTA  
ATTGAGATCCCTCTTACCCTATTAACCGATGCGAAAAGGACAACAAGGGGGCAATGCGAGGCGCGCTATGACACGC  
AAACCCCGTCGCCAGCTCTTTCTGTGCCGTGCGCAGCGTTGCGAAGTGGGTTCCCGCAGAGCTGGGGGAGGTTCA  
CGATATGTTGTACGATAAATCCCTGAGAGGGATAACTGTGGTTTCCGCTGATCGCCACATAGAAGGCGAACCTAGCC  
ACAAGGTAGTGCCTACTGCAATACACGCACTGGCCCGCATGCAGCACCCTGGCGGATTCTCGCCGATGGTAAAACCGC  
GACGGTTGCGGCTTGTGTTACAAAACCGGATCGCTTTTTTCGCATCGTTGCGCAGGAGCGGGCTGGCGTTTAGCAA  
AACTACGCTGTGGGATGCTCTTCTGAATAAAGATCCTGAACTCGCCGCTGCCGACCGCCATCGTTGAAGAAGAAC  
TGCAACGCGAAACCTTGTGATTGTGGGCTGGCGTGTGATGTCCTTAAACGAAGCGTGTGGGTGAAATCGCCCTCTCC  
TCTCTGCCACGATTGAGCAATTTTTGTGAACGCCCGGAGGCTGGCGTCCACGCGATATGGAGCGCGCTGTTTTAT  
CGCCCGCCCGCATTGAAAAGCGTCTCGAAGCCGACAAAGACTTCTACGCTGTAGCCTGTGCAATCTGGTGAACATCT  
ATAAAGGTCTGTGATGCCGACGGATCTGCCGCGTTTTATCTGGATCTTGGGACCTGCGTCTGGAATCGGCCATTTGC  
CTGTTCCACCAGCGCTTCTCCTAACACCGTACCGCGCTGGCCGCTGGCGCAACCGTTCCGCTATCTGGCGATAACGG

TGAAATCAACACCATCACCGGTAACCGCCAATGGGCGCGTGCGGCTACTTATAAATCCAGACACCGCTTATCCCTGACC  
TGCACGACGCCGACCGTTCGTC AACGAAACCGGCTCTGACTCCAGTTTCGATGGATAACATGCTGGAACGCTGCTGGCA  
GGCGGGATGGATATCATCCGCGCCATGCGTCTATTAGTACCACCCGCTGGCAGAACACCCGGATATGGACCCGGAAC  
GCGTGCCTTTTACTTAACTCCATGCATATGGAGCCGTGGGATGGCCCGCGGGCATCGTGATGTCCGACGGTCGTT  
TTGCCGCTGTAACTCGACCGTAACGGTCTGCGTCCGGCGCGCTACGTCATACCAAAGATAAGCTCATCACCTGCGCC  
TCTGAAGTCGGTATCTGGGATTACCAGCTGACGAAGTGGTCGAAAAAGGCCGCGTCCGGCCAGGCGAACTGATGGTTAT  
CGACACCCGACGTGGGCGTATTCTGCACTCGGCAGAAACCGATGACGATCTGAAAAGCCGCCATCCATATAAAGAGTGG  
TGAGAAAAACGTCCGCCACTGGTACCGTTTGAAGATCTGCCGATGAAGAAGTGGGTAGCCGCGAACTGGACGACGAC  
ACGCTTGCCAGCTACCAGAAACAGTTTAACTACAGCGCGGAAGAGCTGGACTCCGTAATTCGCGTACTGGGCGAAAACGG  
TCAGGAAGCGGTGCGTTCGATGGGCGATGATACCCATTGCGCGTCTCCAGTCAGCCGCGCATTATTTACGACTACT  
TCCGCCAGCAGTTTGGCCAGGTGACTAACCCGCCAATCGACCCGCTGCGTGAAGCGCATGTTATGTGCTCGCCACCAGT  
ATCGGTCGTGAAATGAACGCTTTTTGCGAAGCAGAGGGCCAGGCGCACCGTTTAAAGCTTTAAATCGCCGATTCTGCTCTA  
CTCCGATTTCAAACAGCTCACGACGATGAAAGAGGAGCACTACCGCGCAGATACGCTGGATATCACCTTTGACGTACTA  
AAACCACGCTCGAAGCGACAGTCAAAGAGCTGTGCGACAAAGCCGAAAAAATGGTACGTAGCGGCACCGTCTGCTGGT  
CTCTCCGACCGAATATCGCTAAAGATCGCTGCCGTTCCAGCCCGATGGCGGTTGGCGCATCCAGACCCGCTCGGT  
CGATCAAAGCTGCGTTGCGATGCCAACATCATCGTGAACCCGCGCAGCCCGCGATCCGACCACTTCGCCGTTGTC  
TGGGCTTCGGCGCGACGCGTATTTATCCATACCTTGCCATGAAACGCTGGGCCGCTGGTAGACACCCATGCGATTGCC  
AAAGATTATCGTACCGTATGCTCAACTACCGTAACGGCATCAACAAAGGCTTGTACAAAATCATGTCCAAAATGGGCAT  
CTCCACCATCGCCTTACCCTGCTCGAAACTGTTTGAAGCGGTGCGTCTACACGATGATGTAGTGGGCTGTGCTTCC  
AGGGGGCGGTGAGCCGATTGGTGGAGCAAGCTTTGAAGACTTCCAGCAGGATCTGCTGAATCTGTGAAACGTCGCTGG  
CTGGCGCGTAAGCCATCAGCCAGGGCGGTCTGCTGAAATACGTCACGCGGGCGAATACCACGCCTACAACCCGGACGT  
GGTGGCGACGTCGAACAAGCGGTACAAAGCGGCGAGTACAGCGACTATCAGGAATACGCGAAGCTGGTTAATGAGCGTC  
CGGCAACCACGCTGCGCGATCTGCTGGCAATTACGCCGGGTGAAACCGGTCAACATTGCTGATGTTGAACCGGCAAGC  
GAACTGTTTAAACGCTTTGATACCGCCGCGATGTCTATCGGCGGTTAAGCCCGAAGCCACGAGGCGTGGCGGAAGC  
GATGAACAGCATCGGCGTAATTCGAACTCCGGTGAAGGCGGCGAAGACCCGCGCGCTACGGCACAACAAAGTGTGCG  
GCATCAAGCAGGTGGCTTCCGGTCTGTTGGGGTACTCCGGCGTATCTGGTCAATGCCGACGTCATTAGATTAAAGTC  
GCCAGGGCGGAAGCCAGGCGAAGGCGGTGAGTTGCCGGGTGATAAAGTACGCCTTACATCGCCAACTGCGCTATTC  
GGTCCCGGAGTGACGCTGATCTCCCGCGCGCACACGATATCTACTCTATCGAGGACTTAGCGCAGCTCATTTCG  
ACCTCAAGCAGTTAACCAGAAAGCGATGATCTCCGTGAAGCTGTTTCCGAAACCGGGAGTAGGCACCATCGCGACTGGC  
GTGGCAAAAGCTTATGCGGACTTGATCACCATCGCAGGCTATGACGGCGCACCGGCGCAAGTCCGCTTTCATCGGTGAA  
ATACGACGGCTGTCCGTGGGAGCTGGGGCTTGTGAAACCCAGCAGGCGCTGGTTGCTAACGGCTTGGCTCAAGATCC  
GTTTGCAGGTGATGGCGGCTGAAACCGGGTGTGATATCATCAAGGCGGCGATTCTCGGCGCAGAAAGCTTCGGCTTC  
GGCACTGGCCGATGGTGGCGCTCGGCTGTAATATCTACGATTTGCCATCTGAACAACGCGCAACGGGTGTAGCAAC  
TCAGGATGACAACTGCGTAAGAACCACTATCACGGCTGCCATTCAAGGTGACGAATTACTTTGAGTTTATCGCCGCTG  
AAACCCGCGAGCTGATGGCACAGCTTGGCGTAACAGTCTGGTGGATCTGATTGGTCGACCCGACCTGCTGAAAGAGCTG  
GACGGTTTACCAGCAACAGCAGAAGCTGGCGCTGTGAAAGTCTGGAGACTGCCGAACCGCATCCAGGTAAGGCACT  
CTACTGCACCGAAAACAACCCGCGTTTGATAACGGCTGCTGAACGCGCAGTTGCTGCAACAGGCGAAACCGTTTGTG  
ATGAGCGCCAGAGCAAACTTCTGGTTCGATATTCGCAACACCGACCGTTCTGTGCGGCGTCTGCTTTCAGGCTATATC  
GCCAGACGCACGGCGATCAGGGGCTGGCAGCTCCTATCAAAGCGTACTTCAACGGCACCGCAGGCGCAGAGCTTCGG  
CGTGTGAAACGCGGGCGGCTGGAACGTACCTGACCGGTGATGCAACGACTATGTGCGTAAAGGCATGGCGGGCGCT  
TAATCGCCATTGCTCCTCCGTTGGTTCCGCCTCCGACGATGAAGCAAGCATTATCGGCAACACCTGCCTGTATGGC  
GCGACCGGTGCTGCTGTATGCGCAGGCCGCGGGTGAACGTTTCCGGCTGCGTAACTCCGGTGTATCACCGTGGT  
AGAAGGCATTGGCGACAACGGTGTGAAATATATGACGGGTGGTATCGTCTGCATTCTGGGTAAAACCGGCGTTAACTTCG  
GTGCGGGCATGACCGGCGTTTTCGCTTACGTTCTCGATGAAAGCGGCGATTTCCGAAACGCGTTAACCCGGAACGTTGTC  
GAGGTCTTAAGCGTTGACGCTCTGGCGATCCATGAAGAGCATCTGCGTGGTCTTATCACCGAGCATGTGCAGCATAACCG  
CTCTCAGCGCGGTGAAGAGATTCTGGCGAACTGGTCAACCTTCGCCACTAAATTTGCGCTGGTTAAACCGAAGTCCAGTG  
ATGTAAGACTGCTGGTACCGTAGTCGTAGCGCAGCTGAGTTGCGCGTGCAGGCGCAGTAAGGGGTAGCAACAATG  
AGTCAGAATGTTTATCAATTTATCGACCTGCAGCGGTTGATCCGCCAAAGAAACCGCTGAAGATCCGCAAAATGAGTT  
TGTTGAAATTTACGAGCCGTTTCCGAAGGCCAGGCCAAAGCGCAGGCTGACCCTGCTGCTGCGGCAACCCATACT  
GCGAGTGGAAATGCCCGGTACACAACCTACATCCCGAACTGGCTGAAGCTCGCAACGAGGGGCGTATTTTTGAAGCGGCG  
GAACTGTGCGACCAACACACCTGCCGGAAGTTTGGCGACGAGTCTGCCGCAAGACCGTCTGTGCGAAGGTTCCCTG  
CACTCTGAACGATGAGTTTGGCGCGGTGACCATCGGCAACATTGAGCGCTATATCAACGATAAAGCCTTCGAGATGGGCT  
GGGCTCCGGATATGTCTGGTGTGAAACAGACCGGTAAGAAAGTGGCGATTATCGGCGCAGGCCCGGCGAGTCTGGCGTGT  
GCGGATGCTCTGACGCGTAACGGCGTAAAAGCCGTTGTCTTCAGCGTCATCCAGAAATTTGGCGGGCTGCTGACCTTCGG  
TATTCGGCCTTCAAGCTGGAAAAAGAGGTAATGACGCGTCCCGTGAATCTTACCAGGCGATGGGATTGAATCAAAC  
TCAATACCGAAGTGGGCCGCGACGTACAGCTGGACGATCTGCTGAGTGATTACGATGCCGTGTTCTTGGCGTGGGACT

TATCAGTCAATGCGGGCGGCTGAAAAACGAAGACGCCGATGGCGTGTACGCAGCGCTGCCGTTCTCATCGCCAACAC  
CAACAGTTAATGGGCTTTGGTGAAACCCGCGACGAACCGTTCGTAGCATGGAAGGCAAACGCGTGGTGGTCTTGGCG  
GTGGCGACTGCGATGGACTGCGTGCCTACGTCCGTGCGCCAGGAGCGAAGCACGTTACCTGTGCCTATCGTCGTGAT  
GAAGAGAACATGCCGGTCCCGCCGGAAGTAAAAACGCGCGGAAGAAGCGTAGAGTTCAAATTAACGTCCAGCC  
GCTGGGTATTGAAGTGAACGGTAACCGCAAAGTACGCGCGTAAAAATGGTGCCTACCGAAATGGGCGAACCGGACGCCA  
AAGCCGTCGCGCGCGGAGATCGTTGACAGTCCGAACATATCGTTCGGCAGATGCGGTGATCATGGCGTTTGGTTT  
CGTCCACACAACATGGAATGGCTGGCAAAACACAGCGTCGAGCTGGATTACAAGGCCGCATCATCGCCCCGAAGGCAG  
CGACAACGCCTTCAGACCAGCAACCCGAAAATCTTTGCTGGCGCGGATATCGTCCGTGGTCCGATCTGGTGGTGACCG  
CTATTGCCGAAGGTCGTAAGCGCGCAGACGGTATTGAACTGGCTGGAAGTTAAGCGAGGTAACAATGAATTCGCCAG  
ACTGTGTCTGGCGAATCAAATTAAGTGCAGAGTGCCTGTTTCTGGCAAATGCGGCATGAGCGTTTGACCTTCTTA  
TAATAGGGATAATTTTCAATAAATTGTCTTTGTTACCAAGTCTGATGAGTGAAGCACATCAAGCAATTTCTATTAC  
AATCCGTCATTAATTGTTAACCTCTGACAATACCGATTCTGCAAGCTATTCAGTCTTTTATTCCATGTAATTTG  
TCTCGATATTAATATACAAAATATGAATATAAAAAACCAATATATTATCCTTAATTATCTATATATTTTCTATTTTCA  
GCGCAACCATTCATGTAATGAATAATTATCACCACAAACACCTACCAGCACCTTATTATTACATGATCGTAACATA  
AAATTCATTAATAAATCACTCCAGCAAGTTGGCTATTTCTGAACGAGTTATTTATTACATTCACAAAACAGATATA  
TACTGCTTCAGCTTTTTATTTAAAAAATAAATTTGTTATTAAGGATATGTTTCTCATATGTTTTTCAAAAAGAACCTCACAA  
CAGCTGCTATTTGTGACGACTTTCTGTTGACGACTTACGTGCCATGGCAACAGATTCAACTGATACAGAATTAACATC  
ATCGGCGAGTATACCCCTGGTGCATGTACCCAGTTGTTACGGGCGGCGCATTGTTGACTATGGGAAACATCATAACAG  
TGCGCTGAATCCGACCGGTAAGTAATAAACTGGTCAACTGGCCGCAAAAACAGCACATTAATATAACCTGCACAG  
CACCAACGCTAATTGCTGTAACCTCCAAGGATAACCGTCAGTCGACCATTGTAGCGTTAAACGACACATCCTATATTGAA  
AAAGCTTATGATACTCTCGTAGATATGAAGGGAACGAAAAACGCTTTGGTTTAGGTTCTGCGCCTAATGGACAAAAAT  
TGCGCTGCATCCATTGGTATTGACAGGTCTAATGGTGGGATTACGCGCGGACGATACAGGTGAAATTCCTGTGACC  
TGATTCAAACGACTGGTGCAGCAGCGACCCACATGAAAGCCTCATCTAATGGCGCATTCTGCTCGTGACAAGT  
TGCTCAGCAATCGAGCGGTTATTCTGTTGCAAAAACAGGGAACTGACACCTGTTGCTATTACAGCGGTCACCTCCC  
GTTACTGATTGATGCTGCGTAAATGACAATACTATTCTTGGTCTGATGAAACGATCAAACCTGGATGTAACGTCATA  
TCAGCGTTCAGTATTTATAAGAACTTGAATACAGTTTTTATTTTACGCATTAACAGTTAGCTATAACTCGGACAGAT  
TATGCCCTATGACATGGTCTGTCTTAATCAATCTCATCGAAACAGTGCATAACATATATTAACAATATGTTTCTGCGTT  
ATTTATCATTATTACAGGAGTTTTAATTTAATGCTCAGACACATTACATTCATGTTTTATAACAACATCAATGAATA  
CCTTAGCCACAGGGATGGTCTGAAACATCAGTATTGCTGGTGTGAAAAGCGTGGTGAAGCTAGTATTAATATTAAG  
AATACAGATGATCATCTTCATTGCTTTACACCACCTGTTGATTTGCCTGAAAGCAATAAATCAATTCGTTAATCCC  
GACTCAGCCGTTATTCTGTTGAAGCCGGTCAAGTACAACAGTTTCGATTTTTACTTCAGGCGACTGTTCTCTGCAAT  
CAGAAGAGCTGAAACGCGTAACGTTCAAGGATTTCCACAAAAGATGACAAGAGCAGCAGAGTTACTGTTTCAATTCGT  
CAGGATCTACCTGACTGATCCACCCGGTTCCTGCCGGAAGAGCGAGAGACCTGGAATTCCTGGAATGGCGTAAAAA  
TGCGGACCAAATGAGATTAGCAACCCAGTAATTTATGTCGTTGATGACCTTACAATTTAAAAACGCTCCCTTCAGGAA  
AAACGGGGCTATAAATAAGACCTATTTTCTACCACACACCAGTACAACCTACTGCATTAACAAACGCTACGGATACAAA  
GTCGAGTTTTACCCAGCCAGCGATATGGTTATCGCGGTAATAAATATGTCACTGACTTAAAAAATTTGCTGGAGCG  
ACAAGGATGTTAAAAAACGTTACTGGCTACACCATTGGTTTTGCCTTTTCTCCCCAGCCAATGCAGATGGTATAGA  
GATTGCCGCTGTTGATTTGATCGGAAAACATTAATCACTAGGTGTAGATCCTAATATATCGCATTATTTTTCCCGTT  
CAGCCGTTTTTTGCCAGGTGAATATTCACTGATAGTATCAGTAAATGGCGAAAAAAAAGGCAACATTGCTACGCGCTT  
GATGAAAATGGCGACATTTGCTTGTGATCAGGCATTTCTGCAACAAGCCGGTTAAAAATTCCTTCTGAAGAAAAAATGG  
CTGTTACGACTATATATTGCTACCCGCGTACCACAATCACACCATTACCTAACCGGAAGCGTTAGATATTATCGTTT  
CACACAGGCGATCATTCCATAGGGTTGGATCTCACAACGCGCAACTGGTGGAACAGCTGCGCTGCTAAACTACTCT  
CTGATGAGCAGCCGTGAGAATTTTCTAATGGGAGTTCGGACTACTCCAGGCTGCACTTGAAGGCGGGATTAATATTA  
TGACTGGATGTTACGAGCCATCAGTTCCTTACACAAAACAAATGGCACATTCAGTAACCAGAACTCGTCAACCTACCTC  
AACGTACCTTTACAGATCTTAAACACTCATGCGAGCAGGTGAAGTTAACCTCAATAATAGCGTGTGGAAGGAGCCAGT  
ATTTACGGTATCGAAATCGCACCGGACACGCATTGCAAAACAGCGGAGTGGTGTGCAAGTTACTGGTATAGCCAACAC  
CTCTCAGGCTCGTGTGAGATTCTGCAACAAGGAGTTTTAATTCATTCCATTCTGGTTCCTGCGGGCGCATTCACTATCC  
CTGATGTACCTGTTGCAATGGTAATAGTGATCTTAATGTCACCGTGTGCGAAACAGACGGTAGTTCGCACAACATATT  
GTTCCCTCCACCCTGTTAATCAGCATGTAGAAAGTTCAGGGTATCGCTTCGCGATAGGGCGGGTAGACGATGACTA  
TGACGAATCACCTGGGTAATAGTGATCGAGCGGATGGAATCTGACACGCTGGAGTGAATGAACGGCGGCTTATCG  
TAGCAGAAAATATCAGGCGCATCAATCCGGTCTGAGTCTGGTCCCTGCCGATTTAACAGTGAGCAGCAAATTAGT  
ACATCGCAGGATACGAAAGACTCACTGCAAGGACAGAAATATCGTCTTGACCGAACTACAATCTCCATTTTCACTGG  
GCTAAACACCGCCTCACTCGATCTGATCGCCATTATCGCAACTGTCTGAAGCGATTGATGATGATTATACCGATCCGA  
CTAAAAGCACTTATGCGCTTGGTTAACTGGTCTAACTCCATTCTGGTGGTTTCAACATCAGTGGCTATAAAACATAT  
AGTTACGACGGTGAACATGACTCAAGCAACCTTAATATTAAGTGAACAAAGCGTTCAAACACGCCACGGTTTTCCGTCAA  
CTGGCAGCATCAACTAGTGCTTCAGAAAATAATGAAGACGATGGTGTCTGTTCTACGTCAACATCAGTATTCCATTTG

GCAGATCAAACACCGCCACACTGTATACTCGCCATGACGATCATAAAACCCACTATGGTACTGGTGTGCATGGGAGTCGTC  
TCAGATGAGATGCTCTACTATGTGAATGCTGAACGAGATCACGACGAACGTGAAACGAGCTTGAACGGCAGTATCAGTTC  
CAATCTCCATTACACCCAAGTCAGCCTTGCCGCGAGGAGCAAGCGGCAGTGATAGCCGTACTTACAACGGTACGATGTCAG  
GTGGTATTGCCGTACATGATCAGGGAGTGACCTTTTACCCTGGACTATCAATGACACTTTGCCATCGCAAAAATGGAT  
AACAAATATTGCAGGTGTCAGAATTACATCTCAGGCAGGCCAGTATGGACAGATTTTTCGGGGTAATGCCGTCATTCCATC  
AATCCAGCCGTGGCGAACATCAGGAGTTGAGATCGATACCGCCAGCTTGCCAAAAAATGTCGATATCGGTAACGGCACAA  
AAATGATCAAACAAGGCCGTGGTGCAGTAGGGAAAGTCGGATTAGTGCGATAACACAACGCCGTGCATTACTCAATATC  
ACACTTTCCGACGGCAAAAAACTGCCAGAGGCGTTGCGATTGAAGATAGTGAAGGCAACTATCTGACAACATCAGTGGAA  
TGACGGTGTGTATTCTCAATAACATCAAACCGGACATGGTGTAGATATAAAAGATGAGCAGCAATCATGCCGTATTC  
ACCTTACATTTCCAGAAGATGCACCAAAAGATGTGTTCTATGAGACAGCAACAGGAGAGTGCCAATGAAACGGATAATAA  
CAGGATGCCTGCTGCTGAATTCGCCATGGCCGCTCAGGCAGAGTGTAATATCTCCAGTAGCATACAAAATATCGACTAT  
GGCAAACGAAGTGCTGCCATGCGCCAAGTTGACCGGGTAAAACAACACAATTAGCAGACAGAAACAATCACGCTGGTAAT  
GCAATGCGATCAGGACGCTCATATTCGTGTTGAGTTGAATACCGTAATATTTCCAACAACGGATTTGGATTTGGCCGAA  
ATGTTTCATTAATCTGATGCCAGCGATGCATTTTCAGGTAGTAAACAATCTCGACTGGCGTTAGCCAGTGGCAAAAAT  
GACAATCCGGCAGCACAGAAACAGCATCAATTAGGGAAGGTGCAATAAGCGGGGAAATTTCTCTCGGCTGACTCAGTC  
ATTTCAATTTCTCATGTTTTGAGCCGATTTTTCTCCGTAATGCTTGAATCAGCCTATTTAGACCCTTTCTTCGCCAT  
TTAAGGCGTTATCCCAAGTTTTAGTGAGATCTCTCCCACTGACGTATCATTTGGTCCGCCGAAACAGGTTGGCCAGCG  
TGAATAACATCGCCAGTTGGTTATCGTTTTTCAGCAACCCCTGTATCTGGCTTTCACGAAGCCGAATGTCGCTTGATG  
ATGCGAAATGGGTGCTCCACCCTGGCCGGATGCTGGCTTTCATGTATTGATGTTGATGGCCGTTTTGTTCTTGCGTGG  
ATGCTGTTTCAAGGTTCTTACCTTGCCGGGGCGCTCGGCGATCAGCCAGTCCACATCCACCTCGGCCAGCTCCTCGCGCT  
GTGGCGCCCTTGGTAGCCGGCATCGGCTGAGACAAATTGCTCTCTCCATGCAGCAGATTACCCAGCTGATTGAGGTCA  
TGCTCGTTGGCCGCGTGGTACCAGGCTGTGGGTGAGCCACTTTGGCATCGACCAATGTGGGCCCTTCATGCCAAA  
GTGCCACTGATTGCCTTTCTGGTCTGATGCATCTCCGGATCGGCTTGTGCTCTTTGTTCTGGTTCGAGCTGGGTGCCT  
CAATGATGGTGGCATCGACCAAGGTGCCTTGAGTCATCATGACGCTGCTTCGCCAGCCAGCGATTGATGGTCTTGAAC  
AATTGGCGGGCAGTTGATGCTGCTCCAGCAGGTGGCGAAATTCATGATGGTGGTGGTCCGGCAAGGCGCTATCCAG  
GGATAACCGGGCAAACAGACGCATGGAGGCGATTTCTGACAGAGCATCTCCATCGCGCCATCGCTCAGTTGTACCAAT  
GCTGCATGCAGTGAATGCGTAGCATGGTTCCAGCGGATAAAGTCCCGGCCATTACCAGCCTTGGGGTAAAACGGCTCG  
ATGACTTCCACCATGTTTTGCCATGGCAGAATCTGCTCCATGCGGGACAAGAAAATCTCTTTTCTGGTCTGACGGCGCTT  
ACTGCTGAATTCAGTGTCCGCGAAGGTAAGTTGATGACTCATGATGAACCCTGTTCTATGGTCCAGATGACAAACATGA  
TCTCATATCAGGGACTTGTTCGCACCTTCTTAGTACTTCCCAATAAATTGGCTGGTGTATGCAAAAATGGTCAAGAA  
GTGGTAATTGATAGCGGTAAAAGCGTTAGCCTCACACTGACAATGGCTCCAGCTTTAAGGATGAAGGGGAACTAACCGA  
CATGACAGATATTACAGGCAATCTGACGGTCTGGTGGAGGCAAAATGAACAATGTAATAATTAAGTATTGCGCGAAGTGC  
CTTTTTTGGCATGTCAGCGCAAGCCGCTGATAGAGTATCAATTGACGTTAAGGTGACTCTGGAAGCTGCAGCTTGTACTC  
CAATACTAAGCAACGGCGGAGTTGTTAACTTCGGTAGTCATTAGTCAATAGACTTTCAACGCAGCACTACACACAGATT  
GGAACACGTAATTAATATGACTATAACTTGGCAATCCGCTACCGGATTGCGATTACCGCTCGTGATACACGAATGGA  
TAGTATGACCACCGAAAAGATAGTGGGGTCAAGTGGTGTAAAATATACCTTAAATGGCGGAGGTTATATTAGCCAGA  
CAACGCGCTTATTCGGCTTAGGGAAAACAAAAGATAATAAAAAATATCGGTAGTTATGCCGTGTTAATTGATAGCAACAAC  
ATTAGTGCCAGCAATGGTAGCCAGACGTTAGCTGTATCAATAGCAGGTGCAGATGCCGTATAACAGGGCAAAAAAGAGC  
ATGGCAAACGCTCACCCTTATCCGCTTCAGTGCATCAAAGCTATTATTACACCTTTGTAACCAGGTGAAACAACCC  
CAACTCTGTAAACGAACCCATTATACCGCTTCAGTGCAGTGCATCTATCGCAATGATTTAGGCGGTTAGCAAAAAATC  
GAACTTGATGGGAAAGCTGTGATAAGCGTAGTCTACTTGTGATAACAATGCCGGACAGGAGTACTATCAGGCATTCGTTT  
TATACGATCGGTTAATGTTTCAGGAAAGCTCTTCGCATATCTGGGGAAAGTAAATGTAATACGCTGTTCTTAATTGTT  
AGTGCTCACCCCCAGAGTATAGCTCATTCCATTATTCAACTTAGCTCCATATAAAGGGACAGATAATGGAATCGCTCTC  
AGAAGGAACACAGCAGGCTACCAGCAAATCCACGACGGTATTATTATCATCTGGTCGATAGCGCCCGGACGGAAACGGTAC  
GTAGCGTTAACCGTTAATGACCGCGACGTACCAGGAAATGGCCGACGAATTGTCGAATTTGAACAAGGTGGCGAGGCC  
AGGGCTGCGTATGGTGCAGCTAATCAAGCAGTATCAAAGGATTTATGTCTAAGGTATAAGCGTGGGTTCTCTGCAAA  
AACTTACGCCAAATGAGGCTTTTTTACCTCTTTTTTCAACATGTTGAAATTCACCAGACAATGTCTGGCGAATTAACAC  
CATTGGGAATTCGCAGACACCGTCTGCAGAATCCATCGGCAAAGATTTGGCAGACGCTGTCTGCCAAATCTTCCCC  
TTGCCAGGTCACCTACGTCGGTTTACTTTCCGTTAAAACGCTGACGCCCCAGCTTTTATGAAAAGAGACGCTCCG  
CTGTGGCTGGTCTGTTGCCAGCTAGAGCGGCAAAATGCGACCCAGTTTTATGAGCGGACACTACTGTCACATGACAAAT  
CAGCCATGCTGCAACAACACGCTCCTGCCAGACGCATATTCTCCGAACAGGCGATACGCGATCCCTTTGTGCTCGAA  
TTTCTGGAATGAAAGATGAATATTAGAATCCGATTTTGGAGGCGCTGATCAACCACCTGATGGATTTTCATGCTGGA  
ACTTGGGGATGATTTGCTTTGTTGGTCCGCGAGCGAAGGTTACGCATTGATGACAACCTGGTTTCGTGTCGATCTGCTGT  
TTTTCCACCGCGTTTACGCTGCCTGTAATCGTCGATCTAAAAGTGGGCAAAATTCAGCTATAGCGATGCCGGACAGATG  
AATATGATCTCAACTACGCCAAAGAGCACTGGACGCTACCGGATGAAAATCCGCCATCGGTCTGGTTCTCTGTGCAGA  
GAAAGGAGCCGGAGAAGCGCATTATGCTCTGGCAGGTTTGCCTAACACCGTTCTGGCAAGCGAATAAAGATGCAACTAC



CTGATGAGAAACGACTCGCAGATGAACTCGTTCGAACACAGGCGGTGCTAGAGGAAGGCTATAGACGCCGTTAATTTTCCAG  
CGTTTTTGAATTCGACAGCAGTGTCTGCAGAATCTTTAAACGAACTAAGTTTTAAGCCATTAATCAGCCTTAACCTT  
CACCACAACCTTTTTAATCTCTCCAGGCTCGCCGACAACGCATCCTGGTTTTATGCGGTTACCTGGCATAAACACGGCGA  
ACATTTCCCGTTTTAAGATGATGGCTTGTCTGTTATCAATGGTGTGCAAAGCTGATAATCATCCTCATGGTGGAACTCT  
TCACACTGACGCGCAGTGCCTGCCATGCCAAACAGAATCCGTTCTCACCGTTAATAACAGCTGGATATCAATGTATTG  
CTCGTGCAATTCGGCTTTTTTCTCGACGGGCGATTGAGTGTTAAACGTCATGACATTCATAAAGATATTGTCCGCTGT  
ATTGCTAACGACCCGGCGCTTTTTCTTGGCGTCTGGCAGTAATGCCAGCGTTAACGCGTCTGTAACGCAGGATGTAAC  
CCAGCAGACGGTAATGACTGTACTTACCCATCATCATAATTTTTCTCCTGGGCCAACAGCGCAGCCCCAAGTAAACCT  
GCATCATGGCGGTAATGCGCCGCCAGTAAATCAACATGAAATGCCGCTGGCTCCTGCGCCAGATACGTTTCCACCAGCGC  
CAGATACCCTTCTGCCAGACCAACGCTGCCACCGACCACCAGCCTGGCAATCAGTTGTGGCTTTAATATCAGCGATCA  
GCCTTGCAAGCGTACGTGCGGAGCGGTGAATCAGCTGCTGCGCTGCTGTCACCCTGCCCGGCGCGCTGAAAATAGTT  
TTCGCATCCGCGCCAGCCAACTCCCCTGCGCTGCCGCTGCAATGCCGCGACCAGAAGCAATCGCTTCCACGCAACCTGT  
GCGTCCACAGCCGAGACTGGGCGGTGGATCGGCAAGCGTATGCCGATATGCCCGCCAGACCGCCAGGCGCGGTAA  
GCAGTTTGACGCCGCTACTACCCGCGCCAAACCGGTGAAACGGTATAAAGACCATATCGTTTATATCGCCATCC  
AGCGCTGAAACTCCGCCATGCTGCGCCTGCGCTGTTAATGGCAATGGTGGCAAATTGGTAAGTTGTTCCAGCGT  
TTTGACTAACGGAAAGTGTAGCAATCCACCAAGATTATGCGGATTAAGCGCCAGCAAGTGGCGTACGGATTATCCCCG  
TCGAAGCGATGGCAACCCGCTGCGCATGAGCTTGCAACGGAGAGACTAATGCGGATAAAGGCATCACGCAAGGCTTCTG  
GTCTGGCTGGTGGCGTAGGAAAGTTACGACGATCGCGGATCTGCCGTCAGCGCAATCAGCGCGGCGCAAGTTTGT  
ACCGCCGATATCAATCGCCAGTGTGGTCATAGCACCGCCTTTTTCATCGCTGTGTTGTACCACTGACAAATGTGCTCAAG  
ACGCGTGATTGCAGAACCGACCGTACCCGCCACGCGCGTGGCGCATCGCATCCGCCGCTGAGCAGCGGTGTTGTAAC  
GCCCTTTCGGCAATCACCCGACATCCGGCGTGCCTAACGTTTTACCAGCGCCAGATCCGGCTCTTCTGGCGTTTACGGC  
GTGGTATAGCCAGAAAGCGTAGTGCAATAATTTCCGCTCCAGCTTTTGGCATGCCAGGCCGTTTCCGGCGTTGAGCA  
GTCGGTATCGCCAGTAAACCGTATGGTGAATACGTGCCAGCAGCTTTCAACAGGCACCGGACGCGGGCGGTGCGTGC  
CGTCAATGGCGATAATGTCCGCGCCCGCTGCGCCAGCGCATCAACATCTTCAATATAGGCCGTGATGCGTACCGGAGAA  
TCCTCCAGATCGGTTTTACAATTCAAATAATCGGCACGCTACCACCGCACGCTGGCTTGACGATTTGCCACACCTT  
AATGCGAATGGCAACCGCGCCGCTGTTCTGCCGTAATGCCATGGCGGCGACGATTTCCGGTTTATCGAGCGGGCTGT  
CCGGAACCGGCTGGCAGGAGACAATCAGGCCACCGTATGACGCGATTTTTTGTCCAGTTGTGCAAGTAACGACATACAT  
CTTCCCTTAGCGAAAGGCCGATACATAGACCGGGCAACAGGATTAACTTTTGTTTTGACTAAATCGTTTTTGGCGCTG  
CCAAACGGCAGGCCACCGTGAATGGTTTACCGTGCATAGCGTATGAGTACGCAACGCTTCCGGGCGCAACCAACCGTG  
AACGCGAGAAGGCATATCCAGCCAAATCAGCAGGATCACCACGAACGTCAGACTGAACGAGAGCGATGCCAGCGCAGTAC  
CCAGATCCAGACGTTGAGCGATCAACGCGCCGATGATTGGGGCCAGTGACCCGCCAATGCCCAACGTTGTAGGTAAG  
CCCAGGCCCGTGCACGCTGGTTCGGTATCGAAATAACCGCAATCAGTTTTGGTAAGATCCCGGCGATCCCTTGCCAAG  
CATTGTGTTGGAAGAACAGTAAACAGACCGAGCACCAGACGTTTGCGCCGCAATCGCAATACCGGAATAATCAGCAGCT  
GCGAGGCCAGCAGGCTACAAACGTACGTTTTGCGGGTTCAGCCAGTACCCAGGGAAGCCACCTACGCGACATCCCACC  
GCCGCGCAAAGCCACTAAAGAACAGCACATTGGCTACAGTATGCGGGTTATAAGCCAGATCGGTTTTAGATACGTTGG  
CAGCAGCGCTGAATCGCCATGAGTAGAGGAAAGCAAACAACACGACCCACATCAGCATTACGCCGTTGGCCAGCGTT  
TGCTGCACTGACCCATAAAGCTGATAAAGATTGCGGCGCATAACAGCCCAAGAACAGCGACGATCGCGGCATTTTTGC  
AGTTACCGGCGAAGCAGAACACAGCGCAGTAGCCGCGCCAGTGTATTACGATATTGGCAATGCGATGTTACCACG  
GTAGAGAATATCCACCATTTGCGTACTGGTGTCTTACCTGCGTGTCTCTTCCAGTCTCCGTTCCGGGATTTTTG  
TACGACCCAGAGAGCAAAGATGATTGGCAAAATGCCGATAAAGAACAGCGCACGCCAGCCAGACCCGGAACACCCAGG  
CTATAGACCTGAGCGGCAACGACGCCCCACAGAGAAGCTGAAATCAAAAAACCACTGGCTTTGTTACGCAAGTGT  
TGGCCAGCTTTCAATGACATAGGTGGCGCTGGAACCGTATTACCCGCCATCCCATGCCGATGACCAGACGAGCGATAA  
ACATGGTGATGTAGCTGGCGCAAAGCCGAGGCCAGCGTCCCGGCCGAGAAGAGAACGATGCTGGTGACCATTGCCAGA  
CGACGCCCGTAGCGGTACCCATAGCGCCGAGCATCAGGCCGCCGAACAGCGAGAGATAAAGGCTGCAGAGATCAGACT  
TGCCGCTGCACCGTCTGACGCCGAATTACCTTGTACTTGGTGTAGTACCAGGGCGATTAACCGAAATCAAAACCGT  
CAAGCAGATATCCCAACAGGCAGCGGAAAATGCGCGCCATTGTGACGTTGAGATGGCGATACCACGGGATATTCTGG  
GTTGTAGTACTCATTGTGAGTCTCCCGCGGTGGGCGATGCCACACGCTTTGGTATGAAAATTGTAGGGTACAGATGCGT  
TTATTTCCCTCACCCGGTAGGGGCGAGCGAGGGGAAACAACCTACCAGCGCTTTGCATCAACTGCTGGGCCAGCGCCT  
TCAGTTCTGGCAGATTTTTTTCATCTACCGTCAAACGGTTTGGCGCACAGCGGCACAGAAACGACATCCATAATGG  
AGGACAGTTTTCAGGCCGGAATACGCCGTTTTGATCAGTAAATCAATGACTTTATTGCATTAGTTGAGTTTCTG  
CGGGTCTGGATATCGCTTCTTTCAGCGCTTAACGATCCCCTGATAGCGCCAGCCATGATGTTGTAGTACTGCCGA  
TACCACCATCAGCGCCGCCAGCAGACCAGAGGCGAAGATTTCTGCGTAACCGTTATAGAGACAAGATCAGGATGTTCA  
CGACGGATCTGCTCCATCTGATAGAGATCGCCAGAGTCTGTTTACGCGCACCTACGCCAGGCAATGTAACAAGTGTGTT  
GATCTGATCCAGGGTCAGTTTTACCCACTCAGGGCTGGAATGTTGTACACCACCATCGGCAACCATCCGCCAATCAA  
TAATTGCCCGATAGTGTGCGAGTGTCTTCAAAGCTGAAAGGATAGTAGAACGGCGTACGGCGGAGACGGCATCGAAG  
CCATAACGTTTACCGGATGCCGCAAGTTGTTGGCTTTCGGCGGTGCTGACGCAACCGACGTGGGCGATGAGTTAATCTT

ACCTTTCGCTCTTCGGCGACGATTTCCAGTACCTGTTACGCTCGAAAGGCTTTGTACAAAGGCTCGCCGGTGAAC  
CACCCACGTATAAACCGTCGATGCCCTGCTGAATATTGAACTGAACCAGGCGACGCAGACTCGTTTATCCAGTGCTTGT  
TGTTGGTCAAAAAGGAGTCAGGAGTGCAGCCATTACGCCACGTAATTCGTTGCCATAAATACCTCTGAAGTGATGCTTGT  
CTGATAAACGATATACCTTTATACCTGTTATACCAGATCAATTAAGCAACACCCATACAGAAAGCTTATAATGCGATCT  
GTTCACTAAAGTGGCATTATTTCTTTTGGTGGTCTGACCGAAAGCGTCCAGGTAGCAGAGACGCTGTTGAGATG  
CGATTGCAACGCACGATCGGCTTCGTACAGGATCATGACGGCGGATCGCATCAACGATCGCAATATGCTGTTGATAACTAA  
CGTTGTTATGTTCTGTCAGTGCCTGATCGGTAACCGTTGGGCGTGC GGCAATAAGCCAGTCGAGCAGGGCAACGTGGATC  
GCCATGAAGATTGGGTTACCGGGGATCTCCGCCAGCACGCGGTGAAATCAACGCTCGAACGAATGAATGCCGCGTTGTT  
ATCCAGCGACTGACTGTTGATTTCCAGTGCTTTTCCAGCAAAATCGATTTGCTCATCGGTGGCATGTTACGCCGATAGC  
GCACCAGACTGGATCAAAGAACAGACGTAATTTGTCGAAATGGGCAATCCCACCGGATGAGAAAGGAAATCTTTCGCC  
ATGCCGAAAGCTCACCGATGATAGTGTCCGCAGAAAGGACGCGAGACGCGAGCGGTTCCGGTGTGTTTTATTTGCACCAG  
ACCTTTCGCTTTAACGCTGCCAGCGTTCACGCACCGAAGGACGCCGACGTTAAAGAACGCCATCAGTTCGCGTTCAG  
ACGTAATTTGTTACCTTCGCAAATTACGACGGCGGATCATCTGTTCCAGCTCTTCTCCACCATTTCCGAGAGTTTT  
TTACGCGCCAGCGGGCGGCTACGCAAGTTGCGACCAATTGCGAGTGAAGAATCTTCGGTTTGC GAATCAAATGCGTTTCA  
AAGGCCCTCTGTAAGTCAGTGTGATTAACATCATCAGTACATCCTATCACAGGATTGAAAGTAGGGGAAATGGCA  
GGTTTTCTCTTGTGCCTCATCATTACCATAATTAACGGAATAATTAATGCGAAAAATTAATGTAACGCAGATAA  
AAACATCCCGTTTGAATTATTTATAAGACTATTACGAGCATTATGAATATTATGAATGTGTTCTTACAAAAATAATCATA  
AGCGCATATTTTTAATGAAAAATCACCTCACCTACAATTAAAAAACGACATCCGCACCATAAAATAGCCTTGCAAAAAA  
TATAACATCGTTGTTTTCAATCTGCCGTTTATGGGATTGACCGTTTTCTTTTGCACGAGTTCAACAATGTTCCGCATA  
ATTATATCTGTCATCGTATTAATTACGATGGGCTATTTGATCCTGAAAACTACAAACCTCAGGTGGTGTGGTGC GGCG  
AGGTATCTTCTGATGATGTGCGGTGTCTGGTTAGGTTTCCGTTGGTGTACTCGATCCCACAAAAGCAGCGGCTACTTGA  
TCGTCGATATTTATAATGAAATCCTGCGCATGCTGTCCAACCGCATTGCCGATTGGGGCTGTGATTATGGCGGTGGG  
GGTTATGCCCGCTACATGGAGCGCATAGGGGCCAGTCGCGCATGGTGAGCTTGTAAAGCCGCCGTTAAAACTCATTCG  
CTCGCGTATATTATTCTGTCGGCAACTACGTCATCGCCAAATCATGGCGCAGTTTATTACCAGCGCTCCGGTCTGG  
GTATGTTGCTGATGGTCACTTATTTCCGACGCTGGTGAGTCTGGGAGTAAGTCGTCCTCTGCGGTGGCAGTTATCGCA  
ACCAGATGTCATTGAGTGGGGGATTCTGGAACGAACTCCATTTTGTGCCAGGTAGCGGGAATGAAAATTGCCAC  
ATACTTCTTCCACTACCAGTTCGGTGCCTCTTGCGTCATTATCTCGGTGGCGATCTCCACTTTTTCTGTC AACCGCG  
CTTTTGACAAAAAGATAAAAAATCAATCACGAACAGGACAGGCAAAAAGCTCTCGATAATGTCGCCGCGCTCTATTAC  
GCCATTTTACCTGTGATGCCGTTAATCCTGATGCTCGGCTCGCTGTTCTCGCCACGTCGGGCTGATGCAAGT CAGA  
GCATCTGGTGGTGGTGTGTTACTGAGTTTACTGTGACGATGTTTGTGAGTTCTTCCGCAAGCATAACTTGCGCGAAA  
CAATGGACGATGTGACGGCGTTTTTGTACGGCATGGGTACGCAGTTTCCAACGTTGGTAACGCTGGTGGTGC GGGTGAA  
ATATTTGCGAAAGGCTTAACGACGATTGGCACTGTCGATGCGGTTATCAGGGGGGGCGGAGCATTCTGGTCTGGGCGGTAT  
TGGCGTGATGATTATTATGGCGTGGTCAATTTGCCATTTGTGCCATTGTGATGGGCTCTGGCAATGC GCGGTTATGTCAT  
TTGCCAGTCTTATCCGAATATCGCAGCCGACTACATGTACCAGCGTGTGTAATGATTATGCCGATGCATTTT GCCACG  
ACGCTAGCGCGCGCGGTTTCGCCGATTACTGCGTGGTGGTGTGTTACGT CAGGAATTGCAGGCGTTTCGCTTTTGC  
GGTGAAGCGGACAGCGATCCCATGGCAGTCGGTTTCTGTTGAATATGATTGCCACAATCACGCTATTTTATTAAGTCA  
TTAAAAAGACAAAACAGGCCGCTGGGCTGTTTTGTATTACTTACAACGCGTAATGCCGGTGCACCACCGCGTGGTGG  
CTGCGGAGGTTGATGTCAGGATGAGTGTGTCATGCTGTTGATCTGCTGTTGTCGCCATCAATAACCGACATAACGGTTTC  
TGCTGCCGATGCCTCTTATCATTATGATGCTGTTGATCTTTCATGTTAGGCAAGTTCAGGCTCAAACATCGTGCCTGCG  
CCATTTTACGGCGTAGATAGCCAGCACGGCAGCAGCAGGCAAAAACCTGACCGGAATGCCACCAAAGCGCGCGTT  
AAAGCGCACCTCATCATTGCGCAGTTCAGATTGCCGACAGCACGCGGCAATGTTGAGTACGATTGCGGCTCACGCG  
CATATTCATAGGAACCTGCACGCCAGGAGCGTCACATCCACCACAGGTGCCGGCTGAGCTGGTTATCCAGCAACCAC  
TCATAGAATGCACGCAGCAGATAGGGACGACGTGGTGTAGCTGTGACAAATCCATACAGATTAACTCCGGCCCAGACGC  
ATTTACGTTCTGCTTCACTTAAAGAAGCAAGGAAAGAGTACGCTCAAAGACGCGGGTATATAGCCTTTCAGCTCTTT  
CGCACCCGGGCGCTGAACCTGATGCCAGTTGCCGAGACGCCACAGCAGCGGAGCAAGATAGCAATCGACCAGGCTGA  
ACTCATCGCTCAGGAAGTACGGCTTCTGACCGAAGACCGGCGCAATCGCCAGCAGTCTTTCGCGCAGTTGCTTACGTGCG  
GCATCTGCTT CAGAAGCTGAACCGTTGATGATGGTGTTCATCAGCGTGTACCAGTCTTTTTCGATGCGATGCATGTACAG  
ACGGCTTTACCGCGAGCTACCGGTAACAGGCATCAGTGGCGGATGCGGGAAACGCTCATCCAGATATTCATAATGA  
TGCGAGATCCACAGGGTCAGCTCACGATCCACCAGGTGGAACGCTCTGATTGGGTTGAGGTCAATCAGATCCTGA  
GGCGGATTGCTTTTTCCACGTGTTGATCTCGAACTTACACCTTCTCAGCCAGCACAATGCCGACCTGATGGCTATA  
GATGTCAGTAGGACGGAAAACAGCGTATTACCGAACGTTTTGTTGGCAGCGACAGCCATGAAAACCTCCAGGTATAGTC  
AGAATTTTTACTGCTACCAGCCACCAGGTGGCCAGTCAGAAGTGTGTTACCAATAAGGAACGACTCTCTTTGTTGCAA  
AATCAAACAAAAAATGAGCAATACCCGACATTTGGGCAGAAAAATGGATGATAGTTTACCAGATTTTGC GACCATTTGG  
TGAGTCGATGCCGAAATGGGGAAAAAGAGATGCGCTTATGCTGAAATAGTTGACTTAGTCCCTTATTGGCGATGTGGT  
TTTTGTTTTACCTGTCTGTCAGGTGGCAGCAAAAAGCACTTTCCAGTTTTTACGCTGATTAGTATTAATAAAAA  
AACCCGCCGAAGCGGGTTTTTTCGAAAATTGTTTTCTGCCGAGCAGAAGCCAATTAACGTTTGGAGAACTGCGGACGAC

GACGTGCTTTACGCAGACCGACTTTCTTACGTTCAACCTGACGAGCGTCACGAGTAACGAAGCCAGCTTTACGCAGTTCA  
GAACGCAGGGACTCGTCGATTCCATCAGAGCGGGTGATACCGTGACGGATCGACCAGCTGACCAGAGATACCACC  
ACCTTTAACGGTGATGTACAGGTCCAGTTTCTCAACCATGTGACCAGTTCCAGCGGTGACGAACTACCATGCGGGCAG  
TTTACGACCGAAGTACTGTTCCAGAGAACGTTGGTTGATTACGATTTTACCGTTGCCCGTTTGATGAAAAACGCGAGCT  
GCCGAACTTTTGCGGCGACCAGTGCCGTAGTATTGATTTTTCAGCCATTGCCTATAATCCCGATTAGATGTCAAGAACTTG  
CGTTGCTGTGCCGCGTGGTTGTGCTCGTTACCCGCGTAAACTTTTCAAGTTTACGGAACATAGCACGACCCAGCGGGCCTT  
TTGGCAACATGCCCTTAAACCGCATTTCAATCACACGCTCAGGACGGCGAGCAATCATCTCTTCAAAGGTCGCTTGTG  
ATACCACCGATGTGGCCGGTGTGGTGATAGTACACTTTGTGAGTACGCTTGTGCCGGTTACAGCAACTTTGTGACGCTT  
CAGAACGATGATGTAATCACCGGTATCTACGTGCGGAGTGATTCCGCTTTGTGCTTACCGCGCAGGGCAGCAGCCAGTT  
CAGTAGCCAGACGGCCAGAGTTTACCGGTGCGGTCAACAACATACCAGTCGCGTTTTACGGTTTCTGGTTTAGCTGTA  
AAAGTTTTATTAAAAGCTTACCCAATAAATAGTTACACGTTGGTGAACACCCAAACGCTTCAATTGTTGAGGTTACACA  
CGACAAAGTCCGGCAAACCTACCCCTTCGAATAGCCTATGCCAGCACAAAAAGTTTTGGAAAAAACTTTCTTGTA  
CGTGGGGTGCAGGATTATAGAGAAGTCGGGGTCAAAGATCGACCCCTTTTTGTGATTTGTGACAGGTTTTAACCCGCCA  
AATGCTCGCGCTTACGATACCTTTCGCTTTGCATCTTTCAGACGTCGACAGGCAACGCTGGAACCTCAAACCTCAGCCGA  
TCGCCCTGATAAATTTACACAGCGGCACTTCTGCATCACCACCTAATTTGACATGGCGCTGTAACCTCATCCACCAG  
CGCAATAAAGCGCGCTTCGCTCTCCATCAACCGCGTCATAACTGGTACATCAAACAACATGACCGTATGAAAGAGAC  
GTGAGAGCGCAATATAGTCATGCTGACTGCGGGCGTCGACGCACAGCGTAGTAAAAGAGACCGCCAGCGCTGGTTCTCG  
ACGCCATTGTTGCTAATGGCCGATGGTTGATTTCTAACGTGCGTGAATTTTCTGTTTCCCCCGCCAGCGCAACCA  
TAGTTTATCCATTTGCGCCCGGTTTTCATCGTGAAGTGGCGAAAGCCACAGATGCGCCTGAGTGAGTGTACGCAGACGAT  
AATCAACACCAGCGTCCAGCTTATTACATCACAATGCTGTTTAAATGGCATCGATTGCAGGCAGAAAACGCGCAGCTTGC  
AGGCCATTTGATAAAGTTCATCCGGCGGAATATTTGACGTGCTACCAGGGTAATACCGCGAGCGAACAGGGCTTTTCAT  
CAGACCGCCAAGTAGCATGGCATCGGTAATATCAGAAAACAAAAATTCGTAACACAGAGCACGTCAGTTTCGGCTTAA  
AGCGATCGGCAATAATTTCCAGCGGATCGGTCTGCCCTGTAAGGCGATTAGCTTTCATGCACCCGAGCATAAACCGG  
TGAAAGTGCAGGCGCTGTTCCGCTCTCCCGCAGGCTTTGATAGAAAAGGTCATCAGCCAGGTTTTCCCGCGCTCTAC  
ACCGCCACATATAAAGCCACGCACTGGCGTATGCTTTGTGCTTTCGCGTTTACCCACAGCTTACCGACCCGCGCCA  
TTAGCCACTCGTCTGGGGCTGGTGGCGTCTATTGATGAGTCTGATAAATAATTTCCAGGCGGTGACGGCCTCT  
TTTTGAACGTCGTCGGGTTGATGGCTGCCTTCATTAAGCGCTTACAGGATTGCGATGTTGGGGTAACGCTTTGCATGAT  
CTTATTGTTATTCCTGAATAATCGGTGCGCCGTTGTTACCGTTGACGAAAAAAGGCCGTTCTACACTACGCGATATG  
CAGTCGGGATTCACCTTCTGTGGAATTAACGGTTATAGTGGCATAATCAGCCGAGGCATGGAGCCTGAAGCCAACCCC  
TACGGAAACAAAAGACAACGGGAGATGTTTCATGACCTGGGAATATGCGCTAATTTGGGTTAGTCGTCGGCATCATTATTGG  
TGCTGTGGCCATGCGTTTTGGTAATCGTAAACTACGCCAGCAACAGGCGTTGCACTACGAACTGGAAGAATAAAGCTG  
AACTGGACGAGTATCGCGAAGAGCTGGTTAGCCACTTTGCCCGCAGCGCGGAATTAAGGATACCATGGCGCAGACTAT  
CGCCAGCTGTATCAGCACATGGCAAAAAGCTCCAGCAGCCTGCTGCCGAACTGTCTGCTGAAGCAAACCCGTTCCGTA  
TCGCTGTCAGAGTCTGAAGCCAGCAACGATCAGGCACCGGTGCAGATGCCTCGCGACTATTCTGAAGGCGCATCCGGCC  
TGCTGCGTACTGGCGGAAGCGCGACTAATTTATTTTTCGGGCGAGCCATTGCGCCCTCTCTCTCCCTCCCCGAC  
TATCATTTAATCTGGTGTCTCATTGTTAGCGCTGAAAAATCAATAACATCAAACCTGTTTTGAATCTTTTTCTTATCA  
TTCAGGTACGAGAGCAGGAATAATGAAAAACAACCCAGCTGTTGAGTGCATTAGCGTTAAGTGTGGGTTAACTCTCT  
CGGCGTCATTTACGGCGTCCGCTGATTCCAGGCCAGGTTGCCGATCAGGCCCTCTCCCAAGTCTGGCTCCAATGCTG  
GAAAAAGTGTTCGGCAGTGGTGAAGTACGGGTGGAAGAACGGCCAGTCAGGGACAGAAAATCCCGGAAGAATTCAA  
AAAGTTTTTGGTGATGATTTACCGGATCAACCTGCACAACCTTCGAAGGTTTAGGCTCCGGTGTATCATCAACGCCA  
GTAAAGGCTATGTGCTGACCAACAACCATGTGATTAATCAGGCACAGAAAATCAGTATTACGCTCAATGATGGGCGCGAG  
TTTGATGCAAAACTGATTGGTAGCGATGACCAGAGCGATATCGCCCTGTTACAATTTAAAACCCGAGCAATTAACGCA  
AATCGCTATTGCCGACTCCGATAAATGCGCGTGGTGATTTTGGCGTAGCGGTGCGTAACCCATTTGGCCTTGGGCAAA  
CCGCCACTCTGGCATTGTTCCGATTAGGCCGCGAGCGGTTGAATCTTGAAGGTCTGGAACCTTTATCCAGACAGAT  
GCTTCCATTAACCGCGTAACTCCGGCGGTGCACTATTAACCTTAAACGGTGAAGTTAATTGGCATCAACACTGCAATCCT  
TGCGCCTGGCGGCGGGAGCGTGGGATTGGATTTGCCATCCCCAGTAATATGGCGCGAACACTGGCGCAGCAGCTTATCG  
ACTTTGGTGAATCAAACCGGTTTGTAGGCATCAAAGGCACCGAGATGAGTGCCGATATCGCCAAAGCCTTCAACCTT  
GACGTGCAGCGTGGCGGTTTGTGAGCGAAGTGTGCCAGGTTCTGGCTCGGCAAAAGCGGGCGTCAAAGCGGGCGATAT  
TATTACCAGCCTCAACGGCAAACCGCTGAATAGCTTGTGAGTTGCGCTCTCGTATCGCGACCACCGAGCCGGGCACGA  
AAGTGAAGCTTGGCCTGCTGCGTAACGGCAAACCACTGGAAGTAGAAGTACGCTCGATACCAGCACCTTCTGTCGGCC  
AGCGCTGAAATGATCACGCCAGCGCTGGAAGGTGCAACGTTGAGCGATGGTCAGCTAAAAGATGGCGGCAAGGTATTA  
AATCGATGAAGTTGTCAAAGGAAGCCAGCTGCTCAGGCTGGCTTCAAAAAGACGATGTGATCATTGGCGTCAACCGCG  
ATCGGGTGAACCTGATTGCTGAAATGCGTAAAGTGTGGCGGCAAAACCGCCATCATCGCCCTGCAATTTGACGCGGC  
AATGAAAGCATCTATCTGCTGATGCGTTAATGTGTAACCGGGCATCAGGCTTACGTGTGATGTCGGTTAACTCGTGG  
TATGCTGCTGCCGTTCCCTTTTTAATGACGCTCCATCATGTTTGTGAAGCTTTACGTTCCGTTGCGATTGGATTAAT  
GTGCGCGCTATTCTGCTGGTTGCCATGCCTTCGCTGCGCAGCCTTAAACCGCTTTTCACTCCGCAATTTGACAGTACCG

ATGAGACGCTGCCAGCTATAATCTGGCGGTTCCGCCGCGCCGCGCCAGCGGTGGTTAACGTTTACAACCGTGGTTTGAAC  
ACCAACTCTCACAACCAGCTTGAGATCCGCACCCTGGGATCCGGTGAATCATGGATCAACCGGTTATATCATCACAA  
TAAACACGTCATCAACGACGCCGATCAGATCATCGTCGCCTTACAGGATGGACGTGTATTTGAAGCATTGCTGGTGGGAT  
CTGACTCTCTAACCGATCTGGCGGTACTTAAAATTAATGCCACTGGCGGTTTACCTACCATTCCAATTAATGCACGTCCG  
GTACCGCACATTTGGCGACTAGTACTGGCGATCGGTAACCCGTACAACTCGGGCAGACCATTACCCAGGGGATTATTAG  
TGCCACGGGTGCAATCGGTCTGAACCCGACCGGGCGGCAAACTTCTCCAAACCGATGCTTCCATTAACCCAGGTAAC  
CTGGCGGGCGCTGGTGAATCGCTGGCGAAGCTGATGGGCATTAATACGCTGTCTTTGATAAGAGTAACGATGGCGAA  
ACGCCGAAGGTATCGGCTTTGCGATTCTTTCCAGTTAGCAACCAAAATTATGGATAAGCTGATCCGCGATGGTCGCGT  
GATCCGCGGTACATTGGTATCGGCGGACGTGAGATCGCAACTGCACGCGCAGGGCGGTGGTATAGATCAACTGCAAG  
GGATCGTGGTAAATGAAGTGCACCTGACGGCCCGCGCGAATGCGGGTATTCAGGTCAACGATCTGATTATTTGGTG  
GATAACAAACCGGCATCTCTGCTCTGGAGACGATGGATCAGGTGGCGGAAATTCGCCCTGGTTCGGTGATCCCTGTAGT  
AGTGATGCGTGATGATAAGCAGTTAACGCTGCAGGTACCATTAGGAATATCCGGCAACCAATTAAGTCGTGCGCTCAA  
AACAAAAACCGGAGTCTGTCTCCGTTTTTATTATCCGCTAATCAATTACTTATTAACGAACTCTTCGCCCAGGGCG  
ATATCTTCTTCAGCGTATCCAGCATACTTCCAGCGCTTCTGTTCAAATGCCTCAGGGTACCGATAGATTTACGCTC  
TTCCAGCGCTTTTACCAGCAGCAGCGGTTGAGAGAAGAAACGGCGTACTGACCGTGCCTTCAACGTAGGCACATC  
CGACAACGCCTTGTTCGCCCTGCAGTGCACGAAGACAGAGACAGCAAACTGCAGCTGCCTGGCCCATAGACAGGGT  
GCAGACCCGCCACCGCCTTTCGCTTCAACCACTTCAGTACCCGCTTCTGGATGCGTTTTGGTCAGATCAGCCACTTCC  
CTCGGTA AAACTAACGCCAGGAACCTGTGACAGCAGCGGCAGAAATGGTAACACCAGAGTGACCGCAAATAACCGC  
CACTTTCGCTGGCTGTTTTGCCCTTTCAGTTCCGCAACAAAGGTGTTGGAACGAATGATATCCAGCGTGGTAAACGCCG  
AGTTTTTTTTGTATAAACACCGCTTTTTTTCAGCACTTTCAGCAGCAATTGCAACTGTGGTGTAAACCGGGTATGAT  
AATACCAATGCACGCTTTTCGGGCGAGTTTTCGCAACTTGTGTACCAGGTTTTTTCAGATGCCGGCGTTAACGTTAA  
GGTCCGAACGATCCATACCCGGTTTACGCGCTACGCTGCAGAGATAAGAACGACATCTGCCTTCCAGCGCCGGAGT  
GCATCTTACCAGAAAACTTTGATTTTACAGCAGTAGGGATATGGCTCAGATCGACAGCCACACCGGGAGTCACTGG  
AGCGATATCATAAGAGAGAGTTCTGAACCTGAAGGCGATTTGGTTTTTAAACAGTAGTGAAGCGCTGGCCAATACCG  
CAGCAGCGCCGAGGACTGCGACTTTCATCCTAACTCCTTATTATATTGATAAACTAAGATATGTTGCTCCGCTGCCG  
ACCTAATCCAAAAATTTGCCGTTTTACAATGACCACATCTCAAGAAATGTGTAGTCACGCAAGTTTAGCGTTTATGC  
AATTGCCGTAATCAGGAACCTAATTAAGTAATTAACAGTCGCTTATGCATTAGCGCAACATTC AACAGGTGGTGACAA  
TATACCCTACCGTTCAGCCAAAACAACATCAATTTGATAACAATTAATTTACTTTTTAAGCAGAATTTGCATGCCG  
CAGCGATGTTTCTCAATAACGAAATTTGATAAAATCCCGCTTTTATAACATTTTTCAGCCTTCTTCAGGGCTGACT  
TTTTGCATAAAATTCATCTGTATGCACAATAATGTTGTATCAACCACCATATCGGGTGACTTATGCGAAGCTCGG  
CAAGAAGAAGTAAAGCATTAAAGCATTACTTAAAGAAGAGAAATTTAGCTCCAGGGCGAAATCGTCGCCGCGT  
GCAGGAGCAAGGCTTTGACAATATAATCAGTCTAAAGTCTCGCGGATGTTGACCAAGTTTGGTGTGTACGTACACG  
ATGCCAAAATGGAAATGGTTTACTGCCTGCCAGCTGAAGTGGGTGTACCAACCCTCCAGTCCATTGAAGAATCTGG  
CTGGATATCGACTACAACGATGCAGTTGCTGTGATTATACCAGCCCTGGCGCGGCAGTAAATGCTCGCTGCTGGA  
CTCACTGGGCAAAAGCAGAAGGATTCTGGGCAACATCGCTGGCGATGACACCATCTTACCACCCCTGCTAACG  
CAGTCAAAGACCTGTACGAAGCGATTTAGAGCTGTTGCAGCAGGAGCTTAAATCTCTGCCCGTCTGTTCTGACG  
GGAAAATGTTGCTTATCCCTCTCAACCCCTGCTTCCCCTGCGATTAATTTAACGAATAGTGGTTTTACTGCG  
TCATTCACACAATGAATACATAAGGTA AAAAAGCATTATGCAAAATTCATTATCTAATTGAAAACTAGAATTAAC  
GATAAATAACCGTATTTTAAATCTTTTTGTTATTTAAATTCACATTTTAACTTAGTATCACTGAAACAGTTAGC  
GGGTATTAATTAGCTCAATAAATAGTATACTTATTTGTGATATGGGTACGAAACAAAGGCCAGTAAAAGATT  
ATGTCGAGGTA AAAATCATGAAAAATAAACCACTGTTGCTGCATTAAGCGTACTTTCTGTTCTCTTTTCGGTGC  
GCTGCCGACTCCATTGATGCTGCACAAGCACA AATCGTGAAGCAATCGGGACCGTATCCGTAAGTGGTGTGGCTCT  
GCCAATGGATATGCGTGAATGCTGAACAAAAAGCGGAAGAGAAAGGCGCAACGGCCTACCAGATTACTGAAGCTCG  
GCGGTGACACTGGCACGCTACGGCTGACTGTACAATAAACCCCTCATCGTCTTGTCCGACGATATTGCCCGGTTCC  
GGGCTTTTTTGTGCTAATGACGAACATTAACGCAAAATGCCCTTCCAGCTCTTCTCTGCTCATCAAACAGCAAT  
ATTAACGCGCAAAACGGCGACGCTTTTCTCTCCAGATGAACAAATCAATCTCAAGTGGTAGCGGCAGGACATCGTT  
CATTAAACATCCCATAGTGAAGTGCAGATCGCTACCTTATCTTCCGACACAAAGTTTGGCTAAAGTCAGATAAA  
AATCCTCTGACTCTCAATCTCATAAAATCAAAGTATAAATATTATCTGTTGCCACCGTCAGTTTTCGGGCGAGTT  
CTGCCGTGCATCGTAAGTATAGCCATGAAAAACCGACGCTTTTGGCGTGGTTTTGACTTAACATCGGTCAACGCAT  
GTTGATACTTATGGAGCATTCCCGCCAGCGGATTTACCGTCCGTCACCTGCGGTGGCGCTTGCAGATGCGTAGCTTT  
TCCTGGTAGATTTCCAGTCTTCCAGCAACTGGCCAAAGTACCGACGACGTTTATCATCGTACGGGCAGATATCACAT  
GTCTGTGTGGCGCATTGTCGGTGAACGCCGATAAATCCTGTTAACCGGATCGGTGCATCACGCAGGCGCTGGT  
GCCGATAATCATCGTACGCGCCAGGCGAAATTTCCGCAAACTCCCTGGGAATTATTATCAGCAAAAAACAGCTGCTGA  
TAAAGTGCCGGGAGGTGGTCTCTTACGACGTGCCACATTGGTAGTTCATCGCGAAACAGCGGCAGAAACAACTGATT  
AAGCAGTACACGTCGGTCTGTGCGCGATTTATCCCGCACCAAGTAACCGTGAACGCGAGCACACAGCCGACGA  
TTTGCCTAATGCGCTGTGAGAACTGACTGAAATGGAAAGTATCGGGTTATCCAGCACGATAATTTATGGTGTCTG

GCCAGTGGCCCATCGAGCCAGTCGCCGTTTCTGTACTTCTATACCGAGGAAGAATCCCAGCACTGCCAGGCTAATGCA  
CAGCAGCAACATGCTCTGTTGGGTATTAGGGATAATCACAAAAAGTAGAGCAGCCCTAACGCAGCGCGCCAGCGTCC  
CGTAGATAAAGTCGATGCCACCATTGCGTGGATTTCGCAAAACGCATTGCCAGTGACGTCACTACCGCAATCATACCATT  
GCACCACTGCCGGAAGTCCAGCCCCTCCACAGCCAGAAAAGCGTGCCAGAAATGCAGGAAAGTGTGGTTCGCCAGAAGTT  
AACCATTGCATGATGACGTTCCGGTCACTCTACTTTTACTTCCGGTTCGCCTTCGAGGATCTCTTCTCGGTGGCGTTGA  
TTTTTGTTACTGATAACGCCGCGTGGAGAAGCTGATAACGCGTGGCCGCCGACCCAGCTATAAATGGTGACAGGC  
GTTTCCCGTCCCGGTCAGGCGATAACTCTCCGCAAGCGTTTGAGCTGCTTGCGACGTCCTGCGCGTTTCTACCGG  
CGTGTCAAAAAATTCGCGAAAAGTATCAGTGATCAATTCCGGGCGCGTATTCTGAATAAGATAAGTTTCGCGAGATTGGG  
TAATCAGCGTCAGCGATAGCGTATTGATCGCTTTTAAACGTCGATTGGCCCGCGCCAGCGGGAAGATTCCATATTCAGG  
TTGCTGCGCATGCCTGTAGCGCGTGGTGGCGCACCAGGTCGCCCCAGGCTTTATCGACAACCTTCACCATCGCCATG  
CTTGATACAGAGTTGCATTAATTGATATTGCGCGACCAGCAAACTTTCCAGCTCTCGATCCACTTCTGTTTGATCGATC  
GCGGAGAAAAGAGCAAAATCCGCCATAATCGCACACAATACCGATAACGATCTCGCTACAACGTTTCAGCGGCAAACTGC  
GGCGTAAGCAATGGTTCGGCTGAATGGTGATCACAATGATCAGCGCGGTATAAACCAGCGCCCAAGGTTGATCGATC  
TTCTATTGTCAGCGAGGATATCCAGGTACAAAACCGGCCAGATACAGCACACCAGAATCATCAATAATGGTGCCG  
GGATCATCGCAATGATGATCACCAGTCCGGCAATACAGCCAAATAAATGTGCCGATGATGCGCAAAAAGCCACGATAGCGA  
ATAGCGCCAGAATACGGTTCACCTCCCGCAGCAAAGCCGTACCGCGGCAACAATCGCCGCTGTCAGTACCGCCCGGCG  
TGGCGTTTCCAGCTGGAAGTGAAGCCAAACAGCGCCAGTACAATGGCGGTTCGCGAGTTTACCAGAAAGCGAATAT  
GTTGGTTAGCAATGGAGAAAATACCCATCGTGATTAACCAAACCTCACGCGGCGATGGCCATTTTACGGAAGAACAAT  
CCTGGCTTTCGTCGCGATCTTGTGGCCAGTGACCACCACTGTAGCAGTGGTGCCCGCAGGCCAGATGTTCTCTGCTGG  
TTGTCGAGACGAATACGAACCGGAACACGTTGCGCAAGACGCACCATTCAAGGTTAGAGTCTATAGTCGCCATCCCTT  
GTCGTCACGCGTGTGCTGGCGTGGTGACCCCTGCGGCAACACTATCAACAGTCCCTTTCAGCACTTTGTTACTGCCAA  
GCGGCGTGATCTGACGATACCCCGGACGCACCCCTTCCAGCTTAGTTTCTTCATATAGGCCAGTACATAGAAGGAG  
TTCTGTTTCCAGCGCAACCGCGTGGATCCTCGAGTAAATAACTACCGGTATAGACGTTGAGGTTGGTACCCAGCC  
ATCTGCTGGCGCGGGATCACCCTGCGTTCAGATCCAGTTTTGCCAGATCGCGGGTGCCTGCGCTTTCGTAACCTGAT  
GCAGAACGTTTGTAGTACGTTGTTGGCCTGGTGCATCTCTCCGCGAGACATCGCTGCACCCGAGACGGTTACGACGT  
CCGGCTCCTGGCGTTTCTCTGTGCCAGTACCTGATAATAAGCAACATCGGCTTGGCGTTCTCAAGCGCTTTTGATA  
GCGCGGTGGTGCATGGTGAACAGTATCTGCTTTTTTACCAGCTGGTTATCATGAACATTCACCTGGGTAATGAGTC  
CAGAAACGTCGGCGCGATCGCAACGACGTCAGCGCTAAAGCGCGCGTCACGCGTCCAGGGGGATTGGTGAATAGACC  
CAGGCATTAATAAATTCGATGAAGGCCAGAATGACTAATACGACCGTGGTGGCGTACGGGAGAATTTCTTATTAGTGT  
TTCACTTCAACCTCAAACGACAGTCCGATATCAATAAAAACAAGCAGCAATAGAGCGCGGTGTTGAACAACGCCGGA  
TGCCAGACAAAGTCGATAGATACCTGTTGGCACAAGTACCCGGCGCACCAGCCAGAAAATCGCCAGTGATAAAAGCAATTC  
AAAAATATCGGTGGGAAGGACAGCCCAAACACCACGATAACGGGAAACAGACTCATGTTGACCTTGGTGTAAAGAGAG  
AGCAGGCGTTATTATTTTTCAGCATCTGTCGCCGAGAGAAGGGCATGGAAAGCCGGGCGAGAGCAACATTGCTGTAGATT  
GATATTTAATATATTAGCGTAACGTTATGCTGTTATCTATATATATGATGATCTAAATCACTTTTAAAGTCAGAGTGAATAA  
TGGAACGACTAAAACGCATGTCGGTGGTGGCAAAGTAGTTGAATTTGGCTTTTTACCAGCGCCGCCAGACAGCTACAG  
ATGAGCGTTTCGATCCATCAGTCAGACGGTATCAAACTGGAAGATGAGTGCAGGTAAGCTGTTAAACCGTAGCACACG  
CAGCATTGGCTGACCGAAGCCGGTAGAATTTACTACCAGGGTCCCGTCGATGCTTCATGAAGTGCAGGATGTTGATG  
AGCAACTGTATGCCTTCAATAACACCCCATCGGACGCTACGCATTGGCTGTTCTTCAACTATGGCACAAAATGTTCTC  
GCCGGGTGACAGCAAAATGCTGAAAGAATACCCAGGTTTGAGCGTCAATCTGGTTACCGGAATTCAGCCCCGACCT  
GATTGCGCAGGCTGTGGATGTTGGTATCCGCGTCCGCGCTGCAGGATTCCAGCTGTTTTCCCGGCTGTGGCGCCGA  
TGCCAATGGTGTGCGCCGCGAAAAGCTATCTCACACAATACCGCATACCGGAAAACCCGCGATTTGAGTAGTATCAT  
TCATGGCTTGAATACAGCGTGCGCCCGACAATGAATTTGAACTGATCGCACCGGAAGGGATCTGACTCGCCTGATCCC  
ACAAGGAAGATTTGTGACTAATGATCCGATGACGCTGGTGCGTGGCTGACGGCGGGTGGCCGGATCGCTACGTGCCGC  
TGATGTGGGTGATCAACGAGATCAATCGTGGGGAGCTGGAGATCTGCTGCCGCGTTACCAGTCAGATCCACGCCCGGTT  
TATGCGTTATATACGAAAAGATAAGCTGCCGCTGAAGGTACAGGTCTGATCAACTCGTGCAGGATTTTTGTTGA  
GGTCCGTAATTTGTTTCCAGGAGATGCACGGGCGCGGAAAAGAGAAGTAATTCATATTGTACTGTTACGTTGTACAACT  
GTGCCAACGGGTTCCCTCACCTAACCTCACCCAAAGGGGCGAGGGGACCGTTCTGTCACGTAGAAAAGATTAATTAT  
CCTTCTGAAAATAGTGAATATTACGCAGTACCGCAACAGTCAGGTTATCGACTTTCAACGTTGGCTGGCCACGCCA  
ACCGGCAAACTTTGCCCTCTTTACCAGACACCCACGCCGTTATCCAGTTTCAGGTCGTTGCCAACCATCGAAATCTG  
CTGCATGGTTTTGATACCGGAACCAATCAACGTTGCGCTTTACCAGGCTTCTGTTACTTTACCCTTTCAATCAGATATG  
CTTCTGAAGTGGAGAAAACGAATTTGCCGGAGGTGATATCCACTGACCGCCACCAAGTTCGGTGCATAGATACCGTAC  
TCAACGGATTCATAATTTCTGCGGGTTCGATTTACCAGGCGAGCATATAGGTGTTGGTGCATACGCGGATGGGCAGATG  
GGGTAGGATTCAGCGGACCGTTCAGCTCGCGTCATCCCATCAACCGCGGTTGAGTTTATCCTGCATGTAGCCTT  
TCAAGATGCCGTTCTCAATCAGCACGTTGACTGGCTGGCGTACCTTCGTCAATCGCCACCGAACCTCGGCGATCG  
ACCATCGTGCCATCATCAACCACGGTACACAGTCTGAAGCCACCAGTCCCGACCTGTCCACTAAATACTGAAGTGGC  
ACGGCGGTTGAAGTCGCCTTCCAGACCGTGACCAACCGCTTATGCAACAGCACGCCCGGCCAACCTGCGCCAAGTACTA

CCGGCATGGTGCCCGCTGGTGCAGCAACGGCAGAAAGATTGACCAGCGCCATACGCACTGCTTCTTTGCCATGCATCC  
GCACGGACTTCGCCGTCGAGATCGGAAGGAAGAATTCATAACCAAAACGACCGCCGCCACTGGCACCGGTTCCGG  
TTTGCCATCTTCTTCGACGAGAACGCTCACGGAAAGACGCACCAGCGGACGACATCCGCCCTAGCGTGCCGTGGTGG  
CCGCAACCAAAATTAATTCATAGACACCACTGAGGCTGGCAGTCACTTCCTGTACGCGCTTGCCGTTCCGGGGCAACC  
TTATCGACGCGACGCAGGATATCCAGTCTCTTACGGCTCATGCTTTGCAGCGGATCTACCGAGGTATACAACGGGCT  
ATGCTCTACCGCGCCAGCGTCTGTACTTTACCATACCACTATCACGGACGATGGTGGCGCCGCTTGCGCACTCTGTT  
CCAGCGCCAGCAGGCTGATTTGGTCAGCGTAAGCAAATCCGGTTTTTACCCTGATTGCACGCACCAACGCCCTGA  
TCGATGTTGTAAGAACCATCTTAATAATGCGGTCTTAAAACCCAGGATTCGTGATAGCTCGACTGAAAATAGAGATC  
GCCATAATCAAGGCGACGTTCCGGCAGTTGACCGAGGATCGGAACAAGTCTGATGTTTCAGGCCGTTCCGGCTAGCA  
ATTGTTCACTTACCAGGTTAAGACTCATGTTTTTGTACTCGTTAGTTACTGCAGTAGAGGATTTTTACGGCTGCCGG  
ATGGCGGTGAACGCCCTATCCAGCCTACGGTATGTTCCGGTTGTAGGCCTGATAAGACGCACAGCGTCGCATCAGGC  
AACGGCTGTCGGATGCGGCGTAAACGCCTTATCCGACCTACGGTATGTTCCGTTGTAGGCTGATAAGACGCACAGCG  
TCGCATCAGGCAACGGCTGCCGGATGCGGCGTAAACGCCTTATCCGACCTACGGTATGTTCCGTTGTAGGCTGATAA  
GACGCACAGCTCGCATCAGGCAACGGCTGCCGGATGCGGCGTAAACGCCTTATCCGACCTACGGTATGTTCCGTTGT  
TTGGCTTTGGCAACGATTCTATGAGATTGGGGCAATTACGCGCCCTCGTCAAATCATTGCGCTTTTCTTTACGCG  
GTTGGCGCAACACTTCGTTGATTTGCGGATCGTCCAGCGGACCCGAAATGTGATAGCGCAAAATGGAGACTTTGCTCCAC  
AGCGGCCCCAGCACTTTACTGGCGGCAAACTGCCGCGCAACAATGGGGTTAACCGCAAAAGCCGAGCCACGCCAC  
CGTCGAGAAATCTCTGGTGCAGAACCGCTTCCATATTCAGGTGCGGACGTACCAGATTTACCGACCCTTTCATGGCGA  
TATCCGCTCCAGGCCATCCACCAGCGTGTGTCGGTGTGCATAACGCCGCTTTAATCCACGCGGTGCTGCGAATGGAG  
TCAAAATAGAACCCTTCGCCAAAAGTGTCTCTGAAATCAAACGCAGCTTACGCATCAGGGCATCTACGCTCAATAAGCG  
CAGCAATTGCCGGCATGTCGGTATTGATTTGCGTAATTTGCTTTACCCAGTTGAGTATGAATGATGCCATTCAACG  
TCGTTTCTGCTGGCTGCCAGGTTGCTTTGCGCCAGTGTAAATCGTAATCCACATTAATGACGACTGGCGTATGGGCGTC  
GTGACACCAAAAATTCTGCGGCGCATCAATTTTCTGCCGCGCAGTTTTCTTTAGCGAGGTACGTTTATTCCCGG  
ATTATTAACCCATTACCATCGGCAGTAAAGCCGAGAAACAGTATCAATCAGTCCATTGGTCAGCGTTAACGTATCGC  
CAGAAATGGTGATATCACTGTCAATGCGACCGAATTTTGGCCCAAGAACAGCACTCTGTGCATCGATTTGGGCGTCC  
GGCAGCCACGGAAGTAAATGCGCTCCGTTGTGCGGAAAGGTGATGACGGCGTTGAATCACCAGGATTTTCCGACGCT  
CGGTTGTAATAAAGATATTTGATATTCGCCAGCCACGGCGGTTATTACGCATCGCTAGCGTGGCGTTGATTTACGCC  
CTTGGCTTCAACCAGGTTGCCATTTGCCGTCGGTTCGAAACAATACTCAGGTTATTCCATTGCTGATTTCCAGTGAC  
AACATAGGCGTACGTAACGTTATGTTGTGGGAAACTCGCTGCACCACCGACACTCTCCGACGCGCTTCTCGAACAG  
GGCAGCCACTCGGCACCATTATCGGCGGCATATTGAGTTCAACGCCACTTTGTTCCGGCAACGGCGGGAGCGTTTTAC  
TGCTGCCGCCAAATAGCACGATCGAGCGTCAGCTTTGACCAGCAACCAGCGGCTATTGAAATGATTATCCGCACCA  
GCCTGTCCGGTTAATCAAAGCTGTTGAGATTGCCATCAACCTAACGTTTACCCTAGTGTTTACCCCGAGGTTTGGC  
TAACGGTGAAGGTAAGTACTGCTCACATTTTAGATCGCGTTTACGCTCTATGTTATAGGTCGCACCAGCATGATAAG  
GCAGATCAATGCCACTTTACCATCCACGCCACGTCGCCACTCAATGCTTCGTTTACCGCTTACGGCAGAACCGCGGTT  
TTCGCCGTTGCCAGTTACCGTTGAGTTCACCGTACCTGGTAGGCTTTTGGCCCTTCTTTGGTGGAAAATCCAGTT  
CAACGGCTGATTAACCAGCTTGTGTGAGTGGTTCCTTTGCAGATCGCTATTGATAAAGCTGAATTTACCGCTCAAAT  
TTTTAGGGTGTGTCGAGTGGTTGATAAACAGACTGTTATTACGCAGCGTCACTTACCTTTCGCGGTTACAGTTCCG  
CCGTTACGCGGATATCAAGATGTAAGCGAGCATCACATCGCGTCGAGCTGGAGTCTTGACAGGTCGCACCCAGAGA  
ATCTTTAGCGGTGTCTCATCAAAGTAAGGGCAACGGCTTTACCCGGACCTTAATGTGAGCGTCAATCAGCAGTTTTT  
CTTTGAGTAGTCAGGACTCACTGCGGTAAGATTACTCGCGCGCACGCCAGATTAAACGCCATCGGTTTTTATCCAT  
AAACCGTCGTTAATAAAGTCCAGTTCAATATCAAGTTAGTTAATGCAGGCCAGTCCGGCTGGAAGGCAAACTTCGCGTT  
GCGCAGCGCACAGCACTTCAAAGTACCTTCTGTTGTTTATAGGGGAAGGTTGCGGATTGCCACCATAAACAGCG  
TCGCGTTATCCGCTTACCGCCCTGAATCGCGCCACTTAAGTAATCAACCAGGTCTTACCCTCAAGTTTTCCGGGAAA  
TAGCGCCAGGCTTGTGAACCATCATCGGTACTGATGCCAGCCAGAATACCAGCCAGGTTTATCGTTAGCAGGTTGCAG  
GTAACGAAAACCGCCGCGCATGGACGGCTTTGGCTTTAACGTCAATATTACGCCATCCAGCTGGAACCTTTGTTAT  
TGTTACGCCAGCTTATAGTTGCCTGGCCGTCGGCGATTTCTAGTGGCGCACGGAATACCGTTTGTAAAGGATCTTTGCC  
TGCTTATCGACGCGGTAAGCAAACCTTTTCAACGCTGCCGAAAGCGTCCCGGAGAAGTGTCCGCACCCGGTAATAA  
TTCCATTGCTTCCAGGCCAGATCGCTCCAGATGCCTGAAAACGGGCTTGTCTGCCGCTGAAGCGGGATATCCAGCG  
CCAGAGTGTAAATCTTCCGCTCGGTTGTGTTGAGCGCCAAACATCACCCAGTGCAGGTGAAAGTTTCCGCGCCAGCGG  
CGTATGCCCTCAGGCCCTGCCAGCTCCAGATTACTGGCGGAATCCGGAGTTCGCTACTGCGTTTATTGCTTTGCCGCC  
AACGTCCTGTTCCGGTATCCAGGCCAGCTCAATGCTCCGCTCGCCAGGTTTCCGCTCCATCGTGATCCGTGTATCGG  
GAATAGAGAACTGCCAGCCGGATTTTACGCGTAATATGCGCGTCAAGATTATCCACCGACAGCGTATGCGTTTGCTT  
TCGCCAACCGCTGGCACCGCCCTGTTTACGCCAGAGCTCACCGCGGTTACATCGCTTTGTGATCGTATCCAGCC  
TTCAAGGGAGAACTGTGCCGTTTTCCAGCGCAATATTGCTTGCATCCATTTACCAGCCACGGCTTACGGTCGATGTAT  
CCGCTGGAGCCAGCGGACCATTTGCTTAACAACCCCTCATCATCGCGCAAAATCCATGCGCACCTGCATCACGCCGTGC  
TGTCGGTAAGGCTGGAGAGGCTTACCAGGCTTCCGCACGGTGTGACGTGGATCGTTACGCCAGGTGAGTTGTTGGAT

CGCCAGCTCGGCGGCTGACCGGATGGCGTCAGGAACTGACTTCACTGTCGCGAAGATCGAAATGGTCAAATTGACGAA  
GAAACAGATCGCTGATGTGACTGGCTTCCAGACTGTCACTACCACCGCTGGTGATAGGAGTGTTGGTGCGAAAGCGC  
AGCTGCCAGAAAGTGAGGTGCGGAACTGCCAGCGCATATGTAACAGGCTCTGCCAGACATCCAGCGCCAGAGTAACCGC  
TTTAACCGAAAATTCGCCGCCATCTTTTAGTTCTGCACGGATGTCGTGTGCTTCAAGCGTCGGGCCAAAATTCTGCCAGC  
TGGCTGAGAGCTGACTGGCTTCTACCGGCATGCCAGTCGCGGATTCTATTTTGTGAGGATTTCCGGACGCCAGGCGTCA  
AGATGCGGTAAAGCAATACGCAGGCCGCTAACAGCAGGGCAGCGATCACAACGAGCGCGGCTCCAGTAAGCAGTAAAAAT  
CCCCGGCAATCGCCTCACCCGTCACCTCTGTCTGCTAAAAATGTGACTCAAAAACCCCTTGGCCGGATGGCGGCCAGCA  
TCTGTTTACATCATTACGACGTCAAATGCTCCTGGTTATAGAGCGGTTCAATTTGTACTTTAACCTGTTTGCCAACGAA  
AATTTCCACTTCCGCCAGCGAGTGTGACTCTTCGCCTTTCAAGGCTTTCAGCTACTGCCGGAGAAGCATAGACCAGGAAAC  
GGTCGGAGTCGTAAGCATGGTGGACACGAAACAATCTCGCGCATGATTTTCATAGCATACCGTTTCCACGGTTTTACCCTT  
CCGCGACCGTGGCAGGTTGGGCATTCTTACACAGTACGTGCTCAATGCTTTCGCGGGTGCCTTACGCGTCATCTCCAC  
CAGCCCCAGCGCCGAAAACCATTAACGCTGTTTTACCCGGTCTTGTCAACGCCTGCTCCAGCGAGTGCAGCACTC  
GGCGGCGGTGATCTTCATTATTCATATCGATGAAATCAATAATGATAATCCCGCCAGATTACGCAACCGTAACTGGCGA  
GCGATAGCCTGCGTCGCTCAATATTGGTATTGAAAATGGTGTGTCGTCAGATTGCGATGACCGACAAACGCTCCGGTATT  
GATGTCCACGGTGGTCATCGCTTCGGTCTGGTCGATAATGAGATAACCAACCGGATTTTCAGTTCTACTTTGCGTTCCAGCG  
CTCGTGGATTTGCTTTTCGACATCAAAGAGATCGAAAATCGGTCGGCTGCGTCTGTGTAATGCTCCAGTTCCTTGTCTATC  
TCGGGAATGTACTCCGAGGTGAACTCAAGTAACGCTTCGTAAGTCAGGCGTGAGTCAACCGGAATGCGGTCAGTTCCGGC  
ATCGGCGAAATCACGCAGAACACGCTGCGCCAGCGCCAGTTCGCGGTACAGCTGATAACGGGTCTGCGGGCGTTTTTTAC  
GCTCCATAACTTTGGTCCAGACGCGTTTTAGATAAGCGGCATCGGAGGCCAGTTCAGCCTCGCCAACCCCTTCCGCTGCG  
GTACGGATGATAAACCCGCCCTGCTGTCGCAATACTCTGCGACCACTTTTTTCAGGCGTTCACGTTCTGATTGCTTTTC  
AATACGTTGGGAAACCCCAACGTGAGAAGCCCTGGCATAAACACCAGATAGCGAGAAGGGAGCGTGATATCGGTGGTCA  
GGCGCGACCTTTAGTGCCAAGCGGATCTTTCACCACCTGCACCATCAGATCTTGCCCCTGACGAACCAGTTCGAGATG  
TCGCGCACCGTGAATTGCTTTTGTCTTACCCGCCACACATTCGGTGTGCGGCATGATGTCGGATGCATGAAGAAACGC  
GGCTTTATCCAGCCCAATATCTACAAAAGCCGCTGCATACCCGGAAGTACACGACTTACACGACCCTTGTAGATATTGC  
CTACTATTCGCGCTGCGCCTCACGTTCAATATGAATTTCTGCAGAATACCGCCATCAATATACGCCACTCGCGTTTTCC  
GAAGGCGTTACGTTTACTAAACAATTCAGCCGTGATGTTTATCCCTTTTCTCACGCAGTGCCTAAAATTACTTAATAATT  
CATACTTTCAACCAGCGGTAAGCCGACTACGGCGTGATAGCTGCCATTTATCTTCTGACAAAACAGCCACCCAGCCCC  
TGAATACCGTATGCACCTGCTTTATCTAACGGTTCATCGCTGGCGACATAGCCCGCGATGTCTTCGTCTGTTAACGTTCT  
GAAAGTCACATCGGTGACCAACAGGCAATCGAGAATGTGCTGGCTGTCGGCCAACGCCACTGCTGTCATACCTGATGGG  
TCTGACCCGATAATTTGCGCAACATCTGCGCCGATGCTCTGCGTTCGCGCGGTTTTCTCCAGCACTTCTCCGTTCCAGGATA  
ACGATAGTATCCGCACCCAGCACCGGGAGATCCTTTCGCCGTTTTCGCGGACACCTGCCCGTGCTTTCTCGCGCGCCAGACG  
CACAACTACTGCTGCGCGCTCTCCTGCGGTGACGCTGCTCCTCAATGCCCGTAACAATACGTTCAAAGGTCACGCCAA  
GTTGCGCAAGTAACTCCTGACGACGCGGAGAACCAGGAAAGCTAAATACAGAGAAGTCATAGAAAACCTTTATTGCACTGCAA  
ACTGCTGACGGACTTTGCGCATCAGCAAGAAAATCCACGGCCAGAGCACCCATTGACTACACTACTCCAGAACACTTCC  
GGTCTGAAAGAGACGTTAATCACTAAAACTCTGCCAGAAAACAATAATCCACCACCAGCGAAAGCAACATGACGAC  
CAGCGCCTGCTGCATAATGCGAGGTTGCGGAAAAGCTGGTATTTAGCGCCACCAGGTAAGCAATGATGCTCATCGCCA  
ATACGCGTACGCCAAGCGTCGAGCCGTGATCAGATCCAGTATGGCACCCATCACAACCTGTGCCACATTTACGGCA  
TGAGGCAAGGCCAGGATCCAATAACAACAAGATGAGTAACACCCAGTTTGGCCGAAAACAATCAGGTTATCCGGCCAGGG  
CATGATTTGCGAGCAACAGCGCAATGAGGAAAGAGAGCCAGATTACCCAGCGTCCCTGGCTACGATAGCTGCCACTATTG  
CCCTCCCGGCGACGCGCAGCGGTTGAGCACCACTTTGCGGGCGGTAGCCCTTTGTGGAGAGCGATTAGCAGCAGGCT  
GTGTCGGCGCAGCAGGCGAGTAGCTGCATTTCTGTGCGCGTTGCTGCGGAGTCGGCTGAGCGATCCCCGTTGCCGCT  
TCAGGTAACCTTTGGCCCCATCGCTGCTGGCGAAGGCAATACCTGCGGCATCATCTGCATCAGACGTTCTTAGCAACACG  
ATGCACCTCTTCCGGCGTATCGGGTTAGCGCCGTTACGATCTGCCCCCACAGCAGCAGGATAACGCAAAACGTTGCA  
GCCCTGAGTCGGACGCGCTGAATCACAGTATAAGCGCGCTGGGTATCGAGTTTTACGGAAGAGACAACCCGCGACCGGA  
TAGCCTTCCGGGAAACGACCGCCAGACCGGAAGTACCAGCACATACCAACACGAATATCCGTATTCCGGCGAGATG  
CTCAAGCTGCAAAATCATCCGTACAACCGTTACCGGCTGCAATTACCGGATATCGTTGCGCAGCACCTGGATTGGCAGCG  
CGTGGGTGCGATCACAATCAGCAGCACGCGACTGGTCAGTTTAGCGACGGCCACCACCTGACCAACAACACCTTTGTCG  
CTGATGACCGGCTGGCTTTCATAAACGCCATTAACGCTACCTTTATCGATAACAACCTTGATCGCTATAAGGATCGTTAAC  
CGTGAGATAACCTGAGTACCATTTTTCTGCTCATCTGACGCGAGCGGGAACCAGCAGCTCGCGCAGACGCGGTTCT  
CCTGTTTGTATTGTCCAAGCATCAGCAGTTCACTGTTTTTCAGCAACAGTTCTGACGTAACGCCGTTTTCAAGTTCT  
AATGGTACGCGAGGCCAGCGTCTGCGATACGCCATCCAGCAATTACGAGGAGCATTGGAACAAGTAGAAAGGACT  
GACGGCGGTATCCATATAAGTACGGATTTGACTGAACGTCGCCAGCGGCTGTGCGCAATAATAATGCCGAGCGCCACCA  
GCACCGCCAGAATAAGGCGAATCTGTAGCGACGGGCCAGGCTAAAAATTGGCTTATAAGTTATGCGTATTCTCGTATC  
AGACCAGGCAGGGTAAACAGACACTTCCCTGCCTGCATCCGATTAATCTTTCGCTGAACAGGTCGCCCGCGTGATGTCG  
ATCATTTCCAGCGCTTTGCCGCCACCGCGCGCCACACAGGTGAGCGGGTCTTTCAGCAACAACGACTGGAATGCCGTTTT  
TCCATTAACAACCGTCAAGGTTACGCAGCAGTGCACCACCGGTGAGCACCATGCCGCGCTCGGAGATGTCGGAAG

CCAGTTCGGCGGGCACTGTTCCAGTGAACCATTACCGCGCTCACAATACCGGTCAGCGGTTCTGCAGTGCTTCGAGG  
ATTTTCATTGGAGTTCCAGGGTAAAACCGCGTGGAACACCTTTCTGCCAGGTTACGGCCACGAACCTTCGATTTACAGGACTTC  
ATCGCCCGGATAAGCCGAACCGATTTCTGTGCTTGATACGTTCTGCGGTGGCTTACCGGATCAGAGAACCCTAATTACGAC  
GCACATAGTTGATGATAGCTTCGTCGAAACGGTCACCACCAATGCGCACAGAAGAGGAGTAAACCACACCGTTCAAGGAG  
ATAACAGCAACTTCAGTGGTACCACCACCGATATCAACCACCATAGAACCGGTGCTTTCAGAAACCGGCAGGCCAGCAC  
AATTGCGGCAGCCATCGGTTCTTCAATCAGGAAGACTTCACGGGCACCAGCGCCCTGCGCGGATTCACGAATTGCGCGGC  
GTTCAACCTGGGTCGCGCCAACCGGCACACAAACCAGAACGCGCGGGCTTGACGCATAAAGCTGTTGCTGTGCACTTGT  
TTGATGAAGTCTGGAGCATTCTTTTTCAGTACGAAGAAGTCGCGGATAACCGCCGCTTTTCATTGGGCGAATGGCAGCAAT  
ATTGCCCGGCTACGGCCAGCATCTGCTTCGCGTCATGACCTACTGCACTACGCTTTTTCGGTGAACCGGCACGATCCT  
GACGAATGGCCACCACGGAAGGCTCATTCAATACGATGCTTGTCTTTTACATAAATGAGGGTATTTCGAGTACCCAGG  
TCAATGGACAAGTCATTGGAACCATGCCACGAATTTTTTCAACATACTAAGGGATAATCCTGAAAGCTGGGGCGGAAA  
AGAAAATCCGTTACTTTACCAACCACGACGAGCAGCGACAAGGCGCAAAAATCATCTGCTACGGTGAATAATTAGTGACG  
TTCGTTTTCTTTGTTAACAATCTCTGCCTGAGTCCAGAAAGGCTAATGCATCAGCAGCATTCCTGCGCTGTTTGAACC  
GCGTAAGGTCATTATCTGCATATGTGCTGCAACAATCTGGCGAGCAGACAAGCACACTCCCATGAGACGCAGCGCGCAT  
TATTCATCGTGAACCGGATTAACCGGAGGTTAAACCGAGTATCTTTGTGAATATTTTTTTCAGTGTAGTCAAGTGGC  
TGTGAGGACGCGAAAAAATCCCTTGGCCGCTGTAACACCGCGTGAATCAGGGTCTGCCACTCGCTTTCGCGAACGAC  
GCCGGTGGCGTAAACCTGGTGTGCTGGTCCCGGAGCAGGCTTCACCAGGCTTTGAACCAGCAGCTGGTCTCCGTTTCGCT  
TCTCAATGTTTCTGACCAGCCCCGATGGAGCTTGAAGTAACCAATTAAGTTCTTTGATCCAATGTTACTTACCAGC  
GTCAAAACAGCCTGGTTGACGGCTACCCGTACCCCTAAAGCATTCACTAAACGAATAACAGGTTGTAACGACTGATATG  
TTGACCTACATCGGCTCTGCAAGTTCAATAATTATGCGTTTTGTTGATTTTTTACATTGCATTAACGTATCGCGCA  
GCCAACGCTGAAACGCGGGCGAATCAGCGACTCAACGGTAACCTGAATCGCCAGATTTTCTCTGGCCAGTAACGCAAT  
AGTGAATAAGACGGCTGATTTGCAGACGGTCATACTCTTCGATAAGCCAACTGCAAGACCATCGGCATATACTCCGC  
CGAGCTAACCTCTTATTACCATCGAAGATGCGGCACATGAGTTTCGCGATGATGAACCTGACCTTCGCGAGTAACCGCC  
GTTTTGATAAAGGCGGGCGCCCGGACTGAGCATTGCTCGATAAGCGTACGCCAGCGAACATTACCGCTCTTTTT  
TCAGGCAACGAGTCATCGTAAATAGCCAGCTATTGCCCTGCAATCCCGCATTACGCGTGGCAGACTCTGCATGTT  
CATTACCTGCTCGGTATCCTGACCCTACGCCAGGCGAGATACCAATGTGGATCATATCGTCGCGATCGAGCATTAT  
TGTTCCGGAAGGTATCAACGGCTTTGATTAACGACTACCGGCGATGCTCTGCTCTTTTTAACGTCCGGTCCGGAACAGC  
GCAGCAAACTACTGCGGTGTAACCGCCAGCAGTGCAGGAGTGCATCATAAATGTGCAGCAGATTCGTCAG  
AGTGAAGAAGTGTCTTCAACCTGGTGTGCCCCAGGATCGCTCAACATATTGAAATCCGGCAGACGAATCATCATCA  
CGATCCCGTGGGTACCTACTTTCTCTGATCTTCCAGTAAAGTTCGTAACGATTATCGAAAAAGAGTCGGTTATTGAGG  
CCGGTTTTACGTCCTGGCGGCATAAGAGCGGATCAGCGTATCAAGACGGCTGTGTTGTTTCGCGTGCCTTCTGAATTC  
ACGAAGCAGCGTATCCAGCGCACTGCTGGTCTGGGCGGCATTATAGATGGTTCCCAACACATTAGAGCCACGCTCAC  
CGTTAAGATACGAGTAGCCCGGTTTCCAGCAATCTTGGCCGGAAGTTGCCGTTGTAACCAGCGTACCGCCAGGAAG  
AGCATAACAATGATAAAGCAATCGCCCCGTGAGCGGCGGGTGGTCAACGAATGGAATAGTTGCCCATCGGATC  
CTGATAAACGAGCGCAACGACATCCCCGGATGCTTATCAACGGAACGCTCAGTTTCGCGAACAGATCGCTGGAGCCAA  
CTGGACGATAACTACCATTTCTGGCCAGGATATAAAGTGTATCACCATGGAGCAGGTACACGAACGATATCTGCC  
GACATCATTAATTCGGTAATTTGTGGCTTAATACGCTGAAGTATTCGACACAAGGTTGGTATCAATCGCCGTCCGCC  
CGCTGAACCGGATGACTAACTTATACTGAATGGCTTGTAGAACTTAGCGAACAGCCAGCAAAGTCAAAAAATTG  
TTAACCCTGGTGAACGAGTAAACAAGGCGGAAAAATTTGCTCGTAACTCATCCTTTGTGTTAACTCCGATAGTGAGGAG  
CGGCATAGCAAACTAGATTTATCTCGCAATTTATTGCGTTTCATCGGCTTTGCTTTTCCATTAGCGAGTATAGCT  
TCAGAAAATTTTTCAATCCATCATGCACATGAGGACCACTTATGCAGGCGTTACTTTTAGAACAGCAGGACGGCAAAA  
CTCTGCATCAGTACAGACTCTGGACGAAAGTCGCTGCCGAGGGCGATGTACGGTTCGATGTTCACTGGTTCGAGCCTG  
AACTATAAAGATGCGCTGGCGATTACCGGTAAGGGAATAATCATCCGTAATTTCCGATGATTCTGGGATCGATTTTGC  
CGAACTGTACGCCAGCGAAGATCCGCGTTTTATGCGGTCAGGAGGTTACTACTGGCTGGGGCGTTGGTGA  
ACCACTGGGGTGGGCTGGCGGAGCAGGCGGAGTGAAGGTGACTGGCTGGTTCGCGCAAGGGCTGGACGCGCGT  
AAAGCAATGATTATCGGTAATGCGGTTTTACCGCATGCTGTGTGTGATGGCGCTGGAAGATGCCGGTGTTCGCCGCA  
GGACGGGAGATTGTCGTGACGGGTGCCAGTGGTGGCTGGCAGTACCGCGTGGCGCTGCTGCATAAGTTGGGTTATC  
AGGTCGTTGCCGTTTCCGGTCCGAAAGTACCCATGAATATCTGAAAAGTTTGGTGTAGCCGTTCTCCCTCGTGAT  
GAGTTTCCGAATCCCGTCTCTGAAAAACAAGTCTGGGCTGGGCAATTGACACCGTTGGCGACAAAGTCTGGCAAA  
AGTGTGGCGCAAAATGAATTACGGCGGCTGCTGGCGCCTGTGGTCTGGCGGGTGGTTTTACTCTGCCAACACGGTCA  
TGCCATTTATTCTGCGTAATGTCCGTTTGAAGGGTGGATTAGTAATGACGCCACCAGAACGCCGCGACAAGCCTGG  
CAGCGACTGGTCGCCGATTTACCGAATCATTCTATACCCAGGCGCAAAAGAGATATCTCTGTCAGAGGCACCGAATTT  
TGCCGAGGCCATCATTAATAACCAGATCCAGGGTGCACGCTGGTGAAGGTTAACTAACCATTTAGCAGGGAATAATAAG  
AGAGGGAATCATTTTGAATCATTATTCAATCGGTTAACGGGAAAAAGCGGTTAGCCGACAGCTTTCTGTCGAACACCTT  
GGTCAGGAAGTTATAACAATCATCCAACTGGAAGTTCATGATTTGCACTGACCACAAATGATGCGCATTGATACTCC  
ACTAAACAGCTATTATTGATACGCCTCCGTCGCTGTTAGGTTTATGTTGCTTTCGCTGGGCGACGCTACGCTTAGCCCC



TTACTTATTTCTGGTACCATGGGGTGAATAATCTGATTTTGTGGACTACAAATTAATCACTCGAACCTATTTAATGCTG  
AGCATTGTCAATCGGTTAATTTTTCGCTGCTTTAGCATTACATCTATCCAGACGATGCAGTGAAAATTGGGTAATCCCCA  
GCAACCGCTGCGTAATGTCGTCTATCTTGTGCGGATCCTGGCATCCCTACATTATTTGTGGTCTGTGAAGATTATCTCAT  
TGCAGCCCCTCATCTTCGACGGGCTGGCTTTTCAGCTTTTTCACCTTACGTTATAAGAAGTTCGCTCGATGATGGCGCTAA  
TTTCGTGAATTGTGCGGCTTTGTTGCAAATTACACGGTGTGAAGTTATTTACATGTTAGCTGTTGATTATCTTCCCTGA  
TAAGACCAGTATTTAGCTGCCAATTGCTACGAAATCGTTATAATGTGCGACCTCGTCTCCCTGACGCAGTTTTTGGCGT  
GCGGAAAAGGTGACATTGGCGCAACGAAGGTATATTTTGTGTTTTTTCGCGGAGGATAGCAGCAGATCGCTGCAATGTC  
GTCAAGTCTAACATTGACACTCTGGGGCAAATAGACCGGCGTCCCGGCTGCTGGAATTTATCGCTATGCATACAGCTG  
TCGGGGCATAACGTTTACAGACGGCGGTGAAACGCTGTACAATCACACTAAACAAAGAGTACGGAACCCACTCATGGA  
TATTCGTAAGATTAATAAAGTATCGAGCTGGTTGAAGAATCAGGCATCTCCGAACTGGAAATTTCTGAAGGCGAAGAGT  
CAGTACGCATTAGCCGTGACGCTCCTGCCAAGTTTCCCTGTGATGCAACAAGCTTACGCTGCACCAATGATGCAGCAG  
CCAGCTCAATTAACGCAGCCGCTCCGGCGACCGTTCCTTCCATGGAAGCGCCAGCAGCAGCGGAAATCAGTGGTCACAT  
CGTACGTTCCCGATGGTTGGTACTTTCTACCGCACCCAAAGCCCGACGCAAAAAGCGTTCATCGAAGTGGTTCAGAAA  
TCAACGTGGCGATACCCTGTGCATCGTTGAAGCCATGAAAATGATGAACCAGATCGAAGCGGACAAATCCGGTACCGTG  
AAAGCAATTCGGTGAAGAGTGACAACCGGTAGAAATTTGACGAGCCGCTGGTGTGTGATCGAGTAAACGAGCGCAACATGC  
TGGATAAAATTTGTTATTGCCAACCGCGGAGATTGATTGCGTATTCTTCTGCGCTGTAAGAAGTGGGATCAAGACT  
GTCGCTGTGCATCCAGCGGGATCGCGATCTAAAACAGTATTACTGGCAGATGAAACGGTCTGTATTGGCCCTGCTCC  
GTCAGTAAAAAGTTATCTGAACATCCCGCAATCATCAGCGCCGCTGAAATCACCGGCGCAGTAGCAATCCATCCGGGTT  
ACGGCTTCTCTCCGAGAACGCCAATTTGCGGAGCAGGTTGAAACGCTCCGGCTTTATCTTCATTGGCCCCGAAAAGCAGAA  
ACCATTGCGCTGATGGGGCAGAAAATCCGCAATCGCGGCGATGAAAAAGCGGGCGTCCCTTTCGCTACCGGGTTCTGA  
CGGCCCGCTGGGCGACGATATGGATAAAAACCGTGCATTGCTAAACGCATTGGTTATCCGGTATTATCAAAGCCTCCG  
GCGGCGGCGCGGTGCGGTATGCGCGTAGTGGCGGCGACGCTGAACTGGCACAATCCATCTCCATGACCCGTGCGGAA  
GCGAAAAGCTGCTTTCAGCAACGATATGGTTTACATGGAGAATACCTGGAAAATCCTCGCCACGTCGAGATTGAGTACT  
GGCTGACGGTCAGGGCAACGCTATCTATCTGGCGAACGTGACTGCTCCATGCAACGCGCCACCAGAAAAGTGGTGAAG  
AAGCGCCAGCACCGGCTTACCCCGAACTGCGTGCCTACATCGGCGAACGTTGCGCTAAAGCGTGTGTTGATATCGGC  
TATCGCGGTGCAGTACTTTCGAGTTCCTGTTGAAAACGGCGAGTCTATTTTCATCGAAATGAACACCCGATTTCAAGT  
AGAACACCCGTTACAGAAAATGATCACCGCGTTCGCTGATCAAAGAACAGCTGCGTATCGCTGCCGTTCAACCGCTGT  
CGATCAAGCAAGAAGAAGTTCAGTTCGCGGCCATGCGGTGGAATGTCGATCAACGCGGAAGATCCGAACACCTTCCCTG  
CCAAGTCCGGGCAAATCACCCGTTTCACGCGACCTGGCGGTTTTGGCGTACGTTGGGAGTCTCATATCTACGCGGGCTA  
CACCGTACCGCGTACTATGACTCAATGATCGGTAAGCTGATTTGCTACGGTAAAACCGTACGTTGGCGATTGCCCGCA  
TGAAGAATGCGCTGCAGGAGCTGATCATCGACGGTATCAAACCAACGTTGATCTGCAGATCCGCATCATGAATGACGAG  
AACTTCCAGCATGGTGGCACTAACATCCACTATCTGGAGAAAAAAGTTCGGTCTTCAGGAAAAATAAGACTGCTAAAGCGT  
CAAAGGCGCGGATTTTCCGGCTTTTTTATTACTGGGGATCGACAACCCCAATAAGGTACAATCCCGCTTTTCTCACCC  
ATCAGGGCAAAAAATGGACTCGTTTTGTTGAGGCCATAAAGAGGCGCGCTGGGCGCTGGGGCTGACCCTTTTGTAT  
CTGGCAGTTTTGGTTAGTAGCCGTTACTTATCTGGCGTTGCCCGGTTTTACCGGCTTTCCGCGCTGGTTTGGATGGC  
CTGCATCCTGACGCCGCTGCTGTTATTGGACTGTGCTGGCGATGGTGAATTTATCTATCGCGATATCCACTGGAGG  
ATGACGATGCAGCTTGAAGTAACTTACCGCTGGTGCCTATCTGGTGGTGGTTCGGTATCTCGGTTTATGCGATGCG  
TAAACGGAGCACCGGACCTTCTTAATGAGTATTTCTCGGACCGCTCTATGGGCGGATTGTGCTGGCGATGACGC  
TCACCGCACCTATATCAGTCCAGTTCGTTTACGCGGCGGAGGAGCTGTTATAAATACGGGCTGGGCTGGGATTG  
CTGGCGATGATTGAGTTCCTGCAGTTCGGCTTCTACTCGGATTTCTCGGCAAGAAGTTTTGCGATTCTTGCGCGCCGCTA  
CAATGCAGTGACGCTGAACGATATGCTGTTTGCCCGCTACCAGAGTTCGTTCTGGTGTGGCTGGCGAGTTTGAGTTTGC  
TGTTTGCCTTGGTTGGTGGGATGACCGTGCAGTTTTATCGGCGGTGCGCGCTGCTGGAACCGCGGCGGATTTCCTTAT  
GAAACCGGGCTGCTGATTTTTGGTATCAGCATTGCGTTATATACCGCCTTGGTGGCTTTCGCGCCAGCGTGTGAACGA  
CACCATGCAAGGGCTTGTGATGCTGATTGGCACCGTGTGCTGCTTATTGGCGTAGTACATGCCGCTGGCGGCTTAAGTA  
ACGCAGTACAGACCTTCAAACCATCGATCCGCAACTGGTTACGCCACAAGGCGCTGACGATATTCTGTCGCTGCTTT  
ATGACGTGCTTCTGGTACTGGTGTGTTTTGGCGTATTGGCCTGCCGATACTGCGGTGCGCTGATCTCTTATAAAGA  
CAGCAAAGCCGTACATCGGGGATCATCATCGGTACGATTGTGGTCGCAATTTGATGTTCCGGTATGCACCTGGCCGGAG  
CGTTAGGTCCGGCGGTGATCCCGATCTACCGTACCGGACCTGGTATCCCAACGTTAATGGTAAAAGTGTGCCACCG  
TTTGCTGCCGGATCTTCTGGCTGCACCGATGGCTGCGATCATGTCGACAATTAACGCCCAACTGCTGCAAAGTCCGC  
TACGATCATTAAAGATCTCTATCTGAATATCCGTCCGGATCAAATGCAAACGAGACGCGTCTGAAGCGGATGTCGGCGG  
TAATTACGTTAGTTCTCGGCGGTTGCTGCTGCTTGCCGCTGGAAGCCGCCAGAAATGATCATCTGGTGAATTTGTTG  
GCCTTCGGTGGGCTGGAAGCCGTTTTCTGTGGCCGCTGGTGTGGGCTTTACTGGGAACCGCCAACGCCAAAGGCGC  
GCTAAGTGCAGTATGATCGTTGGCGGCGTGTGATGCGGTAATTCGCGACGCTGAATATTGATACCTGGGCTTCCACCCTA  
TCGTGCCCTGTTACTACTAAGTTTGTGGCTTTCTGGTCGAAACCGTTTTGGTACATCCGTCCCGCAAGCTACCGTT  
TTGACTACTGATAAATAAAGAGTTTTGCCATGCCTTGATCCAATGAAACTGAACACCACCGGCGCAACCGGGAAGAT  
CTTAGCGATGCGCTGATGGAAGCGGTGCCGTTTCTATCACTTTTTCAGGATACCCACGATACGCCAGTATTTGAACCGT

GCCGGGCGAAACGCGCCTGTGGGGCGACACCGATGTGATTGGTCTGTTGACGCTGAAACCGATATGAACGACGTGGTGG  
CGATTCTGAAAACCATCCGCTGCTCGGCGCAGGCTTCGCGCATAAAATCGAACAACTAGAAGATAAAGACTGGGAGCGC  
GAATGGATGGATAATTTCCACCCGATGCGCTTTGGTGAACGACTGTGGATCTGCCCTAGCTGGCGTGATGTGCCGGACGA  
AAACGCGCTAACGTGATGTAGATCCAGGGCTGGCGTTTTGGTACGGGTACCCATCCAACCACCTCTCTGTGCTGCAAT  
GGCTCGACAGCCTCGATTTAACCGGTAACAGTCAATCGACTTTGGCTGTGGTTCGGCATTCTGGCGATCGCGGGCTG  
AACTGGGTGCAGAAAAGCCATTGGTATTGATATCGATCCGAGGCGATTAGGCCAGCCGGATAACGCCAACGTA  
TGCGTTTTCTGACCGTCTGAACTCTACTTACCGAAAGATCAGCCAGAAGAAATGAAAGCCGACGTGGTGGTTCGTAACA  
TCCTTGAGGCCCATTACGTGAACGGCACCGTAAATCAGCGTCTGCCGGTTTCAGGCGGTTTGCTGGGCTTTCCGGT  
ATTCTGGCAAGCCAGGCAGAGAGCGTTTTGTGAAGCTTATGCCGATAGCTTCGCACTGGACCCGGTCTGGAAAAAGAAGA  
GTGGTGCCGTTATACCGTCTGAAGAATTAACCTTCGCATCGCGGTAGGGTGACCGGGGGGGAAGTGCAGCAAGCTCAC  
AAAAGGCACGTAATTTGCCGATTATTACGCAAATTTGCGTGCCAAATTTTATTATATAAAGAAAAATTGAGAATTA  
CTCAAATTTCTTTGAGTGTAATTTTAGTCACTATTTCTAATATGATGATTTTTATGAGTAATTATCGCACCACGCTCA  
TTTTAAATGCAATTTTGTATCCATCTCAGAGGATTGGTCAAAGTTTGGCCTTCATCTCGTGCAAAAAATGCGTAAT  
ACGCCGCTTCGAGTCACAGTATGGTCATTTCTAACTCATGCGCATCGGACAATATCAGCTCAGAAATCGCTGATCGC  
AGGCCCATGGCTGGCATTACAGACAGACCTTTTCGACGTTGTCTACGAGATGGGAGCCGGATTGACAGTATCCGAGA  
TGATGCTTTTAACCCACAGGTTTTGGGAAAGCGACAAATCTCGTTTACGGATGGTGCACATTGATGAACCCGGTATTCGC  
ACCGTGCAAATGCTGGTAGCGATCCGAAAGAAATGGCAGATGACGACGATTAACGTGGAAGCGGTGCCAGATTAT  
TGATATCAATATGGGTTGCCCGGCTAAAAAGTGAATCGAAGCTCGCAGGTTAGCCCTTTGACGTACCCGGATGTCTG  
TTAAATCGATCCTTACCGAGGTCGTAATGCAGTGGACGTTCTGTACCTGAAGATTGCAACCCGGTGGGACCCGGAA  
CACCGTAACTGCGAAGAGATTGCCCAACTGGCTGAAGACTGTGGCATTAGGCTCTGACCATTCATGGCCGTACACGCGC  
CTGTTTGTCAATGGAGAAGCTGAGTACGACAGTATTCGGGCAGTTAAGCAGAAAAGTTTCCATTCCGTTATCGCAATG  
GCGACATTACTGACCCGTTAAAGCCAGAGCTGTGCTCGACTATACAGGGGGGATGCCCTGATGATAGGCCGCGCAGCT  
CAGGGAAGACCCTGGATCTTTCCGGAATCCAGCATTATCTGGCACTGGGAGTTGCTGCCCCCGTGCCTTTGCGAGA  
GGTTAAGCGCTTGTTCGCGCACGTTCCGGAATGCATGACTTTTTATGGTCCGCAAAAGGTTACCGAATTCACGTA  
AACAGTTTTCTGGTATCTCCAGAACACGCTCAAATGACAGTTTTCCGCGCACATTCAACGCCATTGAGGATGCCAGC  
GAACAGCTGGAGGCGTTGGAGGCATACTTCGAAAATTTGCGTAAACAGAAATAAAGAGCTGACAGAATATGTTGCAAC  
AACCGTAAATTTCTGACGTAAGCCTTACCGTAACTCTCAGGATCAGGTAACCCAAAAACCCCTGCGTGACTCG  
GTTAAACAGGCACTGAAGAACTATTTTGTCAACTGAATGGTCAGGATGTGAATGACCTCTATGAGCTGGTACTGGCTGA  
AGTAGAACAGCCCTGTTGGACATGGTATGCAATACACCCGTTAACCAGACCCGCTGCTGCGCTGATGATGGGCATCA  
ACCGTGGTACGCTGCGTAAAAAATGAAAAATACGGCATGAATAATTAGGTTAGCTAAATGCTTGATTAAAAAGGCG  
CTACTCGGCATGGGGAAGCGCTTTTTTATAGGTGTCAAAAGGGAGTGACCATGAGAACAGGATGTGAACCCGACCCGGT  
TTGGTAATGAAGCTAAGACCATTATCACGGTATGCGCTTCCGGAACCTAAAAAGATCCCCGCCGAAAGTGTGCTGATCTG  
ATCTTTGCCGACCCACCATATAACATCGGTAATAATTTGATGGTCTGATCGAAGCCTGGAAAAGAAGTCTGTTATCGA  
CTGGCTGTTTGAAGTGATTGAGAGTGCCACCGCGTTCTGAAAAGCAGGGCAGCATGTACATCATGAACAGTACGGAAA  
ACATGCCCTTTATCGATCTCCAGTGCCGCAAGCTTTTTACCATCAAAGTCCGATCGTCTGGTTCATATGACAGTTCTGGA  
GTGCAGGCGAAAAAACAATACGGCTCCATGTACGAACCCATCTGATGATGGTAAAGACGCAAAGAATAACATTCAA  
CGGTGATGCTATTCTGGTAGAAGCCAAACCCGATCGCAGCGCGCTTGATCGATTATCGCAAAAATCTCCACAGCCTT  
ACAATCATAAAAAGTACCGGGTAACGTTTGGGATTTTCGCGCGTGCGTTATTTGATGGATGAATATGAAAACCCCG  
ACGCAAAAACCGGAAGCCTTACTGAAACGCATTTATCTGCCTTCCAACCCAGGCGATATCGTTCTGACCCGTTTTC  
TGGTAGCTTACTACCGGTCCGATGCCAGCAGGACGAAAATTCATTGGTATTGAGATCAACAGCGAGTACATCA  
AAATGGGGCTTCGACGGCTGGATGTGCGTTCGATTACTCTCGGAAGAAGTGGCGAAAAGTAAAAAAAGAAAGACCCG  
AACCTGTCAAAACGAAGCCGGTTAAGCGAAGTTGACCCGATCTCATTACAAAGTAAAGGATGTGTAAGCCTGGTTTTCA  
GATTATTCATTTCTGTGATATTTCTGCCAGACTTGTTTAAACATGCACAGGCTCAGGTAATGATTCGCAAGTATTGGT  
GCTGCTGTTTTGCTGTCTTCTTTTTCTGTTTACTTTACTGATGCAGTGGATTGAACTGCTGGCAACAGAAACAG  
ACAAATGCCGCAATATGAACCTAGTTAATCCACTAAAACCTGGTTAACTGTGACGAACTGAATTTTCAGGACAGAATGTGA  
ATTTACATGACACTTAATTCATTCGTTTGTGATGAATTAATTTCTGTTATGTTTTACTGTCGATGAACATTTTAATACGTT  
ATCGACCAGAGCGGGGCTTGTATAAAGATCATAACCCGCCATATTCATTAACCGATTTTGAACAATTCGCTGAAGG  
CACCATCAATAATAATCATACAACATCTAAATCGAGGTTATTTGCTACACAACCTTGTGCTGACACGCTGCAATACT  
TCGCGGAGAGTCTGCGGATTAAGCCCATTTTTCGCGTATCACTCCCTCGGCCAGCATCTCATATTAATTCACATTT  
GTGATATAAGATTTTTCAGCAACGCTGCTGGCGGGGAATTTGGCAATATATTGCAAGCCGACAATCAATTTTTACGCA  
ATTGTTGAAACGGGTATGCTCTAATCCAGCCGTTAAGTGTTCCTGGATTAACCTCCGCAATGAAGGCTGTTGCAACCA  
ATCTCATTAAACAGTTGAGTCTTGTTCGAAAGTGCAGTAGATAGCGCCACGCGTAACGTTAGCGGCGTGGCAATGTC  
GTTGAGCGTCTGTTGCTTACGCCATGCTGCGCAAACCTGGCGGATGGCAGTTTCAATCAGTTCTTCCGGGTCTTCAGAG  
CTTCCGGCTTTGGTTCTTTTTGCCATGATTAATTTTCAGGAAATAAATATATTGACACAGAGTGAGAAAATAGCGAAGG  
TTAATCTATCACCTAATGTGATTTATACGAGAGGCTAATATTGAGTTGCTATAAATCGTTAAATAAATAATATATATTA  
TTACCTAAGATACATCACTACATCAATATATATTCAATTTACGAGGTTTTAATTCTGCCTCTTTCAACCCGCGTCAA

AATAAACAGTAGAATATTAATCTTTTTTTGTGTTTATGTGCCTTGAGATGCCTGTATTTCATAACTATTCCTTACATCGA  
CGAATGATAATTTGTAGGATAGCGAAGTATTTTTCTTTCTGCGAGTTAACCGTTGCCCTTTTTGGGTAATAACCGCGC  
TTTTGGTTTTTTGAGGAATAGTAATGACGAAACATGCCAGTTTTTCTCCTGCTCCTCTTTATTCTGATCTCCGCGGCT  
TTAATCGCCGGTTGTAACGATAAGGGAGAAGAGAAAGCTCACGTCCGTGAACCCGAGGTTACCGTTCATATTGTAATAAAC  
GGCCCCGTTAGAAAGTTAAGACTGAATTACCAGGCCGCACCAATGCTTATCGTATAGCCGAAGTTCGCCACAGGTTAGCG  
GGATCGTACTGAATCGCAATTTCACTGAAGGCAGCGATGTGCAAGCAGGCCAGTCCCTGTACCAGATCGATCCCAGCGACC  
TATCAGGCAAATTATGACAGCGCGAAAGCGAACTGGCGAAAAGTGAAGCCGCCCGCCATCGCGCATTGACGGTAA  
ACGTTACGTTCCGCTCGTGGGTACGAAATACATCAGCCAGCAGGAGTACGACCAGGCCATTGCTGATGCTCGTCAGGCCG  
ATGCCGCGGTGATTGCCGCAAAAGCCACAGTCAAGAGCGCTCGCATCAATCTTGCTTATACCAAAGTCACTGCGCAATT  
AGCGGACGTATCGGCAAATCGACTGTGACCAGGCGCTTTGTCTACTAATGGGCAAACGACTGAACTGGCGACTGTCCA  
GCAGCTCGATCCTATCTACGTTGATGTGACCCAATCCAGCAACGATTTTATGAGGCTGAAGCAATCCGTAGAGCAAGGAA  
ATTTGCATAAGGAAACGCCACCAGCAACGTAGAGTTGGTCATGAAAACCGTCAAACCTATCCCCTGAAAGGTACGCTG  
CAATTCTCCGATGTGACCGTTGATGAAAGCACCAGCTCCATAACCCTACGTGCTGTCTTCCCTAACCCGCAACATACGCT  
TTTGCCGGGTATGTTTGTGCGTGCACGGATTGATGAAGGCGTCCAACCTGACGCCATTCTTATCCCAGCAACAGGGCTTA  
GCCGCACACCCTGGTGTGCAACCCGCTGATTGTTAACGATAAAAAGTCAGGTTGAAGCGCGCCCTGTCTGTTGCCAGT  
CAGCGGATTGGCGATAAAATGTTGATTAGTGAAGGATGAAATCTGGCGATCAAGTCATTGTCAGCGGCCTGCAAAAAGC  
GCGTCCGGGAGAGCAGGTTAAAGCCACTACCGATACCCCCGCAGATACTGCATCGAAGTAAGGTAATCTGACATGGCAAAA  
CTTTTTTATTGACGACCAGTATTTGCATGGGTGCTGGCCATTATTCTGATGATGGCGGGCGCACTGGCGATCCTACAAT  
TGCCCGTGCCTCAGTATCCAACAATTGACCAGCTGCGGTTTTCTGTTTTAGCAAACTATCCGGGCGCTGATGCGCAGACC  
GTGCAGGATACGGTGACGCAAGTATCGAACAGAATATGAACGGTATCGATAACCTGATGTATATGCTCTCACCAGCGA  
TTCCGCGGTAGCGTGACAATTACCCTTACCTCCAGTCCGGGACCGATCCTGATATCGCGCAAGTGCAGGTGCAGAACA  
AACTCCAGCTCGCCACGCCGTTGCTGCCGAGGAGTTGAGCAGCAGGGATCAGTGTGAAAAGTCCAGTAGCAGCTAT  
TTGATGGTGGCGGCTTTGTCTCTGATAACCCAGGCACACAGGACGATATCTCGGACTATGTGCCCTTAACGTTAA  
AGATACGCTTAGCCGTGTAATGGCGTCCGTGACGTACAGTTTTCGGCGCACAGTATGCGATGCGTATCTGGCTGGATG  
CCGATCTGCTAAACAAATATAAACTGACACCGGTTGATGTGATTAACCAGTTGAAGGTACAGAACGATCAGATCGCTGCC  
GGACAGTTGGCGGAAACGCCAGCGTTACCAGGGCAACAATTGAACGCCTCGATTATTGCTCAGACGGGTTAAAAATCC  
GGAAGAATTCGGCAAAGTGACCCTGCGCGTAAACAGTACGGCTCGGTGGTACGCCGTAAGATGTCGCACGGGTTGAAC  
TTGGCGGTGAAAACATAACGTTATCGCTCGTATCAACGGAAAACCGCGGGCGGCCCTGGGGATTAAGCTGGCAACCGGC  
GCGAATGCTCTCGATACCGGAAAGCCATTAAGGCAAACTGGCGGAATTACAGCCATTCTCCCGCAGGGAATGAAGGT  
TCTTACCCTTATGACACCACGCCATTGTCAGCTTTCTATTACGAAAGTGGTAAAAACGCTGTTTCAAGCCATTATGC  
TGGTGTCTCGGTGATGTATCTGTTCTTGCAAGATATGCGAGCAACGCTGATCCCCACCATTGCGGTACCCTGGTGTG  
TTAGGGACGTTTGCATCCTCGCCGCTTTGGTTACTCCATCAACACACTAACGATGTTCCGGGATGGTGTGTTGCCATCGG  
GCTGCTCGTGCATGATGCGATAGTGGTGGTGGAGAAGCTCGAGCGGTGATGATGGAGGATAAGCTCCCGCCAAAAGAA  
CGACGGAATAATCGATGTCGCAAAATCAGGGCGCACTGGTGGGTATCGCGATGGTGTGCTGTCAGCGGTATTTATTCCGATG  
GCATTCTCGCGGTTCTACTGGGGCAATTTATCGCCAGTCTCTATCACCATCGTTTCCGCAATGGCGCTTTCTGTCT  
GGTGGCATTGATTCTTACCCTGCGTTATGTGCAACGCTGTTAAACCCGCTCTGCTGAGCATCACGAAAAAAGGGCG  
GTTTCTCGGTTGGTTTAAATACCACCTCGATCATAGCGTTAACCCTACACCAACAGCGTGGCAAAATCCTCGGATCC  
ACAGGACGATATTTACTGATCTATGCGCTGATTGTTGAGGAATGGTGGTGTGTTTTACGCTTCCGCTCTTCTTCT  
ACCTGAAGAGGATCAGGGTGTCTTTCTGACCATGATTAGTTACCCGCTGGCGGACGCAAGAGCGGACGCAAAAAGTGT  
TGGATCAAGTTACGGATTACTATCTGAAGAACGAGAAAGCGAAGTTGAAAAGTGTCTTTACGTTAAACGGCTTTAGCTT  
AGCGGCCAGGCACAAAACGCCGATGGCTTTCGTAGCTGTAACCCGTTGGGAAGAGCGTAATGGTGACGAAAACAGTGC  
GGAAGCGTAATCCATCGTGCCAAAATGGAATGGGCAAGATCCGCGACGGTTTTGTCAATTCATTCAATATGCCAGCCA  
TTGTTGAACTGGGCACGGCAACGGTTTTGACTTTGAGTTAATTGATCAGGCTGGGCTGGGTACGATGCCCTAACCCAG  
GCCCGTAAACGTTGCTTGGTATGGCGGCGCAACATCCTGCCAGCTTAGTCAGCGTGCGCCCTAATGGCTGGAAGACAC  
CGCGCAGTTTAACTGGAAGTTGACCAGGAAAGGGCAGGCATTAGGTGTTTCACTTTCTGACATCAATCAGACCATTT  
CAACGGCGCTGGGTGGGACTTACGTTAACGACTTATCGACCGTGGCGCGTAAAAAGTTGATGTTACGGCGGATGCC  
AAATTCGATGCTGCCAGAAGATGTCGATAAACTTTATGTCGCGAGCGCAACGGCGAAATGGTGCCATTCTCGGCCCT  
TACCCTTACATTTGGTGTATGGCTCTCCGCGACTGGAACGCTACAACGGTCTGCCGTCAATGGAGATTGAGGGGAAAG  
CCGCGCCAGGAACGATTCCGGCGATGCCATGGCGTTGATGAAAACCTTGCCTCAAAATTACCTGCGGGCATTGGTTAT  
GACTGGACGGGTATGTCGATCAGGAACGTTATCGGGAAACCAGGCTCCCGCTCTGGTAGCAATTTCTTTGTGGTTGT  
TTTCTGTGCCTGCTGCACTCTATGAAAGCTGGTCAATTCCTGTCTCGGTTATGTTGGTAGTGCCGTTAGGGATTGTCG  
GCGTGTGCTGGCGGCGACACTCTTAAATCAAAAAATGACGCTACTTTATGGTGGGCTTGCTAACGACAATTGGCTTG  
TCGGCAAAAACGCTATTTTGATCGTTGAGTTCCGTAAAGATCTCATGGAGAAAGAGGGTAAAGGTGTTGTTGAAGCGAC  
ACTGATGGCAGTACGTATGCGTCTGCGTCTATCCTGATGACCTCTCTGCCTTTATTCTCGCGTATTACCCTAGCTA  
TCAGTAAACGGTGCCGGCAGTGGCGCGCAGAACGCTGTGGGTATCGGGGAATGGGAGGAATGGTCTCTGCAACGTTGCTG  
GCAATCTTCTCGTACCGGTGTTCTTTGTGGTGATCCGCCGTTGCTTTAAAGGATAAATCAGAAACATAAAGGCGCTTTT

GGGTGCCTTTATTATTTCCAGTGAAACCATAAAAAATTAATAAGATATTCTTCTGCTCACTCTTTAAAAGCTTTCTATAG  
TTCCCGCTCCCTTCACTATTTTTACAATTCACATAATTTGTCATTATTCATTCCGCAAGATTTATAACCTCCGGTGATAA  
AATGGCATTACAGCTCGTTAATAAGAGAGTAACTTATTAAGCGTTAGCGTTTATTACTGAGGTAACACCATGAAAAGATT  
AATTCCTGTGGCATTGCTCACCGCATTGCTGGCGGGCTGTGCTCACGATTGCCCTGCGTTCCGGTTTATGACGATCAGG  
GTCGTCTGGTTCACACCAATACCTGTATGAAAGGCAGGACTCAGGATAACTGGGAAACGGCTGGGGCTATTGCCGGCGGG  
GCAGCTGCTGTTGCTGGCCTGACGATGGGGATCATCGCTCTATCGAAATAACTGAAACAGGGCGCGGAGTTCCGCGCTCTT  
TTTAACGATACAGTATCTCTCCATAAGATAAAAATATTGCTATATTCTGCTGGGTAATTCCCTGCTGATTTAGCATGTTAC  
ATCGCGTTATTTGCTGCTTTCGAAATAACGCATCAATTTAATTTTCACTTCCCACCAGAAATATACTCACGCTAACA  
ATCATTATTCTGCTTAGTAAAAACGCGTAAATATTTTGCGCCAAAATGTGGCGCATGTTTCATTTTTCGACCATTGCGG  
GGCGCTGTTTTTATTATTTCTGTCTACACTCAGCTTATTGCGACGCGAAATCGTGCGCAAAAAGCTGGCACTACTTTTGC  
TTATAAGAGGATGGCCACAGACAGGTAAGAGACGTTTTCCCAAACGTCCTATAACGATAATTTTGCCTCACAGGAAGCAT  
TATGAAAAAGATGATGATAGCCACACTGGCTGCCGCCAGCGTGTGCTTCCGTTGCAAATCAGGCGCTGCTGGCGCGAC  
GCTTGATGCCGTTTCCAGAAAAAGGTTTTGTGCAATCGGGGATCAGTGATGGATTACCTGGTTCTCTTATGCCGATGCTG  
ACGTAAGTTTTCAGGTATTGATGTTGATATTTGTCGTGGTGTGCCGCTGCTGATTTGGTGACGACAGCAAAAGTAAAA  
TATACCCCGCTCACTGCAAAAAGAACGTTTACCCTTTACAGTCAGGGGAGGTTGATTTGCTCTCCCGTAAACGACCTG  
GACTTCATCTCGCGATGCCGGGATGGGAATGGCATTACCAGCGTCACTTATTACGACGGCATTGGCTTCTGACGCACG  
ATAAAGCGGGCTAAAAAGCGCAAGAACTGGATGCCGCTACCCTGTATTACGGCGGGTACTGATACGAACTCAAC  
GTCGCCGACTACTTCAAGGCAAAACAATATGAAGTACACACCGGTGACTTTCGATCGCTCTGACGAATCAGCGAAGGCACT  
GGAATCTGGTCTGCGATACGCTGGCCTCGGATCAATCACAAGTATGCCCTGCGCATCAAATTAAGCAACCCAGCTG  
AATGGATTGTCTTACCAGAAAGTTATCTCAAAGAACCGTTGGTCCGGTAGTTCGTGCGGCGATGATGAATGGTTCTCG  
ATTGTACGCTGGACGCTTTTCGCCATGCTGAATGCTGAAGAGATGGGCATCAATCCAGAACGTCGATGAAAAAGCGGC  
TAATCCAGCAACGCTGATATGGCACATCTGCTGGGTAAGAAGCGGATTACGGCAAGGATCTGAAGCTGGATAATAAAT  
GGGCTATAACATCATCAACAGGTTGGTAACTACTCGAAATTTTTGAGCGTAACGTAGGTTAGAAAAGCCGCTGAAA  
ATTAACGTTGGCAAAATAATCTCTGGAATAACGGCGGTTTACGTACGACCGCCGTCGTTAAGTCGGTGTGAGGTA  
ACGAGCGCTCGTACGGCGCGCTCTCTCAGCGTTATGCTTCCGAGTTTCTATGTCTCATCGCCGCTCAACCGTTAAA  
GGCTCACTCTTTTTGCCAACCTACGGTTCGCGCTGTTTATCCAGATCCTTCCGTTGTTGCTGTTGTGGCATTGT  
TGGTTGGTTATTTCAACAACGTAACGAATCTCAATAATCGTGGCATTACTTACGTTTTGCTTTTCTGGATCGCGCG  
CTGGCTTCGGTATTGTCCAGCATTGATCGATTACCAGCGGGCAGACCTACGGACGCGTTTTTATTGTGGCTTACTC  
AATACGCTACTGGTTTCTGCATTGTGATTTGTTGCTTCTGTTTTGGGCTTCTTATCGGTCTGGCGAGACTTTCGGA  
TAACTGGCTGCTACGAAAGCTTTCCACAATTTATATTGAGATCTTCCGTAATATTTCCCGCGTCTGCAAAATCTTCTCT  
GGTACTTTGCGGTGTTGCGCAATTTGCCCGGACCACGCCAGGCTGTGAGCGGTTTTGATCTGGCCTTTTTGAGCAATCGT  
GGGCTTTATATTCCGTACCCGACGCTGGGAGACGGATTTATTGCGTTTTATCCTGGCTGTTGTTATGGCTATAGTCCTTTC  
TGTTGGGCTATTCCGCTTAATAAAAACATACCAGATAAAGACCGGACAACGCGCCGACCTGGCCGATCGCCGAGTGT  
TGATCATTGGTTTTGCCTTACTGGCGCAATGGCTTTTTGGCGCAGCACTACACTGGGATGTCCAGCCCTACGAGGCTTT  
AACTTCCGCGCGGGATGGTTTTAATCTGAACGGCAGCCTTAAACGCTGGCACTTTCGGTTTATACATCTGCATTTAT  
CGCCGAGATTATCCGCGCTGGATCCAGGCAAGTCCCTTATGGTCAACATGAAGCGGCTCGGTCACTGGGATTACCAACC  
CGTTACGCTACGCCAGGTCATTATCCCCAGGCAATGCGGGTATTATCCACCGTTAACAGCCAGTATCTCAACATC  
GTCAAAAACCTCTCTTCCCGCGCTATTGGCTATCCGATATGGTTTCGCTGTTTCCGGCACCCTGCTGAATCAGAC  
TCTATAAACCGCCGATCGGATCGTTGAAACGCTAAGGAGTCATGATGACAAAAGTATTGCTGCTCATCCCCCGCGCCCG  
GCGAGCCATAACTCAAGCCGCGGATGGTGTGGGTGCGAAAAAATCTGTTCTCCAGCTGGAGCAATAGCCTGCTGACTAT  
TGGTGCATATGGTTGATGTGGAACTGATCCACCGTTGCTGAACTGGGCAATTTTGCAGGCTAACTGGGTTGGCTCAA  
CGCGTCCGACTGCACAAAAGCCGGTGCCTGTTGGTCTTATCCACGAACGATTTGGTCAGTTTATGTATGGGCTTTAC  
CCACACGACCAACGCTGGCGAATTAACCTCGCATTACTGATTGGGCTTGTGTCGATCGACCAATGTTCTGGAAAATACT  
CCCGCATCGCGGTGCTATATTGCGGCTGGGCGGTGATTTACCCACTGATTGTCTGGTGGCTGATGTATGGCGTTTTT  
TTGCTCTTGGCGGGTGAACCCGGCAATGGGCGGGCTGACGCTAACTTTAATTATTGCATCAGTTGGGATTGCGGGG  
GCGTACCCTGGGGATCTTACTGGGTTAGGTCGCCGCTCCCATATGCCGATTGTGCGTATCTTATCGGTCATTTTTAT  
CGAATTCTGGCGGGGCTGCGCTGATTACCGTCTGTTTATGTCTTCCGTCATGCTGCCGTTGTTTATGGCAGAAGGCA  
CCAGTACGACAAATTGATCCGCGCTGTTGGCGTATCCTGTTTCACTCAGCATATGTTGCGGAAGTCGTGCGAGGT  
GGATTACAGGCGTCCATAAAGGGCAATATGAAGCGGACAGGTCGCTGGCGTTGGGTTACTGAAAACCTAGGGGCTGGT  
TATTCTGCCACAGGCTTGAAGCTGGTAAATCCTGGCTGGTAAATACCATCATCGCACTTCAAAGATACCAGCCTGG  
TGATCATTATCGGTTGTTGATCTTTTCACTAGGTTTCAAGCGCAACCGTTGATCCCGCTGGTTGGGTTATGTGACG  
GAAGGGTATTTTTGCCCGCTGATCTACTGGATCTTCTGTTTCAAGCATGTCCGCTATAGCCAGTATCTGAAAAACG  
TTTTAACACCGGGCTACACCGCATTGAGGACACTATGAGCAAAATTTTACTGCAACCTGCTAACCGGATGATTACGCTG  
GAAAACGTCATAAATGGTATGACAATTCATGTTTTGAAAAATAAATTTAACCGTCAACCGGGAGAACGGATCGT  
TCTGTGTGGCCCTCAGGTTCCGGTAAATCGACAACCATTCGTTGATTAATCATCTGGAAGAACATCAACAGGGACGGA

TCGTGGTAGATGGCATCGAACTTAATGAAGATATCCGCAATATTGAGCGGTCAGGCAGGAAGTGGGAATGGTCTTTCAG  
CATTTCATCTCTCCCTCATCTGACCCTTTACAGAACTGTACCCTGGCACCGATTTGGGTACGCAAGATGCCTAAGAA  
AGAGGCTGAAGATCTGGCGGTGCATTACCTAGAGCGGGTGAGAATTGCCGAACATGCGCATAAGTTTTCCCGACAGATTT  
CAGGTGGTCAGCAGCAACCGGTTGCCATTGCGCGTTCGCTGTGTATGAAGCCGAAAATTATGTTGTTTGATGAGCCAACG  
TCGGCGCTCGATCCTGAGATGGTGAAGAGGTTGCTGGATACGATGATTGGGCTGGCGCAGTCGGGTATGACAATGTTGTG  
TGTAACACATGAGATGGGTTTTGCACGAACCGTCGCTGACCGGTAATTTTTATGGATCGTGGGAAAATAGTGGAGCAA  
CTGCACCTGATGAATTTTTGCGCATCCTAAATCAGAGCGTACGAGGGCATTTTTTATCGCAGGTAATCCATTAATGAAT  
GTTAGTTGAAAAGCAAAAAGGCCATCCTTTGCGATGGCCTTTGCTTGTATTGATGTCTGGCAGTTTATGGCGGGCGTC  
CTGCCCGCCACCCTCCGGCCGTTGCTTCGCAACGTTCAAATCCGCTCCCGCGGATTTGCCTACTCGGGAGAGTGTT  
ACCGACAAACAACAGATAAAAACAAAAGGCCAGTCTCCGACTGAGCCTTTTGTATTTATTTGATGTCTGGCAGTTCCTA  
CTCTCGCATGGGAGACCCACACTACCATCGGCGCTACGGCGTTCACTTCTGAGTTCGGCATGGGGTCAGGTGGGACC  
ACCGCGCTACTGCCGACAGCAAATCTTTCTAATCTGCCGAACTTAACCTAAAAGTGGTGTGTATACCCAGAGTCG  
AACTGGGACCTCACCCTTACCAAGGGTGCCTCTACCAACTGAGCCATATCAGCACGTAATTTGATGCCTGGCAGTT  
CCCTACTCTCGCATGGGAGACCCACACTACCATCGGCGCTACGGCGTTCACTTCTGAGTTCGGCATGGGGTCAGGT  
GGACCACCGCTACGGCCGACAGCAAATCTGTTTATCAGACCCTTCTGCTTCTGATTAATCTGATACAGGCTG  
AAAATCTTCTCTCATCCGCCAAAACAGCTTCGGCGTGTAAAGTTAAGCCTCACGGTTCATTAGTACCGGTTAGCTCAAC  
GCATCGCTGCGCTTACACACCCGGCTATCAACGTCGTCGCTTCAACGTTCTTCAGGACCTTAAAGGGTCAGGGAGA  
ACTCATCTCGGGCAAGTTTCGTGCTTAGATGCTTTCAGCACTTATCTTCCGCATTTAGCTACCGGCAGTGCCATTG  
GCATGACAACCCGAACACCAGTGATGCGTCCACTCCGGTCTCTCGTACTAGGAGCAGCCCCCTCAGTTCTCCAGCGCC  
CACGGCAGATAGGGACCGAACTGTCTCACGACGTTCAAACCCAGCTCGCGTACCACTTTAAATGGCGAACAGCATACC  
CTTGGGACCTACTTCAGCCCCAGGATGTGATGAGCCGACATCGAGGTGCCAAACACCGCGTCGATATGAACTCTGGGC  
GGTATCAGCTGTATCCCCGGAGTACTTTTATCCGTTGAGCGATGGCCCTTCCATTGAAACCACCGGATCACTATGA  
CCTGCTTTCGCACCTGCTCGCGCGTACGCTCGCAGTCAAGCTGGCTTATGCCATTGCACTAACCTCCTGATGTCCGAC  
CAGGATTAGCCAACTTCTGCTCCTCCGTTACTCTTAGGAGGAGACCGCCCCAGTCAAACCTACCACCAGACACTGTC  
CGCAACCCGGATTACGGGTCAACGTTAGAACATCAAACATTAAGGGTGGTATTTCAAGGTGGCTCCATGCAGACTGGC  
GTCCACACTTCAAGCCTCCACCTATCTACACATCAAGGCTCAATGTTCAAGTGTCAAGCTATAGTAAAGGTTACGGG  
GTCTTTCGCTTTCGCGCGGTACACTGCATCTTACAGCGAGTTCAATTTCACTGAGTCTCGGGTGGAGACAGCCTGGC  
CATCATTACGCCATTCGTGACGTCGGAACCTACCCGACAAGGAATTTGCTACCTTAGGACCGTTATAGTTACGGCCGC  
CGTTTACCGGGCTTCGATCAAGAGCTTCGCTTGCCTAACCCATCAATTAACCTTCCGGCACCGGGCAGGCCTCACAC  
CGTATACGTCCACTTTCGTGTTGCACAGTGTGTTTTTAATAAACAGTTGCAGCCAGCTGGTATCTTCGACTGATTT  
CAGCTCCACGAGCAAGTCGTTACCTACATATCAGCGTGCCTTCTCCGAAGTTACGGCACCATTTTGCCTAGTTCCTT  
CACCCGAGTTCTCAAGCGCTTGGTATTCTCTACCTGACCACCTGTGTGCTTGGGTTACGATTTGATGTTACCTGA  
TGCTTAGAGGCTTTCCTGGAAGCAGGGCATTTGTTGCTTACGACCGTAGTGCCTCGTCATCACGCCTCAGCCTTATT  
TTCCGGATTTGCCTGGAAAACAGCCTACACGCTTAAACCGGGACAACCGTCGCCCAGGCAACATAGCCTTCTCCGTCC  
CCCTTCGCAGTAAACCAAGTACAGGAATATTAACCTGTTTCCATCGACTACGCCTTTCGGCCTCGCCTTAGGGGTGCA  
CTCACCTGCCCGATTAACGTTGGACAGGAACCCTTGGTCTTCGGCGAGCGGGCTTTTACCCGCTTATCGTTACTT  
ATGTCAGCATTGCACCTTCTGATACCTCAGCATGCCTCACAGCACACCTTCGACGGCTTACAGAACGCTCCCCTACCCA  
ACAACGCATAAGCGTGTGCGCAGCTTCGGTGCATGGTTTAGCCCCGTTACATCTTCGCGCAGGGCGACTCGACCAG  
TGAGTATTACGCTTTCTTAAATGATGGCTGCTTAAAGCAAACATCCTGGCTGTCTGGGCTTCCACATCGTTTCCC  
ACTTAACATGACTTTGGACCTTAGCTGGCGGTTGGGTTGTTCCCTCTCACGACGGACGTTAGCACCCCGCTGTG  
TCTCCCGTGATAACATTTCCGGTATTCGAGTTTGCATCGGGTGGTAAGTCGGGATGACCCCTTGGCGAAAACAGTGC  
TCTACCCCGGAGATGAATTCACGAGGCTACCTAAATAGCTTTCGGGAGAACAGCTATCTCCGGTTTGTGTTGCC  
TTTACCCCGAGCACAAGTCATCCGCTAATTTTTCAACATTAGTCGTTTGGTCTCCAGTTAGTGTACCCAACCTTC  
AACCTGCCCATGGCTAGATCACCAGGTTTCCGGTCTATACCCTGCAACTTAACGCCAGTTAAGACTCGGTTTCCCTCG  
GCTCCCCTATTCGTTAACCTTGTACAGAAATAAGTCGCTGACCCATTATACAAAAGGTACGCAGTCACACGCCTAAG  
CGTGCTCCCAGTGTGACGTACACGGTTTCAGGTTCTTTTTCACTCCCTCGCCGGGTTCTTTTGCCTTTCCCTCA  
CGGTACTGGTTCACTATCGGTCAGTCAGGAGTATTTAGCCTTGGAGGATGGTCCCCCATATTCAGACAGGATAACCAGT  
GTCCCGCCCTACTCATCGAGCTCACAGCATGTGCATTTTTGTGTACGGGCTGTACCCTGTATCGCGCGCTTTCCAGA  
CGCTTCCACTAACACACACTGATTAGGCTCTGGGCTGCTCCCGTTCGCTCGCGCTACTGGGGAAATCTCGGTTGA  
TTTCTTTTCCGTTGACTTAGATGTTTCAAGTCCCCGTTGCTCTAATACCTATGGATTAGTAAATGATAGTGT  
GTCGAAAACACTGGGTTTCCCATTCGAAATCGCGGTTATAACGGTTCATATCACCTTACCAGCGTTATCGCAGAT  
TAGCACGTCTTCATCGCCTGACTGCCAGGGCATCCACCGTACGCTTAGTCGTTAACCTCACAACCCGAAGATGT  
TTCACTTCAAGTTGCGAAAATTTGAGAGACTCACGAACAACCTTCGTTGTTCAAGTGTTCATTTTCAAGTGTGATCCAG  
ATTTTTAAAGAGCAAACTTTCGAGTGAACCTTTCAGGTAACCTCTGAAGTATTTTTATTTAATCACTACAGAGATGG  
TGGAGCTATGCGGGATCGAACCAGACCTCCTGCTGTCAAAGCAGGCGCTCTCCAGCTGAGCTATAGCCCATAACT  
GTAGTTAAACCTTCTCAAATTTGCCGTGCAAATTTGGTAGGCCTGAGTGGACTTGAACCACCGACTCACCTTATCAG

GGGTGCGCTCTAACACCTGAGCTACAAGCCTGTAGAGTTTTACTGCTCATTTCATCAGACAATCTGTGTGAGCACTG  
CAAAGTACGTTCTTTAAGTAAGGAGGTGATCCAACCGCAGGTTCCCTACGGTTACCTTGTACGACTTCACCCAGT  
CATGAATCACAAAGTGGTAAGCGCCCTCCGAAGGTTAAGCTACCTACTTCTTTGCAACCCACTCCCATGGTGTGACGG  
GCGGTGTGTACAAGGCCCGGAACGTATTCACCGTGGCATTCTGATCCACGATTACTAGCGATTCCGACTTCATGGAGTC  
GAGTTGACACTCCAATCCGGACTACGACGCACTTTATGAGGTCCGCTTGCTCTCGCGAGGTGCGTTCTCTTTGTATGCG  
CCATTGTAGCAGTGTGTAGCCCTGGTCGTAAGGGCCATGATGACTTGACGTATCCCCACCTTCTCCAGTTTATCACT  
GGCAGTCTCCTTTGAGTTCCCGGCCGACCGCTGGCAACAAAGGATAAAGGGTTGCGCTCGTTGCGGGACTTAACCCAACA  
TTTCAACACGAGCTGACGACAGCCATGCAGCACCTGTCTCAGGTTCCCGAAGGCACATTCTCATCTCTGAAAACTC  
CGTGGATGTCAAGACCAGGTAAGGTTCTTCGCGTTGCATCGAATTAACACATGCTCCACCGCTTGTGCGGGCCCCCGT  
CAATTCATTGAGTTTAACTTCCGGCCGACTCCCAGCGGTCGACTTAACGCGTTAGCTCCGGAAGCCACGCCTCA  
AGGGCAACCTCCAAGTCGACATCGTTTACGGCGTGGACTACCAGGGTATCTAATCCTGTTTGTCTCCACGCTTTCGC  
ACCTGAGCGTCAGTCTTCGTCAGGGGGCCGCTTCGCCACCGGATTTCTCCAGATCTCTACGATTTACCAGCTACAC  
CTGGAATCTACCCCTTACGAGACTCAAGCTTGCCAGTATCAGATGCAGTTCAGGTTGAGCCCGGGGATTTACA  
TCTGACTTAACAAACCGCTGCGTGCCTTACGCCAGTAATTCCGATTAACGCTTGACCCCTCCGATTAACCGCGGCT  
GCTGGCAGGAGTTAGCCGTTGCTTCTTCGCGGTAACGTCAATGAGCAAAGGTAATTAACCTTACTCCCTTCCCTCCCG  
CTGAAAGTACTTTACAACCCGAAGCCTTCTCATACACGCGGCATGGCTGCATCAGGTTGCGCCATTGTGCAATATT  
CCCCTGCTGCTCCCGTAGGAGTCTGGACCGTGTCTCAGTTCCAGTGTGGCTGGTCATCTCTCAGACCAGCTAGGGA  
TCGTCGCTTGGTGAGCCGTTACCCACCAACAAGTAATCCATCTGGGCACATCCGATGGCAAGAGGCCCGAGGGTCC  
CCCTCTTGGTCTTGCAGCTTATGCGGTATTAGCTACCGTTCCAGTAGTTATCCCCCTCCATCAGGCAGTTTCCAGA  
CATTACTACCCGTCGCGCACTCGTCAGCGAAACAGCAAGCTGTTTCTGTTACCGTTGACTTGCATGTGTTAGGCCGTG  
CCGCCAGCGTTCAATCTGAGCCATGATCAAATCTTCAATTTAAAGTGGTATGCTCAAAGAAATAAATTCGTAATGAA  
TTACGTGTTCACTCTGAGACTTGGTATTCAATTTTCTGCTTTCGCGACGTTAAGAATCCGATCTTCGAGTGCCACACAG  
ATTGCTGATAAATTGTTAAAGAGCAGTTGCGACGCGGCTTTCAGCTACTGTCGCGAGGTGGCGTATATTACGCTTTC  
TCTTTCAGAGTCAACCCTGAATTTCCAGGATTTTTCTCTGCTTTCGACCATCTGTGAAGTGTTCACGTTGTCG  
TCTCAACGGAGGCGCATTATAGGGATCCAATTTTTGCAACAAGTATTTTTGATCTTTTTTCTGTTTGTGTTTTT  
CACCTTTTTGCTGCAATCGCACAAAACGGTCTTTTTGCACTAAAAGACTTGACAAAGCCAATAATGCCCCA  
AAGTCATTAGTAAATCATTTATTGCTGAGGTAAGTATGCTGATGTTTTACGCCATACCGCGATCTTTTTCCACAATC  
GGTCAGCGCTAATGATCGACGATAGCAGTGTGCTGATTGGTACGTTCTGCTGGCTGATGATGTGGGGATCTGGCCGCT  
CGTTGTGATTCTGGAGATGTACATTATGTACAGATCGGAGCACGCCAATATCCAGGATGGCAGTATGTTGCATGTCA  
CTCATAAATCTCGTACAACCCAGATGGCAACCATTAAACATTGGCGAAGATGCACTGTTGGTCACAAGGTGATGCTC  
CACGGCTGCACCATTGGCAATCGAGTTTTGGTTGGGATGGGCTCAATTTACTTGATGGCGCAATAGTAGAAGATGATGT  
GATGATTGGTGCGGGTAGTCTGGTCCCAAAAATAAACGGCTGGAGAGCGGATATCTGTATCTCGGTAGCCCCGTAAAC  
AGATCCGCCGTTAAGTGATGAAGAGAAGGCTGGGTTACGCTATTCCGCGAATAATTACGTGAAATGGAAGGACGAATAT  
CTGGATCAGGGTAACCAGACCAGCCTTATCATCTTCACTTTGTTCTGAATTAAGTTTTCCGCTTCTTCTCCAGGTC  
CCAGCGATGCTGACGAAAATCGTAACCACTGTTCTGGCGTATCTCCAGTAAAGCGATACGCCAGACTCTGCCAGAGA  
TCGCGCATGTAGTGCATACCACTACGAGAGCGGGAAAACATACATTTTTTATTCTCGTCCACTTTCCTGTCC  
GGAAACTGGATGGCTGATTACGCGGACAATTCCTCTGCAATTGCTTTATAACTGGTTCTACGTGAGGACAACCCG  
TGCCAGAGAAGAAAGGATGAGCCGCTGTGCCACCAGCATTCTAAACCATCAGCATTACGCTTGGAGCTCGCTGCTC  
ACACCATGCCAGAAAAGGATTTTTCTCTGATAGAATGTCATAGCAATAAATGCCTGGATGAATGAGCGATGACG  
GGATCGCCGAATATCACCACTGATGCCACTGGATTTGCAATTAATAAGATGAGATCAAACCTGACCTCCAGTTGCTCC  
ATACTCAACGCTGAATACTGCCAGTGTGCGCAACAATTTAGCCAACTCTCCGCGCGGATACCGTCCGATTAGTTAT  
TGTACCAGCAGTCCAGGGAAAGGAGTGGCAGTAGTACGCCGAGATGCTCCACCAGCGCCGATAAGCAGAATACGTA  
AACCAGGGCGGATAAAAGACAGACGTTCCAGATCGTTAAACAAGCCTACACCATCGGTATTGTACCCAGCAGGCGTCCA  
TCTTCTAACCGCATGAGGGTATTAACAGCACAGCAACGCTGCCGTTGAGTAAGCTCATCCGCTCTGGCAAAGCCTC  
TTCTTTAAAGGCACCGTACATTGCGACCTTACCACCAGCACTAAAGAAAGCGTTGAGTGTGTTGATGAAATCATGGA  
TGGGTGCCAACACGCGCCCATAGGGATGTTCAATATTCAGTTGCTGAGCAAATTGCTGATGAATGGCGATTTGCTG  
TGGGCTATCGGATTACCAAAAACAGCATAGGTTTCCATTATGTTACCCTGTGAAACAGTTCACCCGTGAGGGCATCGC  
GGATTTCTGAAGATTTAAACGCCCCCGTTTACCAGGCACAACCGGAACGCCGCGCAAATTGTGCGCAACTTCG  
TCTACTGTTGACAAGGTGGCAATCCACTCAAGTTGGCACTGGTAGAAACAGCGGTTTACCATAAGCCTGGCACAAGC  
AACCACCAACGGATGGTCGGTGACTCGTACAGCAAGCAATCAAGCGGCCCTCAACCAGCGGGTGTGTCGAGGCG  
CGGAAAGACAAGGTGACAGGACCTGGCCAGCGGAAAATGTTTACGCTGCACGTGAGTCAACATGGTGTGATCA  
ATATAGGGTTAAGCTGCTGTAATTTGCTGCGATTAATAACAGCCCTTATCAACCGACGCTGTTTTAACTCCAACAG  
TCGATCACTGCTGTTTCTGATCAGGATCGCACCAACCGGAAACGGCTTCCGTTGGATAGGCGATGACACGTTCTT  
CATTGAGAACATCTATCGCAGCTGCGATAGCGTCTTTGAGGTTATTATTACGTTATTATTCCGCCGAAACCGGCTT  
TCCACATTGTTTACTGGCACAAGGTTTACACCTGCGCGTTTTCTTTTCTGATGAGTAGCGGATAATGACTCAG  
GGCATTCTCAGCTATGGGTTGAAGTTAATGGCAAATGACTCCGGTAGCGATCAACAAGAGTGAATGTTTTGCCA

TAACGGGAGCGGCGCTGGACCAGATGGCCGTCGACATTGGGGCATGTAATTGCTGTTTCGTCGGTATTATCGATAAG  
TTCGGTATGTTTCGATTCAGGGTAGTAAATGCAACCAATAAACATAACCAAAGCGTCCCTGGCGTAATACCAGATTTGCGC  
CACATGCAGGGCAAACCTGCCCTCCAGAACCTTTGACGATATGCCATCCGCTGAAGATTTAGAGGACGGACGTAGTCA  
CACGCCGATACTGTGAGCATCCAAGAAACGGACCGTGTTCGCCGATCGAATAACCAGTTCAGCCCCGACTTTGGGCA  
GGACTCATTATTACGCACCGTGAACAGTGCTGATTTGCCATAACAACCTTATGCTGAATTAAGAAATGATTAATGCAGC  
ATACCTTCATTCACTTCAAAGAGTAATTCTTCCATTTGCTGGTACGCATTTTCGACGCCGGAAATATTGAACAACACCAT  
CAGGATCACCCATTTAGATCATCCAGTTCGAACTCTGCGTTATCCAGCGGAGCACTCGCTCTATCACCATTTACAGG  
TTTCAAGGTTGAGCACCTGAATCTGCTCAAGGAAAAGCAGAAACCCACGGCAGCTGGCATCCAGTTCGTTCACTCTTCC  
GGTGATAAATACGCATGGAGAGAGGATCCGAGGCCAGTTGCATCGGTTCTGCCAACCTTCTGATAATCAGCAAGTTT  
TTCCAGCCATAGCAGGGCATTGTAGATATCTTCTCGCTCAAACCTGCGTCCGTAAGATCCTGTTCAAGTTTGTCTTGAT  
CCACAGCAACTCAGCTTCTGTGTGAATATAGGTTTCAAACAATAACATTAGTACGTCGAACATGGCATGCCCTCTCAA  
TCGGACATAGCCCGGGTACAGCTGCATCCATCTGCTAACCCAGTTCGAGTAGTTGAGTAACTACCTCTGGCAGAG  
GTTGGCCGGCAGTTCAGCGACGACGTCAACAGGTGTACCTCATCTCTACGTTAGCCAGGAGCTCAGGAAATGGCAAT  
GCCACGCTTGTCTGATCTGGTGAATAAAATGAATTTTTCAGGGGCTCTGGCAACCAGTGCAATCAAATTCGAAGTTTTC  
CAGAATTTCTCCGGTCCGTCACAAGAATCGCACCTTGTATTAACCAGTGAGGCCCTTCGTTCCCGATTTCCCTA  
TTGGACTTGGCAAGCAAACCTTCTCGCCCTGCTCAAGCGCAACAGTGTCTCACCAGCGAACCACTACGCAAAGCC  
GTTCCACCACAGTACACCTTTACTTAGACCACTGATAATGCGATTTTCTCGTGGGAAATTTGAAGCAAGGGGTGGAAC  
ATCGAGGGGAAATTCGAGACGAGAGCGCCCCCTGTTCAAGCAGACTGGCAGCCAGTCCGGCATGACGGCGGGGATGAA  
TGGTATTAAGTCCATTTCCCAATACAGCAATGCTGACGCCATTTACTGTAAGGCTGCTTTATGCGCTACACCATCGATT  
CCACGCGCCAGTCCACTCGTAATTGTCACTCCACGCGTCGCCAGAGTTTCGCAAATAATCGTCCCCTCGCTCGCCATA  
CCATGAATGCGCCGACTCCCCTACGGCAAGCTGAAATGAATGCAGCGCGTGCAGTTCTCTTCAACAACAGTGCAGC  
CGGGTAACTGTCTCGCCAGAAGTTGAGGAGGATAAAAATCGCTGTCCGCAAGTAATGATGGTTGGGTTGCTCC  
AACCAACAAGTGAGCTTTCGATACTCTTCTGTGAAATGAAAGAAAGCGTTGTGCCTGCCGAATGTAAGCCCTGTTG  
CTGCAATACAACCGCATCAATATGCGACTGTTTTGCCACCCAGTGAGCGATACGGACCATATCATCGCCGTACAAGCTGC  
TGATACTCATTAACGCAGCAAATTTCTGTATCGACCATCTTATCTCCCTGCCATAAGCAGCCTTAGCAATCTTTGCG  
ATTGGTCAGTGATGCTGTCAATCAGAGGGGATTTGTCTAGAATAGAAGAAATATCTTTCTAACTCCTGAACACATCTC  
TGGAGATTTATGTCAGTTTTGCAAGTGTACATATTCGGACGAGCGGCTTCGCAAAGTTGCTAAACCGTGAAGAAGT  
GAATGCAGAAATTCAGCGTATCGTGCATGATATGTTGAGACGATGTACGCAGAAGAAGGATTGGCCTGGCGGCAACCC  
AGTTTGATATCCATCAACGTATCATTGTTATTGATGTTTCGAAAACCGTGACGAACGGCTAGTGTTAATCAATCCAGAG  
CTTTTAGAAAAAGCGGCGAAACAGGCATTGAAGAAGGTTGCCTGTGCATCCCTGAACAACGTGCTTTAGTGCCGCGCC  
AGAGAAAGTTAAAATTCGCGCCCTTGACCAGCGAGCGTAAACCATTTGAACTGGAAGCAGACGGTCTGTTAGCCATCTGTA  
TTCAGCATGAGATGGATCACCTGGTCGGCAAACCTGTTTATGGATTATCTGTCACCGCTGAAACAACAACGTATTCGTCAG  
AAAGTTGAAAACCTGGATCGTCTGAAAGCCCGGGCTAAGGATAAGAAGTAAACGTGTCAGAATCACTACGTATTTTTT  
GCGGGTACACCTGACTTTGACAGCGCGTCATCTCGACGCGTCTGTTGTCTTCTGGTTCATAACGTCTGGCGTGTTCACCCA  
GCCAGACCGACCGGACGCGGTAAAAACTGATGCCAGCCCGGTTAAAGTTCTGGCTGAGGAAAAGGTCTGCCCG  
TTTTTCAACCTGTTTCCCTGCGTCCACAAGAAAACAGCAACTGGTCCGCGAACTGCAGGCTGATGTTATGGTCTGCTC  
GCCTATGGTTAAATCTGCCGAAAGCAGTGTGAGATGCCGCGTCTGGCTGTATCAACGTTTATGGTCACTGCTGCC  
ACGCTGGCGCGGTGCTGCACCAATCCAACGCTCACTATGGCGGGTATGCAGAACTGGTGTGACCATTATGCAAATGG  
ATGTCTGGTTAGACACCGGTGATATGCTCTATAAGTCTCTGCCGATTACTGCAGAAGTACCAGTGTACGCTGTAC  
GACAAGCTGGCAGAGCTTGGCCCAAGGGCTTACCACGTTGAAACAACGGCAGACGGCACGGGCAAAACGAGAAGT  
TCAGGACGAAACTCTTGTCACTTACGCCGAGAAGTTGAGTAAAGAAGAAGCGCTATTGACTGGTCACTTTCCGGCAGCAC  
AGCTTGAACGCTGCATTGCGCTTTCAATCCATGGCCAATGAGCTGGCTGGAATTAAGGACAGCCGGTAAAGTCTGG  
AAAGCATCGGTCATTGATACGGCAACCAACGCTGCACCAGGAACGATCCTTGAAGCCAACAACAAGGCATTACAGTTGC  
GACTGGTGATGGCATCCTGAACCTGCTCTCGTTACAACCTGCGGGTAAAGAAAGCGATGAGCGCGCAAGACCTCCTGAAC  
CTCGTGGGAAATGGTTTGTTCGGGCAACCGTCTGGTCTGATAGTCCACTCTTCTAAGCCCGTCTTGGCGGGGCTTTTT  
ATACTTATGAAAAACAACGTAATTTACGTAGCATGGCGGCCAGGCCGTTGAACAAGTCTGCGAGCAAGGGCAATCATT  
AAGCAACATTTGCCACCGTCCAGCAAAAAGTTTCCGATAAAGACAAAGCACTTCTTCAAGAGTTGTGCTTTGGCGTAC  
TGCGTACGCTTTCGAGTTAGACTGGCTGATTAATAAGTTAATGGCCGTCGATGACCGGCAAACAGCGGACCGTGCAT  
TACCTGATTATGGTTGGTTTGTATCAACTGCTTTATACCCGATTCACCTCATGCTGCGTGGCTGAAACGGTTGAAGG  
CGCTATCGCAATTAAGCGTCCGCAACTTAAAGGGTGTATAAACGGTGTATTACGCCAGTTCACGCTCAGCAAGAAGAGT  
TATTAGCCGAGTTAATGCCAGTGTACAGTATTCTGCATCCTTCTGTTGTGTAAGCGTCTGCAAAAAGCGTATCCA  
GAGCAGTGGCAATCCATCGTGAAGCCAATAACCAGCGTCCGCCAATGTGGCTGCGTATTAATCGTACGCATCATTCCCG  
CGACAGCTGGCTTGCAATTGCTGGATGAAGCAGGAATGAAAGGTTTCCCGCATGCGGATTACCTGATGCTGTACGCTGG  
AAACACCTGCACCTGTTTCATGCGCTACCTGGTTTTGAAAGCAGGATGGGTTACCGTTTCCAGGATGCATCAGCACAAGGTTGC  
ATGACCTGGCTTGCGCCAAAAACGGTGAACACATTTTGGATCTTGTGCCGCCCGGGTAAACAACCGCATATCCT  
TGAGGTGGCACCAAGCGCAGGTTGTGCGGTTGATATCGACGAACAGCGCTCTCTCGGTTTACGACAATTTAAAC

GCCTTGGTATGAAGGCGACCGTGAACAAGGTGATGGCCGTTACCTTCTCAATGGTGTGGCGAGCAACAGTTTGATCGC  
ATTTTATTAGATGCGCCTTGTTCAGCAACCGGTGTGATTCTGTCGCCATCCAGATATTAATGGTTACGTGCGGATCGCGA  
TATCCCGGAACTCGCGCAATTGCAGTCTGAAATTCTCGACGCCATTTGGCCGATTTAAAAACCGGTGGAACCTGGTCT  
ATGCCACCTGTTCGGTGTACCGGAAGAGAATAGCTGCAGATTAAGCCTTTTTGCAACGTACCGCTGATGCCGAACCT  
TGCGAAACAGGAACACCAGAGCAACCGGTTAAACAAAATCTACCTGGTGCCGAAAGGGCGACGGCTTTTTACGCTAA  
GCTAATCAAAAAGTATGAGATAACGGGTCGCGACTGATGAAAATTATCATTCTGGGTGCCGGCCAGGTTGGCGGCACAC  
TGCCGAAAACCTGGTTGGCGAGAACAACGATATTACTGTTGTCGATACCAACGGTGAGCGTCTGCGGACCTTACAGGAT  
AAATTTGACCTGCGGGTCGTGCAGGGGCATGGCTCTCATCCACGCGTATTGCGGGAGGCAGGTGCCGACGACGCCGAT  
GCTGGTTGCTGTAAACCAGTTCAGATGAAACCAATATGGTTGCCTGCCAGGTAGCCTACTCACTTTTCAACACCCCTAATC  
GCATCGCTCGTATCCGCTCACCAGACTACGTGCGCGATGCCGATAAGCTATTTTCATTGATGCTGTGCCGATTGATCAT  
CTGATCGCACCAGAGCAGTTGGTTATCGATAATATTTACCGACTGATTGAGTATCCCGGCGCATTGCAGGTGGTGAACCT  
CGCTGAGGGTAAAGTCAGCCTGGCTGTGGTTAAAGCCTATTATGGCGGCCGCTGATTGGTAATGCACCTTTCAGCATGC  
GCGAACATATGCCACATATCGATACTCGTGTGCGAGCAATTTCCGCCACGATCGCCCCATTCTCCGCAAGGTTCCGACC  
ATTGTTGAAGTGGTGTGAAGTGTCTTTATTGCCGCTTACAGCATATCCGCGCGGTGATGAGTGAATTACAGCGACT  
GGAAAAACGTAATAAGCGGATCATGCTGGTTGGTGGGTAATATCGGTGCAGGGCTGGCGCGTCTGTGAAAAAGATT  
ACAGCGTTAAACTCATCGAACGTAATCAGCAGCGCGTGCAGAACTGGCGGAAAAGTTACAGAATACGATCGTCTTTTTT  
GGTGTGCGTGGATCAAGAACTACTGGCCGAAGAACAATATCGATCAAGTTGATCTGTTTATTGCCGTACCAACGATGA  
CGAGGCCAATATCATGTCCGCCATGCTTGCCAAACGTATGGTGCGAAAAAGGTGATGGTATTGATCCAGCGTCCGCGTT  
ATGTGGATCTGGTTACAGGGGAGCGTTATCGATATTGCGATTTACCACAACAAGCAACTATTTCTGCGTTGCTTAGCCAT  
GTGCGAAAAGCAGATATTGTTGGTGTTCCTCATTGCGCGCGCGGTAGCAGAAGCTATTGAAGCCGTTGCTCACGGTGA  
TGAAAGCACCTCACGCGTTGTCGGCAGAGTATTGACGAAATCAAGCTACCGCCAGGAACGATTATTGGAGCGGTGGTAC  
GTGGAACGACGTGATGATTGCCAATGACAATCTGCGCATTGAGCAAGGCGATCACGTAATTATGTTCTCACAGATAAA  
AAGTTTATTACCGACGTGAAAAGACTCTCCAGCCAAGCCCTTTCTTTGTAATTAATAAGGCGTCTAATGACGCCTTA  
TTATTTCCCTTTGATTATCAAGGATTAATTAATTCATTCTGGCAGGAAAATGGCTAACATTTGTTAGACTTATGGTT  
GTCGGCTTCATAGGGAGAATAACATGAGCATTATTAAGAATTTCCGCAATTTGCGATGCGCGGGAACGTGGTGGATTTG  
GCGGTGGGTGTCATTATCGGTGCGGCATTCCGGAAGATTGTCCTTCACTGGTTGCCGATATCATCATGCCTCCTCTGGG  
CTTATTAATTGGCGGGATCGATTTAAACAGTTTGTGTCACGCTACGCGATGCGCAGGGGATATCCCTGCTGTTGTGA  
TGCATTACGGTGTCTTCATTAACACGTCTTTGATTTTCTGATTGTGGCCTTGGCATCTTTATGGCGATTAAGCTAATC  
AACAACTGAATCGGAAAAAAGAAGAACCAGCAGCCGACCTGCACCAACTAAAGAAGAAGTATTACTGACAGAAATTCG  
TGATTTGCTGAAAGAGCAGAATAACCGCTCTTAACAAGCGCTGAAAGCAGAAGACCAGTGGTAAAAAAGTGATTTACTT  
TCTTGCCACTGGCCTCCCGATTCCCGGATTGCCATGTTTTCTTTTTCGCATGTAAGTGCCTTTCCCTTCTTATTTTT  
TCTACGCGCTGTCCGAATAAGGGATCATGTAGTAATGCTTCTATCGCATTATCCTTTATCTGCCCTTTAGTATGCTGATA  
TCGACTCATAAAAACTCCAGTTGGTTATTTAACGGCGCGAGTGAATCCTGCCAGTGCAAAAAATCAACAACCACTCTTA  
ACGCCACTCGCCCCTTGTCAAGAGCTTCAAGAATCGAACAATAAACTGCTATGAGCAGTCCACAACAGGCATCGTT  
AAGGCGTTGCAAGGAACGCTGCATACTCTGCAACTCGGCTATCCGTGCTTCCGACTTCTGCAATCTTCTGCACAAATGC  
CTTTGACTCCTGACAGGTATGGTGTTCAGGATCGATGCGGATCGACAGCAACTCGCGGATCGACTCCAGACTGAAACCT  
AGTTGTCTGGCATGGCGGATAAATTTCAATCGCTGGAGATCGCTTTCCGTATATAGGCGAAACCCACCTTCAGTACGCAC  
TTCATGCTCCATCATCTGCTGTTTTTTCGTAATAACGAATCGTGTGGGTGTTACTTCCGCCATTTTGGCAGCTCACAA  
TGCGATAACATACTCAGTATGCTGTTGATTTTGTCCAACAACTTGTGAGCATAATCGCCGCTAAAAAATCGGT  
ACTCAATCCAGCTTGTGCGAGCTTCAATCCAGTAATGACAATCGACGGCTAACCTCTTGATATTGCGGATCATCGTAC  
GGATACCTTTGAGAATATCCAGAAGCTGAATTGCTTCTCCTCGTTGCTCAAGTCTGGCGGTAAGCAACCGGCACTTCTC  
AGCAAGCGATACCCCGCACGTAATTCGGTGGCACGTGAGAATCATCATCCAGTATCAATGGTTCGCCGCTACCTGCCAG  
GTTATCAAACTCACCTTTGCTTGGCTTCTGCTATATGGCGCTCTGCCACTGGTCAAGTAACACATAAAATACTCCAG  
GGGATGAACAAAAAGAGTACAGCTATTGTAGATAAGTGGGGTACTACGGGTATAAAAAAACC CGCGGGGCGGTTTTT  
TTACGTTGCTTACAGTACTCTGCAGCAGCTTCTGCTTTCTGTAACGATCAACCAGCTCGATGTAAGCCATCGCGCGT  
TGTGCTGCTGCAGGAAGCCACACTTCCAGAATACGAGTGTAAACCACCGGCACGGCTCGGAAACGCGGGCCAGTTCTGTTA  
AACAGTTTTGCCACGATCTCGTTATCACGAGTACGGGCGAATGCCAGACGATTAGCAACGCTATCAGTCTTGGCAAG  
AGTAATCAGCGGCTCAACTACGCGCGCAGCTCTTTCGCTTTAGGCGAGTCTGTTGATGATTTTATGACGAACCAAGT  
AACCTGCCATATTGCGGAACATAGCCTGGCGATGGTGTCTGTTGCGGTTGAGTTGACGACCACTCTTACGATGGCGCATG  
ACCTTATCCTTCTCAGTAAAACCTAACCTGTGATCCGGTTACTCGTCAGCGATGCTTGGCGGTGGCCAGTTTTCCAGGC  
GCATGCCAGAGACAGTCCAGGGAAGCCAGCACGTCTTAATCTCAGTAAGAGATTTTTTACCAAGGTAGGCGTTTTA  
AGGAGCTCAACCTCGGTACGCTGTACCAGATCACCAGATATAGTGGATAGCTTCTGCTTTAAGCGAGTTAGCAGAGCGGAC  
AGTCAATTCAGATCGTCAACAGGGCGCAGCAGGATCGGATCGAACTCTGGTTTCTCTTCTTCACTTACGCTGACGTA  
CATCACGTAAGTCAACGAAAAGCTTCCAGTTGTTTCCAGCAGAAATGGTTGCCGACGACGAATCGCTTCTCAGGATCGATT  
GTGCCGTTGGTTTTCCATTTGATGACCGACTTGTCCAGGTCGGTACGCTGTTCTACACGCGTCTTCAACATTGTAGGC  
AATACGCTCCACAGGGCTGTAGCATGCGTCGACCAGCAGACGGCCGATTGGCGCTCATCTTCTTCCGAATGAATTCGGG



TAGAAGCCGGCACATAACCACGACCGCGCTGAACCTTGTATACGCATGCTAATAGACGCGTTCTCATCGGTGAGGTGGCAG  
ATCACGTGCTGCGGCTTGACGATTTCCGACATCACCGTCTGGGTGATATCGGCTGCAGTCACAGGGCCAATGCCAGATTT  
ATTCAAGGTAAGAATAACTTCATCTTTGCCCTGAACTCTACCGCCAGCCCTTTCAGGTTGAGCAGGATTTCCAGGATAT  
CTTCTGAACGCCCTTCTTGGTGTGTACTCATGTAGTACACCATCAATCTCAACCTCGGTACCCGCGCAACCCGGCATC  
GATGAGAGCAGAAATACGGCCGAGTGCCTTACCCAGAGTATGGCCAAAGCCACGCTCTAAAGGCTCAAGGGTCACCTTGGC  
GTGCGTCAACTCACTTGCTCGATATCAACCAGGCGCGTTTTAGAACTCTGTCAAGAACCCTGCATTGTGCTCTCTC  
TTTGGTACTAAGCTTTACTTGGAGTAAAGCTCGACGATCAGGTGTTCTGTTAATGTCGCGACAGATCAGAACGCTCCGG  
CTTACGCTTAAACGTACCTTCATCTTGCAGCATCAACTCCAGCCAGGTTGGCTTTTACGCTGCTCAGCCAGCTCCA  
GAGCGGCTTTACGCGGAGACTGCTTCTCGCTTCTCACGAATGCTTACAACGTCATTCGGACTAACCTGATAAGAAGCG  
ATGTTAACAAACACGACCGTACCATAATTGCTTTATGGTAACCAAGCTGACGTGCTTCTGCAGAGTGGCACCGAAGCC  
CATACGGTATAACAACGTTTCCAGACGACCTTCCAGCAGAGCCAACAGGTTTTACCGGTGTTGCCTTTCAGACGTGCTG  
CTTCTTGTAGTAGTTACGGAACGACGCTCCAGCACACCATAGATACGGCGAACTTTTTGCTTTTACGCAACTGCACA  
CCATAGTCAGACAGACGCGGTTTACGCGACCGTGTGGCCAGGAGCTTGTCAATTTTACTTGGTATCGATCGCGCG  
AACGCCAGACTTAAGGAATAAGTCGGTGCCCTCAGCACGGCTCAGCTTGGCTTAGGACCCAAATATCTTGCATTTTTCT  
TTCTCCAACAAAACCTGGAAAACGAGGGCTTATACGCGACTTTTTTCGGCGGACGACAACCCTTATGAGGATCGGATC  
ACATCAGTAATGTTAGTGATGCGGAAACCTGCGGCTTCAGAGCACGAATAGTAGATTGCGGCGCTGGACCCGGACCTT  
AACCATAACTCCAGATTCTTGATGCCGATTCTTTCACGGCGTCAGCGCAACGCTCTGCTGCAACCTGAGCTGCAAACG  
GAGTGGATTTGCGAGAACCACGAAACCCGAACCACCGGCTGTGCCCAACCAACGCGTTACCCTGACGATCAGTGATA  
GTCACGATGGTGTGTTGAAAGAAGCATGGATATGAGCCACGCCGTCAGAGACTTGTTTTCTTACAGTTTACGTGCACG  
AATTGGTGCCTTTGCCATTATTCAATCACCCGATTATTTCTGATCGGTTTGC CGGACCCCTTACGGGTACGTGCGTTG  
GTCTTGGTACGCTGACCGGAAACCGGAGACCACGACGATGACGCAAACCGGATAGCAACCAAGATCCATCAGGCGCTT  
GATGCTCATGCTGATTTACGCGCAGATCACCTTCAACGACAAATTTGGCAACTTCGTACGCGAGCGTGTGATTTGTC  
CTTACAGACGCTCACTGATCTTAACTCTTACGGATACCCGCTGACGCCAGGATGGCTTTAGAACGGGTCTTGCCGACG  
CCATAAATCGAAGTTAATGCGATTACGGCATGCTTATGATCAGGAATGTTAATGCCTGCTATACGGGCCACTATGCACTC  
CTACTATTTAATATGTACGTTCCATGCTGAAAAGCCGTTTTTCAGGATACTCAAATGGAACGCACAGACATAAAAAGA  
TTGGCTGGCTAATCTAGCCAGCTCAACCAACTTTGCAAGAAAATATGCGAAAATCAGCCTTGGCGCTGTTTATGCT  
TCGGCTCGGCACTGCAAATCACACGGATGACACCATCAGCTTAAACGATTTTGCAGTTACGGCATAATTTCTTGACGGAA  
GCACGAACTTTCATTTTACTCTCCGTAACCTTCTCGGGCGACCAATTATCGGCCGTAGCCTTTTCAGGTTGCGCTTCTCA  
ATGCAGACTATACTGACTGGACATCATCAGAGTTTGCCTTGGCCATAAAGTCCATAATCACGACAACACGATAAGC  
AGTGAGGTCCACCAGGATGAACGGTACTTTTCATTGCATCAGCATGAACTCCGGGATCAGGCAGATAAAGGTAATATA  
CAGCGCACCAACCAGGTCAGGCGGTGCTTACTTTATCGATATACTTCCGCGTTTTGCTCTCCCGGACGAATTCCTGGTA  
CAAATGCACCGGACTTCTCAGGTTATCTGCTGTTTACGCGGTTGAAAACCAACGCCGTGATAAGAAGGAGAAAG  
ATGATTGCAGACGCATAGAGTAACACATAAAGCGGTTGCCAGGCTGCAAATACAGCGAAATTGTTGTGACGCCAGTTCCA  
ACCAGTACCGCCCGAACCATGACGCGATGGTCGCCGGGAACAGAATAACTGGAAGCGAAGATTGCCGGGATTACCC  
CCGCCATTTACTTTTACGCGGTAATGTGTGCTCTGTGCAGCATAGACACGACGACCTTGTGACGTTTCCGCTAGTTT  
ACCACAATGCGGCGTTGACCACGCTCAACAAATAACAAGAACGCTCACTGCAAATACTAATACTGCAACCAACAGCAA  
CACGAGGAAGTGCAGGTCGCTTACGCGCTTGTGCTAGATAGTGGCAATGGCTGGCGGGAGTCCCGCGACAATACCGG  
CGAAGATAATGATTGAAATACCGTTGCCGATACCTCGTTAGTAATCTGTTCCGCAACCATCAGGAACATGGTTCTC  
GTGACAGACTTACAACAGCGGTGAAGTAGAATGCAAAGCCCGGTTAATCACCAGGCCTTGCATACAGGCATATTCGG  
CAGACCGGTAGCAATACCGATGCACTGGAATTTGCCAGACAGTACCGTAGCGGGTACTGGTGTGATCTTACGAC  
GACCAGACTCCCTTTCTTTCTAATTTTCCCAACGTTGGGTGAACCACCGTCAGCAGCTGGATAATGATGACGCGCGAA  
ATATACGGCATGATCCCCAGAGCAAAGATAGAAGCAGGCTGAGAGCACACCAGAGAATGTTAAACATCTCAATGAT  
GGTGCCTCGCTGTTGCTCAAGCAGTTTGGCAAGTACAGCGCATCAATACCAGGGATCGGAATAAAGAGCAATACCGGA  
ACACAATCAGCGCACCGATAACAACAGCAGTCTGCGTTTACGCTGCGCTAAGCCACCTTTGGCACTTTGAAAATCTAAT  
CCCGGTTGTTTAGCCATCTGCTACTTATTCTCGATTTTACCGCCAGCAGCTTGCATAGCAGCAGAGCGCTTTAGTAA  
CACGCGAGGCCACGAACAGTTACCGGAGTCGTTACTTCCGCGCCAGGATCACTTTCCGCAACTCGATCTGGATACCGATA  
ATGTTAGCCGCTTTACGCGTGTTCAGGCTACTACACCCTTCTACTTTAGCCAGGTCAGACAGACGAATTTCCGCTGT  
AATCGCTGCTTACGAGAAGTGAAGCCGAATTTCCGCGACGACGGTACAGAGGCATCTGACCACCCTCGAAACCGCGAC  
GTACGCCACCGCCAGAACGAGACTTCTGACCTTTGTGACACGACCACCGGTTTTACCAGGCCAGAACCAGATACCACGA  
CCAGGCGTTTACCAGCTTTTGGAGCCTTCCGCGGAGACAGAGTATTTAAACGCATCTTACTCTCACTTTAAC  
CATGAAGGAAACCGGTTGATCATACCAGGATAGCAGGAGTATCTCGCGCTCTACGGTGTACCAATACGACGCGAGAC  
CCAGGCAAGCAGCGTTGCCTTGTGTTTCCGCGAGACGACGATTGCACTGCGGTTTTGAGTAATTTTAAAGTCTTTGCC  
ATGTTTTATTTCCCGAATTTCTTCAACGGATTTACCACGCTTGCAGCGACATTTCTGGAGAATTCATATTTCCAG  
GCCATCAATAGTTGCACGAACCACGTTGATCGGTTGGTGAACCATAGGCTTTAGCCAGAACGTTATGAACCCAGCGA  
CTTCCAGAACGGCGCATGACACCACCGCGATGATACCGGTACCTTCCGGAAGCCGGCTGCATGAATACGCGAGAACC  
GTGTGAACACCTTAAACAGGGTGTGACAGAGTGCCTTATTACGCGACGTTAATCATATTGCGACGGGCTTTTCCAT

CGCTTTCTGGATCGCTGCTGGAACCTCACGCGCTTACCGTAACCAAAACCAACGCGACCCTTACCATCGCCAACTACAG  
TCAGAGCTGTGAAGGAGAAAATACGACCACCTTTAACGGTTTTAGATACGCGGTTTACCGCGATCAGCTTTTCCTGCAGT  
TCGCCAGCTTGTTTTTCGATGTGAGCCATTTACACCTCTACCTTAGAACTGAAGGCCAGCTTACGCGGCAGCATCTGCC  
AGTGCTGGACACGACCATGATATTGGAACCCGGAACGGTCAAAGGATACATCTTTGATGCCTTTTTCCAGAGCGCGTTC  
AGCGACAGCTTTACCCACAGCTGCAGCCGCGTCTTTGTACCGGTGTACTTCACTTGTTCAGCGATAGCTTTTTCTACAG  
TAGAAGCAGCTACCAGAACTTCAAGAACCCTCGGTGCAATTACCTGTGCGTAAATGTGACGCGGGGTACGATGTACCACC  
AGGCGAGTTGCGCCAGCTCCTGGAGCTTGCGGCGTGCAGGGTGCACGACGGATACGAGCAGATTTCTTATCCATAGT  
GTTACCTTACTTCTTCTTAGCCTCTTTGGTACGCACGACTTGTTCGGCGTAACGAACACCCTTGCCTTTATAAGGCTCAG  
GACGACGGTAGGCGCGCAGATCCGCTGCAACCTGGCCGATCACCTGCTTATCAGCGCTTTTACGACGATTTTCACTCTGA  
GTCGGACATTCAGCAGTGATACCCGCAGGCAGCTGATGGTCAACAGGATGAGAGAAAACCCAGAGACAGGTTAATCACATT  
GCCTTTAACCGCTGCACGGTAACTACACCAACCAGCTGCAGCTTCTAGTGAAGCCTTCGGTAAACCCGATAACCATTG  
AGTTCAGCAGGCGCGCGGTTACCAGCTGTGCCAACCGTCTGCGTAACCATCACGCGGACCAGGTTAGGTTATTA  
TCTGCATGTTAACTTCAACAGCATCGTTGAGAGTACGAGTCACTGCGCGTTTTTACCTTTGATCGTAATAACTGACC  
GTTGATTTTTACGTCAACGCCGCGCAGGAACAACGACCGGTGCTTAGCAACACGAGACATTTTTCTCCGATTAGGCTA  
CGTAGCAGATAATTTGCCACCAAGACCAGCTGCGCGCTGCACGATCAGTCATAACACCCTTAGAGGTAGAAACAAC  
CGATACCCAGACCCGCCAATTTTCGCGAGCTCATCTTTACGTTTATAGATGCGCAGACCTGGGCGGCTGCACCGT  
AATGCTTTCTACAACAGCTTTGCCCTGGAATACTTACAGTAAGTTCCAGTTCAAGCTTGTTGTCGCCTTCAACTTTAA  
AATCTTCAATAAAAACCTTCTTCTCAGCACGTTGGCGATTGCCACTTTACGCTTGAGGAAAGGCATGGTGACCGCAGCT  
TTGTTGCGGCGCTGACCGTTACGGATACGGGTACGATATCCGCGATCGGATCTTGATGCTCATCTGTCTTTACTCCC  
TGATTCAATTGGTGACAATTACCAGCTAGCCTTTTTACGACCCGGGATTTACCCGCGCATAGCGGCTTACGCGACTTAA  
TACGGCTCAACCCGAACCTCCGAGGAACCATGCGGACGACTGTTTACGCGCAGCGGTTACGCTGACGAGACGGGCTG  
GAATCACGCGGAGAGTCTGACGCTTGAGAACAGCGTTCAACGATCTTGCAGGAAAGCCTTACATCAGAGATGATCGC  
TTTACGTTGCGCGTTCGCGAAGTATTTATCAGTAAAGCTACGCTTTTACTTGCAGTCTTTTATTGATTGCTTAG  
CCATTTAGTAACCTACTTACTTGCAGAACGGGAAGTCAAAGGCAGCCAGCAGAGCGCGGCTTCTTCTGATGATTTG  
CAGTAGTGGTAATGGTAATATCAAACCACGAACCGGTCGACTTATCGTAGTCACTTTGGAAGATGATCTGCTCA  
CGGACACCCATGCTGTAGTTACCACGACCGTCAAGAGACTTAGCGGACAGGCCACGGAAGTACGGATACGAGGTACAGC  
AATAGTGATCAGCGCTCAAAGAACTCCACATGCGTTCGCCACGACGAGTTACTTTACAGCCGATCGGATAGCCCTGAC  
GGATTTGAAGCTGCAACAGATTTGCGTCTTTGGTGATCAGCGGTTTTTACCGGAGATTGCTGCCAGGTCTGCTGCT  
GCGTTATCCAGCAGTTTTTTGTCAGCGATCGTTACCAACACCCATGTTACGGGTGATCTTCTGACCCGAGGGACTTG  
CATGACAGAATTGTAGTTAAACTCAGTCAAGTTTTTAACTACTTCTGCTTTGTAGTAATCATGCAGTTTCGCCATCG  
TACTACTCAAATTACTTGATAGTTTTCGCTGTTAGACTTGAAGAAACGGACTTTTTTACCGTCTTCAATCTAAAGCCTA  
CACGGTCAGCCTTGCCGTTGCCGATTGAAGATTGCTACGTTGGAACCTGAATAGCGGCTTCTTTTTCAACGATGCCA  
CCCGGTTGGTTACGGGCCGGAACCGGCTTCTGATGTTTCTAACAGGTTGATACCTTCAACAATGACCTTGCCGGAAGA  
CAGGACATTTAACTTTACCGGTTTACCTTATCTTTACCGGTTAACACGATAAATCTTGCATCAGCAGGATTTTCG  
CTGCCATGATTCGCTCCTTAGAGTACTTCTGGTCCAGAGAGATAATTTTCACTTACTCACTACGAAGCTCAGGAT  
TACCGGCCAAAAATACGGTACCGATAGGCTGCTCGCTGTTGTTGTTGAGAAACACAAGCATTACCATCGAAGCGAA  
TGACAGAACCCTCGGGCGACGAACACCCTTCTTGGTGGCACCCTACCGCTTACGACATCACCTTTTTTACCTTA  
CCACGCGGAATTGCTTCTTTGATGGTGATCTTGTGATGTGCTACCGCTGCTGAGCAGGTTGCGAGCCACCCAGA  
CTTATGTCACATACGCGACGTGCACCGGAGTTGTCGGCAGCTTCAAGATAGTCTGTTCTTGATCATTATGATGCT  
GCTAATGTCAACTACTAGACCCGAAAATCAGTTCGTTAAAAATCCCATATCGAGGCGCGGCTATTATAACACC  
TTCAAGGATATGGGTAGAAAAATAAACGGCTCATTTCTGAGCCGTTTATTTCGATTGAGAGAGTGTACTGTATTACAGA  
ACCGCTTCTCTACAACCGGAACAGCGTCCAGGATTTAGTCTTGGACAGCGGACCGGATTCGCGGATTTCAACCACGTC  
ACCGATAACCGATTCGTTGTTCTCGTCATGTACGTGCAGTTTGGTTCGTACGCTTGTGAAATTTACCGTAGATCGGGTGT  
TCACAAAACGTTGATAGCAACAACAATGGATTTCTCATTGTTGCTGCTAACACGCGACTTGCAGAGTACGGATTTTA  
TCGGTCATTACGACCCGCTTCTCGTTCAGTAAAGCTTAAACCGGTGCGACATCGCGACGCACTTGTTC AACAGGTGA  
GACTGTTGCAGCTGGCCACTTGACGCTGCATACGAGGTTGAAGTCTCACGCAGCAGGTTACGAGCTCGGTGTTACG  
CTCTTCAACGCTCTTCTCACGAGCTTTTTGCTTTTATTACATCACCGTCTTAGTTACAAAGGTGGTTTTAATCGGCAG  
TTTCTGCTGCTGCCAGCTTGAATGCTTACGGGCCAGCTTCCGGAACACCGTCCATTTATACAGGACTTACCCGGCT  
GAATCAAGGCAACCAATACTCCACGTTACCTTTACCTTACCCATACGCACTGCCAGCGGCTTTTCACTGATCGGTTG  
TCCGGGAACACACGGATCCAGATCTTACCTTACGCTTAACTGCACGGTTCATAGCACGAGTCTGCTTCTGATCTGAC  
GGCAGTCAGACGACCGCCAACAGCTTTCAGACCGAAGCTGCCGAAGCTAACATCCGTACCCTGCGCCAGACCGCGGT  
TACGGCCTTTGTGATTTTACGGAATTTGTACGCTTGGTTGTAACATCAGCGACGCTCCTATTTACGGCCTTTACGC  
TGCTGCTTTTTAGGCTGAGCAGCCGTTTTTCCGGTTGTTCAACAGCAGCCATACCACCCAGGATCTCGCTTTGAAGAT  
CCACTTTAACGCCGATTACACCGTAAGTGGTGTGCGCTTACAGGGTGTGAGTTCGATGTCAGCACGAGAGTGTGCA  
GCGGTACGCGACCTTTCGGGTACGATTCCGCGCCGCCAGCGGCGCTAACTTCAACTTTAATA  
CCTTACGCGCCAGACGATTGCGTTCTGTACAGCACGCTTATAGCACGACGGAACATAACGCGACGTTCCAGCTGAGA

AGTGATGCTGTCAGCAACCACTTTTGCCTCCAGTTCAGGCTTACGAACTTCGGCGATGTTGATCTGTGCAGGAACGCCAG  
CGATGTCCGCTACGACCTTACGCAGTTTTTTCTAGCTCTTACCTTTTTTACCATAACGATACCCGGGCAGCAGTGTGA  
ATGGTTACACGGATGCTCTTAGCCGGACGCTCGATAACGATACGAGATACGGACGCTTTAGCCAGTTCCTTAGTCAGGTA  
CTGACGTACTTTAAAATCGCTGTCCAGGTTGTCAGCGAATTCTTTGGTGTTCGCAAACCAGGTAGAGTCCATGGTTTTA  
CAATACCAGGCGAATACCATTAGGATGTACTTTCTGACCCATTGCTAGTCTCCAGAGTCTCAGCGATCGGACACAACCA  
CAGTGATGTGGCTGGTGGCTTCAGGATGCGATCTGCACGACCTTTTGCACGGCATAATGCGCTTCATGCTCGGGCCT  
TCGTCTACGAAAATTTTCTGTAACCTTTAGATCGTCAATGTCAGCGCCATCGTTGTGTTCAGCGTTAGCAATGGCAGATT  
CAGAACCTTTCTTGACCAGTACAGCCGCTTTCTTGTGGTGTAGGTCAAAATATCCAGAGCCTGCGACACTTTCTTACCGC  
GAATCAGGTACGACAAAGGCGAACCTTTGAGCAGAAGAACGAGCAGTGGCGATGTTTAGCGATAGTTTTCCATCTCTTCC  
TCCTACCTTATTTCTTCTCGCTTTTTTATCAGCAGCGTGCCGGCAGATAAGTACGAGTCCGTCGAATTCACCCAGTTT  
TGACCAACCATTTGTCGGTTACAAAACCGGAACGTCGTCGACGACCATTATGGACAGCGATGGTCAAACCGATCATGTT  
AGGAAAGATCGTTGAACGACGGGACCAAGTGGCGAGGGGCTTTGTCTCCGCTTTCCACCCTTCTCTACCTTCTCA  
GCAAGTGCAGGTCAATAAAAGGACCTTTCTGAGAGAAGCTGGCATGGCTTACCTCTAAAATATTTGTACGGCGACG  
TACGATGAATTTATCAGTACGCTTGTGCTGCGGGCTTTTACCTTTGGTCTGAACGCCCCACGGAGTACCGGGTGT  
TACCAAAGTACGACCTTACCACCACATGTGGGTGTCTACC GGTTTATCGCGGTACCCGGAACGGTCAGGACGAACA  
CCACGGCAGCTGCAGCACTGCTTTACCAGAACGCGCAGCATATGCTCAGCATTGCCAATTTCGCCAGATTGTCAGC  
GCAGTCTGCTTCTACTTTACGCATTTACCAGAACGCGAGCGAGGGTGACATAAAGCACCATCACGAGCAACGATCTGAA  
CGTAAAGTACCAGCGGAACGTGCCAGCTGACCGCCTTACTGTTTCATTTCTACGTTATGAACAGTAGAACCAACCGGG  
ATGTTGCGCATCGGCAGGGTGTACCTGGTTTATTGTCAGCATCAACGCCAGACTGAATCTGGTCGCCAGCTTTACGGCC  
TTTAGGGGCCAGGATGTAACGGGCTTACCGTCTTTGTACAGAACCAGCGCGATGTTGCGGGAACGGTTCGGATCGTACT  
CAAGACGTTCAACAACTGCCGGGATACCGTCTTTGTGCGTTTGAAGTCAACAATACGGTAAGCCTGCTTGTGGCCACCA  
CCGATATGACGAGTGGTGATACGGCATTGTTGTACGACCCCGATTGCTTTTTTTTTCCAGCAACGGAGCAAAGG  
TTTGGCCTTGTGAGCTCAGGGTTAACACTTTAACTAGTGGCAGCAGCCGGAGATGTCGGTTTACATTTAACAAGT  
CCATTGTATTACTCTCGACTTACTCAGCGCCGCAACGAAGTCAGATTCTGGCCTTTCCAGGGTACGTAAGCTT  
TTTTCCAGTGCCTACGACAGCGATACGCTGTCGTCAGTTTAACTTTCCCTTTAACTACCAGGGTGTAACTGCTCG  
ACTTGCCTTCAAACAGTTCTGCACAGCAGCTTTGATTTCTGCTTTGGTCGCGTCTTTAGCAACTTTGAGTACGATGGT  
GTTGGATTTTTCCATCGCAGTAGACGCTTTTTCAGAAACGTGCGGTGCACGCAGCAGCTTACGACAGCCTTACGAGACGTTCTTACGAA  
TCATGCCAGCATCTCCTCAACTTGCTTAAACAGCATCAGCAGTATTACGACTTTGTGCAAGCGCATCAGGCTAACCGGGT  
CGATACCAGTTGCATCGCGTAGTCAACCTTTGTGACGGTGGCGCGAGCCAGGAACAGGTTTTCGTCCAGCTCACCGGTG  
ATGATCAGCACATCTCCAGAGCCATGTCTTTCAGTTTCTGTGCCAGCAGCTTAGTTTTCGCGCTTCTACAGAGAACTT  
CTCGACAACGATCAGACGATCCTGACGTACCAGTTCGGACAGGATGCTTTTACGCGCGCCGGTACATCTTCTGTTAA  
CTTTTTGACTGTGGTCTGCGGACGAGCAGCAAAGTTCAGCCACCAGAACGCCAGATCGGGCTCTTGATAGAACCAGAA  
CGCGCACGGCCGGTGCCTTTCTGGCGCCACGGTTTTTACCAGAACAGTACTTACGACAGGATCTTCTGAGCAGAGT  
ACCCTGACGAGCAGCTGCATAAGCAACAACCTGGTGAACAGCGCTTCTGTTGAAATCACGACCGAAGGTAGTTT  
CGGAAACAGTCAGCGCGCTGTGCGGCTTTCAATACTAATTCCATTGCTATCTCCTTACGCCCTTACAGCTGGTTAAC  
GATCAGGTGCTACCGTTGCACCCGGGACAGCACCTTAAACCAGCAGCAGGTTGCGCTCAGCGTCAACGCTACTACG  
CAAGGCTCTGAACGGTTACAGCTTCGTATCCCATCTGACTGCCATTTTCTTGCCTTTGAACACTTTGCCGGAGTCTGG  
TTCTGACCGATAGAACCAGAACCGGTGAGACAAGGAGTTACCGTAGTAGCTCTGGGTACGGAAGTTCCAGCGCTT  
AACGGTACCTGCGAACCTTTACCTTTAGAGGTGCCAGTACGTTCAACTTTTTAACGTAGCAAAACAGTTCACGCTTAA  
TGCTCTGACCTACAGTGAACCTTTCCCTTACAGCAGCGGAATTTCCACAGACCAGCCAGCTTACGCCAGCTTTA  
GCGAAGTGGCCAGCTTACGCTTGGTCACACGTTAGCTTTTTTAGCACCGGTGGTACCTGAATAGCAGGGTAGCCATC  
GTTAGCCAGGTCTTTAACCTGAGTAAACGCGTGTGCTTCAACTTCGATTACGGTTACTGGGATAGAAACGCCGCTTTCTG  
TGAAGATACGGGTCAATCCACTTTTTTACCAGTAAACCAATCATTGTTTCAACCTCTCAATCGCTCAATGACCTGATT  
AACCCAGGCTGATCTGCACGCTACACCCGACGCCAGATCCAGACGCATCAGAGCATCAACGGTTTTCTCGGTTGGCTCA  
ACGATGTCAACCAGACGCAAGTGAAGTACGGATTTCTACTGATCGCGCGCTTTTGTGACGTGCGGGGAGATCAGAAC  
AGTGAAGCGCTCTTGGCTGTCGGCAGCGGATCGGACCACGGACCTGCGCACCAGTGGCTTGGCAGTCTGACGATTT  
CCGCGGTTGCTTGCATCAGACGATGATCAAACGCTTTAGGCGGATACGGATTCTTGTGCTGATGAGACGAG  
CTCCAATATTTATAAACGAAAATGATTACTCCTCAGACCCATTACGATTGATGGGAGAGTGAACCGTTCTTACGTAG  
CTCCCCGATTGGGAGCATTGTTAGGTAGCCAAATTCGGCTAACTGAGTTTCAAGTGAACCTGCTGTCAACTACGACAAG  
CCCGCGCATTATACATACTTAAACCACCGAACGAAGCTATTGCTAGTAAAGTAAACAGCCTTCGGGTTATCTCTCAAGT  
TCGTTCAAGTGCATTTTTTGCACGCTCTCTTAAACCAGCTTTTCTTCTCGCTTTCTCCACAGTATTTTCTCGTCTCAGA  
AGAAGAGGGGGCATTCTCAACCGCGACGCTGGGTATCTTCTCCTCGACGGATTCGACGACGGGGAGTGGCTGTTTTT  
TGAAGAAATAGTGTGTTGATTGTTTAAAAGCGGGCTTTACGGCTCTACAGTGACTTCGGCTTTTACTATCAAAGC  
ACCCATAGCTGCCTGGCATAACCCACCAACAGCACCTTCTGCAAACACAGGCAAATCAGTAATAAAACAATTACATA  
TATTATGGTGCTGTTTTTGTGCGGAGAGATACCAGGGTACCTGTTTCTTCTGCTCACGCGCGGGATATAGAATT  
CAAACATGTCAATTTCCCTTCACTGTTGTTCCGGGAAATATTTGCTTCTACCCGATATAAGTAGGCACTCTCCCTCG

CACCTGCCAGAGATG TACTAACGTTGAAAAGCCAACAACACCGTCAGTTTTCAAGTGGTGGCTTTTTTGAATTGCTTTA  
TTTTTTCTACCAACAAGGGACGCCACTCCGCCGAAGTTCTGTGCAAATATGCAATGCGCGTTTAAACATCGTTCCAGC  
CAGAGAATCTCTTCTCGCTGCTATCACGCGTAATGGTACTCTCCCTTCCGCGCAGATTTTCCACAACAGAAGATAATC  
ACCCGTCCATACCGACTCAAACATTTATGTGTACGCGTCCACGTTTGTGACCTACGAGGACATCAACGCTAGCCTCAC  
CGACGCGAACGACCACAACAGGCAATTTTTGTCCCGACTTTAAGCGATGCGATCCAGGGCAAATTCTGATCTACCAAT  
GTTTGTAAGAAGCATTCCCCTTTACATGCCAGCCCGCTCTTACTGCCTGATCGCACCAGGCCGAATCAGCTGGGAC  
CTCGTACCCCATACGCCGTATAACACGCTTAGCGCCTCACTATCGCGCATCACCATGAGCAATATCCTTAGTCATAT  
CTTGTTAACTACTGGCGTTACGGGTATCAGCCACGCGAGGAACGGGTAACGTAGCTGTAAGAAGGAGCAGCAGTAGCCAA  
CCACAGGTAAGAGCGATAATGGTCCACTCATACCACGGCAAGCTGCATTTTCCGGGGCGGTTATACCCAATATGCG  
GTAAATCATTCGCCATTGTTTTGCTGTGAAAACGCTGGTCTGCTCGGCTTGTGTAATAAGCGAATTGTTTCGCCGCAA  
GCGCCAGCTTCTGCGATCGCCCGACATAATAAAGCTATCCGTTTCAAGCTCTGCGCGTTAAAAGGAGATCGGGTTGG  
TCAATATTCTGACCTCAAGGATGCTTGCTTAAGTTCGTGCTCCGTGAGACGCTTATCGAGACAAGTCAATGCCCTG  
TTTTTAAAATCAGTTCGACTTTTCGATCGGGTCTGCCGATCAGCAAAATGACCGTCAGGAATAAGAGATATTGCGC  
GTTGGAGATCATCAAGTATGCGGCGGTGATTCAGGTGAGCATTTCATAATAATAAGAGGGCAGCGCATCAGTTCGA  
TGAAGCGCATGCGTAATTTCCCGCATCTCATCTCGCTCCAGGCGCTGTCACGGCAGCCCTGTTCCAGCCGTTATC  
GTCGGTAACGATCCATGCGGCTTACCTTGCCAGGAACAACGAGCTTAAAGTAATCACACGGCGATGTTTTATCTTTTT  
GCAGTTGCTGCGCCAGCCAGGTTTTTCCACTTCCAGCCTCACCAACAAATAGCATAGACGCCAGGTTTACGTTTTCTCA  
CACAAACCAGGAAGAATAACTTCTTCTCGTAGACATAGAATTCTGTTTTAATTATTGATTATCCTTAATCATAAAA  
ATAATGTATGTATTTAATAATAACATATAACTAAATAAAATTTTGCTTATTGATTATGCAAGCGGCATTAATAC  
TATTTATACTAACGTAATATAACCCACCAATCTATTTTATTAGAACATACATCGTGCCCACTACGTTTCCCTT  
CCATCTGGCGAATCATAAAAGATGTGCCATCAATATATTGATTATATTTATAAGCATAGGGTCGATTATTTTTAATG  
TGAATTTTCCATACACTATAGTAAAAATGGACAGATCATTAATCAACCAACAACGCATTTTCAAGTCTGATTTAGC  
CTTGCCGCTTATGGCGTAACGAAAATCATGCTGGGTAAAAGATGCAATCCCGTGGCAGTTAATCAGGAAACACTAA  
GCTCTATAGCGTTAATGGCATTGACTCACATCGAATGATGAGACTTCTTTGTCTTAATTAATGAGGGGAGCGAAC  
AAAAGCGATACTCCCTCAACGAAGCCCTTGAAGTACGCGCCGGGAACTTTATTAGAAAAATAAATAAAACCAGCGTTGTG  
TTTAAAATCAGGGCATTACGAAAAAGTAACTCTCATCCAGGGCTACCTGACATCATCAAGCAGCCTGATTAGAAAAG  
TCAAAATGACTCGCTGATTATATTATCGCCACGCCTATACGTGATGGAGAACAGATATACGGGCTTCGATTGAACCTC  
GTAAGGGCCTCAATGCATTTACCACCAGCTTGTACAACCAGGGGATATCGCCCTCAGGATCAATAATCTTTGCTGACC  
CACCTGATGAGGTTTTACAGGCATTAAGTTTACTGCTAACTCAACAAAGTGTCTGATTTACAATTCGTGCAACGGCGT  
ACCCCGCTTGATAAATGTTCCGTCCGGGAACTTACAGGAATGAATGGACTGCGTCATGAAAGGACTCAATAAAATCACC  
TGCTGCTTGTGGCAGCACTACTCATGCCTTGTGCAGGACACGCTGAGAACAACAATACGGCGCAACTCAATAACGC  
CGATATCCGCCAGTTCGTGGAAATAGTGGGTGAGCATCTTGGCAAAACGATCCTGATCGACCTTCCGGTACAGGGAACCA  
TTTCCGTACGCAGTAATGATACGTTTAGCCAACAGGAGTACTACCAGTCTTTTTAAGTATTCTTGATCTTTACGGTTAT  
TCCGTGATCACGCTGGACAATGGTTTTCTGAAAGTGGTTGCTCAGCTAATGTAACAAACATCGCCAGGGATGATTGCTGA  
CAGTTCTCGTCCAGGCGTAGGTGATGAGTTGGTACCCGAAATGTACCGCTTGAAGGCTTCTGCTCGTACCTGGCCC  
CCCTGCTCCGCCAGATGATGGATGCGGGTAGCGTGGTAATGTTGTGATTATGAACCTCCAAGTCTTATTCTGACC  
GGTCTGCCTCCACCTAATAAACTGATTGAAGTCATAAAGCGCGTTGATGTCATCGGCACAGAGAAGCAGCAAATTA  
TCATCTGGAATATGCGTCAGCGGAAGATCTCGCCGAGATTCTAATCAATTAATCAGCGAAAGCCAGGTAAGGCGAGA  
TGCCAGCCCTCTCCGCGAAGATTGCGGCGATAAGCGAACCACTCTTATCATCAGTGGACCGGAAAAAGCAGCG  
CAGCGCATCACTTACTTAAAGCCTTGTGTCGAAGAGCGGAGGAAAGGAAATACCCGGGTTTTATTACCTGAAATA  
TGCTAAAAGCCAGAACTCTGGTGGAAAGTGAACCGGTGTTTCCGAAAAGCTGAAAGATGAAAAAGGGAATGCGCGTAAGC  
CCTCCTCTTGTGGCGGATGGATAACGTGCGCATTACCGCGATGAACAGACTAACTCTCTGGTCAATACCGCTGACCAG  
TCCGTCCAGGAAAACTCGCCACGGTAATTGCGCGTCTGGACATTGCGCGTGCACAGGTGCTGGTTGAGGCAATCATCGT  
TGAAGTTCAGGATGGAAATGGACTAACTCGGCGTGAATGGGCGAATAAAAAAGTTGGCGCACAGCAATTTACCAATA  
CCGGATTACCGATTTTAAACGCTGCGCAAGGTGGCTGATTAAAAAGAATGGTGGGATCACAGCGCGAATCTGCC  
TGGGATATGTTAGCGCCTACAATGGCATGGCCGAGGCTTCTCAATGGCGACTGGGAGTACTGCTTACCGCGCTGGC  
CAGTAACAATAAAAAATGACATCTCGCCACCCCAAGCATCGTAACGCTGGATAATAAACTCGCGTCTTCAACGTGGGGC  
AGGATGTGCCGGTGCTATCCGGGTACAGACCACTCAGGGGATAACGCTTTAATAACCGTCAACGCAAAACGGTGGGG  
ACAAAATCAAAGTACTCCGAGGTAATGAAGGCAGCGGGTGTGCTGAAAATAGAGCAGGAAGTCTCAGCGTTGA  
CTCTTCTTAACTCGACGCTCGGCCGACGTTTAAATACCGTACTATTCAAACGCGCTGCTGGTCAAACCGGTGAAA  
CGGTGGTCTGGCGGATTGCTGGATGATTTTTCTAAAGAGCAAGTGTCAAAGTTCCTGCTTGGCGATATCTTTA  
GTGGGGCAACTCTTCGCTATACCTCCACCGAGCGCTAAACGCAACCTGATGGTATTTATCCGTCCGACGATTATCCG  
TGACGATGATGTTATCGCTCACTGTCAAAGAGAAATACCCGTTACCGTACAGGACAACAACAGCGGATCGACGGGA  
AATCAAAGCGCTGGTGGCTCGGAAGATTTGCCGGTGTGGATGAAAACACGTTCAACAGTCACGCCCTGCGCCATCG  
TCACGGTGAGGCATTCATATGAGAATCACTCACCGTACCCCGCAGTTGGGCGCTGGCACAAAGAAATGGTTATCTCTA  
TTCAGAGGGCAGATTATTATCTCGCGGATACGCCATTGAGCGGTTACTCGATATCAACGTCAGGTTGGCCAGTGC

AGACCATGACCAGCTTGTACAGGCTGATTTTGAAGCTCGGCTGGAAGCGGTATTCCATCAGAATACCGGTGAGTCGCAA  
CAGATTGCGCAGGATATCGATCAATCCGTCGATCTTCTCTCGTTTCGGAAGAGATGCCCCGAAATGAAGATCTCCTGAA  
TGAAGATTCAGCGGCACCGTTATCCGCTTGATCAATGCGATTTTGTAGTGAGGCATCAAAGAAACCCTCTGATATCC  
ACATTGAAACCTATGAAAAACAATGTCGATCCGTTTTTCGCATCGACGGCGTTTTGCGGACAATTTTACAGCCAAACAAA  
AAACTGGCGGCACTGCTTATCTCCGAATTAAGGTCATGGCTCGTCTTGATATCGCCGAAAAACGTATCCACAGGATGG  
AAGAATTAGTTTGGTATCGGGCGACGTAACATAGATGTCCGCTATCCACACTGCCGTCATCTATGGTGAACCGCGCCG  
TACTCCGCTGTGGATAAAAAACAGCCTCCAGCTTTTATTGAACAACCTGGGGATGACGGCAGCGGATAAGCAGGATTA  
GAAAATCTCATTAGCTTCCGCACGGTATTATCTGGTGACAGGGCCGACAGGCTCCGGTAAAAAGCACCACGCTCTACGC  
CATCTTTTCCGCGCTGAATACTCCCGCCGAATATTCTGACGGTAGAAGATCCCGTGAATATGAGCTGGAAGGCATTG  
GGCAAACGCAGGTGAATACCGGTGTGGATATGTCTTTCGCTCGCGGCTGCGCGCCATACTTCGCCAGGACCCGGATGTC  
GTCATGGTGGGGAAATTCGTGATACAGAAACCGCGCAGATTGCGGTTACGGCTCGCTCACCGGCCATCTGGTACTCTC  
AACTCCACACTAACAGTGCATCAGGCGCAGTACCCGGCTCCGCACATGGGCGTGAATCATTCTGCTTTTCTGCTT  
CCCTGGCAGGATTATCGCGCAACGTCTGGTTCTGCGCTGTGTCGCAATGCCGACAATTACGCCCATCACCCCAA  
CAAGCGCAGATGTTTAAATATCATCAGCTCGGGTACAACAATTGGCACTCCCGTAGGCTGCCCTCATTGCCATCAATC  
CGGCTATCAGGGCGCATGGCGATCCACGAAATGATGGTGGTGACGCGGAATTACGGGCGCTATTTCATGAAAATGTGG  
ATGAAACAAGCACTGGAGCACTAGTCCGGAACAACAACAGGCTTAAATCAAAATGGCCTGCAAAAAGTGATAAGCGGT  
GACACCTCCTGGGATGAGGTTATGCGCGTCGCCAGTGCCACGCTGGAGAGCGAAGCATGAATATCGCTATCGCGCCATG  
ACCCAGGATGTTCAAAAATTGCAAGGGATCATTGATGCTAACGATGAACGTCAGGCACGACTGCGGCTGCGTGAAGAAGG  
GCTTTTTCTGCTGGATATTCGCCCCAAAAAAGTTCCGGAGTAAAAACGTCGCCCGAGGATCAGCCATAGTGAAGTGA  
CGTTTTTACCCGGCAGTTGGCAACCTTAAGCGCAGCGGCTTACCCTGGAAGAGAGCCTTGCCGTAATCGGTCAACAA  
AGCAGTAATAAACGACTGGGTGACGTGTTAAATCAGGTACGCAGCCATCCTTGAAGGGCATCCCCTTTCCGATGCATT  
ACAGCATTTTCCACGCTTTTCTGATTCTGATCCTGTACCCTGGTAAAAGCGGGCGAAAAGAGCGGGCTGCTGGCCCCGG  
TGTTGGAAAAGCTGGCTGATTACAATGAAAACCGGCAGAAAATCCGCAGCAAGTCTATTAGTCACTGATCTACCCCTGT  
ATGCTCACTACGGTGGCGATTGGGGTCTGATTATTCTCCTCACTGCTGTGTCGCCAAAATTACCGAACAGTTCTGTGCA  
TATGAAGCAGCAACTGCCGCTGAGTACACGATTCTTTAGGTCTGAGCGACACGTTGAACGTACCGGCCCGACATTAT  
TAGCGACAGTGTATTATGTCGCTGTAGTTTTCTGGCTGTGTTAAACCGGGCAATAACCGCCACCGTTTTTCAATGCCATG  
TTGCTGCGGTTGCGCTCATCGGCCGCTGATTGCGCCATTAACAGCGCACGCTATCTCCGCACTTTAAGTATTTTGCA  
ATCCAGCGGCTCCCTCTGCTGGATGGATGAATTTGTCCACCAGGCTCAACAACCTGAAATTCGCCAGCGCTCTGG  
CAAATGCGGAGAGAACGTTTCGCCAGGTAACAGCATTCACTTTTCTCGCTGGAACAAACCGCAATTTTCCCGCCGATGATG  
CTCTACATGGTGGCCTCTGGCGAAAAAAGCGGGCAGCTCGGCACATTAATGGTACAGAGCCGAGATAACCCAGGAGACACT  
CCAACAAAATCGGATCGCTTAACGCTCTCCATCTTCGAGCCAGCACTATTATTACGATGGCACTGATCGTCTGTGTTA  
TTGCTGTGCGTACTCCAACTCTTCTTCAACTTAACCAATGATTAATTAAGGAAAGCATAATGCGCGCAACCGGATAAG  
CAACCGGTTTTACATTACTGGAATTAATGGTGGTATCGTATTATCGGCGTACTTGCCAGCCTGGTGGTTCCTAACT  
AATGGGCAATAAAGAAAAGCGGATAAGCAAAAAGCGTCCAGCGATTGTGGCGCTGGAAAAAGCGCCTTGATATGTACA  
AACTCGACAATCATCACTATCCAACCAAAATCAGGGGCTTGAATCCTTAGTAGAAGCGCCGACACTGCCACCGCTGGCC  
GCAAATAAACAAGGAAGTTATATCAAGCGCTCGCTGCCGATCCCTGGGCAATGATTATGTCCTCGTTAATCTGG  
TGAACATGGTGATACGATCTGCTTTCAGCAGGGCCGATGGTGAATGGAACCGAGGACGACATCACCAACTGGGGTT  
TGAGCAAGAAGAAAAGTAAAGTACAGGATGAATCAGCAACGCGGGTTTTACCCTGCTGGAGATGATGCTGGTGTGGCGCT  
GGTCTATCACGGCAAGCGTGGTCTTTCATATGGCCGGGAGGATGTCGCCAGCACTCTGTGGCGGAAAACAGCGG  
CGGGTTTTACCGTGCATTTGAATAGCCATCGACCCGCGCACGCTCAGTGGTGCAGCTGTGGTATCCATTTCTCTGAT  
TCAGCATGGCGCATTATGGTACCAGGAAAACACCATCAGCTGGCGGCTGGGTTCCATTACAAGAAGATGCCGACAGCA  
GAGCAAAAATGACTGGGATGAAGAATCTCAATTCATCTTACGCAATTAACCTGATGACAGCAACCGCCACAGGTTG  
TGATTCTGGCCGACGACAATCAGGCCCTTCTCTTTGTTGATGGCTAACGCCGGGACCGGTGAGCGCTCTGACGTTA  
GTCTGTTGAGGCTCATGGCCCTGGATCAACGCTCGCCAGAGATACCCGCCCATGAACAAACAATCAGGGATGACTGTG  
CTTGAAGTCTTACTGGCGATGAGTATTTTACCAGCTGTGGCTGACTTTAATGAGCAGTATGCAAGGGCAACGAAATGC  
CATCGAGCGAATGCGTACGAGAGCTGGCATTGTGGATAGCGGATAACCAGCTTCAGTACAAGATTCACTCGCGAGG  
AAAACAGTCCAGTTCTGGCAAAGAGTTAATAAATGGCGAAGAGTGGAATGGCGCAGCGATATCCACTCAAGCAAAGAC  
GGCAGCTTCTGGAACGCACCATAACGGTGACATTACCAGCGGTGAGACAACCTCGTTACGCGTTATCAAAGCATCGA  
TAATAAATCCGGGAGGCAAGATGATTAATCGCCAGCAGGGTTTACATTGCTGGAGGTGATGGCGCGCTGGCGATT  
TTCTCAATGCTTAGCGTGTGGCTTTTATGATTTTTTTCGAAAGCTTCGAGTTGATCAACGCTCACAGAAAGAAATCCA  
GCAGTTCAATCAGCTACAGCGCACCATCACCTTTGATAACGATCTCCTGCAACTGGTCCCGGAGGAAATCGGAGTA  
CGGACAAAATCATGGTGTGGGTGAAGAAGCTATTTTTACCACGAAAGTCGCGATCCGCTGGCTCCTCTCAGTGAAGCA  
CAAACCTTACTCACTGTTACTGTTATCTGCGAAATCATACGCTTACCGTGTCTGTTACTTTCTGTGGATGGCAGGAA  
GGATCAACCCGCCCAGGCGATGCTGGAACATGTCGAGAGCTTCTTCTGAAAAGTAAACAGCGGGGAAAGCCAGGAACTTC  
CTCTCTCAGTACGTTTACTTCTGCGAAATCATACGCTTACCGTGTCTGTTACTTCTGTGGATGGCAGGAA  
AGAGAAGAGTCCGAGCTCAGACGCGGCCGGAATAATAACCATGAATAATGAACAACCGGGCTGCGGCTGCTCATTG

TACTCATGTTACTGGCGCTCATGGCTGCTCTGGCAGCAGACATGACGCTCAGTTTTACAGCCAGCTTCAGCGAACCCGC  
CAGGTAAACCATCATCTGCAACGGCAATATGATATTGAACTGGCGGAGAACTTGCCTTCCAGCCTCACCCAGGACGT  
TAAAGATAACGACAGACAGACCACGTTGCAGCAGTACTGGGCACAGCCACAACAGTTGCAGCTGGAAGATGGCAATACAG  
TGAAGTGGCAGTTACGCGATGCCAGCACTGTTTTAATCTCAATGCGTTAGCAAAAATCTCTGACGACCCGCTGGCTTCC  
CCTGATTTCCCGCCAGGTATTAGTGCGCTGCTGATTAACGCCGGTATCGATCGCGAAACACCGATGAGATCGTGCA  
ATCAATCGCTGACTATATTGATGTCGATGACTCACCACGCTTTCACGGCGCAGAAGATAGCTTTTACCAAAGCCAGACGC  
CGCCCCGCGATAGTGCAATCAGATGCTTTTTTCTGACTGGCGAATTACGTCAGATAAAAAGGCATAACCGAAAAATCTAT  
CAGCGGCTTATCCCGTATGTCTGCGTCTCCCGACCACGGAECTTAGCATCAATCTTAATATGCTAACGGAGAACGATAT  
TCCGCTCTTACAGAGGCTTATTCTCAATAACATCACGGATGCTGACGCTCGGGTCTTATTGCAAAAAGGCCGAGGGAAG  
GCTGGTAACCGAGATGCATTTCTTTACTGGGCGCAGCAGGATTTCTCCGGTGTGAAGCCACTGGTTGCTCAGGTGAAA  
AGGCATCTCTTCCCTATAGCCGCTATTTTACGCTGAGTACGGAAAATACAGCGACGAACAATCCAGGGATGGCAAAG  
CCATATTTTTTTCAACCGTAAACAGCAGAGCGCCAAATCTATCGGCGTACGCTGCAACTCTACTAATCATAAGGATCGT  
GATGCTGAATCGTTGATGGTCATACGTTCTTCTCGACGCTGCGTAAGCATTGGGAATGGATGACGTTCTCCGAGATA  
GCGTATCTTCCGATACATACGCTCAGGACGATCTTCCGCTGGAGTGCCTGGCCGATCAGCCGCTGCGGAAATGTTTAT  
CTTTTATCCCACAGAGGCTTTTATATCGTTCCCTCAGCTGCCAACGCCAAATACAAACTCACCCACAAACAT  
ACAATGGCTGGCAGAGGACGTTACCCGACAACACCCAGGACTGGCACTGGACGGTTGTCGATAAAACAAAACGAAAGTG  
TCGAGGTGATAGGCATTACGTCGGAGAACTCAGTCGCTATCTTGAGCGTTTACATACTGCCGGACTCAACGTCACGCGG  
GTTTTGCCAGATGGCTGCTATCTTCCCTGGGAAGTAGATAGCTGGACTCTGGTTAACAGCAAAACAGCTGGCTCATTCG  
CAGTGCCGACATGCCTTCAACGAACCTGGATGAACACTGGTTACAGCATCTTGCTGCCAGTTTCCGCTGAGAATATGC  
TTTGTTATGGTGTAGTACCTCACGGCGTTGCAGCGCCAATCCACTTATCCAGCATCCTGAAATACCATCACTGAGTTTG  
TATTCTGCCGATATTGCATTCCAGCGCTATGACATGCTGCATGGTATTTTTCGTAAACAGAAAACTGTAAGCAAATCGGG  
AAAAATGGCTCGCCCGCTGGCAGTAAGCTGTCTCGTTCTCGCCATTCTTCTTTTGGTGGCAGCCGGAGCATCGCGCTCT  
GGCATAAGATTGAAAGTCAACCTCAGCAACACAGCAAGAACTGGCAACGTTATTTCCGCGAGATCAAACGC  
ACCCACAATTTCTGTTTTACTTTAAGCAGCAACTCGCTCAGCAATATCCTGAAGCTGTGCCGTTGCTCTATCATTTACA  
AACACTTCTGCTGGAACACCCTGAACTGCAGTAAATGGAGCGAACTATAGCCAGAAGCAAAAGTCGCTGACCTTAAAAA  
TGAGTGCTAAGAGTGAAGCTAATATCGATCGTTTCTGTGAGTTAAACAGTCTGGCTCCGATGGAAAAACAGAAAAA  
GATCCGGTCAAGTGATGACAGTAAGGAACTCAGGAAATGATTAATCATGGTGGGCAGAAAAATCCACATCGGAA  
AACAGATCGTTGCCGACTGGCGTTCTCTCGCTCGCGTTTTTGGTTGGCTGGGGTGTAAAAACCGATAGATACCTA  
CATTGCAGAGCATCAGTCCCACGCGCAAAAAATTAAGAAGGACATCAAAATGGATGCAGGATCAAGCGAGACCCATGGTT  
TACTCGGTATCTCGCTTACGCAGCCATCAAAAATATCTTCTCGAGGAAGCAAAAACGTGAGAATTTGGCTATCACG  
CTGAAAAACGGCCGACAATACTCTGACAACTCATCTGTACAGCTCCCCTCGAAAACGTCTCCCCTGGCTCACTAC  
GGCAGAGTAACATACGGTATTGTTATGAAAGACCTCAGTTACTCTTGCCGGAAACGAAGATCACCCCTCAGGCATT  
TGTCTTACAGGAGCAACAATAATGACAACTGCTACTGCCGCTCTTATTCTGGTTGGTTTTATTGAGATTTTGGTTA  
ATGCCATCGCTATCACCTCTCGCGTTGGAGGATAAAACGGCGTAAACGTTTCCGCAGGTATTGGTTCATTTCAGGCAA  
AAAAAATATGCCTGGCATGATACAGTGCCCTGATACTTTGTGTTGCTGCTGATCGCCTGCGCCCTGGCACTTTTAC  
GCCCATCGTACTGGCGCACTTTCTTATTCTGTTTCTGACTCAGCTCAGTGTATTGATTTTCGCACTCAGCTCC  
TGCCGACAAACTCACCTACCCTGCTCTGGCTGGCTTGGTATTAAATGCGCAGTATGGATTAATTGATTTACATGAT  
GCGGTTTACGGCGCGTACGGGCTATGGGTGCTGGTGTGTTACTGGGCGCTGGTTAGTTTGTACAAAAGAGGG  
ATTGGGCTACGGTATTTCAAGTACTGGCGCTGACGCGCATGGTGTGGTGGCAAACTGGCCAATGATACTGCTGA  
TTGCCCTGCTGGTGGCATTGGTTACGCCATCGTTTCAAACTTGCAAACTGCAAACTGGCAAACTGCAAACTGGC  
CCGTGGCTTGGCTCGGCAGCATGATAAACCCTGGGATCTGGCTGGATCTTTATTAACCGGGAGGTTCTCCCTCC  
GACACGGCTCAACCTTCTCGCGATCTGTGCTTGCAGATAATTTTGCAGGCCATCTTCTGAATCAGATCAAGTCCGT  
TTCCAGCCAGTCGATATGGCCTTCTTATCACGCAAAATTTCTATCATATATCGCGGCTGACGTAATCATGAACGCTAT  
CGGCATAACCAATTGCCTCACGCAAACTTCTCGCGCCATCCAGCTCAAGTGCCAGATCAGAACGCAGATTCTCCTAACA  
TCTTACCATGTTAGTTTGGCCAGGCTCTGTAAGTTTGAAGACCTTCCAGAAAAAGAAAGTGCCTCAATATAACGATC  
GGCGTGTTCATCTCATCAATGATTGATGATACTCCACATCATTGAGACGTTTGGACCCAGTTTTTAAACATTGCGG  
CATGGAGAAAGTACTGATTGATGCGACAAGCTCAATTTCCAAACAGTTTGGTAGATAATTTATAACTTTAGTATCACCT  
TTCATTTTTTACTCTTCCGCTCCACTTTGAAGAGTAGAACGGCTTACGAGTAAAGTCAAAAACCACTCCGTTTAT  
GCGGACTCCTTAACTCCGCGACTGCATTAATTCATCTCCATCACTTACGCGCGGCCCCGACACATTTACCGCACTG  
ATTGCCGACCAGAAATAAATTTTTTAAATTGCTGGAACGAGTGAAGGGAAAACTGGCGCACAGCTGACGAATTTTTTAT  
CGCTGATACCATTACAAAGACAACGTACATAGAGACTCCCGTATACTTTCTTCAAAAATAAATGAAAAATAGTTCTTAT  
TCAATTACGGAAGACTCTTTTTAAGCAAAGAATAGAAATATGAATAAAAATAATGGGCTACCAAAGTAGCCATTGA  
CAAAAATGCGCGGATACTGGAAGGATCGCCAACACATTTATTGCTTAGTAAACGGCGCGGAAAGTTTCGCTAAATGCGT  
ACTTCCGGTGCCTGTTCTTTAGTACGGCCGTGGAATTCGGGAGACAGGTTAGTCCGCCCCGGAGGTCGCGCGGATTGAC  
CAGATACCAACCATACCGAGATTACGTTCTGCGCATCTGCATGACCAGACGAGCATCAGAGAGATAGAACACCTCGCC  
CTGAACGTCGTTACGCCAACCATCGGCTGGTACCATCATAGCGTCAATTTCTGCATCGCTCTTATTTGGGATGGAGGC

CTTTCAATTGTGAATGCAGGTTGGCAATCGCAGACGTTGCACACTTACCGTGAATGTTCTGGCCTTCGGTATTTGCAGAC  
TGACAAATCGCGTTACCGTAGTCCATTGTCATCACGTTACACCCGCCAGCTCAACACCTTTCGCTTTGGCATCGCTCAG  
GACATTCATCCCTTCCGGCGTCAGGCCAGTCGGCAGAATTGGCAAGGTGTACCAGATAGCAATATCTTTGCCTTCTGACT  
TCCATTTATCTCTGCACTTTCTTACAGCAAGGTTAGCAGCTTCAATAGATGCCTGATCCGCAACCCAGGTGCCTTCGATA  
TCGAAGTCCAGGACTTTGAGGTTACAGTTATCAACGATGTCATAATAATGCTGCATCAGATCGTCTACGTTCTTACAGGA  
AGCAGCCAGCGGAGCGTGTAGCACCACCGATAGACAGCATCACATCGCCGCCAGCCTCACGCAGAGCTTTGATTTTGC  
TGTACTGAGCGTAATTCTGCATACCGTAAGCGGTACCCCATGTCCGCAGACAGGTGTTCCGATCTTTACTCACCACAAAC  
GCCAGCGTGAAGTGGTGTACGTTATGATTCTTAGCCAGCGCAGCCAGATCCGGGATCGTATTCAGCGTAAAGTCGACATA  
CGGTGCATAAACGTTGTTCCGGCCACGCTTTCTTCCGGCTACTACGCGCTCTTTGGTTCGGTCCAGTCAACAAAAACAC  
GCCACGGGTTGCTGTCAGAAGGAGAAACTTTCTGCACTTTACTCTGAGAAATGTAGTTCACACCGTTAAAGCGAATCAGC  
GTATCGCTGGCATAAAGCGTTCGGATTAACTGCCGGCATTATTAGCTCTTCGTTGCTATAGCTCTGAGCCTTACC  
TAACGGCTTCACGGCGGCTATTGCTACCGGTGGCCTTTGGTTCGCCACCAGAGCAGGGTGTCACTTTGCGTCCAGA  
ACAGCGCTTCATAAGCCTGCCATCAACAACAACGCATCACCTTTCAGGTACACAGTGGATGCGGACCATTGCTTTCGCC  
GGTTCGATTTCTTCCACGGGTTATCGCCGCCGGGACAAAGCCCATGCGTCTTGATCGACAGAAGTTTTATAATGTGC  
ATCGTTATAACTACGATGTGTCGGCTGTACGCTTTGCTGGCCTGGAACCATCGCAACAATGACGCCGCGTTAT  
CAATTTACAGGTAGTCGGGTTACCGTACTGACTCAATTCGCAGCGGTAGCTGTACGCTCGAGACGCCATGGGTTATTG  
GAGTTTTCAGCGCTGGTACCCCGTGGGCAATCTTACAGCCAAACCCAGGCGTTCCTGTAAACATTACCATTGAAAAT  
AACATGGTAAATTTTCGCTACCTTCTGGCCGCTCCACGCTTGAATGAGTAATCGTTAACGCTATCCGCTGGTGTGATG  
GCTCGCTGTTATCCGGAGTTGGGGTACCAGGTTTCCGGAGTTGGATCAACCGGAGTACACAGCACCAGCCATTATTATCC  
GGCTTAACGGAACAGGAGCCAGGGTACCATACTGGCTGATTTCTGTTGCCGTTGCCGCGGAACATAACGCCATGGGTT  
ACTGGCATCGTTTTCTTTCGCATCGCTGGGCAATTTGCCGCGCTACCCAGGCGTCTTATAAATGCCGCGTAT  
AGATAACGTACCATGTAGAAGAACCTTCTGACCTTTCAGGCTACTACAGCATAGTTGTCGTTTGACTTATCAGCTGGG  
GCTGGTGAACATCAGGAGCCGTTTAACTCCGGTCCGGTTTACATCCGGTGAAGGCTGTGGTGTGAAGTACAGGA  
CTGTGGATTACTGTTTCTGAGATTTCCGTTGCCGTAGCGGCACGAACATAACGCCATGGGTTGCTGGCATCATTGCTTT  
TCGCATCACCAGGACAGTTAGAAGAGGCTACCACCAGGCAATTTATATACCCGACCATTAAGACGACATAACCAGGTC  
TGACCGCCTGCTGTTTATTCCAGGCAACTACAGAAGAATTAGACGGAACAGTGCCCTGTGCTGGTGTAGCCGAACCGCC  
ATTAGCCGGCGTATTGGATCGAGGCGTATTTGAATTTGAAGAAGATGAGCTGCCGCTCTTTTCGAGGAAAGTGATTGC  
CAAATGACTAATTTCAGCAGCTGTTGCGGTACGCTTTAAACGCCACGGGTTAGTTGCATCATTGCTTTTCGCTTTTCCC  
GGCAATTTGTAAGAAGAACCCAGGCAATTTTATAAATTTGCCATCGAAAATAACCTGATATTTATTACCACCTTG  
TTGGTTATTCCATGCTTCCATTGCAATGCTGGCAGAGCGGAACACACCAGCCCATACCAATCATAGATTTAGTAAATA  
TATTTAATTTCAATATAATCCCTTGACGTAACAACTGCAAAACAAAAGTCTACGCAGGAATTTTACGTTTTACGA  
GAACCTTCAATATGAATTAATACGGCATTAATAAAGAAAAAGCCTGACAAATGAAGCATTTTAAAAACAGAAAC  
ATTCATATTTAAATGTTAAATTAATTGATATTTAAATATGAATAATTTATTCGTTCTGACAGTACGAATAAGATATG  
CCGTCAACAAATGCAAAAAGGGCGCCGAAGCGCCCTTTCAATTCAAAATAAATTAACGTGAATTAGCCAGAACTTA  
GCAACAACGCCCGCAGCAACCGGTACGGCCGCTTACAGGATTGCGAAACGCAGACCGTCCGATCGCGATCGGGTGGAT  
CAGGGTAACAACCATTTTGTGTTGTCGCCCGGCTTACCATCTACGCCTTCGGCAGTTCCGATGGTACCAGTACGT  
CAGTAGTACGGAAGTAGAACTGCGGACGGTAGCCTTTGAAGAACGGAGTATGACGGCCGCTTCACTTTGGACAGAATG  
TACATTTAGATTCGAACTTGGTGTGCGGCTTGTGGTGCCTGCTTACGAGTACCTGACACGTTTCGATTTCTCACG  
TTTGATACCAACGCAGCAACACCTACGTTTCCACCAGCAGGCTTCGTCAGCAGTTTTCGGAACATTTCAACGCCAG  
TACAGGTAGACTTCTGAGTCTTTGATACCAACGATTTCAACTTCTTACCACCTTTGATGATACCCGCTTCTACAGCA  
CCGGTAACAACCGGTACCACGACCAGGATGGAGAATACGTTCTCGATCGGCAGCAGGAACCGCTTGTCAATCGCACGCTC  
TGGTTCGGAATATAAGAATCCAGGAAGCCAGGCTTCCAGGATTTTTCGTTCCCACTCTGCGTCCGCTTCCAGCGCTT  
TCAGAGCAGAACCAACGATCGGAGTGTGTCGCCCGGGAAGTCTACTGAGACAGAAGTTACGAACCTTCCATTTCAC  
ACCAGTTCAGCAGCTTTCGTCATCAACCATGTCGCATTTGTTCCAGGAACACGATGATGTACGGAACGCTTACCTGACG  
ACCCAGCAGGATGTGCTCACGAGTCTGCCGCATCGGGCGTCACTGCGAGCAACTACCAGGATCGCGCCGCTCATCTGAG  
CAGCACCGGTGATCATGTTTTAAACATAGTCGGCGTCCCGGGCAGTCTACGTTGCGTAGTGACGGGTCCGGGTGTCG  
TATTCACCGTGAAGTGTGATGGTGTATACCAGAGCTTTTCTTCCGGCGCTTATCGATCTGGTCAATGCACGAGC  
AGCACCGCGTAGGTTTTAGCCAGTACGGTGGTATTGACGGGTGAGAGTAGTTTTACCGTGGTCAACGTGGCCGATAG  
TACCAACGTTAACTGCGGTTTTGTACGTTCAAATTTTCTTACAGACGGCTATATTCTTACTATAGTGTCTCCCT  
TCAGGAGAGAGCAGGGACTTTGGTATTAACCTTAGGCTTATTTACCACGGGCTTCAATTACGGCTGAGCAACGTTAC  
TCGGCGCTTATCATACTTACGAATTCATAGTGTATGATGCACGACCTTTGGTCAGAGAACGCAGCTGAGTTGCGTAT  
CCGAACATTTACAGACAGCGTACTTACGCGTGGATTTAAACGCCAGTAACTTACGATTCCTGACCTTTGAGCATAACCAG  
ACGACGGCTCAAGTACCAGTAACGTCACCGGTGTTCTTCCGAGTTTTACTTCAACCTTCATGATCGGCTCAAGCA  
GAACTGGTTTTCGCTTTCTTAAAGCCTTCTTAAAGCGGATAGAAGCAGCCAGTTTAAACGCCAGTTTACAGGAGTCAACG  
TCATGGTAAAGAACCGAAGTGCAGACGAATACCATGTCTACTACCGGTAGCCTGCCAGCGGACCTGCTTTCAGCTGTT  
CTGGATACCTTATCAACGGCCGGATGTATTCGCCAGGGATTACACCACCTTAAATGTCGTTGATGAACCTGAGCCTT





CCAACTCACTGGTTTCGTTGGTTAAAAGCGACCTGGACATGAAAAAAAAACTCCTTTTCAGGAGCCTGTCGTTAACTTT  
TCAGGGCAGGCTCATTAATGATGCGGGTAACTAAATTAATACAGCGGAGGTTCCGCTTTCAGCACTAATTATATCCGGC  
CTGTAATAAAAAAACCGCCCTGGTCAGGCGGGGTTCTTAATGCTTATTTTTAGCAGAATCTGCGGCTTTCGCATCA  
GTTCCGGCTTTCATCAGCCTTCGGCGCTGGTTTCACATCCAGCAGCTCTACGTCAAACACCAGGGTAGAATTCGGTGG  
GATCCCCGGAACACCCGCTTTCGCGTAAGCCAGTTCGGTGGAAATAACCAGTTTGATCTTACCGCCTTCTTGATGTTCT  
TCAGACCTTCTGTCCAACCCGGGATAACCCGTCCAGACGGAAGAAAGCGGTTACCACGGGTGAAGAGTTGTCGAAC  
TCTTACCCTGCATCAGCGTACCTTTGTAGTTCACTACAACAGTATCGCTGTCTTTCGGTGCTTCGCCTTACCAGGCTC  
TACTACCTGATAAACCAGACCAGTTGAAGAGGTTTTACACCTTTCTTTGGCAAATTTCTCGCGTACTCTTACCTT  
TTGCTTCGTTATCAGCCGCTTTTTCCATCTTCGCTGAGCAGAAAGACTTCACGCGAGCTTCGAATGCTTGTAGAGTC  
TGTTGCATCTCTGGTCGGAGAGTTTGCTCTTATCAGCAAATGCATCCTGAACACCAGCGATCAGCTGATCTTATCCAG  
TTTGATGCCAGTTTTCTTGTCTTTTAGAGAGTTTTCCATGTAACGACCCAGCGAGGCCACCCAGTGCATAAGCTGATT  
TCTGATCGTCATTTTTGAACGCTGCTTGTGTGACAGCTGTAGCAGTTTTGCGCTTCAGCAGCAAAAGTATTGGT  
GCATGCAGGGCAACGGCCATTGTGGTCGCCAGCAGCTTACTTTAAACAGTGATTTTATCCATATCTCCAGGATCGGGC  
ATCTCACCCAGGGTAACTATTATCAGAAGGTTACTATAAAGCTTTGTGCAACAAATCTACATACAGACACGCCCTATT  
ATCATCTATTTTCAGACTTTTTTTGTTAAATAGTTTCGATGACCGCAAATGAGTGCTCTCGGGCAGCAAAGTTAA  
GTAGAATCCGGCGCACCATTTCGCAAAAAGAGGTGAATCATGACGATTTATCATTGGAAGCACGCCTGGCAGAGTGA  
GAGCCGACTGGCTTTTCAGGAAATCACCATTGAAGAACTGAACGTACCGGTGACCGCTCATGAAATGGAGATGGCGAAAC  
TGCGGATCATCTGCTGCTGACCAGAAAGTTAAAAGCCAGCCAGCGTCGAACATCGCGTCGAGGCTGAAGAAACG  
CCACCGCCACATTATTGAGGCGTAAAAAAGCGGGATTCCCCGTTTTTTGTCACTTTTTTCGGTATTAGTGGCAACCGC  
AACCGCGTTGCCCTTACCGCCACAGCAGCCTTCGCCACCGTTCATGACCGTGATCGTGCCATGACCGCCGAGCAA  
CCGTCGTGGTCGTGATCGTGGTGGTGATCGTGCGCGCCGTGAACGTACCATGAGCCAGTTCTTTCAGTCGTTCCGC  
AATCGCCACAACCTCAACGTTGAATTTAGGTTCTGACCGCCAGCATGTGGTTACCATCAACCACGACGTGATCGTCTT  
CAACCGAGTATTTCAACCGTACCGGACCCTGGTCGTTTTAGCCAGGAAACGCATACCTACCTGCAGTTCATCAACG  
CCATAAATACGCTTTTAGAACACGTTGACCAAGTTTTGTCGTAAGCTGACCGTAAGCGTTCGCGCCAACAGCGAC  
ATCAAATTTGTCGCAACTCATGACCTCCAGCGCTTTCAGGCCAGAGATCAGGGAACCGTGACCATGCAGGTAGT  
CCAGCGCGCAGCTCACCGGAGACTCATCAACCAACACCGCTTCTGTACGTACCTGATAGGCCAGGCTGACCAACG  
TCTTTTGTACTTTTCATGATATCTCCTGAGCATGGGAAGAATAGTGGCGCAGATTGTAGCGGAATTCTGCAGCCGTGAC  
TCACTAGCTTAAAAAACTCGGCGCATATCGCTAGTCCGGATGAAAAATCCCGATCACTTGCTCATCTTTCGGAACGTGA  
TCGCGGGCTTCTTTGCTGCTTCTCGCATCTGATGTCGCACTTAACACATTAACAATATCAATATTATTTTCGCGCCA  
CATCGCCATTGAATCCTGCGCTGACAGGCCGGCATTTCGCGCCGCAATAAAACGTTTTTCGGATTGCCATCTTACCC  
TCACTCAAATTCATCCAGCCGTCAGCTGGCGTCTTTGTTGCAATTCACGCTGGAAAAATCTTTCCAGTTCCGCT  
CGGGCTTCCCTGGCGGAGAAATTTGTACGGTATCGGCATGCATTGGGATGAGCTCTCGCAGCATCCGCATATCCAGGC  
GCGAAAAATGCAGTTGCGCTCGCTGTGCCTGATGCGGATGCATGCCAAGCGTGACCAGCGCTTTCGCGCCAGCTTAACG  
CACTGGAGAATGTTTACGGGAAAAGTGGCTCACCCCTGCCTGAATAACTCATGCGCTTCCACAGTCCCGCGCTCGC  
GCAAGAATATGCAATGCGGAAAGTGTGTTGGCATATTTCCACCAGTTCATGGTGTCTTCCGGCTCGTTACAGGTAAT  
GACGATAGACTCAGCGGCTCTGCACCCGAGAACGTAAGATCGACCTGCGTGGCGTCGCGTAATAAACTTTGTAGC  
CGTATTTACGCATCAGGTTAACGGCGTGATATCCCGCTCCAGCACGGTAATGCGCATTTTATTTGCCATCAGCAAACGA  
CCAATCACCTGACCAAACGCCGATGTTGGTGGTATTTCCACCAGTTCATGGTGTCTTCCGGCTCGTTACAGGTAAT  
TCACCGTACCAGCAACAACGCCATCTGGTCGCCCTGGAATAAGCGTTGTGAAGAAGCGGTAGAAAAGAGCAAAGGCA  
AACTCACCCCTGACTCAACACGCCAGCAAATGCATCCGCTCTGAGCTACGCACGCCATACAATCGCGCCAGCAGATA  
CAGCACGAGAATTTTACCGCCACCAGCACAACCACGCTTATCACTACCCACAACAGATGGGTATAAAGCACCCGAGGT  
TGAGTGACATGCCGACAGAGATAAAGAACAAACCGAGCAGCAAGCCTTGAAGGGATCGATAGCCGTTTCCAGTTCATGG  
CGATATTCATTTCCGCCAGCAGCAGCCGCAATAAATGTACCGAGCGCCATCGACAGCCCCAGCGCATCCATAAACAA  
TGCGGAACCCAACACCAGCAGCAGCGTCGCGGGGTGAACACTTCCCGCACGCCAGAAGCTGCAATAAAGCGGAATACCG  
GACGCGATAAATAGCGCCACCAATCAGCATGCCGACAAACGCCAGCACCTTCATGCCGACCTTCATCCAGTCGAAATGT  
TCGTCTGCCGACCCGCCAACACGGCACTAACGCCAGTGCTGGGTTACTGCCAGATCCTGAAACAGCAGAACCGAAAA  
CCCGAGCTGGCCGATTTCGTGCGATTATCCCTTTCTACGCATCAATTGCAACGCCATTGCAGTTGAAGACATCGCAA  
GGCAATGCCACCGACCCGCCCTGCCAGGCGAAATCCGTGAGCATCAATAATCCCGCCAGCAACGCCGCGCTAAC  
AGCACCTGTGCCGCGCTACGCCAAAAATCGAACGCCGAGTTGCCAAAGTTTGGAGGGATTCAACTCAAGGCCGATGAT  
AAACATCAGGAATACCACGCCGAGTTCCGAAAAGTGGAGGATCTCATCGACGTGCTAATAAAACCCAGCCCCACGGC  
CAATTGCAATCCCTGCCAGCAAATATCCAAACACAGCGCAATACCAGCCGATGCCAGCGCACCGCAGCCACCGCC  
GCGAAGAGAAACAGCACTCTGCGAGTAAAAATCGGAACCTTCATCAGCGGCTCCTGGAGACAGCGATTGGCCAGC  
CAGTCACCGTAGGCTCTGGCGTGGCTCGCCAGCTCCTGTGCGTTTTGCCGCTCTCGCCAGTAAATAATGATGGGACTTAA  
CCAATGCATCCGGCAGATGCCCCGCCGAGTTCAAAGGGGCGCAGCACATCGCTCATCGGGTAGCGATTACGCGCTCAT  
AACGGTAAGCACTTTCGGCTCGCCGGTGGTAATCACGCTACGCCAGTACTTTCGCCAGTTGGTTCTCCCGCCCC

CTGGCAAACCACGACTTAATACCCGGTCCAGCCACTCTTTCAGTAGCGCCGGGCGAGCTATAGGTATAAAGAGGATGCTG  
AAAGACAATCACCTCGTCTCGCGAGTAATGCCTGCTCACGGGGATATCAATAAAAAAATCGGGATAGTGCGCGTAA  
GGTCGTGCACGGTAACATTGCTGAGCTGCTGGCCGGTTAAGCAGTACCCGGTTTGCCACCGAGTCCTGAGATTCCGGA  
TGGGCATACAGCAGCAAACTTTCGCTGGCTGAGACATCATCCCCCTCCCGTATGGTTTTTGTTGTATAGTCTGCTGTTT  
GGGCTACCACTTGCGCCGGTGCAGCTCGCCATAACATTATCATAATGATAAGTTAACATAGTCTGAACATA  
GGCACCATTGATTGTTTTCTCTCGTTACAAATTCGTCGCGGCTGCAGCTCTGCTGGATAATGCCACCCGCCACCATC  
AACCCTGGGCAGAAAGTCGGCTGGTGGTAAAAACGGCTGTGGTAAATCTACCCTGCTGGCATTGCTGAAAAATGAAAT  
CAGCGCCGACGGCGGAGCTACACCTTTCGGGAAGCTGGCAACTGGCGTGGTGAATCAGGAAACGCCGGCGTTACCGC  
AAGCGGCGCTGGAATATGTCATTGACGGCGACCCTGAATATCGTCAACTAGAAGCGCAGCTACACGACGCCAACGAACGT  
AACGACGGGCACGCCATTGCGACCACTTCATGGCAAGCTGGATGCTATTGACGCATGGAGTATTGCTCCCGTGTGCCAG  
CCTGCTGCACGGCTCGGTTTACGAATGAACTGGAGCGCCGGTAAGTGAATTTTCCGGGGGTGGCGTATGCGTC  
TTAACCCTTGCAGGGCGTATTTGCCGTTACGACTGCTGCTGCTGACGAAACCGACTAACACCTCGATCTCGATGCC  
GTTATCTGGCTGAAAAATGGCTGAAGAGCTATCAGGGCAGCTGATCCTGATCTCTCACGACCGGACTTCTCGATCC  
GATCGTCGATAAAAATTCATATCGAACAAAGCATGTTTCGAGTACCCGGCAACTACAGTTCGTTTGAAGTACAGC  
CGCCACCCTGCTGGCGCAGCAACAAGCGATGTACGAAAGCCAGCAGGAACCGTACGCATCTGCAAGTTATATCGAC  
CGTTTTCTGTCGAAAGCCAAAGCGAAGCAGGCGCCAGAGCATTAAAGATGCTCGAGCGTATGGAGTAAATGGCCCC  
CGCGCAGTCGACAAACCCGTTCCGCTTAGCTTCCGCGCCCGAAAAGCCTGCCAAATCCGTTACTGAAGATGGAAAAAG  
TCAGCGCGGGCTATGGCGATCGCATTATTCTCGACTCGATTAACCTGAACCTGGTGCCCGGCTCGCGTATTGGTCTGTTA  
GGCCGCAATGGCGCGGTAATCGACATTAATAAACTGTTAGCCGGTGAACCTGCGCCAGTCAGCGGTGAAATGGTCT  
GGCGAAAGGGATCAAACCTCGCTACTTTCGCCCAGCATCAAATTGAATACCTGCGCGCCGACGAATCACCTATTCAACATC  
TGGCAGTTTTAGCGCGCAGGAGCTGGAACAAAAACCTGCCTGACTACCTCGGCGGCTTTGGTTTCCAGGGCGATAAAGTA  
ACCGAAGAACCGCGCTTCTCCGGTGGGAAAAAGCCGCCTGGTGTGGCATTAAATGCTGGCAGCGGCCGAATCT  
GCTGCTGCTGACGAACCGACTAACACCTTTCGACTCGCATGCGTCAGGCACTCACCGAAGCATTAAATCGAGTTTGAAG  
GCGCGCTGGTTGCTGTTTTCGACGACCGTCATTTGCTGCGTTCCACCCTGACGATCTCTACCTGGTTCAGCATCGTAAA  
GTCGAACCGTTGACGGCGATCTGGAAGATTATCAACAGTGGTTGAGCGACGTACAAAAGCAGGAAAACAGACCGACGA  
AGCGCAAAAGAGAATGCGAACAGCGCCAGGACGTAAGATCAGAAGCGTGGGAAGCTGAGCTGCGTGCCAAACCC  
AGCCACTGCGTAAAGAGATTGCCGCTGGAAAAAGAGATGGAGAAGCTGAACCGCAACTGGCGCAGGCGAAGAGAAA  
CTCGGCAGACGCAACTGTATGACAGAGCCGTAAGCGGAGTGGACCGCTGCTGCAACAGCAAGCCAGCGCCAAATC  
CGCCTGGAAGAGTGCAGAAATGGCATGGCTGGAAGCCAGGAGCAGTTGAGCAGATGCTGCTGGAAGGCCAAAGCAACT  
GATGGCGCAGATAACGACGACCGATGCCAATGAATTCAGCAGCAGTGCTGAATTCATCCCCATGCGCGGCTTTAGCAATT  
GTCATCTGCAACCATGCTGCCGCTGTGTTTCGTCGTCAGGTAACCTCACCCGCTGAGCCAGCGGCTGGAGTTGCC  
GACGGCGATTTTGTGATCTTGCCTGGAGTGAAAACCTGCACAGGCGCAACATAAACCTGCTGCTGGTGGTGTTCACGG  
GCTGGAAGGCAGTCTCAACAGCCCTTACGCCCACGGTCTGTTGAGGCGGGCAAAAGCGCGGCTGGCTGGGCGTGGTGA  
TGCAATTTTCGCGGATGCAGCGGTGAACCAAACCGTATGACCCGATTTACCACTCGGGCGAAACCGAAGACGCCAGTTGG  
TTTTTACGCTGGCTGCAACCGCAATTTGGTCATGCGCCAACGGCTGCCGTCGGCTATTCGCTCGGCGGTAATATGCTGGC  
CTGTTTGTGGCAAAGGAAAGCAATGATCTCCCGTTCGAGCAGGTTGAGCAGTTACTTGTGAACTGTAAAAGCCAATGCCGCGGC  
GTAGCTATCATATGAAAAAGGGCTTTTCCGCGTTCATCAGCGTACTTGTGAACTGTAAAAGCCAATGCCGCGGC  
AAGCTGGCAGCCTACCCGGAACGCTGCCGATTAATCTCGCGCAGTAAAAATCGGTACGTGCGATCCGTAATTTGACGA  
TCTCATCACCGCCAGAATTCACGGCTACGCGGAGCTATCGACTATTATCGTCAGTGTAGGCCATGCCGATGCTGAACC  
GGATCGCAAACCGACGCTGATTATTACGCCAAAGACGATCCGTTTATGGATCATCAGGATCCCGAAACCGGAAAGT  
CTCCCCCGCAGGTGGAGTATCAACTGACTGAACATGGCGGTGATGTTGGCTTTATTGGCGGTACATTACTTCATCCGCA  
AATGTGGCTGGAGTACGCATTCCTGACTGGTTAACACGTATCTGGAGGCGAAATCATGTTGATTCCGTGGCAAGACCT  
CTCCCCGAAACGCTGAAAAATTTAATTGAAAGCTTTGTGTACGTGAAGGCACCGATTATGGTGAACATGAGCGTACAC  
TTGAACAGAAAGTGCAGCAGTCAAACGCCAGCTACAGTGCAGGAGAGCGGTCCTGATGGTGGTGGTGGTGGTGGTGGTGGT  
GTCAATATTATGCCGCGCAGTCAGTTTCGCGAATAACCTGCAACCGTCCGCGGACGAGATAAATGATAGCTAAGTCAT  
GGAGTTACTATGCTGCCAACATCCGGTTCATTGCGGTAACAGGATCCAGCGGCGCGGGGACCACCACCAGCCTCGC  
GTTTCGTAATAATTGCGCAGTTAACTGTCATGCAGCTGAGGTGGAAGGGGACAGTTTTACCGTTACACCCGCCCGG  
AAATGGACATGGCGATCCGCAAGCGCGGACGCGGGGGCGCATATCAGCTACTTCCGCCCCGAGGCTAACGACTTCCGGC  
CTGCTGGAACAAACCTTCATTGAATACGGTCAGAGCGGCAAGGGAAATCTCGCAATATCTGCATACCTACGACGAAGC  
CGTACCGTGGAAATCAGGTACCGGGACATTCACCCCTGGCAACCTTACCGAACCCACTGATGTAAGTGTATTTATGAAG  
GTTTACACGGCGGCTAGTCACGCCACAGCATAACGTTGCGCAGCATGTGGACTTACTGGTGGCGTGGTGCCTATCGTT  
AACCTTGAGTGGATTCAAAAATGATCCGCGACACCAGCGAGCGGGCACTCACGAGAAGCAGTGTGGACTCAGTAGT  
GCGTTCAATGGAAGACTATATCAACTACATCACACCAGTTTTCCCGCACCACTTAACCTCCAGCGCTTCCACCG  
TCGACACTTCAAACCCGTTCCGCGCAAAGGATCCCGTGCCTCGATGAAAGCTTTGTTGGTATCCATTTTCGTAATCTG  
GAAGGGATCGATTTCCCTGGCTGCTGGCGATGTTGCAAGGCTCATTATTTCCACATCAATACGTTAGTGGTACCGGG  
CGCAAATGGGCTGGCAATGGAATTAATGCTGCCGCTGGTGAACGATTGATGGAAGGAAAGAAAATCGAGTAAC

TCTGCTATTACGCCGATAAAAATACTATCCGGCTTACAACGGGATAGTTAAGTCACGCGGCAACCACTTCATACGAGTG  
AGTAATATTCACCGCTTTTTCCAGCATCAACGCCACTGAACAATATTTCTCGGCAGAGAGATCAACCCGCACGCGCAACCG  
CTGCGTCTTTAGGTTCGCGACCCGGTACGATAAAAATGCAGATTAATGTGCGTAAACAGGCGTGGTGCCTCTTCGCGGCGT  
TCAGAGGTCAATTTTACTTACAATCGACCACATCTGACGCCTTTTTGCAGGATCGAAACCACATCGATGGCACTGCA  
ACCACCCGCCCATCAACACCAATTCATTCGACTTTGGTGTTCATCGCCTGAGTTGCCGTCCATTAATACTGATGAC  
CAGAGGCGGATTCGCCAGAAAAGTTAACCTTCGACCCACTTCACTCGCGCTTGCATTTTTCTACTCCACTGCGTCAA  
TTTTCTGACAGAGTACGGTACTAAACAAATCGCGCAACGGAAGGCGACCTGGGTGTCGATGAAGCGAGACACCAGGAG  
ACACAAAGCGAAAAGTATGCTAAAACAGTCAGGATGCTACAGTAACATTGATGTAATGCAAGGACGACACAGGAT  
CATTACCGTGCAGTACAGTTGATAGCCCTTCCAGGTAGCGGAAGCATATTTTCGGAATCCAGAGACAGCGGCGTAT  
CTGGCTCTGGAGAAAGCTTATAACAGAGGATAACCGCGCATGGTGTCTTGCAAACCGCAAACAGACCCGACTCTCGAATG  
GTTCTTGCTCATTGCCACATTCATAAGTACCCATCCAAGAGCACGCTTATCCAGGCGTAAAGAAAGCGAAACGCTGT  
ACTACATCGTTAAGGCTCTGTGGCAGTGCTGATCAAGAGCAGAAAGGTAAGAAATGATCCTCTCCTATCTGAATCAG  
GGTATTTTATGGCGAACTGGGCCTGTTGAGAGGGCCAGGAACGTAGCGCATGGGTACGTGCGAAACCGCCTGTGA  
AGTGGCTGAAATTCGTACAAAAATTCGCCAATGATTGAGTAAACCCGGACATTCTGATGCGTTTTGTCTGCACAGA  
TGCCGCGTCTGCAAGTCACTTACAGAAAAGTGGCAACCTGGCGTTCCTGACGTGACGGCCGCAATGCACAGCT  
CTGGTGAATCTGGCAAACAACAGCAGCTATGACTCACCAGGATGTAATGCAAAATCAAAATACCCGTAGGAAATTGG  
TCAGATTGTCGCTGTTCTCGTGAAACCGTGGGACGCTTCTGAAAGTGTGGAAGATCAGAACCTGATCTCCGCACACG  
GTAAAAACATCGTCTTTACGGCACTCGTTAATCCCGTTCGGAGTGCGCGCTTACCTGGTAGCGCGCATTGTTCCTCCC  
CGATGTGGCGCAGACTGATTATCACCCCGATATCAACTATGCACTTCGACAAACGCTGGTGTATGTTTCCCGTGCC  
GTTGGGTTAATGCTTGGCGAATTACGATTGCGTCTGCTTCTCCCTGTTCTGCCTGTTGCAATATTCGCGGCGTTGA  
TACGCCCTATAAAGCTTTTTTCAAACGCTTAACTATTGGTGCCTGCTGTTGCCACTGTAGCTTGTGACACAGCTAC  
TACTGGCAAAGATGTTCCCTGCCCTTTTTGCTGACCGGATTAACGCTGGTACTTGGCGTACTGCTGAGCTGGGCGCA  
TTGACGCAAATGCTTCTGCATCGCTGCTGCGCCCATTTTTACCTCAGTTTGGCGGATACATGCCGCTCTGGGA  
ACCGTGTCTCATCTATGCGTGGGCACTCTCTGGTACGATTGTTAAGTGGTTTTGGTTCTGGATCTGGCGCAACAAC  
CGCTGCGGAGTACTAAGTCTGTGTACCGTGAACGGCAGATTAATTGTAAGCAAATACAGCCTGTTACCCAGCAC  
ACCGACCTGAAAAGCGCTGCCGCCGCTGTGGTGCAGCAAAGCGGTGATCTAATACCCAGTCTATCAGCA  
AATGCATATGCTTTCCGCGCAAATAACTGACTACAAGCGGATGCTGCGTATTTCCAGGAGGCGCTGGATTTACAGG  
AACATATTTCCGGTCAGTTTGATCAGCCGGAAGAGGTGAAAAGTGGTTCGAGCGTAGCCATCGGGAAGAAGTTATCCGC  
TGGAAATGCGAAACCGTCCGCGCTCCGCTGCGCGTGTGGCTGATGACATCTTACCATCGCTGCCAAGCGTTTTAC  
GATGAAAAGCAAATGGCGCACTGGA AAAAATCGCCCGCAGCATCCGGATAATCCGGTTGGGCAATTCTGCTACTGGC  
ATTTACGCCGATCGCCCGCTGTGGCCACC AAAAAACCGCTCTATGCCCGTGACTTACTGGCCGATAAACAGCGCGGA  
ATGCCATTTCCGCGCGTGAAAAGTTATCTGTACTAAAGTCTCCGGCGTACGCAATGCCGGACGACTCAGTGTGAT  
GTTAAGCGTTGCCAGCCTGATGGGCACCCGCTGCATCTGCCGAAGTCTGACTGGATCCTGATGACGGTATTGCTGGTGA  
CACAAAATGGCTATGGCGCAACCCGTCTGAGGATTTGAATCGTCCGTGGGAACCGTGGTTCGGGTTAATCATTGCGGGC  
GTGGCGTGCATTTAAAATTTCCGAAGTTACCCCTGACGTTGATGCTGATTACCACCTCGCCAGCTACCTGATATT  
GCGCAAACCTACGGTGGGCGACGGTCCGTTTTACTATTACCAGTGTATACCCTGCACTATTGTGGTTGAACGGCG  
AGCAATACATCCTCCGCGTCTTATCGATACATTAATTGGTGT TTAATGCTTTCCGCGTACTGTCTGGCTGTGGCCG  
CAGTGGCAGAGCGGTTATTGCGTAAAAACGCCCATGATGCTTTAGAAGCCTATCAGGAAGCGATTGCTTTGATTCTTAG  
CGAGGATCCGCAACCTACGCCACTGGCCTGGCAGCAATGCGGGTAAATCAGGCACATAACACTCTGTATAACTATTGA  
ATCAGGCTATGCAAGAACCGCGTTTAACAGCATTATCTGCCAGATATGAAACTGTGGGTAACGCACAGCCAGTTATT  
GTTGAGCATATTAATGCCATGACCACGCTGGC GCGGAACACCCGGCATTGCCACCTGAACTGGCAAGAAGATTTTACA  
GTCTTGAAAATCGCAATTCAGCGTTGTCAGCAGCGACTGGAGTATGACGAACCGGGTAGTTCTGGCGATGCCAATATCA  
TGGATGCGCCGGAGATGACGCGCACGAAGGCGCGGACGTTAGCTGGAGCAGCATTACAGCGGTTATTGGTTCATCTG  
AACACCATGCACACCATTTTCGTCGATGGCATGGCTGACGACCCGATCACGGGATTTGGCTGAGTCGCAAGTTGCGGGA  
TTCGAAGGCGTAATGCAGGTAAACCATCGGATAAGGCATTACGCCGATCCGACATTTTTGCCTGATGCTTCGTATT  
TACGCCCAAACCACTTCGCCACCCGCTGGGCGAAACGTTGCATCCCTTCACTCGATATCCGCATCTTCCACCACCAGCGA  
CGGTGCAAACGCATCACATCCGGTCCGGCATTACGCCAGCCTCTGCGCCCGCATAAGGAAATCACGCG  
CCCGACCTTTGACTGTGGTTTCAGCTCTGCGCCAATCAACAGCCCATACCCGCAATATCGCTAAATACATCGTACTGC  
TGATCGATCTTCTGAGATGGTCAAAAAACGCTGGCGTTTTGCCTGAATGCCTTCCAGCACTTCAGGGGATTGATGAT  
ATCAAACGCCGCCCGCTACTGCACAGGCCAGAGGATACCCCGTAGGTGGAACCGTGAGAACCAGGATGAAACGCAG  
AAGCAATTTCCGCGTGGTCAGCATGGCCTAATCGGAAGCCGCCCTAACGCTTTTCGAGAGGTGAGAAATCCGGC  
GTAACGCCGTAGTGCATGAAGCAAACAATCGCCGTTCCGCCCATCCCGACTGCATTCATAAACCAATAATGC  
CTGATGTTGATCGACAGCTCGCGCAAGCCCTGAAAAACTCTGGCGTCTGTCGCGTCCACCCTCGCCTGGATCG  
GCTCAACCACCACCGCACAGGTGTGATCATCCATCACCCTTTCACTGCATGGAGATCGTTAAAGGGAACGTGGATGATG  
TCTGCCGTTTTCGGCCAAAGCCGTCGGAATATTTGGCTGCCACCCACCGAAACGGTAACAGCGAGCGACCATGAAA  
AGCGTTATGGAAGGCAATAATTTGGTTTTGAACGGCTATGACGACACAGGCGTAATGGCGTGCCAGTTAAAGGCGG

TTTCGTTAGCTTCCGTGCCGGAGTTCATAAACACCACGCGTTCGGCAAACGTTGCCTCAATCAGTTTACGCCAAGACGC  
AGCGCCGGTTCATTGGTGAAACGTTACTGATATGCCACAGAGTTCGCCTGGGTAAAAACGCGTTCACCAGCGCAGG  
ATGGCAATGGCCAACGCCGTAAGTCAATGCCACCCGCGAAATCGACATACTCCTTGCCTTGCTGATCCAGATTCGGC  
TGCCCTGACCTTTTACCAGTAATAACTCTGCCGGAGCATAAATCGGCAGGATCACTTCATCGAAAGTCCGCCGCTGAATT  
GCTGTTTGTCAATTGCCATCTCATGATCACCTGTTACGCATAAACAAATGTGAAATTATAACCACAAAATATGCATAA  
AAAACTACTAAATGGCAATCAGAAATCAGCGATGCAGGAAATTAGCCAGCAGTTGATGTCCTTGTTCCGCTAAGAATACTT  
TCTGGATGGAAGTGCACACCTTCAGATCCCACTGGCGATGGCGAATCCCAATAATCTCTCGGGTTTCGCTCCAGGCCGT  
CACGTCAAAGCACGCTGGAATGAGTCAGGTTCCACCACCAGCGAATGGTAGCGTGCACGGTAAGTGGATTGGCAGCC  
CCCGAAATACGCCCTCACGTTATGTGAATCGGCGAGTTTTCGGTGCATGACCTTTCGGCGCGCACAACCTTACC  
CCAAATGCCTGCGCCATTGCCTGATGACCGAGGCAGACGCCAAGAATCGGCAAGCGCCGGCATAGTGGCGAATAACGTC  
AAGGGAGATCCCGCTTTCATCTGGCGTACAGGGGCCAGGTGAGATGACAATTTTTGTGGTTAAGGGCGTCGATATCCG  
CCAGCGTCAACGCATCGTTGCCTAACACAGCACATCCGCCCCAGTTACAAAAAGTACTGGTAGAGGTTCCAGGTA  
GAATCGTAGTTTCTATAAGCAGGATCATGGCGGCTCCGGTACAAAAGAACCAGGCTATTTACTCAGATTCGGCGCTT  
CGTTTACCAGTTTGTAAATATCATCTGCAGTGCAGTCCGGTACAAAAAGAACGCGCTATTTTACTCAGATTCGGCGCTT  
TCTTTTTCGATACCTGCCCAGTTCAGTTGATATCCGGCATGAATCGCCAGTTGCTCGAAGAAGATCCGCTGCTGCCAGAC  
ACTTCCCACCGAAGGGGATGCAGCACGTTGATTTACAATAGTAATGCGCCAGCCGCTCGACGAACTTCCGTTTCTCCA  
GGCCAACCAGATAACCTTCTCCTCCAGATCCTGCATCAGGGCATTGCCCTTTTTTCGATAAAGCAAAAGTGGCAGAAC  
GGCGTATCACCTGATAAATATCAACTTCACGCAGTTGCCCTGCCAGTCGAAAATATCCTGATACAGCTGGCGATGGAT  
AGTTCGCAATGCGGTAAACCGCGCACAGCGGACCAGCTCAATGGTCGCAGCACGCAGCGCCGTATTTCGTAAGCGG  
CCTGTTCCAGCGCTGCTGCTGGCGGATGTTACGCCGTTACGCATGATATCAAGCCCTGGATAAAGATACGGATCGCGC  
CCTTCGCCGAATTTATCGCTCATAGTACTCCTCAGCTCTTCAAGGCGCGCTAAAGCCTCTGCGGCAGTAAGAGTACTA  
AAGGCATCTCGACGCTTCAAGACGGCGACTGGCCTGAAAATTACGATTACGCTGAAGCTCCAGAGACGGGACTTTTGC  
TTATCGGTGAGTTTCTCACTTGATGCCTCCCTGAACGTGTCATTTGCCACAAGTATAAGCGGCAAATCCGGGTTACGC  
CGGGAGAGCAGAAAGCGGGCAAGATTGCCGCGCGAGAAATCATTACGGCAGGACTTTAGCGGAAAGGATAACTACCGG  
TTTTGACGGCACATTCTGGTACGGACCAACGTATGAGTCGGCACCTGGGAAATCCTATCGGCAACGTTGATAAAGAAC  
CCACTTTACAAAATACCGGTAACCGAAATCACGCTGACCATGGTCAAGGAAGCGTATCGGCAACGTTGATAAAGAAC  
TGGCTGGTGGCGCTGCTTTGTGACGGTACGTGCCATCGCGATGGTGCACGCGTGTGCGCAGGCCGTTATCGGCTT  
ATTTTTGATTGGCGGGTTTGGTTTTCTGCTGCATCTGCTCGGTGAAACCGCCGCCCTGAATCATAAAGCCAGGAATGA  
CGGGTGAAGGTAGTGTGTTATAAAAACCGCTGTTACATAATCGACAAAGTTTTGCACAGACTGCGCTTTTTGT  
TTATCCAGCTCCAGTTGCATGTTACAGCTGAGGTTGTCAACAATACGTGCGGGTCCCCTTTCGCTGCCATTGCTGCGGG  
AGAAAGAGCAGAAAGAGCGAAAAACAGCAGCCATCGCCGCCAGGTCGATTTGAACATGAGATTTCTTAAACAAACAGAGC  
AGAAAAAAGCAAGTGAAGAGATTCTAAATAGCCTCAAGAACAGGCCATCCCTTTACCTAATTTTACGTATCTGAAAT  
ATATGTAACCTGACGATCACTTTTATTCGTGATCAAATCACCTCTAAAATGCAATTTAGCAACCGATTGCAATAAA  
ACATTTAAACAGATCACAAAATCACCTAAAATCGCCGCTCGCGGCATATCCCGCTATGCCATTTATTTTTGAACGCGAG  
GCAATCATGACTAACAGCAATCGCATCAAGCTCACATGGATTAGCTTCTCTCCTACGCACTGACTGGTGCCTGGTTA  
TTGTCACCGGGATGGTATGGGAAATATCGCCGATTATTTCAATCTGCCTGTTTCCAGTATGAGTAATACCTCACCTC  
CTCAACCGCCGATTTTAACTCTATCTTCTCAACGCTGGCTGATGGAATCGTCCCGTTGAAAACGAGTTACGTTT  
TGGCTTCTCCTGATGGTCTGGCGGTGCCGTTTGTGTTACGCCACAGCTGGCGCTGTTCTCGGCGGCATGTTCA  
TTCTCGGGTGGTCAAGGCGATCACCATGTGATTGGTACATTTCTGGTAACAACAATGATGAAGGGCGTCAGCGCGGT  
TCCCGCTGTTATTTACCAGTCTCTCAGTATGCTGGGATGATTTTCCCAATGATCGCCGCTTCTACTGCGCGG  
CAGCATTGAGTGGTACTGGTTTTATGCCTGCATCGGGCTGGTGTATGTCGCTATTTTTTATTCTGACCTTCGGCTGTGAGT  
TCCCGCGCTGGGCAACATGCGCCAAAACGGATGCTCCGGTAGAGAAAGAAAGTGGGGATCGGCCTACTGTTTCT  
TCTGTTGCGGCTTTGCTACATCCTCGTCACTAGGTTTTATCTCTGGGTGCCTGAGTATGCCAAGGCCTGGGCAT  
GAGCCTGAACGACGCGGCACGCTGGTGAAGTAACTTGGATGTCATACATGGTCCGCATGTTGGGCGTTCAGCTTATTC  
TTCGCTTTTGGATTGCAACGATTCTGACCGTACTGGTGGTCTGGTGGGATTCTGATGTACGCTTTAACACCGGA  
ACACCAGCACATATGGCGTGGTCAATTCGCTCTGGGCTTCTTCCAGCGCGATCTATACCACCATCATCACCTGGG  
TTCACAGCAGACAAAGTACCGTCGCCAAAACGTTAACTTTGCTGACCTGCGGAACCATCGGTAATGTTGACCT  
TTGTGGTACCAGCGCGATCGTTGAACATAGCGTCCGAGGGCGACTGCTTACAGCAAACGGTCTGTACGCTGTCGTC  
TTTGTGATGTCTTCTGTTAGGTTTCGTCAGCCGTACCAGTACAGCATAAACCCCTGACCTCTCATTAAATGCTCATGCC  
GGACGCGCTATGCTGTCGGCCCTTTTCTCCTTCCCGTACGTGCATCTATTTCTATAAAACCGCTCATTGTTGTC  
TATTTTTGCACAAACATGAAATATCAGACAATCCGTGACTTAAAGAAAATTATAACAAATCAGCAATATACCATTAAG  
GAGTATATAAAGGTTGAATTTGATTTACATCAATAAGCGGGTTGCTGAATCGTTAAGGTAGCGGTAATAGAAAAGAAAT  
CGAGGCAAAAATGAGCAAAGTCAAGTCCGATGATTACCGGTAACGCTATGGTCCGCTATCGCTTATCGAAGATCTTCTTG  
ATAAATCTGATGCGGCCAATTTGATTTACCGTTTTCTGTAAGAACCGCGCATCGCTTATGACCGGTACACCTCTCG  
TCTTACTTCTCCACACACCGCCGAAGAGCTGTGCGTGGTGGCGAAGGCTTCTACGAGAAAACGGCATCAAAGTCT  
GTGCGGCAACCGCTATCACCATCAACCGTCAGGAGAAGGTGATTCACTCCAGCGCGGACGTACCGTTTTTTTATGACA

AGCTGATCATGGCAACCGGTTCTACCCGTGGATCCCGCCAATCAAAGTTCGATACTCAGGACTGCTTTGTCTATCGC  
 ACTATTGAAGACCTCAACGCCATTGAATCCTGCGCCGTCGCAGCAAACGCGTGCCGTTGTTGGTGGCGCCTGTAGG  
 TCTGGAAGCCGAGCGCGCTGAAAACTTAGGTATTGAAACCCACGTTATCGAATTTGCCCTATGCTGATGGCAGAAC  
 AGCTTGATCAGATGGGCGGCGAGCAGCTGCGTCCGAAAATCGAAAGTATGGGCGTGC GCGTTACACCCAGCAAACACC  
 CTTGAGATTGTCAGGAAGTGTGGAAGCGCGTAAAACCATGCGTTTTGCCGACGGCAGCGAACTGGAAGTCGACTTTAT  
 CGTCTTCTACCCGGTATCCGTCCGCGGATAAGCTGGCAACCCAGTGTGGTCTGGACGTTGCTCCGCGTGGGGATTG  
 TCATTAATGATTCTGCCAGACTTCCGATCCGGATATCTACGCCATCCGTGAATGCGCAAGCTGGAACAACCGTGTATTT  
 GGTTCTGGTAGCACCTGGCTACAAAATGGCGCAGGTCGCGTGGCATATTCTCGGTAGCGAAAAACGCCTTTGAAGTGC  
 TGACCTTAGCGCAAAGCTGAAACTGCTGGGCGTAGACGTAGGCGGATTGGTGTGCGCACGGTGCACGCCTGGCGCAC  
 GTAGCTACGTTTACCTCGACGAAAGTAAAGAGATCTACAAACGCTGATTGTGAGCGAAGACAAACAAACCCCTGCTCGGT  
 GCGGTAAGTTGGGCGATACAGCGACTACGGTAACCTGCTGCAACTGGTGTGAAACGCTATCGAACTGCCGAAAACCC  
 GGATTCCTGATCCTGCCAGCACACTCGGTAAGCGGCAAGCCGTATCGGTGTTGATAAACTGCCGACAGCGCGCAA  
 TCTGCTCCTGCTCGACGTCACCAAAGGTGATCTGATTGTGCATCAACAAAGGTGCCACAGTTGCGGCGCTGAAA  
 GGTGAACCAAAGCGGTACTGGCTGCGGTGGCTGTATCCGCTGGTCACTCAGGTACTGAACGCGGAACTGGCGAAACA  
 GGCATCGAAGTTAAACAACAACTGTGCGAACACTTGTCTTTCGCTCAGGAAGTTCATTTGATCCGCGTTGAAAG  
 GCATTAACCTTCGAAGAAGCTGCTGGCGAAACACGCAAGGCTACGGTTGTGAAGTTGTAAACCAACCGTCCGTTGC  
 CTGCTGGCCTCCTGCTGGAACGAATACATTCTGAAGCCGGAACATACTCCGCTGCAGGATTCTAACGACAACTCCTCGC  
 TAACATCCAGAAAGACGGCACCCTACTCGGTGATCCCGCTTCTCCGGGCGGTGAAATCACCCCGGAAAGGGCTGATGGCGG  
 TAGGTGATCGCGCGTGAATTTAATCTTACACCAAGATCACTGGCTCCAGCGTCTGGCGATGTTGGCGCACAGAAA  
 GACGATCTGCCGAGATCTGGCGTAGCTGATTGAAGCGGCTTCGAAACCGGTCATGCCTATGCGAAAGCACTGCAT  
 GGCGAAACCTGCGTGGTAGCACCTGGTCCGCTACGGGCTGGCGACAGCGTCCGCTCCGCGTGGAACTGGAAACCC  
 GCTACAAAGGCATCCGTACGCCGACAAAATGAAGTTCGGTGTCTCCGGGTATCCCGTGAATGTTTGAAGCTCAGGGT  
 AAAGACGTGGGTTATTATCGCACTGAAAAAGGCTGGAACTGTATGTTTGGGTAAACGGCGGATGAAACCGCGTCATGC  
 GGATCTGCTGGCGGGATATCGATCGCGAACGCTGATCAATATCTCGACCGTTCATGATGTTTACATCCGACTG  
 CCGACAACTGACGCGTACCGCACCCTGGTTAGAAAACCTCGAAGGGCGCATCGATTACCTGAAAGCAGTATCATTGAC  
 GACAAACTGGGGCTGAACGCACATCTGGAAGAAGAGATGGCGCGCTCGGTGAAGCGGTACTGTGTGAGTGGACTGAAAC  
 GGTCAATACCGCTCTGCGCAGACTCGCTTCAAACACTTCATCAACAGCGACAAGCGTGACCCGAACGTGCAGATGGTGC  
 CAGAGCGCAACAGCACCCTCCGGCAACCGGTATGAACGATCCAGTAACCTTGGTGGAGGACAACGCATGAGCCAGT  
 GAAAGACATCTGCAAAATCGATGACATCCTGCCTGAAACCGCGTCTGCGCGCTGTAGGTGACGAGCAGGTCGCGATT  
 TTCCGCCGATCACAGCGATCAGGTGTTGCGATCAGCAACATCGACCCGTTCTTCGAGTCCAGCGTGTCTCACGGG  
 ACTGATTGCGGAAACAGGGCGAGCTGTGGGTCGCGACCCGCTGAAAAACAGCGTTTTTCGCTTAAGCGACGGCTTTGT  
 GCATGGAAGACGAACAGTTTTCCGTCAAACATTACGAAGCGCAGTGAAAGACGGCGTGGTGCAGCTGC CGGGTTAATGT  
 TTTAACGGGAGGCGAATGCCTCCCCTTTTTGCATGGTCTGTAATAATCTTCGGTATATTGCAGGACATTTTTTAACT  
 TTTGTTTTATTTTTTTTTTTTTAATGATAAATCAAATGTTTACAGACTATTAATAAGTGTGCGGCTAACGC  
 TGCGCGATTGACGCGCTGTCGGCAAATAACCCGCTCGGCTTTGGGTAGCTCCGCCATGGCGGGCGGATGTTGGTTC  
 TTGGGATCATCCTGATTTTACGCTCGGTAATTTGCTCGATCCATCCGTACGCCCTTTGGTGTGGGCGGACCTTTGGT  
 ATCGCTTAAACGCTGGTATTATCGCCGTTCTGAACTGTTACCGGACACACCATGTTCTCACCTTTGGGTAACAGC  
 GGCAGCATCAGCCACGGGCAATGTGGCAATCCTGCCGAACTGGCTGGTAACCTGGTCCGTTCCGTCTTCGTTG  
 CCATGCTCTATAGCTGGGCGGGGTAGCCTGCTCCGGTAGATACAGCATCGTTCACTCCGTCGCGTGGCTAAAACC  
 ACTGCACCGGCAATGGTACTTTCTCAAAGGTGATTGTGTAAGTGGCTGGTTCCTGGCAATCTGGATGGCGCGC  
 CACTGAAAGGGCGGCAAAATTTATCGCTATCTGGTGTGCTGCTGGCATTTATCGCGTCCGGCTACGAGCACTCTATCG  
 CTAACATGACGCTGTTGCGCTCTCCTGGTTCCGCAACACAGCGAAGCCTACACGCTGGCGGATTGGTCATAACCTG  
 CTGTGGGTGACGCTGGTAATACTTTATCAGGTGCCGATTCATGGGATTGGTTATTGGTATGCTACGCCGAAAGCGAA  
 TCGTCCGGTTCGCGCAAAATTAATAAACTGAAACGGCTGCCGTTAATTACTAAGGGTTTTTACGTGGATCATTTGC  
 CTATATTTGCCAATTACCGCATCGCGACTGCTGATTGTGCGGGTGGTGTGTCGCGGAACGCAAGCAAGGTTGCTG  
 TTAGACGAGCGCTCGTTAACGGTGAATGCAATTAGCGTTTATTCCACAGTTACCAGCATGGGCAGATGCAGGATGTT  
 AACCTCGTCGAAAGGCCATTTGATGAAAGCCTTCGACACCTGCTGGCTGGCGATTGCAGCGAGGATGATGACGCGC  
 TTAACGAGCGGTGAGCGAAGCGCTGAAGCTGCTCGCATCTTCTGTAACGTTGGTCGATGCGCCGAAAGCCGCGGCTTT  
 ATTATGCCGCTGATTTAGCGCTACCGCTCATGATAGCGGTTCTCTGGCGGCACCTCTCCGTTCTGGCACGCCT  
 GTTGGCGGAAAAACTTGAATCACTGCTGCGTACATCTGGCCAGGTAGCGAAATACGCCGGCAATTACGCGGGCGAG  
 TGAACAACAGTTCGCCACGATGGGTGAGCGTCCGCTTCTGGGAGAAATTGTTGTTAACGACCCCTGGCGGATGCG  
 CTGGCAACAACGATCAGAAAGCCATTACTGAAACGACCGAACAGTAACTCAACGAACCCGCTCGACCATCGCGGTGAAGT  
 GGTGCTGGTTGGTGCAGGTCCGGGCGATCCCGGCTGCTGACTGAAAGGACTGCAACAATTCAGCAGGCAAGATGTTG  
 TGGTCTACGACCGTCTGGTTTCTGACGATATTATGAATCTGGTACGCCGCGATGCGGACCGTTTTCGTCGGCAACCG  
 GCGGATACCACTGCGTACCCAGGAAGAGATTAACAGATCCTGCTGCGGGAAGCGCAAAAGGCAACCGGTTGGTGC  
 GCTGAAAGGTGGCGATCCGTTATTTTTGGCCTGGTGGCAAGAGCTGAAACACTGTGCAACGCGGATTCGTTCT

CGGTGGTCCGGGTATTACCGCAGCTTCTGGTGTCTGCCTATTCGGGTATTCCACTCACGCATCGCGATTATGCCAG  
AGCGTACGCTTAATTACCGACTTAAAAACCGGTGGCGAGCTGGACTGGGAAAACCTGGCGCAGAAAAACAGACGCT  
GGTGTCTATATGGGGTTGAATCAGGCCGCGACTATTACAGAAAAGCTGATTGAACACGGAATGCCAGGCGAAATGCCGG  
TGCAATTGTGAAAACGCTACGGCAGTACGCAGCGCTGATTGACGGTACGCTCACACAGCTGGGAGAAGTTGGCGCAG  
CAATGAACAGTCCATCGCTAATTATTGGTCGGTGTGGCCCTGC CGGATAAACTGAACTGGTTCTCCAACCATTAA  
ATTTAACCCGGGCCAGAGAATTCTGGCCTTCTTAATGACTCTTTTTATATATTACAGAAAATAAAACATAGCCCCATA  
AATATTATCTGCTAATGGTTTATATTACCGTTACAGCGACTTACAAAATTAAGTCATTGCTCACTGACGCCAATTA  
TATTCCTGTATCGTTCTAACGAGCAGTCTGCTTATATTATCATATAATCAATGAATTAATTAATATATAATACATAGGG  
AATGAAATGAACAAATTTATTAAGTTGCACTGGTAGGTGCAGTACTGGCTACGTTAACTGCATGACTGGTCAATTTG  
AAAACCGTATAAGAACTGCTTACGACTACCTGTGCACCCGGCAATTTCTATTTCTAAAATCATTGGCGGTTGGCGT  
CCTACTGCACAGTAAAGTCTGACAGAAAACGGCTAACACCGGTTAATTGCCCCGACGCCCCTGGATTTCCGAGGGCG  
TATTTGTTCTATGTCTTCTTCCCCCGCCGTAATAATTTCACTTTAAATTAATTTGATAACTACATCCATTAG  
CCACAGCGCATCCTGTGCGAAATTTTGATCTTCTCCACATTACATAACATCATATGTTGTTATATTATCATGCTAT  
TGTGATGTTACCTTTAAAGTACTGCAAACCTCTCCCTACAACGATTGGACAAGAAAAGTATCGCTATGGGAAGCCA  
GGAACCTCAAACGAACTCGAATTTTGGCCGTTCTTGCAATCGCCGTCGGGACAACCGTCGGCTCCGTTATTTTGT  
CTGTGGTGAAGTGGCAAAAACAGCGGCAACCGCTGACTGTTTACGGTGTCTCGGTTTTGTCATTGGCGGTTAATTTGT  
CCGCAATGTGCGTCTATGCGGAACTATCCACCGTTATCCGAAAATGGCGCAGATTATGTTTATCTGAAAAATGCCGG  
AAGCCGACCGTGGCTTCTCCTCCGGCTGGGCCAGCTTCTGGGCAACGATGCGCCGTCATTGTCGATTATGGCGCTGG  
CGATTGTCAGCAATCTTGGCTTTTAAACGCCTATCGATCCGTTGCTCGGTAAATTTATCGCCGCCGGATTAATATCGCC  
TTTATGTTGCTACACCTGCGCTCCGTTGAAGGCGCGCAGCGTTTACAGCGTAATTACCATCGCAAATTTATCCCGTT  
CACTATCGTATTGGCCTTGGATCTTCTGGTTAAAGCGGAGAATTTGCGGCCCTACCACCACTGCGATTGGCGCAA  
CGGGCAGCTTTATGGCGTGTGGCGGGATCTTCCACAGTGGTGTATACCGGCATGGCTCTATCTGTTATATG  
ACCGGCAATTAACACCCGAAAACCATGCCAGAGCGCTGATTGGTTCCGTCTGTGTTCTGGTCTACAC  
CCTGCTGGCGTGGTATTTCCGGCTGATGCCCTCGAAAACCTCGCAATTCTGAAACGCGATTTCCGACGCCCCTGA  
CCTGGATCCCCGCACTCGGCAGACCGCTGGGATCTTGTGCCATCACGGCGATGATCGTATTCTTGGTTGCTTTC  
AGCTGCGTGTGACCAGCCGGCTGGAATACGGATGGCGAAAGACAACCTGTTCTTTAAATGCTTCGGCATGTGCA  
TCCGAAATACAACACGCGGATGTCTCCATCATCTGCAAGGGGCGTGGGGATCTTCTCATCTTGGTTCCGATCTCA  
CCAGCCTGCTGGGTTATTTACCGTGGTGTGTGTTTCAAATAACCTCACCTCGGCTCCATCATCTGGTGTGTA  
CGCGACGATTACAACCGCTGTGGCGTACTCCGGCTTTCGGGCTGATGACCACCTCGCCATTGCGTCAAGCCTCATTCT  
GGTCGCCTCAACCTTTGTCTGGGCAACGATTCCCGCCTTATCTGCGCCGTCATCGTTATTGCTACTGGTGTGCTGCT  
ACGCCTTCTGGGCAAGCGTAGCCGCCAGCTCAACGCTTGTGCTAATGTTATCTGGGAAAAATAAATGTTGGATTTG  
ATAAAAACCGTGGACTTTCTGGTACCAGAAAATATGGTTACAGGAGTGGAAAAAGTTCTCAGCCATGACGTTCCGCTG  
GTGCACGCCATCGTGAAGAGATGGTGAAGCGGCACATTGATCGTATTTATTTGCTGCGGATCGCCACTCAACGC  
GGCGAAACGGCGAAACATCTGGCGGATCGCTTTCCGATCTTCAAGTCTACGCCATTTCCGGCTGGGAGTTCTGCGATA  
ACACCCGATCGCCTCGACGATCGTTGGCAGTAATTGGCGTTTCTGACTACGGTAAACCGAAGAGGTAATCAAAGCG  
CTGGAGCTGGGCGGGCTCGGCGCACTCACTGGCGGTTACCAAACGCGCGGATAGCCGATTACCTCGGCGGCGGA  
ATTTAGCATTGATTATCAGCCGACTGTATCTGGAAAATCACCTGCTGCTGCTACAGCGTGGTGTGGAGATGATCA  
CCCGCTCGCGCCGAACGGGAAATCGGCAAGATCAAAAACGATCTCAAGCAGTTGCGGAATGCGCTCGGTCATCTGGTA  
CGACCTGGGAAGAAAAGCGCCAGCTTGGTGAACGCTGAGGAAATTTACCTGGACGCACGGCTGATTGAGAGCG  
GAGAGTTCCGCCATGGCCCCGTGGAGATTGTCGAACCGGCGTTCGGTTCTGTTCTGCTCGGCAATGATGAAAGTCGC  
CACACCACCGAACCGCCATTAACCTTTGTTAAACAGCGTACTGACAACTGATCGTCACTGATTACGCCGAAATTTGCA  
AGGGCTGCACCCGTGGCTGGCACCGTTCTGATGTTCTGTCGCAATGGAGTGGCTCTGCTACTACCTGTCTATTTACAAAG  
ATCACAAACCCGGATGAACGCCGCTATTACGGTGGTCTGGTGAATATTAATCCCTCTCCCGGCCCGCAACGGGCGGAT  
TTACGCAAGGAGTACCAGATGAAAACAGGTATGTTTACCTGGCCACCAGCGGCTGCTATTGAACACGATTTCGTG  
ATGCAAGCGAGCTGGGTTACGACGGCATGAAAATTTGGGGCGTCCCGCACGCGTTCGCGCCGACTTAAAAGCGGGC  
GGCATCAAACAAATCAAGCGCTGGCGCAGAGTATCAGATGCCGATTATCGGCTATACGCCAGAAACCAACGGCTATCC  
GTATAACATGATGCTGGCGATGAACATATGCGTCGCGAAAGCCCTGACATGATCAAGCTGGCGATGGATATGGAAAAAG  
AGATGAACCGGGTTATACGCTGATTTCCGCGGCCACGCGGGCTATCTCACGCCACTAATGTTATCTGGGACGGCTG  
GCAGAGAACCTAAGCGAAGTGTGTGAGTACGCGAAAACATCGGATGGATCTAATCTCGAACCCTAACGCCGATGA  
ATCGAACGTCGTTGTAATGCTAATGATGTGCTTATGCGCTGGCGTGGTGCCTTCCGCCGCTTACGCATGTTCCG  
ACATTTGCGCGCCGATGTCCAGGCGGAACCGGTGATGAGTATTTGCAAAAACGGGGATAAATACGTCATCTGCAT  
ATTGTCGACAGCGACGGGCCAGCGACACGATTACATTCTGGAGAAGGCAAAATGCCGCTGCGGGAACGATGCGCGA  
TATTATTGAGCGGGGCTATGAGGGTACTGTACGGTGGAGCTGGTACGATGATATGAACGAGCCAGACTCTATGCC  
GCCAGGCGTGGAAACGCTTTCGCGCGTGTGCCGGAGGATGAGAGATGAAAACCTGGCGACAATCGGCGATAACTGCG  
TCGATATCTACCCGAACTGAATAAAGCGTTTTCTGGCGTAATGCGGTCAATGTGGCGGTGACTGCACTGCTACGGC

ATACAGCCGGGATGCATTACCTGGGTGGGTGACGATGACTACGGCACAAAGCTGAAGCAGGATCTCGCCCGCATGGGCGT  
CGATATCAGCCATGTCCATACGAAACACGGCGTTACCGCACAACTCAGGTGGAATGCACGACAATGATCGCGTTTTT  
GCGACTACACCGAAGGCGTATGGCCGACTTTGCCCTGAGTGAAGAGGATTACGCCTGGCTGGCGAGTATGACATTGTG  
CACGCCGAATCTGGGGACATGCGGAAGACGCATTCACAGCTGCACGCTGCGGGCAAACCTTACCGCTTCGACTTCTC  
CGACAAGTGGGACAGCCCGTCTGGCAGACACTGGTCCCGCATCTCGATTTTGCCTTTGCCTCCGACCCGCAAGAAGACG  
AAACGCTGCGTCTGAAGATGAAAGCGATTGTTGCCCGTGGCGCAGGAACAGTGATTGTACGCTGGGTGAAAACGGCAGC  
ATTGCTGGGATGGCGCGCAGTTCTGGCGTACGGCTCCTGAACCGGTGACGGTTATCGACACCATGGGTGCCCGAGATT  
GTTTATTGCGGATTCTTTGCGGCTGGTCTGCGGGGATGACATTACCGCAGGCGATAGCGCAGGGAACGGCGTGGCGGG  
CGAAAACCATTCAGTACCACGGTGCCTGGTAGGTATAACGTTGGCGTGAGCATCTTACGCCAACGTGCTGTTACTTGGC  
GGAAAACGACCTATAATCCGAGTAATCATTCTTTATTTAGGGTGCATTATGTGAGCTACGGACCGCTACTCTCATCA  
ACTCTCTACGCTACCGTCCGCCAGCGACTGCTGGATGATATCGCGCAGGGGGTTTACCAGGCCGGGCAACAGATCCCTA  
CCGAAAACGAGCTTTGTACAAATATAACGTGACCCGACTTACCATTGCAAGCCATCAGCGACTTAGTGGCAGACGGC  
GTACTGATCCGCTGGCAGGAAAAGGCACCTTTGTACAAAAGCCAGAAAGTGAATCGAACAGGAACGGGTGAGCGCCGCGCTTTT  
TACCATTGTTGGCTCTACAAGGCAAGGCGACGAAAGAGAAAGTGAATCGAACAGGAACGGGTGAGCGCCGCGCGT  
GGAAAACGTAACATCCCGGAAACAGCGAAGTGTCCATCTGCGGGTATGATCTCGATAAAAGAGCCGCTGTTT  
ATTGATAGTTTCAGTATCCGCTGTCGCGTTATCCTGACTTTGATGAGATTTACGTCGAAAGGAAGTCCACCTATCAGTT  
ATTTAGAGGCGTTTTGACACGCGAGTGGTCAGCGCAAAAAGACCATCGATATCTTTGCGCCACCCCGCCGAGGCAA  
AATGGCTGAAATGCGAAGTGGGCGAACGTTGTTTGCATCAGCAAAAATCGCCTTTGATCAGAATGACAAAACCGGTGAC  
GTCTCCGAACTCTTCTGCGCGCCAATCGCATCACCTTAATGATAATAAAAGACATTAACCGTAGGCGGATAAGA  
TGCGCCAGCATCGCATCCGGCGATGCTGGCGGTTGAATTTACATCCCGTACGTTCCCTCACCTAACCTCTCCCA  
AAGGGGCGAGGGGACCGTTCAGTACGGAATTTAGCTTGACGGTGTATCCAGCATAAATACTGGCAATACTCTCACGCA  
AAATCCGCAGCACCGTCTTTCACCGTGCATTGGGTTAATGCGAATCGCACAAATGTTCTGATTGTGGATTGCGCTGG  
CGAAACGTTCCGAAAGGCGATAAAAGAGCGGCGGATTTTCTATTTGACTCTGCACCCACCGGTAAGGCAAGGCACC  
GCGCTTTTGGCCTCTTCCAGCACTCTGGCGCAATCGGTGATGAACTCGACAATCAACACCTTGGCTGCGCATTAG  
CAATCACCGCGCTTTTCACTCCGGCACCGCACCGTTAAGCAAAGCCAGCAACCGTTCAGATACCCCTGCTGACC  
GCGTGCATCACTGGCGCAAACACAGACCAGCAATACTTCCAGCGCTGTGCGCCCTGGATCTGGCTACCGCGGAGTA  
AAGCGTGGCGCAATACGGTGTATAACATCAGCATCGCCGACCACTGCACCAACACCCTTGCCCAAAATAGCTTGAAGC  
AGGAAAATGTGAGACATTCGCGCCGATTCACAGCCGATTGAGCCACCTTATCACCAGCAATGTTGTCATCGGTTAAC  
GCTGGAAACACTGCGCGCGCAACGTTGCGAGCACATCTGCCAGCAGTATGCTGCTGCGGCTGCTGGCGCGTATGCTG  
CACCAGCGCCGATCCGGTTGTTGCTGCTGACGACCTGTTAGTCCGACAGGTGTTGAAATCAACAGTAATAAGCG  
TCAGCCCCATCTGCTCAATAATAACCCGTGCTGTCGGGTAAACAGGCGGTGATGCACCAGAAAGAGCGTGCCTCGGTTT  
AGCAAGGCGCCAGCCCGCGCAATCGCGCAGTCCCGCGCCTGCACCAGCGCCGAGCTGTGCGTGAATGCATC  
AGCCAGCACCTGTTCCACACGCTGGGTAACGCGGTTGATTAGTCTGCGGTTAAGCCTAAATCACCGCCAGTAAGAA  
ACTGCTGCGGGGAAATGGCGCAAAATGCTATCCACCAGCGCAAACCTGTTTTTGTGCGCTCAATAATCGTCCAGGCTT  
TGAGAGGAAACGTTCTCATAGGTGCTTCTTAAAGCCGGAACGAACAGGCCAAGCCAGTAAAGAACATTCAGCAGAATA  
CCGGTATCATTACTGCCACGACCGGTGCCGCAATTTCTGTACCGGACGGCCAGGGATTCGTTGAGGAAGTAATGGC  
AACCGCGATAGAGAATCCGGTATAACCCGCCATCTTAATGCTGCGAAAATCGAACCGACCGAGCGCCACTTCCATCA  
GCATATTGATGGCTTACGGATGTTATCCGACGATTACGACCGAGGGTAGCGTCCAGCATTTGCCGATCGAACGA  
AGCAGCAAAGACTCCGCCGAAATAACCACTGCGCTAATACCGTGCAACCATCGGATTCGGCGAGAGATGTTCCACCG  
ATAAACAAGTAAAGCCGCAACTGACATACACCCGTTGCTAACCGGGTGGCAATCAACGGCACAAAACCCAGTC  
CGGCATAAATTTGCCAGAGCCCGCTGATTAATCAGCGTTTGCGATTGTTCCGGCGTTACGCTGCGGAATATGCTTTC  
TCCAGTGTGAAGATCGACACTTCACTGCCAGCAAAAATCTTATGCTGGCAACGGCGGCAATCAATGCTCCACGATGGC  
GATATAGGGTAAGTTTTTTGATAATCCGTGACGTGCGTCTTCAAACACCGAAAGCCGCTGGCATCAATGTCATTTTCTC  
CAGGATGACGCGAGTCTGAGTTATCGCGATCCCGCAGCATCACCATGCCAATAAAGATTTTTCGATGGATTACGGGTTA  
AGATGTGGGAAATAGCGCAGACTACCACACGGGTCATCAGTACCACCGCGCGATCAGACTTTGCTTCCAGCCAAA  
CTGGTAGAAAATCGCCACCAGCGGGAACAGTGCAAAAGCTGAAACCACCGGCGAGCTTAAATCCCCAGGCTACCTAATA  
CATCCACCGCAGCGCGTCCAGCAGCTGGTTTACTGGCAACAGGCAAGTAAGGATCAACACGCCCCAGATAGCGCCAAGA  
CCAAACGCCATCAGGCTGTTTATCGCCAGGACGCGGAGGATATCGGTAGGAAGAAAAGTAACCATGCGTTCGAGCGCC  
GGTTTTAGGGTAAAAGAGATCCCCACCGAGGCCACAAAACCAATGCTCAGACCAAAGCGATACTCCCCGCTCGCGAC  
GGTTCATATAGCTTCAATCAGTTGCGGCGAGGATCGGGCGGATGCCGTCATGAAAACAGCGCCCGAGCGATGCGCCAGA  
AGCGATGTACACCGTACGGCAGCCACCGATAATCTGAATATAACAGATCATAGTCTGCTTTTATTTGATGG  
TAAATCAGCATCGAATCGCGTTCGACGTTCAACGGAAAGCCAAACGCCACTTTTCTTACGCGATCATTTTGGC  
GATATGCTGCTTTTCGTTTAAATGCCTGGTTTTGGCAATGGTGAACTTTGTATAGCTATCACCGGATGGCAATCG  
ACAAATGCCCGCCCGCACCGGATTACACGCGCCGATGTAATAATCCAGTTGCCGGATTTTCACTTATTTGCCGTTCC  
ATGTGCTGTGAATGAAACTTCAAACAGCCAGGAGCCGTCGTTCAATAGTTTTTAAATCTGCTCAGCCTGTAAGCC  
TGCAACGCCAATCTTTTCTAGTCTGCTTATTGGAAAATTGAGAGGGATTTTTCAGTAACATCACATCCACATCG

GCCTGACTGAATCCTGACTGGCGCAATTGCGGAATAAAGGTGGT TAGTAAATAGTCATAGCCATAACCACGTTGGCTTT  
TAAATGGGAGCGGCGTAATATCCATCGACAGCATGACGCGTT CAGCAACCACGGTCGCGTAGCGCATGAAGCATCG  
CAATACGCTTTTCGTCCGGTAGTAAGTCTTCCGATGGTGTG GAACTGCACGTACGGCCGAGATCGATCATCTTC  
AAAATGTTGTGAGGTTGTCTTCAGATCGCAGTGACCAACGGT GACGCGGAAAGATCAACCCCGTGGCTTGTAGCAA  
CGCCAGTTGCTCCAGCCCCATCGTGCTGAACGACGTATGCGT GAGATCGGGCGTCCGGTCTGGTTATGCGCCAGCGCAG  
CGGCAATAAATACCTTCTTCCAGCGGCGTAATCTTCCCTTCC GCTGGTCCGATCTCCGCGATGATCCCGGCTTTACG  
TCCGTGCCATCGATACCTGTTCATTCATCGACCATCTCCTGCGC CAGTTCTGCACGTGCGGGTCCGCACATGTT  
CGGGAAAAACGCGTCTGTAATAACCGGTACAGGCCACACGTTG ATCCCCGTCTCGGCGATTACATCAAGCATAAATT  
GCGCATTGCGCCCATGTAAACGGTTCATCTCAATCACATTACGC ACGCCGCGGTCATCAGGTCGTTTCTCTGG  
CAATGAACGCATACTGATCAAGGCGGCACTCCACGTTGTTTTT AAAGCCGAGAGATCAATATGAGATGCTCATGGG  
GAGGGTGTAAACCGTTCGATCAAACTCATAGGGTGTCTCCTGC AAAACCGGAGGGAGGAAAGAAAAGAGCGACCA  
TGCGGTTGGCGCGGAAATTCACACAGGTAGCCCCACATCAGAA AGCGTGGTGCCACACCGAGCTGCGTAGCGA  
TCATCCCTTGTGATAAACAGCACTGGCACCCTCGCGGTTATGGT GGCTGTGACCAATGGTCGGATCGTTGCCGTGA  
TCCGCCATACGACCAGGCAATCATCTGGCTGCATCGCTCAACA AGCCGGCAAGGTTACGGTCAACGACCTGCAACG  
TTCGGCATAACGTGCGACGCTTCTGCATGACCAGCGAGGTTCG GTTTCCTGAATGTTGGTGCAAATAAACGCCGT  
GGTGTTAAATTCGTTGAGGTTGATATCCATAATCCGCTGGTATC CACCAGATTTTGGCAGCTCACGCCATAAGGAT  
TTGACGATATCGCCACCTTACCACCAGCACGGTTGGCACGCC TGCTTCATACAGTTTTTTGTGGCACCTGCACTTT  
ATCGACCCATAGCCCATATGCACGACCTGAAACCCTGTCATAA GCGCCAGAACCGCGCATTGATACCAATAAAGC  
GCCCTTCTTGGCTTCTGCGGCATCGAGAATGCGTTGACTGTCC GTTAAACAGGCCACCAATGTAATGACCCGACCG  
TGACTCTGCTCACGCACGATACGACCAATTTGATTCGCTCGT CAAAAGAGATCACAGAGAGATTGGCGTAATGTT  
GACCTGGCCTAAATCCGCTCGAGATTATCGCAATCGCAACCGC CTGATTGACCCACAGAAATTGCAGATCATCG  
GGCGCTCCACTGCCAGCCAGCGGAAACTAATGCCTGCTCAACAC GGTCAATCACATCGCGAAAAGGCATCCGCAG  
GGTAAACGGCGCGTGCCTAAAATTTCTGATGCCCCATAAAGGT ATCGCCACTTCATGTTGAGCTCTGCCACG  
GGTTGCGGAATCTGACGGTGCATATCGCTGGCGCATAACCCAA TCGGTTGATTAGCCCCAGCGTCTCCAGCGT  
GCTGCAAATGCGGCAACTGGCTCAGGATGTGACCACATGTATTC GCTCCGCATCTTGGGACGCACAGCGT  
TTCATTGCCCTACGCCAAAGCTATCAATCACTAACCCACAAAT CCGGCCATTACGCCCCAGAGAGTTTCCA  
TCATAACGACCGACGATTTCCGTTCCGCACGATGAATAACGGAC ACCAGCACATCGCTACGGGTGACAAA  
CGTGCGAAAACAGAGCACCCTGCACTGCTTACCGAAAATCGCCT GCCAGCGCAGGGTGTAGTCGATACTG  
CCACAGTTTGTAGATTGGTTTCAGTAATCTTTGATTTTCTGGC GTTAAACACCAACGCATGTTGCGCAT  
TAGTAACCGCGCCGTAGCAGTAGCTGTCCACCGGAAATGATGGG AGATTTCACTTAACCAGAGCAT  
AGGCTGATCGCCCTGCTGGTTTCCCGAATAGTGCCCGTCAGCGC ATGACCGGTTCCGGCATGAGT  
CCAGTAATGGCAGCGAAGTGCAGCTGGTTCGCTGAAGGCGGTTCA GTTGCTCAAGTGCAATACCAGATT  
TCCCGTGCCTGTATCAGCGTGTGAAGATTGCGGTGTCGGCAAAC TTTCCGACAGCCTCATCCCAA  
ATGGGTAAGTCCGGCTAAATGCAGCCCTGGCAGATTCTGGATTT CCGGCGACAATCTCCGGCAAC  
CGCTCTCCTGGCCGATAAAGAAAATCATCGTCGCTATAAACTTTA AGCAGCACAGACTGGATT  
GCCGCGCAGAAACTTCCCGGCTTTGTGAGAGTAAACACGGTGATG ACGTCGGTGCCCTGTTCAACG  
CTGATGACAAGGATTTGTACAGATGCCCTGATGCGCCACAGGCAA ACCAGCGCGGCATGACTCGGCTC  
CACCCAGCTGCCGGGCGATCTTGCCCTGCTGCCACAGGCTTAGT GCGGCGGAAATCAGCGCGGTTCT  
ATGCTTCTACAAACATCTGTTGCTTCTGTTCTTGAATTAATAATTC ATTTTTTGAATATTTAGGTTG  
CGTGGATTTGTGCGGAGCTTCAAACCTCTCGTTAGCAGCCATCC ATAATCCATAAAGGTTGCGGCA  
TCACACGGTTAACTTCCAGTGCGAATTCCTTCAACAACACTGATG CAATGCAACCGGCTTCCAGTGG  
CGCCAGTTCTGCCAGCAACTCGTTATCCAGCGGCTTATTTCTTCA CCACCGGCGACTGCGCAT  
GTGTCATCGCCATCGTTCTTGCTCACTGCGCACCGGCAGATGGCA CTCTGTTCCAGTACGTTGACG  
CCTTTGCAGATGTCCTTATCAATAACGCCTGCCTCGCAAAGCAGG TTGAGTCTGGTTCCATATCAG  
ATAACTCGGTTCTGTTCCTTACTACCTGCTGCTCGCAAAGCAGG TTGAGTCTGGTTCCATATCAG  
AGTTGTTGCATTGGGTAATCATCGACTCGGTCAGGACCACGGTTCC GGTGGCTGTAAAAATCGCGG  
CGGCGTGCCTTAATCCCAGCATGGTCAGTTGTTTTCCGCCACCAG TTCCAGATCACCGCATCGACAT  
CAATGCGTTGTAAGTCTCTGATAAGAGAGATCGACTCGTTCCACAT CACTACCGCCAAAACATCGG  
TTCTGATCCGCCGAACGGTATCCAGCCCCACGCGTTCACGTTTGC GGACTCGCTTTACGGCAAATCA  
GCAACGTAGTGTGCGGCCAACTCCAGCGGAGGATAAGCTTTTTTGC GTGAGATAACTTTCCGGCTAG  
AAACCACCGCATGTACACGCACTTAAAGCAGCACTCCACGGGAATA TCAGCGCCACGCATGTCGCG  
GGAAATGCCATCAAAGTGGCTTTCAATCCGCTCGCCAGGCTTCTGT ACAAACGGGTATAGGGCAAGG  
CACGTTGTTGATACCATGAGTCAAGTTCCTTGTATCCATCTCGACC AGATAACTGCCATTGCGCCAC  
CAATCCGATCGCTCCGCTTATTCCAGCGTTTTCAACGCGCCTGCGT CAGGCCAACGGATGAACGGC  
ATTTCATTTGCC



AGCTCATCTATGGTTTTCAATCGATTACCGCACTTTTTACCCAACAAATAACGGGCCAGCGTCGTGATGACGACGCCTT  
TTTTTTGATAAACGTTTCGACGCATAATAAATTTTCAGTAAATTGAATATTTATATCTTCAGGAATTTGAAGATAAGGGC  
AACAGCGAGATGTGAAACGGCGAGGCACTTACATTTTTTCGGATTATTGCAAATGAGGATAAAAAAACGGGTTTCCC  
CGTTTTAGAGTGATGATAAAAGCAAAATTCCTGATGCGCTACGCTTATCAGGCCTACATTTCTTGAATATGTGCAT  
TACTTTGTAGGCCGGATAAAGCGTTACAGCCGCATCCGGCATGAACAAAGCGCAATTTGCCAGCAATAGTGAATTACGGC  
TTGCCACAAAACCAATCGTTCGTACACCGCTTTTAGCGTACGGGAAGCGTGCGCGCTGGCTTTTTCCGCGCCATCTTT  
CATCACCTGTTGCAGGAAGGCTTATCGTTGCGGAAACGGTGATAGCGTTTCTGCAATTCAGTCAGCATACCGGAAACGG  
CATCAGCCACTTACCTTTCAGATGACCATACATCTTGCTTCGAACTGTTTTTCCAGTTCCTGGGATGCTCTGGCCCGTT  
ACCGCTGAAAGGATATCCAACAGGTTGAAACGCCCCGCTTTGTTCTGCACATCGTAGCGAACTACCGGCGGCTCGTCGGA  
GTCAGTGACCGCACGTTTGTATTTCTTACTACCGATTTCCGATCTTCCAGCAGGCCGATAACGTTATTGCGATTATCGT  
CAGACTTGGACATCTTCTGGTCGGCTCCAGCAGCGACATTACGCGCGGCCAGATTTCCGAAATAACGGCTCCGGCACC  
TTAAAGATCTCGCATAACAGCGGTTGAAACGCTGGCAATATCGCGGCTCAGTTCGAGGTGCTGTTTCTGGTCTTACC  
CACCGGTACCAGATTAGTTTGATACAGCAGGATGTCGCTGCCATCAGCACCAGGATAGTCAAACAGACCAGCGTTGATGT  
TCTCGGCATAACGCGCAGATTTATCTTAAACTGCTCATGCGACTCAGTTCGCCGAAGTAGGTATAGCAGTTTCACTGCC  
CAGCCTAAGTGTGATGTTCCGGCAGCTGGGACTGAACAAAAATGGTGTCTTTCTCAGGATCGATACCACAAGCCAGATA  
CAAGGCCAGCGTATCCAGCGTCGCTTACGCGAGTTCGTGTCATCTGCGCAGCGGTCGCGCTGATCGCGTGTGGTCAACGATA  
AGTAAATGCAATGGTAGTATCCTGCATGTTTACCCTGACGCAGCGCACCCATGTAGTTACCAATGGTCAATTCACCT  
GAGGGCTGTGCGCCACTAAAAACGATGGGCTTAGTCATTTTTCGATTCTGATTTTCGCTATGCGGAAGCCCTAATGCGG  
GCAGAAGGTCATTTATAGACTGATAAATTACATCAGGCTGGTGAGATCGATAGCCTCGCCGTAGTTATATCCGTAGGTT  
AAGCCAATGATGGGCAACTGCGCCTTTTGCCTGTAATATCATTGCGTGAGTCGCCGACAAACAGCATCTGTTGTGG  
GGCAATCCCATCCGCTCAGCCACCAGTAAACAGCGGGTCCGGATGCGGTTTTTGTGTTCACATCATCACCAATCA  
CCACGCTGAAGTATTTGGGATATCTAAGGCTTCGAGCAGCGGCGGACGAACGGCGTGGTGTGTTGGTGACCAGGCCT  
AGCGGCAGGCCTTTAGCCTGCAACGCGCCCAACGTATCGCAACGTGCGGGAACAAAACGTCCCCTCTCGCAACCTC  
GCCATAGTAGCATGCAACAGTTTACGCAGAATACGTACTTCTTCTGCCGAATGTCGTATCAACGGGCGGTTTAC  
CCATTGTTTTACGCTGAGTCGACGTTCTGACGCGCCAGGTCAATGCGCGTCCATCAGAACATCTGCGCCGTTACCA  
ATCCAGGTAATAACGCGTCTTTCACCTGCGACGGGCAACTCCAGCGCATAACAGGCCATATCTACCGCAGCAGCAAGACC  
AGGAGCACTGTCGACCAGGTACCATCAAGATCAAAAGCGACGCCGGAATATCTTCAAACCTATTGACTTACCTTT  
GCCAGTTCCTGCGCATTTATCAATGACTTTTTTGTAGTCTGGCTGGTGAAGATTGCCGAACCGGCGACGAACATATC  
CGCGCCCGCGCAGCGATTTTCGCAATGTTGTTACCTTCACGCCACCGTCCACTTCTAGTGAATGTCAAAGCCAGACT  
CGTCGATACGGCGACGTAATTCGCGCAGTTTATCCAGTGTTTGAAGGAAATGAAAGACTGACCGCCGAAACAGGGTTGACG  
GACATCAGCAGGATCACATCCAGCTTATCCATCACGTAATCCAGATAGCTCAGAGGTGTCGCCGGGTTAAATACCAGACC  
CGTTTACAGCCATTTTCTTAATCAGTTGACGCGTGCGGTCAACATGCTCGGAGGCTTCTGGATGAAAGGTAATGATGC  
TGGCACCAGCGGCAGCGAAATCAGGCACAATGCGATCGACGGGTTTACCATCAGGTGTACGTCGATAGGGGGCGTAATG  
CCATAGTTACGCAAGGATTTAGCACCATTGGCCCAATCGTCAGATTGGGAACATAGTGGTTATCCATGACGTCAAATG  
CACGACATCAGCGCCAGCTGCCAGGGCTTTTGGCGTATCTTACCAGCGGGCAAAATCAGCCGACAGAATTGAGGGGG  
CAATCAAATACTGTTTATCCGCTTCTCTTGAAGTATTTTTTCGCGGGTGAACGACTCCTGGTTTGATCAAAGCCA  
GCAGTTCGTCACCTTTTACGTGTGCCCGCTTGTGCTTATACTGCGTGAACCTTTCGACGATGCAATTTTGGCGC  
TGATAACACTCAGCGTTAAACATCGTATCGTATTGGAGATCAGCACTGGAATATGGCGCTCAACCAGACCTTCGGCGAT  
CTCCGCCAGATGCGCTTGTGTTCAAGCGTAAACTGTTTGTGTGATACGCCGTAAGTTGGCGGTGCGACAGACGGTG  
CATAAGCGGATCGCAATAGACGAGGATGCATCATCTGCGCGCCATGCTATCGGCGTAAAGACTCACAATAGAAAAAG  
GCATTTCTGCGTTTTTTCAGCGAAGTGATACAATCTGCTTCCGGGAAATAGGGTTTTTTTTGTAGCGGCCGAACGGCACGTT  
AAACTACCGCGCAGATTGTAACGACACAGGCGTTGTAACCGTAGCGGTTCAAATATAAAAAACGTACCGCCCGACGGA  
ACGGATCCTGGCTTTTGTGAACTCTTCGCGGAACTGATAGTAAACCTCGGCGCAATTTGTTTCCGGAACAAAACAGCTCG  
CGTGCGCCTGTACTACTCATCAGTACGCATCTTCAAAATGTTATAGAGACTGATCAGGTCGCTATTGATATCGGCAAG  
GATATAACGAGAAAAGTCGGTGTTGAGAAACACCGACCCGGCACCTACAAAAGGCTCAACCAGACATTCGCCCTTGGGCA  
AATGCCGTTTAAATATCATCAAGCAGGGGATACTTCCCCCTGCCACTTCAAAAAGCGCGATTTTTTCTTATGCTGACT  
AACTAATTACCTTCTCCGGCTGTGGAGAAAGCTCCGACAGCATCCAGCGCTTCCAGGCAACTCCCGCAACGATAAACC  
TTGCGGGAGATAACCTTGATTACTTACAGTCGGCTGTACTGACGCAGCGGTTTCCGCCACGGGTTTTTGGCTGGACA  
TCTGCTGGCAATGTAGATACCGCTTTTTTCGCTCTTCTTTCGAAGCGTACACGCCAGAAACAGGACATACCACGGCTG  
ACCATTACGCGTCGTTTCATAGACAACGTAGTTTTTTCAGATCTCTTTCTTCCGCCAACCGTTCCAGGTTGTCGTAGTTAG  
AGGAACTGCTCAGCTGCAGAGTGAATGGCTGGACGGTGCCGATTTCAACGAACCAACATTACCTGCGGTCTTCGCCCA  
GCAGCGGGTGTGCTGTGGTTTTCGCGGGGATGCCGTCTGACTGGAGCCGTAAGTCGCCGTCTCTTTTGGTGTGGCGT  
AGAAGTCGACCGCGGTTCGTTGCTGCCACAGGGGCGAGCTGTTTCAAGTACGCTTCGGCGTCTGTGCTACCGGCTTCG  
GCTCCGTTTTTACGGTTGCTTGGGTTTTTTCGTTCAATCACCGCTGCTGACGAGCTGGGCGGTAAGTGGACGGACGT  
TCAGCGTTTTGCGTTTTTCGCGTGTACGCGATGCATTGCCATTGCGAACAGGCCGAACCGTTGCGGGTTCAAGTCGGCAA  
CGTGAATGACCGCCACATTGTTTCAAGTGTGCTGATTTTGTGGCTGGGTACGCGATTGTTTCAAGTACCCTGCACTT

CAACACGTTGTTGACCATCCGTTGCCACCGGGTTTGCCTTGAGTCGGCGTAGAAGAGATCGGTGGCAGAGAAACATCC  
TGCTGAGTATTTCCGCAGACGTGGTTCCCGGGCTGGCTGCACGCCATTCGCCTGATCGGTGCGATTGCCAGCAAGATC  
AATACTCTTCGCCAGACGCGGTTTGATCGCTGGAAGTGGTCGAGGGGCTTTAGCGCAGAACCAGATACCGATGATCA  
ACAGCAGTAGAACAGAATGCCGACGCCATCATATACTGACGAGAAGCGGGTTACTGGCTGCTTTTTGCGCTTA  
CGCGGACGACGCTCTACGCGCTTTCATCCACGGTTTCATCTTCGGATTTCGTC AATTTCTTTCGATTTCCGGTTCCCTC  
ATTGCGCTCTTTTTGCGCACGAGTCGGACGGCGATCGTCAGTGTCAAGTTCAATATCATCAAATTGATCTGCGGTT  
CGCCACGTTAGTACGCTCAGAAGTTGACGAGAACGACGATCGTGGGATCGGGTTTCAGC  
TCGTCTTCTGTTTGAATTCATCCATTTAACACCCCACTAAAAGTTAATGCTTACCACGTTGCAATTAACCTGAAGCTA  
ATAGACCGCTTGATAAGCGGCTGACCTTTCTGTTGTTACGCTGATTGACAATCGGCAATGGCGTTAAGAACAAGCTCG  
TGCGAAACGCCGCTGCGAATTCACCTTACCAATTGCCAACGGAAGAAATTAAGCGCATCTCTCCCGAAGGACTTTCTT  
GTCACGCAGCATATGCGGTAAATACGCTGCGCGGACATTCGCGCGGCCATTGACCGGTAACCCAGCCGCTTGAGCA  
GGTTATAATACGCTGCGTTTGGCAGAACTAACTGCCGAGACGTTCCGACGTCGCGCGGCCATCACCATAACCCGCA  
GCGACCGCTTACCATGTAACCAATTGCCATACCCATTTGAGTTCAATGGCATGACCAAGGTGTGTCCAGATTCAG  
TAAAGCAGTAACCCGGTTTCGCGCTCGTCGGCGGCAACAACCTTCGCTTTCAGTTTCAACAACGGCGAATACAGTACG  
CCATTGCGGACGCTCCAGCGCAACAACGCATCCAGATTCTCTCCAGCCAGTTAAAAACGCACCGTCAAGAATAATG  
CCGTATTTGATGACTTCTGACGACCCCGACGCTAACCTCACGGGGGGAAGCGTTTTTCAGACAGTCGAGATCCACCAC  
TGAAGCAGTTGGTAGAACGCGCAATCATGTTTTTACCGAGGGGATGGTTGACCGCAGTTTTTCCGCCAACGGAGGAAT  
CGACCTGCGACAGTAACGTCGTCGGGACTTGAATGAAACGACACCGCGCTGATAAATCGCCGCCGGAAGCCGGTCAGA  
TCGCCCACTACGCCGCCCAAGCGCCACCAGCGTAGTATCGCGACCATGCGGTTTTTGTAAACACGCCGTAAAGACGGT  
ATCGAGTACAGCCAGGCTTTTATACTGCTCGCCGTCAGGGAGGATAACGCTATCGACGTTAACACCCGCTGTTCAAGTA  
CGCCGCGGACTTATCGAGATACAGAGGAGCCAGGGTTTTGTTGGTACCAACATGACCTGCTCGCCGATTTTCAGCGGT  
AAGAATGAAGCTGGTTCATTAACAACAGATGCGATGGTAATTGGTAACACGTTCCCGAGAGTAACGACAATCCT  
CTCCATAACCGGACATCCACCTAATTACTGTACCCGAGACGAGTGTATATAAAGCCAGAATTAGTTGCTTTCCAGCAT  
GTGAATAATCTGTTTGAACCACTTTAGCGCTTTCATCATGACGATGGTTCAGTCGCGCAATCTCTTCATACAGCG  
GATTGCGTTTCATTGGCCAACGCTTCCAGAACTTCCAGCGGGGTTTCAACGTGACGCAACGGCGTTTTTATCACGC  
TGCGTGCGTCAAGTTGCTTTTCGATGGTCGTTTCAAGATAAAGCAACGCCACGAGCGGAAAGACGGTTACGCGTTT  
ACGGGATTTACAGAGCCGCCAGTAGCCAGCACAATACCCTGTTTTCTCGGTCAACTCATTGATGACTTTTTCTTCGC  
GATCGCGGAAGCCTTCTTCGCTTCTAAATCGAAAACCCAGCCACATCAGCTCCGGTTGTTTTCTCAATCTTTGATCG  
GAATCGTAAATTTCCATATTGAGTTGTTGAGCTAACTGGCGCCCAATAGTGTTTTTCCGGCACCCATAGCCCAACCAG  
AAAGATATTGCGTTTTCTCTGCCATTTTTTTCGGTACTACTAAGACTATTCGTTAATGATAAACCCGCTTCGCTCAGAGAGC  
GCCGAGGACATGAACTGAAACCTCATAAGATATTGCGAGAGTACAGCTGAAAATATCTCAATACTCCAGCGGTTTTGG  
CAACTGAATAAATCACCCATCCCTCTGCATATCTGGTCTGCAAGCGCGCTGCCTTGCTACCACCGCTCTGGCGATAAA  
TCACCGGTAAGATTAGCGTAAAAAGACAGCAAAATGCCGCTGAATGATAAATCATCATGGAACGAGGACGCGA  
AGAGACCAACTCTCAAATCGGTACTCCTTGTATGCTAAATACCTGCGCGGTCAAATAGATGAAACACGTTTCAGCGTAA  
AAACATTACCGTTTTACGGCTGTTTACTCACTGAAAACAGTCGTTGGCGTGATAAACACCACTAACTCGCGTCTTTCAT  
CTTCTTTCCGTCATGACGAAATAATTGCCGCAACAGGGAATGTCGCCAAGCAACGGTACGCTATCTGACCCGATTA  
TTTTTACGGGTA AAAATGCCGCCAGCGCAACGTTTTCTCCGTTTTGACCTCGACCTGCGTTTTGATCTCTGCTTATC  
AATCGCCAGCACTTCCGCTCGGCTGCTGTAGCACCTGCCCGGAACGTTCTGGCTGATGTGTAATTTACGCGGATGC  
GACTTTTTTGTAAACCGTGGGCGTGACCTCCATCCGAGGCGCTCTTTAAATCCACCGACGTCGCGCACTTTCC  
CCGCTGGAACCTGATATGGAATTTGCTCCCCTGTTAATGCTGGCAGGCTGAAGATGTGAGGCCAGACAGCGGACT  
GGGATAAATCCAGCTGCTTTTTTGGTCGAGCGCGAAAGCTCAAGATCCAGCAAGCGTCCGTTGATGCGCCCAATGT  
TAAAACCGACATGCGTTGTGCGCGTGTACGGAGAGGTCGTACCAAGCGTGGTACTTGCCCAACGCCACCAGCGTGT  
TGCGCATCGGCCAGGTCATTTACGCGCTAACTCACGCAAACTTTTTTCAATTAATGGTGACAATATGCGCCGACAGCTC  
AACCTGCCGACCGGCAGATCCATTTGCGCTACCCACTGTTCAAGCGCGTTAACGCGTTTTGTTATCTCGTAGCAAAA  
GGCGATTGGTGCCTTATCGACGCTCATACTCCCTTGGCACTCAGTAGCTTCTCCCCGTTTCGCCAGTTCTCCCGCG  
TCGGCGTATTGACGGTTTACTGCGATTTTCCAGCGGAGATTGCTGCGCCCGCGCTGCTCCGCTCTGGCGGGC  
GATATTGTTATCTGCCAGGCAATGGAATGCACTGAGAGAATGTTGCTTCTGCGGTTATCAGTCCGGCGTTTTCA  
CTACAGTTTGTAGTGCCTGCTTCCAGGGAACATCTGTTAGATGTAACGACACCGTACCGCTGACGTCGCGACACGACC  
AGGTTCAACTTCTCTGTTACGCCAGCGCTGCAACACCTGAGCTACCGAACGTCATCCACCATCAGCGTCACTTTTTG  
CGGTTTTGCCGCTGTACGCCGGTATCAGCATCAACAGTGTGCGGCTATCCATTGCTTCATTTGTATCTCTTGGCGT  
TGCCACAACCATTGTGGCGTTGCGAGTTGTCCCGGTACCCAGCGTTAGTACGTCGCGCTGAGCTGTAAAATTGTCCA  
GCCGTTTTCCAGCACATGTTTTGCTGCACCCGTCGCCATTTCTTTTGCCTCTTTTATTACACCGATGATGCGCTCGC  
CTGCCCTACCATCCCCTGATAGCGCCACTGGCTAAGTTTCGCTAATCCGGCATAGATCTTCCGGCGGTTAAAAGGGTCA  
CGATACCGGTTAAAAGGCACAATGCAATACCTGCCAAACACGCGTTAACCTCATGCGCGTCTCAGTTGTAGCG  
TGAAACAAAAGATCATCACCTTCCACGCTTAAAGAAAACGCTCACGCTGACGTTGCGCTCTGCCAGCCGTGTAATGCC  
GACGGCACTGCTTCCACAGCGTTTTCAACGCCAACTCGCTCCCTGCGCGGATGGATGCCAGGAAACGTTGCGCGCC

GGATAACTGAAATCCAGTGGCGAAAAGGGCAGCGTTTTCTCGCTGAAGGGAGCGGTGTCTACCAGGCATACAGTG  
CGGCCACTGCTGGTGATGACTTGCCCGTAGTCAATTAATGCGTCGCGCTTTCATGGTGTGTCGATGACAGAAAAATG  
AGCGTAACTAACATCAGCAACCAGAATGCCAGCAAAGCTGGCGGAGGCGGGGTGATGTGGCGAACCACCAGTCAAAGAA  
CATGTTTCATCGCTAACCTTCCCTTGTTAACTGATACTCAAATGCCAGCGTCCCTGCGCATCCTGCTGCGTGGCTCCCCGC  
TGATTGAGATGAAAAGATGCATCCTGGCGGAGTGACGTTTTCTAGTGCGTTTAAACGCGGTAATGCTTGTTCAGCCCCCTT  
GATCTCCAGCGTTCCCTGCTGCCAGCTTATCGTTGTAGCCAGGCGTGCTCGGGTAAAAGCGCCGACAGTCTTCCAGCG  
CAGATTGCCAGTGCGGGTAATTTGTCGCTGGCGCTGCCGTTGCGAACGCTGTTGCGTAACTGCTGTTGCTCCAGCAAA  
CGTGGCTTCGTTATCTGTAAGCTGCGGGCAGATTGTTGTTCCGCCTGAAGCAAACTGCGTCTATGCGCGCTTCGGCGCT  
GCCTGTGACACGAGTATTAGCGTTATCCCGACGGCCAGCAGCAGAGGGCGAACGAACATCAGCAACCAGAAAACGCAGAA  
AAGCGGTCCGGCGTGTGTCGCGCAGGGCAAAAATTAATGGCGGGTTCATCAGTACGCCTTCCAAGCGCCAGCCCCA  
GCGCGATGGCAAAGTCTCCACCTGGCGGGGCTAGCGGGGCTGACGAACAGAAAACGGCCTCCAGGGATCAAATCCGCCT  
TCGCCACATATCGCGACGCTTCGGGATCAACGGATAACGCTGCCGCCAGCTCCTTCGCGCTAGTCATCCCCACGCCAG  
TTTGGCCCCCAGCTATAGCGGTCGCCACAGCCACTGTTGTTATCAGGCCAGGCCAGACATTGCTGATGAGAAGGTA  
AAAAAGGCAGGAATCGCTGTAATGCACTGGCATCCGGGGTGTGCGCTCACATGAACACGCAACCTTTCTGCCAGAGTA  
AGCAGCGTTGCCAGCTTTTGTCTTTCGCGGGCAGTACGTTTATAGCGGGACTGAGTGAGTCTTCGCTGTAATCGAAGCG  
CAGGGAGTCCGGATCCATATCCAGTCCCGGGCCATCGTCCCTGACAGCCAGGCCGTTTGTCCCGCTACCAAGGGACA  
TCGACGGGGCGGAAATGACCGCTGTAATGTGCGACTGGCGGAAACGCCAACATAATGTGATGACGCTCGGGCAGTTCG  
CGACTCCACGTTAAACAGTTTTAGCCAGCTGCTGCGCATCAACAATCCGCCATCTTTGATAATGTCGTTCTCCAGCGG  
CAACCGCCACCAGCGTTGCAAAAAGCATTCTTTTGGCCCCGCACGATCGCAACCGCTACCGCTTCTTGTGTTGTAAT  
GCAAAACAATTTGCCAGATCTAAATGCCATTGTGATGATCTCCTTATCACCCGCTACTCTGACGGGTATATCAATGCGT  
CTGGCTTGCCTTATACTACCGCGCTTTGTTTATAAACTGCCAAATGAACTAAATGGGAAATTTCCAGTGAAGTTCG  
TAAAGTATTTTTGATCCTTGACGTCGTTGCATTTGCTGGGAGCAGGCTCGATTTATGGCTATACCGCTACATCGAG  
CCACAACCTGCCGATGTGGCGACATTAAGAGATGTTGCGCTGCAAAATCCGATGCAGATTTACAGCGCCGATGGCGAGCT  
GATTGCTCAATACGGTGAGAAACGTCGATTCCGGTTACGTTGGATCAAATCCACCGGAGATGGTGAAGCCTTTATCG  
CGACAGAAGACAGCCGCTTCTACGAGCATCACGGCGTTGACCCGGTGGGATCTTCCGTGCAGCAAGCGTGGCGCTGTT  
TCCGGTCACGCGTCAAAAGGGCAAGTACCATTACCAGCAGCTGGCGAGAACTTCTTCTCAGTCCAGAACGCACGCT  
GATGCGTAAGATTAAGGAAGTCTTCTCGCGATTGCGATTGAACAGCTGCTGACGAAAGACGAGATCCTCGAGCTTTATC  
TGAACAAGATTTACCTTGGTTACCGCGCTATGGTGTGCGTGTGCGGCACAAGTCTATTTGGAAGAAACGGTCGACCAA  
CTGACGCTGAACGAAATGGCGGTGATAGCCGGGCTCGCGAAAGCGCTTCCACCTTCAACCGCTCTACTCGATGGATCG  
TGCCGTCGCGCGGCGTAACGTGCTGCTGTCGCGGATGCTGGATGAAGGTATATCACCAACAACAGTTCGATCAGACAC  
GCACTGAGGGGATTAACGCTAACTATCACGCGCCGAGATTGCTTCTCTGCGCGTACCTGAGCGAAATGGTGCGCCAG  
GAGATGTATAACCGTTATGGCGAAAGTGCCTATGAAGACGTTATCGCATTTACACCACCATCACCCGAAAAGTGCAGCA  
GGCCGCGCAGCAGGCGGTACGTAATAACGTGCTGGACTACGACATGCGCCACGGCTATCGCGGCCCGGCAATGTGCTGT  
GGAAAGTGGCGAGTCCGGGTGGGATAACAACAAGATTACCGATACGCTGAAGGCGCTGCCAACCTATGGTCCGCTGCTG  
CCTGCCGAGTACCAGCGCAATCTCAGCAAGCGACGGCGATGCTGGCGGACGGGTGACCGCTGCGATTGAGTATGGA  
AGCGGTTGCTGGGCGCTCCTTACCGTTTCGGATACTCAGCAAGGACCGACGCCGCGTAAAGTGACCGATGTTCTGCAAA  
CGGGTCAGCAAATCTGGGTTCGTCAGGTTGGCGATGCATGGTGGCTGGCACAAGTGCCGGAAGTGAACCTCGCGCTGGT  
TCGATCAATCCGAAAACGGTCCGTTTATGGCGTGGTGGTGGCTTTGATTTCAATCAGAGCAAGTTTAAACCGGCCAC  
CCAGGCACTGCGTCAGGTGGGTTCCAAATCAAACCGTCTCTACACCGCGGATGGATAAAGGTCTGACGCTGGCCAA  
GTATGTTGACGATGTGCCAATTTCTCGCTGGGATGCAAGTCCGTTTCTGACTGGCAGCCGAAAGTGAACCTCACCCGAG  
TATGCTGGTCCAATTCGTTACGTAGGGGCTGGGTGAGTCGAAAACGTTGGTATGGTACGCGCAATGGCGGCGATGGG  
CGTCGACTACGCTGCAAGATATCTGCAACGCTTCGGCTTCCCGCACAAAACATTTGTCACACCGAATCGCTGGCGCTGG  
GTTACAGCTCCTTCAACCAATGCAAGTGGCGCGGGCTACGCGGTCATGGCGAACGGCGGCTTCTGGTGGACCCGTTGG  
TTTATCAGCAAAATTGAAAACGATCAGGGCGCGTATTTCGAAAGCAAACCGAAAGTAGCTGCCCGAATGCGATAT  
TCCGGTGATTTACGGTGATACGCAAGATCGAACGTGCTGAAAATAACGATGTTGAAGATGTCGCTATCTCCCGGAGC  
AGCAGAATGTTCTGTACCAATGCCGAGCTGGAGCAGGCAAATCAGGCGTTAGTGGCGAAGACTGGCGCGCAGGAGTAC  
GCACCGCAGTCATCAACACTCCGCTGGCATTCTGATTAAGAGTCTTGAACACCAATATCTTTGGTGGAGCCAGGCTG  
GCAGGGTACTGGCTGGCGTGCAGGTCGTATTTGACGCTGCGGATATCGCGGGAAAACCGGGACCCTAACAGTTCCA  
AAGATGCGTGGTCTCGGGTACGGTCCGGCGTGTGACCTCGGTCTGGATTGGCTTTGATGATACCCTCGTAATCTC  
GGTCATAACAACGGCTTCCGAGCGATTAAAGATCAGATCTCAGGTTACGAAGGCGGTGCCAAGAGTCCCAGCCTGCATG  
GGACGCTTATATGAAAGCCGTTCTTGAAGGTGTGCCGAGCAGCCGCTGACGCCACCAGGATTTGTGACGGTGAATA  
TCGATCGCAGCACCGGGCAGTTAGCTAATGGTGGCAACAGCCGGAAGAGTATTTTCATCGAAGGTACGCAGCCGACACAA  
CAGGCAGTGACAGGTTGGGAACGACCATTATCGATAATGGCGAGGCACAGGAATTGTTCTGATTAAAAAGCGCTTCGG  
CGCTTTTCAGTTTGTGACAAAAGTCACTTGTATTATGCCGATACGGCGTGAACGCTTATCCGGTAAACAAAATCGTG  
AAAACCAATAAATTGCAGAAAACCCATAAAGCTGATAAACATTTGTCATCAGGCAAACTTACGCAATTTACACTCGCCC  
CTGCCCTTCAACATTGCGCGACGAGGAACAGCGCACTGACATTGCGCGCTTATTGAAGTCAGGGTCTTCCAGCAAA

CCATCATATGCGCCAGCGGCCAGCGCACCTGTGGTAGCGGCTCTGGCTCATCGCCTTCCAGTGATTCCGGGTAGAGATCT  
TGCGCTACCACGATATTCATTTTGTGGAAAAGTAAGACGGTGCCATGCTGAGCTTCTTCAAAAAAGTCAGATCGTTCCG  
TCCAAATCCAACCTCTTCTTTTAGCTCGCGGTTAGCGGCTTCTGAGACGCTTACCCGGATCAATTAATCCTTTGAAA  
AACCTAATTCGTAGGATTCAGTTCCACTGCGTATTCGCGGATCAGGATCAGGTGATCGTCCACAATCGGCACAATCATC  
ACTGCTTCCCGGTTGGTTGGACGATTGTTTATAAACACGCCGACGCCATTGCTGAACCTCAGATCCAGCTCTCGAC  
GGTAAACAGTCGGGAACGGGTACAGTTTCAACATTCAGAATGGTGGGTTTTTGAATGATTTGCTCATCGTGGGATCTA  
TGCTGTGAAATCAGCGGTTATTGTGCGATATCGGACACGCTTTCGGCAATGTGAATTGCATGTTATTTACATTTATGTAA  
CTTAATAAATAATCGTCCTCAAATCAAATAAAAGTCAATAGGTTGAAATAACTCCAGGAATTTGCTGATATCCGCTT  
CAGAGGGTTTTGCTATGATCAGCGGTTACTGTGATGTGCTTAATGATGCTCAAGTTAAACTCCAGCTTCCGATAGCCAA  
CCGAGAATCATGATTGTGTCGGTGCAGTACCACGCCTGACAGACTAAGTAAGATGGGGAAAGCATGAGCACCATT  
GTGATTTTTTAGCTGCTTGTGGCTGCTCACTACTTGCAGGATGGCTGATAAAAGTGGATCCAGACGGCGTCAGCT  
GCCCTGGACCAACGCCTTCCGGATGCGCAAACGCGTAAACTCACACCTGAAGAACGTAGCGCCGTTGAAAATTATCTTG  
AGAGCTGACGAGGTATTACAGGTGCTGGCCAAACGGGAGCCAGCGGCCACCGATCTCTGCGCTGAATGCCGAA  
AGCAACAACGTCATGATGCTGACACAGCTATCACGCTTACGGCATCTCTACCGACGATCCGAATAAATGGCGTTACTA  
CCTCGATTCGTTAGAAAGTCACCTGCCCTTTCTGGGAACAGTACATCAACGATGAGAATAACGTTGAACCTGATTATA  
CCGATTCGCTGCGCTGGTATTTACTCAACGGTCAACGCTACAGTGCAGGATACATGCAGGAAACTCGCAGTATGCCTG  
CAACCTGTTCCGTC AACGAGCGTGCATTCGCGGGGAAGAGAGTGAGCAAATCGAGCTACTCAATATTCGCAAAGA AAC  
GCATGAAGAATATGCGCTGAGTCGTCGCGCGGGCTGCGTGAAGCGTTGCTGATCGTCGCTCCTTCTGATGTTCTTTT  
TCTGCTGATTACCCCGGATGATTTGTTCCGTTGGCTGGCAGGCGCGCTTACTGCTGCTGGGCGCAGGTCTGTGGGGG  
CTATTCGCGCCCCCGCAAATCCTCCCTGCGGGAAATTCATTGCTGCGCGGTACACCCCGTCTGGGGATTGTTTGG  
CGAAAACGATCAGGAACAGATCAACAATATTTACTCGGTATTATCGACCTGGTCTATCCCGCACACTGGCAGCCATACA  
TTGCTCAGGATCTCGGTCAACAAACCGATATCGATATCTATCTCGACCGCCATGATGCGTACAGGGACGATATCTTTCG  
CTGCATGATGAAGTAAAAAATTTCCGTTACAGCACTGGCTGCGCAGTACGATTATCGCTGCGGGCTCGCTGCTGGTGT  
GTTTATGCTGTTATTCTGGATCCCGCTGGATATGCCGCTGAAATCACTCTCTCATGGATGAAAGGCGCGCAGACCATTG  
AAGCCACCAGCGTAAACAACCTGGCTGACGCTGGCTGCGGGTAGCGGATACATTGCGTATTAGCGGTACGGGAATGTGT  
AATATTCGAACCTCCGGAACCTGGAGCGCGAAAACCAATTCACCTTTTTTACC GTTTGACTGCTCGCAGATCATCTGGAA  
CGACGCCCGCTCATTGCCATTACCAGAATCTGAACCTGTCAACAAAGCGACGGCATTGACTGAAGCAGTTAATCGCCAGC  
TGACCCCTAAACCGGAAGATGAATCTCGCGTCAGTGCCTCATTACGTTTCAGCAATTCAAAAATCCGGCATGGTATTGCTT  
GATGATTTTGGCGACATTGTAAGACAGCGGATTTATGTTCTGCCAAAGATGACTGTGTGCGACTGAAAAATGCGCT  
GGTCAATCTCGGCAACAGTAAAGACTGGGACGCGCTGGTAAAACGCGCAACGCGGGAAGCTCGATGGCGTGAATGTGT  
TATTACGCCCGGTGAGTGCGGAATCGCTGGATAACCTGGTGGCAACCTCCACCGCGCCGTTTATCACGCATGAAACGGCG  
CGAGCGGCACAATCACTAAACAGTCCGGCCCCCGCGGATTCTGATTGTCAGCGACGAAGGCAGCGATTTTGTGATCA  
GCCCTGGCTTCGGCATCACTTTACGACTACCCGCCGAAGAACAGTGGAACGCTTTCAGAAAATGGCACAATGCTGA  
TGATACGCCGTTTAAACGCCGAGGGTATCGTCAAAAAATCTTACTGACGCCAATGGTACGCAGCATATTGGCCTTCAT  
CCGATCCCGGATCGTTCCGGCTGTGGCCTATCTCAGCACCATTTGCTGCTACTGACGATGCTGGGTAGCGCCATTA  
CAATGGCGTACAGGCCTGGCGTGTACCAGCGTATCGCACTCGCATGATGGAGATTACGGCCTATTATGAAAGCTGCC  
TGAACCCGCAACTGATCACCCCTTCAGAAAGCCTTATCGAATAACAGTTTGC GCGGCAGTTATGCTACCCTGTGCGCG  
AAATTTGCTTACTCTGGAGATTTCCCTCATGCATATCAACATTCCTGGCAGGACGTAGATACCGTCTGCTGGATATGG  
ACGGCACGTTGCTCGACCTGCCTTCGATAACTATTTTGGCAAAAGCTGGTGCCTGAAACATGGGGCGGAAAAACGGG  
GTTACGCCACAGGAAGCATGGAATATATGCGCCAGCAATATCACGACGTACAGCATACGCTAAACTGGTACTGTCTTGA  
TTACTGGAGTGAGCAACTGGGTCTGGATATCTGTGCGATGACCACCGAGATGGGACCGCTGCCGTAAGATA  
CCATTCCGTTTCTTGAGGCACTGAAAGCCAGCGGTAAGCAGCGAATTTTGTCAACATGCGCATCCGCACAACCTGGCG  
GTAAAACCTGAGCATAACCGTCTGGACGCACACCTTGATTTACTTTCCACCCACACATTTGGTTATCCGAAAAGAGGA  
TCAGCGTTTATGGCATGCGGTGGCCGAAGCTACGGGCTGAAAGCTGAAAGAACGCTGTTTATTGATGACAGCGAAGCGA  
TTCTCGATGCTGCGCGCAATTTGGTATTCTGTTACTGCCTCGGCGTACTAATCCTGATTCGGGATTGCCGAGAAACAG  
TATCAACGCCATCCGTCACTGAATGACTACCGCGCTGATCCCTCGTAATGTGAAGGAGACGCCATGAAAGAGAAAC  
CTGCTGTTGAGGTTGACTGGATAAATGGCTATGGGCTGCCGTTTTTATAAAAACCGCGCTGGCCCGTAAATGATT  
GAAGGCGTAAGTGCATTACAACGGGCAGCGCAGCAAGCCGAGCAAATCGTCGAGCTGAATGCCACGCTCACTCTGCG  
CCAGGGAAATGACGAACGCACGGTATTGTAAGGCGATTACTGAACAGCGTCCCGGCCAGCGAGGACGCTTGTGT  
ATGAAGAGACTGCGGAAAGTGTAGAGAAACGCGAAAAAATGGCGCTGGCACGTAACCTTAATGCCTTAACCATGCCGCAC  
CCGACCGACGCCCGACAAAAAGAGCGCGGACCTGTTACGATTTAAACACGGCGACAGTGAATAACTGTCACCTGC  
AAGAGAGATGATTATGCCGCAACATGACCAATTACATCGTATCTGTTTAAAACCTTTGCCGTCGCGGCGAAGCTGGTAA  
CCGTTTCGAAAACCTGCAACAGATCCTTGAGAACCAGGATTATCCGACGCCGTTAAAACGTTGCTGGCAGAACTGCTG  
GTTGCGACCGCTGTTAACCGCTACGCTGAAGTTTGATGGTATATCACCGTACAGCTGCAGGGCGACGGTCCGATGAA  
TCTGGCGGTTATTAACGGTAAACAATAACCAGCAGATGCGCGGTGTGGCGCGGTGCAGGGCGAAATTCAGAAAATGCCG  
ACCTGAAAACGCTGGTCGGCAATGTTACGTGGTATCACATTACCCCGAGCGAAGGCGAACGCTATCAGGGCGTAGTT

GGTCTGGAAGGTGATACCCTGGCGCCTGCCTGGAAGATTACTTTATGCGTTCTGAACAGCTGCCGACGCGCTGTTTTAT  
TCGACCCGGGACGTAGACGGCAAACCGCTGCAGGCGGTATGTTGTTGAGGTAATGCCTGCGCAAATGCCAGCAGG  
ACGACTTTGACCACCTGGCGACGCTAACCGAAACCATCAAACCGAAGAAGTGTGACCTTACCGCAAACGAAGTGTG  
TGGCGTTTGTATCACGAAGAAGAGGTGACGGTTTACGATCCGAGGATGTGGAGTTCAAATGCACCTGCTCGCGTGAACG  
TTGCGCGGATGCGCTGAAAACGCTGCCTGATGAAGAAGTTGATAGCATCCTGGCGGAAGATGGCGAAATTGACATGCATT  
GTGATTACTGCGGTAACCACTATCTGTTCAATGCGATGGATATTGCTGAAATCCGCAACAACGCGTCTCCGGCAGATCCG  
CAAGTTCATTAATGAGTATGTCGGCAGAGAGGGCTCTGCCGATTTTACGACTAATACACCTGATGCGCTTTGTCACTC  
ATTGAGATTCACATTCAGCTTTTACCATCCACTACAAGATCGCGCCAGCCTTAGGCTTCGTCCCGAGTTTTCATCCT  
TCGACGCTGTGAGTAATTTTTCTTTCGTTATTTCTGTTGGAAGTAAACTCATATCAAGCGCGTCCCATTTCTTTCTGTCT  
GAGTCAAAGCCATAGACAATGACTCTGTCATCATTAAAAGCAAACAGGATCCGCTCCGCTGACCATCACTATTCAGATC  
TTGCTCGACCAAGGACGACGGCTTTTTCAATACAGGTCATCACGTTATAGCGATCCTGGATTAAGGCCAGCAGAATG  
TCGCATCAGTTTAAACAGAACCAGGGCAATTAACACATTATCGGTAATACTTTTTCCGATACCTGTTGCTGAAGATGT  
TGCTCTCATCTAACGCCATCAGCAGATCCGCGCGCTTTCCGGTCTTTCATAAACCCGGCATCGCTTTTACGCGACTC  
AAGCGCAGCATGTCATAGCAGCCGCTCTGCTCGAGCATGTAGATAGTTACCTGGTCTGACGTGTTTTGCGGCTCTGAT  
AACCGCCATATGGCTGTTACGCTAATGCGCATACTGCCAGCACCAGGCAATTAAGAAGCACCAGTATCACCAACACC  
AATAACGAAACCGAACCTTACTTTGCCCTGAAGAACAACGGGATTTTGCCTTTACGCCAGACGATGTCGACAAAATA  
CCCCAGCGACCACACCAGTAAACACCAGACCCGCCAGCACGCCCTGCAAGCGGTGACAGTCCAGCCGACTGAGCGACCC  
GCAGCCATAACGCCAGCGCGACGAACACATACAGCGGAGCAACCAGCAAAGCGTTTTAATCAGGCAACGCAACGGC  
CCTGTCCAGGGAGTGACGCTTTTTGCCGATCGCGGACAATAGCCATTAAGATCAATTGCAAAAAGGCCAGCGTCAACAG  
CAACCCGGCGCGGAGATGTGGCGAGAAATCGCGCTCAGGCCCCTAAACGGCAGGGTGTGATAAACATCAGGGTTAGCA  
ATGATACTAACGGCAGCAACCCCGTGGCGATTAACGTGAACAACCTTTGAATAGAGTCGATTAACAGTACTGTGTTCCG  
GCGAGGATCACCGCCAGCGCGTAACCAGACCTAACGTGAGATAAATAAACAGTCCGTTGCAAAAAGAGCGTATTGAA  
AAACGTGATGCCAACAAAGTTTAAACAACCTACTCCACAGTAAAAGCACCAGCCAGTCAAGCCATTGGCGAGAAAATCA  
CCAGTAATAAAGTACGTTATGCCATACTGACTGGTAAAAATAGCGATAGCGGCTACTGTCATTGCGGATGCGAAGGCTT  
TGTTGATCCACGGTAGCAACAACATTGCCATCAACAGCAGATAGCAACCAAATCCCAAAGCGCTTTTACGCTCTCCA  
GGGTTTCATGCCATCAGTTTGCCACTTACGCCAGCCGCTCATCCAGCGTGGCAATAAACACTAGCGCCAGCCATCCCC  
AAAGCGCTTCTGTTTTAAAAGAGATCACGGAGAAGATAAAACGGATGAAAACGCGACGGTGCAGGACGCCATAAACA  
ATCCAATGTGATTTTTTCCGAAAGCCAGGCGATCAGCAGGTAGCAAACAGACCCTGAAGTAATCCGTAAGCAATCAT  
CCCCAGCGTGTGCGGGTAAAAGTTCAACGTTATCCTATGTTGGTATCCAGAATCAAAGGTGGGTTAATTATCGCATC  
CGGGCAGTAGTATTTTGTCTTTTTGAGAAAATAATCAAAAAAGTTAGCGTGGTGAATCGATACTTTACCGTTGAATTT  
GCATCAATTTCAATCAGGAATGCGATTCCACTCACAATATTCCCGCCATATAAACCAAGATTTAACCTTTTGAGAACATT  
TTCCACACCTAAAATGCTATTTCTGCGATAATAGCAACCGTTTCTGTGACAGGAATCACGGAGTTTTTTGTCAAATATGAA  
TTTCTCCAGATACGTAATCTATGAGCCTTGTCGCGTTAACACCCCCAAAAGACTTTACTATTACAGGCAATACATATT  
GGCTAAGGAGCAGTGAATGCGCGTAAACAATGTTTGAACCCGCAAGAAGTTCAGGCTTATGGTATCAGTGACGTACAT  
GATATCGTTTACAACCAAGCTACGACCTGCTGTATCAGGAAGAGCTCGATCCGAGCCTGACAGGTTATGAGCGCGGGT  
GTTAACTAATCTGGGTGCCGTTGCCGTCGATACCGGATCTTACCAGGTCTTACCAAAAGATAAGTATATCGTCCGTG  
ACGATACCACTCGGATACTTTCTGGTGGCAGACAAAGGCAAAGGTAAGAACGACAACAACCTCTCTCCGGAACCC  
TGGCAGCATCTGAAAGGCTGGTGACCAGGACGCTTCCGGCAAACGCTGTGTTGTTGTCGACGCTTTCTGTGGTGGCAA  
CCCGATACTCGTCTTCCGTCCGTTTATCACCAGGAGTGGCTGGCAGGCGATTTTGTCAAAAACATGTTTATTGCCC  
CGAGCGATGAAGAAGTGGCAGGTTTTCAACCCAGACTTATCGTTATGAACGGCGCAAGTGCACCTAACCCGAGTGAAA  
GAACAGGGTCTCAACTCCGAAAACCTCTGCGGTTTTAACCTGACCGAGCGCATGCAGCTGATTGGCGGCACCTGGTACGG  
CGCGAAATGAAGAAAGGATGTTCTCGATGATGAACCTACCTGCTGCCGCTGAAAGGTATCGCTTCTATGCACTGCTCCG  
CCAACGTTGGTGAGAAAGCGATGTTGCGGTTCTTCCGGCTTTCCGGCACCGGTAACCAACCCTTTCCACCGACCCG  
AAACGTCGCTGATTGGCGATGACGAACACGCTGGGACGATGACGGCGTGTAACTTGAAGGCGGCTGCTACGCAA  
AACTATCAAGCTGTGAAAGAGCGGAACCTGAAATCTACAACGCTATCCGTGCTGATGCGTTGCTGGAAAACGTCACCG  
TGCGTGAAGATGGCACTATCGACTTTGATGATGGTTCAAAAACCGAGAACACCCGCTTTCTATCCGATCTATCACATC  
GATAACATTGTTAAGCCGTTTCCAAAGCGGGCCACGCGACTAAGGTTATCTTCTGACTGCTGATGCTTTCCGGCTGTT  
GCCGCCGTTTCTCGCTGACTGCCGATCAAACCCAGTATCACTTCTCTGCTTACCAGCAAACGCGGGTACTG  
AGCGTGGCATCACCGAACGACGCCAACCTTCTCCGTTGCTTCCGGCGGGCATTCCTGTCGCTGCACCCGACTCAGTAC  
GCAGAAGTGTGGTGAACGATGACAGCGGCGGGCGCAGGCTTATCTGTTAAACTGGTGGAAACGGCACTGGCAA  
ACGATCTCGATTAAGATAACCGCGCCATTATCGACGCCATCTCAACGGTTCGCTGGATAATGCAGAAAACCTTCACTC  
TGCCGATGTTTAACTGGGATCCAACCGAACTGCCGGCGTAGACACGAAGATTCTCGATCCGCGTAACACTACGCT  
TCTCCGGAACAGTGGCAGGAAAAGCCGAAACCTGGCGAAACTGTTATCGACAACCTCGATAAATACCCGACACCCC  
TGCGGGTCCGCGCTGGTAGCGGCTGGTCCGAAACTGTAATGATTTGAAGCTGGAGAATATCTATCCAGTATCTTATAGA  
AAGCAAACGGGAGGCACCTTCGCTCCCGTTTTATTACCCTTCTTTGTCGTGCCCTGCGCCCGCTTACCGGCACTGG  
CAGCCAGGCGCAATGAAAAGCCCGCCCCGCTCGCTGGTGCAAGCTCCAGCATCCCGTATGGTTATCCACGATACGCT

GCACAATTGCCAGCCCTAATCCCCTGCCGCTAATGGTGCGCGCACTGTCGCCCGGACAAACGGCTGGAACAGGTGCTTA  
CGTTGTTCCGGCGCAATTCCCGGACCCTCATCTCCACCTGGAACCAGGGCGGATTCCGGCTCCGTTCCGCTGCTGACTTT  
GATCCAGCCATTGCCATAACGGGCGGGCTTGACCACCATATTCGCCACC CGCGT TTGATCGACAGCGGGTGCATTTTCA  
CTTCAATGCTGCCGGGTAAAGCGCGTTTCAATTTCCCGCTCATAGCCACTTTCGGCAGCAATCACCTACCGAGTACT  
GCATTAAGATCCGCCATTTCCATCGGCATCTCTGCCCGTGCAGGTAGTCGATAAACTGCTCAATGATGGCGTTGCA  
CTCTTCGATATCTTTATTGATCGATTCTGCCAGATAGCCATCCTGCTCGCTCATCATCTCAGTCGCCAGGCGAATACGG  
TCAGCGCGTGCSCAAGTCGTGACTTACCCCGCCATCAGCAGCGTGCGGTCATCCGCCAGTTGCTTAACACCAGCCGCC  
ATATGGTTAAAGGCACGGTAAACGGAACGCACCTCCGAAGCGCCATACTCACGCAGCGGGCGGAATAATCCCTTACC  
AACCTGCAAGGCTGCGTGTTCGAGATCGACCAACGGTCCGGTTCTGGATACGAATAAACAGCCACGCCCCGCCTATCGCCA  
ATAGCATAATCGCCAGCGTATAGCGGAACAGCGGAGAGAAATCGCCCTGATGAATTTCCGGTCAGCGGCACGGTACCAG  
ATATTGGGCGACAGCCAGTTTTAGCCAGACGACAGGCGAACTTTTGTGACTCAACGGCGACTTCCGTCCGGCGCC  
CAGTTGCTGCCCATCTGATGGCTAAGAATTCATAGTGTTCGCCAAACGCAGACCTGCCTTTCGGCAGCTCGTTGG  
AGTAGAGAGAGATCCCAGTACGGTAGATCTCCGACGGAAGCGGGAGGCACAACCAACTGCGTCCCGTCTCCAGT  
TGCAATTTGTGCGTCAACATACGCACTTCGTACGCAGGACTTTATTAACCTGCTGGAGGCTCGGCCAAATCGCGAA  
TTCTGGCGAAGCGCAATCGCTCATGCTTTAGAGCCGTCCGGTACAAAGACGTAGCCAGACCCCAGACCGGCTGAA  
TGTAACCGGATGCGCTGATCTTCTCCACCATGCCGCGCAGACGCGAAATCTGCACGTGATGGAGCGTTCCATTGCG  
GAATATTCAGACACGGGCAAGTTTCATCAGCTTATCGCGGAGAGCGGCTCACGCGGATGGCTGACCACTGCCTTACAG  
TACCCAAACCTCACCGTGGTGAGCGGCATCGGCTCGCTTTCGCGGAACATTTCCGCGGTACCAGGTTAAGTTGAACT  
TACCCAAAGCAATTACCGCTTCTTCTGTGACGGTGCCTGGCAGTTCCGTTCCGCTGACGACGCAGCACCGCACGGATA  
CGGGCCAGCAGTTACGCGGGTTAAACGGTTTTGGAATGTAGTCGTAGCGCAATCTCCAGGCTACGATACGGTCCAC  
TTCTCCCTTTCGCCGTACCATAATGATCGGCATCGGGTTGCTGACTACGAAGACGTCCGCAAATCGACAAGCCAT  
CTTACCAGGTAACATTAATCCAGTACCATAAGATGGAAAGATTCAGAGTCAGCAGGCGATCCATCTGTTCTGCATTA  
GCGACGCTTGAACCTGGAAGCTTGTTCGGTGAGATAAGTTCCAGCAGCGCACGAGGCGCATGTCGTATCGACCAC  
CAGAATCTTGTAGTCTCTGATTGTTGTACTCCAAAGGTTCCGAACAATTTGTAAGCGTGATTCTTAATAAAGCT  
CACGTTGTCACCAGCTAAATCTGGTATGAATTTACGCTAAATTTGTTACAAGCATATTAACAGCAGCTTAAGTATAC  
AATTTATTCGGCGAAACATTATTGATTCTGTTGATATGATCACGTTATAACCAATGTGCGCATTATCAAACAGACAAAGG  
GAATCAACGAGATGAAAACGCCCTGGTTACCCGGGAAGGATGAAAACCTCAAACAAGAGCTTAAATATCTCTGGCGT  
GAAGAACGCGGAGGTCAAAAAAGGTGACCTGGGCGCAAGTCTGGGCGACCGCAGCGAAAATGCTGACTATCAGTA  
TAATAAAAAGCGTCTGCGTGAAATCGACCGTCCGCTGCGTATCTCACTAAATGCTTGGAAAATCTCAAATCGTCGATT  
ACTCCCTCAGCAGGAAGGCAAGTCTTTTTGGCGGTGGTGGAGATTGAAAACGACGATGGCGTGACTCACCGTTT  
CGTATTGTCGGCTACGATGAAATTTTTGGCCGTAAGATTACATCTCTATCGATTCCCGATGGCCCGCGCATTGCTGAA  
AAAAGAAGTCGGCGATCTGGCGGTGGTGAATACCCCTGCCGGGAAGCGAGCTGGTATGTTAATGCTATCGAGTACGTGA  
AACCGTAAGGAAGAGTCTTAACCTCTGCCGATGGTGGCATTGTTGCCAGCCAGTCCGTATAACTATCCCTGATTTTT  
GATCCGAAAAGATGAACTCAAACCATGATGAATGATTCGTTCTGCCGATTATTGCGGGTGAATTCAGCGCGCCCGGA  
ACAGGTTGACGCTGCCGTTGCCTGCTTGACGAAGGAATACCGTGCCGTTTATCGCAGTTATCGTAAGGAAATCACC  
GCGGTCTGGATGACACGCAGCTGCGTAATCTGGAACCGCTCTGAGTATCTGCGCGAGCTGGAAGAGAGACGTGAGGG  
ATCTCAAGTCCATTTCCGAGCAAGGCAAACTCACCGATGATCTGGCGAAGGCCATCAACGCCACCCTAAGCAAAACCGA  
ACTCGAAGACTCTACCTGCCCTAAAACCTAAACGCCGCCACCCGCGGCAAACTCGCCATTGAAGCAGGCTTGAGCCGT  
TGGCTGACCTGCTGTGGAGCGATCCGTACACACCGCAGAAGTGCCCGCTGCACAATATGTTTATGCCGATAAAGCGTG  
GCAGATAACCAAGCCGCTGGATGGCGCGCTATATCCTGATGGAACGTTTTGCCGAAGATGCCCGCTGCTGGCGAA  
AGTGGGTGATTATCTGTGGAAGAACCGCATTTGTTTCTACGGTGGTGGAGCGTAAAGAAGGGAAGGGGCGAAATCC  
GGGACTATTTGATCATCACGAACCGTGTCCACGGTGCCTTCTCACCGCGCTGGCGATGTTCCGTGGGCGTAAACGAA  
GGCGTACTTACGCTTTCGCTGAATGCCGATCCACAGTTCGATGAGCCGCCAAAGAGAGCTATTGCGAGCAAATCATCAT  
GGATCACCTTGGCTGCGCTGAACAATGCCCGGCGGATAGCTGGCGCAAAGCGTGGTGGAGCTGGAGCTGGACGTGGCGATCA  
AGGTGCTGATGCATCTGGAACCGAATGATGGCACCGTGCAGCAAGTGCAGGAAGATGAAGCAATCAACGCTTTGCC  
CGTAACCTGCACGATCTGCTGATGGCGGCCCTGCCGACTGCGTGCAACGATGGGCTCGATCCGGGTCTGCGTACTGG  
GGTAAAAGTGGCGGTGGTGGATGCCACTGGCAAACCTGGTGGCGACCAGCACCATTTACCCGCACCCGGACAGGCCGAA  
AAGCAGGATGACCGTTCGCTGCGTGTGAAAAACATAACGTTGAACTGGTGGAGCGTCCGTAACGGTACAGCTTTCCCG  
GAAACTGAGGCTTCTATCTCGATGTGCAGAAGCAGTTCCCGAAGTACCAGCGCAGAAAGTAACTGTCAGCGAAGCAGG  
CGGTGCGTTTTACTGCGTCCGAGTGGTGCACAGGAGTTCCCGATCTCGACGTTTCCGTCGCTGGCGGGTGTCTA  
TCGCCCCCGTTTTGCAGGATCCGCTGGCGGAGTGGTAAAATCGATCCGAAATCTATCGGCGTAGGTCAGTATCAGCAT  
GACGTCAGCCAGACGCAACTGGCCCGAACTGGACGAGTAGTAGAAGACTGCGTAAACGCCGTGGCGTGCATCTCAA  
CACTGCTTCTGTTCCGCTGTTAACC CGGTGGCGGGCTGACCGCATGATGGCGAAAACATCGTTGCCTGGCGCGATG  
AGAACGGTCAGTTCCAGAACCGTCCAGCAACTGTTAAAAGTGAGCCGCTGGGGCCGAAAGCCTTCGAGCAGTGCGCGGG  
TTCTTGGCATTAACCACGGTGATAACCCGCTGGACCGTCTACCGTTCACCCGGAAGCCTATCCGGTGGTGAACGCAT

TCTGGCAGCAACACAGCAGGCACTGAAAGATCTGATGGGTAACAGCAGCGAACTGCGTAACCTGAAAGCGTCTGACTTTA  
CTGATGAGAAATTCGGTGTGCCGACGGTAACCGACATCATCAAAGAGCTGGAAAAACCGGGTCGCGATCCGCGTCCGGAA  
TTTAAAACCGCTCAGTTTGGCGATGGCGTCGAGACAATGAACGACCTGCAACCGGGTATGATCCTCGAAGCGCAGTGAC  
CAACGTCAACAACTTTGGCGCGTTTGTGATATTGGCGTGCATCAGGACGGCCTGGTTCACATCTCTTATTGTGCGAACA  
AGTTTGTGGAAGATCCGCATACCGTGGTGAAGCGGGCAGACATTTGTGAAGGTGAAAAGTGTGGAAAGTGGATCTTCAGCGT  
AAACGTATCGCCTGACTATGCGCCTGGATGAGCAGCTGGCGAAACCAACGCTCGTCGCGCGGCGGTAATGAACGCC  
GCAAAACAACCGCCCGGACCAAAACCACGCGGTCTGAAGCGCAGCCTGCCGGTAATAGCAGCGATGATGGATGCGCTGG  
CGGCGCAATGGGCAAAAACGTTAAACGCCCGTACTGGCCTACGGTTTGAATTTGACGAAATCGTAGGGCAGATAAGG  
CGTTCACGCCGCATCTGGCAACGAACGCTTGCCTGACATAAAAGTGCCGGAGAATATCTCCGGCATTATTTATTCCACAG  
CCAACTCATAATATATTCCGGCAATATTTATCATTTCATTAACAACTGAAACCTTAATTAACATTAGCCAGTCCGGGT  
AATTCATATTGCAATTATTTTGCCTGCGATATAACCTTGAGCCACATCAACATTGAGTCAGATTATTTAAACCA  
ACATTGCGACACATTTTAAAGTATTGCTGATAGAAACATTCTCATTATCATTGTGTTGTTGATTATTTAATCTCTCCTT  
GTTGGCAAATCATCTGGTCTCATGTGCTGTCAAACGCCCCATGAGGTAGTTATCCAGTTAATGAGAAACAAGTAGGCAC  
CTATGCAATACACTCCAGATACTGCGTGGAAAATCACTGGCTTTTCCCGTGAATCAGCCCGCATATCGCAAAAACG  
CTTCTCTGGCATGTTACCTGGCTCTTTAATGTGGTGCAGCTGCTCCACTCGCGACCCCATTCATATCCAAAC  
CCGTGCTGTGAGCCTGGTATTACGCAAAAAGATCTGGCCTTATAGAAGTGAAGCGGTTTCTGTAAATACGGTGATA  
ACAACAATGAAAAAATTAACCACTGGCTTAATTGGTAATCAAATTCTGGCAAGACAACGTTATTTAACCAGCTCACTGG  
CTCACGTCAGCGTGTAGGTAACCTGGGCTGGCGTTACCGTCAACGTAAGAAGGGCAATTTCTCCACCACCGATCATCAGG  
TCACGCTGGTGGACCTGCCCGCACCTATTCTGACCACCATCTCATCGCAGACCTCGCTCGATGAGCAAAATCGCCTGT  
CACTACATTTTGGAGTGGCGACGCGACCTGCTGATTAACGTGGTGGATGCGTCTAACCTTGAGCGTAACCTGTACCTGAC  
GCTACAACCTGCGAACTCGGCATTCCCTGCATTGTGGCACTGAACATGCTCGACATTGCCGAGAAGCAAAAATATTGTA  
TTGAAATTGATGCTCTGTGCGCGCTCTGGGCTGTCCGGTATCCCGTGGTTCACCCCGTGGTCCGGTATTGAAGCG  
CTCAAGCTGGCGATTGATCGCTATAAAGTAACGAGAATGTGGAACCTGGTGCATTACGCACAGCCGCTGCTCAACGAAGC  
AGATTCACTGGCAAAAGTATGCTTCCGACATCCCGCTGAAACAACGTCGCTGGTGGCCTGCAAATGCTGGAAGGCG  
ATATCTACAGCCGCGCTACGCCGGTGAAGCGTCGACGATCTGGATGCCGCCCTGCCCGTCTGCGTAATGAGATGGAC  
GATCCGGCGCTGCACATTGCCGATGCGCGTTACCAGTGCATTGCTGCCATCTGTGATGTGGTAAGCAACACCTGACGGC  
AGAACCAGCCGTTTCAACACTGCGGTAGATAAAATCGTGCTCAACCGTTTTCTCGGTCTGCCGATTTTCTCTTTGTGA  
TGTACCTGATGTTCTGCTGGCTATCAACATCGGCGGGGCTTACAGCCGCTGTTTGACGTGGCTCCGTGGCGCTATTT  
GTGCATGGTATTCAATGGATTGGCTACACGCTCCACTTCCCGACTGGCTGACTATCTTCTCGCCAGGGCCTGGGTGG  
CGGCATTAACACCGTGTGCCACTGGTGGCCGAGATTGGCATGATGTACCTGTTCTCTCTCTCTTGTGAGGACTCCGGGT  
ATATGGCGCGTGCGGCGTTTGTGATGGACCGTCTGATGCAAGCGCTGGGCTTGCCGGGAAATCCTTTGTCCGCTGATC  
GTCGGTTCGGTTGTAACGTACCGTCGGTAATGGGTGCACGTACGCTTATGACCCGCGTGAACGTCTGATGACCATCAT  
GATGGCACCGTTTATGTCTGCGGCGCGCTGCTGGTATCTTCGAGTATTCCGGCTGCCTTCTTCGGGCGAAGCGGTG  
CGCTGGCGGTCTTCTCGCTGATATGCTGGGTATTGTGATGGCGGTGCTGACTGGCCTGATGCTCAAGTACACCATCATG  
CGCGGTGAAGCGACGCCGTTTGTGATGGAGTTGCCGGTCTATCATGTACCACAGTTAAAAGCCTGATTATCCAGACCTG  
GCAGCGTCTGAAAGGCTTCTGCTGCTGGTAAAGTATCATCATGTCAGCATTTCCTGAGCGCTTTCAACAGCT  
TCTCGCTGAGCGGAAAATCGTCGATAACATCAACGACTCGCGCTGGCGTCCGTCAGCCGGGTGATCACCCCGTCTTC  
AAGCCAATTGGCGTGCATGAAGATAACTGGCAGGCAACGGTTGGCCTGTTTACAGGTGCCATGGCGAAAGAAGTGGTAGT  
GGGTACGCTCAACACCCTACACCGCAGAAAATTTACAGACGAAGAGTTCAATCCGGCAGAATTTAACCCTCGGTGAAG  
AGCTGTTCAGTGCGATAGATGAAACCTGGCAGAGCTGAAAGACACCTTCAGCCTTAGCGTACTGATGAACCCCATGAA  
GCCAGCAAAGGCAGCGGCAAAATGGTACCGGGGCGATGGGCGTATGGATCAGAAAATTCGGTAGCGCAGCAGCAGCTTA  
CAGTCACTGATTTTTCTGCTGCTGTATGATACCATGTATCTCGGTGATGGGGGCTATCGCCCGTGAATCAAGCCGTGGCT  
GGATGGGCTTCTCATCCTGTGGGGGCTGAATATCGCTTACTCACTGGCAACATTGTTCTATCAGGTCCGACGCTACAGT  
CAGCATCAACTTACAGCCTGGTGTGCATTCTGGCGTTATCCTGTTTAAACATCGTGGTTATCGGTCTGTGCGCCGCGC  
GCGTAGCCGGGTGGATATCGAACTGCTGGCAACCCGCAAGTCGGTAAGCAGTTGCTGCGCAGCCAGCACCACCGGTGATT  
GCCATTAATGGCTTCACTTATTAGGTGCGCGATTTGCTGGCGTTACGGGGCGTATGGAAGCGGCCAGATAAGCCAGA  
CATTGAACACTCCACAGCCAATGATTAACGCCATGCTGCAACAACCTGAAAGTATGGGCAAAGCCGTGCGGATTGAGAA  
GAACTGACGGCTGCCTCTCTGGCAGTTGAAAAGTGCCTGGAAGGAAAAGCTGCTGCGCGAGTGGTGGGCGTGC  
TTAACCTTACTCCATCGCCTGTTTTGAAAGCCGGTATGCGTCTGCATCCGGGCTTTTTTGCCTGCGGCTTTCCATAAA  
AATGCAACTCTTGACGACGCGGTAAGTTCCTTTGAAAGCATCTCGAGGGATGAAAACCTCGTAATACACAGGTGTGGA  
GTGGCGGTAGAGTCGGCGATTCAAACAACAGGTGAAGGAACGCATGAGCAAAAAGCAGAGTTCACCCACACGATG  
CGCTGTTCAAACCTTTTTACGCCAACGGACACGGCTCGTATTTTCTGCGTTTCAATTTACCGGCACCATTACGCG  
CTTTGTGATATGAAAACCTCAAGCTGGAGTCGAGCAGCTTTATTTGATGACGATCTGCGTGAAGCTATTCGGATGTGCT  
GTGGTGGTGAACCGAACAAGGACCAGGATACATCTATTGTCTGATTGAACATCAAAGCACCTCAAACAACTGATCG  
CATTTGCGATGATGCGTTACGCTATTGCCCAATGCAAAAACCTTGTGCTGGATACAAAACGTTGCCGATGGTGGT  
CCATTGTTGTTTTACCACGGTATTGAAAGCCCTATCCCTATTGCTGTGTTGGCTGGATTGTTTCGCCGATCCAACT

GGCAAGGCAGCTTTATGCCTCCGATTTCCGCTGATTGATGTCACCGTCATGCCTGATGATGAAATCATGCAGCACCAGC  
GTATGGCGCTGCTGGAGTTAATTCAAAAACATATTCGTCAACCGACCTGATGGGGCTGGTAGAGCAAATGGCCTGCTTA  
TTAAGTAGTGGATAACGCTAATGACAGACAAATCAAAGGGCTGTTAATTACATACTGCAAACCTGGCGACGCTGTACGTTT  
TAACGATTTTATCGACGGCGTTGCCGAACGTTACCAGAAACACAAGGAGAGTTAATGACTATTGCGGAAAGATTGCGGC  
AGGAGGGGGAACAATCCAAAGCCCTGCATATAGCCAAAATAATGCTTGAATCCGGAGTTCCCTTTGCAGACATCATGCC  
TTTACC GGCTGTCAGAAGAAGAGTTGGCTGCGGCGAGTCAGTAAAGTTCTGTCTCGCCATTTCAAAGCCACCTACACC  
CTCTGCTTCAACGCCACCAGCAGGTGACAAAACCTCGGCCGGATGCGAAAATAATGGCGCATGGGCCGCTTTGGCGAAGAT  
ATATGATTGCTGTGAGGCCAAAGTTTATCCAGCATCGGCACCCTTTGCGGCGACCAGACCGTCGAGATAGCCATAACA  
ATCGCAAAAACGGCATGGACACGTTTTGACGCGGCTGACGGAGATCGACCGTTTTAGGATTTCCAGCCC GCCATTAAGC  
ACGTCAACCTCCGGCATCGTAAACGCCAGAACGTTTTCTCAACGCCCGGCATCCTGGCGGCCGTTTTCAGTCCCCAT  
GGTTTGAACGCCAGGAACCGCTCCACTGTACGCTGAAAATCATCACTGAGTTGCTGCTGAAATCCC GCCAGCAGTCCG  
GTTTTATCCCCGGCCACTCGTCACGAGCACTAAAACAAGGTGACGACGCCACGGTGACCAGCGCTGAACACGCTCGGGA  
TGGGTTAACGCAATCTGGCTTGCACCAGCCC GCCAGACTCCAGCCTAACCAAATGGCTTATCAGGTGCCTGTTGCAG  
CACGGCTTCGGCCATATAGCAAGTGACAGCGCACCAAATCCCCGGCTACGCCCGAAGCCGGCAGGTCAACAAGGTGCA  
CGGTAAAATGCGAGCTAAGTTCCTCGTCAATGCAACGCCACACTTCGGCATTCAGTCCCCATCCGTGACGACGACAAGA  
TGAACATTTCCCTGACCTTTGGCTGCGCACCAGATGTTATTCATCCGCTATTGTTCTTTTTGACTTACAAGGATGAACA  
TATGCTAACAGTACCGGATTATGCTGGCTATGCCGAATGCCACTGGCGTTAGGTCATTGGGGGATTTGTTCCGGTCTGTT  
CACGCGCCACC CGCACAGATAAAAACGTTATGCCACAATGTGGATTACCCGCCACACACTCCCATCTTCCCTGCGGTGCG  
TGCTGCAAAAACCGCCGCCCTGGCAAAGACTGGTCACGGTTGCCGACTATGCGCCGCCGTTAAGTCCGCTTATCCACCA  
GCTTAAATTTTCCCGCGCAGTGAAATCGCCAGCGCCCTGTCAGCTCTGTTACTATTGGAAGTCTTACACGCTCGTCGCA  
CCACCGGTTGCAATTGCCGGATCGCATCGTCAGCGTTCCGTTATGGCAGCGCGCTCACTGGCGTCGGGGATTTAATCAG  
AGCGATTTGCTGTGTCAGCCGTTATCACGCTGGTTGCACTGCCAATGGGATAGCGAAGCCGTACACGTACACGGGCCAC  
TGCGACCCAGCATTTCAGTGCCCGCTGCGCAAGCGCAACCTGAAAAATGCCTTCGCTTGAATTGCCGTGCAAG  
GTCGCCATATGGTGATTGTGGATGATGCTGTTACCACCGGAAGTACCGTCGCAGAGATTGCGCAGTTGCTTTTACGCAAT  
GGTGGCGCGGCTGTCCAGGTCTGGTGCCTTTGTCGAACCTGTAGAGCCTCGATGATGGGCGTATTATAACCAACTAAAA  
TAGTCAACTATTAGGCCATTACTATGATCCGATTTCCGATGCTGCACAAGCGCACTTTGCCAACTGCTGGCAAATCAG  
GAAGAAGGGACACAAATCCCGGTATTTGTGATTAACCTGGCAGCCTAACGCTGAATGTGGCGTTTCTATTGTCCGCC  
GGACGCTGTGGAAGCCACCAGACACAGCCCTGAAATTTGACCTGCTGACCGCGTATGTTGATGAGTTAAGCGCACCATACC  
TGGAAAGATGCAGAGATCGATTTTGTACCAGCAGTTGGGTTCCAGTTAACGCTGAAAGCCCGAACGCCAAAATGCGT  
AAAGTGGCAGACGATGCACCGCTGATGGAGCGCTGGAGTATATGCTGCAGTCGAGATCAACCCACAGCTTGCTGGTCA  
CGGTGGTCGCTTTGCTGATGGAATCACC GAAGACGGTTACGCCATTCTGCAATTTGGCGGCGGCTGTAACGGTTGTT  
CCATGGTCGATGTGACGCTGAAAGAAGGGATCGAGAAGCAGCTGCTGAACGAATTC CCGGAGCTGAAAGGTGTGCGCGAT  
CTCACGAACACCAGCGCGCGAACACTCCTACTACTAAGTTATCCCCTCTTTTGTAGATTGCCCGATGCGACGCTAAAG  
CGTCATTTCCGGCCTACGTTGAACATGTGCCAGACGTTGGCGCAGCATTGCTTTGCAATCCTCGGTTCCGTTTCCCCGC  
GATAATATGACCAACCTCTCATAATTTAAATTTACCCCGCTCTGGTGATTCTCAAACGCCAGATGTTACC CGTATCATT  
ACATGGGTACCAACATACTCCTGACATCTGACTACAATAATTAGTTTTAGTGGGTATCAGTCGTGGTGGCCGAATATCT  
CTGTTCCCGATTGGGATAATTAGAGTTTGTGTCAGAAAATTTGACGTTACCCATAACAAATGAAAGGCCAGGTAAATCAT  
GCCATTAGTCATTGTTGCTATCGGTGTAATCTTGTGTTGCTCTGATGATCCGCTTCAAATGAACGGCTTCATCGCTC  
TCGCTCTCGTGGCGCTTGTGTTGGATTAATGCAAGGAATGCCGCTGGATAAAGTTATTGGCTCCATCAAAGCCGGTGC  
GGCGGGACGCTCGGTGCTTGCCTGATCATGGGTTTTGGCCGAATGCTGGGCAAAATGCTGGCAGACTGCGGTTGGCGC  
ACAACGATCGCCACCACGCTGATTGCCAAATTTGGTAAAAAACACATCCAGTGGGCGGTGGTACTGACCGTTTTACCG  
TTGGTTTTGCCCTGTTCTATGAAGTGGGCTTTGTGCTGATGCTGCCGCTGGTGTACCATCGCGCTTCTGCGAATATT  
CCTGCTGTATGTTGGTGTACCAATGGCGGCTGCACTGTCTGTGACCCACGGCTTCTGCCACCGCATCCGGGTTCCGAC  
TGCGATTGCCACCATTTTCAATGCCGATATGGGTAAAACCTGCTGTACGCTACTATTCTGGCAATCCCGACCGTGATT  
TCGCGGTCGGTTTACGCTCGCGTGTGAAAGGTATCGATAAGCCAATTCGGGAAGGTCTCTACAGCGGAAAACCTTC  
AGCGAAGAAGAGATGCCGAGCTTTGGCGTCAGCGCTGACCTCTCTGGTGGCGGTAAGTACTGATGGCGATGCGTGCAT  
TGCCGAAATGATCCTGCCGAAAGGTACGCTTTCCTGCCGCTAGCGGAGTTCCCTCGGTGACCCGTAATGGCAACGCTGA  
TTGCCGTGCTGATTGCGATGTTCACTTTGGTCTAAACCGTGGTGGTTCAATGGATCAGATTAACGACACGCTGGTTTCT  
TCCATCAAATCATTGCGATGATGCTGTTGATCATCGGTGGTGGCGGTGCGTTCAAGCAGGTGCTGGTAGACAGCGCGT  
GGACAAATACATTGCTTCCATGATGCACGAAACCAACTTTCTCCGCTGCTGATGGCCTGGTGCATGCTGCGTACTGC  
GTATCGCGCTGGGTTCCGCAACCGTTCGGCAATCACTGCGGGTGGTATCGCGCACCGCTGATTGCAACGACGGGTGTT  
AGCCCGAGCTGATGGTTATTGCGGTTGGTTCCGGTAGTGTGATTTCTCTCATGTAACGATCCGGGCTTCTGGCTGTT  
CAAAGAGTACTTTAACTGACTATCGCGGAGACCATCAAATCCTGGTTCGATGCTGGAAACCATTATCTCGGTGTGCGGTC  
TGGTAGGCTGTCTGCTGCTGAATATGGTGATTTGATAACACTGACTGCCGGATGCGGCGTGACCCCTTATCCGGCCTAC  
GATTCGGGATGAATAGTAGCCGGATAAGACCGCTCAAGCATCGATCCGGCATCAACCCGCACTTACTTCTTCTTCCG  
TGCAGCTCTGCCCGTCTGTCAAATCCTTCAGCAACTGTTACGCCATCATCGGCAACATCGACTCAAGCGTTGCGG



AAAGCTTGCCTGCCAGTTTTTATACTGGTAACTGGTGCCAGGAATATTACCAGTTTCGGCCATATCCAGCCAGTCTTCC  
GGCTGTAGTCTAACAGAGCACTGTTACTGTCGGCAATGTAGCGCTGCAAACCACGGTTCAGCGTCGGCGTCATCGACAT  
CAACGATGCCATTATGCCCGCACGTTTCGGCAGACAACCATATTTATGCAGTGCATCCAGCAGCCCTTGCTTCGCCAGTT  
CGGATCCTGATACAGACCCGCGAGTACCCTTTCATCCGGATACAGCCCCAGGGTTTTGCCAGCGTTAGATCCCCGCAC  
TCCCAGTAACCGCGCAGCGTTGGCAGGTCATGTGTCGCCGCAACCGCCATCGACTGCTCCGGATACGCTTTCGGTGCACG  
GAACGCTTCTCGTGGTCTTTTTGAAATAGAGCACTTTGTAAGAGTACACACCCTGCTGCGCAGCTTACCAGCAATCT  
CTACCGGTACGGTACCGAGATCTTACCAATCACCATACAGCGATGACGTTTACTTTTCAGTGCAGCAATCGAGAGCAGA  
TCATCCACCGGATAGTGAACATACGCGCCCTGATCTGCCGTCTGCCATACGGTATCCACCACAAACGCAGCATCGACAT  
CACATGGTCAATTCGTAATGCGCCGAGTTTTGCATATTGGCAGCAACAGCTCGATAAACGGTTCATAGGCACGCGCGG  
TGATGATATGCGGGTCCATTGGCGGTAATCCCAGTTCTGCCCAACGGGCGGAGGATATCCGGCGGCGCCCAACCGAT  
GCTTTCAGGCAATATAGTTCACGGTACACACAGGTTTCGCCCCACCTTCGGTACGCCAACCGCCAGATCAGGATACAA  
GCCAATCGGCATTTATAGCCCTGGCTTATCTCCAGCAGGCGGCAAACTGGCTGTAAGCCAGCCACTGCAACCAGAGAT  
AAAAATCGACGTCATCAGATGTTCTTCGAGAATGACGCACTTCTGGTGAATCCACGTTCTGATACATCTCTGGCCAT  
GCAGGCCAGCCAGCGCATTTCTGCTCTTTCACTGTCTGGCATGTAGCGCATCAAAGGCTGCCTGCCAGAACAGGCT  
GTCGCCCTGCTCTGCAACAACTGGCGAAACGCGCCATCTGCTCATCATCACGTTGCGCGAAACCTTCCACGCCATTC  
GTAATGCTGTCATTTTAGGGCGGTAACCGTGGAGTAATCGACCAGTCGGCATCGCGCGCTGTTGCAGCGTCTGTTGC  
GTGTCGGCAACTGCCACAGGCTGAGCCTCTTCGCTAAGATGGAATCTTCAACGGCGTTAACGTCGATATAAATCAC  
ATTACGCCAACGGCGAGAAGACGGGCTGTATGGGCTGGCGCTCTCCGGATTTGCCGGATAGAGCGCATGAATCGGGTCA  
GGCAATGAACGACCCGCCAGTTTTGCCACATCCACCAGCATCGCTTTCAGATCGCCAAAATCCCCAATACCCAGTTT  
TTTTCCGATCGCAGCGTATAAAGCTGAACGCAGGCACCCACAGCTTTTGTATTTCAGCAACGCCTGCGGTTGTAACA  
GCGTTTTCGGGCGACAATCACCCGGCAATGCGCGCGCTGGTCTCCTGGGTGAGTGTACGCGTGTGATAACCTTCGGCA  
GCTTCGTCGGTAGATTGAACGCTTTGCCCCCGTTACATGGCCTTTGACTGCGTTCTTCTTCGGTGGTCAGCAGCCAG  
CTATATTGCCGCTGCCCTCCACCACATCGGCATTTTTTTCGCCGCTGGTATAAACCATGACATTGGGACTGGCGTTAC  
CGCCACTTTCGTGGCGGTACGTTGATGCATCGCGTCAAGCAAACGCCGTTTGGTTTTCGGCGTAATCGACTGCGGTTTAC  
CGTGGGCATTGATGTAATTGGGGTAATCCCGCCGCCAGCGCGGCAATTCCAGACGTTTGTCTTCCATCGAGCTTCT  
TAGCGTTTTGCCTGCCAGATACGAGCCTGATAATCGGAATAGAGCGATCCGAGCTAAACATACCGCAGCGGGCGGTATT  
GAGGATCGCCGCGGAGTCCAGGCTCCTGGTCCGGTACAGCACATCCACCTGCTTTTGTCTCTACATAGGCTGCGA  
AATCCGCCATACCCAGATACGGATCGCCGCCCTGTTTCCGATCTGTGCGCATCTGGTGAAGGCATGCTTATCGCCG  
TCGCTGATTTACCGCTTTCAGCTCTTCAATACTGCGTCCAGCACCTTATCTTCTTCGCCATTTACCGGGTCTGTA  
GCCTTTGGCCAGAATTGCCTTCACTTGTCCACGGTATGACCAAAAATAAAGATATTTTCTTACCAGCTTCTCGGGCA  
TTTCAACGTTCCGCCATCCAGCGTACCGACAGTAAGCGCACCATTTGAGCGCCAGTTTCATATTGCCGGTACCGGAAGCT  
TCTTTACCTGCAGTGAATTTGTTCCGAGATATCCGCCCGCGGGATCAGTTTTTCCGCCGCCGAAACGCAATAATCCGG  
CAGGAACACCACCTTCAACTTATCGCCAACAGCGGATCGTTGTTGATCACGTACGCCACTTTGTTGATCGAAAGATAA  
TATTCTTCGCCAGGTAGTAGCCCGTCCGCTTTCGCGCCGAAGAGGAAGACGCGCGGTACGCGATCAGCCTGCGGGTTT  
TCACGAATTTCTTTGTACAACGCCAGAATATGCAGCAGATTAGGTGCTGGCGTTTGTACTCATGAAACGTTTGTACTG  
AATATCGAAAATCGCCTGTGGATTGATCTCAATACCGGTACGAACTTTCACAACTCCGCCAGACGGACTTTATTCGCT  
GCTTGATCTCGGATATTGCTGACGGAATTTGCGATCATCAGCGAATTTTTCCAGATTGATCAGCTGATCGAGATCGTTA  
GCCACTCTTTTTGCAGTGATTTATCCAACAGAGCCGCACTGCGGGTTGCACTGTTTGTCCAGCGACGTGGGGTAAT  
ACCGTTGGTGACGTTATGGAATTTGTTCCGATAGCTGGTATATTCCGGGAACAGATCTTTCACCACAGATCCGAGT  
GCAGCGCCGCAACACGTTACCCGCGAAACGCCAACACACAGGTTCCGCATATGCATATGTTTGTCTGTCGACCCACC  
GCCAGTTTTGGCCACACTTTTTTTCATCGCCCGCCAGGTTTTCTACCAGCGTTTTAAAGCGAGTATTAATTTCTGTTAAT  
AATCTGCATGTGGCGCGGAGTAAGCCTTTCACCAGTTTACATCCAGCGTTCAGCGCTTCTGGCATCAGGGTATGGT  
TGGTGAAGCGAAAGTTTTGCTGGTAATGGCCAGGCGTCATCCAGCTCATCTGGTGTCTCATCGATCAGCACGCGCAGC  
AGTTCTGGAATCGCGATAGTTGGGTGGGTATCGTTACGCTGAATAACTTCGTAATCCGCCAGTTCTGTCAGTTTACGCC  
CGCCAGATGATGGCGACGCAAAATATCCGCTACCGAACAGGCACACTGGAAGTATTGCTGCATCAGGCGCAGCTTTTTAC  
CGGCAGTATGGTTGTCGTTGGATAGAGAACTTTGGTCAGTTTTTCCGATTTGATGCCCTGCTGTTCCGCCAGCAAGAAA  
TCACCGTCTTAAATTTAGTCAGATCAAACGGATGCGCGTGCCTGCCACAGACGCGAGCGGCTGCGCCACGCCATT  
ACGATAGCCGACAACGGGGAGATCCCACGCTTGACCGGTAATGGTAACTCCGGCTCCAGCGTCCGCTTTTCGTCATT  
TACCGCAATCCCTACCTGCACATCCAGTCTTCTGTTGGCGGAACACGGGTAGTTACTGCATGCCAGTCCAGGCGC  
GCTTCAACCTGTTGCCATCGACAAAAGACTGGCGGAACAAACCATATTGATAGTTACAGCCGTAACCCGTCGAGACTG  
ACCGACAGTTGCCATTGAGTCGAGGAAGCAGCCGCCAGAGCTCCAGACCACGTTACCCAGCGCGGGTGCATCTCTT  
CTTCCAGCAGTCCGTCAGATTGATGTACATAAGCCTTCAACGAATCCTGTACATCCTGATACCAGCCGAGATTCAACAGG  
TTGTTGCCCGTACGGCGACCAATCAAAAACCTCATTGAGATGTAGTTAATCATGTCGCTGATTGCCACCAGCTTGGCGAA  
TGGCTGAGCACGAGATTTTCGGCCAGTCTTCACTCACTGCTAGCCACCAGTGGCGAGGAGTCAATTCAGCCCGAGAAAT  
TTAAGCCATAACGCTGCCACTGACGTGAAAGCGCTTCTGAAATGCTTATCGTTAAAAATAGGTTGTGACATAGGAGTT  
CCACTTTTCTAGATTTTCAACACAACGTTATCGCTAGTTTGGCAGGCTCGATGTTGACCTTCTCATCTGCGGGGAT

TAGGCAGGGAGGAGTTGCGGGGATGAGCAAGGAAATGTGATCTCAACCACTTAAAGCTAGTGCAAACCACAGGATTAGCA  
TCAAATCAATGCAATACAGCGCAGAAAATCTGTATCTAAGTGCAAAAATGGCCGTTGCGTATTTTCAAAAAGCGGAAGG  
TAACTCTATAAATTAAGTAAAGGAGTGAACAGTTTCATAAGTAAAATATCCAGTGTGCTCCATCTCATTCTTAATAGAT  
TTATTAAGATCATCTTTTTAGATGGCACTTTTCATCAGGAATGAAGAAGAAAACCTTGCTTAAATGAATCTGATGAACATA  
AGGGAAACCAGTATTCACGCTGGATCAGCGTCGTTTTAGGTGAGTTGTTAATAAAGATTTGGAATTGTGACACAGTGCAA  
ATTACAGACACATAAAAAAACGTCATCGCTTGCAATTAGAAAAGTTTTCTGGCCGACCTTATAACCATTAATTACGAAGCGCA  
AAAAAATAATATTTCTCATTTCACAGTGAAGTGAATTAATGCTGATTCCGTCAAAAATAAGTCGTCGGTTTCTGCA  
CTCGACCATACCGTGTTTGTGAGCGCTGCTGGCTAACTTTCCGGCGCAACAATTCCGGCTGGCGCTGATCACGAG  
TCCTGCGGGCTACGGAAGACCACCCTCATTTCCAGTGGCGGCGAGGCAAAAACGATATCGGCTGGTACTCGCTGGATG  
AAGGTGATAACCAGCAAGAGCGTTTCGCCAGTATCTATTGCCGCCGTGCAGCAGGCAACCAACGGTCACTGTGCGATA  
TGTGAGACGATGGCGAAAAACGGCAATATGCCAGCCTGACGTCACTTTCCGCCAGCTTTTATTGAGCTGGCGGAATG  
GCATAGCCACTTTATCTGGTCATCGATGACTATCATCTGATCACTAATCCAGTGTCCACGAGTCAATGCGCTTCTTA  
TTCGCCATCAACCAGAAAATCTCACCTGGTGGTGTGTGACGCAACCTTCCGCACTGGGCATTGCCAATCTGCGTGT  
CGTGATCAACTGCTGAAATTTGGCAGTCAGCAACTGGCATTACCCATCAGGAAGCGAAGCAGTTTTTTGATTGCCGTCT  
GTCATCGCCGATTGAAGCCGAGAAAGCAGTCCGATTTGCGATGACGTTTTCCGGTTGGCGGACGGCACTACAGCAATCG  
CCCTCTCCGCCGGCAGAAATACCCACTCAGCCATAAGTCCGGCAGCCGCTGGCGGGAATCAATGCCAGCATCTTTCCG  
GATTATCTGGTCGATGAGTTTTGGATAACGTCGATCTCGCAACGCGCCATTTTCTGTTGAAAAGCGCCATTTTGGCGTC  
AATGAACGATGCCCTCATCACCCGTGTGACCGGCGAAGAAAACGGCAAAATGCGCCTCGAAGAGATTGAGCGTCAGGGC  
TGTTTTACAGCGGATGGATGATACCGCGAGTGGTTCTGCTATCACCCGCTGTTTGGTAACTTCTGCGCCAGCGCTGC  
CAGTGGAACTGGCGGGAGCTGCCGAAATCCACCGTCCGCCGAGAAAGTGGATGGCCAGGGATTTCCAGCGA  
AGCAATTCATCATGCGCTGGCGGAGGCGATGCGCTGATGCTGCGCGATATTCTGCTAATCACGCTGGAGTCTGTTCA  
ACCATAGGCAACTGTCGCTGCTGGAAGAGTGCCTAAGGCCCTGCCGTGGGACAGCTTGTGGAAAATCCGAGTTGGTG  
TTATTGAGCGTGGCTGATGCAAAGCCAACATCGTACGGCGAAGTTAACACCCTGCTAGCCCGTGTGAACATGAAAT  
CAAGGACATCAGAGAAGACCCATGCACGAGAATTAACGCTCTGCGGCCAGGTGGCGATTAACGATGGTAATCCGG  
ATGAAGCGGAACGGCTGGCAAACTGGCACTGGAAGAGTCCCGCCGGCTGGTTCTATAGCCGATTGTGGCAACCTCG  
GTGCTGGGTGAAGTGTGCACTGCAAAGCGAATTGACCCGCTCACTGGCGTAATGCAGCAAACCGAACAGATGGCACG  
CCAGCACGATGTCTGGCACTACGCTTTGTGGAGTTAATCCAGCAAAGTGAATTTCTGTTTCCCAAGGGTTCCTGCAAA  
CCGCGTGGGAAACGAGGAAAAGCATTCCAGCTGATCAACGAGCAGCATCTGGAACAGCTGCAATGCATGAGTTTCTG  
GTGCGCATTCTGTCGCGAGCTGTTATGGGCTGGCGCGGCTGGATGAAGCCGAAGCGTCCGGCGGTAGCGGGATTGAAGT  
CTTGCTGCTTATCAGCCACAGCAACAGCTTCAGTGCTGGCAATGTTGATTCAATGCTCGCTGGCCCGTGGTGATTTAG  
ATAACGCCCCTAGCCAGCTGAACCGTCTGAAAACCTGCTGGGGAATGGCAATATCACAGCGACTGGATCTTAACGCC  
AACAAAGTCCGGGTGATTTACTGGCAATGACCGGCGATAAAGCCCGCTGCCAATGTTGCGTCATACGGCTAAACC  
AGAGTTTGGCAACAACCACTTCTGCAAGGTCAATGGCGCAACATTGCCCGTGCACAAATCTTGTGGCGAGTTTGAAC  
CGGCAGAAATGTTCTCGAAGAACTCAATGAAAATGCCCGAGTCTGCGGTTGATGAGCGATCTCAACCGTAACTGTTG  
CTGCTAATCAACTGACTGGCAGGCGGACGTAAGTGAAGTACGCCAGCGCGTGTGCTGGACGATTAATAACTGGCGAA  
TCGCACCGGATTTATCAGCATTGTCATCGAAGCGAAGCGATGGCGCAACAATGCGTCAGCTGATTAGCTTAATA  
CGCTGCCGAACTGGAACAGCATCGCGCGCAGCGTATTCTGCGAGAAATCAATCAACATCATCGGCATAAATTCGCCAT  
TTCGATGAGAAATTTGTTGAAGCTCTGCTAAATCATCTGAAGTACCTGAAGTATGATCCGCACCAGCCCGTACGCAACG  
TGAATGGCAGTACTGGGCTGATCTACTCTGTTACAGCAATGAGCAAATGCGGAGAACTGGAAGTCCGGCAACCA  
CCATCAAAACGCATATCCGCAATCTGTATCAGAAACTCGGCTGGCCATCGCCAGGATGCGGTACAACACGCCAGCAA  
TTGCTGAAGATGATGGGGTACGGGTGAAGTTTAGCCGATAAAGCGCCAGATCCGGCTTACATCTCTGCATCATTTCAA  
TGCTCACCCGCTTACGCCATCTGTTTCTATCAAACATAAACCAGCCGCAAGAAACGCTCCACCACCGGATATTGGTC  
AGCAGATGGCATGAGGGATGGGCGACCGTAAATTCGCCGCGCCGCGCAGCGCCATCGGTAGCACCAGTTGGTCAGCAAG  
ATATTCCCCCACCGCCGCTGCTTGGCAGGTAGCGTTTACCTTTTACCAACTGTGCCGCAACCACCTCGGCACTGA  
CGCGTTTTTACCAGCAGCAAAAAGCGTTCCGGTATATTTTCACTTTGACTTCAAGCGAGACGGTATTACCCGGCCCC  
TGGTCGCGCGGAGGTTATGAATATTCTGTTTATGCAGGAAAAACTCCCCGCGCTGAGCGATTTACGCTCAGCAAC  
ATGGCGGGCACACCAGCTAATAGAATTTCTCCACGCATCTGCACAATGTTCCCGCGCTCGCAAGTTGCAAGGTGTTAA  
ACGATGCCACGGGCGAGACTTCCGTTGCCACCACACCGCTCCGGCAGGGTAAAAACCGTGGCGTAACAGCGTGGTTTGC  
TGATGAATTCATTTTCCGACGAGCGGCTCCAGCACCCGGCGATAAAAATCCGAGGCGGCGGACGGGTTATCGGT  
GCCGCGCTCACTTCAACACGCGAAGTCCATCGGCAACACAGCGGGGAGCACCGTTTGCAGCACAGCGTACAAC  
TTCCGGCGCTACCGATAGCAAAGCGGTAATCGCCGCGCGCACGGTCCGGGCGGAAGAGCAGACGCTGCGACCCAGC  
TCCGCGCTTCCACGTTGCTCCGCAATTTCCGTCGCGCTTTACCGCGGTGATGCTGGCGCAACAGCCCCGTTTT  
CGCCCGCCCGCACGAATGCTGGTGATGTTAATGGCTGGCCGTTATCATCGACAGGCTCAGCGCCGAGCGCAGGATCT  
GCCCCCACCTTCCGCTGTGCGCCATCCAGCGCAATCATCTTTTATCATTATCTTTTACGACACCACCTGACGC  
AGGGTATAGATAAATCCACCAGATCGCTTTGTGCCCATCACCGCATCAATATCTTTATACGCCATCGGGATTTCTGTC  
GATCACTTCGGCATCTTACGGCATTCCACATGCGCGGTGGCAGCAATTTGATCTTCCACGCTGAACAGTTTTTTCTGCT

TAGTTCGGCTCATTACCCGCCGGCACCGTGGCTGCACGAACAGAACGACTCTTCATTTCCAGCCCACGGACGATAAAG  
CTTTTTGCTCCCATCGAACCGGAATAATTCCATATTGACCAGCACGCGCAGACACCGCGCCTTTACGCGTCACGTAGAT  
CTCTTACCAAAGTGCTGTTCTTTTTGCACATAGTTGTGGTGACAGTTGATCTCTTCCATCGCCAGCGTTTGTGGCTGTC  
TGACCGTTTTCTGCGTAATGCTCTGCAATGCCGTTACCACGTTTTCCATCATCGCATCGCGGTTAAGGCTGGCAAAAAGC  
TGCGCCAGGCCACGGCTTTCAGGTAATCATCAAAGTATTCCGTACCTTCCATAAAGTACGCCAGATCACGCGACGGCAA  
CGTCTCAAGCGTTTCTGCATCTCTTTTTGTGCCAGATCGATAAAGTAAGTCCCGATGGCGTTACCAATTCGCGTGAAC  
CGGAGTGCAGCATAATCCACACCTGGTCCGACTCATCAAGGCAGATTTCAATAAAGTGGTTACCGGTTCCAGCGTTCCC  
AGGTGTTTATAGTTATTGGTATTAGGAAACGGGGATTTTTGCGTTAACCCTGATAACCGGCTTCAAGCTCAGCCCA  
TTAGCATCGACGTTAACAGGTGGATTTTCCAGGCACCTTATCACGTTTACAACGGCCAGTGGTACGCCCCTGCGGCA  
CGGCCGTTTCAATCGCCTGACGCGACTCTGCCAGTTTTAGGAGGTTTCCGCCGTTAACGCGGTACGCGACGCGGTTT  
ATTCCACAGCCAATATCCACGCCACCGCCGCGGAATAATCGCCCTTTGGTGGGATCACGCTACCAATGGTGAACC  
TTTACCCAGGTGTACATCAGGCATTACCGCAATATGTTTAAAATAAACGGCATCTTCCCGTATTAATAAGTTGCTGAC  
GCGCATCGGCCTTACCGGCACGCCTTTGGTCCACATTTTTACCGGGCATTTCAGTGGTCAAGTAAATCGTAATTCATT  
TTGTTTTCTCTTTTCGTTGTTGCTGTCTGATAATTGCAACCGTCTGCCAGAAAATTAATAAGCAGCTTAATTTTT  
TAATTCATTGTTTTAAAAAAGATTATATCTTTACGTCCGTAACCGGAGATTTCCGCAAAGCAATTTACCGATAATGAA  
ATATCGTCTTTATAAGGATATCTAAGATGCGTAAAACAGTGGCTTTTGGCTTTGTCGTTACCGTACTGGATTATGCCGG  
GCGCGCAGTACGCGTGGTCAAATGCGTCCGACACTCTGTTTATGCCAGCAAGAATCGTTGGTTCATCGATCGACTGG  
AATTGTTGACGACGCCGCTCGCTATTTGAAACGTTAAACGCGATATCGCCAGCGTTTCCGCAAAAACAGAA  
GTGGTGAGCGTTGAGATTGAACTGCATAACCCGTGGGATTTCAAGAGGTTACGCTGCCTGCATGATTTCCGCCGTTG  
TTACGAGTTTTCAGCCAGAAAAGAAGACTATTTAATCACATCACACCGGTACCCACGTCGCGCAGATTTGCTGGTTT  
TGCTGGCAGAAGCGGTTACCTGCCGCCCGGCTGATAAATCTTCACTCCGCGCAAAAAGAAGCAGCCGCGCGGCCCA  
GGTGAAGTAACGATTATCGATCTCGATTTAAGCCGTTATAACGCCATCGCCAGCCGCTTTGCCGAGGAACGCCAGCAAAC  
GCTTGATTTTCTAAGTCCGGCATTGCCACGCGTAACCCCACTTCAACCGCATGATTGAGCAGATCGAAAAAGTGGCGA  
TCAAATCCCGCGCGCGATTCTGCTTAACGGTCCAACCGCGCGGCAAGTCAATTTCTGGCGGACGCATCTTAGAGTTA  
AAACAGGCGCGGCATCAGTTAGCGCGCGTTTGTGGAAGTGAAGTGCACCCTGCGCGGCGATACCGCCATGTCGAC  
GCTGTTTGGTTCATGATAAAGCGCGTTTACCGGGCGCGGGAATCTCGTGAAGGTTTATTACGCGCGCCAACGGCGGAA  
TGTTGTTTCTGATGAGATTGGCGAAGTGGGCGCAGACGAACAGGCAATGCTGCTGAAAGCCATTGAAGAGAAAACCTTT  
TACCGTTTTGGCAGCGATCGCCAGGTGAGCAGTATTTTACGTTATCGCCGAAACGGTGCAGGATTTGCCAGCTGGT  
TGCCGAAGGCAAAATTTCCGGAAGATCTGTACGCGCGATCAATCTCTGGACCTTACCCTGCCGGTCTACGCCAGCGCC  
AGGAAGATATTGAACCGAACCTGGATTATGAAGTGGAGCGCCACGCTCACTACTGGCGACAGCGTGCCTTTTAAACCC  
GAAGCGCGCGCGCTGGTTGGCTTTTGCACCTCTCCCAGGCAACATGGCGCGGTAACCTTTCCGCAACTTTTCCAG  
CGTCACGCGGATGGCCACCTTTGCCACTAGCGGACGCATCACTCTGGACGTGGTTGAAGATGAGATAAACCGTCTGCGCT  
ATAACTGGCAGGAGAGCCGCCCTCCGCGCTTACGGCGTTGCTGGGCGCAGAGGCAGAAAACATCGATCTCTTCCAGCGT  
ATGCAACTGGAACACGTTATCGCTATCTGCCGCCAGGCAAAAGTGCCTTTCCGCGAGCCGACGCCAGCTTTTTGACGTTT  
GCGCCAGGGCAAAGCCAGCGTCAATGACGCGGATCGGCTACGCAAAATACCTGGCGGTTTTGGTCTGACGTGGGAAGCCG  
TGAGGATCAGCACAGCTCCAGTTGAATAGGTGGTCCGTACGACCTGCATCACGTTACTGGCGCGGGGCGTGGTG  
TAGACGGCATCTACCATGCTGATGCTGCCATATTGACCATCGGTTACGGCCAAATTTTCGAGTGATCGACAACAGCAT  
AACGTGGCGGAGTTCTCAATAATGGCGGTTTTGGTGCGAACCTCGTGGTAATCGAACTCCAGCAGCGAGCCGTCGCTAT  
CGATGCCGCTTATCCCAGAATGCCGAAATCAAGGCGGAATCGGAGATAAAATCGAGCGTCTTCCGCAATGATCCCG  
CCATCGCGGCTGCGTAATTCGCCACCGCGAGAATGATCGAAAAATCTTTTACCATCAACGTGTTAGCAACGTTGAG  
ATTGTTGGTACAATGCGCAAATTTGCTGTGATTGAGCAGTGCCTGCGCTACCGCTTCCGGCGTGGTGCCGATATCGATAA  
ACAGCGTCGAGCCATTGGGGATTTGCTCCGCCACTTTGCGGGCGATGCGCTCTTTTTCTTCCGCTGCGGTGGCCTTGGCA  
TCGTGCCACGGCGTGAACCGAACTGGAAGGCAGCGCCGACCGCCATGATGGCCAGGATCAGGTTTTGCTCCGCCAGC  
TCATTGAGGTGCGCGGAATAGTCTGCGGGCTGACGGAGAAATGCTCTACCAGCTCTTCCGTAAGTACTGACATAAACCTGCTG  
TTTAAACAGTTTCGATAATACCGTTGTGACGTTGTGTTTGTTCATTTATAAATCCCTGGAATTTTTGTTTTCCGCGCA  
TTGAGCGAATCAACAAAAGCCATCGCTAAACCCACGGCTAACCCGGCGATGTGTCTCCGTTCCGCATCGACATCCCAAA  
CAAATCAAACCATCCGGCGACAATCCAGATCAGCGCAAAGATAATTAACCCACGTTGCAGGTAAATGCCACTTTGCGGAT  
CGCGTTCCGCCAGTAGCCAGACGTAGCCATCAGCGCATAACCCAGCCAGAAAAGCCGCAAAACACGGCCCGCTGAAT  
TTTTGCTGCACATAGCCGTTAACAGGGCGCTGATAAGCGTAATGACAATTAGCTTACCGCTACCGAGGCGTTTTTCCAC  
CGCACCGCCGAGATAACCACCAGAGCAGGTTAAAGAGGATATGCATCAGCGAGAAGTGCATTAACGCGTGGGTGAAGT  
AACGCCAGAATCAAATTTAGTGTGGATCGAATGGCCAGGCCAGCCATAACATCACTTCTGATCGCCGAGAATTTGC  
ATGGCAATAAACACCACCACGAGGCGATCATCATACCCAGGTTACCGGACCTGCGGTTACGCAAGGCGGCAAGAA  
AGGATAACGGCGATAATGCAAGGCCACTGCGGATGGCCTGCCTGCCAGCTCGCCGCGAGATAACGCGGATCTGCCGGT  
TTTTGAGAAAACGCGCCAGCTCCGCCGTTACGCGCTCGGCCTGGGACTCATCCGCCAGCCAGACATCGCTTTGGTTATGT  
TGTTGAATCGTGAGGATAACACCCTGCGTCCCATGTAATCAACAAACGCTGCGCCACGCGGGGTTAGCAAAAAGAGGT  
AATCATCAACATCGTTGCTGCTGCTTATTCCACAAAAAGGGACAGTATAAAGCGTTACGCGCCGATGCCACCTCTGC

GGGAACTGACGTTGCCAGGCTTCAAAGCCGCCGTC AATGCTATAGACCACATCGTAGCCCTGTTGCAGCAGATACTGCG  
CCCGCCTTTGCTGCTATTGCCGTGATAACACATCACCATCACC GGAGTGTCAAAGTCGTTATCACGCATAAAAGCGCCC  
AGCGTGTCTGGTTAAATGAAAGCCTGCACCGCATGTCCATTGCGAAACTCTGTGGATCGCGAATATCGACCAGCAC  
CGCTCTTTTTCTGCAACTTCTGGTGC GCGTCCGCAACGTTAATACATTGCAACTGATCCATGCGTCTCTCTTTCTTTA  
CAACAAGTGGGCAAATTTACCGCACAGTTTACGTGGAAGCGGCAGATAAACGCCATAATGTTATACATATCACTCTAAA  
ATGTTTTTCAATGTTACCTAAAGCGCGATTCTTTGCTAATATGTTGATAACGAAATTTATGAGCTTTAACGAAAGTG  
AATGAGGGCAGCATGAAACCAAAGATCTGATTGTGATAGGGGCGGCATCAATGGTGTGTTATCGCGGAGACGCGCC  
TGGACGCGGTTTATCCGTGCTGATGCTGGAGGCGCAGGATCTCGCTTGC GCGACCTCTCCGCCAGTTCAAACTCATT  
ACGGTGGCCTGCGCTACCTTGAGCACTATGAATCCGCTGGT CAGCGAGGCGCTGGTGAACGTGAAGTGTGCTGAAA  
ATGGCCCCGCATATCGCCTCCCGATGCGTTTTGCGCTGCCACATCGTCCGCATCTGCGCCGGCGTGGATGATTGCGAT  
TGGTCTGTTTATGTACGATCATCTGGTAAACGCACCAGCTTGCCGGGATCAACTGTTTTGCGTTTTGGCGCAAATTCAG  
TGTTAAACCGGAAATTAAGCGCGGATTCGAATATTCTGACTGTTGGGTAGACGACGCCGCTGTTACTCGCCAACGCC  
CAGATGGTGGTGC TAAAGCGCGGAAGTGCTTACTCGACTCGGCCACCTCTGCTCGCCGCAAACGGCCTGTGGAT  
TGTGGAAGCGGAAGATATCGATACCGGCAAAAAATATAGCTGGCAAGCGCGGCTTGGTTAACGCCACCGCCCGTGGG  
TGAACAGTCTTCGACGACGGGATGCATCTGCCTTCGCTTATGGCATTGCGCTGATCAAAGGCAGCCATATTGTGGT  
CCGCGCTGCATACCCAGAAGCAAGCCTACATTCTGCAAAACGAAGATAAACGTATTGTGTTCTGTGATCCCGTGGATGGA  
CGATTTTTCCATCATCGGCACTACCGATGTCGAGTACAAAGCGGATCCGAAAGCGGTGAAGATTGAAGAGAGTGAAATCA  
ATTACCTGCTGAATGTGTATAACACGCACTTTAAAAAGCAGTTAAGCCGTGACGATATCGTCTGGACCTACTCCGGTGTG  
CGTCCGCTGTGTGATGATGAGTCCGACTCGCCGAGGCTATTACCCGTGATTACACCCTTGATATTGATGAAAATGG  
CAAAGCACCCTGCTGTGCGTATTGCGCGGTAAGCTGACCACCTACCGAAA ACTGGCGAACATGCGCTGAAAAACTAA  
CGCCGATTATCAGGGTATTGGCCCGCATGGACGAAAGAGAGTGTGCTACCGGGTGGCGCCATTGAAGCGACCGCGAC  
GATTATGCCGCTGCTGCGCCGCGCTATCCGTTCTGACTGAATCGTGGCGGTCATTACGCTCGCACTTACGGCAG  
CAACAGCGAGTGTGCTGCTCGCAATGCGGGAACGGTAAGCGATCTCGGGGAAGATTTGGTATGAGTTCTACGAAGCGG  
AGCTGAAATACCTGGTGGATCACGAATGGTCCGCCGCGGACGACGCCCTGTGGCGTCGCACAAAACAAGGCATGTGG  
CTAAATGCGGATCAACAATCTCGTGTGAGTCAGTGGCTGGTGGAGTATACGCAGCAGAGGTTATCGTGGCGTCGTAAT  
TAACGTAAGGTGATCAGGTCAGATTTCAATCTGGCTGAGACTGATGACAAACAAAACTGCCTGATGCGCTACGCTTA  
TCAGGCCTACGTGTTTTATGCAATATATTGAATTTGCATGGTCTTGTAGGCCAGATAAGACGTTACGTCGCATCCGGCA  
TGAACAAAGCGCACTTTGTCAAAAATCTAACCTACTTTTTAATT CAGGGAATTACCGCAAAGCCCACGCCATCATACCCA  
ACGTAACAAA ACTCAGGCAGGTTCCCACTCGCCCCGAGAAAAATAGCATTAAATGCGCCCAGCGCCAGCATAAAAAATTT  
GAGCAGAAGGTAATTTGTTGGCGTGATAAGGATATTACAACTTCAATAATACCGGCAAGTCCGACCCAGCATGGCAA  
TAACCACCGCCAAAAATGCGCCAGTATGGGGATGCCGAAAAAAGTCATTACCAGCGAGGTCAAATCCATTTTCTGTTT  
TGCAATTATTCTTTCCATTCTTTTTGAATGGTGAATTATACTCCCGAGTCCCCTTGCCCTTCTGGACACTTTTCCGAA  
ATGATGGCGGAAAAAACGGGACCCTTTGGCCCCGTTCTATTTATTGGTGAACTTACAATCTCACC GGATCGATATGCCA  
GATATGATCGGCGTACTCTTTGATAGTACGGTCAGAAGAGAAGTAGCCATATTGGCAATGTT CAGCATCGCTTTTGGCG  
TCCACTCTTCTGAAGCTCGTAGAGTTCATCGACTTTATCCTGACAATCGACATAGCTGCGATAATCCGCCAGTACCTGG  
TAGTGATCGCCGAAGTTGATCAGCGAATCAACCAGATCGCGATAGCGACCCGGATCTTCCGGACTGAATACACCGCTGCC  
GATTTGCGTCAGCACCTGATGCAGCTCCTCATCTTTCTG TAGTATTACGCGGTTTGTAGCCCTGACGACGCACTTCT  
CCACTTCTTCCGCTGTGTTACAAAAATAAGATATTGTGAGCACCAGCATGATCCAGCATCTCGACATTGCAACCGTCC  
AACGTACCGATAGTCAGCGCACCGTTAAGCGCAAAC TTTACTGTTGGTCCCGGAAGCTTCCGTCCTGCCAGCGAAAT  
CTGTTCCAGACAGATCTGCCCGCGAATGATCAACTCGCCAGGTAACGCTGTAGTTGCGGATGAACACGACTTTTCACT  
TATCGCAATCTGCGGATCGTTGTTGATCACTTTGCTACGTCATTGATCAAATGAATAATGTGCTTCCGCATGTAATAG  
GCCGAAGCCGCTTACCGCCAAAAATATTACGCGCGGTACCCACTTCGCATCCGGGTGCGCCTTGATGCGGTTATAGCG  
GGTAATCACATGCAACACATTCAATGACGTTTGTATTCTGTAATACGTTTGATTTGTACATCGAACACGCTTTG  
GATTCACCACCACATT CAGCTGCTGGCGGATATACTCTGCCAGACGCTTTTTGTTCTCCAGCTTGCCTGATGCACAGCG  
TGATTAACCATTGGGAAATCACAGTGTGTTGTCAGCTCATTAAGCAGGCTAAGGTGCGTGC GCGCAGTTACGGCCAGGTG  
TTCGTCCAGCAGCGCTGAAAGCGATGGGTTGCTACCGCCAGCCAGCGACGCGGCGTCACACCGTTGGTGACGTTGGTGA  
AACGACCCGGGAAGATTTTCGAAAGTCGGCAAACAACGATTGCACCATCAGATTAGAGTGCAGTTCCGATACACCGTTA  
ACTTTGTGGCTCACAACAACCGCCAGCCAGGCCATACGCACACGACGACCGTTGGATTCAATGATCGACGCCCGTCC  
CAGCAGATCGGTATCGTTCCGATACTGTTCTGCAAGT TTTCCAGGAAATAGTCGTTGATTTCAAAGATGATCTGCAGGT  
GACGCGGCAGAATTTTACCAGCATATCAACCGCCAGGTTTCCAGCGCCTCGCTCATCAGCGTGTGGTTAGTGTAGGAG  
AAGACCTGACAACACACCTCAAACGCGTCTGCCAGCTAAATTTGGTGTCTATCGATCAGCAGACGCATCATCTCAGGAAT  
CGACAGTACCGGATGGGTATCATTGAGATGAATCGGATTTTATCCGCCAGGTTATCGTAGGTTTTATGCAACTGATAAT  
GGCGGCTTAAATGTCTGAATGGTGCAGGAAACCAGGAAGTATTCTGACGAGGCGCAGCTCACGCCCGGAGTAGGTG  
GAGTCATCCGGATACAGTACGCGAGATACGTTCTCGGAGTGGTTTTATCTTCCACTGCCGGAAGTAGTACCCTGGTT  
GAATTTACCGAGGTTAATTTGCTACTGGCTTGC GCACTCCACAAACGACGCGTGTGGTGC GCGTGGTGTGTAACCG  
GATTATCTGATCGTAAGCGACTCCAGAATCTCTCGGTTTCAATCCAGCGGTTTTTTTTACCTTCTGCTGAATCGCA

CCGCCAAAACGGACTTTATAGCGCGTGTGGCGTTGAATTCCCACGGGTTACCGTATTCCAGCCAGTAGTCTGGCGA  
CTCTTTCTGGCTACCGTTAACGATGTTCTGCTTGAACATACCGTAGTCATAGCGGATGCCGTAACCGCGCCCCGGCAACC  
CTAACGTGCCAGAGAATCAAGGAAGCAAGCCGCCAGACGTCCCAGGCCACCGTTACCGAGGCCTGGGTCAATTTCTTCA  
TCAATCAGCTCTTCGAGATTTAACCCCATCGCTTCCAGTGCGCCCTGTACATCTTCGTAATTCCTAGCGACAACATGGC  
GTTGGAGAGCGTACGGCCAAATCAAAAACCTCCATCGACAGGTAGTAAACCTGACGAGTTTCTTGCAGAACCTGGGCACGGT  
TTGAACGTAACCAGCGCTCCACGAGACGATCGCGCACAGCAAATAACGTTGCGTTCAGCCATTCATGTTTATTGGCGACG  
ACCGGGTCTTTCCAATCGTAAACATCAGCTTGTAAAGCGATAGAGTGCTTAAGAGCTTCTACGCTAAGCGTGGGCGATGA  
ATATGTAACGGAGCATTTCATATAGGCGTTTCTGAAAATATTTCAAGCGATAGTAAAGCTCACGGTACGACTTCGCCG  
CGACCTGCCAGCTAAAATCCATTGCCATAGCCTGACGTTGCACAAACCGCCACAGTGAAGGACGGGACCACAGTACAAAA  
GCACGTGCAATAGCCGTAACAGCGACAGGCATTAATCTTCAAAGACAAACCCACTGGCGACGCCATCTGCAAGGTT  
CTCAAGAGAACAGTCAGAAACCGTATCAGCAAGCCCACCGGTGCGCCGACTAACGGCAGCGTACCGTACTTCAATCCAT  
AAAGTTGCGTTAAGCCGCACGGTCAAACCGGTGGGACCCAGAATGACGTCCGCGCCGCAAGGAAACCTTCTGCAGCACCGG  
GCTTCGTGATAGCAATCTGAACGCCACCTGACCGGGTATTCCGCTGCCGCCGCAAGGAAACCTTCTGCAGCACCGG  
ATCGCCCGCGGAGTAGCGCCAGCTGCCCGCCTGCTCCAGAAGACCCGGTAAAGGCTTCCAGCACAGGTGAGACCTT  
CTGGCTGGTCAGACGGTCCACACTGCAAAAAGCGGCACTTTATCGTCAACCTAAGCCCCATTGCGATTTGTAACCTG  
CGTTATTTTTCCGCTTTATCTTCAACGTATCGCGGTGTAACGGGAGGCCAACAGTAAAGTCCGCTCTGACTCCAGAT  
TTTTCTGTCACGCCGTTTACGTACGCCGAAAGACGCCCTTACCGGTGACGCTGTTGCAACAGACCTTCCATACCGTAGG  
CAAACCTGCGGTTCCGTTGATCTCGCGAGCGTAGGTTGGACTGACCGCCGTAATGTGATCGGCATAGTACAGACCGGCCTT  
AGGAAAAGATTTGTCCGTTGAATTCCAGCCATGAATATTAAGAATGACCATGGCAATTGGATGTCATTTCATGTGATG  
TGATAAAAACATGCCTTGATAGGCCAGGTTGTGCACAGTAAACACCGACTTCGCCGAGCGCCGCGCGCCGAGATACG  
CAGGCGCAAGGCTGCATGCCAGTCGTGCGCATGCACCACATCAGGACGCCAGAATGGGTCAAGCCCGCTGGCCATTTCT  
GCCCCAACCCACCCAGCAGCGCAAAACGCAATACGTTGTGCGTATAGGCAAATAAGTTGGTATCGTGATACGGGCTTCC  
CGGACGATCATAGAGATCGGGCGGTCAATCAGGTAATGCCAACCCGTTGTAATGACCGAAACACAGCGTGATATGTC  
CGGCGAAGGTATCAGGACGGGATACTACCTGCGCATCGGTACGCCACGGCGAATATCGGGAAATGCAGGCAACAGTACG  
CGAGCGTCAACGCCGTCTGCATTTGTGCTGCGGTAATGCCCAATAACATCAGCCAGACCGCGGTTTTAAGCAGCGG  
GAACATCTCTGAACATACATGTAACCTGCATTATCGTCTCTGTTTATGCCCTAATTCCGTAGCATTTCGCGGTTAC  
CAGCAGGATGCCTTCTTGAACGATAGAAACGACGTGCATCTTCTCTGCTTTTACCATAACCATGCCTTCCGGAA  
TAACACAAGCAGCATCGATGACGCAGCGCGCAGACGGCACGAGCGACTACCATACTTCCGGTAACAATACGGCGGAA  
TCAATGTTGAGAATGAATTCACGCGAACGCGCGAGAACAGAACGGACTGCACCACCACCGAACCGGAGATCACACAACC  
GCCGAAACCAAGTGAGTTAAGGGTCATCCCGTGGCTACCGGAGCGATCTGCACGAATTTGCTGGCGGTAATGATTCAT  
TGTAGGTGCGAATTGGCCAATTGCGATCGTACATATCCAGTTCGGGCACCACAGAGGCCAGATCGAGGTTTCGTTTCCAG  
TAAGCTTCCAGCGTACCCACATCGCGCCAGTACGGCTCGGCATCCGGGTGCGATTGTACGCAAGAGAGCGGGAACGGGTG  
CGCATAGGCCAGACCGGCTTCCGGTATCTTGGGAATCAAATCTTTGCCAAAGTCGTGGCTGGAGTTCTCATCGCGATCGT  
CTTCTTCCAGCAGTTCATACAGATAGTCGGCGTCAAAGACGTAGATACCCATACTCGCCAGAGATTTGCTCGGATCGTTC  
GGCATTGACGGCGGGTTAGCAGTTTTTCAACGAATTCGATAATTTTATCGTTCTCATCAACCGCCATAACGCCAAATGC  
GGAGGCTTCTTCAATCGGTACTGGCATAACAAGCAACGGTGCAACGTGCGCCTTTTTCGACGTGATCGATAAGCATAACGG  
AGTAGTCTTGCTGTAGATATGGTCCGCCCGCAGGATCACACGTATTCCGCTTTATAACGGCGGATAATGTCGAGGTTT  
TGGGTGACCGCATCTGCGGTGCCGCGATACCAAGTTTTCCCTTTTATTCTCTGCTGTGCTGGCAGCAGATCGACAAACT  
GTTCAATTTCTTATTGAAGAATGACCAGCCGCGTGAATGTGCTGCACCAGAGTGTGGACTGGTACTGGGTGATCACGC  
CCATACGACGGATCCCGGAGTTGATGCAAGTACAGCGCAAAAGTCGATAATGCGGAACTTACCAGGAAAGTGTACGGCC  
GGTTTTGCTCGCTTATTGGTTAAATCCTTACGGCGGGTACCACGTCTTCCCGCAGTATCAGGGCAACAGATTTCAATGG  
CAGTGGCGCGCAACATTAAGTGATCGTCTTCTCTAAACTAACCATGACTAACTCTTTTTTATCATCTCTGGAACAC  
ACACAATCCGTGTGAGGTCCTGCCAGACAGCCGTAATCACTGGGTTATCCTCTCCAGCGAATGGGGGAATGGCGTGCC  
ACTCCCCAGCAGGTAAAACAATCTCTGTTACCTCAAGCGTGGCGTTAATTGCGATCAAAAAGCGATCCGAGAGCAGAATT  
TGACAGTGTTCGCCCCGTTTTGCCACTCATCCGTGCTTAAAGGTTGAGCATATCGATTTAGCCAACGGACATTGCCGTC  
GCCTTCTTCCACCAGCGATTCTCCACCAAAGCGGGAAATGCGCTTGCAGATGGATTAACGGCGGGTAAATGCGGTTA  
AACACTGCTTGCCTGCGACCAGTCCAACAGGTTAATTGGTTATCTGACAGTAGGCATTGTTATTGCCATGCTGGCTG  
TGACCATGTTGTCACCGGCCAGTAACATCGGCGTACCCTGGGAGAGCAACAACGTTGTTAACAGGGCGTGAATGCTGTC  
GCGCGCGGTTCAACCAGGTCAAGAGAACCCTAACCTTCTTACCATGATTGTTACTGTAATTGTTGTTGGTCCCGT  
CGGATTTTTCTTCCGTTTGTTCATTGTGTTTATGGTTGAAGCAAACGCAGTCGCGAAGCGTAAAACCGTCATGCGCG  
GTGACGAGATTAATCGCGGCACTCGGCAGACGACCTTACGTTTAAAAACATCGCTGGAGGAGCAAAAACCGCCGGCAA  
CGCCCCAGAGGCAAATCATAATGTAGCCAGAAACGACGGGAGCATCGCGAAATGATCGTTCCTACTCGGCAACAGCG  
GCGGAAATTTCCACCTGATAACCACCAGGAGCGATATCCACGGTTCAGCAATTAACCTCACCTGCGAGAGCACCGGG  
CAGTTCTGGATAGCGGTAACAACGGCGCATCTGACGGAACCTGGCGTACGGCCATGACTGCCGCCAGATCAAAGCG  
GAAACCATCGACGTGGCAGGTTTACCCAATAACGCAGGCGAGCGCTGGCATAATCCACCACCGCGGATGACTCAAAT  
TGAGCGTGTGCCGAACCGGTCCAGTTGTGATAATCGCGTCTTCTTATCCAATAATAGCTACGGTTATCGATCCCA

CGCAGCGAGAATAACGGGCCGTCGAGGTCAGTTCGCACTATGGTTGAGCACGATATCAAGAATGACTTCGATACCCGC  
TTTATGCAAGTCTTTGATTGCATCGCGAACTCATCCAGCGCCGTTTCTGGCGAGCAGGCATACGCCGGATGCAGCGCAA  
ACATCGCCACCGGTTGTAACCCAGTAGTTACTTAGCCCATGCGTTGCAGACGTGGTTCCTGACTGGCAAACCTGCGCCACT  
GGCAGCAGTTCAGCGCGGTAAATGCCAATTGTTTCAAATAGTTGATCATCACCGGATGCCGAGGGCTTTATAAGTGCC  
ACCGATCTCGACCGGGATCTCCGGGTGCAAGTACGTTAATCCTTTGACATGGGCTTCATAAATGATGGTGTGCCCCACG  
GCGTGCAGCGGGGGCATCATCTTCCAGTCATAGTGATCAACCACACTACGCATTTGCGCGCAATGGCGGGGTTGTGCG  
CGATAGTCAGGTTCAATTGACCGGCTGCAGCAGCGGGTTATCTTTAAACTCCCCGTCATTTGCGCGCGCAAGGATC  
AATCAACAACCTTCGCCGGTTAAAGCGATGCCCTCGCGGGTTCAGGGGCCATGAACGCGATAACCATAACGCAAAC  
CCGGGCGCGCATCCGGCAGATAACCGTGCCAAATGTGCGCCACTGTGCCCTGGCAAGTCATAGCGATGTTCTGGCCATTG  
GCGTCAAAGACACACAGTTCTACCCGCTCGGCATGAGCGGAGAAAAGTGTGAAGTTGACGCCCTGACCGTCGTAATGCGC  
GCCGAGGGGAGCGGGTTTCCAATGGCGAGTTGTGTATTCTGCCTCCGAACCAGCCAGATAGTGGCCAGCGGTGGTAG  
CGTCAGGCTTAGTGAATGCTGACGACCGTGGCTGGCAATCTCATCGCTGTGTACCGTGCAGCCATTGCCTGCATTACTGC  
CGTGATAGTGCATGGAATCGGTATTGAGGATTTACGCCATTTGCCGGCTGGTTTATGCCGAAGCGATAATCATGACGC  
GGTACCGGCGTAAAGTTACTGGCAACGATGATTTCCGTTACCCTTTTATCGCGACGCACAAAGATCAGCACCGGAGCGTTC  
TTTGTTCATCCACCACCAGCATTCAAAGCCGTACGGGTCAAATCCAGTTCATGCATTGCTTTATGGTGGCGGTAGGTGA  
GGTTCAGATCGCGCACCAGACCGTGGACACCGTGGTCAAATTCAGTTCGCGCCCTTCCAACAGATGCCAGTGCAGGCTGGCG  
TCATGGTTCCACTCGCGCCCTGGGCAAATTCGTTACCCATGAACAGTAGTTTCTTGGCCGGGAATGCCACATCCAGCC  
ATAGTAGGCGCGCAGGTTTCCGCAATTTCTGCCATGCGTGCAGCGCATGCGGTGCGAGAATCGATTTTTTACCCTGGACCA  
CTTCATCATGCGACAACGGCAGGACGAAGTTTTAGTGTAGTTGTAGAGAATCCCGAAGGTCAGTTTATCGTGATGATAC  
TGACGATAAACCGGTCGAGCTTATGTAGTCCAGGGTGTATGCATCCAGCCGAGGTTTCACTTGTACCAGAAGCCAG  
ACCGCCCATATCTGCGGACGAGAAACGCCAGGAAATCGGTAGACTCCTCAGCCATTGTCACCGCACCGGAAACCTGCT  
CACCAGAATACGTTGGTATTACGCAAGAATCAATCGTTCAGATTCTCGCGCCCGCAAATTCGTTCCGGATCCAC  
TCCCCCTTTTACGGCTGTAGTGCAGATAAATCATTGACGCCACCGCATCGACGCGCAGCGCATCAATACAAAACGTTT  
AATCCAGTAAAGCGGTTACCGACGAGGAAGTTACTGACTTCACGGCGACCATAGTTGTAGATCAGCGTGTTCAGTCCCT  
GATGATAGCCTTACGCGGATCGCTGTGTTCATAACAAGTTCTGCCATCAAATTCGGCAAGCGCAAAGTCATCAGTCGGG  
AAGTGGCCTGGCACCCAGTCGAGAATCACGTTCCAGACCAGTGCCTGTGCGGCATCAATGAAATAACGGAAGTCGTGCGG  
AGTACAAAACGGCGGGTGGCGCATAACGGCCGGTGGCTGATAACCCCAACTGCCATCGAAGGGATGCTCGTTAATGG  
GCAGTAGTTCAGGTTGGTAAAGCCCATCCATTTAGCATAAGGCACCAGTTGATCGGCCAGCTCGCGGTAGCTCAACCAG  
AAATTTGTTGTGGTGTGGCGACGCCAGGAACCCAGGTGAACCTTCAAATAGAGATTGGCGCATCAAACCTGATTGCTTT  
TTTGGCTCTTCAAGTCTGTACAACCTTTTCCGGCAGCCCGCAAATAAGAGACGCGGTTTCCGGGCGCATTTCGCGCTTCAA  
AGGCATAAGGGTCCGACTTCAGACGCAAGTTGCCATTGGCATCAATCATCTCGTATTTATAGAGCTGACCGTTATGCGCC  
CCAGGGATAAACAGTTCCAGATGCCGCTCTCTTACCGAGGCGCATCGGGTACGGCGACCGTCCAGTAGTTGAATTG  
CCCAACCACCGAGACCCGACGGGCGTTTGGAGCCAGACAGAGAAAACGCGTACCTGTGACGCCATCCATAGTATCTGCAT  
GCGCGCCTAAGGTTTATACGGGCGCAGGTGAGTACCTCAGATAATAGCCAGGCATCCATTTCTGGATTAGCGGACCA  
AAACGGTAAGGATCATCAATCAGGTTTTGCTGACCATGCCAGACAACAGCCAACTGATAGCGGAAAAAATTTTACGTGCG  
CGAATGACGCCGCTAAAGAATCCCCGTGAGTCGAGACACTCCAGTTTTGCGAGTTTGGCCCGGTTTTCCGTTCAATCA  
CCCACACATCGGTAGCGTCGGGTAAGGGCACGGACTTCCAGTCCCGCGGTGGTTTTATGCATTCCAGTACGGAAAAA  
GGATCCGCAAAATGGCCTGCAATTAGCGGTTAATCACGTCTCATCGATACGATCGGACATGCTTGTCTTCTGTTTTA  
TTGTGTACCCCATCAATTGGATTTTTGACTTCTGGTTGTGACATTTTTTTGACCTGAACGGCGCAGCACTGTGCAT  
CCTCTCTGCTGCTGCTCACTTCAAGTAAAGCTGTGAATACTCATGTATTAGCCACCCTTAAAGAATAGCCAATGCTCT  
ATTTAACTCCCGGTAATCATGAAACATCTGCGCTTACTCTGTATTACGCACTAACAGGGGCGGCATCGCGCCAGAT  
TTAATGAATAAAGATTACGCCAGTTGACGAAGCATCCGACGACGCGGCTCCGCGGCCCCACAGCAGCTGGTCGCCAC  
GGTAAAGGCTGACAGGAACCTCTGGTCCCATATTAGCTTACGACGCGGCTACCGCGTGGTCAGCGTGCCGGTAACGG  
CAGCTGGGGTTAGCTCACGCATAGTGATTTCCCGATCGTTCGGAACGACTTTCCGCCACGGATTGTGCGCAGCCAGCAGT  
TCTTCCAGGTCGGAATAGACACATCTTTTTTCAATTAATAGTGAATGCCTGGCTGTGGCAGCGCAATGCCCGACACG  
CACACATAAACCATCTACCGGAATTACGGAAGATGTGTTGAGGATCTTGTGGTTTTCCGCTGCCCTTCCACTCTTCGC  
GGCTCTGACCGTTATCGAGCTGTTTGTGATCCACGGAATCAGGCTACCCGCCAGCGGCACGCCAAAGTTATCCACCGGC  
AGCTCACCGCTACGGTTAAGGTTGTGACTTTGCGTTCGATATCGAGAATAGCAGAGGACGGGGTTCGCGAGTTTCTGTC  
CACATGGCCATACAGATGGCCATCTGGGTTAATAACTCACGCATATGTCGCGCACCCCGCGGAAGCGGCTGGTAGG  
TTGCAACGGACACCAATCAACAAGATCATTGGCGAATAAACCACCAACGACATCAACATCAGGCTTACGGTACAGTTA  
CCGCCAACAAGTCTGATGCCATTATTAATCCGTGGTAATGACGTCCTGATTGACGGGGTCAAGAATGATGATGGC  
GTCATCTTTTATGCGCAGAGACGATGCTGCGTCAATCCAGTAACCTTGCATCCGCTTTCACGAAGCTTTGGATAGATTT  
CGTTGGTATAATCGCCGCCCTGACAGGTCACAATGATATCGAGGGCTTTAGCGCTCCAGATCAAAGGCATCCTGAAGT  
GTGCCAGTGGTTCCGCAAAAAGACGGCGCAGCCTGGCCAAGCTGAGAAGTAGAAAAGAAGACAGGGCGAATGGCGTCGAA  
GTCGCGCTCTTCAACCATGCGTTGCATGAGAACGGAGCCGACCATACCGCGCCAGCCGATAAAAACCAACATTTTTATAA  
CGTTTTTTTTCTGCAAAGATGTGTGCTGATAAATGTGCCGGTCTCTTGGCACATCTTACCATACAAAAGCAG

CCAAAGTCGCAAGTCAAATTAATCAATGATAGCGAAGCCATCAGTAATGCGACTTATCCTGCTTTGTTAGCACGCAGAAA  
GTCCGCGGCAATTATCAGGGAATTTGAGTTATGAATGAAATCATTCTGCAGCAGTTTTATTGATCCTGATTATGGATCC  
GCTCGGAAACCTACCTATTTTCATGTCCGTAAGTAAACATACTGAACCGAAAAGACGGCGGCAATCATGGTGCAGAGT  
TGCTTATTGCTCCTGGTATGCTGGTGTCTGTTTGCGGGTGAGAAAATCTGGCATTCTTAGCCTACGAGCAGAA  
ACCGTCTCCATTTCTGGCGGCATCATTCTGTTTCTGATCGCCATTAATAATGATTTTCCCAGCGCTTCAGGAAATAGCAG  
CGGGCTTCCGGCAGGTGAAGAGCCATTTATCGTGCCGTTGGCAATTCGTTAGTCGCCGGGCCACTATTCTGCCACGC  
TGATGTTGTTGTCTCATCAGTACCCGAATCAGATGGGGCATCTGGTGATTGCTCTGCTGCTGGCCTGGGGCGGCACCTT  
GTCATCCTGCTACAGTCTTCGCTATTTTTACGTCTGCTGGCGAGAAAAGGGTGAACGCACCTTGAACGCCTGATGGGATT  
GATTCTGGTATGATGGCAACCCAGATGTTCTCGACGGCATTGCAATGTGGATGAAGGGTAAACGAGGAGAGTTTTTCG  
AAAAGAACCCGGTAGCGTCACTACCCGGGCGAACAACTTAACCAACAGCTGGAACGCAATCATCCCAACGATGGCA  
CCGACAGTGCCGAGGATGTTTTCCATCATGGTCCAGTTTTACGCGTTTCGGTTCGGTCCGCGCCGTAATTTACCGAA  
CAACCAGAAACCGGCGTCTAACGTGGCTGACAACAATCGAACACCAGCGATACAAATCGACAGCGCCGCCATTTGCG  
CACCGGAGTAGTTAGTTGTTCAATAACCGGCATCACCAGTCTACCGCCGTTAAACAGGCTACGGTGGCAGAACCTGA  
ATGATGCGCACTGCAGTCCAGCAGCAAGCAGGTGATAGCAATCGGCAGGCCATGCCGTTAACGCTTCGCCCAGTGC  
CGACCTACGCGCAGACTCAACAGCACCTGTTTGAACACGCCCGCCACCAATCACCAGCAGAATGATCCCCGCCGTT  
GCAGCGCTGACCGCAAATCTCCATCACTTTGTCTTTTGGCATGCCCTGACGCATTGCCAGACCGTAAATGCCACAGA  
CAAGCAACCGAATCGCGGTAACCGGATGACCGATAAACTCAAACCTTCGTAAGCAGTTGATCCTTCCGGCACAACCG  
CGCGCAATGTTTTAGCCCTACCAGCACCAGCGCAGCAGGATCAGCGACAGGCTGAATCCGAAAGATGGCATTTTGC  
CTTCGCCGAGATGCGGTTGCTGATGTCGTCAGGAATATGAGCTCAACGTAACGGCTGATGAAGTTACCCACAGCGGC  
CCGGCAATAATCATTCCCGAATTGCCGCACACAGGCCAATCAGGATCATCCAGCCAAAGTCGGCATTCTGCGATGC  
CAGCAGCATCGGCGTGGTCCAGGCACCAGAAATGCCGCCGCTGCCGCCACGCTGCAATAATGGGATTACCAGCTTCA  
CCAGGTTGCTACCGGTGTGGCGGCCATTGAGAAAGCAACGCTAATCAGCAGAACTATCGCCACTTCAAAGAACAGCGGT  
AGCGCACAGACCAGCCCCGCAAGGCCGATGGCATAATGCGCGCGCTGTGACCGAAGGATTTGAGCATTTTGACGGCAAT  
CTGATCGACTGCGCGGTTTCATGTAAGATCTTGCCAAACATAGCTCCAGGGCGACAACCACCGCCAGGAAGCCGAGGG  
TGCTCCCATCCCTTTTTCCATCGTGCCTGCGATTTATCGAGCGGCATACCAGAAAAAGGCCAGCCCCATGGACACC  
ACCATTAAGCCAGGAAAGCGTGCATACGCGCTTCATGACTAAAAACAGCAGCAGTAAACAGACCCTACTGCTGTAA  
AACAAAGCGTAAATGTAGTCACTACTTATTTGCTTTTTTAATAACCTCAATGGTGCTTGCCACAACACCTTCCAGCGGT  
GATCGATATCCACCACAGTACATCGGTTTCGTCCGACCCGGCTCTGCAGGTTTTCAAACCTGCGTCACCAACATTTGG  
GTTTTAAAGAAATGGCCTTTGCGCGCTTTCAGGCGGCTTCAATCACATCAAATCGCCTTTCAAATAGATGAAAGAGAG  
ATTCCGATTACCTTACGCGAGCAAGTCGCGATAGTGTTTTTCAATGCAGAACAGACGATCAGCGACACTTTATTAGTGC  
GCTGCATAGCAAACGCGGCTCGTTCAGCGCCTGCAACCACGGTTTGCATCGTCTGCTCATTAGTGGTTCGCCAGACGCC  
ATTTTTTCGATATTGCGCGTGGATGGAGGAAATCGCCATCAAGAAACGCGGCATGAAGTTGATGCGCCACTTCACTGGC  
GACCGCAGATTTGCCGCTGCCGATACGCCATCAAGACGTAATGTGGTATCATGGTTAGTCTGCTCAAAGTGGTGC  
CCCCACAATACAAGAATTAATAATGTTACGGGTAACGTTATCGGTAACATTGTCCAGCCGGACAATATCAGAAGCAATA  
TCCATCCATGCCTTAAGTGTATAAGTGTGAGCTACTTCAAATTTGTTGGGCTTAAATAGATCCGCCCCGGTGAAGGTGAA  
ACCTAAATCTAACATTTTCGGTGTACAGATTGCCACGAATACGCGCCAGCAGGCGTTACAGCCAAACTGCCCCATCC  
GCTCAGCGGCGTCAGCAGCTCGAAGTCTGGTCCATCACCTGACCAATGTCATGACCGTGGAAACCGGCAATCGCC  
ATATCGTCAGGAATTTTAAACCCAGACGCTGACATTCAAACGCCGCGCCGACCGCCAGGTATCATTGTCAGAAAC  
GCCATCCAGTGCAGATATCCCGCCGCGCTGGCGAATCAGTTCAATACCGGAAGAGTAAGAAGAAGATGCTCAACCA  
TCACGCTATATGGCACCAGGCTGCATCCAGCATCGCTGTTCTGATCCCTTCTGTTTATGATAGTACGTTCTGTCGAGA  
CGTGCGCCGATAGGCAATGTGGCGATGCCCGCGCAATAATGGCAGTGGTATCTGGCGTGTGCTTCAAAGTTATC  
AAAACCGACGCGATATCAAGGCATGGCGACTTGTGTCCATCAGTTCCACCACGGGAATACCCGCCACTTCAATCATCT  
TTAAGGTGCGCGGCTGTGGGTACGTTCCGGTGGAGATCAGGCCGTCGATATTCAGGAGAGCATGGATTGAGGCGTCT  
TGCTCCATTTCCGGTTTATAACCGTAGTGCGCCAGCATGGTCTGATAACCGTGCAGCGTGGTACGCTTTTCGATTCCGCG  
TAATACTTCCGCGAAAACCTGGTTGGTGGAGAGAAGTAACAGGACGCCAATCGCCCGGCTGGTGGCGTTAGAGAGGATAT  
CGGGCGCAGATTGGGAATATAGCCAGTTTCAAGAGCCGCGGCAATCTTGGCCGCTAGAGCGACGGAACCTGCTCC  
GGTTGCGTAAAAACCGGCTGACCGTCAATTTGGTACGCCTACACGGTACGCCACATCCTGAAGTACGGGTCTTTTCTT  
TTTCATCGTCTGAAGGTACAAAAGAGATAGATTCTCTTAGTTTAAACACGGACACATCAGAACCTTCCCGGGGAAAACAG  
TGCTTGTTTACAATTATTAGATATACCTAAATCAATGTCATCGATTGTGCTAACGACCGGCAAAACCCGGAAGCGT  
ACATCAGCACGCGACCGGAGCGAGCGAGGAGCCTGCAAAAAGGCGAGGCTTCAAAGATGCCGTTGAGTTTAAACCGGCG  
GCAGATCGAACAGTAACACTTCGCTGTGCTATCCGCATGGATGGAGATTGCTGCTCATCCAGATTGCCAGACCATCG  
CTGGTGCAGGCTTTCACGCCGTTAATGGTGACATTGCCTTTCACCACCTGGATCCAGACCGGCGTTCAGCGGCAATCTG  
ATGACCGACTGCTCATTTTCAGCAACGCCAGCGGTACAGTTCCATATCCTGATGCACTTTCAATGAACCATCTCGCG  
CATCCGGCGAGAGCACCAGCTGTTTGCCTGTACGGCATCGAAGCGACGCTGTTTATAACGCGGCGTAATACCGTTTTCT  
TCAGGCATGATCCAGATCTGATACAGATGCAGACGCTCGGTGCTGCTTGGGTTGACTCTGAGTGACGAATACCCGTACC  
AGCACTCATAATCTGGAACCTCACCCGCCGAACCTGCTTTTATTGCCATGCTGTCTGATGCTCAACAGTACCTTCCA

GCACGTAGGTCAAATTTCCATATCTTTATGCGGGTGAAGTCCCGAAGCCCTGCCCTGCTTCAATCACGTCGTCGTTAATC  
ACGCGCAGCGCGGAGAAGCCATAAAGTTCGGATCGTAATAGTTGGCAAAGAGAAAGTATGCCAGGAGTCCAGCCAGCC  
ATGATTTGCATGACCACGTTCAATTTGCTTTGCGTAAGTAGATCATTGTATTGCCCCCTGAATGATTTTCGATGGGCTTA  
GTGTGGACCCGATCTGCCTGGGATGATAGAGGGTAAAATTGACCCCTCTGTTCAAAAAAATTGAACTATTCGAGGGGCC  
ATCAAATCTACTAGCGAGAGTTACTGTGGAGGGAGAGGCTTGCTCAAATCCGCGTTCAAGGATTTCCAGATTGGTAAGA  
ACTTCAGATTCCTTGACGTAATTTGGCGCACCGTGGGTGATGGTTTGATACAACGCATCATAAACGCGCCCGTAATCGCC  
CATCTCCGGCTTCATCTCTCTGACCGTCACGCCCTCGTCATTGACATACTCCAGCACACCAGCCGAATCATCCGCTG  
CGAATCCCGGTTCCGCCGGCATAATATTAGCCTTACAGGCTGGTTTCTGCTGGTCGATACCGTATTTAATAAACGAACCT  
TTCTTACCCTGAACGATAAATTTCCGATAATCGATTTTACCAGATGGCTGGTTTTGACGATGGCTTTACAGTCCGCATA  
AAACAGTTGCGCTTCAAAGTGTGTCGACGATTGGCTTTATTACGACGGCTGCGGATGTCATAAGCGACGTGATCCGGGC  
GACCGAACAGAGAAATACTGGTCCATCGATGCACACCAAGCCATAAACGCGCCATCCTGCGGCAGCCAGGTTTG  
GTTTCTGCCACCGGGCGTAATAGTCAAATGGCTTTCCACTTCAACAATCTCTCCAATTTGCCACTTCAATCGCTTT  
TTTCGCTGTCAGGAAGCAGGAGTCAAAGCGACGATTCTGATACGGCGTGACGGTCAGCCCTTGTCTTTCCGCAACGCAA  
ACAGTCTTTGCGCTGCGCAAGTGTGCGAGTGAACGGTTTTTCGACCAGCACATTTTCCCGGCTTCCAGCGCGCTTTC  
GCTGTTGAAATGGATATGGGAATAAATGGGAGCCTGTTCTTCCGGCTTCGCATGGCGACGAAAAAATATGCCGACATGCC  
AGCTATCCTTCCGGTTAAGTACATACGGCAGATGGTAACGGGTGGTGTCTTTTCCGAAGCCAATAAAGGCGCAGTTGATG  
ACCATGATTTGCTCTTTTTAAGGTGGTTATTTACACCTTAGCGCAAAGCGGACGTGGTTCCTACTGGAGTGCGCATAAC  
GAACACAAGCACTCCCGTGGATAAATTGAGAACGAAAGATCAAAAAAAGCCAGCACCCGGCTGGCTAAGTAATACTGG  
AAGCAATGTGAGCAATGTCGTGCTTTACGTTTCTCCGCGAGGGTCTTCTGATCGCGAGACAATAATAATCATTCTCATT  
CGCACTTGTCCAACACTTTTTGCAAAAAAATGCATTTGACTCGCATTTGAAAGTCAATGATGTTGAAAGGGACATTTACC  
CCAAAGAGGACAAAGGAATGAGTGAGATAGTAATACGCCACGCAGAAACACGGGATTACGAGGCCATCAGGCAGATTCAC  
GCCAGCCGGAGGTGATTGCAACACACTACAGGTGCCTATCCTTCCGATCATATGTGGCAGGAGCGACTCGCCGATCG  
TCCCGCATCAAGCAACTCGTCGCTGTATTGATGGAGACGTCGTGGCCATCTCACCATTGACGTGCAACAGCGCCAC  
GCCGAGTCATGTTGCCATTTTGGTATCTGTGTCGACTCTGTTGGAAGAACCAGCGGCTGCCAGCGCCCTGATGCGA  
GAGATGATTGAAATGTGCGACAACCTGGTTCGGGTAGATCGCATTGAACTAACCGTGTGTTGTCGATAACGCCCCGCAAT  
TAAGGTCTATAAAAAATACGGCTTTGAAATTGAAGGACTGGTAAGAAGTACGATTGCGTAATGGTGAATATGTCGATG  
CATATTATATGGCGGGTGAAGTAAGATAGTGCCTTTTTCTGAGATGAAAAAGGGTGTATTCAAATCGACATACC  
TTCCTTTAAGTATTTATTTGCCCAATACATATATTGAGATTTAACTCATAATTAATTCCTAAAGTGAATATTTTATTT  
TTAATATATACGCCTACAATTTCTGGAGTAAATAAATAACAATTAACAAGCATAATATTGCCATTGATAAAAATAGCAT  
GCCATAAAAGGACTTTTACGGGATGAGTAATATTGTTTACCTGACAGTAACGGGAGAACAAACAAGGAAGCATCTCCGCAG  
GTTGTGGGACTTCTGAGTCTACAGGTAATCGTTGGCAGAGCGGGCATGAGGATGAAATATTTACATTCTCACTCTTAAAT  
AATATTAATAATACGGGGCTTGGTTCACAGTTCATGGTATAACATTTTGTAAATTAATTGATAAAAAGCACTCCATTATT  
TATTAATTCATTAAACAATAATGAACAATTTTATGGGATTTGACTTCTATCGAATAAATAGATTTGGTAGATTGGAAA  
AGTATTATTATATACTAAGAGGGCTTTTTTATCGGCTATTCATACCAGATCATTGAAAACCACTGGATACAGAA  
ACAATAACTATTAGTTATGAATTTATCCTCTGTCAACATCTTATCGCAAATACCAGATTGAGTATTTGGCACTCCCTGA  
AAATTATAACCGTTTGTTTTTACCAAATTCAAAAACCAACAATAATCGTTTCAAACGTTAAACAGCAAAGCTATTG  
GCAGGCTACTGCTGCTGGTGGCGTATACAATGGGAACATTGAAGGATTGAGAGATACTGCGGAAAAACTGGGTGGAGAT  
GCAATAAAAGGCTATGATCAAATACTAAATGAAAAACAGCGGGCATAGCGATAGCAACAGCATCTATTCTTTTAACAAA  
GCGTCTAATGTTGATACATATACAGAAATAAATAGTTACTTAGGCAAACTAGAGGTCAACAAAAAATCTTTGATGGTA  
TAGACATAATAGAAATAATATACATTAAGAGACCTTCAAAGACTTAGCTAACTTACGAAAAGGAGTTTAAATAAAACTGTA  
AGAAAAAATTTCTTATCAAACCTGCAAAAACCTCCGAAGCATCTGGAAGATTCAACGCCGAGACCTTTTAAAGATGAG  
AAAGGGCAATGTTCTCTAAATTATAATGTTACCATAAACTATCTCTAGATGATGGTGGTACTAATGATTTGAAAATT  
TAGTATTAATCGAAAACGAACCATATCATAAAGTTTTACTAACATGCAATCACGAATAGCTAAGGGAATATTAGTAGGT  
GAAAGCAAATCACTCCCTGGGCCATTCCATCTGGCTCAATTTATCCTCCCATGAAAAATATTATGGACCACACAAAATG  
ATGACTAAAACCAAATAAATAAATAAATAAATGATGAATGATTTAGACTATCCATTTGAAGCACCGCTCAAGGAATC  
ATTTATTGAAAGTATAATCCAAATAGAATTTAATTTCAATTTCAACTAATTTGCCTGGAGAAGTTATGTAATGAAGTTAGTA  
TTCTTTTTAAGAAATCAACCTGATTATCTACTTTTTAAGAGCAATGGATGGATTGCAAGTTAATGGATTACGATTTT  
AGCCTCTCGATTCCAGAACCTTCAGTTAAAAACCTTTTTGCCGTAATGAATTTATAGAAATAATGATGATTTATAAAA  
CCCTGATCTACAAGAACGGTTAGTGATCGGGGATTATAGCATTCAATTTACTTATGACATTAAGGTGATGCTGCCA  
ACTTACTGATTTAGTGTATGATGGTGTTTTTGAGGTGCTCCAGTGGCTTCTGTTTCTATCAGCTGTCCCTCTGTTCCAGC  
TACTGACGGGGTGGTGCCTAACGGCAAAAGCACCGCGGACATCAGCGCTATCTGCTCTCACTGCCGTAACATGGC  
AACTGCAGTTCACTTACCCGCTTCTCAACCCGGTACGCACCAGAAAATCATTGATATGGCCATGAATGGCGTTGGATGC  
CGGGCAACAGCCCGCATTATGGGCGTTGGCTCAACACGATTTTACGTCATTTAAAAAATCAGGCCGAGTCGGTAACC  
TCGCGCATACAGCCGGGAGTGACGTATCGTCTGCGCGGAAATGGACGAACAGTGGGGCTATGTCGGGGCTAAATCGCG  
CCAGCGCTGGCTGTTTTACGCGTATGACAGTCTCCGGAAGACGGTGTGTCGCACGATTCGGTGAACGCACTATGGCGA



CGCTGGGGCGTCTTATGAGCCTGCTGTCACCCTTTGACGTGGTGATATGGATGACGGATGGCTGGCCGCTGTATGAATCC  
CGCTGAAGGGAAAGCTGCACGTAATCAGCAAGCGATATACGCAGCGAATTGAGCGGCATAACCTGAATCTGAGGCAGCA  
CCTGGCACGGCTGGGACGGAAGTCGCTGTCGTTCTCAAATCGGTGGAGCTGCATGACAAAGTCATCGGGCATTATCTGA  
ACATAAAACACTATCAATAAGTTGGAGTCATTACCGACATTAAGTAACCTTTTTGAAATTAGAGATAATATTGGCACA  
GAAAATATATTCAAGTTGTTAGTGATTTCTCTTATTCTTAAACGAAATCATGGACAGTTGTTTATAAATCAAAGG  
AAACAAAATCATTGTAACCATGCCATCTTTTTAGAGATTACCAGCAGAAAATTCCTTGTTCGAAATTTAGCAGTGCAA  
GCTATGAAAAACTTACAACGGAACACTACTCCTTAAGTGAGATGGACCGAAGACATGTAGTCTCTATTTTAGCCGAAAT  
AGCTAATGGCTATGATGATTTAATGACATGTTGATTTATTTAGAATTTTACCCGAATCATAAGATTCTGATATCTTAA  
TAAGAAAATCCCGTTCGACGTTCTGAAAAAGAAATCATAAAATATTAGCAGATACTTATTTCTGACTATATCTTATCCG  
ATGAACTTTTTTCAAACAGCATTAAATAATATCTTTGACGAAGATGAACGCGCTTTTGTCAATGTATCACACAGGAA  
TAATAATATAACTCAACAATAATATTTATTATAATTATGATTACTTATCACGACGATTTCGCGAAAGCGAACCATTAC  
CTTGATGATGCAGATCTCCCGTCTCATTACTCTACATGGACGCTTTAGCCAGGGCTGGTATTTCTGTTTGAAGCACG  
AGAATTTCTCGAACTGGAGATGAGGCCGCGCCTTAGCTGGTAACGCACCTTTTATTATTGATAAAGACAGTGGTGAAA  
TTCATTCTCTGGGAACGGCAAACCGCTGGAAGAATATCTACAGGATTACGAAATAAAAAAGGCTACCTTCGGCTTGCC  
TGACAAAATACCCCTCTTCCACGAAGAGGGCCGCTAACCTTAGTACCCCGCTTAAATCATCCACCGAGCGGGTTCG  
GATGCGCCGTACAACCTACCGTCCGGCCAAACATAATGCTTTGTGTACTGCCATCGCTCTTTACGCGCACTTTCTG  
ACCTTTTGCTTCCAGCAGCTTGAGCGTATCCGGGCTAAACCTTTTTTCGACACGCACTCGTCCGGCAACCACTGATG  
GGAAACGCGCGCATTGGTCGCTTCCGGCAGCTTCAAGCCATAATCGATGCTATTCACCACCACTTTCAGCACTGTAGT  
ATGATCCGGCTACCGCTGGGCTACCGGTAACCAGCAGGTTTTACCGTCTTTCACCACAATGGTCGGCGACATCGACGA  
CAGCGGGCGTTTGTTCGGCCGACGGCGTTGGCATCACCGCCACCAGCCCGTAAACGTTCCGGTACGCCCGGTTGGCGG  
AGAAATCATCCATCTGGTTATTAAGCAGAATACCGTCTCGCCCGCACAATGCCCGTACCGAAGGTGGTGTTCAGCGTA  
TAGGTACCGCCACCGCTTACCATCTTATCCACCCTGAGTAATGGGTAGTTTGATTACTCTCATAAGGCGCAAGCTT  
GCCGGGGCAATTTGCTGGATGGCTTCGCTTTATTGATATCAATTTGATCGGCAATAGATTTGGCATAGGCTTTATTGG  
TCAGCGCTGCCACGGTACTTTGACAAAATCCGGTTCGCAAGATATTCGAGCGGTGGCGTAGGCGTATTTCTCCGCT  
TCTGCCATGATTTGCATCGCATCGGCGCTGCCAAAGCCGATTTTCTCATATCGAAGTTTTCCAGAATATTGAGGATTTG  
TACGATATGGATCCCGCCGAGGATGGCGGTGGCATGGAGTAACCTGATACCCGCGATAATCGCCGCTTATCGGAGTGC  
GTTCCGACCGCTTATAGGCTGCTAAATCTTCTTAGTGATCAAGCCACCGTTTTTCTGCATCTCCTGGCGATCTGTTCC  
GCAATCGTGCCTTATAGAATTCGTCGGGCGGTTTTAGCAATCATCTCCAGGCTCTTTCGCAAGTTTCGCTGCACCAG  
CGTGTCCGCTTTTTAGCGGCTCGCCCTCTTCCAGAAGATAGCTTACTGTTTTCTGATTCGGCAACCACTTCGCTAC  
CGTAGGTTTTGAGATCGTAGCCAGCGGCTGTTAACGATAAAACCATCGCGTGCCAGTTTAAACGCGGGCTGCACGACT  
TTGTTACGCGCATGGTGCCGATTTATCCAGCGCCAGCGAGAAACCTGCTACCGTACCCGGTGTGCCGGAAGCCAGATG  
CGAAGTGAGTGATTTTTGCTGTCCGGTTGCCCTGATCATCGAGGAACATATCGCGGGTCTGTTGGCGGGTGCCATTT  
CGCGGAAATCGATAGCCGTGGTATTGCCATTTTTGAGCGGATTAACATAAAACCAACCCAGATTCCCTGCCTGC  
GGATGCGTTACCGCCAGCGCTAGCCACCAGCGGCGCATCAACGGCATTCCCGCCCTCTTGAGAATATCCACCCC  
CACCTGAGTGGCAGTGGCGTCCACAGACGCTACCATTCCCTGTTTCGCGCGTACCAGGTTGGAAGACATCTTCTCCACAC  
CATAAGACGGGCGGCGCAGGAGGCGGCGGCGGCTAAACAATCTTCTGAGAGCAGAGCAGCAATGGCCACCCGG  
CGTAAAAACGTCGTTTTATCATGTTATTCTCCAGAGATTAAGGGCAACCCAGCTAAGCCTGGTATATAACTCTGAA  
TTAATCATGTTTTGTCCGGAAGCGAGTAACTTAAAGGATATCTTACAGAGGAGTACCGCATGAAACGACTTCTGATT  
CTTACGGCCTCCTGCGTTTTGTCCGCTTTCACAGCCATTAATACTCTGAACAACCTAACAGCCGGGTATCAGAT  
ACCCAGCCAGCAGCGGATGCAAAACCCAGATGCAGACTCAGCAAATCCAGCAAAAAGGGATGCTGAATCACTGCAACTGAAAA  
CGCAAACTCAGTTGCAACAGCAGCATTTAGAAAACAGATAAAACAATAATTCTCAGCGGGTGTTCAGTACAGCCGGG  
GAGCGAAATCCCGCCGGCAGCAAATGCTGCCAACCAACGGCGGGATGTTAAACAGCAACCGTAATCCGGATAGTTC  
GTTGAATCAGCAGCATATGCTGCCGGAGAGGAGAAACGGCGACATGCTGAATCAGCCAGCACGCCGAGCCTGACATTC  
CGTTGAAAACCTATTGGGCGGTAAAGTTCCGACCAATCACGTCAATCGCATCGGTACAGATGCAATCCACACCCAGCGCA  
GCAACTCTGCTGCGCGTGGGGTTTATTGACGGTATAAACCAGAATCCGCGAGTCCGGCGTCTTCAACTGCATCACTCGC  
GCTTTATTGAGTAACTTATGATTGAGATGAATAGAGACGCAGCCAGCCGCGCGGTGAGTTCCGCGCCAGTCTGCGGCCA  
CTCATCCAGCAACAAACCGCGCGGAGTTCCGGTCCGCTGTTGTGACGCTTCTAAAGCATCAATCTCAAACGATGACA  
GCAGCGGCGGCTCATACCGCCACAGCTCGCGTCCGCGCAGCGCCACCTTTTCCCGTAAATGGCCCGGTGCCGGT  
GTGGTTTTGATTTGATATTCGCCATCATCCGTTTCGCGGCAACGTTCCGCCACTGCGAAAGCAACGGTAGCGGCTC  
ACCTTTAAACATTTTGTGTACCAACTGCCGCATCCAGCGCAGTAAATCCTGCCAGTTTCACTTACCCCGGACGCCCC  
AGCCGTTGCTGGTACGTTGAGATTGTCGTATGGAGCAGGAAGATCTGCCATCTTTCGATAACTTCGCGTCAAATTCG  
ATCATCTTATGACCGTATTTGCCCGACGTCGATTGACGCCAGGGTGTTCGGGGCCAGCTTACCGCCGCCAGATG  
AGCGACGATGCGGGGATAAGGCCAGTTACTCATACTGTTGTCCTGTTTACCATCAAAAAGATGCAGCTGATTTCCGC  
CAGATGCAGCCACAGCGTCTGCTGCCGTCGGGCGTCTGATGCGCCAGTGCACCACCAGCTTCTGCTGCCCCAGC  
GTCCGTGCGCCAGGTTATCTGCGCCGAGGATCTCCAGCGTGTCCATCACCATCGGTACGCCGCTTCTGCTGCGAGCTT  
AGCGCAATATGTTCCGGGCAATGCCGAGAGTCAATTTACGCCCGCATACTGACGGTAGCCACCGTTTAGCGGCAGCTC

AATACCGCCGTCAGTTCGAAATGCGTGCCTTCGTTATTACGCGGCCTGTCAGCAGGTTTCATCGCCGGACTGCCGATAA  
AACTCGCTACAAAACAGGCTGGCGGGCTTTTCGTAGACTTCAACTGGTGTGCCAATCTGTTCCGCAACACCCGCGTTCATC  
ACCATTACTCGCTGGGCGAGCGTCATCGCTTCAACCTGATCGTGAGTAACGTAGAGTGAAGTCGTTTTAGCGCGACGGTG  
CAACTGTTGCAGTTCAAGACGCATCTGCACGCGCAGCTTGGCATCGAGGTTAGAGAGCGGCTCATCAAACAGGAACACCG  
CCGGATCGCGACAATCGCGCGGCCATCGCCACACGCTGGCGTGACCGCCGAAAGCTCGCGCGGGCGACGTTTTGAGC  
AGACCGTCCAGCTCCAGAATGCGCGCCGCTTCTTTAACGCGCTCGGCAATTTGCTGCTTGGCCATGCCGGAATTTTACG  
CCCCACGCCATGTTTTCTCGACACTCATATGCGGATAAAGCGCGTAGTTCGGAACACCATCGCAATCCCGCGATCTT  
TTGGCTCATTTCAGTCACGCGCTGGTTCGTTGATCCAGATATCGCCTTCTGTACCCGCTCCAGCCCGGCAACCATGCGC  
AGCAGCGTCGATTTCCCGCAGCCAGACGGCCGACCATCACGATAAATTCGCCATCCGCCACATCAAGGGTCAGCGGTTT  
AATGACCTGGGTTTTACCATCCCAGCTTTTGGTTACTGCCTGTAATTTTCAGTCTGCCATCTTATTTCTCACTATCGACC  
AGGCCGCGCACGAAGGCAGCTGCATCACTAAAACAATCACCACCGGAGGGATAAAGCGTTAAACAACATCGCCACCATCAC  
TGAGTTCATTCCGTGGTGCCTTCGCCTGTAGCGATCATCCCTTGTATCCCTGCCACGGTGGTGGCAGATCCACATCGG  
TAATAATCAACAACGGCCACAAATACTGATTCCAGCCGTAGATAAAGGTGATCACAACAGCGCCGCCAGATTAGTTTTG  
GAGAGCGGAAAAACGATGTCGAAAAGAAGCGCATTGGCGATGCGCCGTGATCCGCGCGGCTTCCACCAGCTCATCCGG  
CAGCGTCATAAAGAACTGGCGGAACAGGAAAGTAGCGTCCGCCAGGCCATCAGCGCGAGCTTAAACCGCGGTAGCTGT  
CGAGCATGCGAGGTTGGCGATGACTTCCACCGTCCGGAAGATACGTACTTCAACCGGCAGCATCAGGGTGATAAAAAATC  
ATCCAGAAGAAGAGGTTACGTAGCGAAAACGAAACCAGACAATGGCAAATGCCGAGAGCATCGAGACGTAATTTTGCC  
GAGCGTAATGTGAACGCCATCACAAGCTGTTAAGCAACATCCGCCAGAACGGCGCGCTATTCGTGCCTACCCCGTTCA  
CCAGATGTTGTGGATGTTTTCCAGCAGATGTGTGCCGGGGATGAGCGTCATCGGCGCGGCATAGACGGCCTGTTTATCC  
AGCGTCCGCGCAGAAAACGCCACGTACAGCGGGAAGAGGATCACCAGCATCCCGAGGATCAGCATGGTATGGCTGAATAT  
CGTCAGCCACGGACGTTTCAATCATTGGTAACGCACCTTGCTTCAACATAGCGGAACTGCACCACCGTCAGCACGAT  
GACGAGGAACATCAACACCACCGACTGTGCGGCAGACGAAGCCAGATCCAGTCCGGTAAAACCTTCGCGGTAGATCTTAT  
AAATCAGCGTCGTGGTGGCTGAACCGGCCCGCGGACGTGGCGGCTGATCACCGGGAAGGTGTCGAAGAAGGCATAC  
ACCAGTTCACTACCAGCAGGAAGAACTCACCGGGGCGATAAGCGGCAGCGCAATCTTAAAGAAGCGGCGAATCGGCC  
TGCACCGTCGATGGCTGCGGCTTCGATCAACGAACGGGAATGGATTGCAGCGCGCATAGAAGAACAGGAAGTTGTAGC  
TGATTTGCTTCCATACTGAGGCAAACACCACCAGAAACATTGCCTGACCGCTGTTTTGCGCGTGGTTCAGTCGTAGCCG  
AACTCCGCGAGAAAATGGGTGATCAGCCCGCAGCCGGGTTAAACAGGAAGATCCACAATACGGCGGCAACGGCGGGAGC  
CACGGCGTAAGGCAGCAACATTAAGGTTTGTAGAAAACGGCTGCCGCGCACGATGTAATCCACCAGCGCCGAAAAGAACA  
GGATACCAGCAAACCGCTGACGGTGACAAAAGGTGCTGAATTTTATCGTCCGTAAGGAGTCGAGATAGTAGCTGTCA  
TGAAACAGCGTGACGAAGTTATCCAGGCCGACAAAACGGTGGAGAAAACCAAACGGATCGACGCTTTGTAGCGAGTACCA  
CAACGCTTCGCCCCGAGGCCAGATAAAAAAGATAACGGTGTATGATGAGCTGCGGCGCGACCAGCAGATAAAGGCAGCCAGC  
GCGAGCGGAACACCGGACGGGATGATGACATTACGGTTAATTCCTGAACTGTGCCGGATGCGCTTCGCTTATCCGGCCTA  
CACGCGATGCCAGGTCAGATAAGCGAAAACGCATCCGACATTACACTGATTAAGACTTCGTGATTTCTCAAAGCGGCGCA  
GCAACTGATTTCCAGCTCAACGGCGGTATCCAGTGCTGTGTGGTGTCTTACCGGTCCACACGCTCTCCAGCTCT  
TCATCCACAATCACGCGGATCTGCGGCATGTTGCCAGACGCAGCCCTTGGTGAACGGCAACGGCGGCTTATTCAGCAT  
CTGACGCGTCGCGGATCCGCCCTGGTTTTCTCATAAAAAGCCCTGCTCACGGGTGAGTCATACGCTGCTTTGGTGA  
TTGGCAGATAACCGTTTTCTGATGCCACTCGGCAGCGTTTTCTGGCTTCGCGAGGAAATCGAGGAATTCGCCACACCG  
GTATACGTTTTCTTATCTTACCCTGCATACCCACAGGCTGGCTCCGCCGATAATGGCGTTTTGTGGCGCATCTTTCG  
ATCGGCGTCTAAGGCATCATGCCTACGCCGTAGTTAAATTTGGCGTACTCGGAATGTTGGCAAGAGAACCAGGAAGG  
CGGTGGTCATCGCGAATCACCCTTATAGAATCTTCGGTGGATTATCCTTACGACCGAGTACTGAAAGTCCGCCCTTC  
TTGTTTCATCTCCTCGAGCATGGCGATGTGTTTACCTGCTCCGGCTTATTGAACTCCAGCACCGCGCTCCGTGCCGTAAA  
GCCGTTGTTTTGCTGGCAAACGGCAGACCGTTCCAGGCGCTAAAGTTTTCCAGTTGGATCCAGCCCTGCCAGCCGCTGG  
CGTAGCCGCACTTCATGCCGGAGGCTTTCAGTTTCGCGGCATAGTCCGCCAGATCCTGCCAGGTTTTCGCGCGCTGTTCC  
GGGTCTAATCTGCTTTCTTGAAGGCGCTTTTGTGTAATAGAGAACGGGGTTCGAGCTGTTGAATGGCTGGGAGAGTAA  
GTGGCCCGTTTTGCTGTCGGAGTAGTAACCTGAAACCGTGGCACAAAACGCGACTCATCGAACTGAATCCCTGCCTCTT  
TAAACACGTCATACCCGGTTAATGGCTTTCGACGCCATCATGGTGGCGGTGCCAACTTCATAAACCTGCAAAAATAGCC  
GGCGGTTGCCGTTACGAAATGCGGCAATCCCGCGCTTAAATTTCTGTTGCTAGTTGCCTTTATAGGTCGGTACAATTTT  
GTAATCCGGGTTTTCGCGTTAAAACGTTGGGCCAGAGAATCCACCTCTTACCAGTTCCCTTCCATAGAATGCCAGA  
ACGGAATGGTCGTCACCTGTGCATCCCCATTAACGCCAGTCCGAGCGCCAGTGTGAAGCTGTATAATGTAACGGT  
TTCATCGTTTATCTCTTGTGTACCGAATGCGCGAATTCACGCGTTTTATGCTCGCGGGTAACATGACATGCTCGAA  
TTACAGAAAAATAACTTTTTTGTACATTTGTAAGATAGTAAGGTGTCAGAAAAGATGACAAGCGGTCAGCGCGTGGGTG  
AGGAAAAATGGGAGATGGGCGACGGATAAAGCGGAAAAATAGAAAGGTCTGAATCAAATCTACAGATTGCTCATCGTTT  
CATGCCGGATCGGGCGTAAACGCTTATCAGGCCTACAAGATCGTCAAATTCACATATTGCCACTCACCAGTAGGCC  
TGATAAGCGCAGCGCATCAGGCAATTTTACATTTGTCACTGTCTCAAAGGAGTCTTTGACTCCCTATCAATCAACGTG  
TTATTACCCGCTAAATACGCACTTCTCACCCTTCAATCGCCAGCAGCGCATCACCAGTATCGGAAAGCACTACATGGC  
CGTTTTCCAGCACGTAGCCGATCCGCCAGCTTATAGCGCTGTTGGCGTTCTGCTCGACGAGAAAGATAGTCATCCCC

TGCTCGCGCAGCTGCTCGATGGTGTGCGAAAATTTGCTGGATGATAATCGGCGCAAGACCGAGCGATGGCTCATCAAGCAG  
TAGCAAACGCGGGTTGCTCATCAGCGCACGACCAATGCCAGCATCTGCTGTTACCGCCGGACATGGTGCCCGCCCGCT  
GAATACGGCGCTCATGCAGAGCTGGAACAGCTCATAACCCACTTTATGCGCTCCTGAACTGGTCGCTTCAGCAAAA  
AAACCGCCCATCGCCAGGTTCTCTCCACCGTCATCCGCGAGAAGACGCGACGCCCTTCCGGGACAATCGCCACCGCTTC  
GCGCATGATTTTCGCTGTCTGCCAGTCGTAATGTCTTTATCATCAAACACAATTCGCCCGCTGGTGGCACGCGGATCGC  
CGCATAACGTGCCGAGCAAGGTGGTTTTCCCGCCCGTTCCGCGCAATCAGCGTGACAATCTCGCCCTGATTGATATGC  
AGGCTCACCTCATGCAGCGCCTGGATTTTGCCGTAGTGGGCGTGACTTTGTCAAAGGACAACATGACTTTTTCCATCTT  
ATGCCTCACCTAAATAGGCACGGATCAGTCCGGTTATTACGGATCTGCTCCGGCGTACCGTTTTGCCAGCGGCGTCCCC  
TGATTGACCACGTAATTCGGTCCGAAATCCCATCACCAGCTTCATATCGTGTTCATCAACAAGATAGTGGTGTGTG  
ATGATTGCGCAGTTCCGCAATCAGCTCATCCAGCTCTTTGCTCTTTTGGGTTAAGACCTGCCGAGGTTCTGTCGAGCA  
TTAAATCTCCGGCTGCGTCACCATGCAGCGGCAATCTCAAGACGGCGCTGGTACCATAGGCCAGGTTACTCGCTGA  
CGTTGGCGTGTTCAGCAAACCAATGCGCTCAAGCAGGTCCGCGCGCGGTGAGCGCTTCGCTCTGGCGCGACGGAA  
GGATGGCGTTTTCAACAGGCCAGAGAACAGCCCGTTTTAGTTGCTGATGCTGCGCCACCAGCAGGTTTTCAATTACCG  
TCATTTACGGAACAGACGCACATGCTGGAAGGTGCGCACCAGCCCATGCGGGCAATTTGCTGCCCGGTAAACCTTCC  
AGGTGCTGATCGCGCAGTAAATGGTCCCGGGTGGTTTTGAGAATCCGGTCAGACAGTTAAAACCGTGGTTTTTCC  
GGCACCGTTAGGGCGATTAACGAGACGATCTCTGCGGGTACAGTTCAAGATTGACGTTGTTACCGCCAGCAGGCGCG  
CGAAGCGCATCATCAGGCCGTTAACAGATAATAATGGCTGACTCATGCTGCTCTCTTTTCGCTGCGCGTTTTTCAGCT  
TCAGTTGCGGGCGCGTATGGGCGCAAGCCCTGCGGACGCCAGATCATCATCAGCACCATCAAACCACCGAGCATTAA  
ATGCTGTATTGTTGAAATCACGCATCAACTCGCGGACACCACCAGCAAAATTGCCGCGCAATCACCGCAAATTCGGA  
GCCCATACCGCCGAGCACCCTATCGCCAGCACAACCGCGATTCCGCAAGGTGAAGGATTCCGGGCTGACAAAGCCCT  
GACGCGCCGCAACAGCGTTCCGGCAAAACCGCAACCGCGCACTTATGGTAAAGGAGTCACTTATGACGCGGG  
CTTAAGCCAGCAACGGCAGGCGATTTTCATCTTACGCAACGCTTCCACGCACGCCCCAGCGGCATCCGAGCAGGCG  
GTTAATGACAAACAGGCTTAGCACCACCAGCAGCAACGCCACCAGGTAGAGGAAGATGACACGATCGGAGGGATCGTATT  
TCAGGCCAAAGAAATTAAGCAGTGTCCAGCGCCTTACGAGCGGTACGGTGAATCGAGTCCGAAGAGTGTCCGGT  
TTCGGGATCTGACTGATTCCGTTCCGGCCCGCGTAATTTCCGGTGTATTGAGCAGCAATATGCGCACAATTTCCGGAA  
ACCGAGGGTAACGATCGCCAGATAGTCACCGCGCAAACGCAGCACCAGCAAAACCGAGCAGGAAGCCCGCCCGCTGCCA  
TTAATCCAGCAATCGGCAGCAGGTCCAGAAGCCCAAGCCGTAATAGTGATTGAGCAGCGCAAAAGTGAAGCGCCGATG  
GCGTAAAACCGCGTACCCAGCACCAGCAGACCAGAAAGACCAACAACCACGTTCCAGCCGAGACCGAGGATAATGTA  
GATCATGGTACGGGTGGCAATATCCACCGTCCCGCGTGAACCCATAAACGGCCACGCCACCAGCAAGCACCACAGCGCCA  
CGAGGAACAGTTTCTGCTTACCCTGGAGCCATCAATGGCGGGCAGAATAAACTTCGGTCCGGAACGCTTTTTCAACCCCT  
TTCTGGAAGCCGGTCCGAAAGCTGGAAGAAAAGACCACCGCCGTGCCGATAAACACCCACTGCCAACGGACATCCGA  
AGCCGTGTCGACCACCAGTTTGGTGCCATCCAGCTCCAGTTGCACGCCCATAAAGACGCCCGCCAGCACAAGAACATCG  
CGGAGAGAGCAGCGCCATTGCAATATGCATCGTTTTACTTTCTACTCTCCGGGCGACCCAGAATACCGGTCCGCA  
TCACCAGCAGCACCAGAATCAGCAGGGCGAATGAGACCACATCTTTATATTCCGTACTCAGATAGGCAGAAGAGAGCGCC  
TCCGCAATCCCGAGAATCAGGCCGCAATCATCGCTCCCGAATGCTGCCAATCCACCGAGCACCAGCGCGGTAAGGC  
TTTCATCCCGCCATAAAGCCGATGTAGGGGTTAATGACGCGTAGAACTGACCAGCAGCACACCCGCCACCGCCGCA  
TCGCCGCGCAATCACAAAGGTGAGCGCAATCACCCGGTCCGTTAATGCCAAGCAGACTCGCCATTTTCAGATCTTCC  
GCGCAGGCACGACGCGCGACCCATGCGGGAATAGCGAATGAAAATCGTCAGCGCCAGCATGGCGAGGAAGGTAACAAT  
CCAGATCACCAGCTGATGGTGGTAATAGAGGCAGAGAAGTTTTGCTATGCCCCACCACCCTGACCGTTAAACAGGC  
TCGGCAGCGCCAGCTCGCGCAACCTTCGGTCAGGCTGACGTAGTTTTGAGGAAGATGGACATACCGATTGCAGAGATG  
AGTGCAATCAGGCGCTTAGAGTTACGCACCGGGCGTAAGCCACCCGTTTCGATACTCAGCGTAGGCGCTGGCAATGAC  
GATTGCGCCGACGAATCCCGCAGCTACCAGCAGCCAGCCGGTATCAATGCCATCATCATCAGCGCGGCGATGATATAA  
ATGAGACGTAGCTGCCAATCATATAAACCTCGCCGTGGGCGAAGTTGATCATGCCGATAATGCCGTAACCATGGTGTAG  
CCGATGGCTATCAGCGCGTAGGTAAGTCCAGCGTGACGCCGTTAAACATCTGCTGCAAGAAATACAAAACTGCTCAGA  
CATAAGGTAACCTTTCTAAACCCGCCGATTTTACGGGCGGTGGGATGATCACTTGGCTGCCGTGGATGAACCGTCCGC  
GTGCCACTGGAAGACACCAAAATCAAATCCCTTAAGATCGCTTTTTTCATCCAGTTCCAGCGGCCAATCACGGTGTG  
CACCGTTAGCTTTTTAAATCTTTACCAGCGCCAGCGGCTCATCGCTGCCGTTACGCTCAAGGGCAGTCGCCAGAGATTGC  
ACCGCCGCGTAGGTGATCCAGACATAAGGCCCGGACGGATCTTTCTGTCTGCTTTCCAGCGCATCAACGATGCCCTGGTT  
TGCCGGATCTGGTATAGCGTTTTGGCATAGTGACCAACATGCCTTCGGCGGCATCACCAGCAATGTTCCGACAACGACG  
CATTACCCACACCTTCCGGCCCATAACTGGGTTTTAGGCCAACGGAACGGGCTGGCGCAGCATCTGCCCCATTTCC  
GGTAGTAACCGCGTAGTAACGAAGTCGATGTTTTTTTTTTCAGGCGGGCGATCAGCGCGGAGAAATCTTTCTCCCC  
GGCGGTAATACCGTCAAGAAGACGACGTTGGCGTTAGCCGCTTTCAGCCGCTCTGCACCGAACCGCCAGCCCTTCGC  
CATACTGTTGTTGTCGTGAATGATGGCGATGCGCTGGGGCTTACCCTCTCAAGAATGATTTTTGCCCGCTTGGCCCC  
TGGAAGAGTCCAGCCCGCAGTACGCATAATGTGTTGATAACCGCCTGGGTGAGTCCGGGTTGGTCTCCCGGCGA  
GATCATCAGAATACCTTCGTTTATAGATATCTGACGCGAGGCTGGGTAGAAGAAGAACACAGATGACCAATAACGATTT  
TAATGCCGTACATAACGATTTTGTGGCGACCGCAACGGCTGTTTCGGGTCCGATGCGTCTCATATTTCCACGCCAAC

AGTTTATCGCCCTTAATTCCCCCTTTGGCATTAAATGTCTTTAATTGCCTGACGCGCGCCGTTAAATCCATATCGCCCCA  
CTGGGCAATCGGGCCGGACATCGCGCCGACAACGGCGACTTTAATATCGTCAGCCATAGCGGTGTGTGAAATTGCCAGTG  
CAATCATCCCTGCGATGATAGTTTTTCGATTCCGTTTCATAGTCAAAAATCCCCATTTCGTGATGTTGTGTTGCTTTGTTT  
TTATGTGTTAAACAAATCAGACTGTTCTTTTTTATACTGCACTGTTTTTGCCTGTCTGATTAAGGGGTTAGCGCAGTATT  
TTGTGATAATAGCGATTAATAATCCCTATTTTTTCAGTCGATTAAGAACAGATAAATTCTGAATTTATTGATAGATAAACA  
GAAAAAAGTGCCTTTGTGAGCATAAAAATAACGGCACAAAGGGCGGAATAATTCACTATCATTACAGGGGATTATGCTGGAC  
ATTTTTCACTCTAATGTTTTAATTTTGTAAATTTGCTGTTAAAAAATTAATCACCTGCCAAAAGAAAATAAAAAAGAG  
AAAGCCTCCGATTAATTTTCGCTACACTGGTTCCACTTTTGTGATTTACACGGGTTACCCATGAAGCTGACCATCAT  
TCGATTAGAAAAATTTAGCGACCAAGACCGGATTGACCTGCAAAAGATCTGGCCGGAGTATCCCTTCTCCTGTTACAGG  
TTGACGATAACCACCGTATCTACGCCGCGCGTTTTAACGAGCGCTGCTCGTGCCTGCGGGTAACCTTAAGCGGCACC  
GAGGGAGCACTGGATTCCCTGCGCGTGCGGGAAGTCAACCGCGCTGCGGTGTGGGGCAATATCTGCTGGAAGAGGTTTT  
GCGTAACAATCCTGGCGTTTTCATGCTGGTGGATGGCGGATGCAGCGTGAAGATGCGGTGTGATGACGGCGTTTATGC  
AGGCGCTGGGTTTTACGGCACAACAGGGCGCTGGGAGAAGTGAATCGTCAAGTTTGATTTCAAAAGTGATATTGCCT  
GATGCGCTACGCTTACAGGCTACAATGTGTGTTCAATTTACTGATTTCTTTGGATCTTGAGGCCGATAAGGCGTT  
TACGCCCATCCGGCATGAAGCAACGTAACGTAATAGCAATTTGGCGGCAACCCAAAGTTGCCGATTAATGATTACTT  
CGCATCGGTGCGCGTCCGCTGGCGTCCAGTCAAATACGCGAACTCAAAGCCTTTTCAGATCGCCTTTCTCATCCCAGG  
TCAGCGGTCCCATACGGTATCCACGGAGTTTCGCTTTTCAGGATTTGGCGATTTTCAGCCGGATCGTCAGACTGATTCAGG  
CCCGCTGCAAAAGATTGACGCGCGCGTGGTGGTCCAAACGAATGCGCCACTTGGGTCCTGTTTTTTCGCTTTGATCGC  
GTCAACAATGGGTTTTGTTGCGCGAACCTGATCGTAGTTTCTCGGCTTGGTACCAGCAGCCCTTCCGCTGATTCGCCCG  
CAATGTTAGACAGCGAAACGTTAGCCACACCTTCCGGCCCCATAAACTGAGTTTTTCAGCCCTGCCGCGCTGCTGACGC  
AGGATTTGCCCATTTCCGGGTGATAACCGCGTAGTAAACGAAGTCGATATTCTTTTTTCAGACGCGCCACCAGCGT  
TGAGAAATCTTTTTCCCGCGGTGATGCCATCAAAGAACACCACGTTTGCATTGCCTTCTCAGGCCGCTCCTGCACCG  
CTCGCGCCAGACCTTCCGCTATTGCTGTTTGTGCTGAACGATAGCAATACGCTGCGGTTTCACTTCTCAAGAATATAT  
TTCGCCGCGCTGCGCCCTGGTCCGAGTCCAGGCCGGTGGTGCAGGATCAGCTGATAGCCACGGGCGGTGAGCTCCGG  
CGCGTTGCCGCTGGGTGATCATTAAATGCCTTCGCTTTCGATAGATGTCAGACGAGGTCGCTTATGAAGAACAGA  
GGTGACCAATACATATTTAATGCCGTCGTTAACGACTTTGTTGCCACCGCAACCGCCTGTTTCGGGTACAGGCATCG  
TCATATTTTACGATTTGAGTTTGTTCCTTAAATGCCGCTTTAGCGTTGATATCCGCAACCGCCTGCTCTGCGCCGGT  
AAACTCCTGGTCAACGACTGCGCAACCGGACCGGACATTGCGCCACGACCGCGACTTTAATATCTTCTGCCAGAGCCA  
TATTGCTGAATGCCAGCGGATACATCCTGCCAGTAAACGCTTTACCTTTATGTTTCATCCTGAGAATCCCCATTCTTCTG  
GTTATTACGTGTGTTGTGATGTTGTTTTTCAGCACTTATTTTCGTTTTATGCATGACTACCGTGCTTTAGCAGCATACT  
CTGCTAAAACATACCCGATTTTTATGATATTGGAATAGCTATTTTACAGTTTTATTAACAATCTGCGTGGGGATTGGCGT  
TTTGCCGGAGGGGAAATTGATTATTACAGAGGCCAAAAAACAACCCCGGACTCTCATCCAGGGTTCTCTGCTTAAT  
AGCGGAAATTACGCTTCAATGGCAGCACGCAATTTTTTCATCGCGTTCTTTTCCAGCTGGCGTACACGCTCAGCGGAAAC  
GCCGTAACGGTCAGCCAGTTCCTGCAACGTGGACTTGTGCTTCGTCAGCCAGCGCGCACGGATGATGCTCTGGCTGC  
GTTGCTCAGACCCTGCATCGCGTGGTCCAGCGTTTTGCCGCTGCTTCCAGTTATCATCTTCAATGCCGTCGGCA  
AAGTTAGATGATTTATCTCAGATAGAGCACCGGAGCCATCGGCTGGCTGTGGAATCGTCGTCGGAAGACAGGTCAA  
GGTCATGCTGTGCCGCCATACGTGATTCCATCTCACGTACGCTTTGCTGTTACGCCAGTTACAGGGCCACCATT  
CGACTTCATCTGTTAAACAGCCCAGACGCTGCTGGTTTTACGAGGTTGAAGAACAGTTTGCCTGCGCTTTGGTG  
GTCGCAACTTTGACGATACGCCAGTTACGAGAATGATTCGTGATCTCTGCTTTGATCCAGTGAACGCGCAAGGAGAC  
CAGGCGCACCCACTTCCGGGTTGAAACGGCGCACTGCTTTCATCAGGCCGATGTTACCTTCTGAATCAAATCCGCT  
GTGGCAGGCCATAGCCCGCATAAATTACGAGCAATGAAACAACAACCGCAGGTGAGACAGGATCAGCGTTTTAGCTGCT  
TCCAGATCGCCATGGTAATGCACTTTTCAGCCAGCCCGCTCCTGTCAGCCGACAACATCGGCCACGCGTTAGCTGC  
CCGGATGTAGGAATCCAGTTGCCAACTGGGGCTAAAGCTAAACTTTGCATTTTGTGAGTCAATCAAATCCTCTCAATCG  
ATATCTTCTGGCGCTTCACTGGTAGCAACAACCTGTGCCAGAGCTTAAAGCAACGAGGTTATCATTCACTGTTTTATCAG  
ACCGTGATTTTATCCACAAGTTCAATGCAAGCTTGTGAATAAATTACGCACAAAATGTGACATAGAGATGAAATACCGGG  
AAGAGACAACGGGCTCTTTTCCCTGCTACGGAACCCATTGCAGGGAAAGAGTATAACACGCTTTTATTATTACGGCGTA  
AAGTGGCGTAAATGTTGTACCGTGGCAAGCCACGCTGCCACCCAGCCAATCATCGAGCATAACCAGCAGCAATAGCAGGCA  
TTCATCGAATGATAAGCCATTGATATCAAATCTCGTTCCGAAAACCTGTGCCACTTCCGCAACCGCGGATGACAATCGCA  
GCACCAGAATTTCTGACAAAATTAATGACAACAATGCCAGAAAATCCAGCAGTGCGCCACCATAACAGGAACGGGCGC  
AGGATGAATCCATCTGTCGACCAATCAGTTTCTGTACGTTAATGGAGTACGGCGAGCAAAGATACTCAGACGCACACT  
GTTACCGATGACGAGGAACACGGCCGCCACCATCAACACGCCGATCATCGCCGAAACGCGCCGACCAGCCCGGTCAACG  
CCGCCAGACGGGCAAACAGCTGTCATCCATCCGCACTTCGTCATGCCGTTAATCTGCGTGATACGATCACGCAGCGTA  
TTCAGTGATTCGCTCCCTGAAAATCGAGTTTCGGGATCACCACCGCCACTGCCGGAAGCGGGTTTTCTTCCAGCATATC  
CAGCGCACCCAAAACAGACGTTACGGAACCTACCCAGTGCGTCTTACGAGAAAGATAGTTCACTTTCTCCACGC  
CTTGCTCGGCTGCAACTGTGCCACCACGCCGAGCAGGTCATCGTCCAGCGTTTTTTCAGATAAACAGTGATTTGC  
GGTGACGGATAAATACTGCGTGCCTGGCTGGTAACTGTTTGTACACCATATAACAGACGCTGGGCGAGGTCAGAGAAAT

GGCGATAACCATCACCGTAAAAACGTGGCGAACGGTTTGCTTTTCAGATCCTGCAATGCGCCGTGGAAGGCATAGCGCA  
CCTGTTTCGTTGAAAACGTTGGTTTTGCGATTTACCGGTTTTGGCGAGGATTTGCGCGTTTTGGTGCGTTACGACCGCCG  
TCGCTGAGCCGCGACCGATTTACGGAAGCGATCAAGACGCCCCCAAACCTGCCGAATATGATTGATTGCATCGCGCTT  
ATTCATGGCCACGCCTCCATGCAAGTACCATCGCTCAGGGTAGCATGCGATAGGAACGCCGCGAGATCAGGTTGATG  
TCGTGCGTTGCCATCAATACGGTTACCCCAACGCGGTTAAACTCTTCAAACAGACGTAAAAATGCCTTCCGACAGCGCGTC  
GTCCAGGTTACCAGTCGGTTCGTCCGCCAGCAGTACCAGCGGGCTTGTTCACCACCGCGCGGGAATGCCAACACGCTGTT  
GTTACCCGCCCCGAAAGCTGAATAGGGAAGTTCTTCGTTTTGTCCAGTAGCCCGACTTTATCCAGCGCCGCGACACCCGG  
CGACGAATATCGTCACCGCTGGCACCAGCGATAATCAGCGGGATCGCCACGTTATCGTAGACAGTACGGTCCATCAGTAG  
ATGGTGATCCTGGAAAATCATGCCAATCTGGCGGCGCAGAAACGGAACCTTACCGTTTTTCAGACGCGTGATGTCATGGC  
CGTAAACCAGATTTTCCCGGCGCTGGGCCGCTCAATCCACAGATCAGCTTCAGGAGGGTACTTTTTCCCTGCGCCGGAA  
TGACCGGTGAGAAACGCCATCTACCCGGCTGCATATGGAACGTAACGCCCTGCAGCGCTGTCTCCACCGAGATAAGC  
CTTGCTGACATGTTCAAAGCAATCATTGTTAATCTCTCGGGCAAAAAGTGCCTCTATAAAGTCGTCCGCTTAAACGG  
ACGCAAATCTCAATACGTTCCGCCACCAATGTAGCGGATAGGGATACCAAACCTGGTCAGCCACCGAGAAAATTACCC  
CGCTTTGCGCGTGCCGTCAGTTCGTTAGCGTGATGCCGGTTAAGCCAACGGCTTCATGGAACAGTTTGGCCTGGCTT  
ACCGGTTTCCCGGTGTCGATCAATAGTCAGCATAACTTCATGCGGCGCTTCAACGTCGAGTTTTCATCACCGCG  
GACGATTTTTCTCACTCTTCCATCAGGTGCGATTTGTTCTGCAGCGCTCCGGCTGTATCGGCAATCAGGACGTCGATAT  
TAGCGGCTTTAGCTGCCTGAATGGCGTCGAAGATAACAGAGGCGGAATCCGCCCGGTATGCTGGGCAATCACCGAATA  
TTGTTGCGCTGACCCAGACCTGAAGCTGTTCAACCGCAGCTGCACGAAAGTATCACCCGCCGCGCAGCATCACCGATTT  
ACCCTGCTGCTCAAACCTGACGCGCCAGCTTACCAATCGTCGTGGTTTTACCCACACCGTTGACGCCACCATCAGGATCA  
CAAACGCGCTTTGCTTCAACATTCAGCGGCTCATCGACTTTGCGCAGAATCTCGCCATCTCTTTTCAGCAGGCCA  
TAGAGCGCTCGGCGTCACGAAGCTGCTTGGGGATGCGCCTCCGTGAGTTGGTGATAATTTTACGTGTGGTTTCCAC  
ACCCACATCGGCGATCAAAGCTGCTCTTCCAGCTCCTCAAACAGATCATGTCGATTTTTTTACCGCGAACAGGCTGA  
TAAATCCGGAACCGAGATTTTCTTTGGTTTTAACAGGCTGCGTTTCAGGCGCGGAAAAAACCTTCTTTGGTCGGTTTT  
TCCTGCTCCTGAGCGATTTCTTCCACCGCTGCTCTTCTTCTGCCGAGGAACCACCATCACCGCTCTTCTGCCGCTT  
GGCAGCCAGCGCGTTTTCCAGCTCTTCTGCGGTAATTTCTTCTTAGCCGCTTCTTCTCCGCGCTTCGACAATCTCTA  
CGTTTTCCGCTTACGCTGCCACTCTTCTGGCGAAACCGCTTCGCGGTTGACGCTTCCGGAACGGCAGCTTTCACGT  
TCGATAGCCACTGGCTCCGCGTTTTCTTCTACGACCGTTCCGGCTGTGCAACGACTTCCGCTTACGGCTGCGCTTTTT  
ACTTTCAGCAACCTGTTCACTGACTTCCACAACGTGCGCAGCAAAAAGTTTCCGCTCGGCTTACGATGCGCTTGGCGCT  
GCTTTCAACGCTTGTTCAGAGGCTTACAGGCTTTCGCGCTGAACGATTTCTTCTACAACCGGTTGTTCAATTCTGA  
ACTTCTGTCTTTTTCCGGGTGCTGCTTTTTGACCAAAGCCAGCCAGGAAAAAAGCCACGTTTTTTTTTTCTTTCGC  
CATTTGCGACTACACTCCTCGCTGTTGCTTCATGGCACAGCGTTAACGCTATGTACATAGCAGCTAAAAAATGATGAAA  
TAGTCTATCACTTAACCTAATTCACATCACCGCCTGCAAGTATGTGTTATCTGGCGGATTGAGCAATTTATCATGAAAA  
ACCGAATCATTCCGGCAGCGGCCAAATCCGCATTATTGGCGGGCAGTGGCGAGGCCGTAACCTCCCGTTCTGATAGCC  
CAGGTCTGCGCCCCACCACCGACCGCTACGCGAAACGTTGTTAACTGGCTGGCTCCGGTCATTGTTGACGCCAATGT  
CTGGATTGCTTCGCCGGGAGCGGCGCTGGGGCTGGAAGCGTTATCGCGCTACGCTGCGGGGCAACGTTGATTGAGAT  
GGATCGCGCGTTTTCTCAGCAGTTAATTAAGAATCTGGCGACATAAAAGCAGGCAATGCACGCGTGGTGAACAGCAACG  
CGATGTCATTCTGGCGAAAAAGGTACACCGCATAATATCGTTTTGTGATCCACCGTTCCGCGTGGCTTGTAGAA  
GAGACGATAAATTTACTGGAAGATAACGGCTGGCTGGCTGACGAAGCCCTGATTTATGTGAAAGCAGGTCGAAAACGG  
TCTGCCACTGTTCCAGCAAACCTGGTCATTACATCGGAAAAAAGTGGCGGGTACGGTGGCTTATCGGCTGATCAACGCG  
AAGCACAAGGAGAAAGTATGCTGATTAATATTGGTCGTTTTGTTAATGCTGCGTTTTGGGATTTTTAATCCTCAACCT  
GGTGATCCCTTCCACGCGCTGAATATCTTCTGTTAACGTGGCGCTGATTTTTACCGTGCTGATGCATGGTATGCAGC  
TGCGCTATTGAAATCCACTTTACCGAAAGATGGCCCGCAGATGACCACCGCGAAAAGGTACGGATTTTCTTTTCGCG  
GTGTTTGAAGTCTGGCCTGGCAGAAGAAATTTAAAGTTAAAAAATAACCTTATTGTTGCGCTACAAAGCTGACAAAGCG  
CGTTCCTTTATAGCTCAGGTAACCTTTATCGCCACTGTACGGCGTGGTACTGCTGGCGCTCAGGGCGAAACGCTGCT  
CCATTCTCCGCTTTGCGGTTTGAAGCTTGCCTCATAGCGTATACTGGTGCCTGCCGAGTCACTTCTGCTGGCGGAA  
CGGCGATCGTTAATCGGTTTTTCCGCTTGTGCTCACCACCACAGCTTTTGTGGAGCGGAGCCATATCATTATCAGC  
TTTTTCCGCTCGCTGTTGCATAAAACGAAACGATGCGGCGACGACAATTAAGCCAATGATAACAATAAAGAAAAGAGGTG  
GTTTGTCTATCTTTATCCCTCATCGGAAAATGCGGAAATAAGCATAACCTGCCAGTTATGGTGTGTCATCCGTCACCC  
TCGCCACTAACTGGAAGCAAGACCGTAGGCATTCCGCTTACGAAAAATAACGAATTCAGGAACCTAAGATGCTTTGGT  
CGTTTATCGCTGTCTGCTTTCCGCTATGGCTATCTGTGGATGCATCGTATCGTGGGCCAACCTGGCAACGCTGGGTGTT  
AAACCGTTAACCTTCTTCTCCTGCTGTTACTGGCTGGCAAGCGCCGATGTTGACGCCATTAGCTATCTGGTGTGCG  
AGGGCTGTGCGCCTCACTGCTGGGCGATGCGCTAACCTGTTGCCACGTCAACGCTGATGTACGCCATCGCGCGTTTT  
TCCTCTCGACCTGCTGTACACCATCTATTTCCGAGTCAGATGACGCTCTTTCTTCTGGCCTTACCACTGGTGTG  
CTGGTTCTGGTGGCGCTGTTACTGGCGATTATCTGGACGCGCCTGGAAGAGTACCGTTGGCCTATCTGCACGTTTATCGG  
CATGACGCTGGTGTGGTGTGGCTGGCAGGTGAAGTGTGGTTCTCCGTCGACCGCTCCGGCGCTCTCTGCGTTTTGTTG  
CGCTTTCGTTGCTGTTTATCAGTAACTTTGCTGGCTGGGAGCCACTATCGCCGACGCTTCCGTGCGGATAACCGGATT

GCTGCGCCTGCTACTTTGCCGGTCACTTCTGATCGTCCGCTCGCTGTATCTCTGATAAACTTGACTCTGGAGTCGAC  
TCCAGAGTGTATCCTTCGGTTAATGAGAAAAAATAACCGGAGGATGCCATGTCGACTCCTGACAATCACGGCAAGAAA  
GCCCCTCAATTTGCTGCGTTCAAACCGCTAACACGGTACAGAACGCCAACGACTGTTGCTGCGACGGCGCATGTTCCAG  
CAGCCAACTCTCTGAAAACGTCTCCGGCACCCGCTATAGCTGAAAAGTCAGCGGCATGGACTGCGCCGCTGTGCCG  
GCAAAGTAGAAAATGCCGTGCGCCAGCTTGACGGCTGAATCAGGTGCGAGGTGTTGTTCCGCCACCGAAAACTGGTGGTC  
GATGCCGACAATGACATTCGTGCAAGTTGAATCTGCGCTGCAAAAAGCAGGCTATCCCTGCGCGATGAACAGGCCGC  
CGAAGAACCGCAAGCATCACGCCTGAAAGAGAATCTGCCGCTGATTACGCTAATCGTGATGATGGCAATCAGCTGGGGTC  
TGGAGCAGTTCAATCATCCGTTCCGGCAACTGGCGTTATCGCGACCACGCTGGTTGGGCTGTACCCGATTGCTCGTCA  
GCATTACGGTTGATCAAATCCGGCAGCTACTTCGCCATTGAACTTAATGAGCGTAGCCGCTATTGGTGCCTGTTTAT  
TGGCGCAACGGCTGAAGTCGCGATGGTGTGCTGCTGTTTTGATTGGTGAACGACTGGAAGGCTGGGCCGCCAGCCGC  
CGCGTCAGGGCGTTAGCGGTTAATGGCGCTGAAACCAGAAACCGCCACGCGCTGCGTAAGGGTGAGCGGGAAGAGGTG  
GCGATTAACAGCCTGCGCCCTGGCGATGTGATTGAAGTCGCCGAGGTGGCGTTTTGCTGCCGACGGTAACTGCTCTC  
ACCGTTTCCAGTTTTGATGAAAGCGCCTGACCGCGAATCCATTCCGGTGGAGCGCGCAACGGGCGATAAAGTCCCTG  
CTGGTGCACACGCTAGACCGTCTGGTGACGTTGGAAGTGTGTGAGAACCAGGAGCCAGCGCCATTGACCGGATTCTG  
AACTGATCGAAGAAGCCGAAGAGCGTCGCGCTCCCATGAGCGGTTATCGACCGTTTCAGCCGATCTATACGCCCCG  
GATTATGGCCGCTGCTGCTGATTGGCTGCCGTTGCGTTAGTTATCTCAACGCCTGCGGCGATTACCTCCGGCTGGCGCG  
GGCTGACGCTGCTGCTGATTGGCTGCCGTTGCGTTAGTTATCTCAACGCCTGCGGCGATTACCTCCGGCTGGCGCG  
GCAGCGCTGCTGGGCGTTGATTAAGGCGGAGCGCGCTGGAACAGCTGGGTCGTGTTACTCAGGTGGCGTTTGATAA  
AACCGGTACGCTGACCGTCCGTTAAACCGCGCTTACCGCGATTATCCGGCAACGGGTATTAGTGAATCTGAACTGCTGA  
CACTGGCGGGCGGTCGAGCAAGGCGGACGCATCCACTGGCGCAAGCCATCGTACGGAAGCACAGTTGCTGAACTC  
GCCATTCACCGCCGAATCACAGCGGGCGTGGTCCGGTCTGGCATTGAAGCGCAGGTTAACGGTGAGCGCGTATTGAT  
TTGCGCTGCCGGGAAACATCCGCTGATGCATTTACTGGTTAATTAACGAACGGAAAGCGCCGGGCAACGGTAGTGC  
TGGTAGTACGTAACGATGACGTGCTTGGTGTATTGCGTTACAGGATACCCTGCGCGCCGATGCTGCAACTGCCATCAGT  
GAACTGAACGCCTGGGCGTCAAAGGGGTGATCCTACCGCGATAATCCACGCGCAGCGGCGCAATTGCCGGGAGCT  
GGGGCTGGAGTTAAAGCGGGCCTGTTGCCGGAAGATAAAGTCAAAGCGGTGACCGAGCTGAATCAACATGCGCCGCTGG  
CGATGGTCCGTGACGGTATTAACGACGCGCCAGCGATGAAAGCTGCCGCATCGGGATTGCAATGGGTAGCGGCACAGAC  
GTGGCGCTGGAACCGCCGACGAGCATTAAACCATAACCACCTGCGCGCCCTGGTGCAAATGATTGAACTGGCACGCGC  
CACTCACGCCAATATCCGCCAGAATCACTATTGCGCTGGGGCTGAAAGGGATCTTCTCTGTCACCACGCTGTTAGGGA  
TGACCGGGTTGTGGCTGGCAGTGTGGCAGATACGGGGGCGACGGTGTGGTGACAGCGAATGCGTTAAGATTGTTGCCG  
AGGAGATAAGGCAAACCGATCGCAACATTGAGCGGATCGGTCCCTCGCCCTCTGGGGAGAGGGTTAGGGTGAGGGGA  
AAAGGCGGCATCGAAGCCAATCAGCCCTATCAACCGCCTTACGAATCAAATAACGATAAGGCAGTCCATCCGCTCTT  
TAGCAACCAGTTGCTGTTCCATAAAGGTACAAAACCCAGGAATATCGCGGTAGTGGCCGGATCGTCGGCGATAATCAGC  
AACGTTTCCGACGGTGCATATTGCGCACGGTTTTGCGCACCATCATCACCGTTCCGGGCAGCGCAGGCCAAGCGCGTC  
GAGTGTGTGGTCAGGGCTGGAAGAGATCGGTCAATTTCTTCTCATCACTTAAAAAACGGCGCTAGTTTACGCCCTGT  
GAGTCCGTAAGCAAAGTAAAGGTTAAGGTTGCGTGAATAAACCATTGCATTGTCAACGTAAGCAGTATCATGCGGGC  
CTCGAAAAAGGGTAAGCACGTTATTGTTAAGGTAACAGACGTGTCGTACGATTGGTTCCCTCACCCCAATGGTTA  
ATCAAAAAGGTACAATATGAACGTTTTCTCGAACTCAACGCTATAAGGCGTTGTTCTGGTTATCGTTATTTTCTGCTG  
TGGTGATCACCTCCAGTAACTATCTGGTTGAGCTTCCCGTCTCCATTTTGGGTTCCATACCACCTGGGGCGCGTTTAC  
TTTCCGTTTTATTTTTCTTGTACCGACTGACCGTGCATTTTTGGCGCACCGCTGGCCGACGATTATCTTCCGCGT  
AATGATCCCTCGGTTAATCTCCTACGTCATCTGCTGCTATTCTATATGGGTTCTGGCAGGGATTCCGGCAGCTCG  
CCCATTCAACCTGTTTTGTCGCCCGTATCGCCACCGCAGTTTCATGGCCTACGCGCTGGGGCAAATCCTCGACGTGCAC  
GTTTTTAACCGCTGCGTACAGTCCGCGCTGGTGGCTGGCACCGACAGCTCCACACTGTTCCGTAACGTACGCGACAC  
GCTGGCCTTTTTCTTCAATTGCCTTCTGGCGTAGCCCGGATGCCTTTATGGCTGAACACTGGATGGAATCGCGCTGGTGC  
ATTACTGTTTCAAAGTGTAAATCAGTATCGTTTTCTTCTGCCAATGATGGCGTATTACTCAATATGCTGTTGAAAAGA  
CTGGCAGATAAATCCGAAATCAACGCTTTCAGGGCAGTTAAAGGTTGTTATCAGAGTTGTGATAAGATGGATGAATGA  
GCCGTTATGGCCGTTTATCGAAAGGAAGAAGTCAATGCGCAATCTGGTTAAATATGTCGGAATTGGCCTGCTGGTTATGG  
GGCTTGGCGCTGTGATGATAAAGACTAACGCTACGGCGCAGGGTTCCGGTCCGGAAAGTAACGCTACCGGGAATCCC  
GTCAACCTGCTTGTGCAAGTTAAGTTTCTGCTGCCAGCGGATATGACCGACAGAGCGGTAAGCTGGGAACGCAGGC  
CAATAACATGCATGTCTGGTCCGACGCCACCGGCGAAGCAGTCATGTCATCATGGGCGATGATCCGAAAGAAGATC  
TGGCGGTGCTGGCGAAGCGTCTGGAAGATCAGCAACGTAGCCGCGATCCGACGCTGCAAGTGGTAACCAATAAAGCCATT  
GAGCTGAAAGTCAAAAATGCAGCAGTTAGACAGTATTATCTCCGGAAGGCCAGACGGCGTACTCTTCCGTTATTCT  
GGGTAACGTGGGTAATCAACTGCTGACCATGCAAAATACGCTGCCGCTGACGATCAGCAAAAAGCGCAGACCACCGCAG  
AAAACATCATTAAATACGCTGTTATTAGTAAGTTTTAAGATGATGAGGCGGCTCAGGGAGGTGTTCCGGAGGCCGTTT  
TTTTAATCGCCACGTCAGTAATAACCGGATTGCGACCAGTCCCGCCGCCAGATAAATCACCGGTACGCCCGCCAGC  
TCATCACAGCCAGCCAGTGGTCCAGTACGCCAAGCGATAAATCCATAAATACGGTGAAGTTGCCAGCGCCGCCCC  
TGATTTTGTGCGGAACCGTTTTACCGCCACTACCCAATGCCGGAAACACCAGCGAAAACCCGGCCCCGCCAGTAA

GACGCCGATTTTCGCCATCCAGGCATAGTCGCCACGCCAACCAGTAGCAGGCCGATTATCTCAACGCTAAAGCAAATCA  
TCGCTACGTTTAAAGCCACCGATACGGTTAATGCCGTTAGGGAATAACAAACGCGTACCGACAAACGCACAGCTAAACAGC  
GTCAGCGCGAAAGCCGCACCGTCCCAACCTTTAGCGTCATAAAACAGCGTGATAAAGGTGGCGATGACGCCAAATCCGGC  
GGAAGCCAGTGCCAGCGCCATACCGTACAGCCAGACGCGCCAAGCACCGCGCAAACGGCAGCGGTTTGCCTTTACTGG  
CTTTTACCCTCGGACGCGGATCGCCAACAAATGGCCACCAGCGCCACGCCATAATGATTAACGCTAACGCCTGCAAG  
CCGCCCCAGTGATAAAACACGACGCCTAACGGCGCACCCATCGCCATCGCCCCGTAAGTGACAATGCCGTTCCACGAAAT  
CACCCGCCCGATATGCAGCGAGCAACCACGCCAAGCCCATAGGGTGCATCCCGTTCGGCAAACTTTGCCAATCC  
CAAGGATGACGCGCCCCAGGCAAAGTAATAACAGGCTGATGACAGGCAGACTGGCGGTTAATCCTGCCGTGAGATACCC  
AGACCGCTCAAAAAGCAGCCGATAAACC GAAGACGACAATCTTTTTGGGTCCAGCGAATCGGGCTAACGTCGGCATG  
AGGGCGGCTCAGCAAGGTGGCGAAATATTGCAGGCTGATAACCAATCCTGCCAGAAGGCGCTAAAGCCCATCACATCAT  
GGACATAGCCCGTAATACAGCGAGCGGCAACCCGATGGTGAGGTAGCTGGCGAAGTTAAACATGACTATAGAGACAATG  
CGAAATTCAGGCGCAATCCGTTTAGCGCGGTTCCGGTACGGTTCCGGCATGAGGATCACACATTTTTACAACAGTG  
TTTCATTTTTACCAGTGCTGACGTGAAAATCAGCAGTAAGAATCAGAATATTGCTGGCGTACTCCCGTACACTTAAT  
ACAAAAAGTACAAGGAAGCCCAATGAAAACCCCTCAACCCGATAAAACGGGCATGCACATTCTGCTCAAGCTGGCC  
GCTGGTAGTGCTCGCGGGCATTACGCGAGCGAGATATCATTGTGCAGCTGTTACTGGCGCTGTTTTTTGCCATCG  
TCTCAACCCGCTCGTACCTGGTTTTATTGCTCGGGGAGTACAACGCCCCGTTGCCATTACGATTGTAGTGGTGGTGATG  
CTGATCGACTAACCGCGCTGGTCGGCGTACTGGCGCATCGTTTAAACGAATTTATCTCTATGCTGCCGAAGTTAATAA  
GGAGCTGACGCGCAAACCTTTTTAAATTGCAGGAGATGTTGCCTTTTCTTAATTTGCATATGTCGCGGAGCGAATGCTGC  
AGCGGATGGACTCGGAAAAAGTGGTTACCTTACCACAGCGCTAATGACCGGGCTTTCCGGGGCAATGGCGAGCGTGCTT  
TTGCTGGTGATGACCGTAGTTTTTATGCTGTTTGAAGTGCGCCACGTCCCTTACAAAATGCGTTTTGCGTGAATAATCC  
ACAGATTCACATCGCGGATTACACCGCGCACTTAAAGGCGTTTTCGCACTATCTTGCAATTGAAGACGCTACTCAGTTTTAT  
GGACAGGTGTCATCGTCTGGCTGGGGTGGAGCTGATGGGGTGCAGTTTGCCTGATGTGGGCAGTACTGGCGTTTTTG  
CTCAACTACGTGCCAATATCGGCGCGTAATTTCCGCGTACCGCCAATGATTCAGGTGCTGCTGTTTAAATGGTGTTA  
CGAATGTATTCTGGTCGGCGCATTGTTTTAGTGGTCCATATGGTCATCGGCAATATTTAGAACACGGATGATGGGCC  
ATCGCTGGGGATGTCCACCATGGTGGTATTTCTTTCATTGTTAATTTGGGGATGGCTGCTCGGCCCGTAGGGATGCTA  
CTTTCGGTGCCATTAACCAGCGTGTGTAATACTGGATGGAACACCAAAGCGGTAGCAAACCTGGCGATTTTACTGGG  
GCCGGGCGAGCCGAAAAGTCGGTTACCGGGATGAGGCGACAAGTGATACGATACGCACTTTCATTTTCCATTAACGTTG  
GCCCTGATATGTATCGGATAGTTCTGGGGAAGTTTCGACCTAAGCGCAGCTCCACTGCCACCGGGTTTACGCGAGCAA  
GCACCGCAAGTCCACGACGCGAACGCTGGCTGGCGGGCGTGCAATTGCTTTCGCACACGCTTTCGCCGCTACCGGAGAT  
CATCTATGGCGAAACAAGGCAAACCTGCATTTGCGCCGAAATGCCGCTATGTTCAACTTAAGCCATAGCGGTGACGATA  
TCGCCCTGCTGTTGAGTGATGAAGGCGAAGTCGGCTGCGATATCGAAGTGATTGCCCCGCGCGCAACTGGCGCTGGCTG  
GCGAACGCCGATTCAGCCTCGGGGAACAGCTGAGATGGACGCCGTGCATCCTGATCAGCAACTGGAATGTTCTGGCG  
CATCTGGACGCGCAAAGAAGCCATCGTTAAACAGCGTGGCGGACGCGCTGGCAAATCGTCAGCGTAGACAGCACCTATC  
ACTCCTCGCTGTCAGTCAGCATTGTGAGCTTGAATAATTAAGCCTTGCATCTGCACCCCTACTCCCTTTACGCTCACC  
GCCGACAGTGTCAATGGATCGATTAGTTAACTGATCCGCCACCCGACTGCCCATCTATTGATCCAGAACAGGTAATC  
AGTATGACGAATACTTAAATCGTCATACTTATTTCCGCCATCTATTTAATCCATTGGGGTTACCATGCTCTCCACACT  
CCGCCGACTCTATTTGCGTGTGGCTTGTGCGTCTTTATCGTCCATGCCGCTGCACCAGATGAAATCACCACCGCT  
GGCCGGTGAATGTGCGGCCACTAAACCCGCACTTTACACGCCTAACCAGATGTTGCCAGAGCATGGTTTATGAACCA  
TTGGTGAATATCAGCGAGCGGTTCCGGTATCCCGTGGCTGGCAAAAAGCTGGACTCATTGAAAGTGGTAAAACTG  
GACCTTACCCTGCGTGATGACGTGAAATTTCCAACGGTGAACCGTTTCGATGCCGAGGCGCGGCAAAAACCTCCGCG  
CAGTGCTCGATAACCGTCAACGTACGCTGGCTGGAGCTGGCAAACAGATTGTTGATGTTAAAGCACTCAGTAAACA  
GAGCTGCAAATTAACCTGAAAAGCGCCTACTATCCTTCTGCAAGAACTGGCCCTGCCCGTCTTTCCGTTTTATCGC  
TCCCTCGCAGTTTAAAAACCATGAAACCATGAACGGAATTAAGCGCCGATTGGCACCGGACCGTGGATTTTGCAGGAAT  
CGAAACTGAATCAGTACGATGTCTTGTCCGTAACGAAAACCTACTGGGGCGAAAAGCCAGCGATTAAAAAGATCACCTT  
AACGTCATCCCGGACCCGACTACCCGCGCGTGGCTTTGAAACTGGCGATATCGACCTGTGTACGGAACGAAGGGTT  
ATTACCGCTCGATACCTTCCGCCGCTTAGCCAGAATCCGGCTTACCACACCCAACTGTACAGCCGATCGAAACCGTGA  
TGCTGGCGCTCAATACCGCAAAGCCCCACCAACGAGCTGGCAGTACGTGAAGCTCTTAATTACGCGGTAAACAAAAA  
TCGCTGATTGATAACGCGTTGATGGCACCCAGCAGTGGCGACACCTGTTTGCCTTCTGTGCCCTACGCCAACCT  
CGGCTGAAACCGAGCCAGTACGATCCGCAAAAAGCGAAAGCGTTGCTGAAAAAGCCGGTTGGACGCTGCCTGCGGGCA  
AAGACATCCCGGAGAAAAATGGTCAGCCGCTGCGCATTGAACTTTCGTTTCATCGGCACCGATGCGTTAAGCAAATCGATG  
GCGGAAATCATTAGGCTGATATGCGCCAGATTGGCGCAGATGTCTCGTGATTGGCGAAGAAGAGAGCAGTATCTATGC  
TCGTCAGCGCGACGGTCTTTTTGGCATGATTTCCACCGCACCTGGGGCGGCCATATGATCCACACGCCTTCTCAGTT  
CAATGCGCGTACCGTACACGCTGACTTCCAGGCACAGCAAGGATTAGCCGACAAACCGCTGATTGATAAAGAGATCGGC  
GAAGTGCTGGCGACCCATGACGAAACGCAACGTGAGCGCTGATCGCGACATTCTGACCCGCTGCTGATGACGAGGCGGT  
TTATCTGCCTATCAGTTACATCTCAATGATGGTGGTATCAAAACCGGAGCTGGGTAACATCCCTACGCGCCGATCGCCA  
CGAAATTCGGTTGCAACAGATTAACCGGTGAAACCTTAATGTTGCGTTACGTATTACGCCGCTTTCTGCTGCTGATCC

CGATGGTGCTCGCCGCTCGGTGATCATTTTTCTGATGCTGCGCCTCGGTACCGGGACCCGGCGCTCGATTATTTGCGT  
CTGTCTAACCTGCCGCCGACGCCGAGATGCTGGCCTACCCGACCATGCTGGGACTGGATCAGCCGCTGTACGTCCA  
GTACGGCACCTGGTTGTGGAAGGCGCTGCATCTTGACTTTGGTATCTCATTGCCAGCCAACGCCGGTACTGGACGATA  
TGCTGAACTTCTCTGCCGCCACGCTGGAACCTGCAGGTGCGGGCTGGTATTAATTCTGCTCACTTCCGTACCGCTCGGT  
ATCTGGGGCGGCGCCATCGCGACCGTCTGCCGGATTTCCGCGTACGTTTCATCGCGTTTCTTGGCGTGTGATGCCTAA  
CTTCTGGCTGGCGTTTTACTGGTGTGCGTTTTCCGGTGTATCTGCAATGGCTACCCGCGATGGGTTACGGCGGCTGGC  
AGCACATCATTTTTGCCTGCGGTTTCCATTGCCTTATGTGCTGGCGATTAACGCGGTTTACTGCGCGCAGTATGCTG  
GACGTGCGCGGTGACGCTCACGTACCTGGGCGCGTCTGCGCGCCTGAACGACAAACAGACCGAACGTGCGCACATCCT  
GCGCAATGCCTCGCTGCCGATGATCACCGCGTGGGGATGCATATCGGGCAACTGATTGGCGGGACGATGATTATCGAAA  
ACATCTTTGCCTGGCCGGGCGTGGGGCGTATGCGGTGTGCGGATTTTTAACCGTGACTATCCGGTGTCCAGTGCTTT  
ACGCTGATGATGGTGGTGGTTTTGTGGTCTGTAATTTGATTGTGATTTGCTCAACGCCGCGCTGGACCCGCGCATTCG  
TCGTCATGAAGGAGCGCACGCGTGAACTTTTCTCTTCCCGTGGTGGTACGCTGGCGCTGATCATTATCGCCCT  
GCTGGCGCTGATTGCGCTCACAGCCAGTGGTGGCTGCCGATGACCCACAGGCGATTGATTTGCCGTGCGCCTGCTT  
CGCCGGATGCGCAGCACTGGCTGGGACCGATCACTTAGGTCGCGATATTTTTCTCGCGGCTGATGGCAGCAGCCGCGTG  
TCGCTCGTTCCGTAATGGCTGCCTGCTGCTGCTGACATTAGGGCTGGTTATTGGCGCGAGCGCCGGTTGATTGG  
CGGGCGGTTGATCAGGCCACCATGCGCGTCCGCGATGTTTTATGACCTTCCCGACCTCGATTCTGTCTTCTTTATGG  
TTGGCGTGCTCGGCACCGGCTGACCAACGTAATTATCGCCATCGCCCTGTGCGACTGGGCGTGGTATGCACGCATGGTG  
CGCAGCCTGGTGAATTTACTACGCAACGCGAGTTTGTGCTGGCGTACGCGTTTTCCGGTGGCGGCGCATGTGCGGGTGT  
TGTGATCATCTGGCAGGCGCGGTGATCCCTCGCTGCTGGTGGTGGCAACGCTGGATATCGGCCATATGATGCTGCACG  
TCGCGGGGATGTCTTCTTGGCCTCGGTGTGACCGCGCCGACCGCCGAATGGGGCGTGGTATTAACGACGCGCGCCAG  
TATATCTGGACCCAGCGCTGCAAATGTTCTGGCCGGGCTGGCGCTGTTTATCAGCGTATGGCCTTTAACCTGGTGGG  
TGACGCACTGCGCGATCATCTGGACCCTCATCTGGTACGCGAGCACGACACTAATGCCGCAACAGATTGAACTACGTAA  
TATCGCGCTACAGGCCGCGCAGCCGCTGGTACACGGTGTATCGTTAACCTGCAACGCGGGCGCGTGTGGCGTTAGTCG  
GCGGTAGCGGCAGCGGAAATCATTAACTGCGCCGCAACGCTGGGCATTTTCCCGCTGGCGTTCCGAGACGGCGGGG  
GAAATTTAGCCGATGGCAAACCGTTTCGCTTGCCTGCGCGCATCAAATGCCACCATCATGCAGAACCCGCG  
CAGCGCCTTTAATCCACTGCACACCATGCACACCACGCGCGGAAACCTGCCTGGCGTTAGGGAAACCCGCGGATGACG  
CTACGCTTACCCTGCCATAGAAGCGGTGGGGCTGGAAACGCGCGCGCTGTGAAGCTGTACCCGTTGAGATGAGC  
GGCGCATGTTGCAGCGCATGATGATTGCGATGGCGGTGCTGTGTGAATCACCGTTTATCATCGCCGATGAACCGACCAC  
CGACCTTACGTGGTAGCACAGGCGCGCATCCTCGATCTGCTGGAAGCATTATGCAAAAACAAGCGCCGGGAATGCTGC  
TGGTGACCCATGATATGGGCGTTGTGGCGCTGTCGGGATGACGTGGCGGTGATGCTGACGGTAAGATTGTGCAACAG  
GGCGATGTAGAAACGCTGTTAACGCCCCAAACATACAGTGACGCGCAGCCTGGTTTCCGCTCATCTCGCCCTCTACGG  
TATGGAGCTGGCATCATGACTTTACTTAAACATCTCCGGCCTTCCCATCACTATGCGCACGGTGGATTTAACGGAAAACA  
TCAACATCAGGCGGTGCTGAATAACGTTTCCCTGACCCTGAAAAGCGGCGAAACCGTCCGCTGCTGGGGCGCAGCGGT  
GCGGAAAAGTACCCTCGCGCGTTGCTGGTGGGTTAGAATCGCCGCGCAGGGGAATATTAGCTGGCGTGGCGAACCG  
CTGGCGAACTCAATCGCGCCAGCGTAAAGCGTCCGCGCGATATTCAGATGGTATTTAGGACTCCATCAGCGCCGT  
GAATCCGCGCAAAACCGTGCAGGAGATCTGCGTGAACCGATGCGCCACCTGCTATCACTGAAAAATCCGAACACTGG  
CGCGCGCAGCGAAATGCTGAAGGCGGTGATCTCGATGACAGCGTTCTCGACAAAACGCCACCGCAGTTAAGCGGCGGC  
CAGTCCAGCGCTGCTGCTGGCTCGCGCGTGGCGGTGCAACCGAACTACTGATTCTGGATGAAGCCGTTTCTAACCT  
TGATCTCGTTACAGGGCGGTGCTATTCGCTGCTGAAAAAGCTACAACAACAGTTTGGCACCGCCTGCTGTTTCACTCA  
CCCACGACTACGCTGGTAGAACGCTTTTGCACGGGTAATGGTTATGGACAACGGACAAATCGTCAAAACCCAGGTG  
GTGGGAGAGAAATTAACCTTTTCTCTGACGCCGACGTGTGCTACAAAACGCGGTATTACCCGATTCCCGTGGCGCG  
TCGACCCACAGAAAAGTTTAAACGCAAATGCAACGAGTACCATCACGCTTGTGACGATTTACTGGAGACGCTGGACAG  
CCTGAGCCAGCGTCTGGTTATAACAACCGTTCCGAAGCTATCCGCGACATTCTGCGTAGCGCCCTGGCGCAAGAGGCCA  
CCCAGCAGCACGGCACGCAAGGTTTCCGGTGTGTCGATGTGTATGAACACGAAAAACGCGACTTAGCCAGCCGCTATT  
GTCTCCACCCAGCATCATCACACGACCTCTCCGTGCGCACGCTGCATGTGCACATCAACCACGACGACTGTCTGAAAT  
CGCCGTGTTGAAAGGTGACATGGGTGACGTGACGATTTTCCGATGACGTTATCGCCAGCGCGGCTGCGGCACGGGC  
ATTTGACGTGCTTCCGAAGGAAGATTGAGTCTATTATTGGTCTTTGGTGAACGATCAACAAAGGGCCACTAGCACAC  
CTGATCTCTCTAAATACCCTATCCGAACCTTCTCTTTGTAACGTTCTAAATATATTCTAAAAATCTTCAATTCATT  
GTGACCACAAGTTTTTCTCGTTTTTCTGATGAAGATACTGTCATTAATAATAGAAAAGGATTTTACGATGAGCGGA  
AAACCGGCGGCGCTCAGGTGACATGACGCACTATGGCGGTAGCATTGTTCCAGGGTTCAGCCGGGTACGATTTGGTGC  
CCCACCGGCGTGGCTGTTCCGGTGTGCCCGGCGGAGTACGTCGGCCATCCGGTCAATCCCTGCTCGGTGCAAAAGG  
TCCTTCCCGGTGAAACCGACATCGCCCTGCCCGGCGGCTGCCGTTTCCTCTCCCGACCTACAGCAGTTACCGGACA  
AAAACGCCCCGCCGGTGGGGAGCCTCGCCCCGGTGGAAAATGCTGCGGATATCCGCTTACAGCTGCGCGATAACAC  
ACTGATACTCAGTGATAACGGCGGAGAGCCTGTATTTTGGACCTGTTTCCCGGTGAGGACGTTTACAGCCGACGCG  
AGTCACTGTGGCTGGTGGCGGGCGGCTGGCGAACTGGATGAAGGTCACCGGCTGGCCGACTCTGGCAGGCGCTGCCG  
GAAGAACTCCGCTAAGTCCGCATCGTTATCTGGCGACAAACAGTCCGACGGGGCGTGGTGGCTGCTCGGTTGGTGTGA



GCGGGTGCCGGAAGCGGATGAGGTGCTGCCTGCGCCGCTGCCGCCGTACCGGGTACTGACCGGGCTGGTGGACCGCTTCG  
GGCGCACACAGACGTTCCACCGGAAGCCGCCGGTGAATTCAGCGCGGAAATCACCGGCGTGACGGATGGTGCCTGGCGT  
CACTTCCGGCTGGTACTGACCACGCAGCGCAGCGGGCAGAAGAAGCCCGGAGCAGGCCATTTCCGGCGGGACGGAACC  
GTCCGCTTTTCTGATACCTGCGGGTTACACCGAATATGGCCGGGACAACGCATCCGTCTGTCTGCCGTGTGGCTGA  
CGACGACCCGGAATACCCGGAGAATTTACCTGCCGCGCCGCTGGTGCCTATGGCTGGACGCCACGCGCGAACTGGCG  
GTGGTGTATGACCGTAGTGGCAAACAGGTGCGCAGCTTTACTTACGATGATAAATACCGGGCCGGATGGTGGCGACCCG  
TCACACGGGCCGGCCGAAATCCGTTACCGTTACGACAGCGACGGCGGGTGACAGAACAGCTAAACCCGGCAGGCTTAA  
GCTACACGTATCAGTATGAGAAAGACCGCATCACCATCACCGACAGCCTGGACCGCCGTGAAGTGTGCACACGAGGGC  
GAAGCCGGGCTGAAGCGGGTGGTGA AAAAGGAACACGCGGACGGCAGCGTCACGCAGAGTCAGTTTACGCCGTGGGCAG  
GCTCAGGGCACAGACGGATGCCGACGGCAGGACAACAGAGTACAGCCGGATGTGGTGACGGGCTCATCACGCGCATAA  
CCACGCCGGATGGCAGGGCATCGGCGTTTTACTATAACCACCAACAGTTAACGTCAGCCACCGGGCTGACGGGCTG  
GAATTGCGCCGGAATATGATGAATTGGCCGTCTGATTACAGAACTGCCCTGACGGCGATATCACCCGCTACCGTTA  
TGATAATCCACACAGTGACTTACCTGCGCAACGGAAGATGCCACCGCAGCCGAAAACCATGACGTGGAGCCGTTACG  
GTCATTTGTGAGCTTACCGACTGTTCCGGTTATGTAACCCGTTATGACCATGACCGCTTCGGGCAGATGACGGCGGTG  
CACCGCAGGAAGGCTGAGTCAGTACCAGCGCATAACGACAGCCGTGGACAGTTAATTGCCGTGAAAACACGCGAGGCCA  
TGA AACCGGTATGAATAACAACATCGCCGGTGACCTGACCGCCGTCATTGCCCGGACGGCAGCAGAAACGACACAGT  
ACGATGCGTGGGAAAGGCCGTCCGTACCACGACGGCGGGCTGACGCGCAGTATGGAATACGATGCTGCCGGACGGGTC  
ATCCGCTGACCAAGTAAAACGGCAGCCACACCCTTCCGTTACGATGTACTTACCGGCTGATACAGGAAACCGGCTT  
TGACGGCCGCACACAGCGTTATCACCACGACCTGACCGCAAACCTTATCCGACGCGAGGATGAGGGTCTGGTCAACCACT  
GGCACTATGACGAAGCAGACCGCTCACGCACCGCACCGTGAAGGGTGA AACCCGAGAGCGGTGGCAGTATGACGAACGT  
GGCTGGCTGACAGACATCAGCCATATCAGCGAAGGGCACCGGGTGGCGGTGCATTACAGGTATGATGAGAAAGGCCGGCT  
GACCGGTGAGCGTCAGACGGTGCATCACCCGACAGCGGAAGCACTGCTCTGGCAGCATGAGACCAGACATGCGTACAACG  
CGCAGGGGCTGGCGAACCGTGTATACCGGACAGCTGCCCGCCGTGGAATGGCTGACCTACGGCAGCGGTTACCTGGCA  
GGCATGAAACTCGCGACACACCGCTGGTGGAGTACACCCGCGACCGCTGCACCGGAAACGCTGCGCAGCTTCGGCCG  
TTATGAACTCACACCGCTTATACCCCTGCCGGCAGTTACAGAGCCAGCACCTGAACAGCCTGCTGTCTGACCGCGATT  
ACACCTGGAACGACAACGGCGAACTCATCCGATCAGCAGCCCGCCAGACCCGGAGTTACAGCTACAGCACACCGGC  
AGGTGACCGCGTTCACACCACCGCAGCGAATCTGGATATCCGATCCCGTATGCCACAGACCCGGCAGGTAACCGCCT  
GCCCGACCCGGAGCTGCACCCGGACAGCACCTCAGCATGTGGCCGATAACCGTATCGCCCGTGACCGCCTATCTTT  
ACCGGTATGACCGTACCGCAGGCTGACAGAGAAAACCGACCTATCCCGAAGGGGTTATCCGCACGGATGATGAGCGG  
ACTCACCGGTACCATTACGACAGTCAGACCGGCTGGTGCCTACACGCGGACACAATATGAAGAGCCGCTGGTCAAAG  
TCGCTATCTTTACGACCCGCTGGGCCGACGGGTGGCAAACCGGTGTGGCGCGTGAACGGGACCTGACGGGCTGGATGT  
CGCTGTACGGAAACCGCAAGTGACCTGGTACGGCTGGGACGGCGACCGGCTGACCACGATACAGAACGACAGGAGCCGC  
ATCCAGACGATTTATCAGCCGGGAGCTTACGCCACTCATCAGGGTCAAACCTGCCACCGGTGAGCTGGCGAAAACGCA  
GGCCCGCAGCTGGCGGATGCCCTTACGAGTCCGGCGGCGAAGACGGTGGCAGTGTGGTGTTCGCCCGGTGCTGGTGC  
AGATGCTCGACCGGTGAAAGTGAATCCTGGCTGACCGGTGAGTGAGGAAAGCCCGCGCTGGCTGGCATCGTGGCGC  
CTGACCGTGGAGCAGATGAAAAACAGATGGACCCGGTGTACACGCCGGCGGAAAAATCCACTGTACCACTGCGACCA  
TCGCGCCCTGCCGCTGGCGCTCATCAGCACGGAAGGGCAACAGCGTGGTGGCAGAATATGATGAATGGGGCAACCTGC  
TGAATGAAGAGAACCCGCATCAGCTGCAGCAGCTTATCCGGCTGCCGGGCGCAGTATGATGAGGAGTCCGGCCTGTAT  
TACAACGCCACCGCTATTATGACCCGCTGCAGGGCGATATACTCAGGATCCGATTGGACTGAAGGGGGGATGGAA  
CCTGTATGGATATCAATTGAATCCGATATCAGACATCGACCCCTGGGTTTATCTATGTGGAGGATGAAAAATCGGGG  
CATGTACTAATGGTCTTTGCCGACACTATCCGCTATGATAGGTCAGATAAATTTGATTCTATAGATAGCACCGCATAT  
GACGCCTTAAATAAAATAAATAGCCAATCTATTTGCCAAGATAAAGAGTTTCGCTGGTTAATATGTAAGGATAATAGTGG  
CAGATATTTCTCAACAGCACCTAACCGAGGAGAAAGAAAAGGATCATATCCATTCAATAGCCCTTGCCCTAATGGTACTG  
AGAAAGTATCAGCTTATCATACTCATGGTGCAGATAGTCATGGAGAATATTGGGACGAAATATTTTTCAGGTAAAGATGAG  
AAAAAGTTAAAAGTAAAGATAACAATATCAAGTCATTTTATTTAGGTACGCCAGTGGAATTTTAAAGCAATAGATAA  
CCACGGGAAGGAAATAACAAACAGAAAAGGATTACCTAATGTCTGCAGAGTTCATGGTAATATGTA AAAAAATATTGTTT  
AGGAACTGTGCATTGTATCTTTGTTTGTTTTACATAACAACATGGGCGCAGTGAATAATAATTTAAAATAATGCG  
CAAGTATGAAAGTGAAGTAAATATACCGTTAGAAATTTGGTTAAAATAAAGCTATAGCATTGGAATTAGCTGAGATAT  
ATGTTAAGAATCGTTATGGACAGGATGCCGAGAAGAAGAAAACCATACGAAATCACTGAGTTAACAACAAGTTGGGTT  
GTTGAAGGTACCATTCACTCAGACCAATTTGCTGGTGGGTTTTTATTATAGAAATAGGCAAAAATGATGGGAGAATTCT  
GAATTTTGGCCACGGAAAATAAGTATGTAAGGATAATCAAACATCGTGTGCGCTGATGGCAGAGTAGGTGGAGGACTCCA  
GACAGTCAAACGATAGAAAAAGATAGCCTTTATGGAGTTCTGCAATGTCAAATACATACCAGAAAAGAAAGGCAAGTA  
AAGAGTATGGTTTATATAATAAATGTAAGAACTAAATGATGATGAATTTTCGCTTACTTGATGATCGCAATTCCTTG  
AAAAAGATTTTCACTGCCAGAGTATTACAGTTAAGAGGGGGGCAAGACGCTGTTAGATTGGCAATTGAATTTCTGCACTGA  
CAAAAATTATATCCGTAGAGATATCGGAGCATTTATACTCGGGCAATATAAATTTGCAAAAAATGCGAAGATAATGTTT  
TTAATATTTTGAACAATATGGCATTGAATGATAAGAGTGCTTGCCTTCGAGCTACGGCAATCGAGTCAACGGCCAGGAA

AGATCATCAAAGTTCACTTTTGCACTAAATAATTCGATTTTTATGTTAAAAATTGAGATATTCCTTATTACCTGAAG  
CTGTTTTTTATTGCTTATACATGATCAAATACTCCTACCTAATTAAGGAGAACAAAATGGAACCTTAAAAATTGATGGA  
ACATATTTCTATTATCCCCGATTACAGACAAACCTGAAAAGTGGAAACATAAATTATCGGATATTCTACTGTTGACTATTT  
GTGCCGTTATTTCTGGTGCAGAAGGTTGGGAAGATATAGAGGATTTTGGGAAACACATCTCGATTTTTGAAGCAATAT  
GGTGATTTTAAAATGGTATTCCTGTTACGATACCATTGCCAGAGTTGTATCCTGTATCAGTCTCGAAAATTTACGGA  
GTGCTTTATTAAGTGGATGCGTGACTGCCATTCTCAGATGATAAAGACGTCATTGCAATTGATGGAAAAACGCTCCGGC  
ACTCTTATGACAAGAGTCCCGCAGGGGAGCGATTATGTCATTAGTGCGTTCTCAACAATGCACAGTCTGGTCATCGGA  
CAGATCAAGACGGATGAGAAATCTAATGAGATTACAGCTATCCAGAACTTCTTAACATGCTGGATATTAAGGAAAAAT  
CATCACAACCTGATGCGATGGGTTGCCAGAAAGATATTGAGAGAAAGATACAAAAACAGGGAGGTGATTATTTATTCGGG  
TAAAAGGAACCCAGGGGGCGCTAAATAAAGCCTTTGAGGAAAAATTTCCGCTGAAAGAATTAATAATCCAGAGCATGAC  
AGTTACGCAATCAGTGAAAAGAGTCACGGCAGAGAAGAAATCCGCTTTCATATTGTTTGGCATGTCCTGATGAACTTAT  
TGATTTACGTTTGAATGAAAAGGGCTGAAGAAATATGCGTGGCAGTCTCCTTTCCGTCATAATAGCAGAACAAAAGA  
AAGAGCCAGAAATGACGGTCAGATATTATCAGTTCGCTGATTTAACCGTGAGAAATTCGCCACAGCGATCCGAAAT  
ACTGGCACGTTGAGAATAAGCTGCACCTGGCGTCTGGACGTGGTAATGAATGAAGACGACTGCAAAAATAAGAAGAGGAAA  
TGCAGCAGAATTTTTAGGGATACGGCACATTGCTATTAATATTTTACGAATGATAAGTATTCAAGGCAGGGTTAA  
GACGTAAGATGCGAAAAGCAGCCATGGACAGAAACTATCTGGCGTCAGTCTTCCGGGGAGCGGGCTTTCTGAATCTTGC  
CCTGAATACAGGACTGAGTATCAAAAAGCCGGTTAACTGAAACTGTCCAGGTTTTGGGGTTCAGTTCATAAACGCCCTTAT  
CCGGCTAAAAACAATAAATTCAATAAATTGCACCGATGCGTAGTCCCTATAAGCTTACGCATCGGGCAATTGTATTT  
ACGCCATTGTCCCAATCGTCTTCTGAATCGCAGCAGCGCAATGGTGA AAAATGCGCCGCAATTGCCATCAGCGTCAGA  
AACTGCGGCCAGACGATTTGCAATCCGGCACCCCGTAGAGGATGGCCTGCGCGAGGCTAACAAAGTGTGTCGTCGGCAT  
GGTCAGCATAATGTCCTGCACCATCTGCGGCATACTTTGCGCGGGCTGGAACCACCGAAAGCATTTCAGCGGCAGCA  
GCACCAGAATCACCAGCAGCCAGTTGCGGCATTGAACGCGCTATCGTCCCATAAAAATGCCGATTGACGTGGTGGCA  
AACAGACTGAGCGCCAGCCAGCATAAACAGCGGGATCGAGCCTTCAATCGGTACGCCAGTACACCTTACCATCAG  
CACCAGCGATAATCCCGATACCACCAGCACCAGCCCATCGACCAGATCTCGCCATCATGATCTCAAACGGCGTTA  
TCGGCATCACCAGTAAGTGTCCACCGTCCCGTGTTCAGCTCGCGGATCAGCGCCGATCCGGTCAATACAATCGCCAGC  
ATGGTAATGTTGTTGATGATCGCCATCACC CGCAAACACGCGGGATCGAGGTTCCGGTTAAAGCGCATCCGGGTTT  
CAGCGATACCAACGGTTCGCTGTTATCAGGTTAGCGCGGACAAAGCTGTTCACTTACCCTTGATAATATTCTGGATAT  
ACCCATTGCCGTTAAATGCCTGGCTCATGCGCGTGGCATCGACGTTACCTGAATATCCGGCTGGCGTCCGGCGAGGACA  
TCACGCTGAAAATTAGGCGGAATATTTATCGCGAAGGTATAGCGTCCGGCGTCCAGTCCGGATCCATCTCATCGGCGGT  
GATCATCTCCGGTGGCAAAAACACGGACGATAGAAGCTGTTAACGATCCGGTTCGATAACTGCGATTGATCCATATCGG  
CAATGGCGATCGGCGGAGGTTCAACGATCCTGGCGTAACGGTCCGCTGACGAATACACCGACACCGTAAACGAGAAGACA  
ATCAGCGTCAGCATCGCTTTATCACCAGCAGACTGCGCAACTCTTTGATACCCAGATTA AAAATATTGCGTAAATGGCG  
CATCATCCCTCCTGTTTTTTCAGCAGCAGGATACTTAAGCCATCACCAGCGGGATGGCTATCAGTAACGGGATAAAAAG  
TTGCCACAAATCAGTCAGATCCAGCGCTTTGAGAACGTCCTCGGGGCGATAGTCAGAAAATGACTGGTCCGGTAAACCT  
CGCCGATCCAACGTCAGGCCCTTCCAGCGAAGCTACCGGATCGATCATCCCGAAAATGTGTCGCCGGATCAACGTG  
ATAATCGCGTTCCGAAAATGGCGGCAATCTGGCTTTTATAAAGGTGGAGATCAGCAGCCCCATTCCGGTGGCAATGAT  
GATATACAGCAGCGCCGCGAGGTTGAGCGTCAGGAACTGCCTTATGCGGTACGCCAAACACAAACACCGACAGGCCGC  
AGAGCAGGAAAAAGTTGAGCATCCCAGCGCGATGTATGGCACTGTTTACCAAGCAAAAATCACTACGCGTGGTGGGG  
GTCACGTAAGGTTGATAATCGACCAAGCTCTTTTTCCCGCACACGCTAAGGGCGCTTAGCATTGACGGGATCATCAT  
CAGCAGAAGCGGGATCACC CGGAAACAATCGCTGGCAGGCTTTTTACGTCGGGTTATAGCGATAGCGCGTCTCAATAT  
TCATCAGCCCGCTTTGGCTGGCGGGTGTGATTGTGGCTCGCCACATCCTGTAACCGCTTGGTGCATGGCCTGCACG  
TAACTTTTTACGTTTTAGCAGCGGCTCGGCATCGCTCCGTCGATCCAGACCGGAGTTCCACAGGCGTACCACGCGCGAT  
ATCGCGCCGAAATTGGCGGGATCTCAATCGCCACCGTGATATCGCCCGCACGCATCCGACGATCAAGCTCGTCATAAC  
TGGTGAGCGCGGCTGTTTCGATAAAGTAACGGGAACCGGAGAGGTTGAGTGTCCACGCCTGGCTACTGACGGTCTGGTCG  
CGGTCGAGCACCGCAAAGCGCAGGTTTTCCACATCCATACTGATGCCGTAACCCATTATCAGCATCAGGATCACC GTTCC  
CATCAGCGCCAGCGTCAACGTAAGTACTGATCGCGTCCAGGCTTCCAGCGCTTCCGGCGGCTGTAGCTAAACAGACGGCGCA  
GGCTAAATCCCTGACGCGCGCGTGGTGGTGTGCTGTACCACGGCGGCGCTTCCGCTTCTGTTGCTCTGCCCTGCCGCT  
TCCTGCAAATAGGCGATAAATGCCTTCCAGACTGGCGGCTCCGCTTTCTCAACAGTTCCTGCGGTGTACCCTGGC  
AAGCACTTTTCCGGCGTGCATCAGTGAGATGCGGTGCAACGTTCCGCTTCTGTTATAAAGTGGGTGGAGATGAAGATAG  
TCACTTTGCTTGGCGGAGAGATCGACCATCAACTGCCAGAACATATCCCTCGCCACCGGATCGACACCAGAAGTAGGC  
TCATCGAGGATTAACATCTCCGGCGGATGAATCACC GCCACCGCAGCGAAAGCCGCTGGCGAATGCCGAGCGGCAATGA  
CTCCGGCAGAATATCTTCAACGTCGTTGAGCTTAAAACGCTCGCTCATTTACGCCACTCTTCCGGGAATTTCCGCTTCCG  
GGATGTGAAACAAACGGGATGTAACCTCAAGTTTTGCCGACGCTGAGTTCGTTATAGAGCGAAAACGCCTGCGACATA  
TAGCCACCCGACGGCGGATTCGATATCTTTGGATCAACCGGTTGCCGAACAGCCACGCTCACCTTCCGCTGGCGGG  
CAGCAGTCCGGTGGCATTTCATGGTGGTGGATTTACCGCAGCGTTGCAACCAAGAAAACCAAAAATCTCCCGCGTG  
GAATGCGGAAATTAACGTGATCAACGGCAACGAAGGAACAAAACGCATGGTCAGATCGCGCGCTTCGATGGCAATCTCT

CGGTTTTAGGTTGATACGGTGGGATCACTACCGCCTGATGCGCCTGGCGTTGCGCTTGCGGTAACAGATTTATAAATGC  
TTCTCCAGCGTAGCGCTTTGCGTTTGTGCGTAGCTCTTCGGCGCTGCCAGTTGCCAGCACTTCTCCGGCATTTCATCG  
CTACCAGCCAGTCGAAGCGTTCGGCCTCTCCATATAGGCGGTGGCGACCAGCACGCTCATATTGCTCTGCCGCTGGCGA  
ATACTGTGATCAGATCCCAGAAGTGGGAGCGGGAGAGCGGGTCAACCCCGTTGTTGGCTCATCAAGGATCAACAGTTC  
CGGTCGTGGATTAACGCGCAGCACAGCCAAGTTTTTGTTCATCCCGCCGAGAGTTTTCCCTGCCGGACGATCGCGAA  
ACGGTGCTAACCCGGTGGTTCAGCAGCTCATTGATTCGCACTTCCCGCTCCGCTTTGTCGTGACCGAACAGGCGAGCG  
AAAAATCGACGTTTTATACACCGACAAGGTGTGGTAGAGGTTTTTGGCCAGCCCCTGCCGATCCAGGCGATGCGCGG  
GCAGACGTCGCGGCGATGCTTCGGGTGCGCATATCGCCGCCAGCACCATCACATTGCCCTGTTCAATGACGCGGGCAC  
CGGAAATCAACGACAACAAGCTCGACTTCCCGACGCGTCCGGGCCAATCAGCCGACCATACAGCGGGCCGGAATATCG  
AGAGTGATATTGTTTCAGCGCAACGGTTTTTCCATAATGCTGGCTCACGCCCGCAGTTGCGCGACAGGCGGGACGGGAAC  
CAGTTCCAGATGCGTCATTGCGGCAACCTACCAGGAGTTCGTCAGGCCACGGAAGTTCTTCATTACCCGACCCACGC  
TACGCCCGGCAAAACCGTTTTGACATATTCCAGATGCTGCTGGAGTAATCCGGTGGGATACGCGCTTTGACGCGGAACA  
TCAGTTTACGCGTTTCATGCTGGTTTCGACGGTTTTTGGCGTAACTGGCGGACACTGGCGACAAAAGTATGTTGCA  
GGAATACGAGATCTGGCGGCGATCGAGGATCAGCCGGGCTTACCGCCAGTTTCAGCGTCCCGCCTGTTCCGGTTGCT  
CGCAACCCGATACTGCACGCGTCCGTCACGCGGGGCTTTCAGTTTCGCTGTCATCGATATCTGCCGCAATGCCCGTTCA  
GTGGCTTGCGCGCTTCGACGCGGGTTTTGCGCCTGAATGATATTGGTGCCTGCCGCTTCTATAGCCGCTTTAGAAGCCGA  
TACCTGAGCTTTCCGCGATTCCAGCGCAGCTCGGGCCTCTCAGCGGCGGCGGATCGTCATCCAGCTGTTGCGCAGAAA  
TAGCCCTCGTTGGGCCAGTGAACGGGAACGCGTATGACGTTTTGCTACGGAGTCCAGTTCTGCCCTGGCGTTGATTAACC  
AGCGACTGTGCGGCACGAGTTTCGCTTTGCTGTTGCTCCAGCAAAGCCTGCCGCGCAGCAACGGCGCTTTGTGCTCTTT  
GATTTGCGCGATGGCTTCCAGTCGCTGTTCTGCAACACGCGAGTATCCATCTTCGCCAGCACTTCCCTTCGGAACAA  
ACTTGCCTTTTACCAGAATGGTGTGATACGCCGGCAATTTTGTGGCAATATCCACTTCCGTCGCTTCAATGCGC  
CCATTACTGACAGCAAAGCCTTCCGGCACACCTGCCGGGCGCAACAGCCACCACGCCACGATAGCCGCCACCGCAGTAA  
CCGACAACCCACCACGCCAGATGGCGCTTACTCTTATCCATAATCGACCCGCATAATCCCTGTAAGCAAACGACGCGT  
GTTACAACGCGCGAACGACGTTTCAGCGGATTCTCCATCCGGGATAAGAAGGAAACGGCAAATACGACCAGCGCGCA  
GAGCATTGAGCGCAACGGGAAGGCTTAGTGAAAACGGGTAGTAATGTTGTCATCATCAGCATTCTGGCCGTAATGA  
AACACGCATACTATAAGTGTGATCTATAAACTGGCTGACAAAACGGTATCCATCCTGTTGGATAGCGTTTCACGCGCTG  
TTCAGTTGACGGAACAGAGCATTCTTTTTACGTTTTATCAACAGTCTCAACCAGATAGTAACATTAATTCATGTTGT  
CTATGGTTAGAGCTGTAACATTGTGCGCCTTAAATCAAAGGCATAAGTCCATTTCTGTTTTTTTCATGCTGGTAAGAC  
TTCCAGGGAGTGGTTATCTCAGGCCCTGCACCAGGGTTAATTTGGCAATTATGCATGCTGAACATTCTCCAGCATGTTT  
ACTGTACGCGGCGTAAAGACCTAAAACGTCCCCGTTTCGCTATGCGTTCTCTCCACCATTTCCGTTATGTGCAACAA  
CTTGATTTATACCTAACATTTGTGAACATGCTAATAGTGCTTCAAGTTTAGGTCTGTAATCTGTGAAACAGAAAAATAA  
CGATTAAGGATCGACAAGAGATAGCCCGGCTAGTTTTAACTTTTTGCCATTAATTATAGCATGATGCTTTTTATTGAT  
AATTGCCGCTAATTCGACCGGATCGAGAGCATTGGTCATTTATCAATAGAGACTGTTATCGGTCCTATAATGTAACGTT  
TTCGCTGATCATAAAAGTTATCCCATGATGATTTGCCATTTTTGATTTGGGGTATAGAAAACATACAGGATAATCT  
TTTATCCAGAGTAGGTATCCTCATCGAGTGGTTTCATACGCGTGAAGTTCTGCATATAGTTACCATTGCAATTCGTTTC  
ATGATTTCCAGTAATACATGAACATTTTCATTGATACTCATTATGCGTTTTAACAAATCGATGATAAATTGATCACCAC  
AGATATTGCTAAATCGATCGCGGTTTTGGTCGCCGAGAAACGTACATGGCGTCACAGCGTCTTTATTAATAACTAAATAA  
GGCTGAAGACTTTCTAAAATAATGTCTCTGTTTCAGGATACTGATTATTGATTAACATTAGTGTAAAGTTGCTCATT  
AAAGTTCTCCCTTAGCAACTACGTTGAGAATTCATCTTCTATATTAAGCAACTGGCTAAGGAAATTTTCTCTTCAGCCA  
TGATTTCCAAATGTCCCGTTGCGAAAAGCGCAAAAACCTGCACCGACTGAGCCATCGGTATCACAAAATAGTTTGGT  
CTGGTACTTGTGGGATCAACGGGTAACAATTGGAGAAATAGATTCTGTGACGGAACGTTGGTTTTATCATTGTTTCGAA  
TTAATATCAGATACATTATATTGCGATATTTCCAGTTCAGATGGGTTTGTACGACTCAGTAACTGCAACATCATTAG  
CATTATCATTACTGTCATATTATTAAGTAAATAACAATACTGCACCAATTAATATCGGTATTATCAAGAGAGCAACCG  
TAATTTTTGCTATTAATTGTACAATAAACTGATAATTATTATTCCTACGTAGAATATGAGCACGATGCCCGATAGCAT  
ACTATATTTTTCTGAATGATCCGTTTGTATGGTAAATGAAATTTTGTATCTTGAATAGATTGTTGGAACCGTTCTATTT  
GCCAATCATCTATTTTTCCACAACCTCACCGAGCATTGCTCGGCAATACTTGATATATCATCACCTATACCATTTGCA  
ATATACCCAAACAGTTCTTTAGTGAAGTTGGTAAATGCTCTTGACCATATCATTGTTGCGATTGTCGTTGTACTGTC  
GTTAGTGCCTGCCACAGTCCAATTTTCATATTTACCTCATATTTACCAGGAGGAATACATAGTTAACATTTTATC  
TTATGACATACACCTCATGTTGATGGGAAAATAATTATATTTGACAAAATCATTGAGCCTCAAAGCATAATATGAAAT  
TTCTTATCTCATAGCAGAGAAAGTCCCTAAAGATTGTAGAGGCGTCATCAGAACATGCCTTACAATCGATTAAGAAAAC  
CTATGAAATACTGGCAGGATTAAGAAAGACATACCACGATTCATGGAGTTTTAATGTAGTTGAAAACAATAAGCCCTG  
AGGAATAAATTTATTTTATTTTATCAGTGCTTCTTCAGGGAATTTAGCCCATTAATACCATTATCAAATTTGTTGA  
TTATGATCTACCCGGGCCATGATGCCCATATTTTGTCTAATGATTTGCTGGGGTCTTCACCTTTGAGTGTCTCCC  
ACATATGAAGATACGTTACGCTGCTGGTCTGAAATCAGTAGTGTATCAAATAATTAGCATATACAGGTGTGGGTTTCA  
AAGTATTGCTTCGGATTAGATGGAATAGAGGATCATCCATGTGTTCTTTATGTTTTTATTAATAATTTGGCTAATTC

TCAGGATCAGTAGGATTTTTATCTGATTAATGGAACCTGCAAAGCACCGAGACAATAACATTTTTTTCTTCATCTCTT  
ATTATCCGTGATGACTGGTAAAACCTGCTTTCTGAGTCATAATTACAAACATCGAGCGTTTTAATTAAGTTATACGT  
ATCACCGGCAGAGAGTTTATGATTTGCTAGTCGTGCAGTATAGTTACCATTAATAATGATTTTCATGATTTCCAGCCAGAA  
CGACGACATTTTTATTAATACGGCTATCTTTATTACCTCCATATTTGCGATAGAATTTAGCAAAGTAAGGATATATTTA  
TCACAAAAATAGTACTAAATCTATCGCCTGTATGATCCCAAGGAAGATACAAGGGGTTATCGCATCGTCTTTAAAAA  
AACATGTTGATGCAACTCATTCAAGATCATGTCTCTCGTATTTAATAAATCGTAGAGCACTTTATTATTTTTATGTTTGT  
ATGCAGATGAAGCCATCTCTTCGTGTTTTAATAATCACATAATAAACTCCAACCTTTTCCTGTATGCCTATATGCCCT  
GAAACGAGCAATGCATAAAGTACAGCGCTACTCTCCATCTGTATCGCCAAAAAAGCCGTGTTGGCATTGTTGGGGT  
AATCACACCACACTGTTTATAGAAGTCTATTTTTGAAAACACAGATTTAACATAGCTATCAAACTTTTCCTTAGTAAACG  
TCTCTTTAGAGACATCCCAACGCCAGTCAGGTTTGAATTAACACTAAGAAGAGTAAAGAAATTTCTCGCTATGATAGAA  
AGCCCATCACTTTATAAATTATATCTGATTTATCTCCAGAGGAATTAATAAAAAATAAACCGCCTTACACTCAACAGT  
AACGGTAATGGGAGACGATAATTTAACACATGGTTATTGTCTGGTATAATTGTAAAGATAAACGTATCAGTAGTATTGT  
CGGCAATCTATTATTTCTGAATATCTATAGAAGTTCACTATTATAAAACCATACTTTCTCCATCTGGTGACTACGA  
TCATTTACCTCCAGTGACCATGTTGCAGGAAATAGATGATATGCAGGCCAAAATCGTTATCTATTTGCGAATCATTATC  
CAGTTTTACAAATCAACTATCTTTGCACGATGTGTTTTATCAACCTTGCCATGGTGTGATGACTGTTAACTTTATCTG  
AATCTTATCTTGTGCTTGAAGAGATGTTTCTAATCTGATTGCAATTGCTTTTATAAATAACCTGTGATATTTTTGA  
ATTGTTTGTAAACAAAATAAATGATACTTGTCTGAAAAACAGATTTACGACGATATAAATAAATAACTTATATGTTCCG  
TGATTTTAAGCACCGAGACTATCCGGTCTTTTACCAATAATGAAGAATAATCCCTCCCTGGGAAGATAATTGTAACAAAC  
AACAGCATAAGAATTAATCTTAGGATAAATTTTTATTTATCATGGCCTTTTGAACGCTGAAAAGTAGCGCTCTGCAAAGT  
AAACCCCGCTATAGTTATGCTATGCATTTGTCTTTAATGATATCTCGTCATTATATTAACAGGATGAAATTATCATTAAT  
GCATATTTCAATATTAGCAGGGATACCTGAGGAGTTTAAAGTGAACATATATATCGGGTGGCTTTTCAAATTAATCCCTT  
TGATTATGGGCTTAATTTGTATCGCGTTAGTGCGCTTTGTGCTGGAAAGTTCAGGGCAAAGCGAGTATTTCTGCGGGGT  
CATGTGCTGATTTCTCTGGCGCCATATGCCTGGCATTATTCACTACCGCATTATTATCATTTCGCAGCTCACGCGCGG  
CGTTAATACGTTTTACAATACATTGTTCCCATTTATGGCTATGCGGGGTCAATTATCACCATGATATGGGGTGGGCAC  
TGTTAGCAGGCAATGATGTGATGGCAGACGAGTTTGTGCGCGCCATGTTATTTTGGCGTTGGTATGATTGCCGCCTGT  
GTATCGACGGTGGCAGCGTCATCCGGTCACTTTCTGCTCATTCCAAAAATGCAGCGGGGAGCAAGAGCGACGGAACACC  
GGTACAGGCTTATTCTTCAATCGGTAACCTGCCTCATTGCCGTTCCCGTTTTACTCACCTGCTCGGTTTCATTTGGT  
CTATTACGCTGTTACGTAGTGCTGACATAACTCCGATTATGTGCGGGTCCAGTATTGCTTGGGTTAACCGCAATCTGT  
GCCTGTCTAATTTGGCCTTGTGGCCACAATTGTCCATCAACACGTAATACGTTTTCACTAAAGAACACTGGCTGTGGTG  
TTATTGGGTTATTTTTCTCGGCTCAATCACGGTACTGCAGGGATATACGTCTTAGTCAGTTCCGATGCAAGCGCCCGAC  
TGGCTCCCGCATTATTCTTATTTGCCTCGGAATGATCTGTTACAGCATATTCTCAAAAGTCTGGCTACTGGCACTGGTA  
TGGAGACGTACCTGTTGTTAGCCAACAGAATACCGATGATCCCGTCTTCACTGCGCTGTTTTGCCTTTTCTGGCATC  
GTTTCTTGGGAAATGGCGCAGACCGACATGGGATTTTTATTCTTTCGCGAGTTCTGGTCCGGTTGGGAGCGGTATGCT  
TTACGTTGTTCTCAATCGTTTCAATATTAGAAGCGGTTCTGTAAAAAATAATTGCAACGTACCGGATAAAACAGCGT  
TGACCATTTGCGTAACGCTGGTTTTTCTTAGGCATCATGAAATAACGCGACATTAATGCATAGTGGTTAAGTATAAAAA  
CAGCAAAGTACTGTTTTTTCAACCTGTTCAATTTTATAAAGATCTGGCCACTGAGTGAGTTTTCAATCACCTTTCCA  
TCCACCTTATATTAAGCATGGAGGGTTTCAAGTTACGGGCTCATTAGAAAATAATCACAAAGATAAACACTATCAAAATTA  
GCTCATTTTTAATGCGACTTAATAATTTTATCTTTAGGAAATAGTTCAGGACGACTTTGCTGCAATCAAACTCTGCGC  
ACAAGCCCACGCACTCGACCAGCGCCACTGGAAGTTATAGCCCCCAGCCAGCCGGTGACGTCATCTTCCGCGATGA  
AGTACAGCCCAGGCACTTTGCGCGTTCATCTCCGTGAAGAGAGTTTCTGGTGTCCACGCCCAGCGCTCACTTCG  
GCAGTGCATAGCCCTTCAAGTCCGTTGGGTTGTACGCGCCAGTCGGTCAATGTGCTAATCAGTGCCTGTTGGTCCAGCAC  
GTTGAGCTGTTTTAGCGAAACATCCGGGATTTGCCGAGTTGCTGTAAAGCGTTCAACCAACCGCTTCCGTAGATGAACCG  
CCAGTGTGTTTTTCAAGCTTGTGATTCCGATGTGCGTTACGCTGCTCATTGAGGAAGGTTTCCGAGTCCACATCCGGTAGC  
AGATTGATGCTGACAAATCCCGCGTTGCCAGTAGCTTGAATCTGCAACACCGCGGTCCAGACAAGCCGCGGTGGGT  
GAAGAGTAAGTTCTCACGAAAAACGGTCCGTTTTTACGCGTAATCACGGAAGGACCGCCACGCCCGCCAGCACCTGTA  
ACTCTTCGAGCAACGGTTTTATGAGAGTGAATGGCACCAGACCCGCGGGTCCGCGACGTTGAGGCCAAATTTGTTCCG  
GCAATCTTATAACCAAACGGCGACGCGCCAGCCCCGGCATTGACAGCCACCAGTCGCGATGACCAGCTTTTTCGCAACC  
GACAGTCATGCCGTTGAGTCAAGCGTGAAGCCTGTTTATCTTTCGCCACACTCAGCACTTCGCTACGCAATCTGAAGG  
TCACATTGCCCTTCTCGCACTCATCCACCAGCATGTGACAATCTGCTGCGCGGAGTCATCGCAGAAGAGTTGCCCTAAC  
GTTTTCTCGTGCCAGGCGATGCCGTGTTATTGACCAGATCAATGAAATCCCACTGGGTAAAACGTGCGAGTGCAGACTT  
ACAAAAATGCGGATTCTGGCTCAGATAAGCGCTGGTTCGACATAAAGGTTGGTAAAGTTGCAGCGCCACCGCCAGACA  
TAAGGATTTTGCGCCCTGGTTTTTACCATTATCGATCAGCAGAACCCGGCGTCTGCCTGACCTGCCAGCGCAGAACAG  
AACATACCCGCCGACCAGCGCTATAATAATGGCATCAAACCTTTCCACGTTCCGCTCCTTTAGAAAAACGGGCGTG  
AATTGTAAAGATTCTCAGTGGTGCACCAGCATCAATATTAATAAAGGAAGTATTTGCCTGAATTATATAAGATAATT  
ATTTTTGAGTGAAATCCATACAGGGGGCAAATCAAAAAAAGTCTATATTTCACTTTGCCCGCGCCGAAAGTCACTGA  
TAATGCGCCGCTTATGTCCTCAAATGGCGTAACGTCCTATGCTACATTTGTTTGTGGCTGGATTTGCATACCGGG

CTGTTATTATTGCTTGCCTGGCTTTTGTGCTGTTCTACGAAGCCATCAATGGTTTCCATGACACAGCCAACGCCGTGGC  
AACCGTTATCTATACCCGCGGATGCGTTCTCAGCTCGCCGTGGTATGGCGGCGGTATTCAACTTTTTGGGTGTTTTGC  
TGGGTGGTCTGAGTGTTCCTATGCCATTGTGCATATGCTGCCGACGGATCTGCTGCTAATATGGGATCGTCTCATGGC  
CTTGCCATGGTGTCTCTATGTTGCTGGCGGCGATTATCTGGAACCTGGGTACCTGGTACTTTGGTTTACCTGCATCCAG  
CTCTCATACGCTGATTGGCGGATCATCGGGATTGTTAACCAATGCGTTGATGACCGGGACGTCAGTGGTGGATGCAC  
TCAATATCCCGAAAGTATTAAGTATTTTCGGTCTCTGATCGTTTCCCCTATTGTCGGCCTGGTGTGGTGGCGGTCTG  
ATTTTCTTGTGCTGCGTCTACTGGAGCGGCACCAAGAAACGCGCCGATCCACCTGACCCAGCGGAGCGTGAAAAGAA  
AGACGGCAAGAAAAAGCCGCTTCTGGACGCGTATTGCGCTGATCCTTCCGCTATCGGCGTGGCGTTTTGCGACGGCG  
CGAACGATGGTCAGAAAGGCATTGGTCTGGTTATGTTGGTATTGATTGGCGTCGCGCCAGCAGGCTTCGTGGTGAACATG  
AATGCCACTGGCTACGAAATCACCCGTACCCGTGATGCCATCAACAACGTCGAAGCTTACTTTGAGCAGCATCTGCGCT  
GCTCAAACAGGCTACCGGTGCTGATCAGTTAGTACCGGCTCCGGAAGCTGGCGCAACGCAACCTGCGGAGTTCCACTGCC  
ATCCGTCGAATACCATTAACGCGCTCAACCGCTGAAAGGTATGTTGACCACCGATGTGAAAAGCTACGACAAGCTGTCG  
CTTGATCAACGTAGCCAGATGCGCCGATTATGCTGTGCGTTTCTGACACTATCGACAAAGTGGTGAAGATGCCTGGCGT  
GAGTGTGACGATCAGCGCTGTTGAAGAACTGAAGTCCGACATGCTTAGCACCATCGAGTATGCACCGGTGTGGATCA  
TCATGGCGGTGCGCTGGCTTAGTATCGGTACGATGATTGGTGGCGCGGTGGCAACGACTATCGTGGAGAAAATG  
GGTAAGAAAGCATGACCTACGCTCAGGGATGTCTGCCAGATGACGGCGGAGTGTCTATCGGCTGGCGAGTTATAC  
CGGGATGCCGTTTTCCACTACTCACGACTCTCCTCTTCTGTCGCGGGGACGATGGTGGTAGATGGTGGCGGCTTACAGC  
GTAAAACCGTGACCAGCATTCTGATGGCTGGGTGTTTACCCTTCCGCTGCGGTAAGTGTCTTCCGCGGGCTGACTGG  
CTCTCCTTGCAGTTCTGTAATCGTACGCACAAAACGAGCGGTCAGCTGGCCGCTTACAGATTGTGACATAGTGGCGT  
TTGTTTCATGCCGATGCGCGTGAACGCTTATCCGGCTACAAAAACATGCAAATTAATAGATTGCAGAGATTATGTA  
GGCCTGATAAGCGTAGCGCATCAGGCAATTTTGCCTTGTAAATCAGTCTCGAGCGGTCAGTTTACTGGCCCGCTTTTTT  
TATGCGTTATTATTGCTGAAGTGTAAATGCCAAATCATCAATGCAATCAGGCTGACCACCACGACCACACAATGCGC  
TGGTCAGAATAAACTGCCGACGACCCGCTCACAGCGGCAATAAATTCATCATCGTATGATCGCGATAACGTTGGGCA  
TAGATATACAAAACGAGACGCACCTGTTTGTGGTGGCCATGTGAGGTAAAAAGCCCCCTCCATCAACATATTGATA  
GAGCAATGGATCGAGTTACGCAGTACCACTAACACGCGGTAGTATGAGAAATAGCGCGCATGTTAAACATGAAA  
CGACACATAAAGCCAAAATAATGCGACGGTGTATCATACCTCTCCCGGCGACCTGCCCGGGAGTCCACCCCGG  
GGCTACCGCTCCCGATACGCTGCCAATCAGTTAACACCAGGTCCTGGAGAAACCGCTTTTGTGGTGAACACATACGAGC  
GGCTCTATAGATAGTGTAGGAGATCAGTTGTTTTTTTTCCAGAAGTTAACCACTATCAATATTTTCATGTCGAAAATT  
TGTTTATCTAACGAGTAAGCAAGGCGGATTGACGGATCATCCGGTGCCTATAAGGTAAGGATGGTCTTAACACTGAATC  
TTTACGGCTGGTTAGCCCCGCGCACGTAGTTGCGCAGGACGCGGTGACGTAACGGCACAAGAAACGCTAGCTGGCCAGT  
CATCGACAACCTTATGGAAGGAGTAACACTATGGCTTATAAACACATTCTCATCGCGGTGACCTCTCCCGGAAAGCAA  
AGTTCTGGTAGAGAAAGCAGTCTCTATGGCTCGCCCTACAATGCGAAAGTTTCTCTGATCCACGATAGTAAACTACT  
CTGACCTATACACCGGCTTATTGATGTGAATCTGGGTGATATGCAGAAACGCATCTCTGAAGAGACACATCATGCACTG  
ACCGAGCTTTCCACTAATGCAGGCTACCAATCACTGAAACCTGAGCGGCAGCGGACCTGGGCCAGGTTCTGGTCGA  
TGCAATCAAGAAATACGATATGGATTTGGTGGTTTGTGGTACCACCAGGACTTCTGGAGCAAATGATGCTTCCGCAC  
GTCAGCTGATCAACACCGTTACGTTGATATGCTGATTGTTCCGCTGCGCGACGAAGAAGAATAATCTTCCCTCTACGAC  
GTGTTCTGACGCGCCGATATGCGGGCGTTTTGCTTTTTGGCGCGCTTGTACCTGATCAGCGTAAACACCTTATCTG  
GCCTACGGTCTGCGTACGCAATCAAAATCCCAGCAATAACAATTTAACACCATCATATTTCCATCATTAGTGTGAT  
CATCTGGTTATTTTCTGTTGAATAGTGTATTAATCTATTACCAGCATCAATATTAAGAATCTCTGACAGATGTAACCT  
TTTTGCGCGTTATCCCTACGCGTTTACTTTTTAGGATGGTATTGGAAGTTAATAAATATGAATACAACAACACCCA  
TGGGGATGCTGCAGCAACCTCGCCATTTTTTCTGATCTTTTTTGTGAGTTATGGGAGCGATTCCGGCTACTACGGCGTG  
CAGGGCGTACTGGCGTTTTTCTCGTTAAACAGCTTGATTCTCGCAAGAGCAGGCTTTTTGCACTTTTTGGTGTCTTTGC  
TGCCTGGTCTATGGCCTCATTCCATTGGCGGCTATGTCGGCGACCACCTGCTGGGGACCAAACGCACCATTGTTCTTG  
GAGCACTTGTGCTGGCGATTGGCTACTTCATGACCGGCATGTCGCTACTTAAGCCTGACCTGATTTTCATCGCCCTGGGG  
ACTATCGCTGTCGGTAACGGCTGTTTAAAGCTAACCCAGCCAGCTTGTCTTTCGAAAGTGTATCCGCCGAAAGATCCGCG  
GCTTGATGGCGCATTACCCTGTTCTATATGTCGATCAACATCGGCTCGTTGATAGCGTTATCGCTGGCCCTGTGATCG  
CTGATAGATTCGGTTATTCAGTCACCTACAACCTGTGCGGGGCGGGTTAATTATCGCATTACTGGTTTACATCGCCTGT  
CGTGAATGGTGAAGACATTGGTTCTGAACCCGACTTCCGGCAATGAGCTTACGAAACTGTTGTACGTGTTACTTGG  
CAGCGTGGTATGATCTTCGATGCGCATGGCTGATGCACAACGTAGAAGTCGCAATCTGGTGTGATTGTTCTCTCCA  
TCGTCGTACCATCATCTTCTTCTGTCAGGCATTCAAGCTGGATAAAAACCGGGCGCAATAAAATGTTTGTGCGCTTTGTC  
CTGATGCTCGAAGCGGTGGTGTTTTACATTCTCTACGCCAGATGCCAATCGCTGAACTTCTTTGCCATCAACAACGT  
GCATCATGAAATCTCGTTTTTCCATCAACCCGGTCAGCTTCCAGGCGCTTAACCCGTTCTGGGTGGTACTCGCCAGCC  
CAATACTGGCAGGCAATTAACACGCATCTGGGTAACAAGGCAAAGACCTCTCGATGCCGATGAAATTTACTCTCGGCATG  
TTTATGTGCTCACTGGGCTTTTTGACGGCGGCGAGCTGCGGGAATGTGGTTTGGCGATGCACAAGGGCTGACATCGCCATG  
GTTTATCGTGTGGTGTACTTATTCCAGAGCTTAGGTGAAGTGTATTAGCGCCCTTGGCCTGGCGATGATTGCTGCC  
TGGTGCCGACGATTTGATGGGCTTATTCTCGGATGTGGTTCTGACGCAGGCTGCCGCTTCTGCTGGCGGCTAT

GTGGCAACATTTACCGCGGTGCCGGACAACATTACCGATCCGCTTGAGACGTTGCCCGTCTATACCAACGTGTTTGGTAA  
GATTGGTCTGGTCACGCTGGGCGTTGCAGTAGTGATGCTGTTGATGGTGCCGTGGCTGAAACGCATGATTGCGACGCCGG  
AAAGCCATTAATTATTCTTGAGAAAGCAGGGTAGCGTTATCGCTACCCTGTTTTAGTTTTACTGGCGTACCTGCATA  
GATATCAAAGCGATGCCCTTATGACTACCGCGTTTTGGCGTGGCGACATTCGCCAGCGGTGGCGCGTAGTCCGGGCGCT  
TTACCACCACGCGTTTGGTCGCCAGCAAGCGTGCAGGCTCCAGTAATCCATCGGCATCAAGATCCGGTCCACCAGCGAC  
TGAAAGACACGCATCTCTTTTTACTAGCGCGTTTTCTGCTTATGCGGGAACATCGGGTCGAGATAAACACCTGCCG  
GCGCGGGTAATATCAGTCAGCGCCGTAGGCTGGAGGCGTGAATTAAGTGAACCGCTCCGCAACCGCGCCGATT  
CCGCATCCGCATAAACACGCGCCAGGCGCTCGTCGAGTAGCGCGCAACCACTGGATTACGCTCCAGCATCCGCACGCG  
CAGCCGACTGAAGCCAGTACAAAGGCATCGCGCCCAAGTCTGCAGTGGCATCCACCACATCCGGCAAATAATCGCCTT  
AATGCCACCGCTTTCGCCACCGCCTCACCGCGACCACCGCGAATTTGCGTCGGTGGCCATCGCTCCGCCAACAAAAT  
CAACAAAGATGCCGCAAGTTTTGGCTCATCACGCTTGCAGCAATTCAGATGTTCCGGCGTAAACACCAGCGCCATCAGG  
TTGTCTTATCGTGCTCCAGCCCCAGCGGCGCCAGAACAGATAAGGCACCGTCTCCGGTGCCTGTTTCAATTA  
GCAGATTTTACTGAATGATCAGCCCTAATGCCGTAATGCTCCAGCATCGCATCCAGTCCGGTTCAGACCACGGAAG  
CGTTTGAACAGATCCATCGGCTCTTCTGAACCGCCAGGCTCAGAATGTTGTCGAGGAACGACTGCCCGTTTTACGCGT  
GAAAATGCCCTCTTCTCAAAGCGCGAGAAAGCATCGCCGCGAGTACGTACGCCACAGGTAGCTGTAGTAACCTGCCG  
CATAACCACCGCGAAAATATGGCTGAAAGCGTGGCGGAAACCGCCAGGACGGAGATGGCACCCAGCGCAACCGTTT  
TTGATTTCTGCCAGAGTTTTCGAGGATTTTTGCCCTGATCCGGCGGAACTCGGCATGAAGCGGAAAATCAAACAGGCC  
GAACTCCAGCTGACGAGAATAAACAGCGCCGCTGGTAGTTCTTCGCCCGCAGCATTTTTATCCAGCAACTCTTTCGGCA  
GCGGTTTCGCCGTTTTCATAGTGACCAGAGATAAACGCCAGCGCTCCGGTCCAGCACCAGTTTTCCATAAACTGACTC  
GGCAGTTCGACCGCATCCACGGCACACCGCTGATACCGGAAACACCAGCGTTTTGATGCGGGTCAGCATATGGTGCAG  
GCCGTGACCGAACTCGTGGAAAGAGGTGATCACTTCGTGAGTGAACAGCGCGGTTTTACCATTTACCGGGCGGTTGA  
AGTTACAAGTCAAATACGCGACCGTTTTGCAAAGAACCATCAGCTTTACGCATCTGGCTACGCAGTCATCCATCCAC  
GCCCCGCCGCTTGTTCACGGGCATACAGATCGAGGTAGAAGCTACCGCGCAGTTCGTTATTTTCGCATACAGTTC  
GAAGAAACGTACATCCGGATGCCAGACATCAACATCTTACGCTCTTACGGTGTAGTCCGTAATAACGTTAACCACTT  
CAAACAGGCCGTTAACCGCTTGTTCGCCGGAAGTACGGACGCAGCTGTTCTGCTACTGATGCTGTAGAGGTGCTGTTTT  
TGTTTTTCGCTGTAGTAAGCGATATCCACGGCTGCAACTCATCGACGCCAAATTCGGCTTTGGCAAAGGCACGCAATTG  
CGCCAGCTCTTTTTCGCCTGTGGACGCGCGGTTTTGCCAGATCGGTTAAGAAATCCAGCACCTGCTGCGGGTTTTCTG  
CCATTTTAGTGGAAGGGATTTAAAGGCGTAGTTTTCAAAGCCAGCAGTTGCGCCAGTTCGTGACGCAGCGCGAGGATC  
TCTTCCATCACCTTGCTGTTATCCATTTACCGCGTTTTGGGCTTATCGGAGGCGCGGGTCTGTAAGCGCGATACAT  
CTCTTACGCAGAGCCTGGTTGTCGAGTAGGTATTACCGCAAGTAGCTTGGGATATCCAGCGTCAGCAAATAACCTT  
CCAGCTCTTTCGCTTCGGCTGGGCTTTTTGCCGAGCCAGCGCGTTTTCTGGCATCCCCGCCAGCTCCGCTTCGTCGGTA  
ACGAGTTTGGTCCAGCCATTGTGCGATCGAGGACGTTGTTGCTGACTGGTTGCCAGTTCAGAAAGACGGGTGCGAAT  
TTCGCCGTAACGCTGCTGTTTTCTTTCCGGCAGACCTATGCCAGAGAGTTCAAAGTCGCGCAGTGCCTTATCAACCGCTT  
TCTTCTGCGCCGTGTTACGCGTGGCGTAATGATCGCCATCGCGCAGGTGCGGATACGCTTTATACAGCCCTTCATGTTGC  
CCTACCCAGGTGCTGTATCCGACAGCAGCGGAGGTTTTGTTGTTAGGCTTACGCAGTTCGGGCTATTTTTACCGGA  
GTTACGGTGGCTGACCGGGGAGAAGATACGCCCCAACACATCGTCCACTTCGCCAGCGGTGGCAGAGATTTCCAGG  
TGTTCCGGGAGAAATTTAGAAAACGGAGGCAATTCAAAGGGAGTACGTAACGGATTGCTATTGCGCAGTCTGGTTAA  
AGAGGTTAAGGAAGCGCTCAACAGGCGCTTACATAATGTGTGATGAGTAAAGTGAAGTGAATTTCAATGAGAAA  
CGTTACGCTTTCGCGGCGGCGGCTTTTTCGGTACTGTCTGATACGCTTTTTGTGCGCCCCGAATACGGGCGGATTT  
TTACTTACCGGAACACCTTTACCCATGCTCAGTTATCGCCACAGCTTTACGCTGGCAACCACGCCAGCTCCTTAAACA  
TACCGTTACAGCCTGATCATCGAGTGTGAAAGAGAAAGATAAACCGTTTTCTATCTCGACCCACGCAGGGGCGG  
GGCGTTATCAGTTAGGCAGCGAACATGCCGAGCGTACCGGCGAATATCTCGAAGGCATCGCCCGTATCTGGCAGCAGGAC  
GATTTGCCCGCAGAACTGGAGGCGTACATCAATGTGGTAAACACTTCAACCGTAGCGGTGAGTTGCGTTACTACCCCGG  
TTCGCCGTTGATTGCTCGCTGCTACTGCGTGAACAGGACAGCCTGCAACTGACCGAAGTGCACCCGAGCGATTACCCGT  
TGTTGCGTTTGAATTTAGAAAGATAGCCGTGCGCGTGTGAAAAAGCCGACGGTTCCAGCAGCTTAAGGCCAAACTG  
CCGCCGTTTTCCGCGTGGTTTTAATCCTTATCGACCCGCGTATGAAATGAAAAGTACTATCAAGCGGTGGTCAGCGG  
GATAGCAGAAGGTTACAAACGTTTTGCCACTGGTATTTACGCACTGTGGTATCCGGTGGTGTGCGTCAGCAAATTAAGC  
GCATGATCCAGATCTGAAAGCAGCGGATTTCGAAAATTCGAAAATGAACTGGCGGTAAGTGCAGACAGCGATCGC  
CGTGGCATGACCGCTTCCGCATGATTGTGATTAACCCGCGTGGAAACTGGAACAACAGATGAATAACGTGCTGCCGTG  
GCTGCACAGCAAAGTGGTCCGGCAGGACCGGGCACGCCACCGTAAGCTGGATCGTCCGGAGTAATTGCAGCCATTGC  
TGGCACCTATTACGTCTCGCGCTACAATCGCGGTAATCAACGATAAGGACACTTTGTCATGACTAAACACTATGATTACA  
TCGCCATCGGCGGCGCAGCGGCGGATCGCCTCCATCAACCGCGCGGCTATGTACGGCCAGAAATGTGCGCTGATTGAA  
GCCAAAGAGCTGGGCGGCACCTGCGTAAATGTTGGCTGTGCGCGAAAAAGTATGTTGGCACGCGGCGCAAATCCGTGA  
AGCGATCCATATGTACGGCCGGATTATGGTTTTGATACCACTATCAATAAATTCAACTGGGAAACGTTGATCGCCAGCC  
GTACCGCTATATCGACCGTATTCATACTTCTATGAAAACGTGCTCGGTAATAAACGTTGATGTAATCAAAGGCTTT

GCCCCTTCGTTGATGCCAAAACGCTGGAGGTAACGGCGAAACCATCACGGCCGATCATATTCTGATCGCCACAGGCGG  
TCGTCCGAGCCACCCGGATATTCGGGCGTGGAATACGGTATTGATTCTGATGGCTTCTTCGCCCTTCTGCTTTGCCAG  
AGCGCGTGGCGGTTGTTGGCGCGGTTACATCGCCGTTGAGCTGGCGGGCGTGATTAACGGCCTCGGCGCGAAAACGCAT  
CTGTTTGTGCGTAAACATGCGCCGCTGCGCAGCTTCGACCCGATGATTTCCGAAACGCTGGTCAAGTATGAACGCCGA  
AGCCCCGAGCTGCACACCAACGCCATCCGAAAGCGGTAGTAAAAATACCGATGGTAGCCTGACGCTGGAGCTGGAAG  
ATGGTCGAGTGAAACGGTGGATTGCCTGATTTGGGCGATTGGTCGCGAGCCTGCCAATGACAACATCAACCTGGAAGCC  
GCTGGCGTTAAAACTAACGAAAAAGGCTATATCGTCGTCGATAAATATCAAAACACCAATATTGAAGGTATTTACGCGGT  
GGCGGATAACACGGGTGCAGTGGAGCTGACACCGGTGGCAGTTGCAGCGGGTCGCCGTCTCTGAAACGCTGTTAATA  
ACAAGCCGGATGAGCATCTGGATTACAGCAACATTCGACCGTGGTCTTCAGCCATCCGCCGATTGGTACTGTTGGTTA  
ACGGAACCGCAGGCGCGGAGCAGTATGGCGACGATCAGGTGAAAGTGTATAAATCCTCTTTCACCGCGATGTATACCGC  
CGTCAACACTCACCGCCAGCCGTGCCGATGAAGCTGGTGTGCGTTGGATCGGAAGAGAAGATTGTGCGTATTCACGGCA  
TTGGCTTTGGTATGGACGAAATGTTGCAGGGCTTCGCGGTGGCGCTGAAGATGGGGCAACCAAAAAGACTTCGACAA  
ACCGTCGCCATTACCCAACGGCGGAGAGTTCGTGACAAATGCGTTAAATGTTAAAGGGCTAAGAGTAGTGTGCTCT  
TAGCCCTTAATTACGTTTCCGCTATCAGTTCAGAAGCTGAAGCAGAAAGCGGATCAGTTCAGCAGCGCAATTAACGCC  
CTAGAACGATGATTGCTTATCAATCACCCGTTTTCTCCATCGCATGGAGTGAGAATGCATCCGCTTACTCATCCACTGC  
CTGTACGGCGCATGTCTATTGTTAGATAAGAACTCTCTACTCCGGCCAGAGCATTAGTTAACGGCACCAACCGTACT  
TCTGACCAGGACTTTGAAAGCGTTTATGCGCATTGCCAGAGTAAAAATGCCTCAGAGCTAACTGGATAATCATAAGTAC  
ATGCAGTTATAAAAACAGCACGTCTTGAATAGTTTCAGTATGGTATTAGCATTGATGCGTTAGATGATGGCTATCTC  
ACTCCAGTCAGAGCCACCAACTCAGGGCTGGAAGTAAAAACCGACGCAAAGTCGGTTTTTTTACATCCGGATTCCGAC  
AAGGCTTAATATGACGATGACCCAGTAAAGTATATAAATCGTACTGCGATATATACCGAAGTGCTCCCTCCGCCAGCT  
GAAGAAATCGTAATTTGCAATGTTAGCCACTGGCTAATAGTATTGAGCTGTTAGATAAGAATCTCTCACTCCAGCC  
AGAGCCACCAACTCAGGGCTGGAAGTAAAAACCGACGCAAAGTCGGTTTTTTTACGTCCTGATTACAGACTCCTTTCA  
AATGAATAGCCAACTCAAATTCACACCTATTACCTTCTCTGCACTTACACATTGTTAAGTCATATATGTTTTGACT  
TATCCGCTTCGAAGAGAGACTACCTGCAACAATCAGGAGCGCAATATGTCATTTCTGTTACCCATCCAATTGTTCAA  
ATTCTTGCTGATGAAACCCGTCTGGGCATCGTTTTACTGCTCAGCGAACTGGGAGAGTTATGCGTCTGCGATCTCTGCAC  
TGCTCTGACCAGTCGACGCCAAGATCTCCCGCCACTGGCATTGCTGCGTAAAGCGGGCTATTGCTGGACCGCAAGC  
AAGGTAAGTGGTTTATTACCGTTATCACCGCATATCCAGCATGGGCGGCGAAAATTATTGATGAGGCTGGCGATGT  
GAACAGGAAAAGTTCAGGCGATTGTCCGCAACCTGGCTCGACAAAATGTTCCGGGGACAGTAAGAACATTTGCGATTA  
AAAAATTTAGCTAAACACATATGAATTTTACAGATGTGTTTTATCCGGGAGGCATTATGTTACTGGCAGGCGCTATCTTGT  
CCTGACCATCGTATTGGTTATCTGGCAGCCGAAAGTTTAGGCATCGGCTGGAGTGCAACGCTCGGGCGAGTACTGGCGT  
TAGTTACGGGCGTGGTCCATCCGGGTGATATCCGGTGGTGTGGAATATCGTCTGGAACGGGACGGCTGCGTTTTATCGCC  
GTCATTATCATCAGCCTGCTGCTGGATGAGTCCGGCTTTTTGAATGGGCGGCGCTGCACGCTCACGCTGGGGTAATGG  
TCGTGGTGCCTTGCTGTTTACCTGGATTGCTGCTCGGTGCTGCCGTTGCCGCCCTGTTTGCCAATGATGGCGCGGCGC  
TTATTTTGACACCGATTGTCATCGCCATGCTGCTGGCTTATAGGTTTCAAGTAAAGGCACTACGCTGGCGTTGCTGATGGCG  
GCCGATTATTGCCGATACCGCCAGCCTGCCGCTTATTGCTCCAACCTGGTGAATATCGTTTCCGCTGATTTCTTTGG  
CCTCGGCTTTGCGAATACGCCCTCGGTGATGGTCCCGTGGATATCGCCGCGATTGTTGCCACGCTGGTATGTTACATC  
TCTATTTTCGCAAAGATATCCGCAGAATACTGATATGGCGCTGCTGAAATCTCCGCGAGAAGCGATCAAAGATCCTGCT  
ACGTTCAAAACTGGCTGGTTGTTTTACTGCTTCTGCTGGTGGGATTTTTGTCCTGGAACCGCTCGGCATTCCGGTGAG  
CGCATTGCACTGTGGGCGCGCTGATATTTTGTGCTGCTAAACGCGGTCATGCGATTAATACGGGTAAGTCACTGC  
GCGGTGCCCTGGCAGATTGTCATCTTCTGCTGGCATGTATCTGGTGGTTTATGGCCTGCGCAATGCCGGAATTAACG  
GAATATCTTTCTGGCGTACTCAACGTGCTGGCGGATAACGGCCTGTGGGCGCGACGCTCGGCACCGATTCTCACC  
CTTCTCTCTTATTATGAACAATATGCCGACGCTACTGTTGGCGGTTGTCCATTGATGGCAGCACGGCATCTGGCG  
TTATCAAAGAAGCGATGGTTTATGCCAATGTGATTGGCTGCGATTTGGGACCGAAAATTACCCCAATTGGTAGCCTGGCT  
ACGCTACTCTGGCTGCACGTAATTTGCGAGAAGAATATGACTATCAGCTGGGGATATTACTCCGTACAGGGATTATCAT  
GACCCTGCCTGTGCTGTTTGTGACGCTGGCTGCGCTGGCGCTACGCTCTCTTTCACTTTGTAATGAGATACTGATATGA  
GCAACATTACCATTTATCACAACCCGGCTGCGGCACGTCGCGTAATACGCTGGAGATGATCCGCAACAGCGGCACAGAA  
CCGACTATTATCCATTATCTGGAACCTCCGCAACGCGGATGAACTGGTCAAACCTATTGCCGATATGGGGATTTCCGT  
ACGCGCGCTGCTGCGTAAAAACGTCGAACCGTATGAGGAGCTGGGCTTTCGGAAGATAAATTTACTGACGATCGGTTAA  
TCGACTTTATGCTTCAGCACCCGATTCTGATTAATCGCCGATTGTTGACGCGCTGGGAACTCGCTGTGCCGCCCT  
TCAGAAGTGGTCTGGAATTTCTGCCAGATGCGCAAAAAGGCGCATTCTCCAAGGAAGATGGCGAGAAAGTGGTTGATGA  
AGCGGGTAAGCGCTGAAATAAAGCGGCGATATCCCCCACAGTGTGTTAGAAAAGTGCCTTTATTTATGTCGGATGC  
GACGCTGGCGCTTATCCGACCTACAAAGTTATGAAAATTCGATGAATAGTATGTTATTTGTAGGCCTGACAGGCGTA  
GCGCATCAGGCGATTTGCTATTTACACAGTACTCCCTGCGTGAGATTCCAATTATCGCGTCCAGCATGGTGTATCAGTG  
AGCTGCTTAGTTATCAGCGATACAGCGCAGTAGTTTAAAGACGTAAGTATTGATTTATCAGTGGTTTACACAACAAA  
TTATTAATAATTATAAGATACCTTAACCCATTTTATTATTACACATCTAAAACATCACAACAAAAAATCACTTACACAC  
TATCAGAGAACATAAATACTTTTTAAATGAGCGCATTTTGTAGTTGTTAACGATTTCTTTACGATACTACTACTACC

CTTTTTTACACAAAATATTACCGGGTGGAGATAAAAAGGAAATCAAAGGTAATTATATCAGGAAGATATAACGCATTA  
CATTATTGTGTGAGAAGAAAATCCATTCTGTCTAATTATCCAATTTAAACATCTTAGCATAAAAACAAATGATGAAT  
AAGGAATTTTATGTCAATTGACTTTACCCAGGTATAATAAATACATATCACGGCGATATTTATAACTGCACAACAAATA  
CCGATAATGCTAAAACGCCAGACACACCGAAGTGGCCTTGGCATAATTGGGAAGAACAACAACCCATTAATTCCACATTC  
TCTGGAGAAGGATATATCTCTGATCAATATGATTTAGCGCAACACCAACTTCAACAAATTAATGCGTGCCACACGAACAC  
TACATATACAAATGCAGACTACTCAAAAGTTGTGGCTCAACTGTAAGTCTTATTACTAACATTGAAACGATAAGTTCGA  
CACAACCTACGCCAACAGACACAATCAATACTTAATCAGATTAATAACATTAGATATGAAAAAACAACAAAGTGTGAATGT  
CGAATCATTGTTATCGCTAATCCTAAACCCGACAAGGCAATCATAACTAAAATTAGCGTAGAAGAGGGAAATACCCATAAC  
ATTAGTGTCCAAACCATGTTTTAGATACTAATTTTATTGCTGAACAACGAGCTGACTTACCAACTAATATAAAAGATA  
TTCAAAGCCTGTATCAAAAAATGACGAAGTTATATTTGAGCACAGTGAAAAAACAACAGGATGAAAGTCTTTGCCGGA  
ACCAACTTTATTGATTTCAATATGACAGGACAGAACCTGTCCGGTTCGTTCTAACCTTGCAAGTTTTATTTGGAAGA  
TCTACTTAATAAAATTTACTGACGCAATTTAGGGAAGTGCAGTAAGCGGGGAAATCTTCTCGGCTGACTCAGTC  
ATTTCAATTTCTCATGTTGAGCCGATTTTTCTCCGTAATGCCTTGAATCAGCCTATTAGACCGTTTTCTCGCCAT  
TTAAGGCGTTATCCCGATTTTTAGTGAGATCTCTCCACTGACGTATCATTGGTCCGCCGAAACAGGTTGGCCAGCG  
TGAATAACATCGCCAGTTGGTTATCGTTTTTCAGCAACCCCTTATGATCTGGCTTTCACGAAGCCGAACGTGCGTTGATG  
ATGCGAAATGGGTGCTCCACCTGGCCGGATGCTGGCTTTCATGATTCGATTTGATGTTGATGGCCGTTTTGTTCTTGGCTGG  
ATGCTGTTTTCAAGTTCTTACCTTGGCCGGGCGCTCGGCGATCAGCCAGTCCACATCCACCTCGGCCAGCTCCTCGCGCT  
GTGGCGCCCTTGGTAGCCGGCATCGGCTGAGACAAATGCTCCTCCTCATGCAGCAGATTACCCAGCTGATTGAGGTCA  
TGCTCGTTGGCCGCGGTGTTGACCAGGCTGTGGGTGAGGCCACTCTTGGCATGCACCAATGTGGGCTTCATGCCAAA  
GTGCCACTGATTGCCTTTCTTGGTCTGATGCATCTCCGGATCGCGTTGCTGCTCTTTGTTCTTGGTCGAGCTGGGTGCCT  
CAATGATGGTGGCATCGACCAAGGTGCCTTGAGTCATCATGACGCTGCTTCCGCCAGCCAGCGATTGATGGTCTTGAAC  
AATTGGCGGGCAGTTGATGCTGCTCCAGCAGGTGGCGAAATTCATGATGGTGGTGGGTCGGCAAGGCGCTATCCAG  
GGATAACCGGGCAAACAGACGCATGGAGGCGATTTCTGACAGAGCATCTCCATCGCGCCATCGCTCAGTTGTACCAAT  
GCTGCATGCAGTGAATGCGTAGCATGGTTCCAGCGGATAAGGTGCGCGCCATTACCAGCCTTGGGGTAAAACGGCTCG  
ATGACTTCCACCATGTTTTGCCATGGCAGAATCTGCTCCATGCGGGACAAGAAAATCTTTTTCTGGTCTGACGGCGCTT  
ACTGCTGAATTCAGTGTCCGGAAGGTAAGTTGATGACTCATGATGAACCCTGTTCTATGGCTCCAGATGACAAACATGA  
TCTCATATCAGGGACTTGTTCGCACCTCCTTAGGTGACACTATTTTTTTACATAAAGAACACCCCTACCCCAAATTATA  
TAAAGATGGACAATATCTTGACAAACAAATCGAAGTTTATTTTTCAACATTATTAACCATTAATGACAACCTTTTACGAG  
CAAAGCGGAAATTGCTTCGACAATAATTAATTTTTAGAGGCCAGGATAACCAATCTTTCATACAATGACATATTAATA  
TATCAGCAAGAATTCAAAGACAATGTTATAAGCAAGTTAAAGCCTTACGACACTCTCCCGATACAATAAAATTCAAAC  
ATGGGCAGAAATGCTGAATATCAATTCGAAGTATTTCAATACGAGACGCTTAACCCAAAAAATGTACACACGCCTT  
ATTTAAAGAGGCCACTGCCTAATGAAAAAGATATAAATTATGGGGTGGAAATAGAAATACCATCTGGTAAAAAGATTGCG  
TTATCAAATCATTACCAGAAATAATACCATAATATTGATTATTAGCACTTTATAATCATTGAATAAAAAATAGATTTTAT  
GTACTTTTAAAAAATGCACTATATTATGGGGTGTGGATATTCATGTCACGCCCAAATTAACCTGAGTTACCTAAAC  
AGAAAGGATATAAACATCAGACAGGTTACGTTACTATCAGGCATATCACCTCAGAATCAGATGAAAATATAAAGAAAT  
ATCTATTATGGTTTTAATTTTTGTTGATAAGGATAGTAACATGAACATGACAAAAGGTGCACTCATCCTCAGCCTTTCAT  
TTTTGCTTGGCCGATGTAGTTCAATCCGCAAAATATCAAAGGCAATAACCAACCTGATATTCAAAAAGTTTTGTTGCT  
GTTCATAACGACCGGGTTATATGTTGGTCAACAAGCGCGCTTTGGTGGGAAGGTTATCAACGTTATCAATGGCAAAC  
GGATACGTTGTGAAATCTGTATTACCGTTGGATAGCTATGCGAAGCCTGATATTGAAGCCAATCAGGGCCGAC  
TGCTCGCCAGACAAAGCGGCTTCTTGTCCAGTGAACATCGTAATCACTTTGTTACCATCCTCGGCACCATCAGGGT  
GAACAACCTGGCTTTATCAATAAAGTCCCGTATAACTTCTGGAAGTGAATATGCAGGGCATCCAGGTGTGGCATTGAG  
AGAAAGTGGTTAATACCACCTATAACCTGTGGGATTACGGCTATGGTGCATTCTGGCCGGAACCGGGCTGGGGTGCCTT  
ACTACCAATGCGGTGAGTCAGGTAACACCTGAGCTGGTCAAATAACACCACCGAAAGATGCAGATGCTTTCTCAGCAT  
CTGCATCATGCATTACATCAAATTAATACACAGTAAGTAACTATTATTATAAGCCCTGCTGTTAATTACCTTTG  
GCAAACCTGATTATAAAGTTAATGTCCGCACCAGGAGTCGGTTATGTTTTCTTATAATTACCAGGGATACGATGTTCTTAC  
CGCGATGAAAAACATTCTGAGTAAAGGTAATGTCGTTATACAGAACGAAGAAGAGATCGACGTAATGTTGCATCAGA  
ATGCCTTCTGCTATTATTGATACATTAATGAATAATGATTTTCTAATTTTCTCACTCAAATGAAACGATTAAAACCT  
GTCCATGCTATTATTTCTCCCTTTAATATTAACGCTGCCTGGGAAAGTCCCGGTGACCTTTGTTCCGCGGACTAT  
CACTATCATTGATTTTGTGCACTCATCAATGGCAGTTACTGCTCTGTGCTGAAGCGGCTGTGCACTTTCGCGCAAGC  
AACATCAGGTTCTGAGCTGCATTGCGAATCAAATGACAACGGAAGATATTCTGGAGAACTGAAAATATCGTAAAAACG  
TTCTACTGCCATAAACACAATATCATGATGATCCTCAATCTTAAGCGGATCAATGAGCTGGTACGCCATCAGCATATTGA  
TTATCTGGTGTGAATTTAGGCTTACGGTGTGCTGCTACGCTGCCACACAGATTAGCTAATTGAAACGCCTTTCACCC  
CTGCCATACCTTTAATAATCGCAACAGGCTTCTATCGACGTTGTGGCATGAAGCTGGATATCAATGGCGACCACTTCA  
TGATCTTCATTTTCTGCAACGAACTAAATCAGTTTTTATTTTTGCTGCTTAAACCAGTCGAGCATTGATACCGTATT  
ACCGTTCACTAATGTCAGCTGTAATGGTAATTTTTGTTTCATCAGGCGGAAGGTTAATTGATGGAAGACTTCCAGCACCA  
CAAAGGTCATCACTGAACCAATAATACCCAGTTCGTACATACCGCTGCCAATAACCATACCTATGGCGCGGTACCCAG



ATATCCGCTGCCGTCGTGACACCTACAATATTTTGGTTACGAACGAGAATGTTACCTGCACCGATAAACCCGACGCCCGT  
CACCACCTGAGCAGCAATACGGCTGGGGTCGAGTCCGACGTGATCTAAAGACAGCACGTGACGAAAACCATATTTTCGAAA  
CAATCATAAACAGGGCGCTTCCCATGCCAATTAATACATGTGTGCGTAACCCCTGCTCCTTTGCCGCGCATTTCCTTTCC  
ATGCCAATAGCGCCACAGGCAATTGCCGCGAGTATAAGACGTATAATAAATTCTGCTGTCATATAAAAATGCAAAAAGGA  
GCAGCAAGATGGCTCACTTGTACTCCTTTTTACTTGGACCTCATTAATTCGCAAGTCATTAGATGCTTGATTTTTGA  
AGGTATACAAATTTTTCTGCGGGTTTTCTTACAGTATTCGATCACTTTAGGAATTTGAGTGAGATCGGTTTCATTTAA  
GTAACGGTATCGCCACCTTTATATACTGTTTCTTATGCGACATCCACCATGCAACCGGGTCATTGCTTTTGGATTACAG  
ATCAATAAATTCCTGGCAGGTCATATCTTTAGCGGATTATTGGCTGCCAACGCAGATTGTGCGTTCACCAGTGACAAAG  
CCGCTACAGCGCCATAAAAATAAACGCTTTACGGAGAGATGAAATATTCAATTTGTAACCCATTCAATATAGAGATTAT  
ATATGAACAGGAGGAATAGCTGCTTTTAAAGAAGATATCCGGCTGTTCAATATGCAAGGAAGTACGATGTAACGCATT  
CCCGGAATTACATATCTTTCTAATTTTGTCCATTGCGCTTTAACTTTATCTTTAAAGTTGGCTTGTATCCTGAGTA  
CAAGCCTGAACGATAGCTGGGGTACGGTTGCAATACCCTGAACATCTAAAACCGCATCTTCTGGTTTATCTTTGTTGTT  
CAGCGCTTCAGCAAAACCACTGCAGTTGGCTGGAAGGATTGCTCCACAGCCAGGAAATCTTACAGGTCAGGAGTTGA  
CCGGTTTTTTGTTATCAGCTGCTTTTTGCGCATCCGCTGCATTGCTCACAACGGCAGAAGAAGCAGACCACCAAGAATA  
ACGCCTAATACTTTTTTTCATCGTAATATCCTCAACTATAAAGTAAAAGAGCCGTCACGAATCAATTTGACACTGAGTT  
ATAACCTGGTTTTCTGTATATGTCTATGTTGATGGAAAATATAAAAATCAGATATTTTTATTTCAATACAATGAGTTACAG  
ATGCATCAGATACTGCAATAGGAAATTTTTATTAATCGACTGCATTCTTAGACGCGTTTTTGGCATAGATTGATAGCA  
GGGGATTTTCTTCTAATTTTATAGGGTGGTTCTATGTTATATATAGATAAGGCAACAATTTTGAAGTTTGATCTGGAGA  
TGCTTAAAAACATCGCAGAGCAATCCAGTTTATTGCCGTGCTGCTGTTATCGTCGGGTTGCTGTGTATCAGTTTCCCG  
TTCGCTCTGGCGATTTTTAAGCACAGTAGTGGTGCATTATTAATCTGCTCGGGTATTGCGCTTATTGTCGGGTATT  
CAGCAACCGCAGTCATAATTTCTGGCCGTATTATCCGGTTTCTCGTCGAGTCGCTATTTATTGATCGGCTATTTCT  
TCATCCGCGCACCGGAGCTGGGCATTTTTGCCATTGCGGCATTTATTGCCGGTTTGTCTGTGTTGCAGGGTTATTCCG  
CTGATGAGTTGGTATCGTCAGCGTTCAATGAAAGGCAGCTGGCTACAGCTCGTTATTGGTGTGCTGGATATCGTCATTGC  
CTGGATTTCTTGGTGAACGCCGATGGTGTCTGTAACGCTGGTTCCACACTGGTGGGAATTGAACTGATATTTAGCG  
CCGCCAGCCTGTTAGCTTCCGAGTTTGTTCGTTAAGCAGCAATAATTACCCCGTTGTCACCCGGATCATAGTCACTT  
GATGTGACTATGATCCGATTAATACTCTCTCCGCTACGCACTGTTGTAGATCAATTGCGCACTATCATTGAAATAATTAC  
CTGCTAGTGATTATTTCAACCTACTGAATTTTCTAATTTTTTCTACTCTATGGCAAATTAGCCATTTCAAACATTATC  
ATGGCTGATATTTTCCGTAGTCAGGTTAATGTTTTAAAAGTGTGTGGGAAAGTGAACAAAGAGTCCGTAAGCGTTGA  
TGCTATGGGCGTTAAATAAGTAATCCGGGTTCAATTTTTTGAACCTGGCGTTGATTACATTGCATAAATATCCGTGTCT  
CCAGACGCTATATAAAAACCTGAAGACATGAATGCGTTATTTACTCAGGTAATTTCAATGCGTTAAAAGAAAGCTGGCAA  
TCCAATTGCCAGCTTAAGTCGAAACAAGGAGACTCGATATTTAAATCGGATTACATTTTAACTTTAGTAATATTCTTACAG  
AGATCACAACCTGGTTATTGATAAATTATTCTTGGGCGATAATCCGCAAACGTTAACTTTTTGTTTGCTATTTACAAGCT  
GATAACAACCGAATCTTACTTAGGATCAATATATGGAGTGCCTGATGGATAAATCTGAAGTATTGATTAGTGTTAATA  
GACGTATTAGTTCACGAAGGGTAAAGTTCTTATAGGCGTTACTATATTGAACAACGATTCCGGACAAGGATGTAATAAT  
GAAAAGGATGACATATTCGAAACGATAACGGCTAAGGAGCAAGTTATGATTTTTCTCATGACGAAAGATTCTTTCTTTT  
ACAGGGCTTTTGGCAGTTGAAAGATAATCAGGAAATGATAAAAATCAATCCCTGTCAGAGATCAAAAAGTAGGCAATA  
AACCTTCAAGGTTATCATTGATACCTATCAATCATATCCTTGATGAAGAAGCGATTAATTTCTGGAGAATTAGAT  
GCCGAGAGAATTATTGTTTTGGCACCTTATCACATCAGTAAACTAAAAGCTAAAAGCGCTATTTATTTTGTAGCCGCAA  
AGAAAGTATCAAAAATCTTCTTGGATTACTTATGGTAAACACTTGCCCCATAAGAATTCACAATTATGTTTTTACATA  
ATCAGTTCAAAAATGCAACTGATTCTGAAAAATAAAAATGAAAGCAATATCACGTCGACGCTCAATATTTTCGCAACAA  
ACATTAAGATTTCAGAAATCAACATTATGTACAAGCTGAAACTAAGACGTATGAGCGACATCGTCAACCCTGGGTATCAC  
ATCTTATTTTTAGTCAGGACATAAGCAACTGAAATTGATGGCTGGCATGACGAGGGATGCAGATGCTGATTTTCAATACC  
CCGGTGATTACTAAAGGAGAGGCTAAAACGACTTTATCCCTGGTATGTGTATCCACCAGTAGAACCTTCTGTTGCCCG  
AATGCTGGCAGGAACTGTTGGCAGAACGGCAACATTTTTTTTGTGCTTGACCTCACCATGTCGATCACTGTGCTGTATC  
CCACCTTACTGGCTGACAACCCACTATGCCGCTGGTCTGTAATCCCTCATATCTCTCCTCGCGCGCAATTTAAGAAC  
CGTTATTTCTCAAGAATTTTTCAGGGACTAAAATGAACAGAAGAAGAAAGCTGTTAATACCGTTGTTATTCTGCGGCGCA  
TGCTCACCGCTGCGATGACAAATCGGCGGAAAACGCCCGCCATGACGCCTGAGGTGCGTGTGTCACACTCTCCCC  
GGTTCGGTCAATGTGTTGAGCGAATTGCCGGTAGAACGTTCTTATGAAGTTGCCGAGATACGTCCCCAGGTGGGCGG  
TATTATCATTAAACGCACTTTATCGAAGGCGATAAAGTGAACCAGGGCGATTGCTGTATCAGATTGATCCTGCACCTT  
TACAGGCCGAGCTAAACTCCGCCAAAGGCTCGTGGCGAAAGCGCTCTACC GCCAGCAATGCCGCATCACCTTTAAC  
CGCCAGGCATCGTTGCTGAAGACCAACTACGTTAGCCGTGAGGATTACGACACCGCGCGCACCCAGTTGAATGAAGCAGA  
AGCCAATGTCACCGTCGCCAAAGCGGCTGTTGAACAGGCGACGATCAATCTGCAATACGCGAATGTCACCTCGCCGATTA  
CGGGCGTCAGCGGGAAATCGTCCGTGACCGTCCGGCGACTCGTTACCGCTAATCAGGCAGATTCGCTGGTTACCGTACAA  
CGTCTGGACCCGATTTATGTGATCTCACGAGTGGTGAAGATTTCTTACGCATGAAAGAAGAGGTCGCCAGTGGGCA  
AATCAAACAGGTTTCAGGGCAGTACGCCAGTACAGCTCAATCTGAAAAATGGTAAACGCTACAGCCAGACCCGACGCTGA  
AATTCTCCGACCCGACAGTGGATGAAACCACGGGCTCCGTGACGTTACGGGCGATTTTCCCAACCCAAATGGTGACTTG

CTGCCTGGCATGTACGTCACGGCATTAGTGGATGAAGGTAGCCGCCAGAATGTATTACTGGTGCCGCAGGAAGGCGTCAC  
CCACAACGCCAGGGTAAAGCAACGGCGCTCATTCTGGATAAAGACGATGTCGTGCAGCTACGCGAAATTGAAGCCAGCA  
AAGCCATCGGCGACCAGTGGGTCGTACCTCTGGCTTGCAAGGCTGGCGATCGGGTGATCGTTCCGGTTTGAACGCATT  
CGTCCGGGTATCAAAGCACGAGCAATTTCTCCAGCCAGGAAAACGCCAGCACGAATCGAAACAATAACGTTGCAGGCT  
TAAGGGGACTTTCATGGCTAACTATTTTATTGATCGCCGGTTTTTGGCTGGTACTTGCCATTATTATGATGCTTGCA  
GTGGTCTGGCGATCATGAACCTACCGGTTGCGCAGTATCCGCAGATTGCGCCACCGACCATTACCGTCAGCGCTACCTAT  
CCAGGTGCCGATGCGCAAACGGTAGAAGACTCGGTCACTCAGGTGATTGAGCAAAATATGAATGGGCTTGATGGCCTGAT  
GTACATGTCTTCAACCAGTATGCGGGGGCAATGCCTCTATCACTCTGACCTTCGAGACTGGGACATCTCTGATATCG  
CACAGGTTCAAGTGCAAAATAAACTGCAACTCGCTATGCCTTCATTACCTGAAGCAGTGCAGCAGCAGGGGATTAGCGTC  
GATAAGTCGAGCAGTAATATCTGATGGTAGCGGCTTTATTTCTGATAACGGCAGCCTCAACCAGTACGATATCGCGGA  
CTATGTAGCGTCTAATATCAAAGACCCGTAAGCCGTACCGCGGGCGTTGGTAGCGTACAACCTTTTGGTTCCGAGTATG  
CCATGCGTATCTGGCTGGACCCGCAAAAACCTCAATAAATAAACCTGGTACCTTCCGATGTTATTTCCAGATTAAGGTG  
CAAAACAACCAGATTTCCGGTGGTCAACTGGGTGGCATGCCACAGCGGCAGACCAGCAGTAAACGCCTCGATCATTGT  
GCAGACGCGTCTGCAAACCGCGAAGAATTTGGCAAAATCTGTTGAAAGTTCAGCAAGATGGTTCGCAAGTGTCTGTC  
GTGATGTCTGCTCGCTGCAACTTGGGGCGAAGATTATCCACCCTGGCAGTCAAAGAGAACTGAACCGTTATCAGCCTA  
GCCATCAAACCTGGCTGCCGAGCAAACGCCCTGGATACCTCGCGGGCAGTCAAAGAGAACTGAACCGTTATCAGCCTA  
TTTTCCCGCAAGTCTGAAGACGGTTTTATCCTTACGACACCACCGCGTTTTATCGAAATTTCTATTTCAGGAAGTTTTCAAAA  
CACTGGTTGAGGCTATCATCCTAGTCTTCTGGTATGATATCTGTTTTTGCAGAATTTCCGTGCCACAATCATCCCACG  
ATTGCCGTACCGGTGGTTATTCTCGGGACGTTTGGCATCTTGTGGCGGTGGTTTTACCATCAACACGTTGACTATGTT  
CGGGATGGTGTGGCGATAGGGTACTGGTGGATGACGCCATCGTGGTGGGAGAACGTCGAGCGTGCATTGCGGAAG  
ATAAGTACCGCCGAAGGAAGCAGCATAAATCGATGGGGCAGATCCAACGTGCGCTGGTGGTATTGCCGTTGTTCTT  
TCCGCAGTGTATGCGGATGGCCTTTATGAGCGGTGCAACCGGGGAGATCTACCGCAGTTCTCCATCACGCTGATCTC  
CTCCATGCTGCTTTCAGTATTTGTGGCAATGAGCCTGACCCCTGCCCTGTGCGCCACCATTCTGAAAGCCGCGCGGAAG  
GCGGTCACAAACCTAACGCCCTGTTGCGACGCTTCAACACGCTGTTTAAAAATCAACTCAACTATAACCGATAGCACC  
CGCTCGCTGTTGCGTTGTACCGGTGCTACATGGTGGTCTACCTGCTGATTTGCGCCGGGATGGCGGTGCTGTTCTGCG  
CACGCCGACCTCTTTCTTACCAGAAGAGGATCAGGGGGTATTTATGACCACCGCAGTTACCTTCCGGTGCCACCATGG  
TTAACACCACGAAAGTGTGCAACAGGTGACGGATTATTATCTGACTAAAGAGAAAGATAATGTCCAGTCGGTGTACC  
GTTGGCGGCTTTGGCTTACGCGGTGAGGGGCAAAACAACGGCCTGGCGTTTTATCAGTCTCAAGCCGTGGTCTGAACGTG  
CGGTGAGGAAAACCTCGGTTACCGCGATCATTACGCGGCAATGATTGCGTTAAGCAGTATCAATAAAGCCGTGCTCTCC  
CGTTCAACTTACCCGCGGTGGCTGAACTGGGTACCGCGTCAGTTTTGATATGGAACGCTGGACAACGGTAACTGGGG  
CACGAAAACCTAACCCAGGCGGAAACGAGCTGTTATCACTGGCAGCGCAATCACCGAATCAGGTACCCGGGGTACGCC  
GAACGGCCTGGAAGATACGCCGATGTTCAAAGTGAACGTCAACGCTGCGAAAGCTGAAGCGATGGGCGTGGCGCTGTCTG  
ATATCAACCAGACAATTTCCACCGCTTCCGCGAGCAGTACGTGAACGACTTCTCAACCAGGGGCGGGTGAAGAAAGTG  
TATGTCCAGGCAGGCACGCCGTTCCGTATGTTGCCGGATAACATCAACCAATGGTATGTACGCAACGCCTCTGGCAGAT  
GGCACCCTTTCTGCCTACTCGTCTACCGAATGGACCTATGGTTCACCGCGACTGGAACGCTACAACGGCATCCCGTCAA  
TGGAGATTTTAGGTGAAGCGGCGCGGGAAAAGTACCGGTGACGCCATGAAATTTATGGCAGACCTGGTGCCTAACTT  
CCGGCAGGCGTGGCTACTCATGGACCGACTATCGTATCAGGAAGCGTTATCCTCAAATCAGGCTCTGCGCTGTATGC  
GATTTCACTGGTGTGGTGTCTCGCCCTCGCCGACTCTATGAGAGCTGGTCAATTCGGTCTCGGTGATGTTGGTTG  
TTCCGTTAGGCGTGGTTGGCGCATTACTGGCCACCAGTCTGCGCGCTTAAAGTAAAGTACGCTACTTCCAGGTTGGTTG  
CTGACCACCTCGGGCTTTCCGCCAAAACGCCATCCTGATTGCGAATTTGCCGTTGAGATGATGCAAGAAAGAGGGAA  
AACGCCGATAGAGGCAATCATCGAAGCGCGCGGATGCGTTTTACGCCCAATCCTGATGACCTCTCTGGCCTTTATTCTCG  
GCGTGTGCCGCTGGTTATCAGTCATGGTGGCGGTTCTGGCGCGAAAACCGCGTAGGTACCGGCGTGGTGGGCGGGATG  
TTTGCCGCAACAGTGTGGCAATTTACTTCTGTTCCGGTCTTTTTCGTTGTAGTGGAAACATCTCTTTGCCCGCTTTAAAAA  
AGCGTAACGTGTAATGAGAGTAAGGTTGAACATGAAGGTTACGCTTACTCTTCTGCTAACCACTTCAACACTCAACA  
ACCAGTAAACCGTCAGGAATACCAGGCTTAGTACACAGCACTGAAAGTAGAAACCACTCCAGCATTCTGCATCAATTTG  
AACAAACAATACTGACCCACATTTCCCGTAATCGTATGAATTTGACGCTTAATAATCCCAAACATGCCGAGTCTTTTCT  
CCTGAAAATACCGATACCGCTGGCAAACCTGCGAAAGAGAACTAGCCGGTAGCCCGGCAGAAATCATCAGGGAAGAGTTT  
CACATGAAGCAGGTGTGAGATCCTGACCAATATTCAAATGCGAAATATGTCAGGAAAAGGTACCTGGCGAATGTTGCGCA  
AACTGATGTGGCGTTACACCATAATATTGCGAAATGTGTTTATAAAGTACGATGTAAGTACTGATAGCCACATTTTCCGC  
AATAGTATGCAGAGGAATTTGACGTAACCTCGAGTAATCGTCTGGCCATCGACATCCTGGAGGCGAGTAATATTTACTGA  
AACAGGTATTTTCTCCTGCAACTTTTTTTTTGATTAGACTCTCGCTGGTATACATTTCTTTCCGCGATATCGCGCAGATA  
CAACGTTTGGCGATATCAAAGCTAATAAGGCGTTCAACTTTTTCTGAAACAGTCTGATGCTATTGAAAAGTAAGGGGAT  
CAGTTCTTTCTTATGAGAAAACATCGATAAACAGGAAAGGTAGAGCATATTGCTCAGTATCGGTGAATTTACCCCGGATT  
CATTGAAGCTATCAAATCGCCGTCACCAGCGGATGGGGGGTACTGGTTAATTAACAAACGGTCTTTGCTGTGTAAC  
CCTAAATTGCGTGGTAGCTGACGAATTTTTGTAAGTAATGGCAAACGTCAGCTCATCGATATCCAGTCGTGCGTATC  
CGGTGAACAAAACGCAAAATCGTCTGCCAAATTTTTCTCAGCAGCAGAATACTCTCGTTATGCAGCGATATTTTTGTCT

GTTTCATGATAAATATCGAATGAACGACGAATGAGGATCACCGAGCAGACATGAGTCATGATTATCCCTTATATTTTCATAC  
TGCGATTATTTCAATTTTCAGTATACTAATGAAATGATGCCAGACTGTTTTCTAGCGCAAAAACCTGCCAGATTTGGTAGGA  
CCAAAATTTATCCACAAAGTAGTTTTGCATAACAGTTAATTGATAATAAGTAAATGCAGCAGCAATATATTTTCGCACAG  
CGTATAGCTTATGTTTATAAAAAAATGGCTGATCTTATTTCCAGTAAAAGTTATATTTAACTTACTGAGAGCACAAAGTT  
TCCCGTGCCAACAGGGAGTGTATAACGGTTTTATTAGTCTGGAGACGGCAGACTATCCTCTTCCCGGTCCCTATGCCGG  
GTTTTTTTTATGTCTGAGTAAAACCTCTATAATCTTATTCCTTCCGCGAGAACGGTCAAGTCCCTGAAAATTCCTTGGCGA  
ACAATACTTGGCCCGAGTACGGTTCGACAATCTCTGCGCCGATCGCTCCTGATACTCTGTGGGCGTATCCCATAATA  
ATTTTCGAAAGCGTAAATGAAATACGACACGCTGTGATATCCACAGGATACTGCAACTCGCTTAATTGAAAAACCATGTA  
TAACAATAAGTTGCAAAGCAGTTGCATTCTACACTCAGTAAGCAACTGTGAATATGATGTCTTCTTCCGCGCAATTTT  
TTCTTTAACAGACTTGGACTCATCAACAGCTCGCTGGCGATTCCGGCTAGTGTCCACTCATGGGCGATATTATTATTGAT  
AACCGTACAAACTCGTGTTCGCATGTTCCGGTTGTAACAGTTCCAGAACGAGCGGTATAAAGTGTCTATCCTCAAGAAAA  
CAGATAACAACGCAAAGATTAATGCTCTTTACGTAGCATTCTGCATAGCGAAGATTCTATTCTGCGATAGTTGGCGA  
ACTTCTGAAAAACAGGAATATCTCTACTACAGTGTGAACGAGTAATGAAGAACTTTTTTATGTGCATGAAGATTTAA  
TGCCTCCTCCTTGAGCATCGGAGAAAATGAAAGCGTGTCCCTTGACACGAATACAAAATTTTCAACACACTTATCTA  
CTCGAATTTGGCTTGCATCCGCAAAAACAGGTCACCGCCATTAATAAGCGATATTACCATTAAACCTGGTGAGAATA  
TATTTATGTCTTGCATACGCAATTAGACAATCCCATGTAGTGATTGCATAGTTGACTTAATATTACATAAAACATATTAC  
TGTTTTAATAAGTAGCACGCCGCCCTCTTAAGTCAAATTTGATTGATAAATAAATTTAAACGAAGCGGGAGAACAGGATGA  
TAATGTGTGATGTTCTACGGGCAGGATGACTGGATTATAATACAAAACGTTTAAAGAACAGGGAAATTAATAGTA  
AGCAAATAATCCCTTTTCTGACATTAAGGTAATCGCTACATTTAATAAACATTCATATAACATATATCTTATCAACAC  
GATGAATAGACAGCCAATATATTATTGCGATTAATAAGCAACCGAATGCCAGCTGTTTTTTAAAGGCTGGGCATTCCGG  
TTTTTACAACGTTATGTTATCAGGTGTGTTTAAAGCTGTTCTGCTGGGCAATACCCTGCAGTTTCCGGTGATCGCTGAGA  
TATTTACAGGGAGGCTTTGTAGTCTTCCAGCAACAGTTCAGCAAAGTCCATTTTGAAGCCGCGACGACACATAATGCGCAT  
CACCACGATGTCCGGTGGCTTCCCGCCGAGAGTGAAGGCCGGAACCTGCCAGCCGCGCAGACGACGATTCAGAGAGGT  
CGTACAGGGTGTATCCCGGATCTTACCATCTTTAGTGTGAAGCAAACCGCCGGGATGCCTTCTGTCGGGCGACCCGTA  
CAGATGAACCTACACGGCCAGTTTGGCGATTTTACCGCCAGATAAGCGGCAACCTGGTAAAGAGGCGTTCTGTACTTT  
GGTATAGCCTTACGACCGAGGCGCAGGAATTCATAGTACTGTGCAATTACCTGACCCGCCGGGCGGGAGAGTTGATGG  
CAAAAGTACCAATTTGACCACCCAGGTAGTCAACGTTGAACACCAGTTCTGCGGCAGCGCTTCTTCTGACGCCAGATA  
ACCCAGCCGACGCCAGCGGAGCCAGACCGAATTTATGGCCTGAAGCACTGATCGATTTACACGCGGCAGGCGGAAGTC  
CCAGACGATATCCGGGGCGACGAACCGTGCCAGGAAGCCACCGCTGGCAGCGTGCATGTGCATGTGATGTGCATACCGG  
TGTCGGCCTGGAATTTATCCAGCGCATCGTGCAGCGGTTTGGGGAACCTCATAGTTACCGGTGTAGGTCACGCCGAAAGTC  
GGCACCACGCCGATGGTGTTCGTCACAGGCTTCAATCATGCGTTTTCCGGTCCATAAACAACCTGACCCGGGCGCATAGG  
GATCTCACGCAGCTCCACATCCAGTAGCGGGCGAATTTATGCCAGCAGATTTGACCGGACCCGACACCAGGTTTGGTT  
TATCCGTTGGTTTGCCTGCAGTTCATACGCTTGCGCCAACGCCATTTTATCGCCATCCCGCCGAGCATAACAGGCTCG  
GAAGAACCAATGGTGTGGTCCAACGGCCTGACCATTTTTCCGGCGCAGGCGCATGCCACAGATCGGCAACCATATTTAC  
GCAACGCAGGTCGATGGCTGCGGATTGCGGATATCTTCTTTGTCGATCCAGTTTTTATTGATCGACAAATCCATCAATT  
TATGGACGTTTTCTGCTGCCAGGTCTGGCAGAAAGTGCCAGGTTCTGACGAGCGTTCATCAAGATAAATTCATCA  
TTGATAATCTGAAATGCGACATCATCGCGCATTTCTGTCAGCGGAAATCGTTTTGACTCCGCGATAGTAGAAATGGCCTT  
TGCGCAAAAACGTGAATCGAGTAGTTCTGAGCGGAAATCCGTTAACAGCTTCTGGTCCATTTGAACTCCTTAAATTTAT  
TTGAAGGCAATAAAAAGTAGGATTTATCCGCAATGGAAGCAAGCATTACAGGCTTAATTTAAATAACAAAATCCTAAG  
CAGAAAAACGACTTTTTATAATAAACAATTTAACATGATAATTTAAAAACAGACTTTTATATCGTAATAAAAAATCCGCC  
CAAAACATTGCTGTTCCGGGCGATCAAAATTAATTATTGTTTTATCCTGCATATACGGCGTGTACACCCCGTTAGACTGTGCA  
GGAAAGCTACGATATCATCCACATCCTCCTGCGGCAGCTTTTGCCTACCTGATAGCGCAGCATCAGTTTACCGCCCG  
TCCAGCGTCCGACGTCACCGCGATGGAAGTACGGTCCGTTAAAGCAACGTTACGTAAACCGGGTACTTTCTGACGCAA  
TTTATCACGCTCTTCTTTAGTCACATTCATACGACCAATATCCGCCGCCGTAATTTCCCAAAGTTAAAGTCTTTTTTCA  
GCCCAACGGTTCAAAGGAACGTCGCGCGAGAATAATACCACCATGACAAGTTGCACATTTATTATCTTTAAATAATTGA  
TAGCCTTTTTTCTGTTGCGCGTCAGCGCATTTTCTCCTCGCGCAACCATTTATCAAATGGGGAATCCGGCGTAATTA  
TGTTTTCTCAAATTCAGCAATGGCATCAGTAATATTTTCCGCACTGAAACCTTGGCGATAGACTTCGAGGAACTGCGTTT  
TAAGCTGCGGATCTTTTTCCAGCTTAGCAATAATTTCTGCCAGGATTTGACGCCATTTCAATCGGGTTCAACGGCGGT  
CCACCAGCCTGATCCTGCAATGTTGCCGACGACCATCCAGAAGTCTCAACGTTAAATACTGAGTTAAATACCGTCCG  
CGGTTAATCGGCCAACTGCGCCACCAACCAATCGATGTTTTTCTGCCATCGACGCCCCCGATTCAACGCATGGC  
AATGAGCGCATGAAATGGTCTATCAGCCGATAAACGGGATCGTGATACAGCGCAAAACCAACGCCACTTTTTGCGCA  
TCGTAGGCAGTTTTTGGCGGATGGGCTGCACCGGTTCAATGCGATGTTCCGGAGCAGTATCATTGCTGGCGTAATATTC  
CGCGCGCTGTTTTGCAATCCAGGCCAGTATTTCCGCCCGCTTTCATCACTCACCTTACCCGCCAGTGTAGCGCGGTAT  
AACGCGTTGGTGGCATAGTTTCATACTGCATCACCAATTCATCTTATTCAAATCGCTTTGCGAAACGGGTTTATCAGCC  
AGCAGTGCCGCACGCACGGCCTCAAGGTTAAAGATTTATATCCAAGCTTAATGTCGTAATCCATCAACTGTTTCCGCC  
AGGAATATAATAATAGGCGGTAATTCTGCCAAGCGGTGGCAATAGTCGCATCCTTTTTCCGGGAGAAAGCCTAAAA

CCTTATTATTTTCACTGACAGCAGATGCCTGAACATCGGCCTGTTTACTGCGTTTATTATCGTGGTACCACACATAACCA  
GATAAACCTAAATAGCAAATCGCGACGCCAGCCAGCCGATCGCGGTAATACGTGAGACCATTTTCATTATCTTCCCTC  
ACGGTGGTGTGATTATTGTGACCCAGAAAATTTCCAGAATGCTGCAAACGTCTCTGCGAGACAAAGCCATCATAAAAAAC  
AGGGAGATACGCTTTTTGATAGGAATCAATCAATTACATGAATATAAACTATCAATAAGATAGCCTGTGCCTATTACCCA  
GATCAGGAATGCCATATCATGATTGCGGCGAGAGCAGGATTGAATGTTCTGAAAATGAAAAACAACACCAAAATCGGTATT  
TTTATAAATCCATTGATATTAGTGCGTTATATTTTTTGACAGGTTAATAAACGTGATCCACCCGACGCTTTGTGCGCCA  
CCAGGCGGAGCGAATGACTACCTTAAAGAAAAGCCGATAATTAGCGACGAATTTGCGAGGTTGGATCCTTATGCTCAAT  
CAGAAAATCAAACCTAATCCAGACGAACTGATGATCGAAGTCGATCTCTGCTATGAGCTGGACCCGTATGAATTA  
ACTGGATGAGATGATCGAGGCGAACCAGGAAACCCGAGATGATTGAAGGGCTGCTGCTCTGATGCGCTGACGCCTGCCG  
ATCGCTATCTCGAACTGTTCCGAGCATGTTTCAGTCGGCGAAAATTTCCCGACAGTAAAACCTTTCCCGACTGCGCACCT  
AAAATGGACCCGCTGGATATCTAATCCGCTACCGTAAAGTGCGCCGTATCGTGATTTTACTTGGCAGGTTTGTGA  
AAACCACTTCTGGCTGCCGAGGTCTACTCCAGCGAGTATGTATCGGACCCGAAAATCCCTGAAAGAGCATATCGACC  
AGCTGTGGCCGGTGCTAACCCGCGAACCACAGGATCACATTCGGTGGTCTTCTCTGCTGGCGCTGCCGAGTCATATATT  
GTCCCGGGCGGCTTTAGCGAAACCTACTATTGGGATTCTATTTCCCATGCTGGGGCTGGCGGAAAGTGGTCGGGA  
AGATTTGCTGAAATGCATGGCCGATAACTTCGCCTGGATGATCGAAAACACGGTCACATCCCCAACGGCAACCCGACCT  
ATTATTTGAGCCGCTCGCAACCACCGTTTTTGGCTGATGGTGGAGTTGTTGAAGAAGATGGTGTACGCGGTGCGCGC  
CGCTATCTCGACCACCTTAAAATGGAATATGCCTTCTGGATGGACGGTGCAGAATCGTTAATCCCTAATCAGGCCTATCG  
CCATGTTGTGCGGATGCCGACGGATCGCTGCTCAACCGTTACTGGGACGATCGCGACACGCCGCTGACGAATCCTGGC  
TTGAGGACGTTGAAACCGGAAAACATTCTGGTCGCCGCCAACGAGGTGTACCGGATTTACGCGCGGGGGCGGCCTCC  
GGTTGGGATTACTCTTCCGTTGGCTGCGTGATACTGGTCTGCTGGCGAGCATTCTACCACCCAGTTTATCCCATCGA  
TCTGAATGCCTTCTGTTTAACTGGAGAGCGCCATCGCAACATCTCGGCGTGAAGGCGAGAAAGAGACAGAAGCAC  
TGTTCCGCCAGAAAGCCAGTCCCCTGCGGATGCGGTAACCGTTACCTCTGGGATGATGAAAACGGCATCTACCGGAT  
TACGACTGGCGACGCAACAACTGGCGCTGTTTTCCGCTGCCGCCATTGTGCCACTCTATGTCGGTATGGCGAACCATGA  
ACAGGCCGATCGTCTGGCAAACGCCGTGCGCAGTCGGTACTGACACCTGGCGGGATTCTGGCAAGCGAGTACGAAACCG  
GTGAACAGTGGGATAAACCAACGGCTGGCACCCTACAATGGATGGCGATTGAGGATTTAAAATGTACGGCGATGAC  
CTTCTGGGTGATGAAATCGCGGAAGTGGCTGAAGACGGTGAATCAGTTCTATCTGGAACAGCACAACTGATCGAAAA  
ATACCATATTGCCGATGGTGTCCCGCGAAGGCGGCGGTGGCGAGTATCCGTTGCAGGATGGGTTTGGCTGGACTAACG  
GTGTGGTACGCGTTAATTGGTTTGTACGGCGAACATAATATTTTTACAGCCAGCCGTAACCTTCTGCTGGCTGTAA  
AATTATCTTTCAGGAGGAGATATTTAACATCATTGCCGCTGGGTGCGATTTTTCACTTCCAGACGGCGATACAGGGA  
TTCCAGATGCGCTTTTACCGTTCCGGTACTGATATTAGCGCTCTGCCGATCTCCTATTTGATTGCGCCGCCGCTAACCA  
TGTTAAAATCTCCGCTGGCGGGCGCTAACGATTTGAGATCTTAAATGTCCTTTTCCGGCGTCTCCGCCAGTCTCCA  
GGCAGAAACATCATCCCCATCGCCGCACTATTTACCGCCAACGCAAAATGTCTCGACGGTGAATCACGAGGCACAATGGC  
CAGCACATTAATAATGGATAAATCTCTGTAACCACCGTTTATTGCAATCCGTGCGCGTAATTAACACCTTAACCTCAGGAA  
ATTGACCACGGTTTTTTGACGCAACCAGTAGCAAACTCACCATCTGATCGCCATCGAGCATAACTAAGGCTTACGGG  
TAACTTTCCAGCTTTTGCATAACTCGTCTGCCTGACTGGCCCCCTGAATACTCACTCTGGAATACGCTGCTGTAACCT  
GATTTTCATTCATGAATAAATATTGACTGCCTGTCAAACATGACTATTTGCATAACTGAATCTCCACCTGAATACGTTA  
AAAAGACTTAAGTAGTGAAGGGTATTACCCGCGAGAAAAATAAGAATTCGCCATTTGGCGGTGGCCATTCTACAGAGA  
TGACGTGTAGAAAATAGTTACCGATATAAATAGTTACAGCTAAACGCCTGAAATTACATGTCGAGGGCACTATTTAAAC  
AATTTTGAGGATTTCTTATATTGGTGGTTAGTACGCATGCAATTAATAAATGAAATTCGCGACCAAGCCAAAATAAC  
AAACGGCAAGGAGACAAAAATAAGCACAAATAGCCAACACGCTCTGTTTCACTTTAAAGGGAATCGTAAAAATACGC  
TCTGTTTAAAGGGGATTACCTTTCTCAGAAAAGCTATTCGCCCTTTTCTGCTGAGAAATCGCCACATTCGGCATGACAA  
CATTGTGAAACCCGCTATTAGATGTTAGAAAAACAATAAACAATGCGATATGCGGTTACTGTTTTCGCTGTGAACAACA  
ATCGGTCAAAGAAATGGATAAAAATTCACGCAATGCAGTTGTTTCATCAAAGTGCAGGAGCTGAAAAGTTTTTCCGCGCAG  
CGGATTTCTTTGCTTTGCCAAAGGGAAGTGTTCGCGCCAGATACAGGCACTGGAACATCAACTTGGCACCCAGCTTCTC  
CAGCGCACCCGCGACGGTCAAACCTCACGCCAGAAGGATGACCTATTATCAACGAGCAAAAGATGTGTTGAGTAATCT  
CAGCGAACTGGACGGTCTGTTTCAACAGGATGCCACCAGTATCAGCGGTAATACGCATCGACATCCCGCCAGGAATCG  
CGAAAAGCCTGTTACTGCCGCGCTGTGCGAATTTCTATCTGCATCCGGGAATTGAGCTGGAACCTGAGTAGCCATGAC  
CGTCCGGTAGATATTCTCATGATGGTTTTGATTGCGTGATACGCACTGGCGGTTACCGGAAGATGGCGTTATCGCCCG  
TCCCCTCGGCAAACTGACCATGGTCAACTGTGCCAGTCCGCACTATCTGACGCGCTTTGGTTATCCGCAAAGCCCCGATG  
ATCTGACTTACACGCAATAGTGCCTTATACACCGCACCTGGGTGATACATCCGTTAGGTTTTGAGGTTGCCAGCGTTAAT  
GGCGTCCAGTGGTTAAGTCTGGCGGCATGTTGACGGTAAACAGTAGCGAAAATATCTCACCGCCGGTCTTGGCGGTCT  
GGGATTTACAGATCCCGCGCATTGCCGTGCGCGAAGCCCTGCGTGCCGGCGGCTTATTGAAGTATTACCTGGCTACC  
GTGCCGAGCCGCTCTCCCTTTCGCTGGTTATCCGACGCTGGGAGCTTTCCCGGCGTGTAAACCTGTTTATGCAAGTGG  
CTGGCTGGCGTAAATGAAAGAGTACCTGGACTGACCGACTATACTTTTTAAGAATGACCACGACAGAAGGACAAAAGAGCG  
GATGACGACGAGAAAACGAGATCAAACGTCCCATCCAGGATCTGGAGCACGAGCCGATTAAGCCGTTGGATAATAGCGAGA  
AAGCGACAAAAGTTAGCCAGGCGCTGAAACCGTACCACCACTGCCAAAAGTCCAACGCCAACCGTTATTGCGCAC

CTGATTCGCGCGACAGAACGCTTTAACGATCGGCTGGGTAACCAGTTTGGTGGGCTATCACCTATTTCTCATTTTTGTG  
GATGATACCAATTTTGATGGTGTCTGTTGCCGAGGGGCTTTGTCTGGCCTCCCATCCGATGTTGCTACAGGATATCT  
TCGACAAAATCTGCAAAACATCAGCGATCCGACGTAGCCGCCACGTTGAAAAACACCATCAACACCGCGTTCCAGCAG  
CGTACGACTGTAGGGCTTGTGGCCTGGCGGTGGCACTTTATTCCGGCATCAACTGGATGGGTAACCTGCGTGAAGCGAT  
TCGTGCCAGTCGCGGATGTCTGGGAACGCTCGCCGCAAGATCAGGAGAAGTTCTGGGTAATAATCTGCGAGATTTTA  
TTTCGCTGATTGGTTTGTGATTGCGCTGATTGTGACGCTTTCGATCACCTCGGTTGCCGGTTCGGCGCAGCAAATGATT  
ATTAGCGCCCTGCACCTGAACAGCATTGAGTGGCTGAAACCGACGTGGCGATTGATTGGCCTGGCGATTTCCATCTTCGC  
CAACTATCTGCTTTTCTTCTGGATCTTCTGGCGTTGCCGCGCCACCGTCCGCGCAAAAAAGCCCTGATTCCGCGAACAT  
TTCTGGCTGCTATTGGTTTTGAAGTATTAAATCGTGATGACCTACACCCTGCCATCGTTGATGAAATCCCCCTCTGGC  
GCAGCATTTGGTTCGCTGCTGGGGCTGATGGCATTTTCTACTTCTTCGCCGTTTGACGCTGTTTTGCGCGGCGTGGAT  
TGCCACCGCGAATAAAGACGACCCGCAATGCCGGGAAAACGCAGCCTTAAAATAGGCCGGATGCGGCGTAAACGC  
CTTATCCGGCATAAGATTTTATTGGCCTGGCTCCCGTAGGCCGGATAAGATGCGCCAGCATCGCATCCGGCTATAATG  
CGACATAACCTTTGAACTCGTCCCAGAGCCTTTCAGCCATCTATTTGGGAGCAAACAATTTTATTCCAACCTATA  
ACCCAGCATATAATCCAGTTGGTAACTTTTATTAACTGAAACAGTTTTATCCACTATTTATAAAATTTATGTGAAG  
CATTTATAGAAGAAAACTACTGGCCTAAACATTTACCCCTTTTTCCTGATTGTTTACCATTTCCGCGATTTGTTACA  
CATTTGAAATATCACTTTTGTGCTGTGCGTAATATGGTATTCTGTTAGCCAAAAAATAAGAAAAGATTATGCAAGCAACGCC  
ACAACTCGACACGAGCAAGAATACACGCCGATCAACTCGCGTAATAAAGTCTTGTGCTCTCTCATTGGCACAGC  
CATTGAGTTCTTCGACTTTTACATTTACGCCACTGGCGCGTTATTGTGTTTCCGCATATCTTCTCCGCGAGGGCGATC  
CTACGGCAGCAACGCTACAGTCGCTCGCCACCTTCGCCATCGCCTTCGTCGCGCGCCCATTTGGCTCTGCCGTTTTTGGT  
CATTTTGGCGATCGCGTTGGGCGTAAAGCGACGCTGGTCGCTCGTTGCTAACGATGGGATTTGACCGTGGTGATTGG  
TCTGCTGCCGGCTATGCCACGATTGGTATTTTCCGCCGCTGCTGCTGGCGCTGGCTCGATTTGGTCAGGGTCTGGGCT  
TAGGCGGTGAATGGGGCGCGGGCGCTGCTGGCGACTGAAAACGCCACCGCGCAAACGTGCACTGTATGGCTCCTTT  
CCGAGCTGGGCGCACCGATTGGCTTCTTCTTCCCAATGGCACTTTCTTGTGCTTCTGGCTACTGACCGACGAGCA  
GTTTATGAGCTGGGGCTGGCGTGTGCCATTTATCTTCCGGCGTGGTCAATATCGCCCTGTATGTTGCGGTGTCGC  
TGATGAGTCGCCGTGTTGAGAAAGTCGCTAAAGCAAAAAACAGGTGAAGATCCCGCTGGGTACGCTGCTGACCAA  
CATGTTCCGTAACCGTACTGGGTACGTTTATTATGCTGGCAACCTATACGCTGTTTTACATCATGACGGTCTACTCTAT  
GACCTTTAGTACCGCCCGCGCCAGTTGGGCTTGGCTGCCGCTAACGAAGTGTGTTGGATGTTGATGATGGCAGTTA  
TTGGTTTTGGCGTGATGGTGCCAGTCGCTGGATTACTGGCTGATGCCCTTGGTCCCGTAAAAGCATGGTAATCATACC  
ACGCTGATCATCTGTTCCGCTGTTCCGCTTTAACCCACTGCTCGGTTCTGGCAACCCGATTCTGGTTTTTGCCTTCCT  
GCTGCTGGGGTTAAGTCTGATGGGTCTGACCTTCGGGCAATGGGTGCGCTGTTACCAGAGCTGTTCCGACAGAAGTGC  
GTTACACCGGAGCATCGTTCTTACAACGTAGCGTCGATTCTCGGGGCTTCCGTTGCGCCATATATCGCAGCCTGGTTG  
CAGACTAACTACGGGCTAGGTGCGGTGGGTTATATCTGGCGCGATGGCTGGCTTACGTTAATCGCCCTGCTGCTGAC  
CCATGAGACCGCAGCATCAGTCGTTGTAATAAGAGTGAAAAGCCTGATGCGCTACGCTTATCAGGCCTGAATTTCCATACA  
ATATATTGAATTCGCAAGGATTTGTAGCCGGATAAGGCGTTCACGCCGATCCGGCATGAACAAAGCACACTTTGCCAA  
CAATCTAAATCTGTTAATTGCCGGATGTCAGACATCCGGCAATTATCATCACTTCTTCTCATCTGCGACAAAATCGTCCGA  
CACTGATTAGCCTCCCCTTCGGAAGGTGAGATCAGTGCCAGTAACGCCCGCCCGGTGTTACCAGCGTTGCCAGTCCCG  
AGCAACAGCACCGGCAATCAGCGGTCCGGCTTTCACCCAGCCTGCGGATTTTTAAACGTCCCCGCACATACAGCG  
GCGAACGCAGTGTGATAATCCGAATTCCTTACTCTCCGGATCAATAGTCAAATCCAGCTGTTCCGAAGCAAACTTGC  
GTGCCGTAACATTAATCAACGCGTTCAGTATCGAAAGCAAAAATCTGCGGGCGCGCCAGCCGTTGGCAATTTACAG  
ATTCGCCCGCGCAGTTACCCCGACCTCATCATCAAAAATTCGCACCGACAATGTAGTTGCCGACATTCAGCCCAA  
CAATCTCCATCAGGTTGCGGCTCACAGCCCGTATTATCAACAGTTTTAGGTTGCGCTTACTGTTGCCTAAAAGTGC  
GCCACCGAGTTACCGCTACCGCGTAGTTCCGCGTACCGTTCATTTCCCGCAGCGTCTTCTGCATCAGTTCCACATCGGG  
CATCAGTTCTTTCAGTTTTCAGTCGACGAGCCTGAATATCTGCCCGCCCTGCATCGGCTTTTTATCGCCTTCCAGATGAA  
TATTCGCCGCAATGCTGCCGCCCGCATGCCAAATTCAGCGGTTGACGGCGCAGGTCAGCATTTTTGAGGATGATATGA  
GTAGAAAGATCGTAATCGGCAGGCTACTGCCATGCTCAATGCGCCGCCCTTTGAAAGCAACATCGGCATCCATAACGTC  
CCATTTATCGGTTTGAAGCGGTGATAAGGCAGCACTTTCCCGCAGGCTGAACGCTTTTTTCCGCTTCTTCTGTTTACG  
ACCGTTTTCGACTTTTCTGCCCTTTCGGGAATCAACGCCAATCAACGGTCCAGGTCCGCCAGCCGCAATTTGCCGCGAC  
TCGACATCACCTTCCAGTTTTGGTCTGGCTTTCCGGTGGTGTAGACCAGAGAACCCTGGATATCGCTATACCAATTCG  
CCATTTAAAACCGGATAATCAAAGACCGACGATTTTTCAGTGTGATTTTTCGCTACCAGCCGACCATCCGTTTCAAACG  
GCGGGGTATCGGGCAGCAGAACGCCCGTCACTTATAGAGATCACCCAGTGAATCGCCAGAAAATTTAAGCCGTAATTCG  
ACACCGCCATCTTATTGGGTCAATCACGACGCCATCAAAGCAACACGGGTGTTACCAGAGCGGAAATCAGCCTGTAC  
CGGAAACGGCGTCCCTTCCGACGCGAGCGCCAGCATACCGCTATTTTTCCCGTACCCGTGAGCGGTTACCGTTATATC  
GTCCCTGCGCCTTTCAGGCCAAAAACGTAATCGCCACCTTTTTCTTATCCGCTTACCTTTTCGATCCAGTAACTTCGCTG  
AACGGCAGCGGTTGCTAAGGGATCAACAAAAATCTCAGATCCGCTTTGCTTACTTTGTATCAATGGCGATCCGCC  
TTGATCGAAAAGAAATATTATCCAGCCGAAACGACCATGCCGACGGCTTTGATTTCGCTGCTTTGTTATCATCGTTGGCAA  
GATTAACGTCAGTTATTGTTCTTTTTCAGAGAGGCGAATCAGGCGCGCTCGGGCTTTTCGAGCTTGATCCACGGCAGC

CAGACCGTTTTGGTCAGCAGCGCCAGCGGGGCCAGCGTTGCCTCTACGCGTGGCAAATGCACCATCGTGACTTCGGGAAT  
ATCCGGTGGATTGCCAAGAATGATGTCTTCCGCGTGACATGGGGCCACGGCACCCAGCTGCGCCAGCCAGTTTCTTGT  
TTTCCGCTCCACACCACGCCAGATGCCACGGATAGCGAACGGACGATTCAACTCCGAGAGACTTTCTGGTTGATA  
GTGGTTTTGAGTCGATTCCAGTCAAAAAGTTGCAATCAAATGATGCCACGACAATCAACAACAAGAAAGCCCTGAAAT  
CGCAGCGGTTATTTTGCCTGCCTTGTCTATCGTTCCGCTTCTCATATTCTTCTGTGCCAGTCTAAAGATAGTCCAGCC  
AGGCGGAAAATGAGGCAGCTTATAGCGCCAGAACCGCCGATTACAGCGTTTCTATCGGTGCCGGGCGTGAAGAAACAG  
CCTTGTGCGCGAATGCGGGCGAGTTCTGAACATCACGCCACTTCCGCGGTTTCTACGCCCTCGACAATCACCCCGC  
ACAATAGCGATTATTAGATGTAAGCTGAGAAAAGAGTGTGCGTCTTCCGGCGACTGACGCAGCATCACAAACAGTT  
CTCGCGGATTTTGTAGTGCATAACGCACTTCACTTAGCGCAGAGAAATTTGCCATCCCGGTACCAAAATCATCCAGC  
CACAGCGGGCCAAATTCACACATCGAGGCAAAGTTGAATCTTTCGGCAGACGGATATGCTCCACCAGTTCGAAACGCAG  
CCAGGGAAGACGCTCAATCTGGCGCAGGATTTTTGGTTGCTGACGCAGGGCGATGAGCGTAGGGCCATCAATATTGACCG  
ATGCCAGCAGCCGTGCTCTATAAAGAAGTGGCTTTTTGCGCCAGCAAATCAATCTGCTCTTTCACAACCTCCATCCGA  
TGGCTGACGGTATTTTCAAGTAAATAGCGATCCGGCGCAGGCGTTGCGAAGGGTTCAAGGGATGCGTGACCACCGTTAA  
TAGCTCCACGGCCATTAACGCCCGCATGTTTGTAGATCGGCTGCCAGGTGAAGCAGCTCACACTGCAACCAAAAA  
GCCGTTCTGCAAGCTCTGATGCTTGTTCAGGGTTGCTTATTCGCTGGATAACCTTATCATCAAAGATGTCCTG  
TGTTAAAAGTGATGCTGCCCGGACTCGACAAAGATTATCGGCGGTAAAGGCGAGAATTTACCGCTGGCCGGGTA  
TTTCTCACTCCACAACGGAATCTTTCAGGAATACGTTCTGGCTCAAAAAAATAATGGAACACTGTTTTAATATGGTTGA  
CCAGCAAACCACAGCGCAAATAACGCTAATTTTTTACAGATCAGGTTACGACTATGTCAAAAAGATTGCCGTGA  
TTGGCGAATGCATGATTGAGCTTCCGAGAAAGGCGCGACGTTAAGCGCGTTTCCGCGCGGATACCCTGAACACTTCC  
GTCTATATCGCCCGTCAAGTTCGATCCTGCGGCATTAACCGTTCATTACGTAACGGCGTGGGAACGGACAGTTTTAGCCA  
GCAGATGCTGGACGCTGGCAGCGGAGAACGTTGATACTTCCCTGACCAACGGATGGAAAACCGTCTGCCGGCCTTT  
ACTACATTGAAACCGACAGCACCAGCGGAGCGTACGTTTACTACTGGCGAACGAAGCCGCCCAAATTTCTGGCTGGAG  
AGTGAGCAGTCTGCGCGATTTGCGAAGAGTGGCGAATTTGATTATCTCTACCTGAGCGGGATTAGCTGGCGATCTT  
AAGCCGACCGCGGAAAAGCTGCTTCCCTGCTGCGCAATGCCGCGCAACGGCGGAAAAGTATTTTTGACAATA  
ACTATCGTCCGCGCTGTGGCCAGCAAAGAAGAGACACAGCAGGTGACCAACAAATGCTGGAATGCACGGATATCGCC  
TTCCTGACGCTGGACGACGAAGACGCGCTGTGGGTCAACAGCCGGTGAAGACGTCATTGCGCGCACCCATAACCGGG  
CGTGAAAGAAGTGGTGGTGAACCGGGGCGGATTTGCTGCTGTCATTGCTGGCGAAGGGTTAGTGGATGTTCCGG  
CGGTGAAACTGCCGAAAGAAAAGTGATCGATACCACCGCAGCTGGCGACTTTTCAAGTCCGGTTATCTGGCGGTACGT  
CTGACAGGCGGAGCGCGAAGACGCGCGGAAACGTTGGGCACCTGACCGCAAGTACCGTTATTCAGTATCGCGGCGGAT  
TATCCCGCTGAGGCGATGCCAGCGTAAACGCAGCATATGCAAAAAGGCTGGATAAAGTGTACCCCTCTATCCAGCTCAT  
CCATAAATACCTGATGGTTGTGCTAATCATACCATCAGGCATTACTGTGCAGGTGGAATATCCGTCACCTTCAGGATGT  
ACGTCATCCGTGGCGACAGAGGTGGTTCGAGCGGCGGTAGATGGGGCCATGATTTGATCCAGACCGCTGCAACGCTTT  
CATGTTAAATCCGGCTCGCTTTCCGGTGCAGCAGTATTAACGCCATATCATTGACAACGTTGACGCAGATCCTGAT  
TTAACATCTTACCGTCAAGGCTATTAAGGAAATCCTGCCGAGTTTCTGATATTGCTCCGGCGGATATCGACAACCTGA  
TTTTGCAACGAACGCATCCGCTGACCCATCAGAATATCGGTATCAGCTCGTGATAGGCGGCAAACAGTTTCTGCAGCTC  
CAGTTTCTTTTGCCTAACGCATTGAACTCTTCTCCGGCAGACCTTTATCGGAACCTTCGCCAGTTCACGCGCCA  
CCAGATTAAGTTGCTGTTAGCTTGTGTTGGTATTGATGTTGATGGCACACTGCGCACGCAGATACAGCACACGG  
CAGTCAAATCCAAGACCGATGTCTTTGCTGTTACTGGCACTTAACGCTTGTGAACATGCCAGAACAGCGCTCGCGGG  
GGTCTGACGACCGCTCAGTATAAATACTCACCGCTTCCGACGAGCGGAGAAAGCGTGGCACCAGCTGGCGTT  
TCAGTTTTGCCTTTTCAAGTTCGCCAAACGTTTTGTTTTATTTGGTCGACAACCGAGCGCATCCACGTTTTCCACCACAG  
TAGCGTATTGCATCCGGGTGTACCATTTCTGATAGAAATCTTTAATTTTTTCCGCTTCAACGGGTTGTTTCAGCGGAT  
CGCAGGATCGTGACCTAACAGGTTGACCTTTTACAGCAGATAGCGCCACCAGCCCTTTTATGATCGGCAGGCCAGGTT  
GCCACCATGCTGACTTTGACAGCGGTGGTTGATGGTTTCTGGTGTGATGGTCAATTTGCCAGTGGCATTGTCAGATA  
AGAGAGCGCTTCTTTCAGCAAATCGTTACGGTTATTTGGCAAACCTCAGATTAACAGCGTGGTGTGATAAGAGACAATTA  
CCGGCGCATCGGGCTTTAGGGTTCGATCCCTGCTGCCACAATGAACGCGCTGTGCTGCGTCAAGGCCACCGCTTTGC  
GTTAGCGCAATACGAGGGATGGCGTACTGTAACCGCTCTGTTGTGACTTTCCGGCAGCGAACCGGTATTAACAGCAG  
GCGAATTTCAACAGATCGTGGGACGCTGGGGGTGGTACGACTTGCCTGTAACCGTTGAAACCGTTGAAAGCGTCCCTGTT  
GCCATGCTGGATCAGGCTGGAGCGCATCTGCTGCACATAGCCAGCAGTGGCCATCATCAGCAAACCGCCGCTAAAAGT  
CGAATTTTTGTCCCTGCATGTGAACCCCTGATCAACTATCCTGGTAATAAAAAAACTGCCGTTGTGCGTCAAGTCTAAA  
TGACGTTAAAAACACTTCGTGTTAGACCGCAAGAATGAAAATGTCACGGAAGAAGTGAATAAACCTGAACTCACCCA  
GGTGGTAAGTTCAGGCACAGGGTCAATATGCGCAACACCCGACTCGGGGAAGGGAGTGGGGCATAAGTATGAGA  
TTAAGAGGATAAATTCGTGCTTTTCCATCCGGCGCAGGATTTTCAAGCACATCGTCCAGTTTTTTGGTCCAGTTCTT  
TACCCACTTAGCAACGACAATGGTGCCTACGCCGTTACCGACAGGTTAGTACGCGCACGAGCTTTCAGATAAAGCGG  
TCGATACCGAGGATCAGCGCCAGACCCGCTACCGGCAAATGGCCACCGCAGAGAGCGTCCCGCCAGCACGATAAAGCC  
ACTACCCGTTACCCCTGCCGCCCTTTAGAAGAAAGCAGCAACACGATTAACAGCGTATTTGGTGGACGATATCCATCT

GA CTGT TAGTGGCTGGGCGATAAACACCGCCG CATTGT CAGGTATATCGATGTGCCATCAAGGTTAAACGAGTAGCCT  
GTCGGGATGACCAGCCCCACCAGTTTACGGCAGCCGAGTTTCTCCATCTTGTGCGAGCATAACGCGGCAGCGCCGACTC  
GGAAGATGAAGTCCCAGTACAATCAGCAGTTCTTACGGATGTAGCGGATAAAATTTGAAGATACTGAAACCAGTCGCTT  
TAGCGATTGAACCAATACCAGCACCACAAACAGGATACAGGTAATGTAGAAACAGATAATCAGCTGCCCGAGTTGCACC  
AGTGTGCCGACGCCGATTTTACCAGTGGTAAACGCCATTGCCCGAACGCACCAATAGGTGCCAGACGCATGATCATATT  
GATGATGCCGAAGATGACCTGCGAGAACTTTTCGATGACGTTAAAAATCAGTTGGCCTTTGCTGCCAGACGGTGGAGCG  
CAAAACCAAACAGTACGGCAAAACAGCAGCACCTGCAGAATGTTACCGCTGGCAAATGCGCAATGACGCTCGCCGGGATG  
ACATCCATAATGAAGGCGACAATGCCCTGGTCTTTTCGCTGATCGGGCTAAACCGCTACCGCTTTTCGATCAAGCGTTGC  
CGGATCGACGTTTATTCCGGCACCAGGCTGCACGACGTTAACGATGATAAGACCAATAATCAGCGCGATGGTACTGACAA  
TTTCAAAGTAAAGCAGTGCAGCTGCGCCGGTACGACCAGCCGCTTCATGCTTTCCATGCCCGCAATGCCCGTTACGACG  
GTACAAAAGATGACAGGAGCGATGATCATCTTAATGAGCTTAACGAAGCCGTCGCCAAGCGGTTTCATTTGCTCGCCTAT  
TTCAGGATAGAAATGGCCAAGGAGAATACCAATGGCTATCGCTGT CAGGACCTGAAAGTAAAGGCTTTTAAACAGAGAGG  
TTTTCATAGGGTGTCTTTAGTAAAACACAGGTCTTGAAGTTATGGGGTACCTGCGGCCTTAAAATAACACCCAGAC  
AACATCACAGAAATGTACCTGGATCATAATTGAAACAAAAAGGTTAAAAAGTTTGAAGCTGGCTCGCACAAACAGCATT  
TTTAAAGTTTTGTAATCAGTTTGGGTAGCTACTTTTCTCCAGGTAACCTCTTTCGAAGATTTCAATAGGGAGTGGGCG  
AGCAAAAAGGAAGCCCTGGGCAATACCAACGCCGCTTTTTCGAGCCAGTCGCGTTGTGCTTTCAGTCTCCACGCCTTCGG  
CAATCATTTGTAAAGTTACGGCTCTGCGCCAGCATGATAATTGCAGCAATCATGCTGCTATCTCCCGCAAGCCTTCAACA  
AACATTTTGTGATTTTTCAGTACGTCGATTGGCAACGATTTTATATGCTGCAGCTGACGCAGCCCTGCGTAGCCCATGCC  
GAAATCATCCAGCGCCACCCGAACTCCGGCATTGCGCAGCGGACGGAGGATTGCCACCGCAGCATGAGGGTCTGTAATAC  
GTCGGCTTTCTGTCACTTCCAGAATCAGTGTTCGGCTGAATGCGATAGCGGGTTAACAGTTCCAGCATATCCGCCACC  
ATATTCGGGTGCATCAGTTGCAGCGCAGAGAGGTTTACCGACAAGGGCAGCATAATGCCGCGCTTTGCCAGGCTGCAAG  
CAATCGACAGGACTCTTCCAGCACCAGTGACCGACGGTAACCATCAGCCCACAGCACTCAATGCGATCGATTAAGCCAT  
CCGGCAGGTCCCAACTGCCATCCGGTTGCTGGATACGCAGTAACACTTCCGCACTGACCAGTTTACCCTGGTCTCTCG  
ACCTGTGGCTGTAACCAATAGCAAATGATGATTTTCCAGTGCATTAAGGATATCGCTCTTCCGTC AACCGCTTCTG  
GGCGCTTCCATCTGCTGCGGATCAAGAAGTGAATCTGATTTTGCCTTTATGGCGAGCGGTAATGCCGAGAAATAG  
CGGACTGTAAAGCTGTTCCGGCGTGAGATCGCCGTAGAACATCGCCACGCCAATGCTACAGTGGGACGGAGTTGAATA  
CGTTCAATCGGACGGCGCTCGCTCATGATAGTGAGCACTTGTGACCTAAGGTGATTGCGTGCCACGGTCTCTGTACACC  
GTTGGCAATGACAGCAAAGTATAACCGTAATCTGCGCGAGGATCATACTGGCGACAGTACCGATTTGAGTTTTTCCA  
CCAGCGTCAGCAGCAGAAATTTCTCGTTGCGCCTTTTACGACGCCCGCAGTATCACGCAGGGTTTACAGGTGATGATC  
ATCAGCGCGGTGGTTTGTACGCGGACAACCTGCTCCAGCATCTCCATCAGCAAGGCTTTGTTCCGGCAATCCGACAC  
CGGGAAGCGCATCGCATTTTCTGTTCTTTCATAATGGCGCTGCAGCAATTGCTGGTTGAGGTTGTAAGTGCACCA  
ACATACCGATTTATCGTCTGATGCAGACGCGGTAATGCCAGTTGGTGACCAACAAGCTCCTTGGCTGGGATGGCGTTA  
AGTTCCGCGAGCAATATTGCGTAACGGATGCAAAATCAGGCGGTTAATGCACCAGCTGATGGCGACGGTACGGATAAGCGA  
CAAAAGTAAGTAAATGGTCACTAACGTTGAGAGGGTGTCTATCACGAACTTATACATACGGAAGGAATCCGCCTGTAGTA  
CCAGATAGGCAATTTGGCTGCGGGTTTTCGGGACGTTTCGAGCGAGTAAACGCCAGCGAGATTTGAACCGGTAGCTCAAAC  
AGGCGAGTAACATTACCGGCACCGGGCGCTCTGGAATAAACTTTTACGCAGCGCCTGGAAGTGGTTAGGCAGCACTAC  
ATCGGCACGGCTGACCACGCTGCCGTTAATGCTGGCAAGAATAGCTTCCGCTTCGGGAATATCGCTTTCAAATAG  
CTGAAGATAAGGGTTCGCGGACAGAGCGAGCAATGCTTTCCAGTTGCGTAGCCGTGTTATAGCGATTCTGCTGGACCAGA  
TGGAACAGCAAAACGGTGCAAAAAATAAAAACGAACACCAGGACAACGGCTGCCACCATTTGCCATCTGCTTATTGTTAA  
CGAGCGACTTACGCGAAAATTTCTCCCGCGAAAATCCCAGATTGCCCGGATATACCCGATCGCAGCGGCAATTAAG  
AGAGGCGCTATCTGAAAACCTTACCAGTGGCGTAAGGTATCAGCGGCTGCGGCGGTAATCCATGTACCCTGCCATCCG  
GCGGCGGAATAACGTACGTAGAGCAGGAAATGGCTGGGTGCGTAATCTTTCCGCTGCTGGATATCAATTCGCGTGCAC  
AAACCAGTTGGAAGTAACACGTCGTTCAAGTAATGCCCGCGCCGTGTAGCCGAAGCCCTGACTGCTGCCGCCATCGTTGG  
ATTGCCCGCAGCTTCTTCTGCCAGTCGGTTCGGGATCAGATTCATCAGCGGATAACGCGGCATGGTTTTGGTGCGTGAA  
TGCGACCACGAGCCAGACGCACCCAGCTCCACGACCAGTTTTCCGTGCGCTCCCGCCACATCACCAGTATGGCAAACGA  
CAGGTATTCCTGCGGACTGTAGTAACCGCCTGACCAGTGAGTAGCCACTCAGATCTTTGTCGTAATGCCAGATCATGT  
TGTTCAGGCCGATTGTGACGCGGCGATTGTTCTGGTTAATGACCTTATAGTAATAGCCCGTATCCAGCGCAGCGCCAG  
TTATCTTCGACATTTTACCAGTTAAGTTCGCCACTAAGCGATGCCAGACGCCGTTTGTTCACCTTTATCGTAGCT  
CAGACTTAGCCCCACACCGTCGGCACGTACGCCACCCATTTTTTCCGGTATTGCTCGGGGAGTCTTTTTGCCACCAA  
AGGCCAGCAAAGAAGTGGAGATGGGCCAGCGTGGCGTTAACGGTGAACCCAGCGGCCGATATCATCGCTGTAAGT  
ATGCCGCCGACCACATCCACCAGTTGAAGCCATCGCGTGGTACCAGTATCCAGCTCCAGACGTCATTTGCCAGCC  
GACCGCCACGCTGGCACCGAATCCGACTGGCTGCGGTTGCCGCTACAGTCTGTAATGTACAGGTGCCCGAGTTGTCAT  
CCATTTGCCATCGGCATTAGTGGAGAACTGCCGAGTTTATTTGACGAAATCACTGCGAAAGAATCCGCCCCGTC  
GAATACGGCGCATCCACCTGCAACATGGTAGTGTGCGCTTTAGATCGGAGTAACACCGGTGCCGCTCGAACCCAGTA  
ATCGTGCTCAAGGGTACGTTAAGATCTGCTGGCGATAGAGGTCGCGGCATCGCTGCGCACGCCAGTTTCAGCCAGT  
CATCTTTCTGCTGTTACGGGTACGTCGGGTAAGGTGCTGTTATCTGCGGACGCGTCTAGTACACCCGGATGCGACC

ATGGCGTCTTTGTAGTTTTCCAGCGCCTGCGTTGGATCGCCGCCTGCGCTTCAAACCTTCGCACCATCACGCAGCACCAT  
CGCGCTTTCCATCGACGGTGGCTGAGATTTTGCCTGCGGGATCAACTTATTAACGTCCGCTGCGCTGCTGCGGTATCGC  
CAAGCTGCGCCTGTGCCAGCGCCACGCGCGCTGTGTTCAGCGAGGCGTTATCGGTAGCGGGCAGTTTCGCCAGCTGG  
CTACGTGCCGCCGCTTTGTACCCGGCAGCAATATCCACTTCCGTAGACCAAGAATGGCGTGGCGTTAGCTGGCTCCCG  
CGTCAGGACATTCTGATATGCAGCGCGGGCGGCGGTGTAATCACGTGCTTGTTCGCGCCAGTCAGCCAGCGGTGAGGTCAA  
TACGCGTGGAAAGTGGTTGTGGCGCAGCATCGCTTCCGCTTCTGCCTCTTTGCCGCTTCTCGCAGGCGGTTAGCGGTT  
TCCAGCACCTGATCGCTTTCGAGTCGATTAACCAGCTCCTGAATATTGCTGTTCCACTGCGCACGCGGCAGGCTATTGAT  
ATGCGCCAGCGCCGCTCTGTCTGGTCATGACCAGAGAGGTACAGCCCGTAAGCGTAAACCTGCTCCGGGTGCTTGCAGT  
TCTGCTGCGCCAGATTGCGCATTAACTATCGGCCTGGCTGCGTTGTCCGGCTGCCAGAGATCCTGCCAAAAGTCCGGTAA  
GTAATCCATACGCTGCCGGGTCCAGCGCCAGTCGTTGCCGCTGAAGTGTGCCGCTGCGCCATTTGCCCTGGTTTTC  
CAGTGCCTCTGCTGTGCCAGACGGTCGTTTTGAGGCTGCGTTTCGATATCATCAATGCTACGCCGCTGACTGGCAG  
AGAGCGAGGCGATAAACGCTTACGCTTTTTCTGGCGATTGCTGGCGGTAATATTTGCCAGCCGCGCACGGCGTTAGTG  
TTGCCGCTGTCATACGAAAGTCTGTGATAATAACGTTCCGGCGGGGATAATCTTTTCGCGCCATCGCCACATCGCC  
CAGCCCCAGCACTGCATAACTGTGGTGTATCGACATTACGCGCCTGCTGGAACAGGCGTTCTGCCGGTCAGGATTAT  
TGGCTTTACGCGCAGCATCGCCCTGTGATCGCCAGCCAGTAGCGGTTTACTTTACGACAGACTGTTCCATTTGCTGTTG  
TTGCTGCTGTGCGGGTCCAGTGCAGGGCTTTTTCCAGATTCCGCACTGCATTGGCGCGATCGCCTTTCTGAGAATACGC  
CTGGCCAGCGCCCCAGAGCTTCACTGTCTTTCCGGTTTCGCCCGCACCCTGTTGTAGTTCGGGAATGCTTTACCCG  
CCATACCAGAGTCCACCGCGCTAAACCTTGCACGAGCGCGGAAAGCAGGATCGCCAGCTGTTTTGCTGTTCTGCC  
AGTTGCGATTGCGCAGCCGCCACGCTATCGCCATCACTAAAGATCGAGAGATATTTTTTACGCGCCGACACACTGGCATC  
ACTGACGGGATGTCTTTAATCTGCCCGTACCAGATTTAGAGGCCCTTCGCGCCCGGCTTCGATTTTGCATCTGTT  
CCAGGACGGCAAAACCTTGTACGGCGATCGCTACTAAACAGCAATAGCGCCAGATTGTTTTGAGGCCGTTATTGCC  
GGTGCATCCGATTGATGCGTTTTAAGTATTAATCGCTTCCGCCAGCGGAGCCGGAATTTTCCACCCTACTCCAGTA  
CTCGACAGCAATGTCACCTTCCGGCGGCGCACCGTTGAACAGTTTGTGTAACCTGCCACAGCTTCTTCTGCATGACCGG  
TCGTGCGCTGCAATCGTGCCTGTTGCAGTGCCTGACGACCATCCGGCGTGGAAAGTAGCATCGTAGTCCGCGACGATTA  
TACGCAATTTGAACTCGGCGTAACTGCGACAGCCGATCGAGCTGTTTTTGCGCGCCATCAATATCGCCCTGACGTAACAA  
AGAACGGAAACGGGCGGCAACGACGTCCGGGTTATTCGGATCAATAAGTTCCAGCCGATATAACGACTGTTGCACCAGAT  
CTTACGATGGGTGCTTCCCTAACCGAACTTGTCCAGCAACTGTTGCTGAGCGGTTGGTCTGCCTCGACCATCGGC  
ATGACGGCCAGACCGAGGAAAGCGTGAATATGTTTAGTGTGAATTTGCGCATTCTGGCCCCAGTCAGGTAATAACTCA  
CCTTTTGTGAGAAGCGAAACGGTGTGATCCAGCCTTGTCCAAACAGGGTCAGCACATAGTTGTAATAGGCATCGCT  
GCCGGGAAAGTTATCGGCCACGCGCTGGCGCTGAACGGCTGCGCATCGCGTTTTGTA AAAAGGGCAGCATGGCGGCGAG  
AAAAACCGACTGGTCTTTACCCTGCGCTTTCCCGTAGCCACATCCACTTTTTCCGGCGGATAACCGTTTTTCTCAGTG  
AATGTGCCATCGGTTAAACCGGTTGAGCATCCGCGCTTTTTGCGGATCGCTGTCAGGCATCATGCCTACCCACATGTA  
AACCGGATAGCGTCGTAGCTGCTGATCAATGTTTTTTCGCTTTTAGCTGCCAGCCTTTGCTTTCTCATAGCGCACCC  
AGTCTGGCGAAAAACCTTCCGGGCGGTTCCAGCAATAAACGTTGATTGGTTTCGCGCAGCGTGGTCCACGGCGCGCCA  
AAGCGGGTGAATACTGCCCAGCGTCGGCGGCAGGTAGCTGGGTTAAAACGCCAGCTGTTATCCTCAGCAAAACCCAC  
TTTGCCCGGTAACAACATGGAACCCAGCCAGGCACCGTACCCTTCTCCCGCGGATACGTTTTAGCAACGCGCTGC  
CGATGTCGGTATAACGCTGCTTTCCACAAACGCCCCGCTCCAGCAACGACCAGGCCATCCAGACATCACCATCGGAG  
GCCGAATTGCTGTCCAGCACTTCCACTTACTGTTCTTTCTTCCCGCACAGCCAGGCGGCAACGTTCTTTAAAGA  
ACCCTGAGCGAGATTGTTCTGCGTCCAGTCGAGAATATTATCGAAAGTGCACGGTCGTTAGCCGCGGAGGCGAGAGAACA  
TGCCGTAACCTTTGCCCTTCCGAGGTGGTATTTTCCGCGCGCTGCTGGGGTCGATGACGCGCCCTTCTGACTGATGTA  
TCCTTTTTAAACTGCTCCAGGCAAGGACAGGTACAGGCTGCTGAACACTAAAGGCAAGCCAGCAGCATCGTCACGAT  
TCCACTACGCAACACATTCATCTTCAATTACTCGTTATCCGGTTAAGACGACGACGACTAATAATTCGACGAGACGCC  
ACAGTACCCATGCCAGCAATATCACACTGATAGCCGCCAGCACCGCCAGCAGAATCGGATGGTTTCCAGCGCATAACCAC  
ACGCGCTCGAACCACGGCAGATGACCTACGTAATAAACGTCGCCAACACGTAGGCTGTTGATAACCGACTCGCGGATCAC  
CGCGACCGAACCGAATGTTGGCGGCTTTGCCGCTATCGTTACCAGCATCGTTAAGCATTTCATAACCGCGTGGGCTAT  
CTGCCAACAGCGCAATCACGCTGCGCTGGTCTGTTATACGGCGACTGGAAGCCAATCACCGCCGCCATCGCACCAGGAG  
GTCAGCGTTGACCGGTTTTCTGCCGCGGATCGCTCTCGTCCGGCACAATGCCGGGAACGGGGTCTGGCGCATCGGTGT  
TTTACCCAGCTTTCCGTCGCTGCACCAATAGGTCGATCTGCTTATCGTCTTTAGTTTTGTCGGGATACCACCGATGA  
TCATGATGTCGGCATTTTGCCTGAATGGTGTGCTGCCATCATCGGTACCGTCAGATTAATCGCCGGGAAGCCGCTGTGT  
GCGCGGATAAAACCAACAGTATTACGCAACGTTTCCATCTGTGCTTCTGTTAGGCGCTTTCCGATCACGGTGTGTTT  
CGACAGATCCGCCATCCGGTGAATGGGAAGCCCGGTTAGCAAAGCGCGTAGATCCGGCATCGGGATGAAGTGGTAAT  
ACTTCGAGAAGTCGATGGTGGAGTCGTCACCAATCACCATGATTCTGCACCGGCTGGAAGGTAATACAGTTATCCACC  
GAACCGCCCGCATCGGGTTCATATACTCAAAGTCAAGCGCAGCTGGTTGGTTCGCGCCAGTTTCAGCGCCGGAATAGA  
GACATCTGTTTTGCCATCCAGCAAACCTTGAATACCGGAATCCGACGAGCAGCGGTTCCGCTCCTGTTTGTGCTCA  
GGTTGAAGGATTGAGGAACTGGTTATTACAGGCTGATATCCATCCGGAAGTGTCTTTACCGGCGGCGATGGTGTAGCGG  
TAATTAATATCCATATCAATGCCGGTACTGCGCATCAGGTAGAGATCCGGCGGCGAGTTTAGCGAAACGTTAATCGCTGC



TGGCTCAAGACCGCTGGATTGTAAGTGTCTTCATAGGTTTTAGTTTCGCCAAATGTGACCGGACGATCGGTACGTACCC  
AGTTTCGGCGCATCGTACGGTTACGCGGTAGCAGCGTTTTCACTTACTACCACGTTTTACCACGGAACAGAATG  
TTACCTGAGCGATACCTTTGCTGCCTGCAACAGGTTTTGTCGTACGACCAAACACCACCAGCAGTTTGACGTAAGG  
ATTCTGCGGATGGTTAATCATCTCAATCACCGGGGTTTTACCGCCGGATGATCGCGCAGGAAGTCCGGCCGTTTTGTCGT  
TGTTTGCAAAGACAATGGCATTGCGATCCGGCAGTTGGTTATAGAGTACCGGGAAGTTCTGCCACGCCAGCCAGAACGC  
GAACCAAACACGAGGCGACAATGGCAGAGGCTTGTTCGAGCCAAACATCCGGCGCACCCGCAAAGACCATCGGCAAGGT  
GTTGGTGCGGTTATCGCTCGGGTCAAAGAATGGCACCGGAAGTGTGACAGGTCATTCTTACATTAGGGTCTGATAGG  
TCAGATCCAGTCCACTGCTCCGCCAACATCCAGCCAAAGCGTGGTGTGCGCCGGTTTTTCGCACACGTCCTGATAATGG  
CCGACAAACTCCAGCCGTACACGGTTGAAGTCGCTAATAAACAGTGGGTTAATGGGCATTTGCGCCAGCGTTTTTTTACC  
CAACTGTTCTTTGGTCACTGGCAGCACGCCATCAGTTCATCATTGAGATAAACCTTTAACTGCGACTGGACAGGCAGTA  
ACGATGGCGATGGGGTGTATTGAGGTTGAGCATCGCTTCGTCACTTTCATCGCTGCGCATACCAAACCTCAATGCTG  
CCGTTCCGGTTAATGCCACGTAGCACCATGCTGCCCCGGCGGGTGAATTTGCGCAAAGTCACTTACATCACGCGA  
AGGACCGTTTGCGCCACGACTGGCGCATCAGCGCCTGCACGCCGGCATCACTTGCACCTGCGGATTTTGTCCG  
TCTGGGCGGTACAGCTGGCTCAGCATTGATCAGTGTGCTGCTGGCGTCGCTGCGTCATGAAAGAGGGGAACGCA  
CTCATCCCCATAGCCACTGCACAAATCCAGAATAGTTTTCTTTTATCGCTTATCATCATTGTTGAGCCAAAGCCTGAT  
CCGATGGTTGTGCGTTTTGCTCCGCTCCGGGCGGCGGAATAAACGATACAACCCAGGAAACAGAGAAGTCAGACACA  
CGAATATGCCCTTACCAGAAAGGGCGCAAACCTCCGCCAGATGGCGGTAGCCACGGAAGCCGAGCTTACAATATCCAG  
CAGACTTCCAGCGGCTTATCTCCGGGTAGCTGCTGCTGCAGAGCGCCATGTATCCGCACGGGCAAACGTACACTGCA  
CAAATCGATATGTTGCTGGGTGGTGAGCGGCTTAATTTAGCCCAACTTCTTACCATCACGCGCGCCACTGGGTG  
GGGAAGACGTATTCTGCTGACCGGTTAAGCAACAGATCACTTTCTGCCCTTCCAGAATCTGCGCTGACCGTTGAT  
CTTGATCCCCAAACACCGTTCGAGAAATCCTGAACGGTACACGAGAAGAGGTGACCATCTTCCGGGCAATTGCCGCG  
GCATCGTCATCTCACGCGGTGCGATCGGCGTACCTGTTTCTTCTACCGATACCGCAACTGCGCGCCAAAGAACAATC  
AGGTTGTAGAACACCCACACATACTGACGACCAGGTGAGCATCTCGTTGGCGGGCCATAGAAGTAGCGCCAGATGCC  
TACCGCAACGCCACCAGGTTGAGCAGGACAAGGAAGATGTAGGGCCGCGAGATCACCCAGTCGACGACTCTTCTTCCA  
CCAGTCCACCTTTGGCGGTGACGTTAAATTTGCCTTTGTGCGGGTAAATCAGCGCCACCAGCGTGGTGGTGCATATAC  
CACGCCAGCACGTTTTGATAGATTTCACTCCAGAAAGAGTGGCGATATTTGCCCTGGATCTTGGAGTTGGTCAAGGCTGGC  
ATGGATCATATGCGGCAGCAGAATAGGGCGATCATCAACGCTGGCGATAGATGATGTAGGCATGAAGCAGCAGGAACG  
CCAGCGGCGCAGTCAGGAAGATCAGCCGTGGAATGCCCGACAAGAAGTGAACATGGCGTTGACGTAACATAGCCGCTGA  
GCAAATTCAGCCCTTACCAGGTGAGCGGGTTATCGAGACGGAAGATTTGTACCATCCCGCGCGCCAGGGAATACGCTG  
ACCGATATGCGCCGACAGACTTTCCGTCGCCAGCCCCGCCCTCGGGAATACGCATATACCGGAGGTATAGCCACGAC  
GGTGCAACCGCAGAGAAGTATGCGCATCTTCACTACCGTTTTGACAGCAATGCCGCAATTTTATCCAGCGGCTTACGA  
CGAATCACCGCACAGGAACCGCAGAAGAAAGTGGCGTCCACATATCGTTGCCATCCTGCACCAGACCATAGAACAGCGT  
GCCTTCTTCCGGGTTTTACGGAACGCCAGGTTGCGTTCAAACGGGTCCGGTGAGAAGAAGTGGTGCGGCGTCTGCA  
TCATCGCCAGCTGTTTTCTTTCAGGAACAGCCCATGGTCATTTGCAAGAAGATCGCGTTGGTACGTGGTGCAGTCG  
AAAATCGACACGAACTCGCTTTGGCATAATTTAGCGCATTGTTGATGTTGCCTGCTTTCGATGTTTATGAGTGGTGC  
GGGATATATTTACCCCCACGTTTTGCGCAAACGGCGAACTTCCCTGCCCGCTCATCAAGGATCCAGATATTC  
GCTTATCTTTCGGCCAGTCGATACCCAGCGAGGCGTAAATGGTATTTTTACCACGTTGAGATCTTCTGTTAAGTCGGG  
ACAAAGATATCACCGACGGCCACAGCGACATATCTTTCGGCAATGGCACCGGCTGACGATTCAGCGGCCATACTACCTG  
GAAGTAGCCGAGCACCAGACAATCCACGCGTACGTTTTCAGCGAAGAGCAGAATAAGCCCGCACACCAGGCTGACCCGAT  
CGTCCCAGTTACGCGTAGAGGTGTAACGCCACCAGATAAACCGCAAGAAACGGTCAGCGACAGCAAACTCAACATTAGC  
GCCGAGAAGCGCCCCGCGATCCGCGTACGATCAGCGCTACCCCCACAGCAGCATCAGGAAGATAAACTGCGCCAGCGG  
GTTAAACGGCTGAGTAACGCAGATTAACGCCAGAATCAGCGAGAAGGTGACGATGATACCGAGGATCAACCGCCGCGCC  
CGCACTCAAATGACCGAGCTCTTTTTCTCATCCAGATGCTGTGTTTTATGGCTAACGCGCTCAGGCAGCTCGTTCATC  
CATTGATGGTAACGTCCACGAATATTTGACAGCTGAAAATGCCCGCTGCGCGGTTTTCGGCGTTTTCTTTCGCGATGC  
ACCGATCAATAACAGCATGTTTGAATGAGATAACGGACCGGTCAGCGGACGCGGACGCGAGGCGTTGATATGGGAT  
ACAGGTTTTATGTTCTGCGCAATACGCTGCCAGCGGGGTGCTCCAGCGGAATAAAAATCCAGGCCAGGATCATCCAG  
AAACAGCCGAGCGTCGCGTGAAGCCGACGACCGTACGACGATAATCGCGATAACGCCGATAAGCCGCGGTTGAC  
CGGCGGATAAGCAACACCGGTCAGGATACTCATGATGCACTCCGACTGGCGTTTTAGCCCGGAGTAGTTCAACAG  
GCACCAGTTGCCAGCGTCAGTATCTTTCAGCCGCGAGCATCACTGCGATATTCACCTACTGGTTGCTTAGCCGCA  
GGCATTAGCCATCGTTTATCAGCATGAATGAGCATCGGCGTAATCGGCGTGGCTTTGCAACCAAAGCTGGTAAATA  
TCGTCCTGAACCTGACTGCAATACGGAAGTCATTAATCAAATATGTGCGCCATCCGGCAGCGCTTGTGATGCAGTCG  
GATATGGCAGTTGGCATCCACATTGACGATTGCCAGCGAGTGATCGCAAACTCAGCAGCTGGTGGGTTATCTGCGAGG  
CATCACGCGTAAAGTCGATTAATCCACTGGTAACGCCCGTGGCTTTTAGTTGCTGTAAGCCGGAGCAAATATCGCTC  
AGCCGGTTTTGCCAGTGTGTGATTTCTTGTCTTCAATGGATAACTGACAAAAGGCAGCAAATCGAGCTGCGAGGT  
GTAGCGCAACCCAGCGTCACGCCAGTCTGGCCATCCAGCATCGCTTGGCCAGCCCTGACGGTGGGTTAAATCAACAT  
TAAATGACAGGCGCAACAAGTTGTCCGGGAGGCATCGACCACAGGACATTTTCTCCAACATTTGTAATGACCAGGCT

AATGCGGGGTGATGGTTGTTGTCACGCTCCCGCACCCCTGCTATCCAGTACGGCCATTACCAATCCCCTAC  
TTTTGTTGCGCAAACCTGCGCAGCAACGGCCAGCGTTTTAATGCCGCGGCAACTGTTGCGGTTGGGAAATATCGGCATA  
ATCAATATCAGGCAGTAAAATGCCTGCTTTAACGCCACAATATCATTCTGGAAGATATAGCCTATCGCGGGATCAGGCA  
GAGTATCTGGTTCATTGTTATTCATTTTGCTTGATCCCTATGAAATAACCGTACCGTTCATGAGACAATTCTAACCGTGA  
GCATTTGCGCGGTTTATTGTTTACGGCGAGACGGGAATTTGCTCACTTTTTGACTTTCCGTTACGCAACGAAAAAGTTA  
AAAAAGAAAGACTAAAATCACACGTCTGTGACCTTCAAATGATTACATGCTAAATCTGATAAGTTTTAATTTCAA  
TGGTAGGTTTTATTTCTAGCTTTTCGCTAGTAAACTGATAATCAGACAAAATGGTGACATGAGGGACATTGTGGACCCTGT  
ATTCTCTATCGGTATCTCATCATTATGGGATGAGCTGCGACATATGCCAGCAGGCGGCGTCTGGTGGTTTAACTGCGATC  
GCCATGAAGATGCTATCAGTCTGGCGAATCAAACAATTGCATCCAGGCTGAAACCGCACAGTTCGCGGTCATTAGCATG  
GACAGCGATCCGGCGAAAATCTTTCAATTAGATGATTCTCAAGGGCCGAAAAAATAAAATTTTTCAATGCTAAATCA  
TGAAAAAGGTCTATACTATTTGACCCGTGATTTGCAGTGTTCTATTGATCCCATATAATTACCTTTTTATTCTTGTGCG  
CAATAACGCATGGCAAAACATTCTGCCGAGCGGCTTCGCTCATGGTTGGATAAAAATGAATAAATGGAGCAGGTTAAAC  
CATTGTTGCTTTTTGGTAATTAATCCCGAAATAATAACGATAAACAATTTTCATTGTTGCTTGAGGAATACCGTTCCT  
TTTTGGTCTTGCCAGTTTGCCTTTTTCAGGGTGACCAACATTTGCTGGATATTGCCTTCTGGTGCAACGAAAAAGGGTCA  
GCGCCCGTCAGCAGCTTAGCGTTTTCAGCAACAAAATGGTATCTGGACATTAGTTCAAAGCGAAGAGGCGGAGATCAAACCA  
CGCAGCGACGAAAAACGCATTCTGAGTAATGTTGCTGACTGGAAGGTGCGCCCGCTATCGGAACACTGGCAACTGTT  
CAACAATAACGAAGTCTGTTCAATGAAGCCCGTACCGCTCAGGCGGCGACGGTGGTCTTTTTCTTTACAGCAAAATGCGC  
AAATCGAGCCACTGGCCCGCAGCATTACATACCCTGCGTCCAGCGCGGTAGTGCGATGAAAACTCTCGTGCGGAAAAAT  
ACCGCTAGCCTGCGCGCCACCGATGAACGTTTGTATTGGCCTGCGGTGCAAATATGGTTATTCCGTGGAATGCGCCACT  
CTCCCGTTGTCTGACGATGATCGAAAGCGTGCAAGGGCAGAAGTTAGTCGCTATGTGCCGGAAGATACTACTACCTTGC  
TGTAATGACCCAGCGCTCAAACCTGCGTGGTTTCCAGAAGTGGGATGTGTTCTGTAATGCCGTCACAACATGATGAAT  
AACCTCTATTACCTGCCACGGTAAAGGCGTTCTGGTTGCCCTACGTCGGTACCGGATCCGCGTTGAACAAGCCCT  
GACGCTGTGTCGCCCTAACCGTACCGCGATATCATGACATTGGCGTAATCGGCTGGTGTCTTCTCTATTCTGTC  
GGATTAACGATCTGGATACCGGTTGAATCATATTTCCATTGCCTACTGGCGACATTTCTCAAACCGTATGGTCTGG  
TTTGAAGATGATCAAATCAGTGCCGAGCTGGTGCAGATGCGCTTGGCTTGGCCAGAACAATGGGGCATGCCGCTGCCTTT  
AACGCAAAGTTCTAAACCGTCAATGCCGAGCAGATGGTCCGACTGGCGACGAATACCAGAACCATGCGACTGT  
TAGATGATGCTGTGGAGCGCTCATCATGATGACCATCAGCGATATCATTGAAATATTGTCGTTTGGCCTGATATTTT  
TCCCGCTGGGCTATCTGGCGCGGCACTCTTTCGACGCACTTCCGACACCTTACGTTTGTCTTTGCTAAACCTCGTTAT  
GTTAAACCGCGCGGGACGTTACGCCGACGAAAAAGCCAGGGCAACCAAAAAATGACTCAATTTACGCAAAATACCGCC  
ATGCCTTCTCCCTCTGGCAATACTGGCGCGGCTTTCCGGCTGGAATCTATTTTCTGGTTAAGTTCCGCGCTGTTGTG  
GGCGGGATATCTAACTCCATCCGCTCCTCAATTTGGTGTGTTGCCGCTTTCTGCTGATGCCCTTCCGCGCTACAGCC  
TGATCGCTTGCGCCACTGGATTGCCCTGCCGATCGGCTTTGCTTTGTTCTGGCATGACACCTGGTTGCCTGGCCCGGAA  
AGCATAATGAGCCAGGGTTCGAGGTGGCGGGTTCAGTACCGATTATTTAATCGACCTTGTACACGCTTTATTAAGT  
GCAGATGATTGGGGCATTTTTTGTTTTATTAGTGGCCTGGTTATCTGTACAATGGATTGCGATTACCGTTTTTGTGG  
TTGCCATACTGCTATGGTGAACGTACTTACCCTGGCGGACCAAGTTTCTCCTTGTGGCCAGCCGGACAACCGACGACC  
ACTGTAACAACGACGGGTGGTAACGCAGCGGCAACCGTTGCGGCGACGGGTGGCGCACCGGTAGTGGGTGATATGCCCGC  
ACAAACTGCACCGCAACAACGGCGAACCTTAAACGCTGGCTGAATAATTTCTATAACGCGGAGGCGAAACGTAATCGA  
CCTTCCCGTCTTCCGCTGCCGCTGATGCTCAGCCATTTGAACTACTGGTATTAAATCTGTTGCTTTCTGGTGGAT  
ATAGAAGCCCGGGTGGTATGTCGATCCACTGTGGTGCATTTGATATTGAGTTCAAGAATTTAACTCCGCCACCTC  
CTACAGTGGCCCGGCGGATCCGTTTACTGCGCGCAGCTGCGGCGAGACTTCGCACACTAATCTGTATCAACCGGCAA  
ATAACGACTGCTATCTGTTTGATAACCTTTCGAAACTGGGCTTTACCCAGCACCTGATGATGGGACATAACGGCCAGTTC  
GGCGGTTTTTTGAAAGAAGTTTCGCGAAAAATGGCGGATGCAGAGCGAATTGATGGATCAAACAATCTGCCGTTATTTT  
GCTGGGCTTTGATGGTTCGCCGTTTATGACGATACCGCTGTGCTTAAACCGCTGGCTGGACGTTACCGAAAAAGATAAAA  
ACAGCCGTAGTGCCACGTTCTACAACACGCTTCCACTGCATGACGGCAACCATTATCCGGGGTTCAGCAAAAACAGCGGAT  
TACAAAAGCGGGGCGCAGAAATCTTTGATGAACTGGACGCTTCTTTACTGAACTGAGAAATCGGGTCGTAAAGTAT  
GGTGGTCTGTTGCCGGAACACGGCGCGCTGAAGGGCGACAGAATGCAGGTATCTGGCCTACGTGATATCCCTAGCC  
CGTCTATCACCGAGCTCCCCGTTGGGGTGAATTTCTCGCATGAAGGCACCGCATCAGGGGGCACCGATTGTCATCGAA  
CAACCGAGCAGTCTCTGGTATCTCCGATCTGGTGGTTGCGGTTCTCGATGGCAAGATTTTACCAGAAGACAATGTTGA  
CTGAAAAAACTACAGTGGGTTGCCACAACAGCACCAGTCTCCGAGAACTCAAATGCAGTAGTTATCAATACCAGG  
ATAAACCGTACGTTGCTGAAACGGCGGCGACTGGTGCCTTACCAGCAGTAAGAACGAAAAAGGCGCAGAGTTTCCC  
CCTGCGGCTGGTCCGGGCGCAATTTGCCATTACGGCAGCCTGACGCGCATGACACGTTACTTCCGTTGTTCCAGCCA  
GTTACAGATCATACTGGCAAGAATGCCAGCAATGACCGGAGCCGTAATCATGCCAGAAGCCATGCCAGCTCTGCGA  
ACGTCATATAGCCGCTGTGTTGTAATGACAACGTTTTCGCGGCTATTCTTGAAGTGGTCTAGAGTCAAGATTAGCCCCGT  
GGTGTGTCAGGTGCATACCTGCAACGTGCGGGGGTTTTCTCTCCAGCAACCAATGCCACCAGGGATAAAGCCCCCGC  
AACATTGCGCCTACCGGAACCTTTCCGGCTTCCGCGTATTCTACGATTGCTTTTTACTGTCAGCACCCGGCAATCTC  
CTCATTGCGGATGCCTCCAGCTAATTTCTTTATTTGCAATAGTTGCAGTTCATATCCGGGCTGACTCCAGACTGGTA

GTGAAATGCGCAATTTTGTAGAATTGCGCCTCCTCGCGACCTCCCCAGTGAATCTGTTGCCTCATTTTTTACATACTGCG  
TATTCGACTTCTCCACCTGTTGCGCAAGAGAAACTGGGTTTATTCATTTTTGCGAGGCCGACTTCTTTCTGGACAGGACT  
TTATGCAGCACAACACACTATCGAAACACAATCAGAAATTGCCGTTTACACGCTACGACTTCGGCTGGGTTTTATTATGC  
ATAGGCATGGCGATTGGTGCCGGAACCTGCTGATGCCAGTACAAATTGGCTTGAAGGGAATTTGGGTATTTATTACCGC  
AGCGATCATTGCTTATCCTGCCACCTGGGTAGTGCAGGACATTTATTTAAAAACCCCTTCTGAAAGCGATTCTGTAAATG  
ACTACACCGATATTATCAGTCATTACCTGGGGAAGAAGTGGGGAATTTTCTCGGGGTTATCTACTTTTTGATGATTATC  
CACGGGATTTTTATCTACTCTCTCCGTGGTTTTGACAGCGCCTCGTACCTGAAAACCTTCGGTTAACCGATGCCGA  
TCTTTTACAATCTCTACTTTATAAAGTCGCTATTTTCGCCGACTGGTGGCGATTGCGTCTGGTGGTGAACGATTACTGT  
TTAAGATTTCCGGGCAATGGTGGTGGTCAAAGTAGGGATTATTGTCGTGTTCCGGTTTTGCGATGATCCCGCACTGGAAT  
TTCGCCAATAAACCGCCTTCCCGAAGCCTCCGCTTTTTCCCGCATGCTTGTCTTACCATTCCATTTTGTCTTTTTC  
TGCAATTTTATTAGGTAACCAATGAATATTGCCTATCGTAAACGGGAAGCGGATAAAGTACTGGCAACCCCGC  
TCGCGCTGCGTACCCACCGAATTAGTTATATCACGCTCATCGCGTGATCCTGTTTTTGCCTTTTGTTCACCTTCTCA  
ATTAGCCACGAAGAAGCCGTTTCTGCCTTTGAACAAAATATCTCAGCACTGGCGCTGGCCGCGCAGGTGATCCCTGGCA  
TATCATTATATCACCTACGGTGTAAATATCTTTCGCCGACTGACCGCATTCTTTGGCATTATCTCGGTTTCCACG  
AGCCATTAAGGCAATTTCTCAATCTGTTAAGCCGAATTATTGATACCAAGAAAATTAACCTCACGCGTCTGACTCG  
GCGATCTGCGCTTTTATCGTATTACGTTGACGATTGGGTTTTGTTTTGTTGATCGGTGCTGGTGTCTTTCAGTTGGG  
AAGCCCGTTATATGGTATTGTGTCGTGCCTCATTCCGTTTTTCTGATCTATAAAGTCGCACAACCTGAAAAAATCTCGCG  
GATTTAAAGCCTGGCTGATTCTGCTGTACGGCATTGCTATGCTTGTGCGCACTGTTGAAGCTGATTGAGTAAACCGGA  
GCGCATGGCCCCGGTTTTGTGAGTTAACGCTGCGGATTTTTCATCTGATCAACAGCAAAACAAGCTACCAGTTGACCGCC  
GTAGTCTTTTGTAGTGGGCTGCAACTGGGTGAGGGCCGAAGCGCCGACGACAGCGGGGTTGAAGGCGCAACCCGGCG  
GTGGATTAGTGGGCTTGGTAGTTCACCGCTGAGCTTGTGCGCTGCGGCGATCGTCCGGTTTACGGCGCGGCTGCGG  
GAAAGTAGCGCTGAGTGTACGGATGGCGCGGTTATTGAAGATTTGGTCTTTCGTTCCCTTCTCCACGAGCGGCCAG  
GTACATCACCATCACTTATCAGCAATGTGCTCCACCACCGACAGGTGCTGGGAGATAAAGACATAAGACAGCCCAACT  
CCTGCTGCAAATCCATCATCAGATTACGACCTGCGCGCGCACTGAAACATCCAGCGGAAACCGGTTTATCGGCAATC  
ACCACATCCGGGTCGAGCATCAGACCAGGGCGATGGCGATACGCTGACGCTGACCGCCGGAACATATGCGGATAGCG  
GTCATAGTGTGCTGGTTTTAGGCGGACTTTCGCCATCATGACAGGGCTTTTTCCGACGCTGTTCTTTGCTTAAAGCTGG  
TGTTGATCAGCAGCGGCTCTCAAGAATTTGCCGACTTTTTTACGCGGATTACGCGAACCTAAGGGTCTGGAAGACG  
ATCTGGATTTTCTGCCGACGAGCTTCTGCGCTGCGGATCGTGTAAAGCAGATCCTGCCCTGGTAATACAGCTCGCC  
ACCGGTGGGCAATTTCAATCATCGTCAGCAACCGACCGAGGGTTCGATTTACCGCAGCCAGATTCCGCCACTACTGCCAGCG  
TTTTGCCACGTTCAAGGTTAAACGAAACGCCATCCAGCGCTTAAACCAGACGTTCCGGCGCAACATGCCTTTCTTACC  
GGATAATGTTTTTTCAGGTCGATAGCCTGCAACAGCGGTTGTTGACGGTGGCCTTTCGCTACTCATAGTGTGCGCCTC  
CCGGCATCATCAAGTGGGTAATGGCATTGACTGACGCCCGTACGCGAGCATAATCAGCGCCGGTCTTTCAGCGCGACA  
TCTGTACAGTGGCATAGGGGAGCGCGGTTAAGCAGGACCGGTTCCGGGCGGTCGACTTCCCGGGAACGACACCTGGCA  
ACGACGCCAGACGTTCTTTGCTGAGCAAATCTGGCAGCGCACGCAATGCTGAGTATACGGGTGACGCGGCGCA  
TGGAAGATGGCGTGGCATACCCGTTTCCACCCTGGCCTGCATACATCACGATGATTTTATGTGCCGCTTCCGCCAC  
CAGCGCCAGGTATGGGTAATTAACACCAGCGCCATGTTCTTTTCTGCTGTAGCTCCAGCAGTAGTTCGATGATTTGCG  
CCTGAATGGTACGTCACGCGCGGTGGTGGTTTATCGGCAATCAGCAGTTTTGGCCGACAGGCAATCGCCATGGCGATC  
ATCAGCGCTGGTTCATGCCCGGAAAGCTGATGCGGGTAAACTCCAGACGCGATGCCGGATCGGGAATACCGACCTG  
ATCCACGGTGTAGCAGGTTAAGGCTGGTTCATCGGCTTCTGGAAGATCATCGCCACTTCGGCACCCACAGGTTGGCG  
CGCTTTTTTCTGAGATACGCTGCAAATCCTGGCCGTTAAACTCCAGTTTTTCTGCCATTACGCGGCCCGGATAATCAAT  
CAGCCCCATAATCGCCAGTGAACCTGACCGACTTACCGGAGCCGACTCACCCACAATCCCGACCACTTCGCCCTGTTTTA  
CGCTGTAGCTGATGCGGTCTACGGCGGGAACGGCGGCTTTCTGTCGCCGAAATGCACCGATAATTTATCTACATTTAAT  
AACGCCATCTCGAACCTTACTGCTTTCAGTTTGGGATCGAGCGGTCACGACAGCCGTCACCCATCAGGTTAAATGCCA  
GCACCGTACGAGGATCGCCAGACCCGGGAAGGTCACGACCCACCGGCTTTGCGGAACTGCAACACGTCGGAGAGC  
ATGGTGCCCCACTCAGGCGTTGGCGGCTGTGCCCCATGCCGAGGAAACCAAGAGCAGCCATATCGAGAATGGCGTTAGA  
GAAACCGAGCGACGCTGAACAATCAGCGGCGCAAGGAGTTCGGGAAGATGTTAATAACATCTGACGCATCGCCCCGG  
CACCCGCCACGCGAGACGCGGTGACGTAATCGCGTTAACTTCCACCAGCACGGCGGCGGGTTAAGCGCACATAGTGC  
GGCAAGGCAACGAAGTCAAGTCCAGCGCGGCTTACCAATCGACGGCCGAAAATTGCCACCAGCACCGCCAGCAGCAG  
CAGACTTGGCAGCGCCAGCATGATATCGACCACGCGCATAATGATGTTATCGACCAGGCCCAAAGTAACCGCGATCA  
GGCCGAGAATAACGCCATAATCAGCGATAACACAACCTACCAGACAGCAACAGCAGCGACAGGCGCGCACCGTACATC  
AGGCGGACAGCACATCACGCCCTACGTCATCGGTGCCAGCAAGTGCGCCATGCTGCCGCTTCTGCCAGGCTGGCGG  
GGCGAGCAGTGCATCGCGAACTGTTCCGCCGGTTATAGGGTGAATCCAGTTGGCAAAGATCGCGATGAACAGCACGA  
TGACGACGTAACAGCCGACGACCGCGCTTTGTTGCGTTTTAAATAGTGCAGAATCCTGTAACGGGGTTCATCGGC  
ACCGGTGCGCTAATCACTTTATTTTCAAGTAACTGTGACATGATGTCCTTACTTCTTATGACGAATACGCGGGTTAC  
CACGCCGTACAGCAGATCGACCAGCAAGTTGACGAGGATAATCATCGTCGCCACCAGCAATACGCCGCTGCACTACCG

GATAGTCGCGGCGTTGCAGTGCCTCAATCAACCAGCGTCCAGACCGGGCCACGAGAAGATGGTTTCGGTCAGAATCGCC  
CCC GCCAGCAATGTTCCACCTGCAGGCCGATAACGGTCACCACCGGCAGCATCGCGTTACGCAGCGCATGGACGATAAT  
CACCCGCATGCGGGTTAGCCCTTTGGCGCGCGGGTGGGATGTAATCCTCGCCAGCACTCCAGCATCGAGGAGCGTG  
TCATACGCACAATGACCCGACGCGGAATAGTACCCAGCACAATGGCAGGCAAGATCATATGGGCGACGGCATCGATAAAG  
TTGCCGTCTTACCCAGATTGGCGGTGTCGATTAGCATAAAACCGGTTAACGGATTGGAGTCATCGAGGAACACCATATC  
GCTCACGCGACCGGAGACGGGCGTCAGGTTCCAGTGCACC GAAACCAGCATGATCAGCATCATGCCCCACCAGAAGATAG  
GCATTGAATAAACCCTGTCAGCGCCAGGCCAACCGCTGTGTGATCGAAAATGGAACCGCGTTAACCCGACGCCAGCAGCGCC  
ACCGGAATACCGACTGCCGTAGCAAAAATCATCGCGCAGACGCCAAGTTCAGCGTGGCCTGGAAGCGCGGCACGAACTC  
TTCCCAAACCGGGATGCGGCTTTTCATTGAAATGCC TAGATCGCCATGCATAACGCCCCAAATGTAATGGAGATACTGCT  
GCCACATCGGTTTATCTAAGCCGAGTTCAGCCAGCAGCTGCGCGTGACGCTCTGGGAGATCCCACGTTCCGCCCATG  
ATCATACCGGATCGCCGGGATCATGTGGACAAAGGCAAATGTGAGAAGGGTAATACCGATAAACGTGGGGATGACGAG  
TCCCAAACGTGCGAGAATAAACTGCAACATAACCCGGATTCTCTATAGTGACCCGACGCTGGAACGCTGTCTGTATT  
GCTCAGAAATCAATTCCCGCCCTTATCGACAGGGAATGAAGTATTGCTGCCGGATGGCGCTGCACGCAGAGGCACAGCG  
CCACCGGTATACAGATTGTTGACAAAGTGCCTTTGTTTATGCCGGATGCGGCGTTAACGCCTTATCCCGCCTACAAAA  
TCGTGCAAATCAATACATTGCAGAATTTTCGTAGGCTGATAAGCGGAGCGCATCAGGCATTTTTGCCTTTGCCATCAG  
TCTTGATAGGCTTTAATTATTCGATAGAGACGTTTTCGAAGTGATGTTTTGCCTAATGGATCAACCACATAGCCTTTAAC  
TTCTTTACGTACCGGTTCAAACACGGTGGAGTGAGCGATGATCAGTGCCGGAGCCTGATCGTGCATCACCACCTGCGCTT  
GTTTGATACAGTTCAACGCGTTTATTGTGGTCTGCGGTAGCACGCGCCGTTGAATCAGATCTTCAAACGTTTTGTAGCAC  
CATTTTTGAGTAGTTGGAGCCTTGTTCAGAGGCGGCGCAGCTGAACAGGGTGGCGAAGAAGTTATCCGGATCCCCGTTATC  
GCCAGTCCAGCCCATCATTACCGTCTGGTCTCGCCATCTTTCGCACGCTTGAGGTA CTACCCCATTCGTAGGTGACAA  
TTTTGGCCTGCACGCCGACTTTCGCCAGTCTGCCTGAATCATCTCCGCATGCGGCGAGCGTTGGGTTATACGGACGT  
TGTACCGGCATCGCCACAGGTCGATGGAGAAACCTTTTTCCAGACCCGCTTCTTTCAGCAAGGCTTTCGCTTTTTCAGG  
ATCGTAGGTGATGCTGAACGTCGCTGTTATAGCCCCACATGGTTGGCGGGATCAGGTTTTTCGCTGATACGCCCGCGC  
CCTGATAAACCGCTTTGATGATCGCGTCTTGTTCACCGCTAGGTGAGAGCCTGGCGAACTTTCACGTCATCGAGTGGT  
TTTTCTGCACGTTATACGAGAGATAACCGACGTTACGCCCGGCATTTCCATCAGATTGATGGATTTATCCTGCTTCAT  
GCGAGCGATATCTGCCGGTTCGGGTACGGCATCACCTGGCATTCTTTCTGCAATTTTCGCTAACGCACGGAAGCGT  
CAGGGGTAATAGAGAAAACAGCGTATCGATCTGCGGTTTGGTGCCAGTAGCCATCAAACGCTTTGTAGCGGATACGG  
GAATCTTTTTGATACTGCTGTAACGGAACGACCGGTTCCGATTGGGTTGAGGTCCAGTTTTTCCGGTGTACCGGCTTT  
CATCATCGCATCAGCATATCTTTTGACAGAATAGAGGCGAAGTCCATTGCCAGGTGAGCGAGGAACGGCGCTTCCGGGC  
GAGTCAGCACAAAACGACGGTGTGTCGTTCCACTTTTTCACTTCACTGATCAGCTCTGGCAAGCCCATGCCTTCCGAA  
TATTCGTAGCTGCCGCCAGAAACTTTATGGTACGGGTTTTGCGCGTTTTTCTGACGATCGAACGAGAACCACATCATC  
GGCGTTCAGTTCACGCGTGGTTTTGAATCTTTATTGTCGTGCCACTTCACACCTTTACGCAGATGGAAGGTATAGGTTT  
TACCGTCTTCGCTGACTTCCCACTTTTCAGCGAGGCCCGGGATCACTTCGGTGGTGCCGATTTTAAATTC AACCCAGACGG  
TTATAAAGCGGGACGGAAGAGGCGTCATAGGTGGTCCGGAGGTAACAGCTGCGGGTTAAACCTTCCGGAGATCCTTC  
TGAGCAATAAACAGAGTTTTAGCCTGAACACTTGTGCGACGGTCATAGCCACCAGGCTGAGACCAAGCTTCAGCATCC  
CTGACTTTTTCAAGGAAATACGCATTATCTGCTCAATTGTGATGTTTGTGTTTTAACCTTTGCAGTGGGTTGTGCG  
TGCTGACCTTTTTGTTTTTGGCCGGTGGGTCAACGTTATGAGGTGGGGATGCCGTAATAACATCAGTGTAAC  
AGTGGCGATCTCCATAAAATGCCCTCGTGACCTACAATCTGTCAACAGAATGTGAAAACGTCAATACAGCCAACCGGG  
ATTTACACCAACGGTGAGAATCCACACACAAAGATAAAAAACTTCAAACAGCTATTTGCAGCAGAGAAAATTTGTGCTA  
CTCCAACATGACCAGAACAATCAGCTTAATATTTAGCAACTTTGGTGATTAAGTTTTATGATTTAATGAAAAAAATCT  
GAGGAAAAGGTGATATCTGAGCGATTAATACCATGAACGCTAAAACGCACAGCGGAAAATGCCAGGGCCAGCCATAAGT  
AACGCAAAAAAAGATTTAAGCAAATATAAAAAAAGACAATGGTTTTCTGTACAAATCCGTTAATGGATAGTGAGATATGG  
GGCGCAAAATTTGGCAGGGAATGTGTGTCGTGTAGGTCGAATAAGGCGGTGCGGCCATCCGACAATGGCCGGCACATT  
TGCTGATGCGACGCTGACGCGTCTTATCAGGCCTACGTCGAGTCGAACCTCCCTGCCCCGGAGGTTCTCATCCTCATG  
AGCTGCAGATGCAAAAAGCCTGCTCGTTGAGCAGGCTTTTGAATTTGGTGGTGATAGAGGATTACTCGCCACTTCGT  
GGCTCGCCCTGCGGGCGGTTGCTGGCGCAACGTTCTCTCGCTCGCTCGAGTCGAACCTCCCTGCCCCGGAGGTTCTCA  
TCCTCATGAGTCGAGATGCAAAAAGCCTGCTCGTTGAGCAGGCTTTTGAATTTGGTGGTGATAGAGGATTGGAACC  
TCCGACCCCTTCGTCGCAACGAAGTGCCTACCAGGCTGCGCAATCACCGAATGCGGGGCGCATTTACTGCGCAGAT  
ACGCCCTCGTCAATCCCTTAATAGCAAAATGCCTTTTATCGCGGAGAAAGTACGAGGCGCTTAGTTAGCCGCTGCCT  
CTTTGCTGCGGGATGTGACACCAGTTGTTGTTTTCGTTAATTCACCATCCGGTGAAGTATAGCCAAGACAACCCATG  
ATGGTATCGTACAGCTCTACGTGACGGCTGGCACTTTTCATGTGCGCTTCTTTTTTCAGCTGCGCAAACGCTGCGCATT  
GGCCGATTTTCCAGATATTTATCTGACATCCAGACCATCATCGGTACGCGGAACTGCTCCGGCGGTGCCAGTTCACGCG  
GCGTGCCGTGACGGTCTCGGTTCAATTAATTGACTACCGTGGTACGCTGCGTGAACACAATCGCTTTCTTATCGCGA  
ACCTGATCAATCAGCTGGAGATAAAGTGATCCACATAGGTCACCAGTTGTATAGGAGTTGATCATCTGCGCTTTGGT  
ACAGCCGCTATCAACACCAATACATTCCGGCTTCCACTGCGCAAGCTACGCGGATAACGCTGGGTGATGTTAAATGCG  
AACCTTTGGTATGCAAGATGATCAGATGCTTACCATCCGGGTTGCGCCCTAGCGATTGCTGCATTTGCTTACCAGCAAC

ATATCATCTACCGGCTTGCCACGATTACGTGGCTCCGCACCAATCTGCTCACGATAAGCAATGTTGTCCGCCATCGTGTT  
GCTGTAGAACCACATTTTCGCTCTGCATAGCGTAGAGGTGAGAAGTGAATCCTAACTGCTTCAGAACCAGCGAAAATGTTCT  
GTTCTTTTAAATGTGCGCTGCGGATTATCTTCCGCGCCCCCTGACGTACAAACATGCAACGCAGTGAGAGTTTGGTTGCG  
GTATCACAGGAGTAACCACGGAACGCCGCCAGATTTTTCTCTGGGCCAGTTTCGGCGTGGTATTACGCTCATAGCCGAA  
AATACCCATATGGTCCCAACGCGTGGTTTCACCGATGATAAACACGACATAAGTGTATCAACGTTTTGCGGTGCCTGAT  
AAGTGAATTTCTCGCCGATTAAGCAATGAATTATTATCGGAAGATTCATCGACCCGCGCCAGGCATACAGCCCCAAC  
GCAGAAAGCCAGTTTGTATGGCAGATAAGAGTTTCGCTACGACACCGCCATAACTCGGCAAATCAACGCCGGTGCCTCTC  
CACTTTCTTCTGCTGGATATCCAGCAAACGAATCGGTGCCAAACCATAATACCCGCCAGTACGACGACCGCCAGGCTGC  
GAATACGCTGCCCTGGGGTTCGAGTTGTGCGAGCAAGGTGTAGCGACAGCGGTTATTCCAGATAAGGATAAGAGGCAAT  
GCACTAACGGCGATTAACCAGAGAATAAAGTTTCAGACCAACAACCTCTTTTGACAGGTCGATATCGGTGGTCATGACGGA  
AGCGATGATGCCATAACCAATGACCACATTAAGGAAGGTGATGTAATAGCTGGCACCTGCGGAAAAGAGCACCACGCG  
ATGCCAGAATACGCCAGTGCAGCGGCCAAACAGCGAAAGAAGACGTAGTAAAAAGAAGGTACCAGTACGGTGGCGGCC  
AGTTCAACAACAGCAGAAATGCCTTTCCAGACGGTAAAATCGTGGCATAGCTGCCGAAGCGCGGTAAAAAACCGGCC  
ATTCATAAAAAGGCCAATATAGATTGCAAGCAAAAAGCTCAGTCTCTGCTGTGTAATCGATTTGATGTATCTCATGCAAA  
CAAACCTGGCAAAACAGGTGATAACACCTGCTTAGTGGCTTTTCAGGCCGCGAGGAAAAGTGGCGAGGTAGTCAG  
ATAAGTAAAAATCTACACGCGGAATAAGTAGACCACAGCAAAGGAAAAGTGTGGGAAAAGAGTGTGCATGAAGCACAA  
ATTTACAAAAATGCAAGTTTGAAGAGACTTTAGCGTTACAAAAAGCAGTAAAAAGGGCCAGTTAATTGGCCCAAATTT  
TACGAGTCATTGTTTATACATTTCTGTTGATGCGTTTGTGACACGGAAGCTGAAGCCAGTAGCTCGCGGCTGAGCATT  
AAAGGGAGCCATGCGCCTCACGCAACATTTTCTGCTCTGGCTGACGAATCGTCTGAGAAAGCGCAATGACAGAATCAGC  
AGGGCGAAAATCACGTAGAAGGTCACATAGAAGCGCCAAACAGTGAAGCGATAATCGAACCAAAATGTACCGATACC  
GAAACCGAGATAAATCACACCGTAGTTTTTCCGAGGTTATTGAGGCCAAAGAAGTCACTGACCAGTACGCGAAAGACGG  
TAATAGTGGCGCAAAGTAAATGCCACGAGGCAATCGCTGCAAAGAAGTCACTGCATTCAATGGTGCAAACAGCAGG  
GCCGCCATACCACCAGCGATACCTGACCAATGGTAATAACAGCGATACGGCGATTTTGTGAGACAGAATACCCAG  
CACCAGACGACTGAAAGTTGGCGATGGAATAACAGTACTGCTGCTGCGGAAACCACATCAAGGTGTGCCAGAC  
TTTGGCGATATCTTTCGCTACCCCAATCAGTACAGGCGCTCATGAGGCGGTGAGAACATTACCGTAACATCCAG  
TACTGCGGTTTACGCATCGACTCTGCCAGCGTGAATCTTTCTCCACCACACCATTGCTGGTTTTCACTCTCTGTTTTGG  
TGCGTCTTTCATTAACGTTGCGCCGAAAACAATCATCAACAGCGCAATCGCTCCCAAATCACAAAGTTTTTTCCAGAC  
CGACCGTTTCCAGCAGTGGTGTGATAAAATTTGAAACCCAGGCTACCCAGACCATAAGAACCAGTACGGAACGCGGAG  
ATCAGACCTTTACGCTCCGGGAACCATTACACAGTTAGAGAGGTCAGCAGATAACCCGCGCCATCTGCCAGTCCAC  
CAGCACACCGCGCTTAACCACAGCATCATCAGGTTGTGAGAATGCGCTGTGAGGAAGAAGCCTAATCCAGCAAAATGC  
CGAAGCCATGGTGACGCGTTTAAACGCCAAAACGTTCTGTAATTTGCCCGAACAGAAAGCGAAATGCGAGCCCCAGA  
CTTAAACAAGCCGAAAGAGAAAGCGACCTGGCTTACCGGCGCATCCAGCTTGGCGGAAAGCGCGCCATTAACAGGCTCCA  
GGTATAAACCGACCCAGCGCAAACCTGGTAATGATAGTACCGATGAGTGTGAGCCAGCGGGTACGCTGATAATTTGAAG  
GTGTCATGGCAGTATTCTGCGTAATAAAAAGGAAAAATCTCTGCCGACAACCATAACGAAGTGCATTTATGCCTGGG  
GAAAAACGGCATGAAATGCCATCAGAACGGAATGAAATGCCTTAGTTTCAGGAATGAATGACGCGACAATTATCACCAA  
TTTATTATTTGGTAAGTTAGCACCCACTATCGCCACAACCTATTGTTATTTAATGGTTTCAATTGTGACTGTTACGTTAAA  
ATCTGGCGTAACCCCATCGTATACAGATAGTGCCTATTATTAGTGGTATTTTCTGCCTGAGTTAGCGCGGCATAGGCG  
GCAATATTTTATTGAGCAACATATCAGCGCCTACGGTGACATCCAGCCAGTTGCCGTTCTGGTTTGTGCGCGTATCCG  
GCTCAGGCTGATTGCGCCTCCAGATATTCTCGCCAAATGCTGGTTATAGCTGATTTGCGCCAGGTCGGAGATCGC  
CAAGCCGGGAGTCAACACGCCAGCCTAAGGTACTCAGCTGGCATAACGGATCGGTGAGCGTGGTAGTACTGCTG  
CCAAACTCGTTATACATCGAGGTGGTTGTGCCATCGTAATGTAATGCCGCGACCGGGCCGTTGTAACCTGTTTATATAA  
AGGAAAATTCAGCCATACTACTGCTGGTACATCCACAGGGGTTTCTTCCGCCAGATTGACTTCCAGTCCAGCG  
CCTTTTGGCTACTTTGAATACGTTGCGACAAAATATCGTTGTAATCAGGTTGATGATCACTATCCAGGTGTAACGCTCT  
GTGGAAAGTCCGGGTTGCGTATCAACGATATATTCTTGTGCGCAGGCGTAAGCTGTGTTGAGAAAAAAGGCACTGATTAC  
CACGCTCGCCAGCAGGCTTAGCTGCCAGCGACCACCCTTTTTTTTATGATCATTAAACAGACTCCAGGGAAAGCGCGAA  
TTCGGCAATATTATTGTCATTGTATGAAGGATATCGGGCATAGTAGCCCTGTATTAATATTGACTTTTTTACCAGTGGC  
TCAAGAAAAGCGGCTGAAATTTTTACGATCGGGTACATAGCGAGGAAAAGTATGGAACGTTGCGGCTGGGTGAGTCAGGA  
CCCGCTTTATATTGCCTACCATGATAATGAGTGGGCGTGCCTGAAACTGACAGTAAAAAACTGTTGAAATGATCTGCC  
TTGAAGGGCAGCAGGCTGGATTATCGTGGATCACCGTCTCAAAAAACGCGAAAATATCGCGCTGCTTTCATCAGTTC  
GATCCGGTGAAGGTGCGAGCAATGCAGGAAGAGGATGTCGAAAGACTGGTACAGGACGCCGGGATTATCCGCCATCGAGG  
GAAAATTGAGCAATTTGTTAATGCGCGGGCGTACTGCAAAATGGAACAGAACGGCGAACCGTTTTGTCGACTTTGTCT  
GGTCGTTTGAATCATCAGCCACAGGTGACACAAGCCACAACGTTGAGCGAAAATCCACATCTACGTCGCGCTCCGAC  
GCCCTATCTAAGGCACTGAAAAACGTTGTTTTAAGTTTTGTCGGCACCAATCTGTTACTCTTTATGACGGCATGTGG  
GCTGGTGAATGATCATGTGGTTGGCTGCTGTTGCTATCCGGGAAAATAAACCATGATTCCGGGAAAGCGAACGTTTCAGAACT  
CCCCGCGATCTCGAACTGTGGCTGGAAGTACAACCTGGGGCATCCCTTTATAAAAAGCGAATTAAGTGGCGTACTGCA  
TTCCGCTGGTGGGATGCCTATCTTGCCAAACGCGCAAACTGGGTCTGGGAAGAACGCGTAAGCTTCTCGGTTTTGTC

AGCATTATGGAAGGCCGATTTCTGGCAGCGATGTTTGTGCGACC GAAGGCCGT CAGGCGCGGTATTGGTAAGGCGCTGAT  
GCAGTATGTGCAGCAGCGCCATCCCCACTGATGCTGGAGTTTATCAAAAAATCAACCGCGGATAAATTTTTACCAGG  
CACAGGTTTTACATTGTCGATTGCGCATGGCAGGATGAAACCAACTACCCACATGGATTATGAGCTGGCCGGTGGTT  
CAAACGCTGTAAGTGTCAAGTCCGGACCGTTGTATTTTTCCAGCCATGCCAGCGCCGTATTACCCGCACAGCCATCCCC  
AGCCGCGAGCTGGGGAGATCTTTGGTCAGCACGTTCACTGCGCCGTTTTTACAATAACCGTCAGCGGTTAAATCCAGATC  
CGGCCATGCCCCCTTCGTGAATGCAAATCACGCCAGGTTAATTCCCTCGTAATGACCGCTCCGGCAAGAATTTGCCCGC  
GTGCGTTCCACAACCGAACAGTATCGCCATCTTGTATGCCGCGCTCTGGGCATCGTCAGGATGAATGGTGACAGGCTCA  
CGATTTGCCACCGGTACAATTCGCGCAGAGAAGTGAATTCAGCTGGCTGTGCAGGCGGTGCGCCGGATGGGCAGAAAAG  
TACCTGCAACTGTTCTGGTTCGGCATTGCCCTGCCATTCTGTCGGCTCCAGCCACATTGGATGCCAGGGCAATCCGGGT  
AACCGTAATCGGCAATACGCTGTGAGAAGATTTCAATCTTGCCGCTGGCGGTTTTAACGGATGCGCCAGCGGATCGCGG  
CAAAAATCAGCGAAGCGAATAAACCGCTCGCTGTCCGGTTTTCCGGCATCTCAATTAAGTGGTTGGCTTGCAGAACTC  
AGCAAATGGCGCAATTCACCTGTGGCTTCCCCGCGCTGTGGGCAACGTTATAAAACGTTTTCCAGCCATTGCAGCT  
CACTTTTTCTTCCGTAACCGTGCATAACCGCCCTTCTCCAGCGTTCACTTAAGTGGTAAACATCAAAAATCATT  
CGCGCTTATAGCGTGGCGGCACCACTTGCTTATCGGCACAGATGCTGATTACTGTAATCACCGGTATGGTGAGATC  
ATTACGCTCAAAAAGAGGTAGTCGAGGCAGAACGATCCGCGTGTGTTGATATGCCACCAGGGTTTTCCAGTGTCTCAAC  
CCACAGCTCCGGTTTTTGGCAGGCAGGATCAGGCATTTGGTATCCTGATGATGAGTAAAGTTGGCACCGCCGCCAC  
CAGATAAAACGAATATCCGGGAAATGTCGGTTCATACCGTTGTGTTGATATGCCACCAGGGTTTTCCAGTGTCTCAAC  
AATGCGGGCAACAGGATTTTATCCACCGCATCGCAGCCACCCGGCAAGCTGCCCTGCATGGAAAGAGAGACCAGCAAG  
GCCGCGTGGGGTTACCACCATTTGCAAAAATGGTAAGAAAGACCAAAACCGCCGCGGGTGTGCCGATTTGCCCAACATT  
GCTGCCAGCGTGACGATCATCCAGTGTTTTTGCTCACAAACTGTTGGCGCTGCATTCCCCAGCCTGCCATCAGCATGGT  
GGTATTTTGGTGGAAAATAGCCGCCAGCTCGCGATTTTCTGTCGCCAACACCACAAATCTCTGCTGCCATTTCGGCGG  
TTTTCGCTATTCGCTCACTCTGCCAGCAAATAAGAGGCGAAGACGGCATAACCTGTGGTGAACGCGCCAGAAACGCT  
TCGTCGTGCCAACATTTTCCACCAGCGTATGGCGATCCCAGCATCAGCGCAACATCGGTGCCATGTGCGGTGCCAC  
CCACTCCATTTTATCGCAAAGAAATCGACGTTTTCCGATCGCATTGGATCAATGCAGATCAGCTTTTTCCCGCTGTCAC  
GCAGTGCAGAAAAGTAAGAAAGCCCTGCTCATCGGATGCATTCCACGCAATTTTCCAGCGTATTGAGTGGGTTAGCACTC  
CACAGCACCACGACATCGCTATGTTCCAGCACCAGCGGCAACTGGTCTGCTGTTGATAAACTTCACTACCACCCACGAC  
ATACGGCATGATCGCTGTGCCGCGCCGTCGAATAATCCCCAGATGCCCGGTATAACCGCTGCCAGCGCCATATAGC  
GTTGTAATAATGTCGAGGCCTTATGCAGCAGCCGTTTGAACGCCAGCCGTAGGAACCAGCAAAAATCGATGCCGGACCA  
TAAGCCTCACGAATGCGTTTATGTTGTTGGTGAATAAGATCCAGCGCCTCATCCAACCTACGCGCAACAATTCATCCTG  
CCCACGAATGCCTTCCGGTTTTTCCGGTGACGCAAGAAAGCCTTTTTCGACCATTGGAAATCGTACCCGCGTATTGCTGT  
GAACCTGGTCGCAACCGCGCTCTGCAAGGAGTTTTCCATTCTGTGGTAACGCGCCACGCGAGCTAAACACGTTTTCG  
CCGTCGGTTTTCAACCAGCATGGGCCCAATGGCGGCAGTCAGAACGGAATATCGTGAGGATGAGTTGGCCAAACCGAA  
GACTCCTGAAAGGTTAGATGATTGAGCAGTTAAATATTACTTACAAATTTCCGAGTATTTCCAGGAATAATCTTCATGT  
TCACGCGGCATAATCTCCGCCACGGAACCCGTGGCAAAGAATAAAAAGGTTATTAAGGATTAACAATGAAGAAACGTGT  
TTATCTTATTCGCCCGTAGTGAGTGGCGCTCTGGCGGTATCTGGCTGCACAACTAACCCCTTACCCGGCGAACGCGAAG  
CAGGTAATCTGCTATCGGCGCAGGTCTGGGCTCTCTCGTGGCGCGGGTATTGGTGGCTCTCTTCTTCAAGAAAGAT  
CGCGGTAAGGCGCGCTGATTGGCGCAGCAGCGCAGCTCTGGCGCGCGGTTGGTTATTACATGGATGTGCAGGA  
AGCGAAGCTGCGCGACAAAATGCGCGGCACTGGTGTAGCGTAACCCGACGCGGGGATAACATTATCTCAATATGCCGA  
ACAATGTGACCTTCGACAGCAGCAGCGGACCCGTAACCCGCGCGGCTAACACCCTGACCGCGTGGCAATGGTACTG  
AAAGAGTATCGAAAACGGCGGTTAACGTGATTGGTTATACCGCAGCAGCGGTTGGTACGACCTGAACATGCGTCTCTC  
CCAGCAACGTGCGGATTCGTTTCCAGCGCGTTGATCACCCAGGCGTGGACGCCAGCCGATCCGTAACAGGGCCTTG  
GCCCGGCTAACCAATCGCCAGCAACAGCACCGCAGAAAGTAAGGCGCAAAACCGCGTGTAGAAATTACCTTAAGCCCG  
CTGTAATCCCTTTCATGCCAGGTGATGCAGAAATCACCTGGCATTCTTCAAGTTTTCTTATCATATTTTCAAGGTAAGGT  
GATCGCCTTATCAGTGAATGGAGAGAAGCATGAAGCCGTCGTTATCCTCTACAAAGCCTTACCTGATGATTTACTGCAA  
CGCCTGCAAGAGCATTTACCGTTCACCAGTGGCAAACCTCAGCCACAAACCGTGAACAAAATGCAGCAATTTTTGC  
CGAAGCTGAAGTTTTACTGGGTTCAAACGAGAATGTAATGCCGATTGCTGGAAAAATGCCGAACTGCGTGCCACAT  
CAACGATCTCCGTCGGCTATGACAATTTTGTGTCGATGCGCTTACCGCCGAAAAATTTCTGCTGATGCACACGCCAAC  
GTATTAACAGAAACCGTCCCGGATACGCTGATGGCGCTGGTGTGCTACCGCTCGTGGGTTGTGGAGGTAGCAGAACG  
GGTAAAAGCAGGCGAATGGACCGGAGCATAGGCCCGACTGGTACGGCACTGACGTTACCATAAAACACTGGGCATTG  
TCGGGATGGGACGGATCGGCATGGCGTGGCACAACGTGCGCACTTTGGCTTCAACATGCCATCCTCTATAACGCGCGC  
CGCCACCATAAAGAAGCAGAAAGACGTTCAACGCCGCTACTGCGATTTGGTACTCTGTTACAAGAGTCAGATTTCTG  
TTGCCTGATCCTGCCGTTAACTGATGAGACGCATCATCTGTTTGGCGCAGAACAAATTCGCCAAAATGAAATCCTCCGCCA  
TTTTCATTAATGCCGGACGTGGCCCGTGGTTGACGAAAATGCACTGATCGCAGCATTGCAGAAAGGCGAAATTCACGCT  
GCCGGGCTGGATGTCTTCAAAAGAGCCACTGTCCGTAGATTCCCGTTGCTCTCAATGGCAACGTCGTCGAGTACC  
GCATATTGGATCTGCCACCCATGAGACCGGTTATGGCATGGCCGCTGTGCCGTTGGATAATTTGATTGATGCGTTACAAG  
GAAAGGTTGAGAAGAACTGTGTGAATCCGCACGTCGCGGACTAAGCCGCGACTGCGTAGAGTAAAGCCCGATAATCGCTC

GGGCTTTTACTCTTTATTGGGTTGCAGTAACTGCTGTAGTCCAGGCTGATTAACGCCTGATGCTGTGCCGGAATGGC  
GCAATCAGTTTGTATATCACTTGCCTGCTGTGAAGTCGGAAGTGGATGCCATTTGCGACAAAGCTCACCTGAGTACC  
TTGCTGAGCAATGTAGTCTCAACCATACCAGTTGTTGCGTGAAAGTTTGTGCCGCCGAATCAACGGTTGCAATGCAT  
CAGCTGGCGTCTGTACCCTTTGGTGAATGCCTGATCAAAGACCGGTTTCAAATCATCGCTCTGTTTTAGCGCAGAGTGC  
GCAGCATCGGCTGCAACTTCGCATTTTGCAGTTGTTGCGCCAGCACACCCAGCGAACCGTTCATTTACGCGAGCGGACC  
GCTTTGCGTAACGTAATCCTGCGGTACGCGAATTGCGTTAACGCTGTCTACAACCGGGCGCAGACCGGAATCCATCGCCT  
GATTCACCTGCTGAGAATAACCATAACAGAAATCGCGTAATCAGAGACAAAAGGACCAAACCTGTTTTTCTGATCGGCAGTC  
AGGGTTGGTAGACGTTACCCTGCTACGCATCACTGTATTCTGCAGGAAGTCGATAAACGCTTACGCTGATCGCCTTCTTT  
ATCAAAACACCCACTCAGGCTAACTACCATTAATAACGCCGCAAGAGGGCGCAAACAGCGAGAGCAGGACTTTCTGTGCG  
CCATTTTCTTACTCCTTTACCCAAAAAAGCGCACAAACGACACACGCGTGTCTGACGTGACAAGGATAGTCCAGGACAG  
GCTTGCAGGATACCCTTTTACGTAATCTTCTGGTAAAATCATGGAGAAAATGAAACAAGTTAATTTGTTGTTTCATT  
GTAAAAAATGATAGTCCGTTGCCTTTTTGTAGCCAGAGATTTACGCCTTCGAGAAGTTAGATTTTCGAAATCTTT  
ACAAAACAGGAGTGGTAAGAGATATATCGGCATTTATCAGATCGTTAGGTGGCTATAAGTCACGCTAAATGACAGGCTGA  
ATTCAGATCATAGCCAGAGCATGCCCTGACTTCACCCGCTGTGTCTGCTTTTCCGACTATTCTTAATGAGCTTCGATGC  
AACAGATTGTTTTAAAGATGAAACGCAGAAAATACCTGACGCACAGAACAACGTCCTGTACCGAAAATGAGCAGTTA  
CGAAAAGGGACAGGATTAATAATCGATGATTTCCGCCGGGTTTTGGGCGTATCAGTCGCCATGGTAAAGGAATGGGAATC  
CAGACGCGTGAAGCCTTCAAGTGCCGAACATAAATTGATGCGTTTGATTCAAGCCAACCCGCGCATTAAGTAAAGCAGTTGA  
TGGAATAGACTTTTATCCACTTTATTGCTGTTTACGGTCTGATGACAGGACGTTTTTCCAACCGATTAATCATAAATAT  
GAAAAATAATTGTTGCATCACCCGCCAATGCGTGGCTTAATGCACATCAACGGTTTACGCTACAGACCATTAAAGCAGTG  
TAGTAAGGCAAGTCCCTTCAAGAGTTATCGTTGATACCCCTCGTAGTGCACATTCCTTTAACGCTTCAAATCTGTAAG  
CACGCCATATCGCGAAAGGCACACTTAATTATTAAGGTAATACACTATGTCGGTAAAATGACTGGTATCGTAAAATG  
GTTCAACGCTGACAAAGGCTTCGGCTTCACTCCTGACGATGGCTCTAAAGATGTGTTCTGACTTCTCTGCTATCC  
AGAACGATGGTTACAAATCTCTGGACGAAGTGCAGAAAGTGCCTTACCATCGAAAGCGGCGCTAAAGGCCCGCAGCT  
GGTAACGTAACAGCCTGTAATCTCTGCTTAAAAGCACAGAATCTAAGATCCCTGCCATTTGGCGGGATTTTTTTATTT  
GTTTTCAGGAAATAAATAATCGATCGCGTAATAAAATCTATTATTTTTGTGAAGAATAAATTTGGTGCAATGAGAA  
TGCGCAACGCCGTAAGTAAGCGGGAATAATTTCCGCCGAAGACTCTTACTCTTCAATTTGCAAGGCTAAAAACGCCGC  
CAGCTCATAACTCTCCTGTTAATATGCAATTCACACAGTGAATCTTATCATCCAGGTGAAAAATAAAGCGTGA AAC  
AAATCACTATTAAGAAAGTAACTATATTTCTGCGCATTCCAGCCTCCTGTGTTGATTTCCAACGAGTATGACTGC  
ACCCATTTTGTGGACGATGAAATGGAATAGCCCTAATATGTCAAAGCCAAAATACCTTTTTGAAAAGCGCCTTGAAGT  
CGTGAATCACTACTTCACAACTGATGATGGTTACAGGATCATCTCGGCACGTTTTGGTGTCCCCGAACCCAGGTGAGGA  
CATGGGTTGCCCTCTATGAAAAACATGGAGAAAAGGTTTAAATCCCAAACCTAAAGGCGTTAGTGCTGATCCAGAGTTG  
CGTATTAAGGTCGTGAAAGCTGTGATCGAGCAGCAGCATGTCCTTAATCAGGCTGTGCTCACTTTATGCTTGCTGGTAG  
TGTTTCTGTAGCCAGGTGGCTGAAGTCTATGAAGAGCGCGGAGAAGCTGGTTTACGCGCGCTCAAGATTGGCACAAAA  
GAAACATTGCAATATCAGTTGATCCAGAAAAAGCGGCATCAGCATTGGAGCTGTCAAAGACCGCAGCATTGAGGATCTT  
GAAAGGCAAGTTGATTTCTTGAACGCGGCTTATGTATCTAAAAAGCTGAAAGCCTTAGCTCATCCCAGAAAAAGTG  
AAAGTACTCAACGAGCTAAGGCAGTTTTATCCTCTTGTGAGCTTCTCAGGGCTGCGGAGATACCGCGCAGTACGTTTTA  
TTATCATCTAAAGGCTCTCAGCAAGCTGACAAGTATGCGGACGTTAAAAAGCGTATTAGTGAGATTTATCACGAGAATA  
GAGGCCGATACGGATACCGTAGGGTAACGCTGTCTTTCATCGAGAAGGGAACAGATTAACCATAAAGCTGTTGAGGCG  
CTGATGGGAACCTCTCACTTAAAGCAGCGATTAAGGTCAAGCGATACCGCTTACAGAGGAGAGGTAGGGCAAACGCG  
CCCTAATGTTCTCAAAGAGATTTCAAGGCTACGCGGCCAAACGAGAAGTGGGTTACCGATGTTACTGAATTTGCAAGTCA  
ATGGGCGCAAGCTGATTTGTCTCCAGTAATAGATCTTCAACAACGAAGTTATTTCTTACAGCCTTTGCGAAAAGACCA  
GTGATGAACATGGTTGAGAATATGCTCGATCAGGCATTCAAAAAGCTTAATCCTCACGAGCATCCTGTTCTGCACTCTGA  
CCAGGGATGGCAGTATCGTATGAGAAGATATCAAAATATCCTTAAAGAACATGGTATTAACAACAAAGCATGTCAGAAAAAG  
GCAATTGTCTGGATAATGCTGTGGTGGAGTGTCTTTGGAACCTTAAAGTCGGAGTGTTTTTATCTTGATGAGTTCAGT  
AATATAAGCGAACTGAAGGATGCTGTTACGGAATATATTGAATACTACAACAGCAGAAGAATTAGCCTGAAATTAAGG  
TCTGACTCCAATTGAATATCGGAATCAGACCTATATGCCTCGTGTTTAACTGTCCAACCTTTTTGGGGTCAAGTACAACTT  
TGATTTATAGTCAGGTGGGCTTTTCTGTCTGCCTTTCCGTGAATACTGAGACAAACAGTCTCAAGCACCCGTGGCT  
ATTCTAGCTTAATAAGTTTGTCTTCTCCTTGATATAATCTAAAAAATCTCATAAAATTAATATATGAGATAATCTT  
TATTCAGCAGAAGATTATTAAGGTTGCTGTATTATTTAGCGATAAAAAAAGCCTGCCAGATGGCAGGCTATTTAATAAC  
GGCGTTATTATTGCAACAGCGAAATATCCGCAACGCGCAGGAACAGTTCGCGCAGTTTCTCAGCATGGTCAGACGGTTG  
ATACGCAATCTTTGTCATCAACCATGACCATCACTTTATCGAAGAAAGCATCAACCGGTTACGCGAGCTCAGCCAGTTC  
GACCAGCGCATCCTGGTAACGACCTTCGTAAGTACGGCTCCAGCTTGTACGTAGCACCACAACCTGCATCGCCAGTT  
TAATTTCTTCCGGCTCTTTAGGGTAGAGGCATTACGCGGTCGCTCAGCACTTCGTCAGATTTTCCGCGAATGTTAGAT  
ACACGTTTGTTCGCCGCCGAGTGCAGCAGCTGCATCCAGGGTACGGAAATGCGATACCGCTTTCATACGGGCATCGAA  
ATCAGCCGACGAGTCGGACGACGCGCCAGTACCGCTGGATGGTGTCAACGGTATAACCTTCTGCTGATACCAGGCGC

GGAAGCGACCGAGCATAAAGTCGATAACATCATCAACTACGTTGGCATTAGTCAGCTTATCGCCATACAGACGCACCGCT  
TCTTCGGTCAGCGTTTGCAGATCAAGGTTGAGGTTCTTCTCAACGATAATTCGCAGCACGCCAAGCGCGGCACGACGCAG  
CGAAACGGGTCTTTGTGCGCTTTTCGGATGCTGACCGATACCGAAGATACCCGCCAGGGTATCCATCTTGTGAGCAATCG  
CCAGCGCACAAGCTACTGGGTTGGACGGCAGGTCATACCAGCAAACGCGGCTGATACTGCTCATTAGCGCCACCGCG  
ACATCTTCCGCTTCGCCATCGTGACGGCATAGTGCATCCCATAACGCCCTGGGTGTCGGTGAACCTCGAAGACCATGTT  
GGTCATCAGGTCGCACTTAGACAGCAGACCCGCACGGGTAGCGTGGTTAACGTGAGCGCCAATCTGTTAGCAATCCAGC  
CAGCCAGCGCTGGATGCGGTGAGTTTTGTGCGCGACGGTCCCAACTGTTGCTGGAACAACACGGTTTGACGGCGCGGC  
AGTTATCTTCAAGACGTTTTTACGGTCGGTGTGAAGAAGAACTCGGCATCCGCCAGACGGGACGAACGACTTTTCTC  
GTTACCGGAGATAATCTGCTGCGGATCTTTCGATTCGATGTTGGCAACGAAGATAAAGTTCGGCAGCAGTTTGCCGTCGT  
TCGCATACACCGGAAGTATTTCTGGTCACCTTTCATGGTGTAAACCAGCGCTTCAGCCGGCACCGCGAGGAATTTCTCT  
TCGAATTTTGGGTCAGAACGACCGGCCACTCCACCAGCGAAGCCACTTCTCCAGCAGGCTTTCGCTTAAAGTCAGCGTT  
ACCGCAATCTTACGCGCTGCTTCTCGGCATCGGCTTAACTTCTCGCTTACGTTCTTGTAAATCGGCGATGACTTTCC  
CAGCTCACGCAGAATTTCCGATACTGATCGGCGTTATCGATGGTGAATTCGGCTCGCCATAAAGCGGTGGCCGCGA  
ATCACGCGATCGGACTGAATGCCAGAATGGTGGCGAATGACTTGTGCGCCAGCAGAGGGTCACGGTGTGACCGG  
ACGCAGGAAGTGCAGCTGCTTTCGCCCCAACGCATCAGTTTCGGGATCGGCAGTTTCGCCAGAGAAGTGCAAACCAT  
TCGGCAGCAGTCTTCGGTCTTTCGCCCTTACATGGGCGGATACAGCAGCCATTTCGCCCTTATCGGTAGTCAGACGC  
TCAGCCTGGTCAACGTAATACCGCAACCACGCGCCAACTTCTGCCGCTTTCGCTCGGTTTGCCTTCAGCGTCGAACGC  
CTGGGAATCGCCGGGCGGTTTTTTCGATTTACGATCCGGTTCGCGCTTCGCCAGGTTAGCTACTTTTCAGCGCCAGAC  
GACGCGGAGCAGCAAACCATGAAACGGTGCCTGTGCGAGGCCAGCGTTATCCAGTCCCGCAGTAAAGTTCGAGCAAAG  
GACTCAGCCAGGCTGCGCAGTGCTTTTGGTGGCAGCTTTCAGTGCCGATTTCCACCAGAAAAGTTTTCTCAGACATAGC  
CGCTCTTACTTATCTTTGTTGCACATCGGGAAGCCGAGGGCTTCACGGGAAGCGTAGTATGCTTCTGCCACTGCTTTGG  
TCAGGGTGCGAATGCGCAGAATGTAGCGCTGACGCTCGGTGACGGAGATGGCTTTACGCGCATCCAGCAGGTTGAAGCTG  
TGGGCGGCTTTCAGAATACGCTCGTAGGCTGGCAGCGGCGGATTTTCAGCGCCAGCAGCTGCTGCGCTTCTTCTC  
GTACTGCTCGAAGCAGGTGAACAGGAAGTCCACATCCGCGTATTCGAAGTTGAAGTGGACTGCTCCACTTCTGTTCTGAT  
GGAACACGTCGCCGTAGGTGGTTTTACCAGCGGGCGTGCCTCCAGACCAGGTCGTAACGCTGTCTACGCCCTGAATG  
TACATGGCCAGACGTTCCAGACCGTAGGTGATCTCGCCGTAACCGTTTACTCCAGACCACCAACCTGCTGGAAGTA  
AGTGAACGCTCACTTCCATGCCGTTACGCCACACTTCCAGCCAGTCCCAGGCACCCAGCGTGGGTTTTCCAGT  
TATCTTCCAGAAACGGATGTCGTGAATAGTCGGGTCCATGCCAGCTCTTTCAGAGAACCAGGTACAGCTCCTGAATA  
TTGTCCGGCGATGGCTTAAAGTACCACCTGGAAGTATAGTAGTGTGTAACGTTGGGGTTTTTCGCCGTAGCGACCATC  
GGTCGGGCGACGAGAAGGCTGAACATAAGCAGCCGCCATCGGTTCTGGCCCCAGCTCGCGCAGACAGGTCATTGGGTGAG  
AGGTTCCCGCGCCGACTTCCATGTCCAATGGTTGAACAATGGTGCAGCCCTGGCGAGCCAGTAACTCTGTAAGGTGAGG  
ATCAAGCCCTGGAAGGTCCTGGTATCAAACCTTTTGCATATTATTTCTGTGCTGGATACGTGTGGATTTAAAGGAAGGGATC  
AGTATACCCGCTGGATGGAAGATATACAGTACGAAACGGGAAAAGCAGGGCTTAAACGCATGGAAAGATGCAAAAAATGG  
CCATCCGCGTCAAAGAACAGACAAACTGCTCTTACGGAAGGTATAACCGCGCATTTTCATAGCTTCCCTGGAAGTGTTC  
GAAGGCGGTGACGTCGATTTTTTGTGCTCGCCGGTGTATAACGTTTTGCCGCTGATCCTTGATAACGCTTCCATATTA  
ACGAACGCAGAGGATCAACCTTTACCCGTTGTGCTTTCGACGGGTGACGGTATAGAACAACCCACTAGCACCATAAGC  
GCCATTGCCGGAAGAAAGCGTTTATCATCATTAAATACCGTCTGGTTTGCAGGTGAGTCTTATTATTTATATCGGTAT  
AGTGGCTGATATCTTACGAATTTCTTAAAGCTCTAAGCTGTAGTGATAAACTCAGATTATTCAGTGCGCCAACCA  
AATGATTTATCGGTGAGCTTTTTTTAAACCAGATACAGAGACACAGATGCAGCCAAAATTTACTGGATTGATAACCTGC  
GAGGGATAGCGTGTAAATGGTGGTGTGATTACACCACTACCTGGTATGTGACCAATGCTCATAGTTGATAGCCCGTC  
ACATGGGATATCGCCAATGTTCTGAATTCGCTCTCGTGTACGCGTGGCGTATTTTTTCATGATTTCCGGCTATCTCTT  
TTTTGGCGAACGCGCCAGCCGCGCATTTTCTGCGTATCGGCTTATGTCTGATTTTTTATAGCGCAATCGCACTGC  
TCTACATTGCGCTGTTTACCTCCATCAATATGGAGTTAGCGCTGAAAAACCTGCTGAAAAGCCAGTGTTTTACCACTTG  
TGGTTTTTCTTCGCGATTGCGGTGATTTATCTGGTTTACCAGCTGATTCAGGTGAAGAAGTGGCGGAAAAATGTTGCT  
GGTGCTAATGGCGGTGATTGGCATTATCGCTAACCCAAACACAGTCCCGCAGAAAATTGACGGTTTTGAAAGGCTGCCAA  
TTAACTTATATCAATGGCGATACTTTTTACTACATTTCTGTATGGCATGTTGGGCCGCGCTATAGGGATGATGGACACA  
CAGCATAAAGCACTGTCGTGGGTGAGCGCCGCGCTGTTTGCAGCGGGGTTTTTATTATCTCTCGCGGACATTATATGA  
ATTGCAAGTGGCGGAAATTTTCCGATACTGTTATCTTACTGTGGGCCGATGGTTTTTATCTGCGCAATCGCGCTAT  
TGACTCTGGTTAAAAACACGCTGGATACGCTACCATTCGCGGACTTGGCTTAACTCCCAGCATTATTGGGTATATAC  
GGATTCCACGCTTATTATCCATGCGCTGCGCACCCGGGGAATTGAGCTTAAAAATGGCAATACTGGATATTTTGG  
GATCTTTTGCAGCAGTTGGCAGCGAGTTTGTACTTTCTATGCTGGTACAACGAATCGACAGAAACAGATTAGTGAGTT  
AAGTAAAAGCCGGTCACATTGGACTGACCGGGCTACGTGAGTTATTCGCTGATTCTTCTGGGTAACCTGTGTTTCT  
TTTGGTGGGTTTTATTCCGGCATCACGAATTTTTTCTGACCCGCTACTGCACCAAACAAGCTTAAAGAAGAAAGCCAGTCC  
ATAAAAACCTTTTTCTGCTGAGTAATAATGTCGATTCCACAGACCTACCATCAGTAATGCAACAGAGATAATAAAGACAG  
TCAGGCAGGTCATATAATAAATGGAAGTGGTCGGTATGCCTTCATACTTGTCCCGAACGGTCTTTTGATAAGACGCCGCA  
GAAAACAGTCTAATACCAGTACGGCAAATAATATCCTTTTTTCACTTAACTGCATCTCTGCATTCCATAGCCCTAACAG



ATAGGTAACGATACCACCAACGAGAGCTATCCATGACACAATACTAAAGGCCGGTGAATAGGTTGATATTTTGTGTCCA  
TCACAGTATTCCTTTTCTTCTGAATATGTAAGAGCTTTATGTTGCTCATGCCGAGCGAAACAAACGCATTTGACCAAAC  
AAGCAGACAAAAAAGGCGATGGGATAGATCACCATTTATAAGTATTGATAGGTGCGTTTAAAACACCGATAAAACAAGAG  
ACCGATAGTGATTAACGCAACTAAGTGCAGATATGGGTAAAAAATCATCCAGTTGCCCGAGTTTTTCTGCGCGAAGAT  
ATGCATAGTTGCCAAAAGTTGCTGTCATTAACACGCCAAGAAAATAGCCTTTTTCCACTTAACAATGGGCATGAGATCCAT  
AGCCCAACCAGATAAACCCAGCGCCCGACAACAATAATAGTTTTGCCACAGTCTTTGAGGTTTTTATAACGATCTCCAT  
ATCTACCAGCGATACATTACGAGTAACCAACGAAAGACAAAATGAAAAATGCCATTAACAATGATTTTCAGAATAAAT  
TCATACTAAATATTAATTAATTAATGAGATATATAGATGTGAATTATCCCCACCCGGTACGGCAGGGGATAACGTTTTAC  
GCCATTAATGGCAGAAGTTGCTGATAGAGGGCAGCGAACGTTTTCTGTCGTGGCTGATAAGCGGCATAACGCTGCGCATC  
TGGTAGATGCGACTGTTCTAACGGTAGTTGCGGCAACAATTCAATGAGCGATTTCTCTGGATTGCGCCGATCTGCGCCA  
GCCTTGCTGCGCCAGTGTGGCCCAACATCCCCCGTACGGTAATCGAGCTGCTGACCCTGATATCCGCCAGCATC  
TGACGCCAGTACTACTACGCGCCCGCCCAATCAACGTAACACTTTGCGGTTTAAATACCGCAGGCATGCACGACATC  
CATGCCATCTGCCAGCGCATAACCCACGCCTTCCAGCACTGCTCGCGCCAGTTATTGGGGCCATGTTGATGAGTCAAAC  
CAAAGAAAACCCCTTTCGCTGGGGATTATTGTGTGGCGTACGCTCGCCGAAAGATAAAGCAGAAACCAAATGGCTCG  
GCACTTTTATCAGCCTGTTGAGCTGCAGCGATTAAGCTGGGACATTGCTCAGGCCGTTAATTTTCGCGCCCAATCCAG  
ACACGACGCTGCATCAGCATCACAGACATTAATGCCAAGTTGCGGTAGCGCATGGCAAAAGCTATGTACGGCGCTTT  
CTGGCTTGCTTAAGAACCCTTCGCTGACAGCAAAATAGACCCCGACGTCCCCAGCGATAACATTGCCTGATTAGCATCA  
ACCATTCCACACCAACTGCACCAGCTGCATTGTGCCACCGCTGCGACAACCTGGCACCCTGCGCATACCCACGCTTT  
CGCAACTTCAGGTAACAAAGCACCAGTAATTTGCTGCCTTCGTATAATGCGGGCATCTGGTCACGAGATAAGTCGCAAG  
CCTGCGCATGACGTCACTCCAGTCACGCTTTGCGACATCCAGCCACATGGTGCCAGCTGCGTCAGACATATCGCTGGCA  
AACTCCCCGTATACGAGCAGCAAGTAATCTTTGCGTAATAACTTTGTCGATTTGACGGAATATCTCCGGCTCATG  
CCGCTGAACCCATAGCAATTTAGGGCAGTAAATCCGGGCATCATCAGGTTGCCGTAATCACCCGCGATTGCGGAACTC  
GCGCTTCCAGCAAAGTGCACCTTTCGCGCACAGCGCCGCTGTTCCACAAAATGGCAGGGCGTAACACCCGTTGCTGAGCA  
TCCAGCAAGTTGCTCCGTGCATCTGGCCGCAATACCAATGCTTTAACGTCCTGCAGAGAATGCTGATCGCCAGAGC  
TTTCATTGCGCGATCAGTTGCTGCCACCCTGTTCCGGGTCTTGTTCGACCAGAGTGGATGCGGGCGCAACCGTCA  
GCTTTTCCGTTTTCGCGAGCAACCACCTACCCTGCTGTTGAGCAAAATAACTTTTACGCCCGAGGTGCCAAGATCTATC  
CCGATATACATATCGATCGTTCCTTAAAAAATGCCCGGTATCGCTACCGATAACCGGGCCAAACGGACTGCACAGTTAGC  
CGTATTTTGTGCAACAGATAATGGTTTACCAGATTTTCCAGTTGTTCTGGCGACCACTCTGATGCACCGGAGACAAATG  
ATGTTCTGAGCATATTTGGCTAAATCTGCCAGTGACATTTGGCCTTTAGGATTTGCTGGCCAATTTCGCTATTCCAGC  
CGAATAACGCTGCGCGATGCGTTTATCCAGCTCGCCATCTTCAATCATGCGCGCTGCAATTTTACGCGCCAGTGCCATC  
GTATCCATCGCGCCGATATGACCGTAAAAACAGATCATATTTATCAGTACTTTGACGACGACTTTTGGCATCGAAGTTAG  
ACCACCGGTGGTAAACCGCCTGCTTTGAGAATTTATACATACACCAGCGCATTCTCTTCCACACTGTTCCGGAACTGGT  
CGGTGTCAGCCAGTTGCGCATCGCCACGTTGGCGTGCAGAAACGAACAGGCCAAGCGCAATGGCGGTGGCTATT  
TCATGATGGAAGAGTGACTGCCAGCGTCGCGTGGTTAGCTTCAATGTTGAGTTTAACTCTTTTTTCCAGACCAAACCTG  
TTTCAGGAAGCCATAGACCGTCCGCGCATCGTAATCATATTGATGTTTGGTGGTCTTTCGCGTTTTCGGTTTCGATAAGCA  
ACGTGCCCTGGAAACCGATTTTATGTTTATGCTCAACCACCATCTGCATAAAGCGGCCAGTTGTTACGCTCTGACGC  
AAGTCGGTATTTAACAGCGTTTCGTAACCTTACGACCGCCCAACAGGACATAGTTTTACCGCCCAATTTATGGTTGC  
TTCCATCGCTGAACAACCTTGCCTTCCGCGCCAGCTGAAGACTCAGGATCTGGGTTGTCGCGCACCCGCGCCGTAGC  
GAGGGTTTGTAAAGCAGTTGGCGTTCCCAACAGCAGCTTACGCCGCTCTCTTCTTGTCTTGCCTGCCAGGACATCAACC  
ATTTGCGCAAAATTTATGATGACTCTTTTAAACGACGCGCCCTCAGGGGAAACATCCACATCGTGAAGCAATAAAATGG  
CACATGTAACCTTGTGAAAAAATCAAATGCGACATCTGCTTACGCTTTCGCAACCGCCAGTGCCTCACCGGCTGCTGCC  
ACGGACGATTAACAGCCCCACACCAACATATCCGCCCCGTTCCAGCAGAAGGTGTGCCAGTAGCAGGGCGCAAAACGC  
AAGTGCTCTTCCATACGCTTACCAACACCAGTTGCTCGGGATTGTAGTGACGGAATGCTAACGGGTTTGGAGATTTTGA  
GCCTTCATAACGAACGCGATCGAGCTGGTCAAAATAGGCTTGCATATTGAACTCCATAATCAGGTAATGCCGCGGGTGAT  
GGATGATGTCGTAATATTGGGCACTCCCTTTCAGTTGCTCAATTATGTTATTTACACTGCTATTGAGATAAATCACAAG  
TGTGCGCTCGCTCGCAAAATAAAATGGAATGATGAAACTGGGTAATTCCTCGAAGAGAAAAATGCAATAAGTACAATTGC  
GCAACAAAAGTAAAGATCTCGGTATAAATCAAGAAATAAACCAAAAAATCGTAATCGAAAGATAAAAAATCTGTAATTGTTT  
TCCCCTGTTTGTGCTAAAAATTGGTTACGTTTATCGCGGTGATTGTTACTTATTAATAACTGCTCTAACTACAGAAG  
GCCCTACCATGAAAATAAAGAACATTTACTACCCTTTGACCTCACTCTGCTTACCAACGTTGCTGCACACGCCA  
AAGAAGTAAAATAGGTATGGCGATTGATGATCTCCGTCTTGAACGCTGGCAAAAAGATCGAGATATCTTTGTAAAAAG  
GCAGAATCTCTCGGCGCAAGATTTGTACAGTCTCAAATGGCAATGAAGAAACACAAATGTCGCGAGATTGAAAACAT  
GATAAACCGGGGTGTCGATGTTCTTGTATTATTCCGTATAACGGTCAGGTATTAAGTAACGTTGTAAGAAGGCCAAAC  
AAGAAGGCATTAAGTATGACTTACGACCGTATGATTAACGATCGGGATATCGATTTTTATATTTCTTTGATAACGAA  
AAAGTCGGTGAACGAGGCAAAAGCCCTGGTGCATATTGTTCCGCAAGGTAATTACTTCTGATGGGCGCTCGCCGGT  
AGATAACAACGCCAAGCTGTTCCGCGCCGCAAAATGAAAGTGTTAAAACCTTACGTTGATTCCGGAAAAATTAAGTCCG  
TTGGTGACCAATGGGTTGATGGCTGGTTACCGGAAAACGCATTGAAAATTATGGAAAACCGCTAACCGCCAATAATAAC

AAAATTGATGCTGTAGTTGCCTCAAACGATGCCACCGCAGGTGGGCAATTCAGGCATTAAGCGCGCAAGGTTTATCAGG  
GAAAGTAGCAATCTCCGGCCAGGATGCGGATCTCGCAGGTATTAACGTATTGCTGCCGGTACGCAAATATGACGGTGT  
ATAAACCTATTACGTTGTTGGCAAATACTGCCGAGAAATTGCCGTTGAGTTGGGAATGGTCAGGAACCAAAGCAGAT  
ACCACACTGAATAATGGCCTGAAAGATGTCCCTCCCGCTCCTGACACCGATCGATGTGAATAAAAACAACATCAAAGA  
TACGGTAATTAAGACGGATTCCACAAAGAGAGCGAGCTGTAAGCGTTACGCCCCAGCGCGGAGCGGGGGCGTGATTTCT  
CTCCATGCCCGGTGAATGAATTGGCTTAGGTGGAGTCGTTATGCCTTATCTACTTGAAATGAAGAACATTACCAAACCT  
TCGGCAGTGTGAAGGCGATTGATAACGTCTGCTTGGGTTGAATGCTGGCGAAATCGTCTCACTTTGTGGGGAAATGGG  
TCTGGTAAATCAACGCTGATGAAAGTGTGTGTGGTATTTATCCCATGGCTCTACGAAGGCGAAATATTTTTGCGGG  
AGAAGAGATTACAGGCGAGTCACATCCGCGATACCGAACGCAAAGGTATCGCCATCATTATCAGGAATTGGCCCTGGTGA  
AGAATTGACCGTGTGGAAAATATCTTCTGGGTAACGAAATAACCCACAATGGCATTATGGATTATGACCTGATGACG  
CTACGCTGTGAGAAGCTGTCTGCACAGGTCAGTTTTACATTTACCTGATACCCGCGTGGCGATTTAGGGCTGGGCA  
ACAACAACGGTTGAAATTGCCAAGGCACTTAATAAACAGGTGCGCTTGTAAATTCTCGATGAACCGACAGCCTCATTA  
CTGAGCAGGAAACGTGATTTTACTGGATATTATTCGCGATCTACAACAGCACGGTATCGCCTGATTTATATTTTCGCAC  
AACTCAACGAAGTCAAAGCGATTTCCGATACGATTGGCGTTATTCGCGACGGACAGCACATTGGTACGCGTGATGTGC  
CGAATGAGTGAAGCAGATATTACCCATGATGGTCGGGCGAGAGTTAACCGCGCTTTACCCTAATGAACCAACATACCA  
CCGGAGATGAAATATTACGTATTGAACATCTGACGGCATGGCATCCGGTTAATCGTCATATTAACGAGTTAATGATGTC  
TCGTTTTCCCTGAAACGTGGCGAAATATTGGGTATTGCCGGACTCGTTGGTGGCGACGTACCGAGACCATTCAGTGCCT  
GTTTGGTGTGGCCCGACAATGGGAAGGAAAAATTTATATTGATGGCAAACAGGTAGATATTCGTAACGTGACGCAAG  
CCATCGCCAGGGGATTGCGATGGTCCCCGAAGACAGAAAGCGGACGGCATCGTTCCGGTAAATGGCGTTGGTAAAAAT  
ATTACCCTCGCCGCACTCAATAAATTTACCGGTGGCATTAGCCAGCTTGATGACGCGGAGAGCAAAAATGTATTCTGGA  
ATCAATCCAGCAACTCAAAGTTAAACGTCGTCGCCGACCTTGCTATTGGACGTTTGAGCGGGCGCAATCAGCAAAAAG  
CGATCCTCGCTCGCTGTCTGTTACTTAACCCGCGCATTCTCATTCTTGATGAACCCACCAGGGGTATCGATATTGGCGG  
AAATACGAGATCTACAAATTAATTAACCAACTCGTCCAGCAGGTATTGCCGTTATTGTCATCTTCCGAATTACCTGA  
AGTGCTCGGCCTAGCGATCGTGTACTGGTGATGCATGAAGGGAAACTAAAAGCCAACCTGATAAATCATAACCTGACTC  
AGGAGCAGGTGATGGAAGCCGATTGAGGAGCGAACATCATGTCGAAAAGCAATCCGTCTGAAGTGAATTTGGCCGTACC  
GACATCCGGTGGCTTCTCCGGGCTGAAATCACTGAATTTGCAAGTCTTCGTGATGATTGCAGCTATCATCGCAATCATGC  
TGTTCTTACCTGGACCACCGATGGTGCCTACTTAAGCGCCGTAACGTCTCAACCTGTTACGCCAGACCGCGATTACC  
GGCATCCTCGCGGTAGGAATGGTGTTCGTCATAATTTCTGCTGAAATCGACCTTCCGTGCGCTCAATGATGGGGCTGTT  
AGTGGCGTCCGGCGATTTGTGACGTCTGGTTAGGCTGGCCTTTGCCACTTACCATCATTGTGACGCTGGTTCTGGGAC  
TGCTTCTCGGTGCCTGGAACGGATGGTGGGTCGCGTACCGTAAAGTCCCTTCATTTATTGTACCCTCGCGGGCATGTTG  
GCATTTCCGGCATACTCATTGGCATACCAACGGCACGACTGTATCCCCACCAGCGCCGCGATGTCACAAAATGGGCA  
AAGCTATCTCCCCGCCAGTACCGGCTTCATCATTGGCGCGCTTGGCTTAATGGCTTTTGTGGTTGGCAATGGCGGGAA  
GAATGGCGGTGAGGCTTTGGGTTACAGTCTCCGGCTCTACCGCAGTAGTCGGTCGCCAGGCTTTAACCGCTATCATC  
GTATTAGGCGCAATCTGGCTGTTGAATGATTACCGTGGCGTCCCACTCCTGTTCTGCTGTGACGTTGTGTTACTCGG  
CGAATGTTTATGGCAACGCGGACGGCATTGGACGACGATTTATGCCATCGCGGCAATCTGGAAGCAGCACGTCTCT  
CCGGGATTAACGTTGAACGCACCAAACCTGCGGTTCGCGATTAACGGATTAATGGTAGCCATCGCCGATTAATCCTT  
AGTTCGACTTGGCGCTGGTTACCTTCTGCGGAAAATATCGCCGAACCTGGACGCAATTGCAGCATGCGTGATTGGCGG  
CACCAGCTGGCTGGCGGTGGGAAGCGTTGCCGGAGCAGTAATGGGGCATTATCATGGCTTCACTGGATAACGGCA  
TGAGTATGATGATGTACCGACCTTCTGGCAGTATATCGTTAAAGGTGCGATTCTGTTGCTGGCAGTATGGATGGACTC  
GCAACAAAACGCCGTTCTGATTTTGAATAAAATTTCTCAAAGCCGGTTACGTAATTACCCTTTTGGTTTTGATGATGA  
TTCAGCAGGAAAAGAACCATGTTTACTAAACGTACCGCATCACATTAAGTTCAATGCCAATAAAGCCTATGACCGGCA  
GGTAGTAGAAGCGTAGGGGAATTTTACAGGCGTACAATCGGAATGGGATATTTTATTGAAGAAGATTTCCGCGCCC  
GCATTGATAAAATCAAGGACTGTTTAGGAGATGGCGTCATTGCCGACTTCGACGACAAACAGATCGAGCAAGCGCTGGCT  
GATGTGACGCTCCCATTTGTTGGGTTGGCGCTCGTATCACCTTGACAGAAAGTTACCCACCCGTTTATTACATTGCCAC  
CGATAACTATGCGCTGGTTGAAAGCGCATTTTTGCATTTAAAAGAGAAAAGGCGTTAACCGCTTTGCTTTTTATGGTCTT  
CGGAATCAAGCGGCAAACGTTGGGCCACTGAGCGCAATATGCATTTGTCAGCTTGTGCGGCAAGAAAAGTATCGCGGA  
GTGGTTTATCAGGGTTAGAAAACCGCGCCAGAGAACTGGCAACACGCGCAAATCGGCTGGCAGACTGGCTACAAACGCT  
ACCACCGCAAACCGGATTATTGCCGTTACTGACGCCCCGAGCGCGGCATATTCTGCAAGTATGTGAACATCTACATATC  
CCGTACCGGAAAATTTATGCGTGATTGGCATCGATAACGAAGAACTGACCCGCTATCTGTCGCGTGTGCGCCCTTCTTCG  
GTCGCTCAGGGCGCGCGGCAAATGGGCTATCAGGCGCAAACCTGTTGCATCGATTATTAGATAAAGAAGAAATGCCGCT  
ACAGCGAATTTTGGTCCCACGATTCGCGTCATTGAACGGCGCTCAACAGATTATCGCTCGCTGACCGATCCCGCGTTA  
TTCAGGCCATGCATTACATTGTAATCACGCCTGTAAGGGATTAAGTGGATCAGGTAAGGATGCGGTGCGGATCTCG  
CGTCCAATCTTGAGAAGCGTTTTAAGAAGAGGTGGTGAACCATCCATGCCATGATTGATGCCGAGAAGCTGGAGAA  
AGCGCGCAGTCTGCTGATTTCAACCACCTTGTGATCAATGAGATATCGCAAATGTGCGGTTATCCATCGCTGCAATATT  
TCTACTCTGTTTTTAAAAAGCATATGACACGACGCAAAAAGAGTATCGCGATGTAATAGCGAGGTCATGTTGAGCGA  
TGATGAGAATTGTCGGCGTCACATCAGGTAACGCTGCGTGTTGTCGGATGCGGCGTGAACGCCTTATCCGACCTACCCG

CCAGGCATGATAAAACGCACCAACAACGCTTCAGGCTCGTAGCTCAACTGCCTGAGACAAAGTAAAAAGCCTTATCCGAC  
TGACAAGTCGGATAAAGGCTCAAGGAAATGCAATTACATATGCGCCGCGATTAACCGTTGGTTATCCTGGTACATTGCGAA  
CAGGTAGTTGTTATAACTCTCCCTTTGGTCGAGTAGCCCTTCAGCTTGTGAATCATCGCTGTGGCAGTCACTTCCTGAT  
CCGCTTTACGCAGCTGCGCACGCGATTTACGGAACGAAGTAAGCCGGGTGCGTATTAGGTTAGTGACATAGGCGCTC  
ACCGATTCTTTGACAGAACTAAACTGTGAGTACCCTTTCACTTTACTGGCGCATTGGTACAACGTCCTTTCATGCATTT  
CATGCCGAACAGGTTGTTGTTGTTGCGCGCCAGCTTCGACGTTCCCAACCGCTTTCTGCTGCAGCCATCGTCGCCACCA  
TACTGGTGGGGATAATGTCTACGCGTTCAAGCAAGGTATTCCACGGGATTTTTCGCGTATTACCGGACCCTTCACCTTG  
TAGCGTTTGGCGATGTCTTCAGACGCGCACGCTCAGCAGGTGACCATTGGCCCTGATACTGTTTTGAAATGAGCCAGTT  
ACGTTCCGCAGTAATGGCCGCATTTTGGCTGGTAATGTAAGGCATTACGGTCCGGAGAAACGCCTTTTTCTTGGTGTT  
CGGAAGGTATTTTCGAAATCAGGAAGTGAAGTACTCTTTCGACTATTGCGAGAATACTCTGTTTACTGCTTACCTGT  
TTATTACTAGCTTTAGTTAAGTGGGACTTTTGACTCGCTGTTGTTGTGTGCGTCTTCGCTAACACCTCACTCGAAAACAC  
CAGAGTGAGTAACATAAGAATCATCGCCCATATCGTCGATGGGAGTCAAAATCATCAGGTCTCCTGGTCGGATTTAAT  
CATTCCAACACCTTATATTTTTCAAAATTTGAGAGTTGAATCTCAAATCATATCAAAAATAGCTGTCAAGAGCACCCCA  
AGGAATAGTCCAAATCTGAAACTATGTCACGTGTTAACGATTAGATTGGCGTAAATCGCAGAAAATGTGGGGGTTATC  
GCAAAATTCAGCGTTTTTTGCGCGAGATCGCTCACCTTGCTTCTATCCTGTGGACTTACCCTCAGGATGAGTTTT  
GTTTGGCTTACGCTGGCAAACGTCTGAAATCGCAGCAATAAGGACTCATCCGCATGAAACTCGCCGCTGTTTTCTG  
ACACTCCTTCTGCTTTCGCGGTTGCCGCGAGCTGGACTTCTCCGGGTTTTCCGCCTTTAGCGAACAGGGGACAGGAAC  
ATTTGTCAGCCACGCGCAGTTGCCCAAAGGTACGCGTCCACTAACGCTAAATTTTGACCAACAGTGCTGGCAGCCTGCGG  
ATGCGATAAAACTCAATCAGATGCTTTCCTGCAACCTGTAGCAACACGCGCCTCAATGGCGATTGTTAGGGACGGC  
GAATATACGCTGCAATAGACACCCGCTCCGGTACGCCAACATTGATGATTTCCATCCAGAACGCCGCGCAACCGGTAGC  
AAGCCTGGTCCGTGAATGCCGAAATGGGATGGATTACCGCTCACAGTGGATGTCAGCGCCACTTTCGGGAAGGAGCCG  
CCGTACGGGATTATTACAGCAGCAAATGCGATAGTGAAGAAGGTCAAATAATGTTACAACCCGCTGCCACCAGCAAC  
GGTTTACTCCTGCTGGAACGGGAGAACTGACACATCCGCCCTTTCGACTGGCATAACGCCACGGTTTACTTTGTGCT  
GACAGATCGTTTTGAAAACGGCGATCCAGTAATGACCAGAGTACGGACGTCATAAAGACGGTATGGCGGAAATGGCA  
CTTTTACGGCGCGGATTACGCGGCTGACCAACAACTGGATTACCTCCAGCAGTTGGCGTAAATGCTTTATGGATA  
AGCGCCCATTTGAGCAAATCACGGTGGGTGCGCGCGGTACAAAAGGCGATTTCCCGCATTATGCCTACCACGGTTA  
TTACACACAGGACTGGACGAATCTTGATGCCAATATGGCAACGAAGCCGATCTACGGACGCTGGTTGATAGCGCACATC  
AGCGCGGTATTCGATTCTTTGATGTCGTGATGAACCACACCGGCTATGCCACGCTGGCGGATATGCAGGAGTATCAG  
TTTGGCGGTTATATCTTTCTGGTGACGAAGTAAAAAATCGCTGGTGAACGCTGGAGCGACTGGAAACCTGCCGCCGG  
GCAAACCTGGCATAGCTTTAACGATTACATTAATTTAGCGACAAAACAGGCTGGGATAAATGGTGGGAAAAAACTGGA  
TCAGAACGGATATCGCGATTACGACAATCCTGGATTGACGATCTCACTATGTCGCTAGCCTTTTTGCCGGATATCAA  
ACCGAATCAACTACCGCTTCTGGTCTGCCGGTGTCTATAAAAACAAAATGGATACCCACGCCAAAGCCATTGACGGCTA  
TACGCCGCGGATTACTTAAACCACTGGTTAAGTCAAGTGGGTCGCGACTATGGGATTGATGGTTTTCGGGTCGATACCG  
CCAAACATGTTGAGTTGCCCGCTGGCAGCAACTGAAAACCGAAGCCAGCGCCGCGCTTCGGAATGGAAAAAGCTAAC  
CCCGACAAAGCATTAGATGACAAACCTTTCTGGATGACCGGTGAAGCCTGGGGCCACGGCGTGATGCAAAGTACTACTA  
TCGCCACGGCTTCGATGCGATGATCAATTTGATTATCAGGAGCAGGCGGCGAAAGCAGTCGACTGTCTGGCGCAGATGG  
ATACGACCTGGCAGCAAATGGCGGAGAAATGCAAGGTTTTCAAGTGTTGAGTACCTCTCGTCGATGATACCCGCTG  
TTCCGTGAAGGGGGGACAAAGCAGCAGAGTTACTACTATTAGCGCCAGGCGCGGTACAAATCTTTTATGGTGATGAATC  
CTCGCTCCGTTCCGTTCTACAGTTCTGATCCGCTGCAAGGTACACGTTTCGGATATGAACGGCAGGATTTAGCGGTA  
AATCTGCCCGCCAGCGTCCGCACTGGCAGAAAATCAGCCAGTTCCGCGCCGCAATCCCGCAATTGGCGGGGCAACAA  
ACGACACTTTTTGCTGAAGCAGGGCTACGGCTTTTCTGAGCATGGCGACGATAAAGTGCTGGTCTCTGGGCAGGGCA  
ACAGTAACTTTTCCGGCTTCCGTTCTGTCAGTACCTCGGGAAGCCGCAACCAGGATAAATGTCAGCCCTAATCAGCGT  
TGCAGGATAAAGCACCGCTCACTCTTCAACAGACCGATTTGCACCCAGCAAATGTAGCGTTATTGTTACCTTCTTGTCT  
ACAGAGTTCGACAGATATCCCGCTATGACATTCTCCCTTTTTGGTGACAAATTTACCCGCCACTCCGGCATTACGCTGTT  
GATGGAAGATCTGAACGACGGTTTACGCACGCTGGCGGATTATGCTCGCGGCGGTAATCCGGCGCAGATCCCGAAA  
TGCAGGACTACTTCCAGACGCTACTGACCAGCATGCTGGAAGTGGCAAAGCGACTGATGCACTGTGTAACACGACGGT  
CCACAGGGGAAAAACGGAGCTACTCACACTGCTTCCCGGAATGCTGCGCGAGAAGTTGGGTTGGGATATCGAACACAGAA  
TATTGACTAACAAACGGCAGCAGAGCGGTTTTTCTACTTATTTAACCTGTTTCCGGACGCCGTGCCGATGGTCGGG  
TCAAAAAAGTGCTGTTCCCGCTTGCACCGGAATACATTGGCTATGCTGACGCCGACTGGAAGAAGATCTGTTTGTCTCT  
GCGCGTCCGAATATTGAAGTCTGCCGGAAGGCCAGTTAAATACCAGTGCATTTTGGCATCTGCATATTGGCGAAGA  
AACCGGGATGATTTGCTCTCCCGGCCAGCAATCCAACAGGCAATGTGATTACTGACGAAGAGTTGCTGAAGCTTGACG  
CGCTGGCGAATCAACACGGCATTCCGCTGGTGATTGATAACGCTTATGGCGTCCGTTCCCGGTATCATCTTCAGTGAA  
GCCGCGCCGCTATGGAATCCGAATATCTGTGCTGTGCATGAGTCTTCCAAGCTGGGTCTACCTGGCTCCCGCTGCGGCAT  
TATCATCGCAATGAAAAATCATCACCGCCATCACC AATATGAACGGCATTATCAGCCTGGCACCTGGCGGATTGGTTC  
CGGGCATGATGTGAAATGATTAAGCGTAACGATCTGCTGCGCCTGCTGAAACAGTCATCAAACCGTTTTACTACCG  
CGTGTTCAGGAAACTATCGCCATCATTGCGCGCTATTTACCGAAAAATCGCTGCCTGATTATAAACCGGAAGGAGCCAT

TTTCCTCTGGCTATGGTTAAAGGATTTGCCATTACGACCAAGCAGCTCTATCAGCGCCTGAAAGCACGGCGTGCTGA  
TGGTGCCGGGGACAACCTCTCCAGGGCTGGATAAACCGTGGCCGCATACGCATCAATGTATGCGCATGAACTACGTA  
CCAGAGCCGGAGAAAATTGAGGCGGGGTGAAGATTCTGGCGAAGAGATAGAAAGAGCCTGGGCTGAAAGTCACTAAAA  
ATTGCCTGATGCGCTACGTTATCAGGCCTACATGATTTCTGCAATATATTGAATTTGGAAGAATTTGTAGGCCGGATAA  
GGGTTTTACGCCGCATCTGGCATAAACAAAGCGCACTGTTCCGGGTTGAGAAACGCCGAAAACGTTTCAAACAGGCTG  
CTGCCGTAGCCGATGCCGCTGCACTTTCTCGACATCCATGCACTGCAACGCCTTTGTCGGGCAGGCTTCAACACAGGCCG  
GTCCCGTCTCCCGATGCCAGCACAGATCGCACTTAATCGCCCTCGCTTTTTGCGCGAAGAAAACGACCTCCATCGCACCA  
AACGGGCAAGCCAGCATAACAGCTTTTACAGCCAATGCAACGTGTTGTTCAACGAAAATATGCCCATGTTGCGGGCTTAT  
CGCGTCAACAGGGCAGACATTGCGGCACGGTGCATCTTCACTGATGACAGGCTACTGCCGTGGTCCAGCAGTGGTCTT  
TAATGACACGAATACGGGAAATAAACTCGTCTGGTGACAACGCAGCGCAATCCTGATTCTCATGATGCGACACTGCGCAA  
GCCACTTACAGGTACGGCAACCGATACATTTCTGCGCATCCGCAATAATAAACCGTTTATGATCACTCCTTTGACTA  
AAACAGCAGAGTGCCAGAGAGCGCGTCCCTACTGCTTTGATCCAACGAAGGAAATGTTAAAGTTTTGGCACTTGTCCAAA  
GCGTTATGTATGCGGCCAGGTATCCCTGACAGTAAATCCAGTTCATTAGAAATAGCCTGCGCGGTTTACGCGAGTG  
GTTTCAGGAGATTTTTCTCTCCACCTGTTTCAGACGTGATGTCGAAAGCGAAATCGACACGGCGTACGGCACCCGCCA  
TGAATATCAAACCCGGAACAGCAATACAGGAGACGCCGAGTTCGTTTTCTTCTGTCCATCGCCGCTCCGCTTTTCAG  
AATGTGCGCCAGTTCGTGCAACATCGCGGCGAGCTCGTAATGGTATTGCGGGTTAACGGCTGGATCTCATGCTGATGCG  
TTTTCCAGTATGACTTACGTAGTCCGGGTGACCAAACGCCATGTAGATCTTGCCATTGCCGAAACAGTAGAGCGGCATA  
TGCTGGCAATATAGGCACGGGTTGCGAGCATCCCGGTTGTTGGTTCCAGCTTATAAATCAAATAGCGTGATCGTCTTC  
GGGCTGGAGAAGTTAATGGTTTACCAGTGGCGATGTTAGTGCCTCAAGATGCGGAGCGGCATATGAATGATATTC  
GCGAAGACAGCGCCTTCTGCCCAGCGCAATAAATTTGGTGGTCAAGCGATAACTCCCTGCGGCAGGCGCGGTGGTCA  
TAGCCGAGGACTGTAATCCCTGCAATAAGCGATGGACGGTACTCTATTTAAACAGCCAGCTCCGAAAGATGCGCCAA  
CGGACAACCGTTGGATAGTTGCTCAAATCTCAATCAGCATCAACCCGGAACAGACTTGCGTTCCGGCTGGACGCT  
CTTTTTCTGCGCATCTCGTTCTTTTTTTCCCATCACTTCTTCCCATTTTGTGCGCTCCTGATGGTAGCGCAAAG  
TGTGCCGTAGTTCAGCATCTCGACAGATAATTTATAACCAATTGATTTTTATGTCTTTGAAATTCATCAATCAGATTGC  
CTTGTTAAAAAGTGATCGATATATTTGAAATCAAGTTTCGCATATTGAAATTTAAGCCAAAAAGCGATCAAAAAACA  
AGGAAGCCTGGATGAAAGTGACATTTGAGCAGTTAAAAGCAGCCTTAAATCGGGTCTTAATTTACGCGCGGTTGACAG  
CGAAACGGCTGACGCCTGTGCGAGAGATGTTGCCCCGACCACCGAATCCGGCGTTTATTCTCACGGCGTAAATCGTTCC  
CTCGTTTATTCAACAACGAAAACGGCGATATCATTCTGATGCCAACCCAAACGTATAACCAGCCTCGGCACAATT  
GAACAGTGGGACGCCAGCGTTTCGATCGTAACCTGACAGCGAAAAGATGATGGATCGCGCCATTGAACCTGGCTGCCGA  
TCACGGTATTGGTCTGGTGGCACTACGTAATGCCAACCACTGGATTGCGCGGGCGCAGCTACGGCTGGCAGGCGGGGAAA  
AAGGCTATATTGGCATTGCTGGACCAACTCCATCGCCGTAATGCCGCCGTGGGGCGAAAAGAGTGTGCGATAGGCACT  
AACCCGCTGATCGTCGCCATTCTTCCACGCCGATCACCATGGTGCATATGTCGATGTCGATGTTCTCTTACGGCATGTT  
AGAAGTTAACCGTCTGGCAGGTCGTCAGCTCCCGGTGATGGTGGCTTGTGATGATGAGGGCAATTTGACCAAGAACCTG  
GCGTTATCGAGAAGAATCGCCGATTTTCCGATGGGCTACTGAAAAGGTTCTGGCATGTCGATTGTGCTGGATATGATC  
GCTACTCTCTTTCCGACGGCGCATCCGTTGCCGAAGTCAACCCAGGACAACAGCGACGAATACGGCATTTCACAAATTTT  
TATTGCCATTGAAGTGGACAAGCTTATCGACGGTCCACCCGCGATGCCAAGCTGCAACGCATCATGGATTACGTTACTA  
GTCCGAGCGTGCTGACGAAAATCAGGCCATTGCTTACCCGGCCATGAATTTACTACCCTGCTGGCCGAAAACCCCGCT  
AACGGCATCACTGTTGATGACAGCGTGTGGGCCAAAATCCAGGCGTTATGAGGAGATAAGTCATGATTTTTGGACATATC  
GCGCAGCCCAATCCGTGCCGTTTTGCCCGCCATTGAAAAGGCGCTCGATTTTCTGCGCGTACCATTCAACGCCCT  
GGAGCCGGGCTGTGCAAAATCGACGGCAAAAATTTATACGCAAAATTCGATTTAACACACGCGAAGCGGTGGTAA  
ACCGTCCGGAAGTGCATCGTCGGTATATCGATATTCAGTTTTCTGGCGTGGGGCGAAGAGAAAATCGGCATTGCTATTGAT  
ACGGGAAATAATAAAGTCAGCGAATCACTATTAGAGCAGCGCAATATTATTTTTTATCACGACAGTGAACATGAATCATT  
TATAGAAATGATACGGGCAGCTACGCAATTTTCTTCCGAGGATGTTACCGACCAGGTTGATTATGCAACAGCCT  
CTGAGATACGAAAATTTGGTTAAAGTCGCATTAACGGCGCTGAATTAATCGAATAATCGTCTACGCCAGAACGCCTGG  
GTAATGTTATTGCTCTAATAATAAATCAGGTTGCTGCACATGCGACTTGAATTATGACAGACATAGCCTCAAGG  
AATAGCTATGAAAAAATACTCGAAGCAATACTGGCGATTAATCTCGCCGACTTTCTGTATTGATTTATAAACATTA  
TTTTAAGATATGGTTTTAGACAAGCATTATCTGTTGATGAATTTGACGTTATTTATTTGCTGGTTAACGTTTATT  
GGCGGATTGTAGCTTTTATGGATAACGCCACGTTAGGTCACCTTTCTGGTGGAGAACTCTCCCCGATGGCAGCG  
ACGAGTCGCTCTGTTACCCATTCTTAATCTTATTTATTTGTTGGCGACTGGCCTGGGGCGAACGCTAAAAACAATTC  
AGGACTGGAGCGATTATCACCGATCCTCGTTTACCATCGGCCTGATGTATGCCGTTGTCTGCCACCAGCCTCGTT  
ATCGCATTCTTTGAACTGCGTCATTTATCAACTCATCACGCGTAGCAATTCCTAACGTGCCACCAGGAGGCTTA  
ATCATGGCTGTGCTGATTTTTCTGGGCTGTCTGTTGGTGGTATTGCTATCGGTTTGCCTATTGCCTGGGCACTGTTGTT  
GTGCGGGGGCGGTTAATGTTCTGGCTGGACATGTTTGTGATGTCCAGATCATGGCACAACCGCTGGTGAACGGAGCCGATA  
GCTTCTCCCTGCTGGCGATTCCGTTCTTTGTGCTGGCGGGTAAATCATGAATGCGGGCGGCTTGTCAAACGCATTGTT  
GACCTGCCGATGAAACTGGTGGGCATAAACAGGGCGGCTGGGCTACGTGCGCGTGTGGCAGTATGATTATGGCGAG  
CCTTTCTGGTTCTGCCGTTGCGGATACCGCCGCCGTTGCCGCTTACTGGTCCGATGATGCGCAGCGCCAACTATCCGG

TCAACCGGGCGGGGGCTGATTGCCTCTGGCGGCATTATCGCGCAATTATCCCCCTTCCATTCCGTTTATTATCTTC  
GGCGTTTCCAGCGGATTATCCATCAGTAAGCTGTTTATGGCGGGCATTGCCCTGGCATGATGATGGGCGCAACGCTGAT  
GCTTACCTGGTGGTGGCAGGCCAGTCGCCTTAATTTACCCCGCCAGCAAAAAGCAACGATGCAGGAAATCTGGCACTCTT  
TTGTCTCCGGTATCTGGGCGCTGTTTCTCCAGTCATCATTATTGGCGGGTTCGCTCCGGCTGTTTACCCCTACCGAA  
GCCGGGGCCGTTGCTGCTTCTATGCGCTGTTTGTCCGACAGTTATTTACCGTGAAATGACCTTCGCCACACTTTGGCA  
TGTA CT CATTGGCGGGGCAAAAACCACCTCAGTGTTATGTTTCTGGTGGCCTCGGCACAAGTTTCCGCCTGGCTGATTA  
CCATTGCTGAACTGCCGATGATGGTTTCTGATTTACTGCAACCCTGGTTCGATTACCCGCTCTGCTGTTTATCGTCATT  
ATGGTGGCTATCCTGATTGTCCGATGGTCATGGATTAACGCCGACGGTATTAATTCTTACCCCGGTATTAATGCCTTT  
AGTTAAAGAGGCAGGAATCGATCCGATTTATTTCCGGTGCATGTTTATCATTAACTGCTCAATCGGCTTAATTACCCGC  
CTATCGGTAATGTA CT TAACTGTTATTTCCAGGGTGGCAAACTCAAATTCGATGATGCAGTCAGAGGGCTTTTCCCTTAC  
GTCCTGGTTTTATATTATTAGTCGATTTGTTTTTATTCCCGATCTCATCTCCCTTTGAAATGGATTAATTA  
AAAGGAAAATATTATGAAATTACGCTCTGAACCTACGCATTATCATTGCTGGCTGGCTGCATTACGACATCTTCTC  
TGCGGCGACAATCTTTACGTTTCGGTTATGAAACATCAAAACCGACTCGCAACATATTGCGGCGAAAAAATTAATGAT  
TTATTGCAGGAGAAACCAAGCGAGCTGAAATTAATACTGTTCCCGGACAGCACTCTCGGTAACGCGCAGGCGATGAT  
CAGCGGCTACGTGGCGCACCATCGATATGAAATGTCCGGCTCGAATAACTTTGCGGGTTATCACCAGTATGAACT  
TGCTTGTATGCTCTTTCTGTTCCGCGATACCGCTCACGCGATAAAAACGCTCGACGGCAAAAGTCGGTATGATCTGAAA  
GCCTCACTTGAAGGTAAAGGACTGAAAGTACTGGCTACTGGGAAAACGGCTGGCGCGATGTCACCAACTCGCGCGCACC  
GGTAAAACCCCGCGACCTGAAAGGGCTGAAATCCGCACCAACAATAGCCCGATGAATATCGCCGATTCAAAGTCT  
TTGGCGCTAACCCGATCCCGATGCCGTTTCCGAAGTCTATACCGGGCTGAAACCCGCACTATCGACGCTCAGGAACAC  
CCGATCAACGTCGCTGGTTCAGCAAAATTTTTGAAGTGCAGAAGTTCCTTTCTGACGCACCACGCCTATTCCCGCT  
TCTGGTGGTATCAACAAAGCGAAGTTTGATGGCTTAAAGTCCGGAGTTCAGCAGGCGCTAGTTTCTGACACAAGAAG  
CGGGTAACTATCAGCGCAAAGCTGTTGCTGAAGTACAGCAAAAATCATCGACGGCATGAAAGAAGCGGGCGTGAAAGT  
ATCACCGATCTCGACCGCAAAGCTTTAGCGACGCACTGGGAATCAGGTTCCGCGCATGTTTGTAAAGATGTGCCGCA  
GGGAGCTGATCTGCTGAAAGCGTGGATGAGGTGCAATAAACCATGACGCAATACTGGCTGGGGTTAGATTGTGGCGGA  
GCTGGCTGAAAGCGGGCTGTATGACCGCAAGGCCGGAGGCGAGGCGTGCAGCGCTGCCGCTGTGCGCATTAAAGCCG  
CAGCCAGGCTGGGAGAGCGGATATGGCAGAAGTGTGGCAATGCTGCATGGCTGTCATTGCGCCCTGCTTACTATT  
TGGTGTAGCGGGGAACAAATTTGCTCGTATCGGCATCTCCGCACAGGAAAGGGCTTGTTTTTGCTGGATAAAAACGACA  
AACCGCTCGGGAATGCTATTTTGTCTCGGACCGCCGGCGATGAAATCGTTCGTCGCTGGCAGGAAGATGGCATCCCG  
GAAAACTCTACCCGCTGACCCGACAACTTTGTGGACCGGGCATCCGGTGTGCTGTTACGCTGGCTGAAAGAGCACGA  
ACCAGAACGCTACGCGCAAATTTGGCTGCGTGATGATGACGCACGACTACCTGCCTGGTGTAACTGGCGTCAAAGGCT  
GTGAAGAGAGCAATATTTCCGAGTCCAACCTCTACAACATGAGTCTTGGGAATATGACCCGTGCCTCACCGACTGGCTG  
GGGATCGCTGAAATCAATCACGCCCTGCCGCTGTTGTGCGATCTGCCGAAATCTGCGGGGAGATCACCGCTCAGACAGC  
CGCCTGACCGGTCTGAAAGCGGGTACGCCGTTGTTGGCGGCTGTTTGTGTTTCCACCGCACTCTGCGCCGGGA  
TCGAAGACGAATTTACCTCAATGCGGTGATGGGACCTGGGCGGTGACCAGCGGCATAACCCGCGGTTTACGTGACGGT  
GAAGCGATCCGATGCTATGTTGCTACGTTAACGATGGTGAATTTATCGTTACGAAGCCAGCCCTACCTTTCCGG  
CAACCTCGAATGGTTTACCGCACAGTGGGAGAAATCTCGTTTGTGAGATCAATCAGGCCGTTGCCAGCTTCCGAAGG  
CTGGGGCGATCTTTTTCTGCCGTTCTGTACGGCAGCAACGCCGACTCGAGATGACCAGTGGTTTCTACGGGATG  
CAGGCCATTCACCCGCGCACCTGTTGCAGGCCATCTATGAAGGGTGGTGTTCAGCCATATGACCCACTCAACCG  
AATGCGCGAACGTTTTACTGATGTTACACCTACGCGTCACTGGCGGCCGCGCACTCCGATGTCTGGATGCAAATG  
TGCGGACCGTACGCGTTCGCTATCGAGCTGCCAGGTGGAAGAAACCGCTGCTTTGGTGGCGGCTTGGCCCGCCG  
GTCCGACCCGGGTTTATCACAACCTTACGCGAAGCCAACTGACTTGCACACCCGGTGGCGCACCTGCTGCCAGATAT  
GACCGCCATCAGCTTTACAAAAAAATATCAACGTTATCAGCATCTCATTGCCGCACTTACGGCTTTTACGCCCGCA  
TTAAGGAGCACACATTATGAGCCGACCACTTCTGCAACTGGCCCTCGACCACTCATCACTTGAAGCCGCGCAGCGCAGC  
TGACGCTGTTAAAAGACAGCGTCGATATCGTGAAGCGGGCACCATTCTGTTTAAACGAAGGGCTTGGCGCGGTGAAA  
GCCTTGGCGAACAGTGCCCGGACAAAATCATCGTTGCTGACTGGAAGGTGCCGACGCTGGTGAACGCTCGCGCAACA  
GGCGTTTGGCGCAGGCGTAACCTGGATGACCATCATCTGCGCCGCGCGCTCGCGACGGTAGAAAAAGGCCACGCAATGG  
CACAACGCTGCGGGGGTGAATTCAGATAGAGCTGTTCCGTAACCTGGACGCTGGACGACGCCCGGACTGGCATCGTATT  
GGCGTGGCGCAGGCCATTTATCATCGCGTCTGATGCACAGGCCAGCGGGCAACAGTGGGGCGAAGCCGATCTGGCACG  
CATGAAGGCGCTTTCAGATATCGCCCTGAGCTTTCCATTACTGGCGGGATTACCCTGCTGACCTGCCGCTGTTTAAAG  
ATATCCGCGTGAAGCGTTTATTGCCGGCGGGCACTGGCAGGCGCGCAAATCCGGCGCAAGTGGCTGGCGATTTCCAT  
GCGCAAATCGACGCTATCTGGGAGGTGCGCGTGCCTAATCATCAGTTAGGGATTTATGAAAAAGCGCTGGCGAAAGATC  
TCTCTGGCCGAGCGGCTGGTGTGGCAAAAAGCTGCGGTTTTGATTTTGTCAAATGTCGGTGGATGAAACCGACGAA  
CGCTCTCACGCTTACTGAGGCGCCGCAAAAGGACTTCGCTGGTTGCCGCGATGATCGAAACAGGTGTTGGGATCCC  
GTGATGTGCTGTCCGACATCTGCGCTTTCCCTTTGGTAGCCGTGACGAGGAGTGGCGCAACGGGCGGGGAAATCA  
TGAGTAAAGCGATTGCTGCTGGCGCGGATCTCGGCATTGCAACATCCAGCTGGCAGGTTATGACGCTATTACGAAGAC  
CACGACGAAGGCACCCGGCAACGTTTTGCTGAAGGGCTGGCGTGGCAGTGAACAGGCGGGCATCAAGTAATGCT

GGCGGTGGAGATTATGGATACCGGTTTTATGAACTCCATCAGCAAATGGAAAAATGGGACGAGATGCTCGCTCACCGT  
GGTTCACCGTCTACCCGGACGTCGGCAACCTCAGCGCTGGGGCAATGATGTTCCCGCCGAACTGAACTGGGCATTGAC  
CGTATCGCCGCGATCCACCTGAAAGACACCCAGCCAGTCACCGGGCAAAGTCCCGGACAGTTCGCGACGTGCCGTTTGG  
CGAAGGCTGCGTCGATTTCTGTTGGCATCTTCAAACGCTGCATAAACTGAACTATCGCGGTTCTTTCTGATTGAGATGT  
GGACCGAAAAAGCCAAAGAGCCGGTGTGGAGATTATTCAGGCGCGGCGTTGGATTGAAGCGCGTATGCAGGAGGCTGGA  
TTTATATGTTAGAGCAAAGGAAAGCCGACGTGCTGGCGGCAATCTGGCGCTTCCCCTCACCATCTGGTGACGTTACC  
TGGGGCAATGTGAGCGCGGTAGACGAAACGCGGCAATGGATGGTAATCAAACCTTCCGGCGTCGAGTACGACGTGATGAC  
CGCCGACGATATGGTGGTGGTTGAGATAGCCAGCGGTAAGGTGGTGGAAAGGCAAGGAAACCTCTTCCGATACACCAA  
CGCATCTGGCGCTCTACCGTCGCTATGCCGAAATGGCGGATTTGTGCATACCCACTCGCGCCACGCCACCATCTGGTCA  
CAGGCCGGGCTGGATCTCCCGCTGGGGCACCACCACGCGGATATTTTTACGGTGCCATCCCCTGCACGCGACAGAT  
GACCGCAGAGGAGATTAACGGCGAATATGAATATCAGACCGCGGAAGTGATCATTGAAACCTTGAAGAAGCTGGCAGGA  
GTCCGGCACAATCCCGCGGCTGCTGGTGCATTCTACGGCCGTTTCGCATGGGGTAAAAACGCCCGCATGCCGTGCAT  
AACGCGTAGTACTCGAAGAATGCGCTATATGGTCTATTCTCGCGCCAGCTTGCGCCGAGCTCCCTGCGATGCAAAA  
CGAACTGCTGGATAAGCACTACCTGCGTAAGCATGGGGCAATGCTATTACGGGCAGTAATCCCTCACGCCGGGCTTCT  
ATCGCCCCGCGACTACGAATTGATATGTTCTTGTGTAAACGCCCTTCCAGCTGCTGGCGTTAAACCAAGTATGTTTCT  
GAAAAATCTGCCGAAATAGCCAACGTCATTAACCGTATTGTCATGGAGCAGGCCGACAACGTCGAGTCACTGCATAACC  
TGTTGCTGCCCGCGATGCCCATTTACGACATTTGAAGGCAAGGATTGTTACGCCATAAGATCCTGATTACAGACGCCA  
GGTTCGCCGATGAACAGAGCAATCCAGAGCAACAACCTTGTGGCATTACGACGGAGCACCGCCGACCGACATCCAC  
CGGTGAATTAACGCGCAGCTCACCCGGTGACAAAGGTAACCTCTCATTACGATCAATCATCGGGCTGTCGGTAATC  
TCTTCCGGCAGCTCGCTGTATCCTGCGCTCGCCATCAATACGACGTGCTCTCTATCGGGTATTTGCGGTCAGGCTGAC  
ATAGGGCACCAGGCATCTGCGCGGAATAACTTGCAGACCGCTACGACGGGACTCACTCTGAAATGCCATAGTAAT  
AGTCACTGAAATCTCGTCATAATAGAGAACGCCAGCGCAGGTGTGACGACAGACGACCTATCTGCATTTTGTGAAT  
ACCGATAGCTCCCCACCGCAGCGTTGCTGTTATCCAGAACGTCGCGAGCTGCAGAGGCTTTCAGGGTCCCAACGCTC  
GTGGTGATACCAGGCAACCCCGCCATAGCCGTAATCAGCTTATCAAGCTGTTGCATGGCATAATCGTCATTATCGG  
TAGGGTCAAATCCAGCGGCATCCAGGATGCGGTGAGGTAAGTTCATTTTTTCACTTTCGACAGAATAAAACCTAAC  
GTGGTCTGACGAACATAAAAAAGTATCACCTTCATAACTAATCAGCGGAATTGCCTTCGATTTTTATTATAACCGCGATA  
AGGCGATTATTATAAGCCGACCCAGCACCAATGGATAATTGAGAAGCAGTTCGCTTGCATAAAAAGGCAACGCAATA  
ACGCCACAATATTGCGATTAATTAACATGTCGGTATTCATTTTAAATAAGATAAAAAAGAGTCGGCATAATAATGCT  
TACAATTTCTCCGGTGAAGATTATATTTATATAGTAATATATAAAATTATATAAATTGGGCTGTTGCGATGACAAAA  
TTACAATTAAGTACCGGGAGTTAAAAATTATCTCGGTAATCGCTGCCAGTAAAAATATCAGCCATGCCCGGACTGTACT  
TGGCATCGCACAGGCCAACGTCAGCAAATATCTGTGATTTTGAATCAAAGTGGGTTTAAAGTCTTTGACCGAACCA  
CCCGGACGCTGATGCTCACACCTTTTGGCACCGCGTGTACCCTACATCAACGACATGCTGGACAGAAACGAGCAACTT  
AATAATTTTATTGAGATTATAAGCATGAGAAACGTGGTGGGTCACCATCTACGCCCCAACCGGCATAATTACCTATTT  
ATCCAAACATGTAATCGATAAAATTAAGATATCGGTGATACACCTTATCGCTAAAAACCTGCAATCTTGAGCGTAATG  
CTTTTATGAAGGCGTGAATTTCTGATGATTGTGATGTTTTAATCAGCTACGCTCCACCAAAGATGAATCGCTGGTT  
GCCAGTTTTATTACCAATATGCCGTAACCGCTTATGCCAGCCAGCGCTATCTTGAGAAACATCCCATTAGCCGCTGTA  
CGAACTCGAACATCACTCTGTATTTTGTGACTCGATGATGATCGACGACGCGAATATCTGGCGCTTCAACGTGCCG  
GGAGTAAAGAGGTGCGGGATTATCGCGTGAAGGGAAATTACGTTTGCACAACACGCAATCTGCGCTGGAGCTGGCAGGA  
AATCACCTGGGATTGTGTTTGCGCCAGACAAAAGTGTGACAGCGACCTGCAAGACGGCAGCTGGTCCCTGCTTTCA  
GCAACCCTATGAATGGTGGCTGGATCTGGTGGCTATCTTCGTAACGGAATACCAGCCCTGGCGGGTCCAGTATGTC  
TGGATGAAATGCTGCGTGAATTTCCACCCAGCTTGTCTAGTCGACGCAACTGCGGCTGAACAAGCGGCGAAAGCGAA  
GATTAATGATCGAGATAAAGGTAATGCCACCCAGCTGGTGCATGCGTAATAGCACTTTGCGCATCACCGAGACATGGTGAA  
ATGATCAGAGTAAACCGCCACTGGGCGTAAATACCGTCTGGTAAAGCGCTCAATCAGTGTGCTCATCCAGTTCATGG  
TCGCGATAACGCCATCTGAACCCGGCGTGTGTTTAAAGTGTGTAAGGTGCCGGTGCAGTATAAGCTCCGCCGGAAACG  
GCTGGACTAATGGCTGCCAGCTTACCGTGAATACCTTACCTGGCAGAGCATTAAACACCCTTCCGCATCGTCGCCAGG  
AGCCAGTCGACGCAAGGAGTTCTGACGGAACGCGCCAGATTTGCTGTTTCTGATCGGGTATAAACACCATCACCGGAC  
GTAGCGGCAGCGACGCGCATAGGTACCCGGACGAATCAGTACCTGGGTACATAACCATCGCTCGGCGCAGCACTATC  
GTCTGCTCAAGTTATATTTGCTTCCGCGAGCTGTGCTTTCAGGCTGGCGATTTGAGAATGTTACCCAACACCAGGCT  
ATCCAGCTGGCTGATCTGTTTTGTTCCGCCCGGATGACTTACGGAGGCTTCTGCGCCAGATAATTTGCCCGC  
CCACATCGATATCGGTTTCAAACGGGTTACTTTCGCTGGCTGCCACGTGCGTAACGCTGATACTCTTTAGCGAAT  
TTATCCCGCTGGCTTTGCTGCTGAGTATTCCGCCCATCTCATCTAACTCTGCGCCCAACGCCGCTGTTTATGTTT  
TGCGGTAACGATATCCGCCATCAGCCGATCCACCCGCGCTGATAACGCGTCCGGTCCAGTCAAATAGCACCTCACCTT  
TTTTAATCAGCGTATTTTTCTATCCGCTCACTTCAATCACACACAGTCACTGTGGGACAAAGGAATAGAAATAACC  
GCTTTTTGCGCTTAAAGGTATACGGATGGTTATAGTTCATTAACAGAATTAGACCGCTGACAATAAATATTCACCCAG  
GGCCGCTGTGGGAATGGTCCATTTATTTACGGGAATTTGAAGATCTTAAACATTGCCATGCAAAAGCCACATAGGTCA  
AAATAATCAGTAAATCCATAAGTATTACTCGGCAGAAGAGGATTTGATGTGGCGAGCTGTTTCTCCAGCCCGCAATGC

GCTGTTGCAGTTGCATAACGGATGAATCATGGCTTTGCATTCCCCATCCCCGCTCCGGGCGGTAAAGCGTGGCCAAATC  
CACAAAAACGGCCAGATAACATGTAACGTA AAAAGACTCACCAACCAGCAACATGAATGGCGTCGGCATGAGGATGATT  
ACGTTTTTTGGCAATCAGGTAGGGAATATCATGTAAAATAATGATCCCATAGAAGATCACCAAGAAATACAAAAATAAGCA  
CTCCAGTGCAAAATAGTCCAGGAACATATTTCCCTCAAAGAATATAAAAAAGAACAATTAACGCATATTATGAAATGCC  
ATGATGCAGTGAATTTCTTATTTATATAACGACATATTGTTTTTATATACTTTCTTAAATGTGCTGTCTGGTTTTTC  
AACAGGACGAGGTTTATCATATTGAAATAGTGGAACTATTGGCCAACTAATGAATAACTCCAGTAAAACATCCACAGTA  
CAGATTAAGCGTATTAACCTTCAATTATCTACCGTTTATTGCTGATTGGCCTCGGATCACCAATGGTGATTTACGGCCT  
GGTTCCGGCTCACCATCGAAACGCGAGATTAACCTGACAAAAACGCCCCAGAAACGTA CTCTGTTGGCGTAGT  
CTGGGTTATTGCGCACGTAGGTTTAAAACGTA AATTGTAACAACGTGCGCTTTGTTATGCCGGATGCGGCGTGACGCC  
TTATCCGGCTACGGTCAGGTTCCCGTAGGCATGATAAGACGCGTAAGCGTCGCATCAGGCAATGAATACCAATGCGAC  
CAGTTCTTATATCAGAACGCCCCAACGGTTTATCCGAGTAGCTACCAGCAGGCACTTGGTTTGCTGGTAATGCTCCA  
GCATCATCTTGGGTTTTCGCGACCGATACCTGATTGTTGTAGCCACAAACGCCGCATGTGCCGGTAAGCGTGATAA  
CAGTTGGTCCACAGCGCCAGCCTGTATGCCGCGCCCATCTTATAGGCCAGATTACCGTTGCGGCTCCAGACGCCCG  
GCCAGGCCATATTGCGTATCGTTCGCCAGCTCCAGCGCTTCTCCATCGTTTTGAAGGTGGTCACCGCCAGCACC GGCG  
CAAAAATCTCTCTGGAACACCCGCATATTGTTCTGACCAACAGAATCGTCGGTTTCGAGGTAGTAGCCGCTTTT CAGT  
TCACCTTCCAGCAGCTTGGCGCCCGCCCTGTGAGCACGTACGCGCCTCTTTTTTACCGATATCAATGTAGTTGAGGAT  
GGTTTCAGTTGCCCGTGAGAAACCTGCGCGCCATTTGCGTACGCTGTGAGCGGGTTACCGCTACGAATGCTTTT CGA  
CACGGCGGATGCGCGTTCCATAAAGCGTTCGTAGATAGATTCTGCACTAAAGCACGACTCGGACAGGTGCAAACTTCG  
CCCTGGTTAAAGGCAAACAGTGCAAAGCCTTCCAGCGCTTATCGAAAAAGGCATCTTCTTCATCCATCACATCAGCAA  
GAAGATATTTGGCGACTTACCGCCAACTCCAGCGTCACCGGAATAATGTTTTGCGTTGCGTATTGCATAATTTGTTGGC  
CCACTTCCGTTGAGCCGGTAAACGCCACTTTGGCGATGCGTTTCGAGGTGCGCAGATATTCGCCAATTACCCACCTGCG  
CCATTGACCACGTTACCACGCCCGCGGCGAGTAAATCACCGACAATTTCCATTAGCAGCAGTACAGAAAGCGGGTAAAG  
ACGTGCGGGTTTCAGCACACAGTTGCCCGCCGAGCGCGGGAGCCATTTTCCAGCTCGCCATCAGCAGCGGGAAGT  
TCCACGGGATAATCTGCCCCACCACGCCTAACGGTTCATGAAATGATAGGCCACGGTTTCGCTATCAACTTCACTGATC  
CCACCTTCTGCGCCGAATACACGAGGCGAAATAGCGGAAATGGTCAATCGCCAGCGGTACATCCGAGCACTGGTTT C  
GCGAATGGGTTTCCGTTATCCAGGTTT CAGCTGTGCTAACAGCTCGAGTTTTGTTCCATTGATCGGCAATCTTAA  
ACAGAATCGCCGACGATCTGACCCGAGGTGTGCGCCATTTATCTTTCATTTGTGCGCAGCATCCAGCGCCAGATCG  
ATGTCTCGTTTGGCCGAAGACGCCACTTCGCACAGCAGCTGCCGGTCCACCGCGTCAGATTCTGGTAATACTCGCCGTC  
GGCAGGGGCTACCCATTCGCCGCCAATAAAGTTGTCATAGCGGGCTTTAACTTGAGGGGGAAACCATACTCGCCGGGCT  
TAATCTGTGCTGAAGGGGATTATTGGTCATGATCGTCTCCTTGGCGTGTGAGGTATAACAAGGGTAGACGTGACTGGCG  
AAATCTTCGCCAGTCGGTAACAGCTTTACGACAGCTATCACGAATTTACGGGCAAGGGTTACAGAGATAGTTGAAAAAGC  
GGCTAACAATTTGCCAGCGTTGTGGAATGATGATTACATCGCTGCGCGATAAATCGCCACAATTTCTTCTGAGTTGC  
CTGGATCGGGTTAGTAAAGCCACAGGCATCTTTCAGGGCATTAGTCGCCAATACCGCGAAATCTTCTTTCACGTTCA  
GGTCGCGTAGGCTGCCGGGATATCCACTTTCTTCGCCAGTTCACGGATGGCGTTAATGCAGGCTTACAGCACCTTCCGCG  
TCGTTTTTACCTGTACGTTACGCCCATTGACGCGCACAGTCACGCAGACGTGCAGCGGGACTTTGCTGTTGAATAC  
CTGAACGTGCGGCAGCAAAACGGCGTTACATAACCGTGTGGCAGGTTGTAGAAACCGCCAGCTGGTGCCCATCGCAT  
GAACATAACCCAGAGAAGCATTATTGAACGCCATACCGGCGAGGAACTGGGCATAAGCCATTGCTTACGCGCTTTCCGA  
TTACTGCCATCTTCAACGGTAAACGGCAGTTTTTCGGCAATCATGGTCACGGCTTT CAGTGACAAGCGTCAGTGATCGG  
CGTGGCGGCAATAGAAACATAGCTTCGATAGCGTGCCTTAAGGCATCCATAACCGTTGCGGCGGT CAGTACTTCCGCA  
TACCAATCATCAGAGAGGAGTCATTGACAGAAAGCAGCGGAGTGACATGTTTTATCAACAATCGCCATTTGATATGACGC  
GCTTCGTAGTGATGATGACAGAAACGGGTCATTT CAGAGGCCGTACCCCGCGTGGTATTGATGGCGATCATCGGCAGCTG  
CGTTTTTGCAGAGCGGTCAACGCCTTCTGTAATCGCGAATATCGCCGCCATTGGCTGCCACCAGCGCAATACCTTTTGGC  
AGTCGTGTGGAGAACCACCGCCTAAGGAGATCACGTATCGCAATTATTCTCTTTAAGTAATTTCAAACCTGCGGCGACG  
TTTTCCGTGGTGGGGTTAGGTTGGGTGCCATCATAAATAACGCTAAAAATATTGCGTTCTTCCAGTGCTTTTTGCACATC  
GCCCGCCATACCTAATTTGTTAACATATTGTGAGTACAATTAAGGTACGGGTAATCCATAATCTGCCATCATATTCA  
TTGCATCAGTCAATGAATCAGCGCCGATGACATTACAGAAAGGAATAAAGAACGTTGAAGCTGCCATAACACACTCTGA  
AAGTGTA AAAAAGGGCGGGCAGCTTACTGAGGATTTTCATTGAAAAATATGATCAGTATTATTGATTACAAAATTAATC  
TAATAAAAAGCACATTGTATTCATTAACAATGTGCTTTTTTAAATTCATAAGAATTTTGTATTAATTTATTTAAAC  
TTAATTAATCATTCTTATTTTTCCGGAATAATAATGCGTCGCGCAATAAATGATCATTCCACGACGACGCGTAAAG  
CCAATGCGGTCAAATATTCAGAATCTGAATTGCCAGCTTTCGGCTACGCCAAGCGATCGCGGAAATCCGCGCGCA  
GGTTGAACCACACTCTGATCGAGATCGCGGATCATATTGGCAAACCTCGACAATCCGATCGTTACGGTAATAACGATCTT  
TAACGATCGCGGTAATTTCTTGTGCGCCGCTGGCGTAGAGTCAGGCGCATTGCCTGCTCGTGGTTCCCGTCTCT  
TTTGCCAGGTACGCACCCACCACGGTTCGTACCAACAGTGGCTCTGCTTTTTGCCAGATGGCCTGCTGCTCTTCGCT  
GAAGCCCGTTTTGTGATCTGGCAGATGACGCCAGCGGTGATGGCTGTGGATGTGCGCGCTTTCGCGCATTTTTCAATCA  
GCAACAGTACCAGCGCTTCTTCCATTGGCAACGCCATACGTGCGAGCGTTGCGCGCCAGGGCCAGGTTTCATCGCGA  
GTGTGCTCATGATAAGTCGTAATGTGTCGAGAATTTTCCGCTGCCAGCGGGCGCAACCGGCGCATTCAACAAGCTATA

ACCAGCCTGAATATAACCAGGCTGTTGCAGCAATTCGCGCATCCCTTCGCCGTTGAGCTGGCGGCCAGGGGAAATCCG  
CAAGGTTAACCGCGCCGCTCCAGATGAACAGATAACGCATCGCATCGCTCTGCCCCGTGCAAGAGACGCCAGCCAT  
TGCAGATATCCGGCTTACGTTTACCAGCAGCGCGGGTTAAGCATCACGACGCGCTCCGCCAGCGTGTTCGGGGC  
AGAGATATCGCGCAATACCAGGCGGTCTTATCTGCCAGCCATAACGGGGTGTGAAGACCAAGTTCAGCAAGGTTATCTT  
CCAGCAGTGAACCGCTCCCGTGACGTGGCTGGCGCGTGGTGAATATGCAGCGGCTGCCACTGGGTGAGCGGTGTATGG  
GTTTGAAGCTCGACAATACCCGCTGTGAACGGCTCTGGCGGCACATCGGCAAGCAGCCAGTGCACCGGTTAATCTGCTC  
TTTTCCGCATCACCCGCGATGTTAAGCGCGATACGCTGCCCGCATTGGCGGTTTTCTGTTGGCTGGTTTTGCGCATGCA  
GGCAGTACACGCATCGGTTTATTTACACCAGTACGCGAGAGTGAATCGCCTACCTTCACTTCCCGCTAACGCCGTA  
CCGGTGACGACCAGCCCGCACCTTTTACGGTAAATGCGCGTCAATCGCGAGGCGGAAATATGTTGGCTGGCGTGCTC  
GGTTCCGGCAACTGAAGCAGATGCTCGCGCAGGGCATCCATTCCCGACCTTCGGTGTGCGGTGATAAACAGTTTTG  
CCTCAGCAAACCGTATTCGCGAGAACCTCTTTACTGGCGTTCAACCTCATCAACACGCGCTTCGTCACGCGATCG  
GTTTTGGTCAGCGCCACTGTGAGCATCGGTTACCGGTGAGTGCAAAATCGCCAGATGCTCACGGGTCTGTGCCATCAC  
GCCGTATCGCAGCCACCACCAACAGCGCGTATCGATACCACCAACGCCCGCCAGCATGTTGAAAAGAACTTTTTCAT  
GACCAGGAAACGTCGATAAAACAGGCACGCGACCATCCGGTGCAGCCAGTAGGCATAGCCGAGATCGATGGTTCATGCC  
CGTTTTTTTTCTCCGGCAGCGGTGAGCATTACGCGTAATCGCCTGCAATAAGGTTGTTTTGCCGTGGTCAACGTC  
TCCGGCAGTGCATAATCATTCAACAACATCTCCAAAACCGTTGCTCATCTTCAAGGCAGCGTAAATCCAGCCACAA  
TCGTCCGTATAAATACGACCAATCACCGGCACTGGCAATCACGCCAGCGGGCGGTAATACTCAAGTGGCTACCCG  
GTCCATCATGGGGTGAACGTTAATGCCGCGCTCGGCGAGCGATCAACCGGCAGCGAACCACTGCCAATCTGCGAAAGA  
CATGGCATAACCTGTACCGCAAACCTCCGCGCGTAATGTGCGGCAAGGGGGCTGTAAACGTTGTGCTGGATTTGAAT  
GACCTCTGCGTGCGGGTAAAGCAGGCGCAGGGTGGTAATTTTTCACTCAGAGCTTCAGGGTGAATAAAGACGCAACG  
TGGCTTCCAGCGCCGCGAGGGTCATTTTATCCGCGGTAATGCACGCTTCAGCGGGTGGCTTTCAGGCGGGCGATCATC  
TCTTTTTTACCAACAATAATCTGCTGCGGCCCGCTAACAACTTGTGCGCGGAGAACTACCAGACTGACGCCCGC  
CGCAATCAACTCTGCGCATTTGGCTCTTTGGCAAACCGTACTGGTAAGATCGACCAGCGAGCCACTGCCAATCAG  
TCACTACGGGAACATCCAGCTCTTTGCCGAGCGCCACCAGTTCGCTTTCATCTATCGCTTGGTGAACCCCTGAATGCTG  
TAGTACTGGTATGACTTTTCATCAACAGTGCGGTATTTTCACTACCGCTGACGATAATCATTGCGTGCCTGCGGTT  
GGTGGTCCCTACTTCGTGTAGGGTGCAGCCTGCCTGACGATAACATCGGGAATACGAAACGCGCCGCAATCTCCACCA  
GTTCCGCGGAGATACCACCACTCTTTCCGCTGGCAGTGGCCGCAACATCAATAACACCGCCGCGCATTGTTATTG  
ACGATACAGGCATCTTCCGCCCCGTAATACGGCACAGCAGTGCGCCAGCGCCGATCGCGATGTCCGCTCCGGCGTC  
GTCCAGATCATACTCGAGGGTCACTGGCGAACGCATAGCCTGCGCAACGGCTTCCACCGCGGCTTCCGCTGTAAAGCTC  
GCCAAGGTTGGTATGCAGCAGGTTCCCGTCAAGTTGATCACCGGACGAGCGCGCTCTGCGCTTTTTCTGCAACCCG  
GCATCGACTTCTTGCGCCAGTTTTACACCACGCAGGCGAGCTGTGGTGCACGAATCACTTCTCGCGCTTCGTGAG  
CATCTGACGCAACAATCCACCACGCGGGTGTGACCATAAGTATCACGCAAAGAAAGGAAGGAGTATCGCGCAATAAGC  
GATCAATAGCCGGAAGTTGACTATAGAGGGAACGCGTTTTGGTGTATAGGAAACCTGGCTGATCAAGGCCCTCTCACA  
CGGAGAAGGGCGTTAACATAACCACGGATTGTAACGTGAGATGGGTGAGGAGACATATCGCGCATCAAGCCTTTGGCG  
GTTCCGTGCGAGCAAACTTTCCGCGTAAACAGTTTTGACCAGTTTACTAAGTGTGGCGGTGACACACCAACCT  
GGCGCAACGCGCGGAAATTGAGATATCCGACGGCAGGCAATGGCGATAGTCCGAGATTGACCGTATCGTTTTGAG  
TGTGCCATCGACCAGATATCTTCCAGCAGTCCAGACTGCGGTTGATTTTTCTCCGCTGGCGTAAACAATTCATCTTCA  
ACTGCTGCGCGCTGGACGCGCTGTTACGCACCGATAACAGCCGGCATCCATAATGCCATCCGCCAGTGCCTCAATT  
TTGCGCACCCGCAACGACTCCAGCGGATCGCGCGAACATCGCCGAGCGACATTCATTAATTCATATATTGAGCGAT  
GATCGGCGAATCAAACAGCATTCCGCTTTCGGTACCAGCACCGGCACTTTTCTAACGGGTTAAATGCGCCACGC  
CGTTGTCCGCTTATAGGGCAGTTTATAATAAATTCGAAAGTTATGCCTTTTTCTAACAAACAGAATAGAAAGTTTGCCT  
ACAAACGGGCTGGTGTAGCTACCGACGAGTTTATGCCGAGTCTTTGTGCGAGGAAAAATATCAGTATGGCTGGTAT  
GGAAAAAGGGCAGAAAATGTTGATGGTTTTACTTCCAAATAAATCACATATTTATCATGGTATATAAATATTTTTCC  
TAATTTTTCACTCTGATGGATATCTCACTTCAGGCTTTCTATAAATCTGTAGGGTTTCGCTGTCAGCAGACAAATAA  
CCCGATAAAACAAGGATGAGAAATGAGCGGAAAACCGGCGAGCGCTCAGGGCGACATGACGCGATGAGCGGTAGCATTG  
TTCAGGGTTACAGCGGGTGCATTGGTCCCCCAGCGGTGGCTGTTCCGGTGTGCCCGGCGGAGTGACGTCCGGC  
CATCCGGTCAATCCCCTGCTCGGTGCAAAGTCTTCCCGGTGAAACCGACATCGCCCTGCCCGGCCGCTGCCGTTTTCAT  
CCTCTCCCGCACCTACAGCAGTTACCGGACAAAACGCCCGCGCGGTGGGAGCTCGGCCCGGCTGGAAAATGCCTG  
CGGATATCCGTTACAGCTGCGGATAACACACTGATACTCAGTATAACGGCGGCAGAAAGCTGTATTTTGAACCTG  
TTCCCGGTGAGGACGGTTACAGCCGAGCGAGTACTGTGGTGGTGCAGCGCGCGTGGCGAAACTGGATGAAGGTCA  
CCGGCTGGCCGACTCTGGCAGGCGTCCGGAAGAACTCCGTTAAGTCCGCATCGTTATCTGGCGACAAACAGTCCGC  
AGGGGCGTGGTGGCTGCTCGGTTGGTGTGAGCGGGTCCCGGAAGCGGATGAGGTGCTGCCTGCGCCGCTGCCGCCGTAC  
CGGTACTGACCGGGTGGTGGACCGTTCGGGCGCACAGAGTTCACCGCGAAGCCCGGTAATTCAGCGCGCA  
AATCACCGGCTGACGGATGGTGCCTGGCGTCACTTCCGGTGGTACTGACCACGAGGCGAGCGGGCAGAAAGGCC  
GGCAGCAGGCCATTTCCGGCGGACGGAACCGTCCGTTTTCTGATACCCTGCCGGTTACACGAATATGGCCGGGAC  
AACGGCATCCGTCTGTGCTGCCGTGGCTGACGCACGACCCGGAATACCGGAGAATTTACCTGCCGCGCCGCTGGTGGC



CTATGGCTGGACGCCACGGCGGAACCTGGCGGTGGTGTATGACCGTAGTGGCAAACAGGTGCGCAGCTTTACTTACGATG  
ATAAATACCGGGGCCGGATGGTGGCGCACCGTCACACGGGCGCGCGAAATCCGTTACCGTTACGACAGCGACGGGCGG  
GTGACAGAACAGCTAAACCCGGCAGGCTTAAGCTACACGTATCAGTATGAGAAAAGACCGCATACCATCACCGACAGCCT  
GGACCGCGTGAAGTGTGCACACGCAGGGCGAAGCCGGGCTGAAGCGGGTGGTGA AAAAGGAACACCGGGACGGCAGCG  
TCACGCAGAGTCAGTTTACGCCGTGGGCAGGCTCAGGGCACAGACGGATGCCGACGGCAGGACAACAGAGTACAGCCCG  
GATGTGGTGACGGGCTCATCACGCGATAACCACGCCGGATGGCAGGGCATCGGC GTTTTACTATAACCACCACAACCA  
GTTAACGTCAGCCACCGGCCTGACGGCTGGAATTGCGCCGGGAATATGATGAATTGGGCGCTGATT CAGGAACTG  
CCCTGACGGCGATATACCCGCTACCGTTATGATAATCCACACAGTGACTTACCCTGCGCAACGGAAGATGCCACCGGC  
AGCCGAAAACCATGACGTGGAGCCGTTACGGTCAGTTGCTGAGCTTACCGACTGTTCCGGTTATGTAACCCGTTATGA  
CCATGACCGCTTCGGGCAGATGACGGCGGTGCACCGCGAGGAAGGGCTGAGTCAGTACCGGCATACGACAGCCGTGGAC  
AGTTAATTGCCGTGAAAGACACGCAGGGCCATGAAACGCGGTATGAATACAACATCGCCGGTGACCTGACCGCGTCATT  
GCCCCGACGGCAGCAGAAACGGGACACAGTACGATGCGTGGGAAAGGCCGTCCTACCACGCAGGGCGGGCTAACCGC  
CAGTATGGAATACGATGCTGCCGACGGGT CATCCGCTGACCAGTGA AAACGGCAGCCACACCACCTCCGTTACGATG  
TACTTGACCGGCTGATACAGGAAACCGCTTTGACGGCCGACACAGCGTTATCACCACGACTGACCGCAAACCTTATC  
CGCAGCGAGGTGAGGGTCTGGTCACCACTGGCACTATGACGAAGCAGACCGCCTCACGCACCGACTGAAGGGTGA  
AACCGCAGAGCGGTGGCAGTATGACGAACGTGGCTGGCTGACAGACATCAGCCATATCAGCGAAGGGCACC GGGTGGCGG  
TGCAATTACAGTATGATGAGAAAAGGCCGCTGACCGGTGAGCGTCAGACGGTGATCACCCGACAGCGAAGCACTGCTC  
TGGCAGCATGAGACCAGACATGCGTACAACGCGCAGGGCTGGCGAACCGCTGTATACCGGACAGCCTGCCCGCGTGG  
ATGGCTGACCTACGGCAGCGTTACCTGGCAGGCATGAAACTCGCGACACACCGCTGGTGGAGTACACCCGCGACCGCC  
TGACCCGGAAACGCTGCGCAGCTTCGGCCGTTATGAACTCACCACCGCTTATACCCCTGCCGGG CAGTTACAGAGCCAG  
CACCTGAACAGCCTGCTGTCTGACCGGATTACACTGGAACGACAACGGCGAACTCATCCGCATCAGCAGCCCGGCCA  
GACCCGGAGTTACAGCTACAGCACCACCGCAGGCTGACCGCGTTCACACCACCGCAGCGAATCTGGATATCCGCATCC  
CGTATGCCACAGACCCGGCAGGTAACCGCTGCCGACCCGGAGCTGACCCGGACAGCACCTCAGCATGTGGCCGGAT  
AACCGTATCGCCGTGACGCGCACTATCTTTACCGTATGACCGTCACGGCAGGCTGACAGAGAAAACCGACCTCATCCC  
GGAAGGGGTTATCCGCACGGATGATGAGCGGACTCACCGTACCATTACGACAGTCAGCACCGGCTGGTGC ACTACACGC  
GGACACAATATGAAGAGCCGCTGGTCGAAAGTCGATCTTTACGACCCGCTGGGCCGAGGGTGGCAAAACGGGTGTGG  
CGCGTGAACGGGACCTGACGGGCTGGATGTCGCTGTACGGAACCGCAAGTGACCTGGTACGGCTGGGACGGCGACCG  
GCTGACCACAATACAGAACGACAGAACCCGCATCCAGACGATTTATCAGCCGGGAGCTTACGCCACTCATCAGAGTTG  
AAACCGCCACCGGTGAGCTGGCGAAAACGCAGCGCCGACGCTGGCGGATGCGCTTCAGCAGTCCGGCGCGAAGACGCT  
GGCAGTGTGGTGTCCCGCCGGTGTGGTGCAGATGCTGACCGGCTGAAAAGTGAAATCCTGGCTGACCGGGT GAGTGA  
GGAAAGCCGCCGCTGGCTGGCATCGTGCGGCCTGACCGTGAGCAGATGCAAAACAGATGGACCCGGTGTACACGCCGG  
CGCGAAAATCCACCTGTACCACTGCGACCATCGCGGCTGCCGCTGGCCCTTATCAGCAAGGAAGGGACAACAGAATGG  
TGCGCAGAATACGATGAATGGGGCAACCTGCTGAATGAAGAGAACCCGCATCAGCTGCAGCAGCTTATCCGCCTGCCGG  
GCAGCAGTATGATGAGGAGTCCGGCCTGTATTACAACCGCCACCGCTATTATGACCCGCTGCAGGGGCGGTATATCACTC  
AGGATCCGATTGGGCTGAAGGGGGGATGGAATTTTTATCAGTATCCGTTGAATCCAGTTACGAATACAGATCCTCTGGGG  
TTAGAAGTTTTCTAGACCATTCCCTTGCCAATTCATGGCCAAAAGCCCTGCACAGCAGCAAGCAGATGATAATGC  
TGCAAAAGCATTGACAAAATGGTGAACGATACAGCATCACAAGAATATTTGACTCTCTAATATTGAATAATCCGGGAC  
TAGCATTAGATATAACAATGATAGCTTCTCGTGGAAATGTTGCAGACACAGGGATAACTGATCGTGTCAATGACATAATA  
AATGACAGATTCTGGAGTGATGGGAAAAAACCCGACAGATGTGACGTACTTCAGGAACTAATTGATTGTGGTGATATTAG  
TGCTAAAGATGCAAAAAGCACAGAAAAGCCTGGAATTTGCTACTCCAGACAGTCAAACGATAAAAAAAGATAGCCCT  
TGTGGAGGTTCCCTGCAATGTCAAATACATACCAGAAAAGAAAGGCAAGTAAAGAGTATGGTTTATATAATCAATGTAAGA  
AACTAAATGATGATGAATATTTTCGTTACTTGATGATCACAATTCCTTGAAAAGGATTTATCTGCCAGAGTATTACAG  
TTAAGAGGTGGCAAGACGCTGTTAGATTGGCAATTGAGTTCTGCTCTGATAAAAAATTATATCCGTAGAGATATCGGAGC  
ATTTATACTCGGGCAAATAAAAAATTTGCAAAAAATGCGAAGATAATGTTTTTAATATTTTGAACAATATGGCATTGAATG  
ATAAGAGCGCTTGCCTTCGAGCTACGGCAATCGAGTCAACGGCTCAGCGATGCAAGAAAACCCAATTTATTCACCTAAA  
ATAGTAGAACAATCTCAAATTA CTGCTTTTGATAAATCGACTAATGTCAGACGTGCTACAGCATTGCTATTTCTGTTAT  
CAATGATAAAGCAACAATCCACTATTGATTAATCTGTTAAAAGATCCAAATGGAGATGTCAGAACTGGGCCGCTTTG  
CAATAAATATCAATAAATATGATAATAGTATATTAGGATTGTTTTGTGGAGATGCTTCAGGATAAAAAATGAGGAAGTC  
CGTATTGAAGCAATAATCGGACTTTCTACAGAAAAGATAAAAAGGGTTTTATCTGTTTTATGCGATGAGTTAAAAA  
TACTGTTTTATGATGATATCATTGAAGTGCGGGTGAATTAGGTGATAAAACGCTACTTCTGTTTTAGATACTATGTTGT  
ACAAGTTTGATGACAATGAAATTATACTCCGCTATTGATAAGCTGAAGCGTTCATAGCGTGAGTTGCCTATGCACAGT  
GGGGGATCCCGCCGGCACGGTGCAGATGCTCGACCGCTGAAAAGTGAAATCCTGGCTGACCGGGT GAGTGAGGAAAGC  
CGCCGCTGGCTGGCATCGTGCGGCCTGACCGTGGAGCAGATGAAAACAGATGGACCCGGTGTACACGCCGGCGCGAAA  
AATCCACCTGTACCACTGCGACCATCGCGGCCTGCCGCTGGCGCTCATCAGCACGGAAGGGGCAACAGCGTGGTGGCGAG  
AATATGATGAATGGGGCAACCTGCTGAGTGATGAGAACCCGCATCATCTGCAGCAGCTCATTGCTGCTGCCGGT CAGCAG  
TATGATGAGGAGTCCGGCCTGTATTACAACCGCCACCGCTATTATGACCCGCTGCTGGGGCGGTATATCACTCAGGATCC

GATTGGACTGAAGGGGGGATGGAATTTTTATCAGTATCCGTTGAATCCGGTCATAAATGTAGATCCGCAAGGTTTGGTTG  
ATATAAATTTATACCCCGAAAGTGATCTTATCCATTCTGTAGCTGATGAGATTAATATCCCAGGCGTTTTACAATCGGG  
GGGCATGGTACCCACATCTATTGAATCCGCAACGCGCAGTATCATGACAGCTAAAGATCTAGCATATCTAATTAATTT  
TGATGGGAATTATAAAGATGGGATGACAGTTTGGTTATTTTCTTGAATACAGGTAAAGGACAAAATTCATTTGCTAGCT  
AATTAGCTAAAGAGTTACATACAAATGTAATAGGACCTGACACGCTATGGACGTGGTGGGGGCGAGGAACCTAATGGTAA  
TTAAAAATGGATACAGTGCTAACAGCACCAACGAACCTTAATCAATAAGGATCTAATGGCTATAACAACAAAAGACCT  
TGGAATTTGGATAACATATGGGCCATCTGGGCACCCATTTCTAATATGCAAGGTACGCCAGAAAAACCCAGTGATATAA  
GATAGGTTGTAGATGATGAAAGCATGCTTGTACTATTTTTTATTTCTCTTTTATTTGTCAATTGCATGGTGCTGATG  
TGAAAAATAAACAAAACGAAAGTATGATGGGGTCTACAGCAATGACCTATGATTTAAGTGAAGAAAAGTTGATGAACTG  
AAGTATAAATCACAACATGGTGATTGAGAGGCATCATTTGACTATATCAATATTACTGCTTTACTAAAAATAACATTTA  
CAACAATTGCGATTCTTGGAAAGATCAGCATCTCAGGGGAATGTTACAGCGCAGTTAATTATGGGGTCTTTTTATCAG  
ATACAAATCCAACATTATCAGAATATTATAATTTGAATAGAGCTATTTATTGGATGGAATTCGCTGTAATAACGGTAAT  
ATTGATGCAAAGAGCAAACCTTCAAGAGCTCAAAAAGCTAAAGCGAATGGATAGAAGGAAGAATAAGGAGAATCCGTA  
GCAATAGTTTCATCAGACTGCCGAGCAGTAGTATGATGATGAATCAGGGCTGTACTATAACTATTATCGGTAACATTAAC  
CGCAGCAGGGGCGGTATAACACTCAGGCTCCGATTGGGCTGGAAGGTAGGTGGAATTTTTATCAGTATCCGTTGAACCCG  
ATTTCTGGAATCGATCCCTTGGGATTAGCCACCTGTTTATACAGCATAACTTTAGGTATGCTTTTCGTGTTTTCAGATA  
TACCATGTGATGATAATTTTTATGATGTGCTTAGTATTCCAGTCGCTTCTGGTAATAATATGCAATGTAATAAATCC  
CGTTGTACACATTTATAAATAGATGGCCAATACCTCAAGGCCTATGGAGTTGGAATGTTAATGACCCGGGAGCAAGCAAT  
AGAAAACTGACGGCATAACGATTAGTACCCTGAGTTAATACAGGAACCTATAATCGCAATGGATTTTCAATACATAGTTG  
TTTAAACGCTTTTGGTCCGCTTTTAGGACCTCGATTCTGTTCCGAGGGTTGTATAACTGGTTTATCTAATGACATGCAAA  
AATTAATGAGTTAATATTTTTCAGAGCCAGATAGCACATTAACAGTTACGGACTAAAAAATATGGCAAGTTATTAACAA  
TTGTATTTTTTCTCTATTTCTGCGAGTGCAGTTACTGCAAGACAATTTTCAGAGAGAGTTAGATTTGGCAGACAAAGCAA  
TATTATGGGCACTAATATCAGCCAGTACTAAAGAGGGACGAAAAGCGTGTTCACCTAAGCTATTTTGCCTGTAAGGCCGCA  
GAGGCTGAACTCGACTGGCATATATGGCTGCGAATGATAACAAGGAATTTCTCACATCCTTATCTAATAAATGAGGTA  
CAAAATAGATGCTGGACTTTCCGAATCCTATACATGCTATTTATTAAGTAAGGGAAAGATCATAAGACCATATCTGAAAA  
ATCTAAATCCACTCCAACCTGCCGCTGATTGCATTGAAACAGTAAATAAAATAAAAGATAAGAATAAAAAAATCATTGA  
TATAAATTCAGTTAATATTTGTAGTGATGATAAAAAATAAAATTTGAGAGTTAATAGTACTATTATGGCCATTGATGATT  
CTATAAAGTGCATCGATGAATGATAACTTAATTTTTATTTAAAAATATATTAATAACTCACTCTCCAGGAGTTTTTTAAC  
TTAGTTTTATAATGAATACGATAAATAAAAGTGAAGAAGAAAATAGTTGTATACATATATTCATGACCTACATTGTGA  
TCTATAGATTAATATTTTTTAAATGTGACTGTCTCCTTCAGATAATAAAGCCATCATCGCAATAGATGAAAAAGCACT  
CCTGCTCTTTTTGATTAGACCGTGCAGGAGGAACCACTCATATCATCATTGCGATCTCGACGATGTATAGTCTCATC  
CTGCGGCAGAACAAAGACGGATAAAAAATCCAATGAGAGCACACTCATCCAGAACCTATTAACATAATGAATATTAAGAA  
AAATCATCGAAGCTAATGAAGTAATATGCAAAAATAATTAGTCTTACAAGGAGCAAAGTTCCATAATCTCCCCCTCCC  
CCTCAATGATCCAATAAAGATAATGCATCCAGCTGGTCATTCTTAGCAGCACTTTCCGCATCACCGAAACATGGCTGAA  
ATGGTCCGAGTAAACCGCCACCTGGGCGTAGATGCCGTGCGGTAAAGGCATCGATATCATCGTTAGGGTCCAGTTCAATGG  
TTCCAGCACACCGTCCGTGCCGGGCACGACCGTTAATGATTGAATAACCCCTGCGCCTGATAAGAACCCTGGCAGC  
ACAGGTAATAACTAGTCAGTTTCCCGTGAACACCTGCCAGGTAGCGCGTTAAACACCCTTCCGCATCATCGCCAGG  
TTTCAGACGTAACAGCGAGTTTTGCCGAAATTTGGGCGACAATTTGCCGTTTTGCTCGGGGATGAAGACCATCACGGAC  
GCAGCGCAAGGCAGCTGCGTATGTACCTGGGCGGATCAGTACCTGAGTAACGTAGCCATTGCTCGGCGCGGAATGACA  
GTCTGCTCAAGTTATATTTTGTCTCAGTAAGTTGCCCTCTTAAGCTCACAATCTGCGATTGCTCGCCGTTAACATACT  
GTCGAGCTGGCTCTGGATCTGCGCCTGCTCCGCCACCGAGCTTTTACCAGCGCATCCTGCCGCGAGAAAATTTTGGCGG  
CATCGTCGATGTCAGTTCCGAGAACGGATTACCAGCCGCTGGCTGCTTTTCAAGTAACGTTGATAATTTTTAAACAGA  
CGGTGCGGCTCCGCTGAAACCTGGGTGGTGTGGCCTGCGCTTCAAGTACGCTGCGCACGCAGCGTCTTTATATTATGCGT  
CGCCGTCATCAGGTCAGCCTGAAGTCTGTCAACTCGCGCTGTTAACGAACCGGGTTCGAGCTTAAAAAGCACCTCGCCCT  
TTTGAATAAGCTGATTATTTCTGTGCTGACTTTCAGTAAACAATTTCCCGTACCTGTGGCGTGATAGGGATCGCTACT  
GCCTTTTGGCGGTAAGTGTAAAGGTGGTGTAGTTCATCAACAAAATCAAACCACTCACAGAAACACGCTCCCAG  
CGCCGCGTCCGAGCGTCCACTGATTTACCAGGATGCGGAAGATTTTAAAGACCGCCACGCCAGCGCCACGTAAGTTA  
AAACAATCAATAGATCCATAATTAGATCTCCGGAACTGGAATAGTCAGTCTTTTTCTCGGCGGCGAGTTGATGCTCCA  
GCCGGGAAATTCGGTCAGAAAGTGCGGGATTTCCGGTCACTGCTTTCTCCTGCGACGCAACATGTGACTGCATACCC  
CAGCCACGCTCCGTTGATAGAGCTGCGCCAGATCCACAGAAACGGCCAGATAACATGCAGAGTAAACAGGCTCACCCA  
GCCCGCGTATGAATAGCGTGGCATGGGATGGTTCGCTTTTTGGCAATCAGATAAGGGATGTCATGTATCGCGATGA  
TTCCATAAAAAATCACAGAAAGACGAAGATCAGCACTCCCAACGCGAAATAGTTTAAAGAACATATCTGCCTCGGATTC  
CGTTTATCAGTGTGTTTTTGGGCTGGCAGCCAGAAGGAGTCAAGCTGATTTTTGACAATAATCCGGTTTCGCGATT  
TCGCCATAACACCAAAGAATAATTTTTAGAGGTGATGAGTTGCTTAGTTACATAACGATTGTATGACGAAGGCATAACAT  
GCTGTAGATCACATCAGGTGAACGCCGTAAGAAAATATCTGTGATTGATCACAAGATTCAACAAACCATCAAAACA  
AAAATGTGACACTACTCACATTTAAATGCCATTTTTAGCGAAAATCGCCGCTTGTGCTTTTTTACACAAGCGTTTTGT

GATGAACGTCACGTCAATTACCTCTCTACCCCTATATTTATGTGATTGATATCACACAAAAGGCCGTCGACTGGACAGT  
TAACCGATTCAAGTCCAGATTTTCGAGTATCTACAAGTCCGGTACCTCTGCCGCCACATTAACAAAAACCTCGGGCT  
TCCAGCCTGCGCGACAGCAAACATAAGAAGGGGTGTTTTATGTCATCCGATATTAAGATCAAAGTGCAAAGCTTTGGT  
GTTTCCTCAGCAACATGGTATGCCAAATATCGGCGGTTTATCGCGTGGGGTATCATCACCGGCTTATTTATTCCAACA  
GGGTGGTTACCGAACGAGACGCTGGCGAAGCTGGTCCGGCCGATGATCACTTATCTCTGCCGCTGCTGATCGGTTATAC  
CGGTGGTAAGCTGGTAGGCGCGAACGTGGCGGCGTAGTCGGTGCCATCACCACCATGGGCGTTATCGTCCGGCGAGACA  
TGCCGATGTTCCCTCGTTTCTATGATTGACAGTCCGCTGGGCGGCTGGTGCAATTAAGCACTTCGACCGCTGGGTAGACGGT  
AAGATCAAATCCGGTTTTGAGATGCTGGTGAATAACTTCTCCGACGGCATCATCGGGATGATCCTCGCTATTCTGGCATT  
CCTCGGCATTGGCCCGATTGTTGAAGCCCTGTCCAAATGCTGGCTGCGGGCGTTAACTTCATGGTTGCCATGACATGC  
TGCCGCTGGCGTCTATCTTTGTTGAACCGCGGAAAATCCTGTTCTCAACAACGCCATTAACCACGGTATCTTCTCGCCG  
CTGGGTATTACAGCAGTCCCATGAACTGGTAAATCAATCTTCTCCTGATTGAAGCTAACCCAGGTCCAGGTATGGCGGT  
GCTGCTGGCGTACATGTTCTTTGGTCTGGTAGCGCTAAACAGTCTGCGGGCGGTGCGGCAATCATCCACTTCTGGGGG  
GTATCCACGAAATCTACTCCCGTATGTGCTGATGAATCCGCGTCTGATCCTCGCAGTCATCCTCGGCGGTATGACTGGC  
GTGTTACGCTGACTATCCTGGGCGGTGGTCTGGTTTCTCCGGCATCTCCGGTCTATCCTTGTCTGCTGATTTTTGC  
ACCAAAGGTGCTTACTTCGCTAACATCGCGGTGTGTGCGGCGATGGCTGTCTCCTTGTCTCTGATTTTTGC  
TGAAAACCGCAAAGTGAAGAAGAAGATGATATTGAAGCAGCAACTCGTCGATGCAGGACATGAAAGCTGAGCTAAA  
GGCGCATCTCCGCTGTCTGTGGCGATGTGACTAACGACCTGAGCCACGTACGTAATAATCATCGTTGCCGTGACGCCGG  
TATGGGTTCCAGTGCGATGGGCGCAGGCGTTCTGCGTAAGAAAATTCAGGATGCAGGTCTGTCGAGATTTCTGTTACTA  
ACAGCGGATCAACAACCTGCCCGCAGATGTGGACCTCGTCACTCACCCTGACCTGACCGAACCGCGTATGCGCCAG  
GTTCCGCGAGGCACAGCATATTTGCTGACCAACTTCTCGACAGCGGCTGTACACCAGCCTGACCGAACGTCTGGTTGC  
TGCCCAACGCCACACGGCAAACGAAGAGAAAAGTAAAAGACAGCCTGAAAGACAGCTTTGACGATTCCAGTGCTAACCTGT  
TCAAGCTAGGCGCGGAGAACATCTTCTCGGTGCGAAAGCGGCAACCAAAGAAGAAGCGATTCTGTTTTGCTGGCGAGCAG  
CTGGTGAAGGCGGTTACGTTGAGCCGGAATACGTTAGGCGATGCTGGATCGTGAATACTGACCCGACTTATCTGGG  
TGAGTCTATCGCGGTGCCACACGGTACGGTTGAAGCGAAAGATCGGCTACTGAAAACGGGCGTCTGTTCTGCCAGTACC  
CGGAAGGCGTGCCTTCGGTGAAGAAGAAGATGACATTGCCGCTGGTATTGGTATTGCTGCCGTAACAACGAGCAC  
ATTAGGTTATCACCAGCCTGACCAATGCACTGGATGATGAGTCCGTCATCGAGCGTCTGGCACACACCACAGCGTGA  
TGAAGTGTGAACTGCTGGCAGGTCTAAGTAATCAATCCACCTCTCCACATGGAGAAGGTGGGGTAAATTGCCG  
ATGCGCTACGTTATCAGGCTACAGGATGCATCACAATTTGTTGAATTTGCACGTTCTTGTAGGCCGGATAAGGCGCTT  
ACGCCGATCCGGCGTCCCTCTCCTCACGGAGAGGGTTGGGTGAGGGAAAAGCCTCACCCAGCCCTCTCGGGTAA  
AAACATTGATGAAGGTTAACTATGAAAGCATTACATTTGGCGCAGGTAATATCGGTCGTGGCTTTATCGGTAACCTG  
CTGGCAGACGGGATCCAACCTGACGTTTCCGATGTCAATCAGGTGGTACTTGATGCCCTGAATGCCCGTCATAGCTA  
TCAGGTACATGTGGTTGGTGAACCGAGCAGGTAGATACCGTTTTCCGGCGTCAATGCTGTGACGAGCATTGGTGATGATG  
TCGTTGATCTGATTGCTCAGGTTGATTAGTCACTACCGCGTTGGCCCGTTGTGCTGGAACGTATTGCTCCGGCAATC  
GCCAAAGGGCAGGTGAAACGTAAAGAACAAGGTAATGAATCCCGCTGAACATCATCGCTGTGAAAACATGGTACGCGG  
TACCACGCAGTGAAGGCCATGTGATGAACGCCCTGCCGGAAGACGCCAAAGCGTGGGTAGAAGAACACGTTGGCTTTG  
TCGATTCCGCCGTTGACCGCATGTACCGCTTCGGCTTCGGCAACTAACGATCCGCTGGAAGTGACGGTAGAAACCTC  
AGCGAATGGATTGTCGATAAAACGCAGTTCAAAGGCGACTGCCGAACATCCAGGCATGGAGTTAACCGACAACCTGAT  
GGCATTGTGCAACGTAACCTTCCACCTGAACACGGGTCTGCTATAACCGCTACCTCGGAAAACCTGGCCGGTCTC  
AGACCATTGTCGACGCATTCTCGACGAGAAAATCCGCGCGGTGGTAAAAGTGCAGTGAAGAAGAAGTGGTGCAGTATTG  
ATCAAGCGCTACGGCTTTGACGCTGACAAGCATGCGGCGTAACTCAGAAAATCTCGGCCGTTTTGAGAACCCGTACT  
GAAAGATGATGTAGAGCGGTAGGCCGTCAGCCACTGCGTAACTGAGTGTGCGGACCGTCTGATCAAGCCACTGCTCG  
GTACGCTGGAATATGGTCTGCCACATAAAAACTGATTGAAGGTTTGGCGTGAATGCACCTTCCGAGTGAAGATGAT  
CCGACGGCTCAGGAACTGGCAGCACTGATCGCTGACAAAGTCCGACGGCGGCTGGCACAGATTTCCGGTCTTGATGC  
CAACAGCGAGGTTGTATCCGAGGCGGTAACCGCTTATAAAGCAATGCAATAATGGTGGACCAGGCGCAGGACACCCTGCG  
CCCGAATAACAGATTGTCAGATATGCAGGCAACAATGGAACAAACCCAGGCCTTTGAAAACCGTGTGCTTGAGCGTCTGA  
ATGCTGGCAAAACCGTGCGAAGCTTTCTGATCACCGCGCTCGAGCTCCTGACCAGGCGGTAATCTTCTGGTGCTCAG  
GTATTCCGCAAAGACGATTACGCGGTGAAGTATGCTGTAGAACCCTTACTCGACGGCGATGGTCCGCTGGGCGATCTTTC  
TGTGCGTTTTAAACTCATTTACGGTTGGGCGTCATTAACCGCCAGGAATACGAAGATGCGGAACTGCTGATGGCATTGC  
GTGAAGAGCTAAATCACGACGGCAACGAGTACGCCCTTACCGACGACGAAATCCTTGGACCCTTTGGTGAATGCACTGC  
GTGGCGGCTTACCACCGCCGCCACAGTTGAACCAGCAGACTCCAGTTTGTATGCAATGCAAATTCAGCGCTATCAACA  
GGCTGTGCGATCAACAATGGTCTTTCTACTGACTGAGCTGATTTCCAAAATCAGCTTAAAAAAGCCTTTCAAAGTAAG  
CAACGTCTGTTACTGCCCTCTACCTGCTTCGGCCGATAAAGCCGACGATAAATACTCCAGACGTTGTAGATATAACGGC  
ACGCTTTCATCGGGATTCCGGACGGAATCGCGTTACGGGGAGGAAGTTTTTTCAGATACTCCCGAACCGCTGGCTTGA  
TGCCATGAAATCTACGGCTTATCGATAAGAAGCGGAACGTTTTTACCTAATTTGCCATGATGATATCTCCGATTACC  
CCGGCCGGGAATGCGCGGCCGCAATTTTAGTTTTAGGTTCCCGTAAAGATGACATTAAGGAAAACGTGCTGAATCCTC  
ATAATCATCCGCTGCTGTTTATTATCTTTTTCTATAGATTTCTTAATTAATCAACGAATTGCGCAGTTTTTGGAGCATG

TTAATGATTACGTTACAGAACTATTACAATGTCATTAGTTGTGAACAAAGCACCTGGTCGCGCATACTAGGGGCTATAAA  
TTTATCTTTATCAGAAGCCATCACATGAAAGAAGTCGAAAAAACGAAATCAAACGCTCAGCGATCGCCTGGACGCCAT  
CCGCCACCAGCAGGCCGATCTTTCGCTGGTTGAAGCCGACAGACAAATATGCCGAGCTGAAAAAGAGAAAGCCACGCTGG  
AAGCAGAAATTGCTCGCCTCGCTGAAGTTCATAGCCAAAACTGAGTAAAGAAGCACAGAAGCTGATGAAGATGCCATTC  
CAGCGCGCAATTACCAAAAAAGAGCAGGCTGATATGGGCAAGCTGAAGAAAAGTGTTCGCGGACTGGTCTTGTGCACCC  
AATGACCGCACTGGGCGCGAAATGGGCCCTGCAGGAGATGACTGGGTTTTCAAAGACCGCTTTTTAAGAACACAGTATCT  
ACAGGGTGATTCTGCACATTCTATAGGCCGAGTAAGGTGTTACGCGCATCCGGCAAGATAAGGCGCTCTGGATCAAC  
AACCTAAGGGCAATTCTCTGATGAGGATTGCCCTTTTCTTACCAGACATCTCCCCCACAAGAATTGGCCCTACCAATT  
CTTCGCTTATCTGACCTCTGGTTCACAATTTCCCAATTAAGTCAACATCAATGTTGCCAATACATAACATTTAGTTAAC  
CATTATTGTCATTATCCCTACACAACACAATTGGCAGTGCCACTTTTACACAACGTGTGACAAGGAGATGAGCAACAGA  
CTCATTACAGATGTGCGTGGACTCCAGGAGACCTGCAATGAATCTCTGGCAACAAAACACTACGATCCCGCCGGGAATATC  
TGCTTTCCAGTCTGATAGCATCGCTCCCATCTGTTTTCTTTTTCGCTGATTAAGCTCAAACGAAAGGATACGT  
CGCCGCTCGTGGACGGTGGCAATCGCCCTTGGCGTGGCTTTGCTGTTCTATAAAATGCCGGTCTAACGCGCTGGCC  
CGTGGTTTTATGGTTTTCTTACGGGTGTGGCCATCGCGTGGATCATTATTGCAGCGGTGTTCTGCTATAAGATCTCG  
GTGAAAACCGGCACTTTGACATCTTCTGCTATTCTTTTCGATAACCCCTGACCAGCTCTGCAAACTGCTGATCTG  
CGTTTTCTGTTTTCGGCGCTTCTTGAAGGAGCCGACGGCTTTGGCGCACCGGTAGCAATTACCGCCGCTTGTGGTGG  
GCCTGGGTTTTAAACCGCTGTACGCCCGGGCTGTGCTGATTGTTAACACCGCGCCAGTGGCATTGTTGGTGGATGGG  
ATCCAATCTGGTTGCCGACAGGTAACAGGTATCGACAGCTTTGAGATTGGTTCAGATGGTGGGCGGACAGTACCCTT  
TATGACCATTATCGTGTCTTCTGGATCATGGCGATTATGGACGGCTGGCGGGTATCAAAGAGACGTGGCCTGCGGTGG  
TGTTGGGGCGGCTCGTTTGCATCGCTCAGTACCTTAGCTCTAACTTCAATTGGGCGGAGCTGCCGGACATTATCTCT  
TCGCTGGTACTACTGCTCTGCTGACGCTGTTCTCAAACGCTGGCAGCCAGTGCCTGATTCCGTTTTGGTGAATTTGGG  
GGCGTACAGGTTGATATGACGCTGGCCACACCGGTTACTGCGGGTCAAGTGTACGTGCTGGACACCGTTCTCTGT  
TCCTGACAGTACCGTAACACTGTGGAGTATCCCGCGTTAAAGCCCTGTTTCGCATCGGGTGGCGCGCTGATGAGTGG  
GTGATCAATATCCGGTGGCGTACCTCGATAAACTGGTTGCCCGTATGCCGCCAGTGGTCAAGGAGGCTACAGCCTATGC  
CGCCGTGTTTTAAGTTGACTGGTCTCTGCCACCGGACCGCCATTCTGTTTGTGCACTGCTCTGATTGTCTGGCTGA  
AGATGAAACCGTCTGACGCTATCAGCACCTTCGGCAGCAGCTGAAAGAAGTGGCTCTGCCATCTACTCCATCGGTATG  
GTGCTGGCATTGCGCTTTATTTGAACTATTCCGGACTGTCATCAACACTGGCCTGGCACTGGCGCACACCGGTCATGC  
ATCACCTTCTCTGCGCTTCTCGGCTGGCTGGGGTATTCTGACCGGGTGGATACTCATCTAACGCCCTGTTCTG  
CCGCGCTGCAAGCCACCGCAGCACAACAAATGGCGTCTCTGATCTGTTGCTGTTGCCGCAATACCACCGGTGGCGTC  
ACCGGTAAGATGATCTCCCCGCAATCTATCGCTATCGCTGTGCGCGGTAGGCCTGGTGGGCAAAGAGTCTGATTTGTT  
CCGCTTACTGTCAAACACAGCCTGATCTTACCTGTATAGTGGCGGTGATCACCACGCTTCAGGCTTATGTCTTAACGT  
GGATGATTCTTAATGATTGTTTTACCAGACGCGCTGTGAGCAGAGGTTGCCGATCGTGTGCGGGCGCTGATTGATGAAA  
AAAACCTGGAAGCGGGCATGAAGTTGCCCGCTGAGCGCCAACCTGGCGATGCAACTCGGCGTATCACGTAATTCAGTGGC  
GAGGCGCTGGCAAACCTGGTGAAGTGAAGCGGTGCTGCTCAGTGCAGCAGCGGGCGGGACGTTTATTGCTGGCGTATGA  
CACATGGTTCGAGCAAACATCGTCCAGCCGCTAAAAACACTGATGGCCGATGATCCGATTACAGTTTCGATATTCTGG  
AAGCCCGCTACGCCATTGAAGCCAGCACCGCATGGCATGCGGCAATGCGCGCCACACCTGGCGACAAAGAAAAGATTGAG  
CTTTGCTTTGAAGCAACGCTAAGTGAAGACCCGGATATCGCTCACAAGCGGACGTTGTTTTATCTGGCGATTGCCGA  
AGCCTCACATAACATCGTGTGCTGCAAACCATGCGCGTTTTCTCGATGTCCTGCAATCTCAGTGAAGCATAGCCGTC  
AGCGGATGATCTGGTCCACCGTTTTTTTCAACACTGACCGAACACATCAGGCTGTCATTGACGCCATTTTTGCGCGT  
GATGCTGACGGGGCGGTAAGCAATGATGGCGCACCTAGTTTTGTTACACCACCATGAAACGATTGATGAAGATCA  
GGCTCGCCACGCAGGATTACCCCGCTGCCCGTGAGCATAATGAGCATTGAGGGAGAAAAACGCATGATTATTTCCGC  
AGCCAGCGATTATCGCGCCGACGCAACGCATTCTGCCGCGTCTCTGTTCCACTATATGGATGGTGGTGCATATTCTG  
AATACAGCTGCGCGCAACGTGGAAGATTTGTGAGAAGTGGCGTGTGCGCCAGCGTATTCTGAAAAACATGTCCGACTTA  
AGCCTGAAACGACGCTGTTAATGAGAAATTGTCGATGCGGGTGGCACTGGCTCCGGTGGGTTTTGTGTGGCATGTATGC  
GCGTCTGGCGAAGTTACAGGAGCCAAAGCGGGACGCGCATGGTATTCCGTTTACTCTCTGACGTTTTCCGTTTGGC  
CGATTGAAGAAGTTCGCGCCAGCCATCAAGCGCCCAATGTGGTTCCAGCTTTATGTAAGTGCAGTCCGGCTTTATGCGT  
AACGCGCTGGAGCGAGCAAAGCAGCGGTTGTTTCGACGCTGGTTTTACCGTGGATATGCCGACACCGGGCGCACGCTA  
CCGTGATGCGCATTACAGTATGAGCGGCCGAACCGGCAATGCGCGCTACTTGAAGCGGTGACACATCCGCAATGGG  
CGTGGGATGTGGGCTGAACGGTCTCCACATGATTAGGTAATATCTCAGCTTATCTCGGCAACCGACCGGACTGGAA  
GATTACATCGGCTGGCTGGGAATAAATTCGATCCGTCCATCTCATGAAAGACCTTGAATGGATCCGCGATTTCTGGGA  
TGGCCCGATGGTATCAAAGGATCCTCGATCCGGAAGATGCGCGCATGACGTAAGTTTTGGTGTGATGGAATTTGGG  
TTTTAACCACGGTGGCCGCAAGTGGACGGTACTCTCTTCCGCCGTGCACTGCCTGCTATTGAGATGCGGTGAAA  
GGTATATAGCCATTCTGGCGGATAGCGGAATTCGTAACGGGCTTGTGTCGTGCGTATGATTGCGCTCGGTGCCGACAC  
CGTACTGCTGGTCTGTGTTTTCTGTATGCGCTGGCAACAGCGGGCCAGGCGGTGTAGCTAACCTGCTAAATCTGATCG  
AAAAAGAGATGAAAGTGGCGATGACGCTGACTGGCGGAAATCGATCAGCGAAATACGCAAGATTGCTGGTGCAGGGG  
CTGGGTAAGAGTTGCTGCGGCACTGGCTCCATGGCGAAAGGGAATGCGGCATAGTCGTTTGCSCCCCTCACCTAA

CCCTCTCCCTCAGGGAGAGGGGACCGTTCGGCGCTGTATGTACTCCCTCACTCTGAAACGACACCGCACTCTTTTTTCT  
CCCTCGCCCCCGGGGAGAGGGCCGGGTGAGGGGAAAAGGCCGACTGCTACCAATTTCTGCTATCTGCCCCCGC  
ACTAAGGGGGCAGTATGCTAAACATCGTACTTTACGAACCAGAAATTCGCCAAATACTGGCAACATCATCCGTCTTGC  
GCTAATACCGGCTTTCGTCTGCATATCATCGAACCGATGGGATTTGCCTGGGACGATAAGCGCCTGCGCCGCGGGGGCT  
GGACTATCACGAGTTTACCGCCGTACCGCTCATATGACTATCGCGCTTCTCGAAGCAGAAAATCCCCAGCGCCTGT  
TCGCCCTCACACGAAAGGTACACCTGCTCACAGCGCCGTAAGCTATCAGGATGGCGATTATCTGATGTTTCGGCCCGGAA  
ACACGCGCCCTGCCAGCGAGCATTCTTGATGCCCTGCCGCTGAACAAAAAATTCGCATTCCGATGGTGC CGGACAGCCG  
CAGCATGAATCTGTCCAATGCGGTGTGCGTAGTGGTGTATGAAGCCTGGCGGCAGTTGGGGTATCCGGGAGCGGTATTGA  
GAGATTAGTTACTGTAGGCCGATAGATGATTACATCGCATCCGGCAGATCACAGGACATTAGATCCCATCCCATACT  
CAATGTATGGTTAATACCGTTGAAATGCTGGTCCATATCCATTGATGGCTTATCGCTGTCTGGTTTACCAGCAATACGA  
GCCGGAACGCCAGCGCGGTGGTATGCGCGGCACCGGTTGCAGCACCACGGAACCTGCGCAATCTTCGCGCCGCGCC  
AACTTCAATATTGCCGAGGATTTTCGCGCCGCGCCAATCATCACACCTTACGAATTTTCGGGTGACGGTACCACCAG  
ATTTACCCGTACCGCAAAGCGTACAGATTGAGAATCGATACGTCGTTTTCAATCACCGCCGTTTACCACAGCAGATG  
CCTGTGCGTGGTCAAGCATGATACCGGACCAATTTTGTGCGGGTGAATATCGACCTGGAACGTACAGAAAACCTG  
GTTTTGCAGAAAGATTGCCAGTGCAGCGCCCTGATTCACACCCAGTGCAGATAGGCCTGCAAGGCATGAA  
AACCTTTCAGGTATAACAACGGGTTGAGTATTTATCGACTGCCGGTGCAGGATACGCACCCTGAATACACAGCC  
GCAGAGCGATCATTTCCGGTTCAGCGCGTAGGCTTCTTCCACCACTTACGGATAGCAATAGCAGGCATAATTGGCGA  
TGACAGCTTGTTCGCCAGCATGTAGCTCAGTGCAGTGCAGGTTTTCTGTGCTTGTAGTAGCTGCGTGGTAAAACTGG  
CCAGCATTGGCTCACAGTCCGCCAGCGTTCGGCTTCGGCTTTAATATTGTTCCAGACAATTTCCAGTCTTTCACACGAC  
ATTGCTTACTCCACAGATGAGATAATGACCGGCCGTTTTCGCGCGGCGGGTTCATAGCGGTAACAAAGGTTCCCTGGG  
GTTAGTGGCTGCTGCGCTCGTCTTGCCTGACGACCTAGTAAAGTCAATGCTGCTCGCGCGCTTTTTTCCGCAATAT  
AATACTTGATAAATTTCTCGGTTATTGGCATTTCACGCCGAAGCGATGCGCCAGTTCGCGGACTTCTTTCGTATTGCG  
GTAGCTTCCACCACCTGACCAATCTTCTGCGCGCTTGTACATCCATGCCCTGACCGAGCATCATGCCAAAACGGC  
GGTTACGCGACTGTTGTCGGTACAGTAAGCACCAGATCGCAAAGCCCGCCATGCCATAAAGGTGGCAGGGTCCGCA  
CCCAGCGCCGACCAAGACGCGACATTCAGCCAGCCACGGGTGATCAGCGCCGTACGCGCATTGACACAAAACCGAT  
ACCGTCGGACATCCCGCACCAATGGCAATAACGTTTTTACC CGCGCCAAAGCTGCACGCCAATGAAATCCGGATTGC  
TGTAACCGCGAAAATTTTCCGCGAGTGCAGCAGTCTGGAGATCATCGGCAAAGGTCTGATCGGTGAGGCCAGCGAA  
ATAGCTGTGCGTAAACCTGCCGCCAGTCTTTCGAAAACGTTGGCCAGAGATAACCGCCAGCGGAATTTGATCGCTAA  
GGCTCACGCGCCACGTCCTGTAACAGACGTCCGGTTCCGCTTCCAGCCCTTGGTGCACCACACAGCGGCATCAG  
GACGCATCAGTGGTTAATCTGGCGCAGCACTTACC AAAAGACATGGCTGGGTACGACGACGAGAATATTACGGCTGGCT  
GCCAGCGCAGTGGCGAGATCGCTTTCAAGATGGAGCGTATCGGAAAAGGCACATCGGGGAGAAAACGCGCGTTACAGCG  
GTCGCGTTCAAGCGTTGCGATATGTTCAAGGTCATGGCCCCAGAGGACAACCTCGTGGCCATTTCTTCCAGGGTATGG  
CAAGAGCGGTGCCGTACGAGCCGGCACCGATCACAGTATTGAAGCATTACGTTGGTTCATCAGGCATCTGATGTTCTT  
CAGTACCTTCGCCAGCCTGCTGCTGCAATAGTTTATGAACAGCGCATCGAAGTTAACC GGCGCAAGGTTCAAGTTCGGG  
AATGTACCGCGGGATACCATGCTGGTATGCACTCACGAGCATACGGGAACAGAATGTTCCGGCAGTATGCTCCAGGCA  
ATGCGCCATCTGGGTGCCTTCGATACCCGCGATGGAGAAAATACCGCCCTGCTGAATTCACACAGGAACCGGTTTTCTT  
CGCCAAAAGAGCCGTTACGGTAACACGCACTTCCGTAACGTCATCTGCCAGTTGGGAAGATGCCGTATCCAGA  
TCAAGTTTAACTTCTGGTTGCCAATCTTCTGAAAACGTGCGCGCGTTTCGGCGCTTCGAAAAGAGATATCTTGGTATA  
AATACGTTGGATCTGGAAAGTCATTTCACTGTTGTTTTGTTCTGACATGTGTAGAAAACCTTAAAGTGTGCTTAAAT  
ACTGCGCAATGTAATGCCAACGTTTACACGTTAATTTACAGAGGGATCCAGTCCACACAGTGCATCAATGCATACAAGT  
CATCACAGCCGCAATGTGCTGTGCGTCAATAAAAAATCTGGGAACCGTGGTGCAGCCGCTGCGTTTTGATCATCTTCA  
CGCTTGGCGCGTTGCCATCGATCGGAGCTCCTGGAAAACACGCCCTTGTGCTCAGCAGTGTCTTTGCACGATGGCA  
ATACGGGCAGGTTTTCTTGGTATAGATTTCAACATTGGCCATAAATTAGCTCCTGTTTTTTACCCTGAAATTTTATGTT  
GCAGGGCGGCAGCAAAATGGAGTGTCCCCAGAAGCTTATAACAATAAGTCGCTGGGGCCTAATTGCAGTAACGGCCTG  
CATCATGAAAGACGACAGGTAATTTTGGCGCGACCAAAGGCAAGTTTTTCGCCAGCCAGCCAGCGACGCTTCTTT  
CAGCACGAATACTTGGC AAAACCAGCTTTCGTGAGTGCCTTTCAGGCTCCTGGCACTGCATGCCAGAACCGTCTACCA  
CGATAACCGGTTTTGCTTTGTGCTTCTCAAGCTCACCAACATTGTTGGCTTTGATTTGCTCGGCAACAGATTAATAGAA  
CCTGCGATATGGCCTTACGGAAAGTCATCAGCTGACGTAAATCCACAACCACAGCGTCTTCTTTGTTGATCAGACGCGT  
AGCTTACCACGAGTAATCACCTTCACTTTCGAGGTGAGGCTTAAACGTAGTACAAGAACCGCCACCAGTAACCGGA  
TCCAGGCGATACTCAGTATGGGATGACGGCCAACAATTCATAATTTCTTGCATGGGGGGTAACAACCTCCGACGTAGT  
GATTA AAAAAAACAGGAAAGGAGTATACCTGCGCGTGC GGCAAAATACAGCCAGCGGTTAACTGGAATGCAATTTTTCG  
GGCGCGACGAAAAAAAAGCTAAATCTGGCATCGGCTTGC CGGAGCGGTGATATTTTTGATCTTTCAGAGGCTATTTT  
ATCGATTAGTGTAGTAAATACGCAATTTTACTCTTGTAGTATGAGGTTGTCGCAATGTTGGTTTTTAAAAAACCT  
ATGGTACTGGTATTCTGGATGGCTATGGCTATCGCGAAGAACAGCAGGATAACGCCATTTTTAGTGCTAAAAACCCCGT  
AATGGATGCACTGTGGGCAATCGTCCGCATACCCTAATCGACGCTTCCGGTCTGGAAGTCGGTCTGCCTGACCGTCAGA  
TGGGTAACCTCGAAGTAGGCCACGTTAACCTGGGTGCCGGCCGATCGTGTATCAGGACCTGACTCGTCTGGACGTTGAA

ATCAAAGATCGCGCTTTCTTTGCTAATCCGGTGCTGACTGGCGCGGTAGATAAAGCGAAAAACGCAGGCAAAGCGGTACA  
CATTATGGGTCTGCTCTCCGAGGCGCGGTACACAGCCACGAAGATCACATCATGGCGATGGTAGAACTGGCAGCTGAAC  
GCGGCGCAGAAAAATCTACCTGCACGCATTCTTTGACGGTGCAGACTCCGCCGCGCAGTCTGAATCCTCGCTGAAA  
AAATTCGAAGAAAAATTTGCCGCGCTGGGCAAAGGCCGCTAGCGTCCATCATTGGTCTTACTACGCGATGGACCCGGA  
TAACCGTTGGGATCGCGTAGAAAAAGCTTATGACCTGCTGACTCTGGCGCAGGGCGAGTTCAGGCCGATACCGCGTTG  
CTGGTTTGAGGCTGCTTATGCTCGCGACGAAAATGATGAATTCGTGAAAGCGACCGTTATCCGTGCTGAAGGTCAGCCA  
GACGCGGCAATGGAAGACGGCGATGCACTGATTTTCATGAACCTCCGTGCTGACCGCGCGCGTGAAATCACTCGTGCTTT  
CGTGAACGCTGATTTTCGATGGCTTCGCGCGTAAGAAAGTGGTAAACGTCGATTTTCGTGATGCTGACCGAATACGCCGCTG  
ACATCAAACCTGCGGTTGCTTACCCACCCGTTCCCTGGTTAACACCTTCGCGCAGTGGATGGCGAAAAACGACAAAACCT  
CAGTTGCGTATTTCCGAAACCGAAAAATATGCCACGTTACTTTCTTTCAACGGTGGCGTAGAAGAGTCGTTCAAAGG  
CGAAGATCGCATTCTGATCAACTCACCGAAAGTGGTACCTACGATCTGCAACCGGAAATGAGCTCCGCGAGAGCTGACCG  
AAAACTGGTTGCGGCCATCAAGAGCGGCAAATACGACACCATCATCTGTAACATCCGAACGGCGACATGGTAGGTCAC  
ACCGGGGTGATGGAAGCGCGGTTAAAGCGGTTGAAAGCGTGGATCACTGCGTGAAGAAGTCGCGAAAGCGGTTGAGTC  
CGTGGGTGGACAACTGCTGATCACCGTGACCGGTAACGCTGAGCAGATGCGCGATCCGGCAACGGGTGAGGCACACA  
CGGCACACCAACCTGCCAGTTCCGCTGATTTACGTTGGTGATAAGAACGTGAAAGCGGTTGAAGGCGGCAAACTTTCT  
GACATCGCGCCACCATTGTTGTCGCTGATGGGTATGGAATCCCGCAAGAGATGACTGGTAAAGCCGCTGTTTCATCGTGGA  
ATAATCCCTCCCATGAGGGGAAAGGCGATTAATACCATGACACGGCCGTGAAACCGCGCAGGTTTGCAATCAGGCCCA  
TCATCTACGCCAGCGTTCTTAGCGCTGGCGTATTGTTGTCGCGCTTTTCCGCCACGCGGATGAGCGTGACCAACTCAA  
TCTATTAGGCTGACATCGCCGAAAAGAGCGCGCGGTACGCCAAAAGCAACAACAACGCGCAAGCCTGCTCGCACAATT  
GAAAAAGCAGGAAGAAGCGATCTCTGAAGCCACCCGTAAGCTGCGCGAAAACGCAAAACACGCTCAATCAACTCAATAAAC  
AGATTGATGAGATGAACGCGTCGATTGCCAAACTGGAGCAGCAAAAAGCGCCAGGAGCGCAGCCTCGCCGCAACTG  
GATGCCGATTCCGTCAGGGCGAGCATAACCGGATTCAGCTGATTCTCAGCGGTGAAGAAAGCAGCGTGGACAGCGTTT  
ACAGGCTTATTTGGCTATCTCAACAGGCGCGACAAGAAACCATTGCCAGTTGAAGCAAACGCGTGAAGAAGTCGCCA  
TGCAGCGTCTGAACTGGAAGAGAAACAGAGCGAGCAACAACGCTGTTATATGAGCAGCGCGCCAACAGGCGAAACTG  
ACTCAGGCGTGAACGAGCGTAAAAAGACGCTGGCAGGGCTGGAGTCTTCCATCCAGCAAGGTGAGCAACAGTTGAGCGA  
GCTGCGCGCAACGAATCCCGTCTGCGTAACAGCATTGCCCGTGCAGGAGCCGCGCGAAAGCGCGTGCAGAACGAGAAG  
CACGTGAGGCCAGGCGGTTCCGCGACCAGGAAAGAGCGACGCGCAAAGGCACCACCTACAAACCGACCGAAAGCGAA  
AAATCGCTGATGTCCCGTACCGGTGGTCTGGGCGCGCGCGTGGTCAGGCATTCTGGCCGTTTCGCGGGCGACGCTGCA  
TCGCTATGGCGAACAGCTACAGGTTAATTACGCTGAAAGGTATGGTTATCGGTGCTTCTGAAGGTACTGAAGTTAAAG  
CGATTGCCGACGGTGGGTTGATTCTGGCTGACTGGCTGCAAGGCTACGGTCTGGTGGTGGTGGTGGTGGTGGTGGTGGTGGT  
GACATGAGTCTTACGGCTATAATCAGAGCGCACTGGTGGAGCGTTGGTTCGAGGTTCCGCGGGGCCAGCCGATTGCACT  
GGTGGGCGAGCAGTGGCGGTGAGGTCAGGTCGGCCTTCACTCTATTTGAAATTCGCCGCCAGGTCAGGCGGTCAATCCACAGC  
CGTGGTTGGGAAGATAAGTTTTGTTCCATTTCTGTCGTAACGTTCTTGCAATTTGCCGCTCTGTTGGCGCTCTCTCCCC  
GTACTTGCTGGCAAACCTGCCATCGTCATTGATGATTTGGGTATCGCCGCAACGAAAACAGGTGCTGGCGATGCC  
TTCCGCTATCTCCGTCGCTGATTACCCGATTACCCGACGCCAGAGAGATGGCGACCAAAGCGCATAACAGCGGGCACG  
AAGTGTGATTGATCTCCGATGGCACCGTTGAGTAAACAGCCGCTGGAGAAAAATACGCTACGCCGGAGATGAGCAGC  
GACGAAATTGAGCGCATTATTCGTAGTGGTCAATAACGTGCCCTATGCCGTGGGATCAACAACACATGGGCGAGCAA  
GATGACCTTAACCTGTTGGTATGCAGAAAGTATGCAGGCGCTGGAGCGTTACAATCTTACTTCTCGACAGCGTAA  
CCATCGGTAATACCCAGGCGATGCGCGCCGCGCAAGGCACTGGCTGAAGGTGATCAAACGGAAGGTATTCCTCGACGAT  
TCGCAAAATGAAGCGGACATCCGTGTGCAATTTAATCGCGCAATTGACCTGGCGCTCGCAACGGTTCGACCATTTGCCAT  
TGGGATCCTCACCTGCAACGGTACCGGTGTTGCAACAGATGGTTTATAACCTGCCGCGCAGACATTACGCTGGTGAAG  
CCAGCAGCTTGCTGAATGAACCGCAGGTTGATACTTACACCGCGAAAAACGCTGTGCCTGATGACCGCGTAATCCG  
TTCCGTGGCGTGAAGCTGTGCAAACCGAAGAAACCGATAGAACCTGTTTATGCTAATCGCTTCTTTGAAGTATTAAGCGA  
AAGCATCAGCCAGAGCAGCTGATCGTTACTTCCAGCATCAGTGGCAAGGCTGGGCAAACAGCCCGAAGCGGCGAAGT  
TTAACGCTAGCGCAAATTAAGGCGCTACGCGTAATGCGATGGTGCAGCCGCTTTTGTGCGGCCATTGCCATAAGCGGA  
AAGACCACAGTAACGCTGGTAACCGACCTTACGCTGCGCACATTGGTAATCAGGCGCTTATACATACCGGAAGTAAT  
ATCTCGGCAATCATCCGTTGGCGGTAAGAATATCCGGCTCTTTGCGCACCGCATGGCAAACAGCAATGCCTCGTAAGT  
TATTTGCTGATGAAATCCGGATAAATCATAATTTTGTGCGCATAATTTGATTTAATTTCTCAGCAGGCGGGTAATCT  
TAATATAGTGACGTTGATAATTAAGGTTTTTATCCCTGTCTATGCAACCGACTCACTGACGATTATGACAGATAATAT  
TTATATAATGATTGCTCGGTATATCGCGCAGCAGCGGTTAAACATGAATTTCTGTTGCCAGACAATATCTGATGATG  
TAATCCGGCAATAAATTTAATGTTATTTTAAACAATAACATCACGGCGATAAACCCCATCCAGACAACGTGAGTCCAAC  
GGCGCAAGAAAGCCCCATCCGAGCCAGTCCGGGCGGTTAATACGCCGTTGAGCGAAGGCGATCGGTGGGATGGAT  
TGCCAGGTTTTCTCCGTTTACGAAAACACAGTACGCGTTGCACTGCGCCACGTCGAGGTCGCTCTAACGCCATGGT  
CATCAGCGTTTTCTGATGTTGGGATAGACTTCATGCTGAGCATCGCAAAAAGCGACATATTTGCCCGTTGCCACTTCAA  
TCCCAGATTACGCGCCACCGATGCGCCAGCATTCCCTGATGCAACAAACGAACGTGCGGATAGTTTTCTGCGTAATAC  
TTTGCTATTTCAACAGAATTATCCGTTGAACCATCGTTAATAAATGATTTCCAGAGCAGTCCAGGTTTGGCTAATTA

AGATTCCATACAAGTGCGGAAATCATCGCCGCATTATATAACGGAATAATAACACTAAGTTTATTGGTGTGTTTCATCA  
TAAATTACCGACGACCTCTGAAGTTATCTGACGTTTTACAGGCTTTGTATTAAGAACTATTAAGCCTGTGAGATATTA  
TTTTACAGGTGAGAGAGTCACTTCAGGGTAGAGAGATAATGAGAGCAGCTATATAAGAGATCAGCACAATTACGAACCTC  
TTTATTACACTGACAGGATTTTACATATTTAACAGATTATCTCAGATAAAAAGGGCTGGAATACCAGCCCTTGTTCTGT  
TAATCCCAGCTCAGAATAACTTTCCCGGACTGGCCGAAACGCATAGCGTCAAAGCCCTTCTGGAAATCATCGATAGAGAA  
ACGATGGGTAATGATCGGGGAAAGATCGAGGCCAGACTGAATCAGCGCCGCCATCTTGACCAGGTTTCAAACATCTCAC  
GACCGTAAATACCTTTAATGAACAAGCCTTTAAAGTCACTTTGGTCCAGTCGATAGACATATCAGACGGCGGAATACCC  
AGCATCGAATACGGCCGCGTGATTCATGGTGTCAAGCATGGTACGAAACGCTGGCGGCGCACCGGACATTTCCAGACC  
GACATCAAAACCTTCCGGTCATGCCTAACTCCGCCATCACGTCAATTGAGATTTTCTTGCGGACGTTAACCGCACGGGTGA  
TACCCATTTTACGCGCCAGCTCAAGGCGGTATTCGTTAACATCAGTGATCACCACATTGCGTGACCAACGTTTTCGCC  
ACCGCCGCTGCCATAATACCAATCGGGCTGCACCAGAAACCAGCACATCTTCGCCACCAGATCAAACGACAGCGCGGT  
ATGACGGCGTTACCGAAGGGATCAAAAATTGCGGCTAAGTCAATCGGAAATATTGTGCGGGATTTGAAGCGTTGAATG  
CCGGGATCACCAGATTTCCGCAAAGCAGCCCGGGCATTAAACCAACGCCTATCGTGTGCGGCACAAATGGGTACGA  
CCACCAGCAGTTGCGGCAATGACCACAGGTGATATGGCCTTCGCCAGAAACGCGATCGCCGATCTTGAAGCCTTTCAC  
TTCCTGACCAATACCTACCCTTACCAGATATTCATGGCCACGACCATCGGCACCGGGATGGTTTTTTCGCGCCACT  
CATCCCAGTTATAGATGTGAACGTCACTCCCGCAGATGGCTGTTTTACGGATTTTAAATCAGCAGATCGTTATGCCCGAGT  
TCCGGTACAGGAACGTGCGTCATCCAGATGCCCTTCCGCTTTCAGTTTGGATAACGCTTTCATCTCACATCTCAGGC  
GATAACGCCAGTTGTTTACCAATACGCGTAAATGCTTCTACTGCACGCGTAATTTGCTCAGGGGTATGCGCCGAGACA  
TCTGGGTACGAATACGCGCTGACCTTTCGGAACGACCGGATAGAAGAAACCGTAACGTAATGCCCTCTTTTTGCAGC  
TCACGGGCAAATTTCTGCGCCACTACCGCATACCAAGCATGACCGGAATAATGGCGTGATCGGCTCCCGCCAGGGTAAA  
GCCCCGCGCCGACATTTGCTCAGGAACTGACGCGGTTGCCCCACAGCGGTACGCGAGTTCGCTGCCCGCTTCGACCA  
TCTCCAGTACTTTGATGGACGCGGCAACAATGGCCGGTGCCAGCGAGTTGGAGAACAGGTACGGACGAGAACGCTGGCGC  
AGCCACTCAACCCTTCTTTCGCGCCGCGGTATAACCACCAGAAGCCCCGCCAGCGCTTACCAAGCGTACCGGTGAT  
AATATCGACCCGCCCATCACATCGCAGTATTATGGGAACCACGACATTTTACCAGCAAAAACCGACCGGTGGGAGT  
CGTCTACCATCACCAGGGCATCATATTTATCTGCCAGATCGCAAACGCCCTTACAGTTGGCAATCACGCCGTCCATTGAG  
AACACACCATCGGTGGCGATCAGCACATGACGCGCACCGGCTTACGCGCTTCTTTCAGACGTGCTTCCAGCTCCTGCAT  
ATCGTTGTTGGCATAGCGATAGCGTTTAGCTTTCACAGACGCACACCATCAATAATAGACGCGTGGTTCACTGCGTCCG  
AGATAATGGCGTCTTCCGACCCAGAAGCGTTTCAAACAGGCCACCGTTAGCATCAAAGCAGGAAGAGTAGAGAATCGCA  
TCTTCCATCCCAGGAAGGCCGCGCAGTTTTTTGTTCAAGCTCTTTATGGCTGTCTGAGTGCCGAAATAAAACGCACCGA  
AGCCATGCCGAAACCGTGAGAATCCATTTCCCGCCTTTCGCCCGCAATCAGATCAGGATGATTCGCCAGCCCGAGATAGT  
TGTTGGCACAAGGTTAATGACGTGGCTTCCATCAGCCACAGTGATATCTGCTTGTGCGCAGACGTAATAATGCGCTCT  
TCTTTAAACAACCTTCCGCCCCTGCGGTTTCCAGATCGTTGGTTAACTGCTGATAAAATCTCCACGCATTGCGATTCT  
CCAGACAGGGCAAATTCAGCACATATTACCAAACCTATAGGTGCGGACGAGATAACGCGTTAACACTTCTGCAAAAT  
CAGGATAAATAACGTGTAACCTTGATGTCTCAACACCTACAGATAGTAGAAAACTGTACAGTTTGGCTGGGCATAAT  
GATGATTGATTTACTGCATTGATATAAAAAGAAAAATGATGCCAAAGCATCATTTTTCTATCTCAGTTGGTATCAA  
ACGCTACCCACTAATGGAGGGAAACCTATTTTCTGAAAGGAAAAATCTCAGCGCTGCATTTTTGCCCTAAAGTGTTA  
CTCCTGAAGCAGCGAAACAAATCGAACATTTTCTCTCCCAGATAGTTTAGGTTGAAGAGATCGGGGCGTTTGAATA  
GCACATGACAAAAATGCCCTGGTCATCGTCCACAATGTTATTTAGTGTTATTTTTGACTTTCAGAATAATTTAT  
AGAATCTTTCCATTTATGCTGTGAACCAACAATTCGCCCCAAATAATATATACATGATTGCCAATCATGAAATCAAAA  
ACCTGTTGTTGAGATGTGACAGTAAGCCCTTTTTTATAGTAAAAAGATGCATCTTACTTTTCATCAAATGGGAAATCCCA  
AATTTTTCAATCCTCGAGTTACATTTGGCTTATGGCAATAGCCAAAATCTATCCAGCAACAAGAGGCGTTTTCACTAAGC  
CCATGTTGATAGCTTTATTTACAAAATAGGCCTTAAAGTTACATACCAAAAACATACTCTGGTGACCAGTACTCTGGGTTT  
TTAATTGTCGAGGCTCAAGTCTATTTGTAACGACTCATTTTTGAAATTTTTTCGATACGACTTCTGATATATCTAAA  
TTTCTTTTTTATATCGATAACGATAACCGTTGTTGGTTTTCCGTTGCGAATCGCTTCAACCCTTGGTTTCAAATCGGGAG  
AAGTAAAATAATCATCTCATTTTTCAAGTGCGGCCAGCGCTCAAAGTAACTAAAAATAACATCAACTGAACGAGCTAGT  
TTTTACGGAACCTTTATTAGCAGTCCAATCCCCTTACCAATGTCAAATATGCAGTGATAATTGTTGGTGGATGATTT  
CATTACTAATAAGACCTAATATAAAAAAGAATTATATATAAATATTAATAGAATGTATACTGTATATTATCCATTC  
AAATGCTTCCGTTATTTATCATACATCGGAATATTGATACTAAAGCACTATTCACATGCAAAACCAACATCCGCCATGAA  
GGACTAGCTAAAACCCAACTAGTTTGTGCAATTAGCATCTTGCACCTCTATGTAAGGGCTGAAGGGATTGCGATGT  
GATGGTATGATTACAGACATTCGTGTCTGAGATTGTCTGACTCCATAATTCGAAGGTTACAGTTATGATCATCGTTAC  
CGCGGCGCGGCTTTATCGCAGCAACATCGTTAAAGCCCTGAATGATAAAGGCATCACCAGATTTCTGGTGGTGGACA  
ACCTGAAAGACGGCACCAAGTTTGTGAACCTGGTGGATCTGAATATCGCAGACTATATGGATAAGGAAGACTTCTGATC  
CAGATTATGGCTGGCGAAGAGTTCCGGCATGTGCAAGCGATTTCCACGAAGGCGCGTGTCTTCCACCACCGAGTGGGA  
CGCAAGTATATGATGGATAACAATATCAATACTCCAAGGAGCTGCTGCACTACTGCCTGGAGCGTGAAATCCCGTTCC  
TGACGCTTCTTCCGAGCCACCTACGGCGGACGCACCTCCGACTTTATTGAATCCCGGAGTACGAAAAACCGTTGAAC  
GTCTACGGTACTCAAATCTCTGTTGATGAATATGTTCTGCAATCTGCCTGAAGCGAACTCGCAGATTGTTGGCTT

CCGTTATTTCAACGTTTATGGACCGCGTGAAGGCCATAAAGGCAGCATGGCGAGCGTCGCTTCCATCTCAACACCCAGC  
TTAAACAACGGTGAATCACCGAAGCTGTTTGAAGGTAGCGAGAATTCAAACCGGACTTCGTCTATGTGGGCGACGTGGCT  
GATGTGAATCTGTGGTTCCCTGGAAAATGGCGTTTCCGGCATCTTCAATCTCGGTAAGTGGTCTGCGGAATCCTTCCAGGC  
GGTAGCTGATGCTACGCTGGCTTATCACAAGAAAGGCCAGATCGAATACATTCCGTTCCCGGATAAACTGAAAGGCCGCT  
ATCAGGCGTTCACCTCAGGCAGATCTGACAAAATCTGCCGCGGGCGGTTACGACAAAACCGTTCAAACCGTTGCTGAAGT  
GTAACGGAATACATGGCCTGGCTGAATCGCGACGCATAAGAGCTCTGCATGAAAATACTGGTGATCGGCCGCTTGGGT  
TGCGCAGATGATGATGTCGCAAAAGTCTATCGCACGCTCCAGGCGCGTATCCCAGGCGATAATCGATGTGATGGCAC  
CGCATGGTGGCTCCATTATTATCGCGGATGCCGGAAGTTAACGAAGCTATTCCTATGCCTCTCGGTACAGGAGCGCTG  
GAAATCGGCGAACGCCGCAAACTGGGTCTAGCCTGCGTAAAAGCGCTACGACCGCGCTACGTCTTACCCAACCTCCTT  
CAAACTGCAATAGTGCCTTTCTTCCGGGATTTCTCATCGCACCGGCTGGCGCGGAGATGCGCTACGGTTTACTCA  
ACGATGTACCGGTGCTCGATAAAGAAGCTGGCCGTAATGGTGAACGCTATATAGCGCTGGCCTATGACAAAAGGCATT  
ATGGCACAGCACAAGATCTGCCGAGCATTGTTATGGCCGAGTTGCAGGTGAGCGAAGGTGAAAATCATATACCTG  
TAATCAATTTTCGTTTCATCAGAAGTCCGATGATTGGTTTTGCCCCGGTGGGAGTTTGGTCCGGCAAAACGCTGGC  
CACACTACCATATGCGGAGCTGGCAAAGCAGCTGATTGATGAAGTTATCAGGTGGTTCTGTTTGGCTCGGCGAAAGAT  
CATGAAGCGGCAATGAGATTCTTGGCGTTTGAATACCGAGCAGCAGGCATGGTGTGCGAACCTGGCGGGGAAACACA  
GCTTGATCAAGCGGTTATCTTGAATGAGCCTGTAAAAGCATTGTACTAACGATTCTGGCCTGATGCATGTTGCGGCGG  
CGCTCAATCGTCCGCTGGTTGCCCTGTATGGTCCGAGTAGCCCGACTTCACACCGCGCTATCCATAAAGCGCGCTG  
ATCCGTTTATTACCGGCTATCACAAGTGCATAAAGTGCAGCTGCGGAGGTTATCACCAGAGCTTAATCGACATTAC  
TCCCAGCGGCTACTGGAAGAACTCAACGCGCTATTGTTACAAGAGGAAGCCTGACGGATGCGGGTTTTGATCGTAAAA  
CATCGTCGATGGGCGATGTTCTCCATACGTTGCCCGCACTCACTGATGCCAGCAGGCAATCCAGGGATTAAGTTTGAC  
TGGGTGGTGAAGAAGGGTTCGACAGATTCTTCTGACGCTGCCGTTGAGCGAGTTATTCTGTGGCAATACGTCG  
CTGGCGTAAAGCTGGTTCGCCCCCATAAAAGCGGAACGCAAGCGTTTCGTGAAGCGCTACAAGCAGAGAATATG  
ACGAGTTATCGACGCTCAGGGGCTGGTAAAAGCGCGCGCTGGTACGCGCTGGCGCATGGCGTAAAGCATGGCATG  
GACTGGCAAACCGCTCGCGAACCTTTAGCCAGCCTGTTTTACAATCGTAAGCATCATATTGCAAAACAGCAGCACGCCGT  
AGAACGCACCCGCAACTGTTTCCAAAAGTTTGGGCTATAGCAAACCGCAAACCCAGGGCGATTATGCTATCGCACAGC  
ATTTCTGACGAACCTGCCTACAGATGCTGGCGAATATGCCGATTTCTTCATGCGACGCCGTGATGATAAAACTGG  
CCGGAAGAACACTGGCGAGAATTGATTGGTTACTGGCTGATTCAGGAATACGGATTAACCTCCGTTGGGCGCGCCGCA  
TGAGGAAGAACGGGCGAAACGACTGGCGGAAGGATTTGCTTATGTTGAAGTATTGCCGAAGATGAGTCTGGAAGGCGTTG  
CCGCGTGCTGCCGGGCTAAATTTGATGTCGTTGGATACGGGTTAAGCCATTTAACGCGGCACTGGATAGACCC  
AATATCACGTTTATGGACCAACCGATCCGGGATTAATTGGTGGTATGGGAAGAATCAGATGGTATGTAGGGCTCCAAG  
AGAAAATTTAATTAACCTCAACAGTCAAGCAGTTTTGGAAAAGTTATCATCATTATAAAGTAAAACATGCTAACATCCT  
TTAAACTTCATTCATTGAAACCTTACACTCTGAAATCATCAATGATTTTTAGAGATAATAACTTATATATTATGTTTTTT  
TCAATGATAATTGCATTCGTCGATAACTTTACGATAAAAAATATAATATCACTGCTATAGTTTGGCTTATTGCTACT  
AATTTTACGTGGCAGACAAGAAAATTATAATAAAAAACCTTATTCTTCCCCTTTCTATATTTTTAATAGGCTTGCTTG  
ATTTAATTTGGTATTCTGCGTTTAAAGTAGATAATTCGCCATTTCTGCTACTTACCATAGTTATTTAAACTGCCAAA  
ATATTTATATTTGGTTCTTTTATTGTTTTCTTGACACTAACTAGCCAGCTAAAATCAAAAAAGAGAGTATTATACAC  
TTTGATTTCTGTCAATTTCAATTGCTGGATATGCAATGTATATTAATAGCATTATGAAAATGACCGCATTTCTTTT  
GTGTAGGAACGGCAACAGGAGCAGCATATCAACAATGCTAATAGGGATAGTGTGGCGTTGCGATTCTTTATACTAAG  
AAAAATCATCTTTTTTATTATTAATAGTTGCCGGTACTTTATGTTCTGGCGCTAACACAAACAGAGCAACCCCT  
ACTCCTGTTCCCTATAATTTGTGTTGCTGATTAATAGCTTATTATAAATAACACCCAAGAAATCACTTCTCTATTG  
TTCTACTAATTGCTATATTAGCTAGCATTGTTATTATATTTAATAAACCAATACAGAATCGCTATAATGAAGCATTAAAT  
GACTTAAACAGTTATACCAATGCTAATAGTGTACTTCCCTAGGTGCAAGACTGGCAATGTACGAAATGGTTTTAAATAT  
ATTATAAAGTCACTTTTTTCAATTAGATCAGCAGAGTACGCGCTGAAAAGTATGAATTTGTTAGTTGCAGAACACAATA  
GGCTAAGAGGGGCATTGGAGTTTTCTAACGTACATCTACATAATGAGATAATTGAAGCAGGGTCACTGAAAGGTCTGATG  
GGAATTTTTTCCACACTTTTCTCTATTTTTCACTATTTTATATAGCATATAAAAAACGAGCTTTGGGTTTGTGATATT  
AACGCTTGGCATTGTGGGATTGGACTCAGTGATGTGATCATATGGGCACGCAGCATTCCAATTATCATTATATCCGCTA  
TAGTCTCTTACTCGTCATTAATAATCGTAACAATACAATTAATTAAGAATAAAACAAGTTTAAAGAAGTGAAGTAAAAC  
ACTTCTTATCTATAACCTAATCTCTTACTGAATTAGTTAAAGTTTCAGTATCGATATCTTTTACCGTATATGTTGGG  
GATACTATTTGATAGATTTATGATGATTCGGGACCAATTAATGCGAGGGATATTCCGGAGTACGTGAATTAGGGTA  
AAATGCAAGCGTTGGTTTATGATAAGCCGAGCGATATGAACAAGAGCTGTATCAACAGAAATGACAAAATCACTATACT  
TGGTCAACGCAACGGTATAAATAAACTCATCAAATGGTAGTGTTCGATTTCAAGTATTGGTATTGTCAATAAATCTTGC  
GGTAACCCGGTAAATATAATCCGATAATTTCAAAGTGTGTTTTCACTTCTTGATATAAACTTTTATTGCTCAAACGT  
AAGACGGCATATTTTTTTGACCTAATGGATTAATAATGACTATTCTTGTATCTCAATAAATCTTTTATTATCTT  
CAACATCTACTGGTAAATGCAAGTCGTAGTTGGTGGAAAATTTACCCCTACCATAAATATGCTTCAGTATTTCTATTGCT  
CGTGTACTCATATGTTCTTTTAAACATTCATCGTGGGATGGTAAAATGAATAGTAACGCTTATACCAATGATCAAACCC  
CAGAATGTAAGAATCTTTTAAACTTGATAATATTAAGCTATGCTTAAATGAGGGCATAGTTTCAAAGGGTCTAATACAA



TATCGAACTGTAATCCCGCAGATGCTTACATAGAGTAAGCATTTC AAGAAAACCGTTGATTCTTTAATACAGAACTCA  
AATATATTTTTATTATTAGAGAGAAAATCCCCACCCTTTCTATTTGTGAGAAGAGTTATTTTAACCCCTTACTATAAAG  
TTCACGATAAATCGAACTTAATACAATTAGATCACCAAGTTTATTATTATCATGAATAATAAGGCATGATTTAAGTTGTG  
CTGGATCTGTAATTTGATTATTTATTTTATTACGAAATAAAAAAGAAAGGAAATTAATCTTGATTTTGTTTATATAAAAT  
CTTTTCTTTTTGTGAAAAGTTCTTAAGGCGATTTTTATACCATATTATTTTAGTTTCAGGATGATTAATTAGCATAAGAA  
TCGGTTGAAGTTCTATATTGCATTTTTTTCTTGTCCATATCTTTTGATTCTTCTGCACTGATGCTTGAAGTTTAATAAA  
TGGAATTACATCGTAAGAAATAGCTGTATCATCTGATAAATTATAAATATTAATATCTTTTACATTATCATGCATAAAAC  
GAAAAAATGGCAATATTTTGAATAAATCCCTACTTAATTCCGAGGGCATGGGATTTTTATTCTCATCATAGAAAACGAGAA  
CAGCTACCCGTTAAATCAAGACCAGAACAATAATCCGCGCATACTTAAGTGAATATGCGATTTGAATTGCAGCAAAGGC  
AATAGTATGGCATGAGCAATAACCAAGACTAATGTCCTTGCAAAATCCAACCAGACGACCTTTTTTAGACAACGGTACAG  
AGATCAGCAGTTCTTTGTGAATCTGTCTCAAAATATTAATTTAATCTTCTTTATAAAACCACCTTTTTCCCGACGGTAA  
AAGGACCGTAATACGAGGCGATTCTGGAGGATATAAAGTTTATCTTCTTTGGAAGCGTGTTCATAAACGTCAACGTTTAC  
TATGGTATAACGACTTCTCTGGCTAAATTTATAAAATCATCACGACGCTGATGTAATAATCGACATCTGTAAGTACAT  
ATATAAAAGGAACGATATTACTTAAACAGATATTGCGCAGAACCATTGACAGCAATAATATCCTTTGTTCGTAATACT  
GACAAAGGTGTTTTTGGCATGTAGGGCCGAAAGAAAAATAAACATCATCAGATATTTTATTTTCAACTCAGTTTTTT  
AACATCTTTTTTGTCAATGTACTAATATTCTTCATGATAAACCTGTGAAATAAATAAATCCGCTTAAACTGTCCTGGT  
GAAGACATGTAATTGTGGGATTTTTTTAGCGCGCTGTTTTCCCTTTCAAACGCGCATAAAATTGCGCATTTTTTTACG  
ATATACTAAAAGATAATAGCCTAGATCTCTAATCTCATTTTTAATACCGTAATGACGCTCTAAGTCAATACGATCTTTG  
CTTTACGCTGCGCTGAAGCACGCTTTCCGGAGAGATCGATAATTCGAACCTCACCATTTTTTATAATGAAGTTACCACGA  
TGGGGTGCAGAAACCATGCCATGTTGATGTAAGGCATTAATTGATTGCTGAATTTATTTTTTAGCGCATCATCAAT  
ATCGGGCATATCACAACTCTATGCCATCAATATACTCGATGATCATGATATAAGTATGGACAAAACGTAAGGTTTTCC  
GTTCCAGCAATAAATAAAAGTCATTGAGTGTATTTAACCTTCATTTCTGACTTTTTGGGTTTGTCAAAAAGGCGTTCCG  
TAATAATCACCTTTTTAACAGAGACTTAAAGAAACGTTCTGTTACGCTTAACTTTGAGAGAAAAACCTTAAGAATCAATTT  
ACCGTAATCGGTATCAATAAGCATAAATTTGTATCATCAATAGAACGAAAAACCTTGATGATTTTATATTATAAGACA  
AGAAGTCATTTAATACATTGAGGTACTTTGAATTGTTTTCATCGTAAAAACAACCAAGTCTTTGATCTTGTCTTCTGA  
ATCATAATAAACAGTAAATGTTATTTACGGTAATATTTTCCGCAAAGATAACAGACTCCTGCTATAATTCCTGAGATA  
TAATGATGTTGCACTAAAAGATGTTTATATCTTTTTTAAATCAATAATTGATTTGCGATCTCGTGGAGAGTCATCTTT  
CCAGGGGAATTTTTCTAAAGCTATTTTATAGTATTTTACCGATGGATAAATTGCCATTTGTGCCACGGTTTAGTTGCAC  
CTGTATAATGAATAAGAAGAGTACTTTCTGTAATCAGCTTTTTATAGTTTTGATGTGTTTTGTCTTTAATTCATTTTTA  
ATTGTATAAATTTGATTGTAATCAGGAGCAAAAATAATGTCATCCCTTTAGTAAAGACATTCATAACATCCTGATCAGG  
GTATTTATAAACATTATCTTTACTCATAAGAATAGACAACGCTTTTTCTGTTAGTTTTGCGTCAGCCATTTTTTTAAGT  
CTAAATAAACGACACCGAATTAAGTACTGCCAAGTAATTCAGGATCAGACAACCTGGATACCGCCTTTTCTTGCAAT  
GGCTCAACATCTTTAACAACAGCAGCAACCGCTCCATTTAAACCCAGATGTAATAGTTGGTAATATCGCCTTTACAAC  
AACATCTGCATCAAGATAAAGCAAACGATCAAGCGTTAAACCCAATAATTGAAATGCAATAAACGGAAGTACATTGCTC  
TTGACCAGACTGTGTACAAGGCAAGCACTGGAGCTTATCAGTGTAAATCTATATAACGTGATTCTTAATTGGTTTTGC  
TCTGCAAGCTTTGCAATTTTTGAAAAAACCATATTATAAACATCAGCAATAATATAAAATCAAGATTAATATGTGCG  
ATTATTTAGGACAATTGATGTGATGGAACACCTACCCATCAAGATAATTAGCATCGACACCATAGGCAACATTTAAAC  
ATTCAGAAGTATTTATATTAGCTAGCCGAAAATCCCAGGCTTTAACTTTATCTATCTCTATGGCAGGAAATGAGTCCACA  
ATGCTACCCCTATATCATTACTTTATAGTTTCCAGTTTTAATGCTTTATCTTTTCAATAAAAAAAGATAGTTGCT  
AAATCTTTTTAGATATCTATGCTTTTTAAGCATATGTTTTGCGCTATATCTTAATTGATTGCTATTGTTCCGTTTTGCA  
ACGCCGATTTCTTCCATGGCGAAGCATTTTTTGCCTCCATAAAGCTTGTGATACAGGATAATCCCAGGCCAATCATGC  
CAGGGCTTGGTTGGCCGATATAATGGATAAAAATAGTATCGTTGGTTACTGGTTTTATAAAGCTTTCTTTGAGTTGATA  
ATTTAAGCTGAACTGGGTGTTATATTTAATATCAGCGAAAATAAGTTTATCCGCCAGCAACATATTTAACACATCCTGAT  
CAGGATGTGTTATTTTTTATTATTTCTGGCTCATTTAGCATTGCAATAGCTCGTGCAGAAAACCTGCTGAGCCGCCAT  
TGGGCAGTATTAATCAATAAAAAACCGGAGTTAAAGTAACCTTTAGCAATCCCGCAACACCTAACGAATGGGCGCTTT  
TTCCACCAGTCAGCTTGCCTTCTGTAACAACCATTGCGACTTTATCGTCAGGAAATGAGAAATTAATTAGTGGCTCAA  
TAGTCCCCTGACAAATGATATCTGCATCCAGATAAAGGACTTTAGGCGCTTATTAATAAAGTAATCTGCAATAACAAAA  
CGAAAATATATTGCATGAGTCCAATCTTAGTGCTAGGCAATGAGCGCAGTCGATCACCATTAATCAGATATATTTAAT  
TCTGGTTTTTACTGCAACGCCAGGGCATAAAATACTTACGATCATCATCACCAAAATAATCAGTAAAAATATGGAAC  
ACAATCGACTTCTTTCATTATATTTAATATTGAAGCAATCGAAATCCGCAACCAATAGAAAGTTTTTGTGAGTTCCA  
TAAGCGATGTCAGACAAAGATTTTTCTGTTTCTACTTTATGATCATAATCAATAACTGAATTAAGAACTCAGTTTCTG  
GAAAAACACCTGCTGCATTATTTCTCCGGGAAATAGCAGAAATAATTACCTTATGTAATCTATCGTAATACTTCTGATTG  
GTAAAATTCATCGATCGACGAGGAATTTTTTCTGTTCTGATATGAATTTACCTGCTATATATTTTATAGAAGAGTTA  
CAAAACCAGCAATATCTCCCGTTGATACAGATGGCCATTGACATCAGGTTGAATAATGTCAGCAGGCCCGGAGACACAA  
TCGGCACTGATACAAGGAATCCCCACGACAAGGCTTCAAGTAGGGTCATTGGGAAACCTTCAAAGATGACGTGAGCAA  
TAACGCACTCACTTTTTCAATATCTTGTCTGGACCAATTCAGGGATATTGTTGCCAACCATACCAGACAATTCGATCAT

CAATATTTAATTCTCTACCATAAGCCTGGCATTTCGAAATCGGAGCCATCACCCAATACATGGAGTTCCAGTTACCT  
TTCGCTTGATAAGCCATCAAGCAGGCTTTAACTCTTTCTGGCCTTCAAATTTCATACGCCAACATAAATAAACGT  
TGCCGTTTCACCTTCTCGGGCGGGGAATGACTGAGTCTTTAGTTTCGACGGGATTAATAAACATTTATCGTCGATT  
CTGCTACACCTCGATTAATCATTGCTGTTAATGCCAGAGCTGATTGCTAAATGATAGTCGGCACAGGTGATATATCA  
GCATGTTTTTGTGATCTAAAGAAAAATGTGGCCATGAAAATACTGGCATATCAATTCCTGATTTTTTACGTGCTTTTC  
GGCAAACAGGCAGGAGATCACATCAATACAAATAACGATATCTGGTTGGTACTCCTGAAGCCATTTACTTAGAGCATGAA  
TATGTTTCGCCGACGCAAAAAACCTAAACGAATATTGAAAAATGAACATGAGTATTTAATACCTCCAGCCATCCCTTA  
TCCATTTTGTCAATTACGACAAAAAGAAAAACATTTCACTTTGGATATGTTGTTGCCTGAAGGTAGTAATAACATCACGGAT  
GACAGTTTCCATGCCGCCAAATCCAGAAACAGCTTCGCCGATAAACGCTATTTTCATAGAACTCTCATTAAATTGAGTAA  
AACTCACTGTTTTAACGGTTTTATTTGTCTATAAAATCAGAAACAATCGTTGACATCATTTTATCTGGACTGAATTTATA  
TAAACTATCATAATCCATTGGTTTAAACAGATGAGTTAATAAAATACTCTAACTTATCCCAATCATCATGACCTATTATAA  
AAAAGCGAGATTAAGTATAGATTTCTGAACCAAATACATTTATATTATTAGTAATTAATTTTTTATTGAAAAATAGTGCC  
TCAAGTATACGAAGAGTCCAGCCAGATTGGTTTTCTTGGTTATATCAACAATTATATTAGCATTAAATGTTCTTCTAAT  
ATTCTCTTCATAAGATATTTGTTTTCAATCAAATACTTTGAAGTCGTAGATGATGCTTATCTTTGACAAACATTAATAA  
CTAGCTTACATCCTAGTGTGTTAATCTCTCGGCTAACTCATTAAATTTTGAAGACGCCCTTTATCACGACCAAGGAAA  
AAACATATTGGCTGGCTGTTATTTTTGTGAGATAAACTATAATTTCTAATTTTCATCCATTCCTATAGGAAAAAATGTTT  
TATTGCCTTGATCTTTTCAATTCCTATAAATCTATGCTCAAATCATATATAATATCGAAATAATTCCGCTTATCAAGAA  
TAAATCTTCGCCAACAGTATTTCTTAGAAGCAAACCTTTATGACAGTTAATTTTTTAAATATTTGTTTATTGATACCT  
TTATTAACAACACTGTCATTAATGATAATTATGTCATCTTTTTTAAATATCATTGAGGTAATGCTTGATGAATAATCGCCC  
CAGCCATGCATTATCCATCCCTATTTTTGATATTTTTTATTAATCCAGTTATATTTTTTGGTGTGTTATATTTTTTA  
TCTTGACTTTTTTTTTCAGTACTGAATCATTTTTAATTCATAATCTGCAACCAATTTATAAAAAAATAGTCATAATA  
AAGTTAGTTCAGTACATACTAATAAATATTTTTATAATCCTTTGCGTTGTGTTGCTCTTAATACGCTCGGCCTAAC  
GCTTGCCATGTTCAATAAATCTGTTCAAGAGACAATTTTTGCGTAAAGGCATCCCAAATAAACCTTCATAAATCGCC  
AGATATCTCTTTGCGTCAGGCCAATATTCATTGATGAGAAATATAAACCAATCAGGTCTTTATCGCGCCAGCGCGCGGT  
ACTTTTGCAGTATCTGTGCCGATGCAGATCGATAACTGAAATTTTTAATTCATCTTCCCGCCAGTAAATGGCAAATG  
AAGCAAAAAGTGGCAAATGAACAGTCGCGGTGATTTATCCCTGCAGTATGCATTTTACGCACCATAGTTGCTACACGTG  
CGATCAGCATAACGCTAACAGTATATCAGGCGGGTACTGCCCAATCGGCACAATAATCTCAAGGCTAATTGTGGGA  
GTGAGATCTTCGGTAATAATAAATGATGCGCGAGTTAATGGATTTAACCTTTTTCGCCAAACCAATGCCCTTCATTGT  
ATCAACGCCAACATCACTCAGGCGATGAATAGCGTGCCACTCTGTCTGCGCCAAAACGGGCATCCGCAATGAGAGTA  
GATTTTTTATAATCTCTTTAATGTGTCCTTGTGCCATTTAAGAAAATAGCTTTTCCCGGACAGTTCAAAGCGTAAT  
GTACGACGAGTCTCCAGTTCACGAAAGACCTCGCCGTTGAGTTTTTACCTCTGCAAAGCATCTTTACCACGCCAAAG  
TGTGGCAAGCGGCTCTTTAATTCAACCATCTAAACCACCTGTAATGATATCCGCGGCTTTTTCTGGCAAGCTATACAAA  
TCCTGAGTATCGGCATAATGGCGAGCATTCTCCGCCAGGCCATTCGCAATGGCGACTGAGTTAACGCTTTACGTAAAC  
TTCATTTAATTGTTCTGAGAGAAAGTTTCCAGCAGTACCGTTCCACAATGGCATCCGCAATATAATGCGCGTACCCAC  
ATACCGCTGTTGTTAAAACAGGTAACCCAGCAGTATCGCTTCTAGAAGAACGATACCCCGGGCTTCTGATAAGCGGGA  
TGAGTAATAAATCAGCGGCTGCCATTAATCTGACACATCATTGCGACCGGAGAAGAAATGCACATTGCTCCGACGCC  
GAGTTTTTCTGCCAGCGCTCAAATTTTCGCGGCTTATCCTGACCAACAACAATAAAAGCGTATTGTGACGTAATGATT  
CCGGTAACGATGCCAAAGCTCAATTGAGCGATCTACACCTTTACGGCCAAAATCTGATCCAACCTGCAGTAATAAGTTT  
TGTTGCTCTTTATGCCATTTTTCTGGCGATAAATTTACGGCTGTTTGGGATTTGCTCACTGATTTTCTGTCCGGATA  
AATACCGGGAGGAAGAATTTGAAAACGTTCAAGTTGAGTTTGAATGCTTCTGAAAATCGCGGATTTGCTTATCGGTC  
GCATCATAAGTTTCGTGATTTTACCCTGCTCGAAAGTCGCTCGCTCAAATGCGGCATAATGGCGATATCGTGATGTTAAA  
CGATATAAAAAACCTTTTTCTTGCCTAATTTCTCGCGTAACAACATCAGCGGCAAAATAAACATCCAGGCCAGGCAT  
CTTATTAACCAACAACGCGATCTGCGGGATGCTCTTTGAGATGATTTTGTACCCAGGCATAATATTCTGCATTGCGTC  
CATGGTTGGTATGGGACTTAACTGGCACCTGAATAAGCTCAAATGCTTTTCGGGCAATCGCCTTCCACGACTGTGTATAT  
ACCCGAACATGGTGGCCCGTGGCGCAACTGTTGATGCAATGCGCATAAAGTCACGTTGAAGCCACCAATGGAAAATA  
TTTATATAACAAAACGCCACGATCATAATTGTGCTTCTGTGAGTGAAGGGGCATCTTCTGGCAACAGCTTTTCCGT  
AGCGGCGATCACATCCTCCGCTGGGATAACAGAAAGATATTTTTTGTGCGGTCAAGTTCATGCCGGTCCGCATTTTCT  
GATAATTCCCCGCCAGAATTGAATAATATTCTCGTCCAGGGACGCCAGAATACGTGATCCGTTGCACCAATAGACTA  
ATGACTGGCGTTTTACTGCCGCTGCAATATGTCGGCGCAGAATCCACCAATAAAAAGCACTGCATGATCAATTA  
TGCACCCAGTTCAGGAAAACGTGTTTTACCTGCAAGGCCAGTAATGGGTTTTGTTTCGCAACCTCGTGAATCTCATCTA  
CACAAGCGAGATCATCTGCCGAGGGCCACAGGTTAGCACAACTGATAGCCTCGCTGTTGACGCGCATCGATAACCTTA  
GAAAATTTATCGTTATCCCAACACTTAAATATCTGACGCGCTGTGCGTTGGATGACAACATAATGATCTTTTACGCCAG  
GGCATTAATTCGCCGCGATCTTCTTCCAGCAATCTTCGGCGTAACTCATTGTTGTGCGGTGTAGAAATCGGTAATAC  
CTAATGGCTCAAGGACCGATAAATTACGCTCAACAATATGTGTACCGGTGATTGGCGCTAAGTGTGTGAAGCTTTTTTTC  
CAAATACCATGCTGCCGATGACCATAAAGTTGCGATATTTTATCCGTGCGAGTAAACAACGTACCAGCAGCGCCACCAT  
CCACTGATCCGTAAGATTAATGACCAGGTCATAATTATTCGACGCGAGTTTTTATCAACGAAAGCACATTTTTAATTT

TATCGAAAGTCCCGCACCTTTATTGCTTATCCCATAGAGCGCATTAAATTTCCGGGTTTTTCAGACAAAATAGGGATGGTG  
TCCTGATAAAGCAGCATATCGATTTTTGCATCAGGATAATTCTGCTTGAGCGTACTGATGACAGGAGTAGTTAATAACAT  
ATCCCCATGATATCGCATCTTTATGACCAGGATTTTTCGAAATGGCTTTTCCACTAGCGACTCTTTTGTGTGATTGTCTG  
GTTAAGTTAAGCAGAAAAAAGCAGCTACCGCCCCAGGCTCAACAGCTACCTGAATACTGATAACGCACCTTACTTTGACG  
TGCTAGTGTATCATTTCTTCGAGCAATCCGACCCGAATGATTTTTATACACAAAATATACTTTAATCATAAAAATCAA  
ATAGATAAAAAATAGCATTTTCGATAATGTCAGTACGGCCTATGTAGATTTGAAAATGGGGCCGAGTTTCAATGAATCGCA  
TAAAAATACAAAAAATGAAGATGTAGCGGCAGATCAGACCAAATGAAAGCTATTTAAGTCAAAAACGGGAAAAGTAAT  
GGTAAAGCCACAGCTAAATACATAGAATCCCCAGCAGATCCATAAGTCAGCTATTTACTATGCTCGAATTGCTTTACACC  
GCCCTTCTCTACCTTATTAGCCGCTGATCTGGATACGGCTCTGGGTGCGCGGACGTAAGGCTCCGGCCTATCGAAAACG  
CTGGGGTGAACGTTACGGTTTTTACCGCCATCCGCTAAAACCAGGCGGCATTATGCTGCACTCCGCTCCTCGTGGTGA  
CTCTGGCGGCAATCCCGTTGGTGGCGCGCTGCGTCATCGTTATCCTGATTTACCGATTACCGTAACAACCATGACGCCA  
ACCGGTTCCGAGCGCGTACAATCGGCTTTCGGGAAGGATGTTGAGCAGTTTTATCTGCCGTATGATCTGCCCGATGCACT  
CAACCGTTTCTGAATAAAGTCGACCTAAACTGGTGTGATTATGAAAACCGAATGATGCGCTAACCTGATTGCGGGC  
TACATAAACGTAATAATCCGCTGGTGCATCGCTAACGCGGACTCTCTGCCGCTCGGCCGAGTTATGCCAAAACGGGT  
AAATTCGTCCGTCGTTGCTGCGTATTACGCTGATTGCTGCGCAAAAATGAAGAAGATGGTGCACGTTTTGTGGCGCT  
GGCGCAAAAAAATACATCAGTGCACCGTTACCGGTAGCCTGAAATTCGATATTTCTGTAACGCCGAGTTGGCTGCTAAAG  
CCGTGACGCTGCGCCGCGTGGGCACACCCGCGGTATGGATTGCCACAGCACTCAGGAAGGCGAAGAGAGTGTG  
GTGATCGCCGCACATCAGGCATTGTTACAGCAATTCGCAATTTATTGCTCATCCTGGTACCCCGTCATCCGGAACGCTT  
CCCGGATGCGATTAACCTTGTCCGCCAGGCTGGACTAAGCTATATCACACGCTCTTCAGGGGAAGTCCCTCCACCAGCA  
CGCAGGTTGTGGTTGGCGATACGATGGCGAGTTGATGTTACTGTATGGCATTGCCGATCTCGCCTTTGTTGGCGTTCA  
CTGGTTGAACGTGGTGGCATAATCCGCTGGAAGCTGCCGCACACGCTATTCCGGTATTGATGGGGCCGCACTTTTAA  
CTTTAAAGACATTTGCGCGCGGCTGGAGCAGGCAAGCGGGCTGATTACCGTTACCGATGCCACTACGCTTGCAAAAGAGG  
TTTCTCTTTACTACCGACCGGATTACCGTAGTTTCTATGGCCGTCATGCCGTTGAAGTACTGTATCAAAACAGGGC  
GCGCTACAGCGTCTGCTTCAACTGCTGGAACCTTACCTGCCACCAGAAACGCATTGAGGTTGTATGCAAAAACGGGCGA  
TTTATCCGGTACTTTGATCCATTACCAATGGTCATATCGATATCGTGACGCGGCCACGCAGATGTTGATCACGTT  
ATCTGGCGATTGCCGCCAGCCCAGTAAAAACCGATGTTTACCCTGGAAGAGCGTGTGGCACTGGCACAGCAGGCAAC  
CGCGCATCTGGGAACGTGGAAGTGGTGGGTTTAGTGATTTAATGGCGAATTCGCCCGTAATCAACACGCTACGGTGC  
TGATTCTGGCCTGCGTGGCGTGGCAGATTTTGAATATGAAATGCAGCTGGCGCATATGAATGCCACTTAATGCCGGAA  
CTGGAAAGTGTGTTTTCTGATGCCGTGCAAAAGAGTGGTGGTTTATCTCTTCATCGTTGGTGAAGAGGTGGCGGCCATCA  
GGCGATGTACCCATTTCTGCGGAGAATGTCCATCAGGCGCTGATGGCGAAGTTAGCGTAGCGTTTTATGCCGGATGG  
TATGCCATCCGGCGCGCATGAATTAATCTGGCACTGCCGACAATAAAACGTTGCCCGTGCAGTATTTAGTCGCCACA  
ATCGGCGTACCGCACACCCGACACGGCTCACTTTTCGCCGTAACCTGCAATTCCTGAGCGAAATAGCCCGGTTTACC  
ATCACTTTGCAGAAAATCTTTCAGCGTTGTACCACCTGCTCAATCGAACGCAGCAACACCGCTTTAATCACCCGAGCTA  
ACAATTCACACTCTGCCAGCGACAGTGTGACGCCAGCCGATCCGGATGGATCCCCGCCGCAACAGTATTGCTGGCA  
TAGATATCCCTACCCCTACCACAGCTTGTATCCATCAGCCACGGTTAATCGCCGTTTTTTTTCTTCGCGCACTTCTG  
ATGAGATACTCACCATTGAAATCGTCGTAAGCGGCTCCGGTCCAAGATGGTCAGCACATTATGCCCTTCAGCTCTT  
TGGTCCACAGCCAGGCACCAAGCGGCGCGGATCGGTGTAGCGCAGCACTTTGCCGTTGCTCATACCAAATCCACATGG  
TCATGTTTTTACGGGGGAAGTTCTTCTGGAAGGATGCGCAGGCTGCCAGACATCCCTAAATGAATGATAATCCAGCCCTC  
AGGACGCTCCAGCAGCAGATTTTAGCCCGCGCTGCACGCTAAGCACTGGTTGGTTCGTTAAACGGTAGATCTCTTCTG  
AAACCGCCAGCGCAAGCTCCGTTGCCACCACTGCATGAAGAATGGTTGCACCAACAGATGCGGTTCTATGCCCGG  
CGCTGGTTTTCAACTTCGGGTAATTCAGGCATAGCATCTCCAGGAATGAACAGATGCAGTCAATATGGGGCAAGCAGAT  
AACAAAAAACCCCGGAGCGAGTTTTTTGTTACATCAAAGCGAGAATTTTGGATTTTCGCTTTTTGTAGATCAG  
TGCTGGCGAACAACTGGATCGAATTTTTTTCAGTTCCAGTTTTTCCGGCTTAGTACGTTTGTCTTCGTAGTGGTATAGAA  
GTGACCAGTACCAGCAGAAGAAACAGCTTGATTTTCTCACGAATACCTTTAGCCATGATTTATTTCTCTAAGTACTTA  
GTACTTTTTCGCCACGGGCACGCAGTTACGCCAGAATGTATCGATGCCTTTTTTATCGATTACACGCATACCTTTAGCAG  
ATACGCGCAGGGTGACAAAACGCTTCTCGCTCTCAACCCAGAAACGGTGAGAGTGACAGTTCCGGCAGGAAACGGCGTTA  
GTCGCGTTTCACTGCGTGGGAACGTTGTTACCGGTACCGGACGCTTCCAGTAACTTGGCAGACTCGGGACATGTCTAT  
TCTCAAAAATCAAATTAGCTCGAGCTTCGATGGGGTATTGGCGCTCTGTCAGGCTTTACAGCCGGTTCATCGAGTTC  
TATGTGAATCTCGATTGCCAGGCCAAATGCCAAACCGAGATTCTCAAAGTGGCGTAGTATACGCTGACTCAGCGAT  
GTGCTCAAGTCCGAACAGACAAAGATCCGAAGGATCGCGCATAGCGGGTTAAATCCAGCCGCTTCGGCAAAAGAAAC  
ATACTCTCCACGCCAATCAGGATATGGTCGAGCACGCTAAATCCATGAATGACAATCTTTATTATCCGTTTCAAGTAA  
TGAGTTTATCCGTTTACTGGGTTTACGACAACCCGAAGGTTGATATGTGCAAGGATCAGCGCCGAGGCGTTTATTTTT  
ATCGCTTCGGGATAATTTCCCGAGGATGGACTTCAACATGGTTTACGCTGCCGAAAAAAGACGCCTATGCGTTAATAC  
CCGTGTTGGGAGTCGAGAAAGATCACCAATAAGATCTCCCGCTCTCACCCGTGAGCTGGCTTTGTAATAAATCCCTCG  
TCATCTCCGGGCTGAGTAAAGGCTTTCTTACGCATCCGACGTTGTAGTAACGCCGCGCCAGTTTACGCAATCCCTTT  
AACTGGGCAAAATTCGCCACGCCAATTCATGAACGCCACTAAATGTTTATTCAGAGGTTAAACAGCCATAAAGAGA

GCCGAAATTCTCCAGCATCTCTTTTCCAGGGTTAATACATCTTTACCGCGGTTCCGGTACGCAGAAATAGCGCCAGCA  
GCTCGACATCCGTTAAGGCGCTAATACCAAACCTTACGATTTTTTCGCGCGGCATCAACAGCTGTGAATTGTTTTCCAC  
TTACCTCCTTTGTGGTCTCGCATCCTGTATAGCCGTTTCGTTAAATCGACGCCAGTTTTCAATCCTGGAAAGCGCC  
TCGCAAAGTGAATCTCAGGTGAAGGCACGACAACAAAAGTATTGTGATAAAATCGCCAACCTTCTGGTGTACCCCTACAGG  
AAAAATCATCATGAGCCTGGCCGGTAAAAAATCGTCTCGCGGTTAGCGGCGGTATTGCTGCCTATAAAAACCCCTGAAC  
TGGTGCCTCGTTTGGCGGATCGCGGGGCCAGCTCCGCGTAGCCATGACCGAAGCGGCAAAAAGCCTTTATCACCCCACTT  
AGCTTGACGGCGTTTCTGGTTATCCCGTTTCCGACAGTCTGCTGGACCCGGCAGCCGAAGCCGCTATGGGCCATATTGA  
GCTGGGTAAATGGGCTGATTTAGTGATTCTCGCCCTGCCACGGCAGATTTGATTGCCCGTGTGCTGCCGGAATGGCGA  
ATGACCTGGTATCGACGATTTGTCTGGCTACACCTGCGCCTGTAGCCGTGCTCCCCGCCATGAACCAGCAGATGTACCGT  
GCCGCTGCCACGCAGCATAATTTAGAGGTGCTTGTCTCCCGTGGTTTGTCTATCTGGGGCCAGACAGTGGCAGTCAGGC  
TTGTGGTGATATCGGTCTGGGCGAATGCTCGATCCGTTAACCATTGTGGATATGGCGGTAGCGCATTTTTCGCCGTCA  
ACGACCTGAAACATCTGAACATTATGATTACCGCCGGCCGACGCGTGAACCGTCTGATCCGGTGCCTTATCTCTAAT  
CACAGCTCCGGCAAGATGGGTTTTGCTATCGCCGCCCGCTGCCCGTCTGGCGCGAACGTCACGCTGGTATCAGGTCC  
GGTTTCACTACCGACGCCACCGTTTGTAAACGTGTTGATGTATGACCGCGCTGAAAATGGAAGCCCGCTGAATGCTT  
CTGTACAGCAGCAAAATTTTTATCGGCTGCGCCCGGTGGCGGATTATCGCGCAGCTACCGTGGCCAGAGAAAATC  
AAAAAGCAGGCCACGCAGGTGATGAATTAACAATAAAAATGGTTAAAAACCCGATATCGTGCAGGCGTTGCCGCACT  
AAAAGACCATCGACCCTACGTCGTTGGATTTGCCCGGAAACAATAATGTGGAAGAATACGCCCGGCAAAAACGTATCC  
GTAAAAACCTTGATCTGATCTGCGCGAACGATGTTTCCAGCCAACTCAAGGATTTAACAGCGACAACAACGCATTACAC  
CTTTTCTGGCAGGACGGAGATAAAGTCTTACCGCTTGGAGCAGGCTCCTTGGCAATTATTACTCGACGAGATCGT  
GACCCGTTATGATGAAAAAATCGACGTTAAGATTCTGGACCCGCGCGTTGGGAAGGAATTTCCGCTCCCGACTTATGCC  
ACCTCTGGCTCTGCCGACTTGACCTGCGTGCCTGTCTCAACGACGCCGTAGAAGTGGCTCCGGGTGACACTACGCTGGT  
TCCGACCGGGTGGCGATTATATTGCCGATCCTTCACTGGCGCAATGATGCTGCCGCGTCCGGATTGGGACATAAGC  
ACGGTATCGTCTTGGTAACCTGGTAGGATTGATCGATTCTGACTATCAGGGCCAGTTGATGATTTCCGTGTGGAACCGT  
GGTACGACAGCTTACCATTCAACCTGGCGAACGCATCGCCAGATGATTTTTGTTCCGGTAGTACAGGCTGAATTTAA  
TCTGGTGAAGATTTGACGCCACCGACCGGTGAAGCGGCTTTGGTCACTCTGGTCTGAGTAACACATACGCATCC  
GAATAACGTCATAACATAGCCGAAACATTTGTTTGGGTGATAGCGTGGTCCGCTGGCAAGTCTTATTTTCCAGG  
GGATTTTTGTAACATGGCAGAAAAACAACTGCGAAAAGGAACCGTCCGAGGAAATACTTCACTCTGCGCTGATGC  
TGGAATCCAGCGATGGAAGCAACGATCACGACGGCAAACTGGCCGCTCTGTCGGCGTTCCGAAGCGGCACTGTAT  
CGCCACTTCCCGAGTAAGACCCGCATGTTGATAGCCTGATTGATTTATCGAAGATAGCCTGATTACTCGCATCAACCT  
GATTTCTGAAAGATGAGAAAGACACCACAGCGCCTGCGTCTGATTGTGTTGCTGCTTCTCGGTTTTGGTGAAGCTAATC  
CTGGCCTGACCCGCATCCTCACTGGTCAATGCGCTAATGTTGAACAGGATCGCCTGCAAGGGCGCATCAACCAGCTGTT  
GAGCGTATTGAAGCGCAGCTGCGCCAGGTATTGCGTGAAGAGAAATGCGTGAGGGTGAAGGTTACACCACCGATGAAAC  
CCTGCTGGCAAGCCAGATCCTGGCCTTCTGTGAAGTATGCTGTCACGTTTTGTCCGACGGAATTTAAATACCGCCCGA  
CGGATGATTTTACGCGCCGCTGGCCGTAATTGCGGCACAGTTGCAGTAATATGACGCCGGATGACTTTTTCATCCGGCGA  
GTTTTCTTAAACGCCAACTCTTCCGATAGGCCTTAAACCGCCGAGATGTTCCGCCATTTCCGGCTTCTTCCAGGT  
AAGCAATCAGGCTTTTCCAGGTGATGATAGAGATCACTTTGCAGTTGTAATCACGCTCAATTCCTGAATCGCCGAAATC  
TCGCCGCGCCGCTTCTGACGATCGAGCGAAATCAACACGCCAGCAAGCGTCCGCCATTGGCCTGAATAATCTCCAT  
CGACTCGGAAATCGCCGTTCCGGCGGTGATCACATCATCTACCAGATTACGCGTCTTGTAAACGCGCTACCAACCAGAT  
TGCCGCTTACCAGTGGTCTTTGCTTCTTTCGGTTAAAGCAGTACGGCAGTCCAGGTGATGCTCCGCCAGTGCC  
ACAGCGGTTGTGGTGAACCTGGGATCCCTTTGTAAGCAGGGCCAAACAGCAGATCGAATCAATGCCGGAATCCACCAA  
CGCTTTCAGCGTAAAAACGGCCTAACAGTCCAGATCGCGCCCGTATTAACAGCCCGGCTTGAAGAAATAGGGGCTTT  
TGCGCCCGATTTTACGCGTAAACTCGCCAACTTTAACACCTGCTTGTAAAGCGAAATTAATAAACTGGCGCTGATAT  
GGTTTTCATGCCTTCTGCTCCTCATCTTACTTTTCTACAGACAAAAAAGGCGACTCATCAGTCGCCTTAAAAATCAGTTT  
GCCAGCGCCGCTTCTGCGTCTGCTACAATGGATTGATTCCCCTCGGGCCAGAGCCAACAAGATGAGTAGCTTTCATGG  
GTGAACGGCTCGCCTTCTGCGTCCCCTGCACTTCAATGATGCGCCGCTTTCGGTCACTACTACGTTATGTGCGTCTC  
TGCGGCAGAGTCTTCAACGATTTCCAGATCGAAACCGCTTCCGCGTTCACAATTCCGACAGAACTGCGGCTACCATCC  
CTTTTTCATCGGATTGGTTTTTCCAGCTTCCGTTTTTCCACCAGCTTCTGTAGCGCATCTACCAGCGCCACGCAGGCCACCCGTA  
ATCGACGCGGTACGCGTCCACCATCAGCCTGAAGCACGTGCGAGTCCAGCGTAATGGTGAATCACCAGCGCTTTCAA  
ATCTACTGCCGCGGAAGAGCACGGGCGATCAGACGCTGGATTTCCATTGTGCGTCCACCCTGCTTACCTTTCCGCCGTT  
CACGAGCGTTACGGGTGTGGTGAACGTTGGCAGCATGCCGACTCTGCGGTGATCCAGCCCTGGCCCTGACCTTTCCAGG  
AAGCGGGCACGCTTCTCAATAGAGCGGTACACAACACTTTGGTATCGCCAAATTCGACCAGCACCGAGCCTTCTGC  
ATGTTTTGTATAGTTACGAGTACGGGTAACGGGACGCACCTGATTATTGCTACGGCCTGCTGGACGCATATTGAAATCTC  
CGCTTGAACAAATGTGGTGCGCATTATACGGACTTCCGGCGGTTATTCTATCCTGACAAGGCATCGATGGCTATAA  
TCCTTCCACCTCTCTTTTATAAACAGGAACGTCTATGATCCGAGTATGACCGCTACGCCCGGCGTGAATCAAGGGT  
GAATGGGGGAGCGAACCTGGGAAATGCGCTCGGTAACCAGCGTTATCTGGAAACTTACTTTCTGCTGCCGGAGCAGTT  
CCGTAGCCTTGAACTGTGCTTCCGAGCGTATTGTTTCTGCGCTGACGCGCGGTAAGTGAATGTACCCTGCGCTATG

AGCCAGATGTTAGCGCGCAAGGTGAGCTGATCCTCAACGAAAACTGGCTAACAGCTGGTAACTGCCGCGAACTGGGTA  
AAAAATGCAGAGTGACGAAGGGGAAATCAACCCGGTTGATATTCTACGCTGGCCGGGCGTGATGGCAGCCCAGGAGCAGGA  
TCTTGACGCCATTGCCGCTGAAATTCTCGCGGCGCTGGATGGTACGCTGGACGACTTTATTGTGCGCGCGAAACCGAAG  
GTCAGGCACTGAAAGCATTGATCGAGCAGCGTCTGGAAGGCGTACCGCCGAAGTGGTCAAAGTCCGCTCCCATATGCCG  
GAAATCCTGCAATGGCAGCGTGAGCGTCTGGTCGCGAAGCTGGAAGATGCTCAGGTGCAACTGGAAAACAACCGTCTGGA  
GCAGGAACTGGTTCTGCTGGCACAACGAATTGACGTTGCCGAAGAAGCTGGATCGCCTCGAAGCGCATGTCAAAGAGACCT  
ACAACATTCTGAAGAAAAAGAAGCGGTTGGTCGTCGCTGGATTTTATGATGCAGGAGTTCAACCGCGAGTCAACACT  
CTTGGCTCGAAGTCTATCAATGCCGAAGTGACAACTCCGCCATCGAGCTGAAAGTGTGATTGAGCAGATGCGCGAGCA  
GATTCAGAACATCGAATAACTCGTAACGCCAATTCTTACTTTCCGCCTTCAAAAATGCCGCCACTCAAACAGAGCGGCA  
TTTTTTCTCCCGCAACATTCAATTCTGTTTTGCGTGCCTGCTCCAGATTTTGGCATGTTTTTTGCCAGCACACTGAG  
AACGTGAGATACTCAAACTGTATATAAATACAGTTACAGATTTACTTTCTTGAATTGATATCACATGGAGTGGGCAA  
TGAACGAACATCATCAACCTTTTGAAGAGATAAACTGATTAATGCAAACGGAGCAGAACAATGGTCAGCAAGACAACCT  
GGGAAACTACTGGGTTATTCAGAGTATCGTCACTTTATACCTGTATTAACGCGCGCCAAAGAAGCCTGTGAGAACAGTGG  
TCACACAATTGATGACCATTTCGAGGAGATCCTCGATATGGTCAAATGGCTCAAATGCCAAAAGAGCATTAAAAGACA  
TCGTAATCTCCCGCTATGCCTGTTACCTGGTAGTACAAAACGGCACCCTGCGAAACCGGTATTGCGGCGAGGCGAGCT  
TATTTGCTATCCAGACCCGACGGCAGGAGCTTGTGACGATGAAGCATTAAAGCAACTTCGTGAAGACAAAAGCGTCT  
GTTTCTGAGAAATGAGTTGAAAGAACAATAACAAACAATTGGTTGAGGCAGCACAGCAAGCTGGGGTAGCGACAGCTACTG  
ATTTCCGCATATTTTCAAGATCATGGTTACCAGGGGCTGTATGGTGGATTAGATCAGAAAGCTATTCATCAGCGGAAGGGG  
CTGAAAAAGAATCAGAAGATCCTGGATCATATGGGTTCAACAGAAGCTGGCGGCTAATCTTTTTCGAGCTACCCAAACAGA  
AGAAAACTCAAGCGGGATGGCGTGAATTCAAAACAGCAAGCAAAACACCACACTTTGACGTGGGTGCGAAGGTGAGGC  
AAACCATTGAGAACTTGGCGGAACCATGCCTGAGGAGTTGCCGACCCCGCAGGTCAGCATCAAGCAGTTGGAAAACAGT  
GTAAAAATTACAGAGAAGAAATAGCAGAACTAAAACTCTTTTTGTTGATTGAGACACCCGATGCGTAAGCCAAGTCC  
AGGTGACGTGAACACAATGGCTAAATATTGCACCTTTCTTTCCCTCAGTTTTAACCTATTTTTCTTATGCATTTT  
TCAGACAAGAAGTCAAGAATGCATCTCTGCTACAGAAAATAGCGATTTACATAACTACAAGTTATCAATTTCCCTC  
CCCTAAAAAATCTCAATCGTGACAATGCGCACAATCGCTACCCTGCCAGACAGATTTTTAGGGAGAGAACCATGCTGT  
TACACATTTTGTATTTGGTTGGCATTACTGCCGAAGCCATGACGGGGGCGTGGCGGCCGACGACGGCGCATGGATACA  
TTTGGCGTAATTATTATTGCGACCGCCACCAGCAATTGGCGGAGGGTCAAGTGCAGATTTCTGCTGGGCCACTATCCGCT  
CGGCTGGGTCAAACACCCGGAATATGTGATTATCGTGCCTACCGCCGAGTACTCACCCTATCGTTGCTCCTGTAATGC  
CTTACCTGCGCAAAGTGTCTGTTGCTCGATGCGCTCGGACTGTTGGTCTTTTCTATCATCGGGGCACAGGTTGCACTG  
GATATGGGGCACGGCCAAATTATTGCCGTTGTCGCGCGGTAACCACCGGCGTGTGGCGGCGTTTTGCGCGATATGTT  
CTGTAACGATATCCACTGGTATTCCAGAAAGAGTTGTATGCCGTTGCTCATTGCTCCGCCGTGCTGTACATCGCGC  
TGCAACTATGTTTCTAACCATGATGTGGTAATTATCTCCACCCTGGTATTCGGCTTTTTTGGCCGCTTACTGGCGCTA  
CGCCTTAAGCTGGGATTACCGGTCTTTTACTACAGCCACGAAGGACACTAAGTTCAAACCTGTGATCTGCTGGGCAGC  
CAGCCAAGTCCCAGCTTCTTATTGCGCATTTTCTTCCATTAATAACCTGTCTGGCGCGTCCCGATCCAGTCCCCG  
GCAGCTGCTGCCAGAAGTCTCCGTGCTAAATAAAGTTGCGACCAGGACCGTTCATCACTGGCATTAAAGCGCCGCCGG  
GTTAGCGGTATTTCCATTGCCATCACCAGCGAGTAAAAGGCTGCTTACGAGCCAGATTAAGTATGATGCCATAGCTGCGC  
ACTTTTACTTTTTCGCGATCCCGGCGTGTCTGTAATTGCTCTGGCGTTAATAAAAGCCAGGAAAAGATATGTTCAAAGC  
GATGAGTCTGATGCAGCGCGCACAACCGGCTCACAATGCCATCCAGCCAAAGAACCTGTTTTGCCCCAGCCAGACT  
AAGCGTGAATGAATCTTCTGACAAACATCAGAAGCAAAGTACGAGTCAACGAGTTAAAGCGGTTTTCTGGCGGTTG  
CGTTTTGTACGTTCTGACCGGCCACACCATCATCAATGCGAGGAATACCCTGACCGGCAAGGTTGACGAGAATCT  
GATCACAAGGCGCAATATCCCACTCCTGCCAGCGCTGACGGAACCAATATCACCCGCTGGACTTTTTTATCATCCAGC  
ATGACAGGTGCGAGTGACGCAACCACCGATATTTTACCCTCTTACCACCGCAAACCTGAATTGCCTTCACTTCGGCAAC  
CTGAGCTACAGTTGATATTTCCAGGCCACCAGCCACTCTGCCTGGCCCGTAGCCAATGGCGGGATTCTGGCTTTTTCG  
CCGCTCGTACAACCTACGCCATCGGTGACGAAGGGTAATTCCGCTTTCCACCCTCATTGCGTACGCGCGCAACTTCATCA  
GCATTTTTTACCAGCAGGGTATACGTCTGCGTTAGAGTAAAACCTGCGGTAGCCAGCTTTTTAAACGATCAGACATTA  
CTGCGGTCCATCCGGCCATGCCAGACAAAACGCCAGAGAATTGAGCGTGTGCTATCGTCTGGCGCATCATCAAGC  
CAGCAACTTTTTCGCGGGCATTATTCCCCCATTTGTTGTTGGATATGCCCTCGCGCTGGAGAAATATTTCCCCCTGA  
AGCGTACTGTTGGCTAAAGGCCGCTAACGGTTTGGCGCACAGCGGAAATTAAGCTAATTTCTGCGTCCAGTCTCGCC  
TTTACGGCCATTACCGGACTGATTGCTTTGTTGAGTTTCCGCTCCGATAAACAGGGTTACCGCAACGCCATCAACTT  
TTGGCTGACCCAAAGATCGCTACGTTCTCGCATCCACAGACTTAATGCGTTTTTATCCACCATTTTGCGTACACCCGTA  
TGGGCAACCGGATGCATAACCGCACCATTAAAGGCGGCATCATCAGTCCGCGGGCTCGTCCCAAAGCAGCGTTGCCA  
CTGCGTAAGACGGGCGTTAACTGATCGTAAACACCGTCTTCCACCTCACTTTTCTTCTTCCAGTAGTCATCGTCCC  
ACTGTTTTATTTGCTGTTGACGGCGGAAATTTCTTCTGTGCTCTGGCTGGCGACCAGGCGGACAGACCGCCACACA  
GATGATTGCCAGCACAAGATACCTATTAATATCGCCATCCATACTTTTATCATCACCTCCGCTGTAGATAGTCAGGCAGA  
TATAACAACGTGATGAAAGCAAAGCCGAGTGGCAAAAACGGAGTCTGCGAGGACGCTTCTGAAAATCGTCTTTATTGAG  
TGAATGACAGGCAAATGCGGAAGCAGCTACGCAAAACGCAACAACCTTTGCGCAAAAAGTGTGAGCAAGGGCTACGTACA

TGGCCGCGCCGTGATAATAAGCTCGTATGTAGGCTTTATTTTCGCTAATCACATACGAAAGATACTCATGGCTCAAGGCA  
CGCTTTATATTGTTTCTGCCCCAGTGGCGGGTAAATCCAGCCTGATTCAGGCTTTATTAACCAACCGTTGTAT  
GACACCCAGGTTTCTGTTTACACACCACACGCCAACCGCTCCTGGTGAAGTCCACGGTGAACATTATTTCTTTGTTAA  
TCATGATGAATTTAAAGAAATGATTAGCAGAGATGCGTTCTCGAACACGCAGAAGTTTTTGGTAATTACTATGGCACTT  
CGCGTGAGGCCATTGAGCAAGTACTGGCGACCGGTGTCGATGTTTTCTCGATATCGACTGGCAGGGCGCGCAGCAAAT  
CGCCAGAAGATGCCGCACGCGCGGAGTATCTTTATTTACCGCCGTCAAAATTGAACTGGACCGCGTCTACGCGGTG  
CGGTGAGGACAGCGAAGAGGTCATTGCAAAGCGTATGGCGCAAGCTGTTGCAGAAATGAGCCATTACGCCGAATATGATT  
ATCTGATTGTGAATGATGACTTCGATACCGGTTGACCGATTTGAAGACCATTATTCGCGCCGAACGTCTGCGCATGAGC  
CGCCAAAAGCAGCGTCATGACGCTTTAATCAGCAAATTGTTGGCAGACTGAACCTGATTTCACTATCATGCCAGTCATT  
TCTTCACTGTGGAGCTTTTAAAGTATGGCAGCGTAACTGTTGAGGACGCTGTAGAGAAAATGGTAACCGTTTTGACC  
TGGTACTGGTCGCGCGCGTTCGCGCTCGTCAAGTGCAGGTAGGCGGAAAGGATCCGCTGGTACCGGAAGAAAACGATAAA  
ACCACTGTAATCGCGCTGCGGAAAATCGAAGAAGTCTGATCAACAACAGATCCTCGACGTTGCGAACGCCAGGAACA  
GCAAGAGCAGGAAGCCGCTGAATTACAAGCGTTACCGCTATTGCTGAAGGTCGTCGTTAATCACAAGCGGGTTCGCCCT  
TGATCTGTTTGAAGCCTGAATCAACTGATTCAAACCTACCTGCCGGAAGACCAAATCAAGCGTCTGCGGCAGGCGTAT  
CTCGTTGACGATGCTCAGGAGGGCAAACACGTTCAAGCGGTGAACCTATATCACGCACCCGGTAGCGGTTGCCCTG  
CATTCTGGCCGAGATGAAACTCGACTATGAAACGCTGATGGCGGCGTCTGTCATGACGTGATTGAAGTACTCCGCCA  
CCTACCAGGATATGGAACAGCTTTTTGGTAAAAGCGTTCGCGAGCTGGTAGAGGGGTGTCGAAACTTGATAAACTCAAG  
TTCCGCGATAAGAAAAGAGCGCAGGCCGAAAACCTTTGCAAGATGATTATGGCGATGGTGCAGGATATCCGCGTCATCCT  
CATCAAACCTGCCGACCGTACCCACAACATGCGCACGCTGGGCTCACTTCGCCCGGACAAACGTGCGCGCATCGCCCGT  
AAACTCTCGAAATTTATAGCCCGTGGCGCACCGTTAGGTATCCACCACATTAACCAACCGAAGTCTGAAAGAGCTGGGTTT  
GAGGCGCTGTATCCCAACCGTTATCGCGTAATCAAAGAAGTGGTGAAGCGCGCGCGGCAACCGTAAAGAGATGATCCA  
GAAGATTCTTTCTGAAATCGAAGGGCGTTGCGAAGCGGGAATACCGTCCGCGTCAAGTGGTGCAGGAGATCTTT  
ATTCGATTTACTGAAAATGGTGTCAAAGAGCAGCGTTTTCACTCGATCATGGACATCTACGCTTTCCGCGTATCGTC  
AATGATTCTGACACCTGTTATCGCGTGTGGCCAGATGCACAGCCTGTACAAGCCGCGTCCGGGCGCGTGAAGACTA  
TATCGCCATTCAAAGCGAACGGCTATCAGTCTTGCACACCTCGATGATCGGCCGACGGTGTGCCGGTTGAGTCC  
AGATCCGTACCGAAGATATGGACCAGATGGCGGAGATGGGTGTTGCCGCGACTGGGCTTATAAAGAGCAGGCGAAACC  
AGTACTACCGCACAATCCGCGCCAGCGCTGGATGCAAAGCCTGCTGGAGCTGCAACAGAGCGCCGGTAGTTCTGTTGA  
ATTTATCGAGAGCGTTAAATCCGATCTTCCCGGATGAGATTTACGTTTTACACCGGAAGGGCGCATTGTCGAGCTGC  
CTGCCGGTGAACGCCCGTGCAGTTTCGCTTATGCAAGTGCATACCGATATCGGTATGCCTGCGTGGGCGCAGCGTTGAC  
CGCCAGCCTTACCCGCTGTGCGAGCCGCTTACCAGCGTCAAACCGTTGAAATCATTACCGCTCCGGGCGCTCGCCGAA  
TGCCGCTTGGCTGAACCTTTGCTGTTAGCTCGAAAGCGCGCCAAAATTCGTCAGTTGCTGAAAAACCTCAAGCGTGATG  
ATTCTGTAAGCCTGGGCCGTGCTGCTCAACCATGCTTTGGGTGGTAGCCGTAAGCTGAATGAAATCCCGCAGGAAAAT  
ATTCAGCGGAGCTGGATCGCATGAAGCTGGCAACGCTTACGATCTGCTGGCAGAAATCGGACTTGGTAACGCAATGAG  
CGTGGTGGTGCAGAAAATCTGCAACATGGGGACGCTCCATTCCACCGGCAACCCAAAGCCACGGACATCTGCCATTA  
AAGGTGCCGATGGCGTGTGATCACCTTTGCAAAATGCTGCCGCCCTATTCTGGCGACCCGATTATCGCCACGTCAGC  
CCCGTAAAGTCTGGTATCCACCATGAATCCTGCCGTAATATCCGTGGTACCAGAAAGAGCCAGAGAAGTTTATGGC  
TGTGGAATGGGATAAAGAGACGGCGCAGGAGTTCATCACCGAAATCAAGGTGGAGATGTTCAATCATCAGGGTGCCTGG  
CAAACCTGACGGCGCAATTAACACCAGACTTCGAATATTCAAAGTTTGAATACGGAAGAAAAGATGGTGCCTGCTAC  
AGCGCTTTATTCGCTGACCGCTCGTACCGTGTGATCTGGCAATATCATGCGCAAAATCCGCGTATGCCAGACGT  
GATTAAGTCAACCGAAACCGAAATTAATGTTTTATGAACCCAACGTTATGCACGCATTCGCAAAATGCTCGCCAGGC  
GGCAGCCTGATCTGACCGTCTGCATGGAGCAGGTCCACAAACCTATAACGTTTCTGCGATTATTCGACCGAGATGCC  
GTTGGCGTACATGAAGTTACGCGCTGCGCCTGGTAGCCGCATGCGCACCATGGCTTCGGCAGCGGGGTTAGTAACAG  
CTGGGTACAGGTGAAAACACACCGCACCATTTGGCGATGCCGTCGCTCATCTCAAAGCCAGGGCATGCAGATTCTGGCAA  
CCCATCTTTCTGATAACGCTGTCGATTTCCGCGAAATTTGATTACACTCGCCCGACTGCATTTTATGGGACAGGAGAAA  
ACGGGCATCACGAGGAAGCATTGGCCCTGGCGGATCAGGACATCATATTCCGATGATCGGCATGGTGCAGTGCCTGAA  
TGTTTCCGTTGCCCTAGCCCTATTCTTTACGAAGCCAGCGTACGCGGCAAAATGCAGGCATGTACCTGCGTGAAAACA  
GCATGTTGCCGGAAGCAGAGCAACAACGCTGTTGTTTGAAGGCGGCTATCCGGTGTGGCGAAAAGTGCAAAACGCAAA  
GGCCTGCCTTATCCACGTCATCAGCAAGGCGAGATCGAAGCTGATGCCGACTGGTGGGCTACTATGCAGGCTGCAGG  
GTAAGTGCCATGAAAGGTCGCTGTTAGATGCTGTCCACTCAGTTCCTAACGGCGTTGGCGCAGCACTTAGTAACAA  
ACTGGCGAAAATCAACCTGCATACCGTGCAGGATCTACTTTACACCTTCCCTGCGCTACGAAGATCGACCCATCTCT  
ACCCATCGGAGAACTACTGCCGGCGTTTATGCCAGGTGGAAGCGGAAGTGTGAACTGCAATATCTCTTCGGCGGT  
CGGCGGATGATGACCTGCCAGATCAGCGACGGTTCGGCATCCTACCATGCGCTTTTTCAATTTTCAGCGCGCAATGAA  
AAATAGCCTGGCGGGCGGCCGCTGACTGGCTTATGGCGAAGCAAAGCGCGTAAATATGGTGCAGGATGATCCACC  
CGAATACCGGCTGCAAGGGGATCTCAGCACGCCAGAAATACAGGAAACGCTCACGCCGTTTTATCCAACAACGGAAGGC  
GTAAGCAGGCCACGCTGCGTAAATTAACCGACCGGCGTGGATCTGCTCGACACCTGCGCCATTGAAGAACTCTGCC  
CGCGGAACTGTCAAGGAATGATGACGCTACCGGAAGCGTTGCGCACTTGCACCGCCGCCACCGACGCTACAGCTTA

CGGATCTGAAACCGGGCAGCATCCGGCGCAACGTCGTCTGATTCTGGAAGAACTGCTGGCGCACAACTCAGCATGTTA  
GCCTTACGTGCCGGAGCACAGCGTTTTTCATGCCAGCCGCTGAGCGCAATGACAGCTGAAAAATAAACTCCTCGCCGC  
CTTACC GTTCAAGCCAACGGGCGCACAGGCACGCGTAGTGGCGGAGATCGAGCGGATATGGCGCTGGATGTGCCGATGA  
TGCGTCTGGTGACAGGGCGATGTAGGTTCCGGTAAAACGCTGGTCGCCGCCCTCGCCGCGTTGCGTGCGATTGCCACGGC  
AAACAGGTAGCATTGATGGACCAACCGAATTACTGCCGAGCAGCACGCCAATAAATTCCGCAACTGGTTTGACCCGCT  
CGGTATCGAAGTGGGCTGGCTCGCCGGTAAGCAGAAAGGTAAGCACGGCTGGCACAGCAGGAAGCCATCGCCAGCGGT  
AGGTGCAGATGATTGTGGTACACAGCCATCTTCCAGGAACAGGTGCAGTTAACGGCCTGGCGCTGGTGATTATCGAC  
GAACAGCATGTTTTGGCGTGCATCAGCGTCTGGCATTGTGGGAGAAAGGCCAGCAGCAGGGCTTCCATCCGCATCAGTT  
GATCATGACCGCCACGCCGATCCCCGACGCTGGCAATGACTGCGTATGCCGATCTCGATACTCGGTGATAGATGAGC  
TGCCGCCAGGCCGACGCCAGTGACTACGGTCGCTATTCTGATACCCGCCGTACCGACATCATTGACCGCGTGACCCAC  
GCCTGCATAACTGAAGTGTGACGGCATACTGGGTTGTACGTTGATTGAAGAGTCGGAATTGCTGGAAGCGCAGGGCGC  
GGAAGCTACCTGGGAAGAGTTGAAACTGGCGCTACCAGAGTTGACGTTGGCTGGTACACGGGCGGATGAACTCGCC  
AGAAACAGGCGGTGATGGCGTGTAAAACAAGGTGAGCTACACTGCTGGTTGCCACAACCGTTATTGAAGTCGGCGTT  
GATGTGCCTAACGCCAGTCTGATGATTATCGAAAACCCGGAGCGTCTGGGTCTGGCGCAGTTACACCAGCTGCGCGGGC  
CGTAGTCTGGCGCGGTGGCTTCTACTGCGTGTCTCTACAAAACGCCGCTTTCTAAAACGGCGAAATTGCGCTGC  
AAGTGTGCGCGACAGTAACGACGGTTTTGTGATTGCGCAAAAAGATCTGGAGATTCGCGGCCCTGGCGAATTGTTAGGC  
ACCGCTCAGACGGTAATGCTGAATTTAAAGTGGCGGATTTACTGCGGATCAGGCGATGATCCCGGAAGTTTCAGCGCCT  
GGCACCCATATTCACGAACGTTACCCACAACAGGCAAAAGCCCTGATAGAAGCTGGATGCCGAGACGGAACGTTACT  
CGAATGCGTAAAAGCGGCGAGTGAGAAGACCGCCATTTAGGTTACCTACCTTCTGCGGATGCGATTATCACCCCTA  
CAAATTCATAAATTATGAATCAATACGAGGCTTGATAAGCGAAGCGTATCAGGCATTTGTCTTTGTTGCGGCGGCACT  
TCTACCGCGCTTTCATCGTTAACCGGCAAAAACCGCAACATCAATAACAATTAAATACCAGCGCATTGACGATATCG  
ATAAAGAACGCACCGACCATCGGCACCACAAAACGCCATGTGCGACGGGCAAAAGCGTTAGTGATCGCTGCATGTT  
GGCGATTGCCGTTGGCGTTGACCGAGGCCAAAACACAGTGACCCGAGCCAGCACTGCCGATCGTAGTTTTTGCCCA  
TCATGCGCCAGGTAAAGATGGCATAACAACGCCATGAAGATGGTCTGTACCACAGAATCGCCAGCATCGGCAGCGCC  
AGCGAAGCCAGCTCCACAGTTTCAGCCCATCAACGCCATCGCCAGGAACAACGACAAGCTTACGTTACCAGCACGGA  
TACCGCACGCTCAAAGACCGGTAAAAGCCATTATTGACAGACCGTTGCTCAGAATCACGCCAACAAACAGTACACAGA  
CGAAGGTGCGCAGTTCAAAGCAGTGCAGCCAAAAGTTGCGCAACAATTTCCACCGCTCAGGCAGATAGCAATCAGC  
GCGATAGTTTCAATCAGCACCAACGAGGTGATCATGCGTCCACATCCGGCTTTTCAAACGCCGTGCGGACTTCTGGTC  
ATCCGGAATACCGTTCCGGCTGGTGGAGTGTTCACAGATAGCGCGCCACCGACCGCAATCAAGCCGCCAGCACCA  
GACCGAACGTTGCACAGGCCATCGCCACTTCCGTGCGATTGGTGAAGCCATAACGTTCAATGAACAATTTACTCCACGCA  
GCGCCCGTACCGTGACCGCCGAAAGAGTAATAGAACCAGCCCAACAGCCCATCAGCGGATCAAGCCCTAACAGCTAGC  
CATAACCAATGCCAATGGCATTGTCATCACCAACAGACCAACAACCACAATCAAGAAGATGCCAACACACGCCACCGG  
CACGCAAACCTGGCAATGTTGGCGTTACGGCAATGGTGGCGAAGAAAGCCAGCATTAAACGGATCGCGCAGGGACATACA  
AAGTTGACTTCCAGCCCATGCTTTTTTTCAGTACTAGTAGCGCCAGCGCCACCAACAACCAACCCGCAACAGGTTCCGG  
TATGGTGTATTTCTTCAAAGGAGACGGAATGGACCACTTACGCCGAGCAGCAACGTGAGCGTTGCGGCAACAAGCG  
TTGCTAAAGTATCGAGATGAAACATAGTTACTCCTTTGATCCGCATCACTTTTCATACTCGTCATACTTCATCGCGCA  
GTGGCAACTTCATGAACTATGACGGGTATCGAGTTATGCTTTCTGGGTCAAATTCAGCTGTTAATGAACAAATGGCA  
TGGATTTTAAGCAGAAAAATACAAAAGTTATATAAAAAAGTGCAATTTATCTCATTTAAATATTTAGATGAGGATGTGGC  
AAACGTTTGTCTTTCTTTCCGGTCAGTAAAATGCCCGCTTTGCTACCACGGGATTGTTTTGATGTCTGTTTCCACCC  
TCGAGTCAGAAAATGCGCAACCGGTTGCGCAGACTCAAAAACGGAAGTATTACCGCTTGAAGATCGTCCGCGCCTT  
CCTCAAACCCGTGTTGCGCCTGTGAGCATCTGCTGGCGATGTTGCGGTGATCAGCCAGCGCTATTAATCTGCCA  
GGCGCTGGGTTTACCGGCACAAGACACGCAACACATTATTAGTATGTCGCTGTTTGCCTCCGGTGTGGCATCGATTATC  
AAATTAAGGCTGGGGTCCGGTTGGCTCCGGGCTGTTGTCTATTACGGGCACAGCTTCAACTTTGTTGCCCGCTGATT  
ATGGGCGGTACCGCGCTGAAAACCGGTGGTGTGCTGATGTTCTACCATGATGGCGGCTTTGTTGCGCACGTTGATGCTGGC  
AAGTTGCACCGAGATGGTGTCTCCCGCTTCTGCATCTGGCGCGCCGATTATTACCGCGCTGGTTTCTGGCGTTGTGG  
TGATGATTATCGGCTGTGCTAATTCAGGTTGGGTTAACGTCCATTGGCGGCGGTTACGCAGCCATGAGCGATAACACC  
TTCGGCGCACCGAAAAATCTGCTGCTGGCAGGCGTGGTCTTAGCCTTAATTATCCTGCTTAACCGTCAACGTAACCCCTA  
CTTACCGGTGGCTCACTGGTAATTGGGATGGCGGCCGGATATGCGCTGGCGTGGTTTATGGGCATGTTGCCAGAAAGCA  
ACGAACCTATGACGCAAGAACTGATTATGGTGCCAACGCCGCTTATTACGGTCTTGGCATTGAATGGAGTCTGCTGCTG  
CCGCTGATGCTGGTCTTTATGATCACTTCGCTGAAACCATGGCGATATCACGGCGACCTCTGACGTTTCCGAACAGCC  
AGTGTCCGGTCCGCTGTACATGAAACGCCTGAAAGGCGGCGTGTGGCAAACGCCCTGAACCTGTTTGTTCGGCGGTGT  
TTAACACCTTCCCGAACTCTGCTTCCGGCAAAAACAACGGAGTGATCCAGTTGACTGGTGTGCCAGCCGCTATGTGCGT  
TTTGTGCTGCGCTGATGTTGATCGTGTGGGTCTGTTCCCGGAGTGAGCGGTTTTGTACAACACATTCAGAACCAGGT  
TCTGGGCGGCGCAACGCTTGAATGTTTGGCACCATCGCCGCCTCCGGTGTGCGTATGTTTTCTGAGCGCGTGAACC  
GTCGGGCGATTCTGATTATCGCGCTGTGCTGGCGGTTGGTCTGGCGTGTCTCAGCAGCCGCTGATTTTGCAGTTTGGC  
CCTGAATGGCTGAAAACCTGCTCTCCTCCGGATCGCCGCGGCGGATTACTGCCATCGTGTGAATCTGATTTTCC

ACCAGAAAACAGTAATTCCTGCGGGTAAGATAATTACCGCCGAGTCTCACCTCTTAACCATTCCCGCCTTGAG  
GATTGCGCGTAAATCGTGCATAACTCCCTTATGTGCATTTACGGGATGGAAGACCATGAAATTTATTGGGAAGCTGCTT  
CTCTACATTCTCATCGCTCTGTTAGTGGCGATCGCTGGCCTCTATTTTCTTCTGCAAACCCGCTGGGGAGCAGAATAT  
CAGCGCATGGGTTTTCCGAGAATAGCGACTATCATCTGGCCTTCGGGGCGATGGATCACCGTTTTTCCGCGCCATCTCATA  
TCGTGCTGGAGAACGTACGTTTTGGTCTGTATGGCCAGCCCGGACCCCTGGTGGCCAAAAGTTCGACATTGCGCTAAGC  
AGTCGGCAACTGACCGAACCCAGCCATGTCGATACCATCTGCTGAAAAACGGGACGCTGAATCTCACCGACCGACCCG  
GCCGCTACCGTTCAAAGCCGATCGCTGCAACTGCGTGATATGGCGTTTAAATAGCCGAATAGCGAATGGAACTGAGCG  
CGCAGCGGGTAAATGGCGCGTAGTTCCTGGTACCAGGAAAGCCGGTAAAGTGTGGTACGAAGGCGCAGATTAGTTT  
AGTGCCGATCGTTTTGCTCAATGATGTTCTGCCACCAATGTAAGTGAAGGCGATTTGATAACGATCGCGTTAC  
GCTGACTAACCTGGGTGCCGACATCGCCCGGGACATTAACCGAAACGCGCAGCGTAACGCCGACGGCAGCTGGCAA  
TGGAAAACCTGCGCATGGCGGATATACGTCTACAAAGCGAAAATCGTAACCGACTTCTTTGCGCCATTACGCTCTGT  
CCGTCTGTCAGATTGGTGCCTGGAAGTATGATGCTGTTTGAAGTCCGGACTGGCGGGTACCGACCTCGATCT  
CAGCTTGGCAACATGACCTCAGTAAAGATGACTGGCAGACACAGGAAGGCAAATGTGATGAACGCTAGCGAGTTCA  
TTTATGGTTGCTGCATTTATTTGACCCGATTATAAACACGGAATTTTCCCGCAGGGCTAGCGCTGCCCAGTTACC  
AGCCGCTGGGAAGGGGTATGGTCAGAACGTACGGAACTGGCTGCTGACGGAAAACGTTGATCCTTGATGATGCGGC  
AATTGCGGGTGAATATACCTTGCCGAAAACGCAACAGTTGGTGGATGGAAACGACACCCGGTTGGTTAAACAGCC  
TGCAACTGAAGAGATTTAGCGCCAGCCGCAATCTGATCATTGATATCGACCCTGACTTCCCGTGGCAGCTACCGCGCTC  
GATGGTTACGTTGCCAACCTGACGCTGTTACCGATCATAAATGGGGCTCTGGAGTGGCTCGGCGAATCTGAATGCCGC  
CGCCGCGACATTCAATCGTGTGATGTTGCTCGCCGCTGCTGGCGCTGACCGCCAACAGCAGCACGGTGAATATCAGCG  
AACTGAGTGCATTTACTGAAAAAGGCATTCTGGAAGCCACCGCCAGTGTTCACAAAACGCCACAACGTGACACATATC  
AGCCTGAATGGACGCGGTGTCCGGTGAATATTTGCAACAGTGGGGATGGCTGAATTACCGTTGACTGGCAGCGCAA  
TATTCAGCTTACCGCAGTGGCGATATTCAGGCCAATGTCGGTGAACCTACGGTTAGCGGGCAATTGATGCGGTGA  
ACGCCGAAAGCAGCAAGTACTCAACCATGAATGCTGGCATCGTTTCCAGCGGTGAAGTTACATCGACGGAGCCGGTG  
CGGTAACATCAATCTCGCCGGTACGACTCAGACGTACCGGCATTCCATCAATAGATTACAACGTAATTGTCAGCGCA  
TTCCCTTGAGGCTTACCACCAGCCCCGCTCACTTTCAGCCTGCGAACCGTCTTGACAGCATTACTTTCACAACATT  
GCGCAGGCACAGTGTCCAGTCTTTCGCTCGCCCGCACCAGTCACAGTAATCGTGTGGCAGTACGTGCTTTTTAAAG  
TAAAGTACCAGTCCGTCAGCAGCGGGCACTTACAGACGGCTCATGCCCCTTTCAGATTGAAGAGGTGGAATGCC  
GTGCTTTCGTGCCACACGTAATCGGGACGTTGATCGTGTGGCCAGCGCCAGTAGAGTGTATCACGCACATAAACGGG  
CAGACTCAGGAAGCCGTCGCTGTTTATGCCAGCGACTACCGTCGAGTTCATCGTTGTGCCACAGGTGTGTCAGCGAC  
CTTCCGGCAGGTAGAATGCACATCGCCCGCTTCACTGAACACCGCGCAACCATCACGTTGTCGCTAACATGATTTGA  
CGGTCAAGGTAATCACAAGCCGGATCGTCCGGGAATCCATCATCATGGCCCGCATCATCGGCGTACCCCGCGCTTCCG  
ACGCGCAGCTTACGATACAGATACGGCATCATGCGGCATTTCACTTGGTGAAGAAGCGCACCATCACAGGACTCAT  
CATCGTAGGCCACCGCACACGATAAGATTTGCTACCGTGAACCGGCTATGGCTGGAGAGCAAACCAAACCGCACCCAG  
CGTTTGAACCGTGGCCGGAGCGGTATTTCAAAGCCCGGATATCGTGGTCCAGAAGCCAAAACCTGAAAGGCCAAT  
AGACAAACCACCGCGAGGCTTTCCGCCATTGATTCGTAGTTAGCGTAACAATCGCCACCCAGTGTACCGGGAATTTCT  
GCGCACCAGCGAGGCGGAGCGGGCAACAAGACAGCTTCTTCCACCAACGGTGTCTTGAACAGTTCACACCCAGT  
TCGTTGTAGATGTACGCATAATGGTTATGATTTTTGCGGATCGGAACCGTCAAACCACTGAACATCAGTTGGGATACG  
TTCGCCAAAGTCGGTCTTAAAGCAATCAACGCCCATCGCAGCAGACCTTTCACTTGTGCGCGTACCATTGACGGCAT  
CCGATTGGTAAAGTCATAAATCGCCAGACCTGGTGCCATTTATCCACTGCCATAGCGAACCGTCCGGCGGTTTTGAGT  
AAATAGCCTTTCTTGTAACTCTTTAAAGACGGGGGATTTTTGACCGATATAGGGGTTAATCCAGACGAGATTTTTCAG  
TCCTTTTCGTTTTAGGGCGGGATCATCCCTTCCGGGTACGGGAAAGTACGGGGTCCCACTCAAATCGCACCACTGGA  
AGGCTTTCATCCAGAAACAGTCAAAGTGGAAAACATGACGCGGAGATTGCGTTCGCCATACCATCGATAAAGCTGTTT  
ACCGTCTGCTTCTGCTAGTTGGTGGTAAATGAAGTGGTTAGCCACAGGCCGAAGGACCAGCGGGCGGCAGCGCCGGACG  
ACCAGTAAAGCGGGTATAACGATCAAGTACCGCTTTCGGCGTCCGGCCGTCGATAACAAAGTATTCGAGATATTCACTCT  
CAACGCTGAACTGCACTTTGGAGACTTCTCCGATCCCACTTCAAAGAGACACACTGGGGATGATTGACCAGTACCCCA  
TAACCACGGTTAGTCATGTAGAACGGGATATTTTTATACGCTGTTCACTTGTGCCGCGTCCCGGTTCCAGGTCTC  
TACCGTCTGGCATTGCGCACAGGGCAGTAAAGCGCTCTCCAGACCGTAAACTGTTTCGCCAACGCCAAGATCAAGCC  
GCTCAAACATATAATTGCGTTGATTATTCGTGCTGACGAGTACGATTTTTCACCTGACTACCGGTAATACGTTCCG  
CCGTTGCGCAGAAAATCCAGTGACCAGAACTCACCTTGTGACACGCGGCTTAAAGTGGCACTTTTAAACTCAGCATA  
ACGTTCTGTGTTTTGATTGTGACCTTACGTCCTGCAAAAATATTGAGCGGATAATGAGGACCGTTATTCAGCGCCCCCT  
GAAAATGCTCAATCCGCACACCGACAATACCTTCTGTGGGGAGAAAAAGCGCAACGTAATAAAGGGCGTATCAAGCTGC  
CAGGTACGTTACGCACATACGGGGGCGAGCATAGACCACCTTTCATTATCTGCTGTTCAACCTCGAACACCTGAAG  
CGGTGAATCAAATGAGGCCAGGTTGAATCAACAGTTTTCCATCGCTAATTTTCAATTGCCGTTCTTAGTTCTGCACTT  
CTTGAGAGGTGAATGTTGCTGGCAACCGGCTTACCTGAGCCAGCTGTTCCATAACGGTTTTTCAATTGTGCGTCTGT  
AGTGAGTAGTAGGTTTAGCGATAATCGCGCTCAGCAAATAACAGATCGCCGGAACAATCGTGAATAGCGCAATAATGAT  
GCTAATCGTGGCGCTGTTCTGCGCTTTTTCTGCCGATCATATCCGCCATAAGCCAGCATCCAGCGATAAGAGCGCCGC



CGAAGGCCAACCCAGTTT GAGCACAACAGCGTGCCAGCAAACTGATCCCGGTCAGGCGTTT ACCATTGCACCACTCG  
CCGTAGTCGACGGTATCGGACATCATTACCCACTGGATAGGTGTCACCAGTTGATGCAACACACCAATCACAAGATGAA  
GACAAACATAGTGATGCTGGCCTGCATGGGAACAAAGAACATCGCGAGGCTAATCACTGCCAGCAGGGCGTTTCGTCCACC  
AGAAGATAGTGACTTTACATTTCCAGTCGGTCAGAGTTTTGCCAGTGCGGAACCAATCAGGTTACCCACGCAATAAGTG  
GTGAGAAAAGCGACAAACACTTCCGGCGTGCCAAAATCCATGTGACGTAATACATCATCGCCCCACCGGTACGCACAC  
CGCCAGGATATTGAAAATGGTTAGTAAACCGACAATCCGCCACTGGTCGTTTTGCCAGATATCACGTAATCTTCCCGCA  
TAGACGTTGTTGAGGTGGTGCTTCAACGCGTTCCTTAGTGGTGAAGAAACAAAATGCCAGCATCATGAATGCCACCACG  
GAAAAGACCGGATACCGCCCTGGAACCCGAGTGGTTTATTATCACCGCCAATTAATTAACCAGTGGCATCATCAGAAC  
AGTAGAAAGCATGCCTCCCGCGGTCCGCCAGCACAACGCCAGGATTGCAGCGAGATACGCTGAGTCGGGTTCATTGGTGA  
TTACACCACCAATGCGCAGTAAGGGATATTGACGACGGTATAAAGTAAGGTAAGTGGGTGTAAGTAATTGCTGCATAG  
ATCATTTTCCGTTTCATACTGAGATCTGGCGTGCTATAGGCCAGTACACAGACGATCCCGAATGGCAGTGCGCCAACAG  
TACCCACGGACGAAATTTACCCAGCGAGAGCGCGTTCGATCGGCCAACACCCCATGCAAGGATCGGAAATCGCATCCA  
GTGCACGAGCGACAAAAACATGGTTCCGACAAAACCGCAGGAATGCCAAAATATCGGTATAAAGAACATCATATAT  
AACATTAGTTATCGAAAATAATGTGGCTGGCGGCTCTCCATGCCATAACCAATTTCTCTTTAACGGACAACACTTC  
ACTCTTCATCTGCTTTTCCCTTATGCTATAGGGTGCTGAGACCGATAACGCATTTTGTAACCATCCGTGAGAGCGA  
ATATTCGATATCTGGTTATTAATTTATGATTCTTGTTTTATGTGATCGTGGTAGCGTTAATCCGCTCATATATCATTG  
TAAAAATATGGTTTTATATGAACTATAATGCTTTCTGTATAATACGCTGCGTGATTAGGCGGAAAAAAGTATCTGGGG  
GATGTAGAACTCAAGGAAGTAGCTATAATGCGCCCCGCTCCATGTAGCAATCGAGGCGCGGAAGATCGTCTCGCTCCGG  
TGAGGCGGCTGGACTTCAAATCCAGTTGGGGCCGCCAGCGTCCCGGGCAGGTTGACTCCTGTGATCTTCCGCCAAAAT  
GCCTCTCCTGACGTTCTCAACCCCTTGAATACTGTCAATCCAGATATTTTCTACTGCTCAATATTCAATCGGCTTACAG  
GAATACCTGGTCTAAGGTTTTGTGATGGACGATGAGCGGCTGAAGAATCCGCCTGTGCGTTCTTGTCTCGAACGCAT  
CCGCATATTACGCCAGTATGCGCCGTGTTATTTGCAGGTGATTTGCCCCCTGCTGACTCTCAGCCAACGTATCGC  
CATTAAAGTGAAGATGTTGTTTTACTCGCCCAGAACCCTTTTTTATACGACTATTCTATTTCTTTAACCGCTGGCGA  
AAAAAAGTACTATAAATTCACCAATAATCAGACTGCCATCAAGATTAATTTGTTCAATTAATATATCAAATCAACTG  
TTTTATTTTACTATCAAAAATAGCTCATTGCCTACTATAATTAATATATAAATTCGGTAATTAATTTAAACATGCTT  
TTACTAATAATCTCAATTGCTGGCCCTATAATATTGCGCTAGCATTGCTTTCTGGTTGATCAGCGATACTCAAAAATTC  
TTAATAACAATACTCATTGACTGGTACTTATTTGAACTCAGTTATATTTTTTCGCCCGGTGATTGAGAAGATGCAAAA  
AACGGCTACCACTCCATCAAAAATACTTGATCTCACTGCCGCGCATTTTTACTTGTGCTTTCTGACGGGTATTGCGG  
GCGCTCTTCAGACTCCTACCCTAAGTATATTCTCGCAGATGAACTGAAAGCCGCTCTATAATGGTAGGTTTTTTCTTC  
ACCGGTAGCGCTATTATGGGAATTCTGGTCAGTCAATTTCTGGCAAGGCACTCCGATAAACAGGCGACCGTAAATTA  
GATTCTGCTATGTTGCTTATTTGGAGTGTGGCCTGCACGCTTTTTGCGTGGAATCGCAACTACTTATTCTCCTCTCAA  
CGGGCGTACTTCTGAGTAGTTTTGCTTCCACCGCAAACCCGCAAATGTTGCGCCCTCGCCCGTGAACACGCCGACAGAACA  
GGCCGTGAGACGGTCATGTTGAGTACATTTTTACGTGCTCAGATCTCGTTGCTGGGTTATCGGGCCACCGCTCGCTTA  
TGAAGTGGCAATGGGATTTAGTTTTAAAGTATGATGATCTCACCCTGCCATCGCATTTGTTGTTTGGGACTGATAGTCT  
GGTTGTTTTGCCATCAATCAAAAGAAATATTCTGTGCTTACCAACCCGTAGAAATTTACCCTCCACCCACAGGAAG  
CGGGATACGGGCTACTTTTTGTGGTCTGTTCAATGATGTGGCGGCGAATAATCTCTACATGATAAATATGCCGCTATT  
TATTATTGATGAACTGCATCAACCGATAAACTGACTGGAGAAATGATTGGTATCGCTGCCGGTCTGGAAATCCGATGA  
TGTTAATCGCAGGCTATTACATGAAACGATTGGCAAGCGACTATTAATGCTCATTGCTATCGTGAGTGGAAATGTGTTTT  
TACGCCAGCGTACTCATGGCAGACTCCGGCGGTTGAGCTGGAATGCAAATCTTAATGCCATCTTCTTGGTATTCT  
CTGTGGTATCGGCATGCTTTATTTTCAGGACTTGATGCCTGAAAAAATAGGCTCTGCGACAACGTTATGCAAAATACT  
CACGCGTCGGCTGGATTATCGCCGGCTCTGTTGACGGAATTATGTTGAAATCTGGAGCTACCATGCGTTGTTCTGGCTG  
GCGATAGGGATGTTGGGTATTGCGATGATTTGCCTGCTGTTTATTAAGATATTTAGCTCACCACTGCGCTAAGAAAA  
ATCGGCGTGGCGCAAACAGAGCCATCCTCGCATTTTTTGCTATCATGCTGCATACATAAACGACAAAACAGTATGCAGA  
GGAAAAATGGTTCCACCAGAAAGGGGATGCTGAACGTTCTGATTGCCGCGGTGTTGTTGGGGAAGTTACGGGGTCTGCG  
CGCAATACATCATGGAGCAAAGCCAGATGCTGTCGAGTTTTTACTATGACGCGTTTATGATTGCGCGGTTTTGATTCTA  
CTGACGCTGCTATTTGTTATGCGGATAAAATCTTTTCTATTATTAACAATCATAAAGATGCCATTAGCCTGCTGATTTT  
TTCCGTGGTTGGCGGCTAACTGTACAGTCACTTTTTTGTAAACATCGAAAAATCGAACGCAGCCACGGCAACGGTGC  
TGCAATTCCTCTACCGACGATTATCGTCGCTGGTCTCACTGGTGCGTAAATCGCGCCCGGCTTCTGGTTTTCTGC  
GCTATTTGACATCGCTGGTCGGGACTTTTTTATTGGTGACACACGGTAATCCGACGTATTATCGATCTCTCCTGCCGC  
GTTGTTCTGGGGCATTGCCTCGGCATTGCTGCTGCATTCTATACCCTATCCCTCAACGCTAATTGCCGCTATGGCA  
CGTTACCAGTCGTGGCTGGAGTATGCTGATTGGCGGTCTGATTCTGTTGCCTTTTTATGCCAGACAAGGAACAAACTTT  
GTCGTTAACGGCAGTTTATTCTGGCGTTTTTTTATTTGGTGGTCAATGGTACGTCCTGACATTTAGTCTGACCTGAA  
AGGAGCACAATTAATGGCGGTCCAAAAGCCAGCTTTTGGAGCTGTGAGAACCATTAAGTAGCGCGCTACTCTCTTTC  
TGTTGCTGGGGATCACGTTACATTACCGGACTGGCTGGGAACGCTGCTGATTCTGTCATCGGTGATTTTGAATTAATG  
GATTCCTCGTCCCGCGCCAGAAAAATAATCGTCCGGCGCGGCATAAGTGAGAATTACCAGCCAGGCACCGCGCCACCGT  
TAAAAATGGTTTCTGCCGCTTAGCGACTTCGGGTGATTGATAAGATTGCAGAAATTCCTTACGTTTTCTGATTCTTA

TTATCTTCCCCTGCCACCAAAATATTCACATACGGCGAATTCTTATCTTCAATAAATACGCTGTCGTGCACCGGAGAAAAG  
CCCGGTCTGTGAATGTAAGTGGTGTGATAATCGTACATCAACTTTGGGATCATCCAGTACGCGCGGGAGCTGCGCCC  
CCTCGAGTTCCATAATCTGCAAATGACGAGGATTATCGTTTATATCCAGCGCGGTAGGTAATAACCCTTTTCCCTCTTTC  
AGAGTAATTAGCTTCTTTTTGCAACAGTAAAAGTGCAGCAAGGTTGGTGGGTCGTGGGGATCGCCACTGTGCG  
GCCTTTTTATTTGCGCCACGGTTTTGATTTTTTGAATAACCCGCCATAGGGAAGACAAACGATTTCCACCCGCTA  
CCAGTTTATAACCATGCGCCTGATTATCTTGTCAAGAAAGGGTCGATGCTGGAAGACATTCGCATCAAGTTCGCCATGA  
TTTGTGCGCATGTTCCGTAGCAACGAACCGCTAAATCCTACCAGTTCAACATCGAGGCCATATTTCTTTTTGCCACCTT  
TTTAGCGACTTCCGCGACATCTTGTCTGCGCCATTATAACGCCAACTTAATGTGTTTTGCATCGCTGCTACTCTGGT  
CGCAACCTGCCAGCAGAATTCCGGCCAGCAATAATGCGGCCCTGTCCGTAGATGATGTGTTGTCAGTTTCATTTTTTA  
TCTTTTTAAATGATTACTGACTATAGCGGTAAGTGTGCTGCGGTTAAAAAACGAAACGCTATCGATAAGAATAAAA  
AGGAATAAAAGTGAATATAAAGTCTGGCACTTCTTACTGACCACGCAAGCGGTTTCTGACAGCATGATGAGAGCGATG  
AAAGCAAACACTACTTATGCTTTCATTGATACACATTTGTAAGGTTGAATCCATGAAACCAACGACACTACTGCTTAT  
TTTCACTTTTTTGCATGCGCAGGATCGTATACGCCGAGTCCGCTTTAGTCACTGCAGTCCGCAAAAGAGAAAACCA  
CGGTATTACAAGATTTACGTAATAATGACGCGCAGGCGTATTATCAGATGAAGCGTGGGAAAAGTTAATGTTGTCA  
GATGAAAACAATAAACCAACATACGCGAGGCCATCGTGGCGATGGAACGTAATAATCAGAGCAATTATTTGGGAAGCGTT  
GGGTAAGGTAGAATGCCCGATATGTAAGAACAGCAACAACACTGACCAACGCTTCTTTACCTGATATCAGGATTTCTT  
CATTTTTCACCTTTGACGTAACCAACAATGACAGTACGCAACATCAATGTGCCGGAACAACATCAACGCGGAAGTCAGACCAA  
TATTATCCAGCGCATAACCGCCGATTGCCGCGCCACAGGTATTAGCAAGCTGAATAACCGCCACCTGAATAGACCCGGCT  
TTTTCTGCCTGATCGGCCAGCGAGCGGGTGTCCACGTTGACCAGCCGACGGGAACCAATGCAAAAGTTAGCCCCAGAT  
AATCGCCACGCGGTTAGCAACGATTTTTATCGTTCCCAACAGTCACTACCAACGCACTCACAGCCAGTATTAACGGCG  
CGCTGCTAAGCCGATTTTTACCGAACGTTTAAAGAATGAACGACGAAAGCGACGTACCAATAAAGTGGCGATAACAAAA  
CTCAACAGCACCAGCGTTAAGCCATCCACGCCGAATCCCGCCAGTTTCATATACACCGGGCAATATACGTGAAGAAAGC  
AAACTGCCCGCGGAAAGACATGAAGATGGCGATCATCCCTGCCATCACACCCGGACGTTGAATAAGCGGAAAGTATTTT  
GTTTCTGATGCGAGGGTTCCGCTGGCAGTGAAGGCAATGATTTGATAATCCAGAAAATACACAGCAGCCCATCACCGCC  
GCCGATTAAGACATTGCGCAACCGATAAGCTCGCTAAAAAAGTCCCAACGGCGGCAATCACCAGCGCAATAGA  
AACCGCGCCGAAGATCACCAGCAGCGCTTCCGCGCAGTACGCGCGGCGACCAGACGATGGTCAGCGACGCCGACATCG  
CCCAGAACCCGCCAGCGCCAGCCCCAGACAGGCACGACCGATTAAGGCAAACCTGAATGAGTTAGCAAAGGAAACCCAGC  
AAGCAGGAGAGCGTCAGCAAAACGGCAAAACAAATAACAACGTAGCGGCGGTCAAGTACGCTGAAATGTCTGGGTAATAAAA  
CAAACTGGCAACATTGCCACAAAGGGCGTACGGTACCAGTTCGCCGGCAACCCCTTCCGAAATGCCTAAATCCTGGG  
CCATTGGCGTCAACAAACTGACGGCAAAAACCTCAACGATAATCAGACAGGCGACAAAAACGCCACCGAGAAAACGGCT  
GACCAGTTCGGTCCGGTGTGGCATCCGCGCGCGGTTTTCGGCAATAAATCACTCATGGTGTACCCGTGGCATGTTT  
CAGGGGAAAAGCCGACCACTTAAACATTGAAATGTGTGACGCATTTAACGTTTTTGAACCTTTTACGGTGTGCTTGTGAGC  
TGGAGTTAAGATCGAAACGGAAACAGGGCAAGATTACCGGATGCGGGCGTGAACGCTTATCCACCCGACAGGTGAGGCGC  
GGTCTGTAGGTGATAAGACGAAACGGTTTTCAATGCAACAGTGAACGCCCTCGGCAAGGCTGAAAGAACGCGTTATAGCG  
CATCTGAAAAGCATTAAATCCTGCATTTCAAGTTCCGTTTCGCGCAGAAAACCTAGCGCCAGCCTGACCTGAGCGTCCGG  
TAATCGGCGCGCGGAGGGCAGCTTTTTGTAAAATCCGATGCCATTGCAGCAGGTTCTGTTTCGCTACCATCGACAATGACA  
ATTTGCCAGATGAGCAACACCTGCGCGCGTTTTGACAGGTGCGACTCATCCGGACGATGCAATAACGTAATAAAATTCGTC  
ACCAGTACTTTCCATTTGATCGACCATCGACTCCACGGGTACGACATCGATGTTGAGCCGATCGCTGAGACGGCGAA  
TCGTTTTTCTGGCCCCGATGTCAGCACCCGAAAACCAACCAAAACACTACCAGCGTGGCGAGCATTTATCCAGATC  
ATGAGTTCCTGCGTAATCAGAACTCATGATATCTGAAACCCCTCGCAGTTACTAATCCACCAGAATAATCTTACGTC  
CAACACAGAGTGGCGACCAACCAACACACAGGTTGAGATCGGCCAGCGCCGCGTGCATACTTTTCATGATGACGATCGAC  
ATAAAGCCGAGTGCAATCCCTTCGGTATCGAGAAAGTAAAGGGCATCATACCCTGGTAATAAACGCAGGCACCGATT  
GGTAAAATCATCCAGTTAACGCGCGCCAGGCTCGAAGTCATCAGCACGCCAACAAAGATTAACGCTCCGCGGTTGCGT  
AAGGAGGAATATCGCCACCGCGGTGAGAAAGACATAACCAACAGGAACATAACGCCAACCAACCGCAGTCAGCCCC  
GTGCGGCCACCGACTGCCACACCAGAAAGTACTTTCAATATAGGCAGTAACAGACGAGGTGCCGATAAACGCCACCCGCCAC  
CGAACTGACGCTATCAACATACAGCGCTTATTCAATTTGGGGAATTTACCGTTACCATCTATTAAGCCCGCTTTATCAG  
TTACACCAATTAATGTTCTGATGAATCAAATAGGTTGATCAGCATAAAGGAGAAAATGATACCGCGAGTTCAAGTGT  
AACCGCGCGCTCAAATCTACTTCCCAATGACGCGGCTAATATCAGGCGGAATGGAATAGACGCGCTAAAAATGAACATC  
ACCGAAAATAATCCACAGCAAGACGTCACCACAATAGAAACCAGCACCGCGCATGAAAATGACGTGATGACAACACGG  
TTATAATAAAAAACCTAAAATACCTAACACACGCCGTGAGAACTTAAATCGCAATCATCACCAGCGTGTCTTTATTG  
GCGACAATAACGCCAGTATTTTTTAAATCCATTAAGCGGATAAATAATCCAATTCGCTGGTGTACCAATACGTAACT  
TAAGGGAATGTTGGAGATCATCCAGTACCGGATACGAAACAGCGTGAGCAAAAATAGTCCAACTGCGCCCGAATATTG  
CGCCATCCCGGTCTGCCAGGAGATGCCATCGCCCCACGACCAGGAAGGCAAGAAGCGTTCAGCCCAATTGCCGGA  
GCCAGCGCCACGGGTAAGTTAGCAAAATATCCCCATCGCAATACTGCCGATACCGGCAATCAACAGGTGGTAACAAACAC  
CACTTTCCGGTCCATTTGTCCGCGCGGAGGATTTGCGGGTTCACAAAAACGATGTACCCATGGTTAAAAAAGTGGTCA  
TCCCGCAATCAATTCTGTGCGGACGGTGGTCCCATGCTGAGGTAGTTAAATAATCGGAAAGCGTCCCTGATTCTTA

CTCACGTAATCGGTATTGTCATTATTCATTTTTTGTCCATTGGAGGAGATTTAATCCCTTGCTTTTGTAAAACAAATGA  
CAACAACGGTTCAGTGATAATTATCACATTTCAATTGCACATTAATGGATATCTTTAATAATCTCGCGACGTTTCTTTA  
TGATAAATAAATAATCAAATTGATAAAATCAAATGAGAAAAATATGAATAATTCTATTAACCATAAAATTCATCACATTA  
GCCGGGCTGAATACCAGGAATTGTTAGCCGTTTCCCCTGGCGACGCTGTTGCCGATTATATTATTGATAAATGTCTCTATT  
CTCGACCTGATCAATGGCGGAGAAATTTCCGGCCAAATTTGATTAAAGGACGTTACATTGCCGGTGTTGGCGCAGAATA  
CACTGATGCTCCGGCTTTGCAGCGGATTGATGCTCGCGGCGAACGGCGGTGCCAGGGTTTATTGATGCTCACCTGCATA  
TTGAATCCAGCATGATGACGCCGCTACTTTTGAACCCGCTACCTTGCCGCGCGGCTGACGACCGTTATTTGCGACCCCT  
CATGAAATCGTCAACGTGATGGGCGAAGCCGGATTGCGCTGGTTTCCCCTGTGCGGAACAGGCAAGGCAAAACCAGTA  
CTTACAGGTGACGCTTTGCGTACCCGCCCTGGAAGGCTGCGATGTTAACGGTGCCAGTTTTACCCTTGAACAGATGCTCG  
CCTGGCGGGACCATCCGACAGTTACCGGCTTGCAGAAATGATGGACTACCTGGCGTAATTAGCGGGCAGAATGCGCTG  
CTCGATAAATGGATGCATTTGCCACCTGACGCTGGACGGTCACTGCCCGGTTTGGGTGGTAAAGAATTAACGCCTA  
TATTACTGCGGTATTGAAAATGCCACGAAAGTTATCAGCTGGAAGAAGGACGCCGAAATTAACAATCGGCATGTCGT  
TGATGATCCGCGAAGGTCGCTGCCGCAATCTCAACGCGCTGGCACCGTTGATCAACGAATTTAACAGCCCGCAATGC  
ATGCTCTGTACCGATGACCGTAACCCGTGGGAGATCGCCATGAAGGACACATCGATGCCTAATTCGCCGCTGATCGA  
ACAACACAATGTCGGCTGATGTCGCATATCGCTGCGCAGCTGTCGACGGCGGCCACTTTGGTCTGAATCACCTCG  
GCTTACTGGCACCCGCAAGCAGGCGGATATCGCTGTTGAGCGATGCGCGTAAGGTCACGGTGCAGGTAACCTGGTG  
AAAGGCGAGCCGATTGATGCGCAAACCTTACAGGCGGAAGAGTCGGCGAGACTGGCACAATCCGCTCCGCATATGGCAA  
CACCATTGCCCGCCAGCCAGTTTCCGCCAGCAGCTTTGCCCTGCAATTTACGCCGGAAAACGCTATCGGGTCAATTGACG  
TCATCCATAACGAATTGATTACGCACTCCCACTCCAGCGTCTACAGCGAAAATGGTTTTGATCGCGATGATGTGAGCTTT  
ATTGCCGTAATTGAGCGTTACGGGCAACGGCTGGCTCCGGCTTGTGGTTTGCTTGGCGGCTTTGGAATGAAGGTGC  
GCTGGCTGCGACGGTCAGCCATGACAGCCATAATATTGTGGTATCGGTGCGAGTGCCGAAGAGATGGCGCTGGCGGTCA  
ATCAGGTGATTCAGGATGGCGGCGGGCTGTGCGTGTACGTAACGGCCAGGTACAAAGTCATCTGCCGTTACCCATTGCC  
GGGCTGATGAGCACCGACACGGCGAGTCGCTGGCGGAACAAATTGACGCTTAAAGCCGCCCGCTGAATGCGGTCC  
GTTACCCGATGAGCCGTTTATTAGATGGCGTTTCTTCTGCGCAGTATCCCGCGCTAAAATAACCAGTCAGGGGC  
TATTTGATGGCGAGAAGTTGCCTTCACTACGCTGGAAGTCACGGAATAATAAAAAAGCCCGCGTCATGCCGGGCAAA  
AGTCACCAGTTACGTTTATGCCACTGTCAACTGCTGAATTTTTTCTCGCGCGGATTTTGCCTTCTCCATTACCGCCA  
CTATCGCCATCAGGCAGATAACAACCAATCGCGGCGATATCCAGCGCGGCAAGGTGCTGCCAGCCGTAAGGCCGAAT  
ACCGCGTCCCATCGGAATCATTCCAGACCTAATTTGGCAAAGCTGTACCAATCAGGTAAGCAAAGGTGCCTTTAAT  
ACCATCGGCAGCGCAATCGCTTTTTAGGTACAAAGCCAACAGCAGCCACCAATCAACAATTGCGGGCAAAGACCA  
GGAAACCAACGCAAAGAGAGAAGCCAGATAGATATATTCGTTACTGGCATGTTGATACACACCGAGCGTGGCGATAATC  
AGCGCCAGCGGATGAGGCCACAGGCCACGGCGACCGTTCCGCCAGGTGAGAGAGCCAGCCCCACAGCAGCGTACCGAC  
CAGCGCACCAGCTTAAACAGCGTAAAGCCCTGAATCGCCACCGCTTTAGAGAGTTTCACTTCTGGAACCGGTATACGG  
TTGACCACTGGTGATACCAATACGTACCACATAGAGGAAAATGTTGGCGAAGCACAGCAGCCAGATCACTTTGTTTTT  
AGCACATACTCAAAAGATCTGCCACTTGGTCATATCGGTAGATTCTGTCTCTTTGTCCTTCTCGCTGATCTCCTCGCC  
GAACAGTTCTTCACTTTGCCGAGGCCATAAGATTTCCGGGAGTCGCTGCCGTAACGCAGGCCGATAAAACCGACAATCA  
GCGGATAATCGACGGGAAGATAAACATGCCGATGACATGGCCATCGAACAGGTAATTTGCCCCGAACAGCGCCACACT  
GCTGCGCTGCACCGCAAGGTTGTGAGAAATATTCAGAAACCGAGGAATGTCCCGGTTTACGACGCGCGTCCATTT  
GGTATGGTGGAGTAACGCACGAACCGCGTACTCTGAAAAAGCCGTTAAGGCGTAGAAGGCAATCATCAGGAACA  
GGTAACCGAGCCGCTGCCATACTGGCACTGAAGCCAGCATAACAATAGCAGAGAGGATCAGATGAACGGCAGGAAT  
TGTTTTGGTGTTTTTGCCGTGCGCTAGTAGGAAACAGCGTTTTTACCACGCCATAAGTATGAGAGAAACCCAGGCCGAT  
CATCCCCAGCTGCGTCATGCTCAACCCGTAGGTGAAATCATATCGTTTCTGCGCGATGTTAAAGTTCTTGCGAATCAGGT  
ACATCGTCAGGTAGCCGATAAAGACCACAGGTAGGATTGCATGAACGGTTTGAACCACATTTTGCGCCGCACTTCGAGC  
GGAAGGTCCAGGGTGGCTTGCGAACCTGGTTTAAAGAAAGCCAGCATGGGTTACTCCTGAAATGAATACCTGCGTGAGGC  
ATGCATTGAAAAATCAGCAGCAAATCAGGCCTGAGATAGCGTCCAGGCAAAACCTGAAAAATTTCTTAGTTTTGCGGGA  
TATGAAGTGAAGGAGTATGATGATCAGCTTCCGCGGGTGTCTGGCGTTCAAAAAGGGCAGTAACAGCAGTGCGGAAA  
TCCCGGCGGCGATAGAGATAACCAAAAAATCCGCTCCAGTGCCAGGTATCGAGTACTTTCCGCGCGGCCAACAGCA  
AGCGACGCCCCAGATAAGCAAAACAGCCGACAAACCCCGTCCGCCCCCTGCCGCTCTTTGTGGGAACACTCTGCCGC  
CGCCATACCGATTAACATCTGTGGGCCAAAGACAAAAAACCAATGGTGAAGAAGCAGGTTGCTGCATCAGTAGCTGG  
CAAATGGCATCAGCCACAGGAGCCGACTGAAAGCAAAATTCGGCGCGGAAAATCAAATTCATCGGCCCTCGGTTGCCG  
TTAAACAATTTGTCGAGCCCAACCGGCTACCAGCGACCGATAAATCCGCCAGTTCAAACATCGTCACTGCCGTATT  
CGCCGTGACCAGATCGACGCCAGTGTCTCGGACATATACAAATTCGCCAGTCTTGATCGCGCGCCGACCATAGA  
CCAGCACATAGCAAAACGAAAGCAGCCAGATATACGGATTGAGCAACACATATTTGGTGAAGTCTCTTACGCGTCAAC  
CCTGCCCTTCTTGTGTTGAGCAATTTCCAGCGCGTGTGTGCGCATTACCAGCCCGGTAACCTAACGCCTGCGG  
GCGATCGGTAGCCGCCAGCAGAGAAAAATCCCAAGACTATCGCCATACAACCAGCAATCATATCCCGGCGACGCCAGC  
CGTAATGACGCGCAGCCGCTGCCATACAATGGGAATGAGTGCAGCGCCGACGTTATGCGCGGTGTTCCATAATGCCAC  
CAACCGCGCGCTCGGTACGTGAATACCAGCCGTTAACAGACGCGCACACCCGGTGAACCCAGCCCTGAAAAAGG

GTT CAG CACCAGAGCACGGCAAACGCCCATAGCGACGTCGAGAAGCCAAACAGAATGTTGATAATGCCCGTGGCGATAA  
GCCCTATCCCCATAAAAATAACGGGCATTTGAGCGATCGCTGACAATGCCGGAGACAACTTCGACACGCCATAGGTAATG  
TAAAACAGGGTCGCTAACAGCCGATATCGCTACGGCTGAGCACGCCGTTAGCAAGGATTTCTGGTACGGCGGCGTTAAA  
ACTTTTCCGCGTGAAGTAAAACAGCGCGTAACCCAGCCAGATGGTCAGCAGAATATGCCGACGCCAGTAGCGATAGCGGG  
CATCAATTTTATATTTATCAGTCATTAATGGCGCATCGGCAGGCGTTTTAGAAACGGCAACATCATAAACCTTAGACA  
TAGCGTTGAGGTAGAGAAACGCTGACACGCGTGCCGTGCGACAGGAAATGTGTAATGTGCCACCCAGCGCGCTTACGCG  
CTCGCGCATTCCGGTGAGGCCAAAACCTTGTGCCCGGAACCCGGCGGCAAACCCGCTGCCATCGTCTTCAATAACCAGCA  
TCAACCGTTATCCTGCTGCCAGCCTTGACGGGTGACCGCGCTGGCATCAGCATGTTTACAATGTTGTTTCAGCCCTCC  
TGGCAGACACGAAACAGCGTCACGCGCTGGTTTTCGCTAACGCTGATTTCATCGATTGCCATTGAGATGGCTGACAAAT  
ACCGCGCCTTCCAGCTCCATTTCCCGCATCAGTGAGCGGATGGCCTGCTCCAGGGTGAGATCATCCAATGGCGCGGAC  
GTAACCGACCCAAACAAACGGCGCACCGCGTCTGTAACGCCCAGCGATAGTTGTTGATGAGCTGCCCGCTCTGCTTACG  
CTGGCGTTATCTGCCCGCAGCGCTGAACAATGCCCCTGAGTACGAATAGCAGTGATGGTCTGACCGATATCATCATG  
CAGCTCACGCGCCACATCACGGCGCACGCTCTTTCGGTTTTCCAGCAACCGTTAGCCAGATGCTGATTGCGCGCCAGTT  
CCTTTTGCAGCGACTGGTTAAGTTACGCAACCGCTGGATGCCAGCGCAAGCAACAACCCGTGCAGACTTTCACCCAGC  
AGCGAGACAAATAACCCAGGATGATCGCGCGGTTTACTGGCGATCAGCGCGATGGCGTTTCAACGCTGCAAT  
CAGCGCCCCTTCCCAACCATAGTGCCAGGCCAGCGGATAATCGGCAGCGCCAGACAGAATGGCGTAAAGCGCGACGAT  
CGTCCGGCAATCCCACTGGAGCCAGAGACTGATAACAAACAGCAGCAAGTACCAGACCAGATGTCGCCCGCGCCAGTTG  
ATTGGCTGAGAAACAGTGACGGACCGAGCGGCAGCCAGTGTTATTGGCGAGATAGTCCAGAACACCAGACATATCGG  
GGCAGCGTCAGGCCGCCAGTTAAAGTCAGCAACAGCGCATTCCACGACTCTTTGCCGTGCCAAAGCCAGGGCAGCGACT  
GCAACAACGCCCGCGCGTTAACGCCGCCCCCTGTAACAGCAAGGTGCGCCAGTCACGCTGATGGCGATAGCGCGAGATC  
AGCGCTACGGGAGTAACGTAGTAACTACCGATCATCAATAACGGAATAAGGTTAAACCGACCGCTGCGTTAGCCA  
GTAAATCAGCAGCCTCCGCGCCAGCAATACGGGCGCAGTATCCGCGCGGGCATTGCAGCATTAGCCCCAGACGCAGAC  
CAAACGGAATAACAGCACCGCCATATCAGGGCGCTCAACAGATGACGGCTGATACTCCACAGGCAAACCATGCGGCA  
GAGAAGATAAAAAAGCAGGCAATAACGGTAATTAAGCGGGAACAACGTCTTATCACCAGCCATCAAACATGCGGCGC  
GCCAGCTCTACGTCGTTACTGACGCCAGTTTTCCATCAGATTGGCGCGATGGACGTGTACC GTTTTCGGTGACAAGCC  
CAGTTCCGGCGCAATCTCTTTACCGCCATTCTTGCGCCAGTTTTTTCCGCCACCTGGCGTTACGTTTTGGTTAGCGGGT  
CCTGACGACCGGATGCCAGTTAATGGCAATATCCGGCGTCAGATAACAGCCGCCCGTGGCAACCGTATGACCCGCAGCA  
ATGAGTTCATCCGGGCTACAGCGTTTTGAAAAGAAAGCCGCGTGCCCCCGGTTAAGCGCCTGCTCAACCAGCGCAGGACT  
GTCGTGAACGGAGAGCATAATCGTCCGATACCTTTCCGGCAGCTGGCTTAGCAGCTCCAGACCGGAGATATCGGGCATGG  
AGATATCGAAATACACACCTGCACACCGCGCCCCGGCAGCCCCGCCAGCGCCTCGCGCCCCGAACAAACTCGGCAACT  
ACCTGCAAATCAGGTTCCAGCCCCAGCAGCTGCGCAAAGCCGGAGCGGACGATGAGGTGATCGTCTATAAGGGCAACGGT  
GATCATGGTCTTGCTGCGGGTAAAAAAATACGCGCTTACCTAACGATAAGCGCGATGTTGTTCAAGCCTTGAGCG  
GTTACTGAAAAACACCGGATCTTGTTAAACATCGTCGGATCGGACTGATTACGCTGCATTTACAGCATCTTCCAGC  
TTATCGATTTGGCTTATCATCTGCTCCAGACGCTGGTGCATTTGACCAGTAGCCAGATATGGCTTTTGTGCTGTCTG  
AATCGGCAGACAAAGAATGCCTTCAACGTTAAAAGCGCGGGCAGGCAAAAAGCCACAAACGTTGGGTGATTACGCCGGAT  
GGTTGGAACGGTGAGCTCCAGAATTACGTTGTCATGAGTTGTTTTGCATGGCTTATCCCCACCATTTAGTATTC  
GCCGACCTGGCGCACCATCGGTAACCTTTTTCTTGGCATCAATGCGCACATGGATCAGCGCCGGCCAGGGCGATT  
GATGATTTCTGCAATGAAGCTGCGGATCGGCTTTCGTTAATCAATCACAGTTTCGAGGCCAATCCGGCGGCAATCT  
GCATAAAGTTGATTTTCCCGGATAGTGGCGGCAAAAACGCTTGCCTGTAGAACAGACTGTGTTGCTGATGACCCAGC  
CCCAGCGCTTCTGTTGTTATCAGAAATGATTTTGACATCCAGTGATTTTACTGGCGGTGCCATCTCTGAAATTTAT  
CATCAGGCTGCCGTGCCGAGAAACACAACACTTTGCGATCCGGGTTTCGCCAGCGCAGCGCAATCGCCGAGGCAGGC  
CAAAACCATCGTCCCAGCCACCGAGGTCAGCCACTGGCGTGGGCGATTGAGCGGATAAGCTTGCGGGTCCACATC  
TGATGCTGACCAACGTGCGTGGTGATAATTGCATTGTCATCGACACAGGCGGCAACGGCGTTGATCAGGCCGTAATGGCT  
TAACGGATCGCACGCTTTCGGGATTGGACACGAAACTCACGCTGCAAATCCGCTACCAACTGGTGCCACTCTGCACCG  
GTTGCGCTTCCACCAGCGGGATCAACTGCGCCAGCAGTCATCAACATCCGCTGAATCGCCAGTGGCGCTGCTTGATT  
TTACCCAGCTCTGCACGGTCGATATCGACATGAATGATTTTGGCATTGGACAGAACTGCTCGGTTTTGCCAATCGCCCG  
GTCATCAAACCGCACCGGACTATCAACAAATCCGCTCTGCAAAAATAGTTGGTGTGCGCACGCCGTCATCC  
CCAGCATACCCAGCGACAACGGATGCGCTTTTGGCAACATGCCAGCGCCATTAAGTTCATGGTGGTAGGCGATTGCGCT  
TTCTCCGCCAGTTACGCACCCGTGCGGGCGCATTGATCACACCGCCCGCCAGATAAAGCACCGGGCGTTTTGGCAGCGTT  
AATCATCGCCGCTGCGTCACGAATGCTTTCTCGCTAAAGGCGGGGGCGGGCGTTTTCTGCCATAGCGGGCTGTGTTT  
CAATCTCAAAAACGCGTTTGACATCTTAGGAATGTCTATCCACACCGGCCCTGGGCGCGCTGATTGCGCAATGCGG  
AAGGCATCGCTCATGACCTGCGGGAGTCTTCGATATGCTGACCAGATAGTTGTGTTGGTGATGGGGATAGAGATGCC  
GTAGGTGTCCACTTCTGGAAGGCGTCCGTGCCGATCATCGAGGGGGAACCTGACCAGTATGCAAATCAGCGGGATGG  
AGTCCAGCCGCGCATCGGCAATGGCGGTACCCAGGTTAGTCGACCCCGTCCGTACAGGCCATACAGACCGCCGGTTTTA  
CCGTGCGTGGCGCCATTTCCCTGAGCGATAAAGCCCCGCGCCTGTTTATGACGGGCCAGAATATGGCGGATTTGCGTGCT  
TTGGCTTAAGGCATGTAACAGGCGAGGATAGAACCGCCCGAATGCCTGTCACAATCTTAATGCCCTGCTGTTCCAGGA

AATGAACGATAAATTCTGCGCCGGTAAAGCGCTTACGCGTCGATGTTGTGCCGAACTTGCCATGCTCCAGTCCTTTTCT  
TCTGGGCCGACTTTCCGGGAGGTGCTTAAACGAAAAACCCCGCCGGTTTTCGCGCGGGGGTTTTGGAATCGTGTGTTG  
TTCCAGTCCCTACGGCGCATTGCCGACGACCACCACACGCACGACGACCACTGCGGGCGATGGCGCAGTTGGTAGTA  
GTTTTGCGTGGAGCATGGAAGTAGTCATTGGGGACCTTGTGGTTTTGTGTTTAAACAATTTTATACAAGCACAGCTTTA  
CAGGGGAGACAATGGAAAATTTTTAGCAAGGGAAAATTGAGGGGTTGATCACGTTTTGACTGAATTGCAGATAACAAA  
AAACCCCGCCGGAGCGAGTTCGTCAGTCGCTGCGGCTGGTAAACCGCAAAGCACACTGTATTATGTCAACACTGAAAG  
TATACGTGTTCCGCGCAGAACGCGCAATTTCCGACGAAATTTGACGTATTTAGTGCATAGTTGAGTATCGATCACAGTT  
TGCGTTTTGTCCAAATATTAAGTCTTTTATACAGTAAACTTCTATAATATCACTGTACGCAATGTGTTATGCGGGGGC  
CGCATCGTTACCCGGCGCACTAAGTCCTGGTGAACCGGTGGTCCGTCAGCGCTTAACCCCGGTGAGCACACTGTG  
TTATGTCAACAAGCACAACGTTTCTCCTTGAGATACCAGTGCACAACAGCTGGCAACAGGCGGAAAAGGTACGTGAG  
CTGGCAGTGCCTGAACCAAGGAGACGCGTATGAACCTGGTGGATATCGCCATTCTTATCTCAAACCTATTGTTGCA  
GCACTGCAACTGCTTATGCTGTTCTGAAATACCTGAAGTAATTCAGATTCAAGTCGACCAAAGGGGAGCGGAAAACCG  
CTCCCCTTTTATTTAGCGTGCAGGTTGGTGTCCGATGCGATGCTGACGCATCTTATCCGCCCTACCATCTCTCCCGC  
AACATTTATTGCCGCTTTTGTACATATTCTGCCGCTAAACAATTCCCATTCTGCGGTATATCTGGTAACATTATCA  
CAATGTATAGATTCTCTCCCGATTTATGGAAATCGTGTGACTTATTCTAATTTTATAAAAAGCATCCGTGAT  
AATGAAAAGGCAAAGAAACGTCAATTTGTTATTGATGTTGGTATTACTCGTGCCGTCGTTGAGTGGCAGAACACCTTT  
ATATTCCAGCTATTGCCGATATGGCGCGATCTCAACGTCGTTGAAAGGGCGGTGAGAGCGTAATGGCGCTTATCTG  
CTGACTTACGTTGCTCACAGCTGTTTTATGGCCGATTTCCGACCGGTGGGCGCGCACCGGTGATCCTCGTGGAAAT  
GTCCATTTTTATGCTGGCAACGCTGGTGCAGCTCAGCTTACGCTTACGCTTGGTGGTATTGCCGCCAGCGCGATGAGG  
GGATGGGACCAGGCGTTGGCGCGTAATGGCGGTACTTTACCAGGAGATTTATATGAACGGACACAGTTGCGCCATGCT  
AACAGCCTGTTAAACATGGGATTCTCGTCAGTCCGTTGCTCGCACCGTAATCGGCGGTCTGCTGGATACGATGTGAA  
CTGGCGCGCTGTTATCTTTTTGTGGTTCTTTGTGCTGGTGTGACCTTACGATGGCCCGCTGGATGCCGAAACGC  
GTCCGGTCGATGACCGCGCAGCGCTGCTACCAGTTATAAACGCTTTTCGGTAACAGCGGTTTTAACTGTTATTTG  
CTGATGCTGATTGGCGGTGTCGCGGATTGCCGCTTTGAAGCCTGCTCCGGCGTGTGATGGGCGCGGTGTTAGGGCT  
GAGCAGTATGACGGTCAGTATTTGTTATTCTGCCGATTCCGGCAGCTTTTTGGCGCATGTTTTGCCGGACGTCCCA  
ATAAACGCTTCTCACGTTAATGTGGCAGTCGGTATCTGCTGCCTGCTGGCTGGCTTGTGATGTGGATCCCCGACTGG  
TTTGGCGTGTGATGATGTCTGGACGCTGCTCGTTCCCGCGCGTGTCTTTTTCGGTGCCGGGATGCTGTTCCGCTGGC  
GACCAGCGGCGCATGGAGCCGTTCCCCTTCTGGCGGGCAGCGTGGCGCGTGGTCCGGGCTGCAAAAACATTGGTT  
CCGGCGTGTGGCGTGTCTGCGATGTTGCCGAAACCGGTACGGGCGCCTGGGGTTGTTGATGACCTAATGGGA  
TTGTTGATCGTGTGCTGGCTGCCGCTGGCGACGCGGATGTGCATCAGGGGCAGCCCGTTAAGCGCACGTACCCGC  
AGCATCGTCATCAGCTCCATGGGAGAAGCATGCTGCTTTATCAGATCACGCATCACCCGCATATGCGGTGCGGAGTAAGA  
ATAAAACGCTGATAGCCCGCACAAGCACGCTGTCTGGCGTCTCCTGCCGAGCGTGGGGCACAGGCGATGCCAGTGC  
ACGCTTGGCAGTCACAGCGCGTTGGGGTTTTCGTGCACACCATTTTTGTAAGGTGGCGTCAAAAAGCTCAATCGAG  
ATACGACTGATATCTGCCCGACCCAACTCGAACAGGGCAATTAATAAATTTCCCCACAGCTCTGCTGTACCCGAAGC  
GGCGTCAGATCGCCCGGTATCAAAATCAAGATAGGGAATGAGCTGTACGGAGCGGATGCCCGCTGTTTGAATTTG  
GATAAAAATCGGCAGGTTGAGAGCATCTTGACTCTACAACAGTTTATGCCTGTCTCTTCCAGATCAATGACCTGA  
CTTCTGTCATGCGACTCTCAATAAATACGATAAGTTGATGTATATGCGTTACAGCAAACAGTATTGCGAGAGATAAC  
ACCGCGAGGGAGATCAAAAATTTGTCACGGAACAGTAAATGGGAAAAATCGCTATTGCTGACATCCATTAATTTGCG  
ATTACGGGTGAGTGCCAGAGGATCAGCGCCACGATGGCGAGAATGCCAATCGAAATCCAGAATAACATGCCGCCTGGT  
GCCAGTTGTGTTGATAGCAACGCCATCAACCGCGTAGCCAGCATGGTACGAAACCCAGCAGTGTGTCGCTCC  
GGCTGCAGTCTGGGTGCGCAATGCGTCTGGCTTTGGGCTATCCGGCATAACAACAGTCCCATAACGATCACCCGA  
CGACCATCAATATTAAGCTAATGATTAATAAGCTGTTGGTGTAGGGCAGGTCCTTTTTCAGACGCATCGTTTTTATTG  
CGTAACAGCGCAAGTAGCCATACATCGTAACCCCGCGAAAACAGACACAACAACGCCAGCAGTTCGCGAATGAC  
GGCGTGGCGAAATCTGGCGCAAGTTGATCAAGCCCAACCCCGCGCCAGAAATCTAGTGCAGTACGGATCCACGCCA  
GAAAAGTACGCTATTAGCCAGCGAGAAGCGGTAATCAGGCGTCTCCGAGGCGGAAATTTTATTGTTGCTCCTTTG  
CAATTTCACTAACGCTCTACTTTAGCGTTTTTTTTAAGAATTTCTGCCCGCTTTTCTGATATGCTTTTGCCATCCGC  
TACAAGGAGGTGAGATGGTATCATAGCTCAAAATAAATCAGTTCATTGGGCATGCTGTTCCGGTCCATCGCTTAATG  
ATGGGATTATCCACTTTTATTGGCCCTTTCTCCGCACCACCGCAACGTTTGAAGCATCGTGGCGGACAAAACGGC  
TGAAATTAAGAGGTTCTCTCCCGGAATAAAGGCGAAAAATTAACCAGGTGGAGAAAAAAGAGGACGTAGATGTCG  
ATAAATCCTCAATCAAAGCGGTATCGCACTGGCCATTGCTGCGTACTTTGCGCATTTATTGGCGGTATGCGTAAGGAA  
AATCGCTGGGCATTGCGCGCGCTGGTTTTTGGCGGGACGCTGGCTTCCATACCTTCTTTTTGTTATCGGCAT  
CGTGTGCAGCATTTTGTGATATTCTTATCTTTCTTCTGACCGCGGTTACTGGTTAAGCAGCCTGAATAATGC  
CCGCCGGGTGATCATCAGCGGCAATTATCGTCAGAATTTCTGTTTTTCTCCTCACCTTACCCCTTGTGTCGGTAGGC  
CGGTGTATAGTGCAGTACAACGGCAATAGCCATTTTGGACGTGGACGAAACGCCCCATCCAGCGCGGGCGTGC  
TCTTACGCCACGGACGCACTCCATTGGTAAGTGCAGGACGGATCGCAATTTTGTCCATGTAATCCAATAAGGCGTC  
ATGCATTTGCTGCGAACGTCTGAAAACGGATATCATCGATCAGGTTATGCATTTATTGGGTCATTACGGCGATCGT

AAAGTTCATCACTGGTGAAGAGTTGAGTACCAGTTTAAAGTCATCCGTCACCCAGCAACGCACCGGAATAAAACCGCCA  
AAGCTGTCATGCTCAATCTCGTAGCGTTAAATTCACCATCACGCCGCTGGCTCTTTCACGGCAAGGATATTTCCCC  
CGCAGAATCTCTGGTTTTCAATATCTGCCAGCGCATCATTGTCGGCAGTAAATCGATATGACTGACTGGCGTATCGA  
CCTGTCGCCGCTCCCCTTGGGGGAACGGATGATCAGCGGAATGCGGGTATGTCGTCATACATCGCCGCCCTTTACTG  
ATCAGCTTATGTGCGCCATCATTTCCCGTGTATCGGAGGTATAAATAACCCACGTATTTTCACGTTGCTCTGGCGTTAA  
GGCATTGATGACCCGTCGATTTGGTATCAACAAAGTCATTACAGGCAAAATAGAGCGGATGGTGATAAAGCCCGTCAT  
CACCAGTGGCGATGGCATCGCCTGCGCCATAAGCGGTGATGTTCCGGTTTGTAGCCAGGTATCCTGTGCTTTCTCG  
CCCAGCTCGTAGTAAAAATCAGCGTATTTCTCTAAATACTCCACCGGACAGGTGAACGGGTGATGCGGCTCATACACGA  
AACACCATCAGGAAAGGCTCGTCTGCGCGCAGGCTGTTGCAGAAAATCCACCGCCGATTGCTGATACGATGCGCCC  
AGGTGAAGTTTCTGTCGATATGGTTCGCTGTAATCTTCGACGCTGTTTAGGCCATTGCGCCACAGGCTAATCTCTTTT  
TCCGTACAGTTCGTAAGATAGTTCCGCCATCGAACAGTAATCAGCGTCCCACTCCGCGGACACTCGCCAGTGGCGAA  
ATAGTCATGACCGTCGAGATGCCATTTGCCGATGTAACAGGTGTGATAGCCGGCATCCTTAAAGTAGCGCCCATAGTGG  
AGATGTTTTGCTGGCGGACGTTGTTGGTCCACGGCCGGACTGGTTAGCGTAGATACCGGTAAATAGTCCGGCCGT  
GCAGGCGTACAAACGGTGAACAGGTAGGCGGAAATTAAGCGAATACTTCCGCGCAGACTATCAATATTTTGGCT  
ATCAGCGTTTACCCTATAGCAACCGACCATATTGGTGGCTGGGTATCGGTCATGACGAACAGAAAATGGGGCGTT  
TCATAGGTTATCCTTCCCGTGGGAGTAAAGGTTACGGCTGGTGGTGCAGTATCGGCGGACGTTCAAAAATCAGGTAGA  
CAATCACTACGCGCAATGAAATAACTGATCATCGCTAACAGCGCGTACCGTAGCCGCGAATTGAGCCAGCCCGCA  
TAGACGCCAATCATCGCAACAGGATGCCAATTGACGCGATCTTGACGTTTTCCACGTTTTCATGTCCACCGCAAACGC  
ATCTTTGAAGGTGAACGGGTGGCGCGGTTTGTAAAAACCGATCACCAGCATCACGACCACGTTGATGACAGAACGTAC  
AGGCCAGCACATAGAGGAAATGGAAGTCGAACCTCACCAGATAGTTGATGGTATGATAGCTGATTATGCCAATCCCATC  
GCTACTTTTCCGCCAGCGCCGGGATGCGCGGGAAGAAAAGCCATAATGATGATGGTAACAGCGGACGTTGTAAT  
GCCGTTGAGCTGTTTTCATCCAGCTATACAGCCCCTGCGCGGCTTGGCGATCCACGGCGGACAGCACCGAAACGATAG  
CGATAAAGAAACCAATTTGCGCCGACGGTGACAGCTGCTGCGGCTGGCATTCTGGTTAATGATGCGACGGTAAATA  
CCATACTGAATAACGTAAGTGGCGCTATTAGAAAGCGTTGAAGGTAAGTATGATCACCAGCAAAATAACACCGCGCCGAA  
GAAACCCACCATTTGGCACTGGCAGAACGTTATTGACCAGCGTCCGGTAGGCCATGTCGGCTTTCGGTAAATCCTGATACA  
GATGAAACGCAATCAACCCTGGCAGCACCAGTACCAGCGGGTCGAGCATTTTCAGCACCGCCTTAAACAGCGCCCCCTT  
TGCCCTTCCGCCAGGCTTTTGGCCAGCGTGCCTGTCAGCATGCCCTGATTTGTACACCAGTAAAAGGTTCACCAG  
AATCAAACCGTAAATGCCCGCAATCGGCAAGGGATCGGTCCGGCCACCGATTGAGTTAATTTCTCGCGTGAACGG  
TGTTGAGTTGCTCAATGCCCTGCATAAAGCTGCCCTTGCCCATCGGATTAGGCCAAATACCGGCACCATCAACCCGCCG  
ATAACCAGCCCAATACCGTTGATGGAGTCCGCCACTGCCATTGCGCGAGTCCGCCGATCACCGCATAAAAATCCCGC  
CAGACCAAGCAAAATACAGTAGCCAGATAGCCGCACCGTGAGAAATCTGTAGCGATTCCCCGACGTGAAACAGGCTGT  
TGAGCGCAACCGCCGAGTAGAGAACAAATCGGCAGAAAGCAGACGCCGGTGGCAATTAGGAAGCAGAAGTCTGATGATA  
ATACGCGTCGTTTATCATAACGTTCTCCAGAAAATCGGGGATGGTGGCAATGCCGCGTTAGATAGCGCGGTAAAAA  
GATTAGCGGAGGAAGATCAGCGTCACCGCTGAAGTCACTTCCAGCCCATCACCGACATGCCGCTTTTGTAGGCTGCC  
CGGAAAGGCCGACAGTGTTCGTTGGAAGGTTGGTTAGCATTAAACGAAGCGCAATAACCGCGCTTTTGTAGTAAAGT  
CCGGCAAGAAAATAGCCTGTTGCGATCCGGTATCTGTTTGGCGACCTTCCACAGGTGATCACCGCCACAGCAGCGT  
AAAACCGACAAAATCAAGATTTGTAACGAATTCTCATAGCCCTATTTATGTTTATGTCGCGGACGCATGAATATA  
GGGAGAGGTAAAATGCGTCGGGTGAGGAGTCAAGTTCCTAAAATACAAACGTCGATCCCTGAACGGATTGTTTTCTGT  
TAAGTTAGGTTGTGAGCAATAATCGCCGAGGGATTAATAATGAATGGAAAATGCAAAGTTAGATGAAAAACGGA  
AACTCCGTACAATATCCCTTATTGATTAACGAAAATGTGATCAGCGGAATTTCTCTGATCTCGCTGCGCATACT  
ACGCCGACGACATTACCGGTGATCTGCCCGCGGACAAAGAAACCGCTTATCGCCAACTCATGGGTTGCGGTGAT  
ACCGTACAAGGATGTGGGAAAATCTTTTAAAGAATGGCGAACAAATAACACTGCATGGCAACTGTATTATATTCTTAAA  
GCCAATGGATATTCACTTTATCACTGTGAAGGTTTGTGTTAGTCTGGGAACAGTACTGGATGGAATTTACCCCCACAGTATGA  
TGGATATTCGGTGGTCAGCAAAGCGTTATTTATAATGGCGAAATTTATAATCAGGAACTCACCGAAGTTGCTGAGTTA  
ATAACTTACCAGAAGCAATAAAAAATAATCTGGCAGTGCCTTTTCTGACGAAAATTTTATCAGTGGATTTGTCTTAT  
GTACGCAGATGGTAAAAAGATCCACAACGGCGGCAAAATGAAAAATTAATTGCCACTTTACATGCCAGTCTGCAACAAC  
GCTGGAGCGTAGCTGATATGGTGCACGATCCCCTGTAGCGAAGCCTGGTTGCGTCGCTGTTTTTACGCTATAACCGC  
AAGACGCCGAAAGAATAATACCTCGATGCGCGTCTGGATCTGGCCTATCGCTATTAAGCAACAAGGAAACTCGGTTGG  
CGAAGTCTGATACGCTCAACTTCTCGACTCCTTTCATTTAGCAAGCCTTAAACATAAATTTGGTTATGCGCCGT  
CAGCCGTGCTAAGAATACGGACAGCACCACCGGATGCCAGTCCACACAATTAACGTAACCTGGCCAGTACGCTTG  
TTGGCTCCAGCAACTCATCAGAATAGCTTTGGCGACCGAGGCGCTCGGTACCGTTTTCGACAACGTAATCGCTGCCA  
CAGGTGCTGATATGAACGCTGTTCCAGCGCTCCACGACAGTTTTTCCACCGCACTTGCTGACTCATTAAACCCTTCT  
GAAACTGCGGATATCGCCGACCACAGTGGTTAGGCGGTAGTAGCGCACGCGCATCTGTTTGGGATCTTTCAGCCCAA  
CAATTTGCGCATCCGGCTTCAATACCGATTGGCATGTACAGATGTTGAGGATTTTCGATTCGGGCGGACAGACGGC  
GTGGCTTCTGCGACAATGGCTGCGGGTTGGAGTAGTTGAGCATCCAGGCATTTGGTGAATATTTTCCATATAATCCAC  
CAGTTCCAGGACCGCCCAATGGAACGCATGCCGTACGCTATTCCGCGGGTCCGCAAGTTTCTGACCAACAACCGCT

GGCGCAGCGGGATTTTTTCATCCAGTTCGCGCATCGGGTATTTGCCGACGCGGATGTGCGCCATGACAAAATCAACGTCG  
CTGAATGCCACTTCAGGATCGGTGGTGAACATAACGCAATGTCCGGCGCTTTTTCTTTAAGGATGACTTTACAGGCTTC  
GGCAATCACTTCTCGCCGCGCACCATCGTTATCATAAAAATTTAGTGCACGAAGCGGGAAACGGTCTGATTCGCCAGGA  
GCATCAACACGATGCCTGGCGTAAAGGTGCTTCCACCGCTGCGACAACCACTGAGAATTTGGTCATTATACTGCCTCCG  
TAATGGCAACATTTTTCTGCTGATTGATGAGAATTAATTAAGCTATCGAGCTGTTACGCAGCTGAGATACATGCAGACCA  
ATGATCACCTGAATGGCATCGCCACTACGGAAGACGCCGTGCGCTCCAGCTTTTTAAAGACTTTCGTATCCAGCGTTTG  
TGACATGTCATGCAGTGAATACGTAACCGCTGCGCAATTGTTAATGCTGGAGATATTGCCGACCCCGCCAGGGCTT  
GCAGGATACCGGCAGCCTGATCCAGCTTTTTTTTTGGCTTCCGCGGGTGGTTTGGCTCGCGAGGCTTTGTATTGGCT  
TTTGAGTAGAGTTTCACTTCCGCATCTTACGTCCCGGCGTGCACATGTTGAACTGCAGAACTAGTGTGCGGAAAACCA  
GAAGTACAGCAGGGTAAAGCACAACCCAAATGGCGATTTGGGTGAGCATCATATCCGCGTGGTTGCTGAACATCGGGATCC  
AGTTTTGCGGTAAAACCTAGTCAATCAGACCTCCGCCCATGTTGCCACCACACAAAGAGATACATTACGGTCGACATT  
GAGGCCGCCAGCAGCGGTGATCCGCAACAGCAACGGTGAATGAACAGGAAGGTAATTCAGCGGTTGCGTAATTC  
CACCAGCATGGCGTTAAGTTCGCGGAAATCAGCAAGCCGCCACTTTTACCGATTTTCCGGTGCAGGAGTGAAGTACA  
TCGCTAAAGAAATGCCACGGCACCAAGATTTTTGAGTTACCGTGCAGGGCAAACCGCTTCCGGGAACAACGATTT  
AGCGGCTCGCGCTCAAACCTGAACCTTGCAGATGCTGCGCCAGTACATCTGAATGCCGCTTCAACAGCTGCCGAC  
AAAGATAAACTGTCCGTAGATGAAGTGGTGAACCGGTTGGGATCAGAATACGTTTCGAGGAAGGTGTAACCCAGACCC  
CAAGTGCACCCGCCGAACGCAGGAACGCTTGCAGAGATTCAATCCCCATTTGACTTTTGGCCAGCCGAGCAACGTCAGC  
CAGGCACAGGGGATCATACCAGGAAGGCGATAATACCACATAAGACGTCCTTGGAAAATGCCGAGAAAAACCGGCAG  
TTTTTATCGAACAGACGGTTATGCAGCGCGTCACAATGCCGAAATGATAATTGCGCCGATAATGCTGGTATCGAGGG  
TTTTAATCCCGCCATCATTGTGACACCGCTACCTGCCACCGCTCTGAGTGAATCGACGCCGAAGTAGCTTCCCCAG  
GTCATTTCCATCGCGTTGATGAAATAGTTCAGGTGAGAACTCACCATCACCGCCAGACAAGCAGCCCTGCGCTTG  
CTTAGCAAGGCCAATGGGTAACCGACAGCAAAAATCAGCGGCATATTACGGAATACCGTCCAACCGCCCTTTCAATAA  
TGTGTACGATTTGCGCGAATAAACTGTTGCGATCGGTGAGTATTCCCCGACAAACATCGGGTTTTGCAGCAAGATGGCA  
AGACCCACCACAATCCCGCGGAAGGGAACAGCAGCACTGGCGTGAACATCGCGCCGCAAGCGTTGAATTTGACTGAG  
CATTTCCACATCTCTTTCTCAATTCTGAAGTAGGAAGCTGATTGGTTATGCGGCAGGCTGGAGCGAGGATAGGAA  
GATGCGATCGGCAGAATGACGACCCAAATGGGATTCGTGATCGTTTTCATGTTTTCGTTGGCGGTAGAGATCTACGT  
TTTTCGGAAAAAGTAGACCTCTGTGAGCACAGGTACACAGCATCGAACACATCTTAAAAAAAAGATGTTTTTTCAATCG  
ATTAAGCAGAATTTGTGTGCGCATTACCCGGCTTGCAGGCAAAAAGAGATCTAGAGATGATCTACAAAAGCATTGCGG  
AGCGGTTAAGAATTCGACTTAACTCCGCAGATTTACGCTAAACAGCCTTCTTCCCGGTGAAAAAAGCTGGCGGAAGAG  
TTTGCGGTATCGCGGATGACCATCCGTAAGCCATTGACCTGCTGGTAGCGTGGGGGCTGGTGGTCCGCCGCCACGGTAG  
TGCACTTACCTGGTGCGCAAGATGTAATGTCATCAAAACCGCCAGTCTGACCGGGCTGGTGGAGGTGTTAAAACGGCAGG  
GAAAAACGGTCACCAGCCAGGTGCTGATTTTTGAAATCATGCCTGCGCTCCGGCCATTGCCAGCCAGTTACGGATTCAA  
ATCAACGAGCAGATCTACTTCTCCCGTCCGCTCGTTTTGTGGAAGGGAAACCGCTGATGCTGGAAGACAGCTATATGCC  
GGTAAAATGTTCCGTAATCTTTGCTGCAACATCTGGAAGGGTCAAGTGTGAATATATTGAACAAGAGTGCGGGATTT  
TGATTGGCGGTAATTATGAAAGCCTGACGCCAGTGTGCGCGATAGACTGCTGGCGCGGCAATGAAGGTAGCGGAACAC  
ACGCCACTGCTGCGGATCACCTCGTTGCATATAGCAGAGCGGGGAGTTTTTGAATTTAGTGTGTTGAGAAATGC  
CAGCGAATACCAGGTGGAGTACCATTTACGGCGACTCCACCCGAAAAGAGTTAACCATACTCCAGAAGAGCACCCCA  
GTAATTTGGGGGTGATAATGCGCAGGAACATTACCAACGGATAGACAGTGGCGTAAGAGAGCGCCGCCACCGCTGGTT  
GGATGAAGATTATTAGCAACGCCAGCGCCGAGGATCGGTGATGAACTGCCAGCATCCCGCACATGGTCAGGTAATT  
CATTTTGGCTAACATCCGCGCCAGAATGCCAACAGTAATCAGCGGAACGGCGGTGATCAGGGCACCAATCAACATCCAGC  
TTAGCCCTTCGCGATTGACCAGGGTATTCACAAAATCCCCACCGATTTTCCAGCAACACCGAGAGGAACAGCACGATC  
CCAGCTCCCGCAGCGAGGTTGGCGCTTGGCGCATAAACCGTACAGCTTCCCGATACTGCCGATACGCCCGAGGAT  
CAACGCCATAATCAGCGGTCCGCCCGCAGCCCCAGTTTCAACGCGGCGGGAATCCTGGCACAAAGACGGGAATAGAAC  
CTAACAAATACGCCCTAGCCCGATGCCAATAAACACTGGCAGCATCTGAACCTGTTGAGTTTTTGTGCGCATTCCCCAGC  
ACATTGGCAACGGCATCAATTGCGGACGGACGCCACCAGATTGAGGATATCGCCGAACTGCAGGCTGATATCGCCACT  
GGCGACCGATTGACCCCGCAGGTTTACGGCGGAGATAACAACGTATAGCGTTCTTTAAAGTGCAGGTCGCGAATAC  
GTTTTCCGAGCACGTTTTTATTGGTGACCACCACACGCTGACGCGCAAATCAGTGCCTTTCTGTGGACAGCGAAGTATCG  
ACCTCTGACCAATCACCAGTTGCGCATTATGTAATCCGCTGGTGAACCCAGATGCAGCAAATCGCCAGTTGGAT  
AATGGTATCTGGCGAAGGAATTTTAGGGTTTCTTCGCTTTCAGACGCGAGCAGATAATTTTGTGCGGTTGAGAATCG  
GTACATCTTAAATGGCTAAATCATGCAGTTAGGGTCTCAACCGCAATATTGATAGTCTTGATCAGCGCGCCGCTTGTG  
GTGCGTGAAGACTCGTGTGCTGAGCTTCTGTCTGACATTGACGCGAAAAATAACCCGCAACATCCACATGGTGAACAA  
AATCCCGCAAATGCCGAATGGATACGCCATCGCGTAACTCATCCCATCTGATCGACCATTTCCATTGGTGTACCCAGGT  
CGCGAAAATCTGCTGCCCTGCCCCAGCGCTGGCGTATTGGTAAACCGCACCGGAGAAAATCCCCAGCACTACCGGCAGT  
GGAAATATCAAAACAGTTTTATGAGGATGGCGGTAACCAAGACCAGGATGATGACGATCAGAACAGCAAACAGGTTGAGGGC  
TAATCCGGAGACGCGCAATGAGGCAAAGAAGCCCGCCCTACCTGAATCCCGATAGTATAAACGAACAGGATCAGGCCAA  
ATTCCTGAATAACATGCAGCATATCGCTACTTAATGTCATCCCCGCTGAGAAAACAAAATGGCCGACGATGATCCACCA

AACAGCAGCCGCCAATACCTAATCCTATGCCGCGAAATTTGACGTTGCCGATAAAACAAACCGACGACTGCCACCAAAGC  
CAGAATACTGACCGTAAATGCTATATCACTCATCGTCCATTTCTCTTGAGATAACATTTTAATTGCTACGGATTATGGCT  
GAATCGGTGAAGCAGATTTGCCCTATAGCGCACATTATCACGGGAAAGAACGTGCCGAAATATCTTAAACAGTCGAAAT  
TAACGCATTGTTGAGTAAGTAAACAAAAAGCCCCACCAGAATGGCGGGCAAAGAGAATAGCTAGTTAGCTATTTAA  
CGCGGGACGTTGCTGATAGCGATACGCTGCGCTGCCGATGGGTTACGGCTCATTACGAATTAATCAATATGCAAGTAAAC  
CGTTTACGAAGTTGCGCCAGAGACTTCCATATTTTACGCCAGCGTAAAGCTCAGGCTAAATGGCTGATTATAAGCCCT  
TGATGCAGCCATTTTTCTCTTTTTGGCTGCTCCGGCGTGCTTTTTACGCTCAGGCGGTACCTTCCAGTTGAATCTC  
TAAATCTTCTGACGAAACCTGCCAGCGCAAGGTAATGCGGTAGTGGTTATCGTCTGCTTTTTCTCAATGTTGTACGGCG  
GGAAGCTCTGGCTTTACCGCGTTTTGCAAGTGCCTTTGGCCAGTTTGCAAAACCGATCCATTGACGCATCAGTGGGGAT  
AAATCGAAGTTACGCATAGTCATTTCTCTTCTAAGAAGCGAGTAAGTACCTGCAAATCCGAAGATTCGCATATGCTCCC  
TGACGGCGAGCATGGAGATGTCAGGCGCGCCAGGCGGCTTAGGGAATTAGTTGATTTGATACGCGCGGTTTTTTTCG  
CTTCCGGAATCACGCTTCCAGATCGATATACAGCAAACCATTTACCAGTTAGCACCAGCAACATGAATGTTCTCAGCT  
AACTGGAATTTGCGTTCAAAGTTGCGTTACGCGATGCCCTGGTACAGATAGGTGCGCTCTTTTGTTCGTCGGCGTGAGC  
ACCTTTACCACCAGCAGATTATCTGGGCGGTAATTTCCAGTTGCTCTCAGCAAACCGCCACAGCGATAGCAATGC  
GGTAATGGTTTTCTACAGTTCAACGTTATACGGAGGGTAGCCGCCATTACTCTGGCTCTGGTTGTTTTCTAAGTGG  
TTAAACAAACGGTCAAATAGCAGAACCGTAAAGCGGGGATAAATCAAAGTTACGCATAATCAATGACTCCTGAAA  
TCAGCGAGAATGTAAGACCTTCCACAATGGACAGGTGAGGTAGCCAGAACCCATCAGGCGCGTCTCATCGGCTACGA  
TGAAAAATGGTCTGGAATGAACTTTTCAAGCCTTATCAGCGGACTTTTTTTTTGAGTTTATGGTCTATTGCATAGAC  
TGAGGGGCGACGCAACGTTAAAGTGCATAGCCGCCACAGTGCGACGTAATGATGATGTTATTTTCAGCAAGGGATC  
GCTATAACTCATCAGGCCAACCCACGATCAACAGATGAATTTATTATGATAAGAAATGTGTTGTTAGCGTTTCATGATA  
TGACGCGAATGACATTACTCGGAGGATGCTCCAGCGTGATGTCCCATACCGGAGGGAAAGAAGGAACGATCCCGGCAC  
CCGCGCCAGCGCAACCATGATTGGCGACGATGAAACCACTGGGGCACTAAGTCGCTGGCGATTCTCGATATGCCGTTA  
CCGCTGTGATGGACAGCTTTTACTGCCGTGGGATGTGTTCCGCAAAGACAGCTCGGTGCGCTCGCGGTTGAAAAAGC  
GAAGCCAACGCGCAAGCCACCAATGCGGTTATTTCCACCGGCCAGAAATGCCTGATAACTGATTTAGCGATCAGTTTCCGTG  
ATCCACAGCTGGCGCCTTCCATCCACGCCAGCCACTGACCATCCGGCGAGAAGACCACGGCGTCCGCAGAAGGTGAATT  
GGCGTGGTGTTCGGTTAAATACTCAACCTCGCCGTTTTGCGCATGGGCACAAGCAATTCGATTATCCAGCACAAAGCCCA  
ACCATTCTCTGACGGATGCCAGTTAAATGCAGACTGAATATCCGTTTTGTTATGGGTTAACTGGCGCGCTCGCCGCC  
TGTGGCGAGATAAGCCACAGTTGCACAATGCCGTTATCATCTCGCATTA AAAACGCGATTTGTGTACCCTGCGGATTACA  
GCGCACCAGTGGCGCGGGACGTTGACTAACCCCGATAAGCCCGATGGTGGGTAAAGGTTAAACGTCTGTCACGACGC  
CACGCGGTGGCGCGGCAGGGTTGTTCCGTTCCGTTAACGGCGCATCACCTGCCGTTTTCCAGCCAGCTTTCATCTTGC  
GGTAACTCAACGATAAACAGCTCCGGCACTTTCTCGCCCTTTGGCGAAAGTGTGTCGCAATAAAATGCCAGCGCGTATT  
TCCTACCCATCTTCTTCATAAGCAGGATTGATTTCACTGCCAGGCTGTGGCGTGGGCGTGGTTTTGCTACCAGCA  
CGCACCAGTGGTACCCTGTATTACGCGGATGCTGCTTTTTGACGTTGACCGGGCAAACGGCGCAGCAACCCGACG  
TTTCGAAATCCAGCGCCGGATCGAGTTTCATGCATTACATGGTCTTATAGGTAAAGCTCACCTTTCCAGTTCCGGGCT  
AAAGACATGCATGCTGCCGCGCGCAGCACTCTGGCGTACGGCGCGGTAATATCCATCGCATCAAGTTACTCA  
TCTTGCCGCTTCAACAATCACTCCGCGCGGATGATGGAAGTCTGATGCCATGTTTATCAGGATTTCCGGGCGGTGG  
ATGAAAACATATTTCTGACTTCGGATGAACGGTACCACGCCGACGTGTGCGCCTGTGACGCGGATAGATAACCTC  
GACCTCGCCGATGGATATTCACAGCTCAATGGTCTCGCCGTAACGACGCCAGAAGGACGACGTAACATACCA  
GCCACTGGCTGTGGCGCTCAGGATTTGGTATTGGTGAAGGATGATTACGGGGAGCAAAGGTTATCTGTTTCATGGCG  
CGTCTGATACAAAACGGTCCCATCATACTCACAAGGACTTCACTTTGAGACAATAGTCTTTTGCCATCTGAT  
GAATGTGAGTGAAAAGATGGAACATTTTCGACGTGGCGATTATTGGCCTCGGCCGGCAGGATCGGCGTTGGCACGAAAGT  
TAGCAGGCAAAATGCAGGTGATCGCGCTGGATAAAAAGCACAGTGTGGTACTGAAGGTTTTAGCAAACCTGCGGCGGT  
CTGCTGGCACCGGACGCGCAGCATCTTTTATTCGCGATGGGCTGACGCTTCTGTGATGTGATCGCTAATCCGCAGAT  
TTTTAGCGTCAAACCGTCGACGTGCGCCGATCGCTCACGCGTAACTACCAGCGAAGCTATATCAATATTAATCGCCATG  
CTTTGACTTGTGGATGAAATCGCTGATCCCGCCAGCGTTGAGGTTTATCACGACAGCTGTGCCGAAAAATCTGGCGT  
GAGGATGATAAATGGCATGTCATTTTCTGTCGACAGGCTGGGAGCAACATATTACCGCCCTATCTGGTCCGGTGCCGA  
TGCGCAAACCTGATGGTGCGGGACATCTTACCCGGATCATCAAATCCGTAATATGTCGCTATCCAGCAGTGGTTCCG  
CGGAGAAACATCCGGTCCGTTTCTACTCTGCATCTTTGATAATTCGATAACTAAGTATTGATGAGTATCAGCAA  
GACGTTATTTTATCTTTGGCGGTGCCTATCCAATGAAAGACGGTACGACGCTTTCCAGCAGCTGAAAGAGAAAAAGG  
CGCTTTTCACTTCCAGTTTGTAAGACGGTAAAAGCGAAAAATGACGGTGTGTTTTCCCTCGCGCTGGCAGGATTTTG  
TCTGCGGTAAGGACAACGCTTTCTGATTGGTGAAGCGCGGGATTTATCAGCGCCAGCTCGTGGAGGGGATTAGCTAT  
GCGTGGATAGCACAGACATTCTGCGTTCGGTGTACTGAAGCAGCCAGAGAAGCTCAATACCGCTTACTGGCGCGCCAC  
CCGCAAACCTGCGTTTTAAACTCTTTCGGAAGATAGTAAAAGCCGATGCCTGACCGCACCGCTTTAAGAAAAGTGGATTA  
TGCGCAGTGGTGTGGACATATTCCACAGTTGAAGGATTAGCCAACGCGCTTACATCGCCACCAGCAGGATATAAGAG  
AGCGCGCAATCAACGCGACGGCGGAGATATAAACCAGTGAGGTGCGAAACCGTAACCCTGCGCCAGGTACCCACCAC  
CAGCGGAACGGTATGCCGCCAGACCACCGCGAAGTTAAACACGCCGCGGTTAAACCAATCAGGCGCATCGGTGCCA



GAGAAGAAACCAGCGACCAGGTAATCGAAGCAAACCGTTACCGAAGAATGCCAGCGCCATCAGGCACATAATCATCATC  
GGATCGTTAGTGTAGTTAGCGCCATAATGCAGGTGGAGATCAGCAAGCCGAGATAATCGCGTTTTACGCGCAAAGCC  
CAGTGAAAAGCCCTTACGTACCAGCAGATCCGCTACCAGCCAGAGAGCAGGACGCCGACAAACGCCGCGAGGAATGGCA  
CCGTGGTCATAAAGCCTGCTTTCAGCGCCGTGATTCCTTTTTCTGGGTTAAATAGTTCGGGAACCAGGTTAAGAAAAAC  
CACAGTGTAGAAGCCACCGCAAATTGCCCAAGATAAACGCCGATCAGTTTACGATGGAACACCAGTTTCCAGTCTTTGGC  
TGTTAACGGCTGACGCGCCTCTTCTTACCAGGCGCATCACCATCCACCAGACCGCCGCCATCACGAATGTAATCCAGTT  
CAGCTTTGCTGATACCTTTGGTCAGGCGCGCGGCTGATAAACCTTAAACCAAATCAGCGACCAGATAATGCCGATACCA  
CCAGTGACAATGAACACCCAGTGCCAGCTCAACATCTCTGAATCCAGATCAGCAGCGGCGTCAGAAACGCCAGACCAGAC  
AACTGACCAGACGTATAAAAAACCAACGGCAGAAGCGGTTTATGTTCCGGGAACCAGCTGGTCACCATCCGGTTATTGG  
TCGGGAAAGCAGGCGCTTCAAATAACCGGTTATCGCGCGCAGACCAATTAATGACATTAAGCCCGTGGCAAAGCCCTGG  
AATAAAGTCGCCACTGACCAGCCAAATATCGCAATAAAATAAGTCACGCGAGAACCTACGCGATCTAAAAACCAACCGCC  
GGGGATCTGACATAGCGTATAAAGCCAGGCGAAGGCCGAAAATACATAGCCATTTCCGCTTTGGTAATGCCGAACCTT  
CCTGAATATGGGCGGAAGCCAGGCCAGGTTGGCGCGTGCACATAACAAATGACTACCGTAATAAAGATCATCACCAGC  
GTCAGATAACGCCGACGCCCGGCTTTGCTGCATTAACGGGAATATCCATAGCGAGCTTTTCCAGATTTTGGGCATAGC  
GAAGCCGCTACCATGCCCTGTAATTTACAGAGGTTATATTTTTGATTGCTTTTGTAGTCCCGATGAGGGGCTTACG  
TGGCAGGAATACCACCTGCTACGCTGTTATCTTCATGACGCCAGAGCGGATTACGCCAGTCCGGGGCATTTTTACTGA  
ACTCAATCACTTTAGCTTCGTCGATTTCCACGCCTAAGCCCGTTTTGTTAACGGTTTAAAGAAGCCCGCAGCATGCTG  
AAGTCTTCTTTGTTTTTCAAAAAGTCAGTAACCTCCGCGCCTTTGTTGTAATGAATCCCATACTTTGTTCTGAAGTAC  
GGCGTTATAGGAAACAAAGTCGATATGCAGGCAAGCCGCCAGTGAATCGGTCCGAGCGGACAGTGGCGCGCAAGGGTCA  
CGTCATAGGCTTCTGCCATTCCGGCGATTTTGTAGCATTGCGTAATACCGCCCGCGTGGGAGAGATCCGGTTGCAGAATC  
GAAATACCACCTGCTCCAGCAGCGGTTTAAATCGAAGCGTGAGAACATGCGTTCACCCGCCAGTGGAAATATGCGT  
TTGTGCCGCCAGTTTCCGGTAGTATTCCGCTTGTCCGCCAGCACCAGTCTCAATAAACAGCGGGCGATACGGCTCCA  
GTTCTTTAATCAGCACTTTCGCCATCGGCGCGTGCAGCGACCGTGGAAATCAAGACCAAACCTCAATCTGATTGCCAAAA  
GCTTCACGAATTTGTCCACGGTGTTAACCGCCGATCTACCGCGCGGGAGTTATCAATTAGCCCGATCTTCCAAACC  
GTTCAGTTTGAAGGTATCGAAGCCGATTTCCGCTAGCGTTTTAATGCCGTCGATAACATCCGCCGACGATCGCCGCCAA  
CCCAACTGTAGCTTTAATTTTGTCCGAACAGGCCGCCCATCAGTTGCCAGACCGGCGATTCCAGCACTTTACCTTTG  
ATATCCCATAACCGCTGGTCAATCCCGCGGATGGCGCTCATCAGGATCGGACCGCCGCGATAGAATCCGGCGCGATACAT  
CACTTGCATAAAGTCATTGATGCGCGATGGATCCTGACCAATCAAATAGTCACCAGCTCGTGAATGCCGTTCCACCG  
TACGGGCGCGCTTCGATCAGGGCTGCCCAACCGACCACGCTTCATCGTTTTCAATTTTCCAGGAACATCCAGCGG  
GGAGGTAACGATAACGTGTAATTTTGGTGATTTTCAATGCACTGCCTCTCGATACGCCTTAAACAAATGCTGCTGCCTGC  
TGCGCGGTGCGCTCTACGGATTGCCCGCGCGATAGAGATCGTGCCTAAGCCCGCCCTGCACAACCTGCGTCTATCCA  
CTGCGCCAGTTTTCTGGGTCACGCCGCAACGGCAAAGACTGCGATGTCCGATGGCAATACCGTTTTAACGTTTTGA  
TGATTGCGGACAAAAGCCGATGACGGAAATTTTTAGCGCCTGCGCGCCCGCTTCGAGCGCGGTAAGGCTTCGGTC  
GCCGTGCGCAGCCGGGGCAGACGGTCATGCCGTAGCCACCGCACGGCGGATCACTTCACTATGGATATTGGGCGTAAC  
GATGAGCTGACAGCCATCTGGCGAGCGCATCGACCTGTTAGGTTTCACTACCGTACCTGCGCCAATCAACGCCTTGT  
CGCCGTACGCATCAACGATGGCGGAAATGCTTTGCTCCATTGTTGGGAAATTCAGCGGGATTTCAACCGCGTCGAACCCG  
GCGTCAATCACCGCGCAACATGCGCCAGCGCTCGTCCGGCGTAATACCGCGCAAATGGCGATCAGCGGGAGTTTAGT  
TTGCCACTGCATGAGCGATGCTCCTTATACCAGCCTGAAATGCCGTGTCGCCCGCACCGCCGTGACGTCGAACCCATC  
GCCATACTGGCGACCTTCCGCAATCAACAAACAGAGAAATTCGCTGACCTGTTCCGCGGGGAAGTTTCCAGCA  
CATGCGAGGCGCGAACTTCAAAAAGTCGCGCAATATGGCGGGCGTATTAAGACCACGCTCAAGGCCAGCTGTGAAGGCA  
TCGGCAGAGTTTTCTGCGCGCGCAAACCTGCGCAATCAATGAGTGATTTAACAGTAAATGATGTAATTCACCGGTCA  
CACGGTGCGAAAATCGTTGATTTGCTGGCTATCGGCCATGACCCATTTGCAATGGGTTCCGGGCATGACATAAAGAGAGG  
AAGGAGCCAGAGCTCGCGCGCCGATCAATTGTGTTTCTCGCCGCGCATCACATTGTGGTTATCGTCATGAGAGACACAT  
AATCCGGGAATAATCCAGATATTGTGCCAACTGACGTTAATTGTTCCGCAATAGACGAAAAACAGGCAGGAACAGATAA  
ATACGGTGCAACTTTCCAGCCGACGTTGCTGCCAACCTTCTGCCATTACCACTGGCGTTTTCTCTTACGCCAGTCGG  
TCGTGACTTCTGTAACACCGCAGCCGGAGATTTTCCGTTAGGCGCGTGCAGCCTGCTTCTGATTGCCTGCTCTCCAGG  
CAGTGGTCGCCCTGATAAAGCCAGGCGCGCAGATTGGTCGATCCCAGTCAATTGCGATGTAGCGAGCTGCATGTGATT  
TCCTTTAACCTTCGTGTCGAGCTGGCGATCATGGTAAGCGCCGCTGCTGCGCGCATCGCCGTCTGATGTCGATATCGC  
ATCGAACAGCGCCTTATGTTCTGGAGCGTTTGGCGCATGTTGGCCTCATCGCCATCCAGGTTGTTAAAAACCGCCC  
GCTGCAGCGAACTGATCGCAATGCTAAGTTGCTGTAACACCGGTTATGACCCGACTGCAGCACCGCCTCGTGGTAGCGA  
ATATCCGCTTCGTTAAACGCTTCGCGGCTCTGATTGTTGGCAATCATCTCGTTACGCGCCGATTCAATCTGCGCCAGATC  
GCTGGAAGTCGCGGCTCTGCTGCCAACGGGAATCGCCGTTCCACCAGATTTGCACTTCGCTCATGCCACTGATAA  
GCCGTGGGTGCTGATGATTTTTCCAGCACCCATTGACGTACGTGAGTGTGCGAGGTAATCCACTGGTTACGCGGTGCCACA  
AACGCCCGCGATAACGTTTTCAATTCAGCCGCTTCGCCATCAGCGAACGGAAACCTCACGGATGATGTTGCGCGA  
GTTTCAAACCTCTCACAGAGTTCCGCTCAGCCGGAAGCGGCGAGCCTGGCACGATTTGCGGTGAACGATCTGTTTAC

CCAGCGTAATGACAATGCGATCGGTTTTATTGAGAGTCATGGAGAGTCCTTGTGCTCTGTATGTTCTTCTACTTTACC  
CCGATCGATGCATAACCGCGCAACTTTGTAGTACCAGCGTGATGACGTTCCGCTTGGCGTGTAATGTAGTACAAA  
CTTATATTGTTGTACTACAATTTAGATCACAAAAAGAACAATGCATAAAAAAATGACATGCGTCGGGCAGAAATCTGAAA  
AGGGATATCAGCGCTAAACAGGAGGAAAGAAGAGTATGCTTCAACGGCTTAGCTACTCGTTAAAGGATTAATCATG  
AAGTTGAATTTAAGGGATTTTTAAGGCTGCCGTTATTCCACTGGCGCTGATGCTTTCAGGCTGTATCTCGTATGC  
TCTGGTTTCCCATACCGCAAAGGTTAGTTCAGGAAAGTATCAATCGCAGTCAGACACCATCACTGGGCTATCGCAGGCAA  
AAGATAGTAATGGAACAAAAGGCTATGTTTTGTAGGGGAATCGTGGATTACCTTACTCTGATGGTGCCGATGACATC  
GTTAAGATGCTCAATGATCCAGCACTTAACCGGCACAATATTCAGGTTGCCGATGACGCAAGATTTGTTTTAAATGCGGG  
GAAAAAGAAATTTACCGGCACAATATCGCTTTACTACTACTGGAATAACGAAGAAGAAAAGGCACTGGCAACGCATTATG  
GTTTTGCCTGTGGTGTCAACACTGTACCAGGTCACCTGGAACCTAAAAGGCACAATCCATGAGAAAAATAAAACATG  
GATTACTCAAAGGTGATGGCGTTTACCATCCATTTAAAGTGGATTTTATGAATACTATTCACCCAGAGGCATTCCGGA  
TGGTGTTCGCGAGCATTACTGCCAGTGACTGTTACGCTGGACATCATTACTGCACCGCTGCAATTTCTGGTTGTATATG  
CAGTAAACCAATAATCAGTAAGCGGGCAAACGCGTTTATGCTGTTGCCCGCCACAGATTAATTCAGCACATACTTCTC  
AATAGCAAACGCCAGCCATCTTCAAGGTTAGATTTGGTGACAAAGTTGCCACTTCTTTCAGTGAAGGAATAGCGTTAT  
CCATCGCCACACCGCAGCTGCATATTCATCATTGCGATATCGTTTTCTGATCGCAATCGCCATGATTTCTTCCGGT  
TTAATACCTAACACGTCGGCAGTGATTTACCCCCGATCTTTGTTAACCGGTTTATCGAGGATTTTCGAGGAAGTACGG  
CGCACTTTTACGACGCGTATATTTCTTTCCTTCCGGAATACGCGCGATAGCCTGGTTCGAGGATGCGGGTTTCA  
CAATCATCACTTTTCCAGAACTGGGTATTGGGGTCCATTTTCTCCGCTTTCGAGAACACCAGCGGAATGGTGGAACG  
AAGGATTCATGACCCTGTAGTAGCTGATATCACGTTGGCGGTGTACAGCGTGGTGCGGTCAGGGCGTGGAATGAGA  
ACCGACTTCGCGAGAGAGTTTTTCCAGGAAACGATAGTCGTCATAGCTGAGAGCAGTTTGCGCCACGGTGCTACCATCAG  
CGCCTTCTGTACCAGCGCGCGTTATAAGTAATGCAGTAGTCGCCCGGCTGTTCCATATGCAGCTCTTTCAGGTAGTTG  
TGACACCTGCATACGGGCGACCCGCTGTTAGCAGCAGATTACGCCACGGGCGGAGCTGCGGCAATCGCATTTTTAAC  
GGCGGTGAAATGGTGTGATCGGGCAGCAGAAGGTTGCCATCCATATCGATAGCAATGAGTTTAAAGCCATGAGTTCCC  
CAGGTAGATTGGTTCCTGACCCATGCTAACCGGATTCGCTCAAAAATCAGTACAACACCCGAGGGAAAAGGGGGATGCA  
ACGCGGTTGCGTGCTCCCTTTTTGCTTAGCGGAAGAGTTCCCTTTCAGCAGTTCCATGCCTGCGGAAAGCAGATCGTT  
ATTGGCTTGTGGTGACACTTCACTTGGCGTGAGAGCGCATCAATAATCTTCGCAATTGTTCTGCCAGTAAACTGGAAG  
CTGACTGGTATCCACGCCAAGTTTTTCCCGAGATCGGACACCGCATTTGTGCCGAGCGCGATTCCAGTTGCTCGCCA  
CTAACCGATTGATTGCCCTGTTGATTACTCAGCCAGTTGAGAGAATGGCCCCTAAGCCGCCACTTTGCAGTTTTTCCAG  
CAGCACCTGAATGCCGCCCTGCTCCTCAACCAACTTAAAATAGCCTGATATTTCCCGCATCGCCTTTCAGAAAGGCAC  
CGACAACCTCATCAAAAAGCCCATGATAATCACCTGTAAGCGTTACGTGTTGACCCAAAAGTATAGATTTGCGGGAT  
GATAATTGCGGATTGCAGAAATAAAAAGGGCGGAGATGATCTCCGCCCTTTTCTTATAGCTTCTTGCCGGATGCGGCGTG  
AACGCCATTATCCGGCCTACAAAATCATGAAAATTAATACATTGCAAGATTTTTCGTAGGCCTGATAAGCGTAGCGCATCA  
GGCAGCTCGCATGGTTAGCGCCATTAATATCGATATTCGCCGTTTTCAGGGCGTTCTTCAATAAACGCACGGCGCG  
GTTCAACGGGCTCGCCATCAGCGTGGTGAACAATGGTCGGCAGCAATCGCATCTTAAACGGTAACGCGCAGCATACGA  
CGACTTTCGGGTCCATAGTGGTTTCCACAGCTGTTCCGGGTTTCATCTCGCCAGACCTTATAACGCTGGATGGAGAG  
GCCGCGACGGGACTCTTTCACAGCCAGTCCAGCGCTGCTCGAAGCTGGTACCAGGCTGACGACGCTCGCCAGTTTCA  
TAAACGCATCTTCTCAGCAAGCCACGAGTTTCTCACCCAGCGTGAGATACGACGATATTCGCCACCGGTGATAAAC  
TCGTGATCCAGCGGATAGTCAATCCACACCGTGGTACGCACGCAACAATCGGCTCGAACAGTTTTTGTCTCAGCATT  
GGTGTGAACATCAAATCTCACTGGCTGCCGTGCTTCTTTCGTTTCAGTTTCGCTGACCGCGGTTTACCAGCGGG  
TAACGGTCTGCTCATCAGAAAGGTCAGTTCCTCGTCAACGTCGGCTGATAGATAAGCTCTTTCAGCATGCTTTTCGGATAA  
CGACGCTCCATACGATTGATCAATTTTCTGCGTCCGCTTGTACTCAGATACAGTTTTCTTCAACGCTTCGCCAGCCAATGC  
CGGTGCACTGGCGTTGGTGTGACGCTTCCGCGCTCAGCGCATAGAGATCTGGTACTGATCCATCGCTTCTGCTGCTT  
TAATGTAAGTCTGCTTCTGCTTCTTCACTTTGTACAGCGCGGCTGAGCGATGTAGACGTGACCGGTTCAACGATT  
TCCGGCATCTGACGATAGAAGAAGGTCAACAGCAGCTACGAATGTGCGAGCCGTGACGCTCCGCATCGGTCATGATGAT  
GATGCTGTGATAACGAGTTTGTCCGGTTGTACTCGTCACGACCGATACCACAGCCAAGCGCGGTGATAAGCGTCGCCA  
CTTCTGAGAAGAGAGCATCTTATCGAAGCGCGTTTCTCGACGTTGAGGATTTTACCCTTACAGCGCAGAAATCGCCTGG  
TTCTTGGGTTACGCCCTGCTTCCGAGAGCCGCCCGGAGTCCCTTCCACCAGGTACAGTTTCGGAAGCGCGGATC  
GCGTTCTGCGAGTCTGCCAGTTTGGCCGCGAGGCCGCTAAGTCGAGCGCACCTTACGGCGGGTCAATTCACGCGCGC  
GACGCGCGCTTACGGGCACGGCAGCATCGATAATTTGCCAACACGATTTTCCGCTCGGTTGGGTTTTCCAGCAGG  
TATTCTGCCAGAGTTGTTTCACTGCTTCAACCGCGATTTACCTCAGAAGAAACAGTTTGTCTTTGGTCTGGGA  
GGAGAATTTGGGTCCGGCACTTTACGGAACGACCGCAATCAGGCCTTACGCGCATCGTACCAGGTGGCGCTGACTT  
TGGCTTTTTGCTGTAGCCTTCTTGTCCATGTAGGCGTTACGGTACGGGTATCGCCGACGGAAGCCTGCCAGGTGA  
GTACCGCGCTCAGCTGCGGAATGTTGTTGGTAAAGCAGTAGATTTTTCTGGAAGCCATCGTTTCACTGCAACGCCAC  
TTCGACGCCAATACCGTCTTTTTTCACTGGAGAAGTAGAAGATATTCGGGTGGATCGGCGTTTTGTTCTTGTTCAGATATT  
CAACGAACGCCCTGATGCCGCTTTCATAGTGAAGTGGTCTTCTTTCGCGTCCGCTTGTCCGCGCAGACGAATGGAACG  
CCGGAGTTGAGGAACGACAACCTCACGACAGCTTTCGCCAGAATTCATATTCGAACTCGGTCACATTGGTGAAGGTTTC

GAGGCTGGGCCAGAAACGCACCATGGTGCCGGTTTTTTTTCAGTCTCGCCGGTAACCGCCAGCGGGGCTGCGGTACACCGT  
GTTTCGTAGATCTGACGGTGAATTTTACCCTCGCGCTGGATAACCAGCTCCAGTTTTTTCGACAGGGCGTTTACTACCGAA  
ACACCAACGCCGTGCAGACCGCCGGACTTTATAGGAGTTATCGTCAAATTTACCGCCTGCGTGCAGAACGGTCATGAT  
CACTTCCGCCGCCGATACGCCCTCTTCCGGGTGAATACCGGTGCGAATGCCGCGCCCGTCATCCTGTACAGAGACAGAGT  
TATCGGCGTGAATGGTGACGATAATTTCTTTACAGTGACCCGCGAGCGCTTCGTGATAGCGTTATCTACCACCTCGAAT  
ACCATGTGGTGACAGCCGGTGCCGTATCCGTGTGCGCGATATACATACCCGGGCGCTTACGCACCGCATCCAGCCCTTT  
CAGGACTTTGATACTGGAGGAGTCATAAGAATTCGACATCAACGTTTCTCGCTCATTTATACTTGGGTTAATCCGTTATT  
TTACCCTTTTCCACGGTAAACATCTTCGAATTTTCTCGACATGTCTATAACGTGTTACGACTGATCGCGCTGACAAA  
GACCTGTGATTGCGTCGCTTTTAAAGCGGTGGCAAGCAGCCCGGACGCTCATCATCAAGCTCAGAGGCAAAATCATCTA  
TCAGGTAGAGACACCGCCGCCGCTTTTACGGGTGAGGAACTCTCCTTGCGCCAGACGTAAGGCGCACATCAACAGCTTA  
AGCTGCCACGCGATAAGGTATCTTCCACCGGCGCACCGTCCGGCGAATGCGTAAGTCCGCTTTGTGCGGGCGTGGC  
GGTGTAGGTTAGTGGCGATCGCGTTCAAATTACGTTCCAGCACCTCAGCATATTCTGTCTTTTCTCCAGCCGCGCT  
GGAAAGAGAAAGTCAAGAAAACTCAGGAGAAATTGCTTACAGTATCAGCCATATCGGCCGCGATACCGGCGCTATAC  
TCCGCGCGCCAGGTGCTGATTTGCTCCGCCAGCGGGATCAGCTCTTATCCACGGGCGTAGCTGTTCCGTAACGTGTAC  
CTGGCGCAGCGCCGATTCGCTGCTTGAACAATCGTTGAGCAATCGTTGAGATTGCTCCAGGCGGTGAAAAATCCGGTTCGTTGAA  
AGCATCCCCAGTCGAGGAATGCTCTTGTATTTGGGGCCCGCTTGGAGTAAAGTAAACCTTCTGGCGTTATCAACTGC  
ATTGGCATCAGGTGCGCCAGTTCCGCGACCTTATGCCCGTCTGTACCGTCGATGCGGACTTTGCTGTGCGCCTGTTTGT  
TTTGGTTAAGCCAATCGCTGTCTCGCGCTCTTCCGCTGTAATCGCCCGTGGAGAAACAAACGCTCCTGCTCATGGCGAA  
TGACGCGACCAATCTGCAAACGCGAAACGCGGACCATGGCCGAGCGTATAGATGGCTTCCAGCACGCTGGTTTTGCCA  
CTGCCGTTGGCACCTACCAGAAAGTTAAAGCGGGAGATAAGGCGAGATCCGCGGTTTCAATGTTGCGGAAATCGCGGAT  
CAACAAGCGGGTGAGGGACATTACAGTCTCATTGGCATGACAACATAAGCCGCGCTCTGGCTGGCCGATCTTCAATCTG  
CACGCTGGAACCGAATCGGTCAGCATCATGCGGACGTTTTCGCATTTACGCGGTTCCAGAACATCCAGCACATAACTGA  
CGTTGAAGCCGATTTCCATCTCCGACCGCTATAGGTAACGTCGAGGATCTTCTCCGCTTCTTCTGTTCCGGGTTGTTG  
GCGGTGATTTTTCAGCTGGTTTTGCTGACATAAAGACGTACGCCGCGAATTTCTCGTTAGAGAGAATCGCCGCGGAGC  
AAACGCTGCTTGAAGCAGATCGCAGCCAGCTTCCAGATGTTTGTCCGGGTTCTTCCGCGAAGCGGGGATAATCCGGGA  
AGCGACCATCCACCAGTTTGGAGGTGAAGATAAAGTCGCCAACGTGGGCGCGAATGTTGTTGCTGCCAATCTGTACGCGC  
AGCGGATTGTCCGCGCGTGCAGCATAACGATCAGTTCAATCACGCTTTACGCGGTACGATCACCGAATGGCTTGGCAA  
AGATTGACCAATTGGCATTGAACAGACCGCCAGACGGTGGCCGTCGTTGCCACGGTGCAGTCTTCCACCTTCGTTTT  
CAAACAGCATACCATTTAAGTAATAGCGAACGTCCTGATGCGCCATAGAAAACGTTGGGTCGTTCAATCAGACGCTTCATC  
GTTGCTGCGGCGAGGTAATTCGACTTCACTCTGCCAGTCATCGAGGTTCCGGAAATCCGCGCTGGCAGGGTAGACAG  
CGAAAAACGGTACGCCCGGAGCGTACCAGCATCCGTTACCTTCCAGCTGCACGGCAATTTCCGCGCTTCCAGGACAGC  
CACGGCAGATATCAAAGAATTTGCGCGCCGGAACGGTCTGTCGCTCCTGGCTCGTGTGGTGAACCAGCGCAACACGTGCC  
ACCATTTCCATCTCGAGATCAGTACCGGTGAGCGACAACGTACCGTCAGCAACCTGTAACAGCAGATTACCGAGAATCCG  
TAGCGTAGGACGACCACCTAACGGACCGCTCACCTGTTGAGCGGTTTTAATAAATGCTCACGTTCTACGGTAAATTTCA  
TAGGTTTACGATGACAATGTTCTGATTAATTTGAAAAATCTTCTTTGATATCGTGGCTCTTCCAGCAACTGCTCGAT  
CTTACGGCAGGCATGAAGCACCGTCTGTGGTACGCGCCACCAACGCATCGCCAATCTCCGGCAGACTGTGGTTAGTCA  
GCTCTTTCGCCAGCGCCATCGCCATCTGGCGGGACGCGCCACCGAGCGGGATCGACGCTTGGAAAGGAGATCCGCGACT  
TTGATCTTGTAGTACTCCGCCACCGTCTTCTGAATATTGTGATGGTGACCAGTTTTTCTGCAATGCCAGCAAGTCGCG  
CAGCGCTCACGCACGAAGTCGATGGTATCGCCGTCGCGTAAAGTTGGCATTGGCAATGACGCGGTTACGCGCCCTT  
CCAGTCACTACGTTAGATCGTAGACGCTTGGCGATAAAGAAGCCCACTTCCGCGCAAAACGAATGTCGTTTTCTGTCG  
GCCTTTTTTCATCAGGATCGCCACACGGTTTTCCAGCTCTGGCGGTTTCGATCGCCACAGTCAGTCCCCAACCGAAGCGGGA  
TTTTCAAACGATCCTCAACGCGGTTGATCTCTTTCGATAGCGATCCGAGGTGAGAATGATCTGTTGATTACCTTCCAGCA  
GGCGGTTGAAGGTGTGAAAAAACTCTTCTGAGATGTTCTTTATTAGCAAAAAACTGAATATCGTCGATCAGCAGTGCA  
TCTACGGAACGGTAGTAGGTTTTAACTCTTCGATCGCGTTGTTTTGACAGGGCTTTAACCATGTCCTGAACAAAGCGCTC  
GGAGTGCATATAAACCCTTTGGCATTCCGCTTGCAGCGCCATAATGCCGTTACCCACCGCATGCAGCAGGTGAGTTTTAC  
CCAGACCCGTGCCCCATAAAGGAACAACGGGTTATAGGCACCGCCAGGGTTATCCGCCACCTGGCGAGCCGCCGCGCGC  
GCCAGTTGGTTAGATTTACCTTCAACGAAGTTATCAAACGTGTGTTTACGTTTACGTTAGAACGATAGGTGCGTTCTGC  
CGGGGCCGGGACGTTATCCCAACTGAGCGCGTAGAAGGCGCAGCACGTTGCGGCTGCGTTTGCGCCACCTGTGCAGGGG  
CCGCGACGTTGCTCGTACTGCCGCTTGTGGCGTTTGCCTACCAGGTTTGGTCCGACTTCAAACGCAGCTGTGGGGCA  
TCCGCTCCGAGAAACTGGTTAGCAGTCCATTGATATTATTAAGTACTTGTCCGTACCCAATCGAGGACAAAACGGTT  
TGGCGGTACAGGGCCAGCGTGTATCGCTCAGTTCGCTGCAATGGGCGTATCCACATACTGAATTCGTGGCTGGTA  
ACTATCCTGCAATCGGGCAAGACACTGCTGCCAAAGCGAAAGTACACGGCGACTCCACTCGAACAAAAGTCGATAAT  
GACTAAGGCTGAAACATTCATGATTGTTGACGTACGTCGAAAAGACCCTGCTTGGGGTGACGCACGAACCGCTGTCTGC  
GGTTATATGCCGATCAAGATCCTGCAAACGATCGGGACCGGATCATAGCCTAAACTGCGCAAGAGATCTTCTGTTT  
CTCACAGATTTTCCGATTTATCCACAGGACTTTCCAGAACTCGTAAGTGTAAACGATCCTGCCGCGAGGCGGGCACGA  
TTACGCCGCATATTGAAAAATTAATGACCATAGACAAAAATGGCTTAATCGATCTAATAAAGATCCAGGACGATCCT

TGCGCTTTACCCATCAGCCCGTATAATCCTCCACCCGGCGGCCATGCTGGTTTCCACTGGTGTGAGGTCGTACATTTTC  
CCTGCGAAAAGGTGCGGAAAAGCGCGTAAATAAGGAAAGAGAATTGACTCCGGAGTGACAATTATTACAATCCGGCCT  
CTTTAATCACCATGGCTTCGGTGTCCATCGTTTCATTTTTCGCGGATATCCAATAAAGCCATTGAATTTATTCAAGTT  
TAGGTAGAAATCGCCATGAAACGCACTTTTCAACCGTCTGTACTGAAGCGCAACCGTTCTCACGGCTTCCGTGCTCGTAT  
GGCTACTAAAAATGGTCTGACAGTTTCTGGCACGTCTGCTGCTAAAGGCCGCGCTGCTGACCGTTTCTAAGTAATAAA  
GCTAACCCCTGAGTGGTTAAGCTCGCATTTCAGGGAGTTACGCTTGTTAACTCCCAGTCAATTCACATTCGTCTTCCA  
GCAGCCACAACGGGCTGGCACGCCGCAATTAACATTCTCGGCCGCTGAATTCGCTGGGGCATCCCCGTATCGGTCTTA  
CAGTCGCCAAGAAAAACGTTTCGACGCGCCATGAACGCAATCGGATTAACGCTGACGCGTGAAAGCTTCCGTCTGCGC  
CAACATGAACTCCCGCTATGGATTCGTGGTGGTGGCGAAAAAGGGTGGCGACCTCGATAACCGTGCTCTCTCGGA  
AGCGTTGAAAAATTATGGCGCCGCACTGTGCGCTGGCTCGCGGGTCTGATAGCCCTCATTGCGGTCTATCAACGCCCT  
GATTAGTCCGCTACTCGGGCCGATTGTGTTTTCACTCCAACCTGTTCAAGCTACGGAATTGAGGCATTGCGCAGGTTTG  
GAGTGATAAAAGGCAGTTGGTTGACGGTAAACGCGTATTAATGCCACCCCTTACACCCCTGGTGGTACGATCCCCGTC  
CCGCCCGACCATTTGATACCAGAGAACACTAACGATGGATTGCAACGCAATCTTTTAGTCATCGCTTTGCTGTTGCTG  
TCTTTCATGATCTGGCAAGCTGGGAGCAGGATAAAAAACCGCAACCTCAGGCCAACAGACCACGCAGACAACGACCAC  
CGCAGCGGGTAGCGCCGCCAGCAGGGCGTACCGCCAGTGGCCAGGGGAAACTGATCTCGTTAAGACCAGCTGCTTG  
ATCTGACCATCAACCCCGTGGTGGTATGTTGAGCAAGCTCTGCTGCTGCTTACCCGAAAGAGCTGAACTTACCCAG  
CCGTTCCAGCTGTTGAAACTTACCAGCTTTATTTATCAGGCACAGAGCGGTCTGACCGGTCTGATGCCCCGATAA  
CCCGGCTAACGCCCGCTCCGCTGTATAACGTTGAAAAAGACGCTTATGTGCTGGCTGAAGGTCAAACGAACTGCAGG  
TGCCGATGACGTATACCGACGCGGAGGCAACACGTTTACAAAACGTTTGTCTGAAACGTGGTGATTACGCTGTCAAC  
GTCAACTACAACGTGAGAACGCTGGCGAGAAACCGCTGAAATCTCCTCGTTTGGTCAGTTGAAGCAATCCATCACTCT  
GCCACCGCATCTCGATACCGGAAGCAGCAACTTCGCACTGCACACCTTCCGTGGCGGCGGCTACTCCACGCTGACGAGA  
AGTATGAGAAATACAAGTTCGATACCATTGCCGATAACGAAAACCTGAACATCTCTCGAAAGGTGGTTGGGTGGCGATG  
CTGCAACAGTATTTGCGGACGGCGTGGATCCCGCATAACGACGGTACCAACAACCTTCTATACCGCTAATCTGGGTAACGG  
CATCGCCGCTATCGGCTATAAATCTCAGCCGGTACTGGTTCAGCCTGGTCACTGGCGGATGAACAGCACCCCTGTGGG  
TTGGCCCGAAATCCAGGACAAAATGGCAGCTGTTGCTCCGCACCTGGATCTGACCGTTGATTACGGTTGGTTGTGGTTC  
ATCTCTCAGCCGCTGTTCAAACCTGCTGAAATGGATCCATAGCTTTGTGGTAACTGGGGCTTCTCCATTATCATCATCAC  
CTTTATCGTTCTGGCATCATGTACCCGCTGACCAAAGCGCAGTACACCTCCATGGCGAAGATGCGTATGTTGCAGCCGA  
AGATTACGGCAATGCGTGAGCGTCTGGGCGATGACAAAACAGCGTATCAGCCAGGAAATGATGGCGCTGTACAAAGCTGAG  
AAGTTAACCCGCTGGGCGGTGCTTCCCGCTGCTGATCCAGATGCCAATCTTCTGGCGTTGACTACATGCTGATGGG  
TTCCGTTGAACTGCGTCAAGCACCCTTTCGACTGTGGATCCACGACCTGTGGCACAGGACCCGTAATACATCTGCCGA  
TCCTGATGGGCGTAACGATGTTCTTATTGAGAAGATGTGCGCCGACCACAGTGACCGACCCGATGCAGCAGAAGATCATG  
ACCTTTATGCCGGTATCTTACCCTGTTCTTCTGTGGTTCCCGTCAGGTCTGGTGTACTATATCGTCAGCAACCT  
GGTAACCATTATTGAGCAGCAGCTGATTTACCGTGGTCTGAAAAACGTGGCCTGCATAGCCGCGAGAAGAAAAATCCT  
GATTCGGTGTGTTTTGCTAAAATAAGGGCGGTGAGTTGACCGCTTTTTTCTTTTCTGAGGGCGGATAAGCACCGCGCA  
TCCGCCACACAAGCAACAGGAACATCATGAGCGATAATGACACTATCGTAGCCAGGCCACGCTCCGGGACGTGGCGG  
CGTTGGCATCTGCGCATCTCCGGCTTCAAAGCCCGTGAAGTTGCCGAAACCGTGTGGGTAACCTGCCTAAGCCGCGCT  
ACGCCGATTATCTTCCGTTAAAGACGCCGACGGCAGCGTGTGATCAGGGGATTGCGCTATGGTCCCTGGCCCCAAC  
TCGTTACCCGGCAAGATGTGCTGAACTGCAAGGTGATGGCGGTCCGGTGTCTCGACCTGCTGTTAAACGCATTCT  
GACCATTCCCGGCTGCGGATTGCTCGCCCTGGTGGTGTTCGGAACGCGGTTTTCTTAACGATAAACTGACTTAGCCC  
AGGCCAGGCGATTGCCGATCTTATCGACGCCAGTTCGGAACAGGCGGCCGTTCCGGCACTTAACCTGCTGCAAGGCCA  
TTCTCCGCACGGGTTAATCATCTGGTAGAAGCCCTCACCCACTTGCGCATTTACGTGCAAGCGGCAATTGATTTCCCGA  
TGAAGAGATCGATTTCTCTCCGACGGAAAAATTGAAGCCAGCTCAATGACGTTATTGCCGATCTTGTGACGTGCGTG  
CTGAAGCACGTGAGGTTGTTGTTGCGCAAGGGATGAAAGTGGTATTGCCGGACGTCCTAACGCCGTTAAATCGAGC  
CTGTTAAACGCGCTGGCGGGGCGTGAAGCGGCAATCGTAACCGATATCGCCGAACTACGCGTGACGTGCTGCGTGAGCA  
TATCCACATTGACGGAATGCCGCTGCATATCATGATACCGCCGGCTACGTGAAGCCAGTGACGAAGTAGAACGTATTG  
GTATCGAGCGCGCTGGCAGGAAATTGAACAGGCCGACCGCGTGTGTTTATGGTGTGATGGCACCACAACAGACGCCGTG  
GATCCGGCAGAGATCTGGCCGGAATTTATTGCCGCTGTCAGCGGAACTGCCGATCACCGTGGTGGCAATAAAGCCGA  
TATCACCGCGAAACGCTGGGAATGAGTGAAGTGAACGGTACGCGTTAATTCGTCTCTCGGCAAGGACTGGTGAAGGCG  
TGGACGTGCTGCGTAACCATCTCAAACAGAGCATGGCTTTGACACCAACATGGAAGGCGGCTTCTGGCGCGTCTGCGC  
CACCTACAGGCGCTGGAACAGGCGAGGCAACATCTACAACAGGGCAAAGCGCAACTGTTGGGAGCCTGGGACGGTGAAC  
GCTGGCGGAAGAGTTGCGTCTGGCACAGCAGAACTTAAGCGAAATCACCGGGGAATTTACTTCAGACGACCTGCTGGGGC  
GGATTTTCTCCAGCTTCTGTATTGGTAAGTAACCGCGCTTACGAAGCCGCTTCTGACTGTGAGATGCGGCTTCTGTTCA  
TTGTTACCCTCTGTTATCTCAACCTTTTTTAAACATTAATAATCTTTAAAAAAGCA  
TTAATATTGCTCCCGAACGATTGTGATTGATTACATTTAAACAATTTGAAATAGACAAAACTCTGAGTGAATA  
ATGTAGCCTCGTGTCTTGGGAGGATAAGTGCATTATGAATATCTTACATATATGTGTGACCTCAAAATGGTTCAATATTG  
ACAACAAAATTGTCGATCACCGCCCTTGATTTGCCCTTCTGTAGCCATCACAGAGCAAACCGATTAGATTCAATGTGA

TCTATTTGTTTGTATATCTTAATTTTGCCTTTTGCAAAGGTCATCTCTCGTTTATTTACTTGTTTTAGTAAATGATGGT  
GCTTGCATATATATCTGGCAATTAATCGGTATAGCAGATGTAATATTCACAGGGATCACTGTAATTAATAAATGAAG  
GATTATGTAATGGAAAACCTTAAACATCTCCCTGAACCGTTCCGCATTCTGTATTGAGCCAGTAAAACGTACCACTCG  
CGTTATCGTGAAGAGGCAATTATTAATCCGGTATGAACCCGTTCTGCTGGATAGCGAAGATGTTTTATCGATTTAC  
TGACCGACAGCGGCACCGGGGCGGTGACGCAGAGCATGCAGGCTGCGATGATGCGCGGCGACGAAGCCTACAGCGGCAGT  
CGTAGCTACTATGCGTTAGCCGAGTCACTGAAAAATATCTTTGGTTATCAATACACCATTCCGACTACCAAGGGCCGTGG  
CGCAGAGCAAATCTATATCCGGTACTGATTAAAAAACGCGAGCAGGAAAAAGGCCCTGGATCGCAGCAAATGGTGGCGT  
TCTCTAACTATTTCTTTGATACCACGCAGGGCCATAGCCAGATCAACGGCTGTACCGTGCCTAACGTCTATATCAAAGAA  
GCCTTCGATACGGGCGTGCCTTACGACTTTAAAGGCAACTTTGACCTTGAGGGATTAGAACGCGGTATTGAAGAAGTTGG  
TCCGAATAACGTGCCGTATATCGTTGCAACCATCACCAGTAACTCTGCAGGTGGTCAGCCGGTTTCACTGGCAAACCTAA  
AAGCGATGTACAGCATCGGAAGAAATACGATATCCGGTGGTAAATGACTCCGCGCGCTTTGCTGAAAACGCCTATTTT  
ATCAAGCAGCGTGAAGCAGAATACAAAGACTGGACCATCGAGCAGATCACCCGGAACCTACAAATATGCCGATATGCT  
GGCGATGTCCGCAAGAAAGATGCGATGGTGCCTGAGGCGGCTGCTGTGCATGAAAGACGACAGCTTCTTTGATGTGT  
ACACCGAGTGCAGAACCTTTGCGTGGTGCAGGAAGGCTTCCCGACATATGGCGGCTGGAAGGCGGCGCATGGAGCGT  
CTGGCGGTAGTCTGTATACGGCATGAATCTCGACTGGCTGGCTTATCGTATCGCGCAGGTACAGTATCTGGTTCGATGG  
TCTGGAAGAGATTGGCGTTGCTCTGCCAGCAGGCGGGCTCACGCGGCATTCTGTTGATGCCGGTAAACTGTTGCCGCATA  
TCCCGGCAGACCAGTTCCCGGCACAGGCGCTGGCCTGCGAGCTGTATAAAGTCGCCGATCCGTCGCGGTAGAAATTGGC  
TCTTCTGTTAGGCCGATCCGAAAACCGGTAACAACCTGCCATGCCCGGCTGAACTGCTGCGTTTAAACCATTCCGCG  
CGCAACATATACTCAAACACATATGGACTTCATTATTGAAGCCTTAAACATGTGAAAGAGAACGCGGCGAATATTAAG  
GATTAACCTTTACGTACGAACCGAAAGTATTGCGTCACTTACCAGCAAACTTAAAGAAGTTTAAATTAATACTACAGAGT  
GGCTATAAGGATGTTAGCCACTCTCTTACCCTACATCCTCAATAACAAAAATAGCCTTCTCTAAAGGTGGCATCATGAC  
TGATCAAGCTGAAAAAAGCACTCTGCATTTTGGGGTGTATGGTTATAGCAGGTACAGTAAATGGTGGAGGTATGTTT  
CTTTACCTGTTGATCTTGCCGGTGCCTGGTTTTTCTGGGGTGCCTTATCCTTATCATTGCCTGGTTTTCAATGCTTCAT  
TCCGGGTTATTGTTATTAGAAGCAAATTAATATCCCGTCCGCTCCAGTTTTAACACCATACCAAAGATTTAATCGG  
TAACACCTGGAACATTATCAGCGGTATTACCGTTCCTTCTATATCCTCACTTATGCCTATATCTCTGCTAATG  
GTGCGATCATTAGTGAACGATATCAATGAATTTGGGTATCACGCTAATCCACGTATTGTCGGGATCTGCACAGCCATT  
TTCGTTGCCAGCGTATTGTGTTAAGTTCGTTAGCCGCCAGTCTATTACCTCATTGTTCCCTCGGGCTGAAGATTATCTC  
CTTTGTGATCGTGTGGTTCTTTTTCTTCCAGGTCGATTACTCCATTCTGCGCGACGCCACCAGCTCCACTGCGGGAA  
CGTCTTACTTCCCGTATATCTTTATGGCTTTGCCGGTGTGTCTGGCGTCATTTGGTTTCCACGGCAATATCCACGCTG  
ATTATTTGCTATGAAAAACGCAAAGATAAGTTAATCAAAGCGTGGTATTTGGTTTCGCTGCTGGCGCTGGTGATTTATCT  
CTTCTGGCTCTATTGCACCATGGGGAATATCCGCGAGAAAGCTTAAAGCGATTATCTCCTCAGCGCGCAACGTTGATT  
CGCTGGTGAATCGTTCTCGGCACCAACAGCACGGCATTATCGAGTTTTGCCTGCTGGTGTCTCTAACTTAGCTGTT  
GCCAGTTCTGTTCTTTGGTGTACGCTGGGGTGTTCGATTATCTGGCGACCTGTTAAGATTGATACTCCACGCGCG  
GCGTTTCAAACCGTGTCTTTAACCTTCTGCCACCTGCGTGTGTATCTGATCTTCCGAAACGCTTTATTTACGGGA  
TCGGCGGTGCCGGGTGTGCCACCATCTGGGCGGTCAATATCCCGCAGTGTGCAATCAAAGCTCGCAAGAAGTTT  
CCAATCAGATGTTACGGTCTGGGCGGCAATCTTATCCGCGATTGTATTCTCTTTGGTATAACCGTGATTTTGTG  
CTGGTTCGGCAACGTCTTTAACGTGTACCTAAATTTGGCTAAATCCTTCAAGAAGCCAGCATTCTGCTGGCTTCTTGC  
TCTCAGGAAATCACTTATGTCAAATGGCAACTCGCTGATCTCCTTACCACGTATGCTTTGCGTCACCTTACTATCA  
GGACGCTTTAGCCCATGCCGCTTTTGTATTTGATTTTGGCTGTTTTACTTTATCCCGCGGGATGATATGTAC  
CTCGTTGGTTTACCAGCATCGCCGCTCAATGCCAGCAAGCGCAGTTGCATATTGCGTTCTCCGTATATCTGCGC  
GGGATGGCAGCTGCATGTTATTTGCCGGTAAAGTGGCCGATCTGTTTCCAGGGAGAAAGCCGTCGCCATACCCGCGCGG  
CGTATTTATTATTGCTCGGTGTTCTGTTCACTGGCTGAAACCAGCACGTTATTTCTGACGGCCGATTCTACAGGGG  
TTGGGCGCAGGCTGTTGTTACGTAGTGGCTTCGCTATTTGCGCGACACGCTGGATGATCGACGTCGGGCTAAAGTGCT  
GTCATTACTCAACGGTATTACCTGCATCATTCCGGTGTAGCGCCAGTGTCTGGACATCTGATTATGCTTAAATCCCGT  
GGCAGAGTCTGTTCTGGCGATGGCAATGATGGCATCGCGTACTGATGTTGTCTTTGTTTATTTAAAGAAACGCGC  
CCAGCGCCCCCGCAGCTTCGGATAAACCAGGAAAAATAGCGAGTCTGCTGCTTAAACGTTTTTTCTCAGCCGTGTTGT  
TATCACCACCTCAGCGTTTCGGTATCCTCACTTTCTGCAACACGTACCCGGTATTGCTGATGGAATCATGGGGTTG  
AGCGCGGTGAATACGCCACCATTATGGCGCTGACCGCTGGCGTCAGCATGACCGTTTCTTCTCCACGCCATTTGCGCTG  
GGAATTTTTAAGCCACGTACGTTGATGATCCTCGCAGGTGTTATCTGCGCGCGGGGATCACTCTTGCCGTTTACC  
TTCCATGCGGTTTCTGTTTGGTATCAGCTGATTTGCGCCGTTTCTCGGTAGGTTTTGGTGTGGCGATGAGTCAGG  
CGTTAGGGCCGTTTTATTACGCGCGGGCTAGCCAGCTCGACCTTAGGTATTGCGCAGGTTTGGGTTCTGCTACTGTGG  
ATTTGGCTGGCAGCGGTGGTGGTATCGGCGCATGGAATATGCTGATCGGGATTCTGATTGCCTGTAGCATAGTGAGCCT  
GTTGCTGATTATGTTCTGCGCGCTGGACGCCCCGTTGCCGCTCATGAAGAAATCCATACCACGCTTGTCTCAATCTG  
CTGCTTTGCTGCAACTGCTGATGCAGGAGCGCAGCGTAACCAAAGCGGCGAAGCGGATAAACGTGACACCTTCCGGCGT  
GAGTAAAGTCGCTGGCAAAGTTAAGAGCGTGGTTGACGACCCGCTTTTGTGAACTCACCGCTGGGTCTGTGCCACAC  
CGCTGATGGTCAGCATGGAGCAAATCTGGCGGAGTGGATGCAAATGAGCAACCTGCTGCTGGATAAACCACACCAG

ACACCGCGCGCCTGAAGTTTGAGCTGGCGGCGGAATCACCGCTGATGATGATCATGCTTAATGCGCTGTCGAAACAGAT  
CTACCAACGTTACCCGCGAGCGACCATCAAATTACGTAACCTGGGATTACGATTCCTTAGATGCCATTACTCGTGGTGAAG  
TGGATATCGGTTTTCCGGTCGCGAAAGCCATCCTCGCTCGCGGGAGCTGTTAAGCTCGCTACCGTTAGCATTGATTAT  
GAAGTGCTGTTTGTGATGTGCCCTGCGTCTGGTTACGCAAAGATCATCCGGCACTGCATCAAACGTGGAATCTGGACAC  
CTTCTTACGTTATCCGCATATCAGCATTGCTGGGAACAGAGCGATACCTGGGCGCTGGACAATGTGTTACAGGAGCTGG  
GACGCGAACGCACGATTGCTATGAGCCTGCCGGAATTCGAGCAGTCACTGTTTATGGCAGCGCAACCCGACAATCTGCTA  
CTGGCGACCGCGCCGCGCTACTGTCAGTACTACAATCAACTCCATCAACTGCCGTTGGTTGCTCTTCTCTCCGTTTGA  
CGAAAGCCAGCAAAAAAGCTGGAAGTTCCTTTTACCTGCTGTGGCATAAACGGAACAGCCATAATCCGAAGATCGTCT  
GGTTACGGAAACCATTAAAAACCTTTACGCGTCGATGGCATAACCGAATCGTATGAAACGCGACCCAATTTCAATAAA  
AATGTA AAAAGTTGTAATAAGCTTGTCTGAATCGAATTTTAGCCGCTTTAGTCTGTCCATCATTCCAGTAAATGATTA  
CTCTTGATTACATAATGGACCATTAAAGCATGGAGCGAAAAATGGCGACTCACTTTGCCCGAGGGATTTTAAACGGAAGGAC  
ATCTGATTTCTGTTCTCCCTCCAGTGTATCAAGAAGCCGAAACATCCCTCATCGTCAAAGCCGTTTTCTG  
GCGTCCAGAGGTTTACTCGAGAATGATGTTATGCTGTATGGCATTGGCGAATTGCCGGAATCGTACCCTGCCGAA  
AGGTA AACCCGTTTTAGTGATAAAAAATTTGCCCTCGTTTTCCATTTCTATGCCGGAATATGGTTGGCGTGGCGTTAA  
CAACCGAAGTGAATGTGGCTCGATATGGAACACAGCGTGCAGCGCGGTTTTATAGCCACACGCGCCCGGATAAC  
CACACTTTTTCCAGCAATGAATCGTATGGATCAGTAAACAAAAACGATCCTAACGAAGCGCGGCGAGCTCATCGACT  
GCCCGAAGCTGCTAAAACTAACCGGTGATGTTTTGAATGACGATCCGCGCGATCTGCAGCTGCTGCCATTGCCGAC  
GCCTGAAATGTCTCATGTAATCATGTAGAAGCTTATGCGACGCGGAAGACGTGCTGGTGTGGTCCGTGGCGGTACG  
CCCACGATTGAAAAGCTCAGTGTCTGGGAGTTAGATGGCAAACACGGCTGGAAAAGCTGCCGGATATTCACAGCCGCGC  
CAACAATCCTACCAGCCGGATGATGCGTTTTGCCAACTCTTACCGTGAAGGCTTTTTCGCCAAATTGATAGACAACCA  
CAGGAGTCATCATGTCTGAAAAATTGCAGGTGGTTACGTTACTGGGGAGCCTGCGCAAAGGCTCATTTAATGGCATGGTT  
GCACGTACCCTGCCGAAAATTGCTCCGGCGAGCATGGAAGTCAATGCGTTACCATCCATTGCCGACATCCCTTGTATGA  
CGCTGACGTACAGCAGGAAGAAGTTTTCCAGCAACGGTTGAAGCTCTGGCGGAACAGATCCGTCAGGCTGACGGTGTGG  
TGATCGTACGCCGGAATATAACTACTCGGTACCGGTGGGCTGAAAAATGCCATCGACTGGCTTTCCCGCTGCCGGAT  
CAACCGCTGGCCGTA AACCCGTTATTGATTAGACCAGCTCAATGGCGGTGATTGGCGGCGCGCTGTGATACCT  
GCGCCAGATTCTGGTTTTCTCGATGCAATGGTATGAACAAGCCGGAATTTATGGGCGCGTATTGAGAACAAAGTTG  
ATCCGAAACCGGAGAAGTATTGATCAGGGTACGTGGACCACCTGACCGGCAATTGACCGCATTGGTGAGTTTATT  
CAGCGAGTTAAGATCTAAATAAAAAACCCGCCAGCAATCATGCATGGCGGGTTTTTAAACGCGCTATCGATTTTGTGAGC  
GTCGATAAAGACAATCTTACAGATAAACAGCAGCGCAACGATGATTACGCACGGGCTTAGATCACGCAGACGTCGGTAC  
CGATTTTATCACGCAGTAGGAGATAAAGCCAGCGGATACCTTCGGTAATCGAGAAGCTGAACGGCATCATCACGGCG  
GTAATAAACCGCGGAACAGATTAGTAAGATCCTGCCAGTTACGCGTGCCAGACTGGAAGTCATCAGCACGCCAACGTA  
AATCAGCGCACCAAGCTGCAGCGTAGCCTGGCACCATCCCGCCAGCGGCGACAGAAAGATAAACAGCAGGAACAGCAGAC  
CAACAACCACTGCCGTACAGCCGGTACGACCCGCAACCGATACGCCGGAAGAGGACTCAATATAAGCCGTAACGGAAGAA  
GTACCGATAAACGAACCGGTACGGAAGAGATACTGTGACATACAGCGCCTGTTTATGCGCGGGAATTTCCCTTCTC  
ATCCGCCAGACCTGCTTTATCGGTACGCCAATCAGCGTACCGGAGGAGTCAAACAAGTTGACCAACATGAAAGAGAAAA  
TCACCCCTGCCAGCCGAGGTTAAACGACCCGGCTAAATCTACATGACCCACAATGTGATTACGCTCGCGGCGCAGAA  
ACGATGCCATTGTAGTGCACATCACCCAGCATCCAGCCAGCAGCGTGTGACCACGATAGAAACAGCACCCTGCGTG  
AATGTTGCGGAGGCCAGAATAGCAATGATGAAGAAGCCGAGGATACCCAGAAGTACGCTGTGAGAAGTCAGATTACCGA  
TGCTCACCAGCGTTTCCGGTTAGCGACAATCACACTGCGTTTTTTCAGCCCATCATGCCAATGAACAGACCGGATACCG  
CTGTAATACCCACAGACTCACCGAATGTGGCTATCATCCAGTAGCGAAGCGGAAAAATCGTCAAGTAAACAGCAG  
ACCTATCGCGCCCAAGATTGCGCCATCCCGACCTGCCACGCAAGCCATCGCCTGTACAACGACAAAAAGCGAAGA  
ACGCATTAGGCCCATAGCGGGTGCCAGTGAACCTGGCAGGTTAGCAAACAGTCCCATATAATACTGCCGAATGCAGCG  
ATCAGACAGGTAGTGACGAAGACGGCGTGGTATCCATGCCAGCAACGCCAAGAATTTGCGGGTTAACAAAAACGATGTA  
AACCATCGTACGGAAGGTGGTAAAAACCGCGATCACTTCGGTCCGTGCCGTGTCATGTTGCGCAGTTTAAACACGC  
GTTCCAGCATCCCTGACCAGAAGTCTGGGTGGTATGTTGATGACTCATTATCTATTTCCGAACAAGGAGGGAAAAATCCG  
TCGCTATCGTATACAAAATGCGACAATAGGCGCGTTTTGTGAGAGACTTTTTTATTGGATTTACTTATACGGCAACGATT  
GCGTTGCGCAAATCGGCTTACGAAAACGTTAAACTGATTA AAAAGGAAAGGCATGTCCCGGATAGAAGCGGATTTTTTC  
GACTGCGACGGTACGCTGGTGCAGTGAAGTCAATTTGCTCTCGGCATATGTAACGATGTTTCAGGAATTTGGTATTAC  
GCTCGATCCTGAAGAGGTATTCAAACGTTTCAAAGGTGTA AAACGTACGAAATTTATCGATATTGTTTCCCTTGAACATG  
GTGTTACGTTAGCGAAAACAGAAGCTGAACACGTTTACCGTGCAGAAGTCGCTCGGCTGTTGATTGAGAACTGGAAGCC  
ATCGAAGGGGTGGAGCGCTCCTGTCAGCGATCACTGCGCAATGTGTGTTGATCTAACGGCCAAATAACAAAATGCA  
GCATTTCTATGGCAAGCTGAATATGTTGCACTACTCCCGGATAAACTGTTACGCGCTACGATATTCAGCGCTGGAAGC  
CAGACCCGGCTTAATGTTCCATGCGGCAAAAGCGATGAATGTAATGTAGAAAACGCTTCTGGTTGATGACTCAGTT  
GCCGGTGCACAATCTGGTATCGACGCAGGTATGGAAGTGTCTACTTCTGCGCGACCCGCAATAAGCCGATCGTTCA  
CCGAAAAGTACCACCTTTACCCATCTTTCGAGTTACCTGAACTGTGGAAGCGCGTGGTTGGGATATTACGGCATAGT  
TCTTCACTCCCTTCACTTACCCGCTTAAATTGGCGCTCAAAGGTAAGTAAAGGGAGTTTGATATGTCTGTTACGTT

CGGTAATACATCACGGACTTTATTTTGCAGTTTTAGGACCGTTAATTGGTGTCTGTTTCTGTCTCTACATATTCTT  
CGAAAAGAACCGCTGGTCTTTGGGTGATAATACATCCAATTTTTCTTTATTGTCGATAACTACGGGAGCTATTCCCTG  
CGTTGTTAACCGGTGTAATGGTTGCCTGTCTGCCGAAAAGATCGGGTCACAGAAACGTTATCGTTGTCTGGCTGGTGGC  
ATAGGTGGCGTCGTTATCACCGAGATCTATTGTGCAGTTATTGTACATATTAAGGGCATGGCTTCTCGGAGTTGTTTGA  
AAACATTCTTTCTGGTGACAGTCTCGTTGTCCGCATCATTCTGCATTGCTGGCAGGTGTGGTGTATGAGCAGAATCATT  
CCCGTCTACCCGGATTGGATATTTTCATGTCTGAAACAGACTCTTTAAGTTAAGCGGGATACTTTATCTTTGGGCTACTC  
AAAAGCAGACAGGATGTTTTCTATGACTCAAATATCAGGCCGTTACCCCAATTCAAATATCATCCAAGCCACTGGAAC  
AGGCGCATTGAAACAGGATAAAAACCGTAGAGTGCATTGCTGTGAACAACAGACGTCAGTTTATTACTCGGGTCCCTTTT  
ATTGCGTTGATGAAGTTGAACATCTCTGTCCGTGGTGTATTGCGGACGGTTCTGCTGCTGAAAAGTTTGCAGGTAGTTTT  
CAGGATGATGCCAGCATAGAAGGTGTTGAATTTGAGTATGATGAAGAGGACGAATTTGCCGGTATTAAGAACACATATCC  
TGATGAAATGCTGAAAGAGTTGGTTGAACGCACGCCAGGTTATCATGGATGGCAGCAGGAATTTGGCTCGCGCATTGTG  
GCGATTTCTGTGTTTTATCGGCTATGTGGGCTGGAATGATATAAAAAGATCGCTCGATGAATTTGCCAACCTTGAAGAA  
GATTGTGAGAAATTTCCGTATTAGAAATCTGATCTAGCTAAATGCCTGCAAAAGGGTGGTATTGTGAGGTTATCTCTT  
CCGCTGTCTCCACTGCGGCAAGCTGAGACTGTGGGGTATTTTTCGTAGTTATTTAAATAATGAGAACAGCCGGAGCGT  
AATTACACATCCGGCCTATTTCTTAAGCTTAACCGAGTGCTAATTTCTGCGGCAGCGGCTTTATCAGCGATTACCATCA  
GCGAAGGATGCAAGCTGCAACACGGAAGCTGGAACATCTTCGGTAACCGGACCTTGCAAGAACATTTTTAGTGCCTGCGCT  
TTACCCGCGCCGCTGACAATTATCAGCAAGTTTTTCGCCGCCATGATGCTTTTTCGGCCCATCGTCACGTAGCTGTGAGG  
CACTAACGAAAAGTCCGCGCCCAACTCGCCATGCGCCACAATATCAACCATCTCTCCCTGGATCGGGAATCCACGGTTTT  
GCTCATGGAATGGGTGCTATTGCGCAAATGCCACAAAATGACCATCTGCACCTAATCCAGCACCACCAAATCCAGT  
CCGCCTTACGCGCCAGTTTCTGATCATGCTCGCGGTAGTTATCAATAGTGAGCTTCTGGATATTCTCTTCTTTGATCCC  
CGCAGGGGTGAAAACAGATTACGCAGATTGGAATCGTTACGCCTTCTCCCTCTTTGCCGCGAAATGGAATTTTCATCAA  
AATTATAGAAATAGCAGTTATCGTACCAGGGCTTACCTTAAACAGGGTGGTGGGATTCATACATGCCTTTGGGCGTG  
CTACCGCGGTAATTGCCAGGTTAACACGACGCGTCTTCGACATATAACCAAGCAGATGGTGTGCCGCGACCGGCTCAT  
TTCCTGGTAATCTTCGGTAATGATTAATTTTCATCTAATGCCTTATTTTATTTAAATAATTTCTGTACAAAGGCTGCATA  
GGCTGGTCCGACATCCATTTTCATGGTTCAGACCCGGATATTCCTGGTAATCAAAGTTAATTTTTTTCTGCTCAAGCT  
CAGTTTTCAGCCCGGATATCCTTGGCGTTACGACATCTTTATCCCCACAACCACAGTAAAATTACGTAGTTGCTGG  
TTGATAGCTGCCGGATCGTTAGTCCGGCCGCGACACCTTCATCCGGTACGGTTGCTGTTAACACCACTGAATGTGGC  
CAGCCAGCCAAAGCTTTCAGATGATTTCATTCCGAAACCAGCGCTGGTACCCGCCTTGAAAGCCCTGCCAGCGCGC  
GGCCATCGGCATCTTTACGGACATTAACAGCTTGCTAATCAGCGGGATAATATCGTTTCATCAGTTCCGGATCTGCCGCT  
TTAGCATTACGCGGATAAAAAGACTTTACGTCTTTCTGAGGCACGAAATCTTCGGGAATAATGCCCTTCGCATCGGTTT  
TGATACCGGATCACCACCAGCATCGGTTAATTTTCCCTCAGCAAGCAGGTTATCCATGATTTGCGGGATACGCCCT  
GATCGATAGCGGAACGTCGGTATCACCAAAGCCGTGATAGAAATAGAGCACTGGCAAAGGCTCGCCATGCCGGTGTAT  
CCTGGCGGGTCCAGACATACATCTGACGTTTCAGATTGCAATGCGTTGGAGTGGTAAGTTATGGCGATCAAATCACCATG  
CGCAACAGAACCGTATCCAGATAACTGCCTGGCACCAGAATCATACTGGAGTTAACCTGGCGCTGAGGATTAGTCATTG  
CGGTGCCTGTATCAATGTGCGTACACCATCAACATTGAAAAAATACTCGTACAGGTTGCCTTTCAGGATAGGTGTGGC  
CACGACCAGACTCCTGCTTCTGTTGGTTCATCGGGTGAATTTGTCGGAACCGGAACACCACCACACTACAGAGACATT  
TTTTGCCCCAGGGCAAAGTAGCGAAAGGTCACGCTGTTATCGGCATTGACCTGAGTACATACTGTTTACCAGGATAG  
TGGGTGCCGGGCTGGCTGGCATATCCGCTGCTATGGCCACTGAGCAGAAATACCGCTGGCAATAGCCAGCGTTAAAGCA  
GCAATTTTTATATTTCATGTAATATTTCTTTTCAATTAAGTTCCATTACCACAGATTTACGCTGGCAGCCGACAGCAAA  
TGGTCTGCTTTATTGTCTTCAAAGGTGAAGCCATCCAGTTGTTTTCCAGGGCTTTGATATACGTGGCTAGAAACGAAT  
TTCCGGACCGGAGTCAACATACTGGTATTGACTTTAAAGGTATGGAAGAGCGTGGTTTTATAACAGACTCATTAATTA  
TATTACTATTCGCATCTTTGTTTTGCTGGGTGAAATAGCCAGTTCAACACCTGTCTGGTTATATTGGTCCCAAATATAG  
GCCGGGCGAACCAACCGCACGAATAGATTGAAATCAGAGTGGGCGCTGTTTCGTAGCTATATATATCGTTACCGAAGGA  
GTAAACAATCGCGTTAGCTACAATGAAATGATCGCCAATATAGGCTTCGCCCTGCGAAGTCAGACGTACCCTGTTCCGC  
CGGTGTGATCACCATAATAACGACCATTAAAGGTGGTAAATGGACTTTCGCCAGCATAACGGCCAAAGTTACTGGCGATA  
GAGTTATTCGCGACCAGGAAGGAGAATTCGTTGAAGCCACCTTTATCAAATTTCTGCGTTAAAGATGTGCCAAACATCCA  
GGTATCTTTCCAGTCATAATACCCGTTATTATCCTGATTATCTTTTTCCGATGCGCTTTCGTTTGGCGTACATAACGAC  
CACTTACCATTAAAGGTGGCTTTATCCATAACGGGATATCTTTATAGCGTAAATCAATGGTATTGGTATTAATCTGCTGT  
TTGTTTTGAGGCTGCGATCGTAATCATCGACATCTTCGCAACCAGCGGATATCAATTTTACCAGGACCGACTTTCCA  
GTTTTCCAGACCTACACCCGCTGCGGCATCAGTACGCTGCTTTTTCCAGTCAAGCATCTGGATTTCAATTTTCCGGCGAC  
CGTGTTTACCCACCCAGAAATCAGCCTCTGGCGCAAAGGGCAGGAAACCTTTGGTGGTAACGTACATATCGGAGAATGC  
ATATAGTTCTGCCACCGCGTTATCGCCAAACCAGCCGGTAGAGTACTGCTGACCAACGTTACCATCCATCATCACAAC  
GGCATCAACCCGTTTGGCGTTTTGTTGTAGACAGTGTGTTTTAACTGCAAATCAAACCAGCCGGAGTATTCGTTACCAA  
AGCGGCCAGAGAACCAATCGCCATGATTTAGGTGAACCATGAGAGGCGGTCGCCAACCAGAACGGTAAATAGCCGTTG  
TAACTAAAGCCAATTTTCATCTTTACAAAATTTACTGAAATCTTTAGAGTCAATGGAAGAATAAATCGAGCCTGTCTCACT  
GGCATTCTTCTTCAATTTTTGACCAGTACAGCATCAGTTTTGCGGCACTACTGGTCCGGAACGGATTGGCGGCATACC

CTTGATCATTCTACTTACGCTACGATTACCGTCGCTGGCGTATACTTTTTCTTCTTTCATCTTTATACTTTTTGAGT  
TCGCTTTGCGTTTCTCTTAAACGCTTTTCTAATAACTCAAGGCGTTGTTCCACGTTAATGATTACAGCCAATGATTGTGC  
AGAAAAGGCTAACGGTGCCATTAATAAGATGGCAGAGGTAATAAGATTTCTGCTAAACATAATATCCCTTTATGGTGCAA  
AGAAAAGATTAACGCATCGCATCCAGACTGTTCTGAATGCGACGATAATTAAGGTGCTTTAATGGTTATTTTTTTAATG  
ACAGCCCCCGCTTGTGATCACCTCTGCATACCATCCGAAGCTTTTCTTGCGTGTCTTGTGAGGCTTCCCTCGCCATTA  
TCATCACGATCCACATAAATAAGCCGTAGCGCTTAGACATTTGTGAATGAGATGCACTGACTAAATCAATTGGCCCCCA  
ACTGGTGTACCCATAATATCCACACCATCGGCAATCGCTTACCTTACCTGTACCAGGTGATCGTTAAATAGGCAATTC  
GATAATCGTCTGTATCGAACCATCCGCTTCAACGCTGTCTTTTGGCGCTAATCCGTTCTCGACAATAAATAACGGTTTT  
TGATAACGATCCCAAAGCGTATTTAACAGAACCCGTAATCCAACCGGATCAATTTGCCACCCCACTCTGAACCTTTTCAG  
ATGCGGATTGGGGATCATATTCAGTATGTTGCCCTGCGCATTTTTATTAATGCTTTCTGCTGGGAAACACAACCAGTCA  
TGTAATAACTAAAAGAGATGAAATCGACGGTATGTTTTAAATCTTCTGCGTCACTTTACGTATCTCAATGGTGATATTG  
TGGTGCGGAAGAAACGCTGCATATAGCCGGGATACTGGCCACGCGCTGAACATCACAAAGAACATCCAGCGCCGGTT  
CTCTCCATGGCTGCAACATATCTGTGGCTGGCAGGTGAGGGGTAACCAGCCACCGAGAAGCATATTGCCGATTT  
TCGCTTCGGGGAGCAGGCTATGACAGGCTTAACTGCCCGCGCACTGGCAACCAGTTGATGGTGGATAGCCTGATAAAT  
TCCGCTCGCCACTCTCTTCTGCCAGCCACGCCGTGAATGGCGCTGTAACGACATGTTGATTTCAATTAACCGTCAG  
CCATAACGCCACTTTATGTTGGTAGCGAGTAAAGACCGTGGGGGTAATGCTCGAAGTGCATGACCGCTCGATTAG  
CCCAACCGCGTAGTTTTTACCAGCCCATATGGCATTTCGTAATGGGATAACGTTACCAGCGGCTTGATCCCCGCTGC  
GCCATTTTCATCAAACAGCGCATCGTAAACGCTAACCCCGCTTATTGCTTGGCTTGGCTTGGTGGGAAATTCG  
CGCCAGGCAATGAAATACGCAGACAGGTGAAGCCATCTCGGCAAATAACGCGATATCTTCCGGGTAACGGTGATAAA  
AATCGATGGCGACATCTTTGATATTCTTTTCCAGGATGCGCGGTTCCATTTTTCCATTACGCCATGAGGCTGTAAA  
TCTGAGGTCGAGATCCCTTGGCATCTTCTGCCAGGCACCTTCCACCTGATTGGCAGCTGTTGCGCCACCCCAAAGAAA  
TGTTTCTGAAATGCTTTCATAATTAACCTCTTTTATCGTTAGCGAATGATGGATAACAGCGGTTACCTGCGCTTATCT  
GCGCGTGCCGTGGGTAATACGTCCGTAATAATCATCGCTATTACTGATTAATACCGCGTGCAGATCAAATCCGGCC  
TCGCGAATAGCAGGATATCAAAGAAATCAGCCGATCGCTGTATTGACCTTGTACCCACGTTGACGTGAGCGGAAAA  
GAATTTGCCGTCAGTTTTACGGTGTGATACCGACATGAATCAGGATCTCCACACCATCATCTGACTCAATGCAATGG  
CGTGAATGTGGCAACAACGAAGCAATTCGACCCGCAACCGGAGAACGCACCTCACCAACCGAGGGCAGAATGGCAATA  
CCTTTACCCAACAGGCCACTGGCAAACGTGGTATCAGCGACGTGAATGAGCGGCACAATCTCTCCCGTCATCGGTGAACA  
GATACCGCCCTGCTCAGGTGGTGAATAACCTCTGGTGTCTTCTTCTGCGGGCACCTGCGCTGGCTGACGTTTTAGCGG  
TGATGAAATGAAGCATCACCGTACCGACAATGCGCAACCGATGGCAATGACACCGCAATAACGCTGGCCAGACGGTG  
AAATCAATTCGGTTGACGGGATGTTTTGCATGAAGGTGAAAATACTTGGCAAACCAAAGGAGTAGACTTTTCGTTTGGCG  
GTAGCCAATAATGGTGGCCCCAAAGCCCACTGATACAGGCGATAACAAAGGGGTACTTACGCGGCAGGTTGACGCCAT  
ATACCGCTGGTTCCGGTGATACCAAACAGACTCGTCAACGCCGCTGATCCCGCCACCACTTTTTTCTGCGCATCGCGTTCCG  
CAGAGGAAGACGCCGAGCGCCGCCCGGACCTGCGCCATAATGGCGGGCATTAAACAGCGGGATCATGGTGTCTGAGCCAG  
CACGGTGAAGTTATTGATACACAGCGGCACCAGGCCCAGTGCAGTCCGAACATGACGAAGATTTGCCAGAAGCCGCCCA  
TTACCGCGCCGCAAATGCAGGAACCGCTGATAAAGCCAGAGATAACCGCGGCAATCAGTTCGCTTATCCAGGTTGAT  
AGCGGCCCCACCAGCAGAAAAGGTGACGGGTGTGATAACCATCAGACATAGCAATGGTGTGAAGAAATTTTTGATTGCCGA  
CGGTAACCACGCATTAAGTGGCGTCCAGAATGCTGCACAACAGGCAGAAAAAATAATGGGAATAACCGATGACGAGT  
AATCAACAATGTGACCGGAATACCCAGGAAATCCAGCCCCAGCGCATCCGCTTTTTGCCGTTCTCGAAAGCAGTCAGA  
ATTAATGGATGACTAACGCTCCACCAATCACCATGGCAGTAAATGGATTACCGCCGAAGCCTTTCCCGCGGTGTATCC  
CAGGATTAATCGGGAAGAACAAAACAAGGCATCACTGGCGCTGAATAAAATTAATAAGTACCCTTTGTTTCGGTCTCC  
ACTGAAAAGTGAAGCGCCAGAGCCAGCATACCTTTCAAGATCCCGGTTGCCCGCATCAAACCGATCAGAGGCGTAAAAATA  
CCTGAAATAACATAAAACAAGCGGTTTTAGCAGATTACCTTTATCATCATTTTTCCGGTGCCTGTTGCGCTTTTTCTGCAAG  
GCCTGCCACACTGTTAACCGCCAGGAAGACATCGGCCACATGGTTACCTATGACCACCTGAAACTGGCCACCGCTTTCCA  
CCACCATAATAATACCGGGGCTTTTTTACGTACTCTGCTTGGCTTTGCTTTCATCCTTAATTTAAACGTAATCGC  
GTTGCGCAATGCATCAGACTCACAATGTTATCTGCGCCCCGACTCTGCGACTATTTTTCTGGCTAACTCCGTCATAAC  
TTGCCCTTACCGCTTTGCGGCAAACTCCAAAAAAAACCTGAAAAAACGGCCTGACGTGAATCAAGCAATTTTTTTC  
AGGTTTTGCCGCTTAGTGCGGTAACAATCCTTTACTCAGTAATAATATTTAGTGTTCTTTGCGCACGCGCTCTATATT  
TATGGCTAAAAACATAATCTCTGCGGGTGAATTTTACGTTGATACTGCAAACCAATAAAAAATGGCGATCCGTTCCGCAC  
ATTGCCATGCTTGGGGTAATTTGTTTTACTGCTTGTGTAATGATTCACTACTATCGTTAATTGAAGCATGTTCAAGA  
ATACGCCAGGATAAAAATTCAGATGTGTAACAGTCGCTGATAACTCAAGCTTTCTTCTGGTAATTAAGGCTGAACTG  
AAATTTTATTAATTGACGATTTTCCGCGATTAACCTGCTGACACCTGCAACATCCTCCATATTTCCGCTCATTTGGGCAC  
TGACCAGATGCATGGCAATAAAGCCCACTTCACTTTCCGGTAACGACGCCCAACCGTTTATCAATAATGGTTAACGCT  
TCTTCCCTAGCTGGAACCTTTCCGGTAAAGCCGCTGGATATCCACAGCAACGGGTTGGCAGCAACAGCTTTTGCTG  
AAAGCGTTTAAATCGCAAACCTGGCAATGGTCAAGTAGCGAGATATAAATACTGTCTGTAATTTTTCCAAGCGCTCCTGCG  
CTAAAGAGATAATACGATCACAGGTTGCCATCACCTCAAGAGGAATATGACTTAAGAGTTCGCTTAATCGCCGTTCACT  
TCATGACTGCTCAAGGCATACTTTTTTCTATTCCACTGAGTTAATTTCTTTCGCCAGCGGTTTTTGAAGCCAATTC



GC GCCCATGACGACTTTTTCCGCTGTTGATCATCAATAACCACCACAACATTATTGTTGAGAATTTTGGTGATTTGCA  
TGTT CATAGCAAGGACCTTTTTATAACAAAAAACC GACTTACCAGTATTCTCTGGTTATGTCAGGTTTTGCCTGC  
GAATGCAGTAA CAATCCAGTCATTTATTAATGGTTTTATAACGAACATCCAGGTTTCGAAATTAATTTAATTGCGTGCA  
GAGAAAATAGCAATGCGCTATTGATAAAAATATGACCATGCTCGCAGTTATTAAC TTTGTGAATTTTAGGAATTTATAA  
AGTTATATATAACAAATCCCAATAATTAAGTTATTGGGATTTGTCTGGTGAATTATTTGTCGCTATCTTTCCCGCCAGC  
AGTTTATCCAGCTCATCGCCACC GACGTGACGGAATCCTGCCCTTACG TAGTAGAAGATAAACTCACA AATATTCTG  
GCAGCGGTCGCAATACGTT CGATAGAACGCGCGCAGAACAGCGCAGTAAGTACGCTCGGAATGGTACGCGAATCTTCCA  
TCATGTAGGTCATCAGTTGACGAACAATAC TTTCTGATTCTGATCGACTTTTTATCTTCACGATAAATACGTACCGCT  
TCGTCAATGTCCATCCGCGCAACGCGTCCAGCAGCTCGTGCAGCATCTGGATGGTATGACGGCCAGCGACTCCAGACT  
TACCAGCAACGGCTGATGCTGCTGGGAGAATTTCTCAGCGCAGTACGGCAGATTTTGTCCGCCACGTGCGCAATACGCT  
CCAGCTCGGCAATGGTTTTACTGATCACCATAACCAGTCGAGGTCGCTCGCCGTGGCTGACGTTTGGCGATAATGCGC  
ACG CAGGCTTCATCGATCGCACTTCCATCATGTTGACGTTCTTGTGCTTCGATGACGCGCTTCGCCAGATCGCTGTC  
CTGGTTATGCATCGCGGTGATTGCATCAGAAAGCTGCTGCTCCACCATGCCGCCATGGTCATCACCTGCGTGCGGATAC  
TTCCAGTTCCGCGTTGA ACTGGCCGGAATATGTTATTAAGATTGAGACTGTCCATAACGCACTCTGAATCAACCGT  
AACGCCGGTGCATGATGATCTTCTGTTGTTTCTTCGCTGGCTGGTGAACAGATCGTCCGTTGCTGAACCTCAATCAAT  
TCCGCCAGGTACATAAACGCGCTGTGGTCGGAACAACGCGCAGCTGCTGCATGTTGTGGTGACGATCACCACGGTGT  
ATCCTGCTTACGTTTCGGTGATCAGCTCTTCAATACGCCCGGTAGAGATAGGGTCGAGCGCCGAACACGGTTCGTCGAGCA  
GCAGCACTTCCGGGCAATGGCGATACCACGCGCAATACACAGACGCTGTTGCTGACCACCAGAGAGAGAGTAACCGCTC  
TGGTGCAATTTATCTTTGGTTTCGTTCCACAATGCGGCTTTGGTCAATGCCACTGCACGCGCTCGTCCATGTCGGCAG  
GGAGAGCTTCTCAAACAGACGAACGCCAAAAGCGATGTTGTCGTAGATGGACATCGGAAACGGCGTCGGTTTTCTGGAACA  
CCATGCCACTTTTCGACG CAGCAGTGCATATCTGAGAGTTGGTCAGGATGTTGTCGCCATCAAGCAGAATTTACCT  
TCCG CACGCTGCTCCGGTACAGTTCAAACATTTTGTGAAGTACG CAGCAGCGTCGATTTACCGCAGCCGGACGGCCC  
GATAAACGCCGTTACCTGGTTTTTAGCGATATCCAGTTGATGTTTTT CAGGGCATGGAATTTGCCGTAGTAGAAGTTCA  
AATTACGAACCTGAATTTTACTCGGGCAGTTTCAACCATACTCATTGCAATCTTTTCTCATCGTGCCTGATGCCTTC  
GCTAATCAGGCTTACCGTAGGCCGGATCAGGCGTTCACGCCGATCCGGCAAAGTGAACCGTGTACAGAGTCAAAAAG  
GCGCTCGGTCCGCTCCCTCGCCCTCTGGGGAGAGGGTTAGGGTGAGGGGAAAACCGTGT CAGCAATATCAACCGTGT  
ATTCTTCGAAAAACAACGCGCGCCAGAATGTT CAGCAGCAGTACGCACAGGTAATGATCAATACCCCGCCAGGCCA  
ATTGCTGCCATTCGCAAACGGGCTCATCGAAACTTAAAGATCGTACC GGCAAGTTGGCGATCGGCTGCATCATGTCC  
GTGCTCCAGAACTGGTTGGAGAGCGCGTAAACAGCAGCGCGCGGTTTTACCAGCAATACGGGCAATCGCCAGCAGGAT  
ACCGGTCATAATCCCGACACCGACGCTTTCAGCGTAATCGCAGAGATCATCTTCCACTTCGGTGTACCCAGCGCATAAG  
CCGCTTACGCAGGCTGTACGGCACCAGTTT CAGCATGTTCTCGGTGGTGCGGATAACAATCGGCACCTGCAACAACGCC  
AGGGCAATCACGCCCGCCAGCCGGAGAAGTGCTCCATCTGCGCCACCACAATGGTGTAACAAAACAGACCAACCACAAT  
CGACGGCGCAGAGAGCAGAATGTCGTTAATGAAGCGAATCACTTCTGCCAGCCAGGATTTACGACCATATTCGCCAGAT  
AAATCCCGCCATAATGCCAGCGGCTACCGAATACCGTGGCCACAAAATTAACAGCCCGCTACCCGCCAGAGCGTTC  
GCCAGACCACCTTCCGTATTGGGCGGCGGCTCATTT CAGTGAACAGCGCCAGCGACATACCGTCGATACCGCGAGT  
GATGGTGGACATTAATAATCCAGATCAGCCAGAACAGGCCGAAGCCATCGTCCGATCGAGAGCGTCAGCGCAATACGGT  
TTTTGAGGCGGACGCGCTGCATTTGCGGCGAGATT CAGCCAGCGCCGAGTGGTTTGCATTTCAACCATAGCCATT  
AGCGTGCCCTCATTCTTAGCCAGGCGCATAATCATAA ACTTCGATGCGGCGAGGACGATGAAGGTAATCACAACAGG  
ATCAGGCCCAGTTCATCAGTGC GGCAACGTGCAGCCGATTCCGCTTCCGCAAATTCGTTGCCAGCGCAGAGGTGAT  
ACTGTTGCCCGCATATACAGCGAGGCGCTGT CAGCTGGTAGGTGTTACCGATGATAAAGGTCACCGCCATGGTTTAC  
CGAGCGCGCGGCCAGCCAGCATGATGCCCGGATAACACCATTTTTTGGTGAACGGAAGAACGATACGCCAGATAACT  
TCCCAGGTGGTGACGCAATACCGTAGGCCGACTTTT CATCATCACCGGGTTTTGTTGAAACACATCACGCATTACCGC  
CGCAATGTACGGAATAATCATGATGGCGAGGATCACGCCTGCCGCGAGGATACCGATACCAATGCGGGGCCAGAGAACA  
GCGCGCAACAATCGGGATTCGACATGATATTGCCGACCGGCTCTGAAAGTAAACGGCGAACAGCGGCGCAAGATA  
AACAGGCCCCACATGCCGTAACGATACTTGAATGGCTGCCAGCAGCTCAATGGCGATACCCAGCGGGCGTTTTAGCCA  
GCCAGGCGCAAGCTCAGTCAGGAACAGGGCGATACC GAAACTCACGGGACGGCGATCAGCAGCGGATAAACGAAGTCA  
CCAACGTACCGTAGATCGGCACCAGCGCCCGTAGATATCGTTCCGGTGCATCCACTCTTTGGTCCATAGGAAAGCCAGA  
CCAAATTTCTGAATGCTCGGCCAGGAGAGATGATCAGAGAGACAATAATGCCACCAACATCAATAGCACAATCAGCGC  
CGCCAGTTTTACCAGCAGCTGAAAATATGTCGCCCTTTT ACCCGTGGGTTAAAAGCAGGCTTGGTTGCAGCCATAA  
GTTACTCTT CAGTTAAACCGTTTTACAAAGTCATTTTGAATGCCGGATGCGGCGTAAAACACCGTACCCGGCTGGAGT  
TTTATTAGTACAGCGGCTTACCGCTACTGCTTTAATATTGGTCTTCCACGCAGCGGAACCTGTTCAACTACACTATCC  
GGCAGGCTGGCGTAATCCAGGTCGTTTCGCTGTTTAGCCCCGTTTTGTACGCCAGTCGAAGAATTT CAGCACTTCTGT  
GCCTTGTCTGGTTTTCTTGATCTTTGTGGATCAGAA TGAACGTGGTAGAGGTAATAGGCCATGCATCTTCGCTTTCT  
GGTTGGTCAGATCCTGAGCGAAGGTTTTGCTCCAGTCTGCAC TTTTGTGCTTAGCGAAGTTTTCTTCGGTGGACTA  
ACCGGTTTACCATCAGCGGAGATCAGTTTGGTGACGCCAGGTTGTTCTGCTTCGCGTAAGCATATTCAACATAACCAAT  
TGACCCCGCAGACGCTGAACGAACGCGCGGATACCGTCTGTTACCTTTACCGCCAGACCGATCGGCCATTTTACGGTAG

AGCCAGTACCAACGTTGTTTTTCCACTCTTCGTTCACTTTGCCAGGTAGCTGGTGAAGACGAAGGAAGTCCGGAGCCA  
TCTGCGCGGCTACTACAGCAATGTTTTGTGAAGGCAGTTTCAGACCCGGATTAGTTTTGGCGATGGCTTCATCATCCCA  
CTTCTTGATTTTCCCAGGTAGATGTCGCCGAGGGTTTTACCATCCAGCACCAGTTCGCCAGACTTCAGCCCTGGAATGT  
TAACCGCCAGCACCACGCCCAATCACGGTCGGGAAGTGAACAGACCTTCCTGAGCCAGTTTTTTCGTAGACAGCGGC  
GCGTCAGAGGCACAAAATCAACGGTATTAGCGATAATCTGTTTTACGCCACCAGGAAGAACCGATAACCTGGTAGTTAAC  
TTTATTACCGTTTTCTTCTGGTAAGTGTAGCCCATTTGGCATAACCCGGCGCAGGAAGGTTGACCTGCACCTGTCA  
GGCTTGCTTCTGCAAAACACAGAGAAAGCACTCATCGATAAGGTCGCCGCGACAACAGTTGCGACGGTGGTACGCATAACT  
TTCATAATGTCTCCTGGGAGGATTCATAAAGCATTGTTTGTGGCTACGAGAAGCAAAATAGGACAAAACAGGTGACAGTT  
ATATGTAAGGAATATGACAGTTTTATGACAGAGAGATAAAGTCTTCAGTCTGATTTAAATAAGCGTTGATATTCAGTCAA  
TTACAAACATTAATAACGAAGAGATGACAGAAAAATTTTATTCTGTGACAGAGAAAAAGTAGCCGAAGATGACGGTTTG  
TCACATGGAGTTGGCAGGATGTTTGATTA AAAACATAACAGGAAGAAAAATGCCCGCTTACGCAGGGCATCCATTTATT  
ACTCAACCGTAACCGATTTTCCAGGTTACGCGGCTGGTCAACGTCGGTGCCTTTGATCAGCGCGACATGGTAAGCCAGC  
AGCTGCAGCGGAACGGTGTAGAAGATCGGTGCAATCACCTCTCCACATGCGGCATCTCGATGATGTGCATGTTATCGCT  
ACTTACAAAACCCGCATCCTGATCGGCAGAACATAAAGTCAACTGACCCGACGCGCGCAACTTCTTCAATGTTGGATTCA  
GTTTTTCCAGCAATTCGTTTCCGTTGCAACAACAATAACCGGCATATCGGCATCAATTAGCGCCAGCGGACCGTGTTC  
AGTTCGCCAGCAGCGTAGGCTTCAGCGTGAATGTAAGAGATCTCTTCAACTTCAATGCGCCTTCCAGCGGATTGGGTA  
CTGATCGCCACGGCCAGGAACAGCGCGTGTGTTTTGTGAGAGAAATCTTCTGCCAGCGCTTCAATGCGTTTGCCTGAG  
ACAGCATCTGTCTAATACGGCTCGGCAGCGCTGCAGACCATGCAGATGTCATGTTCAATGGAGGCATCCAGACCTTTC  
AGGCGAGACAGCTTCCGCCACCAGCATCAACAGCACAGTTAACTGAGTGGTGAATGCTTTAGTGGATGCCACGCCGATTT  
TGTACCCGCGTTGGTCATTAGCGCCAGATCGGATTCGCGCACCAGAGAAGAACCCGGAACGTTACAGATTGCCAGTGAAC  
CAAGGTAACCCAGCTCTTTCGACAGACGCAGGCCAGCCAGGGTATCCGCGGTTTCCGCCAGACTGTGACAAGGTGATCATC  
AGGCTGTTACGACGCACGGCAGATTTGCGATAGCGGAATTCAGAGGCGATTTCCAGCTGCACGGAATACCTGCTAGCGA  
TTCAAACAGTAGCGGAAACCATACCGGAGTTATAAGAAAGTACCACAGGCGAGGATCTGAATATGCTCAACCTTCGACA  
GCAGTTCGTCGGCTTCCGTTCCAGCTCGCTTAAATCAACCTGACCGTGGCTGATGCGTCCGGTAAGGGTGTTTTTGATC  
GCGTTCGGCTGTTGATAGATCTCTTCTGCATGTAGTACGGTAAATGCCTTATCGCCCGCTCATATTGCAGATTGGA  
TTCGATATCCTGACGTTTTACTTCCGCGCAGTTTTATCGAAGATGTTTACCGAACGGCGAGTGATTTCCGCAATATCGC  
CCTCTTCAAGGAAGATAAAGCGACGGGTACCGGCAACAGCGCCAGCTGGTCAGAAGCGATAAAGTTTTCGCCATCCCC  
AGGCAATCACCAGCGGACTACCAGAACGTGCCGCCAGCGGATCCGGGTGACGGGAGTCCATGATCACTGTACCGTA  
CGCACCACGCAGCTGCGGATAGCACGCAAGACGGCTCACGCAGAGTCCCGCTTGTTCAGCTCCAGTTCACCAGAT  
GGGCAATCACTTCGGTGTGGTTTTAGAAACGAAGGTATAGCCACGCGCTTTTAGCTCTTACGCAGCGGTTTCATGTTTT  
TCGATGATGCCGTTATGCACCACCACAATGTGTTAGAAAACATGCGGATGCGCATTCACTTCTGAAGGTTACCGTGGGT  
CGCCAGCGAGTGTGAGCAATACCAGTCCGCCATGCAGAGGATGTTCTTCCGCTGCTGTGCCAGCATCTGGACTTTAC  
CGAGGCGACGCAGGCGGGTTCATATGACCTTCTGCATCAACAACGGCCAGACCGGCAGAGTTCATATCCGCGGATTCAG  
CGACGTAACCTTCAAGAAGGATTTCTGCTACATCACGTTGCGCGATCGCGCAACAATCCACACATAGTTTTTATTTC  
CGATTTATATCGTTGTCGGTCAACCTGTATGCCGTTTTTTCGGGCGCCCGAGCCTTGTAGAGAGTGGGGTTATTTTTA  
TAGTTACTGCTTGTGGGAGGAGATTATGTTATCTCCTCATCCATGTGACCGGGTTAGCCGGCCAGAATCACTTTTTCT  
TTACCGGACGACGCCAGCCTTCTTCTGAGTCTGCGGCACACGGCTGATAGCTAATGCATTTTCCCGGACATTACGCGTC  
ACAGTTGTACCCGAGCAATGGTCGCGCCTTTGCCTACTGTTACCGGGGCCACCAGCTGAGTGTGGAACCAACAACAC  
ATCGTCGCCGATAATGGTCTTAAATTTATTCGCACCATCGTAGTTGCAGGTAATGGTTCCCGCGCCGATGTTAACGTTAT  
CGCCAATTTCCGCATCGCCAGGTAAGTACAGTACAGCTTTTCGAGCCTTACCAGACGCGCTTTTTTTCATCTCAACG  
AAGTTACCGACGTGAGCACCTTCCAGCAACTCAGCACAGGACGCAAAACGGGCAAAACGGGCAATGGTACAGGCCGCTGC  
CAGATTCGCATCTTCCACAACGGTATACGGACTGATTTGCAATCATCGCCAATCACGCTGTTTTTAAATCACGCAACCGG  
TGCCAATTTTTACGCGATGACCGAGAGTACGTTGCCCTCGATGATAACGTTAGTATCAATTTCAACATCGCGCCCGTGA  
GTTAGCGTACCACGCAGATCAAAACGCGCTGGATCGCGCAGCATAACGCCTGCTAACAGCAGTTTTTTCAGCCTGTTCCGA  
CTGATAAACACGCTCCAGACGGGAGAGTTGACGGCGTTATTACGCCTTCTACTTCGTTAAACGTTGCGGATGAACGG  
CGACGATTTACGCCCTTCTGATACGCCAGCGCAATAATGTCGGTGTAGTATTGCCCCTGAGCATTATTGTTGGTC  
AGCTTCCGACGACGCTTTCATATCTGCGCGTTGGCAATCAGAATGCCGGTGTGATCTCCTGAATCTGACGCTGCTC  
GTCGGTGGCATCTTGTGCTCAACAATGCCGGTAACTTTCCGTTTTTACGGGTGATACGTCATAACCGGTGCGGATCAT  
CCAGTTTACCAGTACGACCAATGCCACCCTGCGGTTTAGCATCACGCAGACGCTGGAGTGTTCGACAGAGATCAGC  
GGCAGTCCCGTAGAGCATTAAAATGTCTTCATCATCGGCAAGAAAGGTGCGGCCTGCTGCATTGCATGACCCGTACC  
CAGCTGCTCTGCCTGAAGCACCCAGTTAAGGTTGCTGCTTTTACGCGCTGTTTTAGCAGATCGCCGCCGTGACCGTACA  
CCAGGTGAACGTGCGCTGCGCTAATTCAATTCGAGCATCAATGACATGCTGAACCATCGCTTCCCGGCAAGGGTATGC  
AGCACTTTCGGAAGATCGGAATACATGCGCGTGCCTTTGCCTGCGCAAGGATCACTACGCTCATAGCATTATTCAACAT  
ACGCGTCTGACTGTAATTTGAGAACGAATTTAAACCGCTTACCTTGA AAAA ACTACATTTTTTTCATCGTGAATGGA  
CAGAGGATAAATTTGTTCAATAACGATTATCCCCGTGACGAAAGCGCCATTTTCGACCATCGTCACGCCTTTTGTCTGC  
AGAAAATTAAGGCAGTACCTTAATTTAAGCGTCAGGTGGATGTTTTGCTCTTATTTTCGATCAATGAATAAACAGAAAA

CAGGGGGTTTTATATCAGCAGGATCTATGTGAACGCTATTCAGGACGGGTACACGCGCAAAAAAAGCCAGCCTGTTT  
CCAGACTGGCTTTTGTGCTTTTCAAGCCGGTGTACATCGCTTTTTGGTCAACTCGATAACGCGCAGCTGCGCGATCGC  
TTTGGCCAGTCCGCGAGCCTGAGCGTAATCTACGTCGCCGTGAGAGCTGCTAATGTGCTTTCAGCCTTACGTTTCG  
CTTCCATGGCTCGCGCTTCGTGCGATCTTGCCGGAATTGCGGTGTCGGCCAGAACGGTACGTTGCCAGGCTGCACT  
TCAAGAATGCCGCCAGACAGATAGATAAACTCTTCGTGACCGTGTGTTTACGATGCGAATCATACCAGGCTTAATGGC  
GGTGAGCAGCGGTGCGTGGCCAGGGTAGATCCCCAGTTCACCTTCGCTACCCGTTACCTGGATTTTCTCGACCAGACCA  
AGAACATTTGTTGCTCTGCGCTGACGACGTCCAGGTGGTAAGTCAATGCCATATCACCTCCGATTAAGGCGTTAAAGTT  
TTTTGGCTTTTTCCACAGCTTCTTCGATGGAACCGACCATGTAGAACGCCTGCTCCGGCAGGTGATCGTATTGCGCTCC  
ATGATGCCTTTAAAGCCACGGATGGTGTCTTTCAGGGAGACGTATTTACCCGGAGAACCGGTGAATACTTCTGCCACGAA  
GAACGGCTGGGACAGGAAGCGCTGGATCTTACGAGCACGCGCTACCACAGTTTGTCTTTCAGACAGTTCATCCATAC  
CCAGGATGGCGATGATGTCTTTCAGTTCCTGATAACGTTGCGAGTGGACTGAACGCCACGCGCGGTGTCGATGTTCC  
TGACCAACCACAGCGGGTCCAGCTGACGGCTGGTGGAGTCCAGCGGTCAACGGCCGGGTAGATACCAGAGACGCGAT  
CTGACGGCTCAGTACCACGGTTGCGTCAAGGTGCGCAAAGGTGGTTGCCGGAGACGGGTGAGTCAAGTCAATCCGAGGTA  
CGTATACTGCTGTACGGAGGTGATAGAACCAGTTTGGTGGAGTGATACGTTCTGCGAAGCGCCATCTCTCCGCC  
AGGGTCGGCTGATAACCTACCGCTGAAGGCATACGGCCAGCAGTCCGGATACCTCCGTACCGCCAGGGTGAACGATA  
GATGTTGTCAACGAACAGCAGAACGTACGACCTTCGTCACGGAATTTCTCAGCCATGGTCAGACCGGTGAGAGCAACGC  
GCAGACGGTTTTCCCGCGGCTCGTTTCATCTGGCCATACCCAGGATACTTTGTCGATAACGTTGGAGTGGTCAATTCG  
TGGTAGAAGTCGTTACCCTCACGAGTACGTTACCTACGCCCGCAACACAGAGTAACCGGAGTGTGATCGCGATGTT  
ACGAATGAGCTCCATCATGTTTACGGTTTTACCTACACCCGACACCGAACAGACCAACTTTACCGCCTTAGCGAACG  
GACACATCAGGTCGATAACTTTGATACCGGTTTCCAGCAGTTCCTGAGAGTTTACAGCTCTTCGTAGGAAGGTGCTGCG  
CGGTGAATCGCCCAACGCTCTTCTTACCAGTCTCGCTTTCATGTCGACCGGTTACCCAGTACGTTTATGATACGGCC  
CAGAGTCGCTTACCTACCGGACTTCAATCGGGTGTTCGAGGCTTTTACATCCAGACCGCAGCAGACCGTCCGAGG  
AACCCATTGCGATGGTACGTACGATACCGCCGCGAGCTGCTGCTGAACTTCCAGCACCAGACGCTCATTACATTTTGC  
ACCTCAAGAGCATCGTACACGCGGGTACGGCATCTGAGGGAATTCGACGTCAACTACGGCGCCGATTACCTGGACAAT  
CTTCCAGTAGCCATCTAAATCCTCTACGAAATAACCTGTTTAAACCGCGCGGCCCCCGAGACGATCTCGGTGAGTTC  
CTGAGTAATGCTGGCCTGACGAGCTTTGTTGATACCAACTGCAGCTCTTAAATCAGGCTGCCGCCATTGTCGGTCCGG  
CTTTCATCGCCACCATAACGGCGGCTGCTCGTGGCCAGGTTTTCAACCACGCCCTGATAAACCTGAGATTCGACATAA  
CGACGACGAGGATCCAGCAACGCCTTCGGATCGGTTTCGTACAGGTAATCCAGGATTTATGTTTCAGATCATCATC  
ATCTGATGCCGTTAACGGCAGCAGCTGGCTGATGGTCGGAACCTGAGACATGGTGTAAATAAATTTGTTGCTGACAATGT  
AAAGCTTGCCAGACGGCCTTCGTCGTAGGCCTGCAACATCACTTTTACCGACCGATCAGTTCGACAGGGAAGGGTTA  
TCCCCATGCCGGTGACCTGGGCAACAACATTGCCGCCACGGAGTTGAAGAACGACACGCCTTTCGAGCCGATCATTGC  
GAGGTGCGATTGAACGCCTTTGTCGGTCCAGGTCTTCAATTCGCCAGCAGTTTTTTGAACAGGTTAATGTTCAAACCAC  
CGCAAAACCAGGTGCGTGCACACCACAGGTAGCCACGCGTTAACGTCGCGGTCTTCCAGGTAAGGGTGTATAT  
TCCAGATTACCGTGTGAAGGTGACCAATCACTTTCGCGATGGTTTCTGCATAAAGGACGGTGGCCGCCATGCGATCCTG  
CGATTTACGCATTTTGAAGCGGCGACCATCTCCATCGCTTTCAGTATCTTTGCGTGTTCGACGCTTTCGATCTTAC  
TACGATCTCTTTGCGCCGCCATGAGCTTCTCCTCAATGCCTTGGCCCTGCCCTAAGGCAAGCCGCCAGACGTTACC  
AGGATTGGGTTGCTTTGAAGGAATCGAGGATGCCTTTCAGCTTGCCTTCGATTCGTCGTTGTAGCCACCGGTCTGGTTG  
ATCTCTGCATCAACGGAGCGTGATCACGGTCGACGTAAGCCAGCAGAGCGGCTTCGAAGTCGCAATTTTCGACAGTTC  
AACATCCGCCAGGTAACCAGTTCGCTGCGAACAGAACAGAGACTGCTGCGCAACGGACATCGGCGCATACTGTTTCT  
GTTTCAGCAGTTCGGTCACTTCTGACCGTGGTCAAGCTGCTTACGTTGCATCGTCAAGGTGCGAATGCAAACTGAGAG  
AACGCTGCCAGTTCACGATACTGTGCCAGAGCGGTACGGATACCCACCGACAGTTTTTTTCATGATCTTGGTCTGTGCTGC  
ACCACCAACACGGGATACGAAATACCCGGTAAACCGCAGGACGAATACCGCGTGAACAGGTTGTTTCCAGGAAGA  
TCTGACCATCGGTAATGGAGATTACGTTGGTCGGAACGACGCAAAACGTCACCCGCCTGAGTTTCGATAATCGGCAGT  
GCGGTGAGAGAACCAGTTTTCCCTTTCACCTTTCACCTTGGTGAAGGCTTCAACGTATTCGCGGTTAACACGTGACGACG  
CTCCAGCAGACGAGAGTGGAGGTAGAAAACGTCGCCGGGAATGCTTACGTCCTGGCGGACGACGGAGCAGAGGGAGA  
TCTGACGGTAAGCAACAGCCTGTTTAGACAGGTATCGTAAATGATCAGCGCATCTTACCAGCGGTACGGAAGTATTCG  
CCCATTGCGCAACCGGCATACGGTCCAGGATTGTCAGTGCAGCGGATTGACGCGGTTGCTACCACAACGATGGTGT  
AGCCAGTGCGCCGTGCTCTTCCAGTTTACGTACCACGTTAGAAATGGTGGACGCTTTCGCGGATAGCGACATAGATA  
ATTTGATACCGGAATCGCGTGGTTGATGATGGCATCGATAGCCAGTGGGTTTTACCTGTCTGACGGTACCAGTATC  
AATTCAGCTGACCACGACCGATTGGGATCATGGAGTCAACGGCTTTATAACCGGTCTGTACCGGCTGATCTACGGACTG  
ACGTTGATAACGCCCGGAGCGATTGCTTACAGCAGAGAAGCCGTGATCCAGCGGACCTTACCCTGATTGGTG  
CACCCAGAGTGTAAACCACAGGCCAGCAGGCCACGGCAACCGGAATTCAGGATACGGCCAGTACACTTAACTTTC  
ATGCCTTCGGCAAGGTGAGGATACGGACCCATAACAACCGCACCTACAGAGTCCGCTCGAGGTTGAGTGGATAGCGTA  
ACGGTTACCCGCGAGGAGATCAATTCACCTGCATAAATCGGCCAGGCCGTGAATGCGGATAACACCGTCACTTACAG  
AAACAATAGTACCTTCGTTGTGAGCTTCACTCAACAATTGAACTGAGCAATGCGCTGCTGATCAGTTCGCTGATTTCCG  
GTGGAATTCAGTTGATGCTCCAGTCCCCTTAAGACTGCAAGACGCTGCAAGGCGCTCAAGACGACCGCGTACGCTGCC

ATCAATGACCATATCACCCGCTCGGATGATAACGCCTGCCATTACAGACTTATCGATTTTGAATTACAGCTTAACTTTGC  
GTGACAGACGTTTTTCCATCGCAGCAGAAATTTTCGCGAGCTGTTGTTCACTCAGTGCGGCAGCGGAAATGACGTCTACC  
TCAGCGGTAGCCTCACTCACGGCACGCAGGTGAATAAACTGCTCCAGAACATCCGGGAGCGGTTAAGACGACCATTTTC  
AGCCATAACCCGAATCAGGTTCTGACCCTTTTCGTCCAGTTGCTCACCACAACTGCGATAAACGACTCGGCGAGCGTTT  
CTGGCGCAAGCGCCAGAGAGAAGCTCTGCCATTTGTTCTGTTTTTGGTTACCTCGGCGGCAAACGCCAGCATGTCCTGC  
CAGCGTTTACACTTTGGTGTTCGACGGCAAAGTCAAAGCTGCTTTGGCGTAGGGGCGAGCTACCGTAATAAATTCAGA  
CATCAGCCCCTCCCTCCTTACAGTTACAGCGACAAGTTATCCAGCATGTCGCTGTTAGCAGCTTATCCACGGAACGTTT  
GATGATCTTCTCGGCGCCAGCAACAGCCAGGATAGCAACTTGCTTACGCAGCTCTTACGGGCACGTTTACGCTCGGCTT  
CAATTTCCGCCTGCGCCTGGGCCACGATTTTAGTACGTTCTGTTCTGCCTCAGCTTTCGTTCTGTCAGAACTGCGAG  
CGGCGTTTGTTCGCTGCTCGATGATTACCTGGGCTTCCGCTTTCGCTTTTTTTCAGCTGGTCGGTCGCGCTGGCCTTTGC  
AAGGTCAAGTCTTATGTCTCGTTCTCGGAAGCAAGGCCGTACAGCAATTTCTTTTTCGAGTTTTTTCGATGGCTGCCA  
TTAATGGCGCCATACGACTTTCATGCAGAACAGAACAGGACAAACCGGATGGCCTGGCCGAGGATTGTTGCGTTA  
AGATTCACAGCACAATGCCTCTATTTAGTTAACGTTCTGATATTGCTCTTTAAATAAAAGCAACGCTTACTACGCGACAG  
CGAACATCAGTACAGACCCAGACCTACAGCGATCATCGGGATAGCATCCACCAGACCCATAACGATAAAGAAGTACGTA  
CGCAGCAGAGGAATCAGATCAGTTGACGCGCTGCGCTTCCAGGAATTTACCCCGAGGATGCCGATACCGATCGCGAG  
ACCGATTGCCCGCAGACCCATCATCACAGCGGCAGCATTGTACAGCAGATCCATATTACAGTTTTTTCATGACAGTCTCCA  
GTTTTGTTTTCAGTTAAACGTAGTAGTGTGGTAAATTAATGTTCTTCAGACGCCATCGACAGATAGACGATCGTCAGAAC  
CATGAAGATGAAGGCTTGCAGCGTAATGATCAGGATGTGGAATAAATGGCCACGGCACATTCAGGATCCACTGTGACCACC  
ACGGCAACAGACCAGCAATCAGAATGAAAATCAGCTCACCGGCATACATGTTACCGAACAGTCGCAAACCGAGTGAAACT  
GGTTTGACAGCAGGCTTACCCCTTCAAGGATTAAGTTGACAGGAATGAACGCCAGTGATTGAACGGCTGCAGCGTCAA  
CTCTTTCTGTAAGCCGCGATGCTTTTTCATTTTATGCTGTAGAACAGAATCAGGATAAATACGCCAGTGCCATAGACA  
GCGTTACGTTACGTCGCGACGGAACACACGCAGTGCAGGCAGACCCAGTACATGTTACGCAATGTACGGCAGCAGG  
TCGATAGGCAGTAAATCCATCAGGTTTATCAGGAATACCCAGACGAAGATCGTCAGGGCCAGCGGAGCAATCAGCTTGCT  
TTTGCCATGGTACATGCTTTTACGCTACCATTAACAAAGCCGATCACCAGCTCAATCGCGGTCTGAAACTTACCTGGCA  
CACCGCTGGTCGCTTTTTGGTACGCTACGGAATAAAACAGGAACAACAGACCCAGCACCCAGAGAAGAACATGGAG  
TCAATATTGATTGTCAGAAAGTGGCTGGGGGTTTTGTGGATCCACCAGCGAGAATGTACGCAGGTCAGCTGAAGGTT  
ATTCAGGTGGTGTCTATGTAATCCTGCGCGTCATATTTTCTGAAGCCATGATGCCTTTTACCCTTTGTTGTTAATTAC  
AGCCGGTGCCAGTATCTGAACCACCAGCACAAAACCCACGTAACGATCAGCGGCAAGAATACCGCTTTAAACCCGCCA  
ACGCCACCACCAGTAACACCAACATCGCCAGAACTTTGAAAGCTTCGCCAAATGCGAATGTCCAGGCCACCCGGCCTTT  
GCTGGTGTATGCGCCTGGTGACGCCAGGCAAATATCATAAAACAAACGTTAGGCAGAAAGACTGCCAGGCCCCCGCTTAT  
TGACAGAGCGCCCAAGAGGGTCTTTGAGGCTGAACAGCAATCCACTTGCTATCACCACCAGTAACTGAACGAGCAGAA  
GCTTCCGAGCAACGTTTTCGACTCACGAGCGACACAGACATCACGTTTTTCACTCCTGCTCCCTTCGAGGTATGCCGCGTG  
TCGTATAAACTTTCTTTAAGGCTTAGAGTCAAGCATCAAAAAGCGGTCAAATTATACGGTGCGCCCCCGTGATTTCAA  
CAATAAGTAGCCAAAAGTGAATAAATGTTTAAATATTTTTCCAGTGCATACAATTGCGACTTTTTCTGCTAACCTGTT  
GATCATGAAAACTGTAAATAACGCGTAAACTGGTGATAAAGCGTGCTTACAGTACATATTGCGCATGTTTCGCGCAC  
AGCATATTTATTTACTTGGCAAATGATGCCTTTGCAAGTTTATGATATTTAGTCTAAAAACAGATACTGTTTTAATAAA  
TGACATTTACACAACAAAACCCATTGACATTTTAAATAATGTTTTAACAGCCAATGATGGTCTTAGCGCCGATTT  
TTAGCAGACTGATTTTTACTAATGACTTATTTTCTGCTTACAAAAAAGCCAGTATCTTGTGATGCAAAAGAGT  
GAACGTGGCGTTAAATGTAACAGTTATATCAGTAGAAAACCTGGTTGTTGTTAACAGTCTAACCGGTCAATTTTTATG  
ATTTTTTTGATAAAAAATTAATTTTTATTTGCTTAAACACCACAGATGACGTTCCGCTCAGGCTGGAACCTGAAGT  
TTAACCACTGATTCGACCTGATATTTTCGGGCAACAAAGCATTTTCATCTTCCGGCATTGCTTTTTCAGCGCGTAGAA  
ACCGCTTGTCTACCAGGAAGATGGTGGCACCAGCTCACCATATCGTTTACAGAGAGGCAAAGCGCGGCTAATTACGCCAT  
CAAATGGCGGCTCTGAAGGAAACTCTTACCTGCTCTGACTGGTTCAATATTCTCCAGTTAAGCTCATGTTGCACC  
TGACGAAGGAAACGCACGCTTTACCAAGGCTATCCAACAGAGTGAAATGGGCTTACAGACGCACGATAGAGAGTGAAT  
GCCTGGCAGTCTGGTCCGGTCCGACATCGATAAACCGTTACCTTGCAGATACGGTGCCACCACAATGCTATCGAGAA  
TATGGCGTACCAGCATCTCATTAGGATCGCGACCGAAGTACAGTTGTACGCTTTGTTCCATTTATGCAGCATATTCAG  
TAGGCAATAAGCTGGTTTTTCTGGTATCGGTAAGCGAAATACCTGCGTCTTTCAGCAGTAAGGAGAGTTTGTGAGCAC  
GGTGATTACCTGTTCTTGTGCGTTGCTGGTAAGCGGGTCTTACCAGGCATTTTTAATGCGTTATGCGCTACGACGCA  
GCATACCCTGTTTTTTCAGCCACACCAGCAGAATGGAGATGGCCGAGCGTGACGCCAGAAATACGCGAAGCTTGGCCG  
ATAGAGGCTGGTTTGTGATCGTTAAGTTTGGCGATCACTTCGTTAGAAAGACCGGATACCTGGCGGTAATCCAGTGTGCG  
GGGTAGCAGGGTGTCTCGTTACGCGACTGCTTTTCGATCTCATCTTGTGCGCGCGATATAACCTTCGATTTAACCT  
GAATCTCAACCTGTTCCGCCCTGTTCTGCTGTCAACGCAGGGGCAAACGGCGTCAGCGTGGTTAATTTTTTCATAAGTC  
ATTTCCGGACGACGAGCAGATCTTACCCTGGCTTACGGGAAAGCGGCGAGTCAGGTGAGCATTACTTCCGGCTGC  
AGCTTCCGCCGACGGGTTACCCAGGTGATTTTCAGACGCTGACGCTCACGCTCGATATTCTCAAGTTTTCTGTTAAAGC  
GCGCCCAACGTTGCTCATCCACCAGGCCAGTTCAGGACCGATTTTCAGTCAAACGCAGATCCGATTATCTTCCGCTAGC  
ATCAGACGATATTCTGCGCGGAAGTAAACATACGATACGTTCTTTGGTCTTAAAGTGCACAGGTCATCAACTAGTAC

CCGAGATACGCCTGAGAACGTGCCGGAGCCAACCTTCTTTGTCAGCAGACAGACGGGCAGCGTTAAGACCGGCCAGCA  
AACCTTGCGCAGCGGCTTCTCGTAACCGGTAGTGCCGTTAATCTGACCAGCAAAGAACAGCCCTGGATAAACTTGCTC  
TCCAGCGTCGGTTTTAGGTCGCGAGGATCGAAGAAGTCATACTCAATGGCATAACCCGGACGCACGATCTTCGCGTTTT  
CATCCCCTGCATAGAGCGGACGATTTGCATCTGCACATCGAACGGCAGGCTGGTGGAGATACCGTTCCGATAAAATTCAT  
TAGAGGTACAGTCTTCCGGTTCAAGGAAGATCTGATGCTGATTTCTGTCGGCGAAGCGCATGACTTTGTCTTCGATCGAC  
GGCAGTAGCGTGGGCCGACACCTTCGATCACCCCTGCGTACATTGGGCTACGATCGAGGTTACTGCGGATCACATCATG  
GGTTTTCTCGTTGGTATGAGTGATATAACACGGCACCTGCTGGGGATGCTGGGACGCATTGCCATAAACGAGAATACCG  
GCATTGGGTTATCGCCATGCTGTTGCGCCAGTACGCTAAAGTCGATGGTTCGAGCATCAATACGCGGTGGTGTCCCGGTT  
TTCAGACGACCAACGCGCAGCGGCAGTTCACGCAAACGGCGAGAAAGCGGAATGGACGGCGGATCACCAGCACGGCCACC  
GCTGTAATTATCCAGACCGATATGAATTTTACCGTCGAGGAACGTCCTAACGGTGAGCACGACGGCTTTGGCACGGAAC  
TCAGTCCCATTGGGTAACAGCACCGACCGACGCGATCGTTTTCGACAATAAGATCTTCAACCGCTGCTGGAAGATCATC  
AGTTCCGGTTGGTTCAGCGCCGTACGTACCGCTGACGGTAGAGCACACGATCCGCTGAGCTCGGGTAGCGCGAAC  
CGCCGGTCTTTGCTTGCCTTAGTATCTAACTGGATACCCGCTGATCGATCGTTTTCGCCATCAGACCGCCGAGTG  
CATCCACTTCTTTTACCAGATGTCCCTTCCAATACCGCCGATCGCCGGTTGACGCTCATCTGCCCCAGAGTGTGATA  
TTGTGTGCAAAAGCAGAGTCTGTTGACCCATACGCGCCGGCCATCGCGGCTCGGTGCATGACCCCGCAAT  
GATGATGACGTCAAAAGGATCCGGATAAAACATGGTATTGCCTCGCATAACGCGGTATGAAAATGGATTGAAGCCCGG  
CCGTGGATTCTACTCACTTTGTCGGCTTGAGAAAGACCTGGGATCCTGGGTATTAAGAAAGAGATCTATTTATTTAGAG  
ATCTGTTCTATTGTGATCTTATTAGGATCGACTGCCCTGTGGATAACAAGGATCCGGCTTTTAAGATCAACAACCTG  
GAAAGGATCATTAAGTGTGAATGATCGGTGATCCTGGACCGTATAAGCTGGGATCAGAATGAGGGTTATACACAACCTCA  
AAAAGTGAACAACAGTTGTTCTTTGGATAACTACCGGTTGATCCAAGCTTCTGACAGAGTTATCCACAGTAGATCGCAC  
GATCTGTATACTTATTTGAGTAAATTAACCCACGATCCAGCCATTCTTCTGCCGGATCTTCCGGAATGTCGTGATCAAG  
AATGTTGATCTTCAGTGTTCGCTGTCTGTTTTGCACCGAATTTTTGAGTCTGCCTCGAGTTATCGATAGCCCCAC  
AAAAGGTGTCATATTACGACTGCAATACCGATTGCGCAAAGCGGACTGCAGAAAGATCGGGCTTCTGTTCTGCAAT  
GCTTCATAGAAAGGAGAAAGGTTGTCGGAATATCTCCGGCACCGTGGGTGGAGCTGATAACCAGCCAGATCCCTGAGGC  
AGGTAATCTTCTAACAGCGGACCGTGCAGCGTTTTGGTGGTAAAACCCGCTCTTCCAGCTTTTCCAGCCAGGTGTTCTG  
CTACATATTCCGACCGCCGAGGGTGTCCGCTGATAAGAGTGATATCGCCATAAACCCGCACCTTTATTAAGAGTGG  
CGTATTGTACGCTGTGAACGCGTTGGGATCTACCTGTGAAAAGTATGGGATTAAGAAAGCCGATCAGGGCTTGATGGTA  
CGCATGATCGGGTTTTGACGACGATCAATGTCTCGGTGGACTGAATTTATCAATTTGTTGGATCTTGTGATAAGTAC  
ATGCTGGAGAGCGTCGATCGAACGGCACATCACTTTTATAAGATGCTGTAGTGGCCGGTTGTGTAATAGCTTCAGTGA  
CTTCATCAAGGCTTTCCAGCTTTGCCAGCGCGGAAGGGTAGTCTTTGGCGCTCTTAATATAATGCCGATAAAGCAGCCT  
ACGTCATAACCGAGCTGCTTCGGGCTGACATCAATACGCGCCCGGTAATGATCCCGCCTGCTTCATTTTCTACTCG  
AACGTGAATCGTCCCGGACTGACGCCAAATGTTTCGCCAGTTCGGCGTAAGCGGTGCGCGCATTGCCATTAATGCTT  
CCAGGATGCCACGGTCCAGATTGTCGATCAGATAATTTCCATAGGATTTTCTTATGCGGATTGATGATTCATTCTATTT  
TAGCCTTCTTTTTAATGAATCAAAAGTGAGTTAGGCTTTTTATTGAATGATTATTGCATGTGTGCGTTTTTGTGCT  
TAATCATAAGCAACAGGACGAGGAGTAAAAAATGAAAACCGTTACATTGCCAAACAACGTCAAATTAGCTTCGTGA  
AATCTCACTTTTCTGTCAACTGGAAGAACGTCGCGGCTGATCGAAGTCCAGCGCCGATTCTTAGCCGTGTGGGGAT  
GGCACGAGGATAACTTGTCCGGCTGTGAAAAGCGGTGCAGGTAAGTGAAGCTCTGCCTGATGCCAGTTCGAAGT  
GGTTCATTCAGTGGCGAAGTGGAAACGTCAGACCTTAGGGCAACGACTTCAGCGCGGGCGAAGGGCTGACACGCACA  
TGAAAGCCCTTCCCGGATGAAGACCGTCTTCTCCGTTGCACTCGGTCTATGTTGACCAAGTGGGAGTGGAAACCGGTA  
ATGGGCGACGGTGAGCGTCAATCTCGACTCTGAAAAGCAGGTCAGAGGCGATCTGGGCGGGAATTAAGCAACCGAAG  
TGGGTTAGCGAAGAGTTTTGGCCTGGCACCGTCTCCGCGGATCAGATCCACTTCGTACACAGCCAGGATTTACTGTCTC  
GTTATCCGGATCTTGATGCCAAAGGGCTGAGCGGGCGATAGCGAAAGATCTTGGCGCGGTTTCTTGTGCGGATTGGC  
GGCAAGCTGAGCGATGGTATCGCCACGACGTGCGCGCACCGGATTATGATGACTGGAGCACCCCGTCAGAGCTGGGCCA  
TGCGGGTCTGAACGGCGATATTCTGGTGTGGAACCCGGTACTGGAAGATGCGTTTGGCTTCTCCATGGGGATCCGTG  
TAGATGCCGACACGCTGAAGCATCAACTGGCGCTGACCGGTGACGAAGATCGCTGGAGCTGGAGTGGCATCAGGCGCTG  
CTGCGCGGTGAAATGCCGACACCATCGCGCGGATCGGCCAGTCTGTTTACTATGCTGCTGCTGCAACTGCCGCA  
TATCGCCAGGTTCAAGTGTGGAGTATGGCCAGCTGCTGTTGCGGAGAGCGTCCCTTCTGCTGTAATAATTTATCGCCG  
CCAGCGTCTGAGCAGGCGGCTTCGCATCCCGGTATCAAAGCGCCAGATATGATCGAAAATGCGCATGATCCCGGTTTTGC  
CGTGTGCCGACATCGCCACGGCATGAAAGCGATGCTGATGTACCGCTGACGCTCTTTCACTTTACTCGTCAGTGTCA  
GGCAACCGCTGAGCGATAAAATCAGAAATCACCACCGCATCGGCATCAAACCTTCCCTGCTTTGCAAGCGTTCATAAT  
GGCGGAAAACAACCTGGCAAGATCGGTGCCGCCAGAACTGCTGGCTTAAAAACGGATTGCTTGTTCGATGCCTTGTG  
GGCTGAAAGCTCATAACGGACGATCTCGGTGAAAATAGCATAATATAGCAGCGCCGGTTTTCTGCGAGAGCAATGGC  
ATCAAGGCCAGGACAGACGCTTTCGCACACTGTTTAAAGCCGCCATTGAGCCGGAAGTATCCACACAGACAATAAA  
CGCCCCGCGCGCTGTTTCATCGTAATCTTATGTACCACCGGACGTTTCGATCACTTTTTACGCCACGACTCACCGTGA  
GGCGATAGGTGAGCAACTGTTTTCCACCAGCCGACGGTAAAACCTCATACTCCAGTTCCGTTATCCCTAGTGTGCCAGT  
TCTGGCGCAGGAGACGTAATAATCATCGCTTGTGAGACCATCAACCTGCTCAGGAACCGTCCCGGTTCCGCGAC

CATGGTGC GGAAGGTTTCCATCTGCGCATCGTTGCGCGGTATTGATTTGGCTTCCCGAGAACGCCCCAGCTGCTCTGCCA  
GGCGTTTCAGTCCGGCTGTTCTGTTAAGAAATTCACCGTATTTTACAATCAACTGATAGTCGCCACGTTTAAAGCTGACCG  
GCGCTCATATCCACAGACGACCAGCTGCAGTATTGTTATCTGCGAGAATCGGTTCAAGTTGTCCGCTCAGCGTCATGCG  
TTCCTGAACCTCACTCAACAGTTGTTGCGGTTCTTCTTCTAATAGCTGTTGATTTAACGTCGTTGCTTGACGATCAGAC  
TTAAACGCCAACGCTGGAGAAAAAGCGTGTGTAACGCTGAAGTATCGTGCTGTTAGCATCAACCAACTGTCGGGCTTGT  
TCTGCCATGGAGAATTCAGACGATGCAGTAAGTCCAGGATCTGTGGTAGCTGCACAATAAACTGTGGCGTGGAGAGGAG  
CTGGCTTTGCTGATAGCACATCACCTCTTCGGTGTGTTCCGGCGGACTCGGGCATCTTTCAGCCGACTGCGCAGCGCTT  
CACGCCAGCGGGGAACATCATCAGTGATTGCCGCTTCAGGCGTGGGAATTTTTCAAAGAAGACCGCCAGCTGCGGTGAG  
GCCAGCAGTGCATGATCATCTCTCGATCAATCCCTCTTCGCTGACGGCCAGCATCACATTAAGCGTATCCAGCGTTAG  
CATTGTTGTGCTGGCGAATCTGTGCACCGACATCTGTAGGCTGGCTTCAATGCGACCTAACAGTCGCCAGGGATAAA  
CAGACATTTTTGCTGTTGCTGAATAAAGCGTGTGCTTGCGCCAGTCGCTTCAAGCTCTTCCAGTTGTTGTTTTATTT  
CACCAGGCAGACCTTCAGCCGATGAACCGGAAGTCCAGCGTACTGCCTTGTAACTTACATCGCGAACGACAAGATGT  
TGGGCGCTATCAACTCCAGATTAGTTTCTGGGCAAAGCCGATACCGTTAGTTTACCAGGATTTTACCACCTTTGCT  
CAGCCACTGTTCCAGCGCTACGCTCAAAGGAGATGAACCACTTCCATATCATGCAGTTTTAACGGTTTTTGCAGCA  
GTAGACTCAGAGTGAAGCAGTAACGTTAACAGGAAGTTGATACTGCTGACGACGGCTGAAAAATGCCGCCAGACGAAT  
ACCGTTAAGGCTGTTTTATCGCTTTGCTGCTGGAGTTGACGTTGACGTTGACAATCGCGCCAAGGCGAGTCAACAT  
CCCTTGCTGTTGCCAGGCGTGACCGGTATCAATACATCAATTTGTTGTTGTATCAAATTCAGGCTTTGCGCGTCATACC  
ACAGGCAATCTTTCAGCAAAATGAGATCTACCGGGCAACAGCACTGCGACCGCTAAAAAAGCGCTGGCCTGCAATAAT  
CGGATCGCTTTTTTCCAGCGACGATCCGAGACATAAGGCGCATCCGGTAATTTATCCAGTTGCTGGCGCAGCATAAAAAAT  
CAGCTCAAATACATGATCGGGCAGCGTAATTTACCAATCTCTTCTGCCAGCGTTTATTTCTTCTGACCTGCA  
AGGCATCAGGAACCGGATTGCTGTTTTATCCTGTTGACTGGTGCAGCATGGAGCGGAAATTCGCTTTATCCTGCACTTTA  
TCTAACCACAGACGAATCAGCATGCGGTATATAACGCTTCCAGACTGCTGTCTGCTTCCGGCAGCTCGTTGGAGGCCGC  
CACCAGCAGACGCATCGGGATTTTTTCTACGTGTGCACCGTTGCGGAACTGGCGCTCGTTAATGGCGGTGAGCAAGGTAT  
TAAGAATTGCCGGGCCGCTTCCAGATCTCATCCAGAAAGACAATTTCTGCTTCCGGCAGGTAACCGCTGGTTAACGT  
TCATAGCGCCCTTCTCTTTAGCGCTGAATAGAAAGGGGACCAAAAACTTCTCCGGCGTGAGAAGCGGGTTCATCAG  
ATATTCAAACGCGCGGGCATTCTGAAAGGCGAATTTAAGCGCCGGCGATCAAACCTTTGGCAATACCTGGCGGGCCAA  
GGAGGAACACACTTCCACTTAATGCCGTAATAAACACAAGCGGATGGCGTGGCTACGTTATAAAGCCCTTTTCC  
AACGAACTGCTCAGGCGGAAATTTCTTCCGCTAATAAATGAGGGTGAGCCATAATGAAGTGGCGTCTTTCGTCAAAAG  
TTCTGCGTAAATTCGAGTATAGACGTTTCTTGGTGGTAAATAGTCTCAAAGGGGGGTATTTTTCTTTGAGCCA  
GGTTAATGTGGCCGATTTAGGAGTACGATTTTGGCTTAATCGTGATACTGTGCGCTTTTTTGTGGGCCAAGGGACTA  
AGCACACATTTTCAATTTCAACGAAAGACTAGTCTATGAGCACTGATAATAAGCAATCATTGCCCCGATTACCCTCGCG  
GCGATTGGAGTTGCTACGGCGATATTGGTACCAGCCGTTATATACTTCTGTAATGTTTGTCCGGCCAGTTTGGTTT  
TGGCGTTGAACCGGATGCCGTGTTTGGCTTTTTATCGCTGATCTTCTGGCTGTAATCTTTGTGGTTTCCATTAATATC  
TCACCTTCTGATGCGGGCAGATAACGCCGTGAGGGGGGATCTGACGTTGATGTGCTTCCGGGGCATAACACCCGC  
GCGGAACCATCAATGCTGGTATTATGGGGCTAATCGCGCCAGCTTTTTCTATGGTGAAGTCGTCATAACACCCGC  
TATTTCCGTGATGTCAGCCATTGAAGTCTGAAATCGTCGCCCGCAGCTGGATACCTGGATAGTTCCCTCTCAATTA  
TCGTTCTCACTTTATTATTTATGATTCAAAACATGGCAGGCTATGGTGGTAAGCTGTTTGCGCCGATCATGCTGACC  
TGGTTTTTATTCTGCGAGGACTGGGTTACGTAGCATTATTGCTAACCCGGAAGTGTGCATGCGCTGAATCCAATGTG  
GGCGGTGCATTTCTTCTGAATACAAAACGGTTTTCTTTATTGATTAGGGGCAGTGGTGTGTCGATTACGGGGTGC  
AGCGCTGTATGCTGATATGGGGCACTTTGGTAAGTTCCTTATTCGCTGGCTGGTTACCGTTCGATTACCTTCTTGG  
ACCCTTAATTACTTTCGGTACGGGAGCGCTGTTGTTAAAGAACCCTGGAAGCGATTAAGAACCCTTCTTCTGTTGGCACC  
GGACTGGGCGTGATCCCGCTGCTGATCATCGCCGACTGGCGACGGTAATTGCCTCGCAGGCGGTTATCTCTGGCGTCT  
TCTCATTGACGCGTCAGGCGGTACGTCTGGGATATTGTGCGCGATGCGCATTATTACACCTCCGAAATGGAGTCAGGG  
CAAATCTATATTCCGTTTGTGAAGTGGATGCTCTATGTCGCGGTGCTGATTGTGATTGTCAGCTTTGAGCACTCCAGCAA  
CCTGGCGGCGGCTACGGGATTGCGGTGACCGGAACCATGGTGTGACGCTATTCTCTCGACTACCGTGGCAGCTCAGA  
ACTGGCACTGGAATAAGTATTTTGTGCGCTGATCTGATTGCTTCTTCTTGTGTCGATATTCCATTGTTACCAGCTAAC  
CTCGATAAACTGCTCTCCGGCGGCTGGTTGCCATTGAGCCTCGGTAAGTGTGATGTTTATCGTATGACCACTGGAAGAG  
CGAGCGTTTCCGCTTCTGCGCGGATGCATGAACATGGTAAGTCTCTGGAAGCGATGATTGCTTCCGCTGGAGAAATCAC  
CGCTGTTCCGCTGCCCGGACCGGTTGATATGTCGCGTGAATCAACGTCATTCCCTTTCGCTGATGCATAACCTT  
AAACATAACAAGGATTGCATGAGCGGTTGATTCTGTTAACTCTGCGACCCGAAGACGCTCCATATGTCCATAACGTCGG  
TCGGGTACAGATTGAACAACTGTCGCCACTTTCTGGCGGTGGTGGCAAGTTATGGTTGGCGAGAAACGCCAAACGTAG  
AGAAGTTTTCCACCGCTGCGGTCTGGAAGGATTAAGTTGCCGGATGATGGAACCTCCTTCTTTATGTCGATGAGTCG  
TTGATCCTCGGCAAACCGCGTGGTATTTGCGTCTGCGCGGAAGCTGTACTTCTGCTGCAACGTAATGCGCTGCGTGC  
ACCAGATCAATTTGAAATCCCGCAAACAGGGTTATCGAACTGGTACTCAGGTCGAAATCTAACGCCAGACGCTCCTT  
TCTTCATAAGGGGGGCTTTTTGTTTTCATGGTTAATCACCATGTAACGTTTTCGAGGTTGATCACATTTCCGTAACGTC  
ACGATGTTTTTCCAACCTCAGTCAGGATTAACCTGTGGGTGAGCGAAACGTTTTGCTGATGGAGAAAAAATGAAAAAG

GCACCGTTCTTAATTCTGATATTTTCATCGGTGATCTCCCGTCTGGGACATACCGATACGCTGGTGGTGTGTGATGCTGGT  
TTACCCATCCCAAAAGTACAACGCGTATCGATATGGCATTAAACCAGGGTGTACCTTCTTTTATGCAGGTGCTGGGCGT  
CGTCACAAATGAAATGCAGGTGAGGGCGCCATTATCGCGGAAGAGATCAAACACCATAATCCGCAACTCCACGAAACGT  
TGCTCACTCACCTTGAGCAGCTGCAAAAACACCAGGAAATACCATTGAAATTCGTTACACCACGCATGAACAATTCAAA  
CAACAAACCGCAGAAAGTCAAGCGGTAATTCGCAGCGGAGAATGTTCTCCGATGCGAATATCATTCTGTGTGCTGGCGT  
GACGTTCTGAGGCCGTATGGAAGCATTACTTCAGCTTAAAGGCATCGATAAAGCCTTCCCGGGCGTAAAAGCCCTCTCG  
GGCGCAGCGTTAAATGTCTATCCGGGCGCGTGATGGCGCTGGTGGGCGAAAACGGCGCGGGTAAATCCACCATGATGAA  
AGTGCTTACTGGCATCTATACTCGCGATGCCGCTACGCTTTTATGGCTGGGAAAGAAACGACATTTACCGGGCCAAAAT  
CTTCCCAGGAAGCCGGGATTGGGATTATCCATCAGGAATGAACCTGATCCCGCAGTTGACCATTGCCGAAAACATTTTC  
CTCGGTCGTGAGTTTGTAAATCGCTTTGGCAAAATGACTGAAAACCATGTATGCCGAAGCGGATAAATTGCTGGCTAA  
ACTTAACCTGCGCTTTAAAAGCGACAAGCTGGTGGGCGATCTTCCATCGGTGACCAGCAAATGGTTGAAATCGCCAAAG  
TGCTGAGCTTTGAGTCGAAAGTCATCATTATGGATGAACCGACCAGTGGCGTACCAGGATAACCGAAACCGAATCCCTGTT  
CGCGTCATCCGCGAGCTGAAATCGAAGCGCGGATTGTCTATATCTCCACCGCATGAAAAGAAATCTTCGAGATTTG  
CGATGACGTTACCGTTTTCTGTGATGGCAATTTATTGCTGAGCGCGAAGTGGCATCACTGACCGAAGATTCGCTGATTG  
AGATGATGGTGGTCGCAAGCTGGAAGATCAATATCCGACCTGGACAAAAGCGCCGGGAGATATCCGCCTGAAAGTCGAT  
AATCTCTGCGGACTGGCGTTAACGATGTCTTTTTACTTTTACGCAAAGCGAAATTTGGCGTCTCTGTTTTGATGGG  
CGCAGGTGCTACCGAACTGATGAAAGTGTCTACGGCGCACTACCGCGCACCGGTTACGTCACCCTGGATGGGCGATG  
AAGTCGTTACCGTTACCGCAGGATGGCCTGGCAAACGGCATTGTGTATATCTCCGAAGACCGTAAACGTGACGGTTTA  
GTGTTGGGCATGTCAGTAAAAGAGAACATGTCGCTGACAGCGCTGCGCTACTTCAGCCGCGCTGGCGGCAGTTTGAAGCA  
TGCCGATGAACAGCAGGCTGTGAGTGATTTTATTCTGTGTTAATGTGAAAACCTCGTCGATGGAACAGGCAATTTGGTC  
TGCTTTCCGGTGGCAATCAGCAAAAAGTGGCGATTGCCGCGGTCTGATGACACGCCCCAAAGTGTGATCCTTGATGAA  
CCTACCCGTGGCGTAGATGTCGGCGCGAAAAAGAGATCTATCAACTGATTAACAGTTCAAAGCCGATGGCTTGAGCAT  
CATTCTGGTGTATCGGAGATGCCAGAAGTATTAGGCATGAGCGATCGCATCATCGTCATGCATGAAGGGCATCTCAGCG  
GGGAATTTACTCGTGAGCAGGCCACCCAGGAAGTGAATGGCTGCCGCTGTGGCAAGCTTAATCGCGTGAATCAGGAG  
TAAAAAATGACAACCCAGACTGTCTGCTGCGCCTTATTTACGAAAGCGTGGCTGATGGAGCAGAAATCGCTTATCG  
CTCTGCTGGTGTGATCGCGATTGTCTGACGTTAAGCCGAACTTTTTACCATCAATAACTTATTCAATATTCTCCAG  
CAAACCTCAGTGAACGCCATTATGGCGGTCCGGATGACGCTGGTATCCTGACGTCGGGCATCGACTTATCGGTAGGTT  
TCTGTTGGCGTACCAGCGCAGTTGCTGCATCTATCGTCGGCATTGAAGTCAATGCGCTGGTGGCTGTGCTGCTGCTC  
TCGCGTTAGGTGCCGAATTTGGTGGCGTAACCGGGTGATTGTAGCGAAAGTCCGCTCCAGGCGTTTATCGCTACGCTG  
GTTATGATGCTTTTACTGCGCGCGTACCATGGTTTATACCAACGGTAGCCAGTGAATACCGGCTTTACTGAGAACGC  
CGATCTGTTTGGCTGTTTTGGTATTGGTCTGCTCCGCTGGGCGTACCAGCCAGTCTGGATCATGGGGATTGTCTTCTCG  
CGCCTGGTACATGCTGCATCACACGCGTCTGGGGCTTACATCTACGCGCTGGGCGGCAACGAAGCGGCAACGCGTCTT  
TCTGGTATCAACGTCAATAAAATCAAATCATCGTCTATTCTTTTGGTCTGCTGGCATCGCTGGCCGGGATCATTGA  
AGTGGCGCGTCTCTCCCGCAACCCACGGCGGGGACTGGCTATGAGCTGGATGCTATTGCTGCGGTGGTTCTGGGCG  
GTACGAGTCTGGCGGGCGAAAAGTTCGATTGTTGGGACGTTGATCGGCGCATTAACTTTGGCTTCTTAATAATGGA  
TTGAATTTGTTAGGTGTTTCTCCTATTACCAGATGATCGTCAAAGCGGTGGTATTGCTGGCGGTGCTGGTAGACAA  
CAAAAAGCAGTAATAACGACTACAGGACATCTTGAATATGAACATGAAAAACTGGCTACCCTGGTTTCCGCTGTTGCGC  
TAAGCGCCACCGTCAGTGCGAATGCGATGGCAAAAGACACCATCGCGCTGGTGGTCTCCACGCTTAACAACCCGTTCTTT  
GTATCGTGAAGATGGCGCGCAGAAAGAGGGGATAAATTTGGCTATAACCTGGTGGTGTGACTCCAGAACAACCC  
GGCGAAAGAGCTGGCGAAGTGCAGGACTTAACCGTTCCGCGCACAAAAATTTGCTGATTAACCCGACCGACTCCGACG  
CAGTGGGTAATGCTGTGAAGATGGCTAACAGGCGAACATCCCGTTTATCACTTTGACCGCCAGGCAACGAAAGGTGAA  
GTGGTGAGCCACATTGCTTCTGATAACGTAAGGGCGCAAAATCGCTGGTATTACATCGCGAAGAAAGCGGGTGAAGG  
TGCCAAAGTTATCGAGCTGCAAGGCATTGCTGGTACATCCGCGAGCCGTAACGTTGGCGAAGGCTTCCAGCAGGCCGTTG  
CTGCTCACAAGTTAATGTTCTTGGCAGCCAGCCAGCAGATTTTATGATCGATTAAAGGTTTGAACGTAATGCAGAACCTG  
TTGACCCTCATCCGATGTTTCAAGCTGATTTCGCGCAGAATGATGAAATGGCGCTGGGCGCGCTGCGCGCACTGCAAC  
TGCCGGTAAATCGGATGTGATGGTCTGCGGATTTGACGGTACCCGGATGGCGAAAAGCGGTGAATGATGGCAAACCTAG  
CAGCGACTATCGCTCAGCTACCCGATCAGATTGGCGCGAAAGCGTCAAACCCGAGATAAAGTGTGAAAGGCGAGAAA  
GTTCAAGCTAAGTATCCGGTTGATCTGAAACTGGTTGTTAAGCAGTAGTTTTAATCAGGTTGATGACCTGATGGTGACA  
TAAATACGTCATCGACAGATGAACGTGAATATAAAGAAAAGCAGGGCACGCGCCACCCTAACACGGTGGCGCATTTTTAT  
GGACATCCCGAATATGCAAAACCGAGGACGCTCGTTGTTCTTGGCAGCATTAAATGCTGACCACATTTCTAATCTTCAAT  
CTTTTCTACTCCAGGCGAAACCGTAACCGGTAACCACTATCAGGTTGCATTTGGCGGCAAGGCGCGAATCAGGCTGTG  
GCTGCTGGGCGTAGCGGTGCGAATATCGCGTTTATTGCTGTACGGGTGATGACAGCATTGGTGGAGAGGTTCCGCCAGCA  
GCTCGCCACTGATAACATTGATATTACTCCGGTCAAGGCGATCAAAGGCGAATCAACAGGTGGCGCTGATTTTTGTTA  
ATGGCGAAGGTGAGAATGTCATCGGTATTCATGCCGCGCTAATGCTGCCCTTTCCCGGGCGTGGTGAAGCGCAACGT  
GAGCGTATTGCCAACGCGTCAGCATTATAATGCAGCTGGAATCAACACTCGAAAGTGTGATGGCAGCGCGGAAAATCGC  
CCATCAAATAAGACTATCGTTGCGCTTAACCCGGTCCGGCTCGCGAACTTCTGACGAACTGCTGGCGCTGGTGGACA

TTATTACGCCAAACGAAACGGAAGCAGAAAAGCTCACCGGTATTCGTGTTGAAAATGATGAAGATGCAGCGAAGGCGGCG  
CAGGTACTGCATGAAAAAGTATCCGTA CTGTACTGATTACTTTAGGAAGTCGTGGTGTATGGGCTAGCGTGAATGGTGA  
AGGTCAGCGCTTCTCGGATTCGGGTGCAGGCTGTGATACCATTGCTGCCGAGATACCTTTAACGGTGCCTTAATCA  
CGCATTGCTGGAAGAAAAACCATTGCCAGAGGCGATTCTGTTTTGCCCATGCTGCCGCTGCGATTGCCGTAAACGTA  
GGCGACAACCTTCCGTACCGTGGCGTGAAGAGATCGACGATTTTTAGACAGCGAGAGGTGACGCTTGGCTACAATGAA  
AGATGTTGCCCGCTGGCGGGCTTTCTACCTCAACAGTTTCTCACGTTATCAATAAAGATCGCTTCTGTCAGTGAAGCGA  
TTACCGCAAAGTTGAAGCGGCGATTAAAGA ACTCAATTACGCGCCATCAGCTCTGGCGCTAGCCTCAAACCTCAATCAA  
ACACATACCATTGGCATGTTGATCACTGCCAGTACCAATCCTTTCTATTCAGAACTGGTGGCTGGCGTTGAACGCAGCTG  
CTTCGAACGCGGTTATAGTCTGCTCCTTTGCAATACCGAAGGCGATGAACAGCGGATGAATCGCAATCTGGAACGCTGA  
TGCAAAAACGCGTTGATGGCTTGTGTTACTGTGCACC GAAACGCATCAACCTTCGCGTGAATCATGCAACGTTATCCG  
ACAGTGCCTACTGTGATGATGGACTGGCTCCGTTCCGATGGCGACAGCGATCTTATT CAGGATAACTCGTTGCTGGCGG  
AGACTTAGCAACGCAATATCTGATCGATAAAGGTCATACCCGATCGCCTGTATTACCGGCCCGCTGGATAAAACTCCGG  
CGCGCTGCGGTTGGAAGTTATCGGGCGGCGATGAAACGTGCGGGTCTCAACATTCCTGATGGCTATGAAGTCACTGGT  
GATTTTGAATTTAACGGCGGGTTTGACGCTATGCGCAACTGCTATCACATCCGCTGCGTCTCAGGCCGCTTTTACCGG  
AAATGACGCTATGGCTGTTGGCGTTTACCAGGCTTATATCAGGCAGAGTTACAGGTTCCGCAGGATATCGCGGTGATTG  
GCTATGACGATATCGAACTGGCAAGCTTTATGACGCCACCATTAACCACTATCCACCAACCGAAAGATGAACTGGGGGAG  
CTGGCGATTGATGTA CTATCCATCGGATAACCCAGCCGACCCTTCAGCAACAACGATTACA ACTTACTCCGATTCTGAT  
GGAACGCGGTTGCGCTTAGATTTACGCTGCTTTTTGATCAAATATTACCATCGGTTGTTTT CAGAAGCATGAACATTGC  
TGCTGAAGCAACAGTAATAATGCCATTGTGATAAACGTATAGTGAATTTGTCGACAGTCGTTGTGCCTTCCATTCTT  
CATAAACGCGAAGGACGGCCGCACTTACAGCAACGCCTAAACTAATCGACAGTTGCTGCGTGACCGCCAGAACACTGTTA  
CCGCTGCTGGCATTGTCATCGGTCAGATCGGCAAGTGTGATGGTATTATCGCGGTA AACTGCGTCGACATAGCCATCCC  
TAATATAAACACGGCAAGATCAGCATCCATATAGCATTGCTGGTATTGCAAAGAGAACTGAGCGATCATTAGCCCAA  
TAATCACCGTATCCCACTAACGATGGCGATAGCCAGACGCTAAGACTTGGGTAACCATCGATTTTGCAATAATG  
GAACCTAACGCTGTCGGTGCATCATAACAGCCAGCAATAAACGCCTGATAACCAATCTACCTGTAACATCAATGGCAT  
AAGGAACGGTACACAGCCGTC CCGAGACGGGTTGCAATATTGCCTACGATACCGATCGAGAAAGTGCGGGTTTTAAATA  
AATCTAATGAAATTAATGGGTTTGGCGTGCCTGTCGATGGAGAATATAGAGAAGCAGTAACCCGATGCTGGTGACAATT  
ACCGTCAAGGCAATCCAGCTGGCGACAATCTTTTCCCGAATAGCTCTATTCCGCTTGAGAAGAGAACAAGGCTGAGGCC  
AAACAGCAAAAAGCCAGTATATCGAATCTGCGTCTGCGGTGGTGAATTTGGGCATATGTTTGC GCGGTAAGAAGGC  
CCGCAATACCTATGGGGATATTGATTA AAAATATCCAGTGCCAGGTTGCCAGGTGACCAGCACGCCCAAGAACGGGG  
CCTAAAATTGGCCCCACCAGACCCGGCATGGCGACAAAATTCAACTGGAAGAAGTTCATTACGAGGATAAGCGCGCAG  
TAAGGCCAGCCGAGCAACAGGCATCATCATTGCGCCGCTATCCCTGAATAACCCGGAAGACAACCAGCTGTGGTAGCG  
AATTAGAAAGTGCAGGAGCCAGAGAACCAATGTGAACAGACTCACGGCAAGGGTAAAAATGCGACGCGTACCGAAGCGA  
TCGGCTAGCCATCCGCTTACCGGAATAAGCATCGCCACCGTCAGCGTATAACTGATGATGGCTGATTGCATCGCGAGAGG  
AGAACGATTAAGGCTATGAGCGATTGCGGGTAAGGCGGTATTAAGAATAGTGGCATCAAGTGCCTGCATGAAGAAGGCCA  
TCGCCGCGATCCACGGCAAAACCCGCCATACTGCGCTCTTTTTATCGCTCATTCAATGTCTGTTATCGGGTTATCACTT  
ATCAGGTGAGCGTAGCAGCGCTGACAAGCTTTAAATGCCGCTGCGCATCGCTTTGGATAATCGCATCGACAATCGCCT  
GATGAGATCCAGCTTATCACTGTGTCGCTGGTAATTGACGTGAAGTAAGTGTGATAAACCGAATGGAATAGCGAGGCG  
AATGAGGTCAAAAACGGATTGGCGCTCATTTATAGATATGCTCATGCCAGGCCATATCGACTTCGATCCAGCGTTACG  
GCGAAAGTTCTTTTTAATGCCGCCATTTCCGCCATTAACGTATTGAGATGCGCTTTCTGTTCCGCGGTC CAACCTGTTG  
CTGCCAGTAGGCAAGCTTGGCGCTCCAGACAGATCGCATAACCCAGAAAGTATCGATGACCTGATGAAAGTTCTCTTCT  
GTCATCCACCAGGTAAGCAATTCCTGATCAAGAAAAATCCAGTTGCGATTGCGCATGACCCGAGTACCAATTCGCGGTCG  
CGGTA AAACCATCCCTTTTTGCCGTTAACGTTTTGACCGCTTCCGCTACCGCTGTACGACTACTCCA AATTGCTCGCCCA  
GCTCAATCTCACCGGCAAAATGGTGCCGGGTTCATATCACCTTTTAAGATCCGTTGCGCCAGCTTCTCAGCCAGAACA  
TACGAAAGGTTTTTCTGTGCAGCTA ACTGTTGTGCGCTTAAAGGCATTACTTATCTTCTTTTTCTTTTTATTCTCTCTT  
AGTATGCCACCAGGAAGTGTGATTACGGTTGCAAAAACGGCAATTGCTTGT TTTATGGCACATTAACGGGGCTTTTGCT  
GAAAAAATGCGCGTCAGAAAATATTTTAAATTTCTCTTGTG CAGGCCGAATAACTCCCTATAATGCGCCACCACTGA  
CACGGAACAACGGCAACACGCCCGGGT CAGCGGGTCTCTGAGA ACTCCGGCAGAGAAAGCAAAAATAAATGCTT  
GACTCTGTAGCGGAAAGCGTATTATGCACACCCCGCCGCTGAGAAAAAGCAAAGCGGCACTGCTCTTAAACAATTA  
TCAGACAATCTGTGTGGCACTCGAAGATACGGATTCTAACGTCGAAGACGAAAAATGAATACCAAGTCTCAAGAGTG  
AACACGTAATTCATTACGAAGTTTAAATCTTTGAGCATCAAAC TTTTAAATTGAAGAGTTTGATCATGGCTCAGATTGAA  
CGCTGGCGGACGCTAACACATGCAAGTCAACCGTAACAGGAAACAGCTTGTGTTTCCGCTGACGAGTGGCGGACGGG  
TGAGTAATGTCTGGGAAACTGCCTGATGGAGGGGATAACTACTGGAACCGTAGCTAATACCGCATAACGTCGCAAGAC  
CAAAGAGGGGGACCTTGGGCTCTTGCCATCAGATGTGCCAGATGGGATTAGCTAGTAGTGGGGTAAACGGCTCACCT  
AGGCGACGATCCCTAGCTGTCTGAGAGGATGACCAGCCACTGGA ACTGAGACAGGTCAGACTCCTACGGGAGGCA  
GCAGTGGGGAATATTGCACAATGGGCGCAAGCCTGATGCAGCCATGCCGCTGTATGAAGAAGGCTTCCGGTTGTAAG  
TACTTT CAGCGGGGAGGAAGGGAGTAAAGTTAATACCTTTGCTCATTGACGTTACCCGAGAAAGACCCGGCTAACTC



CGTGCCAGCAGCCGCGGTAATACGGAGGGTGAAGCGTTAATCGGAATTACTGGGCGTAAAGCGCACGCAGGCGGTTTGT  
TAAGTCAGATGTGAAATCCCCGGGCTCAACCTGGGAAGTGCATCTGATACTGGCAAGCTTGAGTCTCGTAGAGGGGGTA  
GAATTCAGGTGTAGCGGTGAAATGCGTAGAGATCTGGAGGAATACCGGTGGCGAAGGCGGCCCTGGACGAAGACTGA  
CGCTCAGGTGCGAAAGCGTGGGGAGCAACAGGATTAAGATACCCTGGTAGTCCACGCCGTAACGATGTCGACTTGGAGG  
TTGTGCCCTTAGGCGTGGCTTCCGGAGCTAACCGCTTAAGTCGACCGCCTGGGGAGTACGGCCGAAGGTTAAACTCA  
AATGAATTGACGGGGCCCGCAAGCGGTGGAGCATGTGGTTAATTTCGATGCAACGCGAAGAACCTTACCTGGTCTTG  
ACATCCACGGAAGTTTTAGAGATGAGAATGTGCCTTCGGGAACCGTGAGACAGGTGCTGCATGGCTGTCGTCAGCTCGT  
GTTGTGAAATGTTGGGTTAAGTCCCGCAACGAGCGCAACCTTATCCTTTGTTGCCAGCGGTCCGGCCGGGAACCTAAAG  
GAGACTGCCAGTGATAAAGTGGAGGAAGTGGGGATGACGTCAAGTCATCATGGCCCTTACGACAGGGCTACACACGTG  
CTACAATGGCGCATACAAAGAGAAGCGACCTCGCGAGAGCAAGCGGACCTCATAAAGTGCCTGCTAGTCCGGATTGGAGT  
CTGCAACTCGACTCCATGAAGTCGGAATCGTAGTAATCGTGGATCAGAATGCCACGGTGAATACGTTCCCGGCCCTTGT  
ACACACCGCCCGTACACCATGGGAGTGGGTTGCAAAAAGTAGGTAGCTTAACCTTCGGGAGGGCGCTTACCCTTTG  
TGATTCATGACTGGGGTGAAGTCGTAACAAGTAACCGTAGGGGAACCTGCGGTTGGATCACCTCCTTACCTTAAAGAAG  
CGTCTTTGCAAGTGCACACAGATTGCTGATAGGAAGTGAAGAAGCGGCTTTCGGAAGCAGACTGATACGCCCC  
TTCGCTAGAGGCCAGGACCGCCCTTACGGCGGTAACAGGGGTTGCAATCCCTAGGGGACGCCACTTGTGGTT  
TGTGAGTGAAGTCACTGCCTTAATATCTCAAACCTCATCTTCGGGTGATGTTTGAGATATTTGCTCTTAAAAATCTG  
GATCAAGCTGAAAATTGAAACACTGAACAACGAAAGTTGTTCTGAGTCTCTCAAATTTTCGCAACACGATGATGAATCG  
AAAGAAACATCTTCGGGTTGTGAGGTTAAGCGACTAAGCGTACACGGTGGATGCCCTGGCAGTCAGAGGCGATGAAGGAC  
GTGCTAATCTGCGATAAGCGTCGGTAAGGTGATATGAACCGTTATAACCGGCGATTTCCGAATGGGGAACCCAGTGTGT  
TTCGACACACTATCATTAACTGAATCCATAGGTTAATGAGGCGAACCGGGGAACTGAAACATCTAAGTACCCCGAGGAA  
AAGAAATCAACCGAGATTCCCCAGTAGCGGCGAGCAACGGGGAGCAGCCAGAGCCTGAATCAGTATGTGTGTTAGTG  
GAAGCGTCTGGAAGGCGCGGATACAGGGTACAGCCCGTACACAAAATGCACATATTGTGAGCTCGATGAGTAGGG  
CGGGACACGTGGTATCCTGTCTGAATATGGGGGACCATCCTCAAGGCTAAATACTCCTGACTGACCGATAGTGAACCA  
GTACCGTGAGGAAAGGCGAAAAGAACCCCGGCGAGGGGAGTGAAGAAGAACCTGAAACCGTGTACGTACAAGCAGTGGG  
AGCAGCTTAGGCGTGTGACTGCGTACCTTTGTATAATGGGTCAGCGACTTATATTCTGTAGCAAGGTTAACCGAATAG  
GGGAGCCGAAGGGAACCGAGTCTTAACTGGGCGTTAAGTTGACGGGTATAGACCCGAAACCCGGTATCTAGCCATGGG  
CAGGTTGAAGGTTGGGTAACACTAAGTGGAGACCGAACCGACTAATGTTGAAAAATTAGCGGATGACTTGTGGCTGGGG  
GTGAAAGGCCAATCAAACCGGAGATAGCTGGTTCTCCCCGAAAGCTATTTAGGTAGCGCCTCGTGAATTCATCTCCGGG  
GGTAGAGCACTGTTTCGGCAAGGGGGTATCCCGACTTACCAACCGATGCAAACCTGCGAATACCGGAGAAATGTTATCAC  
GGGAGACACACGGCGGTGCTAACGTCCGTGTAAGAGGGAAACAACCCAGACCGCCAGCTAAGGTCCCAAAGTCATGG  
TTAAGTGGGAAACGATGTGGGAAGGCCAGACAGCCAGGATGTTGGCTTAGAAGCAGCCATCATTTAAAGAAAGCGTAAT  
AGCTCACTGGTCGAGTCGGCCTGCGCGGAAGATGTAACGGGGCTAAACCATGCACCGAAGCTGCGGCAGCGACGCTTATG  
CGTTGTTGGGTAGGGGAGCGTTCTGTAAGCCTGCGAAGGTGTGCTGTGAGGCATGCTGGAGGTATCAGAAGTGGCAATGC  
TGACATAAGTAACGATAAAGCGGGTGAAGGCCCCGCTCGCCGGAAGCAAGGGTTCCTGTCCAACGTTAATCGGGGACG  
GGTGAGTCGACCCCTAAGGCGAGGCCGAAAGGCGTAGTCGATGGGAAACAGGTTAATATTCCTGTACTTGGTGTACTGC  
GAAGGGGGACGGAGAAGGCTATGTTGGCCGGGCGACGGTTGTCGGGTTAAGCGTGTAGGCTGGTTTTCCAGGCAAT  
CCGAAAATCAAGGCTGAGGCGTGTGACGAGGCACTACGGTGTGAAGCAACAATGCCCTGCTTCCAGGAAAAGCCTC  
TAAGCATCAGGTAACATCAAATCGTACCCAAACCGACACAGGTGGTCAGGTAGAGAATACCAAGGCGCTTGAGAGAAT  
CGGGTGAAGGAACTAGGCAAAATGGTCCGTAACCTCGGAGAAGGACGCTGATATGTAGGTGAAGCGACTTGTCTGTG  
GAGCTGAAATCAGTGAAGATAACAGTGGCTGCAACTGTTTATTA AAAACACAGCAGTGTGCAAAACGAAAGTGGACG  
TATACGGTGTGACGCTGCCCGGTGCCGGAAGGTTAATTGATGGGTCAGCGCAAGCGAAGCTCTTGATGAAAGCCCCGG  
TAAACGGCGCGGTAACATAACGGTCTAAGGTAGCGAAATCCTTGTCCGGTAAAGTCCGACCTGCACGAATGGCGTA  
ATGATGGCCAGGCTGTCTCCACCCGAGACTCAGTGAATTAAGTTCGCTGTGAAGATGCAGTGTACCCGCGGCAAGACGG  
AAAGACCCCGTGAACCTTACTATAGCTTGACACTGAACATTGAGCCTTGATGTGTAGGATAGGTGGGAGGCTTTGAAGT  
GTGGACGCCAGTCTGCATGGAGCCGACCTTGAATACACCTTTAATGTTTGATGTTCTAACGTGGACCCGTGATCCGG  
GTTGCGGACAGTGTCTGGTGGGTAGTTTACTGGGGCGGCTCCTCCTAAAGAGTAACGGAGGACGACGAAGGTTGGCTA  
ATCCTGGTCCGACATCAGGAGGTTAGTGAATGGCATAAGCCAGCTTACTGCGAGCGTGACGGCGGAGCAGGTGCGAA  
AGCAGGTATAGTGTCCGGTGGTTCTGAATGGAAGGGCCATCGCTCAACGGATAAAAGGTAATCCGGGGATAACAGGCT  
GATACCGCCAAAGAGTTCATATCGACGGCGGTGTTTGGCACCTCGATGTCGGCTCATCACATCTGGAGCTGAAGTAGGT  
CCCAAGGGTATGGCTGTTCCCATTTAAAGTGGTACGCGAGCTGGGTTTAAAGCTCGTGAGACAGTTCCGGTCCCTATCT  
GCCGTGGGCGCTGGAGAAGTGAAGGGGGCTGCTCCTAGTACGAGAGGACCGGAGTGACGCATCACTGGTGTTCGGGTTG  
TCATGCCAATGGCACTGCCCGTAGCTAAATGCGGAAGAGATAAGTGTGAAAGCATCTAAGCACGAAACTTGCCTCGAG  
ATGAGTTCTCCCTGACTCCTTGAGAGTCTGAAGGAACGTTGAAGACGACGACGTTGATAGCCGGGTGTGTAAGCGCAG  
CGATGCGTTGAGCTAACCAGTACTAATGAACCGTGAGGCTTAACCTTACAACGCGGAAGATGTTTTGGCGGATGAGAGAA  
GATTTTCAGCTGATACAGATTAATCAGAACGCGAAGCGGTCTGATGAAACAGAATTTGCCCTGGCGGCGGTAGCGCGG  
TGGTCCACCTGACCCATGCCGAACCTCAGAAGTGAACGCCGTAGCGCGATGGTAGTGTGGGGTCTCCCATGCGAGA

GTAGGGAAGTCCAGGCATCAAATTAAGCAGTAAGCCGGTCATAAAACCGGTGGTTGTAAAAGAATTCGGTGGAGCGGTA  
GTTGAGTCCGTTAGAATACCTGCCTGTACGCAGGGGGTCCGGGTTGAGTCCCGTCCGTTCCGCCACCCTAATTAGGG  
GCGTAGTTCATTGGTAGAGCACCGGTCTCCAAAACCGGGTGTGGGAGTTCGAGTCTCTCCGCCCTGCCAGAAATCAT  
CCTTAGCGAAAGCTAAGGATTTTTTTATCTGAAATAACCCTCTCCGAAGTAAATCCTTCTACCGGCATCCTTGCCAGCC  
ATTCATATTAATACACTTATCCAGCAGGTTAATTTTCAAAGATCGCGAATCAACGCATTTTTATCGCTATTTTGCAGC  
CATATGGCATAAAGCGGCCGTGAAAGTGTGTGCTATCGACAACGGTATGCAGGCCGCCTTTTTTACGCGCCAGCTGAC  
GGTAGCCAGGTGCAACCATTAAGCATCGCAATCTGTTGCTGTGCCAGTTCAGCAGAAGTGGTTGTCAGAATGGGCACTT  
CGTCAGCACCGATCAAACCTGCCTCATGCTGTTGAAAATCTGGCCCCACTCAAGTCGAGATAATTAAGATCTCCCTTT  
AGTTTTGAAGGGGCACTGGTATAAAGCGCTAAAGTGAATATCCAGCAACTGACTACTAAATTCGTCCATTTTGGGCGC  
TTCAGTGGTAATAAGAAGATCAAGCTGGCGTTCATGCAGCTGTTTTACCAGAGACTGCCGTTGGGCAATTCGCGCTTCGA  
ACTGTAAGCCTGTATGGGCATCCTGATTTTGATACAAGCGTCCAGCCACTGATTAAGCATACATCCCAACGAGGGC  
CTGGCACCGATAGAAAACCTGTTATGTCGTGAGGTATGCGCCACCTCCTTACGGGCGCCCTGCCAGGTGCTCATGAGCGT  
TTCTGCATAAAGCAGTAGTTTTTACCAGGCGGTTAAACGGATATTGTTTCTGTGGCGGGTAAAAGGTTACACCCA  
CGCTTCGGCTAACTCCAGGAAAGTTTTAAACAATCCGATCCACAGTGTCTCCGAAAATTTTGTGCTTATGAT  
TTAAATGTTTTGTTTTACACTCTGTCAAGCGTAATAACTCCGCGCCATAACTAGCTCGGTCAAAGAATTAAGGAGCGT  
GCAGGATGGCGGAAAGCTTTACGACGACTAATCGATATTTTGCACAATAAACATTATCCACGTGGATTCTCTGCTCATGGT  
GATTTACCATCAAAGAGGCACAACCTGCTGAGCGTCATGGTTATGCCTTCAATGAGTTGGATCTTGCAAAACGCGAGCC  
GGTTACCGAGGAAGAGAAAACCTTCGTAGCAGTATGCCGTGGCGAACGTGAGCCAGTGACAGAAGCAGAACGCGTGTGGT  
CCAAGTATATGACGCGTATTAAGCGTCCAAAACGTTTTTACACCTTTTCCGGCGGTAACCCGAGGTTGAAGGTGCTGAA  
GACTACACCGATTCTGACGATTAATAAAAAGGGCGAAATGCCCTTTTTTATGTCAGTAGTTTCTGCAGATGGATGAGCA  
AACGGTCAATCGCTCGATAGCTAACTGCCTCCTGCAATGCTGACGTGTGATAATGTCAGACTGATCAATATCAGCAATG  
GTTCTGCAACTTTCAATAACCGCTGCCAGGCACGAATCGATAACCCAGATGGATCAGTGTTCCTTCCAACCACATCGC  
ATCTTCGCTCTCAAGTTTGCAGAATTGGCGTATTTCCGACTATCCAGCCAGGCATTGAGTTATTCTGCCGCTTAAAT  
GGCGCTCTGCGGCCATTACGCGTTGTTAACGGTGGCGCTGCTTTCTCCCGCACTACCGTTTTACTCAAATGCCG  
GGGGTGGTAATGGGATCTCAGTGAGAGATCGAAGCGGTGAGAAAAGGGCCCCGAGAGCCGTTGAGATAACGTAATGT  
CTGTTCTGGCGTGACGCGGTTATGGTTCCCTGATAATGTCCGGTAGGGCTGGGATTCATCGCCGCAACAAGCTGGAAC  
GGGCTGGATAGTTATTTTTGCTCGTGTGCGTGAAGATGGATCTGCCCAGGATCAATCGGCTCTCGAAGGCATCCAGT  
GTACGCCGTTCAAATTCAGTGAGTCTATCAAGAAAAAGCACGCCGTTATGCGCCAGCGAAATTTACCGGCCCTGGAAT  
TGCGCCACCGCTACCATCGCAGTTAACGATGCACTGTGATGAGGTGAGCGAACGGGCGCTGCCGCCATTGTTTTGTA  
CTGATTCAGCATTACCAGACTTAATATCGCAGCACTCTCCAGTGCCCTTTCATTGCTTAAATCTGGCAACAGGCCATTA  
ATACGGCTGGCGAGCATTGTTTTACCTGTTCCCGCGGGCCCAATCAGTAAAAGGTTGTGCCCGCCAGCAGCGGTAATTC  
CAGTCTCGCTTTCCTGTTCTGACCATAACATCACTGAGATCATGTTGTAGCGCCGGGATACTGCATCAGTTGGTT  
TCGGGCGTTCGAGAGCGTGTACCTTCCAGAAACGCACAGACAGCTTGCAGATGATCGGTATCAGGCATCCTTACC  
TTAATTAGCCCCACTTCACTTTCGTTATCTTTCGCGACGATAATTTTTCTGCCGACTTAATAGCTTCAGTTGCACTGGA  
GATTGCGCCGGAAACGCCACGAGAGCGCTGTAAGCGCCAGTTCCTCGACTAATTCATATTCATTAATTATTGGCTG  
TAAGCTGTTCTGAGGCCGCCAGCAACGAATGGCGATAGGTAATCATATCGTCCCCTTCTTTTGGCAGATCAGCTGGA  
GCCAGGTTGATGGTGATTTTTTTCGCCGATTTTATATCCGCTATTGATAATGGCGCTGCGCACGCGATCGCGAGCTT  
TTTTACCCTGTTTCTGGTAAGCCACCATCGTTAAGCCGGTAGACCTTACTGATATGTACCTCAACAGTGTGATGCGG  
GCGCATTTACTCCAGGGTGCAGCGGTATGAACAATTTGACAGTGACATAAGCCCTCCTTGAGTCAACATTTATGTCATA  
AGATATCGTGTGAGCCCGCTAATTCGTGAATTTTGTGGCTGATTCCTGTTTATTTGTGCAAGTGAAGTTGAGTTGT  
TCTGGCGTGAATGATGCTCGAAAAATGCAGCGGACAAAGGATGAACTACGAGGAAGGGAACAACATTACTGAAA  
TTGAATTTTTTCACTCACTATTTTATTTTTAAAAACAACAATTTATATTGAAATTATTAACGCATCATAAAAAATCGG  
CCAAAAATATCTGTACTATTTACAAAACCTATGGTAACTCTTAGGCATTCCTTCAACAAGATGCAAGAAAAGACAA  
AATGACAGCCCTTCTACGAGTGATTAGCCTGGTCTGATTAGCGTGGTGGTATTATATCCACCGTGCGGGGCTGCAC  
TTGGACGAGGAAAGGCTTAGAGATCAAGCCTTAACGAATAAGACCCCCGACCGAAAGGTCGGGGGTTTTTTTTGACC  
TTAAAAACATAACCGAGGAGCAGACAATGAATAACAGCACAAAATTTCTGTTTCTCAAGATTCAGGACGGGAACTAACTA  
TGAATGGCGCACAGTGGTGGTACATGCGTTGCGGGCACAGGGTGTGAACACCGTTTTTGGTTATCCGGGTGGCGCAATT  
ATGCCGTTTTACGATGCATTGTATGACGGCGCGTGGAGCACTTGTATGCCGACATGAGCAGGGTGGCGCAATGGCGGC  
TATCGGTTATGCTCGTGTACCGGCAAACTGGCGTATGTATGCCACGCTGTGTCGGGCGCAACCAACCTGATAACCG  
GGCTTGGGACGCACTGTAGATTCCATCCCTGTTTGTCCATCACCAGTCAAGTGTCCGACCGTTTATCGGCACTGAC  
GCATTTAGGAAGTGGATGCTGGGATTGCTGTTAGCCTGTACCAAGCACAGCTTTCTGGTGCAGTCGCTGGAAGAGTT  
GCCGCGCATCATGGCTGAAGCATTGACGTTGCCTGCTCAGGTGCTCCTGGTCCGGTTCTGGTGCATATCCAAAAGATA  
TCCAGTTAGCCAGCGGTGACCTGGAACCGTGGTTACCACCGTTGAAAACGAAGTGACTTTCCACATGCCGAAGTTGAG  
CAAGCGCGCCAGATGCTGGCAAAAGCGCAAAAACCGATGCTGTACGTTGGCGGTGGCGTGGGTATGGCGCAGGCAGTCC  
GGCTTTCGCTGAATTTCTCGCTGCCAAAAATGCCTGCCACCTGTACGCTGAAAGGGCTGGGCGCAGTAGAAGCAGATT

ATCCGTA CTATCTGGGCATGCTGGGGATGCACGGCACCAAAGCGGCAAACCTTCGCGGTGCAGGAGTGTGACCTGCTGATC  
GCCGTGGGCGCACGTTTTGATGACCGGGTGACCGGCAAACCTTTCGCGCCACACGCCAGTGTTATCCATATGGA  
TATCGACCCCGCAGAAATGAACAAGCTGCGTCAGGCACATGTGGCATTACAAGGTGATTTAAATGCTCTGTTACCAGCAT  
TACAGCAGCCGTTAAATCAATGACTGGCAGCAACACTGCGCGCAGCTGCGTGATGAACATTCCTGGCGTTACGACCATCC  
CGGTGACGCTATCTACGCGCGGTTGTTGTTAAAACAACCTGTCGGATCGTAAACCTGCGGATTGCGTCTGACCACAGATG  
TGGGGCAGCACAGATGTGGGCTGCGCAGCACATCGCCACACTCGCCCGAAAATTTATCACCTCCAGCGGTTTAGGT  
ACCATGGGTTTTGGTTTACCGGCGGGGTTGGCGCACAAAGTCGCGCGACCGAACGATACCGTTGTCTGTATCTCCGGTGA  
CGGCTCTTTCATGATGAATGTGCAAGAGCTGGGCACCGTAAAACGCAAGCAGTTACCGTTGAAAATCGTCTTACTCGATA  
ACCAACGGTTAGGGATGGTTCGACAATGGCAGCAACTGTTTTTCAGGAACGATACAGCGAAACCACCCTTACTGATAAC  
CCCGATTTCTCATGTTAGCCAGCGCCTTCGGCATCCATGGCCAAACATCACCCGAAAGACCAGGTTGAAGCGGCACT  
CGACACCATGCTGAACAGTATGGGCCATACCTGCTTCATGTCTCAATCGACGAACTTGAGAACGCTGCGCCGCTGGTGC  
CGCTGGCGCCAGTAATTCAGAAATGTTGAGAAATATCATGATGCAACATCAGGTCAATGTATCGGCTCGTTCAATC  
CAGAAACCTTAGAACGTTTTTACGCGTGGTGCATCGTGGTTCCACGCTGCTCAATGAATATGGCCGCCGCCAGC  
GATGCACAAAATATAAATATCGAATTGACCGTTGCCAGGCACACCATACAACAAATCCGCGCTGAGCGAAAAGGAATATA  
AAAATGACCACGAAGAAAGCTGATTACATTTGGTTCAATGGGGAGATGGTTTCGCTGGGAAGACGCGAAGGTGCATGTGAT  
GTGCGACGCGCTGCACTATGGCACTTCGGTTTTTGAAGGCATCCGTTGCTACGACTCGCACAAAGGACCGGTTGTATCC  
GCCATCGTGAGCATATGCAGCGTCTGCATGACTCCGCCAAAATCTATCGCTTCCCGGTTTCGAGAGCATTGATGAGCTG  
ATGGAAGCTTGTGCTGACGTGATCCGCAAAAACAATCTCACCAGCGCCTATATCCGTCCGCTGATCTTCTCGGTGATGT  
TGGCATGGGAGTAAACCCGCCAGCGGGATACTCAACCGACGTGATTATCGCTGCTTTCGGTGGGAGCGTATCTGGGCG  
CAGAAGCGCTGGAGCAGGGGATCGATGCGATGGTTTCTCCTGGAACCGCGCAGCACCAAACACCATCCCGACGGCGGCA  
AAAGCCGGTGGTAACTACCTCTCTTCCCTGCTGGTGGGTAGCGAAGCGCGCCGCCACGGTTATCAGGAAGGTATCGCGCT  
GGATGTGAACGGTTATATCTCTGAAGCGCAGGCGAAAACCTGTTTGAAGTAAAAGATGGTGTGCTGTTACCCACCCT  
TCACCTCTCCGCGCTGCCGGTATTACCCGTGATGCCATCATCAAACCTGGCGAAAGAGCTGGGAATTGAAGTACGTGAG  
CAGGTGCTGTGCGCGAATCCCTGTACCTGGCGGATGAAGTGTATGTCCGGTACGGCGGACAGAAATCACGCCAGTGC  
CAGCGTAGACGGTATTACGTTGGCGAAGGCCGTTGTGGCCGGTACCAAACGCATTAGCAAGCCTTCTTCCGGCCTCT  
TCACTGGCGAAACCGAAGATAAATGGGGCTGGTTAGATCAAGTAAATCAATAAATACAAAAAATGGGACGGCACGCACCG  
TCCATTTACGAGACAGACTGGGAGTAAATAAAGTATGCCTAAGTACCGTTCCGCCACCACCCTCATGGTCTGAATA  
TGGCGGGTGTGCTGCGCTGTGGCGCGCCACCGAATGACCGACCGCGATTTCCGGTAAGCCGATTATCGCGGTTGTGAAC  
TCGTTACCCAATTTGTACCGGGTCACGTCCATCTGCGCGATCTCGGTAAACTGGTCCCGCAACAAATTGAAGCGGCTGG  
CGCGTTGCCAAAGAGTTCAACACCATTGCGGTGGATGATGGGATTGCCATGGGCCACGGGGGGATGCTTATTCACTGC  
CATCTCGCAACTGATCGCTGATTCCGTTGAGTATATGGTCAACGCCACTGCGCCGACGCCATGGTCTGCATCTCTAAC  
TGGCAGAAAATCACCCGGGGATGCTGATGGCTTCCCTGCGCTGAATATTCGGGTGATCTTTGTTTCCGGCGGCCCGAT  
GGAGGCCGGAAAACCAAACCTTCCGATCAGATCATCAAGCTCGATCTGGTTGATGCGATGATCCAGGGCGCAGACCCGA  
AAGTATCTGACTCCAGAGCGATCAGGTTGAACGTTCCGCGTGTCCGACCTGCGGTTCTGCTCCGGGATGTTTACCCT  
AACTCAATGAACTGCCTGACCGAAGCGCTGGGCTGTGCGAGCCGGGCAACGGCTCGCTGCTGGCAACCCACGCCGACCG  
TAAGCAGCTGTTCTTAATGCTGGTAAACGCATTGTTGAATTGACCAAACGTTATTACGAGCAAAACGACGAAAGTGCAC  
TGCCGCGTAATATCGCCAGTAAGGCGGGCTTTGAAAACGCCATGACGCTGGATATCGCGATGGGTGGATCGACTAACCC  
TCCACAGCTGTGTAAGTTGCGCCGAGCACCCAGAAAATACCATATGGAAGATGTTACCCGCTGCTGGTGGTATTACGTA  
TTCTCGGCGAACTGGATCGCGCGGGGTTACTGAACCGTGATGTGAAAAACGTAACCTTGGCCTGACGTTGCCGAAACGCTG  
GAACAATACGAGCTTATGCTGACCCAGGATGACGCGGTAAAAAATATGTTCCGCGCAGGTCCTGCAGGCATTCTGACCAC  
ACAGGCATTCTCGCAAGATTGCCGTTGGGATACGCTGGACGACGATCGCGCCAATGGCTGTATCCGCTCGCTGGAACACG  
CCTACAGCAAAGACGGCGCCTGGCGGTGCTCTACGGTAACTTTGCGGAAAACGGCTGCATCGTGAACACGGCAGGCGTC  
GATGACAGCATCTCAAATTCACCGGCCCGCGAAAGTGTACGAAAGCCAGGACGATGCGGTAGAAGCGATTCTCGGCGG  
TAAAGTTGTCGCCGAGATGTGGTAGTAATTCGCTATGAAGGCCCGAAAGCGGTCCGGGGATGCAGGAAATGCTCTACC  
CAACCAGCTTCTGAAATCAATGGGTCTCGGCAAAGCTGTGCGCTGATCACCGACGGTCTGTTTCTGTTGGCACCTCT  
GGTCTTTCATCGCCACGCTCACCGGAAGCGGCAAGCGGCGCAGCATTGGCCTGATTGAAGATGGTACCTGATCGC  
TATCGACATCCGAACCGTGGCATTACAGGTAAGCGATGCCGAACCTGGCGCGCGTCTGTAAGCGCAGGACGCTC  
GAGGTGACAAAGCCTGGACGCCGAAAATCGTGAACGTGAGTCTCCTTTGCCCTGCGTGTATGCCAGCTGGCAACC  
AGCGCCGACAAAGCGCGGTGCGCGATAAATCGAAACTGGGGGTTAATAATGGCTGACTCGCAACCCCTGTCCGGTGCT  
CCGGAAGGTGCCGAATATTTAAGAGCAGTGTGCGCGCGCGGTTTACGAGGCGCGCAGGTTACGCCGCTACAAAAAAT  
GGAAAACTGTGCTGCGCTTGTATAACGTATTCTGGTGAAGCGCGAAGATCGCCAGCCAGTGCACAGCTTTAAGCTGC  
GCGGCGCATACCCATGATGGCGGGCCTGACGGAAGAACAGAAAGCGCACCGCGTGATCACTGCTTCTGCGGGTAACCCAC  
GCGCAGGGCGTGCCTTTTCTTCTGCGCGGTTAGGCGTGAAGGCCCTGATCGTTATGCCAACCCGCCACCGCCGACATCAA  
AGTCGACGCGGTGCGCGGCTTCGGCGGCGAAGTGTGCTCCACGGCGCGAACTTTGATGAAGCGAAAGCCAAAGCGATCG

AACTGTCACAGCAGCAGGGTTACCTGGGTGCCGCGTTGACCATCCGATGGTGATTGCCGGGCAAGGCAGCTGGCG  
CTGGAAGTCTCCAGCAGGACGCCATCTCGACCGGTATTTGTCCAGTCGGCGGCGGGTCTGGCTGCTGGCGTGGC  
GGTCTGATCAACAAGTATGATGCCGAAATCAAAGTATCGCCGTAAGAAGCGGAAGACTCCGCTGCCTGAAAGCAGCGC  
TGGATGCGGGTATCCGGTTGATCTGCCGCGCTAGGGCTATTTGCTGAAGCGTAGCGGTAAAACGCATCGGTGACGAA  
ACCTTCCGTTTATGCCAGGAGTATCTCGACGACATCATCACCGTCGATAGCGATGCGATCTGTGCGGCGATGAAGGATTT  
ATTCGAAGATGTGCGCGGGTGGCGGAACCTCTGGCGCGCTGGCGCTGGCGGGAATGAAAAATATATCGCCCTGCACA  
ACATTCGCGCGAACGGCTGGCGCATATTCTTCCGGTGCCAACGTGAACCTCCACGGCCTGCGCTACGTCTCAGAAGC  
TGCGAAGTGGGCGAACAGCGTGAAGCGTTGTTGGCGGTGACCATTCGGAAGAAAAAGGCAGCTTCTCAAATCTGCCA  
ACTGCTTGGCGGGCGTTCGGTACCCGAGTTCAACTACCGTTTTGCCGATGCCAAAAACGCCTGCATCTTTGTCGGTGTG  
GCCTGAGCCGCGGCTCGAAGAGCGCAAGAAATTTGCGATGCTCAACGACGGCGGCTACAGCGTGGTTGATCTCTCC  
GACGACGAAATGGCGAAGCTACAGTGCCTATATGGTTCGGCGGACGTCCATCGCATCCGTTGAGGAACGCCTCTACAG  
CTTCGAATCCCGAATCACCGGGCGCTGCTGCGCTTCTCAACGCTGGGTACGTACTGGAACATTTCTTTGTTCC  
ACTATCGCAGCATGGCACCAGTACGGGCGCTACTGGCGGCTTGAACCTGGCGACCATGAACCGGATTTGAAACC  
CGGCTGAATGAGCTGGGCTACGATTGCCACGACGAAACCAATAACCCGGCGTTCAGGTTCTTTTGGCGGGTTAGGGAAA  
AATGCCTGATAGCGCTTCGTTATCAGGCTACCCGCGGACACAGTCAATTTGTGGTTCGCAAAATCTCCAGAATGCC  
TCAATAGCGGCTCATGTAGCCGTTTTCTGCGCACACGCCAGCTCAAACGGCGTTTTCTCATCGCTGCGCTCTAA  
AATCATCACGGGTTACGACCCGGTTCGGGGCTGTTTTCCAGCACCCTCCGCAACAATGCCACGCCACAGCCGAGTG  
CCACCATCGATACCATCGCTTCATGCCCGCAACCGTGGCGTAAATCATCGGGTACTGATTTTATTGCGTCAAACAC  
AGTTCAATGCGCGGCGTACCGGCCCTGATCGCCATAATAACGGCACCGTTGACAGTCCGGCTTCTTACCGACAC  
CTGATTACGCACCGGGCAGGGCAGCGCGGGGGAATCAGCACTACTGCCAGATTCTCCAGCATCGAAAACGCCACTGCGC  
CGGGCAAGGTTTCCGGTTTACCGCAATCGCCAGATCCGCTTACCAGTACCACCTTTTCCATCGCATCTGCCGCATCA  
CCAGTAGTAAGTTAATCTCACCGACGGGTGTTCCGCGCGGAAGCGATCCAGAATCGGCGGAGATGGCTGTAGGCAGC  
GGTACCAGCAGAGAAGATATGTAATTCGCCAGAGAGCGACGGCCCTTGTGATCGATGGTGTGGCGCAACTGCTGACT  
GCAACAGCGTTTGTGGCGAAAACCGCGAGCTTTCGCCGCTTCACTCAGCGTACCCTGCGGTTATCGCGCACAAC  
AGCGGCTGACCAGATCTTCTCCAGGCGCTGAATCTGCCGTGAGAGCGTGGATGGGTAACGTGCATCGCCGCGCGCT  
GCGGCCAAAATGGCGGCTTCCGCCAGATGCAGGAAGTTTTAGATCGCGTAAATCCACAGGGACAGCCCTCGATGTTG  
ACGTTGCAAAAATTGCAATGTGACGTTGTGAATATCAATTTCCGCAATAAATTTCTGTATATAGTGAATCAATCT  
CGAAAACGCGAACGAACAATAAGAAGCACAACATCACGAGGAATCACCATGGCTAACTACTTCAATACACTGAATCTGC  
GCCAGCAGCTGGCACAGCTGGGCAATGTGCTTTATGGGCCCGCATGAATTCGCCGATGGCGGAGCTACCTTCAGGGT  
AAAAAGTAGTCATCGTCCGCTGTGGCGCACAGGGTCTGAACCAGGGCTGAACATGCGTGATTCTGGTCTCGATATCTC  
CTACGCTCTGCGTAAAGAAGCGATTGCCGAGAAGCGCGCTCCTGGCGTAAAGCGACCGAAAATGGTTTTAAAGTGGGTA  
CTTACGAAGAACTGATCCCACAGGCGGATCTGGTGATTAACCTGACGCCGGAAGCAGCACTCTGATGTAGTGCACCC  
GTACAGCCACTGATGAAAGACGGCGCGGCTGGGCTACTCGCACGGTTTCAACATCGTCGAAGTGGGCGAGCAGATCCG  
TAAAGATATCACCGTAGTGATGGTTGCCGGAATGCCAGGCACCGAAGTGCGTGAAGAGTACAAACGTGGGTTCCGGC  
TACCAGCGTATTGCCGTTACCCGGAACGATCCGAAAGGCGAAGGCATGGCGATTGCCAAAGCCTGGGCGGCTGCA  
ACCGGTGGTACCCTGCGGGTGTGCTGGAATCGCTTTCGTTGCCGGAAGTGAATCTGACCTGATGGGCGAGCAAACCAT  
CCTGTGCGGTATGTTGCAGGCTGGCTCTGCTGTGCTTCGACAAGCTGGTGGAAAGAAGGTACCGATCCAGCATAACGAG  
AAAAACTGATTCAGTTCCGTTGGGAAACCATCACCGAAGCACTGAAACAGGGCGGCATCACCTGATGATGGACCGTCTC  
TCTAACCCGGCGAAACTCGTGCTTATGCGTTTTGAAACAGTGAAGAGATCATGGCACCCCTGTTCCAGAAACATAT  
GGACGACATCATCTCCGGGAATTTCTTCCGGTATGATGGCGGACTGGGCCAACGATGATAAGAAACTGCTGACCTGGC  
GTGAAGAGACCGGCAAAACCGGTTTTGAAACCGCGCCGACGATGAAGGCAAAATCGGCGAGCAGGAGTACTTCGATAAA  
GGCGTACTGATGATTGCGATGGTGAAGCGGGCGTTGAACTGGCGTTCGAAACCATGGTTCGATTCCGGCATCATTGAAGA  
GTCTGCATATTATGAATCACTGCACGAGCTGCCGCTGATTGCCAACACCATCGCCGTAAGCGTCTGTACGAAATGAACG  
TGTTTATCTCTGATACCGCTGAGTACGGTAACTATCTGTTCTTACGCTTGTGTGCCGTTGCTGAAACCGTTTTATGGCA  
GAGCTGCAACCGGGGACCTGGGTAAGCTATTCCGGAAGGCGGGTAGATAACGGGCAACTGCGTGATGTGAACGAAGC  
GATTCGAGCCATGCGATTGAGCAGGTAGGTAAGAAACTGCGCGGCTATATGACAGATATGAAACGATTGCTGTTGCCG  
GTTAAGTGGCGCTGATGCCCTACCCCGACCTCTCCACAGGGAGAGGGAGAAAACACTCAAGGCCTTCTCTGGAGA  
AGGCCTTGCTATTAGTTGCGGTACAGCACCTTAATGATGTGATATCCGAACTGGGTGTGCAGCGGGCCGGTCCGCTCCAG  
TACCGACAAGAGAAAACCACTTTATCGAACGCCGGAACCATCTGACCTGGCGGAATTCACCTAAATCACCGCCGCGTT  
TGCTGATGGGCAAAATGGAGTGTTCCTGCCAGCTTCCGAAATCGGCCCCGTTCTTAATCTGCTCGAGAAGATCCAGA  
GCCAGTTTCTCTTTTACAAGGATATGAGTGTGCTGCTGTTTTTCCATGATCGTGCCTTGAGTGAATAATTGTCA  
GGCGGCGATTTAGCATGATCCGAGATGCTAACGTAATTGTGAGTCAAGGAGTGGCTGGTACATATATGGCAAAAGCCC  
GGAAAATCCGGCTTCGAGGTCCTCAAGGGGAGAAAACCTTAGGCCTCTATGGGCTACAAGTCATTATCGGGGATGG  
TTATTTTATTGCAATTTATGAGCGATATGGCATTGATTGACTTGATGACCGCCCTCTGTATGTCTGCAACCAACTCATG  
TGCAAAACATTGATTAAGATACCCTCTGTAAGTCTTGTCTGTTAATCTGTTTCGACTGACTTGTTGTACCAGGTCCG  
CTTTGGCCCAACGAATCTGCTGATCAAAGAATTGCAGGTCATTGATAACATTAAGTCTTCAACATGCATTCCACGT

TTAACTTGTCTGGTCGCGAGTGGTTGATAATGGAACGACGATGCATGCGTTGCCATTAATTTTTCCGTTGAGCACGACA  
ACTAACCTGTTTTTATCATTTCAGGAGGAATGCGGCCATCGTAATACGTCGTGCTGAACGGTCCATTTTGGCTAACAGG  
ATAGTTACCAAAGTTGCATTCCAGTATTTACCAACCTTAGGGCTGAAATTAATCGCCACGAGTAAACCTCTCCTTAGTA  
AACTCTGAAAAAGTAATAACACAACGTTACGACCCGATATTTTCTAAGTCTAATGGATTACGATGAACCTCCGATTTCCG  
TCTTCTCTCTGATTTAAACATCCGACGCAACCGGTTAGCGGCTTACACGCGGTACATTCAAATGCGATTCTGCTAC  
AATCCTCCCCCGTTGGAAGATTGAGCAATACACCTATGCGTCTAAACCCCGGCCAACAACAAGCTGTGCAATTCGTTAC  
CGCCCCCTGCCTGGTGTGCGGGCGCGGGTTCCGGTAAAACCTCGTGTATACCAATAAAAATCGCCATCTGATCCGCG  
GTTGCGGTTATCAGGCGCGGCACATTGCGGCGGTGACCTTTACTAATAAAGCAGCGCGGAGATGAAAGAGCGTGTAGGG  
CAGACGCTGGGGCGCAAAGAGGCGCGTGGGCTGATGATCTCCACTTTCCATACGTTGGGGCTGGATATCATCAAACGCGA  
GTATGCGGCGCTTGGGATGAAAGCGAACTTCTCGTTGTTTACGATACCGATCAGCTTGTCTTAAAGAGTTGACCG  
AGGGGCTGATTGAAGATGACAAAGTTCTCCTGCAACAACCTGATTCGACCATCTCTAACTGGAAGAATGATCTCAAACA  
CCGTCACGCGCGCAGCAAGTGCATTGGCGAGCGGACCGTATTTTGGCCATTGTTATGGGCTGTATGATGCACACCT  
GAAAGCCTGTAACTTCTCGACTTCGATGATCTGATTTTATTGCCGACGTTGCTGTGCAACGCAATGAAGAAGTCCGCA  
AGCGCTGGCAGAACAAAATTCGCTATCTGCTGGTGGATGAGTATCAGGACACCAACACCAGCCAGTATGAGCTGGTAAA  
CTGCTGGTGGCGAGCCGCGCGCTTACCCTGGTGGTGGATGACGATGACCAAGTCTACTCTGGCGCGGTGCACGCTCC  
GCAAAACCTGGTGTGCTGAGTCAGGATTTTCCGGCGCTGAAGGTGATTAAGCTTGAGCAGAACTATCGCTCTTCCGGG  
GTATTCTGAAAGCGGCGAACATCTGATCGCAATAACCCGACGCTCTTGAAGAAGCTGTCTTCCGAACTGGGTTAT  
GGCGCGGAGCTAAAAGTATTAAGCGCGAATAACGAAGAATGAGGCTGAGCGCGTTACTGGCGAGCTGATCGCCATCA  
CTTCGTCAATAAAACGAGTACAAAGATTACGCCATTCTTATCGCGGTAACCATCAGTCGCGGGTGTGAAAAATCC  
TGATGCAAAACCGCATCCCGTACAAAATATCTGGTGGTACGTCGTTTTTCTCTCGTCTGAAATCAAGGACTTGGTGGCT  
TATCTGCGGCTGCTGACTAACCCGACGATGACAGCGCATTTCTGCGTATCGTTAACACGCCGAAGCGAGAGATTGGCCC  
GGCTACGCTGAAAAAGCTGGGTGAGTGGGCGATGACGCGCAATAAAGCATGTTTACCGCCAGCTTGTATGGGCTGA  
GTCAGACGCTTAGCGGACGTGGTTATGAAGCATTGACCCGCTTACTCACTGGTTGGCAGAAATCCAGCGCTGGCGGAG  
CGGGAGCCGATTGCCGCGGTGCGTGTATGATCCATGGCATGGATTATGAATCCTGGCTGTACGAAACATCGCCAGCCC  
GAAAGCCGCCGAAATGCGCATGAAGAACGTCAACCAACTGTTTAGCTGGATGACGGAGATGCTGGAAGGCAGTGAAGTGG  
ATGAGCCGATGACGCTACCCAGGTGGTACGCGCTTACTTTGCGCGACATGATGGAGCGTGGTGGAGTGAAGAAGAG  
CTGGATCAGGTGCAACTGATGACTCTCACGCGTCAAAGGGCTGGAGTTTCTTATGTCTACATGGTGGTATGGAAGA  
AGGGTTTTTGGCCACCAGAGCAGCATCGATGAAGATAATATCGATGAGGAGCGCGGCTGGCCTATGTCGGCATTACCC  
GCGCCAGAAAGGAATTGACCTTTACGCTGTGAAAGAACCGCGTCACTACGCGCAACTGGTGGCGCCGAGCCGAGCCGC  
TTTTTGTGGAGCTGCCGAGGATGATCTGATTTGGGAACAGGAGCGCAAAGTGGTCAAGCGCCGAAGAACGGATGCAGAA  
AGGGCAAAGCCATCTGGCGAATCTGAAAGCGATGATGGCGGCAAAACGAGGGAAATAATCAAGGCCGAAAGATGCGTC  
AGCATCGCATCCGGCACTTACTCATTAAATGCACTTCCAGCGGCCAGTGGACATAGCTCTGCCACTGGCTTCTGAGCAA  
TAATCTCTTTACCCAGCGGATGTTGGGTTAGCCAACCTTGGGAAGCGTCAAGGTCAACAGTTCATGGTTAGCCTGTAAT  
GTCATCTCTGGCAGAGATCGTCACGGCGACGGCTGGCAAAAATGATGGCCAGGCGTAGTAAACGGCAGAGTTGTTCTGC  
GACGCGCGGGTACGGCATTGCTGATGCAGCGATGAGAGATCGACCGGATTAGTCTGGTTGAGCAGTAGCGTCGCCA  
GCAATTTTTCTGTGCGGGGTAACCCGGAAGATCCAGATTACGCCAGATAAGCAGCGTGTGCGGCGCTTGTGTTG  
AAGTCAACGCTCAGGCCGATTTTATGAAGCTGACAGCGCTGATGAGCAAATCGCGGCTTATTGCTTCAAGATGCCATC  
GTTTTCCACCTGATCGAAGAAGTTAGCCGCAACTTTGGCTACGCGCTGTGCCTGATCAATATCGATCATAAAGCGGCGTT  
GAATATTACGCAGCGTACGGCTGCGAATATCTGCTCGACGGCCAGATGCAACATGCCGTAGACCAGGCTTACGCGAC  
GCACCGCCGCGAGGTCATACACTGAATATTCAGTTCGGTAAAAATGGCGATCAGGATCGCCAGACCCTCGGGAACAC  
TAACGCACGTTCCAGCGTCAAGCCGTCATCTCCAGTTCTCCAGCCGACCGCAATGAATGGCTCGCTGTTTCAATTGCT  
GCAACTTTTCCAGGGTAATGCGTTCATCCATCCCCTGTGCATCATGATTTCTGTAACGCTGCACGGTCCCGGAAGCA  
CCAACGCACACTTTCCAGCCGTGATACCGTAATTCATCGGCAACCCGACGTAACACTTCCGCTGCGGCTTTTTCTGCAGC  
ATCAAAAATTTCTGCCCCAGATTACGATCGGCAAAATAGCGTTCAGCCAGGTGACGAGCCCATCGACAGGCTGAACA  
ACGAGGTGGTTTGTGACCCGTCGCGGTTACAGTTCAGTACTGGCTCCGCCTATATCCACCACCAGGCGCTGATCGGCA  
CCACCAGTGGTGTGAGCAACGCCCTGATAAATCAGACGTGCTTCTCTTACCAGCTGATCACCTGTACCGGACAACCGAG  
AATTTCTGCGCTTTGGCAATAAAATCACCCGATTGACGGCAAGGCGTAACGTCGCGTAGCGACAACGCAATTTGCG  
AGGGAGGAATATCTTGCAGACGTTACGAAACAGGCGCAAACATTGCCAACCAGCTCCATTGCTTATTGGAGAGGGCA  
TTTTCGCTATTAGGCCAGCAGCCAGACGCACTTTGCGTTTTATTGCGTCAAGCTGCTGGATGCTTCCAGCCACTCGCG  
CACAACCAGCATATGAAAATATTGAAACCGAGATCAATGGCTGCATACAGCGACGAGGTGGAACCCATACTCTTATCC  
TTCAATCTGTCTGTGTTGGCTGCATTTCTTACCTGAATCACTTACTACAGTAAGCTCATCGGGATTCTTCTTGC  
CATCTTGATACAGTTTGAATGATTTTGTGATGACATTTTTTATTAACCTGAACGACGACGATTACCGGAGCGCCAGT  
ACGACGCGGACCAATTGCCTGTGCGCGGGCGGTGAGGCGCAGCGTTTTGGCAGATCGGTCAATGCGTCCGGATTGT  
ATTTGCTTACCGGAATTGAGTGACCAATATAGGTCTCAATAGCAGGCAAATTAATGCATACTCTTACACGCCAGGCGT  
ATAGAGTGACCGCTTGGCCTGCGCGACCTGTACGACCAATACGGTGAACGTAATCTTACAGTCATCGGGTAAATCGTA  
GTTAAAGACGTGCGTCACTGCCGAATATGCAAACACGCGCGCAACGTCGGTGGCAACCAGAATATCCAGATCGCCAC

GGGTAAATTCATCAAGAATACGCAGACGTTTTTCTGCGCGACATCGCTGTCAATAAACCGACACGATGACCATCTGCT  
GCCAGTGGCCCCAGATCTCTTCAACGGTGTGGTGGTGGCGAAAATAATCGCTCTGTCTGGCCACTCTTCTTCGAT  
CAGCGTTTGCAGCAAACGCATTTTTTCTCGTTAGAAAGGTAGAAAAGCTCTTCTTTAATACGGTGGCCCGTTTTCTGTT  
CCGTTCCACTTCAATATATTCGGCATTGTTTCATCTGCTCGAACGCCAGTTCACGTACCCGGTACGAAAGCGTGGCGGAG  
AACAGCATGTTGAGGCGCTGGTTTGCAGGCGGCATACGGCGGAACAGCCAGCGGATATCTTTAATAAAGCCAGATCGTA  
CATGCGATCGGCTTCGTCCAGTACCACCACCTGAATGGCACCGAGGTTAATGTGGTTCTGCTTGGCGTAGTCAATTAAC  
GCCCCGTGGTGCCAATCAGAATGTCAACGCCGCTTTCCAGCACTTTCAGCTGTTTGTGCTAGCCATCACCACCGTAAGCC  
AGACCCAGCTTCAGGCCAGTAGCTTCCGCCAGCGGTTCTGCGTCGGCATGGATCTGCACGGCAAGTTCACGCGTCGGTGC  
CATAATTAAGGCACGCGGCTGATTCACCTTGGCATCGGCAATCGCAGGATGAGAGAGAAGATAATGAAACGTTGACGTAA  
GAAACGCCATCGTTTTCCGGTACCGGTTTGGCGCTGCCCGGTACGTCACGACCCGCCAGCGTCAGCGGAAGGGCCAGT  
GCCTGAATGGGCGTACAGTTATGAAACCTTTTTTTTCAAGGGCTTCTACAACCTTCGGATGCAGGGCGAAGTCGAAAA  
CTTCTGTTCTGTTAAATGTGTTTTGCTCATAGTGTGGTAGAATATCAGCTTACTATTGCTTACGAAAGCGTATCCGGTG  
AAATAAAGTCAACCTTGTAGTTGTTAATGTTACACCAACAACGAAACCAACACGCCAGGCTTATTCTGTGGAGTTATAT  
ATGAGCGATAAAATTATTCACCTGACTGACGACAGTTTTGACACGGATGACTCAAAGCGGACGGGGCGATCCTCGTCGA  
TTTCTGGCAGAGTGGTGGCTCCGTGCAAATGATCGCCCGATTCTGGATGAAATCGCTGACGAATATCAGGGCAAAC  
TGACCTTGCAAAACCTGAACATCGATCAAAACCTGGCACTGCGCAGAAATATGGCATCCGTGGTATCCCGACTCTGCTG  
CTGTTCAAAAACGGTGAAGTGGCGGCAACCAAAGTGGGTGCACTGTCTAAAGGTCAGTTGAAAGAGTTCTCTCGACGCTAA  
CCTGGCGTAAGGGAATTTTATGTTCCGGTGGCCCGTGGCTAAAACTGGACGCCCGCGTGGATCATGCTAACTTAGTGT  
TGACTTCGTATTAACATACCTTATTAAGTTTGAATCTTGAATTTCCAACGCTTCCCGTTTTATCTTAAATGCGAAGTG  
AACAGATTTCTGGCTCGTCACTCAATCCGCTTGTGCTTTCAGTTCTGCGTACTCTCCTGTGACCAGGCAGCGAAAAGAC  
ATGAGTCGATGACCGTAAACAGGCATGGATGATCCTGCCATACCATTACAACATTAAGTTCGAGATTTACCCCAAGTTT  
AAGAACTCACACACTATGAATCTTACCGAATTAAGAATACGCCGGTTTCTGAGCTGACTCTCGGCGAAAATATGG  
GGCTGAAAACCTGGCTCGTATGCGTAAGCAGGACATTATTTTTGCCATCCTGAAGCAGCACGCAAAGAGTGGCGAAGAT  
ATCTTTGGTGTGGCGTACTGGAGATATTGAGGATGGATTTGGTTTCTCCGTTCCGCAGACAGCTCTACCTCGCCGG  
TCCTGATGACATCTACGTTTCCCTAGCAAATCCGCCGTTTCAACCTCCGCACTGGTGATACCATCTCTGGTAAGATTC  
GCCCCGGAAGAAGGTGAACGCTATTTTGGCTGTGAAAGTTAACGAAGTTAACTTCGACAAAACCTGAAAACGCCCGC  
AACAAAATCCTCTTTGAGAACTTAACCCCGTGCACGCAAACCTCTGCTGCGTATGGAACGTGGTAACGGTTCTACTGA  
AGATTTAACTGCTCGGACTGGATCTGGCATCACCTATCGGTGCTGGTCAGCGTGGTCTGATTGTGGCACCCGCCGAAAG  
CCGGTAAAACCATGCTGCTGCGAATATTGCTCAGAGCATTGCTTACAACCACCCGGATTGTGTGCTGATGGTTCTGCTG  
ATCGACGAACGTCGGAAGAAGTAACCGAGATGCAGCGTCTGGTAAAAGGTGAAGTTGTTGCTTCTACCTTTGACGAACC  
CGCATCTCGCCACGTTCCAGTTTGGGAAATGGTGATCGAGAAGGCCAAAACGCCCTGGTTGAGCACAAGAAAGACGTTATCA  
TTCTGCTCGACTCCATCACTCGTCTGGCGCGCGCTTACAACACCGTTGTTCCGGCGTCAGGTAAAGTGTGACCGGTGGT  
GTGGATGCCAACGCCCTGCATCGTCCGAAACGCTTCTTTGGTGGCGCGGTAACGTGGAAGAGGGCGGCAGCCTGACCAT  
TATCGCGACGGCGCTTATCGATACCGTTCTAAAATGGACGAAGTTATCTACGAAGAGTTTAAAGGTACAGGCAACATGG  
AACTGCACCTCTCTGTAAGATCGCTGAAAAACGCGTCTTCCCGCTATCGACTACAACCGTTCTGGTACCCGTAAGAA  
GAGCTGCTCACGACTCAGGAAGAACTGCAGAAAATGTGGATCCTGCGCAAATCATTACCCGATGGGCGAAATCGATGC  
AATGGAATTCCTCATTAAACTGGCAATGACCAAGCAATGACGATTTCTCGAAATGATGAAACGCTCATAAATTT  
GTCTTATGCCAAAACGCCACGTGTTTACGTGGCGTTTTGCTTTTATATCTGAATCTTAAATGCGCGCTGGCGATGTTA  
GGAAAATTCCTGGAATTTGCTGGCATGTTATGCAATTTGCATATCAAATGGTAAATTTTTGCACAGGACTGGTGGGTTG  
GAACGGACTTCCCTTCTGAATAAAGTCTTCTGGTTATACTTCTGCTAATAATTTTTCTGAGAGCATGCATTGTGAA  
TTTACTGACAGTGAGTACTGATCTCATCAGTATTTTTTTTATTACGACACTGTTTCTGTTTTTTTGGCCGTAAGGTGGCAA  
AAAAAGTCGGTTTGTGATAAACCAAACCTTCCGCAAACGTCACCAGGGATTGATACCTCTCGTTGGGGGATTTCCGTT  
TACGCAGGGATTTGCTTACGTTCCGAATTTGTCGATTAATATTTCCGCATGCATCTCTATCTCGTTGTGCCGGTGT  
GCTTGTCTTTCATTGGCGCGCTGGATGACCGTTTTGATATCAGCGTAAAAATCCGTGCCACCATACAGGCCGCTGTTGGCA  
TTGTTATGATGGTGTTCGGCAAGCTTTATCTCAGTAGCCTGGGTTATATCTTTGGCTCCTGGGAGATGGTCTCGGACCG  
TTTGGTTACTTCTGACGCTATTTGCCGCTGGGCGGCCATTAATGCGTTCAACATGGTTGATGGCATTGATGGCTTGCT  
GGGCGGTTGCTCGTCTCGTTTGCAGCAATCGGTATGATTTTTGTGGTTCGACGGGCAAACCAGCCTCGCAATCTGGT  
GCTTTGCGATGATCGCCGCATCCTGCCATACATCATGCTTAACTTGGTATCCTGGTCCGCCGCTACAAAGTCTTTATG  
GGTATGCGGGCAGTACGCTGATTGGTTTTACGTTATCTGGATCCTGCTGAAACGACCCAGGGCAAACCCATCCCAT  
CAGCCCGTTACCGCTTTGTGGATAATCGCCATTCGCTAATGGATATGGTGGCGATTATGTACCGTCCGCTGCGTAAAG  
GCATGAGCCCATCTCTCCTGACCGTACGATATTCACCATTTGATCATGCGTCCCGGTTTACTTCCCGTACGGCGTTT  
GTGCTGATTACCTTGGCGACACTGCTCGCTTCCATTGGCGTCTGGCAGAAATTTCTCATTGTTTGGCCGAGTGGGT  
CATGCTGGTCTTTTTGCTAGCATTCTTCTATGGATATTGATTAAGCGTGCCTGGAAAGTTGCTCGCTTTATTA  
AGCGCGTAAAACCGCAGACTCGGTAGAAATCGTGGTGGCAGCCCAATTTAACCAAATAAATGAGGATGTGATGACACAAC  
CAATGCCTGGGAAACCGGCCGAAGACGCTGAAAATGAACTGGATATTCGTGGGTTGTTTGTACCTTGTGGGCTGGGAAAG  
CTATGGATTATTGGCATGGGGCTGGCGTTTGGTAAATCGCGCTGGCGTATACGTTTTTGTCTGTCAGGAGTGGAGCTC

GACGGCGATTACCGATCGTCCAACGGTGAATATGCTGGGGGATATTACTCGCAGCAGCAATTTTTGCGTAACCTGGATG  
TCCGTTCAAACATGGCTTCTGCCGACCAACCATCGTTCATGGACGAAGCCTATAAAGAGTTTGTATGCAACTGGCCTCG  
TGGGATACCCGCAGAGAGTTCTGGCTGCAAACCGACTATTACAAACAGCGGATGGTGGGCAACAGCAAAGCCGATGCGGC  
GTTGCTGGATGAAATGATTAACAACATCCAGTTTATCCCCGGAGACTTTACCCGCGCGTCAATGACAGCGTGAAGCTTA  
TTGCCGAAACCGCGCCTGACGCTAATAACCTGTTACGTCAAGTATGTTGCTTTTCCAGCCAGCGTGCAGCCAGCCATCTG  
AATGATGAGCTGAAAGGCGCATGGGCGCGCTACCATCCAGATGAAAGCTCAGGTGAAGCGTCAGGAAGAGGTGGCGAA  
AGCCATCTACGACCGCCGATGAACAGCATTGAGCAGGCGCTGAAAATTGCTGAGCAGCATAATATTTCCGCGAGTGGCA  
CAGATGTACCTGCCGAGGAATTACCTGATTACAGAAATGTTCTGCTTGGGCGTCCAATGCTTCAGGCTCGACTGGAAAAT  
TTACAGGCCGTCGGTCCGGCCTTTGATCTCGACTATGATCAGAATCGGGCCATGTTAAACACCCTGAATGTTGGTCCAAC  
CCTGGATCCGCGTTTTACAGCTATCGCTATTTGCTACGCGGAAGAACCAGTAAACCGGATAGCCCCAGCTCGTGCCCT  
TCCTGATGATTATGTGGGCGATTGTGCGGGGGCTGATCGGGGCTGGTGTGCGATTAACCCGCGTTGCTCGAAAATAGCAA  
CACTGCTGCGGTGAGCGCAAAGGCGCTCGCCGCTTATTCGAAGAGAATCGATGTGAAAGTACTGACTGTATTTGGTACGC  
GCCCAGGACCATCAAGATGGCGCCGTTGGTGCATGCTTGGCAAAGATCCTTTTTTTGAGGCTAAAGTTTGGTCACT  
GCGCAGATCCGGAGATGCTCGATCAGTGTGAACTCTTTTCCATTGTACTGACTACGATCTCAACATAATGCAGCC  
AGGACAGGGCTGACAGAGATAACCTGTGCGATTCTGGAAGGGCTAAAACCTATTCTTGCCGAGTTCAAACAGACGTCG  
TGCTGGTTCACGGCGATACGACGACGCTGGCAACCAGCTGGCGGCTTTTATCAGCGTATTCCTGTTGGTACGTT  
GAGGCTGGTCTGCGCACGGCGATCTCTATTCGCCGTGGCCGGAAGAGGCTAACCGTACATTGACCGGGCATCTGGCGAT  
GTATCACTTCTCTCAACCGAAACTTCCCGCAAACCTTGGTGCCTGAAAACGTTGCGGATAGCCGAATCTTATTACCG  
GTAATACAGTCATTGATGCACTGTTATGGGTGCGTGACCAGGTGATGAGCAGCGACAAGCTGCGTTCAGAACTGGCGGCA  
AATTACCCGTTTTATCGACCCCGATAAAAAGATGATTCTGGTGACCGGTCACAGGCGTGAGAGTTTTGCGTGGTGGCTTTGA  
AGAAATCTGCCACGCGCTGGCAGACATCGCCACCACGCACCAGGACATCCAGATTGTCTATCCGGTGCATCTCAACCCGA  
ACGTCAGAGAACCAGTCAATCGCATTCTGGGCGATGTGAAAATGTCATTCTGATCGATCCCAGGAGTATTTACCGTTT  
GTCTGGCTGATGAACCACGCTGGCTGATTTTACCAGCTCAGGCGGATTGAGGAAGAAGCGCTTCGCTGGGAAACC  
TGTGCTGGTGTGCGGATACCACTGAGCGTCCGGAAGCGGTGACGGCGGTACGGTGCCTGTTAGGCACGGATAAGC  
AGCGAATTGTCGAGGAAGTACGCGCTTTTTAAAAGACGAAAACGAATATCAAGCTATGAGCCGCGCCATAACCCGTAT  
GGTATGGTCAGGCATGCTCTCGCATTCTGGAAGCGTTAAAAAATAATCGGATATCACTATGAGTTTTGCGACATTTCT  
GTTATCGGACTGGGTTATATCGGGCTGCCAACGGCAGCAGCGTTTGCCTCACGGCAAAAACAGGTAATTGGTGTGATAT  
CAACCAACATCGCGTTGATACCATCAATCGTGGCGAAATCCATATCGTCAACCTGATTTGGCGAGTGTAGTAAAAACTG  
CCGTAGAAGGCGGTTTTTACGAGCGAGCACGACGCGAGTTGAAGCGGATGCCTGGCTGATTGCTGTACCCACGCGCTTT  
AAGGGCGATCATGAGCCAGATATGACCTACGTTGAATCGGCTGCTCGCTCCATTGCGCCAGTGTGAAAAAGGCGCGCT  
GGTGATCCTTGAATCCACCTCGCCGGTGGGGTCAACCGAGAAGATGGCAGAATGGTTAGCAGAGATGCGTCCGGATCTCA  
CTTTCCCGCAGCAGGTGGCGAGCAGGCGGACGTCAACATTGCTTACTGCCCGAACGCGTGTACCAGGACAGGTAATG  
GTCGAGCTGATTAACCGATCGCGTATTGGTGGTATGACGCGGTTTGTTCGGCCCGCCAGCGAACTGTACAAAAT  
TTTCTCGAAGGTGAGTGTGCTGCTAACTCGCGGACGCGGAAATGTGTAAGCTCACCGAAAACAGCTTCCGCGATG  
TGAATATCGCTTTTGTAAATGAATTGCTGCTGATTTGTCCGATCAGGGGATTAACGTCTGGGAACTGATTCGCTGGCG  
AATCGTCACCTCGCGTTAATATTCTCAGCCTGGCCTGGCGTGGGCGGCTACTGCATTGCTGTTGATCCGTGGTTTTAT  
CGTGGCACAGAACCCAGCAGGCGCGGCTTATCCGTACCGCGCGCAAGTGAACGATCACAAACCGTTCTGGGTTATCG  
ATCAGGTGAAAGCGCGGTGGCTGATTGCCTGGCGGCTACCGATAAACCGCGCAGTGAACGAAAATCGCCTGCTTTGGT  
CTGGCGTTTAAACCGAATTTGATGACCTGCGCGAAAGCCGCGGATGAAAATCGTGAACGATCGCCAGTGGCAGTATG  
CGCGAAAACCTGGTTTGTGAGCCTAACATCCACAGTTGCCGAAAAAATGACCGGGCTTTGTACTCTGGCGCAGCTTG  
ACGAGGCGCTGGCAACGGCAGACGTGGTGTGCTGGTGCATCATAGTCAGTTCAAAGTTATCAATGGCGACAATGTC  
CATCAGCAGTATGCTGCTGATGCCAAAGGAGTCTGGCGCTGATGAGAAAAATTCTGATAACAGGTGGTGGCGGTTTTATT  
GGCTCGGCGCTGGTGCCTTATATCATCAACGAAACGAGCGACGCGGTGGTAGTGGTGCATAAGCTGACCTACGCCGAAA  
CCTGATGTCGCTGGCACCAGTCCGCGAAAGCGAGCGCTTTGCCTTTGAGAAAGTTGATATCTGCGATCGGGCAGAACTGG  
CACGCGTATTCAGTACGATCAGCCAGACTGTGTATGATCTGGCAGCCGAAAGCCATGTTGACCGTTCTATTGACGGC  
CCGGCAGCGTTTTATTGAAACCAACATTGTCGGGACTTATACATTGCTTGAAGCGGCGGGGCTTACTGGAATGCGCTGAC  
GGAAGATAAAAAATCAGCGTTCCGTTTTATCATATCTCCACTGACGAAGTATATGGTACCTGCACTCGACGGATGATT  
TCTTACCAGAAACACGCGGATGCGCCGAGCAGCCCTTATCCGCGTCAAAGCCAGCAGCGACCATCTGGTGGCGGCC  
TGGCTGCGGACCTATGGTCTGCCGACGTTATACCAACTGCTCGAATAACTACGGCCCTTACCCTTTCCGAAAAACT  
GATCCCGCTGATGATCCTCAACGCGTGGCGGGTAAATCGCTGCCGATATATGGCAACGGGACGAAATCCGTGACTGGC  
TGATGTGGAAGATCACGCCGCGCGTATTGCTGGCGACCACGGGAAAGTCGGTGAACCTATAATATTGGTGGT  
CACAAACGAGCGTAAGAATCTCGATGTTGTGGAACCATTTGCGAGCTGCTGGAAGAACTGGCTCCGAACAAGCCGACGG  
CGTGGCGCACTATCGTGACCTGATCACCTTTGCTGCTGACCGTCCGGGCGATGATCTGCGTTATGCCATTGATGCTTCCA  
AAATTGCCCGTGAACCTGGCTGGCTGCCGAGGAAACCTTTGAAAGTGAATGCGTAAAACGGTTCAGTGGTATCTGGCT  
AATGAAAGCTGGTGAAGCAGGTGCAGGACGGCAGCTATCAGGGCGAGCGTTTAGGCTGAAAGGCTAATTTTACGCGGA  
GGCAACATGAAAGGTATTATCTGGCGGGCGGTTCCGGCACCCGATTGCATCCGATTACGCGCGCGTATCGAAGCAAC

TGTTGCCGATTTACGATAAGCCAATGATTTACTATCCGCTGTCGGTGCTGATGCTGGCCGGTATCCGCGAAATTCTCATC  
ATCACTACGCCGAAGATAAAGTTATTTCCAGCGCCTGCTGGCGATGGTAGTGAGTTCCGTATCCAGCTGGAATATGC  
CGAACAGCCCAGCCGGACGGTCTGGCGCAGGCCTTATCATCGGTGAAACCTTCTTAATGGTGAACCTTCTTGTCTGG  
TGCTGGGCGATAACATCTTCTTCGGTCAGGGCTTACGTCCGAAGCTGCGTCATGTTGCGGCGCGCACCGAAGGGGCGACG  
GTTTTTGGCTATCAGGTGATGGACCCGGAACGCTTTGGCGTGGTGGAGTTTGACGACAATTTCCGCGCTATCTCGCTGGA  
AGAAAAGCCAAAACAGCCGAAGTCAAACCTGGGCGGTGACCGGGCTTTATTTCTACGACAGTAAAGTCGTGGAGTACGCAA  
AGCAGGTGAAGCCGTCGGAGCGTGGTGAACCTGGAGATTACCTCCATCAACCAGATGTACCTCGAGGCGGGCAACCTGACC  
GTTGAACCTGCTCGGGCGCGGATTTGCCTGGCTGGATACCGGCACTCACGACAGCCTGATTGAAGCCAGCACCTTTGTACA  
GACGGTGGAAAAACGCCAGGGCTTTAAGATTGCCTGCCTGGAAGAGATTGCCTGGCGTAACGGCTGGCTCGATGACGAGG  
GTGTGAAGCGTGTGCCAGTTTATTAGCGAAAACGGCTACGGCCAATATCTGCTGGAGTTACTTCGTGCCCGTCCGCGC  
CAGTATTGAGCCACTAACCTGGGAAAACGCCCTTCTTTGGTGTAAACAGCGCCATCGTGCGCATTACGTCTGAAGCACCGC  
TCCTGACGCCAGACGCGTTAGCGCCGTGGTACGGGTGCAGGCCAAAATTGCGGCATCAAATACGGGTGAACCTGGATGCC  
CTGCAACAGCTGGGATTTCCCTGGTAGAAGGTGAAGTTGATTTGGCGCTACCCGTGAACAATGCCAGTGATAGCGGTGC  
TGTAGTGGCACAAGAGACCGATATCCCGCATTACGTACGTTAGCCAGCGCCGATTTGCGCAAAGCCGTTTTCTGTGCGC  
CGTGGTATGCGCTGACGCGCAGCAGTCTTTTATGCACAGTGGATTGAAAATGCCGTGCGCGGCACCTTTGATCATCAA  
TGCTGATTTTTACGTGCGCGTCCGGCGATTTCCGGCTATGTCTCTTTACGGGAACCTCAATGCGACAGATGCGCGAAT  
TGGCCTGCTGGCTGGACCGGTGCAGGTGCTGAGCTGATGCAAACGGCGCTAAACTGGGCGTATGCTCGCGGTAAAACAA  
CTTTGCGGGTGGCGACCCAAATGGGCAACACCGCCGCGCTTAAACGATACATACAAAGTGGTGCGAATGTAGAAAGCAC  
CGTACTGGTTATACAGGTGATCACATGATTCCATTTAACGCACCGCCGGTGGTGGGAACCGAACTCGACTATATGCAGT  
CGGCAATGGGTAGCGGCAAACTGTGTGGCGATGGCGTTTTACCCGTGCTGCCAGCAGTGGCTGGAGCAACGTTTTGGC  
AGCGCAAAGTGTACTGACCGCTCTGCACCGCTTCTGCTGGAGATGGCGGCGCTGCTGCTGATATCCAGCCTGGCGA  
TGAAGTGATCATGCCGAGTACACCTTTGTCTCCACCGCAATGCCTTTGTGCTGCGTGGCGCAAAAATCGTTTTTGTGG  
ATGTTGCGCCGACACCATGAACATCGACGAAACGCTGATTGAAGCGCGATCACCGACAAAACGCGCTTATCGTGCCG  
GTCCATTACGCGGTGTGGCTGCGAAATGGACACCATTATGGCGTTGGCGAAAAGCATAAATTTGTTTGTGGTAGAAGA  
TGCCGCTCAGGGCGTGTGCTCACTTACAAAGGGCGTGCCTGGAAACCATTGGTCATATTGGCTGCTTTAGCTTCCATG  
AAACCAAAAACACACGGCGGGCGGTGAAGGCGGCGGACGCTGATTAACGATAAAGCGTTAATCGAACGAGCCGAGATC  
ATCCGTGAAAAGGGCACTAACCGCAGCCAGTTCTTCCGTGGTCAAGTGCATAAATATACCTGGCGGATATTGGCTCCAG  
CTATTTGATGTCGATCTGCAAGTGCATACCTGTGGCGCAACTGGAAGCAGCGGATCGTATCAACCAGCAACGTCTGG  
CGCTGTGGCAAACTACTACGATGCGTTAGCGCCTCTGGCGAAAGCCGGGCGTATCGAGCTGCCGTGATTTCCCGATGGC  
TGCGTGCGAACGCGCATATGTTCTACATTAACCTGCGGGATATTGATGACCGGAGCGCGTTGATTAACCTTTCTGAAAGA  
AGCGGAAATCATGGCGGTGTTTTATTACATTCCGCTGCACGGTGGCCTGCGGGGGAACACTTTGGTGGTTCACGGTG  
AAGATCGCTACACCACCAAGAGAGCGAGCGCCTGCTGCGCCTGCCGCTGTTCTACAACCTGTCGCCCGTCAATCAGCGT  
ACGGTAATTGCGACTTTGTTGAACTACTTTTTCTGATATGTGCTTGGCAAAAGCGTCTTTGTGGACGCGCGCCAGTACAC  
TGGTCAAGATTGGTGCCGGTACTGGTCCGTAAGTTGCTGGCGGTGTCATTTGGTCCGGCGGGGCTTGGGCTGGCGGCA  
AATTTCCGCCAGTTGATTACCGTGTCCGCGTGTGCGGGGCTGGCATCTTTAACGGTGAACCAATACGTTGCCCA  
GTACCATGATAATCCGCAACAGCTGCGCCGCGTGGTCCGCACTTATCAGCGATGGTACTTGGTTTCTCTACGCTGATGG  
CGCTGTTTTTGTGCTGGCAGCTGCGCAATCAGCCAGGGATTGTTTGGTAATACCGACTATCAGGGGCTGGTGCCTTA  
GTGGCGTGGTCAAATGGGATCGCTGGGGCAACCTGTTACTGGCGCTGATGAAAGGCTTTCGCGATGCCGAGGTAA  
TGCGTTATCGCTGATTGTCGCGAGCTTATTGGCGTCTCGCTACTACGTGAGTTACCGTTTGGCGGTTATGAAGGGG  
CGTTGCTGGTGTGGCGTATTCCCGCCTGGTGGTAATTCCTGCCCATCATGTTGATCAAACGTGGTGTCAACCCG  
TTAAGCTATCTGAAACCCAGCTGGGATAACGGTCTGGCAGGGCAGTTGAGCAAATTTACGCTCATGGCGTTGATTACGTC  
GGTGACCTTGCTGTTGCTTACATCATGATGCGTAACTGCTGGCGGCGAGTATAGCTGGGATGAGGTGGGATCTGGC  
AAGGGGTGAGCAGTATTTCCGATGCCTACCTGCAATTTATTACGGCATCGTTACGCGTATATTTGCTGCCACGTTGTGCG  
CGGCTAACGAAAAGCGGATATCACCCGGGAAGTGGTAAATCGCTGAAATTCGCTTACCGGCAGTGGCGGCGGCGAG  
TTTTACCGTCTGGCTGCTGCGTATTTGCTATCTGGCTGCTGTTGTGCAATAAATTTACCGCTATGCGCGATCTTTTG  
CCTGGCAGTTAGTGGGTGATGTGTTAAAAGTGGGCGCTTATGTCTTTGGTTATCTGGTATCGCAAAGCGTCACTGCGG  
TTTTATATTCTGGCGAAGTCAAGCAGTTCACTTTATTGATGGTATTTGCCACTGGCTAATCCCTGCGCATGGTGCCT  
GGGCGCGGCGCAGGCATATATGGCAACTATATCGTCTATTTTTCTTTGTTGTGGCGTGTTTTTACTCTGGCGTAGGC  
GGCATGACTGACTGATTACGTAAGTGGATCGGATATCCCTCACCATAACCGAACCGTTTTGCGGTTTTTCAATGACG  
CGCTGGCCGCGACGAGCGAGCACGCGCGGAGTTTTATGGTTGTTGGCAAGGACGACGGCTTAAAGTGATAGCTGTCCGGC  
CTTTCTGTGCAATTTTTCCCTGGGAAAAATCGCTGGCGGAAGCGGTATCGCGAAAAGCAAAAGCTAACCGTCAGCAGCG  
TTTTTTCTCCACGGTCAATCCACACTGTGGCTGGCTGCTGAGTGGTGGCATTAAAGCCAGCCAGTTTTTCT  
GGCATATCTGGGGGCGACCTGTATGAGCTTTCCAGTGGCTGAGATATAAGCTTTTTTACCCTACTGCTGCGCTGGCG  
CAAAAGCGAGTCGGCTGTGATTTGCCACCCGCGGCAATTTGAGCTTTTTTGC AAAACGCAACCAAGGTGCGGGGCGA  
ACTGCTGTTCTTCCGACGCGGATGGACCCTTCCGCTCAATACGATGGCGAACGATCGGCAACGTGAAGGGAAAATGACCA  
TTCTGGTGGGAACTCCGGCGACCGCAGCAATGAGCATATTGCTGCCTTGGCGCGGTTATCAGCAATTTGGCGATACG



GTAAAAGTGGTGGTGCCGATGGGATATCCGCTAATAACGAAGCGTACATTGAGGAAGTTCGTAGGCGGGGCTGGAGTT  
ATTCAGCGAAGAAAATCTACAAATTCTGAGCGAAAACTGGAATTTGACGCCTATCTGGCGCTACTTCGTAGTGCATC  
TTGGTTACTTTATTTTTGCCCGCCAGCAGGGCATTGGTACGCTGTGCTTACTGATTAGGCGGGCATTCTTGTGTGCTT  
AACCGGGAAAAATCCGTTCTGGCAGGATATGACGGAACAACATTTGCCGGTGTGTTTACTACCGACGATCTCAACGAGGA  
TATTGTGCGTGAAGCGCAGCGCCAGTTGGCGTCCGGTGGATAAAAAACACCATTGCCTTCTTACGCCCTAATCTACAAG  
GCTGGCAGCGGGCCTTGGCGATTGCCGCCAGGGAGTTCGCATGAGTCTGCTGCAATTAGTGGCCTGTTTGTGTCTGGC  
TGCTCTGCACGCTGTTTATTGCCACGCTGACCTGGTTTGGATTTCCGCGTGTGCGCTTAACTTCAATGTCTTCTTTCA  
TTGCTGTTTTTGTCTACCTTTTTCTTCGGCTTCCCGCTGACCAGCGTGTGGTATTTTCGCTTGTGTTGGTGTGCGGCC  
GCCAGAAATCTTGTGACGGCGTTGCTTCTGCGGGCTGCTTCTACGCGTTTACTATGTCACCTACAAAACCCGCCTAC  
GCAAACGCGTTGCTGATGTACCGCGCCGTCGCTGTTTACCATGAACCGCGTGGAGACCAATCTTACGTGGGTGATCCTG  
ATGGGTATCGCGCTGGTAAGCGTCGGCATCTTCTCATGCACAACGGCTTTTTGCTGTTCCGGCTTAACTCCTACAGTCA  
GATCTTTTCCAGTGAAGTCTCCGGCGTGGCGTAAACGCTTCTTTACTTTTTCATCCCGCGATGCTGGTGGTCTACT  
TTCTGCGCCAGACAGCAAAGCGTGGCTGTTTTCTCGTCAGCACGGTCGCCTTTGGCTTGTGACTTATATGATTGTC  
GGCGGACTCGCGCAATATCATCATCGCATTCCGTCATCTTCTGTTTATTGGCATTATTCGCGGCTGGATTTCTGTTG  
GATGCTGACCGCGGGCGGCTGCTGGGATTGTTGGCATGTTCTGGCTGGCACTAAAACGCTATGGAATGAATGTGAGCG  
GCGATGAAGCGTCTATACGTTTTCTATCTCACTCGCACACCTTCTCGCCGTGGGAGAATCTGGCGTGTGCTGTTGCG  
AACTACGACAACATCGACTTCCAGGGCTGGCTCCAATTGTCCGGATTCTATGTCTTATCCCTTCTGGCTGTGGCC  
GGTTCGCCCCGAGTATGGTGTGAACCTAGCCAACCTTTACCTGGGAAGTGTGAATAACCACTCCGGACTGGCGATCT  
CGCTACGCTTATAGGCTCACTGGTGGTGTGAGGGCGCGCTTGTTCATCCCGCTCGGGCGATCGTGGTGGTCTGATC  
ATCAAATGGTTCGACTGGCTGTATGAGCTGGCAACCGCGAGCCTAATCGCTATAAAGCTGCGATATTGCACAGTTTCTG  
CTTTGGGGCGATCTCAATATGATCGTGTGGCGGTGAAGGGCTGGATTGTTTGTCTCACGCGTGGTCTTTTTTATCG  
TGGTCTTCCGCGCATGTCTGATGATCGCAAACTGTTGACTGGCTTTTTGAAAGCGCCGGACTCATTATAAACGTACA  
AAATCATCGCTCCGACGCAGGTTGAAGGATAACAATGAATAACAACACCACGGCACCAACCTATACGCTGCGTGGCTTA  
CAGTTGATTGGTTGGCGTATATGAGCAGCCCTCGATTATCTGTTTGTGACGGCAGCTTAAAGCAGGAAACGCTGGT  
TGCCATTAATGCTGAAAAATGCTGACTATTGAAGATAACGCCGAGGTCAGGGAGTTAATTAACGCTGCCGAATTTAAAT  
ATGCGGATGGCATCAGCGTTGTACGTTACGTAAAAAGTACCCGAGGCGCAGGTTTCCCGCTTGGCGGTGCCGAT  
CTCTGGGAAGAGCTGATGGCGCGCAGGCAAAGAAGGACGCCGGTATTTCTGTGGCGGTAACCTGAAGTGTGGC  
GCAAACCTGAAGCTAACTGCGCAACCACTGGAATGTGAATATCGTTGGCAGTCAAGGATGGTATTTTTAAACCCGAGCAGC  
GTAGGCGCTGTTTGAACGCAATCATGCCAGCGGTGCGCAAATCGTCACCGTTGCGATGGGATCGCAAAGCAGGAGATC  
ATCATGCGCGACTGCCGTCTGGTACATCCAGATGCGCTGTATATGGGCGTTGGCGGGACTTACGATGTTTACCCGGTCA  
CGTAAAACGCGCACCGAAAACTGGCAAACGCTGGGGCTGGAGTGGCTTACCGCTGCTTTCGACGCCGAGCCGATTA  
AGCGTCAGCTTCGTTTGTGCGTATTTACGCTGGCACTACACCGCAACCTATGATTTTCTCTCTTTGTAAGCGCAGC  
GAGTGGTCACTCCGTCGCTGTCTGCTTTTTTATTACAAAGCATTCAAATTTTTAATGCTTATTTGCCATTTCTCCT  
GAATTACGAAAACATTTGCAACACTCGATGTACCCATAACGATAACCGGTAACACCGGAAAGCATGCAAACACAACCGA  
GGATTTATGGCAGATAACAAACCAGAGCTACAGCGTGGGCTGGAAGCTCGACATATCGAATCATCGCCCTGGGGGGCAC  
CATTGGCGTGGCCTGTTTATGGGGCCGCCAGTACCCTGAAATGGGCGGGCCATCCGATTTGTTGGCTATATCATCG  
CCGGCTGTTGCTTTTTTATCATGCGTTCAATGGGCGAAATGTTGTTCTCGAACCGGTTACCGGTTGTTTCCCGTT  
TATGGCATCGTTATATGAGCCGTTCTTTGGCTATCTACCGCTGGTCTTACTGGTTTATGTGGATGGCGGTGGGGAT  
CTCTGAAATACCCGCAATTTGGCGTTTATGTCCAGTCTGGTCCCGGAGATGGCGCAGTGGATAACCGCATTGATCGCAG  
TGGCGCTGGTGGCGTTGGCGAATCTGGCGCGGTGCGGTTGTACGGCGAAATCGAGTCTGGTTTCGCGATGATCAAAGTC  
ACCAGATTATCGTGATGATTGTCTATTGGCCTGGGCGTGAATTTCTTTGGCTTTGGCAATGGCGGGCAGTGGATGGTTT  
TAGCAATCTCACAGAGCATGGCGGTTTTCTTGGCGGTGGCTGGAAAGGGTCTGACCGCTCTGTGATTGTGGTGGCGT  
CTACCAGGGCGTGGAGCTGATTGGCATTACTGCCGGTGAAGCGAAGAATCCGCGAGGTGACGCTGCGCAGTGGCGTAGGC  
AAGGTGCTGTGGCGGATCCTGATTTTCTACGTAGGCGGATTTTCTGTTATCGTCACCATCTTCCCGTGAATGAAATAGG  
CAGCAACGGCAGCCGTTTCTACTGACTTTTTGCCAAATCGGTATTACCGCAGCGGGCGGATTAACCTTTGTGGTGC  
TGACGGCTGCGCTCTCTGGCTGTAACAGCGCATGTACAGTTGCGGACGTATGCTCTACGCACTGGCGAAAAACCGTCAG  
TTACCGGGCAATGGCGAAAGTTCCCGTACGGCGTACCGGTTGCGGGTGTGGCAGTATCTATTGCTATTCTGCTAAT  
TGGCTCATGCCTGAACCTACATATTCCCAATCCGACGCGTGTGTTTGTCTACGCTACAGTCCAGCGTCTTCCGGGA  
TGGTGCCATGGTTTGTGATATTGATAAGCCAGCTGCGTTTTCCGGTGCACATAAAGCGGGGATTGCCAGCCATCCGTT  
CGCTCAATCTGTTCCCGTGGGCAATTACGTAACAATGGCATTCTGATTTGCGTTTTGATCGGCATGTACTTTAATGA  
AGATACGCGTATGTCGCTGTTTGTGGCATCATCTTATGCTGGCGGTGACGGCGATTTATAAAGTTTTTGGCTTAAATC  
GCCACGGGAAAGCGCATAAACTGGAGGAATAAGCAGCAAAACGCACAAACCGTAACCAAACGCGCAATTTATTTAAAAAG  
GGACTAGACAGAGGGTGGGAAGTCCGATTATCCACCCCGCAACGGCGTAAGCGCCCGTAGCTCAGCTGGATAGAGC  
GCTGCCCTCCGGAGGCGAGGTTCTAGGTTCAATCTGTCCGGCGGCCATTTAGTCCCGCGCTTGGCTGCGGTGGT  
AGTAATACCGGTAACAAGATTTGTAGTGGTGGCTATAGCTCAGTTGGTAGAGCCCTGGATTGTGATTCCAGTTGTCGTG  
GGTTCGAATCCATTAGCCACCCATTATTAGAAGTTGTGACAATGCGAAGGTGGCGGAATTGGTAGACGCGCTAGCTT

AGGTGTTAGTGTCTTACGGACGTGGGGTTCAAGTCCCCCTCGACCACGACTTTAAAGAATTGAACTAAAAATTC  
AAAAAGCAGTATTTGGCGAGTAGCGCAGCTTGGTAGCGCAACTGGTTTGGGACCAGTGGGTCGGAGGTTCGAATCCTCT  
CTCGCCGACCAATTTTGAACCCCGCTTCGGCGGGGTTTTTTGTTTTCTGTGCATTTCTGCACCTCCCTTCGAATAAAC  
GCCCCGAATAACTCATTGCCCCACGGTATGATTTCCGCTTAACTGATTGAAGGATGACTTCAGGCAAGGAGCGACCATG  
CTGCAACAGGTTCCAACGCGTGTCTTTTATGTGATGCGGAAACCGAGCGGTTCCGATTGTAATCTGAACTGTGACTACTG  
TTTTTATCTCGAAAAACAATCCCTTTACCGCGAAAAAGCCAGTCACGCATATGGACGATGACACGCTGGAAGCGTATGTCC  
GTCACTATATCGCTGCCAGCGAACCGCAAAACGAAGTGGCTTTTACCTGGCAGGGCGGCGAACCAACGCTACTCGGGCTG  
GCGTTTTACCGCCGTGCCGTAGCGCTACAGGCGAAATATGGTGTGGCAGGAAGATAAGTAACAGCTTCCAGACTAACGG  
CGTGCTGCTGGATGACGAATGGTGCAGCTTTCTCGCGGAGCATATTTTCTTGTGGTTTTATCGCTGGATGGCCCGCTG  
AGATCCACAATCAATATCGCGTGACTAAAGGTGGCAGACCCACGCATAAGCTGGTGATGCGTGCCTGACGCTCCTGCAA  
AAACATCATGTGACTATAACGTGCTGGTCTGCGTTAATCGCACCAGCGCGCAGCAACCGTTGAGGTATATGATTTTTT  
GTGCGATGCGGGAGTCAATTATCCAGTTTATCCGGTGGTCGAGCGCCTGGCTGATGAAACAACGCCCCGCGATGGAC  
TTAAGTTACATGCGCCTGGTATATTCAGGGTGAAGTAAACGAATGGTGGTGGCGCCCCGAGGAGTTCGGTGAGTTTTCTG  
GTGGCGATATTCGACCCTGGATCAAACGCGACGTCGCGAAGATTTTCTGTGATGAATATCGAATGGGCGTTTTGCCAATTT  
TGTGCGTGCAGCGGTTGCCATCATCAGCAACCTGTGGCGCTCGGTGATTGTTGACACAACGGCGACTTT  
ACGCTGTGATCACTATGTTTTATCCGCAATATCGGCTGGGGAATATGCACCAGCAACAATTGCAGAAATGATCGATTCC  
CCGCAACAGCAGGCGTTTTGGTGAAGATAAATTTAAGCAGTTACCGCGCAGTGTGCGAGTTGTAACGTGTTAAAAGCGTG  
CTGGGGAGGCTGCCCCAAACACCGCTTATGCTCGATGCCAGCGGCAAAACCGGGACTGAATTTTGTGTGCCGGGTATC  
AGCGTTATTTCCGCCATCTACCGCATATCTTAAAGCAATGGCTGATTTGCTGGCGCACGGTCCGCCGGCCAGCGACATT  
ATGCATGCGCATTGCTGGTGGTGAGTAAAGTAGAAATCGCGCGCCGCTGCGTTGATTGCCGGATGCGCGTAAACGCC  
TTATCCGGCTACATGATCGTGCAAAATCAATAAATTCAGCGTTCTGTAGGCTGGATAAGATGCGTCAGCATCGCATCC  
GGCAAAGGCAGATCTCAGCGATAGCGCCGGCTTAGTCAGATTTAATCTGCGCGCGTGGTGGATATTTTTTTCAGGATCTCC  
ATATACGCGTGATTTGGTCTGTAGCGGTACACCCATCGGAATATGGCGCACGCCGATGGAGTGCCTTCTGCGGATC  
GGTGTAGAGGTTAAACACCGACGATCCCGCGTTTTGCATTACTGTCCGGTGAATCCACCCTGATATCCGCTCTGGGTAT  
AAGCGTAAGGTTGCTGAATCAGGACGTGATACTTGAACCTATCCATACGCACAGCAGCGAGTTTACCGTTGAGGAAGTAG  
TGCTCGGCCTTACGGTTAGACTGACCATTGTTCCAGGAAGAAGGATGTCTGGTCCACACCATCGATAAAGGTGGTTTT  
CGGCACTAAATTCGCCACTTTCGCTCCAGGATGCCCTGCCAGATCCAGCGCGTAGGGAAGAGATCTGCCAGATCGACAA  
TACCGTCAGATTTACCGGTTGGATCATCCCTTCCAGTAAACGAAAGTCCGTACGCGAACGCCGCTTCCAGGTCGAA  
CCTTTCGACCACGGAACGGGGTGGTCCGTCGCGCGTACTTCCGCTTCCGTTCCGTTATCGGAGGTAAGACGATCAG  
CGTGTATCAAGCTGACCGTTTTTCTCCAGTGTATATACAGATTAGCGAACACATCGTTATCTCCACCATGCAGTCCG  
CATACGAGGTGCGTGCCGGAGAGCTACCCGCATATTTGCAATTTGGGTAGTTATCGAAGTGGCAGCCACGAGTCCGCTAG  
TAGAGGAAGAATGGTTTTATCGCTCTTCCGCATCTTGTGCGAGGAACCTAACGCCATAGTCCATCCAGCGTTGATCCAGATC  
TTCCATATATTTGGCGTAATGTGCGCAATGGCCTGTTGTTCCGCCCGCGCACCCGATGAACGTCATCTTTGCTGAACG  
GTAATTGCTTGATGATTCAGAACGGTCCGGACTCAGGGCCACTTCCGGATTGACGTGAACGTCGCGCCATTCCGGTGTAC  
ATATCAGACACCGAGTTAAAGCCACGGAATCATCAAAGCCAACGTTCTGCGGCTGCGACTCTTTGTTTTCCCCATATG  
CCATTTCCGATGGCCTGAGTGACGTAGCCCTGATCGTGCAGCAACTGCGGCAGCGTGGTTAACCTTGCAGCCCCCG  
GTTGCCCGTACATTGGCGGCATCAGAATGCCGTGGTGGATGGAGTATTGTCCGGTGAGAATGGTGGCGCGGGTTGGGGAA  
GAGCTTGGTTGAGAATACGCCGAAGTTAAATCAGCCCTGGCTGGCAACCGGCTCGATATCTGGTGTAGGGTTACCCAC  
CGCCAGCCCCCACCGTTAAACCGACGTCATCCAGCCACATCTGTCAGCAAGAAAACAACCACATTCGGTTTTCTTAC  
CGTTTTTTTTCTCAAGTTCTGCCAGTCTGCTGGTTTTCTTATCCTGCGCCGGATGCTGATTACCGGCATCATATTTG  
TCGGCAATAGTGGTCGCGGTTTTAACAGATACTGGTTTTGGGTGATCGTATCCGGCAAAGCCTTTGCGTGCGGTGGCAGT  
TGACGGGTATCTGCTGCGCTGGCCATGAGAGGAAGAGCGGCGCGACAGCAACAACAAGACGTTTTGGGTGAAAACGAAA  
ATTCATGCAAAATGCTCCGGTTTTATGTCATCAAAATGATGACGTAATTAAGCATTGATAATTGAGATCCCTCTCCCTG  
ACAGGATGATTACATAAATAATAGTGACAAAAATAAATTTATTTATTTATCCAGAAAATGAATTGGAATAACAGGAGAGCG  
TTTTCAATCCTACCTCTGGCGCAGTTGATATGTAAGGCAGTTTTATTATATCGCGTTGATTATTGATGCTGTTTTTATGTT  
TTAACGGCAATTAATATATGTGTTAATTAATGAATGAATTTTATCATTATAAATAAGTATGTGTAGGATCAAGCTCAGGT  
TAAATATTCAGGAAGTTACTCAGGAAGCAAAGAGGATTACAGAATTATCTATAACAAGTGTAAAGGGATGTT  
ATTTCCGATTCTCTGTGGCATAATAACGAGTAGATGCTCATTCCATCTTATGTTGCGCTTAGTGCCTCATAAACTC  
CGAATGACGCAGAGCGTTTACGGTCTTATCGTCCACTGACAGATGTCGTTATGCCTCATCAGACACCATGGACACA  
ACGTTGAGTGAAGCACCCACTTGTGTCATACAGACCTGTTTTAACGCTGCTCCGTAATAAGAGCAGGCGTTTTTTTTAT  
GTATCAGGAAGGCCCCGGAGGTGCTTGCCTCCGGTGAGAAGGAAGTACTGTGGCGGGTATTCTGCAACGTTAACATCA  
AACCGTCGCGACGCATAGCTGCAGCTTCTCCGGCTTGTGCGAGTCTGTCAGCGCTCGGCAAGCCATGCGTAATCGTAG  
GCGTCCGGAGCTTGTTCAGCGCTGCGCGGAAGGCGAGCGATGCTTCCGCTTCCGTTCTCCGTTCTCATAGTACTGGCC  
CAGTGTGCTCCACAACAGCGGGCGATCGCCGACTTTTTATTGTTGCTGGCGCAGCACTTTTTCCAGCTGTTCCGGATTGT  
TTGTTTTCAGTCGAGGAATCGGCAGCAGTAGGCGATCGTCTACTGGCGTTTTCAGGCCATCGATGATAATTTGCTGGGCA  
GTATCATGATCGTCACATTAATAAGATGTTCCGCCATTGCCACCTGCAACGCTACCTGATGACGCGTTTTCCGGCTTTG

GTTTTCCACCAGTTACGCAAACCTTCGCTACCGTTATCGGCACGCGCTGATCCATCAGGCCAATCCATGCCTGTTGTT  
CCAGCATTGCACGATGTTCTTCATCACCAACATGGGCTTTCGCCATTGATGGGATAATATCCAGCAGCGAACTCCATGCA  
CCTGTGCGGATATACGCCTGTTCCGCCAGACGTAATACTTCCGGATGGCGTGGCGTAACTTCCAGCAGCTTATCCACGCC  
GTGGCGTGACGATGGTTTTATTACGGGCCAGTTGCAGACGTACGCGGGTATTTCTACCGGAATGGTGTGCTGGCCGG  
CCAGCTCCGCTGCGCGTTCAGATGTTGGTTGGCGCGTGTTCATCACCACGTTGTTGCGCGGCTTCGGCAGCCAGTAGA  
TAGTTACCACCGGTTGTTCCGCGTGATCGGCATTTTTCGCCATCAGTTTTCAACTTGCTGATAATCGCCTTCGCCAG  
TTTCAGCAGCGCTGTTCCGTTCTGCTTACGTGCACGGCGACGCTTACGTCCGACAAACCACCCACGGGTGTGCGCGCCAG  
TGCGGAAGATCCGCCGAGTAGCCACTCAATGGCAAACAGCACTACCATCGCCAGAATCAATATGATCGCCAGGCCCGTG  
ACGCTGTTTTCGATATTGTAGTTGTGCGTCTGGATCAGCACATAACCCTGATGGCCGGCAATCATCGGGCCAACCACGAT  
CCCCGCAATCAGCAACACAAAGAGCAATAACACTTTTAGCATGTTATTCTCTTGGCGCGCGGTGCCGGAGTATCAGC  
TTGCGGTGCAGGTGCAGTTTAGCTTCCGTTGTCCCGCTGCCGTTGTGCCAGCAGGTTACGCACGCGAGTCTGCATCA  
GTTTTCCAGCATCGCCTGGCTTTCAGGGTTTCCGGAAGATCCATCGAGATATTTTGTGGCTTAACTGGTCCACCTCG  
TCGAGGAACGCTTTGGTGGTGGCATCATCAGTATCGTAGTAAGCACGTACCCAGGTGGAGACGTTCTCCAGCGCCTGGCG  
ATAAGTCTCTTCTGGTACGCGGTACAGCTTGTGTGCGACCAGCAGGCGAGAGCGAATATTTTCCGCGAGATAGATAT  
CCTGATTTGGCGCTAACAGCGGTACGGCGGTGTATCAGCAGCGCAATCGTAATGAAGTTGTCCATAAAGTTCTGCCAG  
CTTTTTGCGATTGATACGCCATTCGCTGATGGAAGTGGAAAGCTTTACCCTGAATCCATCGCGCAACCACCTCGCT  
GTATTATCGGCCAGACGCGATTATCTACCTGATTTGAAAGCTGATTAAGCTTAAAGGATGATGCCGTATAATCCACCT  
GCGATACTGCAGAAAGGCTGGCGATATCATCGGTAATTGCCGACGAACGGTAATCAGACTCGGGTATTTCATATCCGCC  
AGGCTGGCGTCTGCACTTTTCAGCAACGCTGCAGCGGTCTGACGTCCTGATCGCTCCACAGCTTCCGTCGGCGAGTTT  
CACCAGAAAATCGGCCTGAGCCAGCAGCCAGTTTTAGCATCGCTGCCGAAAATGGTGGCGACCTTTTGTGGACTTCAT  
CCAATGTTTTGCGAGGTTTCTTGTGACGATTCCGCTGCTTAAAGTTGTGACGCTTGTGCTTAAATAATGCCTTCAGC  
TCGGCTTTTTGGCTCTCCTGGGCTTTTTGCAATGCCGTGAGTTGGTTAGCCAGGGCATCGTGGTGGCGGTCTGATTGAC  
GGCTGTTGTTTACCCAGCATAACAACCGATGCCCGCGCCAGAGCAATAGCGATAGCCACCGCGCTGAGAATCAATG  
CGGTATTGTTCTACTCTTTTTTCTGTTGCGACAGTTGTGACGTGGTGTCCACGGCCTCCCTGGTCTTTCAACCAG  
GCGGAGTTTTTTCTTGTCCGTCATTATGGCTTCTGTTATGAGAGTTATTGTAATGCCCGTAAAAGCGCATCGTTGTC  
AGCGTTATCGCGACCTTAATGTCTTGCAGCCAGTCCCGGGCAGTTTCCGCAAACGCTCACTGACGACCAATAGTC  
GACAGTGTAGTAACCAGTGCTCACGATACCATTGGGATCAGCGACCAGAGTTGCTGCAACATTTACCCTGGTAACA  
ACGACCATCGTCACTCGCGGGCTTCCAGCGCATCGCTTCTTGCACCATCGTAATGGATTGCGCATCGTTGATAACA  
TTCACAAAAGTGACCTCAGCACCGCGCCGTCAGGGTATCCCAATTAGCTCACGACCACCTGCCAGTAATATCA  
GCGCACGTTTCCCGCAATATTTGTAATTCAGGTAATTGTAGCAAGACTTCGCTGATTTCCCGATCCTCGCGGTAGAGA  
ATCTTCTGTCCACTTACGGTATGTAGTGCCAGTGCGGTGGTGCCTCAATGGCGAAAATAATCAGGTAGTCGGGGCCATTT  
ACGATCTTGCTGATGCAGCTGTGATTGGGCAAAGCAACCGCGTGTTCGAGAGGGCAAACAACAGATCGCTCTCCCCA  
GGCTGCCAGTTGATCAGCAAGTTGCGGTAATTGTTGACCCGGAGAAAATCAATCAGCGGAAAATGCCAGGCCACCTGC  
CCAGTGTGCGCAGACGGCTCACTAATCTTCTCCAGCGGGAGACGGGCGGTGACAAGGATACTCATGCCGGGGCGTCT  
CGTTATAGACTTCAGCGAGGATCTCGCGCGCGCTTATTAGTAGCTCTTCTGCCAGCGAAATCCCCATTTGTTCCGC  
ATCTTGGCGGCACCGCGCGTTCACCGCAATAATCTGCAACCGTCCGGCGCGCGACCAGCGCACGACGAGATT  
CGCCATCAATAAGCTCGCGTAGCTACCAATTGGCACCTGACATCCGCTTCGAGACGGTATTATGGCGGTTCTGCG  
GTAACGCGCAGTGAGTTTCTGTTGATTGAGCGCGCAAGCAGCTCGCGAGTGCCTGAATCATCAAGGCGGCAATCAAT  
ACCCACCGCCTTGTCTACCGCCGGAAGAGAAATCTCGGTGGCAACGCGCGCGAATACGTGACTCCAGACCTAAAC  
GTTTTAGTCCGGCTACGGCAAGAATGATGGCATCGTATTCGCCCTTATCCAGTTTGTCTCAGCGAGTCCCGACGTTGCCG  
CGCAGGGAGCGGATAATCAGATCCGGACGGCGTTCAGCCAGTTGGCACTGGCGACGTAACCTGGACGTCAGGATACT  
GCCTGCCGGAACGCATCCAGACTGTATAGTTATTGGACACAAAGGCATCGCGAGGATTTACGCTCACAAATAGTGA  
CCAGTCCAGACCTTGGCGGAATCAACCGGCACATCTTTCATTGAGTGACGGCGATATCGCGCGATTTTCGAGGAGC  
GCGACTTCCAGCTTTTTACAAATAAGCCTTTTCCGCTACTTTCGCCAGCGCGTATCAAGAATCACATCGCGCGCGT  
CACCATCGGTACCAGTTCAACGACCAGGCCCGGATGGCTGCCATCAACTTGTCTTGGACATAGTGTGCTGCCAGAGTG  
CAAGTGGGCTTTGGCGTGTGGCAATCTTAAACATTGTCTAACATGCTTGTACCCTATTATCATCCGTGGTCCATCC  
TAACATCTTGCAGAGTGTGTCAGTGTGTTGGTGAACGTAGACGCTGCGCAAACCGTAAAATGAGGTCTGGCAGTG  
GATCCTGACAGGCTTTCACGCCGTTGTAATAAGGAATTTACAGAGAATAAACGGTGTACTACTTGTATGTAGCGCATCT  
TTCTTACGGTCAATCAGCAAGGTGTTAAATTGATCAGTTTTAGACATTTTTTCTGCTGTAACAAAAAACAGGC  
GCGAAAAGTGGTAACGGTACCTTTGACATACGAAATATCCGAATGCCGCGTGTACCCTGATGTTGGCGGAATCACA  
GTCATGACGGGTAGCAAATCAGCGATACGCTTGTACCTCTATATTGAGACTCTGAAACAGAGACTGGATGCCATAAAT  
CAATTGCGTGTGGATCGCGCGTGTGCTGATGGGGCTGCATTCACAGGTCTACAGTCTACTGCCGACATTGTTGCA  
CTATCACCATCCGTAATGCCGGGTTACCTTGTGTTAACGTTCCAAAGGCATTTGCCTTACACGCGCTGATGAAACTC  
AACGCCACTACCTGAACGAGCTTGAACGTATCGTGGAAATGTCAGTACAGGATCCGCCGAAAGGTGAGCTTCCAATTACT  
GGTGATACACCATGGGCAGCACCTCGTCCGTAGGGCAAAGTTGTTCTCTGACCTGGATATCTGGGTCTGTCAATC  
CTGGCTCGATAGCGAAGAGCGCAATTGCTACAACGTAATGTAGCCTGCTGAAAACCTGGCCGCTCGCTGGGTGTGG

AAGTCAGCTTCTTCTGATTGATGAAAACCGCTTCCGTCATAATGAAAGCGGCAGCCTGGGGGGCGAAGATTGTGGCTCC  
ACCCAGCATATACTGCTGCTTACGAATTTTATCGTACCGCGTGCCTCGCCGGTAAGCGTATTCTGTGGAATATGGT  
GCCGTGCGACGAAGAAGAGCATTACGACGACTATGTGATGACGCTTTACGCGCAGGGCGTGTGACGCCAAATGAATGGC  
TGGATCTCGGTGGCTTAAGCTCGCTTTCTGCTGAAGAGTACTTTGGTGCCAGCCTTTGGCAGCTCTACAAGAGTATCGAT  
TCCCATACAAAGCGGTACTGAAAACACTGCTGCTGGAAGCCTATTCTGGGAATACCCGAACCCACGCTGCTGGCGAA  
AGATATCAAACAGCGTTTGACGACGCGGAGATTGTATCGTTTGGTCTCGATCCATACTGCATGATGCTGGAGCGTGTTA  
CTGAATACCTGACGGCGATTGAAGATTTTACCCGCTGAGATTTAGTACGTCGCTGCTTCTATTTAAAAGTGTGCGAAAAG  
CTCAGCCGTGAACGCGCCTGCGTAGGCTGGCGTCGCGCAGTGTGAGCCAGTTAGTGAGCGAGTGGGGTTGGGACGAAGC  
TCGTCTGGCAATGCTCGATAAACCGCGTAACTGGAAGATTGATCAGGTGCGTGAGGGCGACAACGAGTTGCTCGACGCGA  
TGATGCAGAGCTACCGTAATCTGATCCGCTTTGCGCGTCGCAATAACCTTAGCGTCTCCGCCAGTCCGACAGGATATCGGC  
GTGCTGACGCGTAAGCTGTATGCCGCTTTGAAGCATTACCAGGTAAGTGACGCTGGTAAACCCGCAGATTTACCCCGA  
TCTCTCGGAACCGAATCTGACCTTTATTTATGTGCCGCGGGCCGGGCTAACCGTTCAGGTTGGTATCTGTATAACCGCG  
CGCAAATATTGAGTCGATCATCAGCCATCAGCCGCTGGAATATAACCGTACCTGAATAAACTGGTGGCGTGGGCATGG  
TTTAAACGGCCTGCTGACCTCGCGCACCCGTTTGTATATTAAGGTAACGGCATTGTGATTTGCCTAAGTTGCAGGAGAT  
GGTCGCCGACGTTGCGACCAATTTCCGCTGCGCTTACCTGCACCGACCCGAAGGCGCTACAGCCCGTGTGAGATCC  
GCCATCTGGCGATTATCGTTAACCTGGAATATGACCCGACGCGCGTTCGCAATCAGGTGGTGCATTTTCGATTTCCGT  
AAGCTGGATGCTTTCAGCTTTGGCGAGAATCAAAATTCCTGGTAGGTAGCGTTGACCTGCTGACCCGAACTCGTGGAA  
CGAAGTGCGTACGCTGCACTTCAACGCGGAGCAATCGATGATCGAAGCCCTGAAAATATTCTCGGAAAATGCATCAGG  
ACGCCGACCCGACAGATAGCGTGAAGTCTTCTGTTATAGCCAGCATCTGCGCGGCTTAATTCGTACTCGCGTGACGAA  
CTGGTTTCTGAGTGATTGAATTGCGTCTTCCAGCACCCGCGAGAAACCGGGCGTTCGAGGCGTGCAGGTTTCTGG  
TCAAACCTGGGGGTTGTTCTTCAACGCTGAATGTATCGGTACAGAACTGAAAACGCCATCGAGTTTATGGCGCGA  
TTTCGATAACAACTGCACGGCTGTGAGTGCAGGTTGAAACCAATCACGTCAAATTACCGCGGTTGGTGGACGGCTTT  
GCCAGCGAAGGATCATCCAGTTCTTTTTCAAGAAACGCAAGACGAGAATGGCTTTAATATCTACATTTCTGACGAAAG  
CAACCGGGTTGAGGTATATCACCCTGCGAAGGCGAGAAAGAGGAGCTGGTACGTGACGTGAGTCTACTCGTCAT  
CGCATGACCGTTTTACCTACGGCTCAAGCTTCACTCACTTCACTGCGCAGTTCTATCAGATTGTGAAGTTGATGGT  
CGTGAACAGGTGATTCCGTTCCGCACAAAATCTATCGGTAACATGCCGCTGCCAATCAGGATCACGATACGCCGCTATT  
ACAGCAATATTTTTCTGATGAACGTGCCGAAAGCGAGGCTTATCCGGCATGCAATCTTAGCGGAACTGACTGTTTCA  
CCCGCTGCTGCGTGCAGCGCTGTTCCAGCAAATCCAGAAGTTTCCGCGCTGCGATCACAATCCACTCATCGCCTTT  
CAGGTCAAATGGTAGCCGCTGTTTGGTTGCCAGCCATACCTGGTGCAGCGCTCCTGGCGGTTGATAATGATTTTGC  
TGCCATTCTCAAAGGTAATGGTCAGTACGCCCGCTGATTTGCGAGTCGATATCGCTGTGCGCATCCACGTCGTCAGG  
CGTCTTCAATGGTCAGCCAGAGTTGATCAGCCAGGCGATGAAATTCAGTGTGCTTATTGTTGTATCCTGTTTTAAGT  
GATGGCGGCGATATAGCGGCATGGGGTCAGGGCTTCAAAGTTTGCACCTCTGCGGCTGCGTTCGCGCACGATTATCCGT  
CACCGGAATAATGATGCTCTGTGTAGCGAAAGATTTGCTCTTATTAGGGCGCAGTTACACCACGCTTTCCCTGTTT  
CTGGTAAACATTATGATCAGGTTTACCAGGCGAGCATCCTCACGCTGACGGAATAAAAAAGACAACAACAAACCACAT  
TGCGATAGTGCATAAAGCCATCCTGGCGCGAGGTGCCGATCACGAACTACCAGCAAACATAAATCCCCACGAGTAAGC  
GTTATACTCGCAGCATTTCTCACTTTTCACTTTCATAAAGAGTCGCTAAACGCTTGTCTTTACGCTTCTCCTGCGAT  
GATAGAAAGCAGAAAGCGATGAACTTTACAGGCAATCCATAATGAAAACGTTTAAAGGCACTCACTGTATTACTTACT  
CTCTTACGCTGACGGGCTGCGGTCTGAAAGGTCCGCTCTATTTCCGCTGCAGATAAAAACGCACCCGCGCGGACCAA  
ACCGGTAGAGACGCAAACGCAATCCACGGTGCCGATAAAAACGATCGCGCACTGGCGATGGTCCATCCAGGTGAATT  
ACTAAAAGTCAGTTTCTGATCCCGCTGATTGGAGTAAATGATGACGTTCTGAAAATGCATGGCCTTGGCAACGATTTT  
ATGGTCTGCGACGCGGTAACGCAAGATGCTTTTTTCCACCGAGCTGATTCTGCGCCTGGCTGATCGGCACCTGGGGT  
AGGGTTTGACCAACTGCTGGTGGTTGAGCCGCGTATGATCCTGAACTGGATTTTCACTATCGCATTTTCAATGCTGATG  
GCAGTGAAGTGGCGCAGTGCAGCAACGGTGCAGCGCTGCTTTGCCGTTTTGTGCGTCTGAAAGGACTGACCAATAAGCGT  
GATATCCGCGTCAGCACCGCAACGGCGGATGTTTCTGACCGTCACCGATGATGATCTGGTCCGCGTAAATATGGCGCA  
ACCAACTTCAACCTTCCGCGTGCCTTTGCGCTAACAAAGCGGAAAGACCTATATTATGCGCGCCGCGAGCAGA  
CAATCTTATGCGGCGTGGTGTGATGGGAAATCCGATTGCGTATTGAGTGCATGATGTCGATAACCGCGCGGTAGAA  
ACGCTTGGTCTGTTCTGAAAAGCCACGAGCCTTTCCGAGCGCGCAATATCGGTTTTATGCAAGTGGTTAAGCGCGA  
GCATATTGTTTTACGCTTTATGAGCGTGGGGCAGGAGAAACCCAGGCTGCGGCAGCGCGCGTGTGCGGCGGTTGAG  
TAGGGATTAGCAAGTTTCTGGCCGAAGAAGTACGCTGGAACCTCCCGCGGTCGCTTATGATATCGCTGGAAGGT  
CCGGTCAACCTTATATGACTGGCCGCGGTTACATGTCTACGACGGATTTATTATCTATGAAGCAACAGGGGAA  
GAACTGCAGGAAACACTCACGGAGCTTATGACCGGCGGTTGTCGATTATCTGATTAATAATCCTGAGTTTTTTATCCG  
TAATGCGCGCGCAGTAGAAGCGATACGTGTCCGATCCGGTACGCGCACCGTTTCGTTGGTGCAGTGGCAGATGGCCC  
GCGCACGTAATCATATTCATGTTCTGGAAGAGAATCGGCGCTGTTGATGGAACAGGCTATCGCAACGAAGGCTGTTT  
TATCGCTACTTACTGACGCGCAGTCTACCGCCGCCAGCAGTCTCGACGATATGCTGATGCGCTTTACCGCTGGGC  
GCGCGATCTCGCCTGGCAGGTGCGAGTCTGCGCCTGTTTCCGATCGCTGGCGCTTAGGTGCGCGCTCGAACCACTC  
ATCTGGCATTAAAGCGTCAGTCTTTGAAACCGCTGCGTATTACGCGTTTGGGGCAGGAACAGCACTATCTTGGCCGCTT

AACGGACCAGAGCTGCTGGTGGTGTACCGGAAGCGAAAGCGGTGGGATCGGTGGCGATGTCGATGCTGGGAAGCGATGC  
TGATTTGGGTGTCGTGCTGTTTACCAGTCGCGATGCCAGTCACTATCAACAAGGGCAAGGAACGCAGTTACTTCATGAAA  
TTGCGCTGATGTTGCCGGAGCTTCTGGAGCGTTGGATTGAACCGGTATGACCGATTTACACACCGATGTAGAACGCTACC  
TACGTTATCTGAGCGTGGAGCGCCAGCTTAGCCCGATAAACCTGCTTAACTACCAGCGTCAGCTTGAGGGCATCATCAAT  
TTTGCCAGCGAAAACGGCCTGCAAAGCTGGCAGCAATGTGATGTGACGATGGTGCGCAATTTTGTGTACGACGTCGCCG  
TAAAGGGCTGGGAGCAGCAAGTCTGGCGTTACGGCTTTCTGCGCTACGTAGCTTTTTGACTGGCTGGTCAGCCAGAACG  
AACTCAAAGCTAACCCGGCGAAAGGTGTTTCGGCACCGAAAGCGCCGCTCATCTGCCGAAAAACATCGACGTCGACGAT  
ATGAATCGGCTGCTGGATATTGATATCAATGATCCCTCGCTGTACGCGACCGTGCAATGTGGAAGTGTGTACGGCGC  
GGGTCTGCGTCTTTCTGAGCTGGTGGGGCTGGATATTAACACCTCGACCTGGAGTCTGGTGAAGTGTGGGTTATGGGGA  
AAGGCAGCAAAGAGCGCCGCTGCCGATTGGTCGCAACGCTGTGGCGTGGATTGAGCACTGGCTTGATTTGCGCGACCTG  
TTTGGTAGCGAAGACGACGCGCTTTTTCTGTGAACTGGGCAAGCGTATCTCCGCGGTAATGTGCAGAAACGCTTTGC  
CGAATGGGGCATAAAACAAGGGCTGAATAATCACGTTTATCCGCATAAATTACGTACTCGTTGCCACGCATATGCTGG  
AGTCGAGCGCGATCTTCGTGGTGTGCAGGAGCTGTGGGTATGCCAACCTTCCACCACGCAAATCTATACTCATCTT  
GATTTTCAACACCTTGCCCTCGGTGTACGATGCGGCGCATCCACGCGCAAACGGGGAAATAATGCGTTTTTACCGGCT  
TTGGGGCGCATCTCGGCGCTCACCTTGACCTGGATGATACCTTTACGATAACCGTCCGGTGATTTTGGCAGCCGCG  
AGAGCGCTTACCTTTGTGCAAAATTATCATCCGGCGCTGCGCAGCTTCCAGAATGAAGATCTGCAACGCTGCCAGG  
CGGTACGGGAAGCGGAACCCGAGATTTATCACGACGTGACGCGCTGGCGTTTTCTGTTGATTGAACAAGCGATGCTCGAC  
GCCGGGCTGAGTGCCGAAGAACGAGTGCAGGCGCACGCAAGTATCAACTTTGCCAAATGGCGCAGCCGAATCGA  
CGTCCCGCAGCAAACCTCACGACCTTAAAAAGCTGGCGAAGAAATGGCCGCTGGTGGCGATCACCACGGTAACGCC  
AGCCGGAGCTGTTTGGTTTGGGGGATTATTTGAGTTTGTGCTGCGCGCTGGCCCGCACGGGCGCTCAAAACGTTCCAGC  
GATATGACTTTTTGGCTGCGGAAAACTCAACGTGCCGATCGCGGAGATCTTACATGTTGGGGACGATCTCACCCTGA  
CGTGGGTGGGGCAATTCGACGCGGAATGCAGGCTTGTGGATCAGACCGGAAAATGGCGATCTGATGCAAACCTGGGACA  
GCCGTTTACTGCCGATCTGAAATTTCCCGTTGGCATCTGTACCTCGCTGATATAATCAGCAAATCTGTATATATAC  
CCAGCTTTTTGGCGGAGGGCGTTGCGCTTCTCCGCCAACCTATTTTACGCGGCGGTGCCAATGGACGTTTCTTACCTG  
CTCGACAGCCTAATGACAAACAGCGCGAAGCGGTGCCGCGCCACGACGCAACCTTCTGGTGTGGCGGGCGGGGCG  
TGGTAAGACCGCGTACTGGTGCATCGTATCGCTGGTGGTGTGAGCGTGGAAAATGCTCGCCATACTCGATTATGGCGG  
TGACGTTTACCAACAAAGCGCGGGGAGATGCGTATCGTATCGGCAACTGATGGGCACGAGCCAGGGCGGTATGTGG  
GTCGGCACCTTCCACGGGCTGGCGCACCGTTTGTGCTGCGCACCATATGGACGCAATCTGCCGAGGATTTCCAGAT  
CCTCGACAGTGAAGACCAGTACGCTTAAAGCGTCTGATCAAAGCCATGAACCTCGACGAGAAGCAGTGGCCGCCCGC  
GGCAGGCAATGTGGTACATCAACAGCCAGAAAGATGAAGGCCTGCGTCCGCATCATATTCAAAGCTACGGTAATCCGGTG  
GAGCAGACCTGGCAGAAGGTGTATCAGGCGTATCAGGAAGCGTGTGACCGCGGGGCTGGTGGACTTCGCCGAGCTGCT  
GCTGCGCGCTCACGAGTTGTGGCTTAAACAAGCCGATATCTGCAACACTACCAGCAACGTTTTACCAATATCTGGTGG  
ACGAATTCAGGATACCAACAACATTCAGTACGCGTGGATCCGCTGCTGGCGGGGACACCGGCAAAGTGTATCGTC  
GGTGTGACGACCAAGTCAATCTACGGCTGGCGGGGGCGCAGGTGGAGAATATTACGCGTTTCTTAATGATTTCCCGG  
TGCCGAAACTATTCGTCTGGAGCAAACCTACCGCTTACCAGCAATATTCTGAGCGCCGCTAACGCCCTGATTGAAAACA  
ATAACGGGCGTCTGGGTAAAAACTGTGGACCGATGGCGCGGACGGTGGAGCCTATTTCCCTTATTGCGCTTTTAAACGAA  
CTCGATGAAGCGGTTTTGTGGTTAACCGCATCAAACTGGCAGGACAACGGCGGAGCGCTTCCGAGTGCGCCATTCT  
CTACCGCAGCAACGCCAGTCGCGGGTGTGCAAGAGGCGTTATTGCAAGCCAGTATGCCGTACCGTATTACGGCGGGGA  
TGCGCTTCTTGAACGCCAGGAAATCAAAGATGCGTCTCGTATCTGCGCTGATTGCCAACCGCAACGACGACGCGGCC  
TTTGAGCGTGTGGTGAATACGCCAACCGGGGTTATTGGTACCGGACGCTGGACGTGGTACGTGAGCATCGCGCATCG  
CCAGTTAACACTCTGGCAGGCATGTCGTGAGCTGTTGCAAGAAAAAGCCCTCGCCGGGCGAGCTGCCAGCGCCTTGCAGC  
GATTTATGGAATTAATCGACGCTTAGCGCAGGAAAAGTGCAGTATGCGCGTGCATGTACAGACTGACCGGGTAATTTAAA  
GACTCCGGCCTGCGTACCATGTATGAGCAGGAGAAGGGCGAAAAAGGTGACAGCGGTATCGAAAACTTAGAGGAACTGGT  
GACGGCAACCGCCAGTTACGTACAACGAAGAAGCAAGATTTAATGCCGCTGCAGGCGTTCTCTCCCATGCGGCAC  
TGGAAGCAGGTGAAGGGCAGGCGGATACCTGGCAGGATGCGGTGACGTTGATGACGCTACACTCGCGGAAAGGCTGGAG  
TTCCCGCAGGTGTTTATCGTTGGTATGGAAGAGGGCATGTTCCCAAGCCAGATGTCGCTGGATGAAGGGGGGCGTCTGGA  
AGAAGAACGCCGCTGCGCTACGTTGGCGTAACCCGCGGATGCAGAACTGACGCTGACCTACGCGGAAACCCGCCGTC  
TGTATGGTAAAGAGGTTTACCATCGCCCGTGCCTTTATCGCGAGCTGCCGGAAGAGTGTGTGGAAGAGGTGCGCCTG  
CGCGCCACGGTAAGCCGCCCGTCCAGCATCAGCGGATGGGTACGCCGATGGTGCAGAACGACAGCGGCTACAAGCTCGG  
CCAGCGGTACGCCACGTAAGTTTGGTGAAGGCACCATTTCAATATGGAAGGCAGCGGTGAGCATAGCCGTTTGCAGG  
TGGCATTTCAGGGCCAGGTATTAATGGCTGGTGGCGCATACGCCGGCTGGAGTGGTGAACGTTGCCGGATGCGG  
TGCTGCGCACCTATTTGGCTAAAAAATCATTAGATTCAATAAATTGCAACGTCATGTAGCCGGATAGGGCGTTTAC  
GCCGCATCCGGCATCTGCGCATCTTCAAGTATCTGACACAAAATATCGTTTTAACCTTCCGCTCGACGAAATCATGG  
TGACAAAAGGATAGCGTTGCCACGGGATTGCCCGCCTTTTATATACATATGTGAAATCGTGCATCAAGATAAAGCAGC  
TGCTCAACGTTTCAAGTTTGGCTTTGGCATAACAGGCAAAATCATAAAAATTTGTTGCCTGCTGGCTCAACAAAAACCGC  
GTTCCCATGTTTATTAATCCCAACACCGTTACGAATTTTGTGAGGCGACGTTGGGATGAATACGCGGATTAATTACAC

CGTTTTCCATCAACATTGGCCCTGACTGCACCGCAAACCTGAATCTCTTTACTGGTTTTGAAGGCATCCAGACGAACGATG  
CCGACTTTATCTCCCGGACATAAAAACACGCCGCCAGGACGGATAAAGAAATCCCTTCACCTGAAGCGAGATTTAACGC  
CACCTTCTGCTGACCGTTTTCGATGTACAAACCGAGCGGCATAGCTTTCATCATAGATGCCGCCGTTATCGCCATCT  
GCACCTGACCTGACTATTAATATCCGCCAGCAGAGCATGTAACGTTCCCCACGCTTCGCCATTGGCTTTTTGCCAGTAC  
ATTTTCACCCGCTCTGTTTGAGGATTAACGGTATACGCTGTACGGTCAGCGTCGGATCTGAGAGTGGCAGATCATCAGC  
GGCAACAGCAAACAAGGGAAGTAAGGTGAGGGCGAGAAAAATCCGTTTGAGATTCAAGGTGATCATTCTTTACCAATGA  
GTAGCTGATGCGCCATTATAGGTCCTGGATGTGGGATTTTTTATCCTGTTAGCGACCTTGACGAGTACCAAAAAGCGCG  
AAGTTCAACTATTGTTCTGTGGTGTCTGTTGCGTGTGACGGCAAAAATTTGCTGGCGTAACATGCGCGCACGATCACT  
CTAAGAGGACATTCGCTTGACACACCCAGTAGATACTGGCTCACTATCCTGTATCCAGGATCAACTCCTAAGGCTAT  
CCTTTTTGTGATAGCCTTAGCGGTTGTGACGACCTCAATTTTTCCCGTCGCGCTGAGTCAGGCTGTTAATGGTCTG  
AAACCAATTTGTTTCTGTGTGCCACCGAAGTGTCCGATATTTAAGCATTGGGAGTCCCGGTATGCTGAGCGCATT  
CAACTGGAAAATAACCGACTGACCCGGCTGGAAGTCGAAGAGTCACAACCCCTGTAATGCAGTATGGATTGATCTTGT  
CGAACCGGACGACGACGAGCAGTGCAGTACAATCGAATTGGCCAGAGCCTGGCAACCCGCGGAACTGGAAGACA  
TCGAAGCATCGGCAGTTCCTTTGAAGACGACGACGGCCTGCATATTCACCTCTTCTTCTTTGAAGATGCGGAAGAT  
CACGCCGGTAACCTCCACTGTGGCATTACCATCCGTATGGTGTCTGTTTACTCTGCGTGAGCGTGAACCTGCCCCGCTT  
TCGTCTGTATCGTATGCGTGCCCGTAGCCAGTCGATGGTAGACGGTAACGCCTACGAGTTGCTGCTGGATCTGTTGAAA  
CCAAAATCGAACAGTTGGCAGATGAAATTTGAAAATATCTATAGCGACCTGGAGCAGTTGAGCCGGGTGATTATGGAAGGG  
CATCAGGGCGATGAGTACGACGAGGCGCTCTCCACTCTGGCGAACTGGAAGATATCGGCTGGAAAAGTTCGCTGTGTCT  
GATGGATACCCAGCGCGCTCAACTTCTGGTGCCTAAAGCGCTTTACCGGGTGGGCAACTGGAGCAGGCGCGTGAAA  
TCCTGCGAGATATCGAATCCCTGCTGCCGATAACGAATCCCTGTTCCAGAAGGTGAACCTCCTGATGCAGGCGGCAATG  
GGTTTTATCAACATCGAGCAGAACCGCATCATAAAATCTTCTCGGTGGTATCCGTGGTATTCCTGCCGCCGACGCTCGT  
TGCTTCCAGCTATGGCATGAACTTTGAGTTTATGCCAGAACTGAAGTGGAGCTTCGGCTACCCTGGCGGATTATCTTTA  
TGATCCTCGCGGGCTGGCACCGTATCTGTACTTTAAGCGGAAGAACTGGTTGTAAAAACGAGAGCGGTGGCTTAGTCT  
GGCTAAGCCACCTGTTATCAAAGGCTCCAGGTATTTAACCTTTTACCTCTTCTCATAGAACCATTTGTCGTGTTAA  
CAGCAACATAGGCTGCTACGGCAATCCAGAATGTTAACGCCAATTAGTGCACCAACAAATAGAGATAGAATACCAAGT  
AATAGAACTATAATTGCTTTTTTCCATAACCCAGGACAAATAAATATATCCAGGAACAGAAGAAAGCAATGAAATTCAT  
TTGAATAGTTAAGCGTTGCTTACTTTAATGCTTTAATGCTGCTTTATATTTCTGGTGTGCCCCCAGAATCCAGGAA  
AACCATGTTGATCATAAAAATTAATCGGTATTTCCATTTTTCACTTAATGAACCATCGTTCATATATTCCTTACTCATA  
AATACTCCATAACTATTGTTTTGATGAATCAGTAGGTGCAAGCATTAGCATACTGAAAAGTGGAAAAATAACAAATCAAAA  
AAATCATCGAACCAATTGCCTGAACAGGCAAAAATCTTCGGCTATCATTGTGATGATAGAGATGATATATACTGCTAATGTA  
CCAAAAACATAAGTTTTATATAGATGAAACCACTATCACGGAGTCGCTGGCAATTCATGTTGATGACGAGATAATGGAG  
TACGATGGTAGAGACTATAACAAGAAAGCCTGCTTCCATCGTTAAAAAAGATAATAAGAAAGGCAAAAATGAAATTTA  
TTAAAATAAATGAAAATATAAAGCAGCTCTGGAATCTTACCCTTAGATGTTGGGATAAATATACGTAACATAAATTTT  
ACATCCTTGTATGAGTCTCCGGTCAGCATGGCAATATGCCACTCTCATGCAAGAGTCGGCATATTTTTTTCAGAATATAT  
TTATTTTTTATTTGGACGTTCTACGCTGCGTATAAATCGCATCCATCACAAAAATTGCCAGCGCCACCCAAATAAAGGCG  
AAAGTACCATCTTATCGGCACCCGGTTTTTACCATAAAACGTCACAGCCAGCAGGAACATCAGCGTCGGGCAATGTA  
CTGAAAAAGCCTAACGTTGAGAGACGCAAGCGCTGGCAGCGCGGTAAAACACAACAGCGGTACGGTAGTGACAATAC  
CGCGGCGATCAGCAGTAAATTCAGCGACATCGGTTTTGCCCATATGGCTGGTTGAGCTGTGCGCAATAGCAAACAGG  
TAAATTCGCCCCACGGGACGAGCCACATGGTTTTGATTAACATGCCGTTTTGCGCTTCAACGGCAATCTTCTGCGTAC  
CAGACCGTAGAAGGCAAAAATAAATGCCAGTCCCAGCGCGATAAATAGGTAGCAACCAAAAAGTCCACAGCTGGACTAACA  
CGCCACATATCGCCAGAATCACCGCCAGCCATTGCATCCGGCGGAATCGCTCGCCGAGGAAAATCATCCCAAGCACAATG  
TTCACCAGCGGTTAATAAAGTAACCAAGGCTCGCTTCCAGCATATGGTATTGTTACCAGCCAGATAAACAGTAGCCA  
GTTGCCACCAATCAGCACGGCAGAGACTGCCAGCATAAAAAATTTCTGTGGCGTCTGAATCAGCGTTTTTAAATAGGACC  
ACTGGCGGCAATGCTCATCAGCACACCACATAAAGAAAAACGACCAGATCACGCGATGCGTCAGGATTTTCATCGCGGGC  
ACGTAGTAAATCAACTTGAAGTACGCTGGCGCTATACCCCAAATAAAAATAAGCGGCAAGAGCGAGTAATACGCCCTGCCG  
CGTTTGTGTTGTCATCCATCGGGAATACTCATTTTTAATTGGTAACAGCAGTTTACCTGCTTTTATGTCTTCAACCTACCA  
TATAGGTGGCGGTGGCACTGGCAATATAAAGCTGTTCTTATTGTGTAATTCACGCGGGCGACGGCGACTTTATTGCCT  
GCACGCAACAGGCTACTAGTAGCAGTAAAACGCTCGCCCTGCCTGGCGCAGATAATCAACGCGAAGATCAATGGTCCC  
CATCCGCGATAGCCGCTGGCGTAGTTCATCTTACTGATGGTTTTCTGGCGGGTTAAGGTACTTCCCACGCACACCAGAC  
CGCGGCGACATCCAGCGCCGACGCAATGACCCCGCTGCAAAATGCTTTGCGCCAGTTGCCACCATCATTGGCTGA  
TTTTTAAAGGCCAGCTGTGCGAACTCTTTTTCGTAACGCTCCAGTCCATCCCAATGCGCGGTTAATGGCATGTGATA  
AACAAACATCTCACCCACTAATTTAGGGCTTGTTCAGCGGTGAGTACGGCAGACATATCATCCTTACACTTCATTGGTT  
AATGAAATGTTGATTTTATGCTTCTTTGTTGTTGGTTTCTACTTTAGGAAGGATAACTAACGGCTATGGAGTTAAGTAT  
GTAAAATAGCCCGCAGAAAAATATTCACCTTATCAATAATTCTGTACGGAGAACACGACCATGCGGACTCTGCAGGGCT  
GGTTGTTGCCGGTGTGTTATGTTGCCTATGGCAGTATATGCACAAGAGGCAACGGTGAAGAGGTTGATGACGCGCCAGCG  
GTGCGTGGCAGTATTATCGCAATATGCTGCAGGAGCATGACAATCCGTTACGCTCTATCCTTATGACACCAACTACCT

CATTTACACCCAAACCAGCGATCTGAATAAAGAAGCGATTGCCAGTTACGACTGGGCGGAAAATGCGCGTAAGGATGAAG  
TAAAGTTTCAGTTGAGCCTGGCATTTCGCTGTGGCGTGGGATTTAGGCCCGAACTCGGTGTTGGGTGCGTCTTATACG  
CAAAAATCCTGGTGGCAACTGTCCAATAGCGAAGAGTCTTCACCGTTTCGTGAAACCAACTACGAACCGCAATTGTTCCCT  
CGTTTTGCCACCGATTACCGTTTTGCAGGTTGGACGCTGCGCGATGTGGAGATGGGGTATAACCACGACTCTAACGGGC  
GTTCCGACCCGACCTCCCGCAGCTGGAACCGCCTTTATACTCGCCTGATGGCAGAAAACGGTAACTGGCTGGTAGAAGTG  
AAGCCGTGGTATGTGGTGGGTAATACTGACGATAACCCGGATATACCAAATATATGGGTTACTACCAGCTTAAATCGG  
CTATCACCTCGGTGATGCGGTGCTCAGTGCGAAAGGACAGTACAACCTGGAACACCGGCTACGGCGGCGGGAGTTAGGCT  
TAAGTTACCCGATCACCAAACATGTGCGCCTTTATACTCAGGTTTACAGCGGCTATGGCGAATCGCTCATCGACTATAAC  
TTCAACCAGACCCGTGTGCGGTGGGGTTATGCTAAACGATTTGTTTTGATGAACGGTTGAGTGGTTGGCAAATCTGGA  
ATCCAGCATCCAGGATTACCCTCTCAGAGACTAAAAGCATTGCAGTTTCTCGCGCAGGGCGTGAAAATAGCGCCTGTTTT  
TATTTACAGCAATCGGGTGAATGTGGCGCAGGCGGAAGTGTGAATCTGGAGTCCGGAGCTAAACAGGTTTTACAAGAA  
ACTTTTGGCTACCAACAGTTTCGCCCCGGCCAGGAAGAAATATCGACACTGTCTTTCCGGCCGCGATTGCCTCGTCGT  
CATGCCACTGGTGGCGGAAAATCCCTTGTATCAAATCCCTGCCTTATTGCTAAACGGCCTTACCGTGGTTGTTTAC  
CGCTGATTTGTTGATGAAAGATCAGGTGATCAACTGCAAGCAAACGGCGTGGCGGCGGCGTGCCTTAACTCGACGCCA  
ACCCGCGAACGCAACTTGAAGTGATGACAGGCTGCCGACCCGGCAAATTCGTCTGCTTTATATCGCCCCGGAACGCCCT  
GATCTGGATAAATTTCTGAGCATCTGGCGCACTGGAATCCGGTGTATTAGCCGTTGATGAAGCGCATCTATCTCCC  
AATGGGGCCACGATTTCCGCCCCGAATATGCCGCGCTCGGTGAGTTGCGCCAGCGGTTCCGACGCTGCGGTTTTATGGCG  
CTGACCGCCACAGCCGACGACACCACGCGCCAGGATATCGTGCCTGCTGGGGCTGAACGATCCGCTGATTCAAATCAG  
CAGTTTTGACCGTCCGAATATTCGCTACATGCTGATGGAGAAGTTCAAACCGCTCGATCAGTTGATGCGCTACGTGCAGG  
AACAGCGCGGTAAGTCAGGCATTATCTACTGCAACAGCCGCGCGAAAGTAGAAGACACCGCTGCGCGCCTGCAAAGCAAG  
GGAATTAGCGCGGCGCCTATCATGCCGGCTGGAATAATGTTGCGCGCATGTGCAGGAAAAATCCAGCGCGATGA  
CCTGCAAATTTGGTGGCGACGGTGGCGTTGGCATGGGCATCAATAAACCAAACGTTGCTTCTGTTCCACTTTGATA  
TTCCGCGCAATATCGAATCTATTATCAGGAAACCGGACGCGCCGGCGTGATGGCTGCCCGGGAAGCGATGCTGTTT  
TACGATCCGGTATGATGGCGTGGCTGCGCGTTGTCTGGAAGAGAAGCCGACGGGCGAGTTGCAGGATATCGAGCGCCA  
CAAACCTCAATGCGATGGCGCGTTTTGCCGAAGCGCAAACCTGCCGTCGTCTGGTATTGCTGAACTATTTGGCGAAGGGC  
GTCAGGAGCCGTGCGGAACTGCGATATCTGCTCGATCCGCCGAAACAGTACGACGGTTCAACCGATGCTCAGATTGCC  
CTTCCACCATTGGTCTGTGAATCAGCGTTTTGGGATGGGTTATGTGGTGAAGTGATTCGTGGTGCTAATAACCAGCG  
TATCCGCGACTATGGTCATGACAAACTGAAAGTCTATGGCATGGGCCGTGATAAAAGCCATGAACATTGGGTGAGCGTGA  
TCCGCCAGCTGATTCACCTCGGCTGGTACGCAAAATATTGCCAGCATTCTGCCCTACAACCTGACAGAGGCCGCGCGC  
CCGGTGTGCGCGGCAATCCTCTTTGCAAACCTGCCGTGCCGCTATCGTGGCGCTCAAACCGAAAGCGATGCGAAAATC  
GTTCCGCGGCAACTATGATCGCAAACCTGTTCCGCAAATTACGCAAACCTGCGTAAATCGATAGCCGATGAAAGTAATGTCC  
CGCCGTACGTGGTGTTAACGACGCAACCTTGATTGAGATGGCTGAACAGATGCCGATCACCCGACGCAAAATGCTCAGC  
GTTAACGGCGTTGGGATGCGCAAGCTGGAACGCTTTGGCAAACCGTTTATGGCGCTGATTCGTGCGCATGTTGATGGCGA  
TGACGAAGAGTAGTCAGCAGCATAAAAAAGTGCCAGTATGAAGACTCCGTAACGTTTCCCCCGGAGTCAAATGTATGT  
TGATGTTATTTCTACCGTCCGATGTTGACATTTGGCGCTTATGAGCCCCGGTCCCGATTTCTTTTTTGTCTCTCAG  
ACCGCTGTGAGTGTCCCGTAAAGAAGCGATGATGGGCGTGTGGGCATTACCTGCGGCGTAATGGTTTGGGCTGGGAT  
TGCGCTGCTTGGCCTGCATTTGATTATCGAAAAATGGCCTGGCTGCATACGCTGATTATGGTGGGCGGTGGCCTGTATC  
TCTGCTGGATGGGTTACCAGATGCTACGTGGTGCCTGAAAAAGAGGCGGTTTCTGCACCTGCGCCACAGGTCGAGCTG  
GCGAAAAGTGGGCGCAGTTTCTGAAAGTTTACTGACCAATCTCGTAATCCGAAAGCGATTATCTACTTTGGCTCGGT  
GTTCTCATTGTTTGTGCGTGATAACGTTGGCACTACCGCGCTGGGCGATTTTTGCGCTGATCATTGTGAAACGCTGG  
CGTGGTTTACCGTCTTCCAGCCTGTTGCCCTGCCGCAAATGGCCGTTGTTATCAACGCTGCGCAAGTGATTGAT  
GGTTTTGCCGGGCGTTATTTGCCGATTGGCATTATTTGATTATTTGCGGTGATGCCAGACGCGTCTTCAGAGTAA  
GTCGGATAAAGCGTTTACGCCGATCCGACATTATTTTACGCGATGCTCGCCGATGCTAACAGCGCTCCCACCAGCAT  
AAACAACGAGCCGAAAATCTTATTCAGCGCCTTCATCTGCTTTGGTCTTTAATCCATAGAGCAATCCGTTGAGCAAGGG  
TGCGGTAACCGATCATCACAATAATATCGACCACAATAGTGGTACGCCGAGCACGATATACTGCATCAGTTGCGGCTGT  
TGCGGATGATGAATTGCGGAAATAGCGCCGCCAGAAACAATACTTTGGGATTGGTGAAGATTACAAAAACTGCGCG  
CTGGAACAAATGTCGACGCGATTGAGTAGAGGCCAGCGATTTAAGGTCAATTGCACCAGCGGCGGCCACTGCTGGATT  
CCAGCCAAATCAAGTAAGCCGCGCCTGCCACTTCAACACTTCAAACGCAATCACTGAGCGGGAAAATAGCGTCCCCAAC  
CCCAGCCAAACAGCACAAATATGAATCGCAGTCCGGTCTGAAGCCAGCAATAGACGCCACCAGCGCCGCGATAACCGTG  
GTTGAGCGAGGTGGTCATAGTGTGATTGACACCAGAGCCTGGCGACAGGCTTAAATGATCGATGTCAGCAGGTAGGCAA  
ACCACATTCTAAGGTCATGATGAACTCCCGGTGTCTATTTTTGTGCCACAATACGCTACTGTCGACGCGTTGTGTCA  
GGCAGCTAAAAAAAACGATTTTACGTGGTTAAGAGGCGAGTACCAGATGTTTACGAGCAAAAAGACTGGGAAACAA  
GAGAAAACCGTTTTGCTGCTTTTACCATGGGACCGTACTGATTTCTGGCGTACGCGTATGAAGCAGAGTTTACTGGT  
GTGGATGACATTCGGTGGCCTTTGTCCGTTTTGCGCACAGCACCATGACCGGGTGGTAGTCATCTGCCGGGGCGTAT  
TGAGAGCTACGTAATAATGCGGAACTGGCCTATGACCTGTTCCATTTGGGGTTTGGTGTCTTAATCATCGACCATCGCG  
GGCAGGGACGTTCCGGTGCCTGTTAGCCGATCCGCATCTCGGCATGTTAATCGCTTAAATGATTATGTTGATGATCTG

CGGGCATTCTGGCAGCAGGAGGTTCCAGCCGGTCCGTGGCGTAAACGCTATATACTGGCACATTCGATGGGCGGTGCGAT  
CTCCACATTATTTCTGCAACGCCATCCAGGTGTATGTGACGCCATTGCGCTAACTGCGCCAATGTTTGGGATCGTGATTC  
GTATGCCGTCATTTATGGCACGGCAGATCCTCAACTGGGCCGAAGCGCATCCACGTTTCCGTGATGGCTATGCAATAGGC  
ACGGGGCGCTGGCGCGCTGGCCGTTTGTATCAACGTAAGTACCACAGCAGACGATATCGACGTAACCTTACGCTT  
CTATGCTGATGACCCAACGATTCGCGTGGTGGGCCGACTACCATTGGGTACGCGAAAGTATTCTGGCTGGCGAACAGG  
TGTTAGCCGGTGGCGGTGATGACGCCACGCCAACGCTTCTCTTGCAGGCTGAAGAGGAACGCGTGGTGGATAAACCGCATG  
CATGACCGTTTTGTGAACTCCGCACCGCCGCGGGCCATCCTGTGCAAGGAGGACGGCCGTTGGTAATTAAGGTGCTTA  
CCATGAGATCCTTTTTGAAAAGGACGCAATGCGCTCAGTCGCGCTCCACGCCATCGTTGATTTTTTCAACAGGCATAACT  
CACCCAGCGGAAACCGCTTACAGAGGTTAAATTTCTTATGTACCAGGTTGTTGCGTCTGATTTAGATGGCACGTTACT  
TTCTCCCGACCATACGTTATCCCCTTACGCCAAAGAACTCTGAAGCTGCTCACCGCGCGGGCATCAACTTTGTGTTTG  
CGACCGGTGTCACCACGTTGATGTGGGGCAAATTCGCGATAATCTGGAGATTAAGTCTTACATGATTACCTCCAATGGT  
GCGCGGTTACAGATCTGGATGGTAATCTGATTTTTGCTCATAACCTGGATCGCGACATTGCCAGCGATCTGTTGGCGT  
AGTCAACGACAATCCGGACATCATTACTAACGTTTTATCGCGACGACGAATGGTTTATGAATCGCCATCGCCCGGAAGAGA  
TGCGCTTTTTAAAGAAGCGGTGTTCCAATATGCGCTGTATGAGCTGGATTACTGGAGCCGGAAGGCGTCAGCAAAGTG  
TTCTTACCTGCGATTCCCATGAACAACGCTGCTGCCGTGGAGCAGCGATTAAACGCTCGTTGGGCGATCGCGTCAACGT  
CAGTTTTCTCTACCTAACCTGTCTGGAAGTGATGGCGGGCGGCTTTCAAAGGCCATGCGCTGGAAGCGTGGCGAAGA  
AACTGGGCTACAGCTGAAGGATTGATTGCGTTTTGTTGACGGGATGAACGACGCCGAAATGCTGTGATGGCGGGGAAA  
GGCTGCATTATGGGCAGTGCACACCAGCGTCTGAAAGACCTTCATCCCGAGCTGGAAGTGATTGGTACTAATGCCGACGA  
CGCGGTGCCGATTATCTGCGTAAACTCTATTTATCGTAATCGTCTTTATTTGGTCACTTGTCAACCTGATACTTCGCT  
ACAATGGATACCCGTTAATCAAAGAGTTTTCCATTGTGGCGCTACTTATCATCACCACGATTCTGTGGGCCTTCTCCTTT  
AGCTTTTATGGCGAGTACCTTGGCGGGCACGTCGATAGCTATTTTGGCGTGGTGGCGGTTGGCCTGGCGGCACTCGT  
TTTTCTGCCGTTTCTGCGTACCCGTGGCAATAGCCTGAAAACGGTCGGCCTGTATATGCTGGTGGGCGGATGCAGCTTG  
GCGTGATGTATATGCTGAGTTTCCGCGCTTATCTCTACCTGACGGTTTCCGAGCTGCTGCTGTTACCCGTGCTGACGCCG  
CTCTACATCACGCTGATTTATGACATCATGAGTAAGCGCCGCTGCGCTGGGGTATGCCTTTAGCGCCTTGTGGCGGT  
GATTGGTGGCGGATTATTCGCTATGATCAGGTACCAGCATTCTGGACTGGCTTGTGCTGGTGAACCTCTCCAATA  
TCACTTTTGGCATTGGCATGGTGGTTACAAACGCCGATGGAACCTCGCCGATGCCACAGCATAACGCCTTTGCGTGG  
TTCTATCTTGGCGGTTTTCTGGTGGCAGTGATTGCATGTTCTTGTGGGAAATGCGCAGAAAATGCCGCAAACCACGCT  
GCAATGGGGCATTCTGGTGTCTTGGCGTGGTGGCTTCCGGGATTGGCTACTTTATGTGGAACCTACGGCGCGACGCGAGG  
TGGACGCCGGAACGCTGGGCATTATGAATAATATGCACGTTCCGGCAGGGCTGCTGGTAAACCTGGCTATCTGGCACCAA  
CAGCCGCACTGGCCAACGTTTATTACAGGCGCGCTGTTGATCCTGGCCTCACTGTGGTGCATCGTAAGTGGGTCGCTCC  
GGCTCTTCAAAACGGCAGATGATCGCAGGCGTGATTGCGCGCTGAGCGAATAAACGCTTCCGTAACCTGGCTGACGCTG  
CTCGCCATCGCGCACGGCGGCTACAGTCGGCTCCACAAGCCTTCCGCCAGGGTTTTGGTACCACCAGACCCTGGCGCT  
CAAACTCTCTACTACCCAATGCGGTAGCGCGGCAATACCCATCCGCGCGGCAACCATCTGAATCAACAATAAGGTGTTA  
TCGACGCTTTTCAAGTACGGGCTGACGCTGCGGGTGAAGAAAATGCCGCCAGACATCCAGTCGACTACGCTGCACCCG  
ATAAATAATAGCGTCTCGTGGCGAGATCTCCGGTGAATTCGCGTTTTCCGCGCCAGTGGATGGTCAAGTGCTAACA  
CCAGACGCACTTCATAGTCGAACATCGGCAATAATGCAGGCCACTGCGCGGAGAATATCGGACGTATTACCAGATCC  
AGCTCTCCCTGTTGCAAGGCGGGTGCAGGTTCAAATGTCACGCCGATTTAAATCCATCTCTACTGCGGCCAGTTCTT  
ATGGAATTTTCTAACGCGGGTGTGAGCCACTGAATACAGTATGGCACTCAATGGCAATGCGCAGACGCGTCTGCTGCG  
GTTCAATTCAGGCTTGCAGGCTGGCTAATTTGCGGCAGTACCTGGTTTTGCCAGTTGCAACAGGATTTCTCCCTGCGGT  
GTAAGCGTACGGCTGGCTTACGCACAATAGCCGGAAGCAAGGCGTTGTTCCAGATCGCTAAACTGGTGAGACAG  
GGCGGATTGCGTCTGATGCAACGTCGCGCAGCGGCTGCGAGCGAGCCGAGTTCCGCAACGCTTGTAGCGTTTTAGGT  
GTTTTACTTGCATCATGAAAGTCTTCACTTCGGCATGAATAATTTGCGCTTGAAGGAATATACAGTAACGCCAATTATG  
GATGTGTAACATCTGGACGGCTAAAATCCTTCGCTTTTTAAATTTATGGTGGCTGGCTGCGTTTTCTCCACCCCGTCA  
CTTACTTCAAGTCCCGGGGATGAATAAACTTCCGCTTCCCTAAATTCAAAATCCATAGGATTTACATATAATTA  
GAGGAAGAAAAATGACAATATTGAATCACACCCTCGGTTCCCTCGGTTGGCTGCGTGCAGGCTGAAAAAGCGCA  
AGAAAGTTATTGGGCGGGAACTCCACGCGTGAAGAACTGCTGGCGGTAGGGCGTGAATTGCGTGCTCGTACTGGGATC  
AACAAAAGCAAGCGGTATCGACCTGCTGCCGTGGGCGATTTTGCCTGGTACGATCATGTAAGTACCAGCTGCTGCTG  
CTGGGTAACGTTCCGGCGGTCATCAGAACAAAGATGGTTCGGTAGATATCGACACCCTGTTCCGATTGGTGGTGGACG  
TGCGCCGACTGGCAACCTGCGGCGGACGGAATGACCAAATGGTTTAAACCAACTATCACTACATGGTGCCGGAGT  
TCGTTAAAGGCCAACAGTTCAAACGACTGGACGCGAGCTGCTGGACGAAGTGGACGAGGCGCTGGCGCTGGGCCACAAG  
GTGAAACCTGTGCTGCTGGGCGGTTACCTGGCTGTGGCTGGGAAAGTGAAGGTGAACAATTTGACCGCTGAGCCT  
GCTGAACGACATTCGCGGTTTTATCAGCAAGTGTGCGAGAAGTGGCGAAACGCGGCATCGAGTGGGTACAGATTGATG  
AACCCGCGCTGGTACTGGAACCTACCACAGGCGTGGCTGGACGCATACAAACCCGCTTACGACGCGCTCCAGGGACAGGTG  
AAACTGCTGCTGACCACCTATTTTGAAGGCGTAACGCCAAATCTCGACACGATTAAGTGGCTGCTGTTAGGGTCTGCA  
TGTTGACCTCGTACATGGTAAAGATGACGTTGCTGAACTGCACAAGCGCCTGCCTTCTGACTGGTTGCTGTCTGCGGGT  
TGATCAATGGTGTAAACGCTGCGCGCGGATCTTACCAGAAATATGCGCAAATTAAGGACATTGTCGGCAAACGTGAT



TTGTGGGTGGCATCTTCCTGCTCGTTGCTGCACAGCCCATCGACCTGAGCGTGAAACCGCTCTTGATGCAGAAGTGAA  
AAGCTGGTTTTGCCTTCGCCCTACAAAAATGCCATGAACTGGCACTGCTGCGCGATGCGCTGAACAGTGGTGACACGGCAG  
CTCTGGCAGAGTGGAGCGCCCCGATTGAGGCACGTCGCTACTCTACCCGCGTACATAATCCGGCGGTAGAAAAGCGTCTG  
GCGCGATCACCGCCAGGACAGCCAGCGTGCGAATGTCTATGAAGTGCCTGCTGAAGCCAGCGTGCGCGTTTTAACT  
GCCAGCGTGGCCGACCACGATTGGTTCCTCCCGCAAACACGGAAATTCGTACCCTGCGTCTGGATTTCAAAAAGG  
GCAATCTCGACGCCAACAACTACCGCACGGGCATTGCGGAACATATCAAGCAGGCCATTGTTGAGCAGGAACGTTTGGGA  
CTGGATGTGCTGGTACATGGCGAGGCCGAGCGTAATGACATGGTGAATACTTTGGCGAGCACCTCGACGGATTTGTCTT  
TACGCCAAAACGGTTGGGTACAGAGCTACGGTCCCGCTGCGTGAAGCCACCGATTGTCATTGGTGACATTAGCCGCCCGG  
CACCGATTACCGTGGAGTGGGCGAAGTATGCGCAATCGCTGACCGACAAACCGGTGAAAGGGATGCTGACGGGGCCGGT  
ACCACTCTGCTGGTCTTCCCGCTGAAGATGTCAGCCGTGAAACCATCGCCAAACAGATTGCGCTGGCGCTGCGTGA  
TGAAGTGGCCGATCTGGAAGCCGCTGGAATTGGCATCATCCAGATTGACGAACCGCGCTGCGCGAAGTTTTACCGCTGC  
GTCGTAGCGACTGGGATGCGTATCTCCAGTGGGGCTAGAGGCCCTCCGTATCAACGCCCGCTGGCGAAAAGATGACACA  
CAAATCCACACTCACATGTATTGCGAGTTCAACGACATCATGGATTGATTGCGGCGCTGGACGCAGACGTATCAC  
CATCGAAACCTCGGTTCCGACATGGAGTTGCTGGAGTCGTTTGAAGAGTTTGATTATCCAAATGAAATCGTCTGGCG  
TCTATGACATTCCTCGCCAAACGTACCGAGCGTGAATGGATTGAAGCCTTCTGTAAGAAAGCGGCAAAACGCAATCCG  
GCAGAGCCGCTGGGTCAACCCGACTGTTGGCTGAAAACCGCGGCTGGCCAGAAACCGCGGCAACTGGCAGAACAT  
GGTGCAGGGCGCGCAGAACTTTCGCTCGGGGTAAAAATCCAAACCGGGTGGTAATACCACCCGCTTTTTCTATTACAGC  
GACTTCTCCACCATACTGCTTAAACCATTCCAGCATACGCTGCCAGCCATCTTCTGCAGATGCGGCATGATAGCTCGG  
GCGATAATCAGCGTTGAATGCATGCCCGCGTCCGGGTACACGATAATCTCTGCTTTTCGATTAGCAGCCCGCAGCGCCT  
GGCGCATGTTTCAACGCTCTCTGCGGAATGCTGTATCTGACCACCATATAAGCCGAGAATCGGCGCGTTAAGATCG  
GTTGCGATATCAACAGGTTGTTTGGTGAATTCAGCGACTTGTGCGCCGTCAGTTTGGCGTACCACGCCACTGCGGCTTT  
TAGCTGTGGATTATGCGCGGCATACAGCCAGGTGATACGTCCACCCAGCAGAATCCGGTATCATTAAACGATGAACAT  
CGCCCGCTTTCGCGGAAGCCAACTGGCGACATGATCGAGATCGGCCAGCACCTGCGAGTCAGGCACTTTTGTACCAGA  
CCGTAAGCAACGTGGGGATATCGGCAAAATCATTCCGATCGCTTCGCGGAAGTAAAGTTCAGGTGCGATAGCCAGATA  
CCCCTCCAGCGCCAGACGGCAGCAAAATGTCGCGGATATGTTATGCACGCCAAAAATTTCTGCACTACAATGACCACTG  
GCAGTGGGCCATCGCTTTGCTTTGGTCTGGCATGGTAAAGCAGGCATGTTATCCCTTGTGAAGGGATAGAGGTGAAGCCC  
GCCACAATCGCGTCGTCGGGGTCTGAACGATGGTGAAGCGAGAGCGGATGCAGCAGGTGCAAAATCCAGATTGTTGTGT  
TGTTGCCATGGTATTCTCCGTACCCTTATAAAAATGTTGCGCAATGTTAACTATAGTCAGCATGCAACAAATCACATTGC  
CTGAATCGGCTCATCTTTATGCACTCTGCAGAATGAAGGGTATTATGTGATTTGCATCACTTTTGGTGGGTAAATTT  
TATGCAACGCATTTGCGTATGGTATGAGTATCACGAAAAATGTTAAACCCTTCGGTAAAGTGTCTTTTTGCTTCTC  
TGAATAAACCGATTACAGAGGAGTTGTATATGTCCAAGTCTGATGTTTTTCTCTCGGCCTCACTAAAAACGATTTACA  
AGGGGTACGCTTGCATCGTCCCTGGCGACCCGGATCGTGTGAAAAGATCGCCGCGCTGATGGATAAGCCGGTTAAGC  
TGGCATCTCACCGCAATTCCTACCTGGCGTGCAGAGCTGGATGGTAAACCTGTTATCGTCTGCTTACCAGGATCGGC  
GGCCCGTCTACCTCTATTGCTGTTGAAGAGCTGGCACAGCTGGGCATTGCACTTCTCTGCGTATCGGTACAACGGGCGC  
TATTCAGCCGCATATTAATGTGGGTGATGTCCTGGTACCACGGCGTCTGTCCGTCTGGATGGCGCGAGCCTGCACTTCG  
CACCGCTGGAATTTCCCGCTGTCGCTGATTTGCAATGTACGACTGCGCTGGTTGAAGCTGCGAAATCCATTGGCGCGACA  
ACTCACGTTGGCGTGACAGCTTCTTCTGATACCTTCTACCCAGGTGAGGAACGTTACGATACTTACTCTGGTGCAGTAGT  
TCGTCACTTTAAAGGTTCTATGGAAGAGTGGCAGGCATGGGCGTAATGAACTATGAAATGGAATCTGCAACCCTGCTGA  
CCATGTGTGCAAGTCAAGGCTGCGTCCGGTATGGTAGCGGGTATCGTTAACCGCACCCAGCAAGAGATCCCAGAT  
GCTGAGACGATGAAACAAACCGAAAGCCATGCGTGAATAATCGTGGTGAAGCGGCGCTGCTGCTGTAATTTCTTC  
TCCTGTCTGAAGGCCGACGCGTTCCGGCTTTTTGATTTTTGCGTAGCGCCTCGCAGGAAATGCCTTTTCAACTGGACGTT  
TGTACAGCACAAATTTATTTTGTGCGGGTAAAGTTGTTGCGTACAGAGCGTGTGGATTTCTCAATCATGTTTTACGCAG  
TTATTGCGTTGGTGGGTGTGGCAATTGGCTGGCTGTTTGCAGTTATCAACATGCGCAGCAAAAAGCCGAGCAATTAGCT  
GAACGTGAAGAGATGGTCCGCGGAGTTAAGCGCGCAAAAACAACAATTAACCAAGCGAGCACTGGCGTGACAGAGTGC  
GTTACTCAATAACGAAGTGCAGCAGCTGCAAAAGTATTAACACCTCTCTGGAGGCCGATCTGCGTGAAGTAACCACGCGGA  
TGGAAGCCGCACAGCAACATGCTGACGATAAAAATTCGCCAGATGATTAACAGCGAGCAGCGCCTCAGTGAGCAGTTTGA  
AACCTCGCCAACCGTATTTTTGAGCACAGCAATCGCCGGGTTGATGAGCAAAACCGTACAGTCTGAACAGCCTGTTGTC  
GCCGCTACGTGAACAACCTGGACGGTTTTCCGCCGTACGGTTCAGGACAGCTTCGGTAAAGAAGCACAAGAACGCCATACC  
TGACCCACGAAATTCGAATCTCCAGCAACTCAACGCGCAATGGCCAGGAAGCGATCAACTGACGCGCGCGCTGAAA  
GGCGACAATAAAACCCAGGGCAACTGGGGCGAGGTAGTATTGACGCGGGTGTGGAGGCTTCCGGTCTGCGTGAAGGGTA  
TGAATATGAAACCCAGGTGAGCATGAAAATGACGCCGCTCGCGGATGCAGCCGGATGTCATCGTGCCTGCGCAGG  
GAAAAGATGTGGTATGACGCCAAAATGACGCTGGTGCCTATGAACGCTATTTTAAACCGCAAGACACTACACCCGC  
GAAAAGCGCGTACAGGAACATATCGCGTGGTGGTAAACCATATCCGTTTGGTGGGACGAAAGATTATCAACAGCTGCC  
GGGGCTGCGAACTCTGGATTACGTGCTGATGTTTATCCCGTTGAACCCGCTTTTTTACTGGCGCTTACCGCCAGCCGG  
AGCTGATCACCGAAGCGTTGAAAAACAACATCATGCTGGTTAGCCCGACTACGCTGCTGGTGGCGCTGCGCACTATCGCC  
AACCTGTGGCGTTATGAGCATCAAAGCCGAACGCCAGCAAATCGCGATCGTGCAGCAAGCTGTACGACAAGATGCG

TTTGTTCATCGATGACATGTCCGCGATTGGTCAAAGTCTCGACAAAGCGCAGGATAATTATCGGCAGGCAATGAAAAAC  
TCTCTTCAGGGCGCGAAATGTGCTGGCGCAGGCAGAAAGCGTTTCGCGGTTTAGGAGTAGAAATTAACGCGAGATTAAT  
CCGATTTGGCTGAACAGGCGGTGAGCCAGGATGAAGAGTATCGACTTCGGTCGGTCCGGAGCAGCCGAATGATGAAGC  
TTATCAACGCGATGATGAATATAATCAGCAGTCGCGCTAGCCATTGGGAGTAGTTAAGCCGGGTAGAAATCTAGGGCAT  
CGACGCCAATCTGTTACACTTCTGGAACAATTTTTGATGAGCAGGCATTGAGATGGTGGATAAGTCACAAGAAACGAC  
GCACTTTGGTTTTAGACCGTCGCGAAGGAACAAAAAGCGGATATGGTCGCCACGTTTTCCATTCCGTGGCATCAAAAT  
ACGATGTCATGAATGATTTGATGTCATTTGGTATTCATCGTTGTGGAAGCGATTACGATTGATTGCAGCGGCGTACGC  
CGTGGGCAGACCGTGTGGATCTGGCTGGTGGCACCAGGCGACCTGACAGCGAAATCTCCCGCCTGGTCGGAGAAACTGG  
CAAAGTGGTCTTGCTGATATCAATGAATCCATGCTCAAAATGGGCCGCGAGAAGCTGCGTAATATCGGTGTGATTGGCA  
ACGTTGAGTATGTTACAGCGAACGCTGAGGCGCTGCCGTTCCCGGATAACACCTTTGATTGCATCACCATTTGTTGGT  
CTGCGTAACGTCACCGACAAAGATAAAGCACTGCGTTCAATGTATCGCGTGTGAAACCCGGCGGCCCTGCTGGTGTCT  
TGAGTTCTCGAAGCAATATCGAGCCGCTGAGCAAAGCCTATGATGCATACTCCTTCCATGTGCTGCCGCTATTGGCT  
CACTGGTCGGAACGACGCCGACAGCTACCGTTATCTGGCAGAATCCATCCGTATGCATCCCGATCAGGATACCTGAAA  
GCCATGATCAGGATGCCGATTGAAAGTGTGACTACTACAATCTGACGGCAGGGGTTGGGCGCTGCATCGTGGTTA  
TAAGTTCTGACAGGAGACCAGAAATGCCTTTAAACCTTTAGTGACGGCAGGAATTGAAAGTCTGCTCAACACCTTCG  
TATCGCTCACCGCGCTGAAAAACGGCCGCTCGCTGCTGGTAAAGTATTGCGCGTGGAGTAAAAGCTTTTTCGAC  
GTATTGATTCTGGTGTTCAGCGAACGCCAGGTTGATGTAAGTGGCGAATGGGCGAGCGATGCTGACTGACCGTTATCG  
CCTACGCCAGTGTGTTGCCGAAACTTCGCGATCGCCAGCAGCTTACCGCACTGATTGCGAGTGGTGGAGCTGGAAGTGCAG  
GGCGATATTCAGTGGTGAACAACTTCGTTGCGCTGGCAGATCTGGCAGAGTTCGACCCTGCGGAACCTGTCGCCCTTA  
TACCGGTGATATCGCGCTGAAGGAATCAGCAAAGCCTGCGCGGAGGCGCAAAGTTCCTGCATCAGCGCATTAAAGCGCC  
AGCAACGTTATGTGGCGAAGCCATTACTGAAGAGTGGCGTATGGCACCCGGTCCGCTTGAAGTGGCCTGGTTTGGGAA  
GAGACGGCTGCCGTCGAGCGTGTGTTGATGCCCTGACCAAACGGCTGAAAAACTGGAGGCTAAATGACGCCAGGTGAA  
GTACGGCGCTATATTTATCATTGCACTTTTTAAGCTACGGACTTATGAACTGATCCCAAAATGCGTATCACCT  
GCCGCTACGGCTATGGCGATACTCATTATTCTGGATGCCAAATCGGCATAAAGACAAACTTTAGGTGAGCGACTACGAC  
TGGCCCTGCAAGAACTGGGCGCGTTGGATCAAGTTCGGGCAATGTTATCAACCCGCCGCTTTTTCCACCGCAT  
ATTGCCGATCAGCTGGCGTTATTGAGGACAAAGTGTCCGTTGATGGCAAGCTGGCGAAGCAGCAGATTGAAGCTGC  
AATGGGCGGCTTCCCGTAGAAGCGTGGTTTACGATTTTAAATCAAGCCGCTGGCTTCTGCTTCTATCGCCAGGTT  
ATACCGCGGATTGAAATCGAATGGTAAAGAGTGGTATTAAGTCATCCGCCGGATATTTTGGCGTTATTAAGCG  
GATCTGAAACTTATCTACCGTCTGGCTCGCTGGGTGCCGCTTTCGCTGCCGATGGTCGCCCTCTGCGCCAAACCGAAGT  
GGTGGCGAGTACGAAAAGACATTGATTGATGAACTGAATTTGCTGCGGGAATCTGCCAACGCCATTAGCTTCGGCGCA  
ATTTTGAAGACAGCCGATGCTCTACATCCCGAAGTTTACCCTGACTATTGTAGTGAAGGGATGATGGTGTGAGCGC  
ATTTACGGCATTCCGGTGTCTGATGTTGCGGCGCTGGAGAAAAACGGCACTAACATGAAATTGCTGGCGGAACGCGGCGT  
GCAGGTGTTCTTCACTCAGGCTTTTCGCGACAGCTTTTTCCATGCCGATATGCACCCTGGCAACATCTTCGTAAGCTATG  
AACACCCGGAAAAACCGAAATATATCGGCATTGATTGCGGGATTGTTGGCTCGCTAAACAAGAAGATAAACGCTATCTG  
GCAGAAAACCTTATCGCCTTCTTAATCGCGACTATCGCAAAGTGGCAGAGCTACACGTCGATTCTGGCTGGGTGCCACC  
AGATAACCAAGTTGAAGAGTTGCAATTTGCCATTGTCAGGTCTGTGAACCTATCTTTGAGAAACCGTGGCCGAAATTT  
CGTTTGGACATGTAAGTCTGTTAATACGGCGCGTTCGCTTCAATATGGAAGTGCAGCCGCAACTGGTGTACTC  
CAGAAAACCTGCTCTACGTCGAAGGGTAGGACGCCAGCTTTATCCGCAACTCGATTTATGAAAAACGGCGAAGCCTT  
CCTGGAGTCGTGATTAAGATCAGGTCGGTATTCTGCGCTGGTGGAGAGCATTAAAGAAAAAGCGCCGTTCTGGTGC  
AAAAATGCCAGAATGCCTGAATTTGTTTACGACAGTTTTCGCGAGGGCAAGTATTTACAGCACAGTGTGATAAGATT  
GCCCGGAGCTTCAAGTCAAATCATGTACGTGAGGACAATCGCGTTATTTTCTCGGAATTGGCGCTACGTTAGTATTAAG  
TGGCACATTCTTGTGTCAGCCGACCTGAATGGGGCTGATGCCCGCTGGTTAATGGCAGGTGGTCTGATCGCCTGGT  
TTGTCGTTGGCGCAAAACACGCTGATTTTTTATCGCTCAAGGCGGGCCGTGTAACGTATAATGCGGCTTTGTTAATC  
ATCATCTACCACAGGAACATGTATGGTGGTATCAGTATTTGGCAGTTATTGATTATTGCCGTCATCGTTGTAAGTCT  
TTTTGGCACCAAAAAGCTCGGCTCCATCGGTTCCGATCTTGGTGGTGCATCAAGGCTTTAAAAAGCAATGAGCGATG  
ATGAACCAAAGCAGGATAAAACAGTCAAGGATGCTGATTTTACTGCGAAAATATCGCCGATAAGCAGCCGATACGAAT  
CAGGAACAGGCTAAAACAGAAGACGCGAAGCGCCACGATAAAGAGCAGGTGTAATCCGTGTTTATGATCGGTTTTAGCGA  
ACTGCTATTGGTGTTCATCATCGCCCTCGTCTTGGGGCCGCAACGACTGCCTGTGGCGGTAAAAACGGTAGCGGGCT  
GGATTCGCGGTTGCGTTCACTGGCGACAACGGTGCAGAACGAACTGACCCAGGAGTAAACTCCAGGAGTTTCAGGAC  
AGTCTGAAAAAGGTTGAAAAGCGGAGCCTACTAACCTGACGCCCCAACTGAAAGCGTCGATGGATGAACTACGCCAGGC  
CGCGGAGTCGATGAAGCGTCTACGTTGCAAACGATCCTGAAAAGCGGAGCGATGAAGCGCACACCATCCATAACCCGG  
TGGTGAAGATAATGAAGCTGCGCATGAGGGCGTAACGCTGCCGCTGCACAAACGCAGGCCAGTTCCGCGGAACAGAAG  
CCAGAAACCAGCCAGAGCCGGTGGTAAAACCTGCTGCGGACGCTGAACCGAAAACCGCTGCACCTTCCCTTCGTCGAG  
TGATAAACCGTAAACATGTCTGTAGAAGATACTCAACCGCTTATCACGCATCTGATTGAGCTGCGTAAGCGTCTGCTGAA  
CTGCATTATCGCGGTGATCGTGATTTCTGTGTCTGGTCTATTTCCGCAATGACATCTATCACCTGGTATCCGCGCCAT  
TGATCAAGCAGTTGCCGAAAGTCAACGATGATCGCCACCAGCTGGCCTCGCGGTTCTTACGCCGATCAAGCTGACC

TTTATGGTGTGCTGATTCTGTCAGCGCCGGTATTCTCTATCAGGTGTGGCATTATCGCCCCAGCGCTGTATAAGCA  
TGAACGTGCGCTGGTGGTCCGCTGCTGGTTCCAGCTCTCTGCTGTTTTATATCGGCATGGCATTGCGCTACTTTGTGG  
TCTTTCCGCTGGCATTGGCTTCTTCCCAATACCGCGCCGGAAGGGTGCAGGTATCCACCGACATCGCCAGCTATTTA  
AGCTTCGTTATGGCGCTGTTTATGGCGTTTGGTGTCTCTTTGAAGTGCCGGTAGCAATTGTGCTGCTGTGCTGGATGGG  
GATTACCTCGCCAGAAGACTTACGCAAAAAACGCCGTATGTGCTGGTGGTGCATTGTTGTGCGGGATGTTGCTGACGC  
CGCCGATGTCTTCTCGCAAACGCTGTTGGCGATCCCGATGACTGTCTGTTTAAAATCGGTGCTTCTTCTCACGCTTT  
TACGTTGGTAAAGGGCGAAATCGGGAAGAGGAAAACGACGCTGAAGCAGAAAGCGAAAAAACTGAAGAATAAATCAACC  
GCCCCGTCAGGGCGGTTGTATATGGAGTACAGGATGTTTGATATCGGCGTTAATTTGACCAGTTGCGAATTTGCGAAAGA  
CCGTGATGATGTTGTAGCGTGCCTTTTACGCGGGAGTTAATGGGCTACTCATCACCGGCACTAACCTGCGTGAAGCC  
AGCAGGCGCAAAAGCTGGCGCTCAGTATTGCTCTGTTGGTCAACGGCGGGCTACATCCTCACGACAGCAGCCAGTGG  
CAAGCTGCGACTGAAGAAGCGATTATTGAGCTGGCCGCGCAGCCAGAAGTGGTGGCGATTGGTGAATGTGGTCTCGACTT  
TAACCGCAACTTTTTCGACGCGGGAAGAGCAGGAACGCGCTTTTGTGCCAGCTACGCATTGCCGAGATTTAAACATGC  
CGTATTTATGCACTGTGCGATGCCACGAGCGGTTTATGACATTGCTGGAGCCGTGGCTGGATAAACTGCCTGGTGGC  
GTTCTTCATTGCTTTACCGGCACACGCGAAGAGATGCAGGCGTGGTGGCGCATGGAATTTATATCGGCATTACCGGTTG  
GGTTTGCATGAACGACCGGACTGGAGCTGCGGGAACTTTCCGTTGATTCCGGCGGAAAAATTAAGTATGCGAAAGCC  
ATGCGCCGATCTGCTCCCTCGCATCTCACGCCAAAGCCATCATCCCGGCGCAACGAGCCAGCCACTGCCCCAATATT  
TTGCAACGATTTGCGCACTGGCGTGGAGAAGATGCCGCATGGCTGGCTGCCACCACGGATGCTAATGTAAAAACACTGTT  
TGGGATTGCGTTTTAGAGTTTGCAGAACTCGGTATTCTTACACTGTGCTTAATCTCTTTATTAATAAGATTAAGCAATA  
GCATGGAGCGAGCCTCACCATCGGGTTCCGGTGAATGGCCTGAAAGCCTTGAACGCGCCTTCGGAATAATCACCTTA  
TCACCCGATAAAGGGTTGCCGGATCGACAATGTCTTTCGTTTTATATACCGATAGCTGATGAATAACCGCCGATGGGAC  
TATCGCTGGCGACGCGCAAAGCGCACGAAGTGGCTGACACCGCGGGTGCCTTGTATAGTCGTGGTATGAATCACTTCTG  
GGTCAAATCCACAAACAGGTAGTTGGGAACAATGGCTCACTGACTGCAGTACGTTTTCCACGCACGATTTTTTCCAGG  
GTGATCATCGGTGCCAGGCAATTCACAGCCTGTCTTTCGAGGTGTTCTGGGCAGTGAAGTTGCCCGCCTTGCAGTA  
CAGTAAATACCAGGATTGCATAATGACTCTTATCCGTTAATCGGGGCGCAAGGATAGCAAAAGCTTTACGCTAAGTTAA  
TTATATTCCCCGTTTGCCTTATACCGTCAGAGTTCACGCTAATTAACAAATTTACAGCATCGCAAAGATGAACGCCGT  
ATAATGGGCGCAGATTAAGAGGCTACAATGGACGCCATGAAATATAACGATTTACGCGACTTCTTGACGCTGCTTGAACA  
GCAGGGTGAGTAAAACGATCACGCTCCGGTGGATCCGCATCTGAAATCACTGAAATGCTGACCGCACTTTGCGTG  
CCGTGGGCTGCGCTGTTGTTGAAAACCTAAAGGCTACTCAATGCCGGTGTGTGCAACCTGTTCCGGTACGCCAAAG  
CGGTGGCGATGGGCATGGGCGAGGAAGATGTTTCCGCGCTGCGTGAAGTTGGTAAATTATTGGCGTTTTCTGAAAGAGCC  
GGAGCCGCCAAAAGGTTTCCGCGACCTGTTTGATAAACTGCCGAGTTTAAAGCAAGTATTGAACATGCCGACAAAGCGGC  
TGCGTGGTGCGCCCTGCCAACAAAAAATCGTCTCTGGCGATGACGTGATCTCAATCGCATTCCCATTATGACCTGCTGG  
CCGGAAGATGCCGCGCCGCTGATTACCTGGGGGCTGACAGTGACGCGCGGCCACATAAAGAGCGGCAGAATCTGGGCAT  
TTATCGCCAGCAGCTGATTGGTAAAAACAACACTGATTATGCGCTGGCTGTGCGCATCGCGGCGGCGCTGGATTATCAGG  
AGTGGTGTGCGGCGCATCCGGGCGAACGTTTCCCGTTTCTGTGGCGCTGGGTGCCGATCCCGCCACGATTCTCGGTGCA  
GTCACCTCCGTTCCGGATACGCTTTCAGAGTATGCGTTTCCGGATTGCTACGTGGCACCAAGACCGAAGTGGTGAAGTG  
TATCTCAAATGATCTTGAAGTGCCCGCAGTGCGGAGATTGTGCTGGAAGGGTATATCGAACAAAGCGAAACTGCGCCGG  
AAGGGCCGATGGCGACCACCCGTTACTATAATGAAGTCGATAGTTTCCCGTATTTACCGTGACGCATATTACCCAG  
CGTGAAGATGCGATTTACCATTCACCTATACCGGGCGTCCCGCAGATGAGCCCGCGGTGCTGGGTGTGCACTGAACGA  
AGTGTGTGCGCGATTGCAAAAAACAGTCCCGGAAATGTGATTTTTACCTGCCCGCGAAGGCTGCTCTTATCGCC  
TGGCGGTAGTGACAATCAAAAAACAGTACGCGGACACGCGAAGCGCGTCAATGATGGGCGTCTGGTCTTACGCC  
TTTTATGTACTATAAATTTGTGATCGTTTTGCGATGATGACGTTAACGCACCGCACTGGAACGATGTGATTTGGGCGATTAC  
CACCCGTATGGACCCGGCGGGGATACTGTTCTGGTAGAAAATACGCCTATTGATTATCTGGATTTTGCCTCGCCTGTCT  
CCGGGCTGGTTCAAAAATGGGGCTGGATGCCACGAATAAATGGCCGGGGAACCCAGCGTGAATGGGGACGTCCCATC  
AAAAAAGATCCAGATGTTGTGCGCATATTGACGCCATCTGGGATGAACTGGCTATTTTTAAACCGGTAAGGCGCCTG  
ATGCGCGTTTTGTTTTGCCCTATTTATCGATCCGACAGAAAGCGCATGACAACCTTAAGCTGAAAGTGACCTCGGTAG  
AAGCTATCACGGATACCGTATATCGTGTCCGCATCGTGCCAGACGCGCCTTTTCTTTCTGCTGGTCAAGTATTTGATG  
GTAGTGATGGATGAGCGCGACAAACGTCCTTCTCAATGGCTTTCGACGCGGATGAAAAAGGGTTTATCGAGCTGCATAT  
TGGCGCTTCTGAAATCAACCTTTACGCGAAAGCAGTATGACCCGCATCCTCAAAGATCATCAATCGTGGTGCACATTC  
CCCACGGAGAAGCGTGGCTGCGCATGATGAAGAGCGTCCGATGATTTTATTGCGGGCGCACCGGTTCTCTTATGCC  
CGCTCGATTTTGTGACAGCTTGGCGGTAACCCAAACCGTATATCACCATTTACTGGGCGGGCGTGAAGAGCAGCA  
TCTGTATGATCTCTGCGAGCTTGGGCGTAAACCCAAACCGTATATCACCATTTACTGGGCGGGCGTGAAGAGCAGCA  
AAGCGGGCTGGCGTGGGCGTACTGGCACCGTGTAAACGGCGGATTGACAGGATCACGGTACGCTGGCAGAGCATGATATC  
TATATTGCCGAGCTTTGAGATGGCGAAAATGGCCGCGATCTGTTTTGCAAGTGGTGGCGGTTGAACAACCGG  
GTTTGGCGATGCGTTTGCATTTATCTGAGATATAAAAAACCCGCCCTGACAGGCGGGAAGAACGGCAACTAAACTGTT  
ATTCAAGTGGCATTAGATCTATGACGATCTGGCAAACCATGCCCGATGCGACGCTGTGCGCTTATCGTGCCTACAAA  
TAGTCCGAACCGTAGCCGGATAAGGCGTTTACGCCCATCCGGCAATTGGTGCATGATGCCTGATGCGACGCTGTGCGC

TCTTATCGTGCCTACAAATAGTCCGAACCGTAGGCCGGATAAGGCGTTTACGCCGCATCCGGCAATTGGTGCATGATGCC  
TGATGCGACGCTGGCGCGTCTTATCAGGCCTACATTGGTGCCGGATCGGTAGACCGGATAAGGCGTTCACGCCGCATCCG  
GCAAGTGGTTAAACCCGCTCAAACACCGTCGCAATACCTGACCCAGACCGATAACATCGTCGCCAGACAAACTGAAC  
GTCTTTGCGTTCATCAGATTCAGCAGCGTGGTGTGATACGCGCACCGGAACAACCCAGCGGATGACCCAGCGCGATCG  
CGCCACCGTTGAGTTGATCTTCTCGTCAATCTGCTCAATTAGTCCAGATCTTAATACATGGCAGGATCTGCGCGGCA  
AAGGCTTCGTTCAATTCAAACACGCCGATATCGCTGGCAGAAAGCCCCGCTTTTTTTCAGCGCCAGTTTCGAGGCCGGAAC  
CGGGCCGTAACCCATAATCGATGGGTACAACCAACGACCGCCATCGAACGCACACGAGCGCGCGGCTTAAGACCTAATT  
CATGGGCGCGGCTTCACTCATCACCAGCATGGCAGCTGCGCCATCGGAAAGTGCAGAAGATGTGCCCGCGTTACCATA  
CCGTTTACTGGATCAAACGCCGGACGCAGCGTGGCGAGGGCTTCCACGGTGGTTTCGGGGGAATCACTTCGTCGTAATT  
AAACTGCTTCAGGACGCCGTGGCATCGTGACCACCGGTGGGATGATTTCAATTTTAAATGCGGCCGACTGCGTGGCGG  
CCCAGGCGCGGGCGTGTGACCGCGCGGCAAAGGCATCCTGCATTTACGGCTGATACCGTGATACGCGCCAGCATTCT  
GCCGTTAAGCCATCATGCCCGCGCTTTGGCGACATTGCGGCTCAGGCCGGGTGAAAATCGACGCCGTGACTCATCGG  
CACATGGCCATATGCTCCACGCCCAACAGACATGCCTGCGCATCGCCAGTCATGATCATTGCTGCTGCGTCATGCA  
GTGCTGTCATGGATGAACCACACAAGCGATTAACGGTAACCGCCGGGACAGAGTGTGGTACTTCTGCCAGCAGCGCCG  
TTACGGCGATATAAAACCCCTGCTCCAGCGTCTGCTGCACACAACCCAGTAAATATCGTCGAGGGCCCGCTTCCAG  
CGCCGGTTACGCGCAGCAGGCTACGCATTAATGAGCGGAGAGATCTTCTGCACGCACGTTACGAAAAGCACCGCCCT  
TCGAAACGGCCATCGGGGTGCGAATTGCATCGACAATGACAACCTGTTCCATTGTGACTCCTTAAGCCGTTTTTCAGGTCG  
CCAACCGACGGGCTGGCTCAACCGAGGATAGTACGGTTCGTTATGACGCGCTTTATTACGCAGACCTTCCGGCACTT  
ATACAGCGGGCCGAGGTGCTGATATTGCTGTGCCATATCGAGGTATTTGCGCTACCGAGGTGTCCAGCCAGCGGAACG  
CGCCGCGTGGAAACGAGGGAAGCCCAGGCCGTAGACCAGCGCCATATCCGCTTCCGCCGAGTGGCGATAATGCCTTCC  
TCCAGACAGCGCACCACTTCGTTGACCATCGGGATCATCATGCGGGCGATAATCTTCTTTCGCTGAAATCGCGCTTCCG  
CTGGCTCACTTCTGCCAGCAGGTCTTCAACGGCGCGTCTTCTTCTTCTTCCGCTTACCTTTGCTGTCTTCTTTAAAC  
GCCAGAAACCGAGGCCGTTCTTCTGACCAAAGCGGTTGGCATCAAACAGCGCGTCGATGGCATCGCGGTAATCTTTCTGC  
ATCCGCTGCGGGAAGCCTGCTGCCATGACAGCCTGAGCGTGTGCGCGGTATCAATGCCACAACGTCCAGCAGATATGC  
CGGGCCATCGCCAGCCAAACTGTTTTCCATCACTTTGTGATCTTTCGAAATCCGCGCGTTCGCGCAGCAGCTGGC  
TGAAACCGGCAAATACGGGAACAGCAGCGGTTAAACAAGAAGCCGGGCGAGTCGTTAACCACAATCGCGCTTGGCC  
ATCTTGTCTCGCCAGGCGACAACCTTTCGCGATGGTTTCGTCGGAGCTTTTCTCGCCGCAATAATTTCTACCAACGGCAT  
TCGGTGGACCGGTTAAAGAAGTGCATCCCGAGAAGTTTTCCGGCGTTCAGCGCGTTCGCCAGTTGCGTATAGGAA  
TGTTTGAAGTGTAGACGCCAGCAGCGTATCCTGGCGTACTTTTTGTTTCGGTTTCTGCCAGTACGGCTTTTTTCACTTC  
GGTTTTTCAACAACCGCTTCTACCACAATATCCACGCGGTCAAATCCGGCGTAGTCGAGCGTTGGGTGGATTGTGGAGAT  
CACGCCAGCCAGTTTCAGACCATCGATCTTCCCGCGCTCAAGTCTGTTTTCAGCAGTTTCGCGGCTTCGGTTCATGCCGA  
GGTTAACGACTTGTCTGTTGATATCTTTCATGACAACCGGCACGCCTTTCACGCAGACTGTAAGCGATGCCGCCGCC  
ATAATGCCTGCACCCAGCACCGCGCCTGTTTCGGGTTTTCAACGCTCTTGGTGGTTCCTTTCGCTTTCGCTTTTACATA  
TTGATCGTTAAGGAAAATGCCGACCAAGTGCAGCGGCTTCGTTGGTATGCGCCAGCGGGACAAAACCTTTTGTTCAGGT  
TTAAGGCTTTCACGACCAAAACGGGCCGAGCTTCAATGGTTTTACTGCGGTGATGGGGCCGGATAATGTTTCCC  
GCTGTTTGTGCGACCATCCCTTTAGCGATGGTGAAGCTCATGGTGGCTTCAATCTTGTGCTAGTTTTAGTGGTTCCAGCTT  
CGGCTGACGTTTTGCTTTCAGTTCGAGTTCGCGTTAATGGCTGGCGTAAAACCGCTTTCGCGCTTCAACCAAGTTTTT  
CTGCTTGTACTACGCCATCACCAGACCGATTTTCAGCGCTGATCCGCGCCGACATCTTACCAGCGGCAATGATTTCC  
AGCGCACTGTACGCGCCAGCATACGTGGCATAACGTACAGAACCGCCAAAGCCAGGCATGATGCCAGTTTGGTTTTCCGG  
CAGACCGATGCGCAGATCCGCGCTCGCCAGCAGATAATCGGTGCCAGCAGCATTTCGAGCCACCGCCAGCGCATAGC  
CATTGACGGCAGCAATGGTCGGCACCGCAGATCTTCCAGGCGATTAACACGCTATTGGCAAAGTGCAGCCACTGACTT  
AACTGTTCTTCAAGAACGAGGAACAGGGACAAAATTCGGTGATATCAGCACCGACGATAAAGGCTGCTTTGTTTCAACG  
CAGCAGCAGCCCTTTAGATCTGATTGCTGTTCCAGCACGCCGATGGCTCGCCGAGGCTGGCGACGGTTCGAGTGTGCA  
GTTTATTAACCTGAACCTGGGGCATCAAATACCAGTTCGGCAATGCCATCTTCCAGCCAGTCAAGGTACAGGGTGTGCGCT  
TTGTAAGCATGTGAGTCTCCTGAATCCGCAAGGTGATCTGGTGTACCAGATGAGTCGAAGTGTGATTTTTGTGTTAAA  
AATATGCAACAAAAGATTAAGAAAATGCCGATCTGATCAGCTCGGCAGAAAATCAGCTCTGGATGAACGATGTGCTAA  
GATGCGGAGACTTAAGGTCAAAAAACAGAAGGGTAAAAATGGAATCACTGGCTCGCTCTAAAAAATCATATAGCTA  
CCTTACAAGAACGACTCGCGATGCGTGGCGCGCTTCAAGCTGGATGCGTTACTTATTCACTCCGGCGAGCTGTTCAAT  
GTTTTTCTCGACGATCATCCCTATCCGTTTAAAGTGAACCCGCAATTCAAAGCGTGGGTGCCGTAACCTCAGGTGCCAAA  
CTGCTGTTGCTGGTGGATGGCGTGAACAAGCCGAACTGTGGTTCTATCTGCCGTTGATTACTGGCACAACGTGCAAC  
CGCTGCCGACCTTTTCTGACTGAAGATGTGGAAGTATCGCGCTGCCGAAAGCCGATGGCATTGGTAGCTGCTGCCT  
GCTGCGCGCGCAATATCGGTTATATCGGTCGGTCCGGAACGTGCGCTGCAACTGGGTATTGAGGCCAGCAACATCAA  
CCGAAAAGGGTTATCGACTACCTGCATTAATATCGCTCCTTCAAACCTGAGTACGAACTGGCTGTATCGGTGAAGCGC  
AGAAAATGGCGGTCAACGGTCAACCGCGCGGAGAGAAGCGTTCCGTTCTGGCATGAGCGAGTTTCGATATCAACATTGCC  
TATCTGACCGCGACCGGTATCGTATACCGACGTACCTTACAGCAACATTGTGGCGCTTAACGAACACGCTGCGGTACT  
GCATTACCAAACTGGACCATCAGGCACCGGAAGAGATGCGCAGCTTCTGCTGGATGCCGGGCGAGAATATAACGGCT

ATGCGGCTGACCTGACCCGTACCTGGTCGGCAAAAAGTGACAACGACTACGCGCAGCTGGTGAAGGACGTTAATGATGAA  
CAACTGGCGTGATGCCACCATGAAAGCAGGCGTCAGCTATGTGGATTACCACATCCAGTTCATCAGCGCATCGCCAA  
ACTGCTGCGTAAACATCAAATCATCACCGATATGAGTGAAGAAGCGATGGTCGAAAACGATCTTACCGGGCCGTTTATGC  
CGCATGGTATCGGCCATCCGCTGGGCCTGCAGGTGCATGACGTCGCTGGTTTTATGCAGGATGATAGCGGTACGCACCTC  
GCGGCACCGGCAAAATATCCGTACCTGCGCTGCACCCGATTCTCCAGCCGGGCATGGTGTAAACCATCGAACCGGGTAT  
CTACTTCATCGAATCGCTACTGGCACCCTGGCGTGAAGGGCAGTTCAGCAAGCACTTCAACTGGCAGAAAATTGAAGCAC  
TGAAACCGTTCGGCGGCATTGATATCGAAGACAACGTGGTATCCACGAAAACAACGTGAAAAACATGACCCGGGATCTG  
AAACTGGCGTGATGGAAGCTGGTTAATTCCTGCGGCACCGGTACCGGTCGTTGAAGAGATCAAAAAGAGCCGTTCCATA  
ACGATGTTGGCGCATACCGATGGCGTTGAGGCGGCGAAAGCGTTTGTGAATCGGTGCGGGCAGAACACCCCGATGCCCC  
GCACATTGCTGGCGTGGTGCAGGCTGCAGGATGATTCTCAACAGCTGGGTTTCTCTGACGACGGGGAGCCGGCGG  
GAACGGCAGTAAACCGATGCTCGCCAGCTAATGGGCAGCGGCTCGGGGAAATTACCGTGTGGTAGTGCCTACTAC  
GGCGGCATATTGCTTGGCACCGGTGGTTAGTGAAGCGTATGGCGGCGGCTGAATCAGGCGCTGCGCCAGCTAACGAC  
CCAACGCAAGACGCCATTAACCGAATATACTTTGCAATGTGAATATCATCAGTTAACGGCATTGAAGCGTTGCTGGGGC  
AGTGTGACGGCAAAATTACAACAGTGATTATCAGGCACTTCGTTCTGCTGCGGGTGGCGCTCCGGCGGCAAAAGTGGT  
GAATTTCCGCAAGCTGGCGGATTTAGCCGTGTTTCAATGCAATGTTAGCGATTGAAGAATAATCCCACTTCGTTT  
TGCAGAATAAGGAAGCGCAGAGATGCATTTTCGCGCATTACCGAATCGTTGGACTACTGGTTCATCTTATTTTCAGG  
GACCATGATTATCCCTGGGCTGGTAGCACTCATCTACCGGGATGGAGCGGGCCGCTTTTACCCAGACCTTTTTGTGCG  
CCCTCGCCATTGGCTCTATGCTGTGGTGGCCGAACCGCAAAGAGAAAAGCGAACTTAAATCCCGTGAGGGGTTTTCTGATA  
GTGGTGCTGTTCTGGACCGTCTGGTGGTGCCTGCGTCCCTTTTATCTTCTCGAAAGCCGAACCTCACGATTAC  
CGATGCGTTTTTTGAATCTTCTGCGCTGACCACTACGGGAGCCACTACGCTGGTGGGGCTGGATTGCTCCCTCACG  
CCATCTCTTTTATCGCCAGATGCTGCAATGGTTTGGCGGGATGGGGATCATCGTGTGGCGGTTGCGATACTGCCTATC  
CTCGGCGTGGTGGGATGCAGCTCTATCGCGCAGAAATGCCCGGCCGCTGAAAGATAACAAAATGCGCCCGCAATTGC  
GGAAACGGCGAAAACCTGTGGTTGATTTATGCTTGTGACCGTGCCTGTGCGCTGGCGTTGTGGTTTGGCGAATGG  
ATGCTTTGATGCCATCGCCATAGCTTTGCGACTATCGCTATTGGCGGCTTCTCGACACATGATGCCAGTATCGGTTAT  
TTCGATAGCCGACTATTAACACTATCATTGCTATCTTCTGCTGATCTCCGGCTGTAACACTACGGTCTGCACTTTTCACT  
GTTAAGTGGCGTAGTCTGAAGTTTTATTGGCGCATCCGGAATTCGCATGTTTATCGGCGTACAGTTTACGCTGGTGG  
TTATTTGTACCCTCGTACTGTGGTTTCATAATGTCTACAGTTCGCGCCTGATGACAATTAACCAGGCGTTTTTCCAGGTG  
GTGTCGATGGCGACAACCGCGGGTTTACAACGACAGCATTGCCGCTGGCCGCTTTTTTCCCGGACTGCTTTTATG  
TTCAGCCTTTATCGGCGGTTGCGCCGGTCAACGGCGGTTGGCTGAAGGTGATCCGCATCCTGCTGCTGTTAAGCAGG  
GGAACCGTGAGCTGAAACGACTGGTGCATCCGAACCGCTCTATAGCATTAAAGCTGGGGAATCGCGCACTGCCGGAACGT  
ATCCTCGAAGCCGTTTGGGGATTTTTCTCCGCTATGCATTGGTGTATTATTGTCAGTATGCTGGCGATTATCGCCACGGG  
CGTGGATGACTTTTTGCTTTGCGTGGTGTGGCGACATTGAATAACCTGGGGCCAGGGCTTGGCGTGGTTGCTGATA  
ACTTTACCAGTATGAACCGGTGGCTAAATGGATCTGATTGCCAACATGCTGTTTGGTCTGCTCGAGGTCTTTACATTG  
CTGGTGCTCTTTACCCGACTTTCTGGCGTGAATGATGGAGTAATACGTGAAAACATTAATCTTTTCTCAACAAGGGAC  
GGACAAACGGCGGAGATTGCCTCCTACCTGGCTCGGAACTGAAAGAACTGGGGATCCAGGCGGATGTCGCAATGTGCA  
CCGATTGAAGAACCACAGTGGGAAAATATGACCGTGTGGTCAATGGTCTTATTTCGATGTTGCTACTACCATTCAG  
CGTTCAGGAATTTGTCAAAAACATGCGACGCGGCTGAATTCGATGCCGAGCGCTTTTACTCCGTGAATCTGGTGGCG  
CGAAACCGGAGAAGCGTACTCCACAGACCAACAGCTACGCGCGCAAGTTTCTGATGAACTCGAATGGCGTCCCGATCG  
CTGCGCGGCTATTGCCGGGCGCTGCGTTACCCAGTTATCGTGGTACGACCGTTTATGATCAAGCTGATTATGAAGA  
TGTGAGGCGGTGAAACGGTACGCGCAAAAGAAAGTGTCTATACCGAATGGGAGCAGGTGGCGAATTTCCCGCGAGAATC  
GCCATTTAACCGACAACCGGACGCTGAAATAAGCATAAAGAATAAAAAATGCGCGGTGAGAAAATTTTTAAATTTCC  
TCTTGTGAGGCGGAATAACTCCCTATAATGCGCCACCACTGACACGGAACAACGGCAAACACGCCCGGGTACGCGGG  
GTTCTCTGAGAACTCCGGCAGAGAAAAGCAAAAATAAATGCTTACTCTGTAGCGGGAAGGCGTATTATGCACACCCCGC  
GCCGCTGAGAAAAAGCGAAGCGGCACTGCTCTTTAAACAATTTATCAGACAATCTGTGTGGGCACTCGAAGATACGATT  
TTAACGTCGCAAGACGAAAATGAATACCAAGTCTCAAGAGTGAACACGTAATTCATTACGAAGTTTAAATCTTTGAGCG  
TCAAATTTTTAAATTGAAGAGTTTGTATCATGGCTCAGATTGAACGCTGGCGGCAGGCTAACACATGCAAGTCAACCGT  
AACAGGAAGAAGCTTCTTTGCTGACGAGTGGCGGACGGGTGAGTAATGTCTGGGAACTGCCTGATGGAGGGGGAT  
AACTACTGAAACGGTAGCTAATACCGCATAACGTCGCAAGACCAAAGAGGGGTACCTTCGGGCTCTTGCCATCGGATG  
TGCCAGATGGGATTAGCTAGTAGGTGGGTAACGGCTCACCTAGGCGACGATCCCTAGCTGGTCTGAGAGGATGACCAG  
CCACTGAACTGAGACACGGTCCAGACTCCTACGGGAGGACAGTGGGGAATATTGCACAATGGGCGCAAGCCTGAT  
GCAGCCATGCCGCTGTATGAAGAAGGCTTCGGGTTGTAAGTACTTTTCCAGCGGGGAGGAAGGGAGTAAAGTTAATACC  
TTTGTCTATTGACGTTACCCGCAAGAAGAAGCACCAGGCTAATCCGTGCCAGCAGCCGCGGTAATACGGAGGGTGCAAGCG  
TTAATCGGAATTAAGGGCTAAAGCGCACGCGAGGCGTTTGTAAAGTCAAGTGTGAAATCCCGGGCTCAACCTGGGAA  
CTGCATCTGATACTGGCAAGCTTGTGCTGAGAGGGGGTAGAATTCAGGTGTAGCGGTGAAATGCGTAGAGATCTG  
GAGGAATACCGGTGGCGAAGGCGGCCCTTGACGAAAGACTGACGCTCAGGTGCGAAAGCGTGGGGAGCAACAGGATTA  
GATACCCTGGTAGTCCACGCGTAAACGATGTCGACTTGGAGGTTGTGCCCTTGGAGCGTGGCTTCCGGAGCTAACCGGT

TAAGTCGACCGCTGGGGAGTACGGCCGCAAGGTTAAAACCTCAAATGAATTGACGGGGGCCGCACAAGCGGTGGAGCAT  
GTGGTTTAATTCGATGCAACGCGAAGAACCCTTACCTGGTCTTGACATCCACGGAAGTTTTTCAGAGATGAGAATGTGCCCTT  
CGGGAACCGTGAGACAGGTGCTGCATGGCTGTCGTAGCTCGTGTGTGAAATGTTGGGTTAAGTCCCGCAACGAGCGCA  
ACCTTATCCTTTGTTGCCAGCGGTCCGGCCGGAACTCAAAGGAGACTGCCAGTGATAAACTGGAGGAAGGTGGGGATG  
ACGTCAAGTATCATGGCCCTTACGACCAGGGCTACACACGTGCTACAATGGCCATACAAAGAGAAGCGACCTCGCGAG  
AGCAAGCGGACCTCATAAAGTGCCTGTAGTCCGGATTGGAGTCTGCAACTCGACTCCATGAAGTCGGAATCGCTAGTAA  
TCGTGGATCAGAATGCCACGGTGAATACGTTCCCGGCCCTGTACACACCGCCCGTACACCATGGGAGTGGGTTGCAA  
AGAAGTAGGTAGCTTAACCTTCGGGAGGGCGCTTACCACTTTGTATTGACTGGGGTGAAGTCGTAACAAGGTAACC  
GTAGGGAACTGCGGTTGGATCACCTCCTTACCTTAAAGAAGCGTTCTTTGAAGTGTACACAGATTGTCTGATGAAA  
ATGAGCAGTAAAACCTCTACAGGCTTGTAGTCAAGTGGTTAGAGCGCACCCCTGATAAGGGTGAGGTGCGTGGTTCAAG  
TCCACTCAGGCCTACCAATTTGCACGGCAAATTTGAAGAGGTTTTAACTACATGTTATGGGGCTATAGCTCAGCTGGGA  
GAGCGCCTGCTTGCACGCAAGGAGTCTGCGGTTGATCCCGCATAGCTCCACCATCTCTGTAGTGATTAATAAAAAAT  
ACTTCAGAGTGAACCTGCAAAGGTTACTGCGAAGTTTTGCTCTTTAAAAATCTGGATCAAGCTGAAAATTGAAACTG  
AACAAAGAAAGTTGTTGAGTCTCTCAAATTTTCGCAACACGATGATGAATCGAAAGAAACATCTTCGGGTTGTGAGG  
TTAAGCGACTAAGCGTACACGGTGGATGCCCTGGCAGTCAGAGGACGATGAAGGACGTGCTAATCTGCGATAAGCGTCCGT  
AAGGTGATATGAACCGTTATAACCGCGATTTCCGAATGGGGAAACCCAGTGTGTTTCGACACACTATCTAACTGAAT  
CCATAGGTTAATGAGGCGAACCGGGGAACTGAAACATCTAAGTACCCCGAGGAAAAGAAATCAACCGAGATTCCTCCAG  
TAGCGCGAGCGAACGGGGAGCAGCCAGAGCCTGAATCAGTGTGTGTTAGTGGAAGCGTCTGAAAGCGTGCAGATA  
CAGGGTGACAGCCCGTACACAAAAATGCACATGCTGTGAGCTCGATGAGTAGGGCGGACACGTGGTATCCTGTCTGAA  
TATGGGGGGACCATCCTCAAGGCTAAATACTCCTGACTGACCGATAGTGAACCAGTACCGTGAGGGAAAGGCGAAAAGA  
ACCCCGCGAGGGGAGTAAAAAGAACCTGAAACCGTGTACGTACAAGCAGTGGGAGCAGCTTAGGCGTGTGACTGCGT  
ACCTTTGTATAATGGGTGACGCACTTATATTCTGTAGCAAGGTTAACCGAATAGGGGAGCCGAAGGGAAACCGAGTCTT  
AACTGGGCGTTAAGTTCAGGGTATAGACCCGAAACCCGGTGTACTAGCCATGGGCAGGTTGAAGGTTGGGTAACACTAA  
CTGGAGGACCGAACCGACTAATGTTGAAAAATTAGCGGATGACTTGTGGCTGGGGTGAAGGCCAATCAAACCGGGAGA  
TAGCTGGTTCTCCCGAAAGCTATTTAGGTAGCGCCTCGTAATCATCTCCGGGGTAGAGCACTGTTTCGGCAAGGGG  
GTCATCCCGACTTACCAACCGATGCAAACCTGCGAATACCGGAGAATGTTATCACGGGAGACACGGCGGGTGCTAACG  
TCCGTGTAAGAGGGAAACAACCCAGACCGCCAGTAAGGTCCCAAAGTCATGTTAAGTGGGAAACGATGTGGGAAGG  
CCAGACAGCCAGGATGTTGGCTTAGAAGCAGCCATCATTTAAAGAAAGCGTAATAGCTCACTGGTGCAGTCCGCTGCG  
CGAAGATGTAACGGGGCTAAACCATGCAACCGAAGTGCAGGACGCACTATGTGTTGTTGGGTAGGGGAGCGTTCTGT  
AAGCCTGTGAAGGTGTGCTGTGAGGCATGCTGGAGGTATCAGAAGTGCGAATGCTGACATAAGTAACGATAAAGCGGGT  
AAAAGCCCGCTCGCCGGAAGACCAAGGTTTCTGTCCAACGTTAATCGGGGACGGGTGAGTCGACCCCTAAGGCGAGGCC  
GAAAGGCGTAGTCGATGGGAAACAGGTTAATATTCTGTACTTGGTGTACTGCGAAGGGGGACGGAGAAGGCTATGTT  
GGCCGGGCGACGGTTGTCCCGGTTAAGCGTGTAGGCTGGTTTTCCAGGCAAATCCGGAAAATCAAGGCTGAGGCGTAT  
GACGAGGCACTACGGTGTGAAGCAACAAATGCCCTGCTTCCAGGAAAAGCCTTAAGCATCAGGTAACATCAAATCGTA  
CCCCAAACCGACACAGGTGGTCAGGTAGAGAATACCAAGGCGCTTGAAGAACTCGGGTGAAGGAACTAGGCAAAATGGT  
GCCGTAACCTCGGAGAAAGCAGCTGATATGTAGGTGAAGCGACTTGTCTGGAGCTGAAATCAGTCGAAGATACCAG  
CTGGCTGCAACTGTTTATTAACAAACACAGCACTGTGCAACACGAAAGTGGACGTATACGGTGTGACGCTGCCCGGTGC  
CGAAGGTTAATTGATGGGTTAGCCGCAAGGCGAAGCTCTTGATCGAAGCCCGGTAACGGCGCCGTAACGTAAGTGGC  
GAGACTCAGTGAATTAACCTGCTGTGAAGTGCAGTGTACCCGCGCAAGACGGAAGACCCCGTAACCTTTACTAT  
AGCTTGACACTGAACATTGAGCCTTGATGTGTAGGATAGGTGGGAGGCTTTGAAGTGTGGACGCCAGTCTGCATGGAGCC  
GACCTTGAATACCACCCTTAAATGTTTGTGTTCTAACGTTGACCCGTAATCCGGGTTGCGGACAGTGTCTGGTGGGTA  
GTTTACTGGGCGGTCTCCTCCTAAAGAGTAACGGAGGAGCACGAAGGTTGGCTAATCCTGGTGCAGATCAGGAGGTT  
AGTGCAATGGCATAAGCCAGCTTACTGCGAGCGTACGGCGGAGCAGGTGCGAAAGCAGGTCATAGTATCGGTTGGT  
TCTGAATGGAAGGGCCATCGCTCAACGGATAAAAGTACTCCGGGATAACAGGCTGATACCGCCCAAGAGTTTATATCG  
ACGGCGGTGTTTGGCACCTCGATGTCGGCTCATCACATCCTGGGGCTGAAGTAGGTCCTAAGGGTATGGCTGTTCCGCAT  
TTAAAGTGGTACGCGAGCTGGGTTAGAACGTGCTGAGACAGTTCGGTCCCTATCTGCCGTGGGCGCTGGAGAAGTGGG  
GGGGCTGCTCCTAGTACGAGAGGACCGGAGTGGACGCATCACTGGTGTTCGGGTTGTCATGCCAATGGCACTGCCCGTA  
GCTAAATGCGGAAGAGATAAGTGTGAAAGCATCTAAGCACGAACTTGCCCCGAGATGAGTTCTCCTGACTCCTTGAG  
AGTCTGAAGGAACGTTGAAGACGACGACGTTGATAGCCGGGTGTGAAGCGCAGCGATGCGTTGAGCTAACCGGTA  
AATGAACCGTGAAGCTTAACCTTACAACGCCGAAGGTTTTGGCGGATTGAGAGAAGTTTTGAGCCTGATACAGATTA  
AATCAGAACGCAAGCGGTCTGATAAAACAGAATTTGCCCTGGCGCAGTAGCCGGTGGTCCACCTGACCCCATGCCG  
AACTCAGAAGTGAACCGCTAGCGCCGATGGTAGTGTGGGTTCTCTCATGCGAGAGTAGGGAAGTCCAGGCATCAA  
TAAACGAAAGGCTCAGTCGGAAGACTGGGCCTTTCGTTTTATCTGTTGTTGTCGGTGAACGCTCTCCTGAGTAGGACA  
AATCCGCGGGAGCGGATTTGAACGTTGCGAAGCAACGGCCCGGAGGGTGGCGGGCAGGACGCCCGCCATAAACTGCCAG  
GCATCAAATTAAGCAGAAGGCCATCCTGACGGATGGCCTTTTTGCATTGGCGCAGAAAAAATGCCGATGCGACGCTGG

CGCGTCTTATCCAGCCTACTCTTGCTTATCCGTTCTGCTTTTGCATCCACTCCACCACAAAATCAGCCAGCCCCTCAACA  
TCATTAATATCCAGTAATGCACATCAAGATTAAGCGGCACATCACTGGCTACAGCAATAACATGCCTGTCTATCACTAA  
TTCTTCAGGTTCGATGTCCGGCTCCATCGCGAAACAGACAATCTTTGCGATCTCTTCATGCTTAAACCCCTTCGACCAGAA  
TCAAATCCAGCTTTGAGGTATCCATTCGACTTTCGAGAAAATGTAGATCCAGCTCTTCTTCGTCTGGTGTTCGGTCTATC  
AAGGCCATCGTTGCTGGCTGGCAACGATGGTTTGTCCGCGCCAGCCTTTCGCGAGCTCATAGCTATCTTTGCTGGCTT  
ATCAACATCCATATCATGGTGCATGCTTAATCAGCCCTGGACGGATCCCTCTGGCGCATAATGCCGGGATCAGTTTTT  
TCAAAGCGTAGTTTTTCCGGTACCCTCCACGCGGCAAAGGCGAGTAACGGTATCATCGTTTTTCTGCCATCGGGCAA  
GTCCTCTGGCGTATTCACGTTAACAATGCATCTTTATGATCGTGAATCAACCGCATGACCGCCAGCCAGACGCATA  
AATACCATTACCCGGCGTTCCTGCTTCGAGATATTCAGTAATAAAGGCTCAATAGCGCGGTTTACCAGAGCAATAGT  
CGGGTATCGCGTTCACCGTCATGGACCCACACGACAGGCGCATCTTTGCGTGCATGATTAAGCCTGGCTGCTAAATCAG  
GGGAATGTAAGGCGTATCGCACGGGCAAAAACAAAACCACTCACCAGCTTCTGCTGCATTACTGAAAGCATTCTGCC  
AGAGGGCTGGTAATCCGCCAGTGAATCTTCAATCACTTTTCCAGCCGCTTGCCTGATAGATTTCTGATGACGATTAGC  
ATTAACCACGACGTGAGAGAGCTGCGTCATAAGCGCGTCAGCGACATGTTGCCATAATGGTTTCCGTTTAAATCAAGCA  
ATCCTTTATCTACGCCGCCATTCTGCTGGCTTTACCGCTGCCAGCACAACGCCTGTTATCGTCGTATCAGATTACC  
GATATCGCCTCTTTTATTGGGATTGACCTGTCAACGTGTCTCAAGAGTAAGGAGCATCACTATGAAATGTA  
CGTCTGAATGAAGTTATTGAACTCCTCCAGCCAGCCTGGCAAAAAGAGCCAGACCTTAACTGCTGCAATTTTTGCAGAA  
ACTGGCGAAAGAGTCAGTTTTTACCGCGAACTGGCGGATTTGACGGATGACATTCTGATCTATCACCTGAAAATGCGTG  
ATTCCGCGAAAGATGCGGTGATCCCGGTTTGCAGAAAGATTATGAAGAAGACTTCAAACCGCGCTGTTACGCGCTCGC  
GGCGTAATTAAGAGTAAAAGCTTGTAAAGCGCGCCACAAAATCATCGTGAATGATATCCTTCGTCTTTCGTAATGTT  
TTCCGGATGATGGGATGAATAACAGCGCTTTTACTTTCCAGACACTACACCCGGATACCATCATGGACGCTCTGTTTGG  
CATGGGATCCGGGTGGATTCGGTCTTACCCCGTTAACAGCTATGAAAACCGTGTCTATCAATTTCCAGGACGAAGATCG  
TCGACGTTTTGCTGCAATTTTATCGCCCTGAACGTTGGACAGCCGATCAAATCCTCGAAGAACATCAATTTGCGTTGC  
AGCTGGTAAATGATGAAGTCCGGTGCAGCACCTGTGGCCTTTAACGGTCAGACTTTATTGAATCATCAGGGATTTTAT  
TTCGCTGTTTTTCAAGCGTCGGTGGTGCAGTTCGAAGCTGATAATATCGATCAGATGGAAGCGGTTGGGCGTTATTT  
AGGGCGTATGCACCAGACGGGGCGAAACAGCTTTTATCCATCGCCGACCATCGGTTTGAACGAATATCTCATTGAGC  
CACGCAAGCTGTTTGGAGACGCTACACTGATACCTCCGGGTTGAAAGCGGCATTCTGAAAGCGACAGATGAGCTGATT  
GCCGCCGTTACAGCACACTGGCGGAAGATTTACCCTTTCGCGCTACATGGAGACTGCCACGCCGGGAATATTCTCTG  
GCGCGATGGTCCAATGTTTGTGATCTGGATGATGCACGTAATGGTCCAGCCGTTCCAGGATTTGTGGATGTTGCTCAATG  
GCGATAAAGCCGAGCAGCGGATGCAACTGAAAATATTATTGAAGCTTATGAAGAATTTAGCGAGTTCGACACCGCTGAA  
ATCGGACTGATTGAACCTTTACGCGCCATGCGTTTTGTTTTATTATCTTCCCTGGCTAATGCCGCGTTGGGCTGATCCCGC  
GTTCCCGAAAAATTTCCCGTGGTTAACCGGGGAAGATTACTGGCTGCGACAGACGGCGACTTTTATAGAACAGGCAAAAAG  
TTCTACAAGAACCCCTTTGCAATTAACCTATGTATTAATCGGAGAGAGTAGATCATGAAAAAGATTTGGCTGGCGCT  
GGCTGGTTTAGTTTTAGCGTTTAGCGCATCGCGCGCAGTATGAAGATGGTAAACAGTACACTACCCTGAAAAACCGG  
TAGCTGGCGCGCCGAAGTCTGGAGTTTTCTCTTTCTTCTGCCGCACTGCTATCAGTTTGAAGAAGTTCTGCATATT  
TCTGATAATGTGAAGAAAAAATGCGGGAAGGCGTGAAGATGACTAAATACCACGTCAACTTCATGGGTGGTGACCTGGG  
CAAAGATCTGACTCAGGCATGGGCTGTGGCGATGGCGCTGGGCGTGAAGACAAAAGTACTGTTCCGCTGTTTGAAGGCG  
TACAGAAAACCCAGACCATTCGTTCTGCTTCTGATATCCGCGATGATTTATCAACGCAGGTATTAAGGTGAAGAGTAC  
GACGCGGCGTGAACAGCTTCGTTGGTAAATCTCTGGTGCCTCAGCAGGAAAAAGCTGCAGCTGACGTGCAATTCGCTGG  
CGTTCCGGCGATGTTTGTAAACGGTAAATATCAGTGAATCCGCGAGGATGGATACCAGCAATATGGATGTTTTTGTTC  
AGCAGTATGCTGATACAGTGAATATCTGTCGAGAAAAAATAATTCAATGTAATTAACATAAAGCCCGTGAATATTAC  
GGCTTTTTTTTATTATTAATAAATATAAATACATTTCTGATAATGCATCCTGCCGCTGGACATTATTTACGCATAAGTGG  
ATATTCAAAGTTTTGCTGTTTTATCAGGGAATTTTATATGATACGTAAGTACGCTACAGGTGTTATTGTTGCGTTAGCC  
GTAATCTGGGGTGGTGGCACATGGTACACAGGTACGCAAAATCAGCCTGGTGTGCAAAAATTTATTAAGATTTTAAACGA  
TGCTAAAAAGAAAGGTGAACATGCCTACGATATGACGTTAAGTTATCAAAATTTTGAACAAAGGCTTTTTTAAATCCCGTT  
TTCAAATGCAATGACATTCGATAACGGTGCACCCGATCTCAATATCAAGCCAGGCCAGAAAGTTGATTTGATGTGGAT  
GTTGAGCACGGTCCGTTGCCATCACAATGTTAATGCATGGTAATGTCATCCCAGCACTGGCAGCGGCAAAAAGTGAACCT  
AGTGAATAATGAACTGACACAACCGCTATTTATCGCCGCGAAAAATAAATCGCCCGTGAAGCGACATTGCGATTCCGCT  
TTGGTGGCTCATTCTCTACGACATTAGATGTTGCCCTGCAGAGTATGGAAAGTTTTCTTTTGGTGGGGCCAGTTTACT  
TTAATGGTGTAGTTCATTGTCTAACCTGGATATTGAAGGCAAAGTGAAGATATTGTTCTGCAATTATACCAAT  
GAACAAAGTAAACGCAAAAAGTTTTACCATTGATTCTCTGGCGGATTAGAAGAAAAGAAATTTCCGGTGGTGAAGCG  
AGTCAAAATTAATCAGATTAACATTATCAATCACGGGAAGACGTTGCCCAAATCGATGCTTTCGTTGCAAAAACCGAG  
CTGGATCGCGTTAAAGACAAAGATTATCAATGTCAATCTCACCTACGAACTTGATAAGTTAACAAAAGGGAATCAGCA  
ACTCGGTAGTGGTGGTGGTATTGATTGCTGAATCTATTGATCCCTCAGCAGTGCGCCAATTTATCATCCAGTATAACA  
TTGCGATGCAGAAAGCAGCTTCTGCACACCTGAGTTAGCAAACGATGAAGTTGCTCTGCAAGAAGTGAATGCTGCATTG  
TTCAAAGAGTATTTACCGTTATTACAAAAAGTGGCCGACCATTAAACAACCGGTAAGATGGAAGAACGCACTCGGGCA  
ACTAAATGCCAATCTGGATATCAGTATTGCCGACCCAGCAAATCTTCATCATCCACAAACAAAGATATCAAATCGCTCA

ATTTTGATGTGAAGTTACCGCTTAATGTCGTCACAGAAACCGAAAAAGCTTAATTTATCTGAAGGAATGGATGCGGAA  
AAAGCGAAAAGCAGGCTGATAAACAAATCAGCGGGATGATGACATTAGGTCAGATGTTTCAGTTAATCACGATTGACAA  
CAATACCGCTCGCTGCAGTGCCTTATACACCGGGTAAAGTTGTTTTAACGGACAGGAGATGAGCGAAGAAGAATTTA  
TGCTCTGTCGCGGACGTTTTGTTTCATTAATACTACTCGCCTCTGCTCATTAGAGGGCAGTAAAACCTACTTATTCT  
GACGCTGTGATGACATGAGAGACGTCAGAAGCCGGTCTTTTTCTGCCACAATGAGTTCAGCCATTGCTGAAAATGGCC  
TTAAAGCTTTTGCATTGATGTAGTCGCCATGTAACCTCATCGGCAATAGGCTGTAATCCACATGTACGACAATCCGCGT  
CAGTTTACCGCTTAACATATCGAAGAACGGCTGACGGTTATTGTCCGGATAACACAGCGTAACATTAAGCAGTTTATCGA  
ATTGTTTACCCAGTACATTTAGCGCCATCGCAATGCCTGCCGCTTTGGTGGCAACAAGTTTTGAAAAGTGGAGTGGGTT  
TGCTGATGTTTTCTTGCCTGAAACGGGAGCCTTCAACGAAATTGACAATGGTGGTGGGATGCAGGCGAAACTTTTACA  
AGAACGCCGAGTGGTTTCAACATCTTTACCACGTCGCTCCGGATGACGTAATAAATAAGCGCGGAATAACGCTTCATAA  
ACGGCATATCCAGCGACCAGCACGCCAGGCCAAGAAATGGCACCCAGGCCAGCTGTTGCTTGAAGAAATATTTATTCATC  
GGAATGTGCTTACGAAACAGCACGCACAGTACGACAATATCTGCCAACTACGGTGGTTACAAATAAGCAGATACCAGTT  
CTTCTTACTTAACCTTCCAGCCCGTGAACCTCCATTGAAGGTGGGTTGAGTGCAGTAATACCGCCAGACCTTAC  
ACCAGCAATACATCATAAAATCACAAAAACGCGAAACCTTTCCGCAATGACTGGCACAGGTAGCAATAGTTTTACAATC  
CCGCAATGATGATCGGGACGGAACAAAAATAGTACCAAAATGGTCAATACGATACTCAGCAAAAAGGTTATCGCAGC  
GAGTATTCTGCTATAATGAATTTATTTAAAAGGTTAGCCATAGACAGTGCCTAAAGAAGCGCAAGGCGCAGATTTTGA  
CAGAAAACGACCCAAATAACGGATGATCCTTAAGGAGAAAAATAATTCATATCTATCCACATTAGAAAAAATCCATTAT  
CTCAATTATTAGGGATGGATTTATTTTTAACTGCATGAAAAACAAAGACAAACATCATGCTGTAAAAAGCATGATAATAA  
ATTTAAAAGCGATGTAATAATTTATGCACAAAGTTATCCACATGACGATTTGCGAGCGATCCAGAAGATCTACAAAAGAT  
TTTACGAAAAGCGGTGAAAAACTCATGTTTTATCCTGTCTGTGGCATCCTTTACCCATAATCTGATAAACAGGCACGG  
ACATTATGGTTCAGATCCCCAAAATCCACTTATCCTTGTAGATGGTTCATCTTATCTTTATCGCGCATATCACGCTTT  
CCCCGCTGACTAACAGCGCAGGCGAGCCGACCGGTGCGATGTATGGTGTCTCAACATGTGCGCAGTCTGATCATGCA  
ATATAAACCGACGATGCAGCGGTGGTCTTTGACGCCAAGGAAAAACCTTTGCTGATGAACTGTTTGAACATTACAAAT  
CACATCGCCCGCAATGCCGGACGATCTGCGTGCACAAATCGAACCTTGCACGCGATGGTAAAGCGATGGGACTGCCG  
CTGCTGGCGGTTCTGGCGTAGAAGCGGACGACGTTATCGGTACTCTGGCGCGAAGCCGAAAAAGCCGGGCTCCGGT  
GCTGATCAGCACTGGCGATAAAGATATGGCGAGCTGGTGCACCAATATTACGCTTATCAATACCATGACGAATACCA  
TCCTCGGACCGAAGAGGTGGTGAATAAGTACGGCGTCCGCCAGAACTGATCATCGATTTCTGGCGCTGATGGGTGAC  
TCCTCTGATAACATTCCTGGCGTACCGGGCGTCCGTGAAAAACCGCGCAGGCATTGCTGCAAGGTCTTGGCGGACTGGA  
TAGCTGTATCGCGAGCCAGAAAAATGCTGGGTTGAGCTTCCGTGGCGGAAAAAATGGCAGCGAAGCTCGAGCAAAA  
ACAAAGAAGTTGCTTATCTCTACATACCAGCTGGCGACGATTAACCCGACGTTGAACTGGAGCTGACCTGTGAACAACCTG  
GAAGTGACGAACCGGCAGCGGAAGAGTTGTTGGGGCTGTTCAAAAAGTATGAGTTCAAACGCTGGACTGCTGATGTGCA  
AGCGGGCAATGGTTACAGGCCAAAGGGGCAAAACCGCCGGAAGCCACAGGAAACAGTGTTCAGACGGAAGCACCAG  
AAGTGACGGCAACGGTGATTTCTTATGACAACTACGTCACCATCCTTGATGAAGAAACACTGAAAGCGTGGATTGCGAAG  
CTGGAAAAGCGCCGGTATTTGCAATTTGATACCGAAACCGACAGCCTTGATAACATCTCTGCTAACCTGGTCCGGCTTT  
TTTTGCTATCGAGCCAGGCTAGCGGCATATATCCGGTGTCTCATGATTATCTTGATGCGCCGATCAAATCTCTCGCG  
AGCGTGCATCGAGTTGCTAAAACCGTGTGGAAGATGAAAAGCGCTGAAGTCCGGGCAAAACCTGAAATACGATCGC  
GGTATTCTGGCGAACTACGGCATTGAACTGCGTGGGATTGCGTTTGATACCATGCTGGAGTCTACATTTCAATAGCGT  
TGCCGGGCGTACGATATGGACAGCCTCGCGAACGTTGGTTGAAGCACAAAACCATCACTTTTGAAGAGATTGCTGGTA  
AAGGCAAAAACAACGACCTTTAACCAGATTGCCCTGAAGAAGCCGGACGTTACGCCCGCAAGATCGAGATGTACC  
TTGCAGTTGATCTGAAAATGTGGCCGGATCTGCAAAAACAAAGGGCCGTTGAACGCTTTCGAGAATATCGAAAATGCC  
GCTGGTGCCGCTGCTTTCACGCATTGAACGTAACGGTGTGAAGATCGATCCGAAAGTGTGACAATCATTCTGAAGAGC  
TCACCTTCTGCTGGCTGAGCTGAAAAAGAAAGCGCATGAAATTGCAAGTGAAGGAAATTAACCTTTCTTCCACCAAGCAG  
TTACAAACCATTCTCTTTGAAAAACAGGGCATTAAACCGCTGAAGAAAACGCCGGTGGCGCGCCGTCACGTCGGAAGA  
GGTACTGGAAGAACTGGCGCTGGACTATCCGTTGCCAAAAGTATTCTGGAGTATCGTGGTCTGGCGAAGCTGAAATCGA  
CCTACACCGACAAGCTGCCGCTGATGATCAACCCGAAAACCGGGCGTGTGCATACCTCTTATCACCAGGCAGTAACTGCA  
ACGGGACGTTTATCGTCAACCGATCCTAACCTGCAAAAACCTCCGGTGCCTAACGAAGAAGTCTGCTGATCCGCCAGGC  
GTTTATTGCGCCAGAGGATTATGTGATTGCTCAGCGGACTACTCGCAGATTGAACTGCGCATTATGGCGCATCTTTCCG  
GTGACAAAGGCTTGTGACCGCATTCCGCGAAGGAAAAAGATATCCACCGGGCAACGGCGGAGAGTGTGGTTGGTTGCCA  
CTGGAACCGTACCAGCGAGCAACCGCTAGCGCGAAAGCGATCAACTTTGGTCTGATTTATGGCATGAGTCTTTCCG  
TCTGGCGCGCAATTGAACATTCACGTAAGAAGCGCAGAAGTACATGGACCTTTACTTCGAACGCTACCCTGGCGTGC  
TGGAGTATATGGAACGCACCGTGTCTCAGCGAAAGAGCAGGGTACGTTGAAACGCTGGACGGACGCCGCTGTGATCTG  
CCGATATCAAATCCAGCAATGGTGTCTGCTGTCGTCGTCGTCGTCGTCGTCGTCGTCGTCGTCGTCGTCGTCGTCGTCG  
CGCCGACATTATCAAACGGCGATGATTCCGCTTGTGCTGTCGTCGTCGTCGTCGTCGTCGTCGTCGTCGTCGTCGTCG  
AGGTACACGATGAACTGGTATTTGAAGTTCATAAAGATGATGTTGATGCCGTCGGAAGCAGATTCATCAACTGATGGA  
AACTGTACCCGCTCGATGTGCCGTTGCTGGTGAAGTGGGGAGTGGCGAAAACCTGGGATCAGGGCAGTAAAGTTCGCC  
TGAACATGCCTTTTTCTGAAGTAAGCAACATAAGCTGTCACGTTTTGTGATGGCTATTAGAAATTCCTATGCAACAAC



GAAAAAAATTACAAAAAGTGCTTTCTGAACTGAACAAAAAGAGTAAAGTTAGTCGCGTAGGGTACAGAGGTAAGATGT  
TCTATCTTTACAGACCTTTTACTTCACGTAATCGGATTTGGCTGAATATTTTAGCCGCCAGTCAGTAATGACTGGGGCG  
TTTTTTATTGGGCGAAAGAAAAGATCCGTAATGCCTGATGCGCTATGTTTATCAGGCCAACGGTAGAATTGTAATCTATT  
GAATTTACGGGCCGATACGCCACATCCGGCACAAGCATTAAAGCAAGAAAATTATTGCGCGTCTGCGTTTCTTCTACA  
GGCTGCATCTCGCTAAACCAGGTATCCAGTTTCTGCCGAGCTTGTCCACGCTTGTTCCTCAACGAAGAAAACGTTTC  
AACCTGCACATCACCGTTAAACGCCAGTACAGCTTACGCACCATATTCAATTGCGCTTACGTGCGCCGCTTGCCAGTT  
TGTCGCTTTGGTCAGCAGCACCAGAACGGCGATATTGCTGTCTACCGCCCACTCAATCATCTGCTGATCCAAATCTTTC  
AGCGGATGGCGAATATCCATTAGCACCACCAGACCTTGAGGCTCTGACGTTTTTCGAGGTATTGCGCGAGCGCAGCGTG  
CCATTTGCGCTTCATCTCTCCGGGACTTCCGCATAACCGTACCCAGGCAAGTCAACCAGACGCTTGCCGTCAGCCACTT  
CAACAGGTTGATAAGCTGGGTGCGCCCTGGGGTTTTGAGGTACGAGCCAGGCTTTTCTGGTTAGTCAGCGTGTTCAGC  
GGCTGGATTTACCTGCGTTGGAACGGCTGCAAAAGCCACTTCAATTCCGGTATCGGAAGGTAGGTGGCGAATATCAGG  
CGACTCATCAAAAATGCGTCTGTTGATAATTCAATTAGTCAAAGCGTCTCTCCGTCAGTCAAAGCTTTGTGGCGA  
TTATACCTGAACCATAATAAAAGGCGGATTTTTCGGCGTGAGCGTTGTAAGTAAAAGCCATACGCTTTGTGAGACATTGC  
CGATAGTCTTTATGCGAAATAGCAGAGAAAATTCTGCGATGCATGTCAAATAAGCTATATAAATCAGTGAATTGCTTTTA  
TATAAACTCTGAAAATGCAAACTGATGGCGTTGATTGTTTAAAGCAAAGGCTAAAGTAGCACCCATAAGA  
GCGAGGACGCTAACAGGAACAATGACTCAGGATGAGGTCAGGAGCGCCAGGAGCGAAGACAGAGGATTGTCAGGAAGA  
CAACGTCGCGAGACGTAATTAACCGAAATGGAATCAACACGGATTGTTCCGCTAAAGGAAAAACAGGTTGTTGGC  
GGCTGCAAGGATTGTAAGACCCGTTAAGGGTTATGAGTCAGGAAAAAGGCGACAGAGTAATCTGTGCGCTTTTTTCTT  
TGCTTGCTTTCTGTTAGATTCCGCGCAAATCTATACTGAATAAAACGGCTAAAAGACGAACCATTATGAAACCATCATC  
TTCAAACCTCACGCAGCAAAGGTCATGCAAAAGCGCGTCAAAAACACGCGAGGAGTGGATCAGGAAGCTCGTGATCGCA  
AGCGTCAGAAAAAACGTCGTGGTTCATGCGCCGGGACGCGCGAGCGGGCGAAACACCACGTGAGGACGAAAGGCCAG  
AACGCACCAAAAGATCCACGTATTGGCAGTAAAACCCTATTCCATTGGGCGTACTGAAAAAGTCAACCAACAGCACAA  
ACCGAAGAGTGAGAACTATGCTTTACCGCAGGCGGAGTTGGAATTAAGGAAACGATGAGCGTCTGGATGCGCTGC  
TGGAACGTCTGGAAGCAGGCGAAACCCTGAGTGCCGAAGAGCAATCTGGTGGATGCTAACTGGATCGTATTGATGAG  
TTGATGCAGAACTCGGCCCTCTTATGACGATGACGAAGAAGAGGAAGAAGACGAGAAGCAAGAAGACATGATGCGTCT  
GCTGCGGGGCAACTAACGGATTGCCGCCGTTGGCCCTCCCGTTCTGCTGATAACCCTTCCGTTATATGTTATCTGGTGT  
GGTTATTGTTAACTACAGCGTTGTCGCGGACAAAAGTGGCTGCGCAACCGCTGATGACCCGAAACGGGCATCCG  
CCGTACGCCGTAGCCGCCAGAGACGCCATCGGAAGGAGTGAAGTGTCTGTACAGCAAATCGACTGGGATCTGGCCCTG  
ATCCAGAAATATAACTATCCGGGCCAGGATACCTCGTACCCGACCGCGCTGGAGTTTTAGAAAGACTTCGGCGAACA  
GGGTTTTTACAAGCCGTGGCGCGCTATCCTGAGCGTCCATTATCTCTACGTACATATCCCGTTCTGCCATAAGCTTT  
GTTACTTCTGCGGTTGCAATAAGATTGTTACTCGCCAGCAGCACAAAGCCGATCAGTATCTGGACGCGCTGGAGCAAGAA  
ATCGTCCATCGTGCACCGCTGTTCCGCGGGCGTCACGTCAGCCAATTGCACTGGGGCGGCGAAGCCGACGCTATCTGAA  
TAAAGCGCAAATCAGCCGCTGATGAAGTGTGCGCGAAAACCTCAGTTCAATGCCGATGCGGAGATTTGATCGAAG  
TCGATCCGCGGAAATCGAACTGGATGTAATCGATCATTTACGCGCCGAAGGCTTAATCGCTGAGCATGGGCGTGCAG  
GACTTCAACAAAGAAGTGAACGTCGTTAACCAGCAGGATGAAGAGTTCATCTTTCGACTGCTTAAACCATGCGCG  
TGAGATTGGTTTTACCTCCCAACATCGACCTGATTTACGGCTGCCGAAACAGACGCGGAGAGTTTTGCGCTTACC  
TGAAACGTGTGGCGGAGTGAACCCGATCGTCTGAGTGTCTTAACTACGCGCATCTGCCGACATTTTTGCTGCTCAG  
CGAAAATCAAAGATGCTGACCTGCCGAGTCCGAGCAAAAACCGATATCTGCAGGAACCATCGCCTTCTGACGCA  
ATCGGGCTATCAGTTTATCGGTATGGTCACTTTGCCGTCGGATGACGAGTGGCGGTGGCCAGCGTGAAGGCGTGC  
TGCATGTAACCTCCAGGCTACACCACTCAGGGGATACCGATCTGCTGGGATGGGCGTTTTCCGCCATCAGCATGATT  
GGGACTGCTACGCGCAGAACCAGAAAGAGTTGAAGCAGTACTATCAGCAAGTGGATGAACAAGGCAATGCGCTGTGGCG  
TGGTATTGCGCTAACCGGTGATGACTGTATTCGCCGCGATGTGATTAAGTGCCTCATCTGCAACTCCGCTGATTACG  
CCCCATTGAGAAACAGTGGGATTTGCACTTCGCTGATTTTGCAGGAGATCTCAAGCTGCTCGCCCCGTTAGCAAAA  
GATGGGCTGGTGGATGTGGATGAGAAGGGAATACAGGTGACGCGGAAAGGTCGCTTCTGATCCGCAACATTTGATGTG  
CTTTGATACCTATCTGCGCCAGAAAGCGCGGATGCAGCAGTTCTCTCGGGTATTTAAATAGTGAATGGCGCTTCGTTA  
CAAAGTAGAAAACGAAAGCGCCATCAATGTGCTGAGAACAAGATTGCTGATGCGCTGGGCAACAAAACCTGTTGAAATT  
ATTGCTTTTGTAGCCGATAAGGCGTTTACGCCGATCAGGCATCTGAGCATGATGCCTGATGCGGCGTGGTCCGCTC  
TTATCAGGCCATCAGACTTTCTCCGATCCGGCATAAACAACGAGCTTCACTAAACAGCCCAATCATTGCGGCACACAGC  
ACGGCAGCAACGGCAGTTTGGGTGTGGTGTCAACTGCGCCACTCGATACCAGATTAATTATTGATTCCAGCATAAT  
GACTCTCCCCGTTTTCCGGCAAGATCATACTGAACCTATCGAACAGTAAAGCGTAAAATACCAGCAATTTGCGCTCAA  
TAATCAATCTTACACACAAGCTGTGAATCACTCCATCCCAGCTCTTTAACTTACGCGTCAAGGTGTTGCGGCCCCAG  
CCGAGTAGCCGCGCCGCTTCTGTTTATGCCCTGCGTATGTCGCAACGCGGTGTCAGTAAAGTCCGCTCCAGCTCTGG  
CTGCGCTTCGGAAGCAGATTTTATGACCGGAACGAGCGCTGTGCTGCCACTGCGCAAGAAGCGTCCGCCAGCTGT  
CCGTTGCAATTTGCGAAGTACTCTCCGCAACCGTTGATTCAAACAGTTTCCGCGGCAAAATCCTGAATCAACACTTCTGC  
CCGGCGCCATCACCGTTAGCCAGCGGAGGTGTTTTCCAGCTGGCGCACGTTGCCTGGCCACGCCAGACGCGTCAGAGC  
AGCTTCGGTTTTCCGGATGCAGTAACCTCGCTTACGCCAGTTCGCGCGCGGCAACCTGTAAAAATGGCGCGCCAGAC

GGGAATATCTTCCCGACGTTCCGCGACGGCGGCAGATGAACCGGATAACGTTCCAGGCGGTGGAACAGATCCTCACGG  
AACTTACCTTCTGCACTCGCTGTTCCGAGATTCTGGTGAGTGGCAGCGATAATCCGCACATCCACTTTCACCGGCGCATA  
GCCGCCAACCGGTAAAACCTGACCGTCTGCCAGCACGCGCAGCAAACCGTCTGCACATCCAGCGGCATATACCAATTT  
CGTCGAGGAATAATGTACCGCCATCGGCCTGTTCAAACGCCCTGACGAATGGTATTCCGCCAGTAAACGCGCCTTTC  
TCGTGGCCAAACAGTTCTGATTCGATCAAATCTTTGGGATAGCTGCCATATTCAGCGCGATAAACCGGCGCTTTGGCGCG  
CGGACTGTGGCGATGACGGGCATGAGCGACAGTTCCTTACCGGTGCCGGATTCCGCCGTTAATCAGCACGCTAATAGAAG  
AACCGCAAAGCCGACCGATAATACGGAACACGTCCTGCATGGCTGGCGCTTCCCGATGATATCGGTCTTTGGGCGTTA  
AGCTGAACATTACGCGGCTGCTGCTGTTCTGGTAATGACTGATAGCGCGCTCAACCAGCGCCACTGCTTCGTGATATC  
AAACGGTTTGGGCGATAATCAAACGCCCTTGTGATAGGCGCTGACGGCAGCATCCAGATCGGAATGTGCGGTACATAA  
TGATGACCGGAAGCATTGGATGGCGCTGTTAATCTGCTTGAGCAGCGCCAGCCGTCATTCCCGGCATACGGATATCT  
GAAAGCAGCACATCCGGCGTTTTGCTCGCCAGCGCTCCAGCACTTCTGCGCGTTCTCAAACGTCGTACAGGTTAAACC  
TGCCCCAGCGAGCGCACGTTCAAGCACCAACGGATGGAACATCGTCATCGACTACCCAGACTATCCCTCGTTGCATAA  
ACGTCACCTTTATTTCTGATAGGCAGGTAACCCGAGAAGCTCGGTATGCCCTGGCCAACTGGTAAATTTCAATTTGCGTG  
AATGCTGATCAATCAAATTACGAGCGATGGATAAGCAAGCCCGTGGCACCTTCGCGGCCGCTGACCATCGGGTAAAC  
AGCGTATCCTGCAATGAGCGGAATGCCCGCCGTTATCTTCCACATCAATCCGCGCCGAGCCGGTAGCGCTCGCC  
GTGTAAGGTCAAGTTGAAACGCGGTGCGGGTACGCGAATGATTTACCGCCTTCCGGCCCCAGCGCTGTAGCGATTGC  
GCACAATATTCAGCAAGACCTGTTCAATTTGATCCGGTCTGCGCCAGTTCGGTAGGCTGGGATCGTAATCACGAATC  
AACCGCACGTTGTCCGGCAGTTCATCGACACCAGCGTTACCACGCGTTCAGCCACTTTGTGAATACTTTTCGTAACGCG  
CGTACCGGGCAGCTGCGGCCCAACAGACGGTCGACCAGATTTCCGACCGGTCCGCTGTTTCGATAATCACTTTGGTAT  
ATTCCAGTAGTGATGGGTAGGTAACGCTTTGCTGAGCAGCTGCGCCGCGCCACGTAACCCGCAAGCGGATTTTAAATC  
TCATGTGCCAGGCCGCGCACTAAATCACGGGCAGCAACCTGCTGGGCGTGTGTAGCTGTTCTGACTTAAGCGGCGTG  
GTTATCCATCGGAGCCATCTCCAGCAGGATCATGCCGTCCGGCATAACGCTGGGCCGTCACAGAAAGGATATGCGAGCGCC  
CGTCGATGACCAGCGTCACTTCGTTATCGGTAACCTTCCCGCCCTCCAGACTTTCTTGATCAGCTCGATATTTAAT  
GAGAAGTAGCTCAACAGTCCGGTAACGGTGTACCAAAACAATTTGCGGGAGCTTTGGGCGAGCAGTTGTTGCGGCGCAGG  
GTTGGCGTAATGGATCGCCAGGTTGTCATCGATTAACAAAATACTGTTAATCAGCGAGTTGAGGATCTGCCAGCATCGG  
GCTGCGTGCTGTTGCCATAAAGCAGTCTCTGAACAGGTTGACCATTTTAGTGATTATAGCTTTTTACGGATAAAAA  
GCGCGAAGCATCAGAGAATTGACGGAGAAAAAGCCATGCAGAGATGGGCTACAGATAGCTGACAACTTCACGTTGGA  
GAGCGACTCACCTGCTCCGGCTACCACATCATCACGTTGAGCCGGATAAGACGATTTGCGTGCATCCGGCGTGAT  
GTGCTTGCCACCGATCCAGGCTGCCAGAGACAGCGAAAAGTTCCACCGCAACTAAAACCTTAGACGCTGTAGTAC  
AGCTCAAACCTACCGGATCGGGAGTCATACGCACGCGGTCTTCTTCCGCGACGAGAGCGATGTACGCATCAATTC  
TTCGTGAGTGAACACGCCACCGGCTTTAGGAACCTCGCGGTCCAGATCCAGTTCGTTGAGTCTTCTCCAGAGAGCGCTG  
CAACCTGTGGGATCTTTTCGCTTCTTCTGGCGGCAGGTCATACAGGTTTTTGTCCATGGCTTCGCCGGATGGATCTTG  
TTCTTGATACCATCAAGACCGGCCATCAGCAGGGCAGCAAAGCACAGGTACGGGTTAGCTGCCGGATCCGGGAAACGTAC  
TTCGATACGACGTGCTTTCCGGAGAAGAAACACCGGAATACGGATAGACGCAGAACGGTTACGCGCAGAGTAAGCCAGCA  
TTACCGGTGCTTCATAGCCCGGACCAGACGCTTATAAGAGTTGGTGGTCCGGTTTTGCCAGGGCGTTAATCGCTTAGCG  
TGTTTTGATTACCGCCAATGTAGTACAGCGCTGCTCAGACAGACCTGCGTATTTGTCGCTGCGAACAGGTTAACGCC  
GTTTTTAGACAGAGACATGTGGCAGTGCATACCGGAGCCGTTATACCGAACATCGGTTTTGGCATAAAGGTCGCGTTTT  
TACCGAAGCGGTGCGCTACGTTGTGCACAACATATTTGTAGATCTGAATTTGTCAGCTTTTTTGGTCATGGTATTGAAG  
CGGTAGCCATTCGTTCTGACCAGCAGTCTGCTACTTCGTGGTGTGGGCTTCAACCACCAGACCCATCTGTTCCATCAC  
CAGACACATTTCAGAAAGAAATCTGAGCCGAGTCTACCGGTGGAACCGGGAAGTAACCGCTTTACTGCCGAGCGT  
GACCTTTGTTACCACCTTTCGATTTGGGTGGAGGATTCATCGCCCTTCGATATCGTGCATAGCAACGTTGGGAACCGGAG  
ATAGATGATCCGAAACGGATGTCATCGAACAGGAAGAAATTCAGGTTCTGGCCCGAACAGTACGGTGTGCGCAATGCCAGT  
GGAACGCGGTAATCTTCGCGCGCTTCGCAATGGAGCGGGTACCGTTCATAGCCTTGCAGGGTGCCAGGTTCAAGGA  
TGTCGCAACGGATAATCAGGGTGGAGTCCGGCAAGAACGGTCAATCACTGCGGTGGATGCGTCTGGCATCAGCACCATG  
TCGGACTCGTTAATGCCTTTCCAGCCGCAATCGAGGAGCCGTCAAAATTTTTGCCTTCTTCGAAGAATTCAGCATTAC  
CTGATGAGCAGGGATAGTGACGTGCTGTTCTTTACCTTTAGTATCGGTGAAGCGCAAATCAACAACTTCACTTCGTGCT  
CGTTCAGCATCGTCAGTACGTGTTCCAGCGACATACTTTAACTCTCTGGATTGGTCATGGTCTGCTGGTAAACGAAATC  
TGCAATTTTTGGCCGTGTCGCCGTAAGAAAGATAAAGCGAAATCTGTCCAACCTTTAAATTTGCCCTAAAAGGCGTT  
ATCATGCGCACCATCGTCAAAAAGGGTGCACCACGATGTGAATGTTGCACCAATATAGTGCTTCAATGGAAACATTAAG  
CACCATGTTGGTGAATGACCTTTGGATAACCTTTTTATGCTCCGTGAAAGCGATCACAAGGGACTCTGCAATACTTG  
TTTCCGGAGGATGTTGTGATCCTGTTTTGTAGTGCATTAATCCGTGTACAATAACGCGTATTTCTAATGCCTGAGGC  
AAAGTTGTGATCGAAAATTCGTAATATCGCCATCATCGCGACGTAGACCATGGTAAAACACCCTGGTAGACAAGCT  
GCTCCAACAATCCGGTACGTTGACTCTCGTGCCGAAACCAAGAGCGCGTATGGACTCCAACGATTTGGAGAAAGAGC  
GTGGGATTACCATCTCGCGAAAACACCGCTATCAAATGGAATGATTACCGTATCAACATCGTTGATACCCCGGGCAC  
GCCGACTTCGGTGGTGAAGTTGAACGTGTAATGTCCATGGTAGACTCAGTGCTGCTGGTGGTTGACGCATTTGACGGCC  
GATGCCGAAACGCGCTTCGTAACCAAAAAGCGTTTGTACGGCTGAAGCCGATTGTTGTTATCAACAAAGTTGACC

GCCCTGGCGCGCTCCTGATTGGGTTGTGGATCAGGTATTCGATCTGTTTCGTTAACCTCGACGCGACCGACGAGCAGCTG  
GACTTCCCATCGTTTACGTTCTGCGCTGAACGGTATCGCGGTCTGGACCACGAAGATATGGCGGAAGACATGACCCC  
GCTGTACCAGCGATTGTTGACCACGTTCTGCGCCGACGTTGACCTTGACGGTCCGTTCCAGATGCAGATTTCTCAGC  
TCGATTACAACAGCTATGTTGGCGTTATCGGCATTGGCCGCATCAAGCGCGTAAAGTGAAGCCGAACCAGCAGGTCAT  
ATCATCGATAGCGAAGGCAAAACCCGCAACGCGAAAGTCTGGTAAAGTGTGGGCCACCTCGGTCTGGAACGTATCGAAAC  
CGATCTGGCGGAAGCTGGCGATATCGTTGCGATCACGGGCTTGGCGAACTGAACATTTCTGACACCGTTTGGCGACCGC  
AAAACGTTGAAGCGCTGCCGGCACTCTCCGTTGATGAGCCGACCGTTTCTATGTTCTTCTGCGTTAACACCTCGCCGTT  
TGCGGTAAGAAGGTAAGTTCGTAACGTTCTGTCAGATCCTGGATCGTCTGAACAAAGAACTGGTACACAACGTTGCGCT  
GCGCGTAGAAGAAACCGAAGACGCCGATGCGTTCGCGTTCGTTCTGGTCTGGCGAACTGCACCTGTCTGTTCTGATCGAAA  
ACATGCGTCTGAAGTTTGAAGTGGCGGTATCCCGTCCGAAAGTTATCTTCCGTGAAATCGACGGTCTGAAACAAGAG  
CCGTATGAAAACGTGACTCTGGACGTTGAAGAACAGCATCAGGTTCTGTAATGCAGGCGCTGGGCGAACGTAAGGCGA  
CCTGAAAACATGAATCCAGACGGTAAAGGCCGCTACGTTCTGACTACGTGATCCCAAGCCGTGGTCTGATTGGCTTCC  
GTTCTGAGTTCATGACCATGACTTCCGGTACTGGTCTGCTGACTCCACCTTACGCCACTACGACGACGTACGTCCGGGT  
GAAGTGGGTGAGCGTCAGAACGGCGTACTGATCTCTAACGGTCAAGGTAAGCGGTGCGGTTGCGCTGTTCCGGTCTGCA  
GGATCGCGGTAAGCTGTTCTCGGTACGGTGCAGAACTTACGAAGTCAAGTATCGGTATTCATAGCCGCTCTAACG  
ACCTGACTGAAAACGTTGACCGGTAAGAACTGACCAACATGCGTGTCTTCCGGTACTGACGAAGCCGTTGTTCTGGTT  
CCGCTATCCGCATGACTCTGGAACAAGCTCTGGAGTTCATCGATGATGACGAACTGGTAGAAGTACTCCGACCTCTAT  
CCGTATTCGTAACGTCACCTGACGGAACGATCGTCTGCGCGCCAACCGCGCACCGAAAGACGATTAATTTCTTTTTT  
TAGTCATAAAAACTGCCAGCGATGGCAGGTTTTTTTTTGCCTGTCTGAGCGCACACCAATGCGAGTATCTCCCTTAT  
AAGTCTGTGGTTACGTCAATAGAGAGCTTGTGACAATTATCTGCAAAGTACACGCCGTTAATTGCTTTCTTTTTTGGC  
GTAAGCGTAAGATGCTTCATCTGTTTTAAACAAAAGGATTAACAATGGCGGAGAATCAATCCACCGTAGAAAATGCAA  
AAGAGAACTGGATCGGTGGTTGAAAGATGGCATCACACGCCGGTGGAAAACCTCCTTCCAGAAAGAGAGCTGGGAGAA  
CTGCTGGGCATTAACGTATGACGCTGCGCCAGGCGTTGTTGAACCTCGAGGCAGAATCCAAAATCTTCCGTAAGGATCG  
TAAGGGTGGTTCGTGACCCAGCCGCTTAAATTACAGTCCGGAGCTGTGCGCGAGCTTTCAGCGGGCCGCAATTGAGC  
AAGGGCGAGAGCTTCTGGGGTTTTACCGAGAAAACCGTACCAGCGATATCCCGAGACGCTCGCGCCACTGATTGCA  
GTGACGCCATCAACTGAACTCTATCGCATCACCGGTGGGGGGCGTGAAGGACATAAAGTTTTCTATCACGAAACATA  
TATTAATCCTGAAGTTGCTCCGGGCTTATTGAACAACCTGAAAACCACTCATTTTTCTGCAGTCTGGGAAAAGTGTACC  
AAAAAGAGACGGTAGTAAAAAATTGATTTTTCAAACCGTCAAGATGCCGGCGATATCAGCAAGTATCTTGGCGGTTCT  
GCGGTATGCCAGCGATCTTAATTGAAAAGCATCGCCCGACCGCAAGGCAATATTGTCCAAATAGATATTGAATATTG  
GCGATTTGAGGCCGTAGACCTCATTAATCTGTAGGTGTTTTATGGTGACAATAAATAACGCAAGAAAGATTCTACAA  
CGTGTGCACTCTTCTCTTTATTTACATGCTTATGCCTTTCATTTAAATATGCGGCTGGAAAGAGTGTGCTGCTGA  
TTTACTTGATATCGAAGTAAAATAATCTACGTGGCGTCAAATCCATGTTCTCGATGGCGAGCGTTTTTCTTTGGTA  
ATATGGACGATAAAGAACTCTGCTTTGGGGATAAAGCCCGCCGCTGAACCTTGATATTCATATTGAAACCAGCGCC  
TCAGATAAGGCATCTATTGACGAAGCCGTGCCATCGCGTTGAAAACCTGGGGCATCGTCCGTACGTTTTTATCCACGTTA  
TGAAGGTAATTTGCGCGAGTATTATCGATTATCGTAACGACATTGCCTATGTACGGAAACGTATCAGGACAGCGGCC  
TGACTTTTACGATCGAGCAGCATGAAGATTTAAAAGTCAAGTGGTGTGCGTGGTCAAAGAAAGTGAAGTGAATCT  
CTTCTTACTGTTTGAATTTGCGAACATGATCAATGCAAATGAGCATCCATCGACGCTTAAAACGATGGCACCAGCA  
TATTACCAGTCCATATCAAAGATGCCTTATCGTTAAAGAACCGGTTGGCTGGGTGATAAAGCCTGATTTTCAAGTC  
AGGTGATATGCCGTTCAAAGCGTTATTAACGCACCTTATCTGCTGGGTGATGATGAGCCGAGGTGACGGCATATCGCC  
CTGGAAGAAGAGTTGATTAATGCGCCGCGCTTCCGCTTTGAAGACGAAGATGATAATCCGTGGATCCCTTATCGCCA  
GATGAGTGAACACCATTGCCAGAAAATCATTACTGGATGCGCGGTTACGTAAGAAAAGAAAGATGCAATTAATCAGA  
TAAATCATGTGCGTAACGTAACAACAATCAAACAAGAGGCAACCATCTTCTGAACCACTAATAAGTTTTAACTCAT  
ACGCAGTAAATAAAACCATTCATATGAATGGTGGTATCTTATTGCCTTAAAACAGTATTTTTAAAATCGCTTAGGG  
GATGTTATGCTCACGAAAAGAAATGGCGTATTTAGTCTATTAACACTGTGTGGCGGTACAATTTATAAATTACCGTC  
GCTGAAAGATGCGTTTTATATCCCGATGCAGGAATATTTCCATTTGACCAATGGTCAAATGGTAATGCTATGTCGGTAA  
ACTCATTTGTCACCACAGTGGGCTTTTTTCTGTCTATTTATTTTGGCGATAAATACCAGCGAGATACACCATGTCATTC  
TCACTCATTGCGACAGGATTAAGGTTTATTTGACGACAATGCCGGGTATTGGGGCATCCTTTTGTCTGGGCGCT  
ATTTGGCGTACTTGGACATGATGAACTGGCCGTTGCTCAAGTGGTAAAGTGGATTGGGCAATAGCGAACAACAAG  
GTCGGTTGTTGGCTTCTGAAACAGGGCGTGGCATTGTGATACCGTGGTGGCATTCTTCTGCGTTGGCAGTATTTACC  
TGGTTTGGCAGTGGCTTATTAGTTTTAAAGCAGGCATCTGGTCTATTCCCTATTGTGATTGCCGTAGGCATTTAT  
TTTCTTTGCTGAAATGACAAAAGAGGACCGCTCGTTGAGGTGAAAAAAGAAAGACGGAGCATCGAAAAACACCAGTA  
TGACCTCGGTGCTGAAAGACAAAATCTGCTTATCGCTTTAACGCTTCTTCTGTTTACGCGGTTTACTGTGGCCTG  
ACATTTCTCATTCCATTCTGAAAACATCTATCTATTGCCGTTGCGCTGGTGGGGGCTTACGGCATATTAACCAATA  
CTGTCTGAAAATGATTGGTGGACCGATTGGTGGCATGATTTAGATAAAGATCCTGAAATCGCAAGTAAATATCTATGCT  
ACACCTTTATCATTAGTACCCTGCGCTCGTACTGTTGATTATGCTGCCGCACGAAAGTATGCCGGTCTATTTAGGGATG  
GCATGTACGCTGGGCTTTGGCGGATAGTCTTTACACAGCGAGCCGATTTTTTGCACCTATCGCGAAGCAAAAATTCG

TGAAAATAAACAGGTGCGGCGATGGCGTTGGGTAGCTTTATTGGTTACGCTCCGGCGATGTTCTGCTTCAGTCTGTATG  
GCTACATTCTGGATTTAAATCCGGGGATTATTGGCTACAAAATCGTGTGGCATTATGGCCTGCTTCGCATTCAAGTGGT  
GCGGTGGTTTTCCGTAATGCTGGTTAAGCGTATTAGCCAACGTAAGAAAGAGATGCTGGCGGCTGAAGCTTAATTAATGGC  
CGGATGTGCTTAATCCGGCCAACGAAAACCGTATCAACCGTAGGCCGGATAAGGCGTTTACGCCGCATCCGGCAGTTTCA  
CATCAGAAGAAATACTTCGTCCCGATACGGATCTGGTTTTGCTCCGCGGTGGTACGGTTCGACGTTGCGGTCTAACAGCG  
CAATTCGAAATAAGGGAGCCAGTGTTCAATACGGTAACGGAAGGTGTTAGTGATTTCCCAATGATGATCTTTCCCGT  
TGCTACTATTAAGTCATTCCTCGCATGAAGTAATGTGGCTCAAATGTATAGGAAAATTTATCGGTGATTTTAAAATTC  
CAGTAGGTGCCAATTTATAGGTGTCATTATTATCCAGTTCGCCGCTCAAATCTGTTGAACTATAGTTATTATGGTTATA  
GCGATTTCTGACTGTCAGATTAACCATGGTACAAAATTTATAGTTGACGTCCAGATACACTGCACCACCCGAACCGATAC  
TCTTATCATTAAATTAAGCCACCGGGCTGGATGGTTAATTTATCGGTTGGTTTAAATAACGGATACCAGCCTTCAATTTCCG  
TTATATCCATGTTTTAGTTCATCTTCTCGCTGAAAGTTGTAGGTATTGGTTAACATAATACCCGCGCCCATATCGAAGTT  
ATAACCCACACGTAGCATAACCTCGCCCTGATCGGAGGCAAGATTATATGCCTCCCTGTTTTGACGATGCGCCAGCAA  
ATACCGAGGCAGAGTTCAGAGAAGATAATAAAATTTATGATTAATCTTTTTATAATAAGTCCATTTTTTAAACGTAGG  
GAGGCCGCCACCCACAGGATGAAATAGCGGCTATTGACATTTAACGTTACGGAAGCCGTTTTTCTTCTGTGCCCA  
TCTCTTTATTTTTGCGTTGGTTGATTTCTCAATAATCAATGCAAACCGTTTTTCTTGGTGTGAAAAGAAATCCCATC  
GTCAATGACGCAATAATGCCAGTGCACAAGGCCAGATAAAAATGAGCTGACGCAAACCTGTAATGTCGCATCGTTTTG  
CGCGATGTTGGGAACATAACCAATTTGCGTCAGCATAATGCCTGGCAAGAAGCCAGCAAGTGCGGCAGAAATTTTACGAA  
AGAAGGTATAACCGGTATAAACAGAACCTTCGGCACGAATACCGTTTTTCCATTACCGTAATCTACGGTATCTGGTACC  
AGTGCCAGTTCAGGCTGTTTACAAAGGCCGTGCCAAAAAGGCGACACAAGAGAACATGACGAAAAGTAAAAGAGTTACT  
TCCCCAGAAATAATTCAGTATATACCCACCGCCACAGCACCATGCCAGCCAGATAAACCTGTTTTTACCAAACATT  
TTACAGTTAATGGCACCAGTAATACGCCGATGAGGATGCATCCATACTGAAGAATCCCATCCAGACAATAAAATTAATA  
TCATTACGACATACTGGGTGTAATAGACCTGAATCGCCAGTTTATGATTAATGCGCCAGGGTACACAAGTTAGCAAT  
GCATAAAACCAGCAATGGCGGATTCGAAATATCGCGCAAATGATTTGAGAATACTGGCTTATGTCGGGTTGGCGTTG  
TGTCACATAATGCTCTTTGACGCTCTGTAGCACAGCATATAAAAATAAAGCCGCAATGGAGAACATAAGTGCCGCA  
CAGGCATAACCGAGGTTGAGTCAGAAAAAGCGACTGCAACGGAATAAACGCCACGGTACAAATCAATAGCCCTATGGT  
TGCACCACCTGGCGGTAAGCCGCGAGCTGCGCGGCTCATTGGGTTTTTGGTAATTGCCGGGATCATCGACCATACG  
AGCAGTTCATCAGACTGTATGAAAGTCAAACATCATAAACAGCGCGGTGGCAATCGTCGTTTTAACCGCAAACAAAAG  
GTGGTGGCGATAAACTGGAGCGTTGCAATTAACGCCGCCGAACCGCTGCATATAAAATAAAGGGACGAAATTTGCCTTT  
AGGCCCAATATTTTTCCGCGAGTCAGTAAAAATCCGGTGAGCATATCGGTAACCGCGGTAATAAACTTCGCCACCAGAA  
AGATAATCCCGCCATAGTAAGCAGGCATCCCTAATTCATCGGTATAAAAATTTGAGGAGATACAGAGTACCAGTGCAGAGC  
ATTAATTCGAACCGACGTCGCCCATACCATAGGCGATTTTTTCCCGCAGATTCAGTTTTAATGTCAGTGGATTATGGTC  
AGACATAATCACTCCTTATAACGCCCGCAGGGCGTCGTTTATTATTATTACGCCGTGCGTTTACGGGCTTCTATCTCTT  
CCACAATGCGGACATACATCTTCTCGTTCAGGCTGTAGAAGCAACCCATCGCCACAATGGTGACTACCGCCAGTGGCGTT  
GGGTAGATGAAGATCAACTGGCGTAACCTTCAATGGTGTGGTCAGCCTGTGCGACGTTCCGGCACATAGCCAATTTGCGT  
CAGCATCCAGCCGGGAAGAAACCAGCCAGCGCCTGAGACACTTTGCGAAAGAAGGTAAAACCGGTGTAGACCGTTCCTT  
CCGAACGCACGCCGTTGCGCCACTCGCGTACTCGACGGTGTGCGAAACCAGCGCCAGTTCAGGCTGTTAACAAACGCT  
GAGCCAAAGAACGCCAGGAGGAGAACGCCACGAAGCTGACCGAACCGCCGCGGAAAGAAATAGTTGAGCAGATCGCCAG  
CACCAAATCAGCAGGCCCGCATATAAACTTTCTTCTTGCAAAACGCTGACTGAGGCAGGCATCAGGAATACGCCGA  
TGAAAATACAGCCCATGCTGAAAAATCCATATACGACAACAGGATGGGATCGTTAAGCACGTAAGGTTAATAGACC  
TGGATGGCGAGCTTGACGTTAAACGCCCTAAAGTCAGAGGTTGGCAATGCACAGAATGAACAGCGGGCGGTTACCCGC  
AATTGCGCGGAAAGATTGACGAGGCCCGGCTTTTGCGCCGATTAGCAGGCTGGGTTTTCGACATAACGCTCTTTACGC  
CCGAGTAGCAGATCCACATAAACAGCAGGCCAAACAGTGAAAACAGCGTGGCGGCGAAGATATAGCCAAGTTGCTGATTA  
CCTTCGATAAGATTACATACTGGCACGAATCCCACCGTGCACAGCAGCAGGCCAGCGTAGCGCCGCCCTGACGCCATGC  
CGCCAGTGAGGCGCGTTCGTTGGGGTTTTTGGTGATAGCGGAACCATGCGCCGTAGGAGCAGTTCATCATGCTGAAAA  
ACAGTCCGTAAGCATAAACAGAATAGTGGCCATCACCGTTTTTACCGGTGACATCAAACCGGTGTGCCGACAAAGTTGGCG  
ATCGCCAGTAAGGTGACCGGAATGACGCATACAGAATAAAAGGACGGAACCTTACCTTTTGGACCGATCTTGGCTCGGGA  
ATCCAACATAATGCCGTACCCATATCGGTAACGCAGTAAAGAATTTTAAAATCAAAGATAATGCCGCCATAGGTGC  
CTGGCAGCCCCAGAACGTCGGTATAAACTTCAAAGATAAAGCGTACCGATATCCAGCAGGATGTTAGAGGCCAGGTG  
CCAATACCGTAAGAGAGTTTCTCTTTAAAGGCGAGCGTAAAGTTGCTGGATCTTCCGTTGTGATGTGACTCATCGATGT  
TCTCCCTTTGCCCATGAGTTTCCCACGGGCGGATGTGATTAGATGCTTTTTAACGACGCGAACAGTGCCGCCATTTCG  
TATCGGCGGATAAAAGACCGGCGGCTTCCGATGGGCGCATTAACGGTAACCTCCCGCCCCGGAACGTTTCAACCGTC  
CAGGCGTGGACCCAGTTATCTCCGGCAGATAGAGCGTCCAGTCGCTACGGCTTCTTTCATGCACCAGGAGCGACCAGAA  
GTGCGGACCTAACAGGTAAGTATTTTCAAGGTTAAGTGTGCGCATCGTCTTTCGTAATGCAGGAACAGCGGGCGCATAA  
CCGGCAGGCCGACTTCGCATTCAGCGGACGGCCCTTTTCAAGTTAAGGTTTCAAGGTTGGTGAAGACGGTGGTCATACGG  
GCGAAATGGGCGATGTTTTCTGCTGCGCGTCAAATGCCAGTTGTGCCAGGACGGTTACCTTCGTTGGTGGCGATCAT  
CGCGGTGAAGGCGCTGAAATCGCACCAGCGCAGCAGCTCTTTGCTGCGCTTCATCTCAAACAGGGTGGTGAACCGC

CAATGTCGCTGTGGTGCAGGCCATGTCCGGTCATTGCCAGCGACAGCGCCGCCGGGACAACCGACGCCAGGCCATCGTCG  
AGACTCCAGTCGACGTTCTGGTCGCCCCGCCACATCATGGTGGAGTATTTCTGGCTACCGGTAGAACCGGCGGCATAAA  
GAAAAGGATCTCGCCGAGCTTGCCCGTTTCTTCAAGGGCTTCGTAGTTACACTTCGCCACAGCGCAGGCCAGGCGTTAT  
GCATAATTTCCGCACTGACGCCGTTATGCAAGTACGTGTCGGTGGGCAGATACTCGCCGAAGTCAGCCATCCAGCCGCC  
CAGCCGAGTTCAATCATGTTCTTTTTGATCACTTCTTGAACCAGGCGTAGGCTTCTGGATTAGTGAGATCGACAACGCC  
GCCGTA AAACTCGCAA AACTCCACCAGATAGTACC GCCAGAGGCATCTTTTGCCAGATAGCCGTGTTGTGCCGTTCTT  
CGCAGAGATCTTTATCGCTGGCAACATACGGGTTGATATAGGCCAGGAACTGCACGCCCTCCTGATTCCACTGCTTAATG  
CGTGAATCCAGTTGCGGGTAGTTTTCGCTGTTCCACTTCCAGTCCACATCACGCGTTTGCCAAAAGAGGTCATACGAAT  
ACCGGACCAGTCTGCGCCAGATGCCGTTGACCTTACGCCCCGCTTACGCATGGTGTCCAGTTTCTTCTGGCACACTT  
CCGTCCCGCCCTGAATGCCGAGCGTACTCCGTATAAATCCAGTCGGGCAGTTCTGGCTGGCGTCCCAGCAGGGCGGTT  
AATTTTTCCAGCAGGGAAATGTATGTGCAGCACATTA AAAACGCAGCGTTGCTTTGTCTTCCACAGCGCCAGTTCATG  
GTATCCGGGGCACTAAAGTCGAAGTTCATATAGCAACTGTTATCAACATGGCAGTAATACTTCTGCGTGCTGACAAACG  
TAGGCTGTGGGAAGAAAGTCCAGTAATAGTCGCCGCCGCAATTTCTTTGCAGTCGGCCTGCCAGGTGACATAGGTTTGT  
TTGTTGCGACCAACGCCTTGTCTGTTGAGCGGCAAGGCGCAGCCAGATAACGGTTGTGGTTAAGGTTGCTTTTTGTAGTT  
CCAGCAATAAACGCCCTGATCGTCCGCGAGAGATATTCAGCGTGGCGCTAATGTCAGAACCAGGCTGAAATGAATTAAC  
CAACCATCCGGTGACTGGCTGACGATGGCGTCGGTAAGCGCAATTTTCTCTGTAGTTTATCTTTAATGCTGAAATTACC  
GCGGAACATATCGATATCCGCTATACCTGAGCCAATCCATAAACAAGGATTATCTTTGCTATGGGTTAAAATAAGACGTT  
GTTGAAATGTAGGGTAAA AACTGTCGTTATTCTGATGAAATTGAAATCTAATAACTGTGGACGTGGCGTATCCATAACT  
AATCTCCATAGAGTTGAGAACGAGATTGTTGCCTTCTGTTATTACAGGCTTATGTA AATGATTCTCATAAAA AACTGATA  
TATAAAA AACTTACAGAAGCTGAGCTGTTTTAACTTAATAAATTGAAGATACATAATGTTGCCTTTAGCGAGTGAAATG  
TTCTTCAATGATTTTTGACTGCTAATCAATACAAGTTATTTCTCTGTCCGTAATATTA AAAAAACAGGCGGTGCGGTTTT  
CCTGATCCAGTAATAATAAGTCGATACCTGAATTA AAGGCGTTAGGCGGGCAACTCATAGTTCAACTGCCAGTCCCTG  
ACGCTGTAATTTTTACCCGCTATAA AACTGCACCCAGAGTTGATCGGAACA AAGGCTTACCGAAAGCGCCTGCTGTGGAT  
GGGTAATGGTCATTTCCACAAATCATTAGCGGTTTTAAAGGTGTGGTCGATTTTTGTGCGGCTATTTTTTTCGCTGC  
GTGAAATTTAAATCCAGCTCATCAACGTGGTGAAGCGTTGTCGGATTGCGGTGCTCATCGACGGCATAA AACTGGTTTTGC  
CGAAGCTGGAACAGATATTCATCAACAGATGTTAAGTTGAGGTTAATAAGGATGAATACCCACGCCATAAGGCGCTG  
CGACAGTGCCGATATTCTGGCTTGCATCTCAACGGA AAGACCCGTGTGTGCGTTGAGCGAATAAACA AACTGTGAAGCC  
AGCATAA ACGGATAGCCGTA AACTGGGCGCAGAAAAGCTGT CAGGGTAACGCTGGTGGCGGTTAATTCACTAATTTGCCA  
GTCTCGCCAGGCAAGCAGCCGTTGAATAGCGGCTTTTGA AACTATGTTCAATTAATGGGTA AACTGATATTCTGCCCTGAT  
AGCGGTAACAGCCGTTGGCGATCCGGTTCGGCCACGGAATAAGCACTTTACCCAGATGCGCCAGCGGCATCTCTCGGGT  
TTGTGCGGGATGACTAAATGACAACCTGAAAGGTTAATTCAGCCAGACCAGCACCGACGGTCACAATGGTCGCGTGATA  
ATCCCCCGCGGCAAGTGAACCGGTCTGTCCACTGCAATGCATATTGGTGATTTGCATACAAGGCACCTTAATTAACGACA  
TACAGCCTCCCGTGAGGCTGATGTCAAACCCAAA AACTGCACCCGACGGTCCCTCGCCCTTTGGGGAGAGGGTTAGGG  
AGAGGGGAAAACCCGCACCTATTTTTCAGATCAGTTATTTGCGATTAATATCCAGCAGACCCGCTGCAACCGCTGGAGCC  
ATGCCGGGCGTAACGGGATACGCGGGATCACCAGGCAATGCAGCAGGTGATAAATATCCTGTTTGCCGTC CAGACTTT  
GGTGGTGACCTTATTGTCGCATCCAGTCTTCCACCAGGAACATTTTTCATAGTCCATCAGGTA CTTAATGCAGTACT  
CCCACCATGTTTGATACCAGTTTCTACTGGCGATCGCCAGTGACGGTGTAGAGCGCGTAGGCCGTACCATTGCTTCG  
ACGATAGGCCAACGTACAGTTCGCGGACCACCGTTTTCTTCCAGTCAACGGTATAAACAATCCCGTCCGCGCCATC  
GGGTGCCAGGCATCGCGCAGGTGGCGTTAAACAGACCTTTGGCATCTTCTAGCAGCCATGCTGGTGGTTGTTTCGCAAC  
GGGCTTCCAGGGCAGCATGGATGTGCAGCATTAAACGGCCCCATTCCGATCCAGTGGCCTGGTGTACTCCGAAACGCGCGG  
AAGCGATGCGCGGGTTATCTTTGTTGAATCCGCGAGCGGATTCACTGGGTATCGAAGTGTTCGTTAACGCGATAATG  
ATTATTTCTGGCGACGTCGTGGATAATCACGGAAGCCACGGAATCGCGGATCCAGCCATTTTTTGTGCTGAGTGACGT  
CATAAACAATCAAGAAAGCTTCCACCGGTGCATATTGGCATTGCCGCCGCGTACTCTTCGGTTTTGCTGAAGGCTTCG  
TCCCAGGATCCAGGCACATCTGCTCTTCTCGCTCCAGAAATATTTCTCGATAATTTCAATGGTGAATCGAGCAGCTT  
GCGCGCTTCCGGGTGACCCGTTGTGACGGCGCTGGCGGCACCCAGCAGAGCAAAGAAGTGTGATAGCCCTGTTGGAGG  
CATCCACCACGCCCTCGTATTACGCAGGCATACCAGCCGCATATTTTTTATCACGCAGTGCGCCGTTTATGGCTTTG  
ATACCGTGATCAACCAACGAGTAAGCGCCAGGTGACCCATCGCCGAGCAACGGAATAAACGTGCAACATACGAGCGGT  
GATCCACAGATGGGTGCCATCTCTTCTTTGATTTGCCCTTATTGCCTAACCGCCAAAACAGTCGGCACTACGGAAT  
TTTTACAAAATCAAAGATCGGTCGGTTTCTGTTCCAGCCAACGGTTGTGGCTTAGGGTGTAAACCATTTTCTTCT  
TTTATCCTCATCTTAGCGGCTTTAGCCATATTTCTGTCGACGATATCGCCAAGTTGTTGTAATTTCCGTGCGCAAACGT  
CACGCAGCATCAGCTCGTTGTCTGTTAAACCGACGACCGATGCCAGACTGCACGGCCTGCCAGGAATCCCGATGCGCCC  
GCCGTCATTGCCACGCGTACGGCACGCGGAACAGTTTTTCTGTCACACCGGAAGAGAGGATCACCCATGCCATATTGAT  
ATGGTCATTAGACGTTGTGAAGCACAGAGAAGCTCTTGTGCGGACCTTTGCCATAAAGCGGCATTTCACTTTGTAGA  
GGTCAGCGCCACTGTCGCCAGCTCTTTGGCGGCATCGATGATCGCTTGTTCGGCATCGAATTTATCGCCACGACGCGGT  
GGCGGACGACTGGCTCAATGATGCTTACCAGACCGTGTGAGTGGCACAGTTCGTTGAACTCTTCCACATATCCAGACC

TTGCTGCGCATCTTCATCACTACGCCACAGCACCAGCAGTTTTAAGGCTTTGCCACCGTCTTGTGGATCTGTAGCGGAT  
TGATTTTGGCGTCAATAACCACGCTATCGACCGGAATACCGTTGCCAGGAATGAACTCATCGCGGGCACAATCATGGCG  
CAACTTTTGGCAATCGCGTTTTGCTCAACCACCTGGCGGTAGCAGAATTGTTGATCTACCAGAATCGCCGAGGCATAAGG  
CGAGAGGGCCTTTGCAGCGTTAACTTTGAAATCAGTTAAAACGCTATCGGCTACCGGAGCGGGTGCCCGAGCCGCGCAA  
ACATCATGCGCATGGCTTCGCGCTGATCGACCGCCAGCATGGCAAACCGCCGATGCGCGGTAATGTCGTTGATGGTG  
TACTTATTCATTCATTTATCTTTATCCAGTCGTTACATTTTTACTTTGGCAGTCATCCCGGCACTGACACGGACCTGT  
TCCAGAATGGCGGACCAGTCTGGCGACCCGCGACCCGCTGCGCGCGCTGGCTATAAACCTCCCGTGAGGCGGCCCCAG  
CGCATTGGACATGCAGCTGGTTGGCGACATCAAGGGCGATGCCAAGATCCTTATGGCAAGATCGATCATGAAGGCGG  
GAGAAAGATCTCCGCTGAGGACTTTGTTTGGCCAGGAAGTGGTGAAGTGACCTTACCAGCGGGCGGTACCCTCATCACT  
TTGACGGCAACATCGAAGGGAAGATTGAGGGCTTCGCACAAAACGGCGGCTTCTGCCGAAAGCGCATTGAGCGCGATGCT  
CATGTAGTTGTTGATGAGCTTAAACGCGGATCCCATGCCCGACCGCCAGCGTTGATCAACTACTGCCCATCGCCATCA  
GGATCGGTGTGGCAGGTTCAACTTGTTCAGCGGTGCCCGCAGCCAGCAGTAACAGAGTACCGGTAATGGCATTTCAGAA  
GTACGGCTACCGGAACATCCATCATGCTGAAGCCTTTGGCTTCATATCGGCAATCAATTTATCGGTTTGCAGCGGATG  
GATGGTGGACATCAATGACCAGCGCATCGGTAGATAAGCCTTCGAAAACCGCTTTTACCAGAAACACGTTGCGCA  
CCAGATCGCCATTCGGCAACATGGTAATGATAAATTCGGCATCTTAGCGGCTGCGCGGTTGGCGGGGATCGCA  
CCTTTGTCTACAGATGCCGCACAGTTCGGCGTTACATCAAAGACGCGAAGTTGATGCCCTTGGCTGCAATAAATTGCT  
CGCATTGGCGAACCCATTTGTCTAAACCGATAAACGCGATTGCTGCCATAACCTCTCCTGAATACAGTTATGTCACT  
TTTTGTCAATTTATGACATGCTTTGCTTGTCTGTTTTGATCGTATTTGTAATTTATCGTCAAAAAATTGACAGCCGTAC  
TTTTTAAACAATTGGTGAATTTAAATGAACGCATCCAAAATGTTTAAAGGAATGACCATGATTCGTGTTGCTTGTGTAG  
GTATAACCGTGATGGATCGCATCTATTACGTGGAAGGGTTACCAGCGGAGAGCGGTAATACGTGGCGAGAAATTATACG  
GAAGTTGGTGGCGGGCCAGCGGCGACGGCAGCGGTTGCGGCGCAAGGCTGGGGGCGCAGGTCGATTTTTATTGGTCGCGT  
AGGTGATGACGACCGGCAACAGCCTGCTGGCAGAGCTGGAATCCTGGGGCTTAAACCCGTTACACCAAACGGTATA  
ACCAGGCGAAATCTTCGCAATCCGCCATCATGGTGGATACCAAAGGCGAGCGGATAATCATTAACTACCCAGCCCGGAT  
CTGCTGCCTGACGAGAGTGGTTGGAGGAAATTGATTTCTCAGTGGGATGTTGTGCTGGCAGATGTACGCTGGCACGA  
CGGCGCTAAAAAGCCTTACCCTGGCCGTCAGGCGGGTGTGATGACCGTTCTGGACGGGACATTACGCCGAGGATA  
TCAGTGAGCTGGTGGCATTAAAGCGATCACGCGCCCTTTTCAAGCCGGTCTGGCGGCTTAAACGGGCGTAAAGAGATG  
GCCAGTGCCTAAAACAGGCACAAACGCTCACAATGGTATGTCTATGTGACCCAGGGTAGCGCAGGCTGCGACTGGCT  
GGAAAATGGTGGCGCTCAGCATCAACCGCCTTCAAAGTTGATGTGGTAGATACCACAGGTGCGGGTGTGTTTTTACG  
GCGCTTTGGCGGTGGCGCTGGCAACAAGTGGGGATTTAGCGGAGTCACTCCGCTTCGCCAGCGGTGTAGCGGCGTAAAA  
TGACACGTCGCCGGTGGACGAGCCGGATCCCTGACTGTGATCAAACCCGATCTTTTTTGTCACTTTTTGTATAAAATGC  
CAGGGTGTGTTTTTTCGAGGAATTTTCATGAGCCTTACCGAACTAACCGGTAACCCGCGGACGACCAACTCCTCATGC  
TGATCGCCGAGCGTGGGTATATGAATATTGATGAGCTGGCAAATCTGCTGGATGTCTCCACGACAGCGTCCGCCGGGAT  
ATTCGTAATTAAGCGAGCAAGGCCTGATTACGCGCATCACGGTGGCGCGGTGCGGGCTTCCAGCGTCTTAATACGGC  
GTTGAGCAGCGTGAGGTTTCGAAACCGAGGAAAAAAGCGATTGCCGAAGCGGTGGCAGACTATATTCCTGATGGTT  
CAACAATTTTATCACCATTGGTACGACTGTTGAGCATGTTGCCCGGGCGTTACTTAAACATAATCATTTCGGGATAATC  
ACCAACAGCCTGCGTGTGGCGCATATTTTACCACAACCCGCGCTTTGAAGTGTGGTGGCGGCGGTACGTTGCGCTC  
TCATAATAGCGGGATCATTGGCCCTTACGCGGCTCCTTTGTGGCTGATTTTCTGTGCTGATTATCTGGTAAACAGCGTTG  
GGCGATTGAGAGCGATGGCGGTTGATGGAGTTTGTGTAACGAAGCTAACGTGGTGAACAGATGATGGCGCACGCG  
AGAAATATTCTGCTGGTGGCGATCACACTAAGTATCATGCTTCGGCGGCGTTGAAATTGGTAACGTGGCACAGGTCAC  
TGGCTCTTTACCAGCAGGCTGCGCCGCTGCGTAAAATCACGCTTACAAGACAGCCAAATTGAAATCATTCTTCCCC  
AGGAAGACCGCTAGATTTTTGTGACCGTTAACCTGGCTTCATACCTTGCACATAGCCAAACCCATCCTTTCCCGCTACA  
GTTAATTTCTGTGGCGGAAAGGAGGCAAAAATGCTCTATATCTTTGATTTAGGTAATGTGATTGTCGATATCGACTTT  
AACCGTGTGCTGGGAGCCTGGAGCGATTTAACGCGTATTCCGCTGGCATCGCTTAAAGAAGTTTTTATATGGGGGAGGC  
GTTTCATCAGCATGAGCGTGGGAAATTAGCGACGAAGCGTTCGAGAGGCGCTGTGTCATGAGATGGCTCTACCGCTAA  
GCTACGAGCAGTTCTCTACGGCTGGCAGGCGGTGTTTGTGCGCTGCGCCCGAAGTGTGATCGCCATCATGCATAAACTG  
CGTACGAGGGGATCGCGTGGTGGTCTTTCCAATACCAACCGCTGCATACCACCTTCTGGCCGGAAGAATACCCGGA  
AATTCGTGATGCTGCTGACCATATCTATCTGTCGAAGATCTGGGATGCGCAAACCTGAAGCACGAATTTACCAGCATG  
TTTTGCAGGCGGAAGTTTTTACCCAGCGATACGGTCTTTTTCGACGATAACGCCGATAATATAGAAGGAGCCAATCAG  
CTGGCATTACAGTATTCTGGTGAAGATAAAAACCACCATCCCGACTATTTCCGGAAGGTGTTATGCTAAAAACCAT  
CAGGACAAAGCCAGGCACCGTACCCGTCATATGGCCTGGCTAAAATACTCTGGCAACGCATTGATGAGGACAACAT  
GACAACCTGGCAGGTAACCTTGCTATGTGTCGTTGCTCTCATTAGTGCCGCTGGTTGCCGTTGTTTTGCGCTTTTCG  
CCGTTTTCCCATGTTTTCCGACGTCAGCATTAGTACGTCACCTTATTTTTGCCAATTTCTGCTGCTACTGGCGAT  
GTTATTCAGCGGTATATCGAACAATTTGTTGCCAATTTCAACAAGATGACCGCGTGGGGCGTGGGGCTGATCGTCAC  
CGGTTATTGTTGATGACTCCATCGATAGCGGTTGAATACCATCTGGCGAGTAAACGAGCGGACCAAAAAATTTACT  
CGTTCGCCGTGACTGGATGATTTAACGCTGGGGCGCTGCTGGCAGGGGCGAGTCTGGCGATCAGTTCCTATTTGCTC  
TCCCTGCGCTGGGCGAGCGATCTCAACTGTCATCGACAACGTGCTGCGTATTTTTCCGTTGCTGTTGCTGGATCTC

CTTCTGGTTGCTGTACAGCATTGTTCTACCATCCGCGTACCTAACCGCGACGCGATTGTCGGCGCGTTTGTGCGCCGAC  
TCCTGTTCAAGCAGGAAAGAAAGGTTTCGCGCTTATATCACCATGTTCCCGTCATATCAGCTCATTTATGGTGTGCTG  
GCGGTGATCCCATTTCTCTTTGTTGGTCTACTGGACATGGTGTATCGTCTTGCTTGGCGCGAAATTACTGCACTCT  
CGGGGAATACCGCAAATAAAACAAGCAGCTGAACAAGAAGAAGACGACGAACCATGATTGCATTAATCAACGCGTAAC  
CCGTGCCAGCGTCACCGTGAGGGAGAAGTGACGGCGAAATTGGCGCGGGACTTTTGGTGTATTGGGTGTCGAAAAGG  
ATGACGACGAACAGAAAGCAAACCGTCTGTGCGAGCGTGTGCTCGGCTACCGCATCTTTAGCGATGCCGAAGGCAAGATG  
AATCTCAACGTGCAACAGGCGGGCGGCGAGTGTGCTGGTGGTTCCAGTTTACCTCGCCGAGATACCGAACGGGGGAT  
GCGCCCAAGTTTCTCAAAGGTGCATCACCAGGATCGCGCAGAGGCGTTATATGACTATTTGTCGAACGCTGCCGTGAGC  
AAGAGATGAACACGCAACAGGACGCTTCGCTGCGGATATGCAGGTATCGCTGGTCAATGATGGCCCCGTGACATTCTGG  
TTGACGGTATGAGCCAGCTTCCAGGGTGTACGCGGAAACAAGAGAGAGTATCGCTATGTATCACCTTCCGGTTCACAA  
ACAGAAGAAGAATTAGAGCGTTACTATCAGTTTTCGCTGGGAAATGTTGCGTAAGCCCTGCATCAACCAAAGGTTCCGA  
ACGCGACGCGTGGGATGCGATGGCGCATCACCAGATGGTGTGCGACGAGCAGGTAATCTGGTGGCGGTAGGCCGACTGT  
ATATTAATGCCACAATGAAGCGTCCATTGCTTTATGGCCGTTATCCCGACGTGCAGGACAAAGGGTTAGGCACGCTG  
ATGGCGATGACCTGGAGTGGTGGCGGTGAGGAGGCGTTAAGCGGTGACCTGTAGCGCCCGTGAAGACGCGGTGGA  
GTTTTTCGCCAAGCTGGGTTTGTAAATCAGGGAGAAATCACCAGCCAAACCACCGGATTGCGCATTTTTGATGA  
TTAAGCCCGTCCCACTGTGATGACATTCTGCATCGCGGCGACTGGTGGCGCAGCTGCAACAGGCGGTGACGAACAT  
ATCCCGCTTAGTGAAAAAATGGGCGTGGCATTGAGCAATATACCGGGCAAAAATTTACTACTACCATGCCAGAAACCGG  
CAATCAGAATCCGCACCATACGCTGTTTCCGCGGAGTTTATTCTACTGGCGACGCTACTGGTTGGGGACTTATCTGGC  
TGATGCTGCGTGAACGCCACCTCGGCGGAACGATTATTCTGCGGATGCGCATATCCGCTACAGCAAGCCGATTAGCGGT  
AAACCTCATGCGGTAGCCGACTCGGTGCCTAAGCGGCGATCTCGACCGTCTGGCGCGGGACGAAAAGCACGGGTGCA  
GATGACGGTGAATCTTTGGCGACGAGACGCGGGTGCAGTGTGAAAGGCACGTATATCGTTCTGCCCGGAAGCCAT  
TTGGCCCGTATGAAGAGGGCGGAACGAAGAAGAGTAGCTGATGGAGAGGGCGGTGCTGCCTCTCTCATTGAGTCTAT  
TATATTAGTCTTGGCTATTTGCGTTATATTAATAAGAACTCTATAAATTTTTATTCTTCTGTTGGCTCCATACGTGTCT  
TGCTACATCACTGTTGAGGACATTTAAATATTATTGTAGAAGTGTGCAATATCGCAGATAATGCTTAATTCATC  
ATCTTAGTTCATGTTGAGCGATTTTTGATAGTCAAAACCCCTCTGGTCCATACTTTTCTATAAATTTTTTAAAT  
CTATAGCTAACAAATATTATGCAAAGATAATGGACTAGCATATTGTGAGTATCATTACTTACTGCTCTGTATGTTATG  
AATAATTATGTTGATGTTTCTTAAACCGTGGGAAGGAGGCTATAATGGTTGCCAATATAATCTCATTAAACAAGA  
AAGTTATTCTGTTGTTAATTTAGAAAAACAATTTCCGAACTGTTACCAACAAAATTATAACGATGAGCAAGTAAAGAC  
CGTTGGTGGCAGTACTGACCGGTCTGTGATGAAAGATAATTTACCTTAAATCCTGGTGTGTTAGGATGCTGACGTT  
TTTCGGCTACACCATTGATTATGCAAATAAATATCTCTGAATATAATATATTCATAGCACCCATAATTCATCCTGGGC  
GATAACTAAACCATTTTTGAGTAATAAATGAAACAACCTGCAACACTCTTATTATTTCTGAAAAACGCTCGCAAAAACAA  
AACAAATGCAAAAATCCGCTTTTTTAAATGATTTTCCGCGTAATTTTCCGCATACATTAATGAGTAATATATGTAA  
GGTATTGGTAATGGCGATGAATACGGTTTTTCTTATTATCAGAAGAGGCAATTAACCGGCTGAACAAGCTTCCGGGCT  
GGCGTAAGGTTTACGATCTGCAATTTACGCGAAGCGGTAGAGCAATATCTGGAACGTGACGAATCCCGGTGCGTAAA  
GCAAAGGGAGGCGAGGCAAAAGGGGGAGGTAGTTGGTGTGATGATCAGTGTAAAGGAGCATAAGGAATGACAAAAATTTT  
CATTCTGAATATAAAAAACAGATGCCCTTATTCTGGTATTAACAAGGCTGTTTTACTTGAATTAATAACTGCAA  
CTGTTACATCATATCTGAAAAACGCTCGAAAAATAAAAAATGATGCGTAAATGAGCTTTCTTAAAGATTGCGCAAGG  
GTACTTTTCTCCATAGATTCAAAAATGATATTGGCGAGATTTATGAACTCTCTGGCAGGTATAGATATGGGAGAA  
TTAAGGGAAGCGGTAGATCAATCACTGATAAATCAATCGCAACAGCAAGAACCAGTGTTCCTGGCATGCGCAAGGGTG  
TGAGGAAGATGGTGTGCAATATCAGCGTAAGCTGCGCGAGGAATGGTAATGGGAAAAAATGATGTCAATCAGATTGCTGA  
CAACGTGCGCTGTTGTTATGCCGATGCGGCGTGAACGCCCTTATCCGGCCTACAAAAGTCGTATAAATCAATGTATTGCA  
GTTTATTGGTAGGCTGATAAGCGCAGCGCATCAGGCAATCTTACGCTTGTGATCAGTCTCATGCCATAACCTTATTGA  
TGTGGTGGTGGTAAATGAGGCAAACCGGCACTGGCGCATAGCTTGGTGGTAAACGCGGAATACGAGAGATGGTGT  
CGTCACACCCTATGAGCTGTAATCCGGGCGACCTGCGCCACCCGAAACGTCAGAGATTACTCTCTTACCCGGAAC  
AGGAACGGGTTGATGAACTGCGGGCATAGCCTTCTGCTCCATTGCTGCGTCCAGTACCAGAGAGGGCAGGTCATCTGC  
TACGGCTTCGATTTTTGGATCTTTTTCTGATAGAGAATTTTTCAGGTAAGTGTGCGAGTATCGCAGCTTTCGGCTTAA  
TCGCGGCTGTTGCTCATCCAGCGACCGTAATGCAGTTTCCGCTCTGCTCGCAGTTGCTGCATTTTACGCGCACTACG  
TGCCATTGATTTACACAGGTTGAGTGCAGGTAACGTAGCCCTGAGTGGTCCAAATTTGACCATGCTGGACACCGG  
CATAGAACCACAAACCGGCAATATTGACGTTGCTGCGGATTCAGCGCGGGCTTTGCCGGGATCAGATTGGCCATCT  
GCGCCAGTAGAGCGACAGTGCAGCCAGATAAACGCGCTTTATCGCTGCTGACGGACGAGAAATCAGAGGCAAACAGC  
GCGCTGGCCATATCTCCAGCTCCTGAGTCGATGCCCTTCTCCAGATTCTCAATCACTGCCAGCGCCGGGCGCTCATTT  
AGTTTTGAGCTCAGCAATCAGCGCCATCAGCAGTTTTGCCAGTCTTATCACGCGGAGAACGTGAATATCCAGCGGGG  
GCTTGCCTTGTGCGTGGCTTCTTAAATGCGCGCAGTCAAGTCCATCTCCAGCGGATGGTGTACAGCACCCTTCTGG  
GCGTGGGCGATAAGCGCAGCAAAGCGCAGGTAATCACCCAGAGGATTATTTTCTGCCAGCTCGCGCAGACGCTCGGCGCG  
GCGGTTGTATAAATCTTGAAGCGAGGGAACAATAACGGCGGAATCATATCCGCGTACGTTTCTCGCTTGAACCCAGCT

CATCTTGCGGGATTATGCGAATACTCATTAGCTTTCTTTCCGTTGCTTTCGGACCTCACGGTACCAGCGGGGTGAT  
GTTTCTTCGCCAGGCGCTGTAACCCATCCTTCCACCATGGCGTAATCGTGCCTTTCACCAAAGGGCGGCTAGATA  
TGCACCATGATAACCACAATTAACGCCACTGCGGCAATGAATGCAGCATTAAACGCGAATCGGATCACCGGGATTGAGAA  
AGCAGGCGAAAATAAGGACGCCAGATAATCACGCCCTCACCAGCAGCAGAACCAGGAAAATAATCGCCGCCAGAAAA  
CGCATTTCTGACCGAAGTTAATACGCCGGTGTACCTACTTCTCGTTGACGACGATCTTACGAATATTTCTTCGCCAA  
AAGATATCATCCCATTGATTAGGTTGTGATGCCAGTAACGAAAAACATGATGATGAACGAGGCAAACATAACCACGCC  
GACAAAACGGGTGCAGAATTCGCGCCAGCTGCGGTGTGCCATGATTTGCATCAACCAGTTGAAGGACGGGAACAAAAGC  
CCAGCCCGCTCACCGCCGCCAGGATGAAGCAGAAGGCGGTGATCCAGTGGTTGATACGTTCCGGCGCGGTGTAGCGCACG  
ATGGTGTACGTCTGTTTCATTTGCGCTCCTCGTCTTCTTCTCGTGACAGATTATTCTTCTTCTCATCCGCACGGTTCGGA  
CCGACACCCACGTAGTGAAGATACTGGCCGAAAGGTAGCCGCAAGCCAACAGCCGCGAGCGGTTTCCAGATGCCTTT  
CCAGAATTTACGGTTTCGTGATTTCCGGGTTCTCCGGCAAGCCATGATACAGATTTGGCTTGTGACGATGGTGCAGCA  
CGTACATGACGTGTGTACCACCGACGCTGCCGGATCGTACAGACCCGATTGTCGTAACCGCGGTTTTTCAGCTCAGCA  
ACGCGCTCGCTGCCAGCGTTTTTCATCGACTCTTTCGTACCGAAGTGAATCGCGCCGTTGGGCAGGTCTTACGCAGGC  
TGTTCTTTCGCCAACCCACCGCGGTCAACGCACAGCGTACATTTGTAGACGCGGTTGTCTTCCGGGTTGAGGCGCGGAA  
TGTGAAACGGACGCCCGCAATGCAATAACCCGCAAGCAATGCATGCTCGGACTGGAAGTCGACGATACCCGTTGGCATA  
TGAATAATTGCACCTTCCGCCGGCACGCTTTCAGGCAGCTGGATCGGAACAGTGCATACAGCCGCTTTTTCGGGATCAG  
CCATTCCAGTTTGTCTGTTCTGCTCCACTTCCGAGAAGCGCATTACCGTCCACGATTTGGCGCTTAAATCATTGGGGTTGT  
CGTACACCCCAATGTTATTGCCGACGGTATCGCAATGTCTTCCACTCTGAACACGCCACCTGACAGGCTTTACAGCCG  
ATACAGGTGGTAACGTGCATGAGTTTCGCCACTTCTTCTGGAAGTCCCGCCCTGAGGCGCGGGGTGACAGCGTTAGT  
CGCGGAACGACGAATGATATCTTGAGATTGATAAGCCATATGTCTGCTCCGTTACACCTTTTCCACATTCACAAGGAAGG  
ACTTAAACTCCGGCGTCTGCGTGTTCGCATACCAACGAATGGCGTTAAAGTATTGGCAATAAAGCCTTTTTTAGCTACG  
CCTTCATAGCCCCAGTGAATCGGAATACCGATGGTATCGATATCTTTCGGTTCGCTTTCAGCGTGCGAATACGTTTGGT  
CACCACCGCTTTGGCTTTGATATAGCCACGGTTGGAGGAGACTTTCAGGTATCGCCCTGGCAATGCCAAGTTTATTCG  
CCAGCGACTCCCCGATTTCCACAACTGCTCTGGCTGCAAAATCGCGTTCAACAGCGCGTGTGGTCCAGTAGTGAAG  
TGCTCGGTGACGATAGGTGGTTCGACATACGGAACTTATCGGCTTACCATGCTTCGGCGTCTTTAAAGAT  
ACGTGCAGCCGGTTCGAGATAACGTTTGGATGCAGCGGGTGTAGTCCAGCGCGTTCAAACGGCTCGTAGTGTTCG  
GGAACGGACCTTCCGCCATCTTATCGAGGGCAAACAGACGCCCATGCCTTCTGCTGCATGATAACGGCCGACGCCG  
CTACCCGGAGGCGCTGCGCTGTAGTCCGAATATCCAGCCGGTCCACTTAGTGCCGTCCATTTTCAGCAACTGACGCTT  
CGATCCCACGGTTACCCTGCGGATCTGCGGAGGCGCGTTATACAGAATGCGCGGTTAAGCGGCCATGCCATGCC  
AGCCACGCGTGTACCAGGCCAGACGGATCGGCGTTATCACGGCGTCCATCTGGTTGCCTTCCGGCGTCCAGCTACCG  
GCGAAAATCCAGCAGCCACAGGAGGTTGTACCGTATCGCGCAATTGGGCGAACGAACTAAGTTGTTGGCCTTTCTTGAC  
GATAACCGCACCGGTTGCCGGATCGGTAATATCGGCCAGCGCCTTACCGTTGCTCTCCATCGCCACTTCTTGAAGATG  
GCTCATGCGGAATGGCGTAGTTCATGTGATGTTACGACCTGGTCCGGGTTCCGCCACCCTGTTCCGCATACATCTTG  
CGCAAGCGCAGGAAGATACCGGAGAGGATCTCGCGTCACTCAGCGCAATCCCCGGGGCGTCCGCACCTTCCAGTGCCA  
CTGTAACCGACGACCTGAGTTAACGATAGAACGTTCTTTCGGCAAGCAGGTCGATGGCAGACGGAACACTTCGGTCT  
GGATCTTCGACGAGTCAACTTCGTTGAGTCACTGTTCTGCCAGAAGTTAGAGTTTTCAGTGTTCAGTGGGTGATG  
GTGACGAGGAACCTCAGTTTCGACAGACAACCGATCACTTTGTTTTGTTTCGGGAATGAGGCAACAGGGTTAAAGCCCTG  
GCAGATATAGCATTGACCTTGCCTCTTTCATCATCTCGAAGTATTGCAGGACGTGATAGCCTTTATCCACTTCGGCA  
ACCAGTCAAAGCCCCAGTATTTCCGCCGTGCTTTATCACCAAGAAGGCTTTCATCATAAGACAGGAAGATTTCCGG  
TAGTTGCCCCAGTAGTTACCTGGCTTCCAGCAGCGGTTTTGGCGTGTGGCGGTAAGGTAGGTTTGCAGATCGGTCTG  
CTTCTCGCTTGGCAGCGTCAATGTAACCTGGCAGGCTCTGCGACAGCAGCCCCAGGTCCGTGACGCCCTGAATATTGGAGT  
GACCGCGCAGGCGTTAACGCCGCCGCTGCCATCCCCATATTGCCGAGCAGCAGTGGATCATCGCCATCGTACGAATG  
TTTTGCGCACCAACGAGTGTGCGTCCAGCCGAGGCGATACAGGAACGAGGCGAGTTTATCGTGAGCACTGGTTTCTGC  
GATGATTCGACAGACTTTCAGGAACGCGTCTTTTGGCGTACCACAGATGTTTTCAACCACATCTGGCGTGTAGCGGAAA  
CGTGTGTTTTCAGCAAGTTCACACGCAGCGGATGTTGACGCGTGGTATCGCGTTCGGCAAGCGTTTTCTGTCAGT  
TCATAAGTCCAGGAGGATTTATCGTACTTGCCTTTTCCGCGTGTAGCCGGTGAACAGGCCATCTTCAAAGCCGTAATC  
CTCACGCAGATCAGGCTGGCGTGGTATAGGCTTCGGTGTATTCGCGGTTGAATTTTTTATTGTTGACGAGGTACAGCA  
ATACGCTGACAGGAAAGCAATGTGATACCGGAACGAATAGGGGCATAGTAGTACGCTACCGCCGCGTACGCGTAAAG  
CGAGGATCGATACAATCAGCTTCGCGCGTGTGAATTTTGGCTTCCATCGCCAGCGGAACCCGACCGGTGAGCTTC  
AGCGGCGTTACCGCCATCACACGACGAGGTTGGCGTCTTGTGATGTCGACCCAGTGGTTGGTTCATCGCACCGGACCAA  
ATGTTGGAGCAAGACTTGTACCGTTGGTCCGTGTCAGACACGCGCTGTTGTCGACCGGAGCATAACCAGCGCGCGG  
GAGAATTTTTGCGTTAAATAGCCGGTTTCGTTACTGACGCGGAAGCACACAGCATCCCGGTGGAGAGCCAGCGGTTAAC  
AGTACGCTTTCGGCGTTTTGCGCAATGTAGTTAGCATCGCGTCTTCTTTCATCAGTTTGGCGATGCGATCAAACGCC  
CTTCCCAACTGATTTGCTGCCATTTATCAGAACCTGGCGACGGTATTCCGGAACCTCAGACGGCTTTCGGAGTGGATG  
AAATCCACCAGGCCAGCGCTTTCGGCAAAAGTGCACCGCGGTTGACCGGGTATCCGGATCGCCTTCGATATGGAAGAT  
AGATGCTTTGGCGTTTTTCTCGTACCGAGGCTGTACATCAACAGCCACAGCCTACGGAACAATAGGTGACGGTAT



TACGGGTTTCGCGGGTGCAGCAGTTTATACTGCCGGTTCGCGAGTGCTACGCTGGGTGCAAACCCAGTGCCGCT  
GCCGTGGTGCCTGCCATACCGCCAGCGCAGATCTTAAAGAACTGCCTTCTGCTGACCTGCATGGATTGCTCCTTGTTTCG  
ACATTGTCACGTCCCATTACATTCGTTGCTGCGTGTGCAGGGAGTGGGAGTTATTTTTCTTTGCGGAAGGGGCCGCAA  
AGTCCAGAATTGGCTCAATTTCCCTCCATCCAGGAAGGGTTTGTAAACAATACCATAATGTTGGTGTGTGTTCTTA  
TCTGGTTAAGAGAAAGTGAAAAAACACAGCGAAAAAGAAATCGAAAAATGTGACAAATATCACAGGTGTTGTCGTAATGA  
GTTATGGCGGGTGTGATGATTTACAACACCACGGTTAGATGAGGTGCGGGAAGAAGTCCCGTTGCGCTGGTCTACAACG  
GCATTTGCGATGTGGTGTGATGGCGTCGCCCAAAGACCTTGAGTACTTTGCGCTCGGTTTTTCGCTTTCCGAGGGGATT  
ATCGAAAGTCCGCGCGATATCTTCGGCATGGATGTCGTTTCTTCTGTAATGGTCTTGAAGTACAAATGAGCTTTCCAG  
CCGCCGTTTTATGGGGTTGAAGGAGCGCCGCCGGGCGCTGGCGGGACGTACGGGCTGTGGCGTATGCGGCGTGGAGCAAC  
TTAATGACATCGGAAAACCGGTGCAGCCGCTACCGTTCACCCAGACGTTTGATCTCAACAACTGGATGATGCATTACGT  
CATCTCAACGATTTTCAGCCAGTGGGGCAACTGACTGGTTGACTCACGCCGCTGCCTGGATGTTGCCATCTGGCGAACT  
GGTCCGCGGGCATGAAGACGTGGGTGCCATGTGGCGCTGGACAACTGTTAGCCGCCGGTACAAGAAGGGGAAAGCT  
GGCAGCAAGGTGCGGTAAGTGGTTCCAGTCGTGCCAGTTATGAAATGGTAAAAAGTCCGCGATGTGCGGCGTAGAGATT  
TTGTTTGGCGTGTCTGCCGCGACCAGCTTGTGTAGAAGTGGCTGAGCGCTGTAATCTGACACTGGTAGGTTTTGTAA  
ACCGGGTCGGGCAACGGTTATACCCATCCGACGCTTGGAGCAATTAATTAATAAAGTCCGGAATATATTAATTA  
GCAGGACTTATTCATTTCTGTAATTTTATTTTATTTTATAAACAATAAGTGGTGTAGTGGCGTTTTCTTTTTCTATTTA  
TTATGTTCACTCTTATCTATATATTTATAAGGCAATTAATGAAAAGGAATTTATTATCTTCCGCTATTATAGTCGCC  
ATCATGTCCCTCGGTCTGACGGGTTGTGATGATAAAAAAGCCGAAACAGAAACGCTCCCGCTGCCAATAGTCAACCTGC  
CGACCAGCTCCTGAAGCGAAACCTACTGAAGCTCCCGTTGCAAAAGCAGAAGCTAAACCTGAAACACCTGCGCAACCGG  
TGGTCGATGAACAAGCGTTTTTCGACGAAAAATGGATGTCTATATCAAGTGTACAACAAGTTACAGATCCCGGTACAG  
CGCAGTCTGGCGGTTATGCTGACTGGCTGAAAGATTTTAAACAGGGGCTACCGGTGAAGAGCGTACTGTTTATGGCAT  
CTACGGCATTAGTGAATCCAACCTCGTGAGTGTGAAAAAGGCGTAAAAAGTGTGTGGCGTTAACGCTGCGCTGCAAC  
CAATGATGGCGTGGCGGTGAGTTATATCGATGCTGCCGTGGCGTTGGTAATACCATTACGAAATGGATAAATATTAC  
ACCCAGGAAAATTATAAAGACGATGCGTTTTGCGAAAGGAAAACGCTGCACCAGACATTCTAAAAAATCTGGAAGCCTT  
TGAACCTGTAGCCGAATCTTATCATGCGGCGATTACAGGAAATTAATGATAAGCGTCAGCTTCCGGAAGTAAAAATTTG  
AAGAAAGAGAAGGAAAACATTCCTACTACTCTCTGGCAGTCATGATTTCCAGCGAAACAAATTAATAACCTGATATCG  
CAAGATAAGTTTGTGAGCAAGCGCAATGAAGAAAGTGTCTGAACTGGAACGCTAGTGGCGCAGGCCAAAGAAGCGGA  
TAAAGGCGCATGAATTTCTGTTTTAATTCGGCAGGCCAGTATCAACTCGAGGCTAAAAAATACGTTCCGCCGATCA  
GAGATAAAGTCCCGTACTCTGACTGGGATAAAGAGCAACTTCAGGACGCAACTCAAGCTGGATGGTTCGAAGACTCTTTC  
CCGAGAGCATTACGCGAGTACAACGAAATGGTTGATGACTATAATAGCCTGCGTTAAACGTTTTTGTGATAAATGCAGT  
GTCGGATGCGGCGCATCCGACACAGTTCACCCCTTGTGAAGTAACTCCATAAATGCCTCATATCCTGTTAACCCGGCAAT  
AATCTCCGCCGGATGCTGACACAATATGCTTGCCAGATAGCTAAATATTTTTAGCTCATGACGCGCATCGGCGGCGGCGC  
AGGCGATCAAGACATGGTTAATGACTTCGTTATTCACCTCAACTGGTTGGGCGAGGGTAATAAAAAATCCACGAAAACGT  
CGTCTCTGTTCCGTCACGCAATGTGGGATGGCGAGGCGATTAACAATCAGGTTTTACCTTCGCTTCCGCGGCGATGAT  
GCGTTGTGCTTCATCGGCGTAATATGGTGTGTGCGACTAATGCGCACAAATTTGCCGGTAATATGTTGCCAGCTTT  
CACCGGTACATTCGAATAATGAAAACCTCCGGGGCAGAGAAAAACGCTCCGGCTGTTGGCGAATAAATGCCGTGCC  
AGAAAATGTTTTATTTGTTGATACCGGCAGCCGTAATGATATTTTTACGGTGTGTAATTTTACCAGCTCATCCAG  
TAAATAATGGCTGTTGTTAATGATCAATAACGGCTCAATCTCTCCGCAATGGCAACAAGTTCGTTAAGCTACGGGCAA  
TAATTACCCGACAATTTAAACATCGCGCTCAATGGCGAGCTGATTAATAGTGGCAATCGGTTCTGGTCCGAGAGAAA  
ATGATCGGCTGGCGTTGTTTTGATGCCGCTCCAGCGCACAGGCAAAAATCAAAACCGATCAGATCGCTCGAAAAGGGG  
AATATCGAGCTGTTACGCAAGTAGCGTAATAAAGTGCAGACTCATATCAAAGGCCGAGGCCAGCGGCTTTCAGGTTAT  
TCATGCTGCTGCGGCGTCTCAGCAATCCACTGTTGCGGCAAGGCAACGTAATAAATGCCGGTAATATTCTAACCC  
AGCTGCGCATCAATAATATTCAATGACGCGATGCCCGGACCCCTTTCAGCAACCCCTGCACATTATCGGCTGAAATTAC  
CTGCGCTTGTGATGCTGTTTCTATCAAAACCGTCAGGGTTCTTACAGCGTTATACCAAGAAACAGACCCTATGTT  
CAACGATTTGTTTTATCTGTCACCGGGATATTGCGGCCACTCATCGGTGAGTTGATTACGAGGGCGTAAATCGCCAGA  
ATCAGGCTGGAGAGATAATCACCTGCATGAGCGGCCAGCGGTGTTGGTTGTCGAGGCCGTGGATAAATGCTGAAGGTT  
GTCTCGTGTATGCCCGCCAGCGGAATTAAAAACGGATCTTTGCGCAGCAAGTTCGCCAGCAAGATAACGCTTTCTCTT  
CTGTCTCATCAATGAAATGGCCAAACCAGGGCGGTGGCCAGGCAACAAGTGCCTTATAACGCTGTTTTAACCGGGC  
AGACGCTCTGCTACCCAGTTTTCTGGCAAATTAAGCGCCGAGGCGAGTTGCGCACGGGGAGTAAAAGTATTCAGTAATAA  
CAGCGCCAGCAGCCGATCGTCTGTTATCGTCTTTTGCAGCAACTGAAAAAGCTGCGGCGCTGAAGATTTCCAGCTGAT  
AGCCCGCACTGCCACTGGCAGAAATGCGGGCTTTGCCGTTAAGGGTGAAGTTGAGATAGTCAATATCACGAGGATGGTC  
CTGCCTGAAACGCCAGTCTGTTGCGCCAGCTCGCCAGCGGTGCGCGGCTGTTGCTCCAGCAGATCGACAATCTTAACTG  
GCGTTGTTTTAGCATTAAATCCACTGACGGAAGTGGCTAAACGCGTTGACTTTCTCCGAGTTAAGGTGCTCAGAAAACC  
CCGTATCAGCGTGAGCAGAGCTTCTAATCGGCTTTTGAATCATAACCGCTGTTGGCGTGCAGATAACGAGTTGGCAGAC  
ACAGCGGACAACCGGACGCGCCGCCCATCACGTTGTAGCGCCGCCATCCGTCGCACCGGTTTTATGGTGGAAAAAT  
TGCAGCGGTAATCGTTATGTGCGGCACAGCTTTTTAACGCTGCTACCAGTTTCTGTTGGGGAAGTAGCGCTTGTCAA

CAGCATCAGCCCCGGCCCTGGCCAGTTTCAGCGGTATTTAATGTTATCAATGCCCGAACATCGCCCGCTACGGCGG  
TATCCAACACGATCACGACGTCGGTTAATGTGTTCCGCCGAGTTTGCGCCCGCTAGCCAACTTCTTCTCCACA  
CTGCCAACGCCATACAGCGTAATTTCCGGATTATTCACCGTCTGCAATAGTTACGCCATCATTGCGCAGCCGATGCGGTT  
ATCCAACGCCTTGCCGACCACTTTATCTTCGCCCCAGCAGGCAAAATTGGCTTCCGGGCTAATAAAATTACCAATTTCCA  
CGCCGCGCTTTTCCACCTCTTCGCGACTGTTTCGCGCAATATCAATGAACATCTCATCAAATGACAGCGGTTGTTGCTTT  
TGCTTTTCCGTTAACGCATGAGGCGCGACGGAACCAATCACACCAGGGATTTTCACTCCCTTGTGTGTGCGTATGGTTAC  
CCGGTGGTTGAGCATCGACTGATTCCACCAGCCGCAATGGTGGTAAAACGCAGAAAACCGCTCTCGTCGATGTGGTGA  
CCATAAAGCCGACTTCATCCATATGTCCGACAACGGCAACTTTTGGACCTTTATTCCCCTTACGGGCAACAAAGCTGCC  
AGACCATCGAAGGTGATTTCAATCACGCAAGGTTCCAGCGTGTATCAGAATGTCGCGAACTTCTGTTCATCGCCGCT  
GACGGCGCTGGCTTGCACAACGTTGACGTAACCTCAATGTTTCATGGACAAGCTCCTGTTGCGCGGCTTTCGCTTTCGGG  
CGTAACCACAATCCTTTCAGGACGATAATGAATGAAATGTTACGCGCAGGCCAATCGCCAGCACCAGATAAAACGAACC  
CACGGCGACATCAGGCCGATCAGCGGGTCAAAGATACCAAACAGGTGCCAGACGTTTATTCCGAAAGCGATCACC  
GCACGCCGTAATGCCGCCGCCAGCGTATTGGCGTAATCATCGGCAACGGAGCTGCCAGAGCGTAAGGAATAGCCGTT  
TCGGTTGCGACTGTGGCACCAGCACCAATGGCACTACTGGCAGCTCTTTTTCTGTGCGGTAAACAGTTTGGGCGCAAT  
GAACGTGCAAGACCCGCCGACGGCGGCATCAGCGCGACAACCGCCAGCATGGCGTACCAGTCATAAATGTGTTTTT  
CCAGCAGTGAGAAGCAGAAGAACCAGGCGTTTTATTGATGGGGCCGCCATATCGAACGCCAGCATCGCACCAGCAGA  
AACGCTGCCGCAAACTTCATTGATGGAGGAATGGTATTTCAGGAAGTGGAGCAGCCCGCCATGAGGTGCGACATCACC  
CCGATAACGTAGTAAGTGAACGCGCCAAAACAGCAGAGTAACGAACGGGATCAGCATTGAACCGAGCAGCGTTGTA  
ATGCTTTGCCAAGGCGACTTTGCGGAACCAGAAGCAGAAATAGCCAATCGCCAGCCCAGCACCACCGCCGAGGAAT  
CCCGCACCAGCTGGGTGCCGAGCAGCGCTTTCGCTTCGCCAGATAGCAAACAGAAACGCCGAGCGAAAGCCGTTTT  
ATCGGCAATCGACGAGGCAATATAAGCGCCATGATGGGGATCATAAAGGTGAAGCAAGGTAACCGATGGATTCAACTA  
CCCAGGTAACGACGGCGCGCTTTCGACATATCGGTATACGGCAAACCGAAGTGCACCAGCATGTTGGCAAGCGCCACC  
AGGATACCACCGCGATGACAAACGGCAGCGCCGAGAGCAGCGCCATCAGGTGGCTCATCAGCTACCGCTTTCGAC  
TTCCTGTTTCCAAGCTTACGCGCTATCTGCGGCAAAAGCTGCGAGTTTTCGTTAATTCGCTGAAAATCTGGTCGA  
TATTTTTCAACGCTGGGAGATGGCAATCTCATAAACTTTCTCCCGCAAACCGCGCGCATCATCACCCTCAGGCCA  
CGCCGGTAGCGAGAATGACGTAATCGGCAGCGCAATCTCTTCGCTGGATAAGCGTTTTCAACGCCACTGGACCCTG  
AGTTTCCACTTTTATGGTATGACCGAGAGAACGGGCTTCTGTTCCAGGGCTTCCGCCACCATGTAGGTGTGAGCGATCC  
CGCGGGGCGAGTTGGTATCGCGACAATACGTAAGGATGACTCCATCGCCACTTCTTATGAGCTGAGGGTTTGATTTAA  
CAAGGCAAGCCTTGGTGGTATCGCCCTGTTGAGTTGATGAATAAATTCCTTGTGAATAATTTTTCGACACAGTGTGC  
CGATGATTTTACCTGATCTCTTCGCCGCTTTGCGGCACGCCAGGCGAGATCCAGCAATTGACGTCTTCGCCATCGCTG  
GCTTTCCAGTCAATAGCCTGCGCTTTGCGGGCGAATAATACGAACGGTGTAAACGCAGGCGCTTTTACCCTGCGGCAC  
GGCGACACCGGAACCAATCCAGTAGAGTGCATTTTTTCGCGCAGCAGCAGGGTTTGCAGGAACTGGTGTGAGTCGGTGA  
TAAAACCGTTTTGTAACGCTATTGTCGCAACTGCTTCAGAACGGAATAAGCGCCATTGCCCTGAATATTCAGGTCAATA  
CAGCTTGCAGTAAGAGCTGCCATTAATCGGACTCCATAAAATATATTTAATCAATTGTAATGGTGGAGCGATTAAGTGA  
TGAGAGGCGATATGTCGGTAAACAATGACAATTTGAGACAGAGTGAAGGTGAGATTTGCGGAGTAATGCACATAATGGT  
TATTTAAATAAACACATGAATCATTAAATGGTTATTCATTATTTTTGTGATTTACTACAATGTATCAGGGAATATAA  
CTTACCGGGAGATGTAATATGTTTAAATTTTCAAATCGAAATTTAAATATTGTGCCGGAGGCATCTCTGGCACATTGGG  
CAATTACGGCAGGTAAAACACTTCTTCAGCTCGCTACTCACCAGGCTGTTATCCGGTTAGCGGGCATAACATCGGTCA  
TATATTTCCACCAACGTTGGCAAACATCAGTGTGCAACCGCATTCCAGCGTCTTCAGATTCAATCTACCATGGCA  
AACAGCAGATTACGCGCTTGTGAGATAGATGGCTGATTTATCGGCACCGTGAAGATTTTCAGCACTGCTTCCAGTTCTGG  
CCAGATGGGATTATGCCGACGCTGATACTCTTCGTGGGCGTCCGGGTTTACCTGCATGACAAAGGCTTTGCGGATCATGT  
TTGCTCCTTACAGCGCCAGCGCACTGGCGAGTGGCGTAACGCCGAAACGCTTGCAGAGCGTATCAACTCTTACCGCTG  
ATGGTCTGTTTTCATGCCGCCATCGAATAAACCTTCACTAATACTTGTGCTGATTTTTCTGCGGTGTCGATTAACCGAA  
GGTTTTCATCCAGCGTCGCTCCGCTGCCGAAGACGCCGTGGAAGGGCCACAACACCAGCGAATGTTTTTGCATCTCTTGTG  
CGGTGCGCTGGCCGATTTTCGTCGTCGCCGGCACCATCCACGGCAAAATGCCAACGCCATCCGGGAATACCACCAGACAC  
TCGGTGTGCTGCCCTCCACAGTTGGCGAGTGAAGACCGCGGTGTCGTTTTCAAGTACATAGGTGAGGGCGATCAGGTTGGT  
GGCGTGGCAGTGCATGATCACCCGATCTTTCGCGTTGGTGGCTTAAATGCGCTCGCAGTGGGAAAGGAAGTGAAGCGGAA  
GTTCCGAAAGTGGGACGGCTTCGTTGGTTAACCCCAAGAATGTGGTAGCCCGCGCGCTGCTGTCGACTTTTACGATG  
CCTAAGTTAGCCGAGGATCAAGCTGGACGTTACGGAAGAATTTGCCGAGCCGGTACAATAAACGGTGTATTTGCCAG  
TAAAGGCATGGCTGGCTGAGCGGGATATAGCGGGTGTGGTGGAAATTTGCTGATATGGTGCATATCGGCGTCAT  
CCAGGCGTAGCGTCAGGTTCCGCCGTTGCGCTCATCCAGCCTTTCAGCCAGCGCTCGGTGGTGGCTTTGATCATTCCC  
TGGACAAACAGGACTGAGTAATGTTTTGCATGTTCTGTGTTCTGTAAATTCGGTGTGTCGGATGCACGACCCGTAGG  
CCGGATAAGGCGCTCGCGCCGATCCGGCAATCAATGCCTGATGCGACGCTGTGCGCTTATCAGGCCCTACAATTTG  
CCGACCTGTAGCCTGATAAGGCACTTGTGCCGATCCGGCAATCAATGCCTGATGCGACGCTGTGCGCTTATCAGGC  
CTACAATGTTGCCGACCTGTAGGCCGGATAAGGCACTTGTGCCGATCCGGCAATCAATGCCTGATGCGACGCTGTGCG  
GTCTTATCAGGCCATAACTATTGCCGACCTGTAGGCCGGATAAGGCACTTGTGCCGATCCGGCAATCAATGCCTGATG

CGACGCTGTCGCGTCTTATCAGGCCTACAACCTGTTGCCGACCCGTAGGCCGGATAAGGGCGCTCGCGCCGCATCCGGCAGT  
GTTTACCCGCGCGGACTCAAATTTCTTCTCATAAGCCCGCACGCTCTCCAGCCATTCCGTACCTGCTGGCGTATCGTG  
ACGTTGGCAATACATTTCCAGACCGCCTGCCACGGCAACGATTTCTGCTCTTCCAGCAGTGCCAGACGCGCAGTGTAAT  
CGCCCGCCGCTTCCAGCTTCCGCGAGCTCAGCGGTAGTTCCAGCAACGCACGCAGCAGGGCTTTTTTCATATTGCGTGT  
CCAATGACCCACGCGGAATGCGGTTGATAGAGGCATCGAAGAAGTCAAGGCCGATATGCACCCGGTCAAACAGATCGTG  
ACGCACAATCTCACTGGCAATTGCCTGGGTTTCATCATCCAGCAGCACTACGTGATCGCTGTCCCAGCGAACCGGACGGC  
TGACGTGCAGCAGCAACTGCGGCACATACAGCATGGCGGCGGAAATCTTGTGCGAAATCACTTCAGTCGGGTGGAAGTGC  
CCGGCGTCCAGGCACAGCGCAGTCTGGCGGCTGGTGGCATACCCCATGTAAACTCATTGGAGCCAACCGTGTAGCTCTC  
TGCGCAATGCCAAACAATTTGCTCTCAACGGCGTCGATATGGTGCAGGGTTTAGCTTCTCGCTGATCACCTCATCCA  
GTGCTGCCAGCAGCGCTGACGCGGGGCGAGACGGTCAACGGTATATCTTTCATACCATCCGGGATCCAGATGTTTCATC  
ACCGATGGTGTCCGAGTTGCTCGCCAAAATAGGCCGAAACGCGACGGCTGGCTTTGCAGTGATCAATCCAGAACTGGCG  
AATGCTGTGTCGCGCATGGGAAAGCGTAAAGCCATCGGCGCTTAGCGGATGCGAAAAGCAGGAGGGGTTAAAATCCAGAC  
CGAGCTGATTGGCTTTCCGCCATTCAACCCAGTTTTGAAGTGTCTGGTTTGATCTGGTCGCGCGAGACTGGCGTATCT  
GATTCCAGATAGATGGCATGTAAATTAAGCCGTTTTCCGCCCGGAATCAGCCGCATAGCCTGTTCCAGATCGGCACGTAG  
CTCACTGGCATTACGCGCTTTGCCCGGATAATTGCCGTGGCCTGAATCCCCCGTTCAGCGAACCTTCCGGGTTTTCAA  
AACCGGAAACATCATCGCCCTGCCAGCAGTGCATTGAAACGGGTAACGATCAAGTTGGCGCAGCGCCTCCTCGACATCA  
ATCCCCACCGCCGAAACGCTGTTTCGCTAGCTCCAGGCCTGTTCCAGTTGAGTGGTATGCGCAAAGCTCCTTTGTC  
TGTGCTGTAGAGTGAATCTGCGCCACATAGTGGCAATTTCACTGTCAGGATTAGGGGTAAAGGTGGTACAGATTCGCGGT  
GGTGTGACGACCTGACGGAATCATCCACATTGTTGAGTTCATCCAGCGTCATTAAGTGGATGCCGATATTGCCGAGCG  
TCGAGGCTTCAACAGGCCCGGCGATCACCCGAATACCGCAGGCATCGGCGCATAGCTGGTTGAGCAGCGTGTCTGGCAG  
CCTCCGCGGACAATATGCAGTTGCGAGAAATCTTACCAGCGCAGCTGCGCCAGCTCATGCAACACATCGGCATACAGCAG  
CGCCAGACTGTCGAAAATGCAGCGCGCCAGTTCAGCATCACTTCCGGGATCGGTTGCGCCGTTTTCCGACACGCAGCCT  
GAATTTGCTGCACATCGTCTCAGGATTAATAAAGCGATCGTCTTGGGATTGATAATGAAGCGGCAAGCCGGAAGTGC  
TGTGTCGCGGAGATAAGCGCCGAAGATCGTTGATTGCTGCTCCTGAAGCACTCGCTGAAGCAGCCATAAGCCATAAT  
ATTTTTCAGCACCCGATAGCGACCTTCCGCCCGCCTTATTGGTGTGTTGGCTGCCAGTCCGTTGCTATTGGTAAATG  
GCGTCTGGCTTTCGAAGCCCATCAATGACCAGGTGCCAGAAGAGAGATAAGCAGCACGTGAGCCGTTAACGGCGAGGGC  
ATAACCGCGCTGGCGGTATCATGGCTGGCAACGGCGACCCTGGAATCTCATTACCCTGCGGGCAAATCCAGTGACCTAT  
GACATTACCCGGATGCGTCCGGCGACCAAACAGGCTTTGTTGGCCCCGCTCCACGCCAGTAGCGACTCGTCCCAGTCTG  
CGCTATTGATATTGACCAGTTGCGTGGTCTGGCGTTGGTATATTTCCAGTTCACTTCCCGGTCAGGCGATAACTGAAG  
TAATCCGGCATCAGCAGAGCGTGAGCAATGTGTGGAATAAGTTAGGTTGTTGCTCCGTCAGCGCACGCAACTGATAAAG  
CGTATTGAAGGGCAGAACTGGATGCCGCTACGTTGATAAATATCGCGTTTGGCGAGTTGTTGTTGTCCTGCGCCATTA  
GGCCATTGGTGGCGTATCGCGATAAGCAACGGGCAGGCCACACGCTGACCCTGTTGGTCGAGCAGCACAAGTCCACG  
CCCAGGTATCAATCCCAATGCTATCGATACGAATCCCTTCTCGCACACCTTGTAAATCCAAGGCGAATGGCACTTTC  
AAGGCTATCCACATCCCAGGTGACATAGCCGTTCTGACTATGCAGCCATTGTTAAAACGATGGATTTCCGCGCAGCGTCA  
GGCTGCGGCATTACGCTCGTAAACGCGCCAGCATCACGCGCCACTGGATGCGCCGAGATCGACGGCGACACAATTGGCA  
AAGGTCATAATGTGATCTGCTGAATTTATTACGACCAGTCTAAAAAGCGCCTGAATTCGCGACCTTCTCGTTACTGAC  
AGGAAAATGGCCATTGGCAACCAGGGAAAGATGAACGTGATGATGTTCACAATTTGCTGAATTTGGTGTGATGATGCT  
CACCGCATTTCTGAAAATTCACGCTGTATCTTAAAAATCGACGTTTTTTACGTGGTTTTCCGTCGAAAATTTAAGGTA  
AGAACCTGACCTGCTGATTACTATTTCCGCGTGTGACGACATCAGGAGGCCAGTATGACCCTATTACATAGTGTGGATT  
TTTTTCGCTGTTAAGCGTCCGTTGGCGATAGAACCCCGCTCCCGCAGGCGGATTTTCTGAACATCATGATTTTT  
CATGAAATTTGATTGTGAACATGGCACGGGTATTATGTGTTAATGGGCAGCCCTATACCATACCAGGTTGGCACGGT  
CTGTTTCGTACCGCATCATGATCGGCATCTGTATGAACATAACCGATAATCTGTGCTGACCAATGTGCTGTATCGCTCGC  
CGGATCGATTTCAGTTTCTCGCCGGGCTGAATCAGTTGCTGCCACAAGAGCTGGATGGGCAGTATCCGTTCACTGGCGC  
GTTAACCACAGCGTATTGCAGCAGGTGCGACAGCTGTTGACAGATGGAACAGCAGGAAGGGGAAAATGATTTACCCTC  
GACCGCCAGTCCGAGATCTTGTATGCAATTACTGCTCTTGTGCGTAAAAGCAGTTTGCAGGAGAACCTGGAAAACA  
GCGCATCACGCTCAACTTGCTTCTGGCCTGGCTGGAGGACATTTTCCGATGAGGTGAATTTGGGATGCCGTGGCGGAT  
CAATTTTCTTTTCACTGCTACGCTACATCGGCAGCTTAAAGCAGCAAACGGGACTGACGCCTCAGCGATACCTGAACCG  
CCTGCGACTGATGAAAGCCGACATCTGCTACGCCACAGCGAGGCCAGCGTTACTGACATCGCCTATCGCTGTGGATTCA  
GCGACAGTAACCACTTTTCAGCGTTTTTCGCCGAGAGTTAACTGGTACCAGCGTATTTCCGAGGGACGGGATGGC  
TTTTCTGCAATAACCGGAATCTTCTCAACGATTTTGTACGCCATATTGCGAATAATCAACTTCGTTCTTGGCCGAGGTAG  
CCACGGTGGCGCATCAGTAAAACCTTCTCAAAGATGATTTTTTCCAGCGACAGCAGGCGAGTCTGTGGCTGACCGT  
TATCCGCAAGATGCTTTGCTGAACATACACATGATTTTTGTGAGCTGGTATTGTCTGGCGCGTAATGGCCTGCATGT  
ACTCAACGATGCCCTTATCGCATTACCCGTGGCGATCTTTTTACATTATGCTGACGATAAACACTCCTACGCTCCG  
TTAACGATCTGTTTTGCGAATATTATTTATTGCCGGAGCGTCTGAAGCTGAATCTTACTGGCAGGGGGCGATTCCG  
GGATTTAACGCCAGCGCAGGGCAACCACACTGGCGCTTAGGTAGCATGGGGATGGCGCAGGCGCGCAGGTTATCGGTCA  
GCTTGAGCATGAAAGTAGTCAGCATGTCCGTTTGTAAAGAAATGGCTGAGTTGCTGTTCCGGCAGTTGGTGTGTTG

TGAATCGCCATCGTTACACCAGTGATTGCTTCCGCGCAACATCCAGCGAAACGTTGCTGGATAAGCTGATTACCCGGCTG  
GCGGCTAGCCTGAAAAGTCCCTTTGCGCTGGATAAATTTTGATGAGGCATCGTGCAGTGAGCGGCTTTTTCGCTCAGCA  
ATTTCCGCGCAGACTGGAATGACCATCAATCAATATCTGCGACAGGTCAGAGTGTGCATGCGCAATATCTTCTCCAGC  
ATAGCCGCCTGTTAATCAGTGATATTTGACCGAATGTGGCTTTGAAGATAGTAACTATTTTTCGGTGGTGTTCACCCGG  
GAAACCGGGATGACGCCAGCCAGTGGCGTCATCTCAATTCGAGAAAGATTAATTCGCCATGCCGATGCCGACGATGTT  
AGCGGGACAATAATCACCACACAACCGAGGCTCAACACCGTTACCGGACGGCGTCTGCATTGTTCCACTCTTTCAGCA  
CCAGCCGACGATACCGCCGACAATACATAGAACTCATATGCAGCATCCAACCTGATGTAGTCATACTGCGCCGGAATG  
CGGGCGTGGCCCCAGGCATAGAAAAAGAAATTGCAGATACCACATCAACCCGCCAGTGTGAGAGTAACACATTGTGAAT  
GATCAGCGATTTTCCAGCGAGAAGTCCGCTTTTAGCGACAAATCCTTCACTTTTCCAGACGAATAAAACAGAAACCGA  
GGTTAATGATCGCGCCGCCCATGATGACAACATAGCTTGGCAGAGCGACATACAGTGGATCGACGCCAAGTGGCGCA  
GCGGCTTATGATCGGTTTTGCGGCTTTCATCGCAAAGGACATCCCGGCAGAGAAAATGCCGACATCACCGCCAGCAC  
CAGCCCTTTTTTTCAGATTGAACTCTTCCGCTTAAATGCCATCTTGCCTCTTCAACTGCCCGCGCGAGTTACAATCC  
CTACGCCAATCAGCGCCACCAGAACGCCGAGCAACGTCATGCGTCCGCTTCCGTTGCTAATCAACACATCGAAATTTGCCG  
TTGATAATTGGCGTCATCAGCGTACCGACAATCAACGTAATGCCAATGGCGATGCCAATTTCCATCGACATGCCGAGATA  
ACGATGGTCAGGCGTAGTTGATATTACCGATCCCCACATAGCGCCGAACAGAAAACAGGACGAGTCCGCTAGAGACGA  
TAAACGAGCTGTAATACGCCAGAAATTCGGTAGTAACAGGGCGCTGATGGCCACGGCAGAATAATCCACGAAACAATC  
CCACCGACTGACCACATGGTTTTCCATGACCATTTTTTACTTTTTTGAACGAGCGTAAAAACAGGCTGCACTGGCCGC  
GCCGATCAAATGCCAAAATATCCCATCGTAATCGGTTACTCATCTTATCCTCATCATTTTTTTCGTCGCGTCACATC  
TCCGACGAGATGAGTGTAATAATCGTGTGTCGATTAACCTTTCCGCTGTTGCCCGGTTGTCGATTTACTGGCAATCAC  
GGCATTAAAGTGGGTGATTTGCTTACATCTCGGCATTTTTCTGCAAAACCATACCCTTACGAAAAGTACGGCATTGATA  
ATCATTTTTCAATATCATTTAATTAATAACTATAATGAACCAACTGTTACGCGGCATTAACAATCGGCCGCCGACAATACTG  
GAGATGAATATGAGCTATACCCTGCCATCCCTGCCGTATGTTACGATGCCCTGGAACCGCACTTCGATAAAGCAGACCAT  
GGAAATCCACCACACCAACACCATCAGACCTACGTAACAACGCCAACGCGGCGCTGAAAGCCTGCCAGAATTTGCCA  
ACCTGCCGTTGAAGAGCTGATCACCAACTGGACCAGCTGCCAGCAGACAAGAAAACCGTACTGCGCAACAACGCTGGC  
GGTCAGCTAACACAGCCTGTTCTGAAAGGTCTGAAAAAGGCACCACCCTGCAGGGTACCTGAAAGCGGCTATCGA  
ACGTGACTTCCGCTCCGTTGATAACTTCAAAGCAGAATTTGAAAAAGCGGCAGCTTCCCGCTTGGTTCCGCTGGGCAT  
GGCTGGTGTGAAAGGCGATAAACTGGCGGTGGTTTTCTACTGTAACCAGGATTCTCCGCTGATGGGTGAAGCTATTTCT  
GGCGCTTCCGCTTCCCGATTATGGGCTGGATGTGTGGGAACATGCTTACTACCTGAAATTCAGAACCGCCGTCGGGA  
CTACATTAAGAGTTCTGGAACGTGGTGAACGGGACGAGCGGCACGTTTTGCGGCGAAAAATAATCATTTGCCG  
CCTGCTGCAATGAGGCGTATAGGCCGATATCAGCTTAAAAAATGAACCATCGCCAACGGCGGTGGTTTTTTTGATCA  
ATTTCAAAATAAAAAAATGATCCGATAAAAAATAAACAGCGTTTCAATTGATGTGGTTTTGATCACTTTTATTGATTA  
ATGAATGTCTATCTTCCGTTCCATCAACACTGATGTCCATTGAGGAATTACGCATCAGCCCTAAAAATATGCCGACAG  
GTGATGAAATGCAGATAAAACGCTCGATTGAGAAAATCCCGGGGGGATGATGCTCGTCCCGCTATTCCTTGGCGCACT  
GTGCCACACCTTCTCGCCGGGGCGGGGAAATATTTTGATCATTACCAACGGGATGATTACCGGTACGGTGCCCATTC  
TGCGGTGTGGTTTTTTTGCATGGGGCGTCAATAAAATTAAGCGCAGCGGAACGGTACTGCGTAAATCCGGTACGCTG  
GTGGTAACTAAATTTGCCGTCGCTGGTGGTGGCGCAATTGCCTCGCTATTATTCCGGAACATGGTGTGAAGTTGG  
ATTTCTTCCGGACTTTCAACGCTGGCGCTGGTGGCGGCGATGGATATGACCAATGGCGGACTTTACGCTTCCATCATGC  
AGCAGTACGGCAGAAAAGAAGAAGCTGGGCATTTGTGTTGATGTCGTTGGAGTCCGGGCCGCTCATGACGATGATTATT  
CTGGGCACTGCCGGATTCCTCGTTGAAACCGCATTTTTCGTGGCGCAGTATTACCGTTCTGTTGGGCTTTGCCCT  
GGGAACCTTGACCCTGAATTCGAGAAATTTTTAGCAAAAGCGGTGCAAAACGCTGATTTCCATCTTTGCCCTCGGCTGG  
GCAATACATTGATTTGACTGTGATTGCCAGACTGGTTTTGCTGGGATCCTGTTGGGTGTGGCAGTAATTATCGTGACC  
GGTATTCCGTTGATTATCGCCGATAAATTGATTGGCGGTGGCGATGGCACTGCCGGAATTGCCGTTCCAGTTCCGCGAGG  
GGCCGCGTAGCGACACCTGTGCTGATTGCAGAAATGGTGCCTGCGTTTTAAACCGATGGCTCCGGCAGCAACTTCGCTGG  
TAGCGACGGCGGTCATTGTGACTTCGATTCTGGTGCAATTTACTCTATCTGGTACGTAAGTCAAAGCCAGAGCA  
GCGAAAATCGAAATTTAGGTACGGTGAATAAACCTGCTTCTTAATCCCCACAGCCGATGAACTAACGTTCTGTCGG  
TTTGCTATTGAGTTCTGCTGGATACTTACCGGAAAACAGCACGCTGACATAAAATAAATATGGTCTAATGGGGAAA  
TTTCTCGTGGAGAGGGAACAGATGCGATATCCGTTGATGTATACACAGGCAAGATTACGGCTTATCCCGAAGGCAACC  
CAGCGCAATTGCTAAATCCAGTTGATGGTGAGTTGATGCTGACGGAGCTGGGGCTGGAAGGTGACGAGCAGGCGGAGA  
AAAAGTTACGGCGGGCCAGACAGAGCGCTGTGTCATTATCCTCGTGGAGCATTATCTTACTGGGCGCGGAAATTTCCG  
GAACAGGCGGAGTTGTTTGTGCGCTGCGTTTTGGTAAAACCTCTCAACCGACGGCTGACGAAAGTAATGTTTATAT  
GGCGATATTTTCCGCTGGGAGAGGCATTAATTCAGTTCAGCCAGCCGCTGCCTTGTATAAACTCAATTACCATT  
TTGATATCAGCGATATAGCCGAGTTGATGCAAAACACAGTAAGTGGGGTGGTTGATAGCGTGATAGCCAGGGGAAA  
GTGTCTCGGACGCGCCGCTGGAGTTGGTTTTCCCGTTCAGCGATGTGACCGTGCAGGAGGCTGCCGCCATCGCATGGCA  
TATGCCGTTTGTGACGATCAATATCACCGTTTACTCTCCGCTGCCGGGTTATCGAAAAGCTGGACGCGGACGATGCAAA  
AGCGCCGACTGAGCGGAAGATCGAAGATTTTTCCCGCCGTTGTGGGGAAAATAACCCCGGAGTGTAGGCCTGATAAG  
ACGCTATCAGCGTCGATCAGGCATCCTGCTCAAATGCCGGATGCCGCGTAAACGCCTTATCCTGCTGCAAAATGCGAAG

TTAACTCCGCTTATACAGCGGCAACCAAATCACCAGCCGTAACCGCCAGCGGGCTGTCTTCTGCCTTACCCAGCCA  
CGATGCTGCTGAATGGCGGTTTCAACAATCGCCAGCCCAAACCTGTACCGCCAGATTACGATCGCGTGCTTCATCGGT  
ACGATAGAACGGACGGAAAAATCTGTTCCGCGATCTTCCGGGCTAACGCCAGGACCATCGTCGTCCACCGTAATGGTGATAC  
CGTCTTTATCTACCGCAAAGCCCACTTCAATCTTCTGATGGGAATAACGCAGAGCATTACGAACAATGTTTTCCAGCGCA  
CTTTCCAGGGCGTTTCGGATTGCCGTACAGCGGCCACGGCCAGGCGGGAAGTTAACTGTCAACGACTTGGCCATTTGCTC  
GGCTTGAACGCCGCTTATCCAGCACTTCACTCCACAACCTGGTTGGCTTTGATGGTTTCGCTAACAGCGCGTTTTTTTT  
GCTGATTACGTGACATCACCAACAGATCGTTGATCATGCTGTCCAGACGTTGCGCTTCGGTTTCAATACGCTCCAGTTCC  
TTGCTTTCACCGCTACGACGGCGCAGTAACGCCGTACCCAGTTGCAGACGCGTCAGCGGGGTGCGCAGCTCGTGAGAGAT  
ATCAGAAAGCAGACGCTGCTGAGAGGTTCATGCGCTCCAGCGCGGTGACCATCTGGTAAAACTGGCACCTGCGGCAA  
GGAATTCCTGTGGCCCCGCTTCCAGTTCCGGGTGCTGGCGTAAGTTTCCCTGGGCAACTTCATCGGCAGCGTTTTTCCAGC  
TTACGCGCCGTTTTTCCAGACTCCAGGCCAACACAACAGCAGCGGCGTACTGACCAACATGGTGACAATCAGCAGTAA  
TAGCGGGCGGTCAAACAGTAAGTTAATGAAATCGGATTGAGAAGTCTGGCCGACGAATCAGATAAAGTTGGTAATAT  
CTTCGCCATCACGCACGGAGAACGGACCGACAGTTCCAGCGGCCATACTTTTTCTTCTGCGGATGATCGGCGTTATCG  
GCCTGACCAATAAAGTTACGAATGATCTGCATTTGCTGCTGCTCAGCGCCGATCACGCGGCCTTCGGTGGTCACCAATA  
CAAACGCTGTCTGGCGTCCCACTTATCAATCGCCCGAACAGACGCCGCCACCACATTAATCGTTGGCGGATCGT  
TCGCCAGTCCGCTTCGACATGCTGCTCAATCATCAGCCCCTGACGCTGTTGCTATCCAGAAGCTCGGTTCATCTGGCGT  
GAATCGAGCTTGGGTAACATCAAACCAACATCAACACCAGCCAGCGTCAGCCAGAAGATGGCGAAGATGCGCGCGGT  
TAAGCTGCCTATCATGAAGCAGAAACCATCAGATAGCCGACACCAGCAAGTTTTAAACCACGGGTGACCATCTTTACG  
ATCCGGCAGTTTACGACGCAGGTTGGAATGTGCATATCAATAGCGCGGTGAAAGGCGTCAGGCGTTTTGCCAACACTT  
CCTGGCTTAAATGTTACGGGAAACCCTGACCCAGATGCTGTGCCAGCAAATAGAGCAGGGTAAACTCAGTACCGGTT  
AACTCCAGCGTTTTGCCGTCGAAGCTGGCTTCTGACGGCCTGGATTGACACTAAGGCATCAACTTCCAGTGTGCGTGA  
ACCGTTGTCGTTGTTTTGCTGTTGCTCGTCCAGTGCGAACGGCGCAGGATCGCGCAATACGTGCCACCAGCTCACGAT  
CATTAAACGGTTTTCGGGAGATAGTCATCTGCGCCAGCTCAAGGCCGAGAACCGCATCAAGTTCACTGCCGCGCGCCGTC  
AACATAATGACAGGCGTCTGGTGTGCTGGCGAAGTCTTTTTAATGTGTCGATACATTTTTCTTCCGATCATTACGTC  
AAGCAAAAGTAAATCAATGCTGCTGCTCAGAAGATCAAGCGCCTGTTCCCATCGTGGCAACAATCACGTTGAAGCCTT  
CCATCTCGAGCAGCTCCTTAAATAGGGAAGTCAGCTCTCGGTATCATCAACTAACAGGATTTTATTATTGTTAAATA  
CCTCCGAGGCAGAAATTACGTCATCAGACGTCGCTAATCCATGACTTTACGTTGTTTTACACCCCTGACGCATGTTTGC  
AGCCTGAATCGTAAACTCTATCGTTGAATCGCGACAGAAAGATTTTGGGAGCAAATGATGCGCATAGTTACCGCTGCC  
GTATGGCCTCAACGCTGGCAGTCAGTTCAATAGCCACGCTGCTGAAGTCGGTTCAGGCGATAACTGGCATCCGGGTGA  
AGAACTTACGACGCGAGTACGCAGAGCCATATGTTGACGGCATAAGTTTTAACCGAACATCAGCGTCAGCAGATGCGAG  
ATCTTATGCAACAGGCCCGGCACGAACAGCCTCCTGTTAATGTTAGCGAACTGGAGACAATGCATCGCCTTGTACCCGCA  
GAAAATTTTGTGAAAACGCTGTGCGCGCACAGGCAGAAAAAATGGCGAATGAGCAAATGCTCGTCAGGTTGAGATGGC  
AAAAGTCCGCAACCAAATGTATCGCCTGTTAACGCCGGAGCAGCAAGCGTTTTAAACGAGAAACATCAACAACGAATGG  
AGCAGTTGCGTGACGTGACGCAATGGCAAAAAAGTTCATCGTTGAAGCTATTGAGTAGTAGCAACTCACGTTCCAGTAG  
TAAACCCTGTTTTCTTCCATAGACACCATCCCTGCTTCCCCACATGCTGTGGGGTTTTTTTTATCCTCAATTTGC  
CTGCTGCTTAATGCATTGCAGATGATTTGCTTCCGTATACTAGCGTCAGTTGATAGCGGGAGTATTTATGAATCAATCT  
TATGGACGGCTGGTCAGTCGGGCGGCGATTGCTGCGACGGCGATGGCTTCGCTGCTATTGCTGATTAATTTTTGCATG  
GTGGTATACCGGGTCGGTAGTATTCTCGCCGCGCTGGTGGATTGCTGGTGGATATCGGCGCGTCGTTGACGAATTTAT  
TGGTGGTGCATATTCCTGCAACCTGCCGACGATAATCACTCGTTTTGGTCACGGTAAAGCTGAGTCCCTCGCGGCGTG  
GCCAAAAGTATGTTTTATCCGGTTCGGCACTATTCTGTTTTGACGGGTATTCAACATCTGATATCTCAACACCGAT  
GACAGATCCAGGCGTCCGGGTTATCGTGACAATTGTGGCGCTAATTTGTACGATTATCCTTGTCTCGTTTTACGCGTTGGG  
TGGTGGCGGACGCAAAGCCAGGCGGTGCGGGCTGATATGCTACATTACCAGTCTGATGTTATGATGAACGGCGCAATT  
CTGCTGGCGCTGGGGTTGCTTGGTACGGCTGGCATCGCGCCGATGCTCTGTTTGCATTGGGAATCGGCATCTATATTTT  
ATATAGCGCTTACGCATGGGATATGAGGCGGTACAGTCATTACTGGATCGCGCATTGCCTGATGAGGAACGGCAAGAAA  
TTATTGATATCGTGACTTCTGCGGGGTGTTAGCGGCGCTCACGATCTTCGCACGCGGAGTCAGGGCCGACCCGCTTT  
ATTAGATTCAATTTGAAATGGAAGACTCTCTGCCTTTGGTTCAGGCACATATGGTGGCGGATCAGGTAGAGCAGGCTAT  
TTACGGCGTTTTTCCGGATCGGATGTAATTATCCATCAGGACCCTGTTCCGTCGTACCCAGGGAGGGTAAACGGTCTA  
TGCTTTATAATCAGTATAAAAAGAGAGCCAGACCCGATTTTGTGATAAAAATACCGCATTTGGCCTGACCTGAATCAA  
TTCAGCAGGAAGTGATTGTTATACTATTTGCACATTCGTTGGATCACTTCGATGTGCAAGAAGACTTCCGGCAACAGATT  
TCATTTTGCATTTCAAAGTTCAGAGGTAGTCATGATTAAGAAAATCGGTGTGTTGACAAGCGGCGGTGATGCGCCAGGCA  
TGAACGCCGAATTCGCGGGGTTGTTCTGTTCTGCGTGACAGAAGTCTGGAAGTAATGGGATTTTATGACGGCTATCTG  
GGTCTGATGAAGACCGTATGGTACAGCTAGACCGTTACAGCGTGTCTGACATGATCAACCGTGGCGGTACGTTCTCGG  
TTCTGCGGTTTTCCCGAATTCGCGACGAGAACATCCGCGCCGTGGCTATCGAAAACCTGAAAAACGTTGGTATCGACG  
CGCTGGTGGTTATCGGCGGTGACGGTTCCTACATGGGTGCAATGCGTCTGACCGAAAATGGGCTTCCCGTGCATCGGTCTG  
CCGGGCACTATCGACAACGACATCAAAGGCACTGACTACACTATCGGTTTTCTCACTGCGCTGAGCACCGTTGTAGAAGC  
GATCGACCGTCTGCTGACACCTCTTCTTCTACCAGCGTATTTCCGTGGTGAAGTATGGGCCGTTATTGTGGAGATC

TGACGTTGGCTGCGGCCATTGCCGGTGGCTGTGAATTCGTTGTGGTTCCGGAAGTTGAATTCAGCCGTGAAGACCTGGTA  
AACGAAATCAAAGCGGGTATCGCGAAAGTAAAAACACGCGATCGTGGCGATTACCGAACATATGTGTGATGTTGACGA  
ACTGGCGCATTTCATCGAGAAAGAAACCGGTCGTGAAACCCGCGCAACTGTGCTGGGCCACATCCAGCGCGGTGTTCTC  
CGGTGCCTTACGACCGTATTCTGGCTTCCCGTATGGGCGCTTACGCTATCGATCTGCTGCTGGCAGGTTACGGCGGTCTG  
TGTGTAGGTATCCAGAACGAACAGCTGGTTCACCACGACATCATCGACGCTATCGAAAACATGAAGCGTCCGTTCAAAGG  
TGA CTGGCTGGACTGCGCGAAAAA ACTGTATTAATGATTTTCGAAAAAAGGCAGATTCTTTTACCCTGAAACCGATGACAG  
AAGCAAAAATGCCTGATGCGCTTCGCTTATCAGGCCTACATGAATTCTGCAATTTATTGAATTTGCAAACTTTTGTAGGC  
CGGATAAGGCGTTTCGCGCCGCATCCGGCATGGACAAAGCGCACTTTGTCAGCAATATGAGGCGGATTTCTTCCGCTTTT  
TAATCCCTCAACATATACCCGCAAGTTATAGCCAATCTTTTTTATTCTTTAATGTTTGGTTAACCTTCTGGCACGCTTT  
GCTCATCACAACACAACATAAGAGAGTCGGGCGATGAACAAGTGGGGCTAGGGTTAACATTTTTGCTGGCGGCAACCAG  
CGTTATGGCAAAGGATATTCAGCTTCTAACGTTTCATATGATCCAACGCGCAATTGTACGAACAGTACAACAAGGCAT  
TCAGCGCCACTGGAAACAGCAAACCTGGTGATAACGTGGTGATTTCGTGAGTACACGGTGGCTCAGGTAACAAGCGACG  
TCGGTAATCAACGGTATTGAAGCTGATGTTGTACGCTGGCTCTGGCCTATGACGTGGACGCAATTGCGGAACGCGGGCG  
GATTGATAAAGAGTGGATCAAACGTCTGCCGATAACTCCGCACCGTACACTCCACCATTGTTTTCTGGTACGTAAGG  
GAAATCCGAAGCAGATCCATGACTGGAACGATCTGATTAACCCGGTGTTTCGGTGATCACGCCTAATCCGAAAAAGCTCT  
GGTGGCGCGCTGGAACCTGGCAGCTGGGGCTACGCGTGCATCACAACAACAACGATCAGGCAAAAAGCACAGGA  
TTTTGTTCCGGCACTGTATAAAAACGTGGAAGTTCTGGATTCTGGCGCGCTGGCTCCACTAACACTTTTTGTCGAGCGCG  
GAATTTGGCGATGTA CTGATTGCCTGGGAAAAAGCTCTGCTGGCAGCGAATGAACTGGGAAAAAGATAAATTCGAAATC  
GTCACGCCGAGTGAGTCTATCCTCGCAGAGCCAACCGTGTGCGTGGTTCGATAAAGTGGTCGAGAAAAAAGGTA CTAAAGA  
GGTGGCGGAAGCTACCTGAAATATCTCTACTCGCCAGAAGGTCAGGAAATTGCCGCGAAAAA ACTACTACCGTCCGCGCG  
ACGCTGAGGTGGCGAAAAAGTACGAAAATGCGTTTTCAAAGCTGAAGTTATTCACCATTGATGAAGAGTTCGGCGGCTGG  
ACGAAAAGCGCAAAAAGAGCATTTTTGCTAACGGCGGTACGTTGATCAGATCAGCAAACGCTGATTTCCCCAGGATAATTA  
TCAAACCCGGTGGTTTCTCGCGACCGGTTTTTTATTTGTACGATTTTGCCTTACCCTTGCATCTCTTTGAGGTACAGG  
GAAAAAAGATGAAAAAAGCGGTCTTCTTTTTTGGTGATGATAGTTATCGCCGTTGTGGCTGCCGGTATTGGTACTG  
GAAATTAACCGGTGAAGAGTCGGATACATTACGTAAGATTGCCTTGAGGAATGTTTGCCCAATCAGCAGCAAAATCAA  
ATCCTTCGCCATGTGCGGAAGTCAAACCAATGCCGATACGTGGTTTTAAAAGATCTTAATGGCCACTGCAATATCTG  
TTGATGCCAACGTATCGTATTAACGGTACTGAAAGTCTTTGTTGACCGATCCTTCAACGCCGAACCTCTTTTGGTTGGC  
TTGGCAGGCGCGTGATTTTATGAGCAAAAATACGGCCAGCCGGTCCCGATCGCGCGGTTCTTTGGCGATCAACTCCC  
GCACCGGGCGTACGCAAAACCATTTTTCATATTATCTCTTGTATTCTGTCCTGATGTGCGCAACAGCTGGATAACAAT  
CTGGCGAACATCAGCAGCCGCTGGTTGCCACTGCCAGGTGGTTTGC CGGGCATGAATACCTGGCGCGTCCGGTAACGGA  
AAGCGAACTGGTACAACGCAGCCATTTATGATGCTGGCAGAAGAAGTACCTGAGGCGCGGGAACATATGGGACGCTACG  
GGCTGGCGATGGTACGGCAGAGTGATAACTCATTTGTATTGCTGGCGACACAACGAAATCTACTGACGCTTAACCGTGCT  
TCAGCCGAGGAAATTCAGGATCATCAGTGTGAGATTTTGCCTAAGGCGAAGAGTTAAGGAAAAGTAAGTCCCGGATATGA  
AATCCGGCACCTGTGCACTTAAGCCTGTTTAGCCGCTTCTGCAGCTTAAACGATTACTGCGAAGGCGTCAGCTTTCAGA  
GAAGCACCACAACAGCGCGCCGTCGATATCCGGTGTAGCAAACAGTCTGCAAGGTTAGACGCGTTTACAGAGCCGCC  
GTA CTGAATGATCACTTGTTCAGCGATGTTAGCGTCAACTTTAGCGATGTGGTACGGATGAATTTGTGAACAGCCTGTG  
CCTGAGCCGGAGTTGCA GATTTGCCAGTACCGATTGCCATACAGGTTGTAAGCGATAACCGCACCTTCAATGCCGCA  
GCACCCTGAGTTTTAGTACCGCGTCGATCTGACGTGCGCAAACCTTCTTCAAGTTTTGCCCCTTCACTTTTTCAGCTTCGGT  
TTCACCGATGCACAGAACCAGGAGTCAAGCCCTGCTTTTCAAGCAGCGAATTTTTTCGCGATCAGTTGTCAGATTTCT  
TGTGGTAAGTACGACGTTCAAGTCAAGGATGATGATGACTGTGCGCGGATGTCCTTTCAGCATAGCAGCAGAGTTTCA  
CCGGTGAATGCGCCGACAGGTTCAAGTCCACGTTTTTGC GCACCCAGCATGATGTGGTTCGCTTTCAGCTTCCGCTTCGC  
CATATCGATATACATTTCCGGTGGTGGCATTGCAACCCGACAGCCAGCAACACCTGCCAGCTTTTACGAGGTTAGAAA  
CCAGCTCGTGAACCATGTGGCGGCTGCCGTTTCAAGTTTCCAGTTACCCATCACTAAAGGATGTCGCATTTTAAATCTCCAC  
GCTTATAAGCGAATAAAGGAAGATGGCCGCCCGCAGGGCAGCAGGTCTGTGAAACAGTATAGAGATTCATCGGCACAAA  
GGCTTTGCTTTTTGTCAATTTATTCAAACCTTCAAGCGATTGATAGCGCCAGCTTAATCGGTTCAACAGCGAAGGTGAG  
CCCTTTTTCGCCGTTGTCCGCGACAACATAACGCAGTGCACCTTCTGCTCGGTGTAATAACGTTTGTTTTTCCCGCCG  
TTAGTAGCGACTGCAGTTTTTTCTGGCTTTGTGTTTTGGTCATTAATGGGGTGAAGTGTGCGGATCACCGCTGCCATGTAT  
TCCTGAGCTTTCGCTTTCGCGGCTTTTTGCTCTGGCCCTGGATGGGTAGCCAGGTCATTTGAATGCTTTTGATTTTTAA  
GGTACCGCGCTCCAGCGCTGTAGAAGCATAACAAGTCTCATTAAATTTTACTTGCAGCACGAGTGAAGTTGGCTTTGTGCGG  
GACTGCTGTGATGGCACGAAATTCGTTCAAGTGGCAGGCTGGGATTCGGCTGTTAAAGTCTTCTCGAACTGGCTGATG  
GAGAGATCGAAAGTAGGGGCTCCAGCCAGCAGATAAGGCGCGGTCGTTGCCGATCTGGTGTGTTGTGATGCGCCTCTGT  
TGTAACGGTAAATGCAGAACATAAGAGAAAAACAGCGTACACCCTGGCTTCAATTGACAGTACCTTTTGTATGACTGGC  
TCCGATTAACAGGATATCTGTCGCCCTTGTCAAAGGGTAGAATCCTGGAAAAGACAACCATCAAGGAACCTTACATGACC  
ATACAGCAATGTTTATTCTCAATTAAGGGCGTATTGGACGCCGTGATTTCTGGATTTGGATAGGCCTGTGGTTCGCGAGG  
CATGCTGGTGTCTTTCTCACTGGCGGGTAAGAATCTACTCGATATTCAGACCGCGGCTTTTGCCTTGTGTGCTTGTCT  
GGCAACAGCGGCAGTA ACTGTTAAGCGCTTGCATGATCGCGGGCTTCCGGCGCATGGGCATTTCTGATGATTGTGGC

TGGATGCTGCTGGCGGGTAACTGGGCGATTTTACCGGGTGTCTGGCAATGGGCGGTGGGGCGTTTTGTCGCCGACGTTGAT  
TCTGGTGATGATGCTTATCGATCTTGGTGCCTTTGTTGGCACACAAGGCGAAAATAAATATGGTAAAGATACTCAGGATG  
TGAAGTATAAAGCCGACAATAAATCAAGTAATTAACCTTTAATATATCTCTTACTGCTATTTTTTTCCGGGATTGTTATT  
TCCACGATGCAAAATGACAATACCCGAAAATCCTTCTGAACTCTTACCTTAAGCAATATCAAAAAAATGGTAATCCAT  
AAGATCATTACTTGTGTTTCTTCCCTAACGGCGCATTATTCTTAAGTCGTAATCGACAGAGAGGCGAATATACAGAGG  
TGCCCTATGAAAGATGTCGTAGATAAATGCAGTACTAAAGGATGTGCGATTGATATCGGTACGGTGATTGATAACGACAA  
CTGTACCAGTAAGTTTTGCGCTTTTTTCCACCCGCGAAGAAGCAGAGTCTTTTATGACCAAATGAAAGAGCTTGCCG  
CCGCTACATCTCTGAGATGAAGGGGCCAGCGTGGCCTATAAGATTAAGGATCTGGAGGGGCAAGTTGAGCTTGATGCG  
GCCTTCACTTCTCATGCCAGGCCGAGATGATTATTTTGGATTACTGCGTTGCTTAGCTTGATGGAGTTGCTTTAG  
AAGGAGTTAAACATGGCTTATAACACATTGGCGTGGCAATTTCCGGGAATGAAGAAGATGCCTTACTGGTGAATAAAGC  
CCTGGAGCTCGCCAGACATAATGACGCTCACCTGACGTTAATTCATATTGATGATGGCTTAAGCGAGTTGATCCGGGTA  
TCTACTTCCCTGCAACAGAAGATATTCTCAATTGTTGAAGAATAAGTCGGATAACAAGCTGTATAAACTGACGAAAAAT  
ATTCAATGGCCGAAGACAAAATGCGTATTGAACCGGAGAAAATGCCGAAACACTGCTGGAATTTATGCAAAAAGAGCA  
GTGCGACCTCCTTGTCTGTGGTCATCATCACTCATTATCAACCGTTTATGATGCCGGCATATCGCGGGATGATCAATAAGA  
TGAGTGCGGATTTGCTCATCTGCGCTTATCGATAAGTAACCGTTTACCAGTAATGCTCCGCTGTATGATGGCCCGGTC  
GGCGAGTAAATGTTTTGTCATCTGCCGGTCTCTTTAGCAACTGTTGTGTATCGCGCACCATCTGTGGATTGCCGCAC  
AGCATCACATGGCTGGTTTTCTTATTATCGGCAGGCCAATCGTCTTTCCAGTTCCCACTTTCAATTAATGCCGGTAT  
CCGTCCGGTGAGCGACCCCGCTGCCGTTTCCCGACTGACCACCGTCTGAATGCGCAGTTTTCTTCTGATGCGTTTTTCCA  
GTTCTGTCATCAGTGGCAAATAGCTTAAGTCGGCGGCATAACGTGCGCGTGCACCAGGACAGATTTTTGAAGCGATCT  
AAATCTTTACCTAGTTGAGAATCGATAAATAAGGGCAATCGCTGTACCGTTGCCAGCATCCATAGCGTTTTGCGAGTG  
CGGCACTTTCATCGAGCACAAGAATCTGCCGTTCCGTAACCACTGCACTTTCATCGCTGGTTTCACTGCGCCAGTC  
GTGGGCTTAATTTGCCATCGGGGACGGTACCAGGTAATACTCCAGATCGGGATTATCGGGGAGTTTACATAGGAGTAG  
GCGCGCTGGACGCTTCCGCTCGATTCAAGGCCAAGCTTGGTAAATTGCCCGCGGTAACGGAAGCACGGGGCGTG  
AACGGTGAGACTAAACAGGGCGTCCGTCAGTTCTGCACTTTAGTACTTTGCTGTTACCAATCAGCCATGTTTTTCT  
CCTGTTTTGATTGACTTGCCTTATCTTCTGTTCTCGAACAATAAATAATCCAGTCCCGAAGGACTGGAAGGCTCAATCGAT  
CAATCAATCAGAGGATGTGACCTGCATTTCCGGTCTTTGCGATCCAGATAGTGGATGGACTGAATGCCGCGAATGGT  
GCGTGACTTGCCGCGGATCAGCAGCGTTTCCGGTAGTCGCGATATTGCTTTGCGGCTAATGCCTTCCAGCAGATCGCCTT  
TGGAATACCGGTGGCAGAGAAGATGACGTTATCGTGCAGCCATATCGCCAGGCGCAATACTTTACCGCTTCGATG  
CCATCGCTTTGAGCGTGCAGCTCCTGCTCGCAATGCGACGATTCTCTTCTGTTGTCGCTTTGACGTCATGACCGCG  
CAGCAGACGACCGTTTATGTCGCCATTAATGCGCGGATCACCGCCGAGAACTACGCTTCCGGCGCGCCACCAATAC  
CGTACAGCACGTCAACTTCCGCTGTCTGGCATAACAGTGGAGAATTGAGGCCGCAACGTCGCCGTCGGGAATAGCAAATACG  
CGTACGCCGAGTTGCTGCATTTAGCGATAACGGCATCGTGGCGTGGTTAGCCAGAATCGTTACCGTCAGTTGCTCAA  
CGTTTTGCCGAGCGCCGCGCTACATTGCGCAGGTTATCCGCCAGCGCAGGTTAGATCAATGGTGCCTTTGGTCCCG  
GCCCCGACAATCAGCTTCCATATACATATCCGGCGCATTGAGGAAGCAGCCTTTATCGCTACTGCCAGCACCGCCAGC  
GCGTTAGCCTGGCCATCGCGTATGCGCGTGCCTTCAATCGGATCAACAGCAATATCTACCGCGTCGCGCGACCAAGT  
ACCGACTTTTTACCAATGTAGAGCATCGGTGCTTCCGTCGATTACCTTACCAATGACGATGGTGCCTCAATGTTGA  
CCTGTTGAGCATAATACGATGGCGTTTACCGCCGCGCGTCCGCGGTGTTTTATCGCCGCTCTAACCAATTTGTAG  
CCAGCCAGCGCGCTGATTCCGTGACGCGGAAAATTCGATGGCAAGTTCTCGTCTCATAGCAAATCTAAGCAGTAAGG  
AATGGCGCGAAGTGTAGCACAGGGGAAGGAGGGATTATTGATGTGCGGGGTTGCCCGCACGTTTTGGGACTACCG  
GATGCGGCATAAACGCTTCAATCGGCATTTACATTTATCGTCTGTTCTTCCACGCGCATCGCGGTTTTAACCGCTTTTT  
TCCAGCCTGCGTAACCGTAATTAACGCTCAGTGGTTTTGATGCCTGGACGGAATCGCGCTCAATCACCGCTTTCTCTGC  
AGCTCGTCGAGTTTCCGAGAAGCAACCGCCAGGCTGCGAGATAGGCCGACCCAATGCGGTGACTTCCGCGCACTT  
CGGGCGCTCAACGCGGGTCCGAGAATATCGACTGGAATGCATCAGGAAATGTTTGTACTGCGCCACCATCCACGC  
GCAGGGCGTGCAGACGGATACCAGAGTCCGCTGCATCGCTTCCAGCACGTACGCGTCTGATAAGCAATAGACTCCAGC  
GTCGCGGTATAATGTGGTTAGCGTTACCCACAGTGCAGCCGAAAATCGCCCCGCGCATACGGTCCAGTACGG  
CGCACCCAGCCGGTAAATGCCGGAACCACATACACACATTGGTGTGTTTGCATTTGGTGGCGAAATATTCGGAATCGT  
AGGCGTCGTTAATCACTTCACTTTCATCGCGCAGCCACTGAATGGATGCGCCTGCCATAAACACCGCACCTTCAACGCA  
TAGTTCACTTCCGAGTCCGGCCGAGGCGATGGTGGTGCAGGCGGTTTTCTGATTTACCGCTTTCTCGCCAGTGT  
CATCAGCATAAAGCAGCCAGTGCATAGGTGTTCTCGCCATCCCTTCTTCCAGCACAATGACCAACAGCGCGGCT  
GCTGGTCAACCGCGATCCCGGAGATTGGAATACGCGTCCGCTTTGCCGCAATGTTAGTCTGACCGTATACTTCGGAA  
GAACGACGCACTTCTGGCAGCATCTCGCGCGGAATATCCAGCACTTCCAGCATTTTGTGTCGTCAGTCCAGGGTATGGAT  
GTTGAACAACATGGTACGAGAGGCGTTGGTGAATCGTGCATGGACACGGCCCTGAGTCATTTTCCAGATAAGCCACG  
TATCAACCGTACCAACAGCAATTCACACGACGTGCAGCTCGCGAGAGCCTTCCACATGGTCGAGGATCCACTTCACT  
TTGGTGCCAGAAAAGTACGGGTCAATCACAGACCGGTATTGCTCGGGATATAATCTTCTAAACCGTCACGTTTTAAATG  
CTCGCAGATTTCTGCGGTACGACGGCACTGCCAGACAATGGCGTTATAGATAGGCTTCCCGGTTTTTTTTCCAGACAA  
TAGTGGTTTACGCTGGTTCGTAATACCGATAGCTGCAATTTGATCGGAACTGATATCGGCTTTCGCCAGCACTTACC

AGCGTGGAGCTTTGGGTGGCCAGATTTCCATTGGGTCGTGTTCTACCCAACCTGGTTTTGGGTAGATTTGCTCAAATTC  
GCGCTGCGACACGCTAATGATATTGGCATCGTGATCCATTACGACCGCGGGAGCTGGTGGTGCCCTGGTCGAGCGCAA  
CGATATATTTTTTTTTCAGTCATGTTTAAATGTCCTGAGTCATATTACAGCGAAGCTTTTTGTTCTGAAGGAGTTTGGT  
TTCTTTTTCTCCACAACACAGATATCGCAAGGCAAATGGCGACCAATCAGTTTGCGGTAGGCAAATGCACCTACAATCG  
CGCCAACGATAGGGCCGAAAAGCGGCACCAGGAAGTAAGGAATGTCTCTGCCGCGGTAAAGGCGACATTGCCCCAGCCC  
GCCAGCCAGGCAAAGACTTTTCGACCCGAAGTCACGCGCTGGGTTTCATGGCAAAACCTGTCAATGGGCCCATAGATGCGCC  
AATGACCGCAATCAGTAGACCAATCAGCAAGGGAGCCAAAGGGCCGCGTGGTACACCGTTGCCATCGTCCGTTAACGCCA  
GGATCAGCCCCATCAGAATAGCGGTAATCACCATCTCAACTGCGAAAAGCCTGCACAAAATTGATATGAGGATTAGGGTAA  
GTAGAGAAAGTGCCAGCCAGATCAACACTTTCAACGCTGCCGCGAAACAATGTGATGAGTCTGCTCGAAGTCGAAAAATAA  
ATTGTAGTAAAGCCGTAATACTAAAGCCGAGCACAGAAAAGCGCCGGCAACTTGTGAAACGATAAAAGGAATAACTTTGC  
GCTTGTGAAAACAGGCAAACAGCCACAATGCAATGGTAACAGCGGGATTAAGATGCGCGCCGAAACCCCTGCGGTGAGG  
TAGATGGCCATTGCCACCCAGTCCCAATGACACTGATTTCCACTGACCAAAAGACGCACCAGCGACTTTTAGTGC  
TGCAACGCAACCCACCCGAAGAAAATCAACAACCCGGTACCGAGGAATTCAGCAATGCACTGGCCTTCAAGGTTGATG  
TTTGACTCATAATCGGATCTGAAGAGTTAATGTTTGTGTATGCGTGAAAGTCACGGACCTCCACGATGCTTGTAGGCA  
TGCTGTAACCTTATCGTTAACGAGCAAAAACGAGAAAATCGAACTTAAAATGTGTGTCCCTCGTCATAAAAATGAGCGTT  
ATCGCGCCATTTATTCATCTGATTGTACATGATGCATGTTTGTAGATCATTGCGCAACAAATTTTAAACATTTTCG  
ATTGATGTGGATTATGTACCAGGAGAAGGATGAAAAGTGTGGCAAACCGTAATCTGCAAGCGTGGCGTGGACAGCGGA  
TGCGCGGGCTTCATACAATCGGAGCTAACTAAAGTGCCTCGTATTTATTAAGGCGTCACCGTAATCGGGACGAGGATT  
TTTATCCATCAACGCTTGAATTCAGGAGAGGTATGACAATGTCATTAGAAGTGTGAGAAAAGTGAAGCAAAAAGTAC  
AGCAGGCGATTGATACCATCACTCTGTTGCGAGATGGAAATCGAAGAGCTGAAAGAAAAAACAACCTACTGTCGAGGAA  
GTTCAAATGCCAGCATCAGCGCAAGAGCTGGAGCGTGAGAACAACCATCTGAAAGAACAGCAGAACGGCTGGCAGGA  
ACGTCTGCAGGCCCTGCTGGGTGCGATGGAAGAGGTCTGATTACGCTTCTTCCGCGTAATTTCTTACTGTGTAGGC  
CAACAGGTAACGCAGAAAAAAGGCACCTTGGCGTGCCTTTCTTATCATTCAATATCCAGCGGATCTTCTGAAAGAATAAT  
CCCGGATTGTGCGCATAAAGATGGTCCGCGGAGAAGGTGACACCGCAAAATGACGCGGACATCGCTTTCGCCAA  
TGCTTTCGCCAGCGGCACCAACCGAATTGCCGCCATGCCTGGATGCCGATATCCAACCTTCCAGGTCATCTACCTGA  
CGCACCGCGCGTAAATGACCAGACCTTCCATTCTTTGTACTGCCAGACGCGCCAGTTCAGCATCGACCAGTGCAGCG  
ACGAACAGAACCACCGCCATCGACGACAAGAACACGACCACGGCCATTCTGTTGAGCAGATCGTACAGCAACCCGTTGT  
CCTCGAAACATTTTACCGTATTATTTGTCGCGCAAACGACGCGCCGTCGCGCAAAGTTGGAGAACAGCGGTTCCACGACG  
TTAACATCTTCTGATAGATGTCACAAAGCTCGAAAGTATCGTATTTTATAGGCTTAACATTCAGTTGCTGCGAGAATTT  
TCAGTATATCGCGCTATGTGGGCTGTTGGCAAAATCATCAATTGTTAATTGATATTTGTCAGTTATGCTGCCACTGGCT  
TAGGAATATCCCTAAAACAACAGCAGGTTAGTCAGTAACGCTCCCTTGACAGTACGTTCCAGCATTGGTCGCATCGCCA  
CCGGGTCCATTTCCCGCATCACATAACGGGCTTGTTCACCAGTAATGGTGCCGCCAGCAGGAACAGCCAGCCCCACAGG  
CTATGCAGCGAAAAGAGATTAACAGCGCCAGACACACCAGCGAGCCATCAGCAGGCAGGCATGATAACGACGCGCGTT  
CACTTACCTAAGCGCACCAACAGCGTGTTTTTGCCATTTTCGCGGTGCTATTGATATCACGCGAGGTTATTAATATTA  
GTACTGCCGTTGCCAGCAGGCCGATGCGGTGCGCGGAAGGATCAGTGCCGGAATCAATGTATGAGCCTGTAATAACAG  
CTCCCATGACACTCAACCAGCCAAAGAAAACAGTACGGAATATCACCCAGACCGATATAACCATAAGGACGATTGCC  
CACGGTGTAGGTGATAGCGCAATGATCGACAACCCGCAAGAATCAGGAAACCGACAAAATCGGCCAGCGTATGGCATG  
CCACTGCAACAGTGCAGCCCGGAGAGACAGATGAGCACGACGGTAATAATGAGCGCCGTTTTCATCTTGTGTTGGTA  
ATGACCCCTTTTTGATGCCGCGTAGCGGCCAATAGCGGTGAGTTTATCGCTGCTTTTACCAGCATCGCCGTAATCATT  
GGCGAGGTTAGAAAAGGATCTGTAATAGCCGCGGTAATAGTGCAGCAGGGCGACAGGGGATCGAAGTGACCTTGCC  
ACCATGCCAGCGCTGTCGACGATAATTGACGAAAAGGCGAGGGGAGGGTTTTAGGTCGTAACCTTTCCAGCCAGCC  
TGAGTTGCGCTAATTTGTTGTTGAGTCATAATACGCGCAATAAAAATGGGGCCTTTCAGCCCATCAAAACAATGATGAA  
AATGATTGAACGCGATTATAGGATAAAACGGCTCAGATCTTCTGTCACCAACGCATCCAGATGTTTGCTCACATAAT  
CTGCGTCAATAGTGATATTTGACCGCTTAAATCGTGGCGTCTAGGAAATCTTCCATTAAACGCTCCAGAACAGTG  
TGTAACGACGAGCACCAGTGTTCGGTAGATTGTTTACCTGCCATGCCGCTTCCGCGATGCGTTTAAATACGGAGTC  
GGTAAACTCGATATTTACGCTTTCAGTCGCCATCAGTGCTTTGACTGCACGGTATAGAGGCATTGGCTCGGTGAGAA  
TACGCTCGAAGTCGCTGGTGGTCAGCGCTGCAAGTCAACGCGGATTGGCAGACGACCTTGCAGTTCGGGATCAGGTCA  
GACGGTTTTCGCAATCTGGAACGCGCCAGAAGCGATAAACAGAATGTGGTCAAGTTTTGACCATCCCGTGTGGTGGAAAC  
GGTGCAACCTTACCAGCGCAGCAGGTACGCTGAACGCTTACGAGAAACATCCGGACCAGGAACTCGCCGCGCT  
TACAGATTTTGTGATTTGTCGATAAACAGATCCCGTGTGCTCAACAGCGTCGATAGCGTCTTGTTCAGCTCTTCC  
GGTTACCAGTTTCCGCGCTTCTTCTCAATCAGCAGCTTTCATGGCGTCTTGTATTTTACGCTTACGCGCTTTTTGCTT  
CTGGCCGCCAGGTTCTGGAACATGGACTGCAGCTGGCTGGTCTCTTCCATGCCCGGAGGAGCCATAATTTCAACGC  
CCATCGGTGCTGCGGCAAGATCGATCTGATTTCTTGTATCAAGCTGGCCTTACGCGAGTTTTTGGCGAATGCCTGA  
CGAGCAGCGGACGGTTCTGCTGCTGTTCCGCTGTCCCCAGTTGTTTTAGCAGGTGGGATCAGCACGTCGAGAATACG  
TTCTTGTCCAGTTCTTACGCGGATAACGGTTTTTCTCGATAGCCTGGACGCTACCATTTTACGCGGCATCGGTCA  
GATCGCAATAATAGAATCCACTTCTTACCGACGTAGCCACTTCCGGTAATTTGGTGCCTTCAACTTTGATGAACGGC



GCATTCGCCAGCTTAGCCAGACGACGGGCGATTTTCAGTTTTACCGACACCGGTGGGCGGATCATCAGGATATTTTTCGG  
GGTCACTTCATGGCGCAGCTCTTCGTTGAGCTGCATGCGACGCCAGCGTTACGCAGAGCAATCGCCACAGAACGCTTGG  
CGTTGCTCCTGGCCGATGATGTGCTTATCCAGTTCGTGACGATTTCCGCTGGGGTCATTTACAGACATGGGAGATCCTTAC  
GCTTTGTAGCTTAATTCCTCGATGGTGTGAAATGGTTGGTATAGATGCAAATGTCGCCTGCAATATCCAACGCCTTTTC  
AGCAATTTACGGGCGCTAAGTTTCAGTGTTCCTAACAGCGCGCCGCGCAGCCTGGGCGTAAGGGCCGCCGGAGCCGA  
TAGCAATAAGATCGTTTTCTGGCTGCACCACGTACCGTTACCGGTGATGATAAGCGATGCAGTTTCATCCGCGACTGCC  
AGCAGTGCTTCAAGTTTGGCGAGCATGCGATCGGTACGCCAGTCTTTGCCAGCTCAACGGCGGCTTTGACCAGATGGCC  
CTGATGCATTTCCAGTTTACGTTCAAACAGTTTGAACAGCGTAAAGCATCCGCGAGTACCGCCCGAAAGCCCGGATGA  
CTTTGTGCTGTACAGACGGCGGACCTTTTTACGTTGCCCTTTCATTACGGTATTGCCAACGTGGCCTGACCATCACCA  
GGGATGACCACATGGCCGTTACGGCGTACGTTACTATAGTTGCACGAGCTGACCCCTTGGTTACGAATACAGAGTACA  
AACCCCGTACAAAAGTACGGGGCATAATGCAATTATAGATGGGGGGGATTTTGAGGGTTTTCAACCCCGCGCGGAGCCG  
AATGCAGTTTGTATGACCCGCCATCTTCAACCGATTGAGGGTGTGTCTGCGTTCTCTTTGCCCTTACCAGGGCCAAATGA  
CCACAGATTCCAGCCATTGTTGGTGGTATTTTCGAGTCAAAGCCTTGAACGCCAGCTGAGCACGTACCGTCTCTGCC  
TGTTCCGCGCTCTGAACGAACCGCACTGCACCATCCAGCGGCGTTCGTCTTTTTCTCCGCGCTCGGTTTTGGCGCGTC  
AGCGGCACGAGCAACTGGCGCAGTTGCTGCGGCTTCGACTGCGCAGTCTGTGTCGCAGGAGTTTGCAGCAGATCCTGGT  
ACGGTCTGTGAGAAGAAGCCGTTTTAGACTGGCGCGGTTGCGCCTGACCGGTGCGGCTTGGCAGCTACCGTCTGCTGC  
TGCCAGCTTTGTTCACTGCTACGCGACTGCTGAGCCAGGCGTTGCTGTTCCGCTAATTGCTGCGCCTGACGTTGGCGCTG  
TAGCGTTTGTGACGCTGTTCCGGCGTCTGTTCACTCCACGGAACCTTCAACCGCTGCGTTGGCTGCTGGCGCATATCAG  
CCTGCATTTGTTCAAGAAGCTGACGTTGTTCTGGTGTGAGTTGCTCCGGCGTTTTCACTTACCACCGGCGAGAAGGTTCT  
GTGGGCGCACGCACTCCCGGCTGGCGACTTTCCAGCTCTTAAATGTAGCGCCAGCGTCTTCTGGTTTTGGTGGTAGTCC  
GTTTCCGGTCACTTTCTGGCTTTCAGCGTCTCGGACTCTTCTTCTGTGATGCGTAATGAAGTACAGACCACCGATAA  
AGGTACAAGAACGGCGGAGCAATAGCGACCATAGCGGAGAAACCGCAGGCAGATTTGTTGCTTTTTCCGTGAGGTG  
CTTTTTTCCGCCGAAGGTGCCGGTGGTGGCGGTACATAATCTGTTGTGCCACTATCGTTTCGCTGATTTTATT  
CGTTCTGACCCGCCATGTTACTTAAGCGGCGGCTTTGACCAGTACCGCAGTCTTAAAGGTTTACTTTAAGGTAAC  
GCGCGTGTGATCCCGGATGATAAGTTCGAGTCCATTAACGAGAGCCACTGCCAACGTGTTGCCCTGCATTTGATC  
AAGCAATAACAGCATAGCTTCCCGACCGATTTCTGAACGCGGCTGCGCGATGGTTGTCAGCGGCGGATCACAAAATTGCG  
TCAGGTCGATGTTATCAAACCGATTATGAAAGGCTTCCGGGACTTTCCAGCCCTGGCGTTTTGCCTGAGAAAGTGGC  
CCGAGCGCCATCACATCGCTATGGCAGAAGACAGCAGTAGGCGGTTGTGGAAGATCAAGCAGCTGCTGCATCGCTTTGCT  
TCCGGCTTCAAGGTGAAGTGCACCGGCGATGTATTGCGGATCAACCATAATGCCCGAGCGACGCAGCCCTGAACAT  
AGCCTTGCAGGCGGTAGTGACACAGCGGCATCTCTCCGGGACCGCTATACAGCCAATCCGTTTATGCCCTTGCTCATAT  
AAATAATTTACTGCATCAAATGCGGCGGTGAGATTGTCGATATGAACTGTAGGCAGCTCCAGCTCCGGTGCAAATTCGTT  
CGCCATCACCATCGGCGGAGATTACGCTGTTTCTCAATGCTGGCATCAAACGGCAGCCTTGAACCCAGCAACAACATGC  
CATCAATTTGCTTGGTGTGATCAAATCGATAAAGGTTTTTCTGCTGATTTTGTGCGCACAGTCGCCAATCAGCACC  
AGATATCCGTGATTTGCCGCGTAACCTCGATACCGCGAATAATTTGCTAAAGAAGGGATCGCAGATATCCGGGACAA  
CACCAGAATGGTGGGATTATTACGCTTACGTTGCGCCCCATAGGCTGCGGTAATAACCCACTTCCCGGGCCGCTT  
TTTCAACCCGATTACGGGTGGCCTGGGAGACTTTATCGGGATTATTAATGCTCGGAGACGGTCCGCTGTAGAGACTTT  
GCCTTGAGGGCAACGCTTTTCATGGTCCGCGCAGTTTCTGCTTCTCGCTTTCACACTCACTCCTCGCTGGCACGTCA  
GGGCTACTACATCCATGTTTACTTTCACATCGGCAACATTTTACAGATAGCGCGTGAAACCGTTACAGAATTTTCATG  
AAAAGTGTGATGAATATTTGAAATTTTTCGATCCGCCTCGATCGTGGAGCGGTTAACCTCAATCGGATCAACATCCAGCA  
CCCATTTCACTTACGGGAATCCGGTATTGATTGATGAGCGCCAGCGTACCCTAATGATGTGTTGCAAGCGCACGGCGG  
GAAGGGTGTGCAACAATATCTGCCAGCGCCAGCACCGCCAGTTTAGGTGCCAGAGCCGAACCGGACCGGAGAACCCA  
CAGTTTTCTGCTGCTGCCAGTGGGCTGGAGAGGATCAGATTACGCGATTGTTGCAGGAACAATGGCGCGTGTGATTGTTAT  
GATCTTCCGCACGCACAATCACATGGCTGGTCCACGGCGTAGCTGCATCATTCCGCGCTCAGCCAGCGCCTGTTCCGGCA  
AAGGCGTCTGAGCCTTTATAGAGCAACGTTTGAACAGAGGATGTTCCGGATGGTGGCTTTCAGCACCCTTCCGCCCTG  
TTTACCAGCACGCCCGGACGACCGGCGACTGGGTGTAAGCTGAGCGAAACGCTCTGCCGAGCGAAAATCGGCAGAAA  
ACAGCGCGCCGTCACGTCAGTAATGCAACCAGCGTCACATCCGGGAAATGGTACCTTTCCGCGCAGATTTGTGTACCA  
ATCAAAATCCGCGCGCCGCGGATGTAATGCAACCAGCGTCACATCCGGGAAATGGTACCTTTCCGCGCAGATTTGTGTACCA  
GATACGAGAAATGGGCACGCCGGGAACAACGGCGCGAGCGTCTGTTCAAGCTGTTCCGGTCCAGCCCCACGGGGACCA  
GGTGGTGGAAACCGCAGGAAGGCGACTGGCGCGCACCGGACGCTGACTGTCACAGTGGTGGCAGCGCAGATGGTGTGCTGC  
GCCTGATGCAGCGTGTAGTAGTGCACAGTGGGCAATCCAGCCACAGTCTGGCACAGCAGTGCAGGCGC  
AAAGCCACGGCGGTTAAGAAAGAGAATGACCTGGTTATCAGCCTGTAATGCTGGCGCATAACGAGTGATTAACGCCGGAG  
CCAGACCTGCCTGCACCTTCTGACCTTTAAATCCAGCACATGTTGAATTGCCGGACGCGCATTCCCTGCCCGACGGGTG  
AGGCGCAGCAGCGGATTTTTTCTGCTGGACGTTGCATAACGTTTCCAGCGCGGGCGTTGCGGAGCCAAGAATAATCGG  
GATTTGCTCGTGTGCGCACGATACACCAGGTCGCGGGCATGATAGCGCCAGCCTTCTGCTGCTTGTAGGAGCTGT  
CGTGCTCTTCAATGACAATCACGCCGAGATTTTAAACGGCGTAAACAGCGCGGAGCGGGTGCCGATCACAATCGCC  
GCCTCACATTTTTGCTTTTCCAGCCACGCCGAAAGACGCTCGCTGTCTGTTCCAGGCCGGAATGCAGAATTTCCAGGGGGC

ATTA AACGTT CACG AAAACGGGCGATAGTTT GCGGTGTCAGGCCGATTTCCGGCACCATCACCAGCGCCTGTTTGCCT  
GAGCGAGCACGTTTTCCAGTACGCTGAGATAAACCTCCGTTTTACCGGAACCGTAACGCCGCCAGCAGCCAGGCAGAA  
AAAGTATCTGCCGCGCTATGAATTGCGCCAACGGCGGTGGCCTGTTCCGGTATTCAATCGCAACCGCTCACCAGAAACGGC  
ATAGTTCTGTTCCGAGTCGCTAAACTCTGGTGTTCCTACTTGCTAAATCACACAGACCTTTTTTGCCTAGCGCCTGCAACG  
CGGCATCATTAAATTCGAGCGTGGCGACCTGGTGCGCCAGATTTTGCCTTGCCTAACGCCGCCAGCGCCTGTTGTTGC  
TTGGGGGAGCGTTTCAGGCTGTTCCAGATCCACCGCCTGGCCTTGTTCAGTGGCAAACAGTACCACATCGGCCGCTTCCG  
CGCAGGCCGCCCTGGCGTAGTAAATCGGCAAGGCATGAAACAGCACATCGCCAATCGGATGATGATAGTAATCTGCCG  
CCATAGCAGCAATCGCCAGACGGAGTGAGTAAACACCGGCTCACTATCCAGCACTTCGACTACCGCTTTTAGCTCATTG  
AGCGGCAGTTCGCTGGCATCGTAACCTGATACCACAATCCCGATGCGCTCCTGCTGTTGCCAAACGGCACGCGCACGGC  
ACACCCAGCTTTAACCGTCATGCCTTCTGGCAGCAGATAGTCAAAGGTACGAGGAAGCGGAACGGGCAAGGCAACGTGGG  
CAACGGGCATAGCATCATCTGACTTGAAATTCGGTGGGTTAGTATACACATTGCCGTAGAAGAGTGGGATCAGTTTGC  
ATACGCTGGTTAATTTCTGTATGATTTCCGCGCTTCGTACGAAATGATCGTATTGAAGCTATACTTTAACATCGCGTGG  
TGTCTGGCGTTAGGGCTGGAAGAGCGACGCGCCTTAAACCGAGTTTTCCCATGAAAAAGATATTCACCCGAAATACG  
AAGAAATTACTGTAGCTGCTCTTGGCGTAACGTAATGAAAATCCGCTCCACCGTTGGTCATGACCTGAACCTCGACGTG  
TGCAGCAAGTGCCACCGTCTTCACTGGCAAACAGCTGATGTTGCTACCGGTGGCCGTTGACCGCTTCAACAAGCG  
TTTTCAACATCCCGGGCAGCAAATAAGACCGGATTTCCGAAAAAAGCGCCGACGCGCTTTTTTTGTGCCTGAATTTTGG  
TCGTATTACCACGAAAACAGCGCCATTCTTTGGCGACCGTGGTGAAGTTGTGGCGCATCGAAAACGGCTTGTGGCGAGAC  
CACCGTTTTCTCAAGCGAATATTCTTCCGTAACGTTCTTTGAGCTTTGCCTGAACTTGTGGCTGCTCAGGTCGAACT  
CTTTCAACTTCTGCTGCTCGCCACGCGCATTCCCAGCGCTTCTGGTAAACCTTCCACACCACTTCCGAACAGTACTGG  
CGATCGTCGCTCCATGAGAAGCTGAAATCATACGTTTACCGAGATAACGTTTTGCCGTTTGCGCCAGTTTTTGTGTTG  
TTCAACACTCAGTCCGCCTTCAACGCGGCGAACAACGTATTTGCCCTTTTACCATGGCGATCCACTGCTTGAGCGGGG  
TGTATTTACCAGGGCCGACTGCTTCAAAAACGTAGGGCTTTTTTGTGCGTATCACCAGCATAACGGTGTGGCTATAATCG  
GTATGGGTCCGAGTTGGATCGCTTACTTTGCGATGAGCGAGAGATCTGAAAGATGATGTCGCCGGTTTGTGGCTGCCA  
GGCAAAGGCAGGTACAGAAACAGCAGGCTGAGGATCAGCAGCCTGTTTTTCATAGTTAAACGTCCATGTATAAAAAGCG  
GTGGGTCCGAGACAACGTGCTCGTTGTTATGCCGGATGCGGCGTGAACGCCTTATCCGGCTACAAGTTCGTGCAAAAT  
CAATAAATTGCAATATGACGTAGGCCCTGATAAGCGTAGCGCATCAGCGGATTCCACTCCGCGCGCTCTTTTTTGTCTTA  
GTATTTCCACGTCTCCGGTTAATCCCATCTCACGCATGATCTCTTTGCCGCTTCCGGGATTTCTGTCGCTGCGCTCTT  
TACGCAGATCGGCATCATCCGGCAAAGGTTGCCCGTAAAGGCATGCAGAAACGCTTCGCACAGCAGCTCGCTGTTGGTA  
GCCTGACGCAGTTGTTACCTGACGACGCGTGCCTCATCGGTGAGGATTTTAAACCTTAAGAGGAATGAAACCGT  
AATCTTTTTGACTTGTCACTCTTCTTCCGTGCTCAGCGTATGGCTGATATATTCGCCGCTCCATTACGCCATGAGAT  
ACTTAATCCTCTTCTGCAATAAATTGAGACCAGACCACAGTTGATGTGGGTACTGACCGTAAACCCGCATAGTTTACC  
GTACAGGCGTTACCGTGACATCGTGAATGCACCTGTCGGCGTGATAATGCATATAATTTAACGGCTATTTGGGATTTG  
CTCAATCTATACGCAAAGAAGTTTAGATGTCCAGATGATTGACGTCCATTAACACAATGTTTACTCTGGTGCCTGACAT  
TTCACCGACAAAGCCAGGGAACCTTATCACATGACGCGTAAACAGGCCACCATCGCAGTGCCTAGCGGGTTAAATGACG  
ACGAACAGTATGGTTGCGTTGTCCACCGATCCATCTTCCAGCACCTATAACTTTACCGGATTTAATGAACCGCGCGC  
CATGATTACTCGCTCGCGCAACCCAACGCGCATGTGGTTCAGCGTGCCTGGCAGAACTGGAAGGTGGTGTGCTGCTG  
AGTACTTAATAACCGCATGTCCGCGATTACCTGGTAAACGACCGTCTTTTTGAAACCTGGCGATCTGCTGGTTGCGC  
CGCAGACTGCTACGGCGGTAGCTATCGCTGTTGACAGTCTGGCGAAACCGGTTGCTATCGCGTGTGTTTGTGAT  
CAAGGCGATGAACAGGCATTACGGGACGCGTGGCAGAAAAACCAAACCTGGTACTGGTAGAAAGCCAAAGTAATCCATT  
GTTACGCGTGTGGATATTGCGAAAATCTGCCATCTGGCAAGGGAAGTCGGGGCGGTGAGCGTGGTGAACAACTCTT  
TAAGCCCGCATTACAAAATCCGCTGGCATTAGGTGCCGATCTGGTGTTCATTATGCACGAAATATCTGAACCGTAC  
TCAGACGTAGTGGCCGGCTGGTATTGCTAAAGACCCGACGTTGCTACTGAACTGGCCTGGTGGGCAACAATATTGG  
CGTGACGGGCGCGCTTTGACAGCTATCTGCTGCTACGTGGGTTGCGAACGCTGGTGCCGCTATGGAGCTGGCGCAGC  
GCAACGCGCAGGCGATTGTGAAATACCTGCAAAACCCAGCGTTGGTGAACAACTGTATCACCCGCTGTTGCCGAAAAAT  
CAGGGGCATGAAATTGCCGCGGCCAGCAAAAAGGCTTTGGCGCAATGTTGAGTTTTGAACTGGATGGCGATGAGCAGAC  
GCTGCGTCTTTCTGGGCGGGCTGTCTGTTTACGCTGGCGGAATCATTAGGGGGAGTGGAAAGTTTAACTCTCTCACG  
CCGCAACCATGACACATGCAGGCATGGCACCAGAAGCGCGTGTGCCCGGGATCTCCGAGACGCTGCTGCGTATCTCC  
ACCGGATTGAAGATGGCGAAGATTTAATTGCCGACCTGAAAATGGCTTCCGGGCTGCAACAAGGGGTAAAAATGAGT  
GTGATTGCGCAGGCGAGGGCGAAAGGTCGTGAGCTGCATAAATTTGGTGGCAGTAGTCTGGCTGATGTGAAGTGTATTT  
GCGTGTCCGGGCATTATGGCGGAGTACTCTCAGCTGACGATATGATGGTGGTTTCCGCCCGGTTAGCACCCTAAC  
AGTTGATTAAGTGGTTGAAACTAAGCCAGACCGATCTCTCTGCGCATCAGGTTCAACAACGCTGCGTGCCTATCAG  
TGCGATCTGATTAGCGGTCTGCTACCCGCTGAAGAAGCCGATAGCCTCATTAGCGCTTTTGTGAGCGACCTTGGAGCGCT  
GGCGGCGCTGCTGACAGCGGTATTAACGACGCAGTGTATGCGGAAGTGGTGGGCCACGGGGAAGTATGGTGGCGACGTC  
TGATGTCTGCGGTACTTAATCAACAAGGCTGCCAGCGGCTGGCTTGTATGCCCGCGAGTTTTTACCGCTGAACCGCGC  
GCACAACCGCAGGTTGATGAAGGGCTTTCTTACCCGTTGCTGCAACAGCTGCTGGTGAACATCCGGGCAACGCTGTT  
GGTGACCGATTTATCAGCCGCAACAACCGCGGTGAAACGGTGTCTGCTGGGGCGTAACGTTCCGACTATTCCGCGACAC

AAATCGGTGCGCTGGCGGGTGTCTCGCGTAACCATCTGGAGCGACGTGCCGGGGTATACAGTGCCGACCCGCGTAAA  
GTGAAAGATGCCTGCCTGCTGCCGTTGCTGCGTCTGGATGAGGCCAGCGAACTGGCGCGCCTGGCGGCTCCCGTTCTTCA  
CGCCGTACTTTACAGCCGTTTCTGGCAGCGAAATCGACCTGCAACTGCGCTGAGCTACACGCCGGATCAAGGTTCCA  
CGCGCATTGAACGCGTGCTGGCCTCCGGTACTGGTGCGGTATTGTCACCAGCCACGATGATGTCTGTTTGATTGAGTTT  
CAGGTGCCCGCAGTCAGGATTTCAAACCTGGCGCATAAAGAGATCGACCAAATCCTGAAACGCGCGCAGGTACGCCCGCT  
GGCGGTTGGCGTACATAACGATCGCCAGTTGCTGCAATTTGCTACACCTCAGAAGTGCCGACAGTGGCGCTGAAAATCC  
TCGACGAAGCGGGATTACCTGGCGAACTGCGCCTGCGTCAGGGGCTGGCGCTGGTGCGATGGTGGTGCAGGCGTCACC  
CGTAACCCGCTGCATTGCCACCGCTTCTGGCAGCAACTGAAAGGCCAGCCGGTCAATTTACCTGGCAGTCCGATGACGG  
CATCAGCCTGGTGGCAGTACTGCGCACCGGCCGACCGAAAGCCTGATTAGGGGCTGCATCAGTCCGTCTTCCGCGCAG  
AAAAACGCATCGGCCTGGTATTGTTCCGTAAGGGCAATATCGGTTCCCGTTGGCTGGAAGTGTTCGCCGTGAGCAGAGC  
ACGCTTTCGGCACGTACCGGCTTTGAGTTTGTGCTGGCAGGTGGTGGACAGCCGCCGACGCTGTTGAGCTATGACGG  
GCTGGACGCCAGCCGCGCTTAGCCTTCTCAACGATGAAGCGTTGAGCAGGATGAAGAGTCGTTGTTCTGTGGATGC  
GCGCCATCCGTATGATGATTTAGTGGTGTGACGTTACCGCCAGCCAGCAGCTTGTGATCAGTATCTTGATTTCCGC  
AGCCAGGTTTCCAGCTTATCAGCGCCAACAACTGGCGGGAGCCAGCAGCAATAAATATCGCCAGATCCACGACGC  
CTTCGAAAAACCGGGCGTCACTGGCTGTAACAATGCCACCGTGGTGGCGGCTTCCGATCAACACACCCGTCGCGCATC  
TGATCGACAGCGGATACTATTTTGTGATCAGCGGGATCTTCCGCGCAGCTCTCCTGGCTGTTCTGCAATTCGAC  
GGTAGCGTGCCGTTTACCAGCTGGTGGATCAGGCGTGGCAGCAGGGCTTAACCGAACCTGACCCGCGTGACGATCTCTC  
TGGCAAAGACGTGATGCGCAAGCTGGTGATTCTGGCGCGTGAAGCAGGTTACAACATCGAACCCGATCAGGTACGTGTGG  
AATCGCTGGTGCCTGCTCATTGCGAAGCGCGCAGCATCGACCATTTCTTTGAAAATGGCGATGAACTGAACGAGCAGATG  
GTGCAACGGCTGGAAGCGGCCCGCAAATGGGGCTGGTGTGCGTACGTGGCGCGTTCGATGCCAACGGTAAAGCGCG  
TGTAGGCGTGAAGCGGTGCGTGAAGATCATCCGTTGGCATACTGCTGCCGTGCGATAACGTCTTGGCATCGAAAGCC  
GCTGGTATCGCGATAACCTCTGGTATCCGCGGACCTGGCGTGGGCGCGACGTACCGCCGGGGCGATTGAGTCGGAT  
ATCAACCGCTGGCACAGTTGTTGTAATTTAGAAATTTAATAATGCCCGTACTCATGTTTTCGGGTTTATGGTTTCTA  
ATGAAATATATTGAATTATCATAGGATTAGGCCGATTAAGCGTTTACGACGAATCCGGCAAGAAGCAATAAGTACATGG  
TTAGTTTATATTTGAGTCCGTTTGGCTTGCATACCGGATTTTCTTTTCTTACCATCCTGAAGTTTTTTCATCTTCCC  
TGATTTTTCTCACCATCATTGGTCATTTTTCGGTTGACGCCCTTCGGCTTTCTTTCATCTTACATCTGGACGTCTAA  
ACGGATAGATGTGACAACAACAATATAACTACAAGCGATTGATGAGGTAAGGTATGAGCTTTTTTCCGCCAGCCAGC  
GGGATGCCCTGAATCAGAGCCTGGCAGAAGTCCAGGGGCGAGTTAACGTTTTCTCGAGTTTTTCCGCCGCGTACCAGT  
GAAATGGAGCAGACCCTGTGGAACCTCATCGATCGCTTAGCAGCCTGAAACCGAAGTTTGTATCGGTGACCTATGGCGC  
GAACTCCGGCGAGCGGACCGTACGCACAGCATTATTAAGGCAATTAAGATCGCACTGGTCTGGAAGCGGCACCGCATC  
TACTTGCATTGATGCGACGCCGACGAGCTGCGCACCATGACGCGACTACTGGAATAACGGTATTGTCATATCGTG  
GCGCTGCGTGGCGATCTGCCGCCGGGAAGTGGTAAGCCAGAAATGTATGCTTCTGACCTGGTGACGCTGTTAAAAGAAGT  
GGCAGATTTGATATCTCCGTGGCGGCTATCCGGAAGTTCACCCGGAAGCAAAAAGCGCTCAGGCGGATTTGCTTAATC  
TGAACGCAAAGTGGATGCCGGAGCAACCGCGGATTACTCAGTTCTTCTTCGATGTCGAAAAGCTACCTGCGTTTTCTG  
GACCGCTGTGATCGCGGGCATTGATGTGGAATTTTCCGGAATTTTCCGGTATCTAACTTTAAACAGGCGAAGAA  
ATTTGCCGATATGACCAACGTGCGTATCCGGCGTGGATGGCGCAAATGTTGACGCGTCTGGATGATGATGCCGAAACC  
GCAAACCTGGTTGGCGCAATATTGCCATGGATATGGTGAAGATTTAAGCCGTGAAGGAGTGAAGATTTCCACTTCTAT  
ACGCTTAAACGTGCTGAAATGAGTTACGCGATTTGCCATACGCTGGGGGTTGACCTGGTTATAAATAGTGTGGCTTTT  
GTGAAAATCACACAGTATCAAAATTTAAACAGAGCACAAAATGCTGCCTGAAATGAGGGCGGGAAAATAAAGTTAT  
CAGCCTTGTTTCTCCCTCATTACTTGAAGGATATGAAGCTAAAACCTTTTTTATAAAGCATTTGTCGAAATCGGACA  
TAATCAAAAAAGCTTAATTAAGATCAATTTGATCTACATCTCTTAACCAACAATATGTAAGATCTCAACTATCGCATCC  
GTGGATTAATTCAATTATAACTTCTCTAACGCTGTGATCGTAACGGTAACACTGTAGAGGGGAGCACATTGATGAGC  
ACGTCAGACGATATCCATAACACCACAGCCACTGGCAAATGCCGTTCCATCAGGGCGGTACGACCAGAGTGGGGGGC  
GGCACAACCACTCGCGACTGGTGGCCAAATCAACTTCGTGTTGACCTGTTAAACCAACATTCTAATCGTTCTAACCCAC  
TGGGTGAGGACTTTGACTACCGCAAAGAAATCAGCAAATTAGATTACTACGGCCTGAAAAAGATCTGAAAGCCCTGTTG  
ACAGAATCTCAACCGTGGTGGCCAGCCGACTGGGGCAGTTACGCCGCTGTTTATTGATGGCCTGGCACGGCGCGGG  
GACTTACCGTTCAATCGATGGACGCGGTGGCGGGTCTGGTTCAGCAACGTTTTGACCCGCTGAACTCTGGCCGGATA  
ACGTAAGCCTCGATAAAGCGCGTGCCTGTTGTGGCAATCAACAGAAATATGGTCAGAAAATCTCCTGGGCCGACCTG  
TTTATCCTCGCGGTAACGTGGCGCTAGAAAACCTCCGCTTCCGTACCTTCGGTTTTGGTGGCGTCTGTAAGACGCTG  
GGAACCGGATCTGGATGTTAACTGGGGTATGAAAAAGCCTGGCTGACTCACCGTCATCCGGAAGCGCTGGCGAAAGCAC  
CGCTGGGTGCAACCGAGATGGTCTGATTTACGTTAACCCGGAAGGCCCGGATCACAGCGCGAACCGCTTCTGCGGCA  
GCAGCTATCCGCGGACCTTCGGCAACATGGGCATGAACGACGAAGAAACCGTGGCGCTGATTGCGGGTGGTCATACGCT  
GGGTAACCCACGGTGCCGCTCCGACATCAAATGTAGGTCCTGATCCAGAAGCTGCACCGATTGAAGAACAAGTTTTAG  
GTTGGGCGAGCACTTACGGCAGCGGCTTGGCGCAGATGCCATTACCTCTGGTCTGGAAGTGTCTGGACCCAGACGCCG  
ACCCAGTGGAGCAACTATTTCTCGAGAACCTGTTCAAGTATGAGTGGGTACAGACCCGACGCCCGGCTGGCGCAATCCA  
GTTGCAAGCGGTAGACGCACCGAAATATCCCGGATCCGTTGATCCGTGCAAGAAACGTAACCGACAATGCTGGTGA

CCGACCTGACGCTGCGTTTTGATCCTGAGTTCGAGAAGATCTCTCGTCGTTTCTCAACGATCCGCAGGCGTTCAACGAA  
GCCTTTGCCCCTGCTGGTTCAAACCTGACGCACAGGGATATGGGGCCGAAATCTCGCTACATCGGGCCGGAAGTGCCGAA  
AGAAGATCTGATCTGGCAAGATCCGCTGCCGAGCCGATCTACAACCGACCGAGCAGGACATTATCGATCTGAAATTCG  
CGATTGCGGATTCTGGTCTGTCTGTTAGTGAGCTGGTATCGGTGGCCTGGGCATCTGTTCTACCTTCCGTGGTGGCGAC  
AAACGCGGTGGTGCAACCGTGC GCGTCTGGCATTAAATGCCGAGCGGACTGGGATGTGAACGCCGAGCCGTTCTGTGC  
TCTGCTGTTCTGGAGAAAATCCAGAAAAGAGTCTGGTAAAGCCTCGCTGGCGGATATCATAGTGCTGGCTGGTGTGGTTG  
GTGTTGAGAAAAGCCGCAAGCGCCGAGTTTTGAGCATTATGTACCGTTTGGCGCGGTGCGTGGATGCGCGTCAGGAT  
CAGACTGACATTGAGATGTTGAGCTGCTGGAGCCAATTGCTGACGGTTTCCGTAACATCGCGCTCGTCTGGACGTTTC  
CACCACCGAGTCACTGCTGATCGACAAAAGCACAGCAACTGACGCTGACCGCGCCGAAATGACTGCGCTGGTGGCGGCA  
TGCGTGTACTGGGTGCCAATTTCGATGGCAGCAAAAACGGCGTCTTCACTGACCGCGTTGGCGTATTGAGCAATGACTTC  
TTCGTGAACTTGTGGATATGCGTTACGAGTGGAAAAGCAGCCGACGAATCGAAAAGAGCTGTTGAAAGCCGTCACCGTGA  
AACGGCGAAGTGAATTTACGGCCAGCCGTGCGGATCTGGTGTGTTGTTCTAACTCCGTCCTGCGTGGGTGGCGGAAAG  
TTTACGCCAGTAGCGATGCCACGAGAAGTTGTTAAAGACTTCGTGGCGCATGGGTGAAAGTGATGAACCTCGACCGT  
TTCGACCTGCTGAATCTGACCCCGTTACGCGGCTTGTGCTGGCAGTGCCTGAACGTTCTTTACCAGCTATAGTGGGC  
GAACGAAAACACACACTGATCTCTCATGTCTGCCGAGGAAAGCAACCCACTGGCAATCAGTGGCCTGGTTGTGCT  
CACACTTATCTGGAGTTATAGCTGGATTTTCATGAAGCAAGTACCAGTTACATCGGTGCCTTCGACTTTACCGCCTTAC  
GCTGCATTTTTGCGGCTCTCGTTTTATTATCGTCTTTTTATTACGTGGTGC GCGGAATGCGCCCGACACCGTTTTAAATAC  
ACCTTAGCCATTGCCCTGTACAAACCTGCGGGATGTTGGTCTGGCGCAGTGGGCGTTGGTCAGCGGAGGTGCGGGGAA  
GGTGGCGATCTGAGCTATACCATGCCGTTCTGGGTGGTATTTCGCGCGTTGTTTCTCGGTGAACGCCTGCGACGTG  
GGCAATATTTGCGGATTCTGATTGCCGCTTTGCGCTATTTTTGGTGTGACGCGTGGCAACTCGATTTCTCTTCGATG  
AAAAGTGCCATGCTGGCAATCTCTCCGGCGTCACTGGGGGGCAGCGGATTGTTGCTAAACGTCTGTATGCCCGTCA  
TCCGCGCGTGGATTTATTGCTGTTAACATCTGGCAGATGCTGTATGCGGCGTGGTGATGAGTGTGGTCTGTTACTGG  
TGCCGCAACGTGAAATGACTGGCAGCCACCGTGTCTGGGCGTGGCCTACAGTGCATTCTGGCGACGGCACTGGCG  
TGGAGCTTATGGTTGTTGATTGAAAACTTGCCTGCCAGTATTGCCAGCTTAAGCACACTGGCCGTTCCCGTTTGGCG  
CGTACTCTTTCTGGTGGTCTGCTCGGCGAGAATCCGGGGCCGTTGAAGGTAGCGGTATTGTGCTGATTGTGCTGGCAC  
TGGCGCTGGTGGAGCCGTAAGAAAAAAGAACCCGTCAGTGTAAAAGGATCTGAATTTTTCTCATGTGGGGCGATCTCT  
TATTTAACAAAATAACGATAATGCCCCACCATCCGCGAGTTAAACAGCACATCTTCTTCTGCGGCTGCGCAATGTT  
ATGTATCACCAGCGGCTACCGTCCGCGGCGAAGCCATCTGAAACCAACCCCAATATGTGCCAGCCGTTATCCAGTCCG  
AGGAGACAATATCGCCCGCTTGATAGTCACTGGGGTCTTGTGCTGGTGGGCGTGTGTTATCATGGCGGTAAACAGGTT  
TCCAGATTAGGCACCCGACCGGTGATCGATGTTGCTGTCGGGCGCTTTAACTTCCATTTTTGCGGGTACTCAGCAAAATT  
CTTCGCCATATCTTCTGTAACAGTTTCTGCAAATCGACCTTCTGGCTGCGCAATGCGCGGATCACCACATCGGAACATA  
CACCAGCTTCTTGGGAACATCACCAGCAGGATAAGTAAGTGCACATACGCCGGATCGTAAAATAGCGTCTGCCAATT  
TGCTGTCTGGCACCGTCTGCGATGGCAAGGTTGGTATTGGCCTGGATTTGTACCACGGTTGGTGAACGGCGGGAGATT  
TAAGGAGTGGCTGGTAAATGCCGTTAGCAGGCTGAGCAGCGCCAGTGAAGCTTTCATCTGGTTCGTCGTTGAAAATAAGA  
GTCACAGATTCGACCTTCCGGGCTAACGATTGTTCTGTAGAGAAAATGTCCAGAAGCGGATAAAAAATCCTGAACAACG  
TGGGAGTTTTCAGATTACTGGCAGAGTGC GCGATGCGGAGTGAACGCTTATCCGGCTACAAAAGCACGCAAAATCAA  
TATATTGACAGATTGCGTAGGCCTGATAAGCGTAGCGCATCAGGCAATTTTGCCTCAAACCTCCGGACAAGCCGGGAG  
TTTGAGTAGGTTATCCACTCTTGCAGGAAACGTCACCGTACTGGTCCGCTACCAGCAGAGCGGCGTAAACCTGATC  
TGGCGTCCGCGCCAGGCATGTTGTGAATGGTTTACCTTCTGCACATGCCGCTTCTGCCACAATTCGATTTTCCGCG  
GGACATCTTTAATATCCAGTTGAGCGAGAGTATTGGCAAACCTACCGCATGGCTAAGGGCAGTACGGTTTCGATT  
TCCTCCACCGGCGCATTTTCCAGAACCAGCTGCGTACGCGTACCGAATGCCACTTTTTTACCCTGATAAATAGTGATGCGC  
GTCCGGGATAGCGGTGAGCCGTTATGCACTGCGTGC GCGCAGCCAGACCACCTTTCAAACCAACACCGCTCAAAT  
AGGTGTTGCTTCAATCACGCGCTCCAGCGCGGAGTCACTACATGCTGTTGCGCAGCAAGCATCGCTTTTTTGCCTTCT  
TCCAGCAGGTTGTTGTAGCACAGTTACAGCAGTGCCAGCGCAGCTGGGTGCACTTGGCGCCCGCATGGTGGTCCGCGC  
GCTACGAGAGCAGGCACGCGCTTCAAACAGGTTGCCAGCGCATCGCGGATACCCGCGCTAACAGACGTGACGGTGGC  
CAGCGACGATTTTGGTGTGACAATGACCATATTCGGGTTATTTGGCAACAGCAGATAGCGGTCAAACCTACCCTCATCG  
GTGTAGATAACAGACAATGCGCTGCACGGTGCATCGGTAGAGGCGATAGTGGTGGATCGCTACCGGAACACCCATGAA  
ATGTGCCAGTCTTTGGCAGTATCGAGGGTTTTTCCGCCACCGATACCGAGAATTGCGCCACACTGCGCAGTCTCCGCGA  
TGCCACGACAGCGTCTGATCTATTTTGCGAACATTACCGCCAAACGGCGCAATTTCTACTACCAGTCCAGCATCTTA  
AAGCTTTTCTGCAGTGGATTGAGCAAAACCTAAAACAAATTTGTACCCACCACTAACCAGCGTTCTGCCAGCGGCTT  
CAGGTATTCGCCAGACGATTAATCACATCAGCGCCCTGGATGTATTTACCCGGTGATTGAATAATGCGGTCATAATTG  
CTCCTTTAGAGATGAGTAGTCCAAATGCGGCATTCAGTCTGTTCGAACTTCTCTATAGCTGACTCTACCGCAGGGGT  
GTTGAGCATTTGTTGCGCTACATCTAAGGGCAGGGTATGGATTACATCTGCGAGTAAACAGTCCAGCGCCTGACCGG  
GCGTTTTAAAGCTGGCTGCCAGCACCATGCTTTCTGCGCGTGCATTTCTAACAGCGTTTGCAGTCTTGAACCGTACGA  
ATGCCGCTCCGCCCTGGGCATCTACGCGGTTAACATACGAGCAACGTATTTTGCCTGCGAGTGGCGGTAATAACCC  
TTGTGCGGCGTATATACAGCAGTGCCAAAGTGTAGTAATACCCTTTTTTTCAGTATTTTAATTGCTGCCAGACCTTCGG

AAGTCACCGGGATTTTCACCACAATACCCGGAATAGCGTCGCGCAGGCGCTTCGTTCTTCCACCATCCCCTGCGCGTCG  
CGGCTCATGGTCTGAGCAAAACAGAATGCCCTCATACCAATCGCTTTTTGCAGACGCGGCAGCACTTCCCATATGGACTC  
CTTGCTGGCAGCGATAATGCTCGGGTTAGTTGTACCCCGCAATGGGAATATGCGTGCCAGACGTTGACTTCTGCGA  
CGTTAGCGGTGTCAGATACAGTTCATGATGTTTCTTTTACAGTTCAGTTCATGTTGCAGCAGGCTGGCGATAGCGT  
CGGCAGAGGCGCGTTAACACAGCGCTTACGGAATTCCTGTCATGATGCGGCGAGCGAGGCGCGAGAAAATGCGCATA  
TGCTGATCGCCCGCAGCGTGTGTTGTTAGGGTTAACATAATGATGAATTGCGCTTCATCATCGCCCAGCGCACCGGGCC  
TTGCAGACGCGCCACGCTGATGGTGGATTGCTCAATGTGTTCTGATTTGCTGTGTGGAATGGCAAAACTAAAGCCCAGAC  
CGGTAGAGAAAACGGCCTCGCGCGCCACAAGTCGGCTTCCAGTTTACGCGGATAGCGGCAGCGGCCCGCCAGCAGCAGG  
TTATCGGTCATGCCTTTGAGCACTTCTTCTTTGCTGCGCCAGTCGCTTCCAGTGTGATGCACTCGGCGGTGACCAGCGG  
TGCGTCTTGTGGGTGATGCGGAATTGCGCCAGCAGGTGTTCTACTTCCAGCGAAGTACGGCAGGCCATTGCCTGGTTGA  
GCAACTTGGCGCACTCACGGCTATCAAGTTGCGCCATCCGAGCTTTCGCGCCGGAATTGATGGTGGCTCATGCTGAGT  
TCATCCAGCCCTAAGCCGACCAGCAACGGCAGCACGGAACCTTTCGCTCCAGCTCACCGCACAGACCAATCCATTTGCC  
CTGGCGATGCACCGCTTGCACGGCGTAATCGAGCGCCGCAAGAATGCCGGATTACGGCTGTTGTAGTGACGAGTAACCT  
TAGCGTTATCGCGATCCACCGCCAGCAGATACTGCTCAGGTACTACTACCAATACTAAAGAAAATCAATCTCTTCGCGAG  
CATTGATCGATGAACATCACCGACGCACTTCCAGCATGATGCCGAGCTGATTTTCTCATCAAACGGAATGTGTTT  
GTTACGTAGTTGCTGTTGGCTTCCGCACTTTTTCTTCCACCATAAGATCTTCCATTGAGGAGATCATCGGGATCA  
TGATTTTTCAGGCTGCGGTGAGCGGAGGCGCGGAGGATCGACCGTAGCTGCGTGTAAACAACGACCGTACTCTTCATAA  
ATACGCACGGCGCGATAACCGAGGAACGGGTTTGCCTTGCGGGAATGTTGAGATAATCAAAGGGTTTGTGCGCCCAAT  
GTCCATAGTGCACACAATAATGCTGCGTCCGTTGGCGGATTCCAGCGCTGACAAAAAATGTTGTACAACCTGCTTTGCG  
CCGGTGCCTGGTGCATATAGAGCATTTCAGTGCAGCAAAACCAACGCCTTCCGACCATTTGCCGAATGCGGCC  
TGCGCTTCCACGGAGTGAGCGATGTTAGCGGCAATTTCAATGCGGATACCGTCAGCGGTACGGGCTTGTGGGTGAGCCA  
GACACGCTGTTGCTCACGACGGGCTCCTGTACGCGGGCTTCTGCTGATAATAACGAGCTACGGCTTCCCTGGCTCAA  
CCACAATCGCCCCGGCGTTGCCGTCGATATAAATCGTTTGTGCTGCCACGGAGTAAGGGCATCAATATCCACCAACC  
AGCGTTGGAATGTTGAACGAACGGGCAAGGATCACCGTATGTGAGGTGGTCCCGCTTTTTCAGCAACAATCCTTTGAG  
GTGATTTTTATCCAGTTCGAGGAACTGGCTGGGGTTCAGTTCATCAGCCATACAAAATGGCGGGCTGCGTCAGTTTGGCCG  
GTGCCGGGAAGCGTTGCTCACCGTAGATTTGCTGGAGTAACTGGAAGCAGACGTCGCGTACGTCCAGGGCAGCTTCTGC  
AGGTAGCTGCTGCTGGAACGGGAAAATCTTCGAAAAGTGATTCGCGCTGGCAACAATGCTTCGGCGCAGCTTAATCC  
GGCGCTGACGCTGCCAGTAAATGTTCCGCGCAGGGAAGTATCGCCAGCCAGGGATCGGTGAGCTTCCAGAATCGCGCTGG  
TAGCACCGTGCCTATCCAGCAGACGAACTCAATGTTTTTCAGTACCAGCGTCAGGCCGTTTTCCAGTGGGATTGCTCG  
GCGTCAACGCCTTTGGCTGCGGGAAGATTACCCAGCGCATTGAGATCTAAAGAAGAGATCGGCGTCAGAATGCCGCCTGC  
ACTACCGCTGCACACGGTGCGGGCGCGGATAATTTGCGGATTGAGATTGGTCAAGTAAACCGGCGAGTGGTCCAGTTGCT  
CAGATTTAACTTCCGCCAGCGGCGCATCGCAGTGGGGGAATTCATCGCGCAGCCATTGGCTTAAACGCTGGTGCCTTCC  
TGTTGCTGGCCCCGGAATCAGTAACTGGCAGTTATCGCCCGCCAGCGTATCGGTGCCAATCAGCGCAAGGGCGCTTTT  
GGCGTTGCCCTTGCGGTCACTGCGCAGGTTATGCCACTCAATTTGTGATGAAAAAGTATTACACAGCGTTTCAACGTGGC  
TTGCCGACGCGCATGTACGCCGTTAGGTAGCTCACAAATAAATCCACAATCAGGGCCATTGCCTCTCTCCCGGTACGG  
TTTTCTGTTTACAGGATAAGAGCGCACGGCAACGGCCTGCCATGTGACAAATCTGCCAAAAGCTGGACAAATGTAATGTA  
ACCGTCAATTTGCGACGCGTCTACAAGACGCTGTTTTGCGGCATGCTTCCGGTTTATCGCAAGTTATGAGGCGGATCGC  
ATTTTTGACTGATATTACAAAAGTCCAGTAAATGGCCTTTTTATCCACTGTTTGTCTCCGCTGCGATTGCCTATTGTT  
CCTCCATCAAAAATATGGACATGGGCTTTCGAAAGCCGGGAGCAGCTTATGAATGAGTTGGTGCAGATCCTGAAAAATA  
CCCGTCAGCATTTAATGACGGGCGTTTACACATGATTCCTTCTGTTGATATCGGGCGGATTTTTGTGCGGTTTCCGTC  
ATGTTGATGCGAAAAGGCGAGTGGCGGATGCCGTAGCCGATCCAAATCTGAAAAAAGTGTGATATCGCGGTTGCGGG  
CTTGACGCTGATGGTGCCTTCTCGCAGCGTACATCGGTTATTCATTGAGAGCGTTCGCGCTGGCTCCGTCGCGCTA  
TCGGTGCCTGGTTGTAACAGCTTGGTGCGGGCTTCTTGGTGCATGATGCCGGATTATCGGCGGCATCGTGGTG  
CATTACCTGAAGAAAATCCGGTGCATAAAGTCTGCGCTCGGTGATGCCTATCTTATTATCTATCGTCGGCACACT  
GATTACCGCAGGCATCATGATGTGGGGCTTGGGCGAGCCTGTAGGGGCGTTGACCAACAGCCTGACTCAGTGGCTTACGG  
GGATGCAGCAGGGCAGCATTGTTATGCTGGCGGTGATCATGGGTCTGATGCTGGCGTTCGATATGGGCGGTCCGGTTAAC  
AAAGTGGCCTATGCCTTCATGCTGATTTGCGTTGCTCAGGGTGTATACCGTGGTGGCCATCGCTGCCGTGGGTATTTG  
TATCCCGCGCTGGGGATGGGGCTGGCGACGCTGATGGTGTGAAAAATTTCTCCGAGAAGAGCGGAAACCGGCAAG  
CGCACTGGTATGGGCTGTGTTGGCGTACTGAAGGGGCGATTCTTTCGCCGCTGCCGATCCGCTGCGTGTATTCT  
TCCATCATGGTCGGTTCAGTTTGTGGTGCAGTAACTGCGGCGCTGGTGGTGCAGTGTATGCAGGCTGGGGTGGTCT  
GATTTGCTGCCGGTGGTTGAAGGCAAGCTGGGTTATATCGCAGCAGTGGCTGTGCGGAGCAGTGGTGACGGCTGTTTGTG  
TGAACGTGCTGAAAAGTCTGCGCGTAAAAATGGGCTTTCGACTGATGAAAAAGAAGACGACCTGGATTTGGATTTTGA  
ATTAATTAATTTGAGGAACGACCATGACGAAAATTTGACAGTAAACCGCATGTCTTTCAGGTGTTGCCATACCTATATG  
GCAGCAGAGGCGCTGAAAAGTGCAGGAAAAGGCTGGGAAGTGAAGTAGAAAACCCAGGGGTCAATTTGGTCTGGA  
AAATGAACTGACTGCGGAAGATGTGGCGAGCGCTGATATGGTATTCTGACCAAAGATATCGGCATCAAGTTTGAAGAGC  
GTTTTGCTGGCAAGACCATCGTGCAGTCAACATCAGCGATGCAAGTAAACGTGCTGACGCCATTATGAGCAAAATGAA

GCTCACCTGGCGCAAACCGCTTAAGTTCTTCTCCCGCTCGCAAGGGCGGGTTCGCTTCCACAGGAGTTCCTCATGACG  
AATCGTATCTCTGCCTCAAACACTGCACTGTTTGCCTAATCCCGTGAATCTCGCTGGAGCGGGCGCTGCTTTATACCGC  
CAGCCATCGGCAAACCGAAGCGCAACCGGTGATATTGCGCCGGCGAAAGCAACAGCGTATATCCTTGAACATGTTGAAA  
TTTCGATTCTGATGAAGAACTGATTGCCGGTAACCGCACCGTAAAACCGCGCGCCGGGATTATGTGCCGGAAATGGAC  
CCTTACTGGCTGCTGAAAGAGCTGGATCAATCCCGACCGCTCCGACAGGACCGCTTTGCTATCAGCGAAGAGATAAACG  
TATCTACCGTGAAGAGTTGTTCCCGTACTGGGAAAAACGTTGATGAAAAGATTTTCAACCGGCAGATGACAGATGAAG  
TAAAAGCCGCGACCAACAGCAGATTTTCAAGCATCAACCAGACGGATAAAGGCCAGGGGCACATTATTATTGATTACCCA  
CGCTGTTGAATCACGGGCTGGGTGAGCTGGTGGCAGATGCAGCAACATTGTGAGCAACAGCCGGAGAATCACTTTTA  
TCAGGCCGCGTGTACTGCTGGAAGCCTCGAGAAACACATTTTGCCTTACGCCGAACCTGGCGGAAACGATGGCGGCAA  
ACTGCACAGATGCCAGCGTGCAGAGCTGCTGACTATTGCAGAGATCTCCCGCCATAACCGCGCAACATAAGCCGCGAG  
ACGTTCTGGCAGGCGTCCAGTTATTCTGGTACATGAACATCATTCTGCAATACGAATCCAACGCCAGTTCGCTATCGTT  
GGGGCGCTTCGACCAGTATATGTTGCCGTTCTATCAGACATCATTAAACCCAGGGCGAAGATGCGGCGTTCCTGAAAGAAC  
TGCTCGAATCTTATGGGTGAAATGCAACGACATCGTGTGTTGCCCTCCACAGTAGCGCGGTTATTTCCGCGGTTTC  
CCGACCGGCTATACCGACTGCTCGGCGGGTTAACCGAGAACCGACGTAGCGCGGTGAACGTGCTTTTCGTTCCCTTCCCT  
TGACGCCTATCAAAGCGTCAATTACCGCAACCGAACCTCGGCGTGCACACTAACGCCTTGATCGACACGCCGCTTCCTGA  
TGAAAACCGCGAAACACTTCCGTTCCGTTACCGGTATTCGCAAACTTTAACGATGAAGTGGTGGTGGCGGTTCCCTC  
AACCGTGGCGTTTCGCTGGAAGATGCGCGGCGACTATTCGTAAGTGGGCTGTGTGGAATTATCTATTCCCGCAGAACCTA  
CGGCTTGCATGACATCGCGATGTTAATCTGCTGAAAGTATGGAATCTGCCTGCATGAAAATGAAGGCAATGCTGCGC  
TGACTTATGAAGGTTTACTGGAGCAGATCCGCGCAAGATCAGCCACTACATCACCTGATGGTTGAGGGCAGCAATATT  
TGTGATATCGGCCATCGGACTGGGCACCTGTACCGCTGCTCTCATCGTTTATCAGCGATTGTCTGAAAAAGGCCGCGCA  
TATTACCGATGGCGGCGCGGTTATAACTTCTCCGGCTACAGGGGATCGGTATCGCAACCTGAGCGATTCTCTCCATG  
CGTTGAAAGGGATGGTTTTTGGCAACAGCGTTTAAAGTTTTGACGAATTGCTGTGCGTATTTAAAGCCAACTTCGCAACG  
CCAGAAGGGCAAAAAGTCCGCGCTCGTTAATTAACCGCTTCGAGAAATACGGTAACGATATCGACGAGGTGGATAACAT  
CAGCGCCGAACGTTGCGCCACTACTGCAAAGAAGTGGAAAAATACCAGAACCAGCGCGGGGCTACTTCACGCCGGGAT  
CGTATACCGTTTCTGCTCACGTCCCGTGGGATCGGTGGTTGGCGGACGCCAGACGGTCTTTTTGCCGGAACAGCTG  
GCAGACGGCGGCTTGTACCCATGCTGGCCAGGACGACAAGGGCAACAGCGGTACTGAAGTCAGTCAGTAAGCTCGA  
TAAACAGCTGCTGTAACGGTACGTTGCTGAACGTGAAATCACTCCGCGACCTGGAAGTGAAGCAGGATTACGCA  
AACTGGCCGACTTCTTACGGGCGTTTACCAGCTTAAAGTTACAACATATTAGTTTAACTGGTGAACGCCGACACGTTG  
CGGGAAGCGCAACAGCGCCACAAGATTATGCCGGGCTGGTGGTGGCGGTTGCCGGATACAGCGCCTTTTGTGCGAAT  
GTCGAAGGAGATCCAGGATGACATCATCCGCGGACAGCGCATAGCTGTAACGTTGTGGAACCGCGCCGCGATGATGTG  
GCGCGCATTTTTCAACATTACGCGTTATCACTGAATGACGCGGAGGGCATTCTGACGGTGGTCTTTTTTAAAGGCTGTCC  
GCATCTTTGCCGTTGGTGTGCTAATCCGGAGTCGATCTCCGGCAAAATCCAGACGGTACGCAGAGAGGGCGAAATGTCTGC  
ACTGTGCGAAATGTTTGGTGTGATGCGGATGAATGCCCTCCGGGGCGTTTGAACGGATTGGTCCGCGATATCAGCCTTGAC  
GCTCTGGAACGGGAAGTGTGAAAGATGACATTTTCTTTCGACGTCGCGCGGGCGGCGTACGCTTTCTGGCGGCGAAGT  
GTTAATGCAGGCGGAGTTTGTACCCGTTTTTACAGCGACTGCGGCTGTGGGTGTGTATGCGCCATTGAAACTGCCG  
GAGACGCACCAGCAGCAAGCTATTACCGCTGGCGAAATGTGCGATGAAGTGTGTTGATTTAAAATTTATGGACCGG  
ACTCAGGCGCGGGATGTGGTGAAGATGAACCTGCCACGCGTGTGGAGAATCTGCGTTTGTGGTGAAGTGGGGCGTCAA  
CGTGATCCCGGTTTACCCTGATCCCTGGTTTTACGCTCAGCCGGGAGAATATGCAGCAGGCGCTGGATGACTGATCC  
CGCTGAATATCAGGACATCCATCTGTTACCGTTTTATCAGTACGGCGAACCAGAAATACCCTGCTGGGAAAAACATGG  
TCGATGAAAGAGGTGCTGCGCCGCTGAGTGTGGCAACGATGCGCGAAATGGCAGAACGGGCGGACTTCAGGT  
TACCGTGGGAGTTAAAATGGCATACTGGTGGCAGTAACCCGCTGCGTAAGCGGCGTGGCCATACTTATATGGCGGCG  
GAAACGGCTGAAAAAGTTGTGCTGTTAGAGAAGTGGGAGTACGATTGAAACTCAGGGCGGCTGGGAACGGAGAATCG  
TTTAGCGGATGAGGATATCCGCGGGCGGATGTTGCTGTTGATTACGGATATCAGGCTTCCGGTGGCGAGGATTTG  
AACATTGCCGCTATGTGCAATGCAGCATCTACGCATTCTGCGTGAGCCGACGCGGTAATGAGCGCGGTGCGCAAAGTG  
CTTTCTGCGCCGAGCAAAACCATCTTATTCTGGAGTAGTCGGTTTTTCTGTGAGTTGGCTGTGGTACTGCCGGCGATAT  
TCCGACGGCGAGCGTTCCGGTTTTTACGAAACAGACGGCAGAAGTAGTTGCTGTGACAAAGCCGACGGCTGCGCCAC  
TTCTTTTACCTTCAGGTCATAGCCTTTCAATAACGTTTACGCTGCTCCAGTCGCGTGTGATTGAGGATTCGTTAAAC  
CAATGGCCCCGTTTTTTGAAACAGGTGCGAGAGGTAATTTGGCGAAATATAAAACGCCTGTGCAACAGATTGCGGGTA  
AGCGCGGAGGCATAGCGTTCGTCGATATAATCGCAATAGCTTCAAATAGTGCCTGGCTGCGTGAGGCGGTCTGGATTTG  
GCTGCCAAGCAAATCGCGCAGTGGCTAAGCAGGCTGGCGACGATAAGCCTTCCGTTTTGCTGCTCCTGCGGCTGCATTT  
GCATTTTATTGAGCGTTTGTAGCAGAAAAGAACCTATGCTGGGCCGCTGCGGCGACGTGTTGCTTCCGACAGATTTGA  
TATTGTTTGCATCCATTGACAGACGCTGAAGCCAGTTGCTGTTTGCAAACAGCACGCTAAAGGTAGTAGCGGGGGC  
TTGCCATTGTGAAAAATCCAGCCACCAGCAGGAACGTACAGCACATCGCCGGAACTAACGTTGCTCCAGCGCCGGTAT  
CAACAAACTCACTTCCAGCACAATTTCCAGCCGTGAAAAATCGACTGATACGCAAGATCGGGCACCGGGCCGTTACTG  
CTGGCAAAGTAAATCTGGCGCAGGGACAGCGGGCCGTTGATCAGGCGGGAGAGCAGATAGCTGACGCTGATACATGTT  
ATCCCTTAGGTATGTAGACGGGAAAACAGTAACCTGGCATTATTAATAAAGGCCACCTGAAAAGTGTGGCCTGAGGGGAG

TTCGATGTAACATTGCGGCAGTTGTATTGCCGGATGTGGCGTAAACGCCTTATCCAGCCTACCGCCGGATCTGTAGGC  
CGGATAAGACGCGTCAAGCGTCGCATCCGGCAAATAGCGCCTGGCTGATAATTACTGATTACCCACCTGATCGCCATAGG  
GCAGTGTGTCGTAATCGATCAGTGCCTTTTTCTTATACGGGTTACCAATCCAGCGGGTAGTTTCTTTGAACTGCGGATTC  
ACCACTGAACGGGTTGGATCGTAACCGTCGTAAGATAAGCCCCCAAATCTGACCAGGTGTGGATCAGTTCGCCAGGCT  
GTATTTACGATCAACATCCTGCGAGAAATCACGGGGATGAGTCGCTTGCATTTTTCTGACGTCCACAGCAGGAACGGAA  
TGGTGTACATATGACCGCTCGGGTTGTCTCATTACGCCCCTGAGTTTTGTGCGGGCGGCTGTCTGTAACCTCTTACC  
TGGTGAGAGAAATAAACAGGAAACCGTTCCGGGTTTCTGCTTTAAAGTCTTTAATCAGGCTGGCAACCACATGATCGTT  
ATACAGGTTAGCGTTGTCTATAATCGTTATATGACTCCAGCTCTCCGCGTTTAAATCCCGCGGAACATGATCGGTATTGC  
CATCAAACCTTGCCTGATTTTCCGGGTAGCGGATTTGTATTTGATATGCGTACCCAGCAGATGAACAATGATCAGTTTC  
TTCGGCGCAGGGTCATTACAGCACTTCTGGAACGGCTTACGACGTTGGTGTCTGATTACGCGCACTCTGCGTACGTTG  
CTGGTTCATGTAGTACTGCTTGTGGTCTGGCGGAAAATACCGTCAGCATGGTATTGCGGGCGGTATCGTCTGCTGGT  
TGGTGTATCCAGAAGGTTTTATAACCCGCTGTTTCATCATGTTTATCAGCGACGGCTGCGTCAGATACAGATCCGGGTT  
TTTTATTGGCAAAGTCCAGCGCTGTGAGGATTTCAATGGTGTACGGACGAGACGTAACACTACGTTATTAACACGGT  
CAGATTCGGATCGGTTTTATGACGCGCATCCAGCTCCGGCGTGGTTTACGCGGATAAACCGTACAGACTCATGCTCCG  
GCTGGGTCGACTCGCAATACCAGCACTAAAGTCGCGGTTTACCCGATTCTTTGAAATTAGCCAGTGGCGG  
AAGGATTATTTTATTAGTAACCTTTGTTAGCGAGTTTGTGTTGCTGACGATACTGATAATAGCCGGTCAGGAATTGCCA  
CGTGTGCGGAGGCTCCATACGCGAGGCGAGGTTATCCAACGTTTTCTCAAACGCTTGTGTTTTGATAACGTTATTCATGG  
CGATCGGATGAGAATCAAGCCATAAAGCAGGGCAAAGAGACAACATAACGCCACGGCTTTGGAATATAGACGGGGC  
AGGCGTGTCCACAGCAGAACTGCCACCGCGTATAGGCCAGCGGATAAGCACAAATTTTACGGCTGAAATACTGGCTTAA  
ATACTCGCTGGCTTCTGTTGGTGTGGTTTGAACATCACAACAGAACGCTCTGCGAGAACTCTGACCGTAGATGACGT  
AGTAGCACAGCGCCGAGAGAGGCGCCCATAGCACACGCGGATTACTGCGGCAATAATTTAATCCGCTTCGGAAG  
AGGAATACCGGATCAACCACAGGAACTGAATAACAGCGAGTCCGGAATGCCGTTAGTGCCACTATAACCACTGATGTA  
AATAATGGCTGTAGCAGAGTAGAGAAAAACAAAAGTAGAGCAGTGCCCAACCAGGGCTTTCCAGCTAAAAAGAGGTT  
TAGCCTGGACTTCTGTGGAATGCATAGTAAGAACCTGTCTGAAAAAATATCGCGGAATGTAACGACAATTCCTTAAGGA  
TATCTGAAGGTATATTGAGAATTTGAATAAAATGCAGACAGAAATATATTGAAAACGAGGGTGTAGAACAGAAGTATTT  
CAGAAAACCTCGCGAAAAGCACGAGGGTTGAGAAAGGAAGATTAGCCGTTATTACGCATACCTGCCGAATCCCG  
GCAATAGTGACCATTAACGCTTGTTCGACGCGAGGATCCGGTTCCTGGCCTTCTTTTTCTGCCTGGCGGGAGCGGTGCAG  
CAACTCGCCCTGCAATACGTTACGCGGTCGGTGTAAATATTCCGTAGCTGAATAGACTCTGCAATCCACGGCAGATCCG  
CCATCAGATGGGAATCGTTGGCAATCGCCAGCACCCTTTGATGTCTTCTTTCGAGGTTGCGTAACCTTTACCTAAC  
GGCCACAGTGCTTTGTCTACCAGGCGTTGGTCATAGTATTCCGCCAGCCACAGGTCTGCTTTGGCGAAGACCATCTCCAG  
CATGCCGAGACGCGTCGAGAAGAATGGCAATCGCGGCACATAGCCTCCAGCTCGCTCTGTTTGCCGCTTTCGACCACTT  
TTTGACGCGCGTACCTGCACCCAGCCAGGCGGGGAGCATCAGACGGTTTTGCGTCCAGGCGAAGATCCACGGAATGGCG  
CGTAGTGACTCGACGCGCCGGTTGGGCGACGTTTTCCGCGGACGTGAACCCAACGGCAGTTTGCCAGTTCTTGTCCGG  
CGTAGCGGAGCGGAAGTAAGGCACAAAATCTTTGTTTTACGTACGTAGCCGCGGTAGACATCGCAGGAGATGACTGACA  
GTTTCATCCATAATGCGACGCCAGCTCTCTTTCGGCTCCGGCGGTGGCAGCAGTTGGCTTCCAGAATCGCCCCGGTATAA  
AGCGACAGGCTGCTGACGGTATTTCTGGCAGACCATATTTAAAGCGGATCATCTGCCCTGTTCCGTTACGCGCAGGCC  
GCCTTTCAGGCTTCTGCGGTTGTGACAGCAGCGCCGATGAGCAGGTGCGCCGCGCGACCAATGGAACCGCCGCGAC  
CGTGGAAACAACGTGAGCTCAATACCCGCTTTTTCGCAGTTTTGATTAATGCATCCTGTGCCTGATATTGCGCCAGGAA  
GCTGCCATCACTCCCGCATCTTTGCTGAGTCGGAATAGCCAATCATCACCATCTGTTTGCCTGAATCAGGCCACGATA  
CCAGTCAATATTGAGCAGTGGGTCATGACATCGTTGGCGTTGTTTCAGATCATCGAGGTTTTCAAACAGCGGAGCAACCG  
GCATCGAAAACCCGATACCCGCTTCTTTACGAGCAGGTGGACAGCCAGTACGTCGGACGGGTTTTTCGCCATCGAGATC  
ACGTAGGCGCAATGGAGCCTTGGCGTCTTCGGCAATCACCTGGCAGGTATCGAGCACTTCGCGCTTTTCGGCGCTTGG  
TTGCCAGTTGCGCGCAGAAAGCGGACGTTTGGAGTTCAGTTCCGGGATCAGGAACGCTGTTTGTGCGCCTCTGACCAGC  
TTTCGTAGTCGCCGATACCGAGGTAGCGGGTCAGCTCGCCAGCGCTTCGGTATGACGCGTCTCTCCTGACGGATATCA  
ATACGGACCAGCGGTACGCCGAAACATTTACGCGGCGCAGGGTGTGAGCAGATCGCCGTTGGCGATAATACCATGCC  
ACACGCCTGAAGTACTGGTAGCAAGCGTAGAGCGGTTCCACAGTCTTCTGTTTTGTGTCAGCAGGCCCTCTGGTTTTG  
GCAGTCTTTCGCTTTCAGGCGGCTTCCAGCCATGCTGTGTCGCCATCAGGCGAGAACGAGGTTTTTTCATCAGATAG  
CGATACGGTTCTGCGGCACCTTCTTCGCCAACAGCGCCAGCAGTTCAGGGTTCGTTCAACCATCGACAGTTCAGAAAC  
CAGCACCTGAATATCTTTCAGGAACAAATCGGTGGCTTTCAGCGGCTGAGTAGCAGGACGTGGCGGGTATATCGGCAG  
TGACGTTCCGGTTCGCGTCCGGTCCGCCCATCCACGAAGTAAACCGGACCGGAACAAATTCGACGGGAGTTTGTAG  
CCGAGGTTCTCTCCAGTTGTTCTGTTAGTTCGCGCAGGTAATTTGGTACGCTTGCACAGGCTGTTTTCCACTACGGC  
AAAGCCCCATTTGGCTTCTACCTACCGGCTTGGACGACGTTACGGATTTTCATCGGTATGCCATGACTGGGCGATCAACT  
GGCGCAGGCGACGCATCAGTGTGTTGTTCTGATGTCAGCGATATCTTTGTTATCGAGCTGTTTTAAACAGGCGTTCACT  
TCCACCATTTTTGTGGATCAGTGTACGACGGGTAATTTCCGGTGGGTGAGCCGTGAGGACCAGTTCCAGCGACAGCGATT  
CACTGCTTTTTTGTGGTGTCTTCGCTCAGTTCGGCTGGTTTTTTCAGTTTACGAGGTTGCGGGGATCACTTCCGGGT  
TGCTGGCAGCTTCGCTTTCGGCGAAATGCTGTGGTATTGCTCGCGGTTGGCCAGGTTTCAGGAACACTGACTAAACGCA

CGCGCAACGGGCAGCAGCTCGTCGTTGACAAAATTTTGAAGGTGGTGAGCAACTCCTGGCGGTTAGCATCATTGCCAGC  
GCGTGAAGATTTGACAACCTACGGATAGTTTCTACGCGTTCAAGAATGTGTTCTCCAACGCATCCTTGATGGTTTCTC  
CCAGCACTTTGCCGAGCATACTGACATTACTACGCAATGCGGAATATTGTTCTCATATTACCCAGACACCCCATCTT  
ATCGTTTGATAGCCCTGTATCCTTACGTCGCATTGGCGCAATATGCTCGGGCTTTGCTTTTCGTCGTCTTTATAAAG  
CCACGTAAGCGGTGACGTCAAATGCTGCGAAATGCTTTCAGCAAAACGAATAAATAGCAGGAATTTACGTCATTAATTT  
CACGACGCTTTAAATAAGCGTAACTTATGGAAATGTTAAAAAATCGCCCCAAGTAACACCAAAGGTGTAGGTCGGATAAG  
ATGCGCAAGTATCGCATCCGACATTATTGCGGCACTGGAGTTTGGCAACAGTGCCGGATGCGGCGGAGCGCCTTATCCG  
GCCTACAGTTGGGCATCGTTGAGTCACTGTCGGTCGGATAAGATGCGCAAGTATCGCATCCGACATTATTGCGGCACTG  
GAGTTTGGCAACAGTGCCGGATGCGGCGGAGCGCCTTATCCGGCCTACGGTTGGGCATCGTTGAGTCACTGTAGGTCG  
GATAAGATGCGCAAGCATCGCATCCGACATTATTGCGGCACTGGAGTTTGGCAACAGCGCCGGATGCGGCGGAGCGCCT  
TATCCGGCCTACGTTTAAATGCCAGCAAAAATGGTGAATTACCTGGGTTATCAGTTCGCGGGTGGGCTTGATAAACCGTG  
TTTCAGATATTCATCAGTTGATGAGCCTGATTAATTGAGCCAGGCCCCAACACCAGCGTCGGGCATAACGTTTGAATA  
AACGGCGCTTCGGTACAGTAGTTACCACCTTCGTTTTTGTCCGAGCAATTTCTCAACCATTCAACCAGTTGATGATT  
CGGTGGCATTATAGCCAGGGATCGGCGGATGCAGCTCGTCGACCGTCAGACGACCCGGCCAGCGTTGCTCACCAGGAG  
CCAATGCATCTTGAGCAAACCATTAAGTTCAATGAGTGTCAATGCCAGGCAGCGGACGAATATCCATATGCAACTCACAG  
CAAGCGCAAAATACGGTTAGAAAGCGTCGCCACCGTGAATATGCCGAGGTTGAGCGTAGGGTATGGCAGGTAACCGCTT  
GTAGTGATAACGTTTCTTTCAGGTTATCGCGCAATTGCAAAAATATGCCCGATGGCGTCGTGCATTAGTTGATAGCGTTAA  
CTCCGCGTGTGGATCGCTGGAGTGCCCCGACTGGCCCTGAATACGGATGGCGTTAGAGATATGACCTTTATGTGCGCGT  
ACCGGTTGTAGTGACGTCGGTTCCGCAATGATGGCGCAATCCGGGCGCAGGGCGGTAGTTTCGGCAAAAATACCGGCTCC  
GGCATACTGGTTTCTTTCATCAGCAGTCGCCAGAATGTAGAGCGGTTTTTTTCAGTTTCTGACGTCGACATCGCGTAGCG  
CATCAAGGATAAACGCAAAAAGCCTTTCATGTCGGCGGTGCCTAAGCCGTAAGCTTCCGTCATGCTCCGTCAGTGTA  
AACGGATCGCGCGTCCAGCGACCGTCATCAAATGGCACCGTATCGGTATGCCCGCCAGCAACAAGCCGCCAGCCCCCTG  
TCCGATACTTCCAGCATATTGAATTTGTTGCGAGTTCCTGGAACAGGCTGCACTTCCACATTGAAGCCCAAATCTTTAA  
ACCAGTCCGCCAGCAGAGTGATTAATCTGCATTGCTTTGATCGAGTGCCTCTTCCGTGGCGCTTATTGAAGGTGTGGCA  
ATCAGAGCGCGGTAATCTCGATAAATGGCGGTAATTTGTTTTTCATTGTTGACACACCTCTGGTCATGATAGTATCAAT  
ATTCATGCAGTATTTATGAATAAAAATACACTAACGTTGAGCGTAATAAAACCACCAGCCGTAAGGTGAATGTTTTACG  
TTTAACTGGCAACCAGACATAAGAAGGTGAATAGCCCCGATGTTGAATACGCTGATTGTGGGTGCCAGCGGCTACGCTG  
GCGCAGAGCTAGTGACCTATGTAATCGCCATCCGATATGAACATAAACCGCTTGGACTGTTTCAGCGCAAGCAATGAT  
GCGGAAAGTTAATCTCCGATTTGCATCCGAGCTAAAAGGCATCGTTGATCTGCCGTTGACGCCGATGTCGGATATCAG  
CGAGTTTAGCCAGGGGTGGACGTAGTGTCTCGCCACCGCCATGAAGTTAGCCACGATTTAGCGCCGAGTTTCTTG  
AAGCGGGCTGCGTGTTGTCGACCTTTCCGGCGGTTTCGTGTTAACGACGCCACCTTCTATGAAAAATATTACGGCTTT  
ACCCATCAATACCCGGAACGTTGGAACAGGCAGCTACGGTCTGGCGGAGTGGTGCGGTAATAAATTAAGAAAGCGAA  
TTTGATTGCGGTGCCGGGCTGTTATCCGACGGCGGCACAGCTGGCGCTGAAACCGTTGATTGATGCCGATCTTCTTGACC  
TCAATCAGTGGCCGGTATCAACGCCACCAGCGCGGTGAGCGGTGAGGGCGTAAAGCGGCCATTTCAAACAGCTTTTGT  
GAAGTTAGCCTGCAACCGTATGGCGTCTTACTCATCGCCATCAACCAGAGATCGCCACACACCTCGGTGCTGACGTTAT  
CTTACCCACATCTGGGCAATTTCCCGCGGGCATTCTCGAAACCATTACCTGCCGCTGAAATCGGGTGTGACCCAGG  
CGCAAGTCGCGCAAGTGTACAGCAGGCGTATGCCATAAACCGCTGGTGGCGTGTATGACAAAGGCGTTCCGGCGCTG  
AAAAATGTCGTTGGGCTGCCATTTTGCATATCGGGTTTCCGTTTCCAGGGCGAGCATCTGATTATTGTGGCAGCCGAAGA  
CAACTTACTGAAAGGCGCGGCGGCACAAGCGGTACAGTGGCCAAATATTCGTTTCCGCTATGCGGAAACGCAGTCTCTTA  
TTTTAAGGGTCAATGATGAATCCATTATCAAACTGGGCGGCTACTGCTGGATAGTGAAGAGGCGCTGGAACGCTCT  
GTTTAGCGCACTGGTGAATTTATCGTGAGTCACATCAGCGTCCGCTGGTATTGTGACGCGGCGGTTGCTGGTGGATG  
AGCTGATGAAAGGGCTGAATCTGCCGTTGAAAAAGAAAAACGGCTGCGGGTGACGCTGCTGATCAGATAGACATTATC  
ACCGGAGCACTGGCGGAAACGGCAAATAAAACCCTGTTGGCATGGCGAAGAAACATCAGATTGCGGCCGTAGGTTTGT  
TCTCGGTGACGGCGACAGCGTCAAAGTGACCCAGCTTATGAAGAGTTAGGTCATGTTGGACTGGCGCAGCCAGGTTCCG  
CTAAGCTTATCAACTCCTTGTGAGAACGGTTATCTGCCGTTGGTCACTCCATTGGCGTAAACAGACGAAGGGCAACTG  
ATGAACGTCAATGCCAGCAGGCGGCAACGGCGCTGGCGGCAACGCTGGGCGCGGATCTGATTTTGTCTCCGACGTCAG  
CGGCTTCTCGACGGCAAAGGGCAACGCATTGCCGAAATGACCGCCGAAAGCAGAACTGATTGAGCAGGGCATTAA  
TTACTGACGGCATGATAGTAAAGTGAACGCGGCTGGATGCGGCCCGCACGCTGGGCCGCTCCGGTAGATATCGCCTCC  
TGCGCTCATGCGGAGCAGCTTCCGGCACTGTTTAAACGGTATGCCGATGGGTACGCGGATTTTAGCTTAAAGTTTTGTTGGC  
CGGAGGCGCAGCTTCCGGCATTGAATTTCAAATAAGGAAACAGAGTTATGGCACTTTGGGCGGGCGTTTTACCCAGG  
CAGCAGATCAACGGTTCAAACAATTAACGACTCACTGCGCTTTGATTACCGTCTGGCGGAGCAGGATATTGTTGGCTCT  
GTGGCTGGTCAAAGCCCTGGTACGCTAGGCGTGTAAACCGCAGAAGAGCAGGCGCAACTGGAAGAGGCGCTGAACGT  
GTTGCTGGAAGATGTTCCGCCAGGCCACAACAATCCTTGAAGCGACGCCAAGATATCCATAGCTGGGTGGAAGGCA  
AACTGATCGACAAAGTGGGCCAGTTAGGCAAAAAGCTGCATACCGGGCTAGCCGTAATGATCAGGTAGCGACTGACCTG  
AACTGTGGTGCAAAGATACCGTTAGCGAGTTACTGACGGTAACCGGCAGCTGCAATCGGCGCTGGTGGAAACCGCACA  
AAACAATCAGGACGCGGTAATGCCAGTTACTCACTGCAACGCGCCAGCCGGTGACGTTTCGCGCACTGGTGCCTGG



CCTATGTTGAGATGCTGGCGCTGATGAAAGCCGTTTTGCAAGGATGCGCTTAAGCGTCTGGATGTCAGCCCCTAGGCTGT  
GGCGCGCTGGCGGGAACGCCTATGAAATCGACCGTGAACAGTTAGCAGGCTGGCTGGGCTTTGCTTCGGCGACCCGTAA  
CAGTCTCGACAGCGTTTCTGACCGTGACCATGTGTGAACTGCTTTCTGCTGCCGCTATCGGCATGGTGCATCTGTCCG  
GTTTTGCTGAAGATCTGATTTTCTTTAACACCGGCGAAGCGGGTTTGTGGAGCTTTCTGACCGCGTGACTTCCGGTCA  
TCATTAATGCCGAGAAGAAAAACCCGGATGCGCTGGAGCTGATTCGCGGTAATGCGGCCGGTGCAGGGGGCGTTAAC  
CGGCATGATGATGACGCTGAAAAGTTTCCGCTGGCTTACAACAAGATATGCAGGAAGACAAAAGAAGGTCTGTTCGACG  
CGCTCGATACCTGGCTGGACTGCCTGCATATGGCGCGCTGGTGTGAGCAGGATTAGGTAAGACGTCACGTTGCCAG  
GAAGCGCTCAGCAGGGTTACGCCAACGCCACCGAAGTGGCGGATTATCTGGTGGCGAAAGGCGTACCGTTCCGCGAGGC  
GCACCATAATGTTGGTGAAGCGGTGGTGGAGGCCATTCTGCAGGGCAAACCGCTGGAAGATCTGCCGCTCAGTGAGTTGC  
AGAAATCAGTCAGGTGATTGACGAAGATGCTATCCGATTCTGTGCTGCAATCTGCCTCGACAAGCGTGGCGAAAA  
GGCGGCGTCTCACCGCAGCAGGTGGCGCAGGCGATTGCTTTTGGCGAGGCTCGTTAGGGTAAAGAACATTTATATGTATA  
AATTTGAGCCTGGCTTATCGCCGGGCTTTTTTATGGCAAAAAAGCGGATCCTGGAGATCCGAAAAGTTCACGTTGGC  
TTTATGTTATTCGAGTTGAGAACTCTCGAAACGGCGAGTACTCAAGGGTTAAAGAGGTGCCGCTCCGTTTTCTGTGAG  
CAATTCAGTCAGAATGCTTGATAGGGATAATCGTTCATTGCTATTCTACCTATCGCCATGAACTATCGTGGCGATGGA  
GGATGGATAAATATTCGTGATCTTGAGTACCTGGTGGCATTGGCTGAACACCGCATTTTCCGGCTGCCGCGAGATT  
CTGCCACGTTAGCCAGCCGACGCTTAGCGGGCAAATTCGTAAGCTGGAAGATGAGCTGGGCTGATGTTGCTGGAGCGGA  
CCAGCCGTAAGTGTGTTTACCAGCGGGGAATGCTGCTGGTGGATCAGGCGGTAACCGTCTGCATGAGGTGAAAGT  
CTTAAAGAGATGGCAAGCCAGCAGGGCGAGACGATGCTCGGACCGCTGCACATTGTTTTGATTCCACAGTTGGACCGTA  
CCTGCTACCGCATATTATCCCTATGCTGCACCGACCTTTCCAAAGCTGGAATGTATCTGCATGAAGCACAGACCCACC  
AGTTACTGGCGCAACTGGACAGCGCAAACCTCGATTGCGTGATCCTCGCGCTGGTAAAGAGAGCGAAGCATTTCATTGAA  
GTCCGTTGTTTATGATGAGCAATGTTGCTGGCTATCTATGAAGATCACCCGTGGGCGAACC GCGAATGCGTACCGATGGC  
CGATCTGCGCAGGGGAAAACTGCTGATGCTGGAAGATGGTCACTGTTTTGCGGATCAGGCAATGGTTTTCTGTTTTGAA  
CCGGGGCGGATGAAGATACACACTTCCGCGCAGCAGCTGGAACCTGCGCAACATGGTGGCGGCAGGTAGCGGGATC  
ACTTTACTGCCAGCGCTGGCTGTGCCCGCAGCGCAAACGCGATGGGTTGTTTTATCTGCCGTCATTAAGCCGGAACC  
ACGCCGACTATTGGCCTGTTTTATCGTCTGGCTCACCGCTGCGCAGCGCTATGAGCAGCTGGCAGAGCCATCCGCG  
CAAGAATGGATGGCATTTCGATAAAGTTTTAAACAGCGGTTAAACCGTTAAACGCAGCTACCCGATAGGCTTCCGC  
CATCGTCGGGTAGTTAAAGTTGGTGTGACGAAGTACTCAATAGTGTGCCGCCACCTTTCTGTTCCATAATCGCCTGAC  
CGATATGAATAAATTTCCGACGCGCTCGCCAAAGCAGTGAATACCAGAATCTTTTTGTTCCCGATGGAACAAAATT  
TTCAGCGTGCCACGTTTCATGCCGACGATTTGTGCGGTTGCCAGATGTTTAAACTGGGCGCGCCACTTCATATGGCAC  
TTTCATTGCGGTAGCTGCTGTTCCGTTTTGCCACAGAGCTGATTTCCGGGATGGTGAAATACCGGTAGGGATATCTT  
CAATCAGATGTGCGGTGGCTTCGCCTTTTACCAGCGCTGCGCGCAATGCGCCCTGGTTCATAGCCGCGCAGCCAGG  
CTCGGATAACCAATCACGTGCCACCGCGTAAACGTGTGGCTGTGCGGTCTGATACATGCTGTTGACCTTCAGCTGTCC  
GGGCTGTCAGTTTTTAGCCCAATGTTCTGTAACGCCAGCGAATCGGTTTACCAGTGGCAGCCGTTGGCATAGAGCAGGC  
AGTCAGTTTTCAGTTTTTACCAGCTTCAGATGCATGATCACACCATCGTACAGCCTTCGATCTTCTCGTACTCTTCG  
TTGTGACGAATCACTAGCCACTGTTCCAGAAGTGATAGGAGAGAGAATCTGACATCTCTTGATCGAGAAATGCCAGCAG  
GGGATGCGGGTGTTGATCAGATCCACTTTTACATCCATACCGCGAAGATCGACGCATATTCACAGCCGATCACTCCAG  
CACCATAGATAAGTACATGGCGCGTTCGTGGTGCATGCTGAGAAATTGAGTCGCTGTCGTAATGCGTGGATGGGTGAAA  
TCAACATCTGTTGGATGATATGGACGAGAGCCGAGGCAATAACAATTTTTTACCGGTTAGTGTTCACCGCTGCCGTC  
ATCCTGACGCATGCGCGTTTTGTTGATTAAATCACGTATCGCATGGTTAAGGATATCGGCAAAAAGAGCAGCGGAGT  
CGGAATGGTGGCTGTAAGTGGGTTTTGATTGAATTCATAATGCGGCTGACGGGCGTGCAGGAGGCTTTGACGGGAT  
GGTCCCCAGTGGGTGCAACCGCAGCAACATTTTATAACGCTGATAACTGCGACGCGCGACCTTGCTTAACCAGGC  
CCATTGAGCGCCTTCGCCCGCGGGCCGGAACCTATTACTATGGCATCGTAATCGTAGGAATGTGGCATGGTAGGGCTT  
ACCTGTTCTTATACATAAAAAGCAACAGAATGGTAACATTTTATCGCGGTAAGCCAATTGATCCCCGTATTTTATCTGGC  
TATATCCTGAGCGCCTTTGCTTTGTCTGTTTCTACTTTTGGCCTGACGTTTTATTGGATTTTTATCGACGATACTCTC  
CGTTAAGCGGCAGGTTTCCGCTGTACGTAAGAAGACCGGCAAGAATTGCAGTAAATATGTTTTATTGCGTTACCGTT  
CATTCACAATACTGGAGCAATCCAGTATGTTCACTCTGTTATAGTGCAGCAGTACTTTTGGCAAGGATTGAGACATC  
GTGATGGGCGTAAGAGCGCAACAAAAGAAAAAACCAGCGTTCGCTGGTGGAAAGCGCATTTAGCCAATTAAGTGTGA  
ACGCAGTTCCAGCCTGAGTTGCGTGAAGTGGCGGTGAAGCGGCAATTGCTCCACCTTTTTATCGGCATTTCC  
GCGACGTAGACGAACTGGTCTGACCATGGTTGATGAGAGCGGTTAATGCTACGCCAACTCATGCGCCAGGCGGTCAG  
CGTATCGCCAAAGGCGGAGTGTGATCCGCACCTCGGTCACACATTTATGGAGTTCATCGGTAATAATCCTAACGCCCT  
CCGTTATTATTGCGGGAACGCTCCGACCTCCGCTGCGTTTTCTGCCCGTTCGCGGTGAAATTCAGCACTTCATTG  
CGAACTTGCCGACTATCTGGAACGCAAAACCATATGCGCGCTGCGTTTTACTGAAGCGCAAGCCGAAGCAATGGTGACA  
ATTGTCTTCAGTGCGGTGCGAGGCGTGGACGTCGCGCTGCAACAACGTCGCAATTAGAAAGAGCGACTGGTACTGCA  
ACTGCGAATGATTTGAAAAGGGCTTATTAATGTTATGCGCGTGAACAAGAGAAAAACCGCAATTTCCGGGAAATGTGA  
AGGACGAGTAATGAAACAAGCAATCAAGATAGAGGTACGCTGCTGGCCTTAGTTGCTGGCTTATCGAATTAATGTTA

CTTTCGCAGCGCTGTTTAGCTCCATTGTGCCATTTCTGTATTCCCATTATTTCCCTGGTGCTGACGGTTTACTGCCTG  
CATCAACGTTATCTTAATCGCACTATGCCGGTAGGCTTGCCGGGTCTGGCAGCTGCCTGTTTTATTCTCGCGCTACTGCT  
GTACAGCACGGTAGTTCTGTCGGAATATCCGGATATCGGCTCTAACTTCTTCCCGCAGTACTCTCCGTATTATGGTGT  
TCTGGATTGGCGCGAAGATCGGTAACCGTAAGCAGGAAGTTGCTGAGTAATCGGTATTATGCCGGATGCTGGCGCATCCG  
GCATGGGTTTTACTTTCGCGTACAGTAATACGCCGCACTCCATATGGTGCCTGTAGGGGAACGATCAAACAGAGCCAGAC  
GTTTCGACCTTGTGCGTCTGGCTTAATGTTTCCAGATTCTTGCATAACGTTTCCGGGTTACAGGAGATGTACAAAATACGC  
GGATACGCCTGCACCATTTTCTCGGTTTCACTGTCCAGACCGCTGCGCGGAGGGTGCACAAAATGGTTTCGCACTGATA  
ACTCTTTAAGTCGATCCCTTGCAGGCGGTTAAACTCGCGCACACCATTATCGCCTGAGTAAATTTCTTCTGCCGCCATAC  
GAATAATTTGTACGTTATCAATATGGTTAGCTGCGATGTTGTATTGCGCAGCAGCAACCGACGGCTTAGCGATTTCCGGT  
GCTAATACCCGATCAAATTACGCGCCAGCGCTAATGAAAAGTTACCGTTGCCGAGTACAGCTCCAGTAAATCGCCTTT  
TGAGCCTTTGGTTACGTCCAGCGCCATTCCAGCATCTGAATATTCATCGCCGCGTTCCGGTGGGTAAGCTGTTTTCTA  
CCTGACGGTAGATCATCTTTCCCTGCGACCGGACAGCGTTTCATCGATGTAATCCTGATCCAGCTCGATTTTGGTTTT  
GTTGCCCGACCAATCAGATGCACATTCAGATTCTGCGCGCAGTGCATCGCGCAGGGCCTCCGTTCTGACGCCACTC  
ATCATCCAGCTTCTTATGGTATAGCAGGAAACCACCGCTGATTACTCAGTGTAGTGAGGTAATCAATCTGGAACAAT  
TGTGGCGCAGAACGGGATTATTACGCACACCCGCAATCATCGCCGTCATCAACTGGTTGATAAGTTCACTGGCGGGGG  
AAGCTATCCAGCGGATGCGGCTTTTGGTTTTGTTGATCGAAAATGATGTGATACAGGTATCGCCATCGTCCAGATGCG  
GAACTCCGCGCGCATCCGGTAATGACTGACCGGCGAGCGAAACACTTCCGGAACAGGTGAGAAAACGGTCCCATCATA  
TTTGAAAACGTACCACTTTTTCGGCTAACTGCGCTTCACTGTTCTGTTGGAAGGTGTTCCGGGGTTCATGATGATCCT  
GAAAAATTAAGTACGCGCGGATTGTAGGGATTGCTCATCAGATGTCAGATCTTGATGAATTCCTATTTGTGAGCTACG  
TCTGGACAGTAACTTGTACAACTGTAGCATCCACTTGCCGGTCTGTGAGTTAATAGGGAATCCAGTGCGAATCTGGA  
GCTGACGCGCAGCGGTAAGGAAAGGTGCGATGATTGCGTTATGCGGACACTGCCATTCCGTGGGAAGTATCATCTCTTA  
GTATCTTAGATACCCCTCAAGCCGAAGACCTGCCGGCAACGTCGCATCTGGTTCTCATCATCGCGTAATATTGATGA  
AACCTGCGGCATCCTTCTTATTGTGGATGCTTACAATGATTAAGGTTTCGCTGCTGACGGCGTGTCCGTACAG  
GCATTTTCCGTTGGGCACAGGATACCAGCCGGATACTCTCGTCTACTGCTAACCGTTTTGAACAGCCGCGCAGCAC  
TGTGCTTGACCAACCACCGTTGTGACCCGTCAGGATATCGACCGCTGGCAGTGCACCTCGGTCAATGATGTGCTGCGCC  
GTCTTCCGGCGTCGATATACCCAAAACGGCGGTTAGGTCAGCTCTCATCTATTTTTATTCCGGGTACAAATGCCAGT  
CATGTGTTGGTGTAAATTGATGGCGTACGCTGAATCTGGCGGGGTGAGTGGTTCTGCCGACCTTAGCCAGTTCCTAT  
TGCGCTTGCCAGCGTGTGAATATATCCGTGGGCCGCGCTCCGCTGTTTATGGTTCCGATGCAATAGGCGGGGTGGTGA  
ATATCATCACGACGCGCATGAACCCGGAACGGAATTTACAGCAGGGTGGGGAAGCAATAGTTATCAGAACTATGATGTC  
TCTACGCAGCAAACTGGGGGATAAGACACGGGTAACGCTGTTGGGCGATTATGCCATACTCATGGTTATGATGTTGT  
TGCCATGGTAATACCGAACGCAAGCGCAGACAGATAACGATGGTTTTTAAAGTAAAACGCTTTATGGCGCGCTGGAGC  
ATAACTTTACTGATGCCTGGAGCGGCTTTGTGCGCGCTATGGCTATGATAACCGTACCAATTATGACGCGTATTATCT  
CCCGGTTACCGTTGCTCGATACCCGTAACCTCTATAGCCAAAGTTGGGACGCCGGGCTGCGCTATAACGGCGAACTGAT  
TAAATCACAACCTATTACCAGCTATAGCCATAGCAAAGATTACAACTACGATCCCCATTATGGTCGTTATGATTCGTCGG  
CGACGCTCGATGAGATGAAGCAATACACCGTCCAGTGGGCAACAATGTCATCGTTGGTACGGTAGTATTGGTGGGGT  
GTCGACTGGCAGAAACAGACTACGACGCCGGTACAGGTTATGTTGAGGATGGATATGATCAACGTAATACCGGCATCTA  
TCTGACCGGGTCAACAAGTGGCGATTTTACCTTTGAAGGCGCAGCACGAGTGACGATAACTCACAGTTTGGTCGTC  
ATGGAACCTGGCAAACAGCGCCGGTTGGGAATTCATCGAAGGTTATCGTTCATTGCTTCTACGGGACATCTTATAAG  
GCACCAAATCTGGGGCAACTGTATGGCTTCTACGGAATCCGAATCTGGACCCGAGAAAAGCAAACAGTGGGAAGGCGC  
GTTTGAAGGCTTAAACCGTGGGTGAACTGGCGTATTTCCGGATATCGTAACGATGTCAGTACTTATGATGATTATGATG  
ATCACACCCTGAAATATTACAACGAAGGAAAGCGCGATTAAGGGCGTTCGAGGCGACCCCAATTTTATACCGGACCA  
CTGACGCATACTGTGAGTTATGATTATGTCGATGCGCGCAATGCGATTACCGACACGCCGTTGTTACGCCGTGCTAAACA  
GCAGGTGAAATACCAGCTCGACTGGCAGTTGTATGACTTTCGACTGGGGTATTACTTATCAGTATTTAGGCACTCGCTATG  
ATAAGGATTACTCATCTTATCCTTATCAAACCGTTAAAATGGCGGTGTGAGCTTGTGGGATCTTGCGGTTGCGTATCCG  
GTCACCTCTCACCTGACAGTTCTGTTGTAATAAGCCAACTGTTTCGACAAAGATTATGAGACAGTCTATGGCTACCAAAC  
TGCAAGACGGGAATACACCTTGTCTGGCAGTACACCTTCTGAACCACGTCACCAGTGGTGGTTGACTCCGGCGTC  
GGTGGGTTGTCGGTCTATGACGAGATCCGGCATCTTACCAGTCTCCATTACATTTATGCTTTTCGATAACGTCGCTTT  
CCCGTATGGCGAAAAAGCGAAGCGTTTATTGTTGAGCGAGTGGTGGCAATTGTCACCGCGGTGCAAGAAGCTTATCCCC  
TTGCGCTGGCTGTGGTGCCTTGAACACTGCCAGTACCGTTTCACTTCTGCAATACGCGAAAAGTTCGACTTCCCGGTT  
GTTGGTGTGTCGCGCGGATTAACCTGCTGCACGCTGACGGCAATGGCATTGTGCGATTACTGGCAACCCGCGGAAC  
AGTTAAACGTTCTTATACTCATGAGCTGATCGCGCTTTCGCTAATGAATGCCAGATAGAAATGCTGGGCTCGGCAGAGA  
TGTTGAGTTGGCTGAAGCGAAGCTACATGGCGAAGATGTTTCTCTGGATGCACTAAAACGATCCTACGCCCGTGGTTA  
AGAATGAAAGAGCCGCCAGATACCGTTGTATTGGTGGACCCATTTCCCTCTACTACAAGAAGAACTGTTACAAGTGCT  
GCCAGAGGGAACCCGGTGGTGGATTCTGGCGCAGCGATTGCTCGCCGAACGGCCTGGTTGTTAGAACATGAAGCCCCGG  
ATGCAAAATCTGCCGATGCGAATATTGCCTTTGTATGGCAATGACGCCAGGAGCTGAACAATATTGCCGTTTTACAG  
GTTACGGCTTCGAAACGCTCGAAAACCTGGCAGTTTTAGGCTGATTTGGTTGAATGTTGCGCGGTGAGAAAATTTTT

AAATTTCTTGTGTCAGGCCGAATAACTCCCTATAATGCGCCACCACTGACACGGAACAACGGCAAACACGCCGCCGGG  
TCAGCGGGTCTCCTGAGAACTCCGGCAGAGAAAAGCAAAAATAAATGCTTGACTCTGTAGCGGGAAGCGTATTATGCA  
CACCCCGCCGCTGAGAAAAAGCGAAGCGGCACTGCTCTTTAACATTTATCAGACAATCTGTGTGGGCACTCGAAGAT  
ACGGATTCTAACGTCGCAAGACGAAAAATGAATACCAAGTCTCAAGAGTGAACACGTAATTCATTACGAAGTTAATTC  
TTTGAGCGTCAAACCTTTTAAATTGAAGAGTTTGATCATGGCTCAGATTGAACGCTGGCGGCAGGCCTAACACATGCAAGT  
CGAACGGTAACAGGAAGAAGCTTGCTTCTTGTGACGAGTGGCGGACGGGTGAGTAATGTCTGGGAACTGCCTGATGG  
AGGGGATAACTACTGAAACGGTAGCTAATACCGCATAACGTCGCAAGACCAAAGAGGGGGACCTTCGGGCCTCTTGCC  
ATCGGATGTGCCAGATGGGATTAGCTAGTAGGTGGGGTAACGGCTCACCTAGGCGACGATCCCTAGCTGGTCTGAGAGG  
ATGACCAGCCACACTGAACTGAGACACGGTCCAGACTCCTACGGGAGGCAGCAGTGGGGAATATTGCACAATGGGCGCA  
AGCCTGATGCAGCCATGCCGCGTGTATGAAGAAGCCTTCGGGTTGTAAAGTACTTTACGCGGGGAGGAAGGGAGTAAAG  
TTAATACCTTTGCTCATTGACGTTACCCCGAGAAGAAGCACCGGCTAACTCCGTGCCAGCAGCCGCGTAATACGGAGGG  
TGCAAGCGTTAATCGGAATTACTGGGCGTAAAGCGCACGAGCGGTTTGTAAAGTCAGATGTGAAATCCCCGGGCTCAA  
CCTGGGAACTGCATCTGATACTGGCAAGCTTGAGTCTGTAGAGGGGGTAGAATTCAGGTGTAGCGGTGAAATGCGTA  
GAGATCTGGAGGAATACCGGTGGCGAAGCGGCCCTGGACGAAGACTGACGCTCAGGTGCGAAAGCGTGGGGAGCAAA  
CAGGATTAGATAACCTGGTAGTCCACGCCGTAACGATGTCGACTTGGAGTTGTGCCCTTGAGGCGTGGCTTCGGGAG  
TAAACGTTAAGTCGACCGCTGGGGAGTACGGCCGAAGGTTAAACTCAAATGAATTGACGGGGGCCGACAAGCGG  
TGGAGCATGTGGTTAATTCGATGCAACGCGAAGAACCCTTACCTGGTCTTGACATCCACGGAAGTTTTAGAGATGAGAA  
TGTGCCCTTCGGGAACCGTGAGACAGGTGCTGCATGGCTGTCGTGACTCGTGTGAAATGTTGGGTTAAGTCCCGCAA  
CGAGCGCAACCCTTATCCTTTGTTGCCAGCGGTCCGGCCGGAACTCAAAGGAGACTGCCAGTGATAAATGGAGGAAGG  
TGGGGATGACGTCAAGTCATCATGGCCCTTACGACCAGGGCTACACACGTGCTACAATGGCGCATACAAAGAGAAGCGAC  
CTCGCGAGAGCAAGCGGACCTCATAAAGTGCCTGAGTCCGGATTGGAGTCTGCAACTCGACTCCATGAAGTCGGAATC  
GCTAGTAATCGTGGATCAGAATGCCACGGTGAATACGTTCCCGGGCCTGTACACACCGCCGTCACACCATGGGAGTGG  
GTTGCAAAAGAAGTAGGTAGCTAACCTTCGGGAGGGCGTTACCACTTTGTGATTGACTGGGGTGAAGTCGTAACA  
AGGTAACCGTAGGGAACTGCGGTTGGATCACCTCCTTAAAGAAGCGTACTTTGTAGTGCTCACACAGATTGTC  
TGATAGAAAGTAAAAGCAAGCGTTTACGCGTTGGGAGTGAGGCTGAAGAGAATAAGGCCGTTGCTTTCTATTAATGA  
AAGCTCACCTACACGAAAATATCACGCAACGCGTATAAGCAATTTTCGTGTCCCTTCGTCTAGAGGCCAGGACACC  
GCCCTTTCACGGCGGTAACAGGGGTTCAATCCCTAGGGGACGCCACTTGCTGGTTTGTGAGTGAAAGTCGCCGACCTT  
AATATCTCAAACCTCATCTTCGGGTGATGTTGAGATATTTGCTCTTTAAAAATCTGGATCAAGCTGAAAATTGAAACAC  
TGAACAACGAGAGTTGTTCTGTGAGTCTCTCAAATTTTCGCAACACGATGATGAATCGAAAGAAACATCTTCGGGTTGTGA  
GGTTAAGCGACTAAGCGTACACGGTGGATGCCCTGGCAGTCAGAGGCGATGAAGGACGTGCTAATCTGCGATAAGCGTCG  
GTAAGGTGATATGAACCGTTATAACCGGCGATTCCGAATGGGAAACCCAGTGTGTTTCGACACACTATCATTAACTGA  
ATCCATAGGTAAATGAGGCGAACCGGGGAACTGAAACATCTAAGTACCCCGAGGAAAAGAAATCAACCGAGATTCCCC  
AGTAGCGGCGAGCGAACGGGAGCAGCCAGAGCCTGAATCAGTGTGTGTTAGTGAAGCGTCTGAAAGGCGCGCGA  
TACAGGGTGACAGCCCGTACAAAAATGCATGCTGTGAGCTCGATGAGTAGGGCGGGACACGTGGTATCCTGTCTG  
AATATGGGGGACCATCTCCAAGGCTAAATACTCTGACTGACCGATAGTGAACAGTACCGTGAGGGAAAGGCGAAAA  
GAACCCCGGCGAGGGGAGTAAAAAGAACCCTGAAACCGTGTACGTACAAGCAGTGGGAGCACGCTTAGGCGTGTGACTGC  
GTACCTTTGTATAATGGGTGAGGACTTATATTCTGTAGCAAGTTAACCGAATAGGGGAGCCGAAGGGAAACCGAGTC  
TAACTGGGCGTTAAGTTGACGGGTATAGACCCGAAACCCGGTGTACTAGCCATGGGCAGTTGAAGTTGGGTAACACT  
AACTGGAGGACCGAACCGACTAATGTTGAAAAATAGCGGATGACTGTGGCTGGGGGTGAAAGCCAATCAAACCGGGA  
GATAGCTGGTTCTCCCGAAAAGCTATTTAGGTAGCCCTCGTAATTGACTCTCCGGGGTAGAGCAGCTTTTCGGGAAGG  
GGTTCATCCCGACTTACCAACCCGATGCAAACTGCGAATAACCGGAGAATGTTATCACGGGAGACACCGCGGGGTGCTAA  
CGTCCGTCGTGAAGAGGGAAACAACCCAGACCGCCAGCTAAGGTCCCAAAGTCATGGTTAAGTGGGAAACGATGTGGGAA  
GGCCAGACAGCCAGGATGTTGGCTTAGAAGCAGCCATCATTTAAGAAAGCGTAATAGCTCACTGGTCGAGTCGGCCTG  
CGCGGAAGATGTAACGGGGTAAACCATGCACCGAAGCTGCGGCAGCGACGCTTATGCGTTGTTGGGTAGGGGAGCGTTC  
TGTAAGCCTGCGAAGGTGTGCTGTGAGGCATGCTGGAGGTATCAGAAGTGCGAATGCTGACATAAGTAACGATAAAGCGG  
GTGAAAAGCCCGCTCGCCGGAAGACCAAGGGTCTGTCCAACGTTAATCGGGGCGAGGTGAGTCGACCCCTAAGGCGAG  
GCCGAAAGGCGTAGTCGATGGGAAACAGGTTAATATTCTGTACTTGGTGTACTGCGAAGGGGGACGGAGAAGGCTAT  
GTTGGCCGGGCGACGGTTGTCGGGTTAAGCGTGTAGGCTGGTTTTCCAGGCAATCCGGAAAATCAAGGCTGAGGCGT  
GATGACGAGGCACTACGGTGTGAAGCAACAATGCCCTGCTTCCAGGAAAAGCCTTAAGCATCAGGTAACATCAAATC  
GTACCCCAAACCGACACAGGTGGTCAGGTAGAGAATAACCAAGGCGCTTGAGAGAAGTGGGTAAGGAACTAGGCAAAAT  
GGTCCGTAACCTTCGGGAGAAGGCACGCTGATATGTAGGTGAGGTCCTCGCGGATGGAGTGAAATCAGTCGAAGATAC  
CAGCTGGCTGCAACTGTTTATTAAAAACACAGCACTGTGCAAACACGAAAGTGGACGTATACGGTGTGACGCTGCCCGG  
TGCCGGAAGGTTAATTGATGGGTTAGCGCAAGCGAAGCTCTTGATCGAAGCCCGGTAACGGCGGCCGTAACATAAC  
GGTCTAAGGTAGCGAAATTCCTTGTGGGTAAGTTCCGACCTGCACGAATGGCGTAATGATGGCCAGGCTGTCTCCACC  
CGAGACTCAGTGAAATGAACTCGCTGTGAAGATGCAGTGTACCCGCGGCAAGACGGAAAGACCCCGTGAACCTTTACTA  
TAGCTTGACACTGAACATTGAGCCTTGTGTAGGATAGGTGGGAGGCTTTGAAGTGTGGACGCCAGTCTGCATGGAGC

CGACCTTGAATACCACCCTTTAATGTTTGTGTTCTAACGTTGACCCGTAATCCGGGTTGCGGACAGTGTCTGGTGGGT  
AGTTTGACTGGGGCGGTCTCCTCCTAAAGAGTAACGGAGGACGACGAAGGTTGGCTAATCCTGGTCGGACATCAGGAGGT  
TAGTGCAATGGCATAAGCCAGCTTGACTGCGAGCGTGACGGCGGAGCAGGTGCGAAAGCAGGTCATAGTGATCCGGTGG  
TTCTGAATGGAAGGGCCATCGCTCAACGGATAAAAGTACTCCGGGGATAACAGGCTGATACCGCCCAAGAGTTCATATC  
GACGGCGGTGTTTGGCACCTCGATGTCGGCTCATCACATCCTGGGGCTGAAGTAGGTCCCAAGGGTATGGCTGTTCCGCA  
TTTAAAGTGGTACGCGAGCTGGGTTTAGAAGCTCGTGAGACAGTTCGGTCCCTATCTGCCGTGGGCGCTGGAGAAGTACG  
GGGGGTGCTCCTAGTACGAGAGGACCGGAGTGGACGCATCACTGGTGTTCGGGTTGTCATGCCAATGGCACTGCCCGGT  
AGCTAAATGCGGAAGAGATAAGTGCTGAAAGCATCTAAGCACGAAACTTGCCCCGAGATGAGTTTCTCCCTGACCTTTAA  
GGGTCTGAAGGAACGTTGAAGACGACGACGTTGATAGGCCGGTGTGTAAGCGCAGCGATGCGTTGAGCTAACCGGTAC  
TAATGAACCGTGAGGCTTAACCTTACAACGCCGAAGCTGTTTTGGCGGATGAGAGAAGATTTTCAGCCTGATACAGATTA  
AATCAGAACGAGAAGCGGTCTGATAAAACAGAATTTGCTGGCGGAGTAGCGCGGTGGTCCACCTGACCCCATGCCG  
AACTCAGAAGTGAACGCCGTAGCGCCGATGGTAGTGTGGGTCTCCCATGCGAGAGTAGGAACTGCCAGGCATCAA  
TAAAACGAAAGGCTCAGTCGAAAGACTGGGCCTTTGTTTTATCTGTTGTTTGTGCGGTGACGCTCTCCTGAGTAGGACA  
AATCCGCGGGAGCGGATTTGAACTGCGAAGCAACGGCCCGGAGGGTGGCGGGCAGGACGCCCGCCATAAACTGCCAG  
GCATCAAATTAAGCAGAAGCCATCCTGACGGATGGCCTTTTTGCTTTCTACAAACTCTTCTGTGTCATATCTACAA  
GCCATCCCCCACAGATAACGTTAACTAGCCTCGTTTTTGCATCAGGAAAGCAGCTATGAACCACTCCTTAAAACCTGG  
AACACATTTGGCATTGATCATAATGCTCAGCACATTGTATGTCCGGAAGACGAACAACAATTAATCAATGCTGGCAGTA  
TGCAACCGCAGAAGGACAACCCGTTCTTATTCTGGGTGAAGGAAGTAATGTACTTTTTCTGGAGGACTATCGCGGCACGG  
TGATCATCAACCGGATCAAAGGTATCGAAATTCATGATGAACCTGATGCGTGGTATTTACATGTAGGAGCCGGAGAAAAC  
TGGCATCGTCTGGTAAAATACACTTTCAGGAAGGTATGCCTGGTCTGGAAAATCTGGCATTAAATTCCTGGTTGTGTCGG  
CTCATCACCTATCCAGAATATTGGTGTCTATGGCGTAGAATTACAGCGAGTTTGCCTTATGTTGATTCTGTTGAACTGG  
CGACAGGCAAGCAAGTGCCTTAACTGCCAAAGAGTCCGTTTTGGCTATCGCGACAGTATTTTTAAACATGAATACCAG  
GACCGTTCGCTATTGTAGCCGTAGGTCTGCGTCTGCCAAAAGAGTGGCAACCTGTACTAACGTATGGTACTTAACTCG  
TCTGGATCCTACAACAGTAACGCCACAGCAAGTATTTAATGCGGTGTGTCATATGCGCACCAACAACTCCCTGATCCAA  
AAGTGAATGGCAATGCCGTAGTTTCTCAAAAACCTGTTGATCTGCCGAAACGGCTAAAGCATTACTGTCACAATTT  
CCAACAGCACCAATTAACCCAGGCGGATGGTTCAGTAAAACCTGGCAGCAGGTTGGCTTATCGATCAGTGCCAGCTAAA  
AGGGATGCAAATAGGTGGGCTGCGGTGCACCGTCAACAGGCGTTAGTTCTCATTAAATGAAGACAATGCAAAAAGCGAAG  
ATGTTGTACAGCTGGCGCATCATGTAAGACAGAAAGTTGGTGAATAATTAATGTCTGGCTTGAGCCTGAAGTCCGCTTT  
ATTGGTGCATCAGGTGAAGTGAGCGCAGTGGAGACAATTTTCATGAAGGATAACACCGTGCCACTGAAATGATTGCCCTG  
TTAGCGAACGTTGAATTTACTCTGGCGAGCAGTTGGGTGAAACGCTGGGAATGAGCCGGGCGGCTATTAATAAACACAT  
TCAGACACTGCGTGACTGGGCGTTGATGCTTTACCGTTCGGGTAAAGGATACAGCCTGCCTGAGCCTATCCAGTTAC  
TTAATGCTAAACAGATATTGGGTGAGCTGGATGGCGGTAGTGTAGCCGTGCTGCCAGTGATTGACTCCACGAATCAGTAC  
CTTCTTGATCGTATCGGAGAGCTTAAATCGGGCGATGCTTGCATTGCAGAATACCAGCAGGCTGGCCGTGGTCGCCGGG  
TCGGAAATGGTTTTGCCTTTTGGCGCAAACCTATATTTGTGATGTTCTGGCGTCTGGAACAAGGCCGGCGGCGCGCA  
TTGGTTAAGTCTGGTTATCGGTATCGTATGGCGGAAGTATTACGCAAGCTGGGTGCAGATAAAGTTCTGTGTTAAATGG  
CCTAATGACCTCTATCTGCAGGATCGCAAGCTGGCAGGCACTTGGTGGAGCTGACTGGCAAACTGGCGATGCGGCGCA  
AATAGTCATTGGAGCCGGATCAACATGGCAATGCGCCGTGTTGAAGAGAGTGTGTTAATCAGGGGTGGATCACGCTGC  
AGGAAGCGGGATCAATCTCGATCGTAATACGTTGGCGCCATGCTAATACGTGAATTACGTGCTGCGTTGGAACCTTC  
GAACAAGAAGGATTGGCAGCTTATCTGTCGCGTGGGAAAAGCTGGATAATTTTTAATCAGCCAGTGAACCTTATCAT  
TGGTGATAAAGAAATATTTGGCATTTCACGCGGAATAGACAAAACAGGGGGCTTTATTACTTGAGCAGGATGGAATAATA  
AACCTGGATGGGCGGTGAAATATCCCTGCGTAGTGACAGAAAATAAGAAAGGGGAGTATTGCTCCCTGCAAATTTAT  
TGCGTAGTCTGACCTCTTACCAGTATTAGCACTTTTCGTAGGATTAACCTGGCGCGCTCACAGTAGGTAGAATA  
TTTTGCTTTAAGTTACGCCAGTTGATCTCTTCCACAATGTCATGGCAGTCTTAATCGCTTCTTCTTTAGTTAATTTCCG  
GTAGTTATGAAAATAGGAATCCGGGTGCGTAAAAGCCCTTCGCGGAATTTAGAAAACGTTGATATACCATGTCTGAA  
GTAAGTCTTCCGGTGCATCAACATATATCGAAAATCGACAAAATCAGAAACAATACATGATGTGGATCGTGTGGATAA  
TCCATCCCGCTCTGTAAGACATTTAACCTTCAAGAATTTAAATATCAGGCTGAACAACCGTTTTATCTCCATCCGGGAT  
CACATCATAAATAAGATGTGAGTAAACAGGTGCTGTAACGTTTGGCACGCCGATTTGAGATCGGAAACAAACTTACCA  
GGCGATGCATATCATAACGATTCGGGAAGCCTTTCTTCTCATCAGACCAGTCTTTTCCAGAACCTGATTAGGGTGAAGG  
AAGCCATCTGTAGTATGATCAGTTCAACACGACGATGTTCCGGCCAACGGCTTAATAGCGCTGCAATACACGGGCGGTTGT  
ACTTTTCCCACCGGACACTGCCAGCAATACTGATAATGTAAGGAATGCGTTGCCGTTGGTACCAAGAACTGTTCCA  
GAACTGCCTGACGGCGCAGATTCGAGCTTATATAGAAGTTCAGCAACCTGACAAAGGTAATAGATCTCGCAACTTCT  
TCTAACGAGAGATCTTATTAATACCTTTGAGACGGCGATCTCATCTTCCGATAACGTGATAGGTACGGAATCACGCAG  
AGCTGCCACTGGTTCGGTCAAACCTGAGGTAAGGCGTCATTAACGTTTGGCTTTTTACTCATAAGCATGTTTCTGG  
CGGTATAGCTCTATCGGAAAAGCGATATTTGCCATGGCGCGTACAGTTCTGTTGAATGGGTTAATGGGCGAGGAGGTA  
ACACCAGATGGGGAGGAATAATAAGAAAAATCTCTGCCAGGAAGCTATCGTTGAAAAGCAATGTGACAGATATTCATC  
TGATAAAAAGAATTATGGTTTAGCAGGAGCGCATTGTTGAGCACAAATGATGTTGAAAAGTGTGCTAATCTGCCCTCCGT

TCGGCTGTTTCTTCATCGTGTGCGATAAAATGTGACCAATAAAACAAATTATGCAATTTTTAGTTGCATGAACTCGCAT  
GTCTCCATAGAATGCGCGCTACTTGATGCCGACTTAGCTCAGTAGGTAGAGCAACTGACTTGAATCAGTAGGTACCAG  
TTCGATTCCGAGTGTGCGCACCATCAAGTCCGGTGGGTTCCCGAGCGGCCAAAGGGAGCAGACTGTAATCTGCCGTCA  
CAGACTTGAAGGTTTGAATCCTTCCCCACCACCAATTTCCGCCACGCGATGGCGTAGCCCGAGACGATAAGTTCCGCTT  
ACCGGCTCGAATAAAGAGAGCTTCTCTCGATATTAGTGCAGAATGAAAATCAGGTAGCCGAGTTCCAGGATGCGGGCAT  
CGTATAATGGCTATTACCTCAGCCTTCCAAGCTGATGATGCGGGTTCGATTCCCGCTGCCCGCTCCAAGATGTGCTGATA  
TAGCTCAGTTGGTAGAGCGCACCTTGGTAAGGGTAGGTCGGCAGTTTGAATCTGCCTATCAGCACCCTTCTTTTCTC  
CTCCCTGTTTTTCTTCTGTTTATTGCATTCAACAAGTCGGGCATGTTGCCTGGTTGATGTGGTGATATCACCGATTA  
TCCGTGTCTTAGAGGGACAATCGATGTCTAAAGAAAAGTTGAACGTACAAAACCGCACGTTAACGTCGGTACTATCGGC  
CACGTTGACCATGGTAAAACAACGCTGACCGCTGCAATCACTACCGTACTGGCTAAAACCTACGGCGGTGCTGCTCGGC  
ATTGACACAGATCGATAACGCGCCGGAAGAAAAGCTCGTGGTATCACCATCAACACTTCTCACGTTGAATACGACACC  
CGACCCGCTACTACGCACACGTAGACTGCCGGGGCACGCCGACTATGTTAAAAACATGATCACCGGTGCTGCGCAGATG  
GACGGCGGATCCTGGTAGTTGCTGCGACTGACGGCCGATGCCGAGACTCGTGAGCACATCCTGCTGGGTGCTCAGT  
AGCGGTTCCGTACATCATCTGTTCTGAAACAAATGCGACATGGTTGATGACGAAGAGCTGCTGGAATGGTTGAAATGG  
AAGTTCGTGAACCTTCTGTCTCAGTACGACTTCCCGGGCAGCACACTCCGATCGTTCTGTTCTGCTCTGAAAGCGCTG  
GAAGGCGACGAGAGTGGGAAGCGAAAATCCTGAAACTGGCTGGCTTCTGGATTCTTACATTCCGGAACAGAGCGTGC  
GATTGACAAGCGTTCTGCTGCCGATCGAAGACGATTCTCCATCTCCGGTCTGGTACCCTTGTACCCTGCTGTAG  
AACGCGGTATCATCAAAGTTGGTGAAGAAGTTGAAATCGTTGGTATCAAAGAGACTCAGAAGTCTACCTGTACTGGCGTT  
GAAATGTTCCGCAAACCTGCTGGACGAAGGCCGCTGCTGGTGAGAACGTAGGTGTTCTGCTGCGTGGTATCAAACGTGAAGA  
AATCGAACGTGGTCAGTACTGGCTAAGCCGGGCACCATCAAGCCGCACACCAAGTTTGAATCTGAAGTGTACATTCTGT  
CCAAAGATGAAGGCGGCCGTACTACTCCGTTCTTCAAAGGCTACCGTCCGCAGTTTACTTCCGTAAGTACTGACGTGACT  
GGTACCATCGAACTGCCGAAGGCGTAGAGATGGTAATGCCGGGCGACAACATCAAATGGTTGTTACCCTGATCCACC  
GATCGCGATGGACGACGGTCTGCGTTTCGCAATCCGTGAAGGCGGCCGTAACCGTTGGCGGGGCGTTGTAGCAAAGTTC  
TGAGCTAATTGCCGATAACATTTGACGCAATGCGCACTAAAAGGGCATCATTTGATGCCCTTTTTGCACGTTTTCTGACC  
AGAACCTGGCTCATCAGTATTTCTTTGTGATAATCATTGCTGAGACAGGCTCTGTTGAGGGCGTATAATCCGAAAAGC  
TAATACGCGTTTCGATTTGGTTTCCCTCGGATCGCGGGGTGAAAATGTTTGTAGAAAACCTCTGACAGGTTGGTTTATG  
AGTGCGAATACCGAAGCTCAAGGAAGCGGGCGGGCTGGAAGCGATGAAGTGGTCTGTTGTTGGTGGCATTGCTCCTGGT  
GGCGATTGTCGGCAACTATCTTTATCGCGACATTATGCTGCCGCTGCGTGGCCTGAGTAATTCTGATTGCTGCAG  
CGGTGGTGTGCGGCTGTTAACGACAAAAGGTAAGCTACCGTTGCTTTTGCCCGTGAAGCGCGTACCGAAGTCCGTAAG  
GTCAATTTGGCCGACTCGCCAGGAAACATTGCACACCACGCTGATTGTGGCTGCGGTTACCGCAGTAATGTCACTGATCCT  
GTGGGACTGGATGGTATTCTGTTTCCCTGGTATCCTTTACTGTCCTGAGGTTCTGAGATGCTGAAGCTCCTAAA  
AAGCGCTGGTACGTCGTTACGGCGTTTTCCGGTTTTGAAGGCCGCTAGCAACGTCGCTGCGTGGTGGTATCAAATTACA  
CAACATGGAAGATTTGTTTGGTGAAGTCAATGGTACCAACCGAAGAAGTGGTTGAAATCCGTGGCGGTGAGCGTCCGAAAA  
GCGAACGTAATTTCTCCCTGGTACGTCCTCGTTCAGATGGTATGAACGACGCGAGCTGGCACCTGGTGGCAGCGTA  
CCGCGTGTGATGGGCTTCTCGCGGTAAGCCGCTCCGAAACGCTGTTTGAACCGGGTGAATGGTCCGTGTTAATGATGGT  
CGTTGCTGACTTCAACGGTGTGTTGAAGAAGTGGATTACGAGAAAATCTGCTGAAAGTGTCTGTTTCTATCTTCCGT  
CGTGCGACCCCGTAGAGCTGGACTTCAGCCAGGTTGAAAAGCCTAACCCAGCGATCAAAAAAGCGGCGATTTAATCGT  
TGACAAGGCTGAGATTGGAATACAATTTCCGCTTTTGTGTTTATGGGCTTGGCCGTAACCGTAAACGATTTTATATCA  
CGGGGAGCCTCAGAGCGGTTATTACCCAATGAGGAATTTAATGGCTAAGAAAGTACAAGCCTATGTCAAGCTGC  
AGTTTGCAGCTGGTATGGTAAACCCGAGTCCGCCAGTAGGTCGGCTCTGGTCAAGGCGGTAACATCATGGAATTC  
TGCAAAGCGTTCAACGCAAAAACCTGATCCATCGAAAAAGGTCGCCGATTCCGGTAGTAATCACCGTTTACGCTGACC  
TTCTTTCACTTCTGTTACCAAGACCCCGCCGAGCAGTTCTGCTGAAAAAGCGGCTGGTATCAAGTCTGGTTCCGGTA  
AGCCGAACAAAGACAAAGTGGGTAATTTCCCGGCTCAGCTGCAGGAAATCGCGCAGACCAAGCTGCCGACATGACT  
GGTGCCGACATTGAAGCGATGACTCGTCCATCGAAGGTAAGTGCACGTTCCATGGGCTGGTGGTGGAGGACTAAGAAAT  
GGCTAAACTGACCAAGCGCATGCGTGTATCCGCGAAGAAAGTTGATGCAACCAACAGTACGACATCAACGAAGCTATCG  
CACTGCTGAAAGAGCTGGCGACTGCTAAATTCGTAGAAAGCGTGGACGTAGCTGTTAACCTCGGCATCGACGCTCGTAAA  
TCTGACCAGAAGCTACGTGGTGAACGTAAGTGCAGGCTGCTGCGCAGGCTGCTGCGTGGTGGTGGTGGTGGTGGTGGT  
TGCAAAAGCTGAAAGCTGCTAAAGCTGCAGGCGCAGAACTGGTAGGTATGGAAGATCTGGCTGACCAGATCAAGAAAGCG  
AAATGAACCTTTCAGCTTGTATTGCTTCTCCGGATGCAATGCGGTTGTTGGCCAGCTGGCCAGGTTCTGGGTCCGCG  
GGCCTGATGCCAAACCCGAAAGTGGGACTGTAACACCGAACGTTGCTGAAGCGGTTAAAAACGCTAAAGCTGGCCAGGT  
TCGTTACCGTAACGACAAAAACGGCATCATCCACACCACCATCGGTAAGTGGACTTTGACGCTGACAAAACGAAAGAAA  
ACCTGGAAGCTCTGCTGGTTCGCTGAAAAAGCAAAACCGACTCAGGCGAAAGGCGTGTACATCAAGAAAGTTAGCATC  
TCCACCACCATGGGTGACAGTGTGACGTTGACAGGCTGGCCTGAGCGCTTCTGTAAACTAATGCCTTTACGTGGGCGG  
TGATTTTGTCTACAATCTTACCCACGATATAATGCTTAATGCAGACGTATATCCGAGATATTCCGGTGTGGCAAGGCG  
GCAACTGAGTGAAGTGCAGGAGCATAGCTAACTATGTGACTGGTGCATGAAGGAAGCCAAACCGCGTACAAGCTGAA

TAGCGACGGATAGAAAAGATTTGTTTCGTTGGAGCCTGGCCTATCCAGGCCTCCGTCGAAGACCGCAGGAGTTTCGAAGA  
AACTTAATCCCCTGCGTAGACGGTGACAGAACGCTAAGATTATCTTTTATATTCTGGCTTGTTCCTGCTCACCGTAATT  
AAGACGCTCTCTCCGTTTGGAGGAGTGAAGTGAGTTCAGAGATTTTCTCTGGCAAACATCCAGGAGCAAAGCTAATGGC  
TTTAAATCTTCAAGACAAACAAGCGATTGTTGCTGAAGTCAGCGAAGTAGCCAAAGGCGCGCTGTCTGCAGTAGTTGCCG  
ATCCCCGTGGCGTAACTGTAGATAAAATGACTGAACTGCGTAAAGCAGGTGCGGAAGCTGGCGTATACATGCGTGTGT  
CGTAAACCCCTGCTGCGCCGTGCTGTTGAAGTACTCCGTTCCAGTGCCTGAAAGACGCGTTTGTGGTCCGACCCTGAT  
TGCATACTCTATGGAACACCCGGGCGCTGCTGCTGCTGTTCAAAGAGTTCGCGAAAGCGAATGCAAAATTTGAGGTCA  
AAGCCGCTGCCTTTGAAGGTGAGCTGATCCCGCGTCTCAGATCGACCGCTGGCAACTCTGCCGACCTACGAAGAAGCA  
ATTGCACGCCTGATGGCAACCATGAAAGAAGCTTCGGCTGGCAAACCTGGTTCGTAATGACTCTGGCTGCTGTACCGGATGCGAA  
AGAAGCTGCTTAATCGCAGTTATCTTTTTAACGCATTGCTTACGTATAAACTATTCTGATATTGAGAAACAATTTAAA  
TGCTATCACTAAAGATCAAATCATTGAAGCAGTTGAGCTATGTCTGTAATGGACGTTGTAGAATGATCTCTGCAATG  
GAAGAAAAATTCGGTGTTCGCTGCTGCTGCTGATGCTGAGCTGCTGGCCCGTTGAAGCTGCTGAAGAAAAACTGA  
ATTCGACGTAATCTGAAAGCTGCTGGCGCTAACAAAGTTGCTGTTATCAAAGCAGTACGTGGCGCAACTGGCCTGGGT  
TGAAGAAGCTAAAGACCTGGTAGAATCTGCACCGCTGCTCTGAAAGAAGCGTGAGCAAAGACGACGAGAAGCAGT  
AAAAAGCTCTGGAAGAAGCTGGCGTGAAGTTGAAGTTAAATAAGCCAACCTTCCGGTTGCAGCTGAGAAATCAGGC  
TGATGGCTGGTACTTTTTAGTACCAGCCTTTTTGCGCTGTAAGCGCCAGTAGCGTTTACACTGTTTACTACTGCT  
GTGCCCTTCAATGCTTGTTCATCGACGACTTAATACTGCGACAGGACGTCGGTTCTGTGTAATCGCAATGAAATG  
GTTTAAAGCTGATAGCAACAGGCATTGCGGAAAGTGTTCATTTTCCGGTCAACAAAATAGTGTGACAAAACTGTCCGC  
TCAATGGACAGATGGTTCGACTTGTGACGAGCTGAGGAACCCCTATGGTTTACTCCTATACCGAGAAAAAACGTATTTCG  
AAGGATTTTGGTAAACGTCCACAAGTTCTGGATGTACCTTATCTCCTTTCTATCCAGCTTGACTCGTTTTAGAAATTTAT  
CGAGCAAGATCCTGAAGGGCAGTATGGTCTGGAAGCTGCTTCCGTTCCGATTTCCCGATTGAGAGCTACAGCGTAATT  
CCGAGCTGCAATACGTCAGTACCGCCTTGGCGAACCGGTGTTTACGCTCCAGGAATGTCAAATCCGTGGCGTGACCTAT  
TCCGACCGCTGCGGTTAACTGCGTCTGGTATCTATGAGCGCGAAGCGCCGGAAGGCACCGTAAAAGACATTAAGA  
ACAAGAAGTCTACATGGCGGAAATTCGCTCATGACAGACAACGGTACCTTTGTTATCAACGGTACTGAGCGTGTATCG  
TTTCCAGCTGACCGTAGTCCGGGCTCTTCTTACTCCGACAAAGGTAACCCACTCTTCCGGTAAAGTGTGTAT  
AACGCGGTATCATCCCTTACCCTGGTCTGGCTGACTTCAATTCGATCCGAAGGACAACCTGTTCTGATGATTCGA  
CCGTGCGCGTAACTGCCTGCGACCATCATTCTGCGCGCCCTGAACTACACCACAGAGCAGATCCTGACCTGTTCTTTG  
AAAAAGTTATCTTTGAAATCCGTGATAACAAGCTGCAGATGGAACCTGGTCCCGAACGCGCTGCGTGGTGAACCCGATCT  
TTTGACATCGAAGCTAACGTTAAAGTGTACGTAGAAAAAGCCCGCTATCACTGCGCGCCACATTCCGACGCTGAAAA  
AGACGAGCTAAAATGATCGAAGTCCCGTTGAGTACATCGCAGGTAAGTGGTTGCTAAAGACTATATTGATGAGTCTA  
CCGGCGAGCTGATCTGCGCAGCGAACATGGAGCTGAGCCTGGATCTGCTGGCTAAGCTGAGCCAGTCTGGTCAACAGCGT  
ATCGAAACGCTGTTACCAACGATCTGGATCACGGCCATATATCTGAAACCTTACGTGTCGACCCAACTAACGACCG  
TCTGAGCGACTGGTAGAAATCTACCGCATGATGCGCCCTGGCGAGCCCGGACTCGTGAAGCAGCTGAAAGCCTGTTCCG  
AGAACCTGTTCTTCCGAAGACCGTTATGACTTGTCTGCGGTTGGTTCGATGAAGTTCAACCGTTCTCTGCTGCGCGAA  
GAAATCGAAGTTCCGGTATCCTGAGCAAAGACGACATCATTGATGTTATGAAAAAGCTCATCGATATCCGTAACGGTAA  
AGCGAAGTCGATGATATCGACCACCTCGCAACCGTCGATCCGTTCCGTTGGCGAAATGGCGGAAACAGTTCCCGG  
TTGGCCTGGTACGTGTAGAGCGTGGTGAAGAGCGTCTGTCTTGGCGATCTGGATACCTGATGCCACAGGATATG  
ATCAACGCCAAGCCGATTTCCGAGCAGTGAAGAGTCTTCCGTTCCAGCCAGCTGTCTCAGTTTATGGACCAGAACA  
CCCGTGTCTGAGATTACGCACAAACGTCGATCTCCGACTCGCCAGGCGGCTGACCCGTGAACGTGCAGGCTTCG  
AAGTTGAGAGCTACACCCGACTACTACGGTCGCTATGTCCAATCGAAACCCCTGAAGTCCGAACATCCGTTGATC  
AACTCTGTCCGTGACGACAGACTAACGAATACGGCTTCCCTTGAGACTCCGTATCGTAAAGTACCGGACCGGTGTTGT  
AACTGACGAAATTCACTACCTGTCTGCTATCGAAGAAGGCAACTACGTTATCGCCAGGCGAACTCCAACCTGGATGAAG  
AAGGCCACTTCGTAGAAGACCTGGTAACTTCCGCTAGCAAAGGCGAATCCAGCTTGTTCAGCCGCGACCGGTTGACTAC  
ATGGACGATCCACCCAGCAGGTGGTATCCGTCGGTGCCTCCCTGATCCCGTTCTGGAACACGATGACGCCAACCGTGC  
ATTGATGGGTGCGAACATGCAACGTCAGGCCGTTCCGACTCTGCGCGCTGATAAGCCGCTGGTTGGTACTGGTATGGAAC  
GTGCTGTTGCCGTTGACTCCGGTGAACGCGGTAGCTAAACGTTGGTGGTGTGCTTCCAGTACGTGGATGCTTCCCGTATC  
GTTATCAAAGTTAACGAAGACGAGATGTATCCGGGTGAAGCAGGTATCGACATCTACAACCTGACCAAATACACCCGTT  
TAACCAGAACACCTGTATCAACCAGATGCCGTGTGTCTCTGGTGAACCGGTTGAACGTGGCGACGTGCTGGCAGACG  
GTCCGTCCACCGACCTCGGTGAACGCGCTTGGTGAACATGCGCGTAGCGTTCATGCCGTGGAATGGTTACAACCTC  
GAAGACTCCATCCTCGTATCCGAGCGTGTGTTCCAGGAAGACCGTTTACCACCATCCACATTGAGGAACGGCGTGTGT  
GTCCCGTGACACCAAGCTGGTCCGGAAGAGATCACCGCTGACATCCCGAACGTTGGTGAAGCTGCGCTCTCAAACCTGG  
ATGAATCCGGTATCGTTTACATTGGTGGGAAAGTGACCGGTGGCGACATTCTGGTTGGTAAAGTAAACGCCGAAAGGTGAA  
ACTCAGCTGACCCAGAAGAAAACTGCTGCGTGCATCTTCCGTTGAGAAAGCCTCTGACGTTAAAGACTCTTCTCTGCG  
CGTACCAAACGGTGTATCCGGTACGGTATCGACGTTCCAGGCTTTACTCGCGATGGCGTAGAAAAAGACAAACGTGCCG  
TGAAAAATCGAAGAAATGACGCTCAAACAGGCGAAGAAAGACCTGTCTGAAGAACTGCAGATCCTCGAAGCGGGTCTGTT  
AGCCGTATCCGTGCTGTGCTGGTAGCCGGTGGCGTTGAAGCTGAGAAGCTCGACAAACTGCCGCGGATCGCTGGCTGGA

GCTGGGCTGACAGACGAAGAGAAACAAAATCAGCTGGAACAGCTGGCTGAGCAGTATGACGAACTGAAACACGAGTTCG  
AGAAGAACTCGAAGCGAAACGCCGAAAATCACCCAGGGCGACGATCTGGCACGGGCGTCTGAAGATTGTTAAGGTA  
TATCTGGCGGTTAAACGCCGTATCCAGCCTGGTGACAAGATGGCAGGTCGTCACGGTAACAAGGGTGAATTTCTAAGAT  
CAACCCGATCGAAGATATGCCTTACGATGAAAACGGTACGCCGTAGACATCGTACTGAACCCGCTGGGCGTACCGTCTC  
GTATGAACATCGGTGAGATCCTCGAAACCCACTGGGTATGGCTGCGAAAGGTATCGGCGACAAGATCAACGCCATGCTG  
AAACAGCAGCAAGAAGTCGCGAAACTGCGGAATTCATCCAGCGTGCGTACGATCTGGGCGTGACGTTGTCAGAAAGT  
TGACCTGAGTACCTTCAGCGATGAAGAAGTTATGCGTCTGGCTGAAAACCTGCGCAAAGGTATGCCAATCGCAACGCCGG  
TGTTGACGGTGCGAAAGAAGCAGAAATTAAGAGCTGCTGAAACTTGGCGACTGCGGACTTCCGGTCAGATCCGCTG  
TACGATGGTCGCACTGGTGAACAGTTCGAGCGTCCGGTAACCGTTGGTTACATGTACATGTGAAACTGAACCACCTGGT  
CGACGACAAGATGCACGCGCTTCCACCGTTTACAGCCTGGTACTCAGCAGCCGCTGGGTGGTAAGGCACAGTTCG  
GTGGTCAGCGTTTCGGGAGATGGAAGTGTGGGCGTGGAAGCATAACGGCGCAGCATAACCCCTGCAGGAAATGCTCACC  
GTTAAGTCTGATGACGTGAACGGTCGTACCAAGATGTATAAAACATCGTGGACGGCAACCATCAGATGGAGCCGGGCAT  
GCCAGAATCCTTCAACGTATTGTTGAAAGAGATTGTTGCTGGGTATCAACATCGAACTGGAAGACGAGTAATTCGCG  
TCAAACAGGTCAGTGTGCGGTTAAACCCGGCAGCGGATTGTGCTAACTCCGACGGGAGCAAATCCGTGAAAGATTT  
ATTAAGTTTCTGAAAGCGCAGACTAAAACCGAAGATTGATGCGATCAAAATGCTCTGGCTTCGCCAGACATATCC  
GTTACGGTCTTTCGGTGAAGTTAAAAAGCCGAAACCATCAACTACCGTACGTTCAAACCGAAGCTGACGGCCTTTTC  
TGCGCCCGTATCTTTGGGCCGGTAAAAGATTACGAGTGCTGTGCGGTAAGTACAAGCGCCTGAAACACCGTGGCGTAT  
CTGTGAGAAGTGGCGGTTGAAAGTACCCAGACTAAAGTACGCCGTGAGCGTATGGGCCACATCGAACTGGCTTCCCGCA  
CTGCGCACATCTGGTTCTGAAATCGCTGCCGTCCCGTATCGGTCTGCTGCTCGATATGCCGCTGCGCGATATCGAACGC  
GTAAGTGTACTTTGAATCCTATGTGGTTATCGAAGCGGTATGACCAACCTGGAACGTCAGCAGATCCTGACTGAAGAGCA  
GTATCTGGACGCGCTGGAAGAGTTCGGTGACGAATTCGACGCGAAGATGGGGCGGAAGCAATCCAGGCTCTGCTGAAGA  
GCATGGATCTGGAGCAAGAGTGCGAACAGCTGCGTGAAGAGCTGAACGAAACCAACTCCGAAACCAAGCGTAAAAAGCTG  
ACCAAGCGTATCAAAGCTGTTGGAAGCGTTCGTTGAGTCTGGTAACAAACAGAGTGGATGATCCTGACCGTTCGCGGT  
ACTGCCGCGAGATCTGCGTCCGCTGGTCCGCTGGATGGTGGTCTTTGCGACTTCTGACCTGAACGATCTGTATCGTC  
GCGTCATTAACCGTAACAACCGTCTGAAACGCTGCTGGATCTGGCTGCGCCGACATCATCGTACGTAACGAAAAACGT  
ATGCTGAGGAAGCGGTAGACGCCCTGCTGGATAACGGTCTGCGCGTCTGCGATCACCGGTTCTAACAAAGCGTCTCT  
GAAATCTTTGGCCGACATGATCAAAGTAAACAGGGTCTTTCCGTGAGAACCTGCTCGGTAAAGCGTGTGACTACTCCG  
GTCGTTCTGTAATCACCGTAGGTCATACCTGCGTCTGCATCAGTCCGGTCTGCCGAAGAAAATGGCACTGGAGCTGTT  
AAACCGTTCATCTACGGCAAGCTGGAACCTGCGTGGTCTTGTACACCATTAAGCTGCGAAGAAAATGGTTGAGCGCGA  
AGAAGTGTGCTTTGGGATATCCTGGACGAAGTTATCCGGAACACCCGGTACTGCTGAACCGTGCACCGACTCTGCACC  
GTCTGGGTATCCAGGCATTTGAACCGTACTGATCGAAGGTAAGCTATCCAGCTGCACCCGCTGGTTTGTGCGGCATAT  
AACCGCGACTTCGATGGTGACCAGATGGCTGTTACGTAACCGTACGCTGGAAGCCAGCTGGAAGCGCGTGGCTGAT  
GATGCTACCAACAACATCCTGTCCCCGGCGAACGGCGAACCAATCATCGTTCCGTCTCAGGACGTTGTACTGGGTCTGT  
ACTACATGACCCGTGACTGTGTTAACGCCAAAGGCGAAGGCATGGTGTGACTGGCCCGAAAGAAGCAGAACGTCTGTAT  
CGCTCTGGTCTGGCTTCTGATGCGCGCGTTAAAGTGCATACCCGAGTATGAAAAGATGCTAACGGTGAATTAGT  
AGCGAAAACAGCCTGAAAGACAGCTGTTGGCCGTGCCATTCTGTGGATGATTGTACCGAAAGGTCTGCCTACTCCA  
TCGTCAACCGGCGCTGGTAAAAAAGCAATCTCCAAAATGCTGAACACCTGCTACCGCATTCTCGGTCTGAAACCGACC  
GTTATTTTTGCGGACAGATCATGTACACCGGCTTCGCTATGCAGCGGTTCTGGTGCATCTGTTGGTATCGATGACAT  
GGTCATCCCGGAGAAGAAACACGAAATCATCTCCGAGGCGAAGCAGAAGTTGCTGAAATTCAGGAGCATTTCCAGTCTG  
GTCTGGTAACTGCGGGCGAACGCTACAACAAGTTATCGATATCTGGGCTGCGGCGAACGATCGTGTATCCAAAGCGATG  
ATGGATAACCTGCAAACTGAAACCGTATTAACCGTACGGTACGGAAGAGAAGCAGGTTTCCTTCAACAGCATCTACAT  
GATGGCCGACTCCGGTGGCGGTGGTTCTGCGGCACAGATTCGTACGTTGCTGGTATGCGTGGTCTGATGGCGAAGCCGG  
ATGGCTCCATCATCGAAACGCCAATCACCGGAACTCCGTGAAGGTCTGAACGTAACCTCCAGTACTTCTCATCTCCACCCAC  
GGTGTCTGTAAGGTCTGGCGGATACCGCACTGAAAACCTGCGAATCCGGTTACCTGACTCGTCTGTTGACGTGGC  
GCAGGACCTGGTGGTTACCGAAGACGATTGTGGTACCCATGAAGGTATCATGATGACTCCGGTTATCGAGGGTGGTACG  
TTAAAGAGCCGCTGCGGATCGCGTACTGGTCTGTAACCTGCTGAAGACGTTCTGAAGCCGGTACTGCTGATATCCTC  
GTTCCGCGCAACAGCTGCTGCACGAACAGTGGTGTGACCTGCTGGAAGAGAACTCTGTCGACGCGGTTAAAGTACGTT  
TGTTGTATCTGTGACACCGACTTTGGTGTATGTGCGCACTGCTACGGTCTGACCTGGCGCTGGCCACATCATCAACA  
AGGGTGAAGCAATCGGTGTTATCGCGCACAGTCCATCGGTGAACCGGTACACAGCTGACCATGCGTACGTTCCACATC  
GGTGGTGGCGATCTCGTGGCTGCTGAATCCAGCATCAAGTAAAAACAAAGGTAGCATCAAGCTCAGCAACGTGAA  
GTCGGTTGTAACCTCAGCGGTAACCTGGTTATCACCTCCGTAATACTGAACTGAAACTGATCGACGAATTCGGTCTGA  
CTAAAGAAAGTACAAAGTACCTTACGGTGGGACTGGCGAAAGGCGATGGCGAACAGGTTGCTGGCGGCGAAACCGTT  
GCAAACTGGGACCCGCACACCATGCCGTTATCACCGAAGTAAGCGGTTTTGTACGCTTACTGACATGATCGACGGCCA  
GACCATTACGGTTCAGACCGACGAACTGACCGGTCTGTCTCGCTGGTGGTTCTGGATTCCGCGAAGCTACCGCAGGTG  
GTAAGATCTGCGTCCGGCACTGAAAATCGTTGATGCTCAGGGTAACGACGTTCTGATCCAGGTACCGATATGCCAGCG  
CAGTACTTCTGCCGGTAAAGCGATTGTTACGCTGGAAGATGGCGTACAGATCAGCTCTGGTACACCTGGCGCGTAT

TCCGAGGAATCCGGCGGTACCAAGGACATCACCGTGGTCTGCCGCGGTTGCGGACCTGTTGGAAGCACGTCGTCCGA  
AAGAGCCGGCAATCCTGGCTGAAATCAGCGGTATCGTTTCCTTCGGTAAAGAAACCAAAGGTAACGTCGTCTGTTATC  
ACCCGGTAGACGGTAGCGATCCGTACGAAGAGATGATTCCGAAATGGCGTCAGCTCAACGTGTTGGAAGGTGAACGTGT  
AGAACGTGGTACGTAATTTCCGACGGTCCGGAAGCGCCGACGACATTCTGCGTCTGCGTGGTGTTCATGCTGTTACTC  
GTTACATCGTTAACGAAGTACAGGACGTATACCGTCTGCAGGGCGTTAAGATTAACGATAAACACATCGAAGTTATCGTT  
CGTCAGATGCTGCGTAAAGTACCATCGTTAACGCGGGTAGCTCCGACTTCCTGGAAGGCGAACAGGTTGAATACTCTCG  
CGTCAAGATCGCAAACCGGAACTGGAAGCGAACGGCAAAGTGGGTGCAACTTACTCCCGGATCTGCTGGGTATCACCA  
AAGCGTCTCTGGCAACCGAGTCTTTCATCTCCGCGGCATCGTTCCAGGAGACCACTCGCGTCTGACCGAAGCAGCCGTT  
GCGGGCAAACGCGACGAACTGCGCGGCCTGAAAGAGAACGTTATCGTGGTCTGCTGATCCCGCAGGTACCGGTTACGC  
GTACCACCAGGATCGTATGCGTGCCTGCTGCGGGTGAAGCTCCGGTGCACCGCAGGTGACTGCAGAAGCAGCATCTG  
CCAGCCTGGCAGAACTGCTGAACGCAGTCTGGCGGTTCTGATAACGAGTAATCGTTAATCCGAAATAACGTAACAAAC  
CCGCTTCGCGGGTTTTTTTATGGGGGAGTTTAGGGAAAGAGCATTGTGAGAATATTTAAGGAATTTCTGAATACTCA  
TAATCAATGTAGAGTACTAATATCTGAACTGACTGAACTAATTGAGTCAAACCTCGGCAAGGATTCGATACTATTC  
TGTGTAATTTCTTAAGGAACGAGAATGAAACAGGAAGTGGAAAAGTGGCGACTTTTGGACATCCGGATGGTGATTC  
GTGATTTATCATTCTTGTGCTCATCAGGCTGTCTACGTTGAGCATCATGAGGGCAAAGACCTTTAGAGATTCGTTTT  
TGGTTACCTACTCTTCTACTGCTTACAAAAGATTATGAACATCAGACGAACGAAGAAAAACAATCGTTAATGTACCA  
CGCGCTAAAGAAATCTCGTCCCTTCTGCCAGCACCGTTATAACTTAGCGCGCACACTTAAAAAGAACTATTTTGGCGC  
TGCCAGAAAGCAACGTTATTCATGCCGGTATGGTAGCTATGCCGTGATTGAGGTGGACTTAGACGGAGGAGATAAGGCA  
TTTTACTTTGTTGCGTTCAGGGCTTTCAGGGAAAAGAAAAAATCCGTTTGCATGTAACCTAGCGTTCATCCATTTCTGA  
AAAAAGAAAGGTAATCAGTGAAATTTTACCATTGCCTACAACCTATTGAGAAATAAGCAGTTCCTCAGCCCTCAA  
AATAACAAACCCACCTTAAGGTGGGTTTCGCCAGAGAATTATCTCTGGTATTCAGAACGCCATTACCGACTTTGCCTT  
GACCTTGCATAATCGCAGGTTGCGGGATGTCTGAATTTCTCAGTCTGCTGCATCCTGGAAGATGAGAATGTGTTCT  
TATTTTCTGCTCTATCATAGTTGAGTATTTACTCTTACAATCAGATCTCTTTCATTGCTCAACAGGCGATGGCTTACG  
ACTTTGCATTACGGAATTTTAAGAAAGCAGGGCGAAACGAGGAAGAAGCTTTTCCGCTGGACAACATTCCTGCTGAC  
GGCACTACCATAAAAAACACAACGCTTCAACAACCTTGCCTTTTTCATCTCCGTAGCGGCTCGGAATAAATTTACGT  
TCTTACATTCGCTCTCATAGTCTTTCGAGGGCGCTCCAGATAGCTGTCCAGTCTTCCATACCGGCTGCAAACCTG  
AGCGGTTAACGCGCAGCAACCGCTTCCGGTCTGCGATCGTCTGCGGTGAGAACTGTTCCAACCTCGGGGTGATTATCGG  
CATAGCCACCTGGCTGCGTTTTTCGAGAAGGCGCTGACGTTATTGATCGCCAGCGGAATAACCGCATCGCGAAACACGCT  
GATTCGCGGTGGAGAGTGACAGTTCAATCTCCGTCGCAAGCAGTCGGAAGGCGCAGATGGTTTGCATAACTGGCGTTC  
ATCCATAATCGACGCAGGCTCAATGCCGCCAGTACACGGGCGCAGGCGCGGAAAGGAGACAGAGTAACGGCTTTGCCAGT  
AATGCTGTTGACGATAGCAAATGTTCCGGCAACCATATAGCTGTCAACGCGCCAGTTGTGCGAAAGGCCAATTAGCGCG  
CCGAGGCTATCTTATCAATCCCGCACGCCCCAGCCGATCCGGCGTTTCCAGCCGCCAGAAGAAGTCTGTTTTTTGCC  
TTTCAGATGATGGCGGCATAAGTGCCTCGTATGTTCTCTGATAAACCATCACGCCATCCAGACCAAGTTGCTTTA  
ACTCGGCGTATTCGCTCCGCCAGCGTTGCACTTCATCTGTAGTGAAGAGAAGTTCACGAAGGGCAGGGAGATGA  
CGACGAAAGTAATCCATCCCACTTTCCGCTGATGTTACCAGTGACTAACAGCAGATGTTCAAAGCCCATCTCCCGTAT  
AGCGGCACTTTCCCTGGCAATATCCGTTTCATCCAGCGTTTTGCGCTTGTGCGATTACTCATGAAAATCCACAGTACG  
TGAGTCTGTTAGCGCAAAGATTGGAAGATAAAGCGGGACGTAGAACTAATGTTGTTGCCAAATCGTACGGGTGAGA  
CGCTGCGCCGTTGGGCCAGTTGTTCCAGATAGCCACTGGCGGACGGGATAACAGCGCCATCATGTCGTCGCGGGTGG  
TTGCGAGGCAATTTAGCGCCGCTCTACGTCAGCAGCGTTTTGCCGTTGATACGAGGCGGATGTCGTTCCAGTCCAGTT  
GTGCGCAGCATCGCTGAAGTTTTTCATGCCGATCGCTCCAGAAATCCGGTACGCGGCTGGTGGCATGAGCAAAATAAC  
TGGGCTGCCGGTCCGGACTGACGTGCCAGTAGGCTGCTTCTACCGCCAGACGAAATGCCTTCGCCATGTTGACGGGA  
TCGTCGCGACGGCAATCGCCGTATTCACTAACCCGCGTCCGCCCCATTTCCAGCGCTGCGCGGCATGGCTGGGAAC  
GCCGATGCCAGCATCGACAACCACCGCACTGTGGCTGCTGGATAAATAATCTCCAGCATGGCGGGTTTTCCAGTCCCT  
GATTCGAGCAATCGCGCGCCGAGCGGCATCACCGCTGCACAGCCGACTTCTTCCAGACGTTTACACAATACCGGATCG  
GCCCCGAGTAAGGCAGCACGACAAATCCCTGTTGTACCAGGTTTTCGCGGCTTTCCAGGTTTTGATGGGATCGGGCAA  
CAGCCAGCGGGCGTCAGGTTGAATCTTAATTTAACAGTTTTGTGCTAACGTTTACGAGCCAGATGGCGGGCGAAAA  
TGGCTTCTCCGCTGTTTTCCGCCCCGATGATTTGGCAGCAGGGTACACCCCGCCGATAAGCGGTTCCGAGGATAGCG  
TCGTTGTGCTGGCGCAAGTGCACAGTTTTATCGCCAGTGTACCAGCTGGCTGCCGGAAGCGGGATCGCTCCACCAT  
CAGTTGTGAAGAAGCGAATTTCCCTGTGCCGTAACAGATGTGAATCAAACGTTTTGTCCGCAATACGTAACATTTCAA  
CCCCCTGCAATAACCTGAAAAAGCAGGATCTGGTCGCATCCTGCACGATATGTTGCGCCACTGCTCACGGGGACGAT  
TTGCTGATTAATCGCCAGAGCCGCGCCGCTTGTGCTGGTGGTGGTGGTGGTGGTGGTGGTGGTGGTGGTGGTGGTGGT  
CGCACTGCATCGCTTATCGTTAACAGGATCTGCATTGCTTCTCCGCATACCGGGCAACCACTGGCGGGCGCAACGC  
CAGGCTGCGCCACTGGCTGATTTACCGTCAACAGTCGGAGTTCTCCCGAGGTGCTCTATACCGTTAATAACTTAA  
TGGCTTCCAGTGCCTGCAAAGTGGCCATAACCCCGACCACCGGGCAACACGCCCCGCTGCGGCAGTTGCGTTCTGGC  
TCCTGGTTATCTGGCCACAGGCAGCGGTAACACCCCTGCTCCAGGGCGGCGTCAGTACCATCAACTGACCGCAAATCC  
GACCGCGCTGGCGGTGATAAGCGGCGTGTGAGTGCCACGAGCGGCATTAATCTCTGGCGAGTCGCCATATTGTCGG



TACAGTCGAGCACCACATCGGCCCGTGAACCGCATCTTTAACGCCTCACCCGTTAACCGTTGTTGTAATGCTGTCAGT  
TGAATGTCGGGATTCAACTGTGTCAGTCGCTGTTGGCTGACCTGCGATTTTCGGGCGATCGATATCTTCAGTGGTAAAGAG  
GATTTGTCGTTGCAGATTGCTTAAATGCACATCGTCGTATCTGCCAGTACCAGCGTCCCAGCCAGCGCCCGCCAGGT  
ACAGCGCAGCAGGTGTACCCAGCCCGCCAGACCGATAATCAGCACTGGCTGTCGAGCAGTTTTTGTGCCCGTCCAGA  
GCGATATCGTCGAGCAGGATTTGGCGGCTATAACGCATAAAGTACCGGTCATTCATCGCCAACTCCTGCAATTTCCAGCA  
ACTGTGCCGTTGCCAAACGCCAGTCTGCGGCTTGAGTAATGGCGCTGACGACGGCGATACTGCCGACACCCGTTGCTATC  
ACCCGAGGCGCGCTGCCAGACTGATACCCGCAATCGCCACGGTGGGATAATCCGCCAGTGCCTCAACATGCCGTGCCAG  
CTGTTCCAGCCCTGCGGTGCGAAGGCATCTGTTTGGTTGCGTCGGGAACACATGTCCAGCGGATATAAGAGGGGC  
GTGCTGCCAGCGCAGCTGATTTCCATATCGTCATGTGTCGAAACGCCAGCCGAGGCTGCCGCGGGATGGCATTG  
AGATCGGTGGCTTCAAATCTTCTGCCCAAATGGACGCCATACGCCTGATGCTTGATCGCCAGCCGCCAGTAATCGTT  
GATAACAATCGCGCTTATAGCGGCGCCAGCGCAATTGCCGCCAGACATCGGCTTCCACCTCTTCATCGCGCCGAT  
CTTTGATGCGTAGCTGGAGAGTACGTACGCCTGCATCCAACAGACGTTGATCCACTGTACGCTGTCCACCACCGGGTAC  
AGTCTGAACGAAAAGGTACAGGAGGAAAATCAGGCTGATACATCAGCTTCTCCTTACGAGGTAGATTTCTCCGCT  
CTGGCAGGAAGTTCTCCGACATATCCGCCATTCCATTTCAATAGTTTGCCTGGCGGCGTAATCACGCACTTCTGGCT  
GATTTTCATCGAGCAGAATTTCCGCCACACATGGAGCAAAAATGGCGACTTTACCTGACTTTGCGGCGAGGTTTCAT  
CGTGATAAGCGCGGCGGTAACGGGTCGAGGGCCAGATTAACCTGGTCTTCCAGCGAAATTCGAAGCGGGCTTTCGAC  
ATGGCGTTATCGCGAATTTGCGCGCCCGATGCCCTTTCGCCAGTTCAGCGCGCTGGGCGAGCAATCTTATAGGTGATAAG  
CCCTGCTTAAACATCTTCTTATTGGGCGAGCCAGATGCTCTTTTGGCGTTACGTAACAGAGCATCGCGCAGCCAAACC  
AGCCAATCATCGCCGACCAATCCCGACGTGAAGTGGTCATAGCCCGCGCAATATCGGTAGTTAGCGGCCCCAGAGTG  
TAAAACGGCGCTTCTGCGCAGTGTCTAACTCCTCGGTATATTGCGGCGGATCATCTGCATCGGCACGTGGCCTGGGCC  
TTCAATCATCACCTGCACGTATATCCAGGCAATTTTGGTCAGTTGCCAGCGTATGCAGCTCGGCAAACCTGCGCTT  
CATCGTTGGGCTCCTGAATAGAACCGGGCGCAGACCGTCGCCAGCGACAGCGAAACGTATAAGCGGCACAGATTTCA  
CAAATTTGCGGAAAGTGTGATAGAGGAAATTTCTGATGATGGGAGAGGCACATTTGCCATAATCGAACCGCCGCG  
AGAGACGATACCGGTGAGCGTTTCCGGTATCGGCACATAGCGCAGCAGTACGCCCGCATGGATAGTGAAGTAATCCA  
CACCTTGCTCGGCTGTTCCAGCAGCGTGTGCGGAAACGCTTCCAGGTAAGATCTTCCGCGATCCCGTTAACCTTCTCC  
AGCGCTGGTAGATCGGCACTGTACCGATCGGCACCGGGCTGTTACGAAAATCCACTCGCGGGTTTCTGTAATATAGCG  
ACCGGTGGAGAGATCCATACCGTATCCGCTCCCGCAGCGGTGGACCATACCAGCTTTTCCACTTCTTCTCGATGGAAG  
AGGTGACCGCGAGTTGCCGATATTGGCGTTAACTTTACCAGGAAATTGCGACCAATAATCATCGGCTCCGATTCCGGA  
TGATTAATGTTGGCCGGGATAATCGCACGTCCGGCAGCAACTTATCACGGACAAATTCGCGAGTGATTTTTCCGGCAG  
ATGTGCGCCAAAGCTCATTCCCGATGCTGGTGGCGTAAAACCTCGTACGGATGCGCTCGCGGCCATATTCTCGCGGA  
TGCGGATGAATTCATTTCCGGCGTATGATGCCCTGGCGGGCTAGTGCAAGTTGGGTGACACGGCGTCTGCTTTGGCG  
CGTTTTGGTGTAGTACGCCGCTAAAACCGCAGTTGCTGCGAGGCCATCATCTGCCAGCCGCGCTTGTAGTGAATCGGAACT  
GGCAGCGTAAGTTCTTCGGTATCGCCGCGCGCATCGATCCACGGCTGGCGTAGTTTTGCCAGCCCTTGTGACGTTAA  
TGGAATCTGCGGATCACCATACGGGCCGGAGGTGTCTGAGACCGGAATCGTTCGTTTTCTTCTGACTGCGGCTGTTCT  
TTGCTACCGCAATTAGCGTCCGGCTAAGCTGGATCTACGCATCGGCACGCGCACGCCGGGTGTGTGCCAGTGATATA  
AATGCGTTTTGAGTTGGGAAAGGCGGTGCCTTCCAGGTGTGATAAAATGTTGGGCCCGGCGGCTTGTTCGCGCGGG  
TCAGTTTTGTTGAGACATAGCTCATTCCAAAAGTTAAGGACGTGGCTTGTGAGACGACGGATGAAGCAAGAGACGATC  
GCCGAGGGCGATGCGATAGCAGATTAACCTTGTTCCTTCCAGGATATTAGCCTGATCAGGTTCCGCGGATCCCGAA  
TAAACGGTCTCAGCCAGTTAAGGCACTCCGACAAGAAATAGCCCGCAAATGGGGCATTGAATGTAATACGCGTTAA  
CAGCGCAGAATCAAGCAGGATGTTTGACGCGGGCGGCTCAAGCACCAGCAGAATCAGTTATCTTCCAGCACAAGCGC  
CGTTCCAGCGCTCGCCGATGTCAGATAAAACCTGTTGAAACTCAAGGTAATTATCATGATCGATGGCGGTTTTCCAGAC  
TGAATCGTAGTAATCCATAATCTGTTGAGTATTGGCTTCCAGTTGCGGCCAAATCTTCCGCGCGCGCGGAGTTGCCCG  
TTGCCTTCCAGCTTATGAAGAATGCGCTCATAAATACTGAAATGTCCGCGAGACAAGTAATCGACCAGGCTCTGACAAAA  
ATCATCAAGGGCTTTTTGTTTTAGCCTCATGTACGATTCTTGGCAGGCTTAATGCCAACCAGATTGTAGTAAGCCACGA  
GCAGATGCTTACGTACATGTAGCCAGCGATCAACCAGTTTGTACTTCTCTGACGCGCTCCGTCAGGTTATCGAGCTGG  
TTAAGCATGATTGACTCCGCAAGTTTGTATTCAAAAACCTGCTCAGTGAGAAATGTAAAAACCATGTTAAACATGCCAGTG  
ATGCAAAGGTAGTGCAAGAGCTATGGATCGTATAATTGAAAAATTAGATCACGGCTGGTGGTCTGACCCATGAACAAA  
AATTATGGTTGCCAAGGGAGAATTGCCATATGGCGAAGCGGCAATTTGATCTTGTGGTCCAGCGCGCACTACAAATC  
GGCAATGGCAGGGGAACCTGTTTGGTTAGTACAACAGCAGCGGCTCACGATATGGGTGGTACGTCAGGTCATTGA  
TCTCGATGTTGGGCTGTTTCAACTGGCCGACGAGGCGTACAACCTGGCGGAGTTTTACCGATCGCATAAATACTGTGGTT  
ACTGCGGGCATGAAATGTATCCGAGCAAAACCGAATGGCGATGCTGTGAGCCATTGCCGTGAGCGTTACTACCCGCAA  
ATCGCCCCCTGATTATTGTTGCCATCCGTCGCGATGATTGATCCTCCTCGCCAGCATAACCCGCATCGTAACGGTGT  
CCATACAGTACTTGGCGATTGCTCGAAGTGGGCGAAACCTCGAGCAGGAGTCCGCGGGAAAGTATGGAAGAGAGCG  
GAATTAAGTTAAAAACTTGCCTTACGTACTTCTAGCCGTGGCCGTTTTCTCAGTCTTAAATGACCGGTTTTATGGCG  
GAATATGACAGCGCGACATCGTGATCGACCCGAAAGAATTGCTCGAGGCGAACTGGTATCGCTATGACGATTTGCCGTT  
ACTCCCGCCCGCCGCGCAGGCTAGCGCGCGCTGATAGAAGATACGGTGGCGATGTGTCGGGCGAGATGAGTGATGAT

ACACTGACCGCCTGACGACTAAGGAACAGCCAAAATGACCGAECTTAAAAACGATCGTTATCTGCGGGCGCTGCTGCGC  
CAGCCCCTTGATGTCCTCAGTATGGATGATGCGCAGGCGGGTCTGCTATCTACCGGAATATAAAGCCACGCGGCCA  
GGCAGGCGATTTTATGTGCTGTGCAAAAACGCCGAGCTGGCGTGCAGAGTACTTTGCAACCGCTGCGTCTACCCGC  
TGGATGCGGCGATCCTCTTTCCGATATCCTCACCGTGCCGGACGCGATGGGGTTAGGGCTCTATTTGAAAGCCGGAGAA  
GGTCCGCGTTTTACTCGCCAGTACCTGCAAAAGCTGACGTGATAACTGCCAATTCCGGACCCGGAAGATGAACTGGG  
TTACGTGATGAACGCGGTGCGTACCATTGCTGCGGAACTGAAAGGCGAAGTGCCGCTGATTGGTTTTCCGGCAGCCCGT  
GGACGCTGGCGACCTACATGGTGAAGGCGGCGAGCAGCAAAAGCCTTACCCTGATCAAAAAATGATGTATGCCGATCCG  
CAGGCGCTGCACGCTCTGCTCGATAAACTGGCGAAAAGCGTCACTTTGTATCTGAATGCGCAGATTAAGCCGGTGCTCA  
GGCAGTGATGATTTTCGACACCTGGGGCGGCGTCTTACCAGGCGGCGATTATCAACAGTTCTGCTCTATTACATGCATA  
AAATTGTTGATGGTTTACTGCGTGA AACGACGCGTCCCGCTACCCTGCTGTTTACCAAAGGCGGCGGACAGTGG  
CTGGAAGCCATGGCAGAAACCGTTGCGATGCGTGGGCTCGACTGGACAACGGACATCGCCGATGCGCGCCGCGCTGT  
GGCAATAAAGTCGCGTTGAGGGTAATATGGATCCGTCGATGCTGTACGCGCCGCTGCCCGATTGAAGAAGAAGTAG  
CGACTATACTGACGTTTCCGTACGCGCAAGGTCATGCTTTAACCTTGGTACGGCATTATCAGGATGTGCCCA  
GAACATGCTGCGGTGTTGTTGGAGGCAAGTGCATCGACTGTCTGAACAGTATCACCGCTAAGGAGTGATTATGGATCTCG  
GTATTACGCGCTCAACAACTGAACTGGCTTCTTGTGATCCGCGAGGATCGACTCGATAAAGATCCACCGGATCTGA  
TCGCCGAGCGATGTCGGGTTTGGCAGGGCGGAGAAGTGACGCGAGCGGCGATGGTGTGCTGAAATATCCCTCGCTT  
GAGCTGGTCGAGTATAAAGTTGCCCGCATCGCCACCACCATGCCTTACATTCCAGGTTTTCTTTCTTCCGCAATATCC  
TGCCTGCTGGCAGCGTGGGAGATGCTGTGCAAAAAGCCGATTTAGTGTGTCGATGGTTCATGGGATCTCGCATCCTC  
GCCGTCTTGGCGTCCAGCCATTTTGGCTTATTGGTGGATGTGCCGACCATTGGCGTGGCGAAAAAACGGCTCTGCGGT  
AAATTCGAACCGCTCTCCAGCGAACCGGGCGCGTGGCCCCACTGATGGATAAAGGCGAGCAGCTGGCCTGGGTCTGGCG  
CAGCAAAAGCGCGTGAACCCGTTGTTTATCGTACCAGCCATCGGGTACGCGTGGACAGCGCGCTGGCGTGGGTACAAC  
GCTGCATGAAAGGCTATCGTCTGCCGAGCCAACGCGTGGGCGGACGCGTGGCTCGGAACGTCCGGCGTTCTGTCGC  
TATACAGCAAATCAGCCCTAATCAGTAACTGCGGATAATTTCCGATTTGAGAACTCAACATGTTACAAAACCCAAT  
TCATCTGCGTCTGGAGCGCTGAAAGCTGGCAGCATGTCATTTATGGCTTGTCTATGCGAACGCATGTACCCCAATT  
ACGCCATGTTCTGCCAGCAAACCGTTTTGGTGTGGGCAAAATTTACCGTCGATTCTCGATCTCATCTGGGAAACGCTG  
ACCGTTAAAGACGCAAAAGTAAATTTGACAGCCAACCTGGAGAAATTTGAAGAAGCGATTCTTCCAGCCGACGATTTTCA  
TCTGTACGGCGTTTATCCGCAATCGATGCTGCGTGGCGTAAAGTAACTGGTCCATTGCGGTTTGGTGGTAAACGC  
TCGAACACGCGGTGGAAGTGAAGACTCCATCACGACCGTTCGATGCTGAAATGACTCAGGCTGGTCCGCAAAATG  
AGCGATGAAGAGCTTAAAGAAAACCCAGCTGTAGAGCAAGAATGGGACATTCAGTGGGAAATATTCCGACTTTTAGCTGA  
GTGCGAAGAACCGATATCGAGCTGATAAAAGGCCCTTAGGGCAGACCTGCGTGAAGGCGGGTGAAGCAATATTGGTATAA  
TTTTTCCAGCAATAAGACCAGAAAACGTGATTTAACGCTGATTTGTCGTACCTGGAGTCTTCCCTTCCGCCCCCGTCTG  
GTCTACATTTGGGGGGCAAAAAAGTGGCTATCGGTGCGTGTATGCAGGAGAGTGCTATTCTGGCATTTCGCTGCACT  
CGATGCTTAGCAAGCGATAAACACATTGTAAGGATAACTTATGAACAAGACTCAACTGATTGATGTAATTGCAGAGAAAG  
CAGAAGTGTCCAAAACCCAGGCTAAAGCTGCTCTGGAGTCCACTTGGTGCATTAAGTCTCTGAAAGAAGGCGAT  
GCTGTAACTGGTTGGTTTCCGTACCTTCAAAGTGAACACCGCGCTGAGCGTACTGGCCGCAACCCGAGACCGGTA  
AGAAATCAAATTTGCCGAGCTAACGTACCGGCAATTTGTTTCTGGCAAGGCACTGAAAGACGAGTAAAGTAAAGTGGC  
TGGCAGTGAACAGTTTTAACGAAGGGTGGTTTACCCTTTTGTCTTTCTGGCGTGCATATTGATGCTGGCTGGCGCT  
CTGTTCTCACTGCCTGTAGTATAACTTTCACCTTCTCCCTTACCAGCAGTGGATTTGCTGAAGACCAGGGCGCGGT  
ACGCATGTGGCAAAAGACAGCGGCGATAAATGTGCATCTGCTTCCGCTGTTTAGCCCGTGGCGAGTGGATACACGA  
CGGAGAGTATCGCTGGCAGGGCGATAACCTCACGTCATCAATATCAATGTTTACAGCAAAACCGCGTGAATATTCCG  
CGCGTTTTGACGATCGCGGTGATCTGAGCTTTATGCAACGTGAATCCGATGGGGAAAAGCAGCAGCTTTCTAACACCA  
AATCGATTTATACCGTTATCGTGTGATCAGATCCGCCAGATTAGCGATGCCTTACGTGAGGGGAGAGTCTGCTGCGCC  
AGGGGCGCTGGCATGCGATGGAACAGACCGTGACCCTGCGAAGGGCAAACCTTAAACCTGATTTAGATTGCGAGGCG  
ATAGCGCATATCGAGCGCCGAGAGCCGCTCTTCTGTTGATGTCAGCGTGGCATGGCTGGAAGCGCCCGAAGGTTGCGA  
ATTACTGTTAGTGCAAACCTCTGATTTCTGTCGCTGGCAACCAACGAGAAAACGTTCTGATTTACCAGTGGCCATACC  
CATATGACCGCCACCACCGCAGCCGCTAGCCCATGCCATTCCGGCTCCGCGCGGAATACCCGCTTACGCCATCGCGA  
TATCTGTTTTACCCGTAACCTATCTAACGACTGACGCAAATTTCCATCTCTTTGGCGACCGGTTAATTTTGTGCTA  
TCCGGTGGGTTGCGGCTAACAGGGCATTGTATTATAACGCTTCCGTCACCAGTTGCTGTTGAGTGGCTGCTTTGAGC  
GTAAAAGTCAATATGGATTTTCTGCCAGCTGTCTGTTGTCGTTGGTCAAAGGCGCGGCAATTTGCTGCCACATACCCT  
GTCCGCGTGAGCAAATGCAGATGTCGATCCCATCGCCATTGCTGAAAGCGCCATCATTACCAGGGCAATTTTCTGTTT  
CGTTTATGGTTAATCCTCCAGTGGTTGCTTACTTCCGGTATTGATCTTCCGTGCCAACGATGAAACGCTGATATGAC  
GGTAATCTGGCATGATAAACGAGTAAAATGACTGCTGCTGCGGGTAGCGAGTCAATTTTACTCATTGAAACTTAAAG  
CCTTTGTTACAGCGCAGGGTAAGCGCTGATAAAAGATGGCATGATTTCTGCTGTGAGAAAGGGATGAGCAGGCAAAGA  
AGAAGATGCGTTTTATGCAACGTTCTAAAGACTCCTTAGCTAAATGGTTAAGCGCGATCCTCCCCGTGGTATTGTTGGG  
CTGGTGGGATTGTTTGGGTAACCTGTATTCTGATTATGGGCGGCAAGCGAGGCGAGCCGAGGCAATTAAGGAAAA  
AGGTAATGTGCTTATCCGCGCTCTGGAGTCCGGAAGCCGCTAGGGATGGGGATGCGAATGCACCATGTACAGCAACAGG

CGCTTCTGGAAGAGATGGCGGGACAGCCGGGAGTGTGTGGTTTCGAGTCACCGATGCGCAGGGCATCATTATTCTTCAT  
AGCGACCCCGATAAGGTGCGGCGTGCCTCTATTCCCGGATGAAATGCAGAAATTAAGCCAGAGGAAAACCTCCCGCTG  
GCGGCTGCTTGGGAAAACGAAACTACGCTGCACTTGAGGTCTATCGTTTGTCCAGCCAATGTCAGCGCCTGGCGGC  
ATGGAATGCACAATATGCCGCGCTGTAACGGCAAAGCTGTGCCACAAGTAGATGCACAACAGGCTATTTTTATCGCCGTT  
GATGCCAGTGATCTGGTTGCAACCCAGAGTGGGGAAAAGCGCAATACCCTGATTATCCTCTTCGCCCTGGCGACGGTCTT  
GCTGGCAAGCGTATTGTCATTCTTCTGGTATCGCCGCTATCTGCGCTCGCGCCAGTCTCTACAAGATGAAATGAAGCGCA  
AAGAGAAGCTGGTGGCGCTGGGGCATCTTGCGGCAGGCGTTGCCACGAAATCCGTAACCCACTTTCTCGATTAAGGA  
CTGGCGAAATACTTTGCCGAGCGCGCCTGCAGGGGGAGAAGCGCATCAACTGGCGCAGGTGATGGCGAAAAGAGGCCGA  
CCGTTTAAACCGCGTGGTAAGCGAGTTGCTGGAAGTGGTAAGCCAACGCATCTGGCTTTCAGGGCGGTGGATCTCAACA  
CGCTGATTAACCACTCATTACAGCTGGTAAGTCAGGATGCAAACAGCCGGGAGATCCAGTTACGCTTACCGCCAACGAC  
ACATTACCGGAAATTCAGGCCGACCCGGACAGGCTGACTCAGGTCCTGTTGAATCTCTATCTCAATGCTATTCAGGCGAT  
TGGTCAGCATGGCGTGATTAGCGTGACGGCCAGCGAAAAGCGCGCGGGCGTAAAATCAGCGTTACCGACAGCGGTAAGG  
GAATTGCGGCAGATCAGCTTGATGCCATCTTCACTCCGTACTTACCCTAAAGCCGAAGGACCGGATTTGGGGCTGGCG  
GTCGTGCATAATATTGTTGAACAACACGGTGGTACAATTCAGGTCGAAGCCAGGAGGAAAAGGCTCAACGTTACCCCT  
CTGGTCCCGTCAATATTACGCGTAAGGACCCACAAGGATGACGCACGATAAATATCGATATTCTGGTGGTGGATGATGA  
CATTAGCCACTGCATTTTTGCAAGGTTACTGCGCGCTGGGGCTATAACGTCGCGTGGCGAACAGCGGGCGACAGG  
CGTTGGAGCAGGTGCGGAAACAGGTTTTGATCTTGTGCTTTCGATGTGCGAATGGCGGAGATGGACGGCATCGCCACG  
CTGAAAAGAGATCAAAGCGTTAAACCCGGCAATTCGGTGTGATTATGACTGCGTACTCCAGCGTCGAGACGGCGGTAGA  
GGCACTGAAAACCTGGGGCGTGGATTATCTCATCAAGCCGCTGGATTTTCGATAACCTACAGGCGACGCTGAAAAAGCGC  
TCGCGCATAACGCACAGTATTGATGCTGAAACACCTGCGGTGACTGCCAGCCAGTTTCGGTATGGTCGGTAAAAGCCCGCG  
ATGCAACACCTGCTCAGTGAATCGCCCTGTCGCGCCATCGGAAGCCACGGTACTGATCCACGGCGATTCCGGCACCCG  
TAAAGAGCTGGTCGCCAGGGCGATTACGCCAGTAGCGCACGTAGCGAAAACCGCTGGTAACGCTCACTGTGCGGCAC  
TCAACGAATCCTTGTGGAATCTGAATTGTTGCGTCACGAAAAGGGCGTTTACTGGAGCCGATAAACGCCGGGAAGGG  
CGTTTTGTTGAGGCGGACGGCGGCACGCTGTTTCTCGATGAAATTGGCGATATCTCGCGATGATGCAGGTGCGTCTGCT  
GCGTGCATTACAGGAGCGCAAGTTACGCGTGTGCGTAGCAACCAGATTATCTCGTTGATGTCGGGCTGATTGCGGCGA  
CCATCGCGATCTTCCGCGAGAGGTGAATGCCGGCGTTTTCCGAGGATCTCTACTATCGCCTGAATGTGGTGGCGATT  
GAAGTACCATCGCTGCGCAACGGCGGGAAGATATCCCTCTGCTGGCTGGCCATTTTCTGCAGCGCTTTCGCCGAGCGTAA  
TCGCAAGGCGGTAAGGTTTTACGCCCCAGGCGATGGATCTGTTGATTATTACGACTGGCCGGGAAATATTCTGAGC  
TGGAAAACCGCGTGAACGGGCAAGTGGTCTGCTGACCGGGGAATATATTTCCGAACCGGAGCTGCCGCTGGCGATTGCC  
AGTACGCCGATCCCGCTGGGACAAAAGTCAAGATATTAGCCGTTGGTGAAGTGAAAAAGAGGTGATTCTGGCGGCGCT  
GGAGAAAACGGGCGGCAACAAAACCGAAGCCGCCGCTCAGTTAGGGATCACGCGCAAAAACGCTATTGGCAAAAACGTGCGC  
GTTAGTTCTGCTCGCTTCGATAGCGCCAGCCGATATCTTCCGGCAGAAGCAGTCGTCCAGTGGATATCGGTCATT  
AAGGCATAGGCGGTTTTCTGCGCTTCTGCCACGGTATGACCCAGCGCGGTGACGCACAGTACGCGCCCGCGGTTGGTCAC  
TACCTGCTCGTCATCCGCCAGTTTTGTGCCCGGTGGAACACTTTGCCGCTGCCACTTCTTCAGCGGCAGGCGGTGGA  
TCACGTCACCGGTGCGGTAATCACCCGGATATCACCCGAGCCATCACACGCGGAGAGAAGCGGTTCCATCCACTCG  
GACGTTTTCTCGTCCAGTTTGTTCACAGGCCGCCAGGACAGCTCAACCAGATCGGACTTCATGCGCAGCATAATCGG  
CTGGTTTTCCGGATCGCCAAAAGCGGCAAGTAAATTAATAACCTTCGATTGCCCTGTTTGTGATCATCAGGCCCGGT  
AGAGAAAACCGGTGTAGGTGTTGCTTCCGCCCGCATGCTTTTACGCTTGGCCAGATAATACGTTCCATGGTGGCTGA  
TGAACGTCATCGTTACTACCGCGCGGGGAGTAAGCGCCATCCCGCGGTGTTTGGTCCGGTATCTTTATCGCTAC  
GCTTTTGTGATCTGTGGTAGCCATCGGCAGCAGTCTCGCCGTCACCATCACGATAAAGCTCGTTCTTCCGCT  
CGAGGAACTTTCGATAACGATGCGATGACCCCGCTGCCAAAAGCGTTGCCCGCCAGCATATCGTGAACAGCCGCTTCC  
GTTCTTCCAGCGTCATCGCCAGATAACGCTTTCCCGCGAGCCAGACCGTCCGCTTTAATGACGATTGGCGGCGCTTT  
CTCACGAGATACGCCAGCGCAGGTTCTACCTCGGTGAAGTCTGGTATTCCGCGTAGGGATCTTATGGCGGGCCAGGA  
AATCTTTGGTAAACGTTTTGAGCCTTCCAGTTGGGCCGACCTGCGGTTGGGCCGAAGATTTTTCAGCCCGCGGCGCGG  
AAGGTATCGACCAGCCTTTACCAGCGGCGTTCCGGGCCGACGATGGTCAGATCAATCTTTTGTGCGAAATC  
CAACAGCGCCGGGATATCGGTCACGCCAATAGCAACGTTTTGAGCGCGGGTCCAGTGCAGTGCCTGCATTACCCGGAG  
CAACAAAACAGTCTCAACCAGCGGCGACTGGGCCGTTTTCCAGGCCAGCGGTGCTCGCGCCCGCGTTACCAATCACT  
AATACTTTCTATTGCTCATTAAATGGCGGAAGTGGCGATGTCGGTGAAGAGCATCGCAATACCGTGTCTGTCGGCG  
GCGGCAATCACTTCGTCATCAGGATAGAACCGCCAGGCTGGATTACGAGGTACGCCCCGAGCGGCGGCGCATCAAT  
ACCGTCGCGGAACGGGAAGAACCGCTCAGAAGCCATCGAGGAACCTTCACTTCCAGGCCCTCATCGGCCGTTTTAATAC  
CGCGGATTTTTGCGGAGTACAGCGGCTCATCTGGCCCGGCCAATGCCGATAGTCATATTGTTTTTGGCATAGACGATA  
GCGTTGGATTTCAAAAACCTCGCCACCTCCAGCAGAACAGCGCATCACGCAGTTCCTGTTGCTCGGCTGACGTTTGGT  
CACCACGCGCAGTTCTTCCGACCCAGCATCCCCAGGTCACGATCCTGAACCAGCAGACCCCGGTTACGCGTTTTGAAAT  
CGAGGCCCGGAACAGCTCGCCCACTGACCGCAGGTCAGAACCGGTACGTTCTGTTTGGCGGCGGTGATTTTCAGGGCT  
TCTTCGCTGGCGGACGGCGCAATAACTCTTCGACAAAACGAGGAAATGATGGCCTGTGCGGTTTTCCGCATCCAGCTC  
CGGTTAAAGGCAATGATGCCGCCAATGCGGAGGTTGGTTCGTTTTGACGCGCATCGTAAGCATCAAGAATGAAAT

TGCCGATAGCCACGCCGAAGGTTGGCGTGCTTACAATCACACATGCCGGCTCGGCGAACTCTTTCACGCACTCCAGC  
GCCGCATCGGTATCGGCGATGTTGTTATAAGAGAGGGCTTTACCCTGAACCTGGGTTGCGGTAGCAACGGAGGCTTCTTT  
CACATTCTCTTCTATATAGAAGGCAGCCTGCTGGTGGCTGTTCTCGCCGTAACGCATATCCAGCTTCTTAATGAAGTTCA  
GGTTCAGCGTGCCTGGGAAGCGACCGGGCTTCTTTGCTTTCACCGTGTAAGCCGGAACCATGCTGCCGAAGTAGTTG  
GCAATCATGCTGCTAGGCGGCAGTGTGTTCAAGGCTTTGATGGCGAGGTCGAAACGGGTTGCAAGCGTCAGCGATCC  
TTCGTTGTCATCCATCTCTTAAATAATGGCGTCATAGTCGCTGCTTTCACCACGATTGCGACATCTTTATGGTTCTTG  
CGGCGAGCGCACCATCGTTGGGCCGCCGATATCGATGTTCTCAACCGCATCTTCCAGCGAGCAACCTTTCACGGGCCAG  
GTCTGGGCGAACGGATACAGGTTAACAACCACCATATCGATAGGCTGGATCTGATGTTCTTCCATAATGGCATCGTCTG  
GCCGCGACGGCCAGAATGCCACCATGTACTTTCGGATGCAGGCTTTCACGCGTCCATCCATCATCTCCGGGAAACCGG  
TGTAATCGGAACTTCGGTTACCGGCAGACCTTTTTCTGCTAACAGACGGGCGAGTGCCTTGTAGACAGCAGCTCCACA  
CCGCGTGCAGAAAGTGCCTGGGCGAATTCGACGATACCGGCTTTGTCAGAAACTGAGCAGAGCGCGGCGGACTGGACG  
ACGTTGTTGCATGGTAAATCCCCTGGATTGACTATTACAGAGAGCGTTAGCTGAATTTTTCGCGAAAACTCAGCTAAC  
GCCCCTAACGGGGCATCCTATTTTTCGCCGCATTGTAACGAAAACGTTTGCGAACGCTCGGAATTTTTCTCTTTCA  
ATGGTGATCACAATTTTACTGTGGTTACCGTGGGCAAAATACAGAAATTACATTGATGATTGTGGATAACTCTGTGCGT  
AAAAAGGTATAAGCGGGCTTTTGTGGGAATGCAGCAGTCAGTCATTTTTCTGCAATTTTTCTATTGCGCCTGCGGA  
GAACTCCCTATAATGCGCCTCCATCGACACGGCGGATGTAACACTTTCACACAAACAGCCGTTTCGGTTGGAAGAAAA  
ATCCTGAAATTCAGGGTTGACTCTGAAAGAGGAAAGCGTAATATACGCCACCTCGCGACAGTGCCTAAAGCGCGTCGCA  
ACTGCTCTTTAAACAATTTATCAGACAATCTGTGTGGCACTCGAAGATACGGATTCTTAACGTCGCAAGACGAAAAATGA  
ATACCAAGTCTCAAGAGTGAACACGTAATTCATTACGAAGTTAATTTCTTTGAGCATCAAATTTTTAAATGGAAGGTTT  
GATCATGGCTCAGATTGAACGCTGGCGCAGGCCTAACACATGCAAGTGAACGGTAACAGGAAGAAGCTTGCTTCTTTG  
CTGACGAGTGGCGGACGGGTGAGTAATGTCTGGGAACTGCCTGATGGAGGGGATAACTACTGGAACGGTAGCTAATA  
CCGCATAACGTCGCAAGACCAAGAGGGGGACCTTCGGGCTCTTGCATCGGATGTGCCAGATGGGATTAGCTAGTAG  
GTGGGGTAACGGCTCACCTAGGCGACGATCCCTAGCTGGTCTGAGAGGATGACCAGCCACACTGGAAGTGAACACGGTC  
CAGACTCCTACGGGAGGCAGCAGTGGGAATATTGCACAATGGGCGCAAGCCTGATGCAGCCATGCCGCTGTATGAAGA  
AGGCCTTCGGGTTGTAAGTACTTTACGCGGGGAGGAAGGGAGTAAAGTTAATACCTTTGCTCATTGACGTTACCCGCG  
AGAAGCACCGGCTAACTCCGTGCCAGCAGCCGGTAATACGGAGGTTAAGCGTTAATCGGAATTACTGGGCGTAAA  
GCGCACGCAGGCGGTTTGTAAAGTCAAGTGTGAAATCCCCGGCTCAACCTGGGAACTGCATCTGATACTGGCAAGCTTG  
AGTCTCGTAGAGGGGGTAGAATCCAGGTGTAGCGGTGAAATGCGTAGAGATCTGGAGGAATACCGGTGGCGAAGGCGG  
CCCCCTGGACGAAGACTGACGCTCAGGTGCGAAAGCGTGGGGAGCAAACAGGATTAGATACCTGGTAGTCCACGCCGTA  
AACGATGTCGACTTGAGGTTGTGCCCTTGAGGCGTGGCTTCGGAGCTAACGCGTTAAGTCGACCGCCTGGGGAGTACG  
GCCGCAAGGTTAAACTCAAATGAATTGACGGGGGCCCGCACAAAGCGGTGGAGCATGTGGTTAATTCGATGCAACGCGA  
AGAACCTTACCTGGTCTTGACATCCACGGAAGTTTTAGAGATGAGAATGTGCCTTCGGGAACCGTGAGACAGGTGCTGC  
ATGGCTGTCGTGACTCGTGTGTAATGTTGGGTTAAGTCCCACAACGAGCGCAACCCTTATCCTTTGTTGCCAGCGG  
TCCGGCCGGAACTCAAAGGAGACTGCCAGTGATAAAGTGGAGGAAGGTGGGGATGACGTCAAGTCATCATGGCCCTTAC  
GACCAGGGCTACACACGTGCTACAATGGCGCATACAAAGAGAAGCGACCTCGCGAGAGCAAGCGGACCTCATAAAGTGG  
TCGTAGTCCGGATTGGAGTCTGCAACTCGACTCCATGAAGTCGGAATCGCTAGTAATCGTGGATCAGAATGCCACGGTGA  
ATACGTTCCCGGCTTTGTACACACCGCCCGTACACCATGGGAGTGGGTTGCAAAAAGAAGTAGGTAGCTTAACCTTCGG  
GAGGGCGCTTACCACTTTGTGATTGATGACTGGGTTGAAGTCGTAACAAGGTAACCGTAGGGGAACCTGCGGTTGGATCA  
CCTCCTTACCTTAAAGAAGCGTTCTTTGCAAGTGTGCTCACACAGATGCTGATAGAAAGTAAAAGCAAGGCGTCTTGGCA  
AGCAGACTGATACGTCCTTCTGCTAGAGGCCAGGACACCCCTTTCACGCGGTAACAGGGGTTGCAATCCCCTAG  
GGGACGCCACTTGTGGTTTTGTGAGTGAAGTCACCTGCCTTAATATCTCAAACTCATCTTCGGGTGATGTTTGGATA  
TTTGCTCTTTAAAAATCTGGATCAAGCTGAAAATTGAAACTGAACAACGAAAGTTGTTCTGTGAGTCTCTCAAATTTTC  
GCAACACGATGATGAATCGTAAGAAACATCTTCGGGTTGTGAGGTTAAGCGACTAAGCGTACACGGTGGATGCCCTGGCA  
GTCAGAGGCGATGAAGGACGTGCTAATCTGCGATAAGCGTGGTAAGGTGATATGAACCGTTATAACCGGCGATTTCCGA  
ATGGGAAACCCAGTGTGTTTGCACACTATCATTAACTGAATCCATAGGTTAATGAGGCGAACCGGGGAACTGAAAC  
ATCTAAGTACCCGAGGAAAAGAAATCAACCGAGATCCCCAGTAGCGGCGAGCGAACGGGGAGCAGCCAGAGCCTGA  
ATCAGTGTGTGTTAGTGAAGCGTCTGAAAGGCGCGGATACAGGTTGACAGCCCCGTACACAAAAATGCACATGCT  
GTGAGCTCGATGAGTAGGGCGGACACGTGGTATCCTGTCTGAATATGGGGGACCATCTCAAGGCTAAATACTCCTG  
ACTGACCGATAGTGAACAGTACCGTGAAGGAAAGGCGAAAAGAACCCCGGCGAGGGGAGTAAAAAGAACTGAAACCG  
TGTACGTACAAGCAGTGGGAGCACGCTTAGGCGTGTGACTGCGTACCTTTTGTATAATGGGTGAGGACTTATATTCTGT  
AGCAAGGTTAACC GAATAGGGGAGCCGAAGGAAACGAGTCTTAACTGGGCGTTAAGTTGCAAGGTTATAGACCCGAAAC  
CCGTGATCTAGCCATGGCAGGTTGAAGGTTGGGTAACACTAACTGGAGGACCGAACCGACTAATGTTGAAAAATTAGC  
GGATGACTTGTGGCTGGGGTGAAGGCAATCAAAACGGGAGATAGCTGGTTCTCCCGAAAGCTATTTAGGTAGCGCC  
TCGTGAATTCATCTCCGGGGTAGAGCACTGTTTCGGCAAGGGGGTTCATCCGACTTACCAACCCGATGCAAACTGCGAA  
TACCGGAGAATGTTATCACGGGAGACACCGCGGGTGTAACTGCTCGTGAAGAGGGAACAACCCAGACCGCCAGC  
TAAGGTCCCAAAGTCATGTTAAGTGGGAAACGATGTGGGAAGGCCAGACAGCCAGGATGTTGGCTTAGAAGCAGCCAT

CATTTAAAGAAAGCGTAATAGCTCACTGGTCGAGTCGGCCTGCGCGGAAGATGTAACGGGGCTAAACCATGCACCGAAGC  
TGCGGCAGCGACGCTTATGCGTTGTTGGGTAGGGGAGCGTTCTGTAAGCCTGCGAAGGTGTCTGTGAGGCATGCTGGAG  
GTATCAGAAGTGC GAATGCTGACATAAGTAACGATAAAGCGGGTAAAAGCCCCGCTCGCCGGAAGACCAAGGGTTCCTGT  
CCAACGTTAATCGGGGCAGGGTGAGTCGACCCCTAAGCGGAGGCCGAAAGGCCGTAGTCGATGGGAAACAGGTTAATATTC  
CTGTACTTGGTGTACTGCGAAGGGGGGACCGGAGAAGGCTATGTTGGCCGGGCGACGGTTGTCCCGGTTTAAAGCGTGTAG  
GCTGGTTTTCCAGGCAAATCCGAAAAATCAAGGCTGAGGCGTGATGACGAGGCACTACGGTGTGAAGCAACAAATGCC  
TGCTTCAGGAAAAGCCTCTAAGCATCAGGTAACATCAAATCGTACCCCAAACCGACACAGGTGGTCAGGTAGAGAATAC  
CAAGGCGCTTGAGAGAACTCGGGTGAAGGAACTAGGCAAAATGGTGCCGTAACCTTCGGGAGAAGGCACGCTGATATGTAG  
GTGAGGTCCCTCGCGGATGGAGCTGAAATCAGTCGAAGATACCAGCTGGCTGCAACTGTTTATTA AAAACACAGCACTGT  
GCAAACACGAAAGTGACGTATACGGTGTGACGCCTGCCCGTGCCGGAAGGTTAATTGATGGGGTTAGCGCAAGCGAAG  
CTCTTGATCGAAGCCCCGGTAAACGGCGCCGTAACATAACGGTCTAAGGTAGCGAAATTCCTTGTCGGGTAAGTTCC  
GACCTGCACGAATGGCGTAATGATGGCCAGGCTGTCTCCACCCGAGACTCAGTGAATTTGAACTCGCTGTGAAGATGCAG  
TGTACCCGCGCAAGACGGAAAGACCCCGTGAACCTTACTATAGCTTGACACTGAACATTGAGCCTTGATGTGTAGGAT  
AGGTGGGAGGCTTTGAAGTGTGGACGCCAGTCTGCATGGAGCCGACCTTGAATACCACCCCTTAAATGTTTGATGTTCTA  
ACGTTGACCCGTAATCCGGGTTGCGGACAGTGTCTGGTGGTAGTTTACTGGGGCGGTCTCCTCTAAAGAGTAACCGGA  
GGAGCAGAAAGTTGGCTAATCCTGGTCGGACATCAGGAGGTTAGTGAATGGCATAAGCCAGCTTGACTGCGAGCTGGA  
CGCCGCGAGCAGGTGCGAAAAGCAGGTCAAGTATCCGGTGGTTCTGAATGGAAGGGCCATCGCTCAACGGATAAAAAGGT  
ACTCCGGGGATAACAGGCTGATACCGCCCAAGAGTTCATATCGACGGCGGTGTTTGGCACCTCGATGTGCGCTCATACA  
TCCTGGGGCTGAAGTAGGTCCTCAAGGGTATGGCTGTTGCGCATTAAAGTGGTACGCGAGCTGGGTTTGAACGTCGTGA  
GACAGTTCGGTCCCTATCTGCCGTGGGCGCTGGAGAAGTGGGGGGCTGCTCCTAGTACGAGAGGACCGGAGTGGACGC  
ATCACTGGTGTTCGGGTTGTCATGCCAATGGCACTGCCCGGTAGCTAAATGCGGAAGAGATAAGTGTGAAAGCATCTAA  
GCACGAAACTTGC CCGAGATGAGTTCTCCCTGACTCCTTGAGAGTCTGAAGGAACGTTGAAGACGACGACGTTGATAG  
GCCGGTGTGTAAGCGCAGCGATGCGTTGAGCTAACCGTACTAATGAACCGTGAAGGCTTAACTTACAACGCCGAAGGT  
GTTTTGGCGGATTGAGAGAAGATTTT CAGCCTGATACAGATTAATCAGAACGAGAAGCGGTCTGATAAAAACAGAATTT  
GCCTGGCGCAGTAGCGCGTGGTCCCACCTGACCCATGCCGAACCTCAGAAGTGAACGCCGTAGCGCCGATGGTAGTG  
TGGGGTCTCCCATGCGAGAGTAGGAACTGCCAGGCATCAAATTAGAAAAACCCGGTCCATAAGGCCGGGTTTTTTG  
CATATCAATTATTTGCATGATGAAGGGAATCTCATGTCACTTCTGTATATCCAAATTCGTGTAATCAAATTA CTGTTCCG  
CGATCTTGAAGCAAACGTGAAGTGTGAGGAGACGTCGCCTCAGTAACCAGCGCTGTTAATCGCCAATTTCTTTGTTG  
CAGAAAAAGTTCTGCAAGATCTTGTCTGCAACTCCACCCAGTTCAACCTGGCATTCTTTTTTGCAGCAAAACGTATG  
GATATTGTTGTGAGCGCACTGGAAATGAATGAGGGCGGTTTGTACAGGTTGAGGAACGCATTCTCCATGAAGTGGTCCG  
TGGGGCAACGTTAATGAAATATCGCCAGTTCCACATCCATGCGCAATCAGCGGTA CTAGTGATAGTGGGTCATGGCAA  
TGCTTAAGCAGAAATAATCGTGTCAACATTGGTGGTACTAAACCTGAAGTTCAGCCACC CGGGATGAGAAAAAATCGCC  
TACGCCCCACATACGCCAGATT CAGCAACGGATACGGTTTCCCAAATCGTCCACCTCAGAGCGTCCCGTAACTTAAA  
ACCCACCTTCTTATAGAACC AACC GCCTGCTCATTGTTGCTCATTAAACGTTGGTTGTCAGTTCCGGTGCCATCGAGAGCG  
CATGCTCCACCAGCACCCGACCTACGCCGAGCCGCGCACATCAGGATCGATAAACAGCGCATCCATATGCTGCCACTT  
AGCAACATAAATCCAACCGCTGATCCCGCTCATTAAACCGGACCCACAACGGCGCTTCCGGCAGGAAGGAACGAAC TAG  
GTCCTCCAGCTCGGTCCGATACTCTGCTGATAGAAAATCGTGAGTGGCATCGACAGAACGACACCAAATCGCAACGAGTT  
CCTCCCCTTCTCATGCCGTGAGCGGCAATACTAATAACATTTTCTCTCTTTT AGTCATTCTTATATTCTAACGTAG  
TCTTTTCTTGAACCTTTCTCACCTTCAACATGCAGGCTCGACATTTGGCAAATTTCTGGTTATCTTCACTATCTGGAT  
GTCTAAACGTATAAGCGTATGTAGTGAGGTAATCAGGTTATGCCGATTCTGTGCGGACGAGTACCCCGCTCAATTT  
CTTGCCTGAAGAAAAAGCTTTTGTGATGACAACTTCTCGTGCCTGGT CAGGAAATTCGTCCACTTAAGGTTCTGATCC  
TTAACTGATGCCGAAGAAGATTGAAACTGAAAATCAGTTTCTGCGCCTGCTTCAAACCTACCTTTGCAGGTCGATATT  
CAGCTGTTGCGCATCGATTCCCGTGAATCGCGCAACACGCCCGCAGAGCATCTGAACA ACTTCTACTGTAACCTTTGAAGA  
TATTCAGGATCAGAACTTTGACGGTTTGATTGTAAC TGGTGCGCCGCTGGGCCCTGGTGGAGTTAATGATGTCGCTTACT  
GGCCGAGATCAAACAGGTGCTGGAGTGGTGAAGATCAGTCACCTCGACGCTGTTTGTCTGCTGGCGGTACAGGCC  
GCGCTCAATATCTCTACGGCATTCTAAGCAAACCTCGCACCGAAAACTCTCTGGCGTTTACGAGCATCATATTCTCCA  
TCCTCATGCGCTTCTGACGCGTGGCTTTGATGATTCTTCTGGCACCGCATTGCGCTATGCTGACTTTCCGGCAGCGT  
TGATTGCTGATTACACCGATCTGGAATTTCTGGCAGAGACGGAAGAAGGGGATGCATATCTGTTTGCAGTAAAGATAAG  
CGCATTGCCTTTGTGACGGCCATCCCGAATATGATGCGCAAACGCTGGCGCAGGAATTTTCCGCGATGTGGAAGCCGG  
ACTAGACCCGGATGTACCGTATAACTATTTCCCGCACAATGATCCGAAAATACACCGGAGCGAGCTGGCGTAGTCACG  
GTAATTTACTGTTTACCAACTGGCTCAACTATTACGTCTACCAGATCACGCCATACGATCTACGGCACATGAATCCAACG  
CTGGATTAATCTTCTGTGATAGTCGATCGTTAAGCGATT CAGCACCTTACCTCAGGCACCTTCGGGTGCCTTTTTTATTT  
CCGAAACGTACCTCAGCAGGTGAATAAATTTTATTCATATTGTTATCAACAAGTTATCAAGTATTTTTAATTA AAATGGA  
AATTGTTTTGATTTTGCATTTTAAATGAGTAGTCTTAGTTGTGCTGAACGAAAAGAGCACAAACGATCCTTCGTTACAG  
TGGGGAAGTTTTCGGATCCATGACGAGGAGCTGCACGATGACTGAACAGGCAACAACAACCGATGAACTGGCTTTCACAA  
GGCCGATGGCGAGCAGGAGAAGCAAATTTACTGCCGAAGCGGTAGAATTTCTGACTGAGCTGGTACGCATTTTACG

CCACAACGCAATAAACTTCTGGCAGCGCGCATTGAGCAGCAGCAAGATATTGATAACGGAACGTTGCCTGATTTTATTT  
GGAAACAGCTTCCATTGCGGATGCTGATTGGAAAATTCGCGGGATTCTGCGGACTTAGAAGACCGCCGCTAGAGATAA  
CTGGCCCGGTAGAGCGCAAGATGGTGATCAACGCGCTCAACGCCAATGTGAAAGTCTTTATGGCCGATTTGGAAGATTC  
CTGGCACCAGACTGGAACAAAGTGATCGACGGGCAAATTAACCTGCGTGATGCGGTTAACGGCACCATCAGTTACACCAA  
TGAAGCAGGCAAAATTTACCAGCTCAAGCCAATCCAGCGTTTTGATTTGTGCGGTACGCGGTCTGCACTTGC CGGAAA  
AACATGTCACCTGGCGTGGTGAGGCAATCCCCGGCAGCCTGTTTTGATTTTGCCTCTATTTCTTCCACAACATATCAGGCA  
CTGTTGGCAAAGGGCAGTGGTCCCTATTTCTATCTGCCGAAAACCCAGTCTGGCAGGAAGCGGCCTGGTGGAGCGAAGT  
CTTCAGCTATGCGAAGATCGCTTTAATCTGCCGCGCGCACCATCAAGGCGACGTTGCTGATTGAAACGCTGCCCGCCG  
TGTTCCAGATGGATGAAATCCTTACGCGCTGCGTGACCATATGTTGGTCTGAACTGCGGTCTGTTGGGATTACATCTTC  
AGCTATATCAAAACGTTGAAAACTATCCCGATCGCGTCTGCCAGACAGACAGGCAGTGACGATGGATAAACCATTTCT  
GAATGCTTACTCACGCTGTTGATTAACCTGCCATAAACCGGTGCTTTTGGCATGGCGGCATGGCGCGTTTTATTC  
CGAGCAAAGATGAAGAGCACAATAACCAGGTGCTCAACAAAGTAAAGCGGATAAATCGCTGGAAGCCAATAACGGTAC  
GATGGCACATGGATCGCTCACCCAGGCCTTGGGACACGGCAATGGCGGTATTCAACGACATTTCTGGCTCCCGTAAAA  
TCAGCTTGAAGTGATGCGCGAACAAGACGCGCGGATTACTGCCGATCAGCTGCTGGCACCTTGATGGTGAACGCCCG  
AAGAAGTATGCGCGCAACATTCGCGTGGCTGTGCAGTACATCGAAGCGTGGATCTCTGGCAACGGCTGTGTCCGATT  
TATGGCTGATGGAAGATGCGGCGACGGCTGAAATTTCCCGTACCTGATCTGGCAGTGGATCCATCATCAAAAAAGTT  
GAGCAATGGCAAACCGGTGACCAAAGCCTTGTCCGCCAGATGCTGGGCGAAGAGATGAAAGTCATTGCCAGGAACTGG  
GCGAAGAACGTTTTCTCCAGGGCGTTTTGACGATGCCGACGCTTGATGGAACAGATCACCACCTCCGATGAGTTAATT  
GATTTCTGACCTGCCAGGCTACCGCTGTTAGCGTAAACCACCACATAACTATGGAGCATCTGCACATGAAAACCCGT  
ACACAACAAATTGAAGAATTACAGAAAGAGTGGACTCAACCGCTTGGGAAGGCATTACTCGCCATACAGTGCGGAAGA  
TGTGGTGAATTACGCGGTTCACTCAATCCTGAATGCACGCTGGCGCAACTGGGCGCAGCGAAAATGTGGCGTCTGCTGC  
ACGGTGAGTCGAAAAAGGCTACATCAACAGCCTCGGCGACTGACTGGCGGTGAGGCGTGAACAGGCGAAAGCGGGT  
ATTGAAGCAGTCTATCTGCGGATGGCAGGTAGCGGCGGACGCTAACCTGGCGGCAGCATGTATCCGGATCAGTCGCT  
CTATCCGGCAAACCTCGGTGCCAGCTGTGGTGGAGCGGATCAACAACACCTTCCGTCGTGCCGATCAGATCCAATGGTCCG  
CGGGCATTGAGCCGGGCGATCCGCGCTATGTCGATTACTTCTGCCGATCGTTGCCGATGCGGAAGCCGGTTTTGGCGGT  
GTCCTGAATGCCTTTGAACTGATGAAAGCGATGATTGAAGCCGGTGCAGCGGAGTTCACTTGAAGATCAGCTGGCGTC  
AGTGAAGAAATGCGGTACATGGGCGGCAAAGTTTTAGTGCCAACTCAGGAAGCTATTGAGAACTGGTCCGCGCGCTC  
TGGCAGCTGACGTGACGGGCTTCCAACCTGCTGGTTGCCCGTACCGATGCTGATGCGGCGGATCTGATCACCTCCGAT  
TGGGACCCGTATGACAGCGAATTTATTACCGGCGAGCGTACCAGTGAAGGCTTCTTCCGACTCATGCGGCGATTGAGCA  
AGCGATCAGCCGTGGCCTGGCGTATGCGCCATATGCTGACCTGGTCTGGTGTGAAACCTCCACGCCGGATCTGGAACCTG  
CGGTCGCTTTGCACAAGCTATCCACGCGAAATATCCGGGCAAACCTGCTGGCTTATAACTGCTCGCCGTGTTCAACTGG  
CAGAAAAACCTCGACGACAAAACCTATTGCCAGCTTCCAGCAGCAGCTGTGCGATATGGGCTACAAGTTCCAGTTCATCAC  
CCTGGCAGGTATCCACAGCATGTGGTTCAACATGTTTACCTGGCAAACGCCTATGCCAGGGCGAGGGTATGAAGCACT  
ACGTTGAGAAAAGTGCAGCAGCCGGAATTTGCCGCGCGAAAGATGGCTATACCTTCGTATCTACCAGCAGGAAGTGGGT  
ACAGGTTACTTCGATAAAGTACGACTATTATTACGGGCGGCAGCTTTCAGTACCAGCGCTGACCGGCTCCACTGAAGA  
ATCGCAGTTTAAGCAACAACAACCGTTGCTGACTGTAGGCCGGATAAGGCGTTACGCGGCATCCGGCAATCGGTGCAC  
GATGCTGATGCGACGCTTGCAGCTTATCATGCCTACAGCCGTTGCCGAACGTAGGCTGGATAAGGCGTTTACGCCGC  
ATCCGGCAATTTCTGCTCTGATGAGGGCGCTAAATGCCGCGTGGCCTGGAATTTATTGATTGCTCAAACATTTTGCAA  
GGCTTCGATGCTCAGTATGGTTCGATTCCTGAAAGTACCTCCGTTGCGCAGCAGCGTTTCGAACAGGCGACTGGCATTA  
TGCCAGCAGGCGATGAAAAACCGTATCCATCTTACGATCATACGTTGGTCTGGTGGAGCAACTGCGCTGCATTA  
CTAACGGCCAAAGTACGGACCGGCATTTTTACTACGTGTTAAAGAGCATTACACCCGGCTGTTGCCGATTACCCGCGC  
TTCGAGATTGCGGAGAGCTTTTTAACTCCGTGACTGTGCGTTATTTGACCACCGCTCGCTTACTCCCGAGCGGCTTTT  
TATCTTTAGCTCTCAGCCAGAGCGCGCTTTCTGACCATTCCCGCCCGCTGGCGAAAGACTTTTACCCCGATCACGGCT  
GGGAATCTCTACTGATGCGGTTATCAGCGACCTACCCTGCGCTGCGCTGGCAGAATAAAAGCCGTGACATCCATTAC  
ATTATTCGCCATCTGACGGAACGCTGGGACAGACAACTCGCGGAAAGTCAATTTACAGGTGGCGAACGAACTGTTTTA  
CCGCAATAAAGCCGCTGGCTGGTAGGCAAACCTGATCACACCTTCCGGCACATTGCCATTTTTGCTGCCGATCCACCAGA  
CGGACGACGGCGAGTTATTTATTGATACCTGCTGACGACGACCGCCGAAGCGAGCATTGTTTTGGCTTTGCGGTTCT  
TATTTTATGGTTTATGCGCCGCTGCCCGCAGCGCTGGTGGAGTGGCTACGGGAAATTTGCCAGGTAAAACACCGCTGA  
ATTGATATGGCTATCGGCTGCCAGAAGCAGCCAAAACCGAAAGCTACCGCAATATCTCGTTTATCTACAGGGCTGTA  
ATGAGCAGTTCATTGAAGCGCCGGTATTCGTGGAATGGTGTGTTGGTGTTCAGCTGCCGGCTTTGATCGGGTATTC  
AAAGTCATCAAAGACAGGTTCCGCGCCGAGAAAGAGATGCTGCCGCTCACGTTCTGCTGCTATCAACTGGTGAAGA  
GCACGATCGCTGGGCGAATGGCGGACACCCAGGAGTTTAAAACTTTGTGCTGGAGAAGCGGCATATTTCCCGGCAT  
TAATGGAATTACTGCTTCAGGAAGCAGCGGAAAAAATCACCGATCTCGGCGAACAAATTTGATTTCGCCATCTTTATATT  
GAGCGGCGGATGGTCCGCTCAATATCTGGCTGGAACAAGTGAAGGTCAGCAGTTGCGCGACGCCATTGAAGAATACGG  
TAACGCTATTCGCCAGCTTCCGCTGTAACATTTTCCCTGGCGACATGCTGTTAAAAAATTCGGTGTACCCGCTCACG  
GGCTGTGGTTTTTATGATTACGATGAAATTTGCTACATGACGGAAGTGAATTTCCGCGACATCCCGCCCGCGCTAT

CCGGAAGACGAACTTGCCAGCGAACCGTGGTACAGCGTCTCGCCGGGCGATGTTTTCCCGGAAGAGTTTCGCCACTGGCT  
ATGCGCCGACCCGCGTATTGGTCCGCTGTTTGAAGAGATGCACGCCGACCTGTTCCGCGCTGATTACTGGCGCAGCTAC  
AAAACCGCATACGTGAAGGGCATGTGGAAGATGTTTATGCGTATCGGCGCAGGCAAAGATTTAGCGTACGGTATGGGGAG  
ATGCTTTTTTGAAGTAAAGCTTCCATATAATTTTTCTCCGCAATGTATCGAGGGTTATCCGTAAGCCAAAGCTTTACGCC  
ATCTTATTTAATGTATTAAGGATTAATTCAGCAATAACCCGGTGACCAAATTCAAAAGCCAACTCAAAGGCAGAGTATTT  
TTGTGGGGCTTTGTGTTGCCAAAAATCCATAATATCTTCAGCGGTAATCCAAACAGGCGTGCATGGTCAGATAAAGCAA  
GATAAACCGTCTCTACAACATTTTTGTTGTTTATGCTGTATCGTGAAAACAAACCCGGGATTTTCATTAGAATTTATGGC  
AGGAGGAGGGGCTTCATATTTTTTTTATCGAATTTAAACGTATTAACAGAGTGGGTAATGCGTTAAAAATAGTATTAAT  
AACGTTTCATGTGTCCGCGTGCATGGCCATAAACAAACCCGTGTCGCGCGCAAGACTTTTAGCGGTGAGAAGATCTACAA  
TATCGGAAGCTGAAATGTTAATTTCTGGGCTAGGCTGGGCAATGCTTCAAGAATAACTTTACGATATCGCTATGTCCA  
TTTTGCATCGCCAGATATAGTCTGGGCAACCATAAAAAATCCTTTCGCTTACAGGAGATCGAGTACCTGTTCTTTAGTCAA  
ATGACATGTGCGAATTAACAAAGGTAACGCGTTCAAAAATTTTACGATGTGCGCATCACCATTGCCATAACATGGT  
ATAAAACATGGCTGGACGTTCTATTTTTGGCACTCAGGAATTTATACACTTGTTCGTTATCTAAATGATGTGTTGCGGCC  
AGTTTAGGTAAGGCGTTTCAAGATCGAGGTTACAACATTTTTATCCTTACGTGATATCGTAAAAATAATCCAGAAAAAC  
ATTTTTATCTTTTCCAGAAATATGCATGAGATTTTTTTTCGAGAGTAATCCTTCATATCTGTTTCTGACAATGAAT  
TGAAAAATAGTCTCAACGATATCCGATTACCATAATTTATAGCCAAATATAAACCTGGCAGGTTAATACTATTATAGGCA  
GTCAACATTTCTGTTCTATGTAGTTCTGGCATTCTTGGAGTTGAATCATCAGTTGCGTAAGTTGGTGATTCTGACCAAT  
TGCCATTAGCAAATTCATCGTTGCAGGTGATAATGGAGGGTATTTCATCCACAGATCCTTTAACATCAATAGCTGTT  
CTTTCCGAAGTCTGGAATTTATGCAACAGATTGATTAATAACATGATCATTGACCATTTACAGGAGGCTATAATCTACA  
TTCATAAAATCCATCAGAGAATAGTGTTAATATCTCTTTGCTTTCGCTCATAAATTTTATTTTATCGTTAGTTACATT  
AGGATCATAAACCCGAAACCCAGTAATGGGTACATCCTTCAGTTGTGTTCTTTATTTCTAGCCGGACCGTCAAAGCATGGT  
TATCCACCAGTAATATGGCTGCCATAACTGATGCCATTTGATTCCATCTTGTCAAATATGCTTTCATAACTAGCCCG  
AAATCACCGCAGGCAACGCAACGCCCTCAGGACGGTGGAAACCAACGCCAAAGTCTGGTTTTTGCATTTTTTGT  
GAAGTGCCTGAGAAATTTTTAGCTGAAGAGTAATCATCTTGTGGGTTTGAATCAACATTTCTGATAAATATCATTAA  
TATATTGTGCAGCAATGTGTCGCATACTATACGGTTTTGGGGTGCCTCCGAAAATAACATTGACCATTAAGTTTAAAT  
CTTGGGAATCTTTTTCTTTCTATCTGATTTTAGGTTAATTTCTGTTTATCAAGAGTGTCTGAGCGTTGAGGTAAT  
TTCCATTAGGATTTTTCAAATATTGGGCAATGGTTTGAAGTGTGCTGTTTTCGTTTTTATTAATATCGTAATTT  
CTTTCTTATCAGCTTGAAGACGGACGTGAAAATTTAATGACAAAATCCTTGTGCTAAAGATATGACGACCATTTTGT  
CTACAGTTCTCTGAGAAGCTTTTTAATAGAGGCGTCCGACGCTCCTTGCAGAAAATTTATCTCGAGTTCTTTATAAAA  
CAATTCACCTCAGGGTTTTGGTGTTCATTTGCTGGGCTGATTATTAATTTGCAAGAAAAGAACTACGAGGAATACGAG  
TAATCATTTAAATATCTCATTGTTTATTGATGTCTTGAATTTAACTATCAGAACAGTAAAAAATTTAATATGATTACA  
ACTAAAGAAATATCATAAATCGCTCAATCTCATAATGCAGCCGTAAGTTTCGGTGAATGAGATCTTGCATTTTTGTT  
AATAATTAAGTGGTTTGTGTTTAAAAATAATGCTGAGTTAATAAAGTGTGTGAAGTGTATGACATTAAGTTATTTTTGG  
CGTCAATGCGATTAACAGACACCCTTATTCTATTGCCACTCAGGTATGATGGGCAGAAATTTGCTCTGCCCGCCAGAAA  
AAGTCAGCGCATTCCACCGTACGCCAGCGTCACTTCTTCCGCGCTTTAATCACCATCGCGCCAAACTCGGTACGCGGT  
CATCGGTAATACGTGAAATCGGTCCGAAATAGAAATTTGCGGCAACGGTTACGGTGTCTCATCGAAAATACAGCTGCA  
AGGCAACGTAGCCCAGTGCATGTTCTCATCGTCAAATGAATAACCCCGTTTGCCTGTTGGCGGAGATCTTTTAA  
ATGCACAGGAGACACCAGGTTGCGTGGGTATAGGCATGTAACCTTTGCGGTGCAGCAGCTTCTGACCTGTTCTTCCG  
TCAGTTGGGCTAAAAGGCTTTACCCGCACCGGAAGCGTGCATCGGCAATTTACCGCGATAGGCGCGGACATTGCAATC  
AGATGCGTACACTGTACCTGGTGCATAATAATCGTTCGTGATCGCTTTGATCAAGCACCAGCATATTGACCGTTTCCG  
AGACTCTTCCATTAGATTGCGCAGGATAGGGTGAACAAATCGCTAACAAATACGGCTCTGGAGAAAAGCTGCTGCCGACCA  
TAAAGGCATGTGCGCCGATTGCCAATGTCCAGTTCCGCAACCTGACGCACGAAACCTGCTGTTGCATCGTGTTAGC  
AGGCGGTGGTGTGGAATTTGGTAACCCGGCTTGTGCGCCAGTTCCGTGAGTGCCACACTGCCATTGGATTGGCAAT  
CCACTCCAGTAATTTAGGCCACGCGTTAAAGACTGAACCTGTCCAGTCTGCTGGTGCAGTGGCAACCGCGGGTTTTCTGC  
CGCGTTTCCGCGGAATGGTGCACCATGACAGTCTTTTTTCTGTATCGTGGAAATCATTTTATTTTTATTGTTAGC  
TAATGCAATAGTTACTGAACTGATCCGATGAGTTAATGTTGAACAAATCTCATGTTGCGTGGTGGTCTTTTACCACAG  
ATGCGTTTATGCCAGTATGGTTTGTGAATTTTTATTAATCTGGGTTGAGCGTGTGCGGAGCAAGTGTGAGCAGCAAAG  
TGGAACAACCTGCGTGCAGTTAAATGAACGTTTCTGGTGTGACGGCGGTATGGGCACCATGATCCAGAGTTATCGA  
CTGAACGAAGCCGATTTTCTGGTGAACGTTTCCGACTGGCCATGCGACCTCAAAGGCAACAACGACCTGCTGGTACT  
CAGTAAACCGAAGTGTATCGCCGCTATCCACAACGCTACTTTGAAGCGGGCGGATATCATCGAAACCAACACTTCA  
ACTCCACGACCATTTGCGATGCGGATTACCAGATGGAATCCCTGTGCGGGAATCAACTTTGCGGCGGCAAACTGGCG  
CGAGCTTGTGCTGACGAGTGGACCGCGCGCACGCCAGAGAAACCGCGCTACGTTGCCGGTGTCTCGGCCGACCAACCG  
CACGGCGTCTATTTCTCCGACGTCAACGATCCGGCATTTCGTAATATCACTTTTACGGGCTGGTGGCGGCTTATCGAG  
AGTCCACCAAAGCGCTGGTGAAGGTGGCGCGGATCTGATCCTGATTGAAACCGTTTTTCGACACCCTAACGCCAAAGCG  
GCGGATTTTGGGTGAAAACGGAGTTTGAAGCGTGGGCGTTGAGCTGCCGATTATGATCTCCGGCACCATCACCAGCGC  
CTCCGGGCGCACGCTCTCCGGGCGACACCAGCAAGCATTTTACAACCTATTGCGCCACGCCGAAGCTCTGACCTTTGGCC

TGAACTGTGCGCTGGGGCCGATGAACTGCGCCAGTACGTGCAGGAGCTGTCACGGATTGCGGAATGCTACGTCACCGCG  
CACCCGAACGCCGGGCTACCCAACGCCTTTGGTGTGAGTACGATCTCGACGCCGACACGATGGCAAACAGATACGTGAATG  
GGCGCAAGCGGGTTTTCTCAATATCGTCGGCGGCTGCTGTGGCACCACGCCACAACATATTGCAGCGATGAGTCGTGCAG  
TAGAAGGATTAGCGCCGCGCAAACCTGCCGAAATCCCCTAGCCTGCCGTTTGTCCGGCCTGGAGCCGCTGAACATTGGC  
GAAGATAGCCTGTTTGTGAACGTGGGTGAACGCACCAACGTCACCGGTTCCGCTAAGTTCAAGCGCCTGATCAAAGAAGA  
GAAATACAGCGAGGCGCTGGATGTCGCGCGTCAACAGGTGAAAAACGGCGCGCAGATTATCGATATCAACATGGATGAAG  
GGATGCTCGATGCCGAAGCGGCGATGGTGCCTTTCTCAATCTGATTGCCGGTGAACCGGATATCGCTCGCGTGCCGATT  
ATGATCGACTCCTCAAAATGGGACGTCATTGAAAAAGGTCTGAAGTGTATCCAGGGCAAAGGCATTGTTAACTCTATCTC  
GATGAAAGAGGGCGTCGATGCCCTTTATCCATCACGCGAAATGTTGCGTCGCTACGGTGCGGCAGTGGTGGTAATGGCCT  
TTGACGAACAGGGACAGGCCGATACTCGCGCACGGAAAATCGAGATTTGCCGTGCGGCGTACAAAATCCTCACCGAAGAG  
GTTGGCTTCCCGCCAGAAGATATCATCTTCGACCCAAACATCTTCGCGGTGCGCAACTGGCATTGAAGAGCACAACAATA  
CGCGCAGGACTTTATCGCGCGTGTGAAGACATCAACCGCAACTGCCGACGCGCTGATTTCCGGCGCGTATCTAACG  
TTTCTTTCTCGTTCCGTGGCAACGATCCGGTGCAGGAAACGTTACGACAGCTTCCGAGAAATATCGCGGCAAAAACGACG  
TGTGATTCTAATCGTCGCGACGATGGCACCAGCGTTTACTGGAGCTTGCCGAGAAATATCGCGGCAAAAACGACG  
ACACGCCAACGCCCAGCAGCGGAGTGGCGCTCGTGGGAAGTGAATAAACGCTTGGAATACTCGCTGGTCAAAGGCATT  
ACCGAGTTTATCGAGCAGGATACCGAAGAAGCCCGCAGCAGGCTACGCGCCCGATTGAAGTGATTGAAGGCCCGTTGAT  
GGACGGCATGAATGTGGTGGCGACCTGTTTGGCGAAGGAAAATGTTCTGCCACAGGTGGTCAAATCGCGCGCGTCA  
TGAAACAGGGCGTGGCTACCTCGAACGTTTATTGAAGCAGCAAAGAGCAGGGCAAACCAACGGCAAGATGGTGTATC  
GCCACCGTGAAGGGGACGTCACGACATCGGTAATAATATCGTTGGTGTGGTGTGCAATGTAACAACACGAAATTTGT  
CGATCTCGCGTTATGGTGCCTGCGGAAAAAATTCTCCGTACCGTAAAGAAGTGAATGCTGATCTGATTGGCCTTTCCG  
GGCTTATCACGCCGTCGCTGGACGAGATGGTAACTGGCGAAAGAGATGGAGCGTCAGGGCTTACTATTCCGTTACTG  
ATTGGCGCGCGACGACCTCAAAGCGCACACGGCGGTGAAAATCGAGCAGAACTACAGCGGCCGACGGTGTATGTGCA  
GAATGCCTCGCGTACCGTTGGTGTGGTGGCGGCGTCTTTCCGATACCCAGCGTGTATTTTGTGCTCGTACCCGCA  
AGGAGTACGAAACGTCATGATTACGACGCGGCGCAAGAAACCGCGCACACCACCGGTACGCTGGAAGCGCGCGCGAT  
AACGATTTTCGCTTTTACTGGCAGGCTTACACGCCCGCGGTGGCGCACCGTCTCGGCGTGCAGGAAGTGAAGCCAGCAT  
CGAAACGCTGCGTAATTACATCGACTGGACACCGTTCTTTATGACCTGGTCGCTGGCCGGGAAGTATCCGCGCATTCTGG  
AAGATGAAGTGGTGGGCGTTGAGGCGCAGCGGTGTTTAAAGACGCAACGACATGCTGGATAAATTAAGCGCCGAGAAA  
ACGCTGAATCCGCGTGGCGTGGTGGGCGTGTCCCGCAAACCGTGTGGGCGATGACATTGAAATCTACCGTGACGAAAC  
GCGTACCCATGTGATCAACGTCAGCCACCATCTGCGTCAACAGACCGAAAAAACAGGCTTCGCTAACTACTGTCTCGCTG  
ACTTCGTTGCGCCGAAGCTTTCTGGTAAAGCAGATTACATCGGCGCATTGCGGTGACTGGCGGGCTGGAAGAGGACGCA  
CTGGCTGATGCCTTTGAAGCGCAGCAGATGATTACAACAAAATCATGGTGAAGCGCTTGCCGACCGTTTAGCCGAAGC  
CTTTGCGGAGTATCTCATGAGCGTGTGCGTAAAGTCTACTGGGGCTATGCGCCGAACGAGAACCTCAGCAACGAAGAGC  
TGATCCGCGAAAACTACCAGGGCATCCGTCCGGCACCGGGCTATCCGGCCTGCCGGAACATACGAAAAAAGCCACCATC  
TGGGAGCTGCTGGAAGTGGAAAAACACTGGCATGAAACTCACAGAATCTTTCGCCATGTGGCCCGGTGCATCGGTTTC  
GGTTGGTACTTCAGCCACCCGACAGCAAGTACTACGCTGTAGCACAATTCAGCGCGATCAGGTTGAAGATTATGCC  
GCCGTAAAGGTATGAGCGTTACCGAAGTTGAGCGCTGGTGGCACCGAATCTGGGGTATGACGCGGACTGATTCACAAAT  
CTGTCACTTTTCTTACAACAAACAGGGCGCTCAATGAGTGCCTGTCTCTTTATTAATATGAAACACTTATACTGGAAA  
CAGGCTGGAATAATCTTAGCCGAAAAACGAATGTCAAAGGCCACAGTAAAGATGCCAGTCAGCGTGTTCGGGCTCTTT  
GGTCATTCAATTGCTTCAGGAACATATAACGATAAGGAGAACACTGAACTCGTGTAAACGCTTCCACCTGCTTTCCG  
GTCGCCCTGCTGGTCTGGGGGACTCATATTGTTGCAACCGCGTAATGCGCGTCTTCGGCGCGCTTTGCGTACTGTCT  
TAGCCGGAGCGTCAAAAAAAGCAGCTCGCTTTTGCAGGGGATCGGCGTTACCGCACTGGTACAGAGCAGTAATGCCA  
CCACCATGCTGGTGACCTCGTTTGTGCTCAGGATCTGGTAGCCCTCGCACCGGCTCTGGTCATTGTGCTGGGTGCAGAT  
GTCGGGACGGCGCTAATGGCGCGTATTCTCACCTTCGACTTATCTGGTGTACCCTTACTTATTTTTATCGGCGTGAT  
TTTTTCTCGGACGCAAACAGTCACGCGCCGGGCAACTGGCCGCGTGGTATTGGTCTTGGGCTGATTTTGTAGCGC  
TGGAGTTGATTGTGAGGCGCTAACGCCGATCACCCAGGCAAACGGCGTTCAGGTGATCTTTGCTCGCTGACCGGCGAT  
ATTCTGCTGGATGCGCTGATTGGCGCGATGTTGCCATTATCAGTACTCCAGCCTTGCTGCTGACTGCTGACCGCGAC  
TCTGACCGCCGAGGCATTATCTCTTCCCCTGGCGCTGTCTGGTATTGGTGTAACTCGGTTCCGGTCTGCTGG  
CAATGCTCAACAACAGTCCGCCAATGCCGACCCCGGTGTCGCGCTGGTGTGCTGTTAAGCTGGTGGGTAGC  
CTGATTATCTGCGGTTTGTCCATTTGCTGGCAGAGACAATGGGGAAGTTGTCATTGCCAAAAGCGGAACTGGTGTACTA  
TTTCCACGCTCTTACAACCTGTACGTTGCCTGGTGTGCTGCCATTTGTTGACCGGATGGCACGGTTTTGCAAAAACGA  
TTATTCGCGATGAACCGAACTGGATACCCAGCTACGGCTAAACATCTGGATGTCAGCGCGCTGGATACGCCACGCTT  
GCTCTGGCGAACGCCGCGCGAAACCTGCGCATTGGCGACGCCATGGAACAGATGATGGAAGGGTTGAATAAAGTGAT  
GCACGGTGAAGCACGGCAGGAGAAAGAGCTGCGTAAAGTGGCAGATGATATCAACGTTCTTACACCGCCATTAAGCTGT  
ATCTGGCGCGGATGCCAAAAGAAGAGCTGGCGGAGGAGAGTGCAGCGCGTGGGCGAGAGATCATCGAAATGTCGCTCAAC  
CTTGAACAGGCCCTCCGATATCGTCGAGCGCATGGGACGAAATGCTGACAAATCACTGGCAGCACGGCGGGCATTTC



GCTTGATGGGTTGAAGGAACTGGATGCGCTCTATGAGCAATTGCTCAGTAATTTAAAGCTGGCAATGTCGGTGTCTTCT  
CTGGCGATGTACCAGCGCTCGTCGTTTGCCTCGCAGCAAACATCGTTTTCGCATTCTTAATCGCCGCTATCCCACGCC  
CACGTCGATCGCTGCATCAGCAAAACGTGCAGAGCATTGAAACCAGTTCGCTACATTTAGGCTTACTGGGAGATATGCA  
GCGCTGAACGCTGTTTTGTTTCGGTGGCTTACAGTGTGCTGGAACAGCCGGATGAAGATGAAGGACGGGACGAGTATT  
AATATTGTGAATCCTGTAGGCTGATAAGACGCGTCAAGCGTGCATCAGGCACTATGAACAAGATGCCGGATCATGCAT  
CCGGCAATTACTTAAAAACGGTGACCAGCTTCCAGCGGAACCGTCTTACCAGCCTTAAACACATAAGTGGTGTTCG  
GGCCACCAGCGTAGCGTGACCTTTACTACTGTGATCCAGTTACCTTCCGGTAGACCAATAATCGTCAGTTCTGGCGCG  
ACGACCAGCAGTTCGCGAATACGCTGCTCACGGTTTACCTTTATGGCCTTCCGGCAGCGCGTGGTGAAGTGGGGTT  
GATTTGAGCGGGAACAGATTTAGCGCATCGAAACCTTGGGATCGACAATCGGCATATCGTTGGTGGTACGAATAGTTG  
GGCAAGCAAGTTAGCGCTGCGCTCCAGCCAATATACAGAGCGCCACGTTTAAACCAGTCAGTAATGGTGCCAGCAGC  
CCGCGCTCGCGGCACTGTTTACGCAACTGGAAGTATTTCCCGCCGCCACAATCACGATCTCAGCATTTTCAATCGCGGC  
AACGGGATCGACAACGCTATGAATACCGGTGACAGAAAACCCAGCGGAGCGAGAACCCGACGCGTTTTCCGTGTGTAAT  
CATCCAGGTCTGCGTTACGCCAGCGAAAAGGATAAACACCGCTGAGCGGCGACCCTGCAACTGTTACGCAATTAGCGGC  
AGTGCATGTTCCAGCCAGGCTTTACCCGGCAGCGTCGAGTTACTCAATAAAAGCAGTTCATTACTTCTCCGGTTAGTAA  
GAAATCAGCGGAGGCATGCTACCACTCGCAATTTAAACCACTTACTGACATGGCTCACGATGTCGCACATTGCTTCTGGAA  
AGTGATTTGAGCAGGTAACGAATTCAGCCAATGGAATAACAAATAGTTTCGCTCATGACTATTTTTTATCAACCCAAAG  
GTACGGTATATCCGTTTTTACAGGAGAATTTATGCTGCCGACTCATCAGTCCGTTTTAAATAAATACATCAGCGAAAG  
CGAATTTGCTCACGCCGGAAGCGGATCGCTATATCGAGCAAGGCAATGTGTTCTTAATGGCAAGCGAGCCACCATTG  
GCGATCAGGTGAAACCCGGCGACGTTGTGAAAGTAAACGGTCAGTTGATTGAACCTCGGGAAGCCGAAGATTTGGTACTT  
ATCGCCCTGAACAAGCCGTTGGTATTGTAAGCACCACCGAAGATGGCGAGCGGATAACATTGTCGATTTCTGTTAACCA  
CAGCAAAACGCGTGTCCCGATTGGCCGCTGGATAAAGACTCCAGGGGCTGATTTTCTCACCAATCACGGCGATCTGG  
TGAATAAGATCCTGCGTGTGGCAATGATCATGAGAAAAGTATCTGGTACGGTGCATAAACCGATTACCGAGGAGTTT  
ATTGCGGCGATGAGTGGGGGGTGCCAATCCTCGGGACAGTGACCAAAAAGTGCAAAGTTAAAAAGAAGCGCCGTTTGT  
CTTCCGATTACCCTGGTGCAGGGGCTGAACCGTCAGATCCGGCGCATGTGCGAGCATTTCCGGCTATGAAGTAAAAAGC  
TGAAACGCACGCGCATCATGAACGTTAGCTTAAGCGGCATTCCGCTGGGGGAATGGCGGATTTAACCAGCAGTATGAGTTA  
ATCGACCTCTTAAAGCTCATTGAAAAATCCTCTTCCGAGGTAAAACCTAAAGCGAAGGCCAAAACCGAAAACAGCGGGCAT  
CAAACGTCCAGTCGTTAAGATGAAAAAACGGCGGAAAAAGGCGGTGCGCCGCGTCCAACGTAAGCGTTTTACCTCGC  
CGGGCGTAAAAAGAAGGGGCGCTGATTAACGCCTCAGACTGATGAAAACGGCCAAAAGTCCCGGACAGTCCCCTCGC  
CCCTTCGGGAAAAGGTTAGGGTGAGGGGAAAATTGTGTTACACTGACGAGTAAAATCTCAGGCGTTGATTGTGGATT  
AGCGCTGCCGCGCTGCAGTATTTGCTGACCAGCTAAATGACGCTTCCAGGATCCGGTTTTATAAGCCTGCTTTTTCTT  
AACTGGCGGGCTTTTTCGCTTACGCCTCACGCTCAACCATTAATTTATCGATGTAATCTTTCTTAATGCTGTTGGTTT  
GGAGTTGGTCAATACGCGACCATGCGCAATCCGCGCCCGATCCAGCAGTGTTTTAAAGTTACGCTGCTCGGTTAGTCA  
TCTCTTTTTGGTAATACGGGGAGTGCCATGATGGTGCCCTCAGTGAGCCAGAGAGTTAGTGTACGGGAATTCGTTT  
CGAGCAGAACTGATAATATTCATTTTGCCTTCTCTTAACTATTTATCTTTTCGATAATTAATTAGAGATGCAGATAAAA  
AAATTAAGGCAATTTCTCCGATAAAGACGCTGGTTAACAGAGTACAGGCTCGTTTATTGATGAGCATAGTGACAAGA  
AAATCAATACGGCCGAAATATAGCTTCCAGGCCATACAGTATTTACTCAACAATACTATGCAGTTTTTGCACCACC  
TGCTCGGCATCTTCCCGGGCACCAGGAAGCACAGTTATGGTGGATGCGCCATAACAAATCATGCGAATGTTGAACGG  
TTCCAGTACGCCGAATACCTCTTTGCCAACGCCGAGGCTTTTACAGGTCATTGCCAATCAACCGGACAGCGCCAGAC  
CTTCTTCCACTCCACCCGACACAGTGCAGGAAAGTCCATCAGCAGAGATTGCGTCAGCAACGATCGCCAGTGGAGGTT  
GAACCGTGGTATCAAGGGTTAATGCCACGCTACTTCTGACGTGGTATTAAAGTCTACCGAAATATTATGCCGCGAG  
GATGCCGAAAACCTTCCCGAGGAAAACCGGAGAATGCAGCATATTCAGGCTGTGCAAAGTGAGCAGAGTCTGATTGCGAC  
GAAGCGCCAGAGCGGGAACAGCGGGGATTTTTCAGTTTTATTGCACACCAGCGTACCACCTGCGCGTGGGTCTTTGCTG  
GAGCCGACAAAGACCGGATATCGCTGCTACTGCGGGTAGCAACGTTGCCGGATGCGTACTTTTGCACAAAAGTTGC  
CATCTCTGCCGCTTCCGCAACCGGATTTATCAATGCGTTTTGCTGCGGAAACTACGCGTGGATCGGTGGTGTAGATGC  
CCGGGACGTCGGTCCAGATATCAACACGAGATGCGTGTAAAGCCTCCGCCAGCAAGGTTCCGTATAATCGCTGCCTCCA  
CGGCCAAGCGTCGTTGTACGACCTTTATTTTCCGCTACCGATAAATCCCTGGGTGATCACTAAGCCTTCTATTGAGACGTGG  
GAGCAGCTGCAGCGCGGCCAGTTCGCCAGCGCGGTATATCTGGCTCTGCACGACCAATCGGTCGTTGGTACGCATCA  
CTTTACGTACATCAACCCTGTGCCTGAACATCGCTTCCGCGCAGGATCTCAACAACAGCAGGGTGCACATCAGCTCG  
CCGTGGCTGACCAGCTCATCTGTCAGCGCCGAGACGTTGCCAGCGCCGCTTCTGCCAGAACAGTAATGTTCTCCAG  
CAGACGTTCAATCTTTCACGGATAACGTTCCGGTAACGCAGACGTTCCAGAATGGCAAACGGATGTTGCGGATAGCGT  
CGAGTTTTTGAATCGCTGCCAGGTTCCAGTCTTTCAGCTAAAGCGACCAGCAGATTAGTGATACCAGCAGAAGCCGAG  
AGGACAATAAACGCACGTTGGCATCAGAAAGCACAAATATCAGCGCTGCGGTTTCATGGCGTCAAATCAGCTACGCTGGT  
ACCGCAAATTTGGAGACAACAATTTAGACATAACTACCTCGTGTGAGGGGATCCATTTTTCAGCCTTGGCAAACGGGAA  
GAGCGGAAGACGGGTGGGCGCAGAGCGATACTTTCGCTACTATTTTACCAGAAAGTGTCCACCCTTGGCAAACGGCCG  
ACTGCGAACGCTTCTGGTGAACAACCCAGGGGATTACGCCCCTGTAGCCGATGATGAACGTGGCCAGCCGTTCAATCACCT  
CGCGGATGCACCCCTCAGGTGTTATCACAGGACTGGCTCTCCAACACCGTACTTGGGCAACGCGCCTTCTGCGCT

CGCCTAGCGCAGGTAGTACATTTATAAATAAAGGGTGAGCGGGGCGGTTGTCAACGATGGGGTCATGCGGATTTTTTCATC  
CACTCCTGGCGGTGAGTAGTTCAGCTAATAAATGCTTACTGCGCTAAGGGTTTACTCAACATTACGCTAACGGCACT  
AAAACCATCACATTTTTCTGTGACTGGCGCTACAATCTTCAAAGTACAATTCTCAAATCAGAAGAGTATTGCTAATG  
AAAAACATCAATCCAACGACAGCCGCTGCTGGCAGGCACTACAGAAACACTTCGATGAAATGAAAGACGTTACGATCGC  
CGATCTTTTTGCTAAAGACGGCGATGTTTTTCTAAGTTCTCCGCAACCTTCGACGATCAGATGCTGGTGGATTACTCCA  
AAAACCGCATCACTGAAGAGACGCTGGCGAAATTACAGGATCTGGCGAAAGAGTGCGATCTGGCGGGCGGATTAAGTCG  
ATGTTCTCTGGCGAGAAGATCAACCGCACTGAAAACCGCGCCGTGCTGCACGTAGCGCTGCGTAACCGTAGCAATACCC  
GATTTTTGGTTGATGGCAAAGACGTAATGCCGGAAGTCAACGCGGTGCTGGAGAAGATGAAAACCTTCTCAGAAGCGATTA  
TTTCCGGTGAGTGGAAAGTTATACCGGCAAAGCAATCACTGACGTAGTGAACATCGGGATCGGGCGGTTCTGACCTCGGC  
CCATACATGGTGACCGAAGCTCTGCGTCCGTACAAAAACCACTGAACATGCACTTTGTTTCTAACGTCGATGGGACTCA  
CATCGCGGAAGTGCTGAAAAAGTAAACCCGGAACACGCTGTTCTTGGTAGCATCTAAACCTTCACTCAGGAAA  
CTATGACCAACGCCATAGCGCGCTGACTGGTTCTGAAAGCGGAGGTGATGAAAAACGTTGCAAAACACTTTGCG  
GCGCTTCCACCAATGCCAAAGCGTTGGCGAGTTTGGTATTGATACTGCCAACATGTTGAGTTCTGGGACTGGGTGG  
CGGCCGTTACTCTTTGGTTCAGCGATTGGCCTGTCGATTGTTCTCTCCATCGGCTTTGATAACTTCGTTGAACTGCTT  
CCGGCGACACCGGATGGCAAGCATTCTCCACCACGCTGCCGAGAAAAACCTGCTGTACTGCTGGCGCTGATTGGC  
ATCTGGTACAACAATTTCTTTGGTGGGAAACTGAAGCGATTCTGCCGTATGACCAATATGCACCGTTTCGCGGGCGTA  
CTTCCAGCAGGGCAATATGGAGTCCAACGGTAAGTATGTTGACCGTAACGGTAACGTTGTGGATTACCAGACTGGCCGGA  
TTATCTGGGGTGAACCAGGCACTAACGGTCAGCACGCTTCTACCAGCTGATCCACCAGGGAAACAAAATGGTACCGTGC  
GATTTTCATCGTCCGGCTATCACCCATAACCCGCTCTCTGATCATCACCAGAACTGCTGTCTAACTTCTTCGCCAGAC  
CGAAGCGCTGGCGTTTGGTAAATCCCGCGAAGTGTTGAGCAGGAATATCGTGATCAGGGTAAAGATCCGGCAACGCTTG  
ACTACGTGGTGCCGTTCAAAGTATTCGAAGTAACCGCCGACCAACTCCATCCTGCTGCGTGAAATCACTCCGTTGAGC  
CTGGGTGCGTTGATTGCGCTGTATGAGCACAAAATCTTACTCAGGGCGTGATCCTGAACATCTTCACTTCGACAGTG  
GGCGTGGAAGTGGTAAACAGCTGGCGAACCCTGTTCTGCCAGAGCTGAAAGATGATAAAGAAATCAGCAGCCACGATA  
GCTCGACCAATGGTCTGATTAACCGCTATAAAGCGTGGCGGGTAAATCATCGTCGATATGTAGGCCGGATAAGGCGTTC  
ACGCCGATCCGGCAACCGATGCTGATGCGACGCGGTGCGTCTTATCAGGCCACAGGTCGATGCCGATATGTACATC  
GTATTCGGCAATTAATACATAGCACGATTGATTAATAACCTTAATAACAATGCCGACGTTATGTCGGCATTTTTTTATC  
AGATAAATCCCCTTGTCTGTAATTTAACGAAATCATACCGTGAGGTTAATCCTAAAATAGATTTTTAATCGTTGTTTAT  
TTCGAAAATACGAGATTAATTGCTTTTTGTTTTATTTAAGTTTATGATTTTTATTGTTATTTAAATATAAGTTGAAA  
CTTATATTTGATATTCATCCAATTATCTAAAACGCCATCGCTAATTCGCCGCGCGTAATTCGCATGCTTTAGTTGTG  
TATACTCGATCCCGCCGAAATGTTTTGGGTAAATCTCCATTCAATGAAGGGAAATTTGTTATGAAAAAGTTCTG  
TATGGCATTTTTGCATATCTGCGCTTGGCGGACTTCTGCGTGGCTGCACCTGTACAGGTGGGCGAAGCGGAGGGTTC  
GGCAGCAACGTGCGTTTCCGGCGGGAGTTCCTCCGCGACCAGCGTCAGCACCGTAAGCTCGGCGGTGGGTGTCGCGCTG  
CGGCAACCGGTGGCGGTGATGGTTCTAATACCGGGACCACCACAACCACGACCAGTACCAGTAATAAGTATGTAT  
CCCCAAAATAATTCGAGTCATTGCATCTGTGGCTAGAAGTATGAAGGGATTAACCATAACCACACTCCGGTGTGGTTATT  
CTGCCCCTCTGGAGAAGAGTCGTGAAGCGACCTGCACTCATTCTATCTGCCTGTTATTACAGGCCTGTTACGCCAGC  
TAAAGAGCTGGGCAATTCAGTGTGGGACAGTCTGTTCCGACGCCAGGCGTACAGCTGACGGATGATGATTTCAAATA  
TGCCCTACGCCAGCCAGTACATGCAGCTTAATGGCGGGCCGAGTTATTTGGTGGTCTGGCCTTCGCTGAAGACGGACAA  
CAAAAATGGTCACTCAGGATCAGGCTACTCTGTTACCAACATGGCCGTCTGGTGAAGACTCTGCTCGGCGGGCAGCAA  
CCTGATTGAAGTGAATAACCTTGTGCGGACCCGCTGATTAACCCGACAAATCGTTGATGGCGAAGTGGACGGCGCA  
CGATGGGCTGGACCGATACCAGGTAACGCTACGCCACCGACGCTCAGTCTTCAAATGGGATGGCAGCAGTACCGCTC  
AAAGTCGGCAGCGATGAAACCCCGTTGCGGTGCTGGACGAAGAAGTCTCCACCAGCCAGGCGGCTGGCATAACCGCTA  
TTGGATCGACAGCGAAGGGCAAATTCGCCAGTCGGAACAGTATCTCGGCGGGATTATTTCCGGTGAAAACCACTCTCA  
TCAAGGCGGCAAAAACATGATTAACAACACTATTGTGCGGTTGCTTTGAGTGTGGGAGCGTCATCGGTCTTCGCGGAG  
GAACCGTCAAGGTGTTGAGCAATGGCAGCAGTGAGGCCAAAACGCTAACGGGCGCAGAGCATTTAATCGATCTGGTAGGC  
CAACCGCGGCTGGCAAACAGCTGGTGGCCGGTGGGTTGATTAGCGAAGAGCTGGCAACGGCGGAGCATTGCGTCAGCA  
GCAGGCGTTGCTGACACGGCTGGCAGAACAGGGCGCAGATTCCAGCGCCGACGATGCCGCTGCGATTAACGCCTTACGCC  
AGCAAATTCAGGCGTTGAAAGTGACGGGCGAGGCAAAAATCAATCTTGATCCCGATATCGTCCGCGTTGCCGAACGCGGT  
AACCCGCGGTTGACGGGCAACTACACGCTGTGGTCCGACCACCGCGTCCACGGTCACGTTGTTCCGGCTTATCAGCCG  
TCCTGGCAAGCAGCCATTCACTCCAGGTCGCGACGTGGCGAGCTATCTCTGACCAGAGCCTGCTCAGCGGTGCGGATC  
GCAGCTACGCTGGGTGGTTTACCCGGACGGACGCACGAAAAAGCGCCGGTGGCTTACTGGAACAAGCGTCACGTAGAG  
CCGATGCCCGGACGATTATTTATGTTGGCTCGCGACTCCGTCTGGAGTGAGACGCTGATGCCCTAACCGCGACAT  
TCTTCAGACTCTGACGACGGGATACCTCAATAATGAAAAAAGACATCTGCTTAGCTTACTGGCGCTGGCATTAGCAC  
AGCTTGCTACGGCGAAACATATCTGCGCCATTGGTCCGTGCGAGTCGGATTCGGTGGCGTAGGATTATTACAAACGC  
CCACCGCGCTATGGCACGGGAAGGGGAGTTGAGTCTGAACTATCGCGATAACGATCAGTACCCTTACTCAGCTTCA  
GTGCAACTCTTCCCGTGGCTGGAAACAACGCTGCGCTACACCGACGTCGCGACCCGGCAGTACAGCAGCGTCGAAGCGTT  
CTCTGGCGATCAAACGTATAAAGATAAAGCCTTCGATCTCAAACCTGCGTTTGTGGGAAGAGAGTTACTGGCTGCCGCAAG

TGGCGTTGGTGC GCGGGATATCGGCGGTACGGGGCTGTTTGATGCGGAATATCTTGTTGCCAGCAAAGCCTGGGGCCG  
TTCGATTTTACGCTCGGCTGGGCTGGGGTATTTGGGACCAGCGGTAATGTAAAAATCCGCTCTGTTACGCCAGTGA  
TAAATATTGCTATCGGATAACAGCTACAAACAGGCGGGATCTATCGACGGTAGCCAGATGTTCCACGGTCTGCCTCAC  
TGTTTGGCGCGGTGGAATACCAGACGCCCTGGCAACCGCTGCGCCTGAAACTGGAGTATGAAGGCAATAATTATCAGCAG  
GATTTTGGCGGGAAGCTGGAGCAAAAAAGTAAGTTTAACTGCGGTGCGATTTATCGCGTTACCGATTGGGCCGACGTTAA  
CCTTAGCTATGAACGTGGCAACACCTTTATGTTTGGCGTTACGTTGCGCACCACTTTAACGATCTGCGCCCGTCTTACA  
ACGATAACGCCCGCCCGCAATATCAACCCGAGCCGAGGATGCCATTTTGCAGCATTCCGTTGGTGGCAATCAGTTAACG  
CTGTTGAAATACAATGCCGGACTTGCCGATCCACAGATCCAGGCGAAAGGCGATACGCTGTATGTTACCGGCGAGCAGGT  
GAAATATCGTGATTGCGCGGAAGGGATCATCCGTGCGAATCGGATCGTGATGAACGATCTGCCGGATGGGATCAAAACGA  
TCCGATTACGGAAAATCGCCTAACATGCCGAGGTGACGACGGAAACCGATGTCGCCAGCTGAAAAATCATCTCGCC  
GGAGAGCCGTTGGGCCACGAAACGACGCTGGCGCAAAAACGCGTCGAGCCAGTGGTCCGCGAGTCCACCGAGCAGGGCTG  
GTATATCGACAAAATCAGCTTTGATTTCCATATCGATCCGGTGTGAACAGTCCGTTCCGCGAGTCCACCGAGCAGGGCTG  
TGATCAGCTGGGCGTGTGGGAACGGCAGATTTGTGGCTGACGGACCATCTGCTGACCACCGGCAGCCTGTTTGCAAA  
CTTGCCAACTACGACAAGTTTAACTACACTAATCTCCGAGGACTCGCACTTACCGCGCTGCGTACCCATGTGCGC  
CGAGTATGTGCAGAACGATGCTATGTGAATAACCTGCAAGCCAACTACTTCCAGCATCTGGGCAACGGCTCTACGGTC  
AGTCTACGGTGGTTATCTCGAAACCATGTTTGGCGGTGCGGGGGCAGAAGTGTGTATCGCCCGCTGGACAGCACTGG  
GCGTTTGGTCTGGATGCCAACTACGTTAAACAGCGGACTGGCGTAGTGCAAAAAGATATGATGAAATTCACCGACTACAG  
CGTGAACACGGACATCTGACCGCCTACTGGACGCCATCTTTCGCTCAGGATGTGTTAGTTAAAGCCAGCGTGGGCGAGT  
ATCTGGCAGGGGATAAAGCGGCGACGCTGGAGATCGCCAAACGCTTTGATAGCGGCGTGGTGGTGGTGGCTATGCCACG  
ATCACTAATGTTTTCGAAAGAGGAGTACGGCGAAGGGGACTTACCAAAGGCGTGTATGTCTCGGTACCGTTGGATCTCTT  
CTCGTCTGGCCGACACGACGCGCTGCGGCGATTGGCTGGACGCCGCTGACGCGTGACGGTGGTACGCACTTGGGCGTA  
AGTTCAGTTGTATGACATGACCAGCGACCGTAGCGTCAATTTCCGCTAAGTCATGGGAAAGGTGCCAGTTTTGCGACTC  
ACTGGCACCTTATTCTTAATGGCCTGTGAGCCATCAGGAACGAGTTCCTCCCGTTTGGCATCTGGTGTGTAAGG  
CGAAAACATTCTGCTTCTGTCCGTCGATATCGGTTGAGGTCTGGTGCCTGAGCGACTGGCCATCATTGGGCTGGA  
GACATTGCTTTCGGTAGGTGCGCTTTATCAGCAGTACCGAGCGGACCAGCATAAGCAGGAAGAACAGAGACTGATAACA  
TCAAAGCAGCAAAATAAGGCTTCATTTTTACCACCTTATCAGGTTACGTTTCAATTTGTTCCAGAGGAACATTGTGAT  
TTTCGCGCATTGCTGGTGGCTGGGAATCACCTGAATGGGTGATTTTTGAATTACCGGCTTGGTGGGTTTGTCTTGCCG  
GATGCGCCCGCAGGCGCGGCTTATCCGGCTACGGGTAGGTATATCCGGCTTGGTGGAGGCGCGCTCCAAATCCAGGTT  
GAACAAAACATACACAAAAATATAGATCTCCGTCACATTTTTGCGTTATACAGGAAGCTCGCCACTGTGAAGGAGGTAC  
TGCTATGACGCTACTCTCTCGTCCGCGGTGGAGTTTATCTCCACCATTTTGCAGACCGTACTCAATCTTGGCCTGCTGT  
GCCTCGGCCTGATTTTGGTTGTCTTCTCGGCAAGAAACGGTGCATCTGGCTGATGTGCTGTTGCGCCAGAACAAACC  
AGCAAAATAGAGCTGGTAGAAGGACTGGTGGTTACTTTCTCTATTTTCAATTTATCGCGCTGATTGTGAAGTACTTTCA  
GTCCGGTTTTCACTTCCCGCTACGTTACTTTGTCTATATTGGGATCACCGCCATTGTGCGCTTGTATCATCGTCGATCATA  
AATCGCCACTGGATGTGTTGATCTACTCGGCTGCGATCCTGTTACTGGTGTATCACCTGTGGCTGTGTAATTCGAAACGG  
CTGAAGCGGGAGTAAAAGTACGACGCGCCGAAATGGCGCGGCTGCTGGACAGGAAGATTACAGCGTAGCAGTTTGTGTT  
GTTTTCTTGGTTTCCGGTCCAGAGCGCTTCCAGCTCCTCAAGGTTTTACCTTTGGTTTCCGGGACAAATTTCCACAT  
AAACAGTGTGCCAGAACGCCATACAACCGTAAATCCAGTAGGAGAAACCGTGTGGAATGGGCCACCAGCCAGGAGT  
TTTTGTCCATCATCGGAAGGTCCAGGAGACGAAGTAGTTCGCCAGCCACTGGGCCGCCACCAGGATTGCCAGCGCTTTA  
CCACGAATAGCATTGGGAAGATTTCCGACAGCAGTACCCAGCATACCGGACCCAGGACATGGCAAAGCGGCAACATA  
GAACAGCATCGACAGTAGCGCCACAATACCCGGTCTGAGTGTAAAACGCGGTACCGAGGCTAAACATACCGATTGCCA  
TTCCGAGTGCGCCGATAATTTGCAGTGGCTTACGACCAAATTTATCCACCGTCATAATTGCCAGAACGGTGAAGGTGAGG  
TTGATAACTCCGACAATAATGGTCTGCAACAGCGCATATCCGTGCTGGCCCCAGCGTTTTGAACACTTCCGGCGCGTA  
GTACAGCACCAATTGATGCCGACAAATTGCTGGAAGATGGAGAGCATTACGCCGATTACAATCACGCCACGCCAAACA  
TCAGCAGACGACCACCGTTTTGCGGCCATGATCCAGGGAGTGTTAATTTCTGTACTGCCTGAGTTGCAAGCGTGTG  
CCATAATTTTGCAGGATACCTTCCGCTGTTCTTGCTTGGCGCGGACATCAGCCAGCGAGGACTTTCTGGCACGGT  
ATACAGCAGCATTAAAGACAGCAGTGCAGGGATACATTCGAGGCAACATATAACGCCAGCGTCAGTATTACGCCAGC  
TGGCATCACGGAAACGGGCAATAAAAATAGTTTACGCAGTAACTAAAAGTTGCCGAAAATAATCGCAAACCTGGTTAAAA  
GAGACCAGTTTCCGCGAATATGAGCTGGAGCCAGTTCGCAATATACATTGGCGAGAGCATTGAGGCTAAACCAACGCC  
AATACCGCAATAATGCGATAAATAACAAATTCCGGACATAACCTGCCAGATAAACAGGCACAGTGTGTCGGGTTTA  
TAGAGGTAAAACCAAGTTCTGGCCAGGCAGAACCTACACCAGAAATAAAAAACAGGACAGCAGCAATCTAAGTGAATCA  
CGACGACCGAAGCGGTTACTGCAATAACCACCGAGGACCGCCGATGATGCAACCAATCAGAGCGCTGGCCACGCAAAA  
CCCTAACAGGGAGTTGGCAGCGGATTCACTTAAGTTTTGTGGAGCAACAAAGACGGTATTGAGTGACTCAACAGTACCGG  
AAATAACGGCGGTGTCGTAGCCAAATAATAAACCACCTAATGTAGCGACTAAGGTAATCGAAAATATATAACTGGAATTA  
TACTGGGTATTCACTCAGACCTGCCTTAGACCATTCTGATCTTTTATCAGTGCATTGATGTTGGAATTGTACAGCAGTTA  
AGGCAATTATCATTTTTTACAATGCGTTTACGTAATGTCTTTCTGTGATCTTAATTGTGATAATTATCCAAAATTGATA  
AAAAAATACTATTGCCGTGACTCAGAGCACGAAAGAGAATTATCGTAAGTGGGAAAACAAATAACGTAATAATAAG

CTCTATGATGAAATATTAACCGGCGAACGATTGAGATTGCAGACGAAAGAAAAAAGGCGCTCCGTGGAGCGCCGAATA  
ACAGTCACAAGTTGGGATAACGTAAGTTGAGGGTGCAGCGCATAACATTGGCAGAACAACATCTTTAACCTTTACACC  
ACCTGCCGTACAGCGCTTGACCAGCCAGCGTTGAGCCAGCAAGAAGACGATGGTGATCGGTAATGCAGACATCACGGCAG  
CGCGGCAAAGTACCCACAGGTAGTTTTGCGGGTTGAGGTATTGCTGCATCCCCACGGCCAGGGTGTAGCTGTTTACG  
TCACGCAGTAACAGCGACGCGACCGGAACCTTCAGTAATGGCAGCGATAAACGACAGGATGAATACCACCGCCAGAATCCG  
TACTGACAGCGCAACAGGACAAGGCGGAAGGCCTGCCACGGTGTGCGACCATCCAGCGCAGCAGCTTCTTCCAGCGAAC  
TGTCGATGGTTTCGAAATAGCCTTTGATGGTCCAGACATGCAGCGCAATCCCACCCAGATACGCGAAAATTACGCCGCCG  
TGAGTATTCAGGCCAATGAATGGAATGTAATCAGCCAGACGATCAACAACGCATACAACGCGACCAGTAAAAGTACTGC  
CGGGAACATCTGGAATCAGCATTCTTTGAGCAGCGTGCCTTTGCTGAAAAGCGCATAACGGGCGAAAAGCGTAGGGC  
AGGTGGTGGAGAGCGCCACAATGCCAATCGCGGAAATCCCGGCGACCTTTACCGAGTTCCACAGCCACAGCAGTACCGG  
AATGGCGGTGGCGTAATGCGACCATCAGCCTGTTCAACGCTAAAACCTAACGCCAGTTTCCAGTGATCCCAGGAGATTTG  
CTCCGGGATCAGGCTGCCGTCGCAAAGTTTCCCTGACGCGAGGATAGCGACGACCATCAGCAGCGGGAACATAATCG  
CTGCGATAAAAAGTAGCAGTAGCAGGTGAGTAATAAATAAACGAGCTTTTTGCGATTTGCGTTGGACCATTGCCATTTT  
GTTATCTCCCTAATCAAATTCATTCGCGTGGCTTTCAGGTTCACTATCGCCAGCGCACCCACCAGCAGGAAGATCAGC  
GTGGCAATTGCTGCCGACCGAAGTCTGACCCCGCCGCTTCAAAGCGATGCGGTAGGTGTAGTTAACAAGCAG  
GTCGGTATAACCGCTGGCTGGTCTGCGCAAGACGATCCGGGCGCGTTGGTTAACAGTTGAATCAGCACGAAGTTGT  
TAAAGTTAAAGCGAAGCTGGCGATCATCAGCGCGTGCAGCGTTTAAATCAGCAGCGGCGAGCGTAATCTTAAAGAAGTTC  
TGGAACGACCTGCGCCATCCATTGCTGAGGCTTACATAAATCGTCCGGAATCGCTTTCAGCAAGCCCATGCAGAGGAT  
CATCATGTACGGATAACCCAGCCAGGTATTGACGATAATTAGCATCGTGCGGCGGTGGTCCGATCGCTGAACCAGGGCG  
GCTTCACGCCAAAACAGCGCGCTCAACATCATGTTGATTTACCGAAGCTCTGGTTAAACAACCCTTTGAAAATCAAGATT  
GAAATGAACGATGGCACCAGCGTAGGGCAGAATCAGCAGGACGCGATAGACCGCTTTGCCGCGCAACGCTTCCACTGCAC  
CAGACACGCCAGAACCATGCCGACCGCCACCGTTAAAAGACAGTGATCAGCGAGAACCACCGGTCCAGACGAAAATGG  
CGAGGAACGGTTTCTGAATGCCTTCGTCGGTAAAGACGCGGTAAGTTTTTCCAGCCGGTGGTACGGTGTAAACGGGG  
CTTAGCTTTTATCACCAGTTGCCGTGCGGTAATGGACTGGTAAAAGCCAATTTGGTTATTGCGACGATATTTAC  
GCCGCTCTGATTATTGTCACAGTCCGCTCACCGTCGAGTGTGTAGAGCGGCTGCGTCCAGAAAACCTGGCGCAGGGAGC  
TCATCATCACTTTGTTGCCATCCGGCAGAATGGCGTAATGTCAGTGCAGGCTGACGATTCTGGGTAATCAGCGCAGA  
TTCGCGCGTTCGCTTCCGGCTGGGCGGTGTTTTCTTTCAGTTGAGTTTTTGTCTGCGCCAAATTTAAAAGCGTCGGA  
GAGTAATTTTTGCCGTTTCCGCTGCTGAGCGCAGTTGCCACTCATCGCCGCGGGTAAAGACCAAAGTTATAGG  
TTTTGCCTGCTTCCAGGAGCGATCTAACAACTTCTGCGCAGTTCAAAGTCAAGTGGTTAGTGTCTGTAGTTG  
GTGAAGGCAATGGCGATGGTGCAGACCAGAGGGAAGAGGACGAATAATCCATTCCAGCCATTCCCGGGTAAACATAGCG  
CCAGGCGTAGGCTTTACGATTGGCGAAAATATACAGCCCCGCTGAACTCAATATCAGCGTGGTAATGGCGAACAGGTATT  
CCCTTGTGCGTACATTAACAACAAGTAACCCACCAGCAGGCCGAGCAGACCTAGCACTGACCATTTACGCGCGTCCG  
CTTTGCCACCAATGTTTCTTTTAAATGACATCCATGGGGTTCTTCTCATTCCAGGACGGATAAGGCTTTACGCGCTTAT  
CCGACAACAATGCCTGATGCGACGCTGACGCGTCTTATCAGGCTACATACGTTTTCGTTTTGTAGGCCGGAAGGGC  
TTCACGCGCATCCGGCATTTCACAGCATTACTTGGTGATACGAGTCTGCGCGTCTTTCAGGGCTTATCGACAGTCTGA  
CGACCGTGGCGGCGTTGATCACCGCAGTACGACGGCATAACCAGAAAGCGGACATCTGCGGGATGTTCCGGCATGATTC  
ACTTTTCTGGGCGTTTTCCATGGTGGCGGCAATACGTGGATCTTTCGCCAATCTTCTCGTAAGACTTCAGCGCTACGG  
CACCCAGCGTTTTGTCTTTAATACCCTTCCAGACCTTATCAGTGCAGCAGATAGTTTTCGAGGAACCTTTCCGCCAGC  
CAGTACCGTTACACCATAATTCATTTGCTGGTGCATGTTGGACCATGCCACGGCCGTTGATGGTCAATCGCTGTTT  
CGCTTTAATAAAGCGAGTCTGCGATGGAGTAATCGGTGCTGCTGATTATGTTGTTTTAATCAGGTCAACCAGG  
AAGTGCAGACCGCTTTCGCGCCAGCGTTATCCAGCCACGCTTTAATGTGTAATGCGGTTTTTACTTGAACGC  
ATAACCCCGTGCAGCAGCAATCAGCGGCCAGGTGAAGTACGGTCTTGCAGGTTGAACATCAGCGCGCTTACCTTTCG  
CTTTCAGTTCTTATCCAGCGCCGGGATCTTCCAGGTTTTTGGCGGTTCCGGCAGCAGATCTTGTATAAATCAGC  
GATAACGTTCAACAGCGATCGGGTAAGCAATCAGCTTCCGTTGTAACGTACGGCATCCAGGTAACGGATACAGCTT  
GTCCTGGAACGTTTTGTCGGGGTGAATTCAGCCAACAGGCCAGATTGAGCGTAGCCACCAAAGCGGTGCTGCCCCAGA  
AGATAATGTCAGGGCCATCGCCAGTTGCCGAACCTGTGGAAATTTCTTCCAGTTTATCCGGATGCTCAACGGTGACT  
TTAATTCGGTATCTTCTCGAATTTCTTACCAGCTTACGCGAGACCGTTATAGCTTTATCGCGTTAATCCAGATTAC  
CAGTTTACCTTCTCGATTTTGGCGAGAGCCGAGGCCGAAAACATCATGCTGTTAATGCGGATAATGCGAGGATGCGTG  
CACCTGTTTTTATTTTATAATCTATGGTCTTGTGGTGAAGTCTGCGTAAAACACCTAAACGGACTCTAGTTTCTTT  
ATACGGCAACCTTTCCATCTTCTTCCCTACGCCACCGTCTGTTGTGATCTCTGTTACAGAATTGGCGGTA  
ATGTGGAGATGCGCACATAAAAATCGCCACGATTTTTGCAAGCAACATCACGAAATTCCTTACATGACCTCGTTTAGTTC  
ACAGAAGCCGTGTTCTCATCTCCCGCTCTCCCCATAAAAAAGCCAGGGGGTGGAGGATTTAAGCCATCTCCTGATG  
ACGCATAGTACGCCATCATGAATGTTGCTGCGATGACAGGTTGTACAAAGGGAGAAGGGCATGGCGAGCGTACAGCT  
GCAAAAATGTAACGAAAGCCTGGGGCGAGGTGCTGGTATCGAAAGATATAATCTCGATATCCATGAAGGTGAATTCGTGG  
GTTTGTCGGACCGTCTGGTCTGCGTAAATCGACTTACTGCGCATGATTGCCGGGCTTGAGACGATACCAGCGGCGAC

CTGTTTCATCGGTGAGAAACGGATGAATGACACTCCGCCAGCAGAACGCGGCGTTGGTATGGTGTTCAGTCTTACGCGCT  
CTATCCCCACCTGTCAGTAGCAGAAAACATGTCATTTGGCCTGAAACTGGCTGGCGCAAAAAAGAGGTGATTAACCAAC  
GCGTTAACCAGGTGGCGAAGTGTCACTACTGGCGCATTTGCTGGATCGAAACCGAAAGCGCTCTCCGGTGGTCAGCGT  
CAGCGTGTGGCGATTGGCCGTACGCTGGTGGCCGAGCCAAGCGTATTTTGGCTCGATGAACCGCTCTCCAACCTCGATGC  
TGCACTGCGTGTGCAAATGCGTATCGAAATCTCCCGTCTGCATAAACGCCTGGGCCGCACAATGATTTACGTCAACCCAG  
ATCAGGTGCAAGCGATGACGCTGGCCGACAAAATCGTGGTGTGGACGCCGGTCCGCTGGCGCAGGTTGGGAAACCGCTG  
GAGCTGTACCACTATCCGGCAGACCGTTTTGTCGCCGATTATCGGTTCCGCAAAAGATGAACTTCTGCGCGTAAAAGT  
GACCGCCACCGAATCGATCAAGTGCAGGTGGAGCTGCCGATGCCAAATCGTCAGCAAGTCTGGCTGCCAGTTGAAAGCC  
GTGATGTCCAGGTTGGAGCCAATATGTCGCTGGGTATTCGCCCGAACATCTACTGCCGAGTGATATCGTGCAGTGCATC  
CTTGAGGGTGAAGTTCAGGTGTCGAGCACTCGGCAACGAACTCAAATCCATATCCAGATCCCTTCCATTTCGTAACAA  
CCTGGTGTACCGCCAGAACGACGTGGTGTGGTAGAAGAAGGTGCCACATTCGATATCGGCTGCCGCCAGAGCGTTGCC  
ATCTGTTCCGTGAGGATGGCACTGCATGTCGTCGACTGCATAAGGAGCCGGGCGTTAAGCACCCACAAAACACACAAA  
GCCTGTCACAGGTGATGTAAAAAAGAAAAGCAATGACTCAGGAGATAGAATGATGATTACTCTGCGCAAACTTCTCTG  
GCGGTTGCCGTGCGAGCGGGCGTAATGTCTGCTCAGGCAATGGCTGTTGATTCCACGGCTATGCACGTTCCGGTATTGG  
TTGGACAGGTAGCGGCGGTGAACAACAGTGTTCAGACTACCGTGTCTCAAAGTAAATACCGTCTTGGCAACGAATGTG  
AAACTTATGCTGAATTAATAAATGGGTGAGGAAGTGTGGAAAGAGGCGGATAAGAGCTTCTATTTTCGACACTAACGTGGCC  
TATTCGCTGCGACAACAGAATGACTGGGAAGCTACCGATCCGGCTTCCGTGAAGCAAACGTGCAAGGTAACAACTGAT  
CGAATGGCTGCCAGGCTCCACCATCTGGGCGAGTAAAGCGTTCTACCAACGTGATGACGTTTATATGATCGACTTCTACT  
ACTGGGATATTTCTGGTCTGGTGCCGGTCTGGAAAACATCGATGTTGGCTTCCGTTAACTCTCTGCGCAGCAACCCGC  
TCCTCTGAAGCTGGTGGTCTTCTCTTTCCGCCAGCAACAATATTTATGACTATAACCAACGAAACCGCGAACGACGTTTT  
CGATGTGCGTTTAGCGCAGATGAAATCAACCCGGGCGGCACATTAGAAGTGGTGTGACTACGGTCTGCCAACTTGC  
GTGATAACTATCGTCTGGTGTGATGGCGCATCGAAAGACGGCTGGTATTCACTGCTGAACATACTCAGAGTGTCTGAAG  
GGCTTTAACAAGTTTGTGTTGTCAGTACGCTACTGACTCGATGACCTCGCAGGGTAAAGGGTGTGCGCAGGTTCTGGCGT  
TGCATTTGATAACGAAAATTTGCCTACAATATCAACAACAACGGTCACATGCTGCGTATCCTCGACCACGGTGCATCT  
CCATGGGCGACAACCTGGGACATGATGTACGTGGGTATGTACCAGGATATCAACTGGGATAACGACAACGGCACCAAGTGG  
TGGACCGTCCGTTATTCGCCGATGTACAAGTGGACGCCAATCATGAGCACCGTATGGAATCGGCTACGACAACGTGCA  
ATCCAGCGCACCGGCGACAAGAACAATCAGTACAAAATTACCCTCGACAACAATGGCAGGCTGGGCGACAGCATCTGGT  
CAGCCCCGGTATTCTGTCTTCGCAACCTACGCCAAGTGGGATGAGAAATGGGTTACGACTACACCGGTAACGCTGAT  
AACAAACGCAACTTCGGCAAGCCGTTCTGCTGATTTCAACGGCGGAGCTTCGGTCTGGCGACAGCGACGAGTGGAC  
CTTCGGTGCCAGATGGAATCTGGTGGTAATAGCAAAACCTGGGCCGATAAGGCGTTTACGCCGATTCGGCAACCAA  
CGCTGATGCGACGCTTGGCGCTTATCAGGCCTACAACGGCTGTCAAATGTAGGCCGGATAAGGCGTTTACGCCGAT  
CCGGCATAAAAACAGGTTGTATTATCTGAAAGGGGCGAAAGCCCTCTGATTATCGGGTTTAGCGCGCTATTGCCTGGC  
TACCGCTGAGCTCCAGATTTGAGGTGAAAACAATGAAAATGAATAAAAAGTCTCATCGTCTCTGTTTATCAGCAGGGTT  
ACTGGCAAGCGCGCTGGAATTAGCCTTGCCGATGTTAACTACGTACCGCAAAACACCAGCGACGCGCCAGCCATTCCAT  
CTGCTGCGCTGCAACAACCTCACCTGGACACCGGTGATCAATCTAAAACCCAGACCACCAACTGGCGACCGGCGGCA  
CAACTGAACGTTCCCGCATCAGTGGTCCGTTGCTGCGTACAGCGTCCCGCAACATTGGCGAACTGACCCTGACGCT  
GACCAGCGAAGTGAACAACAACACAGCGTTTTTGCGCCAAGCTGCTGATTCTTGATCAGAACATGACCCCATCAGCT  
TCTTCCCAGCAGTTATTTACCTACCAGGAACAGCGGTGATGAGTGCAGATCGGCTGGAAGGCGTTATGCGCCTGACA  
CCGGCTTGGGCGAGCAAAAACCTTTATGTTCTGGTCTTACCAGGAAAAGATCTCCAGCAGACGCCAACTCTCGTA  
GCTTACTGAAACTGAAAGTGAACAAACGAACTCCAGCTCCAGCGTGGTGGTAGGACCTTTATTTGGTTCTCCGCTCCAGCT  
CCGGTTACGGTAGGTAACACGGCGCACAGCTGTGCTGCACCCGCTCCGGCACCGGTGAAGAAAAGCGAGCCGATGCT  
CAACGACACGGAAGTTATTTAATACCGCGATCAAAAACGCTGTGCGGAAAGGTGATGTTGATAAGGCGTTAAAACCTGC  
TTGATGAAGCTGAACGCTGGGATCGACATCTGCCGTTCCACCTTTATCAGCAGTGATAAAGGCAAGGGTAATTACGC  
CCCACAGTGTGATTTTGAACAACCTGGTGGTCTCCTGGCGACCTTTTTTTATGCTTCTTCTGGGATAGAGCGAT  
TTTTTATAGTAACTCACTTCTTCTCACTAAGAATATCCATTATCTCAATGCCATTATCAGAGATTCTTTTCTTTCGCCG  
GTAGTGTCTGGACATTAGGCTACTTTTCCAGGTTATTTTATTTCTGTTATGCAGAGGTTTTATGATAAGTCATATCCTA  
AATTCTGGCGCAATAACTCTTTGATGAAACATGATGGTGAAGGAAATAATATAGTAGATCTTGATTTACTACGTAA  
TTTAAATGGGGTCCAGGTTTAAACAGAGATAACTTTATTTATATCAGCAATATTTTTTCAAATATAAAAACACGGAACG  
AAAAATCATGCAATAAATATGTTTCGTGAAGTCTCAATCAGTAATGATACTATAAGTGTAAAATTCTACAGAAATGAAA  
AAAATTGAATGCGCTTGAATTTTCTGATGGATAAAGATGCGCAGGGTATATCGACCTGTCTGATTTGGATTTAACAAG  
TTGTCATTTTAAAGGTGACGTTATATCGAAGGTGTCTTTTTATCATCAAATCTACAACATGTAACATTCGAATGTAAG  
AAATTGGGGATTGCAATTTTACTACTGCAATAGTTGATAATGTCATATTTAGATGTCGACGTTTACACAATGTGATTTT  
ATCAAAGCGAGTGGTGAATGTGTGATTTTCAGCAAAAATATTCTTGATACAGTTGACTTCTCGCAGAGTCAACTGGTCA  
TAGTAATTTTCCGCAATGTGAGATTAGAAATTCAACTTCGATAATTGTTATCTTTACGCTTCCGACTTACCAGAGCAG  
AGTTTCTGTCTGCCAAGAAATATCATTTATTAATCGAATTTGACAGCTGTTATGTTGATTATGTGCGAATGTGACACA

GGGAATTTTAAAGATTGCATTACAGAACAATTGGAATTAACATTTGATTATTCAGATATATTTTGAATGAAGATCTCGA  
TGGTTATATCAATAACATTATAAAAATGATTGATACATTGCCAGATAATGCAATGATATTGAAATCCGTTCTGGCCGTAA  
AACTGGTGATGCAATTAATAACTTAAATATTGTTAATAAAAACTTTATTGAGAATATGAAGAAAATATTTAGCCATTGT  
CCTTATATAAAAGATCCCATTATACGCAGTTATATCCATTCTGATGAAGATAACAAGTTTCGATGATTTTTATGCGTCAACA  
TCGATTCAGTGAGGTGAATTTTCGATACCCAACAGATGATCGATTTTATTAACAGATTTAATACGAATAAATGGCTAATTG  
ATAAAAATAACAATTTTTTTATCCAATTATCGATCAGGCCTTACGATCAACGGATGATATGATCAAAGCAAATGTTTTGG  
CATCTTTATAAAGAGTGGATTTCGTAGTGATGATGTTTACCTATATTTATAGAACTGAAGATAATTTAAGAACCTTTAA  
CACGAATGAATTAACACGAAACGATAATATCTTTATCCTGTTCTCCTCAGTCGATGATGGGCCAGTTATGGTGGTAAGCT  
CCCAGCGCTTACATGATATGTTGAATCTACAAAAGATAACCAATTGGAATCCACGATATCTACAAATCCAGACATGAG  
ATGTTGCTGTTAATCTTACTCAGGAAACACTTTTTAGCTCCAAATCTCATGGTAAATATGCGCTTTTCCCATTTTTAC  
TGCAGTTGGCGAGCTCATCGTATAATGAATAAGGGTGTAAAGTAAAGGAAAACATCACCCTTCTGGCATCCTGGACG  
GTGATGCCCCACGGTTGCCCTCGCCAGCAGGGCATCGGTAAGCGTAAGGTTCAACATCGTTTTACCATTTCATGCGA  
TTGTTGCGTTTTGTTGCGTATTAGATCACTTAATTTGCTTTACATCTCCCGTAAACACTTTTTCTGCGATACAATGCCT  
TACGTTATGTAACGGAGAGTTCCGGCATGTCACACCCCGGTTAACGCAACTGCGTGCGCTATTGTAAGAGATCC  
CTGCCCTGGATCCGCAACTGCTCGACTGGCTGTTGCTGGAGGATTCATGACAAAACGTTTTGAACAGCAGGGAAAAACG  
GTAAGCGTGACGATGATCCGCGAAGGGTTGTGCGAGCAGAATGAAATCCCGAAGAACTGCCGCTGCTGCCGAAAGAGTC  
TCGTTACTGGTTACGTGAAATTTTGTATGTGCCGATGGTGAACCGTGGCTTCCGGTCTGACCGTCTGTTCTGTGCAA  
CGTTAAGCGGGCCGAGCTGGCGTTACAAAATTGGGTAAACCGCGTTAGGACGCTATCTGTTTACATCATCGACATTA  
ACCCGGACTTTATTGAGATAGGCCGTGATGCCGGCTGTGGGGCGACGTTCCCGCTGCGATTAAGCGGTAAACCGCT  
GTTGCTAACAGAACTGTTTTTACCAGCGTACCCTGTTACTAAGAGGAAAAAATATGGAGTGGAGTCTGACGCAGAATA  
AGCTGCTGGGTTTTATCGCTTAATGCGTACGGATAAGCCAATTGGCGGTTACTGCTGCTCTGGCAACATTATGGGCG  
TTGTGGGTGGCGACACCGGGCGTTCCCCAGCTCTGGATCCTGGCGGTGTTTGTGCGGGGTGCTGGCTGATGCGCGCTGC  
CGGATGTGTGGTGAATGATTATGCTGACCGCAAGTTTGTGTTGATGTTAAGCGCACGGCGAACCGACCATTCCAGCG  
GCGCGGTAACAGAGAAAGAGGCGCGCGCTGTTTGTGCTGCTGGTACTGATTCGTTTTTACTGGTGTGACGCTGAAT  
ACGATGACCATCTGTTGCTGATTGCCGCTAGCGCTGGCGTGGTGTACCCGTTTATGAAGCGGTATACCCATCTACC  
GCAAGTGGTGTGGGCGCGCTTTGGCTGGTGCATCCAATGGCTTTTCCCGCTGTGAGTGAGTCCGTTGCCATTGAGTT  
GCTGGTTAATGTTCTCGCAATATTCTCTGGGCGGTGGCTTACGACACGCAGTATGCGATGGTTGACCGCATGATGAT  
GTGAAGATTGGCATTAAATCCACGGCAATCCTGTTCCGCCAATACGATAAATTGATTATTGGTATTTTGCAGATTGGCGT  
ACTGGCACTGATGGCGATCATCGGTGAGTTAAATGGCTTAGGCTGGGGATATTACTGGTCAATTTCTGGTGGCTGGCGCC  
TGTTTGTATCAACAAAATGATTGCCAACCGGAGCGTGAAGCCTGTTTTAAAGCATTATGAATAAATAACTATGTT  
GGTCTGGTACTATTTTTAGGGCTGGCAATGAGTTACTGGCATTCTGATGATGTAAAAAGCCGGATGATCATCCGGCTT  
TCTTCTGGGTTGCCTGATGCGCGCGCTTCTCAGGCCTACACAACACATCGCAATTTATTGAATTTGCAGATTATGGAAG  
GCCGGATAAGGCGTTTTCCCGCATCCGGCAATTTCTCTGATTACCCTTCCGCTGCGTCCGACTCTCAATCGTCAAC  
GCACGTCTGATGTAATCAACTCCGCCAGCAACTGATAAACCTTTCATGTTTTCTGCCGTTCCGGCATCGCCGCTATCGCTG  
ATATACCCTTCATCACGCAGTGTGACGACAGAGAACTGAACACCGCCTTGTGGAAGAACTCCGGCGGTTGATGCCGTG  
CAGCACGGAGAGCGTTGCGCGACGGTGGGCTCTTTTCTCAGCGTACCAGCGTTGATCGACGGGTTGGCACTCAACA  
ACCAGAAGGTGATGGCATAACGTTGCAGCGTTTCCGCGCGCCTGCGGCCAGCAGCTGTAGCGTGCAGAAATGCGCCGG  
TTGATATGCAACTCATCATCTTGCAGGGTAATCAGCCCTGACGTTGATCTCATTTGCCAGCGCATCAATAACGTCCGG  
CAACTCGTCGCGATCCAGCGCAGGAACAGCTCCGCTTTTCCAGTAAAGCACATTGACGTGCTCCATCAATACGT  
CGCGGGAGATGTGGCGATGCTGGGTGACGATTCCGCCATCAGGCAAGGCAGCAACATATGCGCAATGTTGTTGCGA  
TAGTAGGTCATCAGCACCGTTGCTCGCGCGCAGAATGATGATGTCGCCGATTGTGTCTTTCTGACTTCAAACTTGT  
CATTTGAGCGCGTATCGATAAGCTCGCTGGCGCTGGCTGAAGGAACGGTAGAGTCCGTGGAGTAGGGCACGTTGCGCA  
TCAGATCCAGGTAGCAGTTGAGTTGCTCGGTTAACTGCTCGCGGTGAGTGAGCGCTGACGTGATGCCAGTAGCGAGTA  
CAGCACAGGTTTATGGGTTTCCGCGCCTGCGTTGTTAATGCGTACCATCAGATCGGCAGCAATATTATTGACCGTCCG  
CGTTAACCATGCCGACGCACCGCTTCGATGGGATCGATAGATTACGCCAGTCAGGTACATGCTGGTTAAGGTAGGTCA  
TCAACGGCATTGGTTACCAGGTTGACGTAACCCTGACCGAGATTACGCAGCTTGCTTAAACCGCGCAGCATCTGCGGC  
AGGCTCTCTTTCTCTTCTGTCGCGCCGCGAGTTCTTTGGCGTAAGTACCCACTTCCATGACGTGCTCATAACCGATATA  
GATCGGAATCAGCGTAATCGGACGCGTCCGCCACGCAGCATCGCTGAATGGTTCATCGACAGCGTACCAGTTTTCGGAT  
CCAGCAAACGCCCCGTACGGGAACGACCGCTTCCACGAAGTACTGACGGAATAACCAGCGTGAACAGTTCCGCCGAGA  
TACTCCCGAAAACGGTGAATAAAGTTTATTGCCTTTAAACGTACGGCAATAAAGAACGCCCCAGACGGCGGAAAAT  
CGCCCCGCGAGCCAGAAATTCAGGTTGATCCCGCGCGGATATCGCGCGCACAGCCCCGGTGATACAGCACGTAAG  
AAAGCAGCAGGTAGTCCATGTGACTGCGGTGGCAAGGCACATATACCAGCTCATGACCGTCTGGGCCAGCTGGCGAACG  
CGCTCAGCGTTATGGACGTTGATGCCCTGGTAAAGTCCGTTCCAGGTGAAGCCAGAATACGGTCAAGTACAGCGAATCAT  
CTCGTAAGAGAAATTCGCCCAATCTCTTCCATCAGTGCAATCGGTTCTGCTGCGTTTTTTCATGGGAGATTTTTTTC  
TGCGCGCTTACCTTCTACCCTTTGGCAATGGCGCGGAGGCGAGCAGCTTATTAACAGATCCTGACGAGCAGGCAA  
CGTGGGCTACGGCAGCCAGACGTTGACGGGCAAAGTGATACGCGCCACGCGCGCCAGTTTCTGAGCGATAGTTTTATC

CGTGCCGTGTTTCATCCGCCATACGGCGCAGCGAAACTGACGGCGAGAAACGCACAAAACACTGTCGCGACCGAGCCACAGTA  
CAGCGAAAAATTTCTGTACGCCGTTAAGCATACGCAGCGGGGTTCACTTCGCCTTTTTACGCCCCGGCGCGCGACCA  
AACATCACCGACTGGCACCATCTGCACATCCAGATTTGGGTTGCTACGGTCAAATCGAGATAGTCGTGGAACAGCTT  
AATAGACTCTCTTTTCGGCGTGAATAGGTGAACACACGCGGCCCGCTGAATGAACACATAGCGCGCAGTAGCGTGC  
CGTCGATTTCCAGCGCTCTAACGGGTGAGGCAAGTCACTGTGCCAGACACTGGGCGCGCAACGTCAGCAAATCTGCTTT  
GAGTTGTACGGTAAAACGTACATAATTGGACGAGAGGTATCCAGCCCCAGTTCCGGGGCAGGATCTGCCGGAATAGACTT  
GCTTTTTACCAGGATGCTTAATGGTAAATTCAGTAATTTGTAGTAAATTCGTGGCCAGCCGGACATAAACGATGTAAGC  
CTCTGGTAAATAATGCAAATGCGCGGCAAGGATAGCAGAAAGTCACTGGGAAATTCGTGGTATCCGCTCATGTTTCGCGC  
GGCGCTACGCAAACCCGAATCATCGGATTTAACGGTACACTGATATTGACGCTCATAATGTA AAAAAGGTTCTTTCAATGG  
CCAATAATACCACTGGATTCACCCGAATTATCAAAGCTGCTGGCTATTCTGGAAAGGTTTACGCGCTGCATGGATCAAC  
GAAGCGCATTCCGTGAGGAAGGCGTAGCGGTATTGTTGGCGTGGTCACTCGCTGCTGGTGGATGTGGACGCGATTAC  
CCGCGTGTGCTTATCAGCTCCGTGATGCTGGTGTATTGTGGAAATCCTCAATAGCGCCATCGAAGCAGTGGTTGACC  
GAATGGCTCTGAATACCATGAGCTTTCCGGACGCGCAAAGATATGGGATCCGCTGCGGTGCTGATTGCCATTATCGT  
GCCGTGATTACTGGTGCATTCTGTTATGGTGCATTTTGGATAACCCTTCCAGAATTCGATAAATCTCTGGTTTATTGT  
GCAGTTATGGTCCAAAACGCCTTTGCTGTATATACTCACAGCATAACTGTATATACACCAGGGGGCGGAATGAAA  
GGTTAACGGCCAGCAACAAGAGGTGTTGATCTCATCCGTGATCACATCAGCCAGACAGGTATGCCGCGACGCGTGC  
GGAAATCGCGCAGCGTTTGGGGTCCGTTCCCAAACGCGGCTGAAGAACATCTGAAGGCGCTGGCACGCAAAGCGTTA  
TTGAAATGTTTCCGGCGCATCACGCGGATTCTGTTGAGGAAAGGAAGAAGGGTTGCCGCTGGTAGGTCGTGTG  
GCTGCCGTTGAACCACTTCTGGCGCAACAGCATATTGAAGTCTATTACAGTTCGATCCTTCTTATTCAAGCCGAATGC  
TGATTTCTGCTGCGCGTACGCGGATGTCGATGAAAGATATCGCATTATGGATGGTACTTCTGGCAGTGCATAAAA  
CTCAGGATGTACGTAACGGTCAAGTCTGTCGCACGTATTGATGACGAAGTACCCTAAGCGCTGAAAAACAGGGC  
AATAAAGTCAACTGTTGCCAGAAAATAGCGAGTTTAAACCAATTGCTGTTGACCTTCGTCAGCAGAGCTTACCATTGA  
AGGGCTGGCGGTTGGGGTATTTCGCAACGGCGACTGGCTGTAACATATCTCTGAGACCGCGATGCCGCTGGCGTCCGG  
TTTGTCTTCTCTCTTCTCATCAGGCTTGTCTGCATGGCATTCTCACTTCTGATAAAGCACTCTGGCATCTCGCC  
TTACCCATGATTTTCTCAAATACACCGTTCGTTGCTGGGACTGGTGCATACGGCGGTAATTGGTCACTTGTATAGCCC  
GGTTATTTGGGCGCGTGGCGTTGGTGAACGGCGACCAGCTTCTCTTATGCTGTTGCTGTTTTACGCATGAGCA  
CCACCGGGCTGACTGCGCAGGCTTATGGTGCCAAAATCCTCAGGCATTAGCCCGTACGCTGGTGAACCGTTGCTGTTG  
GCGTTGGGGGCTGGGGGCTTAATTGCGCTGCTGCGTACGCCGATTATCGATCTGGCGTGCATATTGTTGGCGGTAGTGA  
GGCAGTCTGGAACAGGCGCGGCTTTCTTGAATCCGCTGGTTAAGCGCACCGGCGTGGCGAATCTGGTATTAC  
TCGTTGGTACTCGGCGTGAATATGCCGTGCGCCAGTAATTTGTTAGTGGTTCGGCAATATCCTCAACATTGTGCTG  
GATGCTGGCTGGTATGGGGCTGCATATGAACGTGACGGGCGGGCGCTGGCGACGGTATTGCGGAATATGCAACATT  
GCTGATTGGTCTGTAATGGTGCATAAATCCTCAAACACTACGCGGAATTTCCGGCGAAATGCTGAAAACCTGCCTGGCGAG  
GAAACTTCCGTCGCTTGTGGCGCTTAACCGGATATCATGCTGCGTTCCGCTGTTGTTGCAACTCTGTTTCGGCGGATC  
ACCGTACTTGGCGCGGACTGGGGAGTGACATTATCGCTGTTAACCGGTTCTGATGACGCTACTCACCTTACCAGCTA  
TGCGCTGGATGGTTTTGCCTACGCGGTTGAAGCGCACTCCGGTCAAGCATACGGTGCAGCGGACGGTAGCCAGTTGCTGG  
ATGCTGGCGGCGAGCGTCCGCCAGTCCGGGATCGTAGCGTACTGTTTTCCGTTGGTTTTATTTGCTGGCTGGGGAACAC  
ATCATTGCGTACTGACGTCGTTAACCAGATTCAAGCAGTGGCTGACCGCTATCTTATCTGGCAGGTGATTTTCCCGT  
GGTTGGCGTCTGGTGTATCTGCTGGACGGCATGTTATAGGCGCAACGCGTCCACCAGAAATGCGTAACAGTATGGCGG  
TGCCCGCGCAGGTTTTGCGCTGACGCTCCTTACGCTGCGGTGGTGGTAATCATGCTTTGTGGCTGGCATTAAACGTC  
TTCTGGCGTGGCGGGCTTTCTGCGGCTATGCGCGGCTCACTGGCGCAATGGTACCTGGTTTGGCGCAACGTCG  
ACGTTAAAAATTTCTGAATAAATAATCCTAAGCCAAATTTGCTGACTACACTTAATCTCACGTTCAAGAAGAAAAGTGAACG  
TACTCTCATTACAACCTAACGATGAGGTCTTGATTATGAATAAAGATGAAGCCGGCGGTAACCTGAAAACAGTTTAAAGG  
TAAAGTGAAGAGCAATGGGGCAAACCTGACCGATGATGATATGACGATCATTGAAGGTAACCGTATCAACTGGTCCGTA  
AAATCCAGGAACGTTATGGTTATCAGAAAAGATCAGGCGAGAAAAGAGGTCGTGGATTGGGAAACCCGCAATGAATATCGC  
TGGAATTAATCCCTCCTGCCGACGTGTACAAGGATGACGCCCTTAAACGCGGTTTCTTTTTACCTGCACAGAGTG  
ATCATGCTGGCACTGTTCAAGGATGACGACAGCTTCCACTTCTACACATGCCGACAGAGCCCATGTGCTTCAATCACAT  
TATGCCGAGGCAAACCCATTTTTGCCGCCAGCGTATGCATAATGTCTTCCAGCCTTCTGCACACTCTTCTTCACT  
GCGCCGAGCGATCGAAATAAACATGGCTGACGTATGGTGGGCTGATCGAACAGATGACAGAGCACATAACTGTTGGT  
GGATTCCACTTATGCACAAAACCTTGTCAAGCAGAAAATCCAGCGCGGATAAACCGTTGGCGGCTTGGCTTGGGTT  
CAGTTCCGCGCAGTAAATCAAGCAGATCATAAGCGTGTATAGCGCATCCTGCAGACTCATCAGGCGCAACACTTCCAGG  
CGCTGTGGGGTCAAGCGCACATTACGCTGCGCGCAGATTTTTTACGCTGCGCTAATAACTCTGCGTTGTGGTCTTTT  
CATCGGCACCTCAAAGTGGGGTTAAGAATGTCCTTACTTTACCATGTTCCAGGAAAAACCCGAGAACCCTTATTGTT  
GCCGTAATGTTGATTTTCTGTTTTGTAGTAAGGTGTTATGTTGCCTTGTGCTACCATTATCAACACGATAATAATTAAT  
AATTCATTTTTAAATAAATTGCTTCAAGTAACTCGCTATTTATTTAACTGGGTTTAAACGCATACCTGTAGTTCAGAAA  
TTATGAGCGATTTTTGATAGTGACCAGATGGCAAAGAATTATAAGGAGGACACGGTACGACAAAAAAGGTAGATGAATC  
ATGTTGAAGATAATACCCGGTGCAACTGGATACTTTAATAAAACACTCAATTCAAATCAATTCGATAATGAAGATGCAAT

CAAAGATAAATTAGATAATAGAGGTTCAATCAAAGGTAATTAATAATATATATGGTAAATCTATTGATTATGCAGCGC  
TGCGTCATCGGGATATAATTATTGCAAAAATAGATTGTTTATTCAACGAATCACGCATAATTTATGGCATGCACGTAA  
AAAATGTGTTTTAATTGTGCAATAAATGATCTCAAATGTGGGTCAATAAGTATATTGACGATTGCACTGATGAGGAT  
TTAAACGATCGTGACTTTATTGCATCAGTTGTTGACCGGGCTATTTTCATTCGCGATTAATAGTATATGTAATCCTGG  
GGATAATAAGATGCAATGCCATTGAACAATGTACTTTTGATGTAGAACTAAGAATGACCTTCCCTCCACGGTTCAGC  
TATTTTATGAGGAATCTAAGGATAATGAACCTTTAGCGAATATACATTTTCAAGCAATAGTTCTGGTTTTTTAACGTTT  
GTTAATGCCTGCCAGGAACATGATGACAACAGCTTAAAATATTTGCTTCGCTGTTAATTTCACTTTCATATTCTAGTGC  
CTACGCAGATTTATCAGAAACAGTGTATATTAATGAAAATAATGAGAGCTACCTGAAAGCTCAGTTTGAAAAATTATCTC  
AACGTGATATGAAGAAGTACCTGGGAGAGATGAAGCGTCTGGCTGATGGGGGAGAAATGAATTTTGATGGCTATCTGGAT  
AAGATGTCACATCTGGTGAATGAAGGAACGCTCGATCCTGATATTTAAGCAAAATGCGAGATGCTGCACCACAATTAAT  
TAGCTTCGCGAAGTCTTTGACCCAACCTCAAAGGAAGAGATTAATACTTACAGACACTTCAAATTAATTTATGATT  
TGTTCCGGGTTAAATCGGAGAAATAATATGTGAAGTCTTCGATAGTATGGAAGGCATTATATAAAGGACCCAATATTT  
ATTGGGTTCTTTTTCTCTATCAATACTATTAGCAGGGAGATATACCAGAGTTAATGTGTGATTTTTATTTATCTG  
TCGAACCTGGATTGTTTATCATTGGCCTTAACAAAGTTAACGGCTAATAAGATTATTTCCATCACTTCGTGAGAGCTCA  
TGCCTTGAGAGGATCTCAATTTCTTTGCAATGAGACAGGCGCTTCTGTTGTTATGGTATAGTACCCCGCTATTGAGC  
CTCCTGAATAGTGTGCTGAATAACATAACCCCATGATATATCGATAAAAATAATCTCTACATTTGAAAAATGCACGGTAA  
TCTGAAATGCAAAAAATCAACCAAACAGCGCAATGCTGAAAAAATGACGTTCACTGGAGTGGTCCGTTTAGCGTTGC  
ACCAATGCTCGACTGGACGGACAGACATTGCCGCTATTTCTGCGTCTGCTTTCCCGCAATACGTTGCTGTATACCGAAA  
TGGTGACCACAGGGGCGATTATCACGGTAAAGGTGATTATCTGGCGTACAGTGAAGAAGAACATCCGGTAGCGTTGCAA  
CTGGGCGGTAGCGATCCGGCGGCGCTGGCGCAGTGTCAAAGCTGGCAGAAGCGCGCGGATATGATGAGATCAACCTGAA  
TGTCGGCTGCCGCTGACCGGGTGCAGAACGGCATGTTTGGTGCCTGCTGATGGTAATGCGCAGCTGGTTGCCGACT  
GCGTGAAAGCGATGCGCGATGTGGTGTGATTCCGGTGACGGTAAAACGCGTATTGGCATCGACGACCAGGACAGCTAT  
GAATTTCTCTGCGATTTCAATACCGTTTCCGGCAAAGGCGAGTGTGAGATGTTCAATCCACGCACGTAAGCCCTG  
GCTTTCCGGGTTAAGCCCGAAAGAAAACCGTGAATCCCGCGCTGATTATCCGCGTGTGTCAACTGAAGCGTGACT  
TTCCGCATCTGACAATGTGATTAACGGTGGTATCAAGTCTGGAAGAGGCCAAAGCACACCTGCAACATATGGATGGC  
GTGATGGTCCGGCGCGAGGCGTATCAGAAATCCGGGTATTCTGGCGCGGTAGACCGGGAGATCTTTGGTCTCGGATAC  
CGATGCCGATCCGGTGGCGGTAGTGCAGCCCATGTATCCGTACATTGAGCGTGAACCTCAGCAGGGGACGTATCTCGGC  
ATATTACCCGGCATATGTTGGGCTTGTCCAGGGTATTCTGGCGCGCGCAGTGGCGGCTTATTTAAGTGAATAATGCC  
CATAAAGCGGTGCAGACATTAATGTGCTGGAACACGCGCTCAAACCTGGTGGCGGATAAGCGTTAACTTTTACCAAAAA  
GTAGTCAAATTCACCACGCCCTGCGCACCGTCCGGGGCGTTTTGCTGTTAAATCAATAGATTATTTTTGGCATGATTCT  
TGTAATGCCAGCAAGAGATTTCAATTTGGGAGAGCATCATGCTGGAACACTTTTTGTGATTGGCTTTTTTGTATGCT  
GATGGTCACCGCGTTTCGTTGCTGGGCATTATCGCCGCGTGGTTGTGGCGACGGCCATTATGTTCTCGGCGGTATGC  
TGGCATTGATGATTAAGTTGCTGCCGTGGTTACTACTGGCGATTGCGGTGGTGTGGGTTATTAAGGCGATTAAAGCACCA  
AAGTGCCGAAATATCAGCGTTATGACCGCTGGCGTTACTAAGGGATTGTGCGGATGATCACAACTAAGGTTTTATCCT  
TAGAACAAAATAGGAATTGATAATCAATCTGTCACTATTGCGCTCTAACAGATTCACTGTGCTGTACCCTACATACAG  
CCGAATAATAAAGAAAGGGCTTCCAGGTGGAAGCCATTTCTTTTATGGAATCAGCAGGCTGGAACCTTGGTCCG  
CCGGCTTCCAGAATCTCATGCGCACGCTGCGCATCTTACAGCGATATTTCTGCTGCTCGGCGACATCGACCTAATCA  
CACCGCTGGCAATCAAAGAGAACAGTTCATTACTGGCTCGTTAATTTCTCCCGGTGGTATATAGCCTTGCAGGGAA  
GGCGTGTACATAACAACGAGCCTTTTATTGATTGAGAATGCCTAAGTTACACCGGTAACCCGACCTGATGAGTTGCCAAA  
ACTGACCATTAAGCCGCGGCTTGCAGGCAATCCAGCGACCTTCCAGGTGTCTCTGCCACGGAATCTACACCACGC  
GCACTTTCTTACCGCCGGTATCTTTTTAACCGCTGACAGATCCTCTTACAGATAGTTAATAACCTGCCACCGCC  
GCTTTTAGCGGCTCTGCGCTTTTTGCGCGTTCCTACGGTGCCGATAAGTTTTCGCGCCAGGGCTTTTTGCCACTGGCA  
GGCAATTAAGCCAACGCCGACCGCTGCGTGAACAGGAAGTTCATCGGGTTTAATTTATAGTTTTTGCAGCA  
GATAATAAACCGTTAAGCCTTTAGGAAGGATGCCGACGTTGCTCAAAGAAATTGCCGAGGAGAAATCGCCGCTTTA  
TCCGCAATAATGTTATGCACAGAGCTGTAAGCGCTAACGCCGACTGCGCATAGACTACACGATCGCCTGCCTAATATG  
CTTTACACCACTGCCGACTTACTCACGATGCCTGTGCTTCCGGTGCCTAATCCGCTGGGTAGCGATGGCGGGGTTAA  
GGCCGCTGCGGATATATGTGTCGATAAAATTGATGCCGATGGCTTTATTTTCGACCTGGATTTCACTTCCGCCGATCG  
GCAGGAGTGAACCTACGGCTTGAAGTACTTCCGGGCCACCGTGTGTGAAATTAATTCGTGTTGCCATGTGCTCTCC  
AGAACGTATCGTCAGGGTCTGCTTCATATGATAAAGTTTCGACCCATTCTTTATCTCGGTAACCTCATTCACTATGGCAG  
GAAATAAACCTTCAACAAACAGCAGGCTGAACCCCGAACGCGATCCACAAGTTGCCGGCTGAAAGTGCCTCCGCAC  
TCGATCGAAGCGGAGCAGTCCGTGTTGGCGGTTAATGCTAGATAACGAACGCTGGGATGATGTAGCCGAGCGTGGT  
AGCAGACGATTTTTACACCCGCCACACCGTCATATCTTACTGAAATGGCGGTTTTGAGGAAAGCGGTAGCCCTATCG  
ATCTGATTACTTTGCGGAATCGCTGGAACGCCAGGGGCAACTCGATAGCGTCCGGTGGTTTTGCTTATCTGGCAGAGCTG  
TCAAAAAATACCCAAGTGGGCTAACATCAGTGCCTATGCGGACATCGTGCCTGAACGTGCCGTTGCTGAGATGAT  
CTCGGTTGCGAATGAGATTGCCGAAGCTGGTTTTGATCCGAGGGGCGTACCAGCGAAGATCTGCTGGATCTGGCTGAAT  
CCCGCTCTTTAAATTTGCCGAAAGTCTGCAACAAAGACGAAGGGCCGAAGAATCGCCGATGTGCTCGACGCAACC



GTGGCGGTATTGAGCAGTTGTTTCAGCAGCCACACGATGGCGTTACCGGGTAAACACCGGTTATGACGATCTCAACAA  
AAAAACCGCTGGCTTGCAGCCGTCGGATTGATCATCGTCGCCGCGCTCCGTCGATGGGTAACAAACATTTGCGATGA  
ACCTCGTCGAAAAACGCGCGATGTTGCAGGATAAACCGGTAATCTTCTCGCTGGAGATGCCATCAGAACAGATCATG  
ATGCGTTCTCTGGCGTGCCTGTCGCGCTTGACCAGACTAAAATCCGTACCGGGCAGCTCGATGACGAAGACTGGGCGCG  
CATTTCGGCACCATGGGTATTTGCTCGAAAAACGCAATATCTATATCGATGACTCCTCCGGCTGACGCCAACGGAAG  
TGCGTTCCCGCGCACGCCGATTGCCCGTGAACACGGCGCATCGGGCTTATCATGATCGACTACCTGCAACTGATGGCG  
GTACCGGCGCTTTCGATAACCGTACGCTGGAATTCAGAAATCTCTCGCTGCTGAAAGCACTGGCGAAAAGAACTGAA  
CGTGCCGGTGGTGGCGCTGTCCAGTTGAACCGTTCTCTGAAACAACGTGCCGACAAACGCCCGGTAACCTCCGACCTGC  
GTGAATCTGGCTCTATCGAGCAGGATGCGGACTTGTATCATGTTTATCTATCGTGATGAGGTGTATCACGAAAAACAGTGAT  
TTAAAAGGCATCGCGAAATTTATTATCGGTAACAACGTAACGGCCAAATCGGGACGGTACGCTGACCTTTAACGGTCA  
ATGGTGCAGCTTCGACAACATGCGGGGCGCAGTACGACGACGAATAATAATTATTTTATGAATTAGGTAATTAAGCA  
AACACTTATCAAGGAACACAAATGCAAGCGGCAACTGTTGTGATTAACCGCCGCGCTCTGCGACACAACCTGCAACGCT  
TCGTGAACCTGGCCCTGCCAGTAAAATGGTTGCGGTGGTGAAGCGAACGCTTATGGTACGGTCTTCTTGGACCGCGC  
GAACGCTCCCCGATGCTGACGCCTTTGGCGTAGCCGCTCTCGAAGAAGCTCTGCGACTGCGTGGGGGGAAATCACAAA  
CCTGTACTGTTACTCGAAGGCTTTTTGATGCCAGAGATCTGCCGACGATTTCTGCGCAACATTTTCATACCGCCGTGCA  
TAACGAAGAACAGCTGGCTGCGCTGGAAGAGGCTAGCCTGACGAGCCGGTTACCGTCTGGATGAAACTGATACCGGTA  
TGACCGTCTGGGCGTAAGCCGGAACAGGCTGAGGCGTTTTATCATCGCTGACCCAGTGCAAAAACGTTTCGTGAGCCG  
GTGAATATCGTCAGCATTGTCGCGCGCGGATGAACCAAAATGTGGCGCAACCGAAGAACTCGCTATCTTTAATAC  
CTTTTGCAGGCAAACTGGTCAACGTTCCATTGCCGCGTGGGTGGCATTCTGCTGTGGCCACAGTGCATTTTGACT  
GGGTGCGCCCGGGCATCATTCTTTATGGCGTCTCGCCGCTGGAAGATCGCTCCACCGGTGCCGATTTTGGCTGTGAGCCA  
GTGATGTCATAACCTCCAGCCTGATTGCCGTGCGTGAAGATAAAGCCGAGAGCCTGTTGGTTATGGTGAACCTGGGT  
AAGCGAACGTGATACCCGCTTGGCGTAGTGCAGTGGGCTATGGCGATGGTTATCCGCGCGCCGCGCCTCCGGTACGC  
CAGTGTGGTGAACGGTGCAGGATCCGATTGTCGGGCGCGTGGCGATGGATATGATCTGCGTAGACTTAGGTCCACAG  
GCGCAGGACAAAGCCGGGATCCGGTCATTTTATGGGGCGAAGTTTGGCCGTAGAACGTATCGCTGAAATGACGAAAGT  
AAGCGTTACGAACTTATTACGCGCTGACTTCAAGGGTGCAGTGAATACGTGGATTAATCGTTCTGTAATATTTGAT  
TGCTGTGCCGGATGCGCGTGAATGCCTTATCCGGCAATAAAATCCTAAAAATTCAATAAGTTGATGTTCTTTTCATGC  
TCTTATAAAGTCTGTCCTCTGGCGGATGTACGTTTGTATGAGTCTCACTCTGTTGCTAATTGCCGTTGCTCCTGAAC  
ATCCACTCGATCTTCGCCTTCTCCGGTTTATTGTGTTTTAACCACTGCCCGTAAACCTGGAGAACCATCGCGTGTTC  
AAAAAGTTGACGCTACGCTGGCGACCGATTCTTACGCTTATGGAGCGTTTTAAAGAAGACCCTCGCAGCGACAAAGTG  
AATTAAGTATCGGTCTGTACTACAACGAAGACGGAATTATCCACAACGCAAGCCGTGGCGGAGGCGGAAGCGCGCCT  
GAATGCGCAGCCTCATGGCGCTTCGCTTATTTACCGATGGAAGGGCTTAACTGCTATCGCCATGCCATTGCGCCGCTGC  
TGTTTGGTGGGACCATCCGGTACTGAAACAACAGCGCTAGCAACCATTCAAACCTTGGCGGCTCCGGGGCATTGAAA  
GTGGGCGCGGATTTCTGAAACGCTACTTCCCGAATCAGGCGTCTGGTACAGCGATCCTACCTGGGAAAACACGTAGC  
AATATTCGCCGGGCTGGATTGGAAGTGAAGTACTTACCCTGGTATGACGAAGCGACTAACGGCGTGCCTTTAATGACC  
TGTTGGCGACGCTGAAAACATTACCTGCCCGAGTATTGTGTTGCTGCATCCATGTTGCCACAACCAACGGGTGCCGAT  
CTCACTAATGATCAGTGGATGCGGTGATTGAAATCTCAAAGCCCGGAGCTTATTCCATTCCTCGATATTGCCTATCA  
AGGATTTGGTCCGGTATGGAAGAGGATGCCTACGCTATTGCGGCCATTGCCAGCGCTGGATTACCCGCTCTGGTGAACA  
ATTGTTCTCGAAAATTTCTCCCTTACGGCGAGCGCTCGGCGACTTTCTGTTATGTGTAAGATGCCGAAGCCGCT  
GGCCGCTACTGGGCAATTGAAAGCAACAGTTGCCGCAACTCTCAGCCCGCGAATTTTGGTGCAGGTTGGTGGC  
TGCACTGCTAATGACGAGGCAATTGAAAGCCAGTGGCTGGCGAAGTAGAAGAGATGCGTACTCGCTTCTGGCAATGC  
GTCAGGAATTGGTGAAGGATTAAGCACAGAGATGCCAGAACGCAATTTTCGATTATCTGCTAATCAGCGCGCATGTTT  
AGTTATAACCGTTTAAAGTCCGCTCAGGTTGACCGACTACGTGAAGAATTTGGTGTCTATCTCATCGCCAGCGGTGCGAT  
GTGTGTCGCCGGGTTAAATACGGCAAATGTACAACGTGGCAAAGGCGTTTGTGCGGTGATGTAATGCAGGAAAGCAG  
GCTGGAGCTACCCAGCCTGCAGTGAATTAACCTGTCGCTTTCCTCTTTTATAGATGATTTTTTTGATGCCAT  
CGTTCTACGTGAGAGATAATAAACGTTGTTAGTTCTTTTATTGTTAAGCTTATCCCAATTATCTGGAATTCCTTATCCTG  
TTTTTTGGGTGGAGTAATAATTTCTGCACATCTAACCTTATTAATTTAATAATAAGTATCGGGTTTGTACGATAGA  
ATATTTCTATATCCTCAAGAATATGCTTTGCCTTATTGCTGTGACTTTCTGAGATTCAATTATAGTATCGTTAAATCT  
AATGTTAAAGAGAACTCTTTTTCCGCTTGTGTAAGTTTAACTTATATTGATTACCAATATCAATAAAAAAGGCTCTG  
TAATGAGAATAATCACCTTAACTCCTCGCAAAACAGAAAGCGTCAAATATACATAAAGTCTTTCTTACCCTGAT  
TTTGTAACTAAATCAATAAATGCGTGAACAACTTACTTGAATAGAATGATACTTCTTCCAGGTCTAAAAATC  
TTTTGCAATTTTTAACTGTGTTTCTATGTATAAAAAAGAAATCTTTGGCATAAGAGATATCTTTATTATTTAGTGCATCTA  
GCTCAACAGGTAAGATGTCGTTTTGTTGCTATTACATATGATATATTATCATCATCTCCATCGCGAGTAATAAAA  
TTAATCACCATTGTAGGGTAGGGGGCTGGTCAATCAGAAATCATCTTTATAAACTTCGATTGTTTTTGAATGCTGTATC  
ATTAAGTTCATTAATCGTACAGCAGATAAATGTTCTATCAAATTTGCTCATTGCGGAGGATTCATCATAATAAACGT  
AAAATTAATGTATCCTTACATCGAGTAATAAACATTTTTTATACAAAAAAGACAGGAACGTAATTTACTGGGTTAAATAT  
AATCATCTGCTTTTCATCAGAAAAACCGCAGATAATCCTTCTTTCCCGGCGAGCTGGCGTTATGGTACAGATGTTTTT

GCAACAAATCTACAATAAAAAGTTTCAACATACTGACTATTTAGGGAAAAATATGCGCAAGATCACACAGGCAATCAGT  
GCCGTTTGCTTATTGTTGCTCTAAACAGTTCGGCTGTTGCCCTGGCCTCATCTCCTTACCAGCTTAACCCTGGGACTAA  
CGTTGCCAGGCTTGTGAACAGGCACCCATTTCATTGGGTTTCGGTCGCACAAATGAAAATAGCCTCGCAGGGCGTCCGC  
CAATGGCGGTGGGTTTTGATATCGATGACACGGTACTTTTTCCAGTCCGGGCTTCTGGCGCGGCAAAAAACCTTCTCG  
CCAGAAAGCGAAGATTATCTGAAAAATCCTGTGTTCTGGGAAAAATGAACAATGGCTGGGATGAATTACGATTCCAAA  
AGAGGTCGCTCGCCAGCTGATTGATATGCATGTACGCCGCGGTGACGCGATCTTCTTTGTACTGGTCTAGCCCGACGA  
AAACAGAAACGGTTTTCAAAAACGCTGGCGGATAATTTTCATATTCCTGCCACCAACATGAATCCGGTGATCTTTGCGGGC  
GATAAACAGGGCAAAAATACAAAATCGCAATGGCTGCAAGATAAAAAATATCCGAATTTTTTATGGCGATTCTGATAATGA  
TATTACCGCCGACGCGATGTCGGCGCTCGTGGTATCCGCATTCTGCGCGCCTCCAACCTACCTACAAAACCTTGCCAC  
AAGCGGGTGCCTTTGGTGAAGAGGTGATCGTCAATTCAGAATACTGACAGAGCGGGAGAGCGTGATGCTCTCCGAATGC  
TGTTTTTTAATCACACCTTTATCCTTTCGCTGTCTTGTGCTGCAAACTGATTAAGAGAGTTTTATCAAGGAGCAGCACATG  
TGGTATCAAAAGACGCTCACGCTTAGCGCAAATCTCGTGGGTTTCATCTGGTAACGGATGAAATTCTGAATCAGCTGGC  
TGATATGCCGCGCTTAACATCGGCTTACTGCATCTGTTGCTGCAACATACTCCGCTCTCTGACACTTAATGAGAACT  
GCGATCCCACCGTACGCCACGACATGGAGCGTTTTTTCCTCCGCACCGTTCCCGACAACGGAAATTATGACATGACTAT  
GAGGGAGCAGCAGATATCGCTTCTCATATCAAATCCTCAATGCTGGGAACATCGCTTGTATTGCCGGTACATAAAGGGCG  
TATTCAGACGGCAGCTGGCAAGGCATTTGGCTGGGGAACTCGCATCCAGCGCGGATCGCGTCCGATCATCGCGACAC  
TACAAGGGGAGTAAAAAATGACCATTTTCGGAGTTGCTACAATATTGCATGGCAAAACAGGCGCAGAACAGAGCGTGAT  
AATGACTGGAAGCGACGCAGATCAAAGTGGAAGATGACTGTTTGCATGGTGAAGAAGTAGAAAATCGCCAGCTGT  
TTCGCTGAAAACAGCCGGAGCTGGCGGAGCTGCTACGTCAGCAGCACAGCGATGTGCGTCCAAGCCGCCATCTGAATA  
AAGCGCACTGGAGACCGTGATCTCGACGGTTCGCTGCCAGATTCGCAAATCTATTATCTGGTGGATGCGTCTTATCAG  
CAGGCGGTGAATTTACTGCCGAAGAAAAACGTAATTTGCTGGTCAACTCTGAAAGGAAAAGGCCGCTCAGAAAGCGGC  
CTTAACGATTACAGCATCGGCTTAAGGAAGCGTGCCGTGTGTGATGCTTCGCACTCCGCGACGGTTTTCTGGCGTACCGGA  
GACGAGGATCTCGCCGCCACTGCGCCTTCTGGTCCCAGGTCGACAATCCAGTCAGCGGTTTTGATCAGCTCGAGAT  
TGTGCTCAATCACCACAATGGTGTTCCTGATCGCGCAGTTTATGCAGTACGTCGAGCAGTTGCTGAATATCGGCGAAG  
TGCAGACCGGTGGTGGCTGTGAGAATATACAGCGTCTGCCCGGTGCCGCTTTTGACAGTTCACGCGCCAGCTTAC  
GCGCTGGGCTTACCGCCTGAAAGGGTGGTTCGGACTGCCCGAGTCGAATGTACGTCAGGCCAACGTCATCAACGTTT  
GCAGCTTACGCGCCAGTGCAGGTACGGCATCAAAGAATCACGCGCTCTTCGATGGTCATATCCAGCACTTCGTGGATG  
GTTTTGCCTTTGACTTAATCTCCAGCGTTTTCAGGTTATAGCGTTTACCTTTGCACTGGTCCGACGGCAGCTAGATATC  
CGCAGGAAGTGCATCTCCACTTTGATCACGCCATCGCCTGACAGGCTCGCAGCGTCCGCCACGAACGTTAAAGCTGA  
AACGTCCCAGGCTATAGCCGCGCGCACGGGATTCCGGTACGCCCGCAAACAGTTCGCGCACAGGCGTAAACACGCCGGTA  
TAGGTCCGCGGTTAGAAGTGGAGTACGACCAATTTGGGCTTTGGTGCATATCGATCACTTTATCGAAATGCTCCAGCCC  
CTGAATATCGCGATACGGTGTGGTTCGGCGATGGTTCGCCCATTCAACTGGCGTTGGGCAATCGGGAACAGTGTGTGCT  
TAATCAGCGTCGATTTACCGGAACCTGAAACCCCGGTGATGCAGGTAAACAGACCCACCGGACGCTCAGCGTCACGTCC  
TTCAGGTTGTTGCCGCTGCGCCTGTGAGCTTTCAGCACTTTTTCCGGATTCCGCCGAACGCGTTTTCTTCGGCACTTCAAT  
CTTGCGTTTGGCGCTCATGTACTGCCCGGTCAACGACTCCGGCACCGCCATAATCGCTTCCAGCGGACCTTCTGCGACCA  
CTTACCAGCGGTAAACACCTGCGCCCGGGCAATGTGATCACATGGTACAGCGGCGCAATTGCGTCTTCGCTGTGCTCC  
ACCACAATCAGCGTATTACCGAGATCGCGCAGATGGATAAGCGTACCCAACAGGCGCTCGTTATCACGCTGGTGCAGGCC  
GATAGACGGCTCGTCCAGCACGTACATAACGCCAACAGGCCCCACCAATCTGGCTCGCCAGACGGATACGCTGTGCTT  
CACCGCCAGAAAGCGTTTTCTGCCGAGCGGAAAGCGTCAGTAATTCAGGCCGACGTTAACGAGGAATTCAGACATCG  
CCGATCTCTTAAGGATTTTTCTGCAATCTTCGCCGCTGACCTGCGAGTTTGAGATTGTTGAAGAATTCATCGCATG  
ACCAATGCTCATGTCCGAGATAGCAGGCAGCGCGTATTCTCGACATACACGTGGCGCGCTTCCCGACGACGACGCGTCC  
CTTCGAGCTGGCGCACGGACGATTACTGATAAACTTGGCTAATTTCTTCGCGTACCGCGCTGGATTCCGTCTTTTATAG  
CGGCGCTCCATATTATGCAGCACGCTTGAACGGATGACGACGAATGGAGGTATCGCCACGATCGTTTATGATTTGAA  
TTCAATGTTTTCTTGGCAGAACCCTACAACACCCTTTATGCACGTTTCGCGCTCAGGCTGCCCCACGGCGCTTCGACGT  
CGAACTTATAGTGATCTGCCAGCGATTTACGATCTGGAAATAATAGAAGTTGCGGCGATCCAGCCACGGATCGCACCA  
CCAGCCAGCGACAGTTCCGGATTCTGGATCACTCGATCAGGATCGAAATATTGCTGTACGCCAAGGCCGTCGAGGTCCG  
GCAGGCCCCCGCGGGTTGTTAAACGAAAACAGTCGCGGCTCCAGTTCACGCATACTGTAGCCGAAATTTGGCAGGCGA  
AGTTGGCGGAGAACAGCAGCTTTCGGCTTTCGGGTCGTCATATCCGCCACTACCGCGGTACCACCGGAAAGCTCCAGC  
GCGGTTTTCAAATGACTCGCAAGACGTTGGTAAGATCGTCACGCACCTTGAAGCGATCAACCACCACTTCAATGGTATG  
TTTTTTTTGACGTTCCAGTTTTGGCGGATCGGAAAGATCGCAGACTTCGCCATCAATACGAGCACGGATGTAGCCCTGGC  
TTGCCAGGTTCTCCAGCGTTTTGGTGTGTTGCCTTTGCGCTCTTAATGATTGGCGGAGTAGCATCAGACGCTTGCCT  
TCCGGCTGCGACAGCAGTTATCCACCATCTGGCTGACGGTTTGCGCCAGCGGGACGTCGTGGTCCGGACAGCGCGG  
CTGCCAACCGGGCGAATAACAAACGCAATAGTCGTGGATTTCCGGTATTGTCGCCACCGTAGAACCGGGTTATGAG  
ACGTGATTTCTGCTCAATTTGAGATGGCAGGAGAAAGCCCTCAATATGATCGACGTCGGGTTTTCCATCAGTGACAGA  
AACTGCCGCGGTAGGCGGAAAGGATTCAACGTAACGGCGCTGCCCTTCCGGATATAAGGTGTCGAAAGCGAGCGAGGA  
TTTGCCAGAACCAGGCGGTCACGACAATGAGCTTGTGCGGGGGATAACGAGGTTGATGTTTTGAGATTATGGG

TGCGGGCGCCCCGAACCTTCGATCTTATCCATTACCTTTCCCGGATTAACGCTTTTTTGCCTGGTGGCATGGTGTACC  
GGCGATCACAACGGTTAATTATGACACAAATTGACCTGAATGAATATACAGTATTGGAATGCATTACCCGGAGTGTGT  
GTAACAATGTCTGGCCAGGTTTGTTCGCCGAACCGAGGTCAACAATAGTAAAAGCGCTATTGGTAATGGTACAATCGC  
GCGTTTACACTTATTAGAACGATTTTTTTCAGGAGACACGAACATGGCCAGCAGAGGCGTAAACAAGGTTATTCTCGTT  
GGTAATCTGGGTACAGACCCGGAAGTACGCTACATGCCAAATGGTGGCGCAGTTGCCAACATTACGCTGGCTACTCCGA  
ATCCTGGCGTGATAAAGCGACCCGGCGAGATGAAAGAACAGACTGAATGGCACCGCGTTGTGCTGTTCCGCAAACTGGCAG  
AAGTGGCGAGCGAATATCTGCGTAAAGGTTCTCAGGTTTATATCGAAGGTCAGCTGCGTACCCGTAATGGACCGATCAA  
TCCGGTCAGGATCGCTACACCACAGAAGTCGTGGTGAACGTTGGCGGCACCATGCAGATGCTGGGTGGTCTGAGGGTGG  
TGCGCTCCGGCAGGTGGCAATATCGGTGGTGGTCAGCCGAGGGCGGTTGGGGTCAGCCTCAGCAGCCGAGGGTGGCA  
ATCAGTTACAGCGGCGGCGCAGTCTCGCCGACAGCAGTCCGCTCCGGCAGCGCCGTCTAACGAGCCGCCGATGGACTTT  
GATGATGACATTCCGTTCTGATTTGTCAATAAAACAATAGGTTATATTGTTTTAAGGTGGATGATTAAGCATCTGCCAG  
CCATAAAAAAGAGCCTCCGTTATGGAGGCTTCTACGTATCAGGTCAAAATCATTGGCCATTGTGGCGGTGTCTGATTA  
TCTCTTCTATCATACCGACTCGATGTTGTGCCAGATAGCGGTGATGTCCGCCATTGTGATGCCAAGCAACCCATTGCG  
AACCAACAGGCGGAAACAACGCCAGACCGCTGCTGATCACCGAAGCCCGACATAATCAGACCGACGAAACCGGATGT  
GAGTGTGCTGGCCAGAAACATTACGGCACTAAGAAGTTGCCAGCGAAGAAGAACCACGCCAGTGGTGGGATGGCA  
TCAAACAATTCCTCTGAAAAGAGCCGATGCCCTGGACAGCGCGGCTTGTTCACGGGAGGCGTGGTACACTCTGGCTATC  
GCGGGGCTTGCAAGACACAAAAATGAAACACTCTGTTTGTTCATTAATTTTGTGAACATATCACAATTGATTGTTTGT  
TAGCCATATTAGCCGTGACTTTTTATTGCTGTACAGATTATGTGGTTTTTTCAGTGGCATTAAAGGCATATCTTCCCGCCG  
CCTCTGCATTCTGTAGGAAATTAATTTTGAATATCAATGAATTTTTATCCAGGTGACGATTAGAAAAGGTATCAATT  
TCAAATCAGGCAAAAGTGCTATTTATACCGTAAGATTTATCTAAAGACGTCGGTACCCAGGTTTTTACCTTGCAATGGC  
CGGGTATAAACAGGCAAGAAATGATAGCAATGAGTCATCGTGCACGACCAATTAAGCGGTTGCCGGCATTATCTT  
TTAGTTCTCTTCCCATCATTCTTTCGCTATGGATTGCCTTCTTTGGCAAAATCAGAAGTGAATAATCAGCTCCGAA  
CCTTTGCTCAACTGGCACTGGATAAATCCGAGCTGGTCATTGCCAGGCAAGTTAGTGAGCGATGCAGCTGAACGCTAT  
CAGGGGCAAGTTGCACTCCAGCCATCAAAGCGAATGTTGAATATTATTCGTGGCTATCTTTATTAATGAATTGAT  
CTATGCCCGTGATAACCATTTTTATGCTCATCGCTGATAGCGCCTGTAACGGCTATACGATTGCACCGCCGATTATA  
AGCGTGAACCTAACGTTTCTATCTATTATTACCGGATACGCTTTTTTCTCTGGCTATAAAATGACCTATATGCAGCGG  
GGAAATTATGTGGCGTTATCAACCCTCTTCTGGAGTGAAGTGTCTGATGACCCGACATTGCAATGGGGTGTGTA  
TGATACGGTGACGAAAACCTTTTTCTCGTTAAGCAAAGAGGCTCGGCAGCAACGTTTTCTCCGCTGATTCAATTTGAAGG  
ATTTAACCGTACAAAGAAATGGCTATTTATATGCGACAGTTTATTCGACAAAACGCCCAATTGCAGCCATTGTTGCGACT  
TCATATCAACGCTTATAAACCATTTTTATAATCATCTATTTTTGCGTTGCCCGCGGATTTTTGGGGAGTCTTGTCT  
GCTATTACTCTGGCTACGATTCGACAAAATTTTTATCTCCAAACGTAATTTGCAACGCGCCCTCGAAAAACATCAAC  
TTTGTCTTTATTACCAGCAATAATCGATATCAAAACAGAAAAATGTATCGGCCTGAAGCGTTGTTACGTTGGCCTGGT  
GAGCAGGGGCAATAATGAATCCGGCAGAGTTTATTCGCTGGCAGAAAAGGAGGGGATGATAGAACAGATAACTGATTA  
TGTTATTGATAATGTCTCCGCGATCTGGGCGATTACCTGGCAACACATGCAGATCGCTATGTTTCTATTAACCTGTCCG  
CCTCCGATTTTCATACGTACCGTTGATAGCGCAATCAATCAGAAAACAGAGCAATACCGGTTGCGTCCGCAAGAAAT  
AAATTTGAAGTGAAGTGCATGATTTCTGATGTTGACAAAATGACGCCGATTATTCTGGCTTTCCGCCAGGCAAGTTA  
CGAAGTGGCAATGATGATTTTGGTATTGGTACTCTAACTTGCATAACCTTAAATCATTGAATGTGATATTTGAAAA  
TCGACAAATCGTTTGTGAAACGCTGACCACCCACAAAACAGTCAATTTGATTGCGGAACACATCATCGAGCTGGCGCAC  
AGCCTGGGGTAAAAACGATCGCTGAAGCGTCAAACTGAGGAGCAGGTTAACTGGCTGCGCAACGCGGCTGGCCTA  
TTGCCAGGGATGGTTCTTTGCGAAGGCGATGCCGCCAGGTTGTTATGCAATGGATGGAGCAATTACCCGCGCGGAGT  
TAACGCGCGGCAATAAAAATTAACAGGCGTGGCGATAATCGCTGGGAGTGCGATCAAACGCGGAAACGCGGGAG  
AAGTCTGCTGCGAGACATAAACCAGGTCATTGCGATATCAAAAATCGGACGCTCGGTGGTGGCACAACGCGCGC  
CAGTAACAGGCGGCTGGCGAATGTAATCGCAAGCGTCTGATGCGTCACCGTGCAGAACATTGCTTGAAGTACCACT  
TTGAATAGCCTGATTTTTTTCGACTACATCAATGTTAAGCGGCTGGTCAATATGCTCGTCAATCCATGCGATAAGATCC  
TGAATAATTTTCTGATGGGACATAAATCTGCCTTTTTCAGTGTTGAGTTGTTAATTCATCTGTTGGGGAGTAAATTC  
CTCAAGTTAACTTGAGGTAAGCGATTTATGAAAAAGAAATACCCCGCATTAAAGCGCTGCTAACCCCGGCGAAGTGG  
CGAAACGACGCGGTGGCGGATCGGCGCTGCATTTCTATGAAAGTAAAGGTTGATTACCAGTATCCGTAACAGCGGC  
AATCAGCGCGATATAAACGTGATGTGTTGCGATATGTTGCAATTAATCAAATTTGCTCAGCGTATTGGCATTCCGCTGGC  
GACCATTGGTGAAGCGTTTGGCGTGTGCCGAAGGCGATACGTTAAGTGCAGAAAGAGTGGAAACAGCTTTCGTTCCCAAT  
GGCGAGAAGAGTTGGATCGGCGCATTACCTTAGTGGCGCTGCGTGACGAACTGGACGGATGTATTGGTTGTGGCTGC  
CTTTCGCGCAGTATTGCCGTTGCGTAACCCGGGCGACCGCTTAGGAGAAGAAGTACCGCGCACGCTTGTGGAAGA  
TGAACAAAACAAAGCGCCACAAGGGCGCTTTAGTTTGTTCCTTCTCTATCCCGCTGGTACACAG  
GAGGGTTTCCCGGACGTCACACACCTCATTGAGCAGCTGGTGGAGGTTCCGGTTGGTGTGATGCTTAATTTGATG  
TCACCGACGTTTCTTCGCCAGTGATAAAGTATACTTTTTAACCAGCAATTTTTTGTCTATCTCAGACGATTTTTTATCGCA  
ATCCTGAACGGTATACGGCTCGATAACGCTGCAATCTTGGCACCGACGATAACGTTTGGCGATCAATTCCTGGTTTTT  
CATCGTCAAGCAATAAAAGAGAAAAAGCAGCAAACTTCGGTTGAAAAAGCCGCTATGATCGCCGATAATCGTTTGT

TTTTTACCACCGTTTTGTATGCGCGGAGCTAAACGTTTGTCTTTTTGCGACGCAGCAAATTGTCGAAACCTGGAGCA  
GGAAGATAACGTTTCGCTGGCAGGGGATTGTCCGCCACGCATCTTGACGAAAATTAACCTCTCAGGGGATGTTTTCTTAT  
GTCTACGCCATCAGCGCGTACCGGCGGTTCACTCGACGCCTGGTTTAAAATTTACAACGTGGAAGCACTGTCCGTCAGG  
AAGTGGTTGCCGGGTTAAACAACGTTTCTGGCGATGGTCTACTCGTTCATCGTCGTTCCAGGTATGTTGGGTAAGCAGGC  
TTCCCGCTGCGGCAGTTTTGTTGCAACCTGTCTGTTGCCGACTCGGTTCTATCGTGATGGGTCTGTGGGCTAATCT  
GCCGTTGGCGATTGGTTGGCCATCTCCCTGACAGCGTTTACCGCATTACGCCTGGTGTGGGGCAACATATTAGCGTAC  
CTGTCGCGCTGGGTGCCGTCTCTGATGGGTGTGCTGTTACGGTAATTTCTGCCACGGGTATCCGTAGCTGGATTTG  
CGCAACTTGCCTACGGTGTGGCGCACGGCAGGGGATTGGTATCGGTCTGTTCTGCTGCTCATTGCCGCTAACGGTGT  
CGGTCTGGTGATTAACAAACCGCTTGTGGTCTGCCGTTGCGCTGGGTGATTTGCGGACCTCCCGGTGATTATGTCAC  
TGGTAGGTCTGGCGGTGATCATCGGCCTGAAAACTGAAAGTCCCTGGTGGCATTCTGCTGACCATTATCGGTATCTCA  
ATTGTCGGTTTGATCTTCGATCCTAACGTCCATTTCTCCGGCGTTTTGCGCATGCCTTCATTGAGCGATGAAAACGGCAA  
TTACTGATTGGCAGCCTGGACATTATGGGCGCGCTGAATCCTGTAGTCTGCCAAGCGTTCTGGCGCTGGTGTACGG  
CAGTATTTGATGCCACCGAACTATCCGTGCCGTCGCCGGCCAGGCGAACCTGCTGGATAAAGATGGGCAGATCATCGAC  
GGTGGGAAAGCACTGACCACTGACTCCATGAGCAGCGTTTTCTGCGCTGGTGGGTGCGGCTCCGGCAGCGGTATACAT  
CGAGTCTGCGCGGGTACGGCGGCGGTAACCGGTTTACCGGCTATCACCGTTGGCGTGTCTGTTCTCTCTGATTC  
TGTTCTCTCTCCGCTCTTTACCTCGTTCCGGGGTATGCAACGGCTCCGGCGTGTATGACGTTGGCCTGCTGATGCTG  
AGCAACGTGGGAAAATCGACTTTGCTGATTTTGTGATGCGATGGCGGGTCTGGTTACGGCTGTATTATCGTGCTGAC  
CTGTAACATCGTAACAGGCATCATGATCGGCTTCCGCGACTCTGGTGATTGGTGTCTGTTTCCGGCGAATGGCGCAAGT  
TGAACATCGGTACGGTCTTATCGCCGTGGCGCTGGTACCTTCTATGCGGGTGGCTGGGCTATCTAATCTTTCATCGGA  
TTCTGAAAACGGGTGGCAATGGCTGCCGTTTTTATTTTCTCCGCACATTGTGTGAGCTTTTGGCATATTCTGAAAAAA  
TGAGAATTCAGGCATAACGTCTTCTCAGATCATAAAAAACATCGCAACAGGGAAACGCATGGAAATCTTCTTACCATA  
CTGATAATGACCCTCGTGGTCTCGCTGTCCGGGGTGGTCACTCGTGTATGCCCTTTCAGATCCCGCTCCGCTTATGCA  
AATCGCCATCGGTGCGCTACTGGCGTGGCCGACGTTTGGTTGATGTGGAGTTTATCCTGAACTCTTTTTAGTCTTGT  
TTATCCCGCCTTGTCTGCTGATGGCTGAAAAACGCCACCGTGAATTTCTGAACATGGTCGAGAGATTTTCCGC  
CTCGCGCTGGCGCTGGTGGTGGTACCCTGGTGGCATTGGCTTCTTATTTACTGGTGGTCCGGGCATTCCGCTGAT  
CCCTGCCTTTGCGCTGGCGCGGTGCTTTCTCCGACCGATGCTGTGGCGCTCTCCGGATTGTTGGCGAAGGGCGCATCC  
CGAAAAAATCATGGGCATTTTGCAGGGCGAAGCGTTGATGAATGACGCCTCCGGTCTGGTGTCTGTTGAAGTTTGGCGTA  
GCAGTGGCGATGGGGACGATGATCTTACCCTCGCGGTGCGACGGTCAATTTATGAAAGTAGCCATTGGCGGTATTCT  
CGCCGGTTTTGTGGTGGCTGTACGGTCTCGCTGCGATTCTCAGCCGCTGGGGCGGTGATGAACCCGCGACGC  
AGATCGTCTGCTGTTCTGCTGCCATTCTGCTTCTATCTGATTGCCGAACATATTGGCGTTTCCGGCATCTCGCTGG  
GTTGCCCGGGATGACCATCACCCGCTCCGGTGTGATGCGCCGTGCGCCGCTGGCAATGCGCCTGCGTGCAACAGCAC  
CTGGGCGATGTGGAATTTGCTTTAACGGCATGGTGTCTGCTGTTAGGTCTGCAGCTGCCGGTATTCTGGAGACGT  
CGCTGATGGCAGCAGAAATCGACCCTAACGTGCAAACTGGATGCTGTTACCAATATTATTCTGATATATGCGGCGCTG  
ATGCTGGTCCGTTTTGGCTGGTGTGGACGATGAAAAAGTTTACGCAACCGCTTCTGAAGAAGAAGCCGATGGAGTTTGG  
TTCGTGGACCACAGAGAAATCCTGATCGCGTCTTCCGGGGTGGTGGGGCGATCACTCTGGCCGGTGTGCTCTCTA  
TCCCGCTGCTTTGCCGGATGGTAACGTCTTCCGGCGCGCTATGAGCTGGTGTCTGCGGCTGCGTGCATGGAACCTGCGT  
TCGCTGTTTGTGCGCGTGGTGTGTTGCCTATTCTGCTACAACACATTGAAGTCCGGATCATTGCAACAATTGAAAGA  
GGAACGTATTGCGCGAGCGGCAACGGCAGAAAGTGGCATTGTGGCGATCCAGAAAATGGAGGAGCGTCTGGCGCGGATA  
CCGAAGAGAATATCGATAACAGCTGTTACGGAGTCAAGTCTGCGTCAATGGTAACCTGCGTCTGCGCCGATGGA  
CGTAACGACGTTGAAAGTCCGTGCGAGGAAGAGAACCTTGGCCTGCTTCCGTCTGGCGGCTGCGTCTGCAACGATGC  
TGAACCTTACCACCTGCGCGCACACGGGAGATCAGCAACGAAACGCTGCAAAAATTAAGTGCACGATCTCGATTTGCTT  
AAGCGTTGCTAATTGAGGAAAATCAGTAAGCCGAAAGCGACGTAACAGGCCGAGGTAATCTGAAAAAGGTGCAATCTT  
TTGCACCTTTAACAGTTAGCTCGGGCTAACATTATGATTCTAAAACAAATAAATTATCTCTTTTTAAAGTCAATTCA  
TTGGCTGTTCTTCGACTTAACCTCAATCTGCATCTTGATAATATCTGCAGTAATCTTCATAGCGACTGCATGAAGATTA  
TCCTCAGTTTGTGACATGCCAGTATGAGTGGCACAATCTTCTTCAAAGAATTTCTGTAGTGTACCAGGATATCACTATT  
AATGGAGATATTTTCTCACCGGAGAAATGGTAATACCCATTCCCTGGACGCTAGCCTCATCGAAATTAACACGATAGA  
GACGGATATTAACATCCAGGCTTTTTGTTAAACAGAACAGTTGAAATGGCAATTGCTTAAATTGGCATTATTAATAA  
ACATTAGCCATATTAGAGTCGGTACATATAACCATTTCCAGGAACGATTTTGTAAACCGCGTAAAAAAGAGTTTGTATC  
AATTAAGTTTATATTCTGGAGGTTGCTTTATTAGGTTGACACGAGACAGATCAGCATGTTCAAAGTTAATTAATCAA  
GTTTAGAGAAGCTAAGGTCCGCTCAAATAAATTAATATATGGCGCTATTACTTTATAAAGATTTACCTCAGCCATGTAT  
GCCATATAAAAAATTTGAATAATCAAGGAAGGATTTTTAATATTGGCTCTATTCTATTGTTGATTGTAGAATTGAACATG  
CATAGCGGAACATGAATTTAGAGTCCGTCAGTCATTTTTATCTGAGCGAAATTTGAGTCATCGAGAATACAATTATCAA  
AAAGTATTTTTCCATTATGGCGAAATTAATAATCGTTTTATACATATTACAGTCTGAAAAATAGCGTTTTGTAGTCTG  
CAACCTGCAAAATTCGAATTTGGATAAATCTTCTTAAATCACGATACCTTTCAGGCTAAGGTGTGAAAAATCGTAACC  
ACCATTTACTGTCTGTTGGGATTTGATAGTATTATTATGGACGGTACATTATTTATAAAATATACCACCTAATTGACA  
CTTCTTATCTTTAATTAAGTAAACTCTTCTCGAATTTCTATCGTACATTTATTATTGTCATGTGAAGCTATATCTATA

AAATATTTATGTATTTTCCTGTCCGTTTCTTTCTGTGATTTTTCTGATGGTAAACTATCATAAATTCITTTTCATTTTCTG  
AATCAAGCCTATCACTTTTTCATGATCATCCATTTTAAAAGAGAGAGGGCTTTATTGTCAATTAACGTGTTTTTATGAT  
GTTTGCTGTAATTATCTGATTTTGTTCCTTTGTATGTGATGGACTTGTGACAGAGTGGTTATCGTTAATCAGGCAAAGA  
GGAAAAACATATTATTTAAACCATTATAGCGCATAAAATATCCTTATAATTAACAAGAAAAGAAAGGCATATTCTCTGC  
ATTATCATTTTTCTACGACTGTCAAAAATCGCTCATTTTTTAATGAGTTTATTTGTTTAATATTATGGGAAAAGGTGATGC  
ATTTGGGAGAGGAAGATTTCCCGGTGACAGCAGCCGGGGAAGGGGAGAGATTAATGCGCGCGGCTTGTCTCAACGCCA  
AAGCCGGTCTGGGAGCGGATAAACTGCGCGCGGAACAGTTCACGCTCAGCGCGCCTTCCGCTGAGTTATCGGTTGCCGA  
GAAGAACCAGATGCCGAGGAATGCCACGGTGATAGAGAACAGCGCCGGGATTCATACGGGAAGATGGCTTTTTCTGTGAC  
CAAGGATCTGTACCCAAATCGTCGGGCCGAGGATCATCAGTACTACTGCGGTAATCAGCCCCAGCCAGCCACCCATCATC  
GCGCCACGCGTGGTCAGTTTCGACCAGTACATAGAAAGCAGAATGATCGGGAAGTTACAGCTCGCCGCGATGGCAAACGC  
CAGCCCCACCATAAAGGCGATGTTCTGATTCTCAAACAGCAGCGCCGAGGATAATCGCAATCAGCCGAGGATCAGTACGG  
TGATTTTTGATACCCGACGCTTTCACGTTCCGGTCGCGCTTTTTTGAAGACGTTAGCGTACAAGTATGCGAAACCCGCG  
GATGCGCCCGCAGCGTCAGACCCGAACCACCGCGAGGATAGTGGCGAAAGCAACCCTGAAATAAAACCGAGGAACAG  
GTTCCGCGCCACTGCATTCGCCAGGTGAACGGCCGCATGTTGTTACCACCAATCAGATGGCCCGCGCTTTTATATT  
CCGGATTCCGACCAACAGCATGATCGCCGCGAAGCCGATAATAAAGGTGAGAATATAAGAAGTACCCATAAAACCCGGTG  
GCTGAGAACACGCTCTTACGTGCTTCGCGGGCATCGCTGACTGTAAGAAGCGCATCAGAATGTGCGGAAGCCCGCCGT  
ACCAAACATCAGTCCAGACCCAGAGAGCGCGGAGATCGGATCTTTACCAGCCCGCCGCTTTCATGATGTCGACAC  
CTTTCCGGTGTACCGCCATCGCTTCACTGAACAGATTGTTGAAGCTAAAGCCGACGTGTTTCATCACCATAAAGGCCATA  
AAGCTGGCACCGAACAGCAACAGCACGGCTTTGATAATTTGCACCAGGTGGTCGCGCAGCATGCCCGAACAGGACGTA  
CATCATCATCAGCAGCGCCAGCAGCACCACCGCAATGTGATAGTTAAGGCCAAACAGCAGCTCGATCAGTTTACCTGCGC  
CCACCATCTGGGCGATAAGGTAAAGCGCCACCACCACAGAGAACCACAGGCCGAAAGAATACGAATCGGCCCTTGTTC  
AGACGGTAAGAGGCCACATCGGCAAAGGTGTAGCGCCCGAGTTACGCGACGTTCCGCAATCAGGAACAAAATGATCGG  
CCAGCCCACCAGGAAGCCAGCGAGTAAATTAAGCCGTATAGCCGAGGTAACACCAGCGCGGAGATCCCAAGAATG  
AGGCGCGGACATATAGTCCCGCAATCGCCAGCCGTTCTGGAAGCCAGTATATTGCCGCTGCGGTGTAGTAGTCG  
CTACGAGAACGTACGCGTTTTGATGCCAGTAGGTAATGCCGAGCGTAAACACGACGAAAATCAGGAACATAATAATCGC  
CTGCCAGTTCTGTTGGCTGGCGCTCTACGGCCCCGCTAATAGCATCCGCGGCTTAGCTGCGAAAGGGAGTGTGGCGCAA  
GCGCGTCCAGAACTCTTTTCATGATGCTTGTACCTCATGCAGGACTTCATTATTAAGACGGTGAATTCGCCGTTCCGCC  
GCCAGATGTAGATAACCGGTGAGAACAAGGAGATCACAACTCAACACCAATTGGAATACCGCGTGTGACGCTGGTG  
TTCGGATTCAGCGGCTGCCAGCCAGCCGGGCGCAAGGCGATCAGTAAAATAAAGCCGATATAAACTGCCAGCATAAT  
AATCGACAGGATGGTGGCAAACCGTTGCCGTTTTTCCGACTAATCCCTGAAATGCGCATTGTCTTCTATCCGCTGATAAA  
TAGTGCCATTCATCACAGATTCTCCAGAGGTAATGTAGGGATTGTTTTAATTCGCCCTCCCTTATGGGAGAAGGTTAACG  
CTCGGGTAACCCTTGCCGAATGTAGGCCGGATAAGGCGTTTACGCCGCATCCGGAATCAATGCTGATGCGACGCTGTC  
GCGTCTTATCAGGCCTACAAACCGTTACCGACTCGCATCGGGCAATTTGGGTTACGATGGCATCGCGATAGCCTGCTTC  
TCTTCAAGCAGCTTCTCGACTACGCCAGGATCGGCAAGCGTCGAGGTATCGCCAGGTTGCTGGTATCGCCCGCCGCAAT  
TTTGGCAGAAATACGGCGCATAATTTTGGCGAGCGGGTTTTAGGCAGGGAGTCCGTCAGTGCAGCACGCTGGCGTCG  
CCAGCGGCCAATCTCTTACGCACCCAGTTGCGGACTTCTGCGTACAGTTCTGGTACGTTCTCCCGGATTAAGC  
GTGACGTAGGCGTAGATCGCTGACCTTAATATTGTGCGGAATACCTACTACGGCGGCTTCGGCAATCTTCGGATGCGC  
CACCAGCGCCGACTCAATCTCTGCCGTCAGCGGTCGACCGGAGACGTTCCAGCACGTCGTCACACGCCCGGTTATCC  
AGTAATAGCATCTTCCATCGCGACGCGCCGCTGCCGCTGAAATACATATTTTTGAAGGTGGAGAAGTAGTCTGTTCA  
AAACGTTTCGTGATCGCAACAGCGTACGCGCTGACCCGCGCAGGAGTCCGTTGATTACCAGGCTACCTTCGGTGGCCCC  
CTCCAGCGGGTTACCTTCGTTATCGACCAGCGCCGTTGACCGCCGAAGAACGAGCTGTTGCCGAACCGGCTTTCCAGCT  
CGGTAGCGCCAGGCGAGCGGGGTGATCATGAAACCGCGGTTTTCGTCTGCCACCAGGTATCGACCACCGGACATTTCTCG  
TTGCCGATTTTTTTCCAGTACCACTCCACGCTTCCGGGTTAATTGGCTCGCCACGGAACCGAGAATGCGCAGCGACGA  
ACGGTCCGTGCCTTCGATCGCTTTATCGCCTTCCGCCATCAGCGCGCGGATCGCCGTGGGTGCGGTATAGAGAATATTGA  
CCTGATGCTTGTCCACCCTGCGCCATACGGGCGAGCGTCGGCCAGTTGGGTACGCTTCAAACATCAGCGTGGTCCGA  
CCGAGGCCAGCGGGCCGTACAGCAAGTAACTGTGTCCGGTACCCAGCCACATCGGCGGTGCACCAGTAGATATCACC  
CGGATGATAATCAAAGACATATTTAAAGGTGAGCGCCGCTACCCAGATAACCGCCGGTAGTATGCAGCACACCTTTTG  
GCTTACCGGTAGAACCGAGGTGTAGAGAATAAACAGCGGATCTTCGGCGTTTCTCTTCCGCTGGTGTGATCGCTC  
GCTTGTCAACCAGGTGTCGCCACCACAGGTGCGCCCTTCTGCCAGTCAATTTTCCGCCAGTACGTTTCACTACCAC  
CACATGCTCTACGCTGGTACGTTCCGGTTTTTTCAGCGCTCATCAACGTTTTTCTTCCAGCGAATACTGCGCCCGGCAC  
GCACACCTTCTCGGAAGTATCACCAGTCTGAGTTGGAATCAATAATGCGCCGGCAACGGCTTCCGGCAGGAGCCG  
CCGAAAATCACCGAATGCACCGCGCAATGCGGGCGCAGGCCAGCATCGCAACCGCGGCTTCCGGCACCATCGGCATATA  
AATCGCCACCACATCACCTTTTTAATGCCAGCTCGAGCAGGATTGGCGAAGCGGCGAGCGTCCGGTGCAGCTCTT  
TATAGCTGATATGTTTGTCTGCTGGCTGCGCTTCCAGATGATGGCGGTACGATCGCCGTTTTTCTTGCAGATGG  
CGGTCAAGGAGTTTCCCGCAGATTACGCTGCGCTCCTCGTACCATTTAATGGACACATTACCGGGGGCAAAGGAGGT  
GTTTTTACCTTCTGTAAGGTTTGTATCCAGTCAAGAAATTTTCCCTGTTCCGCCAGGATCAGGTACGTTAATAG

ATTGTTGATACATCGCCTCGTACTGCTGAGGGTTTATCAGGCAACGGTCTGCGATGTTGGCAGGAATGGTGTGTTTGTGA  
ATTTGGCTCATGCTTTTTGTTCTCCTTGTAGGATGTTAATAATATGTGGCATAAGCGTTAAATGTAGGGGTATTGGCAGTT  
TTGTTTAGTATTTGGGCGACAGATCACGCAAAAGTAGAATTGTGCAAATAAACGGCAGGGTAATTTTTGAAGGTCAGCAA  
CAAAAGTTGATTAATTTCTTTGAGGAACATGCAGTTATGCATGCTGTTGAAAAAGAGGAAGATACTGACTAACTCTAAAGT  
GGTATTTTACATGCACCTTACAATTGATTAAGACAACATTACAGTGTGGTTATTTGTTACACATAGGGGCGAGCAATGT  
CATGACAGTGTAGGTGCGTTACTGTCTGTAAAAACAATAAAACCCGCATTGCAACAATGGCGCAATTCGGATGAAGCC  
CCTATGACAAGGATAAAAATAAACGCACGCCGTATCTTCAGCTTATTGATTCCTTTTTCTTTTTCACTTCTGTTACGC  
TGAACAAACGGCTGCTCCCGCAAAACCTGTAAGTGTGGAAGCGAAGAATGAAACCTTTGCCCCGAGCATCCCGATCAAT  
ATCTCTCCTGGAAAGCCACTCGGAACAGTCAGAGCGTGTGACGCCCTGGCGGAAGATCCACGGCTGGTGATCCTGTGG  
GCGGGGTATCCCTTCTCGCGGATTACAACAAGCCGCTGGACATGCTTTTGTGTGACCGATGTGCGTGAAACCTGCG  
TACCGGTGCGCGAAAAACGCTGAAGATGGTCCGCTACCGATGGCATGCTGGAGTTGTAAGAGCCCGGATGTGGCGCGT  
TGATCCAGAAAGACGGCGAAGATGGCTACTTCCACGGTAAATGGCGCGCGGGTCCGGAATCGTCAACAACCTTAGGT  
TGTGCCGATTGCCATAACACCGCTCTCCAGAGTTCGCAAAAGGCAACCCGAGTTAACCTTTCCGTCGATGCGGC  
TCGCGCGATGGAAGCCATTGGTAAACCTTTGAGAAAGCCGGACGTTTCGACCAGCAATCGATGGTTTGGTCCAGTCC  
ATGTGGAGTATTACTTTCGACGGCAAAAACAAGCGTTAAATTCCTGTGGGATGACGGCATGAAAGTCGAAAATATGGAG  
CAGTATTACGCAAAAATTGCTTCTCTGACTGGACTAACTCCCTGCGAAAACGCCAATGCTGAAAGCGCAGCACCCGGA  
ATATGAAACCTGGACAGCGGCATTACGGTAAAAACAACGTGACCTGTATCGACTGCCATATGCCAAAAGTGCAGAACG  
CCGAAGGCAAACTCTACCCGACCATAAAATTGGTAATCCGTTTGATAACTTCGCCAGACTTGTGCGAACTGCCATACC  
CAGGACAAAGTGCCTTGCAAAAAGTGGTCGCGAAGCTAAGCAGTCGATTAACGACCTGAAAATCAAGTTGAAGATCA  
ACTGGTTCACGCTCACTTGAAGCGAAAGCAGCGCTGGATGCAGGCGCGACGGAAGCTGAAATGAAGCCAATTACAGACG  
ATATCCGTCATGCCAGTGGCGCTGGGATCTGGCGATCGTTCCACGGCATTATATGCACGCACCGGAAGAAGGTTTA  
CGGATGCTCGGTACGGCGATGGATAAAGCGGCGGATGCACGCACCAAACTGGCGCGCTGTGGCGACCAAGGCATCAC  
CCATGAAATCCAGATCCCGGATATCTCAACCAAAGAGAAAGCCAGCAGGCCATTGGCCTGAACATGGAACAAATCAAGG  
CCGAGAAGCAGGACTTCATCAAAACGGTATCCCGCAGTGGGAAGAACAGGCACGTA AAAACGGTCTGTTAAGCCAATAA  
CCCCGTTCCGCTCGCAAGGGCGGAAAAACAATGGAGTGAATATGAGCGTATTACGTTCTGTTATTAAGTCCGGGGT  
CTGGCGTGGGCTGTTGTGGAGCCTGAACGGAATTACCGTACCCTGCGGCGCAGGCATCTGATGATCGTACGAAGT  
TACCAGCAGCGTAACCCGATGCCGCTGTCTGGACTGTCATAAACAGATACCGAAGGTATGCATGGAACATGCTT  
CCGTTATCAACCCGAATAACAACTGCCGGTACCTGCACCAACTGTCACGGCCAGCCATACCCGCAACCCGCGAAGGG  
GTGAAAGATGTGATGCGCTTAAACGAGCCGATGTACAAGGTTGGAGAGCAGAACAGCGTCTGTATGCTCTGCATCTGCC  
GGAACAGTTGCAAAAAGCGTTCTGGCCGACGATGTCCACGTAACCAAGTGGCGTGCGCCAGCTGCCATTCCTGCATC  
CACAGCAAGATACGATGCAGACGTTAAGTGACAAAGGACGGATTAAGATTTGCGTGCATTGCCACAGCGATCAGCGCAC  
AATCCGAACTTAACCCGGCGTCTGTTCCGTTGCTTAAGGAGCAGCCATGACCTGGTCTGTCGCCAGTTTCTACCCGGC  
GTCGGCGTGTGGCAGCCGTGAGCGGCACCGCAGGGCGCGTGGTGGCGAAAACGTTGAATATCAATGGGGTGGCTTACGG  
CATGGTGCATGACGAGTCTTATGCATCGGCTGTACCGCTGTATGGATGCTTGTGCGGAAGTGAACAAGGTGCCGGAAG  
GCGTCTCGGCCTGACGATTATTCTAGCAGCGCCAGGGCGAATTTCTGATGTGAAATATCGCTTCTCCGTAAGTCT  
TGCCAGCACTGCGATCATGCGCGTGCCTGACGCTGCCCCAGCCGTCGCTTTTTCGCGATGCTGCCAGTGGGATTGT  
CGATGTTAATCCGGATCTCTGCGTGGTTGTGAGTACTGCATCGCCGCTGTCCGTACCGCGTGGCTTTATCCATCCGG  
TCACGAAGACGGCGGACAAATGCGATTTCTGCCGTAAGACCAATTTGAGGCCGTAAGTTGCCCGGTGCGTTGAAGT  
TGCCCGACCAAGGCGCTGACGTTTGGCAATCTGGACGATCCCAACAGTGAATTTGCAACTGCTGCGCCAGAAGCCAC  
TTACCGCTACAAGTGGCTGGGAACCAACGAAAGTGTACCGGATCCGTTTAAATACGGGGAGGTGAGCCAATGAC  
GCAGACTTCCGATTTTCAATTTGAATCGTGGTGTGGGACTGGCCGATTGCCATCTACCTGTTTTTATTGGTATTTCTG  
CTGGTCTGGTACGCTGGCCGTGCTGTTACGTCGCTTACCCGACAGCGGGCGGTGCAGACAGTACGTTGCTGCGCAC  
ACGCTGATTGTGCGGCGGGCGCGGTGATCCTCGGTCTGTTGATCCTCGTCTTCCACCTGACAAGACCGTGGACCTTCTG  
GAAGCTGATGTTCCACTACAGTTTTACCTCGGTGATGTCGATGGGGGTGATGCTGTTTACGCTCTACATGGTGGTGTGG  
TGCTGTGGCTGGCGAAAATCTTTGAACATGATTTGCTTGCCTGCAACAACGCTGGTTGCCGAAGCTGGGGATCGTGCAA  
AAGGTTCTGAGCTGCTGACGCCGTTTACGCGGACTGGAACATTGATGCTGGTGGTGGCGGTGTTGTTGGGGGCTTA  
TACCGGCTTTCTGCTGTCGGCGCTGAAATCGTATCCGTTCTCAATAACCCGATCCTGCCGGTGTGTTCTTCTCCG  
GCATCTCGTCCGGTGGCGGCTGGCGTATCGCCATGGCGATACCCAACGCAGTAACCCGATTCCACGGAAGCGCAG  
TTTGATACCCGATGGAATCCCTGTGGTATGGGGTGAATCTTCTGCTGGTGGCGTTTTTTGTCGGTCTGGCGCTGG  
CGATGACGGTAAAGTTCGTGCGCTGGTGGCGCATTAGGTGGCGTTTTCTGGACGTGGTGGTCTGGCTGGTGTGCCG  
GGCTGGGGCTGATTGTGCAATGCTGCTCAAACCGTGGTCAATCGAGTTCGGCATTCTGCCGTGCTGGCGCGTGT  
GGGGCCAGTCTGGTGGCGTGTGATGCTGCGCTTTTTATTCTCTACGCCGACAGTTGACGGTGGCGTAAGCCAGAAA  
AGAGGTGGTTTCTGGACGATTCCTTCTGAAGTGGTTTTCTGGCGTGTGTTAAGTCTCGGGGTCAACGTGTTGACC  
CCGTTGACGGCTTCCGCGGAGTGGGTTGCGCTGGCTGCCATGATGCGACTCACTTGCATCGGCATTCTGGCGCAGTT  
CGCGCTCTGCTGCTCGCTTTGGCGTACTGACGATTTGTTTTCTCATCAGCGATTTCTCGGTCAATTTATGTCGCGAAC  
ATAGCTATAGCCTGCTGCTGTTGGAACCTAAGCTGGCAGCGGTGTGGGGCGCCATGAAGTTGCTGCTGCTTTGGGTG

CTGCTGCTTTCCGCTGGAGCGCGCTGTTTGCCTGGCATTATCGGCAGCAAACCGATCCGCTATTTCCGCTGACGTTAGC  
CGTTTTATCTCTCATGCTCGCCGACTGCTACTGTTTGTGGTGTGTGGTCCGATCCCTTCGTGCGGATATTTCCACCAG  
CAATCGAAGGCCGCGATCTCAATCCGATGCTGCAACATCCCGGTCTTATCTTTCATCCACCCTGCTTTACCTTGGCTAT  
GGCGGTTTGTGGTAGCGCGGAGCGTGGCGCTGGCGAGTCTACTGCGCGGCGAGTTTGTGGTGCCTGCGCCGAATTTG  
CTGGCGCTGGCGGTTACCTGGCTGGAGTGCATTAACGGCGGGGATCATCCTCGGTTCTGGTGGGCTACTGCGAATCG  
GCTGGGGCGGCTGGTGGTTCTGGGATCCGGTGGAAAACGCCTCTTATTACCCTGGCTTTCTGCCACTGCGCTGCTGCAC  
AGTTTGTCCCTGACACGCCAGCGGGGATTTTTTGCCTACTGGTGGTGGTGGTGGGATAGTACTCTGATGCTGTGCGT  
GCTGGGCACCTTAATTGTCCGTTCTGGCATTCTGGTTTCGGTTTCATGCGTTCGCGCTGGATAACGTCCGCGCCGTGCCGT  
TGTTTCAGCCTGTTTGCCTGATTAGCCTTGCCTCTGCTGTATGGCTGGCGAGCGCGGGACGGTGGCCCGGCGGTG  
CATTTTTCGGGGTTATCGCGGGAATGTTAATCCTCGCTACGCTGTTGCTGTTTTGCGCAGTGCTACTGATGCTGCTGGT  
GGAAACGCTTTATCCGATGATTTACGGCTGCTGGGCTGGGACGCCCTCTCCGTTGGCGCGCCGATTTTTAACCGCGCGA  
CGTTACCGTTTGGTCTGTTGATGCTGGTGGTATTGTGCTGGCGACGTTTGTCTCTGGCAAACCGTGCAGCTTCCGGCG  
CTGGTAGCTCATGCGGGCGTGTGTTATTTGCCGCTGGGTCGTGGTCTCCAGCGTCAGCCGTGAGGATCAGCCTGAA  
TTTACAGCCGGGTGAGCAGTGACGCTGGCAGGATACACCTTCCGTTTTGAGTGCCTCGATCTACAAGCCAAAGGCAATT  
AAGCAGCGCCGTCAACAAATGATGGAACCGTCAATTGCTGGAACGCATCCATGACTGGTATGCGGTATGGGGAGAA  
AACTGGGCCGATCGTTACGCTTTTCTGTTTGTATGTACAAAGCGTGTGCGCTGGATCTGGGGGGAGGATTGTTGATGA  
TTGCGGGCGCATTGTTAAGCGGATGGCGGGGAAGAAGCGGATGAATAAAGGGCTTCTCACGCTACTGCTGTTATTTAC  
CTGTTTTGCGCAGCTCAGGTCGTAGACACCTGGCAATTCGCAATCCGCAACAACAGCAACAGGCGTTAAATATTGCCA  
GCCAGTTACGTTGTCCGAGTGCCAGAATCAAACTTACTGGAATCCAACGCGCCGGTGGCTGTGAGTATGCGCCATCAG  
GTTTACAGCATGGTGGCGGAGGGGAAGAACGAAGTCGAAATCATTGGCTGGATGACCGAACGCTACGGAGATTTTGTTCG  
CTATAACCCACCGTTAACGGGTGAGCAGCTGGTGTATGGGCGCTGCCAGTGGTGTGTTACTGCTGATGGCACTGATCC  
TCTGGCGAGTGAGGGCGAAGCGATGAAACAGCCAAAATACCGGTGAAAATGCTGACAACACTCACGATATTGATGGTAT  
TTCTCTGTGTCGGCAGTTATCTGTTAAGCCAAAATGGCAGGCGTACGTGCGGAGTATCAGCGTCAGCGCGATCCGCTA  
CATCAGTTTGCAGCCAGCAAAACCCGGAAGCGCAGCTTACGGCATTGCAGGATAAAATCCGCGCTAATCCAAAAACAG  
CGAACAGTGGGCGTTACTGGGCGAGTACTATCTGTGGCAAACGATTACAGCAATTCGTTGCTGGCGTACCGTCAGGCGT  
TGCAACTACGTGGTGAGAACGCTGAACGTATGCGGCGCTGGCGACGGTCTTTATTACCAGGCCAGCCAGCATATGACC  
GCCAGACTCGCGCAATGATCGACAAAGCCCTCGCGCTGGACAGTAAATGAAATCACCGCCCTGATGCTGCTGGCTCCGA  
TGCGTTTATGCAAGCGAAGTACGCGCAAGCCATCGAATATGGCAAAAAGTATGGATCTCAACTCACCGCGAGTTAAC  
GAACACAGCTGTTGAGTCGATTAATATGGCGAAATGTTGACGCGGAGATTGGATTAATCATCTGGTATGAAGATTAT  
GTCATTGAGCTGCATAAAAAATAATCGAATGAACATATGCCAAAAATAATCACTAATCAGTATTATTGACAGATTAACAA  
ATAAAAAATCTTTCATAACAAATGTTATTATTAATCCTGCCATAAACTCGGTTATTATGCATTAATGACAGGAAAAAG  
CTCTGTTGTTAAAGGGTTGCGCAACATACCGCGCAATGATACTGATCATAAGCGTTAAAAAATCTACAAACCAACGCA  
ACACAATTCATGCCCTGGCAGTATGTCACGTTCTCGGTTTCTGAACGGGAAACGGCGCTCCATTGAGGAAGTATTTCAT  
ATGAAAAATATAAAATTCAGCCTGGCCTGGCAGATTCTGTTTGTATGGTGTGGGCTTCTCTGGGAAGTACCTGCA  
CTACCATAGCGACAGCCGCGACTGGCTGGTGGTCAATTTGCTCTCTCCGGCGGGTGATATCTTCATCCATCTGATTA  
TGATTGTTGTGCCGATTGTGATCTCCACGCTGGTGGTGGTATCGCGGTGTTGGTATGCCAAACAGCTCGGGCGTATT  
GGCGGAAAACATTACTACTTTCGAGGTGATCACCACCGTCCCATCATTTTGGGGATCACTCTGGCAACGCTCTTCCA  
GCCCCTGCGGGGTGGATATGTCGAGTTGGCGACCGTGCATCTCGAAATATCAGAGCACTACGGAAGCGGTACAAA  
GCAGTTCCCACGGCATTATGGGCACGATTTTGTGCTGGTGGCGACGAAACATTGTGGCGTGCATGGCGAAAAGCGCAAA  
CTGCCGATCATCTTTTTCTCGGTGCTGTTTGGTCTGGGGCTTCTTCCCTGCCCGCGACGCATCGTGAACCGCTGGTAC  
CGTGTTCGCTCCATCTCTGAAACCATGTTTAAAGTACTCACATGGTATGCGTTATGCACCGGTGGGTGTTTTGCCG  
TGATTGCGGTGACGGTGGCTAACTTTGTTTTCTGCTCTCTGTGGCACTGGCGAAAACGGTGTGCTGGTGCATTTGCC  
ATTCTGTTCTTCGCGCTGGTAGTGCTGGGAATTGTGGCGCGCTGTGCGGGTTAAGCGTCTGGATCCTGATTCTGATTCT  
GAAAGATGAGCTGATTCTGGCGTACTCCACTGCCAGCTCTGAAAGCGTGTGCGCGAATTATTGAGAAGATGGAAGCCT  
ACGGAGACCGGTGTCGATCACCAGTTTCTGGTGGCGACCGGTTACTCTTTTAACTTGTGTTGACGCTGTATCAA  
AGTATTGCCGCTATCTTCATCGCGAGTTGTATGGCATTGACCTGTCATCTGGCAGGAAATCATTCTGGTGTGACGCT  
GATGGTACCTCGAAAGGATTGCTGGCGTGCCTGGCGTGTGTTTTGTTGTTGCTGGCAACGCTGGTAGCGTAGGTA  
TTCCGCTGGAAGGTCTGGCGTTTATTGCTGGTGTGACCGTATCCTCGACATGGCGGCTACTGCGCTGAACGTGGTGGT  
AATGCGCTGGCGGTGCTGGTATTGCCAAGTGGGAACAAAATTTGACCGTAAGAAAGCGTGGCTTATGAGCGTGAAGT  
GCTGGGCAAAATTTGATAAACTGCGGATCAATAATTGAAGATTGCCGGGATATCCACCGCAATGTGTGAATGCCTGA  
TGCGACGCTTGCCGCGTCTTATCAGGCCTACGCCAGACAGCGCAATAGCCTGATTTAGCGTATTTTGTAGTCTGGATAA  
GGCGTTTATGCCGATCCGACATCAACGCTGATGCGACGCTTAAACGCGTCTTATCAGGCCTACGCCAGACAGCGCAATA  
GCCTGATTTAGCGTATTTTGTAGGTGCGATAAGGCGTTTACGCCGATCCGACATCAACGCTGATGCGACGCTTGCCG  
CGTCTTATCAGGCCTACGCCAGACAGCGCAATAGCCTGATTTAGCGTATTTTGTAGGTGCGATAAGGCGTTTATGCCG  
ATCCGACATCAACGCTGATGCGACGCTTAAACGCGTCTTATCAGGCCTACGCCAGACAGCGCAATAGCCTGATTTAGCGT

GATTTTGTAGGTCGGATAAGGCGTTTATGCCGCATCCGACATCAACGCCTGATGCGACGCTTAACGCGTCTTATCAGGCC  
TACGCCAGACAGCGCAATAGCCTGATTTAGCGTGATTTTGTAGGTCGGATAAGGCGTTTACCGCATCCGACATCAATGCC  
TGATGCGACGCTTGCCGCGTCTTATCAGGCTATCTTAACCGTTGGTTAATTTTTCAAACCTTTCACACCCGGTATCAAA  
CCCTTCCATACAGCTCAGGTTCAACCAGTGCAGCGCCTTTTGCTTGTCTTCTCGATAAAAACCTTCTTACCAGTTAAGA  
ACATCATTCCCGCCAGTACTCGGAATAACCGGTTCCGGAAATTGCGAGAGCTCGGTTTAAAATACCAGGTTGCCTTGTCA  
TCGTGCGCCTTAATGCCACGCGGTTGGCGTAAATCAAACCAAGCAGCATTGGGCATCGACGGCAGAGTCGTTCTCCAG  
ATCTTCCGAGGCGTTTTCTAACAGCGAAATTGCCTTTGGATAATCCGGTTTACCAGGTTGAGTATTTACCAGAATATGCG  
CCAGCGTACTTACCTTCTTACTGCCCGCTTGGCGCGCTTCTCTGCAAGAACTTTGCTTGTGGATAGTCCAGACTG  
ACCGGATTGGTGATTTTGTCTGCGCCAGCAGCGCGCAGGCATCAGCATCACCGCTGTGCGCGGCTTCTGTGCCAATA  
TTCGGCTTTGCTCAAATCGCCGAGCTAAACCAGCTGTGCGCAAGAAAATATTGTGCGCGTCGGTCCCGGCGCTCTGCTG  
CCTTTAAATACTGGCTGCCAGGCTCGGAGTCTGGCGTGGGCAAAGAATGTCAAAAACAACATCAATGCGATAATTTTT  
TTCATTTTGATAATACGATTGGGTAGGGAGTAACCAGTATAAAGAGTTCGAATGGATAAAAAAACAGCCTCCGAAAGGAG  
GCTGTAGAAAGGACGGTATTACGCCAGTCCGCTTCCGCGCAGGCGAGTTTTCAACTTGTGTAATCGTCAATCACGTA  
GCTGCGCGCGCGCTGATCGCGGATCGGCTCGACGCGAACGGCGCAGTATTTGTAATCGCCCTTTGTTGCGGACATC  
AAGTTTTCGGTAACCGACTGTTACAGGCACCAATCCACCAGTGGTAGGTCATGTAATCGCCCTTTGTTGCGGACATC  
GCTGACTGCGCACGGGTGATAATTTTTGCCTTTACGCGAGTGCACCAAACCAATGCCTCATCTTCAATACCAGACGTT  
TGGCGTCTTCGGTATTGATTTGTGCGTAGCCAGGTTTATCAGCCAGCGCCAGTGGCGCACAGTTACCGGTCATCGAA  
CGGCAAGAGTAGTGACCAACTTACGACCGGTTGACAGTACCATCGGGTACTCGTCGGTAGTTTTGTCGATTGGCGCTAC  
CCAGTGCAGGTGAAGAAGTGCAGCCAGCCGTTCCGGGTATCAAACCTTCTTTAAACAGATAAGAAGTCCCTGATCGG  
CATCTGAAGTATCGCGCAAGGCCACTGAATGAAGCCAGTTCGCCATTTTCTCGTAAGTCGCACCGTAGAAAATCCGGG  
CACAGATGACGCAACTCATCCAGATCTCCTGGGTGTTGTTGTAGTGCATCGGATAAACCATACGGGTGGCGATTTCACT  
GATGATTTGCCAGTCCGTTTTAGATCCATTTCCGTTCAACCGCTTGAAGAAACGCTGGAAGCCACGGTCAGCCGCGAG  
TAAACACGCCTTCATGCTCGCCCCAGACGTTGACGGTAAATAACATCCGCCGCCGACGCGGTTTTGGTCATAAAGATG  
TCCTGAACGATAACCAGTCCAGATCTCAAAGGCTTACGTAATCGCGACAGCTCCGCGTCAGTTTGTAGCGGATCTT  
GCCATAATGTACGCGGCACGCACTTCCGATGCGTGGCGGTCGGCAGCTCGTGTGCGATAGCCGGTATGCGCTG  
GCAGGCTTTCCAGCCCCAGGCTTTGGCGAATTTCTCGCGTTAGCCGGATCTTCCAGTACTGGTATCCCGGATACGTA  
TCCGGCAGCGCGCCATATCGCAGGCACCTGAACGTTGTTCTGACCACGAACGGGTTAACACCCGCATGCGGCTTACC  
GAGGTTACCGGTCAGCATCGCGAGGCTGGTCAGAGAACGCACGGTTTCCAGCCCTGGTAGAACTGGGTTACACCCATGC  
CCACAGGATGCGCGCGCTTTTCCGCTGGGCATACATCCGTGCCCGCTGACGAATCTCACTGGCGCTGACCCGGTGATA  
TCTTCAACCGACTCCGGCGTGTAGCCTTCAACGATTTTACGATCTTCAAAGCCTTCTGTACGTGAAGCGACGAACGC  
TTTGTGCTACAGATTTTCTCAATAATGACATGGCCATCGCATTCAACAGCGCGATGTTTCGAGCCGTTTTTTCAGTGCAA  
TGTGCATGTACGAATGCGCGCGGTTTTCAATTTTGGCGGATCGCAGACGATAATTTTCCGCCGTTACGTTTAGCGTTA  
ATTACGTGATTCGCCACGATTGGGTGGGAATCCGCCGGGTTGTACCCGAAAACGAACACTAAATCGGTATTATCAATTT  
GTTAATAGCATTGCTCATTGCGCCATTACCGACGATTGGTGCAGACCTGCAACCGATGGGCCGTGTCAGACACGAGCGC  
AGCAGTCAACGTTATTGGTACCAATAACGGCGCGCGCAAATTTTTGCATTACATAGTTGGTTTTGTTACCCGTACCACGC  
GAGGAGCCGGTCTGCTGGATGGCATCCGACCGTACTTCTTTGATGGCGCTCAGGCGCTCGGCAACGTAATTCAGTGC  
CTCATCCAGGAAACAGGTTTCGAGTTTCCGCCACGCTGGCGACGGATCATGGGGTTTTTCAGGCGCGGGGTGAGGATCT  
GGGTATCGTTAATGAAGTCCAGCCATAATAACCTTACAGACAGGATACCTGGTTGGTTTTCCCTGCGCTGCCTCC  
GCCCAGGATTTTCCGCTATCGACGACGAGTTGATTTTGAACCTGATGCGCAATAGGGGCAAACCTGACGACTTT  
TTTCACTGGTCTCGCTCCAGTTAATCAAATCAGCATACGCGCTCTGACTACAGTATGCATCTTTTATGCCACATTTTA  
TGTGGGTCATTTCCCTGATATTACGGGCACTATTTATTTCAAACCTGACGAAAAACAGGCTGTCTGATGTTTTGACGTG  
ACGAAAACGAAATACCGGTGACAGCCATCACGCGCAGACATTTTATTTTTTCTGACGACGGGACCTGCCTGATACCCG  
CCGCCAGCGATTTTCACTCAACTGAATGCTTTGGATACCCGGCGGCTGTCCAGCATCAGTAATGACATCTCTTCCGCAAG  
CACTGGCAACCGGCTTCCGTTGGCCTGTAAGCGGCTGGTTAAGCCGCGCTGATAGGCGGCTCGGCAGCGCGCTGGGTAA  
AGCGCGTGGCTTCCAGCGTTCAGCCTGCATTTCTCGCTGTCTGTTGAGCGTTTGCAGACGCGTGCCTTGCAGGCAACG  
TCACGCACCGGCTTCACTACTGACTGGTTGTAACGTTCAATCATCATGTTGCTGGCGCGCGCTGCCTTCCAGATTGGC  
ATTCAACCGTCCACCGTCAAACAGCGGCAATTTAGACCCGGGATGAAGTTGAACTGGCGACTGGTTTTTTTTGAATAAGG  
TATGCAGATGGATGGAGTCCAGACCGAAAAACGCTTTGATATCAAAGCTCGGATAGAACAACGCCCGCGCGGAATCCACC  
TGATCTAATGACGCTGAACATAACCAGCGCATGGCTTGCAGATCCGGCGTCTGGCGAGCAACTCATAAGAGAGTGTGCG  
CGAATGCCGCTGAGACTTGGGTAATGCCACCGTCTGATCTCCGCATATCGTGGCTCCCGGCCAATCAATGCAC  
GCAGAGATTCTCGGTTTTGGTGATTTGCCCTTTGACGGCAACAATTTGTTTATCGACCGCAGAATCTGTGCCCGCGCG  
CCGTGAAAAGGCACTTGGCTTCCAGACCGTGCGCCACTTTACTCTGGTGGCTTTACCAGGTAATCAATCACATCGTG  
AGTTTGTCTAACAGATCGAGCATCTGATAGCTGGCCTGCATACTGTAATAAAGCTGCGCTACGCCCGTGGCCAGCGATA  
GCTCTACTGCTGCGGTTTTCTGCCAGCGCGGCAATATGCGCGCCAATGGCGGCGCAACCGCTGAGCGATGCACACCCAC  
AAATCAAGATCCAGTCCGGCAAACAACCTACTGTGGCTTCCGTATAGTACGGCCCGTCCATACCCAGTGTGGCGCATC  
CATTGAATAAGGGCTTAAAAAGCGGTTCCGCCAGACACGTTGGCGGTTGAGCATCCCTAACGCTGCGACCTGTAATTTGTG



AACCGGCATCTAACAAATCGGCCTGGGACTGCGCTTTTTCTCCCGCAGTTTCGCTTCGGCGAGGGTGTGTGAACCACTT  
AGCGTCCGTTGGATCAGCGCATCCAGCTGCGGGTCATTGAGTTGTTCCACCACTGCGCCTCGGGCCAGCCGGAGCTGGC  
AAGATGAATATCGTCGGCCAGTTTGATTTGTTCCGGTTTGAGCTGTTGATGAGGTGCAGAATCCTTACGTACCAGGGCAC  
AGCCGGAATCAGCGTCGTGCTGCCGAGAATGCTGCACAACAGCAGACGTGAAAGTTGACGATTGATCATTGCGTGGCTC  
CTTGTGCCTGTTCCGTGGCGGGCGTTAATGCCGGGGCTGTCCAGTCTGGCAAGCGGGCGAAAAGCTGGCAGACGTGTTGC  
TCCTGTTTTAATAAGGTGGGCGAGGATGGCCTGAGAGGCGGGTGTCTCTTCAAGCGTTATTTGAGGAGAACGGCTGAGTGC  
GGTTGCCAGACCCGGCAGCGTATTTCTCCAGGGCGTGGCAAACGACCTGCTCTGTCCGGCTGTAGTGCCTTATCCAGCG  
CCTGCGCCGAGTTCCAGGTGGCATCCAGGCGTGAAGAAGATCGCGGCCCTGACGAATAACCGTTTGCGAACGTTCAATC  
AGTAATGCGCGTTCTTCGTGTCCAGTTGACGCTCCAGCGCCACGCGTTGGCACATCTCTTACAGGCATTAAACGCCGC  
ATGCAGACCGATACGAATTTGCAGATAAGTGCAGAGCCGTGACTTCTGTGGCGTGGGATCCGCATTACTTTACTTA  
ACATACCCAGCGTGCCAGCCAGTTTTTGGCGAGTGTGCGCGTTCACCTTTCAGGCCAGACAAAGGTGTAATCACCGGC  
GACACCAGGTACCAATGATGATACCCAGGGCGCATCGCAAATTTCCACCAGTGTACACTGGGCCAAAAACGTTTTT  
GAGCGTGGCGAGCGGAAGTGAACCATCTGTGTCCGATATAAGAAGAGCGTTGAGAGCTGGTGGCAATCCATGCGC  
CCAAACAGGAAAATCGGTGCCAGCACAAACAGCAATTCGACAATATTGTCCAGCCAGGGCATGACCAGTAGCGTGAATAAC  
AGCGCCAGAATCGCGCCAAAAGGCCCGCCAAAACGACACCATCTTCTGGTACGACGAACCGACATTTGGGTTAGC  
GACGATCACGATGTGAGCATACAGGTGTGAATGCCCTCCAGTCCACGCGCTGTAAAAGGTGTAACAGATCAAACAGG  
CGAGCAGCGTTTTTACCCTGAGCGCATATAGTCTGGATTGGTAAAAGCATCGCGGCCATTGATGGCGTTTTGGCTGCG  
GGCGTTGGCGCGTATTCGGGTCCATCTGACCCAGTTGTAACAACGCTTGGCAGATATTCTCCAGTTACATTTCCGTC  
CGCCATCGCTTCACTTCACTGATCCGCCAGTGCCTTGGCAGCACTGACCTTTCAGCAACGGCATGCTGCAGCTTGTGA  
TTTCTGAAGCTAATTTTTGTGGAATTAATAATTGCTGAGAATCAGCAAAAGAGGTGGGATCGTAGCGATTGAGCGTC  
GAGTAAATGTAGGTTACCGTTGCCACGAGCTTGGCCACCATGCGTTTTGAGTTCGCCAGTTGGCATCGTCCGCGAGGCA  
AAAGACATTGAGTTTTGTAGCGCCAGCGCTCTCTTCAATCCGCGTTTCGGGTAGCGGTGCGAGGCTGTCTGTCAGGT  
GACTAATGGCATCATCAAGCCGATCATTAAAGCGCTGATGATTTGCGAAATGGCAGACTGGGAAACCACAGCAGCCG  
ATTAACGTATCAGCAAGTTGGATAGAGGCCAACACGATACCCACAGCGTTAAGCGCACGACCACTCCGGATAGTC  
GAGCATGGCGGGAAAGTTTTGCCGTAATAGCGACAATGGCGACGGCGAAAAAGACCAGCCCAAGCGATGGGTGCGCA  
TCAAAAACATGACGCCATCAGGATCGGTCCGGCGATGATCAATCGGATCAACGGTTCGCCGTATGACCATTTGTAGATC  
AAAAACAGGCTGCCGATCTCCAGCACCGTGGCAACCACAAACAAGATCGCGACAAATTTGGTGTAAAACGCGTTCGACTG  
AATACCGTAAAACAGCACTGCCAGCGATAACGCCACAAAAGGGATCTCAAAGGTATCGAGATCAGAATCACCAGCAGGC  
AGCTACCCAGAGTTGACGGTCTGCGGCACGCGACCTGGTCCGCGCTCGTTAACTCTTATGAAAGAAGCCAGCAGC  
CTGACCACCGTAATGGCAGGGAGTTGAGCGCGCTATTATTGCGGCTCAAGATTAGCGACTGCCGAAGCGCCGATGCGG  
AACATTTCCGGGTGAGTTTATCGACCATGATTTTACCAGGAAAACGCTGGGCAACGCGGACCCAGTTAATAGAACGAGA  
CACTTTCCGGCAGGCCGCCAGCACCAGGCCGCCGTATCCGGTAGCACGCCGTAGCCAATCGAATCACTTTACCTCGA  
AGTTTTGCGGCTGCACTCATCAGGCGAATCGTTGCGGGTGTACCTGAGCGAATATTTTTAGATCGGTTTCGCGGAAG  
TTGGCGATCACATACCAGTGACGAGTGTGATTAGGGTAAAAATAGGGCGCATGGCAGAAGCAAATTTGCCGACGGAGGT  
TTTGAGGAAATGACCCGGCCATCAAACGGCGCGGAACGGTCCGATTTCCAGATGACGTTTGGTACGGCAATATCCG  
CTTCGACCGCCGACGCTGGGCAACTAATGCATCCACGCCGCTGACGGCGCTGGCGGCTGACTGCGCCTGTAACAATACG  
GCATTAAGATCCGCTTCTGCGGCGCGTGCGCCGTTCTTGACGGTCAACATCTTCCGCTGAGACAAAACCTTTCTTCAG  
TAATGGCTCGGTGCGGCGTAATGTATCTGTGGCCTGTTTCCGCGGCGCACGGGCTTTTTCTACCGTGGCATTAAACGAGT  
CGGCACCAAATGTTGCGGCTCAACGCTACGCTGGTGAGCATAATTTGCTTATCCAGCGCCGAGGAGGCTTACGCT  
TTCCGAGATTGGCTTCGACGGGCGGGTGCATGCGGAACAGCAAATCGCCCTGTTTACTGCTGCTGCTGCTGCTGCTGCTGAC  
CGCCAGTTCTACAATGCGGCCGCTGACTTCCGGTACCACATCAATGGTATCTGCTGACGCGTAAGCGTATTAGTTGATG  
GCGCACTGTCTACGCGCCAGATAACGAAAACAAGGGCAACAGCGCAACGCAACCACTAACAGAGCAGGGAATTTACTG  
CGAGGAGCTTTTTTCCGCGTACTTTCCATGAGCGGCTCTCAAATAGATTAGAAAAATGCCAGCCAGAACAGCATGGCGTA  
GAGAGCAAAAAGGGCGGTATAAATAATTCGACAAATGCCAGATTGATATTTGCCCGCTGAATAACTCGCCTCGTGATGA  
GCGTCAAAAATAAGGCTGGCAATGGCGCAGAAAACAGCTGGGATAATAAGCGCCGATCACCGGGATTGCCGGAGATAAT  
GAGCATCCCGAAACCATGAAGACGGGAATTATCCAGGCTGTTTTTTGAGTTGCATCGCCATGCGAGAGAGAACTGTTGG  
CATATTAATACATCCTGTCTGCTGCGAACAATATCTGAGTGAATATCAATATCCATTGAAGGCGTCAGTATGGCTATT  
TTCTTGATGAATAAAAATAGCTTTATTCAGCCACCGCATTATACTTATATATTTATTTATTAATTGGCTGTATATAT  
TTTTAAAATAAATACTTTTGGGGCTTACGCGCCCCAAAAGCGAGTGACATTAATTTGGGGTTACGATATTCACCACA  
AATCGAAATATCCAGACAGGCGATAATTTCTCCAGTTTCGCGCATTGCCAATAATTTGGCTTTCTCGCTTTTACC  
AGATCCGCCATTTTGGCTTGTCCGGTACGACGGCGTGAGATCTTACGGCTGATGTAGAAAAGAGGCGTGGCTTGGC  
TTGACGCTTTTCCGGTAGTTAAGCACGCTATCGTTCAGCGTCAGTTGAGGTTATCGCCGTTGCTCATATTGAAGTTCA  
GGCTGATATTTTACCCGACGTTTCCGCTATCGAGGCGAACGGCCATAAAGTGAACAGCATTTCGACCGACATCCCG  
CGAATGGTGTCCGGGAACCGGTGGTGGCTGAACTTATGACCCCTTCCGCGAGCTTTTCCGCGCGGTGAGGTA  
GAAACCGCGCCATGTGGCGGACTCGGCCGTGATAGCCAGCTGTTCAAAGTTATTCGCTTGCAGATTCTTCCGCGACCTGGT  
CACCCGGGTTGGCGCAATCACCTGTTTACGAGTTCTGCCAGCAGCGTAATCACCTGCTTGTTCGCTTCTTGGCC

AGGTTGATGACACGGGCAGAACC GCCCAGCGCCTGCACGTAACGTTTACCCATCTCCACCTGACCATAACGGATGCAGGTT  
AGCCGGGTTACCGTCGTAATAGCCAAGATAGAAGTTATACACCGCGGGCGTGTGGCTGACAGAACCCTAATAGCCGC  
GGCTGGCCAGTTATTGGCAAGTGCAGCGGCAGCTTAATCATGTCGCCGATTTATTATTGATGATGCTTATTGCCCA  
AGGTGCAGGGTCTGGTCTGTAATGTACTTGATGGTATCGCGGATTTTACCAATAAATCATTGATATGCTTATTGCCCA  
GACCGGCCAGGTGTGCGGCATAAACAGCACTTCCGCGTCTGTTACCCACATATCCAGCGTTTCGTTTACGATACTCGGTCC  
ACTTGCTGGTGTGCGGGTTTTGCGCGCGCAGAGTGTAGAAGTTGTGAGGGTATGCGTGGCGTTCTCGGCGGTACAC  
AGGGCTTTCAGGGCCGAATATAGAAGTGCATTTCCGCTGGCGTTCGCTACCTGGGGTATCAGGAAGTCAAACCTCCAG  
GCCGTCGATAATCATCTTCTCGCCAGTTCTGACGATAGTTTTGCTCGGTGCAATAATGCTCGGGTCCGCCGTTGCCAGCG  
TCACGCCAAGGCCATTACCCACATTGCTTGGCGTGTGCGGCAGTAACAGACCGTAAGAGTAGAGCGCACGGCGGCTC  
ATGATGTTACCCGCCAGCACGTTTTGCTGATGGCTTCGTCATAAAGCCTGCAGGGGCAATCACCTGAACTTTGCCGGA  
TTAACATCGGCTTACAGAGATAATGCCTTTCAGCCACCATAGTGGTGGTGTGGTGTGAGTGTAGATAACGGCAACAA  
TCGGTTTTTGGGACGATGCTGGAAGTAAAGGTCAAGTGGCGTTTTGCGGCAGGGCGGCTACCAGCGGTCGATAACA  
ATAATGCCTTCTCGCCCTAACGAACGTAATGTTAGAGATATCTGGCCGCGCACCTGATACATTTTATCGGTGACTTT  
GAACAGGCCAGAAATACCGTTGATTTGCGACTGACGCCACAGGCTGGGGTTTACGGTTTCCGGCGCTGCGGCATTAAT  
CAAATTTGTAATCGTCCGCGGTTAGTAACTTTACCGTTCGCATCAGCAGAATACCTTATCCAGCAGCGGGGCGATA  
AATCCACGCTGGGCATCGTCAAATCCGACGATCGCTAAACGGTAATGATTTGGCGTAATCTGATTAACCTGTTGGGT  
ATATTGAGTGGCGGTTTTGCTTCTTTCGCGTTAGCGGATTTTACCATCATGCCGCTGGCGGAGTTAACGCAATAA  
CAATCTGCTCAAACGGAATAACCGAGAGTTATTATATAAATCTCCATTTATCATTTATGTCGTAATATGTAATCCAT  
GCAAAATACGTCATTTAAAGCTGGCGTTATCATAATTGGGAAATTGCGACTTTAATAAGTGGAAAGTGTGAGCGGAACGCG  
CCATTTTATTAGGCATTTGTGCTGAAGAGGGAAAATTACAGTAAACTATCATTGCAGAAAATAATATGAGTCGTTTTAT  
GTGTTTATTATATATATTGTACCTGCTGTTGGCACAGCGGGACATTGCGCTACTGTGCCAACGTTTTACTCATGGGGCTT  
TAGCACAGAAGTGTGGCAAAAAACGTTGATGCGCAATATTGCTGCACCCTGAGCGCCATTAAGTCAAGAGATGAGGCG  
GCAATAAAGCGCACGACCTGATGCGGCAGTGGACGGCGCAGGTAATTTGGGTGATGGCAACGAGAGTCTCGCGTGGGAA  
GGCGGCATATCCATCACGCCACCGCCAGGATCACCGCATCGGGATCGAACAGATTAATGCTGGTGGCAATGGCCCGTG  
CCGCGTTTTCAAGCAGACTCTGGACGAAAAGGGCGTTTTCCGCATGGACGAAAAGATCGCGCAATGGTAATTTCCGGGC  
TGTTGTTGTCACCAGCGTCTTAGCGCCATTCCAGAGCAATTGGTTTTCCAGGCACCCAGGATTGCCACACGCGCAGTGTG  
GGTCATATCTCCAGGGGATATGACCCAGTTCCGCTGCCACACCGTGTGCACCCGTCACGGCGCACCGTTTCATCCACA  
CTGCGAACCCATCCCGTACCGAGATAGGCCGCCAGAACCAGTTGTTGCGTAAGGCGGTTTTCTACTACGTCACCGAGG  
AGTTGCAGGTTAACGTCGCGGGGAAAACCAACCGACAATTACGGTATTTTTCAGGCTTATCGGCGAGATCATATAAATC  
CGCCGCTGTTAACGGCAGGTTAGGCGTAGAAAATAATGGTGGTTTTATCTTTACTGACCAGCGCCGAAATCCCATACCA  
GACCATGACAGCGAGCGTTAAAGCGCCTGAGTTGCTCGTCAATCATTTCCGCCGATACCCGACACCAGGCCGGGAGCAATG  
ACTTCTGCGGTCCGCTTTTTTTCGAGTGTAGCGTTTACCTTCTGCTGTCCGAGACAAAAGCGGATATGCGTTGCCCC  
CATATCCACGCCCCTACGACGTTATGCTGTTTTGTCATGAGGCTGTACCTCGCTTTTTCAGCCAGAATCTGCGCGGTC  
ATAATCTCCATGCTTCTGATATTTTCCGCATGATTAACAGGCCGGAAGTCCGACGATAAAGACATCCGCCCTGC  
CGCCATCAGTTTTTTCGTAAGTTGCCTGGTTGAGGAACCGTCCACCTCAATTTCTGACTCCAGACCTTCTCGTTCACGCC  
ATGCCTTCAAGTTCGCAAGTTTATCCAGCATTTTCAAGGATGAACGGTTGTCCGGCAAAGCCGGGATCGACAGTATGACC  
GTAATTTTATCGGCTTATGGATATAGTATTTTATGGCCTCAACTGGCGTCTCCGGTTAAGGATCAGCCCCACTTTTAT  
GTCATGACGGCGGATTTTATCAATCAGCGGAACGCTGGCGGTTGATGGTTTTCCGGATGCAGAGTGTAAATCTGCTC  
CCGACGCGCCAGTTGAGCAATGTAATCCTGCGGCCGCTCACCATCAGATGACAGTTCGAGCGGTTTGTAGTTGCCAGTTT  
TTAACCTGACTTACGAAGAACGGTGAAGTGTGAGATTTGGGACAAAAGTACCCTCCATGATGATGTAAGTGAAGTAAATC  
GGCATGGCTGTCGATAAATTCGATCTGTTCTTTAAATTTTACGAGATCCATACACATTAACGAGGGGGAGATTTTATGTT  
TCAATTCCTTACTTACTGATAAGACGGTCAAGGGCGACAGCCGCGATAATTAATCCGCCATCACCACAGTTGGTAATA  
GGTTTGTACCTGCAAAATATTACAGACCGTTGTTGATGGTGCCGATGATCAACCCGCAATCACCACAGAGAAAATGCGCC  
CCTTGGCGCGAAGAAACTGGTGCCGCAATGATGGCGCTGGCAATGGCATAGGTTTTCAAACCCATACCGGCAAGCGGT  
TCTGCGGCACCGAGTCGTGACGTTGAGACGACGCTGCCAGACCTGCACAAACACCGGAGATGATAAACACCACAGGAT  
GTGGAATTTACGTCATCCCGGAATAGAACGCCGAATTTTTGTTGCCGCCAGTGCCTAGATGTTGCGCCGAGCCGCA  
TACGCGTTGTCAGAAACCAAAGGATGAGCGGACAATTAGTGAGAAGATAACGGGGACAGGTATCCCAATTACGCTGGCG  
GCAAAGAAGTTCAGAAAGTCAAATGAGAAGCCGTATACCGAGTTGGCATCGGAGATCACCAGCGTATCCACGGAAAAT  
CGCGTTGGTCCAAGGGTGTGATGAACGGGTGTAGCCCCGTCAGTTGACCAGGCAGCCGTTGATCGCCCCAGTGGCG  
CGCAACAGTACACCGCAATCATGCTGCGAGAAAAGGGTCAACACCTGCCAACATCAGTTTGGCGGTACCATAACG  
GAAAGCGCCAGAAATCGCGCAACCGAGAGTGCATACCAGCGACAGGATAGCGAAAACCTGCCCATGCCGATCAATAC  
CGTACGGAGCTTTGAACAAAAATCTGGTAATATTATTGGTGGTCAGAAAATATTCTGGTACAGCGAACCAAAGATGG  
CGACGATGATGCCAGGATAAAAAAGGTGCCGATTTTATCCAGAACAGCGCAAAGTTGAACGGTTTTCTTCTCGCTCGCT  
TCGTTTTTACTCTTGTGGTAAAGCCCATGCCATAATCTCTCTTTCGCTCATGTCATCGCGATTGCTCAGGATTTGCGTC  
AGTCGCTCTTTCGAGAACACGGCGATGCGGTCGAGACGGTGATAATTTAGGTAGTTAGATGACACCATCAGGATGAC  
TTTTCCGTCGTCGCCAGTTGGCGCATCACTTTGTAATTTCCGCTTTCGCGCAACGTCGATGCCGCGGTAGGTTTAT

CGAAAATAACTACTTCCGGGCAACAGCACAGCCATTTGGAGATCAGGACTTTCTGCTGATTTCCCCGGAGAGTTCCGGTG  
ATATTCTGGTTTACCGAATGACATTTTCAGCGCCAGCAGTTCCGCGTTGATTTTCAGCGGTACGTTGCTCGTCAACTTCATG  
AAACAAGCCCATCGCGCCTTATAGCCGCCGCTTTTCAGACTGCGGCTGATCGCCATGTTCTGAGCGATGAAAAAGTTGG  
GGAAAAAACCGTTATCCCGCGGCTTTTCAGTGATGTAAGCCATCCCTTTTTTCACGGCATCCAGGGGTGAACGTGGAGAG  
ATATCTTTGCCATTAAGACGGATTTCTCCGCCAGCGCTTTATCCACGCCAAACAGACAATTCATCAGTTCAGTACGTCC  
GGAACCGACAGTCCGGCAAAGCCTAATATTTCTCCCCGGCAGACGCTAAATGAGATATCCCGGACCTTTTTTCTGTAC  
GACTGGTGACGTTCCGCACCTCAAAAACCGTTTCGTGCGCAAGGTTGCTGACATTCTCCTTCATCGCGTTAAAACGGTTT  
TGCAAGTTCGGGCTACCATCAGACGGACGATATCGTCATTTGACACATCGCTTACTATGCCGCTGCAAACGCTGCTGCC  
GTCTTTTCATCACCGTATAGCGGTGCGAAATACGGCGAATTTCCGCCAACTTATGCGAGATATAGACGATGGCCGTACCCCT  
CTTTACGCAACTGATTTCATGATCAGAAACAGATAGTCCACCTCTTTATTGGTGAGTGAGGAGGTGGGTTTCATCCATGATG  
ATGACTTTGGCATCGAGCATCAGCGTTTTGGCAATTTCTAGCATCTGCTTGTGGCTGATAGATAAATTCGCCACTTTCTC  
ATCTAGATCAACTTTCAAGCCACGCGTAATAACATCATGGCGGCGCGGACACGCATTTCTCGCCAGTCGATAATATTGA  
CGCCACAGATTTTTTTCGTCAGATGACGACCAATATATAAATTTCCAGTACGGTTAATTCATCAATAACGCTGAGTTC  
TGATAAATAATCCCGATACCGAGTTGTCCGCTAATTTATGATCCAGCTTGTATAGCTAATGTTATTAATGGTAATGGT  
GCCTTTGGTCGGCTCATGTATTCGGATAAAAACCTTCATTAGCGTGAGTTTACCCGCGCATTTTTCTCCTAGTAATGCC  
GTATTTACCAGGATAAACCGTTAAATTAACCGACTTTAATGCGTGAACCGGACCAAAGGACTTGGCGATCCCCGCCATC  
GATATATATGGCGTGCCATAAATAACCTCTCTGCACGAAATATCGTATTATTGCCGTGATGGCTACATTTATCAGGTCTA  
CGTTCAGGTTATTTTGTGGCCGATAAGACACTTCATTAGCATCATCATCCGGCATCATTAGTTTTATTGAGTGACCA  
GGATTGAATCGACCAGTTTTAAATTCGGTGCTTTATCCAGCGGATAAACCTTGGCGGATTTCTCAGCGTCAACCATCAGC  
TTCAGACCCGTTGCGCGGATATCCGCCGGTTCGGGCAACCGTCGCGGTCATTTGTCGGCTTCCACCATTTTGGGGC  
TTCCGGAATGCCATCTGTACCGACGACCAGCACTTTTCCGTTTTTCCGGCGTTTGGGACTGCCTGAGCAACACCCATTG  
CCATCGTGTATTTCGCGCAATAGATCGCTTAAATATTCGGATTACGTTGCAACACGTTAGTGGCGACATCCAGTGCTTTA  
ATGCGGTCCCAGTCGCGAGGCTGGCTGGCGACAAGCTTGATCTGGCTTGTCTTTTTGAAGGCTTCGGTGGCACCATTACG  
ACGCGCTTCCCGGAGGCGTTACCGGCTTACCCTCAATGATTGCGACTTACCACCTTCCAGCGCCAATTTGTCAATAA  
TGAACGACGCGCTTTCCGCCGACAGCAACGTTATCGGTGGTGAACAAAGCTTCCACATTGCCGCGAGTTTTTTCAGA  
TTATCCATGTCGATTTTTTCATCGAGATTAACCAGATAAATGCCTTTTTCCATGCGCGGGCAGAGGCATGACCAGATT  
CACTGAGGATAAATGGAGCGAAGGCGATACCTTTGTAATTTTTATTACTGAGATCTTCAAATAACTGCAATTGAGATTGAA  
AATCGCTTCTGAAGGAGAGGCAAAAATATCAACGCTGACGCCAGTGTTTTGCTTCATCTTCAATGCCTTTTTTCATA  
TCTACCCAAAATGGGTTGGAGAGGGTTTTCAATACGACAGCATATTCGGCGGACGAAAAGCGCTGGTTGACAACATTA  
GCCCACGAGTGTCCGCTGAAATATTTAGATATTTATTACATAAATGTTCTCACGGTAAGGGGACAGGTAACCTCCGG  
ATGGCGGAATTACCTTTTTCTATTTTCAGCGCGCTGGTGAGAAGAAATCAACAATTGCCGCGGTTTTTGCATATTAAT  
ATTAGCTTGTCAATGTTGAGCTGGGCGACAGAGACAAAAAAGCGTCCAGCAAAGTTAGTTGTAATATTTCTGCCGAGG  
CATTACGACCTAATAACGGCGTTTCCGGGGCTGGTGAGCAAATAATAATCGGCCAGTTTCGCTATCGGTGAATGGTAG  
CTATGGGTTATACAAATAATCTTTGCCCGTCTTTTTTGGCAGTTCTACGGCCGCTTTTACATCACTGGTTCCGCCGA  
ATGGGCTACTACCAGCACAACATCTCCTTCTGTAACAACGAAGCGGACATCATCATGATGTGAGCATCAGGATAGGCCT  
GACAGCGTACGCCAATGCGCAAGAACTTGCTGTACATCAGCACAGATAGCATTTGATCTCCGGCACCCTGACAAATCC  
CGCTGTCTGGCCTGATAGAAAAAGCGGGCGCACGGTGATCTCATCAACGTTGACGATCGACTGACCTTCATAATGGT  
GCGTAAAGTGATGTTAAATACCTTATTCACCACATCTGCGGCGCTTTCATCAAAGCCAACTCGGAAGGCAATACCTGTT  
CTGACTGAGAAAAATAATCTCCAGCGCACTGCGTAAAGTTACGAAAGCCGCTAAACCCAGCAGCTTTGATACCTTAAT  
ATCATCGCTTCAGATACCCGAGAGCTTCTGCGACATCTTTAATTGCGGGTGCAACTCAGGTTACCGGGTTTTGAGTAA  
CCACTCCAGATGCGCGCTTTTCATTTTCTGTCATTCTTCTGCTTCAATTCGAGGTAAGGCGCTAACCTTATACCGTTG  
GAAGCGCTGAATCAAACCTGACTGGCTCATCACGTTCTTGTCTTGAATTGAAGACGCCACTATATACCACAGCAA  
GAACAGAAAAGATGCTGGGACTTCACAAAAAATAAAATTTATAAAGTTTTATTTATTGTGAACAATGGCGAGTGGCTT  
AAAAATTTATTTCAATTAATTAGTTTTAAAAACATGATGTTATTTGTTTTCTGGTTTTTTAGATGATAGATGTTGCTGGA  
TGGTGAGTGTCTTAAACGCTATTGCGCTGTGAGATGTAACCTGTAAAACAGATCAGGAAGGCGTAATTCATCGATTTG  
GGTGTTTTTAATTCATTAACATCACAATGTTTTTTGATTGTGAAGTTTTGCACGGACGGGGAAGATGAATGAAAAAGAT  
TGCAATTTGGCTGTGATCATGTCGGTTTTCAATTTAAAACATGAAATAGTGGCACATTTAGTTGAGCGTGGCGTTGAAGTGA  
TTGATAAAGGAACCTGGTCGTGAGAGCTACTGATTATCCACATTACGCCAGTCAAGTCGCACTGGCTGTTGCTGGCGGA  
GAGGTTGATGGCGGATTTTGAATTTGGTACTGGCGTGGTATTTTCGATAGCGGCAACAAGTTGCCGGAATTCGCGC  
GGTCTGTAGCGAACCTTATTCGCGCAACTTTCCGGCAGCATAACGACACCAACGTGCTGGCTTTTTGGTTCCAGG  
TGGTTGGCCTCGAACTGGCAAAAATGATTGTGGATGCTGGCTGGGCGCACAGTACGAAGGCGGTCGTCATCAACAACGC  
GTGGAGGCGATTACGGCAATAGAGCAGCGGAGAAATGAGATTCACTACTTGCATGGATGAGTAATGATTAATGTG  
GATAGAGTTTTCTTTTGGGTTGGCTAATGAAACGCTTTCCGCTATTTCTTTTATTACCCTGCTCACGCTGCCACCGT  
TCCGGCCAGGCGGATATATCAGCACACCATTTGGCAATATTCAGCAGGCGATTAATGACGCTTATAACCTGACCGTG  
GGCGAGACTATGAAGATTCCGCGACGACGGCTGGCAGCGTGAAGTGAGCGACGATCGCGCAGACAATATGACGACCGC  
CGCCGCGAGTTGAAGATCGCCGAGGACGCTGGACGATCGCCAGCGCCAGCTTGATCAGGAGCGTCGGCAACTGGAGGA

TGAAGAGCGGAGAATGGAAGATGAGTATGGGCGATGAGGTTGGGTATGGAGCAGGCATCGCCCTCACCCAATGGGGAG  
AGGGAGAAAACGAGCGCAATATTCAATATCGAGCACAATCGGTCCCCTCGCCCTCTGGGGAGAGGGTTAGGGTGAGGGG  
GCCAGCGCGCACATTCCTCTCATCACGCCACCCCAATCTCCATCCATCAAACCCACCTCAAACCCTGACGGTAGTGC  
GTTTTCCATCAGCCACGCATCAAACCTGGTGGCTGATATGGGTGAGAAATCACCCGTGGCGAGCGGATAACCTGATTACGGC  
CAAGCACGGTATTTAAATCACAGTGATTACGCGGTGCATCCGCGCGCGGGGGTACTGCAATCCATACCATTACCTGC  
GGCTGATTATTGCGTAAAAATTTACGCGTTTTTCCGGCAAGCCTGCGGTGTGACAGACGCCACGCCACCCGGCTGTGTGC  
CGTTTCAGCAGATAACCGAAGGTGAGTTTTGAGTGTTGAGCGGCAGGGGCGTGACCTGTAACCCCTGCAAATCAAACA  
CCACAAACGGTTCCACCGTGTGGCTGAAATCAAGCAGGCCCGGATGTTTAAACAGATCGTCGCAGCCCTGTTTCATCCGGC  
GGCCGTAACCGGGATCGGATCGCAACGCCACGCGCAGCGGAAACAGCCCTGGACGTGATCCATATGATAATGCGT  
CAGCAAAAACCTGCTGGAACGATCCGGGCGACAGCGATCGGCGAGATCGTGCAGCCCGGCTGATCAGGGTGATTGCGT  
CGTTAACTTCACTACGCCGCTGCACGTTGGCGCGATACTGCGCGAGCGCCGCGCTCTGGCGAGCCCGCACACTCG  
CAGCCCCATGCCGGAACGCCCTGTGCGCCGCGGTGCCGTGAGCGTGAGGGTCAAGGCTCATGTTACAGCGCCTTGGTGA  
AGCGGAAGTGGCTCTGCTCGTAGCCTCGCGCAGATAGAAACGGTGCAGCGTGTGGCGCTTACGTTGGTCAAAGTTCG  
GTCATTTCCGCCCCGGCTGGCGGGCTTCTTCTTCCGCCACGCCAGTAACTTACTGCCGACGTTACAGCCGCGCGCTG  
CGCATTACCACCACTCTGAATTTCCGCGATCCAGTTGACATGATGCAGATGAAACTGCAAATGCAGCCCGATCATGC  
CGACAACCTCGCCATCAAGCAGCGCCAGTGGTAGCGCATGTTTGGGTGCGCAGATTGGCGTTAAAACCCACGCGAAAC  
GCGTGGTGGTCAAACCTCCGCTGTTTTAGCTCACAATCAGCGCGTAAACCGCGTCCGTTGCTGACTGCGTGGCCGGGCG  
AAGCTCACAAGCAGGCATGGTGTCTTCTGATGGATCAGCGTCAGCAGCGTGTGACCGACTGGCGCAGGCTGCCG  
TCATTGTTGAGCGTATGGCAATCCTGTGGAGTATAGCGGGCGGCGCGCCAGGCGGGCGTTAATTTCACTGGCGTTTTC  
ACGGCCACGGTTTTCCAGGCGCTGGCGGAGGATCTCCGGCAAACCTGTAACAGACGGGCAGCAGCGCCGATTGATAGC  
GCGCCCGCGCTGCGGCAGATGGGCGCGTGAGCCGTTGACCAGCACGTCGAATCCGGCGTGACCCAGAGATCAATCTCG  
ACGCCGACGCCATAATACAGACCGTTAGCGTGCCAGCTTAAGGCCAACAGATTTGCCCGCGCGGGTAAAAAACTCCTG  
CTCGCTCAGGGCGATATGGTTTTCACTCCGGCGCTGGCATCGCGCGTATGTAGCGATGCGCCACCAGTAACTGAGTTT  
GTTCCCGCAGGCGGAGTCCGCCAGCAGGCTGTCTTCCGGAGCGGACGGCCCATTAACCAAATCAGTTTTCCCATC  
ATCAGAACACCCTTTACCCTGACGCCAGACGTGGTCGATATGAATATGATTGTCTTGCATGCGCCAGCACCAGGTCG  
GCGCGTTTTGCCCTCGCAATCACCCCGCATCCTGGAGATTAAGCGCTGCGCTGGATTTTTAGTCACCAGCTTACC  
CTGCGGCAGCGTAAAGCGGTTGCTCTGGTCATCGGCAGCGAAATGCCGCATCGAGCAGGCTGGCGGGTAGTAGTCGG  
AAGAGAGGATATCCAGCAGGCCAAGCTGCGCCAGTCACTGGCCGCCACGTTGCCGGAGTGCAGCGCCCGCGCACAATA  
TTCCGGCGGCCATCAGCAGGTTTCATGCCATGTTGCGCGAGGCTTCCGCCGCTTGAACGTTGGTGGGAAATTCGGCGAT  
CACGCTGCCAAGCTGGTGAATTCAGCAACGTGGGCGTGGGTGGCGTCATCGTGGCTGGCAAGCGCAATTTTTCCGCGGC  
GGCAGGGGCGCGATGGATTGCGGATTCGGCTGCGACCAGCGTGCAGCGAGCGCCAGTTGCTCTTTCGTAAGTGTGC  
ATCTGCGCATCAGTGAGGGAGTATTTGCCCTGATAATATTCGCGATACTTCTCGCGGTTGGCGAACTGGCGCTGGCCCGG  
CGAGTGGTCCATCAGCGACACCAGCGTACCAGGCTCGCGTGCACCAGTTTTTCAAACAGCGGCAGCGTGGTGTGATGCG  
GCAGTTCGAGCGCAGATGCAGACGGTGTCTGGCGCGGTTGACGCCGCGTTTTCTGCGTCTTTCGATGGCGTTGATCATC  
TTCTCCAGATTCTCCAGCCGATCGCCCGCTGCGCACGTGCCAATTGCCACGGCATCCAGTACGGTGGTATGCGCGT  
CGCCACCATCAGCGCGTGTGGCTGCTCATCGCCGAGTGGGACAGCCAGTCACTTTCCGGCGCGGGTGAAGAATTTAT  
CCAGATTATCGGTATGCAGTCAATCAGCCCCGGCAGCAGCCAGCCGCTTCCGCGTCCATCGCTCCGGCAGGCGGCTC  
TGGCTTTCCGCAAAGGCGCGGATTTCCGCGTTTGCACCTCCAGCGAACCGTTACCACCTCGTTTTCCAGCACCAGCTT  
AACGTTATTGATAATCATGAAGAGGCTCCATTGGTGCAGGCGGTGCGCGACGTCATTACGTACAGTCTCGTATGGAA  
GATGCCTACGATGGCTGCGCCACGGTTTTGGCTTCCGCGAATCAGTTCCACCACCGCGGCGTGTTTTTGGCGTCCAGC  
AGCGGATAGTTTCGTCAAGCAGCAGAATGGGGTAGTCGACGATAAAGCCGCGGCGGATGTTGACGCGTGTGTTCCGCA  
CCGGAATGTGATGGTGCAGGTGCCACAGGCGTCCGGCACGTTCCAGGCGGGTGAAGAAGCAGCGCGGCTTTAGCGGC  
GCAGGCTTACGCGGAACGCCGGTATCGAGCAGCGGCTGCATCACCACCTCCAGTGCTGAGATACGCGGGATGACGCGCA  
GAAACTGGCTCACCCAGCCGACGGTGGTTTTGCGGATTTCCACCCTTTCGCGCTGGCGCGGTGACCAGGTCTACCCAC  
TCGTCACCGTGTGATCTGGATTTGACCTTCGTCGGGAGATAGTTGGCGTACAGCGAGCGTAGCAGAGTTGATTTGCC  
GCTGCCGGAATGGCCGTGGAGCACCACGATTCGCCCGGTTGACGGTGCAGGAGGCGGATTGAGGACGGGCGAGCGCA  
CGCCGTTTTGCTGGTGCAGGATGAAGTTTTACTGACGTTTTGTACGTTAATCATTTTTCCGCTCGTGGTTCCGGGTGTCG  
GATGCGACGCTGACGCGTCTTATCCGACTACGGGAGCGATTTGTAGGCCGATAAGGCGTTTACGCCGATCCGGCA  
CCGGCTCAATTCTGAAAACCGATGACACCAGCAGTGTGTATACGGATGATGCGGGTCTGAGCAGCGCGGTGGTTAA  
CCACTCTCCACCACTTGCCCTGCTTATCACCAGCAAACGGTCCGCCAGCAGCGGGGACGCCTAAATCATGGGTGA  
CAATCACCACCGGAGGTTACGCTCCACCACCAGGCCGCGCAGCAGGTCGAGCAGGCGGGCTGCACCGACACATCCAGC  
CCGCCGGTTCGTTTCATCCATAAACACCAGCTTCGGATGCGTCACCAGGTTGCCGGCAATCTGCAAACGCTGCTGCATACC  
GCCGAAAAGTGGTTCGGCAGGTCGTGATCCGTTGGCGGGAATCTCCACCTTTCAGCCACTTTCGCGCGGTGGCAC  
GAATATCGCCGTAATGACGTGCCCGGTGCGCATACGCCGCTCGCGGATATTGCCGCTGCCGACACCTGCCGGCGCAGG  
CCGTCGAGTGGATGCTGATGCACCACGCCCATTCGGTACGAGCAGGCGAGCGGCTCGCCCTCGCTCATTGCATACAG  
CGAACGGTTCTCGTAGTGAATTTCCCTGCTGCGCGTCAAGGCGCGGAGATCGACTTACGAGCGTGGTCTTCCCGG

AGCCGGATTCCCCGACAATGCCAGCACTTCCCCGGCCATAAATCAAAGAGACATCGCTAAAGCCTTTGCCCGGCGCG  
TAAAGGTGGGTGAGGTTATTGACCGAAAGTAACGGTTGATTCATTGGTTTTTGCCTCGCTCTGTTGGCGCAATAATCG  
GTATCGGAGCAGACAAACATGCGGTTTCCGGCGTCATCCAGCACCCTTTCATCAAGATAGCTGTGGGTGCATCCGCAGAT  
GGCGCATGGCTCATCCACTGCTGAACGGTGAACGGGTGATCGTGCAGAAATCGAGACTTCCACGCGGGTAAACGGCGGCA  
CCGCATAGATGCGCTTCTCGCGCCCCGCGCCGAACAGTTGCAGGGCGGGCATCATGTCCATTTTTGGGTTATCGAATTC  
GGATCGGCGACGGGTCCATCACGTAGCGCCATTTACCTTACCAGGATAGGCGTAGGTGGTGGCGATATGACCGAAGCG  
GGCGATATCTTCATACAGTTTACCTGCATCACGCCGTACTTCCAGCGCGTGCATGGTGCGGGTTCCGTTTCGCGCG  
GCTCGATAAAGCGCAGCGGCTCGGGGATTGGCACCTGGAAGATAATTATCTGATCTTCCGTCAGCGGCGTTTCGGGGATG  
CGGTGACGCGTCTGGATAACCGTGCATCGTCCGTACGTTCCGTGGTGTTCACCCCGTACGCGCTTGAAGAAGTTGCG  
AATCGACACGGCGTTGGTGGTGTATCCGCGCCCTGGTCAATCACCTTACGACGTCGCTTTCGCAATCACGCTGGCGG  
TAAGCTGAATGCCGCGGTTCCCGAGCGTACGGCATCGGCATCTCGCGCCGCAAACGGCACCTGATAACCGGGGATC  
GCCACCGCTTTAAGATGGCGCGGGGATCATGCGTTTGGTCTGCTCGTGCAGGTAGGCAAAGTTGTAGCCGCTCAGATT  
AGCCATGGTTCTGCTCCTGTTGACAGCTTTGAGTAGTCCAGTTCGGCCTGGAATCGACGTAGTGGGGAGTTTGGG  
TGTGAGACAAAGCCTGCGGCTTTCGACGTTGTCGGCATGTGCCAGCACGAACCTTTCATCCTGCGCGGGCCTGTGCGGTG  
CTCGCGTACTCCGGGCTTGCAGAGCGCGTGCACAGCGGCTGCATCGCCATCGCTTTCGCTCGCTCATGCCGAACCA  
GCCGTCAGCCGCGGTGAAGTGCGGCGGCTCACCCGGCGGTCGATAAAACCGTTAACCTTTCACACTCATCAGC  
AGTTCGCGCAGGTTACCGCAAATCCAGCTTTCGGCACAATCGACACGTGATATAGCCGCTGCGGATCTCGCCTGC  
GAACGGGTGATTGCGCCCTAACCGCTTGGGTGGAGTAGGCCAGCGCCAGCAAATAGCCTTCGTCGCGCGCATCAACT  
GCTGCAAACGGGAGGAGCGTGAGCAGGGTAAACCGCGCGTGCGGGTGATGTCATCCGGCTGTGCGCCGCTATCCTCT  
TCAAACCTCGCAGCCCTGACGCGCCAGCAGGCTGAAAACGTGCGGCGACGGCTGCTGTTTCGCTGTGCGCGGTGGTACG  
CGTCCGCGCTTCCGCTTTGCCAGCAGGGTAAATCGAGCAGGCGATGGGTGTAGTGTAGGTTGGGCCAAGCAGCTGGC  
CGCCGGGAATGTCTTTATAAACGGCGGAGATACGGCTTGCAGACGCATCCCGTGGTGTGAGCGGCTCGCTTACCGCC  
AGCTTCGCAACGTGGTGCGGTAGGCGCGCAGCAGGAAAATCGCTTCAACGTTATCGCCGCTGGCCTGTTTCAGCGCCAG  
CGCCGCCAGTTCGCGGTGCGCAATGCCGCTTCCGTCATCACGCGATCTACCAGGAGTTAAGCTGCTGTTCAATCTGGG  
CGACGCTCAGTTCGGGCAAATCGGTATCGCTCGCGTGGCTCTTTCAGGGCGTGGCGGGCGTGCATCGCCTTCTCG  
CCCCCTTTCACGGCAACGTACATCAGCACACCTCCACATGAGTGGTTCGCGGAATAGCCAGCAGGCGCTGCCACAGGTC  
AGGATCAGGTCGATGCCAGCGGAACGATGCGGGCGCTCGGTGAGTTCGTGAGAATGCACTCCGGCAGCTGCGGAGC  
GATCATTGTTCTTCGGCAATACCCGACAGTAAGCGCAACATGCGTCCGCGCTCAGGCTGGCGACCTGTAATAACA  
GCCTGCGACCCGCTTCCGGCGCAACGGCGGTGCCGTTGAAAGGGCGTTGAGCTGTTTCGCTGGAATCGCCTCATCCGTC  
ACCGCGAAGGTGCGCTGTTCCGGCTGGTGCACAGCGCGGCTGGTATGAAAACGAGGCTCTGTTGACGATATCGTT  
ATTTAATGGGGTAGAAAGCCACACCGCGTGTGCTTATCGCCAGCGTCAGCAGCACGCTGGTGGTGGCGATATCAGCG  
GTTGCCAGCCGCTTTGAGCTGATGCAGGGCGACAATCACGCCGGCTCGCTCATGGCCTTAAACAGGGCAGGAAAACCTG  
TGCTGGGCATCCTGCACGGGAAGCATAAAAGCGGTTTCCAGGGTCATGCGTTGTCTCCGCGAACCATCGTAAAGAAGTCG  
ACCCGGCTGGCGTTCACTTCGGCTGGCGTGCGGCAATGCGTGCCATACGGTCAGCGTCCAGCGGGGCAATAAGGGTTTC  
TGATAAGTTTTGAAAGTGGCGAGATTGCTGCATCAGCGCGTCAATCAGCGCGCAGCGTTCCGGCGTGTGTTTATCAGCC  
CCTGCACCCAGCTGTAGCCGAGCGTCCGTCAGTCAGGCGCACGGCGCGGGTACGCGTGGCGTCCCGGCAAAAAAA  
CGTTCGCGGTGCCGCCATCCGCGCTGAATCTGTACCAGGCCAGTTTTCAGCGCGCGGATCACCTCATAGTCGGCGGT  
GATGTTTAGCGGTTTCCAGCGTGTGCCAGTTTCCAGCGGTTGGCTGTGCGCCAGCACGGACATCCAGTGTGGCGGGTCG  
CGTATCTGCTGCATTAGTGTCCATAGTGAATCAATCATGTGCGCGCGTCCAGGCTGACGGAGTACTCCCGGGG  
CTGCTTACCCTCACGGTGGTTAAGGGTGCAGCAGCACAGCAGCGGACATATTCGGGATTTCAAGACGCTGGCCTC  
TTTGGCCTGGCGCGGGCGGCTGATCCGCGTGTGCTGCGCGCAGCGCAATTCGGTTTTCGCTCGCGCAGAAAATCGT  
GCAGCGAGCCGCTGTGGAAGGTTGCAGCGTCCGCAAGGTTAGGTCGCGAAGTAGTGGTGCATTAACAGAGCGCG  
ACGCCGTTGACACGACGAGGGTGCAGGTTGATGACGTTTCCCCCTCGTAATCCCAGTGCCTGACGACGCTGGCC  
GGACGCGGGGCGCAATACCGAAAGCAGTTTTTTCGCTGGTGGGATGGCTGCCCTGATCCAGCAGATTCTGGCTAAAACCGC  
CCTGGGCGTTGAGCGGTAATCGAACGGGCGCATCAGCACCAGCACGCCGACGCCCTGACGGCGCTGTACCCAGCCTTTT  
TCCACCAGTTGGTGCATGGCGCGGCGCAGGGTGTGGCGATTACCTCAAAGCGCGTCCAGTTGCTGCTCGCGGGAAAG  
ATAGTCGCCGAGCGGTAGTGTGACGAAGCTCCTGCTCAAGTTTTGCGGCTATCTCTTGATAGCGTGTGGGTAGCTGG  
TCGGATGTGTAGACAAGTGCATAGATATCAATGCCTCGCTTATCAGATAAAGTCTTACGCAACCGTTGAGAGAGGAAAT  
CCAGCAGGCTGACCGTACGATGATAAGCACCATCAGGGCGCAGTTTGTGGAAGTGGAAACCGCAATCGCTTCCAC  
AGGGTGACCCGATCCCGCTGCGCCGACCATGCCAGCAGGTCGCGGAGCGGACGTTGGATTGCAAGCGATAGAGGGA  
GTAGGAGATCAGCAGTGGCATCACCTGTGGCAGCACCCGTAGAGGATCTTTCGAGCTTGTGGCACCGGTGGCGCGAA  
TGCTTCCACCGGGCCGGGCTCAATCGCTTCCACCGCTTCGAAAGCAGCTTGGAGAGCACCGGGTGGTGTGGATAAAC  
AGCGCCAGCACGCCAGCACGCCAGCGAACGGGCGAGGCCGACCGGACCGAACAGCATGGCGAAGACCAATTCGTTA  
ATGGCGCGGACGGCTCCATCAGGCGGGAACGGGCTGGTAAACCCACCAGCGCACCGGTTTTTCGGCGCTCATCAGGCC  
AAAGGGGATGGAGAGAACCACCGCCAGCGCGGTGCCCGAGCGCGGATTTGCAGCGTGACGGCCATTTCCGGTGGGTAAT  
CTGCCACTGGCTGAAATCGGGCGGGAAGAGTCCGGCGGCAACGTCGCCATGTTGCCCGCTTTTGTACAGCGTAAGC

GGGGCCATTTCCGCGCCCTGCCACGAGACGACCAACACGGCGAGTACAACGGCCAGCTCAGAAGCGAGAACCAGCTGCG  
CTTGGGTGGGCGATGGTGTATGGTTTGCATGTTTGGCTCCGGTCTGTAGGCCGATAAGGTGCTTGCACCGCATCCGGCA  
TCAACGCCTGCACATTGTCCGATGCGACGCCGGGGCTTATCCGACCTACGATTTACTGCACCGCTTTACTCACCAGAA  
CTCATCGCGCTTAGCGCGTTGTTCCAGGCGGTCCAGGTCATCCAGTGTGCGCCTGAATCTCGGTGGTTTTGCCAGCTTGT  
CTGCTCATTAGTCTTTATTGCTTTTACGCCCCTGCATCTCTTTAAACAGCGCGAGCTGGCGAATCGGCACCAGTTGCA  
GGTCGCTGGAAGCGCGGAATGGCGCCAGCCAGGCGTTCCAGCACCGCTTTTTCTCCGCGGTTTTGCCGTAGTTCATA  
AAGAAGTCGTAGATCTTGTCTTTGGTGGTTTTCGAAAGATTCTTGCGCCAGACGATCGGATCGCCTGGGATCAGCGGCGA  
CTTCCAGATCACCTTCAGTCTTTTCCAGCTTCTCTGGCGCGAGGTTTTCCAGCTTGTGAGGTTTTCCGGTGTGTTGGTGG  
CAACATCCACCTGCTTGTGGCGACGGCCAGCGCTTGGTTTTCATGCCCGGCGTTGACGGTGCCTTGAAGTCGCTGGCG  
GAGATATTGTTTTGGCGAAGACGTAGTAGCCGGGACGAGGAAGCCAGAGGTGGAGTTAGGATCGCCATTGCCAAAGT  
GAGATCTTCCGCTTCGCCAGCAGATCGTTCCAGTGTGATCGGACTGTCTTTGTTGACGATCAACACGCTCCAGTAAC  
CCGGCGATCCATCCGCCGCGACCGTCTGGGCGAAGACCTGGCCATTGGCGCGATCCACCGCTTCCATCGCCGACAGATTG  
CCGTACCAGGCGATATCCACTTTATTGAAGCGCATCCCTGGATAATGCCCGGTAGTCCGGGGCAAAGAAGGCGTTGAC  
TTACAGCCAGCTTCTTCCATATCCTGCAAGAACGGCGTCCATTGCGGTTTCCAGTTTTGCTGTGATTCCGTTGAAA  
TAATGCCGAAATCAACGCCTTTTCTGCTCTTCCGGCTGCGCCGGGCTAACAGGGTGTGAGGCTGAACATGCTGGTG  
AAGCCAGCGAGGCAATTATCTTAGCGTTCATTCTGTTTTCTCAATGATGGGATGTCAGGCGAGCTTTCCGCTTCTCTC  
GACGCGGTTAATGCTGCGGTAGAGATGGTCAAAACGTTCTGTTATCAAACGTTGGCTGCTGCCGCTGTAAGACGTTGCC  
CCTGGCGCAGGGCGACGATGCGTTCGAGTAGCGCAGGGCGTAATCCACCTGATGCAGCGTGACGACCAGGTGATGCCG  
TCGTTCTGTTGATGTGCGCGAGGGTGTCCATCACGATGCGCGCTGATTCTGGGTCCAGCGAGGCGATGGGTTTATCGGC  
CAGAATCACTTTCGCTGTGCATCAGCGCACGGGCAATCGCCACACGTTGCTGCTGGCCGCCGAGAGGGTGAAACGC  
GCTGATGGGCAAAATGCACCATGCCAACGCGGGTACGCGCTGTAAACGCGCGTGTCTGCTCGCCGGTGAACCAGCTA  
AAACAGGTGCGCCAGAACGGCGTGTGCCGAGCGCGCAATCAGCACGTTCTCCAGTACGCTCAGGCGGTTACCAGGTT  
GAATTGTTGGAATATGTAGCCGGTATGGGCGCGCTTTTGGGATATCGCGGCCAGGCGGCTTCCGCGTGGACTGTGC  
GGCCAGCAGCTCGATATGGCTACCGACAGATTTATCGCCGTAATCAAACCGTTAAGTGACGTAAGGGTGGATTTT  
CCGGAACCCGACGGCCAAAGCAGAGCCACATTTACCCTGATGAATGTTCCAGATCAACCGCATGCAGCGCTGATGCTG  
ATTGAAGGTTTTGGCGAGCTTCTCGACACGGATAATCGTTTGCATGATGCAGCTCCCTAAAAAGTGGTCCATCGTGG  
CGGATTATTGTGACGATTTGGTTAATTAAGTACTAACAGATGAAGAGTTAACGGGAATTCGATGACAGTGCGGGAGG  
GCGGGCCTCCCGCGGGTATTGCGTGGTGTGTTTGGACGACATTAATCATCCACGGTACGCCAAATTTATCGGTGAC  
TTTGCCAAAGCCATGCGCCAGAAAGTTTCTGCCAGGCCATTTGATTTTTCCGTTAGCGGCAAGATTGCAAACCAGC  
GTTTTCTTCTCGACCTGTGCAATCGAGCACCAGCGTAAAGCCGGAGTAGCTGGCTTTTCTGACGGCATGGCATCG  
CTCATCATGATGTCGCTTCCGGCAATGCGCACATTTGGCGTGGGCGATGGCGGTATCGGGAAATTCATCCGGAAGGGCA  
GTTCTCGGCGCTGCTCGCTGATTTTGGCATTTCGCCGAAGCTGATTTTATAGAGCAGTTCCGCGCCAAACGTACGTT  
GATAATAGGCAATCGCGTCGGAACAGTTACCGGCAAAAGAGAGGTAGGGACTTAACGGCATGATGGTGACCTCAGTTAAG  
AGAAGCCAGTTAAGTGTAGTTGAAATTTATACAGATGAGAGGCGGCTGATAAGACGCGCGAGCGTGCATCAGGCAGT  
CGGCACTGTTCCGGATGCGGCGTAAACGCCTTATCCGGCCTACGGAGGGTGCGGGAATTTGTAGGCTGATAAGACCGG  
CAAGCGTCGCATCAGGCATCGGACCGTTGCGGATGCGGCGGAGCGCTTATCCGGCTTACCGATCAACAATAAATC  
AGTTCTTTTTCAAACTCAGATTTAGTTTTCATCGGACCAAAACCGTGCATTTTGAATCGATGTTATGGTGCCTTCA  
ACCAGGCGGATTTTTTCACTTTGGTGCATTTTCCAGCATCGAAGAGCTACCTTTACCTTCAGATCTTTAATGATGGT  
AACGCTGTGCGCGTCAGCCAGCAGATTGCCGTTAGCATCTTTAACGATCAGCTCGTCTTCTGTCAGGTTCTGCGT  
CGTTCCATTCTGAGGCATTTCCGGGAGATGTACATGCCGTTATCTTCTGAGGTGATTCGGAGTTGCATTTTGGGAG  
TGTGGTAATGACATGTGGATTTCTCAAAGTACGAGGGCAAAGCGCCAAAAACGGCAGATTGCCGAAAAAGGCCG  
AATTATACAAAAATCCCTGAGTTTGTGCGGGTACTGCTGATTTTAGACGACGATCGTTTTTCAATTTGAAAGGAAACGCA  
AAAAGAAAATAATCTTTTTGCTCTATTTATTTAAGATAATGTTAATGCTCTACTTGTCTTTTTTAATTCACATG  
ATTTTTTATCTTCTGACGTTTTAACGTATCAGAAGACGTTATTTATTCTGATAAAAAACAACACTAAATATAAAA  
TTATTTCTGAGTAATTAAGGCGGAAAACAGAACTCAAAAACAATCTGGCTAAATAAAAATAACAAAATTTGCTTTA  
AGGAAGAATTTCTATGTACACACAGACCCTGTATGAGTTAAGTACGAGGCTGAACGCCTGTACAGCTTCTCGCCAA  
CAGTTGAGTACTGGAAAAATGCCTCTCTGTACCCGGAGACGACGCGCCAAACTGGCTTTACCCTGGAGTCAGCC  
TAATATCGCCGAACGTACGCGATGCTGAATAATGAGTTGCGTAAAATTTCCGACTGGAAATGGTGTGCTGCAATGTG  
GTACCATGAAAGCAGGAAATCAACCACCATTAATGCCATTGTTGGTACGGAGTTTCTGCCTAATCGTAATCGCCAAATG  
ACTGCGCTGCCGACGCTTATTCGCATACGCCCGGGCAAAGGAACCGTACTGCATTTTTACATGTGCGCGCAATCGA  
TTGTTAATCAACAATTACAACAGCGCTGCGTATTGCGATATTAAGCATCTGACCGATGTGCTGAAATAGATAAAG

ATATGCGTGCGCTTATGCAGCGGATCGAAAATGGCGTCGCTTTGAAAAATATTATCTGGGTGCCAGCCTATTTTTTCAT  
TGCTGAAAAAGTTTGAATGATTTAGTGCAGCTGGCGAAGGCGCTGGACGTGATTTTTCTTTTTCTGCTTACGCCGCCAT  
TGAGCATATCCCCTGATTGAAGTGGAGTTTGTCCATCTAGCGGGGCTGGAGAGTTATCCCGTTCAGTTGACGTTACTGG  
ATACCCCGGGCCAAATGAAGCCGGGCAACCGCATCTGCAAAAAATGCTTAACCAGCAGCTGGCACGCGCCTCGGGCGTA  
CTGGCGGTGCTGGATTATACGCAACTGAAATCGATCTCCGATGAAGAGTCCGTGAGGCGATTTTGGCGGTGGGGCAATC  
GGTGCCGCTGTACGTGCTGGTCAATAAGTTTCGATCAACAGGATCGTAACAGTGACGACGCCAGCAGGTGCGGGCACTGA  
TTTTCCGGGACGCTGATGAAAGGCTGTATTACGCCACAGCAGATTTTTCCGGTGTGTCGATGTGGGGCTACCTGGCGAAT  
CGGGCGCGCTATGAGTTAGCCAACAACGGTAAGTTACCACCGCCAGAGCAACAACGCTGGGTGGAAGATTTTGCCATGC  
CGCGTTGGCAGGCGCTGGCGTCATGCCGATCTGGCGGACCTCGAACATATTCGTCATGCTGCCGATCAGTTGTGGGAAG  
ATTGCTGTTCGCCAGCAATTCAGGCGTTGCTTCATGCCGTTACGCTAACGCCCTCGTTGTATGCTCTGCATCTGCC  
GGCATAAACTGTTGAATTACGCGCAGCAGGCGCGGAATACTGGATTTTCGTGCGCACGGGTAAACGTGCTTGTGA  
ACAATTGCGGCAAAATATCCACCAGATCGAAGAAAGTTTGAGCTATTGCAACTCAATCAGGCGCAGGTGAGCGGCGAGA  
TTAAACATGAAATCGAGCTGGCCCTGACCTCCGCCAACCACTTTCTGCGTCAACAGCAAGATGCGCTGAAGGTGCAGTTA  
GCCGCTTGTTCAGGATGATTCGGAGCCGTTAAGCAGATTCGTACCCGCTGTGAGACACTGTTACAGACGGCGCAGAA  
CACCATCAGTCGCGACTTACGCTGCGTTTTGCGGAGCTTGAATCCACCCTTTGCCGGGTGTTAAACCGATTTATTGCC  
CCATTGAGCAACAAGTCAAAATGGAATTGAGCGAGTCAAGGTTTCGTCCTGGGTTTTCATTTTTCTGTTTTTCACGGCGTA  
GTTCCCACTTCAACACTCGCCAGCTGTTCAAGTCAATTCGCGCCAGGAAGCAACGGACGAGCAGACGACGCGTTTT  
AGGCGTTGTGCGTGAGACTTTTTGCGCGTGGTTGAATCAGCCGACTGGGGACGGGAAATGAGAAATCACCGACAGAAA  
CGTTGATTACAGTGTGTTGCAACGAGCATTAAAGCGAGAAGTGCATCTCTATTGCCAACAATGGCTAAAGTTCTGGCA  
GAGCAGGTGATGAATCTGTTACGGCAGGCATGAATACTTTTTCTGCTGAGTTCGTTTCATGTTTGACGGAATTACAGAC  
GCGTTTACGCGAAAGTCTGGCTCTGCGTCAACAAAATGAATCGGTGGTCAAGGCTGATGCAGCAGCAATTCGACGACTG  
TGATGACTCACGGCTGGATTACACCGACGCCAGCTGTTACGCGATGATATCAAACACTTTTACGGCAGAACGATAT  
TGACCAAGACGTTACTTGACGGCCCCGGTCCGCTGCTGGAGTCCGTTTATCCCCGTTTTTGTGATCTGGCGCAGGGT  
GATGATGCCCGCTTCCACAAGCCATCAGCAGCAGTTTCGTGAACGACTGATGCAGGAACCTTTTCCGCTGTGCAGCT  
TCAGACATGGACGAACGGCGGCATGTTAAATGCGCCGTTAGCTGCGTCTGACATTGGTGGAAAAACTGGCGTCGATGC  
TGGATCCCGGTGATCTGGCACTGACGCAGATCGCGCAGCATCTGGCGCTGCTGCAAAAAATGGATCACCGCCAGCACTCT  
GCTTTCCCGGAGCTCCCCAGCAAATGCGCCTTGTATGAGTGGTTTTTCAGCCGTTGTCGCTGGAAGGAAAAGGCGTT  
AACGCAACGAGGCCTACTGTTGACGGCAGGTGATCAGAGCAGCAAAATTTTACCCGCTGGCGTGTGGGGCGTATAACG  
CCTGGTCTGTTGCTGGGCGTGTTTTTATCGTTCTGGAGGAGTTGCGCTGGGGGGCATTGGCGATGCCTGCCGTCTGGGA  
AGCCCGCAAGCGGTGGCGTTGTTGCTGGGTGATTTGCTCGAGAAAGCGACACAACATCTGGCAGAGAGTATCAATGCGGC  
ACCGACCACGGCTCACTATTACCATCAGTGGTTGCTCTTCGACCGTCCGACGGGCGGGGAGCATGCTGATTTTTTAA  
GTTGGCTGGGAAAGTGGACCACGGCAGATAAACAACCCGTTTGTGGTCAAGTACCACCGCTGGCAAATGTGCGCGTG  
GGGATGCCAGACTCTGTTACGCGCAGCGTCTGGCGGGGGCAATGCTCGAGGAAATCTTCTCTGTAATTTGGCGTAAAT  
AATCAGTTACATCAATGAGTCTAAACGAAATCCATGTGTGAAGTTGATCACAATTTAAACACTGGTAGGGTAAAAAGG  
TCATTAAGTCCCAATTCAGGCGTCAACTGGTTTGTGATTCCTTAACCGGAGGGTGAAGCAACCCGCTACGCT  
TGTTACAGAGATTGCATCTGCAATCCCGCTCCCCTTTTGCGGCCGTGCGCTGATTTTTCTGGCGTTTGGGAAATGG  
GCCAACTCTGCGAGGAAAGTATGCTGAAAAGGAAAAAAGTAAACCGATTACCCCTCGTGTGTCACCAATATTGATGA  
CGGTAACCTGCGTAAAGCCATTACCGCAGCATCACTGGGTAATGCAATGGAATGGTTGATTTTTGGTGTATTGTTTTG  
TTGCTTACGCATTAGGTAAGTTTTTTTTCCGGGGGCTGACCCAGCGTGCAGATGGTTGCTGCACTTCCCACTTTCTCC  
GTTCCCTTTCTGATTGACCGCTTGGCGGACTCTTCTTTGGTATGTTGGGCGATAAATATGGTCCGAGAAAGATCCCGC  
TATCACTATTGTGATTATGTCGATCAGTACGTTCTGATTGGCTTAATACCGTCTACACACGATTGGTATTTGGGCAC  
CGATTCTGCTGTTGATCTGTAAGATGGACAAGTTTTCTCGGTGCGCGGTGAATATACCGGGCGTGCATATTTGTTGCG  
GAATACTCCCCTGACCGTAAACGTGGCTTTATGGGAGCTGGCTGGACTTCGTTTCTATTGCCGGTTTTGTGCTGGGTGC  
GGGCGTGGTGGTGAATTTGACCATTTGTCGGCGAAGCGAATTCCTCGATTGGGGCTGGCGTATTCCGTTCTTTATCG  
CTCTGCCGTTAGGGATTATCGGGCTTTACCTGCGCCATGCGCTGGAAGAGACTCCGGCGTTCCAGCAGCATGTGATAAA  
CTGGAACAGGGCGACCGTGAAGTTTTGCAGGATGGCCGAAAGTCTCGTTTAAAGAGATTGCCACTAAATACTGGCGCAG  
CCTGTTGACATGTATTGGTCTGTAATTGCCACCAACGTGACTTACTACATGTTGCTGACCTATATGCCGAGTTATTTGT  
CGCATAACCTGCATTACTCCGAAGACCACGGGTGCTGATTATTATCGCCATTATGATCGGTATGCTGTTTGTCCAGCCG  
GTGATGGGCTTGTGAGTGACGTTTTGGCGTGTCCGTTTGTGCTACTTGGTAGTGTGCCCTGTTTGTGTTGGCGAT  
CCCGCGTTTTATTCTGATTAACAGTAACGTCATCGGCTGATTTTTGCCGGTACTGATGCTGGCGGTGATCCTTAACT  
GCTTACGGGCGTTATGGCTTCTACCTTGCAGCGATGTTCCCGACGATATCCGTTACAGCGCGCTGGCGGCGGCATTT  
AATATTTCCGTGCTGTTGCGGCTGACGCCAACGCTGGCGGCTGGCTGGTCAAAGCTCGAGAATCTGATGATGCC  
TGCTTATTACCTGATGGTAGTGGCGGTGGTTGGTTAATCACCGCGTAACCATGAAAGAGACGGCAAATCGTCCGTTGA  
AAGGTGCGACACCGGCGGCTCAGATATACAGGAAGCGAAGGAAATTTCTCGTCGAGCATTACGATAATATCGAGCAGAAA  
ATCGATGATATTGACCACGAGATTGCCGATTTGCAGGCGAAACGTACCCGCTGGTGCAGCAACATCCCGCAATTTGATGA  
ATAAGCTGAAACGGATGGCTGATGTGACGCTGTCTTATCAGGCCAATTGAACTCTTAAGTTCACTTAATCTCTGACGC

GCATACTCTCCTCCAGGTTAACGGAGGAGAGTGCAATGAAAAACCGTGTTTATGAAAGTTAACTACCGTGTTGAGCGTG  
CTGGTGGTCAGCAGCTTTCTTTATATCTGGTTTCCACGTAAGTCTTTCTCAGCCGTACCCAGGCCCGCGTGCCGGA  
AGTCTCTTGCCGGTTTTGCAGGAAAACTGCCCGTGATGCAACTGTGTAATGCGGCTGACAATACTTAACCCAGACCAA  
TCCCGCCATAACGGCTGTCCATACGTACAAACGCTTTACTCAACTCCCCGATTTACTCTCATCAATACCTGGTCTTCA  
TCTTCAACTGCCATGACCGCTCCGTCATCTTCTGACGTTAATCATAATGTTGCTGCCTTCCGGGCTGTAAACGATGGC  
GTTTTCTACCAGGTTTCGAATAACATCCGACGAGGGTTGCATCACCTGAACGGTGATGTCGGCGGGCTCTCTGGCA  
ATAGCAGGGTTTGTGTCGCTGGTCGAGCATGGTACTGAGTTCGTACATACGAGGGGAGAATGACATCTTCCAGCAGTTTT  
ACATGTTGATAATTACCGGAAGAAAATGACTGTCCGGCACGCGCCAGTTGCAGCAGCTGGGAGACGCTCTCCATCATCTG  
ATCAAGCCGTGCCACTAACGGTGCTACATCAATGTGATGCGTTTTCCAGCAGTTCAGATGCAAACGCACCCCGCCA  
GTGGCGTTCGAGTTCGTGCGCGACGTGACGGTAAACAACCTTTGTTATCCAGCGTGCTGGTCAGGCGACTGACCAGA  
TCGTTTAAACGCCGAAACCACCGCTTCGATTTGAGGGTGGCGCTGTGAATGGCAATGGCGTTAAGTTGTCCGGCGTCCG  
CGTTCCAGCTCTTTTGCAGCTCCGCCAGCGGGCGGGTGTGCGCGTACCGCCTGATAGCAGATAAATAGCGTCAGGC  
TGACCATAAAGACGCCGGGACAATCAGGCTGGCGACCGCTCGCGGATCTCACGCATGATGTGGCGATCGTTGTTGCGA  
TTGTGCGTAGCGCTGTCAAACAGCTGAATCTGCTCGGTACTTTCATGCCATAGCCAGAAGACGCTGATCAGTCAAA  
CACCAACAAAATGGCCCCGATGGTCAATATCAGCCGTTGGCGCAGCGATATTGGTCCGGCAGAAAATGCATCAGATCA  
ATTAGTTTTCTCATTCCGACACAGCATATAGCCAAAAGCCGCGCACGGTGCGGATACGGGCTTTGCCACTTTGTCGCGC  
AGATTGTGGATATGCACTTCCAGGGTGTGGTTCGAGGGTTCATTGTCCAGTTATAGATGTGTTGTAGAGAATTTCCCG  
ATGCACCGACTGCCTGCTTTGAGCATTAAACCGTGACAGCAGAGCATATTCTTTGGCGTCAGAATCAACTCTTCCACGC  
CCATCCATACCTGACGGCGACCCATGTTGAGCGTACAGTTGCCAACAAATCAGCTCACTTTCCGCTGATTATTATGGCGT  
CGTAGCAGGGCGCGGATACGGGCATGTAACCTTCCAGCGCAAAGGCTTACCAGATAGTCGTGCGCACCGACATCCAG  
CCCGCGATTTTGTGCGTACGCTATCGCGAGCGGTGAGGATCAGTACCGGCAGGGTATATTTTTTCTGCCGGATACGGG  
CGAGAAAATGCAGTCCATCTTGTGCGGTAAACCCTAAATCCAGTACCACCGCTGTAATGACCTGCCTCAAGGCTTTGT  
TCCGCCATCCGCGCGTGTGACGCTATCGCACGCTAGCCTTGGTTTGCGCCCGCAGAATCAGTCCCTGCAATAACAG  
CGTATCGTCTCAACAATCAGAATTTTCACTCACTCTCTGCAAGTTTGCAGAATATCATCCGACGCTGTAATA  
CTTCTGCTCAACGCCAGTTAATCCAATAGCGTGGAGAATAAATTGTCTTGTGAATAGTGTGCGTTTGCCTGTTTT  
GCAGGCAGTTCTGGTCAACCTGATACCGTTTTGATAATCTCCGACAGCCACAGCAGCATCGGCACCTGTTTTGGCTA  
TCCGGGGCGATGGCATAAGCGAGACCGTGAGATAGATGCCATTTTACCTAACGATTCACCGTGGTCAGAAAGATAAAC  
CAGGCTGGTGGTAAATTTATCTGATGTTCTTTGAGCAGATTAATCGCTTTATCAACAATATAGTCGACGTAACCAGCG  
TGTTGTGTAAGTGTCCACAGTTGCTCTTTGGTACAGGTCTGGATCTATTGGTGTGCGAGTTGGGGTAAATTTCTG  
AACTGAGGGCGATAGCGGTTGTAATAGGTGCGACCGTGGCTGCCGATGGTGTGTAAGACAATCACGCCATCACCTTGAG  
GTTATTGATGTAAGCTTCAAGCCCGTGGAAACAGCACTTCGTACATAGCATTCCGCGTTGATGCACTGATCAGGTAGATTCA  
GCGCGGTGACGTTCTGGTGAAGCACGCGGTGCGAGGCACCTTTACAGCCGCCATCGTTGTCATTCCACAGCACGTTGATG  
CCCGCTCGTGAATGATATCCAGCACGCTTCTGTTGCTGTGCCAGCTCTTCTTTGTAGTGTACGCGGCATATCCGA  
GAACATGCACGGTACTGAACTGCCGTTGCCGTGCCGCAAGATGCGGTATTAGGGAAATAGACCACGTTATCTTTGCCA  
GCCGCGGTTAGTTTACGCGGGTAGCCGTTGAGGGAGAAGTTCTCCGCCCGGAGGTTTCCGCCGACAATCAGGATGGTC  
AAATTTTTACGTTTTTCTGCTTAAACGGGTTGCGGTGCGGCTTCCACCAATTCGCACCAGCGGCAGATTTGCCAG  
TCGCTGATGGGAGTACCATGACCAGCTGGCAACAATGCTGTTAGAGGGGCTTAAAGATTTACCAGCTCTTTGTTATTGC  
GGAAACAACGAGGCTAGTCTTTATAAAACAGTGGCGGACAGCAAATCAGTAGTACAGAAAACAGAATATTGGCTCA  
CGAAAAGAACACTGCGCAGACGCGAGGTGGCAGTTTATTTTATCCAGCAGGCAATCAGCGCAGCAAGCACGCCGCT  
GAATCCCAGCTTAATAACATTTGCGGTGTCATCAGCGCATAAATTTCTGCCGAGTGGTATCAATAATTGGCAATCA  
TCGAGCGGTGATGACGATGCCGTAAGTCAATATGAAATATTGTGACGCCGCGCAACCAGAATAAACAGGCAGGCCAGT  
GGTCGATTAAGCCATAAGAAAAGAGCTTAGTGTGAGGACAATTAATCACGCTGAAAGCGACGACCGGCATCGACAAGAA  
AACAGTACGTTATGACGGAATCCAGCGGCAGCGCTGCAACACCTGTTTAAAAAAGGCAATATTACGCGAGATAGAGA  
TATAAAAAGCGGCCAACAATAGCCAGCGGAGTAAATCAAAGAGGGTCTTTTTAGTAGGCGCTTCAACATCACGGTGT  
CCATCGAACAAAGTGCAGATATGCTCGCAAAGCAAATTAAGCCAACTTAAGTTCTTAAGGTTGGCTTTTATGTTTGT  
GGATTAAGGGGAATTAATCTTTGCTTATTGGTGCATCTAAGGGATACGGTTTTTATGTAGCCGGTGTAAATCAGCGCA  
TACATGGCGGTGATGACCATCAGGGTGACAAATGACCACATAACCTTTTCTGCTCCGACCCACCACGGCCAGATGCA  
GTAGAGGAAGGCAATGGTAGTAACTGCCAGATATGCCGGGCGTCTTTACCAAAGTGACCGTGTCCGAGCAGCAGTAACG  
CCGCACAGGTGAAAGATATGGCACCAGTGTAAAGATGACCGAGACGGAAGAAACAGACCGAACTCTTTGGTCCGCTTT  
GGTGAATGCTGCTGAGCTGGAAGATGGTCATCAAATACCGACGATAATCAGCCCCGCACTGGCGTACCCGCTTTATT  
TACACGGGCAAAAATCGGTGGAACAGTCCGTCATCGCAGCGGCTTCCGCGTTTGACCCGCGCAACGTCCAGCCGC  
CCAGTGAACCTAAGCAACCCGACGCTGCGCAGAAGGAAACAATGGCCCCGGCGTGTACCCAACGCCATCCGTGCGGCA  
TCACCGAATGGCGAAGCAGAAACGCGAGTGGCGCATTAGGGATCATCCCATAATCGCGGTGGTAGAAAGTACATAGCA  
AACGGCGGCAATCAATACCCACCAATGGTGGCGATAGGGACATTGCGTTTTCGGGTTTTTACCACACCTGCGGCAACGG  
AGGCACTTTCCACACCGATGAACGACCACAGCGTAAAGGTTACTTTGAATTGACCGAAGGTGCCAGGCCGCTG  
ACGTTCCATGCCGCCATATAGGTTTACCACGGAACCGAACCAGCCAAATACGGCAATCCCAGCATGGGGATCAGCGC



CAGCACGGTGGCAACTGCCTGCACACGGGTGATCATTTTTCGGACCGACAATGTTTCAGCAGGACGAAGATCCACAGCACCA  
CGACGCAGGTGATGGTTAATACCAATGGATCTTTCAGAATCGGGAAGAAGTAACTTAAATATCCTACGCCAATGACCACC  
ATGGCGATATTGCCGATCCAGCAGGCCAGCCAGTAGAGGACGTTGGTTTGATAACCGAGAAACGGGCCAAAGCAGCGGCG  
GGCGTAAGCGTAAGAACCACCAGGACTTGGGTTCGAGGAACGACATTTTTGGCGTATACCATCGAGAGCCCCAGTGCACCGA  
TAATCGTCACCAACCATCCATAAATGGCAATCCCGCCAGTAGAGGCCAGGTTTGCAGGTAACAGAAAAACCTGACCCC  
ATAATATCCCCGACACCATCAGGGTGACGGGGATTAAGCCCCTTTGTGAGCATCAGCATCCGAAGACATAATTAACCT  
CCTGCGAAGGCGAGCTTCGTGACAATAAATTACGTCATATCATACGCCTGCATTGATAGTTGAATTATTATCGACCGGG  
TTATCGCTGATGCCGTTATTAATATAGCTCTTCGTTAAGGTTAAAAATCAGGCGACAGTGCCTTCTGTGCTGACTAAC  
ATAATGCAGCGGCGTCATACCGTAGAAGTCTTTAAAGACAGAAATAAAGTACGACGACTGTTGTAGCCGAGGACTGTG  
ATACCTGAGAGATTTTTACCGTCCATCATTAAATTCATTTACGGCATAACGCATGCGGCAGGTGGTGATTATTTGGCTA  
TAACTGGTGTTCGCTTTCACTTTTTCTTTAACAGACTTGGGCTAAGACATAAAACAACCTGGCTACCATACTAAGATT  
CCAGTCTTTGTGAATATCGCTTTCAATAATTTGATAAACGCTGCTACTTACACAATTACGTAACATATACATCATTAAATG  
AAACGAATTTTTACTGTGAGAAAACGGGATAGCACCGTGAATAATAATGCGCGTGTTCTTTCTTTCTGACTCAGTT  
TCTGCGGGCATCATGCTGTTGCGCGCAACGCGAAAGACGCTGCGCGTCAGGCATGGCAGGGTGAGTATGGGCGTAGC  
GCTACGTTGCCATACTGTTAATTTGCGAGAGATCTTTATTCAGAAACCGGAGGTAATCTTTGATGATGCTGCTGACTAATAT  
GAGCAACCAAAGTGTGTTAAGAGAGGAGACGTCGATAAATATTTTACAAATTTAATAACGCCATATGGTTAGCTTTA  
AGGCTAATAGTTCCTTCCATTACCCTTATCCAGACATCTTTTCAGTCAATAAAACAATACAAGGTTGGTCGCTGCA  
AATCCTCATACATGACTCCTGAGTGCGAATAAAAGACCAGTTCTCGCTAAAGCAAAGCGATACCGGAAATGGTTATAT  
AATTGTATGATGAATATAAACATGCATAAAAAATAACGAGTTTTACTAATAGTACAAATTTTTATAGTAATTTCTCATGTA  
CATATTTTTTTACAGGATAAATAACAGGCAAAAAAAGCGGGGTGGGCGCGCAAAAAGTATGACATTTTTGTTTGC  
AGCAATTTTTATGAAAACGTTGCCATACTCAAAGGCCAAGGCCAGGCGGCGTAATGTTATTTAAACAATTACGCCTTC  
AGCGGAATAGTGGTTACGCTTTACGCACATAACGTGGTAAATACCGTCAATAATTTAGTCCCTCAGTTTCGTGTTCA  
AATCCAGGAAATGGTGGTCCAGGATTGCAGCGAGCGTAAATAACTTACTTGCGGACTGTTTTATCGCCGAAGTTTTC  
ACCAGACAGCAGCATCGGGATTCTGGCGGATACGGGATAACTGAGTTTCCCGCATGCGTCTGGCAGATTTTCAATGG  
ATACCAGTTGCACATTGTTGTCGACAATCGCTTGTACGTTACGCGGGGTGACTTCCGCCACCGGCAGGCCGGAATAG  
GCTTCGTTCAACCGTGCGCCAGGGTGTTCCTTTCAGCCAGGCAACATGGTGTACCCAGATCGTGAATCCCATGTT  
CGCGTAAGTGTAGGATATTGTTCAACAAGTTCGGCATCACCTGCGCCAGCGGTGTGTTGGCGTCATAGTGGCGTTTGA  
AGGAGCAAAGGTGTTAACCAGAGTTCCTTCCACGGGTACGCCATAGAGAACAGGAACATAATTTGGAAGTCA  
GTGGTGCGGTAGGTACAATGCCGTGGCGACCAAGCCAGGAGTACCCAGCGCCGCGGAAACCCGGTTCTTCCAGTTC  
ACCATTTACCCATTCCCGGAGCAAGGATGCTGACTTTAATCGGGTTCGAGCATACTCCAGTTATCCGGAATATCTTTGA  
AGCCGTGCCAGCTTTCGCCCCGATGCATTACCCAGCAGTCTGAACGGTGGTGCAGCAGTTTGGTTGGTGCCTCAGCAAAG  
TCATAGTTTTTCCGGTTTGTGGTTCGGTGCAGACTTCTTTGTTCCACGGTTTGAAGAACCAGTACCGTCAGCGGTGAA  
CTCTTTATATAGCCGCGCCATCGCCTGACGGAAATCAACCGCTTCGTCAATCACTTCTGTGTGATGACAGGCCGCTGT  
TGCCGTCCATCATCGACACCGCCACGTCGTTGGATGCGCAGATGGCATAACAGCGGGGAGGTGGTGGCATGCATCATGAG  
GCCTGGTTGAAGCGGGAGAAGTTAATCGCCCCACGACCTTACGTACATGAATATAAGAAGCCTGTGACAGCGCATTACAG  
CAGTTTGTGGTGGAGTGGTGGCGAAAACGGTAGGACCGTGTGATCGCCAGGTTCCCGCGCATGGCATAAGTATCGG  
CATAGATCGGGTTGAAACGTGCATAGCCGTACCAGGCTTGTCAAAGTGCAGACGATCGGAGGTTTTTCCAGCAGATCC  
TGCGCTTCTTAGCGTTATAACACACGCCGTATAGTGCAGTTGGTCCACCAGCAGTAAGACGGTTTTTCCCGGCTTT  
GTCTTTGGTCAAGCGGCTTCACTGATTTTCTTCAAGGTTTCAGGTTGCATTTCTGCGGATAGATTGGCCCGATAA  
TGCCGTACCGGTTGCGGCTTGGCACCATATAGACCGGTTTCCGCGCTGTGAGCATCAAACCTTGTTCGATGGATTTATGG  
CAGTTACGGTCAACGACCACGACATCGTTATCGGTATGCAAGCCTGCATGATGGTGCAGTTAGAGCCGGAAGTACCGAC  
GACTACCGACCAGGAGCGATCGGCACCAATACGCGTGCAGCATAATTTTTCGCTTTCGCCAAATGCGCCAGTATGGTCAA  
GCAAAGAACCAGGGAAGTTCGTTGATGCCATGTGCGTGCAGAACAGATTTTACCATAGTAGTCATGGTAGAAACGT  
CCGGCGGGTGTTCGTTAAACCAACGCCCTGTTGGCCTGGCGCTGCCAGGAATATTCATGGATGCTACTATATTT  
CATCAGCGCGTGAACAGTGGCGCAACAGTGTGCGGTTAGCGGGTATCGCGGCAACGGCGCTCCGGCGATAAAGT  
CGGCGGTATCTCCAGAATCCAGGCGAATTCATCGACAAGCTCCAGCAGGTGCGGATCCATTGCGGCGAGGGCTTTTTCC  
CGATCGCCCAACAGGAAGACCGGCACGTTTTTGTGGCGCTCATGAAGCTTACCAGTCAATTTGCTGACTTTTTGATGTT  
GTCCGGATGTTCCATTTGATAGCTGAACATCAGGCAAGTCAATGGCTTCGTTTGAAGAGAGAATGGCAAACCATCATCAA  
AGGAGGTGGATTTAATCACGGTAACATTTTGTGGCTTAAAGCATCTGCCAGACGCTCAACGGCGTTACCAGCCAGGTG  
TCTTGATGGAGAACTCGCTTTCAACAATTAATACTTTTATCATATTGCTTACCAGGTTATGAAGGAATCTTCGTTGCGGGC  
AAGTATCTTCCGGCTTTTCCGGCTGTAAAGCGCGTAAAAACAACATTTTTGAAATATTTAGTTTTATAAACAATACG  
TTATGTGATATTTTTAAATTTTTACTGCTTATTATCGACGGCTAAACTATTTTTTTGGCTGATACTGATATCGTCTT  
TAGCCGGAAACGCTTCCGGCGCGCTGTTGGCTAAGTTTGGCGTATTGTTGCGGCGACATGCCGACATATTTGCCGAACGT  
GCTGTA AAAACGACTACTTGAACGAAAGCCTGCCGTGAGGCAATATCGAGAATACTTTTATCGGTATCGCTCAGTAACG  
CGGAACGTGGTTGATGCGCATCGCGTAATGTAAGTGTTCATCGTCAATTGCATGACCCGCTGGAATATCCCATTTGCA  
TAGTTGGCGTTAAGTTTACGCTGCTCAGCCACATCGTTGATGGTGCAGCGCTGATCATAGTTTTCGGCAATAAAGCCAG

CATCTGGCTAACATAAAAATTGCGCATGGCGGAGACGCTGTTTTGTGTGTGCGGAGGTTTTATTGACCAGAATCGGTT  
CCCAGCCAGAGAGGCTAAATCGCTTGAGCATCAGGCCAATTTTCATCAATGGCGAGCTGGCGAATTTGCTCGTTCGGACTG  
TTAATTCCTGCTGCCAGCGGCGCACTTCAAACGGGCTAAGTTGCTGTGTGGCCAGTGATTTGATCACCATGCCGTGAGT  
GACGTGGTTAATCAGGTCTTTATCCAGCGGCCAGGAGAGAAAACAGATGCATCGGCAGATTAATAAATCGCCATGCTCTGAC  
AGTTTCCGGTATCTGTTAGTTGGTGCGGTGTACAGGCCAGAACAGCGTGATATGACCCTGATTGATATTTCACTTTTTCA  
TTGTTGATCAGGTATTCCACATCGCCATCGAAAGGCACATTCCTTCGACCTGACCATGCCAGTGGCTGGTGGGCATGAT  
ATGCGGTGCGGAAACTCAATCTCCATCCGCTGGTATTCCGAATACAGCGACAGCGGGCTGCGGGTCTGTTTTTCGTGCG  
TGCTGCACATAAACGTATCTGTATTATGGATGGCTCTTTCTGGAATATCAGAATTATGGCAGGAGTGAGGGAGGAT  
GACTGCGAGTGGGAGCAGGTTTTACCCCTTTCCAGAGGGGCGAGGGGACTCTCCGAGTATCATGAGGCCGAAAACCTC  
TGTTTTCAGTAATTTATCCATAAACTCAGATTTACTGCTGCTTCACGCAGGATCTGAGTTTATGGGAATGCTCAAC  
CTGGAAGCCGGAGTTTTCTGCAGATTCGCTGCCATGATGAAGTTATTCAAGCAAGCCAGGAGATCTGCATGATGTCTG  
CACCCAAAATTACATTTATCGGCGCTGGTTCGACGATTTTCGTTAAAAATATTCTTGGTGTGTGTTCCATCGCGAGGGC  
CTGAAAACGGCGCATATTGCCCTGATGGACATTGACCCACCCGCTGGAAGAGTCGCATATTGTGGTGCCTAAGCTGAT  
GGATTGAGCAGGGCCAGCGGCAAAATCACCTGCCACCCCAACAGAAAAGCCTTAGAGGATGCCGATTTTGTGCTGG  
TGCATTTGAGATTGGCGGTTATGAACCTTGACCGTGACTGATTTTCGAGGCTGTAAAGCGCATGGCTGGAACAAACC  
ATTGCCGATACGTTGGGGCCGGGCGGTATTATGCGCGCGCTACGTACCATTCCGCATCTGTGGCAAATTTGCGAGGACAT  
GACGGAAGTCTGCCCCGATGCCACCATGCTCAACTATGTTAACCAATGGCGATGAATACCTGGGCGATGTATGCCCGCT  
ATCCGCATATCAAACAGGTGCGGCTGTGCCATTGCTGCGAGGAAACGGCGGAAGAGTTGGCGCGTGACCTCAATATCGAC  
CCAGCTACGCTGCGTTACCGTTGCGCAGGTATCAACCATATGGCGTTTTACCTGGAGCTGGAGCGAAAACCGCCGACGG  
CAGTTATGTGAATCTCTACCCGGAAGTCTGGCGGCTTATGAAGCAGGGCAGGCACCGAAGCCGAATATTCATGGCAATA  
CTCGCTGCCAGAAATATTGTCGCTACGAAATGTTCAAAAAGCTGGGCTATTTCTGTCACGGAATCGTCAGAACATTTTGT  
GAGTACACACCGTGGTTTTAAGCCAGGTGCTGAGGATTTGATTGAGCGTTATAAAGTACCCTGGATGAGTACCCGAA  
ACGCTGCGTCGAGCAGCTGGCGAACTGGCATAAAGAGCTGGAGGAGTATAAAAAAGCCTCCCGGATTGATTTAAACCGT  
CACGGGAATATGCCAGCACAATCATGAACGCTATCTGGACTGGCAGCCGAGTGTGATTTACGGCAACGTCGTAACGAT  
GGTTTGATTGATAACCTGCCACAAGGATGTTGCGTGAAGTAGCCTGTCTGGTTGATGCTAATGGCATTACGCCGACCAA  
AGTCGGTACGCTACCTTCGCATCTGGCCGCCCTGATGCAAACCAACATCAACGTACAGACGCTGCTGACCGAAGCTATTC  
TTACGGAATAACCGACCGTGTACCACGCCGCGATGATGGACCCGATACTGCCGCCGTGCTGGGCATTGACGAAATA  
TATGCTCTTGTGACGACCTGATTGCCGCCACGGGACTGGCTGCCAGGCTGTTGCACCGTTAAAACCGGACTAAACG  
CTACTGCGCCGGGGATTTATTCGGCGCACACCTCTGACGATACCAATAACAGAAGGCGGGCGTTGGTAACAGCGACCC  
GATACCCTATGAGCATTTCAATGACTACAAAACCTCAGTTATGGATTTGGAGCGTTCGGGAAGGATTTGCGATCGGCATT  
GTGTATATGTACCTCATGTATTACTACACCGATGTCGTCGGGCTGTCTGTGGGTTTTGGTCGGTACTTTGTTTCTGGTGGC  
GAGGATCTGGGATGCTATTAACGATCCGATTATGGGATGGATTGAAATGCTACGCGATCGCGATGGGGTAAGTTCAAAC  
CCTGGATCCTGATCGGTACGTTGGCAAACCTGTAACTTATTTCTCTTTAGTGCGCATCTGTTTGAAGGTACTACT  
CAGATTGTCTTTGTTGCGTGACCTACATCCTCTGGGGCATGACTTACACCATTATGGATATTCCTTCTGGTCGCTGGT  
TCCAACCATCACGCTCGATAAACGTGAGCGGCAACAACTGGTTCCTTATCCGCGTTTTTTTTGCCAGTCTGGCAGGCTTTG  
TTACGGCAGGTGTGACGCTACCATTTGTTAATTATGTCGGCGGTGGCGATCGGGGATTTGGCTTTGAGATGTTCACTCTG  
GTACTGATCGCCTTTTTTATTGTTTCAACCATCATCACTCTGCCTAATGTGCATGAAGCTTTTCTGTCAGACAATCAACC  
GTCTGCTGAAGGAAGCCATCTGACACTTAAAGCCATCGTTGCGCTAATTTATAAAAAACGATCAGCTTTTCATGCCTCTGG  
GATGGCTCTTGCTTATAATGTAGCCAGCAACATTATACCGGCTTTGCTATCTATTATTTCTCATATGTTATCGGTGAT  
GCGGATTTGTTCCCTATTATCTGTCTGATGCGGGAGCTGCTAACCTGGTGACGTTAGTATTCTTCCACGCTTAGTTAA  
ATCATTATCCCGACGCAATTTTATGGGCGGAGCATCTATTCTCCGGTGTAAAGCTGTGGTGTCTCCTGTTAATGGCAT  
TAATGAGCTATCACAACGTCGTCCTCATTGTGATTGCGGGTATTTTGTGAATGTGGGAACCGCGCTTTTCTGGGTATTA  
CAGGTCATCATGGTGGCAGATATCGTTGATTACGGTGAATATAAACTGCACGTACGCTGTGAAAGTATCGCTTACTCCGT  
GCAGACTATGGTGGTGAAGGGCGGTTACGCTTTGCGGCTTTTTTTCATTGCGGTTGTGTTAGGGATGATTGGCTATGTAC  
CGAATGTTGAACAGTCTACGCAAGCCCTATTAGGTATGCAGTTTATTATGATTGCTCTACCAACTCTGTTTTTTCATGGTA  
ACGCTGATTCTCTACTTCCGTTTTCTATCGCCTCAATGGTGACAGCTGCGCAGGATCCAGATCCATCTGCTGGATAAATA  
TCGCAAAGTACCGCCGAGCCTGTTATGCTGATATTCGGTCCGTCAGTGAGTGATGTGAAAGCCTGACGTGGACAAT  
AGCTAACGAAAATGGCCTGATGCGATATGTTTATCAGGCCACGCTTAAATGTAATGCTTTGGATTTGCAAATTTGTAGA  
CCGATAAGGAATTCACGCCGATCCGGCATCAACAAAGCGCAAGTTGTTATCCGGTTATCAAGCCAAAGCGCCGTAGCT  
GGCGGAATGAAAGCGAGCGAGGAATATCACCGTCTTAAATGCGCAAGCAGCGCGAGAACATATCGGATTGCGTGTCC  
CACTGGTCGCCCTGGGTGCCGAGAAAATCATCCGCTCCCTGACCATTGCCAGCGCTGCCACCCTCGATTAATTCATA  
CATCGCGTTATCGCCAGCGCCACGCAGCAGACCAGGAACGCCACCATTTTACGTCCGCGCACGTACATCCCGCAACGA  
GAATTTCTCGTCCACCAGTGCAGGCACCAGCCCTGGAAAAGTCCCCAGCTTGTGCATACGGATTACGACTCAACCCC  
AGCCATTCTGCACCTCAAACCAACGGGACTTTCCGCTAGGTGTATTGTCCGCCGACCATCAGGATGATGGCGTGAAG  
GAAAATGAGCGTATAGAGCAGCGGCGTTAACGGATAACGTCTGGCGGTGGCAAGCAGTAGCTGCACGACAATAATCACCG  
GTGTCACCTCCATCAGCCAGGTGAGTTTGTGATGGGCCGAAATGCCGGTATAAATCAGGATTAACGTTAGCGTCAGTGCC

CTGGTGTAAAGAATTAACGGCTTGAGTGTGCGGGTCATGGTGAGTTCGCAAATCAGGGAAAATACTGACTATTACCAGC  
AAGCGTGAAATTAACAATCGCAAAGAGGTGGCCAGGGGGATCACCTGGCAGCATGCTGCCAGGCGCTGGGCCGAAGAGT  
TACTTAGTGCAGTTTCGCGCACTGTTTGTGACGATTTGCTGGAAGAAGTCGTTACCTTTGCATCGACCAGGATAAACGC  
CGGAAATCTTCTACTTCGATTTTCCAGATAGCTTCCATACCCAGCTCCGGATAAGCGACGCACTCCAGATGCTTGATGC  
TCTGCTGCGCCAGTACCGCCGCCGACCGCCGATGCTACCGAGGTAGAAGCCGCGTGTATGACACGCGTTCGGTAACC  
TGCTGACTGCGGTTACCTTTCCGACGATGATCATGCTGCCGCCGTGGGATTGCAGCAGATCCACGTAGGAGTCCATACG  
GCCTGCGGTGTTGGGCCAAGTGAACCTGATGGATAACCGGCAGGGGTTTTGCGCCGACCCCGCTAGTAGATCGGGTAT  
CTTTGATGACTGCGGAAGTCTTTACCGGCGTCAATCAGCTCTTTCAGCTTGGCGTGTGCAATATCTCGGCCACGATA  
ATGGTGCCGGTGAGCGACAAACGAGTGGATACCGGGTATTGCGAAAGCTGGGCGAGGATCTCTTTCATCGGGCGGTTAAG  
GTCAACTTTACCCTTCGCTTACCAGGCTGGCGCAGTTCTTGTGGAATGACTGGCCTGGGTTGTGTTCCAGTTTTT  
CGATCCAGATACCTTCGCGGTTGATTTTCGCTTAAATGTTACGGTCAGCGGAGCAGGAGACGCCATGCCGACCGGGCAG  
GATGCGCCGTGACGTGGCAGACGGATAACCGAATGTCGTGCGGAAGTATTTACCGCAAACCTGCGCGCAAGACCGAG  
TTTCTGGCCCTCTCCAGCAGTTCCTGTTCCAGCTGGACATCGCGAAGCCCTGACCATGTTCCCTTCCGTGCGCA  
GTTTCATCGTAATAGTGAGCGCTTCTAACTTGACGGTTTTGAGTTTCCGACGAGGAAGTTTTTCAGTTTCCGCGGAGT  
ATATGGTACGGCGGGCAGTGCAGTACCGAGGTCAGCATTCTTCGACGAGGAAGTTTTTCAGTTTCCGCGGAGT  
CAGGCTTTGGTTTTCTGGTAGAGATACGTTTTGTTGGCAGAGCCCGCTTTCGCAACGCAAAGGAATTTGACTCAT  
CGCCATCTACCGGTACAGTTCGATTTGCGCAGGACGTTAGTGGCGGTGTTGACCTCTTTGTACATGTCAGCGCCGCA  
TTCTGTGAATAGCGCAGGTTATCTTCGATATAGGTGTTATAGACGCCCTTTCGACAGCGTTTTCTTCATCACCGCCGCGT  
CCACACGCGCTGGCCTTTTTTACCAGCATGATCGCGGTGCCGATCCTGGCAGGTCGGCAGCACGCTTTGGCGGCGA  
TTTCGGAGTTTCTAAGAATTGCAGCGCCACGACTTGTGTTTTGCTGGCTTCTGGATCGTGAAGAATAGCCGCAACC  
TGTTTTCTGGTGTGCCGGGCGGAGCATAAAAGAAGCGTCGTGAAAGGCTTGTGCGCCAGCAGGGTCAGGGCTTCTGTTT  
CACTTTAGGATGTTTTGCGCTCGAAGTCGGCAACGCTAACGTAATCGGAAGTGAAGTAGATAGTATTCGGTATTGCTT  
TCCCATCGGAAAGGTGCTGTTAGATAAAGGTTTTGTTGACATAGCTTCCAGCCTGTAACCTGTATTTGTTATTCG  
AAAATGGCGTGCCGCTAGTCACGGGCGCACGCAAAGTGCATTTATAAGAACCCTACATCGCGGCAAGATCCAGCCG  
AAGACGCAGATACGCTCACACCAATCAACCCCGCAGAATAAAGCTGTGGTTGATGACGAAGCGACCGATGTGGTGGT  
GCCGGAACGGTCAAACCTGAATCGCTGCCAGATCGCTCGGATAAGTCGGCAGGATGTAATAACCGTAGCAAGCCGGTGTG  
AAGCCACGATGTATGCCGGATCAACGCCGATCGCCAGCGCACCAGCAACAATCGCCGCCAGCGCCGACGCTGAGAGTTT  
ACAACTTGGAAACCAGCAGCAGAACAATGGCATAGGCCACGGATACTCTTACCATTTCACCCAGTACGCCCTGAAT  
TTCAGACATATGCCACCGAACATGGTTTTCTGCCATCCATGCGATACCGTACACCGCCACGATGGCGATCATACCGAAC  
GGAAGACTTCTTTTTGAGATAGACGCGGGATTGTTTTGGTCAGGATAATAATCAGCGCCCCGGTCAGCAGCATAAAC  
ATCTGAATAACCAGTACCATCGACAGCGGTTTTGCCGCCGAAGGATGGACGCAGGTCCGAATCAGCACCAAGAAGGGCGAC  
TACAGCGATTGCCCGAGGAAAATCCACATTGCCAGCCAGTTGTTTTGCGCAGTTTTTTATCCAGCAGCGTTCGCGGTAT  
CACCGTAAACATACTACGGTTTTCCGGTACGGAGATGAATTTCTGGAACCTTCTGCTTTTATCCAGATCTTACCAGCGG  
AACCAGCTGAAGATACCGATCGCCAGGATACCGATTAACGTCGATGGAATGGTATTGCCAGCAGATCGAGGAACTCAAG  
ATGGCGACCATCAAAGGTGACATTACCAGCATCGCAACCAGAGACACGACCGCAACCGACACCGGACTGGCGATAATCC  
CCATCTGTGCACCGATAGAACTTCCGCCATCGGACGTTCCGGACGGATGTTGTTCTTAATGGCGACGTCGTAGATGATC  
GGCAGAATGGTGAACCACATGACCCGTACCGCAAAGAATGGTCAGTGTACAGGTCAACAACGGCGGACAATTGAGAC  
ATATTTGCGGTTGCGGCGCAGCAGCTTCTCGGCAATTTGCAGCATGACATCAAGACCGCCGAAGCTTGAAGGTGCGCC  
ATGCCGCCACCACCGCAATGATAACCAGCATGACATCAACTGGTGGTTTTACCTGGCTGAAGGTGGAAGACGAAGACCAGA  
ATGACCAGACCGATACCGCTAATAAACCCAGCGGATACACCCTTCTGGCACCATAAAACAGACATATCAGTATTAT  
GATAAGTTGGATAGTAAATAACATGTGTGAACCTCGCGATAATCCTATTTAAATTTTTGCTGAATAGATCACAGTACG  
TTCTGTTTTGTATGAACTGTTTTAGAGCCTGACTAAATATCCGTTTTGGTCTTACCAGCTTTAGCAAATACCTCACAGT  
GAATATTGGCTGATTAAGCAGCGCAAATTTATGCACTGTGATAAGCGGTTTTTTCAGAGAGAAAGACTCTCTGGCGAT  
GGGTTTATAGTTTACTGCGCAGATGTTAATGTTTTGTTGCTGTTATCTTATTGATATTTATCGGTCTATTTTTGTT  
CTCAGGGCAGATGTCATTAGGTTTATAGATTAATCTGATCTACCCATTTGTTGGGTAATAACACATAATGCGGGTGACA  
TAATAGTTAATTAACTTTTGTTAGCGTTTTGAAATTAACACCGTTACCTGAAGAGATATTAATTTTTAGCGATGAT  
GGAGGATAATTATTTGATCTGGCACAAGTTTTACTGATGAAGGATGTAACTTGTGCCAGGGGATTTTTGCATTACGG  
TAATAATTACTTACAGATAACCAGCGATCCGTTATTGGCAATATTGTTTTCAGTAGTGAAGTGTCTGCTGAATA  
CGGTAACGGTAAACTGGACGCCCGTACGCCATAATGGATACTGGTGAACAAGATGTGGCAGTTGACCAGCCAGATGAG  
GTATTTACGGCAGGAAACACGCAAAATGTTAACCTCGTTGGCTAGCTCGTGGTTGAAAATTCATAGTCTGATGCGCGT  
CAATCCACTGGCACAGTGTGCGTAACGCTCGCGGCTTAAAGCCTTTGGCAAGCGACGAGGATCCTGTTCTGTTGGAGCTG  
CTGCCGTGGATTAGCTGATCAAGCTCGGCTGGTCAATAACTGATGTTTTTCCAGCGCCATTTCTTTTGGCGCCAGCC  
GGTGAGCGCTCTTCAAAGCGGGAAGCTGGAAGGGTTTATCAGGTAATCCACGACACCGTAATGCAGGCAATCTTTAA  
TGTTTCCGCATCGGCTGCCGAGGAGATGACAATCACATCACTTTTGAACGCGGTTATGCAGGACAGGCAAGTAAATCG  
AGCCCGTTCTTTTTGCATATAGATATCGAGCAATATCAGGTCGATAGGCGTATCGCTATTGAAGATAATCTTTGGC  
TTCTCCAGCGTGCAGGCTGTTCCACAGCATTGAAAGCCTGGGATTTGTGCTACGTATCGGCGATTACGCTCCGCGACCA

TTGCGTCGTCATCGATAATTAATACATTGATCATCTGTTGACCTCTCCCCGTCCCAGGGTATCTGGACAAAAAATTGTG  
TGAAAAATCCCGGGTCCGATTCCACGGCGATGCTGCCGCCGAGATTTTCTACCTGTTGTTTGACAAGTGCTAAACCGACG  
CCTCGCTCGTTCCTTTTGTGAGACACCTTTGTCAAAAATGTGATCGATTTTATCGGGTGCATCCCCGGTCCATCATC  
ATTAAC TTCACAGTGCAGCCAGCCGTGACGGTAGTGAATGTTACGCTAATTTGCCTCCGGGTTCCGGCCCTAATGCCT  
CCAGCGCGTTTTCTATCAGATTTCCCAACGTGGTAATCAGCGTCGCGACCTGGTCTCACTGCCGCTGTCTGGCAGCTGG  
CTTTCACTGTTTTAAAATCAGCGTATGGCCTAAATCGGTGCGCGGTTAATCTTGCTGATTAAAAAACCAGCGATAACCGG  
AGATTTGATCTTACCAGCAGAGAGCCAACTCTTCTCTGATAGTTATTGGCTGTTTTGAGAATGTAATCTTCCAACCTGCT  
TATAACTCTTCAGATGCAATAATCCGAGAATCACATGCAATTTATTATAAATTCGTGGGATCGTTCACGAAGTGCGTCA  
GCATAGTTGACCAGACCGTCGAGTCGTCGATCAGTTTACGTAATTCAGTTTGTCCCTGAAGGTTGAAATGGCACCAGT  
GATAACGCCATTACTGCGCACCGGAACGGTGTGATCAGTAATAGCCGGTCTTAATCGTAATCTCTTCGTGCGGGCGCG  
GGGTACCGTCGCGTAACACTTCCGAGACATCTACCACCTGTGACCATGAGTGGCTTAGCGTCGACAGTTTCTCATCGTCC  
TGCGACTTACGGTAATTCAGCAATCTTGTGCGGCATCGTTGATCAGCGTGACCTGCCCGCATCGTCCACGGCAACGAC  
GCCTTCTTTGATAGACTGCAACATGGCCTGGCGTTGCTCAAACAGCGTGGAGATTTCTAGGGTCCAGGCCGAAAAGGA  
TTTTTTTTCAGTACCTTAACAGAATGCAGGTGCCAATCAGTCCGACCAGCATGCCAATAATACCGACCAGATAATGCTC  
CAGCGACTGTCATTGATCTGTTGGTCCACCGCTTAACTCAAGCCGATCGCCACCAGCCAATTTGTTATGATTTATGTTTT  
ATCGTAGATGGGGTAAATACCGGTAAGCCTGCGCCAGAAAACCGCGATTGATAGCGACATTTTTCTTCCGATTCAGCG  
CTTTAAGGATGTCATCACCTTTAAATGGCTGACCAATACGCTGGGCTTCAGGATGCGAGTAGCGAAGACTTTTGCATATCG  
GTAACGACAATAAACAGCAGATCGTTGCGTTTTGCGTACGGCTCCGCGATGGCCTGGATGCCACTCTCTGCGGTTTTTT  
CTGCAAGCCCTGACGATTTCCGGCGAGTCGCGGAGGGTACGCGCCACTGCCAGTGCCTTGTGGCTAGCCCATCTCGCG  
TCATATCACTGATTTGCGAGAAGTAAATCAGATGCACCACCAATAGCACCAGAACAGTACCGCACTGACCATTAAGATC  
ACTGTGGTACTCAATTTTCATCGACGTTTGCCTAACATGCGGTAGGGCAATGAATGTCTCATCAGCTTCTTGTGTGACA  
AATTTCTTAAGCATTATCTCTGATGAGGCGGTAATCAAAGGGAGTAAAGATGATTGGCTATATAGGGGAAGAGACTCT  
GGCAACGAAACTGCCAGTCTGTATGAAGATTCGGGGCTATGCTTATAGCGATAATCATACTGATGAGAGAGGGGAAGG  
TCATGGATCAGGCGCTACTGGACGGGGTTATCGCTGTTATACCGGCGAAAAGATCGATGTCTATTTCAACTGCGATA  
TGTCAGCATTCTGGCAATTGCGTACGTGGCAACGGCAAGTTATTTAATCTCAAACGAAAGCCGTGGATCATGCCGGATGA  
AGTCGACGTCGCCACTGTGGTTAAAGTATTGATACGTGCCGAGCGCGCGCTGAAATACCGTCATAAATAAGCGAGGG  
TAAAATGGAATACGCGAAGGCCACAATAAATTTTACATTAATGACAAAACAGCAAGCAAAATCGCTGAAATTTGCTTTG  
TGCCGACCGGAGAGAATTTAGCGATTATCGAACATACCGATGTGATGAAAGCCTGAAAGGGCAAGGGATTGGTAAACAG  
CTGTTTCCGAAAGTCTGGAATAAATGCTGCGGAAACGAAAATTTATCCATTATGCCATTTGCGAAACATGAATT  
TGATAAACGCGGGAGTATGATGATATTCGCAGTTGATGGGAGAGTACAGAGTACGATATTTTTTCACTCTCCGCGAT  
GTGATGAGGAGAGCATCTGAAGGGTAGGGGATGCACAAAGAATGGGCAGAGAGCGCGTTTTTTTTGTCCCAAGTCATCC  
CCTTTACTGAGCAAAAAAGAATATCTCTATATGAGAATCATCAATCGGGGTTAATAAGTTTTGCGTCCCAGAGCGT  
TTAATATTGATAGGAGTCATATTATGGAAGGTA AAAACAAGTTCAATACTTATGTTGTTTCTTTTATTATCCATCATCT  
TATTCCTCAGTGTCTTAAGATTAAGATCATTGATGTATGATGAAATTTCTCTATCGTGGCTGATGAATATGGGAT  
ACCACGACAATTGAATGAAAACCTTTCGCAATAACGACATCGTTAGCCGCAAGTGAATCGAAGATTTAATCAGGCTCA  
AATGCTTAGACTTACCGGATATTGATTTTACCTCAACATTATGACAGTTGATGACTATTTCCGTGAGTTTTACAAGTAG  
CCAGGAAGGATAAGAAGAACATAAAAAATGGCACTATTCTCTAAAATATTAATTTTTTATGTGATTGGTGTGAACATATC  
CTTTGTCAATATCTGTTTTATCTCACATGAGAAAACACATATTCGTTTACTTAGTGCATTCCTGGTCCGGAATAACCTGGC  
CAATGAGTCTGCCTGTGGCATTACTTTTTCTCTTTTTAGGAGCTGTAGTTGAGTGGACCCGCTGGTTATCGTGAACG  
AAGCGTCTCTCTCAAACCTGGATTTGCGGAACGATGAACGAAGCAGTGCCTGACTGCTTCGTTTCAATAAAGTGAAT  
TATTTCTGTGGGCGCATCGCCGGGAAGAGAATAACGTGCGCAATAGTATGGCTGTTAGTAAACAGCATAACTCATTCCGTC  
GATACCAATACCCAGACCAGCGTTGGCGGCAGACCATATCCAGCGCAGTACGTAATCTTCGTCATAGAACATGGCTT  
CGTCGTCACCTGCAGCTTTAGCATTAACTGTTCTGGAACGTTGACGCTGATCTTCTGCGTCGTTAATTCGCTAAAA  
CCATTACCGATTTACGACCACCGATGAAGAATCAAACCGTGGTGGTATTCCGGGTTAACATCATTACGGCGTGCCAG  
CGGGGACACTTCTGCCGATATTCCGTAATAAAGTTGGTGAATCAGATGTGCTTCTGCCACTTCATCAAAGATCTCTG  
TGACAATACGTCCCAACCCCGCTTTCTCTACCGTAATACCGATAGATTAGCTAATGCTTTAGCAGCATCAAATTA  
TCCAGTTCGGCCATATCGGTTTCTGGACGATTTTTTTGATTGCTTCGCGCATGGTGGTTTTTCAAACGGTTTCCGAA  
ATCAAACACATGCTGCCATAAGTACTTTAGTGGTACCCAGAACCTTGTGCCAGGGTGCAGAACAGTACTCTGTCA  
GTTCAATCAAATCGTGGTAATCCGCATACGCCATGTAGAGTTCCATCATTGTGAACTCAGGATTTAGGCGAACAGAAATA  
CCTTCATTACGGAAGTTACGGTTGATTTCAATACCCGTTCAAACCGCTACAACCAGACGTTTCAAGATACAGCTCCGG  
CGGATACGCAGATACATATCTAAATCCAGAGCATTATGATGGTAATAAACGGGCGAGCAGATGCCCCACTGGAATTA  
CCTGCATCATCGGGTTTTACTTCCATAAAGCCGCGCGACCATGAATTGACGGATAGCGGCCAGAATTTTTGAACGG  
ACAACAAACGTTTACCGGATTTATCGTTAGCGATAGGTCCAGATAACGTTGACGATAACGGACTTCTGATCCTGCAG  
ACCATGGAATTTATCTGGTAAAGGACGTAGTCTTTAGTCAGCAGGCGCAGCTCAGTACAGTGAATGGAAGCTCACCCG  
TTTTCGCTTTAAACAGCGTACCGGGGACCGGATAATGTACCCAGATCCCATTTTTTAAACTGATCGTTATAAACACCT  
TCTGGCAGGCTATCTTGTCAACGTACAGTTGAATACGGCCACCGACATCTGCAACGTTACAAAGGAGGCTTTCCCAT

GATACGACGGGTCATCATTTCGGCCAGCAACCGAGACTTCAATGTTTAAAGGATTCCAGTTCCTGGTTATCCTTCGCATCAA  
ACTTTCGTGCAACTGGTCAGAGGTATGGTCGCGGCCAAAATCATTGGGAAACGCCACACCTTGTGACGTAGTGCCGCC  
AGTTTTTCGCGCGGATTTCTCAGTTCATCGTTAAAAAACAATAGCCTCATTGGCTCCCCGTGTTTCTTGTTCAGACATTTT  
GGTTCCTCTAAATCCAGCTTTCAATTTAGCGTAGATAAAGAGACAGATCGGTACTGTATTATCTGCCTCGACTATTAG  
TAACTCAGTTTATCTTATCGAAACTAACGCTTACCTCAAGTTGATTATCACTAATAAATAACCATCAAAATGGTTTAAATG  
ACTTATTAATCTCGATTTGTTAGTGTTATAAACTGAAAGTTAATTTATTTCATAACCAATTGTTTTACGACAGTTAATCG  
TTGCTCTCCTGTATCATATTCGTGCGCGTGCTAAACAGAAAACGGGTAGCAAAGGCCAATACGACGATGATCGCGACACA  
AGCCAACGTCCACTCTCCCATCTGAGAAAAGAATCGCTGGTAAGCTGCAATTGCCATACCGCTAATTTGCGACTCTGTCTG  
TCTGCTGTGCCACGACGCTGCCAGCCAGTTGGCGACCGCGCCTGTTGCCAGCATATAAATCCCGTTAATACGCCAGAC  
ATTTTCAGACGCGTATTGTCGCAATCGCCACCGGGTCAATAAAGAGTTCGGCAAAGCCCATTAGCGCCAGCCGGATAT  
CATCAGCCCCATTGACGCTTACCGTCAGCCGCTGCATGTCCGGCATCAAATGCCAACACATAAAGCCACAAGCCATCA  
GCAGTAAGCCAAAGGCAAATTCAGCCAGACGCGCAATGTTGAGTTGCCGCGGCTTTCTGGCGACGCCAGCCAGGCCAGT  
ACAACCCAGCGAGCATCACCGCAATTGCATTACCCGACTGGAATAGTGTGTAGGTACTTCAATATTGAATGCCTGACG  
ATTCACAAAGCGATCGATAAAACAAGCTGATGGTACTGCCGCCCTGTTGTGCCAGTACCCAGAACAATGCTCCGACAAACA  
TCAACAATACAAATTTGCCAAAAGAGCACGGCGATGTTCCGGGAATTTGATCATCATGCGGGCAATGATTTGTGCGGCAATG  
AGGCAACGATCGCCAGCAAATATCCGGACCACTGTTCTCCAGCAGCAGAGTAAAAAATACTGGGGCTAAACAGAGCAT  
CACCATAACAGCTCCATACTGGTAAGGCAAATTTGACACTAGTGAGCGCTTTTTTATCCATACTACGTGTGGACTGGA  
AATGACGATGACCGCTTAAGAAAATCAACAAACCGATAAAACATGCCGCCACCCGCAAGGGCAAAGCCAACATGCCATCCA  
TACCACTGAGCAGCCAGGCCGAGGCGATTGGGGCTGCGATAGAACCATATTGCCCGCAGCATACAGCAGCGAAAAACC  
GCCATCAGTCGATGATCGTTCTCGTCGTAGAGCTCGCAAGCAAACAGCTGATGTTTGAATTAACCGTAGCCAC  
AAATAATGATTGCCAGCGCCAGATACAGGCTAAAGTTGAATTTGTATCAATACCCAGCACCACATGGCCAAGGGTCATT  
AACAGCGCGCCGCAATCACTGCAGTGCAGTTGCCGAGCAGCGGTCCGCAAGCCAGCCGCGAGAATAGGGGTAACGTA  
AACCAGAGAAGCATATGCGTGAACAGGCTGATGGCATGGTTATCATCAAACCAAGCTGATGGGTGAGATAGAGAATGA  
GTAAGGCACGCATGCCGTA AAAACTGAAGTACTCCAGATTTGGATCGCCACGATATAGTATATCGCGCGCGCTGTGAG  
GGTGTTCATGTGTTCTCCTTATGAGCAAAAAGGGAAGTGGAAGCCACTTCCCTGTACGAGCTAATATTTTTTGC  
TTTTCTTTCAATACCTTAACGGTATAGCGGCCATCAGCCTGACGGTATGCACCGTGAATATCGGTTTCAAAGCCCGGA  
TAGTGAGCGCCGATTTACACAGCATCTGCAGGAACCCAGAACCAGGACGGCTTCTTCGGTGATCATTTACCCGGCAT  
TACCAGAGAACTCCCGCGGGTACGGAAGGATCATATTGGCGTTAATACGACCTACCATTTCTGTCGAGGTAACCTTCTT  
CGTTCATACCGTGCAGCTCTTTCTGGAATGCAGCATACGGAGTATTACCATCTCGGCAGCACTTCAAATGCGCGATAC  
ATCAGATCCGGCAGATTGTTGGTGAACAATCAGTTTGTGGATATTCTGAGCCAGTTCTGAATACGCATGTTTTATAGAA  
TTCAGGATCTTACGATACAGAGACGGCAGCATGTTTTACACCGCAGGTTCAAGTTCGAACGCACGTTTAAAGTCAGTCA  
GAGCACGCAGCAGGCTCAGTGCTTTGGTCTTATCGATACCGATGCTGAACAGGAACAGCAGGTTATACGGACCGTTTTT  
TCAACAACGATGCCATGTTCTGTCGAGGATTTTCGCCACGATGCTGGCCGGAATACCAAAGTCGCTCATGGTGCCGCTTT  
TTCCATCCCCGGAGTCAGCAGGGTGACTTTGATCGGGTCAAGATACATGTGCTCGTTATCGATGTTTTGAAGCCGTGCC  
AGGTGCTGTGAGAACGCAGCGGCCAGCATTAGTCTGATCGATATGATCCGGTGCATACATCAAAGAACCAGCCATCA  
GATTCGGTTCTCAGACGTTTGATCTCTTACGGAATTTGATCGCACGTTCAATAGAACCCTGATCAGACGCTTACCTGC  
ATTGCCTTTCATCATCGCCGAGCGGTTTCAGTGGACGCCACGATACCGTAGTGCAGGAGAAGTGGTGGTGTGCATCATGT  
AGGCTTCGTTAAAGGTTTTCTGTTTACGTCACTTTAACGTGGATCATGGAAGCCTGAGAGAACGCCCCAGCAGTTTG  
TGAGTGGACTGGGTTTCGTAATCACTTTCCCTTACACGGCCACCGCTCATACCGCATTTACCTTCGTAATTCGGTGA  
GAAGTTGGTGAAGGCACCCAGCGGGAGTCAAAGTGGATGGATTTACATCCAGTGTTCCTGATGAAGTCCGTTGTTG  
ACAGCAGACCATCATAGGTAGAGTTGGTAATTACAGCATGTACCGGCCAGGTTGCGTTTGGTGTTCCTTTCACGCGCTTA  
GCAATGGTAGCGTGCTGGAATTCCTCTGTGGGATACCACCAAGAATACCGTAAGCGTTACGGGTCCGGCGGAAATAGAT  
TGCGTAACATCGCTCATCATCAGGTGGGTGAGGATTTGTGGCAGTTACGGTCAATCAGAATGGTGTGCTGCTGCTG  
GAGCAGAGTACATAACCAAAATTTGTTGCGAGTGAAGTACCGTTGGTACCATGTAGCTGCGGTCTGCGTTAAAGACG  
CGAGCGATATACTGTTCTGCTTCTTTGTGTTGACCCTGTGATCCAGCAGAGAACCAGTTCAGATACTGAAATGAAAT  
ATCAGATTTTCATGGTATTCGGACCAAAGAAATCATAGAACAGGCTACCTACCGGGCTTTTCTGGAATGCAGTACCGCCA  
TGTGACCAGGAGTACAGAAAGTATATTTACCTTACGAACATATTTAAACAGTGCTTTAGTCAGCGGAGGCAGAATAGTG  
TTGATATATTCGTGAGTGGTCTGCTTGTATTTAGCAATATCTTCAGCAGCACCCAGCGCATATTCAAAGAAGCTAAT  
CTGTAACGCAGGTCATTACGGCTTACATCGAGAGTGAATACGTATTAGCGAACCGTACAACGGCAGGTTCTCGTTCA  
TTTTGCTAATTTCTTCGCACAGCTCGAGATTATTTATCCAGTCAAAAATAACGCCGCACAGACGCGCATTGTTTTCG  
ATCAGTTTTAATAAGTCGTACGGTCTGCGGTAACAATCTGGAAGTTTCAGACGTTCAAGCGCGGATGAAGTTCACG  
GATGGGTTCTTCTTAAATAAACCCCATGTGATTCAATATTGCAATAACGTTTCATAGTCATATCTCCAGTAAAAAAG  
GCCCTCCCAACATGGGACAAAATGAAAGGAGGAGCCTCGGAAAATACTTTAATTAATGTGCGTTAGACGCGGTGTG  
GTTATCCATTGAGTGGCTCTGGCGCTCGTGATTTTTCGAGCGTGAACATCAGGATAATCAGGCTGACGATGAAGGTAC  
CTGCCAGCTCGAAGGAGCTTGCGCCATCAGCGGATGAAGCAGAACACGCAACCCAGTACAGAGCAGATCAGGCTGACA  
AAGTTGCGGATGTTAACGCCTTCAAACGAATCAGGTCAACGCAAGAGTAGAAATACGGCAGCATAGTCAGCAGTACTGC

GATACCGGTCAGTTCACCGAACAGGTGAGATGCTTTACCACCGGCAGAGTTCATCAGAGTGATAAGGATCATCAGGGCAG  
TCATTTTCACTGCAGCCAGCAGACCTTTTTTCGGAATACCGTTGCTGTCGACTTCACCATAAACTTTTCGGGAAGTTA  
CCGTCGTTAGCGGCACGTACACCTGCCTGGCCTACCAACATCATCCAGGAGCCAGAGAAGTCAGGCACGCAAAGGCGGT  
GAATGCAGAAACCAGCGGCAGCCAGTTACCGAGGATAGTTGAAGCACTGATTGCAAACGGAGCACCGGAAGCCGCCA  
TTACAGAAGACGGATACATACCGGAAAGCACCTGAGTCGCAGCGATGTAAACAATACCTGCTAAACCAGTACCCAGCATG  
GTTGCCAGCGAACGGTACGTTTCGGGTTTTTAACCATACCAGTACTTACAGCTGCGGATTCAACACCCACGAAGGCCCA  
CAGGCAGAGCAGAATACTTTAATGATCGCATGACCATCAGTGGTATCCGCAGTATTCCAGTTAGCTGCATAAGTTGCCG  
CATCAAACCAATGCCAGCCAACAATAGCAGTCATCACCACAGGAATAAGAACCAGCACCAGACCAATAGTGGTTAAACGG  
CTTACCCAAGTACCGCCGAGCATATTTACAAAGGTAATAACCCAGACGATAGCAATACAGGCGATACCCGCCGGAACAGG  
ATCATTTAATACTGGGAAGAAGGTGGAAGATAAGATACAGCGGTAATACCAATCGCCAGGTTACCAATCCAGTTAGCAT  
GGTAATAAAGAACACCTGTCTGAAAACCAATGCAGGGGAAATTTCTCCGGCATAAGCAATTGGGCCACCTTGTTCGGG  
TTTTTTGTTGCCAGTCGGGCATATACATACGCCAGCGACATTGCACCAATAATAGAGATAATCCAACCCAGATAGCAAT  
ACCACCGATACTTGTAGTTTCGCAGGTAATAATGCAATACCGCTCCCATCATATTACCGGCAACAACCCGGTACAGG  
CAAATAGCCGATCTTCTTGGCAGAACTCATGCTCTTCTCTAATTTTCAATTTTGAATTTGGAGTCCGGGTATGATGTA  
TAACTATTTCTGACCAGACCAAACCTGGCGATAAGATTACTCACGAAAAAGGATTAATCCTAAAGATTAGTGAATAA  
CACAAAAGTTTTCTGTAAGTGAGAACTTGAGTTTTTTTATTAACACATCAGGATCGCAAGTTGATATCATGAAAAGATAA  
CATTTAATGTTTTACAATGGATTGCGTGACATTCTCTGGTTAAATTTATGTAATAAAAAATTATGCGGCAAAATAAATTGCCG  
CAACATATTATACCAACAGGAACATACAAAACTCAACAACAAATATTTCCGAGCATAAATCAACCCGGAGTTACTTATT  
CTGAAGCAAGAAATTTGTCGAGATAAGGTACAACATAAGGAACAGAAGTCTGGAATATACCATTTTCAATCCAGTAAAGG  
GTGTTTTGCCCTGGGCGTAAATTAAGGCGGTGAGATATGCATCAGCTGCTTCCCGTTTATCCCCTTATTTCATAAAC  
CTTGCCAAGCAACACATAATTTAGCCAGGACATTTCAAGATCAATGCCAGTATTTATCGCCTGGTAAGACTCATCTGTTT  
TACCTTTTACCAGAGCACTGACCGCTTTTATTTGATATATAATGGACAGGTTGTTCAATCCGGCAGTGAACAATGTTA  
TCTATTTCTGTGTTGAGTGTGCTAATGTTTTTCTAATAAGGATGTTGAGAATGGCGCACGATATCAACTAATGCTTT  
TTCTGCTCTCGCTAGGTAATTTCTGGGATGATTGAACAATCTCACCTAATAATTCACTGGCACGGTTCAATGATTTAT  
CATCGCCATGCAGTAAATAATCATGTGCCTGATAAAAATTAGTTAATAACGCACCACGATGCGGCAAAATTTTCTGGAGC  
GTCTCCTGCATTGTTGTTGGCCACGGTTGGTTAACGCTTTTGTAAACTCTCCAGTAAATCATTTTGAATCGCCAGCTG  
ATTACCGTTAGTGATGACATAACGTTTATCCAGCATGTTGAACCATCTGCATTGTCTACCAATTTTATCGACATAAAGC  
ATTGTTGAGCACGGTATTGGCGCTGATTAACAAACGCAATAGATAATGTTTTACCGGAAGTCTCGGTTTCAATGTTG  
TAGTTGATTTTGTATGCACATAAAGGTGGAGAAGGTGTTAAGTGATGTCGCCACCAATCACCCACGCTATCGCGTA  
AGAGAGCTGATACGGGAAGTCCAGCTGTTACAACCTTTATTTACCATATTAATGTCAATATCGCGTGGATTGAGCAAAA  
TACGCGATTTGCTCATAGGAAGACGTGTATCAAGACTTGAAAACGCTACCAGTGTACACAGATACCTAACGACAACAGG  
AAAAAAACCATACCCAAAAGGTAGTGAATCGTTTGCTTTTAACTGGGGATTGTTTCAAGGTGGCGTTGCGGTGTTTTGAAT  
GTTAAGACTGTGGGAGGGAGAATCTGTGGCAGGAACCGCTCTGGTATAGGGGGAGGCGAAGATAGCATTATTTCTCTC  
CCTCTTCTCGCTGTACCAGATAACCGGCACCATTAATTTATAGCCGCGCTTTGGTACAGTAGCGATATAGACAGGACTA  
TCTTCATCATTATCTTTAATGACTTACGTAGTTCTGAGATACTCTGCGTCACAACGTGATTGGTGACAATACTTCTCTT  
CCAGACATTATCGATAAGTTATCCCTGCTAAGTACTTCGCCACTGTGTTGAGCAAAGAAAACGAGAAGATCGATTAATC  
TCGGCTCAAGGTAAGTTGACGCCATTGCGGCTAATTTGGTTTATGGACGGAGTAACAAGCCATTGCAACGCGAACT  
ACAGGTTGTTGCATAATAGAACTCATTGAAAAGGGAATGATGCAATGATAATTGCCACAACCTATTTTACCATCTAT  
AGATGGGTTTTATTACATATTATTGGTGAATGCAAGACGTTATTTTACCAGCATAAACTTCTTGATTACATAGTATTA  
CGAAAGGATTTTACTGAGAACCAGAAGTAATTTCTTACCATCAAATTCATCATCTTTGCCAAAAGAAAATGTTGAGA  
AAATAATCCATGAAAAATTGTCGGAGCACTTACTATTTTAAATGGATTGTTAGTCTTTGCATGAGCAAGCAAGTATAC  
ATTTCTCTTTGTTCTCATTACAGAAAATCTCATCAGTCGCCGTTGAGACCGGTGTTGTGCTTTATGGATGCGTTACGCTCC  
TGATGACGTCAATTTGACGTTCAACAGCATCACGGGGCCGACGACATTTACGTCAGTTAGTGCTATAGCTCAGGAACAA  
ATTTTCCGAATTTGGGATATGCCCGCAAATGCTGGTGATGTGGGAGAATCTGGTTGAGTTCGGTAGAATTGATTTGGA  
GGCAGAACGCTTAAATCGTGGCGTCTGAAACGAAAAACGACCTCCGTGGAGGTCCGTTTATATGAATTTGGTGGCCGG  
ACTCGGAATCGAACCAAGGACAGGGGATTTTCAATCCCCTGCTCTACCAGTACGCTATCCGGGCAACGGGGCGCATT  
AACCGTAATCTGCACATCTCGTCAACCTAATTTTCAAGTAAAAGCGATTCAACTGCTTAAAGATTGCGGCAAATCGCTTCTTT  
TCTGTGTTTCTGTGAGTCAATGCACCACCTGGCGGCAGCGGGCAAGCGCAGGATATCTCCGCCAGCCGATGTGCAG  
TGTCGACATCCGCTGGCTACGATTACCAGCATTCGGCTTAAACAGCCTTCCAGCACCAGTTCATCTGCTTTGCTACC  
ATCGCCGGATCGTCAACTCCAGTGTGGTTAACAGTTCGTGGGTGAAATCGTAGGCCGCGCTTTTTGCTGATCGGCCAG  
TTGATGAATAGGGTGGCCAGGATCGGGATAAAACGTACAGGCAGCGATAAATAGACAGCCCGATAGCGGTTGTTTTAA  
CGCACTCCGATAACGCTGATAACGTGCCAGCAGCTTTTGTTCGGCGGTTTGCCTTTCGTCAGCATCAGCTGACGACGC  
CAGACATCTATCTGTTGGCTAAGATAACGACAGCGCATCGTAGAGGATTGCCTCTTTGTCTGCCAGAAGCGGCTAGCTC  
GTCCAGTGGATAATCCACACGTTTACGCAACCATCTCCAGCGTGGTGGTGGCAATCCCTTGAATTTCTAATTTTACGGG  
CTTCTCCAGTACATCTTACGTTGCACGCTATTTTCTCCGCTTTTCCACTGCAAGTGTGCTTACCGTTGGCGATCG  
CGCAATGTGCGCTGAAGTTTTAGCATCCATAAAGCCGTGACGCGTGTGTTGGATGCTCCTGGCCTTGTCCGTCAAA

AAAGAGAATTGTCGGTAGGCCAAGGACATTAAGATGCTTTAACAGCGCCACATCTTGTGCGTCGTTGGCCGTGACGTTGG  
CCTGAAGTAAGACCGTGTCTGCTAACGCTTTTTGCACCTGCGGGTCGCTGAAGGTGTATTTCTCAAACCTTTTACAGGGC  
ACGCACCAGTCGGCATAAAGATCTAACATCACCGGTTTGCCTTTGGCTTCAACGAGCGCCTGATTTAACTCATCTACCGT  
TTTGATTTGTGTAAGTTGAGATGCGTCTGAGTTTGC GCGGTATGCGTGCACCAAATGCCAATCCTGAAGTGGGCGCA  
CGCTAACCAATGCCGCTGCCAGCAGAATAATTTGCACAATACGCATCCAGCCGCGTTTAGCCTGTAGGCTGGTGATAAAG  
GCCAGCCAAAGAATGCGACACCCAGCGCCGACCACAAGCGTAATCCCCATACATCACCATCACTCGCTCCAGCAGGAA  
GACCCGGCAGTGCAGGATCACAACCAAACGCGGTTTTGACTTGTTCATCCACGGGCGCTTTTCGGCAGCAAGCGGT  
TACCAAAGACGGTAATTAGCATCAGCGGCAGGCCATGCCAACGCATAGAGATAAAGCGTGCCGCGCCAGCCACATG  
TTCCCGCTTTGGGCGATATACAGCAGAATCGCGTAAGCGGTGCGGTGGTGCATGGTGAACAGATCAGTCCGGCAATCGC  
CCCATAACAAACACACCCGCGAGGTGAGCCGCCCTGTTGGCGATTGCTCATCAACGTGAGACGTGTTTGCAGCGAAGAGG  
GGAGTTGCAGGGTAACAAGCCAAACATTGACATCGCCAGCAAGTAAAGACGATGGCGAGCCAAATGAGCACGTATGGG  
TGCTGTAGCGCCGCTGGAATGTAACCTGCGCGGCAACCACCAGACCCAGCGCCGTGTAGGTGAGCGCCATCCCCTG  
CACATAAATAAAGGTGAGCAACAATGCTCTGGCAGTGGAGAGCCGCTGTTTACCACCAGCACGATGCCAGAAATCAGT  
GGTACATTGGCAGCACGCATGGCGTAAAGGCGATACCAATACCGATCAACAACGCCAGAGCGGAAAAGGGCAATTGC  
GCGGTGGGCTGCTCTTGTGCGGAACAGACACAGGTGTGGCGCTGCGTTGTTGGCGACCCTTCGCTTAAACGGAACGGT  
TTTTGGTTTTCTGGCGGATAACAGAAACCGCATCAGCACAGCCCTGGTAGGTGACAGTTAACGTGCTCCGCACTCGCCT  
GGTTGATGGTGACGGGAAGCGTCAGCCGATCGCGGTAATCTCGCTTTTGCCGTAACACTCATCTTCATGCCAGACGCCT  
TGCGGCAGCTGCACGTGCGCAATTTTTCGCGTGTTCGGCGTAATGCGGATCTGTTTACGTTAGAGGTAGTAAACGCTTTT  
GATCTGCCAGTGCAGATTAAGTGCATGTTGGTTTTGCTGAAAATCAAAGCAAAGGCTTGATCCGCGGGGACAAATTGTG  
AACGTCCCGCGCGCTGCAATAATCCGGCAAAAACGGAAGTGTGCAAAGTAGCAGGATCAGCGTAAAGATGCGTTGAGCC  
ATGAGAGGTAATCTGTGTCTCCGTGTGTAACAGGTAACAGGTTCCGGGGTTTGATATGGATGATGAGACTTCAGG  
CATTCCAGCAGTGCCTGCTGGTGAGATACGGTAGTTTTTAAAATCATCTGCACCTTCGTATTCTTGCTCCAGCTTACCTC  
CCAGTAATAGAGAGAGGTAGCGCGGGGATCAAGTTCGCGCAGCCGCCAGTTTTTCCGCCAGCACTTTGGCGGCTAAAT  
CCTGGGCTGTCGCTTCATCTGGTGCCGTACATAGCACCAGACAGACGCGGTATTGCAACTTTTTTTCATCAAGCATAAAC  
ACCTCGCAAGAACAGATGGAACCGCAAGAGAGAGTACTATAACAACGGACGGGGAAGGATGTTAGTCGGCGGGAAGA  
AAGCGGGGCGTGAACGCCCCGCGATTGATCATTACAGCATGAAGTACCCAGCACGAAGCCGAAGCAAACGGCCAGGGCA  
ACACCAGAGTACCCGGGATGAAGAACGGATGGTTGAAGACGAATTTACCGATACGGGTAGTACCCGTGCATCCATCTG  
TACCGCAGCAACCAGCGTGGGTAGGTGCGCAGAATGAACAGACCAGACCCGACGCGAAAGAAGCAAACAGCGGTGACGG  
GTAAACGTTCAAGTGCAGAGCCATCGGCATCAGTCTTTTTCGCGTTGACGCTGAGAGTACAGCAGAGCAGAAGCAAAG  
AAGAAGATGACGGCCAGCAGCCACGGATGACCCTGAATCACTTACCAGCGGTATCTTTGATCCAGTGCATGTTGTTGGA  
AACGAAAGTATCGCCAGCCACGCAACACCCAGGATACAAATACAGGCGCTCATACCTGCTTTGAAGGTGCTGGAGTTGA  
GGATGTTGTCGGTATCGACTTTACAGATAACGGTGGTCCAGAGTTGCAACGCTGAGCATGATGATCAGGATTGCGTTGGTG  
GTGTTTCATCAGCGTTTTTCAACCAGACCCATGCTTTGGGCTGTTGATGATTGCATAGATAACCACGCCAACTACGCCAG  
CAGGAACAGCCAGACGGAGTTTTTGCACCGGATTTGATTTCAATCTGCTTTTACC CGCGCAGTTCAACCAGGCCCTCTT  
CCAGACGCTTGCAGATAATCGGATCGTCAGAGAGTTTGAGTTGAACAGCATAGTGACCAGGAAGGACATCACCAGAACC  
GCCAGCAGGTGGACGGGATGACCAGGAGAGCAGATGGAGGTAGCTGATGCCATGACCTTCCATCACGGAAGACATGTA  
AACCACTGCCGCTGAGATTGGCGATGCGGTGATCGCAATCTGCGCGGATACCACTGCAGTAGACAGCGGACGGCAAGGTT  
TAACGCCTTGTTCCTTCGCAACTTCAGCGATAACTGGCAGTGTGCCAGAGAGATGTTGCCAGTACCAGCAAAGATAGTC  
AGGAAATAGTTCAGATCGGTGCGAGGATCGTGATGATTTTCGGGTTACGGCGCAGCAGCTTTTCTGTCTGATGAACCG  
ATAGTCCAGACCCAGCAACCTGCATGGCAGAAAATAGCGGCGATAACCGCCATGATAATGGAGATGACATCGAAGCGGA  
TGTTACCGGGTTTTAACGCCAATAGCGGCAAGAACCAGCACCCCAATCCGCTGCAAAACCAATACCTATTTCCCCCAAT  
CTGGCGCCCAAGAAGATCGCCAGCAAAAATGATGAGTTCTACAAC TAGCATATTAGCCTTCTTTGTTTTTAAACAAGT  
TGATATTAGATTGTTATTTTTAAGTTACTGCTCACAAGAAAAAGGCACGTCTGACGTGCCTTTTTTATTTGACTA  
CCCTGTACGATTACTGTTGCTTTTCATCAGTATAGCGTTTTGCTTTGTAAGCCGGGTGCATCAGATTCTGTACGGAGAAA  
ATATCGTCAAGTTCCGCTTCAGTCAACAGACCGGTTCCAGAACGACTTCACGTACACTCTTACCGTTTTCGGCACAGAT  
TTTACCACGATGTCACCGTTGTTGGTGACCGATGAACGGGTTCCAGGTAAGTAACGATACCGATAGAGTTGTAACGTAAC  
CTTCGCACACTTCTTTGTTAGCAGTGTGCGGTTAATGCATTTTTCCAGCAGTTGTAGCAAGCGTTGGTCAGAATGTGA  
ACGGATTGCAACATGGCCTGGCCAATGACCGGCTCCATAACGTTCAACTGCAGCTGACCTGCTTCTGCTGCCATGGTAAC  
AGTGGTGTGTTACCGATGACTTTGAAGCATACTGGTTAACCCTTCCGGAACAACCGGGTTTACTTTAGCTGGCATGA  
TGGAAGAGCCCGCTGCAGTTCGGCAGGTTGATCTGTTTCAGGCCGGCACGTGGGCTGAAGAGAGCAAGCGCAGGTGCG  
TTACAGATTTTGGACATCTTACAGCCAGGCTTTTCAGCGCGCCGTGAACCATAACATAAGCGCCGAGTCAGAGGTGCG  
TTCGATCAGGTTTCAGCCGTTACGCATGGGAAGCCAGTAACTTTCAGCCAGTTTTTTTCACTGCCAGCGGAGAGTACTCTT  
TCGGCGTGTTCAGACCAGTACCGATTGCTGTTGCACCAAGGTTAACTTTCAGCAGCAGTTACGCGGTACGTTGGATGTTT  
TTCACTTCTTCTTTCAGCAGGATGCTGAAAGCGCGAATTCCTGACCGAGGGTCATCGGTAAGTGCCTGACGCTGGGT  
ACGACCCATTTTTCAGGATGCTGGAATTCGACAGCTTTACGTTCAAAGCCTTTCAGCAGTTGGTTAATCGCATCTACCA  
GCTTAATCAGGGAAGAGTAACTGCGATACGAAACCGGTGCGGTAGGCGTCTGTTAGTGGACTGACATTTGTTAACATGG

TCGTTCCGGTTCAGGTAAGTACCTTTTGGTGACCCATCAGTTCAGACCGATATTGGCCAGCACTTCGTTGGT  
GTTTCATGTTTACGGAAGTACCTGCGCCGCCCTGGTAGACGTCTACCGGAACTGATCCATGCATTTTCCGTTGTTCCAGGA  
CTTCATCACATGCGGCAATGATGGCATTGCTACACTTTTAGGAATGGTTTGCAGCTCTTTGTTTCCATAGCTGCGGCT  
TTTTAACCATTACCATACCGCAACAATTAGGAATATCACTGATTTTGTGTTGCTGATATAGAAGTTTTCAATCGC  
TCTCAGAGTGTGAACACCATAGTAGGCATCAGCTGGAACCTCCCTGGTACCCAACAGATCTTCTTCGATACGAATGTTGT  
TTGACATGTGAACCTTCTTTTCAAGCTGCCAATGATTTGCTTTAAACACACAGAATATATGTGGTTTCGAATGTTTTT  
GACCGACGATTATCCCCTGCATCGACCGAATACCCGAGATCATATGCTGCTTGAAGGATTTCTACCGTAATCTGGATCACT  
TTAAGTGTCCGTTTTTACCCTTAATTATTAATTTGTGAAATAGATCACCGCTTTGGGATTACTACCAAAAATAGTTGCG  
CAACATCTTGAAATTTGCTAATGACCACAATATAAGCTAAACGCGATTCCGAACCCATTAGGTTAGCCGGGGTTAAC  
GGCTGCTATTACAGGAGAAACCTTTGCGCTGGTTACCTTTTATTGCCATTTTCTTTATGTCTATATTGAGATTTCAATC  
TTTATTGAGTTGCCATGATTGGGGTATTGCTGACCTCGTGTGTTATATTACGTCAGTTATCGGTATGCTACT  
GGTACGTAACAGGGCTTTAAGAATTCGTGCTGATGCAGCAAAAATGGCGCGGGTGAACCCAGCGCGGAGATGA  
TTAAAAGTGTTCGCTGATCATTGCTGGTTTGTGCTTTTATTACCGGGCTTTTACCAGCTTCTCGGTCTTCTACTT  
TTATTGCCGCGGTGCAAAAGCATCTGACAGTGAAGTTGATGCCGATTTGCGCTTTTCTCGCATGCTGGCGGGCTTT  
TAGCGCGGGACCGGTGGCGTAATACTTTTGTGGTGAGTACCAGCGAAAGGATGATGAGCGCGACCCGCTTGCATATA  
AAGCATCGCCAGGATTAATGTCGAAACGCGGATTATGTGGTTATGCCATTTTCCGCGTTTTTCTGTTTTGGCAGCAA  
CAGCCATAACCCCGCAGCATGATCAGCGCATAGAGACTTTTCCAGCGACCATTTGCCAGTAACAGAACGCATAACAGCC  
CGCAACACCGCCAGTAGTCGATAACGTCCTTGAATAATTTACAGCTGCCAGCATGCATAACAGATAAATCATAATA  
AAGATGCCATTGGCATAAATAAAGAGCGTCCAGATTGATCTCTAAAGCATGAATCACCAAAGTGCTCACACACAGCA  
GCCGAGCACCGCATTGAGGGCATTATTCGGGATATGGCGAGAAGAGAGGCGTCCAGGTAGTGGTCAGGATTATGTTGCG  
CCTGCGACCGAGCCAGGCGGGCAAGCTCTGTATATAAATGTTGAGACTGGCAAAGCAGGCCAGATAGCCAATCACGCAG  
GCAATCCATAACGCTCTACACCGAACAACGACTACAATTTTTGGAAGCGATGCTGCCGCGCCATTTTTTACCATA  
GGCGTGAAGTGAAGACGACTACCGTACAGCCCCAGTAGACTAATCCTGCCAGCAGCAGACCAATCATCAAAGCAGG  
GAAAATCACGCTCTGGATTTTTAAATTCGAGGCGAGATGGGCAATGCCTCCAGACCGACAAAACACCAGAACATCACT  
GATAACGCAGCAAATAACCCGTAAGTTCGATATTACCAGGTGCCGAAAGGGGATATTCCAGGTTTGATATCGCCCGC  
CCACCAGATAGCGACAATCAGCGCGACGATAAGTCCGGCAATAACGGTTTGTAGATTAGCACTGGAACGGCACCGCGAG  
TACCGATATACCACACCGCCAGCGTACCGAGTTCTGCCAACAACAGTTGCCAGCTATGCCAGCCAAACATCGCCTGG  
CCGAACCCGGCGCAATTTGTAGTGGCGCAGGCAAAACCCACGGGAATGACCGATAAAAACAGCCAGCCGGTGACTCGCTC  
AAGCCGCAACCAAACGCCATACCGACGAAGTGGCGGACGCCCTCGCTGGGATAGTGGCGACCCAGAAATCGAAACA  
CAATCGCAATCGGGAACACTAAGATAATCAAAACGGGCCACGCCACAGGCTGTTATTGCCCGCTACCAGCGCAGCTAAC  
GCAGGAACGGCAAACACGCCAGTGCCTAATAATGACGTCGATAGCAGGCCAATGCCCTGGGCCAGCCCCAGTTCTGTTT  
GAGTCCACTCATGGGTTGATGTCCGATTGCGCCAAATTTTGGGCAACTGCGTAGATTTTTCGATGGTAGACAATCAGAT  
TCGCTTATGACGGCGATGAAGAAATTGCGATGAAATGTGAGGTGAATCAGGGTTTTACCCGATTTTGTGCTGATCAGAA  
TTTTTTTTCTTTTTCCCCCTTGAAGGGCGAAGCCTCATCCCCATTTCTCTGGTACCAGCCGGGAAACCACGTAAGCTC  
CGGCGTACCCATAACAGATACGGACTTTCTCAAAGGAGAGTTATCAATGAATATTCGTCATTGCATGATCGCGTGATC  
GTCAAGCGTAAAGAAGTTGAAACTAAATCTGCTGGCGCATCGTTCTGACCGGCTCTGCAGCGGCTAAATCCACCCGCG  
CGAAGTGTGGCTGTCCGCAATGGCCGTATCCTTAAAATGGCGAAGTGAAGCCGCTGGATGTGAAAGTTGGCGACATCG  
TTATTTTCAACGATGGCTACGGTGTGAAATCTGAGAAGATCGACAATGAAGAAGTGTGATCATGTCCGAAAGCGACATT  
CTGGCAATTTGAAGCGTAATCCGCGCACGACACTGAACATACGAATTTAAGGAATAAAGATAATGGCAGCTAAAGACG  
TAAAATTCGTTAACGCGTCTGTGAAAATGCTGCGCGCTAAACGTAAGTACTGGCAGATGCAAGTAAAGTTACCTCGGT  
CCAAAAGGCCGTAACGTAGTTCTGGATAAATCTTTCGGTGCACCGACCATACCAAAGATGGTGTTCGGTTGCTCGTGA  
AATCGAACTGGAAACAAGTTCGAAAATATGGGTGGCAGATGGTGAAGAAGTTGCCTCTAAAGCAAACGACGCTGCAG  
GCGACGGTACCACCACTGCAACCGTACTGGCTCAGGCTATCATCACTGAAGGTCTGAAAGCTGTTGCTGCGGGCATGAAC  
CCGATGGACCTGAAACGTGGTATCGACAAAGCGTTACCGCTGCAGTTGAAGAAGTGAAGCGCTGTCCGTACCATGCTC  
TGACTCTAAAGCGATTGCTCAGGTTGGTACCATCTCCGCTAATCCGACGAAACCGTAGGTAAGTATGATCGCTGAAGCGA  
TGGACAAAGTCGGTAAAGAAGCGTTATCACCGTTGAAGACGGTACCGGCTGCAGGACGAACTGGACGTGGTTGAAGGT  
ATGCAGTTCGACCGTGGCTACCTGTCTCCTTACTTCATCAACAAGCCGAAACTGGCGCAGTAGAACTGGAAAGCCCGTT  
CATCCTGCTGGCTGACAAGAAAATCTCCAACATCCGCGAAATGCTGCCGTTTCTGGAAGCTGTTGCCAAAGCAGGCAAC  
CGCTGCTGATCATCGCTGAAGATGTAGAAGCGAAGCGCTGGCAACTCTGGTTGTTAACACCATGCGTGGCATCGTGAAA  
GTCGCTGCGGTTAAAGCACCGGCTTTCGGCGATCGTGTAAAGCTATGCTGCAGGATATCGCAACCTGACTGGCGGTAC  
CGTATCTCTGAAGAGATCGGTATGGAGCTGAAAAAGCAACCTGGAAGACCTGGGTGAGCTAAACGTGTTGTGATCA  
ACAAAGACACCACCACTATCATCGATGGCGTGGGTGAAGAAGCTGCAATCCAGGGCCGTGTTGCTCAGATCCGTGAGCAG  
ATTGAAGAAGCAACTTCTGACTACGACCGTGAAAAAGTGCAGGAACCGTAGCGAAACTGGCAGGCGCGGTTGCAGTTAT  
CAAAGTGGGTGCTGCTACCGAAGTTGAAATGAAAGGAAAAAAGCACGCTTGAAGATGCCCTGCACGCGACCCGTGCTG  
CGGTAGAAGAAGCGTGGTTGCTGGTGGTGGTGGTGGTGGTGGTGGTGGTGGTGGTGGTGGTGGTGGTGGTGGTGGTGGT  
AACGAAGACCAAGACGTTGGTATCAAAGTTGCACTGCGTGAATGGAAGCTCCGCTGCGTCAGATCGATTGAACTGCGG



CGAAGAACCGTCTGTTGTTGCTAACACCGTTAAAGGCGGCGACGGCAACTACGGTTACAACGCAGCAACCGAAGAATACG  
GCAACATGATCGACATGGGTATCCTGGATCCAACCAAAGTAACTGTTCTGCTCTGCAGTACGCAGCTTCTGTGGCTGGC  
CTGATGATCACCACCGAATGCATGGTTACCGACCTGCCGAAAAACGATGCAGCTGACTTAGCGCTGCTGGCGGTATGGG  
CGGCATGGGTGGCATGGGCGGCATGATGTAATTGCCCTGCACCTGCAGAAAATAAACAAACCCCCGGGCAGAAATGTCTG  
GGGTTTTTTCTTTGGTCATCTTTCTAGTATAAGATTTCAGACACGGACGACGGAGTGGCGTCCAGCTCATTGATTATGG  
GGAATAACATGCACGTAATACTTAGCAGGGATTGTCGGTGGCGGCTACTGATGGCGGGTGTAGCTCCAGCAACGAA  
TTGAGTGTGCCGGTCAGAGTGTACGCATTGTGGACGAGCAGCCAGGCGCAGAGTGCCAGCTGATTGGTACTGCGACAGG  
TAAGCAAAGCAACTGGCTTCCGGGCAACACGGAGAAGAAGGCGGTTCTATGCGCGGCGCAGCAAACGATCTGCGCAACC  
AGGCGGCTGCAATGGGCGGTAACGTGATTTATGGCATCAGTAGCCGTCGCAGGGAATGTTGTCCAGTTTTGTCCCAGC  
GATAGCCAGATTATCGGTGAGGTTTAAAGTGCCGAACTGATGTGATCCAGAGGCTGGGTGACAAACGTATAATTGCCCT  
GATGCGCTTCGCTTATCAGGCCTACATAAGGCATTGCAACTGATTGAATGCTTGAGAATTTGAGGCCGGATAAGGCGTT  
TACGCCGCATCCGGCATGACCAACGATCAGTTCATCAGTATTTCAGGCTGGATGGCTCCAGCCTCGCATTAGCAAAGAT  
GAGATTATTCGCTGTGGTGCAGTTTTGCTGGTGGATTGAACACGTAAGTGTGACGCGCGGTAAGCATTGATCCTGG  
GTTAGCGGTTGGGCGTTATTCGCCGCTACGGTGCGAACATAGACCTGACATGGCACACCCCGAGTTTTTTCAGTCTGG  
GCTGAAATCAAGCATTCCGGCAGTGCATGCTTCTATTCTTTACCCGGCGTTGCTTACGCGTTTTCCACTGCGCCG  
TAAATTTCTTTGCGACTTTCATCTTTAAAGCGGTAAGCACCCGAGATAATGGTCGAACAAGTTATGTTTCCATTCC  
GGTTGGGAATAGGTGTCATATTCCAGATTGCCATTGCTTGGCAGTCAACGTCGTATAACGGCAGGAAATCTAACAGTGA  
GGTAATACGTAATGCCAGTTCACGCATTTCCGCATTATTAATTGCATGAATGATTGCTCGCGCCAGCATTCAACTGCA  
ACTCATTGACGACTAACTCACATTTGCTACCGTCATGTAGCGTTAATACGAAGGTAAGATTTTCGCTTGATTATCGGTA  
AGTTCCAGCGTGTAAACCCGACGATTAATATCGGCATTTTTAAGCTCATCAACCAGAATTTCTGGGATGTTTTCTGCCAT  
TTTTCTAATGACTTTATCGCGAGCTTGTCTACTAGAGGTGTGCAGCAGCATCCAGTTTTGCTTTTGTGACGACGAC  
TTTCCAGCGCAATCAGCAGTTCGCGCAGTTCATGACAGACATAAAGAACAACGATTCTTTATTGCGAGGTTCTTTAATT  
TTCAGCGCCAGTGCAATGAAATTAATCTTTCGGAATAACACCCGGTATTAACACCCTTGATGCTTATGGCCATGTAGGT  
TCTCCCTAACCATTTCTCAATTAATAAATTAATTTAATTTATAAGCCAGATAAATGGGCTTGGTAGTAATAGTTGTTAA  
AATAACATAAATAGCCGTACTACTCTATATAAACAGAAAAGAAAGGTTAATTATTGGTGTAGCTATATAAAAAGTAAC  
AACAGCAATGCATATGAATAATTAAGGTTATGCAACGGGCAAAGATTAACCTCCAGTTAATGACAGGTTGCTGTAC  
TTGCGTTTTGTTGCTCTTCCGGATGCAGCGTAAACGCCTTATCCGGCCTACAGTTCATTGCAAATCCATTCAATTTCAAT  
GCACGATGTAGGCTGATAAGCGTAGCGAATCAGGCAATTTAATGTTTAACTCCCTGTTAATCAGTACTGCTGGCG  
TAGCTGGAGATCCAGCGGCTTTTGTGGGTTCCGCCCAATTTCTCGCGCCAGTTTCCGGACCAGATATCCCGACACCA  
GTGTCAGCAACTCACGCATAATCTGCCGTGCTTCGTCACTACCATAAAAATGCGCCGCGCCCTGTACTTTATCGAGC  
ACATGCAGGTAATACGGCATTACGCCGGCATCGAACACGCATTACTCAGGTTTGCAGCGTTTGTGCGTTATCGTTAC  
ATCACGTAACGAAAGCCTCTGGTTCAGCAAAGTAACGCCTACCCGGCGCAACTTAGCCATCGCCTGACGGAATGTTTCAT  
CTACCTCATTGGCATGGTTGATGTGATTCACCAGCAAGATTTGCAGCGTAGAACGGGCAAAGCATTCAACCAGCGCCTCG  
GTGATACGTGCCGGGATCACAATCGGCAGACGGCTGTGAATCCGCAGACGTTTTATGCGGGATGGCTTCCAGTTGTGT  
GAGCAACCAGTCCAGCTCGTATCTTTCCGCATCAGCGGATCGCCGCGGAGAAAATCATCTCGTCCAGTTCCGGATGCG  
CAGCAACATACTCAAGTGCAGTTTCCAGTTACGCTTGTGTCCTGATTTTCCGCATAGGGGAAGTGACGACGGAAGCAA  
TAGCGGCAATTTACCGCGCAGCCGCTTTGACCAGCAAAGCGCCGTTGTGGTATTTATGCAACAAACCAGGCACTAC  
GCTGTGCTGTTCTTCCAGTGGGTGGTGGAGAATCCGGGCGCATGACAACTCATCTTGCAGGTAAGTACCTGACGCA  
AAAGAGGATCGTCCGGATTGCCCTTTCATGCGATCGATAAATGAGCGGGGACACGCAGGGCAAAGCTTTTTGGCG  
CTGCGTCCGGTAAACAGTTTTCTCCCGCTATATTTCAAAGACGCAAGTTCATCAGGATCGGTCAACAACCCGCGC  
AAGTTGCGTTAACCAATCTTCTGGATGGGGTATTTAGGGTTACAATATGCGCCATTTTGTGGCTTAGCTACCAATTA  
CAAATTTAGAGGGCCTTATGGCAACGTAATAGCAACGATTTTCTGTGCTGTTAAAATCATGTTAGACGGCGAACCC  
TTACGCGGTTGAAGCGAGTGAATTCGTAACCCGGTAAAGGCCAGGCATTTGCTCGGTTAAACTGCGTCTGCTGTA  
CCGGTACTCGGTAGAAAAACCTTCAAATCTACTGATTCCGCTGAAGGCGCTGATGTTGTCGATATGAACCTGACTTAC  
CTGTACAACGACGGTGGATTCTGGCACTTCATGAACAACGAACTTTGAGCAGCTGTCTGCTGATGCAAAAGCAATTGG  
TGACAACGCTAAATGGCTGCTGGATCAGGCAGAGTGTATCGTAACTCTGTGGAATGGTCAGCCGATCTCCGTTACTCCGC  
CGAACTTCTTGAACGAAATCGTTGATACCGATCCGGGCTGAAAGGTGATACCGCAGGTAAGTGGTGGCAAACCGGCT  
ACCCTGTCTACTGGCGTGTGGTTAAAGTTCGCTGTTGTACAAATCGGCGAAGTCATCAAAGTGGATACCCGCTCTGG  
TGAATACGTCTCTCGGTGAAGTAAAGTTCGGTGTGGTGGCGCCTGCAGGCTGCACCATCATTATTAGGTCAGAGATGA  
TGAACGCCTTATCGTTCTGTTTTGCTTCCAGCACGCTGCTCACGGGCTGTAACACCGCTCGCGGTTTCCGGCAAGAC  
ATCAAACATCTCGGCAACTCATCTCTCGGCTGCCAGCTAATTTTTCTTCTTCCGAAAAATCATCAGATTCCCATCA  
TTTTTGGCGATGTTGCTATTATTAATTTGCTATAGGCAACATAAATAACATTACCTAAAAGGAAGACGTTATGGTGAA  
GAAGACAATTGACAGGATTTTTCTGTTCTGGTGTTC AACAGTATTAAGTGCCTGCAACACCACGCGTGGCGTTGGTG  
AAGACATTTCTGATGGCGGTAACGCGATTTCTGGCGCAGCAACGAAAGCGCAGCAATAAGCAATAACGGTACGACAGCTG  
TGTCGTGCCGTTTGTTTTTCTGCGATAGTACAAAAGGTAATAGTTGAAATTTCCCTGCCACCTGGCAAAATATCCGTT  
AACCATCAGCTTTCAGGACGACCTGCAACGCCTTTTTACCCGGGACGCGCCCAATTCTCCGGAGCCTGATATGTC

TGGATTATCTTAGTTATTGCTGGTCTGCTGGAAGTGGTATGGGCCGTTGGCCTGAAATATACCCACGGCTTTAGTCGTTT  
GACGCCGAGTGTATTACTGTGACGGCGATGATTGTGAGTATGGCGCTACTTGCCTGGGCGATGAAATCGTTACCAGTAG  
GGACGGCTTATGCCGTGTGGACGGGTATTGGCGCAGTCGGCGCGCCATAACCCGCATTGTGCTGCTCGGTGAGTCCGCT  
AACCCGATGCGCCTGGCGAGTCTGGCGTTAATCGTATTGGGGATTATTGGTCTGAAACTCAGCACTACTAACCAGG  
CTGCTGTACCCAAATAAATTTACTGACATCAAACCCCTCCCGGTCGCGACTGCCAGCATCTCTGTTTCACTTCGTACG  
AAATGGTTGGCGTGGGGAGAGTATCCACAGGTAGTCGCGTCCGGGCGCAAACCAGCGCATGGCGGTATTCGGATCG  
AGTGCAATAACGTTATAACCGCCATAGAAAGGACCAAGAATGACTTTTACAGCGCAGCGGAGTTGGTGGCCGGTAAA  
GTACGCTTTCCTTCACTCTGCTGCCACATTCCTCTGTGAGGTTATAGCCTTTATTAATGACATTACGGCCGCGTCAT  
CACGCGAGGCTGTATGTTGCGGTGACTTTTTCCAGTCCAGTTCAAAGCGGTGATCAAAACGGGCAATCTCATACCAGGTA  
CCGAGATAACGTTTGGCGTCGAAATTTTACTACGGTCACGCCACGCGGCGCGTAGGAGAACTGCAGGCAACGACCAG  
AAATGCAGCTGTGCTGCGGCAACGAGAGGGAGCAGGCGCATAAATGTTTCTTACTGGTTTTTTCTAAGTGTAGATGA  
CAGCAAGGAAAAGCGGAGAAAAGGTCCGAAAATTCGACCCGATGGAATTTTACTGTAGAGCGTTAAGAATCTGCCAGG  
GGCGTGCAGTCTGCTGGATTGGGATAGTTTTTTGTTGCCAGCATCAGATAACCAGCTTTTTCTGGAATAAACGCGA  
CATAGTACCAAATCCGCCGGTCCGCCCTGTTTTATGTACCATGATGCGCGTACTGCAGGAGTTGGGGCGTAATCGCT  
TTTACGGGCGTGTGCCAGTCAATTTTATTGCTACTGCCGTTAATGATGCTGTCAGGATTTACCGCCAGTCCAGCAT  
TTCCAGCCCAGGCTGTACATATCGCCGTTTCCAGTAGCAGTAGGATTGTGCCAGTTGTATCCCTTGTGAAGCGTTT  
TCTCATTGATATCAAGGGTTTTAAATTTGCTTTGCACCCAGCGGCCATATCTCAATGGTCGACTTCACACCATAAGCT  
TCAGCATCTAACGCCCCAGCGAAACATGCACTGCCTTACCTTCGCGATATCCCAGGCGTAATCTTTTTCTTCTGCGGG  
CGGTACATTAATCCACGTATGGTTGAGTTTGGTGGCTGGAAGACACGAGTTTGCATCGCCTGCTCAAAACTCAAACCAG  
ACGGCTTACAGCCAGTGGCCGAACAAACCGATACTGGAGTTGGCATAACAGACGTTGTGTTCTGGAGCCCATGCAGGC  
TGCCAGTTTTGATAGAAGCGCAGCAAGTCGTTGAGGATTTACCTCATCCGGCACCTGCAATGGCAGGCCGCCAGCAGT  
GTAGGTTGCGAGATGTAATAGTGTATCCATTCCACTGTTTAGCGGTAAGTTCAGGCCAGTATTTTGTGTGGGATCGC  
TTAACTTGATTTCCCTCGAGCAATAGCGTCGCCACCAAGCACGCCAGTAAATGTTTTGCTGACCGAACCTAACTCAAC  
AACGTTTGTGTGACGGGCTGTTTTTGGCGATGCCGATAGCCCAGGTAAGTAATAAGGTTTACCCTGATAAAT  
TACCGCCACCGCATACCCGGGATCTTTTGTGCTATAAGCGGGTAATTGTGCGATGCACAATATCGTTGATTTGTT  
GAGGGGCGCAAAATGTGGAGCAAGAGGCGGTAATTAATAAGGCGCAGAGCGTCTTTTGAACATAGGGTCTGGTTCCAT  
ACAAAACGGCCCGCCATAGCGGGCCGATTTACATTGGCGATGCGTTAGATTGTAACGACACCAATCAGCGTGACAAC  
GTCAGGATAGCAGCCAGACCGTAGAAAACCCATTTGCCCGAGGTACGTGGATTTTTCAGATCGTGCATCGCGTGGTGCAT  
ACGGTGTAAACCACACCACAGCGGCAGAACGATCATCAGGAACAGGAATACCGGACCAATGAAGCTCTGCGCGAACGCCA  
GAACCGCTCTGATGCTCAGCGCATCACCCGAAACAACCCAGTGGCAGCAGAAATACCACCAGCAGGATCATCACCGGC  
GCAATGATGGCGCTCCACATACCACCGGCCCCGAAGAGGCCCCAGAATACCGGTTCTGTCAGAACGCTTTGGATTTGGATT  
AATCATCTCAGGCTCCTTACCAGTACAGGGCAACAAACAGGATTACGATGGTGGCAACCACAGTTACCGCCAGAGACTT  
TTGATAATTGGCTCTGGTCCATTTTTTCTGCTTTTACAATGATATTGGCCGCTTTTCGGTGGCAGTTCAAACCAGGTTTT  
GGTGTGACGAGAGCTGCCGCCAGAGTGTACAGGTTAATGATCAGGATAACCGGGTTTTGTAAAAAGTCGACGAATCCCG  
CCCAGGCTTCCGGCCATTTTTCAGGGCAAACAGCCGAAAATCAGTTCAATGTGAACCACAGCCGGAACCGCCGTG  
CCTTCGCGCAGCATGTAAAAGCGATAAAAACGGCAATTTTTCCACCAGGTGGACGTCAATGGCCGTACATACGGTTTACG  
TTAGTCGTATGTTGACTCCTTAGCGTGGTTTTCAGGGTCCGATAAGAAAGTCTTTTGAACCTTTCTACTTTGCCCTGC  
TGAATGGCCGACCGGATCGACGTGTTTTCGGGCGACTTCGGAGCAGTAGCCACGAAAGTACAGCTCCATACGCCGTT  
CTGGCTGTTTCAACTGCGCCATACGCTCCTTACCCTGGTCCGCGGTATCTTCTGTTATAACGATGCGCCAGCGTAATGG  
CAGCCGACCGATGAACCTTGGGTTTCAGGCCAAACTCGGGCAGCGGCGTAGCACAACACAGTTGATGCAACCCGAG  
AACTGGTGATACTTCGCCATCTGCGCCGGGTCTGGATGTTAGTACCCTGATCCGCGGTGCGGGAGTTGCCGATGATGTA  
CGTTTTGATCGCTTCAGACTTTTCAGTGAAGTGGGTATATCGACCACCAGATCGCGTTCAATCGGGAAGTTAGCTAACG  
CTTCAACCTTCATACCGTGGTGTAAATCACGCGGAAGTTTTACATGCCAGTTTTGGCACGTTGTTAACCATCATGCCG  
CAGGAACCACAATCGCCATACGGCAGGACCAGCGGTAGTCCAGTCCGGTGGCAGGTTGTCTTTGATGTAGCCAGCGC  
ATCCAGTAATGAGGTAGTTGCGTCATAAGGCACTTCATAGAATGCGCTATGCGGTGCGGTATCGACTTCCGGGTTATAGC  
GCACCACCTCAATTTTTCAGTTTTTTCATCTCAGCCATTGCGCTTCTCCTTCTATTGGCTGCTTCCGCTTATCGGCTGC  
ATCCGCTTCCGCCACCGTAAACCGTTTTAGCTGGCGGCAGCGTAGTAATCTTACGTCGCTGTACTCCAGGCGAGTCGTGC  
CATCAGCATCGCGAAGGCGAGGGTGTGTTTGGGAAGTTGACGTCGTCAGCTCGGTGCAACCTTCTGCCAGACGCTGG  
TGCGCGCCGCGGACTCTTACGTGCCATTGCGGAGTGCGCCATACATTAGCAACGTTTCCAGCCGTTGGCCAGTTCAAT  
GGTGTAGAGCAGGTGGTGTGAACACGCTGGAAGTGTGGTGTGCGCACGCGCTTGAAGCGTTCTGCAGCTCTGCCA  
GCTTGTGATGTTTTCTGCATCAGTTCCGGGCTACGGTAGATACCGCAGCCTTCTTCCATAGCCAGGCCATTTCTGTCG  
CGGATCTTCCGCCAGTTTTTCCGCCCATCCTGGTTAACAGATCTTTCAGACGTTGTTCAACGCCAGCTGCCTGCGCTT  
AATTGCCGCTTCTGTTGCCATTACCGGAGTTGCTGCAGCTCTGTGCTTGTACCAGGCCAGACGGCCGAAGACCACCA  
GTTCCGCCAGGGAGTTAGAACCAGACGGTTTTGCACCGTGCAGACCAACAGAGGAACATTCACCCACGGCGAAGACACCT  
TTAATGCGGGTTTTACAGTTCTGATCGTTTTGATACCGCCATGGTGTAGTGTGCGGTGCGACGTACCGGAATCGGTT  
TTAACCGGATCGACGCAACGTACGTTTTGCCAGTTCGAGATGAACGGCAGACGTTTATGCAATTTTTTCTCGCCGA

GGTGACGCAAGTCGAGATAAACCACATCGCCACGGCGTGGAGATGGTGTTCCTTTACGCCATTCGTGCCAGAAGGCC  
TGAGAGACTTTGTCGCGTGGACCCAGTCCATATATTTGTTTTTCGGCTCGCCAGCGGAGTTCCGGGCCATGCCGTA  
ATCTTGAGATAACGGTAGCCATTTTTGTTGACCAGAATACCGCCTTCACCGCGCAACCTTCGGTCATCAGGATACCGG  
AACCTGGCAGACCGGTTGGGTGATACTGAACGAATCCATGTCACGCAGCGGAACGCCGTGGCTTAGCGCCATACCCATA  
CCGTCAACGGTAACGATGCCGCCGTTGGTGTGTAACGATAAACCGACCCGCCAGTACGCATAACGACCGCGTT  
AGCACGGATCTGCACCAGCGTGCTTCCATCATGTTTATTGCTACCAGGCCGCGAACATGACCATCATCAACCAGAATAT  
CCAGCACGAAATGTTTCGTAACCGCTGGATCTGCGGGAATTGCAGAGAGGTCTGGAACAGCGTGTGCAGCATATGGAAG  
CCGGTCTTATCGGCGGCAACAGGTGCGCTCGATTTTCATGCCGCCAAGCGACGTACGTTGACGCTACCATCCGGGCG  
ACGGCTCCATGGGCATCCCCACAGTCCAGTTGGGTCAATTCGGTTGGGCAGTGGTGGACGAAATAATCCACGACATCCT  
GCTCACACAACCAGTCCGCCACCGCTACTGTATCGTAAAGTGATATTCGAAGCTGTCATGATCCTGCGCGACAGCGGCG  
GAGCCCCCTTTCGAGCAACGGTATGGCTACGCATCGGGTATACTTTTGGATTAGTGCATTTTTGCATTCCGATTTGC  
CTGCGCGGACGAATTGCAGCACGTAATCCCGGCCACCGGCCCTACAATGGCAAGATCGGCTTGAAGGTTTGCACGA  
CATTCTCCAGATTGTTTTATCCACAGCCAGTACTTCAGGTAAGTACCTGAAAGTTACGGTCTGCGAACGCTATTC  
CACTGCTCCTTATAGGTACAACAGTATAGTCTGATGGATAAGTCTGAAATTTGACGAGATCGATTTTTTAGTGCGCAA  
GAGGGCTAAATTAACACTGAAGATGATTAATTTAACTAAACCATCAGATCGTGTCTTTTTTAGTCACTGCCACCCT  
TGTTTATTCTCGCTAAAATTTGCTCGCCGTCGCTTTCGAGTAGACTTCGTGCCCTTGTCAAAAACTGGAGATTTAA  
CTATGAGCGAAACGGCATCTGGCAGCCGAGCGCATCCATTCTAACTTATTAACCGCGCGGATTATGGCGGAGATC  
CGTCGTTTTCTTGGCATCGTGGAGTGTGGAGGTGGAGACGCTTGTATGAGCCAGGCGACGGTAACCGATATTCATTT  
GGTCCCCTTTGAGACAGTTTCGTTGGCCCCGGCATTTCGAGGGGATGAATCTCTGGTTAATGACCAGCCCCGAATACC  
ATATGAAACGCCTGCTGGTTCGCGTTGTGGCCGGTATTCCAGCTGTGCCGCAGCTTCCGTAATGAAGAGATGGGGCGT  
TATCACAACCCTGAGTTCACATGCTGGAGTGGTATCGACCGACTATGATATGTACCGGTTGATGAACGAGGTGGACGA  
TCTCTTACAACAGGTGCTGGACTGCCCGCAGCAGAAAGCCTTTCTTATCAACAAGCTTTCTTGCATTACTGGAAATTG  
ACCCGCTCTCTGCCGACAAAACGCAACTGCGGGAAGTGCAGCGAAACTGGATTTGAGCAATGTTGCTGATACCGAAGAA  
GACCGCGACACGCTGCTACAATTGCTGTTACCTTTGGCGTAGAGCAAATATTGGCAAAGAAAAACCGACCTTTGTGTA  
CCACTTTCCAGCCAGCCAGGCATCACTGGCGAAATCAGTACCGAAGATCATCGGGTCTGAAACGCTTTGAGGTTTATT  
ATAAAGGTATTGAGCTGGCGAATGGTTTCCATGAATTGACGGATGCCGTGAGCAGCAACAACGCTTTGAACAAGATAAC  
CGTAAGCGCGCGCGCGGTTTCCCGCAGCACCCATTGACCAGAATCTGATTGAAGCCTTGAAGTCCGATGCCTGA  
CTGTTCCGGCGTGGCATTAGGTGTTGATCGTCTGGTGTGTTGGCGCTGGGCGGAGACACTGGCTGAAGTCATCGCCT  
TTAGCGTTGACCGGGCATAATTCTGAAAATTAAGTAATTAACAGCGAAGAATGGCGTGATAAGCGCCATTCTGTAGCAT  
ATGTTTTATTTTTCCGTTAAAGGCCACAATTAAGACTGGATATTTGATATCATCCAGGTATCAATTCTGTATTGGTTT  
TTACGCTGCCTGCTCAATGTTGCGCAGTGCAGTTCAGTGGCACGTGTTATACACGCGCTGAAATGAAGGATGGTTTCAT  
GCCTCACACGATAAAAAAGATGAGTCTGATAGGACTCATATTGATGATCTTTACTTCCGATTTTGGATTTGCCAATAGCC  
CATCGGCTTATTACTTAATGGGTTATAGTGCAGTTCCTTTTATATATTTCTGCATTGTTATTCTTTATTCCATTCCGC  
TTAATGATGGCTGAAATGGGAGCTGCTTATCGCAAAGAAGAAGCGGATCTATTCTGGATGAATAATAGTGTCCGACC  
ACGTTTTGCCTTCATTGGTACGTTTATGTGGTTTTCTCTTATATCATCTGGATGGTGAAGTACCTCCGCGAAAGTTGGG  
TACCGTTCTCAACATTCCTATGGTAGCGACATGACCCAGCACTGGCGTATTGCCGACTGGAGCCTACGCAGGTGGTT  
GGTCTGCTGGCTGTGGCATGGATGATTCTGGTACCCTGCTTCTAAGGGGATTAATAAATTTGCCGACTTACTGC  
GGTGGGCGGTATTGCAGTAATGTGCTGAATTTAGTATTGCTGTTAGTAAGCATTACTATTTTGTATTAAATGGTGGG  
ATTTCCGCGCAGGATATTAATTTCTTGCATCACCGAACCCGGTTATCAGTCCGGTCTGGCAATGCTATCGTTTGTGGTA  
TTTGCCATTTTCCCTATGGCGGAATTGAAGCGGTTGGTGGTCTGGTCGATAAAAACGAAAAATCCAGAAAAGAACTTGC  
CAAAGGTATTGTTTTTCCGCTATTGTTATTTCAATCGGTTATTCGCTGGCAATATTTTTATGGGGCGTCAGCACA  
GGCAGCAGGTATTAAGTAATGGTTCCGTTAACTCGGCAATTAACCTATGTGCTGATGAAGAGCCTTGGGATGACGCTG  
GGTAATGCACTGCATTTGTCACCTGAAGCGTCAATTGTCGCTGGGCGTATGGTTTGCAGCTATTACTGGACTTTGATGTT  
CCTCGCTATACCGGTGCGTTCTTTACGCTTTGCTATTACCCTGTAAGCCATCATCCAGGGGACGCCGAAAGCATTGT  
GGCCGGAACCGATGACGCGCCTGAATGCGATGGGATGCCGTCTATCGCCATGTGGATGCAGTGGGTTGGTTACTGTC  
TTCATCCTGCTGGTTTCTTTGGTGGCGGTACCGCATCGGCGTTCTTAAACAAGCTGACGCTGATGGCGAACGTGTCTAT  
GACGCTTCTTACTGTTCTCGCGCTGGCTTTCCCGTTCTTAAAGCACGTCAGGATCTCGACAGACCGTTTGTGATTT  
TCAAAACGCATTTGTCGGCAATGATTGCGACAGTGGTTGTCGTAAGTGGTGGTACATTTGCGAACGCTTCCACCATCATT  
CAACCTGTGGTTGAAGCCGAGACTGGGACAGCACATTGTGGATGATTGGCGGCCCTGTCTTCTCGCTGTTAGCGAT  
GGCGATTTACCAGAATATTGCAGCAGAGTGGCAAAAAATCCGCAGTGGGCGGTGGAATAACCGATGCCCTATCGTCTA  
CCTGACGATAGGGCGTAAGACAGGAAATGTTATGGATGACACCAGCCGGACCCGCAATAACCGAAGATGAAATCAGG  
GCGCTGCAATTTCTGCCGGGATGTAGCGGAAATAGAGCAGACGATTCTCTTTTTGTCGATGCCTGCCACACCCGTAA  
AGTGGCGATGGTGGTGGTGGTGGTGGTGGTGGTGGTGGTGGTGGTGGTGGTGGTGGTGGTGGTGGTGGTGGTGGTGG  
ATTGCGCTTATCTTATCCGATGTCTGGTTTTTTCGCGGGGAATTAGTGGGATACGGCGATTTGTTTTCGTATGCGCTATAGC  
GAAATTAAGCGACCGTTACCTTATGAGTGCAGCATGTTTGTCTTATGCTGCATCTGGTTTATTGTGGCGTTCTCTGG  
ATAACCATCACTTCCGCGCTGGACAAAGAGTGGATGATTGATGGACGCGGGATTAACAACGCTGCGATGTGTTGATGTA

TCTCGAAGAAGACGATACCCGTGATGTTGGTGTGATAATGACGTTACCGCTCTTTTTCCCTTTTCTCTGGTTGCTTTGT  
GGCGAAAAAACGCGGCTGGTTATGTACGCCACCGCTGGCTATTTTCGGCTACTGGCTGTGGCAGTTTTTTCTGCGC  
TATCAGTTTTGTTTGTGAGCCGGATTGGTTCATCCGGCACACAACTTACAACTTCCCGCTGACGACCTTTGCCCGCA  
GAGTCAAGCGTTCTCCCCGTTTGTACCCTGAGGCTTTCCAGACGCATCTGGAAGGGCGGGAATGGCATAATCGATACC  
GTGGGCATGGAAGCCAGCCAGAATCAGCTGGTGGATCTCATGGCGTAGCGGCATACGGTGACCCATCTCAGCGGCGTAAA  
TACGCAGCTCGAAAATCTGAATCCCCTGTTGAGATCCACCAGGAAGACTTCCGGTGCCGGGTTGTGATCACCAGCGAG  
CAGCGACGCGCTGCGGTGAGCAGGATTTCCGTCACTTCTTCGCTATTGGCATCGGCAGGGGCCGGTATCGTCAACACCAC  
GCGCGTGACCGAGTCAAGAGAGCGACCAGTTGATAAACTGCTCGGTAATAAACGCCTTGTTCGGCACGATTATCTTTTAC  
GGTCCCAGTCGCTGATGGTGGTGGCGGGGTGTTAATTTTCGTCACGCTACCGGTGAGATCGCGAATTGTACCAGTATCG  
CCAATGCGAATCGTTTTTCGAACAGGATAATCAGACCAGAGATAAAGTTGGCGAAAATTTCTGCAAACAAAACCGAG  
ACCAACACCGAGCGCGGCAACCAGCCACTGCAATTTGACCACTCAATACCAATCATTGAGAAGCCGACCAGCCCGCCAA  
TCAGCATCAGCAGATATTTGGTGTGGTGGTGTGGCGTAACCGTACCCGGCGTTAAATCCAGGTGTGCAAAAATCGCC  
AGTTCCAGCAGCGCGGCAAGTTGCGCACCAGCTGCGTGGTGTGATAAACACCAGAATGGCAATCAGCACCGCACCGAG  
GGTAATGGCTCCAGACTTTCTACGCCCTGTACCGTGGAGGTGACATCCACAGCGAAAATTTTTCGAGGAAGCCGAAA  
TGCGCACTGATGGCATCGAGATCGACTTCGCTTTTCATCGACTTCAATTGCTCCTTCCGGGCTACTGTGATGCGCTTC  
CTTTCCGCCACGCGCACGTTGCGCTAACATCTCTGCCCGCGATGCTTCCGCCGATCAAACGCCAGCCTGCGGCGCTGGA  
TCAGCATCCAGCGGCGATAACGTGATAAACACCAGTAGCAGGAACCAGATGGCAACCGAGGTTTCAAGCCTCGTAAAC  
AGCGCCTGTGCCGTTGCCAGATAACCCACCGCCGACGCCAGAATGGCAACCAACGGCGCGCCAATCATCATGTTCCACAG  
CATATGTTGGTAATGTTGTCGCGCTGCCCTCTTTGTTGAGATACAGCGGAATCCCGCCTTTTTCAGGCTGAGGGTGA  
CCACCGCCAGCGCACCGCAAATGAGGATAAAGCAAAGCCGTCCAGCGAACCAGGAGAATTCACGGTCGTCGAGGTTATCG  
AACATCATCAGCGCCATAATCAGCGGCACAATAAGCCCGATGCTCATCAGGTAGTAGCGCATCCACGGGAAACACGTTT  
GCGCGGCCAGCCAAAATGAGCGATAAACAAGCCGTTCCGGCGGGCAAAGGTGGCGCAAATCATCACTACCACAGCAGCG  
GCACGGTGGCCGTTACACCATCGCCAATCGCAGCCGACGCGATAAGGCCACGCTCGCGCAAGCCGTAACCCAGCGTC  
ATCCACAGCACCGTAACGGTGACGCGACGAGAATCGACCAGAAAAGAGTGCACAACGTCAGCCAGAAGTATCCTGAGT  
CACTTTGCCAACTTTCCGCCCGAACGTTCAAGAAAACGGGTGAAATAGCGGCGGAGTAAATACTGCAACCGACCAGAA  
TCAAACGCGCCAAACAGCGGCAAAATTTGCTCTTTGCTGGTGTGAGTATCATCAGCTGGCTTTGCCAACTGACTGAAGGT  
TCCAGCGAAATGAGACGACGAGATCCTGGGCGATTTCCAGCGGCCAGGCGATGGTCATCGGGCGCACGTGAGAGTCCA  
GAACAGATAGCGGTGCGTTGCTTCCCTTCCAGTCCAGTTGCCCGTTGGAGACTTTAGCTTGGTCA  
GTTCCAATAGTAGCGTGTGCCACCCTGCAACAATGAGTTCAGCAACTCAGCTGAGTGGCAGTTGTGCTTCCAGAATA  
CGTTTTGCTCGGCAGTCAGCGGCTGACCGTCCGCTGATGAATTTGCCGTAGCAGCGGCTGTTTATTAAGCAGATCCTC  
ATAACGTAACCGTTGCACACGCAACTGCGCCATTTCCGGTATCAAGCTGTTGTGGTTTCGGCATTTCGGCAGCCGTGCCA  
CCTGCGCCCGCAGCGCTTCGCCGAGCAGATTGGACGATCCAGCCATTGCGACTGTTACGCGAGCGTATTAACGCCTGC  
CGGACCTGTAACGTCGCTGGTGGCAGCCTGACGCTGTTGCGAGGCAACGAGATCCATCCGCTGCGCCTGTTGATTCAAAGC  
CGCCGATAGTTCCGCGTTAATTTGAATTGCGCGACGATATCTTTCCGCAAATCGGCGCTGTTTTCTGCCAGCAATTCGG  
TACTTTCCAGCGCCGCTCCGCCTCAAGCTGACGTTGGCTGTTAATTGATTACGCAAGGCCTGCAAATACGCATCCAGT  
TGCTGGCTCTTTTTCCGCCAGCTCTGAGCGTAAGCGCGTAATTCCTGGCGGTTATTGGCAGACAGCTGCGCCAGCTC  
CAGTTCATCAACGAGCGCCTTAAGACGTGCAGAGTCAGACTGCAACGCGAAAATTTGTGCCTGATTGAGCGGAGTATTGC  
CGTAAGCGTTCCAGGCGGCGCTCGATCTCATTAACTGACGGCGGGCGTGGTTTGTGTTGCGGCAGTTGATTGAGC  
GAATCGGCAATCTCGCGGGCGGCTCCTGCTTTGCTGGGCTGACGGCTTTTATCCAGCAACTGGCTGACCTGGAG  
AATTTCTGATTCAAGCGCGTCCGTTAGACATTTCCCGGCGACACGCTGCGCGGCTGTCACGATGTTGTTAATTGTGCGC  
GCAGAGTAGCGGAGATTTCCGATAAATATCGATAACTTGTGATATTGTTGATGCGCTCAAGGGAACCTTTTCGTTCC  
TCAAGCGCATTAAAGGCAGACTGGAGCGCCTCTACGACTTCCGGCTGTGCGGGTTTCGCCGCTTTTGCCTGCTCCAGTTC  
CTGAGTGATTTGTTTGTATCGGGGGCGTCCGCGGCTACGCCCCCAACTGAGGCACCAGGCCATCAGAAAAGTGATAA  
TCAGGCGCACGTGAGGTTTCTTTGATGGATTAGACTGGTCTTTTTTGTGCTCAACCAATGGGCTGGCGTCTGTTCT  
GCTTCGATCTCTCAGCAGGAAGCGGGGAGGTTACAGCTGCTGGCGTAACAAAGGTTTCGGTAGATACTGCCAGCGGCTG  
GCCAATTTTCTGACAGACAGGCTTTCCAGTTGCTCAACCAGATTCACTTTACCCGGTGCAAACAGGTTGATAACGGTGG  
AACCGAGTTTTAAAGCGACCCATTTCTGGCTTTTCCAGCAGTGCACAGAACCCTGTTTTCCCGGCGAGCCAGGTCAG  
CGTTGATGATACCTTCCGCGGGCGGCGTAATGGTGCCCGCCAGACCGTCTCAATGCTGCCAACAATCGTCTGCTCCGAC  
CAGAATCTGCGCCATTGGGCCAAATTCGGTATCGAAAAGGCAAATCACGCGTTCGTTACGGGCAAACAGATTCCGGCAGT  
TCTGAGCCGTGAGATGGTTAACGGAGAAGAGATCGCCCGCACGTAGATCATCTCACGCAGAATACCGTTGCACGGCATG  
TGTACGCGGTGATGACGCGGGGAGAGGTAAGTGGTCAAAACGTACCGTTGCGGAACAGGTCCGCCATCAGATAGTT  
GCCTGCCAGCAGGGCTTCAGGCTGTAGTTGTGGCTTTGGCTTGCAGGATTTTATCTTTCGATTTTACCCAACCTGGC  
TGATAACGCCATCGGCAGGCATGACCAGTACATTCCGATCGGTATCGATTGGGCGTACTTCGTCACGCAGCGGACGGACA  
AAGAATTCGTTAAAGGTGCGGTAGCTGGCGGTGTCGGCTTTTGCCTCTTTTCATGTCGACCTTGTAGTATTTAACGAA  
CAGATCGATAACAGTTTTGTGAGCCATCCTGCCCGCTTGTGCGCCCAACCCGCGAGCGAGTAAGCCATAGTTTCC

GCAGAATGACTGTAGCGAAAGTTAAATGAATTTAAACAAGGTAGCCTCCAGGCCATTGTTTTGTCGTTCTGATCCGGC  
CTACATGCCGGATCCTGAAAAAAGGGGACGATTCTAACGACGGTTAGCTTAATTGTCAGTCATCCGTATCAGAAAAGTT  
TTTACGCGTTTTTACCTGCGCCATGCTTTCCAGAATACGGTGATAGTTTTCGAAACGGGTTCCGCGATTTCCCTTCT  
CAACCGCTTCCCGGATAGCGCAGCCCGGATCGGTATCGTGTTGCAATCGCGATATTTACACAGACCTAAATAGTCATGG  
AATTCGACAAAAGCCCTGAGTGATTTGTTCCGGCTCCAGGTGCCAGAGGCCAACTCACGCACTCTCTGGGGAGTCAATCAC  
ATCACCGCCGTGCGGGAAGTGATACAGCCGAGCGCGGTCTGTGGTGTGCTGACCGAGCCCCGAGTTGTGACAGATATCGT  
TGGTGAGGATCTTTTTGACGCCCCAGCAACGCATTACAGCAGGCTGGATTTGCCGACGCCAGACTGCCCGGCAAAAATG  
CTGATGCGCCCGTCAACGCCTCTCCAGCGTTTTAGCCATCTGAGTATGGCTGAAACCATCAATACGCGATAACC  
GATATTGCGGTAGATATCCATCTGCTCGTTGACGAACGCCATGCCTTCGTCGTCAGCAGGCTATCTTGTGAGCACAA  
TAATCGGCTCAATCTGCAAGGTTTCGACAGGCCACAGGTAACGGTCGATAATATTGAGCGACAGCTCCGGCAAAAATGGCG  
GAGACAATGACAATCTGGTCGATGTTGGCGGCAATAGGTTTTACGCCGTCGTAGAAATCCGGACGCGTCAACACCGAGGT  
ACGCTCATGCACCGCTTCCACGATCCCTTTGACATTTACGCCTCCGCCCGCGTTTACCCGGACGCCAGACTACGCGGT  
CGCCGTTACCAGCGAACGGATGGTACGGCGAATATTGACGCGGTGAACGTCGCCATCGGCGGATTCCACATCAGCGTGC  
ATACCAAAGCGGCTGATGACGATACCTCATCAGGCTCGCCAAACAGATTGTCGTCGTAGTCGGGCTTCTCCTTAGACGT  
TTAAGACGACGCTGGTGTGGCGTTCACGCGGCGCTGCTGGCCTTTGGAGAGTTTATTTTTACTCAATCGTACAGACT  
CCTGGTCGCCCTGATGGGCAAAACATCTATGATACACGCAATTTGGATCAATATAGTCACTGTGAATGGGTGAAAAAT  
AGCATGAGTGCCAATGAAAAACAACCTGATTTGGATCGATCTTGAGATGACCGGTCTGGATCCCGAGCGGATCGCATTAT  
TGAGATTGCCACGCTGGTGACCGATGCCAACCTGAATATTCTGGCAGAAGGGCCGACCATTGCAGTACACCAGTCTGATG  
AACAGCTGGCGCTGATGGATGACTGGAACGTGCGCACCCATACCGCCAGCGGGCTGGTAGAGCGCGTGAAGCGAGCACG  
ATGGGCGATCGGGAAGCTGAACTGGCAACGCTCGAATTTTTAAACAGTGGGTGCCTGCGGGAAAAATCGCCGATTTGCGG  
TAACAGCATCGGTGAGGACCGTCTGTTTCTGTTAAATACATGCCGGAGCTGGAAGCCTACTTCCACTACCGTTATCTCG  
ATGTCAGCACCTGAAAGAGCTGGCGCGCGCTGGAAGCCGAAATTTCTGGATGGTTTTACCAAGCAGGGGACGCATCAG  
GCGATGGATGATATCCGTGAATCGGTGGCGGAGCTGGCTTACTACCGCGAGCATTTTATCAAGCTGTAAAATTTTTCTG  
GTCACGTAAGCGCGGAATCCACTTGGCGGCGGTGATTTGACGCTAAATTGAACGCTTGTGATAATTTGACACTT  
GAGATAAAAACGCAAAAAAATTTTTGGGGGTTGCAGAGGAAAAGATTTCTGATAATGCGCTCCCGTAACGACG  
CAGAAATGCGAAAATTACGAAAGCAAAATTAAGTAGTACGCGGGAATAGCTCAGTTGGTAGAGCACGACCTTGCCAAGGT  
CGGGTTCGCGAGTTTCGAGTCTGTTTTCCGCTCCAAAATTTGAAAAGTGTGCAAAGCACAGACCACCCAAGCGGGAATA  
GCTCAGTTGGTAGAGCACGACCTTGCCAAGGTGCGGGTTCGCGAGTTCGAGTCTGTTTTCCGCTCCAAAATTTGAAAGTG  
CTGTAAGGCACAGACCACCAAGCGGGAATAGCTCAGTTGGTAGAGCACGACCTTGCCAAGGTGCGGGTTCGCGAGTTTCA  
GTCTCGTTTTCCGCTCCAAAATTTCTCTCAATAAAATATCCACAGCGACGCGATGCGTTATTGCTGGTTTTTGTGCT  
CTGACAAACTCTGTAACAGAGATTATCCACAGCCTCAGGCTGTAATCTTAATTTCAAAGAACTTCGCACGGTGAATAG  
TATTTTTTAACTATTGATAGATAAGTTAAAAATTAAGATTCGTTTTGTCGAGTCGATCACTTGACGATTTTATTCTG  
CTTGAATTGCAATGCGTTTTTATTTTTATTCACAAGCTGTGGATGAATCAGGCGTCACGCGGTAACCTTTTTCAATCAC  
CCGAACCAGACGCTGTTTTTTCGGCAATTGCACTTCGACTATGCACGCAATTCGTCCTCTATTTGCTGCGCAATCGCCC  
ACGCTATGTGCTCATCGAGAAGTGGGTGCTCACCTTTACGACTTTCCAGCGCTGTCAAATCGTTTATCCCAAGGGGCA  
TTGCCTAATGTACGGCGATATTACGCAGCCAACGCAGGTGACCAATACGACGAATCGCCGATCCTTCCGTGACTTTTTAA  
AACTTCTCTTCGCTCCAGCGCAATAACTCAATGAGTTCGGTGCCTGAGCGGCTTACGCGGGTGAATCCTCTTCTG  
TGGTGAGTTGTAATAGCGATTCCACGGGAGATAAGCTGGCAGTCATCGCAACCGTAAATACGGTTTTCCATTAACGGT  
CGCAACTTTCGGGATCGCCCTTCAAGTTCGATGGTGAGATAAGAGATACAGCGGCGAGCATCGACGGTATATGGCTC  
GACGATGGCACCGGTGCGGCAAACTCGTACAGGCCACGCATTTGCCGATCCTTCTGACTGGTTGATCCACGGGCA  
GCGGAATATCGACCAGCAATTCGCCTAAAAAGAAGAACGAACCGCCCTCGCGATTGAGGATAAGTGAGTGCCTTACCTGTC  
CAGCCGAGCCAGCTTTTTAGCTAACGGGCGCTCGAGAATAGGCGCAGAATCGACAAACGCTCTAAAATTCAGCGAAAC  
ACAATGTTGCTGAATCATCTCGCCAGCTTTTTGAGTCGGTTGCGCAGAAGTTGTGATAGTCACGGCCAGCGCATAAC  
GGCTAACATAGCCGAGTTTGGGTTTTTTCAGCGTGTGGCAAATGCGGCGTTAGCAGGAAGGTAATTCATCCGACGCTG  
ATCACGCGCAGCGTACCGGGCAATAACTCATGAGGGCAGCGCGCAGCATAACCGTGACGTGCCATCCAGTCCATTTCCGC  
GTGGTATTGTTTGCAGCCATGCTTGCAGTTTGGGCTCGACTCGCTGAGATCGGTATCGGTAATACCTACCTGCTGAA  
AGCCGAGTTCCAGCCCCACTGTTAATTTTTGCGCTAACTGATTGAGATCGAGGGGCTCTGACATGACGGACCATAACA  
ATGAAGAAAAACCCGTAAGTATACCACACACCGTCTGGTACGCCGACGATATCCGCCGCGGAGAACGCGAGGCGGCAGA  
TGTGCTGGGGCTCACACTATGAGCTGATGCTTCGCGCTGGCGAGGCCGATTCAGGTGTGTCGTTGGCGTATCCTG  
ACGCCGCCACTGGCTGGTGTGTCGGTTCATGGTAATAACGGCGCGGATGGTACGTGGTCGCGGACTGGCCAAAGCG  
GTCGGCATTGAGGTCACGTTGTTGGCCAGGAGAGCGACAAACCGTTGCCGGAAGAGGCCGCGCTGGCACGCGAAGCATG  
GTTAAACGCGGGTGGCGAGATCCATGCTTCAATATTGCTGCCCCGAATCGGTAGATCTGATTGTTGATGCGCTGCTCG  
GTACCGTTTTGCGGCAAGCGCCCCGCAATCCATTAGCCAGTTAATCGACCACGCTAATCCCATCTGCGCCGATTGTG  
GCGGTTGATATCCCTTCCGCGCTGCTGGCTGAAACTGGCGCTACGCCAGGCGCGGTGATCAACGCCGATCACACCATCAC  
TTTTATTGCGTGAACACAGGCTTGTCTACTGAAAAAGCGGGGATGTTACCGGACAACCTGATTTTACTCACTGGGGC  
TGGATAGTTGGCTGGCAGGTGAGGAGCGAAAAATTCAGCGTTTTTCAGCAGAACAACCTTCTCACTGGCTAAAACCGCGT

CGCCGACTTCGCATAAAGCGGATCACGGGCGGCTGGTAATTATCGGTGGCGATCACGGCACGGCGGGGGCTATTCGTAT  
GACGGGGGAAGCGGCGCTGCTGCTGGTCTGGTTAGTCCGAGTACTGACCCGAGTGAAAAATTGCGCCGCTGCTGA  
CTGCACGACCGGAATTGATGGTGCATGAACTGACGATGGACTCTCTTACCGAAAAGCCTGGAATGGGCCGATGTGGTGGTG  
ATTGGTCCCGTCTGGGCCAGCAAGAGTGGGGGAAAAAAGCACTGCAAAAAGTTGAGAATTTTCGCAAACCGATGTTGTG  
GGATGCCGATGCATTGAACCTGCTGGCAATCAATCCGATAAGCGTCACAATCGCGTGATCACGCCGATCCTGGCGAGG  
CCGCACGGTTGTTAGGCTGTTCCGTCGCTGAAATTGAAAGTGACCCTTACATTGCGCCAAACGTCTGGTACAACGTTAT  
GGCGGCGTAGCGGTGCTGAAAGGTGCCGGAACCGTGGTGCAGCCCATCCTGACGCTTTAGGCATTATTGATGCCGGAAA  
TGCAAGCATGGCGAGCGGGCATGGCGGATGTGCTCTCTGGTATTATTGGCGCATTGCTTGGGCAAAAACGTGTCGCCGT  
ATGATGCAGCTGTGCAGGCTGTGTCGCGCACGGTGCAGCTGACGACTGGCGGCGGCTTTTGAACCGCGGGGATG  
CTGGCAACCGATCTCTTTCCACGCTACAGCGTATTGTTAACCAGGAAGTACTGATAAAAACCATGATGAATCGAGTAA  
TTCCGCTCCCTGATGAGCAGGCAACATTAGACCTGGGCGAGCGGGTAGCGAAAGCCTGCGATGGCGCAACCGTAATCTAT  
CTGTATGGCGATTTAGGCGCAGGTAACACCTTTAGCCGGGGCTTTTACAGGCTCTGGGTATCAGGTAATGTCAA  
AAGCCCCACTTATACGCTGGTGAACCTATACGCTCGACAATTAATGGTCTATCACTTTGATTTGTACCGCTTGCCG  
ATCCCGAGGAGCTGGAGTTTATGGGGATCCGCGATTATTTGCCAACGATGCCATCTGCCTGGTGGAGTGGCCACAACAA  
GGTACAGGTGTTCTTCTGACCCGGATGTCGAAATACACATTGATTATCAGGCACAAGGCCGTGAGGCGCGCTGAGTGC  
GGTTTCTCTGCGGGTGAATTGTTGCTGGCGCTTTAGCCGGTTAACCTTTGAAAGGTGGCGGGATGATGTATCGCATCA  
GAAATTGGTTGGTAGCGACGCTGCTGCTGTGACGCGCGGTGGGTGCCGCGACGCTCTCTGATATTAGGTTTCTAAC  
GGTAATCAACAGGCGCGATAACGTTGAGTTTTATTGGCGATCCTGATTATGCGTTTAGCCATCAAAGCAAACGCACCGT  
GGCGCTCGATATCAAACAAACGGGCGTGATTCAGGGACTGCCGTTGTTGTTAGCGGCAATAATCTGGTGAAGGCGATT  
GCTCTGGAACGCCATAAGATGCACAAACGCTACGGCTGGTGGTGCATCTTACCGAAAACGGTAAAACCGAAGCGGTGAAG  
CGGCAGAATGGCAGCAATTACTGTGCTTTTACGATTAACGCCGATGTGCCGCCACCGCTCTCCGCGCGCCGTTGGT  
TGCGAAACGCGTTGAAACGCTGCGGTTGTGCGACCGCGCTCAGCGAACCGGCGCGCAATCCGTTTAAAACGGAAAGTA  
ACCGCACTACGGGTGTTATCAGCAGTAATACGGTAACGCGTCCGGCAGCGCGCGCACGGTAACACTGGCGATAAAATT  
ATCATCGCTATTGATGCCGGACACGGCGGTGAGGACCTGGCGTATCGGCCCGGTGGTACGCGGGAGAAAAATGTCAC  
CATCGCCATCGCGGTAATTGCGTACTTTGCTCAATGACGATCCGATGTTTAAAGGCGTTTTAACCCGTGACGGGGATT  
ACTTTATCTCGGTGATGGGCGCAGTGTGTCGACGTAAGCAAAAACGCAATTTCTCTGTGTCGATTACGCTGATGCC  
GCACCGAACCGCAGTGCAGCTGGCGCTCCGATGGGTGCTCTTAACCGTGCGCCAACAGTGAAATGGCCAGCTGGCT  
GGAGCAGCACGAGAAACAGTCGGAGCTGCTGGGTGGGCGGGTGTGCTGGCGAACAGTCAGTCTGACCCCTATTTAA  
GCCAGGCGGTGCTGGATTTACAGTTCCGTCATTCCACGCGGTAGGGTATGATGTAGCGACAGTATGATCAGTCAGTTG  
CAACGCATTGGCGAAATACATAAACGTCGACCAGAACACGCCAGCCTTGGCGTTCTGCGCTCGCCGGATATCCCATCAGT  
ACTGGTCGAAACCGGTTTTATCAGCAACAACAGCGAAGAACGTTTGTGTCGCGAGCGACGATTACCAACAACAGCTGGCAG  
AAGCCATTTACAAAGGCCTGCGCAATTAATCTCTTGCATCCGATGCAATCTGCGCCGACGGGTGCAACGGCACAAACT  
GCCAGTACGGTGACGACGCCAGATCGCACGCTGCCAAACTAAGGACGATTGATGCCAATTCAGGTCTTACCGCCACAAC  
GGCGAACAGATTGCCGAGGTGAGGTGGTGCAGCGACCTGCGTCGGTAGTCAAAGAACTAGTGGAAAACAGCCTCGATG  
CAGGTGCGACGCGTATCGATATTGATATCGAACGCGGTGGGGGCAAACTTATCCGCATTCTGATAACGGCTGCGGTATC  
AAAAAGATGAGCTGGCGCTGGCGTGGCTCATGCCACCAGTAAAATCGCTCTCTGGACGATCTCGAAGCCATTAT  
CAGCCTGGGCTTTTCGCGGTGAGGCGCTGGCGAGTATCAGTTCGGTTTTCCGCTGACGCTCACTTCACGCACCGCAGAAC  
AGCAGGAAGCCTGGCAGGCTATGCCGAAGGGCGCGATATGACGTGACGGTAAAACCGGCGCGCATCTGTGGGGACG  
ACGCTGGAGTGCTGGATCTGTTCTACAACACCCCGCGCGCGCAAATTCCTGCGCACCGAGAAAACCGAATTTAACCA  
CATTGATGAGTATCCGCGCATTGCGCTGGCGGTTTTGACGTCACGATCAACCTGTGCGATAACCGTAAAATTGTGC  
GTCAGTACCGCGCAGTGCCGGAAGGGCGGCAAAAAGAACGGCGCTTAGGCGGATTTGCGGCACCGCTTTTCTTGAACAA  
GCGCTGGCGATTGAATGGCAACACGGCGATCTACGCTACGCGGTGGGTGGCCGATCCAAATCACACCACGCCCGACT  
GGCAGAAATTCAGTATTGCTACGTGAACGGTGCATGATGCGCGATCGCTGATCAATCACGCGATCCGCCAGGCGCTGCG  
AAGACAAACTGGGGGCGGATCAGCAACCGGCATTTGTGTTGATCTGGAGATCGACCCACATCAGGTGGACGTCAACGTG  
CACCCCGCAAACACGAAGTGCCTTTCCATCAGTCGCTGTTGTCATGATTTTATCTATCAGGGCGTGTGAGCGTGCT  
ACAACAGCAACTGAAACCGCGTACCCTGGACGATGAACCCCAACCTGCACCGGTTCCATTCCGGAAAACCGCGTGG  
CGGCGGGGCGCAATCACTTTGAGAACCAGGCTCGTGAGCCGGTAGCTCCGCGCTACACTCCTGCGCCAGCATCAGGC  
AGTCGTCGGGTGCCCCCTGGCCGAATGCGCAGCCAGGCTACCAGAAACAGCAAGGTGAAGTGTATCGCCAGCTTTTGA  
AACGCCCGCGCGATGCAAAAATTAAGCGCCGGAACCGCAGGAACCTGCATTGCGGCGAACAGTCAGAGTTTTGGT  
GGTACTGACTATCGTCCATTCGACTGTGCGTTGCTGGAGCGCGACGGCAACATTTCACTTTTATCCTTGCAGTGGCA  
GAACGTTGGTGCCTCAGGCACAATTGACGCCGGTGAAGCGCCGTTTGCGCCAGCCGCTGCTGATTCGTTGCGGCT  
AAAAGTTTCTGCCGAAGAAAAATCGGCATTAGAAAAAGCGAGTCTGCCCTGGCGGAATTGGGTATTGATTTCCAGTCAG  
ATGCACAGCATGTGACCATCAGGGCAGTCCCTTACCCTTACGCCAACAAAATTTACAAATCTTGATTCCTGAACTGATA  
GGCTACCTGGCGAAGCAGTCCGATTTCGAACCTGGCAATATTGCGCAGTGGATTGCACGAAATCTGATGAGCGAACATGC  
GCAGTGGTCAATGGCACAGGCCATAACCTGCTGGCGGACGTGGAACGGTTATGTCGCAACTTGTGAAAACCGCGCCGG  
GTGGTCTGTTACAATCTGTTGATTTACATCCGGCGATAAAAAGCCCTGAAAGATGAGTGATATCAGTAAGGCGAGCCTGCC

TAAGGCGATTTTTTATGATGGGGCCGACGGCCTCCGGTAAAACGGCGTTAGCCATTGAGCTGCGTAAAATTTTACCAGTAG  
AGTTGATAAGCGTTGATTCTGCCCTTATTTACAAAGGGATGGATATCGGGACGGCGAAGCCGAACGCTGAAGAGTTACTC  
GCCGCGCCGACCGATTGCTGGATATTCGCGATCCGTCGAGGCTTACTCGGCTGCTGATTTTCGCCGCGATGCGCTGGC  
GGAAATGGCCGATATCACCCGGCGGGGCGGATCCCACTGTTAGTGGGCGGTACGATGTTGTATTTCAAGGCATTGCTGG  
AAGGGTTGTCGCCGCTACCTGTCGGCAGACCCGGAAGTACGGGCCAGAATTGAGCAACAGGGCGCAGAGCAAGGTTGGGAG  
TCATTGCATCGTCAACTTACAGGAGTAGATCCGGTTGCGGCAGCAAGGATTCATCCAAATGATCCACAAAGGCTTTCCCG  
GGCACTGGAAGTTTTTTTCAATTTCCGGTAAAACCTTTAACGGAACGTACGCAAACGTACAGGAGACGCTCTACCGTATCAGG  
TGATCAGTTCCGCATCGCCCCGGCGAGCCGTGAACGTCCATCAACGCATTGAGCAGCGTTTTTCATCAGATGTTGGCT  
TCAGGTTTTGAAGCAGAAGTCCGGGCGCTTTTTGCCGAGGAGATTTGCATACGGACTTGCCTTCCATTTCGTTGCGTGGG  
TTATCGCCAGATGTGGTCTTACCTTGAAGGCGAAATCTCATACGATGAAATGGTTTATCGAGGTGTTTGCGCCACGAGAC  
AGTTGGCGAAGCGGCAGATAACCTGGCTGCGTGGTGGGAAGGGTTCACTGGCTTGACAGTGAAAACAGAAACAGGGC  
CGTGACGAAGTATTACAGTTGTTGGTGTATCGCAGGCTGAATGTGTACAATTGAGACGTATCGTGCGCAATTTTTTCA  
GAATCGAAAGTTCAAAGTACAATAAGCATATAAGGAAAAGAGAGAATGGCTAAGGGGCAATCTTTACAAGATCCGTT  
CTGAACGCACGTGCGTCGGGAACGTGTTCCAGTTTCTATTTATTTGGTGAATGGTATTAAGCTGCAAGGGCAAATCGAGTC  
TTTTGATCAGTTCTGTGATCCTGTTGAAAAACACGGTCAGCCAGATGGTTTTACAAGCACGCGATTTCTACTGTTGCCGCT  
CTCGCCCGTTTTCTCATCACAGTAACAACCGCGTGGCGGTACCCAGTAACTACCATCATGGTAGCAGCGCAGAAAT  
ACTTCCGCGCAACAGGACAGCGAAGAAAACCGAATAAGGTTTTCCGGCTGTTTTTTTACACGGGGAGCCAGCGATCCTGCGT  
TCCCCGCTGATCTATTTAGAGGTTTATACGCTTGTGTTGACCGTTATGATGCTGGTGAGCAGGCGTACTGGTACACATCT  
ATTTTACGCAAGACAAAGATATGGAAGACCTCCAGGAGTTTGAATCTCTGGTCTCTTCCGCCGGTGTCGAAGCATTGCAAG  
GTGATTACCGGTAGCCGTAAGCGCCGCACCCAAAGTATTTTGTAGGTGAAGGTAAAGCAGTTGAAATTCGCGGAAGCTGT  
CAAAGCGACGGGTGCTTCGGTCTTTTTGACCATGCCCTGAGCCCGCGCAAGAGCGTAACTGGAGCGTTTGTGCG  
AGTGTGCTGTATCGACCGCACCGCCTTATTTTAGATATTTTCGCCAACGTGCGCGTACCATGAGGGTAAAGTTGCAAG  
GTTGAGCTGGCGCAGCTGCGCATCTGGTACGCGCCTGGTGGTGGCTGGACCCACTTGAAGACAGAAAGGCGGGAT  
AGTTTTGCGTGGTCCGGGTGAAACCCAGCTCGAAACCGACCGTCTTTGTTGCGTAATCGCATCGTGAGATAACAGTCGC  
GCCTGAAAAGAGTTGAAAAGCAGCGTGAGCAGGGGCGCAATCGCGTATCAAAGCCGACGTTCTACTGTTTCGCTGGT  
GGATATACCAACGCCGTAATCTACCCTTTTCAATCGCATACCGAAGCGGGTCTACGCGGCAGACCAGTTGTTTGC  
CACCTCGACCCGACGTTGCGGCGTATTGACGTTGAGATGTCGGTGAACCGTACTTGCAGATACCGTAGGGTTTATTC  
GCCACTGCCGCACGATCTGGTGGCGCATTTAAAGCCACGTTACAAGAGACCGGCAAGCCACATTACTGCTGCACGTC  
ATTGATGCGGGGATGTGCTGTACAAGAAAACATCGAAGCGGTGAATACGGTCTTGAAGAGATCGACGCTCACGAGAT  
CCCAACCTGCTGGTATGAACAAGATCGATATGCTGGAAGATTTGAAACCGGCTATTGATCGGGACGAAGAGAACAAC  
CGAACCGTGTCTGGCTTTCCGCACAGACCCGAGCGGGGATACCACAGCTTTTTCAGGCTTTGACGGAGCGGCTTTCCGGC  
GAGGTGGCGCAGCATACTGCGTCTGCCACCGCAGGAAGGGCGTCTGAGAAGTCGTTTTTATCAGCTTCAGGCAATAGA  
AAAAGAGTGGATGGAGGAGGACGGCAGCGTAAGTCTGCAAGTTCGATGCCGATCGTTGACTGGCGTCCCTCTGTAAC  
AAGAACCGGCTTATCGATTACCTGATTAACGGCGTAGCGTCTGAAGCGTGGAGTCATATCCTCTGGCGTCGAAAGAC  
AACAGGGATCACCGCATAACAAATATGGAGCACAACATGGCGTGAATCAGCCCGTAATAACGGACAAGACCGCGACC  
CGTGGGGAAGCAGCAAACCTGGCGGCACTCTGAGGGAATGGAACAAAGCGGTGCGATCAAGGGCCACCTGATTTA  
GATGATATCTCCGAAACTGAGCAAAAAGCTCGGTGGTCTGGGCGCGGTAAGGCACCGGATCTGGCGGTGGCAGTTC  
ATCGCAAGGCCCGCGCCGACGTTGGCGGTGCTGCTGTTACCATCGCAGCGGACGATTGTCATTATCTGGGCGGCCA  
GTGGTTTCTATACCATTAAGAAGCCGAACGCGGCGTGGTAACACGCTTTGGTAAATTCAGCCATCTGGTTGAGCGGGT  
CTGAACTGGAACCCGACGTTTATCGACGAAGTCAAACCGGTGAACGTGGAAGCCGTGCGTGAACCTGGCGCTTCTGGT  
GATGCTGACGTCGGACGAGAACGTAAGTGCAGCTGAGATGAACGTGCAGTACCAGCGTACCAATCCGAAAAAATATCTGT  
ATAGCGTGACCGCCGATGACAGCCTGCGTACGGCTACCGACAGCGCCCTGCGTGGAGTTATCGGTAATAACCCATG  
GACCGCATTCTGACGGAAGTCTGACCGTATTGCTAGCGATACTCAGCGCAACTGGAAGAGACGATTGCTCCGATGA  
CATGGGTATCACGCTGCTGGACGTCAACTTCCAGGCTGCTCGTCCGCCGAAGAAGTAAAAGCGGCGTTTACGATGCGA  
TTGCCGCGGTGAAAACGAACAGCAATACATTGCTGAAGCAGAAGCGTATACCAACGAAGTTCAGCCGCGTGCAGACGGT  
CAGGCGCAACGTATCCTCGAAGAGGCGGTGCGTACAAGGCCAGACCATCTGGAAGCTCAGGGTGAAGTGGCGCGCTT  
TGCTAAACTTCTGCCGAATATAAAGCCGCGCGGAAATTAAGTCTGATATCGAGACGATGAAAAAGTGT  
TGGGTAACACCCGCAAAGTCTGGTTAACGATAAAGGTGGCAACCTGATGGTCTGCCGTTAGACCAGATGCTGAAAGT  
GGTAACGCCCCGCGGCAAGAGCGATAACGGTCCAGCAATCTGCTGCGTCTGCCCGACCTTCTCTCCACAACCAG  
TGGAGCAAGCAACACGTCGTCACCGAGTACGGGCGATATTATGGACCAACCGCGCCAACGCGCAGCGTAACGACTACC  
AGCGTCAGGGGGAATAACGATGCGTAAGTCAAGTATCGCGATTATCATCATCGTGGTAGTGCTTTACATGTCTGTCT  
TTGTGCTCAAAGAAGGTGAGCGCGGATTACGCTGCGTTTTGGTAAGGTAAGTACTGCGTGACGATGACAACAACCTCTGGT  
TATGAGCCGGTCTGCATTTCAAGATACCGTTCATTGAAACGGTAAAATGCTCGACGCAGTATTGAGCCATGGACAA  
CCAGGCCGACCGCTTTGTGACCAAAAGAGAAGAAAGACCTGATCGTCCGACTTTACATCAAATGGCGCATCAGCGATTTCA  
GCCGTTACTACCTGGCAACGGGTGGTGGCGACATTTTCGAAGCGGAAGTGTGTTGAAACGTAAGTCTCTGACCGTCTG  
GTTCTGAAATTTGGTCCGCTGGACGTGAAAGATATCGTACCGATTCCCGTGGTCTGACCCCTCGAAGTACGTGACGC

GCTGAACTCCGGTTCTGCGGGTACAGAAGATGAAGTTACTACCCCGCGGCAGATAACGCCATTGCCGAAGCGGCAGAGC  
GCGTAACGGCTGAGACGAAGGGCAAAGTTCGGTTCATCAACCCGAACAGTATGGCGGCGCTGGGTATTGAAGTTGTCGAT  
GTGCGTATCAAGCAGATCAACCTGCCGACCGAAGTGTCTGAAGCGATCTACAACCGTATGCCGCGGAGCGTGAAGCGGT  
AGCGCGTCGTACCGTTCAAGGTCAGGAAGAAGCGGAAAACTGCGCGGACTGCCGACTATGAAGTGACCAGAACGC  
TGGCAGAAGCTGAGCGTCAGGGCCGCATCATGCGTGGTGAAGGCGATGCCGAAGCAGCCAAACTGTTTGTCTGATGCATTC  
AGTAAAGATCCGGACTTCTACGCATTATCCGTAGCCTGCGTGCTTATGAGAACAGCTTCTCTGGCAATCAGGACGTGAT  
GGTCATGAGCCCGGATAGCGATTTCTTCCGCTACATGAAGACGCCGACTTCCGCAACGCGTAAATAACGACTGCGGTA  
CAGGTCAATAAAGCCACCGCATCTCAGGGATGTCGGTGGTTTTCTTTTCTATAAGGATAATGAATGAATTCGACAATC  
TGCTGCGCTTGGCCTGGTTTTGGTACTGGAAGGTTAGGGCCGATGCTTTACCCGAAGGCATGGAAGAAGATGATCTC  
TGCGATGACCAATTTGCCGATAATATTTACGTCGTTTTGGCGGTGGACTTGTGGTTGCGGGCGTTGTGGTCTACTACA  
TGTTGAGGAAAACGATTGGCTGAACAAAAACAGACTGATCGAGTCATTTTGAGTGCAAAAAGTGTGTAATCTGAA  
AAAGCGATGGTAGAATCCATTTTAAAGCAAACGGTATTTGAAAAATGGGTAAACAACGTCGTCGACTGGGCACCCAA  
GGGTGACGAAGTAAAGGTAAGATCGTCGATCTTCTGACTGAACGGCTAAATATGTTGTACGCTACCAGGGCGGTGAC  
AACGCAGGCCATACTCTCGTAATCAACGGTGA AAAAACCGTTCCATCTTATCCATCAGTATTCTCCGCGAGAATG  
AACCAGATCATCGGTAACGGTGTGCTGTCTCCGGCCGCTGATGAAAGAGATGAAAGAACTGGAAGACCGTGGCA  
TCCCCGTTGAGCGTCTGCTGTCTGAAGCATGTCGCTGATCCTTGATTATCACGTTGCGCTGGATAACGCGCGT  
GAGAAAGCGCGTGGCGCAAAGCGATCGGCACCACCGTCTGGTATCGGGCCTGCTTATGAAGATAAAGTAGCACGTCG  
CGTCTGCGTGTGGCGACCTTTTCGACAAAAGAACCTTCTGCTGAAAACTGAAAGAAGTGAATATCACAACTTCC  
AGTTGGTAACTACTACAAAGCTGAAGCGGTTGATTACCAGAAAGTTCTGGATGATACGATGGCTGTTGCCGACATCTG  
ACTTCTATGGTGGTTGACGTTTCTGACCTGCTCGACCAGGCGCGTCAGCGTGGCGATTTCTCATGTTTGAAGGTGCGCA  
GGGTACGCTGCTGGATATCGACCACGGTACTTATCCGTACGTAACCTTCTTCAAACCACTGCTGGTGGCGTGGCGACCG  
GTTCCGGCCTGGGCCGCTTATGTTGATTACGTTCTGGGTATCCTCAAAGCTTACTCCACTCGTGTAGGTGACGGTCCG  
TTCCCGACCGAAGTGTGATGAACTGGCGAGTTCCTCTGCAAGCAGGGTAACGAATTCGGCGCACTACGGGGCGTCG  
TCGTCGTAACCGCTGGCTGGACACCGTTCGCTTCTGCTGCGGTACAGCTGAACTCCCTGTCTGGCTTCTGCTGACTA  
AACTGGACGTTCTGGATGGCTGAAAGAGGTTAAACTCTGCGTGGCTTACCGTATGCCGGATGGTCGCGAAGTGACTACC  
ACTCCGCTGGCAGCTGACGACTGGAAGGTGTAGAGCCGATTTACGAAACCATGCCGGCTGGTCTGAATCCACCTTCGG  
CGTGAAGATCGTAGCGCCTGCCGACGGCGGCTGAACTATATCAAGCGTATTGAAGAGCTGACTGGTGTCCGATCG  
ATATCATCTTACCGGTCCGGATCGTACTGAAACCATGATTCTGCGCGACCCGTTGACGCGTAATTCTGGTACGCCTGG  
CAGATATTTTCCCTGCCGGCGAACAGTGTGATACATTGCTGTGTCGGGTAAGCCATTACGCTATCCGACACAGTGTTAA  
ATCCTCGCTTTTTCTTCCCGAAGTGAATAAATTAGCGACACAGCTTGTGGCTGGTTTATCATCAATATAAATGTAT  
TTTTTCCCGATTTCCTTTTGAGGTTGATGTGCAGTTAACGAGTTTCACTGATTACGGATTACGTGCGCTGATCTACATG  
GCGTCATTGCCAGAAGGGCGGATGACCAGTATTTCTGAAGTACTGACGCTACGGCGTCTCCCGTAATCATATGGTCAA  
AATAATCAATCAACTTAGTCGTGCCGGTACGTGACTGCTGTTGTTGTAAGGAAATGGCGGCAATTCGCTGGGTAAACCGG  
CGAGTGCATACGATTTGGTGTGTTGTCGCGAGCTGGAGCCCTTATCGCTGGTGAATTGCAGCAGTGAATTTGCCAC  
ATTACACCTGCCTGTAGGTTGAAACAGGCACTTTCTAAGGCCGTGCAAGTTTTCTTACGGAAGTGGATAACTACACGCT  
TGCCGATTTGGTTGAAGAGAATCAACCGCTTTATAAATTATTGCTGGTGGAGTACGAAAATCTTATCAGAGATGACAA  
CGGAGGAACCGAGATGTACAAGATCCTTTCCAGGAACCGCAAGCTGAAAAATACGCGAATCCCATCCCTAGTCGGGAAT  
TTATCCTCGAACATTTAACCAAACGTGAAAAACCGCCAGCCGTGATGAGCTGGCGGTAGAACTGCACATTTGAAGGCGAA  
GAGCAGCTTGAAGGCTGCGTCGCCGCTGCGCGCATGGAGCGCATGGTCAACTGGTCTTCACTCGTGTGAGTGAAG  
TGCCTGCCGGAACCGCTGACCTGGTGAAGGTACCGTTATTGGCCACCGTATGGCTACGGCTTTCTGCGGGTTGAA  
GGCGTAAAGATGATTTGTATCTCCAGCGAGCAGATGAAAACTGCATTATGGCGATCAGGTGCTGGCTCAGCCGCTG  
GGTCTGACCGTAAAGGTCGTCGTGAAGCGCTATTGTCCGCTACTGGTGCCAAAAACCAGCCAGATTGTTGGTGCCTA  
CTTTACCGAAGCGGGCGTGGCTTTGTGGTCTGACGACAGCCGCTGAGCTTCGATATCTTAATCCCGCCCGATCAGA  
TCATGGGCGCGCGGATGGGCTTTGTGGTCTGAGTGAAGTACTGACGCTCCGACTCGCCGACCAAAGCGGTGGGTAAA  
ATCGTGAAGTCTGGGCGACAATATGGGACCGGCATGGCGTTGATATCGCTCTGCGTACCCATGAAATTCGATACAT  
CTGGCCGAGGCTGTTGAGCAACAGGTTGCCGGCTGAAAGAAGAAGTCCGGAAGAAGCAAAGCGGGCGTGTGATC  
TGCGCGATTTACCGCTGGTACCATTGATGGCGAAGACGCCGCTGACTTTGACGATGCAGTTTACTGCGAGAAAAACGC  
GGCGGGCGTGGCTTTATGGTCCGATTTGCCGACGTCAGCTACTATGTGCGTCCGTCAACGCCGCTGGACAGAGAAGC  
GCGTAACCGTGGCAGTCCGTGTACTTCCCTTCGAGGTTATCCCGATGCTGCCGGAAGTGTCTCTAACGGCTGTGTT  
CGCTCAACCCGAGGTAGACCGCTGTGTATGGTGTGCGAGATGACGGTTTCGTCGAAAGGCCGCTGACGGGCTACAAA  
TTCTACGAAGCGGTGATGAGCTCTCACGCGCTGACCTACACAAAGTCTGGCATATTCTGAGGGCGATCAGGATCT  
GCCGAGCAGTACGCCCCGCTGGTTAAGCATCTCGAAGAGTTGCATAACCTCTATAAAGTGTGGATAAAGCCCGTGAAG  
AACGCGGTGGGATCTCATTTGAGAGCGAAGAAGCGAAGTTCATTTTCAACGCTGAACGCCGATTGAACGTATCGAACAG  
ACCCAGCGTAACGACGCGCAAAATTAATTGAAGAGTGCATGATTCTGGCGAATATCTCGGCGGCGGTTTTCGTTGAGAA  
AGCGAAAGAACCAGGCACTGTTCCGATTTACGACAAGCCGAGCACCGAAGCGATTACCTCTTCCGTTAGTGTGGCGG  
AGCTGGGGCTGGAAGTCCGGGGCGTAACAAGCCGGAACCGCGTACTACGCGGAGCTGCTGGAGTGGTTGCCGATCGT



CCTGATGCAGAAATGCTGCAAACCATGCTGCTGCGCTCGATGAAACAGGCGATTTACGATCCAGAAAACCGTGGTCACTT  
TGGCCTGGCATTGCGAGTCTATGCGCACTTTACTTCGCGGATTCTGCTTATCCAGACCTGACGCTGCACCGCGCCATTA  
AATATCTGCTGGCGAAAGAGCAGGGGCATCAGGGCAACACCCTGAAACCGGCGCTACCATTATTTCGATGGAAGAGATG  
CTGCAACTGGGTGAGCACTGTTTCGATGGCGGAACGTCGTGCCGACGAAGCAACGCGCGATGTGGCTGACTGGCTGAAGTG  
TGACTTCATGCTCGACCAGGTAGGTAACGTCTTTAAAGGCGTAATTTCCAGCGTCACTGGCTTTGGCTTCTTCGTCCTGTC  
TGGACGACTTGTTCATTGATGGTCTGGTCCATGTCTCTTCGCTGGACAATGACTACTATCGCTTTGACCAGGTAGGGCAA  
CGCTGATGGGGGAATCCAGCGGCCAGACTTATCGCTGGCGGATCGCGTGAAGTTTCGCGTCGAAGCGGTTAATATGGA  
CGAGCGAAAAATCGACTTTAGCCTGATCTCCAGCGAACGCGCACCCGCGCAACGTCGGTAAAACGGCGCGCGAGAAAAGCGA  
AAAAAGGCGATGCAGGTAAGGCGGCAAGCGTCTGAGGTGCGTAAAAGGTAACCTTTGAGCCAGACAGCGCCTTC  
CGCGGTGAGAAAAAACGAAGCCGAAAGCGGCGAAGAAAGACGCGAGAAAAGCGAAAAGCCATCGGCGAAAAACGCAGAA  
AATAGCTGCAGCGACCAAGCGAAGCGTGCAGCGAAGAAAAAGTGGCAGAGTGATCAATACCCTCTTTAAAAGAAGAGG  
GTTAGATTGCTGACAAAATGCGCTTTGTTTCATGCCGGATGCGCGGTGAACGCCTTATCCGGCTACATAATCACGCAAT  
TCAATATATTGCAGAGATCATGTAGGCCGATAAACGTAGTGCATCAGGCAAAACGTAACAACGAGTACATTAAATGAGC  
GAAATGATTTACGGCATCCACGAGTGCAGGCCCTGCTGGAGCGCGCCCTGAACGTTTTTCAGGAAGTCTTTATTTTAAA  
AGGCCGTGAAGATAACGCTGTTACCCTGATTACGCCCCTTGGTCTCAGGGCGTGGTTATCCAGTTGGCAAACCGCC  
AATATCTCGACGAGAAAAGCGAGCGGTGCCGTGCATCAGGGCATTATCGCCCGCTGAAGCCAGGACGTACGATCAGGAA  
AACGATCTGCCGGATCTGATCGCTTCGCTCGATCAACCGTTCTGCTGATCCTCGACGGCGTAACCGATCCGCAACAACCT  
CGGCGCTGCCTGCGTAGTGCGGACGCCGAGGCGTTCATGCGGTGATTGTGCCGAAAGATCGCTCCGCACAGCTCAACG  
CTACGGCGAAAAAGTAGCCTGCGGCGCGGAGAAAGCGTTCGCTGATTGGGTGACTAACCTTGCGCGCACCATGCGT  
ATGTTGAGGAAGAGAATATCTGGATCGTCGGTACGGCAGGCGAGGCGGATCATACTCTATCAGAGCAAAATGACCGG  
ACGCTGCGCTGGTGTGAGGTTGCGGAAGGTGAAGGTATGCGTGCCTGACTCGTGAACATTGCGATGAGTTGATCAGCA  
TCCCGATGGCTGGAAGCGTTTCTTCCCTGAACGTTTCGTTGCGACCGGAATTTGCTTATTTGAAGCGGTGCGCCAGCGC  
AGCTAATTTCTCAGAATTATGAAAAGCCATCCAGATTTGGATGGTTTTTTTTTGTCTATAGCTGGTAAGATAATTACGTA  
TTGCAATATTCATTTTATAATTTAACTTAATCTATATGGAATAATATATGACATGGAATCCGTTGGCGCTAGCGA  
CGGCGCTGCAAACTGTACCTGAACAAAATATTGATGTAACAAATAGCGAGAACGCATTAATTATTAATAATGAATGATTAT  
GGCGATTTGCAAAATCAATATTCTTTTTACTTCCCGCAAATGATTATCGAAACCTTTATTTGTCCGGTGAAGTATCAG  
CAATCCAGATGAATTTAATACCTTCTTATTAAGAAATCAGAAGATGATGCCGTTGTATCGGTAGGGATCTCCAGCGTAC  
AACAGGAAGAGTATTACATTGTTTTCGGGCGTTCGCTTAAATCTTCTTGAAGATATCTGCTTGAAGATAACCTCG  
CTGGTAGATAACGCATTGGATCTGGCTGAAATTACAGAAGAATATTCACACTAATTACAAGGACGGGTATTTATGGGAAT  
TTAAAAAGTTTTATTTACGCTGGGGAATCGTTTATCTCCAGGCGGAAGAATCCATTGAAGAAAACCCAGGGCGTGC  
TGCTGGAACAGCATATTCGTGACGCTAAAGCTGAACTCGATAAAGCCGAAAATCTCGCGTTGATCTGCTGGCGCGGGT  
AAATTAAGTACAGATAAGCTGAAAGATTTACGTGAGCGCAAAGCCAGTCTGGAAGCCCGTGCCTGGAAGCGTTAAGCAA  
GAACGTTAATCCGTCGTTGATTAACGAAGTTGCTGAAGAAATCGCGCGCCTTGAGAATCTCATTACCCTGAAAGAGCAA  
GTTGTGCAATCTGGAAGTCTCCGTCGATGGCGTGGAAAAAGCAGTTACAGCGACAGCGCAGCGTATCGCTCAGTTTGA  
CAGCAAAATGGAAGTCTTAAAGCCACTGAAGCCATGAGCGTGCACAACAGGCTGTAACAACCTTACCCTTGGCGCATC  
TTCCAGCGTTTCGACAGCGGAGAAATCCTTAAACGCTGCAACCGCTCAGGCCGAACGTCAGGCTCGCTGGATGCTG  
CCGCACAGTTGGAGAAAGTGCAGACGGTCCGACCTTACGAAAAAGCTGGCGGAAGCCGGAATTTGGCGGTAGCAATAAA  
AGTAGCGCCAGGATGTATTAGCAAGACTGCAACGCCAACAGGGCGAGTAATTTTTTCCAGCCTCGTAAAAGGCTGG  
CAACTATTTAAGGATAAAAATATGTCTGGTTTTTCCAGCGTCTGTTTGGCAAGGATAATAAGCCAGTATCGCTGCTGG  
TCCGCTGGGACTTCATCTCAATAGTGGCTTACGCTCGACACGTTAGCGTTTTCTGTTTCTGTTGGAAGATAATGCTGATTG  
CGCTGCCGGGTGAGGAATTTACGGTAGCCCGCTCAGCCACATCGATCTGGGCGCGGTAGTCAGATTTTCCGCTACTAC  
ACTTCAGGCGATGAGTTTCTGCAAAATCAATACCACCGCGCGGAAGATATTGATGACATTGATGATATCAAGCTCTTTGT  
CTATGAAGAGAGCTACGGTATCAGTAAAGAGAGTCACTGGCGGAGGCGATCAACGCCAAAGCGATGGGAGCAATGACCT  
TAAACTGGCAGGAAAAACGCTGGCAGCGATTTTTTAAACAGCGAAGAACCGGGAATATCGAACCCGCTACATGCTGGAA  
AAAGTAGAAAATCAAAACCATGCCAAATGGGAGGTCCATAATTTTACCATGGGCTACCAACGGCAAGTAACCGAAGATAC  
TTACGAATATTTGCTGCTAAATGGTGAGGAATCTTTTAAACGATCTCGGCGAGCCAGAGTGGTTATTTTCCGCGCGTGG  
GTGTCGATATCCCGCTGACATCACTTCATATTATTGGTTAATTACAAGGACGTTTACAATGCATATACTGGATTCACTTC  
TTGCCTTTAGCGCTATTTTTTTTATTGGCGTGGCTATGGTGATTATTTTTCTGTTTATCTATTCTAAAATTACACCGCAC  
AACGAATGGCAGTTAATCAAAAACAATAATACCAGCGCGTCACTGGCGTTCAGCGGTACATTGTTGGGTTACGTTATCCC  
CTTATCCAGTGCAGCAATCAATGCGGTGAGTATTCCAGACTATTTCCGCTGGGCGGGATTGCACTGGTATTGAGTTAC  
TCGTTTTTGTGGTGTGAGACTTTATATGCCCGATTAAGCGAAAAAATTTAATCACAATACCGCAGCAGGAATGTTT  
ATGGGAACCGCGCGCTGGCTGGCGGTATTTTTAACGAGCTTGTATGACATGGTAATGGACGATCATGGCCAGAAAACG  
CAAAATCAAGAAATAACAGTAAAATTTGGTACGGAGCGATTAGTCCGATTGGTAGACCGAATAATCCTTTTGAACCGTCC  
GCAATCGCTACGCACAAAAATACTTAACTTTGGCGTAAATGGGCGGTGCCGCTTTTTCTGATTGAAAGTTGTAGCGAT  
AGTAGCGATGTCGATAACGACGGCGACGGAACGTTTTACGCGACAGTGCAGGATTGATTGATGACGGTAATAATGCCGA  
CATTTGCGCGGTGGCTGGAACAACGCCAAAACGGCATTATGCGGATGTTCCGAAGAATATGACTCAGCAGAACTGTC

AGTCTAAGTACGAAAATTGCTACTACGACAATGTTGAACAGAGTTGGATCCCGGTCGTTTCTGGATTTTTGTTAAGCCGG  
GTTATTCGTAAGATCGCGATGAGCCGTTTGTATAACAGCGCGGTTCTCTTTTCTCGCGCCAGTCTGGCGCAG  
CACTTCTGGTGATTACTCCTGGCGCTCCGGTTCTGGCAAAAAGAGTCTTACTCTTCGGGCGGCTTTACCACCAAAAAAG  
CGTCTACCGTTTTCTCGCGCGGCTATGGTCGTTCTCCAGCGCCGTGGGCATTGGGGAGGCTAATCATGCTGAGACACA  
ACGTTCTGTGCGACGGATCTGGACCAGATCGCCGCTGACAACGGTTTCGACTTTTCATATCATCGACAATGAAATCTAT  
TGGGATGAGAGTCGGGCTTACCGTTTTACTCTGCGCCAGATTGAAGAGCAGATCGAAAAACCGACTGCGGAACTGCATCA  
GATGTGCCCTTGGGTGGTGGATCGCGCGGTAAGAATGAAGAGATCCTGACGCAACTGGCGATCCCGCCGTTGTACTGGG  
ATGTGATCGCTGAAAGCTGGCGCGCCCGCATCCTTCGCTGTATGGACGGATGGATTTTGCCTGGTGTGGCAATGCGCCG  
GTGAAGCTGCTGGAGTACAACGCCGATACGCCAATTCATTGTACGAGTCGGCTTATTTCCAGTGGCTGTGGCTGGAGGA  
TGCCCGGCGCAGCGGCAATTATTCGCGTGATGCCGATCAGTACAATGCTATTCAGGAACGCCTGATTTACGCTTTAGCG  
AGCTTTACAGTCGGAACCGTTTTATTTTTGCTGCTGTGAGACACCGATGAAGACAGGAGTACCGTGTGACTTGCAG  
GACTGCGCCAGCAGGCAGGCAGGAGTCGCGGTTATCTACATTGAAGATCTCGGTTTGGCGTCGCGCGGCTACTGAC  
CGATCTTGATGATAATGTCATCCAGCGTCATTTAAGCTGTATCCGCTGGAGTGGATGATGCGTGACGATAACGGTCCCG  
TGCTGCGCAAGCGTCGCGAGCAATGGTGGAGCCGTTATGGAAAAGTATCTTGAGTAATAAAGGGCTAATGCCGCTGCTT  
TGCGCTTCTCCCTGGTCACTCTAATCTTCTTGGCTCCTGGTTCGATGGCGAGAAAACCGCAGATTGCCGTTGGCGAAAG  
CTATGTGCGTAAACCAATCTATTCGCGGAAGGGCAACGTCACCATTTTTGACGGCAAGAATAACGTTGTTGACCACG  
CTGATGGTGATTTACCGCATGAACCGATGATCTACAGGCGTTTTCAACCTCTGCGCGGTTTTGGCGATAGCTACACACTC  
ATCGGTAGCTGGATTGTCGATGATGAAGCGTGCAGGATGGGGATCCGTGAAGATAACACACTGATCACAAAGACACCTC  
ACGTTTTCTCCGCATTACATTGCTGGATAAGAATGTTTTAGCAATCTCTTTCTGTGATGAATCCATGGCAGTGACCATA  
CTAATGGTGACTGCCATTGATGGAGGGAGACACAGTGCAGTGGCAAACTCACACCGTTTTTAACTAACCTATAACATTA  
ATAACAGCAACTTATACCTGTCTGATGGCGCGCTCTGCAAGCGGTAACGCGTGAAGGTGCTGGCTGGGATAGCGATTTT  
CTAGCCAGTATTGGTCAGCAGTTAGGAACGGCTGAATCCCTTGAAGTGGGGCGGCTGGCGAATGTGAATCCGCTGAATT  
ATTGCGCTACGATGCGCAAGGACGCCGCTGAGCAGTGTGCGTTTTACCCCGCTGGCACCTGCTGATGACGGCGCTAT  
GTACCAATCGGTTGCACAATCTTGCCTGGGAAGAAGACGCTCGCTCCGGCGATTTGTGGCGCGCGCGCGCTTTTATG  
TTACATGCGCAGGTTGAGGCAGGTCGTTATGTCCGATAACCATGACCTTTGCCGCCACGCCATTGTTGTTACAGATGTT  
ACCCGCGCCGTTTCCAGGACTGGACCACGCCGCTATTGAGCGATCGCTACGATTCTCACTTATTGCCAGGTGGGCAAAAAC  
GCGGTTTTGTTGATTGGCATGGGAATGACGAAAAGCAGGGCGGTTCCGATGTTATGAGCAACACCACCCGTGAGAGCGT  
CTGGAAGATGGCTCTTATCGCTGGTGGGCATAAATGGTTTTCTCGGTTCCGCAAAGCGATGCGCATCTGGTGTGGC  
GCAGACCGCGGTTGGTCTGTCTGTTTTTGTGCCGCGTTTTTGCCTGACGGCAACCGAACCGGATTCGCTCGAGC  
GGCTGAAAGATAAGCTGGTAATCGCTTAACGCCAGTTGCGAAGTGGAGTTTCAGGATGCCATTGGTTGGTTGTTGGGG  
CTGGAAGGGGAAGGAATTCGCTGATCCTGAAAATGGGTGGGATGACGCGTTTTGATTGCGCCCTGGGTAGCCATGCCAT  
GATGCGCCGTGCATTTTCGCTGGCGATTTATCATGCACATCAACGCCATGTTTTGGTAATCCATTGATCCAACAGCCCC  
TTATGCGTCATGTCTTAAGTCGCATGGCACTTACGTTGAAGGGCAAACGGCGTTGCTGTTTTGCTTTCGCGGAGCGTGG  
GACCGGCGTGGCGATGCCAAAGAAGCCCTGTGGGCGCGTTATTTACGCCTGCGGCAAAATTTGTGATCTGCAAAAGAGG  
TATGCCGTTTTGTGGCCGAAGCGATGGAGGTGCTGGGCGCATTGGTTATTGCGAGGAGAGTGAGCTGCCGCGGCTTTACC  
GGGAGATGCCGGTAAACAGTATTTGGGAAGGTTCCGGCAATATATGTGCTGGATGTGTTGCGGTTCTCAATAAGCAA  
GCGGGCGTATACGACTTATTGTGCGAAGCATTGTGGAAGTGAAGGGCAGGATCGCTATTTTATCGCGCGGTTCTGTCG  
TTTACAGCAGCAGCTGCGTAAGCCAGCTGAAGAACTGGGGCAGAGATTACTCATCAGCTATTCTGCTGGGCTGCGGTG  
CGCAATGTTGAAATAGCTTCTCCGCAATGGCGCAGGCGTGGTGTGAGGTGATGTTAGATACGCGCGCGGCTGACGG  
TTGTGAGCAGATCCAGAATGATTTATTGCTCGGGCGCAGGGGGAGTGTGTGTAAGCGTATACGACTGATGTCGAC  
GCTGGTTTTCGATTAACATAAATGAAATATGTGAAAATTTGAGGCCGACAAAGCGCTCGCGCCGATCCGGCATTGTTAT  
TTGCTGTAGATGACACTCATGCATACAGTATCGCCTGTACGCGCCAGTTATCAGGCTGCTGTTCTCGTACATGGAATA  
ATGCGGTACCATGACGCACCTTGTTCATCGGCCTTTAAACGCCACGATACGTTCCACGTCCTGCGGATCCCTGAAATATT  
GCTAACTGAGATCTGACCTATTTCACTCAGGCCGTCACGAGTCAGCACTGGCGAATTCTGCAGACTGTGCCGTGGCGC  
TCGAGGATAAGTCACTAATTGAGCGAGGGTGAGGCAAGTAATTGTTTCATCGTCAGCTCCATTTTTGTTTTCCCA  
TGTTGACGGGCATTCCATCGCGGTAATAAACGCCAGGCTTCCAGCCGTAATTTATTGTGACAGGTAACGCATAGGG  
ACGCAAGCAATGTAAGCTGACTATGTAAGTTGTCTGATTTATTTACGGTACAAAATGGCTTGTGAATACCACTGTCCT  
GTCAGGATGGTTTTCTCCACCATGACGACAACGTAATAATCAGCTTTTGCAGCGACAGCTTTCGTTTTGATTTCTGCTAA  
TGCGTCATCCGGAGAACCCGAACCATCGTGCTTACGCTACCTATTGCTGTAACCCTTGCCTGCTGGTCGCGCGAATCT  
CTTGGGATGGTCCGTTACTGGCGGTGCTGGCTGTGGCGTACCTTGCAGTGCCTACAGGCACTTAACATCAACACCAAT  
AATAAACTGGCAAACCGGTAATAACGCTATTACGTTTCTGCTAACCATAGTGTAGTGCCTTATTAATTTAACTTTGGG  
GGAATGTTCCCGAATTGTTACCTGGTACGCGATTTTGAATGAAAACGTGACGAAAGCGTAACCCACATCTCAACATTAT  
GAACTAATACCGCCAGCAGAACTTGTGCTAAGGATTTCTTATGTCATACAGACAAAAGGAGAGACAGATGATTGAA  
ATAGAATCACGCGAGCTGGCAGATATCCCGTTCTTATGCTTATCCTGTGCGGCAAAAAGATAACCCGTTACCGTGGCT  
AATTTTTTATCACGGCTTACTTATCCAGTCTGGTGTATAGCTATTTTGCCTTGGCGTGGCGCAGGCTGGTTGCGGG  
TGATCATGCCGGATGCGCCGATCACGGTAGCCGTTTTAGTGGTGACGCAGCGCGGCGTTAAATCAATCTGGCAAATC

TTGCTACAAAGTATGCAGGAATTCACTACTTTACGTGCGGCAATAGCCGAAGAAAACCTGGCTGCTTGATGACCGTCTGGC  
AGTCGGTGGCGCTCGATGGGCGCGATGACGGCACTGGGGATTACCGCTCGCCACCCACGGTGAGATGTACCGCCAGCA  
TGATGGGATCGGGCTATTTTACATCACTCGCCCGTTACTGTTTCCACCGCTGATACCTGAAACGGCAGCACAGCAGAAT  
GAATTCAATAACATTGTCGCGCCACTGGCAGAGTGGGAAGCGACAACCACCTGGAACAACCTTAGTGACAGACCTCTACT  
GCTGTGGCATGGCCTCGACGATGACGTTGTGCTGCGGACGAATCACTACGTTTGCAGCAGGCCTTAAGCGAGACGGGAC  
GGGATAAACTGCTAACCTGTTTCATGGCAGCCAGGCGTGCCTCACCGCATTACGCCTGAGGCGTTAGATGCTGCCGTGACA  
TTTTTCCGCCAGCATCTTTAAACACGCAGAATGCTGACCCCTTGCCTTCCAGTTGTTGCAGGATTTCCGGGTTAGCATT  
TTTGCCGGTGATAAGCATATCGATTTGATCGGCACGGCTAAAAGCATTCCCGCGCTTCGCCAATCTTACTGCTATCAA  
CCAGTACCACAGTTTCCCTACCACGCTCAGCATCTTCTGCTCTGCCATTGCTGTCAGCATATCGGTTTTATACAACCCCT  
TCTGCGGTGAGCCCTTTTCCGCTGGTAAACATCCAGTGCCTGGCAGTAGAGACTGTTTTGCTGCCCTGCGGGCTTAAAGT  
GATGGACTGACTTTTGTGTACTGTCCGCCATAATGATCACGCTGTCATGTTCTTGATCGATCAGGTAATTTGCCAGCG  
GTAGATAATTAGTGATGATTTGCACTGGCTTGCACACATTTCCCGCCAAGCAGAAACGGGTGGAGCCGAGTTGATG  
ACTACGTTTTGCGCCGATTAACAGCTGCGAGGCGCTTTAGCGATACGTACTTTTTCATCGTGATTCTGCGCCTGATG  
CAGATTATCGGCGTCCAGCGCGGGCGCTGTTGGTAATAGCTTCTGCGCATTGCGCACTTTTTTCAGTTTGGCGCTT  
CGTCAAGTTTATTGATATCGCGTCCGCGAGTGGCAGCGAAATCCAGACGCTCAACGACTTTCTCAACGGTCAAAAAG  
CCCAATTGTGCGAGCATTTCAGGAGGATTTGATGTCTTTGTGCTTCAGTCATGAGCTATCCGATAAAAATTTGATTTTT  
TTAGATGATTTTTGAAATAGCCAGGAAATACTACGCGGATAGCGCGAACTTCTCCACGCTACCCGGTATAAACGACAGA  
TTACAGGAATGACTTGAACGGCAGATCCGGTTCAATAGTGAAGCAATCATCGAAACCGCGGATAGTGGTACTCGAAGT  
TGCTTTTATCCAGCGCCAGGTAAATTTGCCACCCACTGCCAGATAAACGGCTTGAAGCCATACTTCAGGCGATCTTTT  
TTCATCTCCCACAGCAGCGGATCTCTTGCAGTCCGCTGGAAGTTTGACCAGATATCGTGGTGAACGGGATCACTAC  
TTTCGATTACGCGCTTACCACATACGCAGCATATCGGCGCTGGTCATTTTGTGCGTGATACCGCGGGTTTTGCGCGT  
ACGATCCTAACGCCACGTCGATCTGATGTTGTTACCGTGTTCGCATAATAGTTAGAGTAGTGGGAGTCGCGGCTGTGA  
TACAGGGAGCCGCGAGGCTTTTGAACAGGTAGTTCACCGCGGATCGTCCATGCCATCTGGCAGTACGCCAGCCGCTTT  
TTGATCGGCAGGAGGTTGATCAGTGCAGTACGGTCAAAGCATCAAGCGCATGAATTTCAATGTCTTTCACTTTTACTA  
CATCGCCCGTTTTGACCAGATGCAACGCTCTTTCGGTACGCCCCAGCCAATCCACAAATCCACACAGGTTTTCGGTCCG  
ATAAACGGTACGTCTGCACAATTTGATCACGGCAGCAGCGACGTTAACGTGATATGATCGTTGTGATCGTGAGT  
CGCCAGTACCAGTGCATCTGGCGAATCGAAACGGATCAAGAACAACGGGGTGGTACGCGAGTTTTGGCTGCAGTTTTT  
TCACGCCAGCCATGCGCTGCATCTGGTGACCCTGTTTCATTAACGGGTTACCGTGACTTTGTTTGCAGTGCCGACCAG  
AAATCAACGCAACGTTGGTGCCACCTTCCGATTTCAACCAGATCCCGGTGCAGCCAAGCCACCACATCGCAAATGTGCC  
AGGAGCGACCTGTTCTTGTTCATTTCTTCAATTCAACCAGCTACCCCACTCCGGGAAAGTGCTCAGGATCCAGGATTCAC  
GGGTGATACTTTTCACTTACTCATCGCCATTTACCTTCATGATAGTTCAATTCGAATCAATATGTGATTGGTTTTGATT  
AATCCTGACACTATTTTTTTCAGGAAGGCAATGACCATTTTTTACTTTTTGCCAGGGAAGTTGTTGTTGATTTTTGAGTAT  
GGAAAGATTTAATGGAATGTGTAATTCATTAATAAATGAATTTAAATGGATAAATGTTTCGTTGTGTGAATCCCACTC  
TATCCATGTGGAATTTTTCGGGTGCGTACATTTAATCATAAATAATCTTGTGTGATTACTTTTAAAATTAGAGT  
GAGTGCACAACATTCGGGTGTGTGGAATACCCGGTTACCTCTTCTCAGGAGATCGTTATGGAGATCCTCTACAACATC  
TTTACCCTGTTTTTAAACAGGTGATGACCAATGCCCGTTGTTGCTGGGATTTGTGACCTGTCTGGGTACATCCTACT  
GCGCAAAAGTGCAGCGTTATTTAAAGGCACGATTAACCATAAATGGTTTCATGTTGTTGCAGGCAAGGTCCGGCA  
TCCTCACCAGCACCTTCAAACGGTGGTGGCGAAAATGTCCGAAGTCTACGGCATTAAACGGCGCAATTTCCGATACCTAC  
GCTTCAATGATGGCAACCATCGACCGCATGGGCGATGCCTATAGCTGGGTGGTTACGCGGATTGTTAGCGCTGGCGCT  
GAACATCTGTTACGTGCTGTTGCGTGCATTACCGGCTTGCACAATCATGTTGACCGCCACATGTTCCAGCAGG  
CCGGTTGATTGCCGTTACGCTGTTTTATCTTCGGTACTCCATGTGGACCACATTATCTGTACCGGATTCTGGTTTTCG  
CTTACTGGGGCATCACTTCCAACATGATGTACAAGCCGACTCAGGAAGTACGGATGGCTGTGGTTTTCTCCATCGGTCA  
CCAGCAGCAGTTTGCATCATGGATTGCCATATAAAGTGCAGCGCTTCTCGGCAAAAAGAGGAGAGCGTTGAAGACCTCA  
AATTGCCGGGTGCGTGAACATTTTCCACGACAACATCGTCTCCACGGCGATTGTGATGACCATCTTCTTTGGTGCCATT  
CTGCTCTCCTTCGGTATCGACACCGTGCAGGCGATGGCAGGCAAAGTGCAGTGGACGGTGTACATCCTGCAAACTGTTTT  
CTCCTTTGCGGTGGCGATCTTCATCATCACGAGGGTGTGCGCATGTTTGTGGCGGAACTCTCTGAAGCATTAAACGGCA  
TTTTCCAGCGCCTGATCCAGGTGCGGTTCTGGCGATTGACTGTGACGATATCTATAGCTTCGCGCCGAACGCCGTGGTC  
TGGGGCTTTATGTGGGGCACCATCGGTGAGTATTGCGGTTGGCATCCTGGTGCCTGCGGCTCCTCGATCCTGATTAT  
TCCTGGCTTTATCCGATGTTCTTCTAACGCCACCATCGGCGTGTTCGCTAACCACTTCGGCGGCTGGCGTGGCGCG  
TGAAGATTTGCTGGTGTGGGATGATGAAATCTTTGGTTCGCTGCGGCGTGAAACTCACCGGTATGAGTGCCTGG  
ATGGGCATGGCGGACTGGTCGATTCTGGCACCGCGATGATGCAAGGCTTCTTCCATCGGTATCGCTTTATGGCCGT  
CATCATTGAATTCAGTGGCTTATATGTTCTTTCGCTGGCCGCGCTGCGCGCAGAAGAAGATGCAGAAAAACAACCTGG  
CAGAACAGTCTGCTTAATAAGGAGTTTTGATTATGACCGTACGATTTCTGGCTGTGTGGCAACGGACAAGGCAGTTCC  
ATGATCATGAAGATGAAAGTGGACCAGTTTTTAAACCAATCAAACATTGACCATACGGTAAACAGCTGCGCGGTTGGCGA  
GTACAAAAGCGAGTTGAGTGGCGCGGATATCATCATCGCTTCTACGCACATTGCGGGCGAAATCACCGTGACCGGCAACA  
AATACGTGGTTGGCGTGCACAACATGCTCTCCTGCCGACTTTGGCCGAAACTGCTGGAAGTATCAAGAGCATTTT

CCGCAGGATGTGAAGTAAGGACGCGCCATGAAATTACGTGATTGCTGGCGGAAAATAAATCCATCCGCCTGCAGGCTGA  
AGCAGAGACATGGCAGGAAGCGGTGAAAATCGGCGTTGACCTGCTGGTGGCGGCAGATGTGGTAGAGCCGCTTACTACC  
AGCGGATTCTGGATGGCGTTGAACAGTTCGGTCCTATTTTCGTTATCGCTCCGGCCTGGCAATGCCGCACGGGCGTCCG  
GAAGAGGGCGTTAAGAAAACCGTTTTCTCTGTTAACGCTGAAAAAGCCGCTGGAGTTCAACCACGATGACAACGATCC  
GGTGGATATCCTCATCACCATGGCGGCGTTCGATGCCAATACTACCAGGAAGTGGGCATCATGCAGATCGTCAACCTGT  
TTGAAGATGAAGAGAATTTTGACCGTTTACGCGCCTGCCGTACCAGCAGGAAGTACTGGATCTCATTGACCCGACCAAC  
GCGGCAGCTTAAAGAAGGAATTGAACATGTCATTACCAGTGTGCAAGTCCGCGCTGGACAACCAGACTATGGATAGCGCCT  
ACGAAAACACTCGCCTGATTGCCGAAGAAGTCGACATTATCGAAGTGGGCACCATTCTGTGCGTGGGCGAAGGCGTGCCT  
GCGGTTCTGTGACCTGAAAGCGCTTACCCGCACAAAATCGTACTGGCAGACGCCAAAATTGCCGATGCAGGCAAAAATCCT  
TTCGCGTATGTGCTTCAAGCCAACGCTGACTGGGTGACGGTAATTTGCTGTGCGGATATCAACACCGCCAAAGGCGCGC  
TGGACGTGGCAAAAGAGTTTAAACGGCGACGTGCAGATCGAACTGACCGGTTACTGGACCTGGGAACAGGCCGAACAGTGG  
CGGATGCAGGCAATTGGGCAAGTGGTTTATCACCAGCGCTGACCGCGAGGCCGAGGCGTGGCGTGGGCGAAGCGGA  
CATCACCAGGATCAAAACGCTTTCCGATATGGGCTTCAAAGTACCGTACCCGAGGCTGGCGTGGAAAGATCTGCCG  
TGTTCAAGGATTTCCGATTCACGTCTTATCGCGGCGGTAGTATCCGTGATGCCGCTTCCCGGTGGAAGCCGCACGT  
CAGTTCAAACGTTCCATCGTGAACGTGGGGCTAAGGAGCGGATATGTTGTCAAACAAAATCCCGCTTGGCATATGA  
AAAAAGCCTCCCGCGGGGAGTGTGGCTGGAACGCTGCAACTGGCAAAAACGTTAGGCTTCGATTTGTCGAAATGT  
CGGTAGATGAAACTGACGATCGCCTGTGCGCCTCAACTGGAGCCGCGAGCAGCGTCTGGCGCTGGTCAATGCGATTGTT  
GAAACCGCGTGCAGCTGCCGTCCATGTGCCCTTCTGCTCATCGTTCGTTCCCGCTGGGAGTGAAGATGACGCGGTGCG  
GGCGCAGGGGCTGGAGATTATGCGTAAAGCTATCCAGTTCCGCCAGGATGTCGGTATTGCGGTGATCCAGCTGGCGGGCT  
ATGACGTTTACTATCAGGAAGCCAATAACGAAACGCGTCTGCTTTCCGTGACGGCCTGAAAGAGAGCGTTGAGATGGCA  
AGCCGCGCGCAGGTGACGCTGGCGATGGAGATCATGGATTATCCGTTGATGAGCTCCATCAGCAAGGCGCTGGGATACGC  
GCACTATCTCAACAATCCGTGGTTCAGCTTACCCGGATATCGCAACCTGTCGGCGTGGGACAACGATGTGCAGATGG  
AGTTGCAGGCCGAATCGGGCATATCGTCGCGGTACATGTAAAGACACCAACCTGGCGTCTCAAAAACGTGCCGTTT  
GGCGAAGGTGTAGTGGATTTCAACGTTGTTTCAAAACGCTCAAACAGAGTGGCTATTGCGGGCCGTACCTGATTGAGAT  
GTGGAGCAAACGGCGGAAGACCCGGCGCAGAAGTGGCGAAAGCGCGTATTGGGTGAAAGCGCGCATGGCGAAAGCGG  
GCATGGTGGAGCGGCATAATGCAAAAAGCTAAAACAGCAGGTATTTGAAGCCAACATGGAGCTGCCGCGTACGGGCTGG  
TGACCTTTACTGGGGCAACGTGACGCTATCGACCAGCAACCGGGCTGGTGGTATCAAGCCAGCGCGCTTGCCTAC  
GAAACCATGAAAGCGGCCGATATGGTGGTGGTTGATATGAGCGGCAAGGTGGTGAAGGGGAGTATCGCCCATCTTCCGA  
CACTGCGACGATCTCGAATCTACCGTCTGTTACCCGTCGCTTGGTGGCATTGTCCATACCCACTCCACTCATGCCACCG  
CATGGGCGCAGCGGGGCTGGCGATCCCGGCTTAGGCACCACGACGCGGACTACTTCTTTGGCGACATTTCCGTGATCG  
CGCGGGTTAAGCGAAGAAGAGGTGCAGGGCGAGTATGAACTGAACACCGGCAAAAGTATTATCGAAACGCTGGGCAACGC  
CGAGCCGCTGCATACGCCGGGAATTGTGGTGTATCAGCACGGGCGTTCGCCTGGGGGAAAGATGCTCACGATGCGGTGC  
ATAACGCGGTGGTGTGGAAGAAGTGGCGAAAATGGCGTGGATTGCCCGCGCATTAAACCACAACCTCAATCACATCGAC  
AGCTTCTGATGAATAAACACTTATCGCTAAACACGGTCTAACGCTTATTACGGGAGAAAGTAGAACACGCGCTGCGG  
AAATTTCTTCTCGGGAGATAACTGGTCTAATTCGCGAGCGTTTTTCAAAAAAAGCCCCCTGCGAAGGGGGCAAAGC  
AACTATGGCAATGTTTCGTTGGTTATACCTGGTGTAGCGATAAATATCCGCGCTGGCGTGCATATTGCCGTTACTCCC  
CGTTCCCGCATCAGAATTACGTGGTAGTACGTTGCGCCTTGCAGTCTGTTTCTTCAATTAATGCCTGACGTGCTTCGC  
TTTCAAGTGGGAAATATGATTGATATAAATCACGCCTAAGCTTGCACATCGTCCATATTTCTGGCCTGGTGGTTATTA  
ATTTCAATGGTGCATGATTTGCACTTAGCAAAAGCACAGCCAGAAGGGTAAAACACGACTGAACATAGATACCTC  
CTCGACGGTGACTTTGTGTCTCTCCTGTGATGATCTTGTATTTAATTTAATCAATGATAAAGAAGTTGATGTG  
ACCATTTCTGATGCAGTTGTTCAAAAAAACACCATGATGAAGTGTGATGAACCTCAAATCAGCGTGTAGAGGTTAATTG  
CGAAAGGGGAGATTTATTTCCGCTCTGCCCTTGTAGTTAGCGAGGCATACAAGTACTATAACGCGTCATTTTTAGCCGA  
CCTTTAACACGTTCTTGCCTCCCGGGATTGCGCTGACCCAGACAGGAGGCTGAATAATCCGTAAGGAGCAATTCGATG  
CGTCATTACGAAATCGTTTTTATGGTCCATCCTGACCAGAGCGAACAGGTTCCGGGCGATGATCGAGCGCTACACTGCTGC  
CATCACTGGTGCAGAAGGCAAGATCCACCGTCTGGAAGACTGGGGCCGCGTACGCTGGCTTACCCGATCAACAACTGC  
ACAAAGCACACTACGTTCTGATGAATGTTGAAGCTCCGAGGAAGTATCGATGAGCTGGAAACTACCTTCCGCTTCAAC  
GATGCCGTTATCCGAGCATGGTTATGCGTACCAAGCACGCTGTTACCGAAGCATCTCCGATGGTTAAAGCGAAAGACGA  
GCGCGTGGAGCGTGGGATGATTTGCAAAACGAAACCGCTGATGATGCTGAAGCTGGGATTCTGAAGAGTAATTTCTGA  
TGACCAACCGTCTGGTGTGTCGGCACCGTGTGCAGGGCTCCCTTCGAAAGTCAAGTCCATCAGGAATTCCTCACTGC  
CAGTTCGTGCTTGGCATGTTCTGTGCAGGAGGAAGCCGGCTTACCAGGCGGCTGGTGTCAAATGCCGTTATTGT  
TAGCGGACACGAAAACAGGCCATTACTCACAGTATAACGGTCCGAGTGCATAACCGTTAGGGGTTCAATTCATGCC  
ACAAAGCAAAGAACGACTGAGCAAAATGGTTTTGCATGCCGAGCAGATTGAATTGATAGATTCTGGAGACTAGCCATAT  
GGCAGTTATTTCCGCTCGTGCAGATTCTGCCGTTTACCAGCGAAGGCGTTCAAGAGATCGACTATAAAGATATCGCTA  
CGCTGAAAAACTACATCACCAGAAAGCGGTAAGATTGTCCCAAGCGTATCACCAGTACCCGTCGAAAATACCAGCGTACG  
CTGGCTCGCGTATCAAACGCGCTCGCTACCTGTCCCTGCTGCCGTACACTGATCGCCATCAGTAATCGGTACGGTCCA  
TTAATCAGACTTTGAGAGGATAAGGTAATGCAAGTTATTCTGCTTGATAAAGTAGCAAACCTGGGTAGCCTGGGTGATCA

GGTAAACGTTAAAGCGGGCTATGCTCGTAACTTCCTGGTACCGCAGGGTAAAGCTGTTCCAGCTACCAAGAAAAACATTG  
AATTCCTCGAAGCTCGTCGCGCTGAACTGGAAGCTAACTGGCTGAAGTTCTGGCAGCTGCTAATGCTCGCGCTGAGAAA  
ATCAATGCACTGGAACTGTTACCATCGCGTCTAAAGCTGGCGACGAAGGTAAGCTGTTCCGTTCCATCGGTAAGTCCGGA  
CATCGCTGACGCTGTAAGTGCAGCTGGCGTTGAAGTGGCTAAGAGCGAAGTTCGTCTGCCGAACGGCGTTCTGCGTACCA  
CTGGCGAACACGAAGTGAAGTTCAGGTTCCAGGTTCCAGCGAAGTATTCGCGAAAGTATCGTAAACGTAGTAGTGAATAATTC  
GTTATTCAACGAGACGTAATAAACGCCGACCATTGGTCGGCGTTTTGCTTTCTATTTTTCTGTCAGGATTAGTTTTCGCAAG  
TAGATCCATTACCATTCTCTTGTGTCCATAAGTCAGGATGGTTTGTGGCGTTAGATACATACGAGCGCAACTGATGTC  
TCGCTCCTGGGCACTCGCTCGAAACCCAAACCCGAGTAGATTGGCGCTGAAC TTGATAAGGAACGCAGACCAATTTTCA  
AATCATGGGGTAAATCAGAATACGCGTTTAGCAATGCAGCAATGATGAATCCGAGGGCATTAGAAAACGCCTGTAACAGTG  
CGAAGTTGGTCGATATAAAGATCGATTGTTGGTAGTTCAGATGACCAGCAATTAGGCATTTGGGCAGGAAGGGTTACAAC  
GTATCCTATCGTTTGGCCGATAGTCTGGAGTACCATAACCAGTCCCAAACCACTTCGTGATTGTGATTTACTGT  
TGGGTTTCAAGGATTCGACATCTTGAATAAATATTTAGTTCGCGTTAACCTCGCACCCGCGTAAGCTTTATTGTAT  
TTCTGGCGTGAATATTATTAATGTAGCTTCATGGTTCATCCAAAAGAATTATCACCATTATTGTGATTCATCGTA  
AGCATTACACCTCGTCGCTAACTTATTGAATGCTTGCAGTCTGAGAGATCTAGTTTGTGGATCTCAACAGTACGCTGC  
CATCGCAATTATGATCTCTCCACGATTTGAAAGTAATGTAGCGGTGCGTATTGATGAAATTTAATTTACTGGTTG  
TCGGTGGACGAAAAACGAGATAAATATGCAGGAAATGAATAAATAGTCGTTGGTAATGTCATTGTAATGTTACCTGTTTA  
ATGTTTTTATAAATATCGCAGCTGAATGTTCCAGAAAAAATCGATATTAATAAAAAATAAGTTTTGTTTTCTGAAGTGGT  
GAAAAAGCGGATGGTAAAAGATATTAATATCAAAAATCGCTATTATGGATATAACGATGCACCCGGGGAGAAAAATGAC  
TTCCACGCCTTACACCGTACATTCTTGTGTGCGGTATGTAATTATTCTACGCTGTGCGTATCGGTATCGGTGATTTCGTTAATCA  
GCAGGTTAGCCAGCCACAAAAAGCCATTGAGAAAATTATTGATTTTACATGGGATTATTATATTGCTAATCCTTGGTTTT  
TAAAAATTGTGCATAGTGAATCAAAGTAAAGGTGTGATTATGCAAAATCACAGCGTCTCTAGAAATTAACCATGCG  
CACTTGCAGTTAATGGAATCCTTATTGGATGAAGGGAAGAAACACAATATTTTTAAGCCAGATATCGACCATTGCAGGT  
GAATATTAATATTGCTGCGCTTGGCGGATATTATTTGATCAACCAGCATAACGCTTGGCCTGGTTTATCACATCAGTATGG  
TTTACCCCGACTGGAAGCCAGACGTAAGGTATCAAAGAGACAATCCTTAGCTGGCTTTTGGTTGACCCTTCATCT  
ACCGCGCACGAATAAACTGCCATCCGGCTGGCGGGTGAACAGGACCTGTTGATTATTCCCGTATCAATGGTTAAGCCC  
GTCACCACGCCGCTGGCGTTCTGGCGGATTTTACCATCTGCCGTTTTGCAAATTAAGCTCAGCGGCTTACCCGCGCCTTC  
TACCTGCGCCATTGCATAGACATCGGTAGCGGGCAGTCCGTGGTGCAGGAAACAGCTGCGCCATCGTTTTACCGGGTTCGA  
CACGGTAAGAGCGCCATTGATTATCAATTCGCTATCTGGCTGGAATGGTTGCGTTTGGGTAGTTTGGCGCTGCTCTTCT  
GGCTGGCCTTCTGTATAGTTCTGGAGCGACCCGAGCCACTGATCAGGATCATTTTGTGGGGTAAGTAAATGGCGCCG  
CAGCTGTTCTTCTGTCGGCGGTTGTGATTGCGACTGAATATCTAACTGCGCTTACGCGTACCACCGGCGCGTTGGGG  
TATCATCAGATGGAAGCAGAAATCCGACCACCAATACAATGGCGCAATAATGATCCCCGACGATGCATCGGCGGCAGC  
GGGTCCATGAAGCGAAAATTGTCCGGCGCGTCCAGACTTTCTCCAGGGTGGTTTTAGTTCAAAGCGCCCGGGCATGGT  
TTCTCCTGCTCCGCGTCTTGTCTCAATCATAGCCTATGAATAAGCTAACGCTATGATGTCCTGGTAAACCCGCTT  
TATTATATTATACGGGATATTGCTATTGTTCTTTTTCCCTGGGATTTGTCATCATTCCCGCGACAAAGTTTTACCCAA  
AGAAGTGTGGCTGATATGCTGCCGCTACTTTATACCCTAAGAAAGGAAATACGATGACCACCCCACTTTTACACCAT  
CGAAGCGCAAGCAAGCTACGGCATTGGTTGAGGTAGGGCAACAACCTGAGTGAATCTGGCCTGGAAGGGCTGCTGCCAG  
AAGCACTGGTTGAGGATTTGCCGATGCGCTGGAAGGCAACAATCCGGCTGTTCCGGTTGATGTGGTGCATCGCGCGCTG  
CGTGAATCCACGAGCGCGCGGATGCCGTTCTGTCGTCAGCGTTTCCAGGCGATGGCTGCTGAAGGTGTGAATACCTGGA  
AGAAAACGCCAAAAAAGAAGGTGTGAATAGCACCGAATCTGGCCTGCAATTCGCGTATCAACCAGGGTGAAGGCGCAA  
TTCCGGCAGTACCAGCCGCTTCTGTTTATTACCCGGTAACTGATCGACGCGACCTGTTTACAGCTCCGTTGCT  
CGTGGTGAACCCGCTGAATTTCCCGGTTAATGGCGTATCCCTGGCTGGATTGAAGCACTGACTCTGATGCCGGTAGGTTT  
TAAATGGAACTGACTATCCCGCAGGAACTGGCATATGGCGAGCGCGGCGCAGGCGCATCCATCCCTCCGTTACGACCC  
TGGTGTGTTGAAGTGAAGTCTGGAATCCTCTAAGCAGCGCATTCTGTTCCCTCGAACGAGAGGGGAGCAGGCATTCA  
GCAATAAACCTTTCAGTTTGCCAAACGGCGCTATTTTGTGTTGCAAAGACCCCGTAAGCGTGTATTTTTGTGAGCTGTTT  
CGCGTTATCACCGTATGACTACTTTAAACATAAAAATTAACATTAGATCTAAATCTTAGTATTATCCCGCGTAT  
TGTTACCTAATATCGATGAGTCCCGATACAGATTGTCGATCATAGACTGACTAAAGGCGTAGAGCCTGAACAACACA  
GACAGGTACAGGAAGAAAAAATGTTAGATCAGGTAAGTTCGTTGCCGATGATCAGGCTCCGGCTGAACAGTGCCTA  
CGGCGCAATCTCAAAACCGACATATTAGCTTATTGCCATTGGCGGTGCCATTGGTACGGGGTGTGTTATGGGGTCTGG  
CAAAACGATTAGCCTTCCGGGCGCGTGCATATTTTCTGTTTATGATCATTGGTTTTATGCTTTTTCTGATGCGGG  
CAATGGGGGAATTGCTGCTTTCGAATCTGAATACAAATCTTTTAGTGACTTCGCTCCGATTTACTCGGGCCGTGGGCA  
GGATATTTACCGGCTGACTTACTGGTCTGCTGGTTGTAACCGGTATGGCAGACGTTGGGCGATCACGGCTTATGC  
TCAGTTCTGGTCCCGATCTCTCCGACTGGGTGCGCTCGCTGGCGGTGATAGTCTGCTGCTGACGCTCAATCTCGCCA  
CCGTGAAAATGTTCCGGTGAAGTGGAGTTCTGGTTTGGCATGATCAAAATCGTCGCCATTGTGTCGCTGATTGTGCTCGGC  
CTGGTCATGGTGGCGATGCACTTTAGTACCCGACTGGTGTGGAAGCGTCATTGCGCATTTTGTGGAATGACGGCGGGCTG  
GTTCCCGAAAGGTTTAAAGTGGCTTCTTTCGCCGATTCCAGATAGCGGTTTTCGCTTTCGTGGGGATTGAGCTGGTAGGTA  
CAACAGCTGCGGAAACCAAGATCCAGAGAAATCACTGCCACGCGGATTAAGTCCATTCCGATCCGATCATTATGTTT

TACGTCTTCGCGCTGATTGTGATTATGTCGGTGACGCCGTGGAGTTCGGTAGTCCCGGAGAAAAGCCCGTTTGTGAACT  
GTTTCGTGTTGGTAGGGCTGCCTGCTGCCGAAGCGTGATCAACTTTGTGGTGTGACCTCTCGGGCGTCTCCGCTAAACA  
GCGGCGTCTTCTACCAGCGTATGCTGTTTGGTCTGGCGCAGGAAGGTGTGGCACCGAAAAGCGTTCGCTAAACTTTCT  
AAGCGCGCAGTACCCGCGAAAAGGGCTGACGTTCTCGTGATCTGTCTGCTCGGCGGGCTGGTGATGTTGTATGTGAATCC  
TAGTGTGATTGGCGGTTACGATGATTACAACCGTTTCCGCGATTCTGTTTATGTTTCGTCTGGACGATTATCCTTTGCT  
CGTACCTTGTGTATCGAAAACAGCGTCCCTCATCTACATGAGAAGTCGATCTACAAGATGCCGCTCGGCAAGCTGATGTGC  
TGGGTATGTATGGCGTCTTTGTGTTCTGTGGTCTGTTGCTGACACTGGAAGATGACACTCGCCAGGCGCTGCTGGTTAC  
CCCGCTGTGGTTTATCGCGCTGGGGTGGGCTGGCTGTTTATTGGTAAGAAGCGGGCTGCTGAACTGCGGAAATAACCGC  
ATTATCATGCTGGATGGCGCAATGCCATCCAGCTTTTAGATCACTCACCCGCCAGCGCGCTGGGAACAGTACATTGTTT  
TCCAGACTGATGTGATCCATCAGGTCAATCAGTTCATTAATGCCGTTATACATCGCTTTCAGGTGGTGAGGCTTC  
TGGCGGCGGTGTGACGTTATTGGTGGTGTGTTAATCACTTCCAGCAGTTCGCCGCTTCATCGTCTCGCTTTCATTA  
CGCTGATTGGCCCATGCTGGCTGCCATGCCTGTTTGTATCATCGGGAAGAGGATCTGCTCTTTCATCATGTGG  
CTGAAAAGCTTTCATGCAGCATGGTCAGGTATTTTGTAGCCCTTTTGGCACGCTCGGTTTGTGGCGTGAACGCGCTC  
GACTTTAGTCTGCTTGCAGAAATCAGCTCCGGCAGTGTCTCGCGGTGACGATCGTGGTAGCGCACGATGATATGGTCGATGA  
TTTCTGCCAGCGGGGCTACGCCAGTCTTCTCAATCGTGTTCAGCGAGCTTTCAGTTCAGTTCATTAATGACCTCA  
ACATCCAGTCTTTTACGTGCCGCGCGCCAGCTGCTGTTACCGCCACAGCAGTAATCCATATCATATTTACGAAA  
CAGAGCTGAAGCGCGAGGAATAGAGAGCGCCAGTTCACCTAAAGTGTGGTCCGATAAGCCATAGCTGATTACCTCATTCT  
TAATAAGATAAGATGATTTTTAAATGCATCTTTAAGGCAAAAAGCTATAACCCTTACGTAGCAGAGGCTTATTTAACTCAC  
TGCCAGCGTGTCAACTTTCTGAGACAGATTAGTAAAGGTTTTCTGGTTTTGCTCTGACCGCGATGACCACGCCAATC  
ACTAACAGCGGATACCGCTCAGCGTCATTAGCGCGGCATTTGCTGGCGGAGTAAAAAGGTGTACAGCAAACTGCCAG  
CGTTTCAAAAACAATCAGCGGCCGAGAACTACTGTGCGTAATAGCTGGCTGGCGACGTTCCAGCAGAGTGCGCCAACCC  
ATGAGCAAAGCACGGCTATCGCAACCATCAGACTAATAAACACCAGCGGACGGGGGCAAAAGGGTAGGGAGAAGTCCGGC  
GTTTGCATTAGCCAGTAACAAGCGCAGAGATAGCCGATAAGTGAACCGGCAGTGTGACCAGCGCTGCGCTGTTGC  
CCACATCATCGGATGTTTGTGGGATTTTCCCGCAGCCAGCGGGCTTGGCAGGGCATAACCAGCCAGCAGACCAGG  
AACTAACGCCAGCACGATGCCAGAGGTATAACGTGCCAGTCAAAATCGGGGAGTCCGTGGTTTAACTCAGCAATATC  
ACACAGCCAGCCGATGCCAATAACAATCAGTGTGGGGCAGTTCACCGCGAGTTTCCCGTCCGCTGGCTATA  
AAGCAGATTGGCAAAGACAGGAATGACCACCGGCAGGTGCCGATAATCATCGTGGAACAGGCGGCCAGTACGTTGAA  
TGGCACTGGCAAAGCAGAAGTAATAGATGAGGTTGCCATCATAGTGAGCATCAAGGCGGTAAAGCCAGTCCGACGCGCC  
AACTGACCGAGACGCACGCTCCAGCCAGGCAATGGCGAGCGCAATTAACCCTAACGCCAGATAACGCCCATCGACTG  
CAACATCGCCGGTATTCCGGCAGCATCAACGGCCGACAAAAATAAGCCCCACATCAACCTGCTAACAGGGCGTACA  
GCACGCCGTAATCATTACTGGCATCCATTGATCTGTGAGAAGAAAGTTCAGGAAGCAGACATGATTGCTCCCGCATCC  
CGTCATTATCAGAGAGGATCGGGGAGGATGCCACTTAAATTAAGTATTAACATTAAGGAGTGGCTTACGCTTTCG  
GCTAACGTTGTCGTTGGGTGGCAATCAATTTGCTAAGTGTGTTGCTGTGATCAAAACAGACCCGCTTTCGATGCGCCAAC  
GTCAGAATCCGCCAGCATATCCGCCAGTCCGTGGGGCAGTCCGACGCTTTCAGTCCGCGGGCAAAATCGGCTTCGCTCA  
GATTTTGTAGGTAACCTGTTTGGCGTCTGTTTGGTCACTCTGCCGTAAGTGTGCAACGTCAGGCACTATCGCCC  
GCCAGTTCGTAACCTTGCCTTCTGACCGGCTTCGTAATCACGCGTCCGCGAGTCCGCGATAATCTGCCCGGTTGC  
TGAGGCGATTTGCCATCGCCCGCCGACCGATAAATACCGCGTGTCCAGTGTGCGGGGCGCTGGCGAGGTAGTTTT  
CGCTGTACCAGCGTTCGCGCAGCGGTGTAACGATGCCAGAATCAGCCAGCATTTTCTCCGCTCGATGTGCTCATCG  
GCGAGGCCGAGCGGGGAGGTATCTGCATGTAGCAGGCTGGTAAAGCGATAAATTTACGCCAGCCGCTTTCGCGGATT  
AATAACATTACGATGCTCGGGGACGTTGACCCACTTCGCTGGAAGAGATCAGCAGTATTTTTCCACTCCCTGAAGTG  
CAGATGTGAGTCCGCTTATCGCCGTAGTCAGCCTGACCGCAGGTAATGCCTTGTGCTGCCAGGGCTTGGGCTTTTGGC  
GGATTACGAACGATAGCCACTATTTGGCTGGCAGGAACCGTTTTATCAAGGATTCAATAACATAGTGACCAAGTTGGCC  
AGTGGCACCAAGTAATAGCGATCATGGGAAGTCTCCATCGTTTTGTCTGTTTAAATACGCTAACACCTAAACTTACTT  
TTAGTAAGTACGTACAAAAGGTAAGTATGAAATGAGTCAGGTTAGCCTGTGCGCAAACTGAAAGAGGGTAATCTCTTT  
GCGGAACAGTGCCCGTCCGCGAGGTGTTGAAACACGTACCAGCCGTTGGGGGTGTTGATTCTGGTGGCGCTACGCGA  
AGGTACTCATCGCTTTAGCGACCTGCGGCGCAAAATCGGTGGGTGAGTAAAAGATGCTTGCAGTCTGTACAGGCGT  
TAGAACAGGATGGTTTTCTAACCGTATCGCGTATCCGGTGGTCCGCGCATGTGGAATATAGCCTCACGCCGCTGGGC  
GAGCAGGTGAGCGAAAAGTTGCTGCACTGGCGGACTGGATTGAGTTGAATTTGCCGAGGTGTTGGCGGTGCGGGATGA  
ACGTGCGGCATAACTGCCGATGCGCTGAGCTTATCTGGTCTACGGTGCATGGCTTGTAGGGCGGATAAGATGCGCCAGC  
ATCGCATCCGCCAATAAATGCCGATGCGGTTGATGATTTATAGCCGAAAAGAGTGTTTTACTTACTCAATCCACC  
TGATAAATCGAAAACCGATATCATCGGTCCGACTTTATTATCGGATACTGCCCTTCTCTTAATAAACGCTGCGGC  
TTTATCTGACGGAGAGGTTTCGAAACGGATATCCAGTTTCTTATCGCCAGCTATCGGTGCTAAACGCCAGTTGTTATCTG  
CCGCCGGTGAATTTCCCGCACGTTTTCGACTCATCAGCAATCCAGCTGCCAGCACCGAGCGGTTCTCATCCGGTGAA  
GCAAAAAGCGATATGGCTGTGCCCGTACCGGCAATTTGCCGCGTAAGCGCGATAAGTTATGGTGGCAACCAGGAACAT  
GGCGTTCGGATCAATCGGCTTGCATTAAGGTGAGTTCTTAATCCTTTCGATTGGCATTAAATCATCTGGCACTCGC  
GTCATAACGGGCGGGTGGGTAACATCAATCTGATAATTACACCATCAATAACATCAAAGTTATAAGTGGGAAACCA

TCCCAGTTGATGAGTGACTGTGGTTTCGTGCTGTTGGGATCAATCTGGTTAACTGTCCC GCGGAGCACTCCAGCCACT  
TTTACCTCTTTACCGCTGGCTTTCCACACAATCAGCGTATTGGGATAGAGATAAAGATCGCGGCATTACGGAAGGTCA  
ACTGGCCTTTTTCCACCTCCACATAGCTTGC CGGGTCATTTTGCGACCACCGACTTTAAACGGTGCGGCAGCTGAAAGC  
ACCGGCAGTTTTGCCAGATCCGGATCGCCTGAATGTAATGCTCGACATACGCTTTTTGCGCGTTGTTACCACCTGCAC  
GGTCGGATCGTCTGCACACGCCAGATAGCTATACATATTGTGCGCAGATTTACCGATTGGCTTGCTGACGAACTGGC  
GTGTGGCATCGTGATCGGCTTTGAGTGTTTACCAGCTTGCTGTCTCCGCGCGAGGGATTTTTATTAGCGATGTG  
TAAATCGGTGCTGCTCCGCTTTGCGCTGCGTCACCTGCCATTTACCGCTGTCACTACTGAGTTGTAAGTCGACCACCC  
AAGATGATCGCCCATGCCTGGCATTACCGCCGGAACACCATTAGCGTGCCTTTGGCGATATCAGCCCTTCGATAT  
CAGCAAAATCTTTACCTGGGAAAACGGCGTGAGCATGGCCAAACATAATGGCGTTAACGCCGGAATTTCACTGAGGTAA  
TAACTGAGTTTTCCGCCATCACTTTATACGGATCGGCAGATAGCCCGGAATGTGCCAGAACGACAACAACATCGGCACC  
TTTCTCGCGCATTTCAGGCACGATTTGCGCACGGTTTCGGTAATATCATTACCGTCACTTTCCCGGATAAATTAGCTT  
TATCCCAGCCCATGATTTGGTGGCAGCAGCCAAATAGCCAACTTCAGCGTCTGTTTTTTCCGCTTTATCGACC  
ACTTCGGTGTCTTAATTAACACGGTGTAAACATTGGCTGTTGGTCTGCGTCAATGACGTTGGCATTACATAAGG  
GAATTCGCTCCTGCCAGCGCATTTTTCAGGTAATCAGACCGTAGTTAACTCGTGGTTGCCAAGCGTCCGACGGTAT  
AGTCCAGCGTATTTAATGCCTTATAGACCGGGTGAATACACCTGCTTTAATCCTTTCCGCCGACATGTAATCGGCCAGC  
GGACTCCCCTGAATCAAATCGCCGTTATCAACCAGTACGCTGTTTTCACTTCATTGCGGCATCGTTAATCAGGCTTGC  
CGTACGTACCAGTCCGAATTTTTCCGTGGCGGTGCTTTGTAATAATCGAAATCCATCATGTTGCTATGCAGATCAGTGG  
TTTTCCATGATACGCAGATCGACCGTGCCTGCATTACACTGGCGCAATCAGCGTGGCCAGGAGCGTTGCGCTAAACTTA  
ATCATCAGGGACATCCTTTATCATCGGGAATACGAAAGAAAAGGAGAATAAACGCTTACTTATAGAACAGTGAAGAA  
TGCCACAATTTTACGCTTTGAAAATGATGACACTATCACAGTTGGCGCATTCAATTAACGATAGGGTATAAGTAAACAAT  
AAGTTAACACCGCTCACAGAGACGAGGTGGAGAAATGTTAGATCAAGTATGCCAGCTTGCACGGAATGCAGGCGATGCCA  
TTATGCAGGTCTACGACGGGACGAAACCGATGGACGCTGTCAGCAAAGCGGACAATTCTCCGGTAACGGCAGCGGATATT  
GCCGCTCACACCGTTATCATGGACGGTTACGTACGCTGACACCGGATGTTCCGGTCTTTCTGAAGAAGATCCTCCCGG  
TTGGGAAGTCCGTGACACTGGCAGCGTACTGGCTGGTAGACCCGCTGGATGGTACTAAGAGTTTTATTAACGTAATG  
GCGAATTCACCGTTAACATTGCGCTCATTGACCATGGCAAACCGATTTAGGCGTGGTGTATGCGCCGGAATGAACGTA  
ATGTACAGCGCGCAGAAGGCAAAGCGTGGAAAGAAGAGTGGGTGTCGCAAGCAGATTCAGGTCGCGATGCGCGCCC  
GCCGCTGGTGGTATCAGCCGTTCCCATGCGGATGCGGAGCTGAAAGAGTATCTGCAACAGCTTGGCGAACATCAGACCA  
CGTCCATCGGCTCTTCGCTGAAATTCGCTGGTGGCGGAAGGACAGGCGCAGCTGTACCCGCGCTTCGGACCAACGAAT  
ATTTGGGACACCGCCGCTGGACATGCTGTAGCTGCAGCTGCCGAGCGCACGTTACAGACTGGCAGGGTAAACCGCTGGA  
TTACACTCCGCGTGAGTCGTTCTGAATCCGGGGTTAGAGTGTCTATTTACTAAATTCAGATGGCAGAAACAGTGTATT  
TCCTGATTCTGCCATCCTGATTTCTCCCAACCTAAAAAGTTATAAATAAAAAGAGATTGATTTAAAGTGCAAAAATTA  
ATTGCTAATAAGTTACATTTAATAATGAGCGTTTTTTGATAGTTACTTCTATAGTGAGATATTTAATGGCGACATAAA  
GTAACCAAATAAAAATAAGTTGTCATATGTTACCCAGGATCAGACACAATAATTTTATTGGTGGCGTGGAGTTATTTGTA  
AAGTCTTCGTATACAAAACACATTCAAACAATTTTTTAAACAACATCCATCATGCATTTAAGAAAAAAGATTGGATTC  
GAATTATGATAGCCTGTTAACTTTGAGGGAGTTCTTTGTTGCGCAACTCAGATTGATAAAAGTGGTTATCAGGTGCTTT  
CATCAAAAATGAAACTGTTACGCCATGGATAAGTTTCTTATCAGTTTCAGCCTTAAAGATAACGGTCCGAATATACA  
ATGACATTCGAGGTAGTGGATTTGAATACGAAGAAATACCCATAACAATAAATGAATATAACTCATTATGGATTTCAA  
AAACCGTGAATTTCCGTTAGAACAAAACAGACGATTGTATGCCTGGGATATTCTACAGAAAAACAGTCTGACATACCGA  
AAAGGATTAAGGTTATATTACCAGGCGATTGGTGACGTGCTTTAGGTTATGCCTTATTGGAGGATATAGTAAGCAAA  
TTAAAACGGGGTAAATTTGAACTCAAATACCAGGAGTGGAAATTAAGAATGCGATGGATGGTATATTACGAAAAAAT  
AATTGATGATAATTTTGCATAGTCATAGAATCTTTGGGCTTTGCGCTTAAATCTATGGAGGGGATGAACGTTTTTCGTA  
ATGGTTCCTCTGTTGTTTTGGAGGATGAAGATTACTCTTATTTATAATTTCTGTTAATGCAGGTTGCCAACAAAGTC  
GAATTAGCCGAACAAGTGGATGCGATAGTAAAGTGCAGTCTGGCCGAGATAGCGATATTACCAAAGAAAAGATTTGCGA  
GAAATATAAATCGACCATTGAGGCGTTTTAAAAAAGAGCAACTAGCGTTACCAGTATTAGTTGCGCGTAAGAACTCAGAGA  
CTTAATTTCCCTATCCCATAGATAACGATAGGGGAAAATTTTTTGCAGAATTTATGTTATTGCCATTTATTGAGCAAC  
TTTTGCAGCAGGTCCATCACTTGCTGCACCTCTCCGGTGTGAGCGCCCCGCTTTGGCCATTGCACGCGACCATCCTT  
ATCCAGCACCCTACAGCGGAACTTTCTCATCCAGCTGCCAGGCACCGAGCGCGACGCCATTGCTATCGACAATAAAT  
GCGACCAGGGATAAAGCTTTTTATTACTCTCCAGACTGCTGCGCACAAACATCCCTGAACCCGGAATCGCGTCTGCGGTG  
TTAAACATGGTGGTGGTCTGGTAACGATCGTGGTAACTTCGCTGATTTAATCGCTTCAATCAGCGTCCGCTTTTTCTC  
TTTTGCAGAGGTGCGACCAGCAATATGTTGCAGTACTCGCACTTTCCCACTAACTGCGCGCTGTTCCAGGTTTTGTAGC  
TAACTGATCTTTATCAAGCACTCGCCCCGATCGGTAATGCCAATCGGCGGCACTCGCTGACCGGTTTCGAACTGA  
TGTGCGGAAGCCATCATCGCAACAGCAGGCGAGGTGAGTGCCAGAATCTTGGTAGGGTCAATGGTGTTCCTTCTTATGA  
TATGAGGTGATCCGACCACTTGGGTCTGAGTTTTAATCATATGTCTATTTATCGAATTTCCCGCAAGTGTGATGCCAG  
TTTGGGTCAGCGCACAAATCATATGAAAAATGAATGCTTATACTGAAGACC GCGCTTCGGTAAAAAGATAAATCTGAA  
TAATTTGAACTTTAGGTAAGAAAAGTTATACGCGGTGAAACATTGCCCGGATAGTCTATAGTCACTAAGCATTAAAAAT  
TTGCGCCTCATAATAGTTGGGCCGATTGTGGCACCGCACAGGCGTAATACTCAGCAGGAGATAACAATGAAAAATTTCCA

ACGGTACAACCCACTTCAGGTGGCGAAGTACGTAAGATCCTGTTCCGTGGACGGTTATACATCAAGGACGTTGGCGCTT  
TTGAATTCGATAAGGGTAAGATTCTTATCCAAAAGTGAAGGATAAGCTGCATTTGTCAGTGATGTCCGAAGTTAACCGT  
CAGGTTATGCGTCTGCAAACAGAGATGGCTTAACCAAAGTGTATGCAGTAAAAAGTGCTATGCAGTAATAAGACGGCTC  
CTGATTCAGGAGCCGTTGATGTTTTCTGGGGTTACGCGACGCTTCTCTTTATCTTTAGCGTCAGGCAGTTTTGGCGAA  
AGGGCGGTGGCCTTGCTGTCGATCCGGTTCACCAGCAGCTGGTCGATGCGGTAGTTATCGATATCCACCCTTCAAATTT  
GTAGCCGGCAATTTACCGAATCGGTGCGTTTTCGGGATCTTACGCGACATAAACATCATAAAGCCGCCGATGGTTTTCTG  
AGTTGCCGACTGCGGAACTCGTCAATATCCAGCAGCGCATGACGTCGTCATTTGGGGTCCCGCCGTCAATCAGCCAT  
GAGTTCTCATCACGGGCGACAATCTGCTCTTCCAGCCCTGACCGACCAGATCGCCATCAGCGTGGTCATCACGTCATT  
GAGGGTGATGATCCCCACCAGCGGCTACTCGTTCATGATCACCGGAAGTCTTACCTGCGGTTTTAAAACTTTCCA  
ACGCCTCTGAAAGGGTTAACGTATCCGGCACAATCAGCGTGTTCGGAATTTGTACGCCGCTGTTCAAGTCCAGGCTTTGG  
TTAGCCAGCACGCGGTTCCAGAGGCTTTAGAAATCGACATAACCGATGATGTGGTCAATATCTTATTACAGACGAGGAA  
CTTAGAGTGGGATGTTCCGCCACCTATTCTTCCAGGCTTTGCTCATCTTCTGGAGATCAAACAAATCACGTTTTTAC  
GCGGTGTCATTGAAGACGGAACGGTACGGGATCCAGCTCAAAGACGTTTTCAATCAGCTCGTGTCTGTTTACGTAAC  
ACGCCCCGACGCGACCGGCTTCCACTACCGCGTAGATGTCATCAGAAGTGTATCTTACGTACCATTGGCAGTTT  
GAAAATACGGAAGATTATGTTCCGACGGCTTGAAGAACCACACCAGCGGGTGCAAACGTACAGGCGAAGCGCATCG  
GGTTGATGATACGCAAAGCCAGCTTTCGGCGCAATCATACCGATGCGTTTTCGGGGTTAAATCCGCAAACAGGATAAAC  
ATGCCAGTCACTAACGAGAAAGAGAGAATAAAGCTCAGTTGCTCAGAGAGCTCTGCCGACATATAGCGGGAGAACAGGCT  
GTGAAAAGCTGGAGAAAATGCCGCATACCGACGATACCGCCGAGAATCGCCACTGCGTTCAGACCGATTTGGACCACGG  
TAAAGAATCGCCGGATTTTCTGCATATTCAGAACGCGTTGGGCATTTATATTGCTTCATCAGCCAGCAGTTTAAAGT  
TTGATTTTGGTGAGGCGGCAAGCGAGATCTCGACATCGAGAAGAACGCACTTACAGCGATCAAGCAGAGTATGACTAA  
AATACTGTTTAAACATATCTTATCCGACCTTTCAGGCCAGATCTCGGAAGGGGAAGTTGATTAATTTGTGTGAAATACAC  
ATTGAAAGCCGATTGAAGAAAGTGAACCGCATTTTCAAGTGGCTAGTATAGCGTAAGGTAAGTACTGTAAGCCGCCAGAGGG  
TTAAAATTCAGACAGCTGAAAAATGCAAACTGCCTGATACGCTATGCCGATCAGGCCTACGAGTCTTGAATATATT  
GAATTTGGACGATTTTGTAGGCTGGTAAAGTCTGTTACGCCGATCAGGCATAGACAAAGAGCACTTTATCAACAACTA  
CATTTGTACCCGTAACGCTATGCTTCCGGCGGACAGACGCAATTCGCAATTCACAGTAACCATACGGGTTTTT  
ATGCAGATATTGCTGGTGGTTCATCTTCCGATAATAAAACGGTGTGGCGTTAGCGATTTCCGTGGTGTGACGATCGT  
CATCGGCGGAAGCATCGCCGCTGAAAACGTTCCAGACTGGCGCGAGCTGCGGCATCCTGTTCTGGGGTCAGCGGATAA  
ATCGCTGAACGATACTGCGTGCCGTGGTCATTGCCCTGACGCATTCCTGGGCGGGATCGTGATTCTCCAAAATACCTG  
TAGCAACTGCTCATAGCTGATGACGGAAGGATCGTAAACAATGCGTACCGCTTCGGCATGACCCGATACCGGAGCACA  
CTTCCCATAAGTCGGATTTGGCGTATAGCCGCCGTATAGCCTCGCGCGGTGCTGTAACGCCGGGTAACCTGCCAGAAC  
AGACGCTCCACACCCAGAAAACAACCCATCGAAAAATGGCAATCTCATTCCGTACAGGTACATTGGTCATTGAGTGACC  
GTTGACCGCATGCAGCGTGGCTACGGGCATCGGGGTGTACGTCCAGGCAGGGCATCGCGGGGGAAACCAGATGCTTTT  
TATCAAATAAACTCATGGTGTGCTCTCCGAAAATCGGTCAATGGGGTTAAGTTGTAACAAGAGGCGTATTTGCACAC  
AATAACCACCGTGAATAGTCTAAAGTAAAACATAAGAAAATTTGGGGTTAGTCTGCTTTTTAATCCATATTACTGGA  
TTTTTGTAAAGCGTTTAAAGCGGTTCCAGGGCAGGAAAAAGGATATTCAGGAGAAAATGTGCGCTATATCCGACAGT  
TATGCTGTGAAGCTTACTCTGCTTAAAGCGATCTGCCGTGCCGCGAACGTCCTACAGGTCGAGGGTTATCGGGA  
CAGCTGGAAAAGAACGTTCTGCGCAGCTTCTACGATTGAAAGTGTGAAGTACGCCAGACCGTCTGCTTTCGCGCACG  
CGTCGATGATGCCATCCGGAAGGTCTGAAAGCGCTGGGTTATTACCAGCCGACCATTGAATTTGATCTCCGTCCACCCG  
CAAAGAAAGGGCGGACGATTGATCGCCAAAGTACGCCAGGCGTCCGGTGAATTTGGCGGACCCGATGTGGTATTG  
CGCGGCGGCGCGGACCGATAAAGACTATTTGAAATTTGCTCGATACTCGCCCGGCTATTGGCAGGTAAGTGAACAGGG  
CGATTATGAAAATTTCAAAAAGTCTTAAACAGCATTGCGTTGCGTAAAGGTTATTTGATAGCGAATTTACCAAAGCGC  
AGCTGGGCATTGCGCTCGGCCTGCATAAAGCCTTCTGGGATATTGATTATAACAGTGGCGAACGTTACCGCTTTGGGCAT  
GTGACCTTTGAAGGATCACAAATCCGCGATGAATACCTGCAAAATCTGGTGCCGTTTAAAGAGGGCGATGAGTACGAATC  
GAAAGATCTGGCAGAAGTGAACCGCCGACTTTCTGCTACCGGCTGGTTTAACTCGGTGGTGGTGGCTCCACAATTTGATA  
AAGCGCGGAAACGAAAGTATTACATTGACGGGCGTGGTTTCGCCGCGAACAGAAAACACCATCGAAACCGGGTCCGGT  
TACTCTACGGACGTGGGACCGCGCTGAAAGCGACGTGAAAAAGCGTGGATGAACTCTTATGGTCACAGTCTGACCAC  
CAGTACTAGTATTTCCGCGCCGGAACAGACCCTCGACTTCAGCTATAAAATGCCGCTGCTGAAGAATCCACTGGAACAAT  
ATTATTTGGTGACGGGCGGTTTTAAGCGCACTGACCTGAACGATACCGAATCTGACTCCACTACGCTGGTGGCTTCTCGC  
TACTGGGATCTCTCAGCGGCTGGCAGCGTGCCATTAACCTGCGTGGAGTCTCGACCACTTACTCAGGGTGAATTTAC  
CAATACCACGATGCTGTTTTATCTGGGGTGTGATTAGCCGACGCGTTCTCGTGGTGGCCTGATGCCAACCTGGGGCG  
ACTCGAACGCTACTCTATCGACTACTCAACACGGCTGGGGTTCAGATGTCGATTTCTCCGTTTTCCAGGCGCAGAAC  
GTCTGGATCCGCACACTGTACGATCGCCATCGTTTTGTTACACGCGGACGCTGGGCTGGATTGAAACCGGTGATTTTCA  
CAAAGTACCGCCGATCTGCGTTTTCTGCCGGGGCGACCGAGTATTCTGGCTACAAATACAAATCTATCGCTCCGA  
AATACGCCAACGGTGACCTGAAAGGGGCTCGAAGTTGATAACCGGATCGCTGGAATACCAGTACAACGTGACCGGAAAA  
TGGTGGGGCGCGGTGTTTGTGATAGTGGCGAAGCGGTAAGCGATATTCGCCGAGCGACTTTAAAACCGGTACCGGGT  
CGCGTGGCTGGGAATCGCCGGTCCGGCAATCAAATCGATTTTCCGCTACCGGTCGCGGATAAAGACGAAACCGGGT



TACAGTTTTACATCGGTCTGGGGCCAGAATTATGAGTTTATGGAAAAAATCAGCCTCGGCGTGGTTATCGTTATCTTAC  
TGTTGCTGGGATCGGTGGCTTTCTGGTGGGCACCACCAGCGCCTGCATCTGGTATTTAAAGCGGCGGATCGTGGGTG  
CCAGGACTGGATATTGGCAAGTCCACGGCGGCTGGCGGATCTACCTTGTCTGACGTTCTGTTATGAGCAGCCAGGCGT  
GGCGGTAAGCGGGCAATCTGCATCTGGCTGTGGGCTTGGTGCCTGTGGAACAGCAGTGTGTTGATTAATGATCTGG  
CGCTGAAAGACATTCAGGTCAACATCGACAGTAAAAAATGCCTCCTTCTGAACAGGTTGAAGAAGAGGAAGATAGCGGT  
CCGTGGATCTCTCCACGCCGTATCCCATCACCTGACACGGGTGGCACTGGACAACGTCAACATTAAGATTGATGACAC  
CACGGTATCGGTGATGGACTTACCTCCGGCCTGAACTGGCAGGAGAAAACCTGACCCTGAAACCGACGTGCTGAAAG  
GCCTGCTGATTGCTCTGCCGAAAGTGGCGGAAGTGGCGCAGGAAGAAGTGGTGAACCGAAAATTGAAAATCCGCGAGCCG  
GATGAAAAGCCGCTCGGCGAAACGCTGAAAGATCTCTTTCTCGCCCGGATTGCCGGAATGACCGACGTGCAATTTGCC  
GCTTAACCTGAACATTGAAGAGTTAAGGGCAGCAGCTGCGCGTGACGGGCGACCGGACATCACCGTGAGCACCATGC  
TGCTGAAAGTGAGCAGCATTGACGGCAATACTAACTGGACGCCCTGGATATCGATTCCAGTCAAGGGATCGTCAACGCC  
AGCGGCACGGCGCAGCTGTGAGACAATGGCCGGTGGACATCACTCTCAACAGTACACTGAACGTGGAGCCGTTGAAAGG  
TGAAAAGTGAAGCTGAAAATGGGCGGCGCTGCGCGAACAGCTGGAGATTGGCGTTAATCTTTCCGGTCCGGTGGATA  
TGGATTTACGCCCGCAGACGCGACTGGCGGAAGCCGATTGCCGCTCAACGTGGAAGTGAACAGCAACAGCTTTACTGG  
CCGTTCACTGGTGAGAAGCAGTATCAGGCGGATGATCTGAAACTGAAACTTACCGGCAAAATGACCGATTACACGCTCT  
TATGCTACGGCAGTGAAGGGACAGGAGATCCCGCCGCGACTATTACCCTCGACGCGAAAAGTAAATGAACAGCAGGTCA  
ATCTCGACAAAACCTCACCGTCGCGGCGCTGGAAGGGAAAACTGAACTCAAGGCGTTGCTCGACTGGCAACAGGCCATTAGT  
TGCGCGGTGAGCTAACGCTTAACGGCATTAAACACCGCAAGAGTTCCCGACTGGCCGTCGAAAATCAATGGCTTGAT  
TAAAACCCGCGGTAGCCTGTACGGCGCACCTGGCAGATGGACGTGCCGGAGTTGAAGCTGACCGGTAACGTTAAACAGA  
ACAAAGTGAACGTTGACGGCACGCTGAAAGGCAACGTTATATGCAGTGGATGATCCAGGGCTTATCTGGAACCTCGGG  
CCAAACAGTGCCGAAGTGAAGGGCAGCTGGGGTAAAAGATCTCAATCTTGATGCCACCATCAACGCGCCGGGGCTGGA  
TAACGCGCTGCCGGGCTTGGCGGTACAGCGAAAGGCTGGTGAAGTACGGCGCACGGTGGAAAGCGCCACAACACTACTGG  
CAGATATCACCGCGCGGCTGCGCTGGCAGGAACTTCCGTGGCGCAGGTTGCGGTGGAAGGCGATATCAATCCACC  
GATCAGATCGCCGGAAACTCGACGTACGCGTTGAGCAAATTTCCGACCGGATGTAATATCAACCTCGTACCCTGAA  
TGCCAAAGGCAGCGAAAAGCAGCACGAGTACAGTTGCGGATTACGGGGAGCCTGTCTCCGGCAGCTTAATCTGGCAG  
GAAGTTTTGATCGAAAGAAGAACGCTGGAAGGAACTCTTAGCAATACCCGCTCCAGACGCGGTTGGCCGTTGGTCTG  
CTGACCCGCGATATTGCGCTGGATTACCGCAATAAGGAGCAAAAAATCAGCATCGGGCCACACTGCTGGCTTAACCCGAA  
TGCGGAACTGTGCGTGCCGCAACTATCGATGCGGGGGCCGAAGGCGTGGCGTGGTGAATCTCAACCGCTTCGACCTCG  
CCATGCTGAAACCGTTTATGCCAGAAACCACTCAGGCCAGCGGTATCTTACGGGTAAAGCGGACGTTGCCCTGGGACACC  
ACGAAAAGAGGGCTGCCGACGGCAGTATCACCTTTCCGGGGCTAACGTGCAGGTAACGCAACCGTCAACGATGCGGC  
GCTGCCCGTGGCGTTTACAGACTGAATCTGACGGCGGAATTGCGTAACAACCGTGCCGAATTGGGCTGGACCATCCGCC  
TGACCAATAACGGCCAGTTTATGAGCAGGTGCAGGTGACCGATCCGCAAGGCCGCGTAATCTTGGTGGCAACGTCAAT  
ATCCGTAACCTCAACCTTGCATGATAAACCCCATCTTACCCGTGGGAAAAAGCAGCGGGGATGGTGAAGTCCAACCTT  
GCGTCTGGGTGGTGTGTCGAAAGCCGAGTTGTTGGTCACTTACGGTTACGGGTGGTATCGATGGCAACTTTA  
TGCCGTTTATGATGCAACCGAGCCAGCTTGGCGTCACTTTAACGGTATGCGCTCGACGCTTCCGGTACAGTACGGACC  
CAGCAGGTGAAATCTACCTGAACGGTGTGCGGACTGGAGCCAAATTGAAAATGGCGGGCGGGTAAACGGCGAAAGG  
CAGTAAAGTGGGATCACCGTCCCGCCGATGGTACGAATGGATGTATCGCCAGATGTTGATTGAGGCTACACCAAC  
TGTTTACCCTCGATGGTGGTGGATGTCCTTGGCGCGCATCGTGGTGCACGATCTGCCGAAAGCGCAGTAGGCGTC  
TCCAGCGATGGTGTGTTAACGATAACCTGCAACCGGAAGAGCCGAAAACGGCGTCCGATTCCGATTAACAGTAACCT  
GATTGTCACGTTGGCAACAATGTGCGCATTGACGCTTTGGCTGAAAAGCGCGGCTGACGGGCGATCTCAATGTGTTT  
AGGACAAAACAAGGGCTGGTCTGAACGGGCAGATCAACATCCCTGAAGGGCGCTTCCATGCCTATGGTCAGGATCTGATT  
GTGCGTAAAGTGAGTTACTGTTCTCTGGTCCGCCAGATCAACCGTATCTTAATATTGAAGCTATTGTAACCCGGATGC  
TACAGAAGACGACGTAATCGCCGAGTTCGCGTCACTGGTCTGGCGGACGAACCGAAAAGCGGAGATCTTCTGACCCGG  
CGATGTCGCAACAAGCTGCCTTGTCTTATTTGCTACGTGGACAAGGGCTGGAGAGCGATCAGAGCGACAGTGGCGCAATG  
ACCTCGATGCTGATTGGTTTGGGGTTCGCAAGTGGCCAGATTGGGGTAAAATCGGCGAGACGTTTGGCGTAAGCAA  
TTAGCGCTCGACACCCAGGAGTAGGCGACTCCTCCAGGTAGTGGTACGCGGCTATGTATTGCCAGGTCTGCAAGTGA  
AATACGGCGTGGGTATATTTGACTCTATAGCAACACTCACGTTACGTTATCGCCTGATGCCTAAGCTATATCTGGAAGCC  
GTGTCTGGTGTAGACCAGGCACTGGATTTGCTCTATCAGTTGAGTTTTAGCAATGCGAATATTTGCTACGGCAGTTTA  
CGCCACAAAACAAGGCAACAGTCACTGGATGACCAATGCCAGTACTGGGCGATTTAGTATCGATAACTACCAGTTGTA  
TAGCCTGGGCACTATCCAGGCGCAGTTCGGGGAACGGAACGGTACACGGTGAAGTTTATCGTATTGACAACGCCACGC  
TGGCCGAACTGATGCCTTGCACACAGGGGCGGTGAATACGCGGCCAGTTGATTGACGACCGGTACGGGAGTGCATGG  
ATGTACGTTTATCAACGACCCGTCGATGGATTAAGCTAATTGAAAGCGGCGACTGGTTAGACAGGGATAAGTAACCATA  
TGATACGCCACCTTCCGGTGGCGTTGTTTTTGGAGACGACTGCGATTCTGTTTTGTAATCCCTCACCTTTGCTTT  
TCTCTCGAGCCGCTTCCATATCTATTAACGCATAAAAACTCTGCTGGCATTCAAAATGCGCAGGGGTAAAACGTTT  
CCTGTAGCACCGTGAGTTATACTTTGTATAACTTAAGGAGGTGCAGATGCGTATTACCATAAAAAGATGGGGGAACAGTG  
CAGGTATGGTCATTCCCAATATCGAATGAAAGAACCTAATTACAGCCGGGCGAGCGTGGAGGCGCAAGTGAGCAAC

AATCAACTGATTCTGACACCCATCTCCAGGCGCTACTCGCTTGATGAACTGCTGGCACAGTGTGACATGAACGCCGCGGA  
ACTTAGCGAGCAGGATGTCTGGGGTAAATCCACCCCTCGCGGTGACGAAATATGGTAAAGAAAAGTGAATTTGAACGGGG  
AGACATTGTGCTGGTTGGCTTTGATCCAGCAAGCGGCCATGAACAGCAAGGTGCTGGTCGACCTGCGCTTGTGCTCTCCG  
TTCAAGCCTTTAATCAACTGGGAATGACGCTGGTGGCCCCATTACGCAAGGCGGAAATTTTGCCCGTTATGCCGGATTT  
AGCGTTCCTTTACATTGCGAAGAAGGCGATGTGCACGGCGTGGTCTGGTGAATCAGGTGCGGATGATGGATCTACACGC  
CCGGCTGGCAAAGCGTATTGGTCTGGCTGCGGATGAGGTGGTGGAAAGAGGCGTTATTACGCTTGCAAGGCGGTGGTGGAA  
AAGGTGTGTTTATTTATCGCGGGCATAAAAAACCCCTACTAACCGAAGCCCGCGTTCAGGGTATTACGCCAGAAGAA  
CTTATTTATCTTTGCGCGCTCGAAGGAGGCAACGATTTACGCTTTAGCGGCTTCTGCGTTTTCCCAACCTTCAACTTTC  
ACCCACTTGCCTTTTTCGAGGTCTTTGTAGTGCTCGAAGAAGTGAAGCATTGCGCTTTCAGCAGTTCAGGCAGATCGTT  
AACGTCTTTAATGTGATCGTATTCTTTGCTCAGCTTGTGTCGGAACCGCAACCAGTTTCGCATCTTACCAGGCTTCGT  
CGGTCAATTTTACAGAACGCCAACCGGACGGCAACGGATCACAGAACCCGGCTGCAGCGGGTACGGAGTTGGGACCAGTACG  
TCAACCGGGTACCCTCCAGAGACAGGTGTGGTTGATGTAACCGTAGTTGCATGGATAGAACATCGCGGTGGACATGAA  
GCGGTCAACGAACAGTGCAGCGCTCTCTTTGTCGATTTGATTTGATCGGATCTGCGTTAGCCGGGATCTAATAACAA  
CGTAGATGCTTCCGGCAGATCTTTACCCGAGGACGTTGAGTAAGCTCATGTCTGTTTCTTTAAAAATATGTGGCAA  
ACAAAGTCCGAGTATTATAGCCAACCTGCGCCGAATGCTTCGCTTGTTCGCTTCTTATTTTCCCTTTTACCAGTCTT  
AAGACGGTATACAGAGCAGGAAAATCCATAACCGTAGCCGATTTTTCATAGTGAGATGAAAGCGATTACAAAATTGTGA  
TTAACGTTTTTACTTTTTTTGAAGTGTGATGTAACGCAATCTGTTACATAACGAATTGTCTATAGTTTTTTTCGCGAAC  
ATTTTTTAACCAATAATAACTACCCGACGAGGACAACCCATGTGGAAACGCTTACTTATAGTCTCTGCAGTCTCGGCA  
GCCATGTCGTCTATGGCGTTGGCCGCTCCATTAACCGTTGGATTTTCGCAGGTGCGATCGGAATCAGGCTGGCGTGCCGC  
AGAAACCAATGTGGCGAAAAGTGAAGCCGAAAAGCGCGGAATCACGTTGAAAATTGCCGATGGTCAGCAAAAGCAGGAAA  
ACCAGATTAAGCGGTACGTTCTTCTGTTGCACAAGGGGTGGATGCGATCTTATCGCTCCGGTGGTCCGACAGGTTGG  
GAACCGGTATTAAGAGGCGAAAAGATGCCGAAATCCCGTATTCTTCTGCTGATCGTTCCATTGATGTGAAAGACAAATC  
TCTCTATATGACCACCGTCACTGCCGACAACATCCTCGAAGGCAAGTTGATTGGTACTGGCTGGTAAAAGAAAGTGAATG  
GCAAACCATGCAACGTGGTGGAGCTGCAGGACCCGTTGGGGCCAGCGTCCGCTTACCGTAAGAAAGGCTTTGCCGAA  
GCCATTAAGAATGCGCAAATATCAAATCATCCGCTGCGAGTCAAGTACTCACCCGAGTAAAGGCAAAGAAGTCAT  
GGAGAGCTTTATCAAAGCGAAAACAACGGCAAAAACATCTGCATGGTTTACGCCATAACGACGACATGGTGAATGGTG  
CAATTCAGGCAATTAAGAAGCGGGCCTGAAACCGGCAAAGATATCCTCACGGTTCCATTGACGGTGTACCGGACATC  
TACAAAGCGATGATGGATGGCGAAGCGAACGCCAGTGTGAACTGACGCCGAATATGGCAGTCCCAGCTTCCGACGCGCT  
GGAGAAATACAAAAAGACGGCACCATGCCTGAAAAGCTGACGTTAACCAAATCCACCTTTACCTGCCTGATACCGCAA  
AAGAAGAATTAGAGAAGAAGAAAATATGGGGTATTGAGGGTGTATGCCTGATGCCGATTCGTAAGGCCGATAAGGCG  
CTCGCGCCGATCCGGCGATGGTGCATGAAGCCTGATGCGACGCTTACCGCTTATCATGCCTACTGGGAGCAGCT  
TTACACCGGGGAAAACCATGACGACCGACCAACACCAGGAGATCCTCCGACCGAAGGATTAAGTAAATTTTTCCCGGC  
GTCAAAGCGTTAGACAACGTTGATTTACGCTGCGCGTGGCGAAATCATGGCGCTGCTCGGTGAAAACGGGGCGGGAAA  
ATCAACGCTAATCAAAGCATTAACTGGTGTATACCACGCCGATCGCGCACCATCTGGCTGGAAGGCCAGGCTATCTCAC  
CGAAAAATACCGCCACGCGCAACAACTCGGCATTGGCACCGTCTATCAGGAAGTCAACCTGCTACCCAATATGTGGTC  
GCTGATAATCTATTTATAGCCGCGAACCCAAACGCTTCGGCTTCTACGCCGCAAAGAGATGAAAAGCGCGCCACCGA  
ACTGATGGCATCTTACGGTTTCTCCCTGACGTGCGCAACCGCTCAACCGTTTTAGTCCGATGCAGCAATCTGCG  
CTATTTGTCGGGTATCGATCTCTGCCAAAGTGTGATCCTCGATGAACCCAGCCAGTCTCGACACCCAGGAAGTG  
GAGTTACTGTTGACCTGATGCGTCAGTTGCGCATCGCGGCTCAGCCTGATTTTTGTACTCACTTTCTCGATCAGT  
CTATCAGGTCAAGCATCGATCACCCTTACGCAACCGCAGTTTCGTAAGCTGTCGGGAAACGTGCGAGCTACCGCAGA  
TCGAACTGGTAAAAATGATGCTGGGGCGGAGCTGGATACCCACCGCTACAGCGTGCCGGGCGAACATTTGTTGAGCGAC  
AAACCCGTTGCCGCTTCAAAAATTACGGCAAAAAAGAACGATGCGACCGTTTATGCTCGAAGTACGCCCGGCGAGAT  
CGTCGGTCTGGCTGGATTGCTGGGATCAGGACGTACCGAAACCGCGAAGTGTGATCTCGGTATCAAACCTGCTGACAGCG  
GCACGGCGTTGATCAAAGGCAAACCGCAAACCTGCGATCGCCACATCAGGCTTCCGGTACTGGGCAATGGCTTCTGCCCG  
GAAGACAGGAAAACCGATGGCATCATCGCTGCCGCTCGGTGCGGAAAATATCATCCTCGCTCTCAGGCCAGCGCGG  
CTGGCTACGCTCCATTTCCCGCAAAGAACAGCAAGAGATTGCCGAACGCTTTATCCGCCAGTTGGCATTGACACCTT  
CAACTGAACAACCGATTGAATTTCTCTCCGGCGCAATCAGCAAAAAGTGTGCTTTCAGTTGGCTACTGACCCGACCG  
CAATTTCTGATCCTCGATGAGCCAACCCGCGCATTGATGTTGGTCCCACGCCGAGATCATCCGCTGATTGAAACGCT  
ATGCGCGATGGTCTGGCGTCTGGTGTCTCTCCGAACTGGAAGAGCTGGTGGCTATGCCGATCGGGTATTATCA  
TGCGCGATCGAAACAGGTGGCGGAGATCCGCTGGCAGAGCTTCCGTTCCGGCGATCATGAACGCCATTGCGGGCTAA  
GGAGAACAGTGTGATGCCTCAATCTCTCCGGACACCACTACGCCAAAAGGCGCTTTCGTTGGCCGACGGGATGCCGC  
AGCTGGTAGCACTATTGCTGGTGTGCTGGTGTGATAGCCTGGTAGCCCCGATTTCTGGCAGGTGGTGTTCAGGATGGG  
CGTTTGTTCGTTAGCCCCATAGACATTTAACCCTGACGCTCCGTTGCGTTACTGGCGATTGGCATGACGCTGGTGT  
CGCCACCGGTGGGATTGATCTCTCCGTAGGGGCGGTGATGGCTATCGCCGAGCCACAACGGCTGCGATGACGGTCCGG  
GATTCAGCCTGCCGATTGTTTTGTTAAGCGCCCTGGCACCGCATCCTGGCGGGATTGTGGAACGGCATACTGGTAGCG  
ATCTCAAATTCAGCCGTTTGTGCCACTCTGATCCTGATGGTCCGGGGCGGGCTGGCGCAACTGATCACCGCCG

GCAGATCGTCACGTTAACTCGCCGGATCTCTCATGGTTCGGCAGTGGATCGCTGTTGTTCTGCCAACGCCGGTCATTA  
TCGCGGTGCTACGCTTATCCTGTTCTGGCTGTTGACCCGCAAAACGGCGCTGGGGATGTTTATCGAAGCCGTTGGTATC  
AACATTCGGGCGGCAAAAAATGCCGGGTAACACGCGAATCATCGTCACTTATGTGTTGAGCGGGCTGTGTGC  
GGCGATTGCGGGCATTATCGTGGCGGGGATATTCGGGTGCCGATGCCAACACGCTGGGTTATGGCTGGAGCTGGACG  
CCATTCTCGCGGTGGTATTGGCGGGGATCGCTGATGGGCGGGCGCTTTAACCTGCTACTTTTCGGTGGTGGGGCGCTG  
ATTATTCAGGGGATGAACACCGGAATTTGCTTTCCGGCTTTCCGCCAGAGATGAACCAGGTGGTGAAGCGGTGGTGGT  
GCTTTGCGTGTGATTGTTGAGTCGCAACGCTTTATCAGTCTGATTAAGGAGTACGTAGCCGTGATAAAACGTAATTTG  
CCACTGATGATCACCATCGGCGTCTTTGTGTTGGGTATCTTTACTGCTGACCCAGTTTCCCGGTTTTGCTTCCACAA  
AGTGATCTGCAATATCCTGACCGATAATGCCTTTCTGGGATCATTGCCGTTGGCATGACCTTTGTGATCCTCTCAGGTG  
GGATCGATCTCTCGTGGTTCGGTATCGCCTTTACTGGCGTGTTCGGCAAAAGTATTGGCGATTCGGCCTCTCG  
CCGCTGCTGGCGTTTCCGCTAGTGTGGTATGGCTGTGCCTTCGGCGCATTATGGGGCTTCTGATCGACGCCCTGAA  
GATCCCGCATTTATCATTACGCTTCCGGGATGTTCTTTTGGCGGGCTCAGCTATCTCGTTTCCGAAAGTTCGATTC  
CGATAAACCATCCATTTATGACACGCTCTCAAGCCTTGCCTGAAAAATCCCTGGCGGGCTCGTTAAGTGCATGGGA  
CTGCTGATGTTGGCGGTGGTGGTATCGGCATATTCCTCGGCATCGTACCCGTTTTGGTAATCAGGTATACGCCATTGG  
CGCAACGCAACGTCGGCGAATCTGATGGGATTTCACTCGCAGCACCATTTCGCATTTATGATCTCCACCGGAT  
TGGCAACGCTGGCGGGATTGCTTCTCGATTTATACCCAGGCGGATATGCGCTGGCGGGCTAGGTGTGGAATGGAT  
GCTATCGCCTCAGTGGTAATTGGCGGTACGCTTTTGAAGCGGTGGCGTTGGAACGGTATTAGGGACGCTTTTGGCGTGGC  
GATTCAGGGACTGATTGAGACTTACATAAACTTTGATGGCACGCTGAGTTCCTGGTGGACGAAAATCGCCATCGGTATTT  
TGTTGTTATTTTTATAGCATTACAGCGTGGATTAACGGTGTGTGGGAGAATCGTCAAGTTCGCCAGTGACAAGAGTC  
AACATTGCGCAGCAATAAAACGCCTCTCCGTGTGGAGAGGCGCAGGAGATTACGCGTCCGGGAACTCACGGATAAAGCG  
TTCGACATCTTCAACCATATGGTCTTGGCGACAAAGAATGAACGGCGCTGGTGCAGGGTTTCCGGGATGATATCCAGAA  
TACGCTCTTGGCCATCGCTCGCTTACCGCCCGCTTGTCCGCCAGGAATGCCATCGGGTTCGACTCATAACGAAACGC  
AGTTTCCGCTCCGGTGGTGGCGGTGCTGGGTAGAGATAAATACCGCCTTTCAGCAGGTACGGTGGAAATCCGCGAC  
CAGTGAACCGATATAACGTGAGGTATAAGGGCGGTGGTGGATTTATCTTCTCCTGGCAGAAATTAATGACTTCTTCA  
CCCCGTTCCGAAACTTAATGAGTTTCTTCTGTTGATGGAGTAGTTTTGCCTTCTCCGGGAAGCGCATCCGTTCTGG  
CACAGGCAGAAAACGCCGAGCGAAGGATCGTAAGTAAAGCGTGAACACCGCATCCGGTGGTGAACCAGCATGGTAGA  
GGAGCCGTATACCAGTAACCTGCCGCAACCTGTTGTTACCAGGCTGGAGGAAATCTTCTCCGTTACCGCGGTGCCAA  
CAGCGTAACCGCGGCTAGATGGAGAAAATGGTACCGACAGAGACGTTAACATCGATGTTGGACGAGCCATCCAGGGGG  
TCCATCAGCACCGATTTTTGCGTGTTCACAGCCTTCAAAGACGACAATCTCATCTTCTTTCAGAGGCAATGCCCGC  
AACGATATCGCGTGTCTTTCAGTGGCGTTCAGTTTTTCATTAGCGAAACAAGTCGAGTTTTCTGCTGAACCTCGCCCTGCA  
CGTTCTCAGCACCGCTGGCACCCAGGATATCAACAGTCTCTGCTTGTGATATCGCGATGGATAATCTTGGCGCCAGT  
TTTATTGCCGACAGCAAAGCAGTGAGCTCACCGGTAGCATGAGAAAACCTCGTGTGCTTTTTGACAATAAATTCACCTAA  
CGTTTTTATAAAACTTTCCCTGCAATGTTTATGGAGTAAAGCGACCCGCAACAATCTTAACAAATAATCTCAATGTTGGC  
TCAGGTGAATCGCGCCAGCAAATTACGGATTATCCTGAAATGCCTTCTCACTTGCAGCATATGCGTAAAATGAGCGG  
CAGATTAATAAAGGATAGTGACGTATGCGCATTATTTTTAGGAATTTGTGGCACATTTATGGGCGGTCTGGCGATGCT  
GGCGCGCAGTTAGGCCATGAAGTAACGGGTTCCGACGCCAATGTGTATCCGCCGATGAGCACCTTACTTGAAGCAAG  
GCATTGAGCTGATTGAGGGTACGATGCCAGCCAGCTCGAGCCGACCCGGATCTGGTATTATTGGCAACGCCATGACC  
CGTGAAATCCGTGTGTGGAAGCGGTACTGGAAAAAATATCCCTTATATGTCAGGTCCACAGTGGCTGCACGATTTTGT  
GCTGCGGACCGCTGGGTGCTGGCCGTTCCGGTACACAGGCAAAACACCACCGGGAAATGGCGACTGGATTCTGG  
AACAGTGTGGTTACAAACGGGCTTTGTAATCGGCGGTGTGCCGGGAACTTTGAGGTTTTGCGCTCATCTGGGCGAAAGC  
GACTTCTTTGTTATCGAAGCGGATGAGTATGACTGCGCTTCTTCGACAAACGCTCTAAATTTGTTCACTACTGCCCGC  
TACGCTGATCTCAACAACCTTGGATTCGATCACGCCGATATCTTTGACGACCTGAAAGCGATCCAGAAAAGTTCACC  
ATCTGGTGCATCGTTCCGGGGCAGGGCGTATTATCTGGCCGAAAATGACATCAACCTGAAACAGACCATGGCGATG  
GGCTGCTGGAGCGAGCAGGAGCTGGTGGGTGAGCAGGGTCACTGGCAGGCGAAAAAGCTGACCACCGATGCTTCCGAATG  
GGAAGTTTTGCTGGATGGCGAAAAAGTGGGCGAAGTAAATGGTGCCTGGTAGGCGAACATAATATGCACAATGGCCTGA  
TGGCGATTGACAGCGGCTCGCATGTTGGTGTAGCGCCGCGAGATGCCGTAACGCGCTGGGTTCTGTTTATTAATGCTCGT  
CGCCGCTGAGGTTGCGTGGTGAAGCGAATGGCGTACGGTATATGACGATTTTGGCCATCACCCGACGGCGATTCTGGC  
AACGCTGGCGGCGCTGCGTGGCAAAGTGGTGGTACGGCGCATTATTGCTGTGCTGGAGCCGCGCTCGAATACCATGA  
AAATGGGGATCTGAAAGACGATCTGGCACCTTCATTAGGTCTGCCGATGAAGTCTTCTGCTGCAACCGCGCATATT  
CCGTGGCAGGTGGCAGAAGTGGCAGAAGCCTGCGTTCAGCCTGCACACTGGAGTGGCGATGTGGATACGCTGGCAGATAT  
GGTGGTGAACCGCTCAGCCTGGCGACCATATTCTGGTATGAGCAACGGCGTTTTGGTGGGATCCATCAGAACTGC  
TGGATGGGCTGGCGAAGAAGCGGAAGCCGCGCAGTAATTCGGCCTTAGCCAGATATAGTATGCGTAGGCCGGATAAGGC  
GTTACGCCGATCCGGCATTGAGCATAAGTGCCTGATGCGACGCTTATGCGTCTTATCAGGCCTACAGGTGCACCGTA  
TCCGGCAAACCACTACATCAACAACGAAAATTACCCTTCTGCTTCCGCTAACTCGCGCAGATACTGAAAAATCTGGC  
GTGGCGATTTCCGGCGCTTATTCCCTTCTTCTTCTTTCGCGTTCGGGATCAGAGTACGCGATTGCTGACGATCGGCA  
TCGGGCCACAGATTTAATACCTCAGCGATGGCGTATCACCTGATCGATCAGACGATCGCGCAGTTTTCCAGTTTATG

GAACAGCACCTGCTGGTTGTGACGGTTTTTTCAGCTTATCCAGCGCTGACGAATAGGCTCTACGTCGCGCTGGCGCA  
GCATCTTACCGATGAGCTGCAACTGGCGCGGGACCTTCCATCTTAATACGCTGGCGGAGCTCAATAGCCGCGCAG  
TCCGCATCTAACGGGATCTTATCCAGCGGTTTTTCCCAGATCAACAATTTCCGCGCCAAGGCGTTTTAGCTCCTCGC  
ATCACGTTTAAATTTCACTTTTACTGACCCAGATAATTTTCATCGTCTTCGCTTCGATGTCATCACCGGGAACGTCGTCGA  
GCCAGTCTTCGGGCTGCTTAGTCATCTCAGGCTCCTTAAAAAAGAGGCTAATGTTACCAGTTAAGATGCGCACTGAAAA  
ACGGTTCTCTGTTAGACTTCAGAGAACTCTCTACATTATGGCACTTGAATGAAAGTAATCTCTCAAGTTGAAGCGCAG  
CGCAAGATTCTGGAAGAAGCAGTTTCCACTGCGCTGGAGTTGGCCTCAGGCAAATCGGACGGTGCGGAAGTTGCCGTAG  
CAAGACCACGGCATTAGCGTAAGCACGCGTTATGGTGAAGTGGAGAATGTTGAATTCAATAGCGATGGCGCGCTGGGGA  
TCACTGTTTATCACCAAGACCGCAAAGGTAGCGCATCATCCACCGATTTAAGCCCGCAGGCCATTGCCGTACTGTACAG  
GGCGGCTGGATATTGCCGTTTATACCTCGCCAGATCCCTGTGCCGGCGTGGCAGACAAAGAGCTGCTGGCCTTTGACGC  
ACCAGATCTCGACTTGTCCACCCTGCGGAAGTTTTCCCGGATGAAGCCATTGAACTGGCGGCCCGCGCAGAACAGGCGG  
CATTGCAGGCGGACAAACGCATCACCATAACGAAGTGGCAGCTTAAACAGCCACTACGGTGTCAAAGTTTTTGGCAAC  
AGCCACGGCATGTTGAGGGTACTGCTCAACGCGTCATTGCTCTCCAGCTGTGAATTGCCGAAGAAAATGGCGAT  
GGAGCGTATTACGCCTACACCATTGGTCGTGCGATGAGCGATCTGCAAACGCCAGAGTGGTTGGGGCCGACTGTGCTC  
GCCGATTTTATCGCTGTCTGACCCGCTAACTCTCCACATGAAAGCGCCAGTCATTTTTGCCAATGAAGTGGCAACC  
GGCTTTTTGGGCTGTTGGGGCGATAGCGGGTGGATCGGTTTTATCGTAAATCTACCTTCTGCTGGATTTCGCTGGG  
TAAACAAATCTGCCGACTGGCTGACCAATTGAAGAGCATCCGCATCTGCTGAAAGGGCTGGCGTCGACGCCATTTCGACA  
GCGAAGGTGTGCGCACCGAGCGTCGCGATATTATTAAGATGGCATCCTGACTCAGTGGCTGCTGACCAGCTACTCGGCG  
CGGAACTGGGGCTGAAAAGCACCGGACATGCGGGCGTATTCACAACTGGCGGATTGCCGGAAGGTCTAAGCTTCGA  
GCAGATGCTCAAAGAGATGGGCACCGGCTGGTGGTACGGAATTGATGGGCCAGGGCGTGAAGTGCATTACCGGTGATT  
ATCCCGTGGTGCAGCGGGCTTCTGGGTAGAGAATGGCAAATTCAGTATCCGGTGAGCGAAATCACCATCGCAGGTAAT  
TAAAAAGATATGTGGCGCAATATTGTACCGTCCGTAACGATATTGAAACACGCAGTAATATACAGTGTGGTTCTGTGCT  
GTTGCCGGAGATGAAAATCGCCGACAGTAAAAAACTGGCGCGACTGCCGCGCTATAAACTAAAAAATTACACAAAAT  
CATTGCACTGCATCGAGACGGAAGTGAATGAGGGCCGGGAGCGTACTCGCAGTACGTGACCCGGTGAATGAGCGTA  
GTCGTGATGAGGCGAGTGAAGGATGAAGTGAATAAAAAAGGAACTATTCTTGAGTCTCCTCGTTGGTATTGAGTT  
CGGCGTCAATTTGCTGCTGATCTCGAAGACAATATGGAACCCCTCAACGACAATTTAAAAGTGGTGAAGAAAGCCGATAAC  
GCGCGCAAGTCAAAGACGCGTTAACGAAGATGCGCGCCGAGCGCTGGATGCGCAAAAAGCAACGCCCGCGAAGCTCGA  
AGATAAATCACCGGACAGCCGAAATGAAAGATTTCCGCCACGTTTTGACATTCTGGTCCGTCAGATTGACGACGCGC  
TGAAGCTGGCAATGAAGTAAAGTAAAGAAGCGCAGGCTGCTGAGAGCAACTGAAAACGACCCGCAATTCATATCAC  
AAGAAGTATCGTTAATTCCTCATTCCCTGTTGCCTGCACTCAGGTAACAGGGAACCTTATCATCGCAATGATGACCCAC  
CTGATTGCTGCTGCCGCGCAGATCAGGGAAGGGTCTTTAAATCCTGCACAAATTTGCCGTCGACCAGCACGTTAATCA  
AATCAACAACCTGCATTTGCCGAGCGTTGAGTTCGTCGAGTTTATAGCCTGTCCACACCCAGATGCTTTACCCGGACAC  
TCGGCGCGGATGCGTTGTACCAGTTTTCAGAATATCCGGCACGTTTTGCGGATGCAGCGGATCGCCGCCGAGAGGGAAT  
ACCCTGGCGTTTGATACGAGTGTCAATCAGATCGTTAATGATCTGGTCTTCCATTGCTTTGGTAAATGGCTGACCGAAT  
TTACCCGCCATGTGCTTTTGTATAGCAACCGGGCATTATGAACACACCCGAGACAAACAGGGTGAACGAGTGGCG  
GGGCGTTGACGATGTGACAGGATAGTACTGATGATAATTCAATTTTCGCTGGCTTATCAGTCCGCGTGTAGGCTGC  
ATCCGGTAATCAATGCCTGATGCGACGCTGTGCGCTTATCAGACCTGGAGCAATTGCCAAATGTAGCCGGATAAGGC  
GTTTACGCCGATCCGGCATTGCTTAGCTCAGAGTGAAGATTAACCTATCTGCCATTCCCAAATGTTAACGCGGGC  
CTTAACTTCTCTGCTTACCAGCTTAAACGGAGTGCATCCGGGCTACCTAAATATCCGCACACGCGCGGAGTTACCG  
ACACAGGGAGGCGTCAATGTTTACCACATTTCCGGGCAAGTGAAGCCTTTGCTGGTGCATCGAACTCACCGGTAAAGCCA  
CACTCGTAGCACTCATCAATCGGTGTATTGGTGCCGTAATACGGTACATGCTGATAGCTGTAATCCAGACATCTTCCAG  
CGCTTCAGGTTGTGCTGAATGTTGGATACTCGCCGTAGCAAATGAAACCACCGTTCCGCCAGCGGGGTAAGGGCGTT  
CAAAGTCGATCTTGTGCTACGGTTACCTTCTTCTCCACATCGAGGTGAAACTGTTGGTGTAGTAACCTTTATCGGTC  
ACGCCCCGACACGCCAAACTCAGCAGTATCGAGACGGCAGAAGCGATCGCACAGTTTTCACTCGCGGTGCTGTAGAG  
ACTGAAACCATAACCCGTTTCTTCTTCCACTGATCCACTGCCTGACGACAGGTTCAACAATGGCGATACCTTTGCGC  
GAAGCTGCTGTTGTGCTAAACATGCTCGCCGCCAAGCAGCGGTTAATGGTTTTCTGGATGCCGATGTAACCCAGCGAA  
ATAGACGCACGACCGTTTTTGAAGATTTAGAAACATCATCGTCAGCATTGAGACGCACGCCACAAGCACCTTCCATATA  
GAGGATCGGGCCACGCGGCTTTACGCCTTCGAGACGAGGATACGGGTCATCAGCGCCTTACGTGCCAGCACCAGAC  
GTTTCATCCAGCAGCTTCCAGAAGGTGGCTTCATCGCCTTTGCTTCCAGAGCAATACGCGGAGGTTGAGGCTGATCAG  
CCGAGGTTGTTACGACCATCGTGGATCTGCTCGCCGTTTTCATTTTCCACACGCCGAGGAAGCTGCGGCAGCCATCGG  
AGTTTTAAACGAACCGGTGACTTTCACTACCTGATCGTAGTTCAGGATATCCGATACATGCGCTTCTTGGCAGTCCA  
GCGCCAGCTGTTGATGTCGTAGTTCCGATCGCCTTTTTATGGTTCAGGCCATCGCAATCGAAACACAGTTTCCGG  
AACACCGCAGTTTTACGGTTTTTACCGAGGCTGCGATACGGTACGCGAGGATCGATTCTGAATCAGGCGCGATTCCCA  
GCTGGTGGCCAGGCAAAACCAAAGGTTACAAACGGCGTCTGACCGTTGGCGGTGTGAGGTTGTTTACTTCGTAACCA  
GTGACTGGAAGGCATCGTAGCACTTTTGTGTTGAGAGTTAGCGTAGCCTTCGCGCTCCGGGATGTTCCACTCTTCT  
CGGCTTTCGATGTTGTTGAGTGGCAGTGACAAACGGTCCAGCACTTTCATCGATACGGTTAATGGTGGTCCGCC

ATAAATATGGCTGGCAACCTGAGCAATAATCTGCGCAGTTACCGCGGTTGCCGTAGAGATCGACTTCGGCGGTTCAATCT  
CGCGTTCCCCATTTAAAGCCCTGGGTGAGCATGCCTTTGAGTGCATCAACATGCAGTTGAACATCGGGAAGAACGGT  
GAGTAATCGAGATCGTGATAGTGAATATCGCCACGCTCATGTGCCTGCACCACGTCACGCGGCAGCAGGTGCTGACGTGC  
ATAGTGTAGCCACGATCCCGCCAGCAGGTGCGCTGGGTTGGAATCACCTTGCTGTCTTTGTTGGCGTTTTTCGTTGA  
GTAACGAGGCGTTGGTCTGCTCGACCAGACCACGGATCTCCTGGTTCAGGCGACCGGTTTTTTCACGTTCAATGTCCGGA  
TCGTGACGGTACTCGATGTAAGCACGAGCCAGTTGTTGTATGGACCTGACATCAGCTGATTTTCAACTGCGGTCTGGAT  
CTCATTGATATCCACCTGGTTGCGGCCCTGCATCTGCTCGCTGACAACCGCGGCAACAGTGGCGCAATAATCGGCATCAT  
CGACTTCCGCTGCTTTAGCTGCACGCAGAATCGCTTCTTTGATGCGCTCTGATTTAAACGGCACTTTGCAGCCGCTCGT  
TTCATCACATGCGGTGTCATGATCGCTCCATATTTTAAAGAACAGGTTATCCACAGAAATTGGGAAAGGCGTTTTCCGGT  
TTTTCGTTTTCGTTTTCCGGTGCTTTCCGCAATCGCCATCCGCTTATCCACAACCGCGCACCTTTTTCGTGGGGAGCTGT  
AGTAGCAATTATAGTCGATTAATAACAACATATTGGGTTGGGACGCATTTTAAAGTCTATATATAGTGCCTTGCATCAAGG  
ATGTTTGAGCTTTTTTGTAGTCAAAAGTAAAAAGCAGAGCGTACGGATGACGGGCGTACAGCGATATGTAATTT  
TTAATGAATTTGCTGGTGAATAAACAACAATACTGACAGACAAAACCCGGAATGACCGGCATTACCGGG  
GCTTAGGGAAGATTTACTTCTGTAACCACAGACAGCTCAAAAGGCCGTAATTCATGGCACAGGGTTGTTGGTGAAGCT  
TCTTCGTAGTTATGCATACAAGCTGCCAGTTGCCGCGCATTTGCCCTGCCTGCCAGGGTTGGATCTCACGGCTAAGGTT  
GGCAATGACCAGCAAGGTTTCCCTTCCATTACGCGGATAGCACCAATAACAGGGCTGTTGGCAGCAGATCCTGGT  
AATTGCCCATGTCAGGATGGCTTCTGCTTACGAGTGCATTAACTTTTGGTAGGTGTAACACCCGAGGAATCATCG  
GCCAGCGCGCTTCTACGTTGATTTGTTGATAGTTATCGCCAGGCCAATCCACGGTTCGCCAGCCGTAACCCGGCATT  
ATCGCCGTTGCTCCATTGATGGGCGTGCAGCTGTTGTACGGGATTTACTGGCGAGGATTGCCAATAACTCGTCGGCAT  
CACGCCCATCGTTGCGCAGCTCGGCAACATATTGAGGCTCTCTACGTCGCGATAGTCAGTAATGCGCGTGAAATGCGGG  
TTGGTCATGCCAATCTCTCGCCCTGGTAGATATACGGCGTCCCTGCATGCCATGCAGCACCATCGCCAGCATTTTTGC  
CGCAGGCACGCGGTATTACCTTATCACCAAAGCGAGAAACAATGCGCGGCTGATCGTGGTTACACCAGAACAAGGCAT  
TCCATGCTACGTTGTGCTTCTTGTGCGAGTGGCGGAACAATGTTTTCAACGCCACAAAGTCAGGTTTAGCCAGCGTC  
CATTTTTACCACCGGATAATCGACCTTCAAGTGTGAAAATTAAGGTCATCGACAATCACTGCCTGTCAGAGCCGC  
GTATCGCTGGCAATGCTCAAGGCTGGTGGAGGACATTTACCTACGGTCATTAACCCGCGTGGCGTAACACATCGCGGT  
TCATCTCGTCAAAAACCTGTGTGCTCGTGGCCCGTGGTGTAGAAGCGACCCGTCGCCGTCAGGTTTCAGGGAAA  
CGCGGGTCTTTGGAGATCAGATTCACCACATCCAGGCGCAACCCGTCGACCCACGATCGGCCAGAACTCACAGACTTT  
TTTCAGCTCTGCGCGTACCCTGGATTCTCCAGTTGAGATCCGCTGTTCTGGTGCAAAGAGATGCAAATAGTACTGTT  
CGTTTTCCGATGCCAGCGCCACGCACTACCGCAAATTTTGAACGCCAGTTGTTCCGGTGGCGTTTTCTGTTCTCCATCG  
CGCCAGATATAAAAACCTGGCGGTAAGGGCTTTCTTTGTTAGCGCCTCGCGAAACCAGGCATGTTGGGTAGAGGTATGGTT  
AAACACCATATCGAGAATGATACGAATCCCGCGGATTTTGCCTGCGTCACCAGTTCGTCAAATCGTCCAGCGTGCCGT  
AGGTGGGATCAATCGCCGTATAGTTGCTACGTCGTAACCGTTATCGACCTGGGGAGAGACATAAAAGGGGGTTAGCCAG  
ATGGCATCAACGCCAGTTTATGAGATAGTCCAGGTGTTGGATAACGCCACGTAATCGCCGGTACCCTACCCGTGGT  
GTCCTGAAAACCTTTGGATAAATCTGGTAGATAACGCCGTTTTGCCACCAGTGGGGAAGATGAGTCATTACGTTATCC  
TGCGAATGCGAGGGGGCGCAATTGCGCCCCGAAGAAAATTAACAATGTCCAGCGTGCCAGGCGGTATTTCCGCTGATA  
GATAAACGAGGTGAGTACAATCGGGATGATGATGGCGATAGCCATTGCCAGCGCAAACCTGCCAGTAGCTCGTTGAA  
TCGAGAGAATCCCGCAGCGCCCTACGCCGATGCCATTGCCATAACGCCGTTCAAGCCGCATAGCAATCCTGCCAGA  
CCAGAACCAATCATCGCGCACAGCATCGGGAAGCGATTTTCAAGTTGATGCCGTACATTGCAAGGCTCAGTGACCCCAAG  
CCAGGCGGAGATAGCGGCAGGCACGGAGATCTCGCTTCAATGCTTGGCTTGGCTGGAATGATAATGCTATCACGGCCG  
AGCCCTGAGCGATATTGACAGCGCAATCAGCGGCCACATGGCTACCACCCATGCTTTGAATCATGCAAAATCAATA  
GCAAGCGTGGTCTGGTGTACACCGGTGATCACCAGCGGGGCGTACAGGAAGCCAAACAATGCTGCGCCAATCGGAGCAAAA  
GCTGCCGTCATCAGGTGACGTACCGCAAAGGCAACGCCATCGCCAATCATGCGACCAAACGGACCAATCAGCGCATGGG  
CGAGGAACACCGCGAGGATCAGCGAACAGACGGGTACCACCACAGATAGAGGTAATCCGGCACGATGCGTTTTAAGGGCA  
GTTTCAATAACGCCCAGCGCCAGTCCGGCTAACAGTCCCGGATCACCTGCGCCTGATAGCTACTTTGGCGATGCTGAA  
CATGCCAAAGTCCACACTTCCGGCAGCTGCTGCCCGAGCAGATAAGCGTTCATCAGCTGTGGAGAAACAGTGTACGC  
CAAGCACGATACCAAGGATCGGCGTGCCGCCATTTTTTACCAGCTGACCAGCAAATACCAGCCGCGAGGTAGAAGAAG  
ATCGCTTACCAGTCAACACAGAAAATCGTAGATCGTTTGCAGGGAAGGTACATTTGCCCGAGCGTGTACCGTTGCT  
CATGGGCAAATCGCCGATCACATTGCGAAAACCGAGGATCAAACCGCGCTAATCAACGCGGGCAGCAACGGGAAGAAGA  
TCACCGCAAATGAGAGATCAACTGCTCATGCCATTTATATTATGCCGGGCGGCTTTTTTACCTGCTCTTTATCAACC  
TGCGCTGTCCGTTGACGCAATCAGTGTGATAGTAATCACCACGTTGGTCCCAATCACCACCTGAAATGCCCCGGC  
ATTGGTGAACAGCCTTTACCATAGGGAGTTGCTCAATTTCTTTCGGTCTGGCATTGGCCGTTGGTTGAGGACAAAGC  
GTAGGCGAGTAATAACAGTGGCTCACCCTCGCAATATTGCCGCGCCCGCCGACAGTTCAATCAACCGATCGATATCCGTT  
TGTTTTATTTGCTCATATAAAGCCCATGGCAGATGACATTTTGGTTGGCTGCAGAATATATTGCGCGGAAAATTT  
AAAAACGGGAACGTTCCGAAACGCAGCGAAGATACAATTTATCGTTTCAGGAAACGATCAGGACAGGGTGGCGGGGATG  
ATGATTTGTTGCGTTTCGCTGCGCCCGTTACCTGCGCGATCAACTGGCAAGCCGCTGGCGTCCAGCTTCGGCGTAACC  
GGATCTACGGTTACGATCTCCGGATGGAGGAATTTTATTAACGGCGTATTACCAGCGCTCGCCAGTTGCAAGGTGTGCA

TGCGTTGCTCTTGACGGTATTTACTTGCGCCAAGTGCCAGCGTGTGCGTTGCGCACAGTAAGGCGGTAGTTTCAGGCGTA  
ATCACTTTTGAACGTTCTCATAGCCTTGCTTCATAGCAAGCCCTGGCAGGGCGGCAACGGGATGCAGTTTATGCGCTTT  
GCAGAACGCCAGGTAGGCTTCGTGACGTGCTTACCGTTGTGACGTCACTGTGCGGCACGCCGAGATAACTGATATTAC  
GATGCCCTGTCATACAGCCGTTGCATCAGGATTTTGATTGCCCTTCGTGTCATAACAGACCGAAGCAAAGCCTTTT  
GCGTCACGCGCCAGCAGAACCAGCGATGACTGCCAGTGGGCTAACATTTCTTCTGTTATGCCAGTAAAACCGAACAGCAC  
TACGCCGTGATATTACGCCGTTTCAGCACTCCCAAATGTTCCGCAACTAATTGCGGGGAAAACGACTTTCCATCATGA  
TTGGGTCGTAACCTTGTTTATAGAAGCTGGCAGCATGGTTTGAACGCGGAGATTTTCTGACAACGAATCCAGACGGGTA  
ACAATGATGGCGACCACTTTATCGCTTTGCCACGCATAGCGCGCAGAGCGGGAAGGGGAAAATCCATGCTGATTCAT  
CACTGCTTCAACACGCTCGCGGGTGGCTGACGCCGCTTTCGTTATTCAGCACCCGGGAAAACGACTGTAGATTTCCCA  
CGCCGCTTAAGCGCGGATATCTTTGATGGTCAGCCGATTTTGCATCCTGTTGCTCTGTAACGTGTTGTTAATTATTTG  
AGCCTAACGTTACCGTGCATTCAGCAATGGGTAAGTCTGGTTTATCGTTGGTTTGTGTCAGCAGGTATTATATCGC  
CATAGATGCTACGAATATTATTGGATTCTCCTATTATTTGCGCGCTTTTTTCACTTACCGGAGGTTATATGGAACCTG  
ATCCACGCCTCTCCCTCGACGGAGATTAACCTTTCCGTAAGCCGCTTTTACGCGGTTACCGGATGCGTAAGC  
CGTGACGTTTTAACGTCCTGCTCAGCTTTATTACCTCAGGTAAGGCTTCGCCACGCCTGAAGACATTTCTGTACTGTT  
TCAGACAGTGGGAGGACTCCTTATGTTTAAAGAAATTTTTACCCGGCTCATTGCGCATTTACCTTCCCGTCTGGTTCA  
TCGTGATCCATTGCTGGCGCAGCAGCAGTGAATACGGTGGTCCCGCCGCTTAAAGTGGCATTGCTGAAAATGG  
CGGTGATGCCGAAGAAGAATTGTGAAAACGTTTCACACCCATCCGGAAGGTTAAATCAGGCGGAAGTGAATCTGCC  
CGGAACAACATGGTAAAATAAATTACCCGCACAACAACCGTCGCCGTTGGTGGGTACATTTATGGGCTGCTATCGCAA  
CCCTTTAATATTTTACTACCATTCTCGGCGTATTTCTTACGCCACGGAAGATTTATTTGCTGCGGGCTTATCGCGC  
TAATGGTCGCTATTTCTACGTTGCTGAACTTTATTCAGGAAGCACGTTTCACTAAAGCGGCAGATGCCCTGAAAGCGATG  
GTCAGCAATACTGCGACGGTCTGCGCGTAATTAACGACAAAAGCGAAAATGGCTGGTGGAGATCCCGATCGACCAGCT  
GGTGCCCGGATATTATAAACTGGCGCGGGAGATATGATCCCGCAGATTTACGTATCTTGCAGGCGCGGGATCTGT  
TCGTGCTCAGGCGTCTTAAACGGTGGTCTCTGCCGTAAGAAAAGCCGCTACCCTCGCCAGCCGGAGCACAGCAAT  
CCGCTGGAGTGCACACGCTGTGTTTTATGGGACCACCGTGGTGGTGGCAGGACGCAAGCAATGGTATTGCTACAGG  
TGCCAATACCTGGTTTGGTCAACTGGCGGGCGTGTAGTGGCAGGAAAGCGAGCCGAATGCCTTTCAGCAAGGGATCA  
GCCGCGTCAGTATGCTGCTGATTGCTTTATGCTGGTATGGCACCAGTGGTGGTGGTGAATCAATGGTTACACAAAGGC  
GACTGGTGGGAAGCGGCGCTGTTTGGCCTTTCGGTCCGGTAGGCCTAACGCCGAAAATGTTGCCGATGATTGTTACCTC  
GACGCTGGCGCGGGCGCAGTAAAGCTGTCGAAACGAAAAGTATCGTCAAACATCTGGATGCTATTGAACTTTGGCG  
CAATGGATATTTCTGTGACTGATAAAACCGGCACCTGACGCAGGATAAAATTTGCTGGAGAATCATACCGATATCTCC  
GGTAAAACCGGAACGCGTGTGCATAGCGCGTGGTTGAACAGTCAATATCAGACCGACTTAAAACCTGCTCGATAC  
AGCGGTGCTCGAAGGTACGGATGAAGAGTCAGCGCGCTCGCTGGCCAGTCTGTTGGCAAAAATTTGATGAGATTCGTTT  
ATTTGAGCGTCCCGGATGTCGGTGGTGGTGGCAGAAAATACCGAGCACCATCAGCTGGTTTCAAAGGTGCATTGACG  
GAAATCCTCAATGTGTGTTGCGAGGTGCGTCAATGGCGAGATTGTGCCGCTCGATGACATCATGCTGCGTAAGATTA  
GCGGGTACTGATACGCTGAATCGTACGGGGTGGCGGTGGTGGTGGCGACGAAATACCTGCCAGCGCTGAAGGAG  
ATTACAGCGGGCGGATGAATCCGACCTGATCCTCGAAGGATATATTGCTTTTCTTATCCGCAAAAGAGACAACCGCT  
CCGGCACTGAAGGCATTAAGCGAGTGAATTACCGTAAAATCCTTACTGGCGACAGTGGTGGTGGTGGTGGTGGTGGT  
GTCCATGAAGTGGGGTGGACGCGGGAGAGGTGGTATTGGTAGTGATATTGAAACGCTATCTGACGACGAACTGGCAA  
ATCTTGACAGCGTACCAGCTGTTTGGCGCTGACGCCGATGCATAAAGAACGATTGTGACCTTACTGAAGCGCGAA  
GGCATGTGGTGGCTTTATGGGCGATGGTAAATGATGCGCCGCTTACGCGCTGCGGATATCGGCAATTTCTGTGGA  
CGGCGCGTAGATATTCCCGTGAAGCGGCTGATATCATCTGTGAAAAGCCTGATGGTGGTGGTGGTGGTGGTGGTGGT  
TTGAGGGAGTGCACCTTTCGCCAACATGCTGAAATACATCAAATGACGGCGAGCTCTAACTTCGGTAATGTGTTGAGC  
GTGCTGGTAGCGAGTGTCTTTCGCCCTTCTGCCGATGTTGCCGTTACACTTGTCTTATTGAAACCTGCTGTACGATGT  
GTCACAGGTGGCGATCCCGTTTATAACGTCGACGACGAGCAAATCAAAGCCGAGCGTTGGAATCCGGCGGATCTGG  
GGCGCTTATGATCTTTCGACCGATCAGCTCGATCTTGCATTTTTGACGTTTTGCTGATGTGGTGGGATTCCAT  
GCCAACACGCCGAAACGAAACGCTGTTCCAGTCGGGATGGTTTGGTGGGCTTACTGTCGAAACGCTGATTGTGCA  
TATGATCCGACCCCGCGTGTGCCGTTTATTCAGAGCTGTGCATCGTGGCCGTTAATGATCATGACCGTGTGATGATGA  
TTGTCGGGATCGATTGCCGTTTTACCGCTGGCCAGTTATCTGCAATTACAGGCGCTGCCGTTAAGCTATTTCCGTTG  
CTGGTTGCGATTCTGGCAGGGTATATGACATTAACCGATTGGTGAAGGGTCTATAGCCGCTGTTACGGCTGGCAATA  
AAGAATAAACTGGGCAGATAGCCCCGATTGAGATTGACAAAAGTGGTGGTGGTGGTGGTGGTGGTGGTGGTGGTGGT  
CTTATCCGGCAACAAATTAATAAATGACGGAATCAGTAGGCCTGATAAGCGTAGCGCATCAGGCGATTTTGGCTTT  
GTCATCAGACTTAATCCGGGATGATAGCCGGATTTCCATCAAGATTAGCGACGAACAGCGATCGCTTCGATCTCAATC  
TTCAGCTTTTCCGCGACGGCAACTTCAACGCAAGAAGTGGCGGGAAGGTGGCGTTGTTGCGTGAAGAAGGCTTC  
GTAAGTGGCGTTTACGGTTCGAAGTCTTACAGATCTTTTACAACACCGGATGTTTTAACGATGTCGCCCACTTTACGGC  
CAGCGGCTTCAGCATCGCTTTTACGTTATCCAGCGACTGACGTGCTGTGACGCGACGCTGCGCGTACTTCGCCGTT  
TTCGGATTTACCGGGATCTGACCGGAGGTGATGATCATATTGCCAGATCAACGCCCTGTACGTAAGGACCGATAGCTGC  
CGGTGCATTTTCCGTCGCGATAGTTTTGCTCATGATTTCTCTTTATTACAGCGGTAAGGCTGGCTCATTATAGGGA

GCCAGACTTTTATTACCAACCGCAATTAATTGGCCAGCACCACATTATGGGAAAACCTTTTTTACAGTATTTGCATTTG  
AGCGCGATATCATTGGCGGTTTTTCGCACGGCAAAGCTGGATGAAACCGGTTCCGCATGGCTGATACAGTTGCTGTTCCG  
GCAGACCAGCACATTGTCGATGCGCTCCGGCAGACTTGGGCGGATTTACCCACCACTTCATAGTTGTCGATACGGTTAA  
CCGTGGCTTGGCGGCATACAATGCCAGTTGATCTACTTGATCTTCACTCAAAAAGGTATTTTCGATTTTGATCAGATCT  
TTGCGGCCATCTCGCCAGAAGGCAGGTTTCAGACCAATGGTGATGCGCTGATCCGTTTCGGTCAGCTTGAACAGACTCAA  
CAGCTTAAAACCGATCTGGGCGGGGATATGGTCAATTACCGTGCCGCGTTTAAATAGCTTCAACCTGCAATTTATTATCGT  
GTGTCATCTCTATTTCCCTTACAGTACCAGATCGCGATTGAGAACAGTGCCAGTAACGCCTGGCGAGCGAAAATCCCG  
TTGCCTGCCTGCTGGAAGTACCAGGCGTGTGGCGTTTTATCAACATCCGTCGCAATCTCATCAACACGCGGCAGCGGATG  
CAGCACTTTCATATTGGCTTTGGCGTTGTGGAGATCGCTGGCGGAAGAACAACTGCGCTTTCACGTTGGCGTACTCGG  
ACGGGTCCAGACGCTCTTTTTGCACGCGGGTCAATGTACAGGATGTCTACTTCCGCCATCACTTCTTCAATAGAGCTGTGC  
AGACTCCATGCGATCCCTTTTTCATCGAGCATATCCAGAATGTATTGCGGCATTGCCAGCGCTCCGGCGCATGAAGTA  
AAAACGGTTGCCGTCGAACCTTCGCTAACGCCTGAGTCAGGGAGTGAACGGTGCGCCATATTTTCAGGTACCAACCATTG  
CGACGTGGAGATTGTCCAGACGCCCTGGGTTTCTGAATAGTGAATAAGTCCAGCAAGTTTGCCTCGGATGTTGGTTG  
GAGCCATCACCGGCATTACGTACCGGTACATTGCCGAAAACCTCGGTGGCCAGGCGCGCCACCTTCTCGCGGATGACG  
CATCACTATCGCATGACGTAAGTGTGATAACCGAAATGGTATCGGCCAGCGTTTCGCCCTTTTACCCAGTGTAT  
TGGCGTGTGCGAGAAGCCACCACGCTGGCCCCAGCGGTGCATAGATGTTTCGAAAGAGAGGCGGGTACGGGTAGAG  
GCTTCGAAGAAACAGCTGGCAATGACTTTGTGCTTCAACAGCTCTGGTTGCGGGTTTTGCTTTCAGTTTCGCCGCTGTCCG  
CAGCACCAGATTAAGGTCATCGCGACTAAGGTGCTTTATGAAATGATATGTTTCTGATATAGCGGATTAGCCATCTTTT  
ATCTCTGACGCTGGGCAAAAAAAGCCCTCGATTGAGGGGCTGGGAATGGGTGATCAACGGGAAGAAAAACGGCAGG  
CCAGCGTCTTTTTTTCAGACGCGGTAAGACAAAATGTGCAACACACTGAACCATACATCCTCCCGCAAATTTGTCGGCAT  
TATACTCATCGTCAGAAGCGGCGCAAGCATTGATGCAATATTTTGTGAGCGCAAAACGGTTTATTTGAATAAAAGTCAA  
GGTATATGCATTTTTATTTGATGTGATTCTGCAGGGAACTGTCTTTCGGTATCAATAATTGCAGACATTCCTGCTTTT  
TCCTTTTTTCACTTTCACGCAATCAGATATGCATTTTATTCATTATCCGACTTATAGGGCGGAGTGTGAAAGCGAACGG  
CTAACACTATTGCTTACTGCTCAGGGATGCGCGCTATCACTTTAATTTCAAAATCAAAGCCTGCCAGCCATGTAACACC  
ACCGCGTCCAGTTTGATAAGGTGGGGCGCTAAATATTTCACTTTTACCCTCATGATGTCTTCAAATTTGGTTTTCTGG  
ATCGGTATGGAAGCTCGTAACATCAATGATATCGTCAAAGTGCATCCCGCAGCTGCCAGGGTGCATGCAAATTTATCAA  
ATGCCAGTCTGACTTGTGCTGAAAATCGGGTCTGGTGTTCGCTCTCGACTTCTACTTGGCCGAAACAAACAGC  
AAATCGCCGGAACGAATAGCCGAGAATAACGATGCTCAGCATATAGTGAATGTCGGCCAGCAGGGAAAAACAGCGGTTCT  
TTCTACCATTTGGTTATCTCAAGATTTACGACATGAACAGAAGATTTCTTTTACCGGGAGCCGCTTTTAGCGGACGAC  
GTGAGTAAACAAAACCCAGACATCATGGATAATGGCTGGGCTTAATTGAGCGTAGTCGGTTATGCGCCAAACCGCCATC  
AATGGTATGCATCGCGCCGTAACAAAACCTGGCTTCTGGCCCTGTAACCATGCGACCATACCAGCGACCTTCCGGTT  
GCCCATGTCTTTTGATAGCCATCAAATATGCAACATATCGCGCATTGGCCCGTTGGCGGGATTAGCGTCGGTATCAATT  
GGCCCTGGCTGGACGACGTTAATGGTATCCCACGCGGTCCAAAATCACGGGCCAGCCCGCGCCATGCCTTGACGGG  
AGATTTGCTGGCGCATAAGCAGCCATGCCTGCAACAGGCATACGATCGCCATTACGGAGCCGATGATTAAGATGCGCC  
CGCTTTCGGGCATCTGCCGGGCGGCTTCAACAGAGGCATGATAAGGAGCATGAATATTGATTTGAAAAGGCGATCAATA  
TCGTGCGCATTTAATTCAGGGCTCGCCAAAGACGCCAATACCTGCATTTACCACCAGGATATCCAATGCGCCGCTCTT  
ACGAACGACATCAATGACAGCGTCTCTGTGCAACTATCTGTGAATACTGCTGTCGCTCCAGTCTCTTGTGCCAGGCGTT  
TAGCGGCATCTTTCGACCCCGCATAGGTGAATCGTACATTGGCCCATCGGTGACGAAACGACGTACGATAGCGGCACC  
ATACCACGACTGCCACCGGATGAGAATGTCTTACCTGTAAAAGCGCCATAAGGACTCCTTGATTTATTATGTAACA  
TGCAATTAACAACTGTTTTAACTTTCTGTCAACAGGTTTTGTAATGGTCACTAAAAAACAATCTCGCGTTCAGGTGCTC  
CCAGACGTTTTGCTCCTGAGCAGGCAATCTCTGCGGCAAAAGTCTTTTTTACCAAAAAGGTTTTGATGCTGTCAAGTGT  
GCTGAAGTTACTGATTATCTTGGTATTAACCCCCGAGCCTCTACGCGGCTTTTGGCAGTAAAGCTGGGTTATTTAGCCG  
TGTAATCAATGAATACGTGCGGTACGGAAGCTATTCCGCTTGGCGATATTCTTGTGATGATCGTCCGGTAGGCGAGTGCC  
TGTTGAGGTATTAAGAAGCGGCGCGCAGATATAGCCAAAACGGCGGCTGCGCTGGCTGTATGGTTCTTGAAGGTATT  
CATAGTCATGATCCACAAGCGCGTGATATTGCCGTTCAATATTATCACGCCGAGAAACGACCATTTATGACTACATCGC  
CAGGCGGCATCCACAACGCGCACAAATGTGTGACTGATTTTATGAGTACCGTGATGTCTGGGCTTCTGCGAAGGCACGAG  
AGGGGCACTCTATAGAACAACCTCTGTGCAACAGCTGCAATGGCGGGGAAGCGATAAAAACCTATTCTTGAAGGATGATGC  
GGGCTTGACCCGAAAGGCGGAAAGCGCTGCCGATAAGTTGTGATAAGACAATAATTACCGGTTAAGGCTAGCGGAA  
TTGATTATCTTTTGTATAACGATAGAAATGAAACGTTGTTTTAATTAAGGAGTGGAAAAGATGATCATCGGAAATATTC  
ATAATCTTACCGCTGGCTACCCAGGAGTTACGCCAGGCGATTGAGCATATCAAAGCACACGTTACGGCAGAAACGCCA  
AAGGGCAAGCACGATATCGAAGGCAATCGACTGTTTTATCTTATCTCGGAAGATATGACCGAGCCGTACGAAGCTCGCCG  
TGCGGAGTACCATGCCGCTATCTTGACATTCAGATTGTGTTAAAAGGTGAGGAAAGCATGACCTTACGACGCAACCTG  
CAGGCGCGCCGATACCGACTGGTTAGCTGATAAAGACATCGCATTTTTTGGCGAAGGCGTTGATGAGAAAACAGTTATT  
CTAAATGAAGGTGATTTTGTGTTTTATCCGGGGGAAAGTGCATAAACCGCTGTGCGCAGTGGGCGCGCCAGCCAGGT  
TCGCAAAGCAGTAGTGAAGATGCTGATGGCGTGATGACTTTTTGCGCGTAAATAACTCAAGGTTTACGGCGAGTTTGTGAA  
AAGAGCGTTTTTTGATATTTTTTTGTGAGTAAAATTTGTAATGCTTAGACGTTCTTACTCAAGGAGTTCGTCATGA

GCAAAATATCAGATTTAAATTATTCTCAACACATTACATTAGCCGACAATTTTAAACAAAAAGTGAAGTTTTAAATACC  
TGGCGTGTGGAAATGAATGATTTTGCCTGATTGCCGGGGCAGGATAACAGAAGGAATATTCCTTCTCCTGGAGCATT  
TTTAGAGTTTTTGGCAAAGATATTTACCTGGGTTATGTGGATTTAGCAAACGCTCCAACGAAGCGGTAGAAATATGA  
TGGCTCATATTAAGTCTCATCTTATTCTAAAGATACTAATGGCAATGAAAAATGAAGTTTTACATGAATAATCCTGTA  
GGGAACGAGCGGATTACCCAAGGTATTATAGAAATTTCACTTTCCACTATCACTACTATGGGGACTCGTCAAGGACA  
TACAGCCATTATTTCCACAACCTGATGGTTCGACTAACCGTTATGAAGGGAAGTCTTTGAAAGAAAAGATGAGAGTT  
CATTACACCTGATTACTAACAGGTTCTGGCGTGTACCAAAGTGAAGCTAACAAAGAAAATAGCGCGTCTATTAATAAT  
AATCAGGAGTTAAATAATCTACAGAAATTAATAATCTACAGAAGTTAAATAATCTACTGAAGTTAAATAATATACAGGG  
GTTAAATAATCCTCAGGAGTTAAATAATCCGCGAAATTTAAATGATTCTCAGGAGTTAAATAACTCGCAGGAATTAATA  
GTCCACAGGAGTTAAATGATCCGCGAGGTTAAATAATTCTCAGGACTTAAATAACTCTAAGGTGAGTTGTACAGTTTCA  
GTTGATTCTACGATTACGGGTTTATTAAGAACCATTGAATAATGCATTATTAGCAATAAGGAACGAACATCTGCTATT  
AATGCCTCATGTATGTGATGAATCGATTTCACTACTGGCGAAAAAGGTATACTTGAAGAAATAGATAAGCTCTACG  
CATTAAATGATCAGGAATTGATAATGACAAAGTAGTAACAATGAAATTAATGACATCAAAGTTAACCTGTCTCATATT  
CTTATTGATTCCTTAGATGATGCAAAGTTAACCTTACACCGGCATCGATTCTGGAGACTTTTTCAAAATCCCC  
ATATATTAATGATGAAGAATACTGGATTGGTGTTTAATAAAAAGCATGCAATATTTTATGATACTAAAAAGATAAAGC  
ATGCATGCTCCGTAATAAATCATATTAATCTTCCGAGCGATCAGTCTAAAATAGCTGAGACATTATTTTTCAATCTCGAT  
AAAGAACCCTATAAAAATAGCCCTGAATTACAGGGGTTGATTTGGAATAAGTTGGTTGTATATGTCAATGAATTTAACTT  
AAGTAATCGAGAAAAACAATTTAATACAAAGGCTATTTGATAATGTTGAGTCTATATTTAATGAAGTACCTGTCAGCA  
TTTTAGTGAATGATATTTTTATGAATGATTTCTTTATGAAAAATCCTGAGATGATTAATTGGTACTTCCCTCAGTACTT  
AAGAGTTATGAGGGTGAAGAGATTTATTTGATAATTTAAATATGATTTAAATGATAATGATAAGGAATCTAATAAAGA  
AATTTTGAAGAATCAACCAGATAATGTTATCAAAGAAAACTGAATAATGAATACAAACTTAGATTTAGAATGATGAAA  
CTATCTTGAATCGAGAGTTAATGTATTACCATATTAATGAACAGCGTTTAAATAAACTAAATCCACCGGAAAATTTA  
CGTATAGCAATAGAACACTTTGGGTGGAAGAATAGACCTATCACTGCATAAAAATATGTGATGCCGGGATGGTTTGTATT  
TCCCGGCATCTTATAGCGATAGCAATATTTACTGAGCGTCGCGACCATCACCGCTTGTAGTATGCATACGGTTTTT  
CGCTGATCAAAAACAATGCTGGCGGAGATTGAAGACCTCATCAGTGACTCCATACCGCCATGTAGGCCAAATTTCTT  
CCGCCATTTTCTTCCAAGCGTCTGTTGGTGTGATGAAACCGGGCAGGCAGTGGAGGAATTTGACCTCCGGGTTACCG  
GTCAACTGCATCATCTTGTCTTACCTGATATTCACGCGCAATGCAATCCGTTCCGCCATTTCTCTTTTGTCTCCCC  
CATCGACACCCACACATCGGTATAGATAAAGTCAGCACCTTCACTCCCTTCCGCGACATCTTCACTCAGCGTAATATCC  
CACCATTTTGTGTGCCAGGGCGCGGATTCCGTAACCAGCGCAGCTTCCGCGCAGCAGCTTGTGGCGGACCAGACGC  
AAATCCAGACCGGTAAGCGCCGAGCTTCGAGCATCGAATTGCCATGTTGTTACGCGCGTCACTGCATAGACCAGCGT  
CATTTCTGTTGAACGCTTTGCCGGGCAAATGCTCCTGCATGGTGAAGATCCGCCAGCAGTCCGTTGGGATGGAACCTCAT  
TGGTCAGGCCATTCCATACCGGCACGCTAGCGTATTCGCCAGTGTTCGACAACTCCTGACCATAGCCGCGATACTGA  
ATACCGTCATACATGCGACCAAGCAGCGGGCAGTGTCTTAAATCGACTCTTTATGACCAATCTGGCTGCCGCTTGGGCC  
GAGATAAGTAACGCGAGCACCTGGTCATATGCGGCAACTCGAAAGAGCATCGGGTACGAGTTCGAGTCTTTTTCGAAGA  
TGAGCGGATGTTTTTACCAGTGAAGTTGGCTTCTTCTTACCCTTTCTTATCGGCTTTCAGCTTCCGGGCTAACTGC  
AGCAGGCTGTTGAGTTCAGTGGCGTGAATCGAGTAATTTGAGAAATGCTTATGATAAAACCCGGACATAGATCCCTC  
CTGTGGCTAACGCCTCAATGAATTAATTTCAATTTATATGGATGATTATTCATTTGCAAGTCTAAAGCATAAATCTTTG  
TCACAAAGGTGAGGCAATGTCAGTGGTGTGACAATAAGAGTATCGGCAGGACATTAAGAGGAATGAGCCATGGCAAA  
CCCGAAACAACTGGAAGAACAGCGTGAAGAAACAGTGTGATTATTGAAGAATTACTGGAAGATGGCAGCGATCCGGACG  
CGCTGTACACCATCGAACACCATCTTTCCGAGAGCATCTGAAACCCTGGAAAAAGCAGCAGTTGAAGCGTTTAAACTC  
GGTTACGAAGTACCGATCCAGAAGAGTGAAGTTGAAGATGGTGATATCGTGATTTGCTGCGACATCCTCAGCGAGTG  
CGCGTTGAATGCCGATCTGATCGATGCCAGGTTGAACAACCTGATGACGCTGGCAGAGAAATTTGACGTTGAGTACGACG  
GATGGGGCACTTACTTTGAAGATCCTAACGGCGAAGATGGCGACGATGAAGATTTTGTGATGAAGACGATGACGGAGTT  
CGCCACTAATTAAGCGTAGCGCATCAGGCCAGGTAGTTTCTGCAACCTGGTGAATTTGTAGCCCGATAAGGCATTATCAT  
GTCACATCCGGCATAAACAACCGTACGTTGTTAATGTTTGAATGCCCGGAGTTGAACACGCGGGCATTTTTTTAGAGT  
TCGCGCAACATCCGCACTTCAATCGACATGGCCCGTGCAGCCAAGCGCATAGTGCATATGCTCAAAGCCCAAATGCTC  
ATAAAGCGCAATGGCTTCTTTAAAAAAGCGGTCGTTTCCAGATAGCAGCGTTTGAACCCATCTCTCGCGCTGCTCCA  
TCGCCATTAAGCCAGTTTTTTTTGCCAGCCCTTGGCGGGATAGCCGGAAGAAAATACATCTTTTGCAGTTGCAAAATA  
TCCGACTCACTCCGGTTAATGGCGCTATCCACCAGCCGCGACCACTTACCCTCGTACTCAACGACCAATATGCATG  
GCCAGGCTGACTATATACTTATACAGCTCGTCAAGATTCGGATCGCGACGGTGTAGCCTTATCAGCGGTAAGACCGT  
ATTCCGGCGGATACCTGACGAATGACGCGGGCGATAGCAGGATTATCCTGCAGCGTCAGGCGACGATTACAGGTGATTGC  
GGCGCAATGTTATTCATAGTTTAAACCAATAAAAATAAAGTAATTATACATTTGTTAATACCACTCTCTTCTTACGTAC  
GCAAGCGACTTATAAAGTAATAAAGTTTTTGCAGCCCTATTACTGATAAGAGTATTGTAACGTGGCAGAACATTTACTG  
TCTGTATATATAAGTTATATCAATGGATTTTTAATTCAGGGAATTTTTATGGCTCAAGTTATTAATGAATGGATGTT  
CGTCCCATTCTGTTTGTTCATGGTACAGGTGAGAGATTTTTCTTATTTGTGTGGTGAATGTGTTGTTAACGATTATA  
ACGCTAGGTATCTATTTACCATGGCATTAAATGAAATGTAAGCGTTATCTTTATGCTAATATGGAAGTTAACGGACAACG



ATTTTCTTATGGAATTACCGGTGGGAATGTTTTGTTAGTTGTCTTTTTTTGTTTTTTCTATTTTCGCAATCTTAATGA  
CAGTGTGAGCAGATATGCCGCTTGTTGGTTGTGTTTTGACTTTGTTACTGTTGGTTTTGCTTATATTTATGGCAGCAAAA  
GGACTGCGTCATCAGGCCTTAATGACCAGTCTCAACGGCGTAAGATTTAGTTTTAATTGCTCTATGAAAGGGTTCTGGTG  
GGTGACCTTTTTCTTGCCGATTTAATGGCCATTGGGATGGGGACTGTTTTCTTTATCTCGACAAAGATGCTACCTGCCA  
ATAGTTCAAGTAGTGTTATTATATCCATGGTTCTGATGGCAATAGTTGGTATTGTTCCATTGGTATTTTAATGGTACT  
TTATATAGTCTGGTAATGAGTTTTCTCTGGAGTAATACCAGTTTTCGGTATACATCGTTTCAAGGTGAAATTAGATACTAC  
GTATTGTATAAAAATATGCCATTCTCGCATTTTTAGCTTTATTGCCTTTCTCGCTGTTGCTGGTTATATTATCTTCGATC  
AAATATTAATGCGTATGATAGTTCTGTATATGCAAATGATGACATTGAGAATTTACAGCAATTTATGAAAATGCAACGT  
AAAATGATAATCGCGCAGTTAATCTATTATTTGGGATTGCTGTTAGCACAAGTTATTTAACGGTGTCTTTGCGAAACCA  
TTTTATGAGCAACCTGTCACTGAATGATGGGCGTATTCGTTTTCGCTTAACTTTAACGTACCACGGTATGCTTTATCGCA  
TGTGTGCGTTGGTGGTATATCCGGGATTACGGGCGGTCTGGCTTATCCACTGCTGAAAATATGGATGATTGACTGGCAG  
GCAAAAAATACGTATTTGCTGGGCGATTTGGATGACCTTCTTTAATCAATAAAGAAGAACAACCAGATAAAGGCTTCTT  
AGCCAGTATTTACGGGGAGTTATGCCTTCTTTACCATTTCTGTAAGAGATAAAAAAGGCCGAGCATGCTCCGGCCTTCT  
GTTTTCATCTCTGTGTTTTGATTACAGCGCGGCGATAACAGCCTGCTGTTCAATCAGTTTCGCTTTCCGTTCCGCATAGC  
CTCCAGCTTCTCAGCTTCTTCCGATGACCGCTTCCGGTGCAGCGGCGCAAAAGCCTTCCGTTCCGCAATTTGTTCTCG  
ATACGGCTGATTTCACTTCAATCTTCCGCACTTCTTCCGCGAGCGCCAGCTCATCTTCTTTGTTGATGAGGCCAGC  
CATCGGGATCAGCAGCTCTGCACCCTCGATGATCTTGTAAACGGAACCGGACCTTTGTCATCGGCAGGCAGCACGGTGA  
TACTTTCCAGACGCGCCAGGGTTTGCAGGAAGCCACGGTTTTCTTTACGCGACGTTTCTGCATCCGCGCTGCAACCACGC  
AGCAGCAGCTCCAGCGGTTTGCCTGGCGCGATGTTCAATTTCTGCACGGATGTTACGTACCGCAACGATCGCTGTTTACG  
CCATTCCGTGTCGGCCAGTGCAGCTTCAACCTGAGATGCATCGTACTGCGGGAACGGTGCAGCATGATGGTGTGCGG  
CAGTGATACCGCAAAGTACTTTACACGCTGCCAGATGGTTTCCGGTATGAACGGAATGATCGGATGCGCGAGGCGCAGC  
AGACCTTCCAGTACAGTACCAGCGTATGGCGAGTACCAGCGAGTTCTGCTTCCGGTCCACCGTTTATTACCGGCTTGGT  
CAGCTCGAGATACCAGTACAGAACTGGTTCCAGGTGAACCTACAGAAATGCCTGCGGCGATATCGAAGCGGAAGCTGT  
CCAGCGCTTCCGGTACGCTTTGATGGTCTGGTTGAACTCCGCCAGAATCCAGCGGTCCGCCAGCGACAGCGTCATTTCCG  
CCGCGTTGAAGCGCAATCCTGACCTTCTGTGTTATCAGCACAAAGCGGCTGGCGTTCCACAGCTTGTACAGAAGTT  
ACGGTAACCTTCCAGACGCTTCAATCCAGTTGATGTCAGACCGGTAGACGCCAGCGCCGAGGGTGAAGCGCAGCG  
CGTCAGTACCGTCCGGCTCAATACCGTCCGGAACTGCTTCTCGGTGCGCTTACGGATTTTGTCCGCCAGCTGCGGCTGC  
ATCATATTGCCGTTACGTTTTTCCAGCAGTTCTGGCAGCGAAATACCGTCAACCATATCCAGTGGGTGATAACGTTACC  
CTTGATTTGGACATCTTCTGGCCTTCTGCATCAGCAATCAGGCCGGTATGTAACCGGTGTGGAACGGCACCTGCGGTT  
TGCCATTTTCACTTTGATGAAGTGCATGGTCAATGATCATGCGGGCAATCCAGAAGAAAATGATGTGAAAACAGAT  
ACCATCACGCTGGTTGGGTGGAAGTACGCGAGGGCGTCCGATTTTTCCGGCCAGCCAAGGGTAGAGAAGTCCACAGCGC  
AGAAGAGAACCAGGTATCGAGAACGTCTTCTGCTGACGCGAGGACAACATCAGCACCGAGGTTATTTTCTTTACGCACTT  
CGTCTTCTGTTGCGGCAACATAAACGTTACCCGCTTCTGCATACCATGCCGGGATACGGTGACCCACCACAACCTGACGA  
GAGATACACAGTCTGAATATCGCGCATCCAGGAGAAGTACATGTTTTCTGACTGCTTCCGGTACGAACTGAATGTCCGC  
GTTCTCAACCGCTTCAACCGCCGGTTTTGCCAGGACATCGGCACGACGTAACCTGGTCCGGTACGATTGGTTCGATAA  
CTACGCCGCCAGGTCCCGTAAGGAACGGTCAAGTCTGCGGTTAATTTCTTCCAGCAGGCCAAGCGCGTCAACTGCG  
GCAACGACTGCTTTACGTGACGAAAACGCTCCAGTTTCTGGAACCTGACAGGATTTCCGTTGGAATAAACGTGAGATTC  
GTTACCTTTGGTATCGAACCTGGGCGCTTTCAGGATATCGCCGTCAAAGGTGAGGATGTTGATCATCGGCAGGGCGT  
TGTTCTGCGCAACGATCGGAATACGACGGTTAACAGCGGCGAGAATGACATATTTGCAATCAGATTTTGAACCGCGG  
ATCTTCCGGGTTAACGGTACGCCAGTATCGCCAGCAGGGTTTTCTGGACGGTAGTCGCGACCACCAGATAATCTTTAC  
CGTCTGCGGTTTTTCGACCGTCCAGCCAGCGGATAGCGGATGTGCCACATCGAACCTTTGATTGCGGTTTTTCGACTTCC  
AGGTGAGAGATAGCGGTGCGCAGTTTCCGATCCAGTTTACCAGCGGTTTCCACGGTAAATCAGGTCTTCTTTATACAG  
ACGAACGAAAACCTTCTTACCAGCATTGGACAGGCTTCTGTCATGGTGAAGCGTTACGCTCCAGTCCGACGGAGTTGC  
CGAGACGGCGCATCTGACGGGTAATGGTGCCGCCAGATTCCGCTTCCATTCCAGATTTTGTGATGAAAGCTTCCGGG  
CCGTAGTCTGACGGGTTTTACCTTCTTCTGCGCAATCTTGCCTCAACGACCATCTGGGTAGCGATCCCGCGTGGTC  
AGTACCGACTGCCACAGGGTGTTTTTGCCCTGCATGCGCTGATAGCGGATCATGGTATCCATGATGGTTTGTGGAAGG  
CGTGACCCATATGCAAACCTGCCGGTACGTTCCGGCGCGGGATCATGATGACAGAACTTCTGGCTTTCATCGCCATTA  
GGCTTAAAGTAGCCCTGCTTTTCCAGTCTCGTAAAGCGGCTGTTGATATCTTGTGGTTATATGCTTTTCCATTAT  
TTCCAGTTGCGGTATTCAGGTTGAAACCAGCCACGCGGTAGGCTTTATAGCGTTCGCGCGCCAGTTGTTTCCAGAGAATC  
TTCATAAGGAACGAAGTCTACCACTTCTGTGAAAGCGGTGGCAAAATCTGCAAAGCTTGTTCGAGACTAATCAATATAT  
CGCGCCGGCTGCTGCTACGTTTTTCCGGCCAGGCGATCTCCACCGGTGACCCCGCGCGGCTCTTCTCCCGCTAAATTA  
TGCGGAACAAAGCTTTCTGCGGACGCGCCACAGGCTTCTCCAGCCGGTAAAGCCTGCTTTTCACTTTCACAGGCGAT  
GAGCACGCGCTTACCCTGCGCAACGTTCTGCGGCAATTTACACACACAGTTGCTCAACGGCGCTTAAAGCCATCGACGG  
TGGTGTCAATTGTCAGAAGGTAGAAGTCTCGGTTTTTCCATAAATGGGCTTCTTGTGGTGGATTTAAATACGCATCAGGT  
ATACACCGCAGCGCTGATGCGACGCTGTTGTGCTTATCAGGCTACGAGTTCAGTGTGTAGGTGGGATAAGGCGT

TCACGCCGATCCGGCAATAACAGCCTTGCTGACGCAATTACTCTTCGCCGTTAAACCCAGCGCGGTTAACAGGAACT  
GTGCCAGCAACGCTACCGGACGACCGGTGGCGCCTTTTGTCTTACCAGAACGCCAGGCGGTACCGGCATATCCAGGTGC  
GCCAGTTGTACTTACGGGTAAGCGTGACAGGAAGCAACCTGCGGTAATCGCCCACCAGGACGACCGCAATGTTTCGC  
CATATCGGCAAAATTGGACTCCAGTTGTTCTGATACTCGTACCAGCGGTAAGCGCCATGCGCGGTACCGGATTGTT  
CAGACGCGGAATCAGTTTATGGGCCAGCGGATTATGGTTCCGATCAGACCAGTAATATGATGACCCAGCGGATCAG  
CAGGCACCGGTGACGCTGCGCACGTCGAATCACCGCTTCCGGCTCAAAACGCTCAACGTAAGTTAACACGTCGCACAGTAC  
CAGGCGGCCTTACGCTCGGTGTTACGACTTCAACGGTTTGACCGGACATGGTGGTTAACACATCGCCCGGACGATAGG  
CTCGTCCGCCAGGCATGTTTTGCGAGCCTGCCAACACGCCGATAACGTTAATCGGCAGTTGTAGTCCCGGACCATCCGC  
ATCACGCCGTAACCGCTGCCGACCGCACATATCGTACTTATCTCATCCATGCCTTCTGAAGGCTTGATCGAGATACC  
GCCGGAGTCGAAGGTTAAACCTTTACCCACCAGCACGATTGGCGGTGCATCTTCCGACGCGTTGCCTTTGACTCAATCA  
CCGACATCAGCGATTGTTTTGCGAACCTGACCGACCGCCAGATAGGAATGCATCCCCAGCTTTTCATCTGCTGTTCCG  
CCGATAACGCGGGTGATGACATTCTTGTGTAGCTGTACCCAGCTGGCGCGCTTGTGAAGCGAGGTAAGCGGCGTTACA  
GATATTCGGCGCATATTGCCGAGATCTTTGCTGCTTAAATCCCGCGGCAATCGCCAGACCGTGTGGATCGCGCGCT  
CACCGCTGGTCAGTTCACGGCGGTGCGCACGTTGAACACCATTTACGACGCGCTGACGCACTTTCCAGTAGTTGTTACGGCCTT  
AACGTGACGTCAGTCAGAAAGCAGACCGCTTCCATTGAGCCAGTATCATTACGCGTATTAATGGTTTTCTGAATAACCT  
GCTTGTACTGACGCTCATCCAGCTCACGTTCTTTGCCGCAACCAATAAGGAGAATTCGCTCGGAAAGTACATTTCGAAACA  
TGGTGCAGCAACAATGTCTGCCCGGTTTTCTTCCAGTTCGCCCGACGTAGCAGGGCGCTGATGTACCCATCGCTGAT  
TTTATCGAGCTGTTCTGCAATCGGAGAAAGCGACGTGGTTGGAAGACGCCACGACGATGCAGGCACTCCGCTGTTTTCT  
CCGGGTACCGCTTTTTACTAACTCCATGCACTACGCTCCTGAATCTTAAAGACAACGGCGGTGGCTACAGATAGAA  
TTGCAAGCTTTCGTAACATGTCCGCTGTTGCGATGACTTCTGTTAATCTTAAAGTTATTACGGCATTGGCACGTCAG  
AACAAAATCTGAGAGGTGAATCCGTTGAGTATAATTATCTTAGCGACGATTTCCGACGACTCAAGAGAATAAATGACGTTT  
AAGCCATGAAACAAGCTAAATCCTGCAAAAGACGAGTTTTTACGGCGTATTTAAAGTGATAATCATAAGATATCTGGT  
GCGGGAGACGCTCAAAAGCCAGCTGGCGATACTTTCATCTTGTCTTTGATCTTCTTGTCAAAGTTAGTGAGGATCC  
TCGGCGACGCGTTGACGGCGATATCCGGCGAATCTGGTCTCCTTCTCGGGTGGCGGTGCCGAAATGGCGCAG  
CTTATCCTGCCATTAAGCCTGTTCTCGGGCTGCTGATGACGCTGGCAAACGTATACCGAAAGTGAATACGGTAAT  
GCATGCCTGCGCCTGAGCAAAGCGGTTCTGGTGAAGCGGCAATGATCCTTGGGTATTACGGCAATCGTAGCGGCGG  
TTAAGTGATGTGGGCGGACCGTGGTATCGCTCATCAGGATGAAGTGTTAGCAGAAGCGAAAGCGAACCCCTGGCATG  
GCGGCGCTGGCGCAAGGGCAATTCCAGCAAGCGACTAATGGCAGCTCGGTGCTTTCATCGAAAGCGTTGACGGCAGCGA  
TTTCAAAGATGTGTTCTCGCGCAAAATTCGACCAAAAGGTAATGCACGTCCTTCTGTGGTGGTGGCCGATTCCGGACATT  
TAACCCAGCTGCGCGACGGCTCCAGGTGCTCACTCTCAACCAGGGAACGCGCTTCGAAGGCACTGCATTGTTACGTGAT  
TTCCGCATTACGGACTTCCAGGATTATCAGGCGATCATTGGTACCAGGCGGTGGCGCTCGACCCGAACGATAACCGACCA  
GATGGACATGCGCACATTGTGGAACACTGACACCGATCGTGCTCGCGCAGAAGTGAAGTGGCGTATCACGTTGGTATTCA  
CCGTGTTTATGATGGCACTTATGGTGTACCGCTGAGCGTGGTTAACCCACGTCAGGGACGCGTACTGTCGATGCTGCCA  
GCCATGCTGCTGATCTACTTTTCTTCTGATCCAGACCTCCCTGAAATCGAACGGCGGTAAGGTAAGTGGACCCGAC  
GCTGTGGATGTGGACGTTAACCTGATTTATCTGGCTTACGATTGTTCTCAACCTTTGGGACACCGTCCGGTCCGCC  
GCCTGCGCGCCAGTTTTTCGCGTAAAGGAGCGGTGTGATGCAACCTTTGGCGTACTTGACCGCTATATCGGTAAACTA  
TTTTACCACCATCATGATGACACTGTTATGCTGGTGTGCTGTGCGGCATTATCAAGTTTGTGATCAGCTGAAAAAA  
GCCGGGACGGGAGTTACGACGCGTTAGGCGCAGGAATGTATACCTTGTGAGCGTGCCGAAAGATGTGAGATCTTCTT  
CCCGATGGCGGCTGCTGTTGGGCGTTGCTTGGTCTGGGATGCTGGCGCAGCGCAACTGGTGGTATGATGACGAGCTT  
CTGGTTTTACCCGATGACAGGTGGCGCTGCGGTGATGAAAACCGCCATTCCGCTGGTCTTGTGATGCGGATTGGC  
GAATGGGTGCGCCGAGGCGAGCAGATGGCGCGTAACTACCGTGCAGGCGATGTACGGCGGCTCGTTGCTCTCTAC  
CCAGCAAGGCTTATGGGCGAAAGATGGCAACAACCTCGTCTACATTGAGCGGGTTAAAGGTGACGAAGAGTTAGGTGGCA  
TCAGCATTTATGCCTTAAACGAGAATCGTCTGCAATCCGTACGCTATGCCGCTACTGCGAAGTTGACCCGGAACAT  
AAAGTCTGGCGTCTGTGCGAGGTTGATGAATCTGATCTGACCAATCCGAAACAGATTACCGGTTGCGAGACGGTGAGCGG  
CACCTGAAAACCAACCTCACGCCGACAAACTGGCGGTGGTGGCGCTGGACCCGGATGCACTCTCTATCAGCGTTTTGC  
ACAACATGTGAAGTATCTGAAGTCGAGCGGTGAGGATGCCGACGTTATCAGCTCAACATGTGGAGCAAAATCTTCCAG  
CCGCTATCTGTGGCGGTGATGATGCTGATGGCGCTGTCTTCTTTGGCCACTGCGTAGCGTACCGATGGGCGTGCG  
TGTGGTACCAGGATCAGTTTCGGTTTTGCTTCTACGTAAGTGGACGATCTTCCGCCGCTGACGTTGGTTTTATGGCA  
TCCCGCGATCATCGGCGCACTGTTGCCAAGCGCCAGCTTCTTCTAATCAGCTGTGGCTGTTAATGAGAAAATCGTAA  
CCGAATGAACGAATAAAGGAGCGAAAGCTCCCTTTATTATTGTTAGCAAAGTGTGCTTCTGTTTCTTCTGAAAAATAAT  
TAAAATTCAATATATTGAGTGGGGTGGGCATGATAAGACGCGCCAGCGTCGATCAGGCAAGACAAATCTCGCCTGAC  
TTACCTTCTTCCCCCAGCAAACCTCCCAACATCCCGCTACAATCTGATTCGTCACCTGGCGAGCGCGCTTTTGG  
CCATTGTTGACCACACCATCTTTCTTCCCGCGCGTGGTCCGATAGTCCGAAACAAATATCTTCAATCCACCAAGA  
ATGCCGTCATCCACCGCTACCTTTTCCCTTTCGCGGGAGGATTATTTGCTGCTCGGTAAGTGGCCTGAAAGCCTTTTTG  
CAACATCTCATAGGCGGATTCCCGTCCACCTCATCTCATATTTGCCATACACCGGAGAGTGATTAATCAAGCCATTAC

GCTCATCTCCGTACCCGGCCCCATCCGCGAACAAGGCGCGATCACCATCGCACGCTCCACCACAGAAGGGCTTCCTTT  
GCATCCAGAAAAGAGATCAACGCCTCGCCGGTGCCAGTTCCTGAATCGCCTTTTCGGTATCAAACGCCGGATTGGCCCC  
CATGGTTTGCGCCGCTGCCTTCACTGCTTCTGATCTTTTGGCGTAAAAGCCCCGAAAGCATGTTGAACGCGATTACCGA  
GCTGCCCGAGCACATTATCCGGAATATCAGACGGGTTTTGCGAAACGAACCAGACGCCACGCCTTTTGAGCGAATAAGC  
CTTATCACCTGCTCAATCTTATCCAGCAGTACCTGCGGGGCATCGTTAAACAGCAGATGTGCCTCGTCAAGAAAAACAC  
CAGTTTTGGTTTCTCCAGATCGCCCGTTCGGCAATTGTTACATACTCTGAAAAGCATCCACAGCAGGCTGGCGGCGT  
ACAGTTTCGGCATCTGATAAAGTTTCTCGGCGCTGAGGATATTGATAACGCCTTACCGTTGGCATCGGTGCGCATCCAG  
TCTTTGATATCCAGCATCGGCTCACCAAAGAAGTGTGCTGCGCCTTGTGTTCCAGCGACAACAGCCCGCGCTGGATGGC  
ACCAACCGATGCGCTACTGATATTACCGTACTGATTCTGGAAGGATTTGGCGTTATCGCCGATGACTGGGTAATTGCC  
GCAGATCTTTAAAGTCGAGCAGTAACAGCCCTGATCGTCAGCAATGCGGAAGATGATATTCAGCACGCCAGATTGCACA  
TCGTTGAGATTCAACAGTCGTGCCAGCAACAGCGGCCCCAGATCCGAAACCGTCGCCCGCACCCGATGGCCTTTCTCGCC  
AAAGATATCCACACCACCACCGGATTGGCATGCGGTTGCCAGTCATTGACGCCGATATTTTAAAGCCTTGCAGCAGTT  
TTTCCGACACCGTTCTGCTGCGCGACGCCGGTCAGATCGCCTTACATCAGCCATAAACACCGGCACGCCGATTTC  
GACAATGACTCCGCCAGTTTTGACAGCGTAACGGTTTTACCGTCCCGTTCGCCGGTAATCAGCCCATGACGGTTAGC  
CATTCCCGGAGTAAAAACAGTTCTGTGTCGGCGTGGGCAATTAACAGGGGTTCACTCATGAGATATCTCCAGTTT  
CCTGCCTGGAGTATAGGCAACGTCGGCAAGAGAATACGTGAATGAAGAGAAAATAACCTAAAGCGTGTTCGCGTAT  
AAATCTGATACCCGAGGTCAACAGTGTGTGGTTGTGATCGTTATTTTTAATTTTGGTCTCAGCAACATTTGGCGGCCATC  
CGACCAATATCAAACGGGGAGTAATTACGCTGGCGAGGCTTGGGATCATTGCTGCCAATCTCCAGCCATGAAAACC  
CGCAATGGAATTTGTTCTGGCACGGCGAGGTTTCGCTCGCGGCACAGCAGAAGCGCACCCATCGCAATATCGTCATTGG  
TGCAAAATACACCGTCTAAATCCGGGTTTGCCTAAGGGCATCACGCATTAAGTGCATTCTAAATGAATGGATGAGATG  
GCGCGTGGATTGATGCGTAATGGGAAAGATTATGCAGCATCATCGCATCGCAATACCCCTGATAACGCTGTTTATCGCG  
GGTGTCTCTTTGGAACCGAGATACAGAAATTTGTCCTGACTCGCTTCTCCAGCATGGTACACACCATGTCAAAGCGG  
CCTGCCGATTATCAAACCGACCTCCATATCCAGCCGTTCTCCCTGTACATCCATCAATCCACGACCCGGAATGGTGGCT  
GAACGCAGAAATTTACCGTCTGATGGTGTGATATTTTTCCGAAAGTATAATCCCGTCAATGTTATAAGAGAGCAGGTT  
AATCACCGACTCTTCTCGAATCGCGATCGTAATTGTAATTAGCAATAAGGGTCTGATAATTATGCTCAGAGGTGACGG  
ATTCTATTTCCCGCAGAAATGTCAGCGAAGAGTGTATTTGAAATGACGGAATCAAGATACCGAGGGTATAACTTTGTGCA  
TTCAACAACATGCCGGGAGCGGATTAGGGATATAATTGATCTCTCCATAATTTTGGCGATGCGCTCGCCTGTTTCCTT  
TGCCACCTTTTTCGGCGAGCGGATATAACGACTCACGGTCAATTTTTGTTACGCCAGCCAGCGTAGCGATATCCTGTAAG  
AAATTTCTGTGATTGCGCATAACTTCTCCAACGTCGGGGGAATCTTCAATCTTCCCCGAAACTACATACAATATTTTA  
TTCTTTCAAGTGAATACGGCGTAAATGGCTAACACGCCAGCAAAACCATAATAGAAATAAGGGTTTCCATCACCGTCCA  
GGTACGCAACGTTTACCAACCGTCAGATTAATAACCTTTAAATAGCCAGAAGCCAGGGTCTGTTTACGTGTGACGGCA  
TCACGCTGCCCGCACCGGTTGCCAGTACCATTAAAGCGGGATCGGCATGGGTAAACGTTGATAATCGGCAACACCACCCC  
GCGGTGGTAATGGCCGCGACGGTGGCAGAGCCCAGAGCGATACGCAACAGCGCCGCAACAGTCCAGCACATCAATAACGG  
CGAAAGTGTAGTTCCGGTCAATAGTGTGAAATATAGTGCCCGACACCGCTATCTACTAATACCTGCTTAAACGCGCCGC  
CGCCAGCGATAATAAACACAATCATCGCGATAGCGCTATAGAATCCCAATGATATCCATGATTTGCTCGATGGTGGCT  
CCATTACGTCGGCCAGTGTGAAAATCGCAATAACAATGGCAATAAACAGCGCAACGGCAGGGTACCAGCAAAATCAA  
GAAGAGGCGCACGGTGTAGTTTTCGGTAACGTAATTTCAAAACGGCGCGATAGCCATCAGGATGACCGGGATCACGG  
CAGCGAAAATACTGTTCCAGAAGGAGGGCATCTCCTCTTGCCTAAACAGATGAGGATTAATAAGCCTTCCGGTGGTGT  
TTCTCAAAGCGAGTTAGCAGTTTAGAAAACAGCGGCTGCGACAATAACTGTCGGAATGGTAATGATAAATCCATACAG  
TAAAGTCGTTCCGAGATTAGCCTCAAAGATAGTCGCGATGGCATAGGCCCTGGATGTGGCGCAGAAAACAGTGGGTTA  
CAGAGAGCGCTGCTACCATTGGTACGCCAACATACAACAGGGGTAATCCTGATGATGCTACGATGGTAAATACCAACGGC  
AACAGCAGGACAAAACCCACTTCAAAAAACATGGCGAGGCCACAAACAGACCGGTGATCACTAGCGCCATTGCACGG  
TTTTTTACCAAAGTAGCAATCAGCGTAGTGCGGATACGTTGTGCCGACCCCGTATCAGAAATCAGCTTGCCTAACATGG  
CCCCGAAACCGAGGATCATTGCCAGCCCGCGAGCGTGTGCCGATACCATTTTTGTATAGAGTGCAGGACGGCCTGTGCA  
TCCATCCCTTTCGGCAATCCGACGACGGCAGCTACCAGAACGAGGGCAATAAAGCCGTTAACTTTAAAGCCGATCATCAG  
GATAAGAAGCAGCGCAGCCTGCCGCAATAATGATTAATGGCATAGTCTTTATCTCTTATTAGTGCCAGAAAAGCAGCG  
CTTTGCGCTGCACGTAGGGGGCTGTTAAACAGCCACTAACATGCCCCATCAACAAACAACAGGTGGCCGTTTACGAA  
ATCAGAGGCTTTTGAAGAAAGGAACACCCGACCAATCAGTTCCTGCGGATCTCCCAGCGTGGCGGGGGTCCGTT  
TGACAACACAGCGGTGAAGGCTTCGTCCTCAACAGTCTTTAGTCATTTCTGTTTTGAAATAGCCCGGCGCAATACCG  
TTGACCTGAATATTGTGGCGCGCAGCTCGACGCACATGCCGCGGTGAGCATTTTTACCGCCCTTTTCGATGCGGCATA  
AGGGGTGATGGTGCACGTCCAGTTCGCTTTGCATCGAGCAATAATAAATACTTTACCTGCCTTGCCTTCAACCATGT  
GACGAGTTACCGTTGCGATACCAGGAACACGGCGGTCTGTTTTACTGCGATCACATCATTCCACTCTTGTTCAGGGAAC  
TCAGTAAAAGGATGACGGCGCTGGATACCGCGTATTACCAGCACATCAATGGGGCCGATGTCCTTTTCGATATGTT  
AACGGCGGCATCAATTTATGTTTATGAGTAACATTAAGGTTGCGGCAACGGCCTGAATACCCCTCTGTTGGAGTTTTT  
CTACAGCAAGTTCTGCGGTTCCGCGAGTAATATCATTAAATAATTTTGTGCGCCATATTTACCCAGGCCGGTGGCAGT  
AAAAAGCAATGCCCTGTGCTGAACCGGTAATCAAGATATTTTTCTGCCAGTGAAAATAGATCGTTTATTGATTATT

CCTTTATTTATCTCTTAGAAAAAAGCTGGACTTTTGTGCTGGGTTTTATCACCGGCGAAACGTAGCGCCTCTCCAG  
GTCAGTGAAGGATATTCAGCACTCAGTAAAGGCAGTGGATTGATAACGCCATTCGCCAGCCATGACACTGCGGTATTA  
ATTCGCTGGTAAAACGGAAAGAGCCTCTGAGTGAATCTCCTTACCAATCAACGTCATCATTGGGAATCTGCCATCGC  
CCTCCCATACCTACCTGCACCATTACGCCGCGTGCACGAGTGACCTCCAGACAGGTATTACTGATGAAGGATGACCGGA  
CACTTCAAAGCTGACATCGAAATAGCCTTTTTCCGCTTTCAGTGATCCATGTCGTCGTTTTGTGGGTTTACGAGCACAT  
CCGCCCCATCTTTGCCAGCGAAAGGGAACGGGACTCACATCAGCACAGACAATTTCCGCGCCCCCAGTGTTTT  
ACTGCACTGACAATCAGGACGCAATGGTCCAACACCGGAAATAAATACTCGCTTGCCCTGTAACCTGCCGGCCTGATG  
TGCGGCATGAATCGCGACGGCTAAAGTTCGGCAAAAGCCATAACCTTTTCGTAGCTTTGGCCGGATAAGGGACACATT  
GCGACGTTTCGACATTTTATAACGGTAAAACCACCATCAACATGAGGGAAATACATGGCACTGCCAAAAAACGCATA  
TCTGTACACTGATTCTCGTTATGTTCAATGCAGTATTTGCAGTGACCGCACGGTTTAGACGGATTAATGGCTACCGTTG  
CCCTTCATGTAATTCTGATGAGTCGCTATGAATAACTTTACCATAACTTCATGACCTAACCCATCGGTGCCTTTATCA  
TGAATTACCTACTTTTCTTCTGATAATAATGTAATCGGAACCGCAAATCCACCTCGGGTATTTGACTAATGTT  
CCATTATTTCGAATCTATCGTCTGCTCGGTAACGGCAACAGTTTTCTTCCCGCAACAACGAGGACTGTGTTTTAC  
TTGCATAAATTCCTCACTGCTCAGGTAGACACCTCGGAAGCATTAAAGCGTTTTAACTGTCATTATTTGTGATGAAGAT  
CACGTGAGAAAATGTTACTACTATGTTACGCATAACGTGATGTCCTTGAATTTATCAGTAGAAAATAAAAAAAC  
GTGAAATTTATGCGCCAGGCTAGTATCGCAGCAGGTAAGATGATTGAGGATTTTTAAATGGCCGGTGAAGGTTT  
ATTTTGATGGCGTTTTAGGGAGTGGTAAAACATTAATTTGGTAGCAAGTTGCCGCTTATTATCTGCTAAATTTATTGA  
TGGTGACGATCTTCATCCAGCCAAAAATATAGATAAAATGTCGACGGTATTCCATTATCTGATGAAGATCGACTTCCCT  
GGCTGGAACGCTTAAATGATGCTTCATACAGTCTTTATAAAAAGAATGAAACAGGATTTATTGTCTGTTTCATTA  
AAACAGTATCGTGATTTTTACGCAAGGGTAGCCCCATGTTCTTCTGTTAGATGGCGACTATGAACTATTCT  
CGCGCAATGCAGCGTGGGCTGGCATTATGCGCGTAGCGTTACTAAAAAGTCAGTTTGGGCACTGGAGCGTCCAC  
AAGCAGATGAACAGGATTTGTGCGCATTGATATCAACCATGATTTGCCAATGTCACCGAACAATGTCGGCAGGCTGTG  
CTGGCGATACGACAAAACAGAATATGTGCGAAAGAGGGCAGCGCCTCAGATCAGCGCTGCGAATGATTTTAAAAATCGG  
CTTTCAACACCACGCGTAAACGCGCTTACCGTGCACATGCTGGATGGCGTCGTTAATTTTCGACATCGGAACAGT  
TCGGTGGTGGCGCAACCTTGTGCGGGCGCAAAACGCATCAGCTTACGCAGCTCATAAGGCGTCCCGTAGCAGAACC  
AGAGACGCTGCGATCGCCGCAATTAACGTAAAGGCCGGAACAGACAGCGGGTGAAGCCGACCGACCGTATGGAAT  
TACCGCCATAGGTGAGCGCTCAAAAATAGGGCTGCCAGTGCAGGCTGACGTTGACGGTGTGATAATGAGATCAA  
CTGC  
CCCGCCAGTCTTTCAGTGCCTGCGGATCGGGCTATTACCCTTTATCGGCACCCATCGCCAGCACTTCTGCTCTT  
CGCCGATTAGAACTAAAGCTGTCACCTCGCATCCATTGCGTGCAAGTTTTATAGCGATATGCCCCAGCCGCCAA  
TACCAATTACCCCAACGCGGCTGGTAGCAGTGATATGGTGCATCAACAGTGGTTAAAGACCGTGATACCGCCGCA  
AAC  
AGCGGCCCGGGGACTCGATATCAATTTTTCTGGCAGTGAATCACCCATTGCCAGTCCGCACGCACTTCTCGGCAA  
GCCACCGGATTACATAATCGTCGGCACCCGACCTTGTCTGCAGTTGATCTGATTACCGTAATACAGGCGTGCAGT  
GAC  
CACAGTACGCGCGTCCAGCCAATCCCGACAGCTGACCGACCTGCAAACCTTTATCCTGCGCGGGCTCCCGAGT  
GCC  
ACCACGCGCCCAATCACCTCATGCCGGCAACCAGCGGATTTGTGAAAATCCCATTCGTTATCGATCATCGACAGAT  
C  
GGAATGGCAGATCCCGCAGTAATCCACCTGCACTTCAACATCTTGTGGCCTCAGCTCACCGGGATCGTACTCATA  
AACTT  
CCAGTTCGCCGCCGCTTCTTTTGGCGCATAGCTTTTTATCATCGACATTTTTTGGTCTTCTCTGGTGTGTTGG  
GAA  
GTGTAGAGCATGGCAGGGCGGGTGCCTGGAGTGTGACAAAGTTACACATCGCTGTATGCAATGCTGAAAATTT  
CAGCA  
CTTAGCGAGGTGCGAGCAAGCTGGCGCTTGCATGGTGGCGTGCACAGGTATAATCCACAACGTTTTCCGCAT  
ACCTT  
CAGTGCCGAAGTGGCGAAATCGGTAGACGCACTTGAATCAAAAATCAACCGTAGAAAATACGTCCGGTTCGAGT  
CCGGCT  
TCGGCACAAAAGTATGAAATAGACCTCAACTGAGTCTTTTTTTATGCCTGAAATCCAGTGTATCTATCTTTCC  
CG  
CTATATTAACCTCTCAAGGTCAACCGATATCAACGTACATCTACCAACATATGTTGGTACAGATGATGGTATTT  
CCG  
TTCGATAATGCTTGTACCAACAGGGAGGGAATACGATGGCATTAAACAGATATCAAAGTCAGAGCAGCAAGCC  
AACCGGATA  
AGCAATATTAGCTGACTGATGGTGGCGGTATGCATCTGCTTGTCCATCAAATGGTTCTAAGTACTGGCGTTT  
GCA  
CGTTATGAGGGAAAGCAAAAATGCTGGCACTTGGGTTTTATCCTGAAATCACACTAGCGGATGCCAGAGTACGTC  
GTA  
CGAGGCGCGTAAGCTGCTTGCGAATGGCGTGCATCCGGGAGACAAAAAGAAAATGATAAGTTGAACAGAGTAA  
AGCAC  
GAACCTTTAAAGAAGTGCAGTATTGAGTGGCATGGCACCAATAAAAAGTGGTCTGAAGATCACGCCATCGTGT  
GCTAAAA  
AGTCTTGAAGATAATCTTTTTGAGCGCTTGGTGAACGTAATATCGCTGAGTAAAAACTCGAGATTTATTAGC  
ACCTAT  
TAAGGCCGTAGAAATGTCTGGACGCTTGAAGTGGCCGCTCGTCTTACGAGCGCACTACAGCCATCATGCGCT  
ATGCAG  
TGCAAAGTGGGTTAATTGATTATAACCCGGCACAAAGAGATGGCTGGGCGGTTGCTTCTGTAATCGACAACAT  
CGTCCC  
GCGCTTGAATTAAGCGCATCCCTGAGTTGCTTACAAAATAGATAGCTATACTGGTAGGCCGCTAACCCGAT  
GGGCGAT  
AGAACTCACTTTGCTGATCTTTATTCGGTCCAGTGAGCTGCGTTTTGCTCGTTGGTCAGAGATCGATTT  
CGAAGCGT  
CTATGGACTATCCACCGGAGCGGGAGCCTATTCTGGAGTGAACATTCATAGAGGCTCAAAAATGCGTACAAC  
GCAT  
CTAGTGCCTTTTCAACGCAAGCTCTTGAATTTAAAGCAGATAAAACAGTTTTATGGGGCCATGACTTGAT  
TTTTAT  
TGGTGATCACGATTCGCACAAACCCATGAGTGAGAAATACGGTAAATAGTGCCTACGGGTCATGGGGTATG  
ATACAAA  
TAGAGGTTTGTGGTCATGGCTTTCAACAATGGCCTGTAGTTCATTGGTCAATCAGGTCTGTGGTCTCGT  
GATGCT  
GAACGTCAGATGAGCCACATGGCGCAAAATTCAGTGAGGGCCGCTATATCCATAAAGCAGAGCATCTGGA  
AGAACGGCG

ATTGATGCTACAGTGGTGGGCCGATTTTCTGGATGTAACAGAGAAAAGTTTATCAGTCCATTTGAATATGCAAAGATTA  
ATAATCCATTAACAGTAATCATCCCGGCAAATGCCGGGAATTATTCTAGGATTATTTCTTTGTTAAAAAAGACAA  
ACGGTATTAACAGTATTTACTATTTACCGCTCCCTGCAGGGGGATTATCAGAATCCGCGGTTATTCATTATTTATA  
TACATTCATAAAAAAGTAACTCATAAAAATCCTGTACTCACAGGGTATGCGGGATAACTGACGTAAGGAGTGCTGC  
AGGGATTTGATGGTCCCTGTAGACTGGCCCCCTGAATCTCCAGACAACCAATATCACTTAAATAAGTGATAGTCTTAAT  
ACTAGTTTTTACTAGTACTGATTGGAGAACAGATGATTGATGCTTAGGGCCGGAGAAACGCAGACGGCGTACCACACAGG  
AAAAGATCGCAATTGTTGAGCAGAGCTTTGAACCGGGGATGACGGTCTCCCTCGTTGCCCGGCAACATGGTGTAGCAGCC  
AGCCAGTTATTTCTGCGGTAAGCAATACCAGGAAGGAAGTCTTACTGCTGTCGCGCGGGAGAACAGGTTGTTCTCTGC  
CTCTGAACCTGCTGCCGCCATGAAGCAGATTAAGAAGTCCAGCGCTGCTCGGCAAGAAAACGATGGAAAATGAATCC  
TCAAAGAAGCCGTTGAATATGGACGGGCAAAAAGTGGATAGCGCACGCGCCCTTATTGCCCGGGGATGGGGAGTAAGCT  
TAGTCAGCCGTTGCTCCGGGTGTCGCGTGCGCAGTTGACGTCATTCTCAGACGAACCGATGACTGGATGGATGGCCGC  
CGCAGTCGTCACACTGATGATACGGATGTGCTTCTCCGTATACACCATGTTATCGGAGAGCTGCCAACGTATGGTTATCG  
TCGGGTATGGCGCTGCTTCGACAGACAGGCAGAACTTATGGTATGCCTGCGATCAATGCCAAACGTGTTACCGGATCA  
TGCGCCAGAATGCGCTGTTGCTTGAGCGAAAACCTGCTGTACCGCCATCGAAACGGGCACATACAGGCAGAGTGGCCGTG  
AAAGAAAGCAATCAGCGATGGTGTCTGACGGGTTGAGTTCTGCTGTGATAACGGAGAGAGACTGCGTGTACGTTCCGC  
GCTGGACTGCTGATCGTGAGGCACTGACTGGCGGCTACTACCGCGGCTTCAACAGTAAAACAGTACAGGACGTCAT  
TGCTGGGAGCGGTGGAACGCGCTTCGGCAACGATCTTCCGTCGCTCCAGTGGAGTGGCTGACGGATAATGGTTTCATGC  
TACCGGGCTAATGAAACACGCCAGTTCGCCCGGATGTTGGGACTTGAACCGAAGAACACGGCGGTGCGGAGTCCGGAGAG  
TAACGGAATAGCAGAGAGCTTCGTGAAAACGATAAAGCGTGACTACATCAGTATCATGCCAAAACAGACGGGTTAACGG  
CAGCAAAGAACCTTGAGAGGCGTTCGAGCATTATAACGAATGGCATCCGCATAGTGCCTGGGTTATCGCTCGCCACGG  
GAATATCTGCGGCAGCGGGCTTGAATGGGTTAAGTGATAACAGATGCTGGAATATAGGGGCAAATCCACCTTGCT  
GATATGAATACGGATATTTTATACAGAATACTTTTTCAGTACAAGCGACTGTATTACAGTCTGCCATATATGATTACCTGT  
GATCAGGAAGAATAAGTGGCTGAGGTTTCAAACGTCTGCCGGTATATTCTCTCTCCCTAAAAACCATAACAGGTTAG  
TTATCTTCTGCTGTCAGCGGATTGAATGGCGGTATATTTTTCAGTACAATAACCGGTATCCACTGAAAAATACCTGCGAA  
ATGACGGGCACTGATTTTTCTACTGACGGGCTGATGAGACGTTATGCTACTGGCGGTAATAATCAGTGGCACACTGTAGC  
CTCCCTGCACATGACCATAATGATGAACAGGATTGGCACTGTCGCTGACCGACAGCCCAAGCCAGAAAAGTAAAGCATG  
GCGAAATGACGTGAGTACCGCGGAAGGATACCATCAAGCTGGCCAAGAAAGTTATCCAGTTTACTGATGCTGGCGAGGTA  
ACAGGCAATTTTTCGGGGATACTGCTCCAGGTAATTATTCGGCTAGGAGTTAAGGCTGTACACGGATTTGGATGAGAAC  
CCATCATGTGACAGGAAATTTATCTTCGGAGAGGATGTATCCGCCAGCGCACGTTCTGTTTCTGTAAACAAGTTTGTCA  
TCTGTTTTACGGGAAGCGAAGCTGCCTTTCTTGAGGAAAAGTGGCATGCTCCGCATCAGAAGCAATAACAGAGATGCGTGT  
GTCATGCTCCCCAGTTTTCTTATTGGATATCCACCATGTGCTGTATCCTGCTTTTGTGCCAGCGCCACCACATTTGT  
TGCCGGAATCAGGGTTCTGCTCATAGTCATAAATCAGTGTCCGGCTCAGGGAAGACTGTACTGGAGGCTGTGAGGTA  
TAATCGTCAATAAATAAACCAGGTTGCGTATTACGCCACGGTGTGGTTGGTACGGGATAGTCATACACTGACATATAATC  
CCTGCGCACACTCTCACCAGTGACAATAACAATCGTATCATATAACGGTGTCTCCCGGCTGGATTTTCCAGTTGTGAGCC  
CGTGCTACTCAGTTGTTTATAACGCTGCATTTACGTAATGTGTCAGTTGTCCCAACTGTTTCTTTAACCATCCGCA  
ATGGCAACGGTTTACAGAGCATAATACGAATAGCCGTAGAGCCAGCAGTTACGGTGGTCCGATGGTGTGTCGCCAG  
AAAATCACCACGAATACCAGAATCGCGGCACTGACCAGAAAATGATAAACAGGAAACACGGGGCGGTTCACTTTGCTTTC  
TCCTGTAGTGTCTGTAGGTTCTGAACCGTTCTAGCGGGTGTGAGGCTGATGGCAATCGCCGGGCTCTTCTGCA  
TGTTACTGTTACTGCAAGAGGGGCTTCTGCTCCCTGACATTACTCAGTATTTTCACTACTACACCCATCTGCCAT  
CCATAACAACGATTACCCCTCGCGAGGCGTTGTCGCTGACCCCGGACAGACCCGTTATGGACTTCTCTTGTG  
ACGATCGATCAATTGTTATGTCATGCTGACACCACAACCCCGTGGGTATGACCGATGCCTTTCTACTCTCTTCCCGGTC  
ATCGTCCGCTTCCCGTTATTGTGGCGTGTGACACCCTCGACGGCATTTCGATGGCTGCTCAGTGTCTACTCACGTTA  
CGCCCCGATAAACCCTGACTTCTGAAGAAGTGTTCAGGGAGAGATTAGCCCTTTTGTACTCTGACCGCTT  
CTTGTCTTCCAGTCCGAGCGAGAGTTAGCCGGGGGACTTTACCAGCAGGAAAGATCGTGCATTTCAAGGCACACACA  
ACAATATCTGCGAGCGTGTATCCGTCCGGTCTGTTATGGGACGAAAGCCTGGTTGTTGCTGTTCACTGGTGGCCGG  
AACCGCGCGGCACAGATAATGAGCCTTCTGGGAACCGCAGTCTGGAGCCACATGCTTGGCTGACGGACGCTCTGACGCGT  
CTGCCGAGTGGCCGGAGGAGGTTGGCTGAGTTACTGCCTCTTGGGGCTTTACCTTCTCGGGTAAGTGATACCTGC  
CGTCAGGTGTTTGTGACCCGGGCCATAACCTGCAGTTGGGAATGAACGCTGACAACAGGAAATGAGCTAGAGCAGTAA  
ACACGCGGGCTGACAATGGGTGAGAATATGAGTTAGCCGGGCTTATTCTGGGGTCACTTCACTAGCTAGCCTCCGG  
TACCAGACTAGCTAGCCCTACGCAACCAATAAATCAACCATCGTCAGAGTGAATCGTTTATATACACTGTCGGTGAT  
GCGCTAAAAAATGCGTTAATGTTGAGTTCCTCGAACCTTACCAATTAAGGGACATAGCCAGATACGCAACTGGCTGATG  
CAAGCAGTCTAATGTCTTATAGTCCGCTGGCCTGCGGGCATGACAATGTCAAACAGTCAAAGATTGTGGCGTTGACGGTC  
AGTCTTGGGGACAAAAAGCTCAGTATTTCTGTTGGCAACAGATAATTTAACAGTTGATGCTGAAACGAAATAGGCATC  
TTGGTTCTGTAATGCCAGTCAAGTAAAGCAACTGACTGGCTTTTTTCCGGGGCTGTGGGGTATTTCCAGGGCTCTCCTTT  
ACCACTCTCGGGAAGGCCCTTTCCCTTCTGTGCGTAATTTACAAAGTTGTCCCATCTTCAAGATCGCGCATCAGCTC  
CGGTATACGTCCCGGTGAAGCGCCCTGCAATGTCATCAGCATTCTCATACCATTCCGCATGATTCTGAGAAACTCAGTT

GATTCGGCCAGTAACCTTTTCAGATGTTCCGCCATTTAATCATCTGATATCTCACCAGATTATAAGCCAGTAAGACACCC  
CACAGCTCTTGCTCCACAAGCTCCGGCTTTTTACTTCTCAGCGTCAGCCTGCTCCGTTGCATCGTCTGTTTTATCTCCCT  
GTATCCCAGTTCGATTTCCAGCGATGACTGTACAGATCCCCATTTCTCCTCCGGGAAGCGCATGGCGTCCGTCATCG  
ACGTCAGCAGATGGCAGACTTTTCTTTGCGCGTCACGGTCAGCAGGCGGGCAGTCACTTCATTTCCAGTCCCGGCCAC  
TTTTTTCGTGCCTGCGGGCTGGTTTTAGCTTACCAGATGATCGCCTTACCAGTTTTCTGATCTCTTCATATTGCC  
TCCCTTTCTGAGAGGTATCATCCAGTGGCGGTGTTCTCCCGCCAGGCTCCAGGCATTTAACAGTCCAGTGAGTAATAAC  
CTTTATCCATTAACGTGAGAGTGTATCGCCGGTTTGTCTATAAGTTGCTCAGCAAGCTCATTTTCGCTGTTCTTCATC  
GTGCCGAAGGCTGAGCCGTGAGCAGATGGTGGTCACTCTGGCAGACCATTTGACCTGCGGGTAGAGCGCCGG  
GTTCCCGGCATGTGTCTGGCGGGGAAGGCTGCATCGTTCTCTGGTGTATCCGGTGTGCGCCAGAACACACCATCGATGG  
CCAGCAGGGTCAGGCCGACAGTGGGATGCGGCTGGCGTTATGCCAGAGCTGCGCTGTTTTCTGTAACACGCGCGGG  
ACAGCCTCACTTCCAGGCGCTGGCGGGCTGAATAACGGCACTGGGGGCAACGAAGGGGCGATTGCCCGCAGCATGAT  
GTCCAGGCGATTACAATCTGGTGAAGAGTTCTTACGCTCAAGCGCCATGCCAACAATACACCAGACCATCATTTCGA  
GGGAAGACGGCGCTTGGTAGCGTTACAGTACCTGATTCGGCAAGGCAACGAGAGATGAGTTCGGGGTCGAGGTAATCC  
CCCAGAGAAGTCAGTGGTTACGCAGAGAATCGTAACGGGATACCAGATCAAGAGCCTGTCCAATGTGCATAAAAAAATC  
CGAAACAAGTGAGCGTTCCGGATTCTACACGCCACTGGTCACTGATCCTTAACTGATCGGCATTAATCTT  
GGTCTGGTGTGTAACAACTATCAGCTACAAAAATATGCTCAATTTGTGACATCAGTAACAAAACCGCTTTTGTAT  
GTGGATTGCTGTTTTTGTACTGGTATAACAGGTATAAAGGTATACAGAAAAGCAAAGAAATACTGCAAAGGAAAACAG  
CTATAACGTAAGCTAAAGTAATAACCTCTCAGTCTTCTCCTCATTTGACGAAGGGAGTTTTATTCAACCTGAACGGACTAC  
GAAAATGAGCACAATGAATAAGTCAATTTTTGAAGCAGGGTTGAACTGTGCCAGTGGTGAATATCTGGCGAACATTGTT  
TTTTGTTGGTGACCCAAAAGTGTAGGTGGGTATCAGTTTTATCTTTCATAGAGTGAAATATGTTAAGAAGAAATGGAGGA  
AAAGATTGACTGATTAGGTATTGATAACAATCAATAGTACTGGCGTATTTGAAGACAATATAATTATTTCTGGATATTG  
TTGAGGCTCCCTAATATTTACTTTAAGGGCTATATTAGAATAACACAGGAAACAAATATGGCAACAGCATGGTATAACA  
AGTTAATCCACCACAACGAAAGCTCTTTTTCCGCATGGCTGGATATGATTTGATGGCTTTGATTTTATGATGATAT  
TTACATTTCTCATATTATAAAGCAGATCTTGGCATTACGGATATTCAGGCTACTTTAATAGGGACAGTGGCCTTCATA  
GCCAGACCTATTGGAGGTGGTTTTTTGGTGCCATGGCTGATAAATATGGTCTGAAGCCAATGATGATGTGGCAATTTT  
CATTTACTCAGTCGGAACAGGCCTTAGCGGTATTGTACAAACTATATATGCTCGCAGTTTCCGTTTTATTGTTGGCT  
TAGGGATGTCTGGTGAATATGCATGTGCTTCAACTATGCGGTAGAAAGTTGGCCTAAAAATCTTCAATCTAAAGCTAGT  
GCTTTTTTGGTAAAGTGGTTTTTCTGTTGAAATATTATTGCGGCACAATAATCCCTCAGTTTGTGAAGTATATGGATG  
GAGAAACTCTTTTTTATAGGCCTGTACCAGTTTTACTAGTTCTTTGGATCAGAAAAAGTCTCCAGAAAGTCAGGAGT  
GGATTGAAGATAAATAAGGATAAATCAACATTTTTGCTGTCTTCAGAAAACCATCTTTCAATCTCTATGATCGTT  
TTCTCGTCTGTTTTTGTCTATTTGGTGCAAAGTGGCCGATAAACGGACTACTTCTTCTACCTGGCAGATAATGGAGT  
TAATACAGTGGTCATTTCAACTCTGATGACAATAGCAGGTTTAGGAACACTGACAGGTACAATATTTTTTGGTTTTGTTG  
GTGATAAGATTGGTGAAAAAAGCCTTTGTAGTCGGTCTAATAAAGTTCATTTATTTTCTTTGTCCTTTTTTTTTATT  
TCTGTGAAAAACTCTTCTCTTATAGGATTATGTCTCTTTGGATTAATGTTTACAAATTTAGGTATTGCAGGGTTGGTTCC  
AAAATTTATATATGATTACTTTCCAACAAAATTAAGAGGATTAGGGACCGGCTTATTTATAAAGTGGGCAACTGGAG  
GAATGGCCGCACCTGTATTAGCTACATACATTTAGGATATTAAGGCTTAGGTGTTTATTATTGTTACGGTTGCA  
TTCTCTGCCTTATTAATTTTGTAGTTGGTTTTGATATCCAGGTAATAAATTTATAAAGTATCCGTGGCTAAATGATTGGA  
GGCTTTATGATTAATTTAGCGTGTGGTGGTGGTACTTTGGCGCTGAATTAGCTCGTTTTATGAATATGCATGATAA  
TGCAAAAATACATGTGTATACGATCTGAAAATGGAGAAAATTTGCCCGTGAATTGCAGTGTATCAATATGTCAAGCT  
TGGATGCTTTAGTCTCAAGTAAATGATGCTGATCGTAGCCACCCAAATTTATGCATAAAGAACCAGTAATT  
AAAGCAGCAAAGAATAAGAAGCATTTTTTTGTGAAAAACCAATTGCATTAAGTTATGAAGATTGTGGGATATGGTCAA  
AGCGTGTAAGAAGCTGGTGTGACCTTTATGGCCGGCATATTATGAATTTTTTCAATGGGGTTCAATATGCACGGAAGT  
TAATTAAGAAGGTGTTATCGGCGAAATATTATCATGTCATACTAAGAGAAATGGCTGGGAAAAACAACAAGAGAGACTT  
TCCTGGAAAAAGATGAAAGAACAATCTGGTGGACATCTATATCATCATATACATGAGTTAGATTGTGTTGAGCATTACT  
TGGAGAAATACCAGAGACGGTACTATGATTGGTGGAAATTTGGCCATTCTGGTCCAGGATTTGGCAATGAAGATGATA  
TGTTATTTATGACCTTGAATTTCCCGTCAGGAAAAC TAGCAACCTTAGAGTGGGGGAGTGCATTTAACTGGCCGGAACAT  
TATGTCATCATCAATGGAACATAAGGCTCTATTAATTTGATATGCAAGAAACAGCAGGGTCACTTAGGATTGGCGGTCA  
GACAAAGCATTTTTTGGTCCATGAAACACAAGAAGAAGATGATGATCGTGGAAAGGCAATATGACCTCAGAAATGGATG  
GCGCTATAGCATATGGTCCATCCAGGAAAAAACCATTATGGCTTGCAGTTAATAAGAAAGGAGACGTTATTCCTC  
CATAATATCTCTGTGGTCAAACCTGAAGAAGATTATATTGACCTTCTCAATGGTGGAGCGGCCATGTCCGGCATTGC  
TACTGCTGATGCTGCCACTTTTCAAGATCGCAGGACAGGAAAGTAAAATCAGTGAGATCATTAAACATACATCAGTAA  
TGTA AAAACTATACGCTCTTGATTTAATTCAGGAGGCCTTTTATGATGATCAAGAATTTTATCTTCGATAATCTCATA  
ATTTTAGCAGTGCCATTTATGATAAAAACATCCCTTAAAACCAATCTAATCTTTTTCTTCTCTGTGATTTGTTCCCA  
TATGGCGTCATAATTTACGCTACGTAATACGGGATAGTTACGATACGCAGCGATAGCGCTAAGTTTTAGTTAAAATCCCC  
CATCAGCGGGATATGGGATCTCTGGGAGGTTAGGTTTTAGCATCGCGACTTAAATACGACAGACGCTGGTGACGATGA  
TGCCAAGTAGTGACTCTCCGAATAAGGTTCCACTGACCAATTTGGCGCGCTTCGCAATAAAATCTCCCTTCGCCAG

TATTGGGAAAAGTAGATACATTCAAACGTGTACGCTGTTTCGTCTCACAGTTCAGGACATTGCTGGCCGATGAGCTGAC  
CATTGGGCCTATCCGGGCTGTCCCGATGGATATTACGCCGAAGTATGTGGGAATTGCCAGCGGATTGATGAACGCCGGTT  
CCGCTGTCCGGACATTATTTACCTATCGCCTTTGGCATTATTATCGACAAAACAGGCAACTGGAGTTTACCATTCTAC  
GGTCCGTCGCAATTGCTTATTGGTATATTCTGACGTTCTTCATGCGTCCAGATAAGTCATTGTAAGTCAATCA  
GGCTGAAGTGGCACACTGAATTTGGCCACTGAACAGAGGTGATATGCTCACCTCAGAACAACACAGGTGCTCCAATGA  
AAAAAGAAATTTTCAGCGCAGAGTTTAAACGCGAATCCGCTCAACTGTTTGTGACCAGAAATACACGGTGGCAGATGCC  
GCGAAAGCTATGGATGTTGGCCTTTCCACAATGACAAGATGGGTCAAACAACCTGCGTGATGAGCGTCAGGGCAAACACC  
AAAAGCCTCTCCGATAACACCAGAACAATCGAAATACGTAAGCTGAGGAAAAAGCTACAACGGATTGAAATGGAGAATG  
AAATATTAAGGCTACTGTAGATTCAATCTGTCAATGCAACACCCCTTTCAATTATCTCTTTCCGGTGTGTTGAATTC  
AGTGTCTTTCTCGGTCTGTTGTTTAGCTGAGCAGCAACCAGATCTAGTTCATGTTGAGTATATTGGGCAAGACATGTCTT  
TTTAGGAAAGTACTGCCGAATTAGCCATTTGTGTTCTCATTTGTTCCCGCTGCCAAGGACTCTGAGGATCGCAGAAGT  
AACTTTAACGCCGGTGTGACAGTAAATCTAGATGTCTGGCAGTTCATTCTCTGTCCCATGTGAGTATTTTCTG  
AGTCTGACGGTAAACTCAGGAATTTGTCGGTAAGAGCCTGATTTACTGAGACAGAATCTTTGCCCTGAGTCTAAGGAT  
GATCGTATAACGTGATTTTCGGTCTACAAGTGTGGCTATATGAGAGTTTTTTGTACCTGAGACTAAATCGCCCTCCCAAT  
GCCCTAGAGAGCGTCTGTTATCGATATTTCCGGAACGTTCTGTAATTTGGTGTTCGGTTCATATGTTAATCGTACCTCT  
TCGCTTTTGGCGGTATGACGCTGCCATGGCGAAGGCTATGCGACCGTGCAGATGCTGTATATTCAGTGGTGTAGCGC  
TTCACGGCTACGAAAGTACAGCGTTTTATAAATTGTCTCAGGTGATATTCGACGCGTTTTTGGACGTGGTTTTGTTCCGC  
TTAACCATCTGATATTTGCTCTGGAGACCATTTCTCTCAGCTTTTCCAGAACAAGCTTTCGCAATGTTAAATTTTGA  
TCCAGTAAGCACGGTTTTGGCCTTTTCCGCAATTCTGTTGGCTCGTTATTAGCATCAACAGCTTTGTAATAGCGTCTGCC  
CCGATTACGCTGAACTTCACGTGAGATCGTCGAAGGACTGCGATTGAGCAGTAGCTATCGCACGAATGCTCATTGTTGG  
CTGACAAACCAGCTCGTATCTCTCGCGCTCAGACAGTGTGAGTGTGACTACAGCCCGCTTACGCTCATGGGGTTTTATG  
CCGCCAGTATCCCTTAACATAGTGAAGATCGTTCGGGTTTTGAACCCAGGATATTCGCTATTTCACTGAAGCCTGTTCC  
GTTCTTCCATAGTTCAAAAACAGAGGCTTTTCTCTGCTGTAATGTTGCTCTCATTCAAAAACCTCCGCAACCCCAT  
GTTTTACATAACTGTTGCGTTGACCAATTGAATCTACAGTGTCTTTTTTAATATATCTCGCTCAAGGCGAGCTTCATT  
TAACGCCTTACGAGTTCAGAAATTTAGATTCCAGTTCAGCCACCGTGCAGGAAACAGGAGTACCGAGCCCTTTCTGG  
CGCGGTAACCATTGCTCTAAAGTGCCTTCAGGAAGAGATAATCGGGAAGCGCCTTCACTGATCGAAAGTTGATTTTCA  
AGAACCCTTACGACGTTGCGCTTTGAACTTTTTAGAGTAACGTTGGGTTTTCTGCTCATTATTAGCTCCTTCTGATG  
CCATTCTATTTAGGAAGGAGTGTCCGTTAAACTCAGGCTACCTCAGGAAAAACCGTCTGAAAAACAGACGGCAGACG  
GGCTGTATTACGAGTCACTGAGTACTGAGTACATGGCATCAGCCAGGTTCCGGCCGGAGCAAGAAGCATGCCACAATGG  
CAACCCGGAGAGGCTACCAGATGGGACGCTGGCTTGTGCGAGGCTCATGAAAGAGCTGGGGCTGGTCACTGTCAGCAG  
CCGACTCACCGGTATAAACGTGGTGGTGTGATGAACATGTTGCTATCCCTAACTACCTTGAAGGCGAGTTCGCCGTGACCGA  
GCCAAATCAGGTGTGGTGGCGGTGATGTGACCTATATCTGGACGGTAAGCGCTGGGCGTACCTCGCCGTTGTTCTCGACC  
TGTTCCGCAAGAAAACAGTGGGCTGGGCCATGCTGTTCTCGCCGGACAGCAGGCTTACCATGAAAGCACTGGAAATGGCA  
TGGGAAACCGTGGTAAGCCCGTGGGGTGTGTTCCAAGCGATCAAGGCGAGTATTATACGAGCAGGCGATTCCGGCAG  
TTACTGTGGCGATACCGATCAGGCAGAGTATGAGTCCGGCTGGAACCTGCTGGGATAACAGCCCAATGGAGCGCTTCTT  
CAGGAGTCTGAAGAACGAATGGGTGCCAGCGACGGGCTATGTAAGCTTCAAGGATGAGCTCAGCAATAACGGACTATA  
TCGTTGGATATTACAGCGCACTAAGACCGCACGAATATAATGGTGGGTTACCACCAAACGAATCAGAAAACCGATACTGG  
AAAACTCTAACCGGGAGGCCAGTTTTAGTTGACCAACAACAGACTACCTGAAGGAGCCCGGTCGCTGGCAGTTGCAG  
TAGCAGGAGATCATCCAGCCGAGTACAGGTACAGTACTGTTAATGATACCGGCTTTGACCCGCTATTTCCGGC  
TCTATCGTGAATCATGGCGTCAAGCCGCTGACACCATCTATTGTTGACTGGGAGGCTGCCACCATGCTTCCGGC  
TTTTCCCTGCGCGAAAAAGGAGAAGGACGGGCCCGTCTGCTTCACTTTATGCCAGCTTCGGTAAGCTGGGTGAGACAC  
CGACTCATGAAGATATCATTGATAACAATCGATCCATCAACTGGCCTGTATAACGTGGCTGCCGGTATTAAAGAAAGCTG  
CACCTACCTAAGTAGTAGCAAACGCACACTTTTTAGAAAAATCGATGGTCAAGAACTGGATTAGCAATCCGTTCCATGG  
TTGCTTTTGTATTACGTTGGCGTCTGATCATTGATTATCCTCAAAGCCCAACCTCATTGGTAATGAACCAGCTCCGTG  
AATGTCCGCTCTGGCACAGAGCGAAATTTTTGATCTCCCCCTGAAATCTAAACTTAGTCATGTCACGTTTTTGGGTTT  
CTAAAATTTAACTTCGCGTTTTTCTGTTGCCGTAAGGGTTATACAGAAATGTCCGTTAAGCAGAGTTCAAATTTGATTGC  
CGTATCAGACTGGTTTGAAGCCGCGCCCAAGCCTGTACAGCTCTGGTTTGGCTGATTATGAACCTGTCAGCCTAAA  
GCAAGCGGATGGACGATGAGTATTGGTAATCTTTCAGAGTCCGAAAAAGTTCAGCCCAGTCTGAACAGGCTTGTGGCG  
CCAGTCCAGTTTCATTGAGTGTGGTTGGTCTTACGGCCTGTGCAATCTACCTCATTAGGCACATCGGCTGCCAGAT  
ACCGGCTCGGGGTGATTTCCGCTTCCACGCTGAATACTGTTCTCAGCAATCTGGGGTCACTACCTCTTCTGGTGTGCC  
TTGCGCCATAACATGTCCGTTTCCATTACCACCAGTTGATCGCAGTACCGGCTAGCCTGATTAAGGTCGTGACGACAG  
CGACCACCGTTTTCCCTGAGTCCGGAGTTCGCCCATCAACCGCATCAGGTCCACCTGGTATTGATATCAAGATAGGTG  
GTTGGCTCATCAAGTAATAACAGGGGCTATTCTGGGCCAGGACCATTGCCAGAAATGCGCGCTGGCGCTGACCGCCGGA  
AAGCTCGGTTAACCGACGAACGGCAAGATGATTGATCCGGGTCTGGTTCATGGCGACATTAACCTGTCGATTTGCTTACG  
CGGAGAGACGCCCCAGAGTACAGCCAGGATTACGACCATACGAAACAGCTCTGGACTGTGATCCCTCTGGCGTT  
AAATGGTGTGAGGCAGCAGCGAAAGCCTGCGGGCCAACTGGCGCGATGAGAGCATATTTATGGGATTATCGCCGAGAAA

TACGGTGCCAGACTGCGGCATTAAGCCGCGAAAAACAGTTAACAGCGTCGATTTCCCGCAACCGTTAGGACCGATCA  
GGCGGTGATCTTCCCCGTTGGCAGTGAGAGTGAACGTCGTTAAGTACCTTGTCTGTCCCCTAACTGACCGTCAGATTT  
TCAGTTTCGTAAGTCATTTATCGCATTCTACAAGCAACCAGACAAACCACGGCGCACCGATAATGGCGGTGAGCAGCC  
AACCGGGAGCTCCAGTGGGGATGAATAATTCTCGCCAGCAGATCGGCAACCACCAACAGCAACGCACCTGTCAGGGCCG  
AAACAGGCAGCAGTCTGCGGTGACGTCCACCGGTGATGCTACGCATCATATGCGGCACCACGAGACCAATAAAGCTAATC  
GGCCCGCAGGCGGCCACGCCGTTAGATGTCATGGCGACAGCTAGTAACAAAGCCAGAATCGGGTATGGGGCACCGACAC  
ACCGAGCGTGGTGGCGCGCATCGCCGAGTGAAGGAGGTGAGATCGCGGCAAAAACCTAGGCTCAGCGGCAGAAATA  
AAATCATCAGCGGGATGGCAATCTTCAAAAAGCTCCAGTACGGCCCCATAAGCTGCCGGTTCAGCCACAGCAGGGCGTTG  
TTCACATCTCGCGGGCGGAGAGCATCAGATAATCCGTGAGGCTGGCCAGCATGCAGAAAGCGCCACGCCGGTGGAGCGC  
CAGCTTCATCGGCTGGTGGGTCTTTGCCAGCATCTTCAAGCAATCAACCCCGCATGCCGCCGCAAAGGCCAGCAGCG  
GCAGACCATCACGGCAGTGACGGCATAAGAAGTAGACCCCCACAGAGGCCAGGCTGGCGGCATGGTTAACCCGAGA  
ATATCCGGTGTGCCAGAGGGTTGGCACAATCCCCGTATCAGCAGCCCCGACGGCGAGGGCTGCACCGACAAACAG  
TGCCAGCAGCAAGCGCGCAGTCCGTTACTCCATCAATACATAAATGCTCGTGTCCGGCTGCCAGTCCGTCAGCAGCG  
CGGCCACGGCACGGGGTACTCCCATATGGAGTGATAACAGCGCACAGCCCCGAGGGCAAGGGTGTGAAAATAACC  
AGCCAATTTTTCATCTCGCTCCTCACAAGCCAGACAAAGGCTGCCAATCAGCGCCAGACTGCCCTGCCCTGGCGG  
AGATCTCGGGGAAGGCCAGCGCGGTGAGTACATCTGCCAGCAGCATCAGCGTGGCCCCAGCAGCATGCTCACTGG  
CAGTACGTTGGCTGATCGAAGCTGCCCAGAAGCGCGCCAGATGTGGCACCAGCAGACCGATAAACGCCACCGGACCTG  
CTACGCTGACGCACGACCAACCAGAAGCAGCACTAACATATTGATGACCAAACGTAGCCTCGTCAGGTTCACTCCCAGC  
GTATGGCGGTGCTGTGCTGAGGTTGAGCAGGTTGAGTTGATTCGCCAGCAGCAACACGACAGGGACTGCAGTGACCAC  
CACCGGCAAGAGCTGCCAGACATCTGCCAGCGGGCTGGGACTCCTGCCAGCCAGTAAAAGATGCCGTAAGCAT  
GATCTTCGGCCAGCAGCAGGGTGTGCGGGTAAGGCCCATACAAAAGGCCGACAGCGGATACCCGCGAGGATCAGTTTG  
TTTCTGTATGGGTATGACGAAATCCGCCTCCTGCGGTGATGACCAGCAGCCAGCTCACGCCGCCCGCATGCCGCGAT  
GAATGACAGAGAATAGCCTGCAATCGGCGTGGACTCAGCGCGTGGTAAGCGCCATAGCCAGCGCCGCGCGCTGTTAA  
TGCCGAGCAGTGAAGGAGAGGCCATTGGGTTGTGGTCAAGGTTTGCAGCAGCGTCCCGCGAGCGCCAGGCTTGGCCG  
ATCAGAACGGCGACCAGGCTTCGTGGCAAACGAAGTTTTGCACCAGCGCTTCTGGTAGCGTTGGCGTGTGCCAGGCAG  
CAGGGCGCGGGTTGCATCTGCTCCGAAAACAGGAATGGCCGAGTAGCAAAACAGACTCAGCCAGAAAATAATAAAGTG  
CTGCAACGGGAAGCCCCACAGCAGCACCGGGTGTTTTATCGCGTCATTTCAACCGTAAGCGGTGATGGTGAAGA  
TTTTTACCCTGTCAGCGCAATACGCTCTGCAGCAAAAATACCGCGCATCCGCGCCAGGTGTTACTGTGACCGAAGCA  
ACCTGCTGCTTCTGCGCGCGGTTAACATCTGCCAGAGCGGATCTTGTGCCAGCGTTTAAACATGCTCTTTCGCGATA  
GTGGGAACACAGCAGCCAGGCGAGGATTGACCGCCAGCAGTTGCTCCAGGCCATGGACGGCATGGACGCACCCGCCATCG  
CAGCGGGAACGTTTCAGCCCCAGAGAGGCCAGCAGCTGCCGGTCCAGGCTCCTGAGTATGCAGGTTGAATGCTGTTCCG  
CGTGATGTGCCAAAGGCCACGCGTGTCCCTTTGGGAAGCTGGCTGGCCACTGCGCCATCCTCTTTATGTTGTTCCAG  
ACGTGCCTGCATCTCTCGCTTTTTACCCACCATTTCCCGGATGATAGCCGCAGATTGCAAATTTTCAGCGTAGGTTTCGT  
TGCGGGACTTAAGCAGCAGTACCGGCGGATTTGCTGCAAGGCGATGTAACCCCGCATGGCGACTGCTGTCCGCAATG  
ATCAGGTCTGGTTTCAGAGCGCAATGGCTTCCAGGCTCGGCTGCCGCGCGGTTCCGACGGACTGCCACGGTTTCAGGTG  
CGCAGCACTTCGGGCAGGATGCGTTTTGCATCGTTATCGTGGCAATACCGATCGGGATGACGTCCACGGCGGCCAGCG  
CATCGGCGAACGAGAGTTCCAGCACCACAATCCGTTGTGGCGTTTTTTCAGTGTAAACGTGCCGTGTTCTGCTCCTGAACC  
GTGGCGGCAAAGGCGTGGCTGATCACCAGCAGCAGGCTGCAAAAAGAAAACGGATAAATGCCAACATAATCACATTTCA  
GCTAAAAGCCCGCAAGCCGGCGTTAACACATCAGAACTTCAACGACCCCTGCATATACAGCGTGGCGGCTGGCCGTC  
ATAGATGCCCTTTGTTGTTGCTGATAGAGCGGATGAAGTAGTCTGGTGAAGATGTTTTTTCACACCGAATGCCAGGT  
TCAGATCTGCCATCTGCGGGCAAAGTCATACGCCACGCGTGGCCAGAGCATGAAGCCGGGAATGCGCGCGTACTG  
CCGTGCGCGCTCTTTTACCGTATTGGCGTTATCCGCAAACCTGGCTGGACTGGAATCGCTGTTAGATTGAACGTCCA  
GTTTTCTGGCTGTAGTCCACGCCAGCGTGCCTTTATGTTTGGGGAGAATGGTACCAGATTGCCGTAGGTGTGCGCTT  
TCTCGCGGATTTCCGCGTTCACATACGCATAGCTGGCGTAGATGGAAACGTTATCAAGCGTTGGCGTTAGCGTACCCAGA  
TCGTAACGTGCCTGCGTTTTCCAGCCCGGTATGGCGGTTTTGCCACGTGAGTACGGTGTGCTGGTGGTGGAGTC  
GACTGATTGTTAAAGTTAATCAGGAACAGCCCCATTTCCGCGTCAGCGCGCCGTCGTCGATAGCGGGTACCGAGTTCCC  
AGTTTCGCGCTTTTTCCGGTTCAACATTGCCGCTTTGCACAGCCTTGCCAATCTGGCTGACTGTACGGTCCGAACGAG  
CCTTCAGTGTTCGATAAAGATTCCAGCTGTGAGTCAAGTATAGAGCAGTTCAACGCCGGAAGCGGTGCGTTATAGCT  
CACTTCTCGTGCCTGTGATGGCGTTGTTCTGGTATGACTCGATATGTTGAAACGCATACCCGGCGTGTGTTCC  
AGTTGCCGATGTCGATTTTGTGATCCAGATAACAGGCGTGCCTCGGTGCCGGAACGCGTATCGGGTGTAAAGGCTT  
GAGCCGGACGGCAACTGCCCGTGTGGTGGCGGTGAGTAACGATTTTCATGCGTTGATTCATTCAAATAGCGATAGCC  
CACGCCACTTCGTGCGCGAAGGGCCGATCATAAAGATCTGGCTGAGCGTGGCTCAATACCGCGCACCCAGTAGTTAC  
GCGCGAGAGGGTGTGCGTTTTGCTTCCAGGTAGCCGCTGCGCAGGGTTGGGTGTAGAACCCTGAATGTTGAAT  
TTATGCTGGCTGTGGCTGGAACGTTAGCCAGGCTCGCCAGCTTGCAGCAGCCAGAAAGCGGTATACGGGCGGGT  
GGATTGCCAGCGATCGGCGTGTAAATCCGCGGAGACAGGCCACCGGGCATGTCCGCTTACCCTCGTAATATTGCAGCA  
GGCTGTTGAAGGTGTGCACCTCATCCGGCGCATATTTGCTTTTACGATCAGGTCGTCGATGCGGGTGGCGCTGTGCTCG



CGCCAGTCACTGCCGCGGTGCCGGAGTAGAGCAGCGCGGTGCCAAAACCGTTGTCGCTGTGCCGCCACCATCAGGTT  
GTGCGTCTCTTTCCGGTTGTTTTGTGAAGAGGTTGGCTGAGCTGACCTTCCACGCCCGCTCGATACCAAAGTCTCGC  
GAATGGCACGGTAACAAAGTTCACCACGCCGCCACGCTCTGCGGTCCGTAACGCACCGCACCACCACCGGTACCACG  
TCAATGGCATCCATGTTGCCGAGCGAAACGGGAGCCAGTGAAAGCTGCGGCTGACCGTAAGGGGCGAAGGGGACGGGGAT  
GCCGTCCATCAGGACGGTCGAGCGGCTGGCGAGGCGCGGGTTCAGGCCCGGATGCCAAAGTTCATCGCCAGGTCGTGGC  
TGCCGGTGCCGTTGTTTTCCGGCGCGCTGACGCCAGGGATGCGGTTAAGTACCTCACGCATGGTGGTTGCCCGGTTTTG  
GCGAAATCCTCACGGCGGATCACGTACGCGCGCCAGCATGTTCAAATACGTGTTTTACGCGCATACCCAGCCAGTC  
GCCGACCACGGTCAGGGCATCTTCTTTGGTGCGGGCGCGGGCTCCAGCGTCCAGCTGTTATTTCCAGCGGTTTTACCT  
GCAGTCCGCTGCCGTCCAGCAGTTGTTGAGGCGCTCTCGACGTGTAATCGCCGTGCAGGCCGTTGCTCTGCTTGCCG  
CGGTCAGGCTGGCGTCAACCGAGAGGGTAAATCCGCTGTGTGCGGCATACTGATTGAGCGCTTATCGAGCGATCCCGG  
TGCGATTAACCTGTGCAGCAAAGCGGAAACGAGAGACCGGCCAGCGGCAGCAGGCTCAGGCGAATGGTGTTAACCA  
AAGGTGTTGTTTTACGAAAAACGCGTAACGGCGTCATACCTTCCCATCATCTTTTTGTTGTGTTACAGTATGAGTCGA  
ACGAGAAGGGTAAAAAGGACAATCGAAATAAGAATTATTTCTTACAGTGGTAAATGTTATCCAGTACCGCGTAATA  
GACTGAATTTAACGGGAAGCGTTTGCAGGATAACGTTGAGGATCGCATCGGATTTTTTACGCGGAACGTCGCGCTCAG  
GCGCAGCCGGCAACGGCGGATCGCAGCGCAGCACGCCGTTGCGGTAACGGTTAGCGTGGCTATCACCTACCCAGCG  
GTTTTATCGTGAAGCTCAGATGTCCTTTCGTCAGCTTGTACTCTCGTCATCCAGCGTTTCACTGCGCAAACAGAG  
GCCGTGAACTGCAGGCTTTACCAGCGTTCACGATGCGTTTTTGCAGCGGGGCACTGGCGAGAAGCACTTCCACAGCGTG  
CTGCTGCACGTCAAGCTGCGTGAAATTATCTGCTGCGGACGCTAAATTCTGTCCCTAAAGCAGTGAGCTGGCCCTGAC  
GGGTGAGGACCGGAAGGGCGTTGCAGGGCATCTTTCGCGGTAGTAATGGCGATTTACCCTACCAGAGCCGGACGGTG  
CGCTGATGCGCATCAAACGCGACATCCGCCGCGCTTTGGGTATTCAGCGTGAGCAGGGAGCCATCTTCCAGTTGCTGACG  
GCTGACTGTGCTTTGGCGGTGCGGTAATCTGCCCGCAGACCTTCGCGGTTTCCGACTGCCAGAGCTGCCAGCCTCCGC  
CAGCGCCGAGCAACAGCAGTAATCCTTTCATCACGTGACGGCGGGTGAAGGGGATCGTGCAACGCCCGGCTGGCAACG  
TCGCCAGGCACACCGCAAGCTGGTTGCGCAGGTTTTCAACCTGCTGCCAGGCCACTGGTTATCCTGATCCTGTTCCATA  
CCACTGTTGCCAGCGCTTCTGTTGTGGGCTGACGCGCTCGCCGTTAGCACGGCATAACAGTGGGAAGCTGAACGCA  
GCGCCTGACGGCGGAATCGGTTAACAAGGATTATAACCCATACTCCAGACGGAACAGCAGGCAGTGTCTGACGGCTT  
TCGCCAGTATTTTTTACGGAGCTGATGAAACACCGAGTTTGTGCGCAATCTCGCTGTATGTCAGACCATCCAGTTGC  
GAAAGCAGAAACGCTTACGTGTTTTGCCGTTTAGCCGTCAGCATGCTGTCGAGGAGTTGTAGGGTCTCGAGTTGGCT  
TTGCGGTTCTCAGGTGAAGCGCTCCCCCTCCGGCATAAGCGCCAGCATCTCCAGATACGTTTTTCCAGCGCGTTTT  
GGCGAAACAGGTCCACCATCACGCGTTTTGGCGATAGTGAGAGGAAGGAGCGAGGATCGCGGATCGTCGAGAGCGTTTT  
CTGACCATTACCCGCAAAAAAGTGTCCTGGGCAATGTCATCTGCATCAAAAGCAGACTGGAGTTTGGCGTCCAGCCAGCT  
TTTCAACCAGCCGTGATGTGTGCCATAAAGCGACTCGAACGTTAAGGAAGCTGTGGTAGTGCCGCGGTGACAGATGCGGA  
GTGCATCAAAGTTAATTATCACGTAGTCATATTAATGAGAATGGTTATCATTACAATTGGAAATAAAATGTTTCCA  
ATAGACATTTTTAACATGTTGTTTTCTAAGTGTATAAGGTAGGTATAAAATGGGATGGAGCCTCTGCTTCTGGCATGT  
GTCGGTCAGAAATGACTCATGATGTGGTCTGCTATTATTGACATCCTCACTGCCCTAAAGGATGGGGATTTCCGTAATGCT  
GCCAATTAATGATTTAGTGATGATGGTGATTTAAGGTGCTTGGTGGCTCCATTTCCATCAGATGTCCTTCTGCT  
CCGCTACTGAAGCGTGGTGCCTAACGGCAAAAGCACTGCCGGACATCAGCGTATCTCTGCTCTCCTTCCGCTAAAACA  
TGGAACACTACAGTTCACTTACCCGCTCTCAGCCCGTAAGCACCAGAAAATCATTGATATGGCCATGAATGGCGTCGG  
ATGTGCGCCAGTGCACGCATTATGGCGTTGGCCTCAACACGTTTTACGTCATTAATAAACTCAGGCCGAGTCGGT  
AACCTCGCGCATAACCCGGCAGTGATGATTGCTGCGCTGAAATGGACGAACAGTGGGGTACGTCGGTGCTAAAT  
CACGTGAGCGTGGCTGTTTTACGCGTATGACAGGATACGGAGGACGGTTGTGGCGCACGCTTTCGGTGAACGCTCATG  
GCCACTGGAGCGTCTTCTGAGCCTGCTGCGCCTTTGAGGTCGTGGTATAGATGACGGATGGCTGGCCGCTGTATGA  
ATCACGCTGAAGGAAAGCTGCACGTTATCAGCAAGCGTTACACTCAGCGCATTGAGCGACATAATCTGAATCTGAGAC  
AACATCTGGCAAGGCTGGGACGGAAGTACTGTCGTTCTCAAATCGGTGGAGTTGCATGACAAGGTCATCGGGCATTAT  
CTGAACATAAAACACTATCAGTAAGTTGGAGTCATTACCGACCATGTTTATTTACATACATTGTGGGATTGTTCTTATTA  
TCGCCGTAATCAATAAAATCCTGCCCATATCTACATGGGGCAGTTGTTTATTCTTTAGTGTGGAATTCACACGCCA  
GCAAAAACCTGCGGTTCTTTCATCAACAATCAGGTCGTCGATATCTCCAGCAGGGCACCAACGTTGCGTCATAG  
CCTCTTTCCACCAGCAAGGAAGATCTTCCGTTCAATCTGCCTTAGCTGAGCCAGACTGATTTCCAGAATACGCTGGTC  
AACATCAGCCACGACGGGCATCCCTTCTTGTATAGAAGCGACCACAAATGACACCTACTGCGCCTAAATCCCGATACG  
TCTGATTTCTTCTTATTACGACGCCACCCGAATCAGGGATTTTTCATCAAGCGGTTACCCACGACAAAAAGGCT  
TTCGTACAGCGAGTCAGAACGTCAAATTCGATCGAATAATAGGCTCTGCTGTAACCTCCATGGCCAGTCTGGCGCTTGA  
TACCAGGGCGGGCACGTGCAGCGAGGGCAGACGGCTGAAAGCTGTAGGCGATTTGCGATGAGGATTCAATGATCGTCA  
GGTCTGGCTGAGATGGCATGGAACCGAGCATCTGTATAACGGTGACATTTTTACATGACTTCCGGCGTCATGGTTTTGCTC  
ATCTGATGGATTGTTCTTCCAGGCAACCCCGACATCACCATTCTCAATCACCTGATTCAGATACATGCCACCGGC  
ACGTGAAAGGCGAGTCCGCATCAGCTTTGTATCATCAGTTTTCCGGCATGTTCCGCTCCGGCACGATGATCACTCTCT  
GGAGATTGAATTTATCGGAATTTGCAAAGCAGCGTCGATAGAGCCAAAGACATTCACATCCAGGTTGATATGAACAGT  
CATTTTTCCGGGCTGTTTGACAGTATTTGACAACCGTGACGCGGGACACCCCATGATAGCTGCAACTTCAGTCTGGCT

TTTGCCTTCCTGATAGTACAGCCATGTTGCATGAAGTACGGGATCATCATTGAACAGGCTGCTGTTTGTGGTATCTCTAT  
CCACTTTTGTATACCTGTATTAACCCGGGAAATGCTCATCTAACCTGTTTACCCGGAGAGTTGATGCAGATTGCCAG  
TGGCATGATTTTATACAGATATTTTATTCTTTTACATGAAATAAACAGCATAACCATTTGAGCGATCGCCCGCTGTTCCC  
CCATACTGTAAAGCCGGAGACATGCTCCGGCTTTACAGTATTACTGAGAATACACCCATCAAGCATAATCGAAGGTTCAA  
TATCGCCCCTTTTGATCGCCAGCGATTTCGTCACCGTGCAGACGGTTGCCGTCACTCACTAAATTATGGGGGACAGTGAA  
CAACAGGTTGGCTCACTGGCAAGAACCAGATTATAAAAATAAGCTGGCGAGCAGAATAAAAATCAGCCCACTGATGGATA  
AGAGTGTGGACATCAGCGTCCAGGATAACAGCGTTTCTTTGGTGGTCAGGCCAAAAAGTCTTTAATCATCCAGAACTG  
GCATCGTTAACGTGAGAACAATAACAGGATCCGGCACCCGGTAGCCAGCGTAATCAAGGCCAGGTTGGTATTGGGATGTAC  
TGCCAACAATGGGATGACCAGACCCGGGTTAGAGATCGCCGCGACGGTGGCTGAACCCAGACAAAATACGCAGGAATGCGG  
CCACGCCCCAGGCCATCAGGATCGGGTTAATATCCATACCCGAAACCAGGGTGGAAATATACTGACCAACGCCAGAGTCG  
ATGAGAATTTGCTTGAATGCACCACCACCAGGATAATCAGCAGCAGACCCGCAATACCCGCGATAGCTTTTCCGCAAGA  
ATCCATCAGGTCAGGGATTGTTTTCCCGCGCCCCAGGCCATGGTATAGATCGCGAATAGCAGTGAATCAGCATGGCGA  
TCGTTGAATTACCTAAGAACAGTATCACGTTGTAATAAAGCCTGAATCCGCGGCACTTTTGGCATGAGTCATCTGGATG  
ATGGTGACAACCCGCATCAGGATCACCAGCAGCATTGCCGTGAGAAAATGATCCCAAAGCCTGGCATTTCGCTTCGTTTCG  
GAATCGCGGGTGCAGGAGAGGCTATATCCCTCTTTTTTAAAGGCGTCCGGAATAATGCGCTGGCAGAAATTTAT  
TCAATACCCGGGCGCAAAGAATAAAGGTTGGAATGCCGACAATGATACCGTATATCAGTACCAATCCTACATCAGCGCCA  
TATTCCTGGCGATAACAGTCGGGCGGGGTGCGCGCGCAAAAAACCGTGTGCGACCAGCAAAACCAGAAAGCATCGGCAC  
ACACATAAACATCGGTGATATTTTTGCTTACGGGCAATAGCGAATAAAAATAGGTACCAGAAGAATTAACCCGACTTCGA  
AAAAAGTGGGATACCGACAATAAACGCCGAACAGACCACTGCCAGTCAAGTTTATTTTTCCCGAAATAATTCAGCATG  
GTCAGCGCTATTTCGCTGCGCACCACCCGCATCGGCCAGCAAGCGACCGAGCATAACCCGAAGCCAAATATCAAACCAAT  
ATGGCCAGCGTACCGCCAAGTCCGGATTGACTGAGGTGACGACTTTACTCAAATCCATACCCTGGCGATGGCGACAG  
CAATCGAGACAATAATTAACGAAACAACGTATTAAGCTTAATTTTTATGGTAAAAGCAGGAGTAAAGCAATCCCTGCC  
ACAACGATAATTAGTGGCATAACGTCCTCTATAACAGGGTAGCGACCCATCATTATCCGACTGAGCAAATAACGAATGA  
TGCAGAGTCGGATAATTCAGGTGTCTGGATGTTTTATTTATGCTTTCAGTTTTTATTCAAAAATCGCGCAAAGCCGCG  
CCAATTTTGTTCATCATAAATAACAACCGTCCATGTCCACCCTCACGGCCTGAAGCATTGCCATAGCCGGGTATC  
ATCTGGCAATTCAGGATCGGGAAGTAAATCCTGATGGCTGGGTCTGGCATTAAATATTGCAGTTGCCCTCCTCTGTGAAG  
GTAATTGTTTCATCGCTACGGTTCCGAGGAAATTGACTTCGCCGTGAAGCTCGCGACAATCAATTTTAAATTTCAATTTAA  
TCCCGGTGCGTAATTTACCGATGGGGCTCCGGCCAGCGCTTGGCCACATGGCCGATGCACGCGCCAGTAGAAAC  
GCCCCGAGAAAGTGCATCGGTGATTAACGAAACATGCTTACCGTATGACAGATGCTTCAGGGCACTGGTAACCTGGTAGG  
TTCTTTCATCCTGTACCTGAAGGTCCAACGCCAATAATGACCAGAATATCGCCCGCCTTGATCTTGTTCATGTTTGATA  
TCGTAATCGCACTTTTCTCGGACAGATAAACCTTCGCCACACCTTTATGGTAATAGATACCTTGCTCATCAATCATCGA  
GGGTCAATGGCGGTGGATTGATCACCGAACCTTCTGGCGCAATATTGCCACCCGGGAAGGTGATAGTTGAGGTTAATC  
CGCGCGTTTTGCTTGTGCGGAGACATGATCACTTCGTCAGCGTTGATTTGTTCTGATCGAGCAGGAGTTGCTTGAAC  
CGCTGACGCGTTTCGGAGTGCTCCACCAGTCGAGGTTTTCTTCAGCGTGTGCCGGTAACCGTCATAACGTCTTCATG  
CAACAATCCGAGGCTGCGCAGATGCAACATGACTTCGGCACACCACCTGCCATAAAGGCATTGACCGTTGGATGATAAA  
CCGGCCATTAGGCAGTACGCTCACCAGTCGGGGCACGCGCTTGTGATGCGGATCCAGTCATCAACGGTCGGGATATGG  
CAACCTGCCTGGTGAACAATTCGCGGATGTGTAACAGCAGGTTGTTGAACCACCGAACGCGGCATGGACCGTCATCGC  
ATTCTCTATCGCTTATCGGTGAGAATTTCCCGGTGGTATGCTTTTTGACTCAGGTTGAGCGCAGCTCGCGCGGAAG  
CTCTGGCGATCTCCGCCACACAGGCTCACCAGGAGGGGCCAGGCTGAATGTGGGATTGCCAGTCCCAATCCTTCGGCC  
ACCACCTGAGATGTCGGCAGTCCCAAAAATGACAGCCCGCCGGAAGAGGCACAGGCTTTACAGCCCGCACGGCGG  
TGGTCTGTAGAGATAATTCGCCATTGGCGAAGCGTGCGCCAATGGTTTTGCACCTTGCCGTTGTCTTCCATCCTTTG  
CGGGCAGCGTCGCGCCGCCGGGACCAGCACGGTTGCGATGTTGTCTGCGCGCGAGTGCCATCATGGTGGCCGGAAGC  
CCCTTATCGCAACTCGCCACACCAATAACTGCTTTCGCGTCCGGCAGAGAGCGAATAAGGGCGCGCATTACCATCGATGC  
GTCATTTCCGTATGGTAGCGAATCAAACATCCCCGTTGTAACCCTGAGTACGCCCGTCAAAAGGATCGGAGACGTACACGG  
CATAGGGCAGGGCATGGTTGGCTTTAATAACCTCGGCCGCGCTTTCATCTGGATGTCCAGTTCGTAATGCCCTGTGTC  
AACGCCAGCGCCACGGGTTTACCGTCTGCGCCGCTAAGCCACCGAGTGTACTGAGCAGTAAAATACCGTCCCGATCCAG  
CTCGTCCGGAGACCAACCCATTCCGGCATTATGGTCATACCGAACAGATCCCCGCTCGGGCGGTTGATAAGCATCTCTG  
CGGTTAATGGGAGTTCGCGCTCCGGGCCATCGCGTGCCTTCTGACGGTGAATAATCGTGGCTCTCGTCAGCAAAAATA  
TTGCGAACAGACATGAGTTTCTCCTCAGACTGGTAAAATGCCCTGCGCGTAAGCAGCACGTGGACTTTATCTTTGCTT  
CTTCAGATGCTTCAAGAATCGGTGGTAAGCAATATGCTCTACAGGCAGCCGACACACTGCATGCTGTATTTGATCAGT  
GAGACAAAACGGTGTTCGAGGGCGTAAATAGCGGGCAGTTGTAGTAGTTTTTTATTCAGCGTCGACGCGTCCGAGATC  
GCCTTCACGCCAGGCGCGGTAGATGCCGACGGAGAGTCCGGAGCAAAGTTAGCGCTGGCGGTTATCGCACCGTCCGCCG  
CCAGCAGCATCGTATTAGCAAATGATCATCGTAACCGCAGAATACCGAAAACGACGGGCGTACCGACTTAACTGTGTTG  
ATCATCGTACGCAAGTACCAACGCTGTCGATGGTGTCTTTGATGCCAACGATATTCTCGTTTTGAGAGCCAGACCGCT  
CACGGTTTTCCGGGTTAAGTCTGACCCGTCAGATCCGGAAAGTTGTACAGGATCACCGGTAGGGTGACGCTACGGGCGA  
TCTGCTGGTAATAGTCGTAAGATTTCTGTTGCGACTTTCCAGTAGTAGGGTTGATGGCGACGATACCATCAGCGCCG

TAGGCTTGCGCATGCTGCGCCAGTTTGACCGCTTCGTGAGTGGAAAGGGGAACCGACGCCAATCAATACCGGCACTCGCCC  
GTCGACAATGGTTACAGCTTCTTCGGCGAGTGCCATGCGCTGGGCTGTATTCATTTGGCTAAATTCACCACCGGTACCCA  
GATAAAACAGCCCGTCGACCCCTTTAATCAGGAAGTCGGCAACTTCGCGCATTGCCTTTTATCAAGGGTTCGGTCA  
CGATGAAACGTGCTGGATACCGGTGGAATAATGCCGCTGAATTTTTTTCATTACCTCAGTTTCTTTTCGTAAGTGCTCAT  
TTTCGTTTTCTGTATCCAGCCCATATGATATTTGCTCAGCGCATTTCGGGAGCAATTCCAGATAGCTGTCTATCTTATTT  
CCTGAATAAACTACCGGATCGCCAGAAAGTGAGATTGCATAGTTAACTCTGTTATACATATTGAATACCGGCATACTTAA  
ACATACCGCCCATAGGTTGATTCTTCGTTGCTATGGCCATCCCCGAAGCGGTGTTTTTTGTAATCTTCCAGAAACA  
ATTTTTTATCGGTAATGTATTGCGCGTATGTGGAGTTAACGTGAGTGCTTCTAAAAATAATCCAGTCTTCTCGTGTC  
TTCCAGGCTAATAATGCCTTACCCAACGCGGTAATATGCAACTCAAGTTTTTTGCCAATCCAGCTTTTGCTCGTCGGTAC  
AGAGTCCGGACTTTTCGATCTTGTGCGAGATAGATAGCCGAAATGCTCTCCATCGCCCCAAGATGACAAACCAGTCCACTTT  
TCAGCGAACCTCTGCATTGGCCGCTTAGTCACCTCAAATATTTTTGACGGTGTAACGCCTGACAACCAATTCTGTAG  
TTTTTTATTCCAGTGAATAGTAGCCGTTTTTGTTTAATTAAGAAACCACAATCCACCATTACATTCAATAAATTAAG  
CAGGCTGCTTTGGGGTACTGGAATTTATTAATAACTCCATATAACTTGCCATACCAACCCATGCAATGTGGGTTAATA  
TTTTTTCAGCAGGACTAATGAATTACCCCTTTGCGAACCATAAATGGCTCCTTGTCTCATGGAATAAATGGTATCGG  
CATTACATAGTGGAAAATAGCTTTGTTGTCAGCATGCTGAACCGTAATGATGTGATTAATGTGATCTTGTACACACTTTG  
AATAATGAATCCAGAACAGCCACATTTAGTGAATGAGAATAAAAAAGTAGATGGCGTGTTGTTGCAACATCGTAGTGTG  
GATTGCGCCTAGAGCTTCTTTATTCGTTGCGAGCGCATCGCAATATTTTCTATTGGGTGCCATTGATTATTTTTGCTTGA  
AATCCCTCTCGAATGAACCTACTTATCACTTTATTGAATGAGGTAAAAAACAACCTGACATCCGGCTCGCTGATAACGCTGT  
GCAATAGTCTCAGGTAACCCGCTGTCAGTGTGATGCTTTTAAATACATGATAGTGTGCTACAGCATGCGGCTCAACGGC  
ATCAAAATTTGAGTGATCGGCCATGAGAATAACTTCACGCGAGCGTTGAATAATCCGTGTTTTACCCCGACCTCAAACA  
TGGTGGCATTGGTGATCCCCGCTCCAGCGACAGCGCATCGCAGGAGATAAACGACGTTCTACGGAAAAGGCATTGATC  
ATCTCCAGCGCAGACTCTCTCCTACCAGAAAATAACCTGGGCGAATCAGTCTCCGATAATGTAACCTTCCACATGGGG  
AAAAACAGCCAGTTTCATTGGCGATTTTAAATGTGTTGAGATGACCTTTACCCGCGCATCGGCCAGGCATTTCCGAGTT  
CGAGGCAGGTTGAGCCGGAGTCGAGAAAAAGCAGTCGCCATCTTGTGATGTTGTTGCGGCAAGGGCAGTATTTCTCTT  
TTCGCCACAGATTGCAATGTACGTTTACGTCGAAGACGTAATCTTGTGCTGTACTGTGCTGCAAGTCCAGGCAACC  
GTGACCGCGGATCATGCCTGGATACTGGTTGACAATAACTGGAAATCACGACGGACAGTCGTTCCGCATAGCCAAAA  
GCTCCATGGCCTGCTGTGTGGAGAGGTGACGATGTTGCCACAGGTAGTGCAGCATCTGTTGATACGGTCAGGTCTCTGT  
TGGCTCATGAAAACAATCTCTTACAGGGTGGCGAATTGAGCTAAGGTGCGCGGATAGTCAGATGAAGAGAACAGGG  
CGCGCCAATCACCATATGTTGCGCCCAAGTGTGCCAGTTGCTGTGACGCTGCCAGCGTAATCCACCCTCGGCCAG  
CACTCGGTCTGAGGAAAAGCCGTGCGTACTTTTTGGATTTCTCGCATGGAGGGAATAAACCGCTGTCCCTGCCCATC  
GGGCTCACTGGTCATCACCATCACTCCGTCCAGCTCAGACGCCAGATATCGCCAGGCGTGCATCGGGGTTGCCGGATTA  
ATACCAGTCCGGCTCGTGGCCCGGTATGGCGGATCTCAGTTAACGTTTTCCGAAGGATAGTCCAGCGTTTTCTGCATGAACG  
AAGATCCACGCGGGTCTGATTTACGCCAGCGGTTAAACCAGCGCTGTGGCCGGGAAGCATGAAATGAAAGGACAAGGG  
ATGAGGCGTCTGTCTGGCGACGGCCTGCACCGTTTTTATCCCAAACGTAATGTTGTTAATGAAGCTGCTGCTCAATAT  
CCAGATGCAGGCTCCAAAATCCAGATTGTCCAATGCCGTGAGTCCAGCAGGATAGTGCAGAGGATTTGCGCTGGCGAGA  
GAAGGTGCAGGATCATAAGCGCTCCGTTAACCTGATACCAGCGCAAACAGTGCATCGTCTGTGCTGGCATTTCCTACT  
GCCGTTAAGCGTTGTGGCGAATCAATAAACTGGCTGATGCGCTGAATGGTCAAAATATGTGCGTTGGCATCCGTGGCGCT  
GACGAGAGAAGCAGCCAGACGGGGTGCCTCTCGTTACCAAGGCGACCGGGTGGTACGCTGGTACTGACTGACCT  
GATTATAGTTTGGCCTTGTCTGGTGGGCGTGGGCAAGGCGATTCTGGGGCTATCAGATAATAAGGCCCCCACTTA  
AGGGTATTTTTCGATGATCCATTAACGTAGCATGGCTGCGCGGCCACCATAGGCTACCAGGGCGGGTGGCGATTCCAC  
GGCCTGACCGCAGTCCGTTGGCTTTACGTTGTGCTGTACCCATTTAATATCGTTAATCATCCGTCGTTGACTCCATGCCG  
ATTCGGGTTAATCTGGTAGCGATCCCCGTCGATACTTTTACGAAGGCGGCAGGGATCGCAGAAGGGTTATTGCTTTTTG  
CCGGGATAAGCGCTCTGTTATCCCCATCTTATCGCGGTATATGATGCACTTTCTCCATAAACTGACTGACTCGCGCCT  
GGTCAACGAAATTGGCAAAAACGCCGCTTTTTTAAAGGTGGTTGCGGTACACAGCCATCGGCGATACTGAGTTGTTCC  
TCCACGTTTTCCAGGCAGACGCCGTTGTTGGCAACACGAGGTGTGAGGCACCGTTTTCTTTGACCGTTTTTAAACGCGC  
GCTGTGCGGTACGCTCCCGCGGTGAGCCAGAAACACAGAGCGCATCAGGATGGTTGTTAAATACTGTCGATTTAGCAA  
TAGAACAGATATCGGATTGCCAGATACAGCGCGCTCTGGGACGATTTGAACAAGGTTTTTCACTTCGCTGCACCA  
ATCCGGTGTGATGACGGATGGTCTCACCGAGTGTAGTGTCCAGACGCCAAAGTGCCTGGCATAGGCACCGGTAATAT  
CTCGCGATAAACTTAGCGCCGTTAGCCATCGCCAGGTGCAATGAGGCGACCGGATCCACAGAACATTACGCCAAACG  
GGATGCGGATATCGCTCATTAAATTGCCGATGATTCGTGCCATTGCCGAGTGGTTTTCCGGACGCACCTTCGTGAGATAG  
GGAAGACTAAACTCGTTGGAGAACATGACTGCATCCACCCACCATTTTGGAGCGCCATCAGATCGTCCAGGCTTTGTC  
GATAACCCAGTTCATCCCAACTGCGCATAAAACCTGGGTGCGCGGCAATGCACGTAGATGGCACATGGCGATGACCG  
CTTTTTCCGTCCCAATAACTCTTTTACGCCAACTCATTGAAAGTACTCCTTATTCCGATAATTCACGTTTACGTAAGAAC  
AGCACGACGCTGGCGACAATACCAGCCGACAGACAACGCCAATAATCCAAGCGACATCAATTCAGAAATCGACCAACC  
GAACATATTGCCACGGACAACGCTGAGATTTGCGCACTTTACCCGGCAAACTGAAACCGCCTTTGAGCGCCATTTTACG  
TGAAGTAAGGCGCAACTGGGTGGCGATCAGCAGGACGGTAATCATCACGATGACCCCGCTTATCAACGTCTGACCCAGG

TCTCCGCGGTGGATAACCGTAGCCATACAGATAAAGAACGGTGTACCGGCAGGTCTGCGAGGGGTAACACTTTGTTGCC  
CGGTAATAATGCTGGCCAGAATTAACATAATGGGTATCAGTAGCAGACCGACAGCAATGGTGGTTGGATGCCCCAGCGTCA  
CAGCAGTATCCAGACCGATATACACTTACGTCCTTTGAAATATTTCTGGAAGAACTTTCTTGACCCGTGCGAGATGGGC  
AGCAGGCCCTCAACAATCAGGCGGATCATGCGCGGGAACAACACCATGATTGCCGCAACGGTAATCATCAGACTGGCGCA  
ACCTTTAAAGCCTTACCAGCCGCCAGGCCAAAAATCAGACCGAGCACTACGCCGATAATCACCGGATCGCCGACCATGC  
CGTAGCGTTTTCTGGATCTCTGAGCATCGATATTGCGTCCCTTATGAAAGGGATTTTTTCATAGATAGCATCAAGTAGA  
ACGAAAAGCGGTACTGAACTGGAACCGTAGCCTTGGCGTATCGAAATACCTTCCAGCCCGACGATGTTCTGTACCCGTTT  
TGCCGTCCAGTCGGCCATTTTAAACGATAGCGCCGCATGGCAGATTGCCCCAGCACACCATAAATCAGGCTACCGGTCA  
TAAGCTGGACCACCGTACCCGTAATGGCGTAGTGCCAGTAATTGTAATAATCGACGTTTCATCGTTTTGGTCAGACGGGTG  
ACCAGCATGGCGACATTGAGAAGAAAAATAACTGGGATAATCATGGCGCCAATGGCTGTGCATAACCAACGCCGGAGGC  
AGGGCTGCGCAACGTCAAAGACATGCAGGGCTAGGCCGAAACGCTCAATCATCACTTTGATAGGGGGACTGAGGCTGT  
CGATCGCCATGACGATCACCAGTCCCATACCGACAAAACCAATCCCAACCGTTACCCCTGCCTAATCGCTGCAGCCAG  
GGGATGCGGAAGATAAGGCCAATCACGATCATGATGATAGGGACGAAAACGGTACCGCCGAGAGACAGGATGTAATCAA  
CATAATGCCTCCTTTTATTGAGTTAACAGAGCCTTGATTTGTTGTTTTAACGCGTCGTCGTTGATCCCTGTGAGCAGGGC  
GGCGCCATTAAGCGTAGGGATGCCGTAATCACTGTTGGTTCCGATGGAGGTTACAATAAGGTCATACCGTTACAGTTAA  
GAGGATCTCATTGACAGCAGATTGGGCGGTAGTGGCTGAAATGCCCTGTTCACTCAGGAACCTTTGCAGCTTGTGTGCA  
ATCATGGTTGAAGTCGACATGCCGGTACCGCATGCCACAAGGATCTTTTTATAATGGATGTGCCTCTTGTGTAGTGCCT  
GAATCAGGCTCAACGGGAAATGTGCTGCTGACATACCTGCCAGAGCGGTCAATAGCGGATGCAATCAGTCAAATCACG  
CAGGCTGGCAACCTCCGCCGGAGAATGGGTATAGCGACAAGGAATAGAGAGACTGGCGCAGGGAATACCATCCTGCTCAA  
CCTGGATATAACCGGTTTTCTGTTATCACGCCGGAGCCACTTCTCGCTGCACCAGGAATGTTGTGTTCAAGAGCCGTCTGT  
TCCAACATCCGTATCAGGCGAGGAGGCGTGATTAATCCGGCCAGCGTTCCCGACCATGGTAGTTCAGGCAGGTGATCCC  
AACGCCCTGATTAATCCTGACCTCGGAATAATCGTGTAAATCAGGGGTGTCACACGATGGAGTGATATCAATACCAATCG  
CCAGGTCAGGTTTTACACGGCGTAATACGGGAACAATGCCGGGATATTAATTTCTTCTGTACCGAAGCCACCAGATAA  
ACGGCGATATCAAGCTCCATAGTACTGATAGCATCCGCTACACCAGCAGGGCAGTACAGCCTAGACGATCGTCTAGTGC  
TTTACTGCACACCAGATCGTTTGCAGGAGTTGCGGCGGGTTATACAGAGTGACAGGCGTACCGACCTGAATGCCATCC  
GTATAGCGTCTCTTTGCTTTGGCACCAATATCAATCCACAGTTTGTGACAGAAGGTGACTGCGTGCCTCGTGCCT  
TTGGCAAAGTGGTAGGACTTAATGCCGATACACCCATGACTGGCCCTTTGTCCCGGTGAGGGTGACGATGGAACCAGC  
CATAGTGACCTGCGCAGGACCGCTACCGGTTCAAAGCGTAAAAATCCAGACGGCTCTATTTTGCACACATAAAACCGA  
CTTCATCCATATGCGCAAAAATCATCAGTCGCGAGCGCATCGGGTTTATCACTACCGTAGCGCGCAGCATTCCCAAGC  
CTGTCTCGCCAGACCTCTTTTGCTGACGCTGAATTCGCACAGCATGACGTACGCGACAGCGTTTTCTGTCTCTGAAAT  
CGCATTGTGCTGCAAAAGCGAGAACAGGGTTTTCTGCACAGAAAATGACATAGCTATCTCCGTAGACCGTAAAAACAATCA  
CTCGTTGAGCGTTTTATAGGCGCAGACTGGTCAATAATTGTGAGAACGTTACCGTAAAAACGCGAAAGCTGAACAAAT  
AAAAAATTATGTGAGCCGAGTGAATAAAAACGCGTCAACGTTTGTGAAAGTTACGGGCTGGAGAGACCAGTGATTATGGT  
TGAATAATGAGGATGAATAAAAACGCGTAACTGTTATAGCACCCTTTGTTGAGGACGCTCCCTCTTACGTCCT  
GCACGTGGATACCCAGCATCTCCATCAGCGGATCTTAGAATGTAATGGCGCGTGGCAGGTCGTTGGTCCCAGCATAAT  
GTAAGAAAACATCGGATCTCCTGAATAGATTAGAGGGAGTATAGATAATCAGCTCAAATCACTCTCCGTTTTATGAGCC  
CAGGCTGGCATTGCCGTGAGATAACGTTTTGCACGCTTATGTGCTTCTCCGGGCCGACTTTTTGCCAGGAATCAAGGAA  
GCTGGCTAAACCTGATACCGCTTCTCCAGGGTTGAGATTGCCGTTGCTGTGCTGCATTACGCACAATATTGATCAC  
TGGCACTGTGTCATCTGGTGCCGACATCGGCATCCGCAAGCTGACAGAATGTTTCATGTTGTGACATATGATGCTCC  
TTATGGTGACATCTTGATTAATAAACAATACTGAATATGATTGTGCAAGTGATACATCAGTCAAAGCAAAGGTAAGCC  
TCGATATTTCCAGCCAGAAAATACCGGAACCTGTTGTTACCGGGGATGAGTGCGAACACGCCCCAGCCAAAGCATTCCC  
GCGCGTAGGTACGTAGCGTTTTGCGCGCATGTTTAGTTGCGCCCTGACTTCGCGCGCGAAGTCATCGTCAAGATTGCT  
TCCAGCCAGCGCGCATGGTCAGCCATTTTGCAGCTTACATACCGTCCCAGCCTTCTGGTCTGCCAGTACCATTTCCAC  
CACGTCATAGCCGAGATCGTCAACGCTCCGACAAGTCTGGCAGCGTCAGGAAATCGCTTGTGAGCTGACGCCGAGG  
CCTGGGCTATTTCTTCTGTTGCTGGTAGCTGACGCCAGTAGGGTTCGCCGATAAGCATGATCCCGCCGGTTTTAGGCTT  
TGCGCTAGCAGCTCCTCCGCCCCGCAACCCACCGGCAATCCATGTGCGGCCGACGAGGCCGCCACGTCACATTTTTC  
ATTTGCGACGTAACCGGCCGCATCGTTATGAATAAAATGTACGCTTTCGCTGACGCCGAGTCTTCCGCGCAGCCTTTG  
CCTGCGCGGTGAAGAGCGAACTCATGTGATGCCAGTCCCCGTAATGCCATGATCCCTGGCCAGGTGCAGAGCATCTCG  
CCCAGCCGCTGCCGAGGTCAAGAATGCGGGTCCCCGGCTTATGCGCAGCACGCGACCCAGCGTGGCGTACTTCTCTC  
GGTGAACGGGTTATGGATGCGGTGTTCACTTTCGCTGATGGTAAAAATACGTGGGATATCCATTATTTAATTCCTGTTAT  
TGGGTTAAGCCTTAAAAAGGACACAACAAGATTGTTATTCACGTCAGTGCTCCGGTTTCATCAGGGTCTGCGCACCGGAT  
GTGGCCGGTCAGGTCATGGCTGAGCGGTGAGTGATTGCATCATCCAGCAGGCTTTGTGCTCCTCCGGGATGGGATAAG  
GTGCCGGATAGCCTTTGTCTCCGGCACAGGGTTCGAACCCATGTGGGGGTAATAGGTGGCGTGGCCGAGAACAACCAACC  
GTCTGGCAGCCATCAACCTCAGGTGCTCGATGCCAGTGCATCAACCGTCTCCACGCCCATCCCTTGGTATTCCGG  
TATGACCGCCAGGGGAGCGAGGATGTGCATCAACGGTGAATCCATTTCTCCTTTGAAGGTTGCCCGGGTAATAAAATAT  
GCCCCAGCGCTTTGCCTTACATACCGGGTAGCAGCGATAACGCGGGGCGCGCTTTCATCCTCAAGTAAAGAGGCCACT

AAATCGGCTTCTTTGCTGAAGCCAAATGCGCGGGTTTCGACTTCCCGGATATCACTGGCATCACTTTTATCTGTGATATG  
AAAAGTGAAGTGGTGTACTGTACATAGAACTCTCCTTAGCGATTATCGAGCTGAGCGGAACTTTATTACAGCTCGGTGGT  
GTTGATTGATAGGGCTGGCCATTGACGACTTGATAAGTTTTTTGGTTTTGAGTTTTTTGAAGACGGCGAGCGTGCAGT  
CGGTCAGCAACAGCCCTTCGCGGTGTAGCATTCAACGGAAGTGACGCGGCCTGAAGAATCGCGGACGTGCGCAATACGT  
CTACCTTTAGCGAGAACGTGTAAGGTATGTTGTTCCCTGACGGGATAAATTCATACTGAAGAACCTATTTAATCATCATGT  
GCAAAACGTGCAAAACACCCGCGGTGTCCGCATTGATTTTCGGCGCATTGATAATCAGTCCGGCCTGAAAAGGTCGGGGA  
ACTGATTATCGGATGATTACATTCTCCAGCATCAAAGCCTCGGGTTGAGTTGAAAGGATTTTACGGAGCGAATATTAACA  
CGTAGTTATAGGAGGGATATGTTTCAGTAGAAAAAGTGTGATGTACTTTGAAAATTGAATGCCAACCCATTTACTGGAAA  
AGGACAGATGACACTGACGAATGCATGTTGAAGTACGCTGAAATGGCCTCATCGGCTTTCCCTTCGGGAGATTATTCTC  
CTTTTGTTAAATCCAGAATAAATATGCTCACCCATCTTCGATGCTTGAATAATTGAAGCCAATCCTGATAAGTAATTT  
TTTTGAAAGGTTATTTCCGGATTACACCGGCTTTGATGAGTAAAAACCCTTCTTTTTATTACAGTCAATCGTGGCGG  
TAATTGCTTCAATTGCATATCCCTGGCGAGCATAAGCGGACTGATGGTATAGCCGAGCCAAAACACATCGCATTGCTGA  
CGTAAATAGATATACCAATCAAACCTGCGTCAATTTGTTGACAAATGGCCAATTGAATATCGCGAGCAAGTGAAGAACT  
CCCAGCAAGACCCTGTAATAATTCTGTGAATGCCCAGCATTAAAGGTGGCCGCTCAGGCGGTCAACGATTGATGCC  
TAAATGGTCTGAAAAAGTGCAGCATCTGGCAGCATAATGCAGTAGCCAGTTCAACTCTACTACCAGTATGATCCC  
AAGTTTCGAGCGGGAATGTATCTGTATGAGCATCGTCTGTTTCAATAACATCATCGACTACTGTAACACTTTTGCTA  
TCACGGTAAGTTGCAGCCTAAAAAGGGATGAAAAAGGACGATTTTCCCGCAATGGGATATTTACATATTGATGGTAG  
AGGCATGAAGCCAAATGGAGGGAGCCGTACATAACCCTCTGAAGCTGAAACAATAGCAGCATGGCTGGTGGCACATAAGG  
ATGATATAGAGCGCCATTACGGGGAACCACTGTACAAAGTTGTTGGTGTGTGACGCCATTTTCGGCGCAGGTTAATGCT  
ATCAAAATGTCATTGCGTAAGCTGAAATTAATGGCAAAGACGAGCAGGGTTTACTGACAGTGGGGACTGTGCACTCCTT  
GCAGGGGGCGAAAGGGCGATTGTTCTCTTTCTCTGTCTACTCAAACATGAAGATGGCAGGTTTCTTGATAGCAACA  
GCACTATCCTCAATGTTGCTGTCTCACGCGCTAAAGATAGTTTTCTGGTATTTGGCGATATGGACCTTATCGAGATGCAG  
CCCGCATTTTCGCGCGAGGGTTATTGGCAAATATCTTTTTCTCAGATAAATAATGCGTTGCAATTTGAGTTTCAGAA  
ACGACAGGATTTAATTTCCGCACATACACAAATTTCAACGCTGCATGGTGTGGAGCAGCATGATGAATTTTTGAACAAGA  
CTCTTGCCGGAGCTCAAAGAAAATAACGATTATTTCCCTTGTTATCCTGGCAAAGTGGAGCAAACGGGATTTCTG  
GCATCAATGGCTTTGGCCGTTCCCGGGCATTGATATTACCGTGGTACGGATAAAAACTGCAATATAGCGCATGTGCA  
TGATGATAAGCGTCAGGAGAAAACAACATCTGCTGAATGATGCTGTTGAAAAGCTCAATAAGATGGGTATCGTACGAAAT  
TGGTTAATCGTGTTCACAGCAAATTTGATTGAGGATGAAGAACTGCTGTGTGTCGGATCTTTAACTGGTTCAGTGCT  
ACACGGGAAGATAAGTATCAACGATACGATACGTTTGGTGTACCGTGGTGAAGGCGTAAAAATGAAATAAAGGCAAT  
ATATGGTAGTCTGGATCAACGTCAGCTTTAAATGTGATGAGCCGTTTCATGATACAGGAGTAGTAAAGGGCATATTTACC  
AATGTTAAGGCGACTTTCCGTTTTATTGCGAGTCGCTTTCTGATTATAAATCTTATTGTTTACCTAATCATTTTCCTT  
TGCAATAATGCGCCTGGGATTAATGGCGGGTGCTTTTAGGAATGAAAGAAAATGCAAGCAATAATAAATAATGGCCTAAT  
TTCTTTGAACATCATTAAAGCATATCATCATCGTCTATTTGCCAGAATCCGTCGACTTATAATCGCCAGAACGGCATATCA  
GGACGGTGTGCGAACGCTGTGGCCAAAACGTTCCAGTAACTGTGTAGATGTTTCGTAGATTTCCGAGCCATAATCGAA  
AAGGCGCGGATGTCTATTAAGGCATCCGGCTAATCTGTAAGCAATAACAACGGTTTATGCGGTGCGGTTTTTACCCTT  
GTGCCAGATTATATATTGGCAATTGCTGCTGTTGAGCCCGCAAGTGAAGAGATATTACCTTGATCTCATTTGTTTTT  
TGTGCTACTCTGAGAACAACAAGGACATCCCCATGAATAAACTCCCGCTCACCTTTTCGCGCAAAACTGCAAAAT  
TGCTTACAAATCTGTGAGAAATAATCCCCGACGGGCTGCAGTGTGAAATGACTGCTTCGAGTGCCGTCGTCCAGT  
TCTCCGTTGACCGGTACGCTGAACCGTAATATCCCGTCTTAAATCGTCCGGTCTTTCATCAGGCGCGTTCGTGAGTCT  
CTTTACCTGTTGCTGGAAGTGCAGCAAAAATAATTTGGCTAAAAACATTATTTTGATAATTGCCATAAATAGCTTCATA  
CGAATGCGGAAATTTTCTTTCCAGTACCAGGTGGTATCGCCGCAAAACCACGCGCGTCAAGTAAATTTAAGCTGAG  
AATGGTATTGTTTTAGATCCCTACGAAAGGCTTCAACCATATGATTAAGTGTGAGGGTGTGACGCGTAGTCACTGGTC  
ATTAAGTCAAATTCGCTTGCATCCAGCATGCGCCGAGGAATTTGTTCTGCGGATTTTTTGGCAGTGGCGCTCGCGTCT  
GCTGACTAAATCCTGGTACAGCGGAGTATCCGTTCCCAACGACAAGCATCATGGCTGGCTCCGTGCCGTTCTGAATATG  
TCCCTTCGCTGCCCGGGTAAAAGCCGATCCGCCACGGCAACACGGAACGATAAGAATCCCTGCATTATCAGGAATGAAG  
GGCAGTAATTTCCGTGCAATATGCAGTGCCTGGCCAACGGTGCCTACTGTGTTTGTGATTGCTTGCAGAGGATGGTG  
ATAACCCTGCATATCCTGAACATCGTGTGGCAGTGAGTCAAGTGAATAATGTCGTTAAAGTACATGGCGGCCTCCGG  
GATGCGTATGCGCAAATCTCGTAATTTAATTTGTTGAGGATGAGGCGCATCTTCCCTGTCCGGTAATGGCAGTCTTCCG  
CCATACGCCATGGCATTAGACTGACCAGCAACGGTAAGAACATAGTAATAATCGGGCGATATTATTGCGTTCATATAAAT  
TTCGCGTAATTTGAAATGACAAATTTGATAGCAGGGCCCTTTACCAGGGCCCTGAAGCGTTAGTTTTGACTGTGACTTTA  
TTATCCTTACAGTGTCAAACTGAATCCGTCACCGCTTTGCCGCTGCAGTTTCACCGCAATAATCAATAGACTATT  
ATTCAGGGCAATGATACTCCGTAGGCCGACCTTGCAGATAATCACCCGATTTATCCATTTCCCGTATGCCAAAGAT  
GAATATCAGTGTATATGATTTTTTACAGCCTTCATGCGCATAGTCTTACCCTTCTGGTAATTTTTCTCGTGAACCTTTG  
AATCCGGCCCTTCGGCAAATATAAGAGAATCATTGCTTATCCCGCAAAACCAGCTACGCCATCTGGTGTGAGAC  
GGGAGCAAGCTTATTCATTTTAAATTTATACCGGTGAAATCAAGTTCAAATACGGCATCCGTTGCAATCCTGGTTGG  
CTTCGCCATTAATAAGCCAGGTTTTATCACCTTTATTCACAACCGCCGACCAGCGTTCGTAACAGGGCGATTGCCA

CGGTA ACTCCATTGCTGTGTTGAGGGATCAAAGACAACAGAACTTATTGAAGAAATAATCTTCTGCTTTTTGTCAA  
ATAGTGAGCATTGATTTTATCTATAGCGTTGAATCTTTCCAGCCTCGTTGAGATCTTCAAATAGCCATTGAAGATAT  
TCTGGTTAACACCACCAGTAACATAAGCCTTGCCGTTGTGTACAAAAGTACATGGCCCGCCATGCCATCGGCGCGTGC  
GACATCAATTTAACCCAATTATTGGTTTTGGGGTGTATTTGTGTACGTATTAAATACCTGAGTCAAGCCCTCGTGT  
TTTGCCAATGCCGCAACACATACAGATTGCCATCAATAATGCAGAGGTTGCTTGATCTTTGGTCCGCCAGGGAATG  
CAGCTAACGCTGTCCATTTTTATCTTTGGCCTGTGTATCCAGCTTGACCATGCCGTACCTGCGCTACCTAAACCAATG  
TAGACAGTGTCTGTTATCAATTGCTCCGGTACCACCTTTAAATGGCACAGGAGTTCCGGTAATACAGACGCGTTGCGGC  
AAATGAAGCCATCATGATAGCAAGCGCGTTATTGTTTTATTCTTGTGACTGTCTCTGTCTACTACAGTTTAAATGAC  
ACACCAATGCGATAACTGTTTTCCGATAAATTATCTCTGCCGTTGAAAACCCGTACGGTCAAGGTAGTCATATTCTAT  
GTATGGCGTAATATCGGGCGTCATATGGTATTGTAGAACAAATGCATTTCCGTCGCCCATTTCTTATGGTTTGCATAGC  
GATAATCGTTCTGTTTGTGTATAGCGTCTTTGCCATGCGAAGGTGAAATCACTATTAATATGGTAAGTGACATATCCA  
TCCCAACGATGAACGTTATCAGGACATATCACCGGATAAGTCTTGTGTCGTAAGCTTTCCAGTCGTAACGATAGCG  
AATGCCAAAATTAAGATCTTTGTGCGCTCCAGGACAGTTTTACGTAGGGTCCGTAGCGTGTGCCGTTGCTGCTAAAA  
GCGTTAACATTTCCCGGGCGACCGTCCATTGATCATCAAGTTTAAATCGCGTAATTAACCTCAACCTGAACATCATTGAGT  
GCGGCATTTCTTTTTATCATGAATGGTATCCAGGTACTTTCCATGCTTGCCACCATTCCATTTTGGCATCC  
CTCACTGACTTTGAGTCGAGTCTCATAGCGTGGTCCACTACGATATCCACCAGTACGTCAGTCCAGTGTGCGAGCCTGAG  
AAATTAATGGGGACGAAAAGCACAGTAATAATACGCCAGAAAGTATTTAGCCTTTTTCATAAATTTCACTATTTGTAG  
GATACAGAAAGCAATACAAAGCCGCATAAAACAATTAGCATTTATGTTGTGTAATATTTTTTGGCAGGCTTATAGTGT  
TTTTGGCAACCGGTAGCTGTATTTATTTTTTTGTATAAGGTCTCTGTGAAAAATCTTTTTCACATTATTTAAATAA  
ACAGAGATCCAGATTAATACCTGAGTATAAAATCTCTGATGTTTAAATTGATTTGAATGTTTCGTAAGCTATATCACT  
TACTCAATCCATTTTACCAGAGTCATAAAATAGAATGTCTGTTGATCTCATTTTCATATTCCTTTGAGACTGAAGTGG  
TTTTCATCACCCGATGAGAAAGAACTGAAGTGTATTTGCCATAGATTGCGAGATGCCCTGTCTCATTGACTATCTGGT  
GCACCTTTTACTGTTATACCAGATCAAAAATCACGCAATCCATAACAACAAACCAGATTTGCAATTCGTGTCACAAAA  
TATGTGATCTTTTTCTAAGAGGAAGTGCATGTGAAGCCAGACGAACACTTGCAGTGGTCTTCAAAAATAAGATCT  
TAGTTAACTATTTGTTTTATAATAATTTATTAAGAGTCTAAACAAGGGGAGCTTTGCAAGCTAACTCAGTGAGCTTGG  
TGAAAATCAGTGTTTACCCGCCATCAGGCTGAGCATAATTCTCATGAAATATGTTTCTGGTTTGTGGCTTGTAACT  
GGTCACTTCTGAAGTCGATCTGGAGAGGCTTGTGATGTTGGTGTTCAGGATGATGTTTCACTTAGTTTGTGGCGT  
ATCGCCCGGCAATGGCTGTGATTGAGGAAGGTTAAGTCGATGTGACCAAAGCTATATTTACCAACGAATGTAGATGAA  
AAAATCATCTCTGCTTCCCCATATCTCTAGGATAAAAAGGAATGTAACAATCTCATGGCGTAAGCTGACGAATCAGC  
AGGAATAATCGCTAGGGACCTAAGAATTAGCATGATAATAGCCACTAAGAAATTAAGTGGCTCCATGAAATAGCCATTT  
GTGGCAATGGAGTTGACTAATAATGTATATGTGAGACGGCTAGTTGAACGAATATTAATTTTTGCTGAATTTTTATG  
TTGATTTTACTTGTACAGAACATATCACATGATATATAGATAAGATTAGTTGCATTAATGATGAGGGTATTATTAGAT  
TCGTATCCGATTGATAAATATATAAGGTACATAGCATGCAAGAGCATGGCGTTTGTATGGCAACGTTATTATAATTAAC  
AGTTGCTACTCCATTTAAGTTCCTCAGAAAGAACTGGTCCACTTACGTTAGTTATTAAGCAAACGTTCCGTTTTATAAAC  
ATAATCAGGATAAAAATGTTGGATTATTGCTAACCCAGCACAGCTAGTGCAGCTGTGTAATTATAAGGAAAAACGATGA  
AGAATAAGGCTGATAACAAAAAAGGAATCTCTGACCCATAGTAAATCGAATCACTCCTTAAAGCAGCAAATACCGGG  
CCTCATGCAGCACGTAATTTGCTGACTTTGCTTTGTTTTATCATGGTTTCCGGGCGAGTGAAATTTGTCGATTGAG  
GATTTCCGATATTGATCTTAAGGCAAAGTGTATATATCCATCGATTAAAAAAGGCTTTTCAACAACGCACCCGCTAT  
TGAATAAAGAAGTTGAGGCTTTAAAAAAGTGGTGTAGTATCCGTAATTCGTACCCGATGCTGAGAGCGAGTGGGTATTT  
TTATCACGTAAGGGGAATCCGCTTTCTCGCAACAGTTTTACCATATTATCTGACTTCCGCTGGTAAATGCCGGTTGTC  
ACTGGAGATTCAATCCGCACATGTTACGCCATTCTGTGGTTTTGCTTTGGCAATATGGGAATAGATACCGGACTTATCC  
AGGATTATCTTGGCATCGCAATATTCTGCATACTGTCTGGTATACCGCCAGCAATGCAGGGCGTTTTTACGGCATCTGG  
GATAGAGCCAGAGGACGACAGCGTCACGCTGTTTTATAGAGATAGTTGAGATACCAGGGATGGTGTAAAAACTACATTA  
TTCTTACGATATATCAAAAATGATTAACCATTTATTAATTGATGTTATTGTAAGTGTGATTCTTAATTATCATAATAAAC  
ATTAAGTTAACCATATCCATACAAAATACAATGGTTTATGTTCTTCAAAAATAAATAAACAACAAATCATTATAAATTTACA  
CATCACTTAAAATCTCTGTTTCCGCACCTTTTTCTTTATTTTTTAAGCAACTGGAAGTTAATCCACTGCAATCTATTGT  
TATATTGAATCAAATCAATGAAAATAGATGTTGTCACATCAGTGATTTTTATTTTTGTATGATATTTAATGTAATTGAC  
TGATAGCCACATCACTCCGTGTGTGGTTATCTTTTTATCTATTGGGCTAATTTTGACCGATTGAGGTTTCTATAGGTAT  
TCATTCAAATATATCTCAGTTAGGAGTACTACTATTGTGAGTAAACGTCGTTATCTTACCGGTAAGAAGTTCAGGCCAT  
GATGCAGGCGGTTTTGTACGGGCAACGGGAGCCAGAGATTATTGCTTATTCTGTTGGCATATCGGCATGGGATGCGTA  
TTAGTGAAGTCTTGATCTGCATTATCAGGACCTTGACCTTAATGAAGGTAGAATAAATATTCGCCGACTGAAGAACGGA  
TTTTCTACCGTTCACCGTTACGTTTTGATGAGCGTGAAGCCGTGAACGCTGGACCCAGGAACGTGCTAACTGAAAGG  
CGCTGACCGGACTGACGCTATATTTATTTCTCGCCGCGGAGTCCGCTTTCTGCCAGCAGGCCTATCGCATTATTCGCG  
ATGCCGGTATTGAAGCTGGAACCGTAACGCAGACTCATCTCATATGTTAAGGCATGCTTGCGGTTATGAATTGGCGGAG  
CGTGGTGCAGATACTCGTTAATTGAGGATTATCTCGGCATCGAAATTCGCCATACTGTGCGTTATACCGCCAGTAA  
TGCTGCTGTTTTGCCGATTATGGGAAAGAAATAATCTCATAAACGAAAAATTAAGAGAGAGGTTTATTAACT

TATTGATAATAAAGTTAAAAAACAATAAATACAAGACAATTGGGGCCAAACTGTCCATATCATAAATAAGTTACGTAT  
TTTTCTCAAGCATAAAAATATTA AAAAACGACAAAAGCATCTAACTGTTTGATATGTA AATTATTTCTATTGTA AATT  
AATTTACATCACCTCCGCTATATGTA AAGCTAACGTTTCTGTGGCTCGACGCATCTTCTCATTCTTCTCCAAAAAC  
CACCTCATGCAATATAAACATCTATAAATAAAGATAACAATAGAATATTAAGCCAACAAATAAACTGAAAAAGTTTGTCC  
GGATGCTTTCTCTATGAGTCAAAATGGCCCCAAATGTTTCATCTTTTGGGGGAAAACACTGTGCAGTGTTGGCAGTCAAA  
CTCGTTTACAAAACAAAGTGTACAGAAGACTGCCCATGTGCGATTTAGAAATAGTTTTTAAAAGGAAAGCAGCATGAAA  
ATTA AAACTCTGGCAATCGTTGTTCTGTGCGCTCTGTCCCTCAGTTCTACAGCGGCTCTGGCCGCTGCCACGACGGTTAA  
TGGTGGGACC GTTCACTTTAAAGGGGAAGTTGTTAACGCCGCTTGCGCAGTTGATGCAGGCTCTGTTGATCAAACCGTTC  
AGTTAGGACAGGTTCTGACCGCATCGCTGGCACAGGAAGGAGCAAC CAGTTCTGCTGTGCGTTTTAACATT CAGCTGAAT  
GATTGCGATACCAATGTTGCATCTAAAGCCGCTGTTGCCTTTTAGGTACGGC GATTGATGCGGGTCATACCAACGTTCT  
GGCTCTGCAGAGTT CAGTCTGCGGTAGCGCAACAAACGTTGGTGTGCAGATCTGGACAGAACGGGTGCTGCGCTGACGC  
TGATGGTGCACATTTAGTT CAGAAACAACCTGAATAACGGAACCAATACCATTCCGTTCCAGGCGGTTATTTTGA  
ACCGGGCCGCAACCCCGGTGCTGCTAATGCGGATGCGACCTTCAAGGTT CAGTATCAATAACCTACCAGGTT CAGG  
ACGTCATTACGGG CAGGATGCCACCCTTGTGCGATAAAAATAACGATGAAAAGGAAGAGATTATTTCTATTAGCTCG  
TTGCTGCCAATGTTTGTCTGCGCGGAAATAAATGGAATACCACGTTGCCCGCGGAAATATGCAATTT CAGGCGTCA  
TATTGCCGAAACTTGC CGGATTGAAGCCGGTGATAAACAATGACGGTCAATATGGGGCAAATCAGCAGTAAACCGTTC  
ATGCGGTTGGGGAAGATAGCGCACCGGTGCTTTTGTATTATTACGTTTACGGGAATGTAGCACGGTGGT GAGTGAACGTGTA  
GGTGTGGCGTTT CACGGTGTGCGGATGGTAAAAATCCGGATGTGCTTTCCGTGGGAGAGGGGCCAGGGATAGCCACCAA  
TATTGGCGTAGCGTTGTTT GATGATGAAGGAAACCTCGTACC GATTAATCGTCTCCAGCAAACCTGGAACCGGCTTTATT  
CAGGCTCTACTTCGCTACATTT CATCGCCAAATATCGTGCTACCGGGCGTGGGTTACTGGCGGCATCGCCAATGCCCAG  
GCCTGGTTCTCTTAACTATCAGTAATTGTT CAGCAGATAATGTGATAACAGGAACAGGACAGTGAGTAATAAAAACGT  
CAATGTAAGGAAATCGCAGGAAATAACATTCTGCTTGTGCGAGTATCCTGATGTT CATGGCAATGATGGTTGCCGGAC  
GCGCTGAAGCGGGAGTGGCCTTAGGTGCGACTCGCGTAATTTATCCGGCAGGGCAAACAAGAGCAACTTGCCGTGACA  
AATAATGATGAAAATAGTACCTATTTAATTCAATCATGGGTGGA AATGCCGATGGTGTAAAGGATGGTCGTTTTATCGT  
GACGCTCCTCTGTTT GCGATGAAGGGAAAAAAGAGAATACCTTACGTATTCTTGATGCAACAATAACCAATTGCCAC  
AGGACCGGAAAGTTTATTCTGGATGAACGTTAAAGCGATTCCGTC AATGGATAAATCAAATTTGACTGAGAATACGCTA  
CAGCTCGCAATTATCAGCCGATTA AACTGTACTATCGCCGGCTAAATTAGCGTTGCCACCCGATCAGGCCGAGAAAA  
ATTAAGATTTCTGCTG TAGCGGAATTCTCTGACGCTGATTAACCCGACACCCTATTACCTGACGGTAACAGAGTTGAATG  
CCGGAACCCGGTTCTTGAAAATGCATTGGTGCCTCAATGGGCGAAAGCACGGTTAAATTTGCCTTCTGATGCAGGAAGC  
AATATTACTTACC GAACAATAAATGATTATGGCGCACTTACCCCAAATGACGGGCGTAATGGAATAACGCAGGGGGA  
TTTTTCGCTGAATAAAA GAATTGACTGCCGGGTGATTTAAGCCGGAGGAATAATGTCATATCTGAATTTAAGACTTT  
ACCAGCGAAACACACAATGCTTG CATATTCGTAAGCATCGTTTGGCTGGTTTTTTTGTCCGACTCGTTGTGCGCTGTGCT  
TTTGCCGCACAGGCACCTTTGTCATCTGCCGACCTTATTTTAAATCCGCGCTTTT TAGCGGATGATCCCCAGGCTGTGGC  
CGATTTATCGGTTTTGAAAATGGGCAAG AATTACCGCCAGGGACGTATCGCGTCGATATCTATTTGAATAATGGTTATA  
TGGAACGCGTGATGTCATTTAATACGGGCGACAGTGAACAAGGGATTGTTCCCTGCCTGACACGCGCGCAACTCGCC  
AGTATGGGGCTGAATACGGCTTCTGTGCGCGGATGAATCTGTGGCGGATGATGCCTGTGTGCCATTAACCAATGGT  
CCAGGACGCTACTGCGCATCTGGATGTTGGTCAGCAGCGACTGAACCTGACGATCCCTCAGGCATTTATGAGTAATCGCG  
CGCGTGGTTATATTCTCTGAGTTATGGGATCCCGGATTAATGCCGGATTGCTCAATTAATTT CAGCGGAAATAGT  
GTACAGAATCGGATGGGGTAACAGCCATTATGCATTTAAACCTACAGAGTGGGTTAAATATTGGTCGTGGCGTTT  
ACGCGACAATACCACCTGGAGTTATAACAGTAGCGACAGATCATCAGGTAGCAAAAATAAATGGCAGCATATCAATACCT  
GGCTTGAGCGAGACATAATACCGTTACGTTCCCGCTGACGCTGGGTGATGGTTATACTCAGGGCGATTTTTCTGATGGT  
ATTAAC TTTCCGCGGCACAAATTGGCCTCAGATGACAATATGTTACCCGATAGTCAAAGAGGATTTGCCCGGTGATCCA  
CGGTATTGCTCGTGGTACTGCACAGGCTACTATTAACA AATGGGTATGACATTTATAATAGTACGGTGCCACCGGGC  
CTTTTACCATCAACGATATCTATGCCG CAGGTAATAGTGGTGACTTG CAGGTAACGATCAAAGAGGCTGACGGCAGCACG  
CAGATTTTTACCGTACCCTATTCTGTCAGTCCCGCTTTT GCAACGTGAAGGGCATACTCGTTATTCCATTACGGCAGGAGA  
ATACCGTAGTGGAAATGCGCAGCAGGAAAAA ACCCGCTTTTCCAGAGTACATTACTCCACGGCTTCCGGCTGGCTGGA  
CAATATATGGTGGAAACGCAACTGGCGGATCGTTATCGTGCTTTTAAATTTCGGTATCGGGAAAAACATGGGGGCACTGGGC  
GCTCTGTCTGTGGATAGACGCAGGCTAATTCACACTTCCCGATGACAGTCAGCATGACGGACAATCGGTGCGTTTTCT  
CTATAACA AATCGCTCAATGAATCAGGCAGGAATATTCAGTTAGTGGTTACC GTTATTCCGACCAGCGGATATTTTAAAT  
TCGCTGATACAACATACAGTGAATGAATGGCTACAACATCGAAACACAGGACGGAGTTATTCAGGTTAAGCCGAAATTC  
ACCGACTATTACAACCTCGCTTATAACA AACCGGGAAATTACA ACTCACCGTTACTCAGCAACTCGGGCGACATCAAC  
ACTGATTTT GAGTGGTAGCCATCAA CTTATTGGGGAACGAGTAATGTCGATGAGCAATTCAGGCTGGATTA AATACTG  
CGTTCGAAGATATCAACTGGACGCTCAGCTATAGCTGACGAAAAACGCCTGGCAAAAAGGACGGGATCAGATGTTAGCG  
CTTAACGTCAATATTTCTTT CAGCCACTGGCTGCGTTCTGACAGTAAATCTCAGTGGCGACATGCCAGTGCCAGCTACAG  
CATGTACACGATCTCAACGGT CGGATGACCAATCTGGCTGGTGTATACGGTACGTTGCTGGAAAGACAACAACCTCAGCT  
ATAGCGTCAAACCGCTATGCCGGGGAGGCGATGGA AATAGCGGAAGTACAGGCTACGCCACGCTGAATTATCGCGGT

GGTTACGGCAATGCCAATATCGGTTACAGCCATAGCGATGATATTAAGCAGCTCTATTACGGAGTCAGCGGTGGGGTACT  
GGCTCATGCCAATGGCGTAACGCTGGGGCAGCCGTTAAACGATACGGTGGTGTGTTGTTAAAGCGCCTGGCGCAAAGATG  
CAAAGTCGAAAACAGACGGGGTGCCTACCGACTGGCGTGGTTATGCCGTGCTGCCTTATGCCACTGAATATCGGGAA  
AATAGAGTGGCGCTGGATACCAATACCCTGGCTGATAACGTCGATTTAGATAACGCGGTTGCTAACGTTGTTCCCACTCG  
TGGGGCGATCGTGCAGCAGAGTTAAAGCGCGCTGGGATAAAACTGCTCATGACGCTGACCCACAATAATAAGCCGC  
TGCCGTTTGGGGCGATGGTGACATCAGAGAGTAGCCAGAGTAGCCGATTGTTGCGGATAATGGTCAGGTTTACCTCAGC  
GGAATGCCTTTAGCGGAAAAGTTCAGGTGAAATGGGGAGAAGAGGAAAATGCTCACTGTGTCGCAATTATCAACTGCC  
ACCAGAGAGTCAGCAGCAGTTATTAACCCAGCTATCAGCTGAATGTCGTTAAGGGGGCGTGATGAGAAACAAACCTTTTT  
ATCTTCTGTGCGCTTTTTGTGGCTGGCGGTGAGTCACGCTTTGGCTGCGGATAGCAGGTTACTATCCGCGGTATGTC  
AGGGATAACGGCTGTAGTGTGGCCGCTGAATCAACCAATTTTACTGTTGATCTGATGAAAACGCGGCGAAGCAATTTAA  
CAACATTGGCGCAGCAGCTCCTGTTGTTCCATTTGATTTTGTGTCACCTGTGGTAATGCCGTTTCTGCCGTAAGG  
TTGGGTTTACTGGCGTTCAGATAGCCACAATGCCAACCTGCTTGCACTTAAAATACGGTGTGAGCGGCTTCGGGACTG  
GGAATACAGCTTCTGAATGAGCAGCAAAATCAAATACCCCTTAATGCTCCATCGTCCGCGCTTTCGTGGACGACCTGAC  
GCCGGTAAACCAAATACGCTGAATTTTTACGCCGGCTAATGGCGACACAGGTGCCTGTCACTGCGGGGCATATCAATG  
CCACGGCTACCTTCACTTGAATACGTAACCTGGAGATGCTCATGAAATGGTGCAAACGTGGGTATGTTTGGCGCA  
ATATTGGCGCTCGCAAGTGCAGATACAGGCAGGATGTACCATCACGGTGAACGGTAAAGTCTGCGCAAACCGTG  
TACGGTTTCCACCACCAATGCCACGGTTGATCTCGCGATCTTTATTCTTTAGTCTTATGTCTGCCGGGCGGCATCCG  
CCTGGCATGATGTTGCGCTTGTAGTTGACTAATTGTCGGTGGGAACGTCGAGGGTCACTGCCAGTTCAGCGGGCAGCC  
GACAGTACCGGATATTATAAAAAACAGGGGACCGCGCAAACATCCAGTTAGAGCTACAGGATGACAGTGGCAACACATT  
GAATACTGGCGCAACCAAACAGTTACGGTGGATGATTCTCACAATCAGCGCACTTCCCGTTACAGGTGAGAGCATTGA  
CAGTAAATGGCGGAGCCACTCAGGGAACCATTACGGCAGTATTAGCATCACCTATACCTACAGTGAACCCGAAGAGAT  
GATTGTAATGAAACGAGTTATTACCCTGTTTGTGACTGCTGATGGGCTGGTCGGTAAATGCCTGGTCATTGCGCTGTA  
AAACCGCAATGGTACCGCTATCCCTATTGGCGGTGGCAGCGCAATGTTTATGTAACCTTGGCGCCGTGCTGAATGTG  
GGCAAACCTGGTCTGGATCTTTCGACGCAAATCTTTGCCATAACGATTATCCGGAACCACTACAGACTATGTCAC  
ACTGCAACGAGGCTCGGCTTATGGCGCGTGTATCTAATTTTTCCGGGACCGTAAAATATAGTGGCAGTAGCTATCCAT  
TTCCTACCACAGCGAAACGCCGCGCTTGTATAATTGCGAAGGATAAGCCGTGGCCGGTGGCGCTTATTTGACG  
CCTGTGAGCAGTGCAGGGCGGGTGGCGATTAAAGCTGGCTCATTAAATGCGCTGCTTATTTGCGACAGACCAACAATA  
TAACAGCGATGATTTCCAGTTTGTGTGGAATATTTACGCCAATAATGATGTGGTGGTGCCTACTGGCGGCTGCGATGTTT  
CTGCTCGTGTGACCGTTACTCTGCCGGACTACCCTGGTTCACTGCAATTCCTCTTACCGTTTATTGTGCGAAAAGC  
CAAACCTGGGGTATTACCTCTCCGGCAACCCGAGATGCGGGCAACTCGATTTTACCAATACCGCGTCTGTTTACC  
TGACAGGGGCTGCGCGTACAGTTGACGCGCAACGGTACGATTATTCCAGCGAATAACACGGTATCGTTAGGAGCAGTAG  
GACTTTCGGCGGTGAGTCTGGGATTAACGGCAAATTATGCACGTACCGGAGGGCAGGTGACTGCAGGGAATGTGCAATCG  
ATTATTGGCGTGACTTTTGTATCAATAAAGAAATCACAGGACATTGCTAATGCTGGTACGCAATATTACCTGAAGCTA  
AAAACCTGCACGTTAGCCCTTTGTAGGCCAGATAAGACGCGTCAGCGTCGCATCTGGCATAAAACAAAGCGCACTTTGCTG  
GTCTGTTCCCTCACCTAACCTCTCCCGGAGGGGCGAGGGGACTGTCCGGGCACATTTTTAGACTTTGTCATCAGTC  
TGAGCCTGCCATTGGCAGGCTCTGGTGTCTTTTACGCTACCATGCTAATAATCAGCACAATAATCAGCCCAACCACGGA  
GTTGACCAGCTCCAGCAGACCCAGGTTTTCAACGTGTCTTTTACTGACAGGTCAAAGTAACCTTTGAACAACAGAAAAG  
ATGCATCGTTAATGTGGGTGAGGGTGTGGAACCCGACCGCTGCCAGTACCAGCAGCGCGGATTACGCCAACCAGC  
TGACCAGTTGCTGGATCTAGGATTGCAGCACTGATAATCCCGGCGCGGTATCGCCGAAACGACACCTTGACCCGTGCG  
CAGACGAATTAGCAGATGATCAGCCATGCCATGATGTAGGGCAGATATTGCCGTGGGACATCAACATGCCGATGGTGT  
CGCAATGCCGTGTGATGATGGTCTGCTTACGACGCGCACCCGACCGATGATCAGAATCACCATTGCAATACTCTTC  
ACCGCGCTTCAAAGCGTTCATCACCCACTGCATGTCATGACCAGTGCAGTGCAGGTCGCAAGAGTACGAATGCAACCACAT  
CGCAATAAACATTGCAATCGGCGAGGAACCGATAAAGTTAACCCTTCCAGGCAGGGGTATCTTTTACCAGCCAGATAT  
TGCGCATGGTGGTAGAGATCATAATGATCGCGGGATCAGCGGCACCAGAATCGAAACGCCGAAAGAGGGCAGATTATTC  
ATATCTACCGTTGATCTGCTTTCAGGAATGATGGCGTTGGGCGCTCAAGATTGCCGAGGAACTTCGGCAGGATCAGACC  
TGCGCAGATTACACTTGGGATCGTCACCAGTACGCCATAGATATAAACCATCCCATATCCGCGCCATAAGCATTACCA  
GCGCCACCGGACCCGCTGCGGTGGGAACAGTGAATGTGCGGTAGTGGCAGTGTCTACTGCCGGGATCGCCAGTTTTCAGG  
AACGGAATTTTAGCTTCCGGCGCAATAACAATAACCAGCGCGCTAACATGATAAAGGCCACTTCATAGAACATCGCCAG  
ACCAAAAATCAGGCCGATGATAATCACCGACAGCTGTACATAGCGCAGACCGAGACGCGCCAGCAGCGTATGCGCTATCT  
GGTGAGCCGCGCGGAGTCGACCATCAATTTACCGATGACCGCACCGAACACCAGATGATAGCCAGTTCCCGCAGCGTG  
TTGCCGAAGCCGCTTTCATAGTGTGACGAGCGACATCAAATCCATGCCCGCAGCATCCCGACGGACAGCGCGCCAC  
CAACAAAGCCACCATTGAATGATTTTGAATTTCAAATTCAGTACCAGCATCAGACCAATGCCGAATACCACCCAGAGAA  
TGTTAAGCACATGCATAACGTTTTACCTTACCTGGTTGAACCGTTGTTATTTTGGGCGATATGTTATGTAATTTGGTCAA  
CCATTGTTGCGATGAATGTCACATCCTCTGATCAATAACCATCGATTACCCTTTGCTGCAATTTGAGCAACAACCATGA  
GAGTGAAATCTTGTGATGTGGTTAACCAATTTCAGAATTCGGGTTGACATGTCTTACAAAAGGTAGAACTTATACGCC  
ATCTCATCCGATGCAACGCCACGGCTGCGGTCTGGTTGTTATCCGGATACCTAAACAACCTCCAGGGTCCGCGTCTCTT



TGCTGTGGAACCCACTATGTGAAAGAGGAAAAATCATGGAACAGACCTGGCGCTGGTACGGCCAAACGATCCGGTTTCT  
TTAGCTGATGCCGTAGGCGGGCGCAACTGGCGTGGTTACCGCGCTGCACCATATCCCGAACGGCGAAGTATGGTCCGT  
TGAAGAGATCCTCAAACGCAAGGCGATCATTGAAGACGCAAGGCTGGTGTGGTCTGTCTGTAGAAAGCGTGCCAATTCACG  
AAGATATCAAAACCCACACTGGCAACTATGAGCAGTGGATCGCTAACTATCAGCAGACTCTGCGCAACCTGGCGCAGTGT  
GGCATTGCGACCGTGTGCTACAACCTCATGCCGGTCTCGACTGGACCCGACTGACCTCGAATACGTGCTGCCAGACGG  
CTCCAAAGCTCTGCGCTTCCGACCAGATCGAATTCGCTGCATTCGAAATGCATATCCTGAAACGCCAGGCGCGGAAGCGG  
ATTACACCGAAGAAGAAATTGCTCAGGCAGTGAACGCTTCGCCACTATGAGCGATGAAGCAAAGCGCGTCTGACCCGT  
AACATCATTGCTGGTCTTCCGGGCGCGGAAGAAGGTACACCCTCGACCAGTTCGTAACACCTGGAGCTGTACAAAGA  
TATCGACAAAGCGAAGCTGCCGCAAACTTTGCCGTCTTCTGAAAGCGATTATTCAGTTGCTGAAGAAGTCCGGCGTGC  
GTATGGCTGTTACCCGGACGATCCGCCGCGCCGATCCTCGGCTGCCGCGCATTGTTCCACCATTGAAGATATGCAG  
TGGATGGTTGATACCGTAAACAGCATGGCAAACGGTTTTACCATGTGCACCGGTTCTACGGCGTGCCTGCTGACAACGA  
TCTGGTTGATATGATCAAGCAGTTCGGTCCGCGTATTTACTTCACCCATCTGCGCTCCACCATGCGTGAAGATAACCCGA  
AAACCTTCCACGAAGCGCGCACCTGAACGGTGACGTTGATATGTACGAAGTGGTGAAGCGATTGTTGAAGAAGAACAC  
CGTCGTAAGCGGAAGGCAAAGAAGACTGATCCCGATGCGTCCGGACCACGGTTCATCAGATGCTGGACGACCTGAAGAA  
GAAAACCAACCAAGTTACTCCGCAATTGGTCTGCTGAAAGGCCGCGCGAAGTTCGCGGTGTCGAAGTGGCGGCGGCGG  
GCGTTTTCTTAGCCGTTAATATCCACCGCATGGCTGCCGCGCCGTGCCGGTTCCTTCTTCCGTCGCGTCACTCTTTGAA  
GACGGATTCTGGAGTTTACGATGACTACTATTGTTGACAGCAATCTGCCGGTTCGCCGCGGTCATGGGATCATTCTCGT  
CTGGAATCACGCATTGTGCATCTCGGTTGCGGGGCGTTTTACCGCGCGCACCCAGGCGCTGTATACCCATCATCTGCTGGA  
AAGCACCGACAGCGACTGGGCATCTGCGAAGTTAACTGATGCCAGGCAACGACCGCGTGTGATCGAAAACCTGAAAA  
AACAGCAACTGCTGTACCCGTAGCGGAAAAAGGCGCAGAGAGCACCGAGCTGAAAATTATCGGTTGATGAAAGAAGCG  
CTGCATCCGGAATCGATGGCTGCGAAGTATTCTCAACGCGATGGCGCTCCGCAAACGGCGATTGTCTCTCTAACGGT  
CACGAAAAAGGCTACTGCGCTGATGCGGCAAGCGTCAACTGGATCTCAATAACCCGCTGATCAAGCACGATCTGAAAA  
ACCCGACTGCGCCGAAGTCCGCGATTGGTTACATCGTCAAGCGTTGCGTCTGCGTCTGAAAAAGGGTTGAAAGCGTTT  
ACGGTGATGCTCTGCGATAACGTGCGTAAAACGGTCACTGTGGCGAAGTTCGCGGTAAGTGGGCTGGCTCAGGCGCGTGA  
CCCGCAGCTGGCGCATGGATTGAAGAAAATGTACCTTCCCGTGCACCATGGTTGACCGCATCGTTCGGCGGCGACGC  
CAGAAACCTTACAGGAAATTGCTGACCAGCTGGGTGTTACGACCCGTGCGCCATTGCCTGCGAACCGTTCGCTCAGTGG  
GTGATTGAAGATAACTTCGTTAATGGTGCCTCGGATTGGGATAAAGTGGGCGCACAGTTCGTTGACAGACGTTGTGCCGTT  
CGAAATGATGAAGCTGCGTATGCTGAACGGCAGCCACTTTTTCTGGCGTACCTCGGTTACCTCGGCGGCTATGAAACCA  
TTGCCGACACCGTGACTAACCCGGCTTATCGCAAAGCGGCTTTGCCCTGATGATGCAGGAACAAGCGCCAAACGCTGTG  
ATGCCGGAAGGTACAGACCTGAACGCCTATGCGACGCTGCTGATCGAGCGTTTCAGCAACCCGCTCTGCGTCAACCGTAC  
CTGGCAGATTGCGATGGACGGCAGCCAGAAGTTACCGCAGCGTCTGCTGGACCCGGTGCCTGTCACCTGCAAAACGGCG  
GCAGCTGGCGTCACTGGCGCTGGGCGTGGCTGGATGCGTTACACCCAGGGCGTGGATGAGCAGGGTAATGCCATT  
GACGTGGTGCACCCGATGCTGGCGGAGTTCAGAAGATCAACGCGCAGTATCAGGGCGCAGACCGCGTGAAGCGCTGCT  
GGCCTGAGCGGTATTTTTGCCGATGATCTGCCGCAAGTCCGACTTTGTTGGCGCAGTACGGCGGCATATCAGCAGC  
TGTGCGAACCGGTTGCGCGGAGTGTGTGGCTGCGCTGTAACCTGATTACCTACAGACTTACTGGTCAATCAAACCT  
GATATTTGGTTGACAGTTTTGTTTTTTGCCACCTGTACGTGCCAATTCAGTGTAAATGGTATAGTTTGAGATTA  
ACGGGGCCGTAATAATTGCCGTTGTAGGCCGATAAAGCGTTACGCCGCATCCGGCAAAAATTTGATTAACCGCACCT  
AACGGACACAACCATGAAATCTGCCACCTCTGCGCAAAGACCTTACCAGGAAGTCCGGGCGATGATCCGCGATCTGAT  
CATAAAGACGCCGTACAATCCTGGCGAACGGCTGCCCGGAGCTGAAATTCAGAAATGCTTGTATCAGCGGACCGG  
TGGTACGTGAAGCGCTGATCATGCTGGAGATCAAAGGCTGGTGAAGTACGCCGGGTCGGGTTACTATGTTCTTGAT  
AACTCAGGCAGCCAGAACACAGACAGTCCGGATGCCAACGCTGCAACGATGCCGGTCTTTTGGAGCTGTTACAGGCGCG  
GCAGTTATTGGAGAGCAACATCGCCGAGTTTTGCCGTTTTGAGGCTACCCGCGAAGATATCGTCAAAATGCGTCAAGCAT  
TGCAACTGGAAGAGCGTGAACCTGGCTTCCAGTGCAGCGGGCAGCAGGAAAGCGGTGACATGCAGTTCATCTCGTATT  
GCCGAAGCAACGCATAACAGCATGCTGGTGGAGCTGTTCCGTCAGTCTGGCAGTGGCGGGAAAAACAATCCAATGTGGAT  
CCAGTTGCACAGCCATCTGGATGACAGCTGTATCGCAAAGAGTGGTTGGGCGATCACAACAGATCCTCGCCGCGTTAA  
TCAAAAAAGATGCCCGAGCGGCGAAGCTGGCAATGTGGCAGCATCTGAAAACGTTAAGCAACGCTGCTGGAATTCTCG  
AACGTTGACGATATTTATTTTGTGGCTATCTGTTTATTGATTGATGGCCGCTGGATAAAGTGCAGCCTGACTTATTATAAT  
AAGCGCAAGGGTAAACGTTCTTGGCTTTCTTAAATTAAGAAGTGCATGAGTATTACTTTGTAATTTGACGGGTATT  
GTTTAGCTATCTGTATAACCTGAATGTTAGTACTCATTCTTCTGGTAGTTATTTACCAATATAATTCCATTCAACATTT  
TTAATTTCAACAGTTCTGGAAGAGATGACGGTTCAGAGTCATACGTTTGTGGTGCATTTTTCATCACCCGGGATAAC  
TTTATATCCATTTTTGCATGGATCTCCGCGGTACCGGATAGGCTTCTATACCAATTATTGGGTCAATACCCAACCTCAA  
TATTAGCATTAAAGTAATGCGGCAAGGGCGAATCCGGAAGAATTTGCTACCCCTGTTACCGTCAATATCTGATCAATATAG  
ATATCAATCCTTGGCTGCTCATTGGTCCATCTTTTTGCCCTGAGAAGCTGGAAGGGTTGAAATATATCCTATCGTGGTCC  
GGCATAACCAGGAACATTGCAACCAGGGCCTAATGTTATTTTATGAACTGTATTAGTCTCAACAGGATCGAAAGGGCTCT  
TCATAAATAAATTTAGCCGTAACCTTCTGTAACCTCTGTTGATGATGCGCTTTTTACATATGCCACCATATATTTCCG  
TCTAAAGCTGAGGTGATTTTCAAGTTCGGATAGAGCATACGCTCTGTTGTTGAATACCATCGGATTCTCTGCATGCTCC

TGTCACATAATTAATGGCCAAGGCTCTTTACTAATATCAAGTTTTCTAATTCGACAACGCTTTTTCCATCGTAATTAT  
GGTTATTGCCACGAGTAAGAGGCGGAAGATAGATGTTTTCCGAATCCATGCGTGCATATTTAATTTACGTGTAACCTCA  
CTGTGCGACTATTGGGTGATGAAGGAAGTGAGCATCTGTAATAATTTGACTCTGAAGGGCATTGCTTAATGCCATAGACAT  
AATAGTTACCTTTTATGAGTATTTCACTGATGTTTAGAAAAATAGATAAATTTTTCTGTAGTAAAAAGAGAAGTAAACAA  
ATGACATGCATGTTTCTGTTGATGATCAACTCTACCGGTGATATTAAGGGTAGGAAACACTCTAAAGTATCAAA  
AAACGCTCATTAAAAATTATTTGCATGCAATTTAAAAGCATATCTTACTAATTGGAATTTGATGTTGCTATATTGAG  
GTCTATATTAATAATGCCTGTGAATGGTATTTTTGATGATTTGATATGTTATCAATTTATATTATTTACAAACTAATTG  
TTTTCAAATAATACATGGCTGATTATGCGGAAATAAATAATTTCCACCGGAATTAAGTAGCAGCGGTGACAAGTATTTTC  
ATCTACGTAACATTTCGGAATATTCAGAAATACTAGCGGTTTTTTTTGAGTTTGATGATTTTTATCAAAATCATGACTT  
TTTTCTGAAAAGTCAGTAGATATTCATAGGCAAGTAAAGTTTTACTTTGCTGACAGGATTCAGGCCTGTCTCAGACT  
GACATGGATGTAATGAACAAAAGGGAATGGCTATGGAAAATGAGCATCAATACAGTGGTGGCCGGTGTTCAGGGCAAGCC  
GCATATGTTGCTAAACGTCAGGAGTGCCGAAAATGATGCGACAATCACTTCAGGCTGTTTTACCTGAAATTTACAGGCAAT  
AAAACGTCATCGCTGCGTAAATCGGTATGCGAGCATCTCCTCACTTTTTAATTCTCCTCATTGCGCATTACCGTCATT  
ACTTGTTTCAGGCATGCCGAGTGGCAAGTGATAACCCGAGCGACAACATCTCCAGAGCTGGTATTGCCGCTCAGTGC  
GTTCTGCACGTATTTTCATGAGCCACGGATTGCGCGTTGACAGTTAATTTGAAAGAAGCGTACTGCCACACTCTGGCG  
ATCAGCCTTGAGATAATGCTACCACGACGATGAACCGCTAACGTTTTGATCTGGTCTGGGATAATGGCGTTGGCGCAG  
TGGCAGCTGGAGAATGTACGTAAGCACAATCTCCAGCTCGCGCAGTTCACGCCAGAAGCGTTTCGGCAACGGGATTAT  
GCGGGTATTATCCGGTATGCATAGGCCGTAATCGGGATCACCAGTTCGTCCCGATTAGTACAACGAGCTTCCCGCTGC  
GAATTTCTGTTGGATGGCGTACTCCGGCAGCCAGGCAATCCACAGCCGTGAGGGCAACCTGCTTTAAAAGCTCGCTC  
ATCGAAGAGACAAAAAGGTGCTGAACTTAACTCACTGTGGCGCGTCAGGGTGCGATTAATCAATCGCCCCATGTAGGA  
GTTGCGGCTGTAATTCAGTAACGGAAGTGTGGCTGCGCGAGGTTAAAAAGTGCTTCTCCGTGTTGCTACTGGCGCAGA  
CAGGGAACAATTGAGATTCAAATAAGCGAATGTGGTCAAACGGCGCTTCCAGCAAATCTTCGTGCTGAAAGGAAAAATA  
CAGTCACTTTGCCCTTACGCGATTTATCGACCGTTCATCGACATCAATAGCTTCAATTGCCAGGTAAAGAGCGGCGG  
CATCTGGCTGATAATGGACGGTAACAGCCGAGGAAAAGAGAGTGTGACGCGGTATCTTGATTTTTCTGTTGCGCGTAAT  
CGCTGCCGCCACGCGACTCTGCCAGATTGCTCTCTAACTGTTGCAACAGATGGCGGATCTGCGAATGGAAGATTTCCCT  
TGTTCTGAGAGTTGACGCGGCTTACCTGGCGGTTAAACAATTCAACACCAATCGCTGTTCCAGCGCACGGATGCGGCG  
GCTGAATGCCGGTTGCGAGACGTTGCGACTGACTGCCGCTGGGAAAAATTGCGGCATTTTTCCAGGGTCAGAAAATCAT  
AAAGCCATTTGGTTTCAATATTATGCAAAATCGACCACAGTCATCCATTACGTTTTACTCTGTCAGCCGCCCTTGGCGG  
CATTCTACGTCCATTGCGGCGGCTGACAACCGTTTTAAGCCGTTTTCAAACGTTCTTTACGCGAGGCTTTGCCGTCTTGA  
CCATCAGTTTTGCCGCGAGCGTATACCTGCTCAATGCGCAGTTCGTGGCTCATGACCAGCAAGTCAGCATCATTGCCTGGC  
AGAATTTCCGCTTTCCCGGTGAGTTAAGGAAACCGGCTACGCTACTGGTGAGCGGGCGCAGGGCATCGCTGATACTGAA  
ATCATAGTCTTTGACCAGCACCTGCACGGTTCCAGCAACGTTTTCAAACCGGCAACACCGATATGGGTTAAATTCCTT  
CGTCATCGAAGAACGGCTGGCTACCGTTGCCGTGCGAGCTGAGGGTGACGCGTGCCAGCGGAATACCCGCTGAACGGCG  
CGGGCAATACCTTCGGCAGGGGCGACCGGTTGCTCAATGCTGCTGGTGATATCGATGGTGGCCCTTTGCGCGCAACTC  
CAGCGCCTGCTCAAACAACGGTACGTTGCGGTTAACGTGGGTGCGCAGCAGCTTGTGATCGGCACATCGCAGTTTTCCA  
GCAGGTATAAATAGGCTGTAACGCCTTTTACTGTGCCCATGTGGAACACGGTGACGCCAGGTTTACCGCCGAGCAAA  
CCGCCAACGCGGGATTCTGCCGCATATTGGCCAGGTGATAAACGTCGCGGTGCGGCAGAACGGTGATCAGAGATGGCGCA  
TTTACGCCAATCACACGATCGATAATCGCCACGCTTTTTCCACGGAACCCGTAATGGTGGCGGAAGGGACATGATAAG  
CGCCGGTCAGCATCCAGGCGCTGATGCCCTTTCTTATTGAGCGCAGGGTCTTGGCGAGCAGGGATTCCGGGTGGCGAGAG  
ATAGAGTCGGTGCCAGCAGACCAACCACTGACGTGACGCGCCGCTTCCGTGAGGCGACTTAGCGCCACTTCCGGCGTGGC  
CGTCTGGGACCTGCTTCCGCCACCAGCCCAATCAAATGGACGTTGATCAATAAAACCTGGGCAGAGGATCTGCCAC  
TGAGATCGACAACCGTGAGTTCGGTACAATGTGAGAAGGGATATTGCTGGCAACGCGGATAATTTTGGCGTTAGCGACG  
AGGACATCGCAAAATCCCGGATCTTCCGGCGCATACAAATGCGCTCCCTGCAGCAGGGTAAAACCGGCTGCGGTATAATC  
AATCATGGTAACTCCTTGTTAAACAATAAGCTGCATAAACCAGATCGACAGCAATGCGTTAATCACGCAGACCGTAATGA  
TATGCGGGTAATTTGGCATTCACTTCCGGTGTCCCAGGCAGCGACCGACATTTTGACCGGGTTGCCATTAAATAC  
ATCGCGGGCAGTAAAACGGTGACATCGTGACCGGTTAATGCGCCAGCGGTTGCCAGACTGGCGGCAACACCGACTGCGCC  
ACCCATACTCATTAAATGCGGCTAAAAGGACGGTTGCCGCTTACCAGGTAATCCCCACAGCGCCATTACGGGTTACAGA  
TATGCCCCACCAGTCGAGCAGGCGGTAATTTTACGCGCTGAATGATGACAAACGCCATCACCACGTTTGGCAGCAGG  
TTGGTCTGGCGATAGTAAAGCCACGGCGCGGCCATCGATAACATATCCATGACGTTTTTGGCGACCTGAGTTGTCAT  
GCTTGGCTCCTTGGCTTGGGTTGCGACGTTCTTCAAGTTAAGCCAGACGCGCAAAATGTTGGCTCCGACAAATTTAAA  
CACCAGGATGACGGCTAAAGGTACGATTACGGACGTGCCAGAAAGGCAACACCGCGACCGGGAAGAGAAGTAGTTGG  
TGATGATGGCGCTACCGCTGTTTTGATATGCGGCGAAAATCACTTTATCGCGTTCGGTAATTTACCTTCTGCGCCAGC  
TCTTTGGTCATACCGGGCGGCGCATCGGTGTTTTGACAGTTAGCGATCAGCGCCAGCGAGCAGATCCCTGGAATGCCCAA  
CAACGGTTTTAGCACAGGTGTCATTAACCTGCTGCGCGGCGGTAATCCACCAAGACCATCGGTAATTTGAAATAATCCCCA  
GAGAGAGAATGACTGACGGTGCCAGCTCCAGCGCAAAGAGAAAGCCATCTTTAGCCCCGCGCCACCCGCGCCGCAAAAT  
GAGGTGGTGGCTCCGTTGCGACCAGGCAGTTGCCAAAACGATCCGTTTCAAGACGGAAAAATCAAAAACGCGCCACCAGCT

GTCTGTTCCGGAAAAAACACCGAAAAAAGATTATGGTGAGAAAAAGGCCAGATACCCTTTAATGCCACTTTTTCTG  
TCGCCAGCTCCCCGGCTACAGCATCCCCTTGTGTGCATAACAATCCCATTGTTTTTTGTGTTTGTGTGTTGCTTGA  
GCCAGGAAAAATCCTGGAACGAAAAACCTTATCAGCCATGTGGGTATGGGGAAAAATGCAAGTATGTTTCTGGCTATGCG  
TTTTTTCATAGCGGAAAAATTACGCTGTGTGAAAAAGGCTCTGCGCAGGATTGAGTTGCAGAAAAATCATAAACCAAGT  
GACAATGACATCAGTAAATAAAAAACAGAAAAATCCAGGGACGAAAAACGAGATGGCAAAGTACAACGAAAAAGAGCTGGCGG  
ATACGAGCAAGTTTTTAAGTTTTGTCCTCCGACACAACCCGGAGGCGATTGGTATCGTACTGGACCGTGAAGGATGGGCG  
GATATCGATAAGCTCATACTTTGTGCCAAAAAGCGGGCAAGCGGTTAACCCGTGCATTGCTGGATACTGTGGTTGCCAC  
CAGCGATAAAAAAGCGTTTTAGTTATCCAGTGATGGTAGGTGCATCCGCGCGGTTACAGGGCATTGACTTCGCAGGTGC  
CTATTTCTTTGCCGAAAAAACCCGCCACAGTTTTCTACCACGGTACGGCAAGCCGTTTTCTTGACGAGATAAAAAAA  
CAGGGGCTGATTGCAGGTGAGCGTCACTACGTACATCTCTGCTGATGAAGCAACGGCACGCAAAGTGGGAGCAAGACA  
CGGATCGCCGTTATTTTAAACCGTCAAAGCACAGGAAATGGCGAAACGAGGCCCTCCCTTTTGGAAGCGGAAAAACGGG  
TCTGGCTGACATCAACGGTTGCGGTTGAGTTTCTTGTAGTGGTAAGGGAACTTCCCTCATGAAGTGACCACTTGTAGCTT  
AAATAATTGCACTGTGCTGATAAGCGCAGCAATAACAACGCCGCCGCGCCGAGAGTGGCGCTGGCAAGCGCCGATG  
TTCCATTGCTGAGCATACTGGTCAGCGCCGGGCCGAGGATTTGCCAATGCCGTAATGAGCGTCACAAAGCCTAAAAGA  
TTGAGATTTCCCGTACGTCAGTTGGCGGGCGATAGTCATACCAGAGATGTCGTGCCATAAAGTACCAGCAAAAAACC  
AAGACTGCTGATGATAAGCAAGAGAGGGGAGTCGCTGGCGAGAGTAAGCAGCACACAGATAGCCTGCACGCAAAATTCG  
CCGTGAGGCAGGGCAAAGCCCCAACGTTTTGCTGCCATAGCCAGCAAAGCAACCAGGCACAATTGATAAGCCGACT  
AACGTCCAGAGATGGCGGTTAAACAATGGTGAGCCTGCATCTTTGCGCATGAGCGGCAGGTAAGTCGCGACGATGATATA  
ACCAAAATCCCGCCAGGCCGTACAGAATAGCCAGTAACCACCAGCTCATTATCTGTTGCTCCGTTTTTGCCAATGGCATTG  
GTGTGATGGCGTGTTTTTTCGAGGGCATTAAAAGCGTAAGTGCAATCAGCATCATGCCAGAAAGCGCCCCGGCGCCTTGC  
CATAACGTTTTGCGAGGAGAGGTCAAAATGCAGGCCTGCCAGAATATTATTGCCAGTGCATGCCAATGCCAACGCC  
AGAAAACAAAGCTGCCAGCACAAAAGGATGGCGCGTGTGCTGCATAATCAGCGTCGAACCAAAAAATCAGCATAACGGCGC  
TGCGCACCCCGCAGGACGCAATCAATAACACCAGAATAAATGGCGCAACCATGCCATTGCGAGGATCAACAACCCG  
CTCGCCAGGGCAGAAGCCAACAGAAAATGGGCGCAGGCGGATGGTGGTAAATGCGCCAAAAAGAAAATAGCAGACTGCC  
AGCCAGATAACCCGCATAGTTGCCGCTGGCAATCCACGAGAGCTGGTAAATGAAAACGATCCTTCGCCATCATGACGG  
GCAACATAGGCGTATAAAGGAAGCGGCCATAACCCATACCTAAGGTGAGAACCAGCATCCCGAAAAGCGCGGTGCTGAAA  
GAAAAGCGTTCTACGGGATCGGTGGACGAAGGCATGTTAACCTGTTTGTGCTTTTTGTTGTTAACAAGTTAATAACAA  
AAAGGTGAAGCATGCCAGCTGTTAATGCGATGATTGAGGGGTAAGCGATAAAAAAGATTGGTTGCGTAACGATATAA  
ATATTACCAGAGGCATCCATCGCAACCCCTTCGGCCTGTTTGTGTTATGCGACAAACCTCGACTGCCTTTGGTTAGTGA  
CATTTCACCGATAACCTCGCAACCCAGGGTACTTCCCTGGAGTGCAGGAGATTGATGAGACAGCACCAGAAGCGTATTTT  
TTTGTGTTAAATTTCTGCGCCGACACATCATCTAAAGTAAATGCCGTTGTAGTGCCTCGTCTTTGCTGATGTGTAAT  
TCATTGCTACTTAACAGCCCGTTAACTTTGTAGACCTCAATCGGATTTTTCTTTAAAAAACAGAAAGTGTGATCCTG  
GCGAGAATAAGCAACCCCTTCAAACCCGAATGGTTGGGGAGTCTTGCAGCGGGATTTTTATTTTTTGGAGATTTTTA  
CTTCCGAGTTTGGGTGAGTAAATCACATAAATGGCGTAATCGCGCTCATCGCTAATGACAAACTGATTATCGCCAATG  
TATTCGATCGTCTCGAGATCCTTAAACAAAATCCAGAGGAATGTGCGGATAAAATCACCATTGGTGGTCAATTTCAACAAT  
GGCGGCAGGTTTGTGATAGTGCTAAAAAGAGTATTGCTTTGTGCCGACCAGGTGAGCGAAGAGATATTATCGTTATGC  
CTGCAATTTCTTTGCCGTAATGGTGGCGTGGTAATTTGAAATGATGCTGCATGATTGCTTTTACGGGCGCAAGATTGC  
ACGAAGAAAGTACACACTGCCACAATGGCAAAAAGAAATCACAATAATGGAGATGCGTTTACTTAACGAAACTTTTTGT  
CACGGTAATCCCTTAAAGGCAATCAATAAGATATCGAAGTATACGTAGCGACCTTAATGAATCCTTAAACGGGAGAA  
ACCCCGTAATGTGCAATGCAGCGCCAGACCAATCTGCTGTAATAAATGACTCAGTCAGCCAGGATCACCCATTG  
TATTTCTCGCCGGGGGACAGGTGAGCCAAATGCATAAACCAGCCCGCGGTAATACAGGGGAATATCGCTGACGC  
GAAAAGTCATGCCGCTGCCGCAACGCTTTGCGGGTTTGTATGACGCCGACCCTGGAGTAAATAAAAAATAAAACTCT  
TTCATCGCGGTGCTCCTCACTCGTTGACCAATTACCGCCGCGCAATTGCGCCAGCAAAATGCGCATCAGGATGGGTATTT  
ACCGGCATTGCGAGGTGAGATTCCAGCATCCGGGCAAACTTCTGGCAATGACTAACGCCACCAGTAAACAGAATCGGCGC  
TTCACAGGAGAGACGAGCAATGAAATGGCACTCCTCCGCGCATCGGTTAATCACTCCTGCGAGAATCGCTTCTGGCG  
CGACGCCCGCTGAGCGCAGGCTGATCGCTTCTGATTAGCAAACTGTGCACATACTCGTATGGCGTGCAGGCTGAC  
TTTTCGGTAATGCTGTGAGTTGCTCGACGCTGGTGCAAGCGTGCAGGATCACCTCCAGGAAACGCCCGGTGCCCGC  
CGCGCATTGTGCTCATCAGGAAATCGCACAGGTTACCGTATCATCAAGCTGAATCACTTTGCTGTCTGACCACCGA  
TGTCGATTACCGCGCGGTTGCTGGCGCAAGAAACCGTGCAGGAGATTTCCGTTACCTGTTTATCG  
GCAAAATCCACCAGTTGCCGCCGTAGCCGGTGGCGTGCAGAAACGGCGTTGCTCTAACCTTCGCGCAGAGTTCCCA  
GGCTTCAGTAATGCTGTTGCCGGGCAAGGGGGTGAACGAGGAAACGGCGGTAATCACGCCGCTGCCAGTAAGA  
TCCCTTTGGTGGCGGTTGAGCCGGAATCAATGCCAATCGAATATGCCACTGCCACTCCTTACAGCATCTCAATAAAGGCC  
GCGACACGGTACTGAGCTGCCGACATCCGAGGTGGAGTGTGTTTCAATAGCGATATAAGGAATGTTGTGCTGCTG  
GCGCACATGAGTTTTAATCGCCAGCGATTCCACCGCTAGGTATGGCACGCCTGCAAAATCACATCAACTACGCCATCGA  
CCTGATATTCTCCACCATCTGGCTGAGCATTTTACGGCGCTGATCGTTCCGGGAAACACAGGAGCAGCCAATCGCCAGA  
TATTTATCCGCCAGCGCTCGTAGACATCGCCGTTTTCTGCCACGATTGCTCGGTGCTTTCCGCCCGGTGCGATTTT

ATAACCGACAACCCAGCCGCAATTCTCTTCAATCGCGCGCACCCTTTTTCTGCTGCGCCCAATCGGGCAGCCGGTGA  
TTAAATGCGCGGACGCGGGTCCAGTGCCTTCTCCACTGCTGACGAACGCGGGCGTATTGCATCCAGTTCA  
TTGATCAACGCCTCTTTATCGAACCGAAGGTTGCGCGTAAACCACTTTTCAAGATGTCGCTGCCGTAAGCGCCGGAGG  
ATTTAACTGCCAAGATGATAAAAATTAGCCAGTGC CGCAGCTTTCGCGGTTTTTCAGCGCAATGGCATCGCGCAGAGCAT  
CTTCGTAATCTCGTGCCAAAACGTTCTTCTACCGTTTTTTCGAAAGCGCAGCATCTCGGCTTTTCATAACGCACGCGAG  
GCATCGTCTTAAACGCTGTTGGGCAATTGCATCACATGAACAGGCTTAAACTCCGCATGTATTACATACATTTTTCTTTTT  
GCCGTGCGAGGTGGTTTACCGACCACAGATCCGAAAAGTAGAAGTAGGGGCATTTATCGGTTTTGCCGAAGCCGTAGC  
TGCTTTTAAATCAGCGGGCAGAGGTTGCGCGGAGATCTTCTCCGCTTCTTCAATGGTTTTATCAGAGGTGGAACAGAGC  
GAAACCACAACCCGACCGGCTGCCATCGGGATCTTTCGCGCATAAAGGTGACAGTAAGTCCAACAGCGGAATGCCGCG  
CTCCTTGAGATCCATGACGGTGAGAAAGCCTGTCTGGCAGCTTTCAGAGAATGATCGAAAATGGCGGGTAGATCGGTGA  
CAAGTGACATGATTTTCTTCCCGTACCACGGGAGATAATGAAAAGAGGCCACATTATTACCATTCTTTAGTATGGTT  
TATTTGATCTCTCGCGGTTAGCCACTTAGTTTTTTCATGGATTTCTAAAATTGCCGAGGGGGAACAAGCCGGGAGCT  
GCGACAGCAATATAAAATTAGCCCAATAACCGCAACCCAGCGTACC GTTGACACGAATAAACTGCAGATCTTTGCCG  
ATATTTAACTCTATTTGCCGCGACATATCCCGCGCATCCCAGCTTTTTACC GTATCGCTGATGTGGCGGTCAGGAATGC  
GGAAAACCTCAGCGCGCAGCGGTTGTTCAAGATGACCATTTAACGACGCGCCGCAAGGCATCAGGCAATTA  
ACGTTTTCGCCAAACATTGACCCGCTCGTGCGATGCGTTCTTTCACACGAGAATCTTCACTGTTGATATCCACTTTTCAGC  
CATTTCCCGTAAATCCCCCACAATTAAGTGCAGATAGCGATTAAGGCTTTCATCTTCTTTCAGATAGCTTTTTACGGCATC  
GGCTCGCGCTGCCATTTCCGGATCGTTTTTCAGCTTGTGATCAGGGCGAAGGTGGCGGATCAAACGCATGGCGGATCT  
GATGCGCAGATCGGACTAATATCATCAAGCAAAGAAATCACCGCTCAGAAACCAACTCCGCGCTATGTTGCCAAC  
CATTCGGTGGGAGAATTTGGCTTTCAGTGGATGCTCGCTCTCCAGCCAGCGAACAATTTGCTGGGCGATAAACTTGGC  
CGATTTATCGCGCTGGAGAAGGGCGATCAACTGTGCGATCAGCGTATCCAGCAGCACCTGATGACGATCGTTTTTGGTCA  
TACTCTCCAGCATCAACGCACTGGTGCCGAAAGATCGACCTTATCAATCGCCGATGGACCGCGGCTTAAAGCAGGCGC  
TGAATACGCGCATCATCGGTAAGTTCGAGAAAACCGCTCATGATCTGCAACAGATGCTGACCAACGCGGCGGGCTTTTC  
TGGCTGGCTAAACAGTTGCCAATCAGCAACGCGGTTCTGTGGCGTGAATCAATGCCACCAGGGATTGAGTATCAAGAA  
ATTTTTCTGCACGAACCTGGCCGAGATTTTCGCAATCCGGTCTTATTACGCGGATAATCGCCGATGGCGAGAAATG  
ATCGGAATCGGCACGCGGCAACAGCGCCACCACCCAAACAGTCCGCCAGCGCGCCGACCATCGCCGCTTCAGCAAT  
CGCTTTCAGCGGCTCACCAAAAATTGGGCGGCAAAAACAGCGTAACGACAAAGGTAGCAGCGGCGATAAAGCAGTAAAG  
AGAGCGCAACCTTTGGCGGCTGAGTTCGATGAGTTTATTACATAACGTTAAGAATAGAGCCTGACGCGCCGGATCGCG  
CAAAAATCACTGCTCCTCACTAGCTCGGCTGCCTGATGCTGGCGCACGCGATTGAGCAATCCCGCCAGGGTGAAAACGA  
CGATAACGCCCCCACAACGGTAACAGATGAAACGGCAAGCGACCGCGTTAAACCATAGCCAGCGGCCGATTTTCGACC  
GAGACCGACATCACCATCAGGATCACCATATTTAGCGATGCGGAGACGGTCCCTTTTCGTAACCTATTGGAAAACAGCGT  
AAAGCGGAATAAGGTGCGGAAAATCAAACCAATCCC GAAAGCATAACAGACTGGTGCACAGCACCGACACAGCCAGACGT  
GCGGCGACAGCAGATTGCCGACAATCAACAGCGAGAGGCGGACAGTTGAATGGGTACGGCACGCCAGATAAAACCGCGGT  
TCGGTCCGATCTTTAACAAAACGCGCCACGATGGCATTTCGCAACAATCACCGCGCCGAACACCGGAACCTGTGTCCAGGC  
GAACTGCGAAGTTGTTAAGTGCCTGCATCGATAAGGATCACCGGCGAGACAGCCACCCAGCTCATCATCGGGATATAGC  
TTAAAGAGATGGTTGCTGCGCAAAGAGGAACAGCCGATTGCAAAAAGACATTACGAAAATCGCGCAAGACGCTTTTGGCG  
CTAAACGGAACCGCGCCGCTTACCCTCTTGGCATCGCAACAGTAAGCCAACAAATGAGATAAAACCCATAACCGC  
AATGATGGCAAAAAGGACTTTCCAGTGCATAAAGTGCATCAGAGCTGCGCCGAAAGCGGGCCGATAATCGGCGCAATCA  
GTACGATGGAGGTGATAATGCCATCAACTTGATCCCTTTTGTCTGTCCGAACGCTCTGACCGTGACATAAACCAACG  
GTGGCAATAAACAGATAACTGGTGCCTGAATTCAGCGCGGATAAAGAACTGTGTATAGACGTTGTGAACATTGTGCG  
GGCGCAGGCAAGGGTAAAAATTAGCGCCCCGTAATCAGCACCCGCTGCGGCAATTCTGTGCGAAAGCGGCCCCAGCA  
GCCACTGTAACGCCATACCGCCAGCAAGATAGAGACTGACGGCAGCAGGGGCCAGACTGACATCGGCATTTAAAATCACGT  
ACCACATTAATGATCCCAGGCTGGATCAGATCCGTGACAGATACGCAGCAAAGTCATACAAAATCAACGCCATCGGGAA  
AAACAGCGTGGCGCATGGCGGGTAAAAAAACGTGGCATAACAAACAACCTTGTCCGGAGAACCCCAACGGGAAAAAC  
GAAATTCATACCGTCCGTAATGACGAAAGGCAGGTGAGAAGGGCAACGAGACTGCAAATGTAAGTGAATTTTATGTAATC  
AACCACTGCCTGTGAACACACAGACAGAGAAATACTTTCTGACTTCCGGTCCAGAAATGTAACGATTACAAAATAGTCA  
TCAGCACATTACCTCTTGAATTGATGGGTTGCATAGAAAATATACACCTTAAAGTGAATTAATAAATTTGCGGTTAATCA  
AAAGAGCGCGTGGAAAGGGGAATATCTGCCGGTACAGGACATGTAACCGCAGCTTGTTCGGAAAAATGATCGT  
TTGCAGAAGAATAAAAATAGCCTGAAAGCGCTCGGGGAATGGAAATTTGCCGGTGAGAATGGTTTTTGTAGTCGCTA  
AAGTCAGGCCATCTTTTTCAACAGGTGATGGATCGCATGACAACTTACGACCAGCACGCCGATGATGCATTATTTA  
AAACCTTTCTACGCACCCTGACACTGCGCGGATTTTATGGAGATTCACCTAACCTAAAGATTTACGTGAACTGTGCGAT  
CTCGATAGCTTAAAACCTGGAATCCGCCAGCTTTGTGATGAAAAATTGCGGGCGCTACACTCCGATATTTTATGGTCCGT  
AAAGACCCGCAAGGCGATGGCTATATCTATGGTGAATTGAACATCAGAGCCGCGAGGACATTCATATGCCCTTTCGCC  
TGATGCGCTATTTCCATGGCGGTGATGTAGCGCCATATAGAGCATGATAAACGCCAGCCGCTACCGTTGGTTCATCCCAGT  
CTATTTTATACGGTAGCCGTAGTCTTACCCTGGTCCCTGTGCTGGTGGACGAATTTGCCGACCCGACTACCGCACG  
GAAGCTTTATAACGCCGCTTCCCGTGGTGGATGTTACTGCTGTCAGACGACGAGATTGTGACGATCGCAGAGTGC

CCCTGTTGGAGTTGATCCAAAAGCATATTCGCCAGCGCATCTGATGGGGCTTATCGATCAACTGGTAGTATTACTGGTT  
ACAGAGTGTGCTAATGACAGCCAGATAACTGCGCTGTTAAATTACATTTTACTGACTGGCGATGAAGCGCGTTTTAATGA  
GTTTATCAGTGAACCTACCCGTCGAATGCCACAACACAGGGAGCGAATAATGACGATTGCAGAGCGAATTCATAATGATG  
GATATATAAAAAGGGGAGCAGCGCATTCTTCGATTGTTGTTGCAGAATGGGGCGGATCCTGAATGGATACAAAAGATTACC  
GGACTTTTCGGCAGAGCAAATGCAGGCATTAAGGCAGCCCTTGCCCTGAGCGTGAGCGCTATTCATGGCTCAAGAGCTAATC  
AGAGACGGATGACAAACGCAAAGCAGCCTGATGCGCTATGCTTATCAGGTCTACATAACCCATTAATATATTGAACTTT  
AAAGATTTTTGTAGACCTGGTCAGGCGTTCACATGGCATCCGGCATGAACAAAGCGTACTTTGCTTAATTCAGGCTGGAA  
CGTGGCGATGACCCAGCAAAGATAAAACGAGTCACAGGTTATGCATGAGAGGAAATCAGGCGCTTCGCCGCTATTTGAA  
TTTATTCATTGCCCGATACACGGCCTCGCAATTTGCTTCAGTGCTTCGCGATAGGTTTTGCTGAGCGGCAAAGCGCAG  
TTGATGCGCAGACAATTACGGTATTTGCCGGAAGCTGAGAAAATCGAGCCTGCCGCCACCTGGATTTTCATGCGGCACAG  
CTGCCGCGCAGCAGACCATATCGACCTGTTCAGGCAATTCTATCCACAGTAAAAATCCGCCCTTCGGGCGCGTAATAC  
AGATTTTCGAGGAAAATATTTCCGATCCAGCAGGTATAAAGCGCAAATTCGCTGATAGATCTGCCGCATCCGCCGG  
ATATGGCGATGATAGTGACCTTCAGCACAAACGTTGCCGCCCATTTGCGTGAGCGGCACATTAAGCTGCTGATGGC  
GTATTTTCATATGCATCAGTTTATCGTGATAACGCCCGGTGCGACCAACCCACGCGCAGGCTGGTGAATACTTTTAC  
TGAACGAGCTGCAACACGACTCGCCGTCGATATCCAGGAATGAATGGTCCGCGGGCGGATACCTCCGTCGCCAGT  
TCGCCATAGACATCATCTTCAAAAATACAATATCATGACGCTGAGCGAGAGAGAACGGCCGTTTTGCGCGCTCCGG  
CATAATAAATCCAGCGGATTATTACAGTTTTGGACCAGAATGATGCCTTTAATCGGCCACTGTTCCAGGCCAGTTCCA  
GCGCTTCAACGCTGATGCCAGTTTCTGGATCGGTTGGGATTTCAATCACTTTACGCCCATGCCGCGCAGCATCTGCATC  
GAACCGTAATAACAGGGGATTCGACCGCGACAATATCGCCCGTTTACACACTGCCATTAACGCCAGCGACATCGAGTT  
ATGGCAGCCGCTGGTGATGATGATGCATCGCGGTGACCACCGAGCCGCTGTCGAGCATCAGGCGGGCAATCTGCTCTC  
GCAATACTCGTGACCGGTAACAAGTCATAACCGAGAACGGTTTGCAGATTATGCTGCACCACCCGGCTTAGCTCCCGC  
CACAGCGGTTTCAGGCTGGGCGCTTCGACATCCGGTGTGCTTTTCTTAAACGGAACAATGGAATGTCGCTATGCGCTC  
CAGCATATCCAGCACCTGATCCACTGGTAATTTCCACCGGGCGCTGCACCGGACGCGTCATCGCGGTTACTGGCGGCT  
GGGCTTTACGTTGTCGACAAAATAACCCGAACGCGGCTGCGGAGTGATGAGCTTCATCGTCTCCAGCGTCTGATACGCC  
TGCTGCACGGTGTGATACTGACGCCGTCTCTGACTTAAGCTGCGCACCAGGCAATTTCTCCCGTGACGATACAG  
CCCTTGCTCAATCCGTTCCGCAAGCAGAGTCGCCAGATGTTGATAACCGGTCATGCTGTATTCCTTATGTGGACCATA  
GAGAGAAAAACCGGTACAGATGAGGCTAAAAACCGGATGCAGATGCTGTTTTAACCTGTCTGTATGTTAAATAAAAGTA  
ATATTTGAATCTGTATTGTAAGTCCAGAAGGTGGATGATGAAGCCTCTGAAAGATGAGGAGGTAGCAGATGGAATTT  
ACGAAAACAGAGCTAAAGCGCCGTTTATCGGCCTGGTGAACCTCTGGCAGGCGGTGAGGCGTTGGCGGGCAAATGCAG  
ACCCGACGCGTGTACAGCAGATGAGTGATGAGCGGTTGAAGGATATCGGGTTACGCAGGGAGGATGTGGAGTGAGGGG  
GATATAGATTTATATATAATAAAACGTTTTTATGTTTTTAAATTAAGTTATAAAAAATTTCCCGAGACAATTCATCAATA  
GGTATGGAGTGTACAGGAATATCTTCTCACTAACCTCTTAAACTCATGTGATAACGGTCAAAAAACGCACAGTGATT  
ACTTGTGTTTTTTGACTGACTTTACAACCTCATTATTCGCTATTGTGCAGTTTCTCTAATTGTTTTATACCCTGGAAG  
TTAAATGTCAGCTACTGAATACTTTTTGATTGTTTGAGATTTATTTTCAATTTGAAATTAAAAATCAGGTGATAAATGAG  
TTGTGATTAATAGATGGTTGATATCATTTTTATCTAAAATTGATTTATAGTATCGACCTGAAAAAATAGTTGTTGCCGCC  
TGAGTAACATATAAATTTCTGAAAGTTTTCTTCAAATTAGAAATGTTGTGGGGTTTTGTTTTGTATCTTTTATCTC  
TAAGGAGCTTGCTTTGGTCAATCAGAATACATTTATGAAATGACTTCTGCTAAGTAACTTTGTGAATCTTA  
GAGGTTGAGACAACCGGATGGCCGTCCTCTTTATGAATATCATGCAACCAATGATGAATATACCAATTAACGCAGCTA  
CTCCGTGCAGTCGGTCAATCACAATCTAATATATGAAATAGGGACTTTGCTGCCTGTTTTGTTCTTTTTGCTCTGAGTG  
GTACCGCAGGATTAATGAACGGCAATGCGGATGGAGTGGACCTATATATAAAAAAATAGGGATTTTATTACCCGCCA  
CAGAGCTTGGTACTATCGTACCGAAAAGGATGGAAGATTAAGGCTGCGCCCAATTCGATTTTATGAATCTGAACGACGC  
AATTTTCTCGAACATTATTCAGTGAAGGTGGTTTTACCTTTCCGGCTACTCAAAGAATCAGACAGTCCGTTTTCTGGCTGT  
TTTCTCCAGGATCCTTGACAATATGAGCAAGCAAAGCAGTCAGTTTTTCTGCCCTTCGCTGGCAAGAGCTGTCATAG  
AAAAATCAGCGCTGCCAAGTGTTTTTAGCGAAGATACCTCTGTAGAACTTATCAGTCATATGGCTGATAACCTCAATTC  
TTAGTACTTACTACAACCTAATAAATCACAAGAACCAGTACAACAGCTTGAGAAGGTTACCCTACCTGGCGAAGCGA  
GTTTCCAATACCGTTAGATGATGAAACAGGAACGCATTTTTTGAATGGACTGCTATGCGCAGCCTCTGTAGAGGCTAAGC  
CTCGACTACAAAAAATAAGAGTACGCGTTGCCAATTTCTATTGGTCAGAAAAGCATCCAGATGAGCTTAGGGTGATAGTA  
TCTCTTCCGGACGAAGTTTTCTTTCTGTAACAAGCAGCCGTCACCTACGCGCTTTGAACCTGTCATTTGTGAAGATGG  
TGAGGAAGTCTCTGCCCTTGGCCAGCCTATGCTTCTGAAAACAGACAGGCAACAGTTGATTACGTTAAAAGCGAAG  
TGAGATTTGGCAGGCAAATCCATCGGCAGGTTTGTGTTAGTGGCTCGTGCTGGAGGGATGATTGTTGGGAGCATTAAA  
CTTGATGACAGTGAATTTGCCATTGGTGAAGTGGCCTTAACTTTCATCGTTGATGCAGATCAATGGCTGTTACAGGGACA  
GGCTTCTTGCAGTGTGCGAAGCAGCGATGTTCTGATTGTGCTCCCTCGGATAATAGCAATGTTGCTGGTTTTGATGGCC  
AATCGAGGGCAGTAAACGATTAAGGACTAAAAGCACTACCTGTGAAGGGATGTCAGGACGTTACAGTTACAGCAAATGAA  
ACTTATCGGATTCGCACCGAAGAGAAACAAATCAGCATCGGAAGTTTTGCTCTAAATGGAAAGCGTGCAAGCTGGGTTTTG  
TCATCCAGATGAAACATTTATTGGTGTACAAAAGTCATTTCTACACTACCGGATATTCAAAGCATTGATGTAACGCGTT  
ACACGTGCTGACAAAACAGCATTACAGCCAGCAGGAAGTACTGCGTTGGATCGATGCTGTTTCAGGGACTCAACCTAATG

CAAAGGATCCCGCATTTCTTAAAGTCAGGGCGCATATCTTCCAGCGTAATACCTAGGGAATATGGGCTTGTGTTGATAAA  
GATTGCAGATTAAGCACGGTACACCGCTCGACAAAGCTGGCCCTTTGGCTATGTGTATGTGAACCAGCGACAAAATTG  
TGACTGTGGAAGCCCTGTATACGAAGTGCATTCTGTAATGATTGTAATGAGCCTCATCTTCTGGCACGGGACAAAAAGG  
GCAAACCTAGTCCAGTGGGAAAATAAAGGTGGCGATGAATTCTCTTTGCAAGGATGAAGTACCTGTTGAACATGACGCTACA  
GAAGAAAAAGTCGAAAAAGAGAACAGTTTTTCAGCCTCCGTTGATTATTGCCGCAGGAGAGACCAGCGAGGCAGGTTATAC  
CTACAACGCCTCGACCGTACAGCGCGCGTATTGGCGTTATTAACAATGACAGCATTCCGCTGATTATTAATGATATTG  
AACAGGTTTGTAGTGCCAGTGGCTGTGGCTACAGAGGCATGAGTGGGAAACAGCCCTCCGGCGTGCCTATTAGGTGGG  
CCATTTTACGTTACTAATATCGTGCCACCGTCTAGAGTATTGTGAGGACTTTACCAGTATGAAGGCAAAGAGGGCGT  
CGGACCAGATTCGTTGCCAGGACGAGGTGCTGACTCATCACCTTACAGACAGTCGACAAGGACAGCCGAATGGCGG  
TGCGTATGCAGCAAGAAGCAGAACGCAGTGCCTACGCGGAAGCGTAGTCGAAATTCAGCTGGCATCAAAGGACGCAA  
ACGTCTACAGCGCCGAATGCCAATGCCGATCTGGAAAAATTAGCGGCCAGGGCGAAGCAAGCCGTGAGCAGGCAGAAGA  
ATATCGAAGCTGGGGAATGCCAGACCAGCGCAAATGTCAAGCACAGGCTGAACAGCTTGAACAGGCTTATCAGGCTG  
CAACCGGTGGGAAAGCCGCGACTATCCTGGTATCCCGAACCTGGACGAGATGGTTAACGAGCTTAAAGAGAGAGCCGAT  
ATCCGCGGGCGGTTCTGCAATATAACCATTATCTTAAAGCTGAAGTGTTAATGAAAACGGCGGCCCTTAAGCTTTC  
TGAAATGTTGTGTTCCGGGAATTCATGCGTCGCCCTAAACGGACTAACAGCCTGGAAACACAGGGGCTGGTTCAGGTTG  
GTTACCAGGGGCTGGAGAAAATACATAAGAGCCCTTGCACTGGCAGGAAAAAGGATTAACGCTGGATGACTGGCGGAT  
TTTTCTCAAGGTTACGTTGGATCATTACGTTTCGCGAGAGCAACTTCACACAGCTGGATGATGAGCTGAAAACTGGATTGG  
TAGCCGTTTTTTCATCAAAATTCGTCCGTAACCCGGAATCAAAAGATCCTGAAGATAATCAGAACAGACGCTGGCCTCAA  
TTCGTAATGGCAACGTATCCCATCGTTTTAGCGAAGTTGCTGATGCTGGGGGCTGGATTCAAAACCGTCAATGCGGCACT  
ATTGATATTATCAATACATGGCTGAAAGAAGCATGGGCCCACTTACCGACCCTTGCAGTACTGAAACCCGATGGCAA  
CCGTTTTTATTTACGAAAGAGCATATGACTTTTTCTTAAATCACGGATGCCTGGATTTGCCCGTAACCAATAAAATCC  
TGGATACGGCTTTTAAAGGCTTAAACCCCTTATCTGCCTACCCATATTTCTGTTGAGCATCTTACCCTGGCGCAATATGAC  
ACTTTTGTGCGCGAGAAAGTACAATGCCGAAATCTGGAAGCTGGATCGTTACAGGAAGACTACGCAGAGGGTCTGGC  
AAAAGCACGCGACTGGGTACGCCATGATCCGCTGATCGACAATTGCGGTGCGAAAACGTCTGGACAGACATTAACGATC  
GTGTCGTGGAAGGCGGCTTCTACTATCGTACTGCCGAGCACTCTGCCAGCAGTCGTCAGAACGTCTGCAAAGCTATGAA  
AAGATGTTCAAGAATGGGCAACTAAATGTTCTCAACTGTTCCACCACCATGAAATGGGGTTGATACCGATCGCGTATG  
GACGCTGGCCTCTCGCAGCCAGCAGGCAACGATTCCGGGGCCGGAGTGGCACCTGAATGACGAACTGGTGGTGCATGTC  
TCGTTATAAAACGGTAGAACTGAACGAGTTTATCTGCCGGCTAAAGCCACCAACGCTGTGAGCGGGTCAAAGACATT  
CAGATCCACAACAGTTGAATGGACCCTGTGCGAGTTTGGGCAACGCTTCTGGGACGTGCTGTTAACGACCATGAAGA  
AGCGCAGTCACTGATGAATAACACGCGAATTACCGCGTTCATATACCGATCGCTATCTGCAAAACCCGTTGCGCTGG  
CGTTGTTGGGATCAATTCTGAGACCGCTAAAAACAAAGCTGACCGATGGCGCTGAAGTGACGCTGGATACGCTATTTAAA  
GATAAAGATCGCCCCGTAACCGGCTTTCCATGACTGGATGAGCATAGCGGATTTTCAGGATTTTCGCTGATCAGTGGTT  
TGCTGCTGCGCTGGGCAGGCCGGTAGAACTGACGGTGTTCGACTCGCCGCGGATATCCCTCACCATCGTAAACTGACGG  
TGACTTTTGAGGATGGTCAGGTATTGAAGATCCGCTTCGATCAGGGGATGGGCTACTGGCGCATCAACTTTTCATCGCAA  
TGGCATTACTTTGATTTCCGCGATGACGTTTCTTTCCAGTTAGTCAAAATGGCTCAGGCCTGCAAGGAAGGGAATGTGCG  
CAACAGCGAAGAGAGTTGGGCAACGGATGTGCTGGTGGAGGTGATCGCCTCTGATGATGAGCCGCTCCCGATGTGGTGT  
CGGGAGCGGTATTTCTATAAACTTACCGCTTATTTGAGATATTCATCGAAAATGTGAGTAATTTCTGATGTATACAC  
GGCATTCTGACCTAAATTGACGGTACACAAGCCAATATCGAAGCCATTAATTTATAACGATGTTTCACTGCGGTATC  
TACGTGGGGATATTAATAACCCCTATGTTTTCCGATTTTTCAGGCTTTAACGACCATAAGTAATTCATCAGTTGAT  
AAAGATTTTCCGAATGAAATTTTTCTGTTCCCATTCGTCGTAAGGAAATGCTTTATAGTATTTGGCGTCAACGATAAGT  
ATTTTTCTGATGAGCGAATGGTGTGTCAGTTTCCATTCAGGTAACAAATTAAGTGACTGATCCGATATACTCGATGC  
ATCCCATTTTAAATAAGAGCGGTTGTGTTTGCAGAGTAAATTCACGACGCGCAAAATTCATAAAGAACTTTTGATAAA  
GTAATGACATCTTTTTCTTTTCAAATCATAGAAACGGTAGTGTCTTTGTTTTGACCTGGAATAGAATTATTG  
ACGATGAATTTGCAGACACTGATAACGAATTTATAAATAACGCGTATTTTTCCGCCATTAGATAGCTGAAATGCTGCGG  
AGTTAAATGAAGAGTGCTAATGCCCGTAATTTTCTATAAAGTGAACGAGCTTCATCTCTGATAGTTGAATTTAACTTTT  
CATGCTTAATTAATATGGCTAATGTGCTTTTTATAATTCGGTTAGCCAGCGTGTCTTATTAAGCATATCAAAGTACTG  
ACGGTTTTCCCATGATTAAGATGGAAGCCGCGTATTGTTTTAGCAAACCTTATTCGCCCTTTGATGCCAGGAATGATCTC  
GGTGTAGGATTGTAATCAAGCTCAAGCCCTCGCGTGAAAGCTGAAAACCCCTTTATTTAATACATACCCAGGATAT  
CAAGAAGATTGTTACCGGTATGGCTTCAAGGTTTGCCTGCTTAATTTCTGTAATAACCCCATGCATAGGTAAGCATG  
TAATAGATATTACGGACAGTATCACGGGCTGTTCCACTATGAGTCCCTAATAATTTGTTGGTCCATTTCTGTTGTTA  
TAGGGGTATCAAAGAAATATTTCTCGAGTAAAGGGCGGATATCCGTCATCACAATTTTATTAAGCCATTGCGTATCCGG  
AGAGGTGCCATCTTCAACCCACAGCAGAAGTAACTATGCCAATGCGGAATCCTTTCCCAAGGATAGTGGCCTCTTTGC  
TGATTTCTGTTCAACTCGTTCAATTTTTGGCATAAAGACTCAACAAATGAAGGTTCTGCTTTTTTATTAGTAAAAAA  
TTCCGGAACGTGGTGTATCAAACCTGGCTCAATATCTATGAAAGAAAATCGTCTGCGTAGGGCATAGTCAACAACGGC  
CAGAGAGCGATCGGCAGTATTCATTAACCGATGATATAAACATTTCTCCGGGACATAGAATCGTTCTTATCGTTTTCCG  
AGTAGGTTAGGGGAACAGACCAGTTTTACCTCGTTTATCATGTTCCATTAACATCATCACTTCGCCAAACTTTACTG

AGATTGGCACGATTGATTTATCTATAATAAAAAATACTTTTTCTCTGGCTGCTCTTTAGCTTGCTGACAAAAATTGTA  
AAATATGCCGCTTTACGTGCGAAGCCGACGCCATTCGACGATAGCCCTGTATAAAATCCTCATAGCTATAAGATTGAT  
GGAAGTGAACCATATTGACGCGTTGCGGAGCCTTTCTCTGTGACGAAAGTAAAGCCAGACGGCGTGAACAAAGTTTTT  
CCAACGCCGGGCGGCCCTGGAGGATAATTTTTTTTTGATGGTTAATCGTTTGAGTATCGTCTCTATTGTGGTTTCAGG  
GATAAAACAAATCATTTAACGCATCTTCCAGACAGTATGATTAGTTTTTACATAGGTGGAATAAACACTCTTGCCAGAAT  
TAAATATTAATTTATAGTCGTTGATTATGTTGTCCAGCATAGAGGCCAAATCGGGTGAATCAATACCCTGTGAGACTTTT  
TGGGAACAGGGTAATAGGACTGTCCGATTTTTTAGGATATACACCCGAAGTTGCCTGAAAAACTCTGCGATTGTTTT  
AGGTATGTCTGAAGAGAAGTGCATTGGGCATGTGGTTCATTCTGTGCTGCTTATACCATAAGCCAAAACCAACTCATCAA  
AATCTTTATAATAGAGAATAACGGGATATATACCGTTAGAAGTTCCTGACCTTCTCCAAGAAATGCAAACAGGGAATA  
GACGTAATAATTACCATAACCGAAACTCAATTTTACTCGCAGGTTACGGTAAGACGTTGGATAATCTTTAGTGGATTGCGA  
ACGTTGTTGCTGTGCTTGTAAATAAATTTTTCAATCCAGGGTTGAATAGATTCCATAAGATATGCCTTCCTCATTGCTA  
AGCCTCTATTATCGCTTTCGCAACGTAAGTAAACAATAGATTTTTACTGCAAAATCAGACTGGTAAATATTTACTGAGGG  
GGAAAGTTTCTATTGAGTCAGTGAAGGCTCCCGGTGGTTAACGGGAGTAAACGCTGTTACGCGACTTTCTGTTTACCG  
GCAATCACTCCAATAAACGCTGCACCTGCTTTTGTACGCGCCGACAGTTGCACACCTGGCGTAGCGACTGCATCAG  
TTCGCTCTCCTCGCGGGGTTGGTGGCGGTGAGGACAATACAGCCTTCCATCACTTTGACATCTACCGCCGTTGCCA  
TGGCAAAACCGGCGCTTCCAGCCACTGACCTTTAGGGTGTAGCGGGAATACGGCTGTAATCCGGTAGCGACTCGCA  
TAACCGACGGTGACATGACGTTATTTGCGGGGAGACTTCTGCTTCAACGTTGTGCAATAGAATGCGTGTGACGTCAT  
AACTGCTATTCTCAGGAATAGTATTGTGATTAGCGATGCGGGTGTGTTGGCGCACATCCGACCGCGCTAAATACCTG  
TATATATCATCAGTAAATATGGGAAAGTCCAGCTAAAAATAGAATAAAATGGGCAATTTCTGGAATGATTTAAATATAT  
TTATGTGGGTTATGATTGGCGTGAATAATAAAAAGCGCACCGAAAGTGGCGCAGAAAATAATGTTACAGGATTTTTTA  
CGTGAGGCTTTTTTACCCCCGCTAGCTGCGGTTACGCTTTGATTTTTTCCAGCAACGCGGCGGCGCTGTTTTCTCGCT  
GATCAAATCCGGGTTTTCGGCCCGCACTGGCGGTAAGTTCACCACGGAACGTTTTGCCAGGATGGATTGCGTCAGGT  
TGTTGACGCGGCTAAGCGTTGTTGACCTGTTTTCTATGGTGTGCGCGTAGGCGAAGAGTTGCTCGACGCGGCGAACG  
ATTTGCGCTTGTCTTTTACTGGAGGTAATAAAACAACCTGGGATTTGATATCTTTTCTGAAATACCTTTTTGACCAGA  
AGTTGTTTTACGCGATTTCATCATTGCATTTCTGTGCTGAGGGGATGAAAAAATATTTGATATATTCTGGTAAAGCAT  
CTTTGGTAAATCGAGCTCGAATAAGTTTATCAGGATATAGCAAATTTTATGTTGTAATTTTTTCAATAACCCACAAACA  
CCAACAAATCTAAACTTCCGTTATAGCGAGTAAATAAAAGATCTCCATCTTGAATTTGTGGCGGTTAGTTCACTTTC  
TGAACATTCTAGAAACCGAATATCGTTTTGATCTACATGGCCAGCACGTACAGAACTAATGCGTAGTATTGGATGACCAA  
CACCACTTTTCAATTTGGCTTTGATGAAAGACCATTACGTAATTCAGTTAAGATAGATTCAAAATTTAATCTTAAATACA  
GAATGTTGCGGCTCAAATTTACGCCATTTTTCTGTCAATTTTCCATTAACCTGCGCCCCCAATACCGCTTGACGAAAACG  
TTTCAGGATTTGTGGGATTTGCTCAAAACGTTGTTTTGGTGTGCTACTCTGCGCCAGCAGCGTATCGAGTTTTTACGCGA  
TGATTTTTTGTTCGGCAAGTGGTGGGATTGGTATATTTATCAAATCAAAGCTTGCCTGCTTAAATATTAATATTTGCA  
CCAGCAGAAAGTGAATTTTTGTTTCGATAAAGAGAAGTTTTGTGAAATGAGCAATAAAACAGAAAATAAAGTTT  
TTCAGGACGTAATACCCGCAAAATGCGCCGAAACTACATTCAAATGGTAGATGCTGATGTGCGGATTTACCAACTACGG  
ATTTGCTCCCTGATGACATTGCAATAACAATATCTTCCAGGAGATTTTTTACTTTTCTTTAAACAAGATTTTAGGAACA  
AAAACCAAGTCCGTAGTATCAAATTTGCCATTCTGAATATTGTTGCGACGGATAAGAGGCAAAATAATCATCTTTAGATA  
ATTTATTGCCTGCTTTTTTATACGTTACTCCTCGGATTAGAGTTGTGACCGTAGATACTGGGGCGATAACCCACCCCT  
CCGGCAATTTCCCGCACTCATTCTTACCCCAACAAACGCTTCTTCCAGCAACTGACGCTGCAAAATCGGCTCATCGC  
TCGCCCCGATTACGCGATCAGCGCATCCAGTTCCAGACAGCGCTGTACCAGTTCCGCCATCGCTTCTGCGGCTAATACA  
TCCGGCTCCGGCAGGCTGCGGCATCAATACTGTTTATCTTCCAGCCAGGAGATATCCAGCGAATCGGATTTGCGGT  
GCGGATCCACTACGCGTGAATTTGCGCCAGCGGCTGTAAGCAAGATGCTGGTGGTGTGTTTTGTTCTCTTCGCTGTGCG  
CAATTTCCGCTCTTTCGCGGTTAAACTCCATTACCTTTCAGTGGCGGGCTTAAACCGTGGGGTCTTCCGCATACACG  
CGCTCAAACGGCTGCAAATGCTCGTGGTAAACGGTGTGCGCTTGCAGAACTCGGCATATTGGTACGACGGTACATACAC  
CCACACATCATCGGTACAGTTCTTATCCTGATTGCGGTTTCCGACCGTCCCTTTGGTAAAGAACAGCACGTTGGTCTTCA  
CGCCCTGAGCGTAAAAAATACCGTTCGGCAGACGCAAGTGGTGTGACAGTACACTTATCCATCAGGTACGACGAATG  
TCGGTGCCTTTGCGGCTTCAAACAGCACGTTATCCGGCACACCACCGCCGACGACCGCCGGGATGCAGCGTTTCGAT  
AATATGCTGCATAAAGCACAACTGTTTGTGCTGGTGGGTAACAAAGGTGCGGGTAATGTTGGTGCCTGCGGCGCTGC  
CAAACGGCGGGTTAGTGGCGACAATATGCGCCTTCCGAGGTTTTACCCTGCTACCCAGAGTGTGCCCAGACGGATT  
GCGCGCGGTTGGTGCAGGTTGCTTCAATATCGTGCAGCAGGCGTTTCATCAGTGCAGACGACGGGTGCGGGCACAG  
TTCGAGGCCGATAAACGCGCGGTGGATCTGAAATCCTGCGTGTGCCATCAAGGTCGTCAGATCATTGGTTTGCAGT  
TAACATAGCGGTGCGCTTCAATCAAAAAGCCCGCTACCTGCCCGGGTCTGCACCATTACGCGGCTGCGGTTT  
AGCAGATGAATAATGGTTTTAATCAGCGGACGCGGGTGAAGTACTGGCTGCACCAGACTTGGTTTCATTGCGGTTCTT  
CTGCAACAGCCCTTCTGATATATCGCCGAAGTATCGCGGACTTACCGTGGCGCGGTTGTACCAGTCCAGCGAATCCA  
TATTGCTGACCAAGTGGGTTATTTGTTTCCGGCTCGGTGATGGTGGTACTAACATTATGAAAAACTGCCTGTACCAGCTTT  
TTGTCATCTTCCGCTAAATGCACGAGCATTTTTCGGTAGAAGTCAACTGCTCTGCGCGATGCGGGATTTCAGGTCATC  
CCAGCGTAACCTTCCGGCAGGATTCCGCTTCTGACCGGTCTTTACACATTTTCAAAAACAGCAGCGAGGCGAGTT

CATTGACGTAGTTTTGATAGGAAACGCCGCCATCGCGCAGGTTGTCGCACAGCTTCCACAGCTTCGCGACCAGATCGTTA  
TTGTTTCATTGTGAGTTCCGTAATAAAGCAGCGGCCAAATTCATCGAGCCGAGAAGAAGAAATTGCCGAGGGTAATAT  
ACACAAAATCATTGAGTTGCATCAAGCGGCAAGTGAAGTGAATCCCGGGAGCGTACAGAAGTACGTGACCGGGGTGAA  
CGAGCGCAGCCAACGCAGAGGCAGCCTGAAGGATGAAGTGTATACGTGTGAGCCAGCTCGTCCCAGATATAATCGCTGA  
ATTTGCCAGCAGGGTATCGAGATTATCGTCAAAGTTCTTTGACGATCGCCTTCCCGCCGCGACGGTGGAAAGTTGCCG  
GTTTTGAAGACATCGTGTGAGCACCCTTTCTTTTCAGCGCCTGCGCTAAACGATCGAGCCAGCTTAATTGCTCGCT  
GCTCCAGTCGTTTTGCCCTTAATGCGCGTCAGCGCGTGATCGACACGTTTCTCAAACGTTTTAGCGCATCGCCCACCG  
CAGCGCGGCGAATATGACCAATCAGCCGGGCGGCGATATCTTCATTGCGCGTCTTTCCATGCTTTGCGCAGGGAAGAT  
TCCTCAAAGTGTGGCGTCAAACCACTCTGTAGCTCGACCAGCCCTTACGGGTGAGATCGCGCGGGCGATTAATAAC  
TGCTGCAATGCCGTTGCGGTTGCGGGAACGTTGACCAGCGAGTCAAAGGCTTCGAGGAAATCCTGCGGCGTGTGCT  
AATCACCGTACAGCATTACACTCACCCTTCATCGTCGATATCGAGGAAGATCGGCGCATCATTGAGTTGTTGATG  
TCCGTTTTGAGTTTTCCAGACGGGCGATAAAGCCAGGCGATTTGTTAAAGACTTCGGCGCTCCAGTGGCCCTTTTTTC  
CCGAGGCGGAGGCGAAGCCGTTAAAGTTCAGCCCGCGCTCCTGGCATAGCTCATCCAGACGACGCACCTGTTTTAT  
CTATCGTTTTGCTGCGGTACCGTTAAACGTGGCCAGCCGATGATACGCTGGAGCTTCGCCACCAGTTGTTGATGGCTG  
TGCTCGGCAAACTGCGGCTCCGCTTCGGTATTTATAGGTTTCTGAATCGTAATTTATTGACCGGTTGCGCAG  
TTCCACTTCGGGCGCACCCACCGGACGATGGTGTGACGCTTCCAGCGTGTGTAGATATCGACACAGTCAAAAA  
TCTTAAAGCTGGTTTTATTACCTCCGGGCATAAGCGCGTGGCGCGGCTTTTCTGTTGTTACAGAATGCGGCTGCGT  
ACTTTACGCAGGAACACGATATTACAGATCGACGGAATATCGACGCCGTCGTGAGCAGGTCGACGTTACCACGATATT  
GGCAGCCGCTCTTTATTGAAGCGGTGATCATGGTCTGACTTTGCGCGCTCTTTATCGGCATCACCGGTGATCTTGA  
TGATCGCGTGTGCTCCAGTTGCGGATACTTTTTCTTGAACGCGGCACGAGCTTCCACCACCATATCGGCATGGGCA  
TTGGTGACGCAGAAGACCAGCGTTTTTTGCGATCCGGTGGGTCAAGATAATTGGTGAGTTCGTTACAGACGGCGGGT  
AAACGCCGGGATCACAGGCCAGGTTAAAGTGGCGACTTCAAATCCTGATCGTCTTCCAGGTTGTCATTGATCACTT  
CTCCCTGCGGGCTGATGCGCTCTACCTGCTGCCTTTGAGAGATAAAACCCCTCCTGCGGTTGCGGTTGATGATCTGA  
ATAGGCGGATCCTGGTCGATCAGAAAACGTCGATAACCGCGGTACGGTAGGTATAACGGTAAACCGGCTCGCCGAAAT  
CTGCACAGTATGTAGCGCCGGGTGGCGGTGAGAGCGATTTTTACCGCATCGAAGTGTGAGAAATGCGACGGTAGGCAG  
AGACGTAATCCAGCTGGCTCGGAACTGCAGTTCGCTTCGGTCTGCTCTTTATCGAGAATATAGCCGCGATGCGCTTCG  
TCAACGACGATACAGTGTAAACGGGCCACCGCATCGTTTCTGATTGACGGGTGCGTTTACCAGCGACTGTACGGT  
GGCAACGTGAATTTTGGTGTGCTTCCGGGAATTTATCCGTCAGCCCTTAAATGTCGAAAATGCTGTTGAAGGTGTCGC  
CGTTAATACCGGTATCTTCAAACGCGCCAGCGCTTTCGCCAAGAGAACGGCGGTCGACAAGGAAGAGAATGCGTTTA  
AAACGCTGGGACTGGATCAGGCGGAACATCATGGCGATTGCCGTACGGGTTTTACCAGTACGGTCCCATCGCCAGCAG  
GATCTCTGTTGCCCTTACGATTGCTTTTTCAACCGCGCGGACGGCATCTTCTGATAATAACGCAGGCCAGCTCGC  
TCATGCCAGGTTATCGGCAAACTGATTCTGTTTTGCGGTTGCTGCCGAGCATTCCAGCAGCTTCCGGGCGG  
TGCCACTCGGTAAGGCTTTCGACATATTGCGGGTATCACGCAGTCTCGGATACCAGATGCCGCTTTTGGTCTTATTGT  
TGCGCGGATTCGCGCCGTTGGTTCGAGTAGCAGAAGGGGATTTAAACCGTTGTTGCCGCTGGTGTCTGCCAGCTGG  
TTTCATACTCTGGCACTGTTTCATGCACTTCATCCGGTGAAGTGTCTCAAGCAAGTTTTCCCGCAGGAAGCCATTATCG  
AAACATTTACTGTAGCGATACGACTCATTGAGCTGGCGGAACTGCGATATTGTTACGTTTCGCTCTACCACCGCGAT  
GGGTTTGAAGCCGACAAACAGCACATAATCCGAAAGCCCTGATTACCGTTTCATCTTTCCGGTCCGCCATTGCGCAA  
TGCTTTATTGACCGCGGTTCCGGACGTGCGCTTTGAGAAAGCGAGGTTTTGCTGTGCGCTGCCAGCCTGCTTTA  
CGCAGTTGCGCATCAATCAGGAAGCGACTCTCTTTCGCTAAGGTTGAGTGTGCGCTTGTGATGCGCTGATCGGTAATTC  
TTTTGTTGAAGCCTTACGTTCTGTTTGGTCTGTTTTGCCAGTCCGCTTCTTCCGGCAGCTGTGTTCCAGTCCCG  
CAAGGCGAGCCTGGGTTTTGCGCTTCCGTTTCTGCTTTTTGCCCTTCCAGAATGGCGATATAGCCGTTCCAGGCAACCAGC  
TTCTGCTGTTGCGCTTACACTTCTGCCTGAGTCTGCGTTTTTCTCGCACCTGCTGTTCAAGCTGTTGTTTTAGCGTCAG  
CACTTCTGTTGATAGAGTTTTTACCACGTTCCGGCAACACAAACACCGGCACCGGGAAGTCATAATCTTTAGTGACCA  
GACGGTAGTACCAGACAGCCAGGCGGAACCCGAGTCGACGACACATCTGGGCATCGTTGAGATCGTTATGATATTCTGTC  
ACCGCTGTTACCAATGCGGCGTAATTTGTGAAATACAGAGAGGATGTTGTGATCAACAAAGGCGATTTTGCCGAGTTC  
ACGAGGAGATCGTGTGATTCTCACAAAGGGGGATGTTGAGTAACAGACCAAGATGTTTCGCTGTGGCTTCGCCAAACA  
TACGCATTTTAAATCAGCGTGTGTTGGGATCATCCGGTGAATTTTTCCGCCGACAGGCGATGGCATAAGTGAAGTCG  
TTGACGCCCTTCAAGAAATCAAATTTGATTTATTCATCATTGTTATTAATCCATTGCTGTGCGGGCCTGTCAAATATT  
TAAGGCCATAACATCTCATCTTAGCTTTCTGTACCTTTCCGGGCAATGACCACGGTACAGCAACTGACTATTTCTAA  
CGTGTTCGTTATTTTTGTAGTGTATAGTAGCCGAAAAACATCTACCTGATTCTGCAAGGATGTAATGACGGTTCTT  
ACCTATGACAAATTTATTGAACCTGTTCTGCTTATCTGGCAACAAAACCGGAAGGTGCAGCCGCGCGTGATGTTTCATGA  
GGCTGCCGCGGATGCATTAGGACTGGATGACAGCCAGCGAGCGAAAGTCAATACCAGCGGACAACCTGTTTATAAAAATC  
GTGACGGCTGGGCGCATGACCGTTTTAAACGTGCCGGTGTGCGCAAAGTTTGTGCGGTGGCAAATGGTGCCTGACTCCT  
GCGGTTTTGACTGGGTTGCGTCTCATCCCAGCCAATGACGGAGCAGGAGACGAACCATCTGGCCTTCCGTTTTGTGAA  
TGTCAAACTTAAGTACGGCCGGATGCCGTGATTTAGATCCGAAAGCCGACTCTCCGATCATGAAGAATTTGAAAGA  
GCAGCCCGACGATCGGTTAGATCAGGCGCTAAAAGAGCTTCGTGATGCGGTGGCTGATGAGGTTCTGAAAACTTATTG



CAGGTTTCCTTCGCGCTTTGAAGTCATTGTTCTGGATGTTTTGCATCGCCTGGGGTATGGCGGCCACCGTGATGATT  
GCAGCGTGTGGCGGTACTGGAGATGGTGGCATCGATGGTGTGATATCGCTTGATAAACTTGCCTGGAGAAAGTTTATG  
TTCAGGCAAAACGTTGGCAGAATACTGTAGGCAGGCCAGAATTACAGGCATTTTACGGCGCACTGGCTGGCAAAAAGCG  
AAACGTGGGGTGTATTACCACCTTCTGGATTTACTTCTCAGGCGCTGACTTTGCCAATCCGTCGAGGGTATGGTGT  
GGTTGATGGGGAACGCTGTGCACTTAAATGATCGAAAACGAAGTAGGGGTTTCTTACGTTTGTGAAGGTGCCGAAAC  
TGGATATGGACTATTTTGTAGTGAATATCAGGCCGGATGCGGGCTGCGCCTTATCCGGCCATAAACCCCTTACTTCTCAA  
CCCCGAAACGCGAGCCCAATCTCTTCTCCGGCAGCTGGATCCCGATAAACACCATCGTGTCTATGCGGTTTTTTCATCGC  
CCCACGGCCTGTCCAGTCGGCGCTGTAGAGGCGCTGGACGCCCTGGAACAGCAGGCGGTTAGGTTCCGCCGTCATCCAC  
AGCATCCCTTTGTAACGTAGCAGTTTATCCGCCGACTCCAGCAGCAGGTTTTCCATCACGGGGAAACTTCGCTGATATC  
TACCGGGTAATCCAGTTCACCACAATCGACGAAATATCGTTTTGTTTATCTGCGATAAAGTGAAACGCGGTTTGGTGC  
TGACGACGTTTTTCCAGCATAAAACCGTTGGTGTGAACAGCAGGCCAGATCGATGTCGCCGTGGGTGACGGTGTAG  
ACCGGTGCGCGGGCGTTGATGCGCGCCAGGCGTTTATGCAATTTTCTGCTTCCGCTGCGACGTCGGTTTTGGTCAGCAG  
AATGCGGTGCGGTAGCCAACTGTGACTGGCGCATGGTGAACGTTTTCATCTGCTCATCGGCATGTACCGCATCCACCA  
GCGCAATCACGCCGTCCAGCAGATAACGCTGGCATAAACTTCTGGGAGAAAAAGGTCTGAATAATCGGGCCGGGATCG  
GCCATGCCGTCGATTCAATGACCAGACGGTCAACTGAATATTGCCCTTGTGAGATTGTCAGCAGGTCCAGTACGATGCGC  
GTCTCCAGTCGTTGGAGCGCAACACAGATGCAGCCGTTGGTCAGCGTTTTGATCTGCTGGCGCGGTGCCAATCA  
GTTGATCATCAACAGAGACTTCGCCGAATTCGTTTTCAATCACGGCAATCTGTAGCCGTGCTGTTGTTAAGAATATGG  
CGCAGCAGGGTGGTTTTCTGCGCCTAAAAACCGGTGAGTAGGGTAACGCAATCGGGTTCATGCTCTCTCCATTAAC  
AACAGCGCATAACGCCTTACCATCGCCGCCGTAGCGCGCTTGGCGTTCGCGGAAGAATTCTTCATAGCTCATGTAC  
GGCTTGTGGGATGGTTGGTCTTCATATGCTCGACGTAGTTGTGCTAGTCTGGAATGCCAATCAACATCTTCGCCGCTG  
GCCGAGATATTTTTGCTGTCTAAGTTACCAACATAGTTCACTCTGATAAGAACAAGCCCCGCCGAAGCGGGGCT  
AAACACGGTGTAGTGGTGCAGAGATCTTCAGCGCCCTTCCGGGATTGGAACGTACGGTGTCTTTGTCAGTACGTTT  
GTCGCTGTTACGCACCGCAAGCCAGGTTTTGAAACCGTAGAAGATGATGCTGTACACCACAATCAGGAACAGAATACTCA  
GACCTGCGTTGGTGTAGTTGTTACAACGATGTGGTTCATATTGGCAATCTGCTGCGCCGTACGGTACGTTACGTTAGCA  
ATCTTCTTTGTACTGGCTTGCATGTAGAAGAAGCCTTCCATCTGCGGGTGGTGTGAACAGTTTACGGCCAGCGC  
CCAGGTGGTGCAGATAAGCAGCCATACAGCCGGAACAACAGTTACCAGATGTATTGGGTGCGCTTTCATTTAATCAGCA  
CAACGGTGCCAGTACCAGCGCTACGGCTGCCAGCATCTGTTGGAGATACCGAACAGCGGCCACAGGCTCTTAACGCCG  
CCCAGCGGATCAACCAGCCCTGATACAGCAGGTAGCCCCACAGCCACACAGCCCGAGTACCGATGATACCGGCAAC  
CAGAGAATCGTTTTTTTTCAGGAACGGGATGAAGTTACCCAGCAGGTCTTGCAGCATAAAGCGGCCAGAACGGGTACCCG  
CATCCAGCGCGGTGAGGATGAACAGGGCTTCAACAGAATACCGAAGTGATACCAGAAGCCCATGTCAGCCATCGGCAGC  
ACTTTGTGGAACACGTGCGCGATACCTACCGCCAGCGTTCGCGCGCCACCTGCACGGTTCAGGACAGAAGGCTCACCAAT  
GTCTTTCGCGGTTTGCAGGATCTGCTCTGGCGAAATCACGAAGCCCCAGGAGCTGACGGTCTGCTGCCGCTGTGCGGTAA  
CGTCTTTCAGTGTGCGCATGATGATCGGCGGTTCTCGCCACCCATTTTCATGCAAGTTAGGCATGGTGTGATGCCAAGGCCA  
GCAGGCGGGTGTTCATCGCGAAGTAAAGACCCGGTTCGATGATGGACGCAGCAACCAGCGCCATAATCGCCACGAAGGA  
CTCCATCAGCATTGCGCCGTAGCCGATGAAACGCGCGTTCGTTTTATTAGCCAGCAGTTTTGGCGTGTACCGGAAGAGA  
TCAGCGCGTGGAAAGCCAGATACCGCACAGGCGATGGTGTGAACAGGAACGGGAACAGAGCGCCTTCCACAGCGGG  
CCAGTACCGTCAATGTACTGGTTCATGGCAGGCATTTTTCAGTTCCGGGTTTTCAGCACACGATACCCAGCGCCAGGCCGAC  
GATAACGCCGATTTTTCAGGAAGTTGCCAGATAGTCGCGCGGTGCGAGGATCAGCCACACTGGCAGCAGTGGCGAAACAA  
ACGCATAGCCAATCAGCGCAAGGTAATGGTGGTGTCTTTAAAGTTCAGTCCCGGACCCAGTACGGATCGTGTGAGCAATC  
ACGCCACCGAAGTAGATAGAGGCAACCAGCAGCAGTACCAATGACAGAGACTTACCCACACGCCCCGAGCAATAAA  
GCGCATGTAGATACCCATAAACAGCGCAATCGGTACGGTTGAGCAAAACGGTGAAGACACCCCAAGGACTTTCGCGCCAGGG  
CTTTAACCAATCAGCGCCAGGACGCGGAGGATGATGATCATGATTAAGAAACAGCCAAACAGCGCGATAGTCCCCGGT  
ACTGGTCCCATCTCTTTGATCATCTACCAAGAGATGCGCCATTACGGCGAGAGGAGATAAACAGCACCATAAAGTCT  
CTGAACCGCACCGCCAGCAGACCCCGCCAGCAGCCACAGCGTTCAGGCGAGGTAGCCCATCTGCGCGGCGAGAACC  
GACCCACCAGCGGACAGCAGCGGATAGCGCGAAGTGGTACCAACAACAGTAAACGGTTGGTGGGAACTGATGTT  
AGACCGTCTGTTAATAACCGAGGCGTTCGCGCGGTGGGGTTCAGTTCATCACCTTCTGGGCGATGTACAGACTGTA  
GTAGCGATACGCCACCAGATACCCGATACAGAGGCGACCAGATCCACAGGGCGTGTGCTCCCCCGACGTAATG  
CAACTACCGGAGGCAGAATGCACCGATGATCCGAGAATCACCCAGGGTATGTGCTTGAATATCTTTTTAGTATCCATA  
GTAAAACCTGGCATGTATTGATTAATAGTTGGCCGAAGCGTTTTCAGTTTTGCGTTGCGTTTGGAGAGGTAATGACCG  
CTATCTGTAGTGTGTTGCCAGGTTACGCGCGCTAAAGTAAGGTAATAACTGAGTGGTATTTTTAGGGATGTAAGC  
GGTCAGTTTTGCGGTTGAGCGGCAAGGCGTCTTTAAGTACGATAAATATGTGATTCATATCACATATTTATATTGTG  
AATAATTTATGTAATAATGGCTTTTTAAATTCAGAGTGTGAATAAAATTCCTCGGCGTAATCTCCGCGGGATATTCAT  
AAAGTTTTTCTTTCCAGGCCGAAAATCTTGCATCGGTCCACAGGAAAGAGAAACCATGTTAAAACGTATCAAATTTGTG  
ACCAGTTACTGCTGTTTTGGCCGTTTTTGGCCTTTTACAACGATCAGGCGGTCTGTTCTTAAATGCTTAAAGAA  
TGACAAAGAAAATTTCACTGTTTTACAACCATTCGCCAGCAGCAATCCACGCTGAATGGCAGCTGGGTGCGGTTGTTGC  
AGACGCGTAACACCCTCAACCGCGCGGTATCCGCTACATGATGGATCAGAATAATATTGGTAGCGGTTCAACCGTTGCT

GAGCTGATGGAGAGTGCCAGTATTTTCGCTGAAACAGGCGGAAAAAACTGGGCGGATTACGAAGCGTTGCCGCTGACCC  
GCGTCAGAGCACCGCCGAGCGGCAGAGATCAAACGTAATTACGATATTTATACAATGCGCTGGCGGAGCTGATCCAAC  
TGTTAGGTGCAGGCAAAATCAACGAGTCTTTGATCAGCCGACCCAGGGATATCAGGACGGTTTCGAGAAGCAGTATGTG  
GCTTACATGGAGCAAAACGATCGGCTCCATGATATCGCCGTGAGCGATAACAATGCCTCCTACAGCCAGGCGATGTGGAT  
TCTGGTGGGCGTGATGATCGTCTGACTGGCGGTCTCTTCGCCGTCTGGTTCGGTATTAAGCCTCGCTGGTAGCGCCAA  
TGAATCGCCTGATTGACAGCATTCTGTCATATTGCAGGCGGCGATCTGGTGAACCGATTGAGGTGGATGGCTCTAATGAG  
ATGGGGCAACTGGCAGAGAGTTTGCGCCATATGCAGGGAGAGCTGATGCGTACCGTCCGGTATGTGCGCAACGGGGCCAA  
TGCCATCTATAGCGGTGCCAGCGAAATCGCCACCGCAATAACGATCTCTCTTCGCGCACCCGAGCAACAGGCCGCTTCGC  
TGGAAGAGACGGCAGCCAGCATGGAGCAACTGACCGCAACGGTGAAGCAGAACCAGGAAATGCGCGCCAGGCCAGCCAT  
CTGGCGTTAAGTGCTTCTGAAACGGCGCAACGGCGGTAAAGTGGTAGATAACGTGGTGCAGACTATGCGCGATATCTC  
CACCAGTTCGAGAAAATCGCCGATATTATCAGCGTAATTGACGGCATTGCCTTCAGACCAATATTCTGGCTTTGAACG  
CGGCGTTGAGGCTGCGCGTGGGGTGGCAAGGGCGCGTTTTGCGGTGGTGGCGGAGAAGTGCCTAATCTGGCCAG  
CGCAGCGCCAGGCGGCTCGTGAATTAAGCCTGATTGAAGACTCGGTGGGAAAGTGGATGTTGGCTCTACGCTGGT  
CGAAAGCGCCGGGAAACAATGGCGGAGATTGTGAGCGCTGACCCGCGTGACGGACATTATGGGCGAAATTTGCTTCTG  
CTTCTGATGAGCAGAGCCGTGGTATCGATCAGTGGTTCAGCGTTGCTGAGATGGACCGGTAACCAACAGAACGCC  
GCGCTGGTGAAGAGTCTGCCGCTGCCGCGCGCTGGAAGAGCAGGCCAGTCCGCTGACCGAAGCAGTGGCAGTGT  
CCGATTACAGCAACAGCAGCGTGAAACATCGGCTGTGGTAAAAACCGTGACGCCAGCTGCGCGCGTAAATGGCCGTGG  
CAGATAGCGAGGAGAACTGGGAAACATTTAATCGCCATGAAAATGCCCGATAAGCAAAATGTTATCGGGCATAAGGAGA  
TTAATCTTTACGTGGTCTGTTGATCGGCTGACGAACCAGGAAGATGTACGCCAGTGCCCCGCTGCGGTGACGCAACCGC  
AGATGATTAGTGCCAGACGGAATGAGTGGGTGGTATCAACAATAAAACAGTAATGATCGGCGCAAAAGAGGCGCAGATG  
AAGCTGGCAAAGTTCTGGATACTGCCACCGACGCAGTATGCGAGAAGCAACTGCGACGTGGATCAAGCCCAGCAGGA  
TGTTCCGGCAAAGTGAATACAGAACAGTGCCATGCCAATCAGCAGAACCGCCGTATGGATGTTGTCGCTTGTGGTACTA  
TCAGCGTAAAGCGGCAGAACAGAACATCCCGCAATAATGCAGATCTTACGGCTTTAATCGGAGCCATTTCCCTTTG  
ACCAGCCAGTCGGTAACGTAACCGTTGACCAGCATCCCGCAGCCCAAACAGGAAAGGGATAGCCGCCATCAACCCTGT  
GCTTTTTAATCCAGTTATAGGCTGTTTGCAGGTAACCAGGAAGCCAGGCCAGATACAGCCACGCAGTGTAGTTGATGC  
CACTGAATCCGAGCATCATTCCCACATTGTACGGTACGGAACAGGCTGCGCCATTGGGCAAACTGAGCGGATCTCGG  
CGGGCATTGACGCTACCTGCATTGAGATAAGCTTGTCAACGGCAGTCAGTTCTACGTGCTGCGGTTGCGATAGAGCAT  
ATACCAGCCGATGGCGAGAAAAATCCCAGTACACCAATGGTAATAAACATCCCGCGCCAGCCATCACCAGCATCATCG  
CCGCCAGAATCGGTGGGCTTACGGCAACGCAATGGTGAAGCTGCGTTGAAGAAGCCATCGGGCGTCCGCGCTCTTTG  
ATGTTGAACCAAGTCGTTAATGACTTTTACACCGCATGGGTTTCATCGGCGCTTACCAATCCCATAACCGATACGCACCAA  
CACGAACTGCGTAAAGTTGTGACCATGCCAGACATTGCTGGAACAGTGACCAGAAGAACATCCCAGTCCCAGCATCA  
GGCGTGGGCTTTACGATCCAATAGTGGGCGCAAGGAAGTTGCGCAATCCCGTAAGCGAGTGAAAACACGGAGAGCAAA  
GCGCCGATTTCCGTGGCACTTAATCCCAATTTCTTACGAATCGTTAAATTTGCTACCGACAGCGAACTGCGGTGAGATA  
ATTGATTACCGCCGCAAAAAATAATAACAACATGGCGGTGGTTGAATGCGTTAATTCGGGTACTGCGTTGAACTAATC  
CATCTGGTGGCACGGGAATATCTGCCGACGAAGTGGAGTAAATGAAGAACGCGGATCGATGGTGATATTTCTTTTTCC  
ACGCCGACTCCTGTATTTATAATTTAATTTGTTTACGTAATTGTGATTACGCAAGGTTGACATTAACGGCAGGTTAAA  
GTTTTAGGACTTTACTACCGCTCACAAAAACATTTTGTGACTGATTGTGAGCATAGGTAAGCGGGAATTTCCCGGTA  
TTAATGGATCGAATCATTGATTGTTTGTAGCTGAATCAAATGGTTACGGAGCGCAAGGTTGGCATCAAGTCACTCGCGC  
AAATCAGAGCGCTGAGAATGGTATGCTCATCGACGGCAATGATATTGCGCTGTTAAGATCGTTTCTGTCCTTATGA  
TAGTGAANAATGAAAGATGACTGAGATGATCTCAAGCGATTGATCAAAAAAGATATTGTCGGCAGCTGAAAGCAGTAAGGA  
GTGAAAATCTCTGTCAAGTTGCGAGAACATGCGAAAGCTATTGCCGATGTTGTCACGCAGTAGCCGATGACGTTGAGCA  
TGTTTTCGCTGCGAGCCAGCGGGATCATGATCAGGCAGGTTGAGAAAAGTGTGAAGTGAATGTGTTTCGAGCATTTCG  
CGTAGCTCAAACAGCTGCTCGGCGTAGGATTGATCGAATTGCTTCATGCTCCACTGGCCGCGCTTTTCGCTGTGAATAAG  
ATTATAACGGCCGAATTTTAAAAGATATTCTTACTACAACCGGCTGACACCCGCGGCCGAGCCAGTTGCGATTCAG  
AAAACGTTTCCCTGGGCGTAACTGGCGCTGGTTTTATCATCGTAAAAAAGCCTGCTCAAACACTTTGTTTTGTTCACTC  
ATTGAAGCGGTAGTACAGGCGAAACCGTCATCATGGTCAGGTTTACGCGCAATAACATAGTCGTTTCAAACCTGCGTCAA  
GACGCCGATTGCGTAAGTGGCTGAGAATATGACGCACTGTGGTGGGCTGATGTTGTACATTTCCGCCAGCGCACTTT  
GCGATGGAAGTGGGGAAGGATATGACCCGCGCCATATCATCAATGACCTGGTTAATCACATTGTGGCGTAAATTTGT  
GAACGACTCATATTTTCTCCTTGTGAGTCCATTAACCCGATTTAAAACATTTTATGCGTGTGTTTTCAAAAAAAG  
ATTTCCGTTCCGCTGCCATTTTTCATTTTCATTGATATCAAGCAACAAAAAGTGGAGAGCCGAATCATGTCTACGAT  
GAATGTTTTAATTTGCCAGCAGCCGAAAGAATTAGTCTGGAACAACGCGAGATACCTATTCGGGTGACAAATGAAGCAT  
TAATAAAAATTAAGTCTGTGGGATTTGCGGTACCGATATTATGCTGGGTTGAAATCAACCAATTTTTAGTTATCCA  
CGTGTGTTTAGGCCATGAAATATGTGGGAGATTGTTGGGCTGGTAAAAATATTGCTGATCTTAAAAATGGTCAGCAAGT  
TGCTGTGATCCCTTATGTTGCTGTCAGCAATGCCCGCGTGTAAAAAGCGGCGTACCAATTGCTGTGAAAAAATTTAG  
TCATTGGCGTGATCAGGATGGCGTTTTAGTGAGTATTTGAGCGTGCCGGTGGCGAACATTTTCCCGCAGACGGTATT

GACCCGAGGCGGCAGCATTGATTGAACCTTTCGCTATTAGCGCTCATGCGGTGCGTCGCGCAGCCATTGCTCCCGGCGA  
GCAGGTGCTGGTGGTCGGGGCGGGCCAATCGGTCTGGGCGCGCGGCAATCGCTAAAGCCGATGGCGCACAGGTGGTGG  
TGCGGATACAGTCCGGCGCGCGTGAACATGTGGCAACGCGTCTGGAATTACCTTTACTGGACCCGTAGCCGAAGAT  
TTTGACGCGCAGCTACGGGCGCAGTTTGGTGGTTGCTGGCGCAGAAAGTGATCGACGCGACAGGTAATCAACATGCGAT  
GAATAACACCGTGAATTTGATTCGTCACGGCGGCACGGTGGTATTTGTCGGCCTGTTTAAAGGTGAGTTGCAAGTTCTCCG  
ATCCGGAATCCATAAAAAAGAAACGACGATGATGGGCGAGCCGCAACGCCACGCCGGAAGATTTTGTAAAGTCGGTCGA  
CTGATGGCGAAGGAAAAATCACTGCTGACATGATGTTAACCCATCGCTATCCGTTTCGCCACGCTGGCAGAAACCTACGA  
GCGCGATGTGATTAACAATCGTGAGTTAATTAAGGCGTAATTACTTTCTGATAAAGGCGAGATTATTAAGTTGCCATGC  
AGCGTCCGGGAAGTGTGGGCGCTGTTTTTTTTGTTTCTTAATAATGTGTTGTAAGCCGTAGAAGGCGTGTAGGTGCGA  
CCCTATGCGACCTACACATCAGTCAGGAATTACCCTTACGTTTACCACCTTAATTTCCACCATGCCGATCCCGAGCTT  
ACGCGGCGAGTGTCCGAGGATATCCCTTCGTTGGTTGAGACAGTTCCGGCGGCACAATTACAGTGTGTCGGCATCCGG  
TTGGGTTATCGAAATGCAAGTGTGGTGGTGGTCACTTATTGCCAGCACAAGAGTTTGTCTTCATTGCCACGCGTACC  
GGAATAGGACGGCTGGCATTATTGCCGTATGCTTTGGCGGTAATCACCAGGTCAAATTTCTTCCGAGCGGATGCTTGT  
CTCGATTTTACTTATCGCCAGCTGCGGTTGGACCAGCGGCCACGACTCCGGACGGGAAATCCCGCTAAACTTTT  
TCACCTCTTTCGGCGCACCGGCGACGTTAAAGATGAAACTGTGCGCTTTGTAGCGAATATCGTTATCAACAATCTTCAGC  
GTATCGACATTGCCCTTTGTAACGCGCCATGTCGATGACCGTATCTTTAAATGCCGTTTTGCCCTGCCATGTTGTTTTGTC  
AACATGCTGAACAATTTGCTGACCGCCAAGCTGCCCTTGCAGACACACCAGTCGGTGGAAAGTGCCAGTTCCGGAGCCC  
AGAGTTGTCCATCTTGTAGCAACGGTCAACCCAGACGAAATTGTCGCGTGGAGCGAAATCGGCCAGCTGAAACGCGAGC  
GGTGTGAGTATTCGTTTTCCGGCAGCGGTTCCACGCGTTTGTCTGAAACCCGCAACAGCAGCGGCAAACGGAAATGGCT  
ACCCGAGAAGGCAATCATGTTTTCTGCTGGTCGATGGTGAACCTTTTATCTCTTTAGGGAATTTCCACAGGCGGATGA  
TATCTGGCTTCCACGCCAATGTTTTCTTTGATATTGAGGAAGATTTCCGACATCGACTGCCCGATAAACTGCTACGA  
CCAAGTCCGAGATAGTTATCGCCACCGAGAATGTCCAGCACCGTCGCGCGTTATCCATCGTGTACGCTTCACTGCCAG  
CGTCTTTGCTGCGGCTTGTGCCACGAATGACAAAAACAGGTTATTGCGATCCTGCTTATTGAGGTATTTCCACGCCG  
TGTTGTTATCGTAAATGGTCAGAAGAGACGACGATGACGGTATCTTTAAACCACGGTGACGCTTTGATTTTGTGATA  
AACGTGCGGATGTTCTCCTGGCTGCAACTTACCAGCTGAATGACTGATTCCGTTTACCCTCAAATCATATTTTTGCG  
GTTACAGGTACGAGAGATAAAACCATCCGGGTGATGGGTATCGACTGTCAGGGTAAACAGTGAAGATCGCTGACCTGAGC  
GGAAAGCTCTTCAAATTTTTCCACGCTTATCGAGAACGGTATCGTCGTAGAATCCCAGTCGTTGCGATAGTGGGG  
TCGGCTACCACGTTTTTTCAGCTCTTTCGAGCCGTATAAGTGGTGAAGCCATGCGACTTCAGGAACACATCTTTACC  
GCAATCGTGAATCTGTTCCCGGCGAGCTGCTGCGTGTGGTGAATCCAGGCCCTTCAATTTTTCAACGCGCCAGTTC  
AGGCGTGAGATCCGGGAAAGCCTCGTTATCAAAATAGGTCCGCTCGAGACTTTCGCGTAGATATAAACCAGGTTGAGTT  
TCGGGTCAGGATAGTTTTGACGCGCTTTTATAATAAGCCGCAAGTCCGGGTCGCGTGCAGTGGGATTTACC  
AGTTCCGTTATCTGACGAAATGCCGGGCTGGCGTCCACCGAACCCAGCGCCAGTAAAGAGCGCCAGCAGGCTGAACCAA  
ATGGTGGGATGATGGCGACGACGGCGCAGGATCCAGCCAGCGCACCGAACCCGCTGTCAGCCCCAGCACAATGCCGA  
TACCCGGCAAAATGATTTGCTGACGCCAGCAGCGTCAAGGCTGTTGGTTAAGGTATAGAGAACCAGCGTCTGTTAATCCA  
TCGCCAGTAAATAGTCGCTGGCAAACAGGTTGATATTTAAACGACAAATAGCCCAGCACCGTTAACGTGGCTGCAAA  
CCACCAGGTGTTACGTCGCTTCCATGCGTAAATCAGCACAGAGGCGAGAAAAAGGGCGAAAGAGAGTAGTTCTGACA  
ACGGGCGATCTCACTAAACCGGCCGTTTAGCCAACGTTTAAAGTCTTTTGAAGACACAATGTAATGGCGTCCCATAT  
TGCTGCAATTAGTGTCAAAAAAATGCGATGTTGTTAGGAATTAGTTTATAAACAGACTTTTTTATTGATTACGGTCTTC  
CCGTGTAACAGGGGTAAACCGTCCAGGAGCAGGAAAAAGGGCAGGAGAGAGCCGCTCAGCCGGTAAACAGCTAAACG  
CGCGTTTTCGCGGTTAGGAAATGAAGTTCAGCCCTGTTTTAACACCAGATCGCAGGCTTTGGTTTTACCTTTTTCTGC  
CAGCGGAGTTGTTCCGATGTTATCCAGATTGAGTTGCTGACCATCTTTGGTTTTAGCAAAACCCTGAATGCCGTCCAGAT  
AGTTGGTGTCTCTTTTTGCTCTTCACTGTTTCCAGCCAGCTTTTCCAGCACCTGGTTCTTGATGTTTTCGGCATCGGTT  
ACCGAGCCAGCTTTTGTTCGCGCAGTATTGAGAATGCCTGCGGCATTGTTTATGTTATCTGCGCTTAAAGCCTGGTT  
TCCGCTGCTAAGCAAGTTAGTTAATGACGCGAGCGACCAACCGCTTCTGTGCTGCTGTTTTGGTTGCCAAGTTCCG  
TGCGGCGCTGGAGAGCGCATCTTTCCAGGACGCGCATGCACCCGGTGGAAATTAATGCGCTGGCGGCAATGGCACAG  
CACAGAAGATGTTAACAGTTTTTATCATCATTACTCAAGGTGGAATTTGTGTCGAGTATACCGCCAGAAACGGGGATTA  
ATACTTTTACCTGTTACCCGGCTACGGTAGCTATCCAGTTGAAGATCACCCAAACTGTTACCCAGGCGCATACGGT  
CCATCACGCTTCCGCCAGCAACTGGTCACTCTTCCATATTACTGTTGGTCAAGTATCCCGTTGGGCGTTTTGGAAGAA  
GAGCGGCGATCGACGATCTGGTTGATGATCACTTTTTCGTATTTGATTGCGTCTGCACCGCGATCTCATCGATACCAG  
CAGATCAACGTTGCTCAGATCGTTAAGCAGTTGTTCTTCGCTGGTACCGCTATTCTGAAGGTATCTTTATCGCCGACA  
TAATATCGCCACGGTATGATCAATACGGATTTACCGGTAGCAGCAGCTGTTGAGATTGCCCGCCAGATGGTTTT  
TTGCCGTTTCTGGCTTACCAGAAAAGATGAAGCTGCGGATGTTGCCGTCAAACTCTTTCGACATACTGGCGCGCTTTGCT  
TAACGCATTATCTGCCCTTCACTCAACGCGATAGTTCTCAAAGGAACAGTTCTGATGCAAGTGGACGAATACCGGAGC  
GGTTAAAGGTGCGCTGCATTTTATCGCCGATTTTACGTTTCGAGAGCGGCGGAGCGGATCGCTCTTGTCTTTTTGCT

CAGGCCAGTAGTTCTTACCCGTTTTGAATGCGGGTTTGATATGGGCAGGCATCATTTTTTGCAGGCGTTGCATCAGGTC  
GCCAACGTTTTTCATCGTTACCCTCTGAATCCTGGTGAATTTGGCTGTCAGGTTGCTGACCGTATTACATCTCGTTT  
CGCAGTCCGCGTTGCTGGCACGACCGATTTGCAGGCTGCGCGCAGTTTTTGTGCCACTGCACATGGTGAAAGACTT  
TACTTTCCGCCTGCCAGTAGCAATGAATGAGGCCAGTTCTTCGGTGGTACCAGGCTCTTTAGCGCCACGCCCCATAGC  
GCCGCCAGGCGGATAAAATCGGCATCGGGTTGCCAGTCCGGATACATGGCGAATTTCCCATGGGTACAGCAACGGGAGC  
GGTTGCGGTTCTGATAGAGTTGATCGTCCAGAGCGACATCGCTTCCCGGACGCGCCAGCTTTTTCTCCAGCGCCAGCA  
GTTCAGCCAGGCGTGAGGCGTGACGGCATAAAACGCCGGGCGATTGTTAGCAAATACGGCAACCACACCGCCTTCAGCT  
TTTGCCAGAACGGTTTGGTATCGTGTACCAGGGCGTCAATACCAACGACGTCCGGGGTCAAACTCTGGAAGACATACT  
GTTTCTCAAATATGGAACGATGAACGAGAAGGGAGATAACTTTTTATAGTAACACACGGAGGAGAGGAGGCTGTCTCAT  
CCGTGTGCTTAAGCGAGGCAATTTTATACGCGAGGGCGCTTGGGTACAACCATAATCCAGGAATGAAAAGACCGATGGA  
TAACGCACCAACAATCGATGAAGCTGTAAGAAAGTTGGTTAACAGGGTAATCATCAACGGTTCGCTGTAACCTAACTGGC  
TGATTTTTACCGCCGAAATCATTGCGGTATAAGCCGATATGCCGGGAACATAGGGATAACGGCCGCCACGGTAAACT  
TTCGGATGCGCCAGATACCAGCGGACCATTTGAATACCAATGGTACCAGCAGCATAGAAGCCATAAAGTTGACCACT  
AATATTCAACCCGCTGGTATCAAGATCATTGCGGAACCATGACCTATCGAGCAAGCAGCGCACACCAGCGTAACGCC  
GCACGGGAACGTTGAACACCATCGAAAGCCGACCGCAGGAATGGCGGCGAGGATCATATCCTGCGCAACGCTAACAGA  
AATTCGATCACACCCATCCGCGTAGCCCCAAATCGTCACTGTCAGTCCACTACGCGCAGCAGTCCAGTGTCCAGAGA  
CTGGCGATCGCCAGCGTGGCAGTCCGGTATTGATGTGGCCTTTAAACATATCGGCGACGGCATTAACTAACGGAAAGCC  
CGCACTAGCAGCAGAACGCTGGCGGCCATCGCAATGGTGGGGATTGCTGAAAGTGGGGAGTTGCAAAAGCAATCCGG  
AAATGGTGGTGGCGGCGAAAGCGGTAAGGCAAAAGTTGATCTGTGGATGAAGATGACGTTGTGCCAGCAGCTGGCGGATA  
TACATCGCGGTGCTACTGGCAAAGAAGGTGATGACGGCACCATCCAGCCACCGTTATTGAGTTTACAGAAAACAGGCGCA  
AGAAAGGCCAACCATTAAGGCTACCAGCCATCTGGGTAACGTAATGGTGAATTTGGCTAAATCGTTTTCTACGCCCTT  
TGTAATCCAGCAGATGATGCTCCGCAAGAATCACAATGTGCTGGACTTCAGTACCACATGCATATTAATGCCGCGATCG  
TGATTTTTACGTGTCGATGTGAGGCTTCCCATCTTAAAGTTGTCAGCACTATGGCGTTCGAAGAGATAGAATTTT  
GACGCTGTCCATTTCCAGTCCCGACCGAGTCTGGAGAAAGCTCATCAACCAACGCGCTTTCCGACCATGTTGCAAAA  
GAAATAATCCACTGGATAACAAGCCGTTACGGCTCGCTGTTGCTCAGTTTGCATAACTCGCCCTTTGTCATAGACG  
TGCTGCGTATTGTTGAGATAATGAGAATCCATTTGATCATGAAGCAGGTTGTTTTGCGGTAGGTTAAGATCAAAATTG  
CGCTGATTAATCCTGTTATCGGGAGAAGCTCGGTGATAAAAAGCAATTATCTCTCGCCGCAACAACTATCACATGA  
ATATTATCATATAATGAATTTATTGTTTGGCCTTTACGAATCAGGATAATAGATAACCGGGCACGTTTTTAAATGTTAA  
CAAGCTAAAACCATCAGATTTTCATTGAATAAATATTGGTTGTGTGATTTTGATTCTCGGGAAAGGGATATCATTTAATT  
ATAAATTAATGAATGTGATTTCTGTTTTTCTAATAGTATTCTAACAACCTAATGTAGATATTTAAATGTCTCCAGGC  
TATTTACCAGGTTATCATTGATGCTAACCTTCTGACACATGCAGTGGAGTTGTTGTGCAGCAGGAGTATGCTGATATG  
AAAGTGAATGCTAAGGATAATTTATTCGTTAATCTATTAATTTGCTGGAACATTTAAGGAATGAATATCCTGAATAAA  
CCATCATAATTTTAGACAGTGGATGTGGAGGAAATATGTTGCCAGGATGCTGCAAAAATGGAATGTTATCAGTAAAT  
ACCTGTTATGCAAGCAGGTTAAAAGAGGTGATGAGGACTCACTTCCCTGAATATGAAATAATATCCAGCGCCTCTGCGG  
AGGACCTTACCTTATTACAATTACGTGTTCCGGATTAGTCATTGCTGATTTAGCCGGTAAAAGTGAAGATCCACGTTCT  
GTTTGTGAACATTATTCTTTAATCTACAATATCGGAAATCACTGGGTTTTCATGGTGCACGCTCCTGGTATTC  
CCAGGCAGTAGAACTGCTCATGTGCCCTACGGCGACGTTATTGCTGATGTTGAACCCATTGAGAATCTGGTCAAGACCG  
TACGTTCCGGCAATACGCACGAGAGCGTATCAGCGCCATGCTGACCTCCCCGGCAATGACTGAAACTCATGATTTTAGC  
TATCGCTCCGTCATTCTACTCTTTAGAGCGCAAGGTAAGTACTGCGGCTATTAGGTAAGGATGGGGCATCAACCAGATAGC  
TTCATTGCTTAAGAAAAGTAAATAAACTATCAGCGCCCAAAAAACAGTGCATGCGTGCAGTGGCAATTCACAGCAACG  
CTGAAATGTATGCATGGATAAATAGCGCGCAGGGTGAAGAGAACCTAATTTGCCTTCTGTTTATGGAGATGCCGAGAA  
TGGAACACAGCCGAATTAAGAAAGAGAAATGTCGCACTCATAGAAAATGCGTATGAGTAGTATCGGTATTGAGAGTTTA  
TTCAGAAAAGTTGCGGGTAAACCTTATAAGCTCCATACCTATACCAGTCAAGGATCATTTCAAGGATGCCATGTGCGGGAT  
CTCGTTTGGCGCGGTCAATTTTTCTTTTTCTGCCATGAGAAGTGAAGCGCAGAGAGGGATTATCTTGCCTGACTGAACTGG  
CGATTAAGTTTCCGCGTACCAGGCGTTTATTGTTTGGCGGATGATGATTTGAAGCTCGGCTGATTGGTTTATTGTCGCCA  
TCACCGCTGGACGGTGTATTAAGTAAAGCGTCAACGCTGGAGATTTTTTATCAGGAACTTTTTTGTATTAAATGGTGT  
ACGTCAGGCGACCGACTGAACAATCAGTGGTACATTAACCAAGCCGGACGTTAAGCCCGACGGAGAGAGAAATAT  
TGCGCTTTATGTCGCGTGGCTACTCAATGACACAAATTTCCGAGCAGCTTAAACGCAATATCAAAACGATCCGTGCACAT  
AAATTTAATGTGATGTCGAAACTGGGCGTCAATTTGACGCGAGGTTGTTGGAGGCCGAGATATTCTGTTATGATGCG  
GCATTGCGAAACAAGTAATGTGTTGCATCCCTATTAATCCGCATGATGCCGGTTTTACTTCCCGGCGAGTCTTTCATTT  
CAGCGTACAATCGCCACATTGCTGCACATCCGGTAAAGCGATAACGCTGGCAGCAAGTGGCGGCACCCAGCAGGCGTCCG  
GCAGTACCACGGTACGCCAGAGTGGATTATCTTACCGTTCTGAGCGTTTTCTCAAAAAAGAGGGCATGGCGCAGCGAT  
TCAACAGTAGCCTCGCCAGCAGTTGCTTATCTCAGTGAAGTACCAGTTGATCAAATAACCGGTATTACTCCAGATAAG  
TTTGCCGTTGATCTCTCCGTCGCTTCTAGTCTTGACAACCGGAACAGCGCCTGGCTGATTAACGTTTCCATTCGAT  
GCTGCGGCGAATGTGGTGTGCGTTTTTATCTTACACACATCGACCCAGAAACAGGCGACGCGTCCGGTTTCTGTAAC  
TCAGCATGAAATGTTCCGGCGACACATCAATGCCTTTTCTGCGTCAAGTACCGCAGCATTAAATGGTGGCACCATCAG

GCCGATATACCATTGTGCCATAGTGAGATCAGCGGTTTGTCTCGGGATCATCATCGGTTGGTTGCGATAGATATGAT  
CGGAATAGACCGCCAGCAGAGAAGCTTAGCACATTCGGTGATGACCATTGCGCCAGCGTCATGGCGTTAAGTGGGGCAGGT  
TCATCCAGGCGGATAAATCCAGCAAATGTTACGATGTTTTGCGATCGTCGCCCGCACGGCTTGCACAAGCGTGGGATC  
CTGCGGCTGGAGATGCGTTCGCCAGATGACATCTTCATAGAGCGGTGCGGAACGATAGGCCATAATCGGGATAGTAATCT  
AAATGATAATGATTGCTAATCATAGCGATAGGTTTACCCGATAGCAAGGGATTTATCTGGCTTGCAAATGATAAAAATTA  
TCATATGATATTGGTTATCATTATCAATGAAAGAGATGAAATCATGTTGCAACGTACGCTGGGCAGTGGCTGGGGAGTGT  
TGCTGCCGGGATTGCTGATTGCAGGGCTGATGTATGCGGATTTATCGTCAGATCAGTGGCGGATTGTCATTCTGATGGGA  
TTAGTATTGACCCGATGATGCTGTATCACAACAGTTGCGGCATTACATTTTCTACCATCGTGCCTGGCACTTATTGC  
TGGCATCATGCTGATGATAATGAATTTGAATCAGGGATGAAAAATCAAGGAAGAAAACAAGAAAGGAAGTAAAGATAATTG  
GTGCGAGGGGGGGGACTTGAACCCACGTCCTGTAAGGACACTAACACCTGAAGCTAGCGCGTCTACCAATTCGCCACC  
TTCGCACAGTCATCTTACTTTTTTGTATCGCCTCGTTTGGTGCAGGGGGGGGACTTGAACCCACGTCCTGTAAGAA  
CACTAACACCTGAAGCTAGCGCGTCTACCAATTCGCCACCTTCGCCAGTGCAGCAATATCAACGTGGTTTTTGGTGC  
GAGGGGGGGGACTTGAACCCACGTCCTGTAAGGACACTAACACCTGAAGCTAGCGCGTCTACCAATTCGCCACCTTCG  
CATACCATCAATCTTAAAAAGAATTGCTACCACGGAGGCGCATTCTAGTGGTTTTCAGCTTTTCTGCAATAGTTAATTA  
TCGACAGAGGTGAATTGCTGAAAAATGTCATCAGGAACTAGCGTGCAGTTTTGGTATGCATGCGGGGCGAGATGCC  
AGATGCGACGCTGGCGCTTTATCTGGCCTACGAAGGCTAACGTGCAGTTTTGTAGTGCAGATAAGCGCTTACGCC  
GCATCCGACACGGTATTGCGCGAGATAAATTAACCTTTCTTCGCCCTGGCGGGTATAATGGCGCGATACACCTTGAAGCGC  
CCTGTTTGCGGATCACTTCGTGGAAGCAAATGTCTCATCCAGCACGTCGGGATAAGGCAGGAAGGCGTTCGCTACAAT  
TCGACGCTCGCCGCGCTATTAAGATGACGCACCGCACCGCAATCAGCGTTTTGCGCCGATCCAGGCTGGTTTGCATCC  
CATCGTGAACGGCGGGTTGGAGATGATCATATCAAACGACCTTTCACCTCGGAAAAGACGTTGCTGGCAAAGACTTCA  
CCTTCAACACCGTTGGCCGCAAGTGTTCGCGGCTGGCTTACCGCCGGGCGAGACATCGCACAAGTGAGACGAAT  
TTTCGGCGAATGGCGCGAAAGGCAACTGAAAGCACGCCGCGCCACAGCCGACATCCAGCACTTTACCTTTCTGTGCG  
GAGTTAACGTCGAGAGCAGCAACTGGCTACCGACATCCAGACCGTGCAGGCTAAACACGCCAGGCAGCGTTTTGACCGTC  
AGGCCATCGACGCTGTATTCGCCCCAGAATTTCTCCGATCAATACCGGCTTTTTTCCAGACGACCAAAATAGAGGCC  
ACAGCGACGAGCGCTGTCGACTTTATTCAACGGCGCATAATCTGCCAGCATCTGCTCGGCGCTGCGCACGCCGCTGCGGT  
TCTCGCCAACGACAAAAATATCTGCCCCACTGGCAGCAGAGAAAGTAAATTCATCAACTGGAAGTGGGCTTCGGTTTTG  
TTCTTCGGCCAGTAGTAAATCAGCGTATCGCAATCTCGACGTCATCCGCCGTGGCGACCAGACTGAAACGGGCGTTATC  
CCCCATCTGGCGGCTTAATACCTGCCAGTGGTGAATTTGCTGGGTATGAGCACGCTGGCCGCGGTATCTAAACGCGCGG  
GCAGGTCATCTGTAAAGTCTCCGGCAAACAGAATACGGCTTTGTTGCAAATCATCACTGTGACGCAGCAAGACTTCACTT  
GCCGGGTAATGTCAGACATGGAATGCTCCTCAATTGATACTGGCGGCGATTATAGCCATATGTTGGCGCGGTATCGACG  
AATTTGCTATATTTGCGCCCTGACAACAGGAGCGATTGCTATGACATCCCGACGAGACTGGCAGTTACAGCAACTGGG  
CATTACCCAGTGGTGCCTGCGTGCCTGGCCCTGGCGGTTGCAGGGGAGATTGCCATTGCGATCCCGGCACACGTCCTGCTGG  
TGATGGTGGCAAACGATCTTCCCGCCCTGACTGATCCTTTAGTGAGCGATGTTCTGCGCGCATTAACCGTCAGCCCCGAC  
CAGGTGCTGCAACTGACGCCAGAAAAATCGCGATGCTGCCGCAAGGCGAGTCACTGCAACAGTTGGCGGTTGGGTACTGA  
CGAACCGCTATCACTGGAAGGCGCTCAGTGGCATCACCGGCGCTCACCGATTTACGGGCAAACCCAAACGGCACGCGCCG  
CGTTATGGCAACAAATTTGCACATATGAACACGATTTCTTCCCTGAAACGACTGATTTACCGGCGGCTTACCACATTGA  
ACAACGCGCCACGCCTTCCGTGGAGTAAAAACGTTTCCAGCAACAGGGCGAGCGTTATCTCAATTTTCAAGTTAA  
CGAAAAACGGCAAATGGCGGCTTTGCGATTACGCAAGTGGTGTGATGAAGCTACATTGTTCAATATTGCGGTGAT  
CCTGACTATCAGCGTCAGGATTGGGAAGGGCGCTGCTGGAACATCTGATCGACGAATTGAAAAACGGCGGCTGGCGAC  
ACTATGGCTGGAAGTCCGTCTTCAAACGCTCGCCGCTTCCCTGTACGAAAGTTTAGGCTTTAACGAGGCGACGATTC  
GCCGAATTACTACCCACCACGACGGTGCAGAACGCGCATCATGCGGTTGCCAATCAGTATGTAATACAAGGTG  
GAATAATGAAGTGGGACTGGATTTTCTTTGATGCCGATGAAACGCTGTTTACCTTTGACTCATTACCGGCTGCAGCGG  
ATGTTTCTTGATTACAGCGTCACCTTTACCGCTGAAGATTTTTCAGGACTATCAGGCCGTTAACAAGCCACTGTGGTGGGA  
TTATCAAACGGCGGATCACTTACATTACAGCTTACGACGCGGGGTTTGGAGCTGGCCGAAACGGCTGAACGTCGAGC  
CAGGTAACCTCAACGAAGCCTTTATTAATGCGATGGCGGAAATCTGCAGCCGCTGCCGGGCGGTTTTCTGCTTAAAC  
GCCATTCGTGGCAACGCCAAATCGGCATCATACCAACGGCTTTAGTGCCTTGAACAGGTGCGTCTGGAACGCACGGG  
CCTGCGTGATTACTTCGATTTGCTGGTGAATTCGAAGAAGTTGGCGTTGCCAAACGAATAAGAAAATTTTCTGATTATG  
CGCTGGAACAGGCGGCAATCCTGACCGTTCACGCGTCTGATGGTTGGCGACACTGCCGAGTCCGATATTCTCGGTGGC  
ATCAACGCGGGCTTGCACCTGCTGGCTGAATGCACACCATCGCGAGCAACCAGAAGGCATCGCGCCACCTGGACCGT  
TTCTTCGTTGCACGAAGTGGAGCAGCTCCTGTGAAACACTGATTGCCTCCCCCGTTGATGGGTAAAATAGCCGCAAT  
TTTTCGTTTTCAACAAGCGCGGCGGATGCCGTTACTCAAGAAGAAAGAATTATGACGTTGTCTCCTTATTTGCAAGAG  
GTGGCGAAGCGCCGCACTTTTGCATTTTCTCACCCGACGCCGTAAGACTACCATCACCGAGAAGGTGCTGCTGTT  
CGACAGGCCATTCAGACCGCGGTACAGTAAAAGCCGTTGGTTCCAACAGCACGCTAAGTCCGACTGGATGGAGATGG  
AAAAGCAGCGTGGGATCTCCATTACTAGTCTGTGATGCAAGTTTCCGATACAGGATTGCCTGGTTAACCTGCTCGACACC  
CCGGGGCACGAAGACTTCTCGGAAGATACCTATCGTACCCTGACGGCGGTGGACTGCTGCCTGATGGTTATCGACGCCG  
AAAAGGTGTTGAAGATCGTACCCGTAAGCTGATGGAAGTTACCCGCTGCGCGACACGCCGATCCTCACCTTTATGAACA

AACTTGACCGTGATATCCGCGACCCGATGGAGCTGCTCGATGAAGTTGAGAACGAGCTGAAAATCGGCTGTGCGCCGATC  
ACCTGGCCGATTGGCTGCGGCAAGCTGTTAAAGGCGTTTACCACCTTTATAAAGACGAAACCTATCTCTATCAGAGCGG  
TAAAGGCCACACCATTAGGAAGTCCGCATTGTTAAAGGGCTGAATAACCCGGATCTCGATGCTGCGGTTGGTGAAGATC  
TGGCACAGCAGCTGCGTGACGAAGTGGTGAAGGCGCGTCTAACGAGTTCGACAAAGAGCTGTTCTTTCGCGGC  
GAAATCACTCCGGTATTCTTCGGTACTGCGTGGGTAACTTCGGCGTTCGATCATATGTTGGATGGCCTGGTGGAGTGGC  
ACCTGCGCCGATGCGCGCTCAGACTGATACCCGTACCGTAGAAGCGAGCGAAGATAAATTTACCGGCTTCGTATTTAAAA  
TTCAGGCCAACATGGACCCGAAACACCCGCGACCCGCTGGCGTTTTATGCGTGTGGTGTCCGGTAAATATGAAAAAGGCATG  
AAACTGCGCCAGGTGCGCACTGCGAAAGATGTGGTGTCTCCGACGCGCTGACCTTTATGGCGGGTGACCGTTTCGCACGT  
TGAAGAAGCGTATCCGGGCGATATCTCCGGCTGCACAACCACGGCACCATTAGATCGGGGACACCTTTACCCAGGGTG  
AGATGATGAAGTTCACCGGTATTCCGAACTTCGCACCAGAAGTGTCCGTCGTATCCGCTGAAAGATCCGCTGAAGCAA  
AAACAGCTGCTCAAAGGGCTGGTACAGCTTCCGAAGAGGGCGCGGTGCAGGTGTTCCGTCGAATCTCCAACAACGATCT  
GATCGTTGGTGAGTTGGTGTGCTGCAGTTTGTGTGGTGTAGCGCGCTGAAGAGCGAATAACAAGTTGAAGCAGTGT  
ATGAGTCAGTCAACGTTGCCACTGCCCCTGGGTAGAAATGTGCAGACGCGAAGAAATTCGAAGAGTTCAAGCGTAAGAAC  
GAAAGCCAACGGCGCTTGTGGCGGCGATAACCTCGTTACATCGCTACCAGCATGGTCAACCTGCGCCTGGCACAGGA  
ACGTTATCCGACGTTAGTCCACCAGACCCGCGACATTAATCTTGCCTCAGGGCGCGGTAGCCGCTGCGCCCTGT  
CAATTTCCCTTCTTATTAGCCGCTTACGGAATGTTCTAAAACATTCACCTTTGCTTATGTTTTCGCTGATATCCCGAG  
CGTTTTCAAATTTGTGATCTATATTTAACAAAGTGTGACATTTCTGACGGCGTTAAATACCGTTCAATCGGTAGATATC  
AGTATCTAAAGCCGTCGATTGTCATTCTACCGATATTAATAACTGATTACAGAGGCTGTAATGGTCTGTTATTCATCACTCA  
TCGCTTTTGTGATGGCGACCATTGACTTCTGTAGAGGGTGAAGTCTCTCCCTATTCAGCAATGCAACCTCGTGTGCCAG  
GCTCAAATTACGAGCAAACATACAGGAATAAATCGATGACTATGACAAGACTGAAGATTTGAAAACTCTGCTGGCTGTA  
ATGTTGACCTCTGCCGTCGCGACCCGCTCTGCCTACGCGGAAAACAACGCGCAGACTACCAATGAAAGCGCAGGGCAAAA  
AGTCGATAGCTCTATGAATAAAGTCCGTAATTTTCATGGATGACAGCGCCATCACCGGAAAGTGAAGGCGCCCTGGTGG  
ATCATGACAACATCAAGAGCACCGATATCTCTGTA AAAACCGATCAAAAAGTCGTGACCCTGAGCGGTTTCGTTGAAAGC  
CAGGCCCAGGCCGAAGAGGCAGTGAAGTGGCGAAAGCGTTGAAGGGGTGACCTCTGTCAGCGACAACTGCACGTTCCG  
CGACGCTAAGAAGGCTCGGTGAAGGGTACGCGGGTACACCCGCCACCACAGTGAATCAAAGCCAACCTGCTGGCGG  
ACGATATCGTCCCTTCCCGTATGTGAAAGTTGAAACCACCGACGGCGTGGTTCAGCTCTCCGGTACCGTCGATTCTCAG  
GCACAAAGTGACCGTGTGAAAGTATCGCAAAGCGGTAGATGGTGTGAAAAGCGTTAAAAATGATCTGAAAACCTAAGTA  
ATTCGTCGTAATTCGTCCTCCCGAATTTGTCGGGAGCGCGATGTGCACCACACTAAAAATATCGCATTGAGTGATTTT  
CACGCTCATATCAAGCGGTGACATTAATCTATGGTAAAGGAGACGCTTATGTTTCGTTGGGGCATCATATTTCTGTTATC  
GCGTTAATCGCCCGCACTTGGGTTTGGTGGTCTGCCCCTGACCGTGCAGGCGCAGCTAAAATGCTTTTGTGTCGTCGG  
GATTATTCTGTTCTGGTGAAGTTTGTTCATGGGCCGAAAACGACCCTAGATTTACAGACCATTAAGAAAATTTTATCCAAA  
GCCAGTCCAGCGGACTGGCTTTTTCGCTTTTAGCGAATAATAAATTCGCTTACTTTGTCATTCTTTCACAACAAAACAG  
GAAGGCAGAGGTGGGGCAGCGAATACCTGTAACGCTTGGTAATATTGCGCCGTTGTCGCTAAGGCCGTTCCAGCCTGGAC  
GAATAGCTCTGGTGTGCGAAGGCGCGGACAGCGTGAATTTTTCAGCGTGGCGTGTGGATGAGTTTATGCGCGCGCAG  
TTAATCCTTTCGATCTTATCTCGGCACATCTGCCGGGCGCAGAACCTCTCGCGTTTTATCTGCAATCAGCCCGTTA  
CGCGCGAAAGTCATCATGCGCTATACCACAAAACGCGAATTTTTCGATCCATTGCGCTTTGTCGTTGGAGGAAATCTTA  
TCGATCTCGACTGGCTGGTGGAGGCCACTGCAAGCCAGATGCCGTTGCAAATGGATACCGCCGCGCGGTTGTTTACAGC  
GGCAAATCGTTTTATATGTCGCGCTGTGTCAGGATGACTACGCGCCGAATTAATTTTACCAACCAACAAAACCTGGCT  
GGATGTGATTGCGCGCTCCAGTGCAGTACCTGGCTTTTATCGTAGCGGAGTGTGCTGGAAGGCATTAACCTACCTGGATG  
GCGGATCAGTATGATCGGTTCCGGTTAAAGAGGCGGCAAGGACGGCGCTAAAACGTTGGTGTGCTCATTCCGACTGTCCG  
TCACAAATGTACTACACGCCGAGTGGTTCAAACGCATGGAACGCTGGCTGGGTGACAGTAGCCTGCAGCCGCTGGTCAA  
TCTGGTGCAGCATCATGAAACCAGCTATCGTGACATTCAGCAATTTATTGAGAAACCACCGGGCAAGCTGCGGATATTCG  
AAATTTATCCGCCGAAGCCATTACATAGTATCGCGCTTGGCAGTCGGATTCCGGCGCTGCGTGAAGACTATAAACTTGGG  
CGTTTATGCGGTCTGTTATTTCTCGCCACGGTTGGCAAGCTATTAACGAAAAAGCGCCGCTTACCCGCCATCTGGTGCC  
AGTGGTGACGCCGAATCGATTGTCATTCCGCTGCGCCAGTCGCCAACGATACGCTGGTTGCCGAAGTGAAGCAGCGCTC  
CGCAGGCGAACGACCCGACATTTAACAATGAGGATCTGGCTTGTGTTGCGTTTTATCGACACCCACTGCCATTTTGT  
TCCCGCGTTTTAGTGGCGATGAAGAGGCCAGCCTGCAACGCGCGGCAAGCGGGCTAGGCAAGATCATTGTTCCGGCA  
ACAGAGGCGGAAAATTTTCCCGTGTGTTGGCATTAGCGGAAAATTAACACCCTGTATGCCGATTGGGCTTGCATCC  
TGGTATGTTGAAAAACATAGCGATGTGCTCTTGGAGCAGCTACAGCAGGCGTGGAAAGGCGTCCGGCGAAGGTGGTGG  
CGGTGGGGGAGATCGGTCTGGATCTCTTTGGCGACGATCCGCAATTTGAGAGGCAGCAGTGGTTACTCGACGAACAACCTG  
AACTGGCGAAACGCTACGATCTGCCGTTGATCCTGATTACGCGCGACGACGACAACTGGCGATGCATCTTAAACG  
CCACGATTTACCGCGCACTGGCGTGGTTCACGGTTTTTCCGGCAGCTGCAACAGGCCGAACGGTTTTGTACAGCTGGGCT  
ACAAAATTGGCGTAGGCGGTACTATCACCTATCCACGCGCAGTAAAACCCGCGATGTCATCGAAAATTTACCGCTGGCA  
TCGTTATTGCTGGAACCGACGCGCCGATATGCCGCTCAACGGTTTTACAGGGCGAGCCTAACCGCCCGAGCAGGCTGC  
CCGTGTGTTCCCGTGTCTTTCGAGTTGCGCCGGAAACCGCGGATGAGATTGCGCAAGCGTTGCTTAATAACACGTATA  
CGTTGTTAACGTGCCGTAGGCCGATAAGGCGTTCACGCCGATCCGGCAGTTGGCGACAATGCCTGATGCGACGCTT

AACGGTCTTATCATGCCTACAGGTTTGTGCCGAACCGTAGGCCGGATAAAGCGTTACGCCGCATCCGGCAGTTGGCGC  
ACAAATGCCTGATGCGACGCTTGTGCGCTTATCATGCCTACAAGTCTGTGCCGAACCGTAGGCCGGATAAAGCGTTAC  
GCCGCATCCGGCAGTCGGGCATAATGCCTGATGCGACGCTTGTGCGCTTATCATGCCTACAGGTTTGTGCCGAACCG  
TAGGCCGGATAAAGCGTTTCCGCGCCATCCGGCAGTTGGCGCACAATGCCTGATGCGACGCTTACAGCGTCTTATCAGGC  
CTACAAGTCTGTGCCGAACCGTAGGCCGTATCCGGCATGTCACAAATAGAGCGCCGAAATATCAACCGGCTCACCCCGC  
GCACCTTAAACGCATCAGCCAACGGCTCAACGTCTTCCGGCGTGGCGCTCGCCAGCTTTGCGCTCGCCATACACGCCG  
TGGGCATGAAACGCGTTACGGCGTACCAGCAACATCGCCGAGTCCCTTGATAAACGCCGCCAGTTCTTCGATGTGTTGCAA  
ATAATCCACCTGGCCAGGGATCACCAGCAAACGCAGTTCCGCCAGCTTCCGCGCTCTGCCAGCAAATAGATGCTGCGCT  
TAATCTGCTGATTATCGCGTCCGGTGAGTTGTTGATGACATTCGCTCCCCACGCTTTGAGATCGAGCATTGCGCCGTCG  
CACACCGGGAGCAATTTTCCAGCCGGTTTCGCTCAACATGCCGTTACTGTCCACCAGACAGGTGAGATGGCGCAGTTG  
CGGATCGTTTTTATAGCAGTAAACAGCGCCACCACAAACGGCAGCTGGGTCGTGGCTTACCGCCACTCACCGTTATCC  
CTTCGATAAACAGCACTGCTTTCGGGACATGGCTAAGCACTTCGTCCACGCTCATGGATTGCGCCATGGGCGTGGCATGT  
TGCGGACACCTTTCAGGCAAGTATCACACTGCTCGAAACCACAGCGTTCCACACCCTTTCGCGTCAACAATCTGCAA  
CGCTGATGCGGACACTGTGGCAGCACTCCCCACAGTATTGCAACGCTCCATCGTCCACGGATTGTGACAGTTTTTTCG  
AGCGAGATTGACGCCCTGCAAAAAACAGAGCCAGACGACTGCCTGGCCGTAACGCAGGAGAAGGGGATAATCTTACTG  
ACTAAAGCGCATCTGCTGTTTATGGCTTATCACGCGCGGCTGGCGTCCAGAATACGAGTGTGCGTGGCGCTTCTTCGC  
CCAGCCAGGTGGTGGTGGTGGTGAACCTTCGGCGGATATTTTTCTAAATCCGACAAACGCCACCATATAACCGGTAACG  
CGAACAGATCGTTACCGCTGACATTGGCGGTAATTCACGCATTCCGGCTTTAAAGGCACCGAGGCAAAGCTGTACCAG  
TGCTGCGGGTACGTTTATGTTTTCGTCGAGCGTCAGAATGTCGCTGATGCCGGAATAATAAAGCATGATGCGGGG  
CGACAGTTTGCAGATGGGTGATCGGATCTGGCTCATCGCCATACGGCAAACGCCGCGCCGGCGTGGTGGCGATATCGGAA  
CTGATCCCCGACTGTGCGTGAACATGGCGGTTTTTTCAGCCATATTTACGGGGTATTGGCGACAACTCCGCCAG  
TTGCGCGCTGATGCGATAACCTACTTCAATTTGCGGCGGCTTCTTACCGTAGCGCGCGCAATCCCTTCTTTTACACA  
GCAAAGTTAACCGTTCCGCCAGCCATACATGCCAAACATTGGCACAAAACGTTAGGGTTAATCAGCCCTTCTTTACC  
AGGAAGCTATTCTCAAAGAAGTGTGATTGTTGATAGAGGAATTCACCCGCGCATCGATGATGGCGATCTGCTGCTGGCA  
GTAGTGGGTAGAGTGGCGTAAAGAAGTATCCAGCGATTTCGTCGCTCGGCAATGGCTTTCAGGTTAAGGCGTACCA  
GCGTGTGCCACCACCCGCCAGCGGAGTGGTGTAAACAGCTCACAATCCCGTAGCCCCCTTTGTGAAAATTTTATCA  
TGACCCGGACCGTTGGCGATGTGCGGTTTGTACATTACAGATGTTCTTCGCCACTTCCAGCAGCAGGTATCAGGGGT  
GATTTACAGGATCGTAGATAAAGGTCAGTTTCGGTGAACCTGCTTCAACTCTGCATCTGCACGTAAGATCGCGCGGGTAA  
TGGCGGAATCAGACGGGCGGATATTGGCGTGCATAAAGGCGTCTGGCAGGGTCTGTGAGGTAACGCCAGAAACGTTTT  
ATTCGAACATCGATCTGCTTGTGTTAGAATTCTAACATACGGTTGCAACAACGCATCCAGTTGCCCCAGGTAGACCGG  
CATCGATGTGACCGACGCTACGTGGTGGTAAAGAATGGTCAGCAGAGAGAGTGGTGCATCAAGATCTTTCGCGCCTTCCA  
GCTCCAGCCATTCCGAACCGTTCCGCCAGAAAACGGGCGTAATCGGGTAAGACATAGCGCGGTTGTACGGCGCATGACCT  
TCAAACATATCGCAGATTACACCTTATCCAGCGCGCGGCGGGCTTCGGCAGGAAGCTGTGGGTAAGGAGATTGTTTTC  
TGCTTCCAGTGCCAGAAAATGGCGCTTCTGCTCCGGGCTAAGCACTGGGCTGGTGAACAATTTGCTGGCAACGTTGTTGCA  
GTGCATTTTATGAGAAGTGGGCATCTTCTTTCTTTTATGCCGAAGGTGATGCGCCATTGTAAGAAGTTTCGTGATGT  
TCACTTTGATCCTGATGCGTTTCCACCCTGACGCATTCAATTTGAAAGTGAATTTTGAACCAGATCGCATTACAGTG  
ATGCAAACTTGAAGTAGATTTCTTAATTGTGATGTGATCGAAGTGTGTTGCGGAGTAGATGTTAGAATACTAACAAA  
CTCGCAAGGTGAATTTTATTGGCGACAAGCCAGGAGAATGAAATGACTGATCTGAAAGCAAGCAGCCTGCGTGCCTGAA  
ATTGATGGACCTGACCACCTGAATGACGACACCGCAGGAGAAAGTATGCTCGCAAACTCTGAAAGAGCAGGGCACCCCG  
TCGGCAATACCGCGCTATCTGATCTATCTATCTCGTTTTATCCCGATTGCTCGCAAACTCTGAAAGAGCAGGGCACCCCG  
GAAATCCGTATCGCTACGGTAACCAACTTCCACACGGTAACGACGACATCGACATCGCGCTGGCAGAAAACCCGTGCGGC  
AATCGCCTACGGTGTGATGAAAGTTGACGTTGTGTTCCCGTACCGCGCGCTGATGGCGGGTAACGAGCAGGTTGGTTTTG  
ACCTGGTGAAGCCTGTAAAGAGGCTTGCAGCGCAGCGAATGACTGCTGAAAGTATCATCGAAACCGGCGAACTGAAA  
GACGAAGCGCTGATCCGTAAGCGTCTGAAATCTCCATCAAAGCGGGTGGGACTTTCATCAAAACCTTACCAGTAAAGT  
GGCTGTGAACGCGACGCCGAAAGCGCGCATCATGATGGAAGTATCCGTGATATGGGCGTAGAAAAACCGTTGGTT  
TCAAACCGGCGGGCGGCTGCTACTGCGGAAGATGCGCAGAAATATCTCGCCATTGAGATGAACTGTTCCGGTGTGAC  
TGGGCGATGCGCGTCACTACCGCTTTGGCGCTTCCAGCCTGCTGGCAAGCCTGCTGAAAGCGCTGGGTACGGCGACGG  
TAAGAGCGCCAGCAGCTACTAAGTAAGATGCTTTACGCTGATGCGCTGCGCTTATCAGGCCTACGAGACGATCTACCC  
GTAGGCCGGATAAAGCGTAGACGCATCCGGCAAAGCCGCTCATACTTTTTCTCGGGAGGTTACCTGTTTCTCGCA  
CAAGAAATTTCTGTAAAAAACGTGATGGTCATGCGCTGAGCGATGAAGAAATCGTTTTCTTATCAACGGTATTCCGCA  
CAACTATCTCCGAAGGCGAGATTGCCGCCCTCGCGATGACCATTTTTCTCCAGGATATGACAATGCCTGAGCGTGTCT  
CGCTGACCATGGCGATGCGAGATTGCGAACCGTTCTCGACTGAAAAGCCTGCATCTGAATGGCCCGATTGTTGATAAA  
CACTCCACCGTGGCGTGGCGATGTGACTTCGCTGATGTTGGGCGCGATGGTGCAGCCTCGCGCGGCTATATTCCGAT  
GATCTCTGGTGGCGGCTCGGTCATACTGGCGGTACGCTCGACAACTGGAATCCATCCCTGGCTTCGACATTTTCCCGG  
ATGACAACCGTTTCCGCGAAATTTAAAGACGTCGGCGTGGCGATTATCGGTGAGACCAGTTCACTGGCTCCGGCTGAT  
AAACGTTTCTACGCGACCGGTGATATTACCGCAACCGTGGACTCCATCCCGCTGATCACCGCTCTATTCTGGCGAAGAA

ACTTGCGGAAGGTCTGGACGCGCTGGTATGGACGTGAAAGTGGGTAGCGGCGGTTTTATGCCGACCTACGAACTCTCTG  
AAGCCCTTGCCGAAGCGATTGTTGGCGTGGCTAACGGCGCTGGCGTGCGCACCACCGCGCTGCTCACCGACATGAATCAG  
GTACTGGCCTCCAGTGCAGTAACGCGGTTGAAGTTCGTGAAGCGGTGCAGTTCCTGACGGTGAATATCGTAACCCGCG  
TCTGTTTATGTCACGATGGCGCTGTGCGTGGAGATGCTGATCTCCGGCAAACGGCGAAAGATGACGCCGAAGCGCGCG  
CGAAATTGCAGGCGGTGCTGGACAACGGTAAAGCGGCGAGAAGTCTTTGGTCTGATGGTAGCGGCACAAAAAGGCCCGACC  
GACTTCGTTGAGAAGTACGCGAAGTATCTGCCGACAGCGATGCTGACGAAAGCAGTCTATGCTGATACCGAAGGTTTTGT  
CAGTGAAATGGATAACCCGCGCGCTGGGGATGGCAGTGGTTGCAATGGGCGGCGGACGCCGTGAGGCATCTGACACCATCG  
ATTACAGCGTCGGCTTTACTGATATGGCGCGTCTGGGCGACCAGGTAGACGGTCAGCGTCCGCTGGCGGTTATCCACGCG  
AAAGACGAAAACTGGCAGGAAGCGGCGAAAGCGGTGAAAGCGGCAATTAACCTTGCCGATAAAGCACCGGAAAGCAC  
ACCAACTGTCTATCGCCGTATCAGCGAATAACGGTATACTGATCTGATCATTTAAATTTGAAGCACTGAGTACGGAGAAC  
ATATGAAACGTGCATTTATTATGGTGTGGACTCATTGGCGATCGGCGCTACAGAAGATGCAGAACGCTTTGGTGACGTC  
GGGGCTGACACCCTGGGTATATCGCAGAAGCTTGTCCAAAGCGAAGCTGATAACGGTCGTAAGGCCGCTCAATCT  
GCCAAATCTGACCCGTCTGGGGCTGGCGAAAGCACAGAAAGTCTACCGGTTTCAATCCGGCGGGAATGGACGGCAACG  
CTGAAGTTATCGGCGCGTACGCATGGGCGCACGAAATGTCATCCGGTAAAGATACCCCGTCTGGTCACTGGGAAATTTGCC  
GGTGTCCCGTTCTGTTGAGTGGGGATTTTTCTCCGATCACGAAAAAGCTTCCCGCAAGAGCTGCTGGATAAACTGGT  
CGAACGCGCTAATCTGCCGGTTACCTCGGTAACCTGCCACTCTCCGGTACGGTCACTTCTGGATCACTGGGCGAAGAC  
ACATGAAAACCGCAAGCCGATTTTCTATACCTCCGCTGACTCCGTGTTCCAGATTGCCTGCCATGAAGAACTTTTCGGT  
CTGGATAAACTCTACGAACTGTGCGAAATCGCCCGTGAAGAGCTGACCAACGGCGGCTACAATATCGGTGCTGTTATCGC  
TCGTCCGTTTTATCGGCGACAAAGCCGGTAACTTCCAGCGTACCGGTAACCGTCACGACCTGGCTGTTGAGCCGCCAGCAC  
CGACCGTGTGCGAAGCTGGTTGATGAAAAACAGGCCAGGTGGTTTCTGTCCGGTAAAATTGCGGACATCTACGCCAAC  
TGCGGTATCACAAAAAAGTGAAGCGACTGGCCTGGACGCGCTGTTTACGCCACCATCAAAGAGATGAAAGAAGCGGG  
TGATAACACCATCGTCTTACCAACTTCGTTGACTTCTGACTTCTCCTGGGGCCACCGTCGCGACGTCGCCGTTATGCCG  
CGGGTCTGAACTGTTGACCGCGCTCTGCCGAGCTGATGTCTCTGCTGCGCGATGACGACATCCTGATCCTCACCGCT  
GACCACGGTTCGATCCGACCTGGACCGTACTGACCACACGCGTGAACACATTCCGGTACTGGTATATGGCCCGAAAGT  
AAAACCGGGCTCACTGGGTATCGTGAACCTTCCGGATATCGCCAGACTCTGGCAAATATTTTGGTACTTCTGATA  
TGGAATATGGCAAAGCCATGTTCTGATGGATTTGGGCGGAGCGTACTCCGCCTTTGTTATGCACAAAAAGGATAAAA  
CAATGGCTACCCACACATTAATGCAGAAATGGGCGATTTCTGCTGACGTAGTTTTGATGCCAGGCGACCCGCTGCGTGCG  
AAGTATATTGCTGAAACTTTCCTTGAAGATGCCCGTGAAGTGAACAACGTTCCGGGTATGCTGGGCTTACCCGGTACTTA  
CAAAGGCCGAAAATTTCCGTAATGGGTACGGTATGGGTATCCCGTCTGCTCCATCTACACCAAAGAAGTATCACCG  
ATTTCCGGCTGAAGAAAATTTATCCGCGTGGGTTCTGTGGCGAGTTCGCGCACGTAATAACTGCGCGACGTCGTTATC  
GGTATGGGTGCCTGCACCGATTCAAAGTTAACCGCATCCGTTTTAAAGACCATGACTTTGCCGCTATCGCTGACTTCGA  
CATGGTGCCTAACGCAGTAGATGCAGCTAAAGCACTGGGTATTGATGCTCGCGTGGGTAACCTGTTCTCCGCTGACCTGT  
TCTACTCTCCGGACGGCGAAATGTTGACGCTGATGGAAAAATACGGCATTCTCGGCGTGGAAATGGAAGCGGCTGGTATC  
TACGGCGTCTGTCAGAAATTTGGCGGAAAGCCCTGACCATCTGCACCGTATCTGACCACATCCGCACTCACGAGCAGAC  
CACTGCCGCTGAGCGTACACTTCAACGACATGATCAAATCGCACTGGAATCCGTTCTGCTGGCGATAAAGAGT  
AATTGTGTTTTCGCTGCAAGCGATTGCCTTGTGAAGCCGAGCGGAGACTGCTCCGGCTTTTAGTATCTATTCATTTT  
TCTCTCCAGCTTGAATATTTTCGCTACTTTTTCAGTGAATGTGTTAATAAATCTATTCAGGATCTATTCACGAATCT  
ATTCATTAATGAGCGAGCTGACTGATCTTTTACTGCAAGGGCCGCTTCTGCCCGGAATTGCCAGCGTCTGGCAATC  
AGTCAGGCGAGTTCACGCTTGTGTCAGAGAAGATCGGGTATTCGCTTGGTAAAGCACGGGCAACCGGATATGC  
ACTGCTCGCTCCTTATCGCGAATTGAGCGTATTCCCGTCTGGCGGTGGACGATACCGGAAAGGCATAAATTCGCGG  
ACATCCGGTTGTGCTGGCCGAGGGAAGTTGTCTGGTAACAGGCGCAGATGGCGACGAACAGTGGTTTATGGTTTGGCC  
TGGTATTTGACCGATCTCCGACCGAGGGCTTTTTAGGGCGCGCTGGGGCAGGAAAGTTAGCCGCGCAACTGAATCTGAC  
TGATGATATACGCTCTCTGGCAGGAAGAAGATGTGCTCTACGCCCTGACCGTATTTAACGGTGAATATACTGGCGTTGGT  
TGGTCCGGGAGGGGAATTATCAGCGATGGATTACTGCAACAACCCCTGCGGAAATTCCTCTGGATCAAAAACTCACCCAT  
TACGAACAGCTGGCAAGTATGCACTGGCAGGAGAAATTTGGGTTCTTCTGCGGGCGGCGAGCAGCCAAAATTTACCTA  
CTATGCACAAACGCCGTAGGCAATAAATGTTGGTGAATTCACCGTACCACAGCAAACCGGGTACGCCAACGTT  
GGGGTGACCTGCTAATTGCTGAATCTATTGCCGCGCAAATCTGCGTACGGTGGGATCCACGCCATCGAGTCAACGGTG  
CTTGTAACAAGTAACAGGCAAGTATTCCTCGAAGCGGAACGCTTTGACTGCAAAGGTAACGATGGTCTGCTTGCCTATTGT  
GTCGCTGGAGGCGGTGCAGAGTGAATTTATCTTCTCCGGGATCGTGGCCGAGGCAATGCGCGTTTGTGTGAGCAAC  
AACTTGTCACTACCAGAGCGTGGCGCAAACAGAAGTATCTGGCATTGGGCGACTTATCGCAAACAGCGATATGCAC  
GCAGGTAATTTATCGTTTTATTTATCTGAACCGCCATTTGCGCTGACGCCGCTACGACATGCTGCCGATGGTCTATGC  
ACCAAACAGCGCTGGAATGCTGCGTATGCTGCCATTGAGGTGAAGTTTATCTTAACGTCAGTAAAAGCGCTTGGTTAA  
CGGCGATCCCGCTGGCGCAGCAGTTCTGGCAAACGGTGCAGAGATCCCGTATCAGCGAGGCGTTTCCGCACATTGGC  
CAAGAAATGCCGGAATAATCCGGCAAATCGAAGAGAAAGTTGCCCGATGGGCGGTAACCTTACAGCCCCCGCCA  
TCCATGCCGATAACTCCCGTAGCTTTTTTCTGTTCCGGGAAGTCAACCAACAGCGCTTCGCACTCCTGTTGACGATA  
TCTGCGCGGTACAGGCAGCCTTGCAGTCTCGGCGAGGGCTTCCAGCGCGCGGGGTTGAGGCTGTCGGTAAACACCTG



GGCGGGGTGATATGGCCTTTTTCAACGTGAAATGCAGTTCACGCCGCCAGGTAAGCGTTCATCCAGCAGATGCG  
AGAATGCCGGAGCCTGACCGAAGTTCATTCCCAGTACTCTGGCGGGCAAAGTTTCGGCGAAGTTTGGCAAGTCTGGC  
GTTTTGTTCCGGGAGATGATTTCCGCTCCACGCGCTCGCCATAATGGGCGAAAAGGCCCTCGGTTATGGCCTCGAAAC  
CTGCTCATGGGTGATCCCCGGCAACAGCTCGGTGAGTTGGTCACGCGGAACGTACCGACGTAATGCCTTTCCGCCCA  
GTTTCTTTTTATCCGGATTGAGATAGTTTGCAGGCGGCTGAGGTCGGCATTGAGTAGCAAGGTGCCGTGGTGAAGCCG  
CGATCTTTGGTTTCGCGATAGGCCGAGCCTGAGACTTTGCGGTGCGCTTCGACGGTTTTACCACCAGATCGTTACGTCC  
GGACGTTCCGGCGCTGACGCCGAGCGCTTCAGCGCATTGAGCACAATCGACGTGGAGATAGTTTTATCGTACTCCGGCT  
TGCCAGCCATAAAGGTAAGCAGGTATTGCCGAGATCGTGAACACCGCGCCGCCACCCTACTGCGCCGCGCCAGGCGG  
ACGTTATCTTCTTCCATCCGCCGGGATTACTCTTTCCACGGGTTCTGCGCGGACCAATTACTACCCTGTGGCATT  
GGCCAGAGAAAACAGAACGCGCTGCGTGGCGGGCATTGGCGAAAAATACACTCTTCCACCGCCAGGTTAAACCAGGGT  
CGTAAGAGTCAGAGATGAGCAGGCGTAATGTGGACATAACGATTTCTTTCTGTAGTAATGGGTCACCTTTTTTCTCG  
CTTTCTTCTTCCGGCACCGTTTGTGGCGTTAACAGGAAGGGCGATTGCTGCCAGCGGGTGGCTTACCCTGTAG  
CAGCGTGGGGTACAGCTACACCATTGCCAGTGAGAGCAGCAACATCAGGCGTAAAATGTTAGTGGTGTATCCACCT  
GTTGGGCTTCCGGTGGCGAGCGTATGGGTGTCGAGTGCAGGCGAGATAGCCGAGCGGTCTTTTACC CGCAATTGGC  
TCGACAATCTGCTGGTAAAAATAGCCGCTGCTTTTTTACCCTGAGCGCCAGCCGGTCCGCACTTCGACGCTTTCCGCC  
AGAACGTGCGATAAGATCGCCTTGTTCGTCATACACACCCCGCTGAGGATACGGCTTTTCATCCGTTAACTGATCGAGGA  
TCGCTGAATCGGTTTTTATCCGGTGGTACGCTACCGGTCGCAACGTTTACGCGTACCTGACGCGCCAGGGTG  
CGGGCAGTTCTTCCAGCTGTGGATTACGCTGTGCTGGTGGTTTTGACTAAACCATGACGCTCCCTGCATCAGCGCCAC  
TAACAAGGCAAGACAGAACAGGACAATCACTGCCGATGACGCCGAATTTAGTTTTGTGCGAGCCATCTTCCACCCTT  
TGAAAATTTGAGACTTAATGTTGCCAGAAGCAATGGATAACAAGGTAGCCTCATGCGTTATTTTCCCTGCTTCAACGATT  
TTACAGGAGCCTTAATGCCTAACATTACTGGTGGCAGCTGCCTGAAGATGTCTTTATGGCCGGGTCTGCCTTTTCA  
TTAAGTGGTGTGAAGTGTGACTGGATTACCACGAGGTCGTAGCGGCTGGCTGCTGTATGGTGTGGGCTGGATAA  
ACAACGTCTGACCAATACCAGAGCAAATGGTGGCGGATGGTATTGTTGCCGCTGGTGGTGGAAAGATTATCAGG  
TGATTGCTTGGCAGTTCACTCACCGCACGGGCTACACGCTGGCCACGAAGCGCAGCTGGATGTCGCCCCGCTGGGG  
AAAATCCCGCACCTGCGCACGCCGGTGTGGTGTGGATATGACTCCACCGCCATCCAGATTGAATGTATTGATGA  
AATTGCCAAATGGCCGGAACGGGCGAGATGGTGGCGAAGTAACCGAACGGGCGATGCGCGCGAACTCGATTTTACC  
CCAGCTGCGCAGCCGTGTGGCGACGCTGAAAGGCGCTGACGCCAATATTCTGCAACAGGTGCGTGAAAATCTGCCGCTG  
ATGCCAGGCTTAACGCAACTGGTGTCAAGCTGGAACGCTGGGCTGGAAGTGGCGATTGCCCTCCGGCGGCTTTACTTT  
CTTTGCTGAATACCTGCGCGACAAGCTGCGCTGACCGCCGTTGAGCAATGAACTGGAGATCATGGACGGTAAATTTA  
CCGCAATGTGATCGCGCAGATCTGACGCGCAGTACAAAGCGAAAATCTGACTCGCCTCGCGCAGGAGTATGAAATC  
CCGCTGGCGCAGACCGTGGCGATTGGCGATGGAGCCAATGACCTGCCGATGATCAAAGCGGCAGGGCTGGGGATTGCCTA  
CCATGCCAAGCAAAAAGTGAATGAAAAGGCGGAAGTCAACATCCGTCACGCTGACCTGATGGGGGATTCTGCATCCTCT  
CAGGCGCCTGAATCAGAAGTAATTGCTGCCCGCCATCCTGCGGGCGGCACAGCATTAAACGAGGTACACCGTGGCAAAA  
GCTCCAAAACGCGCCTTTGTTTGAATGAATGCGGGGCGGATTATCCGCGCTGGCAGGGGCGAGTGCAGTGCCTGTATGC  
CTGGAACACCATCACCGAGTGGCTTTGCTGCGTCCCAATGGTGGCGGTAACGAGCGTCTCAGCGGCTATGCCGTA  
GGCCGGGGTGGCAAAAGTCCAGAACTCTCCGATATCAGCCTTGAAGAGCTGCCGCTTTTTTCCACCGGATTTAAAGAG  
TTCGACCGGCTACTAGGCGGCGGCTGGTGGCAGGAAGTGCCATTCTGATTGGCGGTAACCCTGGTGGCGGGAAATCCAC  
GCTGCTACTGCAACGCTGTGCAAACTGGCCAGCAGATGAAAACGCTGTATGTCACCGGCGAAGAGTCTGCTGCAACAGG  
TGGAATGCGCGCTCATGCTTGGCCTGCCGACTGACAATCTCAATATGTTGTCGAAACCAGCATGCAACAGATCTGC  
CTGATTGCCGAAGAAGAGCAACCGAAGCTGATGGTAATTGACTGATCCAGGTGATGCATATGGCGGATGATCAGTCA  
GCCTGGTAGCGTGGCGAGGTGCGTGAACGCGGCTTATTTGACACGCTTCGCCAAAACGCGCGGTGTGGCGATTGTCA  
TGTTGGGGCACGTAACCAAAGATGTTTCCGCTGGCTGGCCGAAAGTGTGGAACACTGTATCGACTGTTCCGGTCTTTT  
GATGGCGATGCCGACTCCGTTTTTCCGACCTTGGCAGCCATAAAAAACCGCTTCGGCGCGGTGAATGAGTGGGCGTCTT  
CGCGATGACCGAACAGGGGCTGCGTGAAGTCAACACCTTCGGCAATTTTCTTAAAGTGGCGGCGATGAAGTGCCTCCG  
GTAGCTCAGTGTGGTGTATGGGAAGGAACGCTCCACTGCTGGTGGAGATTAGGCGCTGGTGCATCACTCGATGATG  
GCGAACCCACGCCGCTGGCAGTGGGGCTGGAACAAAACCGTCTGGCAATCCTGCTGGCTGTGTTGCACCGTACGGTGG  
TCTGCAATGGCCGATCAGGATGTGTTTGTGAACGTGGTGGCGGCGTGAAGGTAACCGAAACAGTGGCGACTTAGCGT  
TACTGCTGGCGATGGTTTCCAGCCTGCGGACAGACCGCTGCCGAGGATCTGGTGGTGTGGTGAAGTGGGGCTGGCA  
GGGAGATCCGCCGGTCCAGCGGTGAGGAACGAATCTGAAAGCGGCGAAAACCGTTTTTCCGCCGGCGATTGTTCC  
GGCGGTAACGTGCCGAAAAAGCGCCGGAAGGGATGAGATTTTTGGCGTTAAAAAATCTCCGACGCGCTTAGCGTGT  
TCGACGACTTATAATGAGATATACGGAGGAGATATGTCGTCATTTGATTACCTGAAAATGCCATCAAGCAACAGGGCT  
GCACGCTACAGCAGGTAGCTGATGCCAGCGGTATGACCAAAGGTTATTTAAGCCAGTACTGAATGCCAAAATCAAAGC  
CCAGCGCGCAAAAGCTGGAGGCGTTGACCGTTTTTGGGGCTTGGTTTTCCCGGCGAGAAGAAAACGATCGGTGTCGT  
ATTCCGTAAGTTTACCCACTGCATACCGGACATATCTACCTTATCCAGCGCGCTGTAGCCAGGTTGACGAGCTGCATA  
TCATTATGGGTTTTGACGATACCGTACCGCGCGTTGTTCAAGACAGTGCCATGTCGACGAGCCGACCGTCCGGAT  
CGTCTGCGTTGGTTATTGCAAACTTTAAATATCAGAAAAATATTCGATTATGCTTTCAACGAAGAGGGCATGGAGCC

GTATCCGCACGGCTGGGATGTGTGGAGCAACGGCATCAAAAAGTTTATGGCTGAAAAAGGGATCCAGCCGGATCTGATCT  
ACACCTCGGAAGAAGCCGATGCGCCACAGTATATGGAACATCTGGGGATCGAGACGGTCTGGTGCATCCGAAACGTACC  
TTTATGAGTATCAGCGGTGCGCAGATCCGCGAAAACCCGTTCCGCTACTGGGAATATATTCCTACCGAAGTGAAGCCGTT  
TTTTGTGCGTACCGTGGCGATCCTTGGCGGCGAGTCTGAGCGGTAATCCACCCTGGTAAACAACTTGCCAATATCTTCA  
ACACCACAGTGCCTGGGAATATGGCCCGGATTATGCTTTTTACACCTCGGCGGTGATGAGATCGCATTGACGATTTCT  
GACTACGATAAAATCGCGCTGGGCCACGCTCAATACATTGATTTTTGCGGTGAAATATGCCAATAAAGTGGCATTATCGA  
TACCGATTTTTGTCACTCAGGCGTTCTGCAAAAAGTACGAAGGGCGGGAACATCCGTTCTGTCAGGCGCTGATTGATG  
AATACCGTTTTCGATCTGGTATCCTGTGGAGAACAACACGCCGTGGGTGGCGGATGGTTACGCAGCCTCGGCAGTTCTG  
GTGGATCGCAAAGAGTTCAGAAGTCTGCTGGTGGAGATGCTCGAAGAGAACAATATCGAATTTGTGCGGGTTGAAGAGGA  
AGATTACGACAGTCTTTCTGCGCTGCTGGAAGTGGTGGGAGATGATGGGGGAGCAGAGATAACCGTATGAAACT  
GCTCAAAGGCGAGGTATAAATGAGTTTTTTGATGAGTTGAAAACCTCTCTGGAGAGGCTGTCGAGATTAACAAGGT  
TTGAAAAACCTGCACGGGTGACCCGCCACGAAATTGAGGATGCTAAGGCTGTTGTAGACCGGAAACGGTGTTCACGCCG  
CATCCGGCATTGGTCTCAATGCCTGATGCGACGCTTACCGCTTATCAGGCCTACAGTTTTACAACGATTGAAAT  
TGCTGGTTTTGATGGCCGGATAAAGGCTTCCGCGCCGATCCGGCATTTCAGCATTACTTCGCAATACGCTTGTACTTGA  
TACGCTTCGGCTCCAGCGCTGCGGCCAGCGCTTCTTGTACTCTTCTGACTCGGTAAGTTACCTTCGAAGCTTCAAGAA  
TCAACTTTACCTTCATCTGTAATCCAGAATGTGCTGGCGATACGGTTCGAGGAACCAACGGTCTGCGAGATAACCAT  
CGCACAGCCCCGGAACTCCAGCAGGGCGTTTTCCAGCGCGCAGGGTTTCGATATCCAGGTCGTTGGTTGGTTCTGCGA  
GCAGCAGCATGTTGCCGCCAACCTGCAGCAGCTTCCGAGATGCAGACGACCGCGCTCACCACCGGAGAGTTCACCAACG  
CGTTTACCCTGATCAACCCCTTTAAAGTTAAAGCGGCCAACGTAGGCGCGGCTTGGCATCTCGGTGTTGCCGATCTTCAT  
GATATCCAGCCCGCGGAACTTCTTCCCAAACGGTTTTGCTGTTATCCATTGAGTACGGAAGTATCAACCGACGCCA  
GTTTTACCCTTCCACCAAAGTATGGTCCGCTGTCCGGCTGTTCTGACCAGAGATCATAACGGAACAGGGTGCATTTA  
CCCGCACCGTTCGACCGATGATCCCGACGATCGCTCCTTCCGGATCGAGAAGCTCAGGTCATCAATCAGCAGACGATC  
GCCATAGGATTTACGAGGTTGCTGACTTCCAGCACTTTATCGCCAGACGCGGTCAGGTGGAATAAACAGTTCTGTTGG  
TTTCTGTTACGTTTCTGATATTCGGTGTGTTTCTTCAAAGCGCGCCAGACGTGCTTTACCTTTCGACTGACGGCCT  
TTAGTACCTTGACGTACCCATTCCAGCTCTTCTCAATCGACTTACGACGCGCGCTTCTTGTGAAGCTTCTGCGCCAG  
GCGTCTGATCTTCTGCTCCAGCCAGGAGGAGTAGTTACCTTCCACGGAATACCTTACCAGCGGTCAAGTTCGAGGATCC  
AGCCTGCAACGTTATCGAGGAAGTAACGGTCTGGGTAATCGCCACAACGGTGCCTTCGAAGTCGTGCAGGAAGCGTTC  
AGCCAGGCCACGGATTCCGATCCAGGTGGTGGTGGTTCGTCGAGCAGCAGCATGTCTGGTTTTTCCAGCAGCAGGCG  
GCACAACGCTACGCGACGAGTTTACCACCGGAGAGTTAGCGATTTTCCGCTCCAGTCCGCGAGACGTAGCGCATCCG  
CCGACGCTCCAGCTGTACGTTTCAATGATGACCGTCTGAGCCTGAATGATCTTCCAGACGGCCTTGTTCAGCGGCC  
AGCTTGTCAAAATCGGCATCCGGATCGGCGTACAGCGCATACACTTCATCCAGGCGTTTACGGGCGTTAACCACTTCTGA  
AACCGCTTCTTCAATGGACTCACGCACGGTGTGTTCCGGGTTACGCTGCGGTTCTGCGGCAGATAACCAATCTTGATGT  
CTGGCTGCGGACGCGCTTACCTTCGATGCTTTTATCAATGCCCGCCATAATGCGCAGCAGGGTGGACTTACCCGCGCCA  
TTCAGACCCAGGACACCAATTTTTGCCCCAGGGAAGAACTCAGAGAGATGTTTTTCAAAATATGACGTTTCCGGCGAAC  
AACTTTGCCGACAGATGCATGGTATAAACGAATTGAGCCAGTTGGACTTCGCTCTATGTTTATCGTGATAATGAGTT  
TTCAAAGGCGAAGTGTAGCTTTTTCCCGCCTAATCCAGCCGGTGCATCACCTCGCAGTAAAAGTAAAAAGTGTCC  
GTAACGTGGCGTAAACGGCAATGACTGGTTAGCATAAATCTATTACGCGCATGACGCTGCATTGATGTATTTACACTTA  
GAGGATGCGCTTGTGAAAAAGCCAAACAAGTTACCTGGCGGCTGTTGGCTGCCGGTGTCTGTCTGCTGACGGTCAAGC  
CGTGGCGCGAGCCGACTACTGGATGAGCAGCGTAGTCTGTACGCGCAAATCAAGCAGGCTGGGATAATCGACAAATGG  
ATGTGGTCAACAAATGATGCCTGGACTGAAGGATTATCCGCTTATCCCTACCTGGAATACCGCCAGATCACCGATGAT  
CTGATGAATCAACCGCGGTGACGGTCACTAATTTGTTTCGCGCTAACCCACGCTTCTCCCGCTCGCAGCTGCAATC  
TCGTTTTCTCAATGAACTGGCGCGGCTGAAGACTGCGGTGGCTTGTAGCCTTTAGCCCGGAAAAGCCGGAACACTCCG  
AAGCGCAATGTAATTAATACTATGCGAAATGGAACACCGGCGAGAGTGAAGAAGCTGGCAAGGGGCGAAAGAGCTGTGG  
CTAACCGCAAGAGCCAGCTAACGCCTGTGACAAGTTATTTAGCGTCTGGCGTGCCTCAGGTAACAAGATCCGCTGGC  
GTATTTAGAGCGTATCCGCTGCGGATGAAAGCGGGTAAACACAGGCTGTAACAGTGTGGCAGGGCAGATGCCTGCCG  
ATTACCAGACTATCGCTCGGCAATCATTCTACTGGCGAACACCCCTAATACGGTACTGACCTTCCGCGTACAACCTGGC  
GCGACCGATTTTACCGTCAATGGCGGCGGTGGCTTTGCCAGTGTGGCGCGCAGGATGCTGAGAATGCACGGCTGAT  
GATCCCATCGCTTCCCAGGCGCAGCAGCTTAATGAAGATCAGATTACAGGAGTGCAGCATATCGTCCCTGGCGTTTGA  
TGGGCAACGATGTCACCGACGAGCAGGCGAAATGGCGGATGACGCCATTATGCGCTCGCAATCTACTTCGCTTATTGAA  
CGCCGTGTACGAATGGCGCTTGGCACCGCGATCGTCCGCGCTGAATACCTGGCTGGCGGCTGCTGCTATGGAAGCGAA  
AGAGAAAGATGAATGGCGTACTGGCAGGCGGATTTATTGCTGGAACCGGACGTGAAGCTGAAGCAAAGAGATTTTGC  
ATCAACTCATGCAACAGCGTGGTTTTACCCGATGGTTGCAGCACAACGCATCGCGAAGAGTATGAGCTGAAGATTGAT  
AAAGCGCCGAGAATGTTGACAGCGCCCTGACTCAGGGCCGGAGATGGCGCGGTGCGCGAGTTGATGACTGGAATCT  
CGATAATACCGCGCTAGCGAGTGGGCCAATCTGGTGAAGAGCAAGTCAAAAACAGAGCAGGCTCAACTGGCGCGGTATG  
CTTTCAACAACCAATGGTGGGATCTTAGCGTTACGGCAACGATCGCCGGAAAGCTGTGGGATCATCTGGAAGAGCGATT  
CCGCTGGCTTACAACGATCTTTTCAAACGCTACACCAGCGTAAGGAGATCCCGCAAAGCTATGCGATGGCGATTGCTCG

TCAGGAGAGCGCCTGGAATCCGAAAGTAAATCACCGGTAGGGGCCAGCGGCTTGATGCAGATTATGCCTGGTACAGCGA  
CCCATACGGTGAAGATGTTCTCTATCCCGGTTATAGCAGTCTGGGCAATTGCTGGATCCGAAACGAATATCAACATT  
GGCACCAGTTACTGCAATATGTTTATCAGCAGTTTGGCAATAATCGTATTTTCTCCTCAGCAGCTTATAACGCCGGACC  
AGGGCGGGTGCGAACCTGGCTTGGCAACAGCGCCGGCGTATCGACGCAGTGGCATTGTCGAGAGTATCCATTCTCCG  
AGACGCGCGGTTATGTGAAGAACGTGCTGGCTTATGACGCTTACTACCGCTATTTTCATGGGGGATAAACCGACGTTGATG  
AGCGCCACGGAATGGGGACGTCGTTACTGATCCGCACGTTTATGATATGCTATCGTACTCTTTAGCGAGTACAACCGGGG  
GAGGCATTTTGCTTCCCGGCTAACAATGGCGACATATTATGGCCAAACAATCACCTATTAGCAGCGATGGCAGAACA  
GCGTCACCAGGAGTGGTTACGTTTTGTCGACCTGCTAAGAATGCCTACAAAACGATCTCCATTTACCGTTGTTAAACC  
TGATGCTGACGCCAGATGAGCGCGAAGCGTTGGGGACTCGCGTGGTATTGTCGAAGAGCTTTGCGCGGCGAAATGAGC  
CAGCGTGAGTTAAAAATGAACTCGGCGCAGGCATCGCGACGATTACGCGTGGATCTAACAGCCTGAAAGCCGCGCCCGT  
CGAGCTGCGCCAGTGGCTGGAAGAGGTGTTGCTGAAAAGCGATTGATTTTGTAGGCTGATAAGACGTGGCGCATCAGGC  
ATCGTGACCGAATGCCGGATGCGGCGTGAACGCCTTATCCGTCCTACAAATACCCGTAATTTCAATATGTTTGGTAGGC  
ATGATAAGACGCGGCAGCGTCGCATCAGCGCTTAATACACGGCATTATGAAACGGACTCAGCGCCAGGATCACCGCCTG  
GTGATAGACGCTGGCGGAGTGAGTTTCCCGCGGTAAACACGCCGATCGCCCTTCTTACGACCAATCTCATCAATAC  
CGGTATAACCGGACATCACGGGACCAAGCGCTCACCTTACGCACCTTTTTCCAGAATCACCGCAGGCAACGGCAAAGTA  
GGCGAAGCGCCTCGCCGCTGGCTGGCGTTTTCAATCACCACTGAAAGTGTGTACCATCGATGCCAAGTTT  
AATCGCCACCCAAAAATCAGCCTCTGGAAGTAAACGCGGGCATTGGCTACCGGATTTCTGCGCCAGCGCGCTTTCCT  
CACTGCCAAAGGGCTGTTCCGGTACACCGCTCTCGACGGCAACGGATGCAATATGGCAGGATCCTTCCGCGAAGATCTCG  
TGAAATGCCTGCAGAATGGCTGAATTTAGCGGGATTGGTGGTCGCACAGACAACCTGGTGCATAATCAGCATTACTCA  
GAAAATTAACGTTACAGCAGTATACGGAAAAAAGCATGTTACAGGTATACCTAGTCCGCCACGGTGAACCGCAGTGGAA  
CGCCGAGCGACGTATTACGGCCAGTCTGACAGCCCGTACCGCCAAAGGTGAGCAACAGGCATGAGGTGGCAACCC  
GTGCCAAAGAGCTTGGCATTACGCATATCATCAGTAGCGATTTAGGACGCACCCGGCGTACGGCGAAATCATCGCCAG  
GCCTGCGGCTGTGACATCATCTTTGATTCTGCCTGCGTGAATTAACATGGGTGTGCTGGAAAAAGACATATCGATT  
TCTGACCGAAGAAGAAGAGAACTGGCGTGGCAGCTGGTCAATGGCACCGTTGACGGGCGTATTCTGAAGGCGAGTCAA  
TGCAGGAGCTCAGCGATCGCGTCAATGCGGCACTGGAATCTTCCGGGACTTACCGCAGGGAAGCCGACCGCTGCTGGT  
AGTCATGGTATTGCACTGGGATGCCTGGTGGTACGATTCTCGGATTACCAGCATGGGCAGAGCGCCGTTACGCTCGC  
TAACTGTTCTATTTCCGCGGTGGATTATCAGGAAAGCTGTGGCTGGCGTCTGGCTGGGTGTTGAAACCGCAGGGGACA  
TCTCGCATCTGGACGCCCTGCATTAGATGAGCTGCAGCGTTAACGACGGATCGGAATCAGCAGTTCACAGCGTAGATTA  
ATTGGGCGATCTCCCGCTTTGGCATCTTCTGCCGGTATGATCGCTCAATATCCTGACCTTACGGCGCGTCAAGTTGAG  
CATTGGCATGCACGTTCCGTATACCGTACAGATAAACTCCTGCACGCCGTTCCAGACCTTCATAGGTAACATCACAT  
ATTCCGCGCCCTGCAGCATCACCGGATGCCCCGTACGTACATAGCCATCTGCCTGATCCTGGGCTAACCGGGTGGTATAG  
AATACCTCTTGCTCGTCTTTATCCTGACTCGGACGCGTTTATTACGGCCGTAGAGCACCGGCGGAATGGTCCGGCGC  
GTTGCCGAGAAAAATCGTGCCAGAATGATAACGCATTTATGCGGGAATCAGAGATTTGCTCCAGCGAACAGGAGTAGC  
TCTGGGTAACCAATCAGCGGCGTATCTCCAGGGTGACAAATTTGTGCTCTGGCATAGTGAATTCACCAGGCGTAGC  
GGCGGGCGAATACCAAGGCGCTCCATTACAGGAGAACGGCGTAAAGTGCAGGAGTCTGGGCAACTGCTTCTTGAATGC  
GCGGGTAAATGTCTGTTGAGAGTGAAGCGGTATTGAGCGCGATGTCCAGAATCGGACGCGCAGTCAAGCGTAGTGGCA  
CCGCCGATTTGCAAAACGACGAGCACGAATATACGCGCAATAGCATGGCCAGTGACATCTTTAAACATTTCTGTAAAG  
TGCCACTTGAATAACCTGCTTTCCGCCGTACATTTGCGAGCGACAGGGGCTGATCCAGATGACCTTCCAGCCAGATTA  
AAGGTCGCGAATAATGCCGGCTGATCCATAAAAATCCTCATCTTTCAACAACGAGCACCTGACATCAGTAAATGGA  
TAATAGCATTTTTGCTGTTTTAGCATTCAGTGTTTTTTTCTAGTAGAGTATGTTTTAGGGCTTGACGGAAAAAAAAGT  
ATTGAGATTTTGTCTTAATCAATATGTTATTTACCCTGACGAACTAATTGCTCGTGAATAGATAAAAAATGGTAACAAT  
ATGAAATACAAGCATTTGATCCTGTCTTTAAGCCTGATAATGCTGGGGCCATTGGCTCATGCAGAAGAGATTGGTTCCGT  
CGACACCGTATTTAAATGATCGGCCCGGATCACAAAATTGTTGTGGAAGCCTTTGATGATCCCGATGTGAAAAATGTCA  
CCTGTTATGTGAGCCGGGCGAAAACCGGTGGTATTAAGGGGGATTGGGTCTGGCGGAAGATACCTCCGATGCGGCCATT  
TCTTGTGAGCAAGTGGGCGGATTGAACTGTGCGATCGTATTAAAAACGGCAAAGCTCAGGGCGAGGTAGTATTCAAAAA  
ACGCACGTCCCTGGTCTTTAAGTCTTACAGGTCGTGCGTTTTATGATGCCAAACGCAACGCGCTCGCTTATCTGGCTT  
ACTCCGACAAAGTTGTAGAAGTTCCGCCAAAAACGCGATTAGCGCGTTTCTGTCATGCCGTGGCGGCAATAACAGAGG  
CGATTTATGCAACGGGAAACGGTCTGGTTAGTGAAGATGAGCAAGGGATAGCCGACACGCTGGTCTACATGTTGCAGCA  
GGAAGGTTTTGCCGTGAGGCTTTGAGCGAGGCTTCCGGTGTGGATAAAGCTCGCAAGCAGGTACCCGACGTCATGA  
TTCTCGATGTTGGTCTGCCGATATTAGCGGCTTTGAATGTGCCCCAGTTACTGGCGCTCCATCCGGCGTTACCTGTA  
CTGTTCTGACGGCCGAAGTGAAGAGGTCGATCGCTGCTTGGGCTGGAATTTGGTGTGACGACTACGTGGCTAAACC  
GTTTTACCCCGCAAGTGTGCGCCAGGGTGCACCTTACTGCTCGGGTGAAGAAGTTCTGACGCGCTCTCCCGTCA  
TCCGTATTGGACATTTGAATGAATGAACCCGCGGCGAGATCAGCTGGTTTACACGCCATTAGCGCTGACTCGGTAT  
GAGTTTTTATTGTTGAAGAGGTTACTCAAGTCAACGGGCGCGTCTGGTCCCGCAGCAACTGATGGATAGCGTATGGGA  
AGATGCGCAGGACACCTACGATCGACCGTGCATACCCACATTAACCGCTGCGTGCCAAGCTGCGCGCCATCAACCCCG  
ATCTTTCACCGATTAATACTCATCGCGCATGGGATATAGCCTGAGGGGCTGTAATGCGTATCGGCATCGCGTTGTTGC

TGGGCTATTTTTACTGGTGGCGGTGGCAGCCTGGTTCGTA CTACTGGCCATTTTTGTCAAAGAAGTTAAACCGGGCGTGCGA  
AGAGCAACGGAGGGGACGTTGATCGACACCGCAACGTTGCTGGCGGAGCTGGCGCGTCCCGATTTGCTCTCTGGGGACCC  
AACGCATGGGCAACTGGCGCAGGCGTTAATCAGCTACAACATCGCCGTTTCGCGCCAATATCGGTGGCATTAAACAAAG  
TGCGCAATGAATATCATGTCTATATGACCGATGCGCAGGGCAAAGTATTGTTGATTTCGGCAAATAAAGCCGTTGGACAG  
GATTATTCCGCGCTGGAATGACGTCTGGCTAACGTTGCGTGGTCAGTATGGTGGCGCGCAGCAGCTTGCAAAATCTGCCGA  
TCCCGAAAGTTCTGTGATGTATGTTGCCGCACCGATTATGACGGCTCGCGGCTTATTGGCGTTTTGAGCGTAGGCAAAC  
CGAACGCGGCGATGGCTCCGGTCATTAAGCGTAGCGAGCGGCAATTTATGGGCCAGCGCCATTTGTTGGGGATTGCA  
CTGGTGATTGGCGCAGGCATGGTTGGTGATCAACCGCTCTATTGCCCGGCTCACTCGCTATGCTGATTCCGCTACTGA  
CAATAAGCCCGTTCTCTCCCGATCTCGGTAGTAGCGAGTTGCGTAAACTCGCGCAGGCGCTGGAAAGTATGCGCGTGA  
AGCTGGAAGGGAAAACTATATTGAGCAGTATGTTTACGCATTAECTCATGAGCTAAAAAGCCACTGGCGGCGATTTCGT  
GGAGCGGCGGAAATTTTACGCGAAGTCCGCCCGCGAAGTGGTGGCTCGTTTTACTGACAACATTCTGACGCAAAATGC  
GCGTATGCAGGCATTGGTAGAAACGTTACTACGCCAGGCAAGACTGGAGAATCGTCAGGAAGTCGTTCTGACTGCTGTTG  
ATGTGGCGGCATTATTCCGCCGCTCAGCGAAGCGCGCACCGTGACGTTGGCAGAAAAAAAATCACTCTGCATGTTACG  
CCCACCGAGGTTAACGTTGCTGCTGAACCGCGTTACTGGAGCAGGCGCTGGGAAATTTACTGGATAACGCCATCGATTT  
TACCCCGAGAGCGGTTGCATCAGCTAAGCGCCGAGTGGATCAGGAACACGTCACGCTTAAGGTGCTGGATACCGGTA  
GTGGTATTCTGACTACGCGCTTTACGTAATTTTTGAAACGTTTTACTCTTTGCCTCGTCAAATGGGCAAAAAAGCAGC  
GGTCTGGGGTTGGCGTTCGTCAGTGAGTTCGCCGTTTGTTTAACGGCGAAGTCACGCTGCCCAACGTGACGGAAGGTGG  
CGTGCTGGCCTCGCTTCACTTACCCTCACTTACATAGCTTCAAATCTTCCACATAGCTTTCGATCCTGCTGCCA  
TTGCAAAGGAGAAGACTATGTTGAAATCCCCCTGTCTGAAAAATGACTAGCCTGTTGGTGAGTATTGCTGTTGTTG  
ATTCCGATAATGCTGATTCCGCAGGTGATTGTCGAACGTGCTGATTACCGTAGCGATGTGGAAGATGCGATTTCGCCAAAG  
TACCAGCGGGCCGCAAAACTCGTTGGGCGCTCATCGCTATTCTGTGACCGAGCTTTATACGGTGCAGGAAGAGGATA  
AAACCGTGGAGCGGAAACGAAGTTTTATCCATTTTTGGTTACCTGAGTCACTGATTGATTGGTATGGCAATCAGAACGTGGAA  
GAACGCAAGATAGGGATTTATACCGGTGAGTCTGGCACAGTATTAACTGTTAAAGCCGATTTGATGTTTCGCGTCT  
TAGCGAACTCAACGCGCAAAATATCACCTTAGGCAAGCATTATTGTTGATTAGCGTCGGGATGCGCGTGGTATTGGTG  
TGGTGAAAGCGCTGAAGTTAACGGAACGGCGCTGACCATTGAACCCGGCACCGGTTAGAGCAAGGCGGGCAGGGCGTG  
CATATCCCTTACCTGAAGGGGACTGGCGGAAGCAGAACCTGAAGCTGAATATGGCCCTGAATTTAAGCGGTACCGGCGA  
TCTTTCTGTGGTGCCTGGCGGGCGTAATAGCGAAATGACCTTAACAGCAACTGGCCGATCCAGTTTTTTAGGTGATT  
TTCTACCAGCCAAACGGGAAGTTAGCGAGTCAGTTTTTCAGGGCGACTGGCAAAGCAGCTGGTTTGCTAATAATCTCGGT  
GAGCGTTTTGCTTCAGGCAATGATACCGCTGGGAAAATTTCCCGCGTTTTAGCGTGCAGTAACGACGCCAGCCGATCA  
ATACCAATTAAGTACCGGGCGACTAAGTACGCCATTCTGCTGATTGCACTGACTTTTTATGGCGTTCTTTGTTTTGAAA  
CGCTCACCGCGCAACGTTTACACCAATGCAATATTTGCTGGTGGGGCTTTCATTGGTGATGTTTTATTTGCTCTTGCTG  
GCGTTTTCTGAACATAACCGTTTTTACCCTGGCATGGATAATCGCCAGTCTGATTGGGGCGATAATGAACGGTATTTATTT  
GCAAGCGGTATTGAAAGGTTGGTGCAACAGCATGTTGTTTACCCTCGCGCTGTTGTTGCTGGATGGTGTGATGTGGGGAC  
TGCTCAACTCTGCCGATAGCGCGCTGTTGTTGGGAACAGTGTGCTGGTGGTGGCGCTGGCCGGCATGATGTTTGTGACC  
CGTAATATCGACTGGTATGCGTTTTACTGCCGAAAATGAAAGCCAGTAAAGAAGTTACAACGGACGATGAGTTACGTAT  
CTGGAATAAGGTTGAAAAATAAAAACGGCGCTAAAAAGCGCCGTTTTTTTTGACGGTGGTAAAGCCGATTAATCTTCCA  
GATCACCGCAGAAGCGATAACCTTACCCTGAATGGTGGCGATGATTTCCGGCGTATCCGGCGTAGATTGCAAAATGTTA  
CGAATACGGCGGATCGTCACGTCTACAGTACGGTCGTGCGGTTTACAGTACAGCGCCGGTCATTTTCTTACGAGTTTACG  
ACGGGACTGAATTTGCTGGGTTTTACAGAAAGTGAAGCATGGCGGGAACCTCGTGGCGGCGAGCTTGTACTGCTCGC  
CATCAGGGCCGATCAACGAACGGCTGTTGATGTCAGTCCCAACCTTGAACCTTGTAGCTTTCAACGCTACGACCTTCT  
TCGCTGACAGTACCCAGATTTCATGGTACGGGACAGTAGGTTGCGTGCACGAATCGTCAGTTACGCGGGTTGAACGGTTT  
GGTGATGTAGTCATCTGCACCGATTTGAGGCGGAGAAATTTATCGACTTCTGTTGTCACGGCCAGTCAGGAACATCAACG  
CAACATTGCGCTGCTCGCGCAGTTCACGCGCTAACGAAAGACCGTTCTTACC CGGCGAGATTGATATCCATGATCACCAGG  
TTGATGTCATATTAGAGAGGATCTGATGCATTTCCGCGCATCTGTCGCTTCGAAAACATCATAGCCTTCCGCTTCGAA  
AATACTTTTCAACGTGTTGCGTGTACCAACTCGTCTTCAACGATAAGAATGTGCGGGGTCTGCATGTTTGTACCTAAA  
TTGCCAACTAAATCGAAACAGGAAGTACAAAAGTCCCTGACCTGCCTGATGCATGCTGCAAATTAACATGATCGGCGTAA  
CATGACTAAAGTACGTAATTGCGTTCCTGATGCACTTTCCATCAACGTCAACAACATCATTAGCTTGGTCGTGGGTACTT  
TCCCTCAGGACCCGACAGTGTCAAAAACGGCTGTCATCCTAACCTTTTAAACAGCAACATAACAGGCTAAGAGGGGCGG  
ACACCCAATAAAAACGCTTTCGTTGACATATATCAAGTTCAATTGTAGCACGTTAACAGTTTGTGAAATCATCGTATC  
TAAATGCTAGCTTTGCTCACATTTTAAATAATCCAAGTTCATCATACTAATAAACGTTGGTGAATCCAATTG  
TCGAGATTTATTTTTATAAAATATCCTAAGTAAACAGAAGGATATGTAGCATTTTTTTAACTCAACCGTTAGTACA  
GTCAGGAAATAGTTTAGCCTTTTTTAAAGCTAAGTAAAGGGCTTTTTCTGCGACTTACGTTAAGAATTTGAAATTCGCAC  
CGGTAATAAGTTGACAGTATCACCCGTTTCGCGGTTATTTGATCAAGAAGAGTGGCAATATGCGTATAACGATTATTC  
TGGTGCGACCCGCCAGAGCAGAAAATATTGGGGCAGCGGCGGGCAATGAAAACGATGGGGTTTAGCGATCTGCGGATT  
GTCGATAGTCAGGCACACCTGGAGCCAGCCACCGCTGGGTGCGCATGGATCTGGTGATATTATTGATAATATTAAGT  
TTCCCGACATTGGCTGAATCGTTACAGCATGTCGATTTCACTGTCGCCACCACTGCGCGCAGTCGGGCGAAATATCATT

ACTACGCCACGCCAGTTGAACTGGTGCCGCTGTTAGAGGAAAAATCTTCATGGATGAGCCATGCCGCGCTGGTGTTTGGT  
CGCGAAGATTCCGGGTTGACTAACGAAGAGTTAGCGTTGGCTGACGTTCTTACTGGTGTGCCGATGGTGGCGGATTATCC  
TTCGCTCAATCTGGGGCAGGCGGTGATGGTCTATTGCTATCAATTAGCAACATTAATAACAACAACCGGCGAAAAGTGATG  
CAACGGCAGACCAACATCAACTGCAAGCTTTACGCGAACGAGCCATGACATTGCTGACGACTCTGGCAGTGGCAGATGAC  
ATAAACTGGTCGACTGGTTACAACAACGCTGGGGCTTTTAGAGCAACGAGACACGGCAATGTTGCACCGTTTGCTGCA  
TGATATTGAAAAAATATCACCAAATAAAAAACGCCTTAGTAAGTATTTTTTC
